# Supplementary material
Source: publisher figshare collection journal article supplement (https://tandf.figshare.com/articles/dataset/_/23210832)
Supplement: Supplementary file 1 [file 1]

SRR17520069. 6184  
SRR17520069. 6185  
SRR17520069. 6186  
SRR17520069. 6187  
SRR17520069. 6188  
SRR17520069. 6189  
SRR17520069. 6190  
SRR17520069. 6191  
SRR17520069. 6192  
SRR17520069. 6193  
SRR17520069. 6194  
SRR17520069. 6195  
SRR17520069. 6196  
SRR17520069. 6197  
SRR17520069. 6198  
SRR17520069. 6199  
SRR17520069. 6200  
SRR17520069. 6201  
SRR17520069. 6202  
SRR17520069. 6203  
SRR17520069. 6204  
SRR17520069. 6205  
SRR17520069. 6206  
SRR17520069. 6207  
SRR17520069. 6208  
SRR17520069. 6209  
SRR17520069. 6210  
SRR17520069. 16587  
SRR17520069. 25589  
SRR17520069. 25590  
SRR17520069. 25591  
SRR17520069. 25592  
SRR17520069. 25593  
SRR17520069. 25594  
SRR17520069. 25595  
SRR17520069. 25596  
SRR17520069. 25597  
SRR17520069. 25598  
SRR17520069. 25599  
SRR17520069. 25600  
SRR17520069. 25601  
SRR17520069. 25602  
SRR17520069. 25603  
SRR17520069. 25604  
SRR17520069. 25605  
SRR17520069. 25606  
SRR17520069. 25607

SRR17520069. 25608  
SRR17520069. 25609  
SRR17520069. 25610  
SRR17520069. 25611  
SRR17520069. 25612  
SRR17520069. 25613  
SRR17520069. 25614  
SRR17520069. 25615  
SRR17520069. 25616  
SRR17520069. 25617  
SRR17520069. 25618  
SRR17520069. 25619  
SRR17520069. 25620  
SRR17520069. 25621  
SRR17520069. 25622  
SRR17520069. 25623  
SRR17520069. 25624  
SRR17520069. 25625  
SRR17520069. 25626  
SRR17520069. 25627  
SRR17520069. 25628  
SRR17520069. 25629  
SRR17520069. 25630  
SRR17520069. 25631  
SRR17520069. 25632  
SRR17520069. 25634  
SRR17520069. 25635  
SRR17520069. 25636  
SRR17520069. 25637  
SRR17520069. 25638  
SRR17520069. 25639  
SRR17520069. 25640  
SRR17520069. 25641  
SRR17520069. 25642  
SRR17520069. 25643  
SRR17520069. 25644  
SRR17520069. 25645  
SRR17520069. 25646  
SRR17520069. 25647  
SRR17520069. 25648  
SRR17520069. 25649  
SRR17520069. 25650  
SRR17520069. 25651  
SRR17520069. 25652  
SRR17520069. 25653  
SRR17520069. 25654  
SRR17520069. 25655

SRR17520069. 25656  
SRR17520069. 25657  
SRR17520069. 25658  
SRR17520069. 25659  
SRR17520069. 25660  
SRR17520069. 25662  
SRR17520069. 25663  
SRR17520069. 25664  
SRR17520069. 25665  
SRR17520069. 25666  
SRR17520069. 25667  
SRR17520069. 25668  
SRR17520069. 25669  
SRR17520069. 25670  
SRR17520069. 25671  
SRR17520069. 25672  
SRR17520069. 25673  
SRR17520069. 25674  
SRR17520069. 25675  
SRR17520069. 25676  
SRR17520069. 25677  
SRR17520069. 25678  
SRR17520069. 25679  
SRR17520069. 25680  
SRR17520069. 25681  
SRR17520069. 25682  
SRR17520069. 25683  
SRR17520069. 25684  
SRR17520069. 25685  
SRR17520069. 25686  
SRR17520069. 25687  
SRR17520069. 25688  
SRR17520069. 25689  
SRR17520069. 25690  
SRR17520069. 25691  
SRR17520069. 25692  
SRR17520069. 25693  
SRR17520069. 25694  
SRR17520069. 25695  
SRR17520069. 25696  
SRR17520069. 25697  
SRR17520069. 25698  
SRR17520069. 25699  
SRR17520069. 25700  
SRR17520069. 25701  
SRR17520069. 25702  
SRR17520069. 25703

SRR17520069. 25704  
SRR17520069. 25706  
SRR17520069. 25707  
SRR17520069. 25708  
SRR17520069. 25709  
SRR17520069. 25710  
SRR17520069. 25711  
SRR17520069. 25712  
SRR17520069. 25713  
SRR17520069. 25714  
SRR17520069. 25715  
SRR17520069. 25716  
SRR17520069. 25717  
SRR17520069. 25718  
SRR17520069. 25719  
SRR17520069. 25720  
SRR17520069. 25721  
SRR17520069. 25722  
SRR17520069. 25723  
SRR17520069. 25724  
SRR17520069. 25725  
SRR17520069. 25726  
SRR17520069. 32032  
SRR17520069. 32033  
SRR17520069. 32034  
SRR17520069. 32035  
SRR17520069. 32036  
SRR17520069. 32037  
SRR17520069. 32038  
SRR17520069. 32039  
SRR17520069. 32040  
SRR17520069. 32041  
SRR17520069. 32042  
SRR17520069. 32043  
SRR17520069. 32044  
SRR17520069. 32045  
SRR17520069. 32046  
SRR17520069. 32047  
SRR17520069. 32048  
SRR17520069. 32049  
SRR17520069. 32050  
SRR17520069. 32051  
SRR17520069. 32052  
SRR17520069. 32053  
SRR17520069. 32054  
SRR17520069. 32055  
SRR17520069. 32056

SRR17520069. 32057  
SRR17520069. 32058  
SRR17520069. 32059  
SRR17520069. 32060  
SRR17520069. 32061  
SRR17520069. 32062  
SRR17520069. 32063  
SRR17520069. 32064  
SRR17520069. 32065  
SRR17520069. 32066  
SRR17520069. 32067  
SRR17520069. 32068  
SRR17520069. 32069  
SRR17520069. 32070  
SRR17520069. 32071  
SRR17520069. 32073  
SRR17520069. 32074  
SRR17520069. 32075  
SRR17520069. 32076  
SRR17520069. 32077  
SRR17520069. 32078  
SRR17520069. 32079  
SRR17520069. 32081  
SRR17520069. 32082  
SRR17520069. 32083  
SRR17520069. 32084  
SRR17520069. 32085  
SRR17520069. 32086  
SRR17520069. 32087  
SRR17520069. 32088  
SRR17520069. 32089  
SRR17520069. 32090  
SRR17520069. 32091  
SRR17520069. 32092  
SRR17520069. 32093  
SRR17520069. 32094  
SRR17520069. 32095  
SRR17520069. 32096  
SRR17520069. 32097  
SRR17520069. 32098  
SRR17520069. 32099  
SRR17520069. 32100  
SRR17520069. 32101  
SRR17520069. 32102  
SRR17520069. 32103  
SRR17520069. 32104  
SRR17520069. 32105

SRR17520069. 32106  
SRR17520069. 33387  
SRR17520069. 33388  
SRR17520069. 33389  
SRR17520069. 33390  
SRR17520069. 33391  
SRR17520069. 33392  
SRR17520069. 33393  
SRR17520069. 33394  
SRR17520069. 33395  
SRR17520069. 33396  
SRR17520069. 33397  
SRR17520069. 33398  
SRR17520069. 33399  
SRR17520069. 33400  
SRR17520069. 33401  
SRR17520069. 33402  
SRR17520069. 33403  
SRR17520069. 33404  
SRR17520069. 33405  
SRR17520069. 33406  
SRR17520069. 34484  
SRR17520069. 34485  
SRR17520069. 34486  
SRR17520069. 34487  
SRR17520069. 34488  
SRR17520069. 34489  
SRR17520069. 34490  
SRR17520069. 34491  
SRR17520069. 34492  
SRR17520069. 34493  
SRR17520069. 34494  
SRR17520069. 34495  
SRR17520069. 34496  
SRR17520069. 34497  
SRR17520069. 34498  
SRR17520069. 34499  
SRR17520069. 34500  
SRR17520069. 34501  
SRR17520069. 34502  
SRR17520069. 34503  
SRR17520069. 34504  
SRR17520069. 34505  
SRR17520069. 34506  
SRR17520069. 34507  
SRR17520069. 34508  
SRR17520069. 34509

SRR17520069.34511  
SRR17520069.34512  
SRR17520069.34513  
SRR17520069.34514  
SRR17520069.34515  
SRR17520069.34517  
SRR17520069.34518  
SRR17520069.34519  
SRR17520069.34520  
SRR17520069.34521  
SRR17520069.34522  
SRR17520069.34523  
SRR17520069.34524  
SRR17520069.34525  
SRR17520069.34526  
SRR17520069.34527  
SRR17520069.34528  
SRR17520069.34529  
SRR17520069.34530  
SRR17520069.34531  
SRR17520069.34532  
SRR17520069.34533  
SRR17520069.34534  
SRR17520069.34535  
SRR17520069.34536  
SRR17520069.34537  
SRR17520069.34538  
SRR17520069.34539  
SRR17520069.34540  
SRR17520069.34541  
SRR17520069.34542  
SRR17520069.34543  
SRR17520069.34544  
SRR17520069.34545  
SRR17520069.34546  
SRR17520069.34547  
SRR17520069.34548  
SRR17520069.34549  
SRR17520069.34550  
SRR17520069.34551  
SRR17520069.34552  
SRR17520069.34553  
SRR17520069.34554  
SRR17520069.34555  
SRR17520069.34556  
SRR17520069.34557  
SRR17520069.34558

SRR17520069. 34559  
SRR17520069. 34560  
SRR17520069. 34561  
SRR17520069. 34562  
SRR17520069. 34563  
SRR17520069. 34564  
SRR17520069. 34565  
SRR17520069. 34566  
SRR17520069. 34567  
SRR17520069. 34568  
SRR17520069. 34569  
SRR17520069. 34570  
SRR17520069. 34571  
SRR17520069. 34572  
SRR17520069. 34573  
SRR17520069. 34575  
SRR17520069. 34576  
SRR17520069. 34577  
SRR17520069. 34578  
SRR17520069. 34579  
SRR17520069. 34580  
SRR17520069. 34581  
SRR17520069. 34582  
SRR17520069. 34583  
SRR17520069. 34584  
SRR17520069. 34585  
SRR17520069. 34586  
SRR17520069. 34587  
SRR17520069. 34588  
SRR17520069. 34589  
SRR17520069. 34590  
SRR17520069. 34591  
SRR17520069. 34592  
SRR17520069. 34593  
SRR17520069. 34594  
SRR17520069. 34595  
SRR17520069. 48274  
SRR17520069. 48275  
SRR17520069. 48276  
SRR17520069. 48277  
SRR17520069. 48278  
SRR17520069. 48279  
SRR17520069. 48280  
SRR17520069. 48281  
SRR17520069. 48282  
SRR17520069. 48283  
SRR17520069. 48284



SRR17520069.48285  
SRR17520069.48286  
SRR17520069.48287  
SRR17520069.48288  
SRR17520069.48289  
SRR17520069.48290  
SRR17520069.48291  
SRR17520069.48293  
SRR17520069.48294  
SRR17520069.48295  
SRR17520069.48296  
SRR17520069.48297  
SRR17520069.48298  
SRR17520069.48299  
SRR17520069.48300  
SRR17520069.48301  
SRR17520069.48302  
SRR17520069.48303  
SRR17520069.48304  
SRR17520069.48305  
SRR17520069.48306  
SRR17520069.48307  
SRR17520069.48308  
SRR17520069.48309  
SRR17520069.48310  
SRR17520069.48311  
SRR17520069.48312  
SRR17520069.48313  
SRR17520069.48314  
SRR17520069.48315  
SRR17520069.48316  
SRR17520069.48317  
SRR17520069.48318  
SRR17520069.48319  
SRR17520069.48320  
SRR17520069.48321  
SRR17520069.48322  
SRR17520069.48323  
SRR17520069.48324  
SRR17520069.48325  
SRR17520069.48326  
SRR17520069.48327  
SRR17520069.48328  
SRR17520069.48329  
SRR17520069.48330  
SRR17520069.48331  
SRR17520069.48332

SRR17520069.48333  
SRR17520069.48334  
SRR17520069.48335  
SRR17520069.48336  
SRR17520069.48337  
SRR17520069.48338  
SRR17520069.48339  
SRR17520069.48340  
SRR17520069.48341  
SRR17520069.48342  
SRR17520069.48343  
SRR17520069.48344  
SRR17520069.48345  
SRR17520069.48346  
SRR17520069.48347  
SRR17520069.48348  
SRR17520069.48349  
SRR17520069.48350  
SRR17520069.48351  
SRR17520069.48352  
SRR17520069.48353  
SRR17520069.48354  
SRR17520069.48355  
SRR17520069.48356  
SRR17520069.48357  
SRR17520069.48358  
SRR17520069.48359  
SRR17520069.48360  
SRR17520069.48361  
SRR17520069.48362  
SRR17520069.48363  
SRR17520069.48364  
SRR17520069.48365  
SRR17520069.48366  
SRR17520069.48367  
SRR17520069.48368  
SRR17520069.48369  
SRR17520069.48370  
SRR17520069.48371  
SRR17520069.48372  
SRR17520069.48373  
SRR17520069.48374  
SRR17520069.48375  
SRR17520069.48376  
SRR17520069.48377  
SRR17520069.48378  
SRR17520069.48379

SRR17520069.48380  
SRR17520069.48381  
SRR17520069.48382  
SRR17520069.48384  
SRR17520069.48385  
SRR17520069.48386  
SRR17520069.48387  
SRR17520069.48388  
SRR17520069.48389  
SRR17520069.48390  
SRR17520069.48391  
SRR17520069.48392  
SRR17520069.48393  
SRR17520069.48394  
SRR17520069.48395  
SRR17520069.48396  
SRR17520069.48397  
SRR17520069.48398  
SRR17520069.48399  
SRR17520069.48400  
SRR17520069.48401  
SRR17520069.48402  
SRR17520069.48403  
SRR17520069.48404  
SRR17520069.48406  
SRR17520069.48407  
SRR17520069.48408  
SRR17520069.48409  
SRR17520069.48410  
SRR17520069.48411  
SRR17520069.48412  
SRR17520069.48413  
SRR17520069.48414  
SRR17520069.48415  
SRR17520069.48416  
SRR17520069.48417  
SRR17520069.48418  
SRR17520069.48419  
SRR17520069.48420  
SRR17520069.48421  
SRR17520069.48422  
SRR17520069.48423  
SRR17520069.48424  
SRR17520069.48425  
SRR17520069.48426  
SRR17520069.59872  
SRR17520069.59873

SRR17520069.59874  
SRR17520069.59875  
SRR17520069.59876  
SRR17520069.59877  
SRR17520069.59878  
SRR17520069.59880  
SRR17520069.73358  
SRR17520069.73359  
SRR17520069.73360  
SRR17520069.73361  
SRR17520069.73362  
SRR17520069.82580  
SRR17520069.82581  
SRR17520069.82582  
SRR17520069.82583  
SRR17520069.82584  
SRR17520069.82585  
SRR17520069.82586  
SRR17520069.82587  
SRR17520069.82588  
SRR17520069.82589  
SRR17520069.82590  
SRR17520069.82592  
SRR17520069.82593  
SRR17520069.82594  
SRR17520069.82595  
SRR17520069.82596  
SRR17520069.82597  
SRR17520069.82598  
SRR17520069.82599  
SRR17520069.82600  
SRR17520069.82601  
SRR17520069.82602  
SRR17520069.82603  
SRR17520069.82604  
SRR17520069.82605  
SRR17520069.82606  
SRR17520069.82607  
SRR17520069.82608  
SRR17520069.82609  
SRR17520069.82610  
SRR17520069.82611  
SRR17520069.82612  
SRR17520069.82613  
SRR17520069.82614  
SRR17520069.82615  
SRR17520069.82616

SRR17520069.82617  
SRR17520069.82618  
SRR17520069.82619  
SRR17520069.82620  
SRR17520069.82621  
SRR17520069.82622  
SRR17520069.82623  
SRR17520069.82624  
SRR17520069.82625  
SRR17520069.82626  
SRR17520069.82627  
SRR17520069.82628  
SRR17520069.82629  
SRR17520069.82631  
SRR17520069.82632  
SRR17520069.82633  
SRR17520069.82634  
SRR17520069.82635  
SRR17520069.82636  
SRR17520069.82637  
SRR17520069.82638  
SRR17520069.82639  
SRR17520069.82640  
SRR17520069.82641  
SRR17520069.82642  
SRR17520069.82643  
SRR17520069.82644  
SRR17520069.82645  
SRR17520069.82646  
SRR17520069.82647  
SRR17520069.82648  
SRR17520069.82649  
SRR17520069.82650  
SRR17520069.82651  
SRR17520069.82652  
SRR17520069.82653  
SRR17520069.82654  
SRR17520069.82655  
SRR17520069.82656  
SRR17520069.82657  
SRR17520069.82658  
SRR17520069.82659  
SRR17520069.82660  
SRR17520069.82661  
SRR17520069.82662  
SRR17520069.82663  
SRR17520069.82664

SRR17520069.82665  
SRR17520069.82666  
SRR17520069.82667  
SRR17520069.82668  
SRR17520069.82669  
SRR17520069.82670  
SRR17520069.82671  
SRR17520069.82672  
SRR17520069.82673  
SRR17520069.82674  
SRR17520069.82675  
SRR17520069.82676  
SRR17520069.82677  
SRR17520069.82678  
SRR17520069.82679  
SRR17520069.82680  
SRR17520069.82681  
SRR17520069.82682  
SRR17520069.82683  
SRR17520069.82684  
SRR17520069.82685  
SRR17520069.82686  
SRR17520069.82687  
SRR17520069.82688  
SRR17520069.82689  
SRR17520069.82690  
SRR17520069.82691  
SRR17520069.82692  
SRR17520069.82693  
SRR17520069.82694  
SRR17520069.82695  
SRR17520069.82696  
SRR17520069.82697  
SRR17520069.82698  
SRR17520069.82699  
SRR17520069.82700  
SRR17520069.82701  
SRR17520069.82702  
SRR17520069.82703  
SRR17520069.82704  
SRR17520069.82705  
SRR17520069.82706  
SRR17520069.82707  
SRR17520069.82708  
SRR17520069.82709  
SRR17520069.82710  
SRR17520069.82711

SRR17520069.82712  
SRR17520069.82713  
SRR17520069.82714  
SRR17520069.82715  
SRR17520069.82716  
SRR17520069.82717  
SRR17520069.82718  
SRR17520069.82719  
SRR17520069.82720  
SRR17520069.82721  
SRR17520069.82722  
SRR17520069.82723  
SRR17520069.82724  
SRR17520069.82725  
SRR17520069.82726  
SRR17520069.82727  
SRR17520069.114790  
SRR17520069.123267  
SRR17520069.123268  
SRR17520069.123269  
SRR17520069.123270  
SRR17520069.123271  
SRR17520069.123272  
SRR17520069.123274  
SRR17520069.123343  
SRR17520069.123349  
SRR17520069.123353  
SRR17520069.124757  
SRR17520069.125877  
SRR17520069.125878  
SRR17520069.125879  
SRR17520069.125880  
SRR17520069.125881  
SRR17520069.125882  
SRR17520069.125883  
SRR17520069.125884  
SRR17520069.125885  
SRR17520069.125886  
SRR17520069.125887  
SRR17520069.125888  
SRR17520069.125889  
SRR17520069.125890  
SRR17520069.125891  
SRR17520069.125892  
SRR17520069.125893  
SRR17520069.125894  
SRR17520069.125895

SRR17520069.125897  
SRR17520069.125898  
SRR17520069.125899  
SRR17520069.125900  
SRR17520069.125901  
SRR17520069.125902  
SRR17520069.125903  
SRR17520069.125904  
SRR17520069.125905  
SRR17520069.125906  
SRR17520069.125907  
SRR17520069.125908  
SRR17520069.125909  
SRR17520069.125910  
SRR17520069.125911  
SRR17520069.125912  
SRR17520069.125913  
SRR17520069.125914  
SRR17520069.125915  
SRR17520069.125916  
SRR17520069.125917  
SRR17520069.125918  
SRR17520069.125919  
SRR17520069.125920  
SRR17520069.125921  
SRR17520069.125922  
SRR17520069.125923  
SRR17520069.125925  
SRR17520069.169186  
SRR17520069.169188  
SRR17520069.169189  
SRR17520069.169190  
SRR17520069.169191  
SRR17520069.169192  
SRR17520069.169193  
SRR17520069.169194  
SRR17520069.169195  
SRR17520069.169196  
SRR17520069.169197  
SRR17520069.169198  
SRR17520069.169199  
SRR17520069.169200  
SRR17520069.169201  
SRR17520069.169202  
SRR17520069.169203  
SRR17520069.169204  
SRR17520069.169205



SRR17520069. 169206  
SRR17520069. 169207  
SRR17520069. 169208  
SRR17520069. 169209  
SRR17520069. 169211  
SRR17520069. 169212  
SRR17520069. 169213  
SRR17520069. 169214  
SRR17520069. 169215  
SRR17520069. 169216  
SRR17520069. 169217  
SRR17520069. 169219  
SRR17520069. 169220  
SRR17520069. 169221  
SRR17520069. 169222  
SRR17520069. 169223  
SRR17520069. 169224  
SRR17520069. 169225  
SRR17520069. 169227  
SRR17520069. 169228  
SRR17520069. 169229  
SRR17520069. 169231  
SRR17520069. 169232  
SRR17520069. 169233  
SRR17520069. 186039  
SRR17520069. 187928  
SRR17520069. 195800  
SRR17520069. 195801  
SRR17520069. 195802  
SRR17520069. 195803  
SRR17520069. 195804  
SRR17520069. 195805  
SRR17520069. 195806  
SRR17520069. 204634  
SRR17520069. 207498  
SRR17520069. 215938  
SRR17520069. 215939  
SRR17520069. 215940  
SRR17520069. 215941  
SRR17520069. 215942  
SRR17520069. 215943  
SRR17520069. 215944  
SRR17520069. 215945  
SRR17520069. 215946  
SRR17520069. 215947  
SRR17520069. 218115  
SRR17520069. 224933

SRR17520069.224934  
SRR17520069.224935  
SRR17520069.224936  
SRR17520069.224937  
SRR17520069.224938  
SRR17520069.224939  
SRR17520069.224940  
SRR17520069.224941  
SRR17520069.224942  
SRR17520069.224943  
SRR17520069.224944  
SRR17520069.224945  
SRR17520069.224946  
SRR17520069.224947  
SRR17520069.224948  
SRR17520069.224949  
SRR17520069.224950  
SRR17520069.224951  
SRR17520069.224952  
SRR17520069.224953  
SRR17520069.224954  
SRR17520069.224955  
SRR17520069.224956  
SRR17520069.224957  
SRR17520069.224958  
SRR17520069.224959  
SRR17520069.224960  
SRR17520069.224961  
SRR17520069.224962  
SRR17520069.224963  
SRR17520069.224964  
SRR17520069.224965  
SRR17520069.224966  
SRR17520069.224967  
SRR17520069.224968  
SRR17520069.224969  
SRR17520069.224970  
SRR17520069.224971  
SRR17520069.224972  
SRR17520069.224973  
SRR17520069.224974  
SRR17520069.224975  
SRR17520069.224976  
SRR17520069.224977  
SRR17520069.234155  
SRR17520069.234187  
SRR17520069.234197

SRR17520069.243410  
SRR17520069.243411  
SRR17520069.257210  
SRR17520069.265017  
SRR17520069.265018  
SRR17520069.265019  
SRR17520069.265020  
SRR17520069.265021  
SRR17520069.265022  
SRR17520069.265023  
SRR17520069.265024  
SRR17520069.265025  
SRR17520069.265026  
SRR17520069.265027  
SRR17520069.265028  
SRR17520069.265029  
SRR17520069.265030  
SRR17520069.265031  
SRR17520069.265032  
SRR17520069.265033  
SRR17520069.265034  
SRR17520069.265035  
SRR17520069.265036  
SRR17520069.265037  
SRR17520069.265038  
SRR17520069.265039  
SRR17520069.265040  
SRR17520069.265041  
SRR17520069.265042  
SRR17520069.265043  
SRR17520069.265044  
SRR17520069.265045  
SRR17520069.265046  
SRR17520069.265047  
SRR17520069.265048  
SRR17520069.265049  
SRR17520069.265050  
SRR17520069.265051  
SRR17520069.265052  
SRR17520069.265053  
SRR17520069.265054  
SRR17520069.265055  
SRR17520069.265056  
SRR17520069.265057  
SRR17520069.265058  
SRR17520069.265059  
SRR17520069.265060

SRR17520069. 265061  
SRR17520069. 265062  
SRR17520069. 265063  
SRR17520069. 265064  
SRR17520069. 265065  
SRR17520069. 265066  
SRR17520069. 265068  
SRR17520069. 265069  
SRR17520069. 265070  
SRR17520069. 265071  
SRR17520069. 265073  
SRR17520069. 265074  
SRR17520069. 265075  
SRR17520069. 265076  
SRR17520069. 265077  
SRR17520069. 265078  
SRR17520069. 265079  
SRR17520069. 265080  
SRR17520069. 265081  
SRR17520069. 265082  
SRR17520069. 265083  
SRR17520069. 265084  
SRR17520069. 265085  
SRR17520069. 274683  
SRR17520069. 274684  
SRR17520069. 278245  
SRR17520069. 279424  
SRR17520069. 279429  
SRR17520069. 279462  
SRR17520069. 300871  
SRR17520069. 301036  
SRR17520069. 338804  
SRR17520069. 338805  
SRR17520069. 338806  
SRR17520069. 338807  
SRR17520069. 338808  
SRR17520069. 338809  
SRR17520069. 338810  
SRR17520069. 338811  
SRR17520069. 338813  
SRR17520069. 338815  
SRR17520069. 338817  
SRR17520069. 338818  
SRR17520069. 338819  
SRR17520069. 338820  
SRR17520069. 338821  
SRR17520069. 338824

SRR17520069. 338825  
SRR17520069. 338827  
SRR17520069. 338828  
SRR17520069. 338829  
SRR17520069. 338830  
SRR17520069. 338832  
SRR17520069. 338833  
SRR17520069. 338835  
SRR17520069. 341080  
SRR17520069. 341422  
SRR17520069. 341423  
SRR17520069. 341424  
SRR17520069. 341425  
SRR17520069. 341426  
SRR17520069. 341427  
SRR17520069. 341429  
SRR17520069. 341430  
SRR17520069. 341431  
SRR17520069. 341432  
SRR17520069. 341433  
SRR17520069. 341434  
SRR17520069. 341435  
SRR17520069. 341436  
SRR17520069. 341437  
SRR17520069. 341438  
SRR17520069. 341439  
SRR17520069. 341440  
SRR17520069. 341441  
SRR17520069. 341442  
SRR17520069. 341443  
SRR17520069. 341444  
SRR17520069. 341445  
SRR17520069. 341446  
SRR17520069. 341447  
SRR17520069. 341448  
SRR17520069. 341449  
SRR17520069. 341450  
SRR17520069. 341451  
SRR17520069. 341452  
SRR17520069. 341453  
SRR17520069. 341454  
SRR17520069. 341455  
SRR17520069. 341456  
SRR17520069. 341457  
SRR17520069. 341458  
SRR17520069. 341459  
SRR17520069. 341460

SRR17520069. 341461  
SRR17520069. 341462  
SRR17520069. 341463  
SRR17520069. 341464  
SRR17520069. 341465  
SRR17520069. 341466  
SRR17520069. 341467  
SRR17520069. 341468  
SRR17520069. 341469  
SRR17520069. 341470  
SRR17520069. 341471  
SRR17520069. 341472  
SRR17520069. 341473  
SRR17520069. 341474  
SRR17520069. 341475  
SRR17520069. 341476  
SRR17520069. 341478  
SRR17520069. 341479  
SRR17520069. 341480  
SRR17520069. 341481  
SRR17520069. 341482  
SRR17520069. 341483  
SRR17520069. 341484  
SRR17520069. 341485  
SRR17520069. 341486  
SRR17520069. 341487  
SRR17520069. 341488  
SRR17520069. 341489  
SRR17520069. 341490  
SRR17520069. 341491  
SRR17520069. 341492  
SRR17520069. 341493  
SRR17520069. 341494  
SRR17520069. 341495  
SRR17520069. 341496  
SRR17520069. 341497  
SRR17520069. 341498  
SRR17520069. 341499  
SRR17520069. 341500  
SRR17520069. 341501  
SRR17520069. 341502  
SRR17520069. 341503  
SRR17520069. 341504  
SRR17520069. 341506  
SRR17520069. 341507  
SRR17520069. 341508  
SRR17520069. 341509

SRR17520069.341510  
SRR17520069.341511  
SRR17520069.341512  
SRR17520069.341513  
SRR17520069.341514  
SRR17520069.341515  
SRR17520069.396358  
SRR17520069.396364  
SRR17520069.428059  
SRR17520069.428753  
SRR17520069.442093  
SRR17520069.450622  
SRR17520069.450679  
SRR17520069.450680  
SRR17520069.450681  
SRR17520069.450682  
SRR17520069.450683  
SRR17520069.450684  
SRR17520069.450685  
SRR17520069.450686  
SRR17520069.450687  
SRR17520069.450688  
SRR17520069.450689  
SRR17520069.450690  
SRR17520069.450691  
SRR17520069.450692  
SRR17520069.450693  
SRR17520069.450694  
SRR17520069.450695  
SRR17520069.450696  
SRR17520069.450697  
SRR17520069.450698  
SRR17520069.450699  
SRR17520069.450700  
SRR17520069.450701  
SRR17520069.450702  
SRR17520069.450703  
SRR17520069.450704  
SRR17520069.450705  
SRR17520069.450706  
SRR17520069.450707  
SRR17520069.450708  
SRR17520069.450710  
SRR17520069.450711  
SRR17520069.450712  
SRR17520069.450713  
SRR17520069.450714

SRR17520069.450715  
SRR17520069.450716  
SRR17520069.450717  
SRR17520069.450718  
SRR17520069.450719  
SRR17520069.450720  
SRR17520069.450721  
SRR17520069.450722  
SRR17520069.450723  
SRR17520069.450724  
SRR17520069.450725  
SRR17520069.450726  
SRR17520069.450727  
SRR17520069.450728  
SRR17520069.450729  
SRR17520069.450730  
SRR17520069.450731  
SRR17520069.450732  
SRR17520069.450733  
SRR17520069.450734  
SRR17520069.450736  
SRR17520069.450737  
SRR17520069.450738  
SRR17520069.450739  
SRR17520069.450740  
SRR17520069.450741  
SRR17520069.450742  
SRR17520069.450743  
SRR17520069.450744  
SRR17520069.450745  
SRR17520069.450746  
SRR17520069.450747  
SRR17520069.450748  
SRR17520069.450749  
SRR17520069.450750  
SRR17520069.450751  
SRR17520069.450752  
SRR17520069.450753  
SRR17520069.450754  
SRR17520069.450755  
SRR17520069.450756  
SRR17520069.450757  
SRR17520069.450758  
SRR17520069.450759  
SRR17520069.450760  
SRR17520069.450761  
SRR17520069.450762



SRR17520069.450763  
SRR17520069.450764  
SRR17520069.450765  
SRR17520069.450766  
SRR17520069.450767  
SRR17520069.450768  
SRR17520069.450769  
SRR17520069.450770  
SRR17520069.450771  
SRR17520069.450772  
SRR17520069.450773  
SRR17520069.450774  
SRR17520069.450775  
SRR17520069.450776  
SRR17520069.450777  
SRR17520069.450778  
SRR17520069.450779  
SRR17520069.450780  
SRR17520069.450781  
SRR17520069.450782  
SRR17520069.450783  
SRR17520069.450784  
SRR17520069.450785  
SRR17520069.450786  
SRR17520069.450787  
SRR17520069.450788  
SRR17520069.450789  
SRR17520069.450790  
SRR17520069.450791  
SRR17520069.450792  
SRR17520069.450793  
SRR17520069.450794  
SRR17520069.450795  
SRR17520069.450796  
SRR17520069.450797  
SRR17520069.450798  
SRR17520069.450799  
SRR17520069.450800  
SRR17520069.450801  
SRR17520069.450802  
SRR17520069.450803  
SRR17520069.450804  
SRR17520069.450805  
SRR17520069.450806  
SRR17520069.450807  
SRR17520069.450808  
SRR17520069.450809

SRR17520069.450810  
SRR17520069.450811  
SRR17520069.453700  
SRR17520069.453701  
SRR17520069.453702  
SRR17520069.453703  
SRR17520069.453704  
SRR17520069.453705  
SRR17520069.453706  
SRR17520069.453707  
SRR17520069.453708  
SRR17520069.453709  
SRR17520069.453710  
SRR17520069.453711  
SRR17520069.453712  
SRR17520069.453713  
SRR17520069.453714  
SRR17520069.453715  
SRR17520069.453716  
SRR17520069.453718  
SRR17520069.453719  
SRR17520069.453720  
SRR17520069.453721  
SRR17520069.453722  
SRR17520069.453723  
SRR17520069.453725  
SRR17520069.453726  
SRR17520069.453727  
SRR17520069.453728  
SRR17520069.453729  
SRR17520069.453730  
SRR17520069.453731  
SRR17520069.453733  
SRR17520069.453734  
SRR17520069.453735  
SRR17520069.453736  
SRR17520069.453737  
SRR17520069.453738  
SRR17520069.453739  
SRR17520069.453740  
SRR17520069.453741  
SRR17520069.453742  
SRR17520069.453743  
SRR17520069.453744  
SRR17520069.453745  
SRR17520069.453746  
SRR17520069.453747

SRR17520069.453749  
SRR17520069.453750  
SRR17520069.453751  
SRR17520069.453752  
SRR17520069.453753  
SRR17520069.453754  
SRR17520069.453755  
SRR17520069.453756  
SRR17520069.453757  
SRR17520069.453758  
SRR17520069.453759  
SRR17520069.453760  
SRR17520069.453761  
SRR17520069.453762  
SRR17520069.453763  
SRR17520069.453764  
SRR17520069.453765  
SRR17520069.453767  
SRR17520069.453768  
SRR17520069.453769  
SRR17520069.453770  
SRR17520069.453772  
SRR17520069.453773  
SRR17520069.453774  
SRR17520069.453775  
SRR17520069.453776  
SRR17520069.453778  
SRR17520069.453779  
SRR17520069.453780  
SRR17520069.453781  
SRR17520069.453783  
SRR17520069.453784  
SRR17520069.453785  
SRR17520069.453786  
SRR17520069.453787  
SRR17520069.453788  
SRR17520069.453789  
SRR17520069.453790  
SRR17520069.453792  
SRR17520069.453793  
SRR17520069.453794  
SRR17520069.453795  
SRR17520069.453797  
SRR17520069.453798  
SRR17520069.453799  
SRR17520069.453800  
SRR17520069.453801

SRR17520069.453802  
SRR17520069.453803  
SRR17520069.453804  
SRR17520069.453806  
SRR17520069.453807  
SRR17520069.453808  
SRR17520069.453809  
SRR17520069.453810  
SRR17520069.453811  
SRR17520069.453812  
SRR17520069.453813  
SRR17520069.453814  
SRR17520069.453815  
SRR17520069.453816  
SRR17520069.453817  
SRR17520069.453818  
SRR17520069.453820  
SRR17520069.453821  
SRR17520069.453822  
SRR17520069.453823  
SRR17520069.453824  
SRR17520069.453825  
SRR17520069.453826  
SRR17520069.453827  
SRR17520069.453828  
SRR17520069.453829  
SRR17520069.453830  
SRR17520069.453831  
SRR17520069.453832  
SRR17520069.453834  
SRR17520069.453835  
SRR17520069.453836  
SRR17520069.453837  
SRR17520069.453838  
SRR17520069.471884  
SRR17520069.478824  
SRR17520069.498688  
SRR17520069.498689  
SRR17520069.498690  
SRR17520069.498691  
SRR17520069.498692  
SRR17520069.498693  
SRR17520069.498694  
SRR17520069.498695  
SRR17520069.498696  
SRR17520069.498697  
SRR17520069.498698

SRR17520069.498699  
SRR17520069.498700  
SRR17520069.498701  
SRR17520069.498702  
SRR17520069.498703  
SRR17520069.498704  
SRR17520069.498705  
SRR17520069.498706  
SRR17520069.498707  
SRR17520069.498708  
SRR17520069.498709  
SRR17520069.498710  
SRR17520069.498711  
SRR17520069.498712  
SRR17520069.498713  
SRR17520069.498714  
SRR17520069.498715  
SRR17520069.498716  
SRR17520069.498717  
SRR17520069.498723  
SRR17520069.498724  
SRR17520069.498725  
SRR17520069.498726  
SRR17520069.498727  
SRR17520069.498728  
SRR17520069.498729  
SRR17520069.498730  
SRR17520069.498731  
SRR17520069.498732  
SRR17520069.498733  
SRR17520069.498734  
SRR17520069.498735  
SRR17520069.498736  
SRR17520069.498737  
SRR17520069.498738  
SRR17520069.498739  
SRR17520069.498740  
SRR17520069.498741  
SRR17520069.498742  
SRR17520069.498743  
SRR17520069.498744  
SRR17520069.498745  
SRR17520069.498746  
SRR17520069.498747  
SRR17520069.498748  
SRR17520069.498749  
SRR17520069.498750

SRR17520069.498751  
SRR17520069.498752  
SRR17520069.498753  
SRR17520069.498754  
SRR17520069.498755  
SRR17520069.498756  
SRR17520069.498757  
SRR17520069.498758  
SRR17520069.498759  
SRR17520069.498760  
SRR17520069.498761  
SRR17520069.498762  
SRR17520069.498763  
SRR17520069.498764  
SRR17520069.498765  
SRR17520069.498766  
SRR17520069.498767  
SRR17520069.498768  
SRR17520069.498769  
SRR17520069.498770  
SRR17520069.498771  
SRR17520069.498772  
SRR17520069.498773  
SRR17520069.498774  
SRR17520069.498775  
SRR17520069.498776  
SRR17520069.498777  
SRR17520069.498778  
SRR17520069.498779  
SRR17520069.498780  
SRR17520069.498781  
SRR17520069.498782  
SRR17520069.498783  
SRR17520069.498784  
SRR17520069.498785  
SRR17520069.498786  
SRR17520069.498787  
SRR17520069.498788  
SRR17520069.498789  
SRR17520069.498791  
SRR17520069.498792  
SRR17520069.498793  
SRR17520069.498794  
SRR17520069.498795  
SRR17520069.498796  
SRR17520069.498797  
SRR17520069.498798

SRR17520069.498799  
SRR17520069.498800  
SRR17520069.498801  
SRR17520069.498802  
SRR17520069.498803  
SRR17520069.498805  
SRR17520069.498806  
SRR17520069.498807  
SRR17520069.498808  
SRR17520069.498809  
SRR17520069.498810  
SRR17520069.498811  
SRR17520069.498812  
SRR17520069.498813  
SRR17520069.498814  
SRR17520069.498815  
SRR17520069.498816  
SRR17520069.498817  
SRR17520069.498818  
SRR17520069.498819  
SRR17520069.498820  
SRR17520069.498821  
SRR17520069.498822  
SRR17520069.498823  
SRR17520069.498824  
SRR17520069.498825  
SRR17520069.498826  
SRR17520069.498827  
SRR17520069.498828  
SRR17520069.498829  
SRR17520069.498830  
SRR17520069.498831  
SRR17520069.498832  
SRR17520069.498833  
SRR17520069.498834  
SRR17520069.501532  
SRR17520069.516659  
SRR17520069.516661  
SRR17520069.521179  
SRR17520069.521181  
SRR17520069.521182  
SRR17520069.521183  
SRR17520069.521184  
SRR17520069.521185  
SRR17520069.521186  
SRR17520069.521187  
SRR17520069.521188

SRR17520069.521189  
SRR17520069.521190  
SRR17520069.521191  
SRR17520069.521192  
SRR17520069.521194  
SRR17520069.521195  
SRR17520069.521196  
SRR17520069.521199  
SRR17520069.521200  
SRR17520069.521203  
SRR17520069.521204  
SRR17520069.521205  
SRR17520069.521206  
SRR17520069.521207  
SRR17520069.521208  
SRR17520069.521209  
SRR17520069.521210  
SRR17520069.521212  
SRR17520069.521213  
SRR17520069.521214  
SRR17520069.521215  
SRR17520069.521216  
SRR17520069.521217  
SRR17520069.521218  
SRR17520069.521220  
SRR17520069.521221  
SRR17520069.521948  
SRR17520069.541356  
SRR17520069.541358  
SRR17520069.544944  
SRR17520069.544949  
SRR17520069.545725  
SRR17520069.545751  
SRR17520069.552353  
SRR17520069.556357  
SRR17520069.573821  
SRR17520069.573822  
SRR17520069.573823  
SRR17520069.573824  
SRR17520069.573825  
SRR17520069.573826  
SRR17520069.573827  
SRR17520069.573828  
SRR17520069.573829  
SRR17520069.573830  
SRR17520069.573831  
SRR17520069.573832



SRR17520069. 573833  
SRR17520069. 573834  
SRR17520069. 573835  
SRR17520069. 573836  
SRR17520069. 573837  
SRR17520069. 573838  
SRR17520069. 573839  
SRR17520069. 573840  
SRR17520069. 573841  
SRR17520069. 573842  
SRR17520069. 573843  
SRR17520069. 573844  
SRR17520069. 573845  
SRR17520069. 573846  
SRR17520069. 573847  
SRR17520069. 573848  
SRR17520069. 573849  
SRR17520069. 573850  
SRR17520069. 573851  
SRR17520069. 573852  
SRR17520069. 573853  
SRR17520069. 573854  
SRR17520069. 573855  
SRR17520069. 573856  
SRR17520069. 573857  
SRR17520069. 573858  
SRR17520069. 573859  
SRR17520069. 595016  
SRR17520069. 595017  
SRR17520069. 595018  
SRR17520069. 595019  
SRR17520069. 595021  
SRR17520069. 595022  
SRR17520069. 595023  
SRR17520069. 595024  
SRR17520069. 595025  
SRR17520069. 595026  
SRR17520069. 595027  
SRR17520069. 595028  
SRR17520069. 595029  
SRR17520069. 595030  
SRR17520069. 595031  
SRR17520069. 595032  
SRR17520069. 595033  
SRR17520069. 595034  
SRR17520069. 595035  
SRR17520069. 595036

SRR17520069.595037  
SRR17520069.595038  
SRR17520069.595039  
SRR17520069.595040  
SRR17520069.595041  
SRR17520069.595042  
SRR17520069.595043  
SRR17520069.595044  
SRR17520069.595045  
SRR17520069.595046  
SRR17520069.595047  
SRR17520069.595048  
SRR17520069.595049  
SRR17520069.595050  
SRR17520069.595051  
SRR17520069.595052  
SRR17520069.595053  
SRR17520069.595054  
SRR17520069.595055  
SRR17520069.595056  
SRR17520069.595057  
SRR17520069.595058  
SRR17520069.595059  
SRR17520069.595060  
SRR17520069.595061  
SRR17520069.595062  
SRR17520069.595063  
SRR17520069.595064  
SRR17520069.595065  
SRR17520069.595066  
SRR17520069.595067  
SRR17520069.595068  
SRR17520069.595069  
SRR17520069.595070  
SRR17520069.595071  
SRR17520069.595072  
SRR17520069.595073  
SRR17520069.595074  
SRR17520069.595075  
SRR17520069.595076  
SRR17520069.595077  
SRR17520069.595078  
SRR17520069.595079  
SRR17520069.595080  
SRR17520069.595081  
SRR17520069.595082  
SRR17520069.595083

SRR17520069.595084  
SRR17520069.595085  
SRR17520069.595086  
SRR17520069.595087  
SRR17520069.595088  
SRR17520069.595089  
SRR17520069.595090  
SRR17520069.595092  
SRR17520069.595093  
SRR17520069.595094  
SRR17520069.595095  
SRR17520069.595096  
SRR17520069.595097  
SRR17520069.595098  
SRR17520069.595099  
SRR17520069.595100  
SRR17520069.595101  
SRR17520069.595102  
SRR17520069.595103  
SRR17520069.598191  
SRR17520069.598192  
SRR17520069.598193  
SRR17520069.598194  
SRR17520069.598197  
SRR17520069.598198  
SRR17520069.598199  
SRR17520069.598200  
SRR17520069.598201  
SRR17520069.598202  
SRR17520069.598203  
SRR17520069.598204  
SRR17520069.598205  
SRR17520069.598206  
SRR17520069.598207  
SRR17520069.598208  
SRR17520069.598209  
SRR17520069.598210  
SRR17520069.598211  
SRR17520069.598212  
SRR17520069.598213  
SRR17520069.598214  
SRR17520069.598215  
SRR17520069.598216  
SRR17520069.598217  
SRR17520069.598218  
SRR17520069.598219  
SRR17520069.598220

SRR17520069. 598221  
SRR17520069. 598222  
SRR17520069. 598223  
SRR17520069. 598224  
SRR17520069. 598225  
SRR17520069. 598226  
SRR17520069. 598228  
SRR17520069. 598229  
SRR17520069. 598230  
SRR17520069. 598231  
SRR17520069. 598232  
SRR17520069. 598233  
SRR17520069. 598234  
SRR17520069. 598235  
SRR17520069. 598236  
SRR17520069. 598237  
SRR17520069. 598238  
SRR17520069. 598239  
SRR17520069. 598240  
SRR17520069. 598241  
SRR17520069. 598242  
SRR17520069. 598243  
SRR17520069. 598244  
SRR17520069. 598245  
SRR17520069. 598246  
SRR17520069. 598247  
SRR17520069. 598248  
SRR17520069. 598249  
SRR17520069. 598250  
SRR17520069. 598251  
SRR17520069. 598252  
SRR17520069. 598253  
SRR17520069. 598254  
SRR17520069. 598255  
SRR17520069. 598256  
SRR17520069. 598257  
SRR17520069. 598258  
SRR17520069. 598259  
SRR17520069. 598260  
SRR17520069. 598261  
SRR17520069. 598262  
SRR17520069. 598263  
SRR17520069. 598264  
SRR17520069. 598265  
SRR17520069. 598266  
SRR17520069. 598267  
SRR17520069. 598268

SRR17520069. 598269  
SRR17520069. 598270  
SRR17520069. 598271  
SRR17520069. 598272  
SRR17520069. 598273  
SRR17520069. 598274  
SRR17520069. 598275  
SRR17520069. 598276  
SRR17520069. 598277  
SRR17520069. 598278  
SRR17520069. 598279  
SRR17520069. 598280  
SRR17520069. 598281  
SRR17520069. 598282  
SRR17520069. 598283  
SRR17520069. 598284  
SRR17520069. 598285  
SRR17520069. 598286  
SRR17520069. 598287  
SRR17520069. 598288  
SRR17520069. 598289  
SRR17520069. 598290  
SRR17520069. 598291  
SRR17520069. 598292  
SRR17520069. 598293  
SRR17520069. 598294  
SRR17520069. 598295  
SRR17520069. 598296  
SRR17520069. 598297  
SRR17520069. 598298  
SRR17520069. 598299  
SRR17520069. 598300  
SRR17520069. 598301  
SRR17520069. 598302  
SRR17520069. 598304  
SRR17520069. 598305  
SRR17520069. 598306  
SRR17520069. 598307  
SRR17520069. 598308  
SRR17520069. 598309  
SRR17520069. 598310  
SRR17520069. 598311  
SRR17520069. 598312  
SRR17520069. 598313  
SRR17520069. 598314  
SRR17520069. 598315  
SRR17520069. 598316

SRR17520069. 598317  
SRR17520069. 598318  
SRR17520069. 598319  
SRR17520069. 598320  
SRR17520069. 598321  
SRR17520069. 598322  
SRR17520069. 598323  
SRR17520069. 598324  
SRR17520069. 598325  
SRR17520069. 598326  
SRR17520069. 598327  
SRR17520069. 598328  
SRR17520069. 598329  
SRR17520069. 598331  
SRR17520069. 598332  
SRR17520069. 598333  
SRR17520069. 598334  
SRR17520069. 598335  
SRR17520069. 598336  
SRR17520069. 598337  
SRR17520069. 598338  
SRR17520069. 598339  
SRR17520069. 598340  
SRR17520069. 598341  
SRR17520069. 598342  
SRR17520069. 598343  
SRR17520069. 598344  
SRR17520069. 598345  
SRR17520069. 598346  
SRR17520069. 598347  
SRR17520069. 598348  
SRR17520069. 598349  
SRR17520069. 598350  
SRR17520069. 598351  
SRR17520069. 598352  
SRR17520069. 598353  
SRR17520069. 598354  
SRR17520069. 598355  
SRR17520069. 598356  
SRR17520069. 598357  
SRR17520069. 604790  
SRR17520069. 604791  
SRR17520069. 604792  
SRR17520069. 604793  
SRR17520069. 604794  
SRR17520069. 604795  
SRR17520069. 604796

SRR17520069.604797  
SRR17520069.604798  
SRR17520069.604799  
SRR17520069.604800  
SRR17520069.604801  
SRR17520069.604802  
SRR17520069.604803  
SRR17520069.604804  
SRR17520069.604805  
SRR17520069.604806  
SRR17520069.604807  
SRR17520069.604808  
SRR17520069.604809  
SRR17520069.604810  
SRR17520069.604811  
SRR17520069.604813  
SRR17520069.604814  
SRR17520069.604815  
SRR17520069.610036  
SRR17520069.622212  
SRR17520069.622213  
SRR17520069.622214  
SRR17520069.622215  
SRR17520069.622216  
SRR17520069.622217  
SRR17520069.622218  
SRR17520069.622219  
SRR17520069.622220  
SRR17520069.622221  
SRR17520069.622222  
SRR17520069.622223  
SRR17520069.622225  
SRR17520069.622226  
SRR17520069.622228  
SRR17520069.622229  
SRR17520069.622230  
SRR17520069.622231  
SRR17520069.622232  
SRR17520069.622233  
SRR17520069.622235  
SRR17520069.622236  
SRR17520069.622238  
SRR17520069.622240  
SRR17520069.622241  
SRR17520069.622242  
SRR17520069.622243  
SRR17520069.622244

SRR17520069.622245  
SRR17520069.622247  
SRR17520069.622248  
SRR17520069.622249  
SRR17520069.622250  
SRR17520069.622251  
SRR17520069.622252  
SRR17520069.622253  
SRR17520069.622254  
SRR17520069.622257  
SRR17520069.622258  
SRR17520069.622259  
SRR17520069.622260  
SRR17520069.622261  
SRR17520069.622262  
SRR17520069.622263  
SRR17520069.622264  
SRR17520069.622265  
SRR17520069.622266  
SRR17520069.622267  
SRR17520069.622268  
SRR17520069.622269  
SRR17520069.622270  
SRR17520069.622271  
SRR17520069.622272  
SRR17520069.622273  
SRR17520069.622274  
SRR17520069.622275  
SRR17520069.622276  
SRR17520069.622277  
SRR17520069.622278  
SRR17520069.622279  
SRR17520069.622280  
SRR17520069.622281  
SRR17520069.622282  
SRR17520069.622283  
SRR17520069.622284  
SRR17520069.622285  
SRR17520069.622286  
SRR17520069.622287  
SRR17520069.622288  
SRR17520069.622289  
SRR17520069.622291  
SRR17520069.622292  
SRR17520069.622293  
SRR17520069.622294  
SRR17520069.622295



SRR17520069.622296  
SRR17520069.622297  
SRR17520069.622299  
SRR17520069.622300  
SRR17520069.622301  
SRR17520069.622302  
SRR17520069.622303  
SRR17520069.622304  
SRR17520069.622305  
SRR17520069.622306  
SRR17520069.622307  
SRR17520069.622308  
SRR17520069.622309  
SRR17520069.622310  
SRR17520069.622311  
SRR17520069.622312  
SRR17520069.622313  
SRR17520069.622314  
SRR17520069.622315  
SRR17520069.622316  
SRR17520069.622317  
SRR17520069.622319  
SRR17520069.622320  
SRR17520069.622321  
SRR17520069.622323  
SRR17520069.622324  
SRR17520069.622326  
SRR17520069.622327  
SRR17520069.624575  
SRR17520069.624588  
SRR17520069.624617  
SRR17520069.641465  
SRR17520069.643900  
SRR17520069.643901  
SRR17520069.643902  
SRR17520069.643903  
SRR17520069.643904  
SRR17520069.643905  
SRR17520069.643906  
SRR17520069.643907  
SRR17520069.643908  
SRR17520069.643909  
SRR17520069.643910  
SRR17520069.643911  
SRR17520069.643913  
SRR17520069.643914  
SRR17520069.643915

SRR17520069. 643916  
SRR17520069. 643917  
SRR17520069. 643918  
SRR17520069. 643919  
SRR17520069. 643920  
SRR17520069. 643921  
SRR17520069. 643924  
SRR17520069. 643925  
SRR17520069. 643926  
SRR17520069. 643927  
SRR17520069. 643929  
SRR17520069. 643930  
SRR17520069. 666042  
SRR17520069. 666044  
SRR17520069. 666045  
SRR17520069. 666046  
SRR17520069. 666047  
SRR17520069. 666048  
SRR17520069. 666049  
SRR17520069. 666050  
SRR17520069. 666051  
SRR17520069. 666052  
SRR17520069. 666053  
SRR17520069. 666054  
SRR17520069. 666055  
SRR17520069. 666056  
SRR17520069. 666057  
SRR17520069. 666058  
SRR17520069. 693242  
SRR17520069. 693245  
SRR17520069. 693246  
SRR17520069. 693247  
SRR17520069. 693248  
SRR17520069. 693249  
SRR17520069. 693250  
SRR17520069. 693251  
SRR17520069. 693252  
SRR17520069. 693253  
SRR17520069. 693254  
SRR17520069. 693255  
SRR17520069. 693256  
SRR17520069. 693257  
SRR17520069. 693258  
SRR17520069. 693259  
SRR17520069. 693260  
SRR17520069. 693261  
SRR17520069. 693262

SRR17520069. 693263  
SRR17520069. 693264  
SRR17520069. 693265  
SRR17520069. 693266  
SRR17520069. 693267  
SRR17520069. 693268  
SRR17520069. 693269  
SRR17520069. 693270  
SRR17520069. 693271  
SRR17520069. 693272  
SRR17520069. 693273  
SRR17520069. 693274  
SRR17520069. 693275  
SRR17520069. 693276  
SRR17520069. 693277  
SRR17520069. 693278  
SRR17520069. 693279  
SRR17520069. 693280  
SRR17520069. 693281  
SRR17520069. 693282  
SRR17520069. 693283  
SRR17520069. 693284  
SRR17520069. 693285  
SRR17520069. 693286  
SRR17520069. 693287  
SRR17520069. 693288  
SRR17520069. 693289  
SRR17520069. 693290  
SRR17520069. 693291  
SRR17520069. 693292  
SRR17520069. 693293  
SRR17520069. 693294  
SRR17520069. 693295  
SRR17520069. 693296  
SRR17520069. 693297  
SRR17520069. 693298  
SRR17520069. 693299  
SRR17520069. 693300  
SRR17520069. 693301  
SRR17520069. 693302  
SRR17520069. 693303  
SRR17520069. 693304  
SRR17520069. 693305  
SRR17520069. 693306  
SRR17520069. 693307  
SRR17520069. 693308  
SRR17520069. 693309

SRR17520069.693310  
SRR17520069.693311  
SRR17520069.693312  
SRR17520069.693313  
SRR17520069.693314  
SRR17520069.693316  
SRR17520069.693317  
SRR17520069.693318  
SRR17520069.693319  
SRR17520069.693320  
SRR17520069.693321  
SRR17520069.703682  
SRR17520069.703683  
SRR17520069.703684  
SRR17520069.703685  
SRR17520069.703686  
SRR17520069.703687  
SRR17520069.703690  
SRR17520069.703691  
SRR17520069.703692  
SRR17520069.703693  
SRR17520069.719551  
SRR17520069.719553  
SRR17520069.719554  
SRR17520069.719555  
SRR17520069.719557  
SRR17520069.719558  
SRR17520069.719559  
SRR17520069.719561  
SRR17520069.719562  
SRR17520069.719563  
SRR17520069.719564  
SRR17520069.719565  
SRR17520069.719566  
SRR17520069.719567  
SRR17520069.724920  
SRR17520069.724921  
SRR17520069.724922  
SRR17520069.724923  
SRR17520069.724924  
SRR17520069.724925  
SRR17520069.724926  
SRR17520069.724927  
SRR17520069.724928  
SRR17520069.724929  
SRR17520069.724930  
SRR17520069.724931

SRR17520069. 724932  
SRR17520069. 724933  
SRR17520069. 724934  
SRR17520069. 724935  
SRR17520069. 724936  
SRR17520069. 724937  
SRR17520069. 724938  
SRR17520069. 724939  
SRR17520069. 724940  
SRR17520069. 724941  
SRR17520069. 724942  
SRR17520069. 724943  
SRR17520069. 724944  
SRR17520069. 724945  
SRR17520069. 724946  
SRR17520069. 724947  
SRR17520069. 724948  
SRR17520069. 724949  
SRR17520069. 724950  
SRR17520069. 724951  
SRR17520069. 724952  
SRR17520069. 724953  
SRR17520069. 724954  
SRR17520069. 724955  
SRR17520069. 724956  
SRR17520069. 724957  
SRR17520069. 724958  
SRR17520069. 724959  
SRR17520069. 724960  
SRR17520069. 724961  
SRR17520069. 724962  
SRR17520069. 724963  
SRR17520069. 724964  
SRR17520069. 724965  
SRR17520069. 724967  
SRR17520069. 724968  
SRR17520069. 724969  
SRR17520069. 724970  
SRR17520069. 724971  
SRR17520069. 724972  
SRR17520069. 724973  
SRR17520069. 724974  
SRR17520069. 724975  
SRR17520069. 724976  
SRR17520069. 724977  
SRR17520069. 724978  
SRR17520069. 724979

SRR17520069. 724980  
SRR17520069. 724981  
SRR17520069. 724982  
SRR17520069. 724983  
SRR17520069. 724984  
SRR17520069. 724985  
SRR17520069. 724986  
SRR17520069. 724987  
SRR17520069. 724988  
SRR17520069. 724989  
SRR17520069. 724990  
SRR17520069. 724991  
SRR17520069. 724992  
SRR17520069. 729518  
SRR17520069. 729519  
SRR17520069. 729520  
SRR17520069. 729521  
SRR17520069. 729523  
SRR17520069. 729524  
SRR17520069. 729525  
SRR17520069. 729526  
SRR17520069. 729527  
SRR17520069. 729528  
SRR17520069. 729529  
SRR17520069. 729530  
SRR17520069. 729531  
SRR17520069. 729532  
SRR17520069. 729533  
SRR17520069. 729534  
SRR17520069. 729535  
SRR17520069. 729536  
SRR17520069. 729537  
SRR17520069. 729538  
SRR17520069. 729539  
SRR17520069. 729540  
SRR17520069. 729541  
SRR17520069. 729542  
SRR17520069. 729543  
SRR17520069. 729544  
SRR17520069. 729545  
SRR17520069. 733054  
SRR17520069. 733056  
SRR17520069. 733058  
SRR17520069. 733060  
SRR17520069. 733061  
SRR17520069. 733062  
SRR17520069. 733063

SRR17520069. 733064  
SRR17520069. 733065  
SRR17520069. 733066  
SRR17520069. 733067  
SRR17520069. 733068  
SRR17520069. 733069  
SRR17520069. 733070  
SRR17520069. 733071  
SRR17520069. 733072  
SRR17520069. 733073  
SRR17520069. 733074  
SRR17520069. 733075  
SRR17520069. 733077  
SRR17520069. 733078  
SRR17520069. 733079  
SRR17520069. 733080  
SRR17520069. 733081  
SRR17520069. 733082  
SRR17520069. 733083  
SRR17520069. 733084  
SRR17520069. 733085  
SRR17520069. 733086  
SRR17520069. 733087  
SRR17520069. 733088  
SRR17520069. 733089  
SRR17520069. 733090  
SRR17520069. 733091  
SRR17520069. 733092  
SRR17520069. 733093  
SRR17520069. 733094  
SRR17520069. 733095  
SRR17520069. 733096  
SRR17520069. 733097  
SRR17520069. 733098  
SRR17520069. 733099  
SRR17520069. 733100  
SRR17520069. 733101  
SRR17520069. 733103  
SRR17520069. 733104  
SRR17520069. 733105  
SRR17520069. 733106  
SRR17520069. 733107  
SRR17520069. 733108  
SRR17520069. 733109  
SRR17520069. 733110  
SRR17520069. 733112  
SRR17520069. 733113

SRR17520069. 733114  
SRR17520069. 733115  
SRR17520069. 733116  
SRR17520069. 733117  
SRR17520069. 733118  
SRR17520069. 733119  
SRR17520069. 733120  
SRR17520069. 733121  
SRR17520069. 733122  
SRR17520069. 733123  
SRR17520069. 733124  
SRR17520069. 733125  
SRR17520069. 733126  
SRR17520069. 733127  
SRR17520069. 733128  
SRR17520069. 733129  
SRR17520069. 733130  
SRR17520069. 733131  
SRR17520069. 733132  
SRR17520069. 733133  
SRR17520069. 733134  
SRR17520069. 733135  
SRR17520069. 733136  
SRR17520069. 733138  
SRR17520069. 733139  
SRR17520069. 733140  
SRR17520069. 733141  
SRR17520069. 733142  
SRR17520069. 733143  
SRR17520069. 733144  
SRR17520069. 733145  
SRR17520069. 733146  
SRR17520069. 733147  
SRR17520069. 733148  
SRR17520069. 733149  
SRR17520069. 733150  
SRR17520069. 733151  
SRR17520069. 733152  
SRR17520069. 733153  
SRR17520069. 733154  
SRR17520069. 733155  
SRR17520069. 733156  
SRR17520069. 733157  
SRR17520069. 733158  
SRR17520069. 733159  
SRR17520069. 733160  
SRR17520069. 733161



SRR17520069. 733162  
SRR17520069. 733163  
SRR17520069. 733164  
SRR17520069. 733165  
SRR17520069. 733166  
SRR17520069. 733167  
SRR17520069. 733168  
SRR17520069. 733169  
SRR17520069. 733170  
SRR17520069. 733171  
SRR17520069. 733172  
SRR17520069. 733173  
SRR17520069. 733174  
SRR17520069. 733175  
SRR17520069. 733176  
SRR17520069. 733177  
SRR17520069. 733178  
SRR17520069. 733179  
SRR17520069. 733180  
SRR17520069. 733181  
SRR17520069. 733182  
SRR17520069. 733183  
SRR17520069. 733184  
SRR17520069. 733185  
SRR17520069. 733186  
SRR17520069. 733187  
SRR17520069. 733188  
SRR17520069. 733189  
SRR17520069. 733190  
SRR17520069. 733191  
SRR17520069. 733192  
SRR17520069. 733193  
SRR17520069. 733194  
SRR17520069. 733462  
SRR17520069. 739317  
SRR17520069. 739424  
SRR17520069. 739428  
SRR17520069. 745374  
SRR17520069. 745375  
SRR17520069. 750349  
SRR17520069. 750350  
SRR17520069. 750351  
SRR17520069. 750352  
SRR17520069. 750354  
SRR17520069. 750356  
SRR17520069. 750358  
SRR17520069. 752037

SRR17520069. 752365  
SRR17520069. 789413  
SRR17520069. 789415  
SRR17520069. 798128  
SRR17520069. 803867  
SRR17520069. 803868  
SRR17520069. 803869  
SRR17520069. 803870  
SRR17520069. 803871  
SRR17520069. 803872  
SRR17520069. 803873  
SRR17520069. 803874  
SRR17520069. 803875  
SRR17520069. 803876  
SRR17520069. 803877  
SRR17520069. 803878  
SRR17520069. 803879  
SRR17520069. 803880  
SRR17520069. 803881  
SRR17520069. 803882  
SRR17520069. 803883  
SRR17520069. 803884  
SRR17520069. 803885  
SRR17520069. 803886  
SRR17520069. 803887  
SRR17520069. 803888  
SRR17520069. 803889  
SRR17520069. 803890  
SRR17520069. 803891  
SRR17520069. 803892  
SRR17520069. 803893  
SRR17520069. 803894  
SRR17520069. 803895  
SRR17520069. 803896  
SRR17520069. 803897  
SRR17520069. 803898  
SRR17520069. 803899  
SRR17520069. 803900  
SRR17520069. 803901  
SRR17520069. 803902  
SRR17520069. 803903  
SRR17520069. 803904  
SRR17520069. 803905  
SRR17520069. 803906  
SRR17520069. 803907  
SRR17520069. 803908  
SRR17520069. 803909

SRR17520069.803910  
SRR17520069.803911  
SRR17520069.803914  
SRR17520069.803915  
SRR17520069.803916  
SRR17520069.803917  
SRR17520069.803918  
SRR17520069.803919  
SRR17520069.803920  
SRR17520069.803921  
SRR17520069.803922  
SRR17520069.803923  
SRR17520069.803926  
SRR17520069.803927  
SRR17520069.803928  
SRR17520069.803929  
SRR17520069.803930  
SRR17520069.803931  
SRR17520069.803932  
SRR17520069.803933  
SRR17520069.803934  
SRR17520069.803935  
SRR17520069.803936  
SRR17520069.803937  
SRR17520069.803938  
SRR17520069.803939  
SRR17520069.803940  
SRR17520069.803941  
SRR17520069.803942  
SRR17520069.803943  
SRR17520069.803944  
SRR17520069.803945  
SRR17520069.803946  
SRR17520069.803947  
SRR17520069.803948  
SRR17520069.803949  
SRR17520069.803950  
SRR17520069.803951  
SRR17520069.803952  
SRR17520069.803953  
SRR17520069.803954  
SRR17520069.803955  
SRR17520069.803956  
SRR17520069.803957  
SRR17520069.803958  
SRR17520069.803959  
SRR17520069.803960

SRR17520069.803961  
SRR17520069.803962  
SRR17520069.803963  
SRR17520069.803964  
SRR17520069.803965  
SRR17520069.803966  
SRR17520069.803967  
SRR17520069.803968  
SRR17520069.803969  
SRR17520069.803970  
SRR17520069.803971  
SRR17520069.803972  
SRR17520069.803973  
SRR17520069.803974  
SRR17520069.803975  
SRR17520069.803976  
SRR17520069.803977  
SRR17520069.803978  
SRR17520069.803979  
SRR17520069.803980  
SRR17520069.803981  
SRR17520069.803982  
SRR17520069.803983  
SRR17520069.803984  
SRR17520069.803985  
SRR17520069.803986  
SRR17520069.803987  
SRR17520069.803988  
SRR17520069.803989  
SRR17520069.803990  
SRR17520069.803991  
SRR17520069.803992  
SRR17520069.803993  
SRR17520069.803994  
SRR17520069.803995  
SRR17520069.803996  
SRR17520069.803997  
SRR17520069.803998  
SRR17520069.803999  
SRR17520069.804000  
SRR17520069.804001  
SRR17520069.804002  
SRR17520069.804003  
SRR17520069.804004  
SRR17520069.804006  
SRR17520069.804008  
SRR17520069.804009

SRR17520069.804010  
SRR17520069.804011  
SRR17520069.804012  
SRR17520069.804013  
SRR17520069.804014  
SRR17520069.804015  
SRR17520069.804016  
SRR17520069.804017  
SRR17520069.804018  
SRR17520069.804019  
SRR17520069.804020  
SRR17520069.804021  
SRR17520069.804022  
SRR17520069.804023  
SRR17520069.804024  
SRR17520069.805874  
SRR17520069.835412  
SRR17520069.838481  
SRR17520069.838482  
SRR17520069.838483  
SRR17520069.838484  
SRR17520069.838485  
SRR17520069.838486  
SRR17520069.838487  
SRR17520069.838488  
SRR17520069.838489  
SRR17520069.838490  
SRR17520069.838492  
SRR17520069.838493  
SRR17520069.838494  
SRR17520069.838495  
SRR17520069.838496  
SRR17520069.838497  
SRR17520069.838498  
SRR17520069.838499  
SRR17520069.838500  
SRR17520069.838501  
SRR17520069.838502  
SRR17520069.838503  
SRR17520069.838504  
SRR17520069.838505  
SRR17520069.838506  
SRR17520069.838507  
SRR17520069.838508  
SRR17520069.838509  
SRR17520069.838510  
SRR17520069.838511

SRR17520069.838512  
SRR17520069.838513  
SRR17520069.838514  
SRR17520069.838515  
SRR17520069.838516  
SRR17520069.838517  
SRR17520069.838518  
SRR17520069.838519  
SRR17520069.838520  
SRR17520069.838521  
SRR17520069.838522  
SRR17520069.838523  
SRR17520069.838524  
SRR17520069.838525  
SRR17520069.838526  
SRR17520069.838527  
SRR17520069.838528  
SRR17520069.838529  
SRR17520069.838530  
SRR17520069.838531  
SRR17520069.838532  
SRR17520069.838533  
SRR17520069.838534  
SRR17520069.838535  
SRR17520069.838536  
SRR17520069.838537  
SRR17520069.838538  
SRR17520069.838539  
SRR17520069.838540  
SRR17520069.838541  
SRR17520069.838542  
SRR17520069.838543  
SRR17520069.838544  
SRR17520069.838545  
SRR17520069.838546  
SRR17520069.838547  
SRR17520069.838548  
SRR17520069.838549  
SRR17520069.838550  
SRR17520069.838551  
SRR17520069.838552  
SRR17520069.838553  
SRR17520069.838554  
SRR17520069.838555  
SRR17520069.838556  
SRR17520069.838557  
SRR17520069.838558

SRR17520069.838559  
SRR17520069.838560  
SRR17520069.838561  
SRR17520069.838562  
SRR17520069.838563  
SRR17520069.838564  
SRR17520069.838565  
SRR17520069.838566  
SRR17520069.838567  
SRR17520069.838568  
SRR17520069.838569  
SRR17520069.838570  
SRR17520069.838571  
SRR17520069.838572  
SRR17520069.838573  
SRR17520069.838574  
SRR17520069.838575  
SRR17520069.838576  
SRR17520069.838577  
SRR17520069.838578  
SRR17520069.838579  
SRR17520069.838580  
SRR17520069.838581  
SRR17520069.838582  
SRR17520069.838583  
SRR17520069.838584  
SRR17520069.838585  
SRR17520069.838586  
SRR17520069.838587  
SRR17520069.838588  
SRR17520069.838589  
SRR17520069.838590  
SRR17520069.838591  
SRR17520069.838592  
SRR17520069.838593  
SRR17520069.838594  
SRR17520069.838595  
SRR17520069.838596  
SRR17520069.838597  
SRR17520069.838598  
SRR17520069.838599  
SRR17520069.838600  
SRR17520069.838601  
SRR17520069.838602  
SRR17520069.838603  
SRR17520069.838604  
SRR17520069.838605

SRR17520069.838606  
SRR17520069.838607  
SRR17520069.838608  
SRR17520069.838609  
SRR17520069.838610  
SRR17520069.838611  
SRR17520069.838612  
SRR17520069.838613  
SRR17520069.838614  
SRR17520069.838615  
SRR17520069.838617  
SRR17520069.838618  
SRR17520069.838619  
SRR17520069.838620  
SRR17520069.838621  
SRR17520069.847139  
SRR17520069.867376  
SRR17520069.869609  
SRR17520069.869610  
SRR17520069.869611  
SRR17520069.869612  
SRR17520069.869613  
SRR17520069.869614  
SRR17520069.869615  
SRR17520069.869616  
SRR17520069.869617  
SRR17520069.883124  
SRR17520069.887598  
SRR17520069.893577  
SRR17520069.893578  
SRR17520069.893579  
SRR17520069.893580  
SRR17520069.893581  
SRR17520069.893582  
SRR17520069.893583  
SRR17520069.893584  
SRR17520069.893585  
SRR17520069.893586  
SRR17520069.893587  
SRR17520069.893588  
SRR17520069.893589  
SRR17520069.893590  
SRR17520069.893591  
SRR17520069.893593  
SRR17520069.893594  
SRR17520069.893595  
SRR17520069.893597



SRR17520069.893600  
SRR17520069.895683  
SRR17520069.895684  
SRR17520069.895685  
SRR17520069.895686  
SRR17520069.895687  
SRR17520069.895688  
SRR17520069.895689  
SRR17520069.911331  
SRR17520069.911332  
SRR17520069.911334  
SRR17520069.911335  
SRR17520069.911338  
SRR17520069.911339  
SRR17520069.911340  
SRR17520069.911341  
SRR17520069.911342  
SRR17520069.911343  
SRR17520069.911344  
SRR17520069.911345  
SRR17520069.911346  
SRR17520069.911347  
SRR17520069.911348  
SRR17520069.911349  
SRR17520069.911350  
SRR17520069.911351  
SRR17520069.911353  
SRR17520069.911354  
SRR17520069.911355  
SRR17520069.911356  
SRR17520069.911357  
SRR17520069.911359  
SRR17520069.911360  
SRR17520069.911361  
SRR17520069.911362  
SRR17520069.911364  
SRR17520069.911366  
SRR17520069.911367  
SRR17520069.911370  
SRR17520069.911371  
SRR17520069.911372  
SRR17520069.911374  
SRR17520069.911375  
SRR17520069.911376  
SRR17520069.911377  
SRR17520069.911378  
SRR17520069.911379

SRR17520069.911380  
SRR17520069.911381  
SRR17520069.911382  
SRR17520069.911383  
SRR17520069.911384  
SRR17520069.911385  
SRR17520069.911386  
SRR17520069.911387  
SRR17520069.911388  
SRR17520069.911389  
SRR17520069.911390  
SRR17520069.911392  
SRR17520069.911393  
SRR17520069.911394  
SRR17520069.911395  
SRR17520069.911396  
SRR17520069.911397  
SRR17520069.911398  
SRR17520069.911399  
SRR17520069.911400  
SRR17520069.911401  
SRR17520069.911402  
SRR17520069.911403  
SRR17520069.911404  
SRR17520069.911406  
SRR17520069.911411  
SRR17520069.911412  
SRR17520069.911413  
SRR17520069.911415  
SRR17520069.912567  
SRR17520069.912568  
SRR17520069.912569  
SRR17520069.912570  
SRR17520069.912571  
SRR17520069.912572  
SRR17520069.912573  
SRR17520069.912574  
SRR17520069.912575  
SRR17520069.912576  
SRR17520069.912577  
SRR17520069.912578  
SRR17520069.912579  
SRR17520069.912580  
SRR17520069.912581  
SRR17520069.912582  
SRR17520069.912583  
SRR17520069.912584

SRR17520069.912585  
SRR17520069.912586  
SRR17520069.912587  
SRR17520069.912588  
SRR17520069.924442  
SRR17520069.924443  
SRR17520069.924444  
SRR17520069.924445  
SRR17520069.924446  
SRR17520069.924447  
SRR17520069.924448  
SRR17520069.924449  
SRR17520069.924450  
SRR17520069.924451  
SRR17520069.924452  
SRR17520069.924453  
SRR17520069.924454  
SRR17520069.924455  
SRR17520069.924456  
SRR17520069.924457  
SRR17520069.924458  
SRR17520069.924459  
SRR17520069.924460  
SRR17520069.924461  
SRR17520069.924462  
SRR17520069.924463  
SRR17520069.924464  
SRR17520069.924465  
SRR17520069.924466  
SRR17520069.924467  
SRR17520069.924468  
SRR17520069.924469  
SRR17520069.924470  
SRR17520069.924471  
SRR17520069.924472  
SRR17520069.924473  
SRR17520069.924474  
SRR17520069.924475  
SRR17520069.924477  
SRR17520069.924478  
SRR17520069.924479  
SRR17520069.924480  
SRR17520069.924481  
SRR17520069.924482  
SRR17520069.924483  
SRR17520069.924484  
SRR17520069.924485

SRR17520069.924486  
SRR17520069.924487  
SRR17520069.924488  
SRR17520069.924489  
SRR17520069.924490  
SRR17520069.924491  
SRR17520069.924492  
SRR17520069.924493  
SRR17520069.924494  
SRR17520069.924495  
SRR17520069.924496  
SRR17520069.924497  
SRR17520069.924498  
SRR17520069.924499  
SRR17520069.924500  
SRR17520069.924501  
SRR17520069.924502  
SRR17520069.924503  
SRR17520069.924504  
SRR17520069.924505  
SRR17520069.924506  
SRR17520069.924507  
SRR17520069.924508  
SRR17520069.924509  
SRR17520069.924510  
SRR17520069.924511  
SRR17520069.924512  
SRR17520069.924513  
SRR17520069.924514  
SRR17520069.924515  
SRR17520069.924516  
SRR17520069.924517  
SRR17520069.924518  
SRR17520069.924519  
SRR17520069.924520  
SRR17520069.924521  
SRR17520069.924522  
SRR17520069.924523  
SRR17520069.924524  
SRR17520069.924525  
SRR17520069.924526  
SRR17520069.924527  
SRR17520069.924528  
SRR17520069.924529  
SRR17520069.924530  
SRR17520069.924531  
SRR17520069.924532

SRR17520069.924533  
SRR17520069.924534  
SRR17520069.924535  
SRR17520069.924536  
SRR17520069.924537  
SRR17520069.924538  
SRR17520069.924539  
SRR17520069.924540  
SRR17520069.924541  
SRR17520069.924542  
SRR17520069.924543  
SRR17520069.924544  
SRR17520069.924545  
SRR17520069.924546  
SRR17520069.924547  
SRR17520069.924548  
SRR17520069.924549  
SRR17520069.924550  
SRR17520069.924551  
SRR17520069.924552  
SRR17520069.924553  
SRR17520069.924554  
SRR17520069.924555  
SRR17520069.924556  
SRR17520069.924557  
SRR17520069.924558  
SRR17520069.924559  
SRR17520069.924560  
SRR17520069.924561  
SRR17520069.924562  
SRR17520069.924563  
SRR17520069.924564  
SRR17520069.924565  
SRR17520069.924566  
SRR17520069.924567  
SRR17520069.924568  
SRR17520069.924569  
SRR17520069.924570  
SRR17520069.924571  
SRR17520069.924572  
SRR17520069.924573  
SRR17520069.924574  
SRR17520069.924575  
SRR17520069.924576  
SRR17520069.924577  
SRR17520069.924578  
SRR17520069.924579

SRR17520069.924580  
SRR17520069.924581  
SRR17520069.924582  
SRR17520069.924583  
SRR17520069.924584  
SRR17520069.924585  
SRR17520069.924586  
SRR17520069.924587  
SRR17520069.924588  
SRR17520069.924589  
SRR17520069.924590  
SRR17520069.924591  
SRR17520069.924592  
SRR17520069.924593  
SRR17520069.924594  
SRR17520069.924595  
SRR17520069.924596  
SRR17520069.924597  
SRR17520069.924598  
SRR17520069.924599  
SRR17520069.924600  
SRR17520069.924601  
SRR17520069.924602  
SRR17520069.924603  
SRR17520069.924604  
SRR17520069.924605  
SRR17520069.924606  
SRR17520069.924607  
SRR17520069.924608  
SRR17520069.924609  
SRR17520069.924610  
SRR17520069.924611  
SRR17520069.924612  
SRR17520069.924613  
SRR17520069.924614  
SRR17520069.924615  
SRR17520069.924617  
SRR17520069.924619  
SRR17520069.924620  
SRR17520069.924621  
SRR17520069.924622  
SRR17520069.924623  
SRR17520069.924624  
SRR17520069.924625  
SRR17520069.924626  
SRR17520069.924627  
SRR17520069.924628

SRR17520069.924629  
SRR17520069.924630  
SRR17520069.924631  
SRR17520069.924632  
SRR17520069.924633  
SRR17520069.924634  
SRR17520069.924635  
SRR17520069.937642  
SRR17520069.941713  
SRR17520069.941715  
SRR17520069.941717  
SRR17520069.941719  
SRR17520069.941720  
SRR17520069.941721  
SRR17520069.941722  
SRR17520069.941723  
SRR17520069.941724  
SRR17520069.941725  
SRR17520069.941728  
SRR17520069.941729  
SRR17520069.941730  
SRR17520069.943294  
SRR17520069.943295  
SRR17520069.943296  
SRR17520069.943298  
SRR17520069.943299  
SRR17520069.943300  
SRR17520069.943301  
SRR17520069.948063  
SRR17520069.949888  
SRR17520069.949889  
SRR17520069.949890  
SRR17520069.949891  
SRR17520069.949892  
SRR17520069.949893  
SRR17520069.949894  
SRR17520069.949895  
SRR17520069.949897  
SRR17520069.949898  
SRR17520069.949899  
SRR17520069.949900  
SRR17520069.949901  
SRR17520069.949902  
SRR17520069.949903  
SRR17520069.949904  
SRR17520069.949905  
SRR17520069.949906

SRR17520069.949907  
SRR17520069.949908  
SRR17520069.949909  
SRR17520069.949911  
SRR17520069.949912  
SRR17520069.949914  
SRR17520069.949915  
SRR17520069.949916  
SRR17520069.949917  
SRR17520069.949918  
SRR17520069.949919  
SRR17520069.949920  
SRR17520069.949921  
SRR17520069.949922  
SRR17520069.949923  
SRR17520069.949924  
SRR17520069.949925  
SRR17520069.949926  
SRR17520069.949927  
SRR17520069.949928  
SRR17520069.949929  
SRR17520069.949930  
SRR17520069.949931  
SRR17520069.949932  
SRR17520069.949933  
SRR17520069.949934  
SRR17520069.949935  
SRR17520069.949936  
SRR17520069.949937  
SRR17520069.949938  
SRR17520069.949939  
SRR17520069.949940  
SRR17520069.949942  
SRR17520069.949943  
SRR17520069.949944  
SRR17520069.949945  
SRR17520069.949946  
SRR17520069.949947  
SRR17520069.949948  
SRR17520069.949950  
SRR17520069.949951  
SRR17520069.949952  
SRR17520069.949953  
SRR17520069.949954  
SRR17520069.949955  
SRR17520069.949956  
SRR17520069.949957



SRR17520069.951321  
SRR17520069.957048  
SRR17520069.957049  
SRR17520069.957050  
SRR17520069.957051  
SRR17520069.957052  
SRR17520069.957053  
SRR17520069.957054  
SRR17520069.957055  
SRR17520069.957056  
SRR17520069.957057  
SRR17520069.957058  
SRR17520069.957059  
SRR17520069.957060  
SRR17520069.957061  
SRR17520069.957062  
SRR17520069.964025  
SRR17520069.998923  
SRR17520069.1010036  
SRR17520069.1010332  
SRR17520069.1010333  
SRR17520069.1010334  
SRR17520069.1010335  
SRR17520069.1010336  
SRR17520069.1010337  
SRR17520069.1010338  
SRR17520069.1010339  
SRR17520069.1010340  
SRR17520069.1010341  
SRR17520069.1010342  
SRR17520069.1010343  
SRR17520069.1010344  
SRR17520069.1010345  
SRR17520069.1010346  
SRR17520069.1010347  
SRR17520069.1010348  
SRR17520069.1010349  
SRR17520069.1010351  
SRR17520069.1010352  
SRR17520069.1010353  
SRR17520069.1010354  
SRR17520069.1010355  
SRR17520069.1010356  
SRR17520069.1010357  
SRR17520069.1010358  
SRR17520069.1010359  
SRR17520069.1013727

SRR17520069.1013728  
SRR17520069.1013729  
SRR17520069.1013730  
SRR17520069.1013731  
SRR17520069.1022779  
SRR17520069.1025295  
SRR17520069.1025296  
SRR17520069.1025297  
SRR17520069.1025298  
SRR17520069.1025299  
SRR17520069.1025300  
SRR17520069.1025301  
SRR17520069.1025302  
SRR17520069.1025303  
SRR17520069.1025304  
SRR17520069.1025305  
SRR17520069.1025306  
SRR17520069.1025307  
SRR17520069.1025308  
SRR17520069.1025309  
SRR17520069.1025310  
SRR17520069.1025311  
SRR17520069.1025312  
SRR17520069.1039207  
SRR17520069.1048896  
SRR17520069.1048898  
SRR17520069.1048899  
SRR17520069.1048900  
SRR17520069.1048901  
SRR17520069.1048902  
SRR17520069.1048903  
SRR17520069.1048904  
SRR17520069.1048905  
SRR17520069.1048906  
SRR17520069.1048907  
SRR17520069.1048908  
SRR17520069.1048909  
SRR17520069.1048910  
SRR17520069.1069198  
SRR17520069.1069199  
SRR17520069.1069200  
SRR17520069.1069201  
SRR17520069.1069202  
SRR17520069.1069203  
SRR17520069.1069204  
SRR17520069.1069205  
SRR17520069.1069206

SRR17520069.1069207  
SRR17520069.1069209  
SRR17520069.1069210  
SRR17520069.1069211  
SRR17520069.1069212  
SRR17520069.1069213  
SRR17520069.1069214  
SRR17520069.1069215  
SRR17520069.1069216  
SRR17520069.1069217  
SRR17520069.1069218  
SRR17520069.1069219  
SRR17520069.1069220  
SRR17520069.1069221  
SRR17520069.1069222  
SRR17520069.1069223  
SRR17520069.1069224  
SRR17520069.1069225  
SRR17520069.1069226  
SRR17520069.1069227  
SRR17520069.1069228  
SRR17520069.1069229  
SRR17520069.1069230  
SRR17520069.1069231  
SRR17520069.1069232  
SRR17520069.1069233  
SRR17520069.1069234  
SRR17520069.1069235  
SRR17520069.1069236  
SRR17520069.1069237  
SRR17520069.1069238  
SRR17520069.1069239  
SRR17520069.1069240  
SRR17520069.1069241  
SRR17520069.1069242  
SRR17520069.1069243  
SRR17520069.1069244  
SRR17520069.1069245  
SRR17520069.1069246  
SRR17520069.1069247  
SRR17520069.1069248  
SRR17520069.1069249  
SRR17520069.1069250  
SRR17520069.1069251  
SRR17520069.1069252  
SRR17520069.1069253  
SRR17520069.1069254

SRR17520069.1069255  
SRR17520069.1069256  
SRR17520069.1069257  
SRR17520069.1069258  
SRR17520069.1069259  
SRR17520069.1069260  
SRR17520069.1069261  
SRR17520069.1069262  
SRR17520069.1069263  
SRR17520069.1069264  
SRR17520069.1069265  
SRR17520069.1069266  
SRR17520069.1069267  
SRR17520069.1069268  
SRR17520069.1069269  
SRR17520069.1069270  
SRR17520069.1069272  
SRR17520069.1069273  
SRR17520069.1069274  
SRR17520069.1069275  
SRR17520069.1069276  
SRR17520069.1069277  
SRR17520069.1069278  
SRR17520069.1069279  
SRR17520069.1069280  
SRR17520069.1069281  
SRR17520069.1069282  
SRR17520069.1069283  
SRR17520069.1069284  
SRR17520069.1069285  
SRR17520069.1069286  
SRR17520069.1069287  
SRR17520069.1069288  
SRR17520069.1069289  
SRR17520069.1069290  
SRR17520069.1069291  
SRR17520069.1069292  
SRR17520069.1069293  
SRR17520069.1069294  
SRR17520069.1069295  
SRR17520069.1069296  
SRR17520069.1069297  
SRR17520069.1069298  
SRR17520069.1069299  
SRR17520069.1069300  
SRR17520069.1069301  
SRR17520069.1069302

SRR17520069.1069303  
SRR17520069.1069304  
SRR17520069.1069305  
SRR17520069.1069306  
SRR17520069.1069307  
SRR17520069.1069308  
SRR17520069.1069309  
SRR17520069.1069310  
SRR17520069.1069311  
SRR17520069.1069312  
SRR17520069.1069313  
SRR17520069.1069314  
SRR17520069.1069315  
SRR17520069.1069316  
SRR17520069.1069317  
SRR17520069.1069318  
SRR17520069.1069319  
SRR17520069.1069320  
SRR17520069.1084219  
SRR17520069.1084221  
SRR17520069.1084222  
SRR17520069.1084223  
SRR17520069.1084224  
SRR17520069.1084226  
SRR17520069.1084227  
SRR17520069.1084228  
SRR17520069.1084229  
SRR17520069.1084230  
SRR17520069.1084232  
SRR17520069.1084233  
SRR17520069.1084235  
SRR17520069.1084237  
SRR17520069.1084238  
SRR17520069.1084239  
SRR17520069.1084241  
SRR17520069.1084242  
SRR17520069.1084243  
SRR17520069.1084244  
SRR17520069.1084245  
SRR17520069.1084246  
SRR17520069.1084247  
SRR17520069.1084248  
SRR17520069.1084249  
SRR17520069.1084250  
SRR17520069.1084251  
SRR17520069.1084253  
SRR17520069.1084254

SRR17520069.1084255  
SRR17520069.1084256  
SRR17520069.1084257  
SRR17520069.1084258  
SRR17520069.1084259  
SRR17520069.1084260  
SRR17520069.1084261  
SRR17520069.1084262  
SRR17520069.1084263  
SRR17520069.1084264  
SRR17520069.1084265  
SRR17520069.1084266  
SRR17520069.1084267  
SRR17520069.1084268  
SRR17520069.1084269  
SRR17520069.1084270  
SRR17520069.1084271  
SRR17520069.1084273  
SRR17520069.1084274  
SRR17520069.1084275  
SRR17520069.1084276  
SRR17520069.1084277  
SRR17520069.1084278  
SRR17520069.1084279  
SRR17520069.1084280  
SRR17520069.1084282  
SRR17520069.1084283  
SRR17520069.1084285  
SRR17520069.1084286  
SRR17520069.1084287  
SRR17520069.1084288  
SRR17520069.1088952  
SRR17520069.1088953  
SRR17520069.1088955  
SRR17520069.1100030  
SRR17520069.1100031  
SRR17520069.1100032  
SRR17520069.1100033  
SRR17520069.1100034  
SRR17520069.1100035  
SRR17520069.1100036  
SRR17520069.1100037  
SRR17520069.1100038  
SRR17520069.1100039  
SRR17520069.1100040  
SRR17520069.1100041  
SRR17520069.1100042

SRR17520069.1100043  
SRR17520069.1100044  
SRR17520069.1100045  
SRR17520069.1100046  
SRR17520069.1100047  
SRR17520069.1100048  
SRR17520069.1100049  
SRR17520069.1100050  
SRR17520069.1100051  
SRR17520069.1100052  
SRR17520069.1100053  
SRR17520069.1100054  
SRR17520069.1100055  
SRR17520069.1100056  
SRR17520069.1100057  
SRR17520069.1100058  
SRR17520069.1100059  
SRR17520069.1100060  
SRR17520069.1100061  
SRR17520069.1100062  
SRR17520069.1100063  
SRR17520069.1100064  
SRR17520069.1100065  
SRR17520069.1100066  
SRR17520069.1100067  
SRR17520069.1100068  
SRR17520069.1100069  
SRR17520069.1100070  
SRR17520069.1100071  
SRR17520069.1100072  
SRR17520069.1100073  
SRR17520069.1100074  
SRR17520069.1100075  
SRR17520069.1100076  
SRR17520069.1100077  
SRR17520069.1100078  
SRR17520069.1100079  
SRR17520069.1100080  
SRR17520069.1100081  
SRR17520069.1100082  
SRR17520069.1100083  
SRR17520069.1100084  
SRR17520069.1100085  
SRR17520069.1100086  
SRR17520069.1100087  
SRR17520069.1100088  
SRR17520069.1100089

SRR17520069.1100090  
SRR17520069.1100091  
SRR17520069.1100092  
SRR17520069.1100093  
SRR17520069.1100094  
SRR17520069.1100095  
SRR17520069.1100096  
SRR17520069.1100097  
SRR17520069.1100098  
SRR17520069.1100099  
SRR17520069.1100100  
SRR17520069.1100101  
SRR17520069.1100102  
SRR17520069.1100103  
SRR17520069.1100104  
SRR17520069.1100105  
SRR17520069.1100106  
SRR17520069.1100107  
SRR17520069.1100108  
SRR17520069.1100109  
SRR17520069.1100110  
SRR17520069.1100111  
SRR17520069.1100112  
SRR17520069.1100113  
SRR17520069.1100114  
SRR17520069.1100115  
SRR17520069.1100116  
SRR17520069.1100117  
SRR17520069.1100118  
SRR17520069.1100119  
SRR17520069.1100120  
SRR17520069.1100121  
SRR17520069.1100122  
SRR17520069.1100123  
SRR17520069.1100124  
SRR17520069.1100125  
SRR17520069.1100126  
SRR17520069.1100127  
SRR17520069.1100128  
SRR17520069.1100129  
SRR17520069.1100130  
SRR17520069.1100131  
SRR17520069.1100132  
SRR17520069.1100133  
SRR17520069.1100134  
SRR17520069.1100135  
SRR17520069.1100136



SRR17520069.1100137  
SRR17520069.1100138  
SRR17520069.1100139  
SRR17520069.1100140  
SRR17520069.1100141  
SRR17520069.1100142  
SRR17520069.1100143  
SRR17520069.1100144  
SRR17520069.1100145  
SRR17520069.1100146  
SRR17520069.1100147  
SRR17520069.1100148  
SRR17520069.1100150  
SRR17520069.1100152  
SRR17520069.1100153  
SRR17520069.1100154  
SRR17520069.1100155  
SRR17520069.1100157  
SRR17520069.1100158  
SRR17520069.1100159  
SRR17520069.1100160  
SRR17520069.1100161  
SRR17520069.1100162  
SRR17520069.1100163  
SRR17520069.1100165  
SRR17520069.1100169  
SRR17520069.1100170  
SRR17520069.1100172  
SRR17520069.1100173  
SRR17520069.1100174  
SRR17520069.1100175  
SRR17520069.1100176  
SRR17520069.1100177  
SRR17520069.1100179  
SRR17520069.1100180  
SRR17520069.1100181  
SRR17520069.1100182  
SRR17520069.1100183  
SRR17520069.1100184  
SRR17520069.1100185  
SRR17520069.1104069  
SRR17520069.1121357  
SRR17520069.1121358  
SRR17520069.1121359  
SRR17520069.1121360  
SRR17520069.1121361  
SRR17520069.1121362

SRR17520069.1121363  
SRR17520069.1121364  
SRR17520069.1121365  
SRR17520069.1121366  
SRR17520069.1121367  
SRR17520069.1121368  
SRR17520069.1121369  
SRR17520069.1121370  
SRR17520069.1121371  
SRR17520069.1121372  
SRR17520069.1121373  
SRR17520069.1121374  
SRR17520069.1121375  
SRR17520069.1121376  
SRR17520069.1121377  
SRR17520069.1121378  
SRR17520069.1121379  
SRR17520069.1121380  
SRR17520069.1121381  
SRR17520069.1121382  
SRR17520069.1121383  
SRR17520069.1121385  
SRR17520069.1121386  
SRR17520069.1121387  
SRR17520069.1121388  
SRR17520069.1121389  
SRR17520069.1121390  
SRR17520069.1121391  
SRR17520069.1121392  
SRR17520069.1121393  
SRR17520069.1121394  
SRR17520069.1121395  
SRR17520069.1121396  
SRR17520069.1121397  
SRR17520069.1121398  
SRR17520069.1121399  
SRR17520069.1121400  
SRR17520069.1121401  
SRR17520069.1121402  
SRR17520069.1121403  
SRR17520069.1121404  
SRR17520069.1121405  
SRR17520069.1121406  
SRR17520069.1121407  
SRR17520069.1121408  
SRR17520069.1121409  
SRR17520069.1121410

SRR17520069.1121411  
SRR17520069.1121412  
SRR17520069.1121413  
SRR17520069.1121414  
SRR17520069.1121415  
SRR17520069.1121416  
SRR17520069.1121417  
SRR17520069.1128683  
SRR17520069.1128684  
SRR17520069.1128685  
SRR17520069.1128686  
SRR17520069.1128687  
SRR17520069.1128688  
SRR17520069.1128689  
SRR17520069.1128690  
SRR17520069.1128691  
SRR17520069.1128692  
SRR17520069.1128693  
SRR17520069.1128694  
SRR17520069.1128695  
SRR17520069.1128696  
SRR17520069.1128697  
SRR17520069.1128698  
SRR17520069.1128699  
SRR17520069.1128700  
SRR17520069.1128701  
SRR17520069.1128702  
SRR17520069.1128703  
SRR17520069.1128704  
SRR17520069.1128705  
SRR17520069.1128706  
SRR17520069.1128707  
SRR17520069.1128708  
SRR17520069.1128709  
SRR17520069.1128710  
SRR17520069.1128711  
SRR17520069.1128712  
SRR17520069.1128713  
SRR17520069.1128714  
SRR17520069.1128715  
SRR17520069.1128716  
SRR17520069.1128717  
SRR17520069.1128718  
SRR17520069.1128719  
SRR17520069.1128720  
SRR17520069.1128721  
SRR17520069.1128722

SRR17520069.1128723  
SRR17520069.1128724  
SRR17520069.1128725  
SRR17520069.1128726  
SRR17520069.1128727  
SRR17520069.1128728  
SRR17520069.1128730  
SRR17520069.1128731  
SRR17520069.1128732  
SRR17520069.1128733  
SRR17520069.1128734  
SRR17520069.1128735  
SRR17520069.1128736  
SRR17520069.1128737  
SRR17520069.1128738  
SRR17520069.1128740  
SRR17520069.1128741  
SRR17520069.1128742  
SRR17520069.1128743  
SRR17520069.1128744  
SRR17520069.1128745  
SRR17520069.1128746  
SRR17520069.1128747  
SRR17520069.1128748  
SRR17520069.1128749  
SRR17520069.1128750  
SRR17520069.1128751  
SRR17520069.1128752  
SRR17520069.1128753  
SRR17520069.1128756  
SRR17520069.1128757  
SRR17520069.1128758  
SRR17520069.1128759  
SRR17520069.1128760  
SRR17520069.1128761  
SRR17520069.1128762  
SRR17520069.1128763  
SRR17520069.1128764  
SRR17520069.1128765  
SRR17520069.1128766  
SRR17520069.1128767  
SRR17520069.1128768  
SRR17520069.1128769  
SRR17520069.1128770  
SRR17520069.1128771  
SRR17520069.1128772  
SRR17520069.1128773

SRR17520069.1128775  
SRR17520069.1128776  
SRR17520069.1128777  
SRR17520069.1128778  
SRR17520069.1128779  
SRR17520069.1128780  
SRR17520069.1128781  
SRR17520069.1128782  
SRR17520069.1128783  
SRR17520069.1128784  
SRR17520069.1128785  
SRR17520069.1128786  
SRR17520069.1128788  
SRR17520069.1128789  
SRR17520069.1128790  
SRR17520069.1128791  
SRR17520069.1128792  
SRR17520069.1128793  
SRR17520069.1128794  
SRR17520069.1128795  
SRR17520069.1128796  
SRR17520069.1128797  
SRR17520069.1128798  
SRR17520069.1128799  
SRR17520069.1128800  
SRR17520069.1128801  
SRR17520069.1128802  
SRR17520069.1128803  
SRR17520069.1128804  
SRR17520069.1128805  
SRR17520069.1128806  
SRR17520069.1128807  
SRR17520069.1128808  
SRR17520069.1128809  
SRR17520069.1128810  
SRR17520069.1128811  
SRR17520069.1128812  
SRR17520069.1128813  
SRR17520069.1128814  
SRR17520069.1128815  
SRR17520069.1128816  
SRR17520069.1128817  
SRR17520069.1128818  
SRR17520069.1128819  
SRR17520069.1136749  
SRR17520069.1141608  
SRR17520069.1141637

SRR17520069.1152655  
SRR17520069.1152656  
SRR17520069.1152657  
SRR17520069.1152658  
SRR17520069.1152659  
SRR17520069.1152660  
SRR17520069.1152664  
SRR17520069.1152665  
SRR17520069.1152670  
SRR17520069.1152671  
SRR17520069.1152674  
SRR17520069.1152676  
SRR17520069.1152678  
SRR17520069.1152682  
SRR17520069.1152683  
SRR17520069.1183066  
SRR17520069.1189913  
SRR17520069.1189914  
SRR17520069.1189915  
SRR17520069.1189916  
SRR17520069.1189917  
SRR17520069.1189918  
SRR17520069.1189919  
SRR17520069.1189920  
SRR17520069.1189921  
SRR17520069.1189922  
SRR17520069.1189923  
SRR17520069.1189924  
SRR17520069.1189925  
SRR17520069.1189926  
SRR17520069.1189927  
SRR17520069.1189928  
SRR17520069.1189929  
SRR17520069.1189930  
SRR17520069.1189931  
SRR17520069.1189932  
SRR17520069.1189933  
SRR17520069.1189934  
SRR17520069.1189935  
SRR17520069.1189936  
SRR17520069.1189937  
SRR17520069.1189938  
SRR17520069.1189939  
SRR17520069.1189940  
SRR17520069.1189941  
SRR17520069.1189942  
SRR17520069.1189943

SRR17520069.1189944  
SRR17520069.1189945  
SRR17520069.1189947  
SRR17520069.1189948  
SRR17520069.1189949  
SRR17520069.1189950  
SRR17520069.1189951  
SRR17520069.1189952  
SRR17520069.1189953  
SRR17520069.1189954  
SRR17520069.1189955  
SRR17520069.1189956  
SRR17520069.1189957  
SRR17520069.1189958  
SRR17520069.1189959  
SRR17520069.1189960  
SRR17520069.1189961  
SRR17520069.1189962  
SRR17520069.1189963  
SRR17520069.1189964  
SRR17520069.1189965  
SRR17520069.1189966  
SRR17520069.1189967  
SRR17520069.1189968  
SRR17520069.1189969  
SRR17520069.1189970  
SRR17520069.1189971  
SRR17520069.1189972  
SRR17520069.1189973  
SRR17520069.1189974  
SRR17520069.1189975  
SRR17520069.1189976  
SRR17520069.1189977  
SRR17520069.1189978  
SRR17520069.1189979  
SRR17520069.1189980  
SRR17520069.1189981  
SRR17520069.1189982  
SRR17520069.1189983  
SRR17520069.1189984  
SRR17520069.1189985  
SRR17520069.1189986  
SRR17520069.1189987  
SRR17520069.1189988  
SRR17520069.1189989  
SRR17520069.1189990  
SRR17520069.1189991

SRR17520069.1189992  
SRR17520069.1189994  
SRR17520069.1189995  
SRR17520069.1189996  
SRR17520069.1189997  
SRR17520069.1189998  
SRR17520069.1189999  
SRR17520069.1190000  
SRR17520069.1190001  
SRR17520069.1190002  
SRR17520069.1190003  
SRR17520069.1190004  
SRR17520069.1190005  
SRR17520069.1190006  
SRR17520069.1190007  
SRR17520069.1190008  
SRR17520069.1190009  
SRR17520069.1190010  
SRR17520069.1190011  
SRR17520069.1190012  
SRR17520069.1190013  
SRR17520069.1190015  
SRR17520069.1190016  
SRR17520069.1202067  
SRR17520069.1202068  
SRR17520069.1202069  
SRR17520069.1202070  
SRR17520069.1202071  
SRR17520069.1202072  
SRR17520069.1202073  
SRR17520069.1202074  
SRR17520069.1202075  
SRR17520069.1202076  
SRR17520069.1202077  
SRR17520069.1202078  
SRR17520069.1202079  
SRR17520069.1202080  
SRR17520069.1202081  
SRR17520069.1202082  
SRR17520069.1202083  
SRR17520069.1202084  
SRR17520069.1202085  
SRR17520069.1202086  
SRR17520069.1202087  
SRR17520069.1202088  
SRR17520069.1202089  
SRR17520069.1202090



SRR17520069. 1202091  
SRR17520069. 1202092  
SRR17520069. 1202094  
SRR17520069. 1202095  
SRR17520069. 1202096  
SRR17520069. 1202097  
SRR17520069. 1202098  
SRR17520069. 1202099  
SRR17520069. 1202100  
SRR17520069. 1202101  
SRR17520069. 1202102  
SRR17520069. 1202103  
SRR17520069. 1202104  
SRR17520069. 1202105  
SRR17520069. 1202106  
SRR17520069. 1202107  
SRR17520069. 1202108  
SRR17520069. 1202109  
SRR17520069. 1202110  
SRR17520069. 1202111  
SRR17520069. 1202112  
SRR17520069. 1202113  
SRR17520069. 1202114  
SRR17520069. 1202115  
SRR17520069. 1202116  
SRR17520069. 1202117  
SRR17520069. 1202118  
SRR17520069. 1202119  
SRR17520069. 1202120  
SRR17520069. 1202121  
SRR17520069. 1202122  
SRR17520069. 1202123  
SRR17520069. 1202124  
SRR17520069. 1202125  
SRR17520069. 1202126  
SRR17520069. 1202127  
SRR17520069. 1202128  
SRR17520069. 1202129  
SRR17520069. 1202130  
SRR17520069. 1202131  
SRR17520069. 1202132  
SRR17520069. 1202133  
SRR17520069. 1202134  
SRR17520069. 1202135  
SRR17520069. 1202136  
SRR17520069. 1202137  
SRR17520069. 1202138

SRR17520069. 1202139  
SRR17520069. 1202140  
SRR17520069. 1202141  
SRR17520069. 1202142  
SRR17520069. 1202143  
SRR17520069. 1202144  
SRR17520069. 1202145  
SRR17520069. 1202146  
SRR17520069. 1202147  
SRR17520069. 1202148  
SRR17520069. 1202149  
SRR17520069. 1202150  
SRR17520069. 1202151  
SRR17520069. 1202152  
SRR17520069. 1202153  
SRR17520069. 1202154  
SRR17520069. 1202155  
SRR17520069. 1202156  
SRR17520069. 1202157  
SRR17520069. 1202158  
SRR17520069. 1202159  
SRR17520069. 1202160  
SRR17520069. 1202161  
SRR17520069. 1202162  
SRR17520069. 1202163  
SRR17520069. 1202164  
SRR17520069. 1211814  
SRR17520069. 1253748  
SRR17520069. 1253749  
SRR17520069. 1253750  
SRR17520069. 1253751  
SRR17520069. 1253752  
SRR17520069. 1264747  
SRR17520069. 1264748  
SRR17520069. 1264750  
SRR17520069. 1264751  
SRR17520069. 1264752  
SRR17520069. 1264753  
SRR17520069. 1264754  
SRR17520069. 1264755  
SRR17520069. 1264756  
SRR17520069. 1264757  
SRR17520069. 1264758  
SRR17520069. 1264759  
SRR17520069. 1264760  
SRR17520069. 1264761  
SRR17520069. 1264762

SRR17520069. 1264763  
SRR17520069. 1264766  
SRR17520069. 1264767  
SRR17520069. 1264768  
SRR17520069. 1264769  
SRR17520069. 1264770  
SRR17520069. 1264771  
SRR17520069. 1264772  
SRR17520069. 1264774  
SRR17520069. 1264775  
SRR17520069. 1264776  
SRR17520069. 1264777  
SRR17520069. 1264778  
SRR17520069. 1264779  
SRR17520069. 1264780  
SRR17520069. 1266056  
SRR17520069. 1266057  
SRR17520069. 1266058  
SRR17520069. 1266059  
SRR17520069. 1266060  
SRR17520069. 1266061  
SRR17520069. 1266062  
SRR17520069. 1266063  
SRR17520069. 1266064  
SRR17520069. 1266065  
SRR17520069. 1266066  
SRR17520069. 1266067  
SRR17520069. 1266068  
SRR17520069. 1266069  
SRR17520069. 1266070  
SRR17520069. 1266071  
SRR17520069. 1266072  
SRR17520069. 1266073  
SRR17520069. 1266074  
SRR17520069. 1266075  
SRR17520069. 1266076  
SRR17520069. 1266077  
SRR17520069. 1266078  
SRR17520069. 1266079  
SRR17520069. 1266080  
SRR17520069. 1266081  
SRR17520069. 1266082  
SRR17520069. 1266083  
SRR17520069. 1266084  
SRR17520069. 1266085  
SRR17520069. 1266086  
SRR17520069. 1266087

SRR17520069. 1266088  
SRR17520069. 1266089  
SRR17520069. 1266090  
SRR17520069. 1266091  
SRR17520069. 1266092  
SRR17520069. 1266093  
SRR17520069. 1266094  
SRR17520069. 1266095  
SRR17520069. 1266096  
SRR17520069. 1266097  
SRR17520069. 1266098  
SRR17520069. 1266099  
SRR17520069. 1266100  
SRR17520069. 1266101  
SRR17520069. 1266102  
SRR17520069. 1266103  
SRR17520069. 1266104  
SRR17520069. 1266105  
SRR17520069. 1266106  
SRR17520069. 1266108  
SRR17520069. 1266109  
SRR17520069. 1266110  
SRR17520069. 1266111  
SRR17520069. 1266112  
SRR17520069. 1266113  
SRR17520069. 1266114  
SRR17520069. 1266115  
SRR17520069. 1266117  
SRR17520069. 1266118  
SRR17520069. 1266119  
SRR17520069. 1266120  
SRR17520069. 1266121  
SRR17520069. 1266122  
SRR17520069. 1266123  
SRR17520069. 1266124  
SRR17520069. 1266125  
SRR17520069. 1266126  
SRR17520069. 1266127  
SRR17520069. 1266128  
SRR17520069. 1266129  
SRR17520069. 1266130  
SRR17520069. 1266132  
SRR17520069. 1266133  
SRR17520069. 1266135  
SRR17520069. 1266136  
SRR17520069. 1266137  
SRR17520069. 1266138

SRR17520069. 1266140  
SRR17520069. 1266141  
SRR17520069. 1266142  
SRR17520069. 1266143  
SRR17520069. 1266144  
SRR17520069. 1266145  
SRR17520069. 1266146  
SRR17520069. 1266147  
SRR17520069. 1266148  
SRR17520069. 1266149  
SRR17520069. 1266150  
SRR17520069. 1266151  
SRR17520069. 1266152  
SRR17520069. 1266153  
SRR17520069. 1266154  
SRR17520069. 1266155  
SRR17520069. 1266156  
SRR17520069. 1266157  
SRR17520069. 1266158  
SRR17520069. 1266159  
SRR17520069. 1266160  
SRR17520069. 1266161  
SRR17520069. 1266162  
SRR17520069. 1266163  
SRR17520069. 1266164  
SRR17520069. 1266165  
SRR17520069. 1266166  
SRR17520069. 1266167  
SRR17520069. 1266168  
SRR17520069. 1266169  
SRR17520069. 1266170  
SRR17520069. 1266171  
SRR17520069. 1266172  
SRR17520069. 1266173  
SRR17520069. 1266174  
SRR17520069. 1266175  
SRR17520069. 1266176  
SRR17520069. 1266177  
SRR17520069. 1266178  
SRR17520069. 1266179  
SRR17520069. 1266180  
SRR17520069. 1266181  
SRR17520069. 1266182  
SRR17520069. 1266183  
SRR17520069. 1266184  
SRR17520069. 1266185  
SRR17520069. 1278812

SRR17520069. 1278869  
SRR17520069. 1278909  
SRR17520069. 1316683  
SRR17520069. 1316684  
SRR17520069. 1316686  
SRR17520069. 1316687  
SRR17520069. 1316688  
SRR17520069. 1316689  
SRR17520069. 1316690  
SRR17520069. 1316691  
SRR17520069. 1316692  
SRR17520069. 1316693  
SRR17520069. 1316694  
SRR17520069. 1316695  
SRR17520069. 1316696  
SRR17520069. 1316697  
SRR17520069. 1316698  
SRR17520069. 1316699  
SRR17520069. 1316700  
SRR17520069. 1316701  
SRR17520069. 1316702  
SRR17520069. 1316703  
SRR17520069. 1316704  
SRR17520069. 1316705  
SRR17520069. 1316706  
SRR17520069. 1316707  
SRR17520069. 1316708  
SRR17520069. 1316709  
SRR17520069. 1316710  
SRR17520069. 1316711  
SRR17520069. 1316712  
SRR17520069. 1316713  
SRR17520069. 1316714  
SRR17520069. 1316715  
SRR17520069. 1316716  
SRR17520069. 1316717  
SRR17520069. 1316718  
SRR17520069. 1316719  
SRR17520069. 1316720  
SRR17520069. 1316721  
SRR17520069. 1316722  
SRR17520069. 1316723  
SRR17520069. 1316724  
SRR17520069. 1316725  
SRR17520069. 1316726  
SRR17520069. 1316727  
SRR17520069. 1316728

SRR17520069. 1316729  
SRR17520069. 1316730  
SRR17520069. 1316731  
SRR17520069. 1316732  
SRR17520069. 1316733  
SRR17520069. 1316734  
SRR17520069. 1316735  
SRR17520069. 1316736  
SRR17520069. 1316737  
SRR17520069. 1316738  
SRR17520069. 1316739  
SRR17520069. 1316740  
SRR17520069. 1316741  
SRR17520069. 1316742  
SRR17520069. 1316743  
SRR17520069. 1316744  
SRR17520069. 1316745  
SRR17520069. 1316746  
SRR17520069. 1316747  
SRR17520069. 1316748  
SRR17520069. 1316749  
SRR17520069. 1316750  
SRR17520069. 1316751  
SRR17520069. 1316752  
SRR17520069. 1316753  
SRR17520069. 1316754  
SRR17520069. 1316755  
SRR17520069. 1316756  
SRR17520069. 1316757  
SRR17520069. 1316758  
SRR17520069. 1316759  
SRR17520069. 1316760  
SRR17520069. 1316763  
SRR17520069. 1316764  
SRR17520069. 1316765  
SRR17520069. 1316766  
SRR17520069. 1316767  
SRR17520069. 1316768  
SRR17520069. 1316769  
SRR17520069. 1316770  
SRR17520069. 1316771  
SRR17520069. 1316772  
SRR17520069. 1316774  
SRR17520069. 1316775  
SRR17520069. 1316776  
SRR17520069. 1316777  
SRR17520069. 1316778

SRR17520069. 1316779  
SRR17520069. 1316780  
SRR17520069. 1316781  
SRR17520069. 1316782  
SRR17520069. 1316783  
SRR17520069. 1316785  
SRR17520069. 1316786  
SRR17520069. 1316787  
SRR17520069. 1316788  
SRR17520069. 1316790  
SRR17520069. 1316792  
SRR17520069. 1316793  
SRR17520069. 1316794  
SRR17520069. 1316795  
SRR17520069. 1316796  
SRR17520069. 1316798  
SRR17520069. 1316799  
SRR17520069. 1316800  
SRR17520069. 1316801  
SRR17520069. 1316802  
SRR17520069. 1316803  
SRR17520069. 1316804  
SRR17520069. 1316805  
SRR17520069. 1316806  
SRR17520069. 1316807  
SRR17520069. 1316808  
SRR17520069. 1316809  
SRR17520069. 1316810  
SRR17520069. 1316811  
SRR17520069. 1316812  
SRR17520069. 1316813  
SRR17520069. 1334237  
SRR17520069. 1334238  
SRR17520069. 1334239  
SRR17520069. 1334240  
SRR17520069. 1334241  
SRR17520069. 1334242  
SRR17520069. 1334243  
SRR17520069. 1334244  
SRR17520069. 1334245  
SRR17520069. 1334246  
SRR17520069. 1334247  
SRR17520069. 1334248  
SRR17520069. 1334249  
SRR17520069. 1334250  
SRR17520069. 1334251  
SRR17520069. 1334252



SRR17520069. 1334253  
SRR17520069. 1334254  
SRR17520069. 1334255  
SRR17520069. 1334256  
SRR17520069. 1334257  
SRR17520069. 1334258  
SRR17520069. 1334259  
SRR17520069. 1336037  
SRR17520069. 1336057  
SRR17520069. 1342643  
SRR17520069. 1342644  
SRR17520069. 1342645  
SRR17520069. 1342646  
SRR17520069. 1342647  
SRR17520069. 1342648  
SRR17520069. 1342649  
SRR17520069. 1342650  
SRR17520069. 1342651  
SRR17520069. 1342652  
SRR17520069. 1342653  
SRR17520069. 1347273  
SRR17520069. 1347274  
SRR17520069. 1347275  
SRR17520069. 1347276  
SRR17520069. 1347277  
SRR17520069. 1347278  
SRR17520069. 1347279  
SRR17520069. 1347280  
SRR17520069. 1347281  
SRR17520069. 1347282  
SRR17520069. 1347283  
SRR17520069. 1347284  
SRR17520069. 1347285  
SRR17520069. 1347286  
SRR17520069. 1347287  
SRR17520069. 1347288  
SRR17520069. 1347289  
SRR17520069. 1347290  
SRR17520069. 1347291  
SRR17520069. 1347292  
SRR17520069. 1347293  
SRR17520069. 1347294  
SRR17520069. 1347295  
SRR17520069. 1347296  
SRR17520069. 1347297  
SRR17520069. 1347298  
SRR17520069. 1347299

SRR17520069. 1347300  
SRR17520069. 1347301  
SRR17520069. 1347302  
SRR17520069. 1347303  
SRR17520069. 1347304  
SRR17520069. 1347305  
SRR17520069. 1347306  
SRR17520069. 1347307  
SRR17520069. 1347308  
SRR17520069. 1347309  
SRR17520069. 1347310  
SRR17520069. 1347311  
SRR17520069. 1347312  
SRR17520069. 1347314  
SRR17520069. 1347315  
SRR17520069. 1347316  
SRR17520069. 1347317  
SRR17520069. 1347318  
SRR17520069. 1347319  
SRR17520069. 1347320  
SRR17520069. 1347321  
SRR17520069. 1347322  
SRR17520069. 1347323  
SRR17520069. 1347324  
SRR17520069. 1347325  
SRR17520069. 1347326  
SRR17520069. 1347327  
SRR17520069. 1347328  
SRR17520069. 1347329  
SRR17520069. 1347330  
SRR17520069. 1347331  
SRR17520069. 1347332  
SRR17520069. 1347333  
SRR17520069. 1347334  
SRR17520069. 1347335  
SRR17520069. 1347337  
SRR17520069. 1347338  
SRR17520069. 1347339  
SRR17520069. 1347340  
SRR17520069. 1347341  
SRR17520069. 1347343  
SRR17520069. 1347345  
SRR17520069. 1347346  
SRR17520069. 1347347  
SRR17520069. 1347348  
SRR17520069. 1347349  
SRR17520069. 1347350

SRR17520069. 1347351  
SRR17520069. 1347352  
SRR17520069. 1347353  
SRR17520069. 1347354  
SRR17520069. 1347355  
SRR17520069. 1347356  
SRR17520069. 1347357  
SRR17520069. 1347358  
SRR17520069. 1347359  
SRR17520069. 1347360  
SRR17520069. 1347361  
SRR17520069. 1347362  
SRR17520069. 1347363  
SRR17520069. 1347364  
SRR17520069. 1347365  
SRR17520069. 1347366  
SRR17520069. 1347368  
SRR17520069. 1347369  
SRR17520069. 1347370  
SRR17520069. 1347371  
SRR17520069. 1347372  
SRR17520069. 1347373  
SRR17520069. 1347374  
SRR17520069. 1347375  
SRR17520069. 1347376  
SRR17520069. 1347377  
SRR17520069. 1347378  
SRR17520069. 1347379  
SRR17520069. 1347380  
SRR17520069. 1347381  
SRR17520069. 1347382  
SRR17520069. 1347383  
SRR17520069. 1347384  
SRR17520069. 1347385  
SRR17520069. 1347386  
SRR17520069. 1347387  
SRR17520069. 1347388  
SRR17520069. 1347389  
SRR17520069. 1347390  
SRR17520069. 1347391  
SRR17520069. 1347392  
SRR17520069. 1347393  
SRR17520069. 1347394  
SRR17520069. 1347395  
SRR17520069. 1347396  
SRR17520069. 1347397  
SRR17520069. 1347398

SRR17520069. 1347399  
SRR17520069. 1347400  
SRR17520069. 1347401  
SRR17520069. 1347402  
SRR17520069. 1347403  
SRR17520069. 1347404  
SRR17520069. 1347406  
SRR17520069. 1347407  
SRR17520069. 1347408  
SRR17520069. 1347409  
SRR17520069. 1347410  
SRR17520069. 1347413  
SRR17520069. 1347414  
SRR17520069. 1347415  
SRR17520069. 1347416  
SRR17520069. 1347417  
SRR17520069. 1347418  
SRR17520069. 1347419  
SRR17520069. 1347420  
SRR17520069. 1347421  
SRR17520069. 1347422  
SRR17520069. 1347423  
SRR17520069. 1347424  
SRR17520069. 1347425  
SRR17520069. 1347426  
SRR17520069. 1347427  
SRR17520069. 1347428  
SRR17520069. 1347429  
SRR17520069. 1347430  
SRR17520069. 1347431  
SRR17520069. 1347432  
SRR17520069. 1347433  
SRR17520069. 1347434  
SRR17520069. 1347435  
SRR17520069. 1347436  
SRR17520069. 1347438  
SRR17520069. 1347439  
SRR17520069. 1347440  
SRR17520069. 1347441  
SRR17520069. 1347442  
SRR17520069. 1347443  
SRR17520069. 1348410  
SRR17520069. 1348411  
SRR17520069. 1348412  
SRR17520069. 1348413  
SRR17520069. 1348414  
SRR17520069. 1348415

SRR17520069. 1348416  
SRR17520069. 1348417  
SRR17520069. 1348418  
SRR17520069. 1348419  
SRR17520069. 1348420  
SRR17520069. 1348421  
SRR17520069. 1348422  
SRR17520069. 1348423  
SRR17520069. 1348424  
SRR17520069. 1348425  
SRR17520069. 1348426  
SRR17520069. 1348427  
SRR17520069. 1348428  
SRR17520069. 1396743  
SRR17520069. 1396815  
SRR17520069. 1396824  
SRR17520069. 1412661  
SRR17520069. 1412663  
SRR17520069. 1412664  
SRR17520069. 1412665  
SRR17520069. 1412666  
SRR17520069. 1412668  
SRR17520069. 1412669  
SRR17520069. 1412670  
SRR17520069. 1412671  
SRR17520069. 1412672  
SRR17520069. 1412673  
SRR17520069. 1412674  
SRR17520069. 1412675  
SRR17520069. 1412676  
SRR17520069. 1412677  
SRR17520069. 1412678  
SRR17520069. 1412679  
SRR17520069. 1412680  
SRR17520069. 1412681  
SRR17520069. 1412682  
SRR17520069. 1412683  
SRR17520069. 1412684  
SRR17520069. 1412685  
SRR17520069. 1412686  
SRR17520069. 1412687  
SRR17520069. 1412688  
SRR17520069. 1412689  
SRR17520069. 1412690  
SRR17520069. 1412691  
SRR17520069. 1412693  
SRR17520069. 1412694

SRR17520069. 1412695  
SRR17520069. 1412696  
SRR17520069. 1412697  
SRR17520069. 1412698  
SRR17520069. 1412699  
SRR17520069. 1412700  
SRR17520069. 1412701  
SRR17520069. 1412702  
SRR17520069. 1412703  
SRR17520069. 1412704  
SRR17520069. 1412705  
SRR17520069. 1412706  
SRR17520069. 1412707  
SRR17520069. 1412708  
SRR17520069. 1412710  
SRR17520069. 1412711  
SRR17520069. 1412712  
SRR17520069. 1412714  
SRR17520069. 1412715  
SRR17520069. 1412716  
SRR17520069. 1412717  
SRR17520069. 1412718  
SRR17520069. 1412719  
SRR17520069. 1412720  
SRR17520069. 1412721  
SRR17520069. 1412722  
SRR17520069. 1412723  
SRR17520069. 1412725  
SRR17520069. 1412726  
SRR17520069. 1412727  
SRR17520069. 1412728  
SRR17520069. 1412729  
SRR17520069. 1412730  
SRR17520069. 1412731  
SRR17520069. 1412732  
SRR17520069. 1412733  
SRR17520069. 1412734  
SRR17520069. 1412735  
SRR17520069. 1412736  
SRR17520069. 1412737  
SRR17520069. 1412738  
SRR17520069. 1412739  
SRR17520069. 1412740  
SRR17520069. 1412741  
SRR17520069. 1412742  
SRR17520069. 1412743  
SRR17520069. 1412744

SRR17520069. 1412745  
SRR17520069. 1412746  
SRR17520069. 1412747  
SRR17520069. 1412748  
SRR17520069. 1412749  
SRR17520069. 1412750  
SRR17520069. 1412751  
SRR17520069. 1412752  
SRR17520069. 1412753  
SRR17520069. 1412754  
SRR17520069. 1412756  
SRR17520069. 1435598  
SRR17520069. 1435599  
SRR17520069. 1435600  
SRR17520069. 1435601  
SRR17520069. 1435602  
SRR17520069. 1435603  
SRR17520069. 1435604  
SRR17520069. 1435605  
SRR17520069. 1435606  
SRR17520069. 1435607  
SRR17520069. 1435608  
SRR17520069. 1435609  
SRR17520069. 1435610  
SRR17520069. 1435611  
SRR17520069. 1435612  
SRR17520069. 1435613  
SRR17520069. 1435614  
SRR17520069. 1435615  
SRR17520069. 1435616  
SRR17520069. 1435618  
SRR17520069. 1435619  
SRR17520069. 1435620  
SRR17520069. 1435621  
SRR17520069. 1435622  
SRR17520069. 1435623  
SRR17520069. 1435624  
SRR17520069. 1435625  
SRR17520069. 1435626  
SRR17520069. 1435627  
SRR17520069. 1435629  
SRR17520069. 1435630  
SRR17520069. 1435631  
SRR17520069. 1435632  
SRR17520069. 1435633  
SRR17520069. 1435634  
SRR17520069. 1435635

SRR17520069. 1435636  
SRR17520069. 1435637  
SRR17520069. 1435638  
SRR17520069. 1435639  
SRR17520069. 1435640  
SRR17520069. 1435641  
SRR17520069. 1435642  
SRR17520069. 1435643  
SRR17520069. 1435644  
SRR17520069. 1435645  
SRR17520069. 1435646  
SRR17520069. 1435647  
SRR17520069. 1435648  
SRR17520069. 1435649  
SRR17520069. 1435650  
SRR17520069. 1435651  
SRR17520069. 1435652  
SRR17520069. 1435653  
SRR17520069. 1435654  
SRR17520069. 1435655  
SRR17520069. 1435656  
SRR17520069. 1435657  
SRR17520069. 1435658  
SRR17520069. 1435659  
SRR17520069. 1435660  
SRR17520069. 1435661  
SRR17520069. 1446773  
SRR17520069. 1446817  
SRR17520069. 1462670  
SRR17520069. 1462671  
SRR17520069. 1478849  
SRR17520069. 1486580  
SRR17520069. 1486581  
SRR17520069. 1486582  
SRR17520069. 1486583  
SRR17520069. 1486584  
SRR17520069. 1486585  
SRR17520069. 1486586  
SRR17520069. 1486587  
SRR17520069. 1486588  
SRR17520069. 1486589  
SRR17520069. 1486590  
SRR17520069. 1486591  
SRR17520069. 1486592  
SRR17520069. 1486593  
SRR17520069. 1486594  
SRR17520069. 1486595



SRR17520069.1486596  
SRR17520069.1486597  
SRR17520069.1486598  
SRR17520069.1486599  
SRR17520069.1498690  
SRR17520069.1498691  
SRR17520069.1498692  
SRR17520069.1498693  
SRR17520069.1498694  
SRR17520069.1498695  
SRR17520069.1498696  
SRR17520069.1498697  
SRR17520069.1498698  
SRR17520069.1498699  
SRR17520069.1498700  
SRR17520069.1498701  
SRR17520069.1498702  
SRR17520069.1498703  
SRR17520069.1498704  
SRR17520069.1498705  
SRR17520069.1498706  
SRR17520069.1498707  
SRR17520069.1498708  
SRR17520069.1498709  
SRR17520069.1498710  
SRR17520069.1498711  
SRR17520069.1498712  
SRR17520069.1498713  
SRR17520069.1498714  
SRR17520069.1498715  
SRR17520069.1498716  
SRR17520069.1498717  
SRR17520069.1498718  
SRR17520069.1498719  
SRR17520069.1498720  
SRR17520069.1498721  
SRR17520069.1498722  
SRR17520069.1498723  
SRR17520069.1498724  
SRR17520069.1498725  
SRR17520069.1498726  
SRR17520069.1498727  
SRR17520069.1498728  
SRR17520069.1498729  
SRR17520069.1498730  
SRR17520069.1498731  
SRR17520069.1498732

SRR17520069. 1498733  
SRR17520069. 1498735  
SRR17520069. 1498736  
SRR17520069. 1498737  
SRR17520069. 1498738  
SRR17520069. 1498739  
SRR17520069. 1498740  
SRR17520069. 1498741  
SRR17520069. 1498742  
SRR17520069. 1498743  
SRR17520069. 1498744  
SRR17520069. 1498745  
SRR17520069. 1498746  
SRR17520069. 1498747  
SRR17520069. 1498748  
SRR17520069. 1498749  
SRR17520069. 1498750  
SRR17520069. 1498751  
SRR17520069. 1498752  
SRR17520069. 1498753  
SRR17520069. 1498754  
SRR17520069. 1498755  
SRR17520069. 1498756  
SRR17520069. 1498757  
SRR17520069. 1498758  
SRR17520069. 1498759  
SRR17520069. 1498760  
SRR17520069. 1498761  
SRR17520069. 1498762  
SRR17520069. 1498763  
SRR17520069. 1498764  
SRR17520069. 1498765  
SRR17520069. 1498766  
SRR17520069. 1498767  
SRR17520069. 1498768  
SRR17520069. 1498769  
SRR17520069. 1498770  
SRR17520069. 1498771  
SRR17520069. 1498772  
SRR17520069. 1498773  
SRR17520069. 1498774  
SRR17520069. 1498775  
SRR17520069. 1498776  
SRR17520069. 1498777  
SRR17520069. 1498778  
SRR17520069. 1498785  
SRR17520069. 1498787

SRR17520069. 1498789  
SRR17520069. 1498790  
SRR17520069. 1498794  
SRR17520069. 1498800  
SRR17520069. 1498801  
SRR17520069. 1498805  
SRR17520069. 1498813  
SRR17520069. 1500517  
SRR17520069. 1500518  
SRR17520069. 1518843  
SRR17520069. 1534026  
SRR17520069. 1534027  
SRR17520069. 1534028  
SRR17520069. 1534029  
SRR17520069. 1534030  
SRR17520069. 1534031  
SRR17520069. 1534032  
SRR17520069. 1534033  
SRR17520069. 1534034  
SRR17520069. 1534035  
SRR17520069. 1534036  
SRR17520069. 1534037  
SRR17520069. 1534038  
SRR17520069. 1534039  
SRR17520069. 1534040  
SRR17520069. 1534041  
SRR17520069. 1534042  
SRR17520069. 1534043  
SRR17520069. 1534044  
SRR17520069. 1534045  
SRR17520069. 1534046  
SRR17520069. 1534047  
SRR17520069. 1534048  
SRR17520069. 1534049  
SRR17520069. 1534050  
SRR17520069. 1534051  
SRR17520069. 1534052  
SRR17520069. 1534053  
SRR17520069. 1534054  
SRR17520069. 1534055  
SRR17520069. 1534056  
SRR17520069. 1534057  
SRR17520069. 1534058  
SRR17520069. 1534059  
SRR17520069. 1534060  
SRR17520069. 1534061  
SRR17520069. 1534062

SRR17520069. 1534063  
SRR17520069. 1534064  
SRR17520069. 1534065  
SRR17520069. 1534066  
SRR17520069. 1534067  
SRR17520069. 1534068  
SRR17520069. 1534069  
SRR17520069. 1534070  
SRR17520069. 1534071  
SRR17520069. 1534072  
SRR17520069. 1534073  
SRR17520069. 1534074  
SRR17520069. 1534075  
SRR17520069. 1534076  
SRR17520069. 1534077  
SRR17520069. 1534078  
SRR17520069. 1534079  
SRR17520069. 1534080  
SRR17520069. 1534081  
SRR17520069. 1534082  
SRR17520069. 1534083  
SRR17520069. 1534084  
SRR17520069. 1534085  
SRR17520069. 1534086  
SRR17520069. 1534087  
SRR17520069. 1534088  
SRR17520069. 1534089  
SRR17520069. 1534090  
SRR17520069. 1534091  
SRR17520069. 1534092  
SRR17520069. 1534093  
SRR17520069. 1534094  
SRR17520069. 1534095  
SRR17520069. 1534096  
SRR17520069. 1534097  
SRR17520069. 1534098  
SRR17520069. 1534099  
SRR17520069. 1534100  
SRR17520069. 1534101  
SRR17520069. 1534102  
SRR17520069. 1534103  
SRR17520069. 1534105  
SRR17520069. 1534106  
SRR17520069. 1534107  
SRR17520069. 1534108  
SRR17520069. 1534109  
SRR17520069. 1534110

SRR17520069. 1534111  
SRR17520069. 1534112  
SRR17520069. 1534113  
SRR17520069. 1534114  
SRR17520069. 1534115  
SRR17520069. 1534116  
SRR17520069. 1534117  
SRR17520069. 1534118  
SRR17520069. 1534119  
SRR17520069. 1534120  
SRR17520069. 1534121  
SRR17520069. 1534122  
SRR17520069. 1534123  
SRR17520069. 1534124  
SRR17520069. 1534125  
SRR17520069. 1534126  
SRR17520069. 1534127  
SRR17520069. 1535013  
SRR17520069. 1535014  
SRR17520069. 1535015  
SRR17520069. 1535016  
SRR17520069. 1535017  
SRR17520069. 1535018  
SRR17520069. 1535019  
SRR17520069. 1535020  
SRR17520069. 1535021  
SRR17520069. 1535022  
SRR17520069. 1535023  
SRR17520069. 1535024  
SRR17520069. 1535025  
SRR17520069. 1535026  
SRR17520069. 1535027  
SRR17520069. 1535028  
SRR17520069. 1535029  
SRR17520069. 1535030  
SRR17520069. 1535031  
SRR17520069. 1535033  
SRR17520069. 1535034  
SRR17520069. 1535036  
SRR17520069. 1535037  
SRR17520069. 1535038  
SRR17520069. 1535039  
SRR17520069. 1535040  
SRR17520069. 1535041  
SRR17520069. 1535042  
SRR17520069. 1535043  
SRR17520069. 1535044

SRR17520069. 1535045  
SRR17520069. 1535046  
SRR17520069. 1535047  
SRR17520069. 1535048  
SRR17520069. 1535049  
SRR17520069. 1535050  
SRR17520069. 1535051  
SRR17520069. 1535052  
SRR17520069. 1535053  
SRR17520069. 1535054  
SRR17520069. 1535055  
SRR17520069. 1535056  
SRR17520069. 1535057  
SRR17520069. 1535058  
SRR17520069. 1535059  
SRR17520069. 1535060  
SRR17520069. 1535061  
SRR17520069. 1535062  
SRR17520069. 1535063  
SRR17520069. 1535064  
SRR17520069. 1535065  
SRR17520069. 1535066  
SRR17520069. 1535067  
SRR17520069. 1535068  
SRR17520069. 1535069  
SRR17520069. 1535070  
SRR17520069. 1535071  
SRR17520069. 1535073  
SRR17520069. 1535074  
SRR17520069. 1535075  
SRR17520069. 1535076  
SRR17520069. 1535077  
SRR17520069. 1535078  
SRR17520069. 1535079  
SRR17520069. 1535080  
SRR17520069. 1535081  
SRR17520069. 1535082  
SRR17520069. 1535083  
SRR17520069. 1535085  
SRR17520069. 1535086  
SRR17520069. 1535087  
SRR17520069. 1535088  
SRR17520069. 1535089  
SRR17520069. 1535090  
SRR17520069. 1535091  
SRR17520069. 1535092  
SRR17520069. 1535093

SRR17520069. 1535094  
SRR17520069. 1535095  
SRR17520069. 1535096  
SRR17520069. 1535097  
SRR17520069. 1535098  
SRR17520069. 1535099  
SRR17520069. 1535100  
SRR17520069. 1535101  
SRR17520069. 1535102  
SRR17520069. 1535103  
SRR17520069. 1535104  
SRR17520069. 1535105  
SRR17520069. 1535106  
SRR17520069. 1535107  
SRR17520069. 1535108  
SRR17520069. 1535109  
SRR17520069. 1535110  
SRR17520069. 1535111  
SRR17520069. 1535112  
SRR17520069. 1535113  
SRR17520069. 1535114  
SRR17520069. 1535115  
SRR17520069. 1535116  
SRR17520069. 1535117  
SRR17520069. 1535118  
SRR17520069. 1535119  
SRR17520069. 1535120  
SRR17520069. 1535121  
SRR17520069. 1535122  
SRR17520069. 1535123  
SRR17520069. 1535773  
SRR17520069. 1552426  
SRR17520069. 1552449  
SRR17520069. 1554053  
SRR17520069. 1554055  
SRR17520069. 1554057  
SRR17520069. 1554059  
SRR17520069. 1554060  
SRR17520069. 1554061  
SRR17520069. 1554062  
SRR17520069. 1554063  
SRR17520069. 1554065  
SRR17520069. 1554066  
SRR17520069. 1554069  
SRR17520069. 1554071  
SRR17520069. 1554072  
SRR17520069. 1554073

SRR17520069.1554074  
SRR17520069.1554075  
SRR17520069.1554076  
SRR17520069.1554077  
SRR17520069.1554078  
SRR17520069.1554079  
SRR17520069.1554082  
SRR17520069.1554085  
SRR17520069.1554088  
SRR17520069.1554089  
SRR17520069.1554091  
SRR17520069.1554092  
SRR17520069.1554093  
SRR17520069.1554094  
SRR17520069.1554095  
SRR17520069.1554096  
SRR17520069.1554098  
SRR17520069.1554099  
SRR17520069.1554100  
SRR17520069.1554101  
SRR17520069.1554104  
SRR17520069.1554105  
SRR17520069.1554106  
SRR17520069.1554107  
SRR17520069.1554108  
SRR17520069.1554110  
SRR17520069.1554111  
SRR17520069.1554112  
SRR17520069.1554113  
SRR17520069.1554114  
SRR17520069.1554115  
SRR17520069.1554116  
SRR17520069.1554117  
SRR17520069.1554118  
SRR17520069.1554119  
SRR17520069.1554120  
SRR17520069.1554121  
SRR17520069.1554122  
SRR17520069.1554123  
SRR17520069.1554124  
SRR17520069.1554125  
SRR17520069.1554127  
SRR17520069.1554128  
SRR17520069.1554129  
SRR17520069.1554130  
SRR17520069.1554131  
SRR17520069.1554132



SRR17520069. 1554133  
SRR17520069. 1554134  
SRR17520069. 1554135  
SRR17520069. 1554136  
SRR17520069. 1554137  
SRR17520069. 1554138  
SRR17520069. 1554139  
SRR17520069. 1554140  
SRR17520069. 1554141  
SRR17520069. 1554143  
SRR17520069. 1554144  
SRR17520069. 1554145  
SRR17520069. 1554146  
SRR17520069. 1554147  
SRR17520069. 1554149  
SRR17520069. 1554150  
SRR17520069. 1554151  
SRR17520069. 1554152  
SRR17520069. 1554153  
SRR17520069. 1554154  
SRR17520069. 1554155  
SRR17520069. 1554156  
SRR17520069. 1554157  
SRR17520069. 1554158  
SRR17520069. 1566133  
SRR17520069. 1585301  
SRR17520069. 1585302  
SRR17520069. 1585303  
SRR17520069. 1585304  
SRR17520069. 1585305  
SRR17520069. 1585306  
SRR17520069. 1585307  
SRR17520069. 1585308  
SRR17520069. 1585309  
SRR17520069. 1585310  
SRR17520069. 1585311  
SRR17520069. 1585312  
SRR17520069. 1585313  
SRR17520069. 1585314  
SRR17520069. 1585315  
SRR17520069. 1585316  
SRR17520069. 1585317  
SRR17520069. 1585318  
SRR17520069. 1585319  
SRR17520069. 1585320  
SRR17520069. 1585321  
SRR17520069. 1585322

SRR17520069. 1585323  
SRR17520069. 1585324  
SRR17520069. 1585325  
SRR17520069. 1585326  
SRR17520069. 1585327  
SRR17520069. 1585328  
SRR17520069. 1585329  
SRR17520069. 1585330  
SRR17520069. 1585331  
SRR17520069. 1585332  
SRR17520069. 1585333  
SRR17520069. 1585334  
SRR17520069. 1585335  
SRR17520069. 1585336  
SRR17520069. 1585338  
SRR17520069. 1585339  
SRR17520069. 1585340  
SRR17520069. 1585341  
SRR17520069. 1585342  
SRR17520069. 1585343  
SRR17520069. 1585344  
SRR17520069. 1585345  
SRR17520069. 1585346  
SRR17520069. 1585347  
SRR17520069. 1585348  
SRR17520069. 1585349  
SRR17520069. 1585350  
SRR17520069. 1585351  
SRR17520069. 1585352  
SRR17520069. 1585353  
SRR17520069. 1585354  
SRR17520069. 1585355  
SRR17520069. 1585356  
SRR17520069. 1585357  
SRR17520069. 1585358  
SRR17520069. 1585359  
SRR17520069. 1585360  
SRR17520069. 1585361  
SRR17520069. 1585362  
SRR17520069. 1585365  
SRR17520069. 1585366  
SRR17520069. 1585367  
SRR17520069. 1585368  
SRR17520069. 1585369  
SRR17520069. 1585370  
SRR17520069. 1585371  
SRR17520069. 1585372

SRR17520069. 1585373  
SRR17520069. 1585374  
SRR17520069. 1585375  
SRR17520069. 1585376  
SRR17520069. 1585377  
SRR17520069. 1585378  
SRR17520069. 1585379  
SRR17520069. 1585380  
SRR17520069. 1585381  
SRR17520069. 1585382  
SRR17520069. 1585383  
SRR17520069. 1585384  
SRR17520069. 1585385  
SRR17520069. 1585386  
SRR17520069. 1585387  
SRR17520069. 1585388  
SRR17520069. 1585389  
SRR17520069. 1585390  
SRR17520069. 1585391  
SRR17520069. 1585392  
SRR17520069. 1585393  
SRR17520069. 1585394  
SRR17520069. 1585395  
SRR17520069. 1585396  
SRR17520069. 1585397  
SRR17520069. 1585399  
SRR17520069. 1585400  
SRR17520069. 1585401  
SRR17520069. 1604986  
SRR17520069. 1604987  
SRR17520069. 1604988  
SRR17520069. 1604989  
SRR17520069. 1604990  
SRR17520069. 1604991  
SRR17520069. 1623653  
SRR17520069. 1623654  
SRR17520069. 1623655  
SRR17520069. 1623658  
SRR17520069. 1640566  
SRR17520069. 1640567  
SRR17520069. 1640568  
SRR17520069. 1640569  
SRR17520069. 1640570  
SRR17520069. 1640571  
SRR17520069. 1640572  
SRR17520069. 1640573  
SRR17520069. 1640574

SRR17520069. 1640575  
SRR17520069. 1640576  
SRR17520069. 1640577  
SRR17520069. 1640578  
SRR17520069. 1640579  
SRR17520069. 1640580  
SRR17520069. 1640581  
SRR17520069. 1640582  
SRR17520069. 1640583  
SRR17520069. 1640584  
SRR17520069. 1640585  
SRR17520069. 1640726  
SRR17520069. 1640728  
SRR17520069. 1640730  
SRR17520069. 1640731  
SRR17520069. 1640732  
SRR17520069. 1640733  
SRR17520069. 1640734  
SRR17520069. 1640735  
SRR17520069. 1640736  
SRR17520069. 1640737  
SRR17520069. 1640738  
SRR17520069. 1640739  
SRR17520069. 1640740  
SRR17520069. 1640741  
SRR17520069. 1640742  
SRR17520069. 1640743  
SRR17520069. 1640744  
SRR17520069. 1640745  
SRR17520069. 1640746  
SRR17520069. 1640747  
SRR17520069. 1640748  
SRR17520069. 1640749  
SRR17520069. 1640750  
SRR17520069. 1640751  
SRR17520069. 1640752  
SRR17520069. 1640753  
SRR17520069. 1640754  
SRR17520069. 1640755  
SRR17520069. 1640756  
SRR17520069. 1640757  
SRR17520069. 1640758  
SRR17520069. 1640759  
SRR17520069. 1640760  
SRR17520069. 1640761  
SRR17520069. 1640762  
SRR17520069. 1640763

SRR17520069. 1640765  
SRR17520069. 1640766  
SRR17520069. 1640767  
SRR17520069. 1640768  
SRR17520069. 1640769  
SRR17520069. 1640770  
SRR17520069. 1640771  
SRR17520069. 1640772  
SRR17520069. 1640773  
SRR17520069. 1640774  
SRR17520069. 1640775  
SRR17520069. 1640776  
SRR17520069. 1640777  
SRR17520069. 1640778  
SRR17520069. 1640779  
SRR17520069. 1640780  
SRR17520069. 1640781  
SRR17520069. 1640782  
SRR17520069. 1640783  
SRR17520069. 1640784  
SRR17520069. 1640785  
SRR17520069. 1640786  
SRR17520069. 1640787  
SRR17520069. 1640788  
SRR17520069. 1640789  
SRR17520069. 1640790  
SRR17520069. 1640791  
SRR17520069. 1642992  
SRR17520069. 1643032  
SRR17520069. 1650533  
SRR17520069. 1650545  
SRR17520069. 1650548  
SRR17520069. 1650561  
SRR17520069. 1650607  
SRR17520069. 1653560  
SRR17520069. 1653561  
SRR17520069. 1653562  
SRR17520069. 1653563  
SRR17520069. 1653564  
SRR17520069. 1653565  
SRR17520069. 1653566  
SRR17520069. 1653567  
SRR17520069. 1653568  
SRR17520069. 1653569  
SRR17520069. 1653570  
SRR17520069. 1653571  
SRR17520069. 1653572

SRR17520069. 1653573  
SRR17520069. 1653574  
SRR17520069. 1653575  
SRR17520069. 1653576  
SRR17520069. 1653577  
SRR17520069. 1653578  
SRR17520069. 1653579  
SRR17520069. 1653580  
SRR17520069. 1653581  
SRR17520069. 1653582  
SRR17520069. 1653583  
SRR17520069. 1653584  
SRR17520069. 1653585  
SRR17520069. 1653586  
SRR17520069. 1653587  
SRR17520069. 1653588  
SRR17520069. 1653589  
SRR17520069. 1653590  
SRR17520069. 1653591  
SRR17520069. 1653592  
SRR17520069. 1653593  
SRR17520069. 1653594  
SRR17520069. 1653595  
SRR17520069. 1653596  
SRR17520069. 1653597  
SRR17520069. 1653598  
SRR17520069. 1653600  
SRR17520069. 1653601  
SRR17520069. 1653602  
SRR17520069. 1653603  
SRR17520069. 1653604  
SRR17520069. 1653605  
SRR17520069. 1653606  
SRR17520069. 1653607  
SRR17520069. 1653608  
SRR17520069. 1653609  
SRR17520069. 1653610  
SRR17520069. 1653611  
SRR17520069. 1653612  
SRR17520069. 1653613  
SRR17520069. 1653614  
SRR17520069. 1653615  
SRR17520069. 1653616  
SRR17520069. 1653617  
SRR17520069. 1653618  
SRR17520069. 1653619  
SRR17520069. 1653620

SRR17520069. 1653621  
SRR17520069. 1653622  
SRR17520069. 1653623  
SRR17520069. 1653624  
SRR17520069. 1653625  
SRR17520069. 1653626  
SRR17520069. 1653628  
SRR17520069. 1653629  
SRR17520069. 1653630  
SRR17520069. 1653631  
SRR17520069. 1653633  
SRR17520069. 1653634  
SRR17520069. 1653635  
SRR17520069. 1653636  
SRR17520069. 1653637  
SRR17520069. 1653638  
SRR17520069. 1653639  
SRR17520069. 1653640  
SRR17520069. 1653641  
SRR17520069. 1653642  
SRR17520069. 1653643  
SRR17520069. 1653644  
SRR17520069. 1653645  
SRR17520069. 1653646  
SRR17520069. 1653647  
SRR17520069. 1653648  
SRR17520069. 1653649  
SRR17520069. 1653650  
SRR17520069. 1653651  
SRR17520069. 1653652  
SRR17520069. 1653653  
SRR17520069. 1653654  
SRR17520069. 1653655  
SRR17520069. 1653656  
SRR17520069. 1653657  
SRR17520069. 1653658  
SRR17520069. 1653659  
SRR17520069. 1653660  
SRR17520069. 1653662  
SRR17520069. 1653663  
SRR17520069. 1653664  
SRR17520069. 1653666  
SRR17520069. 1653667  
SRR17520069. 1653668  
SRR17520069. 1653669  
SRR17520069. 1653670  
SRR17520069. 1653671

SRR17520069. 1653672  
SRR17520069. 1653673  
SRR17520069. 1653674  
SRR17520069. 1653675  
SRR17520069. 1653676  
SRR17520069. 1653677  
SRR17520069. 1653678  
SRR17520069. 1655607  
SRR17520069. 1688773  
SRR17520069. 1688774  
SRR17520069. 1688775  
SRR17520069. 1688776  
SRR17520069. 1688777  
SRR17520069. 1688778  
SRR17520069. 1688779  
SRR17520069. 1688780  
SRR17520069. 1688781  
SRR17520069. 1691306  
SRR17520069. 1691307  
SRR17520069. 1691308  
SRR17520069. 1691309  
SRR17520069. 1691310  
SRR17520069. 1691311  
SRR17520069. 1691312  
SRR17520069. 1691313  
SRR17520069. 1691314  
SRR17520069. 1691315  
SRR17520069. 1691316  
SRR17520069. 1691317  
SRR17520069. 1691318  
SRR17520069. 1691319  
SRR17520069. 1691320  
SRR17520069. 1691321  
SRR17520069. 1691322  
SRR17520069. 1691323  
SRR17520069. 1691324  
SRR17520069. 1691325  
SRR17520069. 1691326  
SRR17520069. 1691327  
SRR17520069. 1691328  
SRR17520069. 1691329  
SRR17520069. 1691330  
SRR17520069. 1691331  
SRR17520069. 1691332  
SRR17520069. 1691333  
SRR17520069. 1691334  
SRR17520069. 1709421



SRR17520069. 1724962  
SRR17520069. 1724963  
SRR17520069. 1724964  
SRR17520069. 1724965  
SRR17520069. 1724966  
SRR17520069. 1724967  
SRR17520069. 1724969  
SRR17520069. 1724970  
SRR17520069. 1724971  
SRR17520069. 1724972  
SRR17520069. 1724973  
SRR17520069. 1724974  
SRR17520069. 1724975  
SRR17520069. 1724976  
SRR17520069. 1724977  
SRR17520069. 1724978  
SRR17520069. 1724979  
SRR17520069. 1724980  
SRR17520069. 1724981  
SRR17520069. 1724982  
SRR17520069. 1724983  
SRR17520069. 1724984  
SRR17520069. 1724985  
SRR17520069. 1724986  
SRR17520069. 1724987  
SRR17520069. 1724988  
SRR17520069. 1724989  
SRR17520069. 1724990  
SRR17520069. 1724991  
SRR17520069. 1724992  
SRR17520069. 1724993  
SRR17520069. 1724994  
SRR17520069. 1724995  
SRR17520069. 1724996  
SRR17520069. 1724997  
SRR17520069. 1724998  
SRR17520069. 1724999  
SRR17520069. 1725000  
SRR17520069. 1725001  
SRR17520069. 1725002  
SRR17520069. 1725003  
SRR17520069. 1725004  
SRR17520069. 1725005  
SRR17520069. 1725006  
SRR17520069. 1725007  
SRR17520069. 1725008  
SRR17520069. 1725009

SRR17520069.1725010  
SRR17520069.1725011  
SRR17520069.1725012  
SRR17520069.1725013  
SRR17520069.1725014  
SRR17520069.1725015  
SRR17520069.1725016  
SRR17520069.1725017  
SRR17520069.1725019  
SRR17520069.1725020  
SRR17520069.1725021  
SRR17520069.1725024  
SRR17520069.1725025  
SRR17520069.1725026  
SRR17520069.1725027  
SRR17520069.1725028  
SRR17520069.1725029  
SRR17520069.1725030  
SRR17520069.1725031  
SRR17520069.1725032  
SRR17520069.1725033  
SRR17520069.1725034  
SRR17520069.1725035  
SRR17520069.1725036  
SRR17520069.1725037  
SRR17520069.1725038  
SRR17520069.1725039  
SRR17520069.1725040  
SRR17520069.1729439  
SRR17520069.1729440  
SRR17520069.1729441  
SRR17520069.1729442  
SRR17520069.1729444  
SRR17520069.1744579  
SRR17520069.1744580  
SRR17520069.1744581  
SRR17520069.1744582  
SRR17520069.1744583  
SRR17520069.1744584  
SRR17520069.1751442  
SRR17520069.1751443  
SRR17520069.1751444  
SRR17520069.1751445  
SRR17520069.1751446  
SRR17520069.1751447  
SRR17520069.1751448  
SRR17520069.1751449

SRR17520069. 1751450  
SRR17520069. 1751451  
SRR17520069. 1751452  
SRR17520069. 1751453  
SRR17520069. 1751454  
SRR17520069. 1751455  
SRR17520069. 1751456  
SRR17520069. 1751457  
SRR17520069. 1751458  
SRR17520069. 1751459  
SRR17520069. 1751460  
SRR17520069. 1751462  
SRR17520069. 1751463  
SRR17520069. 1751464  
SRR17520069. 1751465  
SRR17520069. 1751466  
SRR17520069. 1751467  
SRR17520069. 1751468  
SRR17520069. 1751469  
SRR17520069. 1751470  
SRR17520069. 1751471  
SRR17520069. 1751472  
SRR17520069. 1751473  
SRR17520069. 1751474  
SRR17520069. 1751475  
SRR17520069. 1751476  
SRR17520069. 1751477  
SRR17520069. 1751478  
SRR17520069. 1751479  
SRR17520069. 1751480  
SRR17520069. 1751481  
SRR17520069. 1751482  
SRR17520069. 1751483  
SRR17520069. 1751484  
SRR17520069. 1751485  
SRR17520069. 1751486  
SRR17520069. 1751487  
SRR17520069. 1751488  
SRR17520069. 1751489  
SRR17520069. 1751490  
SRR17520069. 1751491  
SRR17520069. 1751492  
SRR17520069. 1751493  
SRR17520069. 1751494  
SRR17520069. 1751495  
SRR17520069. 1751496  
SRR17520069. 1751497

SRR17520069. 1751498  
SRR17520069. 1751499  
SRR17520069. 1751500  
SRR17520069. 1751501  
SRR17520069. 1751502  
SRR17520069. 1751503  
SRR17520069. 1751504  
SRR17520069. 1763952  
SRR17520069. 1763953  
SRR17520069. 1763954  
SRR17520069. 1763955  
SRR17520069. 1763956  
SRR17520069. 1763957  
SRR17520069. 1763958  
SRR17520069. 1763959  
SRR17520069. 1763960  
SRR17520069. 1763961  
SRR17520069. 1763962  
SRR17520069. 1763963  
SRR17520069. 1763964  
SRR17520069. 1763965  
SRR17520069. 1763966  
SRR17520069. 1763967  
SRR17520069. 1769661  
SRR17520069. 1771801  
SRR17520069. 1805330  
SRR17520069. 1807240  
SRR17520069. 1807241  
SRR17520069. 1807242  
SRR17520069. 1807243  
SRR17520069. 1807244  
SRR17520069. 1807245  
SRR17520069. 1807246  
SRR17520069. 1807247  
SRR17520069. 1807248  
SRR17520069. 1807249  
SRR17520069. 1807250  
SRR17520069. 1807251  
SRR17520069. 1807252  
SRR17520069. 1807253  
SRR17520069. 1807254  
SRR17520069. 1807255  
SRR17520069. 1807256  
SRR17520069. 1807257  
SRR17520069. 1807258  
SRR17520069. 1807259  
SRR17520069. 1807260

SRR17520069. 1807261  
SRR17520069. 1807262  
SRR17520069. 1807263  
SRR17520069. 1807264  
SRR17520069. 1807265  
SRR17520069. 1807266  
SRR17520069. 1807267  
SRR17520069. 1807268  
SRR17520069. 1807269  
SRR17520069. 1807270  
SRR17520069. 1807271  
SRR17520069. 1807272  
SRR17520069. 1807273  
SRR17520069. 1807274  
SRR17520069. 1807276  
SRR17520069. 1807277  
SRR17520069. 1807278  
SRR17520069. 1807279  
SRR17520069. 1807280  
SRR17520069. 1807281  
SRR17520069. 1807282  
SRR17520069. 1807283  
SRR17520069. 1807284  
SRR17520069. 1807285  
SRR17520069. 1807286  
SRR17520069. 1807287  
SRR17520069. 1807288  
SRR17520069. 1807289  
SRR17520069. 1807290  
SRR17520069. 1807291  
SRR17520069. 1807292  
SRR17520069. 1807294  
SRR17520069. 1807295  
SRR17520069. 1807296  
SRR17520069. 1807297  
SRR17520069. 1807298  
SRR17520069. 1807299  
SRR17520069. 1807300  
SRR17520069. 1807301  
SRR17520069. 1807302  
SRR17520069. 1807303  
SRR17520069. 1807304  
SRR17520069. 1807305  
SRR17520069. 1807306  
SRR17520069. 1807307  
SRR17520069. 1807308  
SRR17520069. 1807309

SRR17520069.1807310  
SRR17520069.1807311  
SRR17520069.1807312  
SRR17520069.1807313  
SRR17520069.1807314  
SRR17520069.1807315  
SRR17520069.1807316  
SRR17520069.1807317  
SRR17520069.1807318  
SRR17520069.1807319  
SRR17520069.1807320  
SRR17520069.1807321  
SRR17520069.1807322  
SRR17520069.1807323  
SRR17520069.1807324  
SRR17520069.1807325  
SRR17520069.1807326  
SRR17520069.1807327  
SRR17520069.1807328  
SRR17520069.1807329  
SRR17520069.1807330  
SRR17520069.1807331  
SRR17520069.1807332  
SRR17520069.1818443  
SRR17520069.1818444  
SRR17520069.1818445  
SRR17520069.1818446  
SRR17520069.1818447  
SRR17520069.1818448  
SRR17520069.1818450  
SRR17520069.1818451  
SRR17520069.1818452  
SRR17520069.1818453  
SRR17520069.1818454  
SRR17520069.1818455  
SRR17520069.1818456  
SRR17520069.1818457  
SRR17520069.1818458  
SRR17520069.1818459  
SRR17520069.1818460  
SRR17520069.1818461  
SRR17520069.1818462  
SRR17520069.1818463  
SRR17520069.1818464  
SRR17520069.1818465  
SRR17520069.1818466  
SRR17520069.1818467

SRR17520069. 1848544  
SRR17520069. 1848546  
SRR17520069. 1860780  
SRR17520069. 1860832  
SRR17520069. 1860833  
SRR17520069. 1860834  
SRR17520069. 1860835  
SRR17520069. 1860836  
SRR17520069. 1860837  
SRR17520069. 1860838  
SRR17520069. 1860839  
SRR17520069. 1860840  
SRR17520069. 1866413  
SRR17520069. 1866414  
SRR17520069. 1866915  
SRR17520069. 1866916  
SRR17520069. 1866918  
SRR17520069. 1866919  
SRR17520069. 1866920  
SRR17520069. 1881310  
SRR17520069. 1881364  
SRR17520069. 1892109  
SRR17520069. 1894007  
SRR17520069. 1894009  
SRR17520069. 1894011  
SRR17520069. 1894012  
SRR17520069. 1894013  
SRR17520069. 1894015  
SRR17520069. 1901870  
SRR17520069. 1901871  
SRR17520069. 1901872  
SRR17520069. 1901873  
SRR17520069. 1901874  
SRR17520069. 1901875  
SRR17520069. 1901876  
SRR17520069. 1901877  
SRR17520069. 1904432  
SRR17520069. 1904433  
SRR17520069. 1904434  
SRR17520069. 1904435  
SRR17520069. 1904436  
SRR17520069. 1904437  
SRR17520069. 1904438  
SRR17520069. 1904439  
SRR17520069. 1904440  
SRR17520069. 1904441  
SRR17520069. 1904442

SRR17520069.1904443  
SRR17520069.1904444  
SRR17520069.1904445  
SRR17520069.1904446  
SRR17520069.1904447  
SRR17520069.1904448  
SRR17520069.1904449  
SRR17520069.1904450  
SRR17520069.1904451  
SRR17520069.1904452  
SRR17520069.1904453  
SRR17520069.1904454  
SRR17520069.1904455  
SRR17520069.1904456  
SRR17520069.1904457  
SRR17520069.1904458  
SRR17520069.1904459  
SRR17520069.1904460  
SRR17520069.1904461  
SRR17520069.1904462  
SRR17520069.1904463  
SRR17520069.1904464  
SRR17520069.1904465  
SRR17520069.1904466  
SRR17520069.1904467  
SRR17520069.1904468  
SRR17520069.1904469  
SRR17520069.1904470  
SRR17520069.1904471  
SRR17520069.1904472  
SRR17520069.1904474  
SRR17520069.1904475  
SRR17520069.1904476  
SRR17520069.1904478  
SRR17520069.1904479  
SRR17520069.1904480  
SRR17520069.1904481  
SRR17520069.1904482  
SRR17520069.1904483  
SRR17520069.1904484  
SRR17520069.1904485  
SRR17520069.1904486  
SRR17520069.1904487  
SRR17520069.1904488  
SRR17520069.1904489  
SRR17520069.1904490  
SRR17520069.1904491



SRR17520069.1904492  
SRR17520069.1904493  
SRR17520069.1904494  
SRR17520069.1904495  
SRR17520069.1904496  
SRR17520069.1904497  
SRR17520069.1904498  
SRR17520069.1904499  
SRR17520069.1904500  
SRR17520069.1904501  
SRR17520069.1904502  
SRR17520069.1904503  
SRR17520069.1904504  
SRR17520069.1904505  
SRR17520069.1904506  
SRR17520069.1904507  
SRR17520069.1904508  
SRR17520069.1904509  
SRR17520069.1904510  
SRR17520069.1904511  
SRR17520069.1904512  
SRR17520069.1904513  
SRR17520069.1904514  
SRR17520069.1904515  
SRR17520069.1904516  
SRR17520069.1904517  
SRR17520069.1904518  
SRR17520069.1904519  
SRR17520069.1904520  
SRR17520069.1904521  
SRR17520069.1904522  
SRR17520069.1904523  
SRR17520069.1904524  
SRR17520069.1904525  
SRR17520069.1904526  
SRR17520069.1904527  
SRR17520069.1904528  
SRR17520069.1904529  
SRR17520069.1904530  
SRR17520069.1904531  
SRR17520069.1910044  
SRR17520069.1921923  
SRR17520069.1921924  
SRR17520069.1921925  
SRR17520069.1921926  
SRR17520069.1921928  
SRR17520069.1921929

SRR17520069. 1921930  
SRR17520069. 1921931  
SRR17520069. 1921932  
SRR17520069. 1921933  
SRR17520069. 1921934  
SRR17520069. 1921935  
SRR17520069. 1921936  
SRR17520069. 1921937  
SRR17520069. 1921939  
SRR17520069. 1921940  
SRR17520069. 1921941  
SRR17520069. 1921942  
SRR17520069. 1921943  
SRR17520069. 1921944  
SRR17520069. 1942009  
SRR17520069. 1969824  
SRR17520069. 1969825  
SRR17520069. 1969826  
SRR17520069. 1969827  
SRR17520069. 1969828  
SRR17520069. 1969829  
SRR17520069. 1969830  
SRR17520069. 1969831  
SRR17520069. 1969832  
SRR17520069. 1969833  
SRR17520069. 1969834  
SRR17520069. 1969835  
SRR17520069. 1969836  
SRR17520069. 1969837  
SRR17520069. 1969838  
SRR17520069. 1969839  
SRR17520069. 1969840  
SRR17520069. 1969841  
SRR17520069. 1969842  
SRR17520069. 1969843  
SRR17520069. 1969844  
SRR17520069. 1969845  
SRR17520069. 1969846  
SRR17520069. 1969847  
SRR17520069. 1969850  
SRR17520069. 1969851  
SRR17520069. 1969852  
SRR17520069. 1969853  
SRR17520069. 1969854  
SRR17520069. 1969855  
SRR17520069. 1969856  
SRR17520069. 1969857

SRR17520069. 1969858  
SRR17520069. 1969859  
SRR17520069. 1969860  
SRR17520069. 1969861  
SRR17520069. 1969862  
SRR17520069. 1969863  
SRR17520069. 1969864  
SRR17520069. 1969865  
SRR17520069. 1969866  
SRR17520069. 1969867  
SRR17520069. 1969868  
SRR17520069. 1971243  
SRR17520069. 1971244  
SRR17520069. 1971246  
SRR17520069. 1971248  
SRR17520069. 1971249  
SRR17520069. 1971250  
SRR17520069. 1971251  
SRR17520069. 1971252  
SRR17520069. 1971253  
SRR17520069. 1971254  
SRR17520069. 1971255  
SRR17520069. 1971256  
SRR17520069. 1971257  
SRR17520069. 1971258  
SRR17520069. 1971259  
SRR17520069. 1971260  
SRR17520069. 1971261  
SRR17520069. 1971262  
SRR17520069. 1971264  
SRR17520069. 1971265  
SRR17520069. 1971266  
SRR17520069. 1971267  
SRR17520069. 1971268  
SRR17520069. 1971269  
SRR17520069. 1971270  
SRR17520069. 1971271  
SRR17520069. 1971272  
SRR17520069. 1971273  
SRR17520069. 1971274  
SRR17520069. 1971275  
SRR17520069. 1971276  
SRR17520069. 1971277  
SRR17520069. 1971279  
SRR17520069. 1971281  
SRR17520069. 1971282  
SRR17520069. 1971283

SRR17520069. 1971284  
SRR17520069. 1971285  
SRR17520069. 1971286  
SRR17520069. 1971287  
SRR17520069. 1971288  
SRR17520069. 1971289  
SRR17520069. 1971290  
SRR17520069. 1971291  
SRR17520069. 1971292  
SRR17520069. 1971293  
SRR17520069. 1971294  
SRR17520069. 1971295  
SRR17520069. 1971296  
SRR17520069. 1971297  
SRR17520069. 1971298  
SRR17520069. 1971299  
SRR17520069. 1971300  
SRR17520069. 1971301  
SRR17520069. 1971302  
SRR17520069. 1971303  
SRR17520069. 1971304  
SRR17520069. 1971305  
SRR17520069. 1971306  
SRR17520069. 1971307  
SRR17520069. 1971308  
SRR17520069. 1971309  
SRR17520069. 1971310  
SRR17520069. 1971311  
SRR17520069. 1971313  
SRR17520069. 1971314  
SRR17520069. 1971315  
SRR17520069. 1971316  
SRR17520069. 1971317  
SRR17520069. 1971318  
SRR17520069. 1971319  
SRR17520069. 1971320  
SRR17520069. 1971321  
SRR17520069. 1971322  
SRR17520069. 1971323  
SRR17520069. 1971324  
SRR17520069. 1971325  
SRR17520069. 1971326  
SRR17520069. 1971327  
SRR17520069. 1971330  
SRR17520069. 1971331  
SRR17520069. 1971332  
SRR17520069. 1971333

SRR17520069. 1971334  
SRR17520069. 1971335  
SRR17520069. 1971336  
SRR17520069. 1971337  
SRR17520069. 1971338  
SRR17520069. 1971339  
SRR17520069. 1971340  
SRR17520069. 1971341  
SRR17520069. 1971342  
SRR17520069. 1971343  
SRR17520069. 1971344  
SRR17520069. 1971345  
SRR17520069. 1971346  
SRR17520069. 1971347  
SRR17520069. 1971348  
SRR17520069. 1971349  
SRR17520069. 1971350  
SRR17520069. 1971351  
SRR17520069. 1971352  
SRR17520069. 1971353  
SRR17520069. 1971354  
SRR17520069. 1971355  
SRR17520069. 1971356  
SRR17520069. 1971357  
SRR17520069. 1971359  
SRR17520069. 1971360  
SRR17520069. 1971361  
SRR17520069. 1971362  
SRR17520069. 1971363  
SRR17520069. 1971364  
SRR17520069. 1971365  
SRR17520069. 1971366  
SRR17520069. 1971367  
SRR17520069. 1971368  
SRR17520069. 1971369  
SRR17520069. 1971370  
SRR17520069. 1971371  
SRR17520069. 1971372  
SRR17520069. 1971373  
SRR17520069. 1971374  
SRR17520069. 1971375  
SRR17520069. 1971376  
SRR17520069. 1971377  
SRR17520069. 1971378  
SRR17520069. 1971379  
SRR17520069. 1971380  
SRR17520069. 1971381

SRR17520069. 1971382  
SRR17520069. 1971383  
SRR17520069. 1971384  
SRR17520069. 1971385  
SRR17520069. 1971386  
SRR17520069. 1971387  
SRR17520069. 1971388  
SRR17520069. 1971389  
SRR17520069. 1971390  
SRR17520069. 1971391  
SRR17520069. 1971392  
SRR17520069. 1971393  
SRR17520069. 1971394  
SRR17520069. 1971395  
SRR17520069. 1971396  
SRR17520069. 1971397  
SRR17520069. 1971398  
SRR17520069. 1971399  
SRR17520069. 1971400  
SRR17520069. 1971401  
SRR17520069. 1971402  
SRR17520069. 1971403  
SRR17520069. 1971404  
SRR17520069. 1971405  
SRR17520069. 1971406  
SRR17520069. 1971407  
SRR17520069. 1971408  
SRR17520069. 1971409  
SRR17520069. 1971410  
SRR17520069. 1971411  
SRR17520069. 1971412  
SRR17520069. 1971413  
SRR17520069. 1971414  
SRR17520069. 1971415  
SRR17520069. 1971416  
SRR17520069. 1971417  
SRR17520069. 1971418  
SRR17520069. 1971419  
SRR17520069. 1971420  
SRR17520069. 1971421  
SRR17520069. 1971422  
SRR17520069. 1971423  
SRR17520069. 1971424  
SRR17520069. 1971425  
SRR17520069. 1971426  
SRR17520069. 1976502  
SRR17520069. 1976504

SRR17520069. 1976508  
SRR17520069. 1976509  
SRR17520069. 1976519  
SRR17520069. 1976520  
SRR17520069. 1976522  
SRR17520069. 1976524  
SRR17520069. 1976526  
SRR17520069. 1977486  
SRR17520069. 1977487  
SRR17520069. 1977488  
SRR17520069. 1977489  
SRR17520069. 1977490  
SRR17520069. 1977491  
SRR17520069. 1977492  
SRR17520069. 1977493  
SRR17520069. 1977494  
SRR17520069. 1977495  
SRR17520069. 1977496  
SRR17520069. 1977497  
SRR17520069. 1977498  
SRR17520069. 1977499  
SRR17520069. 1977500  
SRR17520069. 1977501  
SRR17520069. 1977502  
SRR17520069. 1977503  
SRR17520069. 1977504  
SRR17520069. 1977505  
SRR17520069. 1977506  
SRR17520069. 1977507  
SRR17520069. 1977508  
SRR17520069. 1977509  
SRR17520069. 1977510  
SRR17520069. 1977511  
SRR17520069. 1977512  
SRR17520069. 1977513  
SRR17520069. 1977514  
SRR17520069. 1977515  
SRR17520069. 1977516  
SRR17520069. 1977517  
SRR17520069. 1977518  
SRR17520069. 1977519  
SRR17520069. 1977520  
SRR17520069. 1977521  
SRR17520069. 1977522  
SRR17520069. 1977523  
SRR17520069. 1977524  
SRR17520069. 1977526

SRR17520069. 1977527  
SRR17520069. 1977528  
SRR17520069. 1977529  
SRR17520069. 1977530  
SRR17520069. 1977531  
SRR17520069. 1977532  
SRR17520069. 1977533  
SRR17520069. 1977534  
SRR17520069. 1977535  
SRR17520069. 1977536  
SRR17520069. 1977537  
SRR17520069. 1977538  
SRR17520069. 1977540  
SRR17520069. 1977541  
SRR17520069. 1977542  
SRR17520069. 1977543  
SRR17520069. 1977544  
SRR17520069. 1977545  
SRR17520069. 1977546  
SRR17520069. 1977547  
SRR17520069. 1977548  
SRR17520069. 1977549  
SRR17520069. 1978655  
SRR17520069. 1978671  
SRR17520069. 1978676  
SRR17520069. 1978686  
SRR17520069. 1980877  
SRR17520069. 1980884  
SRR17520069. 1980995  
SRR17520069. 1980996  
SRR17520069. 1983168  
SRR17520069. 1985078  
SRR17520069. 1990806  
SRR17520069. 1990807  
SRR17520069. 1990808  
SRR17520069. 1990809  
SRR17520069. 1990810  
SRR17520069. 1990811  
SRR17520069. 1990812  
SRR17520069. 1990813  
SRR17520069. 1990814  
SRR17520069. 1990815  
SRR17520069. 1990816  
SRR17520069. 1990817  
SRR17520069. 1990818  
SRR17520069. 1990819  
SRR17520069. 1990820



SRR17520069. 1990821  
SRR17520069. 1990822  
SRR17520069. 1990823  
SRR17520069. 1990824  
SRR17520069. 1990825  
SRR17520069. 1990826  
SRR17520069. 1990827  
SRR17520069. 1990828  
SRR17520069. 1990829  
SRR17520069. 1990830  
SRR17520069. 1990831  
SRR17520069. 1990832  
SRR17520069. 1990833  
SRR17520069. 1990834  
SRR17520069. 1990835  
SRR17520069. 1990836  
SRR17520069. 1990837  
SRR17520069. 1990838  
SRR17520069. 1990839  
SRR17520069. 1990840  
SRR17520069. 1990841  
SRR17520069. 2016963  
SRR17520069. 2034250  
SRR17520069. 2039054  
SRR17520069. 2039055  
SRR17520069. 2039056  
SRR17520069. 2039057  
SRR17520069. 2039058  
SRR17520069. 2039059  
SRR17520069. 2039060  
SRR17520069. 2039061  
SRR17520069. 2039062  
SRR17520069. 2039063  
SRR17520069. 2039064  
SRR17520069. 2039066  
SRR17520069. 2039068  
SRR17520069. 2039069  
SRR17520069. 2039070  
SRR17520069. 2039071  
SRR17520069. 2039072  
SRR17520069. 2039073  
SRR17520069. 2039074  
SRR17520069. 2039076  
SRR17520069. 2039077  
SRR17520069. 2039078  
SRR17520069. 2039080  
SRR17520069. 2039081

SRR17520069. 2039082  
SRR17520069. 2039084  
SRR17520069. 2039086  
SRR17520069. 2039087  
SRR17520069. 2039088  
SRR17520069. 2039089  
SRR17520069. 2039090  
SRR17520069. 2039092  
SRR17520069. 2039094  
SRR17520069. 2039095  
SRR17520069. 2039096  
SRR17520069. 2039097  
SRR17520069. 2039098  
SRR17520069. 2039099  
SRR17520069. 2039100  
SRR17520069. 2039101  
SRR17520069. 2039102  
SRR17520069. 2039103  
SRR17520069. 2039104  
SRR17520069. 2039105  
SRR17520069. 2039106  
SRR17520069. 2039107  
SRR17520069. 2039108  
SRR17520069. 2039109  
SRR17520069. 2039110  
SRR17520069. 2039111  
SRR17520069. 2039112  
SRR17520069. 2039113  
SRR17520069. 2039114  
SRR17520069. 2039115  
SRR17520069. 2039116  
SRR17520069. 2039117  
SRR17520069. 2039118  
SRR17520069. 2039119  
SRR17520069. 2039120  
SRR17520069. 2039121  
SRR17520069. 2039122  
SRR17520069. 2039124  
SRR17520069. 2039125  
SRR17520069. 2039126  
SRR17520069. 2039127  
SRR17520069. 2039128  
SRR17520069. 2039130  
SRR17520069. 2039132  
SRR17520069. 2039133  
SRR17520069. 2039134  
SRR17520069. 2039135

SRR17520069. 2039136  
SRR17520069. 2039137  
SRR17520069. 2039138  
SRR17520069. 2039141  
SRR17520069. 2039142  
SRR17520069. 2039143  
SRR17520069. 2039144  
SRR17520069. 2039145  
SRR17520069. 2039146  
SRR17520069. 2039147  
SRR17520069. 2039148  
SRR17520069. 2039149  
SRR17520069. 2039150  
SRR17520069. 2039151  
SRR17520069. 2039152  
SRR17520069. 2039154  
SRR17520069. 2039156  
SRR17520069. 2039157  
SRR17520069. 2039158  
SRR17520069. 2039159  
SRR17520069. 2039160  
SRR17520069. 2039161  
SRR17520069. 2039162  
SRR17520069. 2039164  
SRR17520069. 2039165  
SRR17520069. 2039166  
SRR17520069. 2039168  
SRR17520069. 2039169  
SRR17520069. 2039170  
SRR17520069. 2039171  
SRR17520069. 2039172  
SRR17520069. 2039173  
SRR17520069. 2039174  
SRR17520069. 2039175  
SRR17520069. 2039176  
SRR17520069. 2039178  
SRR17520069. 2039179  
SRR17520069. 2039180  
SRR17520069. 2039182  
SRR17520069. 2039184  
SRR17520069. 2039185  
SRR17520069. 2039186  
SRR17520069. 2039188  
SRR17520069. 2039190  
SRR17520069. 2039191  
SRR17520069. 2039192  
SRR17520069. 2039193

SRR17520069.2039194  
SRR17520069.2039195  
SRR17520069.2039196  
SRR17520069.2039198  
SRR17520069.2039199  
SRR17520069.2039200  
SRR17520069.2039201  
SRR17520069.2039202  
SRR17520069.2039203  
SRR17520069.2045029  
SRR17520069.2050596  
SRR17520069.2050597  
SRR17520069.2050598  
SRR17520069.2050599  
SRR17520069.2050600  
SRR17520069.2050601  
SRR17520069.2050602  
SRR17520069.2050603  
SRR17520069.2050604  
SRR17520069.2050605  
SRR17520069.2050606  
SRR17520069.2050607  
SRR17520069.2050608  
SRR17520069.2050609  
SRR17520069.2050610  
SRR17520069.2050611  
SRR17520069.2050612  
SRR17520069.2050613  
SRR17520069.2050614  
SRR17520069.2050615  
SRR17520069.2050616  
SRR17520069.2050617  
SRR17520069.2050618  
SRR17520069.2050619  
SRR17520069.2050620  
SRR17520069.2050621  
SRR17520069.2050622  
SRR17520069.2050623  
SRR17520069.2050624  
SRR17520069.2050625  
SRR17520069.2050626  
SRR17520069.2050627  
SRR17520069.2050628  
SRR17520069.2050629  
SRR17520069.2050630  
SRR17520069.2050631  
SRR17520069.2050632

SRR17520069.2050633  
SRR17520069.2050634  
SRR17520069.2050635  
SRR17520069.2050636  
SRR17520069.2050637  
SRR17520069.2050638  
SRR17520069.2050639  
SRR17520069.2050640  
SRR17520069.2050641  
SRR17520069.2050642  
SRR17520069.2050643  
SRR17520069.2050644  
SRR17520069.2050645  
SRR17520069.2050646  
SRR17520069.2050647  
SRR17520069.2050648  
SRR17520069.2050649  
SRR17520069.2050650  
SRR17520069.2050651  
SRR17520069.2050652  
SRR17520069.2050653  
SRR17520069.2050654  
SRR17520069.2050655  
SRR17520069.2050656  
SRR17520069.2050657  
SRR17520069.2050658  
SRR17520069.2050659  
SRR17520069.2050660  
SRR17520069.2050661  
SRR17520069.2050664  
SRR17520069.2050665  
SRR17520069.2052331  
SRR17520069.2076564  
SRR17520069.2076566  
SRR17520069.2076685  
SRR17520069.2106128  
SRR17520069.2114388  
SRR17520069.2114389  
SRR17520069.2114390  
SRR17520069.2114391  
SRR17520069.2114392  
SRR17520069.2114394  
SRR17520069.2114395  
SRR17520069.2114396  
SRR17520069.2114397  
SRR17520069.2114398  
SRR17520069.2114399

SRR17520069.2114400  
SRR17520069.2114401  
SRR17520069.2114402  
SRR17520069.2114403  
SRR17520069.2114404  
SRR17520069.2114405  
SRR17520069.2114406  
SRR17520069.2114407  
SRR17520069.2114408  
SRR17520069.2114409  
SRR17520069.2114410  
SRR17520069.2114411  
SRR17520069.2114412  
SRR17520069.2114413  
SRR17520069.2134993  
SRR17520069.2134994  
SRR17520069.2134995  
SRR17520069.2134996  
SRR17520069.2134998  
SRR17520069.2134999  
SRR17520069.2135000  
SRR17520069.2135001  
SRR17520069.2135002  
SRR17520069.2135003  
SRR17520069.2135004  
SRR17520069.2135005  
SRR17520069.2135006  
SRR17520069.2135007  
SRR17520069.2135008  
SRR17520069.2135009  
SRR17520069.2135010  
SRR17520069.2135011  
SRR17520069.2135012  
SRR17520069.2135013  
SRR17520069.2135014  
SRR17520069.2135015  
SRR17520069.2135016  
SRR17520069.2135017  
SRR17520069.2135018  
SRR17520069.2135019  
SRR17520069.2135020  
SRR17520069.2135021  
SRR17520069.2135022  
SRR17520069.2135023  
SRR17520069.2135024  
SRR17520069.2135025  
SRR17520069.2135026

SRR17520069. 2135027  
SRR17520069. 2135028  
SRR17520069. 2135029  
SRR17520069. 2135030  
SRR17520069. 2135031  
SRR17520069. 2135032  
SRR17520069. 2135033  
SRR17520069. 2135034  
SRR17520069. 2135035  
SRR17520069. 2135036  
SRR17520069. 2135037  
SRR17520069. 2135038  
SRR17520069. 2135039  
SRR17520069. 2135040  
SRR17520069. 2135041  
SRR17520069. 2135042  
SRR17520069. 2135043  
SRR17520069. 2135044  
SRR17520069. 2135045  
SRR17520069. 2135046  
SRR17520069. 2135047  
SRR17520069. 2135048  
SRR17520069. 2135049  
SRR17520069. 2135050  
SRR17520069. 2135051  
SRR17520069. 2135052  
SRR17520069. 2135053  
SRR17520069. 2135054  
SRR17520069. 2135055  
SRR17520069. 2135056  
SRR17520069. 2135057  
SRR17520069. 2135058  
SRR17520069. 2135059  
SRR17520069. 2135060  
SRR17520069. 2135063  
SRR17520069. 2135064  
SRR17520069. 2135065  
SRR17520069. 2135066  
SRR17520069. 2135067  
SRR17520069. 2135068  
SRR17520069. 2135069  
SRR17520069. 2135070  
SRR17520069. 2135071  
SRR17520069. 2135072  
SRR17520069. 2135073  
SRR17520069. 2135074  
SRR17520069. 2135075

SRR17520069.2135076  
SRR17520069.2135077  
SRR17520069.2135078  
SRR17520069.2135080  
SRR17520069.2135081  
SRR17520069.2138509  
SRR17520069.2142413  
SRR17520069.2142414  
SRR17520069.2142415  
SRR17520069.2142416  
SRR17520069.2142417  
SRR17520069.2142418  
SRR17520069.2142419  
SRR17520069.2142420  
SRR17520069.2142421  
SRR17520069.2142422  
SRR17520069.2142423  
SRR17520069.2142424  
SRR17520069.2142425  
SRR17520069.2142426  
SRR17520069.2142427  
SRR17520069.2142428  
SRR17520069.2142429  
SRR17520069.2142430  
SRR17520069.2142431  
SRR17520069.2142432  
SRR17520069.2142433  
SRR17520069.2142434  
SRR17520069.2142435  
SRR17520069.2142436  
SRR17520069.2142437  
SRR17520069.2142438  
SRR17520069.2142439  
SRR17520069.2142440  
SRR17520069.2142441  
SRR17520069.2142442  
SRR17520069.2142443  
SRR17520069.2142909  
SRR17520069.2147789  
SRR17520069.2147790  
SRR17520069.2147791  
SRR17520069.2147792  
SRR17520069.2147793  
SRR17520069.2147794  
SRR17520069.2147795  
SRR17520069.2147796  
SRR17520069.2147797



SRR17520069.2147798  
SRR17520069.2147799  
SRR17520069.2147800  
SRR17520069.2147801  
SRR17520069.2147802  
SRR17520069.2147803  
SRR17520069.2148919  
SRR17520069.2158264  
SRR17520069.2158265  
SRR17520069.2158266  
SRR17520069.2158267  
SRR17520069.2158268  
SRR17520069.2158269  
SRR17520069.2158270  
SRR17520069.2158271  
SRR17520069.2158272  
SRR17520069.2158273  
SRR17520069.2158274  
SRR17520069.2158275  
SRR17520069.2158276  
SRR17520069.2158277  
SRR17520069.2158278  
SRR17520069.2158279  
SRR17520069.2158280  
SRR17520069.2158281  
SRR17520069.2158282  
SRR17520069.2158283  
SRR17520069.2158284  
SRR17520069.2158285  
SRR17520069.2158287  
SRR17520069.2158288  
SRR17520069.2158289  
SRR17520069.2158290  
SRR17520069.2158291  
SRR17520069.2158292  
SRR17520069.2158293  
SRR17520069.2158294  
SRR17520069.2158295  
SRR17520069.2158296  
SRR17520069.2158297  
SRR17520069.2158299  
SRR17520069.2158300  
SRR17520069.2158301  
SRR17520069.2158302  
SRR17520069.2158303  
SRR17520069.2158304  
SRR17520069.2158305

SRR17520069.2158306  
SRR17520069.2158307  
SRR17520069.2158308  
SRR17520069.2158309  
SRR17520069.2158310  
SRR17520069.2158311  
SRR17520069.2158312  
SRR17520069.2158313  
SRR17520069.2158314  
SRR17520069.2158315  
SRR17520069.2158316  
SRR17520069.2158317  
SRR17520069.2158318  
SRR17520069.2158319  
SRR17520069.2158320  
SRR17520069.2170288  
SRR17520069.2170289  
SRR17520069.2170290  
SRR17520069.2170291  
SRR17520069.2170292  
SRR17520069.2170293  
SRR17520069.2170294  
SRR17520069.2170295  
SRR17520069.2170296  
SRR17520069.2170297  
SRR17520069.2170298  
SRR17520069.2170299  
SRR17520069.2170301  
SRR17520069.2170302  
SRR17520069.2170303  
SRR17520069.2170304  
SRR17520069.2170305  
SRR17520069.2170306  
SRR17520069.2170307  
SRR17520069.2170308  
SRR17520069.2170309  
SRR17520069.2170310  
SRR17520069.2170311  
SRR17520069.2170312  
SRR17520069.2170313  
SRR17520069.2170314  
SRR17520069.2170315  
SRR17520069.2170316  
SRR17520069.2170317  
SRR17520069.2170318  
SRR17520069.2170319  
SRR17520069.2170320

SRR17520069.2170321  
SRR17520069.2170322  
SRR17520069.2170323  
SRR17520069.2170324  
SRR17520069.2170325  
SRR17520069.2170326  
SRR17520069.2170327  
SRR17520069.2170328  
SRR17520069.2170329  
SRR17520069.2170330  
SRR17520069.2170331  
SRR17520069.2170332  
SRR17520069.2170334  
SRR17520069.2170335  
SRR17520069.2170336  
SRR17520069.2170337  
SRR17520069.2170338  
SRR17520069.2170339  
SRR17520069.2170340  
SRR17520069.2170341  
SRR17520069.2170342  
SRR17520069.2170343  
SRR17520069.2170344  
SRR17520069.2170345  
SRR17520069.2170346  
SRR17520069.2170347  
SRR17520069.2170348  
SRR17520069.2170349  
SRR17520069.2170350  
SRR17520069.2170351  
SRR17520069.2170352  
SRR17520069.2170353  
SRR17520069.2170354  
SRR17520069.2170355  
SRR17520069.2170356  
SRR17520069.2170357  
SRR17520069.2170358  
SRR17520069.2170359  
SRR17520069.2170360  
SRR17520069.2170361  
SRR17520069.2170362  
SRR17520069.2170363  
SRR17520069.2170364  
SRR17520069.2170365  
SRR17520069.2170366  
SRR17520069.2170367  
SRR17520069.2170368

SRR17520069.2170369  
SRR17520069.2170370  
SRR17520069.2170371  
SRR17520069.2170372  
SRR17520069.2170373  
SRR17520069.2170374  
SRR17520069.2170375  
SRR17520069.2170376  
SRR17520069.2170377  
SRR17520069.2170378  
SRR17520069.2170379  
SRR17520069.2170380  
SRR17520069.2170381  
SRR17520069.2170382  
SRR17520069.2170383  
SRR17520069.2170384  
SRR17520069.2170385  
SRR17520069.2170386  
SRR17520069.2170387  
SRR17520069.2170388  
SRR17520069.2170389  
SRR17520069.2170390  
SRR17520069.2170391  
SRR17520069.2170392  
SRR17520069.2170393  
SRR17520069.2170394  
SRR17520069.2170395  
SRR17520069.2170396  
SRR17520069.2170397  
SRR17520069.2170398  
SRR17520069.2170399  
SRR17520069.2170400  
SRR17520069.2170401  
SRR17520069.2170402  
SRR17520069.2170403  
SRR17520069.2170404  
SRR17520069.2170405  
SRR17520069.2170406  
SRR17520069.2170407  
SRR17520069.2170408  
SRR17520069.2170409  
SRR17520069.2170410  
SRR17520069.2170411  
SRR17520069.2170412  
SRR17520069.2170413  
SRR17520069.2170414  
SRR17520069.2170415

SRR17520069.2170416  
SRR17520069.2170417  
SRR17520069.2170418  
SRR17520069.2170419  
SRR17520069.2170420  
SRR17520069.2170421  
SRR17520069.2170422  
SRR17520069.2170423  
SRR17520069.2170424  
SRR17520069.2170425  
SRR17520069.2170426  
SRR17520069.2170427  
SRR17520069.2170428  
SRR17520069.2170429  
SRR17520069.2170430  
SRR17520069.2170431  
SRR17520069.2170432  
SRR17520069.2170433  
SRR17520069.2170434  
SRR17520069.2170435  
SRR17520069.2170436  
SRR17520069.2170437  
SRR17520069.2170438  
SRR17520069.2170439  
SRR17520069.2170440  
SRR17520069.2170441  
SRR17520069.2170442  
SRR17520069.2170443  
SRR17520069.2170444  
SRR17520069.2170445  
SRR17520069.2170446  
SRR17520069.2170447  
SRR17520069.2170448  
SRR17520069.2170450  
SRR17520069.2170451  
SRR17520069.2170452  
SRR17520069.2170453  
SRR17520069.2170454  
SRR17520069.2170455  
SRR17520069.2170456  
SRR17520069.2170457  
SRR17520069.2170458  
SRR17520069.2170459  
SRR17520069.2170460  
SRR17520069.2170461  
SRR17520069.2170462  
SRR17520069.2170463

SRR17520069.2170464  
SRR17520069.2170465  
SRR17520069.2170466  
SRR17520069.2170467  
SRR17520069.2170468  
SRR17520069.2170469  
SRR17520069.2170470  
SRR17520069.2170471  
SRR17520069.2170472  
SRR17520069.2170473  
SRR17520069.2170474  
SRR17520069.2170475  
SRR17520069.2170476  
SRR17520069.2170477  
SRR17520069.2170478  
SRR17520069.2170479  
SRR17520069.2170480  
SRR17520069.2170481  
SRR17520069.2170482  
SRR17520069.2170483  
SRR17520069.2170484  
SRR17520069.2170485  
SRR17520069.2170486  
SRR17520069.2170487  
SRR17520069.2170488  
SRR17520069.2170489  
SRR17520069.2170490  
SRR17520069.2184610  
SRR17520069.2184611  
SRR17520069.2184612  
SRR17520069.2184613  
SRR17520069.2184614  
SRR17520069.2184615  
SRR17520069.2184616  
SRR17520069.2184617  
SRR17520069.2184618  
SRR17520069.2184619  
SRR17520069.2184620  
SRR17520069.2184621  
SRR17520069.2184622  
SRR17520069.2184623  
SRR17520069.2184624  
SRR17520069.2184625  
SRR17520069.2184626  
SRR17520069.2184627  
SRR17520069.2184628  
SRR17520069.2184629

SRR17520069. 2184630  
SRR17520069. 2184631  
SRR17520069. 2184632  
SRR17520069. 2184633  
SRR17520069. 2184634  
SRR17520069. 2184635  
SRR17520069. 2184636  
SRR17520069. 2202463  
SRR17520069. 2202464  
SRR17520069. 2202465  
SRR17520069. 2202466  
SRR17520069. 2202467  
SRR17520069. 2202469  
SRR17520069. 2202470  
SRR17520069. 2202471  
SRR17520069. 2202472  
SRR17520069. 2202473  
SRR17520069. 2202474  
SRR17520069. 2202475  
SRR17520069. 2202476  
SRR17520069. 2202477  
SRR17520069. 2202478  
SRR17520069. 2202480  
SRR17520069. 2202481  
SRR17520069. 2202482  
SRR17520069. 2202483  
SRR17520069. 2202484  
SRR17520069. 2202485  
SRR17520069. 2202486  
SRR17520069. 2202487  
SRR17520069. 2202488  
SRR17520069. 2202489  
SRR17520069. 2202490  
SRR17520069. 2202491  
SRR17520069. 2202492  
SRR17520069. 2202493  
SRR17520069. 2202494  
SRR17520069. 2202495  
SRR17520069. 2202496  
SRR17520069. 2202497  
SRR17520069. 2202498  
SRR17520069. 2202499  
SRR17520069. 2202500  
SRR17520069. 2202501  
SRR17520069. 2202502  
SRR17520069. 2202503  
SRR17520069. 2202504

SRR17520069. 2202505  
SRR17520069. 2202506  
SRR17520069. 2202507  
SRR17520069. 2202508  
SRR17520069. 2202509  
SRR17520069. 2202510  
SRR17520069. 2202511  
SRR17520069. 2202512  
SRR17520069. 2202513  
SRR17520069. 2202514  
SRR17520069. 2202515  
SRR17520069. 2202516  
SRR17520069. 2202517  
SRR17520069. 2202518  
SRR17520069. 2202519  
SRR17520069. 2202520  
SRR17520069. 2202521  
SRR17520069. 2202522  
SRR17520069. 2202523  
SRR17520069. 2202524  
SRR17520069. 2202525  
SRR17520069. 2202526  
SRR17520069. 2202527  
SRR17520069. 2202528  
SRR17520069. 2202529  
SRR17520069. 2202530  
SRR17520069. 2202531  
SRR17520069. 2202532  
SRR17520069. 2202533  
SRR17520069. 2202534  
SRR17520069. 2202535  
SRR17520069. 2202536  
SRR17520069. 2202537  
SRR17520069. 2202538  
SRR17520069. 2202539  
SRR17520069. 2202540  
SRR17520069. 2202541  
SRR17520069. 2202542  
SRR17520069. 2202543  
SRR17520069. 2202544  
SRR17520069. 2202546  
SRR17520069. 2202547  
SRR17520069. 2202548  
SRR17520069. 2202549  
SRR17520069. 2202550  
SRR17520069. 2202551  
SRR17520069. 2202552



SRR17520069. 2202553  
SRR17520069. 2202554  
SRR17520069. 2202555  
SRR17520069. 2202556  
SRR17520069. 2202557  
SRR17520069. 2202558  
SRR17520069. 2202559  
SRR17520069. 2202560  
SRR17520069. 2202561  
SRR17520069. 2202562  
SRR17520069. 2202563  
SRR17520069. 2202564  
SRR17520069. 2239844  
SRR17520069. 2239845  
SRR17520069. 2239846  
SRR17520069. 2239847  
SRR17520069. 2239848  
SRR17520069. 2239849  
SRR17520069. 2239850  
SRR17520069. 2239851  
SRR17520069. 2239852  
SRR17520069. 2239853  
SRR17520069. 2239854  
SRR17520069. 2239855  
SRR17520069. 2239856  
SRR17520069. 2239857  
SRR17520069. 2239858  
SRR17520069. 2239859  
SRR17520069. 2239860  
SRR17520069. 2239861  
SRR17520069. 2239862  
SRR17520069. 2239863  
SRR17520069. 2239864  
SRR17520069. 2239865  
SRR17520069. 2239866  
SRR17520069. 2239867  
SRR17520069. 2239868  
SRR17520069. 2239869  
SRR17520069. 2239870  
SRR17520069. 2239871  
SRR17520069. 2239872  
SRR17520069. 2239873  
SRR17520069. 2239874  
SRR17520069. 2239875  
SRR17520069. 2239876  
SRR17520069. 2239877  
SRR17520069. 2239878

SRR17520069. 2239879  
SRR17520069. 2239880  
SRR17520069. 2239881  
SRR17520069. 2239882  
SRR17520069. 2239883  
SRR17520069. 2239884  
SRR17520069. 2239885  
SRR17520069. 2239886  
SRR17520069. 2239887  
SRR17520069. 2239888  
SRR17520069. 2239889  
SRR17520069. 2239890  
SRR17520069. 2239891  
SRR17520069. 2239892  
SRR17520069. 2239893  
SRR17520069. 2239894  
SRR17520069. 2239895  
SRR17520069. 2239896  
SRR17520069. 2239897  
SRR17520069. 2239898  
SRR17520069. 2239899  
SRR17520069. 2239900  
SRR17520069. 2239901  
SRR17520069. 2239902  
SRR17520069. 2239903  
SRR17520069. 2241563  
SRR17520069. 2241564  
SRR17520069. 2241565  
SRR17520069. 2241566  
SRR17520069. 2241567  
SRR17520069. 2241569  
SRR17520069. 2241570  
SRR17520069. 2241571  
SRR17520069. 2241572  
SRR17520069. 2241573  
SRR17520069. 2241574  
SRR17520069. 2241575  
SRR17520069. 2241576  
SRR17520069. 2241577  
SRR17520069. 2241578  
SRR17520069. 2241579  
SRR17520069. 2241580  
SRR17520069. 2241581  
SRR17520069. 2241582  
SRR17520069. 2241584  
SRR17520069. 2241585  
SRR17520069. 2241586

SRR17520069.2241587  
SRR17520069.2241588  
SRR17520069.2241589  
SRR17520069.2241590  
SRR17520069.2241591  
SRR17520069.2241592  
SRR17520069.2241593  
SRR17520069.2241594  
SRR17520069.2247029  
SRR17520069.2247030  
SRR17520069.2279355  
SRR17520069.2279356  
SRR17520069.2279357  
SRR17520069.2279358  
SRR17520069.2279359  
SRR17520069.2279360  
SRR17520069.2279361  
SRR17520069.2279362  
SRR17520069.2279363  
SRR17520069.2279364  
SRR17520069.2279365  
SRR17520069.2279366  
SRR17520069.2279367  
SRR17520069.2279368  
SRR17520069.2279369  
SRR17520069.2279370  
SRR17520069.2279371  
SRR17520069.2279372  
SRR17520069.2279373  
SRR17520069.2279374  
SRR17520069.2279375  
SRR17520069.2279376  
SRR17520069.2279377  
SRR17520069.2295970  
SRR17520069.2295971  
SRR17520069.2323263  
SRR17520069.2323277  
SRR17520069.2351083  
SRR17520069.2351084  
SRR17520069.2351085  
SRR17520069.2351087  
SRR17520069.2351088  
SRR17520069.2351089  
SRR17520069.2363281  
SRR17520069.2370154  
SRR17520069.2370155  
SRR17520069.2370156

SRR17520069.2370157  
SRR17520069.2370158  
SRR17520069.2370159  
SRR17520069.2370160  
SRR17520069.2370161  
SRR17520069.2370162  
SRR17520069.2370163  
SRR17520069.2370164  
SRR17520069.2370165  
SRR17520069.2370166  
SRR17520069.2370167  
SRR17520069.2370168  
SRR17520069.2370169  
SRR17520069.2370170  
SRR17520069.2370171  
SRR17520069.2370172  
SRR17520069.2370173  
SRR17520069.2370174  
SRR17520069.2370359  
SRR17520069.2373792  
SRR17520069.2373793  
SRR17520069.2373796  
SRR17520069.2373797  
SRR17520069.2373798  
SRR17520069.2373799  
SRR17520069.2373800  
SRR17520069.2373801  
SRR17520069.2388484  
SRR17520069.2388564  
SRR17520069.2388588  
SRR17520069.2402402  
SRR17520069.2402427  
SRR17520069.2402898  
SRR17520069.2402899  
SRR17520069.2402900  
SRR17520069.2402901  
SRR17520069.2402902  
SRR17520069.2402903  
SRR17520069.2402904  
SRR17520069.2402905  
SRR17520069.2402906  
SRR17520069.2402907  
SRR17520069.2402908  
SRR17520069.2402909  
SRR17520069.2402911  
SRR17520069.2402912  
SRR17520069.2402913

SRR17520069.2402914  
SRR17520069.2402915  
SRR17520069.2402916  
SRR17520069.2402917  
SRR17520069.2402918  
SRR17520069.2402919  
SRR17520069.2402920  
SRR17520069.2402921  
SRR17520069.2402922  
SRR17520069.2402923  
SRR17520069.2402924  
SRR17520069.2402925  
SRR17520069.2402926  
SRR17520069.2417756  
SRR17520069.2435231  
SRR17520069.2435260  
SRR17520069.2446175  
SRR17520069.2446177  
SRR17520069.2446179  
SRR17520069.2464949  
SRR17520069.2481637  
SRR17520069.2495063  
SRR17520069.2495089  
SRR17520069.2497988  
SRR17520069.2497989  
SRR17520069.2497990  
SRR17520069.2497993  
SRR17520069.2497994  
SRR17520069.2497995  
SRR17520069.2497996  
SRR17520069.2497997  
SRR17520069.2497998  
SRR17520069.2498000  
SRR17520069.2498001  
SRR17520069.2498002  
SRR17520069.2498003  
SRR17520069.2498004  
SRR17520069.2498005  
SRR17520069.2498006  
SRR17520069.2498007  
SRR17520069.2498008  
SRR17520069.2498009  
SRR17520069.2498010  
SRR17520069.2498011  
SRR17520069.2498012  
SRR17520069.2498013  
SRR17520069.2498014

SRR17520069.2498015  
SRR17520069.2498016  
SRR17520069.2498017  
SRR17520069.2498018  
SRR17520069.2498019  
SRR17520069.2498020  
SRR17520069.2498021  
SRR17520069.2498022  
SRR17520069.2498023  
SRR17520069.2498024  
SRR17520069.2498025  
SRR17520069.2498026  
SRR17520069.2498027  
SRR17520069.2498028  
SRR17520069.2498029  
SRR17520069.2498030  
SRR17520069.2498031  
SRR17520069.2498032  
SRR17520069.2498033  
SRR17520069.2498034  
SRR17520069.2498035  
SRR17520069.2498036  
SRR17520069.2498037  
SRR17520069.2498038  
SRR17520069.2498039  
SRR17520069.2498040  
SRR17520069.2498041  
SRR17520069.2498042  
SRR17520069.2498043  
SRR17520069.2498044  
SRR17520069.2498045  
SRR17520069.2498046  
SRR17520069.2498047  
SRR17520069.2498048  
SRR17520069.2498049  
SRR17520069.2498050  
SRR17520069.2498051  
SRR17520069.2498052  
SRR17520069.2498053  
SRR17520069.2498055  
SRR17520069.2498056  
SRR17520069.2498057  
SRR17520069.2498058  
SRR17520069.2498059  
SRR17520069.2498060  
SRR17520069.2498061  
SRR17520069.2498062

SRR17520069.2498063  
SRR17520069.2498064  
SRR17520069.2498065  
SRR17520069.2498066  
SRR17520069.2498067  
SRR17520069.2498068  
SRR17520069.2498069  
SRR17520069.2498070  
SRR17520069.2498071  
SRR17520069.2498072  
SRR17520069.2498073  
SRR17520069.2498074  
SRR17520069.2498075  
SRR17520069.2498076  
SRR17520069.2498077  
SRR17520069.2498078  
SRR17520069.2498079  
SRR17520069.2498080  
SRR17520069.2498081  
SRR17520069.2498082  
SRR17520069.2498083  
SRR17520069.2498084  
SRR17520069.2498085  
SRR17520069.2500930  
SRR17520069.2500931  
SRR17520069.2524060  
SRR17520069.2532773  
SRR17520069.2542109  
SRR17520069.2545318  
SRR17520069.2577345  
SRR17520069.2577346  
SRR17520069.2577347  
SRR17520069.2577348  
SRR17520069.2577349  
SRR17520069.2577350  
SRR17520069.2577351  
SRR17520069.2577352  
SRR17520069.2577353  
SRR17520069.2577354  
SRR17520069.2577355  
SRR17520069.2577356  
SRR17520069.2577357  
SRR17520069.2577358  
SRR17520069.2577359  
SRR17520069.2577360  
SRR17520069.2577361  
SRR17520069.2577362

SRR17520069. 2577363  
SRR17520069. 2577364  
SRR17520069. 2577365  
SRR17520069. 2577366  
SRR17520069. 2577367  
SRR17520069. 2577368  
SRR17520069. 2577369  
SRR17520069. 2577370  
SRR17520069. 2577372  
SRR17520069. 2577373  
SRR17520069. 2577374  
SRR17520069. 2577375  
SRR17520069. 2577376  
SRR17520069. 2577378  
SRR17520069. 2577379  
SRR17520069. 2577380  
SRR17520069. 2577381  
SRR17520069. 2577382  
SRR17520069. 2577383  
SRR17520069. 2577384  
SRR17520069. 2577385  
SRR17520069. 2577386  
SRR17520069. 2577387  
SRR17520069. 2577388  
SRR17520069. 2577389  
SRR17520069. 2577390  
SRR17520069. 2577391  
SRR17520069. 2577392  
SRR17520069. 2577393  
SRR17520069. 2577394  
SRR17520069. 2577395  
SRR17520069. 2577396  
SRR17520069. 2577398  
SRR17520069. 2587178  
SRR17520069. 2605281  
SRR17520069. 2605282  
SRR17520069. 2605283  
SRR17520069. 2605284  
SRR17520069. 2605285  
SRR17520069. 2605286  
SRR17520069. 2605287  
SRR17520069. 2605288  
SRR17520069. 2605289  
SRR17520069. 2605290  
SRR17520069. 2605291  
SRR17520069. 2605292  
SRR17520069. 2605293



SRR17520069.2605294  
SRR17520069.2605295  
SRR17520069.2605296  
SRR17520069.2605297  
SRR17520069.2605298  
SRR17520069.2605299  
SRR17520069.2605300  
SRR17520069.2605301  
SRR17520069.2605302  
SRR17520069.2605303  
SRR17520069.2605304  
SRR17520069.2605305  
SRR17520069.2605306  
SRR17520069.2605307  
SRR17520069.2605308  
SRR17520069.2605309  
SRR17520069.2605310  
SRR17520069.2605311  
SRR17520069.2605312  
SRR17520069.2605313  
SRR17520069.2605314  
SRR17520069.2605315  
SRR17520069.2605316  
SRR17520069.2605317  
SRR17520069.2605318  
SRR17520069.2605320  
SRR17520069.2605321  
SRR17520069.2605323  
SRR17520069.2605325  
SRR17520069.2605326  
SRR17520069.2605327  
SRR17520069.2605329  
SRR17520069.2605330  
SRR17520069.2605331  
SRR17520069.2605332  
SRR17520069.2605333  
SRR17520069.2605334  
SRR17520069.2605335  
SRR17520069.2605336  
SRR17520069.2605337  
SRR17520069.2605338  
SRR17520069.2605339  
SRR17520069.2605340  
SRR17520069.2605341  
SRR17520069.2605342  
SRR17520069.2605343  
SRR17520069.2605346

SRR17520069.2605347  
SRR17520069.2605351  
SRR17520069.2605352  
SRR17520069.2605353  
SRR17520069.2605354  
SRR17520069.2605355  
SRR17520069.2605356  
SRR17520069.2605357  
SRR17520069.2605358  
SRR17520069.2605359  
SRR17520069.2605360  
SRR17520069.2605361  
SRR17520069.2605362  
SRR17520069.2605363  
SRR17520069.2605364  
SRR17520069.2605365  
SRR17520069.2605366  
SRR17520069.2605367  
SRR17520069.2605368  
SRR17520069.2605369  
SRR17520069.2605370  
SRR17520069.2605371  
SRR17520069.2605372  
SRR17520069.2605373  
SRR17520069.2605374  
SRR17520069.2605375  
SRR17520069.2605377  
SRR17520069.2605378  
SRR17520069.2605379  
SRR17520069.2605380  
SRR17520069.2605381  
SRR17520069.2605382  
SRR17520069.2605383  
SRR17520069.2605384  
SRR17520069.2605385  
SRR17520069.2605386  
SRR17520069.2605387  
SRR17520069.2605388  
SRR17520069.2605389  
SRR17520069.2605390  
SRR17520069.2605391  
SRR17520069.2605392  
SRR17520069.2605393  
SRR17520069.2605394  
SRR17520069.2605395  
SRR17520069.2605396  
SRR17520069.2605397

SRR17520069.2605398  
SRR17520069.2605399  
SRR17520069.2605400  
SRR17520069.2605401  
SRR17520069.2605402  
SRR17520069.2605403  
SRR17520069.2605404  
SRR17520069.2605405  
SRR17520069.2605406  
SRR17520069.2605407  
SRR17520069.2605408  
SRR17520069.2605409  
SRR17520069.2605410  
SRR17520069.2606271  
SRR17520069.2606272  
SRR17520069.2606273  
SRR17520069.2606274  
SRR17520069.2606275  
SRR17520069.2606276  
SRR17520069.2606277  
SRR17520069.2606278  
SRR17520069.2606279  
SRR17520069.2606280  
SRR17520069.2606281  
SRR17520069.2606282  
SRR17520069.2606283  
SRR17520069.2606284  
SRR17520069.2606285  
SRR17520069.2606286  
SRR17520069.2606287  
SRR17520069.2606288  
SRR17520069.2606289  
SRR17520069.2606290  
SRR17520069.2606291  
SRR17520069.2606292  
SRR17520069.2606293  
SRR17520069.2606294  
SRR17520069.2606295  
SRR17520069.2606296  
SRR17520069.2606297  
SRR17520069.2606298  
SRR17520069.2606299  
SRR17520069.2606300  
SRR17520069.2606301  
SRR17520069.2606302  
SRR17520069.2606303  
SRR17520069.2606304

SRR17520069. 2606305  
SRR17520069. 2606306  
SRR17520069. 2606307  
SRR17520069. 2606308  
SRR17520069. 2606309  
SRR17520069. 2606310  
SRR17520069. 2606311  
SRR17520069. 2606312  
SRR17520069. 2606313  
SRR17520069. 2606314  
SRR17520069. 2606315  
SRR17520069. 2606316  
SRR17520069. 2606317  
SRR17520069. 2606318  
SRR17520069. 2606319  
SRR17520069. 2606320  
SRR17520069. 2606321  
SRR17520069. 2606322  
SRR17520069. 2606323  
SRR17520069. 2606325  
SRR17520069. 2606326  
SRR17520069. 2606327  
SRR17520069. 2606328  
SRR17520069. 2606329  
SRR17520069. 2606330  
SRR17520069. 2606331  
SRR17520069. 2606332  
SRR17520069. 2606333  
SRR17520069. 2606334  
SRR17520069. 2606335  
SRR17520069. 2606336  
SRR17520069. 2606337  
SRR17520069. 2606338  
SRR17520069. 2606339  
SRR17520069. 2606340  
SRR17520069. 2606341  
SRR17520069. 2606342  
SRR17520069. 2606343  
SRR17520069. 2606345  
SRR17520069. 2606346  
SRR17520069. 2606347  
SRR17520069. 2606348  
SRR17520069. 2606349  
SRR17520069. 2606350  
SRR17520069. 2606351  
SRR17520069. 2606353  
SRR17520069. 2606354

SRR17520069. 2606355  
SRR17520069. 2606356  
SRR17520069. 2606357  
SRR17520069. 2606358  
SRR17520069. 2606359  
SRR17520069. 2606360  
SRR17520069. 2606361  
SRR17520069. 2606362  
SRR17520069. 2606363  
SRR17520069. 2606364  
SRR17520069. 2606365  
SRR17520069. 2606366  
SRR17520069. 2606367  
SRR17520069. 2606369  
SRR17520069. 2606370  
SRR17520069. 2612565  
SRR17520069. 2612566  
SRR17520069. 2612567  
SRR17520069. 2612568  
SRR17520069. 2612569  
SRR17520069. 2612570  
SRR17520069. 2612571  
SRR17520069. 2612572  
SRR17520069. 2612573  
SRR17520069. 2612574  
SRR17520069. 2612575  
SRR17520069. 2612576  
SRR17520069. 2612577  
SRR17520069. 2612578  
SRR17520069. 2612579  
SRR17520069. 2612580  
SRR17520069. 2612581  
SRR17520069. 2612582  
SRR17520069. 2612583  
SRR17520069. 2625597  
SRR17520069. 2625598  
SRR17520069. 2625599  
SRR17520069. 2631804  
SRR17520069. 2631805  
SRR17520069. 2631806  
SRR17520069. 2631807  
SRR17520069. 2631808  
SRR17520069. 2631809  
SRR17520069. 2631810  
SRR17520069. 2631811  
SRR17520069. 2631812  
SRR17520069. 2631813

SRR17520069. 2631814  
SRR17520069. 2631815  
SRR17520069. 2631816  
SRR17520069. 2631817  
SRR17520069. 2631818  
SRR17520069. 2631819  
SRR17520069. 2631822  
SRR17520069. 2631823  
SRR17520069. 2631824  
SRR17520069. 2631825  
SRR17520069. 2631826  
SRR17520069. 2631827  
SRR17520069. 2631828  
SRR17520069. 2631829  
SRR17520069. 2631830  
SRR17520069. 2631831  
SRR17520069. 2631832  
SRR17520069. 2631833  
SRR17520069. 2631834  
SRR17520069. 2631835  
SRR17520069. 2631836  
SRR17520069. 2631837  
SRR17520069. 2631838  
SRR17520069. 2631839  
SRR17520069. 2631840  
SRR17520069. 2631841  
SRR17520069. 2631842  
SRR17520069. 2631843  
SRR17520069. 2631844  
SRR17520069. 2631845  
SRR17520069. 2631846  
SRR17520069. 2631847  
SRR17520069. 2631848  
SRR17520069. 2631849  
SRR17520069. 2631850  
SRR17520069. 2631851  
SRR17520069. 2631852  
SRR17520069. 2631853  
SRR17520069. 2631854  
SRR17520069. 2631855  
SRR17520069. 2631856  
SRR17520069. 2631861  
SRR17520069. 2631862  
SRR17520069. 2631864  
SRR17520069. 2634992  
SRR17520069. 2636952  
SRR17520069. 2636958

SRR17520069. 2646185  
SRR17520069. 2646186  
SRR17520069. 2646187  
SRR17520069. 2646188  
SRR17520069. 2646189  
SRR17520069. 2646190  
SRR17520069. 2646191  
SRR17520069. 2646192  
SRR17520069. 2646193  
SRR17520069. 2646194  
SRR17520069. 2646195  
SRR17520069. 2646196  
SRR17520069. 2646197  
SRR17520069. 2646198  
SRR17520069. 2646199  
SRR17520069. 2652457  
SRR17520069. 2652458  
SRR17520069. 2652459  
SRR17520069. 2652460  
SRR17520069. 2652461  
SRR17520069. 2652462  
SRR17520069. 2652463  
SRR17520069. 2652464  
SRR17520069. 2652465  
SRR17520069. 2652466  
SRR17520069. 2652467  
SRR17520069. 2652468  
SRR17520069. 2652469  
SRR17520069. 2652470  
SRR17520069. 2652471  
SRR17520069. 2652472  
SRR17520069. 2652473  
SRR17520069. 2652474  
SRR17520069. 2652475  
SRR17520069. 2652476  
SRR17520069. 2652477  
SRR17520069. 2652478  
SRR17520069. 2652479  
SRR17520069. 2652480  
SRR17520069. 2652481  
SRR17520069. 2652482  
SRR17520069. 2652483  
SRR17520069. 2652484  
SRR17520069. 2693716  
SRR17520069. 2700278  
SRR17520069. 2702931  
SRR17520069. 2705232

SRR17520069.2705233  
SRR17520069.2705234  
SRR17520069.2705235  
SRR17520069.2705236  
SRR17520069.2705237  
SRR17520069.2705238  
SRR17520069.2705239  
SRR17520069.2705240  
SRR17520069.2705241  
SRR17520069.2705242  
SRR17520069.2705243  
SRR17520069.2705245  
SRR17520069.2705246  
SRR17520069.2705247  
SRR17520069.2705248  
SRR17520069.2705249  
SRR17520069.2705250  
SRR17520069.2705251  
SRR17520069.2705252  
SRR17520069.2705253  
SRR17520069.2705254  
SRR17520069.2705255  
SRR17520069.2705256  
SRR17520069.2705257  
SRR17520069.2705258  
SRR17520069.2705259  
SRR17520069.2705261  
SRR17520069.2705262  
SRR17520069.2705263  
SRR17520069.2705264  
SRR17520069.2705265  
SRR17520069.2705266  
SRR17520069.2705267  
SRR17520069.2705268  
SRR17520069.2705269  
SRR17520069.2705270  
SRR17520069.2705271  
SRR17520069.2705272  
SRR17520069.2705273  
SRR17520069.2705274  
SRR17520069.2705275  
SRR17520069.2705278  
SRR17520069.2705279  
SRR17520069.2705280  
SRR17520069.2705281  
SRR17520069.2705283  
SRR17520069.2705284



SRR17520069.2705285  
SRR17520069.2705287  
SRR17520069.2705288  
SRR17520069.2705289  
SRR17520069.2705290  
SRR17520069.2705291  
SRR17520069.2705292  
SRR17520069.2705293  
SRR17520069.2705294  
SRR17520069.2705295  
SRR17520069.2705296  
SRR17520069.2705297  
SRR17520069.2705298  
SRR17520069.2705299  
SRR17520069.2705300  
SRR17520069.2705301  
SRR17520069.2705302  
SRR17520069.2705303  
SRR17520069.2705304  
SRR17520069.2705305  
SRR17520069.2705306  
SRR17520069.2705307  
SRR17520069.2705308  
SRR17520069.2705309  
SRR17520069.2705310  
SRR17520069.2705311  
SRR17520069.2705312  
SRR17520069.2705313  
SRR17520069.2705315  
SRR17520069.2705316  
SRR17520069.2705317  
SRR17520069.2705318  
SRR17520069.2705319  
SRR17520069.2705320  
SRR17520069.2705322  
SRR17520069.2705323  
SRR17520069.2705324  
SRR17520069.2705325  
SRR17520069.2705326  
SRR17520069.2715476  
SRR17520069.2723511  
SRR17520069.2723512  
SRR17520069.2723513  
SRR17520069.2723515  
SRR17520069.2723516  
SRR17520069.2723517  
SRR17520069.2723518

SRR17520069. 2723519  
SRR17520069. 2723520  
SRR17520069. 2723521  
SRR17520069. 2723522  
SRR17520069. 2723523  
SRR17520069. 2723524  
SRR17520069. 2723525  
SRR17520069. 2723526  
SRR17520069. 2723527  
SRR17520069. 2723528  
SRR17520069. 2723529  
SRR17520069. 2723530  
SRR17520069. 2723531  
SRR17520069. 2723532  
SRR17520069. 2723533  
SRR17520069. 2723534  
SRR17520069. 2733819  
SRR17520069. 2752748  
SRR17520069. 2752749  
SRR17520069. 2752750  
SRR17520069. 2752751  
SRR17520069. 2752752  
SRR17520069. 2752754  
SRR17520069. 2752755  
SRR17520069. 2752756  
SRR17520069. 2752757  
SRR17520069. 2752758  
SRR17520069. 2752759  
SRR17520069. 2752760  
SRR17520069. 2752761  
SRR17520069. 2752762  
SRR17520069. 2752763  
SRR17520069. 2752764  
SRR17520069. 2752765  
SRR17520069. 2752766  
SRR17520069. 2752767  
SRR17520069. 2752768  
SRR17520069. 2752769  
SRR17520069. 2752770  
SRR17520069. 2752772  
SRR17520069. 2752773  
SRR17520069. 2752774  
SRR17520069. 2752776  
SRR17520069. 2752777  
SRR17520069. 2752778  
SRR17520069. 2752779  
SRR17520069. 2752780

SRR17520069.2752781  
SRR17520069.2752782  
SRR17520069.2752783  
SRR17520069.2752784  
SRR17520069.2752785  
SRR17520069.2752787  
SRR17520069.2752788  
SRR17520069.2752789  
SRR17520069.2752790  
SRR17520069.2752791  
SRR17520069.2752792  
SRR17520069.2752793  
SRR17520069.2752794  
SRR17520069.2752795  
SRR17520069.2752796  
SRR17520069.2752797  
SRR17520069.2752798  
SRR17520069.2752799  
SRR17520069.2752800  
SRR17520069.2752801  
SRR17520069.2752802  
SRR17520069.2752803  
SRR17520069.2752805  
SRR17520069.2752806  
SRR17520069.2752807  
SRR17520069.2752808  
SRR17520069.2752809  
SRR17520069.2752810  
SRR17520069.2752811  
SRR17520069.2752812  
SRR17520069.2752813  
SRR17520069.2752814  
SRR17520069.2752816  
SRR17520069.2752817  
SRR17520069.2752818  
SRR17520069.2752819  
SRR17520069.2752820  
SRR17520069.2752821  
SRR17520069.2752822  
SRR17520069.2752823  
SRR17520069.2752824  
SRR17520069.2752825  
SRR17520069.2752826  
SRR17520069.2753488  
SRR17520069.2753489  
SRR17520069.2753490  
SRR17520069.2753491

SRR17520069.2753492  
SRR17520069.2753493  
SRR17520069.2753494  
SRR17520069.2753495  
SRR17520069.2753496  
SRR17520069.2753497  
SRR17520069.2753498  
SRR17520069.2753499  
SRR17520069.2753500  
SRR17520069.2753501  
SRR17520069.2753502  
SRR17520069.2753503  
SRR17520069.2753504  
SRR17520069.2753505  
SRR17520069.2753506  
SRR17520069.2753507  
SRR17520069.2753508  
SRR17520069.2753509  
SRR17520069.2753510  
SRR17520069.2753511  
SRR17520069.2753512  
SRR17520069.2753513  
SRR17520069.2753514  
SRR17520069.2753515  
SRR17520069.2753516  
SRR17520069.2753517  
SRR17520069.2753519  
SRR17520069.2753520  
SRR17520069.2753521  
SRR17520069.2753522  
SRR17520069.2753523  
SRR17520069.2753524  
SRR17520069.2753525  
SRR17520069.2753526  
SRR17520069.2753527  
SRR17520069.2753528  
SRR17520069.2753529  
SRR17520069.2753530  
SRR17520069.2753531  
SRR17520069.2753532  
SRR17520069.2753533  
SRR17520069.2753534  
SRR17520069.2753535  
SRR17520069.2753536  
SRR17520069.2753537  
SRR17520069.2753538  
SRR17520069.2753539

SRR17520069.2753540  
SRR17520069.2753541  
SRR17520069.2753542  
SRR17520069.2753543  
SRR17520069.2753544  
SRR17520069.2762966  
SRR17520069.2762967  
SRR17520069.2762968  
SRR17520069.2762969  
SRR17520069.2769159  
SRR17520069.2769177  
SRR17520069.2769178  
SRR17520069.2769179  
SRR17520069.2769180  
SRR17520069.2769181  
SRR17520069.2769182  
SRR17520069.2769183  
SRR17520069.2769184  
SRR17520069.2769185  
SRR17520069.2769186  
SRR17520069.2769187  
SRR17520069.2769188  
SRR17520069.2769189  
SRR17520069.2769190  
SRR17520069.2769191  
SRR17520069.2769192  
SRR17520069.2769193  
SRR17520069.2769194  
SRR17520069.2769195  
SRR17520069.2769196  
SRR17520069.2769197  
SRR17520069.2769198  
SRR17520069.2769199  
SRR17520069.2769200  
SRR17520069.2769201  
SRR17520069.2769202  
SRR17520069.2769203  
SRR17520069.2769204  
SRR17520069.2769205  
SRR17520069.2769206  
SRR17520069.2769207  
SRR17520069.2769208  
SRR17520069.2769209  
SRR17520069.2769210  
SRR17520069.2778853  
SRR17520069.2783800  
SRR17520069.2783801

SRR17520069.2820597  
SRR17520069.2820599  
SRR17520069.2820600  
SRR17520069.2820601  
SRR17520069.2820602  
SRR17520069.2820603  
SRR17520069.2820605  
SRR17520069.2820606  
SRR17520069.2820607  
SRR17520069.2820608  
SRR17520069.2820609  
SRR17520069.2820610  
SRR17520069.2820611  
SRR17520069.2820612  
SRR17520069.2820613  
SRR17520069.2820614  
SRR17520069.2820615  
SRR17520069.2820616  
SRR17520069.2820617  
SRR17520069.2820618  
SRR17520069.2820619  
SRR17520069.2820621  
SRR17520069.2820623  
SRR17520069.2820624  
SRR17520069.2820627  
SRR17520069.2820628  
SRR17520069.2820629  
SRR17520069.2820630  
SRR17520069.2820631  
SRR17520069.2820632  
SRR17520069.2820635  
SRR17520069.2820637  
SRR17520069.2820638  
SRR17520069.2820639  
SRR17520069.2820640  
SRR17520069.2820641  
SRR17520069.2830956  
SRR17520069.2830957  
SRR17520069.2830958  
SRR17520069.2830959  
SRR17520069.2830960  
SRR17520069.2830961  
SRR17520069.2830962  
SRR17520069.2830963  
SRR17520069.2830964  
SRR17520069.2830965  
SRR17520069.2830966

SRR17520069.2847058  
SRR17520069.2847077  
SRR17520069.2850650  
SRR17520069.2850652  
SRR17520069.2850653  
SRR17520069.2850654  
SRR17520069.2850655  
SRR17520069.2850656  
SRR17520069.2850657  
SRR17520069.2850658  
SRR17520069.2850659  
SRR17520069.2850660  
SRR17520069.2850662  
SRR17520069.2850663  
SRR17520069.2850664  
SRR17520069.2850665  
SRR17520069.2850666  
SRR17520069.2850667  
SRR17520069.2850668  
SRR17520069.2850669  
SRR17520069.2850670  
SRR17520069.2850671  
SRR17520069.2850672  
SRR17520069.2850673  
SRR17520069.2850674  
SRR17520069.2850675  
SRR17520069.2850676  
SRR17520069.2850677  
SRR17520069.2850678  
SRR17520069.2850679  
SRR17520069.2850680  
SRR17520069.2850681  
SRR17520069.2850682  
SRR17520069.2850683  
SRR17520069.2850684  
SRR17520069.2850685  
SRR17520069.2850686  
SRR17520069.2850687  
SRR17520069.2850688  
SRR17520069.2850689  
SRR17520069.2850690  
SRR17520069.2850691  
SRR17520069.2850692  
SRR17520069.2850693  
SRR17520069.2850694  
SRR17520069.2850695  
SRR17520069.2850696

SRR17520069.2850697  
SRR17520069.2850698  
SRR17520069.2850699  
SRR17520069.2850700  
SRR17520069.2850701  
SRR17520069.2850702  
SRR17520069.2850703  
SRR17520069.2850704  
SRR17520069.2850705  
SRR17520069.2850706  
SRR17520069.2850707  
SRR17520069.2850708  
SRR17520069.2850709  
SRR17520069.2850710  
SRR17520069.2850711  
SRR17520069.2850712  
SRR17520069.2850713  
SRR17520069.2850714  
SRR17520069.2850715  
SRR17520069.2850716  
SRR17520069.2850717  
SRR17520069.2850718  
SRR17520069.2850719  
SRR17520069.2850720  
SRR17520069.2850721  
SRR17520069.2850722  
SRR17520069.2850723  
SRR17520069.2850724  
SRR17520069.2850725  
SRR17520069.2850726  
SRR17520069.2850727  
SRR17520069.2850728  
SRR17520069.2850729  
SRR17520069.2850730  
SRR17520069.2850731  
SRR17520069.2850732  
SRR17520069.2850733  
SRR17520069.2850734  
SRR17520069.2850735  
SRR17520069.2850736  
SRR17520069.2850737  
SRR17520069.2850738  
SRR17520069.2850739  
SRR17520069.2850740  
SRR17520069.2850741  
SRR17520069.2850742  
SRR17520069.2850743



SRR17520069.2850744  
SRR17520069.2850745  
SRR17520069.2851003  
SRR17520069.2870014  
SRR17520069.2870015  
SRR17520069.2870016  
SRR17520069.2870017  
SRR17520069.2870018  
SRR17520069.2870019  
SRR17520069.2870020  
SRR17520069.2870021  
SRR17520069.2870022  
SRR17520069.2870023  
SRR17520069.2870024  
SRR17520069.2870025  
SRR17520069.2870026  
SRR17520069.2870027  
SRR17520069.2870028  
SRR17520069.2870029  
SRR17520069.2870030  
SRR17520069.2870031  
SRR17520069.2870032  
SRR17520069.2870033  
SRR17520069.2870034  
SRR17520069.2870035  
SRR17520069.2870036  
SRR17520069.2870037  
SRR17520069.2870038  
SRR17520069.2870039  
SRR17520069.2870040  
SRR17520069.2870041  
SRR17520069.2870042  
SRR17520069.2870043  
SRR17520069.2870044  
SRR17520069.2870045  
SRR17520069.2870046  
SRR17520069.2870047  
SRR17520069.2870048  
SRR17520069.2870049  
SRR17520069.2870050  
SRR17520069.2870051  
SRR17520069.2870052  
SRR17520069.2870053  
SRR17520069.2870054  
SRR17520069.2870055  
SRR17520069.2870056  
SRR17520069.2870736

SRR17520069. 2870738  
SRR17520069. 2870739  
SRR17520069. 2870740  
SRR17520069. 2870742  
SRR17520069. 2870743  
SRR17520069. 2870744  
SRR17520069. 2870745  
SRR17520069. 2870746  
SRR17520069. 2870747  
SRR17520069. 2870748  
SRR17520069. 2870750  
SRR17520069. 2870751  
SRR17520069. 2870752  
SRR17520069. 2870753  
SRR17520069. 2870754  
SRR17520069. 2870757  
SRR17520069. 2870758  
SRR17520069. 2870759  
SRR17520069. 2870760  
SRR17520069. 2870762  
SRR17520069. 2870763  
SRR17520069. 2870764  
SRR17520069. 2870765  
SRR17520069. 2870766  
SRR17520069. 2870767  
SRR17520069. 2870768  
SRR17520069. 2870769  
SRR17520069. 2870770  
SRR17520069. 2870771  
SRR17520069. 2870772  
SRR17520069. 2870773  
SRR17520069. 2870774  
SRR17520069. 2870776  
SRR17520069. 2870777  
SRR17520069. 2870778  
SRR17520069. 2870779  
SRR17520069. 2870780  
SRR17520069. 2870781  
SRR17520069. 2870783  
SRR17520069. 2870784  
SRR17520069. 2870785  
SRR17520069. 2870786  
SRR17520069. 2870787  
SRR17520069. 2870788  
SRR17520069. 2870789  
SRR17520069. 2870790  
SRR17520069. 2870791

SRR17520069.2870792  
SRR17520069.2870793  
SRR17520069.2870794  
SRR17520069.2870795  
SRR17520069.2870796  
SRR17520069.2870797  
SRR17520069.2870798  
SRR17520069.2870799  
SRR17520069.2870800  
SRR17520069.2870801  
SRR17520069.2870803  
SRR17520069.2870805  
SRR17520069.2870806  
SRR17520069.2870807  
SRR17520069.2870808  
SRR17520069.2870809  
SRR17520069.2870810  
SRR17520069.2870811  
SRR17520069.2870812  
SRR17520069.2874709  
SRR17520069.2874710  
SRR17520069.2874711  
SRR17520069.2874712  
SRR17520069.2874713  
SRR17520069.2874714  
SRR17520069.2874715  
SRR17520069.2874716  
SRR17520069.2874717  
SRR17520069.2874718  
SRR17520069.2874719  
SRR17520069.2874720  
SRR17520069.2874721  
SRR17520069.2874722  
SRR17520069.2877847  
SRR17520069.2879764  
SRR17520069.2879765  
SRR17520069.2879766  
SRR17520069.2879767  
SRR17520069.2879768  
SRR17520069.2879769  
SRR17520069.2879770  
SRR17520069.2879771  
SRR17520069.2879772  
SRR17520069.2879773  
SRR17520069.2879774  
SRR17520069.2879775  
SRR17520069.2879776

SRR17520069.2879777  
SRR17520069.2879778  
SRR17520069.2879779  
SRR17520069.2879780  
SRR17520069.2879781  
SRR17520069.2879782  
SRR17520069.2879783  
SRR17520069.2879784  
SRR17520069.2879785  
SRR17520069.2879786  
SRR17520069.2879787  
SRR17520069.2879788  
SRR17520069.2879789  
SRR17520069.2879790  
SRR17520069.2879791  
SRR17520069.2879792  
SRR17520069.2879793  
SRR17520069.2879794  
SRR17520069.2879795  
SRR17520069.2879796  
SRR17520069.2879797  
SRR17520069.2879798  
SRR17520069.2879799  
SRR17520069.2879800  
SRR17520069.2879801  
SRR17520069.2879802  
SRR17520069.2879803  
SRR17520069.2879804  
SRR17520069.2879805  
SRR17520069.2879806  
SRR17520069.2879807  
SRR17520069.2879808  
SRR17520069.2879809  
SRR17520069.2879810  
SRR17520069.2879811  
SRR17520069.2879812  
SRR17520069.2879813  
SRR17520069.2879814  
SRR17520069.2879815  
SRR17520069.2879817  
SRR17520069.2879818  
SRR17520069.2879819  
SRR17520069.2879820  
SRR17520069.2879821  
SRR17520069.2879822  
SRR17520069.2879823  
SRR17520069.2879824

SRR17520069.2879825  
SRR17520069.2879826  
SRR17520069.2879827  
SRR17520069.2879828  
SRR17520069.2879829  
SRR17520069.2879830  
SRR17520069.2879831  
SRR17520069.2879832  
SRR17520069.2879833  
SRR17520069.2879834  
SRR17520069.2879835  
SRR17520069.2879836  
SRR17520069.2879837  
SRR17520069.2879838  
SRR17520069.2879839  
SRR17520069.2879840  
SRR17520069.2879841  
SRR17520069.2879842  
SRR17520069.2879843  
SRR17520069.2879844  
SRR17520069.2879845  
SRR17520069.2879846  
SRR17520069.2879847  
SRR17520069.2879848  
SRR17520069.2879849  
SRR17520069.2879850  
SRR17520069.2879851  
SRR17520069.2879852  
SRR17520069.2879853  
SRR17520069.2879854  
SRR17520069.2879855  
SRR17520069.2879856  
SRR17520069.2879857  
SRR17520069.2879858  
SRR17520069.2879859  
SRR17520069.2879860  
SRR17520069.2879861  
SRR17520069.2879862  
SRR17520069.2879863  
SRR17520069.2879864  
SRR17520069.2879865  
SRR17520069.2879866  
SRR17520069.2879867  
SRR17520069.2879868  
SRR17520069.2879869  
SRR17520069.2886771  
SRR17520069.2886772

SRR17520069.2891146  
SRR17520069.2891156  
SRR17520069.2895447  
SRR17520069.2895448  
SRR17520069.2895449  
SRR17520069.2895450  
SRR17520069.2895451  
SRR17520069.2895452  
SRR17520069.2895453  
SRR17520069.2895454  
SRR17520069.2895455  
SRR17520069.2895456  
SRR17520069.2895457  
SRR17520069.2895458  
SRR17520069.2895459  
SRR17520069.2895460  
SRR17520069.2895461  
SRR17520069.2895462  
SRR17520069.2895463  
SRR17520069.2895464  
SRR17520069.2895465  
SRR17520069.2895466  
SRR17520069.2895467  
SRR17520069.2895468  
SRR17520069.2895469  
SRR17520069.2895470  
SRR17520069.2895471  
SRR17520069.2895472  
SRR17520069.2895473  
SRR17520069.2895474  
SRR17520069.2895624  
SRR17520069.2898293  
SRR17520069.2898295  
SRR17520069.2907100  
SRR17520069.2907101  
SRR17520069.2907102  
SRR17520069.2907103  
SRR17520069.2907104  
SRR17520069.2907105  
SRR17520069.2907106  
SRR17520069.2907107  
SRR17520069.2907108  
SRR17520069.2907109  
SRR17520069.2907110  
SRR17520069.2907111  
SRR17520069.2907112  
SRR17520069.2907114

SRR17520069.2907116  
SRR17520069.2907117  
SRR17520069.2907118  
SRR17520069.2907119  
SRR17520069.2907120  
SRR17520069.2907121  
SRR17520069.2907122  
SRR17520069.2907124  
SRR17520069.2907125  
SRR17520069.2907126  
SRR17520069.2907127  
SRR17520069.2907128  
SRR17520069.2907129  
SRR17520069.2907130  
SRR17520069.2907131  
SRR17520069.2907132  
SRR17520069.2907133  
SRR17520069.2907134  
SRR17520069.2907135  
SRR17520069.2907136  
SRR17520069.2907137  
SRR17520069.2907138  
SRR17520069.2907139  
SRR17520069.2907140  
SRR17520069.2907141  
SRR17520069.2907142  
SRR17520069.2907143  
SRR17520069.2907144  
SRR17520069.2907145  
SRR17520069.2907146  
SRR17520069.2907147  
SRR17520069.2907148  
SRR17520069.2907149  
SRR17520069.2907150  
SRR17520069.2907151  
SRR17520069.2907152  
SRR17520069.2907153  
SRR17520069.2907155  
SRR17520069.2907156  
SRR17520069.2907157  
SRR17520069.2907158  
SRR17520069.2907159  
SRR17520069.2907161  
SRR17520069.2907162  
SRR17520069.2907163  
SRR17520069.2907164  
SRR17520069.2907165

SRR17520069.2907166  
SRR17520069.2907168  
SRR17520069.2907169  
SRR17520069.2907170  
SRR17520069.2907171  
SRR17520069.2907172  
SRR17520069.2907173  
SRR17520069.2907174  
SRR17520069.2907175  
SRR17520069.2907176  
SRR17520069.2907177  
SRR17520069.2907178  
SRR17520069.2907179  
SRR17520069.2907180  
SRR17520069.2907181  
SRR17520069.2907182  
SRR17520069.2907183  
SRR17520069.2907184  
SRR17520069.2923196  
SRR17520069.2923197  
SRR17520069.2923198  
SRR17520069.2923199  
SRR17520069.2923200  
SRR17520069.2923201  
SRR17520069.2923202  
SRR17520069.2923203  
SRR17520069.2923204  
SRR17520069.2923205  
SRR17520069.2923206  
SRR17520069.2923207  
SRR17520069.2923208  
SRR17520069.2923209  
SRR17520069.2923210  
SRR17520069.2923211  
SRR17520069.2923212  
SRR17520069.2923213  
SRR17520069.2923215  
SRR17520069.2923216  
SRR17520069.2923217  
SRR17520069.2923218  
SRR17520069.2923219  
SRR17520069.2923221  
SRR17520069.2923222  
SRR17520069.2923223  
SRR17520069.2923224  
SRR17520069.2923225  
SRR17520069.2923228



SRR17520069.2923229  
SRR17520069.2923230  
SRR17520069.2923231  
SRR17520069.2923232  
SRR17520069.2923233  
SRR17520069.2923234  
SRR17520069.2923235  
SRR17520069.2923237  
SRR17520069.2923238  
SRR17520069.2923239  
SRR17520069.2923240  
SRR17520069.2923241  
SRR17520069.2923242  
SRR17520069.2923243  
SRR17520069.2923244  
SRR17520069.2923245  
SRR17520069.2923246  
SRR17520069.2923247  
SRR17520069.2923248  
SRR17520069.2923249  
SRR17520069.2923250  
SRR17520069.2923251  
SRR17520069.2923252  
SRR17520069.2923253  
SRR17520069.2923255  
SRR17520069.2923256  
SRR17520069.2923257  
SRR17520069.2923258  
SRR17520069.2923259  
SRR17520069.2923260  
SRR17520069.2923261  
SRR17520069.2923262  
SRR17520069.2923263  
SRR17520069.2923264  
SRR17520069.2923265  
SRR17520069.2923266  
SRR17520069.2923267  
SRR17520069.2923268  
SRR17520069.2923269  
SRR17520069.2923270  
SRR17520069.2923271  
SRR17520069.2923272  
SRR17520069.2923274  
SRR17520069.2923275  
SRR17520069.2923276  
SRR17520069.2923277  
SRR17520069.2923278

SRR17520069.2923279  
SRR17520069.2923280  
SRR17520069.2923281  
SRR17520069.2923283  
SRR17520069.2923284  
SRR17520069.2923285  
SRR17520069.2923286  
SRR17520069.2923287  
SRR17520069.2923288  
SRR17520069.2939517  
SRR17520069.2939518  
SRR17520069.2939519  
SRR17520069.2939520  
SRR17520069.2939521  
SRR17520069.2939522  
SRR17520069.2939523  
SRR17520069.2939524  
SRR17520069.2939525  
SRR17520069.2939526  
SRR17520069.2939527  
SRR17520069.2939528  
SRR17520069.2939529  
SRR17520069.2939530  
SRR17520069.2939531  
SRR17520069.2939532  
SRR17520069.2939533  
SRR17520069.2939534  
SRR17520069.2939535  
SRR17520069.2939536  
SRR17520069.2939537  
SRR17520069.2939538  
SRR17520069.2939539  
SRR17520069.2939540  
SRR17520069.2939541  
SRR17520069.2939544  
SRR17520069.2939545  
SRR17520069.2939547  
SRR17520069.2939548  
SRR17520069.2939549  
SRR17520069.2939550  
SRR17520069.2939551  
SRR17520069.2939552  
SRR17520069.2939553  
SRR17520069.2939554  
SRR17520069.2939555  
SRR17520069.2939556  
SRR17520069.2939557

SRR17520069. 2939558  
SRR17520069. 2939559  
SRR17520069. 2939560  
SRR17520069. 2939561  
SRR17520069. 2939562  
SRR17520069. 2939563  
SRR17520069. 2939564  
SRR17520069. 2939565  
SRR17520069. 2939566  
SRR17520069. 2939567  
SRR17520069. 2939568  
SRR17520069. 2939569  
SRR17520069. 2939570  
SRR17520069. 2939571  
SRR17520069. 2939572  
SRR17520069. 2939573  
SRR17520069. 2939574  
SRR17520069. 2939575  
SRR17520069. 2939576  
SRR17520069. 2939577  
SRR17520069. 2939578  
SRR17520069. 2939579  
SRR17520069. 2939580  
SRR17520069. 2939581  
SRR17520069. 2939582  
SRR17520069. 2939583  
SRR17520069. 2939584  
SRR17520069. 2939585  
SRR17520069. 2939586  
SRR17520069. 2939587  
SRR17520069. 2939588  
SRR17520069. 2939589  
SRR17520069. 2939590  
SRR17520069. 2939591  
SRR17520069. 2939592  
SRR17520069. 2939593  
SRR17520069. 2939594  
SRR17520069. 2939595  
SRR17520069. 2939596  
SRR17520069. 2939597  
SRR17520069. 2939598  
SRR17520069. 2939599  
SRR17520069. 2939600  
SRR17520069. 2939601  
SRR17520069. 2939603  
SRR17520069. 2939604  
SRR17520069. 2939605

SRR17520069.2939606  
SRR17520069.2939607  
SRR17520069.2939608  
SRR17520069.2939609  
SRR17520069.2939610  
SRR17520069.2939611  
SRR17520069.2943944  
SRR17520069.2943952  
SRR17520069.2955366  
SRR17520069.2955367  
SRR17520069.2955368  
SRR17520069.2955369  
SRR17520069.2955370  
SRR17520069.2955371  
SRR17520069.2955372  
SRR17520069.2955373  
SRR17520069.2955374  
SRR17520069.2955375  
SRR17520069.2955376  
SRR17520069.2955377  
SRR17520069.2955378  
SRR17520069.2955379  
SRR17520069.2955380  
SRR17520069.2955381  
SRR17520069.2955382  
SRR17520069.2955383  
SRR17520069.2955384  
SRR17520069.2955385  
SRR17520069.2955386  
SRR17520069.2955387  
SRR17520069.2955388  
SRR17520069.2955389  
SRR17520069.2955390  
SRR17520069.2955391  
SRR17520069.2955392  
SRR17520069.2955393  
SRR17520069.2955394  
SRR17520069.2955395  
SRR17520069.2955396  
SRR17520069.2955397  
SRR17520069.2955398  
SRR17520069.2955399  
SRR17520069.2955400  
SRR17520069.2955401  
SRR17520069.2955402  
SRR17520069.2955403  
SRR17520069.2955404

SRR17520069.2955405  
SRR17520069.2955406  
SRR17520069.2955407  
SRR17520069.2955408  
SRR17520069.2955409  
SRR17520069.2955410  
SRR17520069.2955411  
SRR17520069.2955412  
SRR17520069.2955413  
SRR17520069.2955414  
SRR17520069.2955415  
SRR17520069.2955416  
SRR17520069.2955417  
SRR17520069.2955418  
SRR17520069.2955419  
SRR17520069.2955420  
SRR17520069.2955421  
SRR17520069.2955422  
SRR17520069.2955423  
SRR17520069.2955424  
SRR17520069.2955425  
SRR17520069.2955426  
SRR17520069.2955427  
SRR17520069.2955428  
SRR17520069.2955429  
SRR17520069.2955430  
SRR17520069.2955431  
SRR17520069.2955432  
SRR17520069.2955433  
SRR17520069.2955434  
SRR17520069.2955435  
SRR17520069.2955436  
SRR17520069.2955437  
SRR17520069.2955438  
SRR17520069.2955439  
SRR17520069.2965844  
SRR17520069.2965904  
SRR17520069.2984768  
SRR17520069.2984770  
SRR17520069.2984771  
SRR17520069.2984772  
SRR17520069.2984773  
SRR17520069.2984774  
SRR17520069.2984775  
SRR17520069.2984776  
SRR17520069.2995373  
SRR17520069.2995374

SRR17520069.2995375  
SRR17520069.2995376  
SRR17520069.2995377  
SRR17520069.2995378  
SRR17520069.2995379  
SRR17520069.2995381  
SRR17520069.2995383  
SRR17520069.2995385  
SRR17520069.2995386  
SRR17520069.2995387  
SRR17520069.2995388  
SRR17520069.2995389  
SRR17520069.2995390  
SRR17520069.2995391  
SRR17520069.2995392  
SRR17520069.2995393  
SRR17520069.2995394  
SRR17520069.2995395  
SRR17520069.3010035  
SRR17520069.3010036  
SRR17520069.3010037  
SRR17520069.3010038  
SRR17520069.3010039  
SRR17520069.3010040  
SRR17520069.3010041  
SRR17520069.3010042  
SRR17520069.3010043  
SRR17520069.3010044  
SRR17520069.3010045  
SRR17520069.3010046  
SRR17520069.3010047  
SRR17520069.3010048  
SRR17520069.3010049  
SRR17520069.3010050  
SRR17520069.3010051  
SRR17520069.3010052  
SRR17520069.3010053  
SRR17520069.3010054  
SRR17520069.3010055  
SRR17520069.3010056  
SRR17520069.3010057  
SRR17520069.3010058  
SRR17520069.3010059  
SRR17520069.3010060  
SRR17520069.3010062  
SRR17520069.3010063  
SRR17520069.3010064

SRR17520069.3010066  
SRR17520069.3010067  
SRR17520069.3010068  
SRR17520069.3010069  
SRR17520069.3010070  
SRR17520069.3010071  
SRR17520069.3010072  
SRR17520069.3010073  
SRR17520069.3010074  
SRR17520069.3010075  
SRR17520069.3010076  
SRR17520069.3010077  
SRR17520069.3010078  
SRR17520069.3010079  
SRR17520069.3010080  
SRR17520069.3010081  
SRR17520069.3010082  
SRR17520069.3010083  
SRR17520069.3010084  
SRR17520069.3010085  
SRR17520069.3010086  
SRR17520069.3010087  
SRR17520069.3010088  
SRR17520069.3010089  
SRR17520069.3010090  
SRR17520069.3010092  
SRR17520069.3010093  
SRR17520069.3010094  
SRR17520069.3010095  
SRR17520069.3010096  
SRR17520069.3010097  
SRR17520069.3010098  
SRR17520069.3010099  
SRR17520069.3010100  
SRR17520069.3010101  
SRR17520069.3010102  
SRR17520069.3010103  
SRR17520069.3010104  
SRR17520069.3010105  
SRR17520069.3010106  
SRR17520069.3010107  
SRR17520069.3010108  
SRR17520069.3010109  
SRR17520069.3010110  
SRR17520069.3010111  
SRR17520069.3010112  
SRR17520069.3010113

SRR17520069.3010114  
SRR17520069.3010115  
SRR17520069.3010116  
SRR17520069.3010117  
SRR17520069.3010118  
SRR17520069.3010119  
SRR17520069.3010120  
SRR17520069.3010121  
SRR17520069.3010122  
SRR17520069.3010123  
SRR17520069.3010124  
SRR17520069.3010125  
SRR17520069.3010126  
SRR17520069.3010127  
SRR17520069.3010128  
SRR17520069.3010129  
SRR17520069.3010130  
SRR17520069.3010131  
SRR17520069.3010132  
SRR17520069.3010133  
SRR17520069.3010134  
SRR17520069.3010135  
SRR17520069.3010136  
SRR17520069.3010137  
SRR17520069.3010138  
SRR17520069.3010139  
SRR17520069.3010140  
SRR17520069.3010141  
SRR17520069.3010142  
SRR17520069.3010143  
SRR17520069.3010144  
SRR17520069.3010145  
SRR17520069.3010146  
SRR17520069.3010147  
SRR17520069.3010148  
SRR17520069.3010150  
SRR17520069.3010151  
SRR17520069.3010152  
SRR17520069.3010153  
SRR17520069.3012081  
SRR17520069.3017826  
SRR17520069.3017846  
SRR17520069.3044052  
SRR17520069.3044080  
SRR17520069.3044122  
SRR17520069.3052339  
SRR17520069.3054452



SRR17520069.3054453  
SRR17520069.3054454  
SRR17520069.3054455  
SRR17520069.3054456  
SRR17520069.3054457  
SRR17520069.3082810  
SRR17520069.3082811  
SRR17520069.3082812  
SRR17520069.3082813  
SRR17520069.3082814  
SRR17520069.3082815  
SRR17520069.3082816  
SRR17520069.3082817  
SRR17520069.3082818  
SRR17520069.3082819  
SRR17520069.3090057  
SRR17520069.3090058  
SRR17520069.3090059  
SRR17520069.3090060  
SRR17520069.3090061  
SRR17520069.3090062  
SRR17520069.3090063  
SRR17520069.3090065  
SRR17520069.3090066  
SRR17520069.3090067  
SRR17520069.3091522  
SRR17520069.3091523  
SRR17520069.3091524  
SRR17520069.3091525  
SRR17520069.3091526  
SRR17520069.3091527  
SRR17520069.3091528  
SRR17520069.3091529  
SRR17520069.3091530  
SRR17520069.3091531  
SRR17520069.3091532  
SRR17520069.3091533  
SRR17520069.3091534  
SRR17520069.3091535  
SRR17520069.3091536  
SRR17520069.3091537  
SRR17520069.3091538  
SRR17520069.3091539  
SRR17520069.3091540  
SRR17520069.3091541  
SRR17520069.3091542  
SRR17520069.3091543

SRR17520069. 3091544  
SRR17520069. 3091545  
SRR17520069. 3091546  
SRR17520069. 3091547  
SRR17520069. 3091548  
SRR17520069. 3091549  
SRR17520069. 3091550  
SRR17520069. 3091551  
SRR17520069. 3091552  
SRR17520069. 3091553  
SRR17520069. 3091554  
SRR17520069. 3091555  
SRR17520069. 3091556  
SRR17520069. 3091557  
SRR17520069. 3091558  
SRR17520069. 3091559  
SRR17520069. 3091560  
SRR17520069. 3091561  
SRR17520069. 3091562  
SRR17520069. 3091563  
SRR17520069. 3091564  
SRR17520069. 3091565  
SRR17520069. 3091566  
SRR17520069. 3091567  
SRR17520069. 3091568  
SRR17520069. 3091569  
SRR17520069. 3091570  
SRR17520069. 3091571  
SRR17520069. 3091572  
SRR17520069. 3091573  
SRR17520069. 3091574  
SRR17520069. 3091575  
SRR17520069. 3091576  
SRR17520069. 3091577  
SRR17520069. 3091578  
SRR17520069. 3091579  
SRR17520069. 3091580  
SRR17520069. 3091581  
SRR17520069. 3091582  
SRR17520069. 3091583  
SRR17520069. 3091584  
SRR17520069. 3091585  
SRR17520069. 3091586  
SRR17520069. 3091587  
SRR17520069. 3091588  
SRR17520069. 3091589  
SRR17520069. 3091590

SRR17520069.3091591  
SRR17520069.3091592  
SRR17520069.3091593  
SRR17520069.3091594  
SRR17520069.3091595  
SRR17520069.3091596  
SRR17520069.3091597  
SRR17520069.3091598  
SRR17520069.3091599  
SRR17520069.3091600  
SRR17520069.3091602  
SRR17520069.3091603  
SRR17520069.3091604  
SRR17520069.3091605  
SRR17520069.3091606  
SRR17520069.3091607  
SRR17520069.3091608  
SRR17520069.3091609  
SRR17520069.3091610  
SRR17520069.3091611  
SRR17520069.3091612  
SRR17520069.3091613  
SRR17520069.3091614  
SRR17520069.3091615  
SRR17520069.3091616  
SRR17520069.3091617  
SRR17520069.3091618  
SRR17520069.3091619  
SRR17520069.3091620  
SRR17520069.3091621  
SRR17520069.3091622  
SRR17520069.3091623  
SRR17520069.3091624  
SRR17520069.3091625  
SRR17520069.3091626  
SRR17520069.3091627  
SRR17520069.3091628  
SRR17520069.3091629  
SRR17520069.3091630  
SRR17520069.3091631  
SRR17520069.3091632  
SRR17520069.3091633  
SRR17520069.3091634  
SRR17520069.3091635  
SRR17520069.3091636  
SRR17520069.3091637  
SRR17520069.3091638

SRR17520069. 3091639  
SRR17520069. 3091640  
SRR17520069. 3091641  
SRR17520069. 3091642  
SRR17520069. 3091644  
SRR17520069. 3091645  
SRR17520069. 3091646  
SRR17520069. 3091647  
SRR17520069. 3091648  
SRR17520069. 3091649  
SRR17520069. 3091650  
SRR17520069. 3091651  
SRR17520069. 3091652  
SRR17520069. 3091653  
SRR17520069. 3091654  
SRR17520069. 3091655  
SRR17520069. 3091656  
SRR17520069. 3091657  
SRR17520069. 3091658  
SRR17520069. 3091659  
SRR17520069. 3091660  
SRR17520069. 3091661  
SRR17520069. 3091662  
SRR17520069. 3091663  
SRR17520069. 3091664  
SRR17520069. 3091665  
SRR17520069. 3091666  
SRR17520069. 3091668  
SRR17520069. 3091669  
SRR17520069. 3091670  
SRR17520069. 3091671  
SRR17520069. 3091672  
SRR17520069. 3091673  
SRR17520069. 3091674  
SRR17520069. 3091675  
SRR17520069. 3091676  
SRR17520069. 3091677  
SRR17520069. 3091678  
SRR17520069. 3091679  
SRR17520069. 3091680  
SRR17520069. 3091681  
SRR17520069. 3091682  
SRR17520069. 3104308  
SRR17520069. 3104309  
SRR17520069. 3104310  
SRR17520069. 3104311  
SRR17520069. 3104312

SRR17520069.3104313  
SRR17520069.3104314  
SRR17520069.3104315  
SRR17520069.3104316  
SRR17520069.3104317  
SRR17520069.3104318  
SRR17520069.3104319  
SRR17520069.3104321  
SRR17520069.3104322  
SRR17520069.3104323  
SRR17520069.3104324  
SRR17520069.3104325  
SRR17520069.3104326  
SRR17520069.3104327  
SRR17520069.3104328  
SRR17520069.3104329  
SRR17520069.3104330  
SRR17520069.3104331  
SRR17520069.3104332  
SRR17520069.3104333  
SRR17520069.3104334  
SRR17520069.3104335  
SRR17520069.3104336  
SRR17520069.3104337  
SRR17520069.3104338  
SRR17520069.3104339  
SRR17520069.3104340  
SRR17520069.3104341  
SRR17520069.3104342  
SRR17520069.3104343  
SRR17520069.3104344  
SRR17520069.3104345  
SRR17520069.3104346  
SRR17520069.3104347  
SRR17520069.3104348  
SRR17520069.3104349  
SRR17520069.3104350  
SRR17520069.3104351  
SRR17520069.3104352  
SRR17520069.3104353  
SRR17520069.3131926  
SRR17520069.3131927  
SRR17520069.3131929  
SRR17520069.3131930  
SRR17520069.3131931  
SRR17520069.3131932  
SRR17520069.3131933

SRR17520069.3131934  
SRR17520069.3131935  
SRR17520069.3132240  
SRR17520069.3138076  
SRR17520069.3140514  
SRR17520069.3140516  
SRR17520069.3140517  
SRR17520069.3140518  
SRR17520069.3140519  
SRR17520069.3140520  
SRR17520069.3140523  
SRR17520069.3140524  
SRR17520069.3140526  
SRR17520069.3140527  
SRR17520069.3140528  
SRR17520069.3140530  
SRR17520069.3140531  
SRR17520069.3152042  
SRR17520069.3152043  
SRR17520069.3152044  
SRR17520069.3152045  
SRR17520069.3152046  
SRR17520069.3152047  
SRR17520069.3152048  
SRR17520069.3152049  
SRR17520069.3152050  
SRR17520069.3152051  
SRR17520069.3152052  
SRR17520069.3152053  
SRR17520069.3152055  
SRR17520069.3152056  
SRR17520069.3152057  
SRR17520069.3152058  
SRR17520069.3152059  
SRR17520069.3152062  
SRR17520069.3152063  
SRR17520069.3152064  
SRR17520069.3152065  
SRR17520069.3152066  
SRR17520069.3152067  
SRR17520069.3152068  
SRR17520069.3152069  
SRR17520069.3152070  
SRR17520069.3152071  
SRR17520069.3152072  
SRR17520069.3152073  
SRR17520069.3152074

SRR17520069. 3152075  
SRR17520069. 3152076  
SRR17520069. 3152077  
SRR17520069. 3152078  
SRR17520069. 3152080  
SRR17520069. 3152081  
SRR17520069. 3152082  
SRR17520069. 3152085  
SRR17520069. 3152086  
SRR17520069. 3152087  
SRR17520069. 3152088  
SRR17520069. 3152089  
SRR17520069. 3152090  
SRR17520069. 3152092  
SRR17520069. 3152093  
SRR17520069. 3152094  
SRR17520069. 3152095  
SRR17520069. 3152096  
SRR17520069. 3152097  
SRR17520069. 3152098  
SRR17520069. 3152099  
SRR17520069. 3152101  
SRR17520069. 3152102  
SRR17520069. 3152103  
SRR17520069. 3152104  
SRR17520069. 3152105  
SRR17520069. 3152106  
SRR17520069. 3152107  
SRR17520069. 3152108  
SRR17520069. 3152109  
SRR17520069. 3152111  
SRR17520069. 3152112  
SRR17520069. 3152113  
SRR17520069. 3152114  
SRR17520069. 3152115  
SRR17520069. 3152116  
SRR17520069. 3152117  
SRR17520069. 3152118  
SRR17520069. 3152119  
SRR17520069. 3152120  
SRR17520069. 3152121  
SRR17520069. 3152122  
SRR17520069. 3152123  
SRR17520069. 3172844  
SRR17520069. 3172929  
SRR17520069. 3172958  
SRR17520069. 3172960

SRR17520069. 3173006  
SRR17520069. 3180706  
SRR17520069. 3180707  
SRR17520069. 3180708  
SRR17520069. 3180709  
SRR17520069. 3180710  
SRR17520069. 3180711  
SRR17520069. 3180712  
SRR17520069. 3180713  
SRR17520069. 3180714  
SRR17520069. 3180715  
SRR17520069. 3180716  
SRR17520069. 3180717  
SRR17520069. 3180718  
SRR17520069. 3180719  
SRR17520069. 3180720  
SRR17520069. 3180721  
SRR17520069. 3180722  
SRR17520069. 3180723  
SRR17520069. 3180724  
SRR17520069. 3180725  
SRR17520069. 3180726  
SRR17520069. 3180727  
SRR17520069. 3180728  
SRR17520069. 3180730  
SRR17520069. 3180731  
SRR17520069. 3180732  
SRR17520069. 3180733  
SRR17520069. 3180734  
SRR17520069. 3180735  
SRR17520069. 3180736  
SRR17520069. 3180737  
SRR17520069. 3199490  
SRR17520069. 3199506  
SRR17520069. 3204228  
SRR17520069. 3204229  
SRR17520069. 3204230  
SRR17520069. 3204231  
SRR17520069. 3204232  
SRR17520069. 3204233  
SRR17520069. 3204234  
SRR17520069. 3204235  
SRR17520069. 3204236  
SRR17520069. 3204237  
SRR17520069. 3204238  
SRR17520069. 3204239  
SRR17520069. 3204240



SRR17520069. 3204241  
SRR17520069. 3204242  
SRR17520069. 3204243  
SRR17520069. 3204244  
SRR17520069. 3204245  
SRR17520069. 3204246  
SRR17520069. 3204247  
SRR17520069. 3204248  
SRR17520069. 3204249  
SRR17520069. 3204250  
SRR17520069. 3204251  
SRR17520069. 3204253  
SRR17520069. 3204254  
SRR17520069. 3204255  
SRR17520069. 3204256  
SRR17520069. 3204257  
SRR17520069. 3204258  
SRR17520069. 3204259  
SRR17520069. 3204260  
SRR17520069. 3204261  
SRR17520069. 3204262  
SRR17520069. 3204263  
SRR17520069. 3204265  
SRR17520069. 3204266  
SRR17520069. 3204267  
SRR17520069. 3204268  
SRR17520069. 3204269  
SRR17520069. 3204270  
SRR17520069. 3204271  
SRR17520069. 3204272  
SRR17520069. 3204273  
SRR17520069. 3204274  
SRR17520069. 3204275  
SRR17520069. 3204276  
SRR17520069. 3204277  
SRR17520069. 3204278  
SRR17520069. 3204279  
SRR17520069. 3204280  
SRR17520069. 3204281  
SRR17520069. 3204282  
SRR17520069. 3204283  
SRR17520069. 3204284  
SRR17520069. 3204285  
SRR17520069. 3204286  
SRR17520069. 3204287  
SRR17520069. 3204288  
SRR17520069. 3204289

SRR17520069. 3204290  
SRR17520069. 3204291  
SRR17520069. 3204292  
SRR17520069. 3204293  
SRR17520069. 3204294  
SRR17520069. 3204295  
SRR17520069. 3204296  
SRR17520069. 3204297  
SRR17520069. 3204298  
SRR17520069. 3204299  
SRR17520069. 3204300  
SRR17520069. 3204301  
SRR17520069. 3204302  
SRR17520069. 3209958  
SRR17520069. 3209959  
SRR17520069. 3209960  
SRR17520069. 3209961  
SRR17520069. 3209962  
SRR17520069. 3209963  
SRR17520069. 3209964  
SRR17520069. 3209965  
SRR17520069. 3209966  
SRR17520069. 3209967  
SRR17520069. 3209968  
SRR17520069. 3209969  
SRR17520069. 3209970  
SRR17520069. 3209971  
SRR17520069. 3209972  
SRR17520069. 3209973  
SRR17520069. 3209974  
SRR17520069. 3209975  
SRR17520069. 3209976  
SRR17520069. 3220085  
SRR17520069. 3220086  
SRR17520069. 3220087  
SRR17520069. 3220088  
SRR17520069. 3220089  
SRR17520069. 3220091  
SRR17520069. 3220092  
SRR17520069. 3220093  
SRR17520069. 3220094  
SRR17520069. 3220095  
SRR17520069. 3220096  
SRR17520069. 3220097  
SRR17520069. 3220098  
SRR17520069. 3220099  
SRR17520069. 3220100

SRR17520069.3220101  
SRR17520069.3220102  
SRR17520069.3220103  
SRR17520069.3220104  
SRR17520069.3220105  
SRR17520069.3220106  
SRR17520069.3220107  
SRR17520069.3220108  
SRR17520069.3220109  
SRR17520069.3220110  
SRR17520069.3220111  
SRR17520069.3220112  
SRR17520069.3220113  
SRR17520069.3220114  
SRR17520069.3220115  
SRR17520069.3220116  
SRR17520069.3220117  
SRR17520069.3220118  
SRR17520069.3220119  
SRR17520069.3220120  
SRR17520069.3220121  
SRR17520069.3220122  
SRR17520069.3220123  
SRR17520069.3220124  
SRR17520069.3220125  
SRR17520069.3220126  
SRR17520069.3220127  
SRR17520069.3220128  
SRR17520069.3220129  
SRR17520069.3220130  
SRR17520069.3220131  
SRR17520069.3220132  
SRR17520069.3220133  
SRR17520069.3220134  
SRR17520069.3220135  
SRR17520069.3220136  
SRR17520069.3220137  
SRR17520069.3220138  
SRR17520069.3220139  
SRR17520069.3220140  
SRR17520069.3220141  
SRR17520069.3220143  
SRR17520069.3220144  
SRR17520069.3220145  
SRR17520069.3220146  
SRR17520069.3220147  
SRR17520069.3220148

SRR17520069. 3220149  
SRR17520069. 3220150  
SRR17520069. 3220151  
SRR17520069. 3220152  
SRR17520069. 3220154  
SRR17520069. 3220155  
SRR17520069. 3220156  
SRR17520069. 3220157  
SRR17520069. 3220158  
SRR17520069. 3220159  
SRR17520069. 3220160  
SRR17520069. 3220161  
SRR17520069. 3220162  
SRR17520069. 3220163  
SRR17520069. 3220164  
SRR17520069. 3220165  
SRR17520069. 3220166  
SRR17520069. 3220167  
SRR17520069. 3220168  
SRR17520069. 3220169  
SRR17520069. 3220170  
SRR17520069. 3220171  
SRR17520069. 3220172  
SRR17520069. 3220173  
SRR17520069. 3220174  
SRR17520069. 3220175  
SRR17520069. 3220176  
SRR17520069. 3220177  
SRR17520069. 3220178  
SRR17520069. 3220179  
SRR17520069. 3228483  
SRR17520069. 3228484  
SRR17520069. 3228485  
SRR17520069. 3228486  
SRR17520069. 3228487  
SRR17520069. 3228488  
SRR17520069. 3228489  
SRR17520069. 3228491  
SRR17520069. 3228492  
SRR17520069. 3228494  
SRR17520069. 3228495  
SRR17520069. 3228496  
SRR17520069. 3228497  
SRR17520069. 3228498  
SRR17520069. 3228499  
SRR17520069. 3235305  
SRR17520069. 3235306

SRR17520069. 3235307  
SRR17520069. 3235308  
SRR17520069. 3235309  
SRR17520069. 3235310  
SRR17520069. 3235311  
SRR17520069. 3235313  
SRR17520069. 3235316  
SRR17520069. 3235319  
SRR17520069. 3235320  
SRR17520069. 3235322  
SRR17520069. 3236277  
SRR17520069. 3236278  
SRR17520069. 3236279  
SRR17520069. 3236280  
SRR17520069. 3236281  
SRR17520069. 3236282  
SRR17520069. 3236283  
SRR17520069. 3236284  
SRR17520069. 3236285  
SRR17520069. 3236286  
SRR17520069. 3236287  
SRR17520069. 3236288  
SRR17520069. 3236291  
SRR17520069. 3236292  
SRR17520069. 3236293  
SRR17520069. 3236294  
SRR17520069. 3236295  
SRR17520069. 3236296  
SRR17520069. 3236297  
SRR17520069. 3236298  
SRR17520069. 3236299  
SRR17520069. 3236300  
SRR17520069. 3236301  
SRR17520069. 3236302  
SRR17520069. 3236303  
SRR17520069. 3236305  
SRR17520069. 3236306  
SRR17520069. 3236307  
SRR17520069. 3236308  
SRR17520069. 3236309  
SRR17520069. 3236310  
SRR17520069. 3236311  
SRR17520069. 3236312  
SRR17520069. 3236313  
SRR17520069. 3236314  
SRR17520069. 3236315  
SRR17520069. 3236316

SRR17520069. 3237072  
SRR17520069. 3249816  
SRR17520069. 3249818  
SRR17520069. 3249819  
SRR17520069. 3255852  
SRR17520069. 3255854  
SRR17520069. 3255855  
SRR17520069. 3255856  
SRR17520069. 3255858  
SRR17520069. 3255859  
SRR17520069. 3255860  
SRR17520069. 3255861  
SRR17520069. 3255862  
SRR17520069. 3255863  
SRR17520069. 3255864  
SRR17520069. 3255866  
SRR17520069. 3255867  
SRR17520069. 3255868  
SRR17520069. 3255870  
SRR17520069. 3255872  
SRR17520069. 3255874  
SRR17520069. 3255875  
SRR17520069. 3258020  
SRR17520069. 3260532  
SRR17520069. 3260533  
SRR17520069. 3260534  
SRR17520069. 3260535  
SRR17520069. 3260536  
SRR17520069. 3260537  
SRR17520069. 3260538  
SRR17520069. 3260539  
SRR17520069. 3260540  
SRR17520069. 3260541  
SRR17520069. 3260542  
SRR17520069. 3260543  
SRR17520069. 3260544  
SRR17520069. 3260545  
SRR17520069. 3260546  
SRR17520069. 3260547  
SRR17520069. 3260548  
SRR17520069. 3260549  
SRR17520069. 3260550  
SRR17520069. 3260551  
SRR17520069. 3260552  
SRR17520069. 3260553  
SRR17520069. 3260554  
SRR17520069. 3260555

SRR17520069. 3260556  
SRR17520069. 3260558  
SRR17520069. 3260559  
SRR17520069. 3260560  
SRR17520069. 3260561  
SRR17520069. 3260562  
SRR17520069. 3260563  
SRR17520069. 3260564  
SRR17520069. 3260565  
SRR17520069. 3260566  
SRR17520069. 3260567  
SRR17520069. 3260568  
SRR17520069. 3260569  
SRR17520069. 3260570  
SRR17520069. 3260571  
SRR17520069. 3260572  
SRR17520069. 3260573  
SRR17520069. 3260574  
SRR17520069. 3260575  
SRR17520069. 3260576  
SRR17520069. 3260577  
SRR17520069. 3260578  
SRR17520069. 3260579  
SRR17520069. 3260580  
SRR17520069. 3260581  
SRR17520069. 3260582  
SRR17520069. 3260583  
SRR17520069. 3260584  
SRR17520069. 3260585  
SRR17520069. 3260586  
SRR17520069. 3273009  
SRR17520069. 3273018  
SRR17520069. 3273019  
SRR17520069. 3273023  
SRR17520069. 3324386  
SRR17520069. 3324387  
SRR17520069. 3324388  
SRR17520069. 3324389  
SRR17520069. 3324390  
SRR17520069. 3324391  
SRR17520069. 3324392  
SRR17520069. 3324393  
SRR17520069. 3324394  
SRR17520069. 3324395  
SRR17520069. 3324396  
SRR17520069. 3324397  
SRR17520069. 3324398

SRR17520069. 3324399  
SRR17520069. 3324400  
SRR17520069. 3324401  
SRR17520069. 3324402  
SRR17520069. 3324403  
SRR17520069. 3324404  
SRR17520069. 3324405  
SRR17520069. 3324406  
SRR17520069. 3324407  
SRR17520069. 3332966  
SRR17520069. 3332967  
SRR17520069. 3332968  
SRR17520069. 3332969  
SRR17520069. 3332970  
SRR17520069. 3332971  
SRR17520069. 3332972  
SRR17520069. 3332973  
SRR17520069. 3332974  
SRR17520069. 3332975  
SRR17520069. 3332976  
SRR17520069. 3332977  
SRR17520069. 3332978  
SRR17520069. 3332979  
SRR17520069. 3332980  
SRR17520069. 3332981  
SRR17520069. 3332982  
SRR17520069. 3332983  
SRR17520069. 3332984  
SRR17520069. 3332985  
SRR17520069. 3332986  
SRR17520069. 3332987  
SRR17520069. 3332988  
SRR17520069. 3332989  
SRR17520069. 3332991  
SRR17520069. 3332992  
SRR17520069. 3332993  
SRR17520069. 3332994  
SRR17520069. 3332995  
SRR17520069. 3332996  
SRR17520069. 3332997  
SRR17520069. 3332998  
SRR17520069. 3332999  
SRR17520069. 3333000  
SRR17520069. 3333001  
SRR17520069. 3333002  
SRR17520069. 3333003  
SRR17520069. 3333004



SRR17520069. 3333005  
SRR17520069. 3333006  
SRR17520069. 3333007  
SRR17520069. 3333008  
SRR17520069. 3333009  
SRR17520069. 3348865  
SRR17520069. 3348866  
SRR17520069. 3348867  
SRR17520069. 3348868  
SRR17520069. 3348869  
SRR17520069. 3348870  
SRR17520069. 3348871  
SRR17520069. 3348872  
SRR17520069. 3348873  
SRR17520069. 3348874  
SRR17520069. 3348875  
SRR17520069. 3348876  
SRR17520069. 3348877  
SRR17520069. 3348878  
SRR17520069. 3348879  
SRR17520069. 3348880  
SRR17520069. 3348881  
SRR17520069. 3348882  
SRR17520069. 3348883  
SRR17520069. 3348884  
SRR17520069. 3348885  
SRR17520069. 3348886  
SRR17520069. 3348887  
SRR17520069. 3348888  
SRR17520069. 3348889  
SRR17520069. 3348890  
SRR17520069. 3348891  
SRR17520069. 3348892  
SRR17520069. 3348893  
SRR17520069. 3348894  
SRR17520069. 3348895  
SRR17520069. 3348896  
SRR17520069. 3348897  
SRR17520069. 3348898  
SRR17520069. 3348900  
SRR17520069. 3348901  
SRR17520069. 3369648  
SRR17520069. 3369649  
SRR17520069. 3369650  
SRR17520069. 3369651  
SRR17520069. 3369652  
SRR17520069. 3369653

SRR17520069. 3369654  
SRR17520069. 3369655  
SRR17520069. 3369656  
SRR17520069. 3369657  
SRR17520069. 3369658  
SRR17520069. 3369659  
SRR17520069. 3369660  
SRR17520069. 3369661  
SRR17520069. 3369662  
SRR17520069. 3409415  
SRR17520069. 3409416  
SRR17520069. 3409417  
SRR17520069. 3409418  
SRR17520069. 3409419  
SRR17520069. 3409420  
SRR17520069. 3409421  
SRR17520069. 3409422  
SRR17520069. 3409423  
SRR17520069. 3409424  
SRR17520069. 3409425  
SRR17520069. 3409426  
SRR17520069. 3409427  
SRR17520069. 3409428  
SRR17520069. 3409429  
SRR17520069. 3409430  
SRR17520069. 3409431  
SRR17520069. 3409432  
SRR17520069. 3409433  
SRR17520069. 3409434  
SRR17520069. 3409436  
SRR17520069. 3409437  
SRR17520069. 3409438  
SRR17520069. 3409439  
SRR17520069. 3409440  
SRR17520069. 3409441  
SRR17520069. 3409442  
SRR17520069. 3409443  
SRR17520069. 3409444  
SRR17520069. 3409445  
SRR17520069. 3409446  
SRR17520069. 3409448  
SRR17520069. 3409449  
SRR17520069. 3409450  
SRR17520069. 3409451  
SRR17520069. 3409452  
SRR17520069. 3409453  
SRR17520069. 3409454

SRR17520069. 3409455  
SRR17520069. 3409456  
SRR17520069. 3409457  
SRR17520069. 3409458  
SRR17520069. 3409459  
SRR17520069. 3409460  
SRR17520069. 3409461  
SRR17520069. 3409462  
SRR17520069. 3409463  
SRR17520069. 3409464  
SRR17520069. 3409465  
SRR17520069. 3409466  
SRR17520069. 3409467  
SRR17520069. 3409468  
SRR17520069. 3409469  
SRR17520069. 3409470  
SRR17520069. 3409471  
SRR17520069. 3409472  
SRR17520069. 3409473  
SRR17520069. 3409474  
SRR17520069. 3414943  
SRR17520069. 3414944  
SRR17520069. 3414945  
SRR17520069. 3414946  
SRR17520069. 3414948  
SRR17520069. 3414949  
SRR17520069. 3414950  
SRR17520069. 3414951  
SRR17520069. 3414952  
SRR17520069. 3414953  
SRR17520069. 3414954  
SRR17520069. 3414955  
SRR17520069. 3414956  
SRR17520069. 3414957  
SRR17520069. 3414958  
SRR17520069. 3414959  
SRR17520069. 3414960  
SRR17520069. 3414961  
SRR17520069. 3414962  
SRR17520069. 3414963  
SRR17520069. 3414964  
SRR17520069. 3414965  
SRR17520069. 3414966  
SRR17520069. 3414967  
SRR17520069. 3414968  
SRR17520069. 3414970  
SRR17520069. 3414971

SRR17520069.3414972  
SRR17520069.3414973  
SRR17520069.3414974  
SRR17520069.3414976  
SRR17520069.3414977  
SRR17520069.3414980  
SRR17520069.3414981  
SRR17520069.3414982  
SRR17520069.3414983  
SRR17520069.3414984  
SRR17520069.3414985  
SRR17520069.3414986  
SRR17520069.3414987  
SRR17520069.3414988  
SRR17520069.3414989  
SRR17520069.3414990  
SRR17520069.3414991  
SRR17520069.3437701  
SRR17520069.3443258  
SRR17520069.3443259  
SRR17520069.3443260  
SRR17520069.3443264  
SRR17520069.3443266  
SRR17520069.3443268  
SRR17520069.3462379  
SRR17520069.3465344  
SRR17520069.3465345  
SRR17520069.3465346  
SRR17520069.3465347  
SRR17520069.3465348  
SRR17520069.3465349  
SRR17520069.3465350  
SRR17520069.3465351  
SRR17520069.3465352  
SRR17520069.3465353  
SRR17520069.3465354  
SRR17520069.3465355  
SRR17520069.3465356  
SRR17520069.3465357  
SRR17520069.3465358  
SRR17520069.3465359  
SRR17520069.3465360  
SRR17520069.3465361  
SRR17520069.3465362  
SRR17520069.3465363  
SRR17520069.3465364  
SRR17520069.3465365

SRR17520069. 3465366  
SRR17520069. 3465367  
SRR17520069. 3465368  
SRR17520069. 3465369  
SRR17520069. 3465370  
SRR17520069. 3465371  
SRR17520069. 3465372  
SRR17520069. 3465373  
SRR17520069. 3465374  
SRR17520069. 3465375  
SRR17520069. 3465376  
SRR17520069. 3465377  
SRR17520069. 3465378  
SRR17520069. 3465379  
SRR17520069. 3465380  
SRR17520069. 3465381  
SRR17520069. 3465382  
SRR17520069. 3465383  
SRR17520069. 3465384  
SRR17520069. 3465385  
SRR17520069. 3465386  
SRR17520069. 3465387  
SRR17520069. 3465388  
SRR17520069. 3465390  
SRR17520069. 3465391  
SRR17520069. 3465392  
SRR17520069. 3465393  
SRR17520069. 3465394  
SRR17520069. 3465395  
SRR17520069. 3465396  
SRR17520069. 3465397  
SRR17520069. 3465398  
SRR17520069. 3465399  
SRR17520069. 3465400  
SRR17520069. 3465401  
SRR17520069. 3465402  
SRR17520069. 3465403  
SRR17520069. 3465404  
SRR17520069. 3465405  
SRR17520069. 3465406  
SRR17520069. 3465407  
SRR17520069. 3465408  
SRR17520069. 3465409  
SRR17520069. 3465410  
SRR17520069. 3465411  
SRR17520069. 3465412  
SRR17520069. 3465413

SRR17520069. 3465414  
SRR17520069. 3465415  
SRR17520069. 3465425  
SRR17520069. 3465426  
SRR17520069. 3465427  
SRR17520069. 3465428  
SRR17520069. 3465429  
SRR17520069. 3465430  
SRR17520069. 3465431  
SRR17520069. 3465432  
SRR17520069. 3465433  
SRR17520069. 3465434  
SRR17520069. 3465435  
SRR17520069. 3465436  
SRR17520069. 3465437  
SRR17520069. 3465438  
SRR17520069. 3465439  
SRR17520069. 3465440  
SRR17520069. 3465441  
SRR17520069. 3465442  
SRR17520069. 3465443  
SRR17520069. 3465444  
SRR17520069. 3465445  
SRR17520069. 3465446  
SRR17520069. 3465447  
SRR17520069. 3465448  
SRR17520069. 3465449  
SRR17520069. 3465450  
SRR17520069. 3465451  
SRR17520069. 3465452  
SRR17520069. 3465453  
SRR17520069. 3465454  
SRR17520069. 3465455  
SRR17520069. 3465456  
SRR17520069. 3465457  
SRR17520069. 3465458  
SRR17520069. 3465460  
SRR17520069. 3465461  
SRR17520069. 3465463  
SRR17520069. 3465464  
SRR17520069. 3465465  
SRR17520069. 3465466  
SRR17520069. 3465467  
SRR17520069. 3465468  
SRR17520069. 3465469  
SRR17520069. 3465470  
SRR17520069. 3465471

SRR17520069. 3465472  
SRR17520069. 3465474  
SRR17520069. 3465476  
SRR17520069. 3465477  
SRR17520069. 3471372  
SRR17520069. 3471373  
SRR17520069. 3471374  
SRR17520069. 3471375  
SRR17520069. 3471377  
SRR17520069. 3471378  
SRR17520069. 3471379  
SRR17520069. 3471381  
SRR17520069. 3471382  
SRR17520069. 3476110  
SRR17520069. 3476111  
SRR17520069. 3476114  
SRR17520069. 3476115  
SRR17520069. 3476116  
SRR17520069. 3476117  
SRR17520069. 3476118  
SRR17520069. 3476119  
SRR17520069. 3476120  
SRR17520069. 3476121  
SRR17520069. 3476122  
SRR17520069. 3476123  
SRR17520069. 3476124  
SRR17520069. 3476125  
SRR17520069. 3476126  
SRR17520069. 3476127  
SRR17520069. 3476128  
SRR17520069. 3476129  
SRR17520069. 3476130  
SRR17520069. 3476131  
SRR17520069. 3476132  
SRR17520069. 3476133  
SRR17520069. 3476134  
SRR17520069. 3476135  
SRR17520069. 3476136  
SRR17520069. 3476137  
SRR17520069. 3476138  
SRR17520069. 3476139  
SRR17520069. 3476140  
SRR17520069. 3476141  
SRR17520069. 3476142  
SRR17520069. 3476143  
SRR17520069. 3476144  
SRR17520069. 3476145

SRR17520069. 3476147  
SRR17520069. 3476148  
SRR17520069. 3476149  
SRR17520069. 3476150  
SRR17520069. 3476151  
SRR17520069. 3476152  
SRR17520069. 3476153  
SRR17520069. 3476154  
SRR17520069. 3476155  
SRR17520069. 3476156  
SRR17520069. 3476157  
SRR17520069. 3476158  
SRR17520069. 3476159  
SRR17520069. 3476160  
SRR17520069. 3476161  
SRR17520069. 3476162  
SRR17520069. 3476163  
SRR17520069. 3476164  
SRR17520069. 3476165  
SRR17520069. 3476166  
SRR17520069. 3476167  
SRR17520069. 3476168  
SRR17520069. 3476169  
SRR17520069. 3476170  
SRR17520069. 3476171  
SRR17520069. 3476172  
SRR17520069. 3476173  
SRR17520069. 3476174  
SRR17520069. 3476175  
SRR17520069. 3476176  
SRR17520069. 3476177  
SRR17520069. 3476178  
SRR17520069. 3476179  
SRR17520069. 3476180  
SRR17520069. 3476181  
SRR17520069. 3476182  
SRR17520069. 3476184  
SRR17520069. 3476185  
SRR17520069. 3476186  
SRR17520069. 3476187  
SRR17520069. 3476188  
SRR17520069. 3476189  
SRR17520069. 3476190  
SRR17520069. 3476191  
SRR17520069. 3476192  
SRR17520069. 3476193  
SRR17520069. 3476194



SRR17520069. 3476195  
SRR17520069. 3476196  
SRR17520069. 3476197  
SRR17520069. 3476198  
SRR17520069. 3476199  
SRR17520069. 3476200  
SRR17520069. 3476201  
SRR17520069. 3476202  
SRR17520069. 3476203  
SRR17520069. 3476204  
SRR17520069. 3476205  
SRR17520069. 3476206  
SRR17520069. 3476207  
SRR17520069. 3476209  
SRR17520069. 3476210  
SRR17520069. 3476211  
SRR17520069. 3476212  
SRR17520069. 3476213  
SRR17520069. 3476214  
SRR17520069. 3476215  
SRR17520069. 3476216  
SRR17520069. 3476217  
SRR17520069. 3476218  
SRR17520069. 3476219  
SRR17520069. 3476220  
SRR17520069. 3476221  
SRR17520069. 3476222  
SRR17520069. 3476223  
SRR17520069. 3476224  
SRR17520069. 3476225  
SRR17520069. 3476226  
SRR17520069. 3476227  
SRR17520069. 3476228  
SRR17520069. 3476229  
SRR17520069. 3476230  
SRR17520069. 3476231  
SRR17520069. 3476232  
SRR17520069. 3478088  
SRR17520069. 3478094  
SRR17520069. 3488481  
SRR17520069. 3488482  
SRR17520069. 3488483  
SRR17520069. 3488484  
SRR17520069. 3488485  
SRR17520069. 3488486  
SRR17520069. 3488487  
SRR17520069. 3488488

SRR17520069. 3488489  
SRR17520069. 3488490  
SRR17520069. 3488492  
SRR17520069. 3488493  
SRR17520069. 3488494  
SRR17520069. 3488495  
SRR17520069. 3488496  
SRR17520069. 3488497  
SRR17520069. 3488498  
SRR17520069. 3488500  
SRR17520069. 3488501  
SRR17520069. 3488502  
SRR17520069. 3488503  
SRR17520069. 3488504  
SRR17520069. 3488505  
SRR17520069. 3488506  
SRR17520069. 3491554  
SRR17520069. 3501685  
SRR17520069. 3512093  
SRR17520069. 3512095  
SRR17520069. 3512096  
SRR17520069. 3512097  
SRR17520069. 3512098  
SRR17520069. 3512099  
SRR17520069. 3512100  
SRR17520069. 3512101  
SRR17520069. 3512102  
SRR17520069. 3512103  
SRR17520069. 3512104  
SRR17520069. 3512105  
SRR17520069. 3512106  
SRR17520069. 3512107  
SRR17520069. 3512108  
SRR17520069. 3512109  
SRR17520069. 3512110  
SRR17520069. 3512111  
SRR17520069. 3512112  
SRR17520069. 3512113  
SRR17520069. 3512114  
SRR17520069. 3512115  
SRR17520069. 3512116  
SRR17520069. 3512117  
SRR17520069. 3512118  
SRR17520069. 3512119  
SRR17520069. 3512120  
SRR17520069. 3512121  
SRR17520069. 3512122

SRR17520069.3512123  
SRR17520069.3512124  
SRR17520069.3512125  
SRR17520069.3512126  
SRR17520069.3512127  
SRR17520069.3512128  
SRR17520069.3512129  
SRR17520069.3512130  
SRR17520069.3512131  
SRR17520069.3512132  
SRR17520069.3512133  
SRR17520069.3512134  
SRR17520069.3512135  
SRR17520069.3512137  
SRR17520069.3512138  
SRR17520069.3512139  
SRR17520069.3512140  
SRR17520069.3512141  
SRR17520069.3512142  
SRR17520069.3512143  
SRR17520069.3512144  
SRR17520069.3512145  
SRR17520069.3512146  
SRR17520069.3512147  
SRR17520069.3512148  
SRR17520069.3512149  
SRR17520069.3512150  
SRR17520069.3512151  
SRR17520069.3512152  
SRR17520069.3512153  
SRR17520069.3512154  
SRR17520069.3512155  
SRR17520069.3512156  
SRR17520069.3512157  
SRR17520069.3512158  
SRR17520069.3512159  
SRR17520069.3512160  
SRR17520069.3512161  
SRR17520069.3512162  
SRR17520069.3512164  
SRR17520069.3512165  
SRR17520069.3512166  
SRR17520069.3512167  
SRR17520069.3512168  
SRR17520069.3512169  
SRR17520069.3512170  
SRR17520069.3512171

SRR17520069.3512172  
SRR17520069.3512173  
SRR17520069.3512174  
SRR17520069.3512175  
SRR17520069.3512176  
SRR17520069.3512177  
SRR17520069.3512178  
SRR17520069.3512179  
SRR17520069.3512180  
SRR17520069.3512181  
SRR17520069.3512182  
SRR17520069.3512183  
SRR17520069.3512184  
SRR17520069.3512185  
SRR17520069.3512186  
SRR17520069.3512187  
SRR17520069.3512188  
SRR17520069.3512189  
SRR17520069.3512190  
SRR17520069.3512191  
SRR17520069.3512192  
SRR17520069.3512193  
SRR17520069.3512194  
SRR17520069.3512195  
SRR17520069.3512196  
SRR17520069.3512197  
SRR17520069.3512198  
SRR17520069.3512199  
SRR17520069.3512200  
SRR17520069.3512201  
SRR17520069.3512203  
SRR17520069.3512204  
SRR17520069.3512205  
SRR17520069.3512206  
SRR17520069.3512207  
SRR17520069.3512208  
SRR17520069.3512209  
SRR17520069.3512210  
SRR17520069.3512211  
SRR17520069.3512212  
SRR17520069.3512213  
SRR17520069.3512214  
SRR17520069.3512215  
SRR17520069.3512216  
SRR17520069.3512217  
SRR17520069.3512218  
SRR17520069.3512219

SRR17520069.3512220  
SRR17520069.3512221  
SRR17520069.3512222  
SRR17520069.3512223  
SRR17520069.3512224  
SRR17520069.3512225  
SRR17520069.3512226  
SRR17520069.3512228  
SRR17520069.3512229  
SRR17520069.3512230  
SRR17520069.3512231  
SRR17520069.3512232  
SRR17520069.3512233  
SRR17520069.3512234  
SRR17520069.3512235  
SRR17520069.3512236  
SRR17520069.3512237  
SRR17520069.3512238  
SRR17520069.3512239  
SRR17520069.3512240  
SRR17520069.3512241  
SRR17520069.3512242  
SRR17520069.3512243  
SRR17520069.3512244  
SRR17520069.3512245  
SRR17520069.3512246  
SRR17520069.3512247  
SRR17520069.3512248  
SRR17520069.3512249  
SRR17520069.3512250  
SRR17520069.3512251  
SRR17520069.3512253  
SRR17520069.3512254  
SRR17520069.3512255  
SRR17520069.3512256  
SRR17520069.3512257  
SRR17520069.3512258  
SRR17520069.3512259  
SRR17520069.3512260  
SRR17520069.3512261  
SRR17520069.3512262  
SRR17520069.3512263  
SRR17520069.3512264  
SRR17520069.3512265  
SRR17520069.3512266  
SRR17520069.3512267  
SRR17520069.3512268

SRR17520069. 3512269  
SRR17520069. 3512270  
SRR17520069. 3512271  
SRR17520069. 3512272  
SRR17520069. 3512273  
SRR17520069. 3512274  
SRR17520069. 3512275  
SRR17520069. 3512276  
SRR17520069. 3512277  
SRR17520069. 3512278  
SRR17520069. 3512279  
SRR17520069. 3512280  
SRR17520069. 3512281  
SRR17520069. 3512282  
SRR17520069. 3512283  
SRR17520069. 3512284  
SRR17520069. 3512285  
SRR17520069. 3512286  
SRR17520069. 3512287  
SRR17520069. 3512288  
SRR17520069. 3512289  
SRR17520069. 3512290  
SRR17520069. 3512291  
SRR17520069. 3512292  
SRR17520069. 3512293  
SRR17520069. 3512294  
SRR17520069. 3512295  
SRR17520069. 3512296  
SRR17520069. 3521627  
SRR17520069. 3539842  
SRR17520069. 3539934  
SRR17520069. 3539952  
SRR17520069. 3544669  
SRR17520069. 3553516  
SRR17520069. 3553517  
SRR17520069. 3553518  
SRR17520069. 3553519  
SRR17520069. 3553520  
SRR17520069. 3553521  
SRR17520069. 3553522  
SRR17520069. 3553523  
SRR17520069. 3553525  
SRR17520069. 3553526  
SRR17520069. 3553527  
SRR17520069. 3553528  
SRR17520069. 3553530  
SRR17520069. 3553531

SRR17520069. 3568947  
SRR17520069. 3568955  
SRR17520069. 3573601  
SRR17520069. 3573782  
SRR17520069. 3578753  
SRR17520069. 3578754  
SRR17520069. 3578755  
SRR17520069. 3578756  
SRR17520069. 3578757  
SRR17520069. 3578758  
SRR17520069. 3578759  
SRR17520069. 3578760  
SRR17520069. 3578761  
SRR17520069. 3578762  
SRR17520069. 3578763  
SRR17520069. 3578764  
SRR17520069. 3578765  
SRR17520069. 3578766  
SRR17520069. 3578767  
SRR17520069. 3578768  
SRR17520069. 3578769  
SRR17520069. 3578770  
SRR17520069. 3578771  
SRR17520069. 3578772  
SRR17520069. 3578773  
SRR17520069. 3578774  
SRR17520069. 3578775  
SRR17520069. 3578776  
SRR17520069. 3578777  
SRR17520069. 3578778  
SRR17520069. 3578779  
SRR17520069. 3578780  
SRR17520069. 3578781  
SRR17520069. 3578782  
SRR17520069. 3578783  
SRR17520069. 3578784  
SRR17520069. 3578785  
SRR17520069. 3578786  
SRR17520069. 3578787  
SRR17520069. 3578788  
SRR17520069. 3578789  
SRR17520069. 3578790  
SRR17520069. 3578791  
SRR17520069. 3578792  
SRR17520069. 3578793  
SRR17520069. 3578796  
SRR17520069. 3578797

SRR17520069. 3578798  
SRR17520069. 3578799  
SRR17520069. 3578800  
SRR17520069. 3578801  
SRR17520069. 3578802  
SRR17520069. 3578803  
SRR17520069. 3578804  
SRR17520069. 3578805  
SRR17520069. 3578806  
SRR17520069. 3578807  
SRR17520069. 3578808  
SRR17520069. 3578810  
SRR17520069. 3578812  
SRR17520069. 3578813  
SRR17520069. 3578814  
SRR17520069. 3578815  
SRR17520069. 3578816  
SRR17520069. 3578817  
SRR17520069. 3578818  
SRR17520069. 3578819  
SRR17520069. 3578820  
SRR17520069. 3578821  
SRR17520069. 3578822  
SRR17520069. 3578823  
SRR17520069. 3578824  
SRR17520069. 3578825  
SRR17520069. 3578826  
SRR17520069. 3578827  
SRR17520069. 3578828  
SRR17520069. 3578829  
SRR17520069. 3578830  
SRR17520069. 3578831  
SRR17520069. 3578833  
SRR17520069. 3578834  
SRR17520069. 3578835  
SRR17520069. 3578836  
SRR17520069. 3578837  
SRR17520069. 3578838  
SRR17520069. 3578839  
SRR17520069. 3578840  
SRR17520069. 3578841  
SRR17520069. 3578842  
SRR17520069. 3578843  
SRR17520069. 3578844  
SRR17520069. 3578845  
SRR17520069. 3578846  
SRR17520069. 3586039



SRR17520069. 3586040  
SRR17520069. 3586041  
SRR17520069. 3586042  
SRR17520069. 3586043  
SRR17520069. 3586044  
SRR17520069. 3586045  
SRR17520069. 3586046  
SRR17520069. 3586047  
SRR17520069. 3586048  
SRR17520069. 3586049  
SRR17520069. 3586050  
SRR17520069. 3586051  
SRR17520069. 3586052  
SRR17520069. 3586053  
SRR17520069. 3586054  
SRR17520069. 3586055  
SRR17520069. 3586056  
SRR17520069. 3586057  
SRR17520069. 3586058  
SRR17520069. 3588623  
SRR17520069. 3588626  
SRR17520069. 3588627  
SRR17520069. 3588628  
SRR17520069. 3588629  
SRR17520069. 3588630  
SRR17520069. 3588631  
SRR17520069. 3588632  
SRR17520069. 3588633  
SRR17520069. 3588634  
SRR17520069. 3588635  
SRR17520069. 3588636  
SRR17520069. 3588638  
SRR17520069. 3588639  
SRR17520069. 3588640  
SRR17520069. 3588641  
SRR17520069. 3588642  
SRR17520069. 3588643  
SRR17520069. 3588644  
SRR17520069. 3588645  
SRR17520069. 3588646  
SRR17520069. 3588647  
SRR17520069. 3588648  
SRR17520069. 3588649  
SRR17520069. 3588650  
SRR17520069. 3588651  
SRR17520069. 3588652  
SRR17520069. 3588653

SRR17520069. 3588654  
SRR17520069. 3630078  
SRR17520069. 3630079  
SRR17520069. 3630080  
SRR17520069. 3630081  
SRR17520069. 3630082  
SRR17520069. 3630083  
SRR17520069. 3630084  
SRR17520069. 3630085  
SRR17520069. 3630086  
SRR17520069. 3630087  
SRR17520069. 3630088  
SRR17520069. 3630089  
SRR17520069. 3630090  
SRR17520069. 3630091  
SRR17520069. 3630092  
SRR17520069. 3630093  
SRR17520069. 3630094  
SRR17520069. 3630095  
SRR17520069. 3630096  
SRR17520069. 3630097  
SRR17520069. 3630099  
SRR17520069. 3630101  
SRR17520069. 3630102  
SRR17520069. 3630103  
SRR17520069. 3630107  
SRR17520069. 3630109  
SRR17520069. 3630110  
SRR17520069. 3630111  
SRR17520069. 3630113  
SRR17520069. 3630117  
SRR17520069. 3630120  
SRR17520069. 3630122  
SRR17520069. 3630123  
SRR17520069. 3630128  
SRR17520069. 3630129  
SRR17520069. 3630130  
SRR17520069. 3630131  
SRR17520069. 3630132  
SRR17520069. 3630133  
SRR17520069. 3630134  
SRR17520069. 3630135  
SRR17520069. 3630136  
SRR17520069. 3630137  
SRR17520069. 3630138  
SRR17520069. 3630139  
SRR17520069. 3630140

SRR17520069. 3630141  
SRR17520069. 3630142  
SRR17520069. 3636801  
SRR17520069. 3636802  
SRR17520069. 3636803  
SRR17520069. 3636804  
SRR17520069. 3636805  
SRR17520069. 3636806  
SRR17520069. 3636807  
SRR17520069. 3636808  
SRR17520069. 3636809  
SRR17520069. 3636810  
SRR17520069. 3636811  
SRR17520069. 3636812  
SRR17520069. 3636813  
SRR17520069. 3636814  
SRR17520069. 3636815  
SRR17520069. 3636816  
SRR17520069. 3636817  
SRR17520069. 3636818  
SRR17520069. 3636819  
SRR17520069. 3636820  
SRR17520069. 3636822  
SRR17520069. 3636823  
SRR17520069. 3636824  
SRR17520069. 3636825  
SRR17520069. 3638453  
SRR17520069. 3638454  
SRR17520069. 3638455  
SRR17520069. 3638456  
SRR17520069. 3638457  
SRR17520069. 3638458  
SRR17520069. 3638459  
SRR17520069. 3638460  
SRR17520069. 3638461  
SRR17520069. 3638462  
SRR17520069. 3638463  
SRR17520069. 3638464  
SRR17520069. 3638465  
SRR17520069. 3638466  
SRR17520069. 3638467  
SRR17520069. 3638468  
SRR17520069. 3638469  
SRR17520069. 3638470  
SRR17520069. 3638471  
SRR17520069. 3638472  
SRR17520069. 3638473

SRR17520069. 3638474  
SRR17520069. 3638475  
SRR17520069. 3638476  
SRR17520069. 3638477  
SRR17520069. 3638478  
SRR17520069. 3638479  
SRR17520069. 3638480  
SRR17520069. 3638481  
SRR17520069. 3638482  
SRR17520069. 3638483  
SRR17520069. 3638484  
SRR17520069. 3638486  
SRR17520069. 3638487  
SRR17520069. 3638488  
SRR17520069. 3638489  
SRR17520069. 3638490  
SRR17520069. 3638491  
SRR17520069. 3638492  
SRR17520069. 3638493  
SRR17520069. 3638494  
SRR17520069. 3638495  
SRR17520069. 3638496  
SRR17520069. 3638497  
SRR17520069. 3638498  
SRR17520069. 3638499  
SRR17520069. 3638500  
SRR17520069. 3638501  
SRR17520069. 3638502  
SRR17520069. 3638503  
SRR17520069. 3638504  
SRR17520069. 3638505  
SRR17520069. 3638506  
SRR17520069. 3638507  
SRR17520069. 3638508  
SRR17520069. 3638509  
SRR17520069. 3638510  
SRR17520069. 3638511  
SRR17520069. 3638512  
SRR17520069. 3638513  
SRR17520069. 3638514  
SRR17520069. 3638515  
SRR17520069. 3638516  
SRR17520069. 3638517  
SRR17520069. 3638518  
SRR17520069. 3638519  
SRR17520069. 3638520  
SRR17520069. 3638521

SRR17520069. 3638522  
SRR17520069. 3638523  
SRR17520069. 3638524  
SRR17520069. 3638525  
SRR17520069. 3638526  
SRR17520069. 3638527  
SRR17520069. 3638528  
SRR17520069. 3638529  
SRR17520069. 3638530  
SRR17520069. 3638531  
SRR17520069. 3638532  
SRR17520069. 3638533  
SRR17520069. 3638534  
SRR17520069. 3638535  
SRR17520069. 3638536  
SRR17520069. 3638537  
SRR17520069. 3644448  
SRR17520069. 3644449  
SRR17520069. 3644450  
SRR17520069. 3660895  
SRR17520069. 3660896  
SRR17520069. 3660897  
SRR17520069. 3660898  
SRR17520069. 3660899  
SRR17520069. 3660900  
SRR17520069. 3660901  
SRR17520069. 3660902  
SRR17520069. 3660903  
SRR17520069. 3660904  
SRR17520069. 3660905  
SRR17520069. 3660906  
SRR17520069. 3660907  
SRR17520069. 3660908  
SRR17520069. 3660909  
SRR17520069. 3660910  
SRR17520069. 3660911  
SRR17520069. 3660912  
SRR17520069. 3660913  
SRR17520069. 3660914  
SRR17520069. 3660915  
SRR17520069. 3660916  
SRR17520069. 3660917  
SRR17520069. 3660918  
SRR17520069. 3660919  
SRR17520069. 3660920  
SRR17520069. 3660921  
SRR17520069. 3660922

SRR17520069. 3660923  
SRR17520069. 3660924  
SRR17520069. 3660925  
SRR17520069. 3660926  
SRR17520069. 3660927  
SRR17520069. 3660928  
SRR17520069. 3660929  
SRR17520069. 3660930  
SRR17520069. 3660931  
SRR17520069. 3660932  
SRR17520069. 3662702  
SRR17520069. 3668032  
SRR17520069. 3668507  
SRR17520069. 3669703  
SRR17520069. 3669704  
SRR17520069. 3669705  
SRR17520069. 3669706  
SRR17520069. 3669707  
SRR17520069. 3669708  
SRR17520069. 3669709  
SRR17520069. 3669710  
SRR17520069. 3669711  
SRR17520069. 3688361  
SRR17520069. 3702757  
SRR17520069. 3704588  
SRR17520069. 3704589  
SRR17520069. 3704590  
SRR17520069. 3704591  
SRR17520069. 3704592  
SRR17520069. 3704593  
SRR17520069. 3704594  
SRR17520069. 3706530  
SRR17520069. 3706531  
SRR17520069. 3706532  
SRR17520069. 3706533  
SRR17520069. 3706534  
SRR17520069. 3706535  
SRR17520069. 3710458  
SRR17520069. 3716033  
SRR17520069. 3716034  
SRR17520069. 3716035  
SRR17520069. 3716036  
SRR17520069. 3716037  
SRR17520069. 3716039  
SRR17520069. 3716040  
SRR17520069. 3716041  
SRR17520069. 3716042

SRR17520069. 3738609  
SRR17520069. 3738610  
SRR17520069. 3738611  
SRR17520069. 3738612  
SRR17520069. 3738613  
SRR17520069. 3738614  
SRR17520069. 3738615  
SRR17520069. 3738616  
SRR17520069. 3738617  
SRR17520069. 3738618  
SRR17520069. 3738619  
SRR17520069. 3738620  
SRR17520069. 3738621  
SRR17520069. 3738622  
SRR17520069. 3738623  
SRR17520069. 3738624  
SRR17520069. 3766847  
SRR17520069. 3772443  
SRR17520069. 3795334  
SRR17520069. 3795335  
SRR17520069. 3795336  
SRR17520069. 3795337  
SRR17520069. 3795338  
SRR17520069. 3795339  
SRR17520069. 3795340  
SRR17520069. 3795341  
SRR17520069. 3795342  
SRR17520069. 3795346  
SRR17520069. 3795347  
SRR17520069. 3795348  
SRR17520069. 3795349  
SRR17520069. 3795350  
SRR17520069. 3795351  
SRR17520069. 3795352  
SRR17520069. 3795353  
SRR17520069. 3795356  
SRR17520069. 3795357  
SRR17520069. 3795359  
SRR17520069. 3795360  
SRR17520069. 3795361  
SRR17520069. 3795362  
SRR17520069. 3795365  
SRR17520069. 3795366  
SRR17520069. 3795367  
SRR17520069. 3809623  
SRR17520069. 3809624  
SRR17520069. 3809625

SRR17520069.3809626  
SRR17520069.3809627  
SRR17520069.3809628  
SRR17520069.3809629  
SRR17520069.3809630  
SRR17520069.3820081  
SRR17520069.3820082  
SRR17520069.3820083  
SRR17520069.3820084  
SRR17520069.3820085  
SRR17520069.3838510  
SRR17520069.3838511  
SRR17520069.3838512  
SRR17520069.3838513  
SRR17520069.3838514  
SRR17520069.3838515  
SRR17520069.3838516  
SRR17520069.3838517  
SRR17520069.3838518  
SRR17520069.3838519  
SRR17520069.3838520  
SRR17520069.3838521  
SRR17520069.3838522  
SRR17520069.3838523  
SRR17520069.3838524  
SRR17520069.3838525  
SRR17520069.3838526  
SRR17520069.3838527  
SRR17520069.3838528  
SRR17520069.3838529  
SRR17520069.3838530  
SRR17520069.3838531  
SRR17520069.3838532  
SRR17520069.3838533  
SRR17520069.3838534  
SRR17520069.3838535  
SRR17520069.3838536  
SRR17520069.3838537  
SRR17520069.3838538  
SRR17520069.3838539  
SRR17520069.3838540  
SRR17520069.3838541  
SRR17520069.3838542  
SRR17520069.3838543  
SRR17520069.3838544  
SRR17520069.3838545  
SRR17520069.3838546



SRR17520069. 3838547  
SRR17520069. 3838548  
SRR17520069. 3838549  
SRR17520069. 3838550  
SRR17520069. 3838551  
SRR17520069. 3838552  
SRR17520069. 3838553  
SRR17520069. 3838554  
SRR17520069. 3838555  
SRR17520069. 3838556  
SRR17520069. 3838557  
SRR17520069. 3838558  
SRR17520069. 3838559  
SRR17520069. 3838560  
SRR17520069. 3838561  
SRR17520069. 3838563  
SRR17520069. 3838564  
SRR17520069. 3838565  
SRR17520069. 3838566  
SRR17520069. 3838567  
SRR17520069. 3838568  
SRR17520069. 3838569  
SRR17520069. 3838570  
SRR17520069. 3838571  
SRR17520069. 3838572  
SRR17520069. 3838573  
SRR17520069. 3838574  
SRR17520069. 3838575  
SRR17520069. 3838576  
SRR17520069. 3838577  
SRR17520069. 3838578  
SRR17520069. 3838579  
SRR17520069. 3838580  
SRR17520069. 3838581  
SRR17520069. 3838582  
SRR17520069. 3838583  
SRR17520069. 3838584  
SRR17520069. 3838585  
SRR17520069. 3838586  
SRR17520069. 3838587  
SRR17520069. 3838588  
SRR17520069. 3838589  
SRR17520069. 3838590  
SRR17520069. 3838591  
SRR17520069. 3838592  
SRR17520069. 3838594  
SRR17520069. 3838595

SRR17520069. 3838596  
SRR17520069. 3838597  
SRR17520069. 3838598  
SRR17520069. 3838599  
SRR17520069. 3838600  
SRR17520069. 3838601  
SRR17520069. 3838602  
SRR17520069. 3838603  
SRR17520069. 3838604  
SRR17520069. 3838605  
SRR17520069. 3838606  
SRR17520069. 3838607  
SRR17520069. 3838608  
SRR17520069. 3838609  
SRR17520069. 3838610  
SRR17520069. 3838611  
SRR17520069. 3838612  
SRR17520069. 3838613  
SRR17520069. 3838614  
SRR17520069. 3838615  
SRR17520069. 3838616  
SRR17520069. 3838617  
SRR17520069. 3838618  
SRR17520069. 3838619  
SRR17520069. 3838620  
SRR17520069. 3838621  
SRR17520069. 3838622  
SRR17520069. 3838623  
SRR17520069. 3858109  
SRR17520069. 3858110  
SRR17520069. 3858111  
SRR17520069. 3858113  
SRR17520069. 3858114  
SRR17520069. 3858115  
SRR17520069. 3858116  
SRR17520069. 3858117  
SRR17520069. 3858118  
SRR17520069. 3858119  
SRR17520069. 3858120  
SRR17520069. 3858121  
SRR17520069. 3858122  
SRR17520069. 3858123  
SRR17520069. 3858124  
SRR17520069. 3858125  
SRR17520069. 3858126  
SRR17520069. 3858127  
SRR17520069. 3858128

SRR17520069.3858129  
SRR17520069.3858130  
SRR17520069.3858131  
SRR17520069.3858133  
SRR17520069.3858134  
SRR17520069.3858135  
SRR17520069.3858136  
SRR17520069.3858137  
SRR17520069.3858138  
SRR17520069.3858139  
SRR17520069.3858140  
SRR17520069.3858141  
SRR17520069.3858142  
SRR17520069.3858144  
SRR17520069.3858145  
SRR17520069.3858146  
SRR17520069.3858147  
SRR17520069.3858148  
SRR17520069.3858149  
SRR17520069.3858150  
SRR17520069.3858151  
SRR17520069.3858152  
SRR17520069.3858154  
SRR17520069.3858155  
SRR17520069.3858156  
SRR17520069.3858157  
SRR17520069.3858158  
SRR17520069.3858159  
SRR17520069.3858160  
SRR17520069.3858161  
SRR17520069.3858162  
SRR17520069.3858163  
SRR17520069.3858165  
SRR17520069.3858167  
SRR17520069.3858168  
SRR17520069.3858169  
SRR17520069.3858170  
SRR17520069.3858171  
SRR17520069.3858172  
SRR17520069.3858173  
SRR17520069.3858174  
SRR17520069.3858176  
SRR17520069.3858177  
SRR17520069.3858178  
SRR17520069.3858179  
SRR17520069.3858181  
SRR17520069.3858183

SRR17520069.3858184  
SRR17520069.3858185  
SRR17520069.3858186  
SRR17520069.3858187  
SRR17520069.3863455  
SRR17520069.3866257  
SRR17520069.3881547  
SRR17520069.3888043  
SRR17520069.3888044  
SRR17520069.3888045  
SRR17520069.3911716  
SRR17520069.3911717  
SRR17520069.3911718  
SRR17520069.3911720  
SRR17520069.3911721  
SRR17520069.3911722  
SRR17520069.3911723  
SRR17520069.3911724  
SRR17520069.3911725  
SRR17520069.3911726  
SRR17520069.3911730  
SRR17520069.3911735  
SRR17520069.3911738  
SRR17520069.3911742  
SRR17520069.3911754  
SRR17520069.3913915  
SRR17520069.3924493  
SRR17520069.3924494  
SRR17520069.3924495  
SRR17520069.3924496  
SRR17520069.3924731  
SRR17520069.3924746  
SRR17520069.3924819  
SRR17520069.3930330  
SRR17520069.3932308  
SRR17520069.3932309  
SRR17520069.3932310  
SRR17520069.3932311  
SRR17520069.3932312  
SRR17520069.3932313  
SRR17520069.3932314  
SRR17520069.3932315  
SRR17520069.3932316  
SRR17520069.3932317  
SRR17520069.3932319  
SRR17520069.3932320  
SRR17520069.3932321

SRR17520069.3932322  
SRR17520069.3932323  
SRR17520069.3932324  
SRR17520069.3932325  
SRR17520069.3932326  
SRR17520069.3932327  
SRR17520069.3932328  
SRR17520069.3932329  
SRR17520069.3932330  
SRR17520069.3932331  
SRR17520069.3932332  
SRR17520069.3932333  
SRR17520069.3932334  
SRR17520069.3932335  
SRR17520069.3932337  
SRR17520069.3932338  
SRR17520069.3932339  
SRR17520069.3932340  
SRR17520069.3932341  
SRR17520069.3932342  
SRR17520069.3932343  
SRR17520069.3932344  
SRR17520069.3932345  
SRR17520069.3932347  
SRR17520069.3932348  
SRR17520069.3932349  
SRR17520069.3932350  
SRR17520069.3932351  
SRR17520069.3932352  
SRR17520069.3932354  
SRR17520069.3940198  
SRR17520069.3940199  
SRR17520069.3940200  
SRR17520069.3940201  
SRR17520069.3940202  
SRR17520069.3940203  
SRR17520069.3940204  
SRR17520069.3940205  
SRR17520069.3940206  
SRR17520069.3940207  
SRR17520069.3940208  
SRR17520069.3940209  
SRR17520069.3940210  
SRR17520069.3940211  
SRR17520069.3940212  
SRR17520069.3940213  
SRR17520069.3940214

SRR17520069.3940215  
SRR17520069.3940216  
SRR17520069.3940217  
SRR17520069.3940218  
SRR17520069.3940219  
SRR17520069.3940220  
SRR17520069.3940221  
SRR17520069.3940222  
SRR17520069.3940223  
SRR17520069.3940224  
SRR17520069.3940225  
SRR17520069.3940226  
SRR17520069.3940227  
SRR17520069.3940228  
SRR17520069.3940229  
SRR17520069.3940230  
SRR17520069.3940231  
SRR17520069.3940232  
SRR17520069.3940234  
SRR17520069.3940235  
SRR17520069.3940236  
SRR17520069.3940237  
SRR17520069.3940238  
SRR17520069.3940239  
SRR17520069.3940240  
SRR17520069.3940241  
SRR17520069.3940242  
SRR17520069.3940243  
SRR17520069.3940244  
SRR17520069.3940245  
SRR17520069.3940246  
SRR17520069.3940247  
SRR17520069.3940248  
SRR17520069.3940249  
SRR17520069.3940250  
SRR17520069.3953077  
SRR17520069.3953078  
SRR17520069.3953079  
SRR17520069.3953080  
SRR17520069.3953081  
SRR17520069.3953082  
SRR17520069.3953083  
SRR17520069.3953084  
SRR17520069.3967023  
SRR17520069.3967583  
SRR17520069.3967584  
SRR17520069.3967585

SRR17520069. 3967586  
SRR17520069. 3967587  
SRR17520069. 3967588  
SRR17520069. 3967589  
SRR17520069. 3967590  
SRR17520069. 3967591  
SRR17520069. 3967592  
SRR17520069. 3967593  
SRR17520069. 3967594  
SRR17520069. 3967595  
SRR17520069. 3967596  
SRR17520069. 3967597  
SRR17520069. 3967598  
SRR17520069. 3967599  
SRR17520069. 3967600  
SRR17520069. 3967601  
SRR17520069. 3967602  
SRR17520069. 3967603  
SRR17520069. 3967604  
SRR17520069. 3967605  
SRR17520069. 3967606  
SRR17520069. 3967607  
SRR17520069. 3967608  
SRR17520069. 3967610  
SRR17520069. 3967611  
SRR17520069. 3967612  
SRR17520069. 3967613  
SRR17520069. 3967614  
SRR17520069. 3967615  
SRR17520069. 3967616  
SRR17520069. 3967617  
SRR17520069. 3967618  
SRR17520069. 3967619  
SRR17520069. 3967620  
SRR17520069. 3967621  
SRR17520069. 3967622  
SRR17520069. 3967623  
SRR17520069. 3967624  
SRR17520069. 3967625  
SRR17520069. 3967626  
SRR17520069. 3967627  
SRR17520069. 3967628  
SRR17520069. 3967629  
SRR17520069. 3967631  
SRR17520069. 3967632  
SRR17520069. 3967633  
SRR17520069. 3967634

SRR17520069.3967635  
SRR17520069.3967636  
SRR17520069.3967637  
SRR17520069.3968309  
SRR17520069.3996181  
SRR17520069.4000566  
SRR17520069.4000567  
SRR17520069.4000568  
SRR17520069.4000569  
SRR17520069.4000570  
SRR17520069.4000571  
SRR17520069.4000572  
SRR17520069.4000573  
SRR17520069.4000574  
SRR17520069.4000575  
SRR17520069.4000576  
SRR17520069.4000577  
SRR17520069.4000578  
SRR17520069.4001604  
SRR17520069.4001606  
SRR17520069.4001608  
SRR17520069.4001609  
SRR17520069.4001610  
SRR17520069.4001611  
SRR17520069.4001613  
SRR17520069.4001614  
SRR17520069.4001615  
SRR17520069.4001617  
SRR17520069.4018180  
SRR17520069.4018182  
SRR17520069.4018183  
SRR17520069.4018184  
SRR17520069.4018185  
SRR17520069.4018186  
SRR17520069.4018187  
SRR17520069.4018188  
SRR17520069.4018189  
SRR17520069.4018190  
SRR17520069.4018192  
SRR17520069.4018193  
SRR17520069.4018194  
SRR17520069.4018195  
SRR17520069.4018196  
SRR17520069.4018197  
SRR17520069.4018198  
SRR17520069.4018199  
SRR17520069.4018200



SRR17520069.4018201  
SRR17520069.4018202  
SRR17520069.4018203  
SRR17520069.4018204  
SRR17520069.4018205  
SRR17520069.4018206  
SRR17520069.4018207  
SRR17520069.4018208  
SRR17520069.4042144  
SRR17520069.4042145  
SRR17520069.4042146  
SRR17520069.4042147  
SRR17520069.4042148  
SRR17520069.4042149  
SRR17520069.4042150  
SRR17520069.4042151  
SRR17520069.4042152  
SRR17520069.4042153  
SRR17520069.4042154  
SRR17520069.4042155  
SRR17520069.4042157  
SRR17520069.4042158  
SRR17520069.4049605  
SRR17520069.4049645  
SRR17520069.4064683  
SRR17520069.4071457  
SRR17520069.4071458  
SRR17520069.4072193  
SRR17520069.4072194  
SRR17520069.4072195  
SRR17520069.4072196  
SRR17520069.4072197  
SRR17520069.4072198  
SRR17520069.4072199  
SRR17520069.4072200  
SRR17520069.4072202  
SRR17520069.4072203  
SRR17520069.4072204  
SRR17520069.4072206  
SRR17520069.4072207  
SRR17520069.4072208  
SRR17520069.4072209  
SRR17520069.4072210  
SRR17520069.4072211  
SRR17520069.4072212  
SRR17520069.4072213  
SRR17520069.4072214

SRR17520069.4072215  
SRR17520069.4072216  
SRR17520069.4072217  
SRR17520069.4072218  
SRR17520069.4072219  
SRR17520069.4072220  
SRR17520069.4072221  
SRR17520069.4072223  
SRR17520069.4072224  
SRR17520069.4072226  
SRR17520069.4072227  
SRR17520069.4076997  
SRR17520069.4076998  
SRR17520069.4076999  
SRR17520069.4077000  
SRR17520069.4077001  
SRR17520069.4077002  
SRR17520069.4077003  
SRR17520069.4077004  
SRR17520069.4077005  
SRR17520069.4077006  
SRR17520069.4077007  
SRR17520069.4077008  
SRR17520069.4077010  
SRR17520069.4077011  
SRR17520069.4077012  
SRR17520069.4077013  
SRR17520069.4094495  
SRR17520069.4094496  
SRR17520069.4094497  
SRR17520069.4094498  
SRR17520069.4094499  
SRR17520069.4094500  
SRR17520069.4094501  
SRR17520069.4094502  
SRR17520069.4094503  
SRR17520069.4094506  
SRR17520069.4094507  
SRR17520069.4094508  
SRR17520069.4103237  
SRR17520069.4103278  
SRR17520069.4103283  
SRR17520069.4103326  
SRR17520069.4121578  
SRR17520069.4121579  
SRR17520069.4121580  
SRR17520069.4121581

SRR17520069.4121582  
SRR17520069.4121583  
SRR17520069.4121584  
SRR17520069.4121585  
SRR17520069.4121586  
SRR17520069.4121587  
SRR17520069.4121588  
SRR17520069.4121589  
SRR17520069.4121590  
SRR17520069.4121591  
SRR17520069.4121592  
SRR17520069.4121593  
SRR17520069.4121594  
SRR17520069.4121595  
SRR17520069.4121596  
SRR17520069.4121597  
SRR17520069.4121599  
SRR17520069.4121600  
SRR17520069.4121601  
SRR17520069.4121603  
SRR17520069.4124618  
SRR17520069.4124619  
SRR17520069.4124620  
SRR17520069.4124621  
SRR17520069.4124622  
SRR17520069.4124623  
SRR17520069.4124624  
SRR17520069.4124625  
SRR17520069.4124626  
SRR17520069.4133097  
SRR17520069.4133098  
SRR17520069.4133099  
SRR17520069.4133100  
SRR17520069.4133101  
SRR17520069.4133103  
SRR17520069.4133104  
SRR17520069.4133105  
SRR17520069.4133106  
SRR17520069.4133107  
SRR17520069.4133108  
SRR17520069.4133109  
SRR17520069.4133110  
SRR17520069.4133111  
SRR17520069.4133112  
SRR17520069.4133113  
SRR17520069.4133114  
SRR17520069.4137678

SRR17520069. 4137680  
SRR17520069. 4137681  
SRR17520069. 4137682  
SRR17520069. 4137683  
SRR17520069. 4137684  
SRR17520069. 4137685  
SRR17520069. 4137686  
SRR17520069. 4137687  
SRR17520069. 4137688  
SRR17520069. 4137689  
SRR17520069. 4137690  
SRR17520069. 4137691  
SRR17520069. 4137692  
SRR17520069. 4137693  
SRR17520069. 4137695  
SRR17520069. 4137696  
SRR17520069. 4137697  
SRR17520069. 4137698  
SRR17520069. 4137699  
SRR17520069. 4137700  
SRR17520069. 4137701  
SRR17520069. 4137702  
SRR17520069. 4137703  
SRR17520069. 4137704  
SRR17520069. 4137705  
SRR17520069. 4143077  
SRR17520069. 4143078  
SRR17520069. 4162534  
SRR17520069. 4164884  
SRR17520069. 4170357  
SRR17520069. 4173065  
SRR17520069. 4178809  
SRR17520069. 4180885  
SRR17520069. 4180886  
SRR17520069. 4180887  
SRR17520069. 4180888  
SRR17520069. 4180889  
SRR17520069. 4180890  
SRR17520069. 4180892  
SRR17520069. 4180894  
SRR17520069. 4180895  
SRR17520069. 4180896  
SRR17520069. 4180898  
SRR17520069. 4180900  
SRR17520069. 4180901  
SRR17520069. 4180902  
SRR17520069. 4180903

SRR17520069.4180904  
SRR17520069.4180905  
SRR17520069.4180906  
SRR17520069.4180907  
SRR17520069.4180910  
SRR17520069.4180912  
SRR17520069.4180913  
SRR17520069.4180914  
SRR17520069.4180915  
SRR17520069.4180916  
SRR17520069.4180917  
SRR17520069.4180918  
SRR17520069.4180920  
SRR17520069.4180921  
SRR17520069.4180922  
SRR17520069.4180925  
SRR17520069.4180928  
SRR17520069.4180929  
SRR17520069.4191679  
SRR17520069.4205999  
SRR17520069.4225249  
SRR17520069.4232003  
SRR17520069.4232039  
SRR17520069.4232096  
SRR17520069.4242381  
SRR17520069.4245668  
SRR17520069.4245669  
SRR17520069.4245670  
SRR17520069.4245671  
SRR17520069.4245672  
SRR17520069.4245673  
SRR17520069.4245674  
SRR17520069.4245675  
SRR17520069.4245676  
SRR17520069.4245677  
SRR17520069.4245678  
SRR17520069.4245679  
SRR17520069.4245680  
SRR17520069.4245681  
SRR17520069.4245682  
SRR17520069.4245683  
SRR17520069.4245684  
SRR17520069.4245685  
SRR17520069.4245686  
SRR17520069.4245687  
SRR17520069.4245688  
SRR17520069.4245689

SRR17520069.4245690  
SRR17520069.4245691  
SRR17520069.4245692  
SRR17520069.4245693  
SRR17520069.4245694  
SRR17520069.4245695  
SRR17520069.4245696  
SRR17520069.4245697  
SRR17520069.4245698  
SRR17520069.4245699  
SRR17520069.4253233  
SRR17520069.4253234  
SRR17520069.4253235  
SRR17520069.4253236  
SRR17520069.4253237  
SRR17520069.4253238  
SRR17520069.4253239  
SRR17520069.4253240  
SRR17520069.4253241  
SRR17520069.4253242  
SRR17520069.4253243  
SRR17520069.4253244  
SRR17520069.4253245  
SRR17520069.4253246  
SRR17520069.4253247  
SRR17520069.4253248  
SRR17520069.4253249  
SRR17520069.4253250  
SRR17520069.4260134  
SRR17520069.4260135  
SRR17520069.4260136  
SRR17520069.4260137  
SRR17520069.4260138  
SRR17520069.4260139  
SRR17520069.4260140  
SRR17520069.4260141  
SRR17520069.4260142  
SRR17520069.4260143  
SRR17520069.4260144  
SRR17520069.4260145  
SRR17520069.4260146  
SRR17520069.4260147  
SRR17520069.4260148  
SRR17520069.4260149  
SRR17520069.4260150  
SRR17520069.4260152  
SRR17520069.4260154

SRR17520069.4260156  
SRR17520069.4262987  
SRR17520069.4262988  
SRR17520069.4262989  
SRR17520069.4262990  
SRR17520069.4262991  
SRR17520069.4262992  
SRR17520069.4262993  
SRR17520069.4262994  
SRR17520069.4262995  
SRR17520069.4262996  
SRR17520069.4262997  
SRR17520069.4262999  
SRR17520069.4263000  
SRR17520069.4263001  
SRR17520069.4263002  
SRR17520069.4263003  
SRR17520069.4263004  
SRR17520069.4263005  
SRR17520069.4263006  
SRR17520069.4263007  
SRR17520069.4263008  
SRR17520069.4263009  
SRR17520069.4263010  
SRR17520069.4263012  
SRR17520069.4263013  
SRR17520069.4263014  
SRR17520069.4263015  
SRR17520069.4263016  
SRR17520069.4263017  
SRR17520069.4263018  
SRR17520069.4263019  
SRR17520069.4263020  
SRR17520069.4263021  
SRR17520069.4263022  
SRR17520069.4263023  
SRR17520069.4263024  
SRR17520069.4263025  
SRR17520069.4263026  
SRR17520069.4263027  
SRR17520069.4263028  
SRR17520069.4263029  
SRR17520069.4263030  
SRR17520069.4263031  
SRR17520069.4263032  
SRR17520069.4263033  
SRR17520069.4263034

SRR17520069.4263035  
SRR17520069.4263036  
SRR17520069.4263037  
SRR17520069.4263038  
SRR17520069.4263039  
SRR17520069.4263040  
SRR17520069.4263041  
SRR17520069.4263042  
SRR17520069.4269070  
SRR17520069.4269071  
SRR17520069.4269072  
SRR17520069.4269073  
SRR17520069.4269074  
SRR17520069.4269075  
SRR17520069.4269076  
SRR17520069.4269077  
SRR17520069.4269078  
SRR17520069.4269079  
SRR17520069.4269080  
SRR17520069.4269081  
SRR17520069.4269084  
SRR17520069.4269085  
SRR17520069.4269086  
SRR17520069.4269088  
SRR17520069.4269089  
SRR17520069.4269090  
SRR17520069.4269091  
SRR17520069.4269092  
SRR17520069.4269094  
SRR17520069.4269095  
SRR17520069.4269096  
SRR17520069.4269097  
SRR17520069.4269098  
SRR17520069.4269099  
SRR17520069.4269100  
SRR17520069.4269101  
SRR17520069.4269102  
SRR17520069.4269103  
SRR17520069.4272766  
SRR17520069.4272769  
SRR17520069.4272770  
SRR17520069.4273067  
SRR17520069.4273068  
SRR17520069.4273069  
SRR17520069.4273070  
SRR17520069.4274484  
SRR17520069.4274485



SRR17520069. 4274486  
SRR17520069. 4274487  
SRR17520069. 4274488  
SRR17520069. 4274490  
SRR17520069. 4274491  
SRR17520069. 4274492  
SRR17520069. 4274494  
SRR17520069. 4274495  
SRR17520069. 4274496  
SRR17520069. 4274497  
SRR17520069. 4274498  
SRR17520069. 4274499  
SRR17520069. 4274500  
SRR17520069. 4274501  
SRR17520069. 4274502  
SRR17520069. 4274503  
SRR17520069. 4274504  
SRR17520069. 4274505  
SRR17520069. 4274506  
SRR17520069. 4274509  
SRR17520069. 4274510  
SRR17520069. 4274511  
SRR17520069. 4274512  
SRR17520069. 4274513  
SRR17520069. 4274514  
SRR17520069. 4274515  
SRR17520069. 4274517  
SRR17520069. 4274518  
SRR17520069. 4274519  
SRR17520069. 4274520  
SRR17520069. 4274522  
SRR17520069. 4274524  
SRR17520069. 4274525  
SRR17520069. 4274526  
SRR17520069. 4274528  
SRR17520069. 4274530  
SRR17520069. 4274531  
SRR17520069. 4274532  
SRR17520069. 4274533  
SRR17520069. 4274534  
SRR17520069. 4274536  
SRR17520069. 4274537  
SRR17520069. 4274538  
SRR17520069. 4274539  
SRR17520069. 4274540  
SRR17520069. 4274541  
SRR17520069. 4274542

SRR17520069. 4274543  
SRR17520069. 4274545  
SRR17520069. 4274546  
SRR17520069. 4274547  
SRR17520069. 4274548  
SRR17520069. 4274549  
SRR17520069. 4274550  
SRR17520069. 4274551  
SRR17520069. 4274553  
SRR17520069. 4274554  
SRR17520069. 4274555  
SRR17520069. 4274556  
SRR17520069. 4274557  
SRR17520069. 4274558  
SRR17520069. 4274559  
SRR17520069. 4274560  
SRR17520069. 4274561  
SRR17520069. 4274562  
SRR17520069. 4274563  
SRR17520069. 4274564  
SRR17520069. 4274565  
SRR17520069. 4274566  
SRR17520069. 4274567  
SRR17520069. 4274569  
SRR17520069. 4274571  
SRR17520069. 4274572  
SRR17520069. 4274573  
SRR17520069. 4274574  
SRR17520069. 4274575  
SRR17520069. 4274576  
SRR17520069. 4274577  
SRR17520069. 4274578  
SRR17520069. 4274580  
SRR17520069. 4274581  
SRR17520069. 4274582  
SRR17520069. 4274584  
SRR17520069. 4274585  
SRR17520069. 4274586  
SRR17520069. 4274588  
SRR17520069. 4274589  
SRR17520069. 4274591  
SRR17520069. 4274592  
SRR17520069. 4274594  
SRR17520069. 4274596  
SRR17520069. 4274597  
SRR17520069. 4274598  
SRR17520069. 4274599

SRR17520069.4274600  
SRR17520069.4274601  
SRR17520069.4274604  
SRR17520069.4274605  
SRR17520069.4274606  
SRR17520069.4274607  
SRR17520069.4274608  
SRR17520069.4274610  
SRR17520069.4274614  
SRR17520069.4274616  
SRR17520069.4274617  
SRR17520069.4274618  
SRR17520069.4274619  
SRR17520069.4274620  
SRR17520069.4274621  
SRR17520069.4274622  
SRR17520069.4274623  
SRR17520069.4274624  
SRR17520069.4274625  
SRR17520069.4274626  
SRR17520069.4274627  
SRR17520069.4274628  
SRR17520069.4274630  
SRR17520069.4274631  
SRR17520069.4274632  
SRR17520069.4274633  
SRR17520069.4274634  
SRR17520069.4274635  
SRR17520069.4274636  
SRR17520069.4274637  
SRR17520069.4274638  
SRR17520069.4274639  
SRR17520069.4274640  
SRR17520069.4274641  
SRR17520069.4274642  
SRR17520069.4274643  
SRR17520069.4274644  
SRR17520069.4274645  
SRR17520069.4274646  
SRR17520069.4274647  
SRR17520069.4274648  
SRR17520069.4274649  
SRR17520069.4274651  
SRR17520069.4274652  
SRR17520069.4274653  
SRR17520069.4274654  
SRR17520069.4274656

SRR17520069.4274657  
SRR17520069.4274659  
SRR17520069.4274660  
SRR17520069.4274661  
SRR17520069.4274662  
SRR17520069.4274663  
SRR17520069.4274664  
SRR17520069.4274665  
SRR17520069.4274666  
SRR17520069.4274667  
SRR17520069.4274668  
SRR17520069.4274669  
SRR17520069.4274670  
SRR17520069.4274671  
SRR17520069.4274673  
SRR17520069.4274674  
SRR17520069.4274675  
SRR17520069.4274676  
SRR17520069.4274677  
SRR17520069.4274678  
SRR17520069.4274679  
SRR17520069.4274681  
SRR17520069.4274682  
SRR17520069.4274683  
SRR17520069.4274684  
SRR17520069.4274685  
SRR17520069.4274686  
SRR17520069.4274687  
SRR17520069.4274689  
SRR17520069.4274690  
SRR17520069.4274691  
SRR17520069.4290030  
SRR17520069.4316310  
SRR17520069.4316311  
SRR17520069.4316312  
SRR17520069.4316313  
SRR17520069.4316314  
SRR17520069.4316315  
SRR17520069.4323369  
SRR17520069.4323370  
SRR17520069.4323374  
SRR17520069.4324361  
SRR17520069.4329444  
SRR17520069.4329501  
SRR17520069.4329576  
SRR17520069.4329585  
SRR17520069.4342283

SRR17520069.4355824  
SRR17520069.4356388  
SRR17520069.4356389  
SRR17520069.4356390  
SRR17520069.4356391  
SRR17520069.4356392  
SRR17520069.4356393  
SRR17520069.4356394  
SRR17520069.4356395  
SRR17520069.4356396  
SRR17520069.4356397  
SRR17520069.4356398  
SRR17520069.4356399  
SRR17520069.4356400  
SRR17520069.4356401  
SRR17520069.4356406  
SRR17520069.4356408  
SRR17520069.4356411  
SRR17520069.4356412  
SRR17520069.4356414  
SRR17520069.4356426  
SRR17520069.4369536  
SRR17520069.4369537  
SRR17520069.4369538  
SRR17520069.4369539  
SRR17520069.4369540  
SRR17520069.4369541  
SRR17520069.4369542  
SRR17520069.4369543  
SRR17520069.4369544  
SRR17520069.4369545  
SRR17520069.4369546  
SRR17520069.4369547  
SRR17520069.4369548  
SRR17520069.4369549  
SRR17520069.4369550  
SRR17520069.4369551  
SRR17520069.4369552  
SRR17520069.4369553  
SRR17520069.4369554  
SRR17520069.4369555  
SRR17520069.4369556  
SRR17520069.4369557  
SRR17520069.4369558  
SRR17520069.4369559  
SRR17520069.4369560  
SRR17520069.4369561

SRR17520069.4369562  
SRR17520069.4369563  
SRR17520069.4369564  
SRR17520069.4369565  
SRR17520069.4369566  
SRR17520069.4369567  
SRR17520069.4369568  
SRR17520069.4369569  
SRR17520069.4369570  
SRR17520069.4369571  
SRR17520069.4369572  
SRR17520069.4369573  
SRR17520069.4369574  
SRR17520069.4369575  
SRR17520069.4369576  
SRR17520069.4369577  
SRR17520069.4369578  
SRR17520069.4369579  
SRR17520069.4369580  
SRR17520069.4369581  
SRR17520069.4369582  
SRR17520069.4369583  
SRR17520069.4369584  
SRR17520069.4369585  
SRR17520069.4369586  
SRR17520069.4369587  
SRR17520069.4369588  
SRR17520069.4369589  
SRR17520069.4369590  
SRR17520069.4369591  
SRR17520069.4369592  
SRR17520069.4369593  
SRR17520069.4369594  
SRR17520069.4369595  
SRR17520069.4369596  
SRR17520069.4369597  
SRR17520069.4369598  
SRR17520069.4369599  
SRR17520069.4369600  
SRR17520069.4369601  
SRR17520069.4369602  
SRR17520069.4369603  
SRR17520069.4369604  
SRR17520069.4369605  
SRR17520069.4369606  
SRR17520069.4369607  
SRR17520069.4369608

SRR17520069.4369609  
SRR17520069.4369610  
SRR17520069.4369611  
SRR17520069.4369612  
SRR17520069.4369613  
SRR17520069.4369614  
SRR17520069.4369615  
SRR17520069.4369616  
SRR17520069.4369617  
SRR17520069.4369618  
SRR17520069.4369619  
SRR17520069.4369620  
SRR17520069.4369621  
SRR17520069.4369622  
SRR17520069.4369623  
SRR17520069.4369624  
SRR17520069.4369625  
SRR17520069.4369626  
SRR17520069.4369627  
SRR17520069.4369628  
SRR17520069.4369629  
SRR17520069.4369630  
SRR17520069.4369631  
SRR17520069.4369666  
SRR17520069.4369667  
SRR17520069.4369668  
SRR17520069.4369669  
SRR17520069.4369670  
SRR17520069.4369671  
SRR17520069.4369672  
SRR17520069.4369673  
SRR17520069.4369674  
SRR17520069.4369675  
SRR17520069.4369676  
SRR17520069.4369677  
SRR17520069.4369678  
SRR17520069.4369679  
SRR17520069.4369680  
SRR17520069.4369681  
SRR17520069.4369682  
SRR17520069.4369683  
SRR17520069.4369684  
SRR17520069.4369685  
SRR17520069.4369686  
SRR17520069.4369687  
SRR17520069.4369688  
SRR17520069.4369689

SRR17520069.4369690  
SRR17520069.4369691  
SRR17520069.4369692  
SRR17520069.4369693  
SRR17520069.4369694  
SRR17520069.4369695  
SRR17520069.4369696  
SRR17520069.4369697  
SRR17520069.4369698  
SRR17520069.4369699  
SRR17520069.4369700  
SRR17520069.4369701  
SRR17520069.4369702  
SRR17520069.4369703  
SRR17520069.4369704  
SRR17520069.4369705  
SRR17520069.4369706  
SRR17520069.4369707  
SRR17520069.4369708  
SRR17520069.4369709  
SRR17520069.4373830  
SRR17520069.4373831  
SRR17520069.4373832  
SRR17520069.4373833  
SRR17520069.4373834  
SRR17520069.4373835  
SRR17520069.4373836  
SRR17520069.4373838  
SRR17520069.4373839  
SRR17520069.4373840  
SRR17520069.4373842  
SRR17520069.4373843  
SRR17520069.4373844  
SRR17520069.4373845  
SRR17520069.4373846  
SRR17520069.4373847  
SRR17520069.4373848  
SRR17520069.4402759  
SRR17520069.4411085  
SRR17520069.4411086  
SRR17520069.4411088  
SRR17520069.4411089  
SRR17520069.4411090  
SRR17520069.4411091  
SRR17520069.4411092  
SRR17520069.4411093  
SRR17520069.4411094



SRR17520069.4411095  
SRR17520069.4411096  
SRR17520069.4411097  
SRR17520069.4411098  
SRR17520069.4411099  
SRR17520069.4411100  
SRR17520069.4411101  
SRR17520069.4411102  
SRR17520069.4411103  
SRR17520069.4411104  
SRR17520069.4411105  
SRR17520069.4411106  
SRR17520069.4411107  
SRR17520069.4411108  
SRR17520069.4411109  
SRR17520069.4411110  
SRR17520069.4411111  
SRR17520069.4411112  
SRR17520069.4411113  
SRR17520069.4411114  
SRR17520069.4411115  
SRR17520069.4411116  
SRR17520069.4411117  
SRR17520069.4411118  
SRR17520069.4411119  
SRR17520069.4416454  
SRR17520069.4416455  
SRR17520069.4416456  
SRR17520069.4416457  
SRR17520069.4416458  
SRR17520069.4416459  
SRR17520069.4416460  
SRR17520069.4416461  
SRR17520069.4416462  
SRR17520069.4416463  
SRR17520069.4416464  
SRR17520069.4416465  
SRR17520069.4416466  
SRR17520069.4416467  
SRR17520069.4416468  
SRR17520069.4416469  
SRR17520069.4416470  
SRR17520069.4416471  
SRR17520069.4416472  
SRR17520069.4416474  
SRR17520069.4416475  
SRR17520069.4416476

SRR17520069.4416477  
SRR17520069.4416478  
SRR17520069.4416479  
SRR17520069.4416480  
SRR17520069.4416481  
SRR17520069.4416482  
SRR17520069.4416483  
SRR17520069.4416484  
SRR17520069.4416485  
SRR17520069.4416486  
SRR17520069.4416487  
SRR17520069.4416488  
SRR17520069.4416489  
SRR17520069.4416490  
SRR17520069.4416491  
SRR17520069.4416492  
SRR17520069.4416493  
SRR17520069.4416494  
SRR17520069.4416495  
SRR17520069.4416496  
SRR17520069.4416497  
SRR17520069.4416498  
SRR17520069.4416499  
SRR17520069.4416500  
SRR17520069.4416501  
SRR17520069.4416502  
SRR17520069.4416503  
SRR17520069.4416504  
SRR17520069.4416505  
SRR17520069.4416506  
SRR17520069.4416507  
SRR17520069.4416508  
SRR17520069.4416956  
SRR17520069.4417055  
SRR17520069.4417064  
SRR17520069.4417066  
SRR17520069.4417067  
SRR17520069.4417068  
SRR17520069.4417069  
SRR17520069.4417070  
SRR17520069.4417071  
SRR17520069.4417072  
SRR17520069.4437453  
SRR17520069.4437454  
SRR17520069.4437455  
SRR17520069.4437456  
SRR17520069.4437457

SRR17520069.4437458  
SRR17520069.4441083  
SRR17520069.4442527  
SRR17520069.4442528  
SRR17520069.4442529  
SRR17520069.4442530  
SRR17520069.4442531  
SRR17520069.4442532  
SRR17520069.4442533  
SRR17520069.4442534  
SRR17520069.4442536  
SRR17520069.4442539  
SRR17520069.4442540  
SRR17520069.4442542  
SRR17520069.4442543  
SRR17520069.4442544  
SRR17520069.4461257  
SRR17520069.4461258  
SRR17520069.4461259  
SRR17520069.4461260  
SRR17520069.4469291  
SRR17520069.4469292  
SRR17520069.4469293  
SRR17520069.4469294  
SRR17520069.4469295  
SRR17520069.4469296  
SRR17520069.4469297  
SRR17520069.4469298  
SRR17520069.4469299  
SRR17520069.4469300  
SRR17520069.4469301  
SRR17520069.4469302  
SRR17520069.4469303  
SRR17520069.4469304  
SRR17520069.4469305  
SRR17520069.4469306  
SRR17520069.4469307  
SRR17520069.4469308  
SRR17520069.4469309  
SRR17520069.4469310  
SRR17520069.4469311  
SRR17520069.4469312  
SRR17520069.4474447  
SRR17520069.4480766  
SRR17520069.4480789  
SRR17520069.4482419  
SRR17520069.4482420

SRR17520069.4482421  
SRR17520069.4482422  
SRR17520069.4482423  
SRR17520069.4482425  
SRR17520069.4482427  
SRR17520069.4482428  
SRR17520069.4482429  
SRR17520069.4482430  
SRR17520069.4482431  
SRR17520069.4482432  
SRR17520069.4482433  
SRR17520069.4482435  
SRR17520069.4482436  
SRR17520069.4482437  
SRR17520069.4482438  
SRR17520069.4482439  
SRR17520069.4482440  
SRR17520069.4482441  
SRR17520069.4482442  
SRR17520069.4482443  
SRR17520069.4482444  
SRR17520069.4482445  
SRR17520069.4482446  
SRR17520069.4482447  
SRR17520069.4482448  
SRR17520069.4482449  
SRR17520069.4482450  
SRR17520069.4482451  
SRR17520069.4482452  
SRR17520069.4482453  
SRR17520069.4482454  
SRR17520069.4482455  
SRR17520069.4482456  
SRR17520069.4482457  
SRR17520069.4485302  
SRR17520069.4485303  
SRR17520069.4485304  
SRR17520069.4485305  
SRR17520069.4485306  
SRR17520069.4485307  
SRR17520069.4485308  
SRR17520069.4485309  
SRR17520069.4485310  
SRR17520069.4485311  
SRR17520069.4485312  
SRR17520069.4485313  
SRR17520069.4485314

SRR17520069.4485315  
SRR17520069.4485316  
SRR17520069.4485317  
SRR17520069.4485318  
SRR17520069.4485319  
SRR17520069.4485320  
SRR17520069.4485321  
SRR17520069.4485322  
SRR17520069.4485323  
SRR17520069.4485324  
SRR17520069.4485325  
SRR17520069.4485326  
SRR17520069.4485327  
SRR17520069.4485328  
SRR17520069.4485329  
SRR17520069.4485330  
SRR17520069.4485331  
SRR17520069.4485332  
SRR17520069.4485333  
SRR17520069.4485334  
SRR17520069.4485335  
SRR17520069.4485336  
SRR17520069.4485337  
SRR17520069.4485338  
SRR17520069.4485339  
SRR17520069.4485340  
SRR17520069.4485341  
SRR17520069.4485342  
SRR17520069.4519347  
SRR17520069.4526673  
SRR17520069.4526674  
SRR17520069.4526675  
SRR17520069.4526676  
SRR17520069.4526677  
SRR17520069.4526678  
SRR17520069.4526679  
SRR17520069.4526680  
SRR17520069.4526681  
SRR17520069.4526682  
SRR17520069.4526683  
SRR17520069.4526684  
SRR17520069.4526685  
SRR17520069.4526686  
SRR17520069.4526687  
SRR17520069.4526688  
SRR17520069.4526689  
SRR17520069.4526690

SRR17520069.4526691  
SRR17520069.4526692  
SRR17520069.4526693  
SRR17520069.4526694  
SRR17520069.4526695  
SRR17520069.4526696  
SRR17520069.4526697  
SRR17520069.4526698  
SRR17520069.4526699  
SRR17520069.4526700  
SRR17520069.4526701  
SRR17520069.4526702  
SRR17520069.4526703  
SRR17520069.4526704  
SRR17520069.4526705  
SRR17520069.4526706  
SRR17520069.4526707  
SRR17520069.4526708  
SRR17520069.4526709  
SRR17520069.4526710  
SRR17520069.4526711  
SRR17520069.4526712  
SRR17520069.4526713  
SRR17520069.4526714  
SRR17520069.4526715  
SRR17520069.4526716  
SRR17520069.4526717  
SRR17520069.4526718  
SRR17520069.4526719  
SRR17520069.4526720  
SRR17520069.4526721  
SRR17520069.4526722  
SRR17520069.4526723  
SRR17520069.4526724  
SRR17520069.4526725  
SRR17520069.4526726  
SRR17520069.4526727  
SRR17520069.4526728  
SRR17520069.4526729  
SRR17520069.4526730  
SRR17520069.4526731  
SRR17520069.4526732  
SRR17520069.4526733  
SRR17520069.4526734  
SRR17520069.4526735  
SRR17520069.4530005  
SRR17520069.4530204

SRR17520069.4530239  
SRR17520069.4537265  
SRR17520069.4539757  
SRR17520069.4539758  
SRR17520069.4539759  
SRR17520069.4539760  
SRR17520069.4539761  
SRR17520069.4539762  
SRR17520069.4539764  
SRR17520069.4539765  
SRR17520069.4539766  
SRR17520069.4539767  
SRR17520069.4539768  
SRR17520069.4539770  
SRR17520069.4539773  
SRR17520069.4539775  
SRR17520069.4539776  
SRR17520069.4539783  
SRR17520069.4539793  
SRR17520069.4539795  
SRR17520069.4539800  
SRR17520069.4539801  
SRR17520069.4539802  
SRR17520069.4539804  
SRR17520069.4540628  
SRR17520069.4540629  
SRR17520069.4540630  
SRR17520069.4540631  
SRR17520069.4540632  
SRR17520069.4540633  
SRR17520069.4540636  
SRR17520069.4540637  
SRR17520069.4540638  
SRR17520069.4549510  
SRR17520069.4554430  
SRR17520069.4580155  
SRR17520069.4580156  
SRR17520069.4580157  
SRR17520069.4580158  
SRR17520069.4580159  
SRR17520069.4580160  
SRR17520069.4580161  
SRR17520069.4580162  
SRR17520069.4580163  
SRR17520069.4580164  
SRR17520069.4580165  
SRR17520069.4580166

SRR17520069.4580168  
SRR17520069.4580169  
SRR17520069.4580170  
SRR17520069.4580171  
SRR17520069.4580173  
SRR17520069.4580174  
SRR17520069.4580175  
SRR17520069.4580176  
SRR17520069.4580177  
SRR17520069.4580178  
SRR17520069.4580179  
SRR17520069.4580180  
SRR17520069.4580181  
SRR17520069.4580182  
SRR17520069.4580183  
SRR17520069.4580184  
SRR17520069.4580185  
SRR17520069.4580186  
SRR17520069.4580187  
SRR17520069.4580188  
SRR17520069.4580189  
SRR17520069.4580190  
SRR17520069.4580191  
SRR17520069.4580192  
SRR17520069.4580193  
SRR17520069.4580194  
SRR17520069.4580195  
SRR17520069.4580196  
SRR17520069.4580197  
SRR17520069.4580198  
SRR17520069.4580199  
SRR17520069.4580200  
SRR17520069.4580201  
SRR17520069.4580202  
SRR17520069.4580203  
SRR17520069.4580204  
SRR17520069.4580205  
SRR17520069.4580206  
SRR17520069.4580207  
SRR17520069.4580208  
SRR17520069.4580209  
SRR17520069.4580210  
SRR17520069.4580212  
SRR17520069.4580213  
SRR17520069.4580214  
SRR17520069.4580215  
SRR17520069.4580216



SRR17520069.4580217  
SRR17520069.4580218  
SRR17520069.4580219  
SRR17520069.4580220  
SRR17520069.4580221  
SRR17520069.4580222  
SRR17520069.4580223  
SRR17520069.4580224  
SRR17520069.4580225  
SRR17520069.4580226  
SRR17520069.4580227  
SRR17520069.4580228  
SRR17520069.4580229  
SRR17520069.4580230  
SRR17520069.4580231  
SRR17520069.4580233  
SRR17520069.4580235  
SRR17520069.4580236  
SRR17520069.4580237  
SRR17520069.4580238  
SRR17520069.4594949  
SRR17520069.4594950  
SRR17520069.4594951  
SRR17520069.4594952  
SRR17520069.4594953  
SRR17520069.4594954  
SRR17520069.4594955  
SRR17520069.4594956  
SRR17520069.4594957  
SRR17520069.4594958  
SRR17520069.4594959  
SRR17520069.4594960  
SRR17520069.4594961  
SRR17520069.4594962  
SRR17520069.4594963  
SRR17520069.4594964  
SRR17520069.4594965  
SRR17520069.4594966  
SRR17520069.4594967  
SRR17520069.4594968  
SRR17520069.4594970  
SRR17520069.4594971  
SRR17520069.4594972  
SRR17520069.4594973  
SRR17520069.4594974  
SRR17520069.4594975  
SRR17520069.4594976

SRR17520069.4594977  
SRR17520069.4594978  
SRR17520069.4594979  
SRR17520069.4594980  
SRR17520069.4594981  
SRR17520069.4594982  
SRR17520069.4594983  
SRR17520069.4594984  
SRR17520069.4594985  
SRR17520069.4594986  
SRR17520069.4594987  
SRR17520069.4594988  
SRR17520069.4594990  
SRR17520069.4594991  
SRR17520069.4594992  
SRR17520069.4594993  
SRR17520069.4594994  
SRR17520069.4594995  
SRR17520069.4594996  
SRR17520069.4594997  
SRR17520069.4594998  
SRR17520069.4595000  
SRR17520069.4595001  
SRR17520069.4595002  
SRR17520069.4595003  
SRR17520069.4595004  
SRR17520069.4595005  
SRR17520069.4595006  
SRR17520069.4595007  
SRR17520069.4595008  
SRR17520069.4595009  
SRR17520069.4595010  
SRR17520069.4595012  
SRR17520069.4595013  
SRR17520069.4595014  
SRR17520069.4595015  
SRR17520069.4595016  
SRR17520069.4595017  
SRR17520069.4595018  
SRR17520069.4595019  
SRR17520069.4595020  
SRR17520069.4595021  
SRR17520069.4595022  
SRR17520069.4595023  
SRR17520069.4595024  
SRR17520069.4595025  
SRR17520069.4595026

SRR17520069.4595027  
SRR17520069.4595028  
SRR17520069.4595029  
SRR17520069.4595030  
SRR17520069.4611249  
SRR17520069.4611250  
SRR17520069.4611251  
SRR17520069.4611252  
SRR17520069.4611253  
SRR17520069.4611254  
SRR17520069.4611255  
SRR17520069.4611256  
SRR17520069.4611257  
SRR17520069.4611258  
SRR17520069.4611259  
SRR17520069.4611260  
SRR17520069.4611261  
SRR17520069.4611262  
SRR17520069.4611263  
SRR17520069.4611264  
SRR17520069.4611265  
SRR17520069.4611266  
SRR17520069.4611267  
SRR17520069.4611268  
SRR17520069.4611269  
SRR17520069.4611270  
SRR17520069.4611271  
SRR17520069.4611272  
SRR17520069.4611273  
SRR17520069.4611274  
SRR17520069.4611275  
SRR17520069.4611276  
SRR17520069.4611277  
SRR17520069.4611278  
SRR17520069.4611279  
SRR17520069.4611280  
SRR17520069.4611281  
SRR17520069.4611282  
SRR17520069.4611283  
SRR17520069.4611284  
SRR17520069.4611285  
SRR17520069.4611286  
SRR17520069.4611287  
SRR17520069.4611288  
SRR17520069.4611289  
SRR17520069.4611290  
SRR17520069.4611291

SRR17520069.4611519  
SRR17520069.4611520  
SRR17520069.4611523  
SRR17520069.4611524  
SRR17520069.4616187  
SRR17520069.4616188  
SRR17520069.4616189  
SRR17520069.4616190  
SRR17520069.4616191  
SRR17520069.4616192  
SRR17520069.4616193  
SRR17520069.4616194  
SRR17520069.4616195  
SRR17520069.4616196  
SRR17520069.4616197  
SRR17520069.4616198  
SRR17520069.4616199  
SRR17520069.4616200  
SRR17520069.4616201  
SRR17520069.4616202  
SRR17520069.4616204  
SRR17520069.4616205  
SRR17520069.4616206  
SRR17520069.4616207  
SRR17520069.4616208  
SRR17520069.4616209  
SRR17520069.4616210  
SRR17520069.4616211  
SRR17520069.4616212  
SRR17520069.4616213  
SRR17520069.4616214  
SRR17520069.4616215  
SRR17520069.4616216  
SRR17520069.4616217  
SRR17520069.4616218  
SRR17520069.4616219  
SRR17520069.4616220  
SRR17520069.4616221  
SRR17520069.4616222  
SRR17520069.4616223  
SRR17520069.4616224  
SRR17520069.4616225  
SRR17520069.4616226  
SRR17520069.4616227  
SRR17520069.4616228  
SRR17520069.4616229  
SRR17520069.4616230

SRR17520069.4616231  
SRR17520069.4616232  
SRR17520069.4616233  
SRR17520069.4616234  
SRR17520069.4616235  
SRR17520069.4616236  
SRR17520069.4616237  
SRR17520069.4616238  
SRR17520069.4616239  
SRR17520069.4616240  
SRR17520069.4616241  
SRR17520069.4616242  
SRR17520069.4616243  
SRR17520069.4616244  
SRR17520069.4616245  
SRR17520069.4616246  
SRR17520069.4616247  
SRR17520069.4616248  
SRR17520069.4616249  
SRR17520069.4616250  
SRR17520069.4616251  
SRR17520069.4616252  
SRR17520069.4616253  
SRR17520069.4616255  
SRR17520069.4616256  
SRR17520069.4616257  
SRR17520069.4616258  
SRR17520069.4616259  
SRR17520069.4616260  
SRR17520069.4616261  
SRR17520069.4616263  
SRR17520069.4616264  
SRR17520069.4616265  
SRR17520069.4616266  
SRR17520069.4616267  
SRR17520069.4616268  
SRR17520069.4616269  
SRR17520069.4616270  
SRR17520069.4616271  
SRR17520069.4616272  
SRR17520069.4616273  
SRR17520069.4616274  
SRR17520069.4616275  
SRR17520069.4616276  
SRR17520069.4616277  
SRR17520069.4616278  
SRR17520069.4616279

SRR17520069.4616280  
SRR17520069.4616281  
SRR17520069.4616282  
SRR17520069.4616283  
SRR17520069.4616284  
SRR17520069.4616285  
SRR17520069.4616286  
SRR17520069.4616287  
SRR17520069.4616288  
SRR17520069.4616289  
SRR17520069.4616290  
SRR17520069.4616291  
SRR17520069.4616292  
SRR17520069.4616294  
SRR17520069.4616295  
SRR17520069.4616296  
SRR17520069.4616297  
SRR17520069.4616298  
SRR17520069.4616299  
SRR17520069.4616300  
SRR17520069.4616301  
SRR17520069.4616302  
SRR17520069.4616303  
SRR17520069.4616304  
SRR17520069.4616305  
SRR17520069.4616306  
SRR17520069.4616307  
SRR17520069.4644890  
SRR17520069.4644891  
SRR17520069.4644892  
SRR17520069.4644893  
SRR17520069.4644894  
SRR17520069.4644895  
SRR17520069.4644899  
SRR17520069.4644900  
SRR17520069.4644901  
SRR17520069.4644902  
SRR17520069.4644903  
SRR17520069.4644904  
SRR17520069.4644905  
SRR17520069.4644906  
SRR17520069.4644907  
SRR17520069.4665800  
SRR17520069.4665803  
SRR17520069.4674887  
SRR17520069.4674899  
SRR17520069.4677619

SRR17520069.4679302  
SRR17520069.4689826  
SRR17520069.4691612  
SRR17520069.4691613  
SRR17520069.4691614  
SRR17520069.4691615  
SRR17520069.4691616  
SRR17520069.4691617  
SRR17520069.4691618  
SRR17520069.4691619  
SRR17520069.4691620  
SRR17520069.4691621  
SRR17520069.4691622  
SRR17520069.4703111  
SRR17520069.4703112  
SRR17520069.4703113  
SRR17520069.4703114  
SRR17520069.4703115  
SRR17520069.4703116  
SRR17520069.4703117  
SRR17520069.4703118  
SRR17520069.4703119  
SRR17520069.4703120  
SRR17520069.4703121  
SRR17520069.4703122  
SRR17520069.4703123  
SRR17520069.4703124  
SRR17520069.4703125  
SRR17520069.4703126  
SRR17520069.4703127  
SRR17520069.4703128  
SRR17520069.4703129  
SRR17520069.4703130  
SRR17520069.4703131  
SRR17520069.4703132  
SRR17520069.4703133  
SRR17520069.4703134  
SRR17520069.4703135  
SRR17520069.4703136  
SRR17520069.4703137  
SRR17520069.4703138  
SRR17520069.4703139  
SRR17520069.4703140  
SRR17520069.4703141  
SRR17520069.4705837  
SRR17520069.4711496  
SRR17520069.4711497

SRR17520069.4711498  
SRR17520069.4711499  
SRR17520069.4711500  
SRR17520069.4711501  
SRR17520069.4711502  
SRR17520069.4711503  
SRR17520069.4711504  
SRR17520069.4711505  
SRR17520069.4711506  
SRR17520069.4711508  
SRR17520069.4711509  
SRR17520069.4711510  
SRR17520069.4711511  
SRR17520069.4711512  
SRR17520069.4711513  
SRR17520069.4711514  
SRR17520069.4711515  
SRR17520069.4711516  
SRR17520069.4711517  
SRR17520069.4711518  
SRR17520069.4720474  
SRR17520069.4720475  
SRR17520069.4720476  
SRR17520069.4745741  
SRR17520069.4745744  
SRR17520069.4745746  
SRR17520069.4745747  
SRR17520069.4745748  
SRR17520069.4745749  
SRR17520069.4745750  
SRR17520069.4745751  
SRR17520069.4745752  
SRR17520069.4745753  
SRR17520069.4745754  
SRR17520069.4745755  
SRR17520069.4745756  
SRR17520069.4745757  
SRR17520069.4745758  
SRR17520069.4745759  
SRR17520069.4756629  
SRR17520069.4756630  
SRR17520069.4756631  
SRR17520069.4756632  
SRR17520069.4756633  
SRR17520069.4756634  
SRR17520069.4756635  
SRR17520069.4756636



SRR17520069.4756637  
SRR17520069.4756638  
SRR17520069.4756639  
SRR17520069.4756640  
SRR17520069.4756641  
SRR17520069.4756642  
SRR17520069.4756643  
SRR17520069.4756645  
SRR17520069.4756646  
SRR17520069.4756647  
SRR17520069.4756648  
SRR17520069.4756649  
SRR17520069.4756650  
SRR17520069.4756651  
SRR17520069.4756652  
SRR17520069.4756653  
SRR17520069.4756654  
SRR17520069.4756655  
SRR17520069.4756656  
SRR17520069.4756657  
SRR17520069.4756658  
SRR17520069.4756659  
SRR17520069.4756660  
SRR17520069.4756661  
SRR17520069.4756662  
SRR17520069.4756663  
SRR17520069.4756664  
SRR17520069.4756665  
SRR17520069.4756666  
SRR17520069.4756674  
SRR17520069.4756676  
SRR17520069.4756677  
SRR17520069.4756678  
SRR17520069.4756679  
SRR17520069.4756680  
SRR17520069.4756681  
SRR17520069.4756684  
SRR17520069.4756685  
SRR17520069.4756686  
SRR17520069.4756687  
SRR17520069.4756688  
SRR17520069.4756689  
SRR17520069.4756690  
SRR17520069.4756691  
SRR17520069.4756692  
SRR17520069.4756693  
SRR17520069.4756694

SRR17520069.4756695  
SRR17520069.4756696  
SRR17520069.4756698  
SRR17520069.4756699  
SRR17520069.4756700  
SRR17520069.4756701  
SRR17520069.4756702  
SRR17520069.4756703  
SRR17520069.4756704  
SRR17520069.4756705  
SRR17520069.4756706  
SRR17520069.4756707  
SRR17520069.4756708  
SRR17520069.4756709  
SRR17520069.4756710  
SRR17520069.4756711  
SRR17520069.4756712  
SRR17520069.4756713  
SRR17520069.4756714  
SRR17520069.4756715  
SRR17520069.4756716  
SRR17520069.4756717  
SRR17520069.4756718  
SRR17520069.4756719  
SRR17520069.4756720  
SRR17520069.4756721  
SRR17520069.4756722  
SRR17520069.4756723  
SRR17520069.4756724  
SRR17520069.4756725  
SRR17520069.4756726  
SRR17520069.4756727  
SRR17520069.4756728  
SRR17520069.4756729  
SRR17520069.4756730  
SRR17520069.4756732  
SRR17520069.4756733  
SRR17520069.4756734  
SRR17520069.4756735  
SRR17520069.4756736  
SRR17520069.4756737  
SRR17520069.4756738  
SRR17520069.4756739  
SRR17520069.4756740  
SRR17520069.4756741  
SRR17520069.4756742  
SRR17520069.4756743

SRR17520069.4756744  
SRR17520069.4756745  
SRR17520069.4756746  
SRR17520069.4756747  
SRR17520069.4756748  
SRR17520069.4756749  
SRR17520069.4756750  
SRR17520069.4756751  
SRR17520069.4756752  
SRR17520069.4756753  
SRR17520069.4756755  
SRR17520069.4756756  
SRR17520069.4756757  
SRR17520069.4756760  
SRR17520069.4756761  
SRR17520069.4756762  
SRR17520069.4756763  
SRR17520069.4756764  
SRR17520069.4756765  
SRR17520069.4756766  
SRR17520069.4756767  
SRR17520069.4756768  
SRR17520069.4756769  
SRR17520069.4756770  
SRR17520069.4756771  
SRR17520069.4763838  
SRR17520069.4764497  
SRR17520069.4764498  
SRR17520069.4764499  
SRR17520069.4764504  
SRR17520069.4764511  
SRR17520069.4764512  
SRR17520069.4764513  
SRR17520069.4764514  
SRR17520069.4764515  
SRR17520069.4764516  
SRR17520069.4764517  
SRR17520069.4764518  
SRR17520069.4764519  
SRR17520069.4764520  
SRR17520069.4764521  
SRR17520069.4764522  
SRR17520069.4764523  
SRR17520069.4764524  
SRR17520069.4764525  
SRR17520069.4764526  
SRR17520069.4764527

SRR17520069.4764528  
SRR17520069.4764529  
SRR17520069.4764530  
SRR17520069.4764531  
SRR17520069.4764532  
SRR17520069.4764533  
SRR17520069.4764534  
SRR17520069.4764535  
SRR17520069.4764536  
SRR17520069.4764537  
SRR17520069.4764538  
SRR17520069.4764539  
SRR17520069.4764540  
SRR17520069.4764541  
SRR17520069.4764542  
SRR17520069.4764543  
SRR17520069.4764544  
SRR17520069.4764545  
SRR17520069.4764546  
SRR17520069.4764547  
SRR17520069.4764548  
SRR17520069.4764549  
SRR17520069.4764550  
SRR17520069.4764551  
SRR17520069.4764552  
SRR17520069.4764553  
SRR17520069.4764554  
SRR17520069.4764555  
SRR17520069.4764556  
SRR17520069.4764557  
SRR17520069.4764558  
SRR17520069.4764559  
SRR17520069.4764560  
SRR17520069.4764561  
SRR17520069.4764562  
SRR17520069.4764563  
SRR17520069.4764564  
SRR17520069.4764565  
SRR17520069.4764566  
SRR17520069.4764567  
SRR17520069.4764568  
SRR17520069.4764569  
SRR17520069.4764570  
SRR17520069.4764571  
SRR17520069.4764572  
SRR17520069.4764573  
SRR17520069.4764574

SRR17520069.4764575  
SRR17520069.4764576  
SRR17520069.4764577  
SRR17520069.4764578  
SRR17520069.4764579  
SRR17520069.4764580  
SRR17520069.4764581  
SRR17520069.4764582  
SRR17520069.4764583  
SRR17520069.4764584  
SRR17520069.4764585  
SRR17520069.4764586  
SRR17520069.4764587  
SRR17520069.4764588  
SRR17520069.4764589  
SRR17520069.4764590  
SRR17520069.4764591  
SRR17520069.4764593  
SRR17520069.4764594  
SRR17520069.4764595  
SRR17520069.4764596  
SRR17520069.4764597  
SRR17520069.4765197  
SRR17520069.4765198  
SRR17520069.4765199  
SRR17520069.4765200  
SRR17520069.4765201  
SRR17520069.4765202  
SRR17520069.4765203  
SRR17520069.4765204  
SRR17520069.4765205  
SRR17520069.4765206  
SRR17520069.4765207  
SRR17520069.4765208  
SRR17520069.4765209  
SRR17520069.4765210  
SRR17520069.4765212  
SRR17520069.4765213  
SRR17520069.4765214  
SRR17520069.4765215  
SRR17520069.4765216  
SRR17520069.4765217  
SRR17520069.4765219  
SRR17520069.4765220  
SRR17520069.4765223  
SRR17520069.4765226  
SRR17520069.4765227

SRR17520069.4765228  
SRR17520069.4765229  
SRR17520069.4765230  
SRR17520069.4765231  
SRR17520069.4765232  
SRR17520069.4765233  
SRR17520069.4765234  
SRR17520069.4765235  
SRR17520069.4765237  
SRR17520069.4765238  
SRR17520069.4765239  
SRR17520069.4765242  
SRR17520069.4765243  
SRR17520069.4765244  
SRR17520069.4765247  
SRR17520069.4765248  
SRR17520069.4771480  
SRR17520069.4771512  
SRR17520069.4782224  
SRR17520069.4782225  
SRR17520069.4782226  
SRR17520069.4782227  
SRR17520069.4782228  
SRR17520069.4782229  
SRR17520069.4782230  
SRR17520069.4782231  
SRR17520069.4782232  
SRR17520069.4782233  
SRR17520069.4782234  
SRR17520069.4782235  
SRR17520069.4782236  
SRR17520069.4782237  
SRR17520069.4782238  
SRR17520069.4782241  
SRR17520069.4782243  
SRR17520069.4782244  
SRR17520069.4782245  
SRR17520069.4782246  
SRR17520069.4782247  
SRR17520069.4782248  
SRR17520069.4782249  
SRR17520069.4782250  
SRR17520069.4782251  
SRR17520069.4792145  
SRR17520069.4792146  
SRR17520069.4792147  
SRR17520069.4792148

SRR17520069.4792149  
SRR17520069.4792150  
SRR17520069.4792151  
SRR17520069.4792152  
SRR17520069.4792153  
SRR17520069.4792154  
SRR17520069.4792155  
SRR17520069.4792156  
SRR17520069.4792157  
SRR17520069.4792158  
SRR17520069.4792159  
SRR17520069.4792160  
SRR17520069.4792161  
SRR17520069.4792162  
SRR17520069.4792163  
SRR17520069.4792164  
SRR17520069.4792165  
SRR17520069.4792166  
SRR17520069.4792167  
SRR17520069.4792168  
SRR17520069.4792169  
SRR17520069.4792170  
SRR17520069.4792171  
SRR17520069.4792172  
SRR17520069.4792173  
SRR17520069.4792174  
SRR17520069.4792175  
SRR17520069.4792176  
SRR17520069.4792177  
SRR17520069.4792178  
SRR17520069.4792179  
SRR17520069.4792180  
SRR17520069.4792181  
SRR17520069.4792182  
SRR17520069.4792183  
SRR17520069.4792184  
SRR17520069.4792185  
SRR17520069.4792186  
SRR17520069.4792187  
SRR17520069.4792188  
SRR17520069.4792189  
SRR17520069.4792190  
SRR17520069.4792191  
SRR17520069.4792192  
SRR17520069.4792193  
SRR17520069.4792194  
SRR17520069.4792195

SRR17520069.4792196  
SRR17520069.4792197  
SRR17520069.4792198  
SRR17520069.4792199  
SRR17520069.4792200  
SRR17520069.4792201  
SRR17520069.4792202  
SRR17520069.4792203  
SRR17520069.4792204  
SRR17520069.4792205  
SRR17520069.4792206  
SRR17520069.4792207  
SRR17520069.4792208  
SRR17520069.4792209  
SRR17520069.4792210  
SRR17520069.4792211  
SRR17520069.4792212  
SRR17520069.4792213  
SRR17520069.4792214  
SRR17520069.4792215  
SRR17520069.4792218  
SRR17520069.4792219  
SRR17520069.4792220  
SRR17520069.4792221  
SRR17520069.4792222  
SRR17520069.4792223  
SRR17520069.4792224  
SRR17520069.4792225  
SRR17520069.4792226  
SRR17520069.4792227  
SRR17520069.4792228  
SRR17520069.4792229  
SRR17520069.4826986  
SRR17520069.4827004  
SRR17520069.4838895  
SRR17520069.4842554  
SRR17520069.4842592  
SRR17520069.4842668  
SRR17520069.4864153  
SRR17520069.4864154  
SRR17520069.4864155  
SRR17520069.4864156  
SRR17520069.4864157  
SRR17520069.4864158  
SRR17520069.4864159  
SRR17520069.4864160  
SRR17520069.4864161



SRR17520069.4864162  
SRR17520069.4864163  
SRR17520069.4864164  
SRR17520069.4864165  
SRR17520069.4864166  
SRR17520069.4864167  
SRR17520069.4864168  
SRR17520069.4864169  
SRR17520069.4864170  
SRR17520069.4864171  
SRR17520069.4864172  
SRR17520069.4864173  
SRR17520069.4864174  
SRR17520069.4864175  
SRR17520069.4864176  
SRR17520069.4864177  
SRR17520069.4864178  
SRR17520069.4864179  
SRR17520069.4864180  
SRR17520069.4864181  
SRR17520069.4864182  
SRR17520069.4864183  
SRR17520069.4864184  
SRR17520069.4864185  
SRR17520069.4864186  
SRR17520069.4864187  
SRR17520069.4864188  
SRR17520069.4864189  
SRR17520069.4864190  
SRR17520069.4864191  
SRR17520069.4864192  
SRR17520069.4864193  
SRR17520069.4864194  
SRR17520069.4864195  
SRR17520069.4864196  
SRR17520069.4864197  
SRR17520069.4864198  
SRR17520069.4864199  
SRR17520069.4864200  
SRR17520069.4864201  
SRR17520069.4864202  
SRR17520069.4864204  
SRR17520069.4864205  
SRR17520069.4864206  
SRR17520069.4864207  
SRR17520069.4864208  
SRR17520069.4864209

SRR17520069.4864210  
SRR17520069.4864211  
SRR17520069.4864212  
SRR17520069.4864213  
SRR17520069.4864214  
SRR17520069.4864215  
SRR17520069.4864216  
SRR17520069.4864217  
SRR17520069.4864218  
SRR17520069.4864219  
SRR17520069.4864220  
SRR17520069.4864221  
SRR17520069.4864222  
SRR17520069.4864223  
SRR17520069.4864224  
SRR17520069.4864225  
SRR17520069.4864226  
SRR17520069.4864227  
SRR17520069.4864228  
SRR17520069.4864229  
SRR17520069.4864230  
SRR17520069.4864231  
SRR17520069.4864232  
SRR17520069.4864233  
SRR17520069.4864234  
SRR17520069.4864235  
SRR17520069.4864236  
SRR17520069.4864237  
SRR17520069.4864238  
SRR17520069.4864239  
SRR17520069.4864240  
SRR17520069.4864241  
SRR17520069.4864242  
SRR17520069.4864243  
SRR17520069.4864244  
SRR17520069.4864245  
SRR17520069.4864246  
SRR17520069.4864247  
SRR17520069.4864248  
SRR17520069.4864249  
SRR17520069.4864250  
SRR17520069.4864251  
SRR17520069.4864253  
SRR17520069.4864254  
SRR17520069.4864255  
SRR17520069.4866785  
SRR17520069.4866803

SRR17520069.4896669  
SRR17520069.4896670  
SRR17520069.4896671  
SRR17520069.4896672  
SRR17520069.4896673  
SRR17520069.4896674  
SRR17520069.4896675  
SRR17520069.4896676  
SRR17520069.4896677  
SRR17520069.4896678  
SRR17520069.4896679  
SRR17520069.4896680  
SRR17520069.4896681  
SRR17520069.4896682  
SRR17520069.4896683  
SRR17520069.4896684  
SRR17520069.4896685  
SRR17520069.4896686  
SRR17520069.4896687  
SRR17520069.4896688  
SRR17520069.4896689  
SRR17520069.4896690  
SRR17520069.4896691  
SRR17520069.4896692  
SRR17520069.4896693  
SRR17520069.4896694  
SRR17520069.4896695  
SRR17520069.4896696  
SRR17520069.4896697  
SRR17520069.4896698  
SRR17520069.4896699  
SRR17520069.4896700  
SRR17520069.4896701  
SRR17520069.4896702  
SRR17520069.4896703  
SRR17520069.4896704  
SRR17520069.4896705  
SRR17520069.4896706  
SRR17520069.4896707  
SRR17520069.4896708  
SRR17520069.4896709  
SRR17520069.4896710  
SRR17520069.4896711  
SRR17520069.4896712  
SRR17520069.4896713  
SRR17520069.4896714  
SRR17520069.4896715

SRR17520069.4896716  
SRR17520069.4896717  
SRR17520069.4896718  
SRR17520069.4896719  
SRR17520069.4896720  
SRR17520069.4896721  
SRR17520069.4896722  
SRR17520069.4896723  
SRR17520069.4896724  
SRR17520069.4896725  
SRR17520069.4896726  
SRR17520069.4896727  
SRR17520069.4896728  
SRR17520069.4896729  
SRR17520069.4896730  
SRR17520069.4896731  
SRR17520069.4896732  
SRR17520069.4896733  
SRR17520069.4896734  
SRR17520069.4896735  
SRR17520069.4896736  
SRR17520069.4896737  
SRR17520069.4896738  
SRR17520069.4896739  
SRR17520069.4896740  
SRR17520069.4896741  
SRR17520069.4896742  
SRR17520069.4896743  
SRR17520069.4896744  
SRR17520069.4896745  
SRR17520069.4896746  
SRR17520069.4896747  
SRR17520069.4896748  
SRR17520069.4896749  
SRR17520069.4896750  
SRR17520069.4896751  
SRR17520069.4896752  
SRR17520069.4896753  
SRR17520069.4896754  
SRR17520069.4896755  
SRR17520069.4896756  
SRR17520069.4896757  
SRR17520069.4896758  
SRR17520069.4896759  
SRR17520069.4896760  
SRR17520069.4896761  
SRR17520069.4896762

SRR17520069.4896763  
SRR17520069.4896764  
SRR17520069.4896765  
SRR17520069.4896766  
SRR17520069.4896767  
SRR17520069.4896768  
SRR17520069.4896769  
SRR17520069.4896770  
SRR17520069.4896771  
SRR17520069.4896772  
SRR17520069.4896773  
SRR17520069.4896774  
SRR17520069.4896775  
SRR17520069.4896776  
SRR17520069.4896777  
SRR17520069.4896778  
SRR17520069.4896779  
SRR17520069.4896780  
SRR17520069.4904589  
SRR17520069.4904641  
SRR17520069.4926857  
SRR17520069.4930309  
SRR17520069.4930312  
SRR17520069.4930314  
SRR17520069.4930315  
SRR17520069.4930317  
SRR17520069.4930318  
SRR17520069.4930319  
SRR17520069.4930320  
SRR17520069.4930321  
SRR17520069.4930322  
SRR17520069.4930323  
SRR17520069.4930324  
SRR17520069.4930325  
SRR17520069.4930327  
SRR17520069.4930328  
SRR17520069.4930329  
SRR17520069.4931231  
SRR17520069.4931254  
SRR17520069.4931273  
SRR17520069.4931289  
SRR17520069.4931310  
SRR17520069.4943378  
SRR17520069.4963400  
SRR17520069.4963401  
SRR17520069.4963402  
SRR17520069.4963403

SRR17520069.4963404  
SRR17520069.4963405  
SRR17520069.4963406  
SRR17520069.4963407  
SRR17520069.4963408  
SRR17520069.4963409  
SRR17520069.4963410  
SRR17520069.4963411  
SRR17520069.4963412  
SRR17520069.4963413  
SRR17520069.4963414  
SRR17520069.4963415  
SRR17520069.4963416  
SRR17520069.4963417  
SRR17520069.4963418  
SRR17520069.4963419  
SRR17520069.4963420  
SRR17520069.4963421  
SRR17520069.4963423  
SRR17520069.4963428  
SRR17520069.4963441  
SRR17520069.4963443  
SRR17520069.4966076  
SRR17520069.4966077  
SRR17520069.4966078  
SRR17520069.4966080  
SRR17520069.4966081  
SRR17520069.4966082  
SRR17520069.4966083  
SRR17520069.4966084  
SRR17520069.4966085  
SRR17520069.4966086  
SRR17520069.4966087  
SRR17520069.4966088  
SRR17520069.4966089  
SRR17520069.4966091  
SRR17520069.4966092  
SRR17520069.4966093  
SRR17520069.4966094  
SRR17520069.4966095  
SRR17520069.4966096  
SRR17520069.4966097  
SRR17520069.4966098  
SRR17520069.4966099  
SRR17520069.4966100  
SRR17520069.4966101  
SRR17520069.4966102

SRR17520069.4966103  
SRR17520069.4966104  
SRR17520069.4966105  
SRR17520069.4966106  
SRR17520069.4966107  
SRR17520069.4987257  
SRR17520069.4987258  
SRR17520069.4987259  
SRR17520069.4987260  
SRR17520069.4987262  
SRR17520069.4987690  
SRR17520069.4987691  
SRR17520069.4987692  
SRR17520069.4987693  
SRR17520069.4987694  
SRR17520069.4987695  
SRR17520069.4987696  
SRR17520069.4987697  
SRR17520069.4987698  
SRR17520069.4987699  
SRR17520069.4987700  
SRR17520069.4987701  
SRR17520069.4987702  
SRR17520069.4987703  
SRR17520069.4987704  
SRR17520069.4987705  
SRR17520069.4987706  
SRR17520069.4987707  
SRR17520069.4987708  
SRR17520069.4987709  
SRR17520069.4987710  
SRR17520069.4987711  
SRR17520069.4987712  
SRR17520069.4987713  
SRR17520069.4987714  
SRR17520069.4987715  
SRR17520069.4987716  
SRR17520069.4987717  
SRR17520069.4987718  
SRR17520069.4987719  
SRR17520069.4987720  
SRR17520069.4987721  
SRR17520069.4987722  
SRR17520069.4987723  
SRR17520069.4987724  
SRR17520069.4987725  
SRR17520069.4987726

SRR17520069.4987727  
SRR17520069.4987728  
SRR17520069.4987729  
SRR17520069.4987730  
SRR17520069.4987731  
SRR17520069.4987732  
SRR17520069.4987733  
SRR17520069.4987734  
SRR17520069.4987735  
SRR17520069.4987736  
SRR17520069.4987737  
SRR17520069.4987738  
SRR17520069.4987739  
SRR17520069.4987740  
SRR17520069.4987741  
SRR17520069.4987742  
SRR17520069.4987743  
SRR17520069.4987744  
SRR17520069.4987745  
SRR17520069.4987746  
SRR17520069.4987747  
SRR17520069.4987748  
SRR17520069.4987749  
SRR17520069.4987750  
SRR17520069.4987751  
SRR17520069.4987752  
SRR17520069.4987753  
SRR17520069.4987754  
SRR17520069.4987755  
SRR17520069.4987756  
SRR17520069.4987757  
SRR17520069.4987758  
SRR17520069.4987759  
SRR17520069.4987760  
SRR17520069.4987761  
SRR17520069.4987762  
SRR17520069.4987763  
SRR17520069.4987764  
SRR17520069.4987765  
SRR17520069.4987766  
SRR17520069.4987767  
SRR17520069.4987768  
SRR17520069.4987769  
SRR17520069.4987770  
SRR17520069.4987771  
SRR17520069.4987772  
SRR17520069.4987773



SRR17520069.4987774  
SRR17520069.4987775  
SRR17520069.4987776  
SRR17520069.4987777  
SRR17520069.4987778  
SRR17520069.4987779  
SRR17520069.4987780  
SRR17520069.4987781  
SRR17520069.4987782  
SRR17520069.4987783  
SRR17520069.4987784  
SRR17520069.4987785  
SRR17520069.4987786  
SRR17520069.4987787  
SRR17520069.4987788  
SRR17520069.4987789  
SRR17520069.4987791  
SRR17520069.4987792  
SRR17520069.4987793  
SRR17520069.4987794  
SRR17520069.4987795  
SRR17520069.4987796  
SRR17520069.4987797  
SRR17520069.4987798  
SRR17520069.4987799  
SRR17520069.4987800  
SRR17520069.4987802  
SRR17520069.4987803  
SRR17520069.4987804  
SRR17520069.4987805  
SRR17520069.4987806  
SRR17520069.4987807  
SRR17520069.4987808  
SRR17520069.4987809  
SRR17520069.4987810  
SRR17520069.4987811  
SRR17520069.4987812  
SRR17520069.4987813  
SRR17520069.4987814  
SRR17520069.4987815  
SRR17520069.4987816  
SRR17520069.4987817  
SRR17520069.4987818  
SRR17520069.4987819  
SRR17520069.4987820  
SRR17520069.4987821  
SRR17520069.4987822

SRR17520069.4987823  
SRR17520069.4987824  
SRR17520069.4987825  
SRR17520069.4987826  
SRR17520069.4987827  
SRR17520069.4987828  
SRR17520069.4987829  
SRR17520069.4987830  
SRR17520069.4987831  
SRR17520069.4987832  
SRR17520069.4989594  
SRR17520069.4989595  
SRR17520069.4989596  
SRR17520069.4989597  
SRR17520069.4989598  
SRR17520069.4989599  
SRR17520069.4989600  
SRR17520069.4989601  
SRR17520069.4989602  
SRR17520069.4989603  
SRR17520069.4989604  
SRR17520069.4989605  
SRR17520069.4989606  
SRR17520069.5000291  
SRR17520069.5000292  
SRR17520069.5000293  
SRR17520069.5000294  
SRR17520069.5000295  
SRR17520069.5000296  
SRR17520069.5000297  
SRR17520069.5000298  
SRR17520069.5000299  
SRR17520069.5000300  
SRR17520069.5000301  
SRR17520069.5000302  
SRR17520069.5000303  
SRR17520069.5000304  
SRR17520069.5000305  
SRR17520069.5000306  
SRR17520069.5000307  
SRR17520069.5000308  
SRR17520069.5000309  
SRR17520069.5000310  
SRR17520069.5000311  
SRR17520069.5000312  
SRR17520069.5000313  
SRR17520069.5000314

SRR17520069.5000315  
SRR17520069.5000316  
SRR17520069.5000317  
SRR17520069.5000318  
SRR17520069.5000319  
SRR17520069.5000320  
SRR17520069.5000321  
SRR17520069.5000322  
SRR17520069.5000323  
SRR17520069.5000324  
SRR17520069.5000325  
SRR17520069.5000326  
SRR17520069.5000327  
SRR17520069.5000328  
SRR17520069.5000329  
SRR17520069.5000330  
SRR17520069.5000331  
SRR17520069.5000332  
SRR17520069.5000333  
SRR17520069.5000334  
SRR17520069.5000335  
SRR17520069.5000336  
SRR17520069.5000337  
SRR17520069.5000338  
SRR17520069.5000339  
SRR17520069.5000340  
SRR17520069.5000341  
SRR17520069.5000342  
SRR17520069.5000343  
SRR17520069.5000344  
SRR17520069.5000345  
SRR17520069.5000346  
SRR17520069.5000347  
SRR17520069.5000348  
SRR17520069.5000350  
SRR17520069.5000351  
SRR17520069.5000352  
SRR17520069.5000353  
SRR17520069.5000354  
SRR17520069.5000355  
SRR17520069.5000356  
SRR17520069.5000357  
SRR17520069.5000359  
SRR17520069.5000360  
SRR17520069.5000361  
SRR17520069.5000362  
SRR17520069.5000363

SRR17520069.5000364  
SRR17520069.5000365  
SRR17520069.5000366  
SRR17520069.5000368  
SRR17520069.5000369  
SRR17520069.5000370  
SRR17520069.5000371  
SRR17520069.5000372  
SRR17520069.5000373  
SRR17520069.5000374  
SRR17520069.5000375  
SRR17520069.5000376  
SRR17520069.5000377  
SRR17520069.5000378  
SRR17520069.5000379  
SRR17520069.5000380  
SRR17520069.5000381  
SRR17520069.5000383  
SRR17520069.5000384  
SRR17520069.5000385  
SRR17520069.5000386  
SRR17520069.5000387  
SRR17520069.5000388  
SRR17520069.5000389  
SRR17520069.5000390  
SRR17520069.5000391  
SRR17520069.5000392  
SRR17520069.5000393  
SRR17520069.5000394  
SRR17520069.5000395  
SRR17520069.5000396  
SRR17520069.5000397  
SRR17520069.5000398  
SRR17520069.5000399  
SRR17520069.5000400  
SRR17520069.5000401  
SRR17520069.5000402  
SRR17520069.5000403  
SRR17520069.5000405  
SRR17520069.5000406  
SRR17520069.5000407  
SRR17520069.5000408  
SRR17520069.5000409  
SRR17520069.5000410  
SRR17520069.5000411  
SRR17520069.5000412  
SRR17520069.5000413

SRR17520069.5000414  
SRR17520069.5000415  
SRR17520069.5000417  
SRR17520069.5000418  
SRR17520069.5000419  
SRR17520069.5000420  
SRR17520069.5000421  
SRR17520069.5000423  
SRR17520069.5000424  
SRR17520069.5000426  
SRR17520069.5000427  
SRR17520069.5000428  
SRR17520069.5000429  
SRR17520069.5000431  
SRR17520069.5000432  
SRR17520069.5000433  
SRR17520069.5000434  
SRR17520069.5000435  
SRR17520069.5000436  
SRR17520069.5000437  
SRR17520069.5000438  
SRR17520069.5000439  
SRR17520069.5000440  
SRR17520069.5000441  
SRR17520069.5000442  
SRR17520069.5000443  
SRR17520069.5000444  
SRR17520069.5000445  
SRR17520069.5000446  
SRR17520069.5000447  
SRR17520069.5000448  
SRR17520069.5000450  
SRR17520069.5000451  
SRR17520069.5000452  
SRR17520069.5000453  
SRR17520069.5000454  
SRR17520069.5000455  
SRR17520069.5000457  
SRR17520069.5000458  
SRR17520069.5000459  
SRR17520069.5000461  
SRR17520069.5000462  
SRR17520069.5000463  
SRR17520069.5000467  
SRR17520069.5000468  
SRR17520069.5000469  
SRR17520069.5000470

SRR17520069.5000471  
SRR17520069.5000472  
SRR17520069.5006573  
SRR17520069.5006574  
SRR17520069.5006575  
SRR17520069.5006576  
SRR17520069.5006577  
SRR17520069.5006578  
SRR17520069.5006580  
SRR17520069.5006581  
SRR17520069.5006582  
SRR17520069.5006583  
SRR17520069.5006584  
SRR17520069.5006585  
SRR17520069.5006586  
SRR17520069.5006587  
SRR17520069.5006589  
SRR17520069.5006590  
SRR17520069.5006591  
SRR17520069.5006592  
SRR17520069.5006593  
SRR17520069.5006594  
SRR17520069.5006595  
SRR17520069.5006596  
SRR17520069.5006597  
SRR17520069.5006598  
SRR17520069.5006599  
SRR17520069.5006600  
SRR17520069.5006601  
SRR17520069.5006602  
SRR17520069.5006603  
SRR17520069.5006604  
SRR17520069.5006605  
SRR17520069.5006606  
SRR17520069.5006607  
SRR17520069.5006608  
SRR17520069.5006611  
SRR17520069.5006612  
SRR17520069.5006613  
SRR17520069.5006614  
SRR17520069.5006615  
SRR17520069.5006616  
SRR17520069.5006617  
SRR17520069.5006618  
SRR17520069.5006619  
SRR17520069.5006620  
SRR17520069.5006623

SRR17520069.5006624  
SRR17520069.5006625  
SRR17520069.5006626  
SRR17520069.5006627  
SRR17520069.5006628  
SRR17520069.5006629  
SRR17520069.5006630  
SRR17520069.5006631  
SRR17520069.5006632  
SRR17520069.5006633  
SRR17520069.5006634  
SRR17520069.5006635  
SRR17520069.5006636  
SRR17520069.5006637  
SRR17520069.5006638  
SRR17520069.5006639  
SRR17520069.5006640  
SRR17520069.5006641  
SRR17520069.5006642  
SRR17520069.5006643  
SRR17520069.5006645  
SRR17520069.5006646  
SRR17520069.5006647  
SRR17520069.5006649  
SRR17520069.5033158  
SRR17520069.5033159  
SRR17520069.5033160  
SRR17520069.5033161  
SRR17520069.5033162  
SRR17520069.5033163  
SRR17520069.5033164  
SRR17520069.5033165  
SRR17520069.5033167  
SRR17520069.5033168  
SRR17520069.5033169  
SRR17520069.5033170  
SRR17520069.5033171  
SRR17520069.5033173  
SRR17520069.5033176  
SRR17520069.5033178  
SRR17520069.5033179  
SRR17520069.5033180  
SRR17520069.5033182  
SRR17520069.5033186  
SRR17520069.5033187  
SRR17520069.5033188  
SRR17520069.5039427

SRR17520069. 5039428  
SRR17520069. 5039429  
SRR17520069. 5039431  
SRR17520069. 5039433  
SRR17520069. 5039435  
SRR17520069. 5039436  
SRR17520069. 5039437  
SRR17520069. 5039439  
SRR17520069. 5039440  
SRR17520069. 5039441  
SRR17520069. 5039442  
SRR17520069. 5039445  
SRR17520069. 5039446  
SRR17520069. 5039447  
SRR17520069. 5039448  
SRR17520069. 5039449  
SRR17520069. 5039450  
SRR17520069. 5039455  
SRR17520069. 5039456  
SRR17520069. 5039458  
SRR17520069. 5039459  
SRR17520069. 5039460  
SRR17520069. 5039461  
SRR17520069. 5039462  
SRR17520069. 5039463  
SRR17520069. 5039466  
SRR17520069. 5039467  
SRR17520069. 5039468  
SRR17520069. 5039469  
SRR17520069. 5039470  
SRR17520069. 5039471  
SRR17520069. 5039473  
SRR17520069. 5050059  
SRR17520069. 5050060  
SRR17520069. 5050061  
SRR17520069. 5050062  
SRR17520069. 5050063  
SRR17520069. 5050064  
SRR17520069. 5050065  
SRR17520069. 5050066  
SRR17520069. 5050067  
SRR17520069. 5050068  
SRR17520069. 5050069  
SRR17520069. 5050070  
SRR17520069. 5050071  
SRR17520069. 5050072  
SRR17520069. 5050073



SRR17520069.5050074  
SRR17520069.5050075  
SRR17520069.5050076  
SRR17520069.5050077  
SRR17520069.5050078  
SRR17520069.5050079  
SRR17520069.5050080  
SRR17520069.5050081  
SRR17520069.5050082  
SRR17520069.5050084  
SRR17520069.5050085  
SRR17520069.5050086  
SRR17520069.5050087  
SRR17520069.5050088  
SRR17520069.5050089  
SRR17520069.5050090  
SRR17520069.5050091  
SRR17520069.5050092  
SRR17520069.5050093  
SRR17520069.5050094  
SRR17520069.5050095  
SRR17520069.5050096  
SRR17520069.5050097  
SRR17520069.5050099  
SRR17520069.5050100  
SRR17520069.5050101  
SRR17520069.5050102  
SRR17520069.5050103  
SRR17520069.5050104  
SRR17520069.5050105  
SRR17520069.5050106  
SRR17520069.5050107  
SRR17520069.5050108  
SRR17520069.5050109  
SRR17520069.5050110  
SRR17520069.5050111  
SRR17520069.5050112  
SRR17520069.5050113  
SRR17520069.5050114  
SRR17520069.5050115  
SRR17520069.5050117  
SRR17520069.5050118  
SRR17520069.5050119  
SRR17520069.5050121  
SRR17520069.5050122  
SRR17520069.5050123  
SRR17520069.5050124

SRR17520069.5050125  
SRR17520069.5050126  
SRR17520069.5050127  
SRR17520069.5051036  
SRR17520069.5051037  
SRR17520069.5051042  
SRR17520069.5051043  
SRR17520069.5051045  
SRR17520069.5051047  
SRR17520069.5051048  
SRR17520069.5051049  
SRR17520069.5056949  
SRR17520069.5056950  
SRR17520069.5062050  
SRR17520069.5062051  
SRR17520069.5062052  
SRR17520069.5062053  
SRR17520069.5062054  
SRR17520069.5062055  
SRR17520069.5062056  
SRR17520069.5062057  
SRR17520069.5062058  
SRR17520069.5062059  
SRR17520069.5062060  
SRR17520069.5062061  
SRR17520069.5062062  
SRR17520069.5062063  
SRR17520069.5062064  
SRR17520069.5062065  
SRR17520069.5062066  
SRR17520069.5062067  
SRR17520069.5062068  
SRR17520069.5062069  
SRR17520069.5062070  
SRR17520069.5062071  
SRR17520069.5062072  
SRR17520069.5062073  
SRR17520069.5062074  
SRR17520069.5062075  
SRR17520069.5062076  
SRR17520069.5062077  
SRR17520069.5062078  
SRR17520069.5062079  
SRR17520069.5062080  
SRR17520069.5062082  
SRR17520069.5062083  
SRR17520069.5062084

SRR17520069. 5062085  
SRR17520069. 5062086  
SRR17520069. 5062087  
SRR17520069. 5062088  
SRR17520069. 5062089  
SRR17520069. 5062090  
SRR17520069. 5062091  
SRR17520069. 5062092  
SRR17520069. 5062093  
SRR17520069. 5062094  
SRR17520069. 5062095  
SRR17520069. 5062096  
SRR17520069. 5062097  
SRR17520069. 5062098  
SRR17520069. 5062099  
SRR17520069. 5062100  
SRR17520069. 5062101  
SRR17520069. 5062102  
SRR17520069. 5062103  
SRR17520069. 5087737  
SRR17520069. 5087738  
SRR17520069. 5087739  
SRR17520069. 5087740  
SRR17520069. 5087741  
SRR17520069. 5087742  
SRR17520069. 5087743  
SRR17520069. 5087744  
SRR17520069. 5087745  
SRR17520069. 5087746  
SRR17520069. 5087747  
SRR17520069. 5087748  
SRR17520069. 5087749  
SRR17520069. 5087750  
SRR17520069. 5087751  
SRR17520069. 5087752  
SRR17520069. 5087753  
SRR17520069. 5087754  
SRR17520069. 5087755  
SRR17520069. 5087756  
SRR17520069. 5087757  
SRR17520069. 5087758  
SRR17520069. 5087759  
SRR17520069. 5087760  
SRR17520069. 5087761  
SRR17520069. 5087762  
SRR17520069. 5087763  
SRR17520069. 5087764

SRR17520069. 5087765  
SRR17520069. 5087766  
SRR17520069. 5087768  
SRR17520069. 5087769  
SRR17520069. 5087770  
SRR17520069. 5087771  
SRR17520069. 5087772  
SRR17520069. 5087773  
SRR17520069. 5087774  
SRR17520069. 5087775  
SRR17520069. 5087776  
SRR17520069. 5087777  
SRR17520069. 5087778  
SRR17520069. 5087779  
SRR17520069. 5087780  
SRR17520069. 5087781  
SRR17520069. 5087782  
SRR17520069. 5087783  
SRR17520069. 5087784  
SRR17520069. 5087785  
SRR17520069. 5087787  
SRR17520069. 5087788  
SRR17520069. 5087790  
SRR17520069. 5087791  
SRR17520069. 5087792  
SRR17520069. 5087793  
SRR17520069. 5087794  
SRR17520069. 5087795  
SRR17520069. 5087796  
SRR17520069. 5087797  
SRR17520069. 5087798  
SRR17520069. 5087799  
SRR17520069. 5087800  
SRR17520069. 5087801  
SRR17520069. 5087802  
SRR17520069. 5087803  
SRR17520069. 5087804  
SRR17520069. 5087805  
SRR17520069. 5087806  
SRR17520069. 5087807  
SRR17520069. 5087808  
SRR17520069. 5087809  
SRR17520069. 5087810  
SRR17520069. 5087811  
SRR17520069. 5087812  
SRR17520069. 5087813  
SRR17520069. 5087814

SRR17520069. 5087815  
SRR17520069. 5087816  
SRR17520069. 5087817  
SRR17520069. 5087818  
SRR17520069. 5087819  
SRR17520069. 5087820  
SRR17520069. 5087821  
SRR17520069. 5087822  
SRR17520069. 5087823  
SRR17520069. 5087824  
SRR17520069. 5087825  
SRR17520069. 5087826  
SRR17520069. 5087827  
SRR17520069. 5087828  
SRR17520069. 5087829  
SRR17520069. 5087830  
SRR17520069. 5087831  
SRR17520069. 5087832  
SRR17520069. 5087833  
SRR17520069. 5087834  
SRR17520069. 5087835  
SRR17520069. 5087836  
SRR17520069. 5087837  
SRR17520069. 5087838  
SRR17520069. 5087839  
SRR17520069. 5087840  
SRR17520069. 5087841  
SRR17520069. 5087842  
SRR17520069. 5087843  
SRR17520069. 5087844  
SRR17520069. 5087845  
SRR17520069. 5087846  
SRR17520069. 5087847  
SRR17520069. 5087848  
SRR17520069. 5087849  
SRR17520069. 5087850  
SRR17520069. 5087851  
SRR17520069. 5087852  
SRR17520069. 5087853  
SRR17520069. 5087854  
SRR17520069. 5087855  
SRR17520069. 5087856  
SRR17520069. 5087857  
SRR17520069. 5087858  
SRR17520069. 5087859  
SRR17520069. 5087860  
SRR17520069. 5087861

SRR17520069. 5087862  
SRR17520069. 5087864  
SRR17520069. 5087865  
SRR17520069. 5087866  
SRR17520069. 5087867  
SRR17520069. 5087868  
SRR17520069. 5087869  
SRR17520069. 5087870  
SRR17520069. 5087871  
SRR17520069. 5087872  
SRR17520069. 5087873  
SRR17520069. 5087874  
SRR17520069. 5087875  
SRR17520069. 5087876  
SRR17520069. 5087877  
SRR17520069. 5087878  
SRR17520069. 5087879  
SRR17520069. 5087880  
SRR17520069. 5087881  
SRR17520069. 5087882  
SRR17520069. 5087883  
SRR17520069. 5087884  
SRR17520069. 5087885  
SRR17520069. 5087886  
SRR17520069. 5087887  
SRR17520069. 5087888  
SRR17520069. 5087889  
SRR17520069. 5087890  
SRR17520069. 5087891  
SRR17520069. 5087892  
SRR17520069. 5087893  
SRR17520069. 5087894  
SRR17520069. 5087895  
SRR17520069. 5087896  
SRR17520069. 5087897  
SRR17520069. 5087898  
SRR17520069. 5087899  
SRR17520069. 5087900  
SRR17520069. 5087901  
SRR17520069. 5087902  
SRR17520069. 5087903  
SRR17520069. 5087904  
SRR17520069. 5087905  
SRR17520069. 5087906  
SRR17520069. 5087907  
SRR17520069. 5087908  
SRR17520069. 5087909

SRR17520069. 5087911  
SRR17520069. 5087912  
SRR17520069. 5087913  
SRR17520069. 5087914  
SRR17520069. 5087915  
SRR17520069. 5087916  
SRR17520069. 5087917  
SRR17520069. 5087918  
SRR17520069. 5087919  
SRR17520069. 5087920  
SRR17520069. 5087921  
SRR17520069. 5087922  
SRR17520069. 5087923  
SRR17520069. 5087924  
SRR17520069. 5087925  
SRR17520069. 5087926  
SRR17520069. 5087927  
SRR17520069. 5087928  
SRR17520069. 5087929  
SRR17520069. 5087930  
SRR17520069. 5087931  
SRR17520069. 5087932  
SRR17520069. 5094259  
SRR17520069. 5095390  
SRR17520069. 5101506  
SRR17520069. 5116363  
SRR17520069. 5125473  
SRR17520069. 5125479  
SRR17520069. 5125482  
SRR17520069. 5125489  
SRR17520069. 5125490  
SRR17520069. 5125495  
SRR17520069. 5125502  
SRR17520069. 5125512  
SRR17520069. 5125513  
SRR17520069. 5125514  
SRR17520069. 5125516  
SRR17520069. 5125520  
SRR17520069. 5125530  
SRR17520069. 5125533  
SRR17520069. 5126127  
SRR17520069. 5131270  
SRR17520069. 5131271  
SRR17520069. 5131272  
SRR17520069. 5131273  
SRR17520069. 5131274  
SRR17520069. 5131275

SRR17520069. 5131276  
SRR17520069. 5131277  
SRR17520069. 5131278  
SRR17520069. 5131279  
SRR17520069. 5131280  
SRR17520069. 5131281  
SRR17520069. 5131282  
SRR17520069. 5131283  
SRR17520069. 5131285  
SRR17520069. 5131286  
SRR17520069. 5131287  
SRR17520069. 5131288  
SRR17520069. 5131289  
SRR17520069. 5131290  
SRR17520069. 5131291  
SRR17520069. 5131292  
SRR17520069. 5131293  
SRR17520069. 5131294  
SRR17520069. 5131295  
SRR17520069. 5131296  
SRR17520069. 5131297  
SRR17520069. 5131298  
SRR17520069. 5131299  
SRR17520069. 5131300  
SRR17520069. 5131301  
SRR17520069. 5131302  
SRR17520069. 5131303  
SRR17520069. 5131304  
SRR17520069. 5131305  
SRR17520069. 5131306  
SRR17520069. 5131307  
SRR17520069. 5131308  
SRR17520069. 5131309  
SRR17520069. 5131310  
SRR17520069. 5131311  
SRR17520069. 5131312  
SRR17520069. 5131313  
SRR17520069. 5131314  
SRR17520069. 5131315  
SRR17520069. 5131316  
SRR17520069. 5131317  
SRR17520069. 5131318  
SRR17520069. 5131319  
SRR17520069. 5131320  
SRR17520069. 5131321  
SRR17520069. 5131322  
SRR17520069. 5131323



SRR17520069. 5131324  
SRR17520069. 5131325  
SRR17520069. 5131326  
SRR17520069. 5131327  
SRR17520069. 5131328  
SRR17520069. 5131329  
SRR17520069. 5131330  
SRR17520069. 5131331  
SRR17520069. 5131332  
SRR17520069. 5131333  
SRR17520069. 5131334  
SRR17520069. 5131335  
SRR17520069. 5131336  
SRR17520069. 5131337  
SRR17520069. 5131338  
SRR17520069. 5131339  
SRR17520069. 5131340  
SRR17520069. 5131341  
SRR17520069. 5131342  
SRR17520069. 5131343  
SRR17520069. 5131344  
SRR17520069. 5131345  
SRR17520069. 5131346  
SRR17520069. 5131347  
SRR17520069. 5131348  
SRR17520069. 5131349  
SRR17520069. 5131350  
SRR17520069. 5131351  
SRR17520069. 5131352  
SRR17520069. 5131353  
SRR17520069. 5131354  
SRR17520069. 5131355  
SRR17520069. 5131356  
SRR17520069. 5131357  
SRR17520069. 5131358  
SRR17520069. 5131359  
SRR17520069. 5131360  
SRR17520069. 5131361  
SRR17520069. 5131362  
SRR17520069. 5131363  
SRR17520069. 5131364  
SRR17520069. 5131365  
SRR17520069. 5131366  
SRR17520069. 5131367  
SRR17520069. 5131368  
SRR17520069. 5131369  
SRR17520069. 5131370

SRR17520069. 5131371  
SRR17520069. 5131372  
SRR17520069. 5131373  
SRR17520069. 5131374  
SRR17520069. 5131376  
SRR17520069. 5131377  
SRR17520069. 5131378  
SRR17520069. 5131380  
SRR17520069. 5131381  
SRR17520069. 5131382  
SRR17520069. 5131383  
SRR17520069. 5131384  
SRR17520069. 5131385  
SRR17520069. 5131386  
SRR17520069. 5131387  
SRR17520069. 5131388  
SRR17520069. 5131389  
SRR17520069. 5131390  
SRR17520069. 5131391  
SRR17520069. 5131392  
SRR17520069. 5131393  
SRR17520069. 5131395  
SRR17520069. 5131396  
SRR17520069. 5131397  
SRR17520069. 5131398  
SRR17520069. 5131399  
SRR17520069. 5131400  
SRR17520069. 5131401  
SRR17520069. 5131402  
SRR17520069. 5131403  
SRR17520069. 5131404  
SRR17520069. 5131405  
SRR17520069. 5131406  
SRR17520069. 5131408  
SRR17520069. 5139421  
SRR17520069. 5139422  
SRR17520069. 5139423  
SRR17520069. 5139424  
SRR17520069. 5139425  
SRR17520069. 5139426  
SRR17520069. 5139428  
SRR17520069. 5139429  
SRR17520069. 5139430  
SRR17520069. 5139431  
SRR17520069. 5139432  
SRR17520069. 5170875  
SRR17520069. 5170876

SRR17520069.5170878  
SRR17520069.5170880  
SRR17520069.5170882  
SRR17520069.5175799  
SRR17520069.5175809  
SRR17520069.5176043  
SRR17520069.5176044  
SRR17520069.5176045  
SRR17520069.5176046  
SRR17520069.5176047  
SRR17520069.5176048  
SRR17520069.5176049  
SRR17520069.5176050  
SRR17520069.5176051  
SRR17520069.5176052  
SRR17520069.5176053  
SRR17520069.5176054  
SRR17520069.5176055  
SRR17520069.5176056  
SRR17520069.5176057  
SRR17520069.5176058  
SRR17520069.5176059  
SRR17520069.5176060  
SRR17520069.5176061  
SRR17520069.5176062  
SRR17520069.5176063  
SRR17520069.5176064  
SRR17520069.5176065  
SRR17520069.5176066  
SRR17520069.5176067  
SRR17520069.5176068  
SRR17520069.5176073  
SRR17520069.5176074  
SRR17520069.5176075  
SRR17520069.5176076  
SRR17520069.5176077  
SRR17520069.5176079  
SRR17520069.5176080  
SRR17520069.5176081  
SRR17520069.5176082  
SRR17520069.5176085  
SRR17520069.5176086  
SRR17520069.5176087  
SRR17520069.5176088  
SRR17520069.5176089  
SRR17520069.5176090  
SRR17520069.5176092

SRR17520069.5176093  
SRR17520069.5176094  
SRR17520069.5176095  
SRR17520069.5176096  
SRR17520069.5176097  
SRR17520069.5176099  
SRR17520069.5176100  
SRR17520069.5176101  
SRR17520069.5176102  
SRR17520069.5176103  
SRR17520069.5176104  
SRR17520069.5176105  
SRR17520069.5176106  
SRR17520069.5176107  
SRR17520069.5176108  
SRR17520069.5176109  
SRR17520069.5176110  
SRR17520069.5176112  
SRR17520069.5176113  
SRR17520069.5176114  
SRR17520069.5176115  
SRR17520069.5176117  
SRR17520069.5176118  
SRR17520069.5176119  
SRR17520069.5176120  
SRR17520069.5176121  
SRR17520069.5176122  
SRR17520069.5176123  
SRR17520069.5176124  
SRR17520069.5176126  
SRR17520069.5176127  
SRR17520069.5176128  
SRR17520069.5176129  
SRR17520069.5176130  
SRR17520069.5176131  
SRR17520069.5176132  
SRR17520069.5176133  
SRR17520069.5176134  
SRR17520069.5176136  
SRR17520069.5176137  
SRR17520069.5176138  
SRR17520069.5176139  
SRR17520069.5176140  
SRR17520069.5176141  
SRR17520069.5176142  
SRR17520069.5176143  
SRR17520069.5176145

SRR17520069. 5176146  
SRR17520069. 5176147  
SRR17520069. 5176148  
SRR17520069. 5176149  
SRR17520069. 5176150  
SRR17520069. 5176151  
SRR17520069. 5176152  
SRR17520069. 5176153  
SRR17520069. 5176154  
SRR17520069. 5176155  
SRR17520069. 5176156  
SRR17520069. 5176157  
SRR17520069. 5176158  
SRR17520069. 5176159  
SRR17520069. 5176160  
SRR17520069. 5176161  
SRR17520069. 5176162  
SRR17520069. 5184225  
SRR17520069. 5199448  
SRR17520069. 5200056  
SRR17520069. 5200057  
SRR17520069. 5200058  
SRR17520069. 5200059  
SRR17520069. 5200062  
SRR17520069. 5200063  
SRR17520069. 5200064  
SRR17520069. 5200065  
SRR17520069. 5200066  
SRR17520069. 5200067  
SRR17520069. 5200068  
SRR17520069. 5200069  
SRR17520069. 5200070  
SRR17520069. 5200071  
SRR17520069. 5200072  
SRR17520069. 5200073  
SRR17520069. 5200074  
SRR17520069. 5200075  
SRR17520069. 5200076  
SRR17520069. 5200077  
SRR17520069. 5200078  
SRR17520069. 5200079  
SRR17520069. 5200080  
SRR17520069. 5200081  
SRR17520069. 5200082  
SRR17520069. 5200083  
SRR17520069. 5200084  
SRR17520069. 5200085

SRR17520069.5200086  
SRR17520069.5200087  
SRR17520069.5200088  
SRR17520069.5200089  
SRR17520069.5200090  
SRR17520069.5200092  
SRR17520069.5200093  
SRR17520069.5200094  
SRR17520069.5200095  
SRR17520069.5200096  
SRR17520069.5200097  
SRR17520069.5200098  
SRR17520069.5200099  
SRR17520069.5200100  
SRR17520069.5200101  
SRR17520069.5200102  
SRR17520069.5200103  
SRR17520069.5200105  
SRR17520069.5200106  
SRR17520069.5200107  
SRR17520069.5200108  
SRR17520069.5200109  
SRR17520069.5200110  
SRR17520069.5200111  
SRR17520069.5200112  
SRR17520069.5200113  
SRR17520069.5200114  
SRR17520069.5200115  
SRR17520069.5200117  
SRR17520069.5200118  
SRR17520069.5200119  
SRR17520069.5200120  
SRR17520069.5200121  
SRR17520069.5200122  
SRR17520069.5200124  
SRR17520069.5200125  
SRR17520069.5200126  
SRR17520069.5200127  
SRR17520069.5200128  
SRR17520069.5200129  
SRR17520069.5200130  
SRR17520069.5200131  
SRR17520069.5200132  
SRR17520069.5200133  
SRR17520069.5200134  
SRR17520069.5200135  
SRR17520069.5200136

SRR17520069.5200137  
SRR17520069.5200138  
SRR17520069.5200166  
SRR17520069.5200167  
SRR17520069.5200168  
SRR17520069.5200169  
SRR17520069.5200170  
SRR17520069.5200171  
SRR17520069.5200172  
SRR17520069.5200173  
SRR17520069.5200174  
SRR17520069.5200177  
SRR17520069.5200178  
SRR17520069.5200179  
SRR17520069.5200180  
SRR17520069.5200181  
SRR17520069.5200182  
SRR17520069.5200183  
SRR17520069.5200184  
SRR17520069.5200185  
SRR17520069.5200186  
SRR17520069.5200187  
SRR17520069.5200188  
SRR17520069.5200189  
SRR17520069.5200190  
SRR17520069.5200191  
SRR17520069.5200192  
SRR17520069.5200193  
SRR17520069.5200194  
SRR17520069.5200195  
SRR17520069.5200196  
SRR17520069.5200197  
SRR17520069.5200198  
SRR17520069.5200199  
SRR17520069.5200200  
SRR17520069.5200201  
SRR17520069.5200202  
SRR17520069.5200203  
SRR17520069.5200204  
SRR17520069.5200205  
SRR17520069.5200206  
SRR17520069.5200207  
SRR17520069.5200208  
SRR17520069.5200209  
SRR17520069.5200210  
SRR17520069.5200211  
SRR17520069.5200212

SRR17520069.5200213  
SRR17520069.5200214  
SRR17520069.5200215  
SRR17520069.5200216  
SRR17520069.5200217  
SRR17520069.5200218  
SRR17520069.5200219  
SRR17520069.5200220  
SRR17520069.5200221  
SRR17520069.5200222  
SRR17520069.5200223  
SRR17520069.5207215  
SRR17520069.5213932  
SRR17520069.5213933  
SRR17520069.5213934  
SRR17520069.5213935  
SRR17520069.5213936  
SRR17520069.5213937  
SRR17520069.5213938  
SRR17520069.5213939  
SRR17520069.5213940  
SRR17520069.5213941  
SRR17520069.5213942  
SRR17520069.5213943  
SRR17520069.5213944  
SRR17520069.5213945  
SRR17520069.5213946  
SRR17520069.5213947  
SRR17520069.5213948  
SRR17520069.5213949  
SRR17520069.5213950  
SRR17520069.5213951  
SRR17520069.5213952  
SRR17520069.5213953  
SRR17520069.5213954  
SRR17520069.5213955  
SRR17520069.5213956  
SRR17520069.5213957  
SRR17520069.5213958  
SRR17520069.5213959  
SRR17520069.5213960  
SRR17520069.5213961  
SRR17520069.5213962  
SRR17520069.5213963  
SRR17520069.5213964  
SRR17520069.5213965  
SRR17520069.5213966



SRR17520069. 5213967  
SRR17520069. 5213968  
SRR17520069. 5213969  
SRR17520069. 5213970  
SRR17520069. 5213971  
SRR17520069. 5213972  
SRR17520069. 5213973  
SRR17520069. 5213974  
SRR17520069. 5213975  
SRR17520069. 5213976  
SRR17520069. 5213977  
SRR17520069. 5213978  
SRR17520069. 5213979  
SRR17520069. 5213980  
SRR17520069. 5213981  
SRR17520069. 5213982  
SRR17520069. 5213983  
SRR17520069. 5213984  
SRR17520069. 5213985  
SRR17520069. 5213986  
SRR17520069. 5213987  
SRR17520069. 5213988  
SRR17520069. 5213989  
SRR17520069. 5213990  
SRR17520069. 5213991  
SRR17520069. 5213992  
SRR17520069. 5213993  
SRR17520069. 5213994  
SRR17520069. 5213995  
SRR17520069. 5213996  
SRR17520069. 5213997  
SRR17520069. 5213998  
SRR17520069. 5213999  
SRR17520069. 5214000  
SRR17520069. 5214001  
SRR17520069. 5214002  
SRR17520069. 5214003  
SRR17520069. 5214004  
SRR17520069. 5214005  
SRR17520069. 5214006  
SRR17520069. 5214007  
SRR17520069. 5214008  
SRR17520069. 5214009  
SRR17520069. 5214010  
SRR17520069. 5214011  
SRR17520069. 5214012  
SRR17520069. 5214013

SRR17520069.5214014  
SRR17520069.5214015  
SRR17520069.5214016  
SRR17520069.5214017  
SRR17520069.5214018  
SRR17520069.5214019  
SRR17520069.5214020  
SRR17520069.5214021  
SRR17520069.5214022  
SRR17520069.5214023  
SRR17520069.5214024  
SRR17520069.5214025  
SRR17520069.5214026  
SRR17520069.5214027  
SRR17520069.5214028  
SRR17520069.5214029  
SRR17520069.5214030  
SRR17520069.5214031  
SRR17520069.5214032  
SRR17520069.5214033  
SRR17520069.5214034  
SRR17520069.5214035  
SRR17520069.5214036  
SRR17520069.5214037  
SRR17520069.5214038  
SRR17520069.5214039  
SRR17520069.5214040  
SRR17520069.5214041  
SRR17520069.5214042  
SRR17520069.5214043  
SRR17520069.5214045  
SRR17520069.5214046  
SRR17520069.5214047  
SRR17520069.5214048  
SRR17520069.5214049  
SRR17520069.5214050  
SRR17520069.5214051  
SRR17520069.5214052  
SRR17520069.5214053  
SRR17520069.5214054  
SRR17520069.5214055  
SRR17520069.5214056  
SRR17520069.5214057  
SRR17520069.5214058  
SRR17520069.5214059  
SRR17520069.5214060  
SRR17520069.5214061

SRR17520069. 5214062  
SRR17520069. 5214063  
SRR17520069. 5214064  
SRR17520069. 5214065  
SRR17520069. 5214066  
SRR17520069. 5261387  
SRR17520069. 5261388  
SRR17520069. 5261389  
SRR17520069. 5261390  
SRR17520069. 5261391  
SRR17520069. 5261392  
SRR17520069. 5261393  
SRR17520069. 5261394  
SRR17520069. 5261395  
SRR17520069. 5261396  
SRR17520069. 5261397  
SRR17520069. 5261398  
SRR17520069. 5261399  
SRR17520069. 5261400  
SRR17520069. 5261401  
SRR17520069. 5261402  
SRR17520069. 5261404  
SRR17520069. 5261405  
SRR17520069. 5261406  
SRR17520069. 5261407  
SRR17520069. 5261408  
SRR17520069. 5261409  
SRR17520069. 5261410  
SRR17520069. 5261411  
SRR17520069. 5261412  
SRR17520069. 5261414  
SRR17520069. 5261415  
SRR17520069. 5261416  
SRR17520069. 5261417  
SRR17520069. 5261419  
SRR17520069. 5261420  
SRR17520069. 5261422  
SRR17520069. 5261423  
SRR17520069. 5261424  
SRR17520069. 5261425  
SRR17520069. 5261426  
SRR17520069. 5261427  
SRR17520069. 5261428  
SRR17520069. 5261429  
SRR17520069. 5261431  
SRR17520069. 5261432  
SRR17520069. 5261433

SRR17520069. 5261434  
SRR17520069. 5261435  
SRR17520069. 5261436  
SRR17520069. 5261437  
SRR17520069. 5261438  
SRR17520069. 5261439  
SRR17520069. 5261440  
SRR17520069. 5261442  
SRR17520069. 5261443  
SRR17520069. 5261444  
SRR17520069. 5261445  
SRR17520069. 5261446  
SRR17520069. 5261449  
SRR17520069. 5261450  
SRR17520069. 5261451  
SRR17520069. 5261452  
SRR17520069. 5261453  
SRR17520069. 5261454  
SRR17520069. 5261455  
SRR17520069. 5261457  
SRR17520069. 5261458  
SRR17520069. 5316911  
SRR17520069. 5316913  
SRR17520069. 5316928  
SRR17520069. 5321504  
SRR17520069. 5321541  
SRR17520069. 5344210  
SRR17520069. 5344211  
SRR17520069. 5344212  
SRR17520069. 5344213  
SRR17520069. 5344214  
SRR17520069. 5344215  
SRR17520069. 5344216  
SRR17520069. 5344217  
SRR17520069. 5344218  
SRR17520069. 5344219  
SRR17520069. 5344220  
SRR17520069. 5344221  
SRR17520069. 5344222  
SRR17520069. 5344223  
SRR17520069. 5344224  
SRR17520069. 5344225  
SRR17520069. 5344226  
SRR17520069. 5344227  
SRR17520069. 5344228  
SRR17520069. 5344229  
SRR17520069. 5344230

SRR17520069.5344231  
SRR17520069.5344232  
SRR17520069.5344233  
SRR17520069.5344234  
SRR17520069.5344235  
SRR17520069.5344236  
SRR17520069.5344237  
SRR17520069.5344238  
SRR17520069.5344239  
SRR17520069.5344240  
SRR17520069.5344241  
SRR17520069.5344242  
SRR17520069.5344243  
SRR17520069.5344244  
SRR17520069.5344245  
SRR17520069.5344246  
SRR17520069.5344247  
SRR17520069.5344248  
SRR17520069.5344249  
SRR17520069.5344250  
SRR17520069.5344251  
SRR17520069.5344252  
SRR17520069.5344253  
SRR17520069.5344254  
SRR17520069.5344255  
SRR17520069.5344256  
SRR17520069.5344257  
SRR17520069.5344258  
SRR17520069.5344259  
SRR17520069.5344260  
SRR17520069.5344261  
SRR17520069.5344262  
SRR17520069.5344263  
SRR17520069.5344264  
SRR17520069.5344265  
SRR17520069.5344266  
SRR17520069.5344267  
SRR17520069.5344268  
SRR17520069.5344269  
SRR17520069.5344270  
SRR17520069.5344271  
SRR17520069.5344272  
SRR17520069.5344273  
SRR17520069.5344274  
SRR17520069.5344275  
SRR17520069.5344276  
SRR17520069.5344277

SRR17520069. 5344278  
SRR17520069. 5344279  
SRR17520069. 5344280  
SRR17520069. 5344281  
SRR17520069. 5344282  
SRR17520069. 5344283  
SRR17520069. 5344284  
SRR17520069. 5344285  
SRR17520069. 5344286  
SRR17520069. 5344287  
SRR17520069. 5344288  
SRR17520069. 5344289  
SRR17520069. 5344290  
SRR17520069. 5344291  
SRR17520069. 5344292  
SRR17520069. 5344293  
SRR17520069. 5344294  
SRR17520069. 5344295  
SRR17520069. 5344296  
SRR17520069. 5344297  
SRR17520069. 5344298  
SRR17520069. 5344299  
SRR17520069. 5344300  
SRR17520069. 5344301  
SRR17520069. 5344302  
SRR17520069. 5344303  
SRR17520069. 5344304  
SRR17520069. 5344305  
SRR17520069. 5344306  
SRR17520069. 5344307  
SRR17520069. 5344308  
SRR17520069. 5344309  
SRR17520069. 5344310  
SRR17520069. 5344311  
SRR17520069. 5344312  
SRR17520069. 5344313  
SRR17520069. 5344314  
SRR17520069. 5344315  
SRR17520069. 5344316  
SRR17520069. 5344317  
SRR17520069. 5344318  
SRR17520069. 5344319  
SRR17520069. 5344320  
SRR17520069. 5344321  
SRR17520069. 5344322  
SRR17520069. 5344323  
SRR17520069. 5344324

SRR17520069. 5344326  
SRR17520069. 5344327  
SRR17520069. 5344328  
SRR17520069. 5344329  
SRR17520069. 5344330  
SRR17520069. 5344331  
SRR17520069. 5344332  
SRR17520069. 5344333  
SRR17520069. 5344334  
SRR17520069. 5344335  
SRR17520069. 5344336  
SRR17520069. 5344337  
SRR17520069. 5344338  
SRR17520069. 5344339  
SRR17520069. 5344340  
SRR17520069. 5344341  
SRR17520069. 5344342  
SRR17520069. 5344343  
SRR17520069. 5344344  
SRR17520069. 5344345  
SRR17520069. 5344346  
SRR17520069. 5344347  
SRR17520069. 5344348  
SRR17520069. 5344349  
SRR17520069. 5344350  
SRR17520069. 5344351  
SRR17520069. 5344352  
SRR17520069. 5344353  
SRR17520069. 5344354  
SRR17520069. 5344355  
SRR17520069. 5344356  
SRR17520069. 5344358  
SRR17520069. 5344359  
SRR17520069. 5344360  
SRR17520069. 5344361  
SRR17520069. 5344362  
SRR17520069. 5344363  
SRR17520069. 5344364  
SRR17520069. 5344365  
SRR17520069. 5344366  
SRR17520069. 5344367  
SRR17520069. 5344368  
SRR17520069. 5344369  
SRR17520069. 5344370  
SRR17520069. 5344372  
SRR17520069. 5344373  
SRR17520069. 5344374

SRR17520069.5344375  
SRR17520069.5344376  
SRR17520069.5344377  
SRR17520069.5344378  
SRR17520069.5344379  
SRR17520069.5344380  
SRR17520069.5344381  
SRR17520069.5344382  
SRR17520069.5344383  
SRR17520069.5344384  
SRR17520069.5344385  
SRR17520069.5351555  
SRR17520069.5351620  
SRR17520069.5356291  
SRR17520069.5358482  
SRR17520069.5369497  
SRR17520069.5369498  
SRR17520069.5369500  
SRR17520069.5369501  
SRR17520069.5369507  
SRR17520069.5378973  
SRR17520069.5378974  
SRR17520069.5378976  
SRR17520069.5378977  
SRR17520069.5378978  
SRR17520069.5378979  
SRR17520069.5378980  
SRR17520069.5378981  
SRR17520069.5378982  
SRR17520069.5378983  
SRR17520069.5378984  
SRR17520069.5378985  
SRR17520069.5378986  
SRR17520069.5378987  
SRR17520069.5378988  
SRR17520069.5378989  
SRR17520069.5378991  
SRR17520069.5378992  
SRR17520069.5385266  
SRR17520069.5389865  
SRR17520069.5389866  
SRR17520069.5389867  
SRR17520069.5389868  
SRR17520069.5389869  
SRR17520069.5389870  
SRR17520069.5389871  
SRR17520069.5389873



SRR17520069. 5389874  
SRR17520069. 5389875  
SRR17520069. 5389876  
SRR17520069. 5389877  
SRR17520069. 5389878  
SRR17520069. 5389879  
SRR17520069. 5389880  
SRR17520069. 5389881  
SRR17520069. 5389882  
SRR17520069. 5389883  
SRR17520069. 5389884  
SRR17520069. 5389885  
SRR17520069. 5389886  
SRR17520069. 5389887  
SRR17520069. 5389888  
SRR17520069. 5389889  
SRR17520069. 5389890  
SRR17520069. 5389891  
SRR17520069. 5389892  
SRR17520069. 5389893  
SRR17520069. 5389894  
SRR17520069. 5389895  
SRR17520069. 5389896  
SRR17520069. 5389897  
SRR17520069. 5389898  
SRR17520069. 5389899  
SRR17520069. 5389900  
SRR17520069. 5389901  
SRR17520069. 5389902  
SRR17520069. 5389903  
SRR17520069. 5389904  
SRR17520069. 5389905  
SRR17520069. 5389906  
SRR17520069. 5389907  
SRR17520069. 5389908  
SRR17520069. 5389909  
SRR17520069. 5389910  
SRR17520069. 5389911  
SRR17520069. 5389912  
SRR17520069. 5389913  
SRR17520069. 5389914  
SRR17520069. 5389915  
SRR17520069. 5389916  
SRR17520069. 5389917  
SRR17520069. 5389918  
SRR17520069. 5389919  
SRR17520069. 5389920

SRR17520069. 5389921  
SRR17520069. 5389922  
SRR17520069. 5389923  
SRR17520069. 5389924  
SRR17520069. 5389925  
SRR17520069. 5397419  
SRR17520069. 5397420  
SRR17520069. 5397421  
SRR17520069. 5397422  
SRR17520069. 5397423  
SRR17520069. 5397424  
SRR17520069. 5397425  
SRR17520069. 5397426  
SRR17520069. 5397427  
SRR17520069. 5397428  
SRR17520069. 5397429  
SRR17520069. 5397430  
SRR17520069. 5397431  
SRR17520069. 5397432  
SRR17520069. 5397433  
SRR17520069. 5397434  
SRR17520069. 5397435  
SRR17520069. 5397436  
SRR17520069. 5397437  
SRR17520069. 5397438  
SRR17520069. 5397439  
SRR17520069. 5397440  
SRR17520069. 5397441  
SRR17520069. 5397442  
SRR17520069. 5397443  
SRR17520069. 5397444  
SRR17520069. 5397445  
SRR17520069. 5397446  
SRR17520069. 5397447  
SRR17520069. 5397448  
SRR17520069. 5397449  
SRR17520069. 5397450  
SRR17520069. 5397451  
SRR17520069. 5397452  
SRR17520069. 5397453  
SRR17520069. 5397454  
SRR17520069. 5397455  
SRR17520069. 5397456  
SRR17520069. 5397457  
SRR17520069. 5397458  
SRR17520069. 5397459  
SRR17520069. 5397460

SRR17520069. 5397461  
SRR17520069. 5397463  
SRR17520069. 5397464  
SRR17520069. 5397465  
SRR17520069. 5397466  
SRR17520069. 5397467  
SRR17520069. 5397468  
SRR17520069. 5397469  
SRR17520069. 5397470  
SRR17520069. 5397471  
SRR17520069. 5397472  
SRR17520069. 5397473  
SRR17520069. 5397474  
SRR17520069. 5397475  
SRR17520069. 5397476  
SRR17520069. 5397477  
SRR17520069. 5397478  
SRR17520069. 5397479  
SRR17520069. 5397480  
SRR17520069. 5397481  
SRR17520069. 5397482  
SRR17520069. 5397483  
SRR17520069. 5397484  
SRR17520069. 5397485  
SRR17520069. 5397487  
SRR17520069. 5397488  
SRR17520069. 5397489  
SRR17520069. 5397490  
SRR17520069. 5397491  
SRR17520069. 5397492  
SRR17520069. 5397493  
SRR17520069. 5397494  
SRR17520069. 5397495  
SRR17520069. 5397496  
SRR17520069. 5397497  
SRR17520069. 5397498  
SRR17520069. 5397499  
SRR17520069. 5397500  
SRR17520069. 5397501  
SRR17520069. 5397502  
SRR17520069. 5397503  
SRR17520069. 5397505  
SRR17520069. 5397506  
SRR17520069. 5397507  
SRR17520069. 5397508  
SRR17520069. 5397509  
SRR17520069. 5397510

SRR17520069. 5397511  
SRR17520069. 5397512  
SRR17520069. 5397513  
SRR17520069. 5397514  
SRR17520069. 5397515  
SRR17520069. 5397516  
SRR17520069. 5397517  
SRR17520069. 5397518  
SRR17520069. 5397519  
SRR17520069. 5397520  
SRR17520069. 5397521  
SRR17520069. 5397522  
SRR17520069. 5397523  
SRR17520069. 5397524  
SRR17520069. 5397525  
SRR17520069. 5397526  
SRR17520069. 5397527  
SRR17520069. 5397528  
SRR17520069. 5397529  
SRR17520069. 5397531  
SRR17520069. 5397532  
SRR17520069. 5397533  
SRR17520069. 5397534  
SRR17520069. 5397536  
SRR17520069. 5397537  
SRR17520069. 5397538  
SRR17520069. 5397539  
SRR17520069. 5397540  
SRR17520069. 5397541  
SRR17520069. 5397542  
SRR17520069. 5397543  
SRR17520069. 5397544  
SRR17520069. 5397545  
SRR17520069. 5397546  
SRR17520069. 5397547  
SRR17520069. 5397548  
SRR17520069. 5397549  
SRR17520069. 5397550  
SRR17520069. 5397551  
SRR17520069. 5397552  
SRR17520069. 5397553  
SRR17520069. 5397554  
SRR17520069. 5397555  
SRR17520069. 5397556  
SRR17520069. 5397557  
SRR17520069. 5397558  
SRR17520069. 5397559

SRR17520069. 5397560  
SRR17520069. 5397562  
SRR17520069. 5397563  
SRR17520069. 5397564  
SRR17520069. 5397565  
SRR17520069. 5397566  
SRR17520069. 5397567  
SRR17520069. 5397568  
SRR17520069. 5397569  
SRR17520069. 5397571  
SRR17520069. 5397572  
SRR17520069. 5397573  
SRR17520069. 5397574  
SRR17520069. 5397575  
SRR17520069. 5397576  
SRR17520069. 5397577  
SRR17520069. 5397578  
SRR17520069. 5397579  
SRR17520069. 5397580  
SRR17520069. 5397581  
SRR17520069. 5402926  
SRR17520069. 5416791  
SRR17520069. 5416792  
SRR17520069. 5416793  
SRR17520069. 5416794  
SRR17520069. 5416795  
SRR17520069. 5416796  
SRR17520069. 5416797  
SRR17520069. 5416798  
SRR17520069. 5416799  
SRR17520069. 5416800  
SRR17520069. 5416801  
SRR17520069. 5424120  
SRR17520069. 5428556  
SRR17520069. 5428558  
SRR17520069. 5428559  
SRR17520069. 5428560  
SRR17520069. 5428561  
SRR17520069. 5428562  
SRR17520069. 5428563  
SRR17520069. 5428564  
SRR17520069. 5430413  
SRR17520069. 5430414  
SRR17520069. 5430415  
SRR17520069. 5430416  
SRR17520069. 5430417  
SRR17520069. 5430418

SRR17520069.5430419  
SRR17520069.5430420  
SRR17520069.5430421  
SRR17520069.5430422  
SRR17520069.5430423  
SRR17520069.5430424  
SRR17520069.5430425  
SRR17520069.5430426  
SRR17520069.5430427  
SRR17520069.5430428  
SRR17520069.5430429  
SRR17520069.5430430  
SRR17520069.5430431  
SRR17520069.5430432  
SRR17520069.5430433  
SRR17520069.5430434  
SRR17520069.5430435  
SRR17520069.5430436  
SRR17520069.5430437  
SRR17520069.5430438  
SRR17520069.5444369  
SRR17520069.5444370  
SRR17520069.5444371  
SRR17520069.5444372  
SRR17520069.5444373  
SRR17520069.5444374  
SRR17520069.5444375  
SRR17520069.5444376  
SRR17520069.5444377  
SRR17520069.5444378  
SRR17520069.5444379  
SRR17520069.5444380  
SRR17520069.5444381  
SRR17520069.5444382  
SRR17520069.5444383  
SRR17520069.5444384  
SRR17520069.5444385  
SRR17520069.5444386  
SRR17520069.5444387  
SRR17520069.5444388  
SRR17520069.5444389  
SRR17520069.5444390  
SRR17520069.5444391  
SRR17520069.5444392  
SRR17520069.5444393  
SRR17520069.5444394  
SRR17520069.5457678

SRR17520069. 5457679  
SRR17520069. 5457683  
SRR17520069. 5457685  
SRR17520069. 5457686  
SRR17520069. 5457687  
SRR17520069. 5457688  
SRR17520069. 5457689  
SRR17520069. 5457690  
SRR17520069. 5457691  
SRR17520069. 5457693  
SRR17520069. 5457694  
SRR17520069. 5457695  
SRR17520069. 5457696  
SRR17520069. 5457697  
SRR17520069. 5457698  
SRR17520069. 5457699  
SRR17520069. 5457700  
SRR17520069. 5457701  
SRR17520069. 5457702  
SRR17520069. 5457703  
SRR17520069. 5457704  
SRR17520069. 5457705  
SRR17520069. 5457707  
SRR17520069. 5457708  
SRR17520069. 5457709  
SRR17520069. 5457711  
SRR17520069. 5462843  
SRR17520069. 5462844  
SRR17520069. 5462845  
SRR17520069. 5462846  
SRR17520069. 5462847  
SRR17520069. 5489865  
SRR17520069. 5489867  
SRR17520069. 5489868  
SRR17520069. 5489869  
SRR17520069. 5489870  
SRR17520069. 5489871  
SRR17520069. 5489872  
SRR17520069. 5489873  
SRR17520069. 5489874  
SRR17520069. 5489875  
SRR17520069. 5489876  
SRR17520069. 5489877  
SRR17520069. 5489878  
SRR17520069. 5489879  
SRR17520069. 5489880  
SRR17520069. 5489881

SRR17520069.5489882  
SRR17520069.5489883  
SRR17520069.5494092  
SRR17520069.5494093  
SRR17520069.5494094  
SRR17520069.5494095  
SRR17520069.5494096  
SRR17520069.5494097  
SRR17520069.5494098  
SRR17520069.5494099  
SRR17520069.5494100  
SRR17520069.5494101  
SRR17520069.5494102  
SRR17520069.5494103  
SRR17520069.5494104  
SRR17520069.5494105  
SRR17520069.5494106  
SRR17520069.5494107  
SRR17520069.5494108  
SRR17520069.5494109  
SRR17520069.5494110  
SRR17520069.5494111  
SRR17520069.5494112  
SRR17520069.5494113  
SRR17520069.5494114  
SRR17520069.5494115  
SRR17520069.5494116  
SRR17520069.5494117  
SRR17520069.5494118  
SRR17520069.5494119  
SRR17520069.5494120  
SRR17520069.5494121  
SRR17520069.5494122  
SRR17520069.5494123  
SRR17520069.5494124  
SRR17520069.5494125  
SRR17520069.5494126  
SRR17520069.5494127  
SRR17520069.5494128  
SRR17520069.5494129  
SRR17520069.5494130  
SRR17520069.5494131  
SRR17520069.5494132  
SRR17520069.5494133  
SRR17520069.5494134  
SRR17520069.5494135  
SRR17520069.5494136



SRR17520069. 5494137  
SRR17520069. 5494138  
SRR17520069. 5494139  
SRR17520069. 5494140  
SRR17520069. 5494141  
SRR17520069. 5494142  
SRR17520069. 5494143  
SRR17520069. 5494144  
SRR17520069. 5494145  
SRR17520069. 5494146  
SRR17520069. 5494147  
SRR17520069. 5494148  
SRR17520069. 5494149  
SRR17520069. 5494150  
SRR17520069. 5494151  
SRR17520069. 5494152  
SRR17520069. 5494153  
SRR17520069. 5494154  
SRR17520069. 5494155  
SRR17520069. 5494156  
SRR17520069. 5494157  
SRR17520069. 5494158  
SRR17520069. 5494159  
SRR17520069. 5494160  
SRR17520069. 5494161  
SRR17520069. 5494162  
SRR17520069. 5494163  
SRR17520069. 5494164  
SRR17520069. 5494165  
SRR17520069. 5494166  
SRR17520069. 5494167  
SRR17520069. 5494168  
SRR17520069. 5494169  
SRR17520069. 5494170  
SRR17520069. 5494171  
SRR17520069. 5494172  
SRR17520069. 5494173  
SRR17520069. 5494174  
SRR17520069. 5520667  
SRR17520069. 5520668  
SRR17520069. 5520670  
SRR17520069. 5520672  
SRR17520069. 5520673  
SRR17520069. 5520674  
SRR17520069. 5520675  
SRR17520069. 5520676  
SRR17520069. 5520677

SRR17520069.5520678  
SRR17520069.5520680  
SRR17520069.5520686  
SRR17520069.5520692  
SRR17520069.5520696  
SRR17520069.5520697  
SRR17520069.5520698  
SRR17520069.5520700  
SRR17520069.5520701  
SRR17520069.5520702  
SRR17520069.5520703  
SRR17520069.5520704  
SRR17520069.5520705  
SRR17520069.5520706  
SRR17520069.5520707  
SRR17520069.5520708  
SRR17520069.5520709  
SRR17520069.5520710  
SRR17520069.5520711  
SRR17520069.5520712  
SRR17520069.5520713  
SRR17520069.5521412  
SRR17520069.5523414  
SRR17520069.5529997  
SRR17520069.5529998  
SRR17520069.5529999  
SRR17520069.5530000  
SRR17520069.5530001  
SRR17520069.5530002  
SRR17520069.5530003  
SRR17520069.5530004  
SRR17520069.5530005  
SRR17520069.5530006  
SRR17520069.5530007  
SRR17520069.5530008  
SRR17520069.5530009  
SRR17520069.5530010  
SRR17520069.5530011  
SRR17520069.5530012  
SRR17520069.5530013  
SRR17520069.5530014  
SRR17520069.5530015  
SRR17520069.5530016  
SRR17520069.5530017  
SRR17520069.5530018  
SRR17520069.5530019  
SRR17520069.5530020

SRR17520069.5530021  
SRR17520069.5530022  
SRR17520069.5530023  
SRR17520069.5530024  
SRR17520069.5530025  
SRR17520069.5530026  
SRR17520069.5530027  
SRR17520069.5530028  
SRR17520069.5530029  
SRR17520069.5530030  
SRR17520069.5530031  
SRR17520069.5530032  
SRR17520069.5530033  
SRR17520069.5530034  
SRR17520069.5530035  
SRR17520069.5530036  
SRR17520069.5530037  
SRR17520069.5530038  
SRR17520069.5530039  
SRR17520069.5530040  
SRR17520069.5530041  
SRR17520069.5530042  
SRR17520069.5530043  
SRR17520069.5530044  
SRR17520069.5530045  
SRR17520069.5530046  
SRR17520069.5530047  
SRR17520069.5530048  
SRR17520069.5530049  
SRR17520069.5530050  
SRR17520069.5530051  
SRR17520069.5530052  
SRR17520069.5530053  
SRR17520069.5530054  
SRR17520069.5530055  
SRR17520069.5530056  
SRR17520069.5530057  
SRR17520069.5530058  
SRR17520069.5530059  
SRR17520069.5530060  
SRR17520069.5530061  
SRR17520069.5530062  
SRR17520069.5530063  
SRR17520069.5530064  
SRR17520069.5530065  
SRR17520069.5530066  
SRR17520069.5530067

SRR17520069. 5538371  
SRR17520069. 5538372  
SRR17520069. 5538373  
SRR17520069. 5538374  
SRR17520069. 5538375  
SRR17520069. 5538376  
SRR17520069. 5538377  
SRR17520069. 5538378  
SRR17520069. 5538379  
SRR17520069. 5538380  
SRR17520069. 5538381  
SRR17520069. 5538382  
SRR17520069. 5538383  
SRR17520069. 5538384  
SRR17520069. 5538385  
SRR17520069. 5538386  
SRR17520069. 5538387  
SRR17520069. 5538388  
SRR17520069. 5538389  
SRR17520069. 5538390  
SRR17520069. 5538391  
SRR17520069. 5538392  
SRR17520069. 5538393  
SRR17520069. 5538395  
SRR17520069. 5538397  
SRR17520069. 5538398  
SRR17520069. 5538399  
SRR17520069. 5538400  
SRR17520069. 5538401  
SRR17520069. 5538402  
SRR17520069. 5538403  
SRR17520069. 5538404  
SRR17520069. 5538405  
SRR17520069. 5538409  
SRR17520069. 5538411  
SRR17520069. 5538412  
SRR17520069. 5538413  
SRR17520069. 5538415  
SRR17520069. 5538417  
SRR17520069. 5538418  
SRR17520069. 5538419  
SRR17520069. 5538420  
SRR17520069. 5538421  
SRR17520069. 5538422  
SRR17520069. 5538423  
SRR17520069. 5538424  
SRR17520069. 5538425

SRR17520069.5538427  
SRR17520069.5538428  
SRR17520069.5544019  
SRR17520069.5544020  
SRR17520069.5544021  
SRR17520069.5544022  
SRR17520069.5544023  
SRR17520069.5544024  
SRR17520069.5544025  
SRR17520069.5544026  
SRR17520069.5544027  
SRR17520069.5544028  
SRR17520069.5544029  
SRR17520069.5544030  
SRR17520069.5544031  
SRR17520069.5544032  
SRR17520069.5544033  
SRR17520069.5544034  
SRR17520069.5544035  
SRR17520069.5544036  
SRR17520069.5544037  
SRR17520069.5544038  
SRR17520069.5544040  
SRR17520069.5544041  
SRR17520069.5544042  
SRR17520069.5544043  
SRR17520069.5544044  
SRR17520069.5544045  
SRR17520069.5544046  
SRR17520069.5544047  
SRR17520069.5544048  
SRR17520069.5544049  
SRR17520069.5544050  
SRR17520069.5544051  
SRR17520069.5544052  
SRR17520069.5544053  
SRR17520069.5544054  
SRR17520069.5544055  
SRR17520069.5544056  
SRR17520069.5544057  
SRR17520069.5544058  
SRR17520069.5544059  
SRR17520069.5544060  
SRR17520069.5544061  
SRR17520069.5544062  
SRR17520069.5544063  
SRR17520069.5544064

SRR17520069.5544065  
SRR17520069.5544066  
SRR17520069.5544067  
SRR17520069.5544068  
SRR17520069.5544069  
SRR17520069.5544070  
SRR17520069.5544071  
SRR17520069.5544072  
SRR17520069.5544073  
SRR17520069.5544074  
SRR17520069.5544075  
SRR17520069.5544076  
SRR17520069.5544077  
SRR17520069.5544078  
SRR17520069.5544079  
SRR17520069.5544080  
SRR17520069.5544081  
SRR17520069.5544082  
SRR17520069.5544083  
SRR17520069.5544084  
SRR17520069.5544085  
SRR17520069.5544086  
SRR17520069.5544087  
SRR17520069.5544088  
SRR17520069.5544089  
SRR17520069.5544090  
SRR17520069.5544091  
SRR17520069.5544092  
SRR17520069.5544093  
SRR17520069.5544094  
SRR17520069.5544095  
SRR17520069.5544096  
SRR17520069.5544097  
SRR17520069.5544098  
SRR17520069.5544099  
SRR17520069.5544100  
SRR17520069.5544101  
SRR17520069.5544102  
SRR17520069.5544103  
SRR17520069.5544104  
SRR17520069.5544105  
SRR17520069.5544106  
SRR17520069.5544107  
SRR17520069.5544108  
SRR17520069.5544109  
SRR17520069.5544110  
SRR17520069.5544111

SRR17520069.5544112  
SRR17520069.5544113  
SRR17520069.5544114  
SRR17520069.5544115  
SRR17520069.5544116  
SRR17520069.5544117  
SRR17520069.5544118  
SRR17520069.5544119  
SRR17520069.5544120  
SRR17520069.5544121  
SRR17520069.5544122  
SRR17520069.5544123  
SRR17520069.5544124  
SRR17520069.5544125  
SRR17520069.5544126  
SRR17520069.5544127  
SRR17520069.5544128  
SRR17520069.5544129  
SRR17520069.5544130  
SRR17520069.5544131  
SRR17520069.5544132  
SRR17520069.5544133  
SRR17520069.5544134  
SRR17520069.5544135  
SRR17520069.5544136  
SRR17520069.5544137  
SRR17520069.5544138  
SRR17520069.5544139  
SRR17520069.5544140  
SRR17520069.5544141  
SRR17520069.5544142  
SRR17520069.5544143  
SRR17520069.5544144  
SRR17520069.5544145  
SRR17520069.5544146  
SRR17520069.5544147  
SRR17520069.5544148  
SRR17520069.5544149  
SRR17520069.5544150  
SRR17520069.5544151  
SRR17520069.5544152  
SRR17520069.5544153  
SRR17520069.5544154  
SRR17520069.5544155  
SRR17520069.5544156  
SRR17520069.5544157  
SRR17520069.5544158

SRR17520069.5544159  
SRR17520069.5544160  
SRR17520069.5544161  
SRR17520069.5544162  
SRR17520069.5544163  
SRR17520069.5544164  
SRR17520069.5544165  
SRR17520069.5544166  
SRR17520069.5544167  
SRR17520069.5544168  
SRR17520069.5544169  
SRR17520069.5544170  
SRR17520069.5544171  
SRR17520069.5544172  
SRR17520069.5544173  
SRR17520069.5544174  
SRR17520069.5544175  
SRR17520069.5544176  
SRR17520069.5544177  
SRR17520069.5544178  
SRR17520069.5544179  
SRR17520069.5544180  
SRR17520069.5544181  
SRR17520069.5544182  
SRR17520069.5553825  
SRR17520069.5553826  
SRR17520069.5553827  
SRR17520069.5553829  
SRR17520069.5553830  
SRR17520069.5553831  
SRR17520069.5553832  
SRR17520069.5553833  
SRR17520069.5553835  
SRR17520069.5553836  
SRR17520069.5553837  
SRR17520069.5553838  
SRR17520069.5553839  
SRR17520069.5553840  
SRR17520069.5553841  
SRR17520069.5553842  
SRR17520069.5553843  
SRR17520069.5553845  
SRR17520069.5553846  
SRR17520069.5553847  
SRR17520069.5553848  
SRR17520069.5553849  
SRR17520069.5553850



SRR17520069.5553851  
SRR17520069.5553852  
SRR17520069.5553853  
SRR17520069.5553854  
SRR17520069.5553855  
SRR17520069.5553856  
SRR17520069.5553857  
SRR17520069.5553858  
SRR17520069.5553859  
SRR17520069.5553860  
SRR17520069.5553861  
SRR17520069.5553862  
SRR17520069.5553863  
SRR17520069.5553864  
SRR17520069.5553865  
SRR17520069.5553867  
SRR17520069.5553868  
SRR17520069.5553869  
SRR17520069.5553870  
SRR17520069.5553871  
SRR17520069.5553872  
SRR17520069.5553873  
SRR17520069.5553874  
SRR17520069.5553875  
SRR17520069.5553876  
SRR17520069.5553877  
SRR17520069.5553878  
SRR17520069.5553879  
SRR17520069.5553880  
SRR17520069.5553881  
SRR17520069.5553882  
SRR17520069.5553883  
SRR17520069.5553884  
SRR17520069.5553885  
SRR17520069.5553886  
SRR17520069.5553887  
SRR17520069.5553888  
SRR17520069.5553889  
SRR17520069.5553890  
SRR17520069.5553891  
SRR17520069.5553892  
SRR17520069.5553893  
SRR17520069.5553894  
SRR17520069.5553895  
SRR17520069.5553896  
SRR17520069.5553897  
SRR17520069.5553898

SRR17520069.5553899  
SRR17520069.5553900  
SRR17520069.5553901  
SRR17520069.5553902  
SRR17520069.5553903  
SRR17520069.5553904  
SRR17520069.5553905  
SRR17520069.5553906  
SRR17520069.5553907  
SRR17520069.5553908  
SRR17520069.5553909  
SRR17520069.5553910  
SRR17520069.5553911  
SRR17520069.5553912  
SRR17520069.5553913  
SRR17520069.5553914  
SRR17520069.5553915  
SRR17520069.5553916  
SRR17520069.5553917  
SRR17520069.5553918  
SRR17520069.5553919  
SRR17520069.5553920  
SRR17520069.5553921  
SRR17520069.5553922  
SRR17520069.5553923  
SRR17520069.5553924  
SRR17520069.5553925  
SRR17520069.5553926  
SRR17520069.5553927  
SRR17520069.5553928  
SRR17520069.5553929  
SRR17520069.5553930  
SRR17520069.5553931  
SRR17520069.5553932  
SRR17520069.5553933  
SRR17520069.5553934  
SRR17520069.5553935  
SRR17520069.5553936  
SRR17520069.5553937  
SRR17520069.5553938  
SRR17520069.5553939  
SRR17520069.5553940  
SRR17520069.5553941  
SRR17520069.5553942  
SRR17520069.5553943  
SRR17520069.5553944  
SRR17520069.5553945

SRR17520069.5553946  
SRR17520069.5553947  
SRR17520069.5553948  
SRR17520069.5553950  
SRR17520069.5553951  
SRR17520069.5553952  
SRR17520069.5553953  
SRR17520069.5553954  
SRR17520069.5553955  
SRR17520069.5553956  
SRR17520069.5553957  
SRR17520069.5553958  
SRR17520069.5553959  
SRR17520069.5553960  
SRR17520069.5553962  
SRR17520069.5553963  
SRR17520069.5553964  
SRR17520069.5553965  
SRR17520069.5553966  
SRR17520069.5553967  
SRR17520069.5553968  
SRR17520069.5553969  
SRR17520069.5553970  
SRR17520069.5553971  
SRR17520069.5553972  
SRR17520069.5553973  
SRR17520069.5553974  
SRR17520069.5553975  
SRR17520069.5553976  
SRR17520069.5553977  
SRR17520069.5553978  
SRR17520069.5553979  
SRR17520069.5553980  
SRR17520069.5553981  
SRR17520069.5553982  
SRR17520069.5553983  
SRR17520069.5553984  
SRR17520069.5553985  
SRR17520069.5553986  
SRR17520069.5553987  
SRR17520069.5553988  
SRR17520069.5553989  
SRR17520069.5553990  
SRR17520069.5553991  
SRR17520069.5553992  
SRR17520069.5553993  
SRR17520069.5553994

SRR17520069.5553995  
SRR17520069.5553996  
SRR17520069.5553997  
SRR17520069.5553998  
SRR17520069.5553999  
SRR17520069.5554000  
SRR17520069.5554001  
SRR17520069.5554002  
SRR17520069.5561789  
SRR17520069.5590508  
SRR17520069.5599629  
SRR17520069.5599630  
SRR17520069.5599631  
SRR17520069.5609230  
SRR17520069.5609236  
SRR17520069.5626061  
SRR17520069.5643547  
SRR17520069.5649791  
SRR17520069.5649793  
SRR17520069.5659374  
SRR17520069.5678814  
SRR17520069.5678815  
SRR17520069.5678816  
SRR17520069.5678817  
SRR17520069.5678818  
SRR17520069.5678819  
SRR17520069.5678820  
SRR17520069.5678821  
SRR17520069.5678822  
SRR17520069.5678823  
SRR17520069.5678824  
SRR17520069.5678825  
SRR17520069.5678826  
SRR17520069.5678827  
SRR17520069.5678828  
SRR17520069.5678829  
SRR17520069.5678830  
SRR17520069.5678831  
SRR17520069.5678832  
SRR17520069.5678833  
SRR17520069.5678834  
SRR17520069.5678835  
SRR17520069.5678836  
SRR17520069.5678837  
SRR17520069.5678838  
SRR17520069.5678839  
SRR17520069.5678840

SRR17520069. 5678841  
SRR17520069. 5678842  
SRR17520069. 5678843  
SRR17520069. 5678844  
SRR17520069. 5678845  
SRR17520069. 5678846  
SRR17520069. 5678847  
SRR17520069. 5678848  
SRR17520069. 5678849  
SRR17520069. 5678850  
SRR17520069. 5678851  
SRR17520069. 5678852  
SRR17520069. 5678853  
SRR17520069. 5678854  
SRR17520069. 5678855  
SRR17520069. 5678856  
SRR17520069. 5678857  
SRR17520069. 5678858  
SRR17520069. 5678859  
SRR17520069. 5678860  
SRR17520069. 5678861  
SRR17520069. 5678862  
SRR17520069. 5678863  
SRR17520069. 5678864  
SRR17520069. 5678865  
SRR17520069. 5678866  
SRR17520069. 5678867  
SRR17520069. 5678868  
SRR17520069. 5678869  
SRR17520069. 5678870  
SRR17520069. 5678871  
SRR17520069. 5678872  
SRR17520069. 5678873  
SRR17520069. 5678874  
SRR17520069. 5678875  
SRR17520069. 5678876  
SRR17520069. 5678877  
SRR17520069. 5678879  
SRR17520069. 5678880  
SRR17520069. 5678881  
SRR17520069. 5679658  
SRR17520069. 5679662  
SRR17520069. 5679664  
SRR17520069. 5686851  
SRR17520069. 5686852  
SRR17520069. 5686853  
SRR17520069. 5686854

SRR17520069.5686855  
SRR17520069.5691364  
SRR17520069.5691365  
SRR17520069.5691366  
SRR17520069.5691367  
SRR17520069.5691368  
SRR17520069.5691369  
SRR17520069.5691370  
SRR17520069.5691371  
SRR17520069.5691372  
SRR17520069.5691373  
SRR17520069.5691374  
SRR17520069.5691375  
SRR17520069.5691376  
SRR17520069.5691377  
SRR17520069.5691378  
SRR17520069.5691379  
SRR17520069.5691380  
SRR17520069.5691381  
SRR17520069.5691382  
SRR17520069.5691383  
SRR17520069.5691384  
SRR17520069.5691385  
SRR17520069.5691386  
SRR17520069.5691387  
SRR17520069.5691388  
SRR17520069.5691390  
SRR17520069.5691391  
SRR17520069.5693921  
SRR17520069.5704340  
SRR17520069.5704358  
SRR17520069.5704360  
SRR17520069.5711169  
SRR17520069.5715470  
SRR17520069.5715471  
SRR17520069.5715472  
SRR17520069.5715473  
SRR17520069.5715475  
SRR17520069.5715478  
SRR17520069.5715479  
SRR17520069.5715480  
SRR17520069.5715481  
SRR17520069.5715482  
SRR17520069.5715483  
SRR17520069.5715484  
SRR17520069.5715485  
SRR17520069.5715486

SRR17520069.5715487  
SRR17520069.5715488  
SRR17520069.5715489  
SRR17520069.5715490  
SRR17520069.5715491  
SRR17520069.5715492  
SRR17520069.5715493  
SRR17520069.5715494  
SRR17520069.5715500  
SRR17520069.5715501  
SRR17520069.5715502  
SRR17520069.5715504  
SRR17520069.5715505  
SRR17520069.5715506  
SRR17520069.5715508  
SRR17520069.5715509  
SRR17520069.5715510  
SRR17520069.5715511  
SRR17520069.5715512  
SRR17520069.5719048  
SRR17520069.5719050  
SRR17520069.5719052  
SRR17520069.5719053  
SRR17520069.5719054  
SRR17520069.5719055  
SRR17520069.5719056  
SRR17520069.5719057  
SRR17520069.5719058  
SRR17520069.5719059  
SRR17520069.5719060  
SRR17520069.5719061  
SRR17520069.5719062  
SRR17520069.5719063  
SRR17520069.5719064  
SRR17520069.5719065  
SRR17520069.5719066  
SRR17520069.5719067  
SRR17520069.5719068  
SRR17520069.5719069  
SRR17520069.5719070  
SRR17520069.5719071  
SRR17520069.5719072  
SRR17520069.5719073  
SRR17520069.5719074  
SRR17520069.5719075  
SRR17520069.5719076  
SRR17520069.5728983

SRR17520069. 5728984  
SRR17520069. 5728985  
SRR17520069. 5728986  
SRR17520069. 5728987  
SRR17520069. 5728988  
SRR17520069. 5728989  
SRR17520069. 5728990  
SRR17520069. 5728991  
SRR17520069. 5728992  
SRR17520069. 5728993  
SRR17520069. 5728994  
SRR17520069. 5728995  
SRR17520069. 5728996  
SRR17520069. 5728997  
SRR17520069. 5728999  
SRR17520069. 5729000  
SRR17520069. 5729001  
SRR17520069. 5729002  
SRR17520069. 5729003  
SRR17520069. 5729004  
SRR17520069. 5729005  
SRR17520069. 5729006  
SRR17520069. 5729007  
SRR17520069. 5729008  
SRR17520069. 5729009  
SRR17520069. 5729010  
SRR17520069. 5729011  
SRR17520069. 5729012  
SRR17520069. 5729013  
SRR17520069. 5729014  
SRR17520069. 5729015  
SRR17520069. 5729016  
SRR17520069. 5729017  
SRR17520069. 5729018  
SRR17520069. 5729019  
SRR17520069. 5729020  
SRR17520069. 5729022  
SRR17520069. 5729023  
SRR17520069. 5729024  
SRR17520069. 5729025  
SRR17520069. 5729026  
SRR17520069. 5729027  
SRR17520069. 5729028  
SRR17520069. 5738258  
SRR17520069. 5738259  
SRR17520069. 5738261  
SRR17520069. 5738263



SRR17520069. 5738264  
SRR17520069. 5738265  
SRR17520069. 5738269  
SRR17520069. 5738270  
SRR17520069. 5738271  
SRR17520069. 5738272  
SRR17520069. 5738274  
SRR17520069. 5738275  
SRR17520069. 5738276  
SRR17520069. 5738277  
SRR17520069. 5738279  
SRR17520069. 5748626  
SRR17520069. 5748627  
SRR17520069. 5748628  
SRR17520069. 5748629  
SRR17520069. 5748630  
SRR17520069. 5748631  
SRR17520069. 5748632  
SRR17520069. 5748633  
SRR17520069. 5748634  
SRR17520069. 5748635  
SRR17520069. 5748636  
SRR17520069. 5748637  
SRR17520069. 5748638  
SRR17520069. 5748639  
SRR17520069. 5748640  
SRR17520069. 5748641  
SRR17520069. 5748642  
SRR17520069. 5748643  
SRR17520069. 5748644  
SRR17520069. 5748645  
SRR17520069. 5748646  
SRR17520069. 5748647  
SRR17520069. 5748648  
SRR17520069. 5748649  
SRR17520069. 5748650  
SRR17520069. 5748651  
SRR17520069. 5748652  
SRR17520069. 5748653  
SRR17520069. 5748654  
SRR17520069. 5748655  
SRR17520069. 5748656  
SRR17520069. 5748657  
SRR17520069. 5748658  
SRR17520069. 5748659  
SRR17520069. 5748660  
SRR17520069. 5748661

SRR17520069.5748662  
SRR17520069.5748663  
SRR17520069.5748664  
SRR17520069.5748665  
SRR17520069.5748666  
SRR17520069.5748667  
SRR17520069.5748668  
SRR17520069.5748669  
SRR17520069.5748670  
SRR17520069.5748671  
SRR17520069.5748672  
SRR17520069.5748673  
SRR17520069.5748674  
SRR17520069.5748675  
SRR17520069.5748676  
SRR17520069.5748677  
SRR17520069.5748678  
SRR17520069.5748679  
SRR17520069.5748680  
SRR17520069.5748681  
SRR17520069.5748682  
SRR17520069.5748683  
SRR17520069.5748684  
SRR17520069.5748685  
SRR17520069.5748686  
SRR17520069.5748688  
SRR17520069.5748689  
SRR17520069.5748690  
SRR17520069.5748691  
SRR17520069.5748692  
SRR17520069.5748693  
SRR17520069.5748694  
SRR17520069.5748695  
SRR17520069.5748696  
SRR17520069.5748697  
SRR17520069.5748698  
SRR17520069.5748699  
SRR17520069.5748700  
SRR17520069.5748701  
SRR17520069.5748702  
SRR17520069.5748703  
SRR17520069.5748704  
SRR17520069.5748705  
SRR17520069.5748706  
SRR17520069.5748707  
SRR17520069.5748708  
SRR17520069.5748709

SRR17520069. 5748710  
SRR17520069. 5748711  
SRR17520069. 5748712  
SRR17520069. 5748713  
SRR17520069. 5748714  
SRR17520069. 5748715  
SRR17520069. 5748717  
SRR17520069. 5748718  
SRR17520069. 5748719  
SRR17520069. 5748720  
SRR17520069. 5748721  
SRR17520069. 5748722  
SRR17520069. 5748723  
SRR17520069. 5748724  
SRR17520069. 5748725  
SRR17520069. 5748726  
SRR17520069. 5748727  
SRR17520069. 5748728  
SRR17520069. 5748729  
SRR17520069. 5748730  
SRR17520069. 5748731  
SRR17520069. 5748732  
SRR17520069. 5748733  
SRR17520069. 5748734  
SRR17520069. 5748735  
SRR17520069. 5748736  
SRR17520069. 5748737  
SRR17520069. 5748738  
SRR17520069. 5748739  
SRR17520069. 5748740  
SRR17520069. 5748741  
SRR17520069. 5748742  
SRR17520069. 5748743  
SRR17520069. 5748744  
SRR17520069. 5748745  
SRR17520069. 5748746  
SRR17520069. 5748747  
SRR17520069. 5748748  
SRR17520069. 5748749  
SRR17520069. 5748750  
SRR17520069. 5748751  
SRR17520069. 5748752  
SRR17520069. 5748753  
SRR17520069. 5748754  
SRR17520069. 5748755  
SRR17520069. 5748756  
SRR17520069. 5748757

SRR17520069. 5748758  
SRR17520069. 5748759  
SRR17520069. 5748760  
SRR17520069. 5748761  
SRR17520069. 5748762  
SRR17520069. 5748763  
SRR17520069. 5748764  
SRR17520069. 5748765  
SRR17520069. 5748766  
SRR17520069. 5748767  
SRR17520069. 5748768  
SRR17520069. 5748769  
SRR17520069. 5748770  
SRR17520069. 5748771  
SRR17520069. 5748772  
SRR17520069. 5748773  
SRR17520069. 5748774  
SRR17520069. 5748775  
SRR17520069. 5748776  
SRR17520069. 5748777  
SRR17520069. 5753769  
SRR17520069. 5767325  
SRR17520069. 5767326  
SRR17520069. 5767327  
SRR17520069. 5767329  
SRR17520069. 5767330  
SRR17520069. 5767331  
SRR17520069. 5767332  
SRR17520069. 5767333  
SRR17520069. 5767335  
SRR17520069. 5767336  
SRR17520069. 5767338  
SRR17520069. 5767339  
SRR17520069. 5767340  
SRR17520069. 5767341  
SRR17520069. 5767342  
SRR17520069. 5767343  
SRR17520069. 5767344  
SRR17520069. 5767345  
SRR17520069. 5767346  
SRR17520069. 5767347  
SRR17520069. 5767348  
SRR17520069. 5767349  
SRR17520069. 5767350  
SRR17520069. 5767351  
SRR17520069. 5767352  
SRR17520069. 5767353

SRR17520069. 5767354  
SRR17520069. 5767355  
SRR17520069. 5767356  
SRR17520069. 5767357  
SRR17520069. 5767358  
SRR17520069. 5767359  
SRR17520069. 5767361  
SRR17520069. 5783993  
SRR17520069. 5785829  
SRR17520069. 5786226  
SRR17520069. 5798754  
SRR17520069. 5798755  
SRR17520069. 5798756  
SRR17520069. 5798757  
SRR17520069. 5798758  
SRR17520069. 5798759  
SRR17520069. 5798760  
SRR17520069. 5798761  
SRR17520069. 5798762  
SRR17520069. 5798763  
SRR17520069. 5798764  
SRR17520069. 5798765  
SRR17520069. 5798766  
SRR17520069. 5798767  
SRR17520069. 5798768  
SRR17520069. 5798769  
SRR17520069. 5798770  
SRR17520069. 5798771  
SRR17520069. 5798772  
SRR17520069. 5798773  
SRR17520069. 5798774  
SRR17520069. 5798775  
SRR17520069. 5798776  
SRR17520069. 5798777  
SRR17520069. 5798778  
SRR17520069. 5798779  
SRR17520069. 5798780  
SRR17520069. 5798781  
SRR17520069. 5798782  
SRR17520069. 5798783  
SRR17520069. 5798784  
SRR17520069. 5798785  
SRR17520069. 5798786  
SRR17520069. 5798787  
SRR17520069. 5798788  
SRR17520069. 5798789  
SRR17520069. 5798790

SRR17520069.5798791  
SRR17520069.5798792  
SRR17520069.5798793  
SRR17520069.5798794  
SRR17520069.5798795  
SRR17520069.5798796  
SRR17520069.5798797  
SRR17520069.5798798  
SRR17520069.5798799  
SRR17520069.5809856  
SRR17520069.5809857  
SRR17520069.5809859  
SRR17520069.5809860  
SRR17520069.5809861  
SRR17520069.5809862  
SRR17520069.5809863  
SRR17520069.5809864  
SRR17520069.5809865  
SRR17520069.5809866  
SRR17520069.5809867  
SRR17520069.5809868  
SRR17520069.5809869  
SRR17520069.5809870  
SRR17520069.5809871  
SRR17520069.5809872  
SRR17520069.5809873  
SRR17520069.5831467  
SRR17520069.5831468  
SRR17520069.5831469  
SRR17520069.5831470  
SRR17520069.5831471  
SRR17520069.5831472  
SRR17520069.5831473  
SRR17520069.5831474  
SRR17520069.5831475  
SRR17520069.5831476  
SRR17520069.5831477  
SRR17520069.5831478  
SRR17520069.5831479  
SRR17520069.5831480  
SRR17520069.5831481  
SRR17520069.5831482  
SRR17520069.5831483  
SRR17520069.5831484  
SRR17520069.5831487  
SRR17520069.5831488  
SRR17520069.5831489

SRR17520069. 5831490  
SRR17520069. 5831491  
SRR17520069. 5831492  
SRR17520069. 5831493  
SRR17520069. 5831494  
SRR17520069. 5831495  
SRR17520069. 5831496  
SRR17520069. 5831497  
SRR17520069. 5831498  
SRR17520069. 5831499  
SRR17520069. 5831500  
SRR17520069. 5831501  
SRR17520069. 5831502  
SRR17520069. 5831503  
SRR17520069. 5831504  
SRR17520069. 5831505  
SRR17520069. 5831506  
SRR17520069. 5831507  
SRR17520069. 5831509  
SRR17520069. 5831510  
SRR17520069. 5831511  
SRR17520069. 5831512  
SRR17520069. 5831513  
SRR17520069. 5831514  
SRR17520069. 5831515  
SRR17520069. 5831516  
SRR17520069. 5831517  
SRR17520069. 5831518  
SRR17520069. 5831519  
SRR17520069. 5831520  
SRR17520069. 5831521  
SRR17520069. 5831522  
SRR17520069. 5831523  
SRR17520069. 5831524  
SRR17520069. 5831525  
SRR17520069. 5831526  
SRR17520069. 5831527  
SRR17520069. 5831528  
SRR17520069. 5831529  
SRR17520069. 5831530  
SRR17520069. 5831531  
SRR17520069. 5831532  
SRR17520069. 5831533  
SRR17520069. 5831534  
SRR17520069. 5831535  
SRR17520069. 5831536  
SRR17520069. 5831537

SRR17520069.5831538  
SRR17520069.5831539  
SRR17520069.5831540  
SRR17520069.5831541  
SRR17520069.5831542  
SRR17520069.5831543  
SRR17520069.5831544  
SRR17520069.5831545  
SRR17520069.5831546  
SRR17520069.5831547  
SRR17520069.5831548  
SRR17520069.5831549  
SRR17520069.5831550  
SRR17520069.5831551  
SRR17520069.5831552  
SRR17520069.5831553  
SRR17520069.5831554  
SRR17520069.5831555  
SRR17520069.5831556  
SRR17520069.5831557  
SRR17520069.5831558  
SRR17520069.5831559  
SRR17520069.5831560  
SRR17520069.5831561  
SRR17520069.5831562  
SRR17520069.5848528  
SRR17520069.5879984  
SRR17520069.5892357  
SRR17520069.5894977  
SRR17520069.5911905  
SRR17520069.5911906  
SRR17520069.5911907  
SRR17520069.5911908  
SRR17520069.5911909  
SRR17520069.5911910  
SRR17520069.5911911  
SRR17520069.5911912  
SRR17520069.5911913  
SRR17520069.5911915  
SRR17520069.5911916  
SRR17520069.5911917  
SRR17520069.5911918  
SRR17520069.5911919  
SRR17520069.5911920  
SRR17520069.5926512  
SRR17520069.5926513  
SRR17520069.5926514



SRR17520069. 5926515  
SRR17520069. 5926516  
SRR17520069. 5926517  
SRR17520069. 5926518  
SRR17520069. 5926519  
SRR17520069. 5926520  
SRR17520069. 5926521  
SRR17520069. 5926522  
SRR17520069. 5926523  
SRR17520069. 5926524  
SRR17520069. 5926525  
SRR17520069. 5926526  
SRR17520069. 5926527  
SRR17520069. 5926528  
SRR17520069. 5926529  
SRR17520069. 5926530  
SRR17520069. 5926531  
SRR17520069. 5926532  
SRR17520069. 5926533  
SRR17520069. 5926534  
SRR17520069. 5926535  
SRR17520069. 5926536  
SRR17520069. 5926537  
SRR17520069. 5926538  
SRR17520069. 5926539  
SRR17520069. 5926540  
SRR17520069. 5926541  
SRR17520069. 5937156  
SRR17520069. 5937157  
SRR17520069. 5937158  
SRR17520069. 5959829  
SRR17520069. 5959831  
SRR17520069. 5959833  
SRR17520069. 5982924  
SRR17520069. 5985858  
SRR17520069. 5985859  
SRR17520069. 5985860  
SRR17520069. 5985861  
SRR17520069. 5985862  
SRR17520069. 5985863  
SRR17520069. 5985864  
SRR17520069. 5985865  
SRR17520069. 5985866  
SRR17520069. 5985867  
SRR17520069. 5985868  
SRR17520069. 5985869  
SRR17520069. 5985870

SRR17520069.5985871  
SRR17520069.5985872  
SRR17520069.5985873  
SRR17520069.5985874  
SRR17520069.5985875  
SRR17520069.5985876  
SRR17520069.5985877  
SRR17520069.5985878  
SRR17520069.5985879  
SRR17520069.5985880  
SRR17520069.5985881  
SRR17520069.5985883  
SRR17520069.5985884  
SRR17520069.5985885  
SRR17520069.5985886  
SRR17520069.5985887  
SRR17520069.5985888  
SRR17520069.5985889  
SRR17520069.5985890  
SRR17520069.5985891  
SRR17520069.5985892  
SRR17520069.5985893  
SRR17520069.5985894  
SRR17520069.5985895  
SRR17520069.5985896  
SRR17520069.5985897  
SRR17520069.5985898  
SRR17520069.5985899  
SRR17520069.5985900  
SRR17520069.5985901  
SRR17520069.5985902  
SRR17520069.5985903  
SRR17520069.5985904  
SRR17520069.5985905  
SRR17520069.5985906  
SRR17520069.5985907  
SRR17520069.5985908  
SRR17520069.5985909  
SRR17520069.5985910  
SRR17520069.5985911  
SRR17520069.5985912  
SRR17520069.5985913  
SRR17520069.5985914  
SRR17520069.5985915  
SRR17520069.5985916  
SRR17520069.5985918  
SRR17520069.5985919

SRR17520069.5985920  
SRR17520069.5985921  
SRR17520069.5985922  
SRR17520069.5985923  
SRR17520069.5985924  
SRR17520069.5985925  
SRR17520069.5985926  
SRR17520069.5985928  
SRR17520069.5985929  
SRR17520069.5985930  
SRR17520069.5985931  
SRR17520069.5987775  
SRR17520069.5987792  
SRR17520069.5989974  
SRR17520069.5989975  
SRR17520069.5989976  
SRR17520069.5989977  
SRR17520069.5989978  
SRR17520069.5989979  
SRR17520069.5989980  
SRR17520069.5989981  
SRR17520069.5989982  
SRR17520069.5989983  
SRR17520069.5989984  
SRR17520069.5989985  
SRR17520069.5989986  
SRR17520069.5989987  
SRR17520069.5989988  
SRR17520069.5989989  
SRR17520069.5989990  
SRR17520069.5989991  
SRR17520069.5989992  
SRR17520069.5989993  
SRR17520069.5989994  
SRR17520069.5989995  
SRR17520069.5989996  
SRR17520069.5989997  
SRR17520069.5989998  
SRR17520069.5989999  
SRR17520069.5990000  
SRR17520069.5990001  
SRR17520069.5990002  
SRR17520069.5990003  
SRR17520069.5990004  
SRR17520069.5990005  
SRR17520069.5990006  
SRR17520069.5990007

SRR17520069.5990008  
SRR17520069.5990009  
SRR17520069.5990010  
SRR17520069.5990011  
SRR17520069.5990012  
SRR17520069.5990013  
SRR17520069.5990014  
SRR17520069.5990015  
SRR17520069.5990016  
SRR17520069.5990017  
SRR17520069.5990018  
SRR17520069.5990019  
SRR17520069.5990020  
SRR17520069.5990021  
SRR17520069.5990022  
SRR17520069.5990023  
SRR17520069.5990024  
SRR17520069.5990025  
SRR17520069.5990026  
SRR17520069.5990027  
SRR17520069.5990028  
SRR17520069.5990029  
SRR17520069.5990030  
SRR17520069.5990031  
SRR17520069.5990032  
SRR17520069.5990033  
SRR17520069.5990034  
SRR17520069.5990035  
SRR17520069.5990036  
SRR17520069.5990037  
SRR17520069.5990038  
SRR17520069.5990039  
SRR17520069.5990040  
SRR17520069.5990041  
SRR17520069.5990042  
SRR17520069.5990043  
SRR17520069.5990044  
SRR17520069.5990045  
SRR17520069.5990046  
SRR17520069.5990047  
SRR17520069.5990048  
SRR17520069.5990049  
SRR17520069.5990050  
SRR17520069.5990051  
SRR17520069.5990052  
SRR17520069.5990053  
SRR17520069.5990054

SRR17520069.5990055  
SRR17520069.5990056  
SRR17520069.5990057  
SRR17520069.5990058  
SRR17520069.5990059  
SRR17520069.5990060  
SRR17520069.5990061  
SRR17520069.5990062  
SRR17520069.5990063  
SRR17520069.5990064  
SRR17520069.5990065  
SRR17520069.5990067  
SRR17520069.5990068  
SRR17520069.5990069  
SRR17520069.5990070  
SRR17520069.5990071  
SRR17520069.5990072  
SRR17520069.5990073  
SRR17520069.5990074  
SRR17520069.5990075  
SRR17520069.5990076  
SRR17520069.5990077  
SRR17520069.5990078  
SRR17520069.5990079  
SRR17520069.5990080  
SRR17520069.5990081  
SRR17520069.5990083  
SRR17520069.5990084  
SRR17520069.5990085  
SRR17520069.5990086  
SRR17520069.5990087  
SRR17520069.5990088  
SRR17520069.5990089  
SRR17520069.5990090  
SRR17520069.5990091  
SRR17520069.5990092  
SRR17520069.5990093  
SRR17520069.5990094  
SRR17520069.5990095  
SRR17520069.5990096  
SRR17520069.5990097  
SRR17520069.5990098  
SRR17520069.5990099  
SRR17520069.5990100  
SRR17520069.5990101  
SRR17520069.5990102  
SRR17520069.5990103

SRR17520069.5990104  
SRR17520069.5990105  
SRR17520069.5990106  
SRR17520069.5990107  
SRR17520069.5990108  
SRR17520069.5990109  
SRR17520069.5990110  
SRR17520069.5990111  
SRR17520069.5990112  
SRR17520069.5990113  
SRR17520069.5990114  
SRR17520069.5990115  
SRR17520069.5990116  
SRR17520069.5990117  
SRR17520069.5990118  
SRR17520069.5990119  
SRR17520069.5990120  
SRR17520069.5990121  
SRR17520069.5990122  
SRR17520069.5992600  
SRR17520069.5992601  
SRR17520069.5992602  
SRR17520069.5992603  
SRR17520069.5992604  
SRR17520069.5992605  
SRR17520069.5992606  
SRR17520069.5992607  
SRR17520069.5992608  
SRR17520069.5992609  
SRR17520069.5992610  
SRR17520069.5992611  
SRR17520069.5992612  
SRR17520069.5992613  
SRR17520069.5992614  
SRR17520069.5992615  
SRR17520069.5992616  
SRR17520069.5992617  
SRR17520069.5992618  
SRR17520069.5992619  
SRR17520069.5992620  
SRR17520069.5992621  
SRR17520069.5992622  
SRR17520069.5992623  
SRR17520069.5992624  
SRR17520069.5992625  
SRR17520069.5992626  
SRR17520069.5992627

SRR17520069.5992628  
SRR17520069.5992629  
SRR17520069.5992630  
SRR17520069.5992631  
SRR17520069.5992632  
SRR17520069.5992633  
SRR17520069.5992634  
SRR17520069.5992635  
SRR17520069.5992636  
SRR17520069.5992637  
SRR17520069.5992638  
SRR17520069.5992639  
SRR17520069.5992640  
SRR17520069.5992641  
SRR17520069.5992642  
SRR17520069.5992643  
SRR17520069.5992644  
SRR17520069.5992645  
SRR17520069.5992646  
SRR17520069.5992649  
SRR17520069.5992651  
SRR17520069.5992652  
SRR17520069.5992653  
SRR17520069.5992654  
SRR17520069.5992655  
SRR17520069.5992656  
SRR17520069.5992657  
SRR17520069.5992658  
SRR17520069.5992659  
SRR17520069.5992667  
SRR17520069.5993251  
SRR17520069.5993252  
SRR17520069.5993253  
SRR17520069.5993254  
SRR17520069.5993255  
SRR17520069.5993256  
SRR17520069.5993257  
SRR17520069.5993258  
SRR17520069.5993259  
SRR17520069.5993260  
SRR17520069.5993261  
SRR17520069.5993262  
SRR17520069.5993263  
SRR17520069.5993264  
SRR17520069.5993265  
SRR17520069.5993266  
SRR17520069.5993267

SRR17520069.5993268  
SRR17520069.5993269  
SRR17520069.5993270  
SRR17520069.5993271  
SRR17520069.5993272  
SRR17520069.5993273  
SRR17520069.5993274  
SRR17520069.5993275  
SRR17520069.5993276  
SRR17520069.5993277  
SRR17520069.5993278  
SRR17520069.5993279  
SRR17520069.5993280  
SRR17520069.5993281  
SRR17520069.5993282  
SRR17520069.5993283  
SRR17520069.5993284  
SRR17520069.5993285  
SRR17520069.5993286  
SRR17520069.5993287  
SRR17520069.5993288  
SRR17520069.5993289  
SRR17520069.5993290  
SRR17520069.5993291  
SRR17520069.5993292  
SRR17520069.5993293  
SRR17520069.5993294  
SRR17520069.5993295  
SRR17520069.5993296  
SRR17520069.5993297  
SRR17520069.5993298  
SRR17520069.5993299  
SRR17520069.5993300  
SRR17520069.5993301  
SRR17520069.5993302  
SRR17520069.5993303  
SRR17520069.5993304  
SRR17520069.5993305  
SRR17520069.5993306  
SRR17520069.5993307  
SRR17520069.5993309  
SRR17520069.5993310  
SRR17520069.5993311  
SRR17520069.5993312  
SRR17520069.5993313  
SRR17520069.5993314  
SRR17520069.5993315



SRR17520069.5993316  
SRR17520069.5993317  
SRR17520069.5993318  
SRR17520069.5993319  
SRR17520069.5993320  
SRR17520069.5993321  
SRR17520069.5993322  
SRR17520069.5993324  
SRR17520069.5993325  
SRR17520069.5993326  
SRR17520069.5993327  
SRR17520069.5993328  
SRR17520069.5993329  
SRR17520069.5993330  
SRR17520069.5993331  
SRR17520069.5993332  
SRR17520069.5993333  
SRR17520069.5993334  
SRR17520069.5993335  
SRR17520069.5993336  
SRR17520069.5993337  
SRR17520069.5993338  
SRR17520069.5993339  
SRR17520069.5993340  
SRR17520069.5993341  
SRR17520069.5993342  
SRR17520069.5993343  
SRR17520069.5993344  
SRR17520069.5993345  
SRR17520069.5993346  
SRR17520069.5993347  
SRR17520069.5993348  
SRR17520069.5993349  
SRR17520069.5993350  
SRR17520069.5993351  
SRR17520069.5993352  
SRR17520069.5993353  
SRR17520069.5993354  
SRR17520069.5993355  
SRR17520069.5993356  
SRR17520069.5993357  
SRR17520069.5993358  
SRR17520069.5993359  
SRR17520069.5993360  
SRR17520069.5993361  
SRR17520069.5993362  
SRR17520069.5993363

SRR17520069.5993364  
SRR17520069.5993365  
SRR17520069.5993366  
SRR17520069.5993367  
SRR17520069.5993368  
SRR17520069.5993369  
SRR17520069.5993370  
SRR17520069.5993371  
SRR17520069.5993372  
SRR17520069.5993373  
SRR17520069.5993374  
SRR17520069.5993375  
SRR17520069.5993376  
SRR17520069.5993377  
SRR17520069.5993378  
SRR17520069.5993379  
SRR17520069.5993380  
SRR17520069.5993381  
SRR17520069.5993382  
SRR17520069.5993383  
SRR17520069.5993384  
SRR17520069.5993385  
SRR17520069.5993386  
SRR17520069.5993387  
SRR17520069.5993388  
SRR17520069.5993389  
SRR17520069.5993390  
SRR17520069.5993391  
SRR17520069.5993392  
SRR17520069.5993393  
SRR17520069.5993394  
SRR17520069.5993395  
SRR17520069.5993396  
SRR17520069.5993397  
SRR17520069.5993398  
SRR17520069.5993399  
SRR17520069.5993400  
SRR17520069.5993401  
SRR17520069.5993402  
SRR17520069.5993403  
SRR17520069.5993404  
SRR17520069.5993405  
SRR17520069.5993406  
SRR17520069.5993407  
SRR17520069.5993408  
SRR17520069.5993409  
SRR17520069.5993410

SRR17520069.6000439  
SRR17520069.6000440  
SRR17520069.6000441  
SRR17520069.6000442  
SRR17520069.6000443  
SRR17520069.6000444  
SRR17520069.6000445  
SRR17520069.6000446  
SRR17520069.6000447  
SRR17520069.6000448  
SRR17520069.6000449  
SRR17520069.6000450  
SRR17520069.6000451  
SRR17520069.6000452  
SRR17520069.6000453  
SRR17520069.6000454  
SRR17520069.6000455  
SRR17520069.6000456  
SRR17520069.6000457  
SRR17520069.6000458  
SRR17520069.6000459  
SRR17520069.6000460  
SRR17520069.6000461  
SRR17520069.6000462  
SRR17520069.6000463  
SRR17520069.6000464  
SRR17520069.6000465  
SRR17520069.6000466  
SRR17520069.6000467  
SRR17520069.6000468  
SRR17520069.6000469  
SRR17520069.6000470  
SRR17520069.6000471  
SRR17520069.6000472  
SRR17520069.6000473  
SRR17520069.6000474  
SRR17520069.6000475  
SRR17520069.6000476  
SRR17520069.6000477  
SRR17520069.6000478  
SRR17520069.6000479  
SRR17520069.6000480  
SRR17520069.6000481  
SRR17520069.6000482  
SRR17520069.6000483  
SRR17520069.6000484  
SRR17520069.6000485

SRR17520069.6000486  
SRR17520069.6000487  
SRR17520069.6000488  
SRR17520069.6000489  
SRR17520069.6000490  
SRR17520069.6000491  
SRR17520069.6000492  
SRR17520069.6000493  
SRR17520069.6000494  
SRR17520069.6000495  
SRR17520069.6000496  
SRR17520069.6000497  
SRR17520069.6000498  
SRR17520069.6000499  
SRR17520069.6000500  
SRR17520069.6000501  
SRR17520069.6000502  
SRR17520069.6000503  
SRR17520069.6000504  
SRR17520069.6000505  
SRR17520069.6000506  
SRR17520069.6000507  
SRR17520069.6000508  
SRR17520069.6000509  
SRR17520069.6000510  
SRR17520069.6000511  
SRR17520069.6000512  
SRR17520069.6000513  
SRR17520069.6000514  
SRR17520069.6000515  
SRR17520069.6000516  
SRR17520069.6000517  
SRR17520069.6000518  
SRR17520069.6000519  
SRR17520069.6000520  
SRR17520069.6000521  
SRR17520069.6000522  
SRR17520069.6000523  
SRR17520069.6000524  
SRR17520069.6000525  
SRR17520069.6000526  
SRR17520069.6000527  
SRR17520069.6000528  
SRR17520069.6000529  
SRR17520069.6000530  
SRR17520069.6000531  
SRR17520069.6000532

SRR17520069.6000533  
SRR17520069.6000534  
SRR17520069.6000535  
SRR17520069.6004981  
SRR17520069.6004982  
SRR17520069.6004983  
SRR17520069.6004984  
SRR17520069.6004985  
SRR17520069.6004986  
SRR17520069.6004987  
SRR17520069.6004988  
SRR17520069.6004989  
SRR17520069.6004990  
SRR17520069.6004991  
SRR17520069.6004992  
SRR17520069.6013075  
SRR17520069.6013076  
SRR17520069.6013077  
SRR17520069.6015521  
SRR17520069.6015522  
SRR17520069.6015523  
SRR17520069.6015524  
SRR17520069.6015525  
SRR17520069.6015526  
SRR17520069.6015527  
SRR17520069.6015528  
SRR17520069.6015529  
SRR17520069.6015530  
SRR17520069.6015531  
SRR17520069.6015533  
SRR17520069.6015534  
SRR17520069.6015535  
SRR17520069.6015536  
SRR17520069.6015537  
SRR17520069.6015538  
SRR17520069.6015539  
SRR17520069.6015541  
SRR17520069.6015543  
SRR17520069.6015544  
SRR17520069.6024142  
SRR17520069.6024143  
SRR17520069.6024144  
SRR17520069.6024145  
SRR17520069.6024146  
SRR17520069.6024147  
SRR17520069.6024148  
SRR17520069.6024149

SRR17520069.6024150  
SRR17520069.6024151  
SRR17520069.6024152  
SRR17520069.6024153  
SRR17520069.6024154  
SRR17520069.6024155  
SRR17520069.6024156  
SRR17520069.6024157  
SRR17520069.6024158  
SRR17520069.6024159  
SRR17520069.6024160  
SRR17520069.6024161  
SRR17520069.6024162  
SRR17520069.6024163  
SRR17520069.6024164  
SRR17520069.6024165  
SRR17520069.6024166  
SRR17520069.6024167  
SRR17520069.6024168  
SRR17520069.6024169  
SRR17520069.6024170  
SRR17520069.6024171  
SRR17520069.6024172  
SRR17520069.6024173  
SRR17520069.6024174  
SRR17520069.6024175  
SRR17520069.6024176  
SRR17520069.6024177  
SRR17520069.6024178  
SRR17520069.6024179  
SRR17520069.6024180  
SRR17520069.6024181  
SRR17520069.6024182  
SRR17520069.6024183  
SRR17520069.6024184  
SRR17520069.6024185  
SRR17520069.6024186  
SRR17520069.6024187  
SRR17520069.6024189  
SRR17520069.6024190  
SRR17520069.6024191  
SRR17520069.6024192  
SRR17520069.6024193  
SRR17520069.6024194  
SRR17520069.6024195  
SRR17520069.6024196  
SRR17520069.6024197

SRR17520069.6024198  
SRR17520069.6024199  
SRR17520069.6024200  
SRR17520069.6024201  
SRR17520069.6024202  
SRR17520069.6024203  
SRR17520069.6024204  
SRR17520069.6024205  
SRR17520069.6024206  
SRR17520069.6024207  
SRR17520069.6024208  
SRR17520069.6024209  
SRR17520069.6024210  
SRR17520069.6024211  
SRR17520069.6024212  
SRR17520069.6024213  
SRR17520069.6024214  
SRR17520069.6024215  
SRR17520069.6024216  
SRR17520069.6024217  
SRR17520069.6024218  
SRR17520069.6024219  
SRR17520069.6024220  
SRR17520069.6024221  
SRR17520069.6024222  
SRR17520069.6024223  
SRR17520069.6024224  
SRR17520069.6024225  
SRR17520069.6024226  
SRR17520069.6024227  
SRR17520069.6024228  
SRR17520069.6024229  
SRR17520069.6024230  
SRR17520069.6024231  
SRR17520069.6024232  
SRR17520069.6024233  
SRR17520069.6024234  
SRR17520069.6024235  
SRR17520069.6024236  
SRR17520069.6024237  
SRR17520069.6024238  
SRR17520069.6024239  
SRR17520069.6024240  
SRR17520069.6024241  
SRR17520069.6024242  
SRR17520069.6024243  
SRR17520069.6024245

SRR17520069.6024246  
SRR17520069.6024247  
SRR17520069.6024248  
SRR17520069.6024249  
SRR17520069.6024250  
SRR17520069.6024251  
SRR17520069.6024252  
SRR17520069.6024253  
SRR17520069.6024254  
SRR17520069.6024255  
SRR17520069.6024256  
SRR17520069.6024257  
SRR17520069.6024258  
SRR17520069.6024259  
SRR17520069.6024260  
SRR17520069.6024261  
SRR17520069.6024262  
SRR17520069.6024263  
SRR17520069.6024264  
SRR17520069.6024265  
SRR17520069.6024266  
SRR17520069.6024267  
SRR17520069.6024268  
SRR17520069.6024269  
SRR17520069.6024270  
SRR17520069.6024271  
SRR17520069.6024272  
SRR17520069.6024273  
SRR17520069.6024274  
SRR17520069.6024275  
SRR17520069.6024276  
SRR17520069.6024590  
SRR17520069.6024591  
SRR17520069.6024593  
SRR17520069.6024594  
SRR17520069.6024595  
SRR17520069.6024596  
SRR17520069.6024597  
SRR17520069.6024598  
SRR17520069.6024600  
SRR17520069.6024601  
SRR17520069.6024602  
SRR17520069.6045193  
SRR17520069.6045195  
SRR17520069.6045198  
SRR17520069.6045200  
SRR17520069.6045201



SRR17520069.6045202  
SRR17520069.6045203  
SRR17520069.6045204  
SRR17520069.6045205  
SRR17520069.6045206  
SRR17520069.6045207  
SRR17520069.6045208  
SRR17520069.6045209  
SRR17520069.6045210  
SRR17520069.6045211  
SRR17520069.6045212  
SRR17520069.6045213  
SRR17520069.6045214  
SRR17520069.6045215  
SRR17520069.6045216  
SRR17520069.6045217  
SRR17520069.6045218  
SRR17520069.6045219  
SRR17520069.6045220  
SRR17520069.6045221  
SRR17520069.6045222  
SRR17520069.6045223  
SRR17520069.6045224  
SRR17520069.6045225  
SRR17520069.6045226  
SRR17520069.6045227  
SRR17520069.6045228  
SRR17520069.6045229  
SRR17520069.6045231  
SRR17520069.6045232  
SRR17520069.6045233  
SRR17520069.6045234  
SRR17520069.6045235  
SRR17520069.6045236  
SRR17520069.6045237  
SRR17520069.6045238  
SRR17520069.6045239  
SRR17520069.6045240  
SRR17520069.6045241  
SRR17520069.6045242  
SRR17520069.6045243  
SRR17520069.6045244  
SRR17520069.6045245  
SRR17520069.6045246  
SRR17520069.6045247  
SRR17520069.6045248  
SRR17520069.6045249

SRR17520069.6045250  
SRR17520069.6045251  
SRR17520069.6045252  
SRR17520069.6045253  
SRR17520069.6045254  
SRR17520069.6045255  
SRR17520069.6045256  
SRR17520069.6045257  
SRR17520069.6045258  
SRR17520069.6045259  
SRR17520069.6045260  
SRR17520069.6045261  
SRR17520069.6045262  
SRR17520069.6049139  
SRR17520069.6049154  
SRR17520069.6052444  
SRR17520069.6052445  
SRR17520069.6052446  
SRR17520069.6052448  
SRR17520069.6052450  
SRR17520069.6052451  
SRR17520069.6052452  
SRR17520069.6052453  
SRR17520069.6052454  
SRR17520069.6052455  
SRR17520069.6052456  
SRR17520069.6052457  
SRR17520069.6052458  
SRR17520069.6052459  
SRR17520069.6052460  
SRR17520069.6052461  
SRR17520069.6052462  
SRR17520069.6052463  
SRR17520069.6052464  
SRR17520069.6052465  
SRR17520069.6052466  
SRR17520069.6052467  
SRR17520069.6052468  
SRR17520069.6052469  
SRR17520069.6052470  
SRR17520069.6052471  
SRR17520069.6052472  
SRR17520069.6052473  
SRR17520069.6052474  
SRR17520069.6052475  
SRR17520069.6052476  
SRR17520069.6052477

SRR17520069.6052478  
SRR17520069.6052479  
SRR17520069.6052480  
SRR17520069.6052481  
SRR17520069.6052482  
SRR17520069.6052483  
SRR17520069.6052484  
SRR17520069.6052485  
SRR17520069.6052486  
SRR17520069.6052487  
SRR17520069.6052488  
SRR17520069.6052489  
SRR17520069.6052490  
SRR17520069.6052491  
SRR17520069.6052492  
SRR17520069.6052493  
SRR17520069.6052494  
SRR17520069.6052495  
SRR17520069.6052496  
SRR17520069.6052497  
SRR17520069.6052498  
SRR17520069.6052499  
SRR17520069.6052500  
SRR17520069.6052501  
SRR17520069.6052502  
SRR17520069.6052503  
SRR17520069.6052504  
SRR17520069.6052505  
SRR17520069.6052506  
SRR17520069.6052507  
SRR17520069.6052508  
SRR17520069.6052509  
SRR17520069.6052510  
SRR17520069.6052511  
SRR17520069.6052512  
SRR17520069.6052513  
SRR17520069.6052514  
SRR17520069.6052515  
SRR17520069.6052516  
SRR17520069.6052517  
SRR17520069.6052518  
SRR17520069.6052519  
SRR17520069.6052520  
SRR17520069.6052521  
SRR17520069.6052522  
SRR17520069.6052523  
SRR17520069.6052524

SRR17520069.6052525  
SRR17520069.6052526  
SRR17520069.6052527  
SRR17520069.6052528  
SRR17520069.6052530  
SRR17520069.6052531  
SRR17520069.6052532  
SRR17520069.6052533  
SRR17520069.6052534  
SRR17520069.6052535  
SRR17520069.6052536  
SRR17520069.6052537  
SRR17520069.6052538  
SRR17520069.6052539  
SRR17520069.6052540  
SRR17520069.6052541  
SRR17520069.6052542  
SRR17520069.6052543  
SRR17520069.6052544  
SRR17520069.6052545  
SRR17520069.6052546  
SRR17520069.6052547  
SRR17520069.6052548  
SRR17520069.6052549  
SRR17520069.6052550  
SRR17520069.6052551  
SRR17520069.6052552  
SRR17520069.6052553  
SRR17520069.6052554  
SRR17520069.6052555  
SRR17520069.6052556  
SRR17520069.6052557  
SRR17520069.6052558  
SRR17520069.6052559  
SRR17520069.6052560  
SRR17520069.6052561  
SRR17520069.6052562  
SRR17520069.6052563  
SRR17520069.6052564  
SRR17520069.6052565  
SRR17520069.6052566  
SRR17520069.6052567  
SRR17520069.6052568  
SRR17520069.6052569  
SRR17520069.6052571  
SRR17520069.6052572  
SRR17520069.6052573

SRR17520069.6052574  
SRR17520069.6052575  
SRR17520069.6052576  
SRR17520069.6052577  
SRR17520069.6052578  
SRR17520069.6052579  
SRR17520069.6052580  
SRR17520069.6052581  
SRR17520069.6052582  
SRR17520069.6052583  
SRR17520069.6052584  
SRR17520069.6052585  
SRR17520069.6052586  
SRR17520069.6052587  
SRR17520069.6052588  
SRR17520069.6052589  
SRR17520069.6052590  
SRR17520069.6052591  
SRR17520069.6052592  
SRR17520069.6052593  
SRR17520069.6052594  
SRR17520069.6052595  
SRR17520069.6069620  
SRR17520069.6069621  
SRR17520069.6069622  
SRR17520069.6069623  
SRR17520069.6069624  
SRR17520069.6069625  
SRR17520069.6069626  
SRR17520069.6069627  
SRR17520069.6069629  
SRR17520069.6069630  
SRR17520069.6069631  
SRR17520069.6069632  
SRR17520069.6069633  
SRR17520069.6069634  
SRR17520069.6069635  
SRR17520069.6069636  
SRR17520069.6069637  
SRR17520069.6069638  
SRR17520069.6069639  
SRR17520069.6069640  
SRR17520069.6069641  
SRR17520069.6069642  
SRR17520069.6069643  
SRR17520069.6069644  
SRR17520069.6069645

SRR17520069. 6069646  
SRR17520069. 6069647  
SRR17520069. 6069648  
SRR17520069. 6069649  
SRR17520069. 6069650  
SRR17520069. 6069651  
SRR17520069. 6069652  
SRR17520069. 6069653  
SRR17520069. 6069654  
SRR17520069. 6069655  
SRR17520069. 6069656  
SRR17520069. 6069657  
SRR17520069. 6069658  
SRR17520069. 6069659  
SRR17520069. 6069660  
SRR17520069. 6069661  
SRR17520069. 6069662  
SRR17520069. 6069663  
SRR17520069. 6069664  
SRR17520069. 6069665  
SRR17520069. 6069666  
SRR17520069. 6069667  
SRR17520069. 6069668  
SRR17520069. 6069669  
SRR17520069. 6069670  
SRR17520069. 6069671  
SRR17520069. 6069672  
SRR17520069. 6069673  
SRR17520069. 6069674  
SRR17520069. 6069675  
SRR17520069. 6069676  
SRR17520069. 6069677  
SRR17520069. 6069678  
SRR17520069. 6069679  
SRR17520069. 6069680  
SRR17520069. 6069681  
SRR17520069. 6069682  
SRR17520069. 6069683  
SRR17520069. 6069684  
SRR17520069. 6069685  
SRR17520069. 6069686  
SRR17520069. 6069687  
SRR17520069. 6069688  
SRR17520069. 6069689  
SRR17520069. 6069690  
SRR17520069. 6069691  
SRR17520069. 6069692

SRR17520069. 6069693  
SRR17520069. 6069694  
SRR17520069. 6069695  
SRR17520069. 6069696  
SRR17520069. 6069697  
SRR17520069. 6069698  
SRR17520069. 6069699  
SRR17520069. 6069700  
SRR17520069. 6069701  
SRR17520069. 6069702  
SRR17520069. 6069703  
SRR17520069. 6069704  
SRR17520069. 6069705  
SRR17520069. 6069706  
SRR17520069. 6069707  
SRR17520069. 6069708  
SRR17520069. 6069709  
SRR17520069. 6069710  
SRR17520069. 6069711  
SRR17520069. 6069712  
SRR17520069. 6069713  
SRR17520069. 6069714  
SRR17520069. 6069715  
SRR17520069. 6069716  
SRR17520069. 6069717  
SRR17520069. 6069718  
SRR17520069. 6069719  
SRR17520069. 6069720  
SRR17520069. 6069721  
SRR17520069. 6069722  
SRR17520069. 6069723  
SRR17520069. 6069724  
SRR17520069. 6069725  
SRR17520069. 6069726  
SRR17520069. 6069727  
SRR17520069. 6069728  
SRR17520069. 6069729  
SRR17520069. 6069730  
SRR17520069. 6069731  
SRR17520069. 6069732  
SRR17520069. 6069733  
SRR17520069. 6069734  
SRR17520069. 6069735  
SRR17520069. 6069736  
SRR17520069. 6069737  
SRR17520069. 6069738  
SRR17520069. 6069739

SRR17520069. 6069740  
SRR17520069. 6069741  
SRR17520069. 6069742  
SRR17520069. 6069743  
SRR17520069. 6069744  
SRR17520069. 6069745  
SRR17520069. 6069746  
SRR17520069. 6069747  
SRR17520069. 6069748  
SRR17520069. 6069749  
SRR17520069. 6069750  
SRR17520069. 6069751  
SRR17520069. 6069752  
SRR17520069. 6069753  
SRR17520069. 6069754  
SRR17520069. 6069755  
SRR17520069. 6069756  
SRR17520069. 6069757  
SRR17520069. 6069758  
SRR17520069. 6069759  
SRR17520069. 6069760  
SRR17520069. 6069761  
SRR17520069. 6069763  
SRR17520069. 6069764  
SRR17520069. 6069765  
SRR17520069. 6069766  
SRR17520069. 6069767  
SRR17520069. 6069768  
SRR17520069. 6069769  
SRR17520069. 6069770  
SRR17520069. 6069771  
SRR17520069. 6069772  
SRR17520069. 6069773  
SRR17520069. 6069774  
SRR17520069. 6069775  
SRR17520069. 6069776  
SRR17520069. 6069777  
SRR17520069. 6069778  
SRR17520069. 6069779  
SRR17520069. 6069780  
SRR17520069. 6069781  
SRR17520069. 6069782  
SRR17520069. 6069783  
SRR17520069. 6069784  
SRR17520069. 6069785  
SRR17520069. 6069786  
SRR17520069. 6069787



SRR17520069.6069788  
SRR17520069.6069789  
SRR17520069.6069790  
SRR17520069.6074511  
SRR17520069.6074512  
SRR17520069.6074513  
SRR17520069.6074514  
SRR17520069.6074515  
SRR17520069.6074516  
SRR17520069.6074517  
SRR17520069.6074518  
SRR17520069.6074519  
SRR17520069.6074520  
SRR17520069.6074521  
SRR17520069.6074522  
SRR17520069.6074523  
SRR17520069.6074524  
SRR17520069.6074525  
SRR17520069.6074526  
SRR17520069.6074527  
SRR17520069.6074528  
SRR17520069.6074529  
SRR17520069.6074530  
SRR17520069.6074531  
SRR17520069.6074532  
SRR17520069.6074533  
SRR17520069.6074534  
SRR17520069.6074535  
SRR17520069.6074536  
SRR17520069.6074537  
SRR17520069.6074538  
SRR17520069.6074539  
SRR17520069.6074540  
SRR17520069.6074541  
SRR17520069.6074542  
SRR17520069.6074543  
SRR17520069.6074544  
SRR17520069.6074545  
SRR17520069.6074546  
SRR17520069.6074547  
SRR17520069.6074548  
SRR17520069.6074549  
SRR17520069.6074550  
SRR17520069.6074551  
SRR17520069.6074552  
SRR17520069.6074553  
SRR17520069.6074554

SRR17520069. 6074555  
SRR17520069. 6074556  
SRR17520069. 6074557  
SRR17520069. 6074558  
SRR17520069. 6074559  
SRR17520069. 6074560  
SRR17520069. 6074561  
SRR17520069. 6074562  
SRR17520069. 6074563  
SRR17520069. 6074564  
SRR17520069. 6074565  
SRR17520069. 6074566  
SRR17520069. 6074567  
SRR17520069. 6074568  
SRR17520069. 6074569  
SRR17520069. 6074570  
SRR17520069. 6074571  
SRR17520069. 6074572  
SRR17520069. 6074573  
SRR17520069. 6074574  
SRR17520069. 6074575  
SRR17520069. 6074576  
SRR17520069. 6074577  
SRR17520069. 6074578  
SRR17520069. 6074579  
SRR17520069. 6074580  
SRR17520069. 6074581  
SRR17520069. 6074582  
SRR17520069. 6074583  
SRR17520069. 6074584  
SRR17520069. 6074585  
SRR17520069. 6074586  
SRR17520069. 6074587  
SRR17520069. 6074588  
SRR17520069. 6074589  
SRR17520069. 6074591  
SRR17520069. 6074592  
SRR17520069. 6074593  
SRR17520069. 6076780  
SRR17520069. 6076781  
SRR17520069. 6076782  
SRR17520069. 6076783  
SRR17520069. 6076784  
SRR17520069. 6076785  
SRR17520069. 6076786  
SRR17520069. 6076787  
SRR17520069. 6076788

SRR17520069.6076789  
SRR17520069.6076790  
SRR17520069.6076791  
SRR17520069.6076792  
SRR17520069.6076793  
SRR17520069.6076794  
SRR17520069.6076795  
SRR17520069.6076796  
SRR17520069.6076797  
SRR17520069.6076798  
SRR17520069.6076812  
SRR17520069.6097159  
SRR17520069.6097163  
SRR17520069.6097164  
SRR17520069.6097167  
SRR17520069.6100017  
SRR17520069.6100037  
SRR17520069.6103158  
SRR17520069.6103160  
SRR17520069.6103161  
SRR17520069.6110700  
SRR17520069.6110701  
SRR17520069.6110702  
SRR17520069.6110703  
SRR17520069.6110704  
SRR17520069.6110705  
SRR17520069.6110706  
SRR17520069.6110707  
SRR17520069.6110708  
SRR17520069.6110709  
SRR17520069.6110710  
SRR17520069.6110711  
SRR17520069.6110712  
SRR17520069.6110713  
SRR17520069.6110714  
SRR17520069.6110715  
SRR17520069.6110716  
SRR17520069.6110717  
SRR17520069.6110718  
SRR17520069.6110719  
SRR17520069.6110720  
SRR17520069.6110721  
SRR17520069.6110722  
SRR17520069.6110723  
SRR17520069.6112586  
SRR17520069.6112588  
SRR17520069.6112589

SRR17520069.6112590  
SRR17520069.6112591  
SRR17520069.6112592  
SRR17520069.6112594  
SRR17520069.6112598  
SRR17520069.6112599  
SRR17520069.6112600  
SRR17520069.6112601  
SRR17520069.6112602  
SRR17520069.6112604  
SRR17520069.6112606  
SRR17520069.6112608  
SRR17520069.6112609  
SRR17520069.6112610  
SRR17520069.6112612  
SRR17520069.6112613  
SRR17520069.6112614  
SRR17520069.6112615  
SRR17520069.6112616  
SRR17520069.6112617  
SRR17520069.6112618  
SRR17520069.6112619  
SRR17520069.6112620  
SRR17520069.6112621  
SRR17520069.6112622  
SRR17520069.6112623  
SRR17520069.6112625  
SRR17520069.6112626  
SRR17520069.6112627  
SRR17520069.6112628  
SRR17520069.6112629  
SRR17520069.6112630  
SRR17520069.6112631  
SRR17520069.6112634  
SRR17520069.6112636  
SRR17520069.6112637  
SRR17520069.6112639  
SRR17520069.6112641  
SRR17520069.6112642  
SRR17520069.6112643  
SRR17520069.6112644  
SRR17520069.6112645  
SRR17520069.6112646  
SRR17520069.6112647  
SRR17520069.6112648  
SRR17520069.6112649  
SRR17520069.6112650

SRR17520069.6112651  
SRR17520069.6112652  
SRR17520069.6112654  
SRR17520069.6112655  
SRR17520069.6112656  
SRR17520069.6112657  
SRR17520069.6112658  
SRR17520069.6112659  
SRR17520069.6112660  
SRR17520069.6112661  
SRR17520069.6112662  
SRR17520069.6112663  
SRR17520069.6112664  
SRR17520069.6112665  
SRR17520069.6112666  
SRR17520069.6112667  
SRR17520069.6112668  
SRR17520069.6112669  
SRR17520069.6112670  
SRR17520069.6112672  
SRR17520069.6112673  
SRR17520069.6112674  
SRR17520069.6112675  
SRR17520069.6112676  
SRR17520069.6112677  
SRR17520069.6112678  
SRR17520069.6112679  
SRR17520069.6112680  
SRR17520069.6112682  
SRR17520069.6112683  
SRR17520069.6112684  
SRR17520069.6112686  
SRR17520069.6112687  
SRR17520069.6112688  
SRR17520069.6112689  
SRR17520069.6112690  
SRR17520069.6112691  
SRR17520069.6112692  
SRR17520069.6112694  
SRR17520069.6112695  
SRR17520069.6112696  
SRR17520069.6112697  
SRR17520069.6112699  
SRR17520069.6112700  
SRR17520069.6112701  
SRR17520069.6112702  
SRR17520069.6112703

SRR17520069.6112704  
SRR17520069.6112705  
SRR17520069.6112707  
SRR17520069.6112708  
SRR17520069.6112709  
SRR17520069.6112710  
SRR17520069.6112711  
SRR17520069.6112712  
SRR17520069.6112713  
SRR17520069.6112714  
SRR17520069.6112715  
SRR17520069.6136241  
SRR17520069.6136242  
SRR17520069.6136243  
SRR17520069.6136244  
SRR17520069.6136245  
SRR17520069.6136246  
SRR17520069.6136247  
SRR17520069.6136248  
SRR17520069.6136249  
SRR17520069.6136250  
SRR17520069.6136251  
SRR17520069.6136252  
SRR17520069.6136253  
SRR17520069.6136254  
SRR17520069.6136255  
SRR17520069.6136256  
SRR17520069.6136257  
SRR17520069.6136258  
SRR17520069.6136259  
SRR17520069.6136260  
SRR17520069.6136261  
SRR17520069.6136262  
SRR17520069.6136263  
SRR17520069.6136264  
SRR17520069.6136265  
SRR17520069.6136266  
SRR17520069.6136267  
SRR17520069.6136268  
SRR17520069.6136269  
SRR17520069.6136270  
SRR17520069.6136272  
SRR17520069.6136273  
SRR17520069.6136274  
SRR17520069.6136276  
SRR17520069.6136277  
SRR17520069.6136278

SRR17520069. 6136279  
SRR17520069. 6136280  
SRR17520069. 6136281  
SRR17520069. 6136282  
SRR17520069. 6136284  
SRR17520069. 6136285  
SRR17520069. 6136286  
SRR17520069. 6136287  
SRR17520069. 6136288  
SRR17520069. 6136289  
SRR17520069. 6136290  
SRR17520069. 6136291  
SRR17520069. 6136292  
SRR17520069. 6136293  
SRR17520069. 6136294  
SRR17520069. 6136295  
SRR17520069. 6136296  
SRR17520069. 6136298  
SRR17520069. 6136299  
SRR17520069. 6136300  
SRR17520069. 6136301  
SRR17520069. 6136302  
SRR17520069. 6136303  
SRR17520069. 6136304  
SRR17520069. 6136305  
SRR17520069. 6136306  
SRR17520069. 6136307  
SRR17520069. 6136308  
SRR17520069. 6136309  
SRR17520069. 6136310  
SRR17520069. 6136311  
SRR17520069. 6136312  
SRR17520069. 6136313  
SRR17520069. 6136314  
SRR17520069. 6136315  
SRR17520069. 6136316  
SRR17520069. 6136317  
SRR17520069. 6142979  
SRR17520069. 6142980  
SRR17520069. 6142981  
SRR17520069. 6142982  
SRR17520069. 6142983  
SRR17520069. 6142984  
SRR17520069. 6142985  
SRR17520069. 6142986  
SRR17520069. 6142987  
SRR17520069. 6142988

SRR17520069.6142989  
SRR17520069.6142990  
SRR17520069.6142991  
SRR17520069.6142992  
SRR17520069.6142993  
SRR17520069.6142994  
SRR17520069.6147716  
SRR17520069.6147738  
SRR17520069.6170482  
SRR17520069.6170483  
SRR17520069.6170484  
SRR17520069.6170485  
SRR17520069.6170486  
SRR17520069.6170487  
SRR17520069.6170488  
SRR17520069.6170489  
SRR17520069.6170490  
SRR17520069.6170491  
SRR17520069.6170492  
SRR17520069.6170493  
SRR17520069.6170494  
SRR17520069.6170495  
SRR17520069.6170496  
SRR17520069.6170497  
SRR17520069.6170498  
SRR17520069.6170499  
SRR17520069.6170500  
SRR17520069.6170501  
SRR17520069.6170502  
SRR17520069.6170503  
SRR17520069.6170504  
SRR17520069.6170505  
SRR17520069.6170506  
SRR17520069.6170507  
SRR17520069.6170508  
SRR17520069.6170509  
SRR17520069.6170510  
SRR17520069.6170511  
SRR17520069.6170512  
SRR17520069.6170513  
SRR17520069.6170514  
SRR17520069.6170515  
SRR17520069.6170516  
SRR17520069.6170518  
SRR17520069.6170519  
SRR17520069.6170520  
SRR17520069.6170521



SRR17520069. 6170522  
SRR17520069. 6170524  
SRR17520069. 6170525  
SRR17520069. 6170526  
SRR17520069. 6170527  
SRR17520069. 6170528  
SRR17520069. 6170529  
SRR17520069. 6170530  
SRR17520069. 6170531  
SRR17520069. 6170532  
SRR17520069. 6170533  
SRR17520069. 6170534  
SRR17520069. 6170535  
SRR17520069. 6170536  
SRR17520069. 6174986  
SRR17520069. 6174987  
SRR17520069. 6174988  
SRR17520069. 6174989  
SRR17520069. 6174990  
SRR17520069. 6174991  
SRR17520069. 6174992  
SRR17520069. 6174993  
SRR17520069. 6174994  
SRR17520069. 6174995  
SRR17520069. 6174996  
SRR17520069. 6174997  
SRR17520069. 6174998  
SRR17520069. 6174999  
SRR17520069. 6175000  
SRR17520069. 6175001  
SRR17520069. 6175002  
SRR17520069. 6175003  
SRR17520069. 6175004  
SRR17520069. 6209461  
SRR17520069. 6221817  
SRR17520069. 6221818  
SRR17520069. 6221819  
SRR17520069. 6221820  
SRR17520069. 6221821  
SRR17520069. 6221822  
SRR17520069. 6221823  
SRR17520069. 6221824  
SRR17520069. 6221825  
SRR17520069. 6221826  
SRR17520069. 6221827  
SRR17520069. 6221828  
SRR17520069. 6221830

SRR17520069.6221831  
SRR17520069.6221832  
SRR17520069.6221833  
SRR17520069.6221834  
SRR17520069.6221835  
SRR17520069.6221836  
SRR17520069.6221837  
SRR17520069.6221838  
SRR17520069.6221839  
SRR17520069.6221840  
SRR17520069.6221841  
SRR17520069.6221842  
SRR17520069.6221843  
SRR17520069.6221844  
SRR17520069.6221845  
SRR17520069.6221846  
SRR17520069.6221847  
SRR17520069.6221848  
SRR17520069.6221849  
SRR17520069.6221850  
SRR17520069.6221851  
SRR17520069.6221852  
SRR17520069.6221853  
SRR17520069.6221854  
SRR17520069.6221856  
SRR17520069.6221857  
SRR17520069.6221858  
SRR17520069.6221859  
SRR17520069.6221860  
SRR17520069.6221861  
SRR17520069.6222535  
SRR17520069.6222546  
SRR17520069.6222606  
SRR17520069.6227803  
SRR17520069.6227804  
SRR17520069.6227805  
SRR17520069.6227806  
SRR17520069.6233338  
SRR17520069.6233339  
SRR17520069.6233340  
SRR17520069.6233341  
SRR17520069.6233342  
SRR17520069.6233343  
SRR17520069.6233344  
SRR17520069.6233345  
SRR17520069.6233346  
SRR17520069.6233347

SRR17520069.6233348  
SRR17520069.6233349  
SRR17520069.6233350  
SRR17520069.6233351  
SRR17520069.6233352  
SRR17520069.6233353  
SRR17520069.6233355  
SRR17520069.6233357  
SRR17520069.6233358  
SRR17520069.6233359  
SRR17520069.6246546  
SRR17520069.6246548  
SRR17520069.6246549  
SRR17520069.6246550  
SRR17520069.6246551  
SRR17520069.6246552  
SRR17520069.6246554  
SRR17520069.6246555  
SRR17520069.6246556  
SRR17520069.6246557  
SRR17520069.6246558  
SRR17520069.6246560  
SRR17520069.6246561  
SRR17520069.6246562  
SRR17520069.6246563  
SRR17520069.6246564  
SRR17520069.6246565  
SRR17520069.6246566  
SRR17520069.6246567  
SRR17520069.6246569  
SRR17520069.6246570  
SRR17520069.6246571  
SRR17520069.6246572  
SRR17520069.6246573  
SRR17520069.6246574  
SRR17520069.6246575  
SRR17520069.6246576  
SRR17520069.6246577  
SRR17520069.6246578  
SRR17520069.6246579  
SRR17520069.6246580  
SRR17520069.6246581  
SRR17520069.6246582  
SRR17520069.6246583  
SRR17520069.6246584  
SRR17520069.6246585  
SRR17520069.6246587

SRR17520069.6246588  
SRR17520069.6246589  
SRR17520069.6246590  
SRR17520069.6246591  
SRR17520069.6246592  
SRR17520069.6246593  
SRR17520069.6246594  
SRR17520069.6246595  
SRR17520069.6246596  
SRR17520069.6273291  
SRR17520069.6273292  
SRR17520069.6273293  
SRR17520069.6273294  
SRR17520069.6273295  
SRR17520069.6273296  
SRR17520069.6273297  
SRR17520069.6273298  
SRR17520069.6273299  
SRR17520069.6273300  
SRR17520069.6273301  
SRR17520069.6273302  
SRR17520069.6273303  
SRR17520069.6273304  
SRR17520069.6273305  
SRR17520069.6273306  
SRR17520069.6273307  
SRR17520069.6273308  
SRR17520069.6273309  
SRR17520069.6273310  
SRR17520069.6273311  
SRR17520069.6273312  
SRR17520069.6273313  
SRR17520069.6273314  
SRR17520069.6273315  
SRR17520069.6273316  
SRR17520069.6273317  
SRR17520069.6273319  
SRR17520069.6273320  
SRR17520069.6273321  
SRR17520069.6273322  
SRR17520069.6273323  
SRR17520069.6273327  
SRR17520069.6273330  
SRR17520069.6273332  
SRR17520069.6273334  
SRR17520069.6273340  
SRR17520069.6273342

SRR17520069.6273347  
SRR17520069.6273348  
SRR17520069.6273353  
SRR17520069.6273354  
SRR17520069.6273355  
SRR17520069.6280894  
SRR17520069.6280895  
SRR17520069.6280896  
SRR17520069.6280897  
SRR17520069.6280899  
SRR17520069.6280901  
SRR17520069.6280902  
SRR17520069.6280903  
SRR17520069.6280904  
SRR17520069.6280906  
SRR17520069.6280907  
SRR17520069.6280908  
SRR17520069.6280909  
SRR17520069.6280910  
SRR17520069.6280912  
SRR17520069.6280913  
SRR17520069.6280914  
SRR17520069.6280915  
SRR17520069.6280917  
SRR17520069.6280918  
SRR17520069.6280919  
SRR17520069.6280920  
SRR17520069.6280921  
SRR17520069.6280922  
SRR17520069.6280924  
SRR17520069.6280925  
SRR17520069.6280926  
SRR17520069.6280927  
SRR17520069.6280928  
SRR17520069.6280929  
SRR17520069.6280930  
SRR17520069.6280931  
SRR17520069.6280932  
SRR17520069.6280933  
SRR17520069.6280934  
SRR17520069.6280936  
SRR17520069.6280937  
SRR17520069.6280938  
SRR17520069.6280939  
SRR17520069.6280940  
SRR17520069.6280941  
SRR17520069.6280942

SRR17520069.6280944  
SRR17520069.6280945  
SRR17520069.6280946  
SRR17520069.6280947  
SRR17520069.6280948  
SRR17520069.6280949  
SRR17520069.6280950  
SRR17520069.6280951  
SRR17520069.6280952  
SRR17520069.6280953  
SRR17520069.6280954  
SRR17520069.6280955  
SRR17520069.6280956  
SRR17520069.6280957  
SRR17520069.6280958  
SRR17520069.6280959  
SRR17520069.6280960  
SRR17520069.6286898  
SRR17520069.6286902  
SRR17520069.6294099  
SRR17520069.6294100  
SRR17520069.6294101  
SRR17520069.6294102  
SRR17520069.6294104  
SRR17520069.6294105  
SRR17520069.6294106  
SRR17520069.6310732  
SRR17520069.6310733  
SRR17520069.6310735  
SRR17520069.6310736  
SRR17520069.6310737  
SRR17520069.6310738  
SRR17520069.6310739  
SRR17520069.6310740  
SRR17520069.6310742  
SRR17520069.6310743  
SRR17520069.6310746  
SRR17520069.6310747  
SRR17520069.6310748  
SRR17520069.6310749  
SRR17520069.6310751  
SRR17520069.6310752  
SRR17520069.6310753  
SRR17520069.6310754  
SRR17520069.6310755  
SRR17520069.6310756  
SRR17520069.6310757

SRR17520069. 6310759  
SRR17520069. 6310760  
SRR17520069. 6310761  
SRR17520069. 6323579  
SRR17520069. 6323600  
SRR17520069. 6338536  
SRR17520069. 6338537  
SRR17520069. 6338538  
SRR17520069. 6338539  
SRR17520069. 6338541  
SRR17520069. 6338543  
SRR17520069. 6338544  
SRR17520069. 6338545  
SRR17520069. 6338546  
SRR17520069. 6338547  
SRR17520069. 6338548  
SRR17520069. 6338549  
SRR17520069. 6338550  
SRR17520069. 6338551  
SRR17520069. 6338552  
SRR17520069. 6338553  
SRR17520069. 6338554  
SRR17520069. 6338555  
SRR17520069. 6338556  
SRR17520069. 6338557  
SRR17520069. 6338558  
SRR17520069. 6338559  
SRR17520069. 6338560  
SRR17520069. 6338561  
SRR17520069. 6338562  
SRR17520069. 6338563  
SRR17520069. 6338564  
SRR17520069. 6343705  
SRR17520069. 6418271  
SRR17520069. 6418272  
SRR17520069. 6418273  
SRR17520069. 6418274  
SRR17520069. 6418275  
SRR17520069. 6418276  
SRR17520069. 6418277  
SRR17520069. 6418278  
SRR17520069. 6418279  
SRR17520069. 6418280  
SRR17520069. 6418281  
SRR17520069. 6418282  
SRR17520069. 6418283  
SRR17520069. 6418284

SRR17520069.6418285  
SRR17520069.6418286  
SRR17520069.6418287  
SRR17520069.6418288  
SRR17520069.6418289  
SRR17520069.6418290  
SRR17520069.6418291  
SRR17520069.6418292  
SRR17520069.6418293  
SRR17520069.6418294  
SRR17520069.6418295  
SRR17520069.6418296  
SRR17520069.6418297  
SRR17520069.6418298  
SRR17520069.6418299  
SRR17520069.6418300  
SRR17520069.6418301  
SRR17520069.6418302  
SRR17520069.6418304  
SRR17520069.6418305  
SRR17520069.6418306  
SRR17520069.6418307  
SRR17520069.6418308  
SRR17520069.6418309  
SRR17520069.6418310  
SRR17520069.6418312  
SRR17520069.6418313  
SRR17520069.6418314  
SRR17520069.6418315  
SRR17520069.6418316  
SRR17520069.6418318  
SRR17520069.6418319  
SRR17520069.6418320  
SRR17520069.6418321  
SRR17520069.6418322  
SRR17520069.6418323  
SRR17520069.6418324  
SRR17520069.6418325  
SRR17520069.6418326  
SRR17520069.6418327  
SRR17520069.6418328  
SRR17520069.6418329  
SRR17520069.6418330  
SRR17520069.6418331  
SRR17520069.6418332  
SRR17520069.6418333  
SRR17520069.6418334



SRR17520069.6418335  
SRR17520069.6418336  
SRR17520069.6418337  
SRR17520069.6418338  
SRR17520069.6418339  
SRR17520069.6419826  
SRR17520069.6419827  
SRR17520069.6419828  
SRR17520069.6419829  
SRR17520069.6419830  
SRR17520069.6419831  
SRR17520069.6419832  
SRR17520069.6419833  
SRR17520069.6419834  
SRR17520069.6419835  
SRR17520069.6419836  
SRR17520069.6419837  
SRR17520069.6419838  
SRR17520069.6419839  
SRR17520069.6419840  
SRR17520069.6419841  
SRR17520069.6419842  
SRR17520069.6419843  
SRR17520069.6419844  
SRR17520069.6419845  
SRR17520069.6419847  
SRR17520069.6419848  
SRR17520069.6419849  
SRR17520069.6419850  
SRR17520069.6419851  
SRR17520069.6419852  
SRR17520069.6419853  
SRR17520069.6419854  
SRR17520069.6419855  
SRR17520069.6419856  
SRR17520069.6419857  
SRR17520069.6419858  
SRR17520069.6419859  
SRR17520069.6419860  
SRR17520069.6419861  
SRR17520069.6419862  
SRR17520069.6419863  
SRR17520069.6419864  
SRR17520069.6419865  
SRR17520069.6419866  
SRR17520069.6419867  
SRR17520069.6419868

SRR17520069.6419869  
SRR17520069.6419870  
SRR17520069.6419871  
SRR17520069.6419872  
SRR17520069.6419873  
SRR17520069.6419874  
SRR17520069.6419875  
SRR17520069.6419876  
SRR17520069.6419877  
SRR17520069.6419878  
SRR17520069.6419879  
SRR17520069.6419880  
SRR17520069.6419881  
SRR17520069.6419882  
SRR17520069.6419883  
SRR17520069.6419884  
SRR17520069.6419885  
SRR17520069.6419886  
SRR17520069.6419887  
SRR17520069.6419888  
SRR17520069.6419889  
SRR17520069.6419890  
SRR17520069.6419891  
SRR17520069.6419892  
SRR17520069.6419893  
SRR17520069.6419894  
SRR17520069.6419895  
SRR17520069.6419896  
SRR17520069.6419897  
SRR17520069.6419898  
SRR17520069.6419899  
SRR17520069.6421188  
SRR17520069.6421198  
SRR17520069.6431481  
SRR17520069.6431482  
SRR17520069.6431483  
SRR17520069.6431484  
SRR17520069.6431485  
SRR17520069.6431486  
SRR17520069.6431487  
SRR17520069.6431488  
SRR17520069.6431489  
SRR17520069.6431490  
SRR17520069.6431491  
SRR17520069.6431492  
SRR17520069.6431493  
SRR17520069.6431494

SRR17520069.6431495  
SRR17520069.6431496  
SRR17520069.6431497  
SRR17520069.6431498  
SRR17520069.6431499  
SRR17520069.6431500  
SRR17520069.6431501  
SRR17520069.6431502  
SRR17520069.6431503  
SRR17520069.6431504  
SRR17520069.6431505  
SRR17520069.6431506  
SRR17520069.6431507  
SRR17520069.6431508  
SRR17520069.6431509  
SRR17520069.6431510  
SRR17520069.6431511  
SRR17520069.6431512  
SRR17520069.6431513  
SRR17520069.6431514  
SRR17520069.6431515  
SRR17520069.6431516  
SRR17520069.6431517  
SRR17520069.6446182  
SRR17520069.6446183  
SRR17520069.6446184  
SRR17520069.6446185  
SRR17520069.6446186  
SRR17520069.6446187  
SRR17520069.6446188  
SRR17520069.6446189  
SRR17520069.6446190  
SRR17520069.6446191  
SRR17520069.6446192  
SRR17520069.6446193  
SRR17520069.6446194  
SRR17520069.6446195  
SRR17520069.6446196  
SRR17520069.6446197  
SRR17520069.6446198  
SRR17520069.6446199  
SRR17520069.6446200  
SRR17520069.6446201  
SRR17520069.6446202  
SRR17520069.6446204  
SRR17520069.6446205  
SRR17520069.6446206

SRR17520069.6446207  
SRR17520069.6446208  
SRR17520069.6446209  
SRR17520069.6446210  
SRR17520069.6446211  
SRR17520069.6446212  
SRR17520069.6446213  
SRR17520069.6446214  
SRR17520069.6446215  
SRR17520069.6446216  
SRR17520069.6446217  
SRR17520069.6446218  
SRR17520069.6446219  
SRR17520069.6446220  
SRR17520069.6446221  
SRR17520069.6446223  
SRR17520069.6446224  
SRR17520069.6448920  
SRR17520069.6448921  
SRR17520069.6448922  
SRR17520069.6448923  
SRR17520069.6448924  
SRR17520069.6448925  
SRR17520069.6448926  
SRR17520069.6448927  
SRR17520069.6448928  
SRR17520069.6448929  
SRR17520069.6448930  
SRR17520069.6448931  
SRR17520069.6448932  
SRR17520069.6448933  
SRR17520069.6448934  
SRR17520069.6448935  
SRR17520069.6448936  
SRR17520069.6448937  
SRR17520069.6448938  
SRR17520069.6448939  
SRR17520069.6448940  
SRR17520069.6448941  
SRR17520069.6448942  
SRR17520069.6448943  
SRR17520069.6448944  
SRR17520069.6448945  
SRR17520069.6448946  
SRR17520069.6448947  
SRR17520069.6448948  
SRR17520069.6448949

SRR17520069.6448950  
SRR17520069.6448951  
SRR17520069.6448952  
SRR17520069.6448953  
SRR17520069.6448954  
SRR17520069.6448955  
SRR17520069.6448956  
SRR17520069.6448957  
SRR17520069.6448958  
SRR17520069.6448959  
SRR17520069.6448960  
SRR17520069.6448961  
SRR17520069.6448962  
SRR17520069.6448963  
SRR17520069.6448964  
SRR17520069.6448965  
SRR17520069.6448966  
SRR17520069.6448967  
SRR17520069.6448968  
SRR17520069.6448969  
SRR17520069.6448970  
SRR17520069.6448971  
SRR17520069.6448972  
SRR17520069.6448973  
SRR17520069.6448974  
SRR17520069.6448975  
SRR17520069.6448976  
SRR17520069.6448977  
SRR17520069.6448978  
SRR17520069.6448979  
SRR17520069.6448980  
SRR17520069.6448981  
SRR17520069.6448982  
SRR17520069.6448983  
SRR17520069.6448985  
SRR17520069.6448986  
SRR17520069.6448988  
SRR17520069.6448989  
SRR17520069.6448990  
SRR17520069.6448991  
SRR17520069.6448992  
SRR17520069.6448993  
SRR17520069.6448994  
SRR17520069.6448995  
SRR17520069.6448996  
SRR17520069.6448997  
SRR17520069.6448998

SRR17520069.6448999  
SRR17520069.6449000  
SRR17520069.6449001  
SRR17520069.6449002  
SRR17520069.6449003  
SRR17520069.6449004  
SRR17520069.6451872  
SRR17520069.6451873  
SRR17520069.6451874  
SRR17520069.6480948  
SRR17520069.6482752  
SRR17520069.6487148  
SRR17520069.6487149  
SRR17520069.6487150  
SRR17520069.6487151  
SRR17520069.6487152  
SRR17520069.6487153  
SRR17520069.6487154  
SRR17520069.6487155  
SRR17520069.6487156  
SRR17520069.6487157  
SRR17520069.6487158  
SRR17520069.6487159  
SRR17520069.6487160  
SRR17520069.6487161  
SRR17520069.6487162  
SRR17520069.6487163  
SRR17520069.6487164  
SRR17520069.6487165  
SRR17520069.6487166  
SRR17520069.6487167  
SRR17520069.6487168  
SRR17520069.6487169  
SRR17520069.6487170  
SRR17520069.6487171  
SRR17520069.6487172  
SRR17520069.6487173  
SRR17520069.6487174  
SRR17520069.6487175  
SRR17520069.6487176  
SRR17520069.6487177  
SRR17520069.6487178  
SRR17520069.6487179  
SRR17520069.6487180  
SRR17520069.6505602  
SRR17520069.6505603  
SRR17520069.6505604

SRR17520069.6505605  
SRR17520069.6505606  
SRR17520069.6505607  
SRR17520069.6505608  
SRR17520069.6505609  
SRR17520069.6505610  
SRR17520069.6505611  
SRR17520069.6505612  
SRR17520069.6505613  
SRR17520069.6505614  
SRR17520069.6505615  
SRR17520069.6505616  
SRR17520069.6505617  
SRR17520069.6505618  
SRR17520069.6505619  
SRR17520069.6505620  
SRR17520069.6505622  
SRR17520069.6505623  
SRR17520069.6505625  
SRR17520069.6505626  
SRR17520069.6505627  
SRR17520069.6505628  
SRR17520069.6505629  
SRR17520069.6505630  
SRR17520069.6505631  
SRR17520069.6505632  
SRR17520069.6505633  
SRR17520069.6505634  
SRR17520069.6505635  
SRR17520069.6505636  
SRR17520069.6505637  
SRR17520069.6505639  
SRR17520069.6505640  
SRR17520069.6505642  
SRR17520069.6505643  
SRR17520069.6505644  
SRR17520069.6505645  
SRR17520069.6505646  
SRR17520069.6505647  
SRR17520069.6505650  
SRR17520069.6505651  
SRR17520069.6505652  
SRR17520069.6505653  
SRR17520069.6505654  
SRR17520069.6505655  
SRR17520069.6505656  
SRR17520069.6505657

SRR17520069.6505658  
SRR17520069.6505659  
SRR17520069.6505660  
SRR17520069.6505661  
SRR17520069.6505662  
SRR17520069.6505663  
SRR17520069.6505664  
SRR17520069.6505665  
SRR17520069.6505666  
SRR17520069.6505667  
SRR17520069.6505668  
SRR17520069.6505669  
SRR17520069.6505670  
SRR17520069.6505671  
SRR17520069.6505672  
SRR17520069.6505673  
SRR17520069.6505674  
SRR17520069.6505675  
SRR17520069.6505676  
SRR17520069.6505677  
SRR17520069.6505678  
SRR17520069.6505679  
SRR17520069.6505680  
SRR17520069.6505681  
SRR17520069.6505682  
SRR17520069.6505683  
SRR17520069.6505684  
SRR17520069.6505685  
SRR17520069.6505686  
SRR17520069.6505687  
SRR17520069.6505688  
SRR17520069.6505689  
SRR17520069.6505690  
SRR17520069.6505691  
SRR17520069.6505692  
SRR17520069.6505693  
SRR17520069.6508844  
SRR17520069.6508845  
SRR17520069.6535191  
SRR17520069.6535192  
SRR17520069.6535193  
SRR17520069.6535194  
SRR17520069.6535195  
SRR17520069.6535196  
SRR17520069.6535197  
SRR17520069.6535198  
SRR17520069.6535199



SRR17520069. 6535200  
SRR17520069. 6535201  
SRR17520069. 6535202  
SRR17520069. 6535203  
SRR17520069. 6535204  
SRR17520069. 6535205  
SRR17520069. 6535206  
SRR17520069. 6535207  
SRR17520069. 6535208  
SRR17520069. 6535209  
SRR17520069. 6535210  
SRR17520069. 6535211  
SRR17520069. 6535212  
SRR17520069. 6535213  
SRR17520069. 6535214  
SRR17520069. 6535215  
SRR17520069. 6535216  
SRR17520069. 6535217  
SRR17520069. 6535218  
SRR17520069. 6535219  
SRR17520069. 6535220  
SRR17520069. 6535221  
SRR17520069. 6535222  
SRR17520069. 6535223  
SRR17520069. 6535225  
SRR17520069. 6538620  
SRR17520069. 6548561  
SRR17520069. 6548562  
SRR17520069. 6548563  
SRR17520069. 6548564  
SRR17520069. 6548565  
SRR17520069. 6548566  
SRR17520069. 6548567  
SRR17520069. 6548568  
SRR17520069. 6548571  
SRR17520069. 6548572  
SRR17520069. 6548573  
SRR17520069. 6548574  
SRR17520069. 6548575  
SRR17520069. 6548576  
SRR17520069. 6548592  
SRR17520069. 6548593  
SRR17520069. 6548594  
SRR17520069. 6548595  
SRR17520069. 6548596  
SRR17520069. 6548597  
SRR17520069. 6548598

SRR17520069.6548599  
SRR17520069.6548600  
SRR17520069.6548601  
SRR17520069.6548602  
SRR17520069.6548603  
SRR17520069.6548604  
SRR17520069.6548605  
SRR17520069.6548606  
SRR17520069.6548607  
SRR17520069.6548608  
SRR17520069.6548609  
SRR17520069.6548610  
SRR17520069.6548611  
SRR17520069.6548612  
SRR17520069.6548613  
SRR17520069.6548614  
SRR17520069.6548615  
SRR17520069.6548616  
SRR17520069.6548617  
SRR17520069.6548618  
SRR17520069.6548619  
SRR17520069.6548620  
SRR17520069.6548621  
SRR17520069.6548622  
SRR17520069.6548623  
SRR17520069.6548624  
SRR17520069.6548625  
SRR17520069.6548626  
SRR17520069.6548627  
SRR17520069.6548628  
SRR17520069.6548629  
SRR17520069.6548630  
SRR17520069.6548631  
SRR17520069.6548632  
SRR17520069.6548633  
SRR17520069.6548634  
SRR17520069.6548635  
SRR17520069.6548636  
SRR17520069.6548637  
SRR17520069.6548638  
SRR17520069.6548639  
SRR17520069.6548640  
SRR17520069.6548641  
SRR17520069.6548642  
SRR17520069.6548643  
SRR17520069.6554075  
SRR17520069.6554076

SRR17520069.6554077  
SRR17520069.6554078  
SRR17520069.6554079  
SRR17520069.6554080  
SRR17520069.6554081  
SRR17520069.6554082  
SRR17520069.6554083  
SRR17520069.6554084  
SRR17520069.6554085  
SRR17520069.6554086  
SRR17520069.6554087  
SRR17520069.6554088  
SRR17520069.6554089  
SRR17520069.6554090  
SRR17520069.6554091  
SRR17520069.6554092  
SRR17520069.6554093  
SRR17520069.6554094  
SRR17520069.6554095  
SRR17520069.6554096  
SRR17520069.6554097  
SRR17520069.6554098  
SRR17520069.6554099  
SRR17520069.6554100  
SRR17520069.6554101  
SRR17520069.6554102  
SRR17520069.6554103  
SRR17520069.6554104  
SRR17520069.6554105  
SRR17520069.6554106  
SRR17520069.6554107  
SRR17520069.6554109  
SRR17520069.6554110  
SRR17520069.6554111  
SRR17520069.6554112  
SRR17520069.6554113  
SRR17520069.6554114  
SRR17520069.6554115  
SRR17520069.6554116  
SRR17520069.6554117  
SRR17520069.6554118  
SRR17520069.6554119  
SRR17520069.6554120  
SRR17520069.6554121  
SRR17520069.6554122  
SRR17520069.6554123  
SRR17520069.6554124

SRR17520069.6554125  
SRR17520069.6554126  
SRR17520069.6554127  
SRR17520069.6554128  
SRR17520069.6554129  
SRR17520069.6554130  
SRR17520069.6554131  
SRR17520069.6554132  
SRR17520069.6554133  
SRR17520069.6554134  
SRR17520069.6554137  
SRR17520069.6554148  
SRR17520069.6554149  
SRR17520069.6554150  
SRR17520069.6554151  
SRR17520069.6554152  
SRR17520069.6554153  
SRR17520069.6554154  
SRR17520069.6554155  
SRR17520069.6554156  
SRR17520069.6554157  
SRR17520069.6554158  
SRR17520069.6554159  
SRR17520069.6554160  
SRR17520069.6554161  
SRR17520069.6554162  
SRR17520069.6554163  
SRR17520069.6554164  
SRR17520069.6554165  
SRR17520069.6554167  
SRR17520069.6554168  
SRR17520069.6554169  
SRR17520069.6554170  
SRR17520069.6554171  
SRR17520069.6554172  
SRR17520069.6554173  
SRR17520069.6554174  
SRR17520069.6554175  
SRR17520069.6554176  
SRR17520069.6554177  
SRR17520069.6554178  
SRR17520069.6554179  
SRR17520069.6554180  
SRR17520069.6554181  
SRR17520069.6554182  
SRR17520069.6554183  
SRR17520069.6554184

SRR17520069.6554185  
SRR17520069.6554186  
SRR17520069.6554187  
SRR17520069.6554188  
SRR17520069.6554189  
SRR17520069.6554190  
SRR17520069.6594551  
SRR17520069.6594552  
SRR17520069.6594553  
SRR17520069.6594554  
SRR17520069.6594555  
SRR17520069.6594556  
SRR17520069.6594557  
SRR17520069.6594558  
SRR17520069.6594559  
SRR17520069.6594561  
SRR17520069.6594563  
SRR17520069.6594564  
SRR17520069.6594565  
SRR17520069.6594566  
SRR17520069.6594567  
SRR17520069.6594568  
SRR17520069.6594569  
SRR17520069.6594570  
SRR17520069.6594571  
SRR17520069.6594572  
SRR17520069.6594573  
SRR17520069.6594574  
SRR17520069.6594575  
SRR17520069.6594576  
SRR17520069.6594577  
SRR17520069.6594578  
SRR17520069.6594579  
SRR17520069.6594580  
SRR17520069.6594581  
SRR17520069.6594582  
SRR17520069.6594583  
SRR17520069.6594584  
SRR17520069.6594585  
SRR17520069.6594586  
SRR17520069.6594587  
SRR17520069.6594588  
SRR17520069.6594589  
SRR17520069.6594590  
SRR17520069.6594591  
SRR17520069.6594592  
SRR17520069.6594593

SRR17520069. 6594594  
SRR17520069. 6594595  
SRR17520069. 6594596  
SRR17520069. 6594597  
SRR17520069. 6594598  
SRR17520069. 6594599  
SRR17520069. 6594600  
SRR17520069. 6594601  
SRR17520069. 6594602  
SRR17520069. 6594603  
SRR17520069. 6594604  
SRR17520069. 6594605  
SRR17520069. 6594606  
SRR17520069. 6594607  
SRR17520069. 6594608  
SRR17520069. 6594609  
SRR17520069. 6594610  
SRR17520069. 6594611  
SRR17520069. 6594612  
SRR17520069. 6594613  
SRR17520069. 6594614  
SRR17520069. 6594615  
SRR17520069. 6594616  
SRR17520069. 6594617  
SRR17520069. 6594618  
SRR17520069. 6594619  
SRR17520069. 6594620  
SRR17520069. 6594621  
SRR17520069. 6594622  
SRR17520069. 6594623  
SRR17520069. 6594624  
SRR17520069. 6594625  
SRR17520069. 6594627  
SRR17520069. 6594628  
SRR17520069. 6594629  
SRR17520069. 6594630  
SRR17520069. 6594631  
SRR17520069. 6594632  
SRR17520069. 6594633  
SRR17520069. 6594634  
SRR17520069. 6594635  
SRR17520069. 6594636  
SRR17520069. 6594637  
SRR17520069. 6594638  
SRR17520069. 6594639  
SRR17520069. 6594640  
SRR17520069. 6594641

SRR17520069. 6594642  
SRR17520069. 6594643  
SRR17520069. 6594644  
SRR17520069. 6594645  
SRR17520069. 6594646  
SRR17520069. 6594647  
SRR17520069. 6594648  
SRR17520069. 6594649  
SRR17520069. 6594650  
SRR17520069. 6594651  
SRR17520069. 6594652  
SRR17520069. 6594653  
SRR17520069. 6594654  
SRR17520069. 6594655  
SRR17520069. 6594656  
SRR17520069. 6594657  
SRR17520069. 6594658  
SRR17520069. 6594659  
SRR17520069. 6594660  
SRR17520069. 6594661  
SRR17520069. 6594662  
SRR17520069. 6594663  
SRR17520069. 6594664  
SRR17520069. 6594665  
SRR17520069. 6594666  
SRR17520069. 6594667  
SRR17520069. 6594668  
SRR17520069. 6594669  
SRR17520069. 6596584  
SRR17520069. 6596585  
SRR17520069. 6596586  
SRR17520069. 6596588  
SRR17520069. 6596590  
SRR17520069. 6596591  
SRR17520069. 6596598  
SRR17520069. 6598065  
SRR17520069. 6634449  
SRR17520069. 6636093  
SRR17520069. 6642563  
SRR17520069. 6642564  
SRR17520069. 6642565  
SRR17520069. 6642566  
SRR17520069. 6642567  
SRR17520069. 6642568  
SRR17520069. 6642569  
SRR17520069. 6642570  
SRR17520069. 6642571

SRR17520069.6642572  
SRR17520069.6642573  
SRR17520069.6642574  
SRR17520069.6642575  
SRR17520069.6642576  
SRR17520069.6642577  
SRR17520069.6642578  
SRR17520069.6642623  
SRR17520069.6642624  
SRR17520069.6642625  
SRR17520069.6642626  
SRR17520069.6642627  
SRR17520069.6642628  
SRR17520069.6642629  
SRR17520069.6642630  
SRR17520069.6642631  
SRR17520069.6642632  
SRR17520069.6642633  
SRR17520069.6642634  
SRR17520069.6642635  
SRR17520069.6642636  
SRR17520069.6642637  
SRR17520069.6642638  
SRR17520069.6642639  
SRR17520069.6642640  
SRR17520069.6642641  
SRR17520069.6642642  
SRR17520069.6642643  
SRR17520069.6642644  
SRR17520069.6642645  
SRR17520069.6642646  
SRR17520069.6642647  
SRR17520069.6642648  
SRR17520069.6642649  
SRR17520069.6642650  
SRR17520069.6642651  
SRR17520069.6642652  
SRR17520069.6642653  
SRR17520069.6642654  
SRR17520069.6642655  
SRR17520069.6642656  
SRR17520069.6642657  
SRR17520069.6642658  
SRR17520069.6642659  
SRR17520069.6642660  
SRR17520069.6642661  
SRR17520069.6642662



SRR17520069. 6642663  
SRR17520069. 6642664  
SRR17520069. 6642665  
SRR17520069. 6642666  
SRR17520069. 6642667  
SRR17520069. 6642668  
SRR17520069. 6642669  
SRR17520069. 6642670  
SRR17520069. 6642671  
SRR17520069. 6642672  
SRR17520069. 6642673  
SRR17520069. 6642674  
SRR17520069. 6642675  
SRR17520069. 6642676  
SRR17520069. 6642677  
SRR17520069. 6642678  
SRR17520069. 6642679  
SRR17520069. 6642680  
SRR17520069. 6642681  
SRR17520069. 6642682  
SRR17520069. 6642683  
SRR17520069. 6642684  
SRR17520069. 6642685  
SRR17520069. 6642686  
SRR17520069. 6642687  
SRR17520069. 6642688  
SRR17520069. 6642689  
SRR17520069. 6642690  
SRR17520069. 6642691  
SRR17520069. 6643652  
SRR17520069. 6643659  
SRR17520069. 6644968  
SRR17520069. 6657705  
SRR17520069. 6657768  
SRR17520069. 6660939  
SRR17520069. 6660940  
SRR17520069. 6660941  
SRR17520069. 6660942  
SRR17520069. 6660943  
SRR17520069. 6660944  
SRR17520069. 6660945  
SRR17520069. 6660946  
SRR17520069. 6660947  
SRR17520069. 6660948  
SRR17520069. 6660949  
SRR17520069. 6660950  
SRR17520069. 6660951

SRR17520069.6660952  
SRR17520069.6660954  
SRR17520069.6660955  
SRR17520069.6660956  
SRR17520069.6660957  
SRR17520069.6660958  
SRR17520069.6660959  
SRR17520069.6660960  
SRR17520069.6660961  
SRR17520069.6660962  
SRR17520069.6660963  
SRR17520069.6663786  
SRR17520069.6663787  
SRR17520069.6663788  
SRR17520069.6663789  
SRR17520069.6663790  
SRR17520069.6663792  
SRR17520069.6663793  
SRR17520069.6663794  
SRR17520069.6663795  
SRR17520069.6663796  
SRR17520069.6663797  
SRR17520069.6663798  
SRR17520069.6663799  
SRR17520069.6663800  
SRR17520069.6663801  
SRR17520069.6663802  
SRR17520069.6663803  
SRR17520069.6663804  
SRR17520069.6663805  
SRR17520069.6663806  
SRR17520069.6663808  
SRR17520069.6663809  
SRR17520069.6663810  
SRR17520069.6663811  
SRR17520069.6663812  
SRR17520069.6663813  
SRR17520069.6663814  
SRR17520069.6663815  
SRR17520069.6663816  
SRR17520069.6663817  
SRR17520069.6663818  
SRR17520069.6663820  
SRR17520069.6666061  
SRR17520069.6666081  
SRR17520069.6668147  
SRR17520069.6668148

SRR17520069.6668149  
SRR17520069.6668150  
SRR17520069.6668151  
SRR17520069.6668152  
SRR17520069.6668153  
SRR17520069.6668154  
SRR17520069.6668155  
SRR17520069.6668156  
SRR17520069.6668157  
SRR17520069.6668159  
SRR17520069.6668160  
SRR17520069.6668161  
SRR17520069.6668162  
SRR17520069.6668163  
SRR17520069.6668165  
SRR17520069.6668166  
SRR17520069.6668167  
SRR17520069.6668168  
SRR17520069.6668169  
SRR17520069.6668170  
SRR17520069.6668171  
SRR17520069.6668173  
SRR17520069.6668174  
SRR17520069.6668175  
SRR17520069.6668176  
SRR17520069.6668177  
SRR17520069.6668178  
SRR17520069.6668179  
SRR17520069.6668180  
SRR17520069.6668181  
SRR17520069.6668182  
SRR17520069.6668183  
SRR17520069.6668184  
SRR17520069.6668185  
SRR17520069.6668187  
SRR17520069.6668188  
SRR17520069.6668189  
SRR17520069.6668190  
SRR17520069.6668191  
SRR17520069.6668192  
SRR17520069.6668193  
SRR17520069.6668194  
SRR17520069.6668195  
SRR17520069.6668197  
SRR17520069.6668199  
SRR17520069.6668201  
SRR17520069.6668202

SRR17520069. 6668203  
SRR17520069. 6668204  
SRR17520069. 6668205  
SRR17520069. 6668206  
SRR17520069. 6668207  
SRR17520069. 6668209  
SRR17520069. 6668210  
SRR17520069. 6668211  
SRR17520069. 6668212  
SRR17520069. 6668213  
SRR17520069. 6668214  
SRR17520069. 6668215  
SRR17520069. 6668216  
SRR17520069. 6668217  
SRR17520069. 6668218  
SRR17520069. 6668219  
SRR17520069. 6668220  
SRR17520069. 6668221  
SRR17520069. 6668222  
SRR17520069. 6668223  
SRR17520069. 6668224  
SRR17520069. 6668225  
SRR17520069. 6668226  
SRR17520069. 6668227  
SRR17520069. 6668228  
SRR17520069. 6668229  
SRR17520069. 6668230  
SRR17520069. 6668231  
SRR17520069. 6668232  
SRR17520069. 6668233  
SRR17520069. 6678547  
SRR17520069. 6678548  
SRR17520069. 6678549  
SRR17520069. 6678550  
SRR17520069. 6678551  
SRR17520069. 6678552  
SRR17520069. 6678553  
SRR17520069. 6678554  
SRR17520069. 6678555  
SRR17520069. 6678556  
SRR17520069. 6678557  
SRR17520069. 6678558  
SRR17520069. 6678559  
SRR17520069. 6678560  
SRR17520069. 6678561  
SRR17520069. 6678562  
SRR17520069. 6678563

SRR17520069. 6678564  
SRR17520069. 6678565  
SRR17520069. 6678567  
SRR17520069. 6678568  
SRR17520069. 6678570  
SRR17520069. 6678571  
SRR17520069. 6678572  
SRR17520069. 6678573  
SRR17520069. 6678575  
SRR17520069. 6678576  
SRR17520069. 6678577  
SRR17520069. 6678578  
SRR17520069. 6678579  
SRR17520069. 6678580  
SRR17520069. 6678581  
SRR17520069. 6678582  
SRR17520069. 6678583  
SRR17520069. 6678584  
SRR17520069. 6678585  
SRR17520069. 6678586  
SRR17520069. 6678587  
SRR17520069. 6678588  
SRR17520069. 6678589  
SRR17520069. 6678590  
SRR17520069. 6678591  
SRR17520069. 6678592  
SRR17520069. 6678595  
SRR17520069. 6678596  
SRR17520069. 6678597  
SRR17520069. 6678598  
SRR17520069. 6678599  
SRR17520069. 6678600  
SRR17520069. 6678601  
SRR17520069. 6678602  
SRR17520069. 6678603  
SRR17520069. 6678604  
SRR17520069. 6678605  
SRR17520069. 6678606  
SRR17520069. 6678607  
SRR17520069. 6678608  
SRR17520069. 6678609  
SRR17520069. 6678610  
SRR17520069. 6678611  
SRR17520069. 6678612  
SRR17520069. 6678613  
SRR17520069. 6678614  
SRR17520069. 6678615

SRR17520069. 6678616  
SRR17520069. 6678617  
SRR17520069. 6678618  
SRR17520069. 6678619  
SRR17520069. 6678620  
SRR17520069. 6678621  
SRR17520069. 6678622  
SRR17520069. 6678625  
SRR17520069. 6678626  
SRR17520069. 6678627  
SRR17520069. 6678628  
SRR17520069. 6678629  
SRR17520069. 6678630  
SRR17520069. 6678631  
SRR17520069. 6678632  
SRR17520069. 6678633  
SRR17520069. 6678634  
SRR17520069. 6678635  
SRR17520069. 6678636  
SRR17520069. 6678637  
SRR17520069. 6678638  
SRR17520069. 6678639  
SRR17520069. 6678640  
SRR17520069. 6678641  
SRR17520069. 6678642  
SRR17520069. 6678643  
SRR17520069. 6678644  
SRR17520069. 6678645  
SRR17520069. 6678646  
SRR17520069. 6678647  
SRR17520069. 6678648  
SRR17520069. 6678649  
SRR17520069. 6678650  
SRR17520069. 6678652  
SRR17520069. 6678653  
SRR17520069. 6678654  
SRR17520069. 6678655  
SRR17520069. 6678656  
SRR17520069. 6678657  
SRR17520069. 6678658  
SRR17520069. 6678659  
SRR17520069. 6678660  
SRR17520069. 6678661  
SRR17520069. 6678662  
SRR17520069. 6678663  
SRR17520069. 6678664  
SRR17520069. 6678665

SRR17520069.6689291  
SRR17520069.6689292  
SRR17520069.6689293  
SRR17520069.6689294  
SRR17520069.6689295  
SRR17520069.6689296  
SRR17520069.6689297  
SRR17520069.6689298  
SRR17520069.6689299  
SRR17520069.6689300  
SRR17520069.6689301  
SRR17520069.6689302  
SRR17520069.6689303  
SRR17520069.6689304  
SRR17520069.6689305  
SRR17520069.6689306  
SRR17520069.6689307  
SRR17520069.6689308  
SRR17520069.6689309  
SRR17520069.6689310  
SRR17520069.6689311  
SRR17520069.6689312  
SRR17520069.6689313  
SRR17520069.6689314  
SRR17520069.6689315  
SRR17520069.6689316  
SRR17520069.6689317  
SRR17520069.6689318  
SRR17520069.6689319  
SRR17520069.6689320  
SRR17520069.6689321  
SRR17520069.6689322  
SRR17520069.6689323  
SRR17520069.6689324  
SRR17520069.6689325  
SRR17520069.6689326  
SRR17520069.6689327  
SRR17520069.6689328  
SRR17520069.6689329  
SRR17520069.6689331  
SRR17520069.6689332  
SRR17520069.6689333  
SRR17520069.6689334  
SRR17520069.6689335  
SRR17520069.6689336  
SRR17520069.6689337  
SRR17520069.6689338

SRR17520069.6689339  
SRR17520069.6689340  
SRR17520069.6689341  
SRR17520069.6689342  
SRR17520069.6689343  
SRR17520069.6689344  
SRR17520069.6689345  
SRR17520069.6689346  
SRR17520069.6689347  
SRR17520069.6689348  
SRR17520069.6689349  
SRR17520069.6689350  
SRR17520069.6689351  
SRR17520069.6689352  
SRR17520069.6689353  
SRR17520069.6689354  
SRR17520069.6689355  
SRR17520069.6689356  
SRR17520069.6689357  
SRR17520069.6689358  
SRR17520069.6689359  
SRR17520069.6689360  
SRR17520069.6689361  
SRR17520069.6689362  
SRR17520069.6689363  
SRR17520069.6689364  
SRR17520069.6689365  
SRR17520069.6689366  
SRR17520069.6689367  
SRR17520069.6689368  
SRR17520069.6689369  
SRR17520069.6689370  
SRR17520069.6689371  
SRR17520069.6689372  
SRR17520069.6689373  
SRR17520069.6689374  
SRR17520069.6689375  
SRR17520069.6689377  
SRR17520069.6689378  
SRR17520069.6689379  
SRR17520069.6689380  
SRR17520069.6689381  
SRR17520069.6689382  
SRR17520069.6689383  
SRR17520069.6689384  
SRR17520069.6689385  
SRR17520069.6689386



SRR17520069.6689387  
SRR17520069.6689388  
SRR17520069.6689389  
SRR17520069.6689390  
SRR17520069.6689391  
SRR17520069.6689392  
SRR17520069.6689393  
SRR17520069.6689394  
SRR17520069.6689395  
SRR17520069.6689396  
SRR17520069.6689397  
SRR17520069.6689398  
SRR17520069.6689399  
SRR17520069.6689400  
SRR17520069.6689401  
SRR17520069.6689402  
SRR17520069.6689403  
SRR17520069.6689405  
SRR17520069.6689406  
SRR17520069.6689407  
SRR17520069.6689408  
SRR17520069.6689409  
SRR17520069.6689410  
SRR17520069.6689411  
SRR17520069.6689412  
SRR17520069.6689413  
SRR17520069.6689414  
SRR17520069.6689415  
SRR17520069.6689416  
SRR17520069.6689417  
SRR17520069.6689418  
SRR17520069.6689419  
SRR17520069.6689420  
SRR17520069.6689421  
SRR17520069.6689422  
SRR17520069.6689423  
SRR17520069.6689424  
SRR17520069.6691508  
SRR17520069.6719188  
SRR17520069.6719189  
SRR17520069.6719190  
SRR17520069.6719191  
SRR17520069.6719192  
SRR17520069.6719193  
SRR17520069.6719194  
SRR17520069.6719195  
SRR17520069.6719196

SRR17520069.6719197  
SRR17520069.6719198  
SRR17520069.6719199  
SRR17520069.6719200  
SRR17520069.6719201  
SRR17520069.6719202  
SRR17520069.6719203  
SRR17520069.6719204  
SRR17520069.6719205  
SRR17520069.6719206  
SRR17520069.6719207  
SRR17520069.6719208  
SRR17520069.6719210  
SRR17520069.6719211  
SRR17520069.6719212  
SRR17520069.6719213  
SRR17520069.6752853  
SRR17520069.6752854  
SRR17520069.6752855  
SRR17520069.6752856  
SRR17520069.6752857  
SRR17520069.6752858  
SRR17520069.6752859  
SRR17520069.6752860  
SRR17520069.6752861  
SRR17520069.6752862  
SRR17520069.6752863  
SRR17520069.6752864  
SRR17520069.6752865  
SRR17520069.6752866  
SRR17520069.6752867  
SRR17520069.6752868  
SRR17520069.6752869  
SRR17520069.6766250  
SRR17520069.6766251  
SRR17520069.6766252  
SRR17520069.6766253  
SRR17520069.6766254  
SRR17520069.6766255  
SRR17520069.6766256  
SRR17520069.6766257  
SRR17520069.6766258  
SRR17520069.6766259  
SRR17520069.6766260  
SRR17520069.6766261  
SRR17520069.6766262  
SRR17520069.6766263

SRR17520069. 6766264  
SRR17520069. 6766265  
SRR17520069. 6766266  
SRR17520069. 6766267  
SRR17520069. 6766268  
SRR17520069. 6766269  
SRR17520069. 6766270  
SRR17520069. 6766272  
SRR17520069. 6766273  
SRR17520069. 6766274  
SRR17520069. 6766275  
SRR17520069. 6766276  
SRR17520069. 6766277  
SRR17520069. 6766278  
SRR17520069. 6766279  
SRR17520069. 6766280  
SRR17520069. 6766281  
SRR17520069. 6766282  
SRR17520069. 6766283  
SRR17520069. 6766284  
SRR17520069. 6766285  
SRR17520069. 6766286  
SRR17520069. 6766287  
SRR17520069. 6766288  
SRR17520069. 6766289  
SRR17520069. 6766291  
SRR17520069. 6766292  
SRR17520069. 6766293  
SRR17520069. 6766294  
SRR17520069. 6766295  
SRR17520069. 6766296  
SRR17520069. 6766297  
SRR17520069. 6766298  
SRR17520069. 6766299  
SRR17520069. 6766300  
SRR17520069. 6766302  
SRR17520069. 6766303  
SRR17520069. 6766304  
SRR17520069. 6766305  
SRR17520069. 6766306  
SRR17520069. 6766307  
SRR17520069. 6766308  
SRR17520069. 6766309  
SRR17520069. 6766310  
SRR17520069. 6766311  
SRR17520069. 6766312  
SRR17520069. 6766313

SRR17520069. 6766314  
SRR17520069. 6766315  
SRR17520069. 6766316  
SRR17520069. 6766317  
SRR17520069. 6766318  
SRR17520069. 6766319  
SRR17520069. 6766320  
SRR17520069. 6766321  
SRR17520069. 6766322  
SRR17520069. 6766323  
SRR17520069. 6766324  
SRR17520069. 6766325  
SRR17520069. 6766326  
SRR17520069. 6766327  
SRR17520069. 6766328  
SRR17520069. 6766329  
SRR17520069. 6766330  
SRR17520069. 6766331  
SRR17520069. 6766332  
SRR17520069. 6766333  
SRR17520069. 6766334  
SRR17520069. 6766335  
SRR17520069. 6766336  
SRR17520069. 6766337  
SRR17520069. 6766338  
SRR17520069. 6766339  
SRR17520069. 6766340  
SRR17520069. 6766341  
SRR17520069. 6766342  
SRR17520069. 6768617  
SRR17520069. 6768717  
SRR17520069. 6773195  
SRR17520069. 6773197  
SRR17520069. 6773198  
SRR17520069. 6773199  
SRR17520069. 6773200  
SRR17520069. 6773201  
SRR17520069. 6773203  
SRR17520069. 6773204  
SRR17520069. 6773206  
SRR17520069. 6773207  
SRR17520069. 6783043  
SRR17520069. 6795708  
SRR17520069. 6810742  
SRR17520069. 6812330  
SRR17520069. 6812363  
SRR17520069. 6824347

SRR17520069.6824909  
SRR17520069.6826073  
SRR17520069.6826074  
SRR17520069.6826075  
SRR17520069.6826076  
SRR17520069.6826077  
SRR17520069.6826079  
SRR17520069.6826080  
SRR17520069.6826081  
SRR17520069.6826082  
SRR17520069.6826083  
SRR17520069.6826084  
SRR17520069.6826085  
SRR17520069.6826086  
SRR17520069.6826087  
SRR17520069.6826088  
SRR17520069.6826089  
SRR17520069.6826090  
SRR17520069.6826091  
SRR17520069.6826092  
SRR17520069.6826093  
SRR17520069.6826094  
SRR17520069.6826095  
SRR17520069.6826096  
SRR17520069.6826097  
SRR17520069.6826098  
SRR17520069.6826099  
SRR17520069.6826100  
SRR17520069.6826101  
SRR17520069.6826102  
SRR17520069.6826103  
SRR17520069.6826104  
SRR17520069.6826105  
SRR17520069.6826106  
SRR17520069.6826107  
SRR17520069.6826108  
SRR17520069.6826109  
SRR17520069.6826110  
SRR17520069.6826111  
SRR17520069.6826112  
SRR17520069.6826113  
SRR17520069.6826114  
SRR17520069.6826115  
SRR17520069.6826116  
SRR17520069.6826117  
SRR17520069.6826118  
SRR17520069.6826119

SRR17520069.6826120  
SRR17520069.6826121  
SRR17520069.6826122  
SRR17520069.6826123  
SRR17520069.6826124  
SRR17520069.6826125  
SRR17520069.6826126  
SRR17520069.6826127  
SRR17520069.6826128  
SRR17520069.6826129  
SRR17520069.6826130  
SRR17520069.6826131  
SRR17520069.6826132  
SRR17520069.6826133  
SRR17520069.6826134  
SRR17520069.6826135  
SRR17520069.6826136  
SRR17520069.6826137  
SRR17520069.6826138  
SRR17520069.6826139  
SRR17520069.6826140  
SRR17520069.6826141  
SRR17520069.6826142  
SRR17520069.6826143  
SRR17520069.6826144  
SRR17520069.6826145  
SRR17520069.6826146  
SRR17520069.6826147  
SRR17520069.6826148  
SRR17520069.6826149  
SRR17520069.6826150  
SRR17520069.6826151  
SRR17520069.6826152  
SRR17520069.6826153  
SRR17520069.6826154  
SRR17520069.6826155  
SRR17520069.6826156  
SRR17520069.6826157  
SRR17520069.6837581  
SRR17520069.6837582  
SRR17520069.6837583  
SRR17520069.6837584  
SRR17520069.6837585  
SRR17520069.6837586  
SRR17520069.6837587  
SRR17520069.6837588  
SRR17520069.6837589

SRR17520069.6837593  
SRR17520069.6837597  
SRR17520069.6837598  
SRR17520069.6837599  
SRR17520069.6837600  
SRR17520069.6837601  
SRR17520069.6837602  
SRR17520069.6837603  
SRR17520069.6837604  
SRR17520069.6837605  
SRR17520069.6837606  
SRR17520069.6837607  
SRR17520069.6837608  
SRR17520069.6837609  
SRR17520069.6837610  
SRR17520069.6837611  
SRR17520069.6837612  
SRR17520069.6837613  
SRR17520069.6837614  
SRR17520069.6837615  
SRR17520069.6837616  
SRR17520069.6837617  
SRR17520069.6837619  
SRR17520069.6837620  
SRR17520069.6837621  
SRR17520069.6837622  
SRR17520069.6837623  
SRR17520069.6837624  
SRR17520069.6837625  
SRR17520069.6837626  
SRR17520069.6837627  
SRR17520069.6837628  
SRR17520069.6837629  
SRR17520069.6837630  
SRR17520069.6837631  
SRR17520069.6837632  
SRR17520069.6837633  
SRR17520069.6838800  
SRR17520069.6844583  
SRR17520069.6844607  
SRR17520069.6848274  
SRR17520069.6848275  
SRR17520069.6848276  
SRR17520069.6848277  
SRR17520069.6848278  
SRR17520069.6848279  
SRR17520069.6848280

SRR17520069.6848281  
SRR17520069.6848282  
SRR17520069.6848283  
SRR17520069.6848284  
SRR17520069.6848285  
SRR17520069.6848286  
SRR17520069.6848287  
SRR17520069.6855661  
SRR17520069.6855662  
SRR17520069.6855663  
SRR17520069.6855664  
SRR17520069.6855665  
SRR17520069.6855666  
SRR17520069.6855667  
SRR17520069.6855668  
SRR17520069.6855669  
SRR17520069.6855670  
SRR17520069.6855671  
SRR17520069.6855672  
SRR17520069.6855673  
SRR17520069.6855675  
SRR17520069.6855676  
SRR17520069.6855677  
SRR17520069.6855678  
SRR17520069.6855679  
SRR17520069.6855680  
SRR17520069.6855681  
SRR17520069.6855682  
SRR17520069.6855683  
SRR17520069.6855684  
SRR17520069.6855685  
SRR17520069.6855686  
SRR17520069.6855687  
SRR17520069.6855688  
SRR17520069.6855689  
SRR17520069.6855690  
SRR17520069.6855691  
SRR17520069.6855692  
SRR17520069.6855693  
SRR17520069.6855694  
SRR17520069.6855695  
SRR17520069.6855696  
SRR17520069.6855697  
SRR17520069.6855698  
SRR17520069.6855699  
SRR17520069.6855700  
SRR17520069.6858116



SRR17520069. 6862903  
SRR17520069. 6863158  
SRR17520069. 6863159  
SRR17520069. 6876271  
SRR17520069. 6876272  
SRR17520069. 6876273  
SRR17520069. 6876274  
SRR17520069. 6876275  
SRR17520069. 6876276  
SRR17520069. 6876277  
SRR17520069. 6876278  
SRR17520069. 6876279  
SRR17520069. 6876280  
SRR17520069. 6876281  
SRR17520069. 6876282  
SRR17520069. 6876283  
SRR17520069. 6876284  
SRR17520069. 6876285  
SRR17520069. 6876286  
SRR17520069. 6876287  
SRR17520069. 6876288  
SRR17520069. 6876289  
SRR17520069. 6876290  
SRR17520069. 6876291  
SRR17520069. 6876292  
SRR17520069. 6876293  
SRR17520069. 6876294  
SRR17520069. 6876295  
SRR17520069. 6876296  
SRR17520069. 6876297  
SRR17520069. 6876298  
SRR17520069. 6876299  
SRR17520069. 6876300  
SRR17520069. 6876301  
SRR17520069. 6876302  
SRR17520069. 6876303  
SRR17520069. 6876304  
SRR17520069. 6876305  
SRR17520069. 6876306  
SRR17520069. 6876307  
SRR17520069. 6876308  
SRR17520069. 6876309  
SRR17520069. 6876310  
SRR17520069. 6876311  
SRR17520069. 6876312  
SRR17520069. 6876313  
SRR17520069. 6876314

SRR17520069. 6876315  
SRR17520069. 6876316  
SRR17520069. 6876317  
SRR17520069. 6876318  
SRR17520069. 6876319  
SRR17520069. 6876320  
SRR17520069. 6876321  
SRR17520069. 6876322  
SRR17520069. 6876323  
SRR17520069. 6876324  
SRR17520069. 6876325  
SRR17520069. 6876326  
SRR17520069. 6876327  
SRR17520069. 6876328  
SRR17520069. 6876329  
SRR17520069. 6876330  
SRR17520069. 6876331  
SRR17520069. 6876333  
SRR17520069. 6876334  
SRR17520069. 6876335  
SRR17520069. 6876336  
SRR17520069. 6876337  
SRR17520069. 6876338  
SRR17520069. 6876339  
SRR17520069. 6876340  
SRR17520069. 6876341  
SRR17520069. 6879370  
SRR17520069. 6879371  
SRR17520069. 6879372  
SRR17520069. 6879373  
SRR17520069. 6879374  
SRR17520069. 6879375  
SRR17520069. 6879376  
SRR17520069. 6879377  
SRR17520069. 6879378  
SRR17520069. 6879379  
SRR17520069. 6879380  
SRR17520069. 6879381  
SRR17520069. 6879382  
SRR17520069. 6879383  
SRR17520069. 6879384  
SRR17520069. 6879385  
SRR17520069. 6879386  
SRR17520069. 6879387  
SRR17520069. 6879388  
SRR17520069. 6879389  
SRR17520069. 6879390

SRR17520069.6879391  
SRR17520069.6879392  
SRR17520069.6879394  
SRR17520069.6879395  
SRR17520069.6879396  
SRR17520069.6879397  
SRR17520069.6879398  
SRR17520069.6879399  
SRR17520069.6879400  
SRR17520069.6879401  
SRR17520069.6879402  
SRR17520069.6879403  
SRR17520069.6879404  
SRR17520069.6879405  
SRR17520069.6879406  
SRR17520069.6879407  
SRR17520069.6879408  
SRR17520069.6879409  
SRR17520069.6879410  
SRR17520069.6879411  
SRR17520069.6879412  
SRR17520069.6879413  
SRR17520069.6879414  
SRR17520069.6879415  
SRR17520069.6879416  
SRR17520069.6879417  
SRR17520069.6879418  
SRR17520069.6879419  
SRR17520069.6879420  
SRR17520069.6879421  
SRR17520069.6911736  
SRR17520069.6911745  
SRR17520069.6913825  
SRR17520069.6914012  
SRR17520069.6914013  
SRR17520069.6914014  
SRR17520069.6914015  
SRR17520069.6914016  
SRR17520069.6914017  
SRR17520069.6914018  
SRR17520069.6921171  
SRR17520069.6933583  
SRR17520069.6943995  
SRR17520069.6947659  
SRR17520069.6953992  
SRR17520069.6953993  
SRR17520069.6953994

SRR17520069.6953995  
SRR17520069.6953996  
SRR17520069.6953997  
SRR17520069.6954785  
SRR17520069.6954786  
SRR17520069.6954787  
SRR17520069.6954788  
SRR17520069.6954789  
SRR17520069.6954790  
SRR17520069.6954791  
SRR17520069.6954792  
SRR17520069.6954793  
SRR17520069.6954794  
SRR17520069.6954795  
SRR17520069.6954796  
SRR17520069.6954797  
SRR17520069.6954798  
SRR17520069.6954799  
SRR17520069.6954800  
SRR17520069.6954801  
SRR17520069.6954802  
SRR17520069.6954803  
SRR17520069.6954804  
SRR17520069.6954805  
SRR17520069.6954806  
SRR17520069.6954807  
SRR17520069.6954808  
SRR17520069.6954809  
SRR17520069.6954810  
SRR17520069.6954811  
SRR17520069.6954812  
SRR17520069.6954813  
SRR17520069.6954814  
SRR17520069.6954815  
SRR17520069.6954816  
SRR17520069.6954817  
SRR17520069.6954818  
SRR17520069.6954819  
SRR17520069.6954820  
SRR17520069.6954821  
SRR17520069.6954823  
SRR17520069.6954824  
SRR17520069.6954825  
SRR17520069.6954827  
SRR17520069.6954828  
SRR17520069.6954829  
SRR17520069.6954830

SRR17520069.6954832  
SRR17520069.6954833  
SRR17520069.6954834  
SRR17520069.6954835  
SRR17520069.6954836  
SRR17520069.6954837  
SRR17520069.6954838  
SRR17520069.6954840  
SRR17520069.6954841  
SRR17520069.6954842  
SRR17520069.6954843  
SRR17520069.6954844  
SRR17520069.6954845  
SRR17520069.6954846  
SRR17520069.6954847  
SRR17520069.6954848  
SRR17520069.6954849  
SRR17520069.6954850  
SRR17520069.6954851  
SRR17520069.6954853  
SRR17520069.6954854  
SRR17520069.6954855  
SRR17520069.6954856  
SRR17520069.6954857  
SRR17520069.6954859  
SRR17520069.6954860  
SRR17520069.6954861  
SRR17520069.6954862  
SRR17520069.6954863  
SRR17520069.6954864  
SRR17520069.6954865  
SRR17520069.6954866  
SRR17520069.6954867  
SRR17520069.6954868  
SRR17520069.6954870  
SRR17520069.6954871  
SRR17520069.6954872  
SRR17520069.6954873  
SRR17520069.6954874  
SRR17520069.6954875  
SRR17520069.6974706  
SRR17520069.6974707  
SRR17520069.6974708  
SRR17520069.6974709  
SRR17520069.6974710  
SRR17520069.6974711  
SRR17520069.6974712

SRR17520069.6974713  
SRR17520069.6974715  
SRR17520069.6974716  
SRR17520069.6974717  
SRR17520069.6974718  
SRR17520069.6974719  
SRR17520069.6974720  
SRR17520069.6974721  
SRR17520069.6974722  
SRR17520069.6974723  
SRR17520069.6974724  
SRR17520069.6974725  
SRR17520069.6974726  
SRR17520069.6974727  
SRR17520069.6974728  
SRR17520069.6974729  
SRR17520069.6974730  
SRR17520069.6974731  
SRR17520069.6974732  
SRR17520069.6974733  
SRR17520069.6974734  
SRR17520069.6974735  
SRR17520069.6974736  
SRR17520069.6974737  
SRR17520069.6974738  
SRR17520069.6974739  
SRR17520069.6974740  
SRR17520069.6974741  
SRR17520069.6974742  
SRR17520069.6974743  
SRR17520069.6974744  
SRR17520069.6974745  
SRR17520069.6974746  
SRR17520069.6974747  
SRR17520069.6974748  
SRR17520069.6974749  
SRR17520069.6974750  
SRR17520069.6974751  
SRR17520069.6974752  
SRR17520069.6974753  
SRR17520069.6974754  
SRR17520069.6974755  
SRR17520069.6974756  
SRR17520069.6974757  
SRR17520069.6974758  
SRR17520069.6974759  
SRR17520069.6974760

SRR17520069. 6974761  
SRR17520069. 6974762  
SRR17520069. 6974763  
SRR17520069. 6974764  
SRR17520069. 6974765  
SRR17520069. 6974766  
SRR17520069. 6974767  
SRR17520069. 6974768  
SRR17520069. 6974769  
SRR17520069. 6974770  
SRR17520069. 6974771  
SRR17520069. 6974772  
SRR17520069. 6974773  
SRR17520069. 6974774  
SRR17520069. 6974775  
SRR17520069. 6974776  
SRR17520069. 6974777  
SRR17520069. 6974778  
SRR17520069. 6974779  
SRR17520069. 6974780  
SRR17520069. 6974781  
SRR17520069. 6974782  
SRR17520069. 6974783  
SRR17520069. 6974785  
SRR17520069. 6974786  
SRR17520069. 6974787  
SRR17520069. 6974788  
SRR17520069. 6974789  
SRR17520069. 6974790  
SRR17520069. 6974791  
SRR17520069. 6974792  
SRR17520069. 6974793  
SRR17520069. 6974794  
SRR17520069. 6974795  
SRR17520069. 6974796  
SRR17520069. 6974797  
SRR17520069. 6974798  
SRR17520069. 6974799  
SRR17520069. 6974800  
SRR17520069. 6974801  
SRR17520069. 6974802  
SRR17520069. 6974803  
SRR17520069. 6974804  
SRR17520069. 6976587  
SRR17520069. 6976588  
SRR17520069. 6976589  
SRR17520069. 6976590

SRR17520069. 6976591  
SRR17520069. 6976592  
SRR17520069. 6976593  
SRR17520069. 6976594  
SRR17520069. 6976595  
SRR17520069. 6976596  
SRR17520069. 6976597  
SRR17520069. 6976598  
SRR17520069. 6976599  
SRR17520069. 6976600  
SRR17520069. 6976601  
SRR17520069. 6976602  
SRR17520069. 6981766  
SRR17520069. 6981767  
SRR17520069. 6981768  
SRR17520069. 6981769  
SRR17520069. 6981770  
SRR17520069. 6981771  
SRR17520069. 6981772  
SRR17520069. 6981774  
SRR17520069. 6981775  
SRR17520069. 6981776  
SRR17520069. 6981777  
SRR17520069. 6981778  
SRR17520069. 6981779  
SRR17520069. 6981780  
SRR17520069. 6981781  
SRR17520069. 6981782  
SRR17520069. 6981783  
SRR17520069. 6981784  
SRR17520069. 6981785  
SRR17520069. 6981786  
SRR17520069. 6981787  
SRR17520069. 6981788  
SRR17520069. 6981789  
SRR17520069. 6981790  
SRR17520069. 6981791  
SRR17520069. 6981792  
SRR17520069. 6981793  
SRR17520069. 6981794  
SRR17520069. 6981795  
SRR17520069. 6981796  
SRR17520069. 6981797  
SRR17520069. 6981798  
SRR17520069. 6981799  
SRR17520069. 6981800  
SRR17520069. 6981801



SRR17520069. 6981802  
SRR17520069. 6981803  
SRR17520069. 6981804  
SRR17520069. 6981805  
SRR17520069. 6981806  
SRR17520069. 6981807  
SRR17520069. 6981808  
SRR17520069. 6981809  
SRR17520069. 6981810  
SRR17520069. 6981811  
SRR17520069. 6981812  
SRR17520069. 6981813  
SRR17520069. 6981814  
SRR17520069. 6981815  
SRR17520069. 6981816  
SRR17520069. 6981817  
SRR17520069. 6981818  
SRR17520069. 6981819  
SRR17520069. 6981820  
SRR17520069. 6981821  
SRR17520069. 6981822  
SRR17520069. 6981823  
SRR17520069. 6981824  
SRR17520069. 6981825  
SRR17520069. 6981826  
SRR17520069. 6981828  
SRR17520069. 6981829  
SRR17520069. 6981830  
SRR17520069. 6981831  
SRR17520069. 6981832  
SRR17520069. 6981833  
SRR17520069. 6981834  
SRR17520069. 6981835  
SRR17520069. 6981836  
SRR17520069. 6981837  
SRR17520069. 6981838  
SRR17520069. 6981839  
SRR17520069. 6981840  
SRR17520069. 6981841  
SRR17520069. 6981842  
SRR17520069. 6981843  
SRR17520069. 6981844  
SRR17520069. 6981845  
SRR17520069. 6981846  
SRR17520069. 6981847  
SRR17520069. 6981848  
SRR17520069. 6981849

SRR17520069. 6981850  
SRR17520069. 6981851  
SRR17520069. 6981852  
SRR17520069. 6981853  
SRR17520069. 6981854  
SRR17520069. 6981855  
SRR17520069. 6981856  
SRR17520069. 6981857  
SRR17520069. 6981858  
SRR17520069. 6981859  
SRR17520069. 6981860  
SRR17520069. 6981861  
SRR17520069. 6981862  
SRR17520069. 6981863  
SRR17520069. 6981864  
SRR17520069. 6981865  
SRR17520069. 6981866  
SRR17520069. 6981867  
SRR17520069. 6981868  
SRR17520069. 6981869  
SRR17520069. 6981870  
SRR17520069. 6981871  
SRR17520069. 6981872  
SRR17520069. 6981873  
SRR17520069. 6981874  
SRR17520069. 6981875  
SRR17520069. 6981876  
SRR17520069. 6981877  
SRR17520069. 6981878  
SRR17520069. 6981879  
SRR17520069. 6981880  
SRR17520069. 6981881  
SRR17520069. 6981882  
SRR17520069. 6981883  
SRR17520069. 6981884  
SRR17520069. 6981885  
SRR17520069. 6981886  
SRR17520069. 6981887  
SRR17520069. 6981888  
SRR17520069. 6981889  
SRR17520069. 6981890  
SRR17520069. 6981891  
SRR17520069. 6981892  
SRR17520069. 6981893  
SRR17520069. 6981894  
SRR17520069. 6981895  
SRR17520069. 6981896

SRR17520069. 6981897  
SRR17520069. 6981898  
SRR17520069. 6981899  
SRR17520069. 6981900  
SRR17520069. 6981901  
SRR17520069. 6981902  
SRR17520069. 6981903  
SRR17520069. 6981904  
SRR17520069. 6981905  
SRR17520069. 6981906  
SRR17520069. 6981907  
SRR17520069. 6981908  
SRR17520069. 6981909  
SRR17520069. 6981910  
SRR17520069. 6981911  
SRR17520069. 6981912  
SRR17520069. 6981913  
SRR17520069. 6981914  
SRR17520069. 6981915  
SRR17520069. 6981916  
SRR17520069. 6981918  
SRR17520069. 6981919  
SRR17520069. 6981920  
SRR17520069. 6981921  
SRR17520069. 6981922  
SRR17520069. 6981923  
SRR17520069. 6981924  
SRR17520069. 6981927  
SRR17520069. 6981928  
SRR17520069. 6981929  
SRR17520069. 6981930  
SRR17520069. 6981931  
SRR17520069. 6981932  
SRR17520069. 6981933  
SRR17520069. 6981934  
SRR17520069. 6981935  
SRR17520069. 6981936  
SRR17520069. 6981937  
SRR17520069. 6981938  
SRR17520069. 6981939  
SRR17520069. 6981940  
SRR17520069. 6981941  
SRR17520069. 6981942  
SRR17520069. 6981943  
SRR17520069. 6981944  
SRR17520069. 6981945  
SRR17520069. 6981946

SRR17520069.6981947  
SRR17520069.6981948  
SRR17520069.6981949  
SRR17520069.6981950  
SRR17520069.6981951  
SRR17520069.6981952  
SRR17520069.6981953  
SRR17520069.6981954  
SRR17520069.6981955  
SRR17520069.6981956  
SRR17520069.6981957  
SRR17520069.6981958  
SRR17520069.6981959  
SRR17520069.6981960  
SRR17520069.6990783  
SRR17520069.7013888  
SRR17520069.7016067  
SRR17520069.7017663  
SRR17520069.7017664  
SRR17520069.7017665  
SRR17520069.7017666  
SRR17520069.7017667  
SRR17520069.7017668  
SRR17520069.7017669  
SRR17520069.7017670  
SRR17520069.7017671  
SRR17520069.7017673  
SRR17520069.7017674  
SRR17520069.7017675  
SRR17520069.7017676  
SRR17520069.7017677  
SRR17520069.7017678  
SRR17520069.7017679  
SRR17520069.7017680  
SRR17520069.7017681  
SRR17520069.7017682  
SRR17520069.7017683  
SRR17520069.7017684  
SRR17520069.7017685  
SRR17520069.7017686  
SRR17520069.7017687  
SRR17520069.7017688  
SRR17520069.7017689  
SRR17520069.7017690  
SRR17520069.7017691  
SRR17520069.7017692  
SRR17520069.7017693

SRR17520069.7017694  
SRR17520069.7017695  
SRR17520069.7017696  
SRR17520069.7017697  
SRR17520069.7017698  
SRR17520069.7017699  
SRR17520069.7017700  
SRR17520069.7017701  
SRR17520069.7017702  
SRR17520069.7017703  
SRR17520069.7017704  
SRR17520069.7017705  
SRR17520069.7017706  
SRR17520069.7017707  
SRR17520069.7017708  
SRR17520069.7017709  
SRR17520069.7017710  
SRR17520069.7017711  
SRR17520069.7017712  
SRR17520069.7019816  
SRR17520069.7019817  
SRR17520069.7019818  
SRR17520069.7019819  
SRR17520069.7019820  
SRR17520069.7033509  
SRR17520069.7033510  
SRR17520069.7033511  
SRR17520069.7033512  
SRR17520069.7033513  
SRR17520069.7033514  
SRR17520069.7033515  
SRR17520069.7033516  
SRR17520069.7033517  
SRR17520069.7033518  
SRR17520069.7033519  
SRR17520069.7033520  
SRR17520069.7033521  
SRR17520069.7033522  
SRR17520069.7033523  
SRR17520069.7033524  
SRR17520069.7033525  
SRR17520069.7033526  
SRR17520069.7033527  
SRR17520069.7033528  
SRR17520069.7033529  
SRR17520069.7033530  
SRR17520069.7033531

SRR17520069.7033532  
SRR17520069.7033533  
SRR17520069.7033534  
SRR17520069.7033535  
SRR17520069.7033536  
SRR17520069.7050690  
SRR17520069.7063747  
SRR17520069.7064162  
SRR17520069.7089415  
SRR17520069.7101958  
SRR17520069.7113836  
SRR17520069.7113839  
SRR17520069.7113841  
SRR17520069.7113842  
SRR17520069.7113845  
SRR17520069.7145714  
SRR17520069.7145715  
SRR17520069.7145716  
SRR17520069.7145717  
SRR17520069.7145718  
SRR17520069.7145719  
SRR17520069.7145720  
SRR17520069.7145721  
SRR17520069.7145722  
SRR17520069.7145723  
SRR17520069.7145724  
SRR17520069.7145725  
SRR17520069.7145726  
SRR17520069.7145727  
SRR17520069.7145728  
SRR17520069.7145729  
SRR17520069.7145730  
SRR17520069.7145731  
SRR17520069.7145732  
SRR17520069.7145733  
SRR17520069.7145734  
SRR17520069.7145735  
SRR17520069.7145736  
SRR17520069.7145737  
SRR17520069.7145738  
SRR17520069.7145739  
SRR17520069.7145740  
SRR17520069.7145741  
SRR17520069.7161151  
SRR17520069.7161152  
SRR17520069.7161153  
SRR17520069.7161154

SRR17520069.7161155  
SRR17520069.7161156  
SRR17520069.7161157  
SRR17520069.7161158  
SRR17520069.7161159  
SRR17520069.7161160  
SRR17520069.7161161  
SRR17520069.7161162  
SRR17520069.7161163  
SRR17520069.7161164  
SRR17520069.7161165  
SRR17520069.7161166  
SRR17520069.7161167  
SRR17520069.7161168  
SRR17520069.7161169  
SRR17520069.7161170  
SRR17520069.7161171  
SRR17520069.7161172  
SRR17520069.7161173  
SRR17520069.7161174  
SRR17520069.7161175  
SRR17520069.7161176  
SRR17520069.7161177  
SRR17520069.7161178  
SRR17520069.7161179  
SRR17520069.7161180  
SRR17520069.7161181  
SRR17520069.7161182  
SRR17520069.7161183  
SRR17520069.7161184  
SRR17520069.7161185  
SRR17520069.7161186  
SRR17520069.7161187  
SRR17520069.7161188  
SRR17520069.7161189  
SRR17520069.7161190  
SRR17520069.7161191  
SRR17520069.7161192  
SRR17520069.7161193  
SRR17520069.7161194  
SRR17520069.7161195  
SRR17520069.7161196  
SRR17520069.7161197  
SRR17520069.7161198  
SRR17520069.7161199  
SRR17520069.7161200  
SRR17520069.7161202

SRR17520069.7161203  
SRR17520069.7161204  
SRR17520069.7161205  
SRR17520069.7161206  
SRR17520069.7161207  
SRR17520069.7161208  
SRR17520069.7161209  
SRR17520069.7161210  
SRR17520069.7161211  
SRR17520069.7161212  
SRR17520069.7161213  
SRR17520069.7161214  
SRR17520069.7161215  
SRR17520069.7161216  
SRR17520069.7161217  
SRR17520069.7161218  
SRR17520069.7161219  
SRR17520069.7161220  
SRR17520069.7161221  
SRR17520069.7166657  
SRR17520069.7166658  
SRR17520069.7166659  
SRR17520069.7166660  
SRR17520069.7166661  
SRR17520069.7166662  
SRR17520069.7166663  
SRR17520069.7166664  
SRR17520069.7166665  
SRR17520069.7166666  
SRR17520069.7166667  
SRR17520069.7166668  
SRR17520069.7166669  
SRR17520069.7166670  
SRR17520069.7166671  
SRR17520069.7166672  
SRR17520069.7166673  
SRR17520069.7166674  
SRR17520069.7166675  
SRR17520069.7166676  
SRR17520069.7166677  
SRR17520069.7166678  
SRR17520069.7166679  
SRR17520069.7166680  
SRR17520069.7166681  
SRR17520069.7166682  
SRR17520069.7166683  
SRR17520069.7166684



SRR17520069. 7166685  
SRR17520069. 7166686  
SRR17520069. 7166687  
SRR17520069. 7166688  
SRR17520069. 7166689  
SRR17520069. 7166690  
SRR17520069. 7166691  
SRR17520069. 7166692  
SRR17520069. 7166693  
SRR17520069. 7166694  
SRR17520069. 7166695  
SRR17520069. 7166696  
SRR17520069. 7166697  
SRR17520069. 7166698  
SRR17520069. 7166699  
SRR17520069. 7166702  
SRR17520069. 7166703  
SRR17520069. 7166704  
SRR17520069. 7166705  
SRR17520069. 7166706  
SRR17520069. 7166707  
SRR17520069. 7166708  
SRR17520069. 7166709  
SRR17520069. 7166710  
SRR17520069. 7166711  
SRR17520069. 7166712  
SRR17520069. 7166713  
SRR17520069. 7166714  
SRR17520069. 7166715  
SRR17520069. 7166716  
SRR17520069. 7166717  
SRR17520069. 7166718  
SRR17520069. 7166719  
SRR17520069. 7166720  
SRR17520069. 7166721  
SRR17520069. 7166722  
SRR17520069. 7166723  
SRR17520069. 7166724  
SRR17520069. 7166725  
SRR17520069. 7166726  
SRR17520069. 7166727  
SRR17520069. 7166728  
SRR17520069. 7178915  
SRR17520069. 7185010  
SRR17520069. 7191352  
SRR17520069. 7191353  
SRR17520069. 7191354

SRR17520069.7191355  
SRR17520069.7197044  
SRR17520069.7197045  
SRR17520069.7197046  
SRR17520069.7197047  
SRR17520069.7197048  
SRR17520069.7197049  
SRR17520069.7197050  
SRR17520069.7197052  
SRR17520069.7197053  
SRR17520069.7197054  
SRR17520069.7197055  
SRR17520069.7197056  
SRR17520069.7197057  
SRR17520069.7197058  
SRR17520069.7197059  
SRR17520069.7197060  
SRR17520069.7197061  
SRR17520069.7197062  
SRR17520069.7197063  
SRR17520069.7197064  
SRR17520069.7197065  
SRR17520069.7197066  
SRR17520069.7197067  
SRR17520069.7197068  
SRR17520069.7197069  
SRR17520069.7197070  
SRR17520069.7197071  
SRR17520069.7197072  
SRR17520069.7197073  
SRR17520069.7197074  
SRR17520069.7197075  
SRR17520069.7197076  
SRR17520069.7197077  
SRR17520069.7197078  
SRR17520069.7197079  
SRR17520069.7197080  
SRR17520069.7197081  
SRR17520069.7197082  
SRR17520069.7197083  
SRR17520069.7197084  
SRR17520069.7197085  
SRR17520069.7197086  
SRR17520069.7197087  
SRR17520069.7197088  
SRR17520069.7197089  
SRR17520069.7197090

SRR17520069.7197091  
SRR17520069.7197092  
SRR17520069.7197093  
SRR17520069.7197094  
SRR17520069.7197095  
SRR17520069.7198580  
SRR17520069.7198581  
SRR17520069.7198582  
SRR17520069.7198583  
SRR17520069.7198584  
SRR17520069.7198585  
SRR17520069.7198586  
SRR17520069.7198587  
SRR17520069.7198588  
SRR17520069.7198589  
SRR17520069.7198591  
SRR17520069.7198592  
SRR17520069.7198593  
SRR17520069.7198594  
SRR17520069.7198596  
SRR17520069.7198597  
SRR17520069.7198598  
SRR17520069.7198599  
SRR17520069.7198600  
SRR17520069.7198601  
SRR17520069.7198602  
SRR17520069.7198603  
SRR17520069.7198604  
SRR17520069.7198605  
SRR17520069.7198606  
SRR17520069.7198607  
SRR17520069.7198608  
SRR17520069.7198609  
SRR17520069.7198610  
SRR17520069.7198611  
SRR17520069.7198612  
SRR17520069.7198613  
SRR17520069.7198614  
SRR17520069.7198615  
SRR17520069.7198616  
SRR17520069.7198617  
SRR17520069.7198619  
SRR17520069.7198620  
SRR17520069.7198621  
SRR17520069.7198622  
SRR17520069.7198623  
SRR17520069.7198624

SRR17520069. 7198625  
SRR17520069. 7198626  
SRR17520069. 7198627  
SRR17520069. 7198628  
SRR17520069. 7198629  
SRR17520069. 7198630  
SRR17520069. 7198631  
SRR17520069. 7198632  
SRR17520069. 7198633  
SRR17520069. 7198634  
SRR17520069. 7198635  
SRR17520069. 7198636  
SRR17520069. 7198637  
SRR17520069. 7198638  
SRR17520069. 7198639  
SRR17520069. 7198640  
SRR17520069. 7198641  
SRR17520069. 7198642  
SRR17520069. 7198643  
SRR17520069. 7198644  
SRR17520069. 7198645  
SRR17520069. 7198646  
SRR17520069. 7198647  
SRR17520069. 7198648  
SRR17520069. 7198649  
SRR17520069. 7198650  
SRR17520069. 7198651  
SRR17520069. 7198652  
SRR17520069. 7198653  
SRR17520069. 7198654  
SRR17520069. 7198655  
SRR17520069. 7202408  
SRR17520069. 7224656  
SRR17520069. 7224657  
SRR17520069. 7224658  
SRR17520069. 7224659  
SRR17520069. 7224660  
SRR17520069. 7224661  
SRR17520069. 7224662  
SRR17520069. 7224663  
SRR17520069. 7224664  
SRR17520069. 7224665  
SRR17520069. 7224666  
SRR17520069. 7224667  
SRR17520069. 7224668  
SRR17520069. 7224669  
SRR17520069. 7224670

SRR17520069. 7224671  
SRR17520069. 7224672  
SRR17520069. 7224673  
SRR17520069. 7224674  
SRR17520069. 7224675  
SRR17520069. 7224676  
SRR17520069. 7224677  
SRR17520069. 7224678  
SRR17520069. 7224679  
SRR17520069. 7224680  
SRR17520069. 7224681  
SRR17520069. 7224682  
SRR17520069. 7224683  
SRR17520069. 7224684  
SRR17520069. 7224685  
SRR17520069. 7224686  
SRR17520069. 7224687  
SRR17520069. 7224688  
SRR17520069. 7224689  
SRR17520069. 7224690  
SRR17520069. 7224691  
SRR17520069. 7224692  
SRR17520069. 7224693  
SRR17520069. 7224694  
SRR17520069. 7224695  
SRR17520069. 7224696  
SRR17520069. 7224697  
SRR17520069. 7224698  
SRR17520069. 7224699  
SRR17520069. 7224700  
SRR17520069. 7224703  
SRR17520069. 7224704  
SRR17520069. 7224705  
SRR17520069. 7224706  
SRR17520069. 7224707  
SRR17520069. 7224708  
SRR17520069. 7224709  
SRR17520069. 7224710  
SRR17520069. 7224711  
SRR17520069. 7224712  
SRR17520069. 7224713  
SRR17520069. 7224714  
SRR17520069. 7224715  
SRR17520069. 7224716  
SRR17520069. 7224717  
SRR17520069. 7224718  
SRR17520069. 7224719

SRR17520069. 7224720  
SRR17520069. 7224721  
SRR17520069. 7224722  
SRR17520069. 7224723  
SRR17520069. 7224725  
SRR17520069. 7224726  
SRR17520069. 7224727  
SRR17520069. 7224728  
SRR17520069. 7224729  
SRR17520069. 7224730  
SRR17520069. 7224731  
SRR17520069. 7224732  
SRR17520069. 7224733  
SRR17520069. 7224734  
SRR17520069. 7224735  
SRR17520069. 7224736  
SRR17520069. 7224737  
SRR17520069. 7224738  
SRR17520069. 7224739  
SRR17520069. 7224740  
SRR17520069. 7224741  
SRR17520069. 7224742  
SRR17520069. 7224743  
SRR17520069. 7224744  
SRR17520069. 7224745  
SRR17520069. 7224746  
SRR17520069. 7224748  
SRR17520069. 7224749  
SRR17520069. 7224750  
SRR17520069. 7224753  
SRR17520069. 7224754  
SRR17520069. 7224755  
SRR17520069. 7224756  
SRR17520069. 7224757  
SRR17520069. 7224758  
SRR17520069. 7224759  
SRR17520069. 7224760  
SRR17520069. 7224762  
SRR17520069. 7224763  
SRR17520069. 7224764  
SRR17520069. 7224765  
SRR17520069. 7227996  
SRR17520069. 7227997  
SRR17520069. 7227998  
SRR17520069. 7227999  
SRR17520069. 7228000  
SRR17520069. 7228001

SRR17520069. 7228002  
SRR17520069. 7228003  
SRR17520069. 7228004  
SRR17520069. 7228005  
SRR17520069. 7228006  
SRR17520069. 7228007  
SRR17520069. 7228008  
SRR17520069. 7228009  
SRR17520069. 7228010  
SRR17520069. 7228011  
SRR17520069. 7228012  
SRR17520069. 7228013  
SRR17520069. 7228014  
SRR17520069. 7228015  
SRR17520069. 7228016  
SRR17520069. 7228018  
SRR17520069. 7228019  
SRR17520069. 7228020  
SRR17520069. 7228021  
SRR17520069. 7228022  
SRR17520069. 7228023  
SRR17520069. 7228024  
SRR17520069. 7228025  
SRR17520069. 7228026  
SRR17520069. 7228027  
SRR17520069. 7228028  
SRR17520069. 7228029  
SRR17520069. 7231843  
SRR17520069. 7231844  
SRR17520069. 7231845  
SRR17520069. 7231846  
SRR17520069. 7231847  
SRR17520069. 7249763  
SRR17520069. 7249764  
SRR17520069. 7249765  
SRR17520069. 7249766  
SRR17520069. 7249767  
SRR17520069. 7249768  
SRR17520069. 7249769  
SRR17520069. 7249770  
SRR17520069. 7249772  
SRR17520069. 7251358  
SRR17520069. 7251359  
SRR17520069. 7251360  
SRR17520069. 7251361  
SRR17520069. 7251362  
SRR17520069. 7251364

SRR17520069. 7251365  
SRR17520069. 7251366  
SRR17520069. 7251367  
SRR17520069. 7251368  
SRR17520069. 7251370  
SRR17520069. 7251371  
SRR17520069. 7251372  
SRR17520069. 7251373  
SRR17520069. 7251374  
SRR17520069. 7251375  
SRR17520069. 7251378  
SRR17520069. 7251380  
SRR17520069. 7251381  
SRR17520069. 7251383  
SRR17520069. 7251384  
SRR17520069. 7251385  
SRR17520069. 7251386  
SRR17520069. 7251387  
SRR17520069. 7251388  
SRR17520069. 7251389  
SRR17520069. 7251390  
SRR17520069. 7251391  
SRR17520069. 7251393  
SRR17520069. 7251394  
SRR17520069. 7251395  
SRR17520069. 7251396  
SRR17520069. 7251397  
SRR17520069. 7251398  
SRR17520069. 7251399  
SRR17520069. 7251400  
SRR17520069. 7251401  
SRR17520069. 7251402  
SRR17520069. 7251403  
SRR17520069. 7251404  
SRR17520069. 7251405  
SRR17520069. 7251406  
SRR17520069. 7251407  
SRR17520069. 7251408  
SRR17520069. 7251409  
SRR17520069. 7251410  
SRR17520069. 7251411  
SRR17520069. 7251412  
SRR17520069. 7251413  
SRR17520069. 7251414  
SRR17520069. 7251415  
SRR17520069. 7251416  
SRR17520069. 7251417



SRR17520069.7251418  
SRR17520069.7251419  
SRR17520069.7251420  
SRR17520069.7251422  
SRR17520069.7251423  
SRR17520069.7251424  
SRR17520069.7251425  
SRR17520069.7251426  
SRR17520069.7251427  
SRR17520069.7251428  
SRR17520069.7251429  
SRR17520069.7251430  
SRR17520069.7251431  
SRR17520069.7251432  
SRR17520069.7251433  
SRR17520069.7251435  
SRR17520069.7251436  
SRR17520069.7251437  
SRR17520069.7251439  
SRR17520069.7251440  
SRR17520069.7251441  
SRR17520069.7251442  
SRR17520069.7251443  
SRR17520069.7251444  
SRR17520069.7251445  
SRR17520069.7251446  
SRR17520069.7251447  
SRR17520069.7251448  
SRR17520069.7253813  
SRR17520069.7258230  
SRR17520069.7258231  
SRR17520069.7258232  
SRR17520069.7258233  
SRR17520069.7258234  
SRR17520069.7258235  
SRR17520069.7258236  
SRR17520069.7258237  
SRR17520069.7258238  
SRR17520069.7258239  
SRR17520069.7258240  
SRR17520069.7258241  
SRR17520069.7258242  
SRR17520069.7258243  
SRR17520069.7258244  
SRR17520069.7258245  
SRR17520069.7258247  
SRR17520069.7258248

SRR17520069.7258249  
SRR17520069.7258250  
SRR17520069.7258251  
SRR17520069.7258252  
SRR17520069.7258253  
SRR17520069.7258254  
SRR17520069.7284366  
SRR17520069.7285803  
SRR17520069.7285820  
SRR17520069.7297131  
SRR17520069.7311088  
SRR17520069.7327092  
SRR17520069.7327093  
SRR17520069.7327094  
SRR17520069.7327095  
SRR17520069.7327096  
SRR17520069.7327097  
SRR17520069.7327098  
SRR17520069.7327099  
SRR17520069.7327100  
SRR17520069.7327101  
SRR17520069.7327102  
SRR17520069.7327103  
SRR17520069.7327104  
SRR17520069.7327105  
SRR17520069.7327106  
SRR17520069.7327107  
SRR17520069.7327108  
SRR17520069.7327109  
SRR17520069.7327110  
SRR17520069.7327111  
SRR17520069.7327112  
SRR17520069.7327113  
SRR17520069.7327114  
SRR17520069.7327115  
SRR17520069.7327116  
SRR17520069.7327117  
SRR17520069.7327118  
SRR17520069.7327119  
SRR17520069.7327120  
SRR17520069.7327121  
SRR17520069.7327122  
SRR17520069.7327123  
SRR17520069.7327124  
SRR17520069.7327125  
SRR17520069.7327127  
SRR17520069.7327128

SRR17520069. 7327129  
SRR17520069. 7327130  
SRR17520069. 7327131  
SRR17520069. 7327132  
SRR17520069. 7327133  
SRR17520069. 7327134  
SRR17520069. 7327135  
SRR17520069. 7327136  
SRR17520069. 7327137  
SRR17520069. 7327138  
SRR17520069. 7327139  
SRR17520069. 7327141  
SRR17520069. 7327142  
SRR17520069. 7327143  
SRR17520069. 7327144  
SRR17520069. 7327145  
SRR17520069. 7327146  
SRR17520069. 7327147  
SRR17520069. 7327148  
SRR17520069. 7327149  
SRR17520069. 7327737  
SRR17520069. 7329034  
SRR17520069. 7329035  
SRR17520069. 7329036  
SRR17520069. 7329039  
SRR17520069. 7329040  
SRR17520069. 7329041  
SRR17520069. 7329042  
SRR17520069. 7329043  
SRR17520069. 7329044  
SRR17520069. 7329045  
SRR17520069. 7329046  
SRR17520069. 7329047  
SRR17520069. 7329048  
SRR17520069. 7329049  
SRR17520069. 7329050  
SRR17520069. 7329051  
SRR17520069. 7329052  
SRR17520069. 7329053  
SRR17520069. 7329054  
SRR17520069. 7329055  
SRR17520069. 7329056  
SRR17520069. 7329057  
SRR17520069. 7329058  
SRR17520069. 7329059  
SRR17520069. 7329060  
SRR17520069. 7329061

SRR17520069. 7329062  
SRR17520069. 7329063  
SRR17520069. 7329065  
SRR17520069. 7329066  
SRR17520069. 7329067  
SRR17520069. 7329068  
SRR17520069. 7329069  
SRR17520069. 7329070  
SRR17520069. 7329071  
SRR17520069. 7329072  
SRR17520069. 7329073  
SRR17520069. 7329074  
SRR17520069. 7329075  
SRR17520069. 7329076  
SRR17520069. 7329077  
SRR17520069. 7329078  
SRR17520069. 7329079  
SRR17520069. 7329080  
SRR17520069. 7329081  
SRR17520069. 7329082  
SRR17520069. 7329083  
SRR17520069. 7329084  
SRR17520069. 7329085  
SRR17520069. 7329086  
SRR17520069. 7329087  
SRR17520069. 7329088  
SRR17520069. 7329089  
SRR17520069. 7329090  
SRR17520069. 7329091  
SRR17520069. 7329092  
SRR17520069. 7329093  
SRR17520069. 7329094  
SRR17520069. 7329095  
SRR17520069. 7329096  
SRR17520069. 7329097  
SRR17520069. 7329098  
SRR17520069. 7329099  
SRR17520069. 7329100  
SRR17520069. 7329101  
SRR17520069. 7329102  
SRR17520069. 7329103  
SRR17520069. 7329104  
SRR17520069. 7329105  
SRR17520069. 7329106  
SRR17520069. 7329107  
SRR17520069. 7329108  
SRR17520069. 7345450

SRR17520069. 7345466  
SRR17520069. 7349697  
SRR17520069. 7349698  
SRR17520069. 7349699  
SRR17520069. 7349700  
SRR17520069. 7349701  
SRR17520069. 7349702  
SRR17520069. 7349703  
SRR17520069. 7349704  
SRR17520069. 7349705  
SRR17520069. 7349706  
SRR17520069. 7349707  
SRR17520069. 7349708  
SRR17520069. 7349709  
SRR17520069. 7349710  
SRR17520069. 7349711  
SRR17520069. 7349712  
SRR17520069. 7349713  
SRR17520069. 7349714  
SRR17520069. 7349715  
SRR17520069. 7349716  
SRR17520069. 7349717  
SRR17520069. 7349718  
SRR17520069. 7349719  
SRR17520069. 7349720  
SRR17520069. 7349721  
SRR17520069. 7349722  
SRR17520069. 7349723  
SRR17520069. 7349724  
SRR17520069. 7349725  
SRR17520069. 7349726  
SRR17520069. 7349727  
SRR17520069. 7349728  
SRR17520069. 7349729  
SRR17520069. 7349730  
SRR17520069. 7349731  
SRR17520069. 7349732  
SRR17520069. 7349733  
SRR17520069. 7349734  
SRR17520069. 7349735  
SRR17520069. 7349736  
SRR17520069. 7349737  
SRR17520069. 7349738  
SRR17520069. 7349739  
SRR17520069. 7349740  
SRR17520069. 7349741  
SRR17520069. 7349742

SRR17520069. 7349743  
SRR17520069. 7349744  
SRR17520069. 7349745  
SRR17520069. 7349746  
SRR17520069. 7349747  
SRR17520069. 7349748  
SRR17520069. 7349749  
SRR17520069. 7349750  
SRR17520069. 7349751  
SRR17520069. 7349752  
SRR17520069. 7349753  
SRR17520069. 7349754  
SRR17520069. 7349755  
SRR17520069. 7349756  
SRR17520069. 7349757  
SRR17520069. 7349758  
SRR17520069. 7349759  
SRR17520069. 7349760  
SRR17520069. 7349761  
SRR17520069. 7349762  
SRR17520069. 7349763  
SRR17520069. 7349764  
SRR17520069. 7349765  
SRR17520069. 7349766  
SRR17520069. 7349767  
SRR17520069. 7349768  
SRR17520069. 7349769  
SRR17520069. 7349770  
SRR17520069. 7349771  
SRR17520069. 7349772  
SRR17520069. 7349773  
SRR17520069. 7349774  
SRR17520069. 7349775  
SRR17520069. 7349776  
SRR17520069. 7349777  
SRR17520069. 7349778  
SRR17520069. 7349779  
SRR17520069. 7349780  
SRR17520069. 7349781  
SRR17520069. 7349782  
SRR17520069. 7349783  
SRR17520069. 7349784  
SRR17520069. 7349785  
SRR17520069. 7349786  
SRR17520069. 7349787  
SRR17520069. 7349788  
SRR17520069. 7349789

SRR17520069. 7349790  
SRR17520069. 7349791  
SRR17520069. 7349792  
SRR17520069. 7349793  
SRR17520069. 7349794  
SRR17520069. 7349795  
SRR17520069. 7349796  
SRR17520069. 7349797  
SRR17520069. 7349798  
SRR17520069. 7349799  
SRR17520069. 7349800  
SRR17520069. 7353543  
SRR17520069. 7353544  
SRR17520069. 7353545  
SRR17520069. 7353546  
SRR17520069. 7353547  
SRR17520069. 7353548  
SRR17520069. 7353549  
SRR17520069. 7353550  
SRR17520069. 7353551  
SRR17520069. 7353552  
SRR17520069. 7353553  
SRR17520069. 7353554  
SRR17520069. 7353555  
SRR17520069. 7353556  
SRR17520069. 7353557  
SRR17520069. 7353558  
SRR17520069. 7353559  
SRR17520069. 7353560  
SRR17520069. 7353561  
SRR17520069. 7353563  
SRR17520069. 7353564  
SRR17520069. 7353565  
SRR17520069. 7353566  
SRR17520069. 7353567  
SRR17520069. 7353568  
SRR17520069. 7353569  
SRR17520069. 7353570  
SRR17520069. 7353571  
SRR17520069. 7387947  
SRR17520069. 7387948  
SRR17520069. 7387949  
SRR17520069. 7387950  
SRR17520069. 7387951  
SRR17520069. 7387954  
SRR17520069. 7387956  
SRR17520069. 7387957

SRR17520069. 7387958  
SRR17520069. 7387959  
SRR17520069. 7387961  
SRR17520069. 7387962  
SRR17520069. 7387963  
SRR17520069. 7387964  
SRR17520069. 7387966  
SRR17520069. 7387969  
SRR17520069. 7387971  
SRR17520069. 7387972  
SRR17520069. 7387973  
SRR17520069. 7387974  
SRR17520069. 7387975  
SRR17520069. 7387976  
SRR17520069. 7387977  
SRR17520069. 7387978  
SRR17520069. 7387980  
SRR17520069. 7387981  
SRR17520069. 7387982  
SRR17520069. 7387983  
SRR17520069. 7387984  
SRR17520069. 7387985  
SRR17520069. 7387986  
SRR17520069. 7387987  
SRR17520069. 7387988  
SRR17520069. 7387989  
SRR17520069. 7387990  
SRR17520069. 7387991  
SRR17520069. 7387992  
SRR17520069. 7387993  
SRR17520069. 7387994  
SRR17520069. 7387995  
SRR17520069. 7387996  
SRR17520069. 7387997  
SRR17520069. 7387998  
SRR17520069. 7387999  
SRR17520069. 7388000  
SRR17520069. 7388001  
SRR17520069. 7388002  
SRR17520069. 7388003  
SRR17520069. 7388004  
SRR17520069. 7388005  
SRR17520069. 7388006  
SRR17520069. 7388007  
SRR17520069. 7388008  
SRR17520069. 7388009  
SRR17520069. 7388010



SRR17520069. 7388011  
SRR17520069. 7388013  
SRR17520069. 7388014  
SRR17520069. 7388015  
SRR17520069. 7388016  
SRR17520069. 7388017  
SRR17520069. 7388018  
SRR17520069. 7388019  
SRR17520069. 7388020  
SRR17520069. 7388021  
SRR17520069. 7388022  
SRR17520069. 7388023  
SRR17520069. 7388025  
SRR17520069. 7388026  
SRR17520069. 7388027  
SRR17520069. 7388028  
SRR17520069. 7388029  
SRR17520069. 7388030  
SRR17520069. 7388031  
SRR17520069. 7388032  
SRR17520069. 7388033  
SRR17520069. 7388034  
SRR17520069. 7388036  
SRR17520069. 7388037  
SRR17520069. 7388038  
SRR17520069. 7388040  
SRR17520069. 7388041  
SRR17520069. 7388042  
SRR17520069. 7388044  
SRR17520069. 7388045  
SRR17520069. 7388046  
SRR17520069. 7388047  
SRR17520069. 7388048  
SRR17520069. 7388049  
SRR17520069. 7388050  
SRR17520069. 7388051  
SRR17520069. 7388053  
SRR17520069. 7388055  
SRR17520069. 7388056  
SRR17520069. 7388057  
SRR17520069. 7388058  
SRR17520069. 7388059  
SRR17520069. 7388060  
SRR17520069. 7388061  
SRR17520069. 7388062  
SRR17520069. 7388063  
SRR17520069. 7388064

SRR17520069. 7388065  
SRR17520069. 7388066  
SRR17520069. 7388067  
SRR17520069. 7388069  
SRR17520069. 7388070  
SRR17520069. 7388071  
SRR17520069. 7388072  
SRR17520069. 7388073  
SRR17520069. 7388074  
SRR17520069. 7388075  
SRR17520069. 7388076  
SRR17520069. 7388077  
SRR17520069. 7388078  
SRR17520069. 7388079  
SRR17520069. 7388080  
SRR17520069. 7388082  
SRR17520069. 7388083  
SRR17520069. 7388085  
SRR17520069. 7388087  
SRR17520069. 7388088  
SRR17520069. 7388091  
SRR17520069. 7388092  
SRR17520069. 7388093  
SRR17520069. 7388094  
SRR17520069. 7388095  
SRR17520069. 7389643  
SRR17520069. 7395441  
SRR17520069. 7401819  
SRR17520069. 7452388  
SRR17520069. 7452389  
SRR17520069. 7452390  
SRR17520069. 7452391  
SRR17520069. 7452392  
SRR17520069. 7452393  
SRR17520069. 7452394  
SRR17520069. 7452395  
SRR17520069. 7452396  
SRR17520069. 7452397  
SRR17520069. 7452398  
SRR17520069. 7476497  
SRR17520069. 7479490  
SRR17520069. 7479694  
SRR17520069. 7488857  
SRR17520069. 7488858  
SRR17520069. 7488859  
SRR17520069. 7488860  
SRR17520069. 7488861

SRR17520069.7488862  
SRR17520069.7488863  
SRR17520069.7488864  
SRR17520069.7488865  
SRR17520069.7488866  
SRR17520069.7488867  
SRR17520069.7488868  
SRR17520069.7488869  
SRR17520069.7488870  
SRR17520069.7488872  
SRR17520069.7488873  
SRR17520069.7488874  
SRR17520069.7488875  
SRR17520069.7488876  
SRR17520069.7488877  
SRR17520069.7488878  
SRR17520069.7488879  
SRR17520069.7488880  
SRR17520069.7488881  
SRR17520069.7488882  
SRR17520069.7488883  
SRR17520069.7488884  
SRR17520069.7488885  
SRR17520069.7488886  
SRR17520069.7488887  
SRR17520069.7488888  
SRR17520069.7488889  
SRR17520069.7488890  
SRR17520069.7488891  
SRR17520069.7488892  
SRR17520069.7488893  
SRR17520069.7488894  
SRR17520069.7488895  
SRR17520069.7488896  
SRR17520069.7488897  
SRR17520069.7488898  
SRR17520069.7488899  
SRR17520069.7488900  
SRR17520069.7488901  
SRR17520069.7488902  
SRR17520069.7488903  
SRR17520069.7488904  
SRR17520069.7488905  
SRR17520069.7488906  
SRR17520069.7488907  
SRR17520069.7488908  
SRR17520069.7488909

SRR17520069.7488910  
SRR17520069.7488911  
SRR17520069.7488912  
SRR17520069.7488913  
SRR17520069.7488914  
SRR17520069.7488915  
SRR17520069.7488916  
SRR17520069.7488917  
SRR17520069.7488918  
SRR17520069.7488919  
SRR17520069.7488920  
SRR17520069.7488921  
SRR17520069.7488923  
SRR17520069.7488924  
SRR17520069.7488925  
SRR17520069.7488926  
SRR17520069.7488927  
SRR17520069.7488928  
SRR17520069.7488929  
SRR17520069.7488930  
SRR17520069.7488931  
SRR17520069.7488932  
SRR17520069.7488933  
SRR17520069.7488934  
SRR17520069.7488935  
SRR17520069.7488936  
SRR17520069.7488937  
SRR17520069.7488938  
SRR17520069.7488939  
SRR17520069.7488940  
SRR17520069.7488941  
SRR17520069.7488942  
SRR17520069.7488943  
SRR17520069.7488944  
SRR17520069.7488945  
SRR17520069.7488946  
SRR17520069.7488947  
SRR17520069.7488948  
SRR17520069.7488949  
SRR17520069.7488950  
SRR17520069.7488951  
SRR17520069.7488952  
SRR17520069.7488953  
SRR17520069.7488954  
SRR17520069.7488955  
SRR17520069.7488956  
SRR17520069.7488957

SRR17520069.7488958  
SRR17520069.7488959  
SRR17520069.7488960  
SRR17520069.7488961  
SRR17520069.7488962  
SRR17520069.7488963  
SRR17520069.7488964  
SRR17520069.7488965  
SRR17520069.7488966  
SRR17520069.7488967  
SRR17520069.7488968  
SRR17520069.7488969  
SRR17520069.7488970  
SRR17520069.7488971  
SRR17520069.7488973  
SRR17520069.7488974  
SRR17520069.7488975  
SRR17520069.7488976  
SRR17520069.7488977  
SRR17520069.7488978  
SRR17520069.7488979  
SRR17520069.7488980  
SRR17520069.7488981  
SRR17520069.7488982  
SRR17520069.7488983  
SRR17520069.7488984  
SRR17520069.7488985  
SRR17520069.7488986  
SRR17520069.7488987  
SRR17520069.7488988  
SRR17520069.7488989  
SRR17520069.7488990  
SRR17520069.7491636  
SRR17520069.7491637  
SRR17520069.7491638  
SRR17520069.7491639  
SRR17520069.7491640  
SRR17520069.7491641  
SRR17520069.7491642  
SRR17520069.7512683  
SRR17520069.7515187  
SRR17520069.7515188  
SRR17520069.7515189  
SRR17520069.7515190  
SRR17520069.7515191  
SRR17520069.7515192  
SRR17520069.7515193

SRR17520069.7515194  
SRR17520069.7515195  
SRR17520069.7515196  
SRR17520069.7515197  
SRR17520069.7515198  
SRR17520069.7515199  
SRR17520069.7515200  
SRR17520069.7515201  
SRR17520069.7515202  
SRR17520069.7515203  
SRR17520069.7515204  
SRR17520069.7515205  
SRR17520069.7515206  
SRR17520069.7515207  
SRR17520069.7515208  
SRR17520069.7515209  
SRR17520069.7515210  
SRR17520069.7515211  
SRR17520069.7515212  
SRR17520069.7515214  
SRR17520069.7515215  
SRR17520069.7515216  
SRR17520069.7515217  
SRR17520069.7515218  
SRR17520069.7515219  
SRR17520069.7515220  
SRR17520069.7515221  
SRR17520069.7515222  
SRR17520069.7515223  
SRR17520069.7515224  
SRR17520069.7533314  
SRR17520069.7533315  
SRR17520069.7533317  
SRR17520069.7533318  
SRR17520069.7533319  
SRR17520069.7533320  
SRR17520069.7533321  
SRR17520069.7533322  
SRR17520069.7533323  
SRR17520069.7533324  
SRR17520069.7533325  
SRR17520069.7533326  
SRR17520069.7533327  
SRR17520069.7533328  
SRR17520069.7533329  
SRR17520069.7533330  
SRR17520069.7533331

SRR17520069. 7533332  
SRR17520069. 7533333  
SRR17520069. 7533334  
SRR17520069. 7533335  
SRR17520069. 7533336  
SRR17520069. 7533337  
SRR17520069. 7545422  
SRR17520069. 7545434  
SRR17520069. 7545438  
SRR17520069. 7545512  
SRR17520069. 7559738  
SRR17520069. 7559739  
SRR17520069. 7559740  
SRR17520069. 7559741  
SRR17520069. 7559742  
SRR17520069. 7559743  
SRR17520069. 7559744  
SRR17520069. 7559745  
SRR17520069. 7559746  
SRR17520069. 7559747  
SRR17520069. 7559748  
SRR17520069. 7559749  
SRR17520069. 7559750  
SRR17520069. 7559751  
SRR17520069. 7559752  
SRR17520069. 7559753  
SRR17520069. 7559754  
SRR17520069. 7559755  
SRR17520069. 7559756  
SRR17520069. 7559757  
SRR17520069. 7559758  
SRR17520069. 7559759  
SRR17520069. 7559760  
SRR17520069. 7559761  
SRR17520069. 7559762  
SRR17520069. 7559763  
SRR17520069. 7559764  
SRR17520069. 7559765  
SRR17520069. 7559766  
SRR17520069. 7559767  
SRR17520069. 7559769  
SRR17520069. 7559770  
SRR17520069. 7559772  
SRR17520069. 7559773  
SRR17520069. 7613041  
SRR17520069. 7613093  
SRR17520069. 7617227

SRR17520069. 7617228  
SRR17520069. 7617229  
SRR17520069. 7617230  
SRR17520069. 7617231  
SRR17520069. 7617232  
SRR17520069. 7617233  
SRR17520069. 7617234  
SRR17520069. 7617235  
SRR17520069. 7617236  
SRR17520069. 7617237  
SRR17520069. 7617238  
SRR17520069. 7617239  
SRR17520069. 7617240  
SRR17520069. 7617241  
SRR17520069. 7617242  
SRR17520069. 7617243  
SRR17520069. 7617244  
SRR17520069. 7617245  
SRR17520069. 7617246  
SRR17520069. 7617247  
SRR17520069. 7617248  
SRR17520069. 7617249  
SRR17520069. 7617250  
SRR17520069. 7617251  
SRR17520069. 7617252  
SRR17520069. 7617253  
SRR17520069. 7617254  
SRR17520069. 7617255  
SRR17520069. 7617256  
SRR17520069. 7617257  
SRR17520069. 7617258  
SRR17520069. 7617259  
SRR17520069. 7617260  
SRR17520069. 7617261  
SRR17520069. 7617262  
SRR17520069. 7617263  
SRR17520069. 7619474  
SRR17520069. 7637121  
SRR17520069. 7642590  
SRR17520069. 7642607  
SRR17520069. 7644212  
SRR17520069. 7672181  
SRR17520069. 7679144  
SRR17520069. 7681950  
SRR17520069. 7681951  
SRR17520069. 7681952  
SRR17520069. 7681953



SRR17520069. 7681954  
SRR17520069. 7681955  
SRR17520069. 7681956  
SRR17520069. 7681957  
SRR17520069. 7681958  
SRR17520069. 7681959  
SRR17520069. 7681960  
SRR17520069. 7681961  
SRR17520069. 7681962  
SRR17520069. 7681963  
SRR17520069. 7681964  
SRR17520069. 7681965  
SRR17520069. 7681966  
SRR17520069. 7681967  
SRR17520069. 7681968  
SRR17520069. 7681969  
SRR17520069. 7681970  
SRR17520069. 7681971  
SRR17520069. 7681972  
SRR17520069. 7681973  
SRR17520069. 7681974  
SRR17520069. 7681975  
SRR17520069. 7681976  
SRR17520069. 7681977  
SRR17520069. 7681978  
SRR17520069. 7681979  
SRR17520069. 7681980  
SRR17520069. 7681981  
SRR17520069. 7681982  
SRR17520069. 7681983  
SRR17520069. 7681984  
SRR17520069. 7681985  
SRR17520069. 7681986  
SRR17520069. 7681987  
SRR17520069. 7681988  
SRR17520069. 7681989  
SRR17520069. 7681990  
SRR17520069. 7681991  
SRR17520069. 7681992  
SRR17520069. 7681993  
SRR17520069. 7681994  
SRR17520069. 7681995  
SRR17520069. 7681996  
SRR17520069. 7681997  
SRR17520069. 7681998  
SRR17520069. 7681999  
SRR17520069. 7682000

SRR17520069. 7682001  
SRR17520069. 7682002  
SRR17520069. 7682003  
SRR17520069. 7682004  
SRR17520069. 7682005  
SRR17520069. 7682006  
SRR17520069. 7682007  
SRR17520069. 7682008  
SRR17520069. 7682009  
SRR17520069. 7682010  
SRR17520069. 7682011  
SRR17520069. 7682012  
SRR17520069. 7682013  
SRR17520069. 7682014  
SRR17520069. 7682015  
SRR17520069. 7682016  
SRR17520069. 7682017  
SRR17520069. 7682018  
SRR17520069. 7682019  
SRR17520069. 7682020  
SRR17520069. 7682021  
SRR17520069. 7682022  
SRR17520069. 7682023  
SRR17520069. 7682024  
SRR17520069. 7682025  
SRR17520069. 7682026  
SRR17520069. 7682027  
SRR17520069. 7682028  
SRR17520069. 7682029  
SRR17520069. 7682030  
SRR17520069. 7682031  
SRR17520069. 7682032  
SRR17520069. 7682033  
SRR17520069. 7682034  
SRR17520069. 7682035  
SRR17520069. 7682036  
SRR17520069. 7682037  
SRR17520069. 7682038  
SRR17520069. 7682039  
SRR17520069. 7682040  
SRR17520069. 7682041  
SRR17520069. 7682042  
SRR17520069. 7682043  
SRR17520069. 7682044  
SRR17520069. 7682045  
SRR17520069. 7682046  
SRR17520069. 7682047

SRR17520069. 7682048  
SRR17520069. 7682049  
SRR17520069. 7682050  
SRR17520069. 7682051  
SRR17520069. 7682052  
SRR17520069. 7682054  
SRR17520069. 7682055  
SRR17520069. 7682056  
SRR17520069. 7682057  
SRR17520069. 7682058  
SRR17520069. 7682059  
SRR17520069. 7682060  
SRR17520069. 7682061  
SRR17520069. 7682062  
SRR17520069. 7682063  
SRR17520069. 7682064  
SRR17520069. 7682065  
SRR17520069. 7682066  
SRR17520069. 7682067  
SRR17520069. 7682068  
SRR17520069. 7682069  
SRR17520069. 7682070  
SRR17520069. 7682071  
SRR17520069. 7682072  
SRR17520069. 7682073  
SRR17520069. 7682074  
SRR17520069. 7682075  
SRR17520069. 7682076  
SRR17520069. 7682077  
SRR17520069. 7682078  
SRR17520069. 7682079  
SRR17520069. 7682080  
SRR17520069. 7682081  
SRR17520069. 7682082  
SRR17520069. 7682083  
SRR17520069. 7682084  
SRR17520069. 7682085  
SRR17520069. 7682086  
SRR17520069. 7682087  
SRR17520069. 7682088  
SRR17520069. 7682089  
SRR17520069. 7682090  
SRR17520069. 7682091  
SRR17520069. 7682092  
SRR17520069. 7682093  
SRR17520069. 7682094  
SRR17520069. 7682095

SRR17520069. 7682096  
SRR17520069. 7682097  
SRR17520069. 7682098  
SRR17520069. 7682099  
SRR17520069. 7682100  
SRR17520069. 7682101  
SRR17520069. 7682102  
SRR17520069. 7682103  
SRR17520069. 7682104  
SRR17520069. 7682105  
SRR17520069. 7682106  
SRR17520069. 7682107  
SRR17520069. 7682108  
SRR17520069. 7682109  
SRR17520069. 7682110  
SRR17520069. 7682111  
SRR17520069. 7682112  
SRR17520069. 7682113  
SRR17520069. 7688304  
SRR17520069. 7688305  
SRR17520069. 7688306  
SRR17520069. 7688308  
SRR17520069. 7688309  
SRR17520069. 7688310  
SRR17520069. 7688311  
SRR17520069. 7688313  
SRR17520069. 7688315  
SRR17520069. 7688316  
SRR17520069. 7688317  
SRR17520069. 7688318  
SRR17520069. 7688320  
SRR17520069. 7688321  
SRR17520069. 7688322  
SRR17520069. 7694506  
SRR17520069. 7696434  
SRR17520069. 7696435  
SRR17520069. 7696436  
SRR17520069. 7696437  
SRR17520069. 7696438  
SRR17520069. 7696439  
SRR17520069. 7696440  
SRR17520069. 7696441  
SRR17520069. 7696442  
SRR17520069. 7696443  
SRR17520069. 7696444  
SRR17520069. 7696445  
SRR17520069. 7696446

SRR17520069. 7696447  
SRR17520069. 7696448  
SRR17520069. 7696449  
SRR17520069. 7696450  
SRR17520069. 7696451  
SRR17520069. 7696452  
SRR17520069. 7696453  
SRR17520069. 7696454  
SRR17520069. 7696455  
SRR17520069. 7696456  
SRR17520069. 7696457  
SRR17520069. 7696458  
SRR17520069. 7696459  
SRR17520069. 7696460  
SRR17520069. 7696461  
SRR17520069. 7696462  
SRR17520069. 7696463  
SRR17520069. 7696464  
SRR17520069. 7696465  
SRR17520069. 7696466  
SRR17520069. 7696467  
SRR17520069. 7696468  
SRR17520069. 7696469  
SRR17520069. 7696470  
SRR17520069. 7696471  
SRR17520069. 7696472  
SRR17520069. 7696473  
SRR17520069. 7696474  
SRR17520069. 7696475  
SRR17520069. 7696476  
SRR17520069. 7696477  
SRR17520069. 7696478  
SRR17520069. 7696479  
SRR17520069. 7696480  
SRR17520069. 7696481  
SRR17520069. 7696482  
SRR17520069. 7696483  
SRR17520069. 7696484  
SRR17520069. 7696485  
SRR17520069. 7696486  
SRR17520069. 7696487  
SRR17520069. 7696488  
SRR17520069. 7696489  
SRR17520069. 7696490  
SRR17520069. 7696491  
SRR17520069. 7696492  
SRR17520069. 7696493

SRR17520069. 7696494  
SRR17520069. 7696495  
SRR17520069. 7696496  
SRR17520069. 7696497  
SRR17520069. 7696498  
SRR17520069. 7696499  
SRR17520069. 7696500  
SRR17520069. 7696501  
SRR17520069. 7696502  
SRR17520069. 7696503  
SRR17520069. 7696504  
SRR17520069. 7696505  
SRR17520069. 7696506  
SRR17520069. 7696507  
SRR17520069. 7696508  
SRR17520069. 7696509  
SRR17520069. 7696510  
SRR17520069. 7696511  
SRR17520069. 7696512  
SRR17520069. 7696513  
SRR17520069. 7696514  
SRR17520069. 7696515  
SRR17520069. 7696516  
SRR17520069. 7696517  
SRR17520069. 7696518  
SRR17520069. 7696519  
SRR17520069. 7696520  
SRR17520069. 7696521  
SRR17520069. 7696522  
SRR17520069. 7696523  
SRR17520069. 7696524  
SRR17520069. 7696526  
SRR17520069. 7696527  
SRR17520069. 7696528  
SRR17520069. 7696529  
SRR17520069. 7696530  
SRR17520069. 7696531  
SRR17520069. 7696532  
SRR17520069. 7696533  
SRR17520069. 7696534  
SRR17520069. 7696535  
SRR17520069. 7696536  
SRR17520069. 7696537  
SRR17520069. 7696538  
SRR17520069. 7696539  
SRR17520069. 7696540  
SRR17520069. 7696541

SRR17520069.7696542  
SRR17520069.7696543  
SRR17520069.7696544  
SRR17520069.7696545  
SRR17520069.7696546  
SRR17520069.7697659  
SRR17520069.7703363  
SRR17520069.7707598  
SRR17520069.7707608  
SRR17520069.7707618  
SRR17520069.7721679  
SRR17520069.7721680  
SRR17520069.7721681  
SRR17520069.7721682  
SRR17520069.7721683  
SRR17520069.7721684  
SRR17520069.7721685  
SRR17520069.7721686  
SRR17520069.7721687  
SRR17520069.7721688  
SRR17520069.7721689  
SRR17520069.7721690  
SRR17520069.7721691  
SRR17520069.7721692  
SRR17520069.7721693  
SRR17520069.7738693  
SRR17520069.7738694  
SRR17520069.7738695  
SRR17520069.7738696  
SRR17520069.7738697  
SRR17520069.7738698  
SRR17520069.7738699  
SRR17520069.7738700  
SRR17520069.7738701  
SRR17520069.7738702  
SRR17520069.7738703  
SRR17520069.7738705  
SRR17520069.7738706  
SRR17520069.7738707  
SRR17520069.7738708  
SRR17520069.7738709  
SRR17520069.7738710  
SRR17520069.7738711  
SRR17520069.7738712  
SRR17520069.7738713  
SRR17520069.7738714  
SRR17520069.7738715

SRR17520069. 7738716  
SRR17520069. 7738717  
SRR17520069. 7738718  
SRR17520069. 7738719  
SRR17520069. 7738720  
SRR17520069. 7738721  
SRR17520069. 7738723  
SRR17520069. 7738725  
SRR17520069. 7738726  
SRR17520069. 7738727  
SRR17520069. 7738728  
SRR17520069. 7738729  
SRR17520069. 7738730  
SRR17520069. 7778450  
SRR17520069. 7778451  
SRR17520069. 7778452  
SRR17520069. 7778453  
SRR17520069. 7778455  
SRR17520069. 7778456  
SRR17520069. 7778457  
SRR17520069. 7778458  
SRR17520069. 7778459  
SRR17520069. 7778460  
SRR17520069. 7778461  
SRR17520069. 7778462  
SRR17520069. 7778463  
SRR17520069. 7778464  
SRR17520069. 7778465  
SRR17520069. 7778466  
SRR17520069. 7778467  
SRR17520069. 7778468  
SRR17520069. 7778469  
SRR17520069. 7778470  
SRR17520069. 7778471  
SRR17520069. 7778472  
SRR17520069. 7778473  
SRR17520069. 7778474  
SRR17520069. 7778475  
SRR17520069. 7778476  
SRR17520069. 7778477  
SRR17520069. 7778478  
SRR17520069. 7778479  
SRR17520069. 7778481  
SRR17520069. 7778482  
SRR17520069. 7778483  
SRR17520069. 7778484  
SRR17520069. 7778485



SRR17520069.7778486  
SRR17520069.7778487  
SRR17520069.7778488  
SRR17520069.7778489  
SRR17520069.7778490  
SRR17520069.7778491  
SRR17520069.7778492  
SRR17520069.7778493  
SRR17520069.7778494  
SRR17520069.7778495  
SRR17520069.7778496  
SRR17520069.7778497  
SRR17520069.7778498  
SRR17520069.7778499  
SRR17520069.7778500  
SRR17520069.7786999  
SRR17520069.7790509  
SRR17520069.7790511  
SRR17520069.7796733  
SRR17520069.7796735  
SRR17520069.7796736  
SRR17520069.7796737  
SRR17520069.7807225  
SRR17520069.7807226  
SRR17520069.7813679  
SRR17520069.7823976  
SRR17520069.7823977  
SRR17520069.7823978  
SRR17520069.7823979  
SRR17520069.7823980  
SRR17520069.7823981  
SRR17520069.7823982  
SRR17520069.7823983  
SRR17520069.7823984  
SRR17520069.7823985  
SRR17520069.7823986  
SRR17520069.7823987  
SRR17520069.7823988  
SRR17520069.7823989  
SRR17520069.7823990  
SRR17520069.7823991  
SRR17520069.7823992  
SRR17520069.7823993  
SRR17520069.7823994  
SRR17520069.7823995  
SRR17520069.7823996  
SRR17520069.7823997

SRR17520069.7823998  
SRR17520069.7823999  
SRR17520069.7824000  
SRR17520069.7824001  
SRR17520069.7824002  
SRR17520069.7824003  
SRR17520069.7824004  
SRR17520069.7824005  
SRR17520069.7824006  
SRR17520069.7824007  
SRR17520069.7824008  
SRR17520069.7824009  
SRR17520069.7824010  
SRR17520069.7824011  
SRR17520069.7824012  
SRR17520069.7824013  
SRR17520069.7824014  
SRR17520069.7824015  
SRR17520069.7824016  
SRR17520069.7824017  
SRR17520069.7824018  
SRR17520069.7824019  
SRR17520069.7824020  
SRR17520069.7824021  
SRR17520069.7824022  
SRR17520069.7824023  
SRR17520069.7824024  
SRR17520069.7824025  
SRR17520069.7824026  
SRR17520069.7824027  
SRR17520069.7824028  
SRR17520069.7824029  
SRR17520069.7824030  
SRR17520069.7824031  
SRR17520069.7824032  
SRR17520069.7824033  
SRR17520069.7824034  
SRR17520069.7824035  
SRR17520069.7824036  
SRR17520069.7824037  
SRR17520069.7824038  
SRR17520069.7824039  
SRR17520069.7824040  
SRR17520069.7824041  
SRR17520069.7824042  
SRR17520069.7824043  
SRR17520069.7824044

SRR17520069.7824045  
SRR17520069.7824046  
SRR17520069.7824047  
SRR17520069.7824048  
SRR17520069.7824049  
SRR17520069.7824050  
SRR17520069.7824051  
SRR17520069.7824052  
SRR17520069.7824053  
SRR17520069.7829101  
SRR17520069.7829102  
SRR17520069.7829103  
SRR17520069.7829104  
SRR17520069.7829105  
SRR17520069.7829106  
SRR17520069.7829107  
SRR17520069.7829108  
SRR17520069.7829109  
SRR17520069.7829110  
SRR17520069.7829111  
SRR17520069.7829112  
SRR17520069.7829113  
SRR17520069.7829114  
SRR17520069.7829115  
SRR17520069.7829116  
SRR17520069.7829117  
SRR17520069.7829118  
SRR17520069.7829119  
SRR17520069.7829120  
SRR17520069.7829121  
SRR17520069.7829122  
SRR17520069.7829123  
SRR17520069.7829124  
SRR17520069.7829125  
SRR17520069.7829126  
SRR17520069.7829127  
SRR17520069.7829128  
SRR17520069.7829129  
SRR17520069.7829130  
SRR17520069.7829131  
SRR17520069.7829132  
SRR17520069.7829133  
SRR17520069.7829134  
SRR17520069.7829135  
SRR17520069.7829136  
SRR17520069.7829137  
SRR17520069.7829138

SRR17520069. 7829139  
SRR17520069. 7829140  
SRR17520069. 7829142  
SRR17520069. 7829143  
SRR17520069. 7829144  
SRR17520069. 7829145  
SRR17520069. 7829146  
SRR17520069. 7829147  
SRR17520069. 7829148  
SRR17520069. 7829149  
SRR17520069. 7829150  
SRR17520069. 7829151  
SRR17520069. 7829153  
SRR17520069. 7829154  
SRR17520069. 7829155  
SRR17520069. 7829156  
SRR17520069. 7829157  
SRR17520069. 7829158  
SRR17520069. 7829159  
SRR17520069. 7829160  
SRR17520069. 7829161  
SRR17520069. 7829162  
SRR17520069. 7829163  
SRR17520069. 7829164  
SRR17520069. 7829165  
SRR17520069. 7829166  
SRR17520069. 7829167  
SRR17520069. 7829168  
SRR17520069. 7829169  
SRR17520069. 7829170  
SRR17520069. 7829171  
SRR17520069. 7829172  
SRR17520069. 7829173  
SRR17520069. 7829174  
SRR17520069. 7829175  
SRR17520069. 7829176  
SRR17520069. 7829177  
SRR17520069. 7829178  
SRR17520069. 7829179  
SRR17520069. 7829180  
SRR17520069. 7829181  
SRR17520069. 7829182  
SRR17520069. 7829185  
SRR17520069. 7829186  
SRR17520069. 7829187  
SRR17520069. 7829188  
SRR17520069. 7829189

SRR17520069.7829190  
SRR17520069.7829191  
SRR17520069.7829192  
SRR17520069.7829193  
SRR17520069.7829194  
SRR17520069.7829195  
SRR17520069.7829196  
SRR17520069.7829197  
SRR17520069.7829198  
SRR17520069.7829199  
SRR17520069.7829200  
SRR17520069.7829201  
SRR17520069.7829202  
SRR17520069.7829203  
SRR17520069.7829204  
SRR17520069.7829205  
SRR17520069.7829206  
SRR17520069.7829207  
SRR17520069.7829208  
SRR17520069.7829209  
SRR17520069.7829210  
SRR17520069.7829211  
SRR17520069.7829212  
SRR17520069.7829213  
SRR17520069.7829214  
SRR17520069.7829215  
SRR17520069.7829216  
SRR17520069.7857424  
SRR17520069.7859839  
SRR17520069.7859840  
SRR17520069.7859841  
SRR17520069.7859842  
SRR17520069.7859843  
SRR17520069.7859844  
SRR17520069.7859845  
SRR17520069.7859846  
SRR17520069.7859847  
SRR17520069.7859848  
SRR17520069.7859849  
SRR17520069.7859850  
SRR17520069.7859852  
SRR17520069.7859853  
SRR17520069.7859854  
SRR17520069.7859855  
SRR17520069.7859856  
SRR17520069.7859857  
SRR17520069.7859858

SRR17520069.7859859  
SRR17520069.7859860  
SRR17520069.7859861  
SRR17520069.7859862  
SRR17520069.7859863  
SRR17520069.7859864  
SRR17520069.7859865  
SRR17520069.7859866  
SRR17520069.7859867  
SRR17520069.7870163  
SRR17520069.7889178  
SRR17520069.7889264  
SRR17520069.7898577  
SRR17520069.7898578  
SRR17520069.7898579  
SRR17520069.7898580  
SRR17520069.7898581  
SRR17520069.7898582  
SRR17520069.7898583  
SRR17520069.7898584  
SRR17520069.7898585  
SRR17520069.7898586  
SRR17520069.7898587  
SRR17520069.7898588  
SRR17520069.7898589  
SRR17520069.7898590  
SRR17520069.7898591  
SRR17520069.7898592  
SRR17520069.7898593  
SRR17520069.7898594  
SRR17520069.7898595  
SRR17520069.7898596  
SRR17520069.7898597  
SRR17520069.7898598  
SRR17520069.7898599  
SRR17520069.7898600  
SRR17520069.7898601  
SRR17520069.7898602  
SRR17520069.7898603  
SRR17520069.7898604  
SRR17520069.7898605  
SRR17520069.7898606  
SRR17520069.7898607  
SRR17520069.7898608  
SRR17520069.7898610  
SRR17520069.7898611  
SRR17520069.7898612

SRR17520069.7898613  
SRR17520069.7898614  
SRR17520069.7898615  
SRR17520069.7898616  
SRR17520069.7898617  
SRR17520069.7898618  
SRR17520069.7898619  
SRR17520069.7898620  
SRR17520069.7898621  
SRR17520069.7898623  
SRR17520069.7898624  
SRR17520069.7898625  
SRR17520069.7898626  
SRR17520069.7898627  
SRR17520069.7898628  
SRR17520069.7898629  
SRR17520069.7898630  
SRR17520069.7898632  
SRR17520069.7898636  
SRR17520069.7898637  
SRR17520069.7898638  
SRR17520069.7898639  
SRR17520069.7898640  
SRR17520069.7898641  
SRR17520069.7898642  
SRR17520069.7898643  
SRR17520069.7898645  
SRR17520069.7898647  
SRR17520069.7898648  
SRR17520069.7898651  
SRR17520069.7898652  
SRR17520069.7898653  
SRR17520069.7898654  
SRR17520069.7898655  
SRR17520069.7898656  
SRR17520069.7898657  
SRR17520069.7898661  
SRR17520069.7898662  
SRR17520069.7898664  
SRR17520069.7898665  
SRR17520069.7898666  
SRR17520069.7898667  
SRR17520069.7898668  
SRR17520069.7898669  
SRR17520069.7898670  
SRR17520069.7898671  
SRR17520069.7898672

SRR17520069.7906223  
SRR17520069.7906224  
SRR17520069.7906225  
SRR17520069.7906226  
SRR17520069.7906227  
SRR17520069.7906228  
SRR17520069.7906229  
SRR17520069.7906230  
SRR17520069.7906231  
SRR17520069.7906232  
SRR17520069.7906233  
SRR17520069.7906234  
SRR17520069.7906235  
SRR17520069.7927233  
SRR17520069.7927236  
SRR17520069.7927237  
SRR17520069.7927238  
SRR17520069.7927239  
SRR17520069.7927240  
SRR17520069.7927241  
SRR17520069.7927242  
SRR17520069.7927243  
SRR17520069.7927244  
SRR17520069.7927245  
SRR17520069.7927246  
SRR17520069.7927248  
SRR17520069.7927252  
SRR17520069.7927255  
SRR17520069.7927256  
SRR17520069.7927257  
SRR17520069.7927259  
SRR17520069.7927263  
SRR17520069.7927264  
SRR17520069.7927266  
SRR17520069.7927267  
SRR17520069.7962904  
SRR17520069.7962905  
SRR17520069.7962906  
SRR17520069.7962907  
SRR17520069.7962908  
SRR17520069.7962909  
SRR17520069.7962910  
SRR17520069.7962911  
SRR17520069.7962912  
SRR17520069.7962913  
SRR17520069.7962914  
SRR17520069.7962915



SRR17520069.7962916  
SRR17520069.7962917  
SRR17520069.7962918  
SRR17520069.7962919  
SRR17520069.7962920  
SRR17520069.7962921  
SRR17520069.7962922  
SRR17520069.7962923  
SRR17520069.7962924  
SRR17520069.7962925  
SRR17520069.7962926  
SRR17520069.7962927  
SRR17520069.7962928  
SRR17520069.7962929  
SRR17520069.7962930  
SRR17520069.7962931  
SRR17520069.7962932  
SRR17520069.7962933  
SRR17520069.7962934  
SRR17520069.7962935  
SRR17520069.7962936  
SRR17520069.7962937  
SRR17520069.7962938  
SRR17520069.7962939  
SRR17520069.7962940  
SRR17520069.7962941  
SRR17520069.7962942  
SRR17520069.7962943  
SRR17520069.7962944  
SRR17520069.7962945  
SRR17520069.7962946  
SRR17520069.7962947  
SRR17520069.7962948  
SRR17520069.7962949  
SRR17520069.7962950  
SRR17520069.7962951  
SRR17520069.7962952  
SRR17520069.7962953  
SRR17520069.7962954  
SRR17520069.7962955  
SRR17520069.7962956  
SRR17520069.7962957  
SRR17520069.7962958  
SRR17520069.7962959  
SRR17520069.7962960  
SRR17520069.7962961  
SRR17520069.7962962

SRR17520069.7962963  
SRR17520069.7962964  
SRR17520069.7962965  
SRR17520069.7962966  
SRR17520069.7962967  
SRR17520069.7962968  
SRR17520069.7962969  
SRR17520069.7962970  
SRR17520069.7962971  
SRR17520069.7978233  
SRR17520069.7978240  
SRR17520069.7978255  
SRR17520069.7984327  
SRR17520069.8014669  
SRR17520069.8014677  
SRR17520069.8014751  
SRR17520069.8034847  
SRR17520069.8034848  
SRR17520069.8034849  
SRR17520069.8034850  
SRR17520069.8034851  
SRR17520069.8034852  
SRR17520069.8034854  
SRR17520069.8034855  
SRR17520069.8034856  
SRR17520069.8034857  
SRR17520069.8034859  
SRR17520069.8034861  
SRR17520069.8034863  
SRR17520069.8034864  
SRR17520069.8034865  
SRR17520069.8034866  
SRR17520069.8034867  
SRR17520069.8034868  
SRR17520069.8034870  
SRR17520069.8034872  
SRR17520069.8034875  
SRR17520069.8034876  
SRR17520069.8034877  
SRR17520069.8034878  
SRR17520069.8034879  
SRR17520069.8063067  
SRR17520069.8063103  
SRR17520069.8080872  
SRR17520069.8080876  
SRR17520069.8080879  
SRR17520069.8086434

SRR17520069.8086435  
SRR17520069.8086436  
SRR17520069.8086437  
SRR17520069.8086438  
SRR17520069.8086439  
SRR17520069.8086440  
SRR17520069.8086441  
SRR17520069.8086442  
SRR17520069.8086443  
SRR17520069.8086444  
SRR17520069.8086445  
SRR17520069.8086446  
SRR17520069.8086447  
SRR17520069.8086448  
SRR17520069.8086450  
SRR17520069.8086451  
SRR17520069.8086453  
SRR17520069.8086454  
SRR17520069.8086455  
SRR17520069.8086456  
SRR17520069.8086457  
SRR17520069.8086458  
SRR17520069.8086459  
SRR17520069.8086460  
SRR17520069.8086461  
SRR17520069.8086463  
SRR17520069.8086464  
SRR17520069.8086465  
SRR17520069.8086466  
SRR17520069.8086467  
SRR17520069.8086468  
SRR17520069.8086469  
SRR17520069.8086471  
SRR17520069.8086472  
SRR17520069.8086473  
SRR17520069.8086474  
SRR17520069.8086475  
SRR17520069.8086477  
SRR17520069.8086478  
SRR17520069.8086479  
SRR17520069.8086480  
SRR17520069.8086481  
SRR17520069.8086482  
SRR17520069.8086483  
SRR17520069.8086484  
SRR17520069.8086485  
SRR17520069.8086486

SRR17520069.8086487  
SRR17520069.8086488  
SRR17520069.8086489  
SRR17520069.8086490  
SRR17520069.8086491  
SRR17520069.8086492  
SRR17520069.8086493  
SRR17520069.8086494  
SRR17520069.8086495  
SRR17520069.8086496  
SRR17520069.8086497  
SRR17520069.8086498  
SRR17520069.8086499  
SRR17520069.8106609  
SRR17520069.8106610  
SRR17520069.8106611  
SRR17520069.8106612  
SRR17520069.8106613  
SRR17520069.8106614  
SRR17520069.8106615  
SRR17520069.8106616  
SRR17520069.8106617  
SRR17520069.8106618  
SRR17520069.8106619  
SRR17520069.8106620  
SRR17520069.8106621  
SRR17520069.8106623  
SRR17520069.8106624  
SRR17520069.8106625  
SRR17520069.8106626  
SRR17520069.8106627  
SRR17520069.8107039  
SRR17520069.8107040  
SRR17520069.8107041  
SRR17520069.8107042  
SRR17520069.8107043  
SRR17520069.8107044  
SRR17520069.8107045  
SRR17520069.8107046  
SRR17520069.8107047  
SRR17520069.8107048  
SRR17520069.8107049  
SRR17520069.8107050  
SRR17520069.8107051  
SRR17520069.8107052  
SRR17520069.8107053  
SRR17520069.8107054

SRR17520069.8107055  
SRR17520069.8107056  
SRR17520069.8107057  
SRR17520069.8107058  
SRR17520069.8107059  
SRR17520069.8107060  
SRR17520069.8107061  
SRR17520069.8107062  
SRR17520069.8107065  
SRR17520069.8107066  
SRR17520069.8107067  
SRR17520069.8107068  
SRR17520069.8107069  
SRR17520069.8107070  
SRR17520069.8107071  
SRR17520069.8107072  
SRR17520069.8107073  
SRR17520069.8107074  
SRR17520069.8107075  
SRR17520069.8107076  
SRR17520069.8107078  
SRR17520069.8107079  
SRR17520069.8107080  
SRR17520069.8107081  
SRR17520069.8107082  
SRR17520069.8107083  
SRR17520069.8107084  
SRR17520069.8107085  
SRR17520069.8107086  
SRR17520069.8107087  
SRR17520069.8107088  
SRR17520069.8107089  
SRR17520069.8107090  
SRR17520069.8107091  
SRR17520069.8107093  
SRR17520069.8107094  
SRR17520069.8107095  
SRR17520069.8107096  
SRR17520069.8107097  
SRR17520069.8107098  
SRR17520069.8107099  
SRR17520069.8107100  
SRR17520069.8107101  
SRR17520069.8107102  
SRR17520069.8107103  
SRR17520069.8107104  
SRR17520069.8107105

SRR17520069.8107106  
SRR17520069.8107107  
SRR17520069.8107108  
SRR17520069.8107109  
SRR17520069.8107110  
SRR17520069.8107111  
SRR17520069.8107112  
SRR17520069.8107113  
SRR17520069.8107114  
SRR17520069.8107115  
SRR17520069.8133570  
SRR17520069.8133571  
SRR17520069.8133572  
SRR17520069.8133573  
SRR17520069.8133574  
SRR17520069.8133575  
SRR17520069.8133576  
SRR17520069.8133577  
SRR17520069.8133578  
SRR17520069.8133579  
SRR17520069.8133580  
SRR17520069.8133581  
SRR17520069.8133582  
SRR17520069.8133583  
SRR17520069.8133584  
SRR17520069.8133585  
SRR17520069.8133586  
SRR17520069.8136293  
SRR17520069.8136294  
SRR17520069.8136295  
SRR17520069.8136296  
SRR17520069.8136297  
SRR17520069.8136298  
SRR17520069.8136299  
SRR17520069.8136300  
SRR17520069.8136301  
SRR17520069.8136303  
SRR17520069.8136304  
SRR17520069.8136305  
SRR17520069.8136307  
SRR17520069.8163552  
SRR17520069.8163553  
SRR17520069.8163554  
SRR17520069.8163555  
SRR17520069.8163556  
SRR17520069.8163557  
SRR17520069.8163558

SRR17520069.8163559  
SRR17520069.8163560  
SRR17520069.8163561  
SRR17520069.8163562  
SRR17520069.8163564  
SRR17520069.8163565  
SRR17520069.8163566  
SRR17520069.8163567  
SRR17520069.8163568  
SRR17520069.8163570  
SRR17520069.8163571  
SRR17520069.8163572  
SRR17520069.8163573  
SRR17520069.8163574  
SRR17520069.8163576  
SRR17520069.8163577  
SRR17520069.8163578  
SRR17520069.8163579  
SRR17520069.8163581  
SRR17520069.8163582  
SRR17520069.8180213  
SRR17520069.8180214  
SRR17520069.8180215  
SRR17520069.8180216  
SRR17520069.8180217  
SRR17520069.8180218  
SRR17520069.8180219  
SRR17520069.8180220  
SRR17520069.8180221  
SRR17520069.8180222  
SRR17520069.8180223  
SRR17520069.8180224  
SRR17520069.8180225  
SRR17520069.8180226  
SRR17520069.8180227  
SRR17520069.8180228  
SRR17520069.8180229  
SRR17520069.8180230  
SRR17520069.8180231  
SRR17520069.8180232  
SRR17520069.8180233  
SRR17520069.8180234  
SRR17520069.8180235  
SRR17520069.8180236  
SRR17520069.8180237  
SRR17520069.8180238  
SRR17520069.8180239

SRR17520069.8180240  
SRR17520069.8180241  
SRR17520069.8180242  
SRR17520069.8180243  
SRR17520069.8180244  
SRR17520069.8180245  
SRR17520069.8180246  
SRR17520069.8180247  
SRR17520069.8180248  
SRR17520069.8180249  
SRR17520069.8180250  
SRR17520069.8180251  
SRR17520069.8180252  
SRR17520069.8180253  
SRR17520069.8180254  
SRR17520069.8180255  
SRR17520069.8180256  
SRR17520069.8180257  
SRR17520069.8180258  
SRR17520069.8180259  
SRR17520069.8180260  
SRR17520069.8180261  
SRR17520069.8180262  
SRR17520069.8180263  
SRR17520069.8180264  
SRR17520069.8180265  
SRR17520069.8180266  
SRR17520069.8180267  
SRR17520069.8180268  
SRR17520069.8180269  
SRR17520069.8180270  
SRR17520069.8180271  
SRR17520069.8180272  
SRR17520069.8180273  
SRR17520069.8180274  
SRR17520069.8180275  
SRR17520069.8180276  
SRR17520069.8180277  
SRR17520069.8180278  
SRR17520069.8180279  
SRR17520069.8180280  
SRR17520069.8180281  
SRR17520069.8180282  
SRR17520069.8180283  
SRR17520069.8180284  
SRR17520069.8180285  
SRR17520069.8180286



SRR17520069.8180287  
SRR17520069.8180288  
SRR17520069.8190729  
SRR17520069.8192356  
SRR17520069.8192357  
SRR17520069.8192358  
SRR17520069.8192359  
SRR17520069.8192360  
SRR17520069.8192361  
SRR17520069.8192362  
SRR17520069.8192363  
SRR17520069.8192364  
SRR17520069.8208066  
SRR17520069.8208067  
SRR17520069.8208068  
SRR17520069.8208070  
SRR17520069.8208071  
SRR17520069.8208072  
SRR17520069.8208073  
SRR17520069.8208074  
SRR17520069.8208075  
SRR17520069.8208076  
SRR17520069.8208077  
SRR17520069.8208078  
SRR17520069.8208079  
SRR17520069.8208080  
SRR17520069.8208081  
SRR17520069.8208083  
SRR17520069.8208084  
SRR17520069.8208085  
SRR17520069.8208086  
SRR17520069.8208087  
SRR17520069.8208088  
SRR17520069.8208089  
SRR17520069.8208090  
SRR17520069.8208091  
SRR17520069.8208092  
SRR17520069.8208093  
SRR17520069.8208094  
SRR17520069.8208095  
SRR17520069.8208096  
SRR17520069.8208097  
SRR17520069.8208098  
SRR17520069.8208099  
SRR17520069.8212970  
SRR17520069.8212971  
SRR17520069.8212973

SRR17520069.8212974  
SRR17520069.8212975  
SRR17520069.8212976  
SRR17520069.8212977  
SRR17520069.8212978  
SRR17520069.8212979  
SRR17520069.8212980  
SRR17520069.8212981  
SRR17520069.8212982  
SRR17520069.8212983  
SRR17520069.8212984  
SRR17520069.8212985  
SRR17520069.8212986  
SRR17520069.8212987  
SRR17520069.8212988  
SRR17520069.8212989  
SRR17520069.8212990  
SRR17520069.8212991  
SRR17520069.8212992  
SRR17520069.8212993  
SRR17520069.8212994  
SRR17520069.8212995  
SRR17520069.8212996  
SRR17520069.8212997  
SRR17520069.8212998  
SRR17520069.8212999  
SRR17520069.8213000  
SRR17520069.8213001  
SRR17520069.8213002  
SRR17520069.8213003  
SRR17520069.8213004  
SRR17520069.8213005  
SRR17520069.8213007  
SRR17520069.8213008  
SRR17520069.8213009  
SRR17520069.8213010  
SRR17520069.8213080  
SRR17520069.8213084  
SRR17520069.8215799  
SRR17520069.8223941  
SRR17520069.8223942  
SRR17520069.8223943  
SRR17520069.8223944  
SRR17520069.8223945  
SRR17520069.8223946  
SRR17520069.8223947  
SRR17520069.8223948

SRR17520069.8223949  
SRR17520069.8223950  
SRR17520069.8223951  
SRR17520069.8223952  
SRR17520069.8223953  
SRR17520069.8223954  
SRR17520069.8223955  
SRR17520069.8223956  
SRR17520069.8223957  
SRR17520069.8223958  
SRR17520069.8223959  
SRR17520069.8223960  
SRR17520069.8225032  
SRR17520069.8234649  
SRR17520069.8243454  
SRR17520069.8243460  
SRR17520069.8243482  
SRR17520069.8243496  
SRR17520069.8245476  
SRR17520069.8245477  
SRR17520069.8245478  
SRR17520069.8245479  
SRR17520069.8245480  
SRR17520069.8245481  
SRR17520069.8245482  
SRR17520069.8245484  
SRR17520069.8245485  
SRR17520069.8245487  
SRR17520069.8245488  
SRR17520069.8245489  
SRR17520069.8245490  
SRR17520069.8245491  
SRR17520069.8245492  
SRR17520069.8245493  
SRR17520069.8245494  
SRR17520069.8245495  
SRR17520069.8245496  
SRR17520069.8245497  
SRR17520069.8245498  
SRR17520069.8245499  
SRR17520069.8245500  
SRR17520069.8245501  
SRR17520069.8245502  
SRR17520069.8245503  
SRR17520069.8245504  
SRR17520069.8245505  
SRR17520069.8245506

SRR17520069.8245507  
SRR17520069.8245508  
SRR17520069.8245509  
SRR17520069.8245510  
SRR17520069.8245511  
SRR17520069.8245512  
SRR17520069.8245513  
SRR17520069.8245514  
SRR17520069.8245515  
SRR17520069.8245516  
SRR17520069.8245517  
SRR17520069.8245518  
SRR17520069.8245519  
SRR17520069.8245520  
SRR17520069.8245521  
SRR17520069.8245522  
SRR17520069.8245523  
SRR17520069.8245524  
SRR17520069.8245525  
SRR17520069.8245526  
SRR17520069.8245527  
SRR17520069.8245528  
SRR17520069.8245529  
SRR17520069.8245530  
SRR17520069.8245532  
SRR17520069.8245533  
SRR17520069.8245534  
SRR17520069.8245535  
SRR17520069.8245536  
SRR17520069.8245537  
SRR17520069.8245538  
SRR17520069.8245539  
SRR17520069.8245540  
SRR17520069.8245541  
SRR17520069.8245542  
SRR17520069.8245543  
SRR17520069.8245544  
SRR17520069.8245545  
SRR17520069.8245546  
SRR17520069.8245547  
SRR17520069.8245548  
SRR17520069.8245549  
SRR17520069.8245550  
SRR17520069.8245551  
SRR17520069.8245552  
SRR17520069.8245553  
SRR17520069.8245554

SRR17520069.8245555  
SRR17520069.8245556  
SRR17520069.8245558  
SRR17520069.8245559  
SRR17520069.8245560  
SRR17520069.8245561  
SRR17520069.8245562  
SRR17520069.8245563  
SRR17520069.8245564  
SRR17520069.8245565  
SRR17520069.8245566  
SRR17520069.8245567  
SRR17520069.8245568  
SRR17520069.8245569  
SRR17520069.8245570  
SRR17520069.8245571  
SRR17520069.8245572  
SRR17520069.8245573  
SRR17520069.8245574  
SRR17520069.8253325  
SRR17520069.8253327  
SRR17520069.8260354  
SRR17520069.8262926  
SRR17520069.8262927  
SRR17520069.8262928  
SRR17520069.8262929  
SRR17520069.8262930  
SRR17520069.8262931  
SRR17520069.8262932  
SRR17520069.8262933  
SRR17520069.8262934  
SRR17520069.8262935  
SRR17520069.8262936  
SRR17520069.8262937  
SRR17520069.8262938  
SRR17520069.8262939  
SRR17520069.8262941  
SRR17520069.8262942  
SRR17520069.8262943  
SRR17520069.8262944  
SRR17520069.8262945  
SRR17520069.8262946  
SRR17520069.8266409  
SRR17520069.8266410  
SRR17520069.8266411  
SRR17520069.8266412  
SRR17520069.8266413

SRR17520069.8266414  
SRR17520069.8266415  
SRR17520069.8266416  
SRR17520069.8266417  
SRR17520069.8266418  
SRR17520069.8266419  
SRR17520069.8266420  
SRR17520069.8266421  
SRR17520069.8266422  
SRR17520069.8266423  
SRR17520069.8266424  
SRR17520069.8266425  
SRR17520069.8266426  
SRR17520069.8275479  
SRR17520069.8275480  
SRR17520069.8275481  
SRR17520069.8275482  
SRR17520069.8275483  
SRR17520069.8275484  
SRR17520069.8275485  
SRR17520069.8275486  
SRR17520069.8275487  
SRR17520069.8275488  
SRR17520069.8291649  
SRR17520069.8302075  
SRR17520069.8306436  
SRR17520069.8306437  
SRR17520069.8306438  
SRR17520069.8306439  
SRR17520069.8306440  
SRR17520069.8306441  
SRR17520069.8306443  
SRR17520069.8306445  
SRR17520069.8306446  
SRR17520069.8306447  
SRR17520069.8306448  
SRR17520069.8306449  
SRR17520069.8306450  
SRR17520069.8306451  
SRR17520069.8306452  
SRR17520069.8306453  
SRR17520069.8306454  
SRR17520069.8306455  
SRR17520069.8306456  
SRR17520069.8306457  
SRR17520069.8306458  
SRR17520069.8306461

SRR17520069. 8306462  
SRR17520069. 8306463  
SRR17520069. 8306464  
SRR17520069. 8306467  
SRR17520069. 8306468  
SRR17520069. 8306469  
SRR17520069. 8306470  
SRR17520069. 8306471  
SRR17520069. 8306472  
SRR17520069. 8306473  
SRR17520069. 8306474  
SRR17520069. 8306475  
SRR17520069. 8306476  
SRR17520069. 8306477  
SRR17520069. 8306478  
SRR17520069. 8306479  
SRR17520069. 8306480  
SRR17520069. 8306482  
SRR17520069. 8306483  
SRR17520069. 8306484  
SRR17520069. 8306485  
SRR17520069. 8306486  
SRR17520069. 8306487  
SRR17520069. 8306488  
SRR17520069. 8306489  
SRR17520069. 8306490  
SRR17520069. 8306491  
SRR17520069. 8306492  
SRR17520069. 8306493  
SRR17520069. 8306496  
SRR17520069. 8319478  
SRR17520069. 8319479  
SRR17520069. 8319480  
SRR17520069. 8319481  
SRR17520069. 8319482  
SRR17520069. 8319483  
SRR17520069. 8319484  
SRR17520069. 8319485  
SRR17520069. 8319486  
SRR17520069. 8319487  
SRR17520069. 8319488  
SRR17520069. 8319489  
SRR17520069. 8319490  
SRR17520069. 8319491  
SRR17520069. 8319492  
SRR17520069. 8319493  
SRR17520069. 8319494

SRR17520069.8319495  
SRR17520069.8319496  
SRR17520069.8319497  
SRR17520069.8319498  
SRR17520069.8319499  
SRR17520069.8319500  
SRR17520069.8319501  
SRR17520069.8319502  
SRR17520069.8319503  
SRR17520069.8319504  
SRR17520069.8319505  
SRR17520069.8319506  
SRR17520069.8319507  
SRR17520069.8319508  
SRR17520069.8319509  
SRR17520069.8319510  
SRR17520069.8319511  
SRR17520069.8319512  
SRR17520069.8319513  
SRR17520069.8319514  
SRR17520069.8319515  
SRR17520069.8319516  
SRR17520069.8319517  
SRR17520069.8319518  
SRR17520069.8319519  
SRR17520069.8319520  
SRR17520069.8319521  
SRR17520069.8319522  
SRR17520069.8319523  
SRR17520069.8319524  
SRR17520069.8319525  
SRR17520069.8319526  
SRR17520069.8319527  
SRR17520069.8319528  
SRR17520069.8319529  
SRR17520069.8319530  
SRR17520069.8319531  
SRR17520069.8319532  
SRR17520069.8319533  
SRR17520069.8319534  
SRR17520069.8319535  
SRR17520069.8319536  
SRR17520069.8319537  
SRR17520069.8319538  
SRR17520069.8319539  
SRR17520069.8319540  
SRR17520069.8319541



SRR17520069.8319542  
SRR17520069.8319543  
SRR17520069.8319544  
SRR17520069.8319545  
SRR17520069.8319546  
SRR17520069.8319547  
SRR17520069.8319548  
SRR17520069.8319549  
SRR17520069.8319550  
SRR17520069.8319551  
SRR17520069.8319552  
SRR17520069.8325950  
SRR17520069.8325951  
SRR17520069.8325952  
SRR17520069.8325953  
SRR17520069.8325954  
SRR17520069.8325955  
SRR17520069.8325956  
SRR17520069.8325957  
SRR17520069.8325958  
SRR17520069.8325959  
SRR17520069.8325960  
SRR17520069.8325961  
SRR17520069.8325962  
SRR17520069.8325963  
SRR17520069.8325964  
SRR17520069.8327959  
SRR17520069.8333858  
SRR17520069.8362987  
SRR17520069.8362988  
SRR17520069.8362989  
SRR17520069.8362990  
SRR17520069.8362991  
SRR17520069.8362992  
SRR17520069.8362993  
SRR17520069.8362994  
SRR17520069.8362995  
SRR17520069.8362996  
SRR17520069.8362997  
SRR17520069.8362998  
SRR17520069.8362999  
SRR17520069.8363000  
SRR17520069.8363001  
SRR17520069.8363002  
SRR17520069.8363003  
SRR17520069.8363004  
SRR17520069.8363005

SRR17520069.8363006  
SRR17520069.8363007  
SRR17520069.8363008  
SRR17520069.8363009  
SRR17520069.8363010  
SRR17520069.8363011  
SRR17520069.8363012  
SRR17520069.8363013  
SRR17520069.8363014  
SRR17520069.8363015  
SRR17520069.8363016  
SRR17520069.8363017  
SRR17520069.8363018  
SRR17520069.8363019  
SRR17520069.8363020  
SRR17520069.8363021  
SRR17520069.8363022  
SRR17520069.8363023  
SRR17520069.8363024  
SRR17520069.8363025  
SRR17520069.8363026  
SRR17520069.8363027  
SRR17520069.8363028  
SRR17520069.8363029  
SRR17520069.8363030  
SRR17520069.8363031  
SRR17520069.8363032  
SRR17520069.8363033  
SRR17520069.8363034  
SRR17520069.8363035  
SRR17520069.8363036  
SRR17520069.8363037  
SRR17520069.8363038  
SRR17520069.8363039  
SRR17520069.8363040  
SRR17520069.8363041  
SRR17520069.8363042  
SRR17520069.8363043  
SRR17520069.8363044  
SRR17520069.8363045  
SRR17520069.8363046  
SRR17520069.8363047  
SRR17520069.8363048  
SRR17520069.8363049  
SRR17520069.8363050  
SRR17520069.8363051  
SRR17520069.8363052

SRR17520069.8363053  
SRR17520069.8363054  
SRR17520069.8363055  
SRR17520069.8363056  
SRR17520069.8363057  
SRR17520069.8363058  
SRR17520069.8363059  
SRR17520069.8363060  
SRR17520069.8363061  
SRR17520069.8363062  
SRR17520069.8363063  
SRR17520069.8363064  
SRR17520069.8363065  
SRR17520069.8363066  
SRR17520069.8363067  
SRR17520069.8363068  
SRR17520069.8363069  
SRR17520069.8363070  
SRR17520069.8363071  
SRR17520069.8363072  
SRR17520069.8363073  
SRR17520069.8363074  
SRR17520069.8363075  
SRR17520069.8363077  
SRR17520069.8363078  
SRR17520069.8363079  
SRR17520069.8363080  
SRR17520069.8363081  
SRR17520069.8363082  
SRR17520069.8363083  
SRR17520069.8363084  
SRR17520069.8363085  
SRR17520069.8363086  
SRR17520069.8363087  
SRR17520069.8363088  
SRR17520069.8363089  
SRR17520069.8363090  
SRR17520069.8363091  
SRR17520069.8363092  
SRR17520069.8363093  
SRR17520069.8363094  
SRR17520069.8363095  
SRR17520069.8363096  
SRR17520069.8363097  
SRR17520069.8363098  
SRR17520069.8363099  
SRR17520069.8363100

SRR17520069.8363101  
SRR17520069.8363102  
SRR17520069.8368394  
SRR17520069.8368395  
SRR17520069.8368396  
SRR17520069.8368397  
SRR17520069.8368398  
SRR17520069.8368399  
SRR17520069.8368400  
SRR17520069.8368401  
SRR17520069.8368402  
SRR17520069.8368403  
SRR17520069.8368404  
SRR17520069.8368405  
SRR17520069.8368406  
SRR17520069.8368407  
SRR17520069.8368408  
SRR17520069.8368409  
SRR17520069.8368410  
SRR17520069.8368411  
SRR17520069.8368412  
SRR17520069.8368413  
SRR17520069.8368415  
SRR17520069.8368416  
SRR17520069.8368417  
SRR17520069.8379888  
SRR17520069.8386844  
SRR17520069.8386845  
SRR17520069.8386846  
SRR17520069.8386847  
SRR17520069.8386848  
SRR17520069.8386849  
SRR17520069.8386850  
SRR17520069.8386851  
SRR17520069.8386852  
SRR17520069.8386853  
SRR17520069.8386854  
SRR17520069.8386855  
SRR17520069.8386857  
SRR17520069.8386858  
SRR17520069.8386859  
SRR17520069.8386860  
SRR17520069.8386862  
SRR17520069.8397708  
SRR17520069.8397709  
SRR17520069.8397710  
SRR17520069.8397711

SRR17520069.8397712  
SRR17520069.8397713  
SRR17520069.8397714  
SRR17520069.8397715  
SRR17520069.8397716  
SRR17520069.8397717  
SRR17520069.8397718  
SRR17520069.8404844  
SRR17520069.8404884  
SRR17520069.8406552  
SRR17520069.8432861  
SRR17520069.8447251  
SRR17520069.8453260  
SRR17520069.8473175  
SRR17520069.8481337  
SRR17520069.8497954  
SRR17520069.8497955  
SRR17520069.8497956  
SRR17520069.8497957  
SRR17520069.8497958  
SRR17520069.8497959  
SRR17520069.8497960  
SRR17520069.8497961  
SRR17520069.8497962  
SRR17520069.8497963  
SRR17520069.8497964  
SRR17520069.8497965  
SRR17520069.8497966  
SRR17520069.8497967  
SRR17520069.8497968  
SRR17520069.8497969  
SRR17520069.8497970  
SRR17520069.8497971  
SRR17520069.8497972  
SRR17520069.8497973  
SRR17520069.8497974  
SRR17520069.8497975  
SRR17520069.8497976  
SRR17520069.8497977  
SRR17520069.8497978  
SRR17520069.8497979  
SRR17520069.8497980  
SRR17520069.8497981  
SRR17520069.8497982  
SRR17520069.8497983  
SRR17520069.8497984  
SRR17520069.8497985

SRR17520069.8497986  
SRR17520069.8497987  
SRR17520069.8497988  
SRR17520069.8497989  
SRR17520069.8497990  
SRR17520069.8497991  
SRR17520069.8497992  
SRR17520069.8497993  
SRR17520069.8497994  
SRR17520069.8497996  
SRR17520069.8497997  
SRR17520069.8497998  
SRR17520069.8497999  
SRR17520069.8498000  
SRR17520069.8498001  
SRR17520069.8498002  
SRR17520069.8498003  
SRR17520069.8498004  
SRR17520069.8498005  
SRR17520069.8498006  
SRR17520069.8498007  
SRR17520069.8498008  
SRR17520069.8498009  
SRR17520069.8498010  
SRR17520069.8498011  
SRR17520069.8498012  
SRR17520069.8498013  
SRR17520069.8498014  
SRR17520069.8498017  
SRR17520069.8498018  
SRR17520069.8498019  
SRR17520069.8498020  
SRR17520069.8498021  
SRR17520069.8498022  
SRR17520069.8498023  
SRR17520069.8498024  
SRR17520069.8498025  
SRR17520069.8498026  
SRR17520069.8498027  
SRR17520069.8498028  
SRR17520069.8498029  
SRR17520069.8498030  
SRR17520069.8498031  
SRR17520069.8498032  
SRR17520069.8498033  
SRR17520069.8498034  
SRR17520069.8498035

SRR17520069.8498036  
SRR17520069.8498037  
SRR17520069.8498038  
SRR17520069.8498039  
SRR17520069.8498040  
SRR17520069.8498041  
SRR17520069.8498042  
SRR17520069.8498043  
SRR17520069.8498044  
SRR17520069.8498045  
SRR17520069.8498046  
SRR17520069.8498047  
SRR17520069.8498048  
SRR17520069.8498049  
SRR17520069.8498050  
SRR17520069.8498051  
SRR17520069.8498052  
SRR17520069.8498053  
SRR17520069.8498054  
SRR17520069.8498055  
SRR17520069.8498056  
SRR17520069.8498057  
SRR17520069.8498058  
SRR17520069.8498059  
SRR17520069.8498060  
SRR17520069.8498061  
SRR17520069.8498062  
SRR17520069.8498063  
SRR17520069.8498064  
SRR17520069.8498065  
SRR17520069.8498066  
SRR17520069.8498067  
SRR17520069.8498068  
SRR17520069.8498069  
SRR17520069.8498070  
SRR17520069.8498071  
SRR17520069.8498072  
SRR17520069.8498073  
SRR17520069.8498074  
SRR17520069.8498075  
SRR17520069.8498076  
SRR17520069.8498077  
SRR17520069.8498078  
SRR17520069.8498079  
SRR17520069.8498080  
SRR17520069.8498081  
SRR17520069.8498082

SRR17520069.8498083  
SRR17520069.8498084  
SRR17520069.8498085  
SRR17520069.8498086  
SRR17520069.8498087  
SRR17520069.8498088  
SRR17520069.8498089  
SRR17520069.8498090  
SRR17520069.8498091  
SRR17520069.8498093  
SRR17520069.8498094  
SRR17520069.8498095  
SRR17520069.8498096  
SRR17520069.8498097  
SRR17520069.8498098  
SRR17520069.8498099  
SRR17520069.8498100  
SRR17520069.8498101  
SRR17520069.8498103  
SRR17520069.8498104  
SRR17520069.8498105  
SRR17520069.8498106  
SRR17520069.8498107  
SRR17520069.8498108  
SRR17520069.8498109  
SRR17520069.8498110  
SRR17520069.8519924  
SRR17520069.8519925  
SRR17520069.8519926  
SRR17520069.8519927  
SRR17520069.8519928  
SRR17520069.8519929  
SRR17520069.8519930  
SRR17520069.8519931  
SRR17520069.8519932  
SRR17520069.8519933  
SRR17520069.8519934  
SRR17520069.8519935  
SRR17520069.8519936  
SRR17520069.8519937  
SRR17520069.8519938  
SRR17520069.8519939  
SRR17520069.8519940  
SRR17520069.8519941  
SRR17520069.8519942  
SRR17520069.8519943  
SRR17520069.8519944



SRR17520069.8519945  
SRR17520069.8519946  
SRR17520069.8519947  
SRR17520069.8519948  
SRR17520069.8519950  
SRR17520069.8519951  
SRR17520069.8519952  
SRR17520069.8519953  
SRR17520069.8519954  
SRR17520069.8519955  
SRR17520069.8519956  
SRR17520069.8519957  
SRR17520069.8519958  
SRR17520069.8519959  
SRR17520069.8519960  
SRR17520069.8519962  
SRR17520069.8519963  
SRR17520069.8519964  
SRR17520069.8519965  
SRR17520069.8519966  
SRR17520069.8519967  
SRR17520069.8519968  
SRR17520069.8519969  
SRR17520069.8519970  
SRR17520069.8519971  
SRR17520069.8519972  
SRR17520069.8519973  
SRR17520069.8519974  
SRR17520069.8522671  
SRR17520069.8522679  
SRR17520069.8524187  
SRR17520069.8524188  
SRR17520069.8524189  
SRR17520069.8524190  
SRR17520069.8524191  
SRR17520069.8524195  
SRR17520069.8524199  
SRR17520069.8524200  
SRR17520069.8524202  
SRR17520069.8524204  
SRR17520069.8524206  
SRR17520069.8524207  
SRR17520069.8524208  
SRR17520069.8524209  
SRR17520069.8524211  
SRR17520069.8524212  
SRR17520069.8524213

SRR17520069.8524214  
SRR17520069.8524215  
SRR17520069.8524216  
SRR17520069.8524217  
SRR17520069.8524218  
SRR17520069.8524219  
SRR17520069.8524220  
SRR17520069.8524221  
SRR17520069.8524222  
SRR17520069.8524224  
SRR17520069.8524225  
SRR17520069.8524226  
SRR17520069.8524227  
SRR17520069.8524228  
SRR17520069.8524229  
SRR17520069.8524230  
SRR17520069.8524231  
SRR17520069.8524232  
SRR17520069.8524233  
SRR17520069.8524234  
SRR17520069.8524235  
SRR17520069.8524236  
SRR17520069.8524237  
SRR17520069.8524239  
SRR17520069.8524240  
SRR17520069.8524241  
SRR17520069.8524242  
SRR17520069.8524243  
SRR17520069.8524244  
SRR17520069.8524245  
SRR17520069.8524246  
SRR17520069.8524247  
SRR17520069.8524249  
SRR17520069.8524250  
SRR17520069.8524251  
SRR17520069.8524252  
SRR17520069.8524253  
SRR17520069.8524254  
SRR17520069.8524256  
SRR17520069.8524257  
SRR17520069.8524258  
SRR17520069.8524259  
SRR17520069.8524260  
SRR17520069.8524261  
SRR17520069.8524262  
SRR17520069.8524263  
SRR17520069.8524265

SRR17520069.8524266  
SRR17520069.8524267  
SRR17520069.8524269  
SRR17520069.8524270  
SRR17520069.8524271  
SRR17520069.8524272  
SRR17520069.8524273  
SRR17520069.8524274  
SRR17520069.8524277  
SRR17520069.8526557  
SRR17520069.8526558  
SRR17520069.8526559  
SRR17520069.8526560  
SRR17520069.8526561  
SRR17520069.8526562  
SRR17520069.8526563  
SRR17520069.8526564  
SRR17520069.8526565  
SRR17520069.8526567  
SRR17520069.8526568  
SRR17520069.8526569  
SRR17520069.8526570  
SRR17520069.8526571  
SRR17520069.8526572  
SRR17520069.8526573  
SRR17520069.8526574  
SRR17520069.8526575  
SRR17520069.8526576  
SRR17520069.8526577  
SRR17520069.8526578  
SRR17520069.8526579  
SRR17520069.8526580  
SRR17520069.8526581  
SRR17520069.8526582  
SRR17520069.8526583  
SRR17520069.8526584  
SRR17520069.8526585  
SRR17520069.8526586  
SRR17520069.8526587  
SRR17520069.8526588  
SRR17520069.8526590  
SRR17520069.8526591  
SRR17520069.8526592  
SRR17520069.8526593  
SRR17520069.8526594  
SRR17520069.8526596  
SRR17520069.8526597

SRR17520069.8526599  
SRR17520069.8526600  
SRR17520069.8526601  
SRR17520069.8526604  
SRR17520069.8526605  
SRR17520069.8526606  
SRR17520069.8526607  
SRR17520069.8526608  
SRR17520069.8526609  
SRR17520069.8526610  
SRR17520069.8526611  
SRR17520069.8526613  
SRR17520069.8526614  
SRR17520069.8526615  
SRR17520069.8526617  
SRR17520069.8526618  
SRR17520069.8526619  
SRR17520069.8526620  
SRR17520069.8526621  
SRR17520069.8526622  
SRR17520069.8526623  
SRR17520069.8526626  
SRR17520069.8526627  
SRR17520069.8526628  
SRR17520069.8526629  
SRR17520069.8526630  
SRR17520069.8526631  
SRR17520069.8526633  
SRR17520069.8526634  
SRR17520069.8526635  
SRR17520069.8526636  
SRR17520069.8526637  
SRR17520069.8526638  
SRR17520069.8526639  
SRR17520069.8526640  
SRR17520069.8526641  
SRR17520069.8526642  
SRR17520069.8526643  
SRR17520069.8526644  
SRR17520069.8526645  
SRR17520069.8526646  
SRR17520069.8526648  
SRR17520069.8526649  
SRR17520069.8526652  
SRR17520069.8526653  
SRR17520069.8526654  
SRR17520069.8526655

SRR17520069.8526657  
SRR17520069.8526658  
SRR17520069.8526659  
SRR17520069.8526660  
SRR17520069.8526661  
SRR17520069.8526662  
SRR17520069.8526663  
SRR17520069.8526664  
SRR17520069.8526665  
SRR17520069.8526666  
SRR17520069.8526667  
SRR17520069.8526668  
SRR17520069.8526669  
SRR17520069.8526670  
SRR17520069.8526671  
SRR17520069.8526672  
SRR17520069.8526673  
SRR17520069.8526674  
SRR17520069.8526675  
SRR17520069.8526676  
SRR17520069.8526677  
SRR17520069.8526678  
SRR17520069.8526679  
SRR17520069.8526680  
SRR17520069.8526681  
SRR17520069.8526684  
SRR17520069.8526685  
SRR17520069.8526686  
SRR17520069.8526687  
SRR17520069.8526689  
SRR17520069.8526690  
SRR17520069.8526691  
SRR17520069.8526692  
SRR17520069.8526695  
SRR17520069.8526696  
SRR17520069.8526697  
SRR17520069.8544767  
SRR17520069.8554335  
SRR17520069.8569641  
SRR17520069.8569642  
SRR17520069.8569643  
SRR17520069.8569644  
SRR17520069.8569645  
SRR17520069.8569646  
SRR17520069.8569647  
SRR17520069.8569648  
SRR17520069.8569649

SRR17520069.8569650  
SRR17520069.8569651  
SRR17520069.8569652  
SRR17520069.8569653  
SRR17520069.8569654  
SRR17520069.8569655  
SRR17520069.8569656  
SRR17520069.8569657  
SRR17520069.8569658  
SRR17520069.8569659  
SRR17520069.8569660  
SRR17520069.8569661  
SRR17520069.8569662  
SRR17520069.8569663  
SRR17520069.8569664  
SRR17520069.8569665  
SRR17520069.8569666  
SRR17520069.8569667  
SRR17520069.8569668  
SRR17520069.8569669  
SRR17520069.8569670  
SRR17520069.8569671  
SRR17520069.8569672  
SRR17520069.8569673  
SRR17520069.8569674  
SRR17520069.8569675  
SRR17520069.8569676  
SRR17520069.8569677  
SRR17520069.8569678  
SRR17520069.8569679  
SRR17520069.8569680  
SRR17520069.8569681  
SRR17520069.8569682  
SRR17520069.8569683  
SRR17520069.8569684  
SRR17520069.8569685  
SRR17520069.8569686  
SRR17520069.8569687  
SRR17520069.8569688  
SRR17520069.8569689  
SRR17520069.8569690  
SRR17520069.8569691  
SRR17520069.8569692  
SRR17520069.8569693  
SRR17520069.8569694  
SRR17520069.8569695  
SRR17520069.8569696

SRR17520069.8575629  
SRR17520069.8575630  
SRR17520069.8575631  
SRR17520069.8575632  
SRR17520069.8575633  
SRR17520069.8575634  
SRR17520069.8575635  
SRR17520069.8575636  
SRR17520069.8575637  
SRR17520069.8575639  
SRR17520069.8575640  
SRR17520069.8575641  
SRR17520069.8575642  
SRR17520069.8575643  
SRR17520069.8593772  
SRR17520069.8593774  
SRR17520069.8593775  
SRR17520069.8593776  
SRR17520069.8593777  
SRR17520069.8593778  
SRR17520069.8593779  
SRR17520069.8593780  
SRR17520069.8593781  
SRR17520069.8593782  
SRR17520069.8593783  
SRR17520069.8593784  
SRR17520069.8593785  
SRR17520069.8593786  
SRR17520069.8593787  
SRR17520069.8593788  
SRR17520069.8593789  
SRR17520069.8593790  
SRR17520069.8593791  
SRR17520069.8593792  
SRR17520069.8593793  
SRR17520069.8593794  
SRR17520069.8593795  
SRR17520069.8593796  
SRR17520069.8593797  
SRR17520069.8593798  
SRR17520069.8593799  
SRR17520069.8593800  
SRR17520069.8593801  
SRR17520069.8593802  
SRR17520069.8593803  
SRR17520069.8593804  
SRR17520069.8593805

SRR17520069.8593806  
SRR17520069.8593807  
SRR17520069.8593808  
SRR17520069.8593809  
SRR17520069.8593810  
SRR17520069.8593811  
SRR17520069.8593812  
SRR17520069.8593813  
SRR17520069.8593814  
SRR17520069.8593815  
SRR17520069.8593816  
SRR17520069.8593817  
SRR17520069.8593818  
SRR17520069.8593819  
SRR17520069.8593820  
SRR17520069.8593821  
SRR17520069.8599928  
SRR17520069.8607416  
SRR17520069.8607417  
SRR17520069.8607418  
SRR17520069.8607419  
SRR17520069.8607420  
SRR17520069.8607421  
SRR17520069.8607422  
SRR17520069.8607423  
SRR17520069.8607425  
SRR17520069.8607426  
SRR17520069.8607427  
SRR17520069.8607428  
SRR17520069.8607429  
SRR17520069.8607430  
SRR17520069.8611067  
SRR17520069.8630207  
SRR17520069.8630261  
SRR17520069.8630266  
SRR17520069.8672329  
SRR17520069.8672330  
SRR17520069.8672331  
SRR17520069.8672332  
SRR17520069.8693102  
SRR17520069.8693103  
SRR17520069.8693104  
SRR17520069.8693108  
SRR17520069.8693109  
SRR17520069.8693110  
SRR17520069.8693111  
SRR17520069.8693112



SRR17520069.8693113  
SRR17520069.8693114  
SRR17520069.8693115  
SRR17520069.8693116  
SRR17520069.8693117  
SRR17520069.8693118  
SRR17520069.8693119  
SRR17520069.8693120  
SRR17520069.8693121  
SRR17520069.8693122  
SRR17520069.8693123  
SRR17520069.8693124  
SRR17520069.8693126  
SRR17520069.8693127  
SRR17520069.8693128  
SRR17520069.8693129  
SRR17520069.8693130  
SRR17520069.8693131  
SRR17520069.8693132  
SRR17520069.8693133  
SRR17520069.8693134  
SRR17520069.8693135  
SRR17520069.8693136  
SRR17520069.8693137  
SRR17520069.8693138  
SRR17520069.8693139  
SRR17520069.8693140  
SRR17520069.8693141  
SRR17520069.8693142  
SRR17520069.8693143  
SRR17520069.8693144  
SRR17520069.8693145  
SRR17520069.8693146  
SRR17520069.8693147  
SRR17520069.8693148  
SRR17520069.8693149  
SRR17520069.8693150  
SRR17520069.8693151  
SRR17520069.8693152  
SRR17520069.8693153  
SRR17520069.8693154  
SRR17520069.8693155  
SRR17520069.8693156  
SRR17520069.8693157  
SRR17520069.8693158  
SRR17520069.8693159  
SRR17520069.8693160

SRR17520069.8693161  
SRR17520069.8693162  
SRR17520069.8693163  
SRR17520069.8693164  
SRR17520069.8693165  
SRR17520069.8693166  
SRR17520069.8693167  
SRR17520069.8693168  
SRR17520069.8693169  
SRR17520069.8693170  
SRR17520069.8693171  
SRR17520069.8693172  
SRR17520069.8693173  
SRR17520069.8693174  
SRR17520069.8693175  
SRR17520069.8693176  
SRR17520069.8693177  
SRR17520069.8693178  
SRR17520069.8693179  
SRR17520069.8693180  
SRR17520069.8693181  
SRR17520069.8693182  
SRR17520069.8693183  
SRR17520069.8693184  
SRR17520069.8693185  
SRR17520069.8693186  
SRR17520069.8693187  
SRR17520069.8693188  
SRR17520069.8693189  
SRR17520069.8693190  
SRR17520069.8700588  
SRR17520069.8702689  
SRR17520069.8707133  
SRR17520069.8726628  
SRR17520069.8728567  
SRR17520069.8728568  
SRR17520069.8728569  
SRR17520069.8728570  
SRR17520069.8728571  
SRR17520069.8728572  
SRR17520069.8728573  
SRR17520069.8728574  
SRR17520069.8728575  
SRR17520069.8728576  
SRR17520069.8728577  
SRR17520069.8728578  
SRR17520069.8728579

SRR17520069.8728580  
SRR17520069.8730412  
SRR17520069.8738815  
SRR17520069.8738886  
SRR17520069.8744758  
SRR17520069.8744759  
SRR17520069.8744760  
SRR17520069.8744761  
SRR17520069.8744762  
SRR17520069.8744763  
SRR17520069.8744764  
SRR17520069.8744765  
SRR17520069.8744766  
SRR17520069.8744767  
SRR17520069.8744768  
SRR17520069.8744769  
SRR17520069.8744770  
SRR17520069.8744771  
SRR17520069.8744772  
SRR17520069.8744773  
SRR17520069.8744774  
SRR17520069.8744775  
SRR17520069.8767167  
SRR17520069.8767168  
SRR17520069.8767169  
SRR17520069.8767170  
SRR17520069.8767171  
SRR17520069.8767172  
SRR17520069.8767173  
SRR17520069.8767174  
SRR17520069.8767175  
SRR17520069.8767176  
SRR17520069.8767177  
SRR17520069.8767178  
SRR17520069.8767179  
SRR17520069.8767180  
SRR17520069.8767181  
SRR17520069.8767182  
SRR17520069.8767183  
SRR17520069.8767184  
SRR17520069.8767185  
SRR17520069.8767186  
SRR17520069.8767187  
SRR17520069.8767188  
SRR17520069.8767189  
SRR17520069.8767190  
SRR17520069.8767191

SRR17520069.8767192  
SRR17520069.8767193  
SRR17520069.8767194  
SRR17520069.8767195  
SRR17520069.8767196  
SRR17520069.8767197  
SRR17520069.8767198  
SRR17520069.8767199  
SRR17520069.8767200  
SRR17520069.8767201  
SRR17520069.8767202  
SRR17520069.8767203  
SRR17520069.8767204  
SRR17520069.8767205  
SRR17520069.8767206  
SRR17520069.8767207  
SRR17520069.8767208  
SRR17520069.8767209  
SRR17520069.8767210  
SRR17520069.8767211  
SRR17520069.8767212  
SRR17520069.8767213  
SRR17520069.8767214  
SRR17520069.8767215  
SRR17520069.8767216  
SRR17520069.8767217  
SRR17520069.8767218  
SRR17520069.8767219  
SRR17520069.8767220  
SRR17520069.8767221  
SRR17520069.8767224  
SRR17520069.8767225  
SRR17520069.8767226  
SRR17520069.8767227  
SRR17520069.8767228  
SRR17520069.8767229  
SRR17520069.8767230  
SRR17520069.8767231  
SRR17520069.8767232  
SRR17520069.8767233  
SRR17520069.8767234  
SRR17520069.8767235  
SRR17520069.8767236  
SRR17520069.8767237  
SRR17520069.8767238  
SRR17520069.8767239  
SRR17520069.8767240

SRR17520069.8767241  
SRR17520069.8767242  
SRR17520069.8767243  
SRR17520069.8767244  
SRR17520069.8767245  
SRR17520069.8767246  
SRR17520069.8767247  
SRR17520069.8767248  
SRR17520069.8767249  
SRR17520069.8767250  
SRR17520069.8767251  
SRR17520069.8767252  
SRR17520069.8767253  
SRR17520069.8772122  
SRR17520069.8773271  
SRR17520069.8788851  
SRR17520069.8788852  
SRR17520069.8788853  
SRR17520069.8788854  
SRR17520069.8788855  
SRR17520069.8788856  
SRR17520069.8788857  
SRR17520069.8788858  
SRR17520069.8788859  
SRR17520069.8788860  
SRR17520069.8788861  
SRR17520069.8788862  
SRR17520069.8788863  
SRR17520069.8791160  
SRR17520069.8817246  
SRR17520069.8817247  
SRR17520069.8817248  
SRR17520069.8817249  
SRR17520069.8817250  
SRR17520069.8817251  
SRR17520069.8817252  
SRR17520069.8817253  
SRR17520069.8817254  
SRR17520069.8817255  
SRR17520069.8817257  
SRR17520069.8817259  
SRR17520069.8817260  
SRR17520069.8817261  
SRR17520069.8817262  
SRR17520069.8817263  
SRR17520069.8817264  
SRR17520069.8817265

SRR17520069.8817266  
SRR17520069.8817267  
SRR17520069.8817268  
SRR17520069.8817269  
SRR17520069.8817270  
SRR17520069.8817271  
SRR17520069.8817272  
SRR17520069.8817273  
SRR17520069.8817274  
SRR17520069.8817275  
SRR17520069.8817276  
SRR17520069.8817277  
SRR17520069.8817278  
SRR17520069.8817279  
SRR17520069.8817280  
SRR17520069.8817281  
SRR17520069.8817282  
SRR17520069.8817283  
SRR17520069.8817284  
SRR17520069.8817285  
SRR17520069.8817286  
SRR17520069.8817287  
SRR17520069.8817288  
SRR17520069.8817289  
SRR17520069.8817290  
SRR17520069.8817291  
SRR17520069.8817292  
SRR17520069.8817293  
SRR17520069.8817294  
SRR17520069.8817295  
SRR17520069.8817296  
SRR17520069.8817297  
SRR17520069.8817298  
SRR17520069.8817299  
SRR17520069.8817300  
SRR17520069.8817301  
SRR17520069.8817302  
SRR17520069.8817303  
SRR17520069.8817304  
SRR17520069.8817305  
SRR17520069.8817306  
SRR17520069.8817307  
SRR17520069.8817308  
SRR17520069.8817309  
SRR17520069.8817310  
SRR17520069.8817311  
SRR17520069.8817312

SRR17520069.8817313  
SRR17520069.8817314  
SRR17520069.8817315  
SRR17520069.8817316  
SRR17520069.8817318  
SRR17520069.8817319  
SRR17520069.8817320  
SRR17520069.8817321  
SRR17520069.8817322  
SRR17520069.8817323  
SRR17520069.8817324  
SRR17520069.8817325  
SRR17520069.8817326  
SRR17520069.8817328  
SRR17520069.8817329  
SRR17520069.8817330  
SRR17520069.8817331  
SRR17520069.8817332  
SRR17520069.8817333  
SRR17520069.8817334  
SRR17520069.8817335  
SRR17520069.8817336  
SRR17520069.8817337  
SRR17520069.8817338  
SRR17520069.8817339  
SRR17520069.8817340  
SRR17520069.8817341  
SRR17520069.8817342  
SRR17520069.8817343  
SRR17520069.8817344  
SRR17520069.8817345  
SRR17520069.8817346  
SRR17520069.8817347  
SRR17520069.8832370  
SRR17520069.8832371  
SRR17520069.8832372  
SRR17520069.8832373  
SRR17520069.8832375  
SRR17520069.8832378  
SRR17520069.8832379  
SRR17520069.8832380  
SRR17520069.8832381  
SRR17520069.8832382  
SRR17520069.8832383  
SRR17520069.8832384  
SRR17520069.8832386  
SRR17520069.8832387

SRR17520069.8832388  
SRR17520069.8832389  
SRR17520069.8832390  
SRR17520069.8832391  
SRR17520069.8832392  
SRR17520069.8832393  
SRR17520069.8832394  
SRR17520069.8832395  
SRR17520069.8832396  
SRR17520069.8832397  
SRR17520069.8832398  
SRR17520069.8832399  
SRR17520069.8832400  
SRR17520069.8832401  
SRR17520069.8832402  
SRR17520069.8832403  
SRR17520069.8832404  
SRR17520069.8843344  
SRR17520069.8849943  
SRR17520069.8849944  
SRR17520069.8849945  
SRR17520069.8849946  
SRR17520069.8849947  
SRR17520069.8849948  
SRR17520069.8849949  
SRR17520069.8849950  
SRR17520069.8849951  
SRR17520069.8849952  
SRR17520069.8849953  
SRR17520069.8849954  
SRR17520069.8849955  
SRR17520069.8849956  
SRR17520069.8849957  
SRR17520069.8849958  
SRR17520069.8849959  
SRR17520069.8849960  
SRR17520069.8849961  
SRR17520069.8849962  
SRR17520069.8849963  
SRR17520069.8849964  
SRR17520069.8849965  
SRR17520069.8849966  
SRR17520069.8849967  
SRR17520069.8849968  
SRR17520069.8849969  
SRR17520069.8849970  
SRR17520069.8849971



SRR17520069.8849972  
SRR17520069.8849973  
SRR17520069.8849974  
SRR17520069.8849975  
SRR17520069.8849977  
SRR17520069.8849978  
SRR17520069.8849979  
SRR17520069.8849980  
SRR17520069.8849981  
SRR17520069.8849982  
SRR17520069.8849983  
SRR17520069.8857302  
SRR17520069.8857303  
SRR17520069.8857304  
SRR17520069.8857305  
SRR17520069.8857306  
SRR17520069.8857307  
SRR17520069.8857308  
SRR17520069.8857309  
SRR17520069.8857310  
SRR17520069.8857311  
SRR17520069.8857312  
SRR17520069.8857313  
SRR17520069.8857314  
SRR17520069.8857315  
SRR17520069.8857316  
SRR17520069.8857317  
SRR17520069.8857318  
SRR17520069.8857319  
SRR17520069.8857320  
SRR17520069.8857321  
SRR17520069.8857322  
SRR17520069.8857323  
SRR17520069.8857324  
SRR17520069.8857325  
SRR17520069.8857326  
SRR17520069.8857327  
SRR17520069.8857328  
SRR17520069.8857329  
SRR17520069.8857330  
SRR17520069.8857331  
SRR17520069.8857332  
SRR17520069.8857333  
SRR17520069.8857334  
SRR17520069.8857335  
SRR17520069.8857336  
SRR17520069.8857337

SRR17520069.8857338  
SRR17520069.8857339  
SRR17520069.8857340  
SRR17520069.8857341  
SRR17520069.8857342  
SRR17520069.8857343  
SRR17520069.8857344  
SRR17520069.8857345  
SRR17520069.8857346  
SRR17520069.8857347  
SRR17520069.8857348  
SRR17520069.8857349  
SRR17520069.8857350  
SRR17520069.8857351  
SRR17520069.8857352  
SRR17520069.8857353  
SRR17520069.8857354  
SRR17520069.8857355  
SRR17520069.8857356  
SRR17520069.8857357  
SRR17520069.8857358  
SRR17520069.8857359  
SRR17520069.8857360  
SRR17520069.8857361  
SRR17520069.8857362  
SRR17520069.8857363  
SRR17520069.8857364  
SRR17520069.8857366  
SRR17520069.8857367  
SRR17520069.8857368  
SRR17520069.8857369  
SRR17520069.8857370  
SRR17520069.8857371  
SRR17520069.8857372  
SRR17520069.8857373  
SRR17520069.8857374  
SRR17520069.8857375  
SRR17520069.8857376  
SRR17520069.8857377  
SRR17520069.8857378  
SRR17520069.8857379  
SRR17520069.8857380  
SRR17520069.8857382  
SRR17520069.8857383  
SRR17520069.8857384  
SRR17520069.8857385  
SRR17520069.8857386

SRR17520069.8857387  
SRR17520069.8857388  
SRR17520069.8857389  
SRR17520069.8857390  
SRR17520069.8857391  
SRR17520069.8857392  
SRR17520069.8857393  
SRR17520069.8857394  
SRR17520069.8857395  
SRR17520069.8857396  
SRR17520069.8857397  
SRR17520069.8857398  
SRR17520069.8857399  
SRR17520069.8857400  
SRR17520069.8857401  
SRR17520069.8857402  
SRR17520069.8857403  
SRR17520069.8857404  
SRR17520069.8857405  
SRR17520069.8857406  
SRR17520069.8857407  
SRR17520069.8857408  
SRR17520069.8857409  
SRR17520069.8857410  
SRR17520069.8857411  
SRR17520069.8857412  
SRR17520069.8857413  
SRR17520069.8857414  
SRR17520069.8857415  
SRR17520069.8857416  
SRR17520069.8857417  
SRR17520069.8857418  
SRR17520069.8857419  
SRR17520069.8857420  
SRR17520069.8857421  
SRR17520069.8857422  
SRR17520069.8857423  
SRR17520069.8857424  
SRR17520069.8857425  
SRR17520069.8857426  
SRR17520069.8857427  
SRR17520069.8857428  
SRR17520069.8857430  
SRR17520069.8857431  
SRR17520069.8857432  
SRR17520069.8857433  
SRR17520069.8857434

SRR17520069.8857435  
SRR17520069.8857436  
SRR17520069.8857437  
SRR17520069.8857438  
SRR17520069.8857439  
SRR17520069.8857440  
SRR17520069.8859418  
SRR17520069.8863299  
SRR17520069.8863300  
SRR17520069.8863301  
SRR17520069.8863302  
SRR17520069.8863303  
SRR17520069.8863304  
SRR17520069.8863305  
SRR17520069.8863306  
SRR17520069.8863307  
SRR17520069.8863308  
SRR17520069.8863309  
SRR17520069.8863311  
SRR17520069.8863312  
SRR17520069.8863313  
SRR17520069.8863314  
SRR17520069.8863315  
SRR17520069.8863316  
SRR17520069.8863317  
SRR17520069.8863318  
SRR17520069.8863319  
SRR17520069.8863320  
SRR17520069.8863321  
SRR17520069.8863322  
SRR17520069.8863323  
SRR17520069.8863324  
SRR17520069.8863325  
SRR17520069.8863326  
SRR17520069.8863327  
SRR17520069.8874648  
SRR17520069.8876090  
SRR17520069.8879338  
SRR17520069.8879339  
SRR17520069.8879342  
SRR17520069.8879343  
SRR17520069.8879344  
SRR17520069.8879345  
SRR17520069.8879346  
SRR17520069.8879347  
SRR17520069.8879348  
SRR17520069.8879349

SRR17520069.8879350  
SRR17520069.8879351  
SRR17520069.8879352  
SRR17520069.8879353  
SRR17520069.8879355  
SRR17520069.8879356  
SRR17520069.8879357  
SRR17520069.8879358  
SRR17520069.8879359  
SRR17520069.8879360  
SRR17520069.8879361  
SRR17520069.8879362  
SRR17520069.8879363  
SRR17520069.8879365  
SRR17520069.8879366  
SRR17520069.8879367  
SRR17520069.8879368  
SRR17520069.8879369  
SRR17520069.8879370  
SRR17520069.8879371  
SRR17520069.8879372  
SRR17520069.8879373  
SRR17520069.8879374  
SRR17520069.8879375  
SRR17520069.8879376  
SRR17520069.8879377  
SRR17520069.8879378  
SRR17520069.8879379  
SRR17520069.8879380  
SRR17520069.8879382  
SRR17520069.8879383  
SRR17520069.8879384  
SRR17520069.8879385  
SRR17520069.8879386  
SRR17520069.8879387  
SRR17520069.8879388  
SRR17520069.8879389  
SRR17520069.8879390  
SRR17520069.8879392  
SRR17520069.8879394  
SRR17520069.8879395  
SRR17520069.8879396  
SRR17520069.8879398  
SRR17520069.8879399  
SRR17520069.8879400  
SRR17520069.8879401  
SRR17520069.8879402

SRR17520069.8879403  
SRR17520069.8879404  
SRR17520069.8879405  
SRR17520069.8879406  
SRR17520069.8879407  
SRR17520069.8879408  
SRR17520069.8879409  
SRR17520069.8879410  
SRR17520069.8879411  
SRR17520069.8879413  
SRR17520069.8879414  
SRR17520069.8879415  
SRR17520069.8879416  
SRR17520069.8879417  
SRR17520069.8879418  
SRR17520069.8879419  
SRR17520069.8879420  
SRR17520069.8879421  
SRR17520069.8879423  
SRR17520069.8879424  
SRR17520069.8879425  
SRR17520069.8879426  
SRR17520069.8879427  
SRR17520069.8879428  
SRR17520069.8879429  
SRR17520069.8879430  
SRR17520069.8879432  
SRR17520069.8879433  
SRR17520069.8879434  
SRR17520069.8879435  
SRR17520069.8879436  
SRR17520069.8879437  
SRR17520069.8879438  
SRR17520069.8879439  
SRR17520069.8879440  
SRR17520069.8879441  
SRR17520069.8879442  
SRR17520069.8879443  
SRR17520069.8879444  
SRR17520069.8879445  
SRR17520069.8879446  
SRR17520069.8879447  
SRR17520069.8879448  
SRR17520069.8879449  
SRR17520069.8879450  
SRR17520069.8879451  
SRR17520069.8879452

SRR17520069.8879453  
SRR17520069.8879455  
SRR17520069.8879456  
SRR17520069.8879457  
SRR17520069.8879458  
SRR17520069.8879459  
SRR17520069.8879463  
SRR17520069.8879464  
SRR17520069.8879465  
SRR17520069.8879469  
SRR17520069.8879471  
SRR17520069.8945345  
SRR17520069.8946580  
SRR17520069.8946581  
SRR17520069.8946582  
SRR17520069.8946583  
SRR17520069.8946584  
SRR17520069.8946585  
SRR17520069.8946586  
SRR17520069.8946587  
SRR17520069.8946588  
SRR17520069.8946589  
SRR17520069.8946590  
SRR17520069.8946591  
SRR17520069.8946592  
SRR17520069.8946593  
SRR17520069.8946594  
SRR17520069.8946595  
SRR17520069.8946596  
SRR17520069.8946597  
SRR17520069.8946598  
SRR17520069.8946599  
SRR17520069.8946600  
SRR17520069.8946601  
SRR17520069.8946602  
SRR17520069.8946603  
SRR17520069.8946604  
SRR17520069.8946605  
SRR17520069.8946606  
SRR17520069.8946607  
SRR17520069.8946608  
SRR17520069.8946609  
SRR17520069.8946610  
SRR17520069.8946611  
SRR17520069.8946612  
SRR17520069.8946613  
SRR17520069.8946614

SRR17520069.8946615  
SRR17520069.8946616  
SRR17520069.8946617  
SRR17520069.8946618  
SRR17520069.8946619  
SRR17520069.8946620  
SRR17520069.8946621  
SRR17520069.8946622  
SRR17520069.8946623  
SRR17520069.8946624  
SRR17520069.8946625  
SRR17520069.8946626  
SRR17520069.8946627  
SRR17520069.8946628  
SRR17520069.8946629  
SRR17520069.8946630  
SRR17520069.8946631  
SRR17520069.8946632  
SRR17520069.8946633  
SRR17520069.8946634  
SRR17520069.8946635  
SRR17520069.8946636  
SRR17520069.8967959  
SRR17520069.8987238  
SRR17520069.8987240  
SRR17520069.8987241  
SRR17520069.8987242  
SRR17520069.8987244  
SRR17520069.8987245  
SRR17520069.8987246  
SRR17520069.8987247  
SRR17520069.8987248  
SRR17520069.8987249  
SRR17520069.8987250  
SRR17520069.8987251  
SRR17520069.8987252  
SRR17520069.8987253  
SRR17520069.8987254  
SRR17520069.8987255  
SRR17520069.8987256  
SRR17520069.8987257  
SRR17520069.8987258  
SRR17520069.8987259  
SRR17520069.8987260  
SRR17520069.8987261  
SRR17520069.8987262  
SRR17520069.8987263



SRR17520069.8987264  
SRR17520069.8987265  
SRR17520069.8987266  
SRR17520069.8987267  
SRR17520069.8987269  
SRR17520069.9006294  
SRR17520069.9008592  
SRR17520069.9008666  
SRR17520069.9017115  
SRR17520069.9017116  
SRR17520069.9017117  
SRR17520069.9017118  
SRR17520069.9017119  
SRR17520069.9017120  
SRR17520069.9017121  
SRR17520069.9017122  
SRR17520069.9017123  
SRR17520069.9017124  
SRR17520069.9017125  
SRR17520069.9017126  
SRR17520069.9017127  
SRR17520069.9017128  
SRR17520069.9017129  
SRR17520069.9017130  
SRR17520069.9017131  
SRR17520069.9017133  
SRR17520069.9017134  
SRR17520069.9017135  
SRR17520069.9017136  
SRR17520069.9017137  
SRR17520069.9017138  
SRR17520069.9017139  
SRR17520069.9017140  
SRR17520069.9017141  
SRR17520069.9017142  
SRR17520069.9017143  
SRR17520069.9017144  
SRR17520069.9017145  
SRR17520069.9017146  
SRR17520069.9017147  
SRR17520069.9017148  
SRR17520069.9017149  
SRR17520069.9017150  
SRR17520069.9017153  
SRR17520069.9017154  
SRR17520069.9017155  
SRR17520069.9017156

SRR17520069.9017157  
SRR17520069.9017158  
SRR17520069.9017159  
SRR17520069.9017160  
SRR17520069.9017161  
SRR17520069.9017162  
SRR17520069.9017163  
SRR17520069.9017164  
SRR17520069.9017165  
SRR17520069.9017166  
SRR17520069.9017167  
SRR17520069.9017168  
SRR17520069.9017169  
SRR17520069.9017170  
SRR17520069.9017171  
SRR17520069.9017172  
SRR17520069.9017173  
SRR17520069.9017174  
SRR17520069.9017175  
SRR17520069.9017176  
SRR17520069.9017177  
SRR17520069.9017178  
SRR17520069.9017179  
SRR17520069.9017180  
SRR17520069.9017181  
SRR17520069.9017182  
SRR17520069.9017183  
SRR17520069.9017184  
SRR17520069.9017185  
SRR17520069.9017186  
SRR17520069.9017187  
SRR17520069.9017188  
SRR17520069.9017189  
SRR17520069.9017190  
SRR17520069.9017191  
SRR17520069.9017192  
SRR17520069.9017193  
SRR17520069.9017194  
SRR17520069.9017195  
SRR17520069.9017196  
SRR17520069.9017197  
SRR17520069.9017198  
SRR17520069.9017199  
SRR17520069.9017200  
SRR17520069.9017201  
SRR17520069.9017203  
SRR17520069.9017204

SRR17520069.9017205  
SRR17520069.9017206  
SRR17520069.9017207  
SRR17520069.9017208  
SRR17520069.9017209  
SRR17520069.9017210  
SRR17520069.9017211  
SRR17520069.9017212  
SRR17520069.9017213  
SRR17520069.9017214  
SRR17520069.9017215  
SRR17520069.9017216  
SRR17520069.9026795  
SRR17520069.9043820  
SRR17520069.9043821  
SRR17520069.9043822  
SRR17520069.9043823  
SRR17520069.9043824  
SRR17520069.9043825  
SRR17520069.9043826  
SRR17520069.9043827  
SRR17520069.9043828  
SRR17520069.9043829  
SRR17520069.9043830  
SRR17520069.9043831  
SRR17520069.9043832  
SRR17520069.9043833  
SRR17520069.9043834  
SRR17520069.9043835  
SRR17520069.9043836  
SRR17520069.9043837  
SRR17520069.9043838  
SRR17520069.9043839  
SRR17520069.9043840  
SRR17520069.9043841  
SRR17520069.9043842  
SRR17520069.9043843  
SRR17520069.9043844  
SRR17520069.9043845  
SRR17520069.9043846  
SRR17520069.9043847  
SRR17520069.9043848  
SRR17520069.9043850  
SRR17520069.9043851  
SRR17520069.9043852  
SRR17520069.9043853  
SRR17520069.9043854

SRR17520069. 9043855  
SRR17520069. 9043856  
SRR17520069. 9043857  
SRR17520069. 9043858  
SRR17520069. 9043859  
SRR17520069. 9043860  
SRR17520069. 9043861  
SRR17520069. 9043862  
SRR17520069. 9043863  
SRR17520069. 9043864  
SRR17520069. 9043865  
SRR17520069. 9043866  
SRR17520069. 9043867  
SRR17520069. 9043868  
SRR17520069. 9043869  
SRR17520069. 9043870  
SRR17520069. 9043871  
SRR17520069. 9043872  
SRR17520069. 9043874  
SRR17520069. 9043875  
SRR17520069. 9043876  
SRR17520069. 9043877  
SRR17520069. 9043878  
SRR17520069. 9043879  
SRR17520069. 9043880  
SRR17520069. 9043881  
SRR17520069. 9043882  
SRR17520069. 9043883  
SRR17520069. 9043884  
SRR17520069. 9043885  
SRR17520069. 9043886  
SRR17520069. 9043887  
SRR17520069. 9043888  
SRR17520069. 9043889  
SRR17520069. 9043890  
SRR17520069. 9043891  
SRR17520069. 9043892  
SRR17520069. 9043893  
SRR17520069. 9043894  
SRR17520069. 9043895  
SRR17520069. 9043896  
SRR17520069. 9043897  
SRR17520069. 9043898  
SRR17520069. 9043899  
SRR17520069. 9043900  
SRR17520069. 9043901  
SRR17520069. 9043902

SRR17520069. 9043903  
SRR17520069. 9043904  
SRR17520069. 9043905  
SRR17520069. 9043906  
SRR17520069. 9043907  
SRR17520069. 9043908  
SRR17520069. 9043909  
SRR17520069. 9043910  
SRR17520069. 9043912  
SRR17520069. 9043913  
SRR17520069. 9043914  
SRR17520069. 9043915  
SRR17520069. 9043916  
SRR17520069. 9043917  
SRR17520069. 9043918  
SRR17520069. 9043919  
SRR17520069. 9043920  
SRR17520069. 9043921  
SRR17520069. 9043922  
SRR17520069. 9043923  
SRR17520069. 9043927  
SRR17520069. 9043928  
SRR17520069. 9048408  
SRR17520069. 9048409  
SRR17520069. 9048410  
SRR17520069. 9048411  
SRR17520069. 9060569  
SRR17520069. 9060570  
SRR17520069. 9060571  
SRR17520069. 9060572  
SRR17520069. 9060573  
SRR17520069. 9060574  
SRR17520069. 9060575  
SRR17520069. 9060576  
SRR17520069. 9060577  
SRR17520069. 9060578  
SRR17520069. 9060579  
SRR17520069. 9060580  
SRR17520069. 9060581  
SRR17520069. 9060582  
SRR17520069. 9060583  
SRR17520069. 9060584  
SRR17520069. 9060585  
SRR17520069. 9060586  
SRR17520069. 9060587  
SRR17520069. 9060588  
SRR17520069. 9060589

SRR17520069.9060590  
SRR17520069.9060591  
SRR17520069.9060592  
SRR17520069.9060593  
SRR17520069.9060594  
SRR17520069.9060595  
SRR17520069.9060596  
SRR17520069.9060597  
SRR17520069.9060598  
SRR17520069.9060599  
SRR17520069.9060600  
SRR17520069.9060601  
SRR17520069.9060602  
SRR17520069.9060603  
SRR17520069.9060604  
SRR17520069.9060605  
SRR17520069.9060606  
SRR17520069.9060607  
SRR17520069.9060608  
SRR17520069.9060609  
SRR17520069.9060610  
SRR17520069.9060611  
SRR17520069.9060612  
SRR17520069.9060614  
SRR17520069.9060615  
SRR17520069.9060616  
SRR17520069.9060617  
SRR17520069.9060618  
SRR17520069.9060619  
SRR17520069.9060620  
SRR17520069.9060621  
SRR17520069.9060622  
SRR17520069.9060623  
SRR17520069.9060624  
SRR17520069.9060625  
SRR17520069.9060626  
SRR17520069.9060627  
SRR17520069.9060628  
SRR17520069.9060629  
SRR17520069.9060630  
SRR17520069.9060631  
SRR17520069.9060632  
SRR17520069.9060633  
SRR17520069.9060634  
SRR17520069.9060635  
SRR17520069.9060636  
SRR17520069.9060637

SRR17520069. 9060638  
SRR17520069. 9060639  
SRR17520069. 9060640  
SRR17520069. 9060641  
SRR17520069. 9060642  
SRR17520069. 9060643  
SRR17520069. 9060644  
SRR17520069. 9060645  
SRR17520069. 9060646  
SRR17520069. 9060647  
SRR17520069. 9060649  
SRR17520069. 9060650  
SRR17520069. 9060652  
SRR17520069. 9060653  
SRR17520069. 9060654  
SRR17520069. 9060655  
SRR17520069. 9060656  
SRR17520069. 9060657  
SRR17520069. 9060658  
SRR17520069. 9060659  
SRR17520069. 9060660  
SRR17520069. 9060661  
SRR17520069. 9060662  
SRR17520069. 9060663  
SRR17520069. 9060664  
SRR17520069. 9060665  
SRR17520069. 9060666  
SRR17520069. 9060667  
SRR17520069. 9060668  
SRR17520069. 9060669  
SRR17520069. 9060670  
SRR17520069. 9060671  
SRR17520069. 9060672  
SRR17520069. 9060673  
SRR17520069. 9060674  
SRR17520069. 9060675  
SRR17520069. 9060676  
SRR17520069. 9060677  
SRR17520069. 9060678  
SRR17520069. 9060679  
SRR17520069. 9060680  
SRR17520069. 9060681  
SRR17520069. 9060682  
SRR17520069. 9061593  
SRR17520069. 9068188  
SRR17520069. 9081409  
SRR17520069. 9083596

SRR17520069.9083598  
SRR17520069.9083599  
SRR17520069.9083600  
SRR17520069.9083601  
SRR17520069.9083602  
SRR17520069.9083603  
SRR17520069.9083604  
SRR17520069.9083610  
SRR17520069.9083626  
SRR17520069.9083630  
SRR17520069.9083641  
SRR17520069.9102608  
SRR17520069.9102609  
SRR17520069.9102610  
SRR17520069.9102611  
SRR17520069.9102613  
SRR17520069.9102614  
SRR17520069.9102615  
SRR17520069.9102616  
SRR17520069.9102617  
SRR17520069.9102618  
SRR17520069.9102619  
SRR17520069.9102620  
SRR17520069.9102621  
SRR17520069.9102622  
SRR17520069.9102623  
SRR17520069.9102624  
SRR17520069.9102625  
SRR17520069.9102626  
SRR17520069.9102627  
SRR17520069.9102628  
SRR17520069.9102629  
SRR17520069.9102630  
SRR17520069.9102631  
SRR17520069.9102632  
SRR17520069.9102633  
SRR17520069.9102634  
SRR17520069.9102635  
SRR17520069.9102636  
SRR17520069.9102637  
SRR17520069.9102638  
SRR17520069.9102639  
SRR17520069.9102640  
SRR17520069.9102641  
SRR17520069.9102642  
SRR17520069.9102643  
SRR17520069.9102644



SRR17520069.9102645  
SRR17520069.9102646  
SRR17520069.9102647  
SRR17520069.9102648  
SRR17520069.9102649  
SRR17520069.9102650  
SRR17520069.9102651  
SRR17520069.9102652  
SRR17520069.9102653  
SRR17520069.9102654  
SRR17520069.9102655  
SRR17520069.9102656  
SRR17520069.9102657  
SRR17520069.9102658  
SRR17520069.9102659  
SRR17520069.9102660  
SRR17520069.9102661  
SRR17520069.9102662  
SRR17520069.9102663  
SRR17520069.9102664  
SRR17520069.9102665  
SRR17520069.9102666  
SRR17520069.9102667  
SRR17520069.9102668  
SRR17520069.9102669  
SRR17520069.9102670  
SRR17520069.9102671  
SRR17520069.9102672  
SRR17520069.9102673  
SRR17520069.9102674  
SRR17520069.9102675  
SRR17520069.9102676  
SRR17520069.9102677  
SRR17520069.9102678  
SRR17520069.9102679  
SRR17520069.9102680  
SRR17520069.9102681  
SRR17520069.9102682  
SRR17520069.9102683  
SRR17520069.9102684  
SRR17520069.9102685  
SRR17520069.9102686  
SRR17520069.9102687  
SRR17520069.9102688  
SRR17520069.9102689  
SRR17520069.9102690  
SRR17520069.9102691

SRR17520069.9102692  
SRR17520069.9102693  
SRR17520069.9102694  
SRR17520069.9102695  
SRR17520069.9120219  
SRR17520069.9120256  
SRR17520069.9134681  
SRR17520069.9134682  
SRR17520069.9134683  
SRR17520069.9134684  
SRR17520069.9134685  
SRR17520069.9134686  
SRR17520069.9134687  
SRR17520069.9134688  
SRR17520069.9134689  
SRR17520069.9134690  
SRR17520069.9134691  
SRR17520069.9134692  
SRR17520069.9134693  
SRR17520069.9134694  
SRR17520069.9134695  
SRR17520069.9134696  
SRR17520069.9134697  
SRR17520069.9134698  
SRR17520069.9134699  
SRR17520069.9134700  
SRR17520069.9134701  
SRR17520069.9134702  
SRR17520069.9134703  
SRR17520069.9134704  
SRR17520069.9134705  
SRR17520069.9134706  
SRR17520069.9134710  
SRR17520069.9134711  
SRR17520069.9134712  
SRR17520069.9134713  
SRR17520069.9134714  
SRR17520069.9134715  
SRR17520069.9134716  
SRR17520069.9134717  
SRR17520069.9134718  
SRR17520069.9134719  
SRR17520069.9157171  
SRR17520069.9159659  
SRR17520069.9159660  
SRR17520069.9159661  
SRR17520069.9159662

SRR17520069.9159663  
SRR17520069.9159664  
SRR17520069.9159665  
SRR17520069.9159666  
SRR17520069.9159667  
SRR17520069.9159668  
SRR17520069.9159669  
SRR17520069.9159670  
SRR17520069.9159671  
SRR17520069.9159672  
SRR17520069.9159673  
SRR17520069.9159674  
SRR17520069.9159675  
SRR17520069.9159676  
SRR17520069.9159677  
SRR17520069.9159678  
SRR17520069.9159679  
SRR17520069.9159680  
SRR17520069.9159681  
SRR17520069.9159682  
SRR17520069.9159683  
SRR17520069.9159684  
SRR17520069.9159685  
SRR17520069.9159686  
SRR17520069.9159687  
SRR17520069.9159688  
SRR17520069.9159689  
SRR17520069.9159690  
SRR17520069.9159691  
SRR17520069.9159692  
SRR17520069.9159693  
SRR17520069.9159694  
SRR17520069.9159696  
SRR17520069.9159697  
SRR17520069.9159698  
SRR17520069.9159699  
SRR17520069.9159700  
SRR17520069.9159702  
SRR17520069.9159704  
SRR17520069.9159705  
SRR17520069.9159706  
SRR17520069.9159707  
SRR17520069.9159708  
SRR17520069.9159709  
SRR17520069.9159710  
SRR17520069.9159711  
SRR17520069.9159712

SRR17520069.9159713  
SRR17520069.9159714  
SRR17520069.9159715  
SRR17520069.9159716  
SRR17520069.9159717  
SRR17520069.9159718  
SRR17520069.9159720  
SRR17520069.9159721  
SRR17520069.9159722  
SRR17520069.9159723  
SRR17520069.9159724  
SRR17520069.9159725  
SRR17520069.9159726  
SRR17520069.9159727  
SRR17520069.9159728  
SRR17520069.9159729  
SRR17520069.9159730  
SRR17520069.9159731  
SRR17520069.9159732  
SRR17520069.9159733  
SRR17520069.9159734  
SRR17520069.9159735  
SRR17520069.9159736  
SRR17520069.9159737  
SRR17520069.9159738  
SRR17520069.9159739  
SRR17520069.9159740  
SRR17520069.9159741  
SRR17520069.9159742  
SRR17520069.9159743  
SRR17520069.9159744  
SRR17520069.9159745  
SRR17520069.9159746  
SRR17520069.9159747  
SRR17520069.9159748  
SRR17520069.9159750  
SRR17520069.9159751  
SRR17520069.9159752  
SRR17520069.9159753  
SRR17520069.9159754  
SRR17520069.9159755  
SRR17520069.9159756  
SRR17520069.9159757  
SRR17520069.9159758  
SRR17520069.9159759  
SRR17520069.9159760  
SRR17520069.9159761

SRR17520069.9159762  
SRR17520069.9159763  
SRR17520069.9159765  
SRR17520069.9159766  
SRR17520069.9159767  
SRR17520069.9159768  
SRR17520069.9159769  
SRR17520069.9159770  
SRR17520069.9174268  
SRR17520069.9178573  
SRR17520069.9200732  
SRR17520069.9200878  
SRR17520069.9210584  
SRR17520069.9210587  
SRR17520069.9235319  
SRR17520069.9237835  
SRR17520069.9243513  
SRR17520069.9243514  
SRR17520069.9243515  
SRR17520069.9243516  
SRR17520069.9243517  
SRR17520069.9243518  
SRR17520069.9243520  
SRR17520069.9243521  
SRR17520069.9243522  
SRR17520069.9243523  
SRR17520069.9243525  
SRR17520069.9243526  
SRR17520069.9243527  
SRR17520069.9243528  
SRR17520069.9243529  
SRR17520069.9243530  
SRR17520069.9243531  
SRR17520069.9243532  
SRR17520069.9243533  
SRR17520069.9243534  
SRR17520069.9243535  
SRR17520069.9243536  
SRR17520069.9243537  
SRR17520069.9243538  
SRR17520069.9243539  
SRR17520069.9243540  
SRR17520069.9243541  
SRR17520069.9243542  
SRR17520069.9243543  
SRR17520069.9243544  
SRR17520069.9243545

SRR17520069. 9243546  
SRR17520069. 9243547  
SRR17520069. 9243548  
SRR17520069. 9243549  
SRR17520069. 9243550  
SRR17520069. 9243551  
SRR17520069. 9243552  
SRR17520069. 9243553  
SRR17520069. 9243554  
SRR17520069. 9243555  
SRR17520069. 9243556  
SRR17520069. 9243557  
SRR17520069. 9243558  
SRR17520069. 9243559  
SRR17520069. 9243560  
SRR17520069. 9243561  
SRR17520069. 9243563  
SRR17520069. 9243564  
SRR17520069. 9243565  
SRR17520069. 9243566  
SRR17520069. 9243567  
SRR17520069. 9243568  
SRR17520069. 9243569  
SRR17520069. 9243570  
SRR17520069. 9243571  
SRR17520069. 9243572  
SRR17520069. 9243573  
SRR17520069. 9243574  
SRR17520069. 9243575  
SRR17520069. 9243576  
SRR17520069. 9243577  
SRR17520069. 9243578  
SRR17520069. 9243579  
SRR17520069. 9243580  
SRR17520069. 9243581  
SRR17520069. 9243582  
SRR17520069. 9243583  
SRR17520069. 9243584  
SRR17520069. 9243585  
SRR17520069. 9243586  
SRR17520069. 9243587  
SRR17520069. 9243588  
SRR17520069. 9243589  
SRR17520069. 9243590  
SRR17520069. 9243591  
SRR17520069. 9243592  
SRR17520069. 9243593

SRR17520069. 9243594  
SRR17520069. 9243595  
SRR17520069. 9243596  
SRR17520069. 9243597  
SRR17520069. 9243598  
SRR17520069. 9243599  
SRR17520069. 9243600  
SRR17520069. 9243601  
SRR17520069. 9243602  
SRR17520069. 9243603  
SRR17520069. 9243604  
SRR17520069. 9243605  
SRR17520069. 9243606  
SRR17520069. 9243607  
SRR17520069. 9243608  
SRR17520069. 9243609  
SRR17520069. 9243610  
SRR17520069. 9243611  
SRR17520069. 9243612  
SRR17520069. 9243613  
SRR17520069. 9243614  
SRR17520069. 9243615  
SRR17520069. 9243616  
SRR17520069. 9243617  
SRR17520069. 9243618  
SRR17520069. 9243619  
SRR17520069. 9243621  
SRR17520069. 9243622  
SRR17520069. 9243623  
SRR17520069. 9243624  
SRR17520069. 9279910  
SRR17520069. 9279911  
SRR17520069. 9279912  
SRR17520069. 9279913  
SRR17520069. 9279914  
SRR17520069. 9279915  
SRR17520069. 9279916  
SRR17520069. 9279917  
SRR17520069. 9279918  
SRR17520069. 9279919  
SRR17520069. 9279921  
SRR17520069. 9279922  
SRR17520069. 9279923  
SRR17520069. 9279924  
SRR17520069. 9279925  
SRR17520069. 9279926  
SRR17520069. 9279927

SRR17520069. 9279928  
SRR17520069. 9279929  
SRR17520069. 9279930  
SRR17520069. 9279931  
SRR17520069. 9279932  
SRR17520069. 9279933  
SRR17520069. 9279934  
SRR17520069. 9279935  
SRR17520069. 9279936  
SRR17520069. 9279937  
SRR17520069. 9279939  
SRR17520069. 9279940  
SRR17520069. 9279941  
SRR17520069. 9279942  
SRR17520069. 9279943  
SRR17520069. 9279944  
SRR17520069. 9279945  
SRR17520069. 9279946  
SRR17520069. 9279947  
SRR17520069. 9279948  
SRR17520069. 9279949  
SRR17520069. 9279950  
SRR17520069. 9279951  
SRR17520069. 9279952  
SRR17520069. 9279953  
SRR17520069. 9279954  
SRR17520069. 9279955  
SRR17520069. 9279956  
SRR17520069. 9279958  
SRR17520069. 9279960  
SRR17520069. 9279961  
SRR17520069. 9279962  
SRR17520069. 9279963  
SRR17520069. 9279964  
SRR17520069. 9279965  
SRR17520069. 9279966  
SRR17520069. 9279967  
SRR17520069. 9279968  
SRR17520069. 9279969  
SRR17520069. 9279970  
SRR17520069. 9279971  
SRR17520069. 9279972  
SRR17520069. 9279973  
SRR17520069. 9279974  
SRR17520069. 9279975  
SRR17520069. 9279976  
SRR17520069. 9279977



SRR17520069. 9279978  
SRR17520069. 9279979  
SRR17520069. 9279980  
SRR17520069. 9279981  
SRR17520069. 9279982  
SRR17520069. 9279983  
SRR17520069. 9279984  
SRR17520069. 9279985  
SRR17520069. 9279986  
SRR17520069. 9279987  
SRR17520069. 9279988  
SRR17520069. 9288381  
SRR17520069. 9303982  
SRR17520069. 9303983  
SRR17520069. 9303984  
SRR17520069. 9303985  
SRR17520069. 9303986  
SRR17520069. 9303987  
SRR17520069. 9303988  
SRR17520069. 9303989  
SRR17520069. 9303990  
SRR17520069. 9303991  
SRR17520069. 9303992  
SRR17520069. 9303993  
SRR17520069. 9303994  
SRR17520069. 9303995  
SRR17520069. 9303996  
SRR17520069. 9303997  
SRR17520069. 9303998  
SRR17520069. 9303999  
SRR17520069. 9304000  
SRR17520069. 9304001  
SRR17520069. 9304002  
SRR17520069. 9304003  
SRR17520069. 9304004  
SRR17520069. 9304005  
SRR17520069. 9304006  
SRR17520069. 9304007  
SRR17520069. 9304008  
SRR17520069. 9304009  
SRR17520069. 9304010  
SRR17520069. 9304011  
SRR17520069. 9304012  
SRR17520069. 9304013  
SRR17520069. 9304014  
SRR17520069. 9304015  
SRR17520069. 9304016

SRR17520069. 9304017  
SRR17520069. 9304018  
SRR17520069. 9304019  
SRR17520069. 9304020  
SRR17520069. 9304022  
SRR17520069. 9304023  
SRR17520069. 9304024  
SRR17520069. 9304025  
SRR17520069. 9304026  
SRR17520069. 9304027  
SRR17520069. 9304029  
SRR17520069. 9304030  
SRR17520069. 9304031  
SRR17520069. 9304032  
SRR17520069. 9304033  
SRR17520069. 9304034  
SRR17520069. 9304035  
SRR17520069. 9304036  
SRR17520069. 9304037  
SRR17520069. 9304038  
SRR17520069. 9304039  
SRR17520069. 9338641  
SRR17520069. 9338642  
SRR17520069. 9338643  
SRR17520069. 9338644  
SRR17520069. 9338645  
SRR17520069. 9338646  
SRR17520069. 9338647  
SRR17520069. 9338648  
SRR17520069. 9338649  
SRR17520069. 9338650  
SRR17520069. 9338651  
SRR17520069. 9338652  
SRR17520069. 9338653  
SRR17520069. 9338654  
SRR17520069. 9338655  
SRR17520069. 9338656  
SRR17520069. 9338657  
SRR17520069. 9338658  
SRR17520069. 9338659  
SRR17520069. 9338660  
SRR17520069. 9338661  
SRR17520069. 9338662  
SRR17520069. 9338663  
SRR17520069. 9338664  
SRR17520069. 9338665  
SRR17520069. 9338666

SRR17520069. 9338667  
SRR17520069. 9338668  
SRR17520069. 9338669  
SRR17520069. 9338670  
SRR17520069. 9338672  
SRR17520069. 9338673  
SRR17520069. 9338674  
SRR17520069. 9338675  
SRR17520069. 9338676  
SRR17520069. 9338677  
SRR17520069. 9338678  
SRR17520069. 9338679  
SRR17520069. 9338680  
SRR17520069. 9338681  
SRR17520069. 9338682  
SRR17520069. 9338683  
SRR17520069. 9338684  
SRR17520069. 9338685  
SRR17520069. 9351584  
SRR17520069. 9351585  
SRR17520069. 9351586  
SRR17520069. 9351587  
SRR17520069. 9351588  
SRR17520069. 9351589  
SRR17520069. 9351590  
SRR17520069. 9351591  
SRR17520069. 9351592  
SRR17520069. 9351593  
SRR17520069. 9351594  
SRR17520069. 9351595  
SRR17520069. 9351596  
SRR17520069. 9351597  
SRR17520069. 9351598  
SRR17520069. 9351599  
SRR17520069. 9351600  
SRR17520069. 9351601  
SRR17520069. 9351602  
SRR17520069. 9351603  
SRR17520069. 9351604  
SRR17520069. 9351605  
SRR17520069. 9351606  
SRR17520069. 9351607  
SRR17520069. 9351608  
SRR17520069. 9351609  
SRR17520069. 9351610  
SRR17520069. 9351611  
SRR17520069. 9351612

SRR17520069.9351613  
SRR17520069.9351614  
SRR17520069.9351615  
SRR17520069.9351616  
SRR17520069.9351617  
SRR17520069.9351618  
SRR17520069.9351619  
SRR17520069.9351620  
SRR17520069.9351621  
SRR17520069.9351622  
SRR17520069.9351623  
SRR17520069.9351624  
SRR17520069.9351625  
SRR17520069.9351626  
SRR17520069.9351627  
SRR17520069.9351628  
SRR17520069.9351629  
SRR17520069.9351630  
SRR17520069.9351631  
SRR17520069.9351632  
SRR17520069.9351633  
SRR17520069.9351634  
SRR17520069.9351635  
SRR17520069.9351636  
SRR17520069.9351637  
SRR17520069.9351638  
SRR17520069.9351639  
SRR17520069.9351640  
SRR17520069.9351641  
SRR17520069.9351642  
SRR17520069.9351643  
SRR17520069.9351644  
SRR17520069.9351645  
SRR17520069.9351646  
SRR17520069.9351647  
SRR17520069.9351648  
SRR17520069.9351649  
SRR17520069.9351650  
SRR17520069.9351651  
SRR17520069.9351652  
SRR17520069.9351653  
SRR17520069.9351654  
SRR17520069.9351655  
SRR17520069.9351656  
SRR17520069.9351657  
SRR17520069.9351658  
SRR17520069.9351659

SRR17520069. 9351660  
SRR17520069. 9351661  
SRR17520069. 9351662  
SRR17520069. 9351663  
SRR17520069. 9351664  
SRR17520069. 9351665  
SRR17520069. 9351666  
SRR17520069. 9351667  
SRR17520069. 9351668  
SRR17520069. 9351669  
SRR17520069. 9351670  
SRR17520069. 9351671  
SRR17520069. 9351672  
SRR17520069. 9351673  
SRR17520069. 9351675  
SRR17520069. 9351676  
SRR17520069. 9351677  
SRR17520069. 9351678  
SRR17520069. 9351679  
SRR17520069. 9351680  
SRR17520069. 9351681  
SRR17520069. 9351682  
SRR17520069. 9351683  
SRR17520069. 9351684  
SRR17520069. 9359048  
SRR17520069. 9359049  
SRR17520069. 9359050  
SRR17520069. 9359051  
SRR17520069. 9359052  
SRR17520069. 9359053  
SRR17520069. 9359054  
SRR17520069. 9359055  
SRR17520069. 9359056  
SRR17520069. 9359057  
SRR17520069. 9359058  
SRR17520069. 9359059  
SRR17520069. 9359060  
SRR17520069. 9359061  
SRR17520069. 9359062  
SRR17520069. 9359921  
SRR17520069. 9359922  
SRR17520069. 9359923  
SRR17520069. 9369995  
SRR17520069. 9369996  
SRR17520069. 9369997  
SRR17520069. 9369998  
SRR17520069. 9369999

SRR17520069.9370000  
SRR17520069.9370001  
SRR17520069.9370002  
SRR17520069.9370003  
SRR17520069.9370004  
SRR17520069.9370005  
SRR17520069.9370006  
SRR17520069.9370007  
SRR17520069.9370008  
SRR17520069.9370009  
SRR17520069.9370010  
SRR17520069.9370011  
SRR17520069.9370012  
SRR17520069.9370013  
SRR17520069.9370014  
SRR17520069.9370015  
SRR17520069.9370016  
SRR17520069.9370017  
SRR17520069.9370018  
SRR17520069.9404815  
SRR17520069.9404816  
SRR17520069.9404817  
SRR17520069.9404818  
SRR17520069.9404819  
SRR17520069.9404820  
SRR17520069.9404821  
SRR17520069.9404822  
SRR17520069.9404823  
SRR17520069.9404824  
SRR17520069.9404825  
SRR17520069.9404827  
SRR17520069.9404828  
SRR17520069.9404829  
SRR17520069.9404830  
SRR17520069.9404831  
SRR17520069.9404832  
SRR17520069.9404833  
SRR17520069.9404834  
SRR17520069.9404835  
SRR17520069.9404836  
SRR17520069.9404837  
SRR17520069.9404838  
SRR17520069.9404839  
SRR17520069.9404840  
SRR17520069.9404841  
SRR17520069.9404842  
SRR17520069.9404843

SRR17520069.9404844  
SRR17520069.9404845  
SRR17520069.9404846  
SRR17520069.9404847  
SRR17520069.9404848  
SRR17520069.9404849  
SRR17520069.9404850  
SRR17520069.9404851  
SRR17520069.9404852  
SRR17520069.9404853  
SRR17520069.9404854  
SRR17520069.9404855  
SRR17520069.9404861  
SRR17520069.9404862  
SRR17520069.9404863  
SRR17520069.9404864  
SRR17520069.9404865  
SRR17520069.9404866  
SRR17520069.9404867  
SRR17520069.9404868  
SRR17520069.9404869  
SRR17520069.9404870  
SRR17520069.9404871  
SRR17520069.9404872  
SRR17520069.9404874  
SRR17520069.9404875  
SRR17520069.9404876  
SRR17520069.9404877  
SRR17520069.9404878  
SRR17520069.9404879  
SRR17520069.9404880  
SRR17520069.9404881  
SRR17520069.9404882  
SRR17520069.9404883  
SRR17520069.9404884  
SRR17520069.9404885  
SRR17520069.9404886  
SRR17520069.9404887  
SRR17520069.9404888  
SRR17520069.9404889  
SRR17520069.9404890  
SRR17520069.9404891  
SRR17520069.9404892  
SRR17520069.9404893  
SRR17520069.9404894  
SRR17520069.9404895  
SRR17520069.9404896

SRR17520069.9404897  
SRR17520069.9404898  
SRR17520069.9404899  
SRR17520069.9404900  
SRR17520069.9404901  
SRR17520069.9404902  
SRR17520069.9404903  
SRR17520069.9404904  
SRR17520069.9404905  
SRR17520069.9404906  
SRR17520069.9404907  
SRR17520069.9404908  
SRR17520069.9404909  
SRR17520069.9404910  
SRR17520069.9404911  
SRR17520069.9404912  
SRR17520069.9404913  
SRR17520069.9404914  
SRR17520069.9404915  
SRR17520069.9404916  
SRR17520069.9404917  
SRR17520069.9404918  
SRR17520069.9404919  
SRR17520069.9404920  
SRR17520069.9404921  
SRR17520069.9404922  
SRR17520069.9404923  
SRR17520069.9404924  
SRR17520069.9404925  
SRR17520069.9404926  
SRR17520069.9404927  
SRR17520069.9404928  
SRR17520069.9404929  
SRR17520069.9404930  
SRR17520069.9404931  
SRR17520069.9404932  
SRR17520069.9404933  
SRR17520069.9404934  
SRR17520069.9404935  
SRR17520069.9404936  
SRR17520069.9404937  
SRR17520069.9404938  
SRR17520069.9404939  
SRR17520069.9404940  
SRR17520069.9404941  
SRR17520069.9404942  
SRR17520069.9404943



SRR17520069.9404944  
SRR17520069.9404945  
SRR17520069.9404946  
SRR17520069.9404947  
SRR17520069.9404948  
SRR17520069.9404949  
SRR17520069.9404950  
SRR17520069.9404951  
SRR17520069.9404953  
SRR17520069.9404954  
SRR17520069.9404955  
SRR17520069.9404956  
SRR17520069.9404957  
SRR17520069.9404958  
SRR17520069.9404959  
SRR17520069.9404960  
SRR17520069.9404961  
SRR17520069.9404962  
SRR17520069.9404963  
SRR17520069.9404964  
SRR17520069.9404965  
SRR17520069.9404966  
SRR17520069.9404967  
SRR17520069.9404968  
SRR17520069.9404969  
SRR17520069.9404970  
SRR17520069.9404971  
SRR17520069.9404972  
SRR17520069.9404973  
SRR17520069.9404974  
SRR17520069.9404975  
SRR17520069.9404976  
SRR17520069.9404977  
SRR17520069.9404978  
SRR17520069.9404979  
SRR17520069.9404980  
SRR17520069.9404981  
SRR17520069.9404983  
SRR17520069.9404984  
SRR17520069.9404985  
SRR17520069.9404986  
SRR17520069.9404987  
SRR17520069.9404988  
SRR17520069.9404989  
SRR17520069.9404990  
SRR17520069.9404992  
SRR17520069.9404993

SRR17520069.9404994  
SRR17520069.9404995  
SRR17520069.9404996  
SRR17520069.9404997  
SRR17520069.9404998  
SRR17520069.9404999  
SRR17520069.9405000  
SRR17520069.9405001  
SRR17520069.9405002  
SRR17520069.9405003  
SRR17520069.9405004  
SRR17520069.9405005  
SRR17520069.9405006  
SRR17520069.9405007  
SRR17520069.9405008  
SRR17520069.9405009  
SRR17520069.9405010  
SRR17520069.9405011  
SRR17520069.9405012  
SRR17520069.9405013  
SRR17520069.9405014  
SRR17520069.9405015  
SRR17520069.9405016  
SRR17520069.9405017  
SRR17520069.9405018  
SRR17520069.9405019  
SRR17520069.9405020  
SRR17520069.9405021  
SRR17520069.9405022  
SRR17520069.9405023  
SRR17520069.9405025  
SRR17520069.9405026  
SRR17520069.9405027  
SRR17520069.9405028  
SRR17520069.9405029  
SRR17520069.9405030  
SRR17520069.9405033  
SRR17520069.9405034  
SRR17520069.9405035  
SRR17520069.9405036  
SRR17520069.9405037  
SRR17520069.9405038  
SRR17520069.9405039  
SRR17520069.9405040  
SRR17520069.9405041  
SRR17520069.9405042  
SRR17520069.9405043

SRR17520069.9405044  
SRR17520069.9405045  
SRR17520069.9405046  
SRR17520069.9405047  
SRR17520069.9405048  
SRR17520069.9405049  
SRR17520069.9405050  
SRR17520069.9405051  
SRR17520069.9405052  
SRR17520069.9405053  
SRR17520069.9405054  
SRR17520069.9405055  
SRR17520069.9405056  
SRR17520069.9405057  
SRR17520069.9405058  
SRR17520069.9405059  
SRR17520069.9405060  
SRR17520069.9405061  
SRR17520069.9405063  
SRR17520069.9428395  
SRR17520069.9428396  
SRR17520069.9428398  
SRR17520069.9428399  
SRR17520069.9428400  
SRR17520069.9428401  
SRR17520069.9428402  
SRR17520069.9428403  
SRR17520069.9428404  
SRR17520069.9428405  
SRR17520069.9428406  
SRR17520069.9428407  
SRR17520069.9428408  
SRR17520069.9428409  
SRR17520069.9428410  
SRR17520069.9428411  
SRR17520069.9428412  
SRR17520069.9428413  
SRR17520069.9428414  
SRR17520069.9428415  
SRR17520069.9428416  
SRR17520069.9428417  
SRR17520069.9428816  
SRR17520069.9442271  
SRR17520069.9442272  
SRR17520069.9442273  
SRR17520069.9442274  
SRR17520069.9442275

SRR17520069.9442280  
SRR17520069.9442281  
SRR17520069.9442282  
SRR17520069.9442283  
SRR17520069.9442284  
SRR17520069.9442285  
SRR17520069.9451355  
SRR17520069.9471367  
SRR17520069.9471389  
SRR17520069.9471422  
SRR17520069.9472209  
SRR17520069.9472213  
SRR17520069.9479177  
SRR17520069.9489301  
SRR17520069.9489303  
SRR17520069.9489304  
SRR17520069.9489305  
SRR17520069.9489306  
SRR17520069.9489307  
SRR17520069.9489308  
SRR17520069.9489309  
SRR17520069.9489310  
SRR17520069.9489311  
SRR17520069.9489312  
SRR17520069.9489313  
SRR17520069.9489314  
SRR17520069.9489315  
SRR17520069.9489316  
SRR17520069.9489317  
SRR17520069.9489318  
SRR17520069.9489319  
SRR17520069.9489320  
SRR17520069.9489321  
SRR17520069.9489322  
SRR17520069.9489323  
SRR17520069.9489324  
SRR17520069.9489325  
SRR17520069.9489326  
SRR17520069.9489327  
SRR17520069.9489328  
SRR17520069.9489329  
SRR17520069.9489330  
SRR17520069.9489331  
SRR17520069.9489332  
SRR17520069.9489333  
SRR17520069.9489334  
SRR17520069.9489335

SRR17520069.9489336  
SRR17520069.9489337  
SRR17520069.9489338  
SRR17520069.9489339  
SRR17520069.9489340  
SRR17520069.9489341  
SRR17520069.9489342  
SRR17520069.9489343  
SRR17520069.9489344  
SRR17520069.9489345  
SRR17520069.9489346  
SRR17520069.9489347  
SRR17520069.9489348  
SRR17520069.9489349  
SRR17520069.9489350  
SRR17520069.9489351  
SRR17520069.9489352  
SRR17520069.9489353  
SRR17520069.9489354  
SRR17520069.9489355  
SRR17520069.9489356  
SRR17520069.9489357  
SRR17520069.9489358  
SRR17520069.9489359  
SRR17520069.9489360  
SRR17520069.9489361  
SRR17520069.9489362  
SRR17520069.9489363  
SRR17520069.9489364  
SRR17520069.9489365  
SRR17520069.9489366  
SRR17520069.9489367  
SRR17520069.9489368  
SRR17520069.9489369  
SRR17520069.9489370  
SRR17520069.9489371  
SRR17520069.9489372  
SRR17520069.9489373  
SRR17520069.9489374  
SRR17520069.9489375  
SRR17520069.9489376  
SRR17520069.9489377  
SRR17520069.9489378  
SRR17520069.9489380  
SRR17520069.9489381  
SRR17520069.9489382  
SRR17520069.9489383

SRR17520069.9489384  
SRR17520069.9489385  
SRR17520069.9489387  
SRR17520069.9489388  
SRR17520069.9489390  
SRR17520069.9489391  
SRR17520069.9489392  
SRR17520069.9489394  
SRR17520069.9489395  
SRR17520069.9489396  
SRR17520069.9489397  
SRR17520069.9489398  
SRR17520069.9489399  
SRR17520069.9489400  
SRR17520069.9489401  
SRR17520069.9489402  
SRR17520069.9489403  
SRR17520069.9489404  
SRR17520069.9489405  
SRR17520069.9489406  
SRR17520069.9489407  
SRR17520069.9489408  
SRR17520069.9489995  
SRR17520069.9489996  
SRR17520069.9489999  
SRR17520069.9490000  
SRR17520069.9490003  
SRR17520069.9490004  
SRR17520069.9490005  
SRR17520069.9490006  
SRR17520069.9490007  
SRR17520069.9490008  
SRR17520069.9490009  
SRR17520069.9490010  
SRR17520069.9490011  
SRR17520069.9490012  
SRR17520069.9490013  
SRR17520069.9490014  
SRR17520069.9490015  
SRR17520069.9490016  
SRR17520069.9490017  
SRR17520069.9490018  
SRR17520069.9490019  
SRR17520069.9490020  
SRR17520069.9490021  
SRR17520069.9490022  
SRR17520069.9490023

SRR17520069.9490024  
SRR17520069.9490025  
SRR17520069.9490026  
SRR17520069.9490027  
SRR17520069.9490028  
SRR17520069.9490029  
SRR17520069.9490030  
SRR17520069.9490031  
SRR17520069.9490032  
SRR17520069.9490033  
SRR17520069.9490034  
SRR17520069.9490035  
SRR17520069.9490036  
SRR17520069.9490037  
SRR17520069.9490038  
SRR17520069.9490039  
SRR17520069.9490040  
SRR17520069.9490042  
SRR17520069.9490043  
SRR17520069.9490044  
SRR17520069.9490045  
SRR17520069.9490046  
SRR17520069.9490047  
SRR17520069.9490048  
SRR17520069.9490049  
SRR17520069.9490050  
SRR17520069.9490051  
SRR17520069.9490052  
SRR17520069.9490053  
SRR17520069.9490054  
SRR17520069.9490055  
SRR17520069.9490056  
SRR17520069.9490057  
SRR17520069.9490058  
SRR17520069.9490059  
SRR17520069.9490060  
SRR17520069.9490061  
SRR17520069.9490062  
SRR17520069.9490063  
SRR17520069.9490064  
SRR17520069.9490065  
SRR17520069.9490066  
SRR17520069.9490067  
SRR17520069.9490068  
SRR17520069.9490069  
SRR17520069.9490070  
SRR17520069.9490071

SRR17520069.9490072  
SRR17520069.9490073  
SRR17520069.9490075  
SRR17520069.9490076  
SRR17520069.9490077  
SRR17520069.9490078  
SRR17520069.9490079  
SRR17520069.9490080  
SRR17520069.9490081  
SRR17520069.9490082  
SRR17520069.9490083  
SRR17520069.9490084  
SRR17520069.9490085  
SRR17520069.9490086  
SRR17520069.9490087  
SRR17520069.9490088  
SRR17520069.9490089  
SRR17520069.9490090  
SRR17520069.9490091  
SRR17520069.9490092  
SRR17520069.9490093  
SRR17520069.9490094  
SRR17520069.9490095  
SRR17520069.9490096  
SRR17520069.9490097  
SRR17520069.9490098  
SRR17520069.9490099  
SRR17520069.9490100  
SRR17520069.9490101  
SRR17520069.9490102  
SRR17520069.9490103  
SRR17520069.9490104  
SRR17520069.9490105  
SRR17520069.9490106  
SRR17520069.9490107  
SRR17520069.9490108  
SRR17520069.9490109  
SRR17520069.9490110  
SRR17520069.9490111  
SRR17520069.9490112  
SRR17520069.9490113  
SRR17520069.9490114  
SRR17520069.9490115  
SRR17520069.9490116  
SRR17520069.9490117  
SRR17520069.9490118  
SRR17520069.9490120



SRR17520069.9490121  
SRR17520069.9490122  
SRR17520069.9490123  
SRR17520069.9490124  
SRR17520069.9490125  
SRR17520069.9490126  
SRR17520069.9505204  
SRR17520069.9505205  
SRR17520069.9505206  
SRR17520069.9505207  
SRR17520069.9505208  
SRR17520069.9505209  
SRR17520069.9505210  
SRR17520069.9505211  
SRR17520069.9505212  
SRR17520069.9505213  
SRR17520069.9505214  
SRR17520069.9505215  
SRR17520069.9505216  
SRR17520069.9505217  
SRR17520069.9505218  
SRR17520069.9505219  
SRR17520069.9505220  
SRR17520069.9505221  
SRR17520069.9505222  
SRR17520069.9505223  
SRR17520069.9505225  
SRR17520069.9505226  
SRR17520069.9505227  
SRR17520069.9505228  
SRR17520069.9505229  
SRR17520069.9505230  
SRR17520069.9505231  
SRR17520069.9505232  
SRR17520069.9505233  
SRR17520069.9505234  
SRR17520069.9505235  
SRR17520069.9505236  
SRR17520069.9505237  
SRR17520069.9505238  
SRR17520069.9505239  
SRR17520069.9505240  
SRR17520069.9505241  
SRR17520069.9505242  
SRR17520069.9505243  
SRR17520069.9505244  
SRR17520069.9505245

SRR17520069.9505246  
SRR17520069.9505247  
SRR17520069.9505248  
SRR17520069.9505249  
SRR17520069.9505250  
SRR17520069.9505252  
SRR17520069.9505253  
SRR17520069.9505254  
SRR17520069.9505255  
SRR17520069.9505256  
SRR17520069.9505257  
SRR17520069.9505258  
SRR17520069.9505259  
SRR17520069.9505260  
SRR17520069.9505261  
SRR17520069.9505262  
SRR17520069.9505263  
SRR17520069.9505264  
SRR17520069.9505265  
SRR17520069.9505266  
SRR17520069.9505267  
SRR17520069.9505268  
SRR17520069.9505269  
SRR17520069.9505270  
SRR17520069.9505271  
SRR17520069.9505272  
SRR17520069.9505273  
SRR17520069.9505274  
SRR17520069.9505275  
SRR17520069.9505276  
SRR17520069.9505277  
SRR17520069.9505278  
SRR17520069.9505279  
SRR17520069.9505280  
SRR17520069.9505281  
SRR17520069.9505282  
SRR17520069.9505286  
SRR17520069.9505289  
SRR17520069.9505292  
SRR17520069.9505294  
SRR17520069.9505309  
SRR17520069.9505314  
SRR17520069.9505315  
SRR17520069.9505318  
SRR17520069.9505325  
SRR17520069.9517088  
SRR17520069.9517089

SRR17520069.9517090  
SRR17520069.9517091  
SRR17520069.9517092  
SRR17520069.9517093  
SRR17520069.9517094  
SRR17520069.9517095  
SRR17520069.9517096  
SRR17520069.9517097  
SRR17520069.9517098  
SRR17520069.9517099  
SRR17520069.9517100  
SRR17520069.9517101  
SRR17520069.9517102  
SRR17520069.9517103  
SRR17520069.9517104  
SRR17520069.9517105  
SRR17520069.9517106  
SRR17520069.9517107  
SRR17520069.9517108  
SRR17520069.9517109  
SRR17520069.9517110  
SRR17520069.9517111  
SRR17520069.9517112  
SRR17520069.9517113  
SRR17520069.9517114  
SRR17520069.9517115  
SRR17520069.9517116  
SRR17520069.9517117  
SRR17520069.9517118  
SRR17520069.9517119  
SRR17520069.9517120  
SRR17520069.9517121  
SRR17520069.9517122  
SRR17520069.9517123  
SRR17520069.9517124  
SRR17520069.9517125  
SRR17520069.9517126  
SRR17520069.9517127  
SRR17520069.9517128  
SRR17520069.9517129  
SRR17520069.9517130  
SRR17520069.9522555  
SRR17520069.9525618  
SRR17520069.9531853  
SRR17520069.9532791  
SRR17520069.9532792  
SRR17520069.9532793

SRR17520069.9532794  
SRR17520069.9532795  
SRR17520069.9532796  
SRR17520069.9532797  
SRR17520069.9532798  
SRR17520069.9532799  
SRR17520069.9532800  
SRR17520069.9532801  
SRR17520069.9532802  
SRR17520069.9532803  
SRR17520069.9532804  
SRR17520069.9532805  
SRR17520069.9532806  
SRR17520069.9532807  
SRR17520069.9532808  
SRR17520069.9537270  
SRR17520069.9537271  
SRR17520069.9537272  
SRR17520069.9537273  
SRR17520069.9537274  
SRR17520069.9537275  
SRR17520069.9537276  
SRR17520069.9537277  
SRR17520069.9537278  
SRR17520069.9537279  
SRR17520069.9537280  
SRR17520069.9537281  
SRR17520069.9537284  
SRR17520069.9537285  
SRR17520069.9537286  
SRR17520069.9537287  
SRR17520069.9537288  
SRR17520069.9537289  
SRR17520069.9537290  
SRR17520069.9537291  
SRR17520069.9537292  
SRR17520069.9537293  
SRR17520069.9537294  
SRR17520069.9537295  
SRR17520069.9537296  
SRR17520069.9537297  
SRR17520069.9537298  
SRR17520069.9537299  
SRR17520069.9537300  
SRR17520069.9537301  
SRR17520069.9537302  
SRR17520069.9537303

SRR17520069.9537304  
SRR17520069.9537305  
SRR17520069.9537306  
SRR17520069.9537307  
SRR17520069.9537308  
SRR17520069.9537309  
SRR17520069.9537310  
SRR17520069.9537311  
SRR17520069.9537312  
SRR17520069.9537313  
SRR17520069.9537314  
SRR17520069.9537315  
SRR17520069.9537317  
SRR17520069.9537318  
SRR17520069.9537319  
SRR17520069.9537320  
SRR17520069.9537321  
SRR17520069.9537322  
SRR17520069.9537325  
SRR17520069.9537326  
SRR17520069.9537327  
SRR17520069.9537328  
SRR17520069.9537329  
SRR17520069.9537330  
SRR17520069.9537331  
SRR17520069.9537332  
SRR17520069.9537333  
SRR17520069.9537334  
SRR17520069.9537335  
SRR17520069.9537337  
SRR17520069.9537338  
SRR17520069.9537339  
SRR17520069.9537340  
SRR17520069.9537341  
SRR17520069.9537342  
SRR17520069.9537343  
SRR17520069.9537344  
SRR17520069.9537345  
SRR17520069.9537346  
SRR17520069.9537347  
SRR17520069.9537348  
SRR17520069.9537349  
SRR17520069.9537350  
SRR17520069.9537351  
SRR17520069.9537352  
SRR17520069.9537353  
SRR17520069.9537354

SRR17520069.9537355  
SRR17520069.9537356  
SRR17520069.9537357  
SRR17520069.9537358  
SRR17520069.9537359  
SRR17520069.9537360  
SRR17520069.9537361  
SRR17520069.9537362  
SRR17520069.9537363  
SRR17520069.9537364  
SRR17520069.9537365  
SRR17520069.9537366  
SRR17520069.9537367  
SRR17520069.9537368  
SRR17520069.9541771  
SRR17520069.9541876  
SRR17520069.9541907  
SRR17520069.9566019  
SRR17520069.9566020  
SRR17520069.9566021  
SRR17520069.9566022  
SRR17520069.9566023  
SRR17520069.9566024  
SRR17520069.9566025  
SRR17520069.9566026  
SRR17520069.9566027  
SRR17520069.9566028  
SRR17520069.9566029  
SRR17520069.9566030  
SRR17520069.9566031  
SRR17520069.9566032  
SRR17520069.9566033  
SRR17520069.9566034  
SRR17520069.9566035  
SRR17520069.9566036  
SRR17520069.9566037  
SRR17520069.9566038  
SRR17520069.9566039  
SRR17520069.9566040  
SRR17520069.9566041  
SRR17520069.9566042  
SRR17520069.9566043  
SRR17520069.9566044  
SRR17520069.9566045  
SRR17520069.9566046  
SRR17520069.9566047  
SRR17520069.9566048

SRR17520069.9566049  
SRR17520069.9566050  
SRR17520069.9566051  
SRR17520069.9566052  
SRR17520069.9566053  
SRR17520069.9566054  
SRR17520069.9566055  
SRR17520069.9566056  
SRR17520069.9566057  
SRR17520069.9566058  
SRR17520069.9566059  
SRR17520069.9566060  
SRR17520069.9566061  
SRR17520069.9566062  
SRR17520069.9566063  
SRR17520069.9566065  
SRR17520069.9566066  
SRR17520069.9566067  
SRR17520069.9566068  
SRR17520069.9566069  
SRR17520069.9566070  
SRR17520069.9566071  
SRR17520069.9566072  
SRR17520069.9566073  
SRR17520069.9566074  
SRR17520069.9566075  
SRR17520069.9566076  
SRR17520069.9566077  
SRR17520069.9566078  
SRR17520069.9566079  
SRR17520069.9566080  
SRR17520069.9566081  
SRR17520069.9566082  
SRR17520069.9566083  
SRR17520069.9566084  
SRR17520069.9566085  
SRR17520069.9566086  
SRR17520069.9566087  
SRR17520069.9566088  
SRR17520069.9566089  
SRR17520069.9566090  
SRR17520069.9566091  
SRR17520069.9566092  
SRR17520069.9566093  
SRR17520069.9566094  
SRR17520069.9566095  
SRR17520069.9566096

SRR17520069.9566097  
SRR17520069.9566098  
SRR17520069.9566099  
SRR17520069.9566100  
SRR17520069.9566101  
SRR17520069.9566102  
SRR17520069.9566103  
SRR17520069.9566104  
SRR17520069.9566105  
SRR17520069.9566106  
SRR17520069.9566107  
SRR17520069.9566108  
SRR17520069.9566109  
SRR17520069.9571717  
SRR17520069.9571728  
SRR17520069.9588893  
SRR17520069.9588897  
SRR17520069.9588898  
SRR17520069.9588900  
SRR17520069.9598567  
SRR17520069.9598570  
SRR17520069.9598574  
SRR17520069.9598578  
SRR17520069.9598582  
SRR17520069.9598588  
SRR17520069.9598594  
SRR17520069.9598595  
SRR17520069.9598600  
SRR17520069.9598603  
SRR17520069.9598604  
SRR17520069.9598605  
SRR17520069.9598607  
SRR17520069.9609065  
SRR17520069.9623068  
SRR17520069.9641129  
SRR17520069.9641130  
SRR17520069.9641131  
SRR17520069.9641132  
SRR17520069.9641133  
SRR17520069.9641134  
SRR17520069.9641136  
SRR17520069.9641137  
SRR17520069.9641138  
SRR17520069.9641139  
SRR17520069.9641140  
SRR17520069.9641141  
SRR17520069.9641142



SRR17520069.9641143  
SRR17520069.9641144  
SRR17520069.9641145  
SRR17520069.9641146  
SRR17520069.9641147  
SRR17520069.9641148  
SRR17520069.9656184  
SRR17520069.9657901  
SRR17520069.9667837  
SRR17520069.9667838  
SRR17520069.9667839  
SRR17520069.9667840  
SRR17520069.9667841  
SRR17520069.9667842  
SRR17520069.9667843  
SRR17520069.9667844  
SRR17520069.9667846  
SRR17520069.9667847  
SRR17520069.9667848  
SRR17520069.9667849  
SRR17520069.9667850  
SRR17520069.9667851  
SRR17520069.9667852  
SRR17520069.9667853  
SRR17520069.9667854  
SRR17520069.9667855  
SRR17520069.9667856  
SRR17520069.9667857  
SRR17520069.9667858  
SRR17520069.9667859  
SRR17520069.9667860  
SRR17520069.9667861  
SRR17520069.9667862  
SRR17520069.9667863  
SRR17520069.9667864  
SRR17520069.9667865  
SRR17520069.9667866  
SRR17520069.9667867  
SRR17520069.9667868  
SRR17520069.9667869  
SRR17520069.9667870  
SRR17520069.9667871  
SRR17520069.9667872  
SRR17520069.9667873  
SRR17520069.9667874  
SRR17520069.9667875  
SRR17520069.9667876

SRR17520069. 9667877  
SRR17520069. 9667878  
SRR17520069. 9667879  
SRR17520069. 9667881  
SRR17520069. 9667882  
SRR17520069. 9667883  
SRR17520069. 9667884  
SRR17520069. 9667885  
SRR17520069. 9667886  
SRR17520069. 9667887  
SRR17520069. 9667888  
SRR17520069. 9667889  
SRR17520069. 9667890  
SRR17520069. 9667891  
SRR17520069. 9667892  
SRR17520069. 9667893  
SRR17520069. 9667894  
SRR17520069. 9667895  
SRR17520069. 9667896  
SRR17520069. 9667897  
SRR17520069. 9667898  
SRR17520069. 9667899  
SRR17520069. 9667900  
SRR17520069. 9667901  
SRR17520069. 9667902  
SRR17520069. 9667903  
SRR17520069. 9667904  
SRR17520069. 9667905  
SRR17520069. 9667906  
SRR17520069. 9667907  
SRR17520069. 9667908  
SRR17520069. 9667909  
SRR17520069. 9667910  
SRR17520069. 9667911  
SRR17520069. 9667912  
SRR17520069. 9667913  
SRR17520069. 9667914  
SRR17520069. 9667915  
SRR17520069. 9667916  
SRR17520069. 9667917  
SRR17520069. 9667918  
SRR17520069. 9667919  
SRR17520069. 9667920  
SRR17520069. 9667921  
SRR17520069. 9667922  
SRR17520069. 9667923  
SRR17520069. 9667924

SRR17520069.9667925  
SRR17520069.9694815  
SRR17520069.9694816  
SRR17520069.9694817  
SRR17520069.9694818  
SRR17520069.9694819  
SRR17520069.9694821  
SRR17520069.9694822  
SRR17520069.9694823  
SRR17520069.9694824  
SRR17520069.9694825  
SRR17520069.9694826  
SRR17520069.9694827  
SRR17520069.9694828  
SRR17520069.9694829  
SRR17520069.9694830  
SRR17520069.9694831  
SRR17520069.9694832  
SRR17520069.9694833  
SRR17520069.9694834  
SRR17520069.9694835  
SRR17520069.9694836  
SRR17520069.9694837  
SRR17520069.9694838  
SRR17520069.9694839  
SRR17520069.9694840  
SRR17520069.9694841  
SRR17520069.9694842  
SRR17520069.9694843  
SRR17520069.9694844  
SRR17520069.9694845  
SRR17520069.9694846  
SRR17520069.9694847  
SRR17520069.9694849  
SRR17520069.9694850  
SRR17520069.9694851  
SRR17520069.9694852  
SRR17520069.9694853  
SRR17520069.9694854  
SRR17520069.9694855  
SRR17520069.9694856  
SRR17520069.9694857  
SRR17520069.9694858  
SRR17520069.9694859  
SRR17520069.9694860  
SRR17520069.9694861  
SRR17520069.9694862

SRR17520069. 9694863  
SRR17520069. 9694864  
SRR17520069. 9694865  
SRR17520069. 9694866  
SRR17520069. 9694867  
SRR17520069. 9694868  
SRR17520069. 9694869  
SRR17520069. 9694870  
SRR17520069. 9694871  
SRR17520069. 9694872  
SRR17520069. 9694873  
SRR17520069. 9694874  
SRR17520069. 9694875  
SRR17520069. 9694876  
SRR17520069. 9694877  
SRR17520069. 9694878  
SRR17520069. 9694879  
SRR17520069. 9694880  
SRR17520069. 9694881  
SRR17520069. 9694882  
SRR17520069. 9694883  
SRR17520069. 9694884  
SRR17520069. 9694885  
SRR17520069. 9694886  
SRR17520069. 9694887  
SRR17520069. 9694888  
SRR17520069. 9694889  
SRR17520069. 9694890  
SRR17520069. 9694891  
SRR17520069. 9694892  
SRR17520069. 9694893  
SRR17520069. 9694894  
SRR17520069. 9694895  
SRR17520069. 9694896  
SRR17520069. 9694897  
SRR17520069. 9694898  
SRR17520069. 9694899  
SRR17520069. 9694900  
SRR17520069. 9694901  
SRR17520069. 9694902  
SRR17520069. 9694903  
SRR17520069. 9694904  
SRR17520069. 9694905  
SRR17520069. 9694906  
SRR17520069. 9694907  
SRR17520069. 9694908  
SRR17520069. 9694909

SRR17520069.9694910  
SRR17520069.9694911  
SRR17520069.9694912  
SRR17520069.9694913  
SRR17520069.9694914  
SRR17520069.9694915  
SRR17520069.9694916  
SRR17520069.9694917  
SRR17520069.9694918  
SRR17520069.9694919  
SRR17520069.9694920  
SRR17520069.9694921  
SRR17520069.9694922  
SRR17520069.9694923  
SRR17520069.9694924  
SRR17520069.9699138  
SRR17520069.9711880  
SRR17520069.9711881  
SRR17520069.9711882  
SRR17520069.9711883  
SRR17520069.9711884  
SRR17520069.9711885  
SRR17520069.9711886  
SRR17520069.9711887  
SRR17520069.9711888  
SRR17520069.9711889  
SRR17520069.9711890  
SRR17520069.9711891  
SRR17520069.9711892  
SRR17520069.9711893  
SRR17520069.9711894  
SRR17520069.9711895  
SRR17520069.9711896  
SRR17520069.9711897  
SRR17520069.9711899  
SRR17520069.9711900  
SRR17520069.9711901  
SRR17520069.9711902  
SRR17520069.9711903  
SRR17520069.9711904  
SRR17520069.9711905  
SRR17520069.9711906  
SRR17520069.9711908  
SRR17520069.9711909  
SRR17520069.9711911  
SRR17520069.9711912  
SRR17520069.9711913

SRR17520069.9711914  
SRR17520069.9711915  
SRR17520069.9711916  
SRR17520069.9711917  
SRR17520069.9711918  
SRR17520069.9711919  
SRR17520069.9711920  
SRR17520069.9711921  
SRR17520069.9711922  
SRR17520069.9711923  
SRR17520069.9711924  
SRR17520069.9711925  
SRR17520069.9711926  
SRR17520069.9711927  
SRR17520069.9711928  
SRR17520069.9711929  
SRR17520069.9711930  
SRR17520069.9711931  
SRR17520069.9711932  
SRR17520069.9711933  
SRR17520069.9711934  
SRR17520069.9711935  
SRR17520069.9711936  
SRR17520069.9711937  
SRR17520069.9711938  
SRR17520069.9711939  
SRR17520069.9711940  
SRR17520069.9711941  
SRR17520069.9711942  
SRR17520069.9711943  
SRR17520069.9711944  
SRR17520069.9711945  
SRR17520069.9711946  
SRR17520069.9711947  
SRR17520069.9711948  
SRR17520069.9711949  
SRR17520069.9711950  
SRR17520069.9711951  
SRR17520069.9711952  
SRR17520069.9711953  
SRR17520069.9711954  
SRR17520069.9711955  
SRR17520069.9711956  
SRR17520069.9711957  
SRR17520069.9711958  
SRR17520069.9711959  
SRR17520069.9711960

SRR17520069.9711961  
SRR17520069.9711962  
SRR17520069.9711963  
SRR17520069.9711964  
SRR17520069.9711965  
SRR17520069.9711966  
SRR17520069.9711967  
SRR17520069.9711968  
SRR17520069.9711969  
SRR17520069.9711970  
SRR17520069.9711971  
SRR17520069.9711972  
SRR17520069.9711973  
SRR17520069.9711974  
SRR17520069.9711975  
SRR17520069.9711976  
SRR17520069.9711977  
SRR17520069.9711978  
SRR17520069.9711979  
SRR17520069.9711980  
SRR17520069.9711981  
SRR17520069.9711982  
SRR17520069.9711983  
SRR17520069.9711984  
SRR17520069.9711985  
SRR17520069.9711986  
SRR17520069.9711987  
SRR17520069.9711988  
SRR17520069.9711989  
SRR17520069.9711990  
SRR17520069.9711991  
SRR17520069.9711992  
SRR17520069.9711993  
SRR17520069.9711994  
SRR17520069.9711995  
SRR17520069.9711996  
SRR17520069.9711998  
SRR17520069.9713267  
SRR17520069.9741208  
SRR17520069.9741209  
SRR17520069.9741210  
SRR17520069.9741211  
SRR17520069.9741212  
SRR17520069.9741213  
SRR17520069.9741214  
SRR17520069.9741215  
SRR17520069.9741216

SRR17520069.9741217  
SRR17520069.9741218  
SRR17520069.9741219  
SRR17520069.9741220  
SRR17520069.9741221  
SRR17520069.9741222  
SRR17520069.9741223  
SRR17520069.9741224  
SRR17520069.9741225  
SRR17520069.9741226  
SRR17520069.9741227  
SRR17520069.9741228  
SRR17520069.9741229  
SRR17520069.9741230  
SRR17520069.9741231  
SRR17520069.9741232  
SRR17520069.9741233  
SRR17520069.9741234  
SRR17520069.9741235  
SRR17520069.9741236  
SRR17520069.9741237  
SRR17520069.9741238  
SRR17520069.9753041  
SRR17520069.9753042  
SRR17520069.9753043  
SRR17520069.9753044  
SRR17520069.9753045  
SRR17520069.9753046  
SRR17520069.9753047  
SRR17520069.9753049  
SRR17520069.9753050  
SRR17520069.9753051  
SRR17520069.9753052  
SRR17520069.9753053  
SRR17520069.9753054  
SRR17520069.9764877  
SRR17520069.9793244  
SRR17520069.9793245  
SRR17520069.9793246  
SRR17520069.9793247  
SRR17520069.9793248  
SRR17520069.9793249  
SRR17520069.9793250  
SRR17520069.9793251  
SRR17520069.9793252  
SRR17520069.9793253  
SRR17520069.9793254



SRR17520069.9793255  
SRR17520069.9793256  
SRR17520069.9793257  
SRR17520069.9793258  
SRR17520069.9793259  
SRR17520069.9793260  
SRR17520069.9793261  
SRR17520069.9793262  
SRR17520069.9793263  
SRR17520069.9793264  
SRR17520069.9793265  
SRR17520069.9793266  
SRR17520069.9793267  
SRR17520069.9793268  
SRR17520069.9793269  
SRR17520069.9793270  
SRR17520069.9793272  
SRR17520069.9793273  
SRR17520069.9793274  
SRR17520069.9793275  
SRR17520069.9802373  
SRR17520069.9813467  
SRR17520069.9813468  
SRR17520069.9813469  
SRR17520069.9813470  
SRR17520069.9813471  
SRR17520069.9813472  
SRR17520069.9813477  
SRR17520069.9813479  
SRR17520069.9813480  
SRR17520069.9813481  
SRR17520069.9813482  
SRR17520069.9813485  
SRR17520069.9813486  
SRR17520069.9843005  
SRR17520069.9843006  
SRR17520069.9843007  
SRR17520069.9843008  
SRR17520069.9843009  
SRR17520069.9843010  
SRR17520069.9843011  
SRR17520069.9843012  
SRR17520069.9843013  
SRR17520069.9843014  
SRR17520069.9843015  
SRR17520069.9843016  
SRR17520069.9843017

SRR17520069.9843018  
SRR17520069.9843019  
SRR17520069.9848901  
SRR17520069.9848902  
SRR17520069.9848903  
SRR17520069.9848904  
SRR17520069.9848905  
SRR17520069.9848906  
SRR17520069.9848907  
SRR17520069.9848908  
SRR17520069.9848909  
SRR17520069.9848910  
SRR17520069.9848911  
SRR17520069.9848912  
SRR17520069.9848913  
SRR17520069.9848914  
SRR17520069.9848915  
SRR17520069.9848916  
SRR17520069.9848917  
SRR17520069.9848918  
SRR17520069.9848919  
SRR17520069.9848920  
SRR17520069.9848921  
SRR17520069.9848922  
SRR17520069.9848923  
SRR17520069.9848924  
SRR17520069.9848925  
SRR17520069.9848926  
SRR17520069.9848927  
SRR17520069.9848928  
SRR17520069.9848929  
SRR17520069.9848930  
SRR17520069.9848931  
SRR17520069.9848932  
SRR17520069.9848933  
SRR17520069.9848934  
SRR17520069.9848935  
SRR17520069.9848936  
SRR17520069.9848937  
SRR17520069.9848938  
SRR17520069.9848939  
SRR17520069.9848940  
SRR17520069.9848941  
SRR17520069.9848942  
SRR17520069.9848944  
SRR17520069.9848945  
SRR17520069.9848946

SRR17520069.9848947  
SRR17520069.9848948  
SRR17520069.9848949  
SRR17520069.9849170  
SRR17520069.9849171  
SRR17520069.9849172  
SRR17520069.9908546  
SRR17520069.9920443  
SRR17520069.9920444  
SRR17520069.9920445  
SRR17520069.9920446  
SRR17520069.9920447  
SRR17520069.9920448  
SRR17520069.9920450  
SRR17520069.9920451  
SRR17520069.9920452  
SRR17520069.9920453  
SRR17520069.9920455  
SRR17520069.9920456  
SRR17520069.9920457  
SRR17520069.9920458  
SRR17520069.9920459  
SRR17520069.9920460  
SRR17520069.9920461  
SRR17520069.9920462  
SRR17520069.9920463  
SRR17520069.9920464  
SRR17520069.9920465  
SRR17520069.9930205  
SRR17520069.9934555  
SRR17520069.9953048  
SRR17520069.9953049  
SRR17520069.9953050  
SRR17520069.9953051  
SRR17520069.9953444  
SRR17520069.9953445  
SRR17520069.9953446  
SRR17520069.9953447  
SRR17520069.9953448  
SRR17520069.9953449  
SRR17520069.9953450  
SRR17520069.9953451  
SRR17520069.9953452  
SRR17520069.9953453  
SRR17520069.9953454  
SRR17520069.9953455  
SRR17520069.9953456

SRR17520069.9953457  
SRR17520069.9953458  
SRR17520069.9953459  
SRR17520069.9953460  
SRR17520069.9953461  
SRR17520069.9953462  
SRR17520069.9953463  
SRR17520069.9953464  
SRR17520069.9953465  
SRR17520069.9953466  
SRR17520069.9953467  
SRR17520069.9953468  
SRR17520069.9953470  
SRR17520069.9953471  
SRR17520069.9953472  
SRR17520069.9953474  
SRR17520069.9953475  
SRR17520069.9953476  
SRR17520069.9953477  
SRR17520069.9982563  
SRR17520069.9983751  
SRR17520069.9983754  
SRR17520069.9983755  
SRR17520069.9983756  
SRR17520069.9983757  
SRR17520069.9983758  
SRR17520069.9983759  
SRR17520069.9983760  
SRR17520069.9983761  
SRR17520069.9983762  
SRR17520069.9983765  
SRR17520069.9983766  
SRR17520069.9983768  
SRR17520069.9983769  
SRR17520069.9983770  
SRR17520069.9983771  
SRR17520069.9983772  
SRR17520069.9983773  
SRR17520069.9983774  
SRR17520069.9983775  
SRR17520069.9983776  
SRR17520069.9983778  
SRR17520069.9983779  
SRR17520069.9983780  
SRR17520069.9983782  
SRR17520069.9983783  
SRR17520069.9983787

SRR17520069. 9983789  
SRR17520069. 9983791  
SRR17520069. 9983792  
SRR17520069. 9983793  
SRR17520069. 9983794  
SRR17520069. 9983795  
SRR17520069. 9983796  
SRR17520069. 9983797  
SRR17520069. 9996777  
SRR17520069. 9996778  
SRR17520069. 9996779  
SRR17520069. 9996780  
SRR17520069. 9996781  
SRR17520069. 9996782  
SRR17520069. 9996783  
SRR17520069. 9996784  
SRR17520069. 9996785  
SRR17520069. 9996786  
SRR17520069. 9996787  
SRR17520069. 9996788  
SRR17520069. 9996789  
SRR17520069. 9996799  
SRR17520069. 9996800  
SRR17520069. 9996802  
SRR17520069. 9996811  
SRR17520069. 9996813  
SRR17520069. 9996816  
SRR17520069. 9997038  
SRR17520069. 9997039  
SRR17520069. 9997040  
SRR17520069. 9997041  
SRR17520069. 9997042  
SRR17520069. 9997043  
SRR17520069. 9997044  
SRR17520069. 9997045  
SRR17520069. 9997046  
SRR17520069. 9997047  
SRR17520069. 9997048  
SRR17520069. 9997049  
SRR17520069. 9997050  
SRR17520069. 9997051  
SRR17520069. 9997052  
SRR17520069. 9997053  
SRR17520069. 9997054  
SRR17520069. 9997055  
SRR17520069. 9997056  
SRR17520069. 9997057

SRR17520069.9997058  
SRR17520069.9997059  
SRR17520069.9997061  
SRR17520069.9997062  
SRR17520069.9997063  
SRR17520069.9997064  
SRR17520069.9997065  
SRR17520069.9997066  
SRR17520069.9997067  
SRR17520069.9997068  
SRR17520069.9997069  
SRR17520069.9997070  
SRR17520069.9997071  
SRR17520069.9997072  
SRR17520069.9997073  
SRR17520069.9997074  
SRR17520069.9997075  
SRR17520069.9997076  
SRR17520069.9997077  
SRR17520069.9997078  
SRR17520069.9997079  
SRR17520069.9997080  
SRR17520069.9997081  
SRR17520069.9997082  
SRR17520069.9997083  
SRR17520069.9997085  
SRR17520069.9997086  
SRR17520069.9997087  
SRR17520069.9997088  
SRR17520069.9997089  
SRR17520069.9997090  
SRR17520069.9997091  
SRR17520069.9997093  
SRR17520069.9997094  
SRR17520069.9997095  
SRR17520069.9997096  
SRR17520069.9997097  
SRR17520069.9997098  
SRR17520069.9997099  
SRR17520069.9997100  
SRR17520069.9997101  
SRR17520069.9997102  
SRR17520069.9997103  
SRR17520069.9997104  
SRR17520069.9997105  
SRR17520069.9997106  
SRR17520069.9997107

SRR17520069. 9997108  
SRR17520069. 9997109  
SRR17520069. 9997110  
SRR17520069. 9997111  
SRR17520069. 9997112  
SRR17520069. 9997113  
SRR17520069. 9997115  
SRR17520069. 9997116  
SRR17520069. 9997117  
SRR17520069. 9997118  
SRR17520069. 9997119  
SRR17520069. 9997120  
SRR17520069. 9997121  
SRR17520069. 9997122  
SRR17520069. 9997123  
SRR17520069. 9997124  
SRR17520069. 9997125  
SRR17520069. 9997126  
SRR17520069. 9997127  
SRR17520069. 9997128  
SRR17520069. 9997129  
SRR17520069. 9997131  
SRR17520069. 9997132  
SRR17520069. 9997133  
SRR17520069. 9997134  
SRR17520069. 9997135  
SRR17520069. 9997136  
SRR17520069. 9997137  
SRR17520069. 9997138  
SRR17520069. 9997139  
SRR17520069. 9997140  
SRR17520069. 9997141  
SRR17520069. 10030174  
SRR17520069. 10030175  
SRR17520069. 10030176  
SRR17520069. 10030177  
SRR17520069. 10030179  
SRR17520069. 10030180  
SRR17520069. 10030181  
SRR17520069. 10030182  
SRR17520069. 10030183  
SRR17520069. 10030184  
SRR17520069. 10030185  
SRR17520069. 10030186  
SRR17520069. 10030187  
SRR17520069. 10030188  
SRR17520069. 10030189

SRR17520069.10030190  
SRR17520069.10030192  
SRR17520069.10030193  
SRR17520069.10030194  
SRR17520069.10030195  
SRR17520069.10030196  
SRR17520069.10030197  
SRR17520069.10030198  
SRR17520069.10030199  
SRR17520069.10030200  
SRR17520069.10030201  
SRR17520069.10030202  
SRR17520069.10030203  
SRR17520069.10030204  
SRR17520069.10030205  
SRR17520069.10030206  
SRR17520069.10030207  
SRR17520069.10030208  
SRR17520069.10030209  
SRR17520069.10030210  
SRR17520069.10030211  
SRR17520069.10030212  
SRR17520069.10030213  
SRR17520069.10030214  
SRR17520069.10030215  
SRR17520069.10030216  
SRR17520069.10030217  
SRR17520069.10030218  
SRR17520069.10030219  
SRR17520069.10030220  
SRR17520069.10030221  
SRR17520069.10030222  
SRR17520069.10030223  
SRR17520069.10030224  
SRR17520069.10030225  
SRR17520069.10030226  
SRR17520069.10030227  
SRR17520069.10030228  
SRR17520069.10030229  
SRR17520069.10030230  
SRR17520069.10030231  
SRR17520069.10030232  
SRR17520069.10030233  
SRR17520069.10030234  
SRR17520069.10030235  
SRR17520069.10030236  
SRR17520069.10030237



SRR17520069.10030238  
SRR17520069.10030239  
SRR17520069.10030240  
SRR17520069.10030241  
SRR17520069.10030242  
SRR17520069.10030243  
SRR17520069.10030244  
SRR17520069.10030245  
SRR17520069.10030246  
SRR17520069.10030247  
SRR17520069.10030248  
SRR17520069.10030249  
SRR17520069.10030250  
SRR17520069.10030251  
SRR17520069.10030252  
SRR17520069.10030253  
SRR17520069.10030254  
SRR17520069.10030255  
SRR17520069.10030256  
SRR17520069.10030257  
SRR17520069.10030258  
SRR17520069.10030259  
SRR17520069.10030260  
SRR17520069.10030261  
SRR17520069.10030262  
SRR17520069.10030263  
SRR17520069.10030264  
SRR17520069.10030265  
SRR17520069.10030266  
SRR17520069.10030267  
SRR17520069.10030268  
SRR17520069.10030269  
SRR17520069.10030270  
SRR17520069.10030271  
SRR17520069.10030272  
SRR17520069.10030273  
SRR17520069.10030274  
SRR17520069.10030275  
SRR17520069.10030276  
SRR17520069.10030277  
SRR17520069.10030278  
SRR17520069.10030279  
SRR17520069.10030280  
SRR17520069.10030281  
SRR17520069.10030282  
SRR17520069.10030283  
SRR17520069.10030284

SRR17520069.10030285  
SRR17520069.10030288  
SRR17520069.10030289  
SRR17520069.10030290  
SRR17520069.10030291  
SRR17520069.10030292  
SRR17520069.10030293  
SRR17520069.10030294  
SRR17520069.10030295  
SRR17520069.10030296  
SRR17520069.10030297  
SRR17520069.10030298  
SRR17520069.10030299  
SRR17520069.10030300  
SRR17520069.10030301  
SRR17520069.10030302  
SRR17520069.10030303  
SRR17520069.10030304  
SRR17520069.10030306  
SRR17520069.10030307  
SRR17520069.10030308  
SRR17520069.10030309  
SRR17520069.10030310  
SRR17520069.10030311  
SRR17520069.10030312  
SRR17520069.10030313  
SRR17520069.10030314  
SRR17520069.10030315  
SRR17520069.10030316  
SRR17520069.10030317  
SRR17520069.10030318  
SRR17520069.10030319  
SRR17520069.10030320  
SRR17520069.10030321  
SRR17520069.10030322  
SRR17520069.10030323  
SRR17520069.10030324  
SRR17520069.10030325  
SRR17520069.10030326  
SRR17520069.10030327  
SRR17520069.10030328  
SRR17520069.10030329  
SRR17520069.10030330  
SRR17520069.10030331  
SRR17520069.10030332  
SRR17520069.10030333  
SRR17520069.10030334

SRR17520069.10030335  
SRR17520069.10030336  
SRR17520069.10030337  
SRR17520069.10030338  
SRR17520069.10030339  
SRR17520069.10030340  
SRR17520069.10030341  
SRR17520069.10030342  
SRR17520069.10030343  
SRR17520069.10030344  
SRR17520069.10030345  
SRR17520069.10030346  
SRR17520069.10030347  
SRR17520069.10030348  
SRR17520069.10030349  
SRR17520069.10030350  
SRR17520069.10030351  
SRR17520069.10030352  
SRR17520069.10030353  
SRR17520069.10030354  
SRR17520069.10030355  
SRR17520069.10030356  
SRR17520069.10030357  
SRR17520069.10030358  
SRR17520069.10030359  
SRR17520069.10030360  
SRR17520069.10030361  
SRR17520069.10030362  
SRR17520069.10030363  
SRR17520069.10030364  
SRR17520069.10042352  
SRR17520069.10042353  
SRR17520069.10042354  
SRR17520069.10042355  
SRR17520069.10042356  
SRR17520069.10042357  
SRR17520069.10042358  
SRR17520069.10042359  
SRR17520069.10042360  
SRR17520069.10042361  
SRR17520069.10042362  
SRR17520069.10042363  
SRR17520069.10042364  
SRR17520069.10042365  
SRR17520069.10042366  
SRR17520069.10042367  
SRR17520069.10042368

SRR17520069.10042369  
SRR17520069.10042370  
SRR17520069.10042371  
SRR17520069.10042372  
SRR17520069.10042373  
SRR17520069.10042374  
SRR17520069.10042375  
SRR17520069.10042376  
SRR17520069.10042377  
SRR17520069.10042378  
SRR17520069.10042379  
SRR17520069.10042380  
SRR17520069.10042381  
SRR17520069.10042382  
SRR17520069.10042385  
SRR17520069.10042386  
SRR17520069.10042387  
SRR17520069.10042388  
SRR17520069.10042390  
SRR17520069.10042391  
SRR17520069.10042392  
SRR17520069.10042393  
SRR17520069.10051247  
SRR17520069.10051248  
SRR17520069.10051249  
SRR17520069.10051250  
SRR17520069.10051251  
SRR17520069.10051252  
SRR17520069.10051253  
SRR17520069.10051254  
SRR17520069.10051255  
SRR17520069.10051256  
SRR17520069.10051257  
SRR17520069.10051258  
SRR17520069.10051259  
SRR17520069.10051260  
SRR17520069.10051261  
SRR17520069.10051262  
SRR17520069.10051264  
SRR17520069.10051265  
SRR17520069.10051268  
SRR17520069.10051269  
SRR17520069.10051270  
SRR17520069.10051271  
SRR17520069.10051272  
SRR17520069.10051274  
SRR17520069.10051275

SRR17520069.10051276  
SRR17520069.10051277  
SRR17520069.10051278  
SRR17520069.10051279  
SRR17520069.10051280  
SRR17520069.10051281  
SRR17520069.10051282  
SRR17520069.10051283  
SRR17520069.10051284  
SRR17520069.10051285  
SRR17520069.10051286  
SRR17520069.10051287  
SRR17520069.10051288  
SRR17520069.10051289  
SRR17520069.10051290  
SRR17520069.10051291  
SRR17520069.10051292  
SRR17520069.10051293  
SRR17520069.10051294  
SRR17520069.10051295  
SRR17520069.10051296  
SRR17520069.10051297  
SRR17520069.10051298  
SRR17520069.10051299  
SRR17520069.10051300  
SRR17520069.10051301  
SRR17520069.10051302  
SRR17520069.10051303  
SRR17520069.10051304  
SRR17520069.10051305  
SRR17520069.10051306  
SRR17520069.10051307  
SRR17520069.10051308  
SRR17520069.10051309  
SRR17520069.10051310  
SRR17520069.10051311  
SRR17520069.10051312  
SRR17520069.10051313  
SRR17520069.10051314  
SRR17520069.10051315  
SRR17520069.10051316  
SRR17520069.10051317  
SRR17520069.10051318  
SRR17520069.10051319  
SRR17520069.10051320  
SRR17520069.10051321  
SRR17520069.10051322

SRR17520069.10051323  
SRR17520069.10051324  
SRR17520069.10051325  
SRR17520069.10051326  
SRR17520069.10051327  
SRR17520069.10051328  
SRR17520069.10051329  
SRR17520069.10051330  
SRR17520069.10051331  
SRR17520069.10051332  
SRR17520069.10051333  
SRR17520069.10051334  
SRR17520069.10051335  
SRR17520069.10051336  
SRR17520069.10051337  
SRR17520069.10051338  
SRR17520069.10051339  
SRR17520069.10051340  
SRR17520069.10051341  
SRR17520069.10051342  
SRR17520069.10051343  
SRR17520069.10051344  
SRR17520069.10051345  
SRR17520069.10051346  
SRR17520069.10051347  
SRR17520069.10051348  
SRR17520069.10051349  
SRR17520069.10051350  
SRR17520069.10051351  
SRR17520069.10053107  
SRR17520069.10056572  
SRR17520069.10061403  
SRR17520069.10061404  
SRR17520069.10062324  
SRR17520069.10062325  
SRR17520069.10062327  
SRR17520069.10062328  
SRR17520069.10062329  
SRR17520069.10062330  
SRR17520069.10062331  
SRR17520069.10062332  
SRR17520069.10062333  
SRR17520069.10062334  
SRR17520069.10062335  
SRR17520069.10062336  
SRR17520069.10062337  
SRR17520069.10062338

SRR17520069.10062339  
SRR17520069.10062340  
SRR17520069.10062341  
SRR17520069.10062342  
SRR17520069.10062343  
SRR17520069.10062344  
SRR17520069.10062345  
SRR17520069.10062346  
SRR17520069.10062347  
SRR17520069.10062348  
SRR17520069.10062349  
SRR17520069.10062350  
SRR17520069.10062351  
SRR17520069.10062352  
SRR17520069.10062353  
SRR17520069.10062354  
SRR17520069.10062355  
SRR17520069.10062356  
SRR17520069.10062357  
SRR17520069.10062358  
SRR17520069.10062359  
SRR17520069.10062360  
SRR17520069.10062361  
SRR17520069.10062362  
SRR17520069.10062363  
SRR17520069.10062364  
SRR17520069.10062365  
SRR17520069.10062366  
SRR17520069.10062368  
SRR17520069.10062370  
SRR17520069.10062371  
SRR17520069.10062372  
SRR17520069.10062373  
SRR17520069.10062374  
SRR17520069.10062375  
SRR17520069.10062376  
SRR17520069.10062377  
SRR17520069.10062378  
SRR17520069.10062379  
SRR17520069.10062380  
SRR17520069.10062381  
SRR17520069.10062382  
SRR17520069.10062383  
SRR17520069.10062384  
SRR17520069.10062385  
SRR17520069.10062386  
SRR17520069.10063806

SRR17520069.10063807  
SRR17520069.10063809  
SRR17520069.10063810  
SRR17520069.10063811  
SRR17520069.10063812  
SRR17520069.10063813  
SRR17520069.10063814  
SRR17520069.10063815  
SRR17520069.10063816  
SRR17520069.10063818  
SRR17520069.10063819  
SRR17520069.10113924  
SRR17520069.10113948  
SRR17520069.10119409  
SRR17520069.10124122  
SRR17520069.10126615  
SRR17520069.10128982  
SRR17520069.10128983  
SRR17520069.10140365  
SRR17520069.10140366  
SRR17520069.10140368  
SRR17520069.10140369  
SRR17520069.10140370  
SRR17520069.10140371  
SRR17520069.10140373  
SRR17520069.10140374  
SRR17520069.10140375  
SRR17520069.10140376  
SRR17520069.10140377  
SRR17520069.10140379  
SRR17520069.10140380  
SRR17520069.10140381  
SRR17520069.10140382  
SRR17520069.10140383  
SRR17520069.10140384  
SRR17520069.10140385  
SRR17520069.10140386  
SRR17520069.10140387  
SRR17520069.10140388  
SRR17520069.10140389  
SRR17520069.10140390  
SRR17520069.10140391  
SRR17520069.10140392  
SRR17520069.10140394  
SRR17520069.10140395  
SRR17520069.10140397  
SRR17520069.10140398



SRR17520069.10140399  
SRR17520069.10140400  
SRR17520069.10140401  
SRR17520069.10140402  
SRR17520069.10140403  
SRR17520069.10140404  
SRR17520069.10140405  
SRR17520069.10140406  
SRR17520069.10140407  
SRR17520069.10140408  
SRR17520069.10140409  
SRR17520069.10140410  
SRR17520069.10140411  
SRR17520069.10140412  
SRR17520069.10140413  
SRR17520069.10140414  
SRR17520069.10140415  
SRR17520069.10142811  
SRR17520069.10142861  
SRR17520069.10146600  
SRR17520069.10146601  
SRR17520069.10146603  
SRR17520069.10146604  
SRR17520069.10146606  
SRR17520069.10146607  
SRR17520069.10146608  
SRR17520069.10146609  
SRR17520069.10146610  
SRR17520069.10146611  
SRR17520069.10146612  
SRR17520069.10146613  
SRR17520069.10146615  
SRR17520069.10146616  
SRR17520069.10146617  
SRR17520069.10146618  
SRR17520069.10146620  
SRR17520069.10146621  
SRR17520069.10146622  
SRR17520069.10146623  
SRR17520069.10146625  
SRR17520069.10146626  
SRR17520069.10146627  
SRR17520069.10146628  
SRR17520069.10146629  
SRR17520069.10146630  
SRR17520069.10146631  
SRR17520069.10146632

SRR17520069.10146633  
SRR17520069.10146634  
SRR17520069.10146635  
SRR17520069.10146636  
SRR17520069.10146637  
SRR17520069.10146639  
SRR17520069.10146640  
SRR17520069.10146641  
SRR17520069.10146642  
SRR17520069.10146643  
SRR17520069.10146644  
SRR17520069.10146645  
SRR17520069.10146646  
SRR17520069.10146647  
SRR17520069.10146648  
SRR17520069.10146649  
SRR17520069.10146650  
SRR17520069.10146651  
SRR17520069.10146652  
SRR17520069.10146653  
SRR17520069.10146654  
SRR17520069.10146655  
SRR17520069.10146656  
SRR17520069.10146657  
SRR17520069.10146658  
SRR17520069.10146659  
SRR17520069.10146660  
SRR17520069.10146661  
SRR17520069.10146662  
SRR17520069.10146663  
SRR17520069.10146664  
SRR17520069.10146665  
SRR17520069.10146666  
SRR17520069.10146667  
SRR17520069.10146668  
SRR17520069.10146669  
SRR17520069.10146670  
SRR17520069.10146671  
SRR17520069.10146672  
SRR17520069.10146673  
SRR17520069.10146674  
SRR17520069.10148013  
SRR17520069.10148014  
SRR17520069.10148015  
SRR17520069.10148016  
SRR17520069.10148017  
SRR17520069.10148018

SRR17520069.10148019  
SRR17520069.10148020  
SRR17520069.10148021  
SRR17520069.10148023  
SRR17520069.10148024  
SRR17520069.10148025  
SRR17520069.10148026  
SRR17520069.10148027  
SRR17520069.10148028  
SRR17520069.10148029  
SRR17520069.10148030  
SRR17520069.10148031  
SRR17520069.10148033  
SRR17520069.10148034  
SRR17520069.10148035  
SRR17520069.10148036  
SRR17520069.10148037  
SRR17520069.10148038  
SRR17520069.10148039  
SRR17520069.10148040  
SRR17520069.10148041  
SRR17520069.10148042  
SRR17520069.10148043  
SRR17520069.10148044  
SRR17520069.10148045  
SRR17520069.10148046  
SRR17520069.10148047  
SRR17520069.10148050  
SRR17520069.10148051  
SRR17520069.10148052  
SRR17520069.10148053  
SRR17520069.10148054  
SRR17520069.10148055  
SRR17520069.10148056  
SRR17520069.10148057  
SRR17520069.10148058  
SRR17520069.10148060  
SRR17520069.10148061  
SRR17520069.10148062  
SRR17520069.10148063  
SRR17520069.10148064  
SRR17520069.10148065  
SRR17520069.10148066  
SRR17520069.10148067  
SRR17520069.10148068  
SRR17520069.10148069  
SRR17520069.10148070

SRR17520069.10148071  
SRR17520069.10148072  
SRR17520069.10148073  
SRR17520069.10148074  
SRR17520069.10148075  
SRR17520069.10148076  
SRR17520069.10148077  
SRR17520069.10148078  
SRR17520069.10148079  
SRR17520069.10148080  
SRR17520069.10148081  
SRR17520069.10148082  
SRR17520069.10148084  
SRR17520069.10148088  
SRR17520069.10148089  
SRR17520069.10148090  
SRR17520069.10148091  
SRR17520069.10148092  
SRR17520069.10148093  
SRR17520069.10148094  
SRR17520069.10148095  
SRR17520069.10148096  
SRR17520069.10148097  
SRR17520069.10148098  
SRR17520069.10148099  
SRR17520069.10148100  
SRR17520069.10148103  
SRR17520069.10148104  
SRR17520069.10148105  
SRR17520069.10148106  
SRR17520069.10148107  
SRR17520069.10148108  
SRR17520069.10148109  
SRR17520069.10148110  
SRR17520069.10148112  
SRR17520069.10148113  
SRR17520069.10148114  
SRR17520069.10148115  
SRR17520069.10148116  
SRR17520069.10148117  
SRR17520069.10148118  
SRR17520069.10148119  
SRR17520069.10148120  
SRR17520069.10148121  
SRR17520069.10148122  
SRR17520069.10148123  
SRR17520069.10148124

SRR17520069.10148125  
SRR17520069.10148126  
SRR17520069.10148128  
SRR17520069.10148129  
SRR17520069.10148130  
SRR17520069.10148131  
SRR17520069.10148132  
SRR17520069.10148133  
SRR17520069.10148134  
SRR17520069.10148135  
SRR17520069.10148136  
SRR17520069.10148137  
SRR17520069.10148138  
SRR17520069.10148139  
SRR17520069.10148140  
SRR17520069.10148141  
SRR17520069.10148142  
SRR17520069.10148143  
SRR17520069.10148144  
SRR17520069.10148145  
SRR17520069.10148146  
SRR17520069.10148147  
SRR17520069.10148148  
SRR17520069.10148149  
SRR17520069.10148150  
SRR17520069.10148151  
SRR17520069.10148152  
SRR17520069.10148153  
SRR17520069.10148154  
SRR17520069.10148155  
SRR17520069.10148156  
SRR17520069.10148157  
SRR17520069.10148158  
SRR17520069.10148159  
SRR17520069.10148160  
SRR17520069.10148161  
SRR17520069.10148162  
SRR17520069.10148163  
SRR17520069.10148164  
SRR17520069.10148165  
SRR17520069.10148166  
SRR17520069.10148167  
SRR17520069.10148168  
SRR17520069.10148169  
SRR17520069.10148170  
SRR17520069.10148171  
SRR17520069.10154856

SRR17520069.10155027  
SRR17520069.10160503  
SRR17520069.10165092  
SRR17520069.10165093  
SRR17520069.10165094  
SRR17520069.10165095  
SRR17520069.10165096  
SRR17520069.10165097  
SRR17520069.10165098  
SRR17520069.10165099  
SRR17520069.10165100  
SRR17520069.10165101  
SRR17520069.10165102  
SRR17520069.10165103  
SRR17520069.10165104  
SRR17520069.10165106  
SRR17520069.10165107  
SRR17520069.10165108  
SRR17520069.10165109  
SRR17520069.10165110  
SRR17520069.10165111  
SRR17520069.10165112  
SRR17520069.10165113  
SRR17520069.10165114  
SRR17520069.10165115  
SRR17520069.10165116  
SRR17520069.10165117  
SRR17520069.10165118  
SRR17520069.10165119  
SRR17520069.10165120  
SRR17520069.10165121  
SRR17520069.10165122  
SRR17520069.10165123  
SRR17520069.10165124  
SRR17520069.10165125  
SRR17520069.10165126  
SRR17520069.10165127  
SRR17520069.10165128  
SRR17520069.10165129  
SRR17520069.10165130  
SRR17520069.10179705  
SRR17520069.10189692  
SRR17520069.10189693  
SRR17520069.10189694  
SRR17520069.10189695  
SRR17520069.10189696  
SRR17520069.10189697

SRR17520069.10189698  
SRR17520069.10189700  
SRR17520069.10189701  
SRR17520069.10189702  
SRR17520069.10191126  
SRR17520069.10191127  
SRR17520069.10191128  
SRR17520069.10191129  
SRR17520069.10191130  
SRR17520069.10191131  
SRR17520069.10191133  
SRR17520069.10191134  
SRR17520069.10191135  
SRR17520069.10191136  
SRR17520069.10191137  
SRR17520069.10191138  
SRR17520069.10191139  
SRR17520069.10191140  
SRR17520069.10191141  
SRR17520069.10191142  
SRR17520069.10191143  
SRR17520069.10191144  
SRR17520069.10191145  
SRR17520069.10191146  
SRR17520069.10191147  
SRR17520069.10191148  
SRR17520069.10191149  
SRR17520069.10191150  
SRR17520069.10191151  
SRR17520069.10191152  
SRR17520069.10191153  
SRR17520069.10191154  
SRR17520069.10191155  
SRR17520069.10191156  
SRR17520069.10191157  
SRR17520069.10191158  
SRR17520069.10191159  
SRR17520069.10191160  
SRR17520069.10191161  
SRR17520069.10191162  
SRR17520069.10191163  
SRR17520069.10191164  
SRR17520069.10191165  
SRR17520069.10191166  
SRR17520069.10191167  
SRR17520069.10191168  
SRR17520069.10191169

SRR17520069.10191170  
SRR17520069.10191171  
SRR17520069.10208044  
SRR17520069.10208763  
SRR17520069.10216682  
SRR17520069.10216683  
SRR17520069.10216684  
SRR17520069.10216685  
SRR17520069.10216686  
SRR17520069.10216687  
SRR17520069.10216688  
SRR17520069.10220919  
SRR17520069.10228819  
SRR17520069.10228820  
SRR17520069.10228821  
SRR17520069.10228822  
SRR17520069.10228823  
SRR17520069.10228824  
SRR17520069.10228825  
SRR17520069.10228826  
SRR17520069.10228827  
SRR17520069.10228829  
SRR17520069.10228830  
SRR17520069.10228831  
SRR17520069.10228832  
SRR17520069.10228833  
SRR17520069.10228834  
SRR17520069.10228835  
SRR17520069.10228836  
SRR17520069.10228837  
SRR17520069.10228838  
SRR17520069.10228839  
SRR17520069.10228840  
SRR17520069.10228841  
SRR17520069.10228843  
SRR17520069.10228844  
SRR17520069.10228845  
SRR17520069.10228846  
SRR17520069.10228847  
SRR17520069.10228848  
SRR17520069.10228849  
SRR17520069.10228850  
SRR17520069.10228851  
SRR17520069.10228852  
SRR17520069.10228853  
SRR17520069.10228854  
SRR17520069.10228856



SRR17520069.10228857  
SRR17520069.10228858  
SRR17520069.10228859  
SRR17520069.10228860  
SRR17520069.10228861  
SRR17520069.10228862  
SRR17520069.10228864  
SRR17520069.10228865  
SRR17520069.10228866  
SRR17520069.10228867  
SRR17520069.10228868  
SRR17520069.10228869  
SRR17520069.10228870  
SRR17520069.10228871  
SRR17520069.10228872  
SRR17520069.10228873  
SRR17520069.10228874  
SRR17520069.10228875  
SRR17520069.10228876  
SRR17520069.10228877  
SRR17520069.10228878  
SRR17520069.10228879  
SRR17520069.10228880  
SRR17520069.10228881  
SRR17520069.10228882  
SRR17520069.10228883  
SRR17520069.10228884  
SRR17520069.10228885  
SRR17520069.10228886  
SRR17520069.10228887  
SRR17520069.10228888  
SRR17520069.10228889  
SRR17520069.10228891  
SRR17520069.10228892  
SRR17520069.10228893  
SRR17520069.10228894  
SRR17520069.10228895  
SRR17520069.10228896  
SRR17520069.10228897  
SRR17520069.10228898  
SRR17520069.10228899  
SRR17520069.10228900  
SRR17520069.10228901  
SRR17520069.10228902  
SRR17520069.10228903  
SRR17520069.10228904  
SRR17520069.10228905

SRR17520069.10228906  
SRR17520069.10228907  
SRR17520069.10228908  
SRR17520069.10228909  
SRR17520069.10228910  
SRR17520069.10228911  
SRR17520069.10228912  
SRR17520069.10228913  
SRR17520069.10228914  
SRR17520069.10228915  
SRR17520069.10228916  
SRR17520069.10228917  
SRR17520069.10228918  
SRR17520069.10228919  
SRR17520069.10228920  
SRR17520069.10228921  
SRR17520069.10228922  
SRR17520069.10228923  
SRR17520069.10228924  
SRR17520069.10228925  
SRR17520069.10228926  
SRR17520069.10228927  
SRR17520069.10228928  
SRR17520069.10228929  
SRR17520069.10228930  
SRR17520069.10228931  
SRR17520069.10228932  
SRR17520069.10228933  
SRR17520069.10228934  
SRR17520069.10228935  
SRR17520069.10228936  
SRR17520069.10228937  
SRR17520069.10228938  
SRR17520069.10228939  
SRR17520069.10228940  
SRR17520069.10228941  
SRR17520069.10228942  
SRR17520069.10228943  
SRR17520069.10228944  
SRR17520069.10228945  
SRR17520069.10228946  
SRR17520069.10228947  
SRR17520069.10228948  
SRR17520069.10228949  
SRR17520069.10228950  
SRR17520069.10228951  
SRR17520069.10228952

SRR17520069.10228953  
SRR17520069.10228954  
SRR17520069.10228955  
SRR17520069.10228956  
SRR17520069.10228957  
SRR17520069.10228959  
SRR17520069.10228960  
SRR17520069.10228961  
SRR17520069.10228962  
SRR17520069.10228963  
SRR17520069.10228964  
SRR17520069.10228965  
SRR17520069.10228966  
SRR17520069.10228967  
SRR17520069.10228968  
SRR17520069.10228969  
SRR17520069.10228970  
SRR17520069.10231962  
SRR17520069.10231963  
SRR17520069.10231964  
SRR17520069.10231965  
SRR17520069.10231966  
SRR17520069.10231967  
SRR17520069.10231968  
SRR17520069.10248423  
SRR17520069.10250780  
SRR17520069.10250781  
SRR17520069.10250782  
SRR17520069.10250783  
SRR17520069.10250784  
SRR17520069.10250785  
SRR17520069.10250786  
SRR17520069.10250787  
SRR17520069.10250789  
SRR17520069.10266208  
SRR17520069.10269219  
SRR17520069.10269220  
SRR17520069.10269221  
SRR17520069.10269222  
SRR17520069.10269223  
SRR17520069.10269224  
SRR17520069.10269225  
SRR17520069.10269226  
SRR17520069.10269227  
SRR17520069.10269228  
SRR17520069.10269229  
SRR17520069.10269230

SRR17520069.10269231  
SRR17520069.10269232  
SRR17520069.10269233  
SRR17520069.10269234  
SRR17520069.10269235  
SRR17520069.10269236  
SRR17520069.10269237  
SRR17520069.10269238  
SRR17520069.10269239  
SRR17520069.10269240  
SRR17520069.10269241  
SRR17520069.10269242  
SRR17520069.10269243  
SRR17520069.10269244  
SRR17520069.10269245  
SRR17520069.10269246  
SRR17520069.10269247  
SRR17520069.10269248  
SRR17520069.10269249  
SRR17520069.10269250  
SRR17520069.10269251  
SRR17520069.10269252  
SRR17520069.10269253  
SRR17520069.10269254  
SRR17520069.10269255  
SRR17520069.10269256  
SRR17520069.10269257  
SRR17520069.10269258  
SRR17520069.10269259  
SRR17520069.10269260  
SRR17520069.10269261  
SRR17520069.10269262  
SRR17520069.10269263  
SRR17520069.10269264  
SRR17520069.10269265  
SRR17520069.10269266  
SRR17520069.10269267  
SRR17520069.10269269  
SRR17520069.10269270  
SRR17520069.10269271  
SRR17520069.10269272  
SRR17520069.10269273  
SRR17520069.10269274  
SRR17520069.10269275  
SRR17520069.10269276  
SRR17520069.10269277  
SRR17520069.10269278

SRR17520069.10269279  
SRR17520069.10269280  
SRR17520069.10269281  
SRR17520069.10269282  
SRR17520069.10269283  
SRR17520069.10269284  
SRR17520069.10269285  
SRR17520069.10269286  
SRR17520069.10269287  
SRR17520069.10269288  
SRR17520069.10269289  
SRR17520069.10269290  
SRR17520069.10269291  
SRR17520069.10269292  
SRR17520069.10269293  
SRR17520069.10269294  
SRR17520069.10269295  
SRR17520069.10269296  
SRR17520069.10269297  
SRR17520069.10269298  
SRR17520069.10269299  
SRR17520069.10269300  
SRR17520069.10269301  
SRR17520069.10269302  
SRR17520069.10269303  
SRR17520069.10269304  
SRR17520069.10269305  
SRR17520069.10269306  
SRR17520069.10269307  
SRR17520069.10269308  
SRR17520069.10269309  
SRR17520069.10269310  
SRR17520069.10269311  
SRR17520069.10269312  
SRR17520069.10269313  
SRR17520069.10269314  
SRR17520069.10269315  
SRR17520069.10269316  
SRR17520069.10269317  
SRR17520069.10269318  
SRR17520069.10269319  
SRR17520069.10269320  
SRR17520069.10273598  
SRR17520069.10273599  
SRR17520069.10273600  
SRR17520069.10273601  
SRR17520069.10273602

SRR17520069.10273603  
SRR17520069.10273604  
SRR17520069.10273605  
SRR17520069.10273606  
SRR17520069.10273607  
SRR17520069.10273608  
SRR17520069.10273609  
SRR17520069.10273610  
SRR17520069.10273611  
SRR17520069.10273612  
SRR17520069.10273613  
SRR17520069.10273614  
SRR17520069.10273615  
SRR17520069.10273616  
SRR17520069.10273617  
SRR17520069.10273618  
SRR17520069.10273619  
SRR17520069.10273620  
SRR17520069.10273621  
SRR17520069.10273622  
SRR17520069.10273623  
SRR17520069.10273624  
SRR17520069.10273625  
SRR17520069.10273626  
SRR17520069.10273627  
SRR17520069.10273628  
SRR17520069.10273629  
SRR17520069.10273630  
SRR17520069.10273631  
SRR17520069.10273632  
SRR17520069.10273633  
SRR17520069.10273634  
SRR17520069.10273635  
SRR17520069.10273636  
SRR17520069.10273637  
SRR17520069.10273638  
SRR17520069.10273639  
SRR17520069.10273640  
SRR17520069.10273641  
SRR17520069.10273642  
SRR17520069.10273643  
SRR17520069.10273644  
SRR17520069.10273645  
SRR17520069.10273646  
SRR17520069.10273647  
SRR17520069.10273648  
SRR17520069.10273649

SRR17520069.10273650  
SRR17520069.10273651  
SRR17520069.10273652  
SRR17520069.10273653  
SRR17520069.10273654  
SRR17520069.10273655  
SRR17520069.10273656  
SRR17520069.10273657  
SRR17520069.10273658  
SRR17520069.10273660  
SRR17520069.10273661  
SRR17520069.10273662  
SRR17520069.10273663  
SRR17520069.10273664  
SRR17520069.10273665  
SRR17520069.10273666  
SRR17520069.10273667  
SRR17520069.10273668  
SRR17520069.10273669  
SRR17520069.10273670  
SRR17520069.10273671  
SRR17520069.10273672  
SRR17520069.10273673  
SRR17520069.10273674  
SRR17520069.10273675  
SRR17520069.10273676  
SRR17520069.10273677  
SRR17520069.10273678  
SRR17520069.10273679  
SRR17520069.10273680  
SRR17520069.10273681  
SRR17520069.10273682  
SRR17520069.10273683  
SRR17520069.10273684  
SRR17520069.10273686  
SRR17520069.10273687  
SRR17520069.10273688  
SRR17520069.10273689  
SRR17520069.10273690  
SRR17520069.10273691  
SRR17520069.10274074  
SRR17520069.10274075  
SRR17520069.10274076  
SRR17520069.10274077  
SRR17520069.10274078  
SRR17520069.10274079  
SRR17520069.10274080

SRR17520069. 10274081  
SRR17520069. 10274082  
SRR17520069. 10274083  
SRR17520069. 10274084  
SRR17520069. 10274085  
SRR17520069. 10274086  
SRR17520069. 10274087  
SRR17520069. 10274088  
SRR17520069. 10274089  
SRR17520069. 10274090  
SRR17520069. 10274091  
SRR17520069. 10274092  
SRR17520069. 10274093  
SRR17520069. 10274094  
SRR17520069. 10274095  
SRR17520069. 10274096  
SRR17520069. 10274097  
SRR17520069. 10274098  
SRR17520069. 10274099  
SRR17520069. 10274100  
SRR17520069. 10274101  
SRR17520069. 10274102  
SRR17520069. 10274103  
SRR17520069. 10274104  
SRR17520069. 10274105  
SRR17520069. 10274106  
SRR17520069. 10274107  
SRR17520069. 10274108  
SRR17520069. 10274109  
SRR17520069. 10274110  
SRR17520069. 10274111  
SRR17520069. 10274112  
SRR17520069. 10274113  
SRR17520069. 10274114  
SRR17520069. 10274115  
SRR17520069. 10274116  
SRR17520069. 10274117  
SRR17520069. 10274118  
SRR17520069. 10274119  
SRR17520069. 10274121  
SRR17520069. 10274122  
SRR17520069. 10274123  
SRR17520069. 10274124  
SRR17520069. 10274125  
SRR17520069. 10274126  
SRR17520069. 10274127  
SRR17520069. 10274128



SRR17520069. 10274129  
SRR17520069. 10274130  
SRR17520069. 10274131  
SRR17520069. 10274132  
SRR17520069. 10274133  
SRR17520069. 10274134  
SRR17520069. 10274135  
SRR17520069. 10274136  
SRR17520069. 10274137  
SRR17520069. 10274138  
SRR17520069. 10274139  
SRR17520069. 10274140  
SRR17520069. 10274141  
SRR17520069. 10274142  
SRR17520069. 10274143  
SRR17520069. 10274144  
SRR17520069. 10274145  
SRR17520069. 10274146  
SRR17520069. 10274147  
SRR17520069. 10274148  
SRR17520069. 10274149  
SRR17520069. 10274150  
SRR17520069. 10274151  
SRR17520069. 10274152  
SRR17520069. 10274153  
SRR17520069. 10274154  
SRR17520069. 10274155  
SRR17520069. 10274156  
SRR17520069. 10274157  
SRR17520069. 10274158  
SRR17520069. 10274159  
SRR17520069. 10274160  
SRR17520069. 10274161  
SRR17520069. 10274162  
SRR17520069. 10274163  
SRR17520069. 10274164  
SRR17520069. 10274165  
SRR17520069. 10274166  
SRR17520069. 10274167  
SRR17520069. 10274168  
SRR17520069. 10274169  
SRR17520069. 10274170  
SRR17520069. 10274171  
SRR17520069. 10274172  
SRR17520069. 10274173  
SRR17520069. 10274174  
SRR17520069. 10274175

SRR17520069.10274177  
SRR17520069.10274178  
SRR17520069.10274180  
SRR17520069.10274181  
SRR17520069.10274182  
SRR17520069.10274183  
SRR17520069.10274184  
SRR17520069.10274185  
SRR17520069.10274186  
SRR17520069.10274187  
SRR17520069.10274188  
SRR17520069.10274189  
SRR17520069.10274190  
SRR17520069.10274191  
SRR17520069.10274192  
SRR17520069.10274193  
SRR17520069.10274194  
SRR17520069.10274195  
SRR17520069.10274196  
SRR17520069.10274197  
SRR17520069.10274198  
SRR17520069.10274199  
SRR17520069.10274200  
SRR17520069.10274201  
SRR17520069.10274202  
SRR17520069.10274203  
SRR17520069.10274204  
SRR17520069.10274205  
SRR17520069.10274206  
SRR17520069.10274207  
SRR17520069.10274208  
SRR17520069.10274209  
SRR17520069.10274210  
SRR17520069.10274211  
SRR17520069.10274213  
SRR17520069.10274214  
SRR17520069.10274215  
SRR17520069.10274216  
SRR17520069.10274217  
SRR17520069.10274218  
SRR17520069.10274219  
SRR17520069.10274220  
SRR17520069.10274221  
SRR17520069.10274222  
SRR17520069.10274223  
SRR17520069.10274224  
SRR17520069.10274225

SRR17520069.10274226  
SRR17520069.10274227  
SRR17520069.10274228  
SRR17520069.10274229  
SRR17520069.10274230  
SRR17520069.10274231  
SRR17520069.10274232  
SRR17520069.10274233  
SRR17520069.10274234  
SRR17520069.10274235  
SRR17520069.10274236  
SRR17520069.10274237  
SRR17520069.10274238  
SRR17520069.10274239  
SRR17520069.10274240  
SRR17520069.10274241  
SRR17520069.10274242  
SRR17520069.10274243  
SRR17520069.10274244  
SRR17520069.10274245  
SRR17520069.10274246  
SRR17520069.10274247  
SRR17520069.10274248  
SRR17520069.10274249  
SRR17520069.10274250  
SRR17520069.10274251  
SRR17520069.10274252  
SRR17520069.10274253  
SRR17520069.10274255  
SRR17520069.10285750  
SRR17520069.10285751  
SRR17520069.10285752  
SRR17520069.10285753  
SRR17520069.10285754  
SRR17520069.10285755  
SRR17520069.10285756  
SRR17520069.10285757  
SRR17520069.10285758  
SRR17520069.10285759  
SRR17520069.10285760  
SRR17520069.10285761  
SRR17520069.10285762  
SRR17520069.10285763  
SRR17520069.10285764  
SRR17520069.10285765  
SRR17520069.10285766  
SRR17520069.10285767

SRR17520069.10285768  
SRR17520069.10285769  
SRR17520069.10285770  
SRR17520069.10285771  
SRR17520069.10285772  
SRR17520069.10285773  
SRR17520069.10285774  
SRR17520069.10285775  
SRR17520069.10285777  
SRR17520069.10285778  
SRR17520069.10285779  
SRR17520069.10285780  
SRR17520069.10285781  
SRR17520069.10285782  
SRR17520069.10285783  
SRR17520069.10285784  
SRR17520069.10285785  
SRR17520069.10285786  
SRR17520069.10285787  
SRR17520069.10285788  
SRR17520069.10285789  
SRR17520069.10285790  
SRR17520069.10285791  
SRR17520069.10285792  
SRR17520069.10285793  
SRR17520069.10285794  
SRR17520069.10285795  
SRR17520069.10285796  
SRR17520069.10285797  
SRR17520069.10285798  
SRR17520069.10285799  
SRR17520069.10285800  
SRR17520069.10285801  
SRR17520069.10285802  
SRR17520069.10285803  
SRR17520069.10285804  
SRR17520069.10285805  
SRR17520069.10285806  
SRR17520069.10285807  
SRR17520069.10285809  
SRR17520069.10285810  
SRR17520069.10285811  
SRR17520069.10285813  
SRR17520069.10285814  
SRR17520069.10285815  
SRR17520069.10285816  
SRR17520069.10285817

SRR17520069.10285818  
SRR17520069.10285819  
SRR17520069.10285820  
SRR17520069.10285821  
SRR17520069.10285822  
SRR17520069.10285823  
SRR17520069.10285824  
SRR17520069.10285825  
SRR17520069.10285826  
SRR17520069.10285828  
SRR17520069.10285829  
SRR17520069.10285830  
SRR17520069.10285831  
SRR17520069.10285832  
SRR17520069.10285833  
SRR17520069.10285834  
SRR17520069.10285835  
SRR17520069.10285836  
SRR17520069.10285838  
SRR17520069.10285839  
SRR17520069.10285840  
SRR17520069.10285841  
SRR17520069.10285842  
SRR17520069.10285843  
SRR17520069.10285845  
SRR17520069.10285847  
SRR17520069.10285849  
SRR17520069.10285850  
SRR17520069.10285851  
SRR17520069.10285852  
SRR17520069.10285853  
SRR17520069.10285854  
SRR17520069.10285855  
SRR17520069.10285856  
SRR17520069.10285857  
SRR17520069.10285858  
SRR17520069.10293144  
SRR17520069.10314413  
SRR17520069.10315361  
SRR17520069.10315611  
SRR17520069.10315612  
SRR17520069.10315613  
SRR17520069.10315614  
SRR17520069.10315615  
SRR17520069.10315616  
SRR17520069.10315618  
SRR17520069.10315619

SRR17520069.10315620  
SRR17520069.10315621  
SRR17520069.10315622  
SRR17520069.10315623  
SRR17520069.10315624  
SRR17520069.10315625  
SRR17520069.10315626  
SRR17520069.10315627  
SRR17520069.10315628  
SRR17520069.10315629  
SRR17520069.10315630  
SRR17520069.10315631  
SRR17520069.10315632  
SRR17520069.10315633  
SRR17520069.10315634  
SRR17520069.10315635  
SRR17520069.10315636  
SRR17520069.10315637  
SRR17520069.10315638  
SRR17520069.10315639  
SRR17520069.10315640  
SRR17520069.10315641  
SRR17520069.10315642  
SRR17520069.10315643  
SRR17520069.10315644  
SRR17520069.10315645  
SRR17520069.10315646  
SRR17520069.10315647  
SRR17520069.10315648  
SRR17520069.10315649  
SRR17520069.10315650  
SRR17520069.10315651  
SRR17520069.10315652  
SRR17520069.10315653  
SRR17520069.10315654  
SRR17520069.10315655  
SRR17520069.10315656  
SRR17520069.10315657  
SRR17520069.10315658  
SRR17520069.10315659  
SRR17520069.10315660  
SRR17520069.10315661  
SRR17520069.10315662  
SRR17520069.10315663  
SRR17520069.10315664  
SRR17520069.10315665  
SRR17520069.10315666

SRR17520069. 10315667  
SRR17520069. 10315668  
SRR17520069. 10315669  
SRR17520069. 10315670  
SRR17520069. 10315671  
SRR17520069. 10315672  
SRR17520069. 10315673  
SRR17520069. 10315674  
SRR17520069. 10315675  
SRR17520069. 10315676  
SRR17520069. 10315677  
SRR17520069. 10315678  
SRR17520069. 10315679  
SRR17520069. 10315680  
SRR17520069. 10315681  
SRR17520069. 10315682  
SRR17520069. 10315683  
SRR17520069. 10315684  
SRR17520069. 10315685  
SRR17520069. 10315686  
SRR17520069. 10315687  
SRR17520069. 10315688  
SRR17520069. 10315689  
SRR17520069. 10315690  
SRR17520069. 10315691  
SRR17520069. 10315692  
SRR17520069. 10315693  
SRR17520069. 10315694  
SRR17520069. 10315695  
SRR17520069. 10315696  
SRR17520069. 10315697  
SRR17520069. 10315698  
SRR17520069. 10315699  
SRR17520069. 10315700  
SRR17520069. 10315702  
SRR17520069. 10315703  
SRR17520069. 10315704  
SRR17520069. 10315705  
SRR17520069. 10315706  
SRR17520069. 10315707  
SRR17520069. 10315708  
SRR17520069. 10315709  
SRR17520069. 10316731  
SRR17520069. 10334272  
SRR17520069. 10348279  
SRR17520069. 10348280  
SRR17520069. 10348281

SRR17520069.10348282  
SRR17520069.10348283  
SRR17520069.10348284  
SRR17520069.10348285  
SRR17520069.10348286  
SRR17520069.10348287  
SRR17520069.10348288  
SRR17520069.10348289  
SRR17520069.10348290  
SRR17520069.10348291  
SRR17520069.10348292  
SRR17520069.10348293  
SRR17520069.10348294  
SRR17520069.10348295  
SRR17520069.10348297  
SRR17520069.10348298  
SRR17520069.10348299  
SRR17520069.10348300  
SRR17520069.10348301  
SRR17520069.10348303  
SRR17520069.10348304  
SRR17520069.10348306  
SRR17520069.10348307  
SRR17520069.10348308  
SRR17520069.10348309  
SRR17520069.10348310  
SRR17520069.10348311  
SRR17520069.10348312  
SRR17520069.10348313  
SRR17520069.10348314  
SRR17520069.10348315  
SRR17520069.10348316  
SRR17520069.10348317  
SRR17520069.10348318  
SRR17520069.10348319  
SRR17520069.10348320  
SRR17520069.10348321  
SRR17520069.10348322  
SRR17520069.10348323  
SRR17520069.10348324  
SRR17520069.10348325  
SRR17520069.10348326  
SRR17520069.10348327  
SRR17520069.10348328  
SRR17520069.10348329  
SRR17520069.10348330  
SRR17520069.10348331



SRR17520069. 10348332  
SRR17520069. 10348333  
SRR17520069. 10348334  
SRR17520069. 10348335  
SRR17520069. 10348336  
SRR17520069. 10348337  
SRR17520069. 10348339  
SRR17520069. 10348340  
SRR17520069. 10348341  
SRR17520069. 10348342  
SRR17520069. 10348343  
SRR17520069. 10348344  
SRR17520069. 10348345  
SRR17520069. 10348346  
SRR17520069. 10348347  
SRR17520069. 10348348  
SRR17520069. 10348349  
SRR17520069. 10348350  
SRR17520069. 10348352  
SRR17520069. 10348353  
SRR17520069. 10348354  
SRR17520069. 10348355  
SRR17520069. 10348356  
SRR17520069. 10348357  
SRR17520069. 10348358  
SRR17520069. 10348359  
SRR17520069. 10348360  
SRR17520069. 10348361  
SRR17520069. 10348362  
SRR17520069. 10348363  
SRR17520069. 10348364  
SRR17520069. 10348366  
SRR17520069. 10348367  
SRR17520069. 10348369  
SRR17520069. 10348370  
SRR17520069. 10348371  
SRR17520069. 10348372  
SRR17520069. 10348373  
SRR17520069. 10348374  
SRR17520069. 10348375  
SRR17520069. 10348376  
SRR17520069. 10348377  
SRR17520069. 10348378  
SRR17520069. 10348379  
SRR17520069. 10348380  
SRR17520069. 10348381  
SRR17520069. 10348382

SRR17520069. 10348383  
SRR17520069. 10348384  
SRR17520069. 10348385  
SRR17520069. 10348386  
SRR17520069. 10348387  
SRR17520069. 10348388  
SRR17520069. 10348389  
SRR17520069. 10348390  
SRR17520069. 10348391  
SRR17520069. 10348392  
SRR17520069. 10348393  
SRR17520069. 10348394  
SRR17520069. 10348395  
SRR17520069. 10348396  
SRR17520069. 10348397  
SRR17520069. 10348398  
SRR17520069. 10348399  
SRR17520069. 10348400  
SRR17520069. 10348401  
SRR17520069. 10348402  
SRR17520069. 10348403  
SRR17520069. 10348404  
SRR17520069. 10348405  
SRR17520069. 10348406  
SRR17520069. 10348407  
SRR17520069. 10348409  
SRR17520069. 10348410  
SRR17520069. 10348411  
SRR17520069. 10348412  
SRR17520069. 10348413  
SRR17520069. 10348414  
SRR17520069. 10348415  
SRR17520069. 10348416  
SRR17520069. 10348417  
SRR17520069. 10348418  
SRR17520069. 10348419  
SRR17520069. 10348420  
SRR17520069. 10348421  
SRR17520069. 10348422  
SRR17520069. 10348423  
SRR17520069. 10348424  
SRR17520069. 10348517  
SRR17520069. 10353664  
SRR17520069. 10353665  
SRR17520069. 10353666  
SRR17520069. 10353667  
SRR17520069. 10353668

SRR17520069.10353669  
SRR17520069.10353670  
SRR17520069.10353671  
SRR17520069.10353672  
SRR17520069.10353673  
SRR17520069.10353674  
SRR17520069.10353675  
SRR17520069.10353676  
SRR17520069.10353677  
SRR17520069.10353678  
SRR17520069.10353679  
SRR17520069.10353680  
SRR17520069.10353681  
SRR17520069.10353682  
SRR17520069.10353683  
SRR17520069.10353684  
SRR17520069.10353685  
SRR17520069.10353686  
SRR17520069.10353687  
SRR17520069.10353688  
SRR17520069.10353689  
SRR17520069.10353690  
SRR17520069.10353691  
SRR17520069.10353692  
SRR17520069.10353693  
SRR17520069.10353694  
SRR17520069.10353695  
SRR17520069.10353696  
SRR17520069.10353697  
SRR17520069.10353699  
SRR17520069.10353700  
SRR17520069.10353701  
SRR17520069.10353702  
SRR17520069.10353703  
SRR17520069.10353704  
SRR17520069.10353705  
SRR17520069.10353706  
SRR17520069.10353707  
SRR17520069.10353708  
SRR17520069.10353709  
SRR17520069.10353710  
SRR17520069.10353711  
SRR17520069.10353712  
SRR17520069.10358709  
SRR17520069.10358710  
SRR17520069.10358718  
SRR17520069.10358719

SRR17520069.10358720  
SRR17520069.10358721  
SRR17520069.10358722  
SRR17520069.10358723  
SRR17520069.10358724  
SRR17520069.10358725  
SRR17520069.10358726  
SRR17520069.10358728  
SRR17520069.10358729  
SRR17520069.10358730  
SRR17520069.10358731  
SRR17520069.10358732  
SRR17520069.10358733  
SRR17520069.10358734  
SRR17520069.10358735  
SRR17520069.10358736  
SRR17520069.10358737  
SRR17520069.10358738  
SRR17520069.10358739  
SRR17520069.10358740  
SRR17520069.10358741  
SRR17520069.10358742  
SRR17520069.10358743  
SRR17520069.10358744  
SRR17520069.10358745  
SRR17520069.10358746  
SRR17520069.10358747  
SRR17520069.10358748  
SRR17520069.10358749  
SRR17520069.10358750  
SRR17520069.10358751  
SRR17520069.10358752  
SRR17520069.10358753  
SRR17520069.10358754  
SRR17520069.10358757  
SRR17520069.10358758  
SRR17520069.10358759  
SRR17520069.10358760  
SRR17520069.10358761  
SRR17520069.10358762  
SRR17520069.10358763  
SRR17520069.10358764  
SRR17520069.10358765  
SRR17520069.10358766  
SRR17520069.10358767  
SRR17520069.10358768  
SRR17520069.10358769

SRR17520069.10358770  
SRR17520069.10358771  
SRR17520069.10358772  
SRR17520069.10358773  
SRR17520069.10358774  
SRR17520069.10358775  
SRR17520069.10358776  
SRR17520069.10358777  
SRR17520069.10358778  
SRR17520069.10358779  
SRR17520069.10358780  
SRR17520069.10358781  
SRR17520069.10358782  
SRR17520069.10358783  
SRR17520069.10358784  
SRR17520069.10358785  
SRR17520069.10358786  
SRR17520069.10358787  
SRR17520069.10358788  
SRR17520069.10358789  
SRR17520069.10358790  
SRR17520069.10358791  
SRR17520069.10358792  
SRR17520069.10358793  
SRR17520069.10358794  
SRR17520069.10358795  
SRR17520069.10358796  
SRR17520069.10358797  
SRR17520069.10358799  
SRR17520069.10358800  
SRR17520069.10358801  
SRR17520069.10358802  
SRR17520069.10358803  
SRR17520069.10358804  
SRR17520069.10358805  
SRR17520069.10358806  
SRR17520069.10358807  
SRR17520069.10358808  
SRR17520069.10358809  
SRR17520069.10358810  
SRR17520069.10358811  
SRR17520069.10358812  
SRR17520069.10358813  
SRR17520069.10358814  
SRR17520069.10358815  
SRR17520069.10358816  
SRR17520069.10358817

SRR17520069.10358818  
SRR17520069.10358819  
SRR17520069.10358820  
SRR17520069.10358821  
SRR17520069.10358822  
SRR17520069.10358823  
SRR17520069.10358825  
SRR17520069.10358826  
SRR17520069.10358827  
SRR17520069.10358828  
SRR17520069.10358829  
SRR17520069.10358830  
SRR17520069.10358831  
SRR17520069.10358833  
SRR17520069.10358834  
SRR17520069.10358835  
SRR17520069.10363167  
SRR17520069.10363193  
SRR17520069.10365079  
SRR17520069.10365203  
SRR17520069.10365204  
SRR17520069.10365205  
SRR17520069.10365206  
SRR17520069.10365207  
SRR17520069.10365208  
SRR17520069.10365209  
SRR17520069.10365211  
SRR17520069.10365212  
SRR17520069.10365213  
SRR17520069.10365214  
SRR17520069.10365215  
SRR17520069.10365216  
SRR17520069.10365217  
SRR17520069.10365218  
SRR17520069.10365219  
SRR17520069.10365220  
SRR17520069.10365221  
SRR17520069.10365222  
SRR17520069.10365223  
SRR17520069.10365224  
SRR17520069.10365225  
SRR17520069.10365226  
SRR17520069.10365227  
SRR17520069.10365228  
SRR17520069.10365229  
SRR17520069.10365230  
SRR17520069.10365231

SRR17520069. 10365232  
SRR17520069. 10365233  
SRR17520069. 10365234  
SRR17520069. 10365235  
SRR17520069. 10365236  
SRR17520069. 10365237  
SRR17520069. 10365238  
SRR17520069. 10365239  
SRR17520069. 10365240  
SRR17520069. 10365241  
SRR17520069. 10365242  
SRR17520069. 10365243  
SRR17520069. 10365244  
SRR17520069. 10365245  
SRR17520069. 10365246  
SRR17520069. 10365247  
SRR17520069. 10365248  
SRR17520069. 10365250  
SRR17520069. 10365251  
SRR17520069. 10365252  
SRR17520069. 10365253  
SRR17520069. 10365254  
SRR17520069. 10365255  
SRR17520069. 10365256  
SRR17520069. 10365257  
SRR17520069. 10365258  
SRR17520069. 10365259  
SRR17520069. 10365260  
SRR17520069. 10365261  
SRR17520069. 10365262  
SRR17520069. 10365263  
SRR17520069. 10365264  
SRR17520069. 10365265  
SRR17520069. 10365266  
SRR17520069. 10365267  
SRR17520069. 10365268  
SRR17520069. 10365269  
SRR17520069. 10365270  
SRR17520069. 10365271  
SRR17520069. 10365272  
SRR17520069. 10365273  
SRR17520069. 10374852  
SRR17520069. 10374853  
SRR17520069. 10374854  
SRR17520069. 10374855  
SRR17520069. 10374856  
SRR17520069. 10374857

SRR17520069. 10374858  
SRR17520069. 10374859  
SRR17520069. 10374860  
SRR17520069. 10374861  
SRR17520069. 10374862  
SRR17520069. 10374863  
SRR17520069. 10374864  
SRR17520069. 10374865  
SRR17520069. 10374866  
SRR17520069. 10374867  
SRR17520069. 10374868  
SRR17520069. 10374870  
SRR17520069. 10374871  
SRR17520069. 10374872  
SRR17520069. 10374873  
SRR17520069. 10374874  
SRR17520069. 10374875  
SRR17520069. 10374876  
SRR17520069. 10374877  
SRR17520069. 10374878  
SRR17520069. 10374879  
SRR17520069. 10376943  
SRR17520069. 10376944  
SRR17520069. 10376945  
SRR17520069. 10376946  
SRR17520069. 10376947  
SRR17520069. 10376948  
SRR17520069. 10376949  
SRR17520069. 10376950  
SRR17520069. 10376951  
SRR17520069. 10376952  
SRR17520069. 10376953  
SRR17520069. 10376954  
SRR17520069. 10376955  
SRR17520069. 10376956  
SRR17520069. 10376957  
SRR17520069. 10376958  
SRR17520069. 10376959  
SRR17520069. 10376960  
SRR17520069. 10376961  
SRR17520069. 10376962  
SRR17520069. 10376963  
SRR17520069. 10376964  
SRR17520069. 10376965  
SRR17520069. 10376966  
SRR17520069. 10376967  
SRR17520069. 10376968



SRR17520069.10376970  
SRR17520069.10376971  
SRR17520069.10376972  
SRR17520069.10376973  
SRR17520069.10376974  
SRR17520069.10376975  
SRR17520069.10376976  
SRR17520069.10376977  
SRR17520069.10376978  
SRR17520069.10376979  
SRR17520069.10376980  
SRR17520069.10376981  
SRR17520069.10376982  
SRR17520069.10376983  
SRR17520069.10376984  
SRR17520069.10376985  
SRR17520069.10376986  
SRR17520069.10394186  
SRR17520069.10394187  
SRR17520069.10394188  
SRR17520069.10394189  
SRR17520069.10394190  
SRR17520069.10394191  
SRR17520069.10394192  
SRR17520069.10394193  
SRR17520069.10394194  
SRR17520069.10394195  
SRR17520069.10394196  
SRR17520069.10394197  
SRR17520069.10394198  
SRR17520069.10394199  
SRR17520069.10394200  
SRR17520069.10394201  
SRR17520069.10394202  
SRR17520069.10394203  
SRR17520069.10394204  
SRR17520069.10394208  
SRR17520069.10394209  
SRR17520069.10394210  
SRR17520069.10394211  
SRR17520069.10394212  
SRR17520069.10394213  
SRR17520069.10394214  
SRR17520069.10394215  
SRR17520069.10394216  
SRR17520069.10394217  
SRR17520069.10394218

SRR17520069.10394219  
SRR17520069.10394220  
SRR17520069.10394221  
SRR17520069.10394222  
SRR17520069.10394223  
SRR17520069.10394224  
SRR17520069.10394225  
SRR17520069.10394226  
SRR17520069.10394227  
SRR17520069.10394228  
SRR17520069.10394229  
SRR17520069.10394230  
SRR17520069.10394231  
SRR17520069.10394232  
SRR17520069.10394233  
SRR17520069.10394234  
SRR17520069.10394235  
SRR17520069.10394236  
SRR17520069.10394237  
SRR17520069.10394238  
SRR17520069.10394239  
SRR17520069.10394240  
SRR17520069.10394241  
SRR17520069.10394242  
SRR17520069.10394243  
SRR17520069.10394244  
SRR17520069.10394245  
SRR17520069.10394246  
SRR17520069.10394247  
SRR17520069.10394248  
SRR17520069.10394249  
SRR17520069.10394250  
SRR17520069.10394251  
SRR17520069.10394252  
SRR17520069.10394253  
SRR17520069.10394254  
SRR17520069.10394255  
SRR17520069.10394256  
SRR17520069.10394257  
SRR17520069.10394258  
SRR17520069.10394259  
SRR17520069.10404721  
SRR17520069.10407077  
SRR17520069.10407078  
SRR17520069.10407079  
SRR17520069.10407080  
SRR17520069.10407081

SRR17520069. 10407082  
SRR17520069. 10407083  
SRR17520069. 10407084  
SRR17520069. 10407085  
SRR17520069. 10407086  
SRR17520069. 10407087  
SRR17520069. 10407088  
SRR17520069. 10407089  
SRR17520069. 10407090  
SRR17520069. 10407091  
SRR17520069. 10407092  
SRR17520069. 10407093  
SRR17520069. 10407094  
SRR17520069. 10407095  
SRR17520069. 10407096  
SRR17520069. 10407097  
SRR17520069. 10407098  
SRR17520069. 10407099  
SRR17520069. 10407100  
SRR17520069. 10407101  
SRR17520069. 10407102  
SRR17520069. 10407103  
SRR17520069. 10407105  
SRR17520069. 10407106  
SRR17520069. 10407107  
SRR17520069. 10407108  
SRR17520069. 10407109  
SRR17520069. 10407110  
SRR17520069. 10407111  
SRR17520069. 10407112  
SRR17520069. 10407113  
SRR17520069. 10407114  
SRR17520069. 10407115  
SRR17520069. 10407116  
SRR17520069. 10407117  
SRR17520069. 10407118  
SRR17520069. 10407119  
SRR17520069. 10407120  
SRR17520069. 10407121  
SRR17520069. 10407122  
SRR17520069. 10407123  
SRR17520069. 10407124  
SRR17520069. 10407125  
SRR17520069. 10407126  
SRR17520069. 10407127  
SRR17520069. 10407129  
SRR17520069. 10407130

SRR17520069. 10407131  
SRR17520069. 10407132  
SRR17520069. 10407133  
SRR17520069. 10407134  
SRR17520069. 10407135  
SRR17520069. 10407136  
SRR17520069. 10407137  
SRR17520069. 10407138  
SRR17520069. 10407139  
SRR17520069. 10407140  
SRR17520069. 10407141  
SRR17520069. 10407142  
SRR17520069. 10407143  
SRR17520069. 10407144  
SRR17520069. 10407145  
SRR17520069. 10407146  
SRR17520069. 10407147  
SRR17520069. 10407148  
SRR17520069. 10407149  
SRR17520069. 10407150  
SRR17520069. 10407151  
SRR17520069. 10407152  
SRR17520069. 10407153  
SRR17520069. 10407154  
SRR17520069. 10407155  
SRR17520069. 10407156  
SRR17520069. 10407157  
SRR17520069. 10407158  
SRR17520069. 10407159  
SRR17520069. 10407160  
SRR17520069. 10407161  
SRR17520069. 10407162  
SRR17520069. 10407163  
SRR17520069. 10407164  
SRR17520069. 10407165  
SRR17520069. 10407166  
SRR17520069. 10407167  
SRR17520069. 10407168  
SRR17520069. 10407169  
SRR17520069. 10407170  
SRR17520069. 10407171  
SRR17520069. 10412234  
SRR17520069. 10412256  
SRR17520069. 10420633  
SRR17520069. 10420634  
SRR17520069. 10420635  
SRR17520069. 10420636

SRR17520069.10420637  
SRR17520069.10420638  
SRR17520069.10420639  
SRR17520069.10420641  
SRR17520069.10420642  
SRR17520069.10420643  
SRR17520069.10420644  
SRR17520069.10420645  
SRR17520069.10420646  
SRR17520069.10420647  
SRR17520069.10420648  
SRR17520069.10420649  
SRR17520069.10420650  
SRR17520069.10420651  
SRR17520069.10420652  
SRR17520069.10420653  
SRR17520069.10420656  
SRR17520069.10420657  
SRR17520069.10420658  
SRR17520069.10420659  
SRR17520069.10420660  
SRR17520069.10420661  
SRR17520069.10420662  
SRR17520069.10420663  
SRR17520069.10420664  
SRR17520069.10420665  
SRR17520069.10420666  
SRR17520069.10420668  
SRR17520069.10420669  
SRR17520069.10420670  
SRR17520069.10420671  
SRR17520069.10420672  
SRR17520069.10420673  
SRR17520069.10420674  
SRR17520069.10420675  
SRR17520069.10420676  
SRR17520069.10420677  
SRR17520069.10420679  
SRR17520069.10420680  
SRR17520069.10420681  
SRR17520069.10420682  
SRR17520069.10420683  
SRR17520069.10420684  
SRR17520069.10420685  
SRR17520069.10420686  
SRR17520069.10420688  
SRR17520069.10420689

SRR17520069.10420690  
SRR17520069.10420692  
SRR17520069.10420693  
SRR17520069.10420694  
SRR17520069.10420695  
SRR17520069.10420696  
SRR17520069.10420697  
SRR17520069.10420699  
SRR17520069.10420700  
SRR17520069.10420701  
SRR17520069.10420702  
SRR17520069.10420703  
SRR17520069.10420704  
SRR17520069.10420705  
SRR17520069.10420707  
SRR17520069.10420708  
SRR17520069.10420709  
SRR17520069.10420710  
SRR17520069.10420711  
SRR17520069.10420712  
SRR17520069.10420713  
SRR17520069.10420714  
SRR17520069.10420715  
SRR17520069.10420717  
SRR17520069.10420718  
SRR17520069.10420719  
SRR17520069.10420720  
SRR17520069.10420721  
SRR17520069.10420722  
SRR17520069.10420723  
SRR17520069.10420724  
SRR17520069.10420725  
SRR17520069.10420726  
SRR17520069.10428257  
SRR17520069.10428258  
SRR17520069.10428259  
SRR17520069.10428260  
SRR17520069.10428261  
SRR17520069.10428262  
SRR17520069.10428263  
SRR17520069.10428264  
SRR17520069.10428265  
SRR17520069.10428266  
SRR17520069.10428267  
SRR17520069.10428268  
SRR17520069.10428269  
SRR17520069.10428270

SRR17520069.10428271  
SRR17520069.10428272  
SRR17520069.10428273  
SRR17520069.10428274  
SRR17520069.10428275  
SRR17520069.10428276  
SRR17520069.10428277  
SRR17520069.10428278  
SRR17520069.10428279  
SRR17520069.10428280  
SRR17520069.10428281  
SRR17520069.10428282  
SRR17520069.10428283  
SRR17520069.10428284  
SRR17520069.10428285  
SRR17520069.10428286  
SRR17520069.10428287  
SRR17520069.10428288  
SRR17520069.10428289  
SRR17520069.10428290  
SRR17520069.10428291  
SRR17520069.10428292  
SRR17520069.10428293  
SRR17520069.10428294  
SRR17520069.10428295  
SRR17520069.10428296  
SRR17520069.10428297  
SRR17520069.10428298  
SRR17520069.10428299  
SRR17520069.10428300  
SRR17520069.10428301  
SRR17520069.10428302  
SRR17520069.10428303  
SRR17520069.10428304  
SRR17520069.10428305  
SRR17520069.10428306  
SRR17520069.10428307  
SRR17520069.10428308  
SRR17520069.10428309  
SRR17520069.10428310  
SRR17520069.10428311  
SRR17520069.10428312  
SRR17520069.10428313  
SRR17520069.10428314  
SRR17520069.10428315  
SRR17520069.10428316  
SRR17520069.10428317

SRR17520069.10428318  
SRR17520069.10428319  
SRR17520069.10428320  
SRR17520069.10428321  
SRR17520069.10428322  
SRR17520069.10428323  
SRR17520069.10428324  
SRR17520069.10428325  
SRR17520069.10428326  
SRR17520069.10428327  
SRR17520069.10428328  
SRR17520069.10428329  
SRR17520069.10428330  
SRR17520069.10428331  
SRR17520069.10428332  
SRR17520069.10428333  
SRR17520069.10428334  
SRR17520069.10428335  
SRR17520069.10428336  
SRR17520069.10428337  
SRR17520069.10428338  
SRR17520069.10428339  
SRR17520069.10428340  
SRR17520069.10428341  
SRR17520069.10428342  
SRR17520069.10428343  
SRR17520069.10428344  
SRR17520069.10428345  
SRR17520069.10428346  
SRR17520069.10428347  
SRR17520069.10428348  
SRR17520069.10428349  
SRR17520069.10428351  
SRR17520069.10428352  
SRR17520069.10428353  
SRR17520069.10428354  
SRR17520069.10428355  
SRR17520069.10428356  
SRR17520069.10428357  
SRR17520069.10428358  
SRR17520069.10428359  
SRR17520069.10428360  
SRR17520069.10428361  
SRR17520069.10428362  
SRR17520069.10428363  
SRR17520069.10428364  
SRR17520069.10428365



SRR17520069. 10428366  
SRR17520069. 10428367  
SRR17520069. 10428368  
SRR17520069. 10428369  
SRR17520069. 10428370  
SRR17520069. 10428371  
SRR17520069. 10428372  
SRR17520069. 10428373  
SRR17520069. 10428374  
SRR17520069. 10428375  
SRR17520069. 10428376  
SRR17520069. 10428377  
SRR17520069. 10428378  
SRR17520069. 10428379  
SRR17520069. 10428380  
SRR17520069. 10428381  
SRR17520069. 10428382  
SRR17520069. 10428383  
SRR17520069. 10428384  
SRR17520069. 10428385  
SRR17520069. 10428386  
SRR17520069. 10428387  
SRR17520069. 10428388  
SRR17520069. 10428389  
SRR17520069. 10428390  
SRR17520069. 10428391  
SRR17520069. 10428392  
SRR17520069. 10428393  
SRR17520069. 10428394  
SRR17520069. 10428395  
SRR17520069. 10428396  
SRR17520069. 10428397  
SRR17520069. 10428398  
SRR17520069. 10428399  
SRR17520069. 10428400  
SRR17520069. 10428401  
SRR17520069. 10428402  
SRR17520069. 10428403  
SRR17520069. 10428404  
SRR17520069. 10428405  
SRR17520069. 10428406  
SRR17520069. 10428407  
SRR17520069. 10428408  
SRR17520069. 10428409  
SRR17520069. 10428410  
SRR17520069. 10428411  
SRR17520069. 10428412

SRR17520069.10428413  
SRR17520069.10428414  
SRR17520069.10428415  
SRR17520069.10428416  
SRR17520069.10428417  
SRR17520069.10428418  
SRR17520069.10428419  
SRR17520069.10428420  
SRR17520069.10428421  
SRR17520069.10428422  
SRR17520069.10428423  
SRR17520069.10428425  
SRR17520069.10428428  
SRR17520069.10428429  
SRR17520069.10428430  
SRR17520069.10428431  
SRR17520069.10428432  
SRR17520069.10428433  
SRR17520069.10428434  
SRR17520069.10428435  
SRR17520069.10428437  
SRR17520069.10428438  
SRR17520069.10428439  
SRR17520069.10428440  
SRR17520069.10428441  
SRR17520069.10428442  
SRR17520069.10428443  
SRR17520069.10428444  
SRR17520069.10428445  
SRR17520069.10428446  
SRR17520069.10428447  
SRR17520069.10428448  
SRR17520069.10428449  
SRR17520069.10428450  
SRR17520069.10428451  
SRR17520069.10428452  
SRR17520069.10428453  
SRR17520069.10428454  
SRR17520069.10428455  
SRR17520069.10428456  
SRR17520069.10428457  
SRR17520069.10428458  
SRR17520069.10428459  
SRR17520069.10428460  
SRR17520069.10428461  
SRR17520069.10428462  
SRR17520069.10428463

SRR17520069.10431180  
SRR17520069.10432357  
SRR17520069.10432363  
SRR17520069.10432373  
SRR17520069.10448447  
SRR17520069.10448449  
SRR17520069.10448450  
SRR17520069.10448451  
SRR17520069.10448452  
SRR17520069.10448456  
SRR17520069.10448457  
SRR17520069.10448458  
SRR17520069.10448459  
SRR17520069.10448460  
SRR17520069.10448461  
SRR17520069.10448462  
SRR17520069.10448463  
SRR17520069.10448464  
SRR17520069.10448465  
SRR17520069.10448466  
SRR17520069.10448467  
SRR17520069.10448469  
SRR17520069.10448470  
SRR17520069.10448472  
SRR17520069.10448473  
SRR17520069.10448474  
SRR17520069.10448475  
SRR17520069.10448476  
SRR17520069.10448477  
SRR17520069.10448479  
SRR17520069.10448481  
SRR17520069.10448482  
SRR17520069.10448484  
SRR17520069.10448485  
SRR17520069.10448486  
SRR17520069.10448487  
SRR17520069.10448489  
SRR17520069.10448490  
SRR17520069.10448491  
SRR17520069.10448493  
SRR17520069.10448494  
SRR17520069.10448496  
SRR17520069.10448497  
SRR17520069.10448498  
SRR17520069.10448499  
SRR17520069.10448500  
SRR17520069.10448501

SRR17520069.10448502  
SRR17520069.10448503  
SRR17520069.10448504  
SRR17520069.10448506  
SRR17520069.10448507  
SRR17520069.10448509  
SRR17520069.10448510  
SRR17520069.10448511  
SRR17520069.10448512  
SRR17520069.10448513  
SRR17520069.10448516  
SRR17520069.10448518  
SRR17520069.10448519  
SRR17520069.10448523  
SRR17520069.10448524  
SRR17520069.10448525  
SRR17520069.10448526  
SRR17520069.10448527  
SRR17520069.10448528  
SRR17520069.10448529  
SRR17520069.10448530  
SRR17520069.10448531  
SRR17520069.10448532  
SRR17520069.10448534  
SRR17520069.10448535  
SRR17520069.10448536  
SRR17520069.10449010  
SRR17520069.10449011  
SRR17520069.10449012  
SRR17520069.10449013  
SRR17520069.10449014  
SRR17520069.10449015  
SRR17520069.10449017  
SRR17520069.10449018  
SRR17520069.10449019  
SRR17520069.10449020  
SRR17520069.10449021  
SRR17520069.10449022  
SRR17520069.10449023  
SRR17520069.10449024  
SRR17520069.10449025  
SRR17520069.10449026  
SRR17520069.10449027  
SRR17520069.10449028  
SRR17520069.10449029  
SRR17520069.10449030  
SRR17520069.10449031

SRR17520069.10449032  
SRR17520069.10449033  
SRR17520069.10449034  
SRR17520069.10449035  
SRR17520069.10449036  
SRR17520069.10449037  
SRR17520069.10449038  
SRR17520069.10449039  
SRR17520069.10449040  
SRR17520069.10449041  
SRR17520069.10449042  
SRR17520069.10449043  
SRR17520069.10449044  
SRR17520069.10449045  
SRR17520069.10449046  
SRR17520069.10449047  
SRR17520069.10449048  
SRR17520069.10449049  
SRR17520069.10449050  
SRR17520069.10449051  
SRR17520069.10449052  
SRR17520069.10449053  
SRR17520069.10449054  
SRR17520069.10449055  
SRR17520069.10449056  
SRR17520069.10449057  
SRR17520069.10449059  
SRR17520069.10449060  
SRR17520069.10449061  
SRR17520069.10449062  
SRR17520069.10449063  
SRR17520069.10449064  
SRR17520069.10449065  
SRR17520069.10449066  
SRR17520069.10449067  
SRR17520069.10449068  
SRR17520069.10449069  
SRR17520069.10449071  
SRR17520069.10449073  
SRR17520069.10449076  
SRR17520069.10449080  
SRR17520069.10449081  
SRR17520069.10449082  
SRR17520069.10449083  
SRR17520069.10449084  
SRR17520069.10456402  
SRR17520069.10459366

SRR17520069. 10459367  
SRR17520069. 10459368  
SRR17520069. 10459369  
SRR17520069. 10459370  
SRR17520069. 10459371  
SRR17520069. 10459372  
SRR17520069. 10459373  
SRR17520069. 10459374  
SRR17520069. 10459375  
SRR17520069. 10459376  
SRR17520069. 10459377  
SRR17520069. 10459378  
SRR17520069. 10459379  
SRR17520069. 10459380  
SRR17520069. 10459381  
SRR17520069. 10459382  
SRR17520069. 10459383  
SRR17520069. 10459384  
SRR17520069. 10459385  
SRR17520069. 10459386  
SRR17520069. 10459387  
SRR17520069. 10459388  
SRR17520069. 10459389  
SRR17520069. 10459390  
SRR17520069. 10459391  
SRR17520069. 10459392  
SRR17520069. 10459393  
SRR17520069. 10459394  
SRR17520069. 10459395  
SRR17520069. 10459396  
SRR17520069. 10459397  
SRR17520069. 10459398  
SRR17520069. 10459399  
SRR17520069. 10459400  
SRR17520069. 10459401  
SRR17520069. 10459402  
SRR17520069. 10459403  
SRR17520069. 10459404  
SRR17520069. 10459405  
SRR17520069. 10459406  
SRR17520069. 10459407  
SRR17520069. 10459408  
SRR17520069. 10459409  
SRR17520069. 10459411  
SRR17520069. 10459412  
SRR17520069. 10459413  
SRR17520069. 10459414

SRR17520069.10459415  
SRR17520069.10459416  
SRR17520069.10459417  
SRR17520069.10459418  
SRR17520069.10459419  
SRR17520069.10459420  
SRR17520069.10459421  
SRR17520069.10459422  
SRR17520069.10459423  
SRR17520069.10459424  
SRR17520069.10459425  
SRR17520069.10459426  
SRR17520069.10459427  
SRR17520069.10459428  
SRR17520069.10459429  
SRR17520069.10459430  
SRR17520069.10459431  
SRR17520069.10459432  
SRR17520069.10459433  
SRR17520069.10459434  
SRR17520069.10459435  
SRR17520069.10459436  
SRR17520069.10459437  
SRR17520069.10459438  
SRR17520069.10459439  
SRR17520069.10459440  
SRR17520069.10459441  
SRR17520069.10459442  
SRR17520069.10459443  
SRR17520069.10459444  
SRR17520069.10459445  
SRR17520069.10459446  
SRR17520069.10459447  
SRR17520069.10459448  
SRR17520069.10459449  
SRR17520069.10459450  
SRR17520069.10459451  
SRR17520069.10459452  
SRR17520069.10459453  
SRR17520069.10459454  
SRR17520069.10459455  
SRR17520069.10459456  
SRR17520069.10459457  
SRR17520069.10459458  
SRR17520069.10459459  
SRR17520069.10459460  
SRR17520069.10459461

SRR17520069. 10459462  
SRR17520069. 10459463  
SRR17520069. 10459464  
SRR17520069. 10459465  
SRR17520069. 10459466  
SRR17520069. 10459467  
SRR17520069. 10459468  
SRR17520069. 10459469  
SRR17520069. 10459470  
SRR17520069. 10459471  
SRR17520069. 10459472  
SRR17520069. 10459473  
SRR17520069. 10459474  
SRR17520069. 10459475  
SRR17520069. 10459477  
SRR17520069. 10459478  
SRR17520069. 10459479  
SRR17520069. 10459480  
SRR17520069. 10459481  
SRR17520069. 10459482  
SRR17520069. 10459483  
SRR17520069. 10459484  
SRR17520069. 10459485  
SRR17520069. 10459486  
SRR17520069. 10459487  
SRR17520069. 10459488  
SRR17520069. 10459489  
SRR17520069. 10459490  
SRR17520069. 10459491  
SRR17520069. 10459492  
SRR17520069. 10459493  
SRR17520069. 10459494  
SRR17520069. 10459495  
SRR17520069. 10459496  
SRR17520069. 10459497  
SRR17520069. 10459498  
SRR17520069. 10459499  
SRR17520069. 10459500  
SRR17520069. 10459501  
SRR17520069. 10459502  
SRR17520069. 10459503  
SRR17520069. 10459504  
SRR17520069. 10459505  
SRR17520069. 10459506  
SRR17520069. 10459507  
SRR17520069. 10459509  
SRR17520069. 10459510



SRR17520069.10459511  
SRR17520069.10459512  
SRR17520069.10459513  
SRR17520069.10459514  
SRR17520069.10459515  
SRR17520069.10459516  
SRR17520069.10459517  
SRR17520069.10459518  
SRR17520069.10459519  
SRR17520069.10459520  
SRR17520069.10459521  
SRR17520069.10459522  
SRR17520069.10499017  
SRR17520069.10505737  
SRR17520069.10547921  
SRR17520069.10547922  
SRR17520069.10547923  
SRR17520069.10547924  
SRR17520069.10547925  
SRR17520069.10547926  
SRR17520069.10547927  
SRR17520069.10547928  
SRR17520069.10547929  
SRR17520069.10547930  
SRR17520069.10547931  
SRR17520069.10547932  
SRR17520069.10547933  
SRR17520069.10547934  
SRR17520069.10547935  
SRR17520069.10547936  
SRR17520069.10547937  
SRR17520069.10547938  
SRR17520069.10547939  
SRR17520069.10547940  
SRR17520069.10547941  
SRR17520069.10547942  
SRR17520069.10547943  
SRR17520069.10547944  
SRR17520069.10547945  
SRR17520069.10547946  
SRR17520069.10547947  
SRR17520069.10547948  
SRR17520069.10547949  
SRR17520069.10547950  
SRR17520069.10547951  
SRR17520069.10547952  
SRR17520069.10547953

SRR17520069.10547954  
SRR17520069.10547955  
SRR17520069.10547956  
SRR17520069.10547957  
SRR17520069.10547958  
SRR17520069.10547959  
SRR17520069.10547960  
SRR17520069.10547961  
SRR17520069.10547962  
SRR17520069.10547963  
SRR17520069.10558427  
SRR17520069.10569537  
SRR17520069.10569538  
SRR17520069.10569539  
SRR17520069.10569540  
SRR17520069.10569541  
SRR17520069.10569542  
SRR17520069.10569543  
SRR17520069.10569544  
SRR17520069.10569545  
SRR17520069.10569546  
SRR17520069.10569547  
SRR17520069.10569548  
SRR17520069.10569549  
SRR17520069.10569550  
SRR17520069.10569551  
SRR17520069.10569552  
SRR17520069.10569553  
SRR17520069.10569554  
SRR17520069.10569555  
SRR17520069.10569556  
SRR17520069.10569557  
SRR17520069.10569558  
SRR17520069.10569559  
SRR17520069.10569560  
SRR17520069.10569561  
SRR17520069.10569562  
SRR17520069.10569563  
SRR17520069.10569564  
SRR17520069.10569565  
SRR17520069.10569566  
SRR17520069.10569567  
SRR17520069.10569568  
SRR17520069.10569569  
SRR17520069.10569570  
SRR17520069.10569571  
SRR17520069.10569572

SRR17520069.10569573  
SRR17520069.10569574  
SRR17520069.10569575  
SRR17520069.10569576  
SRR17520069.10569577  
SRR17520069.10569578  
SRR17520069.10569579  
SRR17520069.10569580  
SRR17520069.10569581  
SRR17520069.10569582  
SRR17520069.10569583  
SRR17520069.10569584  
SRR17520069.10569585  
SRR17520069.10569586  
SRR17520069.10569587  
SRR17520069.10569588  
SRR17520069.10569589  
SRR17520069.10569590  
SRR17520069.10569591  
SRR17520069.10569592  
SRR17520069.10569593  
SRR17520069.10569594  
SRR17520069.10569595  
SRR17520069.10569596  
SRR17520069.10569597  
SRR17520069.10569598  
SRR17520069.10569599  
SRR17520069.10569600  
SRR17520069.10569601  
SRR17520069.10569602  
SRR17520069.10569603  
SRR17520069.10569604  
SRR17520069.10569605  
SRR17520069.10569606  
SRR17520069.10569607  
SRR17520069.10569608  
SRR17520069.10569609  
SRR17520069.10569610  
SRR17520069.10569611  
SRR17520069.10569612  
SRR17520069.10569613  
SRR17520069.10569614  
SRR17520069.10569615  
SRR17520069.10569616  
SRR17520069.10569617  
SRR17520069.10569618  
SRR17520069.10569619

SRR17520069.10569620  
SRR17520069.10569621  
SRR17520069.10569622  
SRR17520069.10569623  
SRR17520069.10569624  
SRR17520069.10569625  
SRR17520069.10569626  
SRR17520069.10569627  
SRR17520069.10569628  
SRR17520069.10569629  
SRR17520069.10569630  
SRR17520069.10569631  
SRR17520069.10569632  
SRR17520069.10569633  
SRR17520069.10569634  
SRR17520069.10569635  
SRR17520069.10569636  
SRR17520069.10569637  
SRR17520069.10569638  
SRR17520069.10569639  
SRR17520069.10569640  
SRR17520069.10569641  
SRR17520069.10569642  
SRR17520069.10569643  
SRR17520069.10569644  
SRR17520069.10569645  
SRR17520069.10569646  
SRR17520069.10569647  
SRR17520069.10569648  
SRR17520069.10569649  
SRR17520069.10569650  
SRR17520069.10569651  
SRR17520069.10569652  
SRR17520069.10569653  
SRR17520069.10569654  
SRR17520069.10569655  
SRR17520069.10569656  
SRR17520069.10569657  
SRR17520069.10569658  
SRR17520069.10569659  
SRR17520069.10569660  
SRR17520069.10569661  
SRR17520069.10569662  
SRR17520069.10569663  
SRR17520069.10569664  
SRR17520069.10569665  
SRR17520069.10569666

SRR17520069.10569667  
SRR17520069.10569668  
SRR17520069.10569669  
SRR17520069.10569670  
SRR17520069.10569671  
SRR17520069.10569672  
SRR17520069.10569673  
SRR17520069.10569674  
SRR17520069.10569675  
SRR17520069.10569676  
SRR17520069.10569677  
SRR17520069.10569678  
SRR17520069.10569679  
SRR17520069.10569680  
SRR17520069.10569681  
SRR17520069.10569682  
SRR17520069.10569683  
SRR17520069.10569684  
SRR17520069.10581026  
SRR17520069.10586093  
SRR17520069.10586094  
SRR17520069.10586095  
SRR17520069.10586096  
SRR17520069.10586097  
SRR17520069.10586098  
SRR17520069.10586099  
SRR17520069.10586100  
SRR17520069.10586101  
SRR17520069.10586102  
SRR17520069.10586103  
SRR17520069.10586104  
SRR17520069.10586105  
SRR17520069.10586106  
SRR17520069.10586107  
SRR17520069.10586108  
SRR17520069.10586109  
SRR17520069.10586110  
SRR17520069.10586111  
SRR17520069.10586112  
SRR17520069.10586113  
SRR17520069.10586114  
SRR17520069.10586115  
SRR17520069.10586116  
SRR17520069.10586117  
SRR17520069.10586118  
SRR17520069.10586119  
SRR17520069.10586120

SRR17520069.10586121  
SRR17520069.10586122  
SRR17520069.10586123  
SRR17520069.10586124  
SRR17520069.10586125  
SRR17520069.10586126  
SRR17520069.10586127  
SRR17520069.10586128  
SRR17520069.10586129  
SRR17520069.10586130  
SRR17520069.10586132  
SRR17520069.10586133  
SRR17520069.10586134  
SRR17520069.10586135  
SRR17520069.10586136  
SRR17520069.10586137  
SRR17520069.10586138  
SRR17520069.10586139  
SRR17520069.10586140  
SRR17520069.10586141  
SRR17520069.10586142  
SRR17520069.10586143  
SRR17520069.10586144  
SRR17520069.10586145  
SRR17520069.10586146  
SRR17520069.10586147  
SRR17520069.10586148  
SRR17520069.10586149  
SRR17520069.10586150  
SRR17520069.10586151  
SRR17520069.10586152  
SRR17520069.10586153  
SRR17520069.10586154  
SRR17520069.10586155  
SRR17520069.10586156  
SRR17520069.10586157  
SRR17520069.10586158  
SRR17520069.10586159  
SRR17520069.10586160  
SRR17520069.10586161  
SRR17520069.10586162  
SRR17520069.10586163  
SRR17520069.10586164  
SRR17520069.10586165  
SRR17520069.10586166  
SRR17520069.10586167  
SRR17520069.10586168

SRR17520069.10586169  
SRR17520069.10586170  
SRR17520069.10586171  
SRR17520069.10586172  
SRR17520069.10586173  
SRR17520069.10586174  
SRR17520069.10586175  
SRR17520069.10586176  
SRR17520069.10586177  
SRR17520069.10586178  
SRR17520069.10586179  
SRR17520069.10586180  
SRR17520069.10586182  
SRR17520069.10586183  
SRR17520069.10586184  
SRR17520069.10586185  
SRR17520069.10588749  
SRR17520069.10596476  
SRR17520069.10596477  
SRR17520069.10596478  
SRR17520069.10596479  
SRR17520069.10596480  
SRR17520069.10596481  
SRR17520069.10596482  
SRR17520069.10596483  
SRR17520069.10596484  
SRR17520069.10596485  
SRR17520069.10596486  
SRR17520069.10596487  
SRR17520069.10596488  
SRR17520069.10596489  
SRR17520069.10596490  
SRR17520069.10596491  
SRR17520069.10596492  
SRR17520069.10596493  
SRR17520069.10596494  
SRR17520069.10596495  
SRR17520069.10596496  
SRR17520069.10596497  
SRR17520069.10596498  
SRR17520069.10596499  
SRR17520069.10596500  
SRR17520069.10596501  
SRR17520069.10596502  
SRR17520069.10596503  
SRR17520069.10596504  
SRR17520069.10596505

SRR17520069.10596506  
SRR17520069.10596507  
SRR17520069.10596508  
SRR17520069.10596509  
SRR17520069.10596510  
SRR17520069.10596511  
SRR17520069.10596512  
SRR17520069.10596514  
SRR17520069.10596515  
SRR17520069.10596516  
SRR17520069.10596517  
SRR17520069.10596518  
SRR17520069.10596519  
SRR17520069.10596520  
SRR17520069.10596521  
SRR17520069.10596522  
SRR17520069.10596524  
SRR17520069.10596525  
SRR17520069.10596526  
SRR17520069.10596527  
SRR17520069.10596529  
SRR17520069.10596530  
SRR17520069.10596531  
SRR17520069.10596532  
SRR17520069.10596533  
SRR17520069.10596534  
SRR17520069.10596535  
SRR17520069.10596536  
SRR17520069.10596537  
SRR17520069.10596538  
SRR17520069.10596539  
SRR17520069.10596540  
SRR17520069.10596541  
SRR17520069.10596542  
SRR17520069.10596543  
SRR17520069.10596544  
SRR17520069.10596545  
SRR17520069.10596546  
SRR17520069.10596547  
SRR17520069.10596548  
SRR17520069.10596549  
SRR17520069.10596550  
SRR17520069.10596551  
SRR17520069.10596552  
SRR17520069.10596553  
SRR17520069.10596554  
SRR17520069.10596555



SRR17520069.10596556  
SRR17520069.10596557  
SRR17520069.10596558  
SRR17520069.10596559  
SRR17520069.10596560  
SRR17520069.10596561  
SRR17520069.10596562  
SRR17520069.10596563  
SRR17520069.10596564  
SRR17520069.10596565  
SRR17520069.10596566  
SRR17520069.10596567  
SRR17520069.10596568  
SRR17520069.10596569  
SRR17520069.10596570  
SRR17520069.10596571  
SRR17520069.10596572  
SRR17520069.10596573  
SRR17520069.10596576  
SRR17520069.10596577  
SRR17520069.10596578  
SRR17520069.10596579  
SRR17520069.10596581  
SRR17520069.10596582  
SRR17520069.10596583  
SRR17520069.10596584  
SRR17520069.10596585  
SRR17520069.10596586  
SRR17520069.10596587  
SRR17520069.10596588  
SRR17520069.10596589  
SRR17520069.10596590  
SRR17520069.10596591  
SRR17520069.10596592  
SRR17520069.10596593  
SRR17520069.10596594  
SRR17520069.10596595  
SRR17520069.10596596  
SRR17520069.10596597  
SRR17520069.10596598  
SRR17520069.10596599  
SRR17520069.10596600  
SRR17520069.10596601  
SRR17520069.10596602  
SRR17520069.10596603  
SRR17520069.10596604  
SRR17520069.10596605

SRR17520069.10596606  
SRR17520069.10596607  
SRR17520069.10596608  
SRR17520069.10596609  
SRR17520069.10596610  
SRR17520069.10596611  
SRR17520069.10596612  
SRR17520069.10596613  
SRR17520069.10596614  
SRR17520069.10596615  
SRR17520069.10596616  
SRR17520069.10596617  
SRR17520069.10596618  
SRR17520069.10596619  
SRR17520069.10596620  
SRR17520069.10596621  
SRR17520069.10596622  
SRR17520069.10596623  
SRR17520069.10596624  
SRR17520069.10596625  
SRR17520069.10596626  
SRR17520069.10596627  
SRR17520069.10596628  
SRR17520069.10596629  
SRR17520069.10605698  
SRR17520069.10605700  
SRR17520069.10605702  
SRR17520069.10605703  
SRR17520069.10605704  
SRR17520069.10605705  
SRR17520069.10605706  
SRR17520069.10605708  
SRR17520069.10605710  
SRR17520069.10605711  
SRR17520069.10605712  
SRR17520069.10605714  
SRR17520069.10605715  
SRR17520069.10605716  
SRR17520069.10605717  
SRR17520069.10605718  
SRR17520069.10605719  
SRR17520069.10605720  
SRR17520069.10605721  
SRR17520069.10605722  
SRR17520069.10605723  
SRR17520069.10605724  
SRR17520069.10605725

SRR17520069.10605726  
SRR17520069.10605728  
SRR17520069.10605729  
SRR17520069.10605730  
SRR17520069.10605731  
SRR17520069.10605732  
SRR17520069.10605733  
SRR17520069.10605734  
SRR17520069.10605736  
SRR17520069.10605737  
SRR17520069.10605738  
SRR17520069.10605739  
SRR17520069.10605740  
SRR17520069.10605741  
SRR17520069.10605742  
SRR17520069.10605743  
SRR17520069.10605744  
SRR17520069.10605746  
SRR17520069.10605747  
SRR17520069.10605748  
SRR17520069.10605749  
SRR17520069.10605750  
SRR17520069.10605751  
SRR17520069.10605752  
SRR17520069.10605753  
SRR17520069.10605754  
SRR17520069.10605756  
SRR17520069.10605757  
SRR17520069.10605759  
SRR17520069.10605760  
SRR17520069.10605761  
SRR17520069.10605762  
SRR17520069.10605764  
SRR17520069.10605765  
SRR17520069.10605766  
SRR17520069.10605767  
SRR17520069.10605768  
SRR17520069.10605770  
SRR17520069.10605771  
SRR17520069.10605772  
SRR17520069.10605773  
SRR17520069.10605774  
SRR17520069.10605775  
SRR17520069.10605776  
SRR17520069.10605777  
SRR17520069.10605778  
SRR17520069.10605779

SRR17520069.10605780  
SRR17520069.10605781  
SRR17520069.10605782  
SRR17520069.10605783  
SRR17520069.10605784  
SRR17520069.10605785  
SRR17520069.10605786  
SRR17520069.10605787  
SRR17520069.10605788  
SRR17520069.10605789  
SRR17520069.10605790  
SRR17520069.10605791  
SRR17520069.10605792  
SRR17520069.10605793  
SRR17520069.10605794  
SRR17520069.10605797  
SRR17520069.10605798  
SRR17520069.10605799  
SRR17520069.10605800  
SRR17520069.10605802  
SRR17520069.10605803  
SRR17520069.10605804  
SRR17520069.10605805  
SRR17520069.10605806  
SRR17520069.10605807  
SRR17520069.10605808  
SRR17520069.10605809  
SRR17520069.10605810  
SRR17520069.10605811  
SRR17520069.10605812  
SRR17520069.10605813  
SRR17520069.10605814  
SRR17520069.10605815  
SRR17520069.10605816  
SRR17520069.10605817  
SRR17520069.10605818  
SRR17520069.10605819  
SRR17520069.10605820  
SRR17520069.10605821  
SRR17520069.10605822  
SRR17520069.10605823  
SRR17520069.10605824  
SRR17520069.10605825  
SRR17520069.10605826  
SRR17520069.10605827  
SRR17520069.10605828  
SRR17520069.10605829

SRR17520069.10605830  
SRR17520069.10605831  
SRR17520069.10605832  
SRR17520069.10605833  
SRR17520069.10605834  
SRR17520069.10605835  
SRR17520069.10605836  
SRR17520069.10605837  
SRR17520069.10605838  
SRR17520069.10605839  
SRR17520069.10605840  
SRR17520069.10605841  
SRR17520069.10605842  
SRR17520069.10605843  
SRR17520069.10605844  
SRR17520069.10605845  
SRR17520069.10605846  
SRR17520069.10605847  
SRR17520069.10605849  
SRR17520069.10605850  
SRR17520069.10605851  
SRR17520069.10605852  
SRR17520069.10605853  
SRR17520069.10605854  
SRR17520069.10605855  
SRR17520069.10605856  
SRR17520069.10605857  
SRR17520069.10605858  
SRR17520069.10605859  
SRR17520069.10605860  
SRR17520069.10605861  
SRR17520069.10605863  
SRR17520069.10605864  
SRR17520069.10605865  
SRR17520069.10605867  
SRR17520069.10605868  
SRR17520069.10605869  
SRR17520069.10609388  
SRR17520069.10609389  
SRR17520069.10609390  
SRR17520069.10609391  
SRR17520069.10609392  
SRR17520069.10609393  
SRR17520069.10609394  
SRR17520069.10609395  
SRR17520069.10609396  
SRR17520069.10609397

SRR17520069.10609398  
SRR17520069.10609399  
SRR17520069.10609400  
SRR17520069.10609401  
SRR17520069.10609402  
SRR17520069.10609403  
SRR17520069.10609404  
SRR17520069.10609405  
SRR17520069.10609406  
SRR17520069.10609407  
SRR17520069.10609408  
SRR17520069.10609410  
SRR17520069.10609411  
SRR17520069.10609412  
SRR17520069.10609413  
SRR17520069.10609414  
SRR17520069.10609415  
SRR17520069.10609416  
SRR17520069.10609417  
SRR17520069.10609418  
SRR17520069.10609419  
SRR17520069.10609420  
SRR17520069.10609421  
SRR17520069.10609422  
SRR17520069.10609423  
SRR17520069.10609424  
SRR17520069.10609425  
SRR17520069.10609426  
SRR17520069.10609427  
SRR17520069.10609428  
SRR17520069.10609429  
SRR17520069.10609430  
SRR17520069.10609431  
SRR17520069.10609432  
SRR17520069.10609433  
SRR17520069.10609434  
SRR17520069.10609435  
SRR17520069.10609436  
SRR17520069.10609437  
SRR17520069.10609438  
SRR17520069.10609439  
SRR17520069.10609440  
SRR17520069.10609441  
SRR17520069.10609442  
SRR17520069.10609443  
SRR17520069.10609444  
SRR17520069.10609445

SRR17520069.10609446  
SRR17520069.10609447  
SRR17520069.10609448  
SRR17520069.10609449  
SRR17520069.10609450  
SRR17520069.10609452  
SRR17520069.10609453  
SRR17520069.10609454  
SRR17520069.10609455  
SRR17520069.10609456  
SRR17520069.10609457  
SRR17520069.10609458  
SRR17520069.10609459  
SRR17520069.10609460  
SRR17520069.10609461  
SRR17520069.10609462  
SRR17520069.10609463  
SRR17520069.10609464  
SRR17520069.10609465  
SRR17520069.10609466  
SRR17520069.10609467  
SRR17520069.10609468  
SRR17520069.10609469  
SRR17520069.10609470  
SRR17520069.10609471  
SRR17520069.10609472  
SRR17520069.10609473  
SRR17520069.10609474  
SRR17520069.10609475  
SRR17520069.10609476  
SRR17520069.10609477  
SRR17520069.10609478  
SRR17520069.10609479  
SRR17520069.10609480  
SRR17520069.10609481  
SRR17520069.10609483  
SRR17520069.10609484  
SRR17520069.10609485  
SRR17520069.10609486  
SRR17520069.10609487  
SRR17520069.10609488  
SRR17520069.10609489  
SRR17520069.10609490  
SRR17520069.10609491  
SRR17520069.10609492  
SRR17520069.10609493  
SRR17520069.10609494

SRR17520069.10609495  
SRR17520069.10609496  
SRR17520069.10609497  
SRR17520069.10609498  
SRR17520069.10609499  
SRR17520069.10609500  
SRR17520069.10609501  
SRR17520069.10609502  
SRR17520069.10609503  
SRR17520069.10609504  
SRR17520069.10609505  
SRR17520069.10609506  
SRR17520069.10609507  
SRR17520069.10609508  
SRR17520069.10609509  
SRR17520069.10609510  
SRR17520069.10609511  
SRR17520069.10609512  
SRR17520069.10609513  
SRR17520069.10609515  
SRR17520069.10609516  
SRR17520069.10609517  
SRR17520069.10609518  
SRR17520069.10609519  
SRR17520069.10609520  
SRR17520069.10615895  
SRR17520069.10615896  
SRR17520069.10615897  
SRR17520069.10615898  
SRR17520069.10615900  
SRR17520069.10615901  
SRR17520069.10615902  
SRR17520069.10615903  
SRR17520069.10615904  
SRR17520069.10615905  
SRR17520069.10615906  
SRR17520069.10615907  
SRR17520069.10615908  
SRR17520069.10615909  
SRR17520069.10615910  
SRR17520069.10615911  
SRR17520069.10615912  
SRR17520069.10615913  
SRR17520069.10615914  
SRR17520069.10615915  
SRR17520069.10615916  
SRR17520069.10615917



SRR17520069.10615918  
SRR17520069.10615919  
SRR17520069.10615920  
SRR17520069.10615921  
SRR17520069.10615922  
SRR17520069.10615923  
SRR17520069.10615924  
SRR17520069.10615925  
SRR17520069.10615926  
SRR17520069.10615927  
SRR17520069.10615928  
SRR17520069.10615929  
SRR17520069.10615930  
SRR17520069.10615931  
SRR17520069.10615932  
SRR17520069.10615933  
SRR17520069.10615934  
SRR17520069.10615935  
SRR17520069.10615936  
SRR17520069.10615937  
SRR17520069.10615938  
SRR17520069.10615939  
SRR17520069.10615940  
SRR17520069.10615941  
SRR17520069.10615942  
SRR17520069.10615943  
SRR17520069.10615944  
SRR17520069.10615945  
SRR17520069.10615946  
SRR17520069.10615947  
SRR17520069.10615948  
SRR17520069.10615949  
SRR17520069.10615950  
SRR17520069.10615951  
SRR17520069.10615952  
SRR17520069.10615953  
SRR17520069.10615954  
SRR17520069.10615955  
SRR17520069.10615956  
SRR17520069.10615957  
SRR17520069.10615958  
SRR17520069.10615959  
SRR17520069.10615960  
SRR17520069.10615961  
SRR17520069.10615962  
SRR17520069.10615963  
SRR17520069.10615964

SRR17520069.10615965  
SRR17520069.10615966  
SRR17520069.10615967  
SRR17520069.10615968  
SRR17520069.10615969  
SRR17520069.10615970  
SRR17520069.10615971  
SRR17520069.10615972  
SRR17520069.10615973  
SRR17520069.10615974  
SRR17520069.10615975  
SRR17520069.10615976  
SRR17520069.10615978  
SRR17520069.10615979  
SRR17520069.10615980  
SRR17520069.10615981  
SRR17520069.10615982  
SRR17520069.10615983  
SRR17520069.10615984  
SRR17520069.10615985  
SRR17520069.10615986  
SRR17520069.10615987  
SRR17520069.10615988  
SRR17520069.10615989  
SRR17520069.10615990  
SRR17520069.10615991  
SRR17520069.10615992  
SRR17520069.10615993  
SRR17520069.10615994  
SRR17520069.10615995  
SRR17520069.10615996  
SRR17520069.10615997  
SRR17520069.10615998  
SRR17520069.10615999  
SRR17520069.10616000  
SRR17520069.10616001  
SRR17520069.10616002  
SRR17520069.10616003  
SRR17520069.10616004  
SRR17520069.10616005  
SRR17520069.10616006  
SRR17520069.10616007  
SRR17520069.10616008  
SRR17520069.10616009  
SRR17520069.10616010  
SRR17520069.10616011  
SRR17520069.10616012

SRR17520069.10616013  
SRR17520069.10616014  
SRR17520069.10616015  
SRR17520069.10616016  
SRR17520069.10616017  
SRR17520069.10616018  
SRR17520069.10616019  
SRR17520069.10616020  
SRR17520069.10616021  
SRR17520069.10616022  
SRR17520069.10616023  
SRR17520069.10616024  
SRR17520069.10616025  
SRR17520069.10616026  
SRR17520069.10616027  
SRR17520069.10616028  
SRR17520069.10616029  
SRR17520069.10616030  
SRR17520069.10616031  
SRR17520069.10616032  
SRR17520069.10616033  
SRR17520069.10616034  
SRR17520069.10616035  
SRR17520069.10616036  
SRR17520069.10616037  
SRR17520069.10616038  
SRR17520069.10616039  
SRR17520069.10616040  
SRR17520069.10616041  
SRR17520069.10616042  
SRR17520069.10616043  
SRR17520069.10616044  
SRR17520069.10616045  
SRR17520069.10616046  
SRR17520069.10616047  
SRR17520069.10616048  
SRR17520069.10616049  
SRR17520069.10616050  
SRR17520069.10616051  
SRR17520069.10616052  
SRR17520069.10616053  
SRR17520069.10616054  
SRR17520069.10616055  
SRR17520069.10616056  
SRR17520069.10616057  
SRR17520069.10616058  
SRR17520069.10616059

SRR17520069.10616060  
SRR17520069.10616061  
SRR17520069.10616062  
SRR17520069.10616063  
SRR17520069.10616064  
SRR17520069.10616065  
SRR17520069.10616066  
SRR17520069.10616067  
SRR17520069.10616068  
SRR17520069.10616069  
SRR17520069.10616070  
SRR17520069.10616071  
SRR17520069.10616072  
SRR17520069.10616073  
SRR17520069.10616074  
SRR17520069.10616075  
SRR17520069.10616076  
SRR17520069.10616077  
SRR17520069.10616078  
SRR17520069.10616080  
SRR17520069.10616081  
SRR17520069.10616082  
SRR17520069.10616083  
SRR17520069.10616084  
SRR17520069.10616085  
SRR17520069.10616086  
SRR17520069.10616087  
SRR17520069.10616088  
SRR17520069.10616089  
SRR17520069.10616090  
SRR17520069.10616091  
SRR17520069.10616092  
SRR17520069.10636870  
SRR17520069.10637703  
SRR17520069.10639091  
SRR17520069.10639092  
SRR17520069.10639093  
SRR17520069.10639094  
SRR17520069.10639095  
SRR17520069.10639096  
SRR17520069.10639097  
SRR17520069.10639098  
SRR17520069.10639099  
SRR17520069.10639100  
SRR17520069.10639101  
SRR17520069.10639102  
SRR17520069.10639103

SRR17520069.10639104  
SRR17520069.10639105  
SRR17520069.10639106  
SRR17520069.10639107  
SRR17520069.10639108  
SRR17520069.10639109  
SRR17520069.10639110  
SRR17520069.10639111  
SRR17520069.10639112  
SRR17520069.10639113  
SRR17520069.10639114  
SRR17520069.10639115  
SRR17520069.10639116  
SRR17520069.10639118  
SRR17520069.10639119  
SRR17520069.10639120  
SRR17520069.10639121  
SRR17520069.10639122  
SRR17520069.10639123  
SRR17520069.10639124  
SRR17520069.10639125  
SRR17520069.10639126  
SRR17520069.10639127  
SRR17520069.10639128  
SRR17520069.10639129  
SRR17520069.10639130  
SRR17520069.10639131  
SRR17520069.10639132  
SRR17520069.10639133  
SRR17520069.10639134  
SRR17520069.10639135  
SRR17520069.10639136  
SRR17520069.10639137  
SRR17520069.10639138  
SRR17520069.10641035  
SRR17520069.10645001  
SRR17520069.10645002  
SRR17520069.10645003  
SRR17520069.10645005  
SRR17520069.10645006  
SRR17520069.10645007  
SRR17520069.10645008  
SRR17520069.10645009  
SRR17520069.10645010  
SRR17520069.10645011  
SRR17520069.10645012  
SRR17520069.10645013

SRR17520069.10645014  
SRR17520069.10645015  
SRR17520069.10645016  
SRR17520069.10645017  
SRR17520069.10645018  
SRR17520069.10645019  
SRR17520069.10645020  
SRR17520069.10645021  
SRR17520069.10645022  
SRR17520069.10645023  
SRR17520069.10645025  
SRR17520069.10645026  
SRR17520069.10645027  
SRR17520069.10645028  
SRR17520069.10645029  
SRR17520069.10645030  
SRR17520069.10645031  
SRR17520069.10645032  
SRR17520069.10645033  
SRR17520069.10645034  
SRR17520069.10645036  
SRR17520069.10645037  
SRR17520069.10645038  
SRR17520069.10645039  
SRR17520069.10645040  
SRR17520069.10645041  
SRR17520069.10645042  
SRR17520069.10645043  
SRR17520069.10645044  
SRR17520069.10645045  
SRR17520069.10645046  
SRR17520069.10645047  
SRR17520069.10645048  
SRR17520069.10645049  
SRR17520069.10645050  
SRR17520069.10645051  
SRR17520069.10645052  
SRR17520069.10645053  
SRR17520069.10645054  
SRR17520069.10645055  
SRR17520069.10645056  
SRR17520069.10645057  
SRR17520069.10645058  
SRR17520069.10645059  
SRR17520069.10645060  
SRR17520069.10645061  
SRR17520069.10645062

SRR17520069.10645064  
SRR17520069.10645065  
SRR17520069.10645066  
SRR17520069.10645067  
SRR17520069.10645068  
SRR17520069.10645069  
SRR17520069.10645070  
SRR17520069.10645071  
SRR17520069.10645072  
SRR17520069.10645073  
SRR17520069.10645074  
SRR17520069.10645075  
SRR17520069.10645076  
SRR17520069.10645077  
SRR17520069.10645078  
SRR17520069.10645079  
SRR17520069.10645080  
SRR17520069.10645081  
SRR17520069.10645083  
SRR17520069.10645084  
SRR17520069.10645085  
SRR17520069.10645086  
SRR17520069.10645087  
SRR17520069.10645088  
SRR17520069.10645089  
SRR17520069.10645090  
SRR17520069.10645091  
SRR17520069.10645092  
SRR17520069.10645093  
SRR17520069.10645094  
SRR17520069.10645095  
SRR17520069.10645096  
SRR17520069.10645097  
SRR17520069.10645098  
SRR17520069.10645099  
SRR17520069.10645100  
SRR17520069.10645101  
SRR17520069.10645102  
SRR17520069.10645103  
SRR17520069.10645104  
SRR17520069.10645105  
SRR17520069.10645106  
SRR17520069.10645107  
SRR17520069.10645108  
SRR17520069.10645109  
SRR17520069.10645110  
SRR17520069.10645111

SRR17520069.10645112  
SRR17520069.10645113  
SRR17520069.10645114  
SRR17520069.10645115  
SRR17520069.10645116  
SRR17520069.10645117  
SRR17520069.10645118  
SRR17520069.10645119  
SRR17520069.10645120  
SRR17520069.10645121  
SRR17520069.10645122  
SRR17520069.10645123  
SRR17520069.10645124  
SRR17520069.10645125  
SRR17520069.10645126  
SRR17520069.10645127  
SRR17520069.10645128  
SRR17520069.10645129  
SRR17520069.10645130  
SRR17520069.10645131  
SRR17520069.10645132  
SRR17520069.10645133  
SRR17520069.10645134  
SRR17520069.10645135  
SRR17520069.10645136  
SRR17520069.10645137  
SRR17520069.10645138  
SRR17520069.10645139  
SRR17520069.10645140  
SRR17520069.10645141  
SRR17520069.10655777  
SRR17520069.10655778  
SRR17520069.10655779  
SRR17520069.10655780  
SRR17520069.10655781  
SRR17520069.10655782  
SRR17520069.10655783  
SRR17520069.10655784  
SRR17520069.10655785  
SRR17520069.10655786  
SRR17520069.10655787  
SRR17520069.10655788  
SRR17520069.10655789  
SRR17520069.10658834  
SRR17520069.10683580  
SRR17520069.10683638  
SRR17520069.10683678



SRR17520069.10686371  
SRR17520069.10686372  
SRR17520069.10686373  
SRR17520069.10686374  
SRR17520069.10686375  
SRR17520069.10686376  
SRR17520069.10686377  
SRR17520069.10686378  
SRR17520069.10686379  
SRR17520069.10686380  
SRR17520069.10686381  
SRR17520069.10686382  
SRR17520069.10686383  
SRR17520069.10686384  
SRR17520069.10686385  
SRR17520069.10686386  
SRR17520069.10686387  
SRR17520069.10686388  
SRR17520069.10686389  
SRR17520069.10686390  
SRR17520069.10686391  
SRR17520069.10686392  
SRR17520069.10686393  
SRR17520069.10686394  
SRR17520069.10686395  
SRR17520069.10686396  
SRR17520069.10686397  
SRR17520069.10686398  
SRR17520069.10686399  
SRR17520069.10686400  
SRR17520069.10686401  
SRR17520069.10686402  
SRR17520069.10686403  
SRR17520069.10686404  
SRR17520069.10686405  
SRR17520069.10686406  
SRR17520069.10686407  
SRR17520069.10686408  
SRR17520069.10686409  
SRR17520069.10686410  
SRR17520069.10686411  
SRR17520069.10686412  
SRR17520069.10686413  
SRR17520069.10686414  
SRR17520069.10686415  
SRR17520069.10686416  
SRR17520069.10686417

SRR17520069.10686418  
SRR17520069.10686419  
SRR17520069.10686420  
SRR17520069.10686421  
SRR17520069.10686422  
SRR17520069.10686423  
SRR17520069.10686424  
SRR17520069.10686425  
SRR17520069.10686427  
SRR17520069.10686428  
SRR17520069.10686429  
SRR17520069.10686430  
SRR17520069.10686431  
SRR17520069.10686432  
SRR17520069.10686433  
SRR17520069.10686434  
SRR17520069.10686435  
SRR17520069.10686436  
SRR17520069.10686437  
SRR17520069.10686438  
SRR17520069.10686439  
SRR17520069.10686440  
SRR17520069.10686441  
SRR17520069.10686442  
SRR17520069.10686443  
SRR17520069.10686445  
SRR17520069.10686446  
SRR17520069.10686447  
SRR17520069.10686448  
SRR17520069.10686449  
SRR17520069.10686450  
SRR17520069.10686451  
SRR17520069.10686452  
SRR17520069.10686453  
SRR17520069.10686454  
SRR17520069.10686455  
SRR17520069.10686456  
SRR17520069.10686457  
SRR17520069.10686458  
SRR17520069.10686459  
SRR17520069.10686460  
SRR17520069.10686461  
SRR17520069.10686462  
SRR17520069.10686463  
SRR17520069.10686464  
SRR17520069.10686465  
SRR17520069.10686466

SRR17520069.10686467  
SRR17520069.10686468  
SRR17520069.10686469  
SRR17520069.10686470  
SRR17520069.10686471  
SRR17520069.10690873  
SRR17520069.10704882  
SRR17520069.10704883  
SRR17520069.10704884  
SRR17520069.10704885  
SRR17520069.10704886  
SRR17520069.10704887  
SRR17520069.10704888  
SRR17520069.10704889  
SRR17520069.10704890  
SRR17520069.10704891  
SRR17520069.10704892  
SRR17520069.10704893  
SRR17520069.10704894  
SRR17520069.10715397  
SRR17520069.10715398  
SRR17520069.10715399  
SRR17520069.10715400  
SRR17520069.10715401  
SRR17520069.10715402  
SRR17520069.10715404  
SRR17520069.10715405  
SRR17520069.10715406  
SRR17520069.10715407  
SRR17520069.10715408  
SRR17520069.10716004  
SRR17520069.10716005  
SRR17520069.10716006  
SRR17520069.10716007  
SRR17520069.10716008  
SRR17520069.10716009  
SRR17520069.10716010  
SRR17520069.10716011  
SRR17520069.10716012  
SRR17520069.10716014  
SRR17520069.10717865  
SRR17520069.10717866  
SRR17520069.10717867  
SRR17520069.10717868  
SRR17520069.10717869  
SRR17520069.10717870  
SRR17520069.10717871

SRR17520069. 10717872  
SRR17520069. 10717873  
SRR17520069. 10717874  
SRR17520069. 10717875  
SRR17520069. 10717876  
SRR17520069. 10717877  
SRR17520069. 10717878  
SRR17520069. 10717879  
SRR17520069. 10717880  
SRR17520069. 10717881  
SRR17520069. 10717882  
SRR17520069. 10727937  
SRR17520069. 10727938  
SRR17520069. 10727940  
SRR17520069. 10727941  
SRR17520069. 10727942  
SRR17520069. 10727943  
SRR17520069. 10727945  
SRR17520069. 10727946  
SRR17520069. 10727947  
SRR17520069. 10727948  
SRR17520069. 10727949  
SRR17520069. 10727951  
SRR17520069. 10727952  
SRR17520069. 10727953  
SRR17520069. 10727954  
SRR17520069. 10727955  
SRR17520069. 10727956  
SRR17520069. 10727958  
SRR17520069. 10727959  
SRR17520069. 10727960  
SRR17520069. 10727961  
SRR17520069. 10727962  
SRR17520069. 10727963  
SRR17520069. 10727964  
SRR17520069. 10727966  
SRR17520069. 10727967  
SRR17520069. 10727968  
SRR17520069. 10727969  
SRR17520069. 10727970  
SRR17520069. 10727972  
SRR17520069. 10727973  
SRR17520069. 10727974  
SRR17520069. 10727976  
SRR17520069. 10727977  
SRR17520069. 10727978  
SRR17520069. 10727979

SRR17520069.10727980  
SRR17520069.10727981  
SRR17520069.10727982  
SRR17520069.10727983  
SRR17520069.10727984  
SRR17520069.10727985  
SRR17520069.10727986  
SRR17520069.10727987  
SRR17520069.10727988  
SRR17520069.10727989  
SRR17520069.10727990  
SRR17520069.10727991  
SRR17520069.10727992  
SRR17520069.10739908  
SRR17520069.10744079  
SRR17520069.10744109  
SRR17520069.10745138  
SRR17520069.10747658  
SRR17520069.10747659  
SRR17520069.10747660  
SRR17520069.10747661  
SRR17520069.10754087  
SRR17520069.10754088  
SRR17520069.10754089  
SRR17520069.10754090  
SRR17520069.10754093  
SRR17520069.10754094  
SRR17520069.10754095  
SRR17520069.10754096  
SRR17520069.10754097  
SRR17520069.10754098  
SRR17520069.10754099  
SRR17520069.10754100  
SRR17520069.10754101  
SRR17520069.10754102  
SRR17520069.10754104  
SRR17520069.10754105  
SRR17520069.10754107  
SRR17520069.10754108  
SRR17520069.10754109  
SRR17520069.10754110  
SRR17520069.10754112  
SRR17520069.10754113  
SRR17520069.10754115  
SRR17520069.10754116  
SRR17520069.10754117  
SRR17520069.10754118

SRR17520069.10754119  
SRR17520069.10754120  
SRR17520069.10768266  
SRR17520069.10768267  
SRR17520069.10768268  
SRR17520069.10768269  
SRR17520069.10768270  
SRR17520069.10768271  
SRR17520069.10768272  
SRR17520069.10768273  
SRR17520069.10768274  
SRR17520069.10768275  
SRR17520069.10768276  
SRR17520069.10768277  
SRR17520069.10768278  
SRR17520069.10768280  
SRR17520069.10768281  
SRR17520069.10768282  
SRR17520069.10768283  
SRR17520069.10768284  
SRR17520069.10768285  
SRR17520069.10768286  
SRR17520069.10768287  
SRR17520069.10768288  
SRR17520069.10768289  
SRR17520069.10768290  
SRR17520069.10768291  
SRR17520069.10768292  
SRR17520069.10768293  
SRR17520069.10768294  
SRR17520069.10768295  
SRR17520069.10768296  
SRR17520069.10768297  
SRR17520069.10768298  
SRR17520069.10768299  
SRR17520069.10768300  
SRR17520069.10768301  
SRR17520069.10768302  
SRR17520069.10782442  
SRR17520069.10782443  
SRR17520069.10782444  
SRR17520069.10782445  
SRR17520069.10782446  
SRR17520069.10782447  
SRR17520069.10782448  
SRR17520069.10782449  
SRR17520069.10782450

SRR17520069. 10782451  
SRR17520069. 10782452  
SRR17520069. 10782453  
SRR17520069. 10782454  
SRR17520069. 10782455  
SRR17520069. 10782456  
SRR17520069. 10782457  
SRR17520069. 10782458  
SRR17520069. 10782459  
SRR17520069. 10782460  
SRR17520069. 10782461  
SRR17520069. 10782463  
SRR17520069. 10782464  
SRR17520069. 10782465  
SRR17520069. 10782466  
SRR17520069. 10782467  
SRR17520069. 10782468  
SRR17520069. 10782469  
SRR17520069. 10782470  
SRR17520069. 10782471  
SRR17520069. 10782472  
SRR17520069. 10782473  
SRR17520069. 10782474  
SRR17520069. 10782475  
SRR17520069. 10782476  
SRR17520069. 10782477  
SRR17520069. 10782479  
SRR17520069. 10782480  
SRR17520069. 10782481  
SRR17520069. 10782482  
SRR17520069. 10782483  
SRR17520069. 10782484  
SRR17520069. 10782485  
SRR17520069. 10782486  
SRR17520069. 10782487  
SRR17520069. 10782488  
SRR17520069. 10782489  
SRR17520069. 10782490  
SRR17520069. 10782491  
SRR17520069. 10782492  
SRR17520069. 10782493  
SRR17520069. 10782494  
SRR17520069. 10782495  
SRR17520069. 10782496  
SRR17520069. 10782497  
SRR17520069. 10782498  
SRR17520069. 10782499

SRR17520069. 10782500  
SRR17520069. 10782501  
SRR17520069. 10782502  
SRR17520069. 10782503  
SRR17520069. 10782504  
SRR17520069. 10782505  
SRR17520069. 10782506  
SRR17520069. 10782507  
SRR17520069. 10782508  
SRR17520069. 10782509  
SRR17520069. 10782510  
SRR17520069. 10782511  
SRR17520069. 10782512  
SRR17520069. 10782513  
SRR17520069. 10782514  
SRR17520069. 10782515  
SRR17520069. 10782516  
SRR17520069. 10782517  
SRR17520069. 10782518  
SRR17520069. 10782519  
SRR17520069. 10782520  
SRR17520069. 10782521  
SRR17520069. 10782523  
SRR17520069. 10782524  
SRR17520069. 10782525  
SRR17520069. 10782526  
SRR17520069. 10782527  
SRR17520069. 10782528  
SRR17520069. 10782529  
SRR17520069. 10782530  
SRR17520069. 10791256  
SRR17520069. 10791258  
SRR17520069. 10811023  
SRR17520069. 10811024  
SRR17520069. 10824469  
SRR17520069. 10852984  
SRR17520069. 10859065  
SRR17520069. 10863023  
SRR17520069. 10863024  
SRR17520069. 10863025  
SRR17520069. 10863026  
SRR17520069. 10863027  
SRR17520069. 10863028  
SRR17520069. 10863029  
SRR17520069. 10885996  
SRR17520069. 10886002  
SRR17520069. 10886014



SRR17520069.10898139  
SRR17520069.10904092  
SRR17520069.10906108  
SRR17520069.10906109  
SRR17520069.10912152  
SRR17520069.10912153  
SRR17520069.10912155  
SRR17520069.10912156  
SRR17520069.10912157  
SRR17520069.10912160  
SRR17520069.10912161  
SRR17520069.10912162  
SRR17520069.10935434  
SRR17520069.10938570  
SRR17520069.10960209  
SRR17520069.10971172  
SRR17520069.10976391  
SRR17520069.10976392  
SRR17520069.10976393  
SRR17520069.10976394  
SRR17520069.10976395  
SRR17520069.10976396  
SRR17520069.10976397  
SRR17520069.10976398  
SRR17520069.10976399  
SRR17520069.10976401  
SRR17520069.10976402  
SRR17520069.10976403  
SRR17520069.10976404  
SRR17520069.10976405  
SRR17520069.10976406  
SRR17520069.10976407  
SRR17520069.10976408  
SRR17520069.10976409  
SRR17520069.10976410  
SRR17520069.10976411  
SRR17520069.10976413  
SRR17520069.10976414  
SRR17520069.10976415  
SRR17520069.10976416  
SRR17520069.10976417  
SRR17520069.10976418  
SRR17520069.10976419  
SRR17520069.10976420  
SRR17520069.10976421  
SRR17520069.10976422  
SRR17520069.10976423

SRR17520069.10976775  
SRR17520069.10986013  
SRR17520069.11012451  
SRR17520069.11012452  
SRR17520069.11012454  
SRR17520069.11012455  
SRR17520069.11012456  
SRR17520069.11012457  
SRR17520069.11012458  
SRR17520069.11012459  
SRR17520069.11012460  
SRR17520069.11012461  
SRR17520069.11012463  
SRR17520069.11012464  
SRR17520069.11012465  
SRR17520069.11012466  
SRR17520069.11012467  
SRR17520069.11012468  
SRR17520069.11012469  
SRR17520069.11012470  
SRR17520069.11012471  
SRR17520069.11012472  
SRR17520069.11012473  
SRR17520069.11012474  
SRR17520069.11012475  
SRR17520069.11012476  
SRR17520069.11012477  
SRR17520069.11012478  
SRR17520069.11012479  
SRR17520069.11012480  
SRR17520069.11012481  
SRR17520069.11012482  
SRR17520069.11012483  
SRR17520069.11012484  
SRR17520069.11012485  
SRR17520069.11012486  
SRR17520069.11012487  
SRR17520069.11012488  
SRR17520069.11012489  
SRR17520069.11012490  
SRR17520069.11012491  
SRR17520069.11012492  
SRR17520069.11012493  
SRR17520069.11012495  
SRR17520069.11012496  
SRR17520069.11012497  
SRR17520069.11012498

SRR17520069.11012499  
SRR17520069.11012500  
SRR17520069.11012501  
SRR17520069.11012502  
SRR17520069.11012503  
SRR17520069.11012504  
SRR17520069.11012505  
SRR17520069.11012506  
SRR17520069.11012507  
SRR17520069.11012508  
SRR17520069.11012509  
SRR17520069.11012510  
SRR17520069.11012511  
SRR17520069.11012512  
SRR17520069.11012513  
SRR17520069.11012515  
SRR17520069.11012516  
SRR17520069.11012517  
SRR17520069.11012518  
SRR17520069.11012519  
SRR17520069.11012520  
SRR17520069.11012521  
SRR17520069.11012522  
SRR17520069.11012523  
SRR17520069.11012524  
SRR17520069.11012525  
SRR17520069.11012526  
SRR17520069.11012527  
SRR17520069.11012528  
SRR17520069.11012529  
SRR17520069.11012530  
SRR17520069.11012531  
SRR17520069.11012532  
SRR17520069.11012533  
SRR17520069.11012534  
SRR17520069.11012535  
SRR17520069.11012536  
SRR17520069.11012537  
SRR17520069.11012538  
SRR17520069.11012539  
SRR17520069.11012540  
SRR17520069.11012541  
SRR17520069.11012542  
SRR17520069.11012543  
SRR17520069.11012544  
SRR17520069.11012545  
SRR17520069.11012546

SRR17520069.11012547  
SRR17520069.11012548  
SRR17520069.11012549  
SRR17520069.11012550  
SRR17520069.11012551  
SRR17520069.11012552  
SRR17520069.11012553  
SRR17520069.11012554  
SRR17520069.11012556  
SRR17520069.11012557  
SRR17520069.11012558  
SRR17520069.11012559  
SRR17520069.11012560  
SRR17520069.11012561  
SRR17520069.11012562  
SRR17520069.11012563  
SRR17520069.11012564  
SRR17520069.11012565  
SRR17520069.11012566  
SRR17520069.11012567  
SRR17520069.11012568  
SRR17520069.11012569  
SRR17520069.11012570  
SRR17520069.11012571  
SRR17520069.11012572  
SRR17520069.11012573  
SRR17520069.11012574  
SRR17520069.11012575  
SRR17520069.11012576  
SRR17520069.11012577  
SRR17520069.11012578  
SRR17520069.11012579  
SRR17520069.11012580  
SRR17520069.11012581  
SRR17520069.11012582  
SRR17520069.11012583  
SRR17520069.11012584  
SRR17520069.11012585  
SRR17520069.11012586  
SRR17520069.11012587  
SRR17520069.11012588  
SRR17520069.11012589  
SRR17520069.11012590  
SRR17520069.11012591  
SRR17520069.11012592  
SRR17520069.11012593  
SRR17520069.11012594

SRR17520069.11012595  
SRR17520069.11012596  
SRR17520069.11012597  
SRR17520069.11012598  
SRR17520069.11017841  
SRR17520069.11022621  
SRR17520069.11022622  
SRR17520069.11022623  
SRR17520069.11022624  
SRR17520069.11022625  
SRR17520069.11022626  
SRR17520069.11022627  
SRR17520069.11022628  
SRR17520069.11036146  
SRR17520069.11036150  
SRR17520069.11036166  
SRR17520069.11070259  
SRR17520069.11070260  
SRR17520069.11070262  
SRR17520069.11070264  
SRR17520069.11070265  
SRR17520069.11070266  
SRR17520069.11070267  
SRR17520069.11070269  
SRR17520069.11070270  
SRR17520069.11070271  
SRR17520069.11070272  
SRR17520069.11070273  
SRR17520069.11070274  
SRR17520069.11070275  
SRR17520069.11070276  
SRR17520069.11070277  
SRR17520069.11070278  
SRR17520069.11070279  
SRR17520069.11070280  
SRR17520069.11070281  
SRR17520069.11070282  
SRR17520069.11070283  
SRR17520069.11070284  
SRR17520069.11070285  
SRR17520069.11070286  
SRR17520069.11070287  
SRR17520069.11070289  
SRR17520069.11070290  
SRR17520069.11070291  
SRR17520069.11070292  
SRR17520069.11070293

SRR17520069.11070294  
SRR17520069.11070295  
SRR17520069.11070296  
SRR17520069.11070297  
SRR17520069.11070298  
SRR17520069.11070299  
SRR17520069.11070300  
SRR17520069.11070301  
SRR17520069.11070302  
SRR17520069.11070303  
SRR17520069.11070304  
SRR17520069.11070305  
SRR17520069.11076267  
SRR17520069.11076268  
SRR17520069.11076269  
SRR17520069.11076270  
SRR17520069.11076271  
SRR17520069.11076272  
SRR17520069.11076273  
SRR17520069.11076274  
SRR17520069.11076275  
SRR17520069.11076276  
SRR17520069.11076277  
SRR17520069.11076278  
SRR17520069.11076279  
SRR17520069.11076280  
SRR17520069.11076281  
SRR17520069.11076282  
SRR17520069.11078351  
SRR17520069.11078352  
SRR17520069.11078353  
SRR17520069.11078354  
SRR17520069.11078355  
SRR17520069.11078356  
SRR17520069.11078357  
SRR17520069.11078358  
SRR17520069.11078359  
SRR17520069.11078360  
SRR17520069.11078361  
SRR17520069.11078362  
SRR17520069.11078363  
SRR17520069.11078364  
SRR17520069.11078365  
SRR17520069.11078366  
SRR17520069.11078367  
SRR17520069.11078369  
SRR17520069.11078370

SRR17520069.11078371  
SRR17520069.11078372  
SRR17520069.11078373  
SRR17520069.11078374  
SRR17520069.11078375  
SRR17520069.11078376  
SRR17520069.11078377  
SRR17520069.11078378  
SRR17520069.11078379  
SRR17520069.11078380  
SRR17520069.11078381  
SRR17520069.11078382  
SRR17520069.11078384  
SRR17520069.11078385  
SRR17520069.11078386  
SRR17520069.11078387  
SRR17520069.11078388  
SRR17520069.11078389  
SRR17520069.11078390  
SRR17520069.11078391  
SRR17520069.11078392  
SRR17520069.11079281  
SRR17520069.11079282  
SRR17520069.11079283  
SRR17520069.11079284  
SRR17520069.11079285  
SRR17520069.11079286  
SRR17520069.11079287  
SRR17520069.11079288  
SRR17520069.11079289  
SRR17520069.11079290  
SRR17520069.11079291  
SRR17520069.11079292  
SRR17520069.11079293  
SRR17520069.11079294  
SRR17520069.11079295  
SRR17520069.11079296  
SRR17520069.11118974  
SRR17520069.11118998  
SRR17520069.11119010  
SRR17520069.11119073  
SRR17520069.11126134  
SRR17520069.11126135  
SRR17520069.11126136  
SRR17520069.11126138  
SRR17520069.11126139  
SRR17520069.11126140

SRR17520069.11126141  
SRR17520069.11126142  
SRR17520069.11126143  
SRR17520069.11126144  
SRR17520069.11126145  
SRR17520069.11126146  
SRR17520069.11126147  
SRR17520069.11126148  
SRR17520069.11126149  
SRR17520069.11126150  
SRR17520069.11126151  
SRR17520069.11126152  
SRR17520069.11126153  
SRR17520069.11126154  
SRR17520069.11126155  
SRR17520069.11126156  
SRR17520069.11126157  
SRR17520069.11126158  
SRR17520069.11126159  
SRR17520069.11126160  
SRR17520069.11126162  
SRR17520069.11126163  
SRR17520069.11126164  
SRR17520069.11126165  
SRR17520069.11126166  
SRR17520069.11126167  
SRR17520069.11126168  
SRR17520069.11126169  
SRR17520069.11126171  
SRR17520069.11126172  
SRR17520069.11126173  
SRR17520069.11126174  
SRR17520069.11126175  
SRR17520069.11126176  
SRR17520069.11126177  
SRR17520069.11126178  
SRR17520069.11126179  
SRR17520069.11126180  
SRR17520069.11126181  
SRR17520069.11126182  
SRR17520069.11126183  
SRR17520069.11126184  
SRR17520069.11126185  
SRR17520069.11126186  
SRR17520069.11126187  
SRR17520069.11126188  
SRR17520069.11126189



SRR17520069.11126190  
SRR17520069.11126191  
SRR17520069.11126192  
SRR17520069.11126193  
SRR17520069.11126194  
SRR17520069.11126195  
SRR17520069.11126196  
SRR17520069.11126197  
SRR17520069.11126198  
SRR17520069.11126199  
SRR17520069.11126200  
SRR17520069.11126201  
SRR17520069.11126202  
SRR17520069.11126203  
SRR17520069.11126204  
SRR17520069.11126205  
SRR17520069.11126206  
SRR17520069.11126207  
SRR17520069.11126208  
SRR17520069.11126209  
SRR17520069.11126210  
SRR17520069.11126211  
SRR17520069.11126212  
SRR17520069.11126213  
SRR17520069.11126214  
SRR17520069.11126215  
SRR17520069.11126216  
SRR17520069.11126217  
SRR17520069.11126218  
SRR17520069.11126219  
SRR17520069.11126220  
SRR17520069.11126221  
SRR17520069.11126222  
SRR17520069.11126223  
SRR17520069.11126224  
SRR17520069.11126225  
SRR17520069.11126226  
SRR17520069.11126227  
SRR17520069.11126228  
SRR17520069.11126229  
SRR17520069.11126230  
SRR17520069.11126231  
SRR17520069.11126232  
SRR17520069.11126233  
SRR17520069.11126234  
SRR17520069.11126235  
SRR17520069.11126236

SRR17520069.11126237  
SRR17520069.11126238  
SRR17520069.11126239  
SRR17520069.11126240  
SRR17520069.11126241  
SRR17520069.11126242  
SRR17520069.11126243  
SRR17520069.11126244  
SRR17520069.11126245  
SRR17520069.11126246  
SRR17520069.11126247  
SRR17520069.11126248  
SRR17520069.11126249  
SRR17520069.11126250  
SRR17520069.11126251  
SRR17520069.11126252  
SRR17520069.11126253  
SRR17520069.11126254  
SRR17520069.11126255  
SRR17520069.11126256  
SRR17520069.11126257  
SRR17520069.11126260  
SRR17520069.11126261  
SRR17520069.11126262  
SRR17520069.11126263  
SRR17520069.11126264  
SRR17520069.11126265  
SRR17520069.11126266  
SRR17520069.11126267  
SRR17520069.11126268  
SRR17520069.11126269  
SRR17520069.11126270  
SRR17520069.11135965  
SRR17520069.11135970  
SRR17520069.11140086  
SRR17520069.11140087  
SRR17520069.11140088  
SRR17520069.11140089  
SRR17520069.11140090  
SRR17520069.11140091  
SRR17520069.11140092  
SRR17520069.11140093  
SRR17520069.11140094  
SRR17520069.11140095  
SRR17520069.11140096  
SRR17520069.11140097  
SRR17520069.11140098

SRR17520069.11140099  
SRR17520069.11140100  
SRR17520069.11140101  
SRR17520069.11140102  
SRR17520069.11140103  
SRR17520069.11140104  
SRR17520069.11140105  
SRR17520069.11140106  
SRR17520069.11140107  
SRR17520069.11140108  
SRR17520069.11140109  
SRR17520069.11140110  
SRR17520069.11140111  
SRR17520069.11140112  
SRR17520069.11140113  
SRR17520069.11140114  
SRR17520069.11140115  
SRR17520069.11140116  
SRR17520069.11140117  
SRR17520069.11140118  
SRR17520069.11140119  
SRR17520069.11140120  
SRR17520069.11140121  
SRR17520069.11140122  
SRR17520069.11140123  
SRR17520069.11140124  
SRR17520069.11140125  
SRR17520069.11140126  
SRR17520069.11140127  
SRR17520069.11140128  
SRR17520069.11140129  
SRR17520069.11140130  
SRR17520069.11140131  
SRR17520069.11140132  
SRR17520069.11140133  
SRR17520069.11140134  
SRR17520069.11140135  
SRR17520069.11140136  
SRR17520069.11140137  
SRR17520069.11140138  
SRR17520069.11140139  
SRR17520069.11140140  
SRR17520069.11140141  
SRR17520069.11140142  
SRR17520069.11140143  
SRR17520069.11140144  
SRR17520069.11140145

SRR17520069.11140146  
SRR17520069.11140147  
SRR17520069.11140148  
SRR17520069.11140149  
SRR17520069.11140150  
SRR17520069.11140151  
SRR17520069.11140152  
SRR17520069.11140153  
SRR17520069.11140154  
SRR17520069.11140155  
SRR17520069.11140156  
SRR17520069.11140157  
SRR17520069.11140158  
SRR17520069.11140159  
SRR17520069.11140160  
SRR17520069.11140161  
SRR17520069.11140162  
SRR17520069.11140163  
SRR17520069.11140164  
SRR17520069.11140165  
SRR17520069.11140167  
SRR17520069.11140168  
SRR17520069.11140169  
SRR17520069.11140170  
SRR17520069.11140171  
SRR17520069.11140172  
SRR17520069.11140173  
SRR17520069.11140174  
SRR17520069.11140175  
SRR17520069.11140176  
SRR17520069.11140177  
SRR17520069.11140178  
SRR17520069.11140179  
SRR17520069.11140180  
SRR17520069.11140181  
SRR17520069.11140182  
SRR17520069.11140183  
SRR17520069.11140184  
SRR17520069.11140185  
SRR17520069.11140186  
SRR17520069.11140187  
SRR17520069.11140188  
SRR17520069.11140189  
SRR17520069.11140191  
SRR17520069.11140192  
SRR17520069.11140193  
SRR17520069.11140194

SRR17520069.11140195  
SRR17520069.11140196  
SRR17520069.11140197  
SRR17520069.11140198  
SRR17520069.11140199  
SRR17520069.11140200  
SRR17520069.11140201  
SRR17520069.11140202  
SRR17520069.11140203  
SRR17520069.11140204  
SRR17520069.11140205  
SRR17520069.11140206  
SRR17520069.11140207  
SRR17520069.11140208  
SRR17520069.11140209  
SRR17520069.11140210  
SRR17520069.11140211  
SRR17520069.11140212  
SRR17520069.11140213  
SRR17520069.11140214  
SRR17520069.11140215  
SRR17520069.11140216  
SRR17520069.11140217  
SRR17520069.11140218  
SRR17520069.11140219  
SRR17520069.11140220  
SRR17520069.11140221  
SRR17520069.11140222  
SRR17520069.11140223  
SRR17520069.11140224  
SRR17520069.11140225  
SRR17520069.11140226  
SRR17520069.11140227  
SRR17520069.11140228  
SRR17520069.11140229  
SRR17520069.11140230  
SRR17520069.11140231  
SRR17520069.11140232  
SRR17520069.11140233  
SRR17520069.11140234  
SRR17520069.11140235  
SRR17520069.11140236  
SRR17520069.11140237  
SRR17520069.11140238  
SRR17520069.11140239  
SRR17520069.11140240  
SRR17520069.11140241

SRR17520069.11140242  
SRR17520069.11140243  
SRR17520069.11140244  
SRR17520069.11140245  
SRR17520069.11140246  
SRR17520069.11140247  
SRR17520069.11140248  
SRR17520069.11140249  
SRR17520069.11140250  
SRR17520069.11149047  
SRR17520069.11149048  
SRR17520069.11160556  
SRR17520069.11160557  
SRR17520069.11160558  
SRR17520069.11160559  
SRR17520069.11160560  
SRR17520069.11160561  
SRR17520069.11160562  
SRR17520069.11160563  
SRR17520069.11160564  
SRR17520069.11160565  
SRR17520069.11160566  
SRR17520069.11160567  
SRR17520069.11160569  
SRR17520069.11160570  
SRR17520069.11160571  
SRR17520069.11160572  
SRR17520069.11160573  
SRR17520069.11160574  
SRR17520069.11160575  
SRR17520069.11160577  
SRR17520069.11160578  
SRR17520069.11160580  
SRR17520069.11160581  
SRR17520069.11160582  
SRR17520069.11160583  
SRR17520069.11160585  
SRR17520069.11160591  
SRR17520069.11160595  
SRR17520069.11160596  
SRR17520069.11160597  
SRR17520069.11160598  
SRR17520069.11160599  
SRR17520069.11160600  
SRR17520069.11160601  
SRR17520069.11160602  
SRR17520069.11160603

SRR17520069.11160604  
SRR17520069.11160605  
SRR17520069.11160607  
SRR17520069.11160608  
SRR17520069.11160609  
SRR17520069.11160611  
SRR17520069.11160612  
SRR17520069.11160613  
SRR17520069.11160615  
SRR17520069.11160618  
SRR17520069.11160620  
SRR17520069.11160621  
SRR17520069.11160622  
SRR17520069.11160623  
SRR17520069.11160624  
SRR17520069.11160625  
SRR17520069.11160626  
SRR17520069.11160627  
SRR17520069.11160628  
SRR17520069.11160629  
SRR17520069.11160630  
SRR17520069.11160632  
SRR17520069.11160634  
SRR17520069.11160635  
SRR17520069.11160636  
SRR17520069.11161179  
SRR17520069.11161180  
SRR17520069.11161181  
SRR17520069.11161182  
SRR17520069.11161183  
SRR17520069.11161184  
SRR17520069.11161185  
SRR17520069.11161186  
SRR17520069.11161187  
SRR17520069.11161188  
SRR17520069.11161189  
SRR17520069.11161190  
SRR17520069.11161191  
SRR17520069.11161192  
SRR17520069.11161193  
SRR17520069.11161194  
SRR17520069.11161195  
SRR17520069.11161196  
SRR17520069.11161197  
SRR17520069.11161198  
SRR17520069.11161199  
SRR17520069.11161200

SRR17520069.11161201  
SRR17520069.11161202  
SRR17520069.11161203  
SRR17520069.11161204  
SRR17520069.11161205  
SRR17520069.11161206  
SRR17520069.11161207  
SRR17520069.11161208  
SRR17520069.11161209  
SRR17520069.11161210  
SRR17520069.11161211  
SRR17520069.11161212  
SRR17520069.11161213  
SRR17520069.11161214  
SRR17520069.11161215  
SRR17520069.11161216  
SRR17520069.11161217  
SRR17520069.11161218  
SRR17520069.11161219  
SRR17520069.11161221  
SRR17520069.11161222  
SRR17520069.11161223  
SRR17520069.11161224  
SRR17520069.11161225  
SRR17520069.11161226  
SRR17520069.11161227  
SRR17520069.11161228  
SRR17520069.11161229  
SRR17520069.11161230  
SRR17520069.11161231  
SRR17520069.11161232  
SRR17520069.11161233  
SRR17520069.11161234  
SRR17520069.11161235  
SRR17520069.11161236  
SRR17520069.11161237  
SRR17520069.11161238  
SRR17520069.11161239  
SRR17520069.11161240  
SRR17520069.11161241  
SRR17520069.11161242  
SRR17520069.11161243  
SRR17520069.11161245  
SRR17520069.11161246  
SRR17520069.11161247  
SRR17520069.11161248  
SRR17520069.11161249



SRR17520069.11161250  
SRR17520069.11161251  
SRR17520069.11161252  
SRR17520069.11161253  
SRR17520069.11161254  
SRR17520069.11161255  
SRR17520069.11161256  
SRR17520069.11161257  
SRR17520069.11161258  
SRR17520069.11161259  
SRR17520069.11161260  
SRR17520069.11161261  
SRR17520069.11161262  
SRR17520069.11161263  
SRR17520069.11161264  
SRR17520069.11161265  
SRR17520069.11161266  
SRR17520069.11161267  
SRR17520069.11161268  
SRR17520069.11161269  
SRR17520069.11161270  
SRR17520069.11161271  
SRR17520069.11161272  
SRR17520069.11161273  
SRR17520069.11161274  
SRR17520069.11161276  
SRR17520069.11161277  
SRR17520069.11161278  
SRR17520069.11161279  
SRR17520069.11161280  
SRR17520069.11161281  
SRR17520069.11161282  
SRR17520069.11161283  
SRR17520069.11161284  
SRR17520069.11161285  
SRR17520069.11187327  
SRR17520069.11187349  
SRR17520069.11187942  
SRR17520069.11187943  
SRR17520069.11187944  
SRR17520069.11187945  
SRR17520069.11187946  
SRR17520069.11187947  
SRR17520069.11187962  
SRR17520069.11187963  
SRR17520069.11187970  
SRR17520069.11187972

SRR17520069.11187980  
SRR17520069.11192597  
SRR17520069.11192598  
SRR17520069.11192599  
SRR17520069.11192600  
SRR17520069.11192601  
SRR17520069.11192602  
SRR17520069.11192603  
SRR17520069.11192604  
SRR17520069.11192605  
SRR17520069.11192606  
SRR17520069.11192607  
SRR17520069.11192609  
SRR17520069.11192610  
SRR17520069.11192611  
SRR17520069.11192612  
SRR17520069.11192613  
SRR17520069.11192614  
SRR17520069.11192617  
SRR17520069.11192618  
SRR17520069.11192619  
SRR17520069.11192620  
SRR17520069.11192621  
SRR17520069.11194422  
SRR17520069.11235550  
SRR17520069.11235551  
SRR17520069.11235552  
SRR17520069.11235553  
SRR17520069.11235554  
SRR17520069.11235555  
SRR17520069.11235556  
SRR17520069.11239952  
SRR17520069.11239953  
SRR17520069.11239954  
SRR17520069.11239955  
SRR17520069.11239956  
SRR17520069.11239957  
SRR17520069.11239958  
SRR17520069.11239959  
SRR17520069.11239960  
SRR17520069.11239961  
SRR17520069.11239962  
SRR17520069.11239963  
SRR17520069.11239964  
SRR17520069.11239965  
SRR17520069.11239966  
SRR17520069.11239967

SRR17520069.11239968  
SRR17520069.11239969  
SRR17520069.11239970  
SRR17520069.11239971  
SRR17520069.11239972  
SRR17520069.11239973  
SRR17520069.11239974  
SRR17520069.11239975  
SRR17520069.11239976  
SRR17520069.11239977  
SRR17520069.11239978  
SRR17520069.11239979  
SRR17520069.11239980  
SRR17520069.11239981  
SRR17520069.11239982  
SRR17520069.11239983  
SRR17520069.11239984  
SRR17520069.11239985  
SRR17520069.11239986  
SRR17520069.11239987  
SRR17520069.11239988  
SRR17520069.11239989  
SRR17520069.11239990  
SRR17520069.11239991  
SRR17520069.11239992  
SRR17520069.11239993  
SRR17520069.11239994  
SRR17520069.11239995  
SRR17520069.11239996  
SRR17520069.11239997  
SRR17520069.11239998  
SRR17520069.11239999  
SRR17520069.11240000  
SRR17520069.11240001  
SRR17520069.11240002  
SRR17520069.11240003  
SRR17520069.11240004  
SRR17520069.11240005  
SRR17520069.11240006  
SRR17520069.11240007  
SRR17520069.11240008  
SRR17520069.11240009  
SRR17520069.11240010  
SRR17520069.11240011  
SRR17520069.11240012  
SRR17520069.11240013  
SRR17520069.11240014

SRR17520069.11240015  
SRR17520069.11240016  
SRR17520069.11240017  
SRR17520069.11240018  
SRR17520069.11240019  
SRR17520069.11240020  
SRR17520069.11240021  
SRR17520069.11240022  
SRR17520069.11240023  
SRR17520069.11240024  
SRR17520069.11240025  
SRR17520069.11240026  
SRR17520069.11240027  
SRR17520069.11240028  
SRR17520069.11240029  
SRR17520069.11240030  
SRR17520069.11240031  
SRR17520069.11240032  
SRR17520069.11240033  
SRR17520069.11240034  
SRR17520069.11240035  
SRR17520069.11240036  
SRR17520069.11240037  
SRR17520069.11240038  
SRR17520069.11240039  
SRR17520069.11240040  
SRR17520069.11240041  
SRR17520069.11240042  
SRR17520069.11240043  
SRR17520069.11240044  
SRR17520069.11240045  
SRR17520069.11240046  
SRR17520069.11240047  
SRR17520069.11240048  
SRR17520069.11240049  
SRR17520069.11240050  
SRR17520069.11240051  
SRR17520069.11240052  
SRR17520069.11240053  
SRR17520069.11240054  
SRR17520069.11240055  
SRR17520069.11240056  
SRR17520069.11240057  
SRR17520069.11240058  
SRR17520069.11240059  
SRR17520069.11240060  
SRR17520069.11240061

SRR17520069.11240062  
SRR17520069.11240063  
SRR17520069.11240064  
SRR17520069.11240065  
SRR17520069.11240066  
SRR17520069.11240067  
SRR17520069.11240068  
SRR17520069.11240069  
SRR17520069.11240070  
SRR17520069.11240071  
SRR17520069.11240072  
SRR17520069.11240073  
SRR17520069.11240074  
SRR17520069.11240075  
SRR17520069.11240076  
SRR17520069.11240077  
SRR17520069.11240078  
SRR17520069.11240079  
SRR17520069.11240080  
SRR17520069.11240081  
SRR17520069.11240082  
SRR17520069.11240083  
SRR17520069.11240084  
SRR17520069.11240085  
SRR17520069.11240086  
SRR17520069.11240087  
SRR17520069.11240088  
SRR17520069.11240089  
SRR17520069.11240090  
SRR17520069.11244255  
SRR17520069.11256638  
SRR17520069.11265768  
SRR17520069.11272651  
SRR17520069.11297583  
SRR17520069.11300380  
SRR17520069.11301931  
SRR17520069.11301932  
SRR17520069.11301933  
SRR17520069.11301934  
SRR17520069.11301935  
SRR17520069.11301936  
SRR17520069.11301937  
SRR17520069.11301938  
SRR17520069.11301939  
SRR17520069.11301940  
SRR17520069.11301941  
SRR17520069.11301942

SRR17520069. 11301943  
SRR17520069. 11301944  
SRR17520069. 11301948  
SRR17520069. 11301950  
SRR17520069. 11301951  
SRR17520069. 11301953  
SRR17520069. 11301954  
SRR17520069. 11301955  
SRR17520069. 11301956  
SRR17520069. 11301957  
SRR17520069. 11301958  
SRR17520069. 11301959  
SRR17520069. 11301960  
SRR17520069. 11301961  
SRR17520069. 11301962  
SRR17520069. 11301963  
SRR17520069. 11301964  
SRR17520069. 11301965  
SRR17520069. 11301966  
SRR17520069. 11301967  
SRR17520069. 11301968  
SRR17520069. 11301969  
SRR17520069. 11301970  
SRR17520069. 11301971  
SRR17520069. 11301972  
SRR17520069. 11301973  
SRR17520069. 11301974  
SRR17520069. 11301975  
SRR17520069. 11301976  
SRR17520069. 11301978  
SRR17520069. 11301979  
SRR17520069. 11301980  
SRR17520069. 11301981  
SRR17520069. 11301982  
SRR17520069. 11301983  
SRR17520069. 11301986  
SRR17520069. 11301987  
SRR17520069. 11301988  
SRR17520069. 11301989  
SRR17520069. 11301990  
SRR17520069. 11301992  
SRR17520069. 11301993  
SRR17520069. 11301994  
SRR17520069. 11301995  
SRR17520069. 11301996  
SRR17520069. 11301998  
SRR17520069. 11301999

SRR17520069.11302000  
SRR17520069.11302001  
SRR17520069.11302002  
SRR17520069.11302003  
SRR17520069.11302004  
SRR17520069.11302005  
SRR17520069.11302006  
SRR17520069.11302007  
SRR17520069.11302008  
SRR17520069.11302009  
SRR17520069.11302010  
SRR17520069.11302011  
SRR17520069.11302012  
SRR17520069.11302013  
SRR17520069.11302014  
SRR17520069.11302015  
SRR17520069.11302016  
SRR17520069.11302017  
SRR17520069.11302018  
SRR17520069.11302019  
SRR17520069.11302020  
SRR17520069.11302021  
SRR17520069.11302023  
SRR17520069.11302024  
SRR17520069.11302025  
SRR17520069.11302026  
SRR17520069.11302028  
SRR17520069.11302029  
SRR17520069.11302030  
SRR17520069.11302031  
SRR17520069.11302032  
SRR17520069.11302033  
SRR17520069.11302034  
SRR17520069.11302035  
SRR17520069.11302036  
SRR17520069.11330729  
SRR17520069.11341555  
SRR17520069.11341605  
SRR17520069.11353107  
SRR17520069.11353108  
SRR17520069.11353109  
SRR17520069.11353110  
SRR17520069.11353111  
SRR17520069.11353112  
SRR17520069.11353114  
SRR17520069.11353115  
SRR17520069.11353116

SRR17520069. 11353117  
SRR17520069. 11353118  
SRR17520069. 11353119  
SRR17520069. 11353120  
SRR17520069. 11353121  
SRR17520069. 11353122  
SRR17520069. 11353123  
SRR17520069. 11353124  
SRR17520069. 11353125  
SRR17520069. 11353126  
SRR17520069. 11353128  
SRR17520069. 11353129  
SRR17520069. 11353130  
SRR17520069. 11353131  
SRR17520069. 11353132  
SRR17520069. 11353133  
SRR17520069. 11353134  
SRR17520069. 11353135  
SRR17520069. 11353136  
SRR17520069. 11353137  
SRR17520069. 11361978  
SRR17520069. 11361979  
SRR17520069. 11361980  
SRR17520069. 11361981  
SRR17520069. 11361982  
SRR17520069. 11361983  
SRR17520069. 11361985  
SRR17520069. 11361986  
SRR17520069. 11361987  
SRR17520069. 11361989  
SRR17520069. 11361991  
SRR17520069. 11361992  
SRR17520069. 11361993  
SRR17520069. 11361994  
SRR17520069. 11361995  
SRR17520069. 11361996  
SRR17520069. 11361997  
SRR17520069. 11361998  
SRR17520069. 11361999  
SRR17520069. 11362000  
SRR17520069. 11362001  
SRR17520069. 11362002  
SRR17520069. 11362003  
SRR17520069. 11362004  
SRR17520069. 11362005  
SRR17520069. 11362006  
SRR17520069. 11362007



SRR17520069. 11362008  
SRR17520069. 11362009  
SRR17520069. 11362010  
SRR17520069. 11362011  
SRR17520069. 11362012  
SRR17520069. 11362013  
SRR17520069. 11362014  
SRR17520069. 11362015  
SRR17520069. 11362017  
SRR17520069. 11362018  
SRR17520069. 11362019  
SRR17520069. 11362020  
SRR17520069. 11362021  
SRR17520069. 11362022  
SRR17520069. 11362023  
SRR17520069. 11362024  
SRR17520069. 11362025  
SRR17520069. 11362026  
SRR17520069. 11362027  
SRR17520069. 11362028  
SRR17520069. 11362029  
SRR17520069. 11362030  
SRR17520069. 11362031  
SRR17520069. 11362032  
SRR17520069. 11362033  
SRR17520069. 11362034  
SRR17520069. 11362035  
SRR17520069. 11362036  
SRR17520069. 11362037  
SRR17520069. 11362038  
SRR17520069. 11362039  
SRR17520069. 11362040  
SRR17520069. 11362041  
SRR17520069. 11362042  
SRR17520069. 11362043  
SRR17520069. 11362044  
SRR17520069. 11362045  
SRR17520069. 11362046  
SRR17520069. 11362048  
SRR17520069. 11362049  
SRR17520069. 11362050  
SRR17520069. 11362051  
SRR17520069. 11362052  
SRR17520069. 11362053  
SRR17520069. 11362054  
SRR17520069. 11362055  
SRR17520069. 11362056

SRR17520069. 11362057  
SRR17520069. 11362058  
SRR17520069. 11362059  
SRR17520069. 11362060  
SRR17520069. 11362061  
SRR17520069. 11362062  
SRR17520069. 11362063  
SRR17520069. 11362064  
SRR17520069. 11362065  
SRR17520069. 11362066  
SRR17520069. 11362067  
SRR17520069. 11362068  
SRR17520069. 11362069  
SRR17520069. 11362070  
SRR17520069. 11362071  
SRR17520069. 11362072  
SRR17520069. 11362073  
SRR17520069. 11379093  
SRR17520069. 11385951  
SRR17520069. 11385952  
SRR17520069. 11385953  
SRR17520069. 11385954  
SRR17520069. 11385955  
SRR17520069. 11385956  
SRR17520069. 11385957  
SRR17520069. 11385958  
SRR17520069. 11385959  
SRR17520069. 11385960  
SRR17520069. 11385961  
SRR17520069. 11385962  
SRR17520069. 11385963  
SRR17520069. 11385964  
SRR17520069. 11385965  
SRR17520069. 11385966  
SRR17520069. 11385967  
SRR17520069. 11385968  
SRR17520069. 11385969  
SRR17520069. 11385970  
SRR17520069. 11385971  
SRR17520069. 11385972  
SRR17520069. 11385973  
SRR17520069. 11385974  
SRR17520069. 11385975  
SRR17520069. 11457679  
SRR17520069. 11457680  
SRR17520069. 11457681  
SRR17520069. 11457682

SRR17520069.11457683  
SRR17520069.11457684  
SRR17520069.11457685  
SRR17520069.11477891  
SRR17520069.11511723  
SRR17520069.11511724  
SRR17520069.11511725  
SRR17520069.11511726  
SRR17520069.11511727  
SRR17520069.11511728  
SRR17520069.11511729  
SRR17520069.11511730  
SRR17520069.11511731  
SRR17520069.11511732  
SRR17520069.11511733  
SRR17520069.11511734  
SRR17520069.11511735  
SRR17520069.11511736  
SRR17520069.11511737  
SRR17520069.11511740  
SRR17520069.11511741  
SRR17520069.11511743  
SRR17520069.11511744  
SRR17520069.11511745  
SRR17520069.11511746  
SRR17520069.11511747  
SRR17520069.11511748  
SRR17520069.11511749  
SRR17520069.11511750  
SRR17520069.11511751  
SRR17520069.11511752  
SRR17520069.11511753  
SRR17520069.11511754  
SRR17520069.11511755  
SRR17520069.11511756  
SRR17520069.11511757  
SRR17520069.11511758  
SRR17520069.11511759  
SRR17520069.11511760  
SRR17520069.11511761  
SRR17520069.11513266  
SRR17520069.11521361  
SRR17520069.11521362  
SRR17520069.11523296  
SRR17520069.11523297  
SRR17520069.11523298  
SRR17520069.11523299

SRR17520069.11523300  
SRR17520069.11526241  
SRR17520069.11526242  
SRR17520069.11526243  
SRR17520069.11526244  
SRR17520069.11526245  
SRR17520069.11526246  
SRR17520069.11526249  
SRR17520069.11526250  
SRR17520069.11526251  
SRR17520069.11526252  
SRR17520069.11526253  
SRR17520069.11526254  
SRR17520069.11526255  
SRR17520069.11526256  
SRR17520069.11526257  
SRR17520069.11526258  
SRR17520069.11526259  
SRR17520069.11526260  
SRR17520069.11526261  
SRR17520069.11526262  
SRR17520069.11526263  
SRR17520069.11526266  
SRR17520069.11526267  
SRR17520069.11526268  
SRR17520069.11526269  
SRR17520069.11526270  
SRR17520069.11526271  
SRR17520069.11526272  
SRR17520069.11526273  
SRR17520069.11526274  
SRR17520069.11526275  
SRR17520069.11526276  
SRR17520069.11526277  
SRR17520069.11526278  
SRR17520069.11526279  
SRR17520069.11526280  
SRR17520069.11526281  
SRR17520069.11526282  
SRR17520069.11526283  
SRR17520069.11526284  
SRR17520069.11526285  
SRR17520069.11526286  
SRR17520069.11526287  
SRR17520069.11526288  
SRR17520069.11526289  
SRR17520069.11526290

SRR17520069.11526291  
SRR17520069.11526292  
SRR17520069.11526293  
SRR17520069.11526294  
SRR17520069.11526295  
SRR17520069.11526296  
SRR17520069.11526297  
SRR17520069.11526298  
SRR17520069.11526300  
SRR17520069.11526301  
SRR17520069.11526302  
SRR17520069.11526303  
SRR17520069.11526304  
SRR17520069.11526305  
SRR17520069.11526306  
SRR17520069.11526307  
SRR17520069.11526308  
SRR17520069.11526309  
SRR17520069.11526310  
SRR17520069.11526311  
SRR17520069.11526312  
SRR17520069.11526313  
SRR17520069.11526314  
SRR17520069.11526315  
SRR17520069.11526316  
SRR17520069.11526317  
SRR17520069.11526318  
SRR17520069.11526319  
SRR17520069.11526320  
SRR17520069.11526321  
SRR17520069.11526322  
SRR17520069.11526323  
SRR17520069.11526324  
SRR17520069.11526325  
SRR17520069.11526326  
SRR17520069.11526329  
SRR17520069.11526330  
SRR17520069.11526331  
SRR17520069.11526332  
SRR17520069.11526333  
SRR17520069.11526334  
SRR17520069.11526335  
SRR17520069.11526336  
SRR17520069.11526337  
SRR17520069.11526338  
SRR17520069.11526339  
SRR17520069.11526340

SRR17520069.11526341  
SRR17520069.11526342  
SRR17520069.11526343  
SRR17520069.11526344  
SRR17520069.11526345  
SRR17520069.11526346  
SRR17520069.11526347  
SRR17520069.11526348  
SRR17520069.11526349  
SRR17520069.11526350  
SRR17520069.11526351  
SRR17520069.11526352  
SRR17520069.11526354  
SRR17520069.11526355  
SRR17520069.11526356  
SRR17520069.11526357  
SRR17520069.11526358  
SRR17520069.11526359  
SRR17520069.11526360  
SRR17520069.11526361  
SRR17520069.11526363  
SRR17520069.11526364  
SRR17520069.11526365  
SRR17520069.11526366  
SRR17520069.11526367  
SRR17520069.11526368  
SRR17520069.11526369  
SRR17520069.11526370  
SRR17520069.11526371  
SRR17520069.11526372  
SRR17520069.11526373  
SRR17520069.11526374  
SRR17520069.11526375  
SRR17520069.11526376  
SRR17520069.11526377  
SRR17520069.11526378  
SRR17520069.11526379  
SRR17520069.11526380  
SRR17520069.11526381  
SRR17520069.11526382  
SRR17520069.11526383  
SRR17520069.11526384  
SRR17520069.11526385  
SRR17520069.11526386  
SRR17520069.11526387  
SRR17520069.11526388  
SRR17520069.11526389

SRR17520069.11526390  
SRR17520069.11526391  
SRR17520069.11526392  
SRR17520069.11529853  
SRR17520069.11529854  
SRR17520069.11529855  
SRR17520069.11529856  
SRR17520069.11529857  
SRR17520069.11529858  
SRR17520069.11529859  
SRR17520069.11529860  
SRR17520069.11529861  
SRR17520069.11529862  
SRR17520069.11529865  
SRR17520069.11529867  
SRR17520069.11529868  
SRR17520069.11529869  
SRR17520069.11529870  
SRR17520069.11529871  
SRR17520069.11529872  
SRR17520069.11529873  
SRR17520069.11529875  
SRR17520069.11529876  
SRR17520069.11529877  
SRR17520069.11529878  
SRR17520069.11529879  
SRR17520069.11529880  
SRR17520069.11529881  
SRR17520069.11529882  
SRR17520069.11529883  
SRR17520069.11529884  
SRR17520069.11529885  
SRR17520069.11529886  
SRR17520069.11529887  
SRR17520069.11529888  
SRR17520069.11529889  
SRR17520069.11529890  
SRR17520069.11529891  
SRR17520069.11529892  
SRR17520069.11529893  
SRR17520069.11529894  
SRR17520069.11529895  
SRR17520069.11529896  
SRR17520069.11529897  
SRR17520069.11529898  
SRR17520069.11529900  
SRR17520069.11529901

SRR17520069.11529902  
SRR17520069.11529903  
SRR17520069.11529904  
SRR17520069.11529905  
SRR17520069.11529906  
SRR17520069.11529907  
SRR17520069.11529908  
SRR17520069.11529909  
SRR17520069.11529910  
SRR17520069.11529911  
SRR17520069.11529913  
SRR17520069.11529914  
SRR17520069.11529915  
SRR17520069.11529916  
SRR17520069.11540158  
SRR17520069.11540160  
SRR17520069.11540161  
SRR17520069.11540162  
SRR17520069.11540163  
SRR17520069.11540164  
SRR17520069.11540165  
SRR17520069.11540166  
SRR17520069.11540167  
SRR17520069.11540168  
SRR17520069.11540169  
SRR17520069.11540170  
SRR17520069.11540171  
SRR17520069.11540172  
SRR17520069.11540173  
SRR17520069.11540174  
SRR17520069.11540175  
SRR17520069.11540176  
SRR17520069.11540177  
SRR17520069.11540178  
SRR17520069.11540179  
SRR17520069.11540180  
SRR17520069.11540181  
SRR17520069.11540182  
SRR17520069.11540183  
SRR17520069.11540184  
SRR17520069.11540185  
SRR17520069.11540186  
SRR17520069.11540187  
SRR17520069.11540188  
SRR17520069.11540189  
SRR17520069.11540190  
SRR17520069.11540191



SRR17520069.11540192  
SRR17520069.11540193  
SRR17520069.11540194  
SRR17520069.11540195  
SRR17520069.11540196  
SRR17520069.11540197  
SRR17520069.11540198  
SRR17520069.11540199  
SRR17520069.11540200  
SRR17520069.11540201  
SRR17520069.11540202  
SRR17520069.11540203  
SRR17520069.11540204  
SRR17520069.11540205  
SRR17520069.11540206  
SRR17520069.11540207  
SRR17520069.11540208  
SRR17520069.11540209  
SRR17520069.11540210  
SRR17520069.11540211  
SRR17520069.11540212  
SRR17520069.11540213  
SRR17520069.11540214  
SRR17520069.11540215  
SRR17520069.11540216  
SRR17520069.11540217  
SRR17520069.11540218  
SRR17520069.11540219  
SRR17520069.11540220  
SRR17520069.11540221  
SRR17520069.11540222  
SRR17520069.11540223  
SRR17520069.11540224  
SRR17520069.11540225  
SRR17520069.11540226  
SRR17520069.11540227  
SRR17520069.11540228  
SRR17520069.11540229  
SRR17520069.11540230  
SRR17520069.11540231  
SRR17520069.11540232  
SRR17520069.11540233  
SRR17520069.11540234  
SRR17520069.11540235  
SRR17520069.11540236  
SRR17520069.11540237  
SRR17520069.11540238

SRR17520069.11540239  
SRR17520069.11540240  
SRR17520069.11540241  
SRR17520069.11540242  
SRR17520069.11562935  
SRR17520069.11562936  
SRR17520069.11562937  
SRR17520069.11562938  
SRR17520069.11562939  
SRR17520069.11562940  
SRR17520069.11562941  
SRR17520069.11562942  
SRR17520069.11562943  
SRR17520069.11562944  
SRR17520069.11562945  
SRR17520069.11562946  
SRR17520069.11562947  
SRR17520069.11562948  
SRR17520069.11562949  
SRR17520069.11562950  
SRR17520069.11562951  
SRR17520069.11562952  
SRR17520069.11562953  
SRR17520069.11562954  
SRR17520069.11562955  
SRR17520069.11562956  
SRR17520069.11562957  
SRR17520069.11562958  
SRR17520069.11562959  
SRR17520069.11562960  
SRR17520069.11562961  
SRR17520069.11562962  
SRR17520069.11562963  
SRR17520069.11562964  
SRR17520069.11562965  
SRR17520069.11562966  
SRR17520069.11562967  
SRR17520069.11562968  
SRR17520069.11562969  
SRR17520069.11562971  
SRR17520069.11562972  
SRR17520069.11562973  
SRR17520069.11562974  
SRR17520069.11562975  
SRR17520069.11562976  
SRR17520069.11562977  
SRR17520069.11562978

SRR17520069.11562979  
SRR17520069.11562980  
SRR17520069.11562981  
SRR17520069.11562982  
SRR17520069.11562983  
SRR17520069.11562984  
SRR17520069.11562985  
SRR17520069.11562986  
SRR17520069.11562987  
SRR17520069.11562988  
SRR17520069.11562989  
SRR17520069.11562990  
SRR17520069.11562991  
SRR17520069.11562992  
SRR17520069.11562993  
SRR17520069.11562994  
SRR17520069.11562995  
SRR17520069.11562996  
SRR17520069.11562997  
SRR17520069.11562998  
SRR17520069.11562999  
SRR17520069.11563001  
SRR17520069.11563002  
SRR17520069.11563003  
SRR17520069.11563004  
SRR17520069.11563005  
SRR17520069.11563006  
SRR17520069.11563007  
SRR17520069.11563008  
SRR17520069.11563009  
SRR17520069.11563010  
SRR17520069.11563011  
SRR17520069.11563012  
SRR17520069.11563013  
SRR17520069.11563014  
SRR17520069.11563015  
SRR17520069.11563016  
SRR17520069.11563017  
SRR17520069.11563018  
SRR17520069.11563019  
SRR17520069.11563020  
SRR17520069.11563021  
SRR17520069.11563024  
SRR17520069.11563025  
SRR17520069.11563026  
SRR17520069.11563027  
SRR17520069.11563028

SRR17520069.11569408  
SRR17520069.11585929  
SRR17520069.11585930  
SRR17520069.11585932  
SRR17520069.11585933  
SRR17520069.11585934  
SRR17520069.11585935  
SRR17520069.11585936  
SRR17520069.11585937  
SRR17520069.11585938  
SRR17520069.11585939  
SRR17520069.11585940  
SRR17520069.11608150  
SRR17520069.11633532  
SRR17520069.11633533  
SRR17520069.11633534  
SRR17520069.11633535  
SRR17520069.11633536  
SRR17520069.11633537  
SRR17520069.11633538  
SRR17520069.11633539  
SRR17520069.11633540  
SRR17520069.11633541  
SRR17520069.11633542  
SRR17520069.11633543  
SRR17520069.11633544  
SRR17520069.11633545  
SRR17520069.11633546  
SRR17520069.11633547  
SRR17520069.11633548  
SRR17520069.11633549  
SRR17520069.11633552  
SRR17520069.11633553  
SRR17520069.11633554  
SRR17520069.11633555  
SRR17520069.11633556  
SRR17520069.11633557  
SRR17520069.11633558  
SRR17520069.11633559  
SRR17520069.11633560  
SRR17520069.11633561  
SRR17520069.11633562  
SRR17520069.11633563  
SRR17520069.11633564  
SRR17520069.11633565  
SRR17520069.11633566  
SRR17520069.11633567

SRR17520069.11633568  
SRR17520069.11633569  
SRR17520069.11633570  
SRR17520069.11633571  
SRR17520069.11633572  
SRR17520069.11633573  
SRR17520069.11633574  
SRR17520069.11633575  
SRR17520069.11633576  
SRR17520069.11633577  
SRR17520069.11633578  
SRR17520069.11633579  
SRR17520069.11633580  
SRR17520069.11633581  
SRR17520069.11633582  
SRR17520069.11633583  
SRR17520069.11633584  
SRR17520069.11633585  
SRR17520069.11633586  
SRR17520069.11633587  
SRR17520069.11633588  
SRR17520069.11633589  
SRR17520069.11633590  
SRR17520069.11633591  
SRR17520069.11633592  
SRR17520069.11633593  
SRR17520069.11633594  
SRR17520069.11633595  
SRR17520069.11633596  
SRR17520069.11633597  
SRR17520069.11633598  
SRR17520069.11633599  
SRR17520069.11633600  
SRR17520069.11633601  
SRR17520069.11633602  
SRR17520069.11633603  
SRR17520069.11633604  
SRR17520069.11633605  
SRR17520069.11633606  
SRR17520069.11633607  
SRR17520069.11633608  
SRR17520069.11633609  
SRR17520069.11633610  
SRR17520069.11633611  
SRR17520069.11633612  
SRR17520069.11633613  
SRR17520069.11633614

SRR17520069.11633615  
SRR17520069.11633616  
SRR17520069.11633617  
SRR17520069.11633618  
SRR17520069.11633619  
SRR17520069.11633620  
SRR17520069.11633621  
SRR17520069.11633622  
SRR17520069.11633623  
SRR17520069.11633624  
SRR17520069.11633625  
SRR17520069.11633626  
SRR17520069.11633627  
SRR17520069.11633628  
SRR17520069.11633630  
SRR17520069.11633631  
SRR17520069.11633632  
SRR17520069.11633633  
SRR17520069.11633634  
SRR17520069.11633635  
SRR17520069.11633636  
SRR17520069.11633637  
SRR17520069.11633638  
SRR17520069.11633639  
SRR17520069.11633640  
SRR17520069.11633641  
SRR17520069.11633642  
SRR17520069.11633643  
SRR17520069.11633644  
SRR17520069.11633645  
SRR17520069.11633646  
SRR17520069.11633647  
SRR17520069.11650990  
SRR17520069.11651001  
SRR17520069.11651002  
SRR17520069.11661230  
SRR17520069.11684451  
SRR17520069.11684458  
SRR17520069.11698817  
SRR17520069.11698822  
SRR17520069.11717562  
SRR17520069.11717563  
SRR17520069.11717564  
SRR17520069.11717565  
SRR17520069.11717566  
SRR17520069.11717567  
SRR17520069.11717568

SRR17520069.11717569  
SRR17520069.11717570  
SRR17520069.11717571  
SRR17520069.11717572  
SRR17520069.11717573  
SRR17520069.11717574  
SRR17520069.11717575  
SRR17520069.11717576  
SRR17520069.11717577  
SRR17520069.11717578  
SRR17520069.11717579  
SRR17520069.11717580  
SRR17520069.11717581  
SRR17520069.11717582  
SRR17520069.11717583  
SRR17520069.11717584  
SRR17520069.11717585  
SRR17520069.11717586  
SRR17520069.11744232  
SRR17520069.11744233  
SRR17520069.11744234  
SRR17520069.11744235  
SRR17520069.11744236  
SRR17520069.11744237  
SRR17520069.11744239  
SRR17520069.11744240  
SRR17520069.11744241  
SRR17520069.11744242  
SRR17520069.11744243  
SRR17520069.11744244  
SRR17520069.11744245  
SRR17520069.11744248  
SRR17520069.11744249  
SRR17520069.11744250  
SRR17520069.11744251  
SRR17520069.11744252  
SRR17520069.11744253  
SRR17520069.11744254  
SRR17520069.11744256  
SRR17520069.11744258  
SRR17520069.11744259  
SRR17520069.11766063  
SRR17520069.11766064  
SRR17520069.11766065  
SRR17520069.11766066  
SRR17520069.11766067  
SRR17520069.11766068

SRR17520069.11766069  
SRR17520069.11766070  
SRR17520069.11766071  
SRR17520069.11766072  
SRR17520069.11766073  
SRR17520069.11766074  
SRR17520069.11766075  
SRR17520069.11766076  
SRR17520069.11766078  
SRR17520069.11766079  
SRR17520069.11766080  
SRR17520069.11766081  
SRR17520069.11766082  
SRR17520069.11766083  
SRR17520069.11766084  
SRR17520069.11766085  
SRR17520069.11766086  
SRR17520069.11766087  
SRR17520069.11766088  
SRR17520069.11766089  
SRR17520069.11766090  
SRR17520069.11766091  
SRR17520069.11766092  
SRR17520069.11766093  
SRR17520069.11766094  
SRR17520069.11766095  
SRR17520069.11766096  
SRR17520069.11766097  
SRR17520069.11766098  
SRR17520069.11766099  
SRR17520069.11766100  
SRR17520069.11766101  
SRR17520069.11766102  
SRR17520069.11766103  
SRR17520069.11766104  
SRR17520069.11766105  
SRR17520069.11766106  
SRR17520069.11766107  
SRR17520069.11766108  
SRR17520069.11766109  
SRR17520069.11766110  
SRR17520069.11766111  
SRR17520069.11766112  
SRR17520069.11766113  
SRR17520069.11766114  
SRR17520069.11766115  
SRR17520069.11766116



SRR17520069.11766117  
SRR17520069.11766118  
SRR17520069.11766119  
SRR17520069.11766120  
SRR17520069.11766121  
SRR17520069.11766122  
SRR17520069.11766123  
SRR17520069.11766124  
SRR17520069.11766125  
SRR17520069.11766126  
SRR17520069.11766127  
SRR17520069.11766128  
SRR17520069.11766129  
SRR17520069.11766130  
SRR17520069.11766131  
SRR17520069.11766132  
SRR17520069.11766133  
SRR17520069.11766134  
SRR17520069.11766135  
SRR17520069.11766137  
SRR17520069.11766138  
SRR17520069.11766139  
SRR17520069.11766140  
SRR17520069.11766141  
SRR17520069.11766142  
SRR17520069.11766143  
SRR17520069.11766144  
SRR17520069.11766145  
SRR17520069.11766146  
SRR17520069.11766147  
SRR17520069.11766148  
SRR17520069.11766149  
SRR17520069.11766150  
SRR17520069.11766151  
SRR17520069.11766152  
SRR17520069.11766153  
SRR17520069.11766154  
SRR17520069.11766155  
SRR17520069.11766156  
SRR17520069.11766157  
SRR17520069.11766158  
SRR17520069.11766159  
SRR17520069.11766161  
SRR17520069.11766162  
SRR17520069.11766163  
SRR17520069.11766164  
SRR17520069.11766165

SRR17520069.11766166  
SRR17520069.11775373  
SRR17520069.11790586  
SRR17520069.11790587  
SRR17520069.11790588  
SRR17520069.11790589  
SRR17520069.11790590  
SRR17520069.11790591  
SRR17520069.11790592  
SRR17520069.11790593  
SRR17520069.11792377  
SRR17520069.11832526  
SRR17520069.11843503  
SRR17520069.11843504  
SRR17520069.11843505  
SRR17520069.11843506  
SRR17520069.11843507  
SRR17520069.11843508  
SRR17520069.11843509  
SRR17520069.11843510  
SRR17520069.11843511  
SRR17520069.11843512  
SRR17520069.11843513  
SRR17520069.11843514  
SRR17520069.11843515  
SRR17520069.11843516  
SRR17520069.11843517  
SRR17520069.11843518  
SRR17520069.11843519  
SRR17520069.11843520  
SRR17520069.11843521  
SRR17520069.11843522  
SRR17520069.11843523  
SRR17520069.11843524  
SRR17520069.11843525  
SRR17520069.11843526  
SRR17520069.11843527  
SRR17520069.11843528  
SRR17520069.11843529  
SRR17520069.11843530  
SRR17520069.11843531  
SRR17520069.11843532  
SRR17520069.11843533  
SRR17520069.11843534  
SRR17520069.11843535  
SRR17520069.11843536  
SRR17520069.11843538

SRR17520069.11843539  
SRR17520069.11843540  
SRR17520069.11843541  
SRR17520069.11843542  
SRR17520069.11843543  
SRR17520069.11843545  
SRR17520069.11843546  
SRR17520069.11843547  
SRR17520069.11843549  
SRR17520069.11843550  
SRR17520069.11843551  
SRR17520069.11843552  
SRR17520069.11843553  
SRR17520069.11843555  
SRR17520069.11843556  
SRR17520069.11843557  
SRR17520069.11843558  
SRR17520069.11843560  
SRR17520069.11843561  
SRR17520069.11843563  
SRR17520069.11843564  
SRR17520069.11843565  
SRR17520069.11843566  
SRR17520069.11843567  
SRR17520069.11843568  
SRR17520069.11843569  
SRR17520069.11843570  
SRR17520069.11843571  
SRR17520069.11843572  
SRR17520069.11843573  
SRR17520069.11843574  
SRR17520069.11843575  
SRR17520069.11843576  
SRR17520069.11843577  
SRR17520069.11843578  
SRR17520069.11843579  
SRR17520069.11843580  
SRR17520069.11843581  
SRR17520069.11843582  
SRR17520069.11843583  
SRR17520069.11843584  
SRR17520069.11843585  
SRR17520069.11843586  
SRR17520069.11843587  
SRR17520069.11843588  
SRR17520069.11843589  
SRR17520069.11843591

SRR17520069.11843592  
SRR17520069.11843593  
SRR17520069.11843594  
SRR17520069.11843595  
SRR17520069.11843596  
SRR17520069.11843597  
SRR17520069.11843599  
SRR17520069.11843600  
SRR17520069.11843601  
SRR17520069.11843602  
SRR17520069.11843604  
SRR17520069.11843605  
SRR17520069.11843606  
SRR17520069.11843607  
SRR17520069.11843608  
SRR17520069.11843609  
SRR17520069.11843610  
SRR17520069.11843612  
SRR17520069.11843613  
SRR17520069.11843614  
SRR17520069.11843615  
SRR17520069.11843616  
SRR17520069.11843617  
SRR17520069.11843618  
SRR17520069.11843619  
SRR17520069.11843620  
SRR17520069.11843621  
SRR17520069.11843622  
SRR17520069.11843623  
SRR17520069.11843624  
SRR17520069.11843625  
SRR17520069.11843626  
SRR17520069.11843627  
SRR17520069.11843628  
SRR17520069.11843629  
SRR17520069.11843630  
SRR17520069.11843631  
SRR17520069.11843632  
SRR17520069.11843633  
SRR17520069.11843634  
SRR17520069.11843635  
SRR17520069.11843636  
SRR17520069.11843637  
SRR17520069.11843638  
SRR17520069.11843639  
SRR17520069.11843640  
SRR17520069.11843641

SRR17520069.11843642  
SRR17520069.11843643  
SRR17520069.11843644  
SRR17520069.11843645  
SRR17520069.11843646  
SRR17520069.11843647  
SRR17520069.11843648  
SRR17520069.11843649  
SRR17520069.11843650  
SRR17520069.11843651  
SRR17520069.11843652  
SRR17520069.11843653  
SRR17520069.11843654  
SRR17520069.11843655  
SRR17520069.11843656  
SRR17520069.11843657  
SRR17520069.11843658  
SRR17520069.11843659  
SRR17520069.11843660  
SRR17520069.11850356  
SRR17520069.11850357  
SRR17520069.11850358  
SRR17520069.11850359  
SRR17520069.11850360  
SRR17520069.11850361  
SRR17520069.11850362  
SRR17520069.11850363  
SRR17520069.11850364  
SRR17520069.11850365  
SRR17520069.11850366  
SRR17520069.11850367  
SRR17520069.11850368  
SRR17520069.11850369  
SRR17520069.11850370  
SRR17520069.11850371  
SRR17520069.11850372  
SRR17520069.11882482  
SRR17520069.11892871  
SRR17520069.11892872  
SRR17520069.11892873  
SRR17520069.11892874  
SRR17520069.11892875  
SRR17520069.11892876  
SRR17520069.11892877  
SRR17520069.11892878  
SRR17520069.11892879  
SRR17520069.11892880

SRR17520069.11892881  
SRR17520069.11892882  
SRR17520069.11892883  
SRR17520069.11892884  
SRR17520069.11892885  
SRR17520069.11892886  
SRR17520069.11892887  
SRR17520069.11892888  
SRR17520069.11892889  
SRR17520069.11892890  
SRR17520069.11894789  
SRR17520069.11894790  
SRR17520069.11894791  
SRR17520069.11894792  
SRR17520069.11894793  
SRR17520069.11894794  
SRR17520069.11894796  
SRR17520069.11894797  
SRR17520069.11894798  
SRR17520069.11894799  
SRR17520069.11894800  
SRR17520069.11894801  
SRR17520069.11894802  
SRR17520069.11894803  
SRR17520069.11894804  
SRR17520069.11894805  
SRR17520069.11894806  
SRR17520069.11894807  
SRR17520069.11894808  
SRR17520069.11894809  
SRR17520069.11894810  
SRR17520069.11894811  
SRR17520069.11894812  
SRR17520069.11894813  
SRR17520069.11894814  
SRR17520069.11894815  
SRR17520069.11894816  
SRR17520069.11894817  
SRR17520069.11894818  
SRR17520069.11894819  
SRR17520069.11894820  
SRR17520069.11894821  
SRR17520069.11894822  
SRR17520069.11894823  
SRR17520069.11894824  
SRR17520069.11894825  
SRR17520069.11894826

SRR17520069.11894827  
SRR17520069.11894828  
SRR17520069.11894829  
SRR17520069.11894830  
SRR17520069.11894831  
SRR17520069.11894832  
SRR17520069.11894833  
SRR17520069.11894834  
SRR17520069.11894835  
SRR17520069.11894836  
SRR17520069.11894837  
SRR17520069.11894839  
SRR17520069.11894840  
SRR17520069.11894841  
SRR17520069.11894842  
SRR17520069.11894843  
SRR17520069.11894844  
SRR17520069.11894845  
SRR17520069.11894846  
SRR17520069.11894847  
SRR17520069.11894848  
SRR17520069.11894849  
SRR17520069.11894850  
SRR17520069.11894851  
SRR17520069.11894852  
SRR17520069.11894853  
SRR17520069.11894854  
SRR17520069.11894855  
SRR17520069.11894856  
SRR17520069.11894857  
SRR17520069.11894858  
SRR17520069.11894859  
SRR17520069.11894860  
SRR17520069.11894861  
SRR17520069.11894862  
SRR17520069.11894863  
SRR17520069.11894864  
SRR17520069.11894865  
SRR17520069.11894866  
SRR17520069.11894867  
SRR17520069.11894868  
SRR17520069.11894869  
SRR17520069.11894870  
SRR17520069.11894871  
SRR17520069.11894872  
SRR17520069.11894873  
SRR17520069.11894874

SRR17520069.11894875  
SRR17520069.11894876  
SRR17520069.11894877  
SRR17520069.11894878  
SRR17520069.11894879  
SRR17520069.11894880  
SRR17520069.11894881  
SRR17520069.11894883  
SRR17520069.11894884  
SRR17520069.11894885  
SRR17520069.11894886  
SRR17520069.11894887  
SRR17520069.11894888  
SRR17520069.11894889  
SRR17520069.11894890  
SRR17520069.11894891  
SRR17520069.11894892  
SRR17520069.11894893  
SRR17520069.11894894  
SRR17520069.11894895  
SRR17520069.11894896  
SRR17520069.11894897  
SRR17520069.11894898  
SRR17520069.11894899  
SRR17520069.11894900  
SRR17520069.11894901  
SRR17520069.11894902  
SRR17520069.11894903  
SRR17520069.11894904  
SRR17520069.11894905  
SRR17520069.11902352  
SRR17520069.11902353  
SRR17520069.11902354  
SRR17520069.11902355  
SRR17520069.11902356  
SRR17520069.11902357  
SRR17520069.11902358  
SRR17520069.11902359  
SRR17520069.11902360  
SRR17520069.11902361  
SRR17520069.11902362  
SRR17520069.11902363  
SRR17520069.11902364  
SRR17520069.11902365  
SRR17520069.11902366  
SRR17520069.11902367  
SRR17520069.11902368



SRR17520069. 11902369  
SRR17520069. 11902370  
SRR17520069. 11902371  
SRR17520069. 11902372  
SRR17520069. 11902373  
SRR17520069. 11902374  
SRR17520069. 11902375  
SRR17520069. 11902376  
SRR17520069. 11902378  
SRR17520069. 11902379  
SRR17520069. 11902380  
SRR17520069. 11902381  
SRR17520069. 11902382  
SRR17520069. 11902383  
SRR17520069. 11902384  
SRR17520069. 11902386  
SRR17520069. 11902387  
SRR17520069. 11902388  
SRR17520069. 11902389  
SRR17520069. 11902390  
SRR17520069. 11902391  
SRR17520069. 11902392  
SRR17520069. 11902394  
SRR17520069. 11902395  
SRR17520069. 11902396  
SRR17520069. 11902397  
SRR17520069. 11902398  
SRR17520069. 11902399  
SRR17520069. 11902400  
SRR17520069. 11902401  
SRR17520069. 11902402  
SRR17520069. 11914008  
SRR17520069. 11914009  
SRR17520069. 11914010  
SRR17520069. 11914012  
SRR17520069. 11914013  
SRR17520069. 11914014  
SRR17520069. 11914015  
SRR17520069. 11914016  
SRR17520069. 11914017  
SRR17520069. 11914018  
SRR17520069. 11914019  
SRR17520069. 11914020  
SRR17520069. 11914022  
SRR17520069. 11914023  
SRR17520069. 11914024  
SRR17520069. 11914025

SRR17520069.11914027  
SRR17520069.11914028  
SRR17520069.11914029  
SRR17520069.11914030  
SRR17520069.11914031  
SRR17520069.11914032  
SRR17520069.11914033  
SRR17520069.11914034  
SRR17520069.11914036  
SRR17520069.11914037  
SRR17520069.11914038  
SRR17520069.11914039  
SRR17520069.11914040  
SRR17520069.11914041  
SRR17520069.11914042  
SRR17520069.11914856  
SRR17520069.11914857  
SRR17520069.11914858  
SRR17520069.11914859  
SRR17520069.11914860  
SRR17520069.11914861  
SRR17520069.11914862  
SRR17520069.11914863  
SRR17520069.11914864  
SRR17520069.11914865  
SRR17520069.11914866  
SRR17520069.11914867  
SRR17520069.11914868  
SRR17520069.11914869  
SRR17520069.11914870  
SRR17520069.11914871  
SRR17520069.11914872  
SRR17520069.11914873  
SRR17520069.11920158  
SRR17520069.11929419  
SRR17520069.11929420  
SRR17520069.11929421  
SRR17520069.11929422  
SRR17520069.11929423  
SRR17520069.11929424  
SRR17520069.11929425  
SRR17520069.11929426  
SRR17520069.11929427  
SRR17520069.11929428  
SRR17520069.11929429  
SRR17520069.11929431  
SRR17520069.11929432

SRR17520069. 11929433  
SRR17520069. 11929434  
SRR17520069. 11929435  
SRR17520069. 11929436  
SRR17520069. 11929437  
SRR17520069. 11929439  
SRR17520069. 11929440  
SRR17520069. 11929441  
SRR17520069. 11929442  
SRR17520069. 11929443  
SRR17520069. 11929444  
SRR17520069. 11929445  
SRR17520069. 11929446  
SRR17520069. 11929447  
SRR17520069. 11929448  
SRR17520069. 11929449  
SRR17520069. 11929450  
SRR17520069. 11929451  
SRR17520069. 11929452  
SRR17520069. 11929453  
SRR17520069. 11929454  
SRR17520069. 11929455  
SRR17520069. 11929456  
SRR17520069. 11929457  
SRR17520069. 11929458  
SRR17520069. 11929462  
SRR17520069. 11929465  
SRR17520069. 11929466  
SRR17520069. 11929467  
SRR17520069. 11929468  
SRR17520069. 11929469  
SRR17520069. 11929470  
SRR17520069. 11929471  
SRR17520069. 11929472  
SRR17520069. 11929473  
SRR17520069. 11929474  
SRR17520069. 11929475  
SRR17520069. 11929476  
SRR17520069. 11929477  
SRR17520069. 11929478  
SRR17520069. 11929479  
SRR17520069. 11929480  
SRR17520069. 11929481  
SRR17520069. 11929482  
SRR17520069. 11929483  
SRR17520069. 11929484  
SRR17520069. 11929485

SRR17520069. 11929486  
SRR17520069. 11929487  
SRR17520069. 11929488  
SRR17520069. 11929489  
SRR17520069. 11929490  
SRR17520069. 11929491  
SRR17520069. 11929492  
SRR17520069. 11929493  
SRR17520069. 11929494  
SRR17520069. 11929495  
SRR17520069. 11929496  
SRR17520069. 11929497  
SRR17520069. 11929498  
SRR17520069. 11929499  
SRR17520069. 11929500  
SRR17520069. 11929501  
SRR17520069. 11929502  
SRR17520069. 11929503  
SRR17520069. 11929504  
SRR17520069. 11929505  
SRR17520069. 11929506  
SRR17520069. 11929507  
SRR17520069. 11929508  
SRR17520069. 11929509  
SRR17520069. 11929510  
SRR17520069. 11929511  
SRR17520069. 11929512  
SRR17520069. 11929513  
SRR17520069. 11929514  
SRR17520069. 11929515  
SRR17520069. 11929516  
SRR17520069. 11929517  
SRR17520069. 11929518  
SRR17520069. 11929519  
SRR17520069. 11929520  
SRR17520069. 11929521  
SRR17520069. 11929522  
SRR17520069. 11929523  
SRR17520069. 11929524  
SRR17520069. 11929525  
SRR17520069. 11929526  
SRR17520069. 11929527  
SRR17520069. 11929528  
SRR17520069. 11929529  
SRR17520069. 11929530  
SRR17520069. 11929531  
SRR17520069. 11929532

SRR17520069.11929533  
SRR17520069.11929534  
SRR17520069.11929535  
SRR17520069.11929536  
SRR17520069.11929537  
SRR17520069.11929538  
SRR17520069.11929539  
SRR17520069.11929540  
SRR17520069.11929542  
SRR17520069.11929543  
SRR17520069.11929544  
SRR17520069.11929545  
SRR17520069.11929546  
SRR17520069.11929547  
SRR17520069.11929548  
SRR17520069.11929549  
SRR17520069.11929550  
SRR17520069.11929551  
SRR17520069.11929552  
SRR17520069.11929553  
SRR17520069.11929554  
SRR17520069.11929555  
SRR17520069.11935945  
SRR17520069.11935946  
SRR17520069.11935947  
SRR17520069.11935948  
SRR17520069.11935949  
SRR17520069.11935950  
SRR17520069.11935951  
SRR17520069.11935952  
SRR17520069.11935953  
SRR17520069.11935954  
SRR17520069.11935955  
SRR17520069.11935956  
SRR17520069.11935957  
SRR17520069.11935958  
SRR17520069.11935959  
SRR17520069.11935960  
SRR17520069.11935961  
SRR17520069.11935962  
SRR17520069.11935963  
SRR17520069.11935964  
SRR17520069.11935965  
SRR17520069.11935966  
SRR17520069.11935967  
SRR17520069.11935968  
SRR17520069.11935969

SRR17520069.11935970  
SRR17520069.11935971  
SRR17520069.11935972  
SRR17520069.11935973  
SRR17520069.11935974  
SRR17520069.11935975  
SRR17520069.11935976  
SRR17520069.11935977  
SRR17520069.11935978  
SRR17520069.11935979  
SRR17520069.11935980  
SRR17520069.11935981  
SRR17520069.11946384  
SRR17520069.11959094  
SRR17520069.11959095  
SRR17520069.11959096  
SRR17520069.11959097  
SRR17520069.11959098  
SRR17520069.11959099  
SRR17520069.11959100  
SRR17520069.11959101  
SRR17520069.11959102  
SRR17520069.11959103  
SRR17520069.11959104  
SRR17520069.11959105  
SRR17520069.11959106  
SRR17520069.11959107  
SRR17520069.11959109  
SRR17520069.11959110  
SRR17520069.11959111  
SRR17520069.11959112  
SRR17520069.11959113  
SRR17520069.11959114  
SRR17520069.11974877  
SRR17520069.11974878  
SRR17520069.11974879  
SRR17520069.11974882  
SRR17520069.11974883  
SRR17520069.11974884  
SRR17520069.11974885  
SRR17520069.11974886  
SRR17520069.11974887  
SRR17520069.11974891  
SRR17520069.11974893  
SRR17520069.11974895  
SRR17520069.11974896  
SRR17520069.11974897

SRR17520069. 11974898  
SRR17520069. 11974899  
SRR17520069. 11974900  
SRR17520069. 11974901  
SRR17520069. 11974903  
SRR17520069. 11974904  
SRR17520069. 11974905  
SRR17520069. 11974907  
SRR17520069. 11974908  
SRR17520069. 11974910  
SRR17520069. 11974911  
SRR17520069. 11974912  
SRR17520069. 11974913  
SRR17520069. 11974915  
SRR17520069. 11974916  
SRR17520069. 11974917  
SRR17520069. 11974920  
SRR17520069. 11974921  
SRR17520069. 11974922  
SRR17520069. 11974923  
SRR17520069. 11974925  
SRR17520069. 11974927  
SRR17520069. 11974928  
SRR17520069. 11974931  
SRR17520069. 11974932  
SRR17520069. 11974934  
SRR17520069. 11983630  
SRR17520069. 12000421  
SRR17520069. 12000422  
SRR17520069. 12000423  
SRR17520069. 12000424  
SRR17520069. 12000425  
SRR17520069. 12000426  
SRR17520069. 12000427  
SRR17520069. 12000428  
SRR17520069. 12000429  
SRR17520069. 12000430  
SRR17520069. 12000431  
SRR17520069. 12000432  
SRR17520069. 12000433  
SRR17520069. 12000434  
SRR17520069. 12000435  
SRR17520069. 12000436  
SRR17520069. 12000437  
SRR17520069. 12000438  
SRR17520069. 12000439  
SRR17520069. 12000440

SRR17520069.12000441  
SRR17520069.12000442  
SRR17520069.12000443  
SRR17520069.12000444  
SRR17520069.12000445  
SRR17520069.12000446  
SRR17520069.12000447  
SRR17520069.12000448  
SRR17520069.12000449  
SRR17520069.12000450  
SRR17520069.12000451  
SRR17520069.12000453  
SRR17520069.12000454  
SRR17520069.12000455  
SRR17520069.12000456  
SRR17520069.12000457  
SRR17520069.12000458  
SRR17520069.12000459  
SRR17520069.12000460  
SRR17520069.12000461  
SRR17520069.12000462  
SRR17520069.12000463  
SRR17520069.12000464  
SRR17520069.12000465  
SRR17520069.12000466  
SRR17520069.12000467  
SRR17520069.12000468  
SRR17520069.12000469  
SRR17520069.12000470  
SRR17520069.12000471  
SRR17520069.12000472  
SRR17520069.12000473  
SRR17520069.12000474  
SRR17520069.12000475  
SRR17520069.12000476  
SRR17520069.12000477  
SRR17520069.12000478  
SRR17520069.12000479  
SRR17520069.12000480  
SRR17520069.12000481  
SRR17520069.12000482  
SRR17520069.12000483  
SRR17520069.12000484  
SRR17520069.12000485  
SRR17520069.12000486  
SRR17520069.12000487  
SRR17520069.12000488



SRR17520069.12000489  
SRR17520069.12000490  
SRR17520069.12000491  
SRR17520069.12000492  
SRR17520069.12000494  
SRR17520069.12000495  
SRR17520069.12000496  
SRR17520069.12000497  
SRR17520069.12000498  
SRR17520069.12000499  
SRR17520069.12000500  
SRR17520069.12000501  
SRR17520069.12000502  
SRR17520069.12000503  
SRR17520069.12000504  
SRR17520069.12000505  
SRR17520069.12000506  
SRR17520069.12000507  
SRR17520069.12000508  
SRR17520069.12000509  
SRR17520069.12000510  
SRR17520069.12000511  
SRR17520069.12000512  
SRR17520069.12000513  
SRR17520069.12000514  
SRR17520069.12000515  
SRR17520069.12000516  
SRR17520069.12000517  
SRR17520069.12000518  
SRR17520069.12000519  
SRR17520069.12000520  
SRR17520069.12000521  
SRR17520069.12000522  
SRR17520069.12000523  
SRR17520069.12000524  
SRR17520069.12000525  
SRR17520069.12000526  
SRR17520069.12000527  
SRR17520069.12000528  
SRR17520069.12000529  
SRR17520069.12000530  
SRR17520069.12000531  
SRR17520069.12000532  
SRR17520069.12000533  
SRR17520069.12000534  
SRR17520069.12000535  
SRR17520069.12008629

SRR17520069.12008641  
SRR17520069.12042485  
SRR17520069.12042521  
SRR17520069.12043667  
SRR17520069.12050269  
SRR17520069.12050270  
SRR17520069.12050271  
SRR17520069.12050272  
SRR17520069.12050273  
SRR17520069.12050274  
SRR17520069.12050275  
SRR17520069.12050276  
SRR17520069.12050277  
SRR17520069.12050278  
SRR17520069.12050279  
SRR17520069.12050280  
SRR17520069.12050281  
SRR17520069.12050282  
SRR17520069.12050283  
SRR17520069.12050284  
SRR17520069.12050285  
SRR17520069.12050286  
SRR17520069.12050287  
SRR17520069.12050288  
SRR17520069.12050289  
SRR17520069.12050290  
SRR17520069.12050291  
SRR17520069.12050292  
SRR17520069.12050293  
SRR17520069.12050294  
SRR17520069.12050295  
SRR17520069.12050296  
SRR17520069.12050297  
SRR17520069.12050298  
SRR17520069.12050299  
SRR17520069.12050300  
SRR17520069.12050301  
SRR17520069.12050302  
SRR17520069.12050303  
SRR17520069.12050304  
SRR17520069.12050305  
SRR17520069.12050306  
SRR17520069.12050307  
SRR17520069.12050308  
SRR17520069.12050309  
SRR17520069.12050311  
SRR17520069.12050312

SRR17520069.12050313  
SRR17520069.12050314  
SRR17520069.12050315  
SRR17520069.12050316  
SRR17520069.12050317  
SRR17520069.12050318  
SRR17520069.12050319  
SRR17520069.12050320  
SRR17520069.12050321  
SRR17520069.12050322  
SRR17520069.12050323  
SRR17520069.12050324  
SRR17520069.12050325  
SRR17520069.12050326  
SRR17520069.12050327  
SRR17520069.12050328  
SRR17520069.12050329  
SRR17520069.12050330  
SRR17520069.12050331  
SRR17520069.12050332  
SRR17520069.12050333  
SRR17520069.12050334  
SRR17520069.12050335  
SRR17520069.12050336  
SRR17520069.12050337  
SRR17520069.12050338  
SRR17520069.12050339  
SRR17520069.12050340  
SRR17520069.12050341  
SRR17520069.12050342  
SRR17520069.12050343  
SRR17520069.12050344  
SRR17520069.12050345  
SRR17520069.12050346  
SRR17520069.12050347  
SRR17520069.12050348  
SRR17520069.12050349  
SRR17520069.12050350  
SRR17520069.12050351  
SRR17520069.12050352  
SRR17520069.12050353  
SRR17520069.12050354  
SRR17520069.12050355  
SRR17520069.12050356  
SRR17520069.12071720  
SRR17520069.12071721  
SRR17520069.12071722

SRR17520069.12071723  
SRR17520069.12071724  
SRR17520069.12071725  
SRR17520069.12071726  
SRR17520069.12071727  
SRR17520069.12071728  
SRR17520069.12071729  
SRR17520069.12071730  
SRR17520069.12071731  
SRR17520069.12071732  
SRR17520069.12071733  
SRR17520069.12071734  
SRR17520069.12071735  
SRR17520069.12071736  
SRR17520069.12071737  
SRR17520069.12081902  
SRR17520069.12081903  
SRR17520069.12081904  
SRR17520069.12081905  
SRR17520069.12081906  
SRR17520069.12081907  
SRR17520069.12081908  
SRR17520069.12081909  
SRR17520069.12081910  
SRR17520069.12081911  
SRR17520069.12081912  
SRR17520069.12081913  
SRR17520069.12081914  
SRR17520069.12081915  
SRR17520069.12081916  
SRR17520069.12081917  
SRR17520069.12081918  
SRR17520069.12081919  
SRR17520069.12081920  
SRR17520069.12081921  
SRR17520069.12081922  
SRR17520069.12081923  
SRR17520069.12081924  
SRR17520069.12081925  
SRR17520069.12081926  
SRR17520069.12081927  
SRR17520069.12081928  
SRR17520069.12081929  
SRR17520069.12081930  
SRR17520069.12081931  
SRR17520069.12081933  
SRR17520069.12081934

SRR17520069. 12081935  
SRR17520069. 12081936  
SRR17520069. 12081937  
SRR17520069. 12081938  
SRR17520069. 12081939  
SRR17520069. 12081940  
SRR17520069. 12081941  
SRR17520069. 12081942  
SRR17520069. 12081943  
SRR17520069. 12081944  
SRR17520069. 12081945  
SRR17520069. 12081946  
SRR17520069. 12081947  
SRR17520069. 12081948  
SRR17520069. 12081949  
SRR17520069. 12081950  
SRR17520069. 12081951  
SRR17520069. 12081952  
SRR17520069. 12081953  
SRR17520069. 12081954  
SRR17520069. 12081955  
SRR17520069. 12081956  
SRR17520069. 12081957  
SRR17520069. 12081958  
SRR17520069. 12081959  
SRR17520069. 12081960  
SRR17520069. 12081961  
SRR17520069. 12081962  
SRR17520069. 12081963  
SRR17520069. 12081964  
SRR17520069. 12081965  
SRR17520069. 12081966  
SRR17520069. 12081967  
SRR17520069. 12081968  
SRR17520069. 12081969  
SRR17520069. 12081970  
SRR17520069. 12081971  
SRR17520069. 12081972  
SRR17520069. 12081973  
SRR17520069. 12081974  
SRR17520069. 12081975  
SRR17520069. 12081976  
SRR17520069. 12081977  
SRR17520069. 12081978  
SRR17520069. 12081979  
SRR17520069. 12081980  
SRR17520069. 12081981

SRR17520069.12081982  
SRR17520069.12081983  
SRR17520069.12081984  
SRR17520069.12081985  
SRR17520069.12081986  
SRR17520069.12081987  
SRR17520069.12081988  
SRR17520069.12081989  
SRR17520069.12081990  
SRR17520069.12081991  
SRR17520069.12081992  
SRR17520069.12081993  
SRR17520069.12081994  
SRR17520069.12081995  
SRR17520069.12081996  
SRR17520069.12081997  
SRR17520069.12081998  
SRR17520069.12081999  
SRR17520069.12082000  
SRR17520069.12082001  
SRR17520069.12082002  
SRR17520069.12082003  
SRR17520069.12082004  
SRR17520069.12082005  
SRR17520069.12082006  
SRR17520069.12083451  
SRR17520069.12083452  
SRR17520069.12083453  
SRR17520069.12083454  
SRR17520069.12083455  
SRR17520069.12083456  
SRR17520069.12083458  
SRR17520069.12083459  
SRR17520069.12083460  
SRR17520069.12083461  
SRR17520069.12083462  
SRR17520069.12083463  
SRR17520069.12083464  
SRR17520069.12083465  
SRR17520069.12083466  
SRR17520069.12083467  
SRR17520069.12083468  
SRR17520069.12083469  
SRR17520069.12083470  
SRR17520069.12083471  
SRR17520069.12083472  
SRR17520069.12083473

SRR17520069.12083474  
SRR17520069.12083475  
SRR17520069.12083478  
SRR17520069.12083479  
SRR17520069.12083480  
SRR17520069.12083481  
SRR17520069.12083482  
SRR17520069.12083483  
SRR17520069.12083484  
SRR17520069.12083485  
SRR17520069.12083486  
SRR17520069.12083487  
SRR17520069.12083488  
SRR17520069.12083489  
SRR17520069.12083490  
SRR17520069.12083491  
SRR17520069.12083492  
SRR17520069.12083493  
SRR17520069.12083494  
SRR17520069.12083495  
SRR17520069.12083496  
SRR17520069.12083497  
SRR17520069.12083498  
SRR17520069.12083499  
SRR17520069.12083500  
SRR17520069.12083501  
SRR17520069.12083502  
SRR17520069.12083503  
SRR17520069.12083504  
SRR17520069.12083505  
SRR17520069.12083506  
SRR17520069.12083507  
SRR17520069.12083509  
SRR17520069.12083510  
SRR17520069.12083511  
SRR17520069.12083512  
SRR17520069.12083513  
SRR17520069.12083514  
SRR17520069.12083515  
SRR17520069.12083516  
SRR17520069.12083517  
SRR17520069.12083518  
SRR17520069.12083519  
SRR17520069.12083520  
SRR17520069.12083521  
SRR17520069.12083522  
SRR17520069.12083523

SRR17520069.12083524  
SRR17520069.12083525  
SRR17520069.12083526  
SRR17520069.12083528  
SRR17520069.12083529  
SRR17520069.12083530  
SRR17520069.12083531  
SRR17520069.12083532  
SRR17520069.12083533  
SRR17520069.12083534  
SRR17520069.12083535  
SRR17520069.12083536  
SRR17520069.12083537  
SRR17520069.12083538  
SRR17520069.12083539  
SRR17520069.12083540  
SRR17520069.12083541  
SRR17520069.12089038  
SRR17520069.12091801  
SRR17520069.12091802  
SRR17520069.12091803  
SRR17520069.12091804  
SRR17520069.12091805  
SRR17520069.12091808  
SRR17520069.12091809  
SRR17520069.12091810  
SRR17520069.12091811  
SRR17520069.12091812  
SRR17520069.12091813  
SRR17520069.12091814  
SRR17520069.12091815  
SRR17520069.12091816  
SRR17520069.12091817  
SRR17520069.12091818  
SRR17520069.12091819  
SRR17520069.12091820  
SRR17520069.12091821  
SRR17520069.12091822  
SRR17520069.12091823  
SRR17520069.12091825  
SRR17520069.12091826  
SRR17520069.12091827  
SRR17520069.12091828  
SRR17520069.12091829  
SRR17520069.12091831  
SRR17520069.12091832  
SRR17520069.12091833



SRR17520069. 12091834  
SRR17520069. 12091835  
SRR17520069. 12091836  
SRR17520069. 12091837  
SRR17520069. 12091838  
SRR17520069. 12091839  
SRR17520069. 12091840  
SRR17520069. 12091841  
SRR17520069. 12091842  
SRR17520069. 12091843  
SRR17520069. 12091844  
SRR17520069. 12091845  
SRR17520069. 12091847  
SRR17520069. 12091848  
SRR17520069. 12091849  
SRR17520069. 12091850  
SRR17520069. 12091851  
SRR17520069. 12091852  
SRR17520069. 12091853  
SRR17520069. 12091854  
SRR17520069. 12091855  
SRR17520069. 12091856  
SRR17520069. 12091857  
SRR17520069. 12091858  
SRR17520069. 12091859  
SRR17520069. 12091860  
SRR17520069. 12091861  
SRR17520069. 12091862  
SRR17520069. 12091864  
SRR17520069. 12091865  
SRR17520069. 12091866  
SRR17520069. 12091868  
SRR17520069. 12091869  
SRR17520069. 12091870  
SRR17520069. 12091871  
SRR17520069. 12091872  
SRR17520069. 12091873  
SRR17520069. 12091874  
SRR17520069. 12091875  
SRR17520069. 12091876  
SRR17520069. 12091877  
SRR17520069. 12091878  
SRR17520069. 12091879  
SRR17520069. 12091880  
SRR17520069. 12110869  
SRR17520069. 12110871  
SRR17520069. 12110872

SRR17520069.12110873  
SRR17520069.12110874  
SRR17520069.12110875  
SRR17520069.12117963  
SRR17520069.12117964  
SRR17520069.12133676  
SRR17520069.12133677  
SRR17520069.12142952  
SRR17520069.12157144  
SRR17520069.12168966  
SRR17520069.12168968  
SRR17520069.12168969  
SRR17520069.12168970  
SRR17520069.12168972  
SRR17520069.12168973  
SRR17520069.12168974  
SRR17520069.12168975  
SRR17520069.12168976  
SRR17520069.12168977  
SRR17520069.12168978  
SRR17520069.12168980  
SRR17520069.12168981  
SRR17520069.12168982  
SRR17520069.12168983  
SRR17520069.12168984  
SRR17520069.12168986  
SRR17520069.12168987  
SRR17520069.12168988  
SRR17520069.12168989  
SRR17520069.12168990  
SRR17520069.12168991  
SRR17520069.12168992  
SRR17520069.12173615  
SRR17520069.12200867  
SRR17520069.12200868  
SRR17520069.12200869  
SRR17520069.12200870  
SRR17520069.12200871  
SRR17520069.12200874  
SRR17520069.12200875  
SRR17520069.12200876  
SRR17520069.12200877  
SRR17520069.12200878  
SRR17520069.12200879  
SRR17520069.12200880  
SRR17520069.12200881  
SRR17520069.12200882

SRR17520069.12200883  
SRR17520069.12200884  
SRR17520069.12200885  
SRR17520069.12200886  
SRR17520069.12200887  
SRR17520069.12200889  
SRR17520069.12201824  
SRR17520069.12237681  
SRR17520069.12253718  
SRR17520069.12262321  
SRR17520069.12265506  
SRR17520069.12269818  
SRR17520069.12279996  
SRR17520069.12279997  
SRR17520069.12279998  
SRR17520069.12279999  
SRR17520069.12280000  
SRR17520069.12280001  
SRR17520069.12280002  
SRR17520069.12280003  
SRR17520069.12280005  
SRR17520069.12280006  
SRR17520069.12280007  
SRR17520069.12280008  
SRR17520069.12280009  
SRR17520069.12280010  
SRR17520069.12280011  
SRR17520069.12280012  
SRR17520069.12280013  
SRR17520069.12280014  
SRR17520069.12280017  
SRR17520069.12280018  
SRR17520069.12280019  
SRR17520069.12280020  
SRR17520069.12280021  
SRR17520069.12280022  
SRR17520069.12280023  
SRR17520069.12280024  
SRR17520069.12280025  
SRR17520069.12280026  
SRR17520069.12280027  
SRR17520069.12280028  
SRR17520069.12280029  
SRR17520069.12280030  
SRR17520069.12280031  
SRR17520069.12280032  
SRR17520069.12280033

SRR17520069.12280034  
SRR17520069.12280035  
SRR17520069.12280036  
SRR17520069.12280037  
SRR17520069.12280038  
SRR17520069.12280039  
SRR17520069.12280040  
SRR17520069.12280041  
SRR17520069.12280042  
SRR17520069.12280043  
SRR17520069.12280053  
SRR17520069.12280055  
SRR17520069.12283321  
SRR17520069.12300326  
SRR17520069.12316385  
SRR17520069.12331052  
SRR17520069.12331053  
SRR17520069.12331054  
SRR17520069.12331055  
SRR17520069.12331056  
SRR17520069.12331057  
SRR17520069.12331058  
SRR17520069.12331059  
SRR17520069.12331060  
SRR17520069.12331061  
SRR17520069.12331062  
SRR17520069.12331063  
SRR17520069.12331064  
SRR17520069.12355350  
SRR17520069.12355351  
SRR17520069.12355352  
SRR17520069.12355353  
SRR17520069.12355354  
SRR17520069.12355355  
SRR17520069.12355356  
SRR17520069.12355357  
SRR17520069.12355358  
SRR17520069.12355359  
SRR17520069.12355360  
SRR17520069.12355361  
SRR17520069.12355362  
SRR17520069.12355364  
SRR17520069.12355365  
SRR17520069.12355366  
SRR17520069.12355367  
SRR17520069.12355368  
SRR17520069.12355369

SRR17520069. 12355370  
SRR17520069. 12355371  
SRR17520069. 12355372  
SRR17520069. 12355373  
SRR17520069. 12355374  
SRR17520069. 12355375  
SRR17520069. 12355376  
SRR17520069. 12355377  
SRR17520069. 12355378  
SRR17520069. 12355379  
SRR17520069. 12355380  
SRR17520069. 12355381  
SRR17520069. 12355382  
SRR17520069. 12355383  
SRR17520069. 12355384  
SRR17520069. 12355385  
SRR17520069. 12355386  
SRR17520069. 12355387  
SRR17520069. 12355388  
SRR17520069. 12355389  
SRR17520069. 12355390  
SRR17520069. 12355391  
SRR17520069. 12355392  
SRR17520069. 12355393  
SRR17520069. 12355394  
SRR17520069. 12355395  
SRR17520069. 12355396  
SRR17520069. 12355398  
SRR17520069. 12355399  
SRR17520069. 12355400  
SRR17520069. 12355401  
SRR17520069. 12355402  
SRR17520069. 12355403  
SRR17520069. 12366004  
SRR17520069. 12367725  
SRR17520069. 12367726  
SRR17520069. 12367727  
SRR17520069. 12367728  
SRR17520069. 12367729  
SRR17520069. 12367730  
SRR17520069. 12367731  
SRR17520069. 12367732  
SRR17520069. 12386349  
SRR17520069. 12386350  
SRR17520069. 12386351  
SRR17520069. 12386352  
SRR17520069. 12386353

SRR17520069. 12386354  
SRR17520069. 12386355  
SRR17520069. 12386356  
SRR17520069. 12386357  
SRR17520069. 12386358  
SRR17520069. 12386359  
SRR17520069. 12386360  
SRR17520069. 12386361  
SRR17520069. 12386362  
SRR17520069. 12386363  
SRR17520069. 12386364  
SRR17520069. 12386365  
SRR17520069. 12386366  
SRR17520069. 12386367  
SRR17520069. 12386368  
SRR17520069. 12386369  
SRR17520069. 12386370  
SRR17520069. 12386371  
SRR17520069. 12386372  
SRR17520069. 12386373  
SRR17520069. 12386374  
SRR17520069. 12386375  
SRR17520069. 12386376  
SRR17520069. 12386377  
SRR17520069. 12386378  
SRR17520069. 12386379  
SRR17520069. 12386380  
SRR17520069. 12393277  
SRR17520069. 12395332  
SRR17520069. 12401091  
SRR17520069. 12401092  
SRR17520069. 12401093  
SRR17520069. 12401094  
SRR17520069. 12401095  
SRR17520069. 12401096  
SRR17520069. 12401097  
SRR17520069. 12401098  
SRR17520069. 12401099  
SRR17520069. 12401100  
SRR17520069. 12401101  
SRR17520069. 12401102  
SRR17520069. 12401103  
SRR17520069. 12401104  
SRR17520069. 12401105  
SRR17520069. 12401106  
SRR17520069. 12401107  
SRR17520069. 12401108

SRR17520069.12401109  
SRR17520069.12401110  
SRR17520069.12401111  
SRR17520069.12401112  
SRR17520069.12401113  
SRR17520069.12401114  
SRR17520069.12401115  
SRR17520069.12401116  
SRR17520069.12401117  
SRR17520069.12401118  
SRR17520069.12410926  
SRR17520069.12410927  
SRR17520069.12410928  
SRR17520069.12410930  
SRR17520069.12410931  
SRR17520069.12410932  
SRR17520069.12410933  
SRR17520069.12410934  
SRR17520069.12410935  
SRR17520069.12410936  
SRR17520069.12410937  
SRR17520069.12410938  
SRR17520069.12410939  
SRR17520069.12410940  
SRR17520069.12410941  
SRR17520069.12410942  
SRR17520069.12410943  
SRR17520069.12410944  
SRR17520069.12410945  
SRR17520069.12410946  
SRR17520069.12410947  
SRR17520069.12410948  
SRR17520069.12410949  
SRR17520069.12410950  
SRR17520069.12410951  
SRR17520069.12410952  
SRR17520069.12410953  
SRR17520069.12410954  
SRR17520069.12410955  
SRR17520069.12410956  
SRR17520069.12410957  
SRR17520069.12410958  
SRR17520069.12410959  
SRR17520069.12410960  
SRR17520069.12410961  
SRR17520069.12410962  
SRR17520069.12410963

SRR17520069. 12410964  
SRR17520069. 12410965  
SRR17520069. 12410966  
SRR17520069. 12410967  
SRR17520069. 12410968  
SRR17520069. 12410969  
SRR17520069. 12410970  
SRR17520069. 12410971  
SRR17520069. 12410972  
SRR17520069. 12410973  
SRR17520069. 12410974  
SRR17520069. 12410975  
SRR17520069. 12410976  
SRR17520069. 12410977  
SRR17520069. 12410978  
SRR17520069. 12410979  
SRR17520069. 12410980  
SRR17520069. 12410981  
SRR17520069. 12410982  
SRR17520069. 12410983  
SRR17520069. 12410984  
SRR17520069. 12410985  
SRR17520069. 12410986  
SRR17520069. 12410987  
SRR17520069. 12410988  
SRR17520069. 12410989  
SRR17520069. 12410990  
SRR17520069. 12410991  
SRR17520069. 12410992  
SRR17520069. 12410993  
SRR17520069. 12410994  
SRR17520069. 12410995  
SRR17520069. 12410996  
SRR17520069. 12410997  
SRR17520069. 12410998  
SRR17520069. 12410999  
SRR17520069. 12411000  
SRR17520069. 12411001  
SRR17520069. 12411002  
SRR17520069. 12411003  
SRR17520069. 12411004  
SRR17520069. 12411006  
SRR17520069. 12411007  
SRR17520069. 12411008  
SRR17520069. 12411009  
SRR17520069. 12411010  
SRR17520069. 12411011



SRR17520069.12411012  
SRR17520069.12411014  
SRR17520069.12411015  
SRR17520069.12411016  
SRR17520069.12411017  
SRR17520069.12411018  
SRR17520069.12411019  
SRR17520069.12411020  
SRR17520069.12411021  
SRR17520069.12411022  
SRR17520069.12411023  
SRR17520069.12411024  
SRR17520069.12411025  
SRR17520069.12411026  
SRR17520069.12411027  
SRR17520069.12411028  
SRR17520069.12411029  
SRR17520069.12411030  
SRR17520069.12411031  
SRR17520069.12411032  
SRR17520069.12411033  
SRR17520069.12411034  
SRR17520069.12411035  
SRR17520069.12411036  
SRR17520069.12411037  
SRR17520069.12411038  
SRR17520069.12411039  
SRR17520069.12411040  
SRR17520069.12411041  
SRR17520069.12411042  
SRR17520069.12411043  
SRR17520069.12411044  
SRR17520069.12411045  
SRR17520069.12411046  
SRR17520069.12411047  
SRR17520069.12411048  
SRR17520069.12411049  
SRR17520069.12411050  
SRR17520069.12411051  
SRR17520069.12411052  
SRR17520069.12411053  
SRR17520069.12411054  
SRR17520069.12411055  
SRR17520069.12411056  
SRR17520069.12411057  
SRR17520069.12411058  
SRR17520069.12411059

SRR17520069.12411060  
SRR17520069.12411061  
SRR17520069.12411062  
SRR17520069.12411063  
SRR17520069.12411064  
SRR17520069.12411065  
SRR17520069.12411067  
SRR17520069.12411068  
SRR17520069.12411069  
SRR17520069.12411070  
SRR17520069.12411071  
SRR17520069.12411072  
SRR17520069.12411073  
SRR17520069.12411074  
SRR17520069.12411075  
SRR17520069.12411076  
SRR17520069.12411077  
SRR17520069.12411078  
SRR17520069.12411079  
SRR17520069.12411080  
SRR17520069.12411081  
SRR17520069.12411082  
SRR17520069.12411083  
SRR17520069.12411084  
SRR17520069.12411085  
SRR17520069.12411087  
SRR17520069.12411088  
SRR17520069.12425050  
SRR17520069.12453992  
SRR17520069.12460184  
SRR17520069.12460185  
SRR17520069.12460186  
SRR17520069.12460187  
SRR17520069.12460188  
SRR17520069.12460189  
SRR17520069.12460190  
SRR17520069.12460191  
SRR17520069.12460192  
SRR17520069.12460193  
SRR17520069.12469810  
SRR17520069.12469811  
SRR17520069.12469812  
SRR17520069.12469813  
SRR17520069.12469814  
SRR17520069.12469815  
SRR17520069.12469816  
SRR17520069.12469817

SRR17520069. 12469818  
SRR17520069. 12469819  
SRR17520069. 12469820  
SRR17520069. 12469821  
SRR17520069. 12469822  
SRR17520069. 12469823  
SRR17520069. 12469824  
SRR17520069. 12469825  
SRR17520069. 12469826  
SRR17520069. 12469827  
SRR17520069. 12469828  
SRR17520069. 12469829  
SRR17520069. 12469830  
SRR17520069. 12469831  
SRR17520069. 12469832  
SRR17520069. 12469833  
SRR17520069. 12469834  
SRR17520069. 12469835  
SRR17520069. 12469836  
SRR17520069. 12469837  
SRR17520069. 12469838  
SRR17520069. 12469839  
SRR17520069. 12469840  
SRR17520069. 12469841  
SRR17520069. 12469842  
SRR17520069. 12469843  
SRR17520069. 12469844  
SRR17520069. 12469845  
SRR17520069. 12469846  
SRR17520069. 12469847  
SRR17520069. 12469848  
SRR17520069. 12469849  
SRR17520069. 12469850  
SRR17520069. 12469851  
SRR17520069. 12469852  
SRR17520069. 12469853  
SRR17520069. 12469854  
SRR17520069. 12469855  
SRR17520069. 12469857  
SRR17520069. 12469858  
SRR17520069. 12469859  
SRR17520069. 12469860  
SRR17520069. 12469861  
SRR17520069. 12469862  
SRR17520069. 12469863  
SRR17520069. 12469864  
SRR17520069. 12469865

SRR17520069.12469866  
SRR17520069.12469867  
SRR17520069.12469868  
SRR17520069.12469869  
SRR17520069.12469870  
SRR17520069.12469871  
SRR17520069.12469872  
SRR17520069.12469873  
SRR17520069.12469874  
SRR17520069.12469875  
SRR17520069.12469876  
SRR17520069.12469877  
SRR17520069.12469878  
SRR17520069.12469879  
SRR17520069.12469880  
SRR17520069.12469881  
SRR17520069.12469882  
SRR17520069.12469883  
SRR17520069.12469884  
SRR17520069.12469885  
SRR17520069.12469886  
SRR17520069.12469887  
SRR17520069.12469888  
SRR17520069.12469889  
SRR17520069.12469890  
SRR17520069.12469891  
SRR17520069.12469892  
SRR17520069.12469893  
SRR17520069.12469894  
SRR17520069.12469895  
SRR17520069.12469896  
SRR17520069.12469897  
SRR17520069.12469898  
SRR17520069.12469899  
SRR17520069.12469900  
SRR17520069.12469901  
SRR17520069.12469902  
SRR17520069.12469903  
SRR17520069.12469904  
SRR17520069.12469905  
SRR17520069.12469906  
SRR17520069.12469907  
SRR17520069.12469908  
SRR17520069.12469909  
SRR17520069.12469910  
SRR17520069.12469911  
SRR17520069.12469912

SRR17520069.12469913  
SRR17520069.12469914  
SRR17520069.12469915  
SRR17520069.12469916  
SRR17520069.12469917  
SRR17520069.12469918  
SRR17520069.12469919  
SRR17520069.12469920  
SRR17520069.12469921  
SRR17520069.12469922  
SRR17520069.12469923  
SRR17520069.12469924  
SRR17520069.12469925  
SRR17520069.12469926  
SRR17520069.12469927  
SRR17520069.12469928  
SRR17520069.12469929  
SRR17520069.12469930  
SRR17520069.12469931  
SRR17520069.12469932  
SRR17520069.12469933  
SRR17520069.12469934  
SRR17520069.12469935  
SRR17520069.12469937  
SRR17520069.12469938  
SRR17520069.12469939  
SRR17520069.12469940  
SRR17520069.12469941  
SRR17520069.12469942  
SRR17520069.12469943  
SRR17520069.12469944  
SRR17520069.12469945  
SRR17520069.12469947  
SRR17520069.12469948  
SRR17520069.12469949  
SRR17520069.12469950  
SRR17520069.12469951  
SRR17520069.12469952  
SRR17520069.12469953  
SRR17520069.12469954  
SRR17520069.12469955  
SRR17520069.12469956  
SRR17520069.12469957  
SRR17520069.12469958  
SRR17520069.12469959  
SRR17520069.12469960  
SRR17520069.12469961

SRR17520069.12469962  
SRR17520069.12469963  
SRR17520069.12469964  
SRR17520069.12469967  
SRR17520069.12469968  
SRR17520069.12508218  
SRR17520069.12508219  
SRR17520069.12508220  
SRR17520069.12508221  
SRR17520069.12508222  
SRR17520069.12508223  
SRR17520069.12508224  
SRR17520069.12508225  
SRR17520069.12508226  
SRR17520069.12508227  
SRR17520069.12508228  
SRR17520069.12508230  
SRR17520069.12510745  
SRR17520069.12510746  
SRR17520069.12510747  
SRR17520069.12510748  
SRR17520069.12510749  
SRR17520069.12510750  
SRR17520069.12510751  
SRR17520069.12510752  
SRR17520069.12510753  
SRR17520069.12510754  
SRR17520069.12510755  
SRR17520069.12510760  
SRR17520069.12510762  
SRR17520069.12510765  
SRR17520069.12510766  
SRR17520069.12510767  
SRR17520069.12510769  
SRR17520069.12510775  
SRR17520069.12510776  
SRR17520069.12510778  
SRR17520069.12510782  
SRR17520069.12510789  
SRR17520069.12510791  
SRR17520069.12510792  
SRR17520069.12510799  
SRR17520069.12510803  
SRR17520069.12510805  
SRR17520069.12520087  
SRR17520069.12520673  
SRR17520069.12520674

SRR17520069.12520675  
SRR17520069.12520676  
SRR17520069.12520677  
SRR17520069.12520678  
SRR17520069.12520679  
SRR17520069.12520680  
SRR17520069.12520681  
SRR17520069.12520682  
SRR17520069.12520685  
SRR17520069.12520686  
SRR17520069.12520687  
SRR17520069.12520688  
SRR17520069.12520689  
SRR17520069.12520690  
SRR17520069.12520691  
SRR17520069.12520692  
SRR17520069.12520693  
SRR17520069.12520694  
SRR17520069.12520695  
SRR17520069.12520696  
SRR17520069.12520697  
SRR17520069.12520698  
SRR17520069.12520699  
SRR17520069.12520700  
SRR17520069.12520701  
SRR17520069.12520702  
SRR17520069.12520703  
SRR17520069.12520704  
SRR17520069.12520705  
SRR17520069.12520706  
SRR17520069.12520708  
SRR17520069.12520709  
SRR17520069.12520710  
SRR17520069.12520711  
SRR17520069.12520712  
SRR17520069.12520713  
SRR17520069.12520714  
SRR17520069.12520715  
SRR17520069.12520716  
SRR17520069.12520717  
SRR17520069.12520718  
SRR17520069.12520719  
SRR17520069.12520720  
SRR17520069.12520721  
SRR17520069.12520722  
SRR17520069.12520723  
SRR17520069.12520724

SRR17520069. 12520725  
SRR17520069. 12520726  
SRR17520069. 12520727  
SRR17520069. 12520728  
SRR17520069. 12520729  
SRR17520069. 12520730  
SRR17520069. 12520731  
SRR17520069. 12520732  
SRR17520069. 12520733  
SRR17520069. 12520734  
SRR17520069. 12520735  
SRR17520069. 12520736  
SRR17520069. 12520737  
SRR17520069. 12520739  
SRR17520069. 12520740  
SRR17520069. 12520741  
SRR17520069. 12520742  
SRR17520069. 12520743  
SRR17520069. 12520744  
SRR17520069. 12520745  
SRR17520069. 12520746  
SRR17520069. 12520747  
SRR17520069. 12520748  
SRR17520069. 12520749  
SRR17520069. 12520750  
SRR17520069. 12520751  
SRR17520069. 12520752  
SRR17520069. 12520753  
SRR17520069. 12520754  
SRR17520069. 12520755  
SRR17520069. 12520756  
SRR17520069. 12520757  
SRR17520069. 12520758  
SRR17520069. 12520759  
SRR17520069. 12520760  
SRR17520069. 12520761  
SRR17520069. 12520762  
SRR17520069. 12520763  
SRR17520069. 12520764  
SRR17520069. 12520765  
SRR17520069. 12520766  
SRR17520069. 12520767  
SRR17520069. 12520769  
SRR17520069. 12520770  
SRR17520069. 12520771  
SRR17520069. 12520772  
SRR17520069. 12520773



SRR17520069. 12520774  
SRR17520069. 12520775  
SRR17520069. 12520776  
SRR17520069. 12520777  
SRR17520069. 12520778  
SRR17520069. 12520779  
SRR17520069. 12520780  
SRR17520069. 12520781  
SRR17520069. 12520782  
SRR17520069. 12520783  
SRR17520069. 12520784  
SRR17520069. 12520785  
SRR17520069. 12520786  
SRR17520069. 12520787  
SRR17520069. 12520789  
SRR17520069. 12520790  
SRR17520069. 12520791  
SRR17520069. 12520792  
SRR17520069. 12520793  
SRR17520069. 12520794  
SRR17520069. 12520795  
SRR17520069. 12520796  
SRR17520069. 12520797  
SRR17520069. 12523717  
SRR17520069. 12523718  
SRR17520069. 12523719  
SRR17520069. 12523720  
SRR17520069. 12523721  
SRR17520069. 12523722  
SRR17520069. 12523723  
SRR17520069. 12523724  
SRR17520069. 12523725  
SRR17520069. 12523726  
SRR17520069. 12523727  
SRR17520069. 12523728  
SRR17520069. 12523729  
SRR17520069. 12523730  
SRR17520069. 12523731  
SRR17520069. 12523733  
SRR17520069. 12523734  
SRR17520069. 12523735  
SRR17520069. 12523736  
SRR17520069. 12523737  
SRR17520069. 12530518  
SRR17520069. 12530519  
SRR17520069. 12530521  
SRR17520069. 12530523

SRR17520069. 12530524  
SRR17520069. 12530525  
SRR17520069. 12530527  
SRR17520069. 12530528  
SRR17520069. 12530529  
SRR17520069. 12530530  
SRR17520069. 12530531  
SRR17520069. 12530532  
SRR17520069. 12530533  
SRR17520069. 12530534  
SRR17520069. 12530535  
SRR17520069. 12536331  
SRR17520069. 12542852  
SRR17520069. 12542853  
SRR17520069. 12542856  
SRR17520069. 12542857  
SRR17520069. 12542858  
SRR17520069. 12542863  
SRR17520069. 12542864  
SRR17520069. 12558939  
SRR17520069. 12565387  
SRR17520069. 12588718  
SRR17520069. 12588721  
SRR17520069. 12589504  
SRR17520069. 12590656  
SRR17520069. 12611809  
SRR17520069. 12611810  
SRR17520069. 12611811  
SRR17520069. 12611812  
SRR17520069. 12611813  
SRR17520069. 12611814  
SRR17520069. 12611815  
SRR17520069. 12611816  
SRR17520069. 12611817  
SRR17520069. 12611818  
SRR17520069. 12611819  
SRR17520069. 12611820  
SRR17520069. 12611821  
SRR17520069. 12611822  
SRR17520069. 12611823  
SRR17520069. 12611824  
SRR17520069. 12611825  
SRR17520069. 12611826  
SRR17520069. 12611827  
SRR17520069. 12611828  
SRR17520069. 12611829  
SRR17520069. 12611830

SRR17520069. 12611831  
SRR17520069. 12611832  
SRR17520069. 12611833  
SRR17520069. 12611834  
SRR17520069. 12611835  
SRR17520069. 12611836  
SRR17520069. 12611837  
SRR17520069. 12611838  
SRR17520069. 12611839  
SRR17520069. 12611840  
SRR17520069. 12611841  
SRR17520069. 12611842  
SRR17520069. 12611843  
SRR17520069. 12611844  
SRR17520069. 12611845  
SRR17520069. 12611846  
SRR17520069. 12611847  
SRR17520069. 12611848  
SRR17520069. 12611849  
SRR17520069. 12611850  
SRR17520069. 12611851  
SRR17520069. 12611852  
SRR17520069. 12611853  
SRR17520069. 12611854  
SRR17520069. 12611855  
SRR17520069. 12611856  
SRR17520069. 12611857  
SRR17520069. 12611858  
SRR17520069. 12611859  
SRR17520069. 12611860  
SRR17520069. 12611861  
SRR17520069. 12611862  
SRR17520069. 12611863  
SRR17520069. 12611864  
SRR17520069. 12611865  
SRR17520069. 12611866  
SRR17520069. 12611867  
SRR17520069. 12611868  
SRR17520069. 12611869  
SRR17520069. 12611870  
SRR17520069. 12611871  
SRR17520069. 12611872  
SRR17520069. 12611873  
SRR17520069. 12611874  
SRR17520069. 12611875  
SRR17520069. 12611877  
SRR17520069. 12611878

SRR17520069. 12611879  
SRR17520069. 12611880  
SRR17520069. 12611881  
SRR17520069. 12611882  
SRR17520069. 12611883  
SRR17520069. 12611884  
SRR17520069. 12611885  
SRR17520069. 12611886  
SRR17520069. 12611887  
SRR17520069. 12611888  
SRR17520069. 12611889  
SRR17520069. 12611890  
SRR17520069. 12611891  
SRR17520069. 12611892  
SRR17520069. 12611893  
SRR17520069. 12611894  
SRR17520069. 12611895  
SRR17520069. 12611896  
SRR17520069. 12611897  
SRR17520069. 12611898  
SRR17520069. 12611899  
SRR17520069. 12611900  
SRR17520069. 12611901  
SRR17520069. 12611902  
SRR17520069. 12611903  
SRR17520069. 12611904  
SRR17520069. 12611905  
SRR17520069. 12611906  
SRR17520069. 12611907  
SRR17520069. 12611908  
SRR17520069. 12611909  
SRR17520069. 12611910  
SRR17520069. 12611911  
SRR17520069. 12611912  
SRR17520069. 12611913  
SRR17520069. 12611914  
SRR17520069. 12611915  
SRR17520069. 12611916  
SRR17520069. 12611917  
SRR17520069. 12611918  
SRR17520069. 12611919  
SRR17520069. 12611920  
SRR17520069. 12611921  
SRR17520069. 12611922  
SRR17520069. 12611923  
SRR17520069. 12611924  
SRR17520069. 12611925

SRR17520069. 12611926  
SRR17520069. 12611927  
SRR17520069. 12611928  
SRR17520069. 12611930  
SRR17520069. 12611931  
SRR17520069. 12611932  
SRR17520069. 12611933  
SRR17520069. 12611934  
SRR17520069. 12611935  
SRR17520069. 12611936  
SRR17520069. 12611937  
SRR17520069. 12611938  
SRR17520069. 12611939  
SRR17520069. 12611940  
SRR17520069. 12611941  
SRR17520069. 12611942  
SRR17520069. 12614063  
SRR17520069. 12615406  
SRR17520069. 12615407  
SRR17520069. 12615408  
SRR17520069. 12615409  
SRR17520069. 12615410  
SRR17520069. 12615411  
SRR17520069. 12617629  
SRR17520069. 12617630  
SRR17520069. 12617631  
SRR17520069. 12617632  
SRR17520069. 12617634  
SRR17520069. 12617635  
SRR17520069. 12617636  
SRR17520069. 12617637  
SRR17520069. 12617638  
SRR17520069. 12617639  
SRR17520069. 12617640  
SRR17520069. 12617641  
SRR17520069. 12617642  
SRR17520069. 12619733  
SRR17520069. 12621099  
SRR17520069. 12645529  
SRR17520069. 12645532  
SRR17520069. 12645533  
SRR17520069. 12645534  
SRR17520069. 12645535  
SRR17520069. 12645536  
SRR17520069. 12645537  
SRR17520069. 12645538  
SRR17520069. 12645539

SRR17520069. 12645540  
SRR17520069. 12645541  
SRR17520069. 12645542  
SRR17520069. 12645543  
SRR17520069. 12645544  
SRR17520069. 12645545  
SRR17520069. 12645546  
SRR17520069. 12645547  
SRR17520069. 12645548  
SRR17520069. 12645549  
SRR17520069. 12645550  
SRR17520069. 12645551  
SRR17520069. 12645552  
SRR17520069. 12645553  
SRR17520069. 12645554  
SRR17520069. 12645555  
SRR17520069. 12645556  
SRR17520069. 12645557  
SRR17520069. 12645558  
SRR17520069. 12645559  
SRR17520069. 12645560  
SRR17520069. 12645561  
SRR17520069. 12645562  
SRR17520069. 12645563  
SRR17520069. 12645564  
SRR17520069. 12645565  
SRR17520069. 12645566  
SRR17520069. 12645567  
SRR17520069. 12645568  
SRR17520069. 12645569  
SRR17520069. 12645570  
SRR17520069. 12645571  
SRR17520069. 12645572  
SRR17520069. 12645573  
SRR17520069. 12645574  
SRR17520069. 12645575  
SRR17520069. 12645576  
SRR17520069. 12645577  
SRR17520069. 12645578  
SRR17520069. 12645579  
SRR17520069. 12645580  
SRR17520069. 12645581  
SRR17520069. 12645582  
SRR17520069. 12645583  
SRR17520069. 12645584  
SRR17520069. 12645585  
SRR17520069. 12645586

SRR17520069. 12645587  
SRR17520069. 12645588  
SRR17520069. 12645589  
SRR17520069. 12645590  
SRR17520069. 12645591  
SRR17520069. 12645592  
SRR17520069. 12645593  
SRR17520069. 12645594  
SRR17520069. 12645595  
SRR17520069. 12645596  
SRR17520069. 12645597  
SRR17520069. 12645598  
SRR17520069. 12645599  
SRR17520069. 12645600  
SRR17520069. 12645601  
SRR17520069. 12645602  
SRR17520069. 12645603  
SRR17520069. 12645604  
SRR17520069. 12645607  
SRR17520069. 12645608  
SRR17520069. 12646140  
SRR17520069. 12646141  
SRR17520069. 12646142  
SRR17520069. 12646143  
SRR17520069. 12646144  
SRR17520069. 12646145  
SRR17520069. 12646146  
SRR17520069. 12646148  
SRR17520069. 12646151  
SRR17520069. 12646152  
SRR17520069. 12646153  
SRR17520069. 12646154  
SRR17520069. 12646156  
SRR17520069. 12646157  
SRR17520069. 12646158  
SRR17520069. 12646159  
SRR17520069. 12646160  
SRR17520069. 12646162  
SRR17520069. 12646163  
SRR17520069. 12646164  
SRR17520069. 12646165  
SRR17520069. 12646168  
SRR17520069. 12646170  
SRR17520069. 12646171  
SRR17520069. 12646172  
SRR17520069. 12648731  
SRR17520069. 12648732

SRR17520069. 12648733  
SRR17520069. 12648734  
SRR17520069. 12648735  
SRR17520069. 12648736  
SRR17520069. 12648737  
SRR17520069. 12648738  
SRR17520069. 12648739  
SRR17520069. 12648740  
SRR17520069. 12648741  
SRR17520069. 12648742  
SRR17520069. 12648743  
SRR17520069. 12648744  
SRR17520069. 12648745  
SRR17520069. 12648747  
SRR17520069. 12648748  
SRR17520069. 12648749  
SRR17520069. 12648750  
SRR17520069. 12648751  
SRR17520069. 12648752  
SRR17520069. 12648753  
SRR17520069. 12648754  
SRR17520069. 12648755  
SRR17520069. 12648756  
SRR17520069. 12648757  
SRR17520069. 12648758  
SRR17520069. 12648759  
SRR17520069. 12648760  
SRR17520069. 12648761  
SRR17520069. 12648762  
SRR17520069. 12648763  
SRR17520069. 12648764  
SRR17520069. 12648765  
SRR17520069. 12648766  
SRR17520069. 12648767  
SRR17520069. 12648768  
SRR17520069. 12648769  
SRR17520069. 12648770  
SRR17520069. 12648771  
SRR17520069. 12648772  
SRR17520069. 12648773  
SRR17520069. 12648774  
SRR17520069. 12648775  
SRR17520069. 12648776  
SRR17520069. 12648777  
SRR17520069. 12648778  
SRR17520069. 12648779  
SRR17520069. 12683788



SRR17520069.12691631  
SRR17520069.12694976  
SRR17520069.12694978  
SRR17520069.12694979  
SRR17520069.12694980  
SRR17520069.12694981  
SRR17520069.12694982  
SRR17520069.12694983  
SRR17520069.12694984  
SRR17520069.12694986  
SRR17520069.12694987  
SRR17520069.12694988  
SRR17520069.12694989  
SRR17520069.12694990  
SRR17520069.12694991  
SRR17520069.12694992  
SRR17520069.12694993  
SRR17520069.12694994  
SRR17520069.12694995  
SRR17520069.12694996  
SRR17520069.12695000  
SRR17520069.12695001  
SRR17520069.12695002  
SRR17520069.12695003  
SRR17520069.12695004  
SRR17520069.12695005  
SRR17520069.12695006  
SRR17520069.12695007  
SRR17520069.12695008  
SRR17520069.12695009  
SRR17520069.12695010  
SRR17520069.12695011  
SRR17520069.12695012  
SRR17520069.12695013  
SRR17520069.12695014  
SRR17520069.12695015  
SRR17520069.12695016  
SRR17520069.12695017  
SRR17520069.12695018  
SRR17520069.12695019  
SRR17520069.12695020  
SRR17520069.12695021  
SRR17520069.12695022  
SRR17520069.12695023  
SRR17520069.12695024  
SRR17520069.12695025  
SRR17520069.12695026

SRR17520069.12695027  
SRR17520069.12695028  
SRR17520069.12695029  
SRR17520069.12695030  
SRR17520069.12695031  
SRR17520069.12695032  
SRR17520069.12695033  
SRR17520069.12695034  
SRR17520069.12695035  
SRR17520069.12695036  
SRR17520069.12695037  
SRR17520069.12695038  
SRR17520069.12695039  
SRR17520069.12695040  
SRR17520069.12695041  
SRR17520069.12695042  
SRR17520069.12695043  
SRR17520069.12695044  
SRR17520069.12695045  
SRR17520069.12695046  
SRR17520069.12695047  
SRR17520069.12695048  
SRR17520069.12695049  
SRR17520069.12695050  
SRR17520069.12695052  
SRR17520069.12695053  
SRR17520069.12695054  
SRR17520069.12695055  
SRR17520069.12695056  
SRR17520069.12695057  
SRR17520069.12695058  
SRR17520069.12695059  
SRR17520069.12695060  
SRR17520069.12695061  
SRR17520069.12695062  
SRR17520069.12695063  
SRR17520069.12695064  
SRR17520069.12695065  
SRR17520069.12695066  
SRR17520069.12695067  
SRR17520069.12695068  
SRR17520069.12695069  
SRR17520069.12695070  
SRR17520069.12695071  
SRR17520069.12695072  
SRR17520069.12695073  
SRR17520069.12695074

SRR17520069.12695075  
SRR17520069.12695076  
SRR17520069.12695077  
SRR17520069.12695078  
SRR17520069.12695079  
SRR17520069.12695080  
SRR17520069.12695081  
SRR17520069.12695082  
SRR17520069.12695083  
SRR17520069.12695084  
SRR17520069.12695085  
SRR17520069.12695086  
SRR17520069.12695087  
SRR17520069.12695088  
SRR17520069.12695089  
SRR17520069.12695090  
SRR17520069.12695091  
SRR17520069.12695092  
SRR17520069.12695093  
SRR17520069.12695094  
SRR17520069.12695095  
SRR17520069.12695096  
SRR17520069.12695097  
SRR17520069.12695098  
SRR17520069.12695099  
SRR17520069.12695100  
SRR17520069.12695101  
SRR17520069.12695102  
SRR17520069.12695103  
SRR17520069.12695104  
SRR17520069.12695105  
SRR17520069.12695106  
SRR17520069.12695107  
SRR17520069.12695108  
SRR17520069.12695109  
SRR17520069.12695110  
SRR17520069.12695111  
SRR17520069.12695112  
SRR17520069.12695113  
SRR17520069.12695114  
SRR17520069.12695115  
SRR17520069.12695116  
SRR17520069.12695117  
SRR17520069.12695118  
SRR17520069.12695119  
SRR17520069.12695120  
SRR17520069.12695121

SRR17520069. 12695122  
SRR17520069. 12695123  
SRR17520069. 12695124  
SRR17520069. 12695125  
SRR17520069. 12695126  
SRR17520069. 12695127  
SRR17520069. 12695128  
SRR17520069. 12695129  
SRR17520069. 12695130  
SRR17520069. 12695131  
SRR17520069. 12695132  
SRR17520069. 12695133  
SRR17520069. 12695134  
SRR17520069. 12695135  
SRR17520069. 12695136  
SRR17520069. 12695137  
SRR17520069. 12695138  
SRR17520069. 12695139  
SRR17520069. 12695140  
SRR17520069. 12695141  
SRR17520069. 12695143  
SRR17520069. 12695144  
SRR17520069. 12695145  
SRR17520069. 12695146  
SRR17520069. 12696542  
SRR17520069. 12698819  
SRR17520069. 12699662  
SRR17520069. 12699663  
SRR17520069. 12699664  
SRR17520069. 12699665  
SRR17520069. 12699666  
SRR17520069. 12699667  
SRR17520069. 12699668  
SRR17520069. 12699669  
SRR17520069. 12699670  
SRR17520069. 12699671  
SRR17520069. 12699672  
SRR17520069. 12699673  
SRR17520069. 12699674  
SRR17520069. 12699675  
SRR17520069. 12699676  
SRR17520069. 12699677  
SRR17520069. 12699678  
SRR17520069. 12699679  
SRR17520069. 12699680  
SRR17520069. 12699681  
SRR17520069. 12699682

SRR17520069.12699683  
SRR17520069.12699684  
SRR17520069.12699685  
SRR17520069.12699686  
SRR17520069.12699687  
SRR17520069.12699688  
SRR17520069.12699689  
SRR17520069.12699690  
SRR17520069.12699691  
SRR17520069.12699692  
SRR17520069.12699693  
SRR17520069.12699694  
SRR17520069.12699695  
SRR17520069.12699696  
SRR17520069.12699697  
SRR17520069.12699699  
SRR17520069.12699700  
SRR17520069.12699701  
SRR17520069.12699702  
SRR17520069.12699703  
SRR17520069.12699704  
SRR17520069.12699705  
SRR17520069.12699706  
SRR17520069.12699707  
SRR17520069.12699708  
SRR17520069.12699709  
SRR17520069.12699710  
SRR17520069.12699711  
SRR17520069.12699712  
SRR17520069.12699713  
SRR17520069.12699714  
SRR17520069.12699715  
SRR17520069.12699716  
SRR17520069.12699717  
SRR17520069.12699718  
SRR17520069.12699719  
SRR17520069.12699720  
SRR17520069.12699721  
SRR17520069.12699722  
SRR17520069.12699723  
SRR17520069.12699724  
SRR17520069.12699725  
SRR17520069.12699726  
SRR17520069.12699727  
SRR17520069.12699728  
SRR17520069.12699729  
SRR17520069.12699730

SRR17520069.12699731  
SRR17520069.12699732  
SRR17520069.12699733  
SRR17520069.12699734  
SRR17520069.12699735  
SRR17520069.12699736  
SRR17520069.12699737  
SRR17520069.12699738  
SRR17520069.12699739  
SRR17520069.12699740  
SRR17520069.12699741  
SRR17520069.12699742  
SRR17520069.12699744  
SRR17520069.12699745  
SRR17520069.12699746  
SRR17520069.12699747  
SRR17520069.12699748  
SRR17520069.12699749  
SRR17520069.12699750  
SRR17520069.12699751  
SRR17520069.12699752  
SRR17520069.12699753  
SRR17520069.12699754  
SRR17520069.12699755  
SRR17520069.12699756  
SRR17520069.12699757  
SRR17520069.12699758  
SRR17520069.12699759  
SRR17520069.12699760  
SRR17520069.12699761  
SRR17520069.12699762  
SRR17520069.12699763  
SRR17520069.12699764  
SRR17520069.12699766  
SRR17520069.12699767  
SRR17520069.12699768  
SRR17520069.12699769  
SRR17520069.12699770  
SRR17520069.12699771  
SRR17520069.12699772  
SRR17520069.12699773  
SRR17520069.12699774  
SRR17520069.12699775  
SRR17520069.12699776  
SRR17520069.12699777  
SRR17520069.12699778  
SRR17520069.12699779

SRR17520069. 12699780  
SRR17520069. 12699781  
SRR17520069. 12699782  
SRR17520069. 12699783  
SRR17520069. 12699784  
SRR17520069. 12699785  
SRR17520069. 12699786  
SRR17520069. 12699787  
SRR17520069. 12699788  
SRR17520069. 12699790  
SRR17520069. 12712730  
SRR17520069. 12712731  
SRR17520069. 12712735  
SRR17520069. 12712736  
SRR17520069. 12712737  
SRR17520069. 12712738  
SRR17520069. 12712739  
SRR17520069. 12712740  
SRR17520069. 12712743  
SRR17520069. 12712744  
SRR17520069. 12712747  
SRR17520069. 12712748  
SRR17520069. 12731563  
SRR17520069. 12735757  
SRR17520069. 12735758  
SRR17520069. 12735759  
SRR17520069. 12735760  
SRR17520069. 12735761  
SRR17520069. 12735762  
SRR17520069. 12735763  
SRR17520069. 12735764  
SRR17520069. 12735765  
SRR17520069. 12735766  
SRR17520069. 12735767  
SRR17520069. 12735768  
SRR17520069. 12735769  
SRR17520069. 12735771  
SRR17520069. 12735772  
SRR17520069. 12735773  
SRR17520069. 12735774  
SRR17520069. 12735775  
SRR17520069. 12735776  
SRR17520069. 12735777  
SRR17520069. 12735778  
SRR17520069. 12735779  
SRR17520069. 12735780  
SRR17520069. 12735781

SRR17520069. 12735782  
SRR17520069. 12735783  
SRR17520069. 12735784  
SRR17520069. 12735785  
SRR17520069. 12735786  
SRR17520069. 12735787  
SRR17520069. 12735788  
SRR17520069. 12735789  
SRR17520069. 12735790  
SRR17520069. 12735791  
SRR17520069. 12735792  
SRR17520069. 12756949  
SRR17520069. 12756950  
SRR17520069. 12756951  
SRR17520069. 12756952  
SRR17520069. 12756953  
SRR17520069. 12756954  
SRR17520069. 12756955  
SRR17520069. 12756956  
SRR17520069. 12756957  
SRR17520069. 12756958  
SRR17520069. 12756959  
SRR17520069. 12756960  
SRR17520069. 12756961  
SRR17520069. 12756962  
SRR17520069. 12756963  
SRR17520069. 12756964  
SRR17520069. 12756965  
SRR17520069. 12756967  
SRR17520069. 12756968  
SRR17520069. 12756969  
SRR17520069. 12756970  
SRR17520069. 12756971  
SRR17520069. 12756972  
SRR17520069. 12756973  
SRR17520069. 12756974  
SRR17520069. 12756975  
SRR17520069. 12756976  
SRR17520069. 12756977  
SRR17520069. 12756978  
SRR17520069. 12756979  
SRR17520069. 12756980  
SRR17520069. 12756981  
SRR17520069. 12756982  
SRR17520069. 12756983  
SRR17520069. 12756984  
SRR17520069. 12756985



SRR17520069. 12756987  
SRR17520069. 12756988  
SRR17520069. 12756989  
SRR17520069. 12756990  
SRR17520069. 12756991  
SRR17520069. 12756992  
SRR17520069. 12756993  
SRR17520069. 12756994  
SRR17520069. 12756995  
SRR17520069. 12756996  
SRR17520069. 12756997  
SRR17520069. 12756998  
SRR17520069. 12756999  
SRR17520069. 12757000  
SRR17520069. 12757001  
SRR17520069. 12757003  
SRR17520069. 12757004  
SRR17520069. 12757005  
SRR17520069. 12757006  
SRR17520069. 12757007  
SRR17520069. 12757008  
SRR17520069. 12757009  
SRR17520069. 12757010  
SRR17520069. 12757011  
SRR17520069. 12757012  
SRR17520069. 12757013  
SRR17520069. 12757014  
SRR17520069. 12757015  
SRR17520069. 12757016  
SRR17520069. 12757017  
SRR17520069. 12757018  
SRR17520069. 12757019  
SRR17520069. 12757020  
SRR17520069. 12757021  
SRR17520069. 12757022  
SRR17520069. 12757023  
SRR17520069. 12757024  
SRR17520069. 12757025  
SRR17520069. 12757026  
SRR17520069. 12757027  
SRR17520069. 12757028  
SRR17520069. 12757029  
SRR17520069. 12757030  
SRR17520069. 12757031  
SRR17520069. 12757032  
SRR17520069. 12757033  
SRR17520069. 12757034

SRR17520069. 12757035  
SRR17520069. 12757036  
SRR17520069. 12757037  
SRR17520069. 12757038  
SRR17520069. 12757039  
SRR17520069. 12757040  
SRR17520069. 12757041  
SRR17520069. 12757042  
SRR17520069. 12757043  
SRR17520069. 12757044  
SRR17520069. 12757045  
SRR17520069. 12757046  
SRR17520069. 12757047  
SRR17520069. 12757048  
SRR17520069. 12757049  
SRR17520069. 12757050  
SRR17520069. 12757051  
SRR17520069. 12757052  
SRR17520069. 12757053  
SRR17520069. 12757054  
SRR17520069. 12757055  
SRR17520069. 12757056  
SRR17520069. 12757057  
SRR17520069. 12757058  
SRR17520069. 12757059  
SRR17520069. 12757060  
SRR17520069. 12759115  
SRR17520069. 12762837  
SRR17520069. 12762839  
SRR17520069. 12768388  
SRR17520069. 12787890  
SRR17520069. 12791313  
SRR17520069. 12791314  
SRR17520069. 12791315  
SRR17520069. 12791316  
SRR17520069. 12791317  
SRR17520069. 12791318  
SRR17520069. 12791319  
SRR17520069. 12791320  
SRR17520069. 12791321  
SRR17520069. 12791322  
SRR17520069. 12791323  
SRR17520069. 12791324  
SRR17520069. 12791325  
SRR17520069. 12791327  
SRR17520069. 12791328  
SRR17520069. 12791329

SRR17520069. 12791330  
SRR17520069. 12791331  
SRR17520069. 12791332  
SRR17520069. 12791334  
SRR17520069. 12791335  
SRR17520069. 12791336  
SRR17520069. 12791338  
SRR17520069. 12791339  
SRR17520069. 12791340  
SRR17520069. 12791341  
SRR17520069. 12791342  
SRR17520069. 12791343  
SRR17520069. 12791344  
SRR17520069. 12791345  
SRR17520069. 12791346  
SRR17520069. 12791347  
SRR17520069. 12791348  
SRR17520069. 12791349  
SRR17520069. 12791350  
SRR17520069. 12791351  
SRR17520069. 12791352  
SRR17520069. 12802794  
SRR17520069. 12802795  
SRR17520069. 12802796  
SRR17520069. 12802797  
SRR17520069. 12802798  
SRR17520069. 12802799  
SRR17520069. 12802800  
SRR17520069. 12802801  
SRR17520069. 12802802  
SRR17520069. 12802804  
SRR17520069. 12802805  
SRR17520069. 12802806  
SRR17520069. 12802807  
SRR17520069. 12802808  
SRR17520069. 12802809  
SRR17520069. 12802810  
SRR17520069. 12802811  
SRR17520069. 12802812  
SRR17520069. 12802813  
SRR17520069. 12802814  
SRR17520069. 12802815  
SRR17520069. 12802816  
SRR17520069. 12802817  
SRR17520069. 12802818  
SRR17520069. 12802819  
SRR17520069. 12802820

SRR17520069. 12802821  
SRR17520069. 12802822  
SRR17520069. 12802823  
SRR17520069. 12802824  
SRR17520069. 12802825  
SRR17520069. 12802826  
SRR17520069. 12802827  
SRR17520069. 12802828  
SRR17520069. 12802829  
SRR17520069. 12802830  
SRR17520069. 12802831  
SRR17520069. 12802832  
SRR17520069. 12802833  
SRR17520069. 12802834  
SRR17520069. 12802835  
SRR17520069. 12802836  
SRR17520069. 12802837  
SRR17520069. 12802838  
SRR17520069. 12802839  
SRR17520069. 12802840  
SRR17520069. 12802841  
SRR17520069. 12802842  
SRR17520069. 12802843  
SRR17520069. 12802844  
SRR17520069. 12802845  
SRR17520069. 12802846  
SRR17520069. 12802847  
SRR17520069. 12802848  
SRR17520069. 12802849  
SRR17520069. 12802850  
SRR17520069. 12802851  
SRR17520069. 12802852  
SRR17520069. 12802853  
SRR17520069. 12802854  
SRR17520069. 12802855  
SRR17520069. 12802856  
SRR17520069. 12802857  
SRR17520069. 12802858  
SRR17520069. 12802859  
SRR17520069. 12802860  
SRR17520069. 12802861  
SRR17520069. 12802862  
SRR17520069. 12802863  
SRR17520069. 12802864  
SRR17520069. 12802865  
SRR17520069. 12802866  
SRR17520069. 12802867

SRR17520069. 12802868  
SRR17520069. 12802869  
SRR17520069. 12802870  
SRR17520069. 12802872  
SRR17520069. 12802873  
SRR17520069. 12802874  
SRR17520069. 12802875  
SRR17520069. 12802876  
SRR17520069. 12802877  
SRR17520069. 12802878  
SRR17520069. 12802879  
SRR17520069. 12802880  
SRR17520069. 12802881  
SRR17520069. 12802882  
SRR17520069. 12802883  
SRR17520069. 12802884  
SRR17520069. 12802885  
SRR17520069. 12802886  
SRR17520069. 12802887  
SRR17520069. 12802888  
SRR17520069. 12802889  
SRR17520069. 12802890  
SRR17520069. 12802891  
SRR17520069. 12802892  
SRR17520069. 12802893  
SRR17520069. 12802894  
SRR17520069. 12802895  
SRR17520069. 12802896  
SRR17520069. 12802897  
SRR17520069. 12802899  
SRR17520069. 12802900  
SRR17520069. 12802901  
SRR17520069. 12802902  
SRR17520069. 12802903  
SRR17520069. 12802904  
SRR17520069. 12802905  
SRR17520069. 12825560  
SRR17520069. 12825752  
SRR17520069. 12825753  
SRR17520069. 12825754  
SRR17520069. 12825755  
SRR17520069. 12825756  
SRR17520069. 12825757  
SRR17520069. 12825758  
SRR17520069. 12825759  
SRR17520069. 12825760  
SRR17520069. 12825761

SRR17520069.12837172  
SRR17520069.12854284  
SRR17520069.12885778  
SRR17520069.12888694  
SRR17520069.12888695  
SRR17520069.12888696  
SRR17520069.12888697  
SRR17520069.12888698  
SRR17520069.12888699  
SRR17520069.12888700  
SRR17520069.12888701  
SRR17520069.12888702  
SRR17520069.12888703  
SRR17520069.12888704  
SRR17520069.12888706  
SRR17520069.12888707  
SRR17520069.12888708  
SRR17520069.12888710  
SRR17520069.12888711  
SRR17520069.12888712  
SRR17520069.12888713  
SRR17520069.12888714  
SRR17520069.12888715  
SRR17520069.12888718  
SRR17520069.12888719  
SRR17520069.12888720  
SRR17520069.12888721  
SRR17520069.12888722  
SRR17520069.12888723  
SRR17520069.12888724  
SRR17520069.12888725  
SRR17520069.12888726  
SRR17520069.12888727  
SRR17520069.12888728  
SRR17520069.12888729  
SRR17520069.12888730  
SRR17520069.12888731  
SRR17520069.12888732  
SRR17520069.12888734  
SRR17520069.12888735  
SRR17520069.12888736  
SRR17520069.12888738  
SRR17520069.12888739  
SRR17520069.12888740  
SRR17520069.12888743  
SRR17520069.12888744  
SRR17520069.12888745

SRR17520069.12888747  
SRR17520069.12888749  
SRR17520069.12888751  
SRR17520069.12888752  
SRR17520069.12888753  
SRR17520069.12888754  
SRR17520069.12888755  
SRR17520069.12888757  
SRR17520069.12888758  
SRR17520069.12888759  
SRR17520069.12888760  
SRR17520069.12888761  
SRR17520069.12888762  
SRR17520069.12888763  
SRR17520069.12888764  
SRR17520069.12888765  
SRR17520069.12888766  
SRR17520069.12888767  
SRR17520069.12888769  
SRR17520069.12888770  
SRR17520069.12888771  
SRR17520069.12888772  
SRR17520069.12888774  
SRR17520069.12902324  
SRR17520069.12902325  
SRR17520069.12902326  
SRR17520069.12902327  
SRR17520069.12902328  
SRR17520069.12902329  
SRR17520069.12902330  
SRR17520069.12902331  
SRR17520069.12902332  
SRR17520069.12902334  
SRR17520069.12902335  
SRR17520069.12902336  
SRR17520069.12902337  
SRR17520069.12902338  
SRR17520069.12902339  
SRR17520069.12902340  
SRR17520069.12902341  
SRR17520069.12902342  
SRR17520069.12902343  
SRR17520069.12902344  
SRR17520069.12902345  
SRR17520069.12902346  
SRR17520069.12902347  
SRR17520069.12902348

SRR17520069. 12902349  
SRR17520069. 12902350  
SRR17520069. 12902351  
SRR17520069. 12902352  
SRR17520069. 12902353  
SRR17520069. 12902354  
SRR17520069. 12902355  
SRR17520069. 12902356  
SRR17520069. 12902357  
SRR17520069. 12902358  
SRR17520069. 12902359  
SRR17520069. 12902360  
SRR17520069. 12902361  
SRR17520069. 12902362  
SRR17520069. 12902363  
SRR17520069. 12902365  
SRR17520069. 12902366  
SRR17520069. 12902367  
SRR17520069. 12902368  
SRR17520069. 12902369  
SRR17520069. 12902370  
SRR17520069. 12902371  
SRR17520069. 12902372  
SRR17520069. 12902373  
SRR17520069. 12902374  
SRR17520069. 12902375  
SRR17520069. 12902376  
SRR17520069. 12902377  
SRR17520069. 12902378  
SRR17520069. 12902379  
SRR17520069. 12902380  
SRR17520069. 12902381  
SRR17520069. 12902382  
SRR17520069. 12902383  
SRR17520069. 12902384  
SRR17520069. 12902385  
SRR17520069. 12902386  
SRR17520069. 12902387  
SRR17520069. 12902388  
SRR17520069. 12902389  
SRR17520069. 12902390  
SRR17520069. 12902391  
SRR17520069. 12902392  
SRR17520069. 12902393  
SRR17520069. 12902394  
SRR17520069. 12902395  
SRR17520069. 12902396



SRR17520069. 12902397  
SRR17520069. 12902398  
SRR17520069. 12902399  
SRR17520069. 12902400  
SRR17520069. 12902401  
SRR17520069. 12902402  
SRR17520069. 12902403  
SRR17520069. 12902404  
SRR17520069. 12902405  
SRR17520069. 12902406  
SRR17520069. 12902407  
SRR17520069. 12902408  
SRR17520069. 12902409  
SRR17520069. 12902410  
SRR17520069. 12902411  
SRR17520069. 12902412  
SRR17520069. 12902413  
SRR17520069. 12902414  
SRR17520069. 12902415  
SRR17520069. 12902416  
SRR17520069. 12902417  
SRR17520069. 12902418  
SRR17520069. 12928605  
SRR17520069. 12928606  
SRR17520069. 12928607  
SRR17520069. 12928608  
SRR17520069. 12928609  
SRR17520069. 12928610  
SRR17520069. 12928611  
SRR17520069. 12928612  
SRR17520069. 12928613  
SRR17520069. 12928614  
SRR17520069. 12928615  
SRR17520069. 12928616  
SRR17520069. 12928617  
SRR17520069. 12928618  
SRR17520069. 12928619  
SRR17520069. 12928620  
SRR17520069. 12928621  
SRR17520069. 12928622  
SRR17520069. 12928623  
SRR17520069. 12928624  
SRR17520069. 12928625  
SRR17520069. 12928626  
SRR17520069. 12928627  
SRR17520069. 12928628  
SRR17520069. 12928629

SRR17520069. 12928630  
SRR17520069. 12928631  
SRR17520069. 12928632  
SRR17520069. 12928633  
SRR17520069. 12928634  
SRR17520069. 12928635  
SRR17520069. 12928636  
SRR17520069. 12928637  
SRR17520069. 12928638  
SRR17520069. 12928639  
SRR17520069. 12928640  
SRR17520069. 12928641  
SRR17520069. 12928642  
SRR17520069. 12928643  
SRR17520069. 12928644  
SRR17520069. 12928645  
SRR17520069. 12928646  
SRR17520069. 12928647  
SRR17520069. 12928648  
SRR17520069. 12928649  
SRR17520069. 12928650  
SRR17520069. 12928651  
SRR17520069. 12928653  
SRR17520069. 12932001  
SRR17520069. 12932002  
SRR17520069. 12932003  
SRR17520069. 12932004  
SRR17520069. 12932005  
SRR17520069. 12932006  
SRR17520069. 12932007  
SRR17520069. 12932008  
SRR17520069. 12932009  
SRR17520069. 12941039  
SRR17520069. 12941040  
SRR17520069. 12941042  
SRR17520069. 12941044  
SRR17520069. 12944104  
SRR17520069. 12952626  
SRR17520069. 12952627  
SRR17520069. 12952628  
SRR17520069. 12952629  
SRR17520069. 12952630  
SRR17520069. 12952631  
SRR17520069. 12952632  
SRR17520069. 12952633  
SRR17520069. 12952634  
SRR17520069. 12952635

SRR17520069. 12952636  
SRR17520069. 12952637  
SRR17520069. 12952638  
SRR17520069. 12952639  
SRR17520069. 12952640  
SRR17520069. 12952641  
SRR17520069. 12952642  
SRR17520069. 12952643  
SRR17520069. 12952644  
SRR17520069. 12952645  
SRR17520069. 12952646  
SRR17520069. 12952647  
SRR17520069. 12952648  
SRR17520069. 12952649  
SRR17520069. 12952650  
SRR17520069. 12952651  
SRR17520069. 12952652  
SRR17520069. 12952653  
SRR17520069. 12952654  
SRR17520069. 12952655  
SRR17520069. 12952656  
SRR17520069. 12952657  
SRR17520069. 12952658  
SRR17520069. 12952659  
SRR17520069. 12952660  
SRR17520069. 12952661  
SRR17520069. 12952662  
SRR17520069. 12952663  
SRR17520069. 12952664  
SRR17520069. 12952665  
SRR17520069. 12952666  
SRR17520069. 12952667  
SRR17520069. 12952668  
SRR17520069. 12952669  
SRR17520069. 12952670  
SRR17520069. 12952671  
SRR17520069. 12952672  
SRR17520069. 12952673  
SRR17520069. 12952680  
SRR17520069. 12952688  
SRR17520069. 12952690  
SRR17520069. 12952702  
SRR17520069. 12952712  
SRR17520069. 12955729  
SRR17520069. 12955730  
SRR17520069. 12955731  
SRR17520069. 12955732

SRR17520069. 12955733  
SRR17520069. 12955734  
SRR17520069. 12955736  
SRR17520069. 12955737  
SRR17520069. 12955738  
SRR17520069. 12955739  
SRR17520069. 12955740  
SRR17520069. 12955741  
SRR17520069. 12955742  
SRR17520069. 12957744  
SRR17520069. 12957745  
SRR17520069. 12957746  
SRR17520069. 12957747  
SRR17520069. 12957748  
SRR17520069. 12957749  
SRR17520069. 12957750  
SRR17520069. 12957751  
SRR17520069. 12957752  
SRR17520069. 12957753  
SRR17520069. 12957754  
SRR17520069. 12957755  
SRR17520069. 12957756  
SRR17520069. 12957757  
SRR17520069. 12959313  
SRR17520069. 12959369  
SRR17520069. 12959952  
SRR17520069. 12959953  
SRR17520069. 12959954  
SRR17520069. 12959955  
SRR17520069. 12959956  
SRR17520069. 12959957  
SRR17520069. 12959958  
SRR17520069. 12959959  
SRR17520069. 12959960  
SRR17520069. 12959961  
SRR17520069. 12959962  
SRR17520069. 12959963  
SRR17520069. 12959964  
SRR17520069. 12959965  
SRR17520069. 12959966  
SRR17520069. 12959967  
SRR17520069. 12959968  
SRR17520069. 12959969  
SRR17520069. 12959970  
SRR17520069. 12959971  
SRR17520069. 12959972  
SRR17520069. 12959973

SRR17520069.12959974  
SRR17520069.12959975  
SRR17520069.12959976  
SRR17520069.12959977  
SRR17520069.12959980  
SRR17520069.12959981  
SRR17520069.12959982  
SRR17520069.12959983  
SRR17520069.12959984  
SRR17520069.12959985  
SRR17520069.12959986  
SRR17520069.12959987  
SRR17520069.12959988  
SRR17520069.12959989  
SRR17520069.12959991  
SRR17520069.12959992  
SRR17520069.12959993  
SRR17520069.12959994  
SRR17520069.12959995  
SRR17520069.12959996  
SRR17520069.12959997  
SRR17520069.12959998  
SRR17520069.12959999  
SRR17520069.12960000  
SRR17520069.12960001  
SRR17520069.12960002  
SRR17520069.12960003  
SRR17520069.12960004  
SRR17520069.12960005  
SRR17520069.12960006  
SRR17520069.12960007  
SRR17520069.12960009  
SRR17520069.12960010  
SRR17520069.12960011  
SRR17520069.12960012  
SRR17520069.12960013  
SRR17520069.12960014  
SRR17520069.12960015  
SRR17520069.12960016  
SRR17520069.12960017  
SRR17520069.12960018  
SRR17520069.12960019  
SRR17520069.12960020  
SRR17520069.12960021  
SRR17520069.12960022  
SRR17520069.12960023  
SRR17520069.12960024

SRR17520069. 12960026  
SRR17520069. 12960027  
SRR17520069. 12960028  
SRR17520069. 12960029  
SRR17520069. 12960030  
SRR17520069. 12960031  
SRR17520069. 12960032  
SRR17520069. 12960033  
SRR17520069. 12960034  
SRR17520069. 12960035  
SRR17520069. 12960036  
SRR17520069. 12960037  
SRR17520069. 12960038  
SRR17520069. 12960039  
SRR17520069. 12960040  
SRR17520069. 12960041  
SRR17520069. 12960042  
SRR17520069. 12960043  
SRR17520069. 12960044  
SRR17520069. 12960045  
SRR17520069. 12960046  
SRR17520069. 12960047  
SRR17520069. 12960048  
SRR17520069. 12960049  
SRR17520069. 12960050  
SRR17520069. 12960051  
SRR17520069. 12960052  
SRR17520069. 12960053  
SRR17520069. 12960054  
SRR17520069. 12960055  
SRR17520069. 12960056  
SRR17520069. 12960057  
SRR17520069. 12960058  
SRR17520069. 12960059  
SRR17520069. 12960060  
SRR17520069. 12960061  
SRR17520069. 12960062  
SRR17520069. 12960063  
SRR17520069. 12960064  
SRR17520069. 12960065  
SRR17520069. 12960066  
SRR17520069. 12960067  
SRR17520069. 12960068  
SRR17520069. 12960069  
SRR17520069. 12960070  
SRR17520069. 12960071  
SRR17520069. 12960072

SRR17520069. 12960073  
SRR17520069. 12960074  
SRR17520069. 12960075  
SRR17520069. 12960076  
SRR17520069. 12960077  
SRR17520069. 12960078  
SRR17520069. 12960079  
SRR17520069. 12960080  
SRR17520069. 12960081  
SRR17520069. 12960082  
SRR17520069. 12960083  
SRR17520069. 12960084  
SRR17520069. 12960085  
SRR17520069. 12960086  
SRR17520069. 12973309  
SRR17520069. 12973310  
SRR17520069. 12973311  
SRR17520069. 12973312  
SRR17520069. 12973313  
SRR17520069. 12973314  
SRR17520069. 12973315  
SRR17520069. 12973316  
SRR17520069. 12973317  
SRR17520069. 12973318  
SRR17520069. 12973319  
SRR17520069. 12973320  
SRR17520069. 12973321  
SRR17520069. 12973322  
SRR17520069. 12973323  
SRR17520069. 12973324  
SRR17520069. 12973325  
SRR17520069. 12973326  
SRR17520069. 12973327  
SRR17520069. 12973328  
SRR17520069. 12973329  
SRR17520069. 12973330  
SRR17520069. 12973331  
SRR17520069. 12973332  
SRR17520069. 12973333  
SRR17520069. 12973334  
SRR17520069. 12973335  
SRR17520069. 12973336  
SRR17520069. 12973337  
SRR17520069. 12973338  
SRR17520069. 12973339  
SRR17520069. 12973340  
SRR17520069. 12973341

SRR17520069. 12973342  
SRR17520069. 12973343  
SRR17520069. 12973344  
SRR17520069. 12973345  
SRR17520069. 12973346  
SRR17520069. 12973347  
SRR17520069. 12973348  
SRR17520069. 12973349  
SRR17520069. 12973350  
SRR17520069. 12973351  
SRR17520069. 12973352  
SRR17520069. 12973353  
SRR17520069. 12973354  
SRR17520069. 12973355  
SRR17520069. 12973356  
SRR17520069. 12973357  
SRR17520069. 12973358  
SRR17520069. 12973359  
SRR17520069. 12973360  
SRR17520069. 12973361  
SRR17520069. 12973362  
SRR17520069. 12973363  
SRR17520069. 12973364  
SRR17520069. 12973365  
SRR17520069. 12973366  
SRR17520069. 12973367  
SRR17520069. 12973368  
SRR17520069. 12973369  
SRR17520069. 12973370  
SRR17520069. 12973371  
SRR17520069. 12973372  
SRR17520069. 12973373  
SRR17520069. 12973374  
SRR17520069. 12973375  
SRR17520069. 12973376  
SRR17520069. 12973377  
SRR17520069. 12973378  
SRR17520069. 12973379  
SRR17520069. 12973380  
SRR17520069. 12973381  
SRR17520069. 12973382  
SRR17520069. 12973383  
SRR17520069. 12973384  
SRR17520069. 12973385  
SRR17520069. 12973386  
SRR17520069. 12973387  
SRR17520069. 12973388



SRR17520069. 12973389  
SRR17520069. 12973390  
SRR17520069. 12973391  
SRR17520069. 12973392  
SRR17520069. 12973393  
SRR17520069. 12973394  
SRR17520069. 12973395  
SRR17520069. 12973396  
SRR17520069. 12973397  
SRR17520069. 12973398  
SRR17520069. 12973399  
SRR17520069. 12973400  
SRR17520069. 12973401  
SRR17520069. 12973402  
SRR17520069. 12973403  
SRR17520069. 12973404  
SRR17520069. 12973405  
SRR17520069. 12973406  
SRR17520069. 12973407  
SRR17520069. 12973408  
SRR17520069. 12973409  
SRR17520069. 12973410  
SRR17520069. 12973411  
SRR17520069. 12973412  
SRR17520069. 12973413  
SRR17520069. 12973414  
SRR17520069. 12973415  
SRR17520069. 12973416  
SRR17520069. 12973417  
SRR17520069. 12973418  
SRR17520069. 12973419  
SRR17520069. 12973420  
SRR17520069. 12973421  
SRR17520069. 12973422  
SRR17520069. 12973423  
SRR17520069. 12973424  
SRR17520069. 12973425  
SRR17520069. 12973426  
SRR17520069. 12973427  
SRR17520069. 12973428  
SRR17520069. 12973429  
SRR17520069. 12973430  
SRR17520069. 12973431  
SRR17520069. 12974978  
SRR17520069. 12974980  
SRR17520069. 12974981  
SRR17520069. 12987717

SRR17520069.12987734  
SRR17520069.12987759  
SRR17520069.13006314  
SRR17520069.13006315  
SRR17520069.13028638  
SRR17520069.13028639  
SRR17520069.13028640  
SRR17520069.13028641  
SRR17520069.13028642  
SRR17520069.13028643  
SRR17520069.13028644  
SRR17520069.13028645  
SRR17520069.13031044  
SRR17520069.13031045  
SRR17520069.13031047  
SRR17520069.13031048  
SRR17520069.13031049  
SRR17520069.13031051  
SRR17520069.13031052  
SRR17520069.13031053  
SRR17520069.13031055  
SRR17520069.13031056  
SRR17520069.13031057  
SRR17520069.13031058  
SRR17520069.13031059  
SRR17520069.13031061  
SRR17520069.13031062  
SRR17520069.13031063  
SRR17520069.13031064  
SRR17520069.13031065  
SRR17520069.13031066  
SRR17520069.13031068  
SRR17520069.13031069  
SRR17520069.13031070  
SRR17520069.13031071  
SRR17520069.13031073  
SRR17520069.13031075  
SRR17520069.13031076  
SRR17520069.13031077  
SRR17520069.13031078  
SRR17520069.13031079  
SRR17520069.13031080  
SRR17520069.13031081  
SRR17520069.13031082  
SRR17520069.13031083  
SRR17520069.13031084  
SRR17520069.13031085

SRR17520069.13031087  
SRR17520069.13031088  
SRR17520069.13031089  
SRR17520069.13031090  
SRR17520069.13031093  
SRR17520069.13031094  
SRR17520069.13031095  
SRR17520069.13031097  
SRR17520069.13031098  
SRR17520069.13031099  
SRR17520069.13031100  
SRR17520069.13031101  
SRR17520069.13031102  
SRR17520069.13031103  
SRR17520069.13031104  
SRR17520069.13031105  
SRR17520069.13031106  
SRR17520069.13031107  
SRR17520069.13031108  
SRR17520069.13031109  
SRR17520069.13031110  
SRR17520069.13031111  
SRR17520069.13031112  
SRR17520069.13031113  
SRR17520069.13031114  
SRR17520069.13031115  
SRR17520069.13031116  
SRR17520069.13031117  
SRR17520069.13031119  
SRR17520069.13031120  
SRR17520069.13031121  
SRR17520069.13031122  
SRR17520069.13031123  
SRR17520069.13031124  
SRR17520069.13031125  
SRR17520069.13031126  
SRR17520069.13031127  
SRR17520069.13031128  
SRR17520069.13031129  
SRR17520069.13031130  
SRR17520069.13031131  
SRR17520069.13031132  
SRR17520069.13031133  
SRR17520069.13031134  
SRR17520069.13031135  
SRR17520069.13031136  
SRR17520069.13031137

SRR17520069.13031138  
SRR17520069.13031139  
SRR17520069.13031140  
SRR17520069.13031141  
SRR17520069.13039600  
SRR17520069.13039601  
SRR17520069.13039602  
SRR17520069.13039603  
SRR17520069.13039604  
SRR17520069.13039605  
SRR17520069.13039606  
SRR17520069.13039607  
SRR17520069.13039608  
SRR17520069.13039609  
SRR17520069.13039610  
SRR17520069.13039611  
SRR17520069.13039612  
SRR17520069.13039613  
SRR17520069.13039614  
SRR17520069.13039615  
SRR17520069.13039616  
SRR17520069.13039617  
SRR17520069.13039618  
SRR17520069.13039619  
SRR17520069.13039620  
SRR17520069.13039621  
SRR17520069.13039622  
SRR17520069.13039623  
SRR17520069.13039624  
SRR17520069.13039625  
SRR17520069.13039626  
SRR17520069.13039627  
SRR17520069.13039628  
SRR17520069.13039629  
SRR17520069.13039630  
SRR17520069.13039631  
SRR17520069.13039632  
SRR17520069.13039633  
SRR17520069.13039634  
SRR17520069.13039635  
SRR17520069.13039636  
SRR17520069.13039637  
SRR17520069.13039638  
SRR17520069.13039639  
SRR17520069.13039640  
SRR17520069.13039641  
SRR17520069.13039642

SRR17520069. 13039643  
SRR17520069. 13039644  
SRR17520069. 13039645  
SRR17520069. 13039646  
SRR17520069. 13039647  
SRR17520069. 13039648  
SRR17520069. 13039649  
SRR17520069. 13039650  
SRR17520069. 13039651  
SRR17520069. 13039652  
SRR17520069. 13039653  
SRR17520069. 13039654  
SRR17520069. 13039655  
SRR17520069. 13039656  
SRR17520069. 13039657  
SRR17520069. 13039658  
SRR17520069. 13039659  
SRR17520069. 13039660  
SRR17520069. 13039661  
SRR17520069. 13039662  
SRR17520069. 13039663  
SRR17520069. 13039664  
SRR17520069. 13039665  
SRR17520069. 13039666  
SRR17520069. 13039667  
SRR17520069. 13039668  
SRR17520069. 13039669  
SRR17520069. 13039670  
SRR17520069. 13039671  
SRR17520069. 13039672  
SRR17520069. 13039673  
SRR17520069. 13039674  
SRR17520069. 13039675  
SRR17520069. 13039676  
SRR17520069. 13039677  
SRR17520069. 13039678  
SRR17520069. 13039679  
SRR17520069. 13039680  
SRR17520069. 13039681  
SRR17520069. 13039682  
SRR17520069. 13039683  
SRR17520069. 13039684  
SRR17520069. 13039685  
SRR17520069. 13039686  
SRR17520069. 13039687  
SRR17520069. 13052374  
SRR17520069. 13052375

SRR17520069. 13052376  
SRR17520069. 13052377  
SRR17520069. 13052378  
SRR17520069. 13052379  
SRR17520069. 13052380  
SRR17520069. 13052381  
SRR17520069. 13052382  
SRR17520069. 13052383  
SRR17520069. 13052384  
SRR17520069. 13052385  
SRR17520069. 13052386  
SRR17520069. 13052387  
SRR17520069. 13052388  
SRR17520069. 13052389  
SRR17520069. 13052390  
SRR17520069. 13052391  
SRR17520069. 13052392  
SRR17520069. 13052393  
SRR17520069. 13052394  
SRR17520069. 13052395  
SRR17520069. 13052396  
SRR17520069. 13052397  
SRR17520069. 13052398  
SRR17520069. 13052399  
SRR17520069. 13052400  
SRR17520069. 13052401  
SRR17520069. 13052402  
SRR17520069. 13052404  
SRR17520069. 13052405  
SRR17520069. 13052406  
SRR17520069. 13052407  
SRR17520069. 13052408  
SRR17520069. 13052409  
SRR17520069. 13052410  
SRR17520069. 13052411  
SRR17520069. 13052412  
SRR17520069. 13052414  
SRR17520069. 13052415  
SRR17520069. 13052416  
SRR17520069. 13052417  
SRR17520069. 13052418  
SRR17520069. 13052419  
SRR17520069. 13052420  
SRR17520069. 13052421  
SRR17520069. 13052422  
SRR17520069. 13052423  
SRR17520069. 13052424

SRR17520069. 13052425  
SRR17520069. 13052426  
SRR17520069. 13052427  
SRR17520069. 13052428  
SRR17520069. 13052429  
SRR17520069. 13052430  
SRR17520069. 13052431  
SRR17520069. 13052432  
SRR17520069. 13052433  
SRR17520069. 13052434  
SRR17520069. 13052435  
SRR17520069. 13052436  
SRR17520069. 13052437  
SRR17520069. 13052438  
SRR17520069. 13052439  
SRR17520069. 13052440  
SRR17520069. 13052441  
SRR17520069. 13052442  
SRR17520069. 13052443  
SRR17520069. 13052444  
SRR17520069. 13052445  
SRR17520069. 13052446  
SRR17520069. 13052447  
SRR17520069. 13052448  
SRR17520069. 13052449  
SRR17520069. 13052450  
SRR17520069. 13052451  
SRR17520069. 13052452  
SRR17520069. 13052453  
SRR17520069. 13052454  
SRR17520069. 13052455  
SRR17520069. 13052456  
SRR17520069. 13052457  
SRR17520069. 13052458  
SRR17520069. 13052459  
SRR17520069. 13052460  
SRR17520069. 13052461  
SRR17520069. 13052462  
SRR17520069. 13052463  
SRR17520069. 13052464  
SRR17520069. 13052465  
SRR17520069. 13052466  
SRR17520069. 13052467  
SRR17520069. 13052468  
SRR17520069. 13052469  
SRR17520069. 13052470  
SRR17520069. 13052471

SRR17520069.13052472  
SRR17520069.13052473  
SRR17520069.13052474  
SRR17520069.13052475  
SRR17520069.13052476  
SRR17520069.13052477  
SRR17520069.13052478  
SRR17520069.13052479  
SRR17520069.13052480  
SRR17520069.13052481  
SRR17520069.13052482  
SRR17520069.13052483  
SRR17520069.13052484  
SRR17520069.13052485  
SRR17520069.13052486  
SRR17520069.13052487  
SRR17520069.13052488  
SRR17520069.13052489  
SRR17520069.13052490  
SRR17520069.13052491  
SRR17520069.13052492  
SRR17520069.13052493  
SRR17520069.13052494  
SRR17520069.13052495  
SRR17520069.13052496  
SRR17520069.13052497  
SRR17520069.13052498  
SRR17520069.13052499  
SRR17520069.13052501  
SRR17520069.13052502  
SRR17520069.13052503  
SRR17520069.13052504  
SRR17520069.13052505  
SRR17520069.13052506  
SRR17520069.13052507  
SRR17520069.13052508  
SRR17520069.13052509  
SRR17520069.13052510  
SRR17520069.13052511  
SRR17520069.13052512  
SRR17520069.13052513  
SRR17520069.13052514  
SRR17520069.13052515  
SRR17520069.13052516  
SRR17520069.13052517  
SRR17520069.13052518  
SRR17520069.13052519



SRR17520069. 13052521  
SRR17520069. 13052522  
SRR17520069. 13052524  
SRR17520069. 13052525  
SRR17520069. 13052526  
SRR17520069. 13052527  
SRR17520069. 13052528  
SRR17520069. 13052529  
SRR17520069. 13052530  
SRR17520069. 13052531  
SRR17520069. 13052532  
SRR17520069. 13052533  
SRR17520069. 13052534  
SRR17520069. 13052535  
SRR17520069. 13052536  
SRR17520069. 13052537  
SRR17520069. 13052538  
SRR17520069. 13052539  
SRR17520069. 13052540  
SRR17520069. 13052541  
SRR17520069. 13052542  
SRR17520069. 13052543  
SRR17520069. 13052544  
SRR17520069. 13052545  
SRR17520069. 13052546  
SRR17520069. 13052547  
SRR17520069. 13052548  
SRR17520069. 13052549  
SRR17520069. 13052550  
SRR17520069. 13052551  
SRR17520069. 13052552  
SRR17520069. 13052553  
SRR17520069. 13052554  
SRR17520069. 13052555  
SRR17520069. 13052556  
SRR17520069. 13052557  
SRR17520069. 13056791  
SRR17520069. 13056792  
SRR17520069. 13056793  
SRR17520069. 13056794  
SRR17520069. 13060901  
SRR17520069. 13060916  
SRR17520069. 13065693  
SRR17520069. 13065694  
SRR17520069. 13065695  
SRR17520069. 13065696  
SRR17520069. 13065698

SRR17520069. 13065699  
SRR17520069. 13065700  
SRR17520069. 13065701  
SRR17520069. 13065702  
SRR17520069. 13065703  
SRR17520069. 13065704  
SRR17520069. 13065705  
SRR17520069. 13065706  
SRR17520069. 13065707  
SRR17520069. 13065708  
SRR17520069. 13065709  
SRR17520069. 13065710  
SRR17520069. 13065711  
SRR17520069. 13065712  
SRR17520069. 13065713  
SRR17520069. 13065714  
SRR17520069. 13065715  
SRR17520069. 13065716  
SRR17520069. 13065717  
SRR17520069. 13065718  
SRR17520069. 13065719  
SRR17520069. 13065720  
SRR17520069. 13065721  
SRR17520069. 13065722  
SRR17520069. 13065723  
SRR17520069. 13065724  
SRR17520069. 13065725  
SRR17520069. 13065726  
SRR17520069. 13065727  
SRR17520069. 13065728  
SRR17520069. 13065729  
SRR17520069. 13065730  
SRR17520069. 13065731  
SRR17520069. 13065732  
SRR17520069. 13065733  
SRR17520069. 13065734  
SRR17520069. 13065735  
SRR17520069. 13065736  
SRR17520069. 13065737  
SRR17520069. 13065738  
SRR17520069. 13065739  
SRR17520069. 13065740  
SRR17520069. 13065741  
SRR17520069. 13065742  
SRR17520069. 13065743  
SRR17520069. 13065744  
SRR17520069. 13065745

SRR17520069. 13065746  
SRR17520069. 13065747  
SRR17520069. 13065748  
SRR17520069. 13065749  
SRR17520069. 13065750  
SRR17520069. 13065751  
SRR17520069. 13065752  
SRR17520069. 13065753  
SRR17520069. 13065756  
SRR17520069. 13065757  
SRR17520069. 13065758  
SRR17520069. 13065759  
SRR17520069. 13065760  
SRR17520069. 13065761  
SRR17520069. 13065762  
SRR17520069. 13065763  
SRR17520069. 13065764  
SRR17520069. 13065765  
SRR17520069. 13065767  
SRR17520069. 13065768  
SRR17520069. 13065769  
SRR17520069. 13065770  
SRR17520069. 13065771  
SRR17520069. 13065772  
SRR17520069. 13065773  
SRR17520069. 13065774  
SRR17520069. 13065775  
SRR17520069. 13065776  
SRR17520069. 13065777  
SRR17520069. 13065778  
SRR17520069. 13065779  
SRR17520069. 13065780  
SRR17520069. 13065781  
SRR17520069. 13065782  
SRR17520069. 13065783  
SRR17520069. 13065784  
SRR17520069. 13065785  
SRR17520069. 13065786  
SRR17520069. 13065787  
SRR17520069. 13065788  
SRR17520069. 13065789  
SRR17520069. 13065790  
SRR17520069. 13065791  
SRR17520069. 13065792  
SRR17520069. 13065793  
SRR17520069. 13065794  
SRR17520069. 13065795

SRR17520069. 13065796  
SRR17520069. 13065797  
SRR17520069. 13065798  
SRR17520069. 13065799  
SRR17520069. 13065800  
SRR17520069. 13065801  
SRR17520069. 13065802  
SRR17520069. 13065803  
SRR17520069. 13065804  
SRR17520069. 13065805  
SRR17520069. 13065806  
SRR17520069. 13065807  
SRR17520069. 13065808  
SRR17520069. 13065809  
SRR17520069. 13065810  
SRR17520069. 13065811  
SRR17520069. 13065812  
SRR17520069. 13065813  
SRR17520069. 13065814  
SRR17520069. 13065815  
SRR17520069. 13065816  
SRR17520069. 13065817  
SRR17520069. 13065818  
SRR17520069. 13065819  
SRR17520069. 13065820  
SRR17520069. 13065821  
SRR17520069. 13065822  
SRR17520069. 13065823  
SRR17520069. 13073754  
SRR17520069. 13086776  
SRR17520069. 13086777  
SRR17520069. 13086778  
SRR17520069. 13086779  
SRR17520069. 13086780  
SRR17520069. 13086781  
SRR17520069. 13086782  
SRR17520069. 13086783  
SRR17520069. 13086784  
SRR17520069. 13086786  
SRR17520069. 13086787  
SRR17520069. 13086788  
SRR17520069. 13086789  
SRR17520069. 13086790  
SRR17520069. 13086791  
SRR17520069. 13086792  
SRR17520069. 13086793  
SRR17520069. 13086794

SRR17520069.13086795  
SRR17520069.13086796  
SRR17520069.13090273  
SRR17520069.13090274  
SRR17520069.13092631  
SRR17520069.13107052  
SRR17520069.13112235  
SRR17520069.13112236  
SRR17520069.13112237  
SRR17520069.13112238  
SRR17520069.13112239  
SRR17520069.13112240  
SRR17520069.13112241  
SRR17520069.13112242  
SRR17520069.13112243  
SRR17520069.13112244  
SRR17520069.13112245  
SRR17520069.13112246  
SRR17520069.13112248  
SRR17520069.13112249  
SRR17520069.13112250  
SRR17520069.13112251  
SRR17520069.13112252  
SRR17520069.13112253  
SRR17520069.13112254  
SRR17520069.13112255  
SRR17520069.13112256  
SRR17520069.13112257  
SRR17520069.13112258  
SRR17520069.13112259  
SRR17520069.13112260  
SRR17520069.13112261  
SRR17520069.13112262  
SRR17520069.13112263  
SRR17520069.13112264  
SRR17520069.13112265  
SRR17520069.13112266  
SRR17520069.13112267  
SRR17520069.13112268  
SRR17520069.13112270  
SRR17520069.13112271  
SRR17520069.13112272  
SRR17520069.13112273  
SRR17520069.13112275  
SRR17520069.13112276  
SRR17520069.13112277  
SRR17520069.13112278

SRR17520069. 13112279  
SRR17520069. 13112280  
SRR17520069. 13112281  
SRR17520069. 13112282  
SRR17520069. 13112283  
SRR17520069. 13112285  
SRR17520069. 13112286  
SRR17520069. 13112287  
SRR17520069. 13112288  
SRR17520069. 13112289  
SRR17520069. 13112290  
SRR17520069. 13112291  
SRR17520069. 13112292  
SRR17520069. 13112293  
SRR17520069. 13112294  
SRR17520069. 13112295  
SRR17520069. 13112296  
SRR17520069. 13112297  
SRR17520069. 13112298  
SRR17520069. 13112299  
SRR17520069. 13112300  
SRR17520069. 13112301  
SRR17520069. 13112302  
SRR17520069. 13112303  
SRR17520069. 13112304  
SRR17520069. 13112305  
SRR17520069. 13112306  
SRR17520069. 13112307  
SRR17520069. 13112308  
SRR17520069. 13128645  
SRR17520069. 13128647  
SRR17520069. 13128648  
SRR17520069. 13128649  
SRR17520069. 13128650  
SRR17520069. 13128651  
SRR17520069. 13128652  
SRR17520069. 13128653  
SRR17520069. 13128655  
SRR17520069. 13128657  
SRR17520069. 13128658  
SRR17520069. 13128659  
SRR17520069. 13128660  
SRR17520069. 13128661  
SRR17520069. 13128662  
SRR17520069. 13128663  
SRR17520069. 13128664  
SRR17520069. 13128665

SRR17520069. 13128667  
SRR17520069. 13128668  
SRR17520069. 13128669  
SRR17520069. 13141144  
SRR17520069. 13144473  
SRR17520069. 13144474  
SRR17520069. 13144475  
SRR17520069. 13144476  
SRR17520069. 13144477  
SRR17520069. 13144479  
SRR17520069. 13144480  
SRR17520069. 13144482  
SRR17520069. 13144483  
SRR17520069. 13144484  
SRR17520069. 13144485  
SRR17520069. 13144486  
SRR17520069. 13144487  
SRR17520069. 13144488  
SRR17520069. 13173167  
SRR17520069. 13173168  
SRR17520069. 13173169  
SRR17520069. 13173170  
SRR17520069. 13173171  
SRR17520069. 13173172  
SRR17520069. 13173173  
SRR17520069. 13173174  
SRR17520069. 13173175  
SRR17520069. 13173177  
SRR17520069. 13173178  
SRR17520069. 13173179  
SRR17520069. 13173180  
SRR17520069. 13173181  
SRR17520069. 13173182  
SRR17520069. 13173183  
SRR17520069. 13173184  
SRR17520069. 13173185  
SRR17520069. 13173186  
SRR17520069. 13173187  
SRR17520069. 13173189  
SRR17520069. 13173190  
SRR17520069. 13173191  
SRR17520069. 13173192  
SRR17520069. 13173193  
SRR17520069. 13173194  
SRR17520069. 13173195  
SRR17520069. 13173196  
SRR17520069. 13173197

SRR17520069. 13173198  
SRR17520069. 13173199  
SRR17520069. 13173200  
SRR17520069. 13173201  
SRR17520069. 13173202  
SRR17520069. 13173203  
SRR17520069. 13173204  
SRR17520069. 13173205  
SRR17520069. 13173206  
SRR17520069. 13173207  
SRR17520069. 13173208  
SRR17520069. 13173209  
SRR17520069. 13173210  
SRR17520069. 13173211  
SRR17520069. 13173212  
SRR17520069. 13173213  
SRR17520069. 13173214  
SRR17520069. 13173215  
SRR17520069. 13173216  
SRR17520069. 13173217  
SRR17520069. 13173218  
SRR17520069. 13173219  
SRR17520069. 13173220  
SRR17520069. 13173221  
SRR17520069. 13173222  
SRR17520069. 13173223  
SRR17520069. 13173224  
SRR17520069. 13173225  
SRR17520069. 13173226  
SRR17520069. 13173227  
SRR17520069. 13173228  
SRR17520069. 13173229  
SRR17520069. 13173230  
SRR17520069. 13173231  
SRR17520069. 13173232  
SRR17520069. 13173233  
SRR17520069. 13173234  
SRR17520069. 13173235  
SRR17520069. 13173236  
SRR17520069. 13173237  
SRR17520069. 13173238  
SRR17520069. 13173239  
SRR17520069. 13173241  
SRR17520069. 13173242  
SRR17520069. 13173243  
SRR17520069. 13173244  
SRR17520069. 13173245



SRR17520069. 13173246  
SRR17520069. 13173247  
SRR17520069. 13173248  
SRR17520069. 13173249  
SRR17520069. 13173250  
SRR17520069. 13173251  
SRR17520069. 13173252  
SRR17520069. 13173253  
SRR17520069. 13173254  
SRR17520069. 13173255  
SRR17520069. 13173256  
SRR17520069. 13173257  
SRR17520069. 13173259  
SRR17520069. 13173260  
SRR17520069. 13173261  
SRR17520069. 13173262  
SRR17520069. 13173263  
SRR17520069. 13173264  
SRR17520069. 13173265  
SRR17520069. 13173266  
SRR17520069. 13173268  
SRR17520069. 13173269  
SRR17520069. 13173270  
SRR17520069. 13173271  
SRR17520069. 13173272  
SRR17520069. 13173273  
SRR17520069. 13173274  
SRR17520069. 13173275  
SRR17520069. 13173276  
SRR17520069. 13173277  
SRR17520069. 13173278  
SRR17520069. 13173279  
SRR17520069. 13173280  
SRR17520069. 13173281  
SRR17520069. 13173282  
SRR17520069. 13173283  
SRR17520069. 13173284  
SRR17520069. 13173285  
SRR17520069. 13173286  
SRR17520069. 13173287  
SRR17520069. 13173288  
SRR17520069. 13173289  
SRR17520069. 13173290  
SRR17520069. 13173291  
SRR17520069. 13173292  
SRR17520069. 13173293  
SRR17520069. 13173294

SRR17520069. 13177682  
SRR17520069. 13177683  
SRR17520069. 13177685  
SRR17520069. 13177686  
SRR17520069. 13177687  
SRR17520069. 13177688  
SRR17520069. 13177689  
SRR17520069. 13177691  
SRR17520069. 13177693  
SRR17520069. 13177695  
SRR17520069. 13177697  
SRR17520069. 13177699  
SRR17520069. 13177701  
SRR17520069. 13177703  
SRR17520069. 13177707  
SRR17520069. 13179625  
SRR17520069. 13179626  
SRR17520069. 13179627  
SRR17520069. 13179628  
SRR17520069. 13179629  
SRR17520069. 13179630  
SRR17520069. 13179631  
SRR17520069. 13179632  
SRR17520069. 13179633  
SRR17520069. 13179634  
SRR17520069. 13179635  
SRR17520069. 13179636  
SRR17520069. 13179637  
SRR17520069. 13179638  
SRR17520069. 13179639  
SRR17520069. 13179640  
SRR17520069. 13179641  
SRR17520069. 13179642  
SRR17520069. 13179643  
SRR17520069. 13179644  
SRR17520069. 13179645  
SRR17520069. 13179646  
SRR17520069. 13179647  
SRR17520069. 13179648  
SRR17520069. 13179649  
SRR17520069. 13179650  
SRR17520069. 13179651  
SRR17520069. 13179652  
SRR17520069. 13179653  
SRR17520069. 13179654  
SRR17520069. 13179655  
SRR17520069. 13179656

SRR17520069. 13179657  
SRR17520069. 13179658  
SRR17520069. 13179659  
SRR17520069. 13179660  
SRR17520069. 13179661  
SRR17520069. 13179662  
SRR17520069. 13179663  
SRR17520069. 13179664  
SRR17520069. 13179665  
SRR17520069. 13179666  
SRR17520069. 13179667  
SRR17520069. 13179668  
SRR17520069. 13179669  
SRR17520069. 13179670  
SRR17520069. 13179671  
SRR17520069. 13179672  
SRR17520069. 13179673  
SRR17520069. 13179674  
SRR17520069. 13179675  
SRR17520069. 13179676  
SRR17520069. 13179677  
SRR17520069. 13179678  
SRR17520069. 13179679  
SRR17520069. 13179680  
SRR17520069. 13179681  
SRR17520069. 13179682  
SRR17520069. 13179683  
SRR17520069. 13179684  
SRR17520069. 13179686  
SRR17520069. 13179687  
SRR17520069. 13179688  
SRR17520069. 13179689  
SRR17520069. 13179690  
SRR17520069. 13179691  
SRR17520069. 13179692  
SRR17520069. 13179693  
SRR17520069. 13179694  
SRR17520069. 13179695  
SRR17520069. 13179696  
SRR17520069. 13179697  
SRR17520069. 13179698  
SRR17520069. 13179699  
SRR17520069. 13179700  
SRR17520069. 13179701  
SRR17520069. 13179702  
SRR17520069. 13179703  
SRR17520069. 13179704

SRR17520069.13179707  
SRR17520069.13179708  
SRR17520069.13179709  
SRR17520069.13179710  
SRR17520069.13179711  
SRR17520069.13179712  
SRR17520069.13179713  
SRR17520069.13179714  
SRR17520069.13179715  
SRR17520069.13179716  
SRR17520069.13179717  
SRR17520069.13179718  
SRR17520069.13179719  
SRR17520069.13179720  
SRR17520069.13179721  
SRR17520069.13179722  
SRR17520069.13179723  
SRR17520069.13179724  
SRR17520069.13179725  
SRR17520069.13179726  
SRR17520069.13179727  
SRR17520069.13179728  
SRR17520069.13179729  
SRR17520069.13179730  
SRR17520069.13179731  
SRR17520069.13179732  
SRR17520069.13179733  
SRR17520069.13179734  
SRR17520069.13179735  
SRR17520069.13179736  
SRR17520069.13179737  
SRR17520069.13179738  
SRR17520069.13179739  
SRR17520069.13179740  
SRR17520069.13179741  
SRR17520069.13179742  
SRR17520069.13179743  
SRR17520069.13179744  
SRR17520069.13179745  
SRR17520069.13179746  
SRR17520069.13179747  
SRR17520069.13179748  
SRR17520069.13179749  
SRR17520069.13179750  
SRR17520069.13179751  
SRR17520069.13179752  
SRR17520069.13179753

SRR17520069. 13179755  
SRR17520069. 13179756  
SRR17520069. 13179757  
SRR17520069. 13179758  
SRR17520069. 13179759  
SRR17520069. 13179760  
SRR17520069. 13179761  
SRR17520069. 13179762  
SRR17520069. 13179763  
SRR17520069. 13179764  
SRR17520069. 13179765  
SRR17520069. 13179766  
SRR17520069. 13179767  
SRR17520069. 13179768  
SRR17520069. 13179769  
SRR17520069. 13179770  
SRR17520069. 13179771  
SRR17520069. 13179772  
SRR17520069. 13179773  
SRR17520069. 13179774  
SRR17520069. 13179775  
SRR17520069. 13179776  
SRR17520069. 13179777  
SRR17520069. 13179778  
SRR17520069. 13179779  
SRR17520069. 13179780  
SRR17520069. 13179781  
SRR17520069. 13179782  
SRR17520069. 13179783  
SRR17520069. 13179784  
SRR17520069. 13179785  
SRR17520069. 13179786  
SRR17520069. 13179787  
SRR17520069. 13179788  
SRR17520069. 13179789  
SRR17520069. 13179790  
SRR17520069. 13179791  
SRR17520069. 13179792  
SRR17520069. 13179793  
SRR17520069. 13189906  
SRR17520069. 13189907  
SRR17520069. 13189908  
SRR17520069. 13189909  
SRR17520069. 13189910  
SRR17520069. 13189911  
SRR17520069. 13189912  
SRR17520069. 13189913

SRR17520069.13189914  
SRR17520069.13189915  
SRR17520069.13189916  
SRR17520069.13189917  
SRR17520069.13189918  
SRR17520069.13189919  
SRR17520069.13189920  
SRR17520069.13189921  
SRR17520069.13189922  
SRR17520069.13189923  
SRR17520069.13189924  
SRR17520069.13189925  
SRR17520069.13189926  
SRR17520069.13189927  
SRR17520069.13189928  
SRR17520069.13189929  
SRR17520069.13189930  
SRR17520069.13189931  
SRR17520069.13189932  
SRR17520069.13189933  
SRR17520069.13189934  
SRR17520069.13189936  
SRR17520069.13189937  
SRR17520069.13189938  
SRR17520069.13189939  
SRR17520069.13189940  
SRR17520069.13189941  
SRR17520069.13189942  
SRR17520069.13189943  
SRR17520069.13189944  
SRR17520069.13189945  
SRR17520069.13189946  
SRR17520069.13189947  
SRR17520069.13189948  
SRR17520069.13189949  
SRR17520069.13189950  
SRR17520069.13189951  
SRR17520069.13189952  
SRR17520069.13189953  
SRR17520069.13189954  
SRR17520069.13189955  
SRR17520069.13189956  
SRR17520069.13189957  
SRR17520069.13189958  
SRR17520069.13189959  
SRR17520069.13189960  
SRR17520069.13189961

SRR17520069. 13189962  
SRR17520069. 13189963  
SRR17520069. 13189964  
SRR17520069. 13189965  
SRR17520069. 13189966  
SRR17520069. 13189967  
SRR17520069. 13189968  
SRR17520069. 13189969  
SRR17520069. 13189970  
SRR17520069. 13189971  
SRR17520069. 13189972  
SRR17520069. 13189973  
SRR17520069. 13189974  
SRR17520069. 13189975  
SRR17520069. 13189976  
SRR17520069. 13189977  
SRR17520069. 13189978  
SRR17520069. 13189979  
SRR17520069. 13189980  
SRR17520069. 13189981  
SRR17520069. 13189982  
SRR17520069. 13189983  
SRR17520069. 13189984  
SRR17520069. 13189985  
SRR17520069. 13189986  
SRR17520069. 13189987  
SRR17520069. 13189988  
SRR17520069. 13189989  
SRR17520069. 13189990  
SRR17520069. 13189991  
SRR17520069. 13189992  
SRR17520069. 13189993  
SRR17520069. 13189994  
SRR17520069. 13189995  
SRR17520069. 13189996  
SRR17520069. 13189997  
SRR17520069. 13189998  
SRR17520069. 13189999  
SRR17520069. 13190001  
SRR17520069. 13190002  
SRR17520069. 13190003  
SRR17520069. 13190004  
SRR17520069. 13190005  
SRR17520069. 13190006  
SRR17520069. 13190007  
SRR17520069. 13190008  
SRR17520069. 13190009

SRR17520069.13190010  
SRR17520069.13190011  
SRR17520069.13190012  
SRR17520069.13190013  
SRR17520069.13190014  
SRR17520069.13190015  
SRR17520069.13190016  
SRR17520069.13190018  
SRR17520069.13190019  
SRR17520069.13190020  
SRR17520069.13190021  
SRR17520069.13213558  
SRR17520069.13213560  
SRR17520069.13213561  
SRR17520069.13213562  
SRR17520069.13213563  
SRR17520069.13213564  
SRR17520069.13213565  
SRR17520069.13213566  
SRR17520069.13213567  
SRR17520069.13213568  
SRR17520069.13213569  
SRR17520069.13213571  
SRR17520069.13213572  
SRR17520069.13213573  
SRR17520069.13213574  
SRR17520069.13213575  
SRR17520069.13213576  
SRR17520069.13213577  
SRR17520069.13213578  
SRR17520069.13213580  
SRR17520069.13213581  
SRR17520069.13213582  
SRR17520069.13213583  
SRR17520069.13213584  
SRR17520069.13213585  
SRR17520069.13213586  
SRR17520069.13213587  
SRR17520069.13213588  
SRR17520069.13213589  
SRR17520069.13213590  
SRR17520069.13213591  
SRR17520069.13213592  
SRR17520069.13213593  
SRR17520069.13213594  
SRR17520069.13213595  
SRR17520069.13213596



SRR17520069. 13213597  
SRR17520069. 13213598  
SRR17520069. 13213599  
SRR17520069. 13213600  
SRR17520069. 13213601  
SRR17520069. 13213602  
SRR17520069. 13213603  
SRR17520069. 13213604  
SRR17520069. 13213605  
SRR17520069. 13213606  
SRR17520069. 13213607  
SRR17520069. 13213608  
SRR17520069. 13213609  
SRR17520069. 13213610  
SRR17520069. 13213611  
SRR17520069. 13213612  
SRR17520069. 13213613  
SRR17520069. 13213614  
SRR17520069. 13213616  
SRR17520069. 13213617  
SRR17520069. 13213618  
SRR17520069. 13213619  
SRR17520069. 13213620  
SRR17520069. 13213621  
SRR17520069. 13213622  
SRR17520069. 13213623  
SRR17520069. 13213624  
SRR17520069. 13213625  
SRR17520069. 13213626  
SRR17520069. 13213627  
SRR17520069. 13213628  
SRR17520069. 13213629  
SRR17520069. 13213630  
SRR17520069. 13213631  
SRR17520069. 13213632  
SRR17520069. 13213633  
SRR17520069. 13213634  
SRR17520069. 13213635  
SRR17520069. 13213636  
SRR17520069. 13213637  
SRR17520069. 13213638  
SRR17520069. 13213639  
SRR17520069. 13213640  
SRR17520069. 13213641  
SRR17520069. 13213642  
SRR17520069. 13213643  
SRR17520069. 13213644

SRR17520069. 13213645  
SRR17520069. 13213646  
SRR17520069. 13213647  
SRR17520069. 13213648  
SRR17520069. 13213649  
SRR17520069. 13213650  
SRR17520069. 13213651  
SRR17520069. 13213652  
SRR17520069. 13213653  
SRR17520069. 13213654  
SRR17520069. 13213655  
SRR17520069. 13213656  
SRR17520069. 13213657  
SRR17520069. 13213658  
SRR17520069. 13213660  
SRR17520069. 13213661  
SRR17520069. 13213662  
SRR17520069. 13213663  
SRR17520069. 13213664  
SRR17520069. 13213665  
SRR17520069. 13213666  
SRR17520069. 13213667  
SRR17520069. 13213668  
SRR17520069. 13213669  
SRR17520069. 13213670  
SRR17520069. 13233936  
SRR17520069. 13233999  
SRR17520069. 13247063  
SRR17520069. 13261862  
SRR17520069. 13263594  
SRR17520069. 13263595  
SRR17520069. 13263598  
SRR17520069. 13263599  
SRR17520069. 13263600  
SRR17520069. 13263601  
SRR17520069. 13263602  
SRR17520069. 13263604  
SRR17520069. 13263605  
SRR17520069. 13263606  
SRR17520069. 13263607  
SRR17520069. 13263610  
SRR17520069. 13263611  
SRR17520069. 13263613  
SRR17520069. 13263614  
SRR17520069. 13263615  
SRR17520069. 13263616  
SRR17520069. 13263617

SRR17520069. 13263618  
SRR17520069. 13271606  
SRR17520069. 13271607  
SRR17520069. 13271608  
SRR17520069. 13271609  
SRR17520069. 13271610  
SRR17520069. 13271611  
SRR17520069. 13271612  
SRR17520069. 13271613  
SRR17520069. 13271614  
SRR17520069. 13271615  
SRR17520069. 13271616  
SRR17520069. 13271617  
SRR17520069. 13271618  
SRR17520069. 13271619  
SRR17520069. 13271620  
SRR17520069. 13271621  
SRR17520069. 13271622  
SRR17520069. 13271623  
SRR17520069. 13271624  
SRR17520069. 13271625  
SRR17520069. 13271626  
SRR17520069. 13271627  
SRR17520069. 13271628  
SRR17520069. 13271629  
SRR17520069. 13271630  
SRR17520069. 13271631  
SRR17520069. 13271632  
SRR17520069. 13271633  
SRR17520069. 13271634  
SRR17520069. 13271635  
SRR17520069. 13271636  
SRR17520069. 13271637  
SRR17520069. 13271638  
SRR17520069. 13271639  
SRR17520069. 13271640  
SRR17520069. 13271641  
SRR17520069. 13271642  
SRR17520069. 13271643  
SRR17520069. 13271644  
SRR17520069. 13271645  
SRR17520069. 13271646  
SRR17520069. 13271647  
SRR17520069. 13271648  
SRR17520069. 13271649  
SRR17520069. 13271650  
SRR17520069. 13271651

SRR17520069. 13271652  
SRR17520069. 13271653  
SRR17520069. 13271654  
SRR17520069. 13271655  
SRR17520069. 13271656  
SRR17520069. 13271657  
SRR17520069. 13271658  
SRR17520069. 13271659  
SRR17520069. 13271660  
SRR17520069. 13271661  
SRR17520069. 13271667  
SRR17520069. 13271668  
SRR17520069. 13278636  
SRR17520069. 13278783  
SRR17520069. 13278784  
SRR17520069. 13278785  
SRR17520069. 13278786  
SRR17520069. 13278787  
SRR17520069. 13278788  
SRR17520069. 13278789  
SRR17520069. 13278790  
SRR17520069. 13278791  
SRR17520069. 13278792  
SRR17520069. 13278793  
SRR17520069. 13278794  
SRR17520069. 13278795  
SRR17520069. 13278796  
SRR17520069. 13278797  
SRR17520069. 13278798  
SRR17520069. 13278799  
SRR17520069. 13278800  
SRR17520069. 13278801  
SRR17520069. 13278802  
SRR17520069. 13278803  
SRR17520069. 13281409  
SRR17520069. 13281410  
SRR17520069. 13281411  
SRR17520069. 13281412  
SRR17520069. 13281413  
SRR17520069. 13281414  
SRR17520069. 13281415  
SRR17520069. 13281416  
SRR17520069. 13282110  
SRR17520069. 13286242  
SRR17520069. 13304282  
SRR17520069. 13307222  
SRR17520069. 13307223

SRR17520069. 13310138  
SRR17520069. 13310139  
SRR17520069. 13310140  
SRR17520069. 13310141  
SRR17520069. 13310142  
SRR17520069. 13310143  
SRR17520069. 13310144  
SRR17520069. 13310145  
SRR17520069. 13310147  
SRR17520069. 13310148  
SRR17520069. 13310149  
SRR17520069. 13310150  
SRR17520069. 13310151  
SRR17520069. 13310152  
SRR17520069. 13310153  
SRR17520069. 13310154  
SRR17520069. 13310155  
SRR17520069. 13310156  
SRR17520069. 13311429  
SRR17520069. 13317022  
SRR17520069. 13319545  
SRR17520069. 13319546  
SRR17520069. 13319547  
SRR17520069. 13319548  
SRR17520069. 13319549  
SRR17520069. 13336885  
SRR17520069. 13336886  
SRR17520069. 13336887  
SRR17520069. 13336888  
SRR17520069. 13336889  
SRR17520069. 13336890  
SRR17520069. 13336891  
SRR17520069. 13336892  
SRR17520069. 13336893  
SRR17520069. 13336894  
SRR17520069. 13336895  
SRR17520069. 13336896  
SRR17520069. 13336897  
SRR17520069. 13336898  
SRR17520069. 13336899  
SRR17520069. 13336900  
SRR17520069. 13336901  
SRR17520069. 13336902  
SRR17520069. 13336903  
SRR17520069. 13336904  
SRR17520069. 13336905  
SRR17520069. 13336906

SRR17520069. 13336907  
SRR17520069. 13336908  
SRR17520069. 13336909  
SRR17520069. 13336910  
SRR17520069. 13336911  
SRR17520069. 13336912  
SRR17520069. 13336913  
SRR17520069. 13336914  
SRR17520069. 13336915  
SRR17520069. 13336916  
SRR17520069. 13336917  
SRR17520069. 13336918  
SRR17520069. 13336919  
SRR17520069. 13336920  
SRR17520069. 13336921  
SRR17520069. 13336922  
SRR17520069. 13336923  
SRR17520069. 13336924  
SRR17520069. 13336925  
SRR17520069. 13336926  
SRR17520069. 13336927  
SRR17520069. 13336928  
SRR17520069. 13336929  
SRR17520069. 13336930  
SRR17520069. 13336931  
SRR17520069. 13336932  
SRR17520069. 13336933  
SRR17520069. 13336934  
SRR17520069. 13336935  
SRR17520069. 13336936  
SRR17520069. 13336937  
SRR17520069. 13336938  
SRR17520069. 13336939  
SRR17520069. 13336940  
SRR17520069. 13336941  
SRR17520069. 13336942  
SRR17520069. 13336943  
SRR17520069. 13336944  
SRR17520069. 13336945  
SRR17520069. 13336946  
SRR17520069. 13336947  
SRR17520069. 13336948  
SRR17520069. 13336949  
SRR17520069. 13336950  
SRR17520069. 13336951  
SRR17520069. 13336952  
SRR17520069. 13336953

SRR17520069. 13336954  
SRR17520069. 13336955  
SRR17520069. 13336956  
SRR17520069. 13336957  
SRR17520069. 13336958  
SRR17520069. 13336959  
SRR17520069. 13336960  
SRR17520069. 13336961  
SRR17520069. 13336962  
SRR17520069. 13336963  
SRR17520069. 13336964  
SRR17520069. 13336965  
SRR17520069. 13336966  
SRR17520069. 13336967  
SRR17520069. 13336968  
SRR17520069. 13336969  
SRR17520069. 13336970  
SRR17520069. 13336971  
SRR17520069. 13336972  
SRR17520069. 13336973  
SRR17520069. 13336974  
SRR17520069. 13336975  
SRR17520069. 13336976  
SRR17520069. 13336977  
SRR17520069. 13336978  
SRR17520069. 13336979  
SRR17520069. 13336980  
SRR17520069. 13336981  
SRR17520069. 13336982  
SRR17520069. 13336983  
SRR17520069. 13336984  
SRR17520069. 13336985  
SRR17520069. 13336986  
SRR17520069. 13336987  
SRR17520069. 13336988  
SRR17520069. 13336989  
SRR17520069. 13336990  
SRR17520069. 13336991  
SRR17520069. 13336992  
SRR17520069. 13336993  
SRR17520069. 13336994  
SRR17520069. 13336995  
SRR17520069. 13336996  
SRR17520069. 13336997  
SRR17520069. 13336998  
SRR17520069. 13336999  
SRR17520069. 13337000

SRR17520069. 13337001  
SRR17520069. 13337002  
SRR17520069. 13337003  
SRR17520069. 13337004  
SRR17520069. 13337005  
SRR17520069. 13337006  
SRR17520069. 13337007  
SRR17520069. 13337008  
SRR17520069. 13337009  
SRR17520069. 13337010  
SRR17520069. 13337011  
SRR17520069. 13337012  
SRR17520069. 13337013  
SRR17520069. 13337014  
SRR17520069. 13337015  
SRR17520069. 13337016  
SRR17520069. 13337017  
SRR17520069. 13337018  
SRR17520069. 13337019  
SRR17520069. 13337020  
SRR17520069. 13337021  
SRR17520069. 13337022  
SRR17520069. 13337023  
SRR17520069. 13337024  
SRR17520069. 13337025  
SRR17520069. 13337026  
SRR17520069. 13337027  
SRR17520069. 13337028  
SRR17520069. 13337029  
SRR17520069. 13337030  
SRR17520069. 13337031  
SRR17520069. 13337032  
SRR17520069. 13337033  
SRR17520069. 13345430  
SRR17520069. 13345456  
SRR17520069. 13348625  
SRR17520069. 13354742  
SRR17520069. 13354743  
SRR17520069. 13354744  
SRR17520069. 13354745  
SRR17520069. 13354746  
SRR17520069. 13354747  
SRR17520069. 13354748  
SRR17520069. 13354749  
SRR17520069. 13354750  
SRR17520069. 13354752  
SRR17520069. 13354753



SRR17520069. 13354754  
SRR17520069. 13354755  
SRR17520069. 13354756  
SRR17520069. 13354757  
SRR17520069. 13354758  
SRR17520069. 13354759  
SRR17520069. 13354760  
SRR17520069. 13354762  
SRR17520069. 13354763  
SRR17520069. 13354764  
SRR17520069. 13354765  
SRR17520069. 13354766  
SRR17520069. 13354767  
SRR17520069. 13354768  
SRR17520069. 13354769  
SRR17520069. 13354770  
SRR17520069. 13354771  
SRR17520069. 13354772  
SRR17520069. 13354773  
SRR17520069. 13354774  
SRR17520069. 13354775  
SRR17520069. 13354776  
SRR17520069. 13354777  
SRR17520069. 13354778  
SRR17520069. 13354779  
SRR17520069. 13354780  
SRR17520069. 13354781  
SRR17520069. 13354782  
SRR17520069. 13354783  
SRR17520069. 13354784  
SRR17520069. 13354785  
SRR17520069. 13354786  
SRR17520069. 13354787  
SRR17520069. 13354788  
SRR17520069. 13354789  
SRR17520069. 13354790  
SRR17520069. 13354791  
SRR17520069. 13354792  
SRR17520069. 13354793  
SRR17520069. 13354794  
SRR17520069. 13354795  
SRR17520069. 13354796  
SRR17520069. 13354797  
SRR17520069. 13354798  
SRR17520069. 13354799  
SRR17520069. 13354800  
SRR17520069. 13354801

SRR17520069. 13354802  
SRR17520069. 13354803  
SRR17520069. 13354804  
SRR17520069. 13354805  
SRR17520069. 13354806  
SRR17520069. 13354807  
SRR17520069. 13354808  
SRR17520069. 13354809  
SRR17520069. 13354810  
SRR17520069. 13354811  
SRR17520069. 13354812  
SRR17520069. 13354813  
SRR17520069. 13354814  
SRR17520069. 13354815  
SRR17520069. 13354816  
SRR17520069. 13354817  
SRR17520069. 13354818  
SRR17520069. 13354819  
SRR17520069. 13354820  
SRR17520069. 13354821  
SRR17520069. 13354822  
SRR17520069. 13354823  
SRR17520069. 13354824  
SRR17520069. 13354825  
SRR17520069. 13354827  
SRR17520069. 13354828  
SRR17520069. 13354829  
SRR17520069. 13354830  
SRR17520069. 13354831  
SRR17520069. 13354832  
SRR17520069. 13354833  
SRR17520069. 13354834  
SRR17520069. 13354835  
SRR17520069. 13354836  
SRR17520069. 13354837  
SRR17520069. 13354838  
SRR17520069. 13354839  
SRR17520069. 13354840  
SRR17520069. 13354841  
SRR17520069. 13390505  
SRR17520069. 13390506  
SRR17520069. 13390507  
SRR17520069. 13390508  
SRR17520069. 13390509  
SRR17520069. 13390510  
SRR17520069. 13390511  
SRR17520069. 13390512

SRR17520069.13390513  
SRR17520069.13390514  
SRR17520069.13390515  
SRR17520069.13390516  
SRR17520069.13390517  
SRR17520069.13390518  
SRR17520069.13390519  
SRR17520069.13390520  
SRR17520069.13390521  
SRR17520069.13390522  
SRR17520069.13390524  
SRR17520069.13390526  
SRR17520069.13396558  
SRR17520069.13400958  
SRR17520069.13400997  
SRR17520069.13415300  
SRR17520069.13415320  
SRR17520069.13415338  
SRR17520069.13415348  
SRR17520069.13429703  
SRR17520069.13460758  
SRR17520069.13460759  
SRR17520069.13460761  
SRR17520069.13460762  
SRR17520069.13460763  
SRR17520069.13460764  
SRR17520069.13460765  
SRR17520069.13460766  
SRR17520069.13460767  
SRR17520069.13460768  
SRR17520069.13460769  
SRR17520069.13463363  
SRR17520069.13470160  
SRR17520069.13470161  
SRR17520069.13470162  
SRR17520069.13470163  
SRR17520069.13470164  
SRR17520069.13470165  
SRR17520069.13470166  
SRR17520069.13470167  
SRR17520069.13470168  
SRR17520069.13470169  
SRR17520069.13470170  
SRR17520069.13470171  
SRR17520069.13470172  
SRR17520069.13470173  
SRR17520069.13470174

SRR17520069. 13470175  
SRR17520069. 13470176  
SRR17520069. 13470177  
SRR17520069. 13470179  
SRR17520069. 13470180  
SRR17520069. 13470181  
SRR17520069. 13470182  
SRR17520069. 13470183  
SRR17520069. 13470184  
SRR17520069. 13470185  
SRR17520069. 13470186  
SRR17520069. 13470187  
SRR17520069. 13470188  
SRR17520069. 13470189  
SRR17520069. 13470190  
SRR17520069. 13470191  
SRR17520069. 13470192  
SRR17520069. 13470193  
SRR17520069. 13470194  
SRR17520069. 13470195  
SRR17520069. 13470196  
SRR17520069. 13470197  
SRR17520069. 13470198  
SRR17520069. 13470199  
SRR17520069. 13470200  
SRR17520069. 13470201  
SRR17520069. 13470202  
SRR17520069. 13470203  
SRR17520069. 13470204  
SRR17520069. 13470205  
SRR17520069. 13470206  
SRR17520069. 13477072  
SRR17520069. 13478297  
SRR17520069. 13484070  
SRR17520069. 13484071  
SRR17520069. 13484072  
SRR17520069. 13484074  
SRR17520069. 13484077  
SRR17520069. 13484079  
SRR17520069. 13484082  
SRR17520069. 13484083  
SRR17520069. 13484085  
SRR17520069. 13484086  
SRR17520069. 13484087  
SRR17520069. 13484088  
SRR17520069. 13484089  
SRR17520069. 13484090

SRR17520069. 13484091  
SRR17520069. 13484092  
SRR17520069. 13484093  
SRR17520069. 13484094  
SRR17520069. 13484095  
SRR17520069. 13484096  
SRR17520069. 13484098  
SRR17520069. 13484099  
SRR17520069. 13484100  
SRR17520069. 13484101  
SRR17520069. 13484102  
SRR17520069. 13484103  
SRR17520069. 13484104  
SRR17520069. 13484105  
SRR17520069. 13484106  
SRR17520069. 13484107  
SRR17520069. 13484108  
SRR17520069. 13484109  
SRR17520069. 13484110  
SRR17520069. 13484111  
SRR17520069. 13484112  
SRR17520069. 13484113  
SRR17520069. 13484114  
SRR17520069. 13484115  
SRR17520069. 13484116  
SRR17520069. 13484117  
SRR17520069. 13484118  
SRR17520069. 13484120  
SRR17520069. 13484121  
SRR17520069. 13484122  
SRR17520069. 13486677  
SRR17520069. 13486678  
SRR17520069. 13486679  
SRR17520069. 13486680  
SRR17520069. 13486681  
SRR17520069. 13486682  
SRR17520069. 13486683  
SRR17520069. 13486684  
SRR17520069. 13486685  
SRR17520069. 13486686  
SRR17520069. 13490856  
SRR17520069. 13490860  
SRR17520069. 13490875  
SRR17520069. 13513573  
SRR17520069. 13513574  
SRR17520069. 13513575  
SRR17520069. 13513576

SRR17520069. 13513577  
SRR17520069. 13513578  
SRR17520069. 13513579  
SRR17520069. 13513580  
SRR17520069. 13513581  
SRR17520069. 13542035  
SRR17520069. 13542036  
SRR17520069. 13542037  
SRR17520069. 13542038  
SRR17520069. 13542039  
SRR17520069. 13542040  
SRR17520069. 13542041  
SRR17520069. 13542042  
SRR17520069. 13542043  
SRR17520069. 13542044  
SRR17520069. 13542045  
SRR17520069. 13542046  
SRR17520069. 13542047  
SRR17520069. 13542048  
SRR17520069. 13542049  
SRR17520069. 13542050  
SRR17520069. 13542051  
SRR17520069. 13542052  
SRR17520069. 13542053  
SRR17520069. 13542054  
SRR17520069. 13542055  
SRR17520069. 13542056  
SRR17520069. 13542057  
SRR17520069. 13542058  
SRR17520069. 13542059  
SRR17520069. 13542060  
SRR17520069. 13542061  
SRR17520069. 13542062  
SRR17520069. 13542063  
SRR17520069. 13542064  
SRR17520069. 13542065  
SRR17520069. 13542066  
SRR17520069. 13542067  
SRR17520069. 13542068  
SRR17520069. 13542069  
SRR17520069. 13542070  
SRR17520069. 13542071  
SRR17520069. 13542072  
SRR17520069. 13542073  
SRR17520069. 13542074  
SRR17520069. 13542075  
SRR17520069. 13542077

SRR17520069. 13542078  
SRR17520069. 13542079  
SRR17520069. 13542080  
SRR17520069. 13542081  
SRR17520069. 13542082  
SRR17520069. 13542083  
SRR17520069. 13542084  
SRR17520069. 13542085  
SRR17520069. 13542086  
SRR17520069. 13542087  
SRR17520069. 13542088  
SRR17520069. 13542089  
SRR17520069. 13542090  
SRR17520069. 13542091  
SRR17520069. 13542092  
SRR17520069. 13542093  
SRR17520069. 13542094  
SRR17520069. 13542095  
SRR17520069. 13542096  
SRR17520069. 13542097  
SRR17520069. 13542098  
SRR17520069. 13542099  
SRR17520069. 13542100  
SRR17520069. 13542101  
SRR17520069. 13542102  
SRR17520069. 13542103  
SRR17520069. 13542104  
SRR17520069. 13542105  
SRR17520069. 13542106  
SRR17520069. 13542107  
SRR17520069. 13542108  
SRR17520069. 13542109  
SRR17520069. 13542110  
SRR17520069. 13542111  
SRR17520069. 13542112  
SRR17520069. 13542113  
SRR17520069. 13542114  
SRR17520069. 13542115  
SRR17520069. 13542116  
SRR17520069. 13542117  
SRR17520069. 13542118  
SRR17520069. 13542119  
SRR17520069. 13542120  
SRR17520069. 13542121  
SRR17520069. 13542122  
SRR17520069. 13542123  
SRR17520069. 13542124

SRR17520069. 13542125  
SRR17520069. 13542126  
SRR17520069. 13542127  
SRR17520069. 13542128  
SRR17520069. 13542129  
SRR17520069. 13542130  
SRR17520069. 13542131  
SRR17520069. 13542133  
SRR17520069. 13542134  
SRR17520069. 13542135  
SRR17520069. 13542136  
SRR17520069. 13542137  
SRR17520069. 13542138  
SRR17520069. 13542139  
SRR17520069. 13542140  
SRR17520069. 13542141  
SRR17520069. 13542142  
SRR17520069. 13542143  
SRR17520069. 13542144  
SRR17520069. 13542145  
SRR17520069. 13542146  
SRR17520069. 13542147  
SRR17520069. 13542148  
SRR17520069. 13542149  
SRR17520069. 13542150  
SRR17520069. 13542151  
SRR17520069. 13542152  
SRR17520069. 13542154  
SRR17520069. 13542155  
SRR17520069. 13542156  
SRR17520069. 13542157  
SRR17520069. 13542158  
SRR17520069. 13542159  
SRR17520069. 13542160  
SRR17520069. 13542161  
SRR17520069. 13542162  
SRR17520069. 13542163  
SRR17520069. 13542164  
SRR17520069. 13542165  
SRR17520069. 13542166  
SRR17520069. 13542167  
SRR17520069. 13542168  
SRR17520069. 13542169  
SRR17520069. 13542170  
SRR17520069. 13542171  
SRR17520069. 13542172  
SRR17520069. 13542173



SRR17520069. 13542174  
SRR17520069. 13542175  
SRR17520069. 13542176  
SRR17520069. 13542177  
SRR17520069. 13542178  
SRR17520069. 13542179  
SRR17520069. 13542180  
SRR17520069. 13542181  
SRR17520069. 13542182  
SRR17520069. 13542183  
SRR17520069. 13542184  
SRR17520069. 13542185  
SRR17520069. 13542186  
SRR17520069. 13542187  
SRR17520069. 13542188  
SRR17520069. 13542189  
SRR17520069. 13542190  
SRR17520069. 13542191  
SRR17520069. 13542192  
SRR17520069. 13542194  
SRR17520069. 13542198  
SRR17520069. 13542199  
SRR17520069. 13542200  
SRR17520069. 13542201  
SRR17520069. 13542202  
SRR17520069. 13542203  
SRR17520069. 13542204  
SRR17520069. 13542205  
SRR17520069. 13542207  
SRR17520069. 13542208  
SRR17520069. 13542209  
SRR17520069. 13542211  
SRR17520069. 13542212  
SRR17520069. 13542213  
SRR17520069. 13542214  
SRR17520069. 13542215  
SRR17520069. 13542216  
SRR17520069. 13542217  
SRR17520069. 13542218  
SRR17520069. 13542219  
SRR17520069. 13542220  
SRR17520069. 13547118  
SRR17520069. 13547119  
SRR17520069. 13547122  
SRR17520069. 13547123  
SRR17520069. 13547124  
SRR17520069. 13547125

SRR17520069. 13547126  
SRR17520069. 13547127  
SRR17520069. 13547128  
SRR17520069. 13547131  
SRR17520069. 13547132  
SRR17520069. 13547135  
SRR17520069. 13547137  
SRR17520069. 13547138  
SRR17520069. 13547139  
SRR17520069. 13547140  
SRR17520069. 13547141  
SRR17520069. 13547142  
SRR17520069. 13547143  
SRR17520069. 13547145  
SRR17520069. 13547146  
SRR17520069. 13547147  
SRR17520069. 13547148  
SRR17520069. 13547149  
SRR17520069. 13547150  
SRR17520069. 13547151  
SRR17520069. 13547152  
SRR17520069. 13547153  
SRR17520069. 13547154  
SRR17520069. 13547155  
SRR17520069. 13547156  
SRR17520069. 13547157  
SRR17520069. 13547158  
SRR17520069. 13547159  
SRR17520069. 13547160  
SRR17520069. 13547161  
SRR17520069. 13547162  
SRR17520069. 13547163  
SRR17520069. 13547164  
SRR17520069. 13547165  
SRR17520069. 13547166  
SRR17520069. 13547167  
SRR17520069. 13547168  
SRR17520069. 13547169  
SRR17520069. 13547170  
SRR17520069. 13547171  
SRR17520069. 13547172  
SRR17520069. 13547173  
SRR17520069. 13547175  
SRR17520069. 13547176  
SRR17520069. 13547177  
SRR17520069. 13547179  
SRR17520069. 13547180

SRR17520069. 13547182  
SRR17520069. 13547183  
SRR17520069. 13573297  
SRR17520069. 13581378  
SRR17520069. 13581379  
SRR17520069. 13581380  
SRR17520069. 13581381  
SRR17520069. 13581382  
SRR17520069. 13581383  
SRR17520069. 13581384  
SRR17520069. 13581385  
SRR17520069. 13581386  
SRR17520069. 13581387  
SRR17520069. 13581388  
SRR17520069. 13581389  
SRR17520069. 13581390  
SRR17520069. 13581391  
SRR17520069. 13581392  
SRR17520069. 13581393  
SRR17520069. 13581394  
SRR17520069. 13581395  
SRR17520069. 13581396  
SRR17520069. 13581397  
SRR17520069. 13581398  
SRR17520069. 13581399  
SRR17520069. 13581400  
SRR17520069. 13581401  
SRR17520069. 13581402  
SRR17520069. 13581403  
SRR17520069. 13581404  
SRR17520069. 13581405  
SRR17520069. 13581406  
SRR17520069. 13581407  
SRR17520069. 13581409  
SRR17520069. 13581410  
SRR17520069. 13581411  
SRR17520069. 13581412  
SRR17520069. 13581413  
SRR17520069. 13581414  
SRR17520069. 13581415  
SRR17520069. 13581416  
SRR17520069. 13581417  
SRR17520069. 13581418  
SRR17520069. 13581419  
SRR17520069. 13581420  
SRR17520069. 13581421  
SRR17520069. 13581422

SRR17520069. 13581423  
SRR17520069. 13581424  
SRR17520069. 13581425  
SRR17520069. 13581426  
SRR17520069. 13581427  
SRR17520069. 13581428  
SRR17520069. 13581429  
SRR17520069. 13581430  
SRR17520069. 13581431  
SRR17520069. 13581432  
SRR17520069. 13581433  
SRR17520069. 13581434  
SRR17520069. 13581435  
SRR17520069. 13581436  
SRR17520069. 13581437  
SRR17520069. 13581438  
SRR17520069. 13581440  
SRR17520069. 13581441  
SRR17520069. 13584083  
SRR17520069. 13584084  
SRR17520069. 13584090  
SRR17520069. 13584091  
SRR17520069. 13584097  
SRR17520069. 13584098  
SRR17520069. 13584100  
SRR17520069. 13584101  
SRR17520069. 13584110  
SRR17520069. 13584111  
SRR17520069. 13584114  
SRR17520069. 13584115  
SRR17520069. 13584120  
SRR17520069. 13584121  
SRR17520069. 13584122  
SRR17520069. 13584123  
SRR17520069. 13584126  
SRR17520069. 13584127  
SRR17520069. 13584129  
SRR17520069. 13584134  
SRR17520069. 13584135  
SRR17520069. 13584136  
SRR17520069. 13584137  
SRR17520069. 13584138  
SRR17520069. 13584140  
SRR17520069. 13584141  
SRR17520069. 13584143  
SRR17520069. 13584148  
SRR17520069. 13584150

SRR17520069. 13584154  
SRR17520069. 13584155  
SRR17520069. 13584158  
SRR17520069. 13584162  
SRR17520069. 13584163  
SRR17520069. 13584164  
SRR17520069. 13584165  
SRR17520069. 13584167  
SRR17520069. 13584172  
SRR17520069. 13597093  
SRR17520069. 13608953  
SRR17520069. 13618904  
SRR17520069. 13618905  
SRR17520069. 13618906  
SRR17520069. 13618907  
SRR17520069. 13618908  
SRR17520069. 13618909  
SRR17520069. 13618910  
SRR17520069. 13618911  
SRR17520069. 13618912  
SRR17520069. 13618913  
SRR17520069. 13618914  
SRR17520069. 13618915  
SRR17520069. 13618916  
SRR17520069. 13618917  
SRR17520069. 13618918  
SRR17520069. 13618919  
SRR17520069. 13618920  
SRR17520069. 13618921  
SRR17520069. 13618922  
SRR17520069. 13618923  
SRR17520069. 13618924  
SRR17520069. 13618925  
SRR17520069. 13618926  
SRR17520069. 13618927  
SRR17520069. 13618928  
SRR17520069. 13618929  
SRR17520069. 13618930  
SRR17520069. 13618933  
SRR17520069. 13618934  
SRR17520069. 13618936  
SRR17520069. 13618938  
SRR17520069. 13618939  
SRR17520069. 13618940  
SRR17520069. 13618941  
SRR17520069. 13618942  
SRR17520069. 13620973

SRR17520069. 13620974  
SRR17520069. 13620975  
SRR17520069. 13620976  
SRR17520069. 13620977  
SRR17520069. 13620978  
SRR17520069. 13620979  
SRR17520069. 13620980  
SRR17520069. 13620981  
SRR17520069. 13620982  
SRR17520069. 13620983  
SRR17520069. 13620984  
SRR17520069. 13620985  
SRR17520069. 13620986  
SRR17520069. 13620987  
SRR17520069. 13620988  
SRR17520069. 13620989  
SRR17520069. 13620990  
SRR17520069. 13620991  
SRR17520069. 13620992  
SRR17520069. 13620993  
SRR17520069. 13620994  
SRR17520069. 13620995  
SRR17520069. 13620996  
SRR17520069. 13620997  
SRR17520069. 13620998  
SRR17520069. 13620999  
SRR17520069. 13621000  
SRR17520069. 13621001  
SRR17520069. 13621002  
SRR17520069. 13621003  
SRR17520069. 13621004  
SRR17520069. 13621005  
SRR17520069. 13621006  
SRR17520069. 13621007  
SRR17520069. 13621008  
SRR17520069. 13638544  
SRR17520069. 13638545  
SRR17520069. 13638546  
SRR17520069. 13638547  
SRR17520069. 13638548  
SRR17520069. 13638549  
SRR17520069. 13638550  
SRR17520069. 13638551  
SRR17520069. 13638552  
SRR17520069. 13638553  
SRR17520069. 13638554  
SRR17520069. 13638555

SRR17520069. 13638556  
SRR17520069. 13638557  
SRR17520069. 13638558  
SRR17520069. 13640321  
SRR17520069. 13640323  
SRR17520069. 13644423  
SRR17520069. 13644424  
SRR17520069. 13644425  
SRR17520069. 13644426  
SRR17520069. 13644427  
SRR17520069. 13644428  
SRR17520069. 13644429  
SRR17520069. 13644430  
SRR17520069. 13644431  
SRR17520069. 13644432  
SRR17520069. 13644433  
SRR17520069. 13644434  
SRR17520069. 13644435  
SRR17520069. 13644436  
SRR17520069. 13644437  
SRR17520069. 13644438  
SRR17520069. 13644439  
SRR17520069. 13644440  
SRR17520069. 13644441  
SRR17520069. 13644442  
SRR17520069. 13644443  
SRR17520069. 13644444  
SRR17520069. 13644445  
SRR17520069. 13644446  
SRR17520069. 13644447  
SRR17520069. 13651356  
SRR17520069. 13651357  
SRR17520069. 13651358  
SRR17520069. 13651359  
SRR17520069. 13651360  
SRR17520069. 13651361  
SRR17520069. 13651362  
SRR17520069. 13651363  
SRR17520069. 13651364  
SRR17520069. 13651365  
SRR17520069. 13651366  
SRR17520069. 13676095  
SRR17520069. 13676107  
SRR17520069. 13676148  
SRR17520069. 13684397  
SRR17520069. 13684398  
SRR17520069. 13684399

SRR17520069. 13684400  
SRR17520069. 13684401  
SRR17520069. 13684402  
SRR17520069. 13684403  
SRR17520069. 13684404  
SRR17520069. 13684405  
SRR17520069. 13684406  
SRR17520069. 13684407  
SRR17520069. 13684408  
SRR17520069. 13684409  
SRR17520069. 13684410  
SRR17520069. 13684411  
SRR17520069. 13684412  
SRR17520069. 13684413  
SRR17520069. 13684414  
SRR17520069. 13684415  
SRR17520069. 13684416  
SRR17520069. 13684417  
SRR17520069. 13684418  
SRR17520069. 13684419  
SRR17520069. 13684420  
SRR17520069. 13684421  
SRR17520069. 13684422  
SRR17520069. 13684423  
SRR17520069. 13684424  
SRR17520069. 13684425  
SRR17520069. 13684426  
SRR17520069. 13684427  
SRR17520069. 13684428  
SRR17520069. 13684429  
SRR17520069. 13684430  
SRR17520069. 13684431  
SRR17520069. 13684432  
SRR17520069. 13684433  
SRR17520069. 13684434  
SRR17520069. 13684435  
SRR17520069. 13684436  
SRR17520069. 13684437  
SRR17520069. 13684438  
SRR17520069. 13684439  
SRR17520069. 13684440  
SRR17520069. 13684441  
SRR17520069. 13684442  
SRR17520069. 13684443  
SRR17520069. 13684444  
SRR17520069. 13684445  
SRR17520069. 13684446



SRR17520069. 13684447  
SRR17520069. 13684448  
SRR17520069. 13684449  
SRR17520069. 13684450  
SRR17520069. 13684451  
SRR17520069. 13684452  
SRR17520069. 13684453  
SRR17520069. 13684454  
SRR17520069. 13684455  
SRR17520069. 13684456  
SRR17520069. 13684457  
SRR17520069. 13684458  
SRR17520069. 13684459  
SRR17520069. 13684460  
SRR17520069. 13684461  
SRR17520069. 13684462  
SRR17520069. 13684463  
SRR17520069. 13684465  
SRR17520069. 13684466  
SRR17520069. 13684467  
SRR17520069. 13684468  
SRR17520069. 13684469  
SRR17520069. 13684470  
SRR17520069. 13684471  
SRR17520069. 13684472  
SRR17520069. 13684473  
SRR17520069. 13684474  
SRR17520069. 13684475  
SRR17520069. 13684476  
SRR17520069. 13684477  
SRR17520069. 13684478  
SRR17520069. 13684479  
SRR17520069. 13684480  
SRR17520069. 13684481  
SRR17520069. 13684482  
SRR17520069. 13684483  
SRR17520069. 13684484  
SRR17520069. 13684485  
SRR17520069. 13684486  
SRR17520069. 13684487  
SRR17520069. 13684488  
SRR17520069. 13684489  
SRR17520069. 13684490  
SRR17520069. 13684491  
SRR17520069. 13684492  
SRR17520069. 13684493  
SRR17520069. 13684495

SRR17520069. 13684496  
SRR17520069. 13684497  
SRR17520069. 13684498  
SRR17520069. 13684499  
SRR17520069. 13684500  
SRR17520069. 13684501  
SRR17520069. 13684502  
SRR17520069. 13684503  
SRR17520069. 13684504  
SRR17520069. 13684505  
SRR17520069. 13684506  
SRR17520069. 13684507  
SRR17520069. 13684508  
SRR17520069. 13684509  
SRR17520069. 13684510  
SRR17520069. 13684511  
SRR17520069. 13684512  
SRR17520069. 13684513  
SRR17520069. 13684514  
SRR17520069. 13684515  
SRR17520069. 13684516  
SRR17520069. 13684517  
SRR17520069. 13684518  
SRR17520069. 13684519  
SRR17520069. 13684520  
SRR17520069. 13684521  
SRR17520069. 13684522  
SRR17520069. 13684523  
SRR17520069. 13684524  
SRR17520069. 13684525  
SRR17520069. 13684526  
SRR17520069. 13684527  
SRR17520069. 13684528  
SRR17520069. 13684529  
SRR17520069. 13684530  
SRR17520069. 13684531  
SRR17520069. 13684532  
SRR17520069. 13684533  
SRR17520069. 13684534  
SRR17520069. 13684535  
SRR17520069. 13684536  
SRR17520069. 13684537  
SRR17520069. 13684539  
SRR17520069. 13684541  
SRR17520069. 13684542  
SRR17520069. 13684543  
SRR17520069. 13684544

SRR17520069. 13684545  
SRR17520069. 13684546  
SRR17520069. 13684548  
SRR17520069. 13684549  
SRR17520069. 13684550  
SRR17520069. 13684551  
SRR17520069. 13684552  
SRR17520069. 13684553  
SRR17520069. 13684554  
SRR17520069. 13684555  
SRR17520069. 13701666  
SRR17520069. 13701680  
SRR17520069. 13701688  
SRR17520069. 13701718  
SRR17520069. 13721479  
SRR17520069. 13721480  
SRR17520069. 13721481  
SRR17520069. 13721482  
SRR17520069. 13721483  
SRR17520069. 13721484  
SRR17520069. 13721485  
SRR17520069. 13721486  
SRR17520069. 13721487  
SRR17520069. 13721488  
SRR17520069. 13721489  
SRR17520069. 13721490  
SRR17520069. 13721491  
SRR17520069. 13721492  
SRR17520069. 13721493  
SRR17520069. 13721494  
SRR17520069. 13721495  
SRR17520069. 13721496  
SRR17520069. 13721497  
SRR17520069. 13721498  
SRR17520069. 13721499  
SRR17520069. 13721500  
SRR17520069. 13721501  
SRR17520069. 13721502  
SRR17520069. 13721503  
SRR17520069. 13721504  
SRR17520069. 13721505  
SRR17520069. 13721507  
SRR17520069. 13721508  
SRR17520069. 13721509  
SRR17520069. 13721510  
SRR17520069. 13721511  
SRR17520069. 13721512

SRR17520069. 13721513  
SRR17520069. 13721514  
SRR17520069. 13721515  
SRR17520069. 13721516  
SRR17520069. 13721517  
SRR17520069. 13721518  
SRR17520069. 13721519  
SRR17520069. 13721520  
SRR17520069. 13721521  
SRR17520069. 13721522  
SRR17520069. 13721523  
SRR17520069. 13721524  
SRR17520069. 13721525  
SRR17520069. 13721526  
SRR17520069. 13721527  
SRR17520069. 13721528  
SRR17520069. 13721529  
SRR17520069. 13721530  
SRR17520069. 13721531  
SRR17520069. 13721532  
SRR17520069. 13721533  
SRR17520069. 13721535  
SRR17520069. 13721536  
SRR17520069. 13721537  
SRR17520069. 13721538  
SRR17520069. 13721539  
SRR17520069. 13721540  
SRR17520069. 13721541  
SRR17520069. 13721542  
SRR17520069. 13721544  
SRR17520069. 13721545  
SRR17520069. 13721546  
SRR17520069. 13721547  
SRR17520069. 13721548  
SRR17520069. 13721549  
SRR17520069. 13721550  
SRR17520069. 13721552  
SRR17520069. 13721553  
SRR17520069. 13721554  
SRR17520069. 13721555  
SRR17520069. 13721556  
SRR17520069. 13721557  
SRR17520069. 13721558  
SRR17520069. 13721559  
SRR17520069. 13721560  
SRR17520069. 13721561  
SRR17520069. 13721562

SRR17520069. 13721563  
SRR17520069. 13721564  
SRR17520069. 13721565  
SRR17520069. 13721566  
SRR17520069. 13721567  
SRR17520069. 13721568  
SRR17520069. 13721569  
SRR17520069. 13721570  
SRR17520069. 13721571  
SRR17520069. 13721572  
SRR17520069. 13721573  
SRR17520069. 13721574  
SRR17520069. 13721575  
SRR17520069. 13721576  
SRR17520069. 13721577  
SRR17520069. 13721578  
SRR17520069. 13721579  
SRR17520069. 13721580  
SRR17520069. 13721581  
SRR17520069. 13721582  
SRR17520069. 13721583  
SRR17520069. 13721584  
SRR17520069. 13721585  
SRR17520069. 13721586  
SRR17520069. 13721587  
SRR17520069. 13721588  
SRR17520069. 13721589  
SRR17520069. 13721590  
SRR17520069. 13721591  
SRR17520069. 13721592  
SRR17520069. 13721593  
SRR17520069. 13721594  
SRR17520069. 13721595  
SRR17520069. 13721596  
SRR17520069. 13721597  
SRR17520069. 13721598  
SRR17520069. 13721599  
SRR17520069. 13721600  
SRR17520069. 13721601  
SRR17520069. 13721602  
SRR17520069. 13721603  
SRR17520069. 13721604  
SRR17520069. 13721605  
SRR17520069. 13721606  
SRR17520069. 13721607  
SRR17520069. 13721608  
SRR17520069. 13721609

SRR17520069. 13721610  
SRR17520069. 13721611  
SRR17520069. 13721612  
SRR17520069. 13721613  
SRR17520069. 13721614  
SRR17520069. 13721615  
SRR17520069. 13721616  
SRR17520069. 13721617  
SRR17520069. 13721618  
SRR17520069. 13721619  
SRR17520069. 13721620  
SRR17520069. 13721621  
SRR17520069. 13721622  
SRR17520069. 13721623  
SRR17520069. 13721624  
SRR17520069. 13721625  
SRR17520069. 13721626  
SRR17520069. 13721627  
SRR17520069. 13721628  
SRR17520069. 13721629  
SRR17520069. 13721630  
SRR17520069. 13721631  
SRR17520069. 13721632  
SRR17520069. 13721633  
SRR17520069. 13721634  
SRR17520069. 13721635  
SRR17520069. 13721636  
SRR17520069. 13721637  
SRR17520069. 13721638  
SRR17520069. 13721639  
SRR17520069. 13721640  
SRR17520069. 13721641  
SRR17520069. 13721642  
SRR17520069. 13721643  
SRR17520069. 13756531  
SRR17520069. 13756532  
SRR17520069. 13756533  
SRR17520069. 13756534  
SRR17520069. 13756535  
SRR17520069. 13756536  
SRR17520069. 13756537  
SRR17520069. 13756538  
SRR17520069. 13756539  
SRR17520069. 13756540  
SRR17520069. 13756541  
SRR17520069. 13756542  
SRR17520069. 13756543

SRR17520069. 13756545  
SRR17520069. 13756546  
SRR17520069. 13756547  
SRR17520069. 13756548  
SRR17520069. 13756549  
SRR17520069. 13756550  
SRR17520069. 13756551  
SRR17520069. 13756552  
SRR17520069. 13756553  
SRR17520069. 13756554  
SRR17520069. 13756555  
SRR17520069. 13756557  
SRR17520069. 13756558  
SRR17520069. 13756559  
SRR17520069. 13756560  
SRR17520069. 13756561  
SRR17520069. 13756562  
SRR17520069. 13756563  
SRR17520069. 13756564  
SRR17520069. 13756565  
SRR17520069. 13756566  
SRR17520069. 13756567  
SRR17520069. 13756568  
SRR17520069. 13756569  
SRR17520069. 13756570  
SRR17520069. 13756571  
SRR17520069. 13756572  
SRR17520069. 13756573  
SRR17520069. 13756574  
SRR17520069. 13756575  
SRR17520069. 13756576  
SRR17520069. 13756577  
SRR17520069. 13756578  
SRR17520069. 13756579  
SRR17520069. 13756580  
SRR17520069. 13756581  
SRR17520069. 13756582  
SRR17520069. 13756586  
SRR17520069. 13756587  
SRR17520069. 13756588  
SRR17520069. 13756589  
SRR17520069. 13756590  
SRR17520069. 13756592  
SRR17520069. 13756593  
SRR17520069. 13756594  
SRR17520069. 13756595  
SRR17520069. 13756596

SRR17520069. 13756597  
SRR17520069. 13756598  
SRR17520069. 13756599  
SRR17520069. 13756601  
SRR17520069. 13756602  
SRR17520069. 13756603  
SRR17520069. 13756604  
SRR17520069. 13756606  
SRR17520069. 13756607  
SRR17520069. 13756608  
SRR17520069. 13756609  
SRR17520069. 13756610  
SRR17520069. 13756612  
SRR17520069. 13756614  
SRR17520069. 13756615  
SRR17520069. 13756616  
SRR17520069. 13756617  
SRR17520069. 13756618  
SRR17520069. 13756620  
SRR17520069. 13756621  
SRR17520069. 13756622  
SRR17520069. 13756623  
SRR17520069. 13756624  
SRR17520069. 13756625  
SRR17520069. 13756626  
SRR17520069. 13756627  
SRR17520069. 13756628  
SRR17520069. 13756629  
SRR17520069. 13756630  
SRR17520069. 13756632  
SRR17520069. 13756633  
SRR17520069. 13756634  
SRR17520069. 13756635  
SRR17520069. 13756638  
SRR17520069. 13756639  
SRR17520069. 13756641  
SRR17520069. 13756642  
SRR17520069. 13756643  
SRR17520069. 13756645  
SRR17520069. 13756646  
SRR17520069. 13756647  
SRR17520069. 13756648  
SRR17520069. 13756649  
SRR17520069. 13756650  
SRR17520069. 13756651  
SRR17520069. 13756652  
SRR17520069. 13756653



SRR17520069. 13756655  
SRR17520069. 13756656  
SRR17520069. 13756658  
SRR17520069. 13756659  
SRR17520069. 13756661  
SRR17520069. 13756662  
SRR17520069. 13756663  
SRR17520069. 13756664  
SRR17520069. 13756667  
SRR17520069. 13756668  
SRR17520069. 13756669  
SRR17520069. 13756670  
SRR17520069. 13756671  
SRR17520069. 13756672  
SRR17520069. 13756673  
SRR17520069. 13756674  
SRR17520069. 13756675  
SRR17520069. 13756676  
SRR17520069. 13756677  
SRR17520069. 13756678  
SRR17520069. 13756679  
SRR17520069. 13756680  
SRR17520069. 13756681  
SRR17520069. 13756682  
SRR17520069. 13756683  
SRR17520069. 13756684  
SRR17520069. 13756686  
SRR17520069. 13756687  
SRR17520069. 13756688  
SRR17520069. 13756689  
SRR17520069. 13756690  
SRR17520069. 13756691  
SRR17520069. 13756692  
SRR17520069. 13756693  
SRR17520069. 13756694  
SRR17520069. 13756695  
SRR17520069. 13756696  
SRR17520069. 13756697  
SRR17520069. 13756698  
SRR17520069. 13756699  
SRR17520069. 13756700  
SRR17520069. 13756701  
SRR17520069. 13756702  
SRR17520069. 13756703  
SRR17520069. 13756704  
SRR17520069. 13756705  
SRR17520069. 13756710

SRR17520069. 13756711  
SRR17520069. 13756712  
SRR17520069. 13756713  
SRR17520069. 13756714  
SRR17520069. 13756716  
SRR17520069. 13756717  
SRR17520069. 13756718  
SRR17520069. 13756719  
SRR17520069. 13756720  
SRR17520069. 13756721  
SRR17520069. 13756722  
SRR17520069. 13756723  
SRR17520069. 13756724  
SRR17520069. 13756725  
SRR17520069. 13756726  
SRR17520069. 13756727  
SRR17520069. 13756728  
SRR17520069. 13756729  
SRR17520069. 13756730  
SRR17520069. 13756731  
SRR17520069. 13756732  
SRR17520069. 13756733  
SRR17520069. 13756734  
SRR17520069. 13756735  
SRR17520069. 13756736  
SRR17520069. 13756737  
SRR17520069. 13756738  
SRR17520069. 13756739  
SRR17520069. 13756740  
SRR17520069. 13756741  
SRR17520069. 13756742  
SRR17520069. 13756743  
SRR17520069. 13756744  
SRR17520069. 13760777  
SRR17520069. 13760778  
SRR17520069. 13760779  
SRR17520069. 13760780  
SRR17520069. 13760781  
SRR17520069. 13760782  
SRR17520069. 13760783  
SRR17520069. 13760784  
SRR17520069. 13760785  
SRR17520069. 13760786  
SRR17520069. 13760787  
SRR17520069. 13760788  
SRR17520069. 13760789  
SRR17520069. 13760790

SRR17520069. 13760791  
SRR17520069. 13760792  
SRR17520069. 13760793  
SRR17520069. 13760794  
SRR17520069. 13760795  
SRR17520069. 13760797  
SRR17520069. 13760798  
SRR17520069. 13760799  
SRR17520069. 13760800  
SRR17520069. 13760801  
SRR17520069. 13760802  
SRR17520069. 13760803  
SRR17520069. 13760804  
SRR17520069. 13760805  
SRR17520069. 13760806  
SRR17520069. 13760807  
SRR17520069. 13760808  
SRR17520069. 13760809  
SRR17520069. 13760810  
SRR17520069. 13760812  
SRR17520069. 13760813  
SRR17520069. 13760814  
SRR17520069. 13760815  
SRR17520069. 13760816  
SRR17520069. 13760817  
SRR17520069. 13760818  
SRR17520069. 13760819  
SRR17520069. 13760820  
SRR17520069. 13760821  
SRR17520069. 13760822  
SRR17520069. 13760823  
SRR17520069. 13760824  
SRR17520069. 13760825  
SRR17520069. 13760826  
SRR17520069. 13760827  
SRR17520069. 13760828  
SRR17520069. 13760829  
SRR17520069. 13760830  
SRR17520069. 13760831  
SRR17520069. 13760832  
SRR17520069. 13760833  
SRR17520069. 13760834  
SRR17520069. 13760835  
SRR17520069. 13760836  
SRR17520069. 13760837  
SRR17520069. 13760838  
SRR17520069. 13760839

SRR17520069. 13760840  
SRR17520069. 13760841  
SRR17520069. 13760842  
SRR17520069. 13760843  
SRR17520069. 13760844  
SRR17520069. 13760845  
SRR17520069. 13760846  
SRR17520069. 13760847  
SRR17520069. 13760848  
SRR17520069. 13760849  
SRR17520069. 13760850  
SRR17520069. 13760851  
SRR17520069. 13760852  
SRR17520069. 13760853  
SRR17520069. 13760854  
SRR17520069. 13760856  
SRR17520069. 13760857  
SRR17520069. 13760858  
SRR17520069. 13760859  
SRR17520069. 13760860  
SRR17520069. 13760861  
SRR17520069. 13760862  
SRR17520069. 13760863  
SRR17520069. 13760864  
SRR17520069. 13760865  
SRR17520069. 13760866  
SRR17520069. 13760867  
SRR17520069. 13760868  
SRR17520069. 13760869  
SRR17520069. 13760870  
SRR17520069. 13760871  
SRR17520069. 13760872  
SRR17520069. 13760873  
SRR17520069. 13760874  
SRR17520069. 13760875  
SRR17520069. 13760876  
SRR17520069. 13760877  
SRR17520069. 13760878  
SRR17520069. 13760880  
SRR17520069. 13760881  
SRR17520069. 13761491  
SRR17520069. 13772291  
SRR17520069. 13772292  
SRR17520069. 13772293  
SRR17520069. 13772294  
SRR17520069. 13772295  
SRR17520069. 13772296

SRR17520069. 13772297  
SRR17520069. 13772298  
SRR17520069. 13772299  
SRR17520069. 13772300  
SRR17520069. 13772301  
SRR17520069. 13772302  
SRR17520069. 13772303  
SRR17520069. 13772304  
SRR17520069. 13772305  
SRR17520069. 13772306  
SRR17520069. 13772307  
SRR17520069. 13772308  
SRR17520069. 13772309  
SRR17520069. 13772310  
SRR17520069. 13772311  
SRR17520069. 13772313  
SRR17520069. 13772314  
SRR17520069. 13772315  
SRR17520069. 13772316  
SRR17520069. 13772317  
SRR17520069. 13772318  
SRR17520069. 13772319  
SRR17520069. 13772320  
SRR17520069. 13772321  
SRR17520069. 13772322  
SRR17520069. 13772323  
SRR17520069. 13772325  
SRR17520069. 13772326  
SRR17520069. 13772327  
SRR17520069. 13772328  
SRR17520069. 13772329  
SRR17520069. 13772330  
SRR17520069. 13772331  
SRR17520069. 13772337  
SRR17520069. 13772338  
SRR17520069. 13772339  
SRR17520069. 13772340  
SRR17520069. 13772341  
SRR17520069. 13772344  
SRR17520069. 13772346  
SRR17520069. 13772347  
SRR17520069. 13772348  
SRR17520069. 13772349  
SRR17520069. 13772350  
SRR17520069. 13772351  
SRR17520069. 13772352  
SRR17520069. 13772353

SRR17520069. 13772354  
SRR17520069. 13772355  
SRR17520069. 13772356  
SRR17520069. 13772357  
SRR17520069. 13772358  
SRR17520069. 13772359  
SRR17520069. 13772360  
SRR17520069. 13772361  
SRR17520069. 13772362  
SRR17520069. 13772363  
SRR17520069. 13772364  
SRR17520069. 13772365  
SRR17520069. 13772366  
SRR17520069. 13772367  
SRR17520069. 13772368  
SRR17520069. 13772369  
SRR17520069. 13772370  
SRR17520069. 13772371  
SRR17520069. 13772372  
SRR17520069. 13772373  
SRR17520069. 13772374  
SRR17520069. 13772375  
SRR17520069. 13772376  
SRR17520069. 13772377  
SRR17520069. 13772378  
SRR17520069. 13772379  
SRR17520069. 13772380  
SRR17520069. 13772381  
SRR17520069. 13772382  
SRR17520069. 13772383  
SRR17520069. 13772384  
SRR17520069. 13772385  
SRR17520069. 13772386  
SRR17520069. 13772387  
SRR17520069. 13772388  
SRR17520069. 13772389  
SRR17520069. 13772390  
SRR17520069. 13772391  
SRR17520069. 13772392  
SRR17520069. 13772393  
SRR17520069. 13772394  
SRR17520069. 13772395  
SRR17520069. 13772396  
SRR17520069. 13772397  
SRR17520069. 13772398  
SRR17520069. 13772399  
SRR17520069. 13772400

SRR17520069. 13772401  
SRR17520069. 13772402  
SRR17520069. 13772403  
SRR17520069. 13772404  
SRR17520069. 13772405  
SRR17520069. 13772406  
SRR17520069. 13772407  
SRR17520069. 13772408  
SRR17520069. 13772409  
SRR17520069. 13772410  
SRR17520069. 13772411  
SRR17520069. 13772412  
SRR17520069. 13772413  
SRR17520069. 13772414  
SRR17520069. 13772415  
SRR17520069. 13772416  
SRR17520069. 13772417  
SRR17520069. 13772418  
SRR17520069. 13772419  
SRR17520069. 13772420  
SRR17520069. 13772421  
SRR17520069. 13772422  
SRR17520069. 13772423  
SRR17520069. 13772424  
SRR17520069. 13772425  
SRR17520069. 13772426  
SRR17520069. 13772427  
SRR17520069. 13772428  
SRR17520069. 13772429  
SRR17520069. 13772430  
SRR17520069. 13772431  
SRR17520069. 13772432  
SRR17520069. 13772433  
SRR17520069. 13772434  
SRR17520069. 13772435  
SRR17520069. 13772436  
SRR17520069. 13772437  
SRR17520069. 13772438  
SRR17520069. 13772439  
SRR17520069. 13772440  
SRR17520069. 13772441  
SRR17520069. 13772442  
SRR17520069. 13772443  
SRR17520069. 13772444  
SRR17520069. 13772445  
SRR17520069. 13772446  
SRR17520069. 13772447

SRR17520069. 13772448  
SRR17520069. 13772450  
SRR17520069. 13772451  
SRR17520069. 13772452  
SRR17520069. 13772453  
SRR17520069. 13775506  
SRR17520069. 13775516  
SRR17520069. 13777124  
SRR17520069. 13777125  
SRR17520069. 13777127  
SRR17520069. 13777439  
SRR17520069. 13777440  
SRR17520069. 13777441  
SRR17520069. 13777442  
SRR17520069. 13777443  
SRR17520069. 13777445  
SRR17520069. 13777446  
SRR17520069. 13777447  
SRR17520069. 13777448  
SRR17520069. 13777449  
SRR17520069. 13777450  
SRR17520069. 13777451  
SRR17520069. 13777452  
SRR17520069. 13777454  
SRR17520069. 13777455  
SRR17520069. 13777456  
SRR17520069. 13777457  
SRR17520069. 13777458  
SRR17520069. 13777459  
SRR17520069. 13777460  
SRR17520069. 13777461  
SRR17520069. 13777462  
SRR17520069. 13777463  
SRR17520069. 13777464  
SRR17520069. 13777465  
SRR17520069. 13777466  
SRR17520069. 13777467  
SRR17520069. 13777468  
SRR17520069. 13777469  
SRR17520069. 13777470  
SRR17520069. 13777471  
SRR17520069. 13777472  
SRR17520069. 13777473  
SRR17520069. 13777474  
SRR17520069. 13777475  
SRR17520069. 13777476  
SRR17520069. 13777477



SRR17520069. 13777478  
SRR17520069. 13777479  
SRR17520069. 13777480  
SRR17520069. 13777481  
SRR17520069. 13777482  
SRR17520069. 13777483  
SRR17520069. 13777484  
SRR17520069. 13777485  
SRR17520069. 13777486  
SRR17520069. 13777487  
SRR17520069. 13777488  
SRR17520069. 13777489  
SRR17520069. 13777490  
SRR17520069. 13777491  
SRR17520069. 13777492  
SRR17520069. 13777493  
SRR17520069. 13777494  
SRR17520069. 13777495  
SRR17520069. 13777496  
SRR17520069. 13777497  
SRR17520069. 13777498  
SRR17520069. 13777499  
SRR17520069. 13777500  
SRR17520069. 13777501  
SRR17520069. 13777502  
SRR17520069. 13778841  
SRR17520069. 13778842  
SRR17520069. 13778843  
SRR17520069. 13778844  
SRR17520069. 13778845  
SRR17520069. 13778846  
SRR17520069. 13778847  
SRR17520069. 13778848  
SRR17520069. 13778849  
SRR17520069. 13778850  
SRR17520069. 13778852  
SRR17520069. 13778853  
SRR17520069. 13778854  
SRR17520069. 13778855  
SRR17520069. 13778856  
SRR17520069. 13778857  
SRR17520069. 13778858  
SRR17520069. 13778859  
SRR17520069. 13778860  
SRR17520069. 13778861  
SRR17520069. 13788390  
SRR17520069. 13788391

SRR17520069. 13788392  
SRR17520069. 13788393  
SRR17520069. 13788395  
SRR17520069. 13788396  
SRR17520069. 13788398  
SRR17520069. 13788399  
SRR17520069. 13788400  
SRR17520069. 13788401  
SRR17520069. 13788402  
SRR17520069. 13788403  
SRR17520069. 13788404  
SRR17520069. 13788405  
SRR17520069. 13788406  
SRR17520069. 13788407  
SRR17520069. 13788408  
SRR17520069. 13788410  
SRR17520069. 13788411  
SRR17520069. 13788412  
SRR17520069. 13788413  
SRR17520069. 13788414  
SRR17520069. 13788415  
SRR17520069. 13788416  
SRR17520069. 13788417  
SRR17520069. 13788418  
SRR17520069. 13788419  
SRR17520069. 13788420  
SRR17520069. 13788421  
SRR17520069. 13788422  
SRR17520069. 13788423  
SRR17520069. 13788425  
SRR17520069. 13788426  
SRR17520069. 13788427  
SRR17520069. 13788428  
SRR17520069. 13788429  
SRR17520069. 13788430  
SRR17520069. 13788668  
SRR17520069. 13788669  
SRR17520069. 13788670  
SRR17520069. 13788671  
SRR17520069. 13788672  
SRR17520069. 13788673  
SRR17520069. 13788674  
SRR17520069. 13788675  
SRR17520069. 13788676  
SRR17520069. 13788677  
SRR17520069. 13788678  
SRR17520069. 13788679

SRR17520069. 13788680  
SRR17520069. 13788681  
SRR17520069. 13788682  
SRR17520069. 13788683  
SRR17520069. 13788684  
SRR17520069. 13788685  
SRR17520069. 13788686  
SRR17520069. 13788687  
SRR17520069. 13788688  
SRR17520069. 13788689  
SRR17520069. 13788690  
SRR17520069. 13788691  
SRR17520069. 13788692  
SRR17520069. 13788693  
SRR17520069. 13788694  
SRR17520069. 13788695  
SRR17520069. 13788696  
SRR17520069. 13788697  
SRR17520069. 13788698  
SRR17520069. 13788699  
SRR17520069. 13788700  
SRR17520069. 13788701  
SRR17520069. 13788702  
SRR17520069. 13788703  
SRR17520069. 13788704  
SRR17520069. 13788705  
SRR17520069. 13788706  
SRR17520069. 13788707  
SRR17520069. 13788708  
SRR17520069. 13788709  
SRR17520069. 13788710  
SRR17520069. 13788711  
SRR17520069. 13788712  
SRR17520069. 13788713  
SRR17520069. 13788714  
SRR17520069. 13788715  
SRR17520069. 13801382  
SRR17520069. 13801929  
SRR17520069. 13801931  
SRR17520069. 13801936  
SRR17520069. 13801937  
SRR17520069. 13801938  
SRR17520069. 13801939  
SRR17520069. 13801940  
SRR17520069. 13801941  
SRR17520069. 13801942  
SRR17520069. 13801943

SRR17520069. 13801944  
SRR17520069. 13801945  
SRR17520069. 13801946  
SRR17520069. 13801947  
SRR17520069. 13801948  
SRR17520069. 13801949  
SRR17520069. 13801950  
SRR17520069. 13801951  
SRR17520069. 13801952  
SRR17520069. 13801953  
SRR17520069. 13801954  
SRR17520069. 13801955  
SRR17520069. 13801956  
SRR17520069. 13801957  
SRR17520069. 13801958  
SRR17520069. 13801959  
SRR17520069. 13801960  
SRR17520069. 13801961  
SRR17520069. 13801962  
SRR17520069. 13801963  
SRR17520069. 13801964  
SRR17520069. 13801965  
SRR17520069. 13801966  
SRR17520069. 13801967  
SRR17520069. 13801968  
SRR17520069. 13801969  
SRR17520069. 13801971  
SRR17520069. 13801972  
SRR17520069. 13801973  
SRR17520069. 13801974  
SRR17520069. 13801975  
SRR17520069. 13801976  
SRR17520069. 13801977  
SRR17520069. 13801978  
SRR17520069. 13801979  
SRR17520069. 13801980  
SRR17520069. 13801981  
SRR17520069. 13801982  
SRR17520069. 13801983  
SRR17520069. 13801984  
SRR17520069. 13801985  
SRR17520069. 13801986  
SRR17520069. 13801987  
SRR17520069. 13801988  
SRR17520069. 13801989  
SRR17520069. 13801990  
SRR17520069. 13801991

SRR17520069. 13801992  
SRR17520069. 13801993  
SRR17520069. 13801994  
SRR17520069. 13801995  
SRR17520069. 13801996  
SRR17520069. 13801997  
SRR17520069. 13801998  
SRR17520069. 13801999  
SRR17520069. 13802000  
SRR17520069. 13802001  
SRR17520069. 13802002  
SRR17520069. 13802003  
SRR17520069. 13802004  
SRR17520069. 13802005  
SRR17520069. 13802006  
SRR17520069. 13802007  
SRR17520069. 13802008  
SRR17520069. 13802009  
SRR17520069. 13802010  
SRR17520069. 13802011  
SRR17520069. 13802012  
SRR17520069. 13802013  
SRR17520069. 13802014  
SRR17520069. 13802015  
SRR17520069. 13802017  
SRR17520069. 13802018  
SRR17520069. 13802019  
SRR17520069. 13802020  
SRR17520069. 13802021  
SRR17520069. 13802022  
SRR17520069. 13802023  
SRR17520069. 13802024  
SRR17520069. 13802026  
SRR17520069. 13802028  
SRR17520069. 13802041  
SRR17520069. 13802045  
SRR17520069. 13802060  
SRR17520069. 13802062  
SRR17520069. 13802067  
SRR17520069. 13802076  
SRR17520069. 13807820  
SRR17520069. 13807821  
SRR17520069. 13807822  
SRR17520069. 13807823  
SRR17520069. 13807825  
SRR17520069. 13807826  
SRR17520069. 13807827

SRR17520069. 13807828  
SRR17520069. 13807829  
SRR17520069. 13807830  
SRR17520069. 13807831  
SRR17520069. 13807832  
SRR17520069. 13807833  
SRR17520069. 13807834  
SRR17520069. 13807835  
SRR17520069. 13807836  
SRR17520069. 13807837  
SRR17520069. 13807838  
SRR17520069. 13807839  
SRR17520069. 13807840  
SRR17520069. 13807841  
SRR17520069. 13807843  
SRR17520069. 13807844  
SRR17520069. 13807845  
SRR17520069. 13807846  
SRR17520069. 13807847  
SRR17520069. 13807848  
SRR17520069. 13807849  
SRR17520069. 13807850  
SRR17520069. 13807851  
SRR17520069. 13807852  
SRR17520069. 13807853  
SRR17520069. 13807854  
SRR17520069. 13807855  
SRR17520069. 13807856  
SRR17520069. 13807858  
SRR17520069. 13807864  
SRR17520069. 13807866  
SRR17520069. 13807869  
SRR17520069. 13811638  
SRR17520069. 13811639  
SRR17520069. 13811640  
SRR17520069. 13822939  
SRR17520069. 13822973  
SRR17520069. 13841740  
SRR17520069. 13841743  
SRR17520069. 13843293  
SRR17520069. 13843294  
SRR17520069. 13843295  
SRR17520069. 13843296  
SRR17520069. 13843297  
SRR17520069. 13843298  
SRR17520069. 13843299  
SRR17520069. 13843300

SRR17520069. 13843301  
SRR17520069. 13843302  
SRR17520069. 13869765  
SRR17520069. 13869766  
SRR17520069. 13869767  
SRR17520069. 13869768  
SRR17520069. 13869769  
SRR17520069. 13869770  
SRR17520069. 13869771  
SRR17520069. 13869772  
SRR17520069. 13869773  
SRR17520069. 13869774  
SRR17520069. 13869775  
SRR17520069. 13869776  
SRR17520069. 13869777  
SRR17520069. 13869778  
SRR17520069. 13869779  
SRR17520069. 13869780  
SRR17520069. 13869781  
SRR17520069. 13869782  
SRR17520069. 13869783  
SRR17520069. 13869784  
SRR17520069. 13869785  
SRR17520069. 13869786  
SRR17520069. 13869787  
SRR17520069. 13869788  
SRR17520069. 13869789  
SRR17520069. 13869790  
SRR17520069. 13869791  
SRR17520069. 13869792  
SRR17520069. 13869793  
SRR17520069. 13869794  
SRR17520069. 13869795  
SRR17520069. 13869796  
SRR17520069. 13869797  
SRR17520069. 13869798  
SRR17520069. 13869799  
SRR17520069. 13869800  
SRR17520069. 13869801  
SRR17520069. 13869802  
SRR17520069. 13869803  
SRR17520069. 13869804  
SRR17520069. 13869805  
SRR17520069. 13869806  
SRR17520069. 13869807  
SRR17520069. 13869808  
SRR17520069. 13869809

SRR17520069. 13869810  
SRR17520069. 13869811  
SRR17520069. 13869812  
SRR17520069. 13869813  
SRR17520069. 13869814  
SRR17520069. 13869815  
SRR17520069. 13869816  
SRR17520069. 13869817  
SRR17520069. 13869818  
SRR17520069. 13871232  
SRR17520069. 13871233  
SRR17520069. 13871234  
SRR17520069. 13871235  
SRR17520069. 13871236  
SRR17520069. 13871237  
SRR17520069. 13871238  
SRR17520069. 13871239  
SRR17520069. 13871240  
SRR17520069. 13871241  
SRR17520069. 13871242  
SRR17520069. 13871243  
SRR17520069. 13871245  
SRR17520069. 13871246  
SRR17520069. 13871247  
SRR17520069. 13871248  
SRR17520069. 13871249  
SRR17520069. 13871250  
SRR17520069. 13871251  
SRR17520069. 13871252  
SRR17520069. 13871253  
SRR17520069. 13871254  
SRR17520069. 13871255  
SRR17520069. 13871256  
SRR17520069. 13871257  
SRR17520069. 13871258  
SRR17520069. 13871259  
SRR17520069. 13871260  
SRR17520069. 13871261  
SRR17520069. 13871262  
SRR17520069. 13874865  
SRR17520069. 13917194  
SRR17520069. 13917530  
SRR17520069. 13917531  
SRR17520069. 13917532  
SRR17520069. 13917533  
SRR17520069. 13917534  
SRR17520069. 13917535



SRR17520069. 13917536  
SRR17520069. 13917537  
SRR17520069. 13921316  
SRR17520069. 13921319  
SRR17520069. 13921320  
SRR17520069. 13921321  
SRR17520069. 13921322  
SRR17520069. 13921323  
SRR17520069. 13921324  
SRR17520069. 13921326  
SRR17520069. 13921327  
SRR17520069. 13921330  
SRR17520069. 13921331  
SRR17520069. 13921334  
SRR17520069. 13921335  
SRR17520069. 13921336  
SRR17520069. 13921337  
SRR17520069. 13921338  
SRR17520069. 13921339  
SRR17520069. 13921340  
SRR17520069. 13921341  
SRR17520069. 13921342  
SRR17520069. 13921343  
SRR17520069. 13921344  
SRR17520069. 13921345  
SRR17520069. 13921346  
SRR17520069. 13921347  
SRR17520069. 13921348  
SRR17520069. 13921349  
SRR17520069. 13921350  
SRR17520069. 13921351  
SRR17520069. 13921352  
SRR17520069. 13921353  
SRR17520069. 13921354  
SRR17520069. 13921355  
SRR17520069. 13921356  
SRR17520069. 13921357  
SRR17520069. 13921358  
SRR17520069. 13921359  
SRR17520069. 13921360  
SRR17520069. 13921361  
SRR17520069. 13921362  
SRR17520069. 13921363  
SRR17520069. 13921364  
SRR17520069. 13921365  
SRR17520069. 13921366  
SRR17520069. 13921367

SRR17520069. 13921368  
SRR17520069. 13921369  
SRR17520069. 13921370  
SRR17520069. 13921371  
SRR17520069. 13921372  
SRR17520069. 13921373  
SRR17520069. 13921374  
SRR17520069. 13921375  
SRR17520069. 13921376  
SRR17520069. 13921377  
SRR17520069. 13921378  
SRR17520069. 13921379  
SRR17520069. 13921381  
SRR17520069. 13921382  
SRR17520069. 13921383  
SRR17520069. 13921385  
SRR17520069. 13921386  
SRR17520069. 13921387  
SRR17520069. 13921388  
SRR17520069. 13921389  
SRR17520069. 13921390  
SRR17520069. 13921391  
SRR17520069. 13921392  
SRR17520069. 13921393  
SRR17520069. 13921394  
SRR17520069. 13921395  
SRR17520069. 13921396  
SRR17520069. 13921397  
SRR17520069. 13921398  
SRR17520069. 13921399  
SRR17520069. 13921401  
SRR17520069. 13921402  
SRR17520069. 13921403  
SRR17520069. 13921404  
SRR17520069. 13921405  
SRR17520069. 13921406  
SRR17520069. 13921407  
SRR17520069. 13944821  
SRR17520069. 13944822  
SRR17520069. 13944823  
SRR17520069. 13944824  
SRR17520069. 13944825  
SRR17520069. 13944826  
SRR17520069. 13944827  
SRR17520069. 13944828  
SRR17520069. 13944829  
SRR17520069. 13944830

SRR17520069. 13944831  
SRR17520069. 13944832  
SRR17520069. 13944833  
SRR17520069. 13944834  
SRR17520069. 13944835  
SRR17520069. 13944836  
SRR17520069. 13944837  
SRR17520069. 13944838  
SRR17520069. 13944839  
SRR17520069. 13944840  
SRR17520069. 13944841  
SRR17520069. 13944842  
SRR17520069. 13944843  
SRR17520069. 13944844  
SRR17520069. 13944845  
SRR17520069. 13944846  
SRR17520069. 13944847  
SRR17520069. 13944848  
SRR17520069. 13944849  
SRR17520069. 13944850  
SRR17520069. 13944851  
SRR17520069. 13944852  
SRR17520069. 13944853  
SRR17520069. 13944854  
SRR17520069. 13944855  
SRR17520069. 13944856  
SRR17520069. 13944857  
SRR17520069. 13944858  
SRR17520069. 13944859  
SRR17520069. 13944860  
SRR17520069. 13944861  
SRR17520069. 13944862  
SRR17520069. 13944863  
SRR17520069. 13944864  
SRR17520069. 13944865  
SRR17520069. 13944866  
SRR17520069. 13944867  
SRR17520069. 13944868  
SRR17520069. 13944869  
SRR17520069. 13944870  
SRR17520069. 13944871  
SRR17520069. 13944872  
SRR17520069. 13944873  
SRR17520069. 13944874  
SRR17520069. 13944875  
SRR17520069. 13944876  
SRR17520069. 13944877

SRR17520069. 13944878  
SRR17520069. 13944879  
SRR17520069. 13944880  
SRR17520069. 13944881  
SRR17520069. 13944882  
SRR17520069. 13944883  
SRR17520069. 13944884  
SRR17520069. 13944885  
SRR17520069. 13944886  
SRR17520069. 13944887  
SRR17520069. 13944888  
SRR17520069. 13944889  
SRR17520069. 13944890  
SRR17520069. 13944891  
SRR17520069. 13944892  
SRR17520069. 13944893  
SRR17520069. 13944894  
SRR17520069. 13944895  
SRR17520069. 13944896  
SRR17520069. 13944897  
SRR17520069. 13944898  
SRR17520069. 13944899  
SRR17520069. 13944900  
SRR17520069. 13944901  
SRR17520069. 13944902  
SRR17520069. 13944903  
SRR17520069. 13944904  
SRR17520069. 13944905  
SRR17520069. 13944906  
SRR17520069. 13944907  
SRR17520069. 13944908  
SRR17520069. 13944909  
SRR17520069. 13944910  
SRR17520069. 13944911  
SRR17520069. 13944912  
SRR17520069. 13944913  
SRR17520069. 13944914  
SRR17520069. 13944915  
SRR17520069. 13944916  
SRR17520069. 13944917  
SRR17520069. 13944918  
SRR17520069. 13979661  
SRR17520069. 13979662  
SRR17520069. 13979663  
SRR17520069. 13979664  
SRR17520069. 13979665  
SRR17520069. 13979666

SRR17520069. 13979667  
SRR17520069. 13979668  
SRR17520069. 13979669  
SRR17520069. 13979670  
SRR17520069. 13979671  
SRR17520069. 13979672  
SRR17520069. 14002175  
SRR17520069. 14003618  
SRR17520069. 14003619  
SRR17520069. 14003620  
SRR17520069. 14003621  
SRR17520069. 14003622  
SRR17520069. 14003623  
SRR17520069. 14003624  
SRR17520069. 14003625  
SRR17520069. 14003626  
SRR17520069. 14003627  
SRR17520069. 14003628  
SRR17520069. 14003629  
SRR17520069. 14003630  
SRR17520069. 14003631  
SRR17520069. 14003632  
SRR17520069. 14003633  
SRR17520069. 14003634  
SRR17520069. 14003635  
SRR17520069. 14003636  
SRR17520069. 14003637  
SRR17520069. 14003638  
SRR17520069. 14003639  
SRR17520069. 14003640  
SRR17520069. 14003641  
SRR17520069. 14003642  
SRR17520069. 14003643  
SRR17520069. 14003644  
SRR17520069. 14003645  
SRR17520069. 14003646  
SRR17520069. 14003647  
SRR17520069. 14003648  
SRR17520069. 14003649  
SRR17520069. 14003650  
SRR17520069. 14003651  
SRR17520069. 14003652  
SRR17520069. 14012778  
SRR17520069. 14012779  
SRR17520069. 14012780  
SRR17520069. 14012781  
SRR17520069. 14012782

SRR17520069.14012783  
SRR17520069.14012785  
SRR17520069.14012786  
SRR17520069.14012787  
SRR17520069.14012788  
SRR17520069.14013073  
SRR17520069.14034335  
SRR17520069.14034336  
SRR17520069.14034337  
SRR17520069.14034338  
SRR17520069.14034340  
SRR17520069.14034341  
SRR17520069.14034342  
SRR17520069.14034343  
SRR17520069.14034346  
SRR17520069.14034348  
SRR17520069.14034349  
SRR17520069.14034350  
SRR17520069.14041775  
SRR17520069.14041776  
SRR17520069.14041777  
SRR17520069.14041778  
SRR17520069.14041779  
SRR17520069.14041780  
SRR17520069.14041781  
SRR17520069.14041782  
SRR17520069.14041783  
SRR17520069.14041784  
SRR17520069.14041785  
SRR17520069.14041786  
SRR17520069.14041787  
SRR17520069.14041788  
SRR17520069.14041789  
SRR17520069.14041790  
SRR17520069.14041791  
SRR17520069.14041792  
SRR17520069.14041794  
SRR17520069.14041795  
SRR17520069.14041796  
SRR17520069.14041797  
SRR17520069.14041798  
SRR17520069.14041799  
SRR17520069.14041800  
SRR17520069.14041801  
SRR17520069.14041802  
SRR17520069.14041803  
SRR17520069.14041804

SRR17520069. 14041805  
SRR17520069. 14041806  
SRR17520069. 14041807  
SRR17520069. 14041808  
SRR17520069. 14041809  
SRR17520069. 14041810  
SRR17520069. 14041811  
SRR17520069. 14041812  
SRR17520069. 14041813  
SRR17520069. 14041814  
SRR17520069. 14041815  
SRR17520069. 14041816  
SRR17520069. 14041817  
SRR17520069. 14041818  
SRR17520069. 14041819  
SRR17520069. 14041820  
SRR17520069. 14041821  
SRR17520069. 14041822  
SRR17520069. 14041823  
SRR17520069. 14041824  
SRR17520069. 14041826  
SRR17520069. 14041827  
SRR17520069. 14041828  
SRR17520069. 14041829  
SRR17520069. 14041830  
SRR17520069. 14041831  
SRR17520069. 14041832  
SRR17520069. 14041833  
SRR17520069. 14041834  
SRR17520069. 14041835  
SRR17520069. 14041836  
SRR17520069. 14041837  
SRR17520069. 14041838  
SRR17520069. 14041839  
SRR17520069. 14041840  
SRR17520069. 14041841  
SRR17520069. 14041842  
SRR17520069. 14041843  
SRR17520069. 14041844  
SRR17520069. 14041845  
SRR17520069. 14041846  
SRR17520069. 14041847  
SRR17520069. 14041848  
SRR17520069. 14041849  
SRR17520069. 14041850  
SRR17520069. 14041851  
SRR17520069. 14041852

SRR17520069. 14041853  
SRR17520069. 14041854  
SRR17520069. 14041855  
SRR17520069. 14041856  
SRR17520069. 14041857  
SRR17520069. 14041858  
SRR17520069. 14041859  
SRR17520069. 14041860  
SRR17520069. 14041861  
SRR17520069. 14041862  
SRR17520069. 14041863  
SRR17520069. 14041864  
SRR17520069. 14041865  
SRR17520069. 14041866  
SRR17520069. 14041867  
SRR17520069. 14041868  
SRR17520069. 14041869  
SRR17520069. 14041870  
SRR17520069. 14041871  
SRR17520069. 14041872  
SRR17520069. 14041873  
SRR17520069. 14041874  
SRR17520069. 14041875  
SRR17520069. 14041876  
SRR17520069. 14041877  
SRR17520069. 14041878  
SRR17520069. 14041879  
SRR17520069. 14041880  
SRR17520069. 14041881  
SRR17520069. 14041882  
SRR17520069. 14041883  
SRR17520069. 14041884  
SRR17520069. 14041885  
SRR17520069. 14041886  
SRR17520069. 14041887  
SRR17520069. 14041888  
SRR17520069. 14041889  
SRR17520069. 14041890  
SRR17520069. 14041891  
SRR17520069. 14041892  
SRR17520069. 14041893  
SRR17520069. 14041894  
SRR17520069. 14041895  
SRR17520069. 14041896  
SRR17520069. 14041897  
SRR17520069. 14041898  
SRR17520069. 14041899



SRR17520069. 14041900  
SRR17520069. 14041901  
SRR17520069. 14041902  
SRR17520069. 14041903  
SRR17520069. 14041904  
SRR17520069. 14041905  
SRR17520069. 14041906  
SRR17520069. 14041907  
SRR17520069. 14041908  
SRR17520069. 14041909  
SRR17520069. 14041910  
SRR17520069. 14041911  
SRR17520069. 14041912  
SRR17520069. 14041913  
SRR17520069. 14041915  
SRR17520069. 14041916  
SRR17520069. 14041917  
SRR17520069. 14041918  
SRR17520069. 14041919  
SRR17520069. 14041920  
SRR17520069. 14041921  
SRR17520069. 14041922  
SRR17520069. 14041923  
SRR17520069. 14041924  
SRR17520069. 14041925  
SRR17520069. 14041926  
SRR17520069. 14041927  
SRR17520069. 14041928  
SRR17520069. 14041929  
SRR17520069. 14041930  
SRR17520069. 14041931  
SRR17520069. 14041932  
SRR17520069. 14041933  
SRR17520069. 14041934  
SRR17520069. 14041935  
SRR17520069. 14041936  
SRR17520069. 14041937  
SRR17520069. 14041938  
SRR17520069. 14041939  
SRR17520069. 14041940  
SRR17520069. 14041941  
SRR17520069. 14041942  
SRR17520069. 14041943  
SRR17520069. 14041944  
SRR17520069. 14041945  
SRR17520069. 14041946  
SRR17520069. 14041947

SRR17520069. 14041948  
SRR17520069. 14041949  
SRR17520069. 14041950  
SRR17520069. 14041951  
SRR17520069. 14041952  
SRR17520069. 14041954  
SRR17520069. 14041955  
SRR17520069. 14041956  
SRR17520069. 14041957  
SRR17520069. 14041958  
SRR17520069. 14041959  
SRR17520069. 14041960  
SRR17520069. 14041961  
SRR17520069. 14041962  
SRR17520069. 14041963  
SRR17520069. 14041964  
SRR17520069. 14041965  
SRR17520069. 14041966  
SRR17520069. 14041967  
SRR17520069. 14041968  
SRR17520069. 14041969  
SRR17520069. 14041970  
SRR17520069. 14041971  
SRR17520069. 14041972  
SRR17520069. 14041973  
SRR17520069. 14041974  
SRR17520069. 14041975  
SRR17520069. 14041976  
SRR17520069. 14041977  
SRR17520069. 14041978  
SRR17520069. 14041979  
SRR17520069. 14041980  
SRR17520069. 14041981  
SRR17520069. 14041982  
SRR17520069. 14041983  
SRR17520069. 14064674  
SRR17520069. 14064675  
SRR17520069. 14064676  
SRR17520069. 14064677  
SRR17520069. 14064678  
SRR17520069. 14064679  
SRR17520069. 14064680  
SRR17520069. 14064681  
SRR17520069. 14064682  
SRR17520069. 14064683  
SRR17520069. 14064684  
SRR17520069. 14064685

SRR17520069. 14064686  
SRR17520069. 14064687  
SRR17520069. 14064688  
SRR17520069. 14064689  
SRR17520069. 14064690  
SRR17520069. 14064691  
SRR17520069. 14064692  
SRR17520069. 14064694  
SRR17520069. 14064695  
SRR17520069. 14064696  
SRR17520069. 14064697  
SRR17520069. 14064698  
SRR17520069. 14064700  
SRR17520069. 14064701  
SRR17520069. 14064702  
SRR17520069. 14064703  
SRR17520069. 14064704  
SRR17520069. 14064705  
SRR17520069. 14064706  
SRR17520069. 14064707  
SRR17520069. 14064708  
SRR17520069. 14064709  
SRR17520069. 14064710  
SRR17520069. 14064711  
SRR17520069. 14064712  
SRR17520069. 14064713  
SRR17520069. 14064714  
SRR17520069. 14064715  
SRR17520069. 14064716  
SRR17520069. 14064717  
SRR17520069. 14064718  
SRR17520069. 14064719  
SRR17520069. 14064720  
SRR17520069. 14064721  
SRR17520069. 14070607  
SRR17520069. 14070663  
SRR17520069. 14070680  
SRR17520069. 14070683  
SRR17520069. 14070689  
SRR17520069. 14089018  
SRR17520069. 14089452  
SRR17520069. 14089453  
SRR17520069. 14089454  
SRR17520069. 14089455  
SRR17520069. 14089456  
SRR17520069. 14150342  
SRR17520069. 14150343

SRR17520069.14150344  
SRR17520069.14150345  
SRR17520069.14150346  
SRR17520069.14150347  
SRR17520069.14150348  
SRR17520069.14150349  
SRR17520069.14150350  
SRR17520069.14150352  
SRR17520069.14150353  
SRR17520069.14150354  
SRR17520069.14150355  
SRR17520069.14150356  
SRR17520069.14150357  
SRR17520069.14150358  
SRR17520069.14150359  
SRR17520069.14150360  
SRR17520069.14150361  
SRR17520069.14150362  
SRR17520069.14150363  
SRR17520069.14150364  
SRR17520069.14150365  
SRR17520069.14150366  
SRR17520069.14150367  
SRR17520069.14150368  
SRR17520069.14150369  
SRR17520069.14150370  
SRR17520069.14150371  
SRR17520069.14150372  
SRR17520069.14150373  
SRR17520069.14150374  
SRR17520069.14150375  
SRR17520069.14150376  
SRR17520069.14150377  
SRR17520069.14150378  
SRR17520069.14150379  
SRR17520069.14150380  
SRR17520069.14150381  
SRR17520069.14150382  
SRR17520069.14201444  
SRR17520069.14201445  
SRR17520069.14201446  
SRR17520069.14201447  
SRR17520069.14201448  
SRR17520069.14201449  
SRR17520069.14201450  
SRR17520069.14201451  
SRR17520069.14201452

SRR17520069.14201454  
SRR17520069.14201455  
SRR17520069.14201456  
SRR17520069.14201457  
SRR17520069.14201458  
SRR17520069.14201459  
SRR17520069.14201460  
SRR17520069.14201461  
SRR17520069.14201462  
SRR17520069.14201463  
SRR17520069.14201464  
SRR17520069.14201465  
SRR17520069.14201466  
SRR17520069.14201467  
SRR17520069.14201468  
SRR17520069.14201469  
SRR17520069.14201470  
SRR17520069.14201471  
SRR17520069.14201472  
SRR17520069.14201473  
SRR17520069.14201474  
SRR17520069.14201475  
SRR17520069.14201476  
SRR17520069.14201478  
SRR17520069.14201479  
SRR17520069.14201480  
SRR17520069.14201481  
SRR17520069.14201482  
SRR17520069.14201483  
SRR17520069.14201484  
SRR17520069.14201485  
SRR17520069.14201486  
SRR17520069.14201487  
SRR17520069.14201488  
SRR17520069.14201489  
SRR17520069.14201490  
SRR17520069.14201491  
SRR17520069.14201492  
SRR17520069.14201493  
SRR17520069.14201494  
SRR17520069.14201495  
SRR17520069.14201496  
SRR17520069.14201497  
SRR17520069.14201498  
SRR17520069.14201499  
SRR17520069.14201500  
SRR17520069.14201501

SRR17520069.14201503  
SRR17520069.14201504  
SRR17520069.14201510  
SRR17520069.14201514  
SRR17520069.14201516  
SRR17520069.14201519  
SRR17520069.14201524  
SRR17520069.14201525  
SRR17520069.14201527  
SRR17520069.14201529  
SRR17520069.14201530  
SRR17520069.14201537  
SRR17520069.14201538  
SRR17520069.14201541  
SRR17520069.14201551  
SRR17520069.14218991  
SRR17520069.14218992  
SRR17520069.14218993  
SRR17520069.14218994  
SRR17520069.14218995  
SRR17520069.14218996  
SRR17520069.14218997  
SRR17520069.14218998  
SRR17520069.14218999  
SRR17520069.14219000  
SRR17520069.14219001  
SRR17520069.14219002  
SRR17520069.14219003  
SRR17520069.14219004  
SRR17520069.14219005  
SRR17520069.14219006  
SRR17520069.14219007  
SRR17520069.14219008  
SRR17520069.14219009  
SRR17520069.14219010  
SRR17520069.14219011  
SRR17520069.14219012  
SRR17520069.14233222  
SRR17520069.14234911  
SRR17520069.14234912  
SRR17520069.14234913  
SRR17520069.14234914  
SRR17520069.14234915  
SRR17520069.14234916  
SRR17520069.14234917  
SRR17520069.14234918  
SRR17520069.14234919

SRR17520069.14234920  
SRR17520069.14234921  
SRR17520069.14234922  
SRR17520069.14234923  
SRR17520069.14234924  
SRR17520069.14234925  
SRR17520069.14234926  
SRR17520069.14234927  
SRR17520069.14234928  
SRR17520069.14234929  
SRR17520069.14234930  
SRR17520069.14234931  
SRR17520069.14234932  
SRR17520069.14234933  
SRR17520069.14234934  
SRR17520069.14234935  
SRR17520069.14234937  
SRR17520069.14234938  
SRR17520069.14234939  
SRR17520069.14234940  
SRR17520069.14234941  
SRR17520069.14234942  
SRR17520069.14234943  
SRR17520069.14234944  
SRR17520069.14234945  
SRR17520069.14234946  
SRR17520069.14234947  
SRR17520069.14234948  
SRR17520069.14234949  
SRR17520069.14234951  
SRR17520069.14234952  
SRR17520069.14234953  
SRR17520069.14234954  
SRR17520069.14234955  
SRR17520069.14234956  
SRR17520069.14234957  
SRR17520069.14234958  
SRR17520069.14234959  
SRR17520069.14234960  
SRR17520069.14234961  
SRR17520069.14234962  
SRR17520069.14234963  
SRR17520069.14234964  
SRR17520069.14234965  
SRR17520069.14234966  
SRR17520069.14234967  
SRR17520069.14234968

SRR17520069. 14234969  
SRR17520069. 14234970  
SRR17520069. 14234971  
SRR17520069. 14234972  
SRR17520069. 14234973  
SRR17520069. 14234974  
SRR17520069. 14234975  
SRR17520069. 14234976  
SRR17520069. 14234977  
SRR17520069. 14234978  
SRR17520069. 14234979  
SRR17520069. 14234980  
SRR17520069. 14234981  
SRR17520069. 14234982  
SRR17520069. 14234983  
SRR17520069. 14234984  
SRR17520069. 14234986  
SRR17520069. 14234987  
SRR17520069. 14234988  
SRR17520069. 14234989  
SRR17520069. 14234990  
SRR17520069. 14234991  
SRR17520069. 14234992  
SRR17520069. 14234993  
SRR17520069. 14234994  
SRR17520069. 14234995  
SRR17520069. 14234996  
SRR17520069. 14234997  
SRR17520069. 14234998  
SRR17520069. 14234999  
SRR17520069. 14235000  
SRR17520069. 14235001  
SRR17520069. 14235002  
SRR17520069. 14235003  
SRR17520069. 14235004  
SRR17520069. 14235005  
SRR17520069. 14235006  
SRR17520069. 14235007  
SRR17520069. 14235008  
SRR17520069. 14235009  
SRR17520069. 14235010  
SRR17520069. 14235011  
SRR17520069. 14235012  
SRR17520069. 14235013  
SRR17520069. 14235014  
SRR17520069. 14235015  
SRR17520069. 14235016



SRR17520069.14235017  
SRR17520069.14235018  
SRR17520069.14235019  
SRR17520069.14235020  
SRR17520069.14235021  
SRR17520069.14235022  
SRR17520069.14235023  
SRR17520069.14235024  
SRR17520069.14235025  
SRR17520069.14235026  
SRR17520069.14235027  
SRR17520069.14235028  
SRR17520069.14235029  
SRR17520069.14235030  
SRR17520069.14235031  
SRR17520069.14235032  
SRR17520069.14235033  
SRR17520069.14235034  
SRR17520069.14235035  
SRR17520069.14235036  
SRR17520069.14235037  
SRR17520069.14235038  
SRR17520069.14235039  
SRR17520069.14235040  
SRR17520069.14235041  
SRR17520069.14235043  
SRR17520069.14235044  
SRR17520069.14235045  
SRR17520069.14235046  
SRR17520069.14235047  
SRR17520069.14264576  
SRR17520069.14264577  
SRR17520069.14264578  
SRR17520069.14264579  
SRR17520069.14264580  
SRR17520069.14264581  
SRR17520069.14264582  
SRR17520069.14264583  
SRR17520069.14264584  
SRR17520069.14264585  
SRR17520069.14264586  
SRR17520069.14264587  
SRR17520069.14264588  
SRR17520069.14264589  
SRR17520069.14264590  
SRR17520069.14264591  
SRR17520069.14264592

SRR17520069.14264593  
SRR17520069.14264594  
SRR17520069.14264595  
SRR17520069.14264596  
SRR17520069.14264597  
SRR17520069.14264598  
SRR17520069.14264599  
SRR17520069.14264600  
SRR17520069.14264601  
SRR17520069.14264602  
SRR17520069.14264603  
SRR17520069.14264604  
SRR17520069.14264605  
SRR17520069.14264606  
SRR17520069.14264607  
SRR17520069.14264608  
SRR17520069.14264609  
SRR17520069.14264610  
SRR17520069.14264611  
SRR17520069.14264612  
SRR17520069.14264613  
SRR17520069.14264614  
SRR17520069.14264615  
SRR17520069.14264616  
SRR17520069.14264617  
SRR17520069.14264618  
SRR17520069.14264619  
SRR17520069.14264620  
SRR17520069.14264621  
SRR17520069.14264622  
SRR17520069.14264623  
SRR17520069.14264624  
SRR17520069.14264625  
SRR17520069.14264626  
SRR17520069.14264627  
SRR17520069.14264628  
SRR17520069.14264629  
SRR17520069.14264630  
SRR17520069.14264631  
SRR17520069.14264632  
SRR17520069.14264633  
SRR17520069.14264634  
SRR17520069.14264635  
SRR17520069.14264636  
SRR17520069.14264637  
SRR17520069.14264638  
SRR17520069.14264639

SRR17520069. 14264640  
SRR17520069. 14264641  
SRR17520069. 14264642  
SRR17520069. 14264643  
SRR17520069. 14264644  
SRR17520069. 14264645  
SRR17520069. 14264646  
SRR17520069. 14264647  
SRR17520069. 14264648  
SRR17520069. 14264649  
SRR17520069. 14264650  
SRR17520069. 14264651  
SRR17520069. 14264652  
SRR17520069. 14264653  
SRR17520069. 14264654  
SRR17520069. 14264655  
SRR17520069. 14264656  
SRR17520069. 14264657  
SRR17520069. 14264658  
SRR17520069. 14264659  
SRR17520069. 14264660  
SRR17520069. 14264661  
SRR17520069. 14264662  
SRR17520069. 14264663  
SRR17520069. 14264664  
SRR17520069. 14264665  
SRR17520069. 14264666  
SRR17520069. 14264667  
SRR17520069. 14264668  
SRR17520069. 14264669  
SRR17520069. 14264670  
SRR17520069. 14264671  
SRR17520069. 14264672  
SRR17520069. 14264673  
SRR17520069. 14264674  
SRR17520069. 14264675  
SRR17520069. 14264676  
SRR17520069. 14264677  
SRR17520069. 14264678  
SRR17520069. 14264680  
SRR17520069. 14264681  
SRR17520069. 14264682  
SRR17520069. 14264683  
SRR17520069. 14264684  
SRR17520069. 14264685  
SRR17520069. 14264686  
SRR17520069. 14264687

SRR17520069. 14264688  
SRR17520069. 14264689  
SRR17520069. 14264690  
SRR17520069. 14264691  
SRR17520069. 14264692  
SRR17520069. 14264693  
SRR17520069. 14264694  
SRR17520069. 14264695  
SRR17520069. 14264696  
SRR17520069. 14264697  
SRR17520069. 14264698  
SRR17520069. 14264699  
SRR17520069. 14264700  
SRR17520069. 14267928  
SRR17520069. 14267929  
SRR17520069. 14267930  
SRR17520069. 14267931  
SRR17520069. 14267932  
SRR17520069. 14267933  
SRR17520069. 14267934  
SRR17520069. 14267935  
SRR17520069. 14267936  
SRR17520069. 14267937  
SRR17520069. 14267938  
SRR17520069. 14267939  
SRR17520069. 14267940  
SRR17520069. 14267941  
SRR17520069. 14267942  
SRR17520069. 14267943  
SRR17520069. 14267944  
SRR17520069. 14267945  
SRR17520069. 14267946  
SRR17520069. 14267949  
SRR17520069. 14267950  
SRR17520069. 14267951  
SRR17520069. 14267952  
SRR17520069. 14267953  
SRR17520069. 14267954  
SRR17520069. 14267955  
SRR17520069. 14267956  
SRR17520069. 14267957  
SRR17520069. 14267958  
SRR17520069. 14267959  
SRR17520069. 14267960  
SRR17520069. 14267961  
SRR17520069. 14267962  
SRR17520069. 14267963

SRR17520069.14267964  
SRR17520069.14267965  
SRR17520069.14267966  
SRR17520069.14267967  
SRR17520069.14267968  
SRR17520069.14267969  
SRR17520069.14267970  
SRR17520069.14267971  
SRR17520069.14267972  
SRR17520069.14267973  
SRR17520069.14267974  
SRR17520069.14267975  
SRR17520069.14267976  
SRR17520069.14267977  
SRR17520069.14267978  
SRR17520069.14267979  
SRR17520069.14267980  
SRR17520069.14267981  
SRR17520069.14267982  
SRR17520069.14267983  
SRR17520069.14267984  
SRR17520069.14267985  
SRR17520069.14267986  
SRR17520069.14267987  
SRR17520069.14267988  
SRR17520069.14267989  
SRR17520069.14267990  
SRR17520069.14267991  
SRR17520069.14267992  
SRR17520069.14267993  
SRR17520069.14267994  
SRR17520069.14267995  
SRR17520069.14267996  
SRR17520069.14267997  
SRR17520069.14267998  
SRR17520069.14267999  
SRR17520069.14268000  
SRR17520069.14268001  
SRR17520069.14268002  
SRR17520069.14268003  
SRR17520069.14268004  
SRR17520069.14268005  
SRR17520069.14268006  
SRR17520069.14268007  
SRR17520069.14268008  
SRR17520069.14268009  
SRR17520069.14268010

SRR17520069. 14268011  
SRR17520069. 14268012  
SRR17520069. 14268013  
SRR17520069. 14268014  
SRR17520069. 14268015  
SRR17520069. 14268016  
SRR17520069. 14268017  
SRR17520069. 14268018  
SRR17520069. 14268019  
SRR17520069. 14268020  
SRR17520069. 14268021  
SRR17520069. 14268022  
SRR17520069. 14268023  
SRR17520069. 14268024  
SRR17520069. 14268025  
SRR17520069. 14268026  
SRR17520069. 14268027  
SRR17520069. 14268028  
SRR17520069. 14268029  
SRR17520069. 14268030  
SRR17520069. 14268031  
SRR17520069. 14268032  
SRR17520069. 14268033  
SRR17520069. 14268034  
SRR17520069. 14268035  
SRR17520069. 14268036  
SRR17520069. 14268037  
SRR17520069. 14268038  
SRR17520069. 14268039  
SRR17520069. 14268040  
SRR17520069. 14268041  
SRR17520069. 14268042  
SRR17520069. 14268044  
SRR17520069. 14268045  
SRR17520069. 14268046  
SRR17520069. 14268047  
SRR17520069. 14268048  
SRR17520069. 14268049  
SRR17520069. 14268050  
SRR17520069. 14268051  
SRR17520069. 14268052  
SRR17520069. 14268053  
SRR17520069. 14268054  
SRR17520069. 14268055  
SRR17520069. 14268056  
SRR17520069. 14273012  
SRR17520069. 14273013

SRR17520069.14273014  
SRR17520069.14273015  
SRR17520069.14273016  
SRR17520069.14273017  
SRR17520069.14273018  
SRR17520069.14273019  
SRR17520069.14273020  
SRR17520069.14273021  
SRR17520069.14273022  
SRR17520069.14273023  
SRR17520069.14273024  
SRR17520069.14273025  
SRR17520069.14273026  
SRR17520069.14273027  
SRR17520069.14273028  
SRR17520069.14273029  
SRR17520069.14273030  
SRR17520069.14273031  
SRR17520069.14273032  
SRR17520069.14273033  
SRR17520069.14273034  
SRR17520069.14273035  
SRR17520069.14273036  
SRR17520069.14273037  
SRR17520069.14273038  
SRR17520069.14273039  
SRR17520069.14273040  
SRR17520069.14273041  
SRR17520069.14284530  
SRR17520069.14293220  
SRR17520069.14293221  
SRR17520069.14293222  
SRR17520069.14293223  
SRR17520069.14293224  
SRR17520069.14293225  
SRR17520069.14293226  
SRR17520069.14293227  
SRR17520069.14293228  
SRR17520069.14293229  
SRR17520069.14293230  
SRR17520069.14293231  
SRR17520069.14293232  
SRR17520069.14293233  
SRR17520069.14293234  
SRR17520069.14293235  
SRR17520069.14293236  
SRR17520069.14293237

SRR17520069.14293238  
SRR17520069.14293240  
SRR17520069.14293241  
SRR17520069.14293242  
SRR17520069.14293243  
SRR17520069.14293244  
SRR17520069.14293245  
SRR17520069.14293246  
SRR17520069.14293247  
SRR17520069.14293248  
SRR17520069.14293249  
SRR17520069.14293250  
SRR17520069.14293251  
SRR17520069.14293252  
SRR17520069.14293253  
SRR17520069.14293254  
SRR17520069.14293255  
SRR17520069.14293256  
SRR17520069.14293257  
SRR17520069.14293258  
SRR17520069.14293259  
SRR17520069.14293260  
SRR17520069.14293261  
SRR17520069.14293262  
SRR17520069.14293263  
SRR17520069.14293264  
SRR17520069.14293265  
SRR17520069.14293266  
SRR17520069.14293267  
SRR17520069.14293268  
SRR17520069.14293269  
SRR17520069.14293270  
SRR17520069.14293271  
SRR17520069.14293272  
SRR17520069.14293273  
SRR17520069.14293274  
SRR17520069.14293275  
SRR17520069.14293276  
SRR17520069.14293277  
SRR17520069.14293278  
SRR17520069.14293279  
SRR17520069.14293280  
SRR17520069.14293281  
SRR17520069.14293283  
SRR17520069.14293287  
SRR17520069.14293292  
SRR17520069.14293293



SRR17520069.14293295  
SRR17520069.14293297  
SRR17520069.14293299  
SRR17520069.14293301  
SRR17520069.14293304  
SRR17520069.14293306  
SRR17520069.14293309  
SRR17520069.14293310  
SRR17520069.14298029  
SRR17520069.14306113  
SRR17520069.14306114  
SRR17520069.14306115  
SRR17520069.14306116  
SRR17520069.14306117  
SRR17520069.14306118  
SRR17520069.14306119  
SRR17520069.14306120  
SRR17520069.14306121  
SRR17520069.14306122  
SRR17520069.14306123  
SRR17520069.14306124  
SRR17520069.14306125  
SRR17520069.14306126  
SRR17520069.14306128  
SRR17520069.14306129  
SRR17520069.14306130  
SRR17520069.14306132  
SRR17520069.14306133  
SRR17520069.14306134  
SRR17520069.14306135  
SRR17520069.14306136  
SRR17520069.14306137  
SRR17520069.14306138  
SRR17520069.14306139  
SRR17520069.14306140  
SRR17520069.14306141  
SRR17520069.14306142  
SRR17520069.14306143  
SRR17520069.14306144  
SRR17520069.14306145  
SRR17520069.14306146  
SRR17520069.14306148  
SRR17520069.14306149  
SRR17520069.14306150  
SRR17520069.14306151  
SRR17520069.14306152  
SRR17520069.14306153

SRR17520069. 14306154  
SRR17520069. 14306155  
SRR17520069. 14306156  
SRR17520069. 14306157  
SRR17520069. 14306158  
SRR17520069. 14306159  
SRR17520069. 14306160  
SRR17520069. 14306161  
SRR17520069. 14306162  
SRR17520069. 14306163  
SRR17520069. 14306164  
SRR17520069. 14306165  
SRR17520069. 14306166  
SRR17520069. 14306167  
SRR17520069. 14306168  
SRR17520069. 14306169  
SRR17520069. 14306170  
SRR17520069. 14306171  
SRR17520069. 14306172  
SRR17520069. 14306173  
SRR17520069. 14306174  
SRR17520069. 14306175  
SRR17520069. 14306176  
SRR17520069. 14306177  
SRR17520069. 14306178  
SRR17520069. 14306179  
SRR17520069. 14306180  
SRR17520069. 14306181  
SRR17520069. 14306182  
SRR17520069. 14306183  
SRR17520069. 14306185  
SRR17520069. 14306186  
SRR17520069. 14306187  
SRR17520069. 14306188  
SRR17520069. 14306189  
SRR17520069. 14306190  
SRR17520069. 14325168  
SRR17520069. 14325169  
SRR17520069. 14325171  
SRR17520069. 14325172  
SRR17520069. 14325173  
SRR17520069. 14325174  
SRR17520069. 14325175  
SRR17520069. 14325176  
SRR17520069. 14325177  
SRR17520069. 14325178  
SRR17520069. 14325179

SRR17520069.14325180  
SRR17520069.14325181  
SRR17520069.14325182  
SRR17520069.14325183  
SRR17520069.14325184  
SRR17520069.14325185  
SRR17520069.14325186  
SRR17520069.14325187  
SRR17520069.14325188  
SRR17520069.14325189  
SRR17520069.14325190  
SRR17520069.14327780  
SRR17520069.14339348  
SRR17520069.14339360  
SRR17520069.14340120  
SRR17520069.14344179  
SRR17520069.14359717  
SRR17520069.14359718  
SRR17520069.14359719  
SRR17520069.14359720  
SRR17520069.14359721  
SRR17520069.14359722  
SRR17520069.14359723  
SRR17520069.14359724  
SRR17520069.14359725  
SRR17520069.14359726  
SRR17520069.14359727  
SRR17520069.14359728  
SRR17520069.14359729  
SRR17520069.14359730  
SRR17520069.14359731  
SRR17520069.14359732  
SRR17520069.14359733  
SRR17520069.14359734  
SRR17520069.14359735  
SRR17520069.14359736  
SRR17520069.14359737  
SRR17520069.14359738  
SRR17520069.14359739  
SRR17520069.14359740  
SRR17520069.14359741  
SRR17520069.14359742  
SRR17520069.14359743  
SRR17520069.14359745  
SRR17520069.14359746  
SRR17520069.14359747  
SRR17520069.14359748

SRR17520069.14359749  
SRR17520069.14359750  
SRR17520069.14359751  
SRR17520069.14359752  
SRR17520069.14359753  
SRR17520069.14359754  
SRR17520069.14359755  
SRR17520069.14359756  
SRR17520069.14359757  
SRR17520069.14359758  
SRR17520069.14359759  
SRR17520069.14359760  
SRR17520069.14359761  
SRR17520069.14359762  
SRR17520069.14359763  
SRR17520069.14359764  
SRR17520069.14359765  
SRR17520069.14359766  
SRR17520069.14359769  
SRR17520069.14359770  
SRR17520069.14359771  
SRR17520069.14359772  
SRR17520069.14359773  
SRR17520069.14359774  
SRR17520069.14359775  
SRR17520069.14359776  
SRR17520069.14359777  
SRR17520069.14359778  
SRR17520069.14359779  
SRR17520069.14359780  
SRR17520069.14359781  
SRR17520069.14359782  
SRR17520069.14359783  
SRR17520069.14359784  
SRR17520069.14359785  
SRR17520069.14359786  
SRR17520069.14359787  
SRR17520069.14359788  
SRR17520069.14359789  
SRR17520069.14359790  
SRR17520069.14359791  
SRR17520069.14359792  
SRR17520069.14359793  
SRR17520069.14359794  
SRR17520069.14359795  
SRR17520069.14359796  
SRR17520069.14359797

SRR17520069. 14359798  
SRR17520069. 14359799  
SRR17520069. 14359800  
SRR17520069. 14359801  
SRR17520069. 14359802  
SRR17520069. 14359803  
SRR17520069. 14359804  
SRR17520069. 14359805  
SRR17520069. 14359806  
SRR17520069. 14359807  
SRR17520069. 14359808  
SRR17520069. 14359809  
SRR17520069. 14359810  
SRR17520069. 14359811  
SRR17520069. 14359812  
SRR17520069. 14359813  
SRR17520069. 14359814  
SRR17520069. 14359815  
SRR17520069. 14359816  
SRR17520069. 14359817  
SRR17520069. 14359818  
SRR17520069. 14359819  
SRR17520069. 14359821  
SRR17520069. 14359822  
SRR17520069. 14359823  
SRR17520069. 14359824  
SRR17520069. 14359825  
SRR17520069. 14359826  
SRR17520069. 14359828  
SRR17520069. 14359829  
SRR17520069. 14359830  
SRR17520069. 14359831  
SRR17520069. 14359832  
SRR17520069. 14359833  
SRR17520069. 14359834  
SRR17520069. 14359835  
SRR17520069. 14359836  
SRR17520069. 14359837  
SRR17520069. 14359838  
SRR17520069. 14359839  
SRR17520069. 14359840  
SRR17520069. 14359841  
SRR17520069. 14359842  
SRR17520069. 14359843  
SRR17520069. 14359844  
SRR17520069. 14359845  
SRR17520069. 14359846

SRR17520069.14359847  
SRR17520069.14359849  
SRR17520069.14359850  
SRR17520069.14359851  
SRR17520069.14359852  
SRR17520069.14359853  
SRR17520069.14359854  
SRR17520069.14359855  
SRR17520069.14359856  
SRR17520069.14359857  
SRR17520069.14359858  
SRR17520069.14359859  
SRR17520069.14359860  
SRR17520069.14359861  
SRR17520069.14359862  
SRR17520069.14359863  
SRR17520069.14359864  
SRR17520069.14359865  
SRR17520069.14359866  
SRR17520069.14359867  
SRR17520069.14359868  
SRR17520069.14359869  
SRR17520069.14359870  
SRR17520069.14359871  
SRR17520069.14359872  
SRR17520069.14359873  
SRR17520069.14359874  
SRR17520069.14359875  
SRR17520069.14359876  
SRR17520069.14359877  
SRR17520069.14359878  
SRR17520069.14359879  
SRR17520069.14359880  
SRR17520069.14363227  
SRR17520069.14363229  
SRR17520069.14365091  
SRR17520069.14365092  
SRR17520069.14365093  
SRR17520069.14365094  
SRR17520069.14365095  
SRR17520069.14365096  
SRR17520069.14365097  
SRR17520069.14365098  
SRR17520069.14365099  
SRR17520069.14365100  
SRR17520069.14365101  
SRR17520069.14365102

SRR17520069. 14365103  
SRR17520069. 14365104  
SRR17520069. 14365105  
SRR17520069. 14365106  
SRR17520069. 14365107  
SRR17520069. 14365108  
SRR17520069. 14365109  
SRR17520069. 14365110  
SRR17520069. 14365111  
SRR17520069. 14365112  
SRR17520069. 14365113  
SRR17520069. 14365114  
SRR17520069. 14365115  
SRR17520069. 14365116  
SRR17520069. 14365117  
SRR17520069. 14365118  
SRR17520069. 14365697  
SRR17520069. 14365698  
SRR17520069. 14365699  
SRR17520069. 14365700  
SRR17520069. 14365701  
SRR17520069. 14365702  
SRR17520069. 14365703  
SRR17520069. 14365704  
SRR17520069. 14365705  
SRR17520069. 14365706  
SRR17520069. 14365707  
SRR17520069. 14365708  
SRR17520069. 14365709  
SRR17520069. 14365710  
SRR17520069. 14365711  
SRR17520069. 14381706  
SRR17520069. 14381708  
SRR17520069. 14381710  
SRR17520069. 14381711  
SRR17520069. 14381712  
SRR17520069. 14381713  
SRR17520069. 14381714  
SRR17520069. 14381715  
SRR17520069. 14381716  
SRR17520069. 14381717  
SRR17520069. 14381718  
SRR17520069. 14381719  
SRR17520069. 14381720  
SRR17520069. 14381721  
SRR17520069. 14381722  
SRR17520069. 14381723

SRR17520069.14381724  
SRR17520069.14381725  
SRR17520069.14381726  
SRR17520069.14381727  
SRR17520069.14381728  
SRR17520069.14381729  
SRR17520069.14381730  
SRR17520069.14381731  
SRR17520069.14381732  
SRR17520069.14381733  
SRR17520069.14381734  
SRR17520069.14381735  
SRR17520069.14381736  
SRR17520069.14381737  
SRR17520069.14381738  
SRR17520069.14381739  
SRR17520069.14381740  
SRR17520069.14381741  
SRR17520069.14381742  
SRR17520069.14381743  
SRR17520069.14381744  
SRR17520069.14381745  
SRR17520069.14381746  
SRR17520069.14381747  
SRR17520069.14381748  
SRR17520069.14381749  
SRR17520069.14381750  
SRR17520069.14381751  
SRR17520069.14381752  
SRR17520069.14381753  
SRR17520069.14381754  
SRR17520069.14381755  
SRR17520069.14381756  
SRR17520069.14381757  
SRR17520069.14381758  
SRR17520069.14381760  
SRR17520069.14381761  
SRR17520069.14381762  
SRR17520069.14381763  
SRR17520069.14381764  
SRR17520069.14381765  
SRR17520069.14381766  
SRR17520069.14381767  
SRR17520069.14381768  
SRR17520069.14381769  
SRR17520069.14381770  
SRR17520069.14381771



SRR17520069. 14381772  
SRR17520069. 14381773  
SRR17520069. 14381774  
SRR17520069. 14381775  
SRR17520069. 14381776  
SRR17520069. 14381777  
SRR17520069. 14381778  
SRR17520069. 14381779  
SRR17520069. 14381780  
SRR17520069. 14381781  
SRR17520069. 14381782  
SRR17520069. 14381783  
SRR17520069. 14381784  
SRR17520069. 14381785  
SRR17520069. 14381786  
SRR17520069. 14381787  
SRR17520069. 14381788  
SRR17520069. 14381789  
SRR17520069. 14381790  
SRR17520069. 14381791  
SRR17520069. 14381792  
SRR17520069. 14381793  
SRR17520069. 14381794  
SRR17520069. 14381795  
SRR17520069. 14381796  
SRR17520069. 14381797  
SRR17520069. 14381798  
SRR17520069. 14381799  
SRR17520069. 14399818  
SRR17520069. 14399819  
SRR17520069. 14399820  
SRR17520069. 14399821  
SRR17520069. 14399822  
SRR17520069. 14399823  
SRR17520069. 14399824  
SRR17520069. 14399825  
SRR17520069. 14399827  
SRR17520069. 14399828  
SRR17520069. 14399829  
SRR17520069. 14399830  
SRR17520069. 14399831  
SRR17520069. 14399832  
SRR17520069. 14399833  
SRR17520069. 14399834  
SRR17520069. 14399835  
SRR17520069. 14399836  
SRR17520069. 14399837

SRR17520069. 14399838  
SRR17520069. 14399839  
SRR17520069. 14399840  
SRR17520069. 14399841  
SRR17520069. 14399842  
SRR17520069. 14399843  
SRR17520069. 14399844  
SRR17520069. 14399845  
SRR17520069. 14399846  
SRR17520069. 14399847  
SRR17520069. 14399848  
SRR17520069. 14399849  
SRR17520069. 14399850  
SRR17520069. 14399851  
SRR17520069. 14399852  
SRR17520069. 14399853  
SRR17520069. 14399854  
SRR17520069. 14399855  
SRR17520069. 14399856  
SRR17520069. 14399857  
SRR17520069. 14399858  
SRR17520069. 14399859  
SRR17520069. 14399860  
SRR17520069. 14399861  
SRR17520069. 14399862  
SRR17520069. 14399863  
SRR17520069. 14399864  
SRR17520069. 14399865  
SRR17520069. 14399866  
SRR17520069. 14399867  
SRR17520069. 14399868  
SRR17520069. 14399869  
SRR17520069. 14399870  
SRR17520069. 14399871  
SRR17520069. 14399872  
SRR17520069. 14399873  
SRR17520069. 14399874  
SRR17520069. 14399875  
SRR17520069. 14399876  
SRR17520069. 14399877  
SRR17520069. 14399878  
SRR17520069. 14399879  
SRR17520069. 14399880  
SRR17520069. 14399881  
SRR17520069. 14399882  
SRR17520069. 14399883  
SRR17520069. 14399884

SRR17520069.14399885  
SRR17520069.14399886  
SRR17520069.14399887  
SRR17520069.14399888  
SRR17520069.14399889  
SRR17520069.14399890  
SRR17520069.14399891  
SRR17520069.14399892  
SRR17520069.14399894  
SRR17520069.14399895  
SRR17520069.14399896  
SRR17520069.14399897  
SRR17520069.14399898  
SRR17520069.14399899  
SRR17520069.14399900  
SRR17520069.14399901  
SRR17520069.14399902  
SRR17520069.14399903  
SRR17520069.14399904  
SRR17520069.14399905  
SRR17520069.14399906  
SRR17520069.14440734  
SRR17520069.14440735  
SRR17520069.14440736  
SRR17520069.14440737  
SRR17520069.14440738  
SRR17520069.14440739  
SRR17520069.14440740  
SRR17520069.14440741  
SRR17520069.14440742  
SRR17520069.14440743  
SRR17520069.14440744  
SRR17520069.14448596  
SRR17520069.14448597  
SRR17520069.14448598  
SRR17520069.14448599  
SRR17520069.14448600  
SRR17520069.14448601  
SRR17520069.14448602  
SRR17520069.14448603  
SRR17520069.14448604  
SRR17520069.14448605  
SRR17520069.14448606  
SRR17520069.14448607  
SRR17520069.14448608  
SRR17520069.14448609  
SRR17520069.14448610

SRR17520069.14448611  
SRR17520069.14448612  
SRR17520069.14448613  
SRR17520069.14448614  
SRR17520069.14448616  
SRR17520069.14448618  
SRR17520069.14448620  
SRR17520069.14448622  
SRR17520069.14448623  
SRR17520069.14448624  
SRR17520069.14448625  
SRR17520069.14448626  
SRR17520069.14448627  
SRR17520069.14448628  
SRR17520069.14448629  
SRR17520069.14448630  
SRR17520069.14448631  
SRR17520069.14448632  
SRR17520069.14448633  
SRR17520069.14448634  
SRR17520069.14448635  
SRR17520069.14448636  
SRR17520069.14448637  
SRR17520069.14448638  
SRR17520069.14448639  
SRR17520069.14448640  
SRR17520069.14448641  
SRR17520069.14448642  
SRR17520069.14448643  
SRR17520069.14448644  
SRR17520069.14448645  
SRR17520069.14448646  
SRR17520069.14448647  
SRR17520069.14448648  
SRR17520069.14448649  
SRR17520069.14448651  
SRR17520069.14448652  
SRR17520069.14448653  
SRR17520069.14448654  
SRR17520069.14448655  
SRR17520069.14448656  
SRR17520069.14448657  
SRR17520069.14448658  
SRR17520069.14448659  
SRR17520069.14448660  
SRR17520069.14448661  
SRR17520069.14448662

SRR17520069.14448663  
SRR17520069.14448664  
SRR17520069.14448665  
SRR17520069.14448666  
SRR17520069.14448667  
SRR17520069.14448668  
SRR17520069.14448669  
SRR17520069.14448670  
SRR17520069.14448671  
SRR17520069.14448672  
SRR17520069.14448673  
SRR17520069.14448674  
SRR17520069.14448675  
SRR17520069.14448676  
SRR17520069.14448677  
SRR17520069.14448678  
SRR17520069.14448679  
SRR17520069.14448680  
SRR17520069.14448681  
SRR17520069.14448682  
SRR17520069.14448683  
SRR17520069.14448684  
SRR17520069.14448685  
SRR17520069.14448686  
SRR17520069.14448687  
SRR17520069.14448688  
SRR17520069.14448689  
SRR17520069.14448690  
SRR17520069.14448691  
SRR17520069.14448692  
SRR17520069.14448693  
SRR17520069.14448694  
SRR17520069.14448695  
SRR17520069.14448696  
SRR17520069.14448697  
SRR17520069.14448698  
SRR17520069.14448699  
SRR17520069.14448700  
SRR17520069.14448701  
SRR17520069.14448702  
SRR17520069.14448703  
SRR17520069.14448704  
SRR17520069.14448705  
SRR17520069.14448706  
SRR17520069.14448707  
SRR17520069.14448708  
SRR17520069.14448709

SRR17520069.14448710  
SRR17520069.14448711  
SRR17520069.14448712  
SRR17520069.14448713  
SRR17520069.14448714  
SRR17520069.14448715  
SRR17520069.14448716  
SRR17520069.14448717  
SRR17520069.14448718  
SRR17520069.14448719  
SRR17520069.14448720  
SRR17520069.14448721  
SRR17520069.14448722  
SRR17520069.14448723  
SRR17520069.14448724  
SRR17520069.14448725  
SRR17520069.14448726  
SRR17520069.14448727  
SRR17520069.14448728  
SRR17520069.14448729  
SRR17520069.14448730  
SRR17520069.14448731  
SRR17520069.14448732  
SRR17520069.14448733  
SRR17520069.14448734  
SRR17520069.14448735  
SRR17520069.14448736  
SRR17520069.14448737  
SRR17520069.14448738  
SRR17520069.14448739  
SRR17520069.14448740  
SRR17520069.14448741  
SRR17520069.14448742  
SRR17520069.14448743  
SRR17520069.14448744  
SRR17520069.14448745  
SRR17520069.14448746  
SRR17520069.14448747  
SRR17520069.14448748  
SRR17520069.14448749  
SRR17520069.14448750  
SRR17520069.14448751  
SRR17520069.14448752  
SRR17520069.14448753  
SRR17520069.14448754  
SRR17520069.14448755  
SRR17520069.14448756

SRR17520069.14448757  
SRR17520069.14448758  
SRR17520069.14448759  
SRR17520069.14448761  
SRR17520069.14448762  
SRR17520069.14448763  
SRR17520069.14448764  
SRR17520069.14448765  
SRR17520069.14448766  
SRR17520069.14448767  
SRR17520069.14448768  
SRR17520069.14448769  
SRR17520069.14448770  
SRR17520069.14448771  
SRR17520069.14448772  
SRR17520069.14448773  
SRR17520069.14448774  
SRR17520069.14448775  
SRR17520069.14448776  
SRR17520069.14448777  
SRR17520069.14448778  
SRR17520069.14449139  
SRR17520069.14449140  
SRR17520069.14449141  
SRR17520069.14449144  
SRR17520069.14449145  
SRR17520069.14449146  
SRR17520069.14449148  
SRR17520069.14449149  
SRR17520069.14449150  
SRR17520069.14449151  
SRR17520069.14449152  
SRR17520069.14449153  
SRR17520069.14449154  
SRR17520069.14449155  
SRR17520069.14449156  
SRR17520069.14449157  
SRR17520069.14449158  
SRR17520069.14449159  
SRR17520069.14449160  
SRR17520069.14449161  
SRR17520069.14449162  
SRR17520069.14449163  
SRR17520069.14449164  
SRR17520069.14449165  
SRR17520069.14449166  
SRR17520069.14449167

SRR17520069.14449168  
SRR17520069.14449169  
SRR17520069.14449170  
SRR17520069.14449171  
SRR17520069.14449172  
SRR17520069.14449173  
SRR17520069.14449174  
SRR17520069.14449175  
SRR17520069.14449176  
SRR17520069.14449177  
SRR17520069.14449178  
SRR17520069.14449179  
SRR17520069.14449180  
SRR17520069.14449181  
SRR17520069.14449182  
SRR17520069.14449183  
SRR17520069.14449184  
SRR17520069.14449185  
SRR17520069.14449186  
SRR17520069.14449187  
SRR17520069.14449188  
SRR17520069.14449189  
SRR17520069.14449190  
SRR17520069.14449191  
SRR17520069.14451007  
SRR17520069.14451008  
SRR17520069.14451010  
SRR17520069.14451011  
SRR17520069.14460213  
SRR17520069.14460214  
SRR17520069.14460215  
SRR17520069.14460216  
SRR17520069.14460217  
SRR17520069.14460218  
SRR17520069.14460219  
SRR17520069.14460220  
SRR17520069.14460221  
SRR17520069.14460222  
SRR17520069.14460223  
SRR17520069.14460224  
SRR17520069.14460225  
SRR17520069.14460226  
SRR17520069.14460227  
SRR17520069.14460228  
SRR17520069.14460229  
SRR17520069.14460230  
SRR17520069.14460231



SRR17520069.14460232  
SRR17520069.14460233  
SRR17520069.14460234  
SRR17520069.14460235  
SRR17520069.14460236  
SRR17520069.14460237  
SRR17520069.14460239  
SRR17520069.14460240  
SRR17520069.14460241  
SRR17520069.14460242  
SRR17520069.14460243  
SRR17520069.14460244  
SRR17520069.14460245  
SRR17520069.14460246  
SRR17520069.14460247  
SRR17520069.14460248  
SRR17520069.14460249  
SRR17520069.14460250  
SRR17520069.14460251  
SRR17520069.14460252  
SRR17520069.14460253  
SRR17520069.14460254  
SRR17520069.14460255  
SRR17520069.14460256  
SRR17520069.14460257  
SRR17520069.14460258  
SRR17520069.14460259  
SRR17520069.14460260  
SRR17520069.14460261  
SRR17520069.14460262  
SRR17520069.14460263  
SRR17520069.14460264  
SRR17520069.14460265  
SRR17520069.14460266  
SRR17520069.14460267  
SRR17520069.14460268  
SRR17520069.14460269  
SRR17520069.14460270  
SRR17520069.14460271  
SRR17520069.14460272  
SRR17520069.14460273  
SRR17520069.14460274  
SRR17520069.14460276  
SRR17520069.14460277  
SRR17520069.14460278  
SRR17520069.14460279  
SRR17520069.14460280

SRR17520069.14460281  
SRR17520069.14511414  
SRR17520069.14511415  
SRR17520069.14511416  
SRR17520069.14511417  
SRR17520069.14511418  
SRR17520069.14511419  
SRR17520069.14511420  
SRR17520069.14511421  
SRR17520069.14511422  
SRR17520069.14511423  
SRR17520069.14511424  
SRR17520069.14511425  
SRR17520069.14511426  
SRR17520069.14511428  
SRR17520069.14532725  
SRR17520069.14532726  
SRR17520069.14532727  
SRR17520069.14532728  
SRR17520069.14532729  
SRR17520069.14532730  
SRR17520069.14532731  
SRR17520069.14532732  
SRR17520069.14532733  
SRR17520069.14532735  
SRR17520069.14532736  
SRR17520069.14532737  
SRR17520069.14532738  
SRR17520069.14532739  
SRR17520069.14532740  
SRR17520069.14532741  
SRR17520069.14532742  
SRR17520069.14532743  
SRR17520069.14532744  
SRR17520069.14532745  
SRR17520069.14532746  
SRR17520069.14532747  
SRR17520069.14532749  
SRR17520069.14532750  
SRR17520069.14532751  
SRR17520069.14532752  
SRR17520069.14532753  
SRR17520069.14532754  
SRR17520069.14532755  
SRR17520069.14532756  
SRR17520069.14532757  
SRR17520069.14532758

SRR17520069.14532759  
SRR17520069.14532762  
SRR17520069.14532763  
SRR17520069.14532764  
SRR17520069.14532765  
SRR17520069.14532766  
SRR17520069.14532767  
SRR17520069.14532768  
SRR17520069.14532769  
SRR17520069.14532770  
SRR17520069.14532771  
SRR17520069.14532772  
SRR17520069.14532773  
SRR17520069.14532774  
SRR17520069.14532775  
SRR17520069.14532776  
SRR17520069.14532777  
SRR17520069.14532778  
SRR17520069.14532779  
SRR17520069.14532780  
SRR17520069.14532781  
SRR17520069.14532782  
SRR17520069.14532783  
SRR17520069.14532784  
SRR17520069.14532785  
SRR17520069.14532786  
SRR17520069.14532787  
SRR17520069.14532788  
SRR17520069.14532789  
SRR17520069.14532790  
SRR17520069.14532791  
SRR17520069.14532792  
SRR17520069.14532793  
SRR17520069.14532794  
SRR17520069.14532795  
SRR17520069.14532796  
SRR17520069.14532797  
SRR17520069.14532798  
SRR17520069.14532799  
SRR17520069.14532800  
SRR17520069.14532801  
SRR17520069.14532802  
SRR17520069.14532803  
SRR17520069.14532804  
SRR17520069.14532805  
SRR17520069.14532806  
SRR17520069.14532807

SRR17520069.14532808  
SRR17520069.14532809  
SRR17520069.14532810  
SRR17520069.14532811  
SRR17520069.14532812  
SRR17520069.14532813  
SRR17520069.14532814  
SRR17520069.14532815  
SRR17520069.14532816  
SRR17520069.14532817  
SRR17520069.14532818  
SRR17520069.14532819  
SRR17520069.14532820  
SRR17520069.14532821  
SRR17520069.14532822  
SRR17520069.14532823  
SRR17520069.14532824  
SRR17520069.14532825  
SRR17520069.14532826  
SRR17520069.14532827  
SRR17520069.14532828  
SRR17520069.14532829  
SRR17520069.14532830  
SRR17520069.14532831  
SRR17520069.14532832  
SRR17520069.14532833  
SRR17520069.14532834  
SRR17520069.14532835  
SRR17520069.14532836  
SRR17520069.14532837  
SRR17520069.14532838  
SRR17520069.14532839  
SRR17520069.14532840  
SRR17520069.14532841  
SRR17520069.14532842  
SRR17520069.14532843  
SRR17520069.14532844  
SRR17520069.14532845  
SRR17520069.14532846  
SRR17520069.14532847  
SRR17520069.14532848  
SRR17520069.14532849  
SRR17520069.14532850  
SRR17520069.14532851  
SRR17520069.14532852  
SRR17520069.14532853  
SRR17520069.14532854

SRR17520069.14532855  
SRR17520069.14532856  
SRR17520069.14532857  
SRR17520069.14532858  
SRR17520069.14532859  
SRR17520069.14532860  
SRR17520069.14532861  
SRR17520069.14532862  
SRR17520069.14532863  
SRR17520069.14532864  
SRR17520069.14532865  
SRR17520069.14532866  
SRR17520069.14532867  
SRR17520069.14532868  
SRR17520069.14532869  
SRR17520069.14532870  
SRR17520069.14540140  
SRR17520069.14540142  
SRR17520069.14540143  
SRR17520069.14540144  
SRR17520069.14540145  
SRR17520069.14540146  
SRR17520069.14540147  
SRR17520069.14540148  
SRR17520069.14540149  
SRR17520069.14540150  
SRR17520069.14540153  
SRR17520069.14540154  
SRR17520069.14540155  
SRR17520069.14540156  
SRR17520069.14540157  
SRR17520069.14540158  
SRR17520069.14540159  
SRR17520069.14540160  
SRR17520069.14540161  
SRR17520069.14540162  
SRR17520069.14540163  
SRR17520069.14540164  
SRR17520069.14540166  
SRR17520069.14540167  
SRR17520069.14540168  
SRR17520069.14540169  
SRR17520069.14540170  
SRR17520069.14540171  
SRR17520069.14540172  
SRR17520069.14540173  
SRR17520069.14540174

SRR17520069.14540175  
SRR17520069.14540176  
SRR17520069.14540177  
SRR17520069.14540178  
SRR17520069.14540179  
SRR17520069.14540180  
SRR17520069.14540181  
SRR17520069.14540182  
SRR17520069.14540183  
SRR17520069.14540184  
SRR17520069.14540186  
SRR17520069.14540187  
SRR17520069.14540188  
SRR17520069.14540189  
SRR17520069.14540190  
SRR17520069.14540191  
SRR17520069.14540192  
SRR17520069.14540194  
SRR17520069.14540195  
SRR17520069.14540196  
SRR17520069.14540197  
SRR17520069.14540198  
SRR17520069.14540199  
SRR17520069.14540200  
SRR17520069.14540202  
SRR17520069.14540203  
SRR17520069.14540204  
SRR17520069.14540205  
SRR17520069.14540206  
SRR17520069.14540207  
SRR17520069.14540208  
SRR17520069.14540209  
SRR17520069.14540210  
SRR17520069.14540211  
SRR17520069.14540212  
SRR17520069.14540213  
SRR17520069.14540214  
SRR17520069.14540215  
SRR17520069.14540216  
SRR17520069.14540217  
SRR17520069.14540218  
SRR17520069.14540219  
SRR17520069.14540220  
SRR17520069.14540221  
SRR17520069.14540222  
SRR17520069.14540223  
SRR17520069.14540224

SRR17520069.14540225  
SRR17520069.14540226  
SRR17520069.14540227  
SRR17520069.14540228  
SRR17520069.14540229  
SRR17520069.14540230  
SRR17520069.14540231  
SRR17520069.14540232  
SRR17520069.14540233  
SRR17520069.14540234  
SRR17520069.14540236  
SRR17520069.14540237  
SRR17520069.14540238  
SRR17520069.14540239  
SRR17520069.14540240  
SRR17520069.14540241  
SRR17520069.14540242  
SRR17520069.14540243  
SRR17520069.14540244  
SRR17520069.14540245  
SRR17520069.14540246  
SRR17520069.14540248  
SRR17520069.14540249  
SRR17520069.14540250  
SRR17520069.14540251  
SRR17520069.14540252  
SRR17520069.14540253  
SRR17520069.14540254  
SRR17520069.14540256  
SRR17520069.14540257  
SRR17520069.14540258  
SRR17520069.14540259  
SRR17520069.14540260  
SRR17520069.14540261  
SRR17520069.14540262  
SRR17520069.14540263  
SRR17520069.14540264  
SRR17520069.14540265  
SRR17520069.14540266  
SRR17520069.14540267  
SRR17520069.14540268  
SRR17520069.14540269  
SRR17520069.14550020  
SRR17520069.14588462  
SRR17520069.14588731  
SRR17520069.14588732  
SRR17520069.14594159

SRR17520069.14594160  
SRR17520069.14594161  
SRR17520069.14594162  
SRR17520069.14594163  
SRR17520069.14594164  
SRR17520069.14594165  
SRR17520069.14599034  
SRR17520069.14599035  
SRR17520069.14599036  
SRR17520069.14599037  
SRR17520069.14599038  
SRR17520069.14599039  
SRR17520069.14599040  
SRR17520069.14599041  
SRR17520069.14599042  
SRR17520069.14599900  
SRR17520069.14599910  
SRR17520069.14616228  
SRR17520069.14622925  
SRR17520069.14657900  
SRR17520069.14657901  
SRR17520069.14657902  
SRR17520069.14657903  
SRR17520069.14657904  
SRR17520069.14657905  
SRR17520069.14657906  
SRR17520069.14657907  
SRR17520069.14657908  
SRR17520069.14657909  
SRR17520069.14657910  
SRR17520069.14657911  
SRR17520069.14663912  
SRR17520069.14686203  
SRR17520069.14735431  
SRR17520069.14764115  
SRR17520069.14764116  
SRR17520069.14764117  
SRR17520069.14764118  
SRR17520069.14764119  
SRR17520069.14764120  
SRR17520069.14764121  
SRR17520069.14764122  
SRR17520069.14764124  
SRR17520069.14764125  
SRR17520069.14764126  
SRR17520069.14764127  
SRR17520069.14764128



SRR17520069. 14764129  
SRR17520069. 14764130  
SRR17520069. 14764131  
SRR17520069. 14764132  
SRR17520069. 14764133  
SRR17520069. 14764134  
SRR17520069. 14764135  
SRR17520069. 14764136  
SRR17520069. 14764137  
SRR17520069. 14764139  
SRR17520069. 14764140  
SRR17520069. 14764141  
SRR17520069. 14764142  
SRR17520069. 14764143  
SRR17520069. 14764144  
SRR17520069. 14764145  
SRR17520069. 14764146  
SRR17520069. 14764147  
SRR17520069. 14764148  
SRR17520069. 14764149  
SRR17520069. 14764150  
SRR17520069. 14764151  
SRR17520069. 14764152  
SRR17520069. 14764153  
SRR17520069. 14764154  
SRR17520069. 14764155  
SRR17520069. 14764156  
SRR17520069. 14764157  
SRR17520069. 14764158  
SRR17520069. 14764159  
SRR17520069. 14764160  
SRR17520069. 14764161  
SRR17520069. 14764162  
SRR17520069. 14764163  
SRR17520069. 14764164  
SRR17520069. 14764165  
SRR17520069. 14764166  
SRR17520069. 14764167  
SRR17520069. 14764168  
SRR17520069. 14764169  
SRR17520069. 14764170  
SRR17520069. 14764171  
SRR17520069. 14764172  
SRR17520069. 14764173  
SRR17520069. 14764174  
SRR17520069. 14764175  
SRR17520069. 14764176

SRR17520069.14764177  
SRR17520069.14764178  
SRR17520069.14764179  
SRR17520069.14764180  
SRR17520069.14764181  
SRR17520069.14764182  
SRR17520069.14764183  
SRR17520069.14764184  
SRR17520069.14764185  
SRR17520069.14764186  
SRR17520069.14764187  
SRR17520069.14764188  
SRR17520069.14764189  
SRR17520069.14764190  
SRR17520069.14764191  
SRR17520069.14764192  
SRR17520069.14764193  
SRR17520069.14764194  
SRR17520069.14764195  
SRR17520069.14764196  
SRR17520069.14764197  
SRR17520069.14764198  
SRR17520069.14764199  
SRR17520069.14764200  
SRR17520069.14764201  
SRR17520069.14764202  
SRR17520069.14764203  
SRR17520069.14764204  
SRR17520069.14764205  
SRR17520069.14764207  
SRR17520069.14764208  
SRR17520069.14764209  
SRR17520069.14764210  
SRR17520069.14764211  
SRR17520069.14764212  
SRR17520069.14764213  
SRR17520069.14764214  
SRR17520069.14764215  
SRR17520069.14764216  
SRR17520069.14764217  
SRR17520069.14764218  
SRR17520069.14764219  
SRR17520069.14764220  
SRR17520069.14764221  
SRR17520069.14764222  
SRR17520069.14764223  
SRR17520069.14764224

SRR17520069. 14764225  
SRR17520069. 14764226  
SRR17520069. 14764227  
SRR17520069. 14764228  
SRR17520069. 14764229  
SRR17520069. 14764230  
SRR17520069. 14764231  
SRR17520069. 14764232  
SRR17520069. 14764233  
SRR17520069. 14764234  
SRR17520069. 14764235  
SRR17520069. 14764236  
SRR17520069. 14764237  
SRR17520069. 14764238  
SRR17520069. 14764239  
SRR17520069. 14764240  
SRR17520069. 14764241  
SRR17520069. 14764242  
SRR17520069. 14764243  
SRR17520069. 14764245  
SRR17520069. 14764246  
SRR17520069. 14764247  
SRR17520069. 14764248  
SRR17520069. 14764249  
SRR17520069. 14764250  
SRR17520069. 14764251  
SRR17520069. 14764253  
SRR17520069. 14764254  
SRR17520069. 14764255  
SRR17520069. 14764256  
SRR17520069. 14764257  
SRR17520069. 14764258  
SRR17520069. 14764259  
SRR17520069. 14764260  
SRR17520069. 14764261  
SRR17520069. 14764262  
SRR17520069. 14764263  
SRR17520069. 14764264  
SRR17520069. 14764265  
SRR17520069. 14764267  
SRR17520069. 14764268  
SRR17520069. 14764269  
SRR17520069. 14764270  
SRR17520069. 14764271  
SRR17520069. 14764273  
SRR17520069. 14764274  
SRR17520069. 14764275

SRR17520069.14764276  
SRR17520069.14764277  
SRR17520069.14764278  
SRR17520069.14764279  
SRR17520069.14764280  
SRR17520069.14764281  
SRR17520069.14764282  
SRR17520069.14764283  
SRR17520069.14764284  
SRR17520069.14764285  
SRR17520069.14764286  
SRR17520069.14764287  
SRR17520069.14764288  
SRR17520069.14764289  
SRR17520069.14764290  
SRR17520069.14764291  
SRR17520069.14764292  
SRR17520069.14764293  
SRR17520069.14764294  
SRR17520069.14764296  
SRR17520069.14764297  
SRR17520069.14764298  
SRR17520069.14767109  
SRR17520069.14819163  
SRR17520069.14819164  
SRR17520069.14819165  
SRR17520069.14819166  
SRR17520069.14819167  
SRR17520069.14819168  
SRR17520069.14819169  
SRR17520069.14819170  
SRR17520069.14819171  
SRR17520069.14819172  
SRR17520069.14819173  
SRR17520069.14819174  
SRR17520069.14819175  
SRR17520069.14819176  
SRR17520069.14819177  
SRR17520069.14819178  
SRR17520069.14819179  
SRR17520069.14824408  
SRR17520069.14824409  
SRR17520069.14824410  
SRR17520069.14824411  
SRR17520069.14824412  
SRR17520069.14824413  
SRR17520069.14824414

SRR17520069.14824417  
SRR17520069.14824418  
SRR17520069.14824419  
SRR17520069.14824420  
SRR17520069.14824421  
SRR17520069.14824422  
SRR17520069.14824423  
SRR17520069.14824424  
SRR17520069.14824425  
SRR17520069.14824426  
SRR17520069.14824427  
SRR17520069.14824428  
SRR17520069.14824429  
SRR17520069.14824430  
SRR17520069.14824431  
SRR17520069.14824432  
SRR17520069.14824433  
SRR17520069.14824434  
SRR17520069.14824435  
SRR17520069.14824436  
SRR17520069.14824437  
SRR17520069.14824438  
SRR17520069.14824439  
SRR17520069.14824440  
SRR17520069.14824441  
SRR17520069.14824442  
SRR17520069.14824443  
SRR17520069.14824444  
SRR17520069.14824445  
SRR17520069.14824446  
SRR17520069.14824447  
SRR17520069.14824448  
SRR17520069.14824449  
SRR17520069.14824450  
SRR17520069.14824451  
SRR17520069.14824452  
SRR17520069.14824453  
SRR17520069.14824454  
SRR17520069.14824455  
SRR17520069.14824456  
SRR17520069.14824457  
SRR17520069.14824458  
SRR17520069.14824459  
SRR17520069.14824460  
SRR17520069.14827935  
SRR17520069.14827936  
SRR17520069.14827937

SRR17520069.14827938  
SRR17520069.14827939  
SRR17520069.14827940  
SRR17520069.14834377  
SRR17520069.14841956  
SRR17520069.14841957  
SRR17520069.14841958  
SRR17520069.14841959  
SRR17520069.14841960  
SRR17520069.14841961  
SRR17520069.14841962  
SRR17520069.14841963  
SRR17520069.14841964  
SRR17520069.14841965  
SRR17520069.14841966  
SRR17520069.14841967  
SRR17520069.14841968  
SRR17520069.14841969  
SRR17520069.14841970  
SRR17520069.14841971  
SRR17520069.14841972  
SRR17520069.14841973  
SRR17520069.14841974  
SRR17520069.14841975  
SRR17520069.14841976  
SRR17520069.14841977  
SRR17520069.14841978  
SRR17520069.14841979  
SRR17520069.14841980  
SRR17520069.14841981  
SRR17520069.14841982  
SRR17520069.14841983  
SRR17520069.14841984  
SRR17520069.14841985  
SRR17520069.14841986  
SRR17520069.14841987  
SRR17520069.14841988  
SRR17520069.14841989  
SRR17520069.14841990  
SRR17520069.14841991  
SRR17520069.14841992  
SRR17520069.14841993  
SRR17520069.14841998  
SRR17520069.14842000  
SRR17520069.14842001  
SRR17520069.14850494  
SRR17520069.14874170

SRR17520069.14874171  
SRR17520069.14874173  
SRR17520069.14874174  
SRR17520069.14874175  
SRR17520069.14874176  
SRR17520069.14874177  
SRR17520069.14874178  
SRR17520069.14874181  
SRR17520069.14874182  
SRR17520069.14874183  
SRR17520069.14874184  
SRR17520069.14874185  
SRR17520069.14874186  
SRR17520069.14874190  
SRR17520069.14874192  
SRR17520069.14877914  
SRR17520069.14877915  
SRR17520069.14877916  
SRR17520069.14877917  
SRR17520069.14877918  
SRR17520069.14877919  
SRR17520069.14877920  
SRR17520069.14877921  
SRR17520069.14877922  
SRR17520069.14877923  
SRR17520069.14877924  
SRR17520069.14877925  
SRR17520069.14877926  
SRR17520069.14877927  
SRR17520069.14877928  
SRR17520069.14877929  
SRR17520069.14877930  
SRR17520069.14877931  
SRR17520069.14877932  
SRR17520069.14877933  
SRR17520069.14877934  
SRR17520069.14877935  
SRR17520069.14877936  
SRR17520069.14877937  
SRR17520069.14877938  
SRR17520069.14877939  
SRR17520069.14877940  
SRR17520069.14877941  
SRR17520069.14877942  
SRR17520069.14877943  
SRR17520069.14877944  
SRR17520069.14877945

SRR17520069.14877946  
SRR17520069.14877947  
SRR17520069.14877948  
SRR17520069.14877949  
SRR17520069.14877950  
SRR17520069.14877951  
SRR17520069.14877952  
SRR17520069.14877953  
SRR17520069.14877954  
SRR17520069.14877955  
SRR17520069.14877956  
SRR17520069.14877957  
SRR17520069.14877958  
SRR17520069.14877959  
SRR17520069.14877960  
SRR17520069.14877961  
SRR17520069.14877962  
SRR17520069.14877963  
SRR17520069.14877964  
SRR17520069.14877965  
SRR17520069.14877966  
SRR17520069.14877967  
SRR17520069.14877968  
SRR17520069.14877969  
SRR17520069.14877970  
SRR17520069.14877971  
SRR17520069.14877972  
SRR17520069.14877973  
SRR17520069.14877974  
SRR17520069.14877975  
SRR17520069.14879725  
SRR17520069.14879726  
SRR17520069.14884143  
SRR17520069.14897094  
SRR17520069.14897098  
SRR17520069.14897114  
SRR17520069.14898474  
SRR17520069.14898475  
SRR17520069.14898476  
SRR17520069.14898477  
SRR17520069.14898478  
SRR17520069.14898479  
SRR17520069.14898480  
SRR17520069.14898481  
SRR17520069.14898482  
SRR17520069.14898483  
SRR17520069.14898484



SRR17520069.14898485  
SRR17520069.14898486  
SRR17520069.14898487  
SRR17520069.14898488  
SRR17520069.14898489  
SRR17520069.14940924  
SRR17520069.14940925  
SRR17520069.14940926  
SRR17520069.14957119  
SRR17520069.14957120  
SRR17520069.14957121  
SRR17520069.14957122  
SRR17520069.14957123  
SRR17520069.14957124  
SRR17520069.14957125  
SRR17520069.14957126  
SRR17520069.14957127  
SRR17520069.14957128  
SRR17520069.14957129  
SRR17520069.14957130  
SRR17520069.14957131  
SRR17520069.14957132  
SRR17520069.14957133  
SRR17520069.14957134  
SRR17520069.14957135  
SRR17520069.14957136  
SRR17520069.14957137  
SRR17520069.14957138  
SRR17520069.14957139  
SRR17520069.14957140  
SRR17520069.14957141  
SRR17520069.14957142  
SRR17520069.14957143  
SRR17520069.14957144  
SRR17520069.14957145  
SRR17520069.14957146  
SRR17520069.14957147  
SRR17520069.14957148  
SRR17520069.14957149  
SRR17520069.14957150  
SRR17520069.14957151  
SRR17520069.14957152  
SRR17520069.14957153  
SRR17520069.14957154  
SRR17520069.14957155  
SRR17520069.14957156  
SRR17520069.14957157

SRR17520069. 14957158  
SRR17520069. 14957159  
SRR17520069. 14957160  
SRR17520069. 14957161  
SRR17520069. 14957162  
SRR17520069. 14957163  
SRR17520069. 14957165  
SRR17520069. 14957166  
SRR17520069. 14957167  
SRR17520069. 14957168  
SRR17520069. 14957169  
SRR17520069. 14957170  
SRR17520069. 14957171  
SRR17520069. 14957172  
SRR17520069. 14957173  
SRR17520069. 14957174  
SRR17520069. 14957175  
SRR17520069. 14957176  
SRR17520069. 14957177  
SRR17520069. 14957178  
SRR17520069. 14957179  
SRR17520069. 14957180  
SRR17520069. 14957181  
SRR17520069. 14957182  
SRR17520069. 14957183  
SRR17520069. 14957184  
SRR17520069. 14957185  
SRR17520069. 14957186  
SRR17520069. 14957187  
SRR17520069. 14957188  
SRR17520069. 14957189  
SRR17520069. 14957190  
SRR17520069. 14957191  
SRR17520069. 14957192  
SRR17520069. 14957193  
SRR17520069. 14957194  
SRR17520069. 14957195  
SRR17520069. 14957196  
SRR17520069. 14957197  
SRR17520069. 14957198  
SRR17520069. 14957199  
SRR17520069. 14957200  
SRR17520069. 14957201  
SRR17520069. 14957202  
SRR17520069. 14957203  
SRR17520069. 14957204  
SRR17520069. 14957205

SRR17520069.14957206  
SRR17520069.14957207  
SRR17520069.14957208  
SRR17520069.14957209  
SRR17520069.14957210  
SRR17520069.14957211  
SRR17520069.14957212  
SRR17520069.14957213  
SRR17520069.14957214  
SRR17520069.14957215  
SRR17520069.14957216  
SRR17520069.14957217  
SRR17520069.14957218  
SRR17520069.14957219  
SRR17520069.14957220  
SRR17520069.14957221  
SRR17520069.14957222  
SRR17520069.14957223  
SRR17520069.14957224  
SRR17520069.14973197  
SRR17520069.14973243  
SRR17520069.14983259  
SRR17520069.14983260  
SRR17520069.14998342  
SRR17520069.14998343  
SRR17520069.14998344  
SRR17520069.14998345  
SRR17520069.14998346  
SRR17520069.14998347  
SRR17520069.14998348  
SRR17520069.14998349  
SRR17520069.14998350  
SRR17520069.14998351  
SRR17520069.14998352  
SRR17520069.14998353  
SRR17520069.14998354  
SRR17520069.14998355  
SRR17520069.14998357  
SRR17520069.14998358  
SRR17520069.14998359  
SRR17520069.14998360  
SRR17520069.14998361  
SRR17520069.14998362  
SRR17520069.14998363  
SRR17520069.14998364  
SRR17520069.14998365  
SRR17520069.14998366

SRR17520069. 14998367  
SRR17520069. 14998368  
SRR17520069. 14998369  
SRR17520069. 14998370  
SRR17520069. 14998371  
SRR17520069. 14998372  
SRR17520069. 14998373  
SRR17520069. 14998374  
SRR17520069. 14998375  
SRR17520069. 14998376  
SRR17520069. 14998377  
SRR17520069. 14998378  
SRR17520069. 14998379  
SRR17520069. 14998380  
SRR17520069. 14998381  
SRR17520069. 14998382  
SRR17520069. 14998383  
SRR17520069. 14998384  
SRR17520069. 14998385  
SRR17520069. 14998386  
SRR17520069. 14998387  
SRR17520069. 14998388  
SRR17520069. 14998389  
SRR17520069. 14998390  
SRR17520069. 14998391  
SRR17520069. 14998392  
SRR17520069. 14998393  
SRR17520069. 14998394  
SRR17520069. 14998395  
SRR17520069. 14998396  
SRR17520069. 14998397  
SRR17520069. 14998398  
SRR17520069. 14998399  
SRR17520069. 14998400  
SRR17520069. 14998401  
SRR17520069. 14998402  
SRR17520069. 14998403  
SRR17520069. 14998404  
SRR17520069. 14998405  
SRR17520069. 14998406  
SRR17520069. 14998407  
SRR17520069. 14998408  
SRR17520069. 14998409  
SRR17520069. 15014839  
SRR17520069. 15014840  
SRR17520069. 15041896  
SRR17520069. 15041897

SRR17520069. 15041898  
SRR17520069. 15041899  
SRR17520069. 15041900  
SRR17520069. 15041901  
SRR17520069. 15041902  
SRR17520069. 15041903  
SRR17520069. 15041904  
SRR17520069. 15041906  
SRR17520069. 15041907  
SRR17520069. 15041908  
SRR17520069. 15041909  
SRR17520069. 15041910  
SRR17520069. 15041911  
SRR17520069. 15041912  
SRR17520069. 15041913  
SRR17520069. 15041914  
SRR17520069. 15041915  
SRR17520069. 15041916  
SRR17520069. 15041917  
SRR17520069. 15041918  
SRR17520069. 15041919  
SRR17520069. 15041920  
SRR17520069. 15041921  
SRR17520069. 15041922  
SRR17520069. 15041923  
SRR17520069. 15041924  
SRR17520069. 15044465  
SRR17520069. 15044466  
SRR17520069. 15044467  
SRR17520069. 15044468  
SRR17520069. 15044469  
SRR17520069. 15044470  
SRR17520069. 15044471  
SRR17520069. 15044472  
SRR17520069. 15044473  
SRR17520069. 15044474  
SRR17520069. 15044475  
SRR17520069. 15044476  
SRR17520069. 15044477  
SRR17520069. 15044478  
SRR17520069. 15044479  
SRR17520069. 15044480  
SRR17520069. 15044482  
SRR17520069. 15044483  
SRR17520069. 15044484  
SRR17520069. 15044485  
SRR17520069. 15044486

SRR17520069.15044487  
SRR17520069.15044488  
SRR17520069.15044489  
SRR17520069.15044490  
SRR17520069.15044491  
SRR17520069.15044492  
SRR17520069.15044493  
SRR17520069.15044494  
SRR17520069.15044495  
SRR17520069.15044496  
SRR17520069.15044497  
SRR17520069.15044498  
SRR17520069.15044499  
SRR17520069.15044500  
SRR17520069.15044501  
SRR17520069.15044502  
SRR17520069.15044503  
SRR17520069.15044504  
SRR17520069.15044505  
SRR17520069.15044506  
SRR17520069.15044508  
SRR17520069.15044509  
SRR17520069.15044510  
SRR17520069.15044511  
SRR17520069.15044512  
SRR17520069.15044513  
SRR17520069.15044514  
SRR17520069.15044515  
SRR17520069.15044516  
SRR17520069.15044517  
SRR17520069.15044518  
SRR17520069.15044519  
SRR17520069.15044520  
SRR17520069.15044521  
SRR17520069.15044522  
SRR17520069.15044523  
SRR17520069.15044524  
SRR17520069.15044525  
SRR17520069.15044526  
SRR17520069.15044527  
SRR17520069.15044528  
SRR17520069.15044529  
SRR17520069.15044530  
SRR17520069.15044531  
SRR17520069.15044532  
SRR17520069.15044533  
SRR17520069.15044534

SRR17520069. 15044535  
SRR17520069. 15044536  
SRR17520069. 15044537  
SRR17520069. 15044538  
SRR17520069. 15044539  
SRR17520069. 15044540  
SRR17520069. 15044541  
SRR17520069. 15044542  
SRR17520069. 15044543  
SRR17520069. 15044544  
SRR17520069. 15044545  
SRR17520069. 15044546  
SRR17520069. 15044547  
SRR17520069. 15044548  
SRR17520069. 15044549  
SRR17520069. 15044550  
SRR17520069. 15044551  
SRR17520069. 15044552  
SRR17520069. 15044553  
SRR17520069. 15044554  
SRR17520069. 15044555  
SRR17520069. 15044556  
SRR17520069. 15044557  
SRR17520069. 15044558  
SRR17520069. 15044559  
SRR17520069. 15044560  
SRR17520069. 15044561  
SRR17520069. 15044562  
SRR17520069. 15044563  
SRR17520069. 15044564  
SRR17520069. 15044565  
SRR17520069. 15044567  
SRR17520069. 15044568  
SRR17520069. 15044569  
SRR17520069. 15044570  
SRR17520069. 15044572  
SRR17520069. 15044573  
SRR17520069. 15044574  
SRR17520069. 15044575  
SRR17520069. 15044576  
SRR17520069. 15044578  
SRR17520069. 15044579  
SRR17520069. 15044580  
SRR17520069. 15044581  
SRR17520069. 15044582  
SRR17520069. 15044583  
SRR17520069. 15044584

SRR17520069. 15044585  
SRR17520069. 15044586  
SRR17520069. 15044587  
SRR17520069. 15044588  
SRR17520069. 15044589  
SRR17520069. 15044590  
SRR17520069. 15044591  
SRR17520069. 15044592  
SRR17520069. 15044593  
SRR17520069. 15044594  
SRR17520069. 15044595  
SRR17520069. 15044596  
SRR17520069. 15044597  
SRR17520069. 15044598  
SRR17520069. 15044599  
SRR17520069. 15044600  
SRR17520069. 15044601  
SRR17520069. 15044602  
SRR17520069. 15044603  
SRR17520069. 15044604  
SRR17520069. 15044605  
SRR17520069. 15044606  
SRR17520069. 15044607  
SRR17520069. 15044608  
SRR17520069. 15044609  
SRR17520069. 15044610  
SRR17520069. 15044611  
SRR17520069. 15044612  
SRR17520069. 15044613  
SRR17520069. 15044614  
SRR17520069. 15044615  
SRR17520069. 15044616  
SRR17520069. 15044617  
SRR17520069. 15044618  
SRR17520069. 15044619  
SRR17520069. 15044620  
SRR17520069. 15044621  
SRR17520069. 15044622  
SRR17520069. 15044623  
SRR17520069. 15044624  
SRR17520069. 15044625  
SRR17520069. 15044626  
SRR17520069. 15044627  
SRR17520069. 15044628  
SRR17520069. 15044629  
SRR17520069. 15044630  
SRR17520069. 15044631



SRR17520069. 15044632  
SRR17520069. 15044633  
SRR17520069. 15044634  
SRR17520069. 15044635  
SRR17520069. 15044636  
SRR17520069. 15044637  
SRR17520069. 15044638  
SRR17520069. 15044639  
SRR17520069. 15044640  
SRR17520069. 15044641  
SRR17520069. 15044642  
SRR17520069. 15044643  
SRR17520069. 15044644  
SRR17520069. 15044645  
SRR17520069. 15044646  
SRR17520069. 15044647  
SRR17520069. 15044648  
SRR17520069. 15044649  
SRR17520069. 15044651  
SRR17520069. 15044652  
SRR17520069. 15044653  
SRR17520069. 15044654  
SRR17520069. 15044655  
SRR17520069. 15044656  
SRR17520069. 15044657  
SRR17520069. 15044658  
SRR17520069. 15044659  
SRR17520069. 15044660  
SRR17520069. 15044661  
SRR17520069. 15051715  
SRR17520069. 15051716  
SRR17520069. 15056516  
SRR17520069. 15056517  
SRR17520069. 15056518  
SRR17520069. 15056519  
SRR17520069. 15056520  
SRR17520069. 15056521  
SRR17520069. 15056522  
SRR17520069. 15056523  
SRR17520069. 15056524  
SRR17520069. 15056525  
SRR17520069. 15056527  
SRR17520069. 15056528  
SRR17520069. 15056529  
SRR17520069. 15056530  
SRR17520069. 15056531  
SRR17520069. 15056532

SRR17520069. 15056533  
SRR17520069. 15056534  
SRR17520069. 15056535  
SRR17520069. 15056536  
SRR17520069. 15056537  
SRR17520069. 15056538  
SRR17520069. 15056539  
SRR17520069. 15056541  
SRR17520069. 15056542  
SRR17520069. 15056543  
SRR17520069. 15056544  
SRR17520069. 15056545  
SRR17520069. 15056546  
SRR17520069. 15056547  
SRR17520069. 15056548  
SRR17520069. 15056549  
SRR17520069. 15056550  
SRR17520069. 15056551  
SRR17520069. 15056552  
SRR17520069. 15056553  
SRR17520069. 15056554  
SRR17520069. 15056555  
SRR17520069. 15056556  
SRR17520069. 15056557  
SRR17520069. 15056558  
SRR17520069. 15056559  
SRR17520069. 15056560  
SRR17520069. 15056561  
SRR17520069. 15056562  
SRR17520069. 15056563  
SRR17520069. 15056564  
SRR17520069. 15056565  
SRR17520069. 15056566  
SRR17520069. 15056567  
SRR17520069. 15056568  
SRR17520069. 15056569  
SRR17520069. 15056570  
SRR17520069. 15056571  
SRR17520069. 15056572  
SRR17520069. 15056573  
SRR17520069. 15056574  
SRR17520069. 15056575  
SRR17520069. 15056576  
SRR17520069. 15056577  
SRR17520069. 15056578  
SRR17520069. 15056579  
SRR17520069. 15056580

SRR17520069. 15056581  
SRR17520069. 15056582  
SRR17520069. 15056583  
SRR17520069. 15056584  
SRR17520069. 15056585  
SRR17520069. 15056586  
SRR17520069. 15056587  
SRR17520069. 15056588  
SRR17520069. 15056589  
SRR17520069. 15056590  
SRR17520069. 15056591  
SRR17520069. 15056592  
SRR17520069. 15056593  
SRR17520069. 15056594  
SRR17520069. 15056595  
SRR17520069. 15056596  
SRR17520069. 15061681  
SRR17520069. 15061682  
SRR17520069. 15061683  
SRR17520069. 15061684  
SRR17520069. 15061685  
SRR17520069. 15061686  
SRR17520069. 15061687  
SRR17520069. 15061688  
SRR17520069. 15061689  
SRR17520069. 15061690  
SRR17520069. 15061691  
SRR17520069. 15061692  
SRR17520069. 15061693  
SRR17520069. 15061694  
SRR17520069. 15061695  
SRR17520069. 15061696  
SRR17520069. 15061697  
SRR17520069. 15063030  
SRR17520069. 15074046  
SRR17520069. 15079316  
SRR17520069. 15079401  
SRR17520069. 15112249  
SRR17520069. 15112250  
SRR17520069. 15112251  
SRR17520069. 15112252  
SRR17520069. 15112253  
SRR17520069. 15112254  
SRR17520069. 15112255  
SRR17520069. 15112256  
SRR17520069. 15112257  
SRR17520069. 15112258

SRR17520069. 15112259  
SRR17520069. 15112260  
SRR17520069. 15112261  
SRR17520069. 15112262  
SRR17520069. 15112263  
SRR17520069. 15112264  
SRR17520069. 15112265  
SRR17520069. 15112266  
SRR17520069. 15112267  
SRR17520069. 15112268  
SRR17520069. 15112269  
SRR17520069. 15112270  
SRR17520069. 15112271  
SRR17520069. 15112272  
SRR17520069. 15112273  
SRR17520069. 15112274  
SRR17520069. 15112275  
SRR17520069. 15112276  
SRR17520069. 15112277  
SRR17520069. 15112278  
SRR17520069. 15112279  
SRR17520069. 15112280  
SRR17520069. 15112281  
SRR17520069. 15112282  
SRR17520069. 15112283  
SRR17520069. 15112284  
SRR17520069. 15112285  
SRR17520069. 15112286  
SRR17520069. 15112287  
SRR17520069. 15112288  
SRR17520069. 15112289  
SRR17520069. 15112290  
SRR17520069. 15112292  
SRR17520069. 15112293  
SRR17520069. 15112294  
SRR17520069. 15112295  
SRR17520069. 15112296  
SRR17520069. 15112297  
SRR17520069. 15112298  
SRR17520069. 15112299  
SRR17520069. 15112300  
SRR17520069. 15112301  
SRR17520069. 15112302  
SRR17520069. 15112303  
SRR17520069. 15112304  
SRR17520069. 15112305  
SRR17520069. 15112306

SRR17520069. 15112307  
SRR17520069. 15112309  
SRR17520069. 15112310  
SRR17520069. 15112311  
SRR17520069. 15112312  
SRR17520069. 15112313  
SRR17520069. 15112314  
SRR17520069. 15112315  
SRR17520069. 15112316  
SRR17520069. 15112317  
SRR17520069. 15112318  
SRR17520069. 15112319  
SRR17520069. 15112320  
SRR17520069. 15112321  
SRR17520069. 15112322  
SRR17520069. 15112323  
SRR17520069. 15112324  
SRR17520069. 15112325  
SRR17520069. 15112326  
SRR17520069. 15112327  
SRR17520069. 15112328  
SRR17520069. 15112329  
SRR17520069. 15112332  
SRR17520069. 15112333  
SRR17520069. 15112334  
SRR17520069. 15112335  
SRR17520069. 15112336  
SRR17520069. 15112337  
SRR17520069. 15112338  
SRR17520069. 15112339  
SRR17520069. 15112340  
SRR17520069. 15112341  
SRR17520069. 15112342  
SRR17520069. 15112343  
SRR17520069. 15112344  
SRR17520069. 15112345  
SRR17520069. 15112346  
SRR17520069. 15112348  
SRR17520069. 15112349  
SRR17520069. 15112350  
SRR17520069. 15112351  
SRR17520069. 15112352  
SRR17520069. 15112353  
SRR17520069. 15112354  
SRR17520069. 15112355  
SRR17520069. 15112356  
SRR17520069. 15112357

SRR17520069. 15112358  
SRR17520069. 15112359  
SRR17520069. 15112360  
SRR17520069. 15112361  
SRR17520069. 15112362  
SRR17520069. 15112363  
SRR17520069. 15112364  
SRR17520069. 15112365  
SRR17520069. 15112366  
SRR17520069. 15112367  
SRR17520069. 15112368  
SRR17520069. 15112369  
SRR17520069. 15112370  
SRR17520069. 15112371  
SRR17520069. 15112372  
SRR17520069. 15112373  
SRR17520069. 15112374  
SRR17520069. 15112375  
SRR17520069. 15112376  
SRR17520069. 15112377  
SRR17520069. 15112378  
SRR17520069. 15112379  
SRR17520069. 15112380  
SRR17520069. 15112381  
SRR17520069. 15112382  
SRR17520069. 15112383  
SRR17520069. 15112384  
SRR17520069. 15112385  
SRR17520069. 15112386  
SRR17520069. 15112387  
SRR17520069. 15112388  
SRR17520069. 15112389  
SRR17520069. 15112390  
SRR17520069. 15112391  
SRR17520069. 15112392  
SRR17520069. 15112393  
SRR17520069. 15112394  
SRR17520069. 15112395  
SRR17520069. 15112396  
SRR17520069. 15112397  
SRR17520069. 15112398  
SRR17520069. 15112399  
SRR17520069. 15112400  
SRR17520069. 15112401  
SRR17520069. 15112402  
SRR17520069. 15112403  
SRR17520069. 15112404

SRR17520069. 15112405  
SRR17520069. 15112406  
SRR17520069. 15112407  
SRR17520069. 15112408  
SRR17520069. 15112409  
SRR17520069. 15112410  
SRR17520069. 15112411  
SRR17520069. 15112412  
SRR17520069. 15112413  
SRR17520069. 15112414  
SRR17520069. 15112415  
SRR17520069. 15112416  
SRR17520069. 15112417  
SRR17520069. 15112418  
SRR17520069. 15112419  
SRR17520069. 15112420  
SRR17520069. 15112421  
SRR17520069. 15112422  
SRR17520069. 15112423  
SRR17520069. 15112424  
SRR17520069. 15112425  
SRR17520069. 15112426  
SRR17520069. 15112427  
SRR17520069. 15112428  
SRR17520069. 15112429  
SRR17520069. 15122220  
SRR17520069. 15122355  
SRR17520069. 15122356  
SRR17520069. 15123271  
SRR17520069. 15123273  
SRR17520069. 15123274  
SRR17520069. 15123275  
SRR17520069. 15123278  
SRR17520069. 15123279  
SRR17520069. 15123280  
SRR17520069. 15123281  
SRR17520069. 15123282  
SRR17520069. 15123284  
SRR17520069. 15123285  
SRR17520069. 15123286  
SRR17520069. 15123287  
SRR17520069. 15123288  
SRR17520069. 15123289  
SRR17520069. 15123291  
SRR17520069. 15123292  
SRR17520069. 15123293  
SRR17520069. 15123294

SRR17520069. 15123295  
SRR17520069. 15123296  
SRR17520069. 15123297  
SRR17520069. 15123298  
SRR17520069. 15123299  
SRR17520069. 15123300  
SRR17520069. 15123301  
SRR17520069. 15123302  
SRR17520069. 15123303  
SRR17520069. 15123304  
SRR17520069. 15123305  
SRR17520069. 15123306  
SRR17520069. 15123307  
SRR17520069. 15123308  
SRR17520069. 15123309  
SRR17520069. 15123310  
SRR17520069. 15123312  
SRR17520069. 15123313  
SRR17520069. 15123314  
SRR17520069. 15134373  
SRR17520069. 15134374  
SRR17520069. 15134375  
SRR17520069. 15134377  
SRR17520069. 15134378  
SRR17520069. 15134379  
SRR17520069. 15134380  
SRR17520069. 15134381  
SRR17520069. 15134382  
SRR17520069. 15134383  
SRR17520069. 15134384  
SRR17520069. 15134385  
SRR17520069. 15134386  
SRR17520069. 15134387  
SRR17520069. 15134388  
SRR17520069. 15134389  
SRR17520069. 15134390  
SRR17520069. 15134391  
SRR17520069. 15134392  
SRR17520069. 15134393  
SRR17520069. 15134394  
SRR17520069. 15134395  
SRR17520069. 15134396  
SRR17520069. 15134397  
SRR17520069. 15134398  
SRR17520069. 15134399  
SRR17520069. 15134400  
SRR17520069. 15134401



SRR17520069. 15134402  
SRR17520069. 15134403  
SRR17520069. 15134404  
SRR17520069. 15134405  
SRR17520069. 15134406  
SRR17520069. 15134407  
SRR17520069. 15134408  
SRR17520069. 15134409  
SRR17520069. 15134410  
SRR17520069. 15134411  
SRR17520069. 15134412  
SRR17520069. 15134413  
SRR17520069. 15134414  
SRR17520069. 15134415  
SRR17520069. 15134416  
SRR17520069. 15134417  
SRR17520069. 15145682  
SRR17520069. 15145685  
SRR17520069. 15145686  
SRR17520069. 15145688  
SRR17520069. 15145689  
SRR17520069. 15145690  
SRR17520069. 15145691  
SRR17520069. 15145692  
SRR17520069. 15145693  
SRR17520069. 15145694  
SRR17520069. 15145695  
SRR17520069. 15145696  
SRR17520069. 15145697  
SRR17520069. 15145698  
SRR17520069. 15145699  
SRR17520069. 15145700  
SRR17520069. 15145701  
SRR17520069. 15145702  
SRR17520069. 15145703  
SRR17520069. 15145704  
SRR17520069. 15145705  
SRR17520069. 15145706  
SRR17520069. 15145707  
SRR17520069. 15145708  
SRR17520069. 15145709  
SRR17520069. 15145710  
SRR17520069. 15145711  
SRR17520069. 15145712  
SRR17520069. 15145713  
SRR17520069. 15145714  
SRR17520069. 15145715

SRR17520069. 15145716  
SRR17520069. 15145717  
SRR17520069. 15145718  
SRR17520069. 15145720  
SRR17520069. 15145721  
SRR17520069. 15145722  
SRR17520069. 15145723  
SRR17520069. 15145724  
SRR17520069. 15145725  
SRR17520069. 15145726  
SRR17520069. 15145727  
SRR17520069. 15145728  
SRR17520069. 15145729  
SRR17520069. 15145730  
SRR17520069. 15145731  
SRR17520069. 15145732  
SRR17520069. 15145733  
SRR17520069. 15145734  
SRR17520069. 15145735  
SRR17520069. 15145736  
SRR17520069. 15145737  
SRR17520069. 15145738  
SRR17520069. 15145739  
SRR17520069. 15145740  
SRR17520069. 15145742  
SRR17520069. 15145743  
SRR17520069. 15145744  
SRR17520069. 15145746  
SRR17520069. 15145747  
SRR17520069. 15145748  
SRR17520069. 15145749  
SRR17520069. 15145750  
SRR17520069. 15145751  
SRR17520069. 15145752  
SRR17520069. 15145753  
SRR17520069. 15145755  
SRR17520069. 15145756  
SRR17520069. 15145757  
SRR17520069. 15145758  
SRR17520069. 15145759  
SRR17520069. 15145760  
SRR17520069. 15145761  
SRR17520069. 15145762  
SRR17520069. 15145763  
SRR17520069. 15145764  
SRR17520069. 15145765  
SRR17520069. 15145766

SRR17520069. 15145767  
SRR17520069. 15145768  
SRR17520069. 15145769  
SRR17520069. 15145770  
SRR17520069. 15145771  
SRR17520069. 15145772  
SRR17520069. 15145773  
SRR17520069. 15145774  
SRR17520069. 15145776  
SRR17520069. 15145778  
SRR17520069. 15145779  
SRR17520069. 15145781  
SRR17520069. 15145783  
SRR17520069. 15179553  
SRR17520069. 15179555  
SRR17520069. 15179556  
SRR17520069. 15179557  
SRR17520069. 15179559  
SRR17520069. 15179560  
SRR17520069. 15179561  
SRR17520069. 15179562  
SRR17520069. 15179563  
SRR17520069. 15179564  
SRR17520069. 15179565  
SRR17520069. 15179566  
SRR17520069. 15179567  
SRR17520069. 15179568  
SRR17520069. 15179569  
SRR17520069. 15179570  
SRR17520069. 15179571  
SRR17520069. 15179572  
SRR17520069. 15179573  
SRR17520069. 15193665  
SRR17520069. 15201744  
SRR17520069. 15201745  
SRR17520069. 15201746  
SRR17520069. 15201747  
SRR17520069. 15201748  
SRR17520069. 15201749  
SRR17520069. 15201750  
SRR17520069. 15201751  
SRR17520069. 15201752  
SRR17520069. 15201753  
SRR17520069. 15201754  
SRR17520069. 15201755  
SRR17520069. 15201756  
SRR17520069. 15201757

SRR17520069. 15201758  
SRR17520069. 15201759  
SRR17520069. 15201760  
SRR17520069. 15201761  
SRR17520069. 15201762  
SRR17520069. 15201763  
SRR17520069. 15201764  
SRR17520069. 15201765  
SRR17520069. 15201766  
SRR17520069. 15201768  
SRR17520069. 15201769  
SRR17520069. 15201770  
SRR17520069. 15201771  
SRR17520069. 15201772  
SRR17520069. 15201773  
SRR17520069. 15201774  
SRR17520069. 15201775  
SRR17520069. 15201776  
SRR17520069. 15201777  
SRR17520069. 15201778  
SRR17520069. 15201779  
SRR17520069. 15201780  
SRR17520069. 15201781  
SRR17520069. 15201782  
SRR17520069. 15201783  
SRR17520069. 15201784  
SRR17520069. 15201785  
SRR17520069. 15201786  
SRR17520069. 15201787  
SRR17520069. 15201788  
SRR17520069. 15201789  
SRR17520069. 15201790  
SRR17520069. 15201791  
SRR17520069. 15201792  
SRR17520069. 15201793  
SRR17520069. 15201794  
SRR17520069. 15201795  
SRR17520069. 15201796  
SRR17520069. 15201797  
SRR17520069. 15201798  
SRR17520069. 15201799  
SRR17520069. 15201800  
SRR17520069. 15201801  
SRR17520069. 15201802  
SRR17520069. 15201803  
SRR17520069. 15201804  
SRR17520069. 15201805

SRR17520069. 15201806  
SRR17520069. 15201807  
SRR17520069. 15201808  
SRR17520069. 15201809  
SRR17520069. 15201810  
SRR17520069. 15201811  
SRR17520069. 15201812  
SRR17520069. 15201813  
SRR17520069. 15201814  
SRR17520069. 15201815  
SRR17520069. 15201816  
SRR17520069. 15201817  
SRR17520069. 15201818  
SRR17520069. 15201819  
SRR17520069. 15201820  
SRR17520069. 15201821  
SRR17520069. 15201822  
SRR17520069. 15201823  
SRR17520069. 15201824  
SRR17520069. 15201825  
SRR17520069. 15201826  
SRR17520069. 15201827  
SRR17520069. 15201828  
SRR17520069. 15201829  
SRR17520069. 15201830  
SRR17520069. 15201831  
SRR17520069. 15201832  
SRR17520069. 15201833  
SRR17520069. 15201834  
SRR17520069. 15201835  
SRR17520069. 15201836  
SRR17520069. 15201837  
SRR17520069. 15201838  
SRR17520069. 15201839  
SRR17520069. 15201840  
SRR17520069. 15201841  
SRR17520069. 15201842  
SRR17520069. 15201843  
SRR17520069. 15201844  
SRR17520069. 15201845  
SRR17520069. 15201846  
SRR17520069. 15201847  
SRR17520069. 15201848  
SRR17520069. 15201849  
SRR17520069. 15201850  
SRR17520069. 15201851  
SRR17520069. 15201852

SRR17520069. 15201853  
SRR17520069. 15201854  
SRR17520069. 15201855  
SRR17520069. 15201856  
SRR17520069. 15201857  
SRR17520069. 15201858  
SRR17520069. 15201859  
SRR17520069. 15201860  
SRR17520069. 15201861  
SRR17520069. 15233135  
SRR17520069. 15237148  
SRR17520069. 15238337  
SRR17520069. 15239731  
SRR17520069. 15240089  
SRR17520069. 15240090  
SRR17520069. 15240091  
SRR17520069. 15240092  
SRR17520069. 15240093  
SRR17520069. 15240094  
SRR17520069. 15240095  
SRR17520069. 15240096  
SRR17520069. 15240097  
SRR17520069. 15240098  
SRR17520069. 15240099  
SRR17520069. 15240100  
SRR17520069. 15240101  
SRR17520069. 15240102  
SRR17520069. 15240103  
SRR17520069. 15240104  
SRR17520069. 15240105  
SRR17520069. 15240106  
SRR17520069. 15240107  
SRR17520069. 15240108  
SRR17520069. 15249782  
SRR17520069. 15249783  
SRR17520069. 15249784  
SRR17520069. 15249785  
SRR17520069. 15249786  
SRR17520069. 15249787  
SRR17520069. 15249788  
SRR17520069. 15249789  
SRR17520069. 15249790  
SRR17520069. 15249791  
SRR17520069. 15249792  
SRR17520069. 15270037  
SRR17520069. 15270039  
SRR17520069. 15270040

SRR17520069. 15270041  
SRR17520069. 15270639  
SRR17520069. 15270640  
SRR17520069. 15270641  
SRR17520069. 15270642  
SRR17520069. 15270643  
SRR17520069. 15270644  
SRR17520069. 15270645  
SRR17520069. 15270646  
SRR17520069. 15270647  
SRR17520069. 15270648  
SRR17520069. 15270650  
SRR17520069. 15272061  
SRR17520069. 15293540  
SRR17520069. 15293542  
SRR17520069. 15293543  
SRR17520069. 15293544  
SRR17520069. 15293545  
SRR17520069. 15293546  
SRR17520069. 15293548  
SRR17520069. 15293549  
SRR17520069. 15293550  
SRR17520069. 15293551  
SRR17520069. 15293552  
SRR17520069. 15293553  
SRR17520069. 15293554  
SRR17520069. 15293555  
SRR17520069. 15293556  
SRR17520069. 15293557  
SRR17520069. 15293558  
SRR17520069. 15293559  
SRR17520069. 15293561  
SRR17520069. 15293562  
SRR17520069. 15293563  
SRR17520069. 15293564  
SRR17520069. 15293565  
SRR17520069. 15293566  
SRR17520069. 15293567  
SRR17520069. 15293568  
SRR17520069. 15293569  
SRR17520069. 15293570  
SRR17520069. 15293571  
SRR17520069. 15293572  
SRR17520069. 15300325  
SRR17520069. 15303433  
SRR17520069. 15303434  
SRR17520069. 15303435

SRR17520069. 15303436  
SRR17520069. 15303437  
SRR17520069. 15303438  
SRR17520069. 15303439  
SRR17520069. 15303440  
SRR17520069. 15303441  
SRR17520069. 15303442  
SRR17520069. 15303443  
SRR17520069. 15303444  
SRR17520069. 15303445  
SRR17520069. 15303446  
SRR17520069. 15303448  
SRR17520069. 15303449  
SRR17520069. 15303450  
SRR17520069. 15326144  
SRR17520069. 15326293  
SRR17520069. 15327471  
SRR17520069. 15327472  
SRR17520069. 15327473  
SRR17520069. 15327474  
SRR17520069. 15327475  
SRR17520069. 15327476  
SRR17520069. 15327477  
SRR17520069. 15327478  
SRR17520069. 15327479  
SRR17520069. 15327480  
SRR17520069. 15327481  
SRR17520069. 15327482  
SRR17520069. 15327483  
SRR17520069. 15327485  
SRR17520069. 15327486  
SRR17520069. 15327488  
SRR17520069. 15327489  
SRR17520069. 15327490  
SRR17520069. 15327491  
SRR17520069. 15327493  
SRR17520069. 15327494  
SRR17520069. 15327495  
SRR17520069. 15327496  
SRR17520069. 15327497  
SRR17520069. 15327498  
SRR17520069. 15327499  
SRR17520069. 15327500  
SRR17520069. 15327501  
SRR17520069. 15327502  
SRR17520069. 15327503  
SRR17520069. 15327504



SRR17520069. 15327505  
SRR17520069. 15327506  
SRR17520069. 15327507  
SRR17520069. 15327509  
SRR17520069. 15327510  
SRR17520069. 15327511  
SRR17520069. 15327512  
SRR17520069. 15327513  
SRR17520069. 15327514  
SRR17520069. 15327515  
SRR17520069. 15327516  
SRR17520069. 15327517  
SRR17520069. 15327518  
SRR17520069. 15327519  
SRR17520069. 15327520  
SRR17520069. 15327521  
SRR17520069. 15327522  
SRR17520069. 15327523  
SRR17520069. 15327524  
SRR17520069. 15327525  
SRR17520069. 15327526  
SRR17520069. 15327527  
SRR17520069. 15327528  
SRR17520069. 15327529  
SRR17520069. 15327530  
SRR17520069. 15327531  
SRR17520069. 15327533  
SRR17520069. 15327534  
SRR17520069. 15327535  
SRR17520069. 15327536  
SRR17520069. 15327537  
SRR17520069. 15327538  
SRR17520069. 15327539  
SRR17520069. 15327540  
SRR17520069. 15327541  
SRR17520069. 15327542  
SRR17520069. 15327543  
SRR17520069. 15327545  
SRR17520069. 15327546  
SRR17520069. 15327548  
SRR17520069. 15327549  
SRR17520069. 15327550  
SRR17520069. 15327551  
SRR17520069. 15327552  
SRR17520069. 15327553  
SRR17520069. 15327554  
SRR17520069. 15327555

SRR17520069. 15327556  
SRR17520069. 15327557  
SRR17520069. 15327558  
SRR17520069. 15327559  
SRR17520069. 15327560  
SRR17520069. 15327561  
SRR17520069. 15327564  
SRR17520069. 15327565  
SRR17520069. 15327566  
SRR17520069. 15327567  
SRR17520069. 15327568  
SRR17520069. 15327569  
SRR17520069. 15327570  
SRR17520069. 15327571  
SRR17520069. 15327572  
SRR17520069. 15327573  
SRR17520069. 15327574  
SRR17520069. 15327575  
SRR17520069. 15327576  
SRR17520069. 15327577  
SRR17520069. 15340054  
SRR17520069. 15340239  
SRR17520069. 15340241  
SRR17520069. 15340242  
SRR17520069. 15340243  
SRR17520069. 15340244  
SRR17520069. 15340245  
SRR17520069. 15340246  
SRR17520069. 15340247  
SRR17520069. 15340248  
SRR17520069. 15340249  
SRR17520069. 15340250  
SRR17520069. 15340251  
SRR17520069. 15340252  
SRR17520069. 15340253  
SRR17520069. 15340254  
SRR17520069. 15340255  
SRR17520069. 15340256  
SRR17520069. 15340257  
SRR17520069. 15340258  
SRR17520069. 15340259  
SRR17520069. 15340260  
SRR17520069. 15340261  
SRR17520069. 15340262  
SRR17520069. 15340263  
SRR17520069. 15340264  
SRR17520069. 15340265

SRR17520069. 15340267  
SRR17520069. 15340268  
SRR17520069. 15340269  
SRR17520069. 15340270  
SRR17520069. 15340271  
SRR17520069. 15340272  
SRR17520069. 15340273  
SRR17520069. 15340274  
SRR17520069. 15340275  
SRR17520069. 15340276  
SRR17520069. 15340277  
SRR17520069. 15340278  
SRR17520069. 15340280  
SRR17520069. 15340281  
SRR17520069. 15340282  
SRR17520069. 15340283  
SRR17520069. 15340284  
SRR17520069. 15340285  
SRR17520069. 15340286  
SRR17520069. 15340287  
SRR17520069. 15340288  
SRR17520069. 15340289  
SRR17520069. 15340290  
SRR17520069. 15340291  
SRR17520069. 15340292  
SRR17520069. 15340293  
SRR17520069. 15340294  
SRR17520069. 15340295  
SRR17520069. 15340296  
SRR17520069. 15340297  
SRR17520069. 15340298  
SRR17520069. 15340299  
SRR17520069. 15340300  
SRR17520069. 15340301  
SRR17520069. 15340302  
SRR17520069. 15340303  
SRR17520069. 15340304  
SRR17520069. 15340305  
SRR17520069. 15340306  
SRR17520069. 15340307  
SRR17520069. 15340308  
SRR17520069. 15340309  
SRR17520069. 15340310  
SRR17520069. 15340312  
SRR17520069. 15340313  
SRR17520069. 15340314  
SRR17520069. 15340315

SRR17520069. 15340316  
SRR17520069. 15340317  
SRR17520069. 15340318  
SRR17520069. 15340319  
SRR17520069. 15340320  
SRR17520069. 15340321  
SRR17520069. 15340322  
SRR17520069. 15340323  
SRR17520069. 15340324  
SRR17520069. 15340325  
SRR17520069. 15340326  
SRR17520069. 15340327  
SRR17520069. 15340328  
SRR17520069. 15340329  
SRR17520069. 15340330  
SRR17520069. 15340331  
SRR17520069. 15340332  
SRR17520069. 15340333  
SRR17520069. 15340334  
SRR17520069. 15340335  
SRR17520069. 15340336  
SRR17520069. 15340337  
SRR17520069. 15340338  
SRR17520069. 15340339  
SRR17520069. 15340340  
SRR17520069. 15340341  
SRR17520069. 15340342  
SRR17520069. 15340343  
SRR17520069. 15340344  
SRR17520069. 15340345  
SRR17520069. 15340346  
SRR17520069. 15340347  
SRR17520069. 15349719  
SRR17520069. 15349721  
SRR17520069. 15349722  
SRR17520069. 15349723  
SRR17520069. 15349724  
SRR17520069. 15349726  
SRR17520069. 15349727  
SRR17520069. 15349728  
SRR17520069. 15349729  
SRR17520069. 15349730  
SRR17520069. 15349731  
SRR17520069. 15349732  
SRR17520069. 15349733  
SRR17520069. 15349734  
SRR17520069. 15349735

SRR17520069. 15349736  
SRR17520069. 15349737  
SRR17520069. 15349738  
SRR17520069. 15349739  
SRR17520069. 15349740  
SRR17520069. 15349741  
SRR17520069. 15349742  
SRR17520069. 15349743  
SRR17520069. 15349744  
SRR17520069. 15349745  
SRR17520069. 15349748  
SRR17520069. 15349749  
SRR17520069. 15349750  
SRR17520069. 15349751  
SRR17520069. 15349757  
SRR17520069. 15349758  
SRR17520069. 15349759  
SRR17520069. 15349760  
SRR17520069. 15349761  
SRR17520069. 15349763  
SRR17520069. 15349764  
SRR17520069. 15349765  
SRR17520069. 15349766  
SRR17520069. 15349768  
SRR17520069. 15349769  
SRR17520069. 15349770  
SRR17520069. 15349771  
SRR17520069. 15349772  
SRR17520069. 15349773  
SRR17520069. 15349774  
SRR17520069. 15349775  
SRR17520069. 15349776  
SRR17520069. 15349777  
SRR17520069. 15349778  
SRR17520069. 15349779  
SRR17520069. 15349780  
SRR17520069. 15349781  
SRR17520069. 15349782  
SRR17520069. 15349783  
SRR17520069. 15349784  
SRR17520069. 15349785  
SRR17520069. 15349786  
SRR17520069. 15349787  
SRR17520069. 15349789  
SRR17520069. 15349790  
SRR17520069. 15349791  
SRR17520069. 15349792

SRR17520069. 15349793  
SRR17520069. 15349794  
SRR17520069. 15349795  
SRR17520069. 15349796  
SRR17520069. 15349797  
SRR17520069. 15349798  
SRR17520069. 15349799  
SRR17520069. 15349800  
SRR17520069. 15349801  
SRR17520069. 15349803  
SRR17520069. 15349804  
SRR17520069. 15349805  
SRR17520069. 15349806  
SRR17520069. 15349807  
SRR17520069. 15349808  
SRR17520069. 15349809  
SRR17520069. 15349810  
SRR17520069. 15349811  
SRR17520069. 15349812  
SRR17520069. 15349813  
SRR17520069. 15349814  
SRR17520069. 15349815  
SRR17520069. 15349816  
SRR17520069. 15349817  
SRR17520069. 15349818  
SRR17520069. 15349819  
SRR17520069. 15349820  
SRR17520069. 15349821  
SRR17520069. 15349822  
SRR17520069. 15349823  
SRR17520069. 15355828  
SRR17520069. 15355829  
SRR17520069. 15355830  
SRR17520069. 15355831  
SRR17520069. 15355832  
SRR17520069. 15355833  
SRR17520069. 15355834  
SRR17520069. 15355835  
SRR17520069. 15355836  
SRR17520069. 15372123  
SRR17520069. 15372157  
SRR17520069. 15380427  
SRR17520069. 15380501  
SRR17520069. 15383541  
SRR17520069. 15383542  
SRR17520069. 15383543  
SRR17520069. 15383544

SRR17520069. 15383546  
SRR17520069. 15383547  
SRR17520069. 15383548  
SRR17520069. 15383549  
SRR17520069. 15383550  
SRR17520069. 15383551  
SRR17520069. 15383552  
SRR17520069. 15383553  
SRR17520069. 15383554  
SRR17520069. 15383555  
SRR17520069. 15383557  
SRR17520069. 15383558  
SRR17520069. 15383559  
SRR17520069. 15395508  
SRR17520069. 15395509  
SRR17520069. 15395510  
SRR17520069. 15395511  
SRR17520069. 15395512  
SRR17520069. 15395513  
SRR17520069. 15395514  
SRR17520069. 15395515  
SRR17520069. 15395516  
SRR17520069. 15395517  
SRR17520069. 15395518  
SRR17520069. 15395519  
SRR17520069. 15395520  
SRR17520069. 15395521  
SRR17520069. 15395522  
SRR17520069. 15395523  
SRR17520069. 15395524  
SRR17520069. 15395525  
SRR17520069. 15395526  
SRR17520069. 15395527  
SRR17520069. 15395528  
SRR17520069. 15395529  
SRR17520069. 15395530  
SRR17520069. 15395531  
SRR17520069. 15395532  
SRR17520069. 15395533  
SRR17520069. 15395534  
SRR17520069. 15395535  
SRR17520069. 15395536  
SRR17520069. 15395537  
SRR17520069. 15395538  
SRR17520069. 15395539  
SRR17520069. 15395540  
SRR17520069. 15395541

SRR17520069. 15395542  
SRR17520069. 15395543  
SRR17520069. 15395544  
SRR17520069. 15395545  
SRR17520069. 15395546  
SRR17520069. 15395547  
SRR17520069. 15395548  
SRR17520069. 15395549  
SRR17520069. 15395550  
SRR17520069. 15395551  
SRR17520069. 15395552  
SRR17520069. 15395554  
SRR17520069. 15395555  
SRR17520069. 15395556  
SRR17520069. 15395557  
SRR17520069. 15395558  
SRR17520069. 15395559  
SRR17520069. 15395562  
SRR17520069. 15395593  
SRR17520069. 15395628  
SRR17520069. 15395629  
SRR17520069. 15395630  
SRR17520069. 15395631  
SRR17520069. 15395632  
SRR17520069. 15395633  
SRR17520069. 15395634  
SRR17520069. 15395635  
SRR17520069. 15395636  
SRR17520069. 15395637  
SRR17520069. 15395638  
SRR17520069. 15395639  
SRR17520069. 15395640  
SRR17520069. 15395641  
SRR17520069. 15395642  
SRR17520069. 15395643  
SRR17520069. 15395644  
SRR17520069. 15395645  
SRR17520069. 15395646  
SRR17520069. 15400913  
SRR17520069. 15400914  
SRR17520069. 15400915  
SRR17520069. 15400916  
SRR17520069. 15400917  
SRR17520069. 15400918  
SRR17520069. 15400919  
SRR17520069. 15400920  
SRR17520069. 15400921



SRR17520069.15400922  
SRR17520069.15400923  
SRR17520069.15400924  
SRR17520069.15400925  
SRR17520069.15400926  
SRR17520069.15400927  
SRR17520069.15400928  
SRR17520069.15400929  
SRR17520069.15400930  
SRR17520069.15400931  
SRR17520069.15400932  
SRR17520069.15400933  
SRR17520069.15400934  
SRR17520069.15400936  
SRR17520069.15400937  
SRR17520069.15400938  
SRR17520069.15400939  
SRR17520069.15400940  
SRR17520069.15400941  
SRR17520069.15400942  
SRR17520069.15400943  
SRR17520069.15400944  
SRR17520069.15400945  
SRR17520069.15400946  
SRR17520069.15400947  
SRR17520069.15400950  
SRR17520069.15400951  
SRR17520069.15400952  
SRR17520069.15400953  
SRR17520069.15400954  
SRR17520069.15400955  
SRR17520069.15400956  
SRR17520069.15400957  
SRR17520069.15400958  
SRR17520069.15400959  
SRR17520069.15400960  
SRR17520069.15400961  
SRR17520069.15400962  
SRR17520069.15400963  
SRR17520069.15400964  
SRR17520069.15400965  
SRR17520069.15400966  
SRR17520069.15400967  
SRR17520069.15400968  
SRR17520069.15400969  
SRR17520069.15400970  
SRR17520069.15400971

SRR17520069.15400972  
SRR17520069.15400973  
SRR17520069.15400974  
SRR17520069.15400975  
SRR17520069.15400976  
SRR17520069.15400977  
SRR17520069.15400978  
SRR17520069.15400979  
SRR17520069.15400980  
SRR17520069.15400981  
SRR17520069.15400982  
SRR17520069.15400983  
SRR17520069.15400984  
SRR17520069.15400985  
SRR17520069.15400986  
SRR17520069.15400987  
SRR17520069.15402144  
SRR17520069.15402145  
SRR17520069.15402146  
SRR17520069.15402147  
SRR17520069.15402150  
SRR17520069.15402151  
SRR17520069.15402152  
SRR17520069.15402153  
SRR17520069.15402154  
SRR17520069.15402155  
SRR17520069.15402156  
SRR17520069.15402157  
SRR17520069.15402158  
SRR17520069.15402160  
SRR17520069.15402161  
SRR17520069.15402163  
SRR17520069.15402164  
SRR17520069.15402165  
SRR17520069.15402166  
SRR17520069.15402167  
SRR17520069.15402168  
SRR17520069.15402169  
SRR17520069.15402170  
SRR17520069.15402171  
SRR17520069.15402172  
SRR17520069.15402173  
SRR17520069.15402174  
SRR17520069.15402175  
SRR17520069.15402176  
SRR17520069.15402177  
SRR17520069.15402178

SRR17520069. 15402179  
SRR17520069. 15402180  
SRR17520069. 15402181  
SRR17520069. 15402182  
SRR17520069. 15402184  
SRR17520069. 15402185  
SRR17520069. 15402186  
SRR17520069. 15402187  
SRR17520069. 15402188  
SRR17520069. 15402189  
SRR17520069. 15402190  
SRR17520069. 15402191  
SRR17520069. 15402192  
SRR17520069. 15402193  
SRR17520069. 15402194  
SRR17520069. 15402195  
SRR17520069. 15402196  
SRR17520069. 15402197  
SRR17520069. 15402198  
SRR17520069. 15402199  
SRR17520069. 15402200  
SRR17520069. 15402201  
SRR17520069. 15402202  
SRR17520069. 15402203  
SRR17520069. 15402204  
SRR17520069. 15402205  
SRR17520069. 15402207  
SRR17520069. 15402208  
SRR17520069. 15402210  
SRR17520069. 15402212  
SRR17520069. 15402213  
SRR17520069. 15402214  
SRR17520069. 15402215  
SRR17520069. 15402216  
SRR17520069. 15402217  
SRR17520069. 15402220  
SRR17520069. 15402221  
SRR17520069. 15402222  
SRR17520069. 15402223  
SRR17520069. 15402224  
SRR17520069. 15402225  
SRR17520069. 15402226  
SRR17520069. 15402227  
SRR17520069. 15402228  
SRR17520069. 15402229  
SRR17520069. 15402230  
SRR17520069. 15402231

SRR17520069. 15402232  
SRR17520069. 15402233  
SRR17520069. 15402234  
SRR17520069. 15402235  
SRR17520069. 15402237  
SRR17520069. 15402238  
SRR17520069. 15402240  
SRR17520069. 15402241  
SRR17520069. 15402242  
SRR17520069. 15402243  
SRR17520069. 15402244  
SRR17520069. 15402245  
SRR17520069. 15402246  
SRR17520069. 15402247  
SRR17520069. 15402248  
SRR17520069. 15402249  
SRR17520069. 15402250  
SRR17520069. 15402251  
SRR17520069. 15402252  
SRR17520069. 15402253  
SRR17520069. 15402254  
SRR17520069. 15402256  
SRR17520069. 15402257  
SRR17520069. 15402258  
SRR17520069. 15402259  
SRR17520069. 15402260  
SRR17520069. 15402261  
SRR17520069. 15402262  
SRR17520069. 15402263  
SRR17520069. 15402264  
SRR17520069. 15402265  
SRR17520069. 15402266  
SRR17520069. 15402267  
SRR17520069. 15402269  
SRR17520069. 15402270  
SRR17520069. 15402271  
SRR17520069. 15402272  
SRR17520069. 15402273  
SRR17520069. 15402274  
SRR17520069. 15402275  
SRR17520069. 15402276  
SRR17520069. 15402277  
SRR17520069. 15402278  
SRR17520069. 15402279  
SRR17520069. 15402280  
SRR17520069. 15402281  
SRR17520069. 15402282

SRR17520069. 15402283  
SRR17520069. 15402284  
SRR17520069. 15402285  
SRR17520069. 15402286  
SRR17520069. 15402287  
SRR17520069. 15402288  
SRR17520069. 15402290  
SRR17520069. 15402292  
SRR17520069. 15402293  
SRR17520069. 15402294  
SRR17520069. 15402295  
SRR17520069. 15402297  
SRR17520069. 15402298  
SRR17520069. 15402300  
SRR17520069. 15402301  
SRR17520069. 15402302  
SRR17520069. 15402303  
SRR17520069. 15402304  
SRR17520069. 15402305  
SRR17520069. 15406283  
SRR17520069. 15406284  
SRR17520069. 15415415  
SRR17520069. 15415416  
SRR17520069. 15415417  
SRR17520069. 15415418  
SRR17520069. 15415419  
SRR17520069. 15415420  
SRR17520069. 15415421  
SRR17520069. 15415422  
SRR17520069. 15415423  
SRR17520069. 15415424  
SRR17520069. 15415425  
SRR17520069. 15415426  
SRR17520069. 15415427  
SRR17520069. 15415428  
SRR17520069. 15415429  
SRR17520069. 15415430  
SRR17520069. 15415431  
SRR17520069. 15415432  
SRR17520069. 15415434  
SRR17520069. 15415435  
SRR17520069. 15415436  
SRR17520069. 15415437  
SRR17520069. 15415438  
SRR17520069. 15415439  
SRR17520069. 15415440  
SRR17520069. 15415441

SRR17520069. 15415442  
SRR17520069. 15415443  
SRR17520069. 15415444  
SRR17520069. 15415445  
SRR17520069. 15415446  
SRR17520069. 15415447  
SRR17520069. 15415448  
SRR17520069. 15415450  
SRR17520069. 15415452  
SRR17520069. 15415453  
SRR17520069. 15415454  
SRR17520069. 15415455  
SRR17520069. 15415456  
SRR17520069. 15415457  
SRR17520069. 15415458  
SRR17520069. 15415459  
SRR17520069. 15415460  
SRR17520069. 15415461  
SRR17520069. 15415462  
SRR17520069. 15415463  
SRR17520069. 15415464  
SRR17520069. 15415465  
SRR17520069. 15415466  
SRR17520069. 15415467  
SRR17520069. 15415468  
SRR17520069. 15415469  
SRR17520069. 15424555  
SRR17520069. 15425205  
SRR17520069. 15425206  
SRR17520069. 15425207  
SRR17520069. 15425208  
SRR17520069. 15425209  
SRR17520069. 15425210  
SRR17520069. 15425211  
SRR17520069. 15425212  
SRR17520069. 15425213  
SRR17520069. 15425214  
SRR17520069. 15425215  
SRR17520069. 15425216  
SRR17520069. 15425217  
SRR17520069. 15425218  
SRR17520069. 15425219  
SRR17520069. 15425220  
SRR17520069. 15425221  
SRR17520069. 15425222  
SRR17520069. 15425223  
SRR17520069. 15425224

SRR17520069. 15425225  
SRR17520069. 15425226  
SRR17520069. 15425227  
SRR17520069. 15425228  
SRR17520069. 15425229  
SRR17520069. 15425230  
SRR17520069. 15425231  
SRR17520069. 15425232  
SRR17520069. 15425233  
SRR17520069. 15425234  
SRR17520069. 15425235  
SRR17520069. 15425236  
SRR17520069. 15425237  
SRR17520069. 15431595  
SRR17520069. 15431596  
SRR17520069. 15431597  
SRR17520069. 15431598  
SRR17520069. 15431599  
SRR17520069. 15431600  
SRR17520069. 15431601  
SRR17520069. 15431602  
SRR17520069. 15431603  
SRR17520069. 15431604  
SRR17520069. 15431605  
SRR17520069. 15431606  
SRR17520069. 15431607  
SRR17520069. 15431608  
SRR17520069. 15431609  
SRR17520069. 15431610  
SRR17520069. 15431612  
SRR17520069. 15431613  
SRR17520069. 15431614  
SRR17520069. 15431615  
SRR17520069. 15437041  
SRR17520069. 15437042  
SRR17520069. 15437043  
SRR17520069. 15437044  
SRR17520069. 15437046  
SRR17520069. 15437047  
SRR17520069. 15437048  
SRR17520069. 15437051  
SRR17520069. 15437052  
SRR17520069. 15437053  
SRR17520069. 15437054  
SRR17520069. 15437055  
SRR17520069. 15437056  
SRR17520069. 15437057

SRR17520069. 15437058  
SRR17520069. 15437059  
SRR17520069. 15437060  
SRR17520069. 15437061  
SRR17520069. 15437062  
SRR17520069. 15437063  
SRR17520069. 15437064  
SRR17520069. 15437065  
SRR17520069. 15437066  
SRR17520069. 15437067  
SRR17520069. 15437068  
SRR17520069. 15437069  
SRR17520069. 15437070  
SRR17520069. 15437071  
SRR17520069. 15437072  
SRR17520069. 15437073  
SRR17520069. 15437074  
SRR17520069. 15437075  
SRR17520069. 15437076  
SRR17520069. 15437077  
SRR17520069. 15437078  
SRR17520069. 15437079  
SRR17520069. 15441475  
SRR17520069. 15441476  
SRR17520069. 15441477  
SRR17520069. 15441478  
SRR17520069. 15441479  
SRR17520069. 15441480  
SRR17520069. 15441481  
SRR17520069. 15441482  
SRR17520069. 15441483  
SRR17520069. 15441484  
SRR17520069. 15441485  
SRR17520069. 15441486  
SRR17520069. 15441487  
SRR17520069. 15441488  
SRR17520069. 15441489  
SRR17520069. 15441490  
SRR17520069. 15441491  
SRR17520069. 15441492  
SRR17520069. 15441493  
SRR17520069. 15441494  
SRR17520069. 15441495  
SRR17520069. 15441496  
SRR17520069. 15441497  
SRR17520069. 15441498  
SRR17520069. 15441499



SRR17520069. 15441500  
SRR17520069. 15441501  
SRR17520069. 15441502  
SRR17520069. 15441503  
SRR17520069. 15441504  
SRR17520069. 15441505  
SRR17520069. 15441506  
SRR17520069. 15441507  
SRR17520069. 15441508  
SRR17520069. 15441509  
SRR17520069. 15441510  
SRR17520069. 15441511  
SRR17520069. 15441512  
SRR17520069. 15441513  
SRR17520069. 15441514  
SRR17520069. 15441515  
SRR17520069. 15441516  
SRR17520069. 15441517  
SRR17520069. 15441518  
SRR17520069. 15441519  
SRR17520069. 15441520  
SRR17520069. 15441521  
SRR17520069. 15441522  
SRR17520069. 15441523  
SRR17520069. 15441524  
SRR17520069. 15441525  
SRR17520069. 15441526  
SRR17520069. 15441527  
SRR17520069. 15441528  
SRR17520069. 15441529  
SRR17520069. 15441530  
SRR17520069. 15441531  
SRR17520069. 15441532  
SRR17520069. 15441533  
SRR17520069. 15441535  
SRR17520069. 15441536  
SRR17520069. 15441537  
SRR17520069. 15441538  
SRR17520069. 15441539  
SRR17520069. 15441540  
SRR17520069. 15441541  
SRR17520069. 15441542  
SRR17520069. 15441543  
SRR17520069. 15441544  
SRR17520069. 15441545  
SRR17520069. 15441546  
SRR17520069. 15441547

SRR17520069. 15441548  
SRR17520069. 15441549  
SRR17520069. 15441550  
SRR17520069. 15441551  
SRR17520069. 15441552  
SRR17520069. 15441553  
SRR17520069. 15441554  
SRR17520069. 15441555  
SRR17520069. 15441556  
SRR17520069. 15441557  
SRR17520069. 15441558  
SRR17520069. 15441559  
SRR17520069. 15441560  
SRR17520069. 15441561  
SRR17520069. 15441562  
SRR17520069. 15441563  
SRR17520069. 15441564  
SRR17520069. 15441565  
SRR17520069. 15441566  
SRR17520069. 15441567  
SRR17520069. 15441568  
SRR17520069. 15441569  
SRR17520069. 15441570  
SRR17520069. 15441571  
SRR17520069. 15441572  
SRR17520069. 15441573  
SRR17520069. 15441574  
SRR17520069. 15441575  
SRR17520069. 15441576  
SRR17520069. 15441577  
SRR17520069. 15441578  
SRR17520069. 15441579  
SRR17520069. 15441580  
SRR17520069. 15441581  
SRR17520069. 15441582  
SRR17520069. 15441583  
SRR17520069. 15441584  
SRR17520069. 15441585  
SRR17520069. 15441586  
SRR17520069. 15441587  
SRR17520069. 15441588  
SRR17520069. 15441589  
SRR17520069. 15441590  
SRR17520069. 15441591  
SRR17520069. 15441592  
SRR17520069. 15441593  
SRR17520069. 15441594

SRR17520069. 15441595  
SRR17520069. 15441596  
SRR17520069. 15441597  
SRR17520069. 15441598  
SRR17520069. 15441599  
SRR17520069. 15441600  
SRR17520069. 15441601  
SRR17520069. 15441602  
SRR17520069. 15441603  
SRR17520069. 15441604  
SRR17520069. 15441605  
SRR17520069. 15441606  
SRR17520069. 15441607  
SRR17520069. 15441608  
SRR17520069. 15441609  
SRR17520069. 15441610  
SRR17520069. 15441611  
SRR17520069. 15441612  
SRR17520069. 15441613  
SRR17520069. 15441614  
SRR17520069. 15441615  
SRR17520069. 15441616  
SRR17520069. 15441617  
SRR17520069. 15441618  
SRR17520069. 15441619  
SRR17520069. 15441620  
SRR17520069. 15441621  
SRR17520069. 15441622  
SRR17520069. 15441623  
SRR17520069. 15441624  
SRR17520069. 15441625  
SRR17520069. 15441626  
SRR17520069. 15441627  
SRR17520069. 15441628  
SRR17520069. 15441629  
SRR17520069. 15441630  
SRR17520069. 15441631  
SRR17520069. 15441632  
SRR17520069. 15441633  
SRR17520069. 15441634  
SRR17520069. 15441635  
SRR17520069. 15441636  
SRR17520069. 15441637  
SRR17520069. 15441638  
SRR17520069. 15441639  
SRR17520069. 15441640  
SRR17520069. 15441642

SRR17520069. 15441643  
SRR17520069. 15441644  
SRR17520069. 15441645  
SRR17520069. 15441646  
SRR17520069. 15441647  
SRR17520069. 15441648  
SRR17520069. 15441649  
SRR17520069. 15441650  
SRR17520069. 15441651  
SRR17520069. 15441652  
SRR17520069. 15441653  
SRR17520069. 15441654  
SRR17520069. 15441655  
SRR17520069. 15441656  
SRR17520069. 15441657  
SRR17520069. 15441658  
SRR17520069. 15441659  
SRR17520069. 15441660  
SRR17520069. 15441661  
SRR17520069. 15441662  
SRR17520069. 15441663  
SRR17520069. 15441664  
SRR17520069. 15441665  
SRR17520069. 15441666  
SRR17520069. 15441667  
SRR17520069. 15441668  
SRR17520069. 15441669  
SRR17520069. 15441670  
SRR17520069. 15441671  
SRR17520069. 15441672  
SRR17520069. 15441673  
SRR17520069. 15441674  
SRR17520069. 15441675  
SRR17520069. 15441676  
SRR17520069. 15441677  
SRR17520069. 15441678  
SRR17520069. 15441679  
SRR17520069. 15441680  
SRR17520069. 15441681  
SRR17520069. 15441682  
SRR17520069. 15441683  
SRR17520069. 15441685  
SRR17520069. 15441686  
SRR17520069. 15447884  
SRR17520069. 15447885  
SRR17520069. 15447886  
SRR17520069. 15447887

SRR17520069. 15447888  
SRR17520069. 15447892  
SRR17520069. 15447893  
SRR17520069. 15447894  
SRR17520069. 15447895  
SRR17520069. 15447896  
SRR17520069. 15447897  
SRR17520069. 15447898  
SRR17520069. 15447899  
SRR17520069. 15447900  
SRR17520069. 15447901  
SRR17520069. 15447902  
SRR17520069. 15447903  
SRR17520069. 15447906  
SRR17520069. 15447907  
SRR17520069. 15447908  
SRR17520069. 15447909  
SRR17520069. 15447910  
SRR17520069. 15447911  
SRR17520069. 15447912  
SRR17520069. 15447913  
SRR17520069. 15447914  
SRR17520069. 15447915  
SRR17520069. 15447916  
SRR17520069. 15447917  
SRR17520069. 15447918  
SRR17520069. 15447919  
SRR17520069. 15447920  
SRR17520069. 15447921  
SRR17520069. 15447922  
SRR17520069. 15447923  
SRR17520069. 15447924  
SRR17520069. 15447925  
SRR17520069. 15447926  
SRR17520069. 15447927  
SRR17520069. 15447928  
SRR17520069. 15447929  
SRR17520069. 15447930  
SRR17520069. 15447931  
SRR17520069. 15447932  
SRR17520069. 15447933  
SRR17520069. 15447934  
SRR17520069. 15447935  
SRR17520069. 15447936  
SRR17520069. 15447937  
SRR17520069. 15447938  
SRR17520069. 15447939

SRR17520069. 15447940  
SRR17520069. 15447941  
SRR17520069. 15447942  
SRR17520069. 15447943  
SRR17520069. 15447944  
SRR17520069. 15447945  
SRR17520069. 15447946  
SRR17520069. 15447947  
SRR17520069. 15447948  
SRR17520069. 15447949  
SRR17520069. 15447950  
SRR17520069. 15447951  
SRR17520069. 15447952  
SRR17520069. 15447953  
SRR17520069. 15447954  
SRR17520069. 15447955  
SRR17520069. 15447956  
SRR17520069. 15447957  
SRR17520069. 15447958  
SRR17520069. 15447959  
SRR17520069. 15447960  
SRR17520069. 15447961  
SRR17520069. 15447962  
SRR17520069. 15447963  
SRR17520069. 15447964  
SRR17520069. 15447965  
SRR17520069. 15447966  
SRR17520069. 15447967  
SRR17520069. 15447968  
SRR17520069. 15447969  
SRR17520069. 15447970  
SRR17520069. 15447971  
SRR17520069. 15447972  
SRR17520069. 15447973  
SRR17520069. 15447974  
SRR17520069. 15447975  
SRR17520069. 15447976  
SRR17520069. 15447977  
SRR17520069. 15447978  
SRR17520069. 15447979  
SRR17520069. 15447980  
SRR17520069. 15447981  
SRR17520069. 15447982  
SRR17520069. 15447983  
SRR17520069. 15447984  
SRR17520069. 15447985  
SRR17520069. 15447986

SRR17520069. 15447987  
SRR17520069. 15447988  
SRR17520069. 15447989  
SRR17520069. 15447990  
SRR17520069. 15447991  
SRR17520069. 15447992  
SRR17520069. 15447993  
SRR17520069. 15447994  
SRR17520069. 15447995  
SRR17520069. 15447996  
SRR17520069. 15447997  
SRR17520069. 15447998  
SRR17520069. 15451785  
SRR17520069. 15452987  
SRR17520069. 15452988  
SRR17520069. 15452989  
SRR17520069. 15452991  
SRR17520069. 15452992  
SRR17520069. 15452993  
SRR17520069. 15452994  
SRR17520069. 15452995  
SRR17520069. 15452996  
SRR17520069. 15452997  
SRR17520069. 15452998  
SRR17520069. 15452999  
SRR17520069. 15453001  
SRR17520069. 15453003  
SRR17520069. 15453005  
SRR17520069. 15453007  
SRR17520069. 15453009  
SRR17520069. 15453011  
SRR17520069. 15453012  
SRR17520069. 15453013  
SRR17520069. 15453015  
SRR17520069. 15453017  
SRR17520069. 15453019  
SRR17520069. 15453021  
SRR17520069. 15454364  
SRR17520069. 15454365  
SRR17520069. 15454366  
SRR17520069. 15454367  
SRR17520069. 15454368  
SRR17520069. 15454369  
SRR17520069. 15454370  
SRR17520069. 15454371  
SRR17520069. 15454372  
SRR17520069. 15454373

SRR17520069. 15454374  
SRR17520069. 15454375  
SRR17520069. 15454376  
SRR17520069. 15454377  
SRR17520069. 15454378  
SRR17520069. 15454379  
SRR17520069. 15454380  
SRR17520069. 15454381  
SRR17520069. 15454382  
SRR17520069. 15454383  
SRR17520069. 15454384  
SRR17520069. 15454385  
SRR17520069. 15454386  
SRR17520069. 15454387  
SRR17520069. 15454388  
SRR17520069. 15454389  
SRR17520069. 15454390  
SRR17520069. 15454391  
SRR17520069. 15454392  
SRR17520069. 15454393  
SRR17520069. 15454394  
SRR17520069. 15454395  
SRR17520069. 15454396  
SRR17520069. 15454397  
SRR17520069. 15454398  
SRR17520069. 15454399  
SRR17520069. 15454400  
SRR17520069. 15454401  
SRR17520069. 15454403  
SRR17520069. 15454404  
SRR17520069. 15454405  
SRR17520069. 15454406  
SRR17520069. 15454407  
SRR17520069. 15454408  
SRR17520069. 15454409  
SRR17520069. 15454410  
SRR17520069. 15454411  
SRR17520069. 15454412  
SRR17520069. 15454413  
SRR17520069. 15454414  
SRR17520069. 15454415  
SRR17520069. 15454416  
SRR17520069. 15454417  
SRR17520069. 15454418  
SRR17520069. 15454419  
SRR17520069. 15454420  
SRR17520069. 15454421



SRR17520069. 15454422  
SRR17520069. 15454423  
SRR17520069. 15454424  
SRR17520069. 15454425  
SRR17520069. 15454426  
SRR17520069. 15454427  
SRR17520069. 15454428  
SRR17520069. 15454429  
SRR17520069. 15454430  
SRR17520069. 15454431  
SRR17520069. 15454432  
SRR17520069. 15454433  
SRR17520069. 15454434  
SRR17520069. 15454435  
SRR17520069. 15454436  
SRR17520069. 15454437  
SRR17520069. 15454438  
SRR17520069. 15454439  
SRR17520069. 15454440  
SRR17520069. 15454441  
SRR17520069. 15454442  
SRR17520069. 15454445  
SRR17520069. 15454446  
SRR17520069. 15454447  
SRR17520069. 15454448  
SRR17520069. 15454449  
SRR17520069. 15454450  
SRR17520069. 15454451  
SRR17520069. 15454452  
SRR17520069. 15454453  
SRR17520069. 15454454  
SRR17520069. 15454455  
SRR17520069. 15454456  
SRR17520069. 15454458  
SRR17520069. 15454459  
SRR17520069. 15454460  
SRR17520069. 15454461  
SRR17520069. 15454462  
SRR17520069. 15454463  
SRR17520069. 15454464  
SRR17520069. 15454465  
SRR17520069. 15454466  
SRR17520069. 15454467  
SRR17520069. 15454468  
SRR17520069. 15454469  
SRR17520069. 15454470  
SRR17520069. 15454471

SRR17520069. 15454472  
SRR17520069. 15454473  
SRR17520069. 15454474  
SRR17520069. 15454475  
SRR17520069. 15454476  
SRR17520069. 15454477  
SRR17520069. 15454479  
SRR17520069. 15454480  
SRR17520069. 15454481  
SRR17520069. 15454482  
SRR17520069. 15454483  
SRR17520069. 15454484  
SRR17520069. 15454485  
SRR17520069. 15454486  
SRR17520069. 15454487  
SRR17520069. 15454488  
SRR17520069. 15454489  
SRR17520069. 15454490  
SRR17520069. 15454491  
SRR17520069. 15454492  
SRR17520069. 15454493  
SRR17520069. 15454494  
SRR17520069. 15454495  
SRR17520069. 15454496  
SRR17520069. 15454497  
SRR17520069. 15454498  
SRR17520069. 15454499  
SRR17520069. 15454500  
SRR17520069. 15454501  
SRR17520069. 15454502  
SRR17520069. 15454503  
SRR17520069. 15454504  
SRR17520069. 15454505  
SRR17520069. 15454506  
SRR17520069. 15454507  
SRR17520069. 15454508  
SRR17520069. 15454509  
SRR17520069. 15454510  
SRR17520069. 15454511  
SRR17520069. 15454512  
SRR17520069. 15454513  
SRR17520069. 15454514  
SRR17520069. 15454515  
SRR17520069. 15454516  
SRR17520069. 15454517  
SRR17520069. 15454518  
SRR17520069. 15454519

SRR17520069. 15454520  
SRR17520069. 15454521  
SRR17520069. 15454522  
SRR17520069. 15454523  
SRR17520069. 15454524  
SRR17520069. 15454525  
SRR17520069. 15454526  
SRR17520069. 15454527  
SRR17520069. 15454528  
SRR17520069. 15454529  
SRR17520069. 15454530  
SRR17520069. 15454531  
SRR17520069. 15454532  
SRR17520069. 15454533  
SRR17520069. 15454534  
SRR17520069. 15454535  
SRR17520069. 15456852  
SRR17520069. 15456853  
SRR17520069. 15456854  
SRR17520069. 15456855  
SRR17520069. 15456856  
SRR17520069. 15456857  
SRR17520069. 15456858  
SRR17520069. 15456859  
SRR17520069. 15456860  
SRR17520069. 15456861  
SRR17520069. 15456862  
SRR17520069. 15456863  
SRR17520069. 15456864  
SRR17520069. 15456865  
SRR17520069. 15456866  
SRR17520069. 15456867  
SRR17520069. 15456868  
SRR17520069. 15456869  
SRR17520069. 15456870  
SRR17520069. 15456871  
SRR17520069. 15456872  
SRR17520069. 15456873  
SRR17520069. 15456874  
SRR17520069. 15456875  
SRR17520069. 15456876  
SRR17520069. 15456877  
SRR17520069. 15456878  
SRR17520069. 15456879  
SRR17520069. 15456880  
SRR17520069. 15456881  
SRR17520069. 15456882

SRR17520069. 15534036  
SRR17520069. 15534037  
SRR17520069. 15534038  
SRR17520069. 15534039  
SRR17520069. 15534040  
SRR17520069. 15534041  
SRR17520069. 15534042  
SRR17520069. 15534043  
SRR17520069. 15534044  
SRR17520069. 15534045  
SRR17520069. 15534046  
SRR17520069. 15534048  
SRR17520069. 15534050  
SRR17520069. 15534051  
SRR17520069. 15534052  
SRR17520069. 15534054  
SRR17520069. 15534055  
SRR17520069. 15534056  
SRR17520069. 15544312  
SRR17520069. 15553468  
SRR17520069. 15553469  
SRR17520069. 15553483  
SRR17520069. 15564416  
SRR17520069. 15564418  
SRR17520069. 15564419  
SRR17520069. 15564420  
SRR17520069. 15564421  
SRR17520069. 15564422  
SRR17520069. 15564423  
SRR17520069. 15564424  
SRR17520069. 15564425  
SRR17520069. 15564426  
SRR17520069. 15564427  
SRR17520069. 15564428  
SRR17520069. 15564429  
SRR17520069. 15564430  
SRR17520069. 15564431  
SRR17520069. 15564432  
SRR17520069. 15564433  
SRR17520069. 15564434  
SRR17520069. 15564435  
SRR17520069. 15564436  
SRR17520069. 15564437  
SRR17520069. 15564438  
SRR17520069. 15564440  
SRR17520069. 15564441  
SRR17520069. 15564442

SRR17520069. 15564444  
SRR17520069. 15564445  
SRR17520069. 15565539  
SRR17520069. 15565540  
SRR17520069. 15565541  
SRR17520069. 15565542  
SRR17520069. 15565545  
SRR17520069. 15565546  
SRR17520069. 15565547  
SRR17520069. 15565548  
SRR17520069. 15565549  
SRR17520069. 15565550  
SRR17520069. 15565551  
SRR17520069. 15565552  
SRR17520069. 15565553  
SRR17520069. 15565554  
SRR17520069. 15565555  
SRR17520069. 15565556  
SRR17520069. 15565557  
SRR17520069. 15565558  
SRR17520069. 15565559  
SRR17520069. 15565560  
SRR17520069. 15565561  
SRR17520069. 15565562  
SRR17520069. 15565563  
SRR17520069. 15565564  
SRR17520069. 15565565  
SRR17520069. 15565566  
SRR17520069. 15565567  
SRR17520069. 15565568  
SRR17520069. 15565569  
SRR17520069. 15565570  
SRR17520069. 15565571  
SRR17520069. 15565572  
SRR17520069. 15565573  
SRR17520069. 15565574  
SRR17520069. 15565575  
SRR17520069. 15565576  
SRR17520069. 15565577  
SRR17520069. 15565578  
SRR17520069. 15565579  
SRR17520069. 15565580  
SRR17520069. 15565581  
SRR17520069. 15565582  
SRR17520069. 15565583  
SRR17520069. 15565584  
SRR17520069. 15565585

SRR17520069. 15565586  
SRR17520069. 15565587  
SRR17520069. 15565588  
SRR17520069. 15565589  
SRR17520069. 15565590  
SRR17520069. 15565592  
SRR17520069. 15565593  
SRR17520069. 15565594  
SRR17520069. 15565595  
SRR17520069. 15565596  
SRR17520069. 15565597  
SRR17520069. 15565598  
SRR17520069. 15565599  
SRR17520069. 15565600  
SRR17520069. 15565601  
SRR17520069. 15565602  
SRR17520069. 15567423  
SRR17520069. 15574885  
SRR17520069. 15577641  
SRR17520069. 15577663  
SRR17520069. 15577705  
SRR17520069. 15590184  
SRR17520069. 15621229  
SRR17520069. 15621230  
SRR17520069. 15621231  
SRR17520069. 15621232  
SRR17520069. 15621233  
SRR17520069. 15621234  
SRR17520069. 15621235  
SRR17520069. 15621236  
SRR17520069. 15621237  
SRR17520069. 15621238  
SRR17520069. 15621239  
SRR17520069. 15621240  
SRR17520069. 15621241  
SRR17520069. 15621242  
SRR17520069. 15621243  
SRR17520069. 15621244  
SRR17520069. 15621245  
SRR17520069. 15621246  
SRR17520069. 15628353  
SRR17520069. 15628354  
SRR17520069. 15628355  
SRR17520069. 15628356  
SRR17520069. 15628357  
SRR17520069. 15628358  
SRR17520069. 15628360

SRR17520069. 15628361  
SRR17520069. 15628362  
SRR17520069. 15628363  
SRR17520069. 15628364  
SRR17520069. 15628365  
SRR17520069. 15628366  
SRR17520069. 15628367  
SRR17520069. 15628369  
SRR17520069. 15640147  
SRR17520069. 15645418  
SRR17520069. 15645419  
SRR17520069. 15645420  
SRR17520069. 15645421  
SRR17520069. 15645422  
SRR17520069. 15645423  
SRR17520069. 15645424  
SRR17520069. 15645425  
SRR17520069. 15645426  
SRR17520069. 15645427  
SRR17520069. 15665104  
SRR17520069. 15683067  
SRR17520069. 15683070  
SRR17520069. 15684176  
SRR17520069. 15684177  
SRR17520069. 15684179  
SRR17520069. 15684180  
SRR17520069. 15684181  
SRR17520069. 15684182  
SRR17520069. 15684183  
SRR17520069. 15684184  
SRR17520069. 15684185  
SRR17520069. 15684187  
SRR17520069. 15684188  
SRR17520069. 15684189  
SRR17520069. 15684190  
SRR17520069. 15684191  
SRR17520069. 15684192  
SRR17520069. 15684193  
SRR17520069. 15684194  
SRR17520069. 15684195  
SRR17520069. 15684196  
SRR17520069. 15684197  
SRR17520069. 15684199  
SRR17520069. 15684200  
SRR17520069. 15684201  
SRR17520069. 15684202  
SRR17520069. 15684203

SRR17520069. 15684204  
SRR17520069. 15684205  
SRR17520069. 15684206  
SRR17520069. 15684207  
SRR17520069. 15684208  
SRR17520069. 15684209  
SRR17520069. 15684210  
SRR17520069. 15684211  
SRR17520069. 15684212  
SRR17520069. 15684213  
SRR17520069. 15684214  
SRR17520069. 15684215  
SRR17520069. 15684216  
SRR17520069. 15684217  
SRR17520069. 15684218  
SRR17520069. 15684219  
SRR17520069. 15684220  
SRR17520069. 15684221  
SRR17520069. 15684222  
SRR17520069. 15684223  
SRR17520069. 15684224  
SRR17520069. 15684225  
SRR17520069. 15684226  
SRR17520069. 15684228  
SRR17520069. 15684229  
SRR17520069. 15684230  
SRR17520069. 15684231  
SRR17520069. 15684232  
SRR17520069. 15684233  
SRR17520069. 15684234  
SRR17520069. 15684235  
SRR17520069. 15684237  
SRR17520069. 15684238  
SRR17520069. 15684239  
SRR17520069. 15684240  
SRR17520069. 15684954  
SRR17520069. 15691700  
SRR17520069. 15691713  
SRR17520069. 15704561  
SRR17520069. 15714865  
SRR17520069. 15714872  
SRR17520069. 15714881  
SRR17520069. 15714887  
SRR17520069. 15737138  
SRR17520069. 15737139  
SRR17520069. 15737140  
SRR17520069. 15737141



SRR17520069. 15737142  
SRR17520069. 15737143  
SRR17520069. 15737144  
SRR17520069. 15737145  
SRR17520069. 15737146  
SRR17520069. 15737147  
SRR17520069. 15737148  
SRR17520069. 15737149  
SRR17520069. 15737150  
SRR17520069. 15737151  
SRR17520069. 15737152  
SRR17520069. 15737153  
SRR17520069. 15737154  
SRR17520069. 15737155  
SRR17520069. 15737156  
SRR17520069. 15737157  
SRR17520069. 15737158  
SRR17520069. 15737159  
SRR17520069. 15737160  
SRR17520069. 15737161  
SRR17520069. 15737162  
SRR17520069. 15737163  
SRR17520069. 15737164  
SRR17520069. 15737165  
SRR17520069. 15737166  
SRR17520069. 15737167  
SRR17520069. 15737168  
SRR17520069. 15737169  
SRR17520069. 15737170  
SRR17520069. 15737171  
SRR17520069. 15737172  
SRR17520069. 15737173  
SRR17520069. 15737174  
SRR17520069. 15737175  
SRR17520069. 15737176  
SRR17520069. 15737177  
SRR17520069. 15737178  
SRR17520069. 15737179  
SRR17520069. 15737180  
SRR17520069. 15737181  
SRR17520069. 15737183  
SRR17520069. 15737184  
SRR17520069. 15737185  
SRR17520069. 15737186  
SRR17520069. 15737187  
SRR17520069. 15737188  
SRR17520069. 15737189

SRR17520069. 15737190  
SRR17520069. 15737191  
SRR17520069. 15737192  
SRR17520069. 15737193  
SRR17520069. 15737194  
SRR17520069. 15752682  
SRR17520069. 15761701  
SRR17520069. 15761702  
SRR17520069. 15761703  
SRR17520069. 15761704  
SRR17520069. 15761705  
SRR17520069. 15761707  
SRR17520069. 15761708  
SRR17520069. 15770869  
SRR17520069. 15772333  
SRR17520069. 15772334  
SRR17520069. 15772335  
SRR17520069. 15772336  
SRR17520069. 15772337  
SRR17520069. 15772338  
SRR17520069. 15772339  
SRR17520069. 15772340  
SRR17520069. 15772341  
SRR17520069. 15772342  
SRR17520069. 15772343  
SRR17520069. 15772344  
SRR17520069. 15772345  
SRR17520069. 15772346  
SRR17520069. 15772347  
SRR17520069. 15772348  
SRR17520069. 15772349  
SRR17520069. 15772350  
SRR17520069. 15772351  
SRR17520069. 15772352  
SRR17520069. 15772353  
SRR17520069. 15772354  
SRR17520069. 15772355  
SRR17520069. 15772356  
SRR17520069. 15772357  
SRR17520069. 15772358  
SRR17520069. 15772359  
SRR17520069. 15772360  
SRR17520069. 15772361  
SRR17520069. 15772362  
SRR17520069. 15772363  
SRR17520069. 15772364  
SRR17520069. 15772365

SRR17520069. 15772366  
SRR17520069. 15772367  
SRR17520069. 15772368  
SRR17520069. 15772369  
SRR17520069. 15772370  
SRR17520069. 15772371  
SRR17520069. 15772373  
SRR17520069. 15772374  
SRR17520069. 15772375  
SRR17520069. 15772376  
SRR17520069. 15772377  
SRR17520069. 15772378  
SRR17520069. 15792398  
SRR17520069. 15808752  
SRR17520069. 15808803  
SRR17520069. 15818692  
SRR17520069. 15833927  
SRR17520069. 15838037  
SRR17520069. 15838038  
SRR17520069. 15838039  
SRR17520069. 15838040  
SRR17520069. 15838041  
SRR17520069. 15838042  
SRR17520069. 15838043  
SRR17520069. 15838044  
SRR17520069. 15838045  
SRR17520069. 15838046  
SRR17520069. 15838047  
SRR17520069. 15838048  
SRR17520069. 15838049  
SRR17520069. 15838050  
SRR17520069. 15838051  
SRR17520069. 15838052  
SRR17520069. 15847234  
SRR17520069. 15847235  
SRR17520069. 15847236  
SRR17520069. 15847237  
SRR17520069. 15847239  
SRR17520069. 15847240  
SRR17520069. 15847241  
SRR17520069. 15848316  
SRR17520069. 15848317  
SRR17520069. 15848318  
SRR17520069. 15848319  
SRR17520069. 15848320  
SRR17520069. 15848321  
SRR17520069. 15848322

SRR17520069. 15848323  
SRR17520069. 15848324  
SRR17520069. 15848325  
SRR17520069. 15848326  
SRR17520069. 15848327  
SRR17520069. 15848328  
SRR17520069. 15848329  
SRR17520069. 15848330  
SRR17520069. 15848331  
SRR17520069. 15848332  
SRR17520069. 15848333  
SRR17520069. 15848334  
SRR17520069. 15848335  
SRR17520069. 15848336  
SRR17520069. 15848337  
SRR17520069. 15848338  
SRR17520069. 15848339  
SRR17520069. 15848340  
SRR17520069. 15848341  
SRR17520069. 15848342  
SRR17520069. 15848343  
SRR17520069. 15848344  
SRR17520069. 15848345  
SRR17520069. 15848346  
SRR17520069. 15848347  
SRR17520069. 15848348  
SRR17520069. 15848349  
SRR17520069. 15848351  
SRR17520069. 15848352  
SRR17520069. 15848353  
SRR17520069. 15848354  
SRR17520069. 15848355  
SRR17520069. 15848356  
SRR17520069. 15848357  
SRR17520069. 15848358  
SRR17520069. 15848359  
SRR17520069. 15848360  
SRR17520069. 15848361  
SRR17520069. 15848362  
SRR17520069. 15848363  
SRR17520069. 15848364  
SRR17520069. 15848365  
SRR17520069. 15848366  
SRR17520069. 15848367  
SRR17520069. 15848368  
SRR17520069. 15848369  
SRR17520069. 15848370

SRR17520069. 15848371  
SRR17520069. 15848372  
SRR17520069. 15848373  
SRR17520069. 15848374  
SRR17520069. 15848375  
SRR17520069. 15848376  
SRR17520069. 15848377  
SRR17520069. 15848378  
SRR17520069. 15848379  
SRR17520069. 15848380  
SRR17520069. 15848381  
SRR17520069. 15848382  
SRR17520069. 15848383  
SRR17520069. 15848384  
SRR17520069. 15848385  
SRR17520069. 15848386  
SRR17520069. 15848387  
SRR17520069. 15848388  
SRR17520069. 15848389  
SRR17520069. 15848390  
SRR17520069. 15848391  
SRR17520069. 15848392  
SRR17520069. 15848393  
SRR17520069. 15848394  
SRR17520069. 15848395  
SRR17520069. 15848396  
SRR17520069. 15848397  
SRR17520069. 15848398  
SRR17520069. 15848399  
SRR17520069. 15848400  
SRR17520069. 15848401  
SRR17520069. 15848402  
SRR17520069. 15848403  
SRR17520069. 15848404  
SRR17520069. 15848405  
SRR17520069. 15848406  
SRR17520069. 15848407  
SRR17520069. 15848408  
SRR17520069. 15848409  
SRR17520069. 15848410  
SRR17520069. 15848411  
SRR17520069. 15848412  
SRR17520069. 15848413  
SRR17520069. 15848414  
SRR17520069. 15848415  
SRR17520069. 15848416  
SRR17520069. 15848417

SRR17520069. 15848418  
SRR17520069. 15848419  
SRR17520069. 15848420  
SRR17520069. 15848421  
SRR17520069. 15848422  
SRR17520069. 15848423  
SRR17520069. 15848424  
SRR17520069. 15848425  
SRR17520069. 15848426  
SRR17520069. 15848428  
SRR17520069. 15848429  
SRR17520069. 15848430  
SRR17520069. 15848431  
SRR17520069. 15848432  
SRR17520069. 15848433  
SRR17520069. 15848434  
SRR17520069. 15848435  
SRR17520069. 15848436  
SRR17520069. 15848437  
SRR17520069. 15848438  
SRR17520069. 15848439  
SRR17520069. 15848440  
SRR17520069. 15848441  
SRR17520069. 15853788  
SRR17520069. 15853789  
SRR17520069. 15856460  
SRR17520069. 15880169  
SRR17520069. 15880751  
SRR17520069. 15880752  
SRR17520069. 15880753  
SRR17520069. 15880754  
SRR17520069. 15880755  
SRR17520069. 15880756  
SRR17520069. 15880757  
SRR17520069. 15880758  
SRR17520069. 15880759  
SRR17520069. 15880760  
SRR17520069. 15880761  
SRR17520069. 15880762  
SRR17520069. 15880763  
SRR17520069. 15880764  
SRR17520069. 15880765  
SRR17520069. 15880766  
SRR17520069. 15880767  
SRR17520069. 15880768  
SRR17520069. 15880769  
SRR17520069. 15880770

SRR17520069. 15880771  
SRR17520069. 15880772  
SRR17520069. 15880773  
SRR17520069. 15880774  
SRR17520069. 15880775  
SRR17520069. 15880776  
SRR17520069. 15880777  
SRR17520069. 15880778  
SRR17520069. 15880779  
SRR17520069. 15880780  
SRR17520069. 15880781  
SRR17520069. 15880782  
SRR17520069. 15880783  
SRR17520069. 15880784  
SRR17520069. 15892363  
SRR17520069. 15892364  
SRR17520069. 15892365  
SRR17520069. 15892366  
SRR17520069. 15892367  
SRR17520069. 15892770  
SRR17520069. 15892771  
SRR17520069. 15892772  
SRR17520069. 15899622  
SRR17520069. 15914908  
SRR17520069. 15914918  
SRR17520069. 15914926  
SRR17520069. 15920827  
SRR17520069. 15938405  
SRR17520069. 15941825  
SRR17520069. 15941826  
SRR17520069. 15941827  
SRR17520069. 15941828  
SRR17520069. 15941829  
SRR17520069. 15941830  
SRR17520069. 15941831  
SRR17520069. 15946459  
SRR17520069. 15946460  
SRR17520069. 15946461  
SRR17520069. 15946462  
SRR17520069. 15946463  
SRR17520069. 15946464  
SRR17520069. 15946465  
SRR17520069. 15946466  
SRR17520069. 15946467  
SRR17520069. 15946468  
SRR17520069. 15946469  
SRR17520069. 15946470

SRR17520069. 15946471  
SRR17520069. 15949921  
SRR17520069. 15955638  
SRR17520069. 15955639  
SRR17520069. 15975343  
SRR17520069. 15997591  
SRR17520069. 15997592  
SRR17520069. 15997593  
SRR17520069. 15997594  
SRR17520069. 15997595  
SRR17520069. 15997597  
SRR17520069. 15997598  
SRR17520069. 15997599  
SRR17520069. 15997600  
SRR17520069. 15997601  
SRR17520069. 15997602  
SRR17520069. 15997603  
SRR17520069. 15997604  
SRR17520069. 15997605  
SRR17520069. 15997606  
SRR17520069. 15997607  
SRR17520069. 15997609  
SRR17520069. 15997610  
SRR17520069. 15997611  
SRR17520069. 15997612  
SRR17520069. 15997613  
SRR17520069. 15997614  
SRR17520069. 15997615  
SRR17520069. 15997616  
SRR17520069. 15997617  
SRR17520069. 15997618  
SRR17520069. 15997619  
SRR17520069. 15997620  
SRR17520069. 15997621  
SRR17520069. 15997622  
SRR17520069. 15997623  
SRR17520069. 15997624  
SRR17520069. 15997625  
SRR17520069. 15997626  
SRR17520069. 15997627  
SRR17520069. 15997628  
SRR17520069. 15997629  
SRR17520069. 16001539  
SRR17520069. 16001574  
SRR17520069. 16001594  
SRR17520069. 16002712  
SRR17520069. 16011254



SRR17520069. 16021801  
SRR17520069. 16021837  
SRR17520069. 16026474  
SRR17520069. 16026475  
SRR17520069. 16026476  
SRR17520069. 16026478  
SRR17520069. 16026479  
SRR17520069. 16026480  
SRR17520069. 16026481  
SRR17520069. 16026482  
SRR17520069. 16026483  
SRR17520069. 16026484  
SRR17520069. 16026486  
SRR17520069. 16026487  
SRR17520069. 16026488  
SRR17520069. 16026490  
SRR17520069. 16026491  
SRR17520069. 16026492  
SRR17520069. 16026495  
SRR17520069. 16026496  
SRR17520069. 16026497  
SRR17520069. 16026498  
SRR17520069. 16026499  
SRR17520069. 16026500  
SRR17520069. 16045244  
SRR17520069. 16054492  
SRR17520069. 16054493  
SRR17520069. 16054494  
SRR17520069. 16054495  
SRR17520069. 16066861  
SRR17520069. 16066862  
SRR17520069. 16066863  
SRR17520069. 16066864  
SRR17520069. 16066866  
SRR17520069. 16066867  
SRR17520069. 16066868  
SRR17520069. 16066869  
SRR17520069. 16066870  
SRR17520069. 16066871  
SRR17520069. 16066872  
SRR17520069. 16066873  
SRR17520069. 16066874  
SRR17520069. 16066875  
SRR17520069. 16066876  
SRR17520069. 16066877  
SRR17520069. 16066878  
SRR17520069. 16066879

SRR17520069. 16066880  
SRR17520069. 16066881  
SRR17520069. 16066882  
SRR17520069. 16066883  
SRR17520069. 16066884  
SRR17520069. 16066885  
SRR17520069. 16066886  
SRR17520069. 16066887  
SRR17520069. 16066888  
SRR17520069. 16066889  
SRR17520069. 16066890  
SRR17520069. 16066891  
SRR17520069. 16066892  
SRR17520069. 16066893  
SRR17520069. 16066894  
SRR17520069. 16066896  
SRR17520069. 16066897  
SRR17520069. 16066898  
SRR17520069. 16066899  
SRR17520069. 16066900  
SRR17520069. 16066901  
SRR17520069. 16066902  
SRR17520069. 16066903  
SRR17520069. 16066904  
SRR17520069. 16066905  
SRR17520069. 16066906  
SRR17520069. 16066907  
SRR17520069. 16066908  
SRR17520069. 16066909  
SRR17520069. 16066910  
SRR17520069. 16066911  
SRR17520069. 16066912  
SRR17520069. 16066913  
SRR17520069. 16066914  
SRR17520069. 16066915  
SRR17520069. 16066916  
SRR17520069. 16066917  
SRR17520069. 16066918  
SRR17520069. 16066919  
SRR17520069. 16066920  
SRR17520069. 16066921  
SRR17520069. 16066923  
SRR17520069. 16066924  
SRR17520069. 16066925  
SRR17520069. 16066926  
SRR17520069. 16066927  
SRR17520069. 16066928

SRR17520069. 16066929  
SRR17520069. 16066930  
SRR17520069. 16066931  
SRR17520069. 16066932  
SRR17520069. 16066933  
SRR17520069. 16066934  
SRR17520069. 16066935  
SRR17520069. 16066936  
SRR17520069. 16066937  
SRR17520069. 16066938  
SRR17520069. 16066939  
SRR17520069. 16066940  
SRR17520069. 16066941  
SRR17520069. 16066942  
SRR17520069. 16066943  
SRR17520069. 16066944  
SRR17520069. 16066945  
SRR17520069. 16066946  
SRR17520069. 16066947  
SRR17520069. 16066948  
SRR17520069. 16066949  
SRR17520069. 16066950  
SRR17520069. 16066951  
SRR17520069. 16066952  
SRR17520069. 16066953  
SRR17520069. 16066954  
SRR17520069. 16066955  
SRR17520069. 16066956  
SRR17520069. 16066957  
SRR17520069. 16066958  
SRR17520069. 16066959  
SRR17520069. 16066961  
SRR17520069. 16066962  
SRR17520069. 16066963  
SRR17520069. 16066964  
SRR17520069. 16066965  
SRR17520069. 16066966  
SRR17520069. 16066967  
SRR17520069. 16066968  
SRR17520069. 16066969  
SRR17520069. 16066970  
SRR17520069. 16066971  
SRR17520069. 16066974  
SRR17520069. 16075722  
SRR17520069. 16075723  
SRR17520069. 16075724  
SRR17520069. 16075725

SRR17520069.16075726  
SRR17520069.16075727  
SRR17520069.16075728  
SRR17520069.16075729  
SRR17520069.16075730  
SRR17520069.16075731  
SRR17520069.16075732  
SRR17520069.16075733  
SRR17520069.16075734  
SRR17520069.16075735  
SRR17520069.16075736  
SRR17520069.16075737  
SRR17520069.16075738  
SRR17520069.16075739  
SRR17520069.16075740  
SRR17520069.16075741  
SRR17520069.16075742  
SRR17520069.16075743  
SRR17520069.16075744  
SRR17520069.16075745  
SRR17520069.16075746  
SRR17520069.16075747  
SRR17520069.16075748  
SRR17520069.16075750  
SRR17520069.16075751  
SRR17520069.16075752  
SRR17520069.16075753  
SRR17520069.16075754  
SRR17520069.16075755  
SRR17520069.16075756  
SRR17520069.16075757  
SRR17520069.16075758  
SRR17520069.16075759  
SRR17520069.16075760  
SRR17520069.16075763  
SRR17520069.16075764  
SRR17520069.16077928  
SRR17520069.16082686  
SRR17520069.16086467  
SRR17520069.16086468  
SRR17520069.16086469  
SRR17520069.16086470  
SRR17520069.16086471  
SRR17520069.16086472  
SRR17520069.16086473  
SRR17520069.16086474  
SRR17520069.16086475

SRR17520069. 16086476  
SRR17520069. 16086477  
SRR17520069. 16086478  
SRR17520069. 16086479  
SRR17520069. 16086480  
SRR17520069. 16086481  
SRR17520069. 16086482  
SRR17520069. 16086483  
SRR17520069. 16086484  
SRR17520069. 16086485  
SRR17520069. 16086486  
SRR17520069. 16086487  
SRR17520069. 16086488  
SRR17520069. 16086489  
SRR17520069. 16086490  
SRR17520069. 16086491  
SRR17520069. 16086492  
SRR17520069. 16086493  
SRR17520069. 16086494  
SRR17520069. 16086495  
SRR17520069. 16086496  
SRR17520069. 16086497  
SRR17520069. 16086498  
SRR17520069. 16086499  
SRR17520069. 16086500  
SRR17520069. 16086501  
SRR17520069. 16086502  
SRR17520069. 16086503  
SRR17520069. 16086504  
SRR17520069. 16086505  
SRR17520069. 16086506  
SRR17520069. 16086507  
SRR17520069. 16086508  
SRR17520069. 16086509  
SRR17520069. 16086510  
SRR17520069. 16086511  
SRR17520069. 16086512  
SRR17520069. 16086513  
SRR17520069. 16086514  
SRR17520069. 16086515  
SRR17520069. 16086516  
SRR17520069. 16086517  
SRR17520069. 16086518  
SRR17520069. 16086519  
SRR17520069. 16086520  
SRR17520069. 16086521  
SRR17520069. 16086522

SRR17520069. 16086523  
SRR17520069. 16086524  
SRR17520069. 16086525  
SRR17520069. 16086526  
SRR17520069. 16086527  
SRR17520069. 16086529  
SRR17520069. 16086530  
SRR17520069. 16086531  
SRR17520069. 16086532  
SRR17520069. 16086533  
SRR17520069. 16086534  
SRR17520069. 16086535  
SRR17520069. 16086536  
SRR17520069. 16086537  
SRR17520069. 16086538  
SRR17520069. 16086539  
SRR17520069. 16086540  
SRR17520069. 16086541  
SRR17520069. 16086542  
SRR17520069. 16086543  
SRR17520069. 16086544  
SRR17520069. 16086545  
SRR17520069. 16086546  
SRR17520069. 16086547  
SRR17520069. 16086548  
SRR17520069. 16086549  
SRR17520069. 16086550  
SRR17520069. 16086551  
SRR17520069. 16086552  
SRR17520069. 16086553  
SRR17520069. 16086554  
SRR17520069. 16086555  
SRR17520069. 16090046  
SRR17520069. 16090047  
SRR17520069. 16090048  
SRR17520069. 16090049  
SRR17520069. 16090050  
SRR17520069. 16090051  
SRR17520069. 16090052  
SRR17520069. 16090053  
SRR17520069. 16090054  
SRR17520069. 16090055  
SRR17520069. 16090056  
SRR17520069. 16090057  
SRR17520069. 16090058  
SRR17520069. 16090059  
SRR17520069. 16090060

SRR17520069.16090061  
SRR17520069.16090062  
SRR17520069.16090063  
SRR17520069.16090064  
SRR17520069.16090065  
SRR17520069.16090066  
SRR17520069.16090067  
SRR17520069.16090068  
SRR17520069.16090069  
SRR17520069.16090070  
SRR17520069.16090071  
SRR17520069.16090072  
SRR17520069.16090073  
SRR17520069.16090074  
SRR17520069.16090075  
SRR17520069.16090076  
SRR17520069.16090077  
SRR17520069.16090078  
SRR17520069.16090080  
SRR17520069.16090081  
SRR17520069.16090082  
SRR17520069.16090083  
SRR17520069.16090084  
SRR17520069.16090085  
SRR17520069.16090086  
SRR17520069.16090087  
SRR17520069.16090088  
SRR17520069.16090089  
SRR17520069.16090090  
SRR17520069.16090091  
SRR17520069.16090092  
SRR17520069.16090093  
SRR17520069.16090094  
SRR17520069.16090095  
SRR17520069.16090096  
SRR17520069.16090097  
SRR17520069.16090098  
SRR17520069.16090099  
SRR17520069.16090100  
SRR17520069.16090101  
SRR17520069.16090102  
SRR17520069.16090103  
SRR17520069.16090104  
SRR17520069.16090105  
SRR17520069.16090106  
SRR17520069.16090107  
SRR17520069.16090108

SRR17520069.16090109  
SRR17520069.16090110  
SRR17520069.16090111  
SRR17520069.16090112  
SRR17520069.16090113  
SRR17520069.16090114  
SRR17520069.16090115  
SRR17520069.16090116  
SRR17520069.16090118  
SRR17520069.16090119  
SRR17520069.16090120  
SRR17520069.16090121  
SRR17520069.16090122  
SRR17520069.16090123  
SRR17520069.16090124  
SRR17520069.16090125  
SRR17520069.16090126  
SRR17520069.16090127  
SRR17520069.16090128  
SRR17520069.16090129  
SRR17520069.16090130  
SRR17520069.16090131  
SRR17520069.16090132  
SRR17520069.16090133  
SRR17520069.16090134  
SRR17520069.16090135  
SRR17520069.16090136  
SRR17520069.16090137  
SRR17520069.16090138  
SRR17520069.16090140  
SRR17520069.16090141  
SRR17520069.16090142  
SRR17520069.16090143  
SRR17520069.16090144  
SRR17520069.16090145  
SRR17520069.16090146  
SRR17520069.16090147  
SRR17520069.16090148  
SRR17520069.16090150  
SRR17520069.16090151  
SRR17520069.16090152  
SRR17520069.16090153  
SRR17520069.16090154  
SRR17520069.16090155  
SRR17520069.16090156  
SRR17520069.16090157  
SRR17520069.16090158



SRR17520069.16090159  
SRR17520069.16090160  
SRR17520069.16090161  
SRR17520069.16090162  
SRR17520069.16090163  
SRR17520069.16090164  
SRR17520069.16090165  
SRR17520069.16091607  
SRR17520069.16094462  
SRR17520069.16105679  
SRR17520069.16105680  
SRR17520069.16105681  
SRR17520069.16105682  
SRR17520069.16105683  
SRR17520069.16105684  
SRR17520069.16105685  
SRR17520069.16105686  
SRR17520069.16105687  
SRR17520069.16105688  
SRR17520069.16105689  
SRR17520069.16105690  
SRR17520069.16105691  
SRR17520069.16105692  
SRR17520069.16105693  
SRR17520069.16105694  
SRR17520069.16105695  
SRR17520069.16105696  
SRR17520069.16105697  
SRR17520069.16105715  
SRR17520069.16134708  
SRR17520069.16134709  
SRR17520069.16134710  
SRR17520069.16147763  
SRR17520069.16151223  
SRR17520069.16157772  
SRR17520069.16169153  
SRR17520069.16190010  
SRR17520069.16190011  
SRR17520069.16190012  
SRR17520069.16190013  
SRR17520069.16190014  
SRR17520069.16190015  
SRR17520069.16190016  
SRR17520069.16190017  
SRR17520069.16190018  
SRR17520069.16190019  
SRR17520069.16190020

SRR17520069.16190022  
SRR17520069.16190023  
SRR17520069.16190024  
SRR17520069.16190025  
SRR17520069.16190026  
SRR17520069.16190027  
SRR17520069.16190028  
SRR17520069.16190029  
SRR17520069.16190031  
SRR17520069.16190032  
SRR17520069.16190033  
SRR17520069.16190035  
SRR17520069.16190036  
SRR17520069.16190037  
SRR17520069.16190038  
SRR17520069.16190039  
SRR17520069.16190041  
SRR17520069.16190044  
SRR17520069.16190045  
SRR17520069.16190047  
SRR17520069.16190048  
SRR17520069.16190049  
SRR17520069.16190054  
SRR17520069.16190059  
SRR17520069.16190061  
SRR17520069.16190062  
SRR17520069.16190064  
SRR17520069.16190065  
SRR17520069.16190066  
SRR17520069.16190067  
SRR17520069.16190068  
SRR17520069.16190069  
SRR17520069.16190070  
SRR17520069.16190071  
SRR17520069.16190072  
SRR17520069.16190073  
SRR17520069.16190074  
SRR17520069.16190075  
SRR17520069.16190076  
SRR17520069.16190077  
SRR17520069.16190078  
SRR17520069.16190079  
SRR17520069.16190080  
SRR17520069.16190081  
SRR17520069.16190082  
SRR17520069.16190083  
SRR17520069.16190084

SRR17520069.16190085  
SRR17520069.16190086  
SRR17520069.16190088  
SRR17520069.16190089  
SRR17520069.16190090  
SRR17520069.16190093  
SRR17520069.16190094  
SRR17520069.16190095  
SRR17520069.16190096  
SRR17520069.16190097  
SRR17520069.16190098  
SRR17520069.16190099  
SRR17520069.16190101  
SRR17520069.16190103  
SRR17520069.16190104  
SRR17520069.16190105  
SRR17520069.16190108  
SRR17520069.16190109  
SRR17520069.16190110  
SRR17520069.16190111  
SRR17520069.16190112  
SRR17520069.16190113  
SRR17520069.16190114  
SRR17520069.16190117  
SRR17520069.16190121  
SRR17520069.16190122  
SRR17520069.16190126  
SRR17520069.16190128  
SRR17520069.16191608  
SRR17520069.16191609  
SRR17520069.16191611  
SRR17520069.16191612  
SRR17520069.16191613  
SRR17520069.16191614  
SRR17520069.16191615  
SRR17520069.16191616  
SRR17520069.16191617  
SRR17520069.16191618  
SRR17520069.16191619  
SRR17520069.16191620  
SRR17520069.16191621  
SRR17520069.16191622  
SRR17520069.16191623  
SRR17520069.16191624  
SRR17520069.16191625  
SRR17520069.16191626  
SRR17520069.16191627

SRR17520069.16191628  
SRR17520069.16191629  
SRR17520069.16191631  
SRR17520069.16193461  
SRR17520069.16193462  
SRR17520069.16193463  
SRR17520069.16193464  
SRR17520069.16193465  
SRR17520069.16193466  
SRR17520069.16193467  
SRR17520069.16193468  
SRR17520069.16193469  
SRR17520069.16193470  
SRR17520069.16193471  
SRR17520069.16193472  
SRR17520069.16193473  
SRR17520069.16193474  
SRR17520069.16193475  
SRR17520069.16193476  
SRR17520069.16193477  
SRR17520069.16193478  
SRR17520069.16193479  
SRR17520069.16193480  
SRR17520069.16193481  
SRR17520069.16193482  
SRR17520069.16193483  
SRR17520069.16193484  
SRR17520069.16193485  
SRR17520069.16193486  
SRR17520069.16193487  
SRR17520069.16193488  
SRR17520069.16193489  
SRR17520069.16193490  
SRR17520069.16193491  
SRR17520069.16193492  
SRR17520069.16193493  
SRR17520069.16193494  
SRR17520069.16193495  
SRR17520069.16193496  
SRR17520069.16193497  
SRR17520069.16193498  
SRR17520069.16193499  
SRR17520069.16193500  
SRR17520069.16193501  
SRR17520069.16193502  
SRR17520069.16193503  
SRR17520069.16193504

SRR17520069. 16193505  
SRR17520069. 16193506  
SRR17520069. 16193507  
SRR17520069. 16193508  
SRR17520069. 16193509  
SRR17520069. 16193510  
SRR17520069. 16193511  
SRR17520069. 16193512  
SRR17520069. 16193513  
SRR17520069. 16193514  
SRR17520069. 16193515  
SRR17520069. 16193516  
SRR17520069. 16193517  
SRR17520069. 16193518  
SRR17520069. 16193519  
SRR17520069. 16193520  
SRR17520069. 16193521  
SRR17520069. 16193522  
SRR17520069. 16193523  
SRR17520069. 16193524  
SRR17520069. 16193525  
SRR17520069. 16193526  
SRR17520069. 16193527  
SRR17520069. 16193528  
SRR17520069. 16193529  
SRR17520069. 16193530  
SRR17520069. 16193531  
SRR17520069. 16193532  
SRR17520069. 16193533  
SRR17520069. 16193534  
SRR17520069. 16193535  
SRR17520069. 16193536  
SRR17520069. 16193537  
SRR17520069. 16193538  
SRR17520069. 16193539  
SRR17520069. 16193540  
SRR17520069. 16193541  
SRR17520069. 16193542  
SRR17520069. 16193543  
SRR17520069. 16193544  
SRR17520069. 16193545  
SRR17520069. 16193546  
SRR17520069. 16193547  
SRR17520069. 16193548  
SRR17520069. 16193549  
SRR17520069. 16193550  
SRR17520069. 16193551

SRR17520069. 16193552  
SRR17520069. 16193553  
SRR17520069. 16193554  
SRR17520069. 16193556  
SRR17520069. 16193557  
SRR17520069. 16193558  
SRR17520069. 16193559  
SRR17520069. 16193560  
SRR17520069. 16193561  
SRR17520069. 16193562  
SRR17520069. 16193563  
SRR17520069. 16193564  
SRR17520069. 16193565  
SRR17520069. 16193566  
SRR17520069. 16193567  
SRR17520069. 16193568  
SRR17520069. 16193569  
SRR17520069. 16193570  
SRR17520069. 16193571  
SRR17520069. 16193572  
SRR17520069. 16193573  
SRR17520069. 16193574  
SRR17520069. 16193575  
SRR17520069. 16193576  
SRR17520069. 16193577  
SRR17520069. 16193578  
SRR17520069. 16193579  
SRR17520069. 16193580  
SRR17520069. 16193581  
SRR17520069. 16193582  
SRR17520069. 16193583  
SRR17520069. 16193584  
SRR17520069. 16193585  
SRR17520069. 16193586  
SRR17520069. 16193587  
SRR17520069. 16193588  
SRR17520069. 16193589  
SRR17520069. 16193590  
SRR17520069. 16193591  
SRR17520069. 16193592  
SRR17520069. 16193593  
SRR17520069. 16193594  
SRR17520069. 16193595  
SRR17520069. 16193596  
SRR17520069. 16193597  
SRR17520069. 16193598  
SRR17520069. 16193599

SRR17520069. 16193600  
SRR17520069. 16193601  
SRR17520069. 16193602  
SRR17520069. 16193603  
SRR17520069. 16193604  
SRR17520069. 16193605  
SRR17520069. 16193606  
SRR17520069. 16193607  
SRR17520069. 16193608  
SRR17520069. 16193609  
SRR17520069. 16193610  
SRR17520069. 16193611  
SRR17520069. 16193612  
SRR17520069. 16193613  
SRR17520069. 16193615  
SRR17520069. 16193616  
SRR17520069. 16193617  
SRR17520069. 16193618  
SRR17520069. 16193619  
SRR17520069. 16193620  
SRR17520069. 16193621  
SRR17520069. 16193622  
SRR17520069. 16193623  
SRR17520069. 16193624  
SRR17520069. 16193625  
SRR17520069. 16193626  
SRR17520069. 16193627  
SRR17520069. 16193628  
SRR17520069. 16193629  
SRR17520069. 16193631  
SRR17520069. 16193632  
SRR17520069. 16193633  
SRR17520069. 16193634  
SRR17520069. 16193636  
SRR17520069. 16193637  
SRR17520069. 16193638  
SRR17520069. 16193639  
SRR17520069. 16193640  
SRR17520069. 16193641  
SRR17520069. 16193642  
SRR17520069. 16193644  
SRR17520069. 16193645  
SRR17520069. 16193646  
SRR17520069. 16193647  
SRR17520069. 16193648  
SRR17520069. 16193649  
SRR17520069. 16193650

SRR17520069. 16193651  
SRR17520069. 16193652  
SRR17520069. 16193653  
SRR17520069. 16193654  
SRR17520069. 16193655  
SRR17520069. 16193656  
SRR17520069. 16193657  
SRR17520069. 16193658  
SRR17520069. 16193659  
SRR17520069. 16193660  
SRR17520069. 16193661  
SRR17520069. 16193662  
SRR17520069. 16197426  
SRR17520069. 16197427  
SRR17520069. 16197428  
SRR17520069. 16197429  
SRR17520069. 16197430  
SRR17520069. 16197431  
SRR17520069. 16197432  
SRR17520069. 16197433  
SRR17520069. 16197434  
SRR17520069. 16197435  
SRR17520069. 16197436  
SRR17520069. 16197437  
SRR17520069. 16197438  
SRR17520069. 16197439  
SRR17520069. 16197440  
SRR17520069. 16197441  
SRR17520069. 16197443  
SRR17520069. 16197444  
SRR17520069. 16197445  
SRR17520069. 16197446  
SRR17520069. 16197447  
SRR17520069. 16197448  
SRR17520069. 16197449  
SRR17520069. 16197450  
SRR17520069. 16197451  
SRR17520069. 16197452  
SRR17520069. 16197453  
SRR17520069. 16197455  
SRR17520069. 16197456  
SRR17520069. 16197457  
SRR17520069. 16197458  
SRR17520069. 16197459  
SRR17520069. 16197460  
SRR17520069. 16197461  
SRR17520069. 16197462



SRR17520069. 16197463  
SRR17520069. 16197464  
SRR17520069. 16197465  
SRR17520069. 16197466  
SRR17520069. 16197467  
SRR17520069. 16197468  
SRR17520069. 16197469  
SRR17520069. 16197470  
SRR17520069. 16197471  
SRR17520069. 16197472  
SRR17520069. 16197473  
SRR17520069. 16197474  
SRR17520069. 16197475  
SRR17520069. 16197476  
SRR17520069. 16197478  
SRR17520069. 16197479  
SRR17520069. 16197481  
SRR17520069. 16197482  
SRR17520069. 16197484  
SRR17520069. 16197485  
SRR17520069. 16197486  
SRR17520069. 16197487  
SRR17520069. 16197489  
SRR17520069. 16197491  
SRR17520069. 16200058  
SRR17520069. 16200059  
SRR17520069. 16200060  
SRR17520069. 16200061  
SRR17520069. 16200062  
SRR17520069. 16200063  
SRR17520069. 16200064  
SRR17520069. 16200066  
SRR17520069. 16200067  
SRR17520069. 16200068  
SRR17520069. 16200069  
SRR17520069. 16200070  
SRR17520069. 16200071  
SRR17520069. 16200072  
SRR17520069. 16200074  
SRR17520069. 16200075  
SRR17520069. 16200076  
SRR17520069. 16200077  
SRR17520069. 16200079  
SRR17520069. 16200081  
SRR17520069. 16200082  
SRR17520069. 16200083  
SRR17520069. 16200084

SRR17520069. 16200085  
SRR17520069. 16200086  
SRR17520069. 16200088  
SRR17520069. 16200089  
SRR17520069. 16200090  
SRR17520069. 16200091  
SRR17520069. 16200092  
SRR17520069. 16200094  
SRR17520069. 16200095  
SRR17520069. 16200096  
SRR17520069. 16200097  
SRR17520069. 16200098  
SRR17520069. 16200099  
SRR17520069. 16200100  
SRR17520069. 16200101  
SRR17520069. 16200102  
SRR17520069. 16200103  
SRR17520069. 16200104  
SRR17520069. 16200105  
SRR17520069. 16200107  
SRR17520069. 16200108  
SRR17520069. 16200109  
SRR17520069. 16201728  
SRR17520069. 16201729  
SRR17520069. 16201730  
SRR17520069. 16201732  
SRR17520069. 16201733  
SRR17520069. 16201734  
SRR17520069. 16201735  
SRR17520069. 16201736  
SRR17520069. 16201737  
SRR17520069. 16201738  
SRR17520069. 16201739  
SRR17520069. 16201740  
SRR17520069. 16201741  
SRR17520069. 16201743  
SRR17520069. 16201744  
SRR17520069. 16201745  
SRR17520069. 16201746  
SRR17520069. 16201747  
SRR17520069. 16201748  
SRR17520069. 16201749  
SRR17520069. 16201750  
SRR17520069. 16201751  
SRR17520069. 16201752  
SRR17520069. 16201753  
SRR17520069. 16201754

SRR17520069. 16201755  
SRR17520069. 16201756  
SRR17520069. 16201757  
SRR17520069. 16201758  
SRR17520069. 16201759  
SRR17520069. 16201760  
SRR17520069. 16201761  
SRR17520069. 16201762  
SRR17520069. 16201763  
SRR17520069. 16201764  
SRR17520069. 16201765  
SRR17520069. 16201766  
SRR17520069. 16201767  
SRR17520069. 16201768  
SRR17520069. 16201769  
SRR17520069. 16201770  
SRR17520069. 16201771  
SRR17520069. 16201772  
SRR17520069. 16201773  
SRR17520069. 16201774  
SRR17520069. 16201775  
SRR17520069. 16201776  
SRR17520069. 16201777  
SRR17520069. 16201778  
SRR17520069. 16201779  
SRR17520069. 16201781  
SRR17520069. 16201784  
SRR17520069. 16201785  
SRR17520069. 16201786  
SRR17520069. 16209567  
SRR17520069. 16209568  
SRR17520069. 16209569  
SRR17520069. 16209570  
SRR17520069. 16209571  
SRR17520069. 16209573  
SRR17520069. 16209576  
SRR17520069. 16217709  
SRR17520069. 16217731  
SRR17520069. 16219455  
SRR17520069. 16222649  
SRR17520069. 16222650  
SRR17520069. 16222651  
SRR17520069. 16222652  
SRR17520069. 16222653  
SRR17520069. 16222654  
SRR17520069. 16222655  
SRR17520069. 16222656

SRR17520069. 16222657  
SRR17520069. 16222658  
SRR17520069. 16222659  
SRR17520069. 16222660  
SRR17520069. 16222662  
SRR17520069. 16222663  
SRR17520069. 16222664  
SRR17520069. 16222665  
SRR17520069. 16222666  
SRR17520069. 16222667  
SRR17520069. 16223996  
SRR17520069. 16225732  
SRR17520069. 16238585  
SRR17520069. 16238586  
SRR17520069. 16238587  
SRR17520069. 16238589  
SRR17520069. 16238592  
SRR17520069. 16238595  
SRR17520069. 16238596  
SRR17520069. 16238597  
SRR17520069. 16238601  
SRR17520069. 16238602  
SRR17520069. 16238603  
SRR17520069. 16238604  
SRR17520069. 16238605  
SRR17520069. 16238606  
SRR17520069. 16238607  
SRR17520069. 16238608  
SRR17520069. 16238609  
SRR17520069. 16238610  
SRR17520069. 16238611  
SRR17520069. 16238612  
SRR17520069. 16238613  
SRR17520069. 16238614  
SRR17520069. 16238616  
SRR17520069. 16242858  
SRR17520069. 16243476  
SRR17520069. 16243477  
SRR17520069. 16243626  
SRR17520069. 16248394  
SRR17520069. 16249314  
SRR17520069. 16249316  
SRR17520069. 16268459  
SRR17520069. 16273575  
SRR17520069. 16273576  
SRR17520069. 16273577  
SRR17520069. 16273578

SRR17520069. 16273579  
SRR17520069. 16273580  
SRR17520069. 16273581  
SRR17520069. 16273582  
SRR17520069. 16273583  
SRR17520069. 16273584  
SRR17520069. 16273585  
SRR17520069. 16273586  
SRR17520069. 16273587  
SRR17520069. 16273588  
SRR17520069. 16273589  
SRR17520069. 16273591  
SRR17520069. 16273592  
SRR17520069. 16273593  
SRR17520069. 16273594  
SRR17520069. 16273595  
SRR17520069. 16273596  
SRR17520069. 16273597  
SRR17520069. 16273598  
SRR17520069. 16273599  
SRR17520069. 16273600  
SRR17520069. 16273601  
SRR17520069. 16273602  
SRR17520069. 16273603  
SRR17520069. 16273604  
SRR17520069. 16273605  
SRR17520069. 16273606  
SRR17520069. 16273607  
SRR17520069. 16273608  
SRR17520069. 16273609  
SRR17520069. 16273610  
SRR17520069. 16273611  
SRR17520069. 16273612  
SRR17520069. 16273613  
SRR17520069. 16273614  
SRR17520069. 16273615  
SRR17520069. 16273616  
SRR17520069. 16273617  
SRR17520069. 16273618  
SRR17520069. 16273619  
SRR17520069. 16273620  
SRR17520069. 16273621  
SRR17520069. 16273622  
SRR17520069. 16273623  
SRR17520069. 16273624  
SRR17520069. 16273625  
SRR17520069. 16273626

SRR17520069. 16273627  
SRR17520069. 16273629  
SRR17520069. 16273630  
SRR17520069. 16273631  
SRR17520069. 16273632  
SRR17520069. 16273633  
SRR17520069. 16273634  
SRR17520069. 16273635  
SRR17520069. 16273636  
SRR17520069. 16273637  
SRR17520069. 16273638  
SRR17520069. 16273639  
SRR17520069. 16273640  
SRR17520069. 16273641  
SRR17520069. 16273642  
SRR17520069. 16273643  
SRR17520069. 16273644  
SRR17520069. 16273645  
SRR17520069. 16273646  
SRR17520069. 16273647  
SRR17520069. 16273648  
SRR17520069. 16273649  
SRR17520069. 16273651  
SRR17520069. 16273652  
SRR17520069. 16273653  
SRR17520069. 16273654  
SRR17520069. 16273655  
SRR17520069. 16273656  
SRR17520069. 16273657  
SRR17520069. 16273658  
SRR17520069. 16273659  
SRR17520069. 16273660  
SRR17520069. 16273661  
SRR17520069. 16273662  
SRR17520069. 16273663  
SRR17520069. 16273664  
SRR17520069. 16273665  
SRR17520069. 16273666  
SRR17520069. 16273667  
SRR17520069. 16273668  
SRR17520069. 16273669  
SRR17520069. 16273670  
SRR17520069. 16273671  
SRR17520069. 16282057  
SRR17520069. 16282058  
SRR17520069. 16282059  
SRR17520069. 16282060

SRR17520069. 16282061  
SRR17520069. 16282062  
SRR17520069. 16282063  
SRR17520069. 16282064  
SRR17520069. 16282065  
SRR17520069. 16282066  
SRR17520069. 16282067  
SRR17520069. 16282068  
SRR17520069. 16282069  
SRR17520069. 16282070  
SRR17520069. 16282071  
SRR17520069. 16282072  
SRR17520069. 16282073  
SRR17520069. 16282074  
SRR17520069. 16282075  
SRR17520069. 16282076  
SRR17520069. 16282077  
SRR17520069. 16282079  
SRR17520069. 16282080  
SRR17520069. 16282081  
SRR17520069. 16282082  
SRR17520069. 16282084  
SRR17520069. 16282085  
SRR17520069. 16282086  
SRR17520069. 16282087  
SRR17520069. 16282088  
SRR17520069. 16282089  
SRR17520069. 16282090  
SRR17520069. 16282092  
SRR17520069. 16282093  
SRR17520069. 16282094  
SRR17520069. 16282095  
SRR17520069. 16282096  
SRR17520069. 16282097  
SRR17520069. 16282098  
SRR17520069. 16282099  
SRR17520069. 16282100  
SRR17520069. 16282101  
SRR17520069. 16282102  
SRR17520069. 16282103  
SRR17520069. 16282104  
SRR17520069. 16282106  
SRR17520069. 16282107  
SRR17520069. 16282108  
SRR17520069. 16282109  
SRR17520069. 16282110  
SRR17520069. 16282111

SRR17520069. 16282112  
SRR17520069. 16282113  
SRR17520069. 16282114  
SRR17520069. 16282115  
SRR17520069. 16282116  
SRR17520069. 16282117  
SRR17520069. 16282118  
SRR17520069. 16282119  
SRR17520069. 16282120  
SRR17520069. 16282121  
SRR17520069. 16282122  
SRR17520069. 16282123  
SRR17520069. 16282124  
SRR17520069. 16282126  
SRR17520069. 16282127  
SRR17520069. 16282128  
SRR17520069. 16282129  
SRR17520069. 16282130  
SRR17520069. 16282131  
SRR17520069. 16282132  
SRR17520069. 16282133  
SRR17520069. 16282134  
SRR17520069. 16282135  
SRR17520069. 16282136  
SRR17520069. 16282137  
SRR17520069. 16282138  
SRR17520069. 16282139  
SRR17520069. 16282140  
SRR17520069. 16282141  
SRR17520069. 16282142  
SRR17520069. 16282143  
SRR17520069. 16282144  
SRR17520069. 16282145  
SRR17520069. 16282147  
SRR17520069. 16282148  
SRR17520069. 16282149  
SRR17520069. 16282150  
SRR17520069. 16282152  
SRR17520069. 16282153  
SRR17520069. 16282154  
SRR17520069. 16282155  
SRR17520069. 16282157  
SRR17520069. 16282158  
SRR17520069. 16282159  
SRR17520069. 16282160  
SRR17520069. 16282161  
SRR17520069. 16282162



SRR17520069. 16282163  
SRR17520069. 16282164  
SRR17520069. 16282166  
SRR17520069. 16282167  
SRR17520069. 16282168  
SRR17520069. 16282169  
SRR17520069. 16282170  
SRR17520069. 16282171  
SRR17520069. 16282172  
SRR17520069. 16282173  
SRR17520069. 16282174  
SRR17520069. 16282175  
SRR17520069. 16282176  
SRR17520069. 16282177  
SRR17520069. 16282178  
SRR17520069. 16282180  
SRR17520069. 16282181  
SRR17520069. 16282182  
SRR17520069. 16282183  
SRR17520069. 16282184  
SRR17520069. 16282185  
SRR17520069. 16282186  
SRR17520069. 16282187  
SRR17520069. 16282188  
SRR17520069. 16282189  
SRR17520069. 16282190  
SRR17520069. 16282191  
SRR17520069. 16282192  
SRR17520069. 16282193  
SRR17520069. 16282194  
SRR17520069. 16282195  
SRR17520069. 16282196  
SRR17520069. 16282197  
SRR17520069. 16282200  
SRR17520069. 16282201  
SRR17520069. 16282202  
SRR17520069. 16282203  
SRR17520069. 16282204  
SRR17520069. 16282205  
SRR17520069. 16282206  
SRR17520069. 16282207  
SRR17520069. 16282208  
SRR17520069. 16282209  
SRR17520069. 16282210  
SRR17520069. 16282212  
SRR17520069. 16282213  
SRR17520069. 16282214

SRR17520069.16282215  
SRR17520069.16282216  
SRR17520069.16282217  
SRR17520069.16282219  
SRR17520069.16282222  
SRR17520069.16282223  
SRR17520069.16282224  
SRR17520069.16282225  
SRR17520069.16282226  
SRR17520069.16282227  
SRR17520069.16293703  
SRR17520069.16293704  
SRR17520069.16293705  
SRR17520069.16293706  
SRR17520069.16293707  
SRR17520069.16293708  
SRR17520069.16293709  
SRR17520069.16293710  
SRR17520069.16293711  
SRR17520069.16293712  
SRR17520069.16293713  
SRR17520069.16293714  
SRR17520069.16293715  
SRR17520069.16293716  
SRR17520069.16293717  
SRR17520069.16293718  
SRR17520069.16293719  
SRR17520069.16293721  
SRR17520069.16293723  
SRR17520069.16293724  
SRR17520069.16293725  
SRR17520069.16293726  
SRR17520069.16293727  
SRR17520069.16293728  
SRR17520069.16293729  
SRR17520069.16293731  
SRR17520069.16293732  
SRR17520069.16293733  
SRR17520069.16293734  
SRR17520069.16293735  
SRR17520069.16293736  
SRR17520069.16293737  
SRR17520069.16293738  
SRR17520069.16293739  
SRR17520069.16293740  
SRR17520069.16293741  
SRR17520069.16293742

SRR17520069. 16293743  
SRR17520069. 16293744  
SRR17520069. 16293745  
SRR17520069. 16293746  
SRR17520069. 16293747  
SRR17520069. 16293748  
SRR17520069. 16293749  
SRR17520069. 16293750  
SRR17520069. 16293751  
SRR17520069. 16293752  
SRR17520069. 16293753  
SRR17520069. 16293754  
SRR17520069. 16293755  
SRR17520069. 16320228  
SRR17520069. 16327040  
SRR17520069. 16342744  
SRR17520069. 16342745  
SRR17520069. 16342746  
SRR17520069. 16342747  
SRR17520069. 16342748  
SRR17520069. 16342749  
SRR17520069. 16342750  
SRR17520069. 16342751  
SRR17520069. 16342752  
SRR17520069. 16342753  
SRR17520069. 16342754  
SRR17520069. 16342755  
SRR17520069. 16342756  
SRR17520069. 16342757  
SRR17520069. 16342758  
SRR17520069. 16342759  
SRR17520069. 16342761  
SRR17520069. 16352161  
SRR17520069. 16352311  
SRR17520069. 16358455  
SRR17520069. 16358456  
SRR17520069. 16358457  
SRR17520069. 16358458  
SRR17520069. 16358459  
SRR17520069. 16358460  
SRR17520069. 16358461  
SRR17520069. 16358462  
SRR17520069. 16361142  
SRR17520069. 16361143  
SRR17520069. 16361144  
SRR17520069. 16361145  
SRR17520069. 16361146

SRR17520069. 16361147  
SRR17520069. 16361148  
SRR17520069. 16361149  
SRR17520069. 16361150  
SRR17520069. 16361151  
SRR17520069. 16361152  
SRR17520069. 16361153  
SRR17520069. 16361154  
SRR17520069. 16361155  
SRR17520069. 16361156  
SRR17520069. 16361157  
SRR17520069. 16361158  
SRR17520069. 16361159  
SRR17520069. 16361160  
SRR17520069. 16361161  
SRR17520069. 16361162  
SRR17520069. 16361163  
SRR17520069. 16361164  
SRR17520069. 16361165  
SRR17520069. 16361166  
SRR17520069. 16361167  
SRR17520069. 16361168  
SRR17520069. 16361170  
SRR17520069. 16361171  
SRR17520069. 16361172  
SRR17520069. 16361173  
SRR17520069. 16361174  
SRR17520069. 16361175  
SRR17520069. 16361176  
SRR17520069. 16361177  
SRR17520069. 16361178  
SRR17520069. 16361179  
SRR17520069. 16361180  
SRR17520069. 16361181  
SRR17520069. 16361182  
SRR17520069. 16361183  
SRR17520069. 16361184  
SRR17520069. 16361185  
SRR17520069. 16361187  
SRR17520069. 16361188  
SRR17520069. 16361189  
SRR17520069. 16361190  
SRR17520069. 16361191  
SRR17520069. 16361192  
SRR17520069. 16361193  
SRR17520069. 16361194  
SRR17520069. 16361196

SRR17520069. 16361197  
SRR17520069. 16361198  
SRR17520069. 16361199  
SRR17520069. 16361200  
SRR17520069. 16361201  
SRR17520069. 16361202  
SRR17520069. 16361203  
SRR17520069. 16361204  
SRR17520069. 16361205  
SRR17520069. 16361206  
SRR17520069. 16361207  
SRR17520069. 16361208  
SRR17520069. 16361209  
SRR17520069. 16361210  
SRR17520069. 16361211  
SRR17520069. 16361212  
SRR17520069. 16361213  
SRR17520069. 16361214  
SRR17520069. 16361215  
SRR17520069. 16361216  
SRR17520069. 16361217  
SRR17520069. 16361218  
SRR17520069. 16361220  
SRR17520069. 16361221  
SRR17520069. 16361222  
SRR17520069. 16361223  
SRR17520069. 16361224  
SRR17520069. 16361226  
SRR17520069. 16361227  
SRR17520069. 16361228  
SRR17520069. 16361229  
SRR17520069. 16361230  
SRR17520069. 16361231  
SRR17520069. 16361232  
SRR17520069. 16361233  
SRR17520069. 16361234  
SRR17520069. 16361235  
SRR17520069. 16361236  
SRR17520069. 16361237  
SRR17520069. 16361238  
SRR17520069. 16361239  
SRR17520069. 16361240  
SRR17520069. 16361241  
SRR17520069. 16361242  
SRR17520069. 16361243  
SRR17520069. 16361244  
SRR17520069. 16361245

SRR17520069. 16361247  
SRR17520069. 16361248  
SRR17520069. 16361249  
SRR17520069. 16361250  
SRR17520069. 16361251  
SRR17520069. 16361252  
SRR17520069. 16361253  
SRR17520069. 16361254  
SRR17520069. 16361255  
SRR17520069. 16382810  
SRR17520069. 16383939  
SRR17520069. 16404234  
SRR17520069. 16404235  
SRR17520069. 16404236  
SRR17520069. 16404237  
SRR17520069. 16404238  
SRR17520069. 16404240  
SRR17520069. 16404241  
SRR17520069. 16405755  
SRR17520069. 16405756  
SRR17520069. 16405757  
SRR17520069. 16405759  
SRR17520069. 16405760  
SRR17520069. 16414011  
SRR17520069. 16433549  
SRR17520069. 16433550  
SRR17520069. 16433551  
SRR17520069. 16433552  
SRR17520069. 16434065  
SRR17520069. 16434066  
SRR17520069. 16434067  
SRR17520069. 16434070  
SRR17520069. 16434072  
SRR17520069. 16434073  
SRR17520069. 16434075  
SRR17520069. 16434077  
SRR17520069. 16434078  
SRR17520069. 16434080  
SRR17520069. 16434081  
SRR17520069. 16434082  
SRR17520069. 16440286  
SRR17520069. 16440287  
SRR17520069. 16440288  
SRR17520069. 16440289  
SRR17520069. 16440290  
SRR17520069. 16440291  
SRR17520069. 16440292

SRR17520069.16440293  
SRR17520069.16440294  
SRR17520069.16440295  
SRR17520069.16440296  
SRR17520069.16440297  
SRR17520069.16440298  
SRR17520069.16440299  
SRR17520069.16440300  
SRR17520069.16440301  
SRR17520069.16440302  
SRR17520069.16440303  
SRR17520069.16440304  
SRR17520069.16440305  
SRR17520069.16440306  
SRR17520069.16440307  
SRR17520069.16440308  
SRR17520069.16440309  
SRR17520069.16440310  
SRR17520069.16440311  
SRR17520069.16440312  
SRR17520069.16440313  
SRR17520069.16440314  
SRR17520069.16440315  
SRR17520069.16440316  
SRR17520069.16440317  
SRR17520069.16440318  
SRR17520069.16440320  
SRR17520069.16440321  
SRR17520069.16440322  
SRR17520069.16440324  
SRR17520069.16440325  
SRR17520069.16440326  
SRR17520069.16440327  
SRR17520069.16440328  
SRR17520069.16440329  
SRR17520069.16440330  
SRR17520069.16440331  
SRR17520069.16440332  
SRR17520069.16440333  
SRR17520069.16440334  
SRR17520069.16440335  
SRR17520069.16440336  
SRR17520069.16440337  
SRR17520069.16440338  
SRR17520069.16440339  
SRR17520069.16440340  
SRR17520069.16440341

SRR17520069.16440342  
SRR17520069.16440343  
SRR17520069.16440344  
SRR17520069.16440345  
SRR17520069.16440346  
SRR17520069.16440347  
SRR17520069.16440348  
SRR17520069.16440349  
SRR17520069.16440350  
SRR17520069.16440351  
SRR17520069.16440352  
SRR17520069.16440353  
SRR17520069.16440354  
SRR17520069.16440355  
SRR17520069.16440356  
SRR17520069.16440357  
SRR17520069.16440358  
SRR17520069.16440359  
SRR17520069.16440360  
SRR17520069.16440361  
SRR17520069.16440362  
SRR17520069.16440363  
SRR17520069.16440364  
SRR17520069.16440365  
SRR17520069.16440366  
SRR17520069.16440367  
SRR17520069.16440368  
SRR17520069.16440369  
SRR17520069.16440370  
SRR17520069.16440371  
SRR17520069.16440372  
SRR17520069.16440373  
SRR17520069.16440374  
SRR17520069.16440375  
SRR17520069.16440376  
SRR17520069.16440377  
SRR17520069.16440378  
SRR17520069.16440379  
SRR17520069.16440380  
SRR17520069.16440381  
SRR17520069.16440382  
SRR17520069.16440383  
SRR17520069.16440384  
SRR17520069.16440385  
SRR17520069.16440386  
SRR17520069.16440387  
SRR17520069.16440388



SRR17520069.16440389  
SRR17520069.16440390  
SRR17520069.16440391  
SRR17520069.16440392  
SRR17520069.16440393  
SRR17520069.16440394  
SRR17520069.16440395  
SRR17520069.16440396  
SRR17520069.16440397  
SRR17520069.16441424  
SRR17520069.16474642  
SRR17520069.16480699  
SRR17520069.16480700  
SRR17520069.16480701  
SRR17520069.16480702  
SRR17520069.16480704  
SRR17520069.16481171  
SRR17520069.16481172  
SRR17520069.16481173  
SRR17520069.16481174  
SRR17520069.16481175  
SRR17520069.16481176  
SRR17520069.16481177  
SRR17520069.16481178  
SRR17520069.16481179  
SRR17520069.16481180  
SRR17520069.16481181  
SRR17520069.16481182  
SRR17520069.16481183  
SRR17520069.16481184  
SRR17520069.16481185  
SRR17520069.16481186  
SRR17520069.16481187  
SRR17520069.16481188  
SRR17520069.16481189  
SRR17520069.16481190  
SRR17520069.16481191  
SRR17520069.16481192  
SRR17520069.16481193  
SRR17520069.16481194  
SRR17520069.16481195  
SRR17520069.16481196  
SRR17520069.16481205  
SRR17520069.16486482  
SRR17520069.16501712  
SRR17520069.16501713  
SRR17520069.16501714

SRR17520069.16501715  
SRR17520069.16501716  
SRR17520069.16501717  
SRR17520069.16501718  
SRR17520069.16501719  
SRR17520069.16501720  
SRR17520069.16501730  
SRR17520069.16501744  
SRR17520069.16501768  
SRR17520069.16501799  
SRR17520069.16510104  
SRR17520069.16510105  
SRR17520069.16510106  
SRR17520069.16510107  
SRR17520069.16510108  
SRR17520069.16510109  
SRR17520069.16510110  
SRR17520069.16510111  
SRR17520069.16510112  
SRR17520069.16510113  
SRR17520069.16510114  
SRR17520069.16510115  
SRR17520069.16510116  
SRR17520069.16510117  
SRR17520069.16510118  
SRR17520069.16510119  
SRR17520069.16510120  
SRR17520069.16510121  
SRR17520069.16510122  
SRR17520069.16510123  
SRR17520069.16510124  
SRR17520069.16510125  
SRR17520069.16510126  
SRR17520069.16510127  
SRR17520069.16510128  
SRR17520069.16510129  
SRR17520069.16510130  
SRR17520069.16510131  
SRR17520069.16510132  
SRR17520069.16510133  
SRR17520069.16510134  
SRR17520069.16510135  
SRR17520069.16510136  
SRR17520069.16510137  
SRR17520069.16510138  
SRR17520069.16510139  
SRR17520069.16510140

SRR17520069.16510141  
SRR17520069.16510142  
SRR17520069.16510144  
SRR17520069.16510145  
SRR17520069.16510146  
SRR17520069.16510147  
SRR17520069.16510148  
SRR17520069.16510149  
SRR17520069.16510150  
SRR17520069.16510151  
SRR17520069.16510152  
SRR17520069.16510153  
SRR17520069.16510154  
SRR17520069.16510155  
SRR17520069.16510156  
SRR17520069.16510157  
SRR17520069.16510158  
SRR17520069.16510159  
SRR17520069.16510160  
SRR17520069.16510161  
SRR17520069.16510162  
SRR17520069.16510163  
SRR17520069.16510164  
SRR17520069.16510165  
SRR17520069.16510166  
SRR17520069.16510167  
SRR17520069.16510168  
SRR17520069.16510169  
SRR17520069.16510170  
SRR17520069.16510171  
SRR17520069.16510172  
SRR17520069.16510173  
SRR17520069.16510174  
SRR17520069.16510175  
SRR17520069.16510177  
SRR17520069.16510178  
SRR17520069.16510179  
SRR17520069.16510180  
SRR17520069.16510181  
SRR17520069.16510182  
SRR17520069.16510183  
SRR17520069.16510184  
SRR17520069.16510185  
SRR17520069.16510186  
SRR17520069.16510187  
SRR17520069.16510189  
SRR17520069.16510190

SRR17520069.16510191  
SRR17520069.16510192  
SRR17520069.16510193  
SRR17520069.16510194  
SRR17520069.16510195  
SRR17520069.16510196  
SRR17520069.16510197  
SRR17520069.16510198  
SRR17520069.16510200  
SRR17520069.16510201  
SRR17520069.16510202  
SRR17520069.16510204  
SRR17520069.16510205  
SRR17520069.16510206  
SRR17520069.16510207  
SRR17520069.16510208  
SRR17520069.16510209  
SRR17520069.16510210  
SRR17520069.16510211  
SRR17520069.16510212  
SRR17520069.16510213  
SRR17520069.16510214  
SRR17520069.16510215  
SRR17520069.16510216  
SRR17520069.16510217  
SRR17520069.16510219  
SRR17520069.16510220  
SRR17520069.16510221  
SRR17520069.16510222  
SRR17520069.16510223  
SRR17520069.16510224  
SRR17520069.16510225  
SRR17520069.16510226  
SRR17520069.16510227  
SRR17520069.16510228  
SRR17520069.16519053  
SRR17520069.16519054  
SRR17520069.16519055  
SRR17520069.16519056  
SRR17520069.16519057  
SRR17520069.16519058  
SRR17520069.16519059  
SRR17520069.16519060  
SRR17520069.16519061  
SRR17520069.16519062  
SRR17520069.16519063  
SRR17520069.16519064

SRR17520069. 16519065  
SRR17520069. 16519066  
SRR17520069. 16519067  
SRR17520069. 16519068  
SRR17520069. 16519069  
SRR17520069. 16519070  
SRR17520069. 16519071  
SRR17520069. 16519072  
SRR17520069. 16519073  
SRR17520069. 16519074  
SRR17520069. 16519075  
SRR17520069. 16519076  
SRR17520069. 16519077  
SRR17520069. 16519078  
SRR17520069. 16519079  
SRR17520069. 16519080  
SRR17520069. 16519081  
SRR17520069. 16519082  
SRR17520069. 16519083  
SRR17520069. 16519084  
SRR17520069. 16519085  
SRR17520069. 16519086  
SRR17520069. 16519087  
SRR17520069. 16519088  
SRR17520069. 16519089  
SRR17520069. 16519090  
SRR17520069. 16519091  
SRR17520069. 16519092  
SRR17520069. 16519093  
SRR17520069. 16519094  
SRR17520069. 16519095  
SRR17520069. 16519097  
SRR17520069. 16519098  
SRR17520069. 16519099  
SRR17520069. 16519100  
SRR17520069. 16519101  
SRR17520069. 16519102  
SRR17520069. 16519103  
SRR17520069. 16519105  
SRR17520069. 16519106  
SRR17520069. 16519107  
SRR17520069. 16519108  
SRR17520069. 16519109  
SRR17520069. 16519110  
SRR17520069. 16519111  
SRR17520069. 16519112  
SRR17520069. 16519113

SRR17520069.16519114  
SRR17520069.16519115  
SRR17520069.16519116  
SRR17520069.16519117  
SRR17520069.16519118  
SRR17520069.16519119  
SRR17520069.16519120  
SRR17520069.16519121  
SRR17520069.16519122  
SRR17520069.16519123  
SRR17520069.16519124  
SRR17520069.16519125  
SRR17520069.16519127  
SRR17520069.16519128  
SRR17520069.16519129  
SRR17520069.16519130  
SRR17520069.16519131  
SRR17520069.16521407  
SRR17520069.16527281  
SRR17520069.16527282  
SRR17520069.16527283  
SRR17520069.16527284  
SRR17520069.16527285  
SRR17520069.16527286  
SRR17520069.16527287  
SRR17520069.16527288  
SRR17520069.16527289  
SRR17520069.16527290  
SRR17520069.16527291  
SRR17520069.16527292  
SRR17520069.16527294  
SRR17520069.16527295  
SRR17520069.16527296  
SRR17520069.16527297  
SRR17520069.16527298  
SRR17520069.16527299  
SRR17520069.16527300  
SRR17520069.16527301  
SRR17520069.16527302  
SRR17520069.16527303  
SRR17520069.16527304  
SRR17520069.16527305  
SRR17520069.16527306  
SRR17520069.16527307  
SRR17520069.16527308  
SRR17520069.16527309  
SRR17520069.16527310

SRR17520069.16527311  
SRR17520069.16527312  
SRR17520069.16527313  
SRR17520069.16527314  
SRR17520069.16527315  
SRR17520069.16527316  
SRR17520069.16527317  
SRR17520069.16527318  
SRR17520069.16527319  
SRR17520069.16527320  
SRR17520069.16581324  
SRR17520069.16581325  
SRR17520069.16581327  
SRR17520069.16581328  
SRR17520069.16581329  
SRR17520069.16588273  
SRR17520069.16588274  
SRR17520069.16588275  
SRR17520069.16588276  
SRR17520069.16588277  
SRR17520069.16588278  
SRR17520069.16588279  
SRR17520069.16588280  
SRR17520069.16588281  
SRR17520069.16588282  
SRR17520069.16588283  
SRR17520069.16588284  
SRR17520069.16588285  
SRR17520069.16588286  
SRR17520069.16588287  
SRR17520069.16588288  
SRR17520069.16588289  
SRR17520069.16588290  
SRR17520069.16588291  
SRR17520069.16588292  
SRR17520069.16588293  
SRR17520069.16588294  
SRR17520069.16588295  
SRR17520069.16588296  
SRR17520069.16588297  
SRR17520069.16588298  
SRR17520069.16599844  
SRR17520069.16600965  
SRR17520069.16600966  
SRR17520069.16600967  
SRR17520069.16600968  
SRR17520069.16600969

SRR17520069.16600970  
SRR17520069.16600971  
SRR17520069.16600972  
SRR17520069.16600973  
SRR17520069.16600974  
SRR17520069.16600976  
SRR17520069.16600977  
SRR17520069.16600978  
SRR17520069.16600979  
SRR17520069.16600980  
SRR17520069.16600981  
SRR17520069.16600982  
SRR17520069.16600983  
SRR17520069.16600984  
SRR17520069.16600985  
SRR17520069.16600987  
SRR17520069.16600988  
SRR17520069.16600989  
SRR17520069.16600990  
SRR17520069.16600991  
SRR17520069.16600992  
SRR17520069.16600993  
SRR17520069.16600994  
SRR17520069.16600995  
SRR17520069.16600996  
SRR17520069.16600997  
SRR17520069.16600998  
SRR17520069.16600999  
SRR17520069.16601000  
SRR17520069.16601001  
SRR17520069.16601002  
SRR17520069.16610405  
SRR17520069.16610406  
SRR17520069.16610407  
SRR17520069.16610408  
SRR17520069.16610409  
SRR17520069.16610410  
SRR17520069.16610411  
SRR17520069.16610412  
SRR17520069.16610413  
SRR17520069.16610414  
SRR17520069.16610415  
SRR17520069.16610416  
SRR17520069.16610417  
SRR17520069.16610418  
SRR17520069.16610419  
SRR17520069.16610420



SRR17520069. 16610421  
SRR17520069. 16610422  
SRR17520069. 16610423  
SRR17520069. 16610424  
SRR17520069. 16610425  
SRR17520069. 16610426  
SRR17520069. 16610427  
SRR17520069. 16610428  
SRR17520069. 16610429  
SRR17520069. 16610431  
SRR17520069. 16610432  
SRR17520069. 16610433  
SRR17520069. 16610434  
SRR17520069. 16610435  
SRR17520069. 16610436  
SRR17520069. 16610437  
SRR17520069. 16610438  
SRR17520069. 16610439  
SRR17520069. 16610440  
SRR17520069. 16610441  
SRR17520069. 16610442  
SRR17520069. 16610443  
SRR17520069. 16610444  
SRR17520069. 16610445  
SRR17520069. 16610446  
SRR17520069. 16610447  
SRR17520069. 16610448  
SRR17520069. 16610449  
SRR17520069. 16610450  
SRR17520069. 16610452  
SRR17520069. 16610453  
SRR17520069. 16610454  
SRR17520069. 16623463  
SRR17520069. 16623464  
SRR17520069. 16623465  
SRR17520069. 16623466  
SRR17520069. 16623467  
SRR17520069. 16623468  
SRR17520069. 16623469  
SRR17520069. 16623470  
SRR17520069. 16623471  
SRR17520069. 16623472  
SRR17520069. 16623473  
SRR17520069. 16623474  
SRR17520069. 16623475  
SRR17520069. 16623476  
SRR17520069. 16623477

SRR17520069.16623478  
SRR17520069.16623479  
SRR17520069.16623480  
SRR17520069.16623481  
SRR17520069.16623482  
SRR17520069.16623483  
SRR17520069.16623484  
SRR17520069.16623485  
SRR17520069.16623486  
SRR17520069.16623487  
SRR17520069.16623488  
SRR17520069.16623489  
SRR17520069.16623490  
SRR17520069.16623491  
SRR17520069.16623492  
SRR17520069.16623493  
SRR17520069.16623494  
SRR17520069.16623495  
SRR17520069.16623496  
SRR17520069.16623497  
SRR17520069.16623498  
SRR17520069.16623499  
SRR17520069.16623500  
SRR17520069.16623501  
SRR17520069.16623502  
SRR17520069.16623503  
SRR17520069.16623504  
SRR17520069.16623505  
SRR17520069.16623506  
SRR17520069.16623507  
SRR17520069.16623508  
SRR17520069.16623509  
SRR17520069.16623510  
SRR17520069.16623511  
SRR17520069.16623512  
SRR17520069.16623513  
SRR17520069.16623514  
SRR17520069.16623515  
SRR17520069.16623516  
SRR17520069.16623517  
SRR17520069.16623518  
SRR17520069.16623519  
SRR17520069.16623520  
SRR17520069.16623521  
SRR17520069.16623522  
SRR17520069.16623523  
SRR17520069.16623524

SRR17520069. 16623525  
SRR17520069. 16623526  
SRR17520069. 16623527  
SRR17520069. 16623528  
SRR17520069. 16623529  
SRR17520069. 16623530  
SRR17520069. 16623531  
SRR17520069. 16623532  
SRR17520069. 16623533  
SRR17520069. 16623534  
SRR17520069. 16623535  
SRR17520069. 16623536  
SRR17520069. 16638097  
SRR17520069. 16638098  
SRR17520069. 16638099  
SRR17520069. 16638100  
SRR17520069. 16638101  
SRR17520069. 16638102  
SRR17520069. 16638103  
SRR17520069. 16638104  
SRR17520069. 16638105  
SRR17520069. 16638106  
SRR17520069. 16638107  
SRR17520069. 16638108  
SRR17520069. 16644339  
SRR17520069. 16647282  
SRR17520069. 16647283  
SRR17520069. 16647284  
SRR17520069. 16647285  
SRR17520069. 16647286  
SRR17520069. 16647287  
SRR17520069. 16647288  
SRR17520069. 16647289  
SRR17520069. 16647290  
SRR17520069. 16647291  
SRR17520069. 16647292  
SRR17520069. 16647294  
SRR17520069. 16647295  
SRR17520069. 16647296  
SRR17520069. 16647297  
SRR17520069. 16647298  
SRR17520069. 16647299  
SRR17520069. 16647300  
SRR17520069. 16647301  
SRR17520069. 16647302  
SRR17520069. 16647305  
SRR17520069. 16647306

SRR17520069.16647307  
SRR17520069.16647308  
SRR17520069.16647309  
SRR17520069.16647310  
SRR17520069.16647311  
SRR17520069.16647312  
SRR17520069.16647313  
SRR17520069.16647314  
SRR17520069.16647315  
SRR17520069.16647316  
SRR17520069.16647317  
SRR17520069.16647320  
SRR17520069.16647321  
SRR17520069.16647322  
SRR17520069.16647323  
SRR17520069.16647324  
SRR17520069.16647325  
SRR17520069.16647326  
SRR17520069.16647327  
SRR17520069.16647328  
SRR17520069.16647329  
SRR17520069.16647330  
SRR17520069.16647331  
SRR17520069.16647332  
SRR17520069.16647333  
SRR17520069.16647334  
SRR17520069.16647335  
SRR17520069.16647336  
SRR17520069.16647337  
SRR17520069.16647338  
SRR17520069.16647340  
SRR17520069.16647341  
SRR17520069.16647342  
SRR17520069.16647343  
SRR17520069.16647344  
SRR17520069.16647345  
SRR17520069.16647346  
SRR17520069.16647347  
SRR17520069.16647348  
SRR17520069.16647349  
SRR17520069.16647350  
SRR17520069.16647351  
SRR17520069.16647352  
SRR17520069.16647353  
SRR17520069.16647354  
SRR17520069.16647355  
SRR17520069.16647356

SRR17520069. 16647357  
SRR17520069. 16647358  
SRR17520069. 16647359  
SRR17520069. 16647360  
SRR17520069. 16647361  
SRR17520069. 16647362  
SRR17520069. 16647363  
SRR17520069. 16647364  
SRR17520069. 16647365  
SRR17520069. 16647366  
SRR17520069. 16647367  
SRR17520069. 16647368  
SRR17520069. 16647369  
SRR17520069. 16647370  
SRR17520069. 16647371  
SRR17520069. 16647372  
SRR17520069. 16647373  
SRR17520069. 16647374  
SRR17520069. 16647375  
SRR17520069. 16647376  
SRR17520069. 16647377  
SRR17520069. 16647378  
SRR17520069. 16647379  
SRR17520069. 16647380  
SRR17520069. 16647381  
SRR17520069. 16647382  
SRR17520069. 16647383  
SRR17520069. 16647384  
SRR17520069. 16647385  
SRR17520069. 16647386  
SRR17520069. 16647387  
SRR17520069. 16647388  
SRR17520069. 16647389  
SRR17520069. 16647390  
SRR17520069. 16647391  
SRR17520069. 16647392  
SRR17520069. 16647393  
SRR17520069. 16647394  
SRR17520069. 16647395  
SRR17520069. 16647396  
SRR17520069. 16647397  
SRR17520069. 16647398  
SRR17520069. 16647399  
SRR17520069. 16647400  
SRR17520069. 16647401  
SRR17520069. 16647402  
SRR17520069. 16647403

SRR17520069.16647404  
SRR17520069.16647405  
SRR17520069.16647406  
SRR17520069.16647407  
SRR17520069.16647408  
SRR17520069.16647409  
SRR17520069.16647410  
SRR17520069.16647411  
SRR17520069.16647412  
SRR17520069.16647413  
SRR17520069.16647414  
SRR17520069.16647415  
SRR17520069.16647416  
SRR17520069.16647417  
SRR17520069.16647418  
SRR17520069.16647419  
SRR17520069.16647420  
SRR17520069.16647421  
SRR17520069.16647422  
SRR17520069.16647423  
SRR17520069.16647424  
SRR17520069.16647425  
SRR17520069.16647426  
SRR17520069.16647427  
SRR17520069.16647428  
SRR17520069.16647429  
SRR17520069.16647430  
SRR17520069.16647431  
SRR17520069.16647432  
SRR17520069.16647433  
SRR17520069.16647434  
SRR17520069.16647435  
SRR17520069.16647436  
SRR17520069.16647437  
SRR17520069.16647438  
SRR17520069.16647439  
SRR17520069.16647440  
SRR17520069.16647441  
SRR17520069.16647442  
SRR17520069.16647443  
SRR17520069.16647444  
SRR17520069.16647446  
SRR17520069.16647447  
SRR17520069.16647448  
SRR17520069.16647449  
SRR17520069.16647450  
SRR17520069.16647451

SRR17520069. 16647452  
SRR17520069. 16647453  
SRR17520069. 16647454  
SRR17520069. 16647455  
SRR17520069. 16647456  
SRR17520069. 16647457  
SRR17520069. 16647458  
SRR17520069. 16647459  
SRR17520069. 16647460  
SRR17520069. 16647461  
SRR17520069. 16647462  
SRR17520069. 16647463  
SRR17520069. 16647464  
SRR17520069. 16647465  
SRR17520069. 16647466  
SRR17520069. 16648354  
SRR17520069. 16648355  
SRR17520069. 16648356  
SRR17520069. 16648357  
SRR17520069. 16648358  
SRR17520069. 16648359  
SRR17520069. 16648360  
SRR17520069. 16648361  
SRR17520069. 16648362  
SRR17520069. 16648363  
SRR17520069. 16653035  
SRR17520069. 16653037  
SRR17520069. 16653038  
SRR17520069. 16653039  
SRR17520069. 16655879  
SRR17520069. 16655880  
SRR17520069. 16655881  
SRR17520069. 16655882  
SRR17520069. 16655883  
SRR17520069. 16674499  
SRR17520069. 16674500  
SRR17520069. 16674501  
SRR17520069. 16674502  
SRR17520069. 16674503  
SRR17520069. 16674504  
SRR17520069. 16674505  
SRR17520069. 16674506  
SRR17520069. 16674507  
SRR17520069. 16674508  
SRR17520069. 16674509  
SRR17520069. 16674510  
SRR17520069. 16674511

SRR17520069. 16674512  
SRR17520069. 16674513  
SRR17520069. 16674514  
SRR17520069. 16674515  
SRR17520069. 16674516  
SRR17520069. 16674517  
SRR17520069. 16674518  
SRR17520069. 16674519  
SRR17520069. 16674520  
SRR17520069. 16674521  
SRR17520069. 16674522  
SRR17520069. 16674523  
SRR17520069. 16674524  
SRR17520069. 16674525  
SRR17520069. 16674526  
SRR17520069. 16674527  
SRR17520069. 16674528  
SRR17520069. 16674529  
SRR17520069. 16697673  
SRR17520069. 16707124  
SRR17520069. 16707159  
SRR17520069. 16710524  
SRR17520069. 16710525  
SRR17520069. 16710526  
SRR17520069. 16710527  
SRR17520069. 16714821  
SRR17520069. 16714833  
SRR17520069. 16714887  
SRR17520069. 16714904  
SRR17520069. 16722106  
SRR17520069. 16748667  
SRR17520069. 16751333  
SRR17520069. 16751362  
SRR17520069. 16753822  
SRR17520069. 16753828  
SRR17520069. 16753843  
SRR17520069. 16753849  
SRR17520069. 16753882  
SRR17520069. 16758554  
SRR17520069. 16758555  
SRR17520069. 16758556  
SRR17520069. 16758557  
SRR17520069. 16758558  
SRR17520069. 16758559  
SRR17520069. 16758560  
SRR17520069. 16758561  
SRR17520069. 16758562



SRR17520069. 16758563  
SRR17520069. 16758564  
SRR17520069. 16758565  
SRR17520069. 16758566  
SRR17520069. 16758567  
SRR17520069. 16758568  
SRR17520069. 16758569  
SRR17520069. 16758570  
SRR17520069. 16758571  
SRR17520069. 16758572  
SRR17520069. 16758573  
SRR17520069. 16770320  
SRR17520069. 16770334  
SRR17520069. 16795424  
SRR17520069. 16795425  
SRR17520069. 16795426  
SRR17520069. 16795427  
SRR17520069. 16795428  
SRR17520069. 16795429  
SRR17520069. 16795430  
SRR17520069. 16795431  
SRR17520069. 16795432  
SRR17520069. 16795433  
SRR17520069. 16795434  
SRR17520069. 16795435  
SRR17520069. 16795436  
SRR17520069. 16795437  
SRR17520069. 16795438  
SRR17520069. 16795439  
SRR17520069. 16795440  
SRR17520069. 16795441  
SRR17520069. 16795442  
SRR17520069. 16795443  
SRR17520069. 16795444  
SRR17520069. 16795445  
SRR17520069. 16795446  
SRR17520069. 16795447  
SRR17520069. 16795448  
SRR17520069. 16795449  
SRR17520069. 16795450  
SRR17520069. 16795451  
SRR17520069. 16795452  
SRR17520069. 16795453  
SRR17520069. 16795456  
SRR17520069. 16795457  
SRR17520069. 16795458  
SRR17520069. 16795459

SRR17520069. 16795460  
SRR17520069. 16795461  
SRR17520069. 16795462  
SRR17520069. 16795463  
SRR17520069. 16795464  
SRR17520069. 16795465  
SRR17520069. 16795466  
SRR17520069. 16795467  
SRR17520069. 16795468  
SRR17520069. 16795477  
SRR17520069. 16795486  
SRR17520069. 16795487  
SRR17520069. 16795489  
SRR17520069. 16808477  
SRR17520069. 16808479  
SRR17520069. 16808480  
SRR17520069. 16808481  
SRR17520069. 16808482  
SRR17520069. 16808483  
SRR17520069. 16808484  
SRR17520069. 16808485  
SRR17520069. 16808486  
SRR17520069. 16808487  
SRR17520069. 16808488  
SRR17520069. 16808489  
SRR17520069. 16808490  
SRR17520069. 16808491  
SRR17520069. 16808492  
SRR17520069. 16808493  
SRR17520069. 16808494  
SRR17520069. 16808495  
SRR17520069. 16808496  
SRR17520069. 16808497  
SRR17520069. 16808498  
SRR17520069. 16808499  
SRR17520069. 16808500  
SRR17520069. 16808501  
SRR17520069. 16808502  
SRR17520069. 16808503  
SRR17520069. 16808504  
SRR17520069. 16808505  
SRR17520069. 16808506  
SRR17520069. 16808507  
SRR17520069. 16808508  
SRR17520069. 16808509  
SRR17520069. 16808510  
SRR17520069. 16808511

SRR17520069.16808512  
SRR17520069.16808513  
SRR17520069.16808514  
SRR17520069.16808515  
SRR17520069.16808516  
SRR17520069.16808517  
SRR17520069.16808518  
SRR17520069.16808519  
SRR17520069.16808520  
SRR17520069.16808521  
SRR17520069.16808522  
SRR17520069.16808523  
SRR17520069.16808524  
SRR17520069.16808525  
SRR17520069.16808526  
SRR17520069.16808527  
SRR17520069.16808528  
SRR17520069.16808529  
SRR17520069.16808530  
SRR17520069.16808531  
SRR17520069.16808532  
SRR17520069.16808533  
SRR17520069.16808534  
SRR17520069.16808535  
SRR17520069.16808536  
SRR17520069.16808537  
SRR17520069.16808538  
SRR17520069.16808539  
SRR17520069.16808540  
SRR17520069.16808541  
SRR17520069.16808542  
SRR17520069.16808543  
SRR17520069.16808544  
SRR17520069.16808545  
SRR17520069.16808546  
SRR17520069.16808547  
SRR17520069.16808548  
SRR17520069.16808549  
SRR17520069.16808550  
SRR17520069.16808551  
SRR17520069.16808552  
SRR17520069.16808553  
SRR17520069.16808554  
SRR17520069.16808555  
SRR17520069.16808556  
SRR17520069.16808557  
SRR17520069.16808558

SRR17520069.16808559  
SRR17520069.16808560  
SRR17520069.16808561  
SRR17520069.16808562  
SRR17520069.16808563  
SRR17520069.16808564  
SRR17520069.16808565  
SRR17520069.16808566  
SRR17520069.16808567  
SRR17520069.16808568  
SRR17520069.16808569  
SRR17520069.16808570  
SRR17520069.16808571  
SRR17520069.16808572  
SRR17520069.16808573  
SRR17520069.16808574  
SRR17520069.16808575  
SRR17520069.16808576  
SRR17520069.16808577  
SRR17520069.16808578  
SRR17520069.16808579  
SRR17520069.16808580  
SRR17520069.16808581  
SRR17520069.16808582  
SRR17520069.16808583  
SRR17520069.16808584  
SRR17520069.16808585  
SRR17520069.16808586  
SRR17520069.16808587  
SRR17520069.16808588  
SRR17520069.16808589  
SRR17520069.16808590  
SRR17520069.16808591  
SRR17520069.16808593  
SRR17520069.16808594  
SRR17520069.16808595  
SRR17520069.16808596  
SRR17520069.16808597  
SRR17520069.16808598  
SRR17520069.16808599  
SRR17520069.16808600  
SRR17520069.16808601  
SRR17520069.16808602  
SRR17520069.16808603  
SRR17520069.16808604  
SRR17520069.16808606  
SRR17520069.16808607

SRR17520069.16808608  
SRR17520069.16808609  
SRR17520069.16808610  
SRR17520069.16808611  
SRR17520069.16808612  
SRR17520069.16808613  
SRR17520069.16808614  
SRR17520069.16808615  
SRR17520069.16808616  
SRR17520069.16808617  
SRR17520069.16808618  
SRR17520069.16808619  
SRR17520069.16808620  
SRR17520069.16808621  
SRR17520069.16808622  
SRR17520069.16808623  
SRR17520069.16808624  
SRR17520069.16808625  
SRR17520069.16808626  
SRR17520069.16808627  
SRR17520069.16808628  
SRR17520069.16808629  
SRR17520069.16808630  
SRR17520069.16808631  
SRR17520069.16808632  
SRR17520069.16808633  
SRR17520069.16808634  
SRR17520069.16808635  
SRR17520069.16808636  
SRR17520069.16808637  
SRR17520069.16808638  
SRR17520069.16808639  
SRR17520069.16808640  
SRR17520069.16808641  
SRR17520069.16808642  
SRR17520069.16808643  
SRR17520069.16808644  
SRR17520069.16808645  
SRR17520069.16808646  
SRR17520069.16808647  
SRR17520069.16808648  
SRR17520069.16808649  
SRR17520069.16808650  
SRR17520069.16808651  
SRR17520069.16808652  
SRR17520069.16808653  
SRR17520069.16808654

SRR17520069.16808655  
SRR17520069.16808656  
SRR17520069.16808657  
SRR17520069.16808658  
SRR17520069.16808659  
SRR17520069.16808660  
SRR17520069.16808661  
SRR17520069.16808662  
SRR17520069.16808663  
SRR17520069.16808664  
SRR17520069.16808665  
SRR17520069.16808666  
SRR17520069.16808667  
SRR17520069.16808668  
SRR17520069.16808669  
SRR17520069.16808670  
SRR17520069.16808671  
SRR17520069.16808672  
SRR17520069.16808673  
SRR17520069.16808674  
SRR17520069.16808675  
SRR17520069.16808676  
SRR17520069.16808677  
SRR17520069.16808678  
SRR17520069.16808679  
SRR17520069.16808680  
SRR17520069.16808681  
SRR17520069.16808682  
SRR17520069.16808683  
SRR17520069.16815334  
SRR17520069.16815335  
SRR17520069.16815336  
SRR17520069.16815337  
SRR17520069.16815338  
SRR17520069.16815339  
SRR17520069.16815340  
SRR17520069.16815341  
SRR17520069.16815342  
SRR17520069.16815343  
SRR17520069.16816994  
SRR17520069.16816995  
SRR17520069.16816996  
SRR17520069.16816997  
SRR17520069.16816998  
SRR17520069.16816999  
SRR17520069.16817000  
SRR17520069.16817001

SRR17520069. 16817002  
SRR17520069. 16817003  
SRR17520069. 16817004  
SRR17520069. 16817005  
SRR17520069. 16817006  
SRR17520069. 16817007  
SRR17520069. 16817008  
SRR17520069. 16817009  
SRR17520069. 16817010  
SRR17520069. 16817011  
SRR17520069. 16817012  
SRR17520069. 16817013  
SRR17520069. 16817014  
SRR17520069. 16817015  
SRR17520069. 16817016  
SRR17520069. 16817017  
SRR17520069. 16817018  
SRR17520069. 16817019  
SRR17520069. 16817020  
SRR17520069. 16817021  
SRR17520069. 16817022  
SRR17520069. 16817023  
SRR17520069. 16817024  
SRR17520069. 16817025  
SRR17520069. 16817026  
SRR17520069. 16817027  
SRR17520069. 16817028  
SRR17520069. 16817029  
SRR17520069. 16817030  
SRR17520069. 16817031  
SRR17520069. 16817032  
SRR17520069. 16817033  
SRR17520069. 16817034  
SRR17520069. 16817035  
SRR17520069. 16817036  
SRR17520069. 16817037  
SRR17520069. 16817038  
SRR17520069. 16817039  
SRR17520069. 16817040  
SRR17520069. 16817041  
SRR17520069. 16817042  
SRR17520069. 16817043  
SRR17520069. 16817044  
SRR17520069. 16817045  
SRR17520069. 16817046  
SRR17520069. 16817047  
SRR17520069. 16817048

SRR17520069. 16817049  
SRR17520069. 16817050  
SRR17520069. 16817051  
SRR17520069. 16817052  
SRR17520069. 16817053  
SRR17520069. 16817054  
SRR17520069. 16817055  
SRR17520069. 16817056  
SRR17520069. 16817057  
SRR17520069. 16817058  
SRR17520069. 16817059  
SRR17520069. 16817060  
SRR17520069. 16817061  
SRR17520069. 16817062  
SRR17520069. 16817063  
SRR17520069. 16817064  
SRR17520069. 16817065  
SRR17520069. 16817066  
SRR17520069. 16817067  
SRR17520069. 16817068  
SRR17520069. 16817069  
SRR17520069. 16817070  
SRR17520069. 16817071  
SRR17520069. 16817072  
SRR17520069. 16817073  
SRR17520069. 16817074  
SRR17520069. 16817075  
SRR17520069. 16817076  
SRR17520069. 16817077  
SRR17520069. 16817078  
SRR17520069. 16817079  
SRR17520069. 16817080  
SRR17520069. 16817081  
SRR17520069. 16817082  
SRR17520069. 16817083  
SRR17520069. 16817084  
SRR17520069. 16817085  
SRR17520069. 16817086  
SRR17520069. 16817087  
SRR17520069. 16817088  
SRR17520069. 16817089  
SRR17520069. 16817090  
SRR17520069. 16817092  
SRR17520069. 16817093  
SRR17520069. 16817094  
SRR17520069. 16817095  
SRR17520069. 16823407



SRR17520069. 16823408  
SRR17520069. 16845032  
SRR17520069. 16845034  
SRR17520069. 16845035  
SRR17520069. 16845036  
SRR17520069. 16845037  
SRR17520069. 16845038  
SRR17520069. 16845039  
SRR17520069. 16845041  
SRR17520069. 16845042  
SRR17520069. 16845043  
SRR17520069. 16845044  
SRR17520069. 16845045  
SRR17520069. 16845046  
SRR17520069. 16845047  
SRR17520069. 16845048  
SRR17520069. 16845049  
SRR17520069. 16845050  
SRR17520069. 16845051  
SRR17520069. 16845052  
SRR17520069. 16845053  
SRR17520069. 16845054  
SRR17520069. 16845055  
SRR17520069. 16845060  
SRR17520069. 16845061  
SRR17520069. 16850974  
SRR17520069. 16865840  
SRR17520069. 16865841  
SRR17520069. 16865842  
SRR17520069. 16865843  
SRR17520069. 16865844  
SRR17520069. 16865845  
SRR17520069. 16865846  
SRR17520069. 16865847  
SRR17520069. 16865848  
SRR17520069. 16865849  
SRR17520069. 16865850  
SRR17520069. 16865851  
SRR17520069. 16865852  
SRR17520069. 16865853  
SRR17520069. 16865854  
SRR17520069. 16865855  
SRR17520069. 16865856  
SRR17520069. 16865857  
SRR17520069. 16865858  
SRR17520069. 16865859  
SRR17520069. 16867224

SRR17520069. 16867225  
SRR17520069. 16867226  
SRR17520069. 16867227  
SRR17520069. 16867228  
SRR17520069. 16867229  
SRR17520069. 16867230  
SRR17520069. 16867231  
SRR17520069. 16867232  
SRR17520069. 16867233  
SRR17520069. 16867234  
SRR17520069. 16867235  
SRR17520069. 16867236  
SRR17520069. 16867237  
SRR17520069. 16867238  
SRR17520069. 16867239  
SRR17520069. 16867240  
SRR17520069. 16867241  
SRR17520069. 16867242  
SRR17520069. 16867243  
SRR17520069. 16867244  
SRR17520069. 16867245  
SRR17520069. 16867246  
SRR17520069. 16867247  
SRR17520069. 16867248  
SRR17520069. 16867249  
SRR17520069. 16867251  
SRR17520069. 16867252  
SRR17520069. 16867253  
SRR17520069. 16867814  
SRR17520069. 16886557  
SRR17520069. 16897350  
SRR17520069. 16897393  
SRR17520069. 16897433  
SRR17520069. 16901265  
SRR17520069. 16901266  
SRR17520069. 16901267  
SRR17520069. 16901268  
SRR17520069. 16914559  
SRR17520069. 16914561  
SRR17520069. 16914562  
SRR17520069. 16914563  
SRR17520069. 16914564  
SRR17520069. 16914565  
SRR17520069. 16914566  
SRR17520069. 16914567  
SRR17520069. 16914568  
SRR17520069. 16914569

SRR17520069. 16914570  
SRR17520069. 16914571  
SRR17520069. 16914572  
SRR17520069. 16914573  
SRR17520069. 16914574  
SRR17520069. 16914575  
SRR17520069. 16914576  
SRR17520069. 16914577  
SRR17520069. 16914578  
SRR17520069. 16914579  
SRR17520069. 16914580  
SRR17520069. 16914581  
SRR17520069. 16914582  
SRR17520069. 16914583  
SRR17520069. 16914584  
SRR17520069. 16914585  
SRR17520069. 16914586  
SRR17520069. 16914587  
SRR17520069. 16914588  
SRR17520069. 16914589  
SRR17520069. 16914590  
SRR17520069. 16914591  
SRR17520069. 16914592  
SRR17520069. 16914593  
SRR17520069. 16914594  
SRR17520069. 16914596  
SRR17520069. 16914597  
SRR17520069. 16914598  
SRR17520069. 16914599  
SRR17520069. 16914600  
SRR17520069. 16914601  
SRR17520069. 16914602  
SRR17520069. 16914603  
SRR17520069. 16914604  
SRR17520069. 16914605  
SRR17520069. 16914606  
SRR17520069. 16923421  
SRR17520069. 16923422  
SRR17520069. 16923423  
SRR17520069. 16923424  
SRR17520069. 16923425  
SRR17520069. 16923426  
SRR17520069. 16923427  
SRR17520069. 16923428  
SRR17520069. 16923429  
SRR17520069. 16923430  
SRR17520069. 16923431

SRR17520069. 16923432  
SRR17520069. 16923433  
SRR17520069. 16923434  
SRR17520069. 16923435  
SRR17520069. 16923436  
SRR17520069. 16923438  
SRR17520069. 16923439  
SRR17520069. 16923440  
SRR17520069. 16923441  
SRR17520069. 16923442  
SRR17520069. 16923443  
SRR17520069. 16923444  
SRR17520069. 16923446  
SRR17520069. 16923447  
SRR17520069. 16923448  
SRR17520069. 16923449  
SRR17520069. 16923450  
SRR17520069. 16923451  
SRR17520069. 16925888  
SRR17520069. 16932727  
SRR17520069. 16935746  
SRR17520069. 16935747  
SRR17520069. 16935748  
SRR17520069. 16935749  
SRR17520069. 16935750  
SRR17520069. 16935751  
SRR17520069. 16935752  
SRR17520069. 16935753  
SRR17520069. 16935754  
SRR17520069. 16935755  
SRR17520069. 16935756  
SRR17520069. 16935757  
SRR17520069. 16935758  
SRR17520069. 16935759  
SRR17520069. 16935760  
SRR17520069. 16935761  
SRR17520069. 16935762  
SRR17520069. 16935763  
SRR17520069. 16935764  
SRR17520069. 16935765  
SRR17520069. 16935766  
SRR17520069. 16935767  
SRR17520069. 16935768  
SRR17520069. 16935769  
SRR17520069. 16935770  
SRR17520069. 16935772  
SRR17520069. 16935773

SRR17520069.16935774  
SRR17520069.16935775  
SRR17520069.16935776  
SRR17520069.16935777  
SRR17520069.16935778  
SRR17520069.16935779  
SRR17520069.16935780  
SRR17520069.16935781  
SRR17520069.16935782  
SRR17520069.16935783  
SRR17520069.16935784  
SRR17520069.16935785  
SRR17520069.16935786  
SRR17520069.16935788  
SRR17520069.16935789  
SRR17520069.16935790  
SRR17520069.16935791  
SRR17520069.16935792  
SRR17520069.16935793  
SRR17520069.16935794  
SRR17520069.16935795  
SRR17520069.16935796  
SRR17520069.16935797  
SRR17520069.16935798  
SRR17520069.16935799  
SRR17520069.16935800  
SRR17520069.16935801  
SRR17520069.16935802  
SRR17520069.16935803  
SRR17520069.16935804  
SRR17520069.16935806  
SRR17520069.16935807  
SRR17520069.16935808  
SRR17520069.16935809  
SRR17520069.16935810  
SRR17520069.16935811  
SRR17520069.16935812  
SRR17520069.16935813  
SRR17520069.16935814  
SRR17520069.16935815  
SRR17520069.16935816  
SRR17520069.16935817  
SRR17520069.16935818  
SRR17520069.16935819  
SRR17520069.16935820  
SRR17520069.16935821  
SRR17520069.16935822

SRR17520069. 16935823  
SRR17520069. 16935824  
SRR17520069. 16935825  
SRR17520069. 16935826  
SRR17520069. 16935827  
SRR17520069. 16935828  
SRR17520069. 16935829  
SRR17520069. 16935830  
SRR17520069. 16935831  
SRR17520069. 16935832  
SRR17520069. 16935833  
SRR17520069. 16935834  
SRR17520069. 16935835  
SRR17520069. 16935836  
SRR17520069. 16935837  
SRR17520069. 16935838  
SRR17520069. 16935839  
SRR17520069. 16935840  
SRR17520069. 16935841  
SRR17520069. 16935843  
SRR17520069. 16935844  
SRR17520069. 16935845  
SRR17520069. 16935846  
SRR17520069. 16935847  
SRR17520069. 16935848  
SRR17520069. 16935849  
SRR17520069. 16935850  
SRR17520069. 16935851  
SRR17520069. 16935852  
SRR17520069. 16935853  
SRR17520069. 16935854  
SRR17520069. 16935855  
SRR17520069. 16935856  
SRR17520069. 16935857  
SRR17520069. 16935858  
SRR17520069. 16935859  
SRR17520069. 16935860  
SRR17520069. 16935861  
SRR17520069. 16935862  
SRR17520069. 16935863  
SRR17520069. 16935864  
SRR17520069. 16935865  
SRR17520069. 16935866  
SRR17520069. 16935867  
SRR17520069. 16935868  
SRR17520069. 16935869  
SRR17520069. 16935870

SRR17520069. 16935871  
SRR17520069. 16935872  
SRR17520069. 16935873  
SRR17520069. 16935874  
SRR17520069. 16935875  
SRR17520069. 16935876  
SRR17520069. 16935877  
SRR17520069. 16935878  
SRR17520069. 16935879  
SRR17520069. 16935882  
SRR17520069. 16935883  
SRR17520069. 16935884  
SRR17520069. 16935885  
SRR17520069. 16935886  
SRR17520069. 16935887  
SRR17520069. 16935888  
SRR17520069. 16935889  
SRR17520069. 16935890  
SRR17520069. 16935891  
SRR17520069. 16935892  
SRR17520069. 16935893  
SRR17520069. 16935894  
SRR17520069. 16935895  
SRR17520069. 16935896  
SRR17520069. 16935897  
SRR17520069. 16935898  
SRR17520069. 16935899  
SRR17520069. 16935900  
SRR17520069. 16935901  
SRR17520069. 16935902  
SRR17520069. 16935903  
SRR17520069. 16935904  
SRR17520069. 16935905  
SRR17520069. 16948474  
SRR17520069. 16948475  
SRR17520069. 16948476  
SRR17520069. 16948477  
SRR17520069. 16948478  
SRR17520069. 16948479  
SRR17520069. 16948480  
SRR17520069. 16948481  
SRR17520069. 16948482  
SRR17520069. 16948483  
SRR17520069. 16948484  
SRR17520069. 16948485  
SRR17520069. 16948486  
SRR17520069. 16948487

SRR17520069. 16948488  
SRR17520069. 16948489  
SRR17520069. 16948490  
SRR17520069. 16948491  
SRR17520069. 16948492  
SRR17520069. 16948493  
SRR17520069. 16948495  
SRR17520069. 16948496  
SRR17520069. 16948497  
SRR17520069. 16948498  
SRR17520069. 16948500  
SRR17520069. 16948501  
SRR17520069. 16948502  
SRR17520069. 16948503  
SRR17520069. 16948504  
SRR17520069. 16948505  
SRR17520069. 16948506  
SRR17520069. 16948508  
SRR17520069. 16948509  
SRR17520069. 16948510  
SRR17520069. 16948511  
SRR17520069. 16948512  
SRR17520069. 16948513  
SRR17520069. 16948514  
SRR17520069. 16948515  
SRR17520069. 16948516  
SRR17520069. 16948517  
SRR17520069. 16948518  
SRR17520069. 16948519  
SRR17520069. 16948520  
SRR17520069. 16948521  
SRR17520069. 16948522  
SRR17520069. 16948523  
SRR17520069. 16948524  
SRR17520069. 16948525  
SRR17520069. 16948526  
SRR17520069. 16948527  
SRR17520069. 16948528  
SRR17520069. 16948529  
SRR17520069. 16948530  
SRR17520069. 16948531  
SRR17520069. 16948532  
SRR17520069. 16948533  
SRR17520069. 16948534  
SRR17520069. 16948535  
SRR17520069. 16948536  
SRR17520069. 16948537



SRR17520069. 16948542  
SRR17520069. 16948543  
SRR17520069. 16948544  
SRR17520069. 16948545  
SRR17520069. 16948546  
SRR17520069. 16948547  
SRR17520069. 16948548  
SRR17520069. 16948549  
SRR17520069. 16948550  
SRR17520069. 16948551  
SRR17520069. 16948552  
SRR17520069. 16948553  
SRR17520069. 16948554  
SRR17520069. 16948555  
SRR17520069. 16948557  
SRR17520069. 16948558  
SRR17520069. 16948559  
SRR17520069. 16948560  
SRR17520069. 16948561  
SRR17520069. 16948562  
SRR17520069. 16948563  
SRR17520069. 16948564  
SRR17520069. 16948565  
SRR17520069. 16948566  
SRR17520069. 16948567  
SRR17520069. 16948568  
SRR17520069. 16948569  
SRR17520069. 16948570  
SRR17520069. 16948571  
SRR17520069. 16948572  
SRR17520069. 16948573  
SRR17520069. 16948574  
SRR17520069. 16948575  
SRR17520069. 16948576  
SRR17520069. 16948577  
SRR17520069. 16948578  
SRR17520069. 16948579  
SRR17520069. 16948580  
SRR17520069. 16948581  
SRR17520069. 16948582  
SRR17520069. 16948583  
SRR17520069. 16948584  
SRR17520069. 16948585  
SRR17520069. 16948586  
SRR17520069. 16948587  
SRR17520069. 16948588  
SRR17520069. 16948589

SRR17520069.16948590  
SRR17520069.16948591  
SRR17520069.16948592  
SRR17520069.16948593  
SRR17520069.16948594  
SRR17520069.16948595  
SRR17520069.16948596  
SRR17520069.16948597  
SRR17520069.16948598  
SRR17520069.16948599  
SRR17520069.16948600  
SRR17520069.16948601  
SRR17520069.16948602  
SRR17520069.16948603  
SRR17520069.16948604  
SRR17520069.16948605  
SRR17520069.16948606  
SRR17520069.16948607  
SRR17520069.16948608  
SRR17520069.16948609  
SRR17520069.16948610  
SRR17520069.16948611  
SRR17520069.16948612  
SRR17520069.16948613  
SRR17520069.16948614  
SRR17520069.16948615  
SRR17520069.16948616  
SRR17520069.16948617  
SRR17520069.16948618  
SRR17520069.16948619  
SRR17520069.16948896  
SRR17520069.16961215  
SRR17520069.16961216  
SRR17520069.16961217  
SRR17520069.16961218  
SRR17520069.16961219  
SRR17520069.16961220  
SRR17520069.16961221  
SRR17520069.16961222  
SRR17520069.16961223  
SRR17520069.16961224  
SRR17520069.16961225  
SRR17520069.16961226  
SRR17520069.16961227  
SRR17520069.16961228  
SRR17520069.16961229  
SRR17520069.16961230

SRR17520069. 16961231  
SRR17520069. 16961232  
SRR17520069. 16961233  
SRR17520069. 16961234  
SRR17520069. 16961235  
SRR17520069. 16961236  
SRR17520069. 16961237  
SRR17520069. 16961238  
SRR17520069. 16961239  
SRR17520069. 16961240  
SRR17520069. 16961241  
SRR17520069. 16961242  
SRR17520069. 16961243  
SRR17520069. 16961244  
SRR17520069. 16961245  
SRR17520069. 16961246  
SRR17520069. 16961247  
SRR17520069. 16961248  
SRR17520069. 16961249  
SRR17520069. 16961250  
SRR17520069. 16961251  
SRR17520069. 16961252  
SRR17520069. 16961253  
SRR17520069. 16961254  
SRR17520069. 16961255  
SRR17520069. 16961256  
SRR17520069. 16961257  
SRR17520069. 16961258  
SRR17520069. 16961259  
SRR17520069. 16961260  
SRR17520069. 16961261  
SRR17520069. 16961262  
SRR17520069. 16961263  
SRR17520069. 16961264  
SRR17520069. 16961265  
SRR17520069. 16961266  
SRR17520069. 16961267  
SRR17520069. 16961268  
SRR17520069. 16961269  
SRR17520069. 16961270  
SRR17520069. 16961271  
SRR17520069. 16961272  
SRR17520069. 16961273  
SRR17520069. 16961274  
SRR17520069. 16961275  
SRR17520069. 16961276  
SRR17520069. 16961277

SRR17520069. 16961278  
SRR17520069. 16961279  
SRR17520069. 16961280  
SRR17520069. 16961281  
SRR17520069. 16961282  
SRR17520069. 16961283  
SRR17520069. 16961284  
SRR17520069. 16961285  
SRR17520069. 16961286  
SRR17520069. 16961287  
SRR17520069. 16961288  
SRR17520069. 16961289  
SRR17520069. 16961290  
SRR17520069. 16961291  
SRR17520069. 16961292  
SRR17520069. 16961293  
SRR17520069. 16961294  
SRR17520069. 16961295  
SRR17520069. 16961296  
SRR17520069. 16961297  
SRR17520069. 16961298  
SRR17520069. 16961299  
SRR17520069. 16961300  
SRR17520069. 16961301  
SRR17520069. 16961302  
SRR17520069. 16961303  
SRR17520069. 16961304  
SRR17520069. 16961305  
SRR17520069. 16961306  
SRR17520069. 16961307  
SRR17520069. 16961308  
SRR17520069. 16961309  
SRR17520069. 16961310  
SRR17520069. 16961311  
SRR17520069. 16961312  
SRR17520069. 16961313  
SRR17520069. 16961314  
SRR17520069. 16963803  
SRR17520069. 16963804  
SRR17520069. 16963805  
SRR17520069. 16963806  
SRR17520069. 16963807  
SRR17520069. 16963808  
SRR17520069. 16963809  
SRR17520069. 16963810  
SRR17520069. 16963811  
SRR17520069. 16963814

SRR17520069. 16963816  
SRR17520069. 16963819  
SRR17520069. 16963820  
SRR17520069. 16963821  
SRR17520069. 16963822  
SRR17520069. 16963823  
SRR17520069. 16963824  
SRR17520069. 16963826  
SRR17520069. 16963827  
SRR17520069. 16963830  
SRR17520069. 16963831  
SRR17520069. 16963833  
SRR17520069. 16963834  
SRR17520069. 16963835  
SRR17520069. 16963837  
SRR17520069. 16963838  
SRR17520069. 16963841  
SRR17520069. 16963842  
SRR17520069. 16963843  
SRR17520069. 16963844  
SRR17520069. 16963846  
SRR17520069. 16963847  
SRR17520069. 16963849  
SRR17520069. 16963850  
SRR17520069. 16963851  
SRR17520069. 16963852  
SRR17520069. 16963853  
SRR17520069. 16963854  
SRR17520069. 16963856  
SRR17520069. 16963857  
SRR17520069. 16963858  
SRR17520069. 16963860  
SRR17520069. 16963861  
SRR17520069. 16963862  
SRR17520069. 16963863  
SRR17520069. 16963866  
SRR17520069. 16963868  
SRR17520069. 16963869  
SRR17520069. 16963870  
SRR17520069. 16963871  
SRR17520069. 16963873  
SRR17520069. 16963875  
SRR17520069. 16963876  
SRR17520069. 16963877  
SRR17520069. 16963878  
SRR17520069. 16963880  
SRR17520069. 16963881

SRR17520069. 16963882  
SRR17520069. 16975290  
SRR17520069. 16975291  
SRR17520069. 16975292  
SRR17520069. 16975293  
SRR17520069. 16975294  
SRR17520069. 16975295  
SRR17520069. 16975296  
SRR17520069. 16975297  
SRR17520069. 16975299  
SRR17520069. 16975300  
SRR17520069. 16975301  
SRR17520069. 16975302  
SRR17520069. 16975303  
SRR17520069. 16975304  
SRR17520069. 16975305  
SRR17520069. 16975306  
SRR17520069. 16975307  
SRR17520069. 16975308  
SRR17520069. 16975309  
SRR17520069. 16975310  
SRR17520069. 16975311  
SRR17520069. 16975312  
SRR17520069. 16975313  
SRR17520069. 16975314  
SRR17520069. 16975315  
SRR17520069. 16975316  
SRR17520069. 16975317  
SRR17520069. 16975318  
SRR17520069. 16975319  
SRR17520069. 16975320  
SRR17520069. 16975321  
SRR17520069. 16975322  
SRR17520069. 16975323  
SRR17520069. 16975324  
SRR17520069. 16975325  
SRR17520069. 16975326  
SRR17520069. 16975327  
SRR17520069. 16975328  
SRR17520069. 16975329  
SRR17520069. 16975330  
SRR17520069. 16975331  
SRR17520069. 16975332  
SRR17520069. 16975333  
SRR17520069. 16975334  
SRR17520069. 16975335  
SRR17520069. 16975336

SRR17520069. 16975337  
SRR17520069. 16975338  
SRR17520069. 16975339  
SRR17520069. 16975340  
SRR17520069. 16975341  
SRR17520069. 16975343  
SRR17520069. 16975344  
SRR17520069. 16975345  
SRR17520069. 16975347  
SRR17520069. 16975349  
SRR17520069. 16975350  
SRR17520069. 16975353  
SRR17520069. 16991338  
SRR17520069. 17000792  
SRR17520069. 17000793  
SRR17520069. 17000794  
SRR17520069. 17000795  
SRR17520069. 17000796  
SRR17520069. 17000797  
SRR17520069. 17000798  
SRR17520069. 17000799  
SRR17520069. 17000800  
SRR17520069. 17000801  
SRR17520069. 17000802  
SRR17520069. 17000803  
SRR17520069. 17000804  
SRR17520069. 17000805  
SRR17520069. 17000806  
SRR17520069. 17000807  
SRR17520069. 17000808  
SRR17520069. 17000809  
SRR17520069. 17000810  
SRR17520069. 17000811  
SRR17520069. 17000812  
SRR17520069. 17000813  
SRR17520069. 17000814  
SRR17520069. 17000815  
SRR17520069. 17000816  
SRR17520069. 17000817  
SRR17520069. 17000818  
SRR17520069. 17000819  
SRR17520069. 17000820  
SRR17520069. 17000821  
SRR17520069. 17000822  
SRR17520069. 17000823  
SRR17520069. 17000824  
SRR17520069. 17000825

SRR17520069.17000826  
SRR17520069.17000827  
SRR17520069.17000828  
SRR17520069.17000829  
SRR17520069.17000831  
SRR17520069.17000832  
SRR17520069.17000833  
SRR17520069.17000834  
SRR17520069.17000835  
SRR17520069.17000837  
SRR17520069.17000839  
SRR17520069.17000840  
SRR17520069.17000841  
SRR17520069.17000842  
SRR17520069.17000843  
SRR17520069.17000844  
SRR17520069.17000845  
SRR17520069.17000846  
SRR17520069.17000847  
SRR17520069.17000848  
SRR17520069.17000849  
SRR17520069.17000850  
SRR17520069.17000851  
SRR17520069.17000852  
SRR17520069.17000853  
SRR17520069.17000854  
SRR17520069.17000855  
SRR17520069.17000856  
SRR17520069.17000857  
SRR17520069.17000858  
SRR17520069.17000859  
SRR17520069.17000860  
SRR17520069.17000861  
SRR17520069.17000862  
SRR17520069.17000863  
SRR17520069.17000864  
SRR17520069.17000865  
SRR17520069.17000866  
SRR17520069.17000867  
SRR17520069.17000868  
SRR17520069.17000869  
SRR17520069.17000870  
SRR17520069.17000871  
SRR17520069.17000872  
SRR17520069.17000873  
SRR17520069.17000874  
SRR17520069.17000875



SRR17520069.17000876  
SRR17520069.17000877  
SRR17520069.17000878  
SRR17520069.17000879  
SRR17520069.17000880  
SRR17520069.17000881  
SRR17520069.17000882  
SRR17520069.17000883  
SRR17520069.17000884  
SRR17520069.17000886  
SRR17520069.17000887  
SRR17520069.17000888  
SRR17520069.17000889  
SRR17520069.17000890  
SRR17520069.17000891  
SRR17520069.17025308  
SRR17520069.17027348  
SRR17520069.17027349  
SRR17520069.17027350  
SRR17520069.17027351  
SRR17520069.17027352  
SRR17520069.17027353  
SRR17520069.17027354  
SRR17520069.17027356  
SRR17520069.17027357  
SRR17520069.17027358  
SRR17520069.17027361  
SRR17520069.17027362  
SRR17520069.17043989  
SRR17520069.17043990  
SRR17520069.17043991  
SRR17520069.17043992  
SRR17520069.17043993  
SRR17520069.17043994  
SRR17520069.17043995  
SRR17520069.17043996  
SRR17520069.17043997  
SRR17520069.17043999  
SRR17520069.17044000  
SRR17520069.17044001  
SRR17520069.17044002  
SRR17520069.17044003  
SRR17520069.17044005  
SRR17520069.17044007  
SRR17520069.17044008  
SRR17520069.17044009  
SRR17520069.17044010

SRR17520069.17044011  
SRR17520069.17056926  
SRR17520069.17056927  
SRR17520069.17056928  
SRR17520069.17056929  
SRR17520069.17056930  
SRR17520069.17056933  
SRR17520069.17056934  
SRR17520069.17056937  
SRR17520069.17056938  
SRR17520069.17056940  
SRR17520069.17056941  
SRR17520069.17056942  
SRR17520069.17056943  
SRR17520069.17056945  
SRR17520069.17056946  
SRR17520069.17056947  
SRR17520069.17056948  
SRR17520069.17056949  
SRR17520069.17056950  
SRR17520069.17056951  
SRR17520069.17056952  
SRR17520069.17056953  
SRR17520069.17056954  
SRR17520069.17056955  
SRR17520069.17056956  
SRR17520069.17056957  
SRR17520069.17056958  
SRR17520069.17056959  
SRR17520069.17056960  
SRR17520069.17056961  
SRR17520069.17056962  
SRR17520069.17056963  
SRR17520069.17056964  
SRR17520069.17056965  
SRR17520069.17056966  
SRR17520069.17056967  
SRR17520069.17056969  
SRR17520069.17056970  
SRR17520069.17056971  
SRR17520069.17056972  
SRR17520069.17056973  
SRR17520069.17056974  
SRR17520069.17056975  
SRR17520069.17056976  
SRR17520069.17056977  
SRR17520069.17056978

SRR17520069.17056979  
SRR17520069.17056980  
SRR17520069.17056981  
SRR17520069.17056982  
SRR17520069.17056983  
SRR17520069.17056984  
SRR17520069.17056985  
SRR17520069.17056986  
SRR17520069.17056987  
SRR17520069.17056989  
SRR17520069.17056990  
SRR17520069.17056991  
SRR17520069.17056993  
SRR17520069.17056994  
SRR17520069.17056995  
SRR17520069.17056996  
SRR17520069.17056997  
SRR17520069.17056998  
SRR17520069.17056999  
SRR17520069.17057001  
SRR17520069.17057002  
SRR17520069.17061849  
SRR17520069.17061850  
SRR17520069.17061851  
SRR17520069.17061852  
SRR17520069.17061853  
SRR17520069.17061854  
SRR17520069.17061855  
SRR17520069.17061856  
SRR17520069.17061857  
SRR17520069.17061858  
SRR17520069.17061859  
SRR17520069.17061860  
SRR17520069.17061861  
SRR17520069.17061862  
SRR17520069.17061863  
SRR17520069.17061864  
SRR17520069.17061865  
SRR17520069.17061866  
SRR17520069.17061867  
SRR17520069.17061868  
SRR17520069.17061869  
SRR17520069.17061870  
SRR17520069.17061871  
SRR17520069.17063084  
SRR17520069.17063087  
SRR17520069.17063088

SRR17520069. 17063089  
SRR17520069. 17063090  
SRR17520069. 17063091  
SRR17520069. 17063092  
SRR17520069. 17063093  
SRR17520069. 17063094  
SRR17520069. 17063095  
SRR17520069. 17063096  
SRR17520069. 17063097  
SRR17520069. 17063098  
SRR17520069. 17063099  
SRR17520069. 17063100  
SRR17520069. 17063101  
SRR17520069. 17063102  
SRR17520069. 17063103  
SRR17520069. 17063104  
SRR17520069. 17063105  
SRR17520069. 17063106  
SRR17520069. 17063107  
SRR17520069. 17063108  
SRR17520069. 17063109  
SRR17520069. 17063110  
SRR17520069. 17063111  
SRR17520069. 17063112  
SRR17520069. 17063113  
SRR17520069. 17063114  
SRR17520069. 17063115  
SRR17520069. 17063116  
SRR17520069. 17063117  
SRR17520069. 17063118  
SRR17520069. 17063119  
SRR17520069. 17063120  
SRR17520069. 17063121  
SRR17520069. 17089908  
SRR17520069. 17089909  
SRR17520069. 17089910  
SRR17520069. 17089911  
SRR17520069. 17089912  
SRR17520069. 17089914  
SRR17520069. 17089915  
SRR17520069. 17089916  
SRR17520069. 17089917  
SRR17520069. 17089918  
SRR17520069. 17089919  
SRR17520069. 17089920  
SRR17520069. 17103966  
SRR17520069. 17103967

SRR17520069. 17103968  
SRR17520069. 17103969  
SRR17520069. 17103970  
SRR17520069. 17103971  
SRR17520069. 17103972  
SRR17520069. 17103973  
SRR17520069. 17103974  
SRR17520069. 17103975  
SRR17520069. 17103976  
SRR17520069. 17103977  
SRR17520069. 17103978  
SRR17520069. 17103979  
SRR17520069. 17103980  
SRR17520069. 17103981  
SRR17520069. 17103982  
SRR17520069. 17103983  
SRR17520069. 17103984  
SRR17520069. 17103985  
SRR17520069. 17103986  
SRR17520069. 17103987  
SRR17520069. 17103988  
SRR17520069. 17103989  
SRR17520069. 17103991  
SRR17520069. 17103992  
SRR17520069. 17103993  
SRR17520069. 17103994  
SRR17520069. 17103995  
SRR17520069. 17103996  
SRR17520069. 17103997  
SRR17520069. 17103998  
SRR17520069. 17103999  
SRR17520069. 17104000  
SRR17520069. 17104001  
SRR17520069. 17104002  
SRR17520069. 17104003  
SRR17520069. 17104004  
SRR17520069. 17104005  
SRR17520069. 17104006  
SRR17520069. 17104007  
SRR17520069. 17104008  
SRR17520069. 17104009  
SRR17520069. 17104010  
SRR17520069. 17104012  
SRR17520069. 17104013  
SRR17520069. 17104014  
SRR17520069. 17104015  
SRR17520069. 17104016

SRR17520069.17104017  
SRR17520069.17104018  
SRR17520069.17104019  
SRR17520069.17104020  
SRR17520069.17104022  
SRR17520069.17104023  
SRR17520069.17104024  
SRR17520069.17104025  
SRR17520069.17104026  
SRR17520069.17104027  
SRR17520069.17104028  
SRR17520069.17104030  
SRR17520069.17104031  
SRR17520069.17104032  
SRR17520069.17104033  
SRR17520069.17104034  
SRR17520069.17104035  
SRR17520069.17104036  
SRR17520069.17104037  
SRR17520069.17104038  
SRR17520069.17104039  
SRR17520069.17104040  
SRR17520069.17104041  
SRR17520069.17104042  
SRR17520069.17104043  
SRR17520069.17104044  
SRR17520069.17104045  
SRR17520069.17104046  
SRR17520069.17104047  
SRR17520069.17104048  
SRR17520069.17104049  
SRR17520069.17104050  
SRR17520069.17104051  
SRR17520069.17104052  
SRR17520069.17104053  
SRR17520069.17104054  
SRR17520069.17104055  
SRR17520069.17104056  
SRR17520069.17104057  
SRR17520069.17104058  
SRR17520069.17104059  
SRR17520069.17104060  
SRR17520069.17104061  
SRR17520069.17104062  
SRR17520069.17104063  
SRR17520069.17104064  
SRR17520069.17104065

SRR17520069. 17104066  
SRR17520069. 17104067  
SRR17520069. 17104068  
SRR17520069. 17104069  
SRR17520069. 17104070  
SRR17520069. 17104071  
SRR17520069. 17104072  
SRR17520069. 17104073  
SRR17520069. 17104074  
SRR17520069. 17104075  
SRR17520069. 17104076  
SRR17520069. 17104077  
SRR17520069. 17104078  
SRR17520069. 17104079  
SRR17520069. 17104080  
SRR17520069. 17104081  
SRR17520069. 17131465  
SRR17520069. 17131466  
SRR17520069. 17131467  
SRR17520069. 17131468  
SRR17520069. 17131469  
SRR17520069. 17131470  
SRR17520069. 17131472  
SRR17520069. 17131473  
SRR17520069. 17131474  
SRR17520069. 17131475  
SRR17520069. 17131476  
SRR17520069. 17131477  
SRR17520069. 17131478  
SRR17520069. 17131479  
SRR17520069. 17131480  
SRR17520069. 17131481  
SRR17520069. 17131482  
SRR17520069. 17131483  
SRR17520069. 17131484  
SRR17520069. 17131485  
SRR17520069. 17131486  
SRR17520069. 17131487  
SRR17520069. 17131489  
SRR17520069. 17131490  
SRR17520069. 17131491  
SRR17520069. 17131492  
SRR17520069. 17131493  
SRR17520069. 17131494  
SRR17520069. 17131495  
SRR17520069. 17131496  
SRR17520069. 17131497

SRR17520069. 17131498  
SRR17520069. 17131499  
SRR17520069. 17131500  
SRR17520069. 17131501  
SRR17520069. 17131502  
SRR17520069. 17131503  
SRR17520069. 17131504  
SRR17520069. 17131505  
SRR17520069. 17131506  
SRR17520069. 17131507  
SRR17520069. 17131508  
SRR17520069. 17131509  
SRR17520069. 17131510  
SRR17520069. 17131511  
SRR17520069. 17131512  
SRR17520069. 17131513  
SRR17520069. 17131514  
SRR17520069. 17131515  
SRR17520069. 17131516  
SRR17520069. 17131517  
SRR17520069. 17131518  
SRR17520069. 17131519  
SRR17520069. 17131520  
SRR17520069. 17131521  
SRR17520069. 17131522  
SRR17520069. 17131523  
SRR17520069. 17131524  
SRR17520069. 17131525  
SRR17520069. 17131527  
SRR17520069. 17131528  
SRR17520069. 17131529  
SRR17520069. 17131530  
SRR17520069. 17131531  
SRR17520069. 17131532  
SRR17520069. 17131533  
SRR17520069. 17131534  
SRR17520069. 17131535  
SRR17520069. 17131536  
SRR17520069. 17131537  
SRR17520069. 17131538  
SRR17520069. 17131539  
SRR17520069. 17131540  
SRR17520069. 17131542  
SRR17520069. 17131543  
SRR17520069. 17131544  
SRR17520069. 17131545  
SRR17520069. 17131546



SRR17520069. 17131547  
SRR17520069. 17131548  
SRR17520069. 17131549  
SRR17520069. 17131550  
SRR17520069. 17131551  
SRR17520069. 17131553  
SRR17520069. 17131554  
SRR17520069. 17131555  
SRR17520069. 17131556  
SRR17520069. 17131557  
SRR17520069. 17131558  
SRR17520069. 17131559  
SRR17520069. 17131560  
SRR17520069. 17131561  
SRR17520069. 17131562  
SRR17520069. 17131563  
SRR17520069. 17131564  
SRR17520069. 17131565  
SRR17520069. 17131566  
SRR17520069. 17131567  
SRR17520069. 17131568  
SRR17520069. 17131569  
SRR17520069. 17131571  
SRR17520069. 17131573  
SRR17520069. 17131574  
SRR17520069. 17131575  
SRR17520069. 17131576  
SRR17520069. 17131577  
SRR17520069. 17131578  
SRR17520069. 17131579  
SRR17520069. 17131580  
SRR17520069. 17131581  
SRR17520069. 17131582  
SRR17520069. 17131583  
SRR17520069. 17131586  
SRR17520069. 17131587  
SRR17520069. 17131588  
SRR17520069. 17131589  
SRR17520069. 17131590  
SRR17520069. 17131591  
SRR17520069. 17131592  
SRR17520069. 17134580  
SRR17520069. 17134581  
SRR17520069. 17134582  
SRR17520069. 17134583  
SRR17520069. 17134584  
SRR17520069. 17134585

SRR17520069. 17134586  
SRR17520069. 17134587  
SRR17520069. 17134588  
SRR17520069. 17134589  
SRR17520069. 17134590  
SRR17520069. 17134591  
SRR17520069. 17134592  
SRR17520069. 17134593  
SRR17520069. 17134595  
SRR17520069. 17134596  
SRR17520069. 17134597  
SRR17520069. 17134598  
SRR17520069. 17134599  
SRR17520069. 17134600  
SRR17520069. 17134601  
SRR17520069. 17134602  
SRR17520069. 17134604  
SRR17520069. 17134605  
SRR17520069. 17134606  
SRR17520069. 17134608  
SRR17520069. 17134609  
SRR17520069. 17134610  
SRR17520069. 17134611  
SRR17520069. 17134612  
SRR17520069. 17134613  
SRR17520069. 17134615  
SRR17520069. 17134616  
SRR17520069. 17134617  
SRR17520069. 17134620  
SRR17520069. 17134622  
SRR17520069. 17134623  
SRR17520069. 17134624  
SRR17520069. 17134625  
SRR17520069. 17134626  
SRR17520069. 17134627  
SRR17520069. 17134628  
SRR17520069. 17134630  
SRR17520069. 17134633  
SRR17520069. 17134636  
SRR17520069. 17134638  
SRR17520069. 17134639  
SRR17520069. 17134640  
SRR17520069. 17134641  
SRR17520069. 17134642  
SRR17520069. 17134643  
SRR17520069. 17134645  
SRR17520069. 17134646

SRR17520069. 17134647  
SRR17520069. 17134648  
SRR17520069. 17134649  
SRR17520069. 17134650  
SRR17520069. 17134651  
SRR17520069. 17134652  
SRR17520069. 17134653  
SRR17520069. 17134654  
SRR17520069. 17134655  
SRR17520069. 17134656  
SRR17520069. 17134657  
SRR17520069. 17134658  
SRR17520069. 17134659  
SRR17520069. 17134660  
SRR17520069. 17134661  
SRR17520069. 17134662  
SRR17520069. 17142440  
SRR17520069. 17142441  
SRR17520069. 17142442  
SRR17520069. 17142445  
SRR17520069. 17142446  
SRR17520069. 17142447  
SRR17520069. 17142449  
SRR17520069. 17142450  
SRR17520069. 17142451  
SRR17520069. 17142452  
SRR17520069. 17142453  
SRR17520069. 17142454  
SRR17520069. 17142458  
SRR17520069. 17142459  
SRR17520069. 17142461  
SRR17520069. 17142462  
SRR17520069. 17142463  
SRR17520069. 17142464  
SRR17520069. 17159509  
SRR17520069. 17159510  
SRR17520069. 17159511  
SRR17520069. 17159512  
SRR17520069. 17159513  
SRR17520069. 17159514  
SRR17520069. 17159515  
SRR17520069. 17159516  
SRR17520069. 17159517  
SRR17520069. 17159518  
SRR17520069. 17159519  
SRR17520069. 17159520  
SRR17520069. 17159521

SRR17520069.17159522  
SRR17520069.17159523  
SRR17520069.17159524  
SRR17520069.17159525  
SRR17520069.17159526  
SRR17520069.17159527  
SRR17520069.17159528  
SRR17520069.17159529  
SRR17520069.17159530  
SRR17520069.17159531  
SRR17520069.17159532  
SRR17520069.17159533  
SRR17520069.17159535  
SRR17520069.17159536  
SRR17520069.17159537  
SRR17520069.17159538  
SRR17520069.17159539  
SRR17520069.17159540  
SRR17520069.17159541  
SRR17520069.17159542  
SRR17520069.17159543  
SRR17520069.17159544  
SRR17520069.17159545  
SRR17520069.17159546  
SRR17520069.17159548  
SRR17520069.17159549  
SRR17520069.17159550  
SRR17520069.17159551  
SRR17520069.17159552  
SRR17520069.17159553  
SRR17520069.17159554  
SRR17520069.17159555  
SRR17520069.17159556  
SRR17520069.17159557  
SRR17520069.17159558  
SRR17520069.17159559  
SRR17520069.17159560  
SRR17520069.17159561  
SRR17520069.17159562  
SRR17520069.17159563  
SRR17520069.17159564  
SRR17520069.17159565  
SRR17520069.17159566  
SRR17520069.17159567  
SRR17520069.17159568  
SRR17520069.17159569  
SRR17520069.17159570

SRR17520069. 17159571  
SRR17520069. 17159572  
SRR17520069. 17159573  
SRR17520069. 17159574  
SRR17520069. 17159575  
SRR17520069. 17159576  
SRR17520069. 17159577  
SRR17520069. 17159578  
SRR17520069. 17159579  
SRR17520069. 17159580  
SRR17520069. 17159581  
SRR17520069. 17159582  
SRR17520069. 17159583  
SRR17520069. 17159584  
SRR17520069. 17159585  
SRR17520069. 17159586  
SRR17520069. 17159587  
SRR17520069. 17179011  
SRR17520069. 17179012  
SRR17520069. 17179013  
SRR17520069. 17179014  
SRR17520069. 17179015  
SRR17520069. 17179016  
SRR17520069. 17179017  
SRR17520069. 17179018  
SRR17520069. 17179019  
SRR17520069. 17179020  
SRR17520069. 17179021  
SRR17520069. 17179022  
SRR17520069. 17179023  
SRR17520069. 17179024  
SRR17520069. 17179025  
SRR17520069. 17179026  
SRR17520069. 17179027  
SRR17520069. 17179028  
SRR17520069. 17179029  
SRR17520069. 17179030  
SRR17520069. 17179031  
SRR17520069. 17179032  
SRR17520069. 17179033  
SRR17520069. 17179034  
SRR17520069. 17179035  
SRR17520069. 17179036  
SRR17520069. 17179037  
SRR17520069. 17179038  
SRR17520069. 17179039  
SRR17520069. 17179040

SRR17520069.17179041  
SRR17520069.17194464  
SRR17520069.17204307  
SRR17520069.17204308  
SRR17520069.17204309  
SRR17520069.17204310  
SRR17520069.17204311  
SRR17520069.17204312  
SRR17520069.17204313  
SRR17520069.17204314  
SRR17520069.17204315  
SRR17520069.17204316  
SRR17520069.17204317  
SRR17520069.17204318  
SRR17520069.17204319  
SRR17520069.17204320  
SRR17520069.17204321  
SRR17520069.17204322  
SRR17520069.17204323  
SRR17520069.17204324  
SRR17520069.17204325  
SRR17520069.17204326  
SRR17520069.17204327  
SRR17520069.17204328  
SRR17520069.17204329  
SRR17520069.17204330  
SRR17520069.17204331  
SRR17520069.17204332  
SRR17520069.17204334  
SRR17520069.17204335  
SRR17520069.17204336  
SRR17520069.17204337  
SRR17520069.17204338  
SRR17520069.17204339  
SRR17520069.17204340  
SRR17520069.17204341  
SRR17520069.17204342  
SRR17520069.17204345  
SRR17520069.17204346  
SRR17520069.17204347  
SRR17520069.17204348  
SRR17520069.17204349  
SRR17520069.17204350  
SRR17520069.17204352  
SRR17520069.17204355  
SRR17520069.17204356  
SRR17520069.17207746

SRR17520069.17235907  
SRR17520069.17235908  
SRR17520069.17235909  
SRR17520069.17235910  
SRR17520069.17235911  
SRR17520069.17235912  
SRR17520069.17235913  
SRR17520069.17235914  
SRR17520069.17235915  
SRR17520069.17235916  
SRR17520069.17235917  
SRR17520069.17235918  
SRR17520069.17235919  
SRR17520069.17235920  
SRR17520069.17235921  
SRR17520069.17235922  
SRR17520069.17235923  
SRR17520069.17235924  
SRR17520069.17235925  
SRR17520069.17235926  
SRR17520069.17235927  
SRR17520069.17235928  
SRR17520069.17235929  
SRR17520069.17235930  
SRR17520069.17235931  
SRR17520069.17235932  
SRR17520069.17235933  
SRR17520069.17235934  
SRR17520069.17235935  
SRR17520069.17235936  
SRR17520069.17235937  
SRR17520069.17235938  
SRR17520069.17235939  
SRR17520069.17235940  
SRR17520069.17235941  
SRR17520069.17235942  
SRR17520069.17235943  
SRR17520069.17235944  
SRR17520069.17235945  
SRR17520069.17235946  
SRR17520069.17235947  
SRR17520069.17235948  
SRR17520069.17235949  
SRR17520069.17235950  
SRR17520069.17254383  
SRR17520069.17274981  
SRR17520069.17275324

SRR17520069. 17275325  
SRR17520069. 17275326  
SRR17520069. 17275327  
SRR17520069. 17275328  
SRR17520069. 17275329  
SRR17520069. 17275330  
SRR17520069. 17275331  
SRR17520069. 17275332  
SRR17520069. 17275334  
SRR17520069. 17275335  
SRR17520069. 17275336  
SRR17520069. 17275337  
SRR17520069. 17275338  
SRR17520069. 17275339  
SRR17520069. 17275340  
SRR17520069. 17275341  
SRR17520069. 17275342  
SRR17520069. 17275343  
SRR17520069. 17275344  
SRR17520069. 17275345  
SRR17520069. 17275346  
SRR17520069. 17275347  
SRR17520069. 17275348  
SRR17520069. 17275349  
SRR17520069. 17275350  
SRR17520069. 17275351  
SRR17520069. 17275352  
SRR17520069. 17275353  
SRR17520069. 17275354  
SRR17520069. 17275355  
SRR17520069. 17275356  
SRR17520069. 17275357  
SRR17520069. 17275358  
SRR17520069. 17275359  
SRR17520069. 17275360  
SRR17520069. 17275361  
SRR17520069. 17275362  
SRR17520069. 17275363  
SRR17520069. 17275364  
SRR17520069. 17275365  
SRR17520069. 17275366  
SRR17520069. 17275367  
SRR17520069. 17275368  
SRR17520069. 17278067  
SRR17520069. 17278074  
SRR17520069. 17278128  
SRR17520069. 17285200



SRR17520069. 17290839  
SRR17520069. 17293940  
SRR17520069. 17293941  
SRR17520069. 17293942  
SRR17520069. 17293943  
SRR17520069. 17293944  
SRR17520069. 17293945  
SRR17520069. 17293946  
SRR17520069. 17293947  
SRR17520069. 17293948  
SRR17520069. 17293949  
SRR17520069. 17306347  
SRR17520069. 17306348  
SRR17520069. 17306349  
SRR17520069. 17306351  
SRR17520069. 17306352  
SRR17520069. 17306353  
SRR17520069. 17306355  
SRR17520069. 17306356  
SRR17520069. 17306357  
SRR17520069. 17306358  
SRR17520069. 17306576  
SRR17520069. 17322267  
SRR17520069. 17337137  
SRR17520069. 17337138  
SRR17520069. 17337139  
SRR17520069. 17337140  
SRR17520069. 17337141  
SRR17520069. 17337142  
SRR17520069. 17337143  
SRR17520069. 17337144  
SRR17520069. 17337145  
SRR17520069. 17337147  
SRR17520069. 17337148  
SRR17520069. 17337149  
SRR17520069. 17337150  
SRR17520069. 17337151  
SRR17520069. 17337152  
SRR17520069. 17337153  
SRR17520069. 17337155  
SRR17520069. 17337156  
SRR17520069. 17337157  
SRR17520069. 17337158  
SRR17520069. 17337159  
SRR17520069. 17337160  
SRR17520069. 17337161  
SRR17520069. 17337162

SRR17520069. 17337163  
SRR17520069. 17337164  
SRR17520069. 17337165  
SRR17520069. 17337166  
SRR17520069. 17337167  
SRR17520069. 17337168  
SRR17520069. 17337169  
SRR17520069. 17337170  
SRR17520069. 17337171  
SRR17520069. 17337172  
SRR17520069. 17337173  
SRR17520069. 17337174  
SRR17520069. 17337175  
SRR17520069. 17337176  
SRR17520069. 17337177  
SRR17520069. 17337178  
SRR17520069. 17337179  
SRR17520069. 17337180  
SRR17520069. 17337181  
SRR17520069. 17337182  
SRR17520069. 17337183  
SRR17520069. 17337184  
SRR17520069. 17337185  
SRR17520069. 17337187  
SRR17520069. 17337189  
SRR17520069. 17337190  
SRR17520069. 17337191  
SRR17520069. 17337192  
SRR17520069. 17337193  
SRR17520069. 17337194  
SRR17520069. 17337195  
SRR17520069. 17337196  
SRR17520069. 17337197  
SRR17520069. 17337198  
SRR17520069. 17337199  
SRR17520069. 17337200  
SRR17520069. 17337201  
SRR17520069. 17337202  
SRR17520069. 17337203  
SRR17520069. 17337204  
SRR17520069. 17337205  
SRR17520069. 17337206  
SRR17520069. 17369465  
SRR17520069. 17369466  
SRR17520069. 17369467  
SRR17520069. 17369468  
SRR17520069. 17377594

SRR17520069. 17377596  
SRR17520069. 17386050  
SRR17520069. 17386051  
SRR17520069. 17386052  
SRR17520069. 17386053  
SRR17520069. 17386054  
SRR17520069. 17386055  
SRR17520069. 17386056  
SRR17520069. 17386057  
SRR17520069. 17386058  
SRR17520069. 17386060  
SRR17520069. 17386061  
SRR17520069. 17386062  
SRR17520069. 17386063  
SRR17520069. 17386064  
SRR17520069. 17386065  
SRR17520069. 17386069  
SRR17520069. 17386071  
SRR17520069. 17386072  
SRR17520069. 17386073  
SRR17520069. 17386074  
SRR17520069. 17386075  
SRR17520069. 17386076  
SRR17520069. 17386077  
SRR17520069. 17386078  
SRR17520069. 17386079  
SRR17520069. 17386080  
SRR17520069. 17386081  
SRR17520069. 17386082  
SRR17520069. 17386083  
SRR17520069. 17386084  
SRR17520069. 17386085  
SRR17520069. 17386086  
SRR17520069. 17386087  
SRR17520069. 17386088  
SRR17520069. 17386089  
SRR17520069. 17386090  
SRR17520069. 17386091  
SRR17520069. 17386092  
SRR17520069. 17386093  
SRR17520069. 17386094  
SRR17520069. 17386095  
SRR17520069. 17386096  
SRR17520069. 17386097  
SRR17520069. 17386099  
SRR17520069. 17386100  
SRR17520069. 17403768

SRR17520069.17403784  
SRR17520069.17407600  
SRR17520069.17407610  
SRR17520069.17407629  
SRR17520069.17407668  
SRR17520069.17407708  
SRR17520069.17407715  
SRR17520069.17410230  
SRR17520069.17410231  
SRR17520069.17410232  
SRR17520069.17410233  
SRR17520069.17410234  
SRR17520069.17410235  
SRR17520069.17410236  
SRR17520069.17410237  
SRR17520069.17410238  
SRR17520069.17410239  
SRR17520069.17410240  
SRR17520069.17410241  
SRR17520069.17410242  
SRR17520069.17410243  
SRR17520069.17410244  
SRR17520069.17410245  
SRR17520069.17410246  
SRR17520069.17410247  
SRR17520069.17410248  
SRR17520069.17410249  
SRR17520069.17410250  
SRR17520069.17410251  
SRR17520069.17410252  
SRR17520069.17410253  
SRR17520069.17410254  
SRR17520069.17410255  
SRR17520069.17410256  
SRR17520069.17410257  
SRR17520069.17410258  
SRR17520069.17410259  
SRR17520069.17410260  
SRR17520069.17410261  
SRR17520069.17410262  
SRR17520069.17410263  
SRR17520069.17410264  
SRR17520069.17410265  
SRR17520069.17410266  
SRR17520069.17410267  
SRR17520069.17410268  
SRR17520069.17410269

SRR17520069.17410270  
SRR17520069.17410271  
SRR17520069.17410272  
SRR17520069.17410273  
SRR17520069.17410274  
SRR17520069.17410275  
SRR17520069.17410276  
SRR17520069.17410277  
SRR17520069.17410278  
SRR17520069.17410279  
SRR17520069.17410280  
SRR17520069.17410281  
SRR17520069.17410282  
SRR17520069.17410283  
SRR17520069.17410284  
SRR17520069.17410285  
SRR17520069.17410286  
SRR17520069.17410287  
SRR17520069.17410288  
SRR17520069.17410289  
SRR17520069.17410290  
SRR17520069.17410291  
SRR17520069.17410292  
SRR17520069.17410294  
SRR17520069.17410295  
SRR17520069.17410296  
SRR17520069.17410297  
SRR17520069.17410298  
SRR17520069.17410299  
SRR17520069.17410300  
SRR17520069.17410301  
SRR17520069.17410302  
SRR17520069.17410303  
SRR17520069.17410304  
SRR17520069.17410305  
SRR17520069.17410306  
SRR17520069.17410307  
SRR17520069.17410308  
SRR17520069.17410310  
SRR17520069.17410311  
SRR17520069.17410312  
SRR17520069.17410313  
SRR17520069.17410878  
SRR17520069.17410879  
SRR17520069.17410880  
SRR17520069.17410881  
SRR17520069.17410882

SRR17520069. 17410883  
SRR17520069. 17410884  
SRR17520069. 17410885  
SRR17520069. 17410886  
SRR17520069. 17410887  
SRR17520069. 17410888  
SRR17520069. 17410889  
SRR17520069. 17410890  
SRR17520069. 17410891  
SRR17520069. 17410892  
SRR17520069. 17410893  
SRR17520069. 17410894  
SRR17520069. 17410895  
SRR17520069. 17410896  
SRR17520069. 17427372  
SRR17520069. 17427373  
SRR17520069. 17427375  
SRR17520069. 17427377  
SRR17520069. 17427378  
SRR17520069. 17427380  
SRR17520069. 17427381  
SRR17520069. 17427382  
SRR17520069. 17427383  
SRR17520069. 17427384  
SRR17520069. 17427385  
SRR17520069. 17427386  
SRR17520069. 17427387  
SRR17520069. 17427388  
SRR17520069. 17427389  
SRR17520069. 17427391  
SRR17520069. 17427392  
SRR17520069. 17427393  
SRR17520069. 17427394  
SRR17520069. 17427395  
SRR17520069. 17427396  
SRR17520069. 17427397  
SRR17520069. 17427398  
SRR17520069. 17427402  
SRR17520069. 17427404  
SRR17520069. 17427405  
SRR17520069. 17427406  
SRR17520069. 17427407  
SRR17520069. 17427408  
SRR17520069. 17427409  
SRR17520069. 17427410  
SRR17520069. 17427411  
SRR17520069. 17427413

SRR17520069. 17427414  
SRR17520069. 17427415  
SRR17520069. 17427416  
SRR17520069. 17427417  
SRR17520069. 17427418  
SRR17520069. 17427420  
SRR17520069. 17427421  
SRR17520069. 17427422  
SRR17520069. 17427423  
SRR17520069. 17427424  
SRR17520069. 17427425  
SRR17520069. 17427426  
SRR17520069. 17427427  
SRR17520069. 17427428  
SRR17520069. 17427429  
SRR17520069. 17427430  
SRR17520069. 17427432  
SRR17520069. 17427433  
SRR17520069. 17427434  
SRR17520069. 17427435  
SRR17520069. 17427436  
SRR17520069. 17427438  
SRR17520069. 17427439  
SRR17520069. 17427441  
SRR17520069. 17427442  
SRR17520069. 17427443  
SRR17520069. 17427444  
SRR17520069. 17427445  
SRR17520069. 17427446  
SRR17520069. 17427447  
SRR17520069. 17427448  
SRR17520069. 17427449  
SRR17520069. 17427450  
SRR17520069. 17427451  
SRR17520069. 17427453  
SRR17520069. 17427454  
SRR17520069. 17427455  
SRR17520069. 17427456  
SRR17520069. 17427457  
SRR17520069. 17427460  
SRR17520069. 17427461  
SRR17520069. 17427462  
SRR17520069. 17427463  
SRR17520069. 17427465  
SRR17520069. 17427467  
SRR17520069. 17427468  
SRR17520069. 17427469

SRR17520069. 17427470  
SRR17520069. 17427471  
SRR17520069. 17427474  
SRR17520069. 17427475  
SRR17520069. 17427476  
SRR17520069. 17427477  
SRR17520069. 17427478  
SRR17520069. 17427479  
SRR17520069. 17427480  
SRR17520069. 17427481  
SRR17520069. 17427482  
SRR17520069. 17427483  
SRR17520069. 17427484  
SRR17520069. 17427486  
SRR17520069. 17427489  
SRR17520069. 17427490  
SRR17520069. 17427492  
SRR17520069. 17427493  
SRR17520069. 17427494  
SRR17520069. 17427495  
SRR17520069. 17427496  
SRR17520069. 17427497  
SRR17520069. 17427498  
SRR17520069. 17427499  
SRR17520069. 17427500  
SRR17520069. 17427501  
SRR17520069. 17427502  
SRR17520069. 17427503  
SRR17520069. 17427504  
SRR17520069. 17456031  
SRR17520069. 17456032  
SRR17520069. 17456033  
SRR17520069. 17456034  
SRR17520069. 17456035  
SRR17520069. 17456036  
SRR17520069. 17456037  
SRR17520069. 17456038  
SRR17520069. 17456040  
SRR17520069. 17456041  
SRR17520069. 17456042  
SRR17520069. 17456043  
SRR17520069. 17456044  
SRR17520069. 17456045  
SRR17520069. 17456046  
SRR17520069. 17456047  
SRR17520069. 17456050  
SRR17520069. 17456051



SRR17520069. 17456052  
SRR17520069. 17456053  
SRR17520069. 17456054  
SRR17520069. 17456055  
SRR17520069. 17456056  
SRR17520069. 17456057  
SRR17520069. 17456058  
SRR17520069. 17456059  
SRR17520069. 17456060  
SRR17520069. 17456061  
SRR17520069. 17456062  
SRR17520069. 17456063  
SRR17520069. 17456064  
SRR17520069. 17456065  
SRR17520069. 17456066  
SRR17520069. 17456067  
SRR17520069. 17456068  
SRR17520069. 17456069  
SRR17520069. 17456070  
SRR17520069. 17456071  
SRR17520069. 17456072  
SRR17520069. 17456073  
SRR17520069. 17456074  
SRR17520069. 17456075  
SRR17520069. 17456076  
SRR17520069. 17456077  
SRR17520069. 17456078  
SRR17520069. 17456079  
SRR17520069. 17456080  
SRR17520069. 17456081  
SRR17520069. 17456082  
SRR17520069. 17456083  
SRR17520069. 17456084  
SRR17520069. 17456085  
SRR17520069. 17456086  
SRR17520069. 17456087  
SRR17520069. 17456088  
SRR17520069. 17456089  
SRR17520069. 17456090  
SRR17520069. 17456091  
SRR17520069. 17456092  
SRR17520069. 17456093  
SRR17520069. 17456094  
SRR17520069. 17456095  
SRR17520069. 17456096  
SRR17520069. 17456097  
SRR17520069. 17456098

SRR17520069. 17456099  
SRR17520069. 17456100  
SRR17520069. 17456211  
SRR17520069. 17456212  
SRR17520069. 17456213  
SRR17520069. 17456214  
SRR17520069. 17456215  
SRR17520069. 17456216  
SRR17520069. 17456217  
SRR17520069. 17456218  
SRR17520069. 17456219  
SRR17520069. 17456220  
SRR17520069. 17456221  
SRR17520069. 17456222  
SRR17520069. 17456223  
SRR17520069. 17456224  
SRR17520069. 17456225  
SRR17520069. 17456226  
SRR17520069. 17456227  
SRR17520069. 17456228  
SRR17520069. 17456229  
SRR17520069. 17456230  
SRR17520069. 17456231  
SRR17520069. 17462279  
SRR17520069. 17462280  
SRR17520069. 17462281  
SRR17520069. 17462282  
SRR17520069. 17462283  
SRR17520069. 17462284  
SRR17520069. 17462285  
SRR17520069. 17462286  
SRR17520069. 17462287  
SRR17520069. 17462288  
SRR17520069. 17462289  
SRR17520069. 17462290  
SRR17520069. 17462291  
SRR17520069. 17462292  
SRR17520069. 17462293  
SRR17520069. 17462294  
SRR17520069. 17462295  
SRR17520069. 17462296  
SRR17520069. 17462297  
SRR17520069. 17462298  
SRR17520069. 17462299  
SRR17520069. 17462300  
SRR17520069. 17462301  
SRR17520069. 17462302

SRR17520069. 17462303  
SRR17520069. 17462304  
SRR17520069. 17462305  
SRR17520069. 17462306  
SRR17520069. 17462307  
SRR17520069. 17472140  
SRR17520069. 17484068  
SRR17520069. 17484069  
SRR17520069. 17484070  
SRR17520069. 17484071  
SRR17520069. 17484072  
SRR17520069. 17484076  
SRR17520069. 17492796  
SRR17520069. 17492797  
SRR17520069. 17492798  
SRR17520069. 17492799  
SRR17520069. 17492800  
SRR17520069. 17492801  
SRR17520069. 17492802  
SRR17520069. 17492803  
SRR17520069. 17492804  
SRR17520069. 17492805  
SRR17520069. 17492806  
SRR17520069. 17492807  
SRR17520069. 17492808  
SRR17520069. 17492809  
SRR17520069. 17492810  
SRR17520069. 17492811  
SRR17520069. 17492812  
SRR17520069. 17492813  
SRR17520069. 17492814  
SRR17520069. 17492815  
SRR17520069. 17492816  
SRR17520069. 17492817  
SRR17520069. 17492818  
SRR17520069. 17492819  
SRR17520069. 17492820  
SRR17520069. 17492821  
SRR17520069. 17492822  
SRR17520069. 17492823  
SRR17520069. 17492824  
SRR17520069. 17492825  
SRR17520069. 17492826  
SRR17520069. 17492827  
SRR17520069. 17492828  
SRR17520069. 17492829  
SRR17520069. 17492830

SRR17520069. 17492831  
SRR17520069. 17492832  
SRR17520069. 17492833  
SRR17520069. 17492834  
SRR17520069. 17492836  
SRR17520069. 17492837  
SRR17520069. 17492838  
SRR17520069. 17492839  
SRR17520069. 17492840  
SRR17520069. 17492841  
SRR17520069. 17492842  
SRR17520069. 17492843  
SRR17520069. 17492844  
SRR17520069. 17492845  
SRR17520069. 17492846  
SRR17520069. 17492847  
SRR17520069. 17492848  
SRR17520069. 17496142  
SRR17520069. 17496143  
SRR17520069. 17496144  
SRR17520069. 17496145  
SRR17520069. 17496146  
SRR17520069. 17496147  
SRR17520069. 17496148  
SRR17520069. 17496149  
SRR17520069. 17496150  
SRR17520069. 17496151  
SRR17520069. 17496152  
SRR17520069. 17496153  
SRR17520069. 17496154  
SRR17520069. 17496155  
SRR17520069. 17496156  
SRR17520069. 17496157  
SRR17520069. 17496158  
SRR17520069. 17496159  
SRR17520069. 17496160  
SRR17520069. 17496161  
SRR17520069. 17496162  
SRR17520069. 17496163  
SRR17520069. 17496164  
SRR17520069. 17496165  
SRR17520069. 17496166  
SRR17520069. 17496167  
SRR17520069. 17496168  
SRR17520069. 17496169  
SRR17520069. 17496170  
SRR17520069. 17496171

SRR17520069. 17496172  
SRR17520069. 17496173  
SRR17520069. 17496174  
SRR17520069. 17496175  
SRR17520069. 17496176  
SRR17520069. 17496177  
SRR17520069. 17496178  
SRR17520069. 17496179  
SRR17520069. 17496180  
SRR17520069. 17496181  
SRR17520069. 17496182  
SRR17520069. 17496183  
SRR17520069. 17496184  
SRR17520069. 17496185  
SRR17520069. 17496186  
SRR17520069. 17496187  
SRR17520069. 17496188  
SRR17520069. 17496189  
SRR17520069. 17496190  
SRR17520069. 17496191  
SRR17520069. 17496192  
SRR17520069. 17496193  
SRR17520069. 17496194  
SRR17520069. 17496195  
SRR17520069. 17496196  
SRR17520069. 17496197  
SRR17520069. 17496198  
SRR17520069. 17496199  
SRR17520069. 17496200  
SRR17520069. 17496201  
SRR17520069. 17496202  
SRR17520069. 17496203  
SRR17520069. 17496204  
SRR17520069. 17496205  
SRR17520069. 17496206  
SRR17520069. 17496207  
SRR17520069. 17496208  
SRR17520069. 17496209  
SRR17520069. 17496210  
SRR17520069. 17496211  
SRR17520069. 17496212  
SRR17520069. 17496213  
SRR17520069. 17496214  
SRR17520069. 17511695  
SRR17520069. 17511741  
SRR17520069. 17529963  
SRR17520069. 17529964

SRR17520069. 17529966  
SRR17520069. 17529967  
SRR17520069. 17529968  
SRR17520069. 17529969  
SRR17520069. 17529970  
SRR17520069. 17529971  
SRR17520069. 17529972  
SRR17520069. 17529973  
SRR17520069. 17529974  
SRR17520069. 17529975  
SRR17520069. 17529976  
SRR17520069. 17529977  
SRR17520069. 17529978  
SRR17520069. 17529979  
SRR17520069. 17529980  
SRR17520069. 17529981  
SRR17520069. 17529982  
SRR17520069. 17529983  
SRR17520069. 17529984  
SRR17520069. 17529985  
SRR17520069. 17529986  
SRR17520069. 17529987  
SRR17520069. 17529988  
SRR17520069. 17529989  
SRR17520069. 17529990  
SRR17520069. 17529991  
SRR17520069. 17529992  
SRR17520069. 17529993  
SRR17520069. 17529994  
SRR17520069. 17529995  
SRR17520069. 17529996  
SRR17520069. 17529997  
SRR17520069. 17529998  
SRR17520069. 17529999  
SRR17520069. 17530000  
SRR17520069. 17530001  
SRR17520069. 17530002  
SRR17520069. 17530003  
SRR17520069. 17530004  
SRR17520069. 17530005  
SRR17520069. 17530006  
SRR17520069. 17530007  
SRR17520069. 17530008  
SRR17520069. 17530009  
SRR17520069. 17530010  
SRR17520069. 17530011  
SRR17520069. 17530012

SRR17520069.17530013  
SRR17520069.17530014  
SRR17520069.17530015  
SRR17520069.17532933  
SRR17520069.17541219  
SRR17520069.17541220  
SRR17520069.17541221  
SRR17520069.17541223  
SRR17520069.17541224  
SRR17520069.17541225  
SRR17520069.17541226  
SRR17520069.17541227  
SRR17520069.17541228  
SRR17520069.17541229  
SRR17520069.17541230  
SRR17520069.17548073  
SRR17520069.17550865  
SRR17520069.17550866  
SRR17520069.17550867  
SRR17520069.17550868  
SRR17520069.17550869  
SRR17520069.17550870  
SRR17520069.17550871  
SRR17520069.17550872  
SRR17520069.17550873  
SRR17520069.17550874  
SRR17520069.17550875  
SRR17520069.17550876  
SRR17520069.17550877  
SRR17520069.17550878  
SRR17520069.17550879  
SRR17520069.17550880  
SRR17520069.17550881  
SRR17520069.17550882  
SRR17520069.17551250  
SRR17520069.17551251  
SRR17520069.17551252  
SRR17520069.17551253  
SRR17520069.17551254  
SRR17520069.17551255  
SRR17520069.17551256  
SRR17520069.17551257  
SRR17520069.17551258  
SRR17520069.17551259  
SRR17520069.17551260  
SRR17520069.17551261  
SRR17520069.17551262

SRR17520069.17551263  
SRR17520069.17551264  
SRR17520069.17551265  
SRR17520069.17557156  
SRR17520069.17557159  
SRR17520069.17557160  
SRR17520069.17557161  
SRR17520069.17557162  
SRR17520069.17557163  
SRR17520069.17557164  
SRR17520069.17557166  
SRR17520069.17557167  
SRR17520069.17557168  
SRR17520069.17557169  
SRR17520069.17557170  
SRR17520069.17557171  
SRR17520069.17557172  
SRR17520069.17557173  
SRR17520069.17557174  
SRR17520069.17557175  
SRR17520069.17557176  
SRR17520069.17557177  
SRR17520069.17557178  
SRR17520069.17557179  
SRR17520069.17557180  
SRR17520069.17576503  
SRR17520069.17576645  
SRR17520069.17576646  
SRR17520069.17581365  
SRR17520069.17583241  
SRR17520069.17583242  
SRR17520069.17583243  
SRR17520069.17583244  
SRR17520069.17583245  
SRR17520069.17583246  
SRR17520069.17583247  
SRR17520069.17583248  
SRR17520069.17583249  
SRR17520069.17583250  
SRR17520069.17583251  
SRR17520069.17583252  
SRR17520069.17583253  
SRR17520069.17583254  
SRR17520069.17583255  
SRR17520069.17583256  
SRR17520069.17583258  
SRR17520069.17583259



SRR17520069. 17583260  
SRR17520069. 17583261  
SRR17520069. 17583262  
SRR17520069. 17583264  
SRR17520069. 17583265  
SRR17520069. 17583266  
SRR17520069. 17583267  
SRR17520069. 17583268  
SRR17520069. 17583269  
SRR17520069. 17584662  
SRR17520069. 17593855  
SRR17520069. 17593856  
SRR17520069. 17593858  
SRR17520069. 17593859  
SRR17520069. 17593860  
SRR17520069. 17593861  
SRR17520069. 17593862  
SRR17520069. 17593863  
SRR17520069. 17593864  
SRR17520069. 17593865  
SRR17520069. 17593866  
SRR17520069. 17593867  
SRR17520069. 17628536  
SRR17520069. 17628560  
SRR17520069. 17628571  
SRR17520069. 17641311  
SRR17520069. 17641312  
SRR17520069. 17641313  
SRR17520069. 17641314  
SRR17520069. 17641315  
SRR17520069. 17641316  
SRR17520069. 17641317  
SRR17520069. 17641318  
SRR17520069. 17641319  
SRR17520069. 17641320  
SRR17520069. 17641321  
SRR17520069. 17641322  
SRR17520069. 17641323  
SRR17520069. 17641324  
SRR17520069. 17641325  
SRR17520069. 17641326  
SRR17520069. 17641327  
SRR17520069. 17641328  
SRR17520069. 17641329  
SRR17520069. 17641330  
SRR17520069. 17641331  
SRR17520069. 17641332

SRR17520069. 17641333  
SRR17520069. 17641334  
SRR17520069. 17641335  
SRR17520069. 17641336  
SRR17520069. 17641337  
SRR17520069. 17641338  
SRR17520069. 17641339  
SRR17520069. 17641340  
SRR17520069. 17641341  
SRR17520069. 17641342  
SRR17520069. 17641343  
SRR17520069. 17641344  
SRR17520069. 17641345  
SRR17520069. 17641346  
SRR17520069. 17641347  
SRR17520069. 17641348  
SRR17520069. 17641349  
SRR17520069. 17641350  
SRR17520069. 17641351  
SRR17520069. 17641352  
SRR17520069. 17641353  
SRR17520069. 17641354  
SRR17520069. 17641355  
SRR17520069. 17641356  
SRR17520069. 17641357  
SRR17520069. 17641358  
SRR17520069. 17641359  
SRR17520069. 17641360  
SRR17520069. 17641361  
SRR17520069. 17641362  
SRR17520069. 17641363  
SRR17520069. 17641364  
SRR17520069. 17641365  
SRR17520069. 17641366  
SRR17520069. 17641367  
SRR17520069. 17641368  
SRR17520069. 17641369  
SRR17520069. 17641370  
SRR17520069. 17641371  
SRR17520069. 17641372  
SRR17520069. 17641373  
SRR17520069. 17641374  
SRR17520069. 17641375  
SRR17520069. 17641376  
SRR17520069. 17641378  
SRR17520069. 17682695  
SRR17520069. 17692097

SRR17520069. 17692098  
SRR17520069. 17692099  
SRR17520069. 17692100  
SRR17520069. 17692101  
SRR17520069. 17692102  
SRR17520069. 17692103  
SRR17520069. 17692104  
SRR17520069. 17692105  
SRR17520069. 17692106  
SRR17520069. 17692107  
SRR17520069. 17692108  
SRR17520069. 17692109  
SRR17520069. 17692110  
SRR17520069. 17692111  
SRR17520069. 17692112  
SRR17520069. 17692113  
SRR17520069. 17692114  
SRR17520069. 17692115  
SRR17520069. 17692116  
SRR17520069. 17692117  
SRR17520069. 17692118  
SRR17520069. 17692119  
SRR17520069. 17692120  
SRR17520069. 17692121  
SRR17520069. 17692122  
SRR17520069. 17692123  
SRR17520069. 17692126  
SRR17520069. 17692128  
SRR17520069. 17692130  
SRR17520069. 17692131  
SRR17520069. 17712558  
SRR17520069. 17712559  
SRR17520069. 17712560  
SRR17520069. 17712561  
SRR17520069. 17712562  
SRR17520069. 17712563  
SRR17520069. 17712564  
SRR17520069. 17712565  
SRR17520069. 17712566  
SRR17520069. 17731065  
SRR17520069. 17731066  
SRR17520069. 17731067  
SRR17520069. 17736206  
SRR17520069. 17736207  
SRR17520069. 17736208  
SRR17520069. 17736209  
SRR17520069. 17736210

SRR17520069.17736211  
SRR17520069.17736212  
SRR17520069.17736213  
SRR17520069.17736214  
SRR17520069.17736215  
SRR17520069.17736216  
SRR17520069.17750497  
SRR17520069.17750498  
SRR17520069.17750499  
SRR17520069.17750500  
SRR17520069.17750501  
SRR17520069.17750502  
SRR17520069.17750503  
SRR17520069.17750504  
SRR17520069.17750505  
SRR17520069.17750506  
SRR17520069.17750507  
SRR17520069.17750508  
SRR17520069.17750509  
SRR17520069.17750510  
SRR17520069.17750511  
SRR17520069.17750512  
SRR17520069.17750513  
SRR17520069.17750514  
SRR17520069.17750515  
SRR17520069.17750516  
SRR17520069.17750517  
SRR17520069.17750518  
SRR17520069.17750519  
SRR17520069.17750520  
SRR17520069.17750521  
SRR17520069.17750522  
SRR17520069.17750523  
SRR17520069.17750526  
SRR17520069.17750527  
SRR17520069.17750528  
SRR17520069.17750529  
SRR17520069.17750531  
SRR17520069.17750532  
SRR17520069.17750533  
SRR17520069.17750534  
SRR17520069.17760786  
SRR17520069.17768183  
SRR17520069.17774212  
SRR17520069.17790539  
SRR17520069.17790541  
SRR17520069.17795588

SRR17520069.17841244  
SRR17520069.17850958  
SRR17520069.17852456  
SRR17520069.17856756  
SRR17520069.17856757  
SRR17520069.17856758  
SRR17520069.17856759  
SRR17520069.17856760  
SRR17520069.17856761  
SRR17520069.17856762  
SRR17520069.17856763  
SRR17520069.17856765  
SRR17520069.17856766  
SRR17520069.17856767  
SRR17520069.17856768  
SRR17520069.17856769  
SRR17520069.17856770  
SRR17520069.17856771  
SRR17520069.17856772  
SRR17520069.17856773  
SRR17520069.17856774  
SRR17520069.17856775  
SRR17520069.17856776  
SRR17520069.17856777  
SRR17520069.17856778  
SRR17520069.17856779  
SRR17520069.17856780  
SRR17520069.17856781  
SRR17520069.17856782  
SRR17520069.17856783  
SRR17520069.17856784  
SRR17520069.17856785  
SRR17520069.17856786  
SRR17520069.17856787  
SRR17520069.17856788  
SRR17520069.17856789  
SRR17520069.17856790  
SRR17520069.17856791  
SRR17520069.17856792  
SRR17520069.17856793  
SRR17520069.17856794  
SRR17520069.17856795  
SRR17520069.17856796  
SRR17520069.17856797  
SRR17520069.17856798  
SRR17520069.17856799  
SRR17520069.17856800

SRR17520069.17856801  
SRR17520069.17856802  
SRR17520069.17856803  
SRR17520069.17856804  
SRR17520069.17856805  
SRR17520069.17856806  
SRR17520069.17856807  
SRR17520069.17856808  
SRR17520069.17856809  
SRR17520069.17856810  
SRR17520069.17856811  
SRR17520069.17856812  
SRR17520069.17856813  
SRR17520069.17856814  
SRR17520069.17856815  
SRR17520069.17856816  
SRR17520069.17856817  
SRR17520069.17856818  
SRR17520069.17856819  
SRR17520069.17856820  
SRR17520069.17856821  
SRR17520069.17856822  
SRR17520069.17856823  
SRR17520069.17856825  
SRR17520069.17856826  
SRR17520069.17856827  
SRR17520069.17856828  
SRR17520069.17856829  
SRR17520069.17856830  
SRR17520069.17856831  
SRR17520069.17856832  
SRR17520069.17856833  
SRR17520069.17856834  
SRR17520069.17856835  
SRR17520069.17856836  
SRR17520069.17856837  
SRR17520069.17856838  
SRR17520069.17856839  
SRR17520069.17856840  
SRR17520069.17856841  
SRR17520069.17856842  
SRR17520069.17856843  
SRR17520069.17856844  
SRR17520069.17856845  
SRR17520069.17856846  
SRR17520069.17856847  
SRR17520069.17856848

SRR17520069.17856849  
SRR17520069.17856850  
SRR17520069.17856851  
SRR17520069.17856852  
SRR17520069.17856853  
SRR17520069.17856854  
SRR17520069.17856855  
SRR17520069.17856856  
SRR17520069.17856857  
SRR17520069.17856858  
SRR17520069.17856860  
SRR17520069.17856861  
SRR17520069.17856862  
SRR17520069.17856863  
SRR17520069.17856864  
SRR17520069.17906453  
SRR17520069.17913691  
SRR17520069.17931634  
SRR17520069.17931635  
SRR17520069.17935406  
SRR17520069.17935407  
SRR17520069.17935408  
SRR17520069.17935409  
SRR17520069.17935410  
SRR17520069.17935411  
SRR17520069.17935412  
SRR17520069.17935413  
SRR17520069.17935414  
SRR17520069.17935415  
SRR17520069.17935416  
SRR17520069.17935417  
SRR17520069.17935418  
SRR17520069.17935419  
SRR17520069.17935420  
SRR17520069.17935422  
SRR17520069.17935423  
SRR17520069.17935424  
SRR17520069.17935425  
SRR17520069.17935426  
SRR17520069.17935427  
SRR17520069.17935429  
SRR17520069.17935430  
SRR17520069.17935431  
SRR17520069.17935432  
SRR17520069.17935433  
SRR17520069.17935434  
SRR17520069.17935435

SRR17520069. 17935436  
SRR17520069. 17935437  
SRR17520069. 17935438  
SRR17520069. 17935439  
SRR17520069. 17935440  
SRR17520069. 17935441  
SRR17520069. 17935442  
SRR17520069. 17935443  
SRR17520069. 17935444  
SRR17520069. 17935445  
SRR17520069. 17935446  
SRR17520069. 17935447  
SRR17520069. 17935448  
SRR17520069. 17935449  
SRR17520069. 17935450  
SRR17520069. 17935451  
SRR17520069. 17935452  
SRR17520069. 17935453  
SRR17520069. 17935454  
SRR17520069. 17935455  
SRR17520069. 17935456  
SRR17520069. 17935457  
SRR17520069. 17935458  
SRR17520069. 17935459  
SRR17520069. 17935460  
SRR17520069. 17935461  
SRR17520069. 17935462  
SRR17520069. 17935463  
SRR17520069. 17935464  
SRR17520069. 17935465  
SRR17520069. 17935466  
SRR17520069. 17935467  
SRR17520069. 17935468  
SRR17520069. 17935469  
SRR17520069. 17935470  
SRR17520069. 17935471  
SRR17520069. 17935472  
SRR17520069. 17935473  
SRR17520069. 17935474  
SRR17520069. 17935475  
SRR17520069. 17935476  
SRR17520069. 17935477  
SRR17520069. 17935478  
SRR17520069. 17935479  
SRR17520069. 17935480  
SRR17520069. 17935481  
SRR17520069. 17935482



SRR17520069. 17935483  
SRR17520069. 17935484  
SRR17520069. 17935485  
SRR17520069. 17935486  
SRR17520069. 17935487  
SRR17520069. 17935488  
SRR17520069. 17935489  
SRR17520069. 17935490  
SRR17520069. 17935491  
SRR17520069. 17935492  
SRR17520069. 17935493  
SRR17520069. 17935494  
SRR17520069. 17935495  
SRR17520069. 17935496  
SRR17520069. 17935497  
SRR17520069. 17935498  
SRR17520069. 17935499  
SRR17520069. 17935500  
SRR17520069. 17935501  
SRR17520069. 17935504  
SRR17520069. 17935505  
SRR17520069. 17935506  
SRR17520069. 17935507  
SRR17520069. 17935508  
SRR17520069. 17935509  
SRR17520069. 17935510  
SRR17520069. 17935511  
SRR17520069. 17935512  
SRR17520069. 17935513  
SRR17520069. 17935514  
SRR17520069. 17935515  
SRR17520069. 17935516  
SRR17520069. 17935517  
SRR17520069. 17935518  
SRR17520069. 17935519  
SRR17520069. 17935520  
SRR17520069. 17935521  
SRR17520069. 17935522  
SRR17520069. 17935523  
SRR17520069. 17935524  
SRR17520069. 17935525  
SRR17520069. 17935526  
SRR17520069. 17935527  
SRR17520069. 17943005  
SRR17520069. 17949091  
SRR17520069. 17949101  
SRR17520069. 17949102

SRR17520069.17949103  
SRR17520069.17949104  
SRR17520069.17949105  
SRR17520069.17949107  
SRR17520069.17949109  
SRR17520069.17949110  
SRR17520069.17949113  
SRR17520069.17949114  
SRR17520069.17949115  
SRR17520069.17949116  
SRR17520069.17949117  
SRR17520069.17949118  
SRR17520069.17949119  
SRR17520069.17949120  
SRR17520069.17949121  
SRR17520069.17949122  
SRR17520069.17949123  
SRR17520069.17949124  
SRR17520069.17949125  
SRR17520069.17949126  
SRR17520069.17949127  
SRR17520069.17949128  
SRR17520069.17949129  
SRR17520069.17949130  
SRR17520069.17949131  
SRR17520069.17949132  
SRR17520069.17949133  
SRR17520069.17949134  
SRR17520069.17949135  
SRR17520069.17949136  
SRR17520069.17949137  
SRR17520069.17949138  
SRR17520069.17949139  
SRR17520069.17949140  
SRR17520069.17949141  
SRR17520069.17949142  
SRR17520069.17949143  
SRR17520069.17949144  
SRR17520069.17949145  
SRR17520069.17949146  
SRR17520069.17949147  
SRR17520069.17949148  
SRR17520069.17949149  
SRR17520069.17949150  
SRR17520069.17949151  
SRR17520069.17949152  
SRR17520069.17949153

SRR17520069.17949155  
SRR17520069.17949156  
SRR17520069.17949157  
SRR17520069.17949158  
SRR17520069.17949159  
SRR17520069.17949160  
SRR17520069.17949161  
SRR17520069.17949162  
SRR17520069.17949163  
SRR17520069.17949164  
SRR17520069.17949165  
SRR17520069.17949166  
SRR17520069.17949167  
SRR17520069.17949168  
SRR17520069.17949169  
SRR17520069.17949170  
SRR17520069.17949171  
SRR17520069.17949172  
SRR17520069.17949173  
SRR17520069.17949174  
SRR17520069.17949175  
SRR17520069.17949176  
SRR17520069.17949177  
SRR17520069.17949178  
SRR17520069.17949179  
SRR17520069.17949180  
SRR17520069.17949181  
SRR17520069.17949182  
SRR17520069.17949183  
SRR17520069.17949184  
SRR17520069.17949185  
SRR17520069.17949186  
SRR17520069.17949187  
SRR17520069.17949188  
SRR17520069.17949189  
SRR17520069.17949190  
SRR17520069.17949191  
SRR17520069.17949192  
SRR17520069.17949193  
SRR17520069.17949194  
SRR17520069.17949195  
SRR17520069.17949196  
SRR17520069.17949197  
SRR17520069.17949198  
SRR17520069.17949199  
SRR17520069.17949201  
SRR17520069.17949202

SRR17520069.17949203  
SRR17520069.17949204  
SRR17520069.17949205  
SRR17520069.17949206  
SRR17520069.17949207  
SRR17520069.17949209  
SRR17520069.17949210  
SRR17520069.17949211  
SRR17520069.17949212  
SRR17520069.17949213  
SRR17520069.17949214  
SRR17520069.17949215  
SRR17520069.17949216  
SRR17520069.17949217  
SRR17520069.17949218  
SRR17520069.17949219  
SRR17520069.17949220  
SRR17520069.17949221  
SRR17520069.17949222  
SRR17520069.17949223  
SRR17520069.17949224  
SRR17520069.17949225  
SRR17520069.17949226  
SRR17520069.17949227  
SRR17520069.17949228  
SRR17520069.17949229  
SRR17520069.17949230  
SRR17520069.17949231  
SRR17520069.17949232  
SRR17520069.17949233  
SRR17520069.17949234  
SRR17520069.17949235  
SRR17520069.17949236  
SRR17520069.17949237  
SRR17520069.17949238  
SRR17520069.17949239  
SRR17520069.17949240  
SRR17520069.17949241  
SRR17520069.17949242  
SRR17520069.17949243  
SRR17520069.17952331  
SRR17520069.17965548  
SRR17520069.17965549  
SRR17520069.17965550  
SRR17520069.17965551  
SRR17520069.17965552  
SRR17520069.17965553

SRR17520069. 17965555  
SRR17520069. 17965557  
SRR17520069. 17965558  
SRR17520069. 17965559  
SRR17520069. 17965560  
SRR17520069. 17965561  
SRR17520069. 17965562  
SRR17520069. 17965563  
SRR17520069. 17965564  
SRR17520069. 17965565  
SRR17520069. 17965566  
SRR17520069. 17965567  
SRR17520069. 17965568  
SRR17520069. 17965569  
SRR17520069. 17965570  
SRR17520069. 17965571  
SRR17520069. 17965572  
SRR17520069. 17965573  
SRR17520069. 17965574  
SRR17520069. 17965575  
SRR17520069. 17965576  
SRR17520069. 17965577  
SRR17520069. 17965578  
SRR17520069. 17965579  
SRR17520069. 17965580  
SRR17520069. 17965581  
SRR17520069. 17965582  
SRR17520069. 17965583  
SRR17520069. 17965584  
SRR17520069. 17965585  
SRR17520069. 17965586  
SRR17520069. 17965587  
SRR17520069. 17965588  
SRR17520069. 17965589  
SRR17520069. 17965590  
SRR17520069. 17965591  
SRR17520069. 17965592  
SRR17520069. 17965593  
SRR17520069. 17965594  
SRR17520069. 17965595  
SRR17520069. 17965596  
SRR17520069. 17965597  
SRR17520069. 17965598  
SRR17520069. 17965599  
SRR17520069. 17965600  
SRR17520069. 17965601  
SRR17520069. 17965602

SRR17520069. 17965603  
SRR17520069. 17965604  
SRR17520069. 17965605  
SRR17520069. 17965606  
SRR17520069. 17965607  
SRR17520069. 17965608  
SRR17520069. 17966081  
SRR17520069. 17966082  
SRR17520069. 17966083  
SRR17520069. 17966084  
SRR17520069. 17966085  
SRR17520069. 17966086  
SRR17520069. 17966087  
SRR17520069. 17966088  
SRR17520069. 17966089  
SRR17520069. 17966090  
SRR17520069. 17966091  
SRR17520069. 17966092  
SRR17520069. 17966093  
SRR17520069. 17966094  
SRR17520069. 17966095  
SRR17520069. 17966096  
SRR17520069. 17966097  
SRR17520069. 17966098  
SRR17520069. 17966099  
SRR17520069. 17966100  
SRR17520069. 17966101  
SRR17520069. 17966102  
SRR17520069. 17966103  
SRR17520069. 17966105  
SRR17520069. 17966106  
SRR17520069. 17966107  
SRR17520069. 17966108  
SRR17520069. 17966109  
SRR17520069. 17966110  
SRR17520069. 17966111  
SRR17520069. 17966112  
SRR17520069. 17966113  
SRR17520069. 17966114  
SRR17520069. 17966115  
SRR17520069. 17966116  
SRR17520069. 17966117  
SRR17520069. 17966118  
SRR17520069. 17966119  
SRR17520069. 17966120  
SRR17520069. 17966121  
SRR17520069. 17966122

SRR17520069. 17966123  
SRR17520069. 17966124  
SRR17520069. 17966125  
SRR17520069. 17966126  
SRR17520069. 17966127  
SRR17520069. 17966128  
SRR17520069. 17966129  
SRR17520069. 17966130  
SRR17520069. 17966131  
SRR17520069. 17966133  
SRR17520069. 17966134  
SRR17520069. 17966135  
SRR17520069. 17966136  
SRR17520069. 17966137  
SRR17520069. 17972148  
SRR17520069. 17972149  
SRR17520069. 17972150  
SRR17520069. 17972151  
SRR17520069. 17972152  
SRR17520069. 17972153  
SRR17520069. 17972154  
SRR17520069. 17972155  
SRR17520069. 17972156  
SRR17520069. 17972157  
SRR17520069. 17972158  
SRR17520069. 17972159  
SRR17520069. 17972160  
SRR17520069. 17972161  
SRR17520069. 17972162  
SRR17520069. 17972163  
SRR17520069. 17972164  
SRR17520069. 17972165  
SRR17520069. 17972166  
SRR17520069. 17972167  
SRR17520069. 17972168  
SRR17520069. 17972169  
SRR17520069. 17989811  
SRR17520069. 18001506  
SRR17520069. 18001508  
SRR17520069. 18001509  
SRR17520069. 18001510  
SRR17520069. 18001511  
SRR17520069. 18001512  
SRR17520069. 18001514  
SRR17520069. 18001517  
SRR17520069. 18001518  
SRR17520069. 18001520

SRR17520069.18001522  
SRR17520069.18001523  
SRR17520069.18001524  
SRR17520069.18001525  
SRR17520069.18001526  
SRR17520069.18001527  
SRR17520069.18001532  
SRR17520069.18003141  
SRR17520069.18003142  
SRR17520069.18004833  
SRR17520069.18013330  
SRR17520069.18013331  
SRR17520069.18013332  
SRR17520069.18013333  
SRR17520069.18013335  
SRR17520069.18013336  
SRR17520069.18013337  
SRR17520069.18013338  
SRR17520069.18013339  
SRR17520069.18013340  
SRR17520069.18013341  
SRR17520069.18013342  
SRR17520069.18013343  
SRR17520069.18013344  
SRR17520069.18013345  
SRR17520069.18013346  
SRR17520069.18013347  
SRR17520069.18013348  
SRR17520069.18013352  
SRR17520069.18013353  
SRR17520069.18034636  
SRR17520069.18034658  
SRR17520069.18045697  
SRR17520069.18045698  
SRR17520069.18045699  
SRR17520069.18045700  
SRR17520069.18045701  
SRR17520069.18045702  
SRR17520069.18045703  
SRR17520069.18045704  
SRR17520069.18045705  
SRR17520069.18045706  
SRR17520069.18045707  
SRR17520069.18045708  
SRR17520069.18045709  
SRR17520069.18045710  
SRR17520069.18045711



SRR17520069. 18045712  
SRR17520069. 18045713  
SRR17520069. 18045714  
SRR17520069. 18045715  
SRR17520069. 18045717  
SRR17520069. 18045718  
SRR17520069. 18045719  
SRR17520069. 18045720  
SRR17520069. 18045721  
SRR17520069. 18045722  
SRR17520069. 18045723  
SRR17520069. 18045724  
SRR17520069. 18045725  
SRR17520069. 18045726  
SRR17520069. 18045727  
SRR17520069. 18045728  
SRR17520069. 18045729  
SRR17520069. 18045730  
SRR17520069. 18045731  
SRR17520069. 18045732  
SRR17520069. 18045733  
SRR17520069. 18045734  
SRR17520069. 18045735  
SRR17520069. 18045736  
SRR17520069. 18045737  
SRR17520069. 18045738  
SRR17520069. 18045739  
SRR17520069. 18045740  
SRR17520069. 18045741  
SRR17520069. 18045742  
SRR17520069. 18045743  
SRR17520069. 18045744  
SRR17520069. 18045745  
SRR17520069. 18045746  
SRR17520069. 18045747  
SRR17520069. 18045748  
SRR17520069. 18045749  
SRR17520069. 18045750  
SRR17520069. 18045751  
SRR17520069. 18045752  
SRR17520069. 18045753  
SRR17520069. 18045754  
SRR17520069. 18045755  
SRR17520069. 18045756  
SRR17520069. 18045757  
SRR17520069. 18045758  
SRR17520069. 18045759

SRR17520069.18045760  
SRR17520069.18045761  
SRR17520069.18045762  
SRR17520069.18045763  
SRR17520069.18045764  
SRR17520069.18045765  
SRR17520069.18045766  
SRR17520069.18045767  
SRR17520069.18045768  
SRR17520069.18045769  
SRR17520069.18045771  
SRR17520069.18045772  
SRR17520069.18045773  
SRR17520069.18045774  
SRR17520069.18045775  
SRR17520069.18045776  
SRR17520069.18045777  
SRR17520069.18045778  
SRR17520069.18045779  
SRR17520069.18045780  
SRR17520069.18045781  
SRR17520069.18045782  
SRR17520069.18045783  
SRR17520069.18045784  
SRR17520069.18045785  
SRR17520069.18045786  
SRR17520069.18045787  
SRR17520069.18045788  
SRR17520069.18045789  
SRR17520069.18045790  
SRR17520069.18045791  
SRR17520069.18045792  
SRR17520069.18045793  
SRR17520069.18045794  
SRR17520069.18045795  
SRR17520069.18045796  
SRR17520069.18045797  
SRR17520069.18045798  
SRR17520069.18045799  
SRR17520069.18045800  
SRR17520069.18045801  
SRR17520069.18045802  
SRR17520069.18045803  
SRR17520069.18045804  
SRR17520069.18045805  
SRR17520069.18045806  
SRR17520069.18045807

SRR17520069.18045808  
SRR17520069.18045809  
SRR17520069.18045810  
SRR17520069.18045811  
SRR17520069.18057513  
SRR17520069.18057514  
SRR17520069.18057515  
SRR17520069.18083065  
SRR17520069.18083082  
SRR17520069.18087123  
SRR17520069.18087124  
SRR17520069.18087125  
SRR17520069.18087126  
SRR17520069.18087127  
SRR17520069.18087128  
SRR17520069.18087129  
SRR17520069.18087130  
SRR17520069.18087131  
SRR17520069.18087132  
SRR17520069.18087133  
SRR17520069.18087134  
SRR17520069.18087135  
SRR17520069.18087136  
SRR17520069.18087137  
SRR17520069.18087138  
SRR17520069.18087139  
SRR17520069.18087140  
SRR17520069.18087141  
SRR17520069.18087142  
SRR17520069.18087143  
SRR17520069.18087144  
SRR17520069.18087145  
SRR17520069.18087146  
SRR17520069.18087147  
SRR17520069.18087148  
SRR17520069.18087149  
SRR17520069.18087150  
SRR17520069.18087151  
SRR17520069.18087152  
SRR17520069.18087153  
SRR17520069.18087154  
SRR17520069.18087155  
SRR17520069.18087156  
SRR17520069.18087157  
SRR17520069.18087158  
SRR17520069.18087159  
SRR17520069.18087160

SRR17520069. 18087161  
SRR17520069. 18087162  
SRR17520069. 18087163  
SRR17520069. 18087164  
SRR17520069. 18087165  
SRR17520069. 18087166  
SRR17520069. 18087167  
SRR17520069. 18087168  
SRR17520069. 18087169  
SRR17520069. 18087170  
SRR17520069. 18087171  
SRR17520069. 18087172  
SRR17520069. 18087173  
SRR17520069. 18087174  
SRR17520069. 18087175  
SRR17520069. 18087176  
SRR17520069. 18087177  
SRR17520069. 18087178  
SRR17520069. 18087179  
SRR17520069. 18087181  
SRR17520069. 18087182  
SRR17520069. 18087183  
SRR17520069. 18087185  
SRR17520069. 18087186  
SRR17520069. 18087187  
SRR17520069. 18087188  
SRR17520069. 18087189  
SRR17520069. 18087190  
SRR17520069. 18087191  
SRR17520069. 18087192  
SRR17520069. 18087193  
SRR17520069. 18087194  
SRR17520069. 18087195  
SRR17520069. 18087196  
SRR17520069. 18087197  
SRR17520069. 18087198  
SRR17520069. 18087199  
SRR17520069. 18087200  
SRR17520069. 18087201  
SRR17520069. 18087202  
SRR17520069. 18087203  
SRR17520069. 18087204  
SRR17520069. 18087205  
SRR17520069. 18087206  
SRR17520069. 18087208  
SRR17520069. 18087209  
SRR17520069. 18087210

SRR17520069. 18087211  
SRR17520069. 18087212  
SRR17520069. 18087213  
SRR17520069. 18087214  
SRR17520069. 18087215  
SRR17520069. 18087216  
SRR17520069. 18087217  
SRR17520069. 18087218  
SRR17520069. 18087219  
SRR17520069. 18087220  
SRR17520069. 18087221  
SRR17520069. 18087222  
SRR17520069. 18087223  
SRR17520069. 18087224  
SRR17520069. 18087225  
SRR17520069. 18087226  
SRR17520069. 18087227  
SRR17520069. 18087228  
SRR17520069. 18087229  
SRR17520069. 18087230  
SRR17520069. 18087231  
SRR17520069. 18087232  
SRR17520069. 18087233  
SRR17520069. 18087234  
SRR17520069. 18087235  
SRR17520069. 18087236  
SRR17520069. 18087237  
SRR17520069. 18087238  
SRR17520069. 18087239  
SRR17520069. 18087240  
SRR17520069. 18087241  
SRR17520069. 18087242  
SRR17520069. 18087243  
SRR17520069. 18087244  
SRR17520069. 18087245  
SRR17520069. 18087246  
SRR17520069. 18087247  
SRR17520069. 18087248  
SRR17520069. 18087249  
SRR17520069. 18087250  
SRR17520069. 18087251  
SRR17520069. 18087252  
SRR17520069. 18087253  
SRR17520069. 18087254  
SRR17520069. 18087255  
SRR17520069. 18087257  
SRR17520069. 18087258

SRR17520069. 18087259  
SRR17520069. 18087260  
SRR17520069. 18087261  
SRR17520069. 18087262  
SRR17520069. 18087263  
SRR17520069. 18087264  
SRR17520069. 18087265  
SRR17520069. 18087266  
SRR17520069. 18087267  
SRR17520069. 18087268  
SRR17520069. 18087269  
SRR17520069. 18087270  
SRR17520069. 18087271  
SRR17520069. 18087272  
SRR17520069. 18087273  
SRR17520069. 18087274  
SRR17520069. 18087275  
SRR17520069. 18087276  
SRR17520069. 18087277  
SRR17520069. 18087278  
SRR17520069. 18087279  
SRR17520069. 18087280  
SRR17520069. 18087281  
SRR17520069. 18087282  
SRR17520069. 18087283  
SRR17520069. 18087284  
SRR17520069. 18087285  
SRR17520069. 18087286  
SRR17520069. 18087287  
SRR17520069. 18087288  
SRR17520069. 18087289  
SRR17520069. 18087290  
SRR17520069. 18087292  
SRR17520069. 18087293  
SRR17520069. 18087294  
SRR17520069. 18087295  
SRR17520069. 18087296  
SRR17520069. 18087297  
SRR17520069. 18087298  
SRR17520069. 18087299  
SRR17520069. 18087300  
SRR17520069. 18087301  
SRR17520069. 18087302  
SRR17520069. 18087303  
SRR17520069. 18087304  
SRR17520069. 18087305  
SRR17520069. 18087306

SRR17520069. 18087307  
SRR17520069. 18087308  
SRR17520069. 18087309  
SRR17520069. 18087310  
SRR17520069. 18087311  
SRR17520069. 18087312  
SRR17520069. 18087313  
SRR17520069. 18087314  
SRR17520069. 18087315  
SRR17520069. 18087316  
SRR17520069. 18087317  
SRR17520069. 18087318  
SRR17520069. 18087319  
SRR17520069. 18087320  
SRR17520069. 18087321  
SRR17520069. 18087322  
SRR17520069. 18087323  
SRR17520069. 18087324  
SRR17520069. 18087325  
SRR17520069. 18088061  
SRR17520069. 18088062  
SRR17520069. 18088063  
SRR17520069. 18088064  
SRR17520069. 18088065  
SRR17520069. 18088066  
SRR17520069. 18088067  
SRR17520069. 18088068  
SRR17520069. 18088069  
SRR17520069. 18088070  
SRR17520069. 18088071  
SRR17520069. 18088072  
SRR17520069. 18088073  
SRR17520069. 18088074  
SRR17520069. 18088075  
SRR17520069. 18088076  
SRR17520069. 18088077  
SRR17520069. 18088078  
SRR17520069. 18088079  
SRR17520069. 18088080  
SRR17520069. 18088081  
SRR17520069. 18088082  
SRR17520069. 18088083  
SRR17520069. 18088084  
SRR17520069. 18088085  
SRR17520069. 18088086  
SRR17520069. 18088087  
SRR17520069. 18088088

SRR17520069.18088089  
SRR17520069.18088090  
SRR17520069.18088091  
SRR17520069.18088092  
SRR17520069.18088093  
SRR17520069.18088094  
SRR17520069.18088095  
SRR17520069.18088096  
SRR17520069.18088097  
SRR17520069.18088098  
SRR17520069.18088099  
SRR17520069.18088100  
SRR17520069.18088101  
SRR17520069.18088102  
SRR17520069.18088104  
SRR17520069.18088105  
SRR17520069.18088107  
SRR17520069.18088108  
SRR17520069.18088109  
SRR17520069.18088110  
SRR17520069.18088111  
SRR17520069.18088112  
SRR17520069.18088113  
SRR17520069.18088114  
SRR17520069.18088115  
SRR17520069.18088116  
SRR17520069.18088117  
SRR17520069.18088118  
SRR17520069.18088119  
SRR17520069.18088120  
SRR17520069.18088121  
SRR17520069.18088122  
SRR17520069.18088123  
SRR17520069.18088124  
SRR17520069.18088125  
SRR17520069.18088126  
SRR17520069.18088127  
SRR17520069.18088128  
SRR17520069.18088129  
SRR17520069.18088130  
SRR17520069.18088131  
SRR17520069.18088132  
SRR17520069.18088133  
SRR17520069.18088134  
SRR17520069.18088135  
SRR17520069.18088136  
SRR17520069.18088137



SRR17520069. 18088138  
SRR17520069. 18088139  
SRR17520069. 18088140  
SRR17520069. 18088145  
SRR17520069. 18088147  
SRR17520069. 18088149  
SRR17520069. 18088152  
SRR17520069. 18088156  
SRR17520069. 18088158  
SRR17520069. 18088159  
SRR17520069. 18088161  
SRR17520069. 18088163  
SRR17520069. 18088165  
SRR17520069. 18088166  
SRR17520069. 18088167  
SRR17520069. 18088168  
SRR17520069. 18088169  
SRR17520069. 18088170  
SRR17520069. 18088179  
SRR17520069. 18088180  
SRR17520069. 18102681  
SRR17520069. 18102682  
SRR17520069. 18102683  
SRR17520069. 18102684  
SRR17520069. 18102685  
SRR17520069. 18102686  
SRR17520069. 18102687  
SRR17520069. 18102688  
SRR17520069. 18102689  
SRR17520069. 18102690  
SRR17520069. 18102691  
SRR17520069. 18102692  
SRR17520069. 18102697  
SRR17520069. 18102700  
SRR17520069. 18102702  
SRR17520069. 18102703  
SRR17520069. 18102704  
SRR17520069. 18102705  
SRR17520069. 18102706  
SRR17520069. 18102709  
SRR17520069. 18102711  
SRR17520069. 18116520  
SRR17520069. 18116521  
SRR17520069. 18116522  
SRR17520069. 18116523  
SRR17520069. 18116524  
SRR17520069. 18116525

SRR17520069.18116526  
SRR17520069.18116527  
SRR17520069.18116528  
SRR17520069.18116529  
SRR17520069.18116530  
SRR17520069.18116531  
SRR17520069.18116532  
SRR17520069.18116533  
SRR17520069.18116534  
SRR17520069.18116535  
SRR17520069.18116536  
SRR17520069.18116537  
SRR17520069.18116538  
SRR17520069.18116539  
SRR17520069.18116540  
SRR17520069.18116541  
SRR17520069.18116542  
SRR17520069.18116543  
SRR17520069.18116544  
SRR17520069.18116545  
SRR17520069.18116546  
SRR17520069.18116547  
SRR17520069.18116548  
SRR17520069.18116549  
SRR17520069.18116550  
SRR17520069.18116551  
SRR17520069.18116552  
SRR17520069.18116553  
SRR17520069.18116554  
SRR17520069.18116555  
SRR17520069.18116556  
SRR17520069.18116557  
SRR17520069.18116558  
SRR17520069.18116559  
SRR17520069.18116560  
SRR17520069.18116561  
SRR17520069.18116562  
SRR17520069.18116563  
SRR17520069.18116564  
SRR17520069.18116565  
SRR17520069.18116566  
SRR17520069.18116567  
SRR17520069.18116568  
SRR17520069.18116569  
SRR17520069.18116570  
SRR17520069.18116571  
SRR17520069.18116572

SRR17520069. 18116573  
SRR17520069. 18116574  
SRR17520069. 18116575  
SRR17520069. 18116576  
SRR17520069. 18120214  
SRR17520069. 18122986  
SRR17520069. 18122989  
SRR17520069. 18122990  
SRR17520069. 18122991  
SRR17520069. 18122992  
SRR17520069. 18122993  
SRR17520069. 18122994  
SRR17520069. 18152772  
SRR17520069. 18156285  
SRR17520069. 18156286  
SRR17520069. 18156287  
SRR17520069. 18156288  
SRR17520069. 18156289  
SRR17520069. 18156290  
SRR17520069. 18156291  
SRR17520069. 18156292  
SRR17520069. 18156293  
SRR17520069. 18156294  
SRR17520069. 18156295  
SRR17520069. 18156296  
SRR17520069. 18156297  
SRR17520069. 18156298  
SRR17520069. 18156301  
SRR17520069. 18156303  
SRR17520069. 18156304  
SRR17520069. 18156305  
SRR17520069. 18156306  
SRR17520069. 18156307  
SRR17520069. 18156308  
SRR17520069. 18156309  
SRR17520069. 18156310  
SRR17520069. 18156311  
SRR17520069. 18156312  
SRR17520069. 18156313  
SRR17520069. 18156314  
SRR17520069. 18156315  
SRR17520069. 18156316  
SRR17520069. 18156317  
SRR17520069. 18156318  
SRR17520069. 18156319  
SRR17520069. 18156320  
SRR17520069. 18156321

SRR17520069. 18156322  
SRR17520069. 18156323  
SRR17520069. 18156324  
SRR17520069. 18156326  
SRR17520069. 18156327  
SRR17520069. 18156328  
SRR17520069. 18156330  
SRR17520069. 18156332  
SRR17520069. 18156333  
SRR17520069. 18156334  
SRR17520069. 18156335  
SRR17520069. 18156336  
SRR17520069. 18156337  
SRR17520069. 18156338  
SRR17520069. 18156339  
SRR17520069. 18156340  
SRR17520069. 18156341  
SRR17520069. 18156342  
SRR17520069. 18156343  
SRR17520069. 18156344  
SRR17520069. 18156345  
SRR17520069. 18156346  
SRR17520069. 18156347  
SRR17520069. 18156348  
SRR17520069. 18156349  
SRR17520069. 18156350  
SRR17520069. 18156351  
SRR17520069. 18156352  
SRR17520069. 18156353  
SRR17520069. 18156354  
SRR17520069. 18156355  
SRR17520069. 18156356  
SRR17520069. 18156357  
SRR17520069. 18156358  
SRR17520069. 18156359  
SRR17520069. 18156360  
SRR17520069. 18156361  
SRR17520069. 18156362  
SRR17520069. 18156363  
SRR17520069. 18156364  
SRR17520069. 18156365  
SRR17520069. 18156366  
SRR17520069. 18156367  
SRR17520069. 18156368  
SRR17520069. 18156369  
SRR17520069. 18156370  
SRR17520069. 18156371

SRR17520069. 18156372  
SRR17520069. 18156373  
SRR17520069. 18156374  
SRR17520069. 18156375  
SRR17520069. 18156376  
SRR17520069. 18156377  
SRR17520069. 18156378  
SRR17520069. 18156379  
SRR17520069. 18156380  
SRR17520069. 18156381  
SRR17520069. 18156382  
SRR17520069. 18156383  
SRR17520069. 18156384  
SRR17520069. 18156385  
SRR17520069. 18156386  
SRR17520069. 18156387  
SRR17520069. 18156388  
SRR17520069. 18156389  
SRR17520069. 18156390  
SRR17520069. 18156391  
SRR17520069. 18156392  
SRR17520069. 18156393  
SRR17520069. 18156394  
SRR17520069. 18156395  
SRR17520069. 18156396  
SRR17520069. 18156397  
SRR17520069. 18156398  
SRR17520069. 18156399  
SRR17520069. 18156400  
SRR17520069. 18156401  
SRR17520069. 18156402  
SRR17520069. 18156403  
SRR17520069. 18156404  
SRR17520069. 18156405  
SRR17520069. 18156406  
SRR17520069. 18156407  
SRR17520069. 18156408  
SRR17520069. 18166313  
SRR17520069. 18168956  
SRR17520069. 18168957  
SRR17520069. 18168958  
SRR17520069. 18168959  
SRR17520069. 18168960  
SRR17520069. 18168961  
SRR17520069. 18168962  
SRR17520069. 18168963  
SRR17520069. 18168964

SRR17520069. 18168965  
SRR17520069. 18168966  
SRR17520069. 18168967  
SRR17520069. 18168968  
SRR17520069. 18168969  
SRR17520069. 18168970  
SRR17520069. 18168971  
SRR17520069. 18168972  
SRR17520069. 18168973  
SRR17520069. 18168974  
SRR17520069. 18168975  
SRR17520069. 18168976  
SRR17520069. 18168977  
SRR17520069. 18168978  
SRR17520069. 18168979  
SRR17520069. 18168980  
SRR17520069. 18168981  
SRR17520069. 18168982  
SRR17520069. 18168983  
SRR17520069. 18168984  
SRR17520069. 18168985  
SRR17520069. 18168986  
SRR17520069. 18168987  
SRR17520069. 18168988  
SRR17520069. 18168989  
SRR17520069. 18168990  
SRR17520069. 18168991  
SRR17520069. 18168992  
SRR17520069. 18168993  
SRR17520069. 18168994  
SRR17520069. 18168995  
SRR17520069. 18168996  
SRR17520069. 18168997  
SRR17520069. 18168998  
SRR17520069. 18168999  
SRR17520069. 18169000  
SRR17520069. 18169001  
SRR17520069. 18169002  
SRR17520069. 18169003  
SRR17520069. 18169004  
SRR17520069. 18169005  
SRR17520069. 18169006  
SRR17520069. 18169007  
SRR17520069. 18169008  
SRR17520069. 18169009  
SRR17520069. 18169011  
SRR17520069. 18169012

SRR17520069. 18169013  
SRR17520069. 18169014  
SRR17520069. 18169015  
SRR17520069. 18169016  
SRR17520069. 18169017  
SRR17520069. 18169018  
SRR17520069. 18169019  
SRR17520069. 18169020  
SRR17520069. 18169021  
SRR17520069. 18169022  
SRR17520069. 18169023  
SRR17520069. 18169024  
SRR17520069. 18169025  
SRR17520069. 18169026  
SRR17520069. 18169027  
SRR17520069. 18169028  
SRR17520069. 18169029  
SRR17520069. 18169030  
SRR17520069. 18169031  
SRR17520069. 18169032  
SRR17520069. 18169033  
SRR17520069. 18169034  
SRR17520069. 18169035  
SRR17520069. 18169036  
SRR17520069. 18169037  
SRR17520069. 18169038  
SRR17520069. 18169039  
SRR17520069. 18169040  
SRR17520069. 18169041  
SRR17520069. 18169042  
SRR17520069. 18169043  
SRR17520069. 18169044  
SRR17520069. 18169045  
SRR17520069. 18169046  
SRR17520069. 18169047  
SRR17520069. 18169048  
SRR17520069. 18169049  
SRR17520069. 18169050  
SRR17520069. 18169051  
SRR17520069. 18169052  
SRR17520069. 18169053  
SRR17520069. 18169054  
SRR17520069. 18169055  
SRR17520069. 18169056  
SRR17520069. 18169057  
SRR17520069. 18169058  
SRR17520069. 18169059

SRR17520069. 18169060  
SRR17520069. 18169061  
SRR17520069. 18169062  
SRR17520069. 18169063  
SRR17520069. 18169064  
SRR17520069. 18169065  
SRR17520069. 18169066  
SRR17520069. 18169067  
SRR17520069. 18169068  
SRR17520069. 18169069  
SRR17520069. 18169070  
SRR17520069. 18169071  
SRR17520069. 18169072  
SRR17520069. 18169073  
SRR17520069. 18169074  
SRR17520069. 18169075  
SRR17520069. 18169076  
SRR17520069. 18169077  
SRR17520069. 18169078  
SRR17520069. 18169079  
SRR17520069. 18169080  
SRR17520069. 18169081  
SRR17520069. 18169090  
SRR17520069. 18169092  
SRR17520069. 18169093  
SRR17520069. 18169096  
SRR17520069. 18169105  
SRR17520069. 18169107  
SRR17520069. 18169108  
SRR17520069. 18170044  
SRR17520069. 18170045  
SRR17520069. 18170046  
SRR17520069. 18170047  
SRR17520069. 18183396  
SRR17520069. 18183397  
SRR17520069. 18183398  
SRR17520069. 18183399  
SRR17520069. 18183400  
SRR17520069. 18183401  
SRR17520069. 18183402  
SRR17520069. 18183403  
SRR17520069. 18183404  
SRR17520069. 18183405  
SRR17520069. 18183406  
SRR17520069. 18183407  
SRR17520069. 18183408  
SRR17520069. 18183409



SRR17520069. 18183410  
SRR17520069. 18183411  
SRR17520069. 18183412  
SRR17520069. 18183413  
SRR17520069. 18183414  
SRR17520069. 18183415  
SRR17520069. 18183416  
SRR17520069. 18183417  
SRR17520069. 18183418  
SRR17520069. 18183419  
SRR17520069. 18183420  
SRR17520069. 18183421  
SRR17520069. 18183422  
SRR17520069. 18183423  
SRR17520069. 18183424  
SRR17520069. 18183425  
SRR17520069. 18183426  
SRR17520069. 18183427  
SRR17520069. 18183428  
SRR17520069. 18183429  
SRR17520069. 18183430  
SRR17520069. 18183431  
SRR17520069. 18183432  
SRR17520069. 18183433  
SRR17520069. 18183434  
SRR17520069. 18183435  
SRR17520069. 18183436  
SRR17520069. 18183437  
SRR17520069. 18183438  
SRR17520069. 18183439  
SRR17520069. 18183440  
SRR17520069. 18183441  
SRR17520069. 18183442  
SRR17520069. 18183443  
SRR17520069. 18183444  
SRR17520069. 18183445  
SRR17520069. 18183446  
SRR17520069. 18183447  
SRR17520069. 18183448  
SRR17520069. 18183449  
SRR17520069. 18183450  
SRR17520069. 18183451  
SRR17520069. 18183452  
SRR17520069. 18183453  
SRR17520069. 18183454  
SRR17520069. 18183455  
SRR17520069. 18183456

SRR17520069. 18183457  
SRR17520069. 18183458  
SRR17520069. 18183459  
SRR17520069. 18183460  
SRR17520069. 18183461  
SRR17520069. 18183462  
SRR17520069. 18183463  
SRR17520069. 18183464  
SRR17520069. 18183465  
SRR17520069. 18183466  
SRR17520069. 18183467  
SRR17520069. 18183468  
SRR17520069. 18183469  
SRR17520069. 18183470  
SRR17520069. 18183472  
SRR17520069. 18183473  
SRR17520069. 18183474  
SRR17520069. 18183475  
SRR17520069. 18183476  
SRR17520069. 18183477  
SRR17520069. 18183478  
SRR17520069. 18183479  
SRR17520069. 18183480  
SRR17520069. 18183481  
SRR17520069. 18183482  
SRR17520069. 18183483  
SRR17520069. 18183484  
SRR17520069. 18183485  
SRR17520069. 18183486  
SRR17520069. 18183487  
SRR17520069. 18183488  
SRR17520069. 18183489  
SRR17520069. 18183490  
SRR17520069. 18183491  
SRR17520069. 18183492  
SRR17520069. 18183493  
SRR17520069. 18183496  
SRR17520069. 18183497  
SRR17520069. 18183498  
SRR17520069. 18183499  
SRR17520069. 18183500  
SRR17520069. 18183501  
SRR17520069. 18183502  
SRR17520069. 18183503  
SRR17520069. 18183504  
SRR17520069. 18183505  
SRR17520069. 18183506

SRR17520069. 18183507  
SRR17520069. 18183508  
SRR17520069. 18183509  
SRR17520069. 18183510  
SRR17520069. 18183511  
SRR17520069. 18183512  
SRR17520069. 18183513  
SRR17520069. 18183514  
SRR17520069. 18183515  
SRR17520069. 18183516  
SRR17520069. 18183517  
SRR17520069. 18199250  
SRR17520069. 18199309  
SRR17520069. 18211323  
SRR17520069. 18211324  
SRR17520069. 18211326  
SRR17520069. 18211327  
SRR17520069. 18211328  
SRR17520069. 18211329  
SRR17520069. 18211330  
SRR17520069. 18211331  
SRR17520069. 18211332  
SRR17520069. 18211333  
SRR17520069. 18211335  
SRR17520069. 18214476  
SRR17520069. 18214477  
SRR17520069. 18214478  
SRR17520069. 18214479  
SRR17520069. 18214480  
SRR17520069. 18214481  
SRR17520069. 18214482  
SRR17520069. 18214484  
SRR17520069. 18214485  
SRR17520069. 18214486  
SRR17520069. 18214487  
SRR17520069. 18214488  
SRR17520069. 18214489  
SRR17520069. 18214490  
SRR17520069. 18214491  
SRR17520069. 18214492  
SRR17520069. 18214493  
SRR17520069. 18214494  
SRR17520069. 18214495  
SRR17520069. 18214496  
SRR17520069. 18214497  
SRR17520069. 18214498  
SRR17520069. 18214499

SRR17520069. 18214500  
SRR17520069. 18214501  
SRR17520069. 18214502  
SRR17520069. 18214503  
SRR17520069. 18214504  
SRR17520069. 18214505  
SRR17520069. 18214506  
SRR17520069. 18214507  
SRR17520069. 18214508  
SRR17520069. 18214509  
SRR17520069. 18214510  
SRR17520069. 18214511  
SRR17520069. 18214512  
SRR17520069. 18214513  
SRR17520069. 18214514  
SRR17520069. 18214515  
SRR17520069. 18219362  
SRR17520069. 18219363  
SRR17520069. 18219364  
SRR17520069. 18219365  
SRR17520069. 18219366  
SRR17520069. 18219367  
SRR17520069. 18219368  
SRR17520069. 18219369  
SRR17520069. 18219370  
SRR17520069. 18219372  
SRR17520069. 18219373  
SRR17520069. 18219374  
SRR17520069. 18219375  
SRR17520069. 18219376  
SRR17520069. 18219377  
SRR17520069. 18219378  
SRR17520069. 18219379  
SRR17520069. 18219380  
SRR17520069. 18219382  
SRR17520069. 18219383  
SRR17520069. 18219384  
SRR17520069. 18219385  
SRR17520069. 18219386  
SRR17520069. 18219387  
SRR17520069. 18219388  
SRR17520069. 18219389  
SRR17520069. 18219390  
SRR17520069. 18219391  
SRR17520069. 18219392  
SRR17520069. 18219393  
SRR17520069. 18219394

SRR17520069. 18219395  
SRR17520069. 18219397  
SRR17520069. 18219398  
SRR17520069. 18219399  
SRR17520069. 18232391  
SRR17520069. 18232452  
SRR17520069. 18236710  
SRR17520069. 18236711  
SRR17520069. 18236712  
SRR17520069. 18236713  
SRR17520069. 18236714  
SRR17520069. 18236715  
SRR17520069. 18236716  
SRR17520069. 18236717  
SRR17520069. 18236718  
SRR17520069. 18236719  
SRR17520069. 18236720  
SRR17520069. 18236721  
SRR17520069. 18236722  
SRR17520069. 18236723  
SRR17520069. 18236724  
SRR17520069. 18236725  
SRR17520069. 18236726  
SRR17520069. 18236727  
SRR17520069. 18236728  
SRR17520069. 18236729  
SRR17520069. 18236730  
SRR17520069. 18236731  
SRR17520069. 18236732  
SRR17520069. 18236733  
SRR17520069. 18236734  
SRR17520069. 18236735  
SRR17520069. 18236736  
SRR17520069. 18236737  
SRR17520069. 18236738  
SRR17520069. 18236739  
SRR17520069. 18236740  
SRR17520069. 18236741  
SRR17520069. 18236742  
SRR17520069. 18236743  
SRR17520069. 18236744  
SRR17520069. 18236745  
SRR17520069. 18236746  
SRR17520069. 18236747  
SRR17520069. 18236748  
SRR17520069. 18236749  
SRR17520069. 18236750

SRR17520069. 18236751  
SRR17520069. 18236752  
SRR17520069. 18236753  
SRR17520069. 18236754  
SRR17520069. 18236755  
SRR17520069. 18236756  
SRR17520069. 18236757  
SRR17520069. 18236758  
SRR17520069. 18236759  
SRR17520069. 18236760  
SRR17520069. 18236761  
SRR17520069. 18236762  
SRR17520069. 18236763  
SRR17520069. 18236764  
SRR17520069. 18236765  
SRR17520069. 18236766  
SRR17520069. 18236767  
SRR17520069. 18236768  
SRR17520069. 18236769  
SRR17520069. 18236770  
SRR17520069. 18236774  
SRR17520069. 18236775  
SRR17520069. 18236776  
SRR17520069. 18236809  
SRR17520069. 18250866  
SRR17520069. 18250882  
SRR17520069. 18250895  
SRR17520069. 18250898  
SRR17520069. 18250906  
SRR17520069. 18258371  
SRR17520069. 18258373  
SRR17520069. 18258374  
SRR17520069. 18258375  
SRR17520069. 18258376  
SRR17520069. 18258377  
SRR17520069. 18258378  
SRR17520069. 18258379  
SRR17520069. 18258380  
SRR17520069. 18258381  
SRR17520069. 18258382  
SRR17520069. 18258383  
SRR17520069. 18258384  
SRR17520069. 18258385  
SRR17520069. 18258386  
SRR17520069. 18258387  
SRR17520069. 18258388  
SRR17520069. 18258389

SRR17520069. 18258390  
SRR17520069. 18258391  
SRR17520069. 18258392  
SRR17520069. 18258393  
SRR17520069. 18258394  
SRR17520069. 18258396  
SRR17520069. 18258397  
SRR17520069. 18258398  
SRR17520069. 18258399  
SRR17520069. 18258400  
SRR17520069. 18258401  
SRR17520069. 18258402  
SRR17520069. 18258403  
SRR17520069. 18258404  
SRR17520069. 18258405  
SRR17520069. 18258406  
SRR17520069. 18258407  
SRR17520069. 18258408  
SRR17520069. 18258409  
SRR17520069. 18258410  
SRR17520069. 18258411  
SRR17520069. 18258412  
SRR17520069. 18277579  
SRR17520069. 18277580  
SRR17520069. 18277581  
SRR17520069. 18281254  
SRR17520069. 18283449  
SRR17520069. 18283450  
SRR17520069. 18283451  
SRR17520069. 18283452  
SRR17520069. 18283453  
SRR17520069. 18283454  
SRR17520069. 18283455  
SRR17520069. 18283456  
SRR17520069. 18283457  
SRR17520069. 18283458  
SRR17520069. 18283459  
SRR17520069. 18283460  
SRR17520069. 18283461  
SRR17520069. 18283462  
SRR17520069. 18283463  
SRR17520069. 18283464  
SRR17520069. 18283465  
SRR17520069. 18283466  
SRR17520069. 18283468  
SRR17520069. 18283469  
SRR17520069. 18283470

SRR17520069. 18283471  
SRR17520069. 18283472  
SRR17520069. 18283473  
SRR17520069. 18283474  
SRR17520069. 18283475  
SRR17520069. 18283477  
SRR17520069. 18283479  
SRR17520069. 18283480  
SRR17520069. 18283481  
SRR17520069. 18283482  
SRR17520069. 18283483  
SRR17520069. 18283486  
SRR17520069. 18283487  
SRR17520069. 18283488  
SRR17520069. 18283489  
SRR17520069. 18283490  
SRR17520069. 18283491  
SRR17520069. 18283492  
SRR17520069. 18283493  
SRR17520069. 18283496  
SRR17520069. 18283497  
SRR17520069. 18283498  
SRR17520069. 18283499  
SRR17520069. 18283500  
SRR17520069. 18283501  
SRR17520069. 18283502  
SRR17520069. 18283503  
SRR17520069. 18284164  
SRR17520069. 18293806  
SRR17520069. 18293807  
SRR17520069. 18293808  
SRR17520069. 18293809  
SRR17520069. 18293810  
SRR17520069. 18293811  
SRR17520069. 18293812  
SRR17520069. 18293813  
SRR17520069. 18293814  
SRR17520069. 18293815  
SRR17520069. 18293816  
SRR17520069. 18293817  
SRR17520069. 18293818  
SRR17520069. 18293819  
SRR17520069. 18293820  
SRR17520069. 18293822  
SRR17520069. 18293823  
SRR17520069. 18293824  
SRR17520069. 18293825



SRR17520069. 18293826  
SRR17520069. 18293827  
SRR17520069. 18293828  
SRR17520069. 18293829  
SRR17520069. 18293830  
SRR17520069. 18293831  
SRR17520069. 18293832  
SRR17520069. 18293833  
SRR17520069. 18293834  
SRR17520069. 18293835  
SRR17520069. 18293836  
SRR17520069. 18293837  
SRR17520069. 18293838  
SRR17520069. 18293839  
SRR17520069. 18293840  
SRR17520069. 18293841  
SRR17520069. 18293842  
SRR17520069. 18293844  
SRR17520069. 18293845  
SRR17520069. 18293846  
SRR17520069. 18293847  
SRR17520069. 18293848  
SRR17520069. 18293849  
SRR17520069. 18293850  
SRR17520069. 18293851  
SRR17520069. 18293852  
SRR17520069. 18293853  
SRR17520069. 18293854  
SRR17520069. 18293855  
SRR17520069. 18293856  
SRR17520069. 18293857  
SRR17520069. 18293858  
SRR17520069. 18293859  
SRR17520069. 18293860  
SRR17520069. 18293861  
SRR17520069. 18293862  
SRR17520069. 18293863  
SRR17520069. 18293864  
SRR17520069. 18293865  
SRR17520069. 18293866  
SRR17520069. 18293867  
SRR17520069. 18293868  
SRR17520069. 18293869  
SRR17520069. 18293870  
SRR17520069. 18293871  
SRR17520069. 18293872  
SRR17520069. 18293873

SRR17520069. 18293874  
SRR17520069. 18293875  
SRR17520069. 18293876  
SRR17520069. 18293877  
SRR17520069. 18293878  
SRR17520069. 18293879  
SRR17520069. 18293880  
SRR17520069. 18293881  
SRR17520069. 18293882  
SRR17520069. 18293883  
SRR17520069. 18293884  
SRR17520069. 18293885  
SRR17520069. 18293886  
SRR17520069. 18293887  
SRR17520069. 18293888  
SRR17520069. 18293889  
SRR17520069. 18293890  
SRR17520069. 18293891  
SRR17520069. 18293892  
SRR17520069. 18293893  
SRR17520069. 18293894  
SRR17520069. 18293895  
SRR17520069. 18293896  
SRR17520069. 18293897  
SRR17520069. 18293898  
SRR17520069. 18293899  
SRR17520069. 18293900  
SRR17520069. 18293901  
SRR17520069. 18293903  
SRR17520069. 18293904  
SRR17520069. 18293905  
SRR17520069. 18293906  
SRR17520069. 18293907  
SRR17520069. 18293908  
SRR17520069. 18293909  
SRR17520069. 18293910  
SRR17520069. 18293911  
SRR17520069. 18293912  
SRR17520069. 18293913  
SRR17520069. 18293914  
SRR17520069. 18293915  
SRR17520069. 18293916  
SRR17520069. 18293917  
SRR17520069. 18293919  
SRR17520069. 18293920  
SRR17520069. 18293921  
SRR17520069. 18293922

SRR17520069. 18293923  
SRR17520069. 18293924  
SRR17520069. 18293925  
SRR17520069. 18293926  
SRR17520069. 18293927  
SRR17520069. 18293928  
SRR17520069. 18293929  
SRR17520069. 18293930  
SRR17520069. 18293931  
SRR17520069. 18293932  
SRR17520069. 18293933  
SRR17520069. 18293934  
SRR17520069. 18293935  
SRR17520069. 18293936  
SRR17520069. 18293937  
SRR17520069. 18293938  
SRR17520069. 18293939  
SRR17520069. 18293940  
SRR17520069. 18293941  
SRR17520069. 18293942  
SRR17520069. 18293943  
SRR17520069. 18293944  
SRR17520069. 18293945  
SRR17520069. 18293946  
SRR17520069. 18293947  
SRR17520069. 18293948  
SRR17520069. 18293949  
SRR17520069. 18293950  
SRR17520069. 18293951  
SRR17520069. 18293952  
SRR17520069. 18293953  
SRR17520069. 18293954  
SRR17520069. 18293955  
SRR17520069. 18293956  
SRR17520069. 18293957  
SRR17520069. 18293958  
SRR17520069. 18293959  
SRR17520069. 18293960  
SRR17520069. 18293961  
SRR17520069. 18293962  
SRR17520069. 18293963  
SRR17520069. 18293964  
SRR17520069. 18293965  
SRR17520069. 18293966  
SRR17520069. 18293967  
SRR17520069. 18293968  
SRR17520069. 18293969

SRR17520069. 18293970  
SRR17520069. 18293971  
SRR17520069. 18293972  
SRR17520069. 18293973  
SRR17520069. 18293975  
SRR17520069. 18293976  
SRR17520069. 18293977  
SRR17520069. 18293978  
SRR17520069. 18293979  
SRR17520069. 18293980  
SRR17520069. 18293981  
SRR17520069. 18293982  
SRR17520069. 18293983  
SRR17520069. 18293984  
SRR17520069. 18293985  
SRR17520069. 18293986  
SRR17520069. 18293988  
SRR17520069. 18293989  
SRR17520069. 18293990  
SRR17520069. 18293991  
SRR17520069. 18293992  
SRR17520069. 18293993  
SRR17520069. 18293994  
SRR17520069. 18293995  
SRR17520069. 18293996  
SRR17520069. 18293997  
SRR17520069. 18293998  
SRR17520069. 18293999  
SRR17520069. 18294000  
SRR17520069. 18294001  
SRR17520069. 18294002  
SRR17520069. 18294003  
SRR17520069. 18294004  
SRR17520069. 18294005  
SRR17520069. 18294006  
SRR17520069. 18294008  
SRR17520069. 18294009  
SRR17520069. 18294010  
SRR17520069. 18294011  
SRR17520069. 18294012  
SRR17520069. 18294013  
SRR17520069. 18294014  
SRR17520069. 18294015  
SRR17520069. 18294016  
SRR17520069. 18294017  
SRR17520069. 18294448  
SRR17520069. 18294452

SRR17520069. 18294453  
SRR17520069. 18301481  
SRR17520069. 18301494  
SRR17520069. 18301496  
SRR17520069. 18301525  
SRR17520069. 18301561  
SRR17520069. 18317964  
SRR17520069. 18317965  
SRR17520069. 18317966  
SRR17520069. 18317967  
SRR17520069. 18317968  
SRR17520069. 18317969  
SRR17520069. 18321478  
SRR17520069. 18321479  
SRR17520069. 18321480  
SRR17520069. 18321481  
SRR17520069. 18321482  
SRR17520069. 18321483  
SRR17520069. 18321484  
SRR17520069. 18321485  
SRR17520069. 18321486  
SRR17520069. 18321487  
SRR17520069. 18321488  
SRR17520069. 18321489  
SRR17520069. 18321490  
SRR17520069. 18321491  
SRR17520069. 18321492  
SRR17520069. 18321494  
SRR17520069. 18321495  
SRR17520069. 18321496  
SRR17520069. 18321497  
SRR17520069. 18321498  
SRR17520069. 18321499  
SRR17520069. 18321500  
SRR17520069. 18321501  
SRR17520069. 18321502  
SRR17520069. 18321503  
SRR17520069. 18321504  
SRR17520069. 18321505  
SRR17520069. 18321506  
SRR17520069. 18321507  
SRR17520069. 18321508  
SRR17520069. 18321509  
SRR17520069. 18321510  
SRR17520069. 18321511  
SRR17520069. 18321512  
SRR17520069. 18321513

SRR17520069. 18321514  
SRR17520069. 18321515  
SRR17520069. 18321516  
SRR17520069. 18321518  
SRR17520069. 18321519  
SRR17520069. 18321520  
SRR17520069. 18321521  
SRR17520069. 18321522  
SRR17520069. 18321523  
SRR17520069. 18321525  
SRR17520069. 18321526  
SRR17520069. 18321527  
SRR17520069. 18321528  
SRR17520069. 18321529  
SRR17520069. 18321530  
SRR17520069. 18321531  
SRR17520069. 18321533  
SRR17520069. 18321534  
SRR17520069. 18321535  
SRR17520069. 18321536  
SRR17520069. 18321537  
SRR17520069. 18321541  
SRR17520069. 18321542  
SRR17520069. 18321544  
SRR17520069. 18321545  
SRR17520069. 18321546  
SRR17520069. 18321547  
SRR17520069. 18321548  
SRR17520069. 18321549  
SRR17520069. 18321550  
SRR17520069. 18321551  
SRR17520069. 18321552  
SRR17520069. 18321553  
SRR17520069. 18324001  
SRR17520069. 18324624  
SRR17520069. 18324625  
SRR17520069. 18324626  
SRR17520069. 18324627  
SRR17520069. 18324628  
SRR17520069. 18324629  
SRR17520069. 18324630  
SRR17520069. 18324631  
SRR17520069. 18324632  
SRR17520069. 18324633  
SRR17520069. 18324634  
SRR17520069. 18324635  
SRR17520069. 18324636

SRR17520069. 18324637  
SRR17520069. 18324638  
SRR17520069. 18324639  
SRR17520069. 18324640  
SRR17520069. 18328612  
SRR17520069. 18328613  
SRR17520069. 18328614  
SRR17520069. 18328615  
SRR17520069. 18328616  
SRR17520069. 18328617  
SRR17520069. 18328618  
SRR17520069. 18328619  
SRR17520069. 18328620  
SRR17520069. 18328621  
SRR17520069. 18328622  
SRR17520069. 18328623  
SRR17520069. 18328624  
SRR17520069. 18328625  
SRR17520069. 18328626  
SRR17520069. 18328627  
SRR17520069. 18328628  
SRR17520069. 18328629  
SRR17520069. 18328630  
SRR17520069. 18328631  
SRR17520069. 18328633  
SRR17520069. 18328634  
SRR17520069. 18328636  
SRR17520069. 18334030  
SRR17520069. 18341630  
SRR17520069. 18341631  
SRR17520069. 18341632  
SRR17520069. 18341633  
SRR17520069. 18341634  
SRR17520069. 18341635  
SRR17520069. 18341636  
SRR17520069. 18341637  
SRR17520069. 18341638  
SRR17520069. 18341639  
SRR17520069. 18341640  
SRR17520069. 18341641  
SRR17520069. 18341642  
SRR17520069. 18341643  
SRR17520069. 18341644  
SRR17520069. 18341645  
SRR17520069. 18341646  
SRR17520069. 18341647  
SRR17520069. 18341648

SRR17520069. 18341649  
SRR17520069. 18341650  
SRR17520069. 18341651  
SRR17520069. 18341652  
SRR17520069. 18341654  
SRR17520069. 18341655  
SRR17520069. 18341656  
SRR17520069. 18341657  
SRR17520069. 18341658  
SRR17520069. 18341659  
SRR17520069. 18341660  
SRR17520069. 18341661  
SRR17520069. 18341662  
SRR17520069. 18341663  
SRR17520069. 18341664  
SRR17520069. 18341665  
SRR17520069. 18341666  
SRR17520069. 18341667  
SRR17520069. 18341668  
SRR17520069. 18341669  
SRR17520069. 18341670  
SRR17520069. 18341671  
SRR17520069. 18341673  
SRR17520069. 18341674  
SRR17520069. 18341675  
SRR17520069. 18341676  
SRR17520069. 18341677  
SRR17520069. 18341678  
SRR17520069. 18341679  
SRR17520069. 18341680  
SRR17520069. 18341681  
SRR17520069. 18341682  
SRR17520069. 18341683  
SRR17520069. 18341684  
SRR17520069. 18341685  
SRR17520069. 18341686  
SRR17520069. 18341687  
SRR17520069. 18341688  
SRR17520069. 18341689  
SRR17520069. 18341690  
SRR17520069. 18341691  
SRR17520069. 18341692  
SRR17520069. 18341693  
SRR17520069. 18341694  
SRR17520069. 18341695  
SRR17520069. 18341696  
SRR17520069. 18341697



SRR17520069. 18341698  
SRR17520069. 18341699  
SRR17520069. 18341700  
SRR17520069. 18341701  
SRR17520069. 18341702  
SRR17520069. 18341703  
SRR17520069. 18341704  
SRR17520069. 18341705  
SRR17520069. 18341706  
SRR17520069. 18341707  
SRR17520069. 18341708  
SRR17520069. 18341709  
SRR17520069. 18341710  
SRR17520069. 18341711  
SRR17520069. 18341712  
SRR17520069. 18341713  
SRR17520069. 18341714  
SRR17520069. 18341715  
SRR17520069. 18341716  
SRR17520069. 18341717  
SRR17520069. 18341718  
SRR17520069. 18341719  
SRR17520069. 18341720  
SRR17520069. 18341721  
SRR17520069. 18341722  
SRR17520069. 18341723  
SRR17520069. 18341724  
SRR17520069. 18341725  
SRR17520069. 18341726  
SRR17520069. 18341727  
SRR17520069. 18341728  
SRR17520069. 18341729  
SRR17520069. 18341730  
SRR17520069. 18341731  
SRR17520069. 18341732  
SRR17520069. 18341733  
SRR17520069. 18341734  
SRR17520069. 18341735  
SRR17520069. 18341736  
SRR17520069. 18341737  
SRR17520069. 18341738  
SRR17520069. 18341739  
SRR17520069. 18341740  
SRR17520069. 18341741  
SRR17520069. 18341742  
SRR17520069. 18341743  
SRR17520069. 18341744

SRR17520069. 18341745  
SRR17520069. 18341746  
SRR17520069. 18341747  
SRR17520069. 18341748  
SRR17520069. 18341749  
SRR17520069. 18341750  
SRR17520069. 18341751  
SRR17520069. 18341752  
SRR17520069. 18341753  
SRR17520069. 18341754  
SRR17520069. 18341755  
SRR17520069. 18341756  
SRR17520069. 18341757  
SRR17520069. 18341758  
SRR17520069. 18341760  
SRR17520069. 18341761  
SRR17520069. 18341762  
SRR17520069. 18341763  
SRR17520069. 18341764  
SRR17520069. 18341765  
SRR17520069. 18341766  
SRR17520069. 18341767  
SRR17520069. 18341768  
SRR17520069. 18341769  
SRR17520069. 18341770  
SRR17520069. 18341771  
SRR17520069. 18341772  
SRR17520069. 18341773  
SRR17520069. 18341774  
SRR17520069. 18341775  
SRR17520069. 18341776  
SRR17520069. 18341777  
SRR17520069. 18341778  
SRR17520069. 18341779  
SRR17520069. 18341780  
SRR17520069. 18341781  
SRR17520069. 18341782  
SRR17520069. 18341783  
SRR17520069. 18341784  
SRR17520069. 18341785  
SRR17520069. 18341786  
SRR17520069. 18341787  
SRR17520069. 18341788  
SRR17520069. 18341789  
SRR17520069. 18341790  
SRR17520069. 18341791  
SRR17520069. 18341792

SRR17520069. 18341793  
SRR17520069. 18341794  
SRR17520069. 18341795  
SRR17520069. 18341796  
SRR17520069. 18341797  
SRR17520069. 18341798  
SRR17520069. 18341799  
SRR17520069. 18341800  
SRR17520069. 18341801  
SRR17520069. 18341802  
SRR17520069. 18341803  
SRR17520069. 18341804  
SRR17520069. 18341805  
SRR17520069. 18341806  
SRR17520069. 18341807  
SRR17520069. 18341808  
SRR17520069. 18341809  
SRR17520069. 18341810  
SRR17520069. 18341811  
SRR17520069. 18341812  
SRR17520069. 18341813  
SRR17520069. 18341814  
SRR17520069. 18341815  
SRR17520069. 18341816  
SRR17520069. 18341817  
SRR17520069. 18341818  
SRR17520069. 18341819  
SRR17520069. 18341820  
SRR17520069. 18341821  
SRR17520069. 18341822  
SRR17520069. 18341823  
SRR17520069. 18341824  
SRR17520069. 18341825  
SRR17520069. 18341826  
SRR17520069. 18341827  
SRR17520069. 18341828  
SRR17520069. 18341829  
SRR17520069. 18341830  
SRR17520069. 18341831  
SRR17520069. 18341832  
SRR17520069. 18341833  
SRR17520069. 18341834  
SRR17520069. 18341835  
SRR17520069. 18344744  
SRR17520069. 18348752  
SRR17520069. 18362560  
SRR17520069. 18381621

SRR17520069. 18381622  
SRR17520069. 18381623  
SRR17520069. 18381624  
SRR17520069. 18381625  
SRR17520069. 18381626  
SRR17520069. 18381627  
SRR17520069. 18381628  
SRR17520069. 18381629  
SRR17520069. 18381630  
SRR17520069. 18381631  
SRR17520069. 18381632  
SRR17520069. 18381633  
SRR17520069. 18381634  
SRR17520069. 18381635  
SRR17520069. 18381636  
SRR17520069. 18381637  
SRR17520069. 18381638  
SRR17520069. 18381639  
SRR17520069. 18381640  
SRR17520069. 18381641  
SRR17520069. 18381642  
SRR17520069. 18381643  
SRR17520069. 18381644  
SRR17520069. 18381645  
SRR17520069. 18381646  
SRR17520069. 18381647  
SRR17520069. 18381648  
SRR17520069. 18381649  
SRR17520069. 18381650  
SRR17520069. 18381651  
SRR17520069. 18381652  
SRR17520069. 18381653  
SRR17520069. 18381655  
SRR17520069. 18381656  
SRR17520069. 18381657  
SRR17520069. 18381658  
SRR17520069. 18381659  
SRR17520069. 18381660  
SRR17520069. 18381661  
SRR17520069. 18381662  
SRR17520069. 18381663  
SRR17520069. 18381664  
SRR17520069. 18381665  
SRR17520069. 18381666  
SRR17520069. 18381667  
SRR17520069. 18381668  
SRR17520069. 18381669

SRR17520069. 18381670  
SRR17520069. 18381671  
SRR17520069. 18381672  
SRR17520069. 18381673  
SRR17520069. 18381674  
SRR17520069. 18381675  
SRR17520069. 18381676  
SRR17520069. 18381677  
SRR17520069. 18381678  
SRR17520069. 18381679  
SRR17520069. 18381680  
SRR17520069. 18381681  
SRR17520069. 18381682  
SRR17520069. 18381683  
SRR17520069. 18381684  
SRR17520069. 18381685  
SRR17520069. 18381686  
SRR17520069. 18381687  
SRR17520069. 18381688  
SRR17520069. 18381689  
SRR17520069. 18381690  
SRR17520069. 18381691  
SRR17520069. 18381692  
SRR17520069. 18381693  
SRR17520069. 18381694  
SRR17520069. 18381695  
SRR17520069. 18381696  
SRR17520069. 18381697  
SRR17520069. 18381698  
SRR17520069. 18381699  
SRR17520069. 18381700  
SRR17520069. 18381701  
SRR17520069. 18381702  
SRR17520069. 18381703  
SRR17520069. 18381704  
SRR17520069. 18381705  
SRR17520069. 18381706  
SRR17520069. 18381707  
SRR17520069. 18381708  
SRR17520069. 18381709  
SRR17520069. 18381710  
SRR17520069. 18381711  
SRR17520069. 18381712  
SRR17520069. 18381713  
SRR17520069. 18381714  
SRR17520069. 18381715  
SRR17520069. 18381716

SRR17520069. 18381717  
SRR17520069. 18381718  
SRR17520069. 18381719  
SRR17520069. 18381720  
SRR17520069. 18381721  
SRR17520069. 18381722  
SRR17520069. 18381723  
SRR17520069. 18381724  
SRR17520069. 18381725  
SRR17520069. 18381726  
SRR17520069. 18381727  
SRR17520069. 18381728  
SRR17520069. 18381729  
SRR17520069. 18381730  
SRR17520069. 18381731  
SRR17520069. 18381732  
SRR17520069. 18381733  
SRR17520069. 18381734  
SRR17520069. 18381735  
SRR17520069. 18381736  
SRR17520069. 18381737  
SRR17520069. 18381738  
SRR17520069. 18381739  
SRR17520069. 18381740  
SRR17520069. 18381741  
SRR17520069. 18381742  
SRR17520069. 18381743  
SRR17520069. 18381744  
SRR17520069. 18381745  
SRR17520069. 18381746  
SRR17520069. 18381747  
SRR17520069. 18381748  
SRR17520069. 18381749  
SRR17520069. 18383521  
SRR17520069. 18383542  
SRR17520069. 18383968  
SRR17520069. 18383969  
SRR17520069. 18383971  
SRR17520069. 18383972  
SRR17520069. 18383973  
SRR17520069. 18391318  
SRR17520069. 18391414  
SRR17520069. 18391431  
SRR17520069. 18399013  
SRR17520069. 18399014  
SRR17520069. 18399015  
SRR17520069. 18399016

SRR17520069. 18399017  
SRR17520069. 18399018  
SRR17520069. 18399019  
SRR17520069. 18399020  
SRR17520069. 18399021  
SRR17520069. 18399022  
SRR17520069. 18399023  
SRR17520069. 18399024  
SRR17520069. 18399025  
SRR17520069. 18399026  
SRR17520069. 18399027  
SRR17520069. 18399028  
SRR17520069. 18399029  
SRR17520069. 18399030  
SRR17520069. 18399031  
SRR17520069. 18399032  
SRR17520069. 18399033  
SRR17520069. 18399034  
SRR17520069. 18399035  
SRR17520069. 18399036  
SRR17520069. 18399037  
SRR17520069. 18399038  
SRR17520069. 18399039  
SRR17520069. 18399040  
SRR17520069. 18399041  
SRR17520069. 18434320  
SRR17520069. 18440768  
SRR17520069. 18440769  
SRR17520069. 18440770  
SRR17520069. 18440771  
SRR17520069. 18440772  
SRR17520069. 18440773  
SRR17520069. 18440774  
SRR17520069. 18440776  
SRR17520069. 18440777  
SRR17520069. 18440780  
SRR17520069. 18440781  
SRR17520069. 18440782  
SRR17520069. 18472662  
SRR17520069. 18472663  
SRR17520069. 18472664  
SRR17520069. 18472665  
SRR17520069. 18472666  
SRR17520069. 18472667  
SRR17520069. 18472668  
SRR17520069. 18472669  
SRR17520069. 18472670

SRR17520069. 18472671  
SRR17520069. 18472672  
SRR17520069. 18472673  
SRR17520069. 18472674  
SRR17520069. 18472675  
SRR17520069. 18472676  
SRR17520069. 18472677  
SRR17520069. 18472678  
SRR17520069. 18472679  
SRR17520069. 18472680  
SRR17520069. 18472681  
SRR17520069. 18472682  
SRR17520069. 18472683  
SRR17520069. 18472684  
SRR17520069. 18472685  
SRR17520069. 18472686  
SRR17520069. 18472687  
SRR17520069. 18472688  
SRR17520069. 18472689  
SRR17520069. 18472690  
SRR17520069. 18472691  
SRR17520069. 18472692  
SRR17520069. 18472693  
SRR17520069. 18472694  
SRR17520069. 18472695  
SRR17520069. 18472696  
SRR17520069. 18472697  
SRR17520069. 18472698  
SRR17520069. 18472699  
SRR17520069. 18472700  
SRR17520069. 18472701  
SRR17520069. 18472702  
SRR17520069. 18472703  
SRR17520069. 18472704  
SRR17520069. 18472705  
SRR17520069. 18472706  
SRR17520069. 18472707  
SRR17520069. 18472708  
SRR17520069. 18472709  
SRR17520069. 18472710  
SRR17520069. 18472711  
SRR17520069. 18472712  
SRR17520069. 18472713  
SRR17520069. 18472714  
SRR17520069. 18472715  
SRR17520069. 18472716  
SRR17520069. 18472717



SRR17520069. 18472718  
SRR17520069. 18472719  
SRR17520069. 18472720  
SRR17520069. 18472721  
SRR17520069. 18472722  
SRR17520069. 18472723  
SRR17520069. 18472725  
SRR17520069. 18472726  
SRR17520069. 18472727  
SRR17520069. 18472728  
SRR17520069. 18472729  
SRR17520069. 18472730  
SRR17520069. 18472731  
SRR17520069. 18472732  
SRR17520069. 18472733  
SRR17520069. 18472734  
SRR17520069. 18472735  
SRR17520069. 18472736  
SRR17520069. 18472737  
SRR17520069. 18472738  
SRR17520069. 18472739  
SRR17520069. 18472740  
SRR17520069. 18472741  
SRR17520069. 18472742  
SRR17520069. 18472743  
SRR17520069. 18472744  
SRR17520069. 18472745  
SRR17520069. 18472746  
SRR17520069. 18472747  
SRR17520069. 18472748  
SRR17520069. 18472749  
SRR17520069. 18472750  
SRR17520069. 18472751  
SRR17520069. 18472752  
SRR17520069. 18472753  
SRR17520069. 18472754  
SRR17520069. 18472755  
SRR17520069. 18472756  
SRR17520069. 18472757  
SRR17520069. 18472758  
SRR17520069. 18472759  
SRR17520069. 18472760  
SRR17520069. 18472761  
SRR17520069. 18472762  
SRR17520069. 18472763  
SRR17520069. 18472764  
SRR17520069. 18472765

SRR17520069. 18472766  
SRR17520069. 18472767  
SRR17520069. 18472768  
SRR17520069. 18472769  
SRR17520069. 18472770  
SRR17520069. 18472771  
SRR17520069. 18472772  
SRR17520069. 18472773  
SRR17520069. 18472774  
SRR17520069. 18472775  
SRR17520069. 18472776  
SRR17520069. 18472777  
SRR17520069. 18472778  
SRR17520069. 18472779  
SRR17520069. 18472780  
SRR17520069. 18472781  
SRR17520069. 18472782  
SRR17520069. 18472783  
SRR17520069. 18472784  
SRR17520069. 18472785  
SRR17520069. 18472786  
SRR17520069. 18472787  
SRR17520069. 18472788  
SRR17520069. 18472789  
SRR17520069. 18490405  
SRR17520069. 18492626  
SRR17520069. 18533383  
SRR17520069. 18533384  
SRR17520069. 18533385  
SRR17520069. 18533386  
SRR17520069. 18533387  
SRR17520069. 18533388  
SRR17520069. 18533389  
SRR17520069. 18533390  
SRR17520069. 18533391  
SRR17520069. 18533392  
SRR17520069. 18533393  
SRR17520069. 18533394  
SRR17520069. 18533395  
SRR17520069. 18533396  
SRR17520069. 18533397  
SRR17520069. 18533398  
SRR17520069. 18533399  
SRR17520069. 18533400  
SRR17520069. 18533401  
SRR17520069. 18533402  
SRR17520069. 18533403

SRR17520069. 18533404  
SRR17520069. 18533405  
SRR17520069. 18533406  
SRR17520069. 18533407  
SRR17520069. 18533408  
SRR17520069. 18533409  
SRR17520069. 18533410  
SRR17520069. 18533411  
SRR17520069. 18533412  
SRR17520069. 18533413  
SRR17520069. 18533414  
SRR17520069. 18533415  
SRR17520069. 18533416  
SRR17520069. 18533417  
SRR17520069. 18533419  
SRR17520069. 18533420  
SRR17520069. 18533421  
SRR17520069. 18533423  
SRR17520069. 18533424  
SRR17520069. 18533425  
SRR17520069. 18533426  
SRR17520069. 18533427  
SRR17520069. 18533428  
SRR17520069. 18533429  
SRR17520069. 18533431  
SRR17520069. 18533432  
SRR17520069. 18533433  
SRR17520069. 18533434  
SRR17520069. 18533436  
SRR17520069. 18533437  
SRR17520069. 18533438  
SRR17520069. 18533439  
SRR17520069. 18533441  
SRR17520069. 18533442  
SRR17520069. 18533443  
SRR17520069. 18533444  
SRR17520069. 18533445  
SRR17520069. 18533447  
SRR17520069. 18533448  
SRR17520069. 18533449  
SRR17520069. 18533450  
SRR17520069. 18533451  
SRR17520069. 18533453  
SRR17520069. 18533454  
SRR17520069. 18533455  
SRR17520069. 18533456  
SRR17520069. 18533457

SRR17520069. 18533458  
SRR17520069. 18533460  
SRR17520069. 18533461  
SRR17520069. 18533462  
SRR17520069. 18533463  
SRR17520069. 18533464  
SRR17520069. 18533465  
SRR17520069. 18533466  
SRR17520069. 18533467  
SRR17520069. 18533468  
SRR17520069. 18533469  
SRR17520069. 18533470  
SRR17520069. 18533471  
SRR17520069. 18533472  
SRR17520069. 18533473  
SRR17520069. 18533474  
SRR17520069. 18533475  
SRR17520069. 18533476  
SRR17520069. 18533478  
SRR17520069. 18533479  
SRR17520069. 18533480  
SRR17520069. 18533481  
SRR17520069. 18533482  
SRR17520069. 18533483  
SRR17520069. 18533485  
SRR17520069. 18533486  
SRR17520069. 18533488  
SRR17520069. 18533489  
SRR17520069. 18533490  
SRR17520069. 18533491  
SRR17520069. 18533492  
SRR17520069. 18533493  
SRR17520069. 18533494  
SRR17520069. 18533495  
SRR17520069. 18533496  
SRR17520069. 18616710  
SRR17520069. 18620264  
SRR17520069. 18620265  
SRR17520069. 18620266  
SRR17520069. 18620267  
SRR17520069. 18620268  
SRR17520069. 18620269  
SRR17520069. 18620270  
SRR17520069. 18620271  
SRR17520069. 18620272  
SRR17520069. 18620273  
SRR17520069. 18620274

SRR17520069. 18620275  
SRR17520069. 18620276  
SRR17520069. 18620277  
SRR17520069. 18620278  
SRR17520069. 18620279  
SRR17520069. 18620280  
SRR17520069. 18620281  
SRR17520069. 18620282  
SRR17520069. 18620283  
SRR17520069. 18620284  
SRR17520069. 18620285  
SRR17520069. 18620286  
SRR17520069. 18620287  
SRR17520069. 18620288  
SRR17520069. 18620289  
SRR17520069. 18620290  
SRR17520069. 18620291  
SRR17520069. 18620292  
SRR17520069. 18620293  
SRR17520069. 18620294  
SRR17520069. 18620295  
SRR17520069. 18620296  
SRR17520069. 18620297  
SRR17520069. 18620298  
SRR17520069. 18620299  
SRR17520069. 18620300  
SRR17520069. 18620301  
SRR17520069. 18620302  
SRR17520069. 18620303  
SRR17520069. 18620304  
SRR17520069. 18620305  
SRR17520069. 18620306  
SRR17520069. 18620307  
SRR17520069. 18620308  
SRR17520069. 18620309  
SRR17520069. 18620310  
SRR17520069. 18620311  
SRR17520069. 18620312  
SRR17520069. 18620313  
SRR17520069. 18620314  
SRR17520069. 18620315  
SRR17520069. 18620316  
SRR17520069. 18620317  
SRR17520069. 18620318  
SRR17520069. 18620319  
SRR17520069. 18620320  
SRR17520069. 18620321

SRR17520069. 18620322  
SRR17520069. 18620323  
SRR17520069. 18620324  
SRR17520069. 18620325  
SRR17520069. 18620326  
SRR17520069. 18620327  
SRR17520069. 18620328  
SRR17520069. 18620329  
SRR17520069. 18621500  
SRR17520069. 18621501  
SRR17520069. 18621502  
SRR17520069. 18621503  
SRR17520069. 18621504  
SRR17520069. 18621505  
SRR17520069. 18621506  
SRR17520069. 18621507  
SRR17520069. 18621508  
SRR17520069. 18621509  
SRR17520069. 18621510  
SRR17520069. 18621511  
SRR17520069. 18621512  
SRR17520069. 18621513  
SRR17520069. 18621514  
SRR17520069. 18626610  
SRR17520069. 18665126  
SRR17520069. 18665127  
SRR17520069. 18665128  
SRR17520069. 18665129  
SRR17520069. 18665130  
SRR17520069. 18665131  
SRR17520069. 18665132  
SRR17520069. 18665133  
SRR17520069. 18665134  
SRR17520069. 18665135  
SRR17520069. 18665136  
SRR17520069. 18665137  
SRR17520069. 18665138  
SRR17520069. 18665139  
SRR17520069. 18665140  
SRR17520069. 18665141  
SRR17520069. 18665142  
SRR17520069. 18665143  
SRR17520069. 18665144  
SRR17520069. 18665145  
SRR17520069. 18665146  
SRR17520069. 18665147  
SRR17520069. 18665148

SRR17520069. 18665149  
SRR17520069. 18665150  
SRR17520069. 18665151  
SRR17520069. 18665152  
SRR17520069. 18665153  
SRR17520069. 18665154  
SRR17520069. 18665155  
SRR17520069. 18665156  
SRR17520069. 18665157  
SRR17520069. 18665158  
SRR17520069. 18665159  
SRR17520069. 18665160  
SRR17520069. 18665161  
SRR17520069. 18665162  
SRR17520069. 18665163  
SRR17520069. 18665164  
SRR17520069. 18665165  
SRR17520069. 18665166  
SRR17520069. 18665167  
SRR17520069. 18665168  
SRR17520069. 18665169  
SRR17520069. 18665170  
SRR17520069. 18665171  
SRR17520069. 18665172  
SRR17520069. 18665173  
SRR17520069. 18665174  
SRR17520069. 18665175  
SRR17520069. 18665296  
SRR17520069. 18673524  
SRR17520069. 18682855  
SRR17520069. 18682856  
SRR17520069. 18682857  
SRR17520069. 18682858  
SRR17520069. 18682859  
SRR17520069. 18682860  
SRR17520069. 18682861  
SRR17520069. 18682862  
SRR17520069. 18682863  
SRR17520069. 18682864  
SRR17520069. 18689236  
SRR17520069. 18693970  
SRR17520069. 18710380  
SRR17520069. 18716210  
SRR17520069. 18716211  
SRR17520069. 18716212  
SRR17520069. 18716213  
SRR17520069. 18716214

SRR17520069. 18716215  
SRR17520069. 18716216  
SRR17520069. 18716217  
SRR17520069. 18716218  
SRR17520069. 18716219  
SRR17520069. 18716220  
SRR17520069. 18716221  
SRR17520069. 18716222  
SRR17520069. 18716223  
SRR17520069. 18720984  
SRR17520069. 18722617  
SRR17520069. 18722618  
SRR17520069. 18722619  
SRR17520069. 18722620  
SRR17520069. 18722621  
SRR17520069. 18722622  
SRR17520069. 18722623  
SRR17520069. 18722624  
SRR17520069. 18722625  
SRR17520069. 18722626  
SRR17520069. 18722627  
SRR17520069. 18722628  
SRR17520069. 18722629  
SRR17520069. 18722631  
SRR17520069. 18722632  
SRR17520069. 18722633  
SRR17520069. 18722634  
SRR17520069. 18722635  
SRR17520069. 18722636  
SRR17520069. 18722637  
SRR17520069. 18722638  
SRR17520069. 18722639  
SRR17520069. 18722640  
SRR17520069. 18722641  
SRR17520069. 18722642  
SRR17520069. 18722643  
SRR17520069. 18722644  
SRR17520069. 18722645  
SRR17520069. 18722647  
SRR17520069. 18722648  
SRR17520069. 18722649  
SRR17520069. 18722650  
SRR17520069. 18722651  
SRR17520069. 18722652  
SRR17520069. 18722653  
SRR17520069. 18722654  
SRR17520069. 18722655



SRR17520069. 18722656  
SRR17520069. 18722657  
SRR17520069. 18722658  
SRR17520069. 18722659  
SRR17520069. 18722660  
SRR17520069. 18722661  
SRR17520069. 18722662  
SRR17520069. 18722663  
SRR17520069. 18722664  
SRR17520069. 18722665  
SRR17520069. 18722666  
SRR17520069. 18722667  
SRR17520069. 18722668  
SRR17520069. 18722669  
SRR17520069. 18722670  
SRR17520069. 18722671  
SRR17520069. 18722672  
SRR17520069. 18722673  
SRR17520069. 18722674  
SRR17520069. 18722675  
SRR17520069. 18722676  
SRR17520069. 18722677  
SRR17520069. 18722678  
SRR17520069. 18722679  
SRR17520069. 18722680  
SRR17520069. 18722681  
SRR17520069. 18722682  
SRR17520069. 18722683  
SRR17520069. 18722684  
SRR17520069. 18722685  
SRR17520069. 18722686  
SRR17520069. 18722687  
SRR17520069. 18722688  
SRR17520069. 18722689  
SRR17520069. 18722690  
SRR17520069. 18722691  
SRR17520069. 18722692  
SRR17520069. 18722693  
SRR17520069. 18722694  
SRR17520069. 18722695  
SRR17520069. 18722696  
SRR17520069. 18722697  
SRR17520069. 18722698  
SRR17520069. 18722699  
SRR17520069. 18722700  
SRR17520069. 18722701  
SRR17520069. 18722702

SRR17520069. 18722703  
SRR17520069. 18722704  
SRR17520069. 18722705  
SRR17520069. 18722706  
SRR17520069. 18722708  
SRR17520069. 18722709  
SRR17520069. 18722710  
SRR17520069. 18722711  
SRR17520069. 18722712  
SRR17520069. 18722713  
SRR17520069. 18722714  
SRR17520069. 18722715  
SRR17520069. 18722716  
SRR17520069. 18722717  
SRR17520069. 18722718  
SRR17520069. 18722719  
SRR17520069. 18722720  
SRR17520069. 18722721  
SRR17520069. 18722722  
SRR17520069. 18722723  
SRR17520069. 18722724  
SRR17520069. 18722725  
SRR17520069. 18722726  
SRR17520069. 18722727  
SRR17520069. 18722728  
SRR17520069. 18722729  
SRR17520069. 18722730  
SRR17520069. 18722731  
SRR17520069. 18722732  
SRR17520069. 18722733  
SRR17520069. 18725114  
SRR17520069. 18725115  
SRR17520069. 18725116  
SRR17520069. 18725117  
SRR17520069. 18725118  
SRR17520069. 18725119  
SRR17520069. 18725120  
SRR17520069. 18725121  
SRR17520069. 18725122  
SRR17520069. 18725123  
SRR17520069. 18725124  
SRR17520069. 18725125  
SRR17520069. 18725126  
SRR17520069. 18725127  
SRR17520069. 18725128  
SRR17520069. 18725129  
SRR17520069. 18725130

SRR17520069. 18725131  
SRR17520069. 18725132  
SRR17520069. 18725133  
SRR17520069. 18725134  
SRR17520069. 18725135  
SRR17520069. 18725136  
SRR17520069. 18725137  
SRR17520069. 18725138  
SRR17520069. 18725139  
SRR17520069. 18725140  
SRR17520069. 18725141  
SRR17520069. 18725142  
SRR17520069. 18725143  
SRR17520069. 18725144  
SRR17520069. 18725145  
SRR17520069. 18725146  
SRR17520069. 18725147  
SRR17520069. 18725148  
SRR17520069. 18725149  
SRR17520069. 18725150  
SRR17520069. 18725151  
SRR17520069. 18725152  
SRR17520069. 18725153  
SRR17520069. 18725154  
SRR17520069. 18725155  
SRR17520069. 18725156  
SRR17520069. 18725157  
SRR17520069. 18725158  
SRR17520069. 18725159  
SRR17520069. 18725160  
SRR17520069. 18725161  
SRR17520069. 18725162  
SRR17520069. 18725164  
SRR17520069. 18725165  
SRR17520069. 18725166  
SRR17520069. 18725167  
SRR17520069. 18725168  
SRR17520069. 18725169  
SRR17520069. 18725170  
SRR17520069. 18725171  
SRR17520069. 18725172  
SRR17520069. 18725173  
SRR17520069. 18725174  
SRR17520069. 18725175  
SRR17520069. 18725176  
SRR17520069. 18725178  
SRR17520069. 18725179

SRR17520069. 18725180  
SRR17520069. 18725181  
SRR17520069. 18725182  
SRR17520069. 18725183  
SRR17520069. 18725184  
SRR17520069. 18725185  
SRR17520069. 18725186  
SRR17520069. 18725187  
SRR17520069. 18725188  
SRR17520069. 18725190  
SRR17520069. 18725191  
SRR17520069. 18725192  
SRR17520069. 18725193  
SRR17520069. 18725194  
SRR17520069. 18725195  
SRR17520069. 18725196  
SRR17520069. 18725197  
SRR17520069. 18725198  
SRR17520069. 18725199  
SRR17520069. 18725200  
SRR17520069. 18725201  
SRR17520069. 18725202  
SRR17520069. 18725203  
SRR17520069. 18725204  
SRR17520069. 18725206  
SRR17520069. 18725207  
SRR17520069. 18725208  
SRR17520069. 18725209  
SRR17520069. 18725210  
SRR17520069. 18725211  
SRR17520069. 18725212  
SRR17520069. 18725213  
SRR17520069. 18725214  
SRR17520069. 18725218  
SRR17520069. 18725220  
SRR17520069. 18732257  
SRR17520069. 18732258  
SRR17520069. 18732259  
SRR17520069. 18744954  
SRR17520069. 18744955  
SRR17520069. 18744956  
SRR17520069. 18744958  
SRR17520069. 18744959  
SRR17520069. 18744960  
SRR17520069. 18744961  
SRR17520069. 18744962  
SRR17520069. 18744963

SRR17520069. 18744964  
SRR17520069. 18744965  
SRR17520069. 18744966  
SRR17520069. 18744967  
SRR17520069. 18744968  
SRR17520069. 18744969  
SRR17520069. 18744970  
SRR17520069. 18744971  
SRR17520069. 18744972  
SRR17520069. 18744973  
SRR17520069. 18744974  
SRR17520069. 18744975  
SRR17520069. 18744976  
SRR17520069. 18744977  
SRR17520069. 18744978  
SRR17520069. 18744979  
SRR17520069. 18744981  
SRR17520069. 18744982  
SRR17520069. 18744983  
SRR17520069. 18744984  
SRR17520069. 18744985  
SRR17520069. 18744986  
SRR17520069. 18744987  
SRR17520069. 18744988  
SRR17520069. 18744989  
SRR17520069. 18746596  
SRR17520069. 18746597  
SRR17520069. 18746598  
SRR17520069. 18746599  
SRR17520069. 18746600  
SRR17520069. 18746601  
SRR17520069. 18746602  
SRR17520069. 18746603  
SRR17520069. 18746604  
SRR17520069. 18746605  
SRR17520069. 18746606  
SRR17520069. 18746607  
SRR17520069. 18746608  
SRR17520069. 18746609  
SRR17520069. 18746610  
SRR17520069. 18746611  
SRR17520069. 18746612  
SRR17520069. 18746613  
SRR17520069. 18746614  
SRR17520069. 18746615  
SRR17520069. 18746616  
SRR17520069. 18746617

SRR17520069. 18746618  
SRR17520069. 18746619  
SRR17520069. 18746620  
SRR17520069. 18746621  
SRR17520069. 18746622  
SRR17520069. 18746623  
SRR17520069. 18746624  
SRR17520069. 18746625  
SRR17520069. 18746626  
SRR17520069. 18746627  
SRR17520069. 18746628  
SRR17520069. 18746629  
SRR17520069. 18746630  
SRR17520069. 18746631  
SRR17520069. 18746632  
SRR17520069. 18746633  
SRR17520069. 18746634  
SRR17520069. 18746635  
SRR17520069. 18746636  
SRR17520069. 18746637  
SRR17520069. 18746638  
SRR17520069. 18746639  
SRR17520069. 18746640  
SRR17520069. 18746641  
SRR17520069. 18746642  
SRR17520069. 18746643  
SRR17520069. 18746644  
SRR17520069. 18746645  
SRR17520069. 18746646  
SRR17520069. 18746647  
SRR17520069. 18746648  
SRR17520069. 18746649  
SRR17520069. 18746651  
SRR17520069. 18746652  
SRR17520069. 18746653  
SRR17520069. 18746654  
SRR17520069. 18746655  
SRR17520069. 18746656  
SRR17520069. 18746657  
SRR17520069. 18746658  
SRR17520069. 18746659  
SRR17520069. 18746660  
SRR17520069. 18746661  
SRR17520069. 18746662  
SRR17520069. 18746663  
SRR17520069. 18746664  
SRR17520069. 18746665

SRR17520069. 18746666  
SRR17520069. 18746667  
SRR17520069. 18746668  
SRR17520069. 18746669  
SRR17520069. 18746670  
SRR17520069. 18746671  
SRR17520069. 18746672  
SRR17520069. 18746673  
SRR17520069. 18746674  
SRR17520069. 18746675  
SRR17520069. 18746676  
SRR17520069. 18746677  
SRR17520069. 18746678  
SRR17520069. 18746679  
SRR17520069. 18746680  
SRR17520069. 18746681  
SRR17520069. 18746682  
SRR17520069. 18746683  
SRR17520069. 18746684  
SRR17520069. 18746685  
SRR17520069. 18746687  
SRR17520069. 18746688  
SRR17520069. 18746689  
SRR17520069. 18746690  
SRR17520069. 18746691  
SRR17520069. 18746692  
SRR17520069. 18746693  
SRR17520069. 18746694  
SRR17520069. 18746695  
SRR17520069. 18746696  
SRR17520069. 18746697  
SRR17520069. 18746698  
SRR17520069. 18746699  
SRR17520069. 18746700  
SRR17520069. 18746701  
SRR17520069. 18746702  
SRR17520069. 18746703  
SRR17520069. 18746704  
SRR17520069. 18746705  
SRR17520069. 18746707  
SRR17520069. 18746708  
SRR17520069. 18746709  
SRR17520069. 18746710  
SRR17520069. 18746711  
SRR17520069. 18746712  
SRR17520069. 18746713  
SRR17520069. 18746714

SRR17520069. 18746715  
SRR17520069. 18746716  
SRR17520069. 18746717  
SRR17520069. 18746718  
SRR17520069. 18746719  
SRR17520069. 18746720  
SRR17520069. 18746721  
SRR17520069. 18746722  
SRR17520069. 18746723  
SRR17520069. 18746724  
SRR17520069. 18746725  
SRR17520069. 18746726  
SRR17520069. 18746727  
SRR17520069. 18746728  
SRR17520069. 18746729  
SRR17520069. 18746730  
SRR17520069. 18746731  
SRR17520069. 18746732  
SRR17520069. 18746733  
SRR17520069. 18746734  
SRR17520069. 18746735  
SRR17520069. 18746736  
SRR17520069. 18746737  
SRR17520069. 18746738  
SRR17520069. 18746739  
SRR17520069. 18746740  
SRR17520069. 18746741  
SRR17520069. 18746742  
SRR17520069. 18746743  
SRR17520069. 18746744  
SRR17520069. 18746745  
SRR17520069. 18746746  
SRR17520069. 18757558  
SRR17520069. 18757559  
SRR17520069. 18757560  
SRR17520069. 18757561  
SRR17520069. 18757562  
SRR17520069. 18757563  
SRR17520069. 18764100  
SRR17520069. 18764108  
SRR17520069. 18772539  
SRR17520069. 18772540  
SRR17520069. 18772541  
SRR17520069. 18772543  
SRR17520069. 18772544  
SRR17520069. 18772545  
SRR17520069. 18772546



SRR17520069. 18772547  
SRR17520069. 18778520  
SRR17520069. 18778521  
SRR17520069. 18807233  
SRR17520069. 18810718  
SRR17520069. 18810763  
SRR17520069. 18810784  
SRR17520069. 18810812  
SRR17520069. 18826398  
SRR17520069. 18826400  
SRR17520069. 18826401  
SRR17520069. 18826402  
SRR17520069. 18842195  
SRR17520069. 18842196  
SRR17520069. 18842197  
SRR17520069. 18842198  
SRR17520069. 18842199  
SRR17520069. 18842200  
SRR17520069. 18842201  
SRR17520069. 18842202  
SRR17520069. 18842203  
SRR17520069. 18842204  
SRR17520069. 18842205  
SRR17520069. 18842206  
SRR17520069. 18842207  
SRR17520069. 18842208  
SRR17520069. 18842209  
SRR17520069. 18842210  
SRR17520069. 18842211  
SRR17520069. 18842212  
SRR17520069. 18842213  
SRR17520069. 18842214  
SRR17520069. 18842215  
SRR17520069. 18842217  
SRR17520069. 18842218  
SRR17520069. 18842219  
SRR17520069. 18842220  
SRR17520069. 18842222  
SRR17520069. 18842223  
SRR17520069. 18842224  
SRR17520069. 18842225  
SRR17520069. 18842226  
SRR17520069. 18842227  
SRR17520069. 18842228  
SRR17520069. 18842229  
SRR17520069. 18842230  
SRR17520069. 18842231

SRR17520069.18842232  
SRR17520069.18842233  
SRR17520069.18842234  
SRR17520069.18842235  
SRR17520069.18842236  
SRR17520069.18842237  
SRR17520069.18842238  
SRR17520069.18842239  
SRR17520069.18842240  
SRR17520069.18842241  
SRR17520069.18842242  
SRR17520069.18842243  
SRR17520069.18842244  
SRR17520069.18842245  
SRR17520069.18842246  
SRR17520069.18842247  
SRR17520069.18842248  
SRR17520069.18842249  
SRR17520069.18842250  
SRR17520069.18842251  
SRR17520069.18842252  
SRR17520069.18842253  
SRR17520069.18842254  
SRR17520069.18842255  
SRR17520069.18842256  
SRR17520069.18842257  
SRR17520069.18842258  
SRR17520069.18842259  
SRR17520069.18842260  
SRR17520069.18842261  
SRR17520069.18842262  
SRR17520069.18842263  
SRR17520069.18842264  
SRR17520069.18842265  
SRR17520069.18842266  
SRR17520069.18842267  
SRR17520069.18842268  
SRR17520069.18842269  
SRR17520069.18842270  
SRR17520069.18842271  
SRR17520069.18842273  
SRR17520069.18842274  
SRR17520069.18842275  
SRR17520069.18842276  
SRR17520069.18842277  
SRR17520069.18842278  
SRR17520069.18842279

SRR17520069.18842280  
SRR17520069.18842281  
SRR17520069.18842282  
SRR17520069.18842283  
SRR17520069.18842284  
SRR17520069.18842285  
SRR17520069.18842286  
SRR17520069.18842287  
SRR17520069.18842288  
SRR17520069.18842289  
SRR17520069.18842290  
SRR17520069.18842291  
SRR17520069.18842292  
SRR17520069.18842293  
SRR17520069.18842294  
SRR17520069.18842295  
SRR17520069.18842296  
SRR17520069.18842297  
SRR17520069.18842298  
SRR17520069.18842299  
SRR17520069.18842300  
SRR17520069.18842301  
SRR17520069.18842302  
SRR17520069.18842303  
SRR17520069.18842304  
SRR17520069.18842305  
SRR17520069.18842306  
SRR17520069.18842307  
SRR17520069.18842308  
SRR17520069.18842309  
SRR17520069.18842310  
SRR17520069.18842311  
SRR17520069.18842312  
SRR17520069.18842313  
SRR17520069.18842314  
SRR17520069.18842315  
SRR17520069.18842316  
SRR17520069.18842317  
SRR17520069.18842318  
SRR17520069.18842319  
SRR17520069.18842320  
SRR17520069.18842321  
SRR17520069.18842322  
SRR17520069.18842323  
SRR17520069.18842324  
SRR17520069.18842325  
SRR17520069.18842326

SRR17520069.18842327  
SRR17520069.18842328  
SRR17520069.18842329  
SRR17520069.18842330  
SRR17520069.18842331  
SRR17520069.18842332  
SRR17520069.18842333  
SRR17520069.18842334  
SRR17520069.18842335  
SRR17520069.18842336  
SRR17520069.18842337  
SRR17520069.18842338  
SRR17520069.18842339  
SRR17520069.18842340  
SRR17520069.18842341  
SRR17520069.18842342  
SRR17520069.18842343  
SRR17520069.18842344  
SRR17520069.18842345  
SRR17520069.18842346  
SRR17520069.18842347  
SRR17520069.18842348  
SRR17520069.18842349  
SRR17520069.18842350  
SRR17520069.18842351  
SRR17520069.18842352  
SRR17520069.18842353  
SRR17520069.18842354  
SRR17520069.18842355  
SRR17520069.18842356  
SRR17520069.18842357  
SRR17520069.18842358  
SRR17520069.18842359  
SRR17520069.18842360  
SRR17520069.18842361  
SRR17520069.18842362  
SRR17520069.18842363  
SRR17520069.18842364  
SRR17520069.18842365  
SRR17520069.18842366  
SRR17520069.18842367  
SRR17520069.18842368  
SRR17520069.18842369  
SRR17520069.18848459  
SRR17520069.18848827  
SRR17520069.18848828  
SRR17520069.18848829

SRR17520069.18848830  
SRR17520069.18848831  
SRR17520069.18848833  
SRR17520069.18848834  
SRR17520069.18848839  
SRR17520069.18848840  
SRR17520069.18848841  
SRR17520069.18848842  
SRR17520069.18848843  
SRR17520069.18848844  
SRR17520069.18848845  
SRR17520069.18848846  
SRR17520069.18848847  
SRR17520069.18848848  
SRR17520069.18848849  
SRR17520069.18848850  
SRR17520069.18848851  
SRR17520069.18848852  
SRR17520069.18848853  
SRR17520069.18848854  
SRR17520069.18848855  
SRR17520069.18848856  
SRR17520069.18848857  
SRR17520069.18848858  
SRR17520069.18848859  
SRR17520069.18848860  
SRR17520069.18848861  
SRR17520069.18848862  
SRR17520069.18848863  
SRR17520069.18848864  
SRR17520069.18848865  
SRR17520069.18848866  
SRR17520069.18848867  
SRR17520069.18848868  
SRR17520069.18848869  
SRR17520069.18848870  
SRR17520069.18848871  
SRR17520069.18848872  
SRR17520069.18848873  
SRR17520069.18848874  
SRR17520069.18848875  
SRR17520069.18848876  
SRR17520069.18848877  
SRR17520069.18848878  
SRR17520069.18848879  
SRR17520069.18848880  
SRR17520069.18848881

SRR17520069.18848882  
SRR17520069.18848883  
SRR17520069.18848884  
SRR17520069.18848885  
SRR17520069.18848886  
SRR17520069.18848887  
SRR17520069.18848888  
SRR17520069.18848889  
SRR17520069.18848890  
SRR17520069.18868914  
SRR17520069.18868915  
SRR17520069.18868916  
SRR17520069.18868917  
SRR17520069.18868918  
SRR17520069.18868919  
SRR17520069.18868920  
SRR17520069.18868921  
SRR17520069.18868922  
SRR17520069.18868923  
SRR17520069.18868924  
SRR17520069.18868925  
SRR17520069.18868929  
SRR17520069.18868930  
SRR17520069.18868931  
SRR17520069.18868932  
SRR17520069.18868933  
SRR17520069.18868934  
SRR17520069.18868935  
SRR17520069.18868936  
SRR17520069.18868937  
SRR17520069.18868938  
SRR17520069.18868939  
SRR17520069.18868940  
SRR17520069.18868941  
SRR17520069.18868942  
SRR17520069.18868943  
SRR17520069.18868944  
SRR17520069.18868945  
SRR17520069.18868946  
SRR17520069.18868948  
SRR17520069.18868949  
SRR17520069.18868950  
SRR17520069.18868951  
SRR17520069.18868952  
SRR17520069.18868953  
SRR17520069.18868954  
SRR17520069.18868955

SRR17520069.18868956  
SRR17520069.18868957  
SRR17520069.18868958  
SRR17520069.18868959  
SRR17520069.18868960  
SRR17520069.18868961  
SRR17520069.18868962  
SRR17520069.18868963  
SRR17520069.18868964  
SRR17520069.18868965  
SRR17520069.18868966  
SRR17520069.18868967  
SRR17520069.18868968  
SRR17520069.18868969  
SRR17520069.18868970  
SRR17520069.18868971  
SRR17520069.18868972  
SRR17520069.18868973  
SRR17520069.18868974  
SRR17520069.18868975  
SRR17520069.18868976  
SRR17520069.18868977  
SRR17520069.18868978  
SRR17520069.18868979  
SRR17520069.18868980  
SRR17520069.18868981  
SRR17520069.18868982  
SRR17520069.18868983  
SRR17520069.18868984  
SRR17520069.18868985  
SRR17520069.18868986  
SRR17520069.18868987  
SRR17520069.18868988  
SRR17520069.18868989  
SRR17520069.18868990  
SRR17520069.18868992  
SRR17520069.18868993  
SRR17520069.18868994  
SRR17520069.18868995  
SRR17520069.18868996  
SRR17520069.18868997  
SRR17520069.18868998  
SRR17520069.18868999  
SRR17520069.18869000  
SRR17520069.18869001  
SRR17520069.18869002  
SRR17520069.18869003

SRR17520069.18869004  
SRR17520069.18869005  
SRR17520069.18869006  
SRR17520069.18869007  
SRR17520069.18869008  
SRR17520069.18869009  
SRR17520069.18869010  
SRR17520069.18869011  
SRR17520069.18869012  
SRR17520069.18869013  
SRR17520069.18869014  
SRR17520069.18869015  
SRR17520069.18869016  
SRR17520069.18869017  
SRR17520069.18869018  
SRR17520069.18869019  
SRR17520069.18869020  
SRR17520069.18869021  
SRR17520069.18869022  
SRR17520069.18869023  
SRR17520069.18869024  
SRR17520069.18869025  
SRR17520069.18869026  
SRR17520069.18869027  
SRR17520069.18869028  
SRR17520069.18869029  
SRR17520069.18869030  
SRR17520069.18869031  
SRR17520069.18869032  
SRR17520069.18869033  
SRR17520069.18869034  
SRR17520069.18869035  
SRR17520069.18869036  
SRR17520069.18869037  
SRR17520069.18869038  
SRR17520069.18869039  
SRR17520069.18869040  
SRR17520069.18869041  
SRR17520069.18869042  
SRR17520069.18869043  
SRR17520069.18869044  
SRR17520069.18869045  
SRR17520069.18869046  
SRR17520069.18869047  
SRR17520069.18869048  
SRR17520069.18869049  
SRR17520069.18869050



SRR17520069.18869051  
SRR17520069.18869052  
SRR17520069.18869053  
SRR17520069.18869054  
SRR17520069.18869055  
SRR17520069.18869056  
SRR17520069.18894607  
SRR17520069.18894608  
SRR17520069.18894610  
SRR17520069.18894611  
SRR17520069.18894612  
SRR17520069.18894613  
SRR17520069.18894614  
SRR17520069.18894615  
SRR17520069.18894616  
SRR17520069.18894617  
SRR17520069.18894618  
SRR17520069.18894620  
SRR17520069.18894621  
SRR17520069.18894622  
SRR17520069.18894623  
SRR17520069.18894624  
SRR17520069.18894625  
SRR17520069.18894626  
SRR17520069.18894627  
SRR17520069.18894628  
SRR17520069.18894629  
SRR17520069.18894630  
SRR17520069.18894631  
SRR17520069.18894633  
SRR17520069.18894634  
SRR17520069.18894635  
SRR17520069.18894636  
SRR17520069.18894637  
SRR17520069.18894638  
SRR17520069.18894640  
SRR17520069.18894641  
SRR17520069.18894642  
SRR17520069.18894643  
SRR17520069.18894644  
SRR17520069.18894645  
SRR17520069.18894646  
SRR17520069.18894647  
SRR17520069.18894649  
SRR17520069.18894651  
SRR17520069.18894652  
SRR17520069.18894654

SRR17520069.18894655  
SRR17520069.18894656  
SRR17520069.18894657  
SRR17520069.18894659  
SRR17520069.18894660  
SRR17520069.18894661  
SRR17520069.18894662  
SRR17520069.18894663  
SRR17520069.18894664  
SRR17520069.18894667  
SRR17520069.18894668  
SRR17520069.18894669  
SRR17520069.18894670  
SRR17520069.18894671  
SRR17520069.18894672  
SRR17520069.18894673  
SRR17520069.18894674  
SRR17520069.18894675  
SRR17520069.18894677  
SRR17520069.18894678  
SRR17520069.18894679  
SRR17520069.18894680  
SRR17520069.18894681  
SRR17520069.18894682  
SRR17520069.18894683  
SRR17520069.18894684  
SRR17520069.18894685  
SRR17520069.18894686  
SRR17520069.18894687  
SRR17520069.18894688  
SRR17520069.18894689  
SRR17520069.18894690  
SRR17520069.18894691  
SRR17520069.18894692  
SRR17520069.18894693  
SRR17520069.18894694  
SRR17520069.18894695  
SRR17520069.18894696  
SRR17520069.18894697  
SRR17520069.18894698  
SRR17520069.18894699  
SRR17520069.18894700  
SRR17520069.18894702  
SRR17520069.18894703  
SRR17520069.18894704  
SRR17520069.18894705  
SRR17520069.18894706

SRR17520069.18894707  
SRR17520069.18894708  
SRR17520069.18894709  
SRR17520069.18894710  
SRR17520069.18894711  
SRR17520069.18894712  
SRR17520069.18894713  
SRR17520069.18894714  
SRR17520069.18894716  
SRR17520069.18894718  
SRR17520069.18894719  
SRR17520069.18894720  
SRR17520069.18894721  
SRR17520069.18894722  
SRR17520069.18894723  
SRR17520069.18894725  
SRR17520069.18894726  
SRR17520069.18894727  
SRR17520069.18894728  
SRR17520069.18894729  
SRR17520069.18894730  
SRR17520069.18894731  
SRR17520069.18894732  
SRR17520069.18894733  
SRR17520069.18894735  
SRR17520069.18894736  
SRR17520069.18894737  
SRR17520069.18894738  
SRR17520069.18894739  
SRR17520069.18894740  
SRR17520069.18894741  
SRR17520069.18894742  
SRR17520069.18894744  
SRR17520069.18894745  
SRR17520069.18894746  
SRR17520069.18894747  
SRR17520069.18894749  
SRR17520069.18894750  
SRR17520069.18894751  
SRR17520069.18894752  
SRR17520069.18894754  
SRR17520069.18894755  
SRR17520069.18894756  
SRR17520069.18894757  
SRR17520069.18894758  
SRR17520069.18894759  
SRR17520069.18894760

SRR17520069. 18894761  
SRR17520069. 18894762  
SRR17520069. 18894763  
SRR17520069. 18913971  
SRR17520069. 18913972  
SRR17520069. 18915117  
SRR17520069. 18915126  
SRR17520069. 18919357  
SRR17520069. 18920024  
SRR17520069. 18920025  
SRR17520069. 18920026  
SRR17520069. 18920027  
SRR17520069. 18920028  
SRR17520069. 18920029  
SRR17520069. 18920030  
SRR17520069. 18920031  
SRR17520069. 18923951  
SRR17520069. 18923952  
SRR17520069. 18923953  
SRR17520069. 18923954  
SRR17520069. 18923955  
SRR17520069. 18923956  
SRR17520069. 18923958  
SRR17520069. 18923959  
SRR17520069. 18923960  
SRR17520069. 18923961  
SRR17520069. 18923962  
SRR17520069. 18923963  
SRR17520069. 18923964  
SRR17520069. 18923965  
SRR17520069. 18923966  
SRR17520069. 18923967  
SRR17520069. 18923968  
SRR17520069. 18923969  
SRR17520069. 18923970  
SRR17520069. 18923971  
SRR17520069. 18923972  
SRR17520069. 18923973  
SRR17520069. 18923974  
SRR17520069. 18923975  
SRR17520069. 18923976  
SRR17520069. 18923977  
SRR17520069. 18923978  
SRR17520069. 18923979  
SRR17520069. 18923980  
SRR17520069. 18923981  
SRR17520069. 18923982

SRR17520069. 18923983  
SRR17520069. 18923984  
SRR17520069. 18923985  
SRR17520069. 18923986  
SRR17520069. 18923987  
SRR17520069. 18923988  
SRR17520069. 18923989  
SRR17520069. 18923990  
SRR17520069. 18923991  
SRR17520069. 18923992  
SRR17520069. 18923993  
SRR17520069. 18923995  
SRR17520069. 18923997  
SRR17520069. 18923998  
SRR17520069. 18923999  
SRR17520069. 18924000  
SRR17520069. 18924001  
SRR17520069. 18924002  
SRR17520069. 18924003  
SRR17520069. 18924004  
SRR17520069. 18924005  
SRR17520069. 18924006  
SRR17520069. 18924007  
SRR17520069. 18924008  
SRR17520069. 18924009  
SRR17520069. 18924509  
SRR17520069. 18924514  
SRR17520069. 18924515  
SRR17520069. 18924516  
SRR17520069. 18924528  
SRR17520069. 18924531  
SRR17520069. 18924535  
SRR17520069. 18924536  
SRR17520069. 18925778  
SRR17520069. 18925779  
SRR17520069. 18925780  
SRR17520069. 18925781  
SRR17520069. 18925782  
SRR17520069. 18948051  
SRR17520069. 18962316  
SRR17520069. 18962354  
SRR17520069. 18969058  
SRR17520069. 18969059  
SRR17520069. 18969060  
SRR17520069. 18976740  
SRR17520069. 18976741  
SRR17520069. 18976742

SRR17520069.18976743  
SRR17520069.18976744  
SRR17520069.18976745  
SRR17520069.18976746  
SRR17520069.18976747  
SRR17520069.18986000  
SRR17520069.18998578  
SRR17520069.18999863  
SRR17520069.18999879  
SRR17520069.19012375  
SRR17520069.19012376  
SRR17520069.19012377  
SRR17520069.19012378  
SRR17520069.19012379  
SRR17520069.19012380  
SRR17520069.19012381  
SRR17520069.19012382  
SRR17520069.19012383  
SRR17520069.19012385  
SRR17520069.19012386  
SRR17520069.19012387  
SRR17520069.19012388  
SRR17520069.19012389  
SRR17520069.19012390  
SRR17520069.19012391  
SRR17520069.19012393  
SRR17520069.19012394  
SRR17520069.19012396  
SRR17520069.19012397  
SRR17520069.19012398  
SRR17520069.19012399  
SRR17520069.19012400  
SRR17520069.19012402  
SRR17520069.19012403  
SRR17520069.19012404  
SRR17520069.19012405  
SRR17520069.19012406  
SRR17520069.19012407  
SRR17520069.19012409  
SRR17520069.19012410  
SRR17520069.19056209  
SRR17520069.19056212  
SRR17520069.19060867  
SRR17520069.19060868  
SRR17520069.19060869  
SRR17520069.19060870  
SRR17520069.19060871

SRR17520069.19060872  
SRR17520069.19060874  
SRR17520069.19060876  
SRR17520069.19060877  
SRR17520069.19060878  
SRR17520069.19060879  
SRR17520069.19060880  
SRR17520069.19060882  
SRR17520069.19060883  
SRR17520069.19060884  
SRR17520069.19060885  
SRR17520069.19060886  
SRR17520069.19060887  
SRR17520069.19060888  
SRR17520069.19060889  
SRR17520069.19060890  
SRR17520069.19060891  
SRR17520069.19060892  
SRR17520069.19060893  
SRR17520069.19060894  
SRR17520069.19060895  
SRR17520069.19060896  
SRR17520069.19060897  
SRR17520069.19060898  
SRR17520069.19060899  
SRR17520069.19060900  
SRR17520069.19060901  
SRR17520069.19060902  
SRR17520069.19060903  
SRR17520069.19060904  
SRR17520069.19060905  
SRR17520069.19060907  
SRR17520069.19060908  
SRR17520069.19060909  
SRR17520069.19066002  
SRR17520069.19075382  
SRR17520069.19075383  
SRR17520069.19075384  
SRR17520069.19075385  
SRR17520069.19075386  
SRR17520069.19075387  
SRR17520069.19075389  
SRR17520069.19075390  
SRR17520069.19075391  
SRR17520069.19075393  
SRR17520069.19075394  
SRR17520069.19075395

SRR17520069.19075396  
SRR17520069.19075397  
SRR17520069.19075398  
SRR17520069.19075399  
SRR17520069.19075400  
SRR17520069.19075401  
SRR17520069.19075402  
SRR17520069.19075403  
SRR17520069.19075404  
SRR17520069.19075405  
SRR17520069.19075406  
SRR17520069.19075407  
SRR17520069.19075408  
SRR17520069.19075409  
SRR17520069.19075410  
SRR17520069.19075411  
SRR17520069.19075412  
SRR17520069.19075413  
SRR17520069.19075414  
SRR17520069.19075415  
SRR17520069.19075416  
SRR17520069.19075417  
SRR17520069.19075418  
SRR17520069.19075419  
SRR17520069.19075420  
SRR17520069.19075421  
SRR17520069.19080927  
SRR17520069.19092624  
SRR17520069.19092646  
SRR17520069.19100242  
SRR17520069.19100243  
SRR17520069.19100244  
SRR17520069.19100245  
SRR17520069.19100246  
SRR17520069.19100247  
SRR17520069.19100248  
SRR17520069.19100249  
SRR17520069.19100250  
SRR17520069.19100251  
SRR17520069.19100252  
SRR17520069.19100253  
SRR17520069.19100254  
SRR17520069.19100255  
SRR17520069.19100256  
SRR17520069.19100257  
SRR17520069.19100258  
SRR17520069.19100259



SRR17520069.19100260  
SRR17520069.19100261  
SRR17520069.19100262  
SRR17520069.19100263  
SRR17520069.19100264  
SRR17520069.19100265  
SRR17520069.19100267  
SRR17520069.19100268  
SRR17520069.19100269  
SRR17520069.19100270  
SRR17520069.19103737  
SRR17520069.19103762  
SRR17520069.19103765  
SRR17520069.19105557  
SRR17520069.19105558  
SRR17520069.19105559  
SRR17520069.19105560  
SRR17520069.19105561  
SRR17520069.19105562  
SRR17520069.19105563  
SRR17520069.19105564  
SRR17520069.19105565  
SRR17520069.19105566  
SRR17520069.19105567  
SRR17520069.19105568  
SRR17520069.19105569  
SRR17520069.19105570  
SRR17520069.19105571  
SRR17520069.19105572  
SRR17520069.19105573  
SRR17520069.19105574  
SRR17520069.19105575  
SRR17520069.19105576  
SRR17520069.19105577  
SRR17520069.19105578  
SRR17520069.19105579  
SRR17520069.19105580  
SRR17520069.19105581  
SRR17520069.19105582  
SRR17520069.19105583  
SRR17520069.19105584  
SRR17520069.19105585  
SRR17520069.19105586  
SRR17520069.19105587  
SRR17520069.19105588  
SRR17520069.19105589  
SRR17520069.19105590

SRR17520069.19105591  
SRR17520069.19105592  
SRR17520069.19105593  
SRR17520069.19105594  
SRR17520069.19105595  
SRR17520069.19105596  
SRR17520069.19105597  
SRR17520069.19105598  
SRR17520069.19105599  
SRR17520069.19105600  
SRR17520069.19105601  
SRR17520069.19105602  
SRR17520069.19105603  
SRR17520069.19105604  
SRR17520069.19105605  
SRR17520069.19105606  
SRR17520069.19105607  
SRR17520069.19105608  
SRR17520069.19105609  
SRR17520069.19105610  
SRR17520069.19105611  
SRR17520069.19105612  
SRR17520069.19105613  
SRR17520069.19105614  
SRR17520069.19105615  
SRR17520069.19105616  
SRR17520069.19105617  
SRR17520069.19105618  
SRR17520069.19105619  
SRR17520069.19105620  
SRR17520069.19105621  
SRR17520069.19105622  
SRR17520069.19105623  
SRR17520069.19105624  
SRR17520069.19105625  
SRR17520069.19105626  
SRR17520069.19105627  
SRR17520069.19105628  
SRR17520069.19105629  
SRR17520069.19105630  
SRR17520069.19105631  
SRR17520069.19105632  
SRR17520069.19105633  
SRR17520069.19105634  
SRR17520069.19105635  
SRR17520069.19105636  
SRR17520069.19105637

SRR17520069.19105638  
SRR17520069.19105639  
SRR17520069.19105640  
SRR17520069.19105641  
SRR17520069.19105642  
SRR17520069.19105643  
SRR17520069.19105644  
SRR17520069.19105645  
SRR17520069.19105646  
SRR17520069.19105647  
SRR17520069.19105648  
SRR17520069.19105649  
SRR17520069.19105650  
SRR17520069.19105651  
SRR17520069.19105652  
SRR17520069.19105653  
SRR17520069.19105654  
SRR17520069.19105655  
SRR17520069.19105656  
SRR17520069.19105657  
SRR17520069.19105658  
SRR17520069.19105659  
SRR17520069.19105660  
SRR17520069.19105661  
SRR17520069.19105662  
SRR17520069.19105663  
SRR17520069.19105664  
SRR17520069.19105665  
SRR17520069.19105666  
SRR17520069.19105667  
SRR17520069.19105668  
SRR17520069.19105669  
SRR17520069.19105670  
SRR17520069.19105671  
SRR17520069.19105672  
SRR17520069.19105673  
SRR17520069.19105674  
SRR17520069.19105675  
SRR17520069.19105676  
SRR17520069.19105677  
SRR17520069.19105678  
SRR17520069.19105679  
SRR17520069.19105680  
SRR17520069.19105681  
SRR17520069.19105682  
SRR17520069.19105683  
SRR17520069.19105684

SRR17520069.19105685  
SRR17520069.19105686  
SRR17520069.19105687  
SRR17520069.19105688  
SRR17520069.19105689  
SRR17520069.19105690  
SRR17520069.19105691  
SRR17520069.19105692  
SRR17520069.19105693  
SRR17520069.19105694  
SRR17520069.19105695  
SRR17520069.19105696  
SRR17520069.19105697  
SRR17520069.19105698  
SRR17520069.19105699  
SRR17520069.19105700  
SRR17520069.19105701  
SRR17520069.19105702  
SRR17520069.19105703  
SRR17520069.19105704  
SRR17520069.19105705  
SRR17520069.19105706  
SRR17520069.19105707  
SRR17520069.19132864  
SRR17520069.19132865  
SRR17520069.19132866  
SRR17520069.19132867  
SRR17520069.19132868  
SRR17520069.19132870  
SRR17520069.19132872  
SRR17520069.19132873  
SRR17520069.19132874  
SRR17520069.19132875  
SRR17520069.19132876  
SRR17520069.19132877  
SRR17520069.19132878  
SRR17520069.19132879  
SRR17520069.19132880  
SRR17520069.19132881  
SRR17520069.19132882  
SRR17520069.19144357  
SRR17520069.19144358  
SRR17520069.19144359  
SRR17520069.19144360  
SRR17520069.19144361  
SRR17520069.19144363  
SRR17520069.19144364

SRR17520069.19144365  
SRR17520069.19144367  
SRR17520069.19144369  
SRR17520069.19144371  
SRR17520069.19152507  
SRR17520069.19152508  
SRR17520069.19152509  
SRR17520069.19152510  
SRR17520069.19152511  
SRR17520069.19152512  
SRR17520069.19152513  
SRR17520069.19152514  
SRR17520069.19152515  
SRR17520069.19152516  
SRR17520069.19152517  
SRR17520069.19152518  
SRR17520069.19152519  
SRR17520069.19152520  
SRR17520069.19152521  
SRR17520069.19152522  
SRR17520069.19152523  
SRR17520069.19152524  
SRR17520069.19152525  
SRR17520069.19152526  
SRR17520069.19152527  
SRR17520069.19152528  
SRR17520069.19152529  
SRR17520069.19152530  
SRR17520069.19152531  
SRR17520069.19166209  
SRR17520069.19166219  
SRR17520069.19184854  
SRR17520069.19195323  
SRR17520069.19195324  
SRR17520069.19195325  
SRR17520069.19195326  
SRR17520069.19195327  
SRR17520069.19195328  
SRR17520069.19195329  
SRR17520069.19195330  
SRR17520069.19195331  
SRR17520069.19195332  
SRR17520069.19195334  
SRR17520069.19195335  
SRR17520069.19195336  
SRR17520069.19195337  
SRR17520069.19195338

SRR17520069. 19195339  
SRR17520069. 19195340  
SRR17520069. 19195341  
SRR17520069. 19195343  
SRR17520069. 19195344  
SRR17520069. 19195345  
SRR17520069. 19195346  
SRR17520069. 19195347  
SRR17520069. 19195348  
SRR17520069. 19195349  
SRR17520069. 19195350  
SRR17520069. 19195351  
SRR17520069. 19195352  
SRR17520069. 19195353  
SRR17520069. 19195354  
SRR17520069. 19195355  
SRR17520069. 19195356  
SRR17520069. 19195357  
SRR17520069. 19195358  
SRR17520069. 19195359  
SRR17520069. 19195360  
SRR17520069. 19195361  
SRR17520069. 19195362  
SRR17520069. 19195363  
SRR17520069. 19195365  
SRR17520069. 19195366  
SRR17520069. 19195367  
SRR17520069. 19195368  
SRR17520069. 19195369  
SRR17520069. 19195370  
SRR17520069. 19195371  
SRR17520069. 19195372  
SRR17520069. 19195373  
SRR17520069. 19195374  
SRR17520069. 19195375  
SRR17520069. 19195376  
SRR17520069. 19195377  
SRR17520069. 19195378  
SRR17520069. 19195379  
SRR17520069. 19195380  
SRR17520069. 19195381  
SRR17520069. 19195382  
SRR17520069. 19195383  
SRR17520069. 19195384  
SRR17520069. 19203916  
SRR17520069. 19203917  
SRR17520069. 19203918

SRR17520069. 19203919  
SRR17520069. 19203920  
SRR17520069. 19203921  
SRR17520069. 19203922  
SRR17520069. 19203923  
SRR17520069. 19203924  
SRR17520069. 19203925  
SRR17520069. 19203926  
SRR17520069. 19203927  
SRR17520069. 19203928  
SRR17520069. 19203929  
SRR17520069. 19203930  
SRR17520069. 19203932  
SRR17520069. 19203933  
SRR17520069. 19203935  
SRR17520069. 19203936  
SRR17520069. 19203937  
SRR17520069. 19203938  
SRR17520069. 19203939  
SRR17520069. 19203940  
SRR17520069. 19203941  
SRR17520069. 19203942  
SRR17520069. 19203943  
SRR17520069. 19203946  
SRR17520069. 19203947  
SRR17520069. 19203948  
SRR17520069. 19203949  
SRR17520069. 19203950  
SRR17520069. 19203951  
SRR17520069. 19203952  
SRR17520069. 19203953  
SRR17520069. 19203955  
SRR17520069. 19203956  
SRR17520069. 19203957  
SRR17520069. 19203958  
SRR17520069. 19208713  
SRR17520069. 19208714  
SRR17520069. 19208715  
SRR17520069. 19208716  
SRR17520069. 19208717  
SRR17520069. 19208718  
SRR17520069. 19208719  
SRR17520069. 19208720  
SRR17520069. 19208721  
SRR17520069. 19208722  
SRR17520069. 19208723  
SRR17520069. 19208724

SRR17520069. 19208725  
SRR17520069. 19208726  
SRR17520069. 19208727  
SRR17520069. 19208728  
SRR17520069. 19208729  
SRR17520069. 19208730  
SRR17520069. 19208731  
SRR17520069. 19208732  
SRR17520069. 19208733  
SRR17520069. 19208734  
SRR17520069. 19208735  
SRR17520069. 19208736  
SRR17520069. 19208737  
SRR17520069. 19208738  
SRR17520069. 19208739  
SRR17520069. 19208740  
SRR17520069. 19208741  
SRR17520069. 19208742  
SRR17520069. 19208743  
SRR17520069. 19208744  
SRR17520069. 19208745  
SRR17520069. 19208746  
SRR17520069. 19208747  
SRR17520069. 19208748  
SRR17520069. 19208749  
SRR17520069. 19208750  
SRR17520069. 19208751  
SRR17520069. 19208752  
SRR17520069. 19208753  
SRR17520069. 19208754  
SRR17520069. 19208755  
SRR17520069. 19208756  
SRR17520069. 19208757  
SRR17520069. 19240420  
SRR17520069. 19240421  
SRR17520069. 19240422  
SRR17520069. 19240423  
SRR17520069. 19240424  
SRR17520069. 19240425  
SRR17520069. 19240426  
SRR17520069. 19240427  
SRR17520069. 19240428  
SRR17520069. 19240429  
SRR17520069. 19240430  
SRR17520069. 19240431  
SRR17520069. 19240432  
SRR17520069. 19240433



SRR17520069. 19240434  
SRR17520069. 19240435  
SRR17520069. 19240436  
SRR17520069. 19240437  
SRR17520069. 19240438  
SRR17520069. 19240439  
SRR17520069. 19240440  
SRR17520069. 19240441  
SRR17520069. 19240442  
SRR17520069. 19240443  
SRR17520069. 19240444  
SRR17520069. 19240445  
SRR17520069. 19240446  
SRR17520069. 19240447  
SRR17520069. 19240448  
SRR17520069. 19240449  
SRR17520069. 19240450  
SRR17520069. 19240451  
SRR17520069. 19240452  
SRR17520069. 19240453  
SRR17520069. 19240454  
SRR17520069. 19240455  
SRR17520069. 19240456  
SRR17520069. 19240457  
SRR17520069. 19240458  
SRR17520069. 19240459  
SRR17520069. 19240460  
SRR17520069. 19240461  
SRR17520069. 19240462  
SRR17520069. 19240463  
SRR17520069. 19240464  
SRR17520069. 19240465  
SRR17520069. 19240466  
SRR17520069. 19240467  
SRR17520069. 19240468  
SRR17520069. 19240469  
SRR17520069. 19240470  
SRR17520069. 19240471  
SRR17520069. 19240472  
SRR17520069. 19240473  
SRR17520069. 19240474  
SRR17520069. 19240475  
SRR17520069. 19240476  
SRR17520069. 19240477  
SRR17520069. 19240478  
SRR17520069. 19240479  
SRR17520069. 19240480

SRR17520069. 19240481  
SRR17520069. 19247080  
SRR17520069. 19252339  
SRR17520069. 19252340  
SRR17520069. 19252341  
SRR17520069. 19252342  
SRR17520069. 19252343  
SRR17520069. 19252344  
SRR17520069. 19252345  
SRR17520069. 19252346  
SRR17520069. 19252347  
SRR17520069. 19252348  
SRR17520069. 19252349  
SRR17520069. 19252350  
SRR17520069. 19252351  
SRR17520069. 19252352  
SRR17520069. 19252353  
SRR17520069. 19252354  
SRR17520069. 19252355  
SRR17520069. 19252356  
SRR17520069. 19252357  
SRR17520069. 19252358  
SRR17520069. 19252359  
SRR17520069. 19252360  
SRR17520069. 19252361  
SRR17520069. 19252362  
SRR17520069. 19252363  
SRR17520069. 19252364  
SRR17520069. 19252365  
SRR17520069. 19252366  
SRR17520069. 19252367  
SRR17520069. 19264471  
SRR17520069. 19298111  
SRR17520069. 19298112  
SRR17520069. 19298113  
SRR17520069. 19298114  
SRR17520069. 19298115  
SRR17520069. 19298116  
SRR17520069. 19298117  
SRR17520069. 19298118  
SRR17520069. 19298119  
SRR17520069. 19300463  
SRR17520069. 19300464  
SRR17520069. 19300465  
SRR17520069. 19300466  
SRR17520069. 19300467  
SRR17520069. 19300468

SRR17520069.19300469  
SRR17520069.19300470  
SRR17520069.19300471  
SRR17520069.19300472  
SRR17520069.19300473  
SRR17520069.19300474  
SRR17520069.19300475  
SRR17520069.19300476  
SRR17520069.19300477  
SRR17520069.19300478  
SRR17520069.19300479  
SRR17520069.19300480  
SRR17520069.19300481  
SRR17520069.19300482  
SRR17520069.19300483  
SRR17520069.19300484  
SRR17520069.19300485  
SRR17520069.19300486  
SRR17520069.19300487  
SRR17520069.19300488  
SRR17520069.19300489  
SRR17520069.19300490  
SRR17520069.19300491  
SRR17520069.19300492  
SRR17520069.19300494  
SRR17520069.19300495  
SRR17520069.19300496  
SRR17520069.19300497  
SRR17520069.19300498  
SRR17520069.19300499  
SRR17520069.19300500  
SRR17520069.19300501  
SRR17520069.19300502  
SRR17520069.19300504  
SRR17520069.19300505  
SRR17520069.19300506  
SRR17520069.19300507  
SRR17520069.19300508  
SRR17520069.19300509  
SRR17520069.19300510  
SRR17520069.19300511  
SRR17520069.19300512  
SRR17520069.19300513  
SRR17520069.19300514  
SRR17520069.19300515  
SRR17520069.19300516  
SRR17520069.19300517

SRR17520069. 19300518  
SRR17520069. 19300519  
SRR17520069. 19300520  
SRR17520069. 19300521  
SRR17520069. 19300522  
SRR17520069. 19300523  
SRR17520069. 19300524  
SRR17520069. 19300525  
SRR17520069. 19300526  
SRR17520069. 19300527  
SRR17520069. 19300528  
SRR17520069. 19300529  
SRR17520069. 19300530  
SRR17520069. 19300531  
SRR17520069. 19300532  
SRR17520069. 19300533  
SRR17520069. 19300534  
SRR17520069. 19308821  
SRR17520069. 19308822  
SRR17520069. 19308823  
SRR17520069. 19308824  
SRR17520069. 19308825  
SRR17520069. 19308826  
SRR17520069. 19308827  
SRR17520069. 19308828  
SRR17520069. 19308829  
SRR17520069. 19308830  
SRR17520069. 19308831  
SRR17520069. 19308832  
SRR17520069. 19308834  
SRR17520069. 19308835  
SRR17520069. 19308836  
SRR17520069. 19308837  
SRR17520069. 19308838  
SRR17520069. 19308839  
SRR17520069. 19308840  
SRR17520069. 19308841  
SRR17520069. 19311461  
SRR17520069. 19311462  
SRR17520069. 19311463  
SRR17520069. 19311464  
SRR17520069. 19311465  
SRR17520069. 19311466  
SRR17520069. 19311467  
SRR17520069. 19311468  
SRR17520069. 19311469  
SRR17520069. 19311470

SRR17520069.19311471  
SRR17520069.19311472  
SRR17520069.19311473  
SRR17520069.19311474  
SRR17520069.19311475  
SRR17520069.19311476  
SRR17520069.19311477  
SRR17520069.19311478  
SRR17520069.19311479  
SRR17520069.19311480  
SRR17520069.19311481  
SRR17520069.19311482  
SRR17520069.19311483  
SRR17520069.19311484  
SRR17520069.19311485  
SRR17520069.19311486  
SRR17520069.19311488  
SRR17520069.19311489  
SRR17520069.19311491  
SRR17520069.19311492  
SRR17520069.19311493  
SRR17520069.19311494  
SRR17520069.19311495  
SRR17520069.19311496  
SRR17520069.19312877  
SRR17520069.19312878  
SRR17520069.19312879  
SRR17520069.19312880  
SRR17520069.19312881  
SRR17520069.19312882  
SRR17520069.19312883  
SRR17520069.19312884  
SRR17520069.19312885  
SRR17520069.19312886  
SRR17520069.19312887  
SRR17520069.19317078  
SRR17520069.19317079  
SRR17520069.19317080  
SRR17520069.19317081  
SRR17520069.19317082  
SRR17520069.19317083  
SRR17520069.19317084  
SRR17520069.19317085  
SRR17520069.19317086  
SRR17520069.19317087  
SRR17520069.19317088  
SRR17520069.19317089

SRR17520069. 19317090  
SRR17520069. 19317091  
SRR17520069. 19317092  
SRR17520069. 19317093  
SRR17520069. 19317094  
SRR17520069. 19317095  
SRR17520069. 19317096  
SRR17520069. 19317097  
SRR17520069. 19317098  
SRR17520069. 19317099  
SRR17520069. 19317100  
SRR17520069. 19317101  
SRR17520069. 19317102  
SRR17520069. 19317103  
SRR17520069. 19317104  
SRR17520069. 19317105  
SRR17520069. 19317106  
SRR17520069. 19317107  
SRR17520069. 19317108  
SRR17520069. 19317109  
SRR17520069. 19317110  
SRR17520069. 19317111  
SRR17520069. 19317112  
SRR17520069. 19317113  
SRR17520069. 19317114  
SRR17520069. 19317115  
SRR17520069. 19317116  
SRR17520069. 19317117  
SRR17520069. 19317118  
SRR17520069. 19317119  
SRR17520069. 19317120  
SRR17520069. 19317121  
SRR17520069. 19317122  
SRR17520069. 19317123  
SRR17520069. 19317124  
SRR17520069. 19317125  
SRR17520069. 19317126  
SRR17520069. 19317127  
SRR17520069. 19317128  
SRR17520069. 19317129  
SRR17520069. 19317130  
SRR17520069. 19317131  
SRR17520069. 19317132  
SRR17520069. 19317133  
SRR17520069. 19317135  
SRR17520069. 19317136  
SRR17520069. 19317137

SRR17520069. 19317138  
SRR17520069. 19317139  
SRR17520069. 19319607  
SRR17520069. 19319608  
SRR17520069. 19319609  
SRR17520069. 19319610  
SRR17520069. 19319611  
SRR17520069. 19319612  
SRR17520069. 19319613  
SRR17520069. 19319614  
SRR17520069. 19319615  
SRR17520069. 19319616  
SRR17520069. 19319617  
SRR17520069. 19319618  
SRR17520069. 19319619  
SRR17520069. 19319620  
SRR17520069. 19319621  
SRR17520069. 19319622  
SRR17520069. 19319623  
SRR17520069. 19325896  
SRR17520069. 19325897  
SRR17520069. 19325898  
SRR17520069. 19325899  
SRR17520069. 19325900  
SRR17520069. 19325901  
SRR17520069. 19325902  
SRR17520069. 19325903  
SRR17520069. 19325904  
SRR17520069. 19325905  
SRR17520069. 19325906  
SRR17520069. 19325907  
SRR17520069. 19325908  
SRR17520069. 19325909  
SRR17520069. 19325910  
SRR17520069. 19325911  
SRR17520069. 19325912  
SRR17520069. 19325913  
SRR17520069. 19325914  
SRR17520069. 19325915  
SRR17520069. 19325916  
SRR17520069. 19325917  
SRR17520069. 19325918  
SRR17520069. 19325920  
SRR17520069. 19325921  
SRR17520069. 19325922  
SRR17520069. 19325923  
SRR17520069. 19325924

SRR17520069.19325925  
SRR17520069.19325926  
SRR17520069.19325927  
SRR17520069.19325928  
SRR17520069.19325929  
SRR17520069.19325930  
SRR17520069.19325931  
SRR17520069.19325932  
SRR17520069.19325933  
SRR17520069.19325934  
SRR17520069.19325935  
SRR17520069.19325936  
SRR17520069.19325937  
SRR17520069.19325938  
SRR17520069.19325939  
SRR17520069.19325940  
SRR17520069.19325941  
SRR17520069.19325942  
SRR17520069.19325943  
SRR17520069.19325944  
SRR17520069.19325945  
SRR17520069.19325946  
SRR17520069.19325947  
SRR17520069.19325948  
SRR17520069.19325949  
SRR17520069.19325950  
SRR17520069.19325951  
SRR17520069.19325953  
SRR17520069.19325954  
SRR17520069.19325955  
SRR17520069.19325956  
SRR17520069.19325957  
SRR17520069.19325958  
SRR17520069.19325959  
SRR17520069.19325960  
SRR17520069.19325961  
SRR17520069.19325962  
SRR17520069.19325963  
SRR17520069.19325964  
SRR17520069.19325965  
SRR17520069.19325966  
SRR17520069.19325967  
SRR17520069.19325968  
SRR17520069.19325969  
SRR17520069.19325970  
SRR17520069.19325971  
SRR17520069.19329410



SRR17520069. 19348758  
SRR17520069. 19348759  
SRR17520069. 19348760  
SRR17520069. 19397872  
SRR17520069. 19397873  
SRR17520069. 19397874  
SRR17520069. 19409292  
SRR17520069. 19409293  
SRR17520069. 19409294  
SRR17520069. 19409295  
SRR17520069. 19409296  
SRR17520069. 19409297  
SRR17520069. 19409298  
SRR17520069. 19409299  
SRR17520069. 19409300  
SRR17520069. 19409301  
SRR17520069. 19409302  
SRR17520069. 19409303  
SRR17520069. 19409304  
SRR17520069. 19409305  
SRR17520069. 19409306  
SRR17520069. 19409307  
SRR17520069. 19409308  
SRR17520069. 19409309  
SRR17520069. 19409310  
SRR17520069. 19409311  
SRR17520069. 19409312  
SRR17520069. 19409313  
SRR17520069. 19409314  
SRR17520069. 19409315  
SRR17520069. 19409316  
SRR17520069. 19409317  
SRR17520069. 19409318  
SRR17520069. 19409320  
SRR17520069. 19409321  
SRR17520069. 19409323  
SRR17520069. 19409324  
SRR17520069. 19409325  
SRR17520069. 19409326  
SRR17520069. 19409327  
SRR17520069. 19409328  
SRR17520069. 19409329  
SRR17520069. 19409330  
SRR17520069. 19409331  
SRR17520069. 19409332  
SRR17520069. 19412768  
SRR17520069. 19412769

SRR17520069. 19412770  
SRR17520069. 19412771  
SRR17520069. 19412772  
SRR17520069. 19412773  
SRR17520069. 19412774  
SRR17520069. 19412775  
SRR17520069. 19412776  
SRR17520069. 19412777  
SRR17520069. 19412778  
SRR17520069. 19412779  
SRR17520069. 19412780  
SRR17520069. 19412781  
SRR17520069. 19412782  
SRR17520069. 19412783  
SRR17520069. 19412784  
SRR17520069. 19412785  
SRR17520069. 19412786  
SRR17520069. 19412787  
SRR17520069. 19412788  
SRR17520069. 19412789  
SRR17520069. 19412790  
SRR17520069. 19412791  
SRR17520069. 19412792  
SRR17520069. 19412793  
SRR17520069. 19412794  
SRR17520069. 19412795  
SRR17520069. 19412796  
SRR17520069. 19412797  
SRR17520069. 19412798  
SRR17520069. 19412799  
SRR17520069. 19412800  
SRR17520069. 19412801  
SRR17520069. 19412802  
SRR17520069. 19412803  
SRR17520069. 19412804  
SRR17520069. 19412805  
SRR17520069. 19412806  
SRR17520069. 19412807  
SRR17520069. 19412808  
SRR17520069. 19412809  
SRR17520069. 19412810  
SRR17520069. 19412811  
SRR17520069. 19412812  
SRR17520069. 19412813  
SRR17520069. 19412814  
SRR17520069. 19412815  
SRR17520069. 19412816

SRR17520069. 19412817  
SRR17520069. 19412818  
SRR17520069. 19412819  
SRR17520069. 19412820  
SRR17520069. 19412821  
SRR17520069. 19412822  
SRR17520069. 19412823  
SRR17520069. 19412824  
SRR17520069. 19412825  
SRR17520069. 19412826  
SRR17520069. 19412827  
SRR17520069. 19412828  
SRR17520069. 19412829  
SRR17520069. 19412830  
SRR17520069. 19412831  
SRR17520069. 19412833  
SRR17520069. 19429311  
SRR17520069. 19469901  
SRR17520069. 19469902  
SRR17520069. 19469903  
SRR17520069. 19469904  
SRR17520069. 19469905  
SRR17520069. 19469906  
SRR17520069. 19469907  
SRR17520069. 19469908  
SRR17520069. 19469909  
SRR17520069. 19469910  
SRR17520069. 19469911  
SRR17520069. 19469912  
SRR17520069. 19469913  
SRR17520069. 19469914  
SRR17520069. 19475541  
SRR17520069. 19475542  
SRR17520069. 19475543  
SRR17520069. 19475544  
SRR17520069. 19475545  
SRR17520069. 19475546  
SRR17520069. 19475547  
SRR17520069. 19475548  
SRR17520069. 19475549  
SRR17520069. 19475550  
SRR17520069. 19475551  
SRR17520069. 19475552  
SRR17520069. 19475553  
SRR17520069. 19475554  
SRR17520069. 19475555  
SRR17520069. 19475556

SRR17520069. 19475557  
SRR17520069. 19475558  
SRR17520069. 19475559  
SRR17520069. 19475560  
SRR17520069. 19475561  
SRR17520069. 19475562  
SRR17520069. 19475563  
SRR17520069. 19475564  
SRR17520069. 19475565  
SRR17520069. 19475566  
SRR17520069. 19475567  
SRR17520069. 19475568  
SRR17520069. 19475569  
SRR17520069. 19475570  
SRR17520069. 19475571  
SRR17520069. 19475572  
SRR17520069. 19475573  
SRR17520069. 19475574  
SRR17520069. 19475575  
SRR17520069. 19475576  
SRR17520069. 19475577  
SRR17520069. 19475578  
SRR17520069. 19475579  
SRR17520069. 19475580  
SRR17520069. 19475581  
SRR17520069. 19475582  
SRR17520069. 19475583  
SRR17520069. 19475584  
SRR17520069. 19486128  
SRR17520069. 19486129  
SRR17520069. 19486131  
SRR17520069. 19503478  
SRR17520069. 19503479  
SRR17520069. 19503480  
SRR17520069. 19503481  
SRR17520069. 19503483  
SRR17520069. 19503484  
SRR17520069. 19503485  
SRR17520069. 19503486  
SRR17520069. 19503487  
SRR17520069. 19503488  
SRR17520069. 19503489  
SRR17520069. 19503490  
SRR17520069. 19503491  
SRR17520069. 19503492  
SRR17520069. 19503493  
SRR17520069. 19503494

SRR17520069. 19503495  
SRR17520069. 19503496  
SRR17520069. 19503497  
SRR17520069. 19503498  
SRR17520069. 19503499  
SRR17520069. 19503500  
SRR17520069. 19503501  
SRR17520069. 19503502  
SRR17520069. 19503503  
SRR17520069. 19503504  
SRR17520069. 19503505  
SRR17520069. 19503506  
SRR17520069. 19503507  
SRR17520069. 19503508  
SRR17520069. 19503509  
SRR17520069. 19503510  
SRR17520069. 19503511  
SRR17520069. 19503512  
SRR17520069. 19503513  
SRR17520069. 19503514  
SRR17520069. 19503515  
SRR17520069. 19503516  
SRR17520069. 19503518  
SRR17520069. 19503519  
SRR17520069. 19503520  
SRR17520069. 19503521  
SRR17520069. 19503522  
SRR17520069. 19503523  
SRR17520069. 19503524  
SRR17520069. 19503525  
SRR17520069. 19503526  
SRR17520069. 19503527  
SRR17520069. 19503528  
SRR17520069. 19503529  
SRR17520069. 19503530  
SRR17520069. 19503531  
SRR17520069. 19503532  
SRR17520069. 19503533  
SRR17520069. 19503534  
SRR17520069. 19503535  
SRR17520069. 19503536  
SRR17520069. 19503537  
SRR17520069. 19503538  
SRR17520069. 19503539  
SRR17520069. 19503540  
SRR17520069. 19503541  
SRR17520069. 19503542

SRR17520069. 19503543  
SRR17520069. 19503544  
SRR17520069. 19503545  
SRR17520069. 19503546  
SRR17520069. 19503547  
SRR17520069. 19503548  
SRR17520069. 19503549  
SRR17520069. 19503550  
SRR17520069. 19503551  
SRR17520069. 19503552  
SRR17520069. 19503553  
SRR17520069. 19503554  
SRR17520069. 19503555  
SRR17520069. 19503556  
SRR17520069. 19503557  
SRR17520069. 19503559  
SRR17520069. 19503560  
SRR17520069. 19503561  
SRR17520069. 19503562  
SRR17520069. 19503563  
SRR17520069. 19503564  
SRR17520069. 19503565  
SRR17520069. 19503566  
SRR17520069. 19506904  
SRR17520069. 19506905  
SRR17520069. 19506906  
SRR17520069. 19506907  
SRR17520069. 19506908  
SRR17520069. 19506910  
SRR17520069. 19506911  
SRR17520069. 19506912  
SRR17520069. 19506913  
SRR17520069. 19506914  
SRR17520069. 19506915  
SRR17520069. 19506916  
SRR17520069. 19506917  
SRR17520069. 19506918  
SRR17520069. 19506919  
SRR17520069. 19506920  
SRR17520069. 19506921  
SRR17520069. 19506922  
SRR17520069. 19506923  
SRR17520069. 19506924  
SRR17520069. 19506925  
SRR17520069. 19506926  
SRR17520069. 19506927  
SRR17520069. 19506928

SRR17520069. 19506929  
SRR17520069. 19506930  
SRR17520069. 19506931  
SRR17520069. 19506932  
SRR17520069. 19506933  
SRR17520069. 19506934  
SRR17520069. 19506935  
SRR17520069. 19506937  
SRR17520069. 19506938  
SRR17520069. 19506939  
SRR17520069. 19506940  
SRR17520069. 19506941  
SRR17520069. 19506942  
SRR17520069. 19506943  
SRR17520069. 19506944  
SRR17520069. 19506945  
SRR17520069. 19506946  
SRR17520069. 19506947  
SRR17520069. 19506948  
SRR17520069. 19506949  
SRR17520069. 19506950  
SRR17520069. 19506951  
SRR17520069. 19510737  
SRR17520069. 19510738  
SRR17520069. 19510739  
SRR17520069. 19510740  
SRR17520069. 19510741  
SRR17520069. 19510742  
SRR17520069. 19510743  
SRR17520069. 19510744  
SRR17520069. 19510745  
SRR17520069. 19510746  
SRR17520069. 19510747  
SRR17520069. 19510748  
SRR17520069. 19510749  
SRR17520069. 19510750  
SRR17520069. 19510751  
SRR17520069. 19510752  
SRR17520069. 19510753  
SRR17520069. 19510754  
SRR17520069. 19510755  
SRR17520069. 19510756  
SRR17520069. 19510757  
SRR17520069. 19510758  
SRR17520069. 19510759  
SRR17520069. 19510760  
SRR17520069. 19510761

SRR17520069. 19510762  
SRR17520069. 19510763  
SRR17520069. 19510764  
SRR17520069. 19510765  
SRR17520069. 19510766  
SRR17520069. 19510767  
SRR17520069. 19510768  
SRR17520069. 19510769  
SRR17520069. 19510770  
SRR17520069. 19510771  
SRR17520069. 19510772  
SRR17520069. 19510773  
SRR17520069. 19510774  
SRR17520069. 19510775  
SRR17520069. 19510776  
SRR17520069. 19510777  
SRR17520069. 19510778  
SRR17520069. 19510779  
SRR17520069. 19510780  
SRR17520069. 19510781  
SRR17520069. 19510782  
SRR17520069. 19517107  
SRR17520069. 19517108  
SRR17520069. 19517109  
SRR17520069. 19517110  
SRR17520069. 19517111  
SRR17520069. 19517112  
SRR17520069. 19517113  
SRR17520069. 19517114  
SRR17520069. 19517115  
SRR17520069. 19517116  
SRR17520069. 19517117  
SRR17520069. 19517118  
SRR17520069. 19528914  
SRR17520069. 19548965  
SRR17520069. 19557903  
SRR17520069. 19557904  
SRR17520069. 19557905  
SRR17520069. 19557906  
SRR17520069. 19557907  
SRR17520069. 19557908  
SRR17520069. 19557909  
SRR17520069. 19557910  
SRR17520069. 19557911  
SRR17520069. 19557912  
SRR17520069. 19557913  
SRR17520069. 19557914



SRR17520069.19557915  
SRR17520069.19557916  
SRR17520069.19557917  
SRR17520069.19557918  
SRR17520069.19557919  
SRR17520069.19557920  
SRR17520069.19557921  
SRR17520069.19557922  
SRR17520069.19557923  
SRR17520069.19557924  
SRR17520069.19557925  
SRR17520069.19557926  
SRR17520069.19557927  
SRR17520069.19557928  
SRR17520069.19557929  
SRR17520069.19557930  
SRR17520069.19557931  
SRR17520069.19557932  
SRR17520069.19557933  
SRR17520069.19557934  
SRR17520069.19557935  
SRR17520069.19557936  
SRR17520069.19557937  
SRR17520069.19557938  
SRR17520069.19557939  
SRR17520069.19557940  
SRR17520069.19557941  
SRR17520069.19557942  
SRR17520069.19557943  
SRR17520069.19557944  
SRR17520069.19557945  
SRR17520069.19557946  
SRR17520069.19557947  
SRR17520069.19557948  
SRR17520069.19557949  
SRR17520069.19557950  
SRR17520069.19557951  
SRR17520069.19557952  
SRR17520069.19557953  
SRR17520069.19557954  
SRR17520069.19557955  
SRR17520069.19557956  
SRR17520069.19557957  
SRR17520069.19557958  
SRR17520069.19557959  
SRR17520069.19557960  
SRR17520069.19557961

SRR17520069.19557962  
SRR17520069.19557963  
SRR17520069.19557964  
SRR17520069.19557965  
SRR17520069.19557966  
SRR17520069.19557967  
SRR17520069.19557968  
SRR17520069.7652  
SRR17520069.23562  
SRR17520069.29604  
SRR17520069.29606  
SRR17520069.53776  
SRR17520069.65024  
SRR17520069.65025  
SRR17520069.65026  
SRR17520069.65027  
SRR17520069.65028  
SRR17520069.120847  
SRR17520069.120848  
SRR17520069.120849  
SRR17520069.120850  
SRR17520069.120851  
SRR17520069.120852  
SRR17520069.120853  
SRR17520069.120854  
SRR17520069.120855  
SRR17520069.120856  
SRR17520069.123341  
SRR17520069.131677  
SRR17520069.145018  
SRR17520069.145453  
SRR17520069.145598  
SRR17520069.155813  
SRR17520069.192497  
SRR17520069.192506  
SRR17520069.194010  
SRR17520069.202090  
SRR17520069.214407  
SRR17520069.214408  
SRR17520069.214409  
SRR17520069.214410  
SRR17520069.214411  
SRR17520069.214412  
SRR17520069.214413  
SRR17520069.214414  
SRR17520069.214415  
SRR17520069.214416

SRR17520069.214417  
SRR17520069.214418  
SRR17520069.214419  
SRR17520069.214420  
SRR17520069.214421  
SRR17520069.214422  
SRR17520069.214423  
SRR17520069.214424  
SRR17520069.214425  
SRR17520069.214426  
SRR17520069.214427  
SRR17520069.214428  
SRR17520069.214429  
SRR17520069.214430  
SRR17520069.214431  
SRR17520069.214432  
SRR17520069.214433  
SRR17520069.214434  
SRR17520069.214435  
SRR17520069.214436  
SRR17520069.214437  
SRR17520069.214438  
SRR17520069.214439  
SRR17520069.214440  
SRR17520069.214441  
SRR17520069.214442  
SRR17520069.214443  
SRR17520069.214444  
SRR17520069.214445  
SRR17520069.214446  
SRR17520069.214447  
SRR17520069.214448  
SRR17520069.214449  
SRR17520069.214450  
SRR17520069.214451  
SRR17520069.214452  
SRR17520069.214453  
SRR17520069.214454  
SRR17520069.214455  
SRR17520069.214456  
SRR17520069.214457  
SRR17520069.214458  
SRR17520069.214459  
SRR17520069.214460  
SRR17520069.214461  
SRR17520069.214463  
SRR17520069.224657

SRR17520069.224663  
SRR17520069.263630  
SRR17520069.265016  
SRR17520069.274694  
SRR17520069.293510  
SRR17520069.299517  
SRR17520069.311496  
SRR17520069.311607  
SRR17520069.366694  
SRR17520069.366859  
SRR17520069.366940  
SRR17520069.433591  
SRR17520069.450414  
SRR17520069.491007  
SRR17520069.491008  
SRR17520069.491009  
SRR17520069.491010  
SRR17520069.491011  
SRR17520069.491012  
SRR17520069.491014  
SRR17520069.491015  
SRR17520069.491016  
SRR17520069.491017  
SRR17520069.491018  
SRR17520069.491019  
SRR17520069.491020  
SRR17520069.491021  
SRR17520069.491022  
SRR17520069.491023  
SRR17520069.491024  
SRR17520069.491025  
SRR17520069.491027  
SRR17520069.491028  
SRR17520069.491029  
SRR17520069.491030  
SRR17520069.491031  
SRR17520069.491032  
SRR17520069.491033  
SRR17520069.491034  
SRR17520069.491035  
SRR17520069.491036  
SRR17520069.491038  
SRR17520069.491039  
SRR17520069.491040  
SRR17520069.491041  
SRR17520069.491042  
SRR17520069.491044

SRR17520069.491045  
SRR17520069.491046  
SRR17520069.491047  
SRR17520069.491048  
SRR17520069.491049  
SRR17520069.491050  
SRR17520069.491051  
SRR17520069.491052  
SRR17520069.491054  
SRR17520069.491055  
SRR17520069.491056  
SRR17520069.491057  
SRR17520069.491058  
SRR17520069.501544  
SRR17520069.540249  
SRR17520069.544208  
SRR17520069.572425  
SRR17520069.610118  
SRR17520069.624556  
SRR17520069.624634  
SRR17520069.630651  
SRR17520069.644582  
SRR17520069.649609  
SRR17520069.649610  
SRR17520069.663467  
SRR17520069.666791  
SRR17520069.688744  
SRR17520069.688745  
SRR17520069.688746  
SRR17520069.688750  
SRR17520069.688751  
SRR17520069.688752  
SRR17520069.688753  
SRR17520069.688754  
SRR17520069.688755  
SRR17520069.688756  
SRR17520069.688757  
SRR17520069.688758  
SRR17520069.688759  
SRR17520069.688760  
SRR17520069.688761  
SRR17520069.688762  
SRR17520069.688763  
SRR17520069.688764  
SRR17520069.688765  
SRR17520069.688766  
SRR17520069.688767

SRR17520069.688768  
SRR17520069.688769  
SRR17520069.688770  
SRR17520069.688771  
SRR17520069.688772  
SRR17520069.688773  
SRR17520069.688774  
SRR17520069.688775  
SRR17520069.688776  
SRR17520069.688777  
SRR17520069.688778  
SRR17520069.688779  
SRR17520069.688780  
SRR17520069.688781  
SRR17520069.688782  
SRR17520069.688783  
SRR17520069.688784  
SRR17520069.688785  
SRR17520069.688786  
SRR17520069.688787  
SRR17520069.688788  
SRR17520069.688789  
SRR17520069.731660  
SRR17520069.733451  
SRR17520069.764123  
SRR17520069.769577  
SRR17520069.772295  
SRR17520069.772303  
SRR17520069.772310  
SRR17520069.772311  
SRR17520069.772315  
SRR17520069.772319  
SRR17520069.772323  
SRR17520069.772329  
SRR17520069.772343  
SRR17520069.772344  
SRR17520069.772346  
SRR17520069.772353  
SRR17520069.772355  
SRR17520069.772379  
SRR17520069.772406  
SRR17520069.772407  
SRR17520069.772411  
SRR17520069.773992  
SRR17520069.798831  
SRR17520069.798832  
SRR17520069.798833

SRR17520069.816148  
SRR17520069.882602  
SRR17520069.885870  
SRR17520069.885880  
SRR17520069.896960  
SRR17520069.901945  
SRR17520069.902050  
SRR17520069.902063  
SRR17520069.930437  
SRR17520069.931756  
SRR17520069.951316  
SRR17520069.961085  
SRR17520069.963866  
SRR17520069.963929  
SRR17520069.981112  
SRR17520069.1000237  
SRR17520069.1022720  
SRR17520069.1033156  
SRR17520069.1033157  
SRR17520069.1033159  
SRR17520069.1033160  
SRR17520069.1033161  
SRR17520069.1033162  
SRR17520069.1033163  
SRR17520069.1033164  
SRR17520069.1033165  
SRR17520069.1033166  
SRR17520069.1033167  
SRR17520069.1033168  
SRR17520069.1033169  
SRR17520069.1033170  
SRR17520069.1033171  
SRR17520069.1033172  
SRR17520069.1033173  
SRR17520069.1033174  
SRR17520069.1033175  
SRR17520069.1033176  
SRR17520069.1033177  
SRR17520069.1033178  
SRR17520069.1033179  
SRR17520069.1033180  
SRR17520069.1033181  
SRR17520069.1033182  
SRR17520069.1033183  
SRR17520069.1033184  
SRR17520069.1033185  
SRR17520069.1033186

SRR17520069.1033187  
SRR17520069.1033188  
SRR17520069.1033189  
SRR17520069.1033190  
SRR17520069.1033191  
SRR17520069.1033192  
SRR17520069.1033193  
SRR17520069.1033194  
SRR17520069.1033195  
SRR17520069.1033196  
SRR17520069.1033197  
SRR17520069.1033198  
SRR17520069.1033199  
SRR17520069.1033200  
SRR17520069.1033201  
SRR17520069.1033202  
SRR17520069.1033203  
SRR17520069.1033204  
SRR17520069.1033205  
SRR17520069.1033206  
SRR17520069.1033207  
SRR17520069.1033208  
SRR17520069.1033209  
SRR17520069.1033210  
SRR17520069.1033211  
SRR17520069.1033212  
SRR17520069.1033213  
SRR17520069.1033214  
SRR17520069.1033215  
SRR17520069.1033216  
SRR17520069.1038239  
SRR17520069.1038240  
SRR17520069.1038241  
SRR17520069.1038242  
SRR17520069.1038243  
SRR17520069.1038244  
SRR17520069.1038245  
SRR17520069.1038246  
SRR17520069.1038247  
SRR17520069.1038248  
SRR17520069.1038249  
SRR17520069.1038250  
SRR17520069.1038251  
SRR17520069.1038252  
SRR17520069.1038253  
SRR17520069.1038254  
SRR17520069.1038255



SRR17520069. 1038256  
SRR17520069. 1038257  
SRR17520069. 1038258  
SRR17520069. 1038259  
SRR17520069. 1038260  
SRR17520069. 1038261  
SRR17520069. 1038262  
SRR17520069. 1038263  
SRR17520069. 1038264  
SRR17520069. 1038265  
SRR17520069. 1038266  
SRR17520069. 1038267  
SRR17520069. 1038268  
SRR17520069. 1038269  
SRR17520069. 1038270  
SRR17520069. 1038271  
SRR17520069. 1038272  
SRR17520069. 1038273  
SRR17520069. 1038274  
SRR17520069. 1038275  
SRR17520069. 1038276  
SRR17520069. 1038277  
SRR17520069. 1038278  
SRR17520069. 1038279  
SRR17520069. 1039115  
SRR17520069. 1044929  
SRR17520069. 1056827  
SRR17520069. 1056828  
SRR17520069. 1056829  
SRR17520069. 1056830  
SRR17520069. 1056831  
SRR17520069. 1056832  
SRR17520069. 1056833  
SRR17520069. 1056834  
SRR17520069. 1056835  
SRR17520069. 1056836  
SRR17520069. 1056837  
SRR17520069. 1056838  
SRR17520069. 1056839  
SRR17520069. 1056840  
SRR17520069. 1056841  
SRR17520069. 1056842  
SRR17520069. 1056843  
SRR17520069. 1056844  
SRR17520069. 1056845  
SRR17520069. 1056846  
SRR17520069. 1056847

SRR17520069. 1056849  
SRR17520069. 1056850  
SRR17520069. 1056851  
SRR17520069. 1056852  
SRR17520069. 1056853  
SRR17520069. 1056854  
SRR17520069. 1056855  
SRR17520069. 1056856  
SRR17520069. 1056857  
SRR17520069. 1056858  
SRR17520069. 1056859  
SRR17520069. 1056860  
SRR17520069. 1056861  
SRR17520069. 1071943  
SRR17520069. 1078112  
SRR17520069. 1110981  
SRR17520069. 1115975  
SRR17520069. 1124712  
SRR17520069. 1185833  
SRR17520069. 1214758  
SRR17520069. 1249548  
SRR17520069. 1259956  
SRR17520069. 1287593  
SRR17520069. 1287594  
SRR17520069. 1287596  
SRR17520069. 1287597  
SRR17520069. 1287598  
SRR17520069. 1287599  
SRR17520069. 1287600  
SRR17520069. 1287601  
SRR17520069. 1287602  
SRR17520069. 1287603  
SRR17520069. 1287604  
SRR17520069. 1287605  
SRR17520069. 1287606  
SRR17520069. 1287607  
SRR17520069. 1287608  
SRR17520069. 1287609  
SRR17520069. 1287610  
SRR17520069. 1287611  
SRR17520069. 1287612  
SRR17520069. 1287613  
SRR17520069. 1287614  
SRR17520069. 1287615  
SRR17520069. 1287616  
SRR17520069. 1287617  
SRR17520069. 1287618

SRR17520069. 1287619  
SRR17520069. 1287620  
SRR17520069. 1287621  
SRR17520069. 1287622  
SRR17520069. 1287623  
SRR17520069. 1287624  
SRR17520069. 1287625  
SRR17520069. 1287626  
SRR17520069. 1287627  
SRR17520069. 1287628  
SRR17520069. 1287629  
SRR17520069. 1287630  
SRR17520069. 1287631  
SRR17520069. 1287632  
SRR17520069. 1287633  
SRR17520069. 1287634  
SRR17520069. 1287635  
SRR17520069. 1287636  
SRR17520069. 1287637  
SRR17520069. 1287638  
SRR17520069. 1287639  
SRR17520069. 1287640  
SRR17520069. 1287641  
SRR17520069. 1287642  
SRR17520069. 1287643  
SRR17520069. 1287644  
SRR17520069. 1287645  
SRR17520069. 1287646  
SRR17520069. 1287647  
SRR17520069. 1287648  
SRR17520069. 1287649  
SRR17520069. 1287650  
SRR17520069. 1287651  
SRR17520069. 1287652  
SRR17520069. 1287653  
SRR17520069. 1287654  
SRR17520069. 1287655  
SRR17520069. 1287656  
SRR17520069. 1287657  
SRR17520069. 1287658  
SRR17520069. 1287659  
SRR17520069. 1288080  
SRR17520069. 1288094  
SRR17520069. 1295158  
SRR17520069. 1295159  
SRR17520069. 1295160  
SRR17520069. 1295161

SRR17520069. 1295162  
SRR17520069. 1295163  
SRR17520069. 1295164  
SRR17520069. 1295165  
SRR17520069. 1295166  
SRR17520069. 1295167  
SRR17520069. 1295168  
SRR17520069. 1295169  
SRR17520069. 1295170  
SRR17520069. 1295171  
SRR17520069. 1295172  
SRR17520069. 1295173  
SRR17520069. 1295174  
SRR17520069. 1295175  
SRR17520069. 1295176  
SRR17520069. 1295177  
SRR17520069. 1295178  
SRR17520069. 1295179  
SRR17520069. 1295180  
SRR17520069. 1295181  
SRR17520069. 1295182  
SRR17520069. 1295183  
SRR17520069. 1295184  
SRR17520069. 1295185  
SRR17520069. 1295186  
SRR17520069. 1295187  
SRR17520069. 1295188  
SRR17520069. 1296452  
SRR17520069. 1299062  
SRR17520069. 1319114  
SRR17520069. 1319115  
SRR17520069. 1319116  
SRR17520069. 1319117  
SRR17520069. 1319118  
SRR17520069. 1319119  
SRR17520069. 1319120  
SRR17520069. 1319121  
SRR17520069. 1319122  
SRR17520069. 1319123  
SRR17520069. 1319124  
SRR17520069. 1319125  
SRR17520069. 1319126  
SRR17520069. 1319127  
SRR17520069. 1319128  
SRR17520069. 1319129  
SRR17520069. 1319130  
SRR17520069. 1319131

SRR17520069.1319132  
SRR17520069.1319133  
SRR17520069.1319134  
SRR17520069.1319135  
SRR17520069.1319136  
SRR17520069.1319137  
SRR17520069.1319138  
SRR17520069.1319139  
SRR17520069.1319140  
SRR17520069.1319141  
SRR17520069.1319142  
SRR17520069.1319143  
SRR17520069.1319144  
SRR17520069.1319145  
SRR17520069.1319146  
SRR17520069.1319147  
SRR17520069.1319148  
SRR17520069.1319149  
SRR17520069.1319150  
SRR17520069.1319151  
SRR17520069.1319152  
SRR17520069.1319153  
SRR17520069.1319154  
SRR17520069.1319155  
SRR17520069.1319156  
SRR17520069.1319157  
SRR17520069.1319158  
SRR17520069.1319159  
SRR17520069.1319160  
SRR17520069.1319161  
SRR17520069.1319162  
SRR17520069.1319163  
SRR17520069.1319165  
SRR17520069.1319166  
SRR17520069.1319167  
SRR17520069.1319168  
SRR17520069.1319169  
SRR17520069.1319170  
SRR17520069.1319171  
SRR17520069.1319172  
SRR17520069.1319173  
SRR17520069.1319174  
SRR17520069.1319175  
SRR17520069.1319176  
SRR17520069.1319177  
SRR17520069.1319178  
SRR17520069.1319179

SRR17520069.1319180  
SRR17520069.1319181  
SRR17520069.1319182  
SRR17520069.1319183  
SRR17520069.1319184  
SRR17520069.1319185  
SRR17520069.1319186  
SRR17520069.1319187  
SRR17520069.1319188  
SRR17520069.1319189  
SRR17520069.1319190  
SRR17520069.1319191  
SRR17520069.1319192  
SRR17520069.1319193  
SRR17520069.1319194  
SRR17520069.1319195  
SRR17520069.1319196  
SRR17520069.1319197  
SRR17520069.1319198  
SRR17520069.1319199  
SRR17520069.1319200  
SRR17520069.1319201  
SRR17520069.1319202  
SRR17520069.1319203  
SRR17520069.1319204  
SRR17520069.1319205  
SRR17520069.1319206  
SRR17520069.1319207  
SRR17520069.1319208  
SRR17520069.1319209  
SRR17520069.1319210  
SRR17520069.1319211  
SRR17520069.1319212  
SRR17520069.1319213  
SRR17520069.1319214  
SRR17520069.1319215  
SRR17520069.1319216  
SRR17520069.1319217  
SRR17520069.1319218  
SRR17520069.1319219  
SRR17520069.1319220  
SRR17520069.1319221  
SRR17520069.1319222  
SRR17520069.1319223  
SRR17520069.1319224  
SRR17520069.1319225  
SRR17520069.1319226

SRR17520069. 1319227  
SRR17520069. 1319228  
SRR17520069. 1319229  
SRR17520069. 1319230  
SRR17520069. 1319231  
SRR17520069. 1319232  
SRR17520069. 1319233  
SRR17520069. 1319234  
SRR17520069. 1319235  
SRR17520069. 1319236  
SRR17520069. 1319237  
SRR17520069. 1319238  
SRR17520069. 1319239  
SRR17520069. 1319240  
SRR17520069. 1319241  
SRR17520069. 1319242  
SRR17520069. 1319243  
SRR17520069. 1319244  
SRR17520069. 1319245  
SRR17520069. 1319246  
SRR17520069. 1319247  
SRR17520069. 1319248  
SRR17520069. 1319249  
SRR17520069. 1319250  
SRR17520069. 1319251  
SRR17520069. 1319252  
SRR17520069. 1319253  
SRR17520069. 1319254  
SRR17520069. 1319255  
SRR17520069. 1319256  
SRR17520069. 1319257  
SRR17520069. 1319258  
SRR17520069. 1319259  
SRR17520069. 1319260  
SRR17520069. 1319261  
SRR17520069. 1319262  
SRR17520069. 1319263  
SRR17520069. 1319264  
SRR17520069. 1319265  
SRR17520069. 1319266  
SRR17520069. 1319267  
SRR17520069. 1319268  
SRR17520069. 1319269  
SRR17520069. 1319270  
SRR17520069. 1319271  
SRR17520069. 1319272  
SRR17520069. 1319273

SRR17520069.1319274  
SRR17520069.1319275  
SRR17520069.1319276  
SRR17520069.1319277  
SRR17520069.1319278  
SRR17520069.1319279  
SRR17520069.1319280  
SRR17520069.1319281  
SRR17520069.1319282  
SRR17520069.1319283  
SRR17520069.1319284  
SRR17520069.1319285  
SRR17520069.1334572  
SRR17520069.1352101  
SRR17520069.1367242  
SRR17520069.1406562  
SRR17520069.1406563  
SRR17520069.1406564  
SRR17520069.1406565  
SRR17520069.1406566  
SRR17520069.1406567  
SRR17520069.1406568  
SRR17520069.1406569  
SRR17520069.1406570  
SRR17520069.1406571  
SRR17520069.1406572  
SRR17520069.1406573  
SRR17520069.1406574  
SRR17520069.1406575  
SRR17520069.1406576  
SRR17520069.1406577  
SRR17520069.1406578  
SRR17520069.1406579  
SRR17520069.1406580  
SRR17520069.1406581  
SRR17520069.1406582  
SRR17520069.1406583  
SRR17520069.1406584  
SRR17520069.1406585  
SRR17520069.1434977  
SRR17520069.1434978  
SRR17520069.1434979  
SRR17520069.1434980  
SRR17520069.1434981  
SRR17520069.1434982  
SRR17520069.1434983  
SRR17520069.1434984



SRR17520069. 1434986  
SRR17520069. 1434987  
SRR17520069. 1434988  
SRR17520069. 1434989  
SRR17520069. 1434990  
SRR17520069. 1434991  
SRR17520069. 1468537  
SRR17520069. 1468538  
SRR17520069. 1468539  
SRR17520069. 1468540  
SRR17520069. 1468541  
SRR17520069. 1468542  
SRR17520069. 1468543  
SRR17520069. 1497629  
SRR17520069. 1497630  
SRR17520069. 1497631  
SRR17520069. 1497632  
SRR17520069. 1497633  
SRR17520069. 1497634  
SRR17520069. 1497635  
SRR17520069. 1497636  
SRR17520069. 1497637  
SRR17520069. 1497638  
SRR17520069. 1497639  
SRR17520069. 1497640  
SRR17520069. 1497641  
SRR17520069. 1497642  
SRR17520069. 1497643  
SRR17520069. 1497644  
SRR17520069. 1497645  
SRR17520069. 1497646  
SRR17520069. 1497647  
SRR17520069. 1497648  
SRR17520069. 1497649  
SRR17520069. 1500504  
SRR17520069. 1506020  
SRR17520069. 1518860  
SRR17520069. 1521107  
SRR17520069. 1521142  
SRR17520069. 1521147  
SRR17520069. 1631653  
SRR17520069. 1631664  
SRR17520069. 1650537  
SRR17520069. 1656125  
SRR17520069. 1658596  
SRR17520069. 1667955  
SRR17520069. 1718533

SRR17520069.1766123  
SRR17520069.1796514  
SRR17520069.1810033  
SRR17520069.1831543  
SRR17520069.1833455  
SRR17520069.1841481  
SRR17520069.1847373  
SRR17520069.1848588  
SRR17520069.1870940  
SRR17520069.1879964  
SRR17520069.1890047  
SRR17520069.1917944  
SRR17520069.1921239  
SRR17520069.1921241  
SRR17520069.1951292  
SRR17520069.1951293  
SRR17520069.1978397  
SRR17520069.1993953  
SRR17520069.2015947  
SRR17520069.2016957  
SRR17520069.2017968  
SRR17520069.2018004  
SRR17520069.2035423  
SRR17520069.2047454  
SRR17520069.2047455  
SRR17520069.2047456  
SRR17520069.2047457  
SRR17520069.2047458  
SRR17520069.2047459  
SRR17520069.2047461  
SRR17520069.2047463  
SRR17520069.2047464  
SRR17520069.2047465  
SRR17520069.2047466  
SRR17520069.2047467  
SRR17520069.2047469  
SRR17520069.2047472  
SRR17520069.2047473  
SRR17520069.2047474  
SRR17520069.2047475  
SRR17520069.2047477  
SRR17520069.2047478  
SRR17520069.2073972  
SRR17520069.2076562  
SRR17520069.2101561  
SRR17520069.2106130  
SRR17520069.2113409

SRR17520069. 2128826  
SRR17520069. 2148933  
SRR17520069. 2188680  
SRR17520069. 2209524  
SRR17520069. 2209525  
SRR17520069. 2209526  
SRR17520069. 2209527  
SRR17520069. 2209528  
SRR17520069. 2209529  
SRR17520069. 2209530  
SRR17520069. 2209531  
SRR17520069. 2209532  
SRR17520069. 2255347  
SRR17520069. 2255348  
SRR17520069. 2255349  
SRR17520069. 2255350  
SRR17520069. 2255351  
SRR17520069. 2255352  
SRR17520069. 2255353  
SRR17520069. 2255354  
SRR17520069. 2255355  
SRR17520069. 2255356  
SRR17520069. 2255357  
SRR17520069. 2255358  
SRR17520069. 2255359  
SRR17520069. 2255361  
SRR17520069. 2255362  
SRR17520069. 2262168  
SRR17520069. 2305255  
SRR17520069. 2363327  
SRR17520069. 2366370  
SRR17520069. 2402430  
SRR17520069. 2424518  
SRR17520069. 2435280  
SRR17520069. 2438444  
SRR17520069. 2463282  
SRR17520069. 2464943  
SRR17520069. 2478027  
SRR17520069. 2478028  
SRR17520069. 2478029  
SRR17520069. 2478030  
SRR17520069. 2478031  
SRR17520069. 2478032  
SRR17520069. 2478033  
SRR17520069. 2478034  
SRR17520069. 2478035  
SRR17520069. 2478036

SRR17520069. 2478037  
SRR17520069. 2489180  
SRR17520069. 2489282  
SRR17520069. 2494986  
SRR17520069. 2495091  
SRR17520069. 2495093  
SRR17520069. 2514583  
SRR17520069. 2545385  
SRR17520069. 2545386  
SRR17520069. 2545387  
SRR17520069. 2545388  
SRR17520069. 2545389  
SRR17520069. 2545390  
SRR17520069. 2545391  
SRR17520069. 2545392  
SRR17520069. 2545393  
SRR17520069. 2545394  
SRR17520069. 2545395  
SRR17520069. 2545396  
SRR17520069. 2545397  
SRR17520069. 2545398  
SRR17520069. 2545399  
SRR17520069. 2545400  
SRR17520069. 2545401  
SRR17520069. 2545402  
SRR17520069. 2545403  
SRR17520069. 2545404  
SRR17520069. 2545405  
SRR17520069. 2545406  
SRR17520069. 2545407  
SRR17520069. 2545408  
SRR17520069. 2545410  
SRR17520069. 2545411  
SRR17520069. 2545412  
SRR17520069. 2545413  
SRR17520069. 2545414  
SRR17520069. 2545415  
SRR17520069. 2545416  
SRR17520069. 2545417  
SRR17520069. 2545418  
SRR17520069. 2545419  
SRR17520069. 2545420  
SRR17520069. 2564234  
SRR17520069. 2573171  
SRR17520069. 2573174  
SRR17520069. 2573208  
SRR17520069. 2573215

SRR17520069.2597347  
SRR17520069.2600638  
SRR17520069.2626878  
SRR17520069.2636940  
SRR17520069.2638930  
SRR17520069.2693755  
SRR17520069.2719111  
SRR17520069.2719113  
SRR17520069.2742435  
SRR17520069.2748907  
SRR17520069.2778839  
SRR17520069.2798796  
SRR17520069.2804901  
SRR17520069.2804902  
SRR17520069.2804903  
SRR17520069.2804904  
SRR17520069.2804905  
SRR17520069.2804906  
SRR17520069.2804907  
SRR17520069.2804908  
SRR17520069.2804909  
SRR17520069.2804910  
SRR17520069.2804911  
SRR17520069.2804912  
SRR17520069.2804913  
SRR17520069.2804914  
SRR17520069.2804915  
SRR17520069.2804916  
SRR17520069.2804917  
SRR17520069.2804919  
SRR17520069.2804920  
SRR17520069.2804921  
SRR17520069.2804922  
SRR17520069.2804923  
SRR17520069.2804924  
SRR17520069.2804925  
SRR17520069.2804926  
SRR17520069.2804927  
SRR17520069.2804928  
SRR17520069.2804930  
SRR17520069.2804931  
SRR17520069.2804932  
SRR17520069.2804933  
SRR17520069.2804934  
SRR17520069.2804935  
SRR17520069.2804936  
SRR17520069.2804937

SRR17520069.2804938  
SRR17520069.2804939  
SRR17520069.2804940  
SRR17520069.2804941  
SRR17520069.2804943  
SRR17520069.2804945  
SRR17520069.2804946  
SRR17520069.2804947  
SRR17520069.2804948  
SRR17520069.2804949  
SRR17520069.2908942  
SRR17520069.2908954  
SRR17520069.2908994  
SRR17520069.2914032  
SRR17520069.2916847  
SRR17520069.2932276  
SRR17520069.2953591  
SRR17520069.2957133  
SRR17520069.2957146  
SRR17520069.2965902  
SRR17520069.2999865  
SRR17520069.3006802  
SRR17520069.3006826  
SRR17520069.3044151  
SRR17520069.3048494  
SRR17520069.3048495  
SRR17520069.3048496  
SRR17520069.3048498  
SRR17520069.3048499  
SRR17520069.3048500  
SRR17520069.3048501  
SRR17520069.3048502  
SRR17520069.3048503  
SRR17520069.3048504  
SRR17520069.3048505  
SRR17520069.3048506  
SRR17520069.3048507  
SRR17520069.3048508  
SRR17520069.3048509  
SRR17520069.3048510  
SRR17520069.3048511  
SRR17520069.3048512  
SRR17520069.3048513  
SRR17520069.3082424  
SRR17520069.3082426  
SRR17520069.3082427  
SRR17520069.3082428

SRR17520069. 3082429  
SRR17520069. 3082430  
SRR17520069. 3082431  
SRR17520069. 3082432  
SRR17520069. 3082433  
SRR17520069. 3082434  
SRR17520069. 3161361  
SRR17520069. 3169902  
SRR17520069. 3172876  
SRR17520069. 3172965  
SRR17520069. 3173010  
SRR17520069. 3222676  
SRR17520069. 3222677  
SRR17520069. 3222678  
SRR17520069. 3222679  
SRR17520069. 3222680  
SRR17520069. 3222681  
SRR17520069. 3222682  
SRR17520069. 3222683  
SRR17520069. 3222684  
SRR17520069. 3222685  
SRR17520069. 3222686  
SRR17520069. 3222687  
SRR17520069. 3222688  
SRR17520069. 3222689  
SRR17520069. 3222690  
SRR17520069. 3222691  
SRR17520069. 3222692  
SRR17520069. 3222693  
SRR17520069. 3222694  
SRR17520069. 3222695  
SRR17520069. 3222696  
SRR17520069. 3222697  
SRR17520069. 3222701  
SRR17520069. 3222704  
SRR17520069. 3222705  
SRR17520069. 3222706  
SRR17520069. 3222708  
SRR17520069. 3222709  
SRR17520069. 3222710  
SRR17520069. 3222711  
SRR17520069. 3222712  
SRR17520069. 3222713  
SRR17520069. 3222714  
SRR17520069. 3222715  
SRR17520069. 3222716  
SRR17520069. 3222717

SRR17520069. 3222718  
SRR17520069. 3222719  
SRR17520069. 3222720  
SRR17520069. 3222721  
SRR17520069. 3222722  
SRR17520069. 3222723  
SRR17520069. 3222724  
SRR17520069. 3222725  
SRR17520069. 3231608  
SRR17520069. 3237093  
SRR17520069. 3252789  
SRR17520069. 3264950  
SRR17520069. 3264951  
SRR17520069. 3264952  
SRR17520069. 3264953  
SRR17520069. 3264954  
SRR17520069. 3264955  
SRR17520069. 3264956  
SRR17520069. 3264957  
SRR17520069. 3264958  
SRR17520069. 3264959  
SRR17520069. 3264960  
SRR17520069. 3264961  
SRR17520069. 3264962  
SRR17520069. 3264963  
SRR17520069. 3264964  
SRR17520069. 3264965  
SRR17520069. 3264966  
SRR17520069. 3264967  
SRR17520069. 3264968  
SRR17520069. 3264969  
SRR17520069. 3264970  
SRR17520069. 3264971  
SRR17520069. 3274005  
SRR17520069. 3274006  
SRR17520069. 3274007  
SRR17520069. 3274008  
SRR17520069. 3274009  
SRR17520069. 3274010  
SRR17520069. 3274011  
SRR17520069. 3274012  
SRR17520069. 3274013  
SRR17520069. 3274014  
SRR17520069. 3274015  
SRR17520069. 3274016  
SRR17520069. 3274017  
SRR17520069. 3274018



SRR17520069. 3274019  
SRR17520069. 3274020  
SRR17520069. 3274021  
SRR17520069. 3274022  
SRR17520069. 3274023  
SRR17520069. 3274024  
SRR17520069. 3292219  
SRR17520069. 3309996  
SRR17520069. 3309997  
SRR17520069. 3309998  
SRR17520069. 3309999  
SRR17520069. 3310000  
SRR17520069. 3310001  
SRR17520069. 3310002  
SRR17520069. 3310003  
SRR17520069. 3310004  
SRR17520069. 3310005  
SRR17520069. 3310006  
SRR17520069. 3310007  
SRR17520069. 3310008  
SRR17520069. 3310009  
SRR17520069. 3310010  
SRR17520069. 3310011  
SRR17520069. 3310012  
SRR17520069. 3310013  
SRR17520069. 3310014  
SRR17520069. 3310015  
SRR17520069. 3310016  
SRR17520069. 3310017  
SRR17520069. 3310018  
SRR17520069. 3310019  
SRR17520069. 3310020  
SRR17520069. 3310021  
SRR17520069. 3310022  
SRR17520069. 3310023  
SRR17520069. 3310024  
SRR17520069. 3310025  
SRR17520069. 3310026  
SRR17520069. 3310027  
SRR17520069. 3310028  
SRR17520069. 3310029  
SRR17520069. 3310030  
SRR17520069. 3310031  
SRR17520069. 3310032  
SRR17520069. 3310033  
SRR17520069. 3310034  
SRR17520069. 3310036

SRR17520069. 3310037  
SRR17520069. 3328787  
SRR17520069. 3328797  
SRR17520069. 3339686  
SRR17520069. 3342622  
SRR17520069. 3342623  
SRR17520069. 3342624  
SRR17520069. 3342625  
SRR17520069. 3342626  
SRR17520069. 3342627  
SRR17520069. 3342628  
SRR17520069. 3342629  
SRR17520069. 3342630  
SRR17520069. 3342631  
SRR17520069. 3342632  
SRR17520069. 3342633  
SRR17520069. 3342634  
SRR17520069. 3342635  
SRR17520069. 3342636  
SRR17520069. 3342637  
SRR17520069. 3342638  
SRR17520069. 3342639  
SRR17520069. 3342640  
SRR17520069. 3342641  
SRR17520069. 3342642  
SRR17520069. 3342643  
SRR17520069. 3342644  
SRR17520069. 3342645  
SRR17520069. 3342646  
SRR17520069. 3342647  
SRR17520069. 3342648  
SRR17520069. 3342649  
SRR17520069. 3342650  
SRR17520069. 3342651  
SRR17520069. 3342652  
SRR17520069. 3342653  
SRR17520069. 3342654  
SRR17520069. 3342655  
SRR17520069. 3342656  
SRR17520069. 3342657  
SRR17520069. 3342658  
SRR17520069. 3342659  
SRR17520069. 3342660  
SRR17520069. 3342662  
SRR17520069. 3342663  
SRR17520069. 3342664  
SRR17520069. 3342665

SRR17520069. 3342666  
SRR17520069. 3342667  
SRR17520069. 3342668  
SRR17520069. 3342669  
SRR17520069. 3342670  
SRR17520069. 3342671  
SRR17520069. 3342672  
SRR17520069. 3342673  
SRR17520069. 3342674  
SRR17520069. 3342675  
SRR17520069. 3342676  
SRR17520069. 3342677  
SRR17520069. 3342678  
SRR17520069. 3342679  
SRR17520069. 3342680  
SRR17520069. 3342681  
SRR17520069. 3342682  
SRR17520069. 3342683  
SRR17520069. 3342684  
SRR17520069. 3342685  
SRR17520069. 3342686  
SRR17520069. 3342687  
SRR17520069. 3342688  
SRR17520069. 3345265  
SRR17520069. 3345276  
SRR17520069. 3345322  
SRR17520069. 3346376  
SRR17520069. 3375926  
SRR17520069. 3375927  
SRR17520069. 3375928  
SRR17520069. 3375929  
SRR17520069. 3375931  
SRR17520069. 3375932  
SRR17520069. 3375933  
SRR17520069. 3375934  
SRR17520069. 3375935  
SRR17520069. 3375937  
SRR17520069. 3375938  
SRR17520069. 3375939  
SRR17520069. 3375940  
SRR17520069. 3375941  
SRR17520069. 3375943  
SRR17520069. 3375944  
SRR17520069. 3375945  
SRR17520069. 3375946  
SRR17520069. 3375947  
SRR17520069. 3375948

SRR17520069. 3375949  
SRR17520069. 3375951  
SRR17520069. 3375952  
SRR17520069. 3375953  
SRR17520069. 3375954  
SRR17520069. 3375955  
SRR17520069. 3375956  
SRR17520069. 3375957  
SRR17520069. 3375958  
SRR17520069. 3375959  
SRR17520069. 3375960  
SRR17520069. 3375962  
SRR17520069. 3375963  
SRR17520069. 3375964  
SRR17520069. 3375966  
SRR17520069. 3375967  
SRR17520069. 3375968  
SRR17520069. 3375970  
SRR17520069. 3375971  
SRR17520069. 3375972  
SRR17520069. 3375973  
SRR17520069. 3375974  
SRR17520069. 3375975  
SRR17520069. 3375977  
SRR17520069. 3375978  
SRR17520069. 3375979  
SRR17520069. 3375980  
SRR17520069. 3375981  
SRR17520069. 3375982  
SRR17520069. 3375983  
SRR17520069. 3375984  
SRR17520069. 3375985  
SRR17520069. 3375986  
SRR17520069. 3375987  
SRR17520069. 3375989  
SRR17520069. 3375990  
SRR17520069. 3375991  
SRR17520069. 3375992  
SRR17520069. 3375993  
SRR17520069. 3375994  
SRR17520069. 3375995  
SRR17520069. 3375996  
SRR17520069. 3375997  
SRR17520069. 3375998  
SRR17520069. 3375999  
SRR17520069. 3376000  
SRR17520069. 3376002

SRR17520069. 3376003  
SRR17520069. 3376004  
SRR17520069. 3376005  
SRR17520069. 3376006  
SRR17520069. 3376007  
SRR17520069. 3376008  
SRR17520069. 3376009  
SRR17520069. 3376010  
SRR17520069. 3376011  
SRR17520069. 3376014  
SRR17520069. 3376015  
SRR17520069. 3376016  
SRR17520069. 3376017  
SRR17520069. 3376018  
SRR17520069. 3376021  
SRR17520069. 3376022  
SRR17520069. 3376023  
SRR17520069. 3376024  
SRR17520069. 3376025  
SRR17520069. 3376026  
SRR17520069. 3376027  
SRR17520069. 3376028  
SRR17520069. 3376029  
SRR17520069. 3376030  
SRR17520069. 3376031  
SRR17520069. 3376032  
SRR17520069. 3376033  
SRR17520069. 3376034  
SRR17520069. 3376035  
SRR17520069. 3376036  
SRR17520069. 3376037  
SRR17520069. 3376038  
SRR17520069. 3376039  
SRR17520069. 3376040  
SRR17520069. 3376041  
SRR17520069. 3376042  
SRR17520069. 3376044  
SRR17520069. 3376045  
SRR17520069. 3376046  
SRR17520069. 3376047  
SRR17520069. 3376048  
SRR17520069. 3376049  
SRR17520069. 3376050  
SRR17520069. 3376051  
SRR17520069. 3376052  
SRR17520069. 3376053  
SRR17520069. 3376054

SRR17520069. 3376055  
SRR17520069. 3376056  
SRR17520069. 3376057  
SRR17520069. 3376059  
SRR17520069. 3376060  
SRR17520069. 3376061  
SRR17520069. 3376063  
SRR17520069. 3376064  
SRR17520069. 3376065  
SRR17520069. 3376066  
SRR17520069. 3376068  
SRR17520069. 3376069  
SRR17520069. 3376070  
SRR17520069. 3376072  
SRR17520069. 3376073  
SRR17520069. 3376074  
SRR17520069. 3376075  
SRR17520069. 3376076  
SRR17520069. 3376077  
SRR17520069. 3376078  
SRR17520069. 3376079  
SRR17520069. 3376080  
SRR17520069. 3376081  
SRR17520069. 3376082  
SRR17520069. 3376083  
SRR17520069. 3376084  
SRR17520069. 3376085  
SRR17520069. 3376086  
SRR17520069. 3376087  
SRR17520069. 3376088  
SRR17520069. 3376089  
SRR17520069. 3376090  
SRR17520069. 3376092  
SRR17520069. 3376093  
SRR17520069. 3376094  
SRR17520069. 3376095  
SRR17520069. 3376096  
SRR17520069. 3376097  
SRR17520069. 3376098  
SRR17520069. 3376099  
SRR17520069. 3376100  
SRR17520069. 3376101  
SRR17520069. 3376102  
SRR17520069. 3376103  
SRR17520069. 3376104  
SRR17520069. 3376105  
SRR17520069. 3376106

SRR17520069. 3376107  
SRR17520069. 3376108  
SRR17520069. 3376109  
SRR17520069. 3376110  
SRR17520069. 3376111  
SRR17520069. 3376112  
SRR17520069. 3376114  
SRR17520069. 3376115  
SRR17520069. 3376116  
SRR17520069. 3376117  
SRR17520069. 3376118  
SRR17520069. 3376119  
SRR17520069. 3376121  
SRR17520069. 3376122  
SRR17520069. 3376123  
SRR17520069. 3376125  
SRR17520069. 3376126  
SRR17520069. 3376127  
SRR17520069. 3376128  
SRR17520069. 3376130  
SRR17520069. 3376131  
SRR17520069. 3376132  
SRR17520069. 3376133  
SRR17520069. 3376135  
SRR17520069. 3376137  
SRR17520069. 3376138  
SRR17520069. 3376139  
SRR17520069. 3376140  
SRR17520069. 3376141  
SRR17520069. 3376142  
SRR17520069. 3376143  
SRR17520069. 3376144  
SRR17520069. 3376147  
SRR17520069. 3376148  
SRR17520069. 3376149  
SRR17520069. 3376150  
SRR17520069. 3376151  
SRR17520069. 3376152  
SRR17520069. 3376153  
SRR17520069. 3376154  
SRR17520069. 3376155  
SRR17520069. 3376156  
SRR17520069. 3391609  
SRR17520069. 3407531  
SRR17520069. 3407533  
SRR17520069. 3407534  
SRR17520069. 3407535

SRR17520069. 3407536  
SRR17520069. 3407537  
SRR17520069. 3407538  
SRR17520069. 3407539  
SRR17520069. 3407540  
SRR17520069. 3407541  
SRR17520069. 3407542  
SRR17520069. 3407543  
SRR17520069. 3407544  
SRR17520069. 3407545  
SRR17520069. 3407546  
SRR17520069. 3407547  
SRR17520069. 3407548  
SRR17520069. 3407549  
SRR17520069. 3407550  
SRR17520069. 3407551  
SRR17520069. 3407553  
SRR17520069. 3407554  
SRR17520069. 3407555  
SRR17520069. 3407556  
SRR17520069. 3407557  
SRR17520069. 3407558  
SRR17520069. 3407559  
SRR17520069. 3407560  
SRR17520069. 3407561  
SRR17520069. 3407563  
SRR17520069. 3407564  
SRR17520069. 3407565  
SRR17520069. 3407566  
SRR17520069. 3407567  
SRR17520069. 3407569  
SRR17520069. 3428104  
SRR17520069. 3430894  
SRR17520069. 3430904  
SRR17520069. 3434679  
SRR17520069. 3474191  
SRR17520069. 3480298  
SRR17520069. 3485892  
SRR17520069. 3527741  
SRR17520069. 3527743  
SRR17520069. 3527745  
SRR17520069. 3527746  
SRR17520069. 3527747  
SRR17520069. 3527748  
SRR17520069. 3527749  
SRR17520069. 3527751  
SRR17520069. 3527752



SRR17520069. 3527753  
SRR17520069. 3527754  
SRR17520069. 3527755  
SRR17520069. 3527756  
SRR17520069. 3527757  
SRR17520069. 3527759  
SRR17520069. 3527762  
SRR17520069. 3527763  
SRR17520069. 3527765  
SRR17520069. 3527766  
SRR17520069. 3527767  
SRR17520069. 3527768  
SRR17520069. 3527769  
SRR17520069. 3527770  
SRR17520069. 3527771  
SRR17520069. 3527772  
SRR17520069. 3527773  
SRR17520069. 3527774  
SRR17520069. 3527775  
SRR17520069. 3527776  
SRR17520069. 3527777  
SRR17520069. 3527779  
SRR17520069. 3527782  
SRR17520069. 3527783  
SRR17520069. 3527786  
SRR17520069. 3527787  
SRR17520069. 3527788  
SRR17520069. 3527790  
SRR17520069. 3527791  
SRR17520069. 3527792  
SRR17520069. 3527795  
SRR17520069. 3527796  
SRR17520069. 3527797  
SRR17520069. 3527799  
SRR17520069. 3527800  
SRR17520069. 3527801  
SRR17520069. 3527804  
SRR17520069. 3527805  
SRR17520069. 3527809  
SRR17520069. 3527811  
SRR17520069. 3527812  
SRR17520069. 3527813  
SRR17520069. 3527815  
SRR17520069. 3527816  
SRR17520069. 3527817  
SRR17520069. 3527819  
SRR17520069. 3527820

SRR17520069. 3527822  
SRR17520069. 3527823  
SRR17520069. 3527824  
SRR17520069. 3527826  
SRR17520069. 3527827  
SRR17520069. 3527828  
SRR17520069. 3527829  
SRR17520069. 3527830  
SRR17520069. 3527831  
SRR17520069. 3527832  
SRR17520069. 3527833  
SRR17520069. 3527834  
SRR17520069. 3527835  
SRR17520069. 3527836  
SRR17520069. 3527838  
SRR17520069. 3527839  
SRR17520069. 3527840  
SRR17520069. 3527841  
SRR17520069. 3527843  
SRR17520069. 3527844  
SRR17520069. 3527845  
SRR17520069. 3527847  
SRR17520069. 3527849  
SRR17520069. 3527850  
SRR17520069. 3527851  
SRR17520069. 3527853  
SRR17520069. 3527854  
SRR17520069. 3527855  
SRR17520069. 3527856  
SRR17520069. 3527859  
SRR17520069. 3527861  
SRR17520069. 3527862  
SRR17520069. 3527863  
SRR17520069. 3527864  
SRR17520069. 3527865  
SRR17520069. 3527866  
SRR17520069. 3527867  
SRR17520069. 3527868  
SRR17520069. 3527869  
SRR17520069. 3527870  
SRR17520069. 3527871  
SRR17520069. 3540088  
SRR17520069. 3608319  
SRR17520069. 3633915  
SRR17520069. 3633946  
SRR17520069. 3644271  
SRR17520069. 3644272

SRR17520069.3644273  
SRR17520069.3644274  
SRR17520069.3644275  
SRR17520069.3644276  
SRR17520069.3644277  
SRR17520069.3644278  
SRR17520069.3644279  
SRR17520069.3644280  
SRR17520069.3644281  
SRR17520069.3644282  
SRR17520069.3644283  
SRR17520069.3644284  
SRR17520069.3644285  
SRR17520069.3644286  
SRR17520069.3644287  
SRR17520069.3644289  
SRR17520069.3644290  
SRR17520069.3644291  
SRR17520069.3644292  
SRR17520069.3644293  
SRR17520069.3644294  
SRR17520069.3644295  
SRR17520069.3644296  
SRR17520069.3644297  
SRR17520069.3644298  
SRR17520069.3644299  
SRR17520069.3644300  
SRR17520069.3644301  
SRR17520069.3644302  
SRR17520069.3644303  
SRR17520069.3644304  
SRR17520069.3644305  
SRR17520069.3657344  
SRR17520069.3657345  
SRR17520069.3657346  
SRR17520069.3657347  
SRR17520069.3657348  
SRR17520069.3657349  
SRR17520069.3657350  
SRR17520069.3657351  
SRR17520069.3657352  
SRR17520069.3657353  
SRR17520069.3657354  
SRR17520069.3657356  
SRR17520069.3657357  
SRR17520069.3657358  
SRR17520069.3657359

SRR17520069. 3657360  
SRR17520069. 3657361  
SRR17520069. 3657362  
SRR17520069. 3657363  
SRR17520069. 3657364  
SRR17520069. 3657365  
SRR17520069. 3657366  
SRR17520069. 3657367  
SRR17520069. 3657368  
SRR17520069. 3657369  
SRR17520069. 3657371  
SRR17520069. 3657372  
SRR17520069. 3657373  
SRR17520069. 3657374  
SRR17520069. 3657375  
SRR17520069. 3657376  
SRR17520069. 3657377  
SRR17520069. 3657378  
SRR17520069. 3657379  
SRR17520069. 3657380  
SRR17520069. 3657381  
SRR17520069. 3657382  
SRR17520069. 3657383  
SRR17520069. 3657384  
SRR17520069. 3657385  
SRR17520069. 3657386  
SRR17520069. 3657387  
SRR17520069. 3657388  
SRR17520069. 3657389  
SRR17520069. 3657390  
SRR17520069. 3657391  
SRR17520069. 3657392  
SRR17520069. 3657393  
SRR17520069. 3657394  
SRR17520069. 3657395  
SRR17520069. 3657396  
SRR17520069. 3657397  
SRR17520069. 3657398  
SRR17520069. 3657399  
SRR17520069. 3657400  
SRR17520069. 3657401  
SRR17520069. 3657402  
SRR17520069. 3657403  
SRR17520069. 3657404  
SRR17520069. 3657405  
SRR17520069. 3657406  
SRR17520069. 3657407

SRR17520069. 3657408  
SRR17520069. 3657409  
SRR17520069. 3657410  
SRR17520069. 3657411  
SRR17520069. 3657412  
SRR17520069. 3657413  
SRR17520069. 3657414  
SRR17520069. 3657415  
SRR17520069. 3657416  
SRR17520069. 3657417  
SRR17520069. 3657418  
SRR17520069. 3657419  
SRR17520069. 3657420  
SRR17520069. 3657421  
SRR17520069. 3657422  
SRR17520069. 3657423  
SRR17520069. 3657424  
SRR17520069. 3657425  
SRR17520069. 3657426  
SRR17520069. 3657427  
SRR17520069. 3657428  
SRR17520069. 3657429  
SRR17520069. 3657430  
SRR17520069. 3657431  
SRR17520069. 3657432  
SRR17520069. 3657433  
SRR17520069. 3657434  
SRR17520069. 3657435  
SRR17520069. 3657436  
SRR17520069. 3657437  
SRR17520069. 3657438  
SRR17520069. 3657439  
SRR17520069. 3657440  
SRR17520069. 3657441  
SRR17520069. 3657442  
SRR17520069. 3657443  
SRR17520069. 3657444  
SRR17520069. 3657445  
SRR17520069. 3657446  
SRR17520069. 3657447  
SRR17520069. 3657448  
SRR17520069. 3657449  
SRR17520069. 3657450  
SRR17520069. 3657451  
SRR17520069. 3657452  
SRR17520069. 3657454  
SRR17520069. 3657455

SRR17520069. 3657456  
SRR17520069. 3657457  
SRR17520069. 3657458  
SRR17520069. 3657459  
SRR17520069. 3657460  
SRR17520069. 3657461  
SRR17520069. 3657463  
SRR17520069. 3657464  
SRR17520069. 3657465  
SRR17520069. 3657466  
SRR17520069. 3657467  
SRR17520069. 3657468  
SRR17520069. 3657469  
SRR17520069. 3657470  
SRR17520069. 3657471  
SRR17520069. 3657472  
SRR17520069. 3657473  
SRR17520069. 3657474  
SRR17520069. 3657475  
SRR17520069. 3662829  
SRR17520069. 3668491  
SRR17520069. 3668582  
SRR17520069. 3695955  
SRR17520069. 3695956  
SRR17520069. 3695957  
SRR17520069. 3695958  
SRR17520069. 3695959  
SRR17520069. 3695960  
SRR17520069. 3715784  
SRR17520069. 3729245  
SRR17520069. 3730155  
SRR17520069. 3770176  
SRR17520069. 3829843  
SRR17520069. 3839135  
SRR17520069. 3839199  
SRR17520069. 3863476  
SRR17520069. 3891862  
SRR17520069. 3902636  
SRR17520069. 3914528  
SRR17520069. 3914553  
SRR17520069. 3914559  
SRR17520069. 3930334  
SRR17520069. 3954140  
SRR17520069. 3960619  
SRR17520069. 3962174  
SRR17520069. 3971238  
SRR17520069. 3971239

SRR17520069.3997585  
SRR17520069.4004036  
SRR17520069.4039357  
SRR17520069.4046605  
SRR17520069.4046606  
SRR17520069.4046607  
SRR17520069.4046608  
SRR17520069.4046609  
SRR17520069.4046610  
SRR17520069.4065745  
SRR17520069.4069883  
SRR17520069.4093484  
SRR17520069.4093485  
SRR17520069.4093489  
SRR17520069.4093490  
SRR17520069.4093491  
SRR17520069.4093492  
SRR17520069.4093493  
SRR17520069.4093494  
SRR17520069.4093495  
SRR17520069.4093496  
SRR17520069.4093497  
SRR17520069.4093498  
SRR17520069.4093499  
SRR17520069.4093500  
SRR17520069.4093501  
SRR17520069.4093502  
SRR17520069.4093503  
SRR17520069.4093504  
SRR17520069.4093505  
SRR17520069.4093506  
SRR17520069.4111749  
SRR17520069.4154367  
SRR17520069.4155083  
SRR17520069.4155113  
SRR17520069.4158221  
SRR17520069.4170382  
SRR17520069.4173085  
SRR17520069.4189992  
SRR17520069.4216177  
SRR17520069.4216178  
SRR17520069.4216179  
SRR17520069.4216180  
SRR17520069.4216181  
SRR17520069.4216182  
SRR17520069.4216183  
SRR17520069.4216184

SRR17520069.4216185  
SRR17520069.4216186  
SRR17520069.4216187  
SRR17520069.4216188  
SRR17520069.4217547  
SRR17520069.4223226  
SRR17520069.4231937  
SRR17520069.4232101  
SRR17520069.4234711  
SRR17520069.4240845  
SRR17520069.4314258  
SRR17520069.4314303  
SRR17520069.4329468  
SRR17520069.4329552  
SRR17520069.4342405  
SRR17520069.4342406  
SRR17520069.4342407  
SRR17520069.4342408  
SRR17520069.4342409  
SRR17520069.4342410  
SRR17520069.4342411  
SRR17520069.4342412  
SRR17520069.4342413  
SRR17520069.4473425  
SRR17520069.4474442  
SRR17520069.4475602  
SRR17520069.4480751  
SRR17520069.4486052  
SRR17520069.4486054  
SRR17520069.4486056  
SRR17520069.4486057  
SRR17520069.4486058  
SRR17520069.4486059  
SRR17520069.4486060  
SRR17520069.4486061  
SRR17520069.4486062  
SRR17520069.4486063  
SRR17520069.4486064  
SRR17520069.4486065  
SRR17520069.4486066  
SRR17520069.4486067  
SRR17520069.4486068  
SRR17520069.4486069  
SRR17520069.4486070  
SRR17520069.4486071  
SRR17520069.4486072  
SRR17520069.4486073



SRR17520069.4486074  
SRR17520069.4486075  
SRR17520069.4486076  
SRR17520069.4486077  
SRR17520069.4486078  
SRR17520069.4486079  
SRR17520069.4486080  
SRR17520069.4486081  
SRR17520069.4487451  
SRR17520069.4492995  
SRR17520069.4493070  
SRR17520069.4511605  
SRR17520069.4511607  
SRR17520069.4511612  
SRR17520069.4511614  
SRR17520069.4511615  
SRR17520069.4511616  
SRR17520069.4511617  
SRR17520069.4520537  
SRR17520069.4520558  
SRR17520069.4530014  
SRR17520069.4531077  
SRR17520069.4584111  
SRR17520069.4584112  
SRR17520069.4584113  
SRR17520069.4584114  
SRR17520069.4584115  
SRR17520069.4584116  
SRR17520069.4584117  
SRR17520069.4584118  
SRR17520069.4584119  
SRR17520069.4584120  
SRR17520069.4584121  
SRR17520069.4584122  
SRR17520069.4584123  
SRR17520069.4584124  
SRR17520069.4584125  
SRR17520069.4584126  
SRR17520069.4584127  
SRR17520069.4584128  
SRR17520069.4584129  
SRR17520069.4584130  
SRR17520069.4584131  
SRR17520069.4584132  
SRR17520069.4584133  
SRR17520069.4584134  
SRR17520069.4584135

SRR17520069.4584136  
SRR17520069.4584137  
SRR17520069.4584138  
SRR17520069.4584139  
SRR17520069.4584140  
SRR17520069.4584141  
SRR17520069.4584142  
SRR17520069.4584143  
SRR17520069.4584144  
SRR17520069.4584145  
SRR17520069.4584146  
SRR17520069.4584147  
SRR17520069.4584148  
SRR17520069.4584149  
SRR17520069.4584150  
SRR17520069.4584151  
SRR17520069.4584152  
SRR17520069.4584153  
SRR17520069.4584154  
SRR17520069.4584155  
SRR17520069.4584156  
SRR17520069.4584157  
SRR17520069.4584158  
SRR17520069.4584159  
SRR17520069.4584160  
SRR17520069.4584161  
SRR17520069.4584898  
SRR17520069.4626188  
SRR17520069.4655726  
SRR17520069.4655727  
SRR17520069.4655728  
SRR17520069.4655729  
SRR17520069.4655730  
SRR17520069.4655731  
SRR17520069.4655734  
SRR17520069.4655735  
SRR17520069.4655736  
SRR17520069.4655737  
SRR17520069.4655738  
SRR17520069.4655740  
SRR17520069.4703320  
SRR17520069.4719662  
SRR17520069.4749487  
SRR17520069.4770535  
SRR17520069.4794806  
SRR17520069.4794807  
SRR17520069.4794808

SRR17520069.4794809  
SRR17520069.4794810  
SRR17520069.4838841  
SRR17520069.4838861  
SRR17520069.4838866  
SRR17520069.4843893  
SRR17520069.4843894  
SRR17520069.4843895  
SRR17520069.4843896  
SRR17520069.4843897  
SRR17520069.4843898  
SRR17520069.4843899  
SRR17520069.4843900  
SRR17520069.4843901  
SRR17520069.4843902  
SRR17520069.4843903  
SRR17520069.4843904  
SRR17520069.4843905  
SRR17520069.4843907  
SRR17520069.4843908  
SRR17520069.4843909  
SRR17520069.4843910  
SRR17520069.4843911  
SRR17520069.4843912  
SRR17520069.4843913  
SRR17520069.4843914  
SRR17520069.4843915  
SRR17520069.4843916  
SRR17520069.4843917  
SRR17520069.4843918  
SRR17520069.4843919  
SRR17520069.4843920  
SRR17520069.4843921  
SRR17520069.4843922  
SRR17520069.4843923  
SRR17520069.4843924  
SRR17520069.4843925  
SRR17520069.4843926  
SRR17520069.4843927  
SRR17520069.4843928  
SRR17520069.4843929  
SRR17520069.4843930  
SRR17520069.4843931  
SRR17520069.4843932  
SRR17520069.4843933  
SRR17520069.4843934  
SRR17520069.4843935

SRR17520069.4843936  
SRR17520069.4843937  
SRR17520069.4843938  
SRR17520069.4843940  
SRR17520069.4843941  
SRR17520069.4849344  
SRR17520069.4964600  
SRR17520069.4964601  
SRR17520069.4964602  
SRR17520069.4964603  
SRR17520069.4964604  
SRR17520069.4964605  
SRR17520069.4964606  
SRR17520069.4964607  
SRR17520069.4964608  
SRR17520069.4964609  
SRR17520069.4964610  
SRR17520069.4964611  
SRR17520069.4964612  
SRR17520069.4964613  
SRR17520069.4964614  
SRR17520069.4964615  
SRR17520069.4964616  
SRR17520069.4964617  
SRR17520069.4964618  
SRR17520069.4964619  
SRR17520069.4964620  
SRR17520069.4964621  
SRR17520069.4964622  
SRR17520069.4964623  
SRR17520069.4964624  
SRR17520069.4964625  
SRR17520069.4964626  
SRR17520069.4964627  
SRR17520069.4964628  
SRR17520069.4964629  
SRR17520069.4964630  
SRR17520069.4964631  
SRR17520069.4964632  
SRR17520069.4964633  
SRR17520069.4964634  
SRR17520069.4964635  
SRR17520069.4964636  
SRR17520069.4964637  
SRR17520069.4964638  
SRR17520069.4964639  
SRR17520069.4964640

SRR17520069.4964641  
SRR17520069.4964642  
SRR17520069.4964643  
SRR17520069.4964644  
SRR17520069.4964645  
SRR17520069.4964646  
SRR17520069.4964647  
SRR17520069.4964648  
SRR17520069.4964649  
SRR17520069.4964650  
SRR17520069.4964651  
SRR17520069.4964652  
SRR17520069.4964653  
SRR17520069.4964654  
SRR17520069.4964655  
SRR17520069.4964656  
SRR17520069.4964657  
SRR17520069.4964658  
SRR17520069.4964660  
SRR17520069.4964661  
SRR17520069.4964662  
SRR17520069.4964663  
SRR17520069.4964664  
SRR17520069.4964665  
SRR17520069.4964666  
SRR17520069.4964667  
SRR17520069.4964668  
SRR17520069.4964669  
SRR17520069.4964670  
SRR17520069.4964672  
SRR17520069.4964673  
SRR17520069.4964674  
SRR17520069.4964675  
SRR17520069.4964676  
SRR17520069.4964677  
SRR17520069.4964678  
SRR17520069.4964679  
SRR17520069.4964680  
SRR17520069.5075063  
SRR17520069.5083461  
SRR17520069.5095446  
SRR17520069.5100669  
SRR17520069.5104977  
SRR17520069.5112923  
SRR17520069.5126118  
SRR17520069.5126122  
SRR17520069.5126123

SRR17520069. 5126125  
SRR17520069. 5126126  
SRR17520069. 5126134  
SRR17520069. 5126135  
SRR17520069. 5126136  
SRR17520069. 5126139  
SRR17520069. 5126140  
SRR17520069. 5126141  
SRR17520069. 5154496  
SRR17520069. 5154546  
SRR17520069. 5177619  
SRR17520069. 5210020  
SRR17520069. 5210021  
SRR17520069. 5210022  
SRR17520069. 5219576  
SRR17520069. 5225579  
SRR17520069. 5248075  
SRR17520069. 5316910  
SRR17520069. 5321523  
SRR17520069. 5321555  
SRR17520069. 5351524  
SRR17520069. 5351575  
SRR17520069. 5373424  
SRR17520069. 5373425  
SRR17520069. 5373426  
SRR17520069. 5373427  
SRR17520069. 5373428  
SRR17520069. 5373429  
SRR17520069. 5373430  
SRR17520069. 5373432  
SRR17520069. 5373433  
SRR17520069. 5373434  
SRR17520069. 5373435  
SRR17520069. 5373436  
SRR17520069. 5373437  
SRR17520069. 5373438  
SRR17520069. 5373439  
SRR17520069. 5373440  
SRR17520069. 5373441  
SRR17520069. 5373442  
SRR17520069. 5373443  
SRR17520069. 5373444  
SRR17520069. 5373446  
SRR17520069. 5373447  
SRR17520069. 5373448  
SRR17520069. 5373450  
SRR17520069. 5373451

SRR17520069. 5373452  
SRR17520069. 5373453  
SRR17520069. 5373454  
SRR17520069. 5373455  
SRR17520069. 5373456  
SRR17520069. 5373457  
SRR17520069. 5373458  
SRR17520069. 5373459  
SRR17520069. 5373460  
SRR17520069. 5373461  
SRR17520069. 5373462  
SRR17520069. 5373463  
SRR17520069. 5373464  
SRR17520069. 5373465  
SRR17520069. 5373466  
SRR17520069. 5373467  
SRR17520069. 5373468  
SRR17520069. 5373469  
SRR17520069. 5373470  
SRR17520069. 5373471  
SRR17520069. 5398564  
SRR17520069. 5424107  
SRR17520069. 5424213  
SRR17520069. 5429533  
SRR17520069. 5439445  
SRR17520069. 5439446  
SRR17520069. 5439447  
SRR17520069. 5439448  
SRR17520069. 5439449  
SRR17520069. 5439450  
SRR17520069. 5439451  
SRR17520069. 5439452  
SRR17520069. 5439453  
SRR17520069. 5439454  
SRR17520069. 5439455  
SRR17520069. 5439456  
SRR17520069. 5439457  
SRR17520069. 5439458  
SRR17520069. 5439459  
SRR17520069. 5439460  
SRR17520069. 5439461  
SRR17520069. 5439462  
SRR17520069. 5439463  
SRR17520069. 5439464  
SRR17520069. 5439465  
SRR17520069. 5439466  
SRR17520069. 5439467

SRR17520069. 5439468  
SRR17520069. 5439469  
SRR17520069. 5439470  
SRR17520069. 5439471  
SRR17520069. 5439472  
SRR17520069. 5439473  
SRR17520069. 5439474  
SRR17520069. 5439475  
SRR17520069. 5439476  
SRR17520069. 5439477  
SRR17520069. 5439478  
SRR17520069. 5439479  
SRR17520069. 5439480  
SRR17520069. 5439481  
SRR17520069. 5439482  
SRR17520069. 5439483  
SRR17520069. 5439484  
SRR17520069. 5439485  
SRR17520069. 5439486  
SRR17520069. 5439487  
SRR17520069. 5439488  
SRR17520069. 5439489  
SRR17520069. 5439490  
SRR17520069. 5439491  
SRR17520069. 5439492  
SRR17520069. 5439493  
SRR17520069. 5439494  
SRR17520069. 5439495  
SRR17520069. 5439496  
SRR17520069. 5439497  
SRR17520069. 5439498  
SRR17520069. 5439499  
SRR17520069. 5460115  
SRR17520069. 5460116  
SRR17520069. 5460117  
SRR17520069. 5460118  
SRR17520069. 5460119  
SRR17520069. 5460120  
SRR17520069. 5460122  
SRR17520069. 5460123  
SRR17520069. 5460124  
SRR17520069. 5460125  
SRR17520069. 5460126  
SRR17520069. 5460127  
SRR17520069. 5460128  
SRR17520069. 5460129  
SRR17520069. 5460130



SRR17520069. 5460131  
SRR17520069. 5460132  
SRR17520069. 5460133  
SRR17520069. 5460134  
SRR17520069. 5460135  
SRR17520069. 5460136  
SRR17520069. 5460137  
SRR17520069. 5460138  
SRR17520069. 5460139  
SRR17520069. 5460140  
SRR17520069. 5460141  
SRR17520069. 5460142  
SRR17520069. 5460144  
SRR17520069. 5460145  
SRR17520069. 5460146  
SRR17520069. 5460147  
SRR17520069. 5460148  
SRR17520069. 5460149  
SRR17520069. 5460151  
SRR17520069. 5460152  
SRR17520069. 5460153  
SRR17520069. 5460154  
SRR17520069. 5460155  
SRR17520069. 5460156  
SRR17520069. 5460157  
SRR17520069. 5460158  
SRR17520069. 5460159  
SRR17520069. 5460160  
SRR17520069. 5460161  
SRR17520069. 5460162  
SRR17520069. 5460163  
SRR17520069. 5460164  
SRR17520069. 5460165  
SRR17520069. 5460167  
SRR17520069. 5460168  
SRR17520069. 5460169  
SRR17520069. 5460170  
SRR17520069. 5460171  
SRR17520069. 5460172  
SRR17520069. 5460216  
SRR17520069. 5496376  
SRR17520069. 5496445  
SRR17520069. 5496450  
SRR17520069. 5509897  
SRR17520069. 5521184  
SRR17520069. 5521185  
SRR17520069. 5521186

SRR17520069.5521187  
SRR17520069.5521188  
SRR17520069.5521189  
SRR17520069.5521190  
SRR17520069.5521191  
SRR17520069.5521192  
SRR17520069.5521193  
SRR17520069.5521194  
SRR17520069.5521195  
SRR17520069.5521196  
SRR17520069.5521197  
SRR17520069.5521198  
SRR17520069.5521199  
SRR17520069.5521200  
SRR17520069.5521201  
SRR17520069.5521202  
SRR17520069.5521203  
SRR17520069.5521204  
SRR17520069.5521205  
SRR17520069.5521206  
SRR17520069.5521207  
SRR17520069.5521208  
SRR17520069.5521209  
SRR17520069.5521210  
SRR17520069.5521211  
SRR17520069.5521212  
SRR17520069.5521213  
SRR17520069.5521214  
SRR17520069.5521215  
SRR17520069.5521216  
SRR17520069.5521217  
SRR17520069.5521218  
SRR17520069.5521219  
SRR17520069.5521220  
SRR17520069.5521221  
SRR17520069.5521222  
SRR17520069.5521223  
SRR17520069.5521224  
SRR17520069.5521225  
SRR17520069.5521226  
SRR17520069.5521227  
SRR17520069.5521228  
SRR17520069.5521229  
SRR17520069.5521230  
SRR17520069.5521231  
SRR17520069.5550542  
SRR17520069.5573146

SRR17520069.5573245  
SRR17520069.5574005  
SRR17520069.5601796  
SRR17520069.5601818  
SRR17520069.5601840  
SRR17520069.5615830  
SRR17520069.5637282  
SRR17520069.5637283  
SRR17520069.5639441  
SRR17520069.5643545  
SRR17520069.5693922  
SRR17520069.5701802  
SRR17520069.5701805  
SRR17520069.5701810  
SRR17520069.5701817  
SRR17520069.5704814  
SRR17520069.5704828  
SRR17520069.5704829  
SRR17520069.5704838  
SRR17520069.5704842  
SRR17520069.5704844  
SRR17520069.5704847  
SRR17520069.5711164  
SRR17520069.5762172  
SRR17520069.5762187  
SRR17520069.5784030  
SRR17520069.5784064  
SRR17520069.5800605  
SRR17520069.5822092  
SRR17520069.5822094  
SRR17520069.5822098  
SRR17520069.5822101  
SRR17520069.5822106  
SRR17520069.5822107  
SRR17520069.5822112  
SRR17520069.5822116  
SRR17520069.5822120  
SRR17520069.5822122  
SRR17520069.5822123  
SRR17520069.5839942  
SRR17520069.5843661  
SRR17520069.5848963  
SRR17520069.5848975  
SRR17520069.5885263  
SRR17520069.5898471  
SRR17520069.5901803  
SRR17520069.5956286

SRR17520069.5975718  
SRR17520069.5975720  
SRR17520069.5975721  
SRR17520069.5975722  
SRR17520069.5975723  
SRR17520069.5975724  
SRR17520069.5982847  
SRR17520069.5984443  
SRR17520069.5987765  
SRR17520069.6034089  
SRR17520069.6076845  
SRR17520069.6076846  
SRR17520069.6076847  
SRR17520069.6076849  
SRR17520069.6076850  
SRR17520069.6076851  
SRR17520069.6076852  
SRR17520069.6076853  
SRR17520069.6076854  
SRR17520069.6093324  
SRR17520069.6093325  
SRR17520069.6093326  
SRR17520069.6093327  
SRR17520069.6093328  
SRR17520069.6093329  
SRR17520069.6093330  
SRR17520069.6093331  
SRR17520069.6093332  
SRR17520069.6093333  
SRR17520069.6093334  
SRR17520069.6093335  
SRR17520069.6093337  
SRR17520069.6093338  
SRR17520069.6093339  
SRR17520069.6093340  
SRR17520069.6093341  
SRR17520069.6093342  
SRR17520069.6093343  
SRR17520069.6093344  
SRR17520069.6093345  
SRR17520069.6093346  
SRR17520069.6093347  
SRR17520069.6093348  
SRR17520069.6093349  
SRR17520069.6093350  
SRR17520069.6093351  
SRR17520069.6093352

SRR17520069. 6093353  
SRR17520069. 6093354  
SRR17520069. 6093355  
SRR17520069. 6093356  
SRR17520069. 6093357  
SRR17520069. 6093358  
SRR17520069. 6093359  
SRR17520069. 6093360  
SRR17520069. 6093361  
SRR17520069. 6093363  
SRR17520069. 6093364  
SRR17520069. 6093365  
SRR17520069. 6093366  
SRR17520069. 6093367  
SRR17520069. 6093368  
SRR17520069. 6093369  
SRR17520069. 6093370  
SRR17520069. 6093371  
SRR17520069. 6093372  
SRR17520069. 6093373  
SRR17520069. 6093374  
SRR17520069. 6093375  
SRR17520069. 6093376  
SRR17520069. 6093377  
SRR17520069. 6093378  
SRR17520069. 6093379  
SRR17520069. 6093380  
SRR17520069. 6093381  
SRR17520069. 6093382  
SRR17520069. 6093383  
SRR17520069. 6093384  
SRR17520069. 6093385  
SRR17520069. 6093386  
SRR17520069. 6093594  
SRR17520069. 6097161  
SRR17520069. 6097172  
SRR17520069. 6108750  
SRR17520069. 6127117  
SRR17520069. 6148571  
SRR17520069. 6155186  
SRR17520069. 6169724  
SRR17520069. 6169725  
SRR17520069. 6169726  
SRR17520069. 6169727  
SRR17520069. 6169728  
SRR17520069. 6169729  
SRR17520069. 6169730

SRR17520069.6169731  
SRR17520069.6169732  
SRR17520069.6169734  
SRR17520069.6169735  
SRR17520069.6169736  
SRR17520069.6169737  
SRR17520069.6169738  
SRR17520069.6169739  
SRR17520069.6169740  
SRR17520069.6169741  
SRR17520069.6169742  
SRR17520069.6169743  
SRR17520069.6169744  
SRR17520069.6169745  
SRR17520069.6169746  
SRR17520069.6169748  
SRR17520069.6169749  
SRR17520069.6169750  
SRR17520069.6169751  
SRR17520069.6169752  
SRR17520069.6169753  
SRR17520069.6188045  
SRR17520069.6191610  
SRR17520069.6198434  
SRR17520069.6237045  
SRR17520069.6237057  
SRR17520069.6237064  
SRR17520069.6246952  
SRR17520069.6246953  
SRR17520069.6246954  
SRR17520069.6246955  
SRR17520069.6246956  
SRR17520069.6246957  
SRR17520069.6246958  
SRR17520069.6246959  
SRR17520069.6246961  
SRR17520069.6246962  
SRR17520069.6246963  
SRR17520069.6246964  
SRR17520069.6246966  
SRR17520069.6246967  
SRR17520069.6246968  
SRR17520069.6271904  
SRR17520069.6289468  
SRR17520069.6289514  
SRR17520069.6291752  
SRR17520069.6291772

SRR17520069. 6293723  
SRR17520069. 6293724  
SRR17520069. 6293725  
SRR17520069. 6293726  
SRR17520069. 6293727  
SRR17520069. 6293728  
SRR17520069. 6293729  
SRR17520069. 6293730  
SRR17520069. 6293731  
SRR17520069. 6293732  
SRR17520069. 6293733  
SRR17520069. 6293734  
SRR17520069. 6293735  
SRR17520069. 6293736  
SRR17520069. 6293737  
SRR17520069. 6293738  
SRR17520069. 6293739  
SRR17520069. 6293740  
SRR17520069. 6293741  
SRR17520069. 6293742  
SRR17520069. 6293743  
SRR17520069. 6293744  
SRR17520069. 6293745  
SRR17520069. 6293746  
SRR17520069. 6293747  
SRR17520069. 6293748  
SRR17520069. 6341518  
SRR17520069. 6349863  
SRR17520069. 6368300  
SRR17520069. 6378057  
SRR17520069. 6401979  
SRR17520069. 6408753  
SRR17520069. 6421200  
SRR17520069. 6457925  
SRR17520069. 6511916  
SRR17520069. 6574121  
SRR17520069. 6589322  
SRR17520069. 6598055  
SRR17520069. 6632192  
SRR17520069. 6648885  
SRR17520069. 6657680  
SRR17520069. 6657729  
SRR17520069. 6657746  
SRR17520069. 6666063  
SRR17520069. 6666076  
SRR17520069. 6691510  
SRR17520069. 6715079

SRR17520069.6738643  
SRR17520069.6762427  
SRR17520069.6795703  
SRR17520069.6835664  
SRR17520069.6835665  
SRR17520069.6835666  
SRR17520069.6835668  
SRR17520069.6835669  
SRR17520069.6835670  
SRR17520069.6835671  
SRR17520069.6835672  
SRR17520069.6835673  
SRR17520069.6835674  
SRR17520069.6835675  
SRR17520069.6835676  
SRR17520069.6835677  
SRR17520069.6835678  
SRR17520069.6835679  
SRR17520069.6835680  
SRR17520069.6835681  
SRR17520069.6835683  
SRR17520069.6835684  
SRR17520069.6857971  
SRR17520069.6927886  
SRR17520069.6936141  
SRR17520069.6947693  
SRR17520069.6949980  
SRR17520069.6949981  
SRR17520069.6949982  
SRR17520069.6949983  
SRR17520069.6949984  
SRR17520069.6949985  
SRR17520069.6949986  
SRR17520069.6949987  
SRR17520069.6949988  
SRR17520069.6949989  
SRR17520069.6949990  
SRR17520069.6949991  
SRR17520069.6949992  
SRR17520069.6949993  
SRR17520069.6949994  
SRR17520069.6949995  
SRR17520069.6949996  
SRR17520069.6949997  
SRR17520069.6949998  
SRR17520069.6949999  
SRR17520069.6950000



SRR17520069.6950001  
SRR17520069.6950002  
SRR17520069.6950003  
SRR17520069.6950004  
SRR17520069.6950005  
SRR17520069.6950006  
SRR17520069.6950007  
SRR17520069.6950008  
SRR17520069.6950009  
SRR17520069.6950010  
SRR17520069.6950011  
SRR17520069.6950012  
SRR17520069.6950013  
SRR17520069.6950014  
SRR17520069.6950015  
SRR17520069.6950016  
SRR17520069.6950017  
SRR17520069.6950018  
SRR17520069.6950019  
SRR17520069.6950020  
SRR17520069.6950021  
SRR17520069.6950022  
SRR17520069.6950023  
SRR17520069.6950024  
SRR17520069.6950025  
SRR17520069.6950026  
SRR17520069.6950027  
SRR17520069.6950028  
SRR17520069.6950029  
SRR17520069.6950030  
SRR17520069.6950031  
SRR17520069.6950032  
SRR17520069.6950033  
SRR17520069.6950034  
SRR17520069.6950035  
SRR17520069.6950036  
SRR17520069.6950037  
SRR17520069.6950038  
SRR17520069.6950039  
SRR17520069.6950040  
SRR17520069.6950041  
SRR17520069.6950042  
SRR17520069.6950043  
SRR17520069.6950044  
SRR17520069.6950045  
SRR17520069.6950046  
SRR17520069.6950047

SRR17520069.6950048  
SRR17520069.6950049  
SRR17520069.6950050  
SRR17520069.6950051  
SRR17520069.6950052  
SRR17520069.6950053  
SRR17520069.6950054  
SRR17520069.6950055  
SRR17520069.6950056  
SRR17520069.6950057  
SRR17520069.6950058  
SRR17520069.6950059  
SRR17520069.6950060  
SRR17520069.6950061  
SRR17520069.6950062  
SRR17520069.6950063  
SRR17520069.6950064  
SRR17520069.6950065  
SRR17520069.6950066  
SRR17520069.6950067  
SRR17520069.6950068  
SRR17520069.6950069  
SRR17520069.6950070  
SRR17520069.6950071  
SRR17520069.6950072  
SRR17520069.6950073  
SRR17520069.6950074  
SRR17520069.6950075  
SRR17520069.6950076  
SRR17520069.6950077  
SRR17520069.6950078  
SRR17520069.6950079  
SRR17520069.6950080  
SRR17520069.6950081  
SRR17520069.6950082  
SRR17520069.6950083  
SRR17520069.6950084  
SRR17520069.6950085  
SRR17520069.6950086  
SRR17520069.6950087  
SRR17520069.6950088  
SRR17520069.6950089  
SRR17520069.6950090  
SRR17520069.6950091  
SRR17520069.6950092  
SRR17520069.6950093  
SRR17520069.6950094

SRR17520069.6950095  
SRR17520069.6950096  
SRR17520069.6950097  
SRR17520069.6950098  
SRR17520069.6950099  
SRR17520069.6950100  
SRR17520069.6950101  
SRR17520069.6950102  
SRR17520069.6950103  
SRR17520069.6950104  
SRR17520069.6950105  
SRR17520069.6950106  
SRR17520069.6950107  
SRR17520069.6950108  
SRR17520069.6950109  
SRR17520069.6950110  
SRR17520069.6950111  
SRR17520069.6950113  
SRR17520069.6950114  
SRR17520069.6950115  
SRR17520069.6950116  
SRR17520069.6950117  
SRR17520069.6950118  
SRR17520069.6950119  
SRR17520069.6950120  
SRR17520069.6950121  
SRR17520069.6950122  
SRR17520069.6950123  
SRR17520069.6950124  
SRR17520069.6950125  
SRR17520069.6950126  
SRR17520069.6950127  
SRR17520069.6950128  
SRR17520069.6950129  
SRR17520069.6950130  
SRR17520069.6950131  
SRR17520069.6950132  
SRR17520069.6990785  
SRR17520069.6990817  
SRR17520069.7021450  
SRR17520069.7040884  
SRR17520069.7063744  
SRR17520069.7101960  
SRR17520069.7169076  
SRR17520069.7169077  
SRR17520069.7169078  
SRR17520069.7169079

SRR17520069.7169080  
SRR17520069.7169081  
SRR17520069.7169082  
SRR17520069.7169083  
SRR17520069.7169084  
SRR17520069.7169085  
SRR17520069.7169086  
SRR17520069.7169087  
SRR17520069.7169088  
SRR17520069.7169089  
SRR17520069.7169090  
SRR17520069.7169091  
SRR17520069.7169092  
SRR17520069.7192084  
SRR17520069.7192091  
SRR17520069.7231854  
SRR17520069.7231988  
SRR17520069.7231993  
SRR17520069.7237151  
SRR17520069.7254121  
SRR17520069.7274565  
SRR17520069.7281841  
SRR17520069.7281842  
SRR17520069.7281843  
SRR17520069.7281844  
SRR17520069.7281845  
SRR17520069.7281846  
SRR17520069.7281847  
SRR17520069.7281848  
SRR17520069.7281849  
SRR17520069.7281850  
SRR17520069.7281851  
SRR17520069.7281852  
SRR17520069.7281853  
SRR17520069.7281854  
SRR17520069.7281855  
SRR17520069.7281856  
SRR17520069.7281857  
SRR17520069.7281858  
SRR17520069.7281859  
SRR17520069.7281860  
SRR17520069.7281861  
SRR17520069.7281862  
SRR17520069.7281863  
SRR17520069.7281864  
SRR17520069.7281865  
SRR17520069.7284391

SRR17520069.7299631  
SRR17520069.7311090  
SRR17520069.7318869  
SRR17520069.7345390  
SRR17520069.7370996  
SRR17520069.7371053  
SRR17520069.7376257  
SRR17520069.7389678  
SRR17520069.7394917  
SRR17520069.7420613  
SRR17520069.7435015  
SRR17520069.7435016  
SRR17520069.7435017  
SRR17520069.7435018  
SRR17520069.7435019  
SRR17520069.7435020  
SRR17520069.7435021  
SRR17520069.7435022  
SRR17520069.7435023  
SRR17520069.7435024  
SRR17520069.7435025  
SRR17520069.7435026  
SRR17520069.7435027  
SRR17520069.7435028  
SRR17520069.7435029  
SRR17520069.7435030  
SRR17520069.7456622  
SRR17520069.7470059  
SRR17520069.7484314  
SRR17520069.7484315  
SRR17520069.7484316  
SRR17520069.7484317  
SRR17520069.7484318  
SRR17520069.7484319  
SRR17520069.7490658  
SRR17520069.7491942  
SRR17520069.7491953  
SRR17520069.7524835  
SRR17520069.7529736  
SRR17520069.7552695  
SRR17520069.7579494  
SRR17520069.7605670  
SRR17520069.7631215  
SRR17520069.7644208  
SRR17520069.7679442  
SRR17520069.7689268  
SRR17520069.7689269

SRR17520069.7689270  
SRR17520069.7689271  
SRR17520069.7689272  
SRR17520069.7689273  
SRR17520069.7689275  
SRR17520069.7689276  
SRR17520069.7689277  
SRR17520069.7689278  
SRR17520069.7689279  
SRR17520069.7689280  
SRR17520069.7689281  
SRR17520069.7689282  
SRR17520069.7689285  
SRR17520069.7689286  
SRR17520069.7689287  
SRR17520069.7689288  
SRR17520069.7689289  
SRR17520069.7689292  
SRR17520069.7689293  
SRR17520069.7689295  
SRR17520069.7689296  
SRR17520069.7689297  
SRR17520069.7689298  
SRR17520069.7689299  
SRR17520069.7689300  
SRR17520069.7689302  
SRR17520069.7689303  
SRR17520069.7689304  
SRR17520069.7689305  
SRR17520069.7689306  
SRR17520069.7689307  
SRR17520069.7689309  
SRR17520069.7689311  
SRR17520069.7689312  
SRR17520069.7689313  
SRR17520069.7689315  
SRR17520069.7689317  
SRR17520069.7689318  
SRR17520069.7689319  
SRR17520069.7689322  
SRR17520069.7689323  
SRR17520069.7689324  
SRR17520069.7689326  
SRR17520069.7689327  
SRR17520069.7689328  
SRR17520069.7689329  
SRR17520069.7689330

SRR17520069. 7689331  
SRR17520069. 7689332  
SRR17520069. 7689333  
SRR17520069. 7689334  
SRR17520069. 7689335  
SRR17520069. 7689336  
SRR17520069. 7689337  
SRR17520069. 7689338  
SRR17520069. 7689339  
SRR17520069. 7689340  
SRR17520069. 7689341  
SRR17520069. 7689342  
SRR17520069. 7689343  
SRR17520069. 7689344  
SRR17520069. 7689345  
SRR17520069. 7689346  
SRR17520069. 7689347  
SRR17520069. 7689348  
SRR17520069. 7689349  
SRR17520069. 7689351  
SRR17520069. 7689353  
SRR17520069. 7689354  
SRR17520069. 7689356  
SRR17520069. 7689357  
SRR17520069. 7689359  
SRR17520069. 7689360  
SRR17520069. 7689362  
SRR17520069. 7689363  
SRR17520069. 7689365  
SRR17520069. 7689366  
SRR17520069. 7703331  
SRR17520069. 7703368  
SRR17520069. 7707620  
SRR17520069. 7714986  
SRR17520069. 7716406  
SRR17520069. 7716407  
SRR17520069. 7716408  
SRR17520069. 7716409  
SRR17520069. 7716410  
SRR17520069. 7750478  
SRR17520069. 7754766  
SRR17520069. 7754857  
SRR17520069. 7764940  
SRR17520069. 7806358  
SRR17520069. 7806375  
SRR17520069. 7813707  
SRR17520069. 7817808

SRR17520069.7848310  
SRR17520069.7850448  
SRR17520069.7857329  
SRR17520069.7892868  
SRR17520069.7897231  
SRR17520069.7905293  
SRR17520069.7906128  
SRR17520069.7960939  
SRR17520069.7960940  
SRR17520069.7960941  
SRR17520069.7960942  
SRR17520069.7960943  
SRR17520069.7960944  
SRR17520069.7960947  
SRR17520069.7960948  
SRR17520069.7960949  
SRR17520069.7960950  
SRR17520069.7964740  
SRR17520069.7964748  
SRR17520069.8004061  
SRR17520069.8004062  
SRR17520069.8004063  
SRR17520069.8004064  
SRR17520069.8004065  
SRR17520069.8004066  
SRR17520069.8004067  
SRR17520069.8004068  
SRR17520069.8004069  
SRR17520069.8004070  
SRR17520069.8004071  
SRR17520069.8004072  
SRR17520069.8004073  
SRR17520069.8004074  
SRR17520069.8004075  
SRR17520069.8004076  
SRR17520069.8004078  
SRR17520069.8004079  
SRR17520069.8004080  
SRR17520069.8004081  
SRR17520069.8004082  
SRR17520069.8004083  
SRR17520069.8004084  
SRR17520069.8004085  
SRR17520069.8004086  
SRR17520069.8004087  
SRR17520069.8004088  
SRR17520069.8004089



SRR17520069.8004090  
SRR17520069.8004091  
SRR17520069.8004093  
SRR17520069.8007361  
SRR17520069.8023015  
SRR17520069.8023025  
SRR17520069.8033455  
SRR17520069.8033457  
SRR17520069.8033458  
SRR17520069.8033459  
SRR17520069.8033460  
SRR17520069.8033461  
SRR17520069.8033462  
SRR17520069.8033463  
SRR17520069.8033464  
SRR17520069.8033465  
SRR17520069.8033466  
SRR17520069.8033468  
SRR17520069.8033469  
SRR17520069.8033470  
SRR17520069.8033471  
SRR17520069.8033472  
SRR17520069.8033473  
SRR17520069.8033474  
SRR17520069.8033475  
SRR17520069.8033476  
SRR17520069.8033477  
SRR17520069.8033478  
SRR17520069.8033479  
SRR17520069.8033480  
SRR17520069.8033481  
SRR17520069.8033482  
SRR17520069.8033483  
SRR17520069.8033484  
SRR17520069.8033485  
SRR17520069.8033486  
SRR17520069.8033487  
SRR17520069.8033488  
SRR17520069.8033489  
SRR17520069.8033490  
SRR17520069.8033491  
SRR17520069.8033492  
SRR17520069.8033493  
SRR17520069.8033494  
SRR17520069.8033495  
SRR17520069.8033496  
SRR17520069.8033497

SRR17520069.8033498  
SRR17520069.8033499  
SRR17520069.8033500  
SRR17520069.8033501  
SRR17520069.8033502  
SRR17520069.8033503  
SRR17520069.8033504  
SRR17520069.8033505  
SRR17520069.8033506  
SRR17520069.8033507  
SRR17520069.8033508  
SRR17520069.8033509  
SRR17520069.8033510  
SRR17520069.8033511  
SRR17520069.8033512  
SRR17520069.8063042  
SRR17520069.8077672  
SRR17520069.8087944  
SRR17520069.8093601  
SRR17520069.8147629  
SRR17520069.8158000  
SRR17520069.8158001  
SRR17520069.8158002  
SRR17520069.8174494  
SRR17520069.8184933  
SRR17520069.8193572  
SRR17520069.8236162  
SRR17520069.8267507  
SRR17520069.8282290  
SRR17520069.8282291  
SRR17520069.8282292  
SRR17520069.8282293  
SRR17520069.8282294  
SRR17520069.8282295  
SRR17520069.8282296  
SRR17520069.8282297  
SRR17520069.8282298  
SRR17520069.8282299  
SRR17520069.8282300  
SRR17520069.8282301  
SRR17520069.8282302  
SRR17520069.8282303  
SRR17520069.8282304  
SRR17520069.8282305  
SRR17520069.8282306  
SRR17520069.8282307  
SRR17520069.8282308

SRR17520069.8282309  
SRR17520069.8282310  
SRR17520069.8282311  
SRR17520069.8282312  
SRR17520069.8282313  
SRR17520069.8282314  
SRR17520069.8282315  
SRR17520069.8282316  
SRR17520069.8282317  
SRR17520069.8282318  
SRR17520069.8282319  
SRR17520069.8282320  
SRR17520069.8282321  
SRR17520069.8282322  
SRR17520069.8282323  
SRR17520069.8282324  
SRR17520069.8282325  
SRR17520069.8282326  
SRR17520069.8282327  
SRR17520069.8282328  
SRR17520069.8282329  
SRR17520069.8282330  
SRR17520069.8282331  
SRR17520069.8282332  
SRR17520069.8282333  
SRR17520069.8282334  
SRR17520069.8282335  
SRR17520069.8282336  
SRR17520069.8282337  
SRR17520069.8288276  
SRR17520069.8288278  
SRR17520069.8302031  
SRR17520069.8315768  
SRR17520069.8315771  
SRR17520069.8315776  
SRR17520069.8315797  
SRR17520069.8315799  
SRR17520069.8315807  
SRR17520069.8315809  
SRR17520069.8315811  
SRR17520069.8315829  
SRR17520069.8315841  
SRR17520069.8315843  
SRR17520069.8315845  
SRR17520069.8315847  
SRR17520069.8315849  
SRR17520069.8315855

SRR17520069.8315859  
SRR17520069.8315861  
SRR17520069.8332395  
SRR17520069.8335270  
SRR17520069.8335340  
SRR17520069.8335341  
SRR17520069.8335342  
SRR17520069.8335343  
SRR17520069.8335344  
SRR17520069.8335345  
SRR17520069.8335346  
SRR17520069.8335347  
SRR17520069.8335348  
SRR17520069.8335349  
SRR17520069.8335350  
SRR17520069.8335351  
SRR17520069.8335352  
SRR17520069.8335353  
SRR17520069.8335354  
SRR17520069.8335355  
SRR17520069.8335356  
SRR17520069.8335357  
SRR17520069.8335358  
SRR17520069.8335359  
SRR17520069.8335360  
SRR17520069.8335361  
SRR17520069.8335362  
SRR17520069.8335363  
SRR17520069.8335364  
SRR17520069.8335365  
SRR17520069.8335366  
SRR17520069.8354555  
SRR17520069.8360409  
SRR17520069.8363958  
SRR17520069.8384140  
SRR17520069.8432833  
SRR17520069.8448012  
SRR17520069.8448013  
SRR17520069.8448014  
SRR17520069.8448015  
SRR17520069.8448016  
SRR17520069.8448017  
SRR17520069.8448018  
SRR17520069.8448019  
SRR17520069.8448020  
SRR17520069.8467196  
SRR17520069.8467221

SRR17520069.8467224  
SRR17520069.8481327  
SRR17520069.8486624  
SRR17520069.8486625  
SRR17520069.8486626  
SRR17520069.8486627  
SRR17520069.8489450  
SRR17520069.8500959  
SRR17520069.8500960  
SRR17520069.8522653  
SRR17520069.8552646  
SRR17520069.8564353  
SRR17520069.8565976  
SRR17520069.8585900  
SRR17520069.8603842  
SRR17520069.8608052  
SRR17520069.8608053  
SRR17520069.8608054  
SRR17520069.8608055  
SRR17520069.8622244  
SRR17520069.8622245  
SRR17520069.8622246  
SRR17520069.8622247  
SRR17520069.8622248  
SRR17520069.8622249  
SRR17520069.8622250  
SRR17520069.8622251  
SRR17520069.8622252  
SRR17520069.8622253  
SRR17520069.8622254  
SRR17520069.8622255  
SRR17520069.8622256  
SRR17520069.8622257  
SRR17520069.8622258  
SRR17520069.8622259  
SRR17520069.8622260  
SRR17520069.8622261  
SRR17520069.8630198  
SRR17520069.8648482  
SRR17520069.8648489  
SRR17520069.8648492  
SRR17520069.8648509  
SRR17520069.8648513  
SRR17520069.8648518  
SRR17520069.8648521  
SRR17520069.8648532  
SRR17520069.8648537

SRR17520069.8648552  
SRR17520069.8648560  
SRR17520069.8648568  
SRR17520069.8648572  
SRR17520069.8662454  
SRR17520069.8698650  
SRR17520069.8698651  
SRR17520069.8698652  
SRR17520069.8698655  
SRR17520069.8698656  
SRR17520069.8698657  
SRR17520069.8698659  
SRR17520069.8698660  
SRR17520069.8698661  
SRR17520069.8698662  
SRR17520069.8698663  
SRR17520069.8698664  
SRR17520069.8698665  
SRR17520069.8698666  
SRR17520069.8698667  
SRR17520069.8698668  
SRR17520069.8698669  
SRR17520069.8698670  
SRR17520069.8698671  
SRR17520069.8698673  
SRR17520069.8698674  
SRR17520069.8698675  
SRR17520069.8698677  
SRR17520069.8698679  
SRR17520069.8698680  
SRR17520069.8698681  
SRR17520069.8698682  
SRR17520069.8698683  
SRR17520069.8698685  
SRR17520069.8698686  
SRR17520069.8698687  
SRR17520069.8698688  
SRR17520069.8698689  
SRR17520069.8698690  
SRR17520069.8698691  
SRR17520069.8698692  
SRR17520069.8698693  
SRR17520069.8698695  
SRR17520069.8698696  
SRR17520069.8698697  
SRR17520069.8698698  
SRR17520069.8698699

SRR17520069.8698700  
SRR17520069.8698701  
SRR17520069.8698702  
SRR17520069.8698703  
SRR17520069.8698704  
SRR17520069.8698705  
SRR17520069.8698706  
SRR17520069.8698707  
SRR17520069.8698708  
SRR17520069.8700589  
SRR17520069.8716172  
SRR17520069.8716173  
SRR17520069.8716174  
SRR17520069.8716175  
SRR17520069.8716176  
SRR17520069.8716177  
SRR17520069.8716178  
SRR17520069.8716179  
SRR17520069.8716180  
SRR17520069.8716181  
SRR17520069.8716182  
SRR17520069.8716183  
SRR17520069.8716184  
SRR17520069.8716185  
SRR17520069.8716186  
SRR17520069.8716187  
SRR17520069.8716188  
SRR17520069.8716189  
SRR17520069.8716190  
SRR17520069.8716191  
SRR17520069.8716192  
SRR17520069.8716193  
SRR17520069.8716194  
SRR17520069.8716195  
SRR17520069.8716196  
SRR17520069.8716197  
SRR17520069.8716198  
SRR17520069.8716199  
SRR17520069.8716200  
SRR17520069.8716201  
SRR17520069.8716202  
SRR17520069.8716203  
SRR17520069.8716204  
SRR17520069.8716205  
SRR17520069.8716206  
SRR17520069.8720353  
SRR17520069.8723273

SRR17520069.8723280  
SRR17520069.8723281  
SRR17520069.8723289  
SRR17520069.8723293  
SRR17520069.8723295  
SRR17520069.8723303  
SRR17520069.8723304  
SRR17520069.8723307  
SRR17520069.8723309  
SRR17520069.8723311  
SRR17520069.8723313  
SRR17520069.8723315  
SRR17520069.8723316  
SRR17520069.8723321  
SRR17520069.8723329  
SRR17520069.8723333  
SRR17520069.8723334  
SRR17520069.8723339  
SRR17520069.8723347  
SRR17520069.8723353  
SRR17520069.8723356  
SRR17520069.8723359  
SRR17520069.8723361  
SRR17520069.8723363  
SRR17520069.8723366  
SRR17520069.8723371  
SRR17520069.8723377  
SRR17520069.8723379  
SRR17520069.8723393  
SRR17520069.8723394  
SRR17520069.8723397  
SRR17520069.8723407  
SRR17520069.8723409  
SRR17520069.8723412  
SRR17520069.8723417  
SRR17520069.8723418  
SRR17520069.8731477  
SRR17520069.8758708  
SRR17520069.8798213  
SRR17520069.8861510  
SRR17520069.8861522  
SRR17520069.8910636  
SRR17520069.8922573  
SRR17520069.8933422  
SRR17520069.8945337  
SRR17520069.8946677  
SRR17520069.8974379



SRR17520069.8974383  
SRR17520069.8974397  
SRR17520069.8975867  
SRR17520069.9006238  
SRR17520069.9008658  
SRR17520069.9026812  
SRR17520069.9068189  
SRR17520069.9081341  
SRR17520069.9081394  
SRR17520069.9083297  
SRR17520069.9084276  
SRR17520069.9108941  
SRR17520069.9140605  
SRR17520069.9165062  
SRR17520069.9165063  
SRR17520069.9165923  
SRR17520069.9165924  
SRR17520069.9165925  
SRR17520069.9165926  
SRR17520069.9166985  
SRR17520069.9166999  
SRR17520069.9170568  
SRR17520069.9174243  
SRR17520069.9198294  
SRR17520069.9198331  
SRR17520069.9202214  
SRR17520069.9202218  
SRR17520069.9205571  
SRR17520069.9205705  
SRR17520069.9248646  
SRR17520069.9248654  
SRR17520069.9250878  
SRR17520069.9250879  
SRR17520069.9250880  
SRR17520069.9250881  
SRR17520069.9251427  
SRR17520069.9274531  
SRR17520069.9279483  
SRR17520069.9279489  
SRR17520069.9284868  
SRR17520069.9288341  
SRR17520069.9305432  
SRR17520069.9314095  
SRR17520069.9340559  
SRR17520069.9342985  
SRR17520069.9342986  
SRR17520069.9342987

SRR17520069.9342988  
SRR17520069.9342989  
SRR17520069.9342991  
SRR17520069.9342992  
SRR17520069.9342993  
SRR17520069.9342994  
SRR17520069.9342995  
SRR17520069.9342996  
SRR17520069.9342997  
SRR17520069.9342998  
SRR17520069.9342999  
SRR17520069.9354497  
SRR17520069.9371761  
SRR17520069.9390979  
SRR17520069.9442867  
SRR17520069.9442868  
SRR17520069.9442869  
SRR17520069.9442870  
SRR17520069.9442871  
SRR17520069.9442872  
SRR17520069.9442873  
SRR17520069.9442874  
SRR17520069.9466561  
SRR17520069.9471268  
SRR17520069.9479132  
SRR17520069.9491423  
SRR17520069.9492325  
SRR17520069.9498837  
SRR17520069.9498849  
SRR17520069.9500232  
SRR17520069.9500233  
SRR17520069.9500234  
SRR17520069.9500235  
SRR17520069.9500236  
SRR17520069.9500237  
SRR17520069.9500238  
SRR17520069.9500239  
SRR17520069.9500240  
SRR17520069.9500241  
SRR17520069.9500242  
SRR17520069.9500243  
SRR17520069.9500244  
SRR17520069.9500245  
SRR17520069.9500246  
SRR17520069.9500247  
SRR17520069.9500248  
SRR17520069.9500249

SRR17520069.9500250  
SRR17520069.9500251  
SRR17520069.9500252  
SRR17520069.9500253  
SRR17520069.9500254  
SRR17520069.9500255  
SRR17520069.9500256  
SRR17520069.9500257  
SRR17520069.9500258  
SRR17520069.9500259  
SRR17520069.9500260  
SRR17520069.9500261  
SRR17520069.9500262  
SRR17520069.9500263  
SRR17520069.9500264  
SRR17520069.9500265  
SRR17520069.9500266  
SRR17520069.9500267  
SRR17520069.9500268  
SRR17520069.9500269  
SRR17520069.9500270  
SRR17520069.9500271  
SRR17520069.9500272  
SRR17520069.9500273  
SRR17520069.9500274  
SRR17520069.9500275  
SRR17520069.9541783  
SRR17520069.9587304  
SRR17520069.9587306  
SRR17520069.9587307  
SRR17520069.9602451  
SRR17520069.9602452  
SRR17520069.9602453  
SRR17520069.9602454  
SRR17520069.9602455  
SRR17520069.9602456  
SRR17520069.9602457  
SRR17520069.9602458  
SRR17520069.9602459  
SRR17520069.9602460  
SRR17520069.9602461  
SRR17520069.9602462  
SRR17520069.9602463  
SRR17520069.9602464  
SRR17520069.9602465  
SRR17520069.9602466  
SRR17520069.9602467

SRR17520069.9602468  
SRR17520069.9602469  
SRR17520069.9602470  
SRR17520069.9602471  
SRR17520069.9602472  
SRR17520069.9602473  
SRR17520069.9602474  
SRR17520069.9602475  
SRR17520069.9602476  
SRR17520069.9602477  
SRR17520069.9602478  
SRR17520069.9602479  
SRR17520069.9602480  
SRR17520069.9602481  
SRR17520069.9602482  
SRR17520069.9603974  
SRR17520069.9648596  
SRR17520069.9648600  
SRR17520069.9648604  
SRR17520069.9648612  
SRR17520069.9648622  
SRR17520069.9650856  
SRR17520069.9657916  
SRR17520069.9663051  
SRR17520069.9677008  
SRR17520069.9699149  
SRR17520069.9731257  
SRR17520069.9742322  
SRR17520069.9742324  
SRR17520069.9742357  
SRR17520069.9742363  
SRR17520069.9742372  
SRR17520069.9742374  
SRR17520069.9742417  
SRR17520069.9742490  
SRR17520069.9742922  
SRR17520069.9755629  
SRR17520069.9760733  
SRR17520069.9776800  
SRR17520069.9776801  
SRR17520069.9776802  
SRR17520069.9776803  
SRR17520069.9776804  
SRR17520069.9776805  
SRR17520069.9776806  
SRR17520069.9776807  
SRR17520069.9776808

SRR17520069.9776809  
SRR17520069.9776810  
SRR17520069.9776811  
SRR17520069.9776812  
SRR17520069.9776813  
SRR17520069.9776814  
SRR17520069.9776815  
SRR17520069.9776816  
SRR17520069.9776817  
SRR17520069.9776818  
SRR17520069.9776819  
SRR17520069.9776820  
SRR17520069.9776821  
SRR17520069.9776822  
SRR17520069.9776823  
SRR17520069.9783885  
SRR17520069.9802345  
SRR17520069.9802365  
SRR17520069.9854890  
SRR17520069.9854904  
SRR17520069.9888889  
SRR17520069.9892970  
SRR17520069.9905584  
SRR17520069.9934559  
SRR17520069.9937600  
SRR17520069.9956200  
SRR17520069.9956201  
SRR17520069.9956202  
SRR17520069.9956203  
SRR17520069.9956204  
SRR17520069.9956205  
SRR17520069.9956206  
SRR17520069.9956207  
SRR17520069.9956208  
SRR17520069.9956209  
SRR17520069.9956210  
SRR17520069.9956211  
SRR17520069.9956212  
SRR17520069.9956213  
SRR17520069.9956214  
SRR17520069.9956215  
SRR17520069.9956216  
SRR17520069.9956217  
SRR17520069.9956218  
SRR17520069.9956219  
SRR17520069.9956220  
SRR17520069.9956221

SRR17520069.9956222  
SRR17520069.9956223  
SRR17520069.9956224  
SRR17520069.9956225  
SRR17520069.9956226  
SRR17520069.9956227  
SRR17520069.9956228  
SRR17520069.9956229  
SRR17520069.9956230  
SRR17520069.9956231  
SRR17520069.9956232  
SRR17520069.9956233  
SRR17520069.9956234  
SRR17520069.9956235  
SRR17520069.9956236  
SRR17520069.9956237  
SRR17520069.9956238  
SRR17520069.9956239  
SRR17520069.9956240  
SRR17520069.9956241  
SRR17520069.9956242  
SRR17520069.9956243  
SRR17520069.9956244  
SRR17520069.9956245  
SRR17520069.9956246  
SRR17520069.9956247  
SRR17520069.9956249  
SRR17520069.9956250  
SRR17520069.9956251  
SRR17520069.9956252  
SRR17520069.9956253  
SRR17520069.9956254  
SRR17520069.9956255  
SRR17520069.9956256  
SRR17520069.9956257  
SRR17520069.9956258  
SRR17520069.9956259  
SRR17520069.9956260  
SRR17520069.9956261  
SRR17520069.9956262  
SRR17520069.9956263  
SRR17520069.9956264  
SRR17520069.9956265  
SRR17520069.9956266  
SRR17520069.9956267  
SRR17520069.9956268  
SRR17520069.9956269

SRR17520069.9956270  
SRR17520069.9956271  
SRR17520069.9956272  
SRR17520069.9956273  
SRR17520069.9956274  
SRR17520069.9956275  
SRR17520069.9956276  
SRR17520069.9956277  
SRR17520069.9956278  
SRR17520069.9956279  
SRR17520069.9956280  
SRR17520069.9956281  
SRR17520069.9956282  
SRR17520069.9956283  
SRR17520069.9956284  
SRR17520069.9956285  
SRR17520069.9956286  
SRR17520069.9956287  
SRR17520069.9956288  
SRR17520069.9956289  
SRR17520069.9956290  
SRR17520069.9956292  
SRR17520069.9956293  
SRR17520069.9956294  
SRR17520069.9956295  
SRR17520069.9956297  
SRR17520069.9956298  
SRR17520069.9956299  
SRR17520069.9956300  
SRR17520069.9956301  
SRR17520069.9956302  
SRR17520069.9956303  
SRR17520069.9956304  
SRR17520069.9956305  
SRR17520069.9956306  
SRR17520069.9956307  
SRR17520069.9956308  
SRR17520069.9956310  
SRR17520069.9956311  
SRR17520069.9956312  
SRR17520069.9956313  
SRR17520069.9956314  
SRR17520069.9956315  
SRR17520069.9956316  
SRR17520069.9956317  
SRR17520069.9956318  
SRR17520069.9956319

SRR17520069.9956320  
SRR17520069.9956321  
SRR17520069.9956322  
SRR17520069.9956323  
SRR17520069.9956324  
SRR17520069.9956325  
SRR17520069.9971761  
SRR17520069.9980593  
SRR17520069.10014143  
SRR17520069.10017982  
SRR17520069.10033017  
SRR17520069.10039973  
SRR17520069.10051009  
SRR17520069.10053117  
SRR17520069.10057245  
SRR17520069.10081829  
SRR17520069.10088858  
SRR17520069.10120431  
SRR17520069.10120433  
SRR17520069.10120434  
SRR17520069.10120435  
SRR17520069.10120436  
SRR17520069.10120437  
SRR17520069.10120438  
SRR17520069.10120439  
SRR17520069.10120440  
SRR17520069.10120441  
SRR17520069.10120442  
SRR17520069.10120443  
SRR17520069.10120444  
SRR17520069.10128971  
SRR17520069.10146119  
SRR17520069.10146120  
SRR17520069.10146121  
SRR17520069.10146122  
SRR17520069.10146124  
SRR17520069.10146125  
SRR17520069.10146126  
SRR17520069.10146127  
SRR17520069.10146128  
SRR17520069.10146129  
SRR17520069.10146130  
SRR17520069.10146131  
SRR17520069.10146132  
SRR17520069.10146133  
SRR17520069.10146134  
SRR17520069.10146136



SRR17520069.10146137  
SRR17520069.10146139  
SRR17520069.10146140  
SRR17520069.10146141  
SRR17520069.10146142  
SRR17520069.10146143  
SRR17520069.10146144  
SRR17520069.10146145  
SRR17520069.10146146  
SRR17520069.10146147  
SRR17520069.10146148  
SRR17520069.10146149  
SRR17520069.10146150  
SRR17520069.10147602  
SRR17520069.10147611  
SRR17520069.10147622  
SRR17520069.10154871  
SRR17520069.10247605  
SRR17520069.10247606  
SRR17520069.10247607  
SRR17520069.10247608  
SRR17520069.10247609  
SRR17520069.10247610  
SRR17520069.10247611  
SRR17520069.10247612  
SRR17520069.10247613  
SRR17520069.10247614  
SRR17520069.10247615  
SRR17520069.10247616  
SRR17520069.10299860  
SRR17520069.10305978  
SRR17520069.10305985  
SRR17520069.10315375  
SRR17520069.10316729  
SRR17520069.10317665  
SRR17520069.10317676  
SRR17520069.10327150  
SRR17520069.10336223  
SRR17520069.10336224  
SRR17520069.10336225  
SRR17520069.10336226  
SRR17520069.10336227  
SRR17520069.10336228  
SRR17520069.10336229  
SRR17520069.10336230  
SRR17520069.10336231  
SRR17520069.10336232

SRR17520069. 10336233  
SRR17520069. 10336234  
SRR17520069. 10336235  
SRR17520069. 10336236  
SRR17520069. 10336237  
SRR17520069. 10336238  
SRR17520069. 10336239  
SRR17520069. 10336240  
SRR17520069. 10336241  
SRR17520069. 10336242  
SRR17520069. 10336243  
SRR17520069. 10336244  
SRR17520069. 10336245  
SRR17520069. 10336246  
SRR17520069. 10336247  
SRR17520069. 10336248  
SRR17520069. 10336249  
SRR17520069. 10336250  
SRR17520069. 10336251  
SRR17520069. 10336252  
SRR17520069. 10336253  
SRR17520069. 10336254  
SRR17520069. 10336255  
SRR17520069. 10336256  
SRR17520069. 10336258  
SRR17520069. 10336259  
SRR17520069. 10336260  
SRR17520069. 10336262  
SRR17520069. 10336263  
SRR17520069. 10336264  
SRR17520069. 10336265  
SRR17520069. 10336266  
SRR17520069. 10336267  
SRR17520069. 10336268  
SRR17520069. 10336269  
SRR17520069. 10336270  
SRR17520069. 10336271  
SRR17520069. 10336273  
SRR17520069. 10336274  
SRR17520069. 10336275  
SRR17520069. 10336276  
SRR17520069. 10336277  
SRR17520069. 10339159  
SRR17520069. 10378588  
SRR17520069. 10378602  
SRR17520069. 10382222  
SRR17520069. 10394678

SRR17520069. 10394679  
SRR17520069. 10394680  
SRR17520069. 10394681  
SRR17520069. 10394682  
SRR17520069. 10394683  
SRR17520069. 10394684  
SRR17520069. 10394685  
SRR17520069. 10394686  
SRR17520069. 10394687  
SRR17520069. 10394688  
SRR17520069. 10394689  
SRR17520069. 10394690  
SRR17520069. 10394691  
SRR17520069. 10394692  
SRR17520069. 10394693  
SRR17520069. 10394694  
SRR17520069. 10394695  
SRR17520069. 10394696  
SRR17520069. 10394697  
SRR17520069. 10394698  
SRR17520069. 10394699  
SRR17520069. 10394700  
SRR17520069. 10394701  
SRR17520069. 10394702  
SRR17520069. 10394703  
SRR17520069. 10394704  
SRR17520069. 10394705  
SRR17520069. 10394706  
SRR17520069. 10394707  
SRR17520069. 10394708  
SRR17520069. 10394709  
SRR17520069. 10394710  
SRR17520069. 10394711  
SRR17520069. 10394712  
SRR17520069. 10394713  
SRR17520069. 10394714  
SRR17520069. 10394715  
SRR17520069. 10422271  
SRR17520069. 10422283  
SRR17520069. 10431196  
SRR17520069. 10456441  
SRR17520069. 10476839  
SRR17520069. 10476860  
SRR17520069. 10487884  
SRR17520069. 10487885  
SRR17520069. 10487886  
SRR17520069. 10487887

SRR17520069.10513296  
SRR17520069.10518614  
SRR17520069.10551083  
SRR17520069.10560064  
SRR17520069.10562404  
SRR17520069.10568322  
SRR17520069.10593951  
SRR17520069.10593952  
SRR17520069.10593957  
SRR17520069.10593958  
SRR17520069.10593971  
SRR17520069.10593988  
SRR17520069.10593991  
SRR17520069.10593992  
SRR17520069.10594013  
SRR17520069.10594018  
SRR17520069.10599961  
SRR17520069.10602410  
SRR17520069.10602411  
SRR17520069.10602412  
SRR17520069.10602413  
SRR17520069.10602414  
SRR17520069.10602415  
SRR17520069.10602416  
SRR17520069.10602417  
SRR17520069.10602418  
SRR17520069.10602419  
SRR17520069.10602420  
SRR17520069.10602421  
SRR17520069.10602422  
SRR17520069.10602423  
SRR17520069.10602424  
SRR17520069.10602425  
SRR17520069.10602426  
SRR17520069.10602427  
SRR17520069.10602428  
SRR17520069.10602429  
SRR17520069.10602430  
SRR17520069.10602431  
SRR17520069.10602432  
SRR17520069.10602433  
SRR17520069.10602434  
SRR17520069.10602435  
SRR17520069.10602436  
SRR17520069.10602437  
SRR17520069.10602438  
SRR17520069.10602439

SRR17520069.10602441  
SRR17520069.10602442  
SRR17520069.10602443  
SRR17520069.10602444  
SRR17520069.10602445  
SRR17520069.10602446  
SRR17520069.10602448  
SRR17520069.10611032  
SRR17520069.10611033  
SRR17520069.10611034  
SRR17520069.10611035  
SRR17520069.10611036  
SRR17520069.10611037  
SRR17520069.10611038  
SRR17520069.10611039  
SRR17520069.10611040  
SRR17520069.10611041  
SRR17520069.10611042  
SRR17520069.10611043  
SRR17520069.10611044  
SRR17520069.10611045  
SRR17520069.10611046  
SRR17520069.10611047  
SRR17520069.10611048  
SRR17520069.10611049  
SRR17520069.10611050  
SRR17520069.10611051  
SRR17520069.10611052  
SRR17520069.10611053  
SRR17520069.10611054  
SRR17520069.10611055  
SRR17520069.10611056  
SRR17520069.10611057  
SRR17520069.10611058  
SRR17520069.10611059  
SRR17520069.10611060  
SRR17520069.10611061  
SRR17520069.10611062  
SRR17520069.10611063  
SRR17520069.10611064  
SRR17520069.10611065  
SRR17520069.10611066  
SRR17520069.10611067  
SRR17520069.10611068  
SRR17520069.10611069  
SRR17520069.10611070  
SRR17520069.10611071

SRR17520069.10611072  
SRR17520069.10611073  
SRR17520069.10611074  
SRR17520069.10611075  
SRR17520069.10611076  
SRR17520069.10611077  
SRR17520069.10611078  
SRR17520069.10611079  
SRR17520069.10611080  
SRR17520069.10611082  
SRR17520069.10611083  
SRR17520069.10611084  
SRR17520069.10611085  
SRR17520069.10611086  
SRR17520069.10611087  
SRR17520069.10611088  
SRR17520069.10611089  
SRR17520069.10611090  
SRR17520069.10611091  
SRR17520069.10611092  
SRR17520069.10611093  
SRR17520069.10611094  
SRR17520069.10611095  
SRR17520069.10611096  
SRR17520069.10611097  
SRR17520069.10611098  
SRR17520069.10611099  
SRR17520069.10611100  
SRR17520069.10611101  
SRR17520069.10611102  
SRR17520069.10611103  
SRR17520069.10611104  
SRR17520069.10614385  
SRR17520069.10633050  
SRR17520069.10633051  
SRR17520069.10633052  
SRR17520069.10633053  
SRR17520069.10633054  
SRR17520069.10633055  
SRR17520069.10633056  
SRR17520069.10633057  
SRR17520069.10633058  
SRR17520069.10633059  
SRR17520069.10633060  
SRR17520069.10633061  
SRR17520069.10633062  
SRR17520069.10633063

SRR17520069.10633064  
SRR17520069.10633065  
SRR17520069.10633066  
SRR17520069.10633067  
SRR17520069.10633068  
SRR17520069.10633069  
SRR17520069.10633070  
SRR17520069.10633071  
SRR17520069.10633072  
SRR17520069.10633073  
SRR17520069.10637731  
SRR17520069.10657797  
SRR17520069.10657798  
SRR17520069.10657799  
SRR17520069.10657800  
SRR17520069.10657802  
SRR17520069.10657803  
SRR17520069.10657804  
SRR17520069.10657805  
SRR17520069.10657806  
SRR17520069.10657807  
SRR17520069.10657808  
SRR17520069.10657809  
SRR17520069.10657810  
SRR17520069.10657811  
SRR17520069.10657812  
SRR17520069.10657813  
SRR17520069.10657814  
SRR17520069.10657815  
SRR17520069.10657816  
SRR17520069.10657817  
SRR17520069.10657818  
SRR17520069.10657819  
SRR17520069.10657820  
SRR17520069.10657821  
SRR17520069.10657822  
SRR17520069.10657823  
SRR17520069.10657824  
SRR17520069.10657825  
SRR17520069.10657826  
SRR17520069.10657827  
SRR17520069.10657828  
SRR17520069.10657829  
SRR17520069.10662567  
SRR17520069.10663615  
SRR17520069.10663616  
SRR17520069.10678461

SRR17520069. 10678462  
SRR17520069. 10678463  
SRR17520069. 10678464  
SRR17520069. 10678465  
SRR17520069. 10678467  
SRR17520069. 10678468  
SRR17520069. 10678469  
SRR17520069. 10678470  
SRR17520069. 10678471  
SRR17520069. 10678472  
SRR17520069. 10678473  
SRR17520069. 10678474  
SRR17520069. 10678475  
SRR17520069. 10678476  
SRR17520069. 10678477  
SRR17520069. 10678478  
SRR17520069. 10678479  
SRR17520069. 10678480  
SRR17520069. 10678481  
SRR17520069. 10678482  
SRR17520069. 10678484  
SRR17520069. 10678485  
SRR17520069. 10678486  
SRR17520069. 10678487  
SRR17520069. 10678488  
SRR17520069. 10678489  
SRR17520069. 10678490  
SRR17520069. 10678491  
SRR17520069. 10678492  
SRR17520069. 10678493  
SRR17520069. 10678494  
SRR17520069. 10678495  
SRR17520069. 10678498  
SRR17520069. 10678499  
SRR17520069. 10678500  
SRR17520069. 10678501  
SRR17520069. 10678502  
SRR17520069. 10678503  
SRR17520069. 10678504  
SRR17520069. 10678505  
SRR17520069. 10678506  
SRR17520069. 10678507  
SRR17520069. 10678508  
SRR17520069. 10678509  
SRR17520069. 10678510  
SRR17520069. 10678511  
SRR17520069. 10678512



SRR17520069.10678513  
SRR17520069.10678514  
SRR17520069.10678515  
SRR17520069.10678516  
SRR17520069.10678517  
SRR17520069.10678518  
SRR17520069.10678519  
SRR17520069.10678520  
SRR17520069.10678521  
SRR17520069.10678522  
SRR17520069.10678523  
SRR17520069.10678524  
SRR17520069.10678525  
SRR17520069.10678526  
SRR17520069.10678527  
SRR17520069.10678528  
SRR17520069.10678529  
SRR17520069.10678530  
SRR17520069.10678531  
SRR17520069.10678532  
SRR17520069.10678533  
SRR17520069.10678534  
SRR17520069.10678535  
SRR17520069.10678536  
SRR17520069.10678537  
SRR17520069.10678538  
SRR17520069.10678539  
SRR17520069.10678540  
SRR17520069.10678541  
SRR17520069.10678542  
SRR17520069.10678543  
SRR17520069.10678544  
SRR17520069.10678545  
SRR17520069.10678546  
SRR17520069.10678547  
SRR17520069.10678548  
SRR17520069.10678549  
SRR17520069.10678550  
SRR17520069.10678551  
SRR17520069.10678552  
SRR17520069.10678553  
SRR17520069.10678554  
SRR17520069.10678555  
SRR17520069.10678556  
SRR17520069.10678557  
SRR17520069.10678558  
SRR17520069.10678559

SRR17520069.10678560  
SRR17520069.10678561  
SRR17520069.10678562  
SRR17520069.10678563  
SRR17520069.10678564  
SRR17520069.10678565  
SRR17520069.10678566  
SRR17520069.10678567  
SRR17520069.10678568  
SRR17520069.10678569  
SRR17520069.10678570  
SRR17520069.10678571  
SRR17520069.10678572  
SRR17520069.10678573  
SRR17520069.10678574  
SRR17520069.10678575  
SRR17520069.10678576  
SRR17520069.10678578  
SRR17520069.10678579  
SRR17520069.10678580  
SRR17520069.10678581  
SRR17520069.10678582  
SRR17520069.10678583  
SRR17520069.10678584  
SRR17520069.10678585  
SRR17520069.10678586  
SRR17520069.10678587  
SRR17520069.10678588  
SRR17520069.10690050  
SRR17520069.10717160  
SRR17520069.10717161  
SRR17520069.10717162  
SRR17520069.10717163  
SRR17520069.10717164  
SRR17520069.10717165  
SRR17520069.10717166  
SRR17520069.10717167  
SRR17520069.10717168  
SRR17520069.10717169  
SRR17520069.10717170  
SRR17520069.10717171  
SRR17520069.10717172  
SRR17520069.10717173  
SRR17520069.10717174  
SRR17520069.10717175  
SRR17520069.10717176  
SRR17520069.10717177

SRR17520069.10717178  
SRR17520069.10717179  
SRR17520069.10717180  
SRR17520069.10717181  
SRR17520069.10717182  
SRR17520069.10717183  
SRR17520069.10717186  
SRR17520069.10717187  
SRR17520069.10717188  
SRR17520069.10717189  
SRR17520069.10717190  
SRR17520069.10717191  
SRR17520069.10717192  
SRR17520069.10717193  
SRR17520069.10717194  
SRR17520069.10717195  
SRR17520069.10717196  
SRR17520069.10717197  
SRR17520069.10717198  
SRR17520069.10717199  
SRR17520069.10717200  
SRR17520069.10717201  
SRR17520069.10717202  
SRR17520069.10717203  
SRR17520069.10717204  
SRR17520069.10717205  
SRR17520069.10717206  
SRR17520069.10717207  
SRR17520069.10717208  
SRR17520069.10721283  
SRR17520069.10744089  
SRR17520069.10747969  
SRR17520069.10768641  
SRR17520069.10774734  
SRR17520069.10809808  
SRR17520069.10813511  
SRR17520069.10813512  
SRR17520069.10813514  
SRR17520069.10813515  
SRR17520069.10813517  
SRR17520069.10813518  
SRR17520069.10813519  
SRR17520069.10813520  
SRR17520069.10813521  
SRR17520069.10813522  
SRR17520069.10813523  
SRR17520069.10813524

SRR17520069.10813525  
SRR17520069.10813526  
SRR17520069.10813527  
SRR17520069.10813529  
SRR17520069.10813530  
SRR17520069.10813531  
SRR17520069.10813532  
SRR17520069.10813533  
SRR17520069.10813534  
SRR17520069.10813535  
SRR17520069.10813536  
SRR17520069.10813537  
SRR17520069.10813538  
SRR17520069.10813539  
SRR17520069.10813540  
SRR17520069.10813613  
SRR17520069.10823064  
SRR17520069.10823065  
SRR17520069.10823066  
SRR17520069.10823067  
SRR17520069.10823068  
SRR17520069.10823070  
SRR17520069.10823071  
SRR17520069.10823072  
SRR17520069.10823073  
SRR17520069.10823074  
SRR17520069.10823075  
SRR17520069.10823076  
SRR17520069.10823077  
SRR17520069.10823078  
SRR17520069.10823079  
SRR17520069.10823080  
SRR17520069.10823081  
SRR17520069.10823082  
SRR17520069.10823083  
SRR17520069.10823084  
SRR17520069.10823085  
SRR17520069.10823086  
SRR17520069.10823087  
SRR17520069.10823088  
SRR17520069.10823089  
SRR17520069.10823090  
SRR17520069.10823091  
SRR17520069.10823092  
SRR17520069.10823093  
SRR17520069.10823094  
SRR17520069.10823095

SRR17520069.10823096  
SRR17520069.10823097  
SRR17520069.10823098  
SRR17520069.10841600  
SRR17520069.10841604  
SRR17520069.10852306  
SRR17520069.10853023  
SRR17520069.10859994  
SRR17520069.10859995  
SRR17520069.10859997  
SRR17520069.10859998  
SRR17520069.10859999  
SRR17520069.10860000  
SRR17520069.10860002  
SRR17520069.10860003  
SRR17520069.10860004  
SRR17520069.10860005  
SRR17520069.10860006  
SRR17520069.10860007  
SRR17520069.10860008  
SRR17520069.10860009  
SRR17520069.10860010  
SRR17520069.10860011  
SRR17520069.10860012  
SRR17520069.10860013  
SRR17520069.10860014  
SRR17520069.10860015  
SRR17520069.10860016  
SRR17520069.10860017  
SRR17520069.10860018  
SRR17520069.10860019  
SRR17520069.10860020  
SRR17520069.10860022  
SRR17520069.10860023  
SRR17520069.10860024  
SRR17520069.10860025  
SRR17520069.10860026  
SRR17520069.10860027  
SRR17520069.10860028  
SRR17520069.10860030  
SRR17520069.10860031  
SRR17520069.10860032  
SRR17520069.10861853  
SRR17520069.10877026  
SRR17520069.10884905  
SRR17520069.10921425  
SRR17520069.10967381

SRR17520069.10971801  
SRR17520069.10980443  
SRR17520069.10988107  
SRR17520069.11003520  
SRR17520069.11003521  
SRR17520069.11003522  
SRR17520069.11009249  
SRR17520069.11011758  
SRR17520069.11015019  
SRR17520069.11017349  
SRR17520069.11017350  
SRR17520069.11017351  
SRR17520069.11017352  
SRR17520069.11017354  
SRR17520069.11017355  
SRR17520069.11017356  
SRR17520069.11017357  
SRR17520069.11017358  
SRR17520069.11017360  
SRR17520069.11017361  
SRR17520069.11017362  
SRR17520069.11017363  
SRR17520069.11017364  
SRR17520069.11017365  
SRR17520069.11017366  
SRR17520069.11017368  
SRR17520069.11017369  
SRR17520069.11018136  
SRR17520069.11037224  
SRR17520069.11037225  
SRR17520069.11037226  
SRR17520069.11046021  
SRR17520069.11046025  
SRR17520069.11076057  
SRR17520069.11091938  
SRR17520069.11103989  
SRR17520069.11115915  
SRR17520069.11115916  
SRR17520069.11115917  
SRR17520069.11115918  
SRR17520069.11115919  
SRR17520069.11115920  
SRR17520069.11115921  
SRR17520069.11115922  
SRR17520069.11115923  
SRR17520069.11115924  
SRR17520069.11115925

SRR17520069.11115926  
SRR17520069.11115927  
SRR17520069.11115928  
SRR17520069.11115929  
SRR17520069.11115930  
SRR17520069.11115931  
SRR17520069.11115932  
SRR17520069.11115933  
SRR17520069.11115934  
SRR17520069.11115935  
SRR17520069.11115936  
SRR17520069.11115937  
SRR17520069.11115938  
SRR17520069.11115939  
SRR17520069.11115940  
SRR17520069.11115941  
SRR17520069.11115942  
SRR17520069.11115943  
SRR17520069.11115944  
SRR17520069.11115945  
SRR17520069.11115946  
SRR17520069.11115947  
SRR17520069.11115948  
SRR17520069.11115949  
SRR17520069.11118373  
SRR17520069.11118956  
SRR17520069.11122278  
SRR17520069.11144491  
SRR17520069.11155512  
SRR17520069.11155513  
SRR17520069.11155514  
SRR17520069.11155515  
SRR17520069.11155516  
SRR17520069.11155517  
SRR17520069.11155518  
SRR17520069.11155519  
SRR17520069.11155520  
SRR17520069.11155521  
SRR17520069.11155522  
SRR17520069.11155523  
SRR17520069.11155524  
SRR17520069.11155525  
SRR17520069.11155526  
SRR17520069.11155527  
SRR17520069.11155528  
SRR17520069.11155529  
SRR17520069.11155530

SRR17520069.11155531  
SRR17520069.11155532  
SRR17520069.11155533  
SRR17520069.11155534  
SRR17520069.11155535  
SRR17520069.11155536  
SRR17520069.11155537  
SRR17520069.11155538  
SRR17520069.11155539  
SRR17520069.11155540  
SRR17520069.11188048  
SRR17520069.11216324  
SRR17520069.11241824  
SRR17520069.11300379  
SRR17520069.11300400  
SRR17520069.11300408  
SRR17520069.11331339  
SRR17520069.11331404  
SRR17520069.11349339  
SRR17520069.11349452  
SRR17520069.11379106  
SRR17520069.11383461  
SRR17520069.11415099  
SRR17520069.11415174  
SRR17520069.11425710  
SRR17520069.11433268  
SRR17520069.11433295  
SRR17520069.11434280  
SRR17520069.11458274  
SRR17520069.11458277  
SRR17520069.11458278  
SRR17520069.11458279  
SRR17520069.11458280  
SRR17520069.11458281  
SRR17520069.11458282  
SRR17520069.11458283  
SRR17520069.11458284  
SRR17520069.11458285  
SRR17520069.11458286  
SRR17520069.11458287  
SRR17520069.11458288  
SRR17520069.11458289  
SRR17520069.11458290  
SRR17520069.11458291  
SRR17520069.11458292  
SRR17520069.11458293  
SRR17520069.11458294



SRR17520069.11458295  
SRR17520069.11458296  
SRR17520069.11458297  
SRR17520069.11458298  
SRR17520069.11458299  
SRR17520069.11458300  
SRR17520069.11458301  
SRR17520069.11458302  
SRR17520069.11458303  
SRR17520069.11458304  
SRR17520069.11458305  
SRR17520069.11458306  
SRR17520069.11458307  
SRR17520069.11458308  
SRR17520069.11458309  
SRR17520069.11458310  
SRR17520069.11458311  
SRR17520069.11458312  
SRR17520069.11458313  
SRR17520069.11458314  
SRR17520069.11458315  
SRR17520069.11458316  
SRR17520069.11458317  
SRR17520069.11458318  
SRR17520069.11458319  
SRR17520069.11458320  
SRR17520069.11458321  
SRR17520069.11458322  
SRR17520069.11458323  
SRR17520069.11458324  
SRR17520069.11458325  
SRR17520069.11458326  
SRR17520069.11458327  
SRR17520069.11458328  
SRR17520069.11473791  
SRR17520069.11473792  
SRR17520069.11473793  
SRR17520069.11473794  
SRR17520069.11473795  
SRR17520069.11473796  
SRR17520069.11473797  
SRR17520069.11473798  
SRR17520069.11473799  
SRR17520069.11509194  
SRR17520069.11509259  
SRR17520069.11569395  
SRR17520069.11587693

SRR17520069.11603566  
SRR17520069.11608166  
SRR17520069.11624721  
SRR17520069.11638979  
SRR17520069.11661271  
SRR17520069.11672039  
SRR17520069.11708043  
SRR17520069.11736312  
SRR17520069.11789946  
SRR17520069.11790252  
SRR17520069.11790254  
SRR17520069.11823684  
SRR17520069.11865001  
SRR17520069.11882468  
SRR17520069.11883711  
SRR17520069.11924585  
SRR17520069.11924598  
SRR17520069.11945268  
SRR17520069.11946388  
SRR17520069.11982609  
SRR17520069.12029217  
SRR17520069.12042549  
SRR17520069.12051763  
SRR17520069.12051771  
SRR17520069.12051775  
SRR17520069.12051777  
SRR17520069.12051783  
SRR17520069.12051785  
SRR17520069.12051787  
SRR17520069.12051789  
SRR17520069.12051792  
SRR17520069.12051795  
SRR17520069.12051805  
SRR17520069.12051813  
SRR17520069.12051816  
SRR17520069.12051823  
SRR17520069.12051829  
SRR17520069.12051835  
SRR17520069.12051838  
SRR17520069.12051839  
SRR17520069.12051849  
SRR17520069.12051853  
SRR17520069.12051857  
SRR17520069.12051859  
SRR17520069.12068051  
SRR17520069.12079242  
SRR17520069.12102348

SRR17520069.12110454  
SRR17520069.12117639  
SRR17520069.12129086  
SRR17520069.12155209  
SRR17520069.12155212  
SRR17520069.12155213  
SRR17520069.12155214  
SRR17520069.12155215  
SRR17520069.12155216  
SRR17520069.12155217  
SRR17520069.12155218  
SRR17520069.12155219  
SRR17520069.12155220  
SRR17520069.12155221  
SRR17520069.12155222  
SRR17520069.12155223  
SRR17520069.12155224  
SRR17520069.12155225  
SRR17520069.12155228  
SRR17520069.12155229  
SRR17520069.12155231  
SRR17520069.12155232  
SRR17520069.12155233  
SRR17520069.12155234  
SRR17520069.12155235  
SRR17520069.12155236  
SRR17520069.12155237  
SRR17520069.12155238  
SRR17520069.12155239  
SRR17520069.12155240  
SRR17520069.12155242  
SRR17520069.12155243  
SRR17520069.12155244  
SRR17520069.12155246  
SRR17520069.12155247  
SRR17520069.12155248  
SRR17520069.12155249  
SRR17520069.12173636  
SRR17520069.12185065  
SRR17520069.12185310  
SRR17520069.12199849  
SRR17520069.12201834  
SRR17520069.12235055  
SRR17520069.12245691  
SRR17520069.12249097  
SRR17520069.12249104  
SRR17520069.12260606

SRR17520069. 12260607  
SRR17520069. 12260608  
SRR17520069. 12260609  
SRR17520069. 12260610  
SRR17520069. 12260612  
SRR17520069. 12260614  
SRR17520069. 12260615  
SRR17520069. 12260617  
SRR17520069. 12260618  
SRR17520069. 12260619  
SRR17520069. 12260621  
SRR17520069. 12260622  
SRR17520069. 12260624  
SRR17520069. 12260625  
SRR17520069. 12260626  
SRR17520069. 12260627  
SRR17520069. 12260628  
SRR17520069. 12260629  
SRR17520069. 12260630  
SRR17520069. 12260631  
SRR17520069. 12260632  
SRR17520069. 12260633  
SRR17520069. 12260634  
SRR17520069. 12260635  
SRR17520069. 12260636  
SRR17520069. 12260637  
SRR17520069. 12260638  
SRR17520069. 12260639  
SRR17520069. 12260640  
SRR17520069. 12260641  
SRR17520069. 12269740  
SRR17520069. 12289503  
SRR17520069. 12297497  
SRR17520069. 12303460  
SRR17520069. 12303464  
SRR17520069. 12316397  
SRR17520069. 12323276  
SRR17520069. 12326650  
SRR17520069. 12326651  
SRR17520069. 12326652  
SRR17520069. 12326653  
SRR17520069. 12326654  
SRR17520069. 12366029  
SRR17520069. 12448509  
SRR17520069. 12490007  
SRR17520069. 12507144  
SRR17520069. 12520025

SRR17520069.12520034  
SRR17520069.12531043  
SRR17520069.12535688  
SRR17520069.12536820  
SRR17520069.12565930  
SRR17520069.12584595  
SRR17520069.12665794  
SRR17520069.12683610  
SRR17520069.12683611  
SRR17520069.12683612  
SRR17520069.12683613  
SRR17520069.12683614  
SRR17520069.12683615  
SRR17520069.12683616  
SRR17520069.12683617  
SRR17520069.12683618  
SRR17520069.12683619  
SRR17520069.12683620  
SRR17520069.12683621  
SRR17520069.12683622  
SRR17520069.12683623  
SRR17520069.12683624  
SRR17520069.12683625  
SRR17520069.12683626  
SRR17520069.12683627  
SRR17520069.12683628  
SRR17520069.12683629  
SRR17520069.12683630  
SRR17520069.12683631  
SRR17520069.12683632  
SRR17520069.12683633  
SRR17520069.12683634  
SRR17520069.12683635  
SRR17520069.12683636  
SRR17520069.12683637  
SRR17520069.12683638  
SRR17520069.12683639  
SRR17520069.12683640  
SRR17520069.12683641  
SRR17520069.12683642  
SRR17520069.12683643  
SRR17520069.12683644  
SRR17520069.12683645  
SRR17520069.12683646  
SRR17520069.12683647  
SRR17520069.12683648  
SRR17520069.12683649

SRR17520069. 12721559  
SRR17520069. 12731614  
SRR17520069. 12735510  
SRR17520069. 12767099  
SRR17520069. 12767107  
SRR17520069. 12785051  
SRR17520069. 12787909  
SRR17520069. 12820017  
SRR17520069. 12820018  
SRR17520069. 12820019  
SRR17520069. 12820020  
SRR17520069. 12820021  
SRR17520069. 12820022  
SRR17520069. 12820023  
SRR17520069. 12820025  
SRR17520069. 12820029  
SRR17520069. 12820030  
SRR17520069. 12820031  
SRR17520069. 12820032  
SRR17520069. 12820033  
SRR17520069. 12820034  
SRR17520069. 12820035  
SRR17520069. 12820036  
SRR17520069. 12820037  
SRR17520069. 12820038  
SRR17520069. 12820039  
SRR17520069. 12820040  
SRR17520069. 12820041  
SRR17520069. 12820042  
SRR17520069. 12820043  
SRR17520069. 12820044  
SRR17520069. 12820046  
SRR17520069. 12820047  
SRR17520069. 12820048  
SRR17520069. 12820049  
SRR17520069. 12820050  
SRR17520069. 12820051  
SRR17520069. 12820052  
SRR17520069. 12820053  
SRR17520069. 12820054  
SRR17520069. 12832898  
SRR17520069. 12832899  
SRR17520069. 12832900  
SRR17520069. 12832901  
SRR17520069. 12832902  
SRR17520069. 12832903  
SRR17520069. 12832904

SRR17520069.12832905  
SRR17520069.12832906  
SRR17520069.12832907  
SRR17520069.12832908  
SRR17520069.12832909  
SRR17520069.12832910  
SRR17520069.12832911  
SRR17520069.12832912  
SRR17520069.12832913  
SRR17520069.12832914  
SRR17520069.12832915  
SRR17520069.12832916  
SRR17520069.12832917  
SRR17520069.12832918  
SRR17520069.12832920  
SRR17520069.12832921  
SRR17520069.12832922  
SRR17520069.12832923  
SRR17520069.12832924  
SRR17520069.12832925  
SRR17520069.12832926  
SRR17520069.12832927  
SRR17520069.12832928  
SRR17520069.12832929  
SRR17520069.12832930  
SRR17520069.12832931  
SRR17520069.12832932  
SRR17520069.12832933  
SRR17520069.12832934  
SRR17520069.12832935  
SRR17520069.12832936  
SRR17520069.12832937  
SRR17520069.12832938  
SRR17520069.12832939  
SRR17520069.12832940  
SRR17520069.12832941  
SRR17520069.12832942  
SRR17520069.12832943  
SRR17520069.12832944  
SRR17520069.12832945  
SRR17520069.12832946  
SRR17520069.12841050  
SRR17520069.12854936  
SRR17520069.12896345  
SRR17520069.12897142  
SRR17520069.12925413  
SRR17520069.12925414

SRR17520069. 12925415  
SRR17520069. 12925417  
SRR17520069. 12925419  
SRR17520069. 12925422  
SRR17520069. 12925423  
SRR17520069. 12925424  
SRR17520069. 12925425  
SRR17520069. 12925426  
SRR17520069. 12927564  
SRR17520069. 12932345  
SRR17520069. 12959823  
SRR17520069. 12965414  
SRR17520069. 12969490  
SRR17520069. 12985330  
SRR17520069. 13042829  
SRR17520069. 13042840  
SRR17520069. 13042850  
SRR17520069. 13042868  
SRR17520069. 13058177  
SRR17520069. 13058189  
SRR17520069. 13093109  
SRR17520069. 13093110  
SRR17520069. 13093111  
SRR17520069. 13093112  
SRR17520069. 13098028  
SRR17520069. 13126063  
SRR17520069. 13133177  
SRR17520069. 13141163  
SRR17520069. 13239884  
SRR17520069. 13244605  
SRR17520069. 13244606  
SRR17520069. 13244607  
SRR17520069. 13244608  
SRR17520069. 13244609  
SRR17520069. 13244610  
SRR17520069. 13244611  
SRR17520069. 13244612  
SRR17520069. 13244613  
SRR17520069. 13244614  
SRR17520069. 13244615  
SRR17520069. 13244616  
SRR17520069. 13244617  
SRR17520069. 13244618  
SRR17520069. 13244619  
SRR17520069. 13244620  
SRR17520069. 13244621  
SRR17520069. 13244622



SRR17520069. 13244623  
SRR17520069. 13244624  
SRR17520069. 13244625  
SRR17520069. 13244626  
SRR17520069. 13244627  
SRR17520069. 13244628  
SRR17520069. 13244629  
SRR17520069. 13244630  
SRR17520069. 13244631  
SRR17520069. 13244634  
SRR17520069. 13244635  
SRR17520069. 13244636  
SRR17520069. 13244639  
SRR17520069. 13244640  
SRR17520069. 13244644  
SRR17520069. 13244645  
SRR17520069. 13244646  
SRR17520069. 13247089  
SRR17520069. 13249206  
SRR17520069. 13249207  
SRR17520069. 13249208  
SRR17520069. 13249209  
SRR17520069. 13249210  
SRR17520069. 13249211  
SRR17520069. 13249212  
SRR17520069. 13249213  
SRR17520069. 13249214  
SRR17520069. 13249215  
SRR17520069. 13249216  
SRR17520069. 13249217  
SRR17520069. 13249218  
SRR17520069. 13249219  
SRR17520069. 13249220  
SRR17520069. 13249221  
SRR17520069. 13249222  
SRR17520069. 13249223  
SRR17520069. 13249224  
SRR17520069. 13249225  
SRR17520069. 13249226  
SRR17520069. 13249227  
SRR17520069. 13249228  
SRR17520069. 13249229  
SRR17520069. 13249230  
SRR17520069. 13249231  
SRR17520069. 13249232  
SRR17520069. 13249233  
SRR17520069. 13249234

SRR17520069. 13249235  
SRR17520069. 13249236  
SRR17520069. 13249237  
SRR17520069. 13249238  
SRR17520069. 13249239  
SRR17520069. 13249240  
SRR17520069. 13249241  
SRR17520069. 13249242  
SRR17520069. 13249243  
SRR17520069. 13249244  
SRR17520069. 13249245  
SRR17520069. 13249246  
SRR17520069. 13251722  
SRR17520069. 13261867  
SRR17520069. 13262906  
SRR17520069. 13262907  
SRR17520069. 13262908  
SRR17520069. 13262909  
SRR17520069. 13262910  
SRR17520069. 13262911  
SRR17520069. 13262912  
SRR17520069. 13262913  
SRR17520069. 13262914  
SRR17520069. 13262915  
SRR17520069. 13262916  
SRR17520069. 13262917  
SRR17520069. 13262918  
SRR17520069. 13262919  
SRR17520069. 13262920  
SRR17520069. 13262921  
SRR17520069. 13262922  
SRR17520069. 13262923  
SRR17520069. 13262924  
SRR17520069. 13262925  
SRR17520069. 13262926  
SRR17520069. 13262927  
SRR17520069. 13262928  
SRR17520069. 13262929  
SRR17520069. 13262930  
SRR17520069. 13262931  
SRR17520069. 13262932  
SRR17520069. 13262933  
SRR17520069. 13262934  
SRR17520069. 13262935  
SRR17520069. 13262936  
SRR17520069. 13262937  
SRR17520069. 13262938

SRR17520069. 13262939  
SRR17520069. 13262940  
SRR17520069. 13262941  
SRR17520069. 13262942  
SRR17520069. 13262943  
SRR17520069. 13262944  
SRR17520069. 13262945  
SRR17520069. 13262947  
SRR17520069. 13262948  
SRR17520069. 13295871  
SRR17520069. 13295872  
SRR17520069. 13295874  
SRR17520069. 13295875  
SRR17520069. 13295876  
SRR17520069. 13295877  
SRR17520069. 13295878  
SRR17520069. 13295879  
SRR17520069. 13295880  
SRR17520069. 13295881  
SRR17520069. 13295882  
SRR17520069. 13295883  
SRR17520069. 13295885  
SRR17520069. 13297391  
SRR17520069. 13355987  
SRR17520069. 13400923  
SRR17520069. 13400932  
SRR17520069. 13400946  
SRR17520069. 13400954  
SRR17520069. 13400970  
SRR17520069. 13401002  
SRR17520069. 13412033  
SRR17520069. 13431890  
SRR17520069. 13431891  
SRR17520069. 13431892  
SRR17520069. 13431893  
SRR17520069. 13431894  
SRR17520069. 13431895  
SRR17520069. 13431896  
SRR17520069. 13431897  
SRR17520069. 13431898  
SRR17520069. 13431900  
SRR17520069. 13431901  
SRR17520069. 13431902  
SRR17520069. 13431903  
SRR17520069. 13431904  
SRR17520069. 13431905  
SRR17520069. 13431906

SRR17520069.13431907  
SRR17520069.13431908  
SRR17520069.13431909  
SRR17520069.13431910  
SRR17520069.13431912  
SRR17520069.13431913  
SRR17520069.13431914  
SRR17520069.13431915  
SRR17520069.13431916  
SRR17520069.13431917  
SRR17520069.13431918  
SRR17520069.13431919  
SRR17520069.13431920  
SRR17520069.13431921  
SRR17520069.13431922  
SRR17520069.13431923  
SRR17520069.13431924  
SRR17520069.13431925  
SRR17520069.13431926  
SRR17520069.13431927  
SRR17520069.13431928  
SRR17520069.13431929  
SRR17520069.13431930  
SRR17520069.13431931  
SRR17520069.13431932  
SRR17520069.13448852  
SRR17520069.13459753  
SRR17520069.13471202  
SRR17520069.13473199  
SRR17520069.13477118  
SRR17520069.13477812  
SRR17520069.13484709  
SRR17520069.13490901  
SRR17520069.13511388  
SRR17520069.13521645  
SRR17520069.13521646  
SRR17520069.13521647  
SRR17520069.13526843  
SRR17520069.13526844  
SRR17520069.13526845  
SRR17520069.13526846  
SRR17520069.13526847  
SRR17520069.13526848  
SRR17520069.13526849  
SRR17520069.13526850  
SRR17520069.13526851  
SRR17520069.13526852

SRR17520069. 13526853  
SRR17520069. 13526855  
SRR17520069. 13526856  
SRR17520069. 13526857  
SRR17520069. 13526858  
SRR17520069. 13526859  
SRR17520069. 13526860  
SRR17520069. 13526861  
SRR17520069. 13526862  
SRR17520069. 13526863  
SRR17520069. 13526864  
SRR17520069. 13526865  
SRR17520069. 13526866  
SRR17520069. 13526867  
SRR17520069. 13526868  
SRR17520069. 13526869  
SRR17520069. 13526870  
SRR17520069. 13526871  
SRR17520069. 13550754  
SRR17520069. 13554998  
SRR17520069. 13564223  
SRR17520069. 13564224  
SRR17520069. 13564229  
SRR17520069. 13564230  
SRR17520069. 13564231  
SRR17520069. 13582699  
SRR17520069. 13592149  
SRR17520069. 13605833  
SRR17520069. 13606612  
SRR17520069. 13606613  
SRR17520069. 13606614  
SRR17520069. 13606615  
SRR17520069. 13606616  
SRR17520069. 13606617  
SRR17520069. 13606618  
SRR17520069. 13606619  
SRR17520069. 13606620  
SRR17520069. 13606621  
SRR17520069. 13606622  
SRR17520069. 13606623  
SRR17520069. 13606624  
SRR17520069. 13606625  
SRR17520069. 13606626  
SRR17520069. 13606627  
SRR17520069. 13606628  
SRR17520069. 13606629  
SRR17520069. 13606630

SRR17520069. 13606631  
SRR17520069. 13606632  
SRR17520069. 13606633  
SRR17520069. 13606634  
SRR17520069. 13606635  
SRR17520069. 13606636  
SRR17520069. 13606637  
SRR17520069. 13606638  
SRR17520069. 13606639  
SRR17520069. 13606640  
SRR17520069. 13606641  
SRR17520069. 13606642  
SRR17520069. 13606643  
SRR17520069. 13606644  
SRR17520069. 13606645  
SRR17520069. 13606646  
SRR17520069. 13606789  
SRR17520069. 13654902  
SRR17520069. 13654903  
SRR17520069. 13654904  
SRR17520069. 13654905  
SRR17520069. 13654906  
SRR17520069. 13654907  
SRR17520069. 13654908  
SRR17520069. 13654909  
SRR17520069. 13654910  
SRR17520069. 13654911  
SRR17520069. 13654912  
SRR17520069. 13654913  
SRR17520069. 13654914  
SRR17520069. 13654915  
SRR17520069. 13654916  
SRR17520069. 13654917  
SRR17520069. 13654918  
SRR17520069. 13654919  
SRR17520069. 13654920  
SRR17520069. 13654921  
SRR17520069. 13654922  
SRR17520069. 13654923  
SRR17520069. 13654924  
SRR17520069. 13654925  
SRR17520069. 13658970  
SRR17520069. 13667520  
SRR17520069. 13683134  
SRR17520069. 13683137  
SRR17520069. 13683142  
SRR17520069. 13683146

SRR17520069. 13685952  
SRR17520069. 13691457  
SRR17520069. 13691923  
SRR17520069. 13695689  
SRR17520069. 13698159  
SRR17520069. 13698160  
SRR17520069. 13698161  
SRR17520069. 13698162  
SRR17520069. 13698163  
SRR17520069. 13698164  
SRR17520069. 13698165  
SRR17520069. 13698166  
SRR17520069. 13698167  
SRR17520069. 13698168  
SRR17520069. 13698169  
SRR17520069. 13698170  
SRR17520069. 13698171  
SRR17520069. 13698172  
SRR17520069. 13698173  
SRR17520069. 13698174  
SRR17520069. 13698175  
SRR17520069. 13698176  
SRR17520069. 13698177  
SRR17520069. 13698178  
SRR17520069. 13698179  
SRR17520069. 13698180  
SRR17520069. 13698182  
SRR17520069. 13698183  
SRR17520069. 13698184  
SRR17520069. 13698186  
SRR17520069. 13698187  
SRR17520069. 13698188  
SRR17520069. 13698189  
SRR17520069. 13698190  
SRR17520069. 13698191  
SRR17520069. 13715386  
SRR17520069. 13715418  
SRR17520069. 13715424  
SRR17520069. 13715428  
SRR17520069. 13715434  
SRR17520069. 13721277  
SRR17520069. 13721280  
SRR17520069. 13727708  
SRR17520069. 13757354  
SRR17520069. 13759959  
SRR17520069. 13759963  
SRR17520069. 13761530

SRR17520069. 13764115  
SRR17520069. 13809109  
SRR17520069. 13880619  
SRR17520069. 13880620  
SRR17520069. 13880621  
SRR17520069. 13880622  
SRR17520069. 13880623  
SRR17520069. 13880624  
SRR17520069. 13880625  
SRR17520069. 13880626  
SRR17520069. 13880627  
SRR17520069. 13880628  
SRR17520069. 13880629  
SRR17520069. 13880630  
SRR17520069. 13880631  
SRR17520069. 13880632  
SRR17520069. 13880645  
SRR17520069. 13910751  
SRR17520069. 13917651  
SRR17520069. 13987916  
SRR17520069. 13987917  
SRR17520069. 13987918  
SRR17520069. 13987919  
SRR17520069. 13993141  
SRR17520069. 13997069  
SRR17520069. 13997070  
SRR17520069. 13997071  
SRR17520069. 13997072  
SRR17520069. 13997073  
SRR17520069. 13997074  
SRR17520069. 13997075  
SRR17520069. 13997076  
SRR17520069. 13997077  
SRR17520069. 13997078  
SRR17520069. 13997079  
SRR17520069. 14040061  
SRR17520069. 14040073  
SRR17520069. 14047336  
SRR17520069. 14057965  
SRR17520069. 14070701  
SRR17520069. 14093322  
SRR17520069. 14093323  
SRR17520069. 14093324  
SRR17520069. 14093325  
SRR17520069. 14093326  
SRR17520069. 14093327  
SRR17520069. 14093328



SRR17520069.14093329  
SRR17520069.14093330  
SRR17520069.14093331  
SRR17520069.14093332  
SRR17520069.14093333  
SRR17520069.14100729  
SRR17520069.14100730  
SRR17520069.14100733  
SRR17520069.14145732  
SRR17520069.14156510  
SRR17520069.14159713  
SRR17520069.14174145  
SRR17520069.14178439  
SRR17520069.14182045  
SRR17520069.14236810  
SRR17520069.14284511  
SRR17520069.14284576  
SRR17520069.14326465  
SRR17520069.14326466  
SRR17520069.14326467  
SRR17520069.14326468  
SRR17520069.14326469  
SRR17520069.14326470  
SRR17520069.14326471  
SRR17520069.14326472  
SRR17520069.14326473  
SRR17520069.14326474  
SRR17520069.14326475  
SRR17520069.14326476  
SRR17520069.14326477  
SRR17520069.14326478  
SRR17520069.14326479  
SRR17520069.14326480  
SRR17520069.14326481  
SRR17520069.14326482  
SRR17520069.14326483  
SRR17520069.14326484  
SRR17520069.14326485  
SRR17520069.14326486  
SRR17520069.14326487  
SRR17520069.14326488  
SRR17520069.14326489  
SRR17520069.14326490  
SRR17520069.14326491  
SRR17520069.14326492  
SRR17520069.14326493  
SRR17520069.14326494

SRR17520069. 14326495  
SRR17520069. 14326496  
SRR17520069. 14326497  
SRR17520069. 14326498  
SRR17520069. 14326499  
SRR17520069. 14326500  
SRR17520069. 14326501  
SRR17520069. 14326502  
SRR17520069. 14326503  
SRR17520069. 14326504  
SRR17520069. 14326505  
SRR17520069. 14326506  
SRR17520069. 14326507  
SRR17520069. 14326508  
SRR17520069. 14326509  
SRR17520069. 14326510  
SRR17520069. 14326511  
SRR17520069. 14326512  
SRR17520069. 14326513  
SRR17520069. 14326515  
SRR17520069. 14326516  
SRR17520069. 14326517  
SRR17520069. 14339342  
SRR17520069. 14344206  
SRR17520069. 14397968  
SRR17520069. 14399908  
SRR17520069. 14426620  
SRR17520069. 14446388  
SRR17520069. 14446451  
SRR17520069. 14446452  
SRR17520069. 14447287  
SRR17520069. 14447288  
SRR17520069. 14447289  
SRR17520069. 14447290  
SRR17520069. 14447291  
SRR17520069. 14447292  
SRR17520069. 14447293  
SRR17520069. 14447294  
SRR17520069. 14447295  
SRR17520069. 14447296  
SRR17520069. 14447297  
SRR17520069. 14447298  
SRR17520069. 14447299  
SRR17520069. 14447300  
SRR17520069. 14447301  
SRR17520069. 14447302  
SRR17520069. 14447303

SRR17520069.14447304  
SRR17520069.14447305  
SRR17520069.14486089  
SRR17520069.14544054  
SRR17520069.14571767  
SRR17520069.14572433  
SRR17520069.14605647  
SRR17520069.14609677  
SRR17520069.14609678  
SRR17520069.14609679  
SRR17520069.14609680  
SRR17520069.14609681  
SRR17520069.14609682  
SRR17520069.14609683  
SRR17520069.14609684  
SRR17520069.14609685  
SRR17520069.14609686  
SRR17520069.14609687  
SRR17520069.14609688  
SRR17520069.14609689  
SRR17520069.14609690  
SRR17520069.14609691  
SRR17520069.14609692  
SRR17520069.14609693  
SRR17520069.14609694  
SRR17520069.14609695  
SRR17520069.14609696  
SRR17520069.14609698  
SRR17520069.14609699  
SRR17520069.14609700  
SRR17520069.14609701  
SRR17520069.14609702  
SRR17520069.14609703  
SRR17520069.14609704  
SRR17520069.14609705  
SRR17520069.14609706  
SRR17520069.14609707  
SRR17520069.14609708  
SRR17520069.14609709  
SRR17520069.14609710  
SRR17520069.14609711  
SRR17520069.14622937  
SRR17520069.14641142  
SRR17520069.14663943  
SRR17520069.14663947  
SRR17520069.14663952  
SRR17520069.14665435

SRR17520069.14683918  
SRR17520069.14693822  
SRR17520069.14710141  
SRR17520069.14710142  
SRR17520069.14710143  
SRR17520069.14710144  
SRR17520069.14710145  
SRR17520069.14710146  
SRR17520069.14710147  
SRR17520069.14710148  
SRR17520069.14710149  
SRR17520069.14710150  
SRR17520069.14710151  
SRR17520069.14710152  
SRR17520069.14710153  
SRR17520069.14710154  
SRR17520069.14710155  
SRR17520069.14710156  
SRR17520069.14710157  
SRR17520069.14710159  
SRR17520069.14710160  
SRR17520069.14710161  
SRR17520069.14710162  
SRR17520069.14710165  
SRR17520069.14710168  
SRR17520069.14734162  
SRR17520069.14752804  
SRR17520069.14782177  
SRR17520069.14783922  
SRR17520069.14822245  
SRR17520069.14843640  
SRR17520069.14888431  
SRR17520069.14888432  
SRR17520069.14888433  
SRR17520069.14888438  
SRR17520069.14888439  
SRR17520069.14892093  
SRR17520069.14892571  
SRR17520069.14918255  
SRR17520069.14936063  
SRR17520069.14973193  
SRR17520069.14989534  
SRR17520069.15005002  
SRR17520069.15005003  
SRR17520069.15005004  
SRR17520069.15005005  
SRR17520069.15005006

SRR17520069.15005007  
SRR17520069.15005008  
SRR17520069.15005009  
SRR17520069.15005010  
SRR17520069.15005012  
SRR17520069.15005013  
SRR17520069.15043861  
SRR17520069.15063005  
SRR17520069.15063045  
SRR17520069.15063084  
SRR17520069.15063107  
SRR17520069.15063108  
SRR17520069.15063109  
SRR17520069.15063110  
SRR17520069.15063111  
SRR17520069.15063112  
SRR17520069.15063113  
SRR17520069.15063114  
SRR17520069.15063115  
SRR17520069.15063116  
SRR17520069.15063117  
SRR17520069.15063118  
SRR17520069.15063119  
SRR17520069.15063120  
SRR17520069.15063121  
SRR17520069.15063122  
SRR17520069.15063123  
SRR17520069.15063124  
SRR17520069.15063125  
SRR17520069.15063126  
SRR17520069.15064712  
SRR17520069.15064713  
SRR17520069.15064714  
SRR17520069.15064715  
SRR17520069.15064716  
SRR17520069.15064717  
SRR17520069.15064718  
SRR17520069.15064719  
SRR17520069.15064720  
SRR17520069.15064721  
SRR17520069.15064722  
SRR17520069.15064723  
SRR17520069.15064724  
SRR17520069.15064725  
SRR17520069.15064726  
SRR17520069.15064727  
SRR17520069.15064728

SRR17520069. 15064729  
SRR17520069. 15064730  
SRR17520069. 15064731  
SRR17520069. 15064732  
SRR17520069. 15064733  
SRR17520069. 15064734  
SRR17520069. 15064735  
SRR17520069. 15064736  
SRR17520069. 15064737  
SRR17520069. 15064738  
SRR17520069. 15064739  
SRR17520069. 15064740  
SRR17520069. 15064741  
SRR17520069. 15064742  
SRR17520069. 15064743  
SRR17520069. 15064744  
SRR17520069. 15064745  
SRR17520069. 15064746  
SRR17520069. 15072326  
SRR17520069. 15072327  
SRR17520069. 15072328  
SRR17520069. 15072329  
SRR17520069. 15072330  
SRR17520069. 15072331  
SRR17520069. 15072332  
SRR17520069. 15072333  
SRR17520069. 15072334  
SRR17520069. 15072335  
SRR17520069. 15072336  
SRR17520069. 15074094  
SRR17520069. 15074095  
SRR17520069. 15076374  
SRR17520069. 15076391  
SRR17520069. 15115156  
SRR17520069. 15117869  
SRR17520069. 15122309  
SRR17520069. 15157046  
SRR17520069. 15182321  
SRR17520069. 15182327  
SRR17520069. 15182725  
SRR17520069. 15182726  
SRR17520069. 15182727  
SRR17520069. 15182728  
SRR17520069. 15182729  
SRR17520069. 15182730  
SRR17520069. 15182731  
SRR17520069. 15182732

SRR17520069. 15182733  
SRR17520069. 15182734  
SRR17520069. 15182735  
SRR17520069. 15182736  
SRR17520069. 15182737  
SRR17520069. 15182738  
SRR17520069. 15182739  
SRR17520069. 15182740  
SRR17520069. 15182741  
SRR17520069. 15182743  
SRR17520069. 15182744  
SRR17520069. 15182745  
SRR17520069. 15182746  
SRR17520069. 15182747  
SRR17520069. 15182748  
SRR17520069. 15182749  
SRR17520069. 15182750  
SRR17520069. 15182751  
SRR17520069. 15182752  
SRR17520069. 15182753  
SRR17520069. 15182754  
SRR17520069. 15182755  
SRR17520069. 15182757  
SRR17520069. 15182758  
SRR17520069. 15182760  
SRR17520069. 15182761  
SRR17520069. 15182762  
SRR17520069. 15182763  
SRR17520069. 15182764  
SRR17520069. 15182765  
SRR17520069. 15182766  
SRR17520069. 15182767  
SRR17520069. 15182768  
SRR17520069. 15182769  
SRR17520069. 15182770  
SRR17520069. 15182771  
SRR17520069. 15182772  
SRR17520069. 15182773  
SRR17520069. 15182774  
SRR17520069. 15214546  
SRR17520069. 15214547  
SRR17520069. 15214548  
SRR17520069. 15214549  
SRR17520069. 15214550  
SRR17520069. 15214551  
SRR17520069. 15214552  
SRR17520069. 15214553

SRR17520069. 15214554  
SRR17520069. 15214555  
SRR17520069. 15214556  
SRR17520069. 15214557  
SRR17520069. 15214558  
SRR17520069. 15214559  
SRR17520069. 15214560  
SRR17520069. 15214561  
SRR17520069. 15214562  
SRR17520069. 15214563  
SRR17520069. 15233177  
SRR17520069. 15272066  
SRR17520069. 15285471  
SRR17520069. 15285694  
SRR17520069. 15296490  
SRR17520069. 15296514  
SRR17520069. 15305248  
SRR17520069. 15305249  
SRR17520069. 15305250  
SRR17520069. 15305251  
SRR17520069. 15305252  
SRR17520069. 15305253  
SRR17520069. 15305254  
SRR17520069. 15305255  
SRR17520069. 15305256  
SRR17520069. 15305257  
SRR17520069. 15305258  
SRR17520069. 15305259  
SRR17520069. 15323151  
SRR17520069. 15325693  
SRR17520069. 15340072  
SRR17520069. 15345775  
SRR17520069. 15352380  
SRR17520069. 15380493  
SRR17520069. 15414719  
SRR17520069. 15418007  
SRR17520069. 15491613  
SRR17520069. 15491614  
SRR17520069. 15491615  
SRR17520069. 15491616  
SRR17520069. 15491617  
SRR17520069. 15491618  
SRR17520069. 15491619  
SRR17520069. 15491620  
SRR17520069. 15491621  
SRR17520069. 15491622  
SRR17520069. 15491623



SRR17520069. 15491624  
SRR17520069. 15491626  
SRR17520069. 15491627  
SRR17520069. 15494750  
SRR17520069. 15494751  
SRR17520069. 15494752  
SRR17520069. 15494753  
SRR17520069. 15494754  
SRR17520069. 15494755  
SRR17520069. 15494756  
SRR17520069. 15494757  
SRR17520069. 15494758  
SRR17520069. 15494759  
SRR17520069. 15494760  
SRR17520069. 15494761  
SRR17520069. 15494762  
SRR17520069. 15494763  
SRR17520069. 15494765  
SRR17520069. 15494766  
SRR17520069. 15494767  
SRR17520069. 15494768  
SRR17520069. 15494769  
SRR17520069. 15494772  
SRR17520069. 15494773  
SRR17520069. 15494777  
SRR17520069. 15494778  
SRR17520069. 15494779  
SRR17520069. 15494781  
SRR17520069. 15494782  
SRR17520069. 15494785  
SRR17520069. 15494787  
SRR17520069. 15514266  
SRR17520069. 15552589  
SRR17520069. 15564286  
SRR17520069. 15574857  
SRR17520069. 15574887  
SRR17520069. 15577673  
SRR17520069. 15577740  
SRR17520069. 15578418  
SRR17520069. 15581390  
SRR17520069. 15590215  
SRR17520069. 15596764  
SRR17520069. 15596772  
SRR17520069. 15596774  
SRR17520069. 15596782  
SRR17520069. 15596783  
SRR17520069. 15596788

SRR17520069. 15596790  
SRR17520069. 15596792  
SRR17520069. 15596793  
SRR17520069. 15596794  
SRR17520069. 15596795  
SRR17520069. 15596796  
SRR17520069. 15596799  
SRR17520069. 15596800  
SRR17520069. 15596803  
SRR17520069. 15596804  
SRR17520069. 15596807  
SRR17520069. 15596810  
SRR17520069. 15616583  
SRR17520069. 15665101  
SRR17520069. 15671050  
SRR17520069. 15671084  
SRR17520069. 15691722  
SRR17520069. 15730032  
SRR17520069. 15748075  
SRR17520069. 15767774  
SRR17520069. 15767777  
SRR17520069. 15767778  
SRR17520069. 15767779  
SRR17520069. 15767780  
SRR17520069. 15767781  
SRR17520069. 15767782  
SRR17520069. 15767783  
SRR17520069. 15767785  
SRR17520069. 15767786  
SRR17520069. 15767787  
SRR17520069. 15767788  
SRR17520069. 15767789  
SRR17520069. 15767790  
SRR17520069. 15767791  
SRR17520069. 15767792  
SRR17520069. 15767793  
SRR17520069. 15767794  
SRR17520069. 15767795  
SRR17520069. 15767796  
SRR17520069. 15767797  
SRR17520069. 15767798  
SRR17520069. 15767799  
SRR17520069. 15767800  
SRR17520069. 15767801  
SRR17520069. 15814336  
SRR17520069. 15814337  
SRR17520069. 15814338

SRR17520069. 15814339  
SRR17520069. 15814340  
SRR17520069. 15814341  
SRR17520069. 15814342  
SRR17520069. 15814343  
SRR17520069. 15814344  
SRR17520069. 15814345  
SRR17520069. 15814346  
SRR17520069. 15814347  
SRR17520069. 15814348  
SRR17520069. 15814349  
SRR17520069. 15814350  
SRR17520069. 15814351  
SRR17520069. 15814352  
SRR17520069. 15814353  
SRR17520069. 15814354  
SRR17520069. 15814355  
SRR17520069. 15814356  
SRR17520069. 15814357  
SRR17520069. 15814358  
SRR17520069. 15814359  
SRR17520069. 15814360  
SRR17520069. 15814361  
SRR17520069. 15814362  
SRR17520069. 15814363  
SRR17520069. 15814364  
SRR17520069. 15814365  
SRR17520069. 15814366  
SRR17520069. 15814367  
SRR17520069. 15814368  
SRR17520069. 15814369  
SRR17520069. 15814370  
SRR17520069. 15814371  
SRR17520069. 15814372  
SRR17520069. 15814373  
SRR17520069. 15814374  
SRR17520069. 15814375  
SRR17520069. 15814376  
SRR17520069. 15814377  
SRR17520069. 15814378  
SRR17520069. 15814379  
SRR17520069. 15814380  
SRR17520069. 15814381  
SRR17520069. 15814382  
SRR17520069. 15814383  
SRR17520069. 15814384  
SRR17520069. 15814385

SRR17520069. 15814386  
SRR17520069. 15814387  
SRR17520069. 15814388  
SRR17520069. 15814389  
SRR17520069. 15814390  
SRR17520069. 15814391  
SRR17520069. 15814392  
SRR17520069. 15814393  
SRR17520069. 15814394  
SRR17520069. 15814395  
SRR17520069. 15814396  
SRR17520069. 15814397  
SRR17520069. 15814398  
SRR17520069. 15814399  
SRR17520069. 15814400  
SRR17520069. 15814401  
SRR17520069. 15814402  
SRR17520069. 15814403  
SRR17520069. 15814404  
SRR17520069. 15814405  
SRR17520069. 15814406  
SRR17520069. 15814407  
SRR17520069. 15824054  
SRR17520069. 15846352  
SRR17520069. 15853995  
SRR17520069. 15865129  
SRR17520069. 15879114  
SRR17520069. 15879174  
SRR17520069. 15885777  
SRR17520069. 15932666  
SRR17520069. 15948905  
SRR17520069. 15949883  
SRR17520069. 15969842  
SRR17520069. 15969843  
SRR17520069. 15969845  
SRR17520069. 15969846  
SRR17520069. 15969847  
SRR17520069. 15969848  
SRR17520069. 15969849  
SRR17520069. 15969850  
SRR17520069. 15969851  
SRR17520069. 15969853  
SRR17520069. 15969854  
SRR17520069. 15969855  
SRR17520069. 15969856  
SRR17520069. 15969857  
SRR17520069. 15969858

SRR17520069. 15969860  
SRR17520069. 15969862  
SRR17520069. 15969863  
SRR17520069. 15969864  
SRR17520069. 15969866  
SRR17520069. 15969867  
SRR17520069. 15969870  
SRR17520069. 15969871  
SRR17520069. 15969872  
SRR17520069. 15969873  
SRR17520069. 15969874  
SRR17520069. 15969875  
SRR17520069. 15969876  
SRR17520069. 15969877  
SRR17520069. 15969878  
SRR17520069. 15969885  
SRR17520069. 15969886  
SRR17520069. 15969891  
SRR17520069. 15969894  
SRR17520069. 15969896  
SRR17520069. 15969899  
SRR17520069. 15969903  
SRR17520069. 15969904  
SRR17520069. 15969905  
SRR17520069. 15969906  
SRR17520069. 15969907  
SRR17520069. 15969908  
SRR17520069. 15969910  
SRR17520069. 15969911  
SRR17520069. 15969913  
SRR17520069. 15969914  
SRR17520069. 15969916  
SRR17520069. 15969918  
SRR17520069. 15969919  
SRR17520069. 15969923  
SRR17520069. 15969924  
SRR17520069. 15969925  
SRR17520069. 15969926  
SRR17520069. 15969928  
SRR17520069. 15969929  
SRR17520069. 15969931  
SRR17520069. 15970219  
SRR17520069. 15970390  
SRR17520069. 15981102  
SRR17520069. 15981107  
SRR17520069. 15981109  
SRR17520069. 15981110

SRR17520069.15981111  
SRR17520069.15981112  
SRR17520069.15981113  
SRR17520069.15981114  
SRR17520069.15981115  
SRR17520069.15983084  
SRR17520069.15983099  
SRR17520069.15991811  
SRR17520069.15991812  
SRR17520069.15991813  
SRR17520069.15991814  
SRR17520069.15991815  
SRR17520069.15991816  
SRR17520069.15991817  
SRR17520069.15991818  
SRR17520069.15991819  
SRR17520069.15991820  
SRR17520069.15991821  
SRR17520069.15991822  
SRR17520069.15991823  
SRR17520069.15991824  
SRR17520069.15991825  
SRR17520069.15991826  
SRR17520069.15991827  
SRR17520069.15991828  
SRR17520069.15991829  
SRR17520069.15991830  
SRR17520069.15991831  
SRR17520069.15991832  
SRR17520069.15991833  
SRR17520069.15991834  
SRR17520069.15991835  
SRR17520069.15991836  
SRR17520069.15991837  
SRR17520069.15991838  
SRR17520069.15991839  
SRR17520069.15991840  
SRR17520069.15991841  
SRR17520069.15991842  
SRR17520069.15991843  
SRR17520069.15991844  
SRR17520069.15991845  
SRR17520069.15991846  
SRR17520069.15991847  
SRR17520069.15991848  
SRR17520069.15991849  
SRR17520069.15991850

SRR17520069. 15991851  
SRR17520069. 15991852  
SRR17520069. 15991853  
SRR17520069. 15991854  
SRR17520069. 15991855  
SRR17520069. 15991856  
SRR17520069. 15991857  
SRR17520069. 15991858  
SRR17520069. 15991859  
SRR17520069. 15991860  
SRR17520069. 15991861  
SRR17520069. 15991862  
SRR17520069. 15991864  
SRR17520069. 15991865  
SRR17520069. 15991866  
SRR17520069. 15991867  
SRR17520069. 15991868  
SRR17520069. 15991869  
SRR17520069. 15991870  
SRR17520069. 15991871  
SRR17520069. 15991872  
SRR17520069. 15991873  
SRR17520069. 15991874  
SRR17520069. 15991875  
SRR17520069. 15991876  
SRR17520069. 15991877  
SRR17520069. 15991878  
SRR17520069. 15991879  
SRR17520069. 15991880  
SRR17520069. 15991881  
SRR17520069. 15991882  
SRR17520069. 15991883  
SRR17520069. 15991884  
SRR17520069. 15991885  
SRR17520069. 15991887  
SRR17520069. 15991888  
SRR17520069. 15991889  
SRR17520069. 15991890  
SRR17520069. 15991891  
SRR17520069. 15991892  
SRR17520069. 15991893  
SRR17520069. 15991894  
SRR17520069. 15991895  
SRR17520069. 15991896  
SRR17520069. 15991897  
SRR17520069. 15991898  
SRR17520069. 15991899

SRR17520069. 15991900  
SRR17520069. 15991901  
SRR17520069. 15991902  
SRR17520069. 15991903  
SRR17520069. 15991904  
SRR17520069. 15991905  
SRR17520069. 15991906  
SRR17520069. 15991907  
SRR17520069. 15991908  
SRR17520069. 15991909  
SRR17520069. 15991910  
SRR17520069. 15991911  
SRR17520069. 15991912  
SRR17520069. 15991913  
SRR17520069. 15991914  
SRR17520069. 16003890  
SRR17520069. 16016532  
SRR17520069. 16042507  
SRR17520069. 16048782  
SRR17520069. 16048783  
SRR17520069. 16048784  
SRR17520069. 16048785  
SRR17520069. 16048786  
SRR17520069. 16048787  
SRR17520069. 16048788  
SRR17520069. 16048789  
SRR17520069. 16048790  
SRR17520069. 16048792  
SRR17520069. 16048793  
SRR17520069. 16048794  
SRR17520069. 16048795  
SRR17520069. 16048796  
SRR17520069. 16048797  
SRR17520069. 16048798  
SRR17520069. 16048799  
SRR17520069. 16048800  
SRR17520069. 16048801  
SRR17520069. 16048802  
SRR17520069. 16048803  
SRR17520069. 16048804  
SRR17520069. 16048805  
SRR17520069. 16048806  
SRR17520069. 16048808  
SRR17520069. 16048809  
SRR17520069. 16048811  
SRR17520069. 16048812  
SRR17520069. 16048813



SRR17520069. 16048819  
SRR17520069. 16048820  
SRR17520069. 16048821  
SRR17520069. 16048822  
SRR17520069. 16048823  
SRR17520069. 16048824  
SRR17520069. 16048825  
SRR17520069. 16048826  
SRR17520069. 16048827  
SRR17520069. 16048828  
SRR17520069. 16048829  
SRR17520069. 16048830  
SRR17520069. 16048831  
SRR17520069. 16048832  
SRR17520069. 16048833  
SRR17520069. 16048834  
SRR17520069. 16048835  
SRR17520069. 16048836  
SRR17520069. 16048837  
SRR17520069. 16048838  
SRR17520069. 16048839  
SRR17520069. 16048840  
SRR17520069. 16048841  
SRR17520069. 16048842  
SRR17520069. 16048843  
SRR17520069. 16048844  
SRR17520069. 16048845  
SRR17520069. 16048846  
SRR17520069. 16048847  
SRR17520069. 16048848  
SRR17520069. 16048849  
SRR17520069. 16048850  
SRR17520069. 16048851  
SRR17520069. 16048852  
SRR17520069. 16048853  
SRR17520069. 16048854  
SRR17520069. 16048855  
SRR17520069. 16048856  
SRR17520069. 16048857  
SRR17520069. 16048858  
SRR17520069. 16048859  
SRR17520069. 16048860  
SRR17520069. 16048861  
SRR17520069. 16048862  
SRR17520069. 16048863  
SRR17520069. 16048864  
SRR17520069. 16048865

SRR17520069. 16048866  
SRR17520069. 16048867  
SRR17520069. 16048868  
SRR17520069. 16048869  
SRR17520069. 16048870  
SRR17520069. 16048871  
SRR17520069. 16048872  
SRR17520069. 16048873  
SRR17520069. 16048874  
SRR17520069. 16048875  
SRR17520069. 16048876  
SRR17520069. 16048877  
SRR17520069. 16048878  
SRR17520069. 16048879  
SRR17520069. 16048880  
SRR17520069. 16048881  
SRR17520069. 16048882  
SRR17520069. 16048883  
SRR17520069. 16048885  
SRR17520069. 16048886  
SRR17520069. 16048887  
SRR17520069. 16048888  
SRR17520069. 16048890  
SRR17520069. 16048891  
SRR17520069. 16048892  
SRR17520069. 16048893  
SRR17520069. 16048894  
SRR17520069. 16048895  
SRR17520069. 16048896  
SRR17520069. 16048897  
SRR17520069. 16048898  
SRR17520069. 16048899  
SRR17520069. 16048900  
SRR17520069. 16048901  
SRR17520069. 16048902  
SRR17520069. 16048903  
SRR17520069. 16048904  
SRR17520069. 16048905  
SRR17520069. 16048906  
SRR17520069. 16048907  
SRR17520069. 16048908  
SRR17520069. 16048909  
SRR17520069. 16048910  
SRR17520069. 16048911  
SRR17520069. 16048912  
SRR17520069. 16048913  
SRR17520069. 16048914

SRR17520069.16063510  
SRR17520069.16065260  
SRR17520069.16065261  
SRR17520069.16065262  
SRR17520069.16065263  
SRR17520069.16091572  
SRR17520069.16092342  
SRR17520069.16112434  
SRR17520069.16116945  
SRR17520069.16117835  
SRR17520069.16139467  
SRR17520069.16139471  
SRR17520069.16139473  
SRR17520069.16139474  
SRR17520069.16139475  
SRR17520069.16139476  
SRR17520069.16139477  
SRR17520069.16139478  
SRR17520069.16139479  
SRR17520069.16139480  
SRR17520069.16157721  
SRR17520069.16157733  
SRR17520069.16157760  
SRR17520069.16217673  
SRR17520069.16225719  
SRR17520069.16239390  
SRR17520069.16239392  
SRR17520069.16239393  
SRR17520069.16239394  
SRR17520069.16239395  
SRR17520069.16239397  
SRR17520069.16239398  
SRR17520069.16239399  
SRR17520069.16239400  
SRR17520069.16239401  
SRR17520069.16239402  
SRR17520069.16239404  
SRR17520069.16239405  
SRR17520069.16239406  
SRR17520069.16239407  
SRR17520069.16239408  
SRR17520069.16239409  
SRR17520069.16239410  
SRR17520069.16239411  
SRR17520069.16239412  
SRR17520069.16239413  
SRR17520069.16239414

SRR17520069. 16239415  
SRR17520069. 16239417  
SRR17520069. 16239418  
SRR17520069. 16239419  
SRR17520069. 16239420  
SRR17520069. 16239421  
SRR17520069. 16239422  
SRR17520069. 16239423  
SRR17520069. 16239424  
SRR17520069. 16239425  
SRR17520069. 16239426  
SRR17520069. 16239427  
SRR17520069. 16239428  
SRR17520069. 16239429  
SRR17520069. 16239430  
SRR17520069. 16239431  
SRR17520069. 16239432  
SRR17520069. 16239433  
SRR17520069. 16239435  
SRR17520069. 16239436  
SRR17520069. 16239437  
SRR17520069. 16239438  
SRR17520069. 16239439  
SRR17520069. 16239440  
SRR17520069. 16239441  
SRR17520069. 16239442  
SRR17520069. 16239443  
SRR17520069. 16239444  
SRR17520069. 16239446  
SRR17520069. 16239447  
SRR17520069. 16239448  
SRR17520069. 16239449  
SRR17520069. 16239450  
SRR17520069. 16239451  
SRR17520069. 16239452  
SRR17520069. 16239453  
SRR17520069. 16239454  
SRR17520069. 16239455  
SRR17520069. 16239456  
SRR17520069. 16239457  
SRR17520069. 16239458  
SRR17520069. 16239459  
SRR17520069. 16239460  
SRR17520069. 16239461  
SRR17520069. 16239462  
SRR17520069. 16239463  
SRR17520069. 16239464

SRR17520069. 16239465  
SRR17520069. 16239467  
SRR17520069. 16239468  
SRR17520069. 16239469  
SRR17520069. 16239470  
SRR17520069. 16239471  
SRR17520069. 16239472  
SRR17520069. 16239473  
SRR17520069. 16239474  
SRR17520069. 16239475  
SRR17520069. 16239477  
SRR17520069. 16239478  
SRR17520069. 16239479  
SRR17520069. 16239480  
SRR17520069. 16239481  
SRR17520069. 16239482  
SRR17520069. 16239483  
SRR17520069. 16239484  
SRR17520069. 16239485  
SRR17520069. 16239486  
SRR17520069. 16239487  
SRR17520069. 16239488  
SRR17520069. 16239489  
SRR17520069. 16239490  
SRR17520069. 16239491  
SRR17520069. 16239492  
SRR17520069. 16239493  
SRR17520069. 16239494  
SRR17520069. 16239495  
SRR17520069. 16239496  
SRR17520069. 16239497  
SRR17520069. 16239498  
SRR17520069. 16239499  
SRR17520069. 16239502  
SRR17520069. 16239503  
SRR17520069. 16239504  
SRR17520069. 16239505  
SRR17520069. 16239506  
SRR17520069. 16239507  
SRR17520069. 16239508  
SRR17520069. 16239509  
SRR17520069. 16239510  
SRR17520069. 16239511  
SRR17520069. 16239513  
SRR17520069. 16239514  
SRR17520069. 16239515  
SRR17520069. 16239516

SRR17520069. 16239517  
SRR17520069. 16239518  
SRR17520069. 16239520  
SRR17520069. 16239521  
SRR17520069. 16239522  
SRR17520069. 16239524  
SRR17520069. 16239525  
SRR17520069. 16240764  
SRR17520069. 16242852  
SRR17520069. 16245837  
SRR17520069. 16259804  
SRR17520069. 16261834  
SRR17520069. 16303128  
SRR17520069. 16320234  
SRR17520069. 16320245  
SRR17520069. 16320265  
SRR17520069. 16327521  
SRR17520069. 16349217  
SRR17520069. 16352164  
SRR17520069. 16382832  
SRR17520069. 16400235  
SRR17520069. 16407361  
SRR17520069. 16427347  
SRR17520069. 16450307  
SRR17520069. 16450308  
SRR17520069. 16450309  
SRR17520069. 16450310  
SRR17520069. 16450311  
SRR17520069. 16450312  
SRR17520069. 16450313  
SRR17520069. 16450314  
SRR17520069. 16450315  
SRR17520069. 16450316  
SRR17520069. 16450317  
SRR17520069. 16450318  
SRR17520069. 16450319  
SRR17520069. 16450320  
SRR17520069. 16450321  
SRR17520069. 16450322  
SRR17520069. 16515552  
SRR17520069. 16516980  
SRR17520069. 16522377  
SRR17520069. 16531387  
SRR17520069. 16559419  
SRR17520069. 16575981  
SRR17520069. 16594954  
SRR17520069. 16594955

SRR17520069.16594956  
SRR17520069.16594957  
SRR17520069.16594958  
SRR17520069.16594959  
SRR17520069.16594960  
SRR17520069.16596681  
SRR17520069.16596682  
SRR17520069.16596684  
SRR17520069.16596685  
SRR17520069.16596686  
SRR17520069.16596687  
SRR17520069.16596688  
SRR17520069.16596689  
SRR17520069.16596690  
SRR17520069.16596691  
SRR17520069.16596692  
SRR17520069.16596693  
SRR17520069.16596694  
SRR17520069.16596695  
SRR17520069.16596696  
SRR17520069.16596697  
SRR17520069.16596698  
SRR17520069.16596699  
SRR17520069.16596700  
SRR17520069.16597319  
SRR17520069.16597320  
SRR17520069.16597321  
SRR17520069.16597322  
SRR17520069.16597323  
SRR17520069.16597324  
SRR17520069.16597325  
SRR17520069.16597326  
SRR17520069.16597329  
SRR17520069.16597330  
SRR17520069.16597331  
SRR17520069.16597332  
SRR17520069.16597333  
SRR17520069.16597334  
SRR17520069.16597335  
SRR17520069.16597336  
SRR17520069.16597337  
SRR17520069.16597338  
SRR17520069.16597339  
SRR17520069.16597340  
SRR17520069.16597341  
SRR17520069.16597342  
SRR17520069.16597343

SRR17520069. 16597345  
SRR17520069. 16597346  
SRR17520069. 16597347  
SRR17520069. 16597348  
SRR17520069. 16597349  
SRR17520069. 16597350  
SRR17520069. 16597351  
SRR17520069. 16597352  
SRR17520069. 16597353  
SRR17520069. 16597354  
SRR17520069. 16597355  
SRR17520069. 16597356  
SRR17520069. 16597357  
SRR17520069. 16597358  
SRR17520069. 16597359  
SRR17520069. 16597360  
SRR17520069. 16597361  
SRR17520069. 16597362  
SRR17520069. 16597363  
SRR17520069. 16597364  
SRR17520069. 16597365  
SRR17520069. 16597366  
SRR17520069. 16597367  
SRR17520069. 16597368  
SRR17520069. 16597369  
SRR17520069. 16597370  
SRR17520069. 16597371  
SRR17520069. 16597372  
SRR17520069. 16597373  
SRR17520069. 16597374  
SRR17520069. 16597375  
SRR17520069. 16597376  
SRR17520069. 16597377  
SRR17520069. 16597378  
SRR17520069. 16597379  
SRR17520069. 16597381  
SRR17520069. 16597382  
SRR17520069. 16605684  
SRR17520069. 16656319  
SRR17520069. 16656320  
SRR17520069. 16656321  
SRR17520069. 16656322  
SRR17520069. 16656323  
SRR17520069. 16656324  
SRR17520069. 16656325  
SRR17520069. 16656327  
SRR17520069. 16656328



SRR17520069.16656329  
SRR17520069.16656330  
SRR17520069.16656331  
SRR17520069.16656332  
SRR17520069.16656333  
SRR17520069.16656334  
SRR17520069.16656335  
SRR17520069.16656336  
SRR17520069.16656337  
SRR17520069.16656338  
SRR17520069.16656339  
SRR17520069.16656340  
SRR17520069.16656341  
SRR17520069.16656342  
SRR17520069.16656343  
SRR17520069.16656344  
SRR17520069.16656345  
SRR17520069.16656346  
SRR17520069.16692453  
SRR17520069.16720462  
SRR17520069.16721534  
SRR17520069.16748656  
SRR17520069.16752858  
SRR17520069.16790819  
SRR17520069.16790820  
SRR17520069.16790821  
SRR17520069.16790822  
SRR17520069.16790823  
SRR17520069.16790824  
SRR17520069.16790825  
SRR17520069.16790826  
SRR17520069.16798447  
SRR17520069.16798479  
SRR17520069.16823415  
SRR17520069.16830356  
SRR17520069.16852713  
SRR17520069.16867559  
SRR17520069.16867560  
SRR17520069.16867561  
SRR17520069.16867562  
SRR17520069.16867563  
SRR17520069.16867564  
SRR17520069.16867565  
SRR17520069.16867566  
SRR17520069.16867567  
SRR17520069.16867568  
SRR17520069.16867569

SRR17520069. 16867570  
SRR17520069. 16867571  
SRR17520069. 16867572  
SRR17520069. 16867573  
SRR17520069. 16867574  
SRR17520069. 16867575  
SRR17520069. 16867576  
SRR17520069. 16867577  
SRR17520069. 16867578  
SRR17520069. 16867579  
SRR17520069. 16867580  
SRR17520069. 16867581  
SRR17520069. 16867582  
SRR17520069. 16867583  
SRR17520069. 16867584  
SRR17520069. 16867585  
SRR17520069. 16867586  
SRR17520069. 16867587  
SRR17520069. 16867588  
SRR17520069. 16867589  
SRR17520069. 16867590  
SRR17520069. 16867591  
SRR17520069. 16867592  
SRR17520069. 16867593  
SRR17520069. 16867594  
SRR17520069. 16867595  
SRR17520069. 16867596  
SRR17520069. 16867597  
SRR17520069. 16867598  
SRR17520069. 16867599  
SRR17520069. 16889788  
SRR17520069. 16913302  
SRR17520069. 16925832  
SRR17520069. 16955209  
SRR17520069. 16955210  
SRR17520069. 16955211  
SRR17520069. 16955212  
SRR17520069. 16955213  
SRR17520069. 16955214  
SRR17520069. 16955215  
SRR17520069. 16955216  
SRR17520069. 16955217  
SRR17520069. 16955218  
SRR17520069. 16955219  
SRR17520069. 16955220  
SRR17520069. 16955221  
SRR17520069. 16960533

SRR17520069.16981715  
SRR17520069.16981718  
SRR17520069.16981723  
SRR17520069.16981735  
SRR17520069.16981738  
SRR17520069.16981747  
SRR17520069.16991635  
SRR17520069.16992680  
SRR17520069.16994827  
SRR17520069.17004331  
SRR17520069.17025316  
SRR17520069.17025319  
SRR17520069.17025321  
SRR17520069.17025324  
SRR17520069.17025329  
SRR17520069.17025331  
SRR17520069.17025336  
SRR17520069.17025343  
SRR17520069.17025347  
SRR17520069.17025354  
SRR17520069.17025368  
SRR17520069.17025371  
SRR17520069.17025373  
SRR17520069.17025377  
SRR17520069.17025380  
SRR17520069.17025381  
SRR17520069.17025388  
SRR17520069.17025390  
SRR17520069.17025396  
SRR17520069.17025402  
SRR17520069.17025409  
SRR17520069.17025411  
SRR17520069.17025412  
SRR17520069.17025419  
SRR17520069.17025420  
SRR17520069.17025431  
SRR17520069.17025438  
SRR17520069.17025444  
SRR17520069.17025448  
SRR17520069.17025454  
SRR17520069.17038393  
SRR17520069.17040211  
SRR17520069.17040212  
SRR17520069.17040213  
SRR17520069.17040214  
SRR17520069.17040215  
SRR17520069.17040216

SRR17520069.17040217  
SRR17520069.17040218  
SRR17520069.17040219  
SRR17520069.17040220  
SRR17520069.17040221  
SRR17520069.17040222  
SRR17520069.17040223  
SRR17520069.17044306  
SRR17520069.17070982  
SRR17520069.17073338  
SRR17520069.17073339  
SRR17520069.17113470  
SRR17520069.17119943  
SRR17520069.17181884  
SRR17520069.17194451  
SRR17520069.17195299  
SRR17520069.17215663  
SRR17520069.17235650  
SRR17520069.17235673  
SRR17520069.17237377  
SRR17520069.17237399  
SRR17520069.17237401  
SRR17520069.17241039  
SRR17520069.17256276  
SRR17520069.17278158  
SRR17520069.17285271  
SRR17520069.17295605  
SRR17520069.17303100  
SRR17520069.17303103  
SRR17520069.17303104  
SRR17520069.17303105  
SRR17520069.17303106  
SRR17520069.17303107  
SRR17520069.17303109  
SRR17520069.17303110  
SRR17520069.17303111  
SRR17520069.17303112  
SRR17520069.17303113  
SRR17520069.17303116  
SRR17520069.17303117  
SRR17520069.17303118  
SRR17520069.17303119  
SRR17520069.17303121  
SRR17520069.17303122  
SRR17520069.17303123  
SRR17520069.17303124  
SRR17520069.17303125

SRR17520069. 17303126  
SRR17520069. 17303127  
SRR17520069. 17303128  
SRR17520069. 17303129  
SRR17520069. 17303130  
SRR17520069. 17303131  
SRR17520069. 17303132  
SRR17520069. 17303133  
SRR17520069. 17303134  
SRR17520069. 17303135  
SRR17520069. 17303136  
SRR17520069. 17303137  
SRR17520069. 17303138  
SRR17520069. 17303139  
SRR17520069. 17303140  
SRR17520069. 17303141  
SRR17520069. 17303142  
SRR17520069. 17303143  
SRR17520069. 17303144  
SRR17520069. 17303145  
SRR17520069. 17303146  
SRR17520069. 17303147  
SRR17520069. 17303148  
SRR17520069. 17303149  
SRR17520069. 17303150  
SRR17520069. 17303152  
SRR17520069. 17303153  
SRR17520069. 17303154  
SRR17520069. 17303155  
SRR17520069. 17303156  
SRR17520069. 17303157  
SRR17520069. 17303158  
SRR17520069. 17303159  
SRR17520069. 17303160  
SRR17520069. 17303161  
SRR17520069. 17303162  
SRR17520069. 17303163  
SRR17520069. 17303164  
SRR17520069. 17303165  
SRR17520069. 17303166  
SRR17520069. 17303167  
SRR17520069. 17303168  
SRR17520069. 17303169  
SRR17520069. 17303170  
SRR17520069. 17303171  
SRR17520069. 17303172  
SRR17520069. 17303174

SRR17520069.17303175  
SRR17520069.17303176  
SRR17520069.17303177  
SRR17520069.17303178  
SRR17520069.17303179  
SRR17520069.17303180  
SRR17520069.17303181  
SRR17520069.17303182  
SRR17520069.17303183  
SRR17520069.17303184  
SRR17520069.17303185  
SRR17520069.17303186  
SRR17520069.17303187  
SRR17520069.17303188  
SRR17520069.17303189  
SRR17520069.17303190  
SRR17520069.17303191  
SRR17520069.17303192  
SRR17520069.17303193  
SRR17520069.17303194  
SRR17520069.17304083  
SRR17520069.17306440  
SRR17520069.17322328  
SRR17520069.17324352  
SRR17520069.17333859  
SRR17520069.17333913  
SRR17520069.17339105  
SRR17520069.17345581  
SRR17520069.17357585  
SRR17520069.17357676  
SRR17520069.17357704  
SRR17520069.17359064  
SRR17520069.17362874  
SRR17520069.17372408  
SRR17520069.17374368  
SRR17520069.17386578  
SRR17520069.17387742  
SRR17520069.17399325  
SRR17520069.17403744  
SRR17520069.17403753  
SRR17520069.17430396  
SRR17520069.17465851  
SRR17520069.17465852  
SRR17520069.17465853  
SRR17520069.17465854  
SRR17520069.17465855  
SRR17520069.17465856

SRR17520069. 17465857  
SRR17520069. 17465858  
SRR17520069. 17465859  
SRR17520069. 17477116  
SRR17520069. 17477117  
SRR17520069. 17477118  
SRR17520069. 17477119  
SRR17520069. 17477120  
SRR17520069. 17477121  
SRR17520069. 17477122  
SRR17520069. 17477123  
SRR17520069. 17477124  
SRR17520069. 17477125  
SRR17520069. 17477126  
SRR17520069. 17477127  
SRR17520069. 17477128  
SRR17520069. 17477129  
SRR17520069. 17477130  
SRR17520069. 17477131  
SRR17520069. 17477132  
SRR17520069. 17477133  
SRR17520069. 17477134  
SRR17520069. 17477135  
SRR17520069. 17477136  
SRR17520069. 17477137  
SRR17520069. 17477138  
SRR17520069. 17477139  
SRR17520069. 17477140  
SRR17520069. 17477141  
SRR17520069. 17477142  
SRR17520069. 17477143  
SRR17520069. 17477144  
SRR17520069. 17477145  
SRR17520069. 17477146  
SRR17520069. 17477147  
SRR17520069. 17477148  
SRR17520069. 17477149  
SRR17520069. 17477150  
SRR17520069. 17477151  
SRR17520069. 17477152  
SRR17520069. 17477153  
SRR17520069. 17477154  
SRR17520069. 17477155  
SRR17520069. 17477156  
SRR17520069. 17477157  
SRR17520069. 17477158  
SRR17520069. 17477159

SRR17520069. 17477160  
SRR17520069. 17477161  
SRR17520069. 17477162  
SRR17520069. 17477163  
SRR17520069. 17477164  
SRR17520069. 17477165  
SRR17520069. 17477166  
SRR17520069. 17477167  
SRR17520069. 17477169  
SRR17520069. 17477170  
SRR17520069. 17477171  
SRR17520069. 17477172  
SRR17520069. 17477173  
SRR17520069. 17477174  
SRR17520069. 17477175  
SRR17520069. 17477176  
SRR17520069. 17477177  
SRR17520069. 17477178  
SRR17520069. 17477179  
SRR17520069. 17477180  
SRR17520069. 17477181  
SRR17520069. 17477182  
SRR17520069. 17477183  
SRR17520069. 17477184  
SRR17520069. 17477185  
SRR17520069. 17477186  
SRR17520069. 17477187  
SRR17520069. 17477188  
SRR17520069. 17477189  
SRR17520069. 17478273  
SRR17520069. 17487009  
SRR17520069. 17511631  
SRR17520069. 17511672  
SRR17520069. 17519976  
SRR17520069. 17519980  
SRR17520069. 17519990  
SRR17520069. 17519998  
SRR17520069. 17520140  
SRR17520069. 17530544  
SRR17520069. 17538582  
SRR17520069. 17540863  
SRR17520069. 17574031  
SRR17520069. 17574034  
SRR17520069. 17579066  
SRR17520069. 17585938  
SRR17520069. 17586290  
SRR17520069. 17588261



SRR17520069. 17588448  
SRR17520069. 17647859  
SRR17520069. 17647862  
SRR17520069. 17647864  
SRR17520069. 17647868  
SRR17520069. 17647869  
SRR17520069. 17647876  
SRR17520069. 17647890  
SRR17520069. 17647892  
SRR17520069. 17647894  
SRR17520069. 17667514  
SRR17520069. 17687536  
SRR17520069. 17703998  
SRR17520069. 17710979  
SRR17520069. 17710996  
SRR17520069. 17710999  
SRR17520069. 17711000  
SRR17520069. 17711001  
SRR17520069. 17711002  
SRR17520069. 17711003  
SRR17520069. 17711004  
SRR17520069. 17711005  
SRR17520069. 17711006  
SRR17520069. 17715238  
SRR17520069. 17717314  
SRR17520069. 17717327  
SRR17520069. 17752286  
SRR17520069. 17752287  
SRR17520069. 17760780  
SRR17520069. 17766355  
SRR17520069. 17766356  
SRR17520069. 17766357  
SRR17520069. 17766358  
SRR17520069. 17766359  
SRR17520069. 17766360  
SRR17520069. 17766361  
SRR17520069. 17766362  
SRR17520069. 17766363  
SRR17520069. 17766364  
SRR17520069. 17766365  
SRR17520069. 17766366  
SRR17520069. 17766367  
SRR17520069. 17766368  
SRR17520069. 17766369  
SRR17520069. 17766370  
SRR17520069. 17766371  
SRR17520069. 17766372

SRR17520069. 17766373  
SRR17520069. 17766374  
SRR17520069. 17766375  
SRR17520069. 17766376  
SRR17520069. 17766377  
SRR17520069. 17766379  
SRR17520069. 17766380  
SRR17520069. 17766381  
SRR17520069. 17766382  
SRR17520069. 17766384  
SRR17520069. 17766385  
SRR17520069. 17766386  
SRR17520069. 17766388  
SRR17520069. 17766389  
SRR17520069. 17766390  
SRR17520069. 17766391  
SRR17520069. 17766392  
SRR17520069. 17766393  
SRR17520069. 17766394  
SRR17520069. 17766395  
SRR17520069. 17766396  
SRR17520069. 17766397  
SRR17520069. 17766398  
SRR17520069. 17766399  
SRR17520069. 17766400  
SRR17520069. 17766401  
SRR17520069. 17766402  
SRR17520069. 17766403  
SRR17520069. 17766404  
SRR17520069. 17766405  
SRR17520069. 17766406  
SRR17520069. 17766407  
SRR17520069. 17766408  
SRR17520069. 17766409  
SRR17520069. 17766410  
SRR17520069. 17766411  
SRR17520069. 17766412  
SRR17520069. 17766413  
SRR17520069. 17766414  
SRR17520069. 17766415  
SRR17520069. 17766416  
SRR17520069. 17766417  
SRR17520069. 17766418  
SRR17520069. 17784571  
SRR17520069. 17791025  
SRR17520069. 17834883  
SRR17520069. 17834884

SRR17520069. 17834885  
SRR17520069. 17834886  
SRR17520069. 17834887  
SRR17520069. 17834888  
SRR17520069. 17834889  
SRR17520069. 17834890  
SRR17520069. 17834891  
SRR17520069. 17834892  
SRR17520069. 17834893  
SRR17520069. 17834894  
SRR17520069. 17834895  
SRR17520069. 17834896  
SRR17520069. 17834897  
SRR17520069. 17834898  
SRR17520069. 17834899  
SRR17520069. 17834900  
SRR17520069. 17834901  
SRR17520069. 17834902  
SRR17520069. 17834903  
SRR17520069. 17834904  
SRR17520069. 17834905  
SRR17520069. 17834906  
SRR17520069. 17834907  
SRR17520069. 17834908  
SRR17520069. 17834909  
SRR17520069. 17834910  
SRR17520069. 17834911  
SRR17520069. 17834912  
SRR17520069. 17834913  
SRR17520069. 17834914  
SRR17520069. 17834915  
SRR17520069. 17846724  
SRR17520069. 17852439  
SRR17520069. 17852462  
SRR17520069. 17899494  
SRR17520069. 17899495  
SRR17520069. 17899496  
SRR17520069. 17899497  
SRR17520069. 17899498  
SRR17520069. 17899499  
SRR17520069. 17899500  
SRR17520069. 17899501  
SRR17520069. 17899502  
SRR17520069. 17899503  
SRR17520069. 17899504  
SRR17520069. 17899505  
SRR17520069. 17899506

SRR17520069. 17899507  
SRR17520069. 17899508  
SRR17520069. 17899509  
SRR17520069. 17899510  
SRR17520069. 17908189  
SRR17520069. 17934934  
SRR17520069. 17941340  
SRR17520069. 17942992  
SRR17520069. 17944076  
SRR17520069. 17944090  
SRR17520069. 17957131  
SRR17520069. 17960381  
SRR17520069. 17993631  
SRR17520069. 18004875  
SRR17520069. 18006544  
SRR17520069. 18006545  
SRR17520069. 18006546  
SRR17520069. 18006547  
SRR17520069. 18006548  
SRR17520069. 18006549  
SRR17520069. 18006550  
SRR17520069. 18006551  
SRR17520069. 18006552  
SRR17520069. 18006553  
SRR17520069. 18006554  
SRR17520069. 18028833  
SRR17520069. 18028834  
SRR17520069. 18028835  
SRR17520069. 18028836  
SRR17520069. 18028837  
SRR17520069. 18034553  
SRR17520069. 18034662  
SRR17520069. 18035817  
SRR17520069. 18035855  
SRR17520069. 18035857  
SRR17520069. 18036451  
SRR17520069. 18058216  
SRR17520069. 18058222  
SRR17520069. 18064140  
SRR17520069. 18133085  
SRR17520069. 18151974  
SRR17520069. 18151975  
SRR17520069. 18192178  
SRR17520069. 18197594  
SRR17520069. 18197654  
SRR17520069. 18235206  
SRR17520069. 18235207

SRR17520069. 18235208  
SRR17520069. 18235209  
SRR17520069. 18235210  
SRR17520069. 18235211  
SRR17520069. 18235212  
SRR17520069. 18235213  
SRR17520069. 18235214  
SRR17520069. 18235215  
SRR17520069. 18235216  
SRR17520069. 18235217  
SRR17520069. 18235219  
SRR17520069. 18235220  
SRR17520069. 18235221  
SRR17520069. 18235222  
SRR17520069. 18235223  
SRR17520069. 18235224  
SRR17520069. 18235225  
SRR17520069. 18235226  
SRR17520069. 18235227  
SRR17520069. 18235228  
SRR17520069. 18235229  
SRR17520069. 18235230  
SRR17520069. 18235231  
SRR17520069. 18235232  
SRR17520069. 18235233  
SRR17520069. 18235234  
SRR17520069. 18235235  
SRR17520069. 18235236  
SRR17520069. 18235237  
SRR17520069. 18235239  
SRR17520069. 18235240  
SRR17520069. 18235241  
SRR17520069. 18235242  
SRR17520069. 18235243  
SRR17520069. 18235244  
SRR17520069. 18235245  
SRR17520069. 18235246  
SRR17520069. 18235247  
SRR17520069. 18235248  
SRR17520069. 18235249  
SRR17520069. 18235250  
SRR17520069. 18235251  
SRR17520069. 18235252  
SRR17520069. 18235253  
SRR17520069. 18235254  
SRR17520069. 18235255  
SRR17520069. 18235256

SRR17520069. 18235257  
SRR17520069. 18235258  
SRR17520069. 18235259  
SRR17520069. 18235260  
SRR17520069. 18235261  
SRR17520069. 18235262  
SRR17520069. 18235263  
SRR17520069. 18235264  
SRR17520069. 18235265  
SRR17520069. 18235266  
SRR17520069. 18235267  
SRR17520069. 18235268  
SRR17520069. 18235269  
SRR17520069. 18235270  
SRR17520069. 18235271  
SRR17520069. 18235272  
SRR17520069. 18235273  
SRR17520069. 18235274  
SRR17520069. 18235275  
SRR17520069. 18235276  
SRR17520069. 18235277  
SRR17520069. 18235278  
SRR17520069. 18235279  
SRR17520069. 18235280  
SRR17520069. 18235281  
SRR17520069. 18235282  
SRR17520069. 18235283  
SRR17520069. 18235284  
SRR17520069. 18235285  
SRR17520069. 18235286  
SRR17520069. 18235287  
SRR17520069. 18235288  
SRR17520069. 18235289  
SRR17520069. 18235291  
SRR17520069. 18235292  
SRR17520069. 18235293  
SRR17520069. 18235294  
SRR17520069. 18235295  
SRR17520069. 18235296  
SRR17520069. 18235297  
SRR17520069. 18235298  
SRR17520069. 18235300  
SRR17520069. 18235301  
SRR17520069. 18235302  
SRR17520069. 18235303  
SRR17520069. 18235304  
SRR17520069. 18238255

SRR17520069. 18250970  
SRR17520069. 18272652  
SRR17520069. 18280457  
SRR17520069. 18281263  
SRR17520069. 18290813  
SRR17520069. 18301473  
SRR17520069. 18301529  
SRR17520069. 18304616  
SRR17520069. 18334012  
SRR17520069. 18334018  
SRR17520069. 18334957  
SRR17520069. 18356255  
SRR17520069. 18356266  
SRR17520069. 18356271  
SRR17520069. 18356274  
SRR17520069. 18373737  
SRR17520069. 18378960  
SRR17520069. 18379054  
SRR17520069. 18391405  
SRR17520069. 18393138  
SRR17520069. 18439448  
SRR17520069. 18444249  
SRR17520069. 18453685  
SRR17520069. 18453686  
SRR17520069. 18453687  
SRR17520069. 18453688  
SRR17520069. 18453689  
SRR17520069. 18453690  
SRR17520069. 18453691  
SRR17520069. 18453692  
SRR17520069. 18453693  
SRR17520069. 18453694  
SRR17520069. 18453695  
SRR17520069. 18453696  
SRR17520069. 18453697  
SRR17520069. 18453698  
SRR17520069. 18453699  
SRR17520069. 18453700  
SRR17520069. 18453701  
SRR17520069. 18453702  
SRR17520069. 18453703  
SRR17520069. 18453704  
SRR17520069. 18453705  
SRR17520069. 18453706  
SRR17520069. 18453707  
SRR17520069. 18453708  
SRR17520069. 18453709

SRR17520069.18453710  
SRR17520069.18453711  
SRR17520069.18453712  
SRR17520069.18453713  
SRR17520069.18453714  
SRR17520069.18453715  
SRR17520069.18453716  
SRR17520069.18453717  
SRR17520069.18453718  
SRR17520069.18453719  
SRR17520069.18453720  
SRR17520069.18453721  
SRR17520069.18464406  
SRR17520069.18490415  
SRR17520069.18490429  
SRR17520069.18519979  
SRR17520069.18520132  
SRR17520069.18520134  
SRR17520069.18523265  
SRR17520069.18527210  
SRR17520069.18588410  
SRR17520069.18588411  
SRR17520069.18588412  
SRR17520069.18588413  
SRR17520069.18588414  
SRR17520069.18588415  
SRR17520069.18588416  
SRR17520069.18588417  
SRR17520069.18588418  
SRR17520069.18588419  
SRR17520069.18588420  
SRR17520069.18588421  
SRR17520069.18588422  
SRR17520069.18588423  
SRR17520069.18588424  
SRR17520069.18588425  
SRR17520069.18592529  
SRR17520069.18595983  
SRR17520069.18623311  
SRR17520069.18651772  
SRR17520069.18673504  
SRR17520069.18703428  
SRR17520069.18703429  
SRR17520069.18718245  
SRR17520069.18720515  
SRR17520069.18720521  
SRR17520069.18720992



SRR17520069. 18747027  
SRR17520069. 18790754  
SRR17520069. 18804777  
SRR17520069. 18804780  
SRR17520069. 18804781  
SRR17520069. 18804782  
SRR17520069. 18804783  
SRR17520069. 18804784  
SRR17520069. 18804786  
SRR17520069. 18810768  
SRR17520069. 18810771  
SRR17520069. 18810790  
SRR17520069. 18810800  
SRR17520069. 18817724  
SRR17520069. 18817729  
SRR17520069. 18823969  
SRR17520069. 18831556  
SRR17520069. 18879734  
SRR17520069. 18882351  
SRR17520069. 18882352  
SRR17520069. 18882353  
SRR17520069. 18882354  
SRR17520069. 18882355  
SRR17520069. 18882356  
SRR17520069. 18882357  
SRR17520069. 18882358  
SRR17520069. 18882359  
SRR17520069. 18882360  
SRR17520069. 18882361  
SRR17520069. 18882362  
SRR17520069. 18882363  
SRR17520069. 18882364  
SRR17520069. 18882365  
SRR17520069. 18882366  
SRR17520069. 18882367  
SRR17520069. 18882368  
SRR17520069. 18891278  
SRR17520069. 18935054  
SRR17520069. 18948527  
SRR17520069. 18949138  
SRR17520069. 18949144  
SRR17520069. 18949168  
SRR17520069. 18957656  
SRR17520069. 18957660  
SRR17520069. 18977984  
SRR17520069. 18977998  
SRR17520069. 18987910

SRR17520069.19006859  
SRR17520069.19010372  
SRR17520069.19048854  
SRR17520069.19065964  
SRR17520069.19066170  
SRR17520069.19066186  
SRR17520069.19076617  
SRR17520069.19081920  
SRR17520069.19082943  
SRR17520069.19082944  
SRR17520069.19082945  
SRR17520069.19082947  
SRR17520069.19082948  
SRR17520069.19082949  
SRR17520069.19082950  
SRR17520069.19082951  
SRR17520069.19082952  
SRR17520069.19082953  
SRR17520069.19082954  
SRR17520069.19082955  
SRR17520069.19082956  
SRR17520069.19082957  
SRR17520069.19082958  
SRR17520069.19082959  
SRR17520069.19082961  
SRR17520069.19082962  
SRR17520069.19104625  
SRR17520069.19114596  
SRR17520069.19114597  
SRR17520069.19114598  
SRR17520069.19114599  
SRR17520069.19114600  
SRR17520069.19114601  
SRR17520069.19114602  
SRR17520069.19114603  
SRR17520069.19114604  
SRR17520069.19114605  
SRR17520069.19114606  
SRR17520069.19114608  
SRR17520069.19114609  
SRR17520069.19114610  
SRR17520069.19114611  
SRR17520069.19114612  
SRR17520069.19114613  
SRR17520069.19114614  
SRR17520069.19114615  
SRR17520069.19114616

SRR17520069.19114617  
SRR17520069.19114618  
SRR17520069.19114619  
SRR17520069.19114620  
SRR17520069.19114621  
SRR17520069.19114622  
SRR17520069.19114623  
SRR17520069.19114624  
SRR17520069.19114625  
SRR17520069.19114626  
SRR17520069.19114627  
SRR17520069.19114628  
SRR17520069.19114629  
SRR17520069.19114630  
SRR17520069.19114631  
SRR17520069.19114632  
SRR17520069.19114633  
SRR17520069.19114634  
SRR17520069.19114635  
SRR17520069.19114636  
SRR17520069.19114637  
SRR17520069.19114638  
SRR17520069.19114639  
SRR17520069.19114640  
SRR17520069.19114641  
SRR17520069.19114642  
SRR17520069.19114643  
SRR17520069.19114644  
SRR17520069.19114645  
SRR17520069.19114646  
SRR17520069.19114647  
SRR17520069.19114648  
SRR17520069.19114649  
SRR17520069.19114650  
SRR17520069.19114651  
SRR17520069.19114652  
SRR17520069.19114653  
SRR17520069.19114654  
SRR17520069.19114655  
SRR17520069.19114656  
SRR17520069.19114657  
SRR17520069.19114659  
SRR17520069.19114660  
SRR17520069.19114661  
SRR17520069.19114662  
SRR17520069.19114663  
SRR17520069.19114664

SRR17520069. 19114665  
SRR17520069. 19140198  
SRR17520069. 19200023  
SRR17520069. 19200024  
SRR17520069. 19200025  
SRR17520069. 19200026  
SRR17520069. 19200027  
SRR17520069. 19200028  
SRR17520069. 19200029  
SRR17520069. 19200030  
SRR17520069. 19200031  
SRR17520069. 19200032  
SRR17520069. 19200033  
SRR17520069. 19200034  
SRR17520069. 19200035  
SRR17520069. 19200036  
SRR17520069. 19200037  
SRR17520069. 19200038  
SRR17520069. 19200039  
SRR17520069. 19200040  
SRR17520069. 19201583  
SRR17520069. 19257472  
SRR17520069. 19257473  
SRR17520069. 19257474  
SRR17520069. 19257476  
SRR17520069. 19257477  
SRR17520069. 19257478  
SRR17520069. 19257479  
SRR17520069. 19257480  
SRR17520069. 19257481  
SRR17520069. 19257482  
SRR17520069. 19257484  
SRR17520069. 19257485  
SRR17520069. 19257486  
SRR17520069. 19257487  
SRR17520069. 19257488  
SRR17520069. 19257489  
SRR17520069. 19257490  
SRR17520069. 19257491  
SRR17520069. 19257492  
SRR17520069. 19257493  
SRR17520069. 19257494  
SRR17520069. 19257495  
SRR17520069. 19257496  
SRR17520069. 19257497  
SRR17520069. 19257498  
SRR17520069. 19257499

SRR17520069. 19257500  
SRR17520069. 19257501  
SRR17520069. 19257502  
SRR17520069. 19257504  
SRR17520069. 19257505  
SRR17520069. 19257506  
SRR17520069. 19257507  
SRR17520069. 19257508  
SRR17520069. 19257509  
SRR17520069. 19257510  
SRR17520069. 19257511  
SRR17520069. 19257512  
SRR17520069. 19257513  
SRR17520069. 19257514  
SRR17520069. 19257516  
SRR17520069. 19257517  
SRR17520069. 19257518  
SRR17520069. 19257519  
SRR17520069. 19257520  
SRR17520069. 19257521  
SRR17520069. 19257522  
SRR17520069. 19257523  
SRR17520069. 19257524  
SRR17520069. 19257525  
SRR17520069. 19257526  
SRR17520069. 19257527  
SRR17520069. 19257528  
SRR17520069. 19257529  
SRR17520069. 19257530  
SRR17520069. 19257531  
SRR17520069. 19257532  
SRR17520069. 19257533  
SRR17520069. 19273438  
SRR17520069. 19273439  
SRR17520069. 19273440  
SRR17520069. 19273441  
SRR17520069. 19273442  
SRR17520069. 19273443  
SRR17520069. 19273444  
SRR17520069. 19273445  
SRR17520069. 19273446  
SRR17520069. 19273447  
SRR17520069. 19273448  
SRR17520069. 19273449  
SRR17520069. 19273450  
SRR17520069. 19273451  
SRR17520069. 19273453

SRR17520069. 19273454  
SRR17520069. 19273455  
SRR17520069. 19273456  
SRR17520069. 19273457  
SRR17520069. 19273458  
SRR17520069. 19273459  
SRR17520069. 19273460  
SRR17520069. 19273461  
SRR17520069. 19273462  
SRR17520069. 19273463  
SRR17520069. 19273464  
SRR17520069. 19273465  
SRR17520069. 19273466  
SRR17520069. 19273467  
SRR17520069. 19273468  
SRR17520069. 19273469  
SRR17520069. 19273470  
SRR17520069. 19273471  
SRR17520069. 19273472  
SRR17520069. 19273473  
SRR17520069. 19273474  
SRR17520069. 19273475  
SRR17520069. 19273476  
SRR17520069. 19273477  
SRR17520069. 19273478  
SRR17520069. 19273479  
SRR17520069. 19273480  
SRR17520069. 19274822  
SRR17520069. 19279490  
SRR17520069. 19324213  
SRR17520069. 19341313  
SRR17520069. 19361007  
SRR17520069. 19361478  
SRR17520069. 19364638  
SRR17520069. 19368351  
SRR17520069. 19378123  
SRR17520069. 19378184  
SRR17520069. 19378196  
SRR17520069. 19443204  
SRR17520069. 19451434  
SRR17520069. 19451435  
SRR17520069. 19451436  
SRR17520069. 19451437  
SRR17520069. 19451438  
SRR17520069. 19451439  
SRR17520069. 19451440  
SRR17520069. 19451441

SRR17520069. 19451442  
SRR17520069. 19451443  
SRR17520069. 19451444  
SRR17520069. 19451445  
SRR17520069. 19451446  
SRR17520069. 19451447  
SRR17520069. 19451448  
SRR17520069. 19451449  
SRR17520069. 19451450  
SRR17520069. 19451452  
SRR17520069. 19451453  
SRR17520069. 19451454  
SRR17520069. 19451455  
SRR17520069. 19451456  
SRR17520069. 19451457  
SRR17520069. 19451458  
SRR17520069. 19451459  
SRR17520069. 19451460  
SRR17520069. 19451461  
SRR17520069. 19451462  
SRR17520069. 19451463  
SRR17520069. 19451464  
SRR17520069. 19451465  
SRR17520069. 19451466  
SRR17520069. 19451467  
SRR17520069. 19451468  
SRR17520069. 19451469  
SRR17520069. 19451470  
SRR17520069. 19451471  
SRR17520069. 19451472  
SRR17520069. 19451473  
SRR17520069. 19451474  
SRR17520069. 19451476  
SRR17520069. 19451477  
SRR17520069. 19451478  
SRR17520069. 19451479  
SRR17520069. 19451480  
SRR17520069. 19451481  
SRR17520069. 19451483  
SRR17520069. 19451484  
SRR17520069. 19451485  
SRR17520069. 19451486  
SRR17520069. 19451487  
SRR17520069. 19451488  
SRR17520069. 19451489  
SRR17520069. 19451490  
SRR17520069. 19451491

SRR17520069. 19451492  
SRR17520069. 19451493  
SRR17520069. 19451494  
SRR17520069. 19451495  
SRR17520069. 19451496  
SRR17520069. 19451497  
SRR17520069. 19451498  
SRR17520069. 19451499  
SRR17520069. 19451500  
SRR17520069. 19451501  
SRR17520069. 19451502  
SRR17520069. 19451503  
SRR17520069. 19451504  
SRR17520069. 19451505  
SRR17520069. 19451506  
SRR17520069. 19485566  
SRR17520069. 19491131  
SRR17520069. 19548672  
SRR17520069. 19553258  
SRR17520069. 29375  
SRR17520069. 29406  
SRR17520069. 72060  
SRR17520069. 114804  
SRR17520069. 169218  
SRR17520069. 186044  
SRR17520069. 187323  
SRR17520069. 192541  
SRR17520069. 212982  
SRR17520069. 234921  
SRR17520069. 243412  
SRR17520069. 317268  
SRR17520069. 317505  
SRR17520069. 319730  
SRR17520069. 341420  
SRR17520069. 383637  
SRR17520069. 416114  
SRR17520069. 478823  
SRR17520069. 521222  
SRR17520069. 573571  
SRR17520069. 578016  
SRR17520069. 578673  
SRR17520069. 592081  
SRR17520069. 623166  
SRR17520069. 623175  
SRR17520069. 630672  
SRR17520069. 630684  
SRR17520069. 643899



SRR17520069.690283  
SRR17520069.700254  
SRR17520069.700267  
SRR17520069.700270  
SRR17520069.715900  
SRR17520069.731680  
SRR17520069.731682  
SRR17520069.745380  
SRR17520069.763297  
SRR17520069.764911  
SRR17520069.774048  
SRR17520069.867372  
SRR17520069.868440  
SRR17520069.873714  
SRR17520069.883366  
SRR17520069.883373  
SRR17520069.900709  
SRR17520069.902008  
SRR17520069.902054  
SRR17520069.902081  
SRR17520069.906454  
SRR17520069.911416  
SRR17520069.919474  
SRR17520069.922003  
SRR17520069.931800  
SRR17520069.941712  
SRR17520069.981099  
SRR17520069.1040333  
SRR17520069.1110974  
SRR17520069.1112020  
SRR17520069.1128340  
SRR17520069.1170823  
SRR17520069.1178349  
SRR17520069.1186309  
SRR17520069.1196422  
SRR17520069.1196423  
SRR17520069.1206145  
SRR17520069.1249542  
SRR17520069.1265025  
SRR17520069.1287111  
SRR17520069.1351645  
SRR17520069.1360246  
SRR17520069.1435175  
SRR17520069.1435178  
SRR17520069.1435179  
SRR17520069.1435185  
SRR17520069.1448959

SRR17520069. 1471325  
SRR17520069. 1496234  
SRR17520069. 1500516  
SRR17520069. 1503312  
SRR17520069. 1551276  
SRR17520069. 1552417  
SRR17520069. 1554068  
SRR17520069. 1554081  
SRR17520069. 1566134  
SRR17520069. 1570991  
SRR17520069. 1575704  
SRR17520069. 1575708  
SRR17520069. 1575769  
SRR17520069. 1628214  
SRR17520069. 1657148  
SRR17520069. 1658563  
SRR17520069. 1658570  
SRR17520069. 1691427  
SRR17520069. 1734622  
SRR17520069. 1734640  
SRR17520069. 1734643  
SRR17520069. 1734647  
SRR17520069. 1739630  
SRR17520069. 1752955  
SRR17520069. 1752964  
SRR17520069. 1752973  
SRR17520069. 1752978  
SRR17520069. 1752984  
SRR17520069. 1753003  
SRR17520069. 1753027  
SRR17520069. 1753058  
SRR17520069. 1753081  
SRR17520069. 1759671  
SRR17520069. 1767518  
SRR17520069. 1767550  
SRR17520069. 1786033  
SRR17520069. 1833328  
SRR17520069. 1833410  
SRR17520069. 1893940  
SRR17520069. 1895958  
SRR17520069. 1926812  
SRR17520069. 1949483  
SRR17520069. 1957418  
SRR17520069. 1990738  
SRR17520069. 1990759  
SRR17520069. 1990769  
SRR17520069. 2002298

SRR17520069. 2017972  
SRR17520069. 2028434  
SRR17520069. 2028435  
SRR17520069. 2039197  
SRR17520069. 2107424  
SRR17520069. 2129779  
SRR17520069. 2134844  
SRR17520069. 2142903  
SRR17520069. 2142907  
SRR17520069. 2175308  
SRR17520069. 2250032  
SRR17520069. 2293388  
SRR17520069. 2299373  
SRR17520069. 2305245  
SRR17520069. 2316719  
SRR17520069. 2330387  
SRR17520069. 2340361  
SRR17520069. 2366203  
SRR17520069. 2366224  
SRR17520069. 2398443  
SRR17520069. 2402891  
SRR17520069. 2403674  
SRR17520069. 2432686  
SRR17520069. 2435242  
SRR17520069. 2435263  
SRR17520069. 2437203  
SRR17520069. 2440388  
SRR17520069. 2458063  
SRR17520069. 2458129  
SRR17520069. 2495067  
SRR17520069. 2495085  
SRR17520069. 2505990  
SRR17520069. 2524056  
SRR17520069. 2558858  
SRR17520069. 2573136  
SRR17520069. 2573207  
SRR17520069. 2687284  
SRR17520069. 2707160  
SRR17520069. 2737667  
SRR17520069. 2798782  
SRR17520069. 2820636  
SRR17520069. 2829185  
SRR17520069. 2841588  
SRR17520069. 2841603  
SRR17520069. 2841604  
SRR17520069. 2860203  
SRR17520069. 2860661

SRR17520069. 2871356  
SRR17520069. 2891858  
SRR17520069. 2898296  
SRR17520069. 2981978  
SRR17520069. 2995396  
SRR17520069. 3006828  
SRR17520069. 3007335  
SRR17520069. 3070204  
SRR17520069. 3149205  
SRR17520069. 3183430  
SRR17520069. 3271406  
SRR17520069. 3274876  
SRR17520069. 3314022  
SRR17520069. 3331709  
SRR17520069. 3332731  
SRR17520069. 3332738  
SRR17520069. 3332739  
SRR17520069. 3345299  
SRR17520069. 3346081  
SRR17520069. 3346354  
SRR17520069. 3352869  
SRR17520069. 3369663  
SRR17520069. 3430867  
SRR17520069. 3482984  
SRR17520069. 3508285  
SRR17520069. 3508296  
SRR17520069. 3511646  
SRR17520069. 3514397  
SRR17520069. 3514403  
SRR17520069. 3544102  
SRR17520069. 3564899  
SRR17520069. 3576861  
SRR17520069. 3588622  
SRR17520069. 3608311  
SRR17520069. 3613712  
SRR17520069. 3630098  
SRR17520069. 3630976  
SRR17520069. 3643958  
SRR17520069. 3660027  
SRR17520069. 3665810  
SRR17520069. 3786588  
SRR17520069. 3795368  
SRR17520069. 3809446  
SRR17520069. 3864713  
SRR17520069. 3888320  
SRR17520069. 3946731  
SRR17520069. 3960612

SRR17520069.3993020  
SRR17520069.4063083  
SRR17520069.4064682  
SRR17520069.4093487  
SRR17520069.4107590  
SRR17520069.4107629  
SRR17520069.4111738  
SRR17520069.4154686  
SRR17520069.4158206  
SRR17520069.4161730  
SRR17520069.4161752  
SRR17520069.4161829  
SRR17520069.4181107  
SRR17520069.4189979  
SRR17520069.4196747  
SRR17520069.4196754  
SRR17520069.4233947  
SRR17520069.4274590  
SRR17520069.4307058  
SRR17520069.4314298  
SRR17520069.4319781  
SRR17520069.4353844  
SRR17520069.4356679  
SRR17520069.4356867  
SRR17520069.4360782  
SRR17520069.4360802  
SRR17520069.4367638  
SRR17520069.4372563  
SRR17520069.4373153  
SRR17520069.4373154  
SRR17520069.4396541  
SRR17520069.4417053  
SRR17520069.4424000  
SRR17520069.4487444  
SRR17520069.4492988  
SRR17520069.4505294  
SRR17520069.4519338  
SRR17520069.4522975  
SRR17520069.4532015  
SRR17520069.4537195  
SRR17520069.4537354  
SRR17520069.4611853  
SRR17520069.4639639  
SRR17520069.4644898  
SRR17520069.4680962  
SRR17520069.4691623  
SRR17520069.4693023

SRR17520069.4719665  
SRR17520069.4720281  
SRR17520069.4735369  
SRR17520069.4764505  
SRR17520069.4766796  
SRR17520069.4813664  
SRR17520069.4837227  
SRR17520069.4931305  
SRR17520069.4931314  
SRR17520069.4988366  
SRR17520069.4988387  
SRR17520069.5016512  
SRR17520069.5033157  
SRR17520069.5033185  
SRR17520069.5042441  
SRR17520069.5042443  
SRR17520069.5051038  
SRR17520069.5056968  
SRR17520069.5094253  
SRR17520069.5114279  
SRR17520069.5114797  
SRR17520069.5118687  
SRR17520069.5206567  
SRR17520069.5224472  
SRR17520069.5242349  
SRR17520069.5303084  
SRR17520069.5313441  
SRR17520069.5313442  
SRR17520069.5313443  
SRR17520069.5313447  
SRR17520069.5313468  
SRR17520069.5360996  
SRR17520069.5373449  
SRR17520069.5375076  
SRR17520069.5375077  
SRR17520069.5375078  
SRR17520069.5379294  
SRR17520069.5385343  
SRR17520069.5429534  
SRR17520069.5430439  
SRR17520069.5438812  
SRR17520069.5496366  
SRR17520069.5496368  
SRR17520069.5496369  
SRR17520069.5504308  
SRR17520069.5513497  
SRR17520069.5524366

SRR17520069.5558971  
SRR17520069.5601834  
SRR17520069.5601898  
SRR17520069.5601948  
SRR17520069.5601964  
SRR17520069.5601971  
SRR17520069.5610061  
SRR17520069.5612408  
SRR17520069.5618277  
SRR17520069.5625182  
SRR17520069.5625189  
SRR17520069.5630868  
SRR17520069.5649790  
SRR17520069.5666575  
SRR17520069.5694702  
SRR17520069.5717706  
SRR17520069.5717709  
SRR17520069.5717710  
SRR17520069.5717721  
SRR17520069.5719047  
SRR17520069.5738396  
SRR17520069.5738399  
SRR17520069.5738422  
SRR17520069.5738449  
SRR17520069.5738460  
SRR17520069.5738462  
SRR17520069.5738489  
SRR17520069.5774772  
SRR17520069.5811828  
SRR17520069.5871276  
SRR17520069.5871376  
SRR17520069.5871386  
SRR17520069.5871389  
SRR17520069.5871411  
SRR17520069.5873907  
SRR17520069.5873917  
SRR17520069.5885260  
SRR17520069.5889642  
SRR17520069.5922991  
SRR17520069.5947172  
SRR17520069.5994437  
SRR17520069.6026662  
SRR17520069.6040997  
SRR17520069.6041159  
SRR17520069.6054510  
SRR17520069.6057002  
SRR17520069.6057072

SRR17520069.6057075  
SRR17520069.6057084  
SRR17520069.6057110  
SRR17520069.6058469  
SRR17520069.6085844  
SRR17520069.6093336  
SRR17520069.6097157  
SRR17520069.6100069  
SRR17520069.6138949  
SRR17520069.6148609  
SRR17520069.6155197  
SRR17520069.6172618  
SRR17520069.6215179  
SRR17520069.6215193  
SRR17520069.6215196  
SRR17520069.6224227  
SRR17520069.6233356  
SRR17520069.6250867  
SRR17520069.6250874  
SRR17520069.6264886  
SRR17520069.6339573  
SRR17520069.6342618  
SRR17520069.6350222  
SRR17520069.6419901  
SRR17520069.6446181  
SRR17520069.6451871  
SRR17520069.6472847  
SRR17520069.6560855  
SRR17520069.6578707  
SRR17520069.6578795  
SRR17520069.6596583  
SRR17520069.6597685  
SRR17520069.6674652  
SRR17520069.6715076  
SRR17520069.6725650  
SRR17520069.6740214  
SRR17520069.6751487  
SRR17520069.6781830  
SRR17520069.6792171  
SRR17520069.6792715  
SRR17520069.6795054  
SRR17520069.6807505  
SRR17520069.6807538  
SRR17520069.6810395  
SRR17520069.6821167  
SRR17520069.6837580  
SRR17520069.6857976



SRR17520069.6907178  
SRR17520069.6936665  
SRR17520069.6938491  
SRR17520069.6995151  
SRR17520069.7052936  
SRR17520069.7096690  
SRR17520069.7150442  
SRR17520069.7192126  
SRR17520069.7220727  
SRR17520069.7224747  
SRR17520069.7251462  
SRR17520069.7261578  
SRR17520069.7261579  
SRR17520069.7261581  
SRR17520069.7261582  
SRR17520069.7261583  
SRR17520069.7261584  
SRR17520069.7261585  
SRR17520069.7261587  
SRR17520069.7261588  
SRR17520069.7261589  
SRR17520069.7261591  
SRR17520069.7261592  
SRR17520069.7261593  
SRR17520069.7261594  
SRR17520069.7261595  
SRR17520069.7261596  
SRR17520069.7261597  
SRR17520069.7261599  
SRR17520069.7261600  
SRR17520069.7261601  
SRR17520069.7261603  
SRR17520069.7261604  
SRR17520069.7261605  
SRR17520069.7261606  
SRR17520069.7261607  
SRR17520069.7261608  
SRR17520069.7261609  
SRR17520069.7261610  
SRR17520069.7261611  
SRR17520069.7261612  
SRR17520069.7261613  
SRR17520069.7261614  
SRR17520069.7261615  
SRR17520069.7261616  
SRR17520069.7261617  
SRR17520069.7261618

SRR17520069. 7261619  
SRR17520069. 7261620  
SRR17520069. 7261621  
SRR17520069. 7261622  
SRR17520069. 7261623  
SRR17520069. 7261624  
SRR17520069. 7261625  
SRR17520069. 7261627  
SRR17520069. 7261629  
SRR17520069. 7261630  
SRR17520069. 7261631  
SRR17520069. 7261632  
SRR17520069. 7261633  
SRR17520069. 7261635  
SRR17520069. 7261636  
SRR17520069. 7261637  
SRR17520069. 7261638  
SRR17520069. 7261639  
SRR17520069. 7261640  
SRR17520069. 7261641  
SRR17520069. 7261642  
SRR17520069. 7261643  
SRR17520069. 7261644  
SRR17520069. 7261645  
SRR17520069. 7261646  
SRR17520069. 7261647  
SRR17520069. 7261648  
SRR17520069. 7261649  
SRR17520069. 7261650  
SRR17520069. 7261651  
SRR17520069. 7261652  
SRR17520069. 7261653  
SRR17520069. 7261654  
SRR17520069. 7261655  
SRR17520069. 7261656  
SRR17520069. 7261657  
SRR17520069. 7261658  
SRR17520069. 7261659  
SRR17520069. 7261660  
SRR17520069. 7261661  
SRR17520069. 7261663  
SRR17520069. 7261664  
SRR17520069. 7261665  
SRR17520069. 7261666  
SRR17520069. 7261667  
SRR17520069. 7261668  
SRR17520069. 7261669

SRR17520069.7261671  
SRR17520069.7261672  
SRR17520069.7261673  
SRR17520069.7261674  
SRR17520069.7261675  
SRR17520069.7261676  
SRR17520069.7261677  
SRR17520069.7261678  
SRR17520069.7261679  
SRR17520069.7261680  
SRR17520069.7261681  
SRR17520069.7261682  
SRR17520069.7261683  
SRR17520069.7261684  
SRR17520069.7261685  
SRR17520069.7261689  
SRR17520069.7261690  
SRR17520069.7261691  
SRR17520069.7261693  
SRR17520069.7261694  
SRR17520069.7261695  
SRR17520069.7269326  
SRR17520069.7307347  
SRR17520069.7388090  
SRR17520069.7401868  
SRR17520069.7472354  
SRR17520069.7472378  
SRR17520069.7478258  
SRR17520069.7478277  
SRR17520069.7542724  
SRR17520069.7542725  
SRR17520069.7568888  
SRR17520069.7579002  
SRR17520069.7579020  
SRR17520069.7623727  
SRR17520069.7648500  
SRR17520069.7648501  
SRR17520069.7655646  
SRR17520069.7688319  
SRR17520069.7699241  
SRR17520069.7710933  
SRR17520069.7710934  
SRR17520069.7743141  
SRR17520069.7744020  
SRR17520069.7746639  
SRR17520069.7755070  
SRR17520069.7817787

SRR17520069.7817807  
SRR17520069.7835762  
SRR17520069.7883765  
SRR17520069.7898633  
SRR17520069.7907826  
SRR17520069.7927261  
SRR17520069.7980153  
SRR17520069.8026532  
SRR17520069.8074447  
SRR17520069.8080878  
SRR17520069.8163575  
SRR17520069.8193580  
SRR17520069.8216583  
SRR17520069.8225006  
SRR17520069.8255026  
SRR17520069.8255093  
SRR17520069.8255101  
SRR17520069.8260342  
SRR17520069.8306442  
SRR17520069.8315781  
SRR17520069.8344110  
SRR17520069.8344111  
SRR17520069.8375300  
SRR17520069.8378555  
SRR17520069.8394714  
SRR17520069.8441895  
SRR17520069.8443366  
SRR17520069.8483933  
SRR17520069.8519975  
SRR17520069.8524186  
SRR17520069.8525830  
SRR17520069.8556819  
SRR17520069.8556828  
SRR17520069.8567524  
SRR17520069.8577170  
SRR17520069.8585901  
SRR17520069.8602279  
SRR17520069.8607415  
SRR17520069.8633576  
SRR17520069.8640020  
SRR17520069.8648479  
SRR17520069.8656291  
SRR17520069.8700373  
SRR17520069.8702690  
SRR17520069.8705163  
SRR17520069.8723369  
SRR17520069.8753540

SRR17520069.8853018  
SRR17520069.8853060  
SRR17520069.8861457  
SRR17520069.8879354  
SRR17520069.8879412  
SRR17520069.8879467  
SRR17520069.8879472  
SRR17520069.8947171  
SRR17520069.8947178  
SRR17520069.8950477  
SRR17520069.8971226  
SRR17520069.8989790  
SRR17520069.9011856  
SRR17520069.9083594  
SRR17520069.9104898  
SRR17520069.9157253  
SRR17520069.9187367  
SRR17520069.9187386  
SRR17520069.9187400  
SRR17520069.9187453  
SRR17520069.9195809  
SRR17520069.9198269  
SRR17520069.9202392  
SRR17520069.9210557  
SRR17520069.9213518  
SRR17520069.9224425  
SRR17520069.9238097  
SRR17520069.9273457  
SRR17520069.9275183  
SRR17520069.9289706  
SRR17520069.9298362  
SRR17520069.9303351  
SRR17520069.9308140  
SRR17520069.9312276  
SRR17520069.9328396  
SRR17520069.9357931  
SRR17520069.9357934  
SRR17520069.9369653  
SRR17520069.9371768  
SRR17520069.9470832  
SRR17520069.9470887  
SRR17520069.9472226  
SRR17520069.9481560  
SRR17520069.9491402  
SRR17520069.9500231  
SRR17520069.9505283  
SRR17520069.9588894

SRR17520069.9590264  
SRR17520069.9643287  
SRR17520069.9644310  
SRR17520069.9710113  
SRR17520069.9716572  
SRR17520069.9738499  
SRR17520069.9738520  
SRR17520069.9741097  
SRR17520069.9766596  
SRR17520069.9772863  
SRR17520069.9790303  
SRR17520069.9790312  
SRR17520069.9792847  
SRR17520069.9874484  
SRR17520069.9885547  
SRR17520069.9901128  
SRR17520069.9901157  
SRR17520069.9901164  
SRR17520069.9901174  
SRR17520069.9901183  
SRR17520069.9969341  
SRR17520069.9982502  
SRR17520069.9983983  
SRR17520069.9983991  
SRR17520069.9992011  
SRR17520069.9997037  
SRR17520069.10039962  
SRR17520069.10119394  
SRR17520069.10119411  
SRR17520069.10119420  
SRR17520069.10119421  
SRR17520069.10119423  
SRR17520069.10119424  
SRR17520069.10119433  
SRR17520069.10119435  
SRR17520069.10119447  
SRR17520069.10126587  
SRR17520069.10126593  
SRR17520069.10126597  
SRR17520069.10126620  
SRR17520069.10126627  
SRR17520069.10130210  
SRR17520069.10147597  
SRR17520069.10147599  
SRR17520069.10147638  
SRR17520069.10154857  
SRR17520069.10199043

SRR17520069.10203448  
SRR17520069.10208716  
SRR17520069.10273597  
SRR17520069.10317350  
SRR17520069.10340105  
SRR17520069.10363676  
SRR17520069.10429223  
SRR17520069.10446427  
SRR17520069.10448478  
SRR17520069.10491689  
SRR17520069.10520622  
SRR17520069.10533808  
SRR17520069.10576815  
SRR17520069.10605763  
SRR17520069.10605795  
SRR17520069.10617479  
SRR17520069.10639090  
SRR17520069.10699983  
SRR17520069.10699990  
SRR17520069.10716003  
SRR17520069.10716015  
SRR17520069.10730819  
SRR17520069.10746428  
SRR17520069.10794546  
SRR17520069.10794595  
SRR17520069.10798100  
SRR17520069.10824119  
SRR17520069.10848950  
SRR17520069.10912158  
SRR17520069.10921467  
SRR17520069.10933658  
SRR17520069.10980449  
SRR17520069.10980450  
SRR17520069.11030816  
SRR17520069.11030827  
SRR17520069.11030828  
SRR17520069.11046049  
SRR17520069.11124635  
SRR17520069.11175842  
SRR17520069.11208199  
SRR17520069.11231884  
SRR17520069.11241636  
SRR17520069.11296684  
SRR17520069.11334103  
SRR17520069.11336720  
SRR17520069.11338647  
SRR17520069.11378247

SRR17520069.11378252  
SRR17520069.11378269  
SRR17520069.11444091  
SRR17520069.11444107  
SRR17520069.11477998  
SRR17520069.11530682  
SRR17520069.11530688  
SRR17520069.11530691  
SRR17520069.11542368  
SRR17520069.11615838  
SRR17520069.11627935  
SRR17520069.11627979  
SRR17520069.11627984  
SRR17520069.11627990  
SRR17520069.11627998  
SRR17520069.11644669  
SRR17520069.11644670  
SRR17520069.11644671  
SRR17520069.11644672  
SRR17520069.11736213  
SRR17520069.11744260  
SRR17520069.11777284  
SRR17520069.11777286  
SRR17520069.11780119  
SRR17520069.11789973  
SRR17520069.11818689  
SRR17520069.11843598  
SRR17520069.11905272  
SRR17520069.11914007  
SRR17520069.11938720  
SRR17520069.11974894  
SRR17520069.11989074  
SRR17520069.12056183  
SRR17520069.12098548  
SRR17520069.12155226  
SRR17520069.12155245  
SRR17520069.12174121  
SRR17520069.12188882  
SRR17520069.12201264  
SRR17520069.12201300  
SRR17520069.12264332  
SRR17520069.12297334  
SRR17520069.12297415  
SRR17520069.12317788  
SRR17520069.12348074  
SRR17520069.12371423  
SRR17520069.12371428



SRR17520069. 12383826  
SRR17520069. 12449841  
SRR17520069. 12529794  
SRR17520069. 12531020  
SRR17520069. 12531047  
SRR17520069. 12542861  
SRR17520069. 12599539  
SRR17520069. 12604288  
SRR17520069. 12604744  
SRR17520069. 12638448  
SRR17520069. 12645525  
SRR17520069. 12736852  
SRR17520069. 12749700  
SRR17520069. 12797184  
SRR17520069. 12839968  
SRR17520069. 12941041  
SRR17520069. 12973141  
SRR17520069. 12973149  
SRR17520069. 12973169  
SRR17520069. 12973182  
SRR17520069. 12973230  
SRR17520069. 13042791  
SRR17520069. 13042795  
SRR17520069. 13042859  
SRR17520069. 13043901  
SRR17520069. 13057523  
SRR17520069. 13080319  
SRR17520069. 13128643  
SRR17520069. 13141242  
SRR17520069. 13146689  
SRR17520069. 13158900  
SRR17520069. 13174528  
SRR17520069. 13177702  
SRR17520069. 13223747  
SRR17520069. 13245965  
SRR17520069. 13261871  
SRR17520069. 13263597  
SRR17520069. 13343531  
SRR17520069. 13343538  
SRR17520069. 13390525  
SRR17520069. 13397479  
SRR17520069. 13401480  
SRR17520069. 13429726  
SRR17520069. 13448302  
SRR17520069. 13471200  
SRR17520069. 13484771  
SRR17520069. 13529058

SRR17520069. 13529061  
SRR17520069. 13529064  
SRR17520069. 13529092  
SRR17520069. 13529095  
SRR17520069. 13529110  
SRR17520069. 13529142  
SRR17520069. 13529147  
SRR17520069. 13529150  
SRR17520069. 13529636  
SRR17520069. 13543710  
SRR17520069. 13543717  
SRR17520069. 13543720  
SRR17520069. 13543725  
SRR17520069. 13543730  
SRR17520069. 13547133  
SRR17520069. 13554942  
SRR17520069. 13582698  
SRR17520069. 13584093  
SRR17520069. 13584095  
SRR17520069. 13584125  
SRR17520069. 13584145  
SRR17520069. 13584169  
SRR17520069. 13608190  
SRR17520069. 13608653  
SRR17520069. 13654263  
SRR17520069. 13672618  
SRR17520069. 13672629  
SRR17520069. 13715387  
SRR17520069. 13757498  
SRR17520069. 13757499  
SRR17520069. 13757500  
SRR17520069. 13757501  
SRR17520069. 13757502  
SRR17520069. 13757503  
SRR17520069. 13757504  
SRR17520069. 13757505  
SRR17520069. 13757506  
SRR17520069. 13757507  
SRR17520069. 13757508  
SRR17520069. 13757509  
SRR17520069. 13757510  
SRR17520069. 13757511  
SRR17520069. 13757512  
SRR17520069. 13757513  
SRR17520069. 13757514  
SRR17520069. 13757516  
SRR17520069. 13757517

SRR17520069. 13757518  
SRR17520069. 13757519  
SRR17520069. 13757520  
SRR17520069. 13757521  
SRR17520069. 13757522  
SRR17520069. 13757524  
SRR17520069. 13757525  
SRR17520069. 13757526  
SRR17520069. 13757527  
SRR17520069. 13757528  
SRR17520069. 13757529  
SRR17520069. 13757530  
SRR17520069. 13757531  
SRR17520069. 13757533  
SRR17520069. 13757534  
SRR17520069. 13757536  
SRR17520069. 13757537  
SRR17520069. 13757538  
SRR17520069. 13757539  
SRR17520069. 13757540  
SRR17520069. 13757541  
SRR17520069. 13757542  
SRR17520069. 13757543  
SRR17520069. 13757544  
SRR17520069. 13757546  
SRR17520069. 13757547  
SRR17520069. 13757548  
SRR17520069. 13757549  
SRR17520069. 13757550  
SRR17520069. 13757551  
SRR17520069. 13757552  
SRR17520069. 13757553  
SRR17520069. 13757554  
SRR17520069. 13757555  
SRR17520069. 13757556  
SRR17520069. 13757557  
SRR17520069. 13757558  
SRR17520069. 13757559  
SRR17520069. 13757560  
SRR17520069. 13757561  
SRR17520069. 13757562  
SRR17520069. 13757563  
SRR17520069. 13757564  
SRR17520069. 13757565  
SRR17520069. 13757566  
SRR17520069. 13757567  
SRR17520069. 13757568

SRR17520069. 13757569  
SRR17520069. 13757570  
SRR17520069. 13757571  
SRR17520069. 13757572  
SRR17520069. 13757573  
SRR17520069. 13757574  
SRR17520069. 13757575  
SRR17520069. 13757576  
SRR17520069. 13757577  
SRR17520069. 13757578  
SRR17520069. 13757579  
SRR17520069. 13757580  
SRR17520069. 13757581  
SRR17520069. 13757582  
SRR17520069. 13757583  
SRR17520069. 13757584  
SRR17520069. 13757585  
SRR17520069. 13757586  
SRR17520069. 13757587  
SRR17520069. 13757588  
SRR17520069. 13757589  
SRR17520069. 13757590  
SRR17520069. 13757591  
SRR17520069. 13757592  
SRR17520069. 13757593  
SRR17520069. 13757594  
SRR17520069. 13757595  
SRR17520069. 13757596  
SRR17520069. 13757597  
SRR17520069. 13757598  
SRR17520069. 13757599  
SRR17520069. 13757600  
SRR17520069. 13757601  
SRR17520069. 13757602  
SRR17520069. 13757603  
SRR17520069. 13757604  
SRR17520069. 13757605  
SRR17520069. 13757606  
SRR17520069. 13757607  
SRR17520069. 13757608  
SRR17520069. 13757609  
SRR17520069. 13757610  
SRR17520069. 13757611  
SRR17520069. 13757612  
SRR17520069. 13757614  
SRR17520069. 13757615  
SRR17520069. 13757616

SRR17520069. 13757617  
SRR17520069. 13757618  
SRR17520069. 13757619  
SRR17520069. 13757620  
SRR17520069. 13757621  
SRR17520069. 13757622  
SRR17520069. 13757623  
SRR17520069. 13757624  
SRR17520069. 13767606  
SRR17520069. 13777123  
SRR17520069. 13802029  
SRR17520069. 13840882  
SRR17520069. 13840889  
SRR17520069. 13840890  
SRR17520069. 13840893  
SRR17520069. 13841744  
SRR17520069. 13860997  
SRR17520069. 13861978  
SRR17520069. 13884507  
SRR17520069. 13923584  
SRR17520069. 13936062  
SRR17520069. 13946239  
SRR17520069. 13987563  
SRR17520069. 14013063  
SRR17520069. 14034188  
SRR17520069. 14058870  
SRR17520069. 14058871  
SRR17520069. 14058878  
SRR17520069. 14058885  
SRR17520069. 14058891  
SRR17520069. 14145660  
SRR17520069. 14171321  
SRR17520069. 14171324  
SRR17520069. 14171329  
SRR17520069. 14171337  
SRR17520069. 14227434  
SRR17520069. 14264070  
SRR17520069. 14326824  
SRR17520069. 14361514  
SRR17520069. 14378128  
SRR17520069. 14378155  
SRR17520069. 14378228  
SRR17520069. 14378240  
SRR17520069. 14381707  
SRR17520069. 14399907  
SRR17520069. 14404030  
SRR17520069. 14404044

SRR17520069.14404062  
SRR17520069.14451005  
SRR17520069.14471262  
SRR17520069.14481948  
SRR17520069.14504791  
SRR17520069.14508720  
SRR17520069.14526040  
SRR17520069.14547394  
SRR17520069.14607639  
SRR17520069.14629706  
SRR17520069.14641533  
SRR17520069.14641534  
SRR17520069.14653712  
SRR17520069.14672098  
SRR17520069.14687085  
SRR17520069.14693818  
SRR17520069.14722874  
SRR17520069.14782158  
SRR17520069.14782162  
SRR17520069.14782168  
SRR17520069.14782173  
SRR17520069.14782183  
SRR17520069.14798081  
SRR17520069.14805189  
SRR17520069.14824840  
SRR17520069.14873356  
SRR17520069.14873369  
SRR17520069.14873373  
SRR17520069.14958564  
SRR17520069.15015196  
SRR17520069.15015197  
SRR17520069.15015198  
SRR17520069.15015199  
SRR17520069.15015200  
SRR17520069.15088458  
SRR17520069.15123283  
SRR17520069.15132378  
SRR17520069.15160310  
SRR17520069.15167752  
SRR17520069.15194047  
SRR17520069.15246374  
SRR17520069.15272058  
SRR17520069.15293871  
SRR17520069.15300323  
SRR17520069.15302702  
SRR17520069.15304756  
SRR17520069.15464458

SRR17520069. 15477698  
SRR17520069. 15477737  
SRR17520069. 15534053  
SRR17520069. 15534057  
SRR17520069. 15566451  
SRR17520069. 15578420  
SRR17520069. 15614978  
SRR17520069. 15669319  
SRR17520069. 15685348  
SRR17520069. 15685349  
SRR17520069. 15685373  
SRR17520069. 15690260  
SRR17520069. 15786168  
SRR17520069. 15812876  
SRR17520069. 15838053  
SRR17520069. 15853983  
SRR17520069. 15894797  
SRR17520069. 15895539  
SRR17520069. 15915546  
SRR17520069. 15956970  
SRR17520069. 15970377  
SRR17520069. 15975372  
SRR17520069. 16001598  
SRR17520069. 16041890  
SRR17520069. 16045254  
SRR17520069. 16060278  
SRR17520069. 16075749  
SRR17520069. 16086557  
SRR17520069. 16090166  
SRR17520069. 16092244  
SRR17520069. 16092259  
SRR17520069. 16092260  
SRR17520069. 16092263  
SRR17520069. 16092355  
SRR17520069. 16130018  
SRR17520069. 16201789  
SRR17520069. 16223984  
SRR17520069. 16223989  
SRR17520069. 16223994  
SRR17520069. 16242856  
SRR17520069. 16245832  
SRR17520069. 16256589  
SRR17520069. 16298573  
SRR17520069. 16305596  
SRR17520069. 16306681  
SRR17520069. 16326965  
SRR17520069. 16326975

SRR17520069. 16326981  
SRR17520069. 16342648  
SRR17520069. 16361950  
SRR17520069. 16382145  
SRR17520069. 16410206  
SRR17520069. 16422662  
SRR17520069. 16440017  
SRR17520069. 16440020  
SRR17520069. 16450393  
SRR17520069. 16517045  
SRR17520069. 16517047  
SRR17520069. 16517094  
SRR17520069. 16567311  
SRR17520069. 16567338  
SRR17520069. 16569793  
SRR17520069. 16612868  
SRR17520069. 16625822  
SRR17520069. 16697594  
SRR17520069. 16697617  
SRR17520069. 16697618  
SRR17520069. 16697627  
SRR17520069. 16697660  
SRR17520069. 16697671  
SRR17520069. 16697703  
SRR17520069. 16697721  
SRR17520069. 16697730  
SRR17520069. 16697741  
SRR17520069. 16701767  
SRR17520069. 16730356  
SRR17520069. 16743005  
SRR17520069. 16799381  
SRR17520069. 16822121  
SRR17520069. 16822178  
SRR17520069. 16899741  
SRR17520069. 16902215  
SRR17520069. 16903368  
SRR17520069. 16911470  
SRR17520069. 16981501  
SRR17520069. 16983860  
SRR17520069. 17048314  
SRR17520069. 17065901  
SRR17520069. 17077658  
SRR17520069. 17079793  
SRR17520069. 17079794  
SRR17520069. 17079800  
SRR17520069. 17079815  
SRR17520069. 17088684



SRR17520069.17116170  
SRR17520069.17274977  
SRR17520069.17306350  
SRR17520069.17311921  
SRR17520069.17337154  
SRR17520069.17403798  
SRR17520069.17411934  
SRR17520069.17411939  
SRR17520069.17411951  
SRR17520069.17411952  
SRR17520069.17411958  
SRR17520069.17411965  
SRR17520069.17411967  
SRR17520069.17411968  
SRR17520069.17411969  
SRR17520069.17411971  
SRR17520069.17427440  
SRR17520069.17427491  
SRR17520069.17439752  
SRR17520069.17452381  
SRR17520069.17473194  
SRR17520069.17484077  
SRR17520069.17526117  
SRR17520069.17526128  
SRR17520069.17557157  
SRR17520069.17593661  
SRR17520069.17608105  
SRR17520069.17648773  
SRR17520069.17651379  
SRR17520069.17662819  
SRR17520069.17671072  
SRR17520069.17687534  
SRR17520069.17865553  
SRR17520069.17865570  
SRR17520069.17883948  
SRR17520069.17932041  
SRR17520069.17933030  
SRR17520069.17966147  
SRR17520069.17966182  
SRR17520069.17966187  
SRR17520069.17966188  
SRR17520069.17966193  
SRR17520069.18001528  
SRR17520069.18001531  
SRR17520069.18008340  
SRR17520069.18025337  
SRR17520069.18035837

SRR17520069.18057654  
SRR17520069.18057656  
SRR17520069.18098457  
SRR17520069.18126045  
SRR17520069.18151973  
SRR17520069.18152781  
SRR17520069.18188392  
SRR17520069.18188403  
SRR17520069.18190143  
SRR17520069.18190152  
SRR17520069.18280449  
SRR17520069.18324873  
SRR17520069.18327285  
SRR17520069.18329832  
SRR17520069.18358750  
SRR17520069.18358772  
SRR17520069.18358801  
SRR17520069.18358841  
SRR17520069.18396426  
SRR17520069.18410585  
SRR17520069.18431203  
SRR17520069.18439450  
SRR17520069.18466305  
SRR17520069.18528664  
SRR17520069.18581575  
SRR17520069.18588426  
SRR17520069.18623903  
SRR17520069.18744609  
SRR17520069.18767379  
SRR17520069.18817723  
SRR17520069.18823348  
SRR17520069.18826849  
SRR17520069.18850644  
SRR17520069.18850661  
SRR17520069.18894653  
SRR17520069.18918979  
SRR17520069.18924529  
SRR17520069.18986998  
SRR17520069.19021155  
SRR17520069.19021178  
SRR17520069.19055104  
SRR17520069.19064170  
SRR17520069.19064227  
SRR17520069.19068214  
SRR17520069.19081893  
SRR17520069.19081947  
SRR17520069.19081951

SRR17520069.19099797  
SRR17520069.19099798  
SRR17520069.19103720  
SRR17520069.19123801  
SRR17520069.19129312  
SRR17520069.19144136  
SRR17520069.19175341  
SRR17520069.19175344  
SRR17520069.19201763  
SRR17520069.19243002  
SRR17520069.19280538  
SRR17520069.19365916  
SRR17520069.19368278  
SRR17520069.19378164  
SRR17520069.19443211  
SRR17520069.19460325  
SRR17520069.19460326  
SRR17520069.19560281  
SRR17520069.19560284  
SRR17520069.19567122  
SRR17520069.19567123  
SRR17520069.1028  
SRR17520069.1030  
SRR17520069.1032  
SRR17520069.1036  
SRR17520069.2813  
SRR17520069.2815  
SRR17520069.2817  
SRR17520069.2819  
SRR17520069.2821  
SRR17520069.2823  
SRR17520069.2825  
SRR17520069.2827  
SRR17520069.2829  
SRR17520069.2831  
SRR17520069.2833  
SRR17520069.2837  
SRR17520069.2839  
SRR17520069.2843  
SRR17520069.2845  
SRR17520069.2847  
SRR17520069.2849  
SRR17520069.2851  
SRR17520069.2853  
SRR17520069.2855  
SRR17520069.2857  
SRR17520069.2859

SRR17520069. 2863  
SRR17520069. 2865  
SRR17520069. 2867  
SRR17520069. 2869  
SRR17520069. 2871  
SRR17520069. 2873  
SRR17520069. 2875  
SRR17520069. 2877  
SRR17520069. 5315  
SRR17520069. 5317  
SRR17520069. 5319  
SRR17520069. 5321  
SRR17520069. 5323  
SRR17520069. 5325  
SRR17520069. 5327  
SRR17520069. 7613  
SRR17520069. 7615  
SRR17520069. 7617  
SRR17520069. 7619  
SRR17520069. 7621  
SRR17520069. 7623  
SRR17520069. 7625  
SRR17520069. 7627  
SRR17520069. 7629  
SRR17520069. 7631  
SRR17520069. 7633  
SRR17520069. 7635  
SRR17520069. 7637  
SRR17520069. 7641  
SRR17520069. 7643  
SRR17520069. 7645  
SRR17520069. 7647  
SRR17520069. 7649  
SRR17520069. 7651  
SRR17520069. 7653  
SRR17520069. 7655  
SRR17520069. 7659  
SRR17520069. 7661  
SRR17520069. 7663  
SRR17520069. 7665  
SRR17520069. 7667  
SRR17520069. 7669  
SRR17520069. 7671  
SRR17520069. 7673  
SRR17520069. 7681  
SRR17520069. 7683  
SRR17520069. 7687

SRR17520069. 9786  
SRR17520069. 9788  
SRR17520069. 9790  
SRR17520069. 9792  
SRR17520069. 9794  
SRR17520069. 9796  
SRR17520069. 9798  
SRR17520069. 11689  
SRR17520069. 11691  
SRR17520069. 11693  
SRR17520069. 13808  
SRR17520069. 13810  
SRR17520069. 13812  
SRR17520069. 23542  
SRR17520069. 23544  
SRR17520069. 23546  
SRR17520069. 23548  
SRR17520069. 23550  
SRR17520069. 23552  
SRR17520069. 23554  
SRR17520069. 23556  
SRR17520069. 23558  
SRR17520069. 23560  
SRR17520069. 23564  
SRR17520069. 23566  
SRR17520069. 23568  
SRR17520069. 23572  
SRR17520069. 23805  
SRR17520069. 23807  
SRR17520069. 23809  
SRR17520069. 23811  
SRR17520069. 23813  
SRR17520069. 23815  
SRR17520069. 23819  
SRR17520069. 23821  
SRR17520069. 23823  
SRR17520069. 23825  
SRR17520069. 23827  
SRR17520069. 23829  
SRR17520069. 23831  
SRR17520069. 23833  
SRR17520069. 23835  
SRR17520069. 23837  
SRR17520069. 23839  
SRR17520069. 23841  
SRR17520069. 23843  
SRR17520069. 23847

SRR17520069.23849  
SRR17520069.23851  
SRR17520069.25705  
SRR17520069.30009  
SRR17520069.30011  
SRR17520069.30015  
SRR17520069.30017  
SRR17520069.30019  
SRR17520069.30021  
SRR17520069.30023  
SRR17520069.30025  
SRR17520069.30027  
SRR17520069.30029  
SRR17520069.30033  
SRR17520069.30035  
SRR17520069.30037  
SRR17520069.30039  
SRR17520069.30041  
SRR17520069.30043  
SRR17520069.30045  
SRR17520069.30047  
SRR17520069.30049  
SRR17520069.30051  
SRR17520069.30053  
SRR17520069.30057  
SRR17520069.30059  
SRR17520069.30061  
SRR17520069.30063  
SRR17520069.30065  
SRR17520069.30067  
SRR17520069.30071  
SRR17520069.30073  
SRR17520069.30075  
SRR17520069.32072  
SRR17520069.32107  
SRR17520069.34516  
SRR17520069.36684  
SRR17520069.36686  
SRR17520069.36688  
SRR17520069.36690  
SRR17520069.36692  
SRR17520069.36696  
SRR17520069.36698  
SRR17520069.36700  
SRR17520069.36702  
SRR17520069.36704  
SRR17520069.53633

SRR17520069. 53635  
SRR17520069. 53637  
SRR17520069. 53639  
SRR17520069. 53641  
SRR17520069. 53643  
SRR17520069. 53645  
SRR17520069. 53647  
SRR17520069. 53649  
SRR17520069. 53653  
SRR17520069. 53655  
SRR17520069. 53657  
SRR17520069. 53659  
SRR17520069. 53661  
SRR17520069. 53663  
SRR17520069. 53665  
SRR17520069. 53667  
SRR17520069. 53669  
SRR17520069. 53671  
SRR17520069. 53673  
SRR17520069. 53677  
SRR17520069. 53679  
SRR17520069. 53681  
SRR17520069. 53683  
SRR17520069. 53685  
SRR17520069. 53687  
SRR17520069. 53689  
SRR17520069. 53691  
SRR17520069. 53693  
SRR17520069. 53695  
SRR17520069. 53697  
SRR17520069. 53699  
SRR17520069. 53701  
SRR17520069. 53703  
SRR17520069. 53705  
SRR17520069. 53707  
SRR17520069. 53709  
SRR17520069. 53711  
SRR17520069. 53713  
SRR17520069. 53717  
SRR17520069. 53719  
SRR17520069. 53721  
SRR17520069. 53723  
SRR17520069. 53725  
SRR17520069. 53729  
SRR17520069. 53731  
SRR17520069. 53733  
SRR17520069. 53737

SRR17520069. 53739  
SRR17520069. 53741  
SRR17520069. 53743  
SRR17520069. 53745  
SRR17520069. 53749  
SRR17520069. 53751  
SRR17520069. 53753  
SRR17520069. 53755  
SRR17520069. 53757  
SRR17520069. 53759  
SRR17520069. 53761  
SRR17520069. 53763  
SRR17520069. 53765  
SRR17520069. 53767  
SRR17520069. 53769  
SRR17520069. 53771  
SRR17520069. 53773  
SRR17520069. 53775  
SRR17520069. 53777  
SRR17520069. 53783  
SRR17520069. 53785  
SRR17520069. 53787  
SRR17520069. 53789  
SRR17520069. 53791  
SRR17520069. 53793  
SRR17520069. 53799  
SRR17520069. 53801  
SRR17520069. 53803  
SRR17520069. 53807  
SRR17520069. 53809  
SRR17520069. 53813  
SRR17520069. 53819  
SRR17520069. 53825  
SRR17520069. 56896  
SRR17520069. 56898  
SRR17520069. 56900  
SRR17520069. 56902  
SRR17520069. 56904  
SRR17520069. 56906  
SRR17520069. 56908  
SRR17520069. 56910  
SRR17520069. 56912  
SRR17520069. 56914  
SRR17520069. 56916  
SRR17520069. 56918  
SRR17520069. 56920  
SRR17520069. 56922



SRR17520069. 56924  
SRR17520069. 56926  
SRR17520069. 57813  
SRR17520069. 60630  
SRR17520069. 60632  
SRR17520069. 60634  
SRR17520069. 60636  
SRR17520069. 60638  
SRR17520069. 60640  
SRR17520069. 60642  
SRR17520069. 60644  
SRR17520069. 60646  
SRR17520069. 60648  
SRR17520069. 60650  
SRR17520069. 60652  
SRR17520069. 60654  
SRR17520069. 60656  
SRR17520069. 60658  
SRR17520069. 60660  
SRR17520069. 60662  
SRR17520069. 62478  
SRR17520069. 62480  
SRR17520069. 62482  
SRR17520069. 62484  
SRR17520069. 62486  
SRR17520069. 62488  
SRR17520069. 62490  
SRR17520069. 62492  
SRR17520069. 62494  
SRR17520069. 62496  
SRR17520069. 62498  
SRR17520069. 62500  
SRR17520069. 62502  
SRR17520069. 62504  
SRR17520069. 62506  
SRR17520069. 62508  
SRR17520069. 64163  
SRR17520069. 64165  
SRR17520069. 64167  
SRR17520069. 64169  
SRR17520069. 64171  
SRR17520069. 64173  
SRR17520069. 64175  
SRR17520069. 64177  
SRR17520069. 64179  
SRR17520069. 64181  
SRR17520069. 64183

SRR17520069.64185  
SRR17520069.64187  
SRR17520069.64189  
SRR17520069.65389  
SRR17520069.65391  
SRR17520069.65393  
SRR17520069.65395  
SRR17520069.65397  
SRR17520069.65399  
SRR17520069.65401  
SRR17520069.65403  
SRR17520069.65405  
SRR17520069.65407  
SRR17520069.65409  
SRR17520069.65411  
SRR17520069.65413  
SRR17520069.79062  
SRR17520069.79064  
SRR17520069.79066  
SRR17520069.79068  
SRR17520069.79070  
SRR17520069.79072  
SRR17520069.79074  
SRR17520069.79076  
SRR17520069.79078  
SRR17520069.79080  
SRR17520069.79082  
SRR17520069.79084  
SRR17520069.79086  
SRR17520069.103875  
SRR17520069.103877  
SRR17520069.103879  
SRR17520069.103883  
SRR17520069.103885  
SRR17520069.103887  
SRR17520069.103889  
SRR17520069.103891  
SRR17520069.106219  
SRR17520069.106221  
SRR17520069.106223  
SRR17520069.106225  
SRR17520069.106227  
SRR17520069.106229  
SRR17520069.108456  
SRR17520069.108458  
SRR17520069.108460  
SRR17520069.108462

SRR17520069.108464  
SRR17520069.108466  
SRR17520069.108468  
SRR17520069.108470  
SRR17520069.108472  
SRR17520069.114737  
SRR17520069.114739  
SRR17520069.114741  
SRR17520069.114743  
SRR17520069.114745  
SRR17520069.114747  
SRR17520069.114749  
SRR17520069.114751  
SRR17520069.114753  
SRR17520069.114755  
SRR17520069.114757  
SRR17520069.114759  
SRR17520069.114761  
SRR17520069.114763  
SRR17520069.114765  
SRR17520069.114767  
SRR17520069.114769  
SRR17520069.114771  
SRR17520069.114773  
SRR17520069.114775  
SRR17520069.114777  
SRR17520069.114779  
SRR17520069.114781  
SRR17520069.114783  
SRR17520069.114785  
SRR17520069.114787  
SRR17520069.114789  
SRR17520069.114791  
SRR17520069.114793  
SRR17520069.114795  
SRR17520069.114797  
SRR17520069.114799  
SRR17520069.114801  
SRR17520069.114803  
SRR17520069.123340  
SRR17520069.123342  
SRR17520069.123344  
SRR17520069.123348  
SRR17520069.123350  
SRR17520069.123352  
SRR17520069.123354  
SRR17520069.123356

SRR17520069. 124712  
SRR17520069. 124714  
SRR17520069. 124716  
SRR17520069. 124718  
SRR17520069. 124720  
SRR17520069. 124722  
SRR17520069. 124724  
SRR17520069. 124726  
SRR17520069. 124728  
SRR17520069. 124730  
SRR17520069. 124732  
SRR17520069. 124734  
SRR17520069. 124736  
SRR17520069. 124738  
SRR17520069. 124740  
SRR17520069. 124742  
SRR17520069. 124744  
SRR17520069. 124746  
SRR17520069. 124748  
SRR17520069. 124750  
SRR17520069. 124752  
SRR17520069. 124754  
SRR17520069. 124756  
SRR17520069. 124758  
SRR17520069. 124760  
SRR17520069. 124762  
SRR17520069. 124764  
SRR17520069. 125360  
SRR17520069. 125362  
SRR17520069. 125896  
SRR17520069. 126942  
SRR17520069. 126944  
SRR17520069. 126946  
SRR17520069. 126948  
SRR17520069. 126950  
SRR17520069. 126952  
SRR17520069. 126954  
SRR17520069. 126956  
SRR17520069. 131659  
SRR17520069. 131661  
SRR17520069. 131663  
SRR17520069. 131665  
SRR17520069. 131667  
SRR17520069. 131669  
SRR17520069. 131671  
SRR17520069. 131673  
SRR17520069. 131675

SRR17520069. 131679  
SRR17520069. 131681  
SRR17520069. 131685  
SRR17520069. 131689  
SRR17520069. 131691  
SRR17520069. 131693  
SRR17520069. 131695  
SRR17520069. 131697  
SRR17520069. 145015  
SRR17520069. 145017  
SRR17520069. 145455  
SRR17520069. 145457  
SRR17520069. 145459  
SRR17520069. 145461  
SRR17520069. 145463  
SRR17520069. 145465  
SRR17520069. 145467  
SRR17520069. 145469  
SRR17520069. 145471  
SRR17520069. 145473  
SRR17520069. 145475  
SRR17520069. 145477  
SRR17520069. 145479  
SRR17520069. 145481  
SRR17520069. 145483  
SRR17520069. 145485  
SRR17520069. 145487  
SRR17520069. 145489  
SRR17520069. 145491  
SRR17520069. 145495  
SRR17520069. 145497  
SRR17520069. 145499  
SRR17520069. 145501  
SRR17520069. 145503  
SRR17520069. 145505  
SRR17520069. 145507  
SRR17520069. 145509  
SRR17520069. 145511  
SRR17520069. 145513  
SRR17520069. 145515  
SRR17520069. 145517  
SRR17520069. 145519  
SRR17520069. 145521  
SRR17520069. 145523  
SRR17520069. 145525  
SRR17520069. 145527  
SRR17520069. 145529

SRR17520069.145531  
SRR17520069.145533  
SRR17520069.145535  
SRR17520069.145537  
SRR17520069.145539  
SRR17520069.145541  
SRR17520069.145543  
SRR17520069.145545  
SRR17520069.145547  
SRR17520069.145549  
SRR17520069.145551  
SRR17520069.145553  
SRR17520069.145555  
SRR17520069.145557  
SRR17520069.145559  
SRR17520069.145561  
SRR17520069.145563  
SRR17520069.145565  
SRR17520069.145567  
SRR17520069.145569  
SRR17520069.145571  
SRR17520069.145573  
SRR17520069.145575  
SRR17520069.145577  
SRR17520069.145579  
SRR17520069.145583  
SRR17520069.145585  
SRR17520069.145587  
SRR17520069.145589  
SRR17520069.145591  
SRR17520069.145593  
SRR17520069.145595  
SRR17520069.145597  
SRR17520069.145599  
SRR17520069.145601  
SRR17520069.145603  
SRR17520069.145605  
SRR17520069.145607  
SRR17520069.145609  
SRR17520069.145611  
SRR17520069.148112  
SRR17520069.148114  
SRR17520069.148116  
SRR17520069.148118  
SRR17520069.148120  
SRR17520069.148122  
SRR17520069.148128

SRR17520069. 148130  
SRR17520069. 148132  
SRR17520069. 148134  
SRR17520069. 148138  
SRR17520069. 148140  
SRR17520069. 148144  
SRR17520069. 148146  
SRR17520069. 148148  
SRR17520069. 148150  
SRR17520069. 148152  
SRR17520069. 148156  
SRR17520069. 148158  
SRR17520069. 148160  
SRR17520069. 148162  
SRR17520069. 148164  
SRR17520069. 148168  
SRR17520069. 148170  
SRR17520069. 148172  
SRR17520069. 148178  
SRR17520069. 148180  
SRR17520069. 148182  
SRR17520069. 148184  
SRR17520069. 148186  
SRR17520069. 148188  
SRR17520069. 148190  
SRR17520069. 148192  
SRR17520069. 148194  
SRR17520069. 151533  
SRR17520069. 151535  
SRR17520069. 151537  
SRR17520069. 151539  
SRR17520069. 151541  
SRR17520069. 151543  
SRR17520069. 151545  
SRR17520069. 151547  
SRR17520069. 151549  
SRR17520069. 151551  
SRR17520069. 151553  
SRR17520069. 151555  
SRR17520069. 151557  
SRR17520069. 151559  
SRR17520069. 151561  
SRR17520069. 151563  
SRR17520069. 151565  
SRR17520069. 151569  
SRR17520069. 151573  
SRR17520069. 151575

SRR17520069. 151577  
SRR17520069. 151579  
SRR17520069. 151581  
SRR17520069. 151585  
SRR17520069. 151587  
SRR17520069. 151591  
SRR17520069. 154633  
SRR17520069. 154635  
SRR17520069. 154637  
SRR17520069. 154639  
SRR17520069. 154641  
SRR17520069. 154643  
SRR17520069. 154645  
SRR17520069. 154647  
SRR17520069. 154649  
SRR17520069. 154651  
SRR17520069. 154653  
SRR17520069. 154655  
SRR17520069. 154657  
SRR17520069. 154659  
SRR17520069. 154661  
SRR17520069. 154663  
SRR17520069. 154665  
SRR17520069. 154667  
SRR17520069. 154669  
SRR17520069. 154671  
SRR17520069. 154673  
SRR17520069. 154675  
SRR17520069. 154677  
SRR17520069. 154679  
SRR17520069. 154681  
SRR17520069. 154683  
SRR17520069. 154687  
SRR17520069. 154689  
SRR17520069. 154691  
SRR17520069. 154693  
SRR17520069. 154695  
SRR17520069. 154697  
SRR17520069. 154699  
SRR17520069. 154701  
SRR17520069. 154703  
SRR17520069. 154705  
SRR17520069. 154707  
SRR17520069. 154709  
SRR17520069. 154711  
SRR17520069. 154713  
SRR17520069. 154715



SRR17520069. 154717  
SRR17520069. 154719  
SRR17520069. 155714  
SRR17520069. 155716  
SRR17520069. 155718  
SRR17520069. 155722  
SRR17520069. 155724  
SRR17520069. 155726  
SRR17520069. 155728  
SRR17520069. 155730  
SRR17520069. 155732  
SRR17520069. 155734  
SRR17520069. 155736  
SRR17520069. 155738  
SRR17520069. 155740  
SRR17520069. 155742  
SRR17520069. 155744  
SRR17520069. 155746  
SRR17520069. 155748  
SRR17520069. 155750  
SRR17520069. 155752  
SRR17520069. 155754  
SRR17520069. 155756  
SRR17520069. 155758  
SRR17520069. 155760  
SRR17520069. 155762  
SRR17520069. 155766  
SRR17520069. 155768  
SRR17520069. 155770  
SRR17520069. 155774  
SRR17520069. 155776  
SRR17520069. 155778  
SRR17520069. 155780  
SRR17520069. 155784  
SRR17520069. 155786  
SRR17520069. 155788  
SRR17520069. 155790  
SRR17520069. 155792  
SRR17520069. 155794  
SRR17520069. 155796  
SRR17520069. 155798  
SRR17520069. 155800  
SRR17520069. 155802  
SRR17520069. 155804  
SRR17520069. 155810  
SRR17520069. 155812  
SRR17520069. 155817

SRR17520069. 155819  
SRR17520069. 155821  
SRR17520069. 160703  
SRR17520069. 160705  
SRR17520069. 160707  
SRR17520069. 160709  
SRR17520069. 160711  
SRR17520069. 160715  
SRR17520069. 160717  
SRR17520069. 160719  
SRR17520069. 160721  
SRR17520069. 160723  
SRR17520069. 160725  
SRR17520069. 160727  
SRR17520069. 160729  
SRR17520069. 160731  
SRR17520069. 160733  
SRR17520069. 160735  
SRR17520069. 160951  
SRR17520069. 160953  
SRR17520069. 160955  
SRR17520069. 160957  
SRR17520069. 160959  
SRR17520069. 160961  
SRR17520069. 160963  
SRR17520069. 160965  
SRR17520069. 160967  
SRR17520069. 160969  
SRR17520069. 160971  
SRR17520069. 160973  
SRR17520069. 160975  
SRR17520069. 160977  
SRR17520069. 160979  
SRR17520069. 160981  
SRR17520069. 160983  
SRR17520069. 160985  
SRR17520069. 160987  
SRR17520069. 160989  
SRR17520069. 160991  
SRR17520069. 160993  
SRR17520069. 160995  
SRR17520069. 160997  
SRR17520069. 160999  
SRR17520069. 161001  
SRR17520069. 161003  
SRR17520069. 161005  
SRR17520069. 161007

SRR17520069. 161009  
SRR17520069. 161011  
SRR17520069. 162876  
SRR17520069. 162878  
SRR17520069. 162880  
SRR17520069. 162882  
SRR17520069. 162884  
SRR17520069. 162886  
SRR17520069. 162888  
SRR17520069. 162890  
SRR17520069. 162892  
SRR17520069. 162894  
SRR17520069. 162896  
SRR17520069. 162898  
SRR17520069. 162900  
SRR17520069. 162902  
SRR17520069. 162904  
SRR17520069. 162906  
SRR17520069. 162908  
SRR17520069. 162910  
SRR17520069. 162912  
SRR17520069. 162914  
SRR17520069. 162916  
SRR17520069. 162918  
SRR17520069. 162920  
SRR17520069. 165365  
SRR17520069. 165367  
SRR17520069. 165369  
SRR17520069. 165371  
SRR17520069. 165373  
SRR17520069. 165375  
SRR17520069. 165377  
SRR17520069. 165379  
SRR17520069. 165383  
SRR17520069. 167702  
SRR17520069. 167704  
SRR17520069. 167706  
SRR17520069. 167708  
SRR17520069. 167710  
SRR17520069. 169187  
SRR17520069. 176814  
SRR17520069. 176816  
SRR17520069. 176818  
SRR17520069. 176820  
SRR17520069. 176822  
SRR17520069. 176824  
SRR17520069. 176826

SRR17520069. 176828  
SRR17520069. 176830  
SRR17520069. 176832  
SRR17520069. 176834  
SRR17520069. 176836  
SRR17520069. 176838  
SRR17520069. 176840  
SRR17520069. 176842  
SRR17520069. 176844  
SRR17520069. 176846  
SRR17520069. 176848  
SRR17520069. 176850  
SRR17520069. 176854  
SRR17520069. 176856  
SRR17520069. 176858  
SRR17520069. 176860  
SRR17520069. 176862  
SRR17520069. 176864  
SRR17520069. 176868  
SRR17520069. 176870  
SRR17520069. 176872  
SRR17520069. 176874  
SRR17520069. 176878  
SRR17520069. 176880  
SRR17520069. 179473  
SRR17520069. 179477  
SRR17520069. 179479  
SRR17520069. 179481  
SRR17520069. 179483  
SRR17520069. 179485  
SRR17520069. 179487  
SRR17520069. 179489  
SRR17520069. 179491  
SRR17520069. 179493  
SRR17520069. 179495  
SRR17520069. 179499  
SRR17520069. 179503  
SRR17520069. 179505  
SRR17520069. 179507  
SRR17520069. 179509  
SRR17520069. 179511  
SRR17520069. 179513  
SRR17520069. 179515  
SRR17520069. 186013  
SRR17520069. 186015  
SRR17520069. 186017  
SRR17520069. 186019

SRR17520069.186023  
SRR17520069.186025  
SRR17520069.186027  
SRR17520069.186029  
SRR17520069.186031  
SRR17520069.186033  
SRR17520069.186035  
SRR17520069.186037  
SRR17520069.187325  
SRR17520069.187327  
SRR17520069.187329  
SRR17520069.187899  
SRR17520069.187901  
SRR17520069.187903  
SRR17520069.187905  
SRR17520069.187907  
SRR17520069.187909  
SRR17520069.187911  
SRR17520069.187913  
SRR17520069.187915  
SRR17520069.187917  
SRR17520069.187919  
SRR17520069.187921  
SRR17520069.187923  
SRR17520069.187925  
SRR17520069.187927  
SRR17520069.187929  
SRR17520069.187931  
SRR17520069.187933  
SRR17520069.187935  
SRR17520069.187937  
SRR17520069.187939  
SRR17520069.187941  
SRR17520069.189174  
SRR17520069.189176  
SRR17520069.189178  
SRR17520069.193996  
SRR17520069.193998  
SRR17520069.194000  
SRR17520069.194002  
SRR17520069.194004  
SRR17520069.194012  
SRR17520069.194014  
SRR17520069.194016  
SRR17520069.194018  
SRR17520069.194020  
SRR17520069.194022

SRR17520069. 194024  
SRR17520069. 194026  
SRR17520069. 194028  
SRR17520069. 194030  
SRR17520069. 194032  
SRR17520069. 194034  
SRR17520069. 194036  
SRR17520069. 194040  
SRR17520069. 194042  
SRR17520069. 194044  
SRR17520069. 194046  
SRR17520069. 194048  
SRR17520069. 194050  
SRR17520069. 196775  
SRR17520069. 196777  
SRR17520069. 196779  
SRR17520069. 196781  
SRR17520069. 196783  
SRR17520069. 197773  
SRR17520069. 197775  
SRR17520069. 198011  
SRR17520069. 198013  
SRR17520069. 198015  
SRR17520069. 198017  
SRR17520069. 198019  
SRR17520069. 198021  
SRR17520069. 198023  
SRR17520069. 198025  
SRR17520069. 198027  
SRR17520069. 198029  
SRR17520069. 198031  
SRR17520069. 198033  
SRR17520069. 198035  
SRR17520069. 200667  
SRR17520069. 200669  
SRR17520069. 202079  
SRR17520069. 202081  
SRR17520069. 202083  
SRR17520069. 202085  
SRR17520069. 202089  
SRR17520069. 204631  
SRR17520069. 204633  
SRR17520069. 204635  
SRR17520069. 204637  
SRR17520069. 207499  
SRR17520069. 207503  
SRR17520069. 207505

SRR17520069.207507  
SRR17520069.207509  
SRR17520069.207511  
SRR17520069.207513  
SRR17520069.216913  
SRR17520069.217815  
SRR17520069.217817  
SRR17520069.217819  
SRR17520069.217821  
SRR17520069.217823  
SRR17520069.217825  
SRR17520069.218068  
SRR17520069.218070  
SRR17520069.218072  
SRR17520069.218074  
SRR17520069.218076  
SRR17520069.218078  
SRR17520069.218080  
SRR17520069.218082  
SRR17520069.218084  
SRR17520069.218086  
SRR17520069.218088  
SRR17520069.218090  
SRR17520069.218092  
SRR17520069.218094  
SRR17520069.218096  
SRR17520069.218098  
SRR17520069.218100  
SRR17520069.218102  
SRR17520069.218104  
SRR17520069.218106  
SRR17520069.218108  
SRR17520069.218110  
SRR17520069.218112  
SRR17520069.218114  
SRR17520069.218116  
SRR17520069.218118  
SRR17520069.218120  
SRR17520069.218122  
SRR17520069.218124  
SRR17520069.218126  
SRR17520069.218128  
SRR17520069.218130  
SRR17520069.218132  
SRR17520069.218134  
SRR17520069.218136  
SRR17520069.218138

SRR17520069.218140  
SRR17520069.218142  
SRR17520069.218144  
SRR17520069.218146  
SRR17520069.218148  
SRR17520069.218150  
SRR17520069.218152  
SRR17520069.218154  
SRR17520069.218156  
SRR17520069.218158  
SRR17520069.218160  
SRR17520069.218162  
SRR17520069.218164  
SRR17520069.218166  
SRR17520069.218168  
SRR17520069.218170  
SRR17520069.218172  
SRR17520069.218174  
SRR17520069.218176  
SRR17520069.218178  
SRR17520069.218180  
SRR17520069.218182  
SRR17520069.218184  
SRR17520069.218186  
SRR17520069.218188  
SRR17520069.218190  
SRR17520069.224650  
SRR17520069.224652  
SRR17520069.224654  
SRR17520069.224656  
SRR17520069.224659  
SRR17520069.224661  
SRR17520069.224665  
SRR17520069.224667  
SRR17520069.224669  
SRR17520069.224671  
SRR17520069.224673  
SRR17520069.224675  
SRR17520069.224677  
SRR17520069.224679  
SRR17520069.224681  
SRR17520069.224683  
SRR17520069.224685  
SRR17520069.224687  
SRR17520069.224689  
SRR17520069.225173  
SRR17520069.225175



SRR17520069. 225177  
SRR17520069. 225179  
SRR17520069. 225181  
SRR17520069. 225183  
SRR17520069. 225185  
SRR17520069. 225187  
SRR17520069. 225189  
SRR17520069. 225191  
SRR17520069. 225193  
SRR17520069. 225197  
SRR17520069. 225209  
SRR17520069. 227277  
SRR17520069. 227279  
SRR17520069. 227281  
SRR17520069. 227283  
SRR17520069. 227285  
SRR17520069. 227287  
SRR17520069. 227289  
SRR17520069. 227291  
SRR17520069. 227293  
SRR17520069. 227295  
SRR17520069. 227297  
SRR17520069. 234126  
SRR17520069. 234128  
SRR17520069. 234130  
SRR17520069. 234132  
SRR17520069. 234134  
SRR17520069. 234136  
SRR17520069. 234138  
SRR17520069. 234140  
SRR17520069. 234142  
SRR17520069. 234144  
SRR17520069. 234146  
SRR17520069. 234148  
SRR17520069. 234150  
SRR17520069. 234152  
SRR17520069. 234154  
SRR17520069. 234156  
SRR17520069. 234158  
SRR17520069. 234160  
SRR17520069. 234162  
SRR17520069. 234164  
SRR17520069. 234168  
SRR17520069. 234170  
SRR17520069. 234172  
SRR17520069. 234174  
SRR17520069. 234176

SRR17520069.234178  
SRR17520069.234180  
SRR17520069.234182  
SRR17520069.234184  
SRR17520069.234186  
SRR17520069.234188  
SRR17520069.234190  
SRR17520069.234192  
SRR17520069.234194  
SRR17520069.234196  
SRR17520069.234198  
SRR17520069.234200  
SRR17520069.234202  
SRR17520069.234204  
SRR17520069.234206  
SRR17520069.234208  
SRR17520069.234210  
SRR17520069.234212  
SRR17520069.234214  
SRR17520069.234216  
SRR17520069.234218  
SRR17520069.234220  
SRR17520069.234222  
SRR17520069.234831  
SRR17520069.234835  
SRR17520069.234837  
SRR17520069.234841  
SRR17520069.234843  
SRR17520069.234845  
SRR17520069.234847  
SRR17520069.234849  
SRR17520069.234853  
SRR17520069.234855  
SRR17520069.234857  
SRR17520069.234859  
SRR17520069.234861  
SRR17520069.234863  
SRR17520069.234865  
SRR17520069.234867  
SRR17520069.234869  
SRR17520069.234871  
SRR17520069.234873  
SRR17520069.234875  
SRR17520069.234879  
SRR17520069.234881  
SRR17520069.234883  
SRR17520069.234885

SRR17520069.234887  
SRR17520069.234889  
SRR17520069.234895  
SRR17520069.234897  
SRR17520069.234899  
SRR17520069.234901  
SRR17520069.234903  
SRR17520069.234907  
SRR17520069.234911  
SRR17520069.234913  
SRR17520069.234915  
SRR17520069.234917  
SRR17520069.234919  
SRR17520069.238201  
SRR17520069.238203  
SRR17520069.238205  
SRR17520069.238207  
SRR17520069.238209  
SRR17520069.238211  
SRR17520069.238213  
SRR17520069.238215  
SRR17520069.238217  
SRR17520069.238219  
SRR17520069.238221  
SRR17520069.238223  
SRR17520069.238225  
SRR17520069.238227  
SRR17520069.238229  
SRR17520069.238231  
SRR17520069.238233  
SRR17520069.238235  
SRR17520069.239535  
SRR17520069.245528  
SRR17520069.245530  
SRR17520069.245534  
SRR17520069.245536  
SRR17520069.245538  
SRR17520069.245540  
SRR17520069.245542  
SRR17520069.245544  
SRR17520069.245546  
SRR17520069.245548  
SRR17520069.245550  
SRR17520069.245552  
SRR17520069.245554  
SRR17520069.245556  
SRR17520069.245558

SRR17520069.245560  
SRR17520069.245562  
SRR17520069.245564  
SRR17520069.245566  
SRR17520069.245568  
SRR17520069.245570  
SRR17520069.245572  
SRR17520069.245576  
SRR17520069.245578  
SRR17520069.245580  
SRR17520069.245582  
SRR17520069.245584  
SRR17520069.245586  
SRR17520069.245588  
SRR17520069.245594  
SRR17520069.245596  
SRR17520069.245600  
SRR17520069.245602  
SRR17520069.245604  
SRR17520069.245606  
SRR17520069.245608  
SRR17520069.245610  
SRR17520069.245612  
SRR17520069.245614  
SRR17520069.245616  
SRR17520069.245618  
SRR17520069.245620  
SRR17520069.245622  
SRR17520069.245624  
SRR17520069.245628  
SRR17520069.245630  
SRR17520069.245632  
SRR17520069.245634  
SRR17520069.245636  
SRR17520069.245640  
SRR17520069.245642  
SRR17520069.245644  
SRR17520069.252218  
SRR17520069.252220  
SRR17520069.252222  
SRR17520069.252224  
SRR17520069.252226  
SRR17520069.252228  
SRR17520069.252230  
SRR17520069.252232  
SRR17520069.252234  
SRR17520069.252236

SRR17520069. 252238  
SRR17520069. 252240  
SRR17520069. 252242  
SRR17520069. 252244  
SRR17520069. 252246  
SRR17520069. 253752  
SRR17520069. 253754  
SRR17520069. 253756  
SRR17520069. 257193  
SRR17520069. 257195  
SRR17520069. 257197  
SRR17520069. 257199  
SRR17520069. 257201  
SRR17520069. 257203  
SRR17520069. 257205  
SRR17520069. 257207  
SRR17520069. 257209  
SRR17520069. 257211  
SRR17520069. 257213  
SRR17520069. 257215  
SRR17520069. 257217  
SRR17520069. 257219  
SRR17520069. 257221  
SRR17520069. 257223  
SRR17520069. 257225  
SRR17520069. 257227  
SRR17520069. 261598  
SRR17520069. 261600  
SRR17520069. 261602  
SRR17520069. 261604  
SRR17520069. 261606  
SRR17520069. 261608  
SRR17520069. 261610  
SRR17520069. 262414  
SRR17520069. 262416  
SRR17520069. 262418  
SRR17520069. 262420  
SRR17520069. 262422  
SRR17520069. 262424  
SRR17520069. 262426  
SRR17520069. 262428  
SRR17520069. 262430  
SRR17520069. 263616  
SRR17520069. 263618  
SRR17520069. 263620  
SRR17520069. 263622  
SRR17520069. 263624

SRR17520069. 263626  
SRR17520069. 263628  
SRR17520069. 263632  
SRR17520069. 265067  
SRR17520069. 265518  
SRR17520069. 265520  
SRR17520069. 265522  
SRR17520069. 265524  
SRR17520069. 265526  
SRR17520069. 265528  
SRR17520069. 265530  
SRR17520069. 265534  
SRR17520069. 265536  
SRR17520069. 266192  
SRR17520069. 266194  
SRR17520069. 266196  
SRR17520069. 266198  
SRR17520069. 266200  
SRR17520069. 266204  
SRR17520069. 266206  
SRR17520069. 266208  
SRR17520069. 266210  
SRR17520069. 266212  
SRR17520069. 266214  
SRR17520069. 266216  
SRR17520069. 266218  
SRR17520069. 266220  
SRR17520069. 266222  
SRR17520069. 266224  
SRR17520069. 266226  
SRR17520069. 266228  
SRR17520069. 266230  
SRR17520069. 266232  
SRR17520069. 274665  
SRR17520069. 274667  
SRR17520069. 274669  
SRR17520069. 274671  
SRR17520069. 274673  
SRR17520069. 274675  
SRR17520069. 274677  
SRR17520069. 274679  
SRR17520069. 274681  
SRR17520069. 274685  
SRR17520069. 274687  
SRR17520069. 274689  
SRR17520069. 274691  
SRR17520069. 274693

SRR17520069.274695  
SRR17520069.274697  
SRR17520069.274699  
SRR17520069.274701  
SRR17520069.274703  
SRR17520069.274705  
SRR17520069.274707  
SRR17520069.274709  
SRR17520069.274711  
SRR17520069.274713  
SRR17520069.274715  
SRR17520069.274717  
SRR17520069.274719  
SRR17520069.274721  
SRR17520069.274723  
SRR17520069.279418  
SRR17520069.279420  
SRR17520069.279422  
SRR17520069.279426  
SRR17520069.279428  
SRR17520069.279430  
SRR17520069.279432  
SRR17520069.279434  
SRR17520069.279436  
SRR17520069.279438  
SRR17520069.279440  
SRR17520069.279442  
SRR17520069.279444  
SRR17520069.279446  
SRR17520069.279448  
SRR17520069.279450  
SRR17520069.279452  
SRR17520069.279454  
SRR17520069.279456  
SRR17520069.279458  
SRR17520069.279460  
SRR17520069.279464  
SRR17520069.279466  
SRR17520069.279468  
SRR17520069.279470  
SRR17520069.279472  
SRR17520069.279474  
SRR17520069.279476  
SRR17520069.279478  
SRR17520069.279480  
SRR17520069.279482  
SRR17520069.279484

SRR17520069.279486  
SRR17520069.279488  
SRR17520069.279490  
SRR17520069.279492  
SRR17520069.279494  
SRR17520069.279496  
SRR17520069.279498  
SRR17520069.279500  
SRR17520069.279502  
SRR17520069.279504  
SRR17520069.279506  
SRR17520069.279508  
SRR17520069.279510  
SRR17520069.279512  
SRR17520069.279514  
SRR17520069.279516  
SRR17520069.279518  
SRR17520069.279520  
SRR17520069.279522  
SRR17520069.288285  
SRR17520069.288287  
SRR17520069.288289  
SRR17520069.288291  
SRR17520069.288293  
SRR17520069.288295  
SRR17520069.288297  
SRR17520069.288299  
SRR17520069.288301  
SRR17520069.288303  
SRR17520069.288305  
SRR17520069.288307  
SRR17520069.288309  
SRR17520069.288311  
SRR17520069.288313  
SRR17520069.288315  
SRR17520069.288317  
SRR17520069.288319  
SRR17520069.288321  
SRR17520069.288323  
SRR17520069.288325  
SRR17520069.288327  
SRR17520069.288329  
SRR17520069.288331  
SRR17520069.288333  
SRR17520069.288335  
SRR17520069.288337  
SRR17520069.288339



SRR17520069.288341  
SRR17520069.288343  
SRR17520069.288345  
SRR17520069.288347  
SRR17520069.288349  
SRR17520069.288351  
SRR17520069.293493  
SRR17520069.293495  
SRR17520069.293497  
SRR17520069.293499  
SRR17520069.293501  
SRR17520069.293503  
SRR17520069.293505  
SRR17520069.293507  
SRR17520069.293509  
SRR17520069.293511  
SRR17520069.293513  
SRR17520069.293515  
SRR17520069.293517  
SRR17520069.293519  
SRR17520069.293521  
SRR17520069.293523  
SRR17520069.293525  
SRR17520069.293527  
SRR17520069.293529  
SRR17520069.293531  
SRR17520069.293533  
SRR17520069.293535  
SRR17520069.293537  
SRR17520069.293539  
SRR17520069.293541  
SRR17520069.297416  
SRR17520069.297418  
SRR17520069.297420  
SRR17520069.297422  
SRR17520069.297424  
SRR17520069.297426  
SRR17520069.297428  
SRR17520069.297430  
SRR17520069.297432  
SRR17520069.297434  
SRR17520069.297436  
SRR17520069.297438  
SRR17520069.297440  
SRR17520069.297442  
SRR17520069.297444  
SRR17520069.298535

SRR17520069.298537  
SRR17520069.298539  
SRR17520069.298541  
SRR17520069.298543  
SRR17520069.298545  
SRR17520069.298549  
SRR17520069.298551  
SRR17520069.298553  
SRR17520069.298555  
SRR17520069.298557  
SRR17520069.298559  
SRR17520069.298561  
SRR17520069.299516  
SRR17520069.300865  
SRR17520069.300867  
SRR17520069.300869  
SRR17520069.300875  
SRR17520069.300877  
SRR17520069.300879  
SRR17520069.300881  
SRR17520069.300883  
SRR17520069.300885  
SRR17520069.300887  
SRR17520069.300889  
SRR17520069.300891  
SRR17520069.300893  
SRR17520069.300895  
SRR17520069.301025  
SRR17520069.301027  
SRR17520069.301029  
SRR17520069.301031  
SRR17520069.301033  
SRR17520069.301035  
SRR17520069.301037  
SRR17520069.301039  
SRR17520069.301041  
SRR17520069.301043  
SRR17520069.301045  
SRR17520069.301047  
SRR17520069.301049  
SRR17520069.301051  
SRR17520069.305950  
SRR17520069.305952  
SRR17520069.305954  
SRR17520069.305956  
SRR17520069.305958  
SRR17520069.305960

SRR17520069.305962  
SRR17520069.311485  
SRR17520069.311487  
SRR17520069.311489  
SRR17520069.311491  
SRR17520069.311493  
SRR17520069.311495  
SRR17520069.311497  
SRR17520069.311499  
SRR17520069.311501  
SRR17520069.311503  
SRR17520069.311505  
SRR17520069.311507  
SRR17520069.311509  
SRR17520069.311511  
SRR17520069.311515  
SRR17520069.311517  
SRR17520069.311519  
SRR17520069.311521  
SRR17520069.311523  
SRR17520069.311525  
SRR17520069.311527  
SRR17520069.311529  
SRR17520069.311531  
SRR17520069.311533  
SRR17520069.311535  
SRR17520069.311537  
SRR17520069.311539  
SRR17520069.311543  
SRR17520069.311545  
SRR17520069.311547  
SRR17520069.311549  
SRR17520069.311551  
SRR17520069.311553  
SRR17520069.311555  
SRR17520069.311557  
SRR17520069.311559  
SRR17520069.311561  
SRR17520069.311563  
SRR17520069.311565  
SRR17520069.311567  
SRR17520069.311569  
SRR17520069.311573  
SRR17520069.311575  
SRR17520069.311577  
SRR17520069.311579  
SRR17520069.311581

SRR17520069.311583  
SRR17520069.311585  
SRR17520069.311587  
SRR17520069.311589  
SRR17520069.311591  
SRR17520069.311593  
SRR17520069.311595  
SRR17520069.311599  
SRR17520069.311601  
SRR17520069.311603  
SRR17520069.311605  
SRR17520069.311609  
SRR17520069.311611  
SRR17520069.311615  
SRR17520069.311617  
SRR17520069.311621  
SRR17520069.311623  
SRR17520069.311625  
SRR17520069.311627  
SRR17520069.311629  
SRR17520069.311631  
SRR17520069.312859  
SRR17520069.312861  
SRR17520069.312863  
SRR17520069.312865  
SRR17520069.312867  
SRR17520069.312869  
SRR17520069.312871  
SRR17520069.312873  
SRR17520069.312875  
SRR17520069.312877  
SRR17520069.312879  
SRR17520069.312881  
SRR17520069.312883  
SRR17520069.312885  
SRR17520069.312887  
SRR17520069.312889  
SRR17520069.312891  
SRR17520069.312893  
SRR17520069.312895  
SRR17520069.312897  
SRR17520069.312899  
SRR17520069.312901  
SRR17520069.312903  
SRR17520069.312905  
SRR17520069.312907  
SRR17520069.312909

SRR17520069. 312911  
SRR17520069. 312913  
SRR17520069. 312915  
SRR17520069. 312917  
SRR17520069. 312919  
SRR17520069. 312921  
SRR17520069. 312923  
SRR17520069. 312925  
SRR17520069. 312927  
SRR17520069. 312929  
SRR17520069. 312931  
SRR17520069. 312933  
SRR17520069. 312935  
SRR17520069. 312937  
SRR17520069. 312939  
SRR17520069. 312941  
SRR17520069. 312943  
SRR17520069. 312945  
SRR17520069. 312947  
SRR17520069. 312949  
SRR17520069. 312951  
SRR17520069. 312953  
SRR17520069. 312955  
SRR17520069. 312957  
SRR17520069. 312959  
SRR17520069. 312961  
SRR17520069. 312963  
SRR17520069. 312965  
SRR17520069. 312967  
SRR17520069. 312971  
SRR17520069. 312973  
SRR17520069. 312975  
SRR17520069. 312977  
SRR17520069. 312979  
SRR17520069. 312981  
SRR17520069. 313962  
SRR17520069. 313964  
SRR17520069. 313966  
SRR17520069. 313968  
SRR17520069. 313970  
SRR17520069. 313972  
SRR17520069. 313974  
SRR17520069. 313976  
SRR17520069. 317260  
SRR17520069. 317264  
SRR17520069. 321123  
SRR17520069. 321125

SRR17520069. 321127  
SRR17520069. 321129  
SRR17520069. 321131  
SRR17520069. 321133  
SRR17520069. 321135  
SRR17520069. 321137  
SRR17520069. 321139  
SRR17520069. 321141  
SRR17520069. 321143  
SRR17520069. 321145  
SRR17520069. 321147  
SRR17520069. 321149  
SRR17520069. 321151  
SRR17520069. 321153  
SRR17520069. 321155  
SRR17520069. 321157  
SRR17520069. 321159  
SRR17520069. 321161  
SRR17520069. 325791  
SRR17520069. 325793  
SRR17520069. 325795  
SRR17520069. 325797  
SRR17520069. 325799  
SRR17520069. 325801  
SRR17520069. 325803  
SRR17520069. 325805  
SRR17520069. 325809  
SRR17520069. 325811  
SRR17520069. 328764  
SRR17520069. 328768  
SRR17520069. 328770  
SRR17520069. 328772  
SRR17520069. 328774  
SRR17520069. 328776  
SRR17520069. 328778  
SRR17520069. 328780  
SRR17520069. 332881  
SRR17520069. 332883  
SRR17520069. 332885  
SRR17520069. 332887  
SRR17520069. 332889  
SRR17520069. 332891  
SRR17520069. 332893  
SRR17520069. 332895  
SRR17520069. 332897  
SRR17520069. 332899  
SRR17520069. 332901

SRR17520069. 332903  
SRR17520069. 332905  
SRR17520069. 332907  
SRR17520069. 332909  
SRR17520069. 332911  
SRR17520069. 332913  
SRR17520069. 341053  
SRR17520069. 341055  
SRR17520069. 341057  
SRR17520069. 341059  
SRR17520069. 341061  
SRR17520069. 341063  
SRR17520069. 341065  
SRR17520069. 341067  
SRR17520069. 341069  
SRR17520069. 341071  
SRR17520069. 341073  
SRR17520069. 341075  
SRR17520069. 341077  
SRR17520069. 341079  
SRR17520069. 341081  
SRR17520069. 341083  
SRR17520069. 341085  
SRR17520069. 341477  
SRR17520069. 341505  
SRR17520069. 343408  
SRR17520069. 343410  
SRR17520069. 344368  
SRR17520069. 344370  
SRR17520069. 347175  
SRR17520069. 347177  
SRR17520069. 347179  
SRR17520069. 348565  
SRR17520069. 348567  
SRR17520069. 348569  
SRR17520069. 348573  
SRR17520069. 348575  
SRR17520069. 348577  
SRR17520069. 348579  
SRR17520069. 348581  
SRR17520069. 348583  
SRR17520069. 348585  
SRR17520069. 348587  
SRR17520069. 348589  
SRR17520069. 348591  
SRR17520069. 348988  
SRR17520069. 348990

SRR17520069. 348992  
SRR17520069. 354060  
SRR17520069. 354062  
SRR17520069. 354064  
SRR17520069. 354066  
SRR17520069. 354068  
SRR17520069. 354070  
SRR17520069. 354072  
SRR17520069. 354074  
SRR17520069. 359986  
SRR17520069. 359990  
SRR17520069. 359992  
SRR17520069. 359996  
SRR17520069. 359998  
SRR17520069. 360000  
SRR17520069. 360004  
SRR17520069. 360006  
SRR17520069. 360008  
SRR17520069. 360010  
SRR17520069. 360012  
SRR17520069. 360014  
SRR17520069. 360016  
SRR17520069. 360018  
SRR17520069. 360020  
SRR17520069. 360022  
SRR17520069. 360026  
SRR17520069. 360028  
SRR17520069. 360030  
SRR17520069. 360032  
SRR17520069. 360036  
SRR17520069. 360040  
SRR17520069. 360042  
SRR17520069. 360044  
SRR17520069. 363297  
SRR17520069. 363299  
SRR17520069. 366207  
SRR17520069. 366209  
SRR17520069. 366211  
SRR17520069. 366213  
SRR17520069. 366215  
SRR17520069. 366217  
SRR17520069. 366219  
SRR17520069. 366221  
SRR17520069. 366223  
SRR17520069. 366225  
SRR17520069. 366227  
SRR17520069. 366229



SRR17520069. 366231  
SRR17520069. 366233  
SRR17520069. 366235  
SRR17520069. 366237  
SRR17520069. 366239  
SRR17520069. 366241  
SRR17520069. 366245  
SRR17520069. 366247  
SRR17520069. 366249  
SRR17520069. 366251  
SRR17520069. 366255  
SRR17520069. 366257  
SRR17520069. 366259  
SRR17520069. 366261  
SRR17520069. 366263  
SRR17520069. 366265  
SRR17520069. 366267  
SRR17520069. 366271  
SRR17520069. 366273  
SRR17520069. 366275  
SRR17520069. 366277  
SRR17520069. 366279  
SRR17520069. 366281  
SRR17520069. 366283  
SRR17520069. 366285  
SRR17520069. 366287  
SRR17520069. 366289  
SRR17520069. 366291  
SRR17520069. 366295  
SRR17520069. 366297  
SRR17520069. 366299  
SRR17520069. 366676  
SRR17520069. 366678  
SRR17520069. 366680  
SRR17520069. 366682  
SRR17520069. 366684  
SRR17520069. 366686  
SRR17520069. 366688  
SRR17520069. 366692  
SRR17520069. 366828  
SRR17520069. 366830  
SRR17520069. 366832  
SRR17520069. 366834  
SRR17520069. 366836  
SRR17520069. 366838  
SRR17520069. 366840  
SRR17520069. 366842

SRR17520069. 366844  
SRR17520069. 366846  
SRR17520069. 366850  
SRR17520069. 366852  
SRR17520069. 366854  
SRR17520069. 366856  
SRR17520069. 366858  
SRR17520069. 366862  
SRR17520069. 366864  
SRR17520069. 366866  
SRR17520069. 366868  
SRR17520069. 366870  
SRR17520069. 366872  
SRR17520069. 366874  
SRR17520069. 366876  
SRR17520069. 366878  
SRR17520069. 366880  
SRR17520069. 366882  
SRR17520069. 366884  
SRR17520069. 366886  
SRR17520069. 366888  
SRR17520069. 366890  
SRR17520069. 366892  
SRR17520069. 366894  
SRR17520069. 366896  
SRR17520069. 366898  
SRR17520069. 366900  
SRR17520069. 366902  
SRR17520069. 366904  
SRR17520069. 366906  
SRR17520069. 366908  
SRR17520069. 366910  
SRR17520069. 366912  
SRR17520069. 366914  
SRR17520069. 366916  
SRR17520069. 366918  
SRR17520069. 366920  
SRR17520069. 366922  
SRR17520069. 366924  
SRR17520069. 366928  
SRR17520069. 366930  
SRR17520069. 366932  
SRR17520069. 366934  
SRR17520069. 366936  
SRR17520069. 366938  
SRR17520069. 366942  
SRR17520069. 366944

SRR17520069. 366946  
SRR17520069. 366948  
SRR17520069. 366950  
SRR17520069. 366952  
SRR17520069. 366954  
SRR17520069. 366956  
SRR17520069. 366958  
SRR17520069. 366960  
SRR17520069. 366962  
SRR17520069. 366964  
SRR17520069. 366966  
SRR17520069. 366968  
SRR17520069. 366970  
SRR17520069. 366972  
SRR17520069. 366974  
SRR17520069. 366976  
SRR17520069. 366978  
SRR17520069. 366980  
SRR17520069. 366982  
SRR17520069. 366984  
SRR17520069. 366986  
SRR17520069. 366988  
SRR17520069. 366990  
SRR17520069. 366992  
SRR17520069. 366994  
SRR17520069. 366996  
SRR17520069. 366998  
SRR17520069. 367000  
SRR17520069. 367004  
SRR17520069. 367006  
SRR17520069. 367008  
SRR17520069. 367010  
SRR17520069. 367014  
SRR17520069. 367018  
SRR17520069. 367020  
SRR17520069. 367022  
SRR17520069. 367024  
SRR17520069. 367026  
SRR17520069. 367028  
SRR17520069. 367030  
SRR17520069. 367032  
SRR17520069. 367034  
SRR17520069. 367036  
SRR17520069. 367038  
SRR17520069. 367040  
SRR17520069. 368217  
SRR17520069. 368219

SRR17520069. 368221  
SRR17520069. 368223  
SRR17520069. 368225  
SRR17520069. 368227  
SRR17520069. 368229  
SRR17520069. 368231  
SRR17520069. 368233  
SRR17520069. 368235  
SRR17520069. 368237  
SRR17520069. 368241  
SRR17520069. 368243  
SRR17520069. 368245  
SRR17520069. 368247  
SRR17520069. 368249  
SRR17520069. 368251  
SRR17520069. 368253  
SRR17520069. 368255  
SRR17520069. 368257  
SRR17520069. 368259  
SRR17520069. 368261  
SRR17520069. 368263  
SRR17520069. 368265  
SRR17520069. 368267  
SRR17520069. 368269  
SRR17520069. 368271  
SRR17520069. 368273  
SRR17520069. 368275  
SRR17520069. 368277  
SRR17520069. 368279  
SRR17520069. 368281  
SRR17520069. 368283  
SRR17520069. 368285  
SRR17520069. 368287  
SRR17520069. 368289  
SRR17520069. 368291  
SRR17520069. 368293  
SRR17520069. 368295  
SRR17520069. 368299  
SRR17520069. 368301  
SRR17520069. 368303  
SRR17520069. 368305  
SRR17520069. 368307  
SRR17520069. 368309  
SRR17520069. 368311  
SRR17520069. 368313  
SRR17520069. 368315  
SRR17520069. 368317

SRR17520069. 368319  
SRR17520069. 368321  
SRR17520069. 368325  
SRR17520069. 368327  
SRR17520069. 368329  
SRR17520069. 368333  
SRR17520069. 368339  
SRR17520069. 368341  
SRR17520069. 368343  
SRR17520069. 368347  
SRR17520069. 371546  
SRR17520069. 371548  
SRR17520069. 371550  
SRR17520069. 371552  
SRR17520069. 371556  
SRR17520069. 371558  
SRR17520069. 371560  
SRR17520069. 371562  
SRR17520069. 372400  
SRR17520069. 372402  
SRR17520069. 372408  
SRR17520069. 372410  
SRR17520069. 372412  
SRR17520069. 372414  
SRR17520069. 372416  
SRR17520069. 372418  
SRR17520069. 372420  
SRR17520069. 372422  
SRR17520069. 372424  
SRR17520069. 373154  
SRR17520069. 373156  
SRR17520069. 373158  
SRR17520069. 373160  
SRR17520069. 373162  
SRR17520069. 373164  
SRR17520069. 373166  
SRR17520069. 373168  
SRR17520069. 373170  
SRR17520069. 373172  
SRR17520069. 373174  
SRR17520069. 373176  
SRR17520069. 373178  
SRR17520069. 373180  
SRR17520069. 373182  
SRR17520069. 373184  
SRR17520069. 373186  
SRR17520069. 373188

SRR17520069. 373190  
SRR17520069. 373192  
SRR17520069. 373194  
SRR17520069. 373196  
SRR17520069. 373198  
SRR17520069. 373200  
SRR17520069. 373202  
SRR17520069. 373204  
SRR17520069. 373206  
SRR17520069. 373208  
SRR17520069. 373210  
SRR17520069. 373212  
SRR17520069. 373214  
SRR17520069. 373216  
SRR17520069. 373218  
SRR17520069. 373220  
SRR17520069. 373222  
SRR17520069. 373224  
SRR17520069. 373226  
SRR17520069. 373228  
SRR17520069. 373232  
SRR17520069. 373234  
SRR17520069. 373236  
SRR17520069. 373238  
SRR17520069. 373240  
SRR17520069. 373242  
SRR17520069. 373244  
SRR17520069. 373246  
SRR17520069. 373248  
SRR17520069. 381850  
SRR17520069. 381852  
SRR17520069. 381854  
SRR17520069. 381856  
SRR17520069. 381858  
SRR17520069. 381860  
SRR17520069. 381862  
SRR17520069. 381864  
SRR17520069. 381866  
SRR17520069. 381868  
SRR17520069. 381870  
SRR17520069. 381872  
SRR17520069. 381874  
SRR17520069. 381876  
SRR17520069. 381878  
SRR17520069. 381880  
SRR17520069. 381882  
SRR17520069. 381884

SRR17520069. 381886  
SRR17520069. 381888  
SRR17520069. 381890  
SRR17520069. 381892  
SRR17520069. 381894  
SRR17520069. 381896  
SRR17520069. 381898  
SRR17520069. 381900  
SRR17520069. 381902  
SRR17520069. 381904  
SRR17520069. 381906  
SRR17520069. 381908  
SRR17520069. 381910  
SRR17520069. 381912  
SRR17520069. 381914  
SRR17520069. 381916  
SRR17520069. 381918  
SRR17520069. 381920  
SRR17520069. 383638  
SRR17520069. 383640  
SRR17520069. 383642  
SRR17520069. 383644  
SRR17520069. 383648  
SRR17520069. 383650  
SRR17520069. 383652  
SRR17520069. 383654  
SRR17520069. 383658  
SRR17520069. 383660  
SRR17520069. 383662  
SRR17520069. 383664  
SRR17520069. 383666  
SRR17520069. 383668  
SRR17520069. 383674  
SRR17520069. 383676  
SRR17520069. 383678  
SRR17520069. 383680  
SRR17520069. 383682  
SRR17520069. 383684  
SRR17520069. 383686  
SRR17520069. 383688  
SRR17520069. 383690  
SRR17520069. 383692  
SRR17520069. 383694  
SRR17520069. 383698  
SRR17520069. 383702  
SRR17520069. 383704  
SRR17520069. 383706

SRR17520069.383708  
SRR17520069.383710  
SRR17520069.383712  
SRR17520069.383714  
SRR17520069.383716  
SRR17520069.383718  
SRR17520069.383720  
SRR17520069.390299  
SRR17520069.390301  
SRR17520069.390416  
SRR17520069.390420  
SRR17520069.390424  
SRR17520069.390426  
SRR17520069.390428  
SRR17520069.390430  
SRR17520069.390432  
SRR17520069.390434  
SRR17520069.390436  
SRR17520069.390438  
SRR17520069.390440  
SRR17520069.390442  
SRR17520069.390444  
SRR17520069.390448  
SRR17520069.390450  
SRR17520069.392350  
SRR17520069.392352  
SRR17520069.392354  
SRR17520069.392356  
SRR17520069.392358  
SRR17520069.392360  
SRR17520069.392362  
SRR17520069.392364  
SRR17520069.392366  
SRR17520069.392368  
SRR17520069.392370  
SRR17520069.392372  
SRR17520069.392374  
SRR17520069.392376  
SRR17520069.392378  
SRR17520069.392380  
SRR17520069.392382  
SRR17520069.392384  
SRR17520069.392386  
SRR17520069.392388  
SRR17520069.392390  
SRR17520069.392392  
SRR17520069.392394



SRR17520069. 392396  
SRR17520069. 392398  
SRR17520069. 392400  
SRR17520069. 392402  
SRR17520069. 392404  
SRR17520069. 392406  
SRR17520069. 392408  
SRR17520069. 392410  
SRR17520069. 392412  
SRR17520069. 392414  
SRR17520069. 392416  
SRR17520069. 392418  
SRR17520069. 392420  
SRR17520069. 392422  
SRR17520069. 395156  
SRR17520069. 395158  
SRR17520069. 395162  
SRR17520069. 395164  
SRR17520069. 395166  
SRR17520069. 395168  
SRR17520069. 395170  
SRR17520069. 395172  
SRR17520069. 395174  
SRR17520069. 395176  
SRR17520069. 395178  
SRR17520069. 395180  
SRR17520069. 395182  
SRR17520069. 395184  
SRR17520069. 395186  
SRR17520069. 395188  
SRR17520069. 395190  
SRR17520069. 395192  
SRR17520069. 395194  
SRR17520069. 395196  
SRR17520069. 395200  
SRR17520069. 396359  
SRR17520069. 396361  
SRR17520069. 396363  
SRR17520069. 397652  
SRR17520069. 397654  
SRR17520069. 397656  
SRR17520069. 397658  
SRR17520069. 397660  
SRR17520069. 397662  
SRR17520069. 397664  
SRR17520069. 403102  
SRR17520069. 403104

SRR17520069.403106  
SRR17520069.415809  
SRR17520069.415811  
SRR17520069.415813  
SRR17520069.416112  
SRR17520069.416116  
SRR17520069.416118  
SRR17520069.416120  
SRR17520069.420365  
SRR17520069.420367  
SRR17520069.420369  
SRR17520069.420371  
SRR17520069.420373  
SRR17520069.420375  
SRR17520069.420377  
SRR17520069.428752  
SRR17520069.428754  
SRR17520069.429195  
SRR17520069.429197  
SRR17520069.429199  
SRR17520069.429201  
SRR17520069.429203  
SRR17520069.429205  
SRR17520069.429207  
SRR17520069.429209  
SRR17520069.429211  
SRR17520069.429213  
SRR17520069.429215  
SRR17520069.429217  
SRR17520069.429219  
SRR17520069.429221  
SRR17520069.429223  
SRR17520069.429225  
SRR17520069.429227  
SRR17520069.429229  
SRR17520069.429231  
SRR17520069.429233  
SRR17520069.429235  
SRR17520069.429237  
SRR17520069.429239  
SRR17520069.429241  
SRR17520069.429243  
SRR17520069.429245  
SRR17520069.429247  
SRR17520069.429249  
SRR17520069.429251  
SRR17520069.429253

SRR17520069.429255  
SRR17520069.429257  
SRR17520069.429261  
SRR17520069.429263  
SRR17520069.429265  
SRR17520069.429267  
SRR17520069.432425  
SRR17520069.432427  
SRR17520069.432429  
SRR17520069.432431  
SRR17520069.433542  
SRR17520069.433544  
SRR17520069.433548  
SRR17520069.433550  
SRR17520069.433552  
SRR17520069.433554  
SRR17520069.433556  
SRR17520069.433558  
SRR17520069.433560  
SRR17520069.433564  
SRR17520069.433566  
SRR17520069.433568  
SRR17520069.433570  
SRR17520069.433572  
SRR17520069.433574  
SRR17520069.433576  
SRR17520069.433578  
SRR17520069.433580  
SRR17520069.433582  
SRR17520069.433584  
SRR17520069.433586  
SRR17520069.433588  
SRR17520069.433590  
SRR17520069.433592  
SRR17520069.433594  
SRR17520069.433596  
SRR17520069.433598  
SRR17520069.433600  
SRR17520069.433602  
SRR17520069.433606  
SRR17520069.433608  
SRR17520069.433610  
SRR17520069.433612  
SRR17520069.433614  
SRR17520069.433616  
SRR17520069.433618  
SRR17520069.433620

SRR17520069.433622  
SRR17520069.433624  
SRR17520069.442094  
SRR17520069.442096  
SRR17520069.442098  
SRR17520069.442100  
SRR17520069.442102  
SRR17520069.442104  
SRR17520069.442624  
SRR17520069.442626  
SRR17520069.442628  
SRR17520069.442630  
SRR17520069.442634  
SRR17520069.442636  
SRR17520069.442638  
SRR17520069.442640  
SRR17520069.442642  
SRR17520069.442644  
SRR17520069.442646  
SRR17520069.442648  
SRR17520069.442650  
SRR17520069.442652  
SRR17520069.442654  
SRR17520069.442656  
SRR17520069.442658  
SRR17520069.442660  
SRR17520069.442662  
SRR17520069.442664  
SRR17520069.442666  
SRR17520069.442668  
SRR17520069.442670  
SRR17520069.442672  
SRR17520069.442674  
SRR17520069.442676  
SRR17520069.442678  
SRR17520069.442680  
SRR17520069.445448  
SRR17520069.445450  
SRR17520069.445452  
SRR17520069.445454  
SRR17520069.445456  
SRR17520069.445458  
SRR17520069.445460  
SRR17520069.445462  
SRR17520069.445464  
SRR17520069.445466  
SRR17520069.445468

SRR17520069.450357  
SRR17520069.450359  
SRR17520069.450361  
SRR17520069.450363  
SRR17520069.450365  
SRR17520069.450367  
SRR17520069.450369  
SRR17520069.450371  
SRR17520069.450373  
SRR17520069.450375  
SRR17520069.450377  
SRR17520069.450379  
SRR17520069.450381  
SRR17520069.450383  
SRR17520069.450385  
SRR17520069.450387  
SRR17520069.450389  
SRR17520069.450391  
SRR17520069.450393  
SRR17520069.450395  
SRR17520069.450397  
SRR17520069.450399  
SRR17520069.450401  
SRR17520069.450403  
SRR17520069.450405  
SRR17520069.450407  
SRR17520069.450409  
SRR17520069.450411  
SRR17520069.450413  
SRR17520069.450415  
SRR17520069.450417  
SRR17520069.450419  
SRR17520069.450421  
SRR17520069.450423  
SRR17520069.450425  
SRR17520069.450427  
SRR17520069.450429  
SRR17520069.450431  
SRR17520069.450433  
SRR17520069.450620  
SRR17520069.450624  
SRR17520069.450626  
SRR17520069.450628  
SRR17520069.450630  
SRR17520069.450632  
SRR17520069.450634  
SRR17520069.450636

SRR17520069.452112  
SRR17520069.452116  
SRR17520069.452118  
SRR17520069.452120  
SRR17520069.452122  
SRR17520069.452124  
SRR17520069.452126  
SRR17520069.452128  
SRR17520069.452130  
SRR17520069.452132  
SRR17520069.452134  
SRR17520069.452136  
SRR17520069.452138  
SRR17520069.452140  
SRR17520069.452142  
SRR17520069.452144  
SRR17520069.452146  
SRR17520069.452148  
SRR17520069.452150  
SRR17520069.452152  
SRR17520069.452154  
SRR17520069.452156  
SRR17520069.452158  
SRR17520069.452160  
SRR17520069.452162  
SRR17520069.452164  
SRR17520069.453791  
SRR17520069.453819  
SRR17520069.458650  
SRR17520069.458652  
SRR17520069.458654  
SRR17520069.458656  
SRR17520069.458658  
SRR17520069.471473  
SRR17520069.471475  
SRR17520069.471477  
SRR17520069.471479  
SRR17520069.471481  
SRR17520069.471483  
SRR17520069.471485  
SRR17520069.471487  
SRR17520069.471489  
SRR17520069.471491  
SRR17520069.471493  
SRR17520069.471495  
SRR17520069.471497  
SRR17520069.471499

SRR17520069.471885  
SRR17520069.471887  
SRR17520069.472621  
SRR17520069.472623  
SRR17520069.472625  
SRR17520069.472627  
SRR17520069.472629  
SRR17520069.472631  
SRR17520069.472635  
SRR17520069.472637  
SRR17520069.472639  
SRR17520069.472641  
SRR17520069.472643  
SRR17520069.472645  
SRR17520069.472647  
SRR17520069.472649  
SRR17520069.472651  
SRR17520069.472653  
SRR17520069.472655  
SRR17520069.472657  
SRR17520069.472659  
SRR17520069.472661  
SRR17520069.472663  
SRR17520069.472665  
SRR17520069.472669  
SRR17520069.472671  
SRR17520069.472673  
SRR17520069.472675  
SRR17520069.472677  
SRR17520069.472679  
SRR17520069.472681  
SRR17520069.472683  
SRR17520069.472685  
SRR17520069.472687  
SRR17520069.472689  
SRR17520069.472691  
SRR17520069.472693  
SRR17520069.472697  
SRR17520069.472701  
SRR17520069.472703  
SRR17520069.472705  
SRR17520069.472707  
SRR17520069.472709  
SRR17520069.472711  
SRR17520069.472713  
SRR17520069.472715  
SRR17520069.472717

SRR17520069.472719  
SRR17520069.472721  
SRR17520069.472723  
SRR17520069.472725  
SRR17520069.472727  
SRR17520069.472729  
SRR17520069.472731  
SRR17520069.475108  
SRR17520069.475110  
SRR17520069.475114  
SRR17520069.475116  
SRR17520069.475118  
SRR17520069.475120  
SRR17520069.475122  
SRR17520069.475126  
SRR17520069.475128  
SRR17520069.475130  
SRR17520069.475132  
SRR17520069.475134  
SRR17520069.475136  
SRR17520069.475138  
SRR17520069.475140  
SRR17520069.475142  
SRR17520069.476805  
SRR17520069.476807  
SRR17520069.476809  
SRR17520069.476811  
SRR17520069.476813  
SRR17520069.478827  
SRR17520069.491026  
SRR17520069.491037  
SRR17520069.491043  
SRR17520069.491405  
SRR17520069.491407  
SRR17520069.491409  
SRR17520069.491411  
SRR17520069.491413  
SRR17520069.491415  
SRR17520069.491419  
SRR17520069.491421  
SRR17520069.491423  
SRR17520069.491425  
SRR17520069.491427  
SRR17520069.491429  
SRR17520069.491431  
SRR17520069.491433  
SRR17520069.491435



SRR17520069.491437  
SRR17520069.491439  
SRR17520069.491441  
SRR17520069.491443  
SRR17520069.491445  
SRR17520069.491447  
SRR17520069.491449  
SRR17520069.491451  
SRR17520069.498804  
SRR17520069.500899  
SRR17520069.501527  
SRR17520069.501529  
SRR17520069.501531  
SRR17520069.501533  
SRR17520069.501535  
SRR17520069.501537  
SRR17520069.501539  
SRR17520069.501541  
SRR17520069.501543  
SRR17520069.501545  
SRR17520069.501547  
SRR17520069.501549  
SRR17520069.501551  
SRR17520069.501553  
SRR17520069.501555  
SRR17520069.504404  
SRR17520069.504406  
SRR17520069.504408  
SRR17520069.504410  
SRR17520069.508120  
SRR17520069.508122  
SRR17520069.508124  
SRR17520069.508126  
SRR17520069.508128  
SRR17520069.508130  
SRR17520069.508132  
SRR17520069.508134  
SRR17520069.508136  
SRR17520069.514051  
SRR17520069.514053  
SRR17520069.514055  
SRR17520069.514057  
SRR17520069.514059  
SRR17520069.514061  
SRR17520069.514063  
SRR17520069.514065  
SRR17520069.514067

SRR17520069.514069  
SRR17520069.514071  
SRR17520069.514073  
SRR17520069.514075  
SRR17520069.514077  
SRR17520069.514079  
SRR17520069.514081  
SRR17520069.514083  
SRR17520069.514085  
SRR17520069.514087  
SRR17520069.514089  
SRR17520069.514091  
SRR17520069.514093  
SRR17520069.514095  
SRR17520069.514097  
SRR17520069.514099  
SRR17520069.514101  
SRR17520069.516660  
SRR17520069.521937  
SRR17520069.521939  
SRR17520069.521941  
SRR17520069.521943  
SRR17520069.521945  
SRR17520069.521947  
SRR17520069.521949  
SRR17520069.521951  
SRR17520069.521953  
SRR17520069.521955  
SRR17520069.521957  
SRR17520069.533919  
SRR17520069.533921  
SRR17520069.533923  
SRR17520069.533925  
SRR17520069.533927  
SRR17520069.533929  
SRR17520069.533931  
SRR17520069.533933  
SRR17520069.533935  
SRR17520069.533937  
SRR17520069.533939  
SRR17520069.533941  
SRR17520069.533943  
SRR17520069.533945  
SRR17520069.533947  
SRR17520069.533949  
SRR17520069.533951  
SRR17520069.533953

SRR17520069. 537950  
SRR17520069. 537952  
SRR17520069. 537954  
SRR17520069. 537956  
SRR17520069. 537958  
SRR17520069. 537960  
SRR17520069. 537962  
SRR17520069. 538211  
SRR17520069. 538215  
SRR17520069. 538217  
SRR17520069. 538219  
SRR17520069. 538221  
SRR17520069. 538223  
SRR17520069. 538225  
SRR17520069. 538227  
SRR17520069. 538229  
SRR17520069. 544135  
SRR17520069. 544137  
SRR17520069. 544139  
SRR17520069. 544141  
SRR17520069. 544143  
SRR17520069. 544145  
SRR17520069. 544147  
SRR17520069. 544149  
SRR17520069. 544153  
SRR17520069. 544155  
SRR17520069. 544157  
SRR17520069. 544159  
SRR17520069. 544161  
SRR17520069. 544163  
SRR17520069. 544165  
SRR17520069. 544167  
SRR17520069. 544169  
SRR17520069. 544171  
SRR17520069. 544173  
SRR17520069. 544177  
SRR17520069. 544179  
SRR17520069. 544181  
SRR17520069. 544183  
SRR17520069. 544185  
SRR17520069. 544187  
SRR17520069. 544189  
SRR17520069. 544191  
SRR17520069. 544193  
SRR17520069. 544195  
SRR17520069. 544197  
SRR17520069. 544199

SRR17520069.544201  
SRR17520069.544203  
SRR17520069.544205  
SRR17520069.544207  
SRR17520069.544209  
SRR17520069.544211  
SRR17520069.544213  
SRR17520069.544215  
SRR17520069.544217  
SRR17520069.544219  
SRR17520069.544221  
SRR17520069.544223  
SRR17520069.544225  
SRR17520069.544227  
SRR17520069.544229  
SRR17520069.544231  
SRR17520069.544233  
SRR17520069.544235  
SRR17520069.544945  
SRR17520069.544947  
SRR17520069.544951  
SRR17520069.544953  
SRR17520069.544955  
SRR17520069.545728  
SRR17520069.545730  
SRR17520069.545732  
SRR17520069.545734  
SRR17520069.545736  
SRR17520069.545738  
SRR17520069.545740  
SRR17520069.545742  
SRR17520069.545744  
SRR17520069.545746  
SRR17520069.545748  
SRR17520069.545750  
SRR17520069.545752  
SRR17520069.545754  
SRR17520069.545756  
SRR17520069.545758  
SRR17520069.545760  
SRR17520069.545762  
SRR17520069.545764  
SRR17520069.545766  
SRR17520069.545768  
SRR17520069.545770  
SRR17520069.545772  
SRR17520069.545774

SRR17520069.545776  
SRR17520069.545778  
SRR17520069.545780  
SRR17520069.545782  
SRR17520069.545784  
SRR17520069.545786  
SRR17520069.545788  
SRR17520069.545790  
SRR17520069.545792  
SRR17520069.545794  
SRR17520069.545796  
SRR17520069.545798  
SRR17520069.545800  
SRR17520069.545802  
SRR17520069.545804  
SRR17520069.545806  
SRR17520069.545808  
SRR17520069.545810  
SRR17520069.545812  
SRR17520069.545814  
SRR17520069.545816  
SRR17520069.545818  
SRR17520069.545820  
SRR17520069.545822  
SRR17520069.545824  
SRR17520069.545826  
SRR17520069.552321  
SRR17520069.552323  
SRR17520069.552325  
SRR17520069.552327  
SRR17520069.552329  
SRR17520069.552331  
SRR17520069.552333  
SRR17520069.552335  
SRR17520069.552345  
SRR17520069.552347  
SRR17520069.552349  
SRR17520069.552351  
SRR17520069.556344  
SRR17520069.556346  
SRR17520069.556348  
SRR17520069.556350  
SRR17520069.556352  
SRR17520069.556354  
SRR17520069.561098  
SRR17520069.561100  
SRR17520069.561102

SRR17520069.561104  
SRR17520069.561106  
SRR17520069.561108  
SRR17520069.561110  
SRR17520069.561112  
SRR17520069.561114  
SRR17520069.561116  
SRR17520069.561118  
SRR17520069.561120  
SRR17520069.561122  
SRR17520069.561124  
SRR17520069.561126  
SRR17520069.561128  
SRR17520069.561130  
SRR17520069.569769  
SRR17520069.569771  
SRR17520069.569773  
SRR17520069.569775  
SRR17520069.569777  
SRR17520069.569779  
SRR17520069.569887  
SRR17520069.569889  
SRR17520069.569891  
SRR17520069.569893  
SRR17520069.569895  
SRR17520069.569897  
SRR17520069.569899  
SRR17520069.569901  
SRR17520069.569903  
SRR17520069.569905  
SRR17520069.569907  
SRR17520069.569909  
SRR17520069.569911  
SRR17520069.569913  
SRR17520069.569915  
SRR17520069.569917  
SRR17520069.569919  
SRR17520069.569921  
SRR17520069.569923  
SRR17520069.569925  
SRR17520069.569927  
SRR17520069.569929  
SRR17520069.569931  
SRR17520069.569933  
SRR17520069.569935  
SRR17520069.569937  
SRR17520069.569939

SRR17520069.569941  
SRR17520069.569943  
SRR17520069.569945  
SRR17520069.569947  
SRR17520069.569949  
SRR17520069.569951  
SRR17520069.569953  
SRR17520069.569955  
SRR17520069.569957  
SRR17520069.569959  
SRR17520069.569961  
SRR17520069.572377  
SRR17520069.572379  
SRR17520069.572381  
SRR17520069.572383  
SRR17520069.572385  
SRR17520069.572387  
SRR17520069.572389  
SRR17520069.572391  
SRR17520069.572393  
SRR17520069.572395  
SRR17520069.572397  
SRR17520069.572399  
SRR17520069.572401  
SRR17520069.572403  
SRR17520069.572405  
SRR17520069.572407  
SRR17520069.572409  
SRR17520069.572411  
SRR17520069.572413  
SRR17520069.572415  
SRR17520069.572417  
SRR17520069.572419  
SRR17520069.572421  
SRR17520069.572429  
SRR17520069.572431  
SRR17520069.572433  
SRR17520069.573113  
SRR17520069.573115  
SRR17520069.573117  
SRR17520069.578635  
SRR17520069.578637  
SRR17520069.578639  
SRR17520069.578641  
SRR17520069.578643  
SRR17520069.578645  
SRR17520069.578647

SRR17520069. 578651  
SRR17520069. 578653  
SRR17520069. 578655  
SRR17520069. 578657  
SRR17520069. 578659  
SRR17520069. 578661  
SRR17520069. 578663  
SRR17520069. 578665  
SRR17520069. 578667  
SRR17520069. 578669  
SRR17520069. 578671  
SRR17520069. 578840  
SRR17520069. 578842  
SRR17520069. 584293  
SRR17520069. 584295  
SRR17520069. 584297  
SRR17520069. 584299  
SRR17520069. 584301  
SRR17520069. 584303  
SRR17520069. 584305  
SRR17520069. 584307  
SRR17520069. 585079  
SRR17520069. 585378  
SRR17520069. 585380  
SRR17520069. 585382  
SRR17520069. 585384  
SRR17520069. 589028  
SRR17520069. 589030  
SRR17520069. 589032  
SRR17520069. 589034  
SRR17520069. 589036  
SRR17520069. 589038  
SRR17520069. 589040  
SRR17520069. 589042  
SRR17520069. 589044  
SRR17520069. 589046  
SRR17520069. 589048  
SRR17520069. 592043  
SRR17520069. 592045  
SRR17520069. 592047  
SRR17520069. 592049  
SRR17520069. 592051  
SRR17520069. 592053  
SRR17520069. 592055  
SRR17520069. 592057  
SRR17520069. 592061  
SRR17520069. 592063



SRR17520069. 592065  
SRR17520069. 592067  
SRR17520069. 592069  
SRR17520069. 592071  
SRR17520069. 592073  
SRR17520069. 592075  
SRR17520069. 592077  
SRR17520069. 592079  
SRR17520069. 592880  
SRR17520069. 592882  
SRR17520069. 592884  
SRR17520069. 592886  
SRR17520069. 592888  
SRR17520069. 592890  
SRR17520069. 592892  
SRR17520069. 592894  
SRR17520069. 592896  
SRR17520069. 592898  
SRR17520069. 592900  
SRR17520069. 592902  
SRR17520069. 592904  
SRR17520069. 592906  
SRR17520069. 592908  
SRR17520069. 592910  
SRR17520069. 592912  
SRR17520069. 592914  
SRR17520069. 592916  
SRR17520069. 592918  
SRR17520069. 592920  
SRR17520069. 592922  
SRR17520069. 592924  
SRR17520069. 592926  
SRR17520069. 592928  
SRR17520069. 592930  
SRR17520069. 592932  
SRR17520069. 592934  
SRR17520069. 592936  
SRR17520069. 592938  
SRR17520069. 592940  
SRR17520069. 592942  
SRR17520069. 592944  
SRR17520069. 592946  
SRR17520069. 592948  
SRR17520069. 592950  
SRR17520069. 592952  
SRR17520069. 592954  
SRR17520069. 592956

SRR17520069. 592958  
SRR17520069. 592960  
SRR17520069. 592962  
SRR17520069. 592964  
SRR17520069. 592966  
SRR17520069. 592968  
SRR17520069. 592970  
SRR17520069. 592972  
SRR17520069. 592974  
SRR17520069. 592976  
SRR17520069. 592978  
SRR17520069. 592980  
SRR17520069. 592982  
SRR17520069. 592984  
SRR17520069. 592986  
SRR17520069. 592988  
SRR17520069. 592990  
SRR17520069. 592992  
SRR17520069. 592996  
SRR17520069. 592998  
SRR17520069. 593000  
SRR17520069. 593002  
SRR17520069. 593004  
SRR17520069. 593006  
SRR17520069. 593008  
SRR17520069. 593010  
SRR17520069. 593012  
SRR17520069. 593014  
SRR17520069. 593016  
SRR17520069. 593018  
SRR17520069. 593020  
SRR17520069. 593022  
SRR17520069. 593024  
SRR17520069. 593026  
SRR17520069. 593028  
SRR17520069. 593030  
SRR17520069. 593034  
SRR17520069. 593036  
SRR17520069. 593038  
SRR17520069. 593040  
SRR17520069. 593042  
SRR17520069. 593044  
SRR17520069. 593046  
SRR17520069. 593048  
SRR17520069. 593052  
SRR17520069. 593056  
SRR17520069. 593058

SRR17520069. 593060  
SRR17520069. 593062  
SRR17520069. 593064  
SRR17520069. 593066  
SRR17520069. 593068  
SRR17520069. 593070  
SRR17520069. 593072  
SRR17520069. 593074  
SRR17520069. 593076  
SRR17520069. 594764  
SRR17520069. 594766  
SRR17520069. 594768  
SRR17520069. 594770  
SRR17520069. 594772  
SRR17520069. 594774  
SRR17520069. 594776  
SRR17520069. 594778  
SRR17520069. 594780  
SRR17520069. 594782  
SRR17520069. 594784  
SRR17520069. 594786  
SRR17520069. 594790  
SRR17520069. 594792  
SRR17520069. 594794  
SRR17520069. 594796  
SRR17520069. 594798  
SRR17520069. 594802  
SRR17520069. 594806  
SRR17520069. 594810  
SRR17520069. 594812  
SRR17520069. 594814  
SRR17520069. 594816  
SRR17520069. 607526  
SRR17520069. 607530  
SRR17520069. 607532  
SRR17520069. 607534  
SRR17520069. 607536  
SRR17520069. 607538  
SRR17520069. 607540  
SRR17520069. 610031  
SRR17520069. 610033  
SRR17520069. 610035  
SRR17520069. 610037  
SRR17520069. 610039  
SRR17520069. 610041  
SRR17520069. 610043  
SRR17520069. 610045

SRR17520069.610047  
SRR17520069.610049  
SRR17520069.610051  
SRR17520069.610053  
SRR17520069.610055  
SRR17520069.610057  
SRR17520069.610059  
SRR17520069.610061  
SRR17520069.610063  
SRR17520069.610065  
SRR17520069.610067  
SRR17520069.610069  
SRR17520069.610071  
SRR17520069.610073  
SRR17520069.610075  
SRR17520069.610077  
SRR17520069.610079  
SRR17520069.610081  
SRR17520069.610083  
SRR17520069.610085  
SRR17520069.610087  
SRR17520069.610089  
SRR17520069.610091  
SRR17520069.610093  
SRR17520069.610095  
SRR17520069.610097  
SRR17520069.610099  
SRR17520069.610101  
SRR17520069.610103  
SRR17520069.610105  
SRR17520069.610107  
SRR17520069.610109  
SRR17520069.610111  
SRR17520069.610113  
SRR17520069.610115  
SRR17520069.610117  
SRR17520069.610119  
SRR17520069.610121  
SRR17520069.610123  
SRR17520069.610125  
SRR17520069.610127  
SRR17520069.610129  
SRR17520069.610131  
SRR17520069.610133  
SRR17520069.610135  
SRR17520069.610137  
SRR17520069.610139

SRR17520069.610141  
SRR17520069.610143  
SRR17520069.610145  
SRR17520069.610147  
SRR17520069.610149  
SRR17520069.610151  
SRR17520069.610153  
SRR17520069.610155  
SRR17520069.610157  
SRR17520069.610159  
SRR17520069.610161  
SRR17520069.610163  
SRR17520069.610167  
SRR17520069.610169  
SRR17520069.610171  
SRR17520069.610173  
SRR17520069.615344  
SRR17520069.615346  
SRR17520069.615348  
SRR17520069.615350  
SRR17520069.615352  
SRR17520069.615354  
SRR17520069.615356  
SRR17520069.615358  
SRR17520069.615360  
SRR17520069.615362  
SRR17520069.615364  
SRR17520069.615366  
SRR17520069.615368  
SRR17520069.615370  
SRR17520069.615372  
SRR17520069.615374  
SRR17520069.615376  
SRR17520069.615378  
SRR17520069.623168  
SRR17520069.624525  
SRR17520069.624527  
SRR17520069.624529  
SRR17520069.624531  
SRR17520069.624533  
SRR17520069.624535  
SRR17520069.624537  
SRR17520069.624539  
SRR17520069.624541  
SRR17520069.624543  
SRR17520069.624545  
SRR17520069.624547

SRR17520069.624549  
SRR17520069.624551  
SRR17520069.624553  
SRR17520069.624555  
SRR17520069.624557  
SRR17520069.624559  
SRR17520069.624561  
SRR17520069.624563  
SRR17520069.624565  
SRR17520069.624567  
SRR17520069.624569  
SRR17520069.624571  
SRR17520069.624573  
SRR17520069.624577  
SRR17520069.624579  
SRR17520069.624581  
SRR17520069.624583  
SRR17520069.624585  
SRR17520069.624587  
SRR17520069.624589  
SRR17520069.624591  
SRR17520069.624593  
SRR17520069.624595  
SRR17520069.624597  
SRR17520069.624599  
SRR17520069.624601  
SRR17520069.624603  
SRR17520069.624605  
SRR17520069.624607  
SRR17520069.624609  
SRR17520069.624611  
SRR17520069.624613  
SRR17520069.624615  
SRR17520069.624619  
SRR17520069.624621  
SRR17520069.624623  
SRR17520069.624625  
SRR17520069.624627  
SRR17520069.624629  
SRR17520069.624631  
SRR17520069.624633  
SRR17520069.624635  
SRR17520069.624637  
SRR17520069.624639  
SRR17520069.624641  
SRR17520069.624643  
SRR17520069.624645

SRR17520069. 624647  
SRR17520069. 624649  
SRR17520069. 624651  
SRR17520069. 624653  
SRR17520069. 624655  
SRR17520069. 624657  
SRR17520069. 624659  
SRR17520069. 624661  
SRR17520069. 624663  
SRR17520069. 624665  
SRR17520069. 624667  
SRR17520069. 624669  
SRR17520069. 624671  
SRR17520069. 624673  
SRR17520069. 624675  
SRR17520069. 624677  
SRR17520069. 624679  
SRR17520069. 624681  
SRR17520069. 624683  
SRR17520069. 624685  
SRR17520069. 624687  
SRR17520069. 624689  
SRR17520069. 624691  
SRR17520069. 624693  
SRR17520069. 624695  
SRR17520069. 630624  
SRR17520069. 630628  
SRR17520069. 630630  
SRR17520069. 630634  
SRR17520069. 630636  
SRR17520069. 630642  
SRR17520069. 630644  
SRR17520069. 630646  
SRR17520069. 630650  
SRR17520069. 630652  
SRR17520069. 630654  
SRR17520069. 630656  
SRR17520069. 630658  
SRR17520069. 630660  
SRR17520069. 630664  
SRR17520069. 630666  
SRR17520069. 630668  
SRR17520069. 630670  
SRR17520069. 630688  
SRR17520069. 630690  
SRR17520069. 630692  
SRR17520069. 630698

SRR17520069. 630700  
SRR17520069. 630702  
SRR17520069. 630704  
SRR17520069. 630708  
SRR17520069. 630710  
SRR17520069. 630712  
SRR17520069. 630714  
SRR17520069. 630716  
SRR17520069. 630718  
SRR17520069. 630720  
SRR17520069. 630722  
SRR17520069. 630724  
SRR17520069. 630726  
SRR17520069. 630728  
SRR17520069. 630730  
SRR17520069. 630732  
SRR17520069. 630734  
SRR17520069. 630736  
SRR17520069. 630738  
SRR17520069. 630740  
SRR17520069. 630742  
SRR17520069. 630744  
SRR17520069. 630746  
SRR17520069. 630748  
SRR17520069. 630750  
SRR17520069. 630752  
SRR17520069. 634857  
SRR17520069. 634859  
SRR17520069. 634861  
SRR17520069. 634863  
SRR17520069. 634865  
SRR17520069. 634867  
SRR17520069. 634869  
SRR17520069. 634871  
SRR17520069. 634873  
SRR17520069. 634875  
SRR17520069. 634877  
SRR17520069. 634879  
SRR17520069. 634881  
SRR17520069. 634883  
SRR17520069. 634885  
SRR17520069. 634887  
SRR17520069. 634889  
SRR17520069. 634891  
SRR17520069. 634893  
SRR17520069. 634895  
SRR17520069. 634897



SRR17520069. 634899  
SRR17520069. 634901  
SRR17520069. 634903  
SRR17520069. 634905  
SRR17520069. 634907  
SRR17520069. 634909  
SRR17520069. 634911  
SRR17520069. 634913  
SRR17520069. 634915  
SRR17520069. 634917  
SRR17520069. 634919  
SRR17520069. 634921  
SRR17520069. 635742  
SRR17520069. 635744  
SRR17520069. 635746  
SRR17520069. 635748  
SRR17520069. 635750  
SRR17520069. 635752  
SRR17520069. 635754  
SRR17520069. 635756  
SRR17520069. 635758  
SRR17520069. 635760  
SRR17520069. 635762  
SRR17520069. 635764  
SRR17520069. 635766  
SRR17520069. 635768  
SRR17520069. 635770  
SRR17520069. 635772  
SRR17520069. 635774  
SRR17520069. 635776  
SRR17520069. 635778  
SRR17520069. 635780  
SRR17520069. 635782  
SRR17520069. 635784  
SRR17520069. 635786  
SRR17520069. 635790  
SRR17520069. 635792  
SRR17520069. 635794  
SRR17520069. 635796  
SRR17520069. 635798  
SRR17520069. 635800  
SRR17520069. 640429  
SRR17520069. 640431  
SRR17520069. 640433  
SRR17520069. 640435  
SRR17520069. 640437  
SRR17520069. 640439

SRR17520069.640441  
SRR17520069.640443  
SRR17520069.641408  
SRR17520069.641410  
SRR17520069.641412  
SRR17520069.641414  
SRR17520069.641416  
SRR17520069.641418  
SRR17520069.641420  
SRR17520069.641422  
SRR17520069.641424  
SRR17520069.641426  
SRR17520069.641428  
SRR17520069.641430  
SRR17520069.641432  
SRR17520069.641434  
SRR17520069.641436  
SRR17520069.641438  
SRR17520069.641440  
SRR17520069.641442  
SRR17520069.641444  
SRR17520069.641446  
SRR17520069.641448  
SRR17520069.641450  
SRR17520069.641452  
SRR17520069.641454  
SRR17520069.641456  
SRR17520069.641460  
SRR17520069.641462  
SRR17520069.641464  
SRR17520069.641466  
SRR17520069.641468  
SRR17520069.641470  
SRR17520069.641472  
SRR17520069.641474  
SRR17520069.641476  
SRR17520069.641478  
SRR17520069.641480  
SRR17520069.641482  
SRR17520069.641484  
SRR17520069.641486  
SRR17520069.641488  
SRR17520069.641490  
SRR17520069.641492  
SRR17520069.641494  
SRR17520069.641496  
SRR17520069.641498

SRR17520069.641500  
SRR17520069.641502  
SRR17520069.641504  
SRR17520069.641506  
SRR17520069.641508  
SRR17520069.641510  
SRR17520069.641512  
SRR17520069.641514  
SRR17520069.644562  
SRR17520069.644564  
SRR17520069.644566  
SRR17520069.644568  
SRR17520069.644570  
SRR17520069.644572  
SRR17520069.644574  
SRR17520069.644576  
SRR17520069.644578  
SRR17520069.644580  
SRR17520069.654115  
SRR17520069.654117  
SRR17520069.654119  
SRR17520069.654121  
SRR17520069.654123  
SRR17520069.654125  
SRR17520069.654127  
SRR17520069.654129  
SRR17520069.654131  
SRR17520069.654133  
SRR17520069.654135  
SRR17520069.654137  
SRR17520069.654139  
SRR17520069.654141  
SRR17520069.654143  
SRR17520069.654145  
SRR17520069.654147  
SRR17520069.654149  
SRR17520069.654151  
SRR17520069.654153  
SRR17520069.654155  
SRR17520069.654157  
SRR17520069.654159  
SRR17520069.654161  
SRR17520069.654163  
SRR17520069.654165  
SRR17520069.654167  
SRR17520069.654169  
SRR17520069.654171

SRR17520069.654173  
SRR17520069.654175  
SRR17520069.654177  
SRR17520069.654179  
SRR17520069.654181  
SRR17520069.654183  
SRR17520069.654185  
SRR17520069.654187  
SRR17520069.654189  
SRR17520069.654191  
SRR17520069.654193  
SRR17520069.654195  
SRR17520069.654197  
SRR17520069.654199  
SRR17520069.654201  
SRR17520069.654203  
SRR17520069.654205  
SRR17520069.654207  
SRR17520069.654209  
SRR17520069.654211  
SRR17520069.654213  
SRR17520069.654215  
SRR17520069.655775  
SRR17520069.662433  
SRR17520069.663312  
SRR17520069.663314  
SRR17520069.663316  
SRR17520069.663318  
SRR17520069.663320  
SRR17520069.663322  
SRR17520069.663324  
SRR17520069.663326  
SRR17520069.663328  
SRR17520069.663330  
SRR17520069.663332  
SRR17520069.663334  
SRR17520069.663336  
SRR17520069.663338  
SRR17520069.663340  
SRR17520069.663342  
SRR17520069.663344  
SRR17520069.663346  
SRR17520069.663348  
SRR17520069.663350  
SRR17520069.663352  
SRR17520069.663354  
SRR17520069.663356

SRR17520069. 663358  
SRR17520069. 663360  
SRR17520069. 663362  
SRR17520069. 663364  
SRR17520069. 663366  
SRR17520069. 663368  
SRR17520069. 663370  
SRR17520069. 663372  
SRR17520069. 663374  
SRR17520069. 663376  
SRR17520069. 663378  
SRR17520069. 663380  
SRR17520069. 663382  
SRR17520069. 663384  
SRR17520069. 663386  
SRR17520069. 663388  
SRR17520069. 663390  
SRR17520069. 663392  
SRR17520069. 663394  
SRR17520069. 663396  
SRR17520069. 663398  
SRR17520069. 663400  
SRR17520069. 663402  
SRR17520069. 663404  
SRR17520069. 663406  
SRR17520069. 663408  
SRR17520069. 663410  
SRR17520069. 663412  
SRR17520069. 663414  
SRR17520069. 663416  
SRR17520069. 663418  
SRR17520069. 663420  
SRR17520069. 663422  
SRR17520069. 663424  
SRR17520069. 663426  
SRR17520069. 663428  
SRR17520069. 663430  
SRR17520069. 663432  
SRR17520069. 663434  
SRR17520069. 663436  
SRR17520069. 663438  
SRR17520069. 663440  
SRR17520069. 663442  
SRR17520069. 663444  
SRR17520069. 663446  
SRR17520069. 663448  
SRR17520069. 663450

SRR17520069. 663452  
SRR17520069. 663454  
SRR17520069. 663456  
SRR17520069. 663458  
SRR17520069. 663460  
SRR17520069. 663462  
SRR17520069. 663464  
SRR17520069. 663466  
SRR17520069. 663468  
SRR17520069. 663470  
SRR17520069. 664522  
SRR17520069. 664524  
SRR17520069. 664526  
SRR17520069. 664528  
SRR17520069. 664530  
SRR17520069. 664532  
SRR17520069. 664534  
SRR17520069. 664536  
SRR17520069. 664538  
SRR17520069. 664540  
SRR17520069. 664542  
SRR17520069. 664544  
SRR17520069. 664546  
SRR17520069. 664548  
SRR17520069. 664550  
SRR17520069. 664552  
SRR17520069. 664554  
SRR17520069. 664556  
SRR17520069. 664558  
SRR17520069. 664560  
SRR17520069. 664562  
SRR17520069. 664564  
SRR17520069. 664566  
SRR17520069. 664568  
SRR17520069. 664570  
SRR17520069. 664572  
SRR17520069. 664574  
SRR17520069. 664576  
SRR17520069. 664578  
SRR17520069. 664580  
SRR17520069. 664582  
SRR17520069. 664584  
SRR17520069. 664586  
SRR17520069. 664588  
SRR17520069. 664592  
SRR17520069. 664594  
SRR17520069. 664596

SRR17520069.664598  
SRR17520069.664600  
SRR17520069.664602  
SRR17520069.664606  
SRR17520069.664608  
SRR17520069.666790  
SRR17520069.672447  
SRR17520069.672449  
SRR17520069.679661  
SRR17520069.679663  
SRR17520069.680886  
SRR17520069.680888  
SRR17520069.680890  
SRR17520069.680892  
SRR17520069.680894  
SRR17520069.680896  
SRR17520069.680898  
SRR17520069.680900  
SRR17520069.680902  
SRR17520069.680904  
SRR17520069.680906  
SRR17520069.680908  
SRR17520069.680910  
SRR17520069.680912  
SRR17520069.680914  
SRR17520069.680916  
SRR17520069.680918  
SRR17520069.680920  
SRR17520069.680922  
SRR17520069.680924  
SRR17520069.680926  
SRR17520069.686055  
SRR17520069.686057  
SRR17520069.686061  
SRR17520069.686063  
SRR17520069.686067  
SRR17520069.686069  
SRR17520069.686071  
SRR17520069.686073  
SRR17520069.686075  
SRR17520069.686077  
SRR17520069.686079  
SRR17520069.686081  
SRR17520069.690280  
SRR17520069.690282  
SRR17520069.695248  
SRR17520069.695250

SRR17520069.695252  
SRR17520069.695254  
SRR17520069.695256  
SRR17520069.695258  
SRR17520069.695260  
SRR17520069.695262  
SRR17520069.695264  
SRR17520069.695266  
SRR17520069.695268  
SRR17520069.695270  
SRR17520069.695272  
SRR17520069.695274  
SRR17520069.695278  
SRR17520069.695280  
SRR17520069.695282  
SRR17520069.695284  
SRR17520069.695286  
SRR17520069.695288  
SRR17520069.695290  
SRR17520069.695292  
SRR17520069.695294  
SRR17520069.695296  
SRR17520069.695298  
SRR17520069.695300  
SRR17520069.695302  
SRR17520069.695306  
SRR17520069.695308  
SRR17520069.695310  
SRR17520069.695312  
SRR17520069.695314  
SRR17520069.695318  
SRR17520069.695320  
SRR17520069.695322  
SRR17520069.695324  
SRR17520069.696129  
SRR17520069.696131  
SRR17520069.696133  
SRR17520069.696135  
SRR17520069.696137  
SRR17520069.696139  
SRR17520069.696143  
SRR17520069.696145  
SRR17520069.696147  
SRR17520069.696149  
SRR17520069.696153  
SRR17520069.696155  
SRR17520069.696157



SRR17520069.696159  
SRR17520069.696161  
SRR17520069.696163  
SRR17520069.696167  
SRR17520069.700255  
SRR17520069.701316  
SRR17520069.701318  
SRR17520069.701320  
SRR17520069.701322  
SRR17520069.701324  
SRR17520069.701326  
SRR17520069.701328  
SRR17520069.701330  
SRR17520069.701332  
SRR17520069.702943  
SRR17520069.702945  
SRR17520069.708907  
SRR17520069.708909  
SRR17520069.708911  
SRR17520069.708913  
SRR17520069.708915  
SRR17520069.708917  
SRR17520069.708919  
SRR17520069.711086  
SRR17520069.711088  
SRR17520069.711090  
SRR17520069.711092  
SRR17520069.711094  
SRR17520069.711096  
SRR17520069.715828  
SRR17520069.715830  
SRR17520069.715832  
SRR17520069.715834  
SRR17520069.715836  
SRR17520069.715840  
SRR17520069.715844  
SRR17520069.715848  
SRR17520069.715850  
SRR17520069.715854  
SRR17520069.715856  
SRR17520069.715858  
SRR17520069.715860  
SRR17520069.715862  
SRR17520069.715864  
SRR17520069.715866  
SRR17520069.715868  
SRR17520069.715870

SRR17520069.715872  
SRR17520069.715874  
SRR17520069.715876  
SRR17520069.715878  
SRR17520069.715880  
SRR17520069.715882  
SRR17520069.715884  
SRR17520069.715886  
SRR17520069.715888  
SRR17520069.715890  
SRR17520069.715892  
SRR17520069.715894  
SRR17520069.715896  
SRR17520069.715898  
SRR17520069.717912  
SRR17520069.721061  
SRR17520069.721063  
SRR17520069.721065  
SRR17520069.721067  
SRR17520069.721069  
SRR17520069.721071  
SRR17520069.721073  
SRR17520069.721075  
SRR17520069.721077  
SRR17520069.721079  
SRR17520069.721081  
SRR17520069.721083  
SRR17520069.725657  
SRR17520069.725659  
SRR17520069.725661  
SRR17520069.725663  
SRR17520069.725665  
SRR17520069.725667  
SRR17520069.725669  
SRR17520069.732263  
SRR17520069.732265  
SRR17520069.732267  
SRR17520069.732269  
SRR17520069.732271  
SRR17520069.732273  
SRR17520069.732275  
SRR17520069.732277  
SRR17520069.732281  
SRR17520069.732283  
SRR17520069.732287  
SRR17520069.732289  
SRR17520069.732293

SRR17520069. 732295  
SRR17520069. 732297  
SRR17520069. 732299  
SRR17520069. 732303  
SRR17520069. 732305  
SRR17520069. 732307  
SRR17520069. 732309  
SRR17520069. 732311  
SRR17520069. 732315  
SRR17520069. 732317  
SRR17520069. 733076  
SRR17520069. 733447  
SRR17520069. 733449  
SRR17520069. 733453  
SRR17520069. 733455  
SRR17520069. 733457  
SRR17520069. 733459  
SRR17520069. 733461  
SRR17520069. 733463  
SRR17520069. 733465  
SRR17520069. 733467  
SRR17520069. 733469  
SRR17520069. 733471  
SRR17520069. 733473  
SRR17520069. 733475  
SRR17520069. 733477  
SRR17520069. 733479  
SRR17520069. 733481  
SRR17520069. 733483  
SRR17520069. 733485  
SRR17520069. 733487  
SRR17520069. 733489  
SRR17520069. 733491  
SRR17520069. 733493  
SRR17520069. 733495  
SRR17520069. 733497  
SRR17520069. 737565  
SRR17520069. 739319  
SRR17520069. 739367  
SRR17520069. 739369  
SRR17520069. 739371  
SRR17520069. 739373  
SRR17520069. 739375  
SRR17520069. 739377  
SRR17520069. 739379  
SRR17520069. 739381  
SRR17520069. 739383

SRR17520069. 739385  
SRR17520069. 739387  
SRR17520069. 739389  
SRR17520069. 739391  
SRR17520069. 739393  
SRR17520069. 739395  
SRR17520069. 739397  
SRR17520069. 739399  
SRR17520069. 739401  
SRR17520069. 739403  
SRR17520069. 739405  
SRR17520069. 739407  
SRR17520069. 739409  
SRR17520069. 739411  
SRR17520069. 739413  
SRR17520069. 739415  
SRR17520069. 739417  
SRR17520069. 739419  
SRR17520069. 739421  
SRR17520069. 739423  
SRR17520069. 739425  
SRR17520069. 739427  
SRR17520069. 739429  
SRR17520069. 750359  
SRR17520069. 751543  
SRR17520069. 751545  
SRR17520069. 751549  
SRR17520069. 751551  
SRR17520069. 751553  
SRR17520069. 751555  
SRR17520069. 751557  
SRR17520069. 751559  
SRR17520069. 751561  
SRR17520069. 751563  
SRR17520069. 751565  
SRR17520069. 751567  
SRR17520069. 751569  
SRR17520069. 751571  
SRR17520069. 751573  
SRR17520069. 751575  
SRR17520069. 751577  
SRR17520069. 751579  
SRR17520069. 751581  
SRR17520069. 751583  
SRR17520069. 751587  
SRR17520069. 751589  
SRR17520069. 751591

SRR17520069.751593  
SRR17520069.751595  
SRR17520069.751597  
SRR17520069.751599  
SRR17520069.751601  
SRR17520069.751603  
SRR17520069.751605  
SRR17520069.751607  
SRR17520069.751609  
SRR17520069.751611  
SRR17520069.751615  
SRR17520069.751617  
SRR17520069.752015  
SRR17520069.752017  
SRR17520069.752019  
SRR17520069.752021  
SRR17520069.752023  
SRR17520069.752025  
SRR17520069.752027  
SRR17520069.752029  
SRR17520069.752031  
SRR17520069.752033  
SRR17520069.752035  
SRR17520069.752039  
SRR17520069.752041  
SRR17520069.752043  
SRR17520069.752364  
SRR17520069.752366  
SRR17520069.752368  
SRR17520069.753438  
SRR17520069.753440  
SRR17520069.753442  
SRR17520069.753444  
SRR17520069.753446  
SRR17520069.753448  
SRR17520069.753455  
SRR17520069.753459  
SRR17520069.755229  
SRR17520069.755231  
SRR17520069.755233  
SRR17520069.755235  
SRR17520069.755237  
SRR17520069.755239  
SRR17520069.755241  
SRR17520069.755243  
SRR17520069.755245  
SRR17520069.755247

SRR17520069. 755249  
SRR17520069. 755251  
SRR17520069. 755253  
SRR17520069. 755255  
SRR17520069. 755257  
SRR17520069. 755259  
SRR17520069. 755261  
SRR17520069. 755263  
SRR17520069. 755265  
SRR17520069. 755267  
SRR17520069. 755269  
SRR17520069. 755271  
SRR17520069. 755273  
SRR17520069. 755275  
SRR17520069. 755277  
SRR17520069. 755281  
SRR17520069. 755283  
SRR17520069. 755285  
SRR17520069. 755287  
SRR17520069. 755289  
SRR17520069. 755291  
SRR17520069. 755293  
SRR17520069. 755295  
SRR17520069. 755297  
SRR17520069. 755299  
SRR17520069. 755301  
SRR17520069. 764125  
SRR17520069. 764127  
SRR17520069. 764129  
SRR17520069. 764131  
SRR17520069. 764133  
SRR17520069. 764135  
SRR17520069. 764137  
SRR17520069. 764139  
SRR17520069. 764141  
SRR17520069. 764145  
SRR17520069. 764147  
SRR17520069. 764149  
SRR17520069. 764151  
SRR17520069. 764155  
SRR17520069. 764157  
SRR17520069. 764159  
SRR17520069. 764161  
SRR17520069. 764165  
SRR17520069. 764167  
SRR17520069. 764169  
SRR17520069. 764171

SRR17520069.764175  
SRR17520069.764177  
SRR17520069.764179  
SRR17520069.764181  
SRR17520069.764183  
SRR17520069.764185  
SRR17520069.764187  
SRR17520069.764189  
SRR17520069.766996  
SRR17520069.766998  
SRR17520069.767000  
SRR17520069.767002  
SRR17520069.767004  
SRR17520069.767006  
SRR17520069.767008  
SRR17520069.767010  
SRR17520069.767012  
SRR17520069.767014  
SRR17520069.769572  
SRR17520069.769574  
SRR17520069.769576  
SRR17520069.769582  
SRR17520069.769584  
SRR17520069.769586  
SRR17520069.769588  
SRR17520069.769590  
SRR17520069.769592  
SRR17520069.769594  
SRR17520069.769596  
SRR17520069.769598  
SRR17520069.769600  
SRR17520069.771138  
SRR17520069.771140  
SRR17520069.771142  
SRR17520069.771144  
SRR17520069.771146  
SRR17520069.771148  
SRR17520069.771150  
SRR17520069.771152  
SRR17520069.771154  
SRR17520069.771156  
SRR17520069.771158  
SRR17520069.771160  
SRR17520069.771162  
SRR17520069.771164  
SRR17520069.771168  
SRR17520069.771170

SRR17520069.771172  
SRR17520069.771174  
SRR17520069.771176  
SRR17520069.771178  
SRR17520069.772336  
SRR17520069.773982  
SRR17520069.773984  
SRR17520069.773986  
SRR17520069.773988  
SRR17520069.773990  
SRR17520069.773994  
SRR17520069.773998  
SRR17520069.774000  
SRR17520069.774002  
SRR17520069.774006  
SRR17520069.774008  
SRR17520069.774010  
SRR17520069.774012  
SRR17520069.774014  
SRR17520069.774016  
SRR17520069.774018  
SRR17520069.774020  
SRR17520069.774022  
SRR17520069.774024  
SRR17520069.774026  
SRR17520069.774028  
SRR17520069.774032  
SRR17520069.774034  
SRR17520069.774036  
SRR17520069.774038  
SRR17520069.774040  
SRR17520069.774042  
SRR17520069.774044  
SRR17520069.774046  
SRR17520069.777881  
SRR17520069.777883  
SRR17520069.777885  
SRR17520069.777887  
SRR17520069.777889  
SRR17520069.777891  
SRR17520069.777893  
SRR17520069.777895  
SRR17520069.777897  
SRR17520069.777899  
SRR17520069.777901  
SRR17520069.777903  
SRR17520069.777905



SRR17520069.777907  
SRR17520069.777909  
SRR17520069.777911  
SRR17520069.777913  
SRR17520069.777915  
SRR17520069.785443  
SRR17520069.785445  
SRR17520069.785448  
SRR17520069.785450  
SRR17520069.785452  
SRR17520069.785454  
SRR17520069.785456  
SRR17520069.785458  
SRR17520069.785460  
SRR17520069.789384  
SRR17520069.789386  
SRR17520069.789388  
SRR17520069.789390  
SRR17520069.789392  
SRR17520069.789394  
SRR17520069.789396  
SRR17520069.789398  
SRR17520069.789400  
SRR17520069.789402  
SRR17520069.789404  
SRR17520069.789406  
SRR17520069.789408  
SRR17520069.789410  
SRR17520069.789412  
SRR17520069.789414  
SRR17520069.789416  
SRR17520069.789418  
SRR17520069.789420  
SRR17520069.791378  
SRR17520069.791380  
SRR17520069.791382  
SRR17520069.791384  
SRR17520069.791386  
SRR17520069.791388  
SRR17520069.791390  
SRR17520069.791394  
SRR17520069.791396  
SRR17520069.791398  
SRR17520069.791400  
SRR17520069.791402  
SRR17520069.791404  
SRR17520069.791406

SRR17520069.791408  
SRR17520069.791410  
SRR17520069.791412  
SRR17520069.791414  
SRR17520069.791416  
SRR17520069.793883  
SRR17520069.793885  
SRR17520069.793887  
SRR17520069.793889  
SRR17520069.793891  
SRR17520069.793893  
SRR17520069.793895  
SRR17520069.793897  
SRR17520069.793899  
SRR17520069.798129  
SRR17520069.798131  
SRR17520069.805850  
SRR17520069.805852  
SRR17520069.805854  
SRR17520069.805856  
SRR17520069.805858  
SRR17520069.805860  
SRR17520069.805862  
SRR17520069.805864  
SRR17520069.805866  
SRR17520069.805868  
SRR17520069.805872  
SRR17520069.805876  
SRR17520069.805878  
SRR17520069.805880  
SRR17520069.805882  
SRR17520069.805884  
SRR17520069.805886  
SRR17520069.805888  
SRR17520069.805890  
SRR17520069.805892  
SRR17520069.805894  
SRR17520069.805896  
SRR17520069.805898  
SRR17520069.813863  
SRR17520069.813865  
SRR17520069.813867  
SRR17520069.813869  
SRR17520069.813871  
SRR17520069.813873  
SRR17520069.813875  
SRR17520069.813879

SRR17520069.813881  
SRR17520069.813883  
SRR17520069.813885  
SRR17520069.813887  
SRR17520069.816150  
SRR17520069.816152  
SRR17520069.816154  
SRR17520069.816156  
SRR17520069.816158  
SRR17520069.816160  
SRR17520069.816162  
SRR17520069.816164  
SRR17520069.816168  
SRR17520069.816170  
SRR17520069.816172  
SRR17520069.816178  
SRR17520069.818303  
SRR17520069.821112  
SRR17520069.821114  
SRR17520069.821116  
SRR17520069.821118  
SRR17520069.821120  
SRR17520069.821122  
SRR17520069.821124  
SRR17520069.821126  
SRR17520069.821128  
SRR17520069.821130  
SRR17520069.821132  
SRR17520069.821134  
SRR17520069.821136  
SRR17520069.821138  
SRR17520069.821140  
SRR17520069.826693  
SRR17520069.826695  
SRR17520069.826697  
SRR17520069.826699  
SRR17520069.826701  
SRR17520069.839507  
SRR17520069.839509  
SRR17520069.839511  
SRR17520069.839513  
SRR17520069.839515  
SRR17520069.839517  
SRR17520069.839519  
SRR17520069.847126  
SRR17520069.847130  
SRR17520069.847132

SRR17520069.847134  
SRR17520069.847136  
SRR17520069.847138  
SRR17520069.847140  
SRR17520069.847142  
SRR17520069.847144  
SRR17520069.847146  
SRR17520069.847148  
SRR17520069.847150  
SRR17520069.847152  
SRR17520069.847154  
SRR17520069.847156  
SRR17520069.847158  
SRR17520069.847160  
SRR17520069.847162  
SRR17520069.847164  
SRR17520069.847166  
SRR17520069.847168  
SRR17520069.847170  
SRR17520069.847172  
SRR17520069.847176  
SRR17520069.847178  
SRR17520069.847180  
SRR17520069.847182  
SRR17520069.847184  
SRR17520069.847186  
SRR17520069.847188  
SRR17520069.847190  
SRR17520069.849597  
SRR17520069.849599  
SRR17520069.849601  
SRR17520069.855369  
SRR17520069.855371  
SRR17520069.855373  
SRR17520069.855375  
SRR17520069.855377  
SRR17520069.855379  
SRR17520069.855381  
SRR17520069.855383  
SRR17520069.855385  
SRR17520069.855387  
SRR17520069.855389  
SRR17520069.855391  
SRR17520069.855393  
SRR17520069.855395  
SRR17520069.855397  
SRR17520069.855399

SRR17520069.855401  
SRR17520069.855403  
SRR17520069.855405  
SRR17520069.855407  
SRR17520069.855409  
SRR17520069.855411  
SRR17520069.855413  
SRR17520069.855415  
SRR17520069.855417  
SRR17520069.855419  
SRR17520069.855421  
SRR17520069.855423  
SRR17520069.855425  
SRR17520069.855427  
SRR17520069.855429  
SRR17520069.855431  
SRR17520069.855433  
SRR17520069.855435  
SRR17520069.855437  
SRR17520069.855439  
SRR17520069.855441  
SRR17520069.855443  
SRR17520069.863491  
SRR17520069.863493  
SRR17520069.863495  
SRR17520069.863497  
SRR17520069.863499  
SRR17520069.863501  
SRR17520069.863503  
SRR17520069.863505  
SRR17520069.863507  
SRR17520069.863509  
SRR17520069.863511  
SRR17520069.863513  
SRR17520069.863515  
SRR17520069.863517  
SRR17520069.863519  
SRR17520069.863521  
SRR17520069.863523  
SRR17520069.863525  
SRR17520069.865665  
SRR17520069.865667  
SRR17520069.865669  
SRR17520069.865671  
SRR17520069.865673  
SRR17520069.865675  
SRR17520069.865677

SRR17520069.865679  
SRR17520069.865681  
SRR17520069.865683  
SRR17520069.865685  
SRR17520069.865687  
SRR17520069.865689  
SRR17520069.865691  
SRR17520069.865693  
SRR17520069.865695  
SRR17520069.865697  
SRR17520069.865699  
SRR17520069.865703  
SRR17520069.865705  
SRR17520069.865707  
SRR17520069.865709  
SRR17520069.865711  
SRR17520069.865713  
SRR17520069.865715  
SRR17520069.865717  
SRR17520069.865719  
SRR17520069.865721  
SRR17520069.865723  
SRR17520069.865725  
SRR17520069.865727  
SRR17520069.865729  
SRR17520069.865731  
SRR17520069.865733  
SRR17520069.865735  
SRR17520069.865737  
SRR17520069.865739  
SRR17520069.865741  
SRR17520069.865743  
SRR17520069.865745  
SRR17520069.865747  
SRR17520069.865749  
SRR17520069.865751  
SRR17520069.865753  
SRR17520069.865755  
SRR17520069.865757  
SRR17520069.865759  
SRR17520069.865761  
SRR17520069.865763  
SRR17520069.865765  
SRR17520069.865767  
SRR17520069.865769  
SRR17520069.865771  
SRR17520069.865773

SRR17520069.865775  
SRR17520069.865777  
SRR17520069.865779  
SRR17520069.865781  
SRR17520069.865783  
SRR17520069.865785  
SRR17520069.865787  
SRR17520069.867375  
SRR17520069.867441  
SRR17520069.867443  
SRR17520069.867445  
SRR17520069.868444  
SRR17520069.868446  
SRR17520069.868448  
SRR17520069.868450  
SRR17520069.868452  
SRR17520069.868456  
SRR17520069.868712  
SRR17520069.868714  
SRR17520069.868716  
SRR17520069.868718  
SRR17520069.868722  
SRR17520069.868724  
SRR17520069.868726  
SRR17520069.868728  
SRR17520069.868730  
SRR17520069.868732  
SRR17520069.868734  
SRR17520069.868736  
SRR17520069.868738  
SRR17520069.868742  
SRR17520069.868744  
SRR17520069.868746  
SRR17520069.868748  
SRR17520069.871634  
SRR17520069.871636  
SRR17520069.871638  
SRR17520069.871640  
SRR17520069.871642  
SRR17520069.871644  
SRR17520069.871646  
SRR17520069.871648  
SRR17520069.871650  
SRR17520069.871652  
SRR17520069.871654  
SRR17520069.871656  
SRR17520069.873010

SRR17520069.873012  
SRR17520069.873014  
SRR17520069.873016  
SRR17520069.873018  
SRR17520069.873020  
SRR17520069.873022  
SRR17520069.873024  
SRR17520069.873712  
SRR17520069.873716  
SRR17520069.876985  
SRR17520069.876987  
SRR17520069.876989  
SRR17520069.876991  
SRR17520069.876993  
SRR17520069.876995  
SRR17520069.876997  
SRR17520069.876999  
SRR17520069.877001  
SRR17520069.877003  
SRR17520069.877005  
SRR17520069.877007  
SRR17520069.877009  
SRR17520069.877011  
SRR17520069.877013  
SRR17520069.877015  
SRR17520069.877017  
SRR17520069.877019  
SRR17520069.877021  
SRR17520069.877023  
SRR17520069.877025  
SRR17520069.877027  
SRR17520069.877029  
SRR17520069.877031  
SRR17520069.877033  
SRR17520069.877035  
SRR17520069.877037  
SRR17520069.877039  
SRR17520069.877041  
SRR17520069.877043  
SRR17520069.877045  
SRR17520069.877047  
SRR17520069.877049  
SRR17520069.877051  
SRR17520069.877053  
SRR17520069.877055  
SRR17520069.877057  
SRR17520069.877059



SRR17520069.877061  
SRR17520069.877450  
SRR17520069.877452  
SRR17520069.877454  
SRR17520069.877456  
SRR17520069.877458  
SRR17520069.877460  
SRR17520069.882280  
SRR17520069.882282  
SRR17520069.882284  
SRR17520069.882286  
SRR17520069.882288  
SRR17520069.882290  
SRR17520069.882292  
SRR17520069.882296  
SRR17520069.882298  
SRR17520069.882509  
SRR17520069.882511  
SRR17520069.882515  
SRR17520069.882517  
SRR17520069.882519  
SRR17520069.882523  
SRR17520069.882525  
SRR17520069.882529  
SRR17520069.882531  
SRR17520069.882533  
SRR17520069.882535  
SRR17520069.882537  
SRR17520069.882539  
SRR17520069.882541  
SRR17520069.882543  
SRR17520069.882545  
SRR17520069.882547  
SRR17520069.882549  
SRR17520069.882551  
SRR17520069.882553  
SRR17520069.882555  
SRR17520069.882557  
SRR17520069.882559  
SRR17520069.882561  
SRR17520069.882563  
SRR17520069.882565  
SRR17520069.882567  
SRR17520069.882569  
SRR17520069.882571  
SRR17520069.882573  
SRR17520069.882575

SRR17520069.882577  
SRR17520069.882579  
SRR17520069.882581  
SRR17520069.882583  
SRR17520069.882585  
SRR17520069.882587  
SRR17520069.882593  
SRR17520069.882595  
SRR17520069.882597  
SRR17520069.882599  
SRR17520069.882601  
SRR17520069.882603  
SRR17520069.882605  
SRR17520069.882609  
SRR17520069.882611  
SRR17520069.882613  
SRR17520069.883125  
SRR17520069.883127  
SRR17520069.883129  
SRR17520069.883131  
SRR17520069.885698  
SRR17520069.885700  
SRR17520069.885702  
SRR17520069.885704  
SRR17520069.885706  
SRR17520069.885708  
SRR17520069.885710  
SRR17520069.885712  
SRR17520069.885714  
SRR17520069.885718  
SRR17520069.885720  
SRR17520069.885722  
SRR17520069.885724  
SRR17520069.885823  
SRR17520069.885827  
SRR17520069.885831  
SRR17520069.885833  
SRR17520069.885837  
SRR17520069.885839  
SRR17520069.885841  
SRR17520069.885843  
SRR17520069.885845  
SRR17520069.885847  
SRR17520069.885853  
SRR17520069.885855  
SRR17520069.885857  
SRR17520069.885859

SRR17520069.885861  
SRR17520069.885863  
SRR17520069.885865  
SRR17520069.885867  
SRR17520069.885869  
SRR17520069.885873  
SRR17520069.885875  
SRR17520069.885877  
SRR17520069.885879  
SRR17520069.885881  
SRR17520069.885883  
SRR17520069.885885  
SRR17520069.885887  
SRR17520069.885889  
SRR17520069.885891  
SRR17520069.885893  
SRR17520069.887589  
SRR17520069.887591  
SRR17520069.887593  
SRR17520069.887595  
SRR17520069.887597  
SRR17520069.887599  
SRR17520069.887601  
SRR17520069.887603  
SRR17520069.887605  
SRR17520069.887607  
SRR17520069.887609  
SRR17520069.887611  
SRR17520069.887613  
SRR17520069.887615  
SRR17520069.887617  
SRR17520069.887619  
SRR17520069.887621  
SRR17520069.887623  
SRR17520069.887625  
SRR17520069.887627  
SRR17520069.887629  
SRR17520069.887631  
SRR17520069.887633  
SRR17520069.887635  
SRR17520069.888405  
SRR17520069.888407  
SRR17520069.888409  
SRR17520069.888411  
SRR17520069.888413  
SRR17520069.896945  
SRR17520069.896947

SRR17520069.896949  
SRR17520069.896951  
SRR17520069.896953  
SRR17520069.896955  
SRR17520069.896957  
SRR17520069.896959  
SRR17520069.896961  
SRR17520069.896963  
SRR17520069.896965  
SRR17520069.896967  
SRR17520069.896971  
SRR17520069.896998  
SRR17520069.897000  
SRR17520069.897002  
SRR17520069.909562  
SRR17520069.909564  
SRR17520069.909566  
SRR17520069.909568  
SRR17520069.909570  
SRR17520069.909572  
SRR17520069.909574  
SRR17520069.909576  
SRR17520069.909578  
SRR17520069.909580  
SRR17520069.909582  
SRR17520069.909584  
SRR17520069.909586  
SRR17520069.909588  
SRR17520069.909590  
SRR17520069.909592  
SRR17520069.911365  
SRR17520069.911369  
SRR17520069.912189  
SRR17520069.912191  
SRR17520069.912193  
SRR17520069.912195  
SRR17520069.912197  
SRR17520069.912199  
SRR17520069.912201  
SRR17520069.912203  
SRR17520069.913349  
SRR17520069.913353  
SRR17520069.913355  
SRR17520069.913357  
SRR17520069.929989  
SRR17520069.929991  
SRR17520069.929993

SRR17520069. 930350  
SRR17520069. 930352  
SRR17520069. 930354  
SRR17520069. 930356  
SRR17520069. 930358  
SRR17520069. 930360  
SRR17520069. 930362  
SRR17520069. 930364  
SRR17520069. 930366  
SRR17520069. 930368  
SRR17520069. 930370  
SRR17520069. 930372  
SRR17520069. 930374  
SRR17520069. 930376  
SRR17520069. 930378  
SRR17520069. 930380  
SRR17520069. 930382  
SRR17520069. 930384  
SRR17520069. 930386  
SRR17520069. 930388  
SRR17520069. 930390  
SRR17520069. 930392  
SRR17520069. 930394  
SRR17520069. 930396  
SRR17520069. 930398  
SRR17520069. 930400  
SRR17520069. 930402  
SRR17520069. 930404  
SRR17520069. 930406  
SRR17520069. 930408  
SRR17520069. 930410  
SRR17520069. 930412  
SRR17520069. 930414  
SRR17520069. 930416  
SRR17520069. 930418  
SRR17520069. 930420  
SRR17520069. 930422  
SRR17520069. 930424  
SRR17520069. 930426  
SRR17520069. 930428  
SRR17520069. 930430  
SRR17520069. 930432  
SRR17520069. 930434  
SRR17520069. 930436  
SRR17520069. 930438  
SRR17520069. 930440  
SRR17520069. 930442

SRR17520069. 930444  
SRR17520069. 930446  
SRR17520069. 930448  
SRR17520069. 930768  
SRR17520069. 930770  
SRR17520069. 930774  
SRR17520069. 930778  
SRR17520069. 930780  
SRR17520069. 930782  
SRR17520069. 930784  
SRR17520069. 930788  
SRR17520069. 930790  
SRR17520069. 930792  
SRR17520069. 930794  
SRR17520069. 930796  
SRR17520069. 931753  
SRR17520069. 931755  
SRR17520069. 931759  
SRR17520069. 931761  
SRR17520069. 931763  
SRR17520069. 931765  
SRR17520069. 931767  
SRR17520069. 931769  
SRR17520069. 931771  
SRR17520069. 931773  
SRR17520069. 931775  
SRR17520069. 931777  
SRR17520069. 931779  
SRR17520069. 931781  
SRR17520069. 931783  
SRR17520069. 931785  
SRR17520069. 931787  
SRR17520069. 931789  
SRR17520069. 931791  
SRR17520069. 931793  
SRR17520069. 931795  
SRR17520069. 931797  
SRR17520069. 931799  
SRR17520069. 937418  
SRR17520069. 937420  
SRR17520069. 937422  
SRR17520069. 937424  
SRR17520069. 937426  
SRR17520069. 937428  
SRR17520069. 937430  
SRR17520069. 937637  
SRR17520069. 937639

SRR17520069.937646  
SRR17520069.937648  
SRR17520069.937650  
SRR17520069.937652  
SRR17520069.937654  
SRR17520069.937656  
SRR17520069.937658  
SRR17520069.937660  
SRR17520069.937662  
SRR17520069.937664  
SRR17520069.937666  
SRR17520069.937668  
SRR17520069.937670  
SRR17520069.937672  
SRR17520069.948055  
SRR17520069.948057  
SRR17520069.948059  
SRR17520069.948061  
SRR17520069.948067  
SRR17520069.948069  
SRR17520069.948071  
SRR17520069.948073  
SRR17520069.948075  
SRR17520069.948077  
SRR17520069.948079  
SRR17520069.949887  
SRR17520069.949910  
SRR17520069.949913  
SRR17520069.949941  
SRR17520069.949949  
SRR17520069.951318  
SRR17520069.951320  
SRR17520069.951322  
SRR17520069.951324  
SRR17520069.957735  
SRR17520069.957737  
SRR17520069.957739  
SRR17520069.957743  
SRR17520069.957745  
SRR17520069.958195  
SRR17520069.958197  
SRR17520069.958199  
SRR17520069.958201  
SRR17520069.961035  
SRR17520069.961037  
SRR17520069.961039  
SRR17520069.961041

SRR17520069.961043  
SRR17520069.961045  
SRR17520069.961047  
SRR17520069.961049  
SRR17520069.961051  
SRR17520069.961053  
SRR17520069.961055  
SRR17520069.961057  
SRR17520069.961059  
SRR17520069.961061  
SRR17520069.961063  
SRR17520069.961065  
SRR17520069.961067  
SRR17520069.961069  
SRR17520069.961071  
SRR17520069.961073  
SRR17520069.961075  
SRR17520069.961077  
SRR17520069.961079  
SRR17520069.961081  
SRR17520069.961083  
SRR17520069.961087  
SRR17520069.961089  
SRR17520069.961091  
SRR17520069.961093  
SRR17520069.961095  
SRR17520069.961097  
SRR17520069.961099  
SRR17520069.961101  
SRR17520069.961103  
SRR17520069.961105  
SRR17520069.963856  
SRR17520069.963858  
SRR17520069.963860  
SRR17520069.963862  
SRR17520069.963864  
SRR17520069.963868  
SRR17520069.963870  
SRR17520069.963872  
SRR17520069.963874  
SRR17520069.963876  
SRR17520069.963878  
SRR17520069.963880  
SRR17520069.963882  
SRR17520069.963884  
SRR17520069.963886  
SRR17520069.963888



SRR17520069.963890  
SRR17520069.963892  
SRR17520069.963894  
SRR17520069.963896  
SRR17520069.963898  
SRR17520069.963900  
SRR17520069.963902  
SRR17520069.963904  
SRR17520069.963906  
SRR17520069.963908  
SRR17520069.963910  
SRR17520069.963912  
SRR17520069.963914  
SRR17520069.963916  
SRR17520069.963918  
SRR17520069.963920  
SRR17520069.963922  
SRR17520069.963924  
SRR17520069.963926  
SRR17520069.963928  
SRR17520069.963930  
SRR17520069.963932  
SRR17520069.963934  
SRR17520069.963936  
SRR17520069.963938  
SRR17520069.963940  
SRR17520069.963942  
SRR17520069.963944  
SRR17520069.963946  
SRR17520069.963948  
SRR17520069.964021  
SRR17520069.964023  
SRR17520069.965212  
SRR17520069.965214  
SRR17520069.965216  
SRR17520069.965218  
SRR17520069.965220  
SRR17520069.965222  
SRR17520069.965224  
SRR17520069.965226  
SRR17520069.971868  
SRR17520069.971870  
SRR17520069.971872  
SRR17520069.971874  
SRR17520069.971876  
SRR17520069.971878  
SRR17520069.971880

SRR17520069.971882  
SRR17520069.971884  
SRR17520069.971888  
SRR17520069.978162  
SRR17520069.981100  
SRR17520069.981102  
SRR17520069.981104  
SRR17520069.981106  
SRR17520069.981108  
SRR17520069.981110  
SRR17520069.981114  
SRR17520069.981116  
SRR17520069.981118  
SRR17520069.981120  
SRR17520069.981122  
SRR17520069.988106  
SRR17520069.988108  
SRR17520069.988110  
SRR17520069.988112  
SRR17520069.988114  
SRR17520069.988116  
SRR17520069.988118  
SRR17520069.988120  
SRR17520069.988126  
SRR17520069.988128  
SRR17520069.988130  
SRR17520069.998916  
SRR17520069.998918  
SRR17520069.998920  
SRR17520069.998922  
SRR17520069.998924  
SRR17520069.998926  
SRR17520069.998928  
SRR17520069.998930  
SRR17520069.998932  
SRR17520069.998934  
SRR17520069.998936  
SRR17520069.998938  
SRR17520069.998940  
SRR17520069.998942  
SRR17520069.998944  
SRR17520069.1000219  
SRR17520069.1000221  
SRR17520069.1000223  
SRR17520069.1000227  
SRR17520069.1000229  
SRR17520069.1000231

SRR17520069.1000233  
SRR17520069.1000235  
SRR17520069.1000239  
SRR17520069.1000241  
SRR17520069.1000243  
SRR17520069.1000245  
SRR17520069.1000247  
SRR17520069.1000249  
SRR17520069.1000251  
SRR17520069.1000253  
SRR17520069.1000255  
SRR17520069.1000257  
SRR17520069.1000259  
SRR17520069.1000261  
SRR17520069.1000263  
SRR17520069.1001883  
SRR17520069.1001891  
SRR17520069.1004748  
SRR17520069.1004750  
SRR17520069.1004752  
SRR17520069.1004754  
SRR17520069.1004756  
SRR17520069.1004758  
SRR17520069.1017669  
SRR17520069.1022722  
SRR17520069.1022724  
SRR17520069.1022726  
SRR17520069.1022728  
SRR17520069.1022730  
SRR17520069.1022732  
SRR17520069.1022734  
SRR17520069.1022736  
SRR17520069.1022738  
SRR17520069.1022740  
SRR17520069.1022742  
SRR17520069.1022744  
SRR17520069.1022746  
SRR17520069.1022748  
SRR17520069.1022750  
SRR17520069.1022752  
SRR17520069.1022754  
SRR17520069.1022756  
SRR17520069.1022758  
SRR17520069.1022760  
SRR17520069.1022762  
SRR17520069.1022764  
SRR17520069.1022766

SRR17520069.1022768  
SRR17520069.1022770  
SRR17520069.1022772  
SRR17520069.1022774  
SRR17520069.1022776  
SRR17520069.1022778  
SRR17520069.1022782  
SRR17520069.1022784  
SRR17520069.1022788  
SRR17520069.1022790  
SRR17520069.1022792  
SRR17520069.1032915  
SRR17520069.1032917  
SRR17520069.1032919  
SRR17520069.1032921  
SRR17520069.1032923  
SRR17520069.1032925  
SRR17520069.1032929  
SRR17520069.1032931  
SRR17520069.1032933  
SRR17520069.1032935  
SRR17520069.1032937  
SRR17520069.1032939  
SRR17520069.1032943  
SRR17520069.1032945  
SRR17520069.1032947  
SRR17520069.1033158  
SRR17520069.1038513  
SRR17520069.1038515  
SRR17520069.1038517  
SRR17520069.1038519  
SRR17520069.1038521  
SRR17520069.1038523  
SRR17520069.1038525  
SRR17520069.1039083  
SRR17520069.1039085  
SRR17520069.1039087  
SRR17520069.1039089  
SRR17520069.1039091  
SRR17520069.1039093  
SRR17520069.1039095  
SRR17520069.1039097  
SRR17520069.1039099  
SRR17520069.1039101  
SRR17520069.1039103  
SRR17520069.1039105  
SRR17520069.1039107

SRR17520069. 1039109  
SRR17520069. 1039111  
SRR17520069. 1039113  
SRR17520069. 1039117  
SRR17520069. 1039119  
SRR17520069. 1039121  
SRR17520069. 1039123  
SRR17520069. 1039125  
SRR17520069. 1039127  
SRR17520069. 1039129  
SRR17520069. 1039131  
SRR17520069. 1039133  
SRR17520069. 1039139  
SRR17520069. 1039141  
SRR17520069. 1039143  
SRR17520069. 1039147  
SRR17520069. 1039149  
SRR17520069. 1039151  
SRR17520069. 1039155  
SRR17520069. 1039165  
SRR17520069. 1039171  
SRR17520069. 1039173  
SRR17520069. 1039175  
SRR17520069. 1039177  
SRR17520069. 1039179  
SRR17520069. 1039181  
SRR17520069. 1039183  
SRR17520069. 1039185  
SRR17520069. 1039187  
SRR17520069. 1039189  
SRR17520069. 1039191  
SRR17520069. 1039193  
SRR17520069. 1039195  
SRR17520069. 1039197  
SRR17520069. 1039199  
SRR17520069. 1039201  
SRR17520069. 1039203  
SRR17520069. 1039205  
SRR17520069. 1040321  
SRR17520069. 1040323  
SRR17520069. 1040325  
SRR17520069. 1040327  
SRR17520069. 1040331  
SRR17520069. 1043002  
SRR17520069. 1043004  
SRR17520069. 1043006  
SRR17520069. 1043008

SRR17520069.1043010  
SRR17520069.1043012  
SRR17520069.1043014  
SRR17520069.1043016  
SRR17520069.1043018  
SRR17520069.1043020  
SRR17520069.1043022  
SRR17520069.1043024  
SRR17520069.1043026  
SRR17520069.1043028  
SRR17520069.1043030  
SRR17520069.1043032  
SRR17520069.1043034  
SRR17520069.1043036  
SRR17520069.1043040  
SRR17520069.1043042  
SRR17520069.1043044  
SRR17520069.1043046  
SRR17520069.1043048  
SRR17520069.1043050  
SRR17520069.1043052  
SRR17520069.1043054  
SRR17520069.1043056  
SRR17520069.1043058  
SRR17520069.1043062  
SRR17520069.1043064  
SRR17520069.1043066  
SRR17520069.1043070  
SRR17520069.1043072  
SRR17520069.1043074  
SRR17520069.1043078  
SRR17520069.1043080  
SRR17520069.1043082  
SRR17520069.1043084  
SRR17520069.1043086  
SRR17520069.1043088  
SRR17520069.1043090  
SRR17520069.1043092  
SRR17520069.1043094  
SRR17520069.1043096  
SRR17520069.1043098  
SRR17520069.1043100  
SRR17520069.1043102  
SRR17520069.1043104  
SRR17520069.1043106  
SRR17520069.1043108  
SRR17520069.1043110

SRR17520069.1043112  
SRR17520069.1043114  
SRR17520069.1043118  
SRR17520069.1044896  
SRR17520069.1044898  
SRR17520069.1044900  
SRR17520069.1044902  
SRR17520069.1044904  
SRR17520069.1044906  
SRR17520069.1044908  
SRR17520069.1044910  
SRR17520069.1044912  
SRR17520069.1044914  
SRR17520069.1044916  
SRR17520069.1044918  
SRR17520069.1044920  
SRR17520069.1044922  
SRR17520069.1044924  
SRR17520069.1044926  
SRR17520069.1044928  
SRR17520069.1051458  
SRR17520069.1051460  
SRR17520069.1051462  
SRR17520069.1056848  
SRR17520069.1065394  
SRR17520069.1065396  
SRR17520069.1065398  
SRR17520069.1065400  
SRR17520069.1065402  
SRR17520069.1065404  
SRR17520069.1065406  
SRR17520069.1065410  
SRR17520069.1065414  
SRR17520069.1065416  
SRR17520069.1065418  
SRR17520069.1065420  
SRR17520069.1069271  
SRR17520069.1071921  
SRR17520069.1071925  
SRR17520069.1071927  
SRR17520069.1071929  
SRR17520069.1071931  
SRR17520069.1071933  
SRR17520069.1071935  
SRR17520069.1071937  
SRR17520069.1071939  
SRR17520069.1071941

SRR17520069. 1071949  
SRR17520069. 1071951  
SRR17520069. 1071953  
SRR17520069. 1071955  
SRR17520069. 1071957  
SRR17520069. 1071959  
SRR17520069. 1071961  
SRR17520069. 1071963  
SRR17520069. 1071965  
SRR17520069. 1071967  
SRR17520069. 1071969  
SRR17520069. 1071971  
SRR17520069. 1071973  
SRR17520069. 1071977  
SRR17520069. 1071979  
SRR17520069. 1078080  
SRR17520069. 1078082  
SRR17520069. 1078084  
SRR17520069. 1078086  
SRR17520069. 1078088  
SRR17520069. 1078092  
SRR17520069. 1078094  
SRR17520069. 1078096  
SRR17520069. 1078098  
SRR17520069. 1078100  
SRR17520069. 1078102  
SRR17520069. 1078104  
SRR17520069. 1078106  
SRR17520069. 1078108  
SRR17520069. 1078110  
SRR17520069. 1078114  
SRR17520069. 1078116  
SRR17520069. 1078118  
SRR17520069. 1078120  
SRR17520069. 1078122  
SRR17520069. 1078124  
SRR17520069. 1078128  
SRR17520069. 1078132  
SRR17520069. 1078134  
SRR17520069. 1078136  
SRR17520069. 1081002  
SRR17520069. 1081004  
SRR17520069. 1081006  
SRR17520069. 1081008  
SRR17520069. 1081010  
SRR17520069. 1081012  
SRR17520069. 1081014



SRR17520069.1081016  
SRR17520069.1081018  
SRR17520069.1081020  
SRR17520069.1081022  
SRR17520069.1081024  
SRR17520069.1090519  
SRR17520069.1093379  
SRR17520069.1093381  
SRR17520069.1093383  
SRR17520069.1093385  
SRR17520069.1093387  
SRR17520069.1093389  
SRR17520069.1093391  
SRR17520069.1093393  
SRR17520069.1093395  
SRR17520069.1093397  
SRR17520069.1093399  
SRR17520069.1093401  
SRR17520069.1093403  
SRR17520069.1093405  
SRR17520069.1093407  
SRR17520069.1100178  
SRR17520069.1104028  
SRR17520069.1104030  
SRR17520069.1104032  
SRR17520069.1104034  
SRR17520069.1104036  
SRR17520069.1104038  
SRR17520069.1104040  
SRR17520069.1104042  
SRR17520069.1104044  
SRR17520069.1104046  
SRR17520069.1104048  
SRR17520069.1104050  
SRR17520069.1104052  
SRR17520069.1104054  
SRR17520069.1104056  
SRR17520069.1104058  
SRR17520069.1104060  
SRR17520069.1104062  
SRR17520069.1104064  
SRR17520069.1104066  
SRR17520069.1104068  
SRR17520069.1104070  
SRR17520069.1104072  
SRR17520069.1104074  
SRR17520069.1104620

SRR17520069.1104622  
SRR17520069.1104624  
SRR17520069.1104626  
SRR17520069.1104628  
SRR17520069.1104630  
SRR17520069.1105631  
SRR17520069.1105633  
SRR17520069.1105635  
SRR17520069.1105637  
SRR17520069.1109450  
SRR17520069.1109454  
SRR17520069.1109456  
SRR17520069.1109458  
SRR17520069.1110976  
SRR17520069.1110982  
SRR17520069.1110984  
SRR17520069.1110986  
SRR17520069.1110988  
SRR17520069.1110990  
SRR17520069.1110992  
SRR17520069.1110994  
SRR17520069.1110996  
SRR17520069.1110998  
SRR17520069.1111000  
SRR17520069.1111002  
SRR17520069.1111004  
SRR17520069.1111006  
SRR17520069.1111008  
SRR17520069.1111010  
SRR17520069.1111012  
SRR17520069.1111014  
SRR17520069.1111016  
SRR17520069.1111018  
SRR17520069.1111020  
SRR17520069.1111022  
SRR17520069.1111024  
SRR17520069.1111026  
SRR17520069.1111028  
SRR17520069.1111030  
SRR17520069.1111032  
SRR17520069.1111034  
SRR17520069.1111036  
SRR17520069.1111038  
SRR17520069.1111040  
SRR17520069.1111044  
SRR17520069.1112024  
SRR17520069.1112028

SRR17520069.1112030  
SRR17520069.1112032  
SRR17520069.1112038  
SRR17520069.1112040  
SRR17520069.1112044  
SRR17520069.1112046  
SRR17520069.1112048  
SRR17520069.1115602  
SRR17520069.1115604  
SRR17520069.1115606  
SRR17520069.1115608  
SRR17520069.1115610  
SRR17520069.1115612  
SRR17520069.1115614  
SRR17520069.1115961  
SRR17520069.1115963  
SRR17520069.1115965  
SRR17520069.1115967  
SRR17520069.1115969  
SRR17520069.1115971  
SRR17520069.1115973  
SRR17520069.1116149  
SRR17520069.1116151  
SRR17520069.1116153  
SRR17520069.1116155  
SRR17520069.1116157  
SRR17520069.1116159  
SRR17520069.1116161  
SRR17520069.1116163  
SRR17520069.1116165  
SRR17520069.1116167  
SRR17520069.1116169  
SRR17520069.1116171  
SRR17520069.1116173  
SRR17520069.1116175  
SRR17520069.1116177  
SRR17520069.1116179  
SRR17520069.1116181  
SRR17520069.1116183  
SRR17520069.1116185  
SRR17520069.1116187  
SRR17520069.1116189  
SRR17520069.1116191  
SRR17520069.1116193  
SRR17520069.1116197  
SRR17520069.1116199  
SRR17520069.1116201

SRR17520069.1116203  
SRR17520069.1116205  
SRR17520069.1116207  
SRR17520069.1116209  
SRR17520069.1116211  
SRR17520069.1116213  
SRR17520069.1116215  
SRR17520069.1116217  
SRR17520069.1116219  
SRR17520069.1116221  
SRR17520069.1116223  
SRR17520069.1116225  
SRR17520069.1116227  
SRR17520069.1121237  
SRR17520069.1121239  
SRR17520069.1121241  
SRR17520069.1121243  
SRR17520069.1121245  
SRR17520069.1121247  
SRR17520069.1121384  
SRR17520069.1124709  
SRR17520069.1124714  
SRR17520069.1125341  
SRR17520069.1128342  
SRR17520069.1128344  
SRR17520069.1128346  
SRR17520069.1128348  
SRR17520069.1128350  
SRR17520069.1128352  
SRR17520069.1128354  
SRR17520069.1128356  
SRR17520069.1128358  
SRR17520069.1136716  
SRR17520069.1136718  
SRR17520069.1136720  
SRR17520069.1136722  
SRR17520069.1136724  
SRR17520069.1136726  
SRR17520069.1136728  
SRR17520069.1136730  
SRR17520069.1136732  
SRR17520069.1136734  
SRR17520069.1136736  
SRR17520069.1136738  
SRR17520069.1136740  
SRR17520069.1136742  
SRR17520069.1136744

SRR17520069. 1136746  
SRR17520069. 1136748  
SRR17520069. 1136750  
SRR17520069. 1136752  
SRR17520069. 1136754  
SRR17520069. 1136756  
SRR17520069. 1136758  
SRR17520069. 1136760  
SRR17520069. 1136762  
SRR17520069. 1141609  
SRR17520069. 1141611  
SRR17520069. 1141613  
SRR17520069. 1141615  
SRR17520069. 1141617  
SRR17520069. 1141619  
SRR17520069. 1141621  
SRR17520069. 1141623  
SRR17520069. 1141625  
SRR17520069. 1141627  
SRR17520069. 1141629  
SRR17520069. 1141631  
SRR17520069. 1141633  
SRR17520069. 1141635  
SRR17520069. 1141639  
SRR17520069. 1141641  
SRR17520069. 1141643  
SRR17520069. 1141645  
SRR17520069. 1141647  
SRR17520069. 1141649  
SRR17520069. 1141651  
SRR17520069. 1141653  
SRR17520069. 1141655  
SRR17520069. 1141657  
SRR17520069. 1141659  
SRR17520069. 1141661  
SRR17520069. 1141663  
SRR17520069. 1141665  
SRR17520069. 1141667  
SRR17520069. 1141669  
SRR17520069. 1141671  
SRR17520069. 1141673  
SRR17520069. 1141675  
SRR17520069. 1141677  
SRR17520069. 1141679  
SRR17520069. 1141681  
SRR17520069. 1141683  
SRR17520069. 1141685

SRR17520069.1141687  
SRR17520069.1141689  
SRR17520069.1141691  
SRR17520069.1141693  
SRR17520069.1141695  
SRR17520069.1141697  
SRR17520069.1141699  
SRR17520069.1141701  
SRR17520069.1141703  
SRR17520069.1141705  
SRR17520069.1149342  
SRR17520069.1149344  
SRR17520069.1149346  
SRR17520069.1154408  
SRR17520069.1154410  
SRR17520069.1154412  
SRR17520069.1154416  
SRR17520069.1154418  
SRR17520069.1155979  
SRR17520069.1155981  
SRR17520069.1155983  
SRR17520069.1155985  
SRR17520069.1155987  
SRR17520069.1155989  
SRR17520069.1155991  
SRR17520069.1155993  
SRR17520069.1155995  
SRR17520069.1155997  
SRR17520069.1155999  
SRR17520069.1156001  
SRR17520069.1156003  
SRR17520069.1156005  
SRR17520069.1156007  
SRR17520069.1156009  
SRR17520069.1156011  
SRR17520069.1156013  
SRR17520069.1156017  
SRR17520069.1156019  
SRR17520069.1170094  
SRR17520069.1170096  
SRR17520069.1170098  
SRR17520069.1173491  
SRR17520069.1173493  
SRR17520069.1173495  
SRR17520069.1173497  
SRR17520069.1173499  
SRR17520069.1173501

SRR17520069.1173503  
SRR17520069.1173505  
SRR17520069.1173507  
SRR17520069.1173509  
SRR17520069.1173511  
SRR17520069.1173513  
SRR17520069.1173515  
SRR17520069.1173517  
SRR17520069.1173519  
SRR17520069.1173521  
SRR17520069.1173523  
SRR17520069.1173525  
SRR17520069.1173527  
SRR17520069.1173529  
SRR17520069.1173531  
SRR17520069.1173533  
SRR17520069.1173535  
SRR17520069.1173537  
SRR17520069.1173539  
SRR17520069.1173541  
SRR17520069.1173543  
SRR17520069.1178131  
SRR17520069.1182973  
SRR17520069.1182975  
SRR17520069.1182977  
SRR17520069.1182979  
SRR17520069.1182981  
SRR17520069.1182983  
SRR17520069.1182985  
SRR17520069.1182987  
SRR17520069.1182989  
SRR17520069.1182991  
SRR17520069.1182993  
SRR17520069.1182995  
SRR17520069.1182997  
SRR17520069.1182999  
SRR17520069.1183001  
SRR17520069.1183003  
SRR17520069.1183005  
SRR17520069.1183007  
SRR17520069.1183009  
SRR17520069.1183011  
SRR17520069.1183013  
SRR17520069.1183015  
SRR17520069.1183017  
SRR17520069.1183019  
SRR17520069.1183021

SRR17520069.1183023  
SRR17520069.1183025  
SRR17520069.1183027  
SRR17520069.1183029  
SRR17520069.1183031  
SRR17520069.1183033  
SRR17520069.1183035  
SRR17520069.1183037  
SRR17520069.1183039  
SRR17520069.1183041  
SRR17520069.1183043  
SRR17520069.1183045  
SRR17520069.1183047  
SRR17520069.1183049  
SRR17520069.1183051  
SRR17520069.1183053  
SRR17520069.1183055  
SRR17520069.1183057  
SRR17520069.1183059  
SRR17520069.1183061  
SRR17520069.1183063  
SRR17520069.1183065  
SRR17520069.1183067  
SRR17520069.1183069  
SRR17520069.1183071  
SRR17520069.1183073  
SRR17520069.1183075  
SRR17520069.1183077  
SRR17520069.1183079  
SRR17520069.1183081  
SRR17520069.1183083  
SRR17520069.1183085  
SRR17520069.1185828  
SRR17520069.1185830  
SRR17520069.1185832  
SRR17520069.1185834  
SRR17520069.1185836  
SRR17520069.1185838  
SRR17520069.1185840  
SRR17520069.1185842  
SRR17520069.1187421  
SRR17520069.1187423  
SRR17520069.1187425  
SRR17520069.1187427  
SRR17520069.1187429  
SRR17520069.1187431  
SRR17520069.1187433



SRR17520069. 1187437  
SRR17520069. 1187439  
SRR17520069. 1187441  
SRR17520069. 1187443  
SRR17520069. 1187445  
SRR17520069. 1187447  
SRR17520069. 1187449  
SRR17520069. 1187451  
SRR17520069. 1187453  
SRR17520069. 1187455  
SRR17520069. 1187457  
SRR17520069. 1187459  
SRR17520069. 1187461  
SRR17520069. 1187463  
SRR17520069. 1187465  
SRR17520069. 1187467  
SRR17520069. 1187471  
SRR17520069. 1187473  
SRR17520069. 1187475  
SRR17520069. 1187477  
SRR17520069. 1187479  
SRR17520069. 1187481  
SRR17520069. 1187483  
SRR17520069. 1187485  
SRR17520069. 1187487  
SRR17520069. 1187489  
SRR17520069. 1187491  
SRR17520069. 1187493  
SRR17520069. 1188074  
SRR17520069. 1188631  
SRR17520069. 1188633  
SRR17520069. 1188635  
SRR17520069. 1188637  
SRR17520069. 1188639  
SRR17520069. 1188641  
SRR17520069. 1188643  
SRR17520069. 1201709  
SRR17520069. 1202093  
SRR17520069. 1205151  
SRR17520069. 1205153  
SRR17520069. 1205155  
SRR17520069. 1205157  
SRR17520069. 1205159  
SRR17520069. 1205161  
SRR17520069. 1205163  
SRR17520069. 1205165  
SRR17520069. 1205167

SRR17520069.1205169  
SRR17520069.1205171  
SRR17520069.1205173  
SRR17520069.1205175  
SRR17520069.1205177  
SRR17520069.1205179  
SRR17520069.1205181  
SRR17520069.1205183  
SRR17520069.1205185  
SRR17520069.1205187  
SRR17520069.1208149  
SRR17520069.1208151  
SRR17520069.1208153  
SRR17520069.1208155  
SRR17520069.1208157  
SRR17520069.1209634  
SRR17520069.1209638  
SRR17520069.1209640  
SRR17520069.1209642  
SRR17520069.1209644  
SRR17520069.1214756  
SRR17520069.1214760  
SRR17520069.1214762  
SRR17520069.1214764  
SRR17520069.1214766  
SRR17520069.1214768  
SRR17520069.1214770  
SRR17520069.1216339  
SRR17520069.1216341  
SRR17520069.1216343  
SRR17520069.1217346  
SRR17520069.1217348  
SRR17520069.1225958  
SRR17520069.1225960  
SRR17520069.1225962  
SRR17520069.1225964  
SRR17520069.1225966  
SRR17520069.1225968  
SRR17520069.1225970  
SRR17520069.1225972  
SRR17520069.1225974  
SRR17520069.1225976  
SRR17520069.1225978  
SRR17520069.1225980  
SRR17520069.1225982  
SRR17520069.1225984  
SRR17520069.1228929

SRR17520069.1228931  
SRR17520069.1228933  
SRR17520069.1228935  
SRR17520069.1228937  
SRR17520069.1228939  
SRR17520069.1228941  
SRR17520069.1228943  
SRR17520069.1228945  
SRR17520069.1228947  
SRR17520069.1228949  
SRR17520069.1228951  
SRR17520069.1228953  
SRR17520069.1228957  
SRR17520069.1228959  
SRR17520069.1228961  
SRR17520069.1228963  
SRR17520069.1228965  
SRR17520069.1228967  
SRR17520069.1228969  
SRR17520069.1235382  
SRR17520069.1235384  
SRR17520069.1235386  
SRR17520069.1235388  
SRR17520069.1235390  
SRR17520069.1235392  
SRR17520069.1235394  
SRR17520069.1237662  
SRR17520069.1237664  
SRR17520069.1237666  
SRR17520069.1237668  
SRR17520069.1237670  
SRR17520069.1237672  
SRR17520069.1237674  
SRR17520069.1237676  
SRR17520069.1237678  
SRR17520069.1238649  
SRR17520069.1238651  
SRR17520069.1238653  
SRR17520069.1238655  
SRR17520069.1238657  
SRR17520069.1238659  
SRR17520069.1238661  
SRR17520069.1243686  
SRR17520069.1243688  
SRR17520069.1243690  
SRR17520069.1243692  
SRR17520069.1243694

SRR17520069. 1243696  
SRR17520069. 1243698  
SRR17520069. 1243700  
SRR17520069. 1243702  
SRR17520069. 1243704  
SRR17520069. 1243706  
SRR17520069. 1243709  
SRR17520069. 1243711  
SRR17520069. 1243713  
SRR17520069. 1243715  
SRR17520069. 1243717  
SRR17520069. 1243719  
SRR17520069. 1243721  
SRR17520069. 1243723  
SRR17520069. 1243725  
SRR17520069. 1243727  
SRR17520069. 1243729  
SRR17520069. 1249508  
SRR17520069. 1249512  
SRR17520069. 1249516  
SRR17520069. 1249518  
SRR17520069. 1249520  
SRR17520069. 1249522  
SRR17520069. 1249524  
SRR17520069. 1249526  
SRR17520069. 1249530  
SRR17520069. 1249532  
SRR17520069. 1249534  
SRR17520069. 1249536  
SRR17520069. 1249538  
SRR17520069. 1249540  
SRR17520069. 1249544  
SRR17520069. 1249546  
SRR17520069. 1249550  
SRR17520069. 1249552  
SRR17520069. 1249556  
SRR17520069. 1249558  
SRR17520069. 1249560  
SRR17520069. 1249568  
SRR17520069. 1249572  
SRR17520069. 1249576  
SRR17520069. 1249578  
SRR17520069. 1249580  
SRR17520069. 1249582  
SRR17520069. 1249586  
SRR17520069. 1249588  
SRR17520069. 1249590

SRR17520069. 1249594  
SRR17520069. 1249598  
SRR17520069. 1249600  
SRR17520069. 1256932  
SRR17520069. 1256938  
SRR17520069. 1256962  
SRR17520069. 1257631  
SRR17520069. 1257633  
SRR17520069. 1258183  
SRR17520069. 1258185  
SRR17520069. 1258187  
SRR17520069. 1258189  
SRR17520069. 1258191  
SRR17520069. 1258193  
SRR17520069. 1258195  
SRR17520069. 1258755  
SRR17520069. 1258757  
SRR17520069. 1258759  
SRR17520069. 1258761  
SRR17520069. 1258763  
SRR17520069. 1258765  
SRR17520069. 1258767  
SRR17520069. 1258769  
SRR17520069. 1258771  
SRR17520069. 1258773  
SRR17520069. 1258775  
SRR17520069. 1258777  
SRR17520069. 1258779  
SRR17520069. 1258781  
SRR17520069. 1258783  
SRR17520069. 1258785  
SRR17520069. 1258787  
SRR17520069. 1264773  
SRR17520069. 1267958  
SRR17520069. 1267960  
SRR17520069. 1267962  
SRR17520069. 1267964  
SRR17520069. 1267966  
SRR17520069. 1267970  
SRR17520069. 1267972  
SRR17520069. 1278768  
SRR17520069. 1278770  
SRR17520069. 1278772  
SRR17520069. 1278774  
SRR17520069. 1278776  
SRR17520069. 1278778  
SRR17520069. 1278780

SRR17520069. 1278782  
SRR17520069. 1278784  
SRR17520069. 1278786  
SRR17520069. 1278788  
SRR17520069. 1278790  
SRR17520069. 1278792  
SRR17520069. 1278794  
SRR17520069. 1278796  
SRR17520069. 1278798  
SRR17520069. 1278800  
SRR17520069. 1278802  
SRR17520069. 1278804  
SRR17520069. 1278806  
SRR17520069. 1278808  
SRR17520069. 1278810  
SRR17520069. 1278814  
SRR17520069. 1278816  
SRR17520069. 1278818  
SRR17520069. 1278820  
SRR17520069. 1278822  
SRR17520069. 1278824  
SRR17520069. 1278826  
SRR17520069. 1278828  
SRR17520069. 1278830  
SRR17520069. 1278832  
SRR17520069. 1278834  
SRR17520069. 1278836  
SRR17520069. 1278838  
SRR17520069. 1278840  
SRR17520069. 1278842  
SRR17520069. 1278846  
SRR17520069. 1278848  
SRR17520069. 1278850  
SRR17520069. 1278852  
SRR17520069. 1278854  
SRR17520069. 1278856  
SRR17520069. 1278858  
SRR17520069. 1278860  
SRR17520069. 1278862  
SRR17520069. 1278864  
SRR17520069. 1278866  
SRR17520069. 1278868  
SRR17520069. 1278870  
SRR17520069. 1278872  
SRR17520069. 1278874  
SRR17520069. 1278876  
SRR17520069. 1278878

SRR17520069. 1278880  
SRR17520069. 1278882  
SRR17520069. 1278884  
SRR17520069. 1278886  
SRR17520069. 1278888  
SRR17520069. 1278890  
SRR17520069. 1278903  
SRR17520069. 1278905  
SRR17520069. 1278907  
SRR17520069. 1278917  
SRR17520069. 1278927  
SRR17520069. 1278931  
SRR17520069. 1278939  
SRR17520069. 1282102  
SRR17520069. 1282104  
SRR17520069. 1288018  
SRR17520069. 1288020  
SRR17520069. 1288022  
SRR17520069. 1288024  
SRR17520069. 1288026  
SRR17520069. 1288028  
SRR17520069. 1288030  
SRR17520069. 1288032  
SRR17520069. 1288034  
SRR17520069. 1288036  
SRR17520069. 1288038  
SRR17520069. 1288040  
SRR17520069. 1288042  
SRR17520069. 1288044  
SRR17520069. 1288046  
SRR17520069. 1288048  
SRR17520069. 1288050  
SRR17520069. 1288052  
SRR17520069. 1288054  
SRR17520069. 1288056  
SRR17520069. 1288058  
SRR17520069. 1288062  
SRR17520069. 1288064  
SRR17520069. 1288066  
SRR17520069. 1288068  
SRR17520069. 1288070  
SRR17520069. 1288072  
SRR17520069. 1288074  
SRR17520069. 1288076  
SRR17520069. 1288078  
SRR17520069. 1288082  
SRR17520069. 1288084

SRR17520069.1288086  
SRR17520069.1288088  
SRR17520069.1288090  
SRR17520069.1288092  
SRR17520069.1288096  
SRR17520069.1288098  
SRR17520069.1288100  
SRR17520069.1288102  
SRR17520069.1288104  
SRR17520069.1291972  
SRR17520069.1291974  
SRR17520069.1291976  
SRR17520069.1291978  
SRR17520069.1291980  
SRR17520069.1291982  
SRR17520069.1291984  
SRR17520069.1291986  
SRR17520069.1291988  
SRR17520069.1291990  
SRR17520069.1291992  
SRR17520069.1291994  
SRR17520069.1291996  
SRR17520069.1291998  
SRR17520069.1292000  
SRR17520069.1292002  
SRR17520069.1292004  
SRR17520069.1292006  
SRR17520069.1292008  
SRR17520069.1292010  
SRR17520069.1292012  
SRR17520069.1292014  
SRR17520069.1292016  
SRR17520069.1292018  
SRR17520069.1292020  
SRR17520069.1292022  
SRR17520069.1292024  
SRR17520069.1292026  
SRR17520069.1292028  
SRR17520069.1292030  
SRR17520069.1292032  
SRR17520069.1292034  
SRR17520069.1292036  
SRR17520069.1292038  
SRR17520069.1292040  
SRR17520069.1292042  
SRR17520069.1292044  
SRR17520069.1292872



SRR17520069. 1292874  
SRR17520069. 1292878  
SRR17520069. 1292880  
SRR17520069. 1292882  
SRR17520069. 1292884  
SRR17520069. 1292886  
SRR17520069. 1292890  
SRR17520069. 1292892  
SRR17520069. 1292894  
SRR17520069. 1293830  
SRR17520069. 1293832  
SRR17520069. 1293834  
SRR17520069. 1294886  
SRR17520069. 1295399  
SRR17520069. 1295401  
SRR17520069. 1295403  
SRR17520069. 1295407  
SRR17520069. 1295409  
SRR17520069. 1295411  
SRR17520069. 1295413  
SRR17520069. 1296435  
SRR17520069. 1296437  
SRR17520069. 1296439  
SRR17520069. 1296441  
SRR17520069. 1296443  
SRR17520069. 1296445  
SRR17520069. 1296447  
SRR17520069. 1296449  
SRR17520069. 1296451  
SRR17520069. 1298480  
SRR17520069. 1298482  
SRR17520069. 1298484  
SRR17520069. 1298486  
SRR17520069. 1298488  
SRR17520069. 1299051  
SRR17520069. 1299053  
SRR17520069. 1299055  
SRR17520069. 1299057  
SRR17520069. 1299059  
SRR17520069. 1299061  
SRR17520069. 1299063  
SRR17520069. 1299065  
SRR17520069. 1299067  
SRR17520069. 1299069  
SRR17520069. 1299071  
SRR17520069. 1299580  
SRR17520069. 1299582

SRR17520069. 1299584  
SRR17520069. 1299586  
SRR17520069. 1299588  
SRR17520069. 1299590  
SRR17520069. 1299592  
SRR17520069. 1299594  
SRR17520069. 1299596  
SRR17520069. 1299598  
SRR17520069. 1302833  
SRR17520069. 1302835  
SRR17520069. 1302837  
SRR17520069. 1302839  
SRR17520069. 1302841  
SRR17520069. 1302843  
SRR17520069. 1302845  
SRR17520069. 1302847  
SRR17520069. 1302849  
SRR17520069. 1307456  
SRR17520069. 1307458  
SRR17520069. 1316685  
SRR17520069. 1316761  
SRR17520069. 1316773  
SRR17520069. 1319164  
SRR17520069. 1320279  
SRR17520069. 1320281  
SRR17520069. 1322946  
SRR17520069. 1322948  
SRR17520069. 1322950  
SRR17520069. 1322952  
SRR17520069. 1322954  
SRR17520069. 1322956  
SRR17520069. 1322958  
SRR17520069. 1322960  
SRR17520069. 1322962  
SRR17520069. 1322964  
SRR17520069. 1322966  
SRR17520069. 1322968  
SRR17520069. 1322970  
SRR17520069. 1322972  
SRR17520069. 1322974  
SRR17520069. 1322976  
SRR17520069. 1322978  
SRR17520069. 1322980  
SRR17520069. 1329758  
SRR17520069. 1329760  
SRR17520069. 1332796  
SRR17520069. 1332798

SRR17520069. 1332800  
SRR17520069. 1332802  
SRR17520069. 1332804  
SRR17520069. 1332806  
SRR17520069. 1332808  
SRR17520069. 1332810  
SRR17520069. 1332812  
SRR17520069. 1332814  
SRR17520069. 1332816  
SRR17520069. 1332818  
SRR17520069. 1332820  
SRR17520069. 1332822  
SRR17520069. 1334564  
SRR17520069. 1334566  
SRR17520069. 1334568  
SRR17520069. 1334570  
SRR17520069. 1334574  
SRR17520069. 1334578  
SRR17520069. 1335975  
SRR17520069. 1335977  
SRR17520069. 1335979  
SRR17520069. 1335981  
SRR17520069. 1335983  
SRR17520069. 1335985  
SRR17520069. 1335987  
SRR17520069. 1335989  
SRR17520069. 1335991  
SRR17520069. 1335993  
SRR17520069. 1335995  
SRR17520069. 1335997  
SRR17520069. 1335999  
SRR17520069. 1336001  
SRR17520069. 1336003  
SRR17520069. 1336005  
SRR17520069. 1336007  
SRR17520069. 1336009  
SRR17520069. 1336011  
SRR17520069. 1336013  
SRR17520069. 1336015  
SRR17520069. 1336017  
SRR17520069. 1336019  
SRR17520069. 1336021  
SRR17520069. 1336023  
SRR17520069. 1336025  
SRR17520069. 1336027  
SRR17520069. 1336029  
SRR17520069. 1336031

SRR17520069. 1336033  
SRR17520069. 1336035  
SRR17520069. 1336039  
SRR17520069. 1336041  
SRR17520069. 1336043  
SRR17520069. 1336045  
SRR17520069. 1336047  
SRR17520069. 1336049  
SRR17520069. 1336051  
SRR17520069. 1336053  
SRR17520069. 1336055  
SRR17520069. 1336059  
SRR17520069. 1336061  
SRR17520069. 1336063  
SRR17520069. 1336065  
SRR17520069. 1336067  
SRR17520069. 1340596  
SRR17520069. 1341610  
SRR17520069. 1341612  
SRR17520069. 1341614  
SRR17520069. 1342002  
SRR17520069. 1342004  
SRR17520069. 1342006  
SRR17520069. 1342008  
SRR17520069. 1342010  
SRR17520069. 1342012  
SRR17520069. 1342014  
SRR17520069. 1342016  
SRR17520069. 1342020  
SRR17520069. 1342022  
SRR17520069. 1342024  
SRR17520069. 1342026  
SRR17520069. 1342028  
SRR17520069. 1342030  
SRR17520069. 1342032  
SRR17520069. 1342034  
SRR17520069. 1342036  
SRR17520069. 1342038  
SRR17520069. 1342040  
SRR17520069. 1342042  
SRR17520069. 1342044  
SRR17520069. 1342046  
SRR17520069. 1342048  
SRR17520069. 1342050  
SRR17520069. 1342052  
SRR17520069. 1342054  
SRR17520069. 1342056

SRR17520069. 1342058  
SRR17520069. 1342060  
SRR17520069. 1342062  
SRR17520069. 1342064  
SRR17520069. 1342066  
SRR17520069. 1342068  
SRR17520069. 1342070  
SRR17520069. 1342072  
SRR17520069. 1342074  
SRR17520069. 1342076  
SRR17520069. 1342078  
SRR17520069. 1342080  
SRR17520069. 1342082  
SRR17520069. 1342084  
SRR17520069. 1342086  
SRR17520069. 1347336  
SRR17520069. 1347411  
SRR17520069. 1351646  
SRR17520069. 1351648  
SRR17520069. 1351650  
SRR17520069. 1351652  
SRR17520069. 1351654  
SRR17520069. 1351658  
SRR17520069. 1351660  
SRR17520069. 1352024  
SRR17520069. 1352026  
SRR17520069. 1352028  
SRR17520069. 1352030  
SRR17520069. 1352032  
SRR17520069. 1352034  
SRR17520069. 1352038  
SRR17520069. 1352040  
SRR17520069. 1352042  
SRR17520069. 1352044  
SRR17520069. 1352046  
SRR17520069. 1352048  
SRR17520069. 1352050  
SRR17520069. 1352052  
SRR17520069. 1352054  
SRR17520069. 1352056  
SRR17520069. 1352058  
SRR17520069. 1352060  
SRR17520069. 1352064  
SRR17520069. 1352066  
SRR17520069. 1352068  
SRR17520069. 1352070  
SRR17520069. 1352072

SRR17520069. 1352074  
SRR17520069. 1352076  
SRR17520069. 1352078  
SRR17520069. 1352080  
SRR17520069. 1352082  
SRR17520069. 1352084  
SRR17520069. 1352086  
SRR17520069. 1352088  
SRR17520069. 1352090  
SRR17520069. 1352092  
SRR17520069. 1352094  
SRR17520069. 1352096  
SRR17520069. 1352098  
SRR17520069. 1352100  
SRR17520069. 1357470  
SRR17520069. 1357472  
SRR17520069. 1357474  
SRR17520069. 1357476  
SRR17520069. 1357478  
SRR17520069. 1357480  
SRR17520069. 1357482  
SRR17520069. 1357484  
SRR17520069. 1357486  
SRR17520069. 1357488  
SRR17520069. 1357490  
SRR17520069. 1357492  
SRR17520069. 1357494  
SRR17520069. 1357496  
SRR17520069. 1357498  
SRR17520069. 1357500  
SRR17520069. 1357502  
SRR17520069. 1357504  
SRR17520069. 1357506  
SRR17520069. 1357508  
SRR17520069. 1357510  
SRR17520069. 1357512  
SRR17520069. 1357514  
SRR17520069. 1357516  
SRR17520069. 1357518  
SRR17520069. 1357520  
SRR17520069. 1357522  
SRR17520069. 1357524  
SRR17520069. 1357526  
SRR17520069. 1357528  
SRR17520069. 1357530  
SRR17520069. 1357532  
SRR17520069. 1357534

SRR17520069. 1357536  
SRR17520069. 1357538  
SRR17520069. 1357540  
SRR17520069. 1357542  
SRR17520069. 1357544  
SRR17520069. 1357546  
SRR17520069. 1357548  
SRR17520069. 1357550  
SRR17520069. 1357552  
SRR17520069. 1357554  
SRR17520069. 1357556  
SRR17520069. 1357558  
SRR17520069. 1357560  
SRR17520069. 1357562  
SRR17520069. 1357564  
SRR17520069. 1357566  
SRR17520069. 1358094  
SRR17520069. 1358098  
SRR17520069. 1358100  
SRR17520069. 1358102  
SRR17520069. 1358104  
SRR17520069. 1358106  
SRR17520069. 1358108  
SRR17520069. 1358110  
SRR17520069. 1358112  
SRR17520069. 1358114  
SRR17520069. 1358116  
SRR17520069. 1358118  
SRR17520069. 1358120  
SRR17520069. 1358122  
SRR17520069. 1358126  
SRR17520069. 1358128  
SRR17520069. 1358130  
SRR17520069. 1358134  
SRR17520069. 1358136  
SRR17520069. 1358138  
SRR17520069. 1358140  
SRR17520069. 1362508  
SRR17520069. 1362510  
SRR17520069. 1362512  
SRR17520069. 1362514  
SRR17520069. 1362518  
SRR17520069. 1362520  
SRR17520069. 1362522  
SRR17520069. 1362524  
SRR17520069. 1362526  
SRR17520069. 1362528

SRR17520069. 1362530  
SRR17520069. 1362532  
SRR17520069. 1364220  
SRR17520069. 1364222  
SRR17520069. 1364224  
SRR17520069. 1364226  
SRR17520069. 1364228  
SRR17520069. 1364230  
SRR17520069. 1364232  
SRR17520069. 1364234  
SRR17520069. 1364236  
SRR17520069. 1364238  
SRR17520069. 1364240  
SRR17520069. 1364242  
SRR17520069. 1364244  
SRR17520069. 1364246  
SRR17520069. 1364248  
SRR17520069. 1364250  
SRR17520069. 1364252  
SRR17520069. 1364254  
SRR17520069. 1364256  
SRR17520069. 1364258  
SRR17520069. 1364260  
SRR17520069. 1364262  
SRR17520069. 1364264  
SRR17520069. 1364266  
SRR17520069. 1364268  
SRR17520069. 1364270  
SRR17520069. 1364272  
SRR17520069. 1364274  
SRR17520069. 1364276  
SRR17520069. 1364278  
SRR17520069. 1364280  
SRR17520069. 1364282  
SRR17520069. 1364284  
SRR17520069. 1364286  
SRR17520069. 1364288  
SRR17520069. 1364290  
SRR17520069. 1364292  
SRR17520069. 1364296  
SRR17520069. 1364298  
SRR17520069. 1364300  
SRR17520069. 1364304  
SRR17520069. 1364308  
SRR17520069. 1364310  
SRR17520069. 1364312  
SRR17520069. 1364316



SRR17520069. 1364318  
SRR17520069. 1364320  
SRR17520069. 1367223  
SRR17520069. 1367225  
SRR17520069. 1367227  
SRR17520069. 1367229  
SRR17520069. 1367231  
SRR17520069. 1367233  
SRR17520069. 1367237  
SRR17520069. 1367239  
SRR17520069. 1367241  
SRR17520069. 1368185  
SRR17520069. 1368189  
SRR17520069. 1368191  
SRR17520069. 1368193  
SRR17520069. 1368195  
SRR17520069. 1368199  
SRR17520069. 1368203  
SRR17520069. 1368205  
SRR17520069. 1368207  
SRR17520069. 1368209  
SRR17520069. 1368211  
SRR17520069. 1368215  
SRR17520069. 1368219  
SRR17520069. 1368221  
SRR17520069. 1368223  
SRR17520069. 1368225  
SRR17520069. 1368227  
SRR17520069. 1368229  
SRR17520069. 1368231  
SRR17520069. 1368233  
SRR17520069. 1368235  
SRR17520069. 1368237  
SRR17520069. 1381084  
SRR17520069. 1381086  
SRR17520069. 1381088  
SRR17520069. 1381090  
SRR17520069. 1381092  
SRR17520069. 1381094  
SRR17520069. 1382720  
SRR17520069. 1388992  
SRR17520069. 1388994  
SRR17520069. 1388996  
SRR17520069. 1388998  
SRR17520069. 1389000  
SRR17520069. 1389002  
SRR17520069. 1389004

SRR17520069.1389006  
SRR17520069.1390013  
SRR17520069.1390015  
SRR17520069.1390017  
SRR17520069.1390019  
SRR17520069.1390023  
SRR17520069.1390025  
SRR17520069.1390029  
SRR17520069.1390031  
SRR17520069.1390033  
SRR17520069.1390035  
SRR17520069.1392522  
SRR17520069.1394565  
SRR17520069.1394567  
SRR17520069.1394569  
SRR17520069.1394571  
SRR17520069.1394573  
SRR17520069.1394575  
SRR17520069.1394577  
SRR17520069.1394579  
SRR17520069.1394581  
SRR17520069.1394960  
SRR17520069.1394962  
SRR17520069.1394966  
SRR17520069.1394970  
SRR17520069.1394972  
SRR17520069.1394974  
SRR17520069.1394976  
SRR17520069.1396738  
SRR17520069.1396740  
SRR17520069.1396742  
SRR17520069.1396744  
SRR17520069.1396746  
SRR17520069.1396748  
SRR17520069.1396750  
SRR17520069.1396752  
SRR17520069.1396754  
SRR17520069.1396756  
SRR17520069.1396758  
SRR17520069.1396760  
SRR17520069.1396762  
SRR17520069.1396764  
SRR17520069.1396766  
SRR17520069.1396768  
SRR17520069.1396770  
SRR17520069.1396772  
SRR17520069.1396774

SRR17520069. 1396776  
SRR17520069. 1396778  
SRR17520069. 1396780  
SRR17520069. 1396782  
SRR17520069. 1396784  
SRR17520069. 1396786  
SRR17520069. 1396788  
SRR17520069. 1396790  
SRR17520069. 1396792  
SRR17520069. 1396794  
SRR17520069. 1396796  
SRR17520069. 1396798  
SRR17520069. 1396800  
SRR17520069. 1396802  
SRR17520069. 1396804  
SRR17520069. 1396806  
SRR17520069. 1396808  
SRR17520069. 1396810  
SRR17520069. 1396812  
SRR17520069. 1396814  
SRR17520069. 1396816  
SRR17520069. 1396818  
SRR17520069. 1396820  
SRR17520069. 1396822  
SRR17520069. 1396826  
SRR17520069. 1396828  
SRR17520069. 1396830  
SRR17520069. 1396832  
SRR17520069. 1396834  
SRR17520069. 1396836  
SRR17520069. 1396838  
SRR17520069. 1396840  
SRR17520069. 1396842  
SRR17520069. 1396844  
SRR17520069. 1396846  
SRR17520069. 1396848  
SRR17520069. 1396850  
SRR17520069. 1396852  
SRR17520069. 1396854  
SRR17520069. 1396856  
SRR17520069. 1396858  
SRR17520069. 1396860  
SRR17520069. 1396862  
SRR17520069. 1396864  
SRR17520069. 1396866  
SRR17520069. 1396868  
SRR17520069. 1396870

SRR17520069. 1396872  
SRR17520069. 1396874  
SRR17520069. 1396876  
SRR17520069. 1396878  
SRR17520069. 1396880  
SRR17520069. 1396882  
SRR17520069. 1396884  
SRR17520069. 1396886  
SRR17520069. 1396888  
SRR17520069. 1396890  
SRR17520069. 1396892  
SRR17520069. 1396894  
SRR17520069. 1396896  
SRR17520069. 1396898  
SRR17520069. 1396900  
SRR17520069. 1396902  
SRR17520069. 1396904  
SRR17520069. 1396906  
SRR17520069. 1396908  
SRR17520069. 1396910  
SRR17520069. 1396912  
SRR17520069. 1396914  
SRR17520069. 1396916  
SRR17520069. 1396918  
SRR17520069. 1400492  
SRR17520069. 1406290  
SRR17520069. 1406292  
SRR17520069. 1406391  
SRR17520069. 1409714  
SRR17520069. 1409716  
SRR17520069. 1409718  
SRR17520069. 1409720  
SRR17520069. 1409722  
SRR17520069. 1409724  
SRR17520069. 1409726  
SRR17520069. 1409728  
SRR17520069. 1409730  
SRR17520069. 1409732  
SRR17520069. 1409734  
SRR17520069. 1409736  
SRR17520069. 1409738  
SRR17520069. 1409740  
SRR17520069. 1409742  
SRR17520069. 1409744  
SRR17520069. 1412692  
SRR17520069. 1418511  
SRR17520069. 1418515

SRR17520069.1418517  
SRR17520069.1418519  
SRR17520069.1419543  
SRR17520069.1419545  
SRR17520069.1419547  
SRR17520069.1419551  
SRR17520069.1419553  
SRR17520069.1419555  
SRR17520069.1419559  
SRR17520069.1433201  
SRR17520069.1433205  
SRR17520069.1433207  
SRR17520069.1433209  
SRR17520069.1433211  
SRR17520069.1433215  
SRR17520069.1433217  
SRR17520069.1433219  
SRR17520069.1433221  
SRR17520069.1433223  
SRR17520069.1436076  
SRR17520069.1436078  
SRR17520069.1436080  
SRR17520069.1436082  
SRR17520069.1436084  
SRR17520069.1436088  
SRR17520069.1436090  
SRR17520069.1436092  
SRR17520069.1436094  
SRR17520069.1436096  
SRR17520069.1436100  
SRR17520069.1436102  
SRR17520069.1436104  
SRR17520069.1436106  
SRR17520069.1436108  
SRR17520069.1436110  
SRR17520069.1436114  
SRR17520069.1436116  
SRR17520069.1436118  
SRR17520069.1436120  
SRR17520069.1436122  
SRR17520069.1436124  
SRR17520069.1436126  
SRR17520069.1436162  
SRR17520069.1442190  
SRR17520069.1442192  
SRR17520069.1442194  
SRR17520069.1442196

SRR17520069.1442198  
SRR17520069.1442200  
SRR17520069.1442202  
SRR17520069.1444608  
SRR17520069.1444612  
SRR17520069.1444614  
SRR17520069.1444616  
SRR17520069.1444618  
SRR17520069.1444620  
SRR17520069.1444622  
SRR17520069.1445867  
SRR17520069.1445869  
SRR17520069.1445871  
SRR17520069.1445873  
SRR17520069.1445875  
SRR17520069.1445877  
SRR17520069.1445879  
SRR17520069.1445881  
SRR17520069.1445883  
SRR17520069.1445885  
SRR17520069.1445887  
SRR17520069.1445889  
SRR17520069.1446736  
SRR17520069.1446738  
SRR17520069.1446740  
SRR17520069.1446742  
SRR17520069.1446744  
SRR17520069.1446746  
SRR17520069.1446748  
SRR17520069.1446750  
SRR17520069.1446752  
SRR17520069.1446756  
SRR17520069.1446758  
SRR17520069.1446760  
SRR17520069.1446762  
SRR17520069.1446764  
SRR17520069.1446766  
SRR17520069.1446768  
SRR17520069.1446770  
SRR17520069.1446772  
SRR17520069.1446774  
SRR17520069.1446776  
SRR17520069.1446778  
SRR17520069.1446780  
SRR17520069.1446782  
SRR17520069.1446784  
SRR17520069.1446786

SRR17520069.1446788  
SRR17520069.1446790  
SRR17520069.1446792  
SRR17520069.1446794  
SRR17520069.1446796  
SRR17520069.1446798  
SRR17520069.1446800  
SRR17520069.1446804  
SRR17520069.1446806  
SRR17520069.1446808  
SRR17520069.1446810  
SRR17520069.1446812  
SRR17520069.1446814  
SRR17520069.1446816  
SRR17520069.1446818  
SRR17520069.1446820  
SRR17520069.1446822  
SRR17520069.1446824  
SRR17520069.1446826  
SRR17520069.1446828  
SRR17520069.1446830  
SRR17520069.1446832  
SRR17520069.1446836  
SRR17520069.1446838  
SRR17520069.1446840  
SRR17520069.1446842  
SRR17520069.1446844  
SRR17520069.1446846  
SRR17520069.1446848  
SRR17520069.1446850  
SRR17520069.1446852  
SRR17520069.1446854  
SRR17520069.1446856  
SRR17520069.1446858  
SRR17520069.1446860  
SRR17520069.1446862  
SRR17520069.1446864  
SRR17520069.1452525  
SRR17520069.1452527  
SRR17520069.1452529  
SRR17520069.1452531  
SRR17520069.1453326  
SRR17520069.1458488  
SRR17520069.1458490  
SRR17520069.1458492  
SRR17520069.1458494  
SRR17520069.1458498

SRR17520069.1458500  
SRR17520069.1458502  
SRR17520069.1458504  
SRR17520069.1458506  
SRR17520069.1458508  
SRR17520069.1458510  
SRR17520069.1458512  
SRR17520069.1470937  
SRR17520069.1478635  
SRR17520069.1478637  
SRR17520069.1478639  
SRR17520069.1478641  
SRR17520069.1478643  
SRR17520069.1478645  
SRR17520069.1478647  
SRR17520069.1478649  
SRR17520069.1478651  
SRR17520069.1478653  
SRR17520069.1478655  
SRR17520069.1478657  
SRR17520069.1478659  
SRR17520069.1478661  
SRR17520069.1478663  
SRR17520069.1478665  
SRR17520069.1478667  
SRR17520069.1478669  
SRR17520069.1478671  
SRR17520069.1478673  
SRR17520069.1478677  
SRR17520069.1478681  
SRR17520069.1478683  
SRR17520069.1478685  
SRR17520069.1478687  
SRR17520069.1478689  
SRR17520069.1478691  
SRR17520069.1478695  
SRR17520069.1478697  
SRR17520069.1478699  
SRR17520069.1478701  
SRR17520069.1478703  
SRR17520069.1478707  
SRR17520069.1478709  
SRR17520069.1478713  
SRR17520069.1478715  
SRR17520069.1478717  
SRR17520069.1478719  
SRR17520069.1478723



SRR17520069. 1478725  
SRR17520069. 1478727  
SRR17520069. 1478729  
SRR17520069. 1478731  
SRR17520069. 1478733  
SRR17520069. 1478735  
SRR17520069. 1478737  
SRR17520069. 1478739  
SRR17520069. 1478741  
SRR17520069. 1478743  
SRR17520069. 1478745  
SRR17520069. 1478747  
SRR17520069. 1478749  
SRR17520069. 1478751  
SRR17520069. 1478753  
SRR17520069. 1478755  
SRR17520069. 1478757  
SRR17520069. 1478759  
SRR17520069. 1478761  
SRR17520069. 1478763  
SRR17520069. 1478765  
SRR17520069. 1478767  
SRR17520069. 1478769  
SRR17520069. 1478771  
SRR17520069. 1478773  
SRR17520069. 1478775  
SRR17520069. 1478779  
SRR17520069. 1478781  
SRR17520069. 1478783  
SRR17520069. 1478785  
SRR17520069. 1478787  
SRR17520069. 1478789  
SRR17520069. 1478791  
SRR17520069. 1478793  
SRR17520069. 1478795  
SRR17520069. 1478797  
SRR17520069. 1478799  
SRR17520069. 1478801  
SRR17520069. 1478803  
SRR17520069. 1478805  
SRR17520069. 1478807  
SRR17520069. 1478809  
SRR17520069. 1478811  
SRR17520069. 1478813  
SRR17520069. 1478815  
SRR17520069. 1478817  
SRR17520069. 1478819

SRR17520069. 1478821  
SRR17520069. 1478823  
SRR17520069. 1478825  
SRR17520069. 1478829  
SRR17520069. 1478831  
SRR17520069. 1478833  
SRR17520069. 1478835  
SRR17520069. 1478841  
SRR17520069. 1478843  
SRR17520069. 1478845  
SRR17520069. 1478847  
SRR17520069. 1478851  
SRR17520069. 1478853  
SRR17520069. 1478855  
SRR17520069. 1478857  
SRR17520069. 1478859  
SRR17520069. 1478861  
SRR17520069. 1478863  
SRR17520069. 1478865  
SRR17520069. 1478867  
SRR17520069. 1478869  
SRR17520069. 1478871  
SRR17520069. 1478873  
SRR17520069. 1478875  
SRR17520069. 1478877  
SRR17520069. 1478879  
SRR17520069. 1478881  
SRR17520069. 1478883  
SRR17520069. 1478885  
SRR17520069. 1478887  
SRR17520069. 1478889  
SRR17520069. 1478891  
SRR17520069. 1478893  
SRR17520069. 1478895  
SRR17520069. 1478897  
SRR17520069. 1478899  
SRR17520069. 1478901  
SRR17520069. 1478903  
SRR17520069. 1478905  
SRR17520069. 1478907  
SRR17520069. 1478909  
SRR17520069. 1478911  
SRR17520069. 1478913  
SRR17520069. 1478915  
SRR17520069. 1478917  
SRR17520069. 1478919  
SRR17520069. 1478921

SRR17520069. 1478923  
SRR17520069. 1478925  
SRR17520069. 1478927  
SRR17520069. 1478929  
SRR17520069. 1478931  
SRR17520069. 1478933  
SRR17520069. 1478935  
SRR17520069. 1478937  
SRR17520069. 1478939  
SRR17520069. 1478941  
SRR17520069. 1478943  
SRR17520069. 1478945  
SRR17520069. 1478949  
SRR17520069. 1478951  
SRR17520069. 1478953  
SRR17520069. 1478955  
SRR17520069. 1478957  
SRR17520069. 1478959  
SRR17520069. 1478961  
SRR17520069. 1478963  
SRR17520069. 1478965  
SRR17520069. 1478967  
SRR17520069. 1478969  
SRR17520069. 1478971  
SRR17520069. 1478973  
SRR17520069. 1478975  
SRR17520069. 1478977  
SRR17520069. 1478979  
SRR17520069. 1478981  
SRR17520069. 1486179  
SRR17520069. 1486181  
SRR17520069. 1486183  
SRR17520069. 1486185  
SRR17520069. 1486187  
SRR17520069. 1494140  
SRR17520069. 1494142  
SRR17520069. 1494144  
SRR17520069. 1494146  
SRR17520069. 1494148  
SRR17520069. 1494150  
SRR17520069. 1494152  
SRR17520069. 1494154  
SRR17520069. 1494156  
SRR17520069. 1494158  
SRR17520069. 1494160  
SRR17520069. 1494162  
SRR17520069. 1494164

SRR17520069. 1494166  
SRR17520069. 1494168  
SRR17520069. 1494170  
SRR17520069. 1494172  
SRR17520069. 1494174  
SRR17520069. 1494176  
SRR17520069. 1494178  
SRR17520069. 1494180  
SRR17520069. 1494182  
SRR17520069. 1494184  
SRR17520069. 1494186  
SRR17520069. 1494190  
SRR17520069. 1494192  
SRR17520069. 1494194  
SRR17520069. 1494196  
SRR17520069. 1494198  
SRR17520069. 1494200  
SRR17520069. 1494202  
SRR17520069. 1494204  
SRR17520069. 1496185  
SRR17520069. 1496187  
SRR17520069. 1496189  
SRR17520069. 1496191  
SRR17520069. 1496195  
SRR17520069. 1496197  
SRR17520069. 1496199  
SRR17520069. 1496201  
SRR17520069. 1496203  
SRR17520069. 1496205  
SRR17520069. 1496207  
SRR17520069. 1496209  
SRR17520069. 1496211  
SRR17520069. 1496213  
SRR17520069. 1496215  
SRR17520069. 1496217  
SRR17520069. 1496219  
SRR17520069. 1496221  
SRR17520069. 1496223  
SRR17520069. 1496225  
SRR17520069. 1496227  
SRR17520069. 1496229  
SRR17520069. 1496231  
SRR17520069. 1496233  
SRR17520069. 1496235  
SRR17520069. 1496237  
SRR17520069. 1496239  
SRR17520069. 1496241

SRR17520069. 1496243  
SRR17520069. 1496245  
SRR17520069. 1496247  
SRR17520069. 1496249  
SRR17520069. 1496255  
SRR17520069. 1496257  
SRR17520069. 1496259  
SRR17520069. 1496261  
SRR17520069. 1496263  
SRR17520069. 1496265  
SRR17520069. 1496267  
SRR17520069. 1496269  
SRR17520069. 1496271  
SRR17520069. 1496273  
SRR17520069. 1496275  
SRR17520069. 1496277  
SRR17520069. 1496279  
SRR17520069. 1496283  
SRR17520069. 1496285  
SRR17520069. 1496287  
SRR17520069. 1496289  
SRR17520069. 1496291  
SRR17520069. 1496293  
SRR17520069. 1496295  
SRR17520069. 1496297  
SRR17520069. 1496299  
SRR17520069. 1496301  
SRR17520069. 1496303  
SRR17520069. 1496305  
SRR17520069. 1496307  
SRR17520069. 1496309  
SRR17520069. 1496311  
SRR17520069. 1496313  
SRR17520069. 1496315  
SRR17520069. 1496319  
SRR17520069. 1496321  
SRR17520069. 1496323  
SRR17520069. 1496325  
SRR17520069. 1496327  
SRR17520069. 1496329  
SRR17520069. 1496331  
SRR17520069. 1496333  
SRR17520069. 1496335  
SRR17520069. 1496337  
SRR17520069. 1496339  
SRR17520069. 1496341  
SRR17520069. 1496343

SRR17520069. 1496345  
SRR17520069. 1496347  
SRR17520069. 1496351  
SRR17520069. 1496353  
SRR17520069. 1496355  
SRR17520069. 1496357  
SRR17520069. 1496359  
SRR17520069. 1496361  
SRR17520069. 1496363  
SRR17520069. 1496365  
SRR17520069. 1496367  
SRR17520069. 1496371  
SRR17520069. 1496373  
SRR17520069. 1496377  
SRR17520069. 1496379  
SRR17520069. 1496381  
SRR17520069. 1496385  
SRR17520069. 1496387  
SRR17520069. 1496389  
SRR17520069. 1496391  
SRR17520069. 1496393  
SRR17520069. 1496395  
SRR17520069. 1496397  
SRR17520069. 1496399  
SRR17520069. 1496401  
SRR17520069. 1496403  
SRR17520069. 1496405  
SRR17520069. 1496407  
SRR17520069. 1496409  
SRR17520069. 1498734  
SRR17520069. 1500503  
SRR17520069. 1500505  
SRR17520069. 1500507  
SRR17520069. 1500509  
SRR17520069. 1500511  
SRR17520069. 1500513  
SRR17520069. 1500515  
SRR17520069. 1500519  
SRR17520069. 1503306  
SRR17520069. 1503308  
SRR17520069. 1503310  
SRR17520069. 1505158  
SRR17520069. 1505160  
SRR17520069. 1505162  
SRR17520069. 1505166  
SRR17520069. 1505168  
SRR17520069. 1505170

SRR17520069. 1505172  
SRR17520069. 1505174  
SRR17520069. 1505176  
SRR17520069. 1505178  
SRR17520069. 1505180  
SRR17520069. 1505182  
SRR17520069. 1505184  
SRR17520069. 1505186  
SRR17520069. 1505188  
SRR17520069. 1505190  
SRR17520069. 1505192  
SRR17520069. 1505194  
SRR17520069. 1505196  
SRR17520069. 1505198  
SRR17520069. 1505200  
SRR17520069. 1505872  
SRR17520069. 1505874  
SRR17520069. 1505876  
SRR17520069. 1505878  
SRR17520069. 1505880  
SRR17520069. 1505882  
SRR17520069. 1505884  
SRR17520069. 1505886  
SRR17520069. 1505888  
SRR17520069. 1505890  
SRR17520069. 1505892  
SRR17520069. 1505894  
SRR17520069. 1505896  
SRR17520069. 1505898  
SRR17520069. 1505900  
SRR17520069. 1505902  
SRR17520069. 1505906  
SRR17520069. 1505908  
SRR17520069. 1505910  
SRR17520069. 1505912  
SRR17520069. 1505914  
SRR17520069. 1505916  
SRR17520069. 1505918  
SRR17520069. 1505920  
SRR17520069. 1505922  
SRR17520069. 1505924  
SRR17520069. 1505926  
SRR17520069. 1505928  
SRR17520069. 1505930  
SRR17520069. 1505932  
SRR17520069. 1505934  
SRR17520069. 1505936

SRR17520069. 1505938  
SRR17520069. 1505940  
SRR17520069. 1505942  
SRR17520069. 1505944  
SRR17520069. 1505946  
SRR17520069. 1505948  
SRR17520069. 1505950  
SRR17520069. 1505952  
SRR17520069. 1505954  
SRR17520069. 1505956  
SRR17520069. 1505960  
SRR17520069. 1505962  
SRR17520069. 1505964  
SRR17520069. 1505966  
SRR17520069. 1505968  
SRR17520069. 1505970  
SRR17520069. 1505972  
SRR17520069. 1505974  
SRR17520069. 1505976  
SRR17520069. 1505978  
SRR17520069. 1505982  
SRR17520069. 1505984  
SRR17520069. 1505986  
SRR17520069. 1505990  
SRR17520069. 1505992  
SRR17520069. 1505994  
SRR17520069. 1505996  
SRR17520069. 1505998  
SRR17520069. 1506000  
SRR17520069. 1506002  
SRR17520069. 1506004  
SRR17520069. 1506006  
SRR17520069. 1506008  
SRR17520069. 1506010  
SRR17520069. 1506012  
SRR17520069. 1506014  
SRR17520069. 1506016  
SRR17520069. 1506022  
SRR17520069. 1506024  
SRR17520069. 1506026  
SRR17520069. 1506903  
SRR17520069. 1506905  
SRR17520069. 1506907  
SRR17520069. 1508022  
SRR17520069. 1508024  
SRR17520069. 1508026  
SRR17520069. 1508028



SRR17520069. 1508030  
SRR17520069. 1508032  
SRR17520069. 1508034  
SRR17520069. 1508036  
SRR17520069. 1508038  
SRR17520069. 1508040  
SRR17520069. 1508042  
SRR17520069. 1508044  
SRR17520069. 1508046  
SRR17520069. 1508048  
SRR17520069. 1508050  
SRR17520069. 1508052  
SRR17520069. 1508054  
SRR17520069. 1508056  
SRR17520069. 1508058  
SRR17520069. 1508060  
SRR17520069. 1508062  
SRR17520069. 1508064  
SRR17520069. 1508066  
SRR17520069. 1508068  
SRR17520069. 1508070  
SRR17520069. 1508072  
SRR17520069. 1508074  
SRR17520069. 1516438  
SRR17520069. 1516440  
SRR17520069. 1516442  
SRR17520069. 1516444  
SRR17520069. 1516446  
SRR17520069. 1516448  
SRR17520069. 1516450  
SRR17520069. 1516452  
SRR17520069. 1516454  
SRR17520069. 1516456  
SRR17520069. 1516458  
SRR17520069. 1516460  
SRR17520069. 1516462  
SRR17520069. 1516464  
SRR17520069. 1516466  
SRR17520069. 1516468  
SRR17520069. 1516470  
SRR17520069. 1516472  
SRR17520069. 1516474  
SRR17520069. 1516476  
SRR17520069. 1516478  
SRR17520069. 1516480  
SRR17520069. 1516482  
SRR17520069. 1516484

SRR17520069. 1516486  
SRR17520069. 1516488  
SRR17520069. 1516490  
SRR17520069. 1516492  
SRR17520069. 1516494  
SRR17520069. 1516496  
SRR17520069. 1516498  
SRR17520069. 1516500  
SRR17520069. 1516502  
SRR17520069. 1516504  
SRR17520069. 1516506  
SRR17520069. 1516508  
SRR17520069. 1516510  
SRR17520069. 1516512  
SRR17520069. 1516514  
SRR17520069. 1516516  
SRR17520069. 1517149  
SRR17520069. 1517151  
SRR17520069. 1517153  
SRR17520069. 1517155  
SRR17520069. 1517157  
SRR17520069. 1517159  
SRR17520069. 1517161  
SRR17520069. 1517163  
SRR17520069. 1517165  
SRR17520069. 1517167  
SRR17520069. 1517169  
SRR17520069. 1517171  
SRR17520069. 1517173  
SRR17520069. 1517177  
SRR17520069. 1517179  
SRR17520069. 1517181  
SRR17520069. 1517183  
SRR17520069. 1517185  
SRR17520069. 1518837  
SRR17520069. 1518841  
SRR17520069. 1518845  
SRR17520069. 1518847  
SRR17520069. 1518849  
SRR17520069. 1518851  
SRR17520069. 1518853  
SRR17520069. 1518855  
SRR17520069. 1518857  
SRR17520069. 1518859  
SRR17520069. 1518861  
SRR17520069. 1518863  
SRR17520069. 1518865

SRR17520069. 1518867  
SRR17520069. 1518869  
SRR17520069. 1518871  
SRR17520069. 1518873  
SRR17520069. 1518875  
SRR17520069. 1518879  
SRR17520069. 1518881  
SRR17520069. 1518883  
SRR17520069. 1518885  
SRR17520069. 1518887  
SRR17520069. 1518889  
SRR17520069. 1518891  
SRR17520069. 1518893  
SRR17520069. 1518895  
SRR17520069. 1518897  
SRR17520069. 1518899  
SRR17520069. 1518901  
SRR17520069. 1518903  
SRR17520069. 1518905  
SRR17520069. 1518907  
SRR17520069. 1518909  
SRR17520069. 1518911  
SRR17520069. 1518913  
SRR17520069. 1518915  
SRR17520069. 1518917  
SRR17520069. 1518919  
SRR17520069. 1518921  
SRR17520069. 1518923  
SRR17520069. 1518925  
SRR17520069. 1518927  
SRR17520069. 1518929  
SRR17520069. 1518931  
SRR17520069. 1518933  
SRR17520069. 1518935  
SRR17520069. 1518937  
SRR17520069. 1518939  
SRR17520069. 1518941  
SRR17520069. 1518943  
SRR17520069. 1521109  
SRR17520069. 1521111  
SRR17520069. 1521113  
SRR17520069. 1521115  
SRR17520069. 1521117  
SRR17520069. 1521119  
SRR17520069. 1521121  
SRR17520069. 1521123  
SRR17520069. 1521125

SRR17520069. 1521127  
SRR17520069. 1521129  
SRR17520069. 1521131  
SRR17520069. 1521133  
SRR17520069. 1521135  
SRR17520069. 1521137  
SRR17520069. 1521139  
SRR17520069. 1521141  
SRR17520069. 1521143  
SRR17520069. 1521145  
SRR17520069. 1521149  
SRR17520069. 1521151  
SRR17520069. 1521153  
SRR17520069. 1521155  
SRR17520069. 1521157  
SRR17520069. 1521159  
SRR17520069. 1521161  
SRR17520069. 1521163  
SRR17520069. 1521165  
SRR17520069. 1521167  
SRR17520069. 1521169  
SRR17520069. 1521171  
SRR17520069. 1522093  
SRR17520069. 1533082  
SRR17520069. 1533084  
SRR17520069. 1533086  
SRR17520069. 1533088  
SRR17520069. 1533090  
SRR17520069. 1533092  
SRR17520069. 1533094  
SRR17520069. 1533096  
SRR17520069. 1533098  
SRR17520069. 1535084  
SRR17520069. 1535772  
SRR17520069. 1535774  
SRR17520069. 1535776  
SRR17520069. 1535778  
SRR17520069. 1535780  
SRR17520069. 1535782  
SRR17520069. 1540096  
SRR17520069. 1540098  
SRR17520069. 1540100  
SRR17520069. 1542235  
SRR17520069. 1542237  
SRR17520069. 1542239  
SRR17520069. 1542241  
SRR17520069. 1542243

SRR17520069. 1542245  
SRR17520069. 1542247  
SRR17520069. 1551277  
SRR17520069. 1554087  
SRR17520069. 1556179  
SRR17520069. 1556183  
SRR17520069. 1556185  
SRR17520069. 1556187  
SRR17520069. 1556189  
SRR17520069. 1556191  
SRR17520069. 1556193  
SRR17520069. 1556195  
SRR17520069. 1556199  
SRR17520069. 1556201  
SRR17520069. 1556203  
SRR17520069. 1556205  
SRR17520069. 1566135  
SRR17520069. 1566137  
SRR17520069. 1566139  
SRR17520069. 1566141  
SRR17520069. 1566143  
SRR17520069. 1566145  
SRR17520069. 1566149  
SRR17520069. 1566151  
SRR17520069. 1566153  
SRR17520069. 1566155  
SRR17520069. 1572749  
SRR17520069. 1572751  
SRR17520069. 1572753  
SRR17520069. 1572755  
SRR17520069. 1572757  
SRR17520069. 1572759  
SRR17520069. 1572763  
SRR17520069. 1572765  
SRR17520069. 1572769  
SRR17520069. 1572771  
SRR17520069. 1572773  
SRR17520069. 1572775  
SRR17520069. 1572777  
SRR17520069. 1572779  
SRR17520069. 1572783  
SRR17520069. 1572785  
SRR17520069. 1572787  
SRR17520069. 1572789  
SRR17520069. 1572791  
SRR17520069. 1572793  
SRR17520069. 1572795

SRR17520069. 1572797  
SRR17520069. 1572799  
SRR17520069. 1572801  
SRR17520069. 1572803  
SRR17520069. 1572805  
SRR17520069. 1572807  
SRR17520069. 1572809  
SRR17520069. 1572813  
SRR17520069. 1575703  
SRR17520069. 1578059  
SRR17520069. 1578061  
SRR17520069. 1578063  
SRR17520069. 1578065  
SRR17520069. 1578067  
SRR17520069. 1578069  
SRR17520069. 1578071  
SRR17520069. 1578075  
SRR17520069. 1578077  
SRR17520069. 1578079  
SRR17520069. 1578083  
SRR17520069. 1578085  
SRR17520069. 1578087  
SRR17520069. 1578089  
SRR17520069. 1578091  
SRR17520069. 1578093  
SRR17520069. 1578095  
SRR17520069. 1578097  
SRR17520069. 1578099  
SRR17520069. 1578101  
SRR17520069. 1578103  
SRR17520069. 1578251  
SRR17520069. 1578253  
SRR17520069. 1578255  
SRR17520069. 1578257  
SRR17520069. 1578259  
SRR17520069. 1578261  
SRR17520069. 1578263  
SRR17520069. 1578265  
SRR17520069. 1578267  
SRR17520069. 1578269  
SRR17520069. 1578271  
SRR17520069. 1578273  
SRR17520069. 1578275  
SRR17520069. 1578277  
SRR17520069. 1578279  
SRR17520069. 1578281  
SRR17520069. 1578283

SRR17520069. 1578285  
SRR17520069. 1578287  
SRR17520069. 1578289  
SRR17520069. 1585398  
SRR17520069. 1585402  
SRR17520069. 1589942  
SRR17520069. 1589944  
SRR17520069. 1589946  
SRR17520069. 1589948  
SRR17520069. 1589950  
SRR17520069. 1589952  
SRR17520069. 1589954  
SRR17520069. 1589956  
SRR17520069. 1589958  
SRR17520069. 1589960  
SRR17520069. 1589962  
SRR17520069. 1592648  
SRR17520069. 1592650  
SRR17520069. 1592652  
SRR17520069. 1592654  
SRR17520069. 1592656  
SRR17520069. 1592658  
SRR17520069. 1592660  
SRR17520069. 1592662  
SRR17520069. 1592664  
SRR17520069. 1592666  
SRR17520069. 1596619  
SRR17520069. 1596621  
SRR17520069. 1596623  
SRR17520069. 1596625  
SRR17520069. 1596627  
SRR17520069. 1596629  
SRR17520069. 1596631  
SRR17520069. 1596633  
SRR17520069. 1596635  
SRR17520069. 1596637  
SRR17520069. 1596639  
SRR17520069. 1596641  
SRR17520069. 1596643  
SRR17520069. 1596645  
SRR17520069. 1596647  
SRR17520069. 1596651  
SRR17520069. 1596653  
SRR17520069. 1596655  
SRR17520069. 1596657  
SRR17520069. 1596659  
SRR17520069. 1596667

SRR17520069. 1596669  
SRR17520069. 1596671  
SRR17520069. 1596673  
SRR17520069. 1608006  
SRR17520069. 1608008  
SRR17520069. 1608010  
SRR17520069. 1608012  
SRR17520069. 1608014  
SRR17520069. 1608016  
SRR17520069. 1608018  
SRR17520069. 1608020  
SRR17520069. 1608022  
SRR17520069. 1608024  
SRR17520069. 1608026  
SRR17520069. 1608028  
SRR17520069. 1608030  
SRR17520069. 1608032  
SRR17520069. 1608034  
SRR17520069. 1608036  
SRR17520069. 1608038  
SRR17520069. 1608040  
SRR17520069. 1608042  
SRR17520069. 1608044  
SRR17520069. 1608046  
SRR17520069. 1608048  
SRR17520069. 1608050  
SRR17520069. 1608052  
SRR17520069. 1608054  
SRR17520069. 1608058  
SRR17520069. 1608060  
SRR17520069. 1608062  
SRR17520069. 1608064  
SRR17520069. 1608066  
SRR17520069. 1608068  
SRR17520069. 1608070  
SRR17520069. 1608072  
SRR17520069. 1608074  
SRR17520069. 1608076  
SRR17520069. 1608078  
SRR17520069. 1608080  
SRR17520069. 1608082  
SRR17520069. 1608084  
SRR17520069. 1608086  
SRR17520069. 1608088  
SRR17520069. 1608090  
SRR17520069. 1608092  
SRR17520069. 1608094



SRR17520069. 1608096  
SRR17520069. 1608102  
SRR17520069. 1608110  
SRR17520069. 1608112  
SRR17520069. 1608114  
SRR17520069. 1608116  
SRR17520069. 1608118  
SRR17520069. 1608120  
SRR17520069. 1608122  
SRR17520069. 1608124  
SRR17520069. 1608130  
SRR17520069. 1608132  
SRR17520069. 1608136  
SRR17520069. 1608138  
SRR17520069. 1608142  
SRR17520069. 1608144  
SRR17520069. 1608146  
SRR17520069. 1608148  
SRR17520069. 1608150  
SRR17520069. 1608152  
SRR17520069. 1608154  
SRR17520069. 1608156  
SRR17520069. 1608158  
SRR17520069. 1608160  
SRR17520069. 1608162  
SRR17520069. 1608164  
SRR17520069. 1608166  
SRR17520069. 1608168  
SRR17520069. 1608172  
SRR17520069. 1608174  
SRR17520069. 1608176  
SRR17520069. 1608178  
SRR17520069. 1608180  
SRR17520069. 1608182  
SRR17520069. 1611249  
SRR17520069. 1614296  
SRR17520069. 1614298  
SRR17520069. 1623656  
SRR17520069. 1631635  
SRR17520069. 1631637  
SRR17520069. 1631639  
SRR17520069. 1631641  
SRR17520069. 1631643  
SRR17520069. 1631645  
SRR17520069. 1631647  
SRR17520069. 1631649  
SRR17520069. 1631651

SRR17520069. 1631655  
SRR17520069. 1631657  
SRR17520069. 1631659  
SRR17520069. 1631661  
SRR17520069. 1631663  
SRR17520069. 1631665  
SRR17520069. 1631667  
SRR17520069. 1631669  
SRR17520069. 1631671  
SRR17520069. 1631673  
SRR17520069. 1631675  
SRR17520069. 1631677  
SRR17520069. 1631679  
SRR17520069. 1631681  
SRR17520069. 1631683  
SRR17520069. 1631685  
SRR17520069. 1631687  
SRR17520069. 1631689  
SRR17520069. 1631691  
SRR17520069. 1631693  
SRR17520069. 1631695  
SRR17520069. 1631697  
SRR17520069. 1631699  
SRR17520069. 1631701  
SRR17520069. 1631703  
SRR17520069. 1631705  
SRR17520069. 1635995  
SRR17520069. 1640966  
SRR17520069. 1640968  
SRR17520069. 1640970  
SRR17520069. 1640972  
SRR17520069. 1640974  
SRR17520069. 1640976  
SRR17520069. 1640978  
SRR17520069. 1640980  
SRR17520069. 1642993  
SRR17520069. 1642995  
SRR17520069. 1642997  
SRR17520069. 1642999  
SRR17520069. 1643001  
SRR17520069. 1643003  
SRR17520069. 1643005  
SRR17520069. 1643007  
SRR17520069. 1643009  
SRR17520069. 1643011  
SRR17520069. 1643013  
SRR17520069. 1643015

SRR17520069.1643017  
SRR17520069.1643019  
SRR17520069.1643021  
SRR17520069.1643023  
SRR17520069.1643025  
SRR17520069.1643027  
SRR17520069.1643029  
SRR17520069.1643031  
SRR17520069.1643033  
SRR17520069.1643035  
SRR17520069.1643037  
SRR17520069.1643039  
SRR17520069.1650478  
SRR17520069.1650482  
SRR17520069.1650484  
SRR17520069.1650486  
SRR17520069.1650488  
SRR17520069.1650490  
SRR17520069.1650492  
SRR17520069.1650494  
SRR17520069.1650496  
SRR17520069.1650498  
SRR17520069.1650500  
SRR17520069.1650502  
SRR17520069.1650504  
SRR17520069.1650506  
SRR17520069.1650508  
SRR17520069.1650510  
SRR17520069.1650512  
SRR17520069.1650514  
SRR17520069.1650516  
SRR17520069.1650518  
SRR17520069.1650520  
SRR17520069.1650522  
SRR17520069.1650524  
SRR17520069.1650526  
SRR17520069.1650528  
SRR17520069.1650530  
SRR17520069.1650532  
SRR17520069.1650534  
SRR17520069.1650536  
SRR17520069.1650538  
SRR17520069.1650540  
SRR17520069.1650542  
SRR17520069.1650544  
SRR17520069.1650546  
SRR17520069.1650550

SRR17520069.1650552  
SRR17520069.1650554  
SRR17520069.1650556  
SRR17520069.1650558  
SRR17520069.1650560  
SRR17520069.1650562  
SRR17520069.1650564  
SRR17520069.1650566  
SRR17520069.1650568  
SRR17520069.1650570  
SRR17520069.1650572  
SRR17520069.1650574  
SRR17520069.1650576  
SRR17520069.1650578  
SRR17520069.1650580  
SRR17520069.1650582  
SRR17520069.1650584  
SRR17520069.1650586  
SRR17520069.1650588  
SRR17520069.1650590  
SRR17520069.1650592  
SRR17520069.1650594  
SRR17520069.1650596  
SRR17520069.1650598  
SRR17520069.1650600  
SRR17520069.1650602  
SRR17520069.1650604  
SRR17520069.1650606  
SRR17520069.1656129  
SRR17520069.1656131  
SRR17520069.1656133  
SRR17520069.1656135  
SRR17520069.1656141  
SRR17520069.1656145  
SRR17520069.1656147  
SRR17520069.1656149  
SRR17520069.1656151  
SRR17520069.1656153  
SRR17520069.1656157  
SRR17520069.1656159  
SRR17520069.1656161  
SRR17520069.1656163  
SRR17520069.1656165  
SRR17520069.1656167  
SRR17520069.1656169  
SRR17520069.1656171  
SRR17520069.1656173

SRR17520069.1656175  
SRR17520069.1659465  
SRR17520069.1659467  
SRR17520069.1660906  
SRR17520069.1660908  
SRR17520069.1660910  
SRR17520069.1660912  
SRR17520069.1660914  
SRR17520069.1660916  
SRR17520069.1660918  
SRR17520069.1660920  
SRR17520069.1660922  
SRR17520069.1660924  
SRR17520069.1660926  
SRR17520069.1660928  
SRR17520069.1660930  
SRR17520069.1660932  
SRR17520069.1660934  
SRR17520069.1660936  
SRR17520069.1660938  
SRR17520069.1660940  
SRR17520069.1660942  
SRR17520069.1660944  
SRR17520069.1660946  
SRR17520069.1660948  
SRR17520069.1660950  
SRR17520069.1660952  
SRR17520069.1660954  
SRR17520069.1660956  
SRR17520069.1660958  
SRR17520069.1660960  
SRR17520069.1663298  
SRR17520069.1663911  
SRR17520069.1663913  
SRR17520069.1663915  
SRR17520069.1663917  
SRR17520069.1663919  
SRR17520069.1663921  
SRR17520069.1663923  
SRR17520069.1663925  
SRR17520069.1663927  
SRR17520069.1663929  
SRR17520069.1663931  
SRR17520069.1663933  
SRR17520069.1663935  
SRR17520069.1663937  
SRR17520069.1663939

SRR17520069. 1663941  
SRR17520069. 1663943  
SRR17520069. 1663945  
SRR17520069. 1663947  
SRR17520069. 1663949  
SRR17520069. 1663951  
SRR17520069. 1663953  
SRR17520069. 1663955  
SRR17520069. 1663957  
SRR17520069. 1663959  
SRR17520069. 1663961  
SRR17520069. 1663963  
SRR17520069. 1663965  
SRR17520069. 1663967  
SRR17520069. 1663969  
SRR17520069. 1663971  
SRR17520069. 1663973  
SRR17520069. 1663975  
SRR17520069. 1663977  
SRR17520069. 1663979  
SRR17520069. 1663981  
SRR17520069. 1663983  
SRR17520069. 1663985  
SRR17520069. 1663987  
SRR17520069. 1663989  
SRR17520069. 1663991  
SRR17520069. 1663993  
SRR17520069. 1663995  
SRR17520069. 1663997  
SRR17520069. 1663999  
SRR17520069. 1664001  
SRR17520069. 1664003  
SRR17520069. 1664005  
SRR17520069. 1664007  
SRR17520069. 1664009  
SRR17520069. 1664011  
SRR17520069. 1664013  
SRR17520069. 1664015  
SRR17520069. 1664017  
SRR17520069. 1664019  
SRR17520069. 1664021  
SRR17520069. 1664023  
SRR17520069. 1664813  
SRR17520069. 1664815  
SRR17520069. 1664817  
SRR17520069. 1664819  
SRR17520069. 1664821

SRR17520069.1664823  
SRR17520069.1664825  
SRR17520069.1664827  
SRR17520069.1664831  
SRR17520069.1664833  
SRR17520069.1664835  
SRR17520069.1664837  
SRR17520069.1664839  
SRR17520069.1667930  
SRR17520069.1667932  
SRR17520069.1667934  
SRR17520069.1667936  
SRR17520069.1667938  
SRR17520069.1667940  
SRR17520069.1667942  
SRR17520069.1667944  
SRR17520069.1667946  
SRR17520069.1667948  
SRR17520069.1667950  
SRR17520069.1667952  
SRR17520069.1667954  
SRR17520069.1667958  
SRR17520069.1667960  
SRR17520069.1667962  
SRR17520069.1667964  
SRR17520069.1667966  
SRR17520069.1667968  
SRR17520069.1667970  
SRR17520069.1667974  
SRR17520069.1667976  
SRR17520069.1667978  
SRR17520069.1667980  
SRR17520069.1667982  
SRR17520069.1667984  
SRR17520069.1667986  
SRR17520069.1667988  
SRR17520069.1667990  
SRR17520069.1667992  
SRR17520069.1667994  
SRR17520069.1667996  
SRR17520069.1668000  
SRR17520069.1668002  
SRR17520069.1668004  
SRR17520069.1668006  
SRR17520069.1668008  
SRR17520069.1668010  
SRR17520069.1668012

SRR17520069. 1668014  
SRR17520069. 1668016  
SRR17520069. 1671351  
SRR17520069. 1671353  
SRR17520069. 1671355  
SRR17520069. 1671357  
SRR17520069. 1671359  
SRR17520069. 1671361  
SRR17520069. 1671363  
SRR17520069. 1671365  
SRR17520069. 1671367  
SRR17520069. 1671369  
SRR17520069. 1671371  
SRR17520069. 1671373  
SRR17520069. 1671375  
SRR17520069. 1671377  
SRR17520069. 1671379  
SRR17520069. 1671381  
SRR17520069. 1671383  
SRR17520069. 1671385  
SRR17520069. 1671387  
SRR17520069. 1671389  
SRR17520069. 1671391  
SRR17520069. 1671393  
SRR17520069. 1671395  
SRR17520069. 1672190  
SRR17520069. 1672192  
SRR17520069. 1672194  
SRR17520069. 1672196  
SRR17520069. 1672941  
SRR17520069. 1672943  
SRR17520069. 1672945  
SRR17520069. 1672947  
SRR17520069. 1672949  
SRR17520069. 1672951  
SRR17520069. 1672953  
SRR17520069. 1672955  
SRR17520069. 1672957  
SRR17520069. 1674642  
SRR17520069. 1674644  
SRR17520069. 1674646  
SRR17520069. 1674648  
SRR17520069. 1674650  
SRR17520069. 1674652  
SRR17520069. 1674654  
SRR17520069. 1674656  
SRR17520069. 1674658



SRR17520069. 1674660  
SRR17520069. 1674662  
SRR17520069. 1674664  
SRR17520069. 1674666  
SRR17520069. 1674668  
SRR17520069. 1674670  
SRR17520069. 1674672  
SRR17520069. 1674674  
SRR17520069. 1674676  
SRR17520069. 1674678  
SRR17520069. 1674680  
SRR17520069. 1674682  
SRR17520069. 1674684  
SRR17520069. 1674686  
SRR17520069. 1674688  
SRR17520069. 1674690  
SRR17520069. 1678502  
SRR17520069. 1678504  
SRR17520069. 1678506  
SRR17520069. 1678508  
SRR17520069. 1678510  
SRR17520069. 1678514  
SRR17520069. 1678518  
SRR17520069. 1678520  
SRR17520069. 1678522  
SRR17520069. 1678524  
SRR17520069. 1678997  
SRR17520069. 1678999  
SRR17520069. 1679001  
SRR17520069. 1679003  
SRR17520069. 1679005  
SRR17520069. 1679007  
SRR17520069. 1679009  
SRR17520069. 1679011  
SRR17520069. 1679013  
SRR17520069. 1679015  
SRR17520069. 1679017  
SRR17520069. 1679019  
SRR17520069. 1679021  
SRR17520069. 1679023  
SRR17520069. 1679025  
SRR17520069. 1679027  
SRR17520069. 1679029  
SRR17520069. 1679031  
SRR17520069. 1679033  
SRR17520069. 1679035  
SRR17520069. 1679037

SRR17520069. 1679039  
SRR17520069. 1679043  
SRR17520069. 1679045  
SRR17520069. 1679047  
SRR17520069. 1679049  
SRR17520069. 1679051  
SRR17520069. 1679053  
SRR17520069. 1679055  
SRR17520069. 1679057  
SRR17520069. 1679059  
SRR17520069. 1679061  
SRR17520069. 1679063  
SRR17520069. 1679065  
SRR17520069. 1679067  
SRR17520069. 1679069  
SRR17520069. 1679071  
SRR17520069. 1679073  
SRR17520069. 1679075  
SRR17520069. 1679077  
SRR17520069. 1679079  
SRR17520069. 1679081  
SRR17520069. 1679083  
SRR17520069. 1679085  
SRR17520069. 1679087  
SRR17520069. 1679089  
SRR17520069. 1679091  
SRR17520069. 1679093  
SRR17520069. 1679095  
SRR17520069. 1680826  
SRR17520069. 1680828  
SRR17520069. 1680830  
SRR17520069. 1680832  
SRR17520069. 1680836  
SRR17520069. 1680838  
SRR17520069. 1680840  
SRR17520069. 1680842  
SRR17520069. 1680844  
SRR17520069. 1680846  
SRR17520069. 1680848  
SRR17520069. 1680850  
SRR17520069. 1680852  
SRR17520069. 1680854  
SRR17520069. 1680856  
SRR17520069. 1680858  
SRR17520069. 1680860  
SRR17520069. 1680862  
SRR17520069. 1680864

SRR17520069. 1680866  
SRR17520069. 1680868  
SRR17520069. 1680870  
SRR17520069. 1680872  
SRR17520069. 1680874  
SRR17520069. 1680876  
SRR17520069. 1680878  
SRR17520069. 1680880  
SRR17520069. 1680882  
SRR17520069. 1680884  
SRR17520069. 1680886  
SRR17520069. 1680888  
SRR17520069. 1680890  
SRR17520069. 1680892  
SRR17520069. 1680894  
SRR17520069. 1686217  
SRR17520069. 1686219  
SRR17520069. 1686221  
SRR17520069. 1686225  
SRR17520069. 1686227  
SRR17520069. 1686573  
SRR17520069. 1686575  
SRR17520069. 1686577  
SRR17520069. 1690326  
SRR17520069. 1690328  
SRR17520069. 1690330  
SRR17520069. 1690332  
SRR17520069. 1690334  
SRR17520069. 1690336  
SRR17520069. 1690338  
SRR17520069. 1690340  
SRR17520069. 1690342  
SRR17520069. 1690344  
SRR17520069. 1690346  
SRR17520069. 1690348  
SRR17520069. 1690350  
SRR17520069. 1700483  
SRR17520069. 1700485  
SRR17520069. 1700487  
SRR17520069. 1700489  
SRR17520069. 1700491  
SRR17520069. 1700493  
SRR17520069. 1700495  
SRR17520069. 1700497  
SRR17520069. 1702400  
SRR17520069. 1702402  
SRR17520069. 1702404

SRR17520069.1702406  
SRR17520069.1702408  
SRR17520069.1702410  
SRR17520069.1702412  
SRR17520069.1702414  
SRR17520069.1702416  
SRR17520069.1702418  
SRR17520069.1702420  
SRR17520069.1704797  
SRR17520069.1704799  
SRR17520069.1704801  
SRR17520069.1704803  
SRR17520069.1704805  
SRR17520069.1704807  
SRR17520069.1704809  
SRR17520069.1704811  
SRR17520069.1704813  
SRR17520069.1704815  
SRR17520069.1704817  
SRR17520069.1704819  
SRR17520069.1704821  
SRR17520069.1704823  
SRR17520069.1704827  
SRR17520069.1704829  
SRR17520069.1704831  
SRR17520069.1704833  
SRR17520069.1705725  
SRR17520069.1705727  
SRR17520069.1705729  
SRR17520069.1705731  
SRR17520069.1705733  
SRR17520069.1705735  
SRR17520069.1705737  
SRR17520069.1705739  
SRR17520069.1705741  
SRR17520069.1705743  
SRR17520069.1709418  
SRR17520069.1709420  
SRR17520069.1709422  
SRR17520069.1709424  
SRR17520069.1709426  
SRR17520069.1709428  
SRR17520069.1709430  
SRR17520069.1709432  
SRR17520069.1709434  
SRR17520069.1709436  
SRR17520069.1709438

SRR17520069.1709440  
SRR17520069.1709442  
SRR17520069.1709444  
SRR17520069.1709446  
SRR17520069.1709448  
SRR17520069.1709450  
SRR17520069.1709452  
SRR17520069.1709454  
SRR17520069.1709456  
SRR17520069.1709458  
SRR17520069.1709460  
SRR17520069.1709462  
SRR17520069.1709464  
SRR17520069.1716221  
SRR17520069.1716223  
SRR17520069.1716225  
SRR17520069.1716227  
SRR17520069.1716229  
SRR17520069.1716231  
SRR17520069.1716233  
SRR17520069.1716235  
SRR17520069.1716237  
SRR17520069.1716239  
SRR17520069.1716241  
SRR17520069.1716243  
SRR17520069.1716245  
SRR17520069.1718504  
SRR17520069.1718506  
SRR17520069.1718508  
SRR17520069.1718510  
SRR17520069.1718512  
SRR17520069.1718514  
SRR17520069.1718516  
SRR17520069.1718518  
SRR17520069.1718520  
SRR17520069.1718522  
SRR17520069.1718524  
SRR17520069.1718526  
SRR17520069.1718528  
SRR17520069.1718530  
SRR17520069.1718532  
SRR17520069.1718534  
SRR17520069.1718536  
SRR17520069.1718538  
SRR17520069.1718540  
SRR17520069.1718542  
SRR17520069.1718544

SRR17520069. 1718546  
SRR17520069. 1718548  
SRR17520069. 1718550  
SRR17520069. 1718552  
SRR17520069. 1718554  
SRR17520069. 1718556  
SRR17520069. 1726598  
SRR17520069. 1726600  
SRR17520069. 1726602  
SRR17520069. 1726604  
SRR17520069. 1726606  
SRR17520069. 1726608  
SRR17520069. 1726610  
SRR17520069. 1726612  
SRR17520069. 1726614  
SRR17520069. 1726616  
SRR17520069. 1726618  
SRR17520069. 1726620  
SRR17520069. 1726622  
SRR17520069. 1726624  
SRR17520069. 1726626  
SRR17520069. 1726628  
SRR17520069. 1726630  
SRR17520069. 1740901  
SRR17520069. 1740903  
SRR17520069. 1740905  
SRR17520069. 1740907  
SRR17520069. 1750484  
SRR17520069. 1750486  
SRR17520069. 1750488  
SRR17520069. 1750492  
SRR17520069. 1751719  
SRR17520069. 1751721  
SRR17520069. 1751723  
SRR17520069. 1751725  
SRR17520069. 1751727  
SRR17520069. 1751729  
SRR17520069. 1751731  
SRR17520069. 1751733  
SRR17520069. 1751735  
SRR17520069. 1751737  
SRR17520069. 1751739  
SRR17520069. 1751741  
SRR17520069. 1751743  
SRR17520069. 1751745  
SRR17520069. 1751747  
SRR17520069. 1751749

SRR17520069.1751751  
SRR17520069.1751753  
SRR17520069.1751755  
SRR17520069.1751757  
SRR17520069.1751759  
SRR17520069.1751761  
SRR17520069.1751763  
SRR17520069.1751765  
SRR17520069.1751767  
SRR17520069.1751769  
SRR17520069.1751771  
SRR17520069.1751773  
SRR17520069.1751775  
SRR17520069.1752746  
SRR17520069.1752748  
SRR17520069.1752750  
SRR17520069.1752752  
SRR17520069.1752754  
SRR17520069.1752756  
SRR17520069.1752758  
SRR17520069.1752760  
SRR17520069.1752762  
SRR17520069.1752764  
SRR17520069.1752766  
SRR17520069.1752768  
SRR17520069.1753061  
SRR17520069.1757738  
SRR17520069.1757740  
SRR17520069.1757742  
SRR17520069.1757744  
SRR17520069.1757746  
SRR17520069.1759635  
SRR17520069.1759639  
SRR17520069.1759643  
SRR17520069.1759645  
SRR17520069.1759649  
SRR17520069.1759651  
SRR17520069.1759653  
SRR17520069.1759655  
SRR17520069.1759657  
SRR17520069.1759659  
SRR17520069.1759661  
SRR17520069.1759663  
SRR17520069.1759665  
SRR17520069.1759669  
SRR17520069.1765365  
SRR17520069.1766100

SRR17520069.1766102  
SRR17520069.1766104  
SRR17520069.1766106  
SRR17520069.1766108  
SRR17520069.1766110  
SRR17520069.1766112  
SRR17520069.1766114  
SRR17520069.1766116  
SRR17520069.1766118  
SRR17520069.1766120  
SRR17520069.1766122  
SRR17520069.1768585  
SRR17520069.1769632  
SRR17520069.1769634  
SRR17520069.1769636  
SRR17520069.1769638  
SRR17520069.1769640  
SRR17520069.1769642  
SRR17520069.1769644  
SRR17520069.1769646  
SRR17520069.1769648  
SRR17520069.1769650  
SRR17520069.1769652  
SRR17520069.1769654  
SRR17520069.1769656  
SRR17520069.1769658  
SRR17520069.1769660  
SRR17520069.1769662  
SRR17520069.1769664  
SRR17520069.1769666  
SRR17520069.1769668  
SRR17520069.1769670  
SRR17520069.1769672  
SRR17520069.1769674  
SRR17520069.1769676  
SRR17520069.1769678  
SRR17520069.1769680  
SRR17520069.1769682  
SRR17520069.1769684  
SRR17520069.1769686  
SRR17520069.1769688  
SRR17520069.1769690  
SRR17520069.1769692  
SRR17520069.1769694  
SRR17520069.1769696  
SRR17520069.1769698  
SRR17520069.1769700



SRR17520069. 1769702  
SRR17520069. 1769704  
SRR17520069. 1769706  
SRR17520069. 1769708  
SRR17520069. 1769710  
SRR17520069. 1769712  
SRR17520069. 1769714  
SRR17520069. 1769716  
SRR17520069. 1769718  
SRR17520069. 1769720  
SRR17520069. 1769722  
SRR17520069. 1769724  
SRR17520069. 1769726  
SRR17520069. 1769728  
SRR17520069. 1769730  
SRR17520069. 1769732  
SRR17520069. 1769734  
SRR17520069. 1769736  
SRR17520069. 1769738  
SRR17520069. 1769740  
SRR17520069. 1769742  
SRR17520069. 1769744  
SRR17520069. 1769746  
SRR17520069. 1769750  
SRR17520069. 1770385  
SRR17520069. 1770387  
SRR17520069. 1770389  
SRR17520069. 1770391  
SRR17520069. 1770393  
SRR17520069. 1770395  
SRR17520069. 1770397  
SRR17520069. 1770399  
SRR17520069. 1770401  
SRR17520069. 1770403  
SRR17520069. 1770405  
SRR17520069. 1774370  
SRR17520069. 1774375  
SRR17520069. 1774377  
SRR17520069. 1774379  
SRR17520069. 1774381  
SRR17520069. 1774383  
SRR17520069. 1774385  
SRR17520069. 1774387  
SRR17520069. 1774389  
SRR17520069. 1774391  
SRR17520069. 1774393  
SRR17520069. 1774397

SRR17520069. 1774399  
SRR17520069. 1788146  
SRR17520069. 1788148  
SRR17520069. 1788150  
SRR17520069. 1788152  
SRR17520069. 1788154  
SRR17520069. 1796513  
SRR17520069. 1796515  
SRR17520069. 1796519  
SRR17520069. 1796521  
SRR17520069. 1796523  
SRR17520069. 1796527  
SRR17520069. 1796529  
SRR17520069. 1796531  
SRR17520069. 1796533  
SRR17520069. 1796535  
SRR17520069. 1796537  
SRR17520069. 1796539  
SRR17520069. 1796541  
SRR17520069. 1796543  
SRR17520069. 1796545  
SRR17520069. 1796547  
SRR17520069. 1796549  
SRR17520069. 1796551  
SRR17520069. 1796553  
SRR17520069. 1796555  
SRR17520069. 1796557  
SRR17520069. 1796559  
SRR17520069. 1796561  
SRR17520069. 1796563  
SRR17520069. 1796565  
SRR17520069. 1796569  
SRR17520069. 1796571  
SRR17520069. 1796573  
SRR17520069. 1796575  
SRR17520069. 1796577  
SRR17520069. 1796579  
SRR17520069. 1796581  
SRR17520069. 1796583  
SRR17520069. 1796585  
SRR17520069. 1796587  
SRR17520069. 1796589  
SRR17520069. 1796591  
SRR17520069. 1796593  
SRR17520069. 1796597  
SRR17520069. 1796603  
SRR17520069. 1796605

SRR17520069.1796607  
SRR17520069.1796609  
SRR17520069.1796611  
SRR17520069.1796615  
SRR17520069.1796617  
SRR17520069.1796619  
SRR17520069.1797812  
SRR17520069.1797814  
SRR17520069.1797816  
SRR17520069.1797818  
SRR17520069.1797820  
SRR17520069.1797822  
SRR17520069.1797824  
SRR17520069.1797826  
SRR17520069.1797828  
SRR17520069.1797830  
SRR17520069.1797832  
SRR17520069.1797834  
SRR17520069.1797836  
SRR17520069.1797838  
SRR17520069.1799143  
SRR17520069.1799145  
SRR17520069.1799147  
SRR17520069.1799149  
SRR17520069.1799151  
SRR17520069.1799153  
SRR17520069.1799155  
SRR17520069.1799157  
SRR17520069.1799161  
SRR17520069.1799163  
SRR17520069.1799165  
SRR17520069.1799167  
SRR17520069.1799169  
SRR17520069.1799171  
SRR17520069.1799173  
SRR17520069.1799175  
SRR17520069.1799177  
SRR17520069.1799179  
SRR17520069.1799181  
SRR17520069.1799183  
SRR17520069.1799185  
SRR17520069.1799187  
SRR17520069.1799189  
SRR17520069.1799191  
SRR17520069.1799193  
SRR17520069.1799195  
SRR17520069.1799197

SRR17520069.1799199  
SRR17520069.1799201  
SRR17520069.1799203  
SRR17520069.1799205  
SRR17520069.1799207  
SRR17520069.1799209  
SRR17520069.1799213  
SRR17520069.1799215  
SRR17520069.1799217  
SRR17520069.1799219  
SRR17520069.1799221  
SRR17520069.1799223  
SRR17520069.1799225  
SRR17520069.1799227  
SRR17520069.1799231  
SRR17520069.1799233  
SRR17520069.1799235  
SRR17520069.1799241  
SRR17520069.1799243  
SRR17520069.1799245  
SRR17520069.1799247  
SRR17520069.1799249  
SRR17520069.1799251  
SRR17520069.1799253  
SRR17520069.1799255  
SRR17520069.1799257  
SRR17520069.1799259  
SRR17520069.1799261  
SRR17520069.1799263  
SRR17520069.1799265  
SRR17520069.1799267  
SRR17520069.1799271  
SRR17520069.1799273  
SRR17520069.1799275  
SRR17520069.1799277  
SRR17520069.1799281  
SRR17520069.1799283  
SRR17520069.1799285  
SRR17520069.1799287  
SRR17520069.1799289  
SRR17520069.1799291  
SRR17520069.1799293  
SRR17520069.1799295  
SRR17520069.1799297  
SRR17520069.1799299  
SRR17520069.1799301  
SRR17520069.1799303

SRR17520069. 1799305  
SRR17520069. 1799307  
SRR17520069. 1799309  
SRR17520069. 1799311  
SRR17520069. 1799313  
SRR17520069. 1799315  
SRR17520069. 1799317  
SRR17520069. 1799319  
SRR17520069. 1799321  
SRR17520069. 1799323  
SRR17520069. 1799325  
SRR17520069. 1799329  
SRR17520069. 1799331  
SRR17520069. 1799333  
SRR17520069. 1799335  
SRR17520069. 1799337  
SRR17520069. 1799339  
SRR17520069. 1799341  
SRR17520069. 1799343  
SRR17520069. 1799345  
SRR17520069. 1799347  
SRR17520069. 1799349  
SRR17520069. 1804859  
SRR17520069. 1804861  
SRR17520069. 1804863  
SRR17520069. 1804865  
SRR17520069. 1804867  
SRR17520069. 1804869  
SRR17520069. 1804871  
SRR17520069. 1804873  
SRR17520069. 1804875  
SRR17520069. 1804877  
SRR17520069. 1804879  
SRR17520069. 1805136  
SRR17520069. 1805323  
SRR17520069. 1805325  
SRR17520069. 1805327  
SRR17520069. 1805329  
SRR17520069. 1805331  
SRR17520069. 1805333  
SRR17520069. 1805335  
SRR17520069. 1805337  
SRR17520069. 1805339  
SRR17520069. 1807275  
SRR17520069. 1809680  
SRR17520069. 1809682  
SRR17520069. 1810018

SRR17520069. 1810020  
SRR17520069. 1810022  
SRR17520069. 1810026  
SRR17520069. 1810028  
SRR17520069. 1810030  
SRR17520069. 1810032  
SRR17520069. 1810184  
SRR17520069. 1810186  
SRR17520069. 1810188  
SRR17520069. 1818449  
SRR17520069. 1831519  
SRR17520069. 1831521  
SRR17520069. 1831523  
SRR17520069. 1831525  
SRR17520069. 1831527  
SRR17520069. 1831529  
SRR17520069. 1831531  
SRR17520069. 1831533  
SRR17520069. 1831535  
SRR17520069. 1831537  
SRR17520069. 1831539  
SRR17520069. 1831541  
SRR17520069. 1831549  
SRR17520069. 1831551  
SRR17520069. 1831553  
SRR17520069. 1831555  
SRR17520069. 1831557  
SRR17520069. 1831559  
SRR17520069. 1831561  
SRR17520069. 1831563  
SRR17520069. 1831565  
SRR17520069. 1831567  
SRR17520069. 1831569  
SRR17520069. 1831571  
SRR17520069. 1831573  
SRR17520069. 1831575  
SRR17520069. 1831577  
SRR17520069. 1831579  
SRR17520069. 1831581  
SRR17520069. 1831583  
SRR17520069. 1831585  
SRR17520069. 1831587  
SRR17520069. 1831591  
SRR17520069. 1831593  
SRR17520069. 1831595  
SRR17520069. 1831670  
SRR17520069. 1831672

SRR17520069. 1831674  
SRR17520069. 1831676  
SRR17520069. 1831678  
SRR17520069. 1831680  
SRR17520069. 1831684  
SRR17520069. 1831686  
SRR17520069. 1831688  
SRR17520069. 1831690  
SRR17520069. 1831692  
SRR17520069. 1831694  
SRR17520069. 1831696  
SRR17520069. 1831698  
SRR17520069. 1831700  
SRR17520069. 1831702  
SRR17520069. 1831704  
SRR17520069. 1831706  
SRR17520069. 1831708  
SRR17520069. 1831710  
SRR17520069. 1831712  
SRR17520069. 1831714  
SRR17520069. 1831716  
SRR17520069. 1831718  
SRR17520069. 1833296  
SRR17520069. 1833298  
SRR17520069. 1833302  
SRR17520069. 1833304  
SRR17520069. 1833306  
SRR17520069. 1833308  
SRR17520069. 1833310  
SRR17520069. 1833312  
SRR17520069. 1833314  
SRR17520069. 1833316  
SRR17520069. 1833318  
SRR17520069. 1833320  
SRR17520069. 1833324  
SRR17520069. 1833326  
SRR17520069. 1833330  
SRR17520069. 1833332  
SRR17520069. 1833334  
SRR17520069. 1833338  
SRR17520069. 1833340  
SRR17520069. 1833342  
SRR17520069. 1833346  
SRR17520069. 1833348  
SRR17520069. 1833350  
SRR17520069. 1833354  
SRR17520069. 1833358

SRR17520069. 1833360  
SRR17520069. 1833362  
SRR17520069. 1833364  
SRR17520069. 1833366  
SRR17520069. 1833368  
SRR17520069. 1833370  
SRR17520069. 1833372  
SRR17520069. 1833374  
SRR17520069. 1833378  
SRR17520069. 1833380  
SRR17520069. 1833382  
SRR17520069. 1833384  
SRR17520069. 1833386  
SRR17520069. 1833390  
SRR17520069. 1833392  
SRR17520069. 1833394  
SRR17520069. 1833396  
SRR17520069. 1833402  
SRR17520069. 1833404  
SRR17520069. 1833406  
SRR17520069. 1833408  
SRR17520069. 1833412  
SRR17520069. 1833414  
SRR17520069. 1833416  
SRR17520069. 1833418  
SRR17520069. 1833420  
SRR17520069. 1833422  
SRR17520069. 1833424  
SRR17520069. 1833426  
SRR17520069. 1833428  
SRR17520069. 1833430  
SRR17520069. 1833432  
SRR17520069. 1833434  
SRR17520069. 1833436  
SRR17520069. 1833438  
SRR17520069. 1833440  
SRR17520069. 1833442  
SRR17520069. 1833444  
SRR17520069. 1833446  
SRR17520069. 1833450  
SRR17520069. 1833454  
SRR17520069. 1833457  
SRR17520069. 1833462  
SRR17520069. 1833464  
SRR17520069. 1833468  
SRR17520069. 1841480  
SRR17520069. 1841482



SRR17520069. 1841486  
SRR17520069. 1841488  
SRR17520069. 1841490  
SRR17520069. 1841492  
SRR17520069. 1841494  
SRR17520069. 1841984  
SRR17520069. 1841986  
SRR17520069. 1841988  
SRR17520069. 1841990  
SRR17520069. 1841992  
SRR17520069. 1841994  
SRR17520069. 1841996  
SRR17520069. 1841998  
SRR17520069. 1842000  
SRR17520069. 1842002  
SRR17520069. 1845663  
SRR17520069. 1845665  
SRR17520069. 1845667  
SRR17520069. 1845669  
SRR17520069. 1845671  
SRR17520069. 1845673  
SRR17520069. 1845675  
SRR17520069. 1845677  
SRR17520069. 1845679  
SRR17520069. 1845681  
SRR17520069. 1845683  
SRR17520069. 1845685  
SRR17520069. 1845687  
SRR17520069. 1847354  
SRR17520069. 1847356  
SRR17520069. 1847358  
SRR17520069. 1847360  
SRR17520069. 1847362  
SRR17520069. 1847364  
SRR17520069. 1847366  
SRR17520069. 1847368  
SRR17520069. 1847370  
SRR17520069. 1847372  
SRR17520069. 1847374  
SRR17520069. 1847376  
SRR17520069. 1847378  
SRR17520069. 1847380  
SRR17520069. 1847382  
SRR17520069. 1847384  
SRR17520069. 1847388  
SRR17520069. 1847390  
SRR17520069. 1847392

SRR17520069. 1847394  
SRR17520069. 1847396  
SRR17520069. 1847398  
SRR17520069. 1847400  
SRR17520069. 1847402  
SRR17520069. 1847404  
SRR17520069. 1847406  
SRR17520069. 1847408  
SRR17520069. 1847410  
SRR17520069. 1848461  
SRR17520069. 1848463  
SRR17520069. 1848465  
SRR17520069. 1848467  
SRR17520069. 1848469  
SRR17520069. 1848471  
SRR17520069. 1848473  
SRR17520069. 1848475  
SRR17520069. 1848477  
SRR17520069. 1848479  
SRR17520069. 1848481  
SRR17520069. 1848483  
SRR17520069. 1848485  
SRR17520069. 1848487  
SRR17520069. 1848489  
SRR17520069. 1848491  
SRR17520069. 1848493  
SRR17520069. 1848495  
SRR17520069. 1848497  
SRR17520069. 1848499  
SRR17520069. 1848501  
SRR17520069. 1848503  
SRR17520069. 1848505  
SRR17520069. 1848507  
SRR17520069. 1848509  
SRR17520069. 1848511  
SRR17520069. 1848513  
SRR17520069. 1848515  
SRR17520069. 1848517  
SRR17520069. 1848519  
SRR17520069. 1848521  
SRR17520069. 1848523  
SRR17520069. 1848525  
SRR17520069. 1848527  
SRR17520069. 1848529  
SRR17520069. 1848531  
SRR17520069. 1848533  
SRR17520069. 1848535

SRR17520069. 1848537  
SRR17520069. 1848539  
SRR17520069. 1848541  
SRR17520069. 1848543  
SRR17520069. 1848545  
SRR17520069. 1848547  
SRR17520069. 1848549  
SRR17520069. 1848551  
SRR17520069. 1848553  
SRR17520069. 1848555  
SRR17520069. 1848557  
SRR17520069. 1848559  
SRR17520069. 1848561  
SRR17520069. 1848563  
SRR17520069. 1848565  
SRR17520069. 1848567  
SRR17520069. 1848569  
SRR17520069. 1848571  
SRR17520069. 1848573  
SRR17520069. 1848575  
SRR17520069. 1848577  
SRR17520069. 1848579  
SRR17520069. 1848581  
SRR17520069. 1848583  
SRR17520069. 1848585  
SRR17520069. 1848587  
SRR17520069. 1848590  
SRR17520069. 1848592  
SRR17520069. 1848594  
SRR17520069. 1848596  
SRR17520069. 1848598  
SRR17520069. 1848600  
SRR17520069. 1848602  
SRR17520069. 1848604  
SRR17520069. 1848606  
SRR17520069. 1848608  
SRR17520069. 1848610  
SRR17520069. 1848612  
SRR17520069. 1848614  
SRR17520069. 1848616  
SRR17520069. 1848618  
SRR17520069. 1848620  
SRR17520069. 1848622  
SRR17520069. 1848624  
SRR17520069. 1848626  
SRR17520069. 1848628  
SRR17520069. 1848630

SRR17520069. 1849585  
SRR17520069. 1849587  
SRR17520069. 1849589  
SRR17520069. 1854318  
SRR17520069. 1854320  
SRR17520069. 1854322  
SRR17520069. 1854324  
SRR17520069. 1854326  
SRR17520069. 1854328  
SRR17520069. 1854330  
SRR17520069. 1854332  
SRR17520069. 1854334  
SRR17520069. 1854336  
SRR17520069. 1854338  
SRR17520069. 1854340  
SRR17520069. 1854342  
SRR17520069. 1854344  
SRR17520069. 1854346  
SRR17520069. 1854348  
SRR17520069. 1854350  
SRR17520069. 1854352  
SRR17520069. 1854354  
SRR17520069. 1854356  
SRR17520069. 1854358  
SRR17520069. 1854360  
SRR17520069. 1854362  
SRR17520069. 1854364  
SRR17520069. 1854366  
SRR17520069. 1854368  
SRR17520069. 1854370  
SRR17520069. 1854372  
SRR17520069. 1854374  
SRR17520069. 1854376  
SRR17520069. 1857592  
SRR17520069. 1857594  
SRR17520069. 1857596  
SRR17520069. 1857598  
SRR17520069. 1857600  
SRR17520069. 1857602  
SRR17520069. 1857604  
SRR17520069. 1857606  
SRR17520069. 1860743  
SRR17520069. 1860745  
SRR17520069. 1860747  
SRR17520069. 1860749  
SRR17520069. 1860751  
SRR17520069. 1860753

SRR17520069. 1860755  
SRR17520069. 1860757  
SRR17520069. 1860759  
SRR17520069. 1860761  
SRR17520069. 1860763  
SRR17520069. 1860765  
SRR17520069. 1860767  
SRR17520069. 1860769  
SRR17520069. 1860771  
SRR17520069. 1860773  
SRR17520069. 1860775  
SRR17520069. 1860777  
SRR17520069. 1860779  
SRR17520069. 1860781  
SRR17520069. 1860783  
SRR17520069. 1860785  
SRR17520069. 1860787  
SRR17520069. 1860789  
SRR17520069. 1860791  
SRR17520069. 1860793  
SRR17520069. 1860795  
SRR17520069. 1860797  
SRR17520069. 1860799  
SRR17520069. 1860801  
SRR17520069. 1860803  
SRR17520069. 1860805  
SRR17520069. 1860807  
SRR17520069. 1860809  
SRR17520069. 1860811  
SRR17520069. 1860815  
SRR17520069. 1860817  
SRR17520069. 1860819  
SRR17520069. 1860821  
SRR17520069. 1860823  
SRR17520069. 1860825  
SRR17520069. 1860827  
SRR17520069. 1860829  
SRR17520069. 1866388  
SRR17520069. 1866390  
SRR17520069. 1866392  
SRR17520069. 1866394  
SRR17520069. 1866396  
SRR17520069. 1866398  
SRR17520069. 1866400  
SRR17520069. 1866402  
SRR17520069. 1866404  
SRR17520069. 1866406

SRR17520069. 1866408  
SRR17520069. 1866917  
SRR17520069. 1870889  
SRR17520069. 1870891  
SRR17520069. 1870893  
SRR17520069. 1870895  
SRR17520069. 1870897  
SRR17520069. 1870899  
SRR17520069. 1870901  
SRR17520069. 1870903  
SRR17520069. 1870905  
SRR17520069. 1870907  
SRR17520069. 1870909  
SRR17520069. 1870911  
SRR17520069. 1870913  
SRR17520069. 1870915  
SRR17520069. 1870917  
SRR17520069. 1870919  
SRR17520069. 1870921  
SRR17520069. 1870923  
SRR17520069. 1870925  
SRR17520069. 1870927  
SRR17520069. 1870931  
SRR17520069. 1870933  
SRR17520069. 1870935  
SRR17520069. 1870939  
SRR17520069. 1878927  
SRR17520069. 1879966  
SRR17520069. 1879968  
SRR17520069. 1879970  
SRR17520069. 1879972  
SRR17520069. 1879974  
SRR17520069. 1879976  
SRR17520069. 1879978  
SRR17520069. 1879980  
SRR17520069. 1879982  
SRR17520069. 1879984  
SRR17520069. 1879986  
SRR17520069. 1879988  
SRR17520069. 1879990  
SRR17520069. 1879992  
SRR17520069. 1879994  
SRR17520069. 1879996  
SRR17520069. 1880000  
SRR17520069. 1880002  
SRR17520069. 1880004  
SRR17520069. 1881305

SRR17520069. 1881307  
SRR17520069. 1881309  
SRR17520069. 1881311  
SRR17520069. 1881313  
SRR17520069. 1881315  
SRR17520069. 1881317  
SRR17520069. 1881319  
SRR17520069. 1881321  
SRR17520069. 1881323  
SRR17520069. 1881325  
SRR17520069. 1881327  
SRR17520069. 1881329  
SRR17520069. 1881331  
SRR17520069. 1881333  
SRR17520069. 1881335  
SRR17520069. 1881337  
SRR17520069. 1881339  
SRR17520069. 1881341  
SRR17520069. 1881343  
SRR17520069. 1881345  
SRR17520069. 1881347  
SRR17520069. 1881349  
SRR17520069. 1881351  
SRR17520069. 1881353  
SRR17520069. 1881355  
SRR17520069. 1881357  
SRR17520069. 1881359  
SRR17520069. 1881361  
SRR17520069. 1881363  
SRR17520069. 1881365  
SRR17520069. 1881367  
SRR17520069. 1881369  
SRR17520069. 1881371  
SRR17520069. 1881373  
SRR17520069. 1881375  
SRR17520069. 1881377  
SRR17520069. 1881379  
SRR17520069. 1881381  
SRR17520069. 1881383  
SRR17520069. 1881385  
SRR17520069. 1881387  
SRR17520069. 1881389  
SRR17520069. 1881391  
SRR17520069. 1881393  
SRR17520069. 1881395  
SRR17520069. 1881397  
SRR17520069. 1881399

SRR17520069.1881401  
SRR17520069.1881403  
SRR17520069.1881405  
SRR17520069.1881407  
SRR17520069.1881409  
SRR17520069.1881411  
SRR17520069.1881413  
SRR17520069.1881415  
SRR17520069.1881417  
SRR17520069.1881419  
SRR17520069.1881421  
SRR17520069.1881423  
SRR17520069.1881425  
SRR17520069.1881427  
SRR17520069.1881429  
SRR17520069.1881431  
SRR17520069.1881433  
SRR17520069.1881435  
SRR17520069.1881437  
SRR17520069.1881439  
SRR17520069.1881441  
SRR17520069.1881443  
SRR17520069.1881445  
SRR17520069.1881447  
SRR17520069.1881449  
SRR17520069.1881451  
SRR17520069.1881453  
SRR17520069.1881455  
SRR17520069.1881457  
SRR17520069.1881459  
SRR17520069.1881461  
SRR17520069.1881463  
SRR17520069.1881465  
SRR17520069.1881467  
SRR17520069.1881469  
SRR17520069.1881471  
SRR17520069.1881473  
SRR17520069.1881475  
SRR17520069.1881477  
SRR17520069.1881479  
SRR17520069.1881481  
SRR17520069.1881483  
SRR17520069.1881485  
SRR17520069.1881487  
SRR17520069.1881489  
SRR17520069.1881491  
SRR17520069.1881493



SRR17520069.1885096  
SRR17520069.1885098  
SRR17520069.1885100  
SRR17520069.1885102  
SRR17520069.1885104  
SRR17520069.1885106  
SRR17520069.1887369  
SRR17520069.1887371  
SRR17520069.1887373  
SRR17520069.1887375  
SRR17520069.1887379  
SRR17520069.1887381  
SRR17520069.1887383  
SRR17520069.1887385  
SRR17520069.1887387  
SRR17520069.1887389  
SRR17520069.1887391  
SRR17520069.1887393  
SRR17520069.1887395  
SRR17520069.1887397  
SRR17520069.1887399  
SRR17520069.1887401  
SRR17520069.1887403  
SRR17520069.1887405  
SRR17520069.1887407  
SRR17520069.1887409  
SRR17520069.1887411  
SRR17520069.1887413  
SRR17520069.1887415  
SRR17520069.1887417  
SRR17520069.1887419  
SRR17520069.1887421  
SRR17520069.1887423  
SRR17520069.1887425  
SRR17520069.1887427  
SRR17520069.1887429  
SRR17520069.1887431  
SRR17520069.1890049  
SRR17520069.1890992  
SRR17520069.1890994  
SRR17520069.1890996  
SRR17520069.1890998  
SRR17520069.1891000  
SRR17520069.1891002  
SRR17520069.1891006  
SRR17520069.1891008  
SRR17520069.1891010

SRR17520069.1891014  
SRR17520069.1891018  
SRR17520069.1891020  
SRR17520069.1891022  
SRR17520069.1891024  
SRR17520069.1891026  
SRR17520069.1891028  
SRR17520069.1891030  
SRR17520069.1891032  
SRR17520069.1891034  
SRR17520069.1891036  
SRR17520069.1891038  
SRR17520069.1891040  
SRR17520069.1891042  
SRR17520069.1891044  
SRR17520069.1891046  
SRR17520069.1891048  
SRR17520069.1891050  
SRR17520069.1891052  
SRR17520069.1891054  
SRR17520069.1891056  
SRR17520069.1891058  
SRR17520069.1891060  
SRR17520069.1891062  
SRR17520069.1891064  
SRR17520069.1891066  
SRR17520069.1891068  
SRR17520069.1891070  
SRR17520069.1891072  
SRR17520069.1891076  
SRR17520069.1891078  
SRR17520069.1891080  
SRR17520069.1891082  
SRR17520069.1891084  
SRR17520069.1891086  
SRR17520069.1891088  
SRR17520069.1891090  
SRR17520069.1891092  
SRR17520069.1891094  
SRR17520069.1891096  
SRR17520069.1891098  
SRR17520069.1891100  
SRR17520069.1891102  
SRR17520069.1891104  
SRR17520069.1891106  
SRR17520069.1891108  
SRR17520069.1892111

SRR17520069. 1892113  
SRR17520069. 1892115  
SRR17520069. 1892117  
SRR17520069. 1892119  
SRR17520069. 1892121  
SRR17520069. 1892123  
SRR17520069. 1892125  
SRR17520069. 1892127  
SRR17520069. 1892129  
SRR17520069. 1892131  
SRR17520069. 1892133  
SRR17520069. 1892135  
SRR17520069. 1892137  
SRR17520069. 1892139  
SRR17520069. 1892141  
SRR17520069. 1892143  
SRR17520069. 1892145  
SRR17520069. 1892147  
SRR17520069. 1892149  
SRR17520069. 1892151  
SRR17520069. 1892153  
SRR17520069. 1892155  
SRR17520069. 1892157  
SRR17520069. 1892159  
SRR17520069. 1892161  
SRR17520069. 1892163  
SRR17520069. 1892165  
SRR17520069. 1892167  
SRR17520069. 1892169  
SRR17520069. 1892171  
SRR17520069. 1892173  
SRR17520069. 1892175  
SRR17520069. 1892177  
SRR17520069. 1895966  
SRR17520069. 1895968  
SRR17520069. 1895970  
SRR17520069. 1895972  
SRR17520069. 1895974  
SRR17520069. 1895976  
SRR17520069. 1895978  
SRR17520069. 1895980  
SRR17520069. 1895982  
SRR17520069. 1895984  
SRR17520069. 1895986  
SRR17520069. 1895990  
SRR17520069. 1895992  
SRR17520069. 1895994

SRR17520069. 1895996  
SRR17520069. 1895998  
SRR17520069. 1896000  
SRR17520069. 1896002  
SRR17520069. 1896004  
SRR17520069. 1896006  
SRR17520069. 1896008  
SRR17520069. 1896010  
SRR17520069. 1896012  
SRR17520069. 1896014  
SRR17520069. 1896016  
SRR17520069. 1896018  
SRR17520069. 1896020  
SRR17520069. 1896022  
SRR17520069. 1896024  
SRR17520069. 1896026  
SRR17520069. 1896028  
SRR17520069. 1896030  
SRR17520069. 1896032  
SRR17520069. 1896034  
SRR17520069. 1896036  
SRR17520069. 1896038  
SRR17520069. 1896040  
SRR17520069. 1896042  
SRR17520069. 1896044  
SRR17520069. 1896046  
SRR17520069. 1896048  
SRR17520069. 1896050  
SRR17520069. 1896052  
SRR17520069. 1896054  
SRR17520069. 1896056  
SRR17520069. 1899900  
SRR17520069. 1899902  
SRR17520069. 1899904  
SRR17520069. 1899906  
SRR17520069. 1899908  
SRR17520069. 1899910  
SRR17520069. 1899912  
SRR17520069. 1903355  
SRR17520069. 1903361  
SRR17520069. 1903365  
SRR17520069. 1905386  
SRR17520069. 1905388  
SRR17520069. 1905390  
SRR17520069. 1905392  
SRR17520069. 1905394  
SRR17520069. 1905396

SRR17520069.1905398  
SRR17520069.1905400  
SRR17520069.1905402  
SRR17520069.1905404  
SRR17520069.1905408  
SRR17520069.1905410  
SRR17520069.1905412  
SRR17520069.1905414  
SRR17520069.1905416  
SRR17520069.1905418  
SRR17520069.1905420  
SRR17520069.1910043  
SRR17520069.1917897  
SRR17520069.1917899  
SRR17520069.1917901  
SRR17520069.1917903  
SRR17520069.1917905  
SRR17520069.1917907  
SRR17520069.1917909  
SRR17520069.1917911  
SRR17520069.1917913  
SRR17520069.1917915  
SRR17520069.1917917  
SRR17520069.1917919  
SRR17520069.1917921  
SRR17520069.1917923  
SRR17520069.1917925  
SRR17520069.1917927  
SRR17520069.1917929  
SRR17520069.1917931  
SRR17520069.1917933  
SRR17520069.1917935  
SRR17520069.1917937  
SRR17520069.1917939  
SRR17520069.1917941  
SRR17520069.1917943  
SRR17520069.1917945  
SRR17520069.1917947  
SRR17520069.1917949  
SRR17520069.1917951  
SRR17520069.1917953  
SRR17520069.1917955  
SRR17520069.1917958  
SRR17520069.1917964  
SRR17520069.1917966  
SRR17520069.1917968  
SRR17520069.1917970

SRR17520069. 1917972  
SRR17520069. 1917974  
SRR17520069. 1917978  
SRR17520069. 1917984  
SRR17520069. 1917986  
SRR17520069. 1917988  
SRR17520069. 1917990  
SRR17520069. 1917992  
SRR17520069. 1917994  
SRR17520069. 1917996  
SRR17520069. 1917998  
SRR17520069. 1918000  
SRR17520069. 1918002  
SRR17520069. 1918004  
SRR17520069. 1918006  
SRR17520069. 1918008  
SRR17520069. 1918010  
SRR17520069. 1918014  
SRR17520069. 1918018  
SRR17520069. 1921243  
SRR17520069. 1921247  
SRR17520069. 1921249  
SRR17520069. 1921251  
SRR17520069. 1921253  
SRR17520069. 1921255  
SRR17520069. 1921662  
SRR17520069. 1921664  
SRR17520069. 1921666  
SRR17520069. 1921668  
SRR17520069. 1921670  
SRR17520069. 1921672  
SRR17520069. 1921674  
SRR17520069. 1921676  
SRR17520069. 1921678  
SRR17520069. 1921680  
SRR17520069. 1921682  
SRR17520069. 1921684  
SRR17520069. 1921686  
SRR17520069. 1921688  
SRR17520069. 1921690  
SRR17520069. 1921692  
SRR17520069. 1921694  
SRR17520069. 1921696  
SRR17520069. 1921698  
SRR17520069. 1921819  
SRR17520069. 1921821  
SRR17520069. 1921823

SRR17520069. 1921825  
SRR17520069. 1921827  
SRR17520069. 1923432  
SRR17520069. 1923434  
SRR17520069. 1923436  
SRR17520069. 1923438  
SRR17520069. 1923440  
SRR17520069. 1923442  
SRR17520069. 1923444  
SRR17520069. 1923446  
SRR17520069. 1923684  
SRR17520069. 1923686  
SRR17520069. 1923688  
SRR17520069. 1923690  
SRR17520069. 1923692  
SRR17520069. 1923694  
SRR17520069. 1923696  
SRR17520069. 1923698  
SRR17520069. 1923700  
SRR17520069. 1923702  
SRR17520069. 1923704  
SRR17520069. 1923706  
SRR17520069. 1923708  
SRR17520069. 1923710  
SRR17520069. 1923712  
SRR17520069. 1923714  
SRR17520069. 1923716  
SRR17520069. 1923718  
SRR17520069. 1923720  
SRR17520069. 1923722  
SRR17520069. 1923724  
SRR17520069. 1926776  
SRR17520069. 1926778  
SRR17520069. 1926780  
SRR17520069. 1926782  
SRR17520069. 1926784  
SRR17520069. 1926786  
SRR17520069. 1926788  
SRR17520069. 1926790  
SRR17520069. 1926792  
SRR17520069. 1926794  
SRR17520069. 1926796  
SRR17520069. 1926798  
SRR17520069. 1926800  
SRR17520069. 1926802  
SRR17520069. 1926804  
SRR17520069. 1926806

SRR17520069. 1926808  
SRR17520069. 1926810  
SRR17520069. 1926814  
SRR17520069. 1926816  
SRR17520069. 1926818  
SRR17520069. 1926820  
SRR17520069. 1926822  
SRR17520069. 1926824  
SRR17520069. 1926826  
SRR17520069. 1926830  
SRR17520069. 1926832  
SRR17520069. 1926834  
SRR17520069. 1926836  
SRR17520069. 1926838  
SRR17520069. 1926840  
SRR17520069. 1937398  
SRR17520069. 1937400  
SRR17520069. 1937402  
SRR17520069. 1937404  
SRR17520069. 1937406  
SRR17520069. 1938389  
SRR17520069. 1938393  
SRR17520069. 1938395  
SRR17520069. 1938397  
SRR17520069. 1938399  
SRR17520069. 1942012  
SRR17520069. 1942014  
SRR17520069. 1942016  
SRR17520069. 1942018  
SRR17520069. 1942020  
SRR17520069. 1942024  
SRR17520069. 1942026  
SRR17520069. 1949481  
SRR17520069. 1951531  
SRR17520069. 1951533  
SRR17520069. 1951535  
SRR17520069. 1951537  
SRR17520069. 1951539  
SRR17520069. 1951541  
SRR17520069. 1951543  
SRR17520069. 1951545  
SRR17520069. 1951547  
SRR17520069. 1951549  
SRR17520069. 1951551  
SRR17520069. 1951553  
SRR17520069. 1951555  
SRR17520069. 1951557



SRR17520069. 1951559  
SRR17520069. 1951561  
SRR17520069. 1951563  
SRR17520069. 1951565  
SRR17520069. 1951567  
SRR17520069. 1951569  
SRR17520069. 1951571  
SRR17520069. 1951573  
SRR17520069. 1951575  
SRR17520069. 1951577  
SRR17520069. 1951579  
SRR17520069. 1951581  
SRR17520069. 1951585  
SRR17520069. 1951587  
SRR17520069. 1951589  
SRR17520069. 1951591  
SRR17520069. 1951593  
SRR17520069. 1951595  
SRR17520069. 1951597  
SRR17520069. 1951599  
SRR17520069. 1951601  
SRR17520069. 1951603  
SRR17520069. 1951605  
SRR17520069. 1951607  
SRR17520069. 1951609  
SRR17520069. 1951611  
SRR17520069. 1951613  
SRR17520069. 1951615  
SRR17520069. 1951617  
SRR17520069. 1951619  
SRR17520069. 1951621  
SRR17520069. 1951623  
SRR17520069. 1951625  
SRR17520069. 1951627  
SRR17520069. 1951629  
SRR17520069. 1957133  
SRR17520069. 1957135  
SRR17520069. 1957137  
SRR17520069. 1962143  
SRR17520069. 1962145  
SRR17520069. 1962147  
SRR17520069. 1962149  
SRR17520069. 1962151  
SRR17520069. 1968262  
SRR17520069. 1971247  
SRR17520069. 1971280  
SRR17520069. 1971699

SRR17520069. 1971701  
SRR17520069. 1971703  
SRR17520069. 1971705  
SRR17520069. 1971707  
SRR17520069. 1971709  
SRR17520069. 1971711  
SRR17520069. 1971715  
SRR17520069. 1971717  
SRR17520069. 1971719  
SRR17520069. 1971721  
SRR17520069. 1977178  
SRR17520069. 1977180  
SRR17520069. 1977182  
SRR17520069. 1977184  
SRR17520069. 1977186  
SRR17520069. 1977188  
SRR17520069. 1977190  
SRR17520069. 1977192  
SRR17520069. 1977194  
SRR17520069. 1977196  
SRR17520069. 1977198  
SRR17520069. 1977200  
SRR17520069. 1977202  
SRR17520069. 1977204  
SRR17520069. 1977206  
SRR17520069. 1977208  
SRR17520069. 1977210  
SRR17520069. 1977212  
SRR17520069. 1977214  
SRR17520069. 1977216  
SRR17520069. 1977218  
SRR17520069. 1977220  
SRR17520069. 1977222  
SRR17520069. 1977224  
SRR17520069. 1977226  
SRR17520069. 1977228  
SRR17520069. 1977230  
SRR17520069. 1977232  
SRR17520069. 1977234  
SRR17520069. 1977236  
SRR17520069. 1977238  
SRR17520069. 1977240  
SRR17520069. 1977242  
SRR17520069. 1977244  
SRR17520069. 1977246  
SRR17520069. 1977248  
SRR17520069. 1977250

SRR17520069. 1977252  
SRR17520069. 1977254  
SRR17520069. 1977256  
SRR17520069. 1977258  
SRR17520069. 1977260  
SRR17520069. 1977262  
SRR17520069. 1977264  
SRR17520069. 1977266  
SRR17520069. 1977268  
SRR17520069. 1978384  
SRR17520069. 1978386  
SRR17520069. 1978388  
SRR17520069. 1978390  
SRR17520069. 1978392  
SRR17520069. 1978394  
SRR17520069. 1978396  
SRR17520069. 1978399  
SRR17520069. 1978401  
SRR17520069. 1978403  
SRR17520069. 1978405  
SRR17520069. 1978407  
SRR17520069. 1978409  
SRR17520069. 1978411  
SRR17520069. 1978413  
SRR17520069. 1978415  
SRR17520069. 1978417  
SRR17520069. 1978419  
SRR17520069. 1978421  
SRR17520069. 1978423  
SRR17520069. 1978425  
SRR17520069. 1978427  
SRR17520069. 1978429  
SRR17520069. 1978431  
SRR17520069. 1978433  
SRR17520069. 1978435  
SRR17520069. 1978437  
SRR17520069. 1978439  
SRR17520069. 1978441  
SRR17520069. 1978443  
SRR17520069. 1978445  
SRR17520069. 1978447  
SRR17520069. 1978449  
SRR17520069. 1978451  
SRR17520069. 1978453  
SRR17520069. 1978455  
SRR17520069. 1978457  
SRR17520069. 1978459

SRR17520069. 1978461  
SRR17520069. 1978463  
SRR17520069. 1978465  
SRR17520069. 1978467  
SRR17520069. 1978469  
SRR17520069. 1978637  
SRR17520069. 1978639  
SRR17520069. 1978641  
SRR17520069. 1978643  
SRR17520069. 1978645  
SRR17520069. 1978647  
SRR17520069. 1978649  
SRR17520069. 1978651  
SRR17520069. 1978653  
SRR17520069. 1978657  
SRR17520069. 1978659  
SRR17520069. 1978661  
SRR17520069. 1978663  
SRR17520069. 1978665  
SRR17520069. 1978667  
SRR17520069. 1978669  
SRR17520069. 1978673  
SRR17520069. 1978675  
SRR17520069. 1978677  
SRR17520069. 1978681  
SRR17520069. 1978683  
SRR17520069. 1978685  
SRR17520069. 1978687  
SRR17520069. 1980876  
SRR17520069. 1980878  
SRR17520069. 1980880  
SRR17520069. 1980882  
SRR17520069. 1980886  
SRR17520069. 1980888  
SRR17520069. 1980890  
SRR17520069. 1980892  
SRR17520069. 1980894  
SRR17520069. 1980896  
SRR17520069. 1980898  
SRR17520069. 1980900  
SRR17520069. 1980902  
SRR17520069. 1980904  
SRR17520069. 1980906  
SRR17520069. 1980908  
SRR17520069. 1980910  
SRR17520069. 1980912  
SRR17520069. 1980914

SRR17520069. 1980916  
SRR17520069. 1980918  
SRR17520069. 1980920  
SRR17520069. 1980922  
SRR17520069. 1980924  
SRR17520069. 1980926  
SRR17520069. 1980928  
SRR17520069. 1980930  
SRR17520069. 1980932  
SRR17520069. 1980934  
SRR17520069. 1980936  
SRR17520069. 1980938  
SRR17520069. 1980940  
SRR17520069. 1980942  
SRR17520069. 1980944  
SRR17520069. 1980946  
SRR17520069. 1980948  
SRR17520069. 1980950  
SRR17520069. 1980952  
SRR17520069. 1980954  
SRR17520069. 1980956  
SRR17520069. 1980958  
SRR17520069. 1980960  
SRR17520069. 1980962  
SRR17520069. 1980964  
SRR17520069. 1980966  
SRR17520069. 1980968  
SRR17520069. 1980970  
SRR17520069. 1980972  
SRR17520069. 1980974  
SRR17520069. 1980976  
SRR17520069. 1980978  
SRR17520069. 1980982  
SRR17520069. 1980984  
SRR17520069. 1980986  
SRR17520069. 1980988  
SRR17520069. 1980992  
SRR17520069. 1980998  
SRR17520069. 1981000  
SRR17520069. 1981002  
SRR17520069. 1981004  
SRR17520069. 1981006  
SRR17520069. 1981008  
SRR17520069. 1981016  
SRR17520069. 1983069  
SRR17520069. 1983071  
SRR17520069. 1983073

SRR17520069. 1983075  
SRR17520069. 1983077  
SRR17520069. 1983079  
SRR17520069. 1983081  
SRR17520069. 1983083  
SRR17520069. 1983085  
SRR17520069. 1983087  
SRR17520069. 1983089  
SRR17520069. 1983091  
SRR17520069. 1983093  
SRR17520069. 1983095  
SRR17520069. 1983097  
SRR17520069. 1983099  
SRR17520069. 1983101  
SRR17520069. 1983103  
SRR17520069. 1983105  
SRR17520069. 1983107  
SRR17520069. 1983109  
SRR17520069. 1983111  
SRR17520069. 1983113  
SRR17520069. 1983115  
SRR17520069. 1983117  
SRR17520069. 1983119  
SRR17520069. 1983121  
SRR17520069. 1983123  
SRR17520069. 1983125  
SRR17520069. 1983127  
SRR17520069. 1983129  
SRR17520069. 1983131  
SRR17520069. 1983133  
SRR17520069. 1983135  
SRR17520069. 1983137  
SRR17520069. 1983139  
SRR17520069. 1983141  
SRR17520069. 1983143  
SRR17520069. 1983145  
SRR17520069. 1983147  
SRR17520069. 1983149  
SRR17520069. 1983151  
SRR17520069. 1983153  
SRR17520069. 1983155  
SRR17520069. 1983157  
SRR17520069. 1983159  
SRR17520069. 1983161  
SRR17520069. 1983163  
SRR17520069. 1983165  
SRR17520069. 1983167

SRR17520069. 1983169  
SRR17520069. 1983171  
SRR17520069. 1983790  
SRR17520069. 1983792  
SRR17520069. 1985079  
SRR17520069. 1985081  
SRR17520069. 1985083  
SRR17520069. 1985085  
SRR17520069. 1985087  
SRR17520069. 1985089  
SRR17520069. 1985091  
SRR17520069. 1985093  
SRR17520069. 1985095  
SRR17520069. 1985097  
SRR17520069. 1985099  
SRR17520069. 1993823  
SRR17520069. 1993955  
SRR17520069. 1993957  
SRR17520069. 1993959  
SRR17520069. 1993961  
SRR17520069. 1993963  
SRR17520069. 1993965  
SRR17520069. 1993967  
SRR17520069. 1995131  
SRR17520069. 1995133  
SRR17520069. 1995135  
SRR17520069. 1995137  
SRR17520069. 1995139  
SRR17520069. 1995141  
SRR17520069. 1995143  
SRR17520069. 1995145  
SRR17520069. 1995147  
SRR17520069. 1995149  
SRR17520069. 1995151  
SRR17520069. 1995153  
SRR17520069. 1998133  
SRR17520069. 1998135  
SRR17520069. 1998137  
SRR17520069. 1998139  
SRR17520069. 1998141  
SRR17520069. 1998145  
SRR17520069. 1998147  
SRR17520069. 1998149  
SRR17520069. 1998151  
SRR17520069. 1998153  
SRR17520069. 1998155  
SRR17520069. 1998157

SRR17520069. 1998159  
SRR17520069. 1998161  
SRR17520069. 1998165  
SRR17520069. 1998167  
SRR17520069. 1998169  
SRR17520069. 1998171  
SRR17520069. 1998173  
SRR17520069. 1998175  
SRR17520069. 1998177  
SRR17520069. 1998179  
SRR17520069. 1998181  
SRR17520069. 1998183  
SRR17520069. 1998185  
SRR17520069. 1998187  
SRR17520069. 1998189  
SRR17520069. 1998191  
SRR17520069. 1998193  
SRR17520069. 1998197  
SRR17520069. 1998199  
SRR17520069. 1998201  
SRR17520069. 1998203  
SRR17520069. 1998205  
SRR17520069. 1998207  
SRR17520069. 1998209  
SRR17520069. 1998211  
SRR17520069. 1998213  
SRR17520069. 1998215  
SRR17520069. 1998217  
SRR17520069. 1998221  
SRR17520069. 1998223  
SRR17520069. 1998225  
SRR17520069. 1998227  
SRR17520069. 1998229  
SRR17520069. 1998231  
SRR17520069. 1998233  
SRR17520069. 1998235  
SRR17520069. 1998237  
SRR17520069. 1998239  
SRR17520069. 1998241  
SRR17520069. 1998243  
SRR17520069. 1998245  
SRR17520069. 1998247  
SRR17520069. 1998249  
SRR17520069. 1998251  
SRR17520069. 1998253  
SRR17520069. 2004398  
SRR17520069. 2004400



SRR17520069.2004402  
SRR17520069.2004404  
SRR17520069.2004406  
SRR17520069.2004408  
SRR17520069.2004410  
SRR17520069.2004412  
SRR17520069.2004414  
SRR17520069.2004416  
SRR17520069.2004418  
SRR17520069.2006830  
SRR17520069.2006832  
SRR17520069.2006840  
SRR17520069.2006842  
SRR17520069.2006844  
SRR17520069.2006846  
SRR17520069.2006848  
SRR17520069.2006850  
SRR17520069.2006852  
SRR17520069.2006854  
SRR17520069.2006856  
SRR17520069.2014514  
SRR17520069.2014518  
SRR17520069.2014520  
SRR17520069.2014522  
SRR17520069.2014524  
SRR17520069.2014526  
SRR17520069.2014528  
SRR17520069.2014530  
SRR17520069.2014532  
SRR17520069.2014534  
SRR17520069.2014536  
SRR17520069.2014538  
SRR17520069.2014540  
SRR17520069.2014542  
SRR17520069.2014544  
SRR17520069.2014546  
SRR17520069.2014548  
SRR17520069.2014550  
SRR17520069.2014552  
SRR17520069.2014554  
SRR17520069.2014558  
SRR17520069.2014560  
SRR17520069.2014562  
SRR17520069.2014564  
SRR17520069.2014566  
SRR17520069.2014568  
SRR17520069.2014570

SRR17520069.2014572  
SRR17520069.2014574  
SRR17520069.2014576  
SRR17520069.2014578  
SRR17520069.2014580  
SRR17520069.2014582  
SRR17520069.2014584  
SRR17520069.2014586  
SRR17520069.2014588  
SRR17520069.2014590  
SRR17520069.2014592  
SRR17520069.2014594  
SRR17520069.2014596  
SRR17520069.2014598  
SRR17520069.2014600  
SRR17520069.2014602  
SRR17520069.2014604  
SRR17520069.2014606  
SRR17520069.2014608  
SRR17520069.2014610  
SRR17520069.2014612  
SRR17520069.2015900  
SRR17520069.2015902  
SRR17520069.2015904  
SRR17520069.2015906  
SRR17520069.2015908  
SRR17520069.2015910  
SRR17520069.2015912  
SRR17520069.2015914  
SRR17520069.2015916  
SRR17520069.2015918  
SRR17520069.2015920  
SRR17520069.2015922  
SRR17520069.2015924  
SRR17520069.2015926  
SRR17520069.2015928  
SRR17520069.2015932  
SRR17520069.2015934  
SRR17520069.2015936  
SRR17520069.2015938  
SRR17520069.2015940  
SRR17520069.2015942  
SRR17520069.2015944  
SRR17520069.2015946  
SRR17520069.2015948  
SRR17520069.2015950  
SRR17520069.2015952

SRR17520069.2015954  
SRR17520069.2015956  
SRR17520069.2015958  
SRR17520069.2015960  
SRR17520069.2016952  
SRR17520069.2016954  
SRR17520069.2016956  
SRR17520069.2016958  
SRR17520069.2016960  
SRR17520069.2016962  
SRR17520069.2016964  
SRR17520069.2016966  
SRR17520069.2016968  
SRR17520069.2016970  
SRR17520069.2016972  
SRR17520069.2016974  
SRR17520069.2016976  
SRR17520069.2016978  
SRR17520069.2017508  
SRR17520069.2017510  
SRR17520069.2017512  
SRR17520069.2017961  
SRR17520069.2017963  
SRR17520069.2017965  
SRR17520069.2017967  
SRR17520069.2017969  
SRR17520069.2017973  
SRR17520069.2017975  
SRR17520069.2017977  
SRR17520069.2017979  
SRR17520069.2017981  
SRR17520069.2017983  
SRR17520069.2017985  
SRR17520069.2017987  
SRR17520069.2017989  
SRR17520069.2017991  
SRR17520069.2017993  
SRR17520069.2017995  
SRR17520069.2017997  
SRR17520069.2017999  
SRR17520069.2018001  
SRR17520069.2018003  
SRR17520069.2018005  
SRR17520069.2018007  
SRR17520069.2018009  
SRR17520069.2018011  
SRR17520069.2018013

SRR17520069.2018015  
SRR17520069.2018017  
SRR17520069.2023940  
SRR17520069.2023942  
SRR17520069.2023946  
SRR17520069.2023948  
SRR17520069.2023950  
SRR17520069.2023952  
SRR17520069.2023954  
SRR17520069.2024223  
SRR17520069.2024225  
SRR17520069.2024227  
SRR17520069.2024229  
SRR17520069.2024231  
SRR17520069.2024233  
SRR17520069.2024235  
SRR17520069.2024237  
SRR17520069.2024239  
SRR17520069.2024241  
SRR17520069.2024243  
SRR17520069.2024245  
SRR17520069.2032874  
SRR17520069.2032876  
SRR17520069.2032878  
SRR17520069.2032880  
SRR17520069.2032882  
SRR17520069.2032884  
SRR17520069.2032886  
SRR17520069.2032888  
SRR17520069.2032890  
SRR17520069.2032892  
SRR17520069.2032894  
SRR17520069.2032896  
SRR17520069.2032898  
SRR17520069.2032900  
SRR17520069.2034169  
SRR17520069.2034171  
SRR17520069.2034173  
SRR17520069.2034175  
SRR17520069.2034177  
SRR17520069.2034179  
SRR17520069.2034181  
SRR17520069.2034183  
SRR17520069.2034185  
SRR17520069.2034187  
SRR17520069.2034189  
SRR17520069.2034191

SRR17520069. 2034193  
SRR17520069. 2034195  
SRR17520069. 2034197  
SRR17520069. 2034199  
SRR17520069. 2034201  
SRR17520069. 2034203  
SRR17520069. 2034205  
SRR17520069. 2034207  
SRR17520069. 2034209  
SRR17520069. 2034211  
SRR17520069. 2034213  
SRR17520069. 2034215  
SRR17520069. 2034217  
SRR17520069. 2034219  
SRR17520069. 2034221  
SRR17520069. 2034223  
SRR17520069. 2034225  
SRR17520069. 2034227  
SRR17520069. 2034229  
SRR17520069. 2034231  
SRR17520069. 2034233  
SRR17520069. 2034235  
SRR17520069. 2034237  
SRR17520069. 2034239  
SRR17520069. 2034241  
SRR17520069. 2034243  
SRR17520069. 2034245  
SRR17520069. 2034247  
SRR17520069. 2034249  
SRR17520069. 2034251  
SRR17520069. 2034253  
SRR17520069. 2034255  
SRR17520069. 2034257  
SRR17520069. 2035362  
SRR17520069. 2035364  
SRR17520069. 2035366  
SRR17520069. 2035370  
SRR17520069. 2035372  
SRR17520069. 2035374  
SRR17520069. 2035376  
SRR17520069. 2035378  
SRR17520069. 2035380  
SRR17520069. 2035382  
SRR17520069. 2035384  
SRR17520069. 2035386  
SRR17520069. 2035388  
SRR17520069. 2035390

SRR17520069. 2035394  
SRR17520069. 2035396  
SRR17520069. 2035398  
SRR17520069. 2035400  
SRR17520069. 2035402  
SRR17520069. 2035404  
SRR17520069. 2035406  
SRR17520069. 2035408  
SRR17520069. 2035410  
SRR17520069. 2035412  
SRR17520069. 2035414  
SRR17520069. 2035418  
SRR17520069. 2035420  
SRR17520069. 2035422  
SRR17520069. 2038350  
SRR17520069. 2038352  
SRR17520069. 2038354  
SRR17520069. 2038356  
SRR17520069. 2038360  
SRR17520069. 2038362  
SRR17520069. 2038364  
SRR17520069. 2039083  
SRR17520069. 2039085  
SRR17520069. 2039129  
SRR17520069. 2041870  
SRR17520069. 2041872  
SRR17520069. 2041874  
SRR17520069. 2041876  
SRR17520069. 2041878  
SRR17520069. 2041880  
SRR17520069. 2041882  
SRR17520069. 2041884  
SRR17520069. 2041886  
SRR17520069. 2041888  
SRR17520069. 2041890  
SRR17520069. 2041892  
SRR17520069. 2041894  
SRR17520069. 2041896  
SRR17520069. 2041898  
SRR17520069. 2041900  
SRR17520069. 2044968  
SRR17520069. 2044970  
SRR17520069. 2044972  
SRR17520069. 2044974  
SRR17520069. 2044976  
SRR17520069. 2044978  
SRR17520069. 2044980

SRR17520069.2044982  
SRR17520069.2044984  
SRR17520069.2044986  
SRR17520069.2044988  
SRR17520069.2044990  
SRR17520069.2044992  
SRR17520069.2044994  
SRR17520069.2044996  
SRR17520069.2044998  
SRR17520069.2045000  
SRR17520069.2045002  
SRR17520069.2045004  
SRR17520069.2045006  
SRR17520069.2045008  
SRR17520069.2045010  
SRR17520069.2045012  
SRR17520069.2045014  
SRR17520069.2045016  
SRR17520069.2045018  
SRR17520069.2045020  
SRR17520069.2045022  
SRR17520069.2045024  
SRR17520069.2045026  
SRR17520069.2045028  
SRR17520069.2045030  
SRR17520069.2045032  
SRR17520069.2045034  
SRR17520069.2045036  
SRR17520069.2045038  
SRR17520069.2045040  
SRR17520069.2045042  
SRR17520069.2045044  
SRR17520069.2045046  
SRR17520069.2045048  
SRR17520069.2045050  
SRR17520069.2045052  
SRR17520069.2045054  
SRR17520069.2045056  
SRR17520069.2045569  
SRR17520069.2045571  
SRR17520069.2045573  
SRR17520069.2045575  
SRR17520069.2048048  
SRR17520069.2048050  
SRR17520069.2048052  
SRR17520069.2052289  
SRR17520069.2052291

SRR17520069.2052293  
SRR17520069.2052295  
SRR17520069.2052297  
SRR17520069.2052299  
SRR17520069.2052301  
SRR17520069.2052303  
SRR17520069.2052305  
SRR17520069.2052307  
SRR17520069.2052309  
SRR17520069.2052311  
SRR17520069.2052313  
SRR17520069.2052315  
SRR17520069.2052317  
SRR17520069.2052319  
SRR17520069.2052321  
SRR17520069.2052323  
SRR17520069.2052325  
SRR17520069.2052327  
SRR17520069.2052329  
SRR17520069.2060681  
SRR17520069.2060683  
SRR17520069.2060685  
SRR17520069.2060687  
SRR17520069.2066657  
SRR17520069.2066659  
SRR17520069.2066661  
SRR17520069.2066663  
SRR17520069.2066665  
SRR17520069.2066667  
SRR17520069.2066669  
SRR17520069.2066671  
SRR17520069.2066673  
SRR17520069.2066675  
SRR17520069.2066677  
SRR17520069.2066679  
SRR17520069.2066681  
SRR17520069.2066685  
SRR17520069.2066687  
SRR17520069.2066689  
SRR17520069.2066691  
SRR17520069.2073930  
SRR17520069.2073932  
SRR17520069.2073934  
SRR17520069.2073936  
SRR17520069.2073938  
SRR17520069.2073940  
SRR17520069.2073942



SRR17520069.2073944  
SRR17520069.2073948  
SRR17520069.2073952  
SRR17520069.2073954  
SRR17520069.2073956  
SRR17520069.2073958  
SRR17520069.2073960  
SRR17520069.2073964  
SRR17520069.2073966  
SRR17520069.2073968  
SRR17520069.2073970  
SRR17520069.2073974  
SRR17520069.2073976  
SRR17520069.2073978  
SRR17520069.2073982  
SRR17520069.2073984  
SRR17520069.2073986  
SRR17520069.2073988  
SRR17520069.2076538  
SRR17520069.2076540  
SRR17520069.2076542  
SRR17520069.2076544  
SRR17520069.2076546  
SRR17520069.2076548  
SRR17520069.2076550  
SRR17520069.2076552  
SRR17520069.2076554  
SRR17520069.2076556  
SRR17520069.2076558  
SRR17520069.2076560  
SRR17520069.2076568  
SRR17520069.2076570  
SRR17520069.2076574  
SRR17520069.2076576  
SRR17520069.2076578  
SRR17520069.2076580  
SRR17520069.2076582  
SRR17520069.2076584  
SRR17520069.2076586  
SRR17520069.2076588  
SRR17520069.2076590  
SRR17520069.2076592  
SRR17520069.2076594  
SRR17520069.2076596  
SRR17520069.2076598  
SRR17520069.2076600  
SRR17520069.2076602

SRR17520069.2076604  
SRR17520069.2076606  
SRR17520069.2076608  
SRR17520069.2076610  
SRR17520069.2076612  
SRR17520069.2076614  
SRR17520069.2076616  
SRR17520069.2076618  
SRR17520069.2076620  
SRR17520069.2076622  
SRR17520069.2076624  
SRR17520069.2076626  
SRR17520069.2076630  
SRR17520069.2076632  
SRR17520069.2076634  
SRR17520069.2076636  
SRR17520069.2076638  
SRR17520069.2076640  
SRR17520069.2076642  
SRR17520069.2076644  
SRR17520069.2076646  
SRR17520069.2076648  
SRR17520069.2076650  
SRR17520069.2076652  
SRR17520069.2076654  
SRR17520069.2076656  
SRR17520069.2076658  
SRR17520069.2076660  
SRR17520069.2076662  
SRR17520069.2076664  
SRR17520069.2076666  
SRR17520069.2076668  
SRR17520069.2076670  
SRR17520069.2076672  
SRR17520069.2076674  
SRR17520069.2076676  
SRR17520069.2076678  
SRR17520069.2076680  
SRR17520069.2076682  
SRR17520069.2076684  
SRR17520069.2076686  
SRR17520069.2079030  
SRR17520069.2079032  
SRR17520069.2079034  
SRR17520069.2079954  
SRR17520069.2079956  
SRR17520069.2079958

SRR17520069.2079960  
SRR17520069.2079962  
SRR17520069.2079964  
SRR17520069.2079966  
SRR17520069.2079968  
SRR17520069.2079970  
SRR17520069.2079972  
SRR17520069.2079974  
SRR17520069.2079976  
SRR17520069.2079978  
SRR17520069.2079980  
SRR17520069.2079982  
SRR17520069.2079984  
SRR17520069.2079986  
SRR17520069.2079988  
SRR17520069.2079990  
SRR17520069.2079992  
SRR17520069.2079994  
SRR17520069.2079996  
SRR17520069.2079998  
SRR17520069.2080000  
SRR17520069.2080002  
SRR17520069.2080004  
SRR17520069.2080006  
SRR17520069.2080008  
SRR17520069.2080010  
SRR17520069.2080012  
SRR17520069.2080014  
SRR17520069.2080016  
SRR17520069.2080018  
SRR17520069.2080020  
SRR17520069.2080492  
SRR17520069.2080494  
SRR17520069.2080496  
SRR17520069.2080498  
SRR17520069.2080500  
SRR17520069.2080502  
SRR17520069.2080504  
SRR17520069.2080506  
SRR17520069.2080508  
SRR17520069.2080510  
SRR17520069.2080512  
SRR17520069.2080514  
SRR17520069.2080516  
SRR17520069.2080518  
SRR17520069.2080520  
SRR17520069.2080522

SRR17520069.2080524  
SRR17520069.2080526  
SRR17520069.2080528  
SRR17520069.2080530  
SRR17520069.2080532  
SRR17520069.2080534  
SRR17520069.2080536  
SRR17520069.2080538  
SRR17520069.2080540  
SRR17520069.2080542  
SRR17520069.2087781  
SRR17520069.2087783  
SRR17520069.2087785  
SRR17520069.2087787  
SRR17520069.2087789  
SRR17520069.2087791  
SRR17520069.2087793  
SRR17520069.2087795  
SRR17520069.2087797  
SRR17520069.2087799  
SRR17520069.2087801  
SRR17520069.2087803  
SRR17520069.2087805  
SRR17520069.2087807  
SRR17520069.2087809  
SRR17520069.2087811  
SRR17520069.2087813  
SRR17520069.2087815  
SRR17520069.2087817  
SRR17520069.2087819  
SRR17520069.2087821  
SRR17520069.2087823  
SRR17520069.2087825  
SRR17520069.2087827  
SRR17520069.2087829  
SRR17520069.2087831  
SRR17520069.2087833  
SRR17520069.2087835  
SRR17520069.2087837  
SRR17520069.2087839  
SRR17520069.2087841  
SRR17520069.2087843  
SRR17520069.2087845  
SRR17520069.2087847  
SRR17520069.2087849  
SRR17520069.2087851  
SRR17520069.2087853

SRR17520069.2087855  
SRR17520069.2087857  
SRR17520069.2087859  
SRR17520069.2087861  
SRR17520069.2087863  
SRR17520069.2087865  
SRR17520069.2087867  
SRR17520069.2087869  
SRR17520069.2087871  
SRR17520069.2087873  
SRR17520069.2087875  
SRR17520069.2097231  
SRR17520069.2098220  
SRR17520069.2098222  
SRR17520069.2098226  
SRR17520069.2098228  
SRR17520069.2098230  
SRR17520069.2101512  
SRR17520069.2101514  
SRR17520069.2101516  
SRR17520069.2101518  
SRR17520069.2101520  
SRR17520069.2101522  
SRR17520069.2101524  
SRR17520069.2101526  
SRR17520069.2101528  
SRR17520069.2101530  
SRR17520069.2101532  
SRR17520069.2101536  
SRR17520069.2101540  
SRR17520069.2101542  
SRR17520069.2101544  
SRR17520069.2101546  
SRR17520069.2101548  
SRR17520069.2101550  
SRR17520069.2101552  
SRR17520069.2101554  
SRR17520069.2101556  
SRR17520069.2101558  
SRR17520069.2101560  
SRR17520069.2101564  
SRR17520069.2101566  
SRR17520069.2101568  
SRR17520069.2101570  
SRR17520069.2101572  
SRR17520069.2101574  
SRR17520069.2101576

SRR17520069.2101580  
SRR17520069.2106129  
SRR17520069.2106131  
SRR17520069.2106133  
SRR17520069.2106135  
SRR17520069.2106137  
SRR17520069.2106139  
SRR17520069.2106141  
SRR17520069.2106143  
SRR17520069.2106584  
SRR17520069.2106588  
SRR17520069.2106590  
SRR17520069.2106592  
SRR17520069.2106594  
SRR17520069.2106596  
SRR17520069.2106598  
SRR17520069.2106600  
SRR17520069.2106602  
SRR17520069.2106604  
SRR17520069.2106606  
SRR17520069.2106608  
SRR17520069.2106610  
SRR17520069.2106612  
SRR17520069.2106616  
SRR17520069.2106618  
SRR17520069.2106620  
SRR17520069.2106622  
SRR17520069.2106624  
SRR17520069.2106626  
SRR17520069.2106628  
SRR17520069.2106630  
SRR17520069.2106632  
SRR17520069.2106634  
SRR17520069.2107402  
SRR17520069.2107406  
SRR17520069.2107408  
SRR17520069.2107410  
SRR17520069.2107412  
SRR17520069.2107416  
SRR17520069.2107418  
SRR17520069.2107422  
SRR17520069.2110842  
SRR17520069.2110844  
SRR17520069.2110846  
SRR17520069.2110848  
SRR17520069.2110850  
SRR17520069.2110852

SRR17520069.2110854  
SRR17520069.2110856  
SRR17520069.2110858  
SRR17520069.2110860  
SRR17520069.2110862  
SRR17520069.2110864  
SRR17520069.2110868  
SRR17520069.2110870  
SRR17520069.2113411  
SRR17520069.2113413  
SRR17520069.2113415  
SRR17520069.2113417  
SRR17520069.2113421  
SRR17520069.2113721  
SRR17520069.2113723  
SRR17520069.2113725  
SRR17520069.2113727  
SRR17520069.2113729  
SRR17520069.2113731  
SRR17520069.2125174  
SRR17520069.2125176  
SRR17520069.2125178  
SRR17520069.2127071  
SRR17520069.2127073  
SRR17520069.2127075  
SRR17520069.2128828  
SRR17520069.2128830  
SRR17520069.2134826  
SRR17520069.2134828  
SRR17520069.2134830  
SRR17520069.2134832  
SRR17520069.2134834  
SRR17520069.2134836  
SRR17520069.2134838  
SRR17520069.2134840  
SRR17520069.2134842  
SRR17520069.2134846  
SRR17520069.2134848  
SRR17520069.2134850  
SRR17520069.2136608  
SRR17520069.2136610  
SRR17520069.2136612  
SRR17520069.2136614  
SRR17520069.2136616  
SRR17520069.2136618  
SRR17520069.2136620  
SRR17520069.2136622

SRR17520069. 2136624  
SRR17520069. 2136626  
SRR17520069. 2136628  
SRR17520069. 2136630  
SRR17520069. 2136632  
SRR17520069. 2136634  
SRR17520069. 2136636  
SRR17520069. 2136638  
SRR17520069. 2136640  
SRR17520069. 2136642  
SRR17520069. 2136644  
SRR17520069. 2136646  
SRR17520069. 2136648  
SRR17520069. 2136650  
SRR17520069. 2136652  
SRR17520069. 2136654  
SRR17520069. 2136656  
SRR17520069. 2136658  
SRR17520069. 2136660  
SRR17520069. 2136662  
SRR17520069. 2137113  
SRR17520069. 2137115  
SRR17520069. 2137117  
SRR17520069. 2137119  
SRR17520069. 2137121  
SRR17520069. 2137123  
SRR17520069. 2138511  
SRR17520069. 2141496  
SRR17520069. 2141498  
SRR17520069. 2141500  
SRR17520069. 2142900  
SRR17520069. 2142902  
SRR17520069. 2142906  
SRR17520069. 2142912  
SRR17520069. 2142914  
SRR17520069. 2143718  
SRR17520069. 2143720  
SRR17520069. 2143722  
SRR17520069. 2143724  
SRR17520069. 2143726  
SRR17520069. 2143728  
SRR17520069. 2143730  
SRR17520069. 2143732  
SRR17520069. 2145037  
SRR17520069. 2145039  
SRR17520069. 2145043  
SRR17520069. 2145045



SRR17520069.2145047  
SRR17520069.2145049  
SRR17520069.2145051  
SRR17520069.2145053  
SRR17520069.2145055  
SRR17520069.2145057  
SRR17520069.2145059  
SRR17520069.2145061  
SRR17520069.2145065  
SRR17520069.2145067  
SRR17520069.2145069  
SRR17520069.2145071  
SRR17520069.2148916  
SRR17520069.2148918  
SRR17520069.2148920  
SRR17520069.2148922  
SRR17520069.2148924  
SRR17520069.2148928  
SRR17520069.2148932  
SRR17520069.2148936  
SRR17520069.2148938  
SRR17520069.2148940  
SRR17520069.2148942  
SRR17520069.2148944  
SRR17520069.2160474  
SRR17520069.2160476  
SRR17520069.2167598  
SRR17520069.2170041  
SRR17520069.2170043  
SRR17520069.2170045  
SRR17520069.2170047  
SRR17520069.2170051  
SRR17520069.2175264  
SRR17520069.2175266  
SRR17520069.2175268  
SRR17520069.2175270  
SRR17520069.2175272  
SRR17520069.2175274  
SRR17520069.2175276  
SRR17520069.2175278  
SRR17520069.2175280  
SRR17520069.2175282  
SRR17520069.2175284  
SRR17520069.2175286  
SRR17520069.2175290  
SRR17520069.2175292  
SRR17520069.2175294

SRR17520069.2175296  
SRR17520069.2175298  
SRR17520069.2175300  
SRR17520069.2175302  
SRR17520069.2175304  
SRR17520069.2175306  
SRR17520069.2175310  
SRR17520069.2175312  
SRR17520069.2175314  
SRR17520069.2175318  
SRR17520069.2175320  
SRR17520069.2175322  
SRR17520069.2175324  
SRR17520069.2175326  
SRR17520069.2175328  
SRR17520069.2175330  
SRR17520069.2176621  
SRR17520069.2176623  
SRR17520069.2176625  
SRR17520069.2176627  
SRR17520069.2176629  
SRR17520069.2176631  
SRR17520069.2176633  
SRR17520069.2176635  
SRR17520069.2176637  
SRR17520069.2176639  
SRR17520069.2176641  
SRR17520069.2176643  
SRR17520069.2176645  
SRR17520069.2176647  
SRR17520069.2181540  
SRR17520069.2181542  
SRR17520069.2181544  
SRR17520069.2181546  
SRR17520069.2181548  
SRR17520069.2181550  
SRR17520069.2181552  
SRR17520069.2181554  
SRR17520069.2181556  
SRR17520069.2181558  
SRR17520069.2181560  
SRR17520069.2181562  
SRR17520069.2188653  
SRR17520069.2188655  
SRR17520069.2188657  
SRR17520069.2188659  
SRR17520069.2188661

SRR17520069.2188663  
SRR17520069.2188665  
SRR17520069.2188669  
SRR17520069.2188671  
SRR17520069.2188673  
SRR17520069.2188675  
SRR17520069.2188677  
SRR17520069.2188681  
SRR17520069.2188683  
SRR17520069.2188685  
SRR17520069.2188687  
SRR17520069.2188689  
SRR17520069.2188691  
SRR17520069.2188693  
SRR17520069.2188695  
SRR17520069.2188697  
SRR17520069.2188699  
SRR17520069.2188701  
SRR17520069.2188703  
SRR17520069.2188705  
SRR17520069.2188707  
SRR17520069.2188709  
SRR17520069.2188711  
SRR17520069.2188719  
SRR17520069.2188721  
SRR17520069.2190732  
SRR17520069.2190734  
SRR17520069.2190736  
SRR17520069.2190738  
SRR17520069.2190740  
SRR17520069.2202764  
SRR17520069.2202766  
SRR17520069.2202768  
SRR17520069.2209803  
SRR17520069.2209805  
SRR17520069.2209807  
SRR17520069.2209809  
SRR17520069.2209811  
SRR17520069.2209813  
SRR17520069.2209815  
SRR17520069.2209817  
SRR17520069.2209819  
SRR17520069.2209821  
SRR17520069.2209823  
SRR17520069.2209825  
SRR17520069.2209827  
SRR17520069.2209829

SRR17520069. 2209831  
SRR17520069. 2209833  
SRR17520069. 2209835  
SRR17520069. 2209837  
SRR17520069. 2209839  
SRR17520069. 2209841  
SRR17520069. 2209843  
SRR17520069. 2209845  
SRR17520069. 2209847  
SRR17520069. 2209849  
SRR17520069. 2209851  
SRR17520069. 2209853  
SRR17520069. 2209855  
SRR17520069. 2209857  
SRR17520069. 2209859  
SRR17520069. 2209861  
SRR17520069. 2209863  
SRR17520069. 2209865  
SRR17520069. 2209867  
SRR17520069. 2209869  
SRR17520069. 2209871  
SRR17520069. 2209873  
SRR17520069. 2209875  
SRR17520069. 2209877  
SRR17520069. 2209879  
SRR17520069. 2209881  
SRR17520069. 2209883  
SRR17520069. 2209885  
SRR17520069. 2209887  
SRR17520069. 2209889  
SRR17520069. 2209891  
SRR17520069. 2209893  
SRR17520069. 2209895  
SRR17520069. 2209897  
SRR17520069. 2209921  
SRR17520069. 2209923  
SRR17520069. 2209925  
SRR17520069. 2209927  
SRR17520069. 2209929  
SRR17520069. 2209931  
SRR17520069. 2209933  
SRR17520069. 2209935  
SRR17520069. 2209937  
SRR17520069. 2209939  
SRR17520069. 2209941  
SRR17520069. 2209943  
SRR17520069. 2223817

SRR17520069.2228854  
SRR17520069.2228856  
SRR17520069.2228858  
SRR17520069.2230242  
SRR17520069.2230244  
SRR17520069.2230246  
SRR17520069.2230252  
SRR17520069.2230254  
SRR17520069.2230256  
SRR17520069.2230258  
SRR17520069.2230260  
SRR17520069.2230262  
SRR17520069.2230264  
SRR17520069.2230266  
SRR17520069.2230270  
SRR17520069.2230272  
SRR17520069.2230274  
SRR17520069.2230276  
SRR17520069.2230278  
SRR17520069.2230282  
SRR17520069.2230284  
SRR17520069.2230286  
SRR17520069.2230288  
SRR17520069.2230290  
SRR17520069.2230292  
SRR17520069.2230294  
SRR17520069.2230296  
SRR17520069.2230300  
SRR17520069.2230306  
SRR17520069.2230308  
SRR17520069.2230310  
SRR17520069.2230312  
SRR17520069.2230314  
SRR17520069.2230316  
SRR17520069.2230318  
SRR17520069.2230320  
SRR17520069.2230322  
SRR17520069.2230324  
SRR17520069.2230326  
SRR17520069.2230328  
SRR17520069.2230330  
SRR17520069.2230332  
SRR17520069.2230334  
SRR17520069.2230336  
SRR17520069.2230338  
SRR17520069.2230340  
SRR17520069.2230342

SRR17520069.2235062  
SRR17520069.2235064  
SRR17520069.2235066  
SRR17520069.2235068  
SRR17520069.2235070  
SRR17520069.2235072  
SRR17520069.2235074  
SRR17520069.2248857  
SRR17520069.2248859  
SRR17520069.2248861  
SRR17520069.2248863  
SRR17520069.2248865  
SRR17520069.2248867  
SRR17520069.2248869  
SRR17520069.2248871  
SRR17520069.2248875  
SRR17520069.2248877  
SRR17520069.2252032  
SRR17520069.2252034  
SRR17520069.2252036  
SRR17520069.2252038  
SRR17520069.2252040  
SRR17520069.2252042  
SRR17520069.2252044  
SRR17520069.2252046  
SRR17520069.2252048  
SRR17520069.2252050  
SRR17520069.2252052  
SRR17520069.2252054  
SRR17520069.2252056  
SRR17520069.2252058  
SRR17520069.2252060  
SRR17520069.2252062  
SRR17520069.2256993  
SRR17520069.2256995  
SRR17520069.2256997  
SRR17520069.2256999  
SRR17520069.2257001  
SRR17520069.2257003  
SRR17520069.2257005  
SRR17520069.2257007  
SRR17520069.2257009  
SRR17520069.2257011  
SRR17520069.2257013  
SRR17520069.2257015  
SRR17520069.2257017  
SRR17520069.2257019

SRR17520069. 2257021  
SRR17520069. 2261307  
SRR17520069. 2261309  
SRR17520069. 2262163  
SRR17520069. 2262165  
SRR17520069. 2262167  
SRR17520069. 2279524  
SRR17520069. 2279526  
SRR17520069. 2279528  
SRR17520069. 2279530  
SRR17520069. 2279532  
SRR17520069. 2279534  
SRR17520069. 2279536  
SRR17520069. 2279538  
SRR17520069. 2279540  
SRR17520069. 2279542  
SRR17520069. 2280984  
SRR17520069. 2280986  
SRR17520069. 2280988  
SRR17520069. 2280990  
SRR17520069. 2280992  
SRR17520069. 2280994  
SRR17520069. 2280996  
SRR17520069. 2280998  
SRR17520069. 2281000  
SRR17520069. 2281002  
SRR17520069. 2281004  
SRR17520069. 2281006  
SRR17520069. 2281008  
SRR17520069. 2281010  
SRR17520069. 2281012  
SRR17520069. 2281014  
SRR17520069. 2281016  
SRR17520069. 2281018  
SRR17520069. 2281020  
SRR17520069. 2282014  
SRR17520069. 2305246  
SRR17520069. 2305248  
SRR17520069. 2305250  
SRR17520069. 2305254  
SRR17520069. 2305256  
SRR17520069. 2307117  
SRR17520069. 2307119  
SRR17520069. 2310072  
SRR17520069. 2310074  
SRR17520069. 2310076  
SRR17520069. 2310078

SRR17520069.2310080  
SRR17520069.2310082  
SRR17520069.2310084  
SRR17520069.2310086  
SRR17520069.2310088  
SRR17520069.2310090  
SRR17520069.2310092  
SRR17520069.2310094  
SRR17520069.2310096  
SRR17520069.2310098  
SRR17520069.2310100  
SRR17520069.2310102  
SRR17520069.2310104  
SRR17520069.2310106  
SRR17520069.2310108  
SRR17520069.2310110  
SRR17520069.2314532  
SRR17520069.2316720  
SRR17520069.2321483  
SRR17520069.2321485  
SRR17520069.2321487  
SRR17520069.2323262  
SRR17520069.2323264  
SRR17520069.2323266  
SRR17520069.2323268  
SRR17520069.2323270  
SRR17520069.2323272  
SRR17520069.2323274  
SRR17520069.2323276  
SRR17520069.2323278  
SRR17520069.2323280  
SRR17520069.2323282  
SRR17520069.2323284  
SRR17520069.2323286  
SRR17520069.2323288  
SRR17520069.2323290  
SRR17520069.2328031  
SRR17520069.2328033  
SRR17520069.2328035  
SRR17520069.2328037  
SRR17520069.2328039  
SRR17520069.2328041  
SRR17520069.2328043  
SRR17520069.2328045  
SRR17520069.2328047  
SRR17520069.2328049  
SRR17520069.2328051



SRR17520069.2328053  
SRR17520069.2328055  
SRR17520069.2328057  
SRR17520069.2328059  
SRR17520069.2328061  
SRR17520069.2328063  
SRR17520069.2328065  
SRR17520069.2328067  
SRR17520069.2328069  
SRR17520069.2328071  
SRR17520069.2328075  
SRR17520069.2328077  
SRR17520069.2328079  
SRR17520069.2328081  
SRR17520069.2328083  
SRR17520069.2328085  
SRR17520069.2328087  
SRR17520069.2328089  
SRR17520069.2328094  
SRR17520069.2328096  
SRR17520069.2328098  
SRR17520069.2328100  
SRR17520069.2328102  
SRR17520069.2328104  
SRR17520069.2328106  
SRR17520069.2328108  
SRR17520069.2336080  
SRR17520069.2336082  
SRR17520069.2336084  
SRR17520069.2336088  
SRR17520069.2336090  
SRR17520069.2336092  
SRR17520069.2336094  
SRR17520069.2336096  
SRR17520069.2336098  
SRR17520069.2336100  
SRR17520069.2336102  
SRR17520069.2336104  
SRR17520069.2336106  
SRR17520069.2336108  
SRR17520069.2336110  
SRR17520069.2336112  
SRR17520069.2336114  
SRR17520069.2336116  
SRR17520069.2336118  
SRR17520069.2336120  
SRR17520069.2340344

SRR17520069.2340348  
SRR17520069.2340350  
SRR17520069.2340352  
SRR17520069.2340354  
SRR17520069.2340356  
SRR17520069.2340358  
SRR17520069.2340360  
SRR17520069.2340362  
SRR17520069.2340364  
SRR17520069.2340366  
SRR17520069.2340368  
SRR17520069.2340370  
SRR17520069.2340372  
SRR17520069.2340374  
SRR17520069.2340380  
SRR17520069.2340382  
SRR17520069.2340384  
SRR17520069.2340388  
SRR17520069.2340390  
SRR17520069.2340392  
SRR17520069.2340394  
SRR17520069.2340396  
SRR17520069.2340398  
SRR17520069.2340400  
SRR17520069.2340402  
SRR17520069.2340404  
SRR17520069.2340406  
SRR17520069.2340408  
SRR17520069.2340410  
SRR17520069.2340412  
SRR17520069.2340414  
SRR17520069.2340416  
SRR17520069.2340418  
SRR17520069.2345404  
SRR17520069.2345406  
SRR17520069.2345408  
SRR17520069.2345410  
SRR17520069.2345412  
SRR17520069.2345414  
SRR17520069.2345416  
SRR17520069.2345420  
SRR17520069.2345422  
SRR17520069.2345424  
SRR17520069.2345426  
SRR17520069.2345428  
SRR17520069.2345430  
SRR17520069.2345432

SRR17520069.2345434  
SRR17520069.2345436  
SRR17520069.2345438  
SRR17520069.2345440  
SRR17520069.2345442  
SRR17520069.2345444  
SRR17520069.2345446  
SRR17520069.2345448  
SRR17520069.2345450  
SRR17520069.2345452  
SRR17520069.2357982  
SRR17520069.2357984  
SRR17520069.2357986  
SRR17520069.2357988  
SRR17520069.2363264  
SRR17520069.2363266  
SRR17520069.2363268  
SRR17520069.2363270  
SRR17520069.2363272  
SRR17520069.2363274  
SRR17520069.2363276  
SRR17520069.2363278  
SRR17520069.2363280  
SRR17520069.2363282  
SRR17520069.2363284  
SRR17520069.2363286  
SRR17520069.2363288  
SRR17520069.2363290  
SRR17520069.2363292  
SRR17520069.2363294  
SRR17520069.2363296  
SRR17520069.2363298  
SRR17520069.2363300  
SRR17520069.2363302  
SRR17520069.2363304  
SRR17520069.2363306  
SRR17520069.2363308  
SRR17520069.2363310  
SRR17520069.2363312  
SRR17520069.2363314  
SRR17520069.2363316  
SRR17520069.2363318  
SRR17520069.2363320  
SRR17520069.2363322  
SRR17520069.2363324  
SRR17520069.2363326  
SRR17520069.2363328

SRR17520069. 2363330  
SRR17520069. 2363332  
SRR17520069. 2363334  
SRR17520069. 2363336  
SRR17520069. 2363338  
SRR17520069. 2363340  
SRR17520069. 2363342  
SRR17520069. 2363344  
SRR17520069. 2363346  
SRR17520069. 2363348  
SRR17520069. 2363350  
SRR17520069. 2363352  
SRR17520069. 2363354  
SRR17520069. 2363356  
SRR17520069. 2363358  
SRR17520069. 2363360  
SRR17520069. 2363362  
SRR17520069. 2363364  
SRR17520069. 2363366  
SRR17520069. 2363368  
SRR17520069. 2363370  
SRR17520069. 2363372  
SRR17520069. 2363374  
SRR17520069. 2363376  
SRR17520069. 2363486  
SRR17520069. 2363488  
SRR17520069. 2363490  
SRR17520069. 2363492  
SRR17520069. 2363494  
SRR17520069. 2363496  
SRR17520069. 2363498  
SRR17520069. 2363500  
SRR17520069. 2363502  
SRR17520069. 2363504  
SRR17520069. 2363506  
SRR17520069. 2363508  
SRR17520069. 2363510  
SRR17520069. 2363512  
SRR17520069. 2363514  
SRR17520069. 2363516  
SRR17520069. 2363520  
SRR17520069. 2363524  
SRR17520069. 2363526  
SRR17520069. 2363528  
SRR17520069. 2363530  
SRR17520069. 2363532  
SRR17520069. 2363538

SRR17520069. 2363542  
SRR17520069. 2363544  
SRR17520069. 2363546  
SRR17520069. 2364212  
SRR17520069. 2364214  
SRR17520069. 2364216  
SRR17520069. 2364218  
SRR17520069. 2364220  
SRR17520069. 2364222  
SRR17520069. 2364224  
SRR17520069. 2366357  
SRR17520069. 2366359  
SRR17520069. 2366361  
SRR17520069. 2366363  
SRR17520069. 2366365  
SRR17520069. 2366367  
SRR17520069. 2366369  
SRR17520069. 2366371  
SRR17520069. 2366373  
SRR17520069. 2366375  
SRR17520069. 2366377  
SRR17520069. 2366379  
SRR17520069. 2366381  
SRR17520069. 2366383  
SRR17520069. 2366387  
SRR17520069. 2366389  
SRR17520069. 2366391  
SRR17520069. 2377102  
SRR17520069. 2377104  
SRR17520069. 2377106  
SRR17520069. 2377108  
SRR17520069. 2377110  
SRR17520069. 2377112  
SRR17520069. 2377114  
SRR17520069. 2377116  
SRR17520069. 2377118  
SRR17520069. 2377120  
SRR17520069. 2377122  
SRR17520069. 2377124  
SRR17520069. 2377126  
SRR17520069. 2377128  
SRR17520069. 2377132  
SRR17520069. 2377134  
SRR17520069. 2377136  
SRR17520069. 2377138  
SRR17520069. 2377140  
SRR17520069. 2377142

SRR17520069.2377144  
SRR17520069.2377146  
SRR17520069.2377148  
SRR17520069.2377150  
SRR17520069.2377152  
SRR17520069.2377154  
SRR17520069.2377156  
SRR17520069.2377158  
SRR17520069.2377160  
SRR17520069.2377162  
SRR17520069.2377164  
SRR17520069.2377166  
SRR17520069.2377994  
SRR17520069.2378038  
SRR17520069.2378040  
SRR17520069.2381320  
SRR17520069.2381322  
SRR17520069.2385598  
SRR17520069.2385600  
SRR17520069.2385602  
SRR17520069.2385604  
SRR17520069.2385606  
SRR17520069.2385608  
SRR17520069.2385610  
SRR17520069.2385612  
SRR17520069.2385614  
SRR17520069.2385616  
SRR17520069.2385618  
SRR17520069.2385620  
SRR17520069.2385622  
SRR17520069.2385624  
SRR17520069.2385626  
SRR17520069.2385630  
SRR17520069.2385632  
SRR17520069.2385634  
SRR17520069.2385636  
SRR17520069.2385638  
SRR17520069.2385640  
SRR17520069.2385642  
SRR17520069.2385644  
SRR17520069.2385646  
SRR17520069.2385648  
SRR17520069.2385650  
SRR17520069.2385652  
SRR17520069.2385654  
SRR17520069.2385658  
SRR17520069.2385660

SRR17520069. 2385662  
SRR17520069. 2385664  
SRR17520069. 2385666  
SRR17520069. 2385668  
SRR17520069. 2385670  
SRR17520069. 2385672  
SRR17520069. 2385674  
SRR17520069. 2385676  
SRR17520069. 2385678  
SRR17520069. 2385680  
SRR17520069. 2388459  
SRR17520069. 2388461  
SRR17520069. 2388463  
SRR17520069. 2388465  
SRR17520069. 2388467  
SRR17520069. 2388469  
SRR17520069. 2388471  
SRR17520069. 2388473  
SRR17520069. 2388475  
SRR17520069. 2388477  
SRR17520069. 2388479  
SRR17520069. 2388481  
SRR17520069. 2388483  
SRR17520069. 2388485  
SRR17520069. 2388487  
SRR17520069. 2388489  
SRR17520069. 2388491  
SRR17520069. 2388493  
SRR17520069. 2388495  
SRR17520069. 2388497  
SRR17520069. 2388499  
SRR17520069. 2388501  
SRR17520069. 2388503  
SRR17520069. 2388507  
SRR17520069. 2388509  
SRR17520069. 2388511  
SRR17520069. 2388515  
SRR17520069. 2388517  
SRR17520069. 2388519  
SRR17520069. 2388521  
SRR17520069. 2388523  
SRR17520069. 2388525  
SRR17520069. 2388527  
SRR17520069. 2388529  
SRR17520069. 2388531  
SRR17520069. 2388533  
SRR17520069. 2388535

SRR17520069. 2388537  
SRR17520069. 2388539  
SRR17520069. 2388541  
SRR17520069. 2388543  
SRR17520069. 2388545  
SRR17520069. 2388547  
SRR17520069. 2388549  
SRR17520069. 2388551  
SRR17520069. 2388553  
SRR17520069. 2388555  
SRR17520069. 2388557  
SRR17520069. 2388559  
SRR17520069. 2388561  
SRR17520069. 2388563  
SRR17520069. 2388565  
SRR17520069. 2388567  
SRR17520069. 2388569  
SRR17520069. 2388571  
SRR17520069. 2388573  
SRR17520069. 2388575  
SRR17520069. 2388577  
SRR17520069. 2388579  
SRR17520069. 2388581  
SRR17520069. 2388583  
SRR17520069. 2388585  
SRR17520069. 2388587  
SRR17520069. 2388589  
SRR17520069. 2388597  
SRR17520069. 2388599  
SRR17520069. 2388607  
SRR17520069. 2388615  
SRR17520069. 2388617  
SRR17520069. 2388619  
SRR17520069. 2389558  
SRR17520069. 2391402  
SRR17520069. 2391404  
SRR17520069. 2391406  
SRR17520069. 2391408  
SRR17520069. 2391410  
SRR17520069. 2391412  
SRR17520069. 2391414  
SRR17520069. 2391416  
SRR17520069. 2394979  
SRR17520069. 2394981  
SRR17520069. 2394983  
SRR17520069. 2394985  
SRR17520069. 2394987



SRR17520069.2394989  
SRR17520069.2394991  
SRR17520069.2394995  
SRR17520069.2394997  
SRR17520069.2394999  
SRR17520069.2395001  
SRR17520069.2395003  
SRR17520069.2395005  
SRR17520069.2395007  
SRR17520069.2395009  
SRR17520069.2395011  
SRR17520069.2395013  
SRR17520069.2395015  
SRR17520069.2395017  
SRR17520069.2395019  
SRR17520069.2395021  
SRR17520069.2395023  
SRR17520069.2395025  
SRR17520069.2395027  
SRR17520069.2395029  
SRR17520069.2395031  
SRR17520069.2395033  
SRR17520069.2395035  
SRR17520069.2395037  
SRR17520069.2395041  
SRR17520069.2395043  
SRR17520069.2395047  
SRR17520069.2395049  
SRR17520069.2395051  
SRR17520069.2395053  
SRR17520069.2395055  
SRR17520069.2395057  
SRR17520069.2395059  
SRR17520069.2395061  
SRR17520069.2395063  
SRR17520069.2395065  
SRR17520069.2395067  
SRR17520069.2395069  
SRR17520069.2395071  
SRR17520069.2395073  
SRR17520069.2395075  
SRR17520069.2395077  
SRR17520069.2395079  
SRR17520069.2395081  
SRR17520069.2395083  
SRR17520069.2395089  
SRR17520069.2395091

SRR17520069. 2395093  
SRR17520069. 2395095  
SRR17520069. 2395097  
SRR17520069. 2398352  
SRR17520069. 2398354  
SRR17520069. 2398356  
SRR17520069. 2398358  
SRR17520069. 2398360  
SRR17520069. 2398362  
SRR17520069. 2398364  
SRR17520069. 2398366  
SRR17520069. 2398368  
SRR17520069. 2398370  
SRR17520069. 2398374  
SRR17520069. 2398376  
SRR17520069. 2398378  
SRR17520069. 2398380  
SRR17520069. 2398384  
SRR17520069. 2398386  
SRR17520069. 2398388  
SRR17520069. 2398390  
SRR17520069. 2398392  
SRR17520069. 2398394  
SRR17520069. 2398396  
SRR17520069. 2398400  
SRR17520069. 2398402  
SRR17520069. 2398404  
SRR17520069. 2398406  
SRR17520069. 2398408  
SRR17520069. 2398410  
SRR17520069. 2398412  
SRR17520069. 2398414  
SRR17520069. 2398416  
SRR17520069. 2398418  
SRR17520069. 2398420  
SRR17520069. 2398424  
SRR17520069. 2398426  
SRR17520069. 2398428  
SRR17520069. 2398432  
SRR17520069. 2398434  
SRR17520069. 2398436  
SRR17520069. 2398438  
SRR17520069. 2398440  
SRR17520069. 2398442  
SRR17520069. 2398445  
SRR17520069. 2402399  
SRR17520069. 2402401

SRR17520069.2402403  
SRR17520069.2402405  
SRR17520069.2402407  
SRR17520069.2402409  
SRR17520069.2402411  
SRR17520069.2402413  
SRR17520069.2402415  
SRR17520069.2402417  
SRR17520069.2402419  
SRR17520069.2402421  
SRR17520069.2402423  
SRR17520069.2402425  
SRR17520069.2402429  
SRR17520069.2402431  
SRR17520069.2402433  
SRR17520069.2402435  
SRR17520069.2402437  
SRR17520069.2402439  
SRR17520069.2402441  
SRR17520069.2402443  
SRR17520069.2402445  
SRR17520069.2402447  
SRR17520069.2402449  
SRR17520069.2402451  
SRR17520069.2402453  
SRR17520069.2402455  
SRR17520069.2402457  
SRR17520069.2402459  
SRR17520069.2402461  
SRR17520069.2402463  
SRR17520069.2402465  
SRR17520069.2402467  
SRR17520069.2402469  
SRR17520069.2402471  
SRR17520069.2402473  
SRR17520069.2402475  
SRR17520069.2402477  
SRR17520069.2402479  
SRR17520069.2402481  
SRR17520069.2402483  
SRR17520069.2402485  
SRR17520069.2402487  
SRR17520069.2402489  
SRR17520069.2402491  
SRR17520069.2402493  
SRR17520069.2402495  
SRR17520069.2402497

SRR17520069.2402876  
SRR17520069.2402878  
SRR17520069.2402880  
SRR17520069.2402882  
SRR17520069.2402884  
SRR17520069.2402886  
SRR17520069.2402888  
SRR17520069.2402890  
SRR17520069.2402892  
SRR17520069.2402894  
SRR17520069.2408371  
SRR17520069.2408373  
SRR17520069.2408375  
SRR17520069.2408377  
SRR17520069.2408379  
SRR17520069.2408381  
SRR17520069.2408383  
SRR17520069.2408385  
SRR17520069.2408387  
SRR17520069.2408389  
SRR17520069.2408391  
SRR17520069.2408393  
SRR17520069.2408395  
SRR17520069.2408397  
SRR17520069.2408399  
SRR17520069.2408401  
SRR17520069.2408403  
SRR17520069.2408405  
SRR17520069.2408407  
SRR17520069.2408409  
SRR17520069.2408411  
SRR17520069.2417732  
SRR17520069.2417734  
SRR17520069.2417736  
SRR17520069.2417738  
SRR17520069.2417740  
SRR17520069.2417742  
SRR17520069.2417744  
SRR17520069.2417746  
SRR17520069.2417748  
SRR17520069.2417750  
SRR17520069.2417752  
SRR17520069.2417754  
SRR17520069.2417758  
SRR17520069.2417760  
SRR17520069.2417762  
SRR17520069.2417764

SRR17520069.2417766  
SRR17520069.2417768  
SRR17520069.2417770  
SRR17520069.2424517  
SRR17520069.2425180  
SRR17520069.2425182  
SRR17520069.2425184  
SRR17520069.2425186  
SRR17520069.2425188  
SRR17520069.2431809  
SRR17520069.2431811  
SRR17520069.2431813  
SRR17520069.2431815  
SRR17520069.2431817  
SRR17520069.2431819  
SRR17520069.2431821  
SRR17520069.2431823  
SRR17520069.2431825  
SRR17520069.2431827  
SRR17520069.2431829  
SRR17520069.2431831  
SRR17520069.2431835  
SRR17520069.2431837  
SRR17520069.2431839  
SRR17520069.2431841  
SRR17520069.2431843  
SRR17520069.2431845  
SRR17520069.2431847  
SRR17520069.2432688  
SRR17520069.2432690  
SRR17520069.2432692  
SRR17520069.2435225  
SRR17520069.2435227  
SRR17520069.2435233  
SRR17520069.2435237  
SRR17520069.2435239  
SRR17520069.2435251  
SRR17520069.2435253  
SRR17520069.2435255  
SRR17520069.2435265  
SRR17520069.2435267  
SRR17520069.2435269  
SRR17520069.2435271  
SRR17520069.2435273  
SRR17520069.2435277  
SRR17520069.2435279  
SRR17520069.2435281

SRR17520069. 2435283  
SRR17520069. 2438285  
SRR17520069. 2438287  
SRR17520069. 2438289  
SRR17520069. 2438291  
SRR17520069. 2438293  
SRR17520069. 2438295  
SRR17520069. 2438297  
SRR17520069. 2438299  
SRR17520069. 2438301  
SRR17520069. 2438303  
SRR17520069. 2438305  
SRR17520069. 2438307  
SRR17520069. 2438309  
SRR17520069. 2438311  
SRR17520069. 2438313  
SRR17520069. 2438315  
SRR17520069. 2438317  
SRR17520069. 2438319  
SRR17520069. 2438321  
SRR17520069. 2438446  
SRR17520069. 2438448  
SRR17520069. 2438450  
SRR17520069. 2438452  
SRR17520069. 2438454  
SRR17520069. 2440389  
SRR17520069. 2440391  
SRR17520069. 2443705  
SRR17520069. 2443707  
SRR17520069. 2443709  
SRR17520069. 2448849  
SRR17520069. 2448851  
SRR17520069. 2448853  
SRR17520069. 2448855  
SRR17520069. 2448857  
SRR17520069. 2448859  
SRR17520069. 2448861  
SRR17520069. 2448863  
SRR17520069. 2448865  
SRR17520069. 2448867  
SRR17520069. 2448869  
SRR17520069. 2448871  
SRR17520069. 2448873  
SRR17520069. 2448875  
SRR17520069. 2448877  
SRR17520069. 2448879  
SRR17520069. 2448881

SRR17520069.2448883  
SRR17520069.2448885  
SRR17520069.2448887  
SRR17520069.2448889  
SRR17520069.2448891  
SRR17520069.2448893  
SRR17520069.2448895  
SRR17520069.2448897  
SRR17520069.2448899  
SRR17520069.2448901  
SRR17520069.2448903  
SRR17520069.2448905  
SRR17520069.2448907  
SRR17520069.2448909  
SRR17520069.2448911  
SRR17520069.2448913  
SRR17520069.2448915  
SRR17520069.2448917  
SRR17520069.2448919  
SRR17520069.2448921  
SRR17520069.2454527  
SRR17520069.2454529  
SRR17520069.2454531  
SRR17520069.2454533  
SRR17520069.2454535  
SRR17520069.2454537  
SRR17520069.2454539  
SRR17520069.2454541  
SRR17520069.2454543  
SRR17520069.2454545  
SRR17520069.2454547  
SRR17520069.2454549  
SRR17520069.2454551  
SRR17520069.2454553  
SRR17520069.2454555  
SRR17520069.2454557  
SRR17520069.2454559  
SRR17520069.2454563  
SRR17520069.2454565  
SRR17520069.2454567  
SRR17520069.2454569  
SRR17520069.2454571  
SRR17520069.2454573  
SRR17520069.2454575  
SRR17520069.2454579  
SRR17520069.2454583  
SRR17520069.2454585

SRR17520069.2454587  
SRR17520069.2462057  
SRR17520069.2462059  
SRR17520069.2462065  
SRR17520069.2462067  
SRR17520069.2462069  
SRR17520069.2462071  
SRR17520069.2462073  
SRR17520069.2462075  
SRR17520069.2462077  
SRR17520069.2462079  
SRR17520069.2462081  
SRR17520069.2462085  
SRR17520069.2462087  
SRR17520069.2462089  
SRR17520069.2462548  
SRR17520069.2462550  
SRR17520069.2462552  
SRR17520069.2462554  
SRR17520069.2462556  
SRR17520069.2462558  
SRR17520069.2462560  
SRR17520069.2462562  
SRR17520069.2462564  
SRR17520069.2463283  
SRR17520069.2463285  
SRR17520069.2463287  
SRR17520069.2463289  
SRR17520069.2463291  
SRR17520069.2463293  
SRR17520069.2463295  
SRR17520069.2464937  
SRR17520069.2464939  
SRR17520069.2464941  
SRR17520069.2464945  
SRR17520069.2485113  
SRR17520069.2485115  
SRR17520069.2485117  
SRR17520069.2485119  
SRR17520069.2485121  
SRR17520069.2489159  
SRR17520069.2489161  
SRR17520069.2489163  
SRR17520069.2489165  
SRR17520069.2489167  
SRR17520069.2489169  
SRR17520069.2489171



SRR17520069.2489173  
SRR17520069.2489175  
SRR17520069.2489177  
SRR17520069.2489179  
SRR17520069.2489181  
SRR17520069.2489183  
SRR17520069.2489185  
SRR17520069.2489187  
SRR17520069.2489189  
SRR17520069.2489191  
SRR17520069.2489193  
SRR17520069.2489195  
SRR17520069.2489197  
SRR17520069.2489199  
SRR17520069.2489201  
SRR17520069.2489203  
SRR17520069.2489205  
SRR17520069.2489207  
SRR17520069.2489209  
SRR17520069.2489211  
SRR17520069.2489213  
SRR17520069.2489215  
SRR17520069.2489217  
SRR17520069.2489219  
SRR17520069.2489221  
SRR17520069.2489223  
SRR17520069.2489225  
SRR17520069.2489227  
SRR17520069.2489229  
SRR17520069.2489231  
SRR17520069.2489233  
SRR17520069.2489235  
SRR17520069.2489239  
SRR17520069.2489241  
SRR17520069.2489243  
SRR17520069.2489245  
SRR17520069.2489247  
SRR17520069.2489249  
SRR17520069.2489251  
SRR17520069.2489253  
SRR17520069.2489255  
SRR17520069.2489257  
SRR17520069.2489259  
SRR17520069.2489261  
SRR17520069.2489263  
SRR17520069.2489265  
SRR17520069.2489267

SRR17520069.2489269  
SRR17520069.2489271  
SRR17520069.2489273  
SRR17520069.2489275  
SRR17520069.2489277  
SRR17520069.2489279  
SRR17520069.2489281  
SRR17520069.2489283  
SRR17520069.2489285  
SRR17520069.2489287  
SRR17520069.2489289  
SRR17520069.2489291  
SRR17520069.2489293  
SRR17520069.2489295  
SRR17520069.2489297  
SRR17520069.2489299  
SRR17520069.2489301  
SRR17520069.2489303  
SRR17520069.2489305  
SRR17520069.2489307  
SRR17520069.2489309  
SRR17520069.2489311  
SRR17520069.2489313  
SRR17520069.2489315  
SRR17520069.2490000  
SRR17520069.2490002  
SRR17520069.2490004  
SRR17520069.2490006  
SRR17520069.2490008  
SRR17520069.2490010  
SRR17520069.2490012  
SRR17520069.2490014  
SRR17520069.2490016  
SRR17520069.2490018  
SRR17520069.2490020  
SRR17520069.2490022  
SRR17520069.2490024  
SRR17520069.2490026  
SRR17520069.2490028  
SRR17520069.2490030  
SRR17520069.2490032  
SRR17520069.2490034  
SRR17520069.2494985  
SRR17520069.2495028  
SRR17520069.2495030  
SRR17520069.2495032  
SRR17520069.2495034

SRR17520069.2495036  
SRR17520069.2495038  
SRR17520069.2495040  
SRR17520069.2495042  
SRR17520069.2495044  
SRR17520069.2495046  
SRR17520069.2495048  
SRR17520069.2495050  
SRR17520069.2495052  
SRR17520069.2495054  
SRR17520069.2495056  
SRR17520069.2495058  
SRR17520069.2495060  
SRR17520069.2495064  
SRR17520069.2495066  
SRR17520069.2495068  
SRR17520069.2495072  
SRR17520069.2495076  
SRR17520069.2495080  
SRR17520069.2495084  
SRR17520069.2495088  
SRR17520069.2495092  
SRR17520069.2495096  
SRR17520069.2497851  
SRR17520069.2497853  
SRR17520069.2497855  
SRR17520069.2497857  
SRR17520069.2497859  
SRR17520069.2497861  
SRR17520069.2497863  
SRR17520069.2497865  
SRR17520069.2497867  
SRR17520069.2497869  
SRR17520069.2497873  
SRR17520069.2497875  
SRR17520069.2497877  
SRR17520069.2497879  
SRR17520069.2497881  
SRR17520069.2497883  
SRR17520069.2497885  
SRR17520069.2497887  
SRR17520069.2497889  
SRR17520069.2497891  
SRR17520069.2497893  
SRR17520069.2497895  
SRR17520069.2497897  
SRR17520069.2497899

SRR17520069.2497999  
SRR17520069.2501454  
SRR17520069.2501456  
SRR17520069.2501458  
SRR17520069.2501460  
SRR17520069.2501462  
SRR17520069.2501464  
SRR17520069.2501466  
SRR17520069.2501468  
SRR17520069.2501470  
SRR17520069.2501472  
SRR17520069.2501474  
SRR17520069.2501476  
SRR17520069.2501478  
SRR17520069.2501480  
SRR17520069.2501482  
SRR17520069.2501484  
SRR17520069.2501486  
SRR17520069.2505960  
SRR17520069.2505964  
SRR17520069.2505966  
SRR17520069.2505972  
SRR17520069.2505976  
SRR17520069.2505978  
SRR17520069.2505982  
SRR17520069.2505984  
SRR17520069.2505986  
SRR17520069.2505988  
SRR17520069.2505994  
SRR17520069.2505996  
SRR17520069.2505998  
SRR17520069.2506000  
SRR17520069.2506002  
SRR17520069.2506004  
SRR17520069.2506006  
SRR17520069.2506008  
SRR17520069.2506010  
SRR17520069.2506012  
SRR17520069.2506014  
SRR17520069.2506016  
SRR17520069.2506018  
SRR17520069.2506020  
SRR17520069.2506022  
SRR17520069.2506026  
SRR17520069.2506028  
SRR17520069.2506030  
SRR17520069.2506032

SRR17520069.2506036  
SRR17520069.2506038  
SRR17520069.2506040  
SRR17520069.2506042  
SRR17520069.2506044  
SRR17520069.2506046  
SRR17520069.2506048  
SRR17520069.2506050  
SRR17520069.2506052  
SRR17520069.2506054  
SRR17520069.2506056  
SRR17520069.2514527  
SRR17520069.2514529  
SRR17520069.2514531  
SRR17520069.2514533  
SRR17520069.2514535  
SRR17520069.2514537  
SRR17520069.2514539  
SRR17520069.2514541  
SRR17520069.2514545  
SRR17520069.2514547  
SRR17520069.2514549  
SRR17520069.2514551  
SRR17520069.2514553  
SRR17520069.2514555  
SRR17520069.2514557  
SRR17520069.2514559  
SRR17520069.2514561  
SRR17520069.2514563  
SRR17520069.2514567  
SRR17520069.2514569  
SRR17520069.2514571  
SRR17520069.2514573  
SRR17520069.2514575  
SRR17520069.2514577  
SRR17520069.2514579  
SRR17520069.2514581  
SRR17520069.2514585  
SRR17520069.2514587  
SRR17520069.2514589  
SRR17520069.2514591  
SRR17520069.2514593  
SRR17520069.2514595  
SRR17520069.2514597  
SRR17520069.2514599  
SRR17520069.2514601  
SRR17520069.2514603

SRR17520069. 2514605  
SRR17520069. 2520965  
SRR17520069. 2520967  
SRR17520069. 2520969  
SRR17520069. 2520971  
SRR17520069. 2520973  
SRR17520069. 2520975  
SRR17520069. 2520977  
SRR17520069. 2520979  
SRR17520069. 2520981  
SRR17520069. 2520983  
SRR17520069. 2520985  
SRR17520069. 2520987  
SRR17520069. 2520991  
SRR17520069. 2520993  
SRR17520069. 2520995  
SRR17520069. 2520997  
SRR17520069. 2520999  
SRR17520069. 2521001  
SRR17520069. 2521003  
SRR17520069. 2521005  
SRR17520069. 2521007  
SRR17520069. 2524057  
SRR17520069. 2524059  
SRR17520069. 2524061  
SRR17520069. 2524063  
SRR17520069. 2524065  
SRR17520069. 2524067  
SRR17520069. 2524069  
SRR17520069. 2524071  
SRR17520069. 2524073  
SRR17520069. 2524075  
SRR17520069. 2524077  
SRR17520069. 2524079  
SRR17520069. 2524081  
SRR17520069. 2524083  
SRR17520069. 2524085  
SRR17520069. 2524087  
SRR17520069. 2524089  
SRR17520069. 2524091  
SRR17520069. 2524093  
SRR17520069. 2524095  
SRR17520069. 2524097  
SRR17520069. 2524099  
SRR17520069. 2524101  
SRR17520069. 2524103  
SRR17520069. 2524105

SRR17520069. 2524107  
SRR17520069. 2524109  
SRR17520069. 2524111  
SRR17520069. 2524113  
SRR17520069. 2524115  
SRR17520069. 2524117  
SRR17520069. 2524119  
SRR17520069. 2524121  
SRR17520069. 2524123  
SRR17520069. 2524125  
SRR17520069. 2524127  
SRR17520069. 2524129  
SRR17520069. 2524131  
SRR17520069. 2524133  
SRR17520069. 2526004  
SRR17520069. 2526006  
SRR17520069. 2526008  
SRR17520069. 2526010  
SRR17520069. 2526012  
SRR17520069. 2526014  
SRR17520069. 2526016  
SRR17520069. 2526018  
SRR17520069. 2526020  
SRR17520069. 2526022  
SRR17520069. 2526024  
SRR17520069. 2526026  
SRR17520069. 2526028  
SRR17520069. 2526030  
SRR17520069. 2526032  
SRR17520069. 2526034  
SRR17520069. 2526036  
SRR17520069. 2526038  
SRR17520069. 2526040  
SRR17520069. 2526042  
SRR17520069. 2526044  
SRR17520069. 2526046  
SRR17520069. 2526048  
SRR17520069. 2526050  
SRR17520069. 2526052  
SRR17520069. 2526054  
SRR17520069. 2526056  
SRR17520069. 2526058  
SRR17520069. 2526060  
SRR17520069. 2526062  
SRR17520069. 2526064  
SRR17520069. 2526066  
SRR17520069. 2526068

SRR17520069. 2526072  
SRR17520069. 2526074  
SRR17520069. 2526076  
SRR17520069. 2526078  
SRR17520069. 2526080  
SRR17520069. 2526082  
SRR17520069. 2526084  
SRR17520069. 2526086  
SRR17520069. 2526088  
SRR17520069. 2526090  
SRR17520069. 2526092  
SRR17520069. 2526094  
SRR17520069. 2526096  
SRR17520069. 2526098  
SRR17520069. 2526100  
SRR17520069. 2526102  
SRR17520069. 2526104  
SRR17520069. 2526106  
SRR17520069. 2526108  
SRR17520069. 2526110  
SRR17520069. 2526112  
SRR17520069. 2526114  
SRR17520069. 2526116  
SRR17520069. 2526118  
SRR17520069. 2526120  
SRR17520069. 2526122  
SRR17520069. 2526124  
SRR17520069. 2526126  
SRR17520069. 2532768  
SRR17520069. 2532770  
SRR17520069. 2532772  
SRR17520069. 2532774  
SRR17520069. 2532776  
SRR17520069. 2532778  
SRR17520069. 2532780  
SRR17520069. 2532782  
SRR17520069. 2532784  
SRR17520069. 2532786  
SRR17520069. 2532788  
SRR17520069. 2532790  
SRR17520069. 2532792  
SRR17520069. 2532794  
SRR17520069. 2532796  
SRR17520069. 2532798  
SRR17520069. 2532800  
SRR17520069. 2532802  
SRR17520069. 2532804



SRR17520069. 2532806  
SRR17520069. 2532808  
SRR17520069. 2532810  
SRR17520069. 2532812  
SRR17520069. 2532814  
SRR17520069. 2532816  
SRR17520069. 2532818  
SRR17520069. 2532820  
SRR17520069. 2532822  
SRR17520069. 2532824  
SRR17520069. 2532826  
SRR17520069. 2532828  
SRR17520069. 2532830  
SRR17520069. 2532832  
SRR17520069. 2532834  
SRR17520069. 2532836  
SRR17520069. 2532838  
SRR17520069. 2532840  
SRR17520069. 2532842  
SRR17520069. 2532844  
SRR17520069. 2542071  
SRR17520069. 2542073  
SRR17520069. 2542075  
SRR17520069. 2542077  
SRR17520069. 2542079  
SRR17520069. 2542081  
SRR17520069. 2542083  
SRR17520069. 2542085  
SRR17520069. 2542087  
SRR17520069. 2542089  
SRR17520069. 2542091  
SRR17520069. 2542093  
SRR17520069. 2542095  
SRR17520069. 2542097  
SRR17520069. 2542099  
SRR17520069. 2542101  
SRR17520069. 2542103  
SRR17520069. 2542105  
SRR17520069. 2542107  
SRR17520069. 2542111  
SRR17520069. 2542113  
SRR17520069. 2542115  
SRR17520069. 2542117  
SRR17520069. 2542119  
SRR17520069. 2542121  
SRR17520069. 2542123  
SRR17520069. 2542125

SRR17520069.2542127  
SRR17520069.2542129  
SRR17520069.2543529  
SRR17520069.2543531  
SRR17520069.2543533  
SRR17520069.2543537  
SRR17520069.2543539  
SRR17520069.2545275  
SRR17520069.2545277  
SRR17520069.2545279  
SRR17520069.2545281  
SRR17520069.2545283  
SRR17520069.2545285  
SRR17520069.2545287  
SRR17520069.2545289  
SRR17520069.2545291  
SRR17520069.2545293  
SRR17520069.2545295  
SRR17520069.2545297  
SRR17520069.2545299  
SRR17520069.2545301  
SRR17520069.2545303  
SRR17520069.2545305  
SRR17520069.2545307  
SRR17520069.2545309  
SRR17520069.2545311  
SRR17520069.2545313  
SRR17520069.2545315  
SRR17520069.2545317  
SRR17520069.2545319  
SRR17520069.2545409  
SRR17520069.2550476  
SRR17520069.2550478  
SRR17520069.2550480  
SRR17520069.2550482  
SRR17520069.2550484  
SRR17520069.2550486  
SRR17520069.2550488  
SRR17520069.2550490  
SRR17520069.2550492  
SRR17520069.2550494  
SRR17520069.2550496  
SRR17520069.2550498  
SRR17520069.2550500  
SRR17520069.2550502  
SRR17520069.2550504  
SRR17520069.2550506

SRR17520069.2550510  
SRR17520069.2550512  
SRR17520069.2550514  
SRR17520069.2550516  
SRR17520069.2550518  
SRR17520069.2550520  
SRR17520069.2550522  
SRR17520069.2550524  
SRR17520069.2550526  
SRR17520069.2550528  
SRR17520069.2550530  
SRR17520069.2550532  
SRR17520069.2550534  
SRR17520069.2550536  
SRR17520069.2550538  
SRR17520069.2550540  
SRR17520069.2550542  
SRR17520069.2550544  
SRR17520069.2550546  
SRR17520069.2550548  
SRR17520069.2550550  
SRR17520069.2550552  
SRR17520069.2550554  
SRR17520069.2550556  
SRR17520069.2550558  
SRR17520069.2550560  
SRR17520069.2550562  
SRR17520069.2550564  
SRR17520069.2550566  
SRR17520069.2550568  
SRR17520069.2550570  
SRR17520069.2550572  
SRR17520069.2550574  
SRR17520069.2550576  
SRR17520069.2550578  
SRR17520069.2550582  
SRR17520069.2550584  
SRR17520069.2550586  
SRR17520069.2550588  
SRR17520069.2550590  
SRR17520069.2550592  
SRR17520069.2555255  
SRR17520069.2555257  
SRR17520069.2555259  
SRR17520069.2555261  
SRR17520069.2555263  
SRR17520069.2555265

SRR17520069.2555267  
SRR17520069.2555269  
SRR17520069.2555271  
SRR17520069.2555273  
SRR17520069.2555275  
SRR17520069.2555277  
SRR17520069.2555279  
SRR17520069.2555281  
SRR17520069.2555283  
SRR17520069.2555285  
SRR17520069.2555287  
SRR17520069.2555289  
SRR17520069.2555291  
SRR17520069.2556255  
SRR17520069.2556257  
SRR17520069.2556259  
SRR17520069.2556261  
SRR17520069.2556263  
SRR17520069.2563340  
SRR17520069.2563342  
SRR17520069.2563344  
SRR17520069.2563346  
SRR17520069.2563348  
SRR17520069.2563350  
SRR17520069.2563352  
SRR17520069.2563354  
SRR17520069.2563356  
SRR17520069.2563358  
SRR17520069.2564239  
SRR17520069.2564243  
SRR17520069.2564245  
SRR17520069.2567029  
SRR17520069.2567031  
SRR17520069.2567033  
SRR17520069.2567035  
SRR17520069.2567037  
SRR17520069.2567039  
SRR17520069.2567041  
SRR17520069.2567043  
SRR17520069.2567045  
SRR17520069.2567047  
SRR17520069.2567049  
SRR17520069.2567051  
SRR17520069.2567053  
SRR17520069.2567055  
SRR17520069.2567057  
SRR17520069.2567059

SRR17520069.2567061  
SRR17520069.2567063  
SRR17520069.2567065  
SRR17520069.2567067  
SRR17520069.2567069  
SRR17520069.2567071  
SRR17520069.2567073  
SRR17520069.2567075  
SRR17520069.2567077  
SRR17520069.2567079  
SRR17520069.2567081  
SRR17520069.2567083  
SRR17520069.2575943  
SRR17520069.2575945  
SRR17520069.2575949  
SRR17520069.2577371  
SRR17520069.2577856  
SRR17520069.2577858  
SRR17520069.2577860  
SRR17520069.2577862  
SRR17520069.2577864  
SRR17520069.2597338  
SRR17520069.2597340  
SRR17520069.2597342  
SRR17520069.2597344  
SRR17520069.2597346  
SRR17520069.2597348  
SRR17520069.2597350  
SRR17520069.2597352  
SRR17520069.2597354  
SRR17520069.2597356  
SRR17520069.2597358  
SRR17520069.2597360  
SRR17520069.2597362  
SRR17520069.2597364  
SRR17520069.2597366  
SRR17520069.2597368  
SRR17520069.2597370  
SRR17520069.2597372  
SRR17520069.2597374  
SRR17520069.2597378  
SRR17520069.2597380  
SRR17520069.2597382  
SRR17520069.2597384  
SRR17520069.2597386  
SRR17520069.2597388  
SRR17520069.2597390

SRR17520069. 2597392  
SRR17520069. 2597394  
SRR17520069. 2597396  
SRR17520069. 2597398  
SRR17520069. 2597400  
SRR17520069. 2597402  
SRR17520069. 2597404  
SRR17520069. 2597406  
SRR17520069. 2597408  
SRR17520069. 2597410  
SRR17520069. 2600633  
SRR17520069. 2600635  
SRR17520069. 2600637  
SRR17520069. 2600639  
SRR17520069. 2600641  
SRR17520069. 2600643  
SRR17520069. 2600645  
SRR17520069. 2600647  
SRR17520069. 2600649  
SRR17520069. 2600651  
SRR17520069. 2600653  
SRR17520069. 2600655  
SRR17520069. 2604779  
SRR17520069. 2604781  
SRR17520069. 2604783  
SRR17520069. 2604785  
SRR17520069. 2604787  
SRR17520069. 2604789  
SRR17520069. 2604791  
SRR17520069. 2604793  
SRR17520069. 2604795  
SRR17520069. 2604797  
SRR17520069. 2604799  
SRR17520069. 2604801  
SRR17520069. 2604803  
SRR17520069. 2604805  
SRR17520069. 2604807  
SRR17520069. 2604809  
SRR17520069. 2604811  
SRR17520069. 2604813  
SRR17520069. 2604815  
SRR17520069. 2604817  
SRR17520069. 2604819  
SRR17520069. 2604821  
SRR17520069. 2604823  
SRR17520069. 2604825  
SRR17520069. 2604829

SRR17520069.2604831  
SRR17520069.2605344  
SRR17520069.2609906  
SRR17520069.2609908  
SRR17520069.2609910  
SRR17520069.2611784  
SRR17520069.2611786  
SRR17520069.2611788  
SRR17520069.2611790  
SRR17520069.2611792  
SRR17520069.2611794  
SRR17520069.2611796  
SRR17520069.2611798  
SRR17520069.2611800  
SRR17520069.2611802  
SRR17520069.2611804  
SRR17520069.2611806  
SRR17520069.2611808  
SRR17520069.2611810  
SRR17520069.2611812  
SRR17520069.2611816  
SRR17520069.2611818  
SRR17520069.2611820  
SRR17520069.2611822  
SRR17520069.2614047  
SRR17520069.2614049  
SRR17520069.2614051  
SRR17520069.2614053  
SRR17520069.2614055  
SRR17520069.2614057  
SRR17520069.2614059  
SRR17520069.2614061  
SRR17520069.2614063  
SRR17520069.2614065  
SRR17520069.2614067  
SRR17520069.2614069  
SRR17520069.2614071  
SRR17520069.2614073  
SRR17520069.2614075  
SRR17520069.2614077  
SRR17520069.2614079  
SRR17520069.2614081  
SRR17520069.2614083  
SRR17520069.2614085  
SRR17520069.2614087  
SRR17520069.2614089  
SRR17520069.2614091

SRR17520069.2614093  
SRR17520069.2614095  
SRR17520069.2614097  
SRR17520069.2614101  
SRR17520069.2614103  
SRR17520069.2614105  
SRR17520069.2614107  
SRR17520069.2614109  
SRR17520069.2614111  
SRR17520069.2614113  
SRR17520069.2614115  
SRR17520069.2614117  
SRR17520069.2614119  
SRR17520069.2614121  
SRR17520069.2614123  
SRR17520069.2614125  
SRR17520069.2614129  
SRR17520069.2614131  
SRR17520069.2614133  
SRR17520069.2614135  
SRR17520069.2614137  
SRR17520069.2614139  
SRR17520069.2614141  
SRR17520069.2614143  
SRR17520069.2614145  
SRR17520069.2614147  
SRR17520069.2614149  
SRR17520069.2614151  
SRR17520069.2614153  
SRR17520069.2614155  
SRR17520069.2614157  
SRR17520069.2614159  
SRR17520069.2614161  
SRR17520069.2614163  
SRR17520069.2614165  
SRR17520069.2614167  
SRR17520069.2614169  
SRR17520069.2614171  
SRR17520069.2614173  
SRR17520069.2614288  
SRR17520069.2614292  
SRR17520069.2614294  
SRR17520069.2614296  
SRR17520069.2614302  
SRR17520069.2614306  
SRR17520069.2614308  
SRR17520069.2614310



SRR17520069. 2614312  
SRR17520069. 2614314  
SRR17520069. 2614316  
SRR17520069. 2614318  
SRR17520069. 2614320  
SRR17520069. 2614322  
SRR17520069. 2614324  
SRR17520069. 2614326  
SRR17520069. 2614328  
SRR17520069. 2614330  
SRR17520069. 2614332  
SRR17520069. 2625495  
SRR17520069. 2625497  
SRR17520069. 2625499  
SRR17520069. 2625503  
SRR17520069. 2626864  
SRR17520069. 2626866  
SRR17520069. 2626868  
SRR17520069. 2626870  
SRR17520069. 2626872  
SRR17520069. 2626874  
SRR17520069. 2626880  
SRR17520069. 2626882  
SRR17520069. 2629025  
SRR17520069. 2630244  
SRR17520069. 2630246  
SRR17520069. 2636933  
SRR17520069. 2636935  
SRR17520069. 2636937  
SRR17520069. 2636941  
SRR17520069. 2636943  
SRR17520069. 2636945  
SRR17520069. 2636947  
SRR17520069. 2636949  
SRR17520069. 2636951  
SRR17520069. 2636953  
SRR17520069. 2636955  
SRR17520069. 2636957  
SRR17520069. 2636959  
SRR17520069. 2636961  
SRR17520069. 2636963  
SRR17520069. 2636965  
SRR17520069. 2636967  
SRR17520069. 2636969  
SRR17520069. 2636971  
SRR17520069. 2636973  
SRR17520069. 2636975

SRR17520069. 2636977  
SRR17520069. 2636979  
SRR17520069. 2636981  
SRR17520069. 2636983  
SRR17520069. 2636985  
SRR17520069. 2636987  
SRR17520069. 2636989  
SRR17520069. 2636991  
SRR17520069. 2636993  
SRR17520069. 2636995  
SRR17520069. 2638867  
SRR17520069. 2638869  
SRR17520069. 2638871  
SRR17520069. 2638873  
SRR17520069. 2638875  
SRR17520069. 2638877  
SRR17520069. 2638879  
SRR17520069. 2638881  
SRR17520069. 2638883  
SRR17520069. 2638885  
SRR17520069. 2638887  
SRR17520069. 2638889  
SRR17520069. 2638891  
SRR17520069. 2638893  
SRR17520069. 2638895  
SRR17520069. 2638897  
SRR17520069. 2638899  
SRR17520069. 2638901  
SRR17520069. 2638903  
SRR17520069. 2638905  
SRR17520069. 2638907  
SRR17520069. 2638909  
SRR17520069. 2638911  
SRR17520069. 2638913  
SRR17520069. 2638915  
SRR17520069. 2638917  
SRR17520069. 2638919  
SRR17520069. 2638921  
SRR17520069. 2638923  
SRR17520069. 2638925  
SRR17520069. 2638927  
SRR17520069. 2638929  
SRR17520069. 2638931  
SRR17520069. 2638933  
SRR17520069. 2638935  
SRR17520069. 2638937  
SRR17520069. 2638939

SRR17520069. 2638941  
SRR17520069. 2638943  
SRR17520069. 2638945  
SRR17520069. 2638947  
SRR17520069. 2638949  
SRR17520069. 2638951  
SRR17520069. 2638953  
SRR17520069. 2638955  
SRR17520069. 2638957  
SRR17520069. 2638959  
SRR17520069. 2638963  
SRR17520069. 2638965  
SRR17520069. 2638967  
SRR17520069. 2638969  
SRR17520069. 2638971  
SRR17520069. 2638973  
SRR17520069. 2638975  
SRR17520069. 2638977  
SRR17520069. 2638979  
SRR17520069. 2638983  
SRR17520069. 2642410  
SRR17520069. 2642412  
SRR17520069. 2642414  
SRR17520069. 2642416  
SRR17520069. 2642418  
SRR17520069. 2642420  
SRR17520069. 2642422  
SRR17520069. 2642424  
SRR17520069. 2642426  
SRR17520069. 2642428  
SRR17520069. 2642430  
SRR17520069. 2642432  
SRR17520069. 2642434  
SRR17520069. 2642436  
SRR17520069. 2642440  
SRR17520069. 2642444  
SRR17520069. 2642446  
SRR17520069. 2642450  
SRR17520069. 2642452  
SRR17520069. 2642454  
SRR17520069. 2642456  
SRR17520069. 2642458  
SRR17520069. 2642460  
SRR17520069. 2642462  
SRR17520069. 2642464  
SRR17520069. 2642466  
SRR17520069. 2642468

SRR17520069. 2642693  
SRR17520069. 2642695  
SRR17520069. 2642697  
SRR17520069. 2642699  
SRR17520069. 2642701  
SRR17520069. 2642703  
SRR17520069. 2645426  
SRR17520069. 2645428  
SRR17520069. 2645430  
SRR17520069. 2645432  
SRR17520069. 2645434  
SRR17520069. 2645436  
SRR17520069. 2645438  
SRR17520069. 2645440  
SRR17520069. 2645442  
SRR17520069. 2645444  
SRR17520069. 2645446  
SRR17520069. 2645448  
SRR17520069. 2645450  
SRR17520069. 2649972  
SRR17520069. 2649974  
SRR17520069. 2649976  
SRR17520069. 2649978  
SRR17520069. 2649980  
SRR17520069. 2649982  
SRR17520069. 2651267  
SRR17520069. 2651269  
SRR17520069. 2651271  
SRR17520069. 2651273  
SRR17520069. 2654313  
SRR17520069. 2654315  
SRR17520069. 2654317  
SRR17520069. 2654319  
SRR17520069. 2654321  
SRR17520069. 2654323  
SRR17520069. 2654325  
SRR17520069. 2654327  
SRR17520069. 2654329  
SRR17520069. 2654331  
SRR17520069. 2654333  
SRR17520069. 2654335  
SRR17520069. 2654339  
SRR17520069. 2654341  
SRR17520069. 2654343  
SRR17520069. 2654345  
SRR17520069. 2654347  
SRR17520069. 2654349

SRR17520069.2654351  
SRR17520069.2654353  
SRR17520069.2654355  
SRR17520069.2654357  
SRR17520069.2654359  
SRR17520069.2654361  
SRR17520069.2654363  
SRR17520069.2654365  
SRR17520069.2654367  
SRR17520069.2654369  
SRR17520069.2654371  
SRR17520069.2654373  
SRR17520069.2654377  
SRR17520069.2654379  
SRR17520069.2654381  
SRR17520069.2654383  
SRR17520069.2672073  
SRR17520069.2672075  
SRR17520069.2672077  
SRR17520069.2672079  
SRR17520069.2672081  
SRR17520069.2672083  
SRR17520069.2672085  
SRR17520069.2687116  
SRR17520069.2687118  
SRR17520069.2687120  
SRR17520069.2687122  
SRR17520069.2687124  
SRR17520069.2687126  
SRR17520069.2687128  
SRR17520069.2687130  
SRR17520069.2687132  
SRR17520069.2687134  
SRR17520069.2687136  
SRR17520069.2687138  
SRR17520069.2687140  
SRR17520069.2687142  
SRR17520069.2687144  
SRR17520069.2687146  
SRR17520069.2687148  
SRR17520069.2687150  
SRR17520069.2687152  
SRR17520069.2687273  
SRR17520069.2687275  
SRR17520069.2687277  
SRR17520069.2687279  
SRR17520069.2687281

SRR17520069. 2687283  
SRR17520069. 2690624  
SRR17520069. 2690626  
SRR17520069. 2690628  
SRR17520069. 2690630  
SRR17520069. 2690632  
SRR17520069. 2690634  
SRR17520069. 2690636  
SRR17520069. 2690638  
SRR17520069. 2690640  
SRR17520069. 2690642  
SRR17520069. 2690644  
SRR17520069. 2690646  
SRR17520069. 2690648  
SRR17520069. 2690650  
SRR17520069. 2690652  
SRR17520069. 2690654  
SRR17520069. 2690658  
SRR17520069. 2690660  
SRR17520069. 2690662  
SRR17520069. 2690664  
SRR17520069. 2690666  
SRR17520069. 2690668  
SRR17520069. 2690670  
SRR17520069. 2690672  
SRR17520069. 2690674  
SRR17520069. 2690676  
SRR17520069. 2690678  
SRR17520069. 2690680  
SRR17520069. 2690682  
SRR17520069. 2690684  
SRR17520069. 2690686  
SRR17520069. 2690688  
SRR17520069. 2690690  
SRR17520069. 2690692  
SRR17520069. 2690694  
SRR17520069. 2690696  
SRR17520069. 2690698  
SRR17520069. 2690700  
SRR17520069. 2690702  
SRR17520069. 2690704  
SRR17520069. 2690706  
SRR17520069. 2690708  
SRR17520069. 2690710  
SRR17520069. 2690712  
SRR17520069. 2690714  
SRR17520069. 2690716

SRR17520069.2690718  
SRR17520069.2690720  
SRR17520069.2690722  
SRR17520069.2690724  
SRR17520069.2690726  
SRR17520069.2690728  
SRR17520069.2690730  
SRR17520069.2690732  
SRR17520069.2690734  
SRR17520069.2690736  
SRR17520069.2690738  
SRR17520069.2690740  
SRR17520069.2690742  
SRR17520069.2690744  
SRR17520069.2690746  
SRR17520069.2690748  
SRR17520069.2690750  
SRR17520069.2690752  
SRR17520069.2690754  
SRR17520069.2690758  
SRR17520069.2690760  
SRR17520069.2690762  
SRR17520069.2690766  
SRR17520069.2690768  
SRR17520069.2690770  
SRR17520069.2693260  
SRR17520069.2693262  
SRR17520069.2693264  
SRR17520069.2693266  
SRR17520069.2693268  
SRR17520069.2693270  
SRR17520069.2693272  
SRR17520069.2693274  
SRR17520069.2693276  
SRR17520069.2693708  
SRR17520069.2693710  
SRR17520069.2693712  
SRR17520069.2693714  
SRR17520069.2693718  
SRR17520069.2693720  
SRR17520069.2693722  
SRR17520069.2693724  
SRR17520069.2693726  
SRR17520069.2693728  
SRR17520069.2693730  
SRR17520069.2693732  
SRR17520069.2693734

SRR17520069. 2693736  
SRR17520069. 2693738  
SRR17520069. 2693740  
SRR17520069. 2693742  
SRR17520069. 2693744  
SRR17520069. 2693746  
SRR17520069. 2693748  
SRR17520069. 2693750  
SRR17520069. 2693752  
SRR17520069. 2693754  
SRR17520069. 2693756  
SRR17520069. 2693758  
SRR17520069. 2693760  
SRR17520069. 2693762  
SRR17520069. 2693764  
SRR17520069. 2693766  
SRR17520069. 2693768  
SRR17520069. 2693770  
SRR17520069. 2693774  
SRR17520069. 2693776  
SRR17520069. 2693778  
SRR17520069. 2693780  
SRR17520069. 2693782  
SRR17520069. 2695724  
SRR17520069. 2695726  
SRR17520069. 2695728  
SRR17520069. 2695732  
SRR17520069. 2695734  
SRR17520069. 2695736  
SRR17520069. 2695738  
SRR17520069. 2695740  
SRR17520069. 2695742  
SRR17520069. 2695744  
SRR17520069. 2695746  
SRR17520069. 2695748  
SRR17520069. 2695750  
SRR17520069. 2695752  
SRR17520069. 2695754  
SRR17520069. 2695756  
SRR17520069. 2695758  
SRR17520069. 2695760  
SRR17520069. 2695762  
SRR17520069. 2695764  
SRR17520069. 2695766  
SRR17520069. 2695768  
SRR17520069. 2695770  
SRR17520069. 2700319



SRR17520069.2700321  
SRR17520069.2702923  
SRR17520069.2702925  
SRR17520069.2702927  
SRR17520069.2702929  
SRR17520069.2702933  
SRR17520069.2702935  
SRR17520069.2702937  
SRR17520069.2702939  
SRR17520069.2702941  
SRR17520069.2702943  
SRR17520069.2702945  
SRR17520069.2702947  
SRR17520069.2702949  
SRR17520069.2702951  
SRR17520069.2702953  
SRR17520069.2702955  
SRR17520069.2702957  
SRR17520069.2702959  
SRR17520069.2702961  
SRR17520069.2702965  
SRR17520069.2702967  
SRR17520069.2702969  
SRR17520069.2702971  
SRR17520069.2702973  
SRR17520069.2705277  
SRR17520069.2709441  
SRR17520069.2709443  
SRR17520069.2709445  
SRR17520069.2709447  
SRR17520069.2715464  
SRR17520069.2715466  
SRR17520069.2715468  
SRR17520069.2715470  
SRR17520069.2715472  
SRR17520069.2715474  
SRR17520069.2715478  
SRR17520069.2715480  
SRR17520069.2715482  
SRR17520069.2715484  
SRR17520069.2717369  
SRR17520069.2717371  
SRR17520069.2717373  
SRR17520069.2717375  
SRR17520069.2717377  
SRR17520069.2717379  
SRR17520069.2717381

SRR17520069.2717383  
SRR17520069.2717385  
SRR17520069.2717387  
SRR17520069.2717389  
SRR17520069.2717717  
SRR17520069.2717719  
SRR17520069.2717721  
SRR17520069.2717723  
SRR17520069.2717725  
SRR17520069.2717727  
SRR17520069.2717729  
SRR17520069.2717731  
SRR17520069.2717733  
SRR17520069.2717735  
SRR17520069.2717737  
SRR17520069.2731045  
SRR17520069.2731047  
SRR17520069.2731049  
SRR17520069.2733816  
SRR17520069.2733818  
SRR17520069.2733820  
SRR17520069.2733822  
SRR17520069.2733824  
SRR17520069.2733826  
SRR17520069.2733828  
SRR17520069.2733830  
SRR17520069.2733832  
SRR17520069.2733834  
SRR17520069.2733836  
SRR17520069.2733838  
SRR17520069.2733840  
SRR17520069.2733842  
SRR17520069.2733844  
SRR17520069.2733846  
SRR17520069.2733848  
SRR17520069.2733850  
SRR17520069.2733854  
SRR17520069.2742437  
SRR17520069.2742439  
SRR17520069.2742441  
SRR17520069.2742443  
SRR17520069.2742445  
SRR17520069.2742447  
SRR17520069.2742449  
SRR17520069.2742451  
SRR17520069.2742455  
SRR17520069.2742457

SRR17520069.2742459  
SRR17520069.2742461  
SRR17520069.2742463  
SRR17520069.2742465  
SRR17520069.2742467  
SRR17520069.2742469  
SRR17520069.2742471  
SRR17520069.2742473  
SRR17520069.2742477  
SRR17520069.2743876  
SRR17520069.2743878  
SRR17520069.2743880  
SRR17520069.2743882  
SRR17520069.2743884  
SRR17520069.2743886  
SRR17520069.2743888  
SRR17520069.2743890  
SRR17520069.2743894  
SRR17520069.2743896  
SRR17520069.2743898  
SRR17520069.2743900  
SRR17520069.2743902  
SRR17520069.2743904  
SRR17520069.2743906  
SRR17520069.2743908  
SRR17520069.2743910  
SRR17520069.2748844  
SRR17520069.2748846  
SRR17520069.2748848  
SRR17520069.2748850  
SRR17520069.2748852  
SRR17520069.2748854  
SRR17520069.2748856  
SRR17520069.2748858  
SRR17520069.2748860  
SRR17520069.2748862  
SRR17520069.2748864  
SRR17520069.2748866  
SRR17520069.2748868  
SRR17520069.2748870  
SRR17520069.2748872  
SRR17520069.2748874  
SRR17520069.2748876  
SRR17520069.2748878  
SRR17520069.2748880  
SRR17520069.2748882  
SRR17520069.2748884

SRR17520069.2748886  
SRR17520069.2748888  
SRR17520069.2748890  
SRR17520069.2748892  
SRR17520069.2748894  
SRR17520069.2748896  
SRR17520069.2748898  
SRR17520069.2748900  
SRR17520069.2748902  
SRR17520069.2748904  
SRR17520069.2748906  
SRR17520069.2748908  
SRR17520069.2748910  
SRR17520069.2748912  
SRR17520069.2748914  
SRR17520069.2748916  
SRR17520069.2748918  
SRR17520069.2748920  
SRR17520069.2748922  
SRR17520069.2748924  
SRR17520069.2748926  
SRR17520069.2748928  
SRR17520069.2748930  
SRR17520069.2748932  
SRR17520069.2748934  
SRR17520069.2748936  
SRR17520069.2752804  
SRR17520069.2754324  
SRR17520069.2754326  
SRR17520069.2754328  
SRR17520069.2754330  
SRR17520069.2754332  
SRR17520069.2754334  
SRR17520069.2754336  
SRR17520069.2754338  
SRR17520069.2754340  
SRR17520069.2754342  
SRR17520069.2754344  
SRR17520069.2754346  
SRR17520069.2754348  
SRR17520069.2754350  
SRR17520069.2758388  
SRR17520069.2758390  
SRR17520069.2758392  
SRR17520069.2758394  
SRR17520069.2758396  
SRR17520069.2758398

SRR17520069.2758400  
SRR17520069.2758402  
SRR17520069.2758404  
SRR17520069.2758406  
SRR17520069.2758408  
SRR17520069.2758410  
SRR17520069.2758412  
SRR17520069.2758414  
SRR17520069.2758416  
SRR17520069.2758418  
SRR17520069.2758420  
SRR17520069.2758422  
SRR17520069.2758424  
SRR17520069.2758426  
SRR17520069.2758428  
SRR17520069.2758430  
SRR17520069.2758434  
SRR17520069.2758436  
SRR17520069.2758438  
SRR17520069.2758440  
SRR17520069.2758442  
SRR17520069.2758444  
SRR17520069.2758446  
SRR17520069.2758448  
SRR17520069.2758450  
SRR17520069.2758452  
SRR17520069.2758454  
SRR17520069.2758456  
SRR17520069.2758458  
SRR17520069.2758460  
SRR17520069.2758462  
SRR17520069.2758464  
SRR17520069.2758466  
SRR17520069.2758468  
SRR17520069.2758470  
SRR17520069.2760955  
SRR17520069.2760957  
SRR17520069.2760959  
SRR17520069.2760961  
SRR17520069.2773400  
SRR17520069.2773402  
SRR17520069.2773404  
SRR17520069.2773432  
SRR17520069.2773434  
SRR17520069.2773436  
SRR17520069.2773438  
SRR17520069.2773440

SRR17520069.2773442  
SRR17520069.2773444  
SRR17520069.2773446  
SRR17520069.2773448  
SRR17520069.2773450  
SRR17520069.2773452  
SRR17520069.2773454  
SRR17520069.2773456  
SRR17520069.2773458  
SRR17520069.2773460  
SRR17520069.2773462  
SRR17520069.2773464  
SRR17520069.2773466  
SRR17520069.2773468  
SRR17520069.2773470  
SRR17520069.2773472  
SRR17520069.2773474  
SRR17520069.2773476  
SRR17520069.2777385  
SRR17520069.2777387  
SRR17520069.2777389  
SRR17520069.2777393  
SRR17520069.2777395  
SRR17520069.2777397  
SRR17520069.2777401  
SRR17520069.2777403  
SRR17520069.2777405  
SRR17520069.2777407  
SRR17520069.2777409  
SRR17520069.2778825  
SRR17520069.2778827  
SRR17520069.2778829  
SRR17520069.2778831  
SRR17520069.2778833  
SRR17520069.2778835  
SRR17520069.2778837  
SRR17520069.2778841  
SRR17520069.2778843  
SRR17520069.2778845  
SRR17520069.2778847  
SRR17520069.2778849  
SRR17520069.2778851  
SRR17520069.2778855  
SRR17520069.2778857  
SRR17520069.2778859  
SRR17520069.2778861  
SRR17520069.2778863

SRR17520069.2778865  
SRR17520069.2778867  
SRR17520069.2778869  
SRR17520069.2778871  
SRR17520069.2778873  
SRR17520069.2778875  
SRR17520069.2778877  
SRR17520069.2778879  
SRR17520069.2778881  
SRR17520069.2778883  
SRR17520069.2778885  
SRR17520069.2778887  
SRR17520069.2778889  
SRR17520069.2778891  
SRR17520069.2778893  
SRR17520069.2778895  
SRR17520069.2778897  
SRR17520069.2778899  
SRR17520069.2778901  
SRR17520069.2778903  
SRR17520069.2778905  
SRR17520069.2778907  
SRR17520069.2778909  
SRR17520069.2778911  
SRR17520069.2778913  
SRR17520069.2778915  
SRR17520069.2778917  
SRR17520069.2780697  
SRR17520069.2781766  
SRR17520069.2781768  
SRR17520069.2781770  
SRR17520069.2781772  
SRR17520069.2781774  
SRR17520069.2781805  
SRR17520069.2781807  
SRR17520069.2781809  
SRR17520069.2781811  
SRR17520069.2781813  
SRR17520069.2781815  
SRR17520069.2781817  
SRR17520069.2781819  
SRR17520069.2781821  
SRR17520069.2781823  
SRR17520069.2781825  
SRR17520069.2781827  
SRR17520069.2781829  
SRR17520069.2781831

SRR17520069.2781833  
SRR17520069.2782895  
SRR17520069.2782897  
SRR17520069.2782899  
SRR17520069.2785654  
SRR17520069.2785656  
SRR17520069.2785658  
SRR17520069.2785660  
SRR17520069.2785662  
SRR17520069.2785664  
SRR17520069.2785666  
SRR17520069.2785668  
SRR17520069.2785670  
SRR17520069.2785672  
SRR17520069.2785674  
SRR17520069.2785676  
SRR17520069.2785678  
SRR17520069.2785680  
SRR17520069.2785682  
SRR17520069.2785684  
SRR17520069.2785686  
SRR17520069.2785688  
SRR17520069.2785690  
SRR17520069.2785692  
SRR17520069.2785694  
SRR17520069.2785696  
SRR17520069.2785698  
SRR17520069.2785700  
SRR17520069.2785702  
SRR17520069.2785704  
SRR17520069.2785706  
SRR17520069.2785708  
SRR17520069.2785710  
SRR17520069.2785712  
SRR17520069.2785714  
SRR17520069.2785716  
SRR17520069.2785718  
SRR17520069.2785720  
SRR17520069.2785722  
SRR17520069.2790822  
SRR17520069.2790824  
SRR17520069.2790828  
SRR17520069.2790830  
SRR17520069.2790832  
SRR17520069.2790834  
SRR17520069.2790836  
SRR17520069.2790838



SRR17520069.2790840  
SRR17520069.2790842  
SRR17520069.2790844  
SRR17520069.2790846  
SRR17520069.2790848  
SRR17520069.2790850  
SRR17520069.2790852  
SRR17520069.2790854  
SRR17520069.2790856  
SRR17520069.2790858  
SRR17520069.2790860  
SRR17520069.2790862  
SRR17520069.2790864  
SRR17520069.2790866  
SRR17520069.2790868  
SRR17520069.2790870  
SRR17520069.2790872  
SRR17520069.2804929  
SRR17520069.2804944  
SRR17520069.2814136  
SRR17520069.2814138  
SRR17520069.2814140  
SRR17520069.2814142  
SRR17520069.2814144  
SRR17520069.2814146  
SRR17520069.2814148  
SRR17520069.2814150  
SRR17520069.2814152  
SRR17520069.2814154  
SRR17520069.2814156  
SRR17520069.2814158  
SRR17520069.2814160  
SRR17520069.2814162  
SRR17520069.2814164  
SRR17520069.2814166  
SRR17520069.2814168  
SRR17520069.2814170  
SRR17520069.2814172  
SRR17520069.2814174  
SRR17520069.2814176  
SRR17520069.2814178  
SRR17520069.2814180  
SRR17520069.2814182  
SRR17520069.2814184  
SRR17520069.2814186  
SRR17520069.2814188  
SRR17520069.2814190

SRR17520069.2814192  
SRR17520069.2814194  
SRR17520069.2814196  
SRR17520069.2814198  
SRR17520069.2814200  
SRR17520069.2814202  
SRR17520069.2814204  
SRR17520069.2814206  
SRR17520069.2816633  
SRR17520069.2820625  
SRR17520069.2823735  
SRR17520069.2823737  
SRR17520069.2823739  
SRR17520069.2823741  
SRR17520069.2823743  
SRR17520069.2823745  
SRR17520069.2836143  
SRR17520069.2836145  
SRR17520069.2836147  
SRR17520069.2836149  
SRR17520069.2836151  
SRR17520069.2845384  
SRR17520069.2845386  
SRR17520069.2845388  
SRR17520069.2845390  
SRR17520069.2845392  
SRR17520069.2845394  
SRR17520069.2845396  
SRR17520069.2845398  
SRR17520069.2845400  
SRR17520069.2845402  
SRR17520069.2845404  
SRR17520069.2845406  
SRR17520069.2845408  
SRR17520069.2845410  
SRR17520069.2845412  
SRR17520069.2845414  
SRR17520069.2845416  
SRR17520069.2845418  
SRR17520069.2845420  
SRR17520069.2845422  
SRR17520069.2845426  
SRR17520069.2845428  
SRR17520069.2845430  
SRR17520069.2845432  
SRR17520069.2845434  
SRR17520069.2845436

SRR17520069.2845438  
SRR17520069.2845440  
SRR17520069.2845442  
SRR17520069.2845444  
SRR17520069.2845446  
SRR17520069.2845448  
SRR17520069.2845450  
SRR17520069.2845452  
SRR17520069.2845454  
SRR17520069.2845456  
SRR17520069.2845458  
SRR17520069.2845460  
SRR17520069.2845462  
SRR17520069.2845464  
SRR17520069.2845466  
SRR17520069.2845468  
SRR17520069.2845470  
SRR17520069.2845472  
SRR17520069.2845474  
SRR17520069.2845476  
SRR17520069.2847034  
SRR17520069.2847036  
SRR17520069.2847038  
SRR17520069.2847040  
SRR17520069.2847042  
SRR17520069.2847044  
SRR17520069.2847046  
SRR17520069.2847048  
SRR17520069.2847050  
SRR17520069.2847052  
SRR17520069.2847054  
SRR17520069.2847056  
SRR17520069.2847060  
SRR17520069.2847062  
SRR17520069.2847064  
SRR17520069.2847066  
SRR17520069.2847068  
SRR17520069.2847070  
SRR17520069.2847072  
SRR17520069.2847074  
SRR17520069.2847076  
SRR17520069.2847078  
SRR17520069.2847080  
SRR17520069.2855069  
SRR17520069.2855071  
SRR17520069.2856968  
SRR17520069.2858004

SRR17520069.2858006  
SRR17520069.2858008  
SRR17520069.2858010  
SRR17520069.2858012  
SRR17520069.2858014  
SRR17520069.2858016  
SRR17520069.2858018  
SRR17520069.2858020  
SRR17520069.2858022  
SRR17520069.2858024  
SRR17520069.2858026  
SRR17520069.2858028  
SRR17520069.2858030  
SRR17520069.2858032  
SRR17520069.2858034  
SRR17520069.2858036  
SRR17520069.2858038  
SRR17520069.2858040  
SRR17520069.2858042  
SRR17520069.2858044  
SRR17520069.2858046  
SRR17520069.2858048  
SRR17520069.2858050  
SRR17520069.2858052  
SRR17520069.2858056  
SRR17520069.2858058  
SRR17520069.2858060  
SRR17520069.2861749  
SRR17520069.2861751  
SRR17520069.2861753  
SRR17520069.2861755  
SRR17520069.2861757  
SRR17520069.2861759  
SRR17520069.2861761  
SRR17520069.2861763  
SRR17520069.2861765  
SRR17520069.2861767  
SRR17520069.2861769  
SRR17520069.2861771  
SRR17520069.2861773  
SRR17520069.2861775  
SRR17520069.2861777  
SRR17520069.2861779  
SRR17520069.2861781  
SRR17520069.2861783  
SRR17520069.2861785  
SRR17520069.2861787

SRR17520069. 2861789  
SRR17520069. 2861791  
SRR17520069. 2861793  
SRR17520069. 2861795  
SRR17520069. 2861797  
SRR17520069. 2861799  
SRR17520069. 2861801  
SRR17520069. 2861803  
SRR17520069. 2861805  
SRR17520069. 2861807  
SRR17520069. 2861809  
SRR17520069. 2861811  
SRR17520069. 2861813  
SRR17520069. 2861815  
SRR17520069. 2861817  
SRR17520069. 2861819  
SRR17520069. 2862869  
SRR17520069. 2862871  
SRR17520069. 2862873  
SRR17520069. 2862877  
SRR17520069. 2862879  
SRR17520069. 2862881  
SRR17520069. 2862883  
SRR17520069. 2862885  
SRR17520069. 2870755  
SRR17520069. 2871349  
SRR17520069. 2871351  
SRR17520069. 2871353  
SRR17520069. 2871355  
SRR17520069. 2871357  
SRR17520069. 2871359  
SRR17520069. 2871363  
SRR17520069. 2873140  
SRR17520069. 2873142  
SRR17520069. 2873144  
SRR17520069. 2873146  
SRR17520069. 2873148  
SRR17520069. 2873150  
SRR17520069. 2873154  
SRR17520069. 2873158  
SRR17520069. 2873160  
SRR17520069. 2873164  
SRR17520069. 2873166  
SRR17520069. 2873168  
SRR17520069. 2873170  
SRR17520069. 2873172  
SRR17520069. 2873174

SRR17520069.2873176  
SRR17520069.2873178  
SRR17520069.2873180  
SRR17520069.2873182  
SRR17520069.2873186  
SRR17520069.2873188  
SRR17520069.2873192  
SRR17520069.2873194  
SRR17520069.2873196  
SRR17520069.2873198  
SRR17520069.2873200  
SRR17520069.2873202  
SRR17520069.2873204  
SRR17520069.2873206  
SRR17520069.2875001  
SRR17520069.2875003  
SRR17520069.2875005  
SRR17520069.2875007  
SRR17520069.2875009  
SRR17520069.2875011  
SRR17520069.2875013  
SRR17520069.2875015  
SRR17520069.2875017  
SRR17520069.2875019  
SRR17520069.2875021  
SRR17520069.2875023  
SRR17520069.2875025  
SRR17520069.2875029  
SRR17520069.2875031  
SRR17520069.2875033  
SRR17520069.2875035  
SRR17520069.2875037  
SRR17520069.2875039  
SRR17520069.2875041  
SRR17520069.2875043  
SRR17520069.2875045  
SRR17520069.2875047  
SRR17520069.2877842  
SRR17520069.2877844  
SRR17520069.2877846  
SRR17520069.2877848  
SRR17520069.2877850  
SRR17520069.2877852  
SRR17520069.2877854  
SRR17520069.2877856  
SRR17520069.2877858  
SRR17520069.2877862

SRR17520069.2877864  
SRR17520069.2877866  
SRR17520069.2877868  
SRR17520069.2877870  
SRR17520069.2877872  
SRR17520069.2877874  
SRR17520069.2877876  
SRR17520069.2877878  
SRR17520069.2877880  
SRR17520069.2877882  
SRR17520069.2877884  
SRR17520069.2877886  
SRR17520069.2877888  
SRR17520069.2877890  
SRR17520069.2877892  
SRR17520069.2877894  
SRR17520069.2877896  
SRR17520069.2877898  
SRR17520069.2877900  
SRR17520069.2877902  
SRR17520069.2877904  
SRR17520069.2878700  
SRR17520069.2878702  
SRR17520069.2880656  
SRR17520069.2880658  
SRR17520069.2880660  
SRR17520069.2880662  
SRR17520069.2880664  
SRR17520069.2889372  
SRR17520069.2889374  
SRR17520069.2889378  
SRR17520069.2889380  
SRR17520069.2891109  
SRR17520069.2891111  
SRR17520069.2891113  
SRR17520069.2891115  
SRR17520069.2891117  
SRR17520069.2891119  
SRR17520069.2891121  
SRR17520069.2891123  
SRR17520069.2891125  
SRR17520069.2891127  
SRR17520069.2891129  
SRR17520069.2891131  
SRR17520069.2891133  
SRR17520069.2891135  
SRR17520069.2891137

SRR17520069.2891139  
SRR17520069.2891141  
SRR17520069.2891143  
SRR17520069.2891145  
SRR17520069.2891147  
SRR17520069.2891149  
SRR17520069.2891151  
SRR17520069.2891153  
SRR17520069.2891155  
SRR17520069.2891157  
SRR17520069.2891159  
SRR17520069.2891161  
SRR17520069.2891163  
SRR17520069.2891165  
SRR17520069.2891167  
SRR17520069.2891169  
SRR17520069.2891171  
SRR17520069.2891173  
SRR17520069.2891814  
SRR17520069.2891816  
SRR17520069.2891818  
SRR17520069.2891820  
SRR17520069.2891822  
SRR17520069.2891824  
SRR17520069.2891826  
SRR17520069.2891828  
SRR17520069.2891830  
SRR17520069.2891832  
SRR17520069.2891834  
SRR17520069.2891836  
SRR17520069.2891838  
SRR17520069.2891840  
SRR17520069.2891844  
SRR17520069.2891846  
SRR17520069.2891848  
SRR17520069.2891850  
SRR17520069.2891852  
SRR17520069.2891854  
SRR17520069.2891856  
SRR17520069.2892498  
SRR17520069.2892500  
SRR17520069.2892502  
SRR17520069.2894208  
SRR17520069.2894210  
SRR17520069.2895602  
SRR17520069.2895604  
SRR17520069.2895606



SRR17520069.2895608  
SRR17520069.2895610  
SRR17520069.2895612  
SRR17520069.2895614  
SRR17520069.2895616  
SRR17520069.2895618  
SRR17520069.2895620  
SRR17520069.2895622  
SRR17520069.2895626  
SRR17520069.2895628  
SRR17520069.2895630  
SRR17520069.2895632  
SRR17520069.2895634  
SRR17520069.2895636  
SRR17520069.2895638  
SRR17520069.2895640  
SRR17520069.2895642  
SRR17520069.2895644  
SRR17520069.2898562  
SRR17520069.2898564  
SRR17520069.2898566  
SRR17520069.2898568  
SRR17520069.2898572  
SRR17520069.2898574  
SRR17520069.2898576  
SRR17520069.2898578  
SRR17520069.2904835  
SRR17520069.2908919  
SRR17520069.2908921  
SRR17520069.2908923  
SRR17520069.2908925  
SRR17520069.2908929  
SRR17520069.2908931  
SRR17520069.2908935  
SRR17520069.2908937  
SRR17520069.2908939  
SRR17520069.2908943  
SRR17520069.2908945  
SRR17520069.2908947  
SRR17520069.2908949  
SRR17520069.2908951  
SRR17520069.2908953  
SRR17520069.2908955  
SRR17520069.2908957  
SRR17520069.2908959  
SRR17520069.2908961  
SRR17520069.2908963

SRR17520069.2908965  
SRR17520069.2908969  
SRR17520069.2908971  
SRR17520069.2908973  
SRR17520069.2908977  
SRR17520069.2908979  
SRR17520069.2908983  
SRR17520069.2908985  
SRR17520069.2908987  
SRR17520069.2908989  
SRR17520069.2908991  
SRR17520069.2908993  
SRR17520069.2908995  
SRR17520069.2908997  
SRR17520069.2908999  
SRR17520069.2909001  
SRR17520069.2909003  
SRR17520069.2909005  
SRR17520069.2909007  
SRR17520069.2909009  
SRR17520069.2909011  
SRR17520069.2911489  
SRR17520069.2911491  
SRR17520069.2911493  
SRR17520069.2911497  
SRR17520069.2911499  
SRR17520069.2911501  
SRR17520069.2911503  
SRR17520069.2911505  
SRR17520069.2911507  
SRR17520069.2911509  
SRR17520069.2911511  
SRR17520069.2911513  
SRR17520069.2913975  
SRR17520069.2913977  
SRR17520069.2913979  
SRR17520069.2913981  
SRR17520069.2913983  
SRR17520069.2913985  
SRR17520069.2913987  
SRR17520069.2913989  
SRR17520069.2913991  
SRR17520069.2913993  
SRR17520069.2913995  
SRR17520069.2913997  
SRR17520069.2913999  
SRR17520069.2914001

SRR17520069.2914003  
SRR17520069.2914005  
SRR17520069.2914007  
SRR17520069.2914009  
SRR17520069.2914011  
SRR17520069.2914013  
SRR17520069.2914015  
SRR17520069.2914017  
SRR17520069.2914019  
SRR17520069.2914021  
SRR17520069.2914023  
SRR17520069.2914025  
SRR17520069.2914027  
SRR17520069.2914029  
SRR17520069.2914031  
SRR17520069.2914033  
SRR17520069.2914035  
SRR17520069.2914037  
SRR17520069.2914039  
SRR17520069.2914041  
SRR17520069.2914043  
SRR17520069.2914045  
SRR17520069.2914047  
SRR17520069.2914049  
SRR17520069.2914051  
SRR17520069.2914053  
SRR17520069.2914055  
SRR17520069.2914057  
SRR17520069.2914059  
SRR17520069.2914061  
SRR17520069.2914063  
SRR17520069.2914065  
SRR17520069.2914067  
SRR17520069.2914069  
SRR17520069.2914071  
SRR17520069.2914073  
SRR17520069.2914075  
SRR17520069.2914077  
SRR17520069.2914079  
SRR17520069.2915194  
SRR17520069.2915196  
SRR17520069.2915198  
SRR17520069.2915200  
SRR17520069.2915204  
SRR17520069.2915208  
SRR17520069.2915210  
SRR17520069.2915212

SRR17520069.2915214  
SRR17520069.2915216  
SRR17520069.2915218  
SRR17520069.2915222  
SRR17520069.2915224  
SRR17520069.2915230  
SRR17520069.2915232  
SRR17520069.2915234  
SRR17520069.2915236  
SRR17520069.2915238  
SRR17520069.2915240  
SRR17520069.2915242  
SRR17520069.2915246  
SRR17520069.2915248  
SRR17520069.2915252  
SRR17520069.2916773  
SRR17520069.2916777  
SRR17520069.2916779  
SRR17520069.2916781  
SRR17520069.2916783  
SRR17520069.2916785  
SRR17520069.2916787  
SRR17520069.2916789  
SRR17520069.2916791  
SRR17520069.2916793  
SRR17520069.2916795  
SRR17520069.2916797  
SRR17520069.2916799  
SRR17520069.2916801  
SRR17520069.2916803  
SRR17520069.2916805  
SRR17520069.2916807  
SRR17520069.2916811  
SRR17520069.2916815  
SRR17520069.2916817  
SRR17520069.2916819  
SRR17520069.2916823  
SRR17520069.2916825  
SRR17520069.2916827  
SRR17520069.2916829  
SRR17520069.2916831  
SRR17520069.2916833  
SRR17520069.2916835  
SRR17520069.2916839  
SRR17520069.2916841  
SRR17520069.2916845  
SRR17520069.2916849

SRR17520069.2916851  
SRR17520069.2916853  
SRR17520069.2916855  
SRR17520069.2916859  
SRR17520069.2916861  
SRR17520069.2916863  
SRR17520069.2917995  
SRR17520069.2917997  
SRR17520069.2917999  
SRR17520069.2918001  
SRR17520069.2918003  
SRR17520069.2918005  
SRR17520069.2918007  
SRR17520069.2918009  
SRR17520069.2923254  
SRR17520069.2925671  
SRR17520069.2925673  
SRR17520069.2925675  
SRR17520069.2925677  
SRR17520069.2925679  
SRR17520069.2925681  
SRR17520069.2925683  
SRR17520069.2925685  
SRR17520069.2925687  
SRR17520069.2925689  
SRR17520069.2925691  
SRR17520069.2925693  
SRR17520069.2925695  
SRR17520069.2925697  
SRR17520069.2925699  
SRR17520069.2927333  
SRR17520069.2927335  
SRR17520069.2932278  
SRR17520069.2932280  
SRR17520069.2932282  
SRR17520069.2932286  
SRR17520069.2932288  
SRR17520069.2932290  
SRR17520069.2932292  
SRR17520069.2932294  
SRR17520069.2932296  
SRR17520069.2932298  
SRR17520069.2932300  
SRR17520069.2932302  
SRR17520069.2932304  
SRR17520069.2932306  
SRR17520069.2932308

SRR17520069.2932310  
SRR17520069.2932312  
SRR17520069.2932314  
SRR17520069.2932318  
SRR17520069.2932320  
SRR17520069.2932322  
SRR17520069.2932324  
SRR17520069.2932326  
SRR17520069.2932328  
SRR17520069.2932330  
SRR17520069.2932332  
SRR17520069.2932334  
SRR17520069.2932336  
SRR17520069.2932338  
SRR17520069.2932340  
SRR17520069.2932342  
SRR17520069.2932344  
SRR17520069.2932346  
SRR17520069.2935160  
SRR17520069.2935162  
SRR17520069.2935164  
SRR17520069.2935166  
SRR17520069.2935168  
SRR17520069.2935170  
SRR17520069.2935172  
SRR17520069.2935174  
SRR17520069.2935176  
SRR17520069.2935178  
SRR17520069.2935180  
SRR17520069.2935182  
SRR17520069.2935184  
SRR17520069.2935186  
SRR17520069.2935188  
SRR17520069.2935192  
SRR17520069.2935194  
SRR17520069.2936115  
SRR17520069.2936117  
SRR17520069.2936119  
SRR17520069.2936121  
SRR17520069.2936123  
SRR17520069.2936125  
SRR17520069.2936127  
SRR17520069.2936129  
SRR17520069.2936131  
SRR17520069.2936133  
SRR17520069.2936135  
SRR17520069.2936137

SRR17520069.2936139  
SRR17520069.2936141  
SRR17520069.2938057  
SRR17520069.2938059  
SRR17520069.2938061  
SRR17520069.2938607  
SRR17520069.2938609  
SRR17520069.2938611  
SRR17520069.2939602  
SRR17520069.2943895  
SRR17520069.2943897  
SRR17520069.2943899  
SRR17520069.2943901  
SRR17520069.2943903  
SRR17520069.2943905  
SRR17520069.2943907  
SRR17520069.2943909  
SRR17520069.2943911  
SRR17520069.2943913  
SRR17520069.2943915  
SRR17520069.2943917  
SRR17520069.2943919  
SRR17520069.2943921  
SRR17520069.2943923  
SRR17520069.2943925  
SRR17520069.2943927  
SRR17520069.2943929  
SRR17520069.2943931  
SRR17520069.2943933  
SRR17520069.2943935  
SRR17520069.2943937  
SRR17520069.2943939  
SRR17520069.2943941  
SRR17520069.2943943  
SRR17520069.2943945  
SRR17520069.2943947  
SRR17520069.2943949  
SRR17520069.2943951  
SRR17520069.2943953  
SRR17520069.2943955  
SRR17520069.2943957  
SRR17520069.2943959  
SRR17520069.2943961  
SRR17520069.2943963  
SRR17520069.2943965  
SRR17520069.2943967  
SRR17520069.2943969

SRR17520069.2943971  
SRR17520069.2943973  
SRR17520069.2943975  
SRR17520069.2943977  
SRR17520069.2943979  
SRR17520069.2943981  
SRR17520069.2943983  
SRR17520069.2943985  
SRR17520069.2943987  
SRR17520069.2943989  
SRR17520069.2943991  
SRR17520069.2943993  
SRR17520069.2943995  
SRR17520069.2947977  
SRR17520069.2947979  
SRR17520069.2947981  
SRR17520069.2953554  
SRR17520069.2953556  
SRR17520069.2953558  
SRR17520069.2953560  
SRR17520069.2953562  
SRR17520069.2953566  
SRR17520069.2953568  
SRR17520069.2953570  
SRR17520069.2953572  
SRR17520069.2953574  
SRR17520069.2953576  
SRR17520069.2953590  
SRR17520069.2953596  
SRR17520069.2957105  
SRR17520069.2957107  
SRR17520069.2957109  
SRR17520069.2957113  
SRR17520069.2957115  
SRR17520069.2957117  
SRR17520069.2957119  
SRR17520069.2957121  
SRR17520069.2957123  
SRR17520069.2957125  
SRR17520069.2957127  
SRR17520069.2957129  
SRR17520069.2957131  
SRR17520069.2957137  
SRR17520069.2957139  
SRR17520069.2957143  
SRR17520069.2957145  
SRR17520069.2957147



SRR17520069.2957149  
SRR17520069.2957151  
SRR17520069.2957153  
SRR17520069.2957155  
SRR17520069.2964951  
SRR17520069.2964953  
SRR17520069.2965833  
SRR17520069.2965835  
SRR17520069.2965837  
SRR17520069.2965839  
SRR17520069.2965841  
SRR17520069.2965843  
SRR17520069.2965845  
SRR17520069.2965847  
SRR17520069.2965849  
SRR17520069.2965851  
SRR17520069.2965853  
SRR17520069.2965855  
SRR17520069.2965857  
SRR17520069.2965859  
SRR17520069.2965861  
SRR17520069.2965863  
SRR17520069.2965865  
SRR17520069.2965867  
SRR17520069.2965869  
SRR17520069.2965871  
SRR17520069.2965873  
SRR17520069.2965875  
SRR17520069.2965877  
SRR17520069.2965879  
SRR17520069.2965881  
SRR17520069.2965883  
SRR17520069.2965885  
SRR17520069.2965887  
SRR17520069.2965889  
SRR17520069.2965891  
SRR17520069.2965893  
SRR17520069.2965895  
SRR17520069.2965897  
SRR17520069.2965899  
SRR17520069.2965901  
SRR17520069.2965903  
SRR17520069.2965905  
SRR17520069.2965907  
SRR17520069.2965909  
SRR17520069.2965911  
SRR17520069.2965913

SRR17520069.2965915  
SRR17520069.2965917  
SRR17520069.2965919  
SRR17520069.2965921  
SRR17520069.2965923  
SRR17520069.2965925  
SRR17520069.2965927  
SRR17520069.2965929  
SRR17520069.2965931  
SRR17520069.2965933  
SRR17520069.2965935  
SRR17520069.2965937  
SRR17520069.2965939  
SRR17520069.2965941  
SRR17520069.2965943  
SRR17520069.2965945  
SRR17520069.2965947  
SRR17520069.2967915  
SRR17520069.2967917  
SRR17520069.2967921  
SRR17520069.2967923  
SRR17520069.2967925  
SRR17520069.2967927  
SRR17520069.2967929  
SRR17520069.2967931  
SRR17520069.2967933  
SRR17520069.2967935  
SRR17520069.2967937  
SRR17520069.2967939  
SRR17520069.2967941  
SRR17520069.2967943  
SRR17520069.2967945  
SRR17520069.2967947  
SRR17520069.2967949  
SRR17520069.2967951  
SRR17520069.2967953  
SRR17520069.2967955  
SRR17520069.2981336  
SRR17520069.2981338  
SRR17520069.2985837  
SRR17520069.2985839  
SRR17520069.2985841  
SRR17520069.2985843  
SRR17520069.2985847  
SRR17520069.2985849  
SRR17520069.2985851  
SRR17520069.2986134

SRR17520069. 2986136  
SRR17520069. 2986138  
SRR17520069. 2986140  
SRR17520069. 2986142  
SRR17520069. 2986144  
SRR17520069. 2986146  
SRR17520069. 2986148  
SRR17520069. 2986150  
SRR17520069. 2986152  
SRR17520069. 2986154  
SRR17520069. 2986156  
SRR17520069. 2986158  
SRR17520069. 2986160  
SRR17520069. 2986162  
SRR17520069. 2999864  
SRR17520069. 2999872  
SRR17520069. 2999874  
SRR17520069. 2999876  
SRR17520069. 2999878  
SRR17520069. 2999880  
SRR17520069. 2999882  
SRR17520069. 2999884  
SRR17520069. 2999886  
SRR17520069. 2999888  
SRR17520069. 2999890  
SRR17520069. 2999892  
SRR17520069. 2999896  
SRR17520069. 2999898  
SRR17520069. 2999900  
SRR17520069. 2999902  
SRR17520069. 2999904  
SRR17520069. 3006789  
SRR17520069. 3006791  
SRR17520069. 3006793  
SRR17520069. 3006795  
SRR17520069. 3006797  
SRR17520069. 3006799  
SRR17520069. 3006801  
SRR17520069. 3006803  
SRR17520069. 3006805  
SRR17520069. 3006807  
SRR17520069. 3006813  
SRR17520069. 3006825  
SRR17520069. 3006827  
SRR17520069. 3006829  
SRR17520069. 3007318  
SRR17520069. 3007320

SRR17520069.3007322  
SRR17520069.3007324  
SRR17520069.3007326  
SRR17520069.3007328  
SRR17520069.3007330  
SRR17520069.3007332  
SRR17520069.3007334  
SRR17520069.3011190  
SRR17520069.3011192  
SRR17520069.3011194  
SRR17520069.3011196  
SRR17520069.3011198  
SRR17520069.3011200  
SRR17520069.3011202  
SRR17520069.3011204  
SRR17520069.3011206  
SRR17520069.3011208  
SRR17520069.3011210  
SRR17520069.3011212  
SRR17520069.3011214  
SRR17520069.3011216  
SRR17520069.3011218  
SRR17520069.3011220  
SRR17520069.3011222  
SRR17520069.3011224  
SRR17520069.3011226  
SRR17520069.3011228  
SRR17520069.3011230  
SRR17520069.3011232  
SRR17520069.3011234  
SRR17520069.3011236  
SRR17520069.3011238  
SRR17520069.3011240  
SRR17520069.3011242  
SRR17520069.3011244  
SRR17520069.3011246  
SRR17520069.3011248  
SRR17520069.3011250  
SRR17520069.3011252  
SRR17520069.3011254  
SRR17520069.3011256  
SRR17520069.3011258  
SRR17520069.3011260  
SRR17520069.3011262  
SRR17520069.3011264  
SRR17520069.3011266  
SRR17520069.3011268

SRR17520069.3011270  
SRR17520069.3011272  
SRR17520069.3011274  
SRR17520069.3011276  
SRR17520069.3011992  
SRR17520069.3011994  
SRR17520069.3011996  
SRR17520069.3011998  
SRR17520069.3012000  
SRR17520069.3012002  
SRR17520069.3012004  
SRR17520069.3012006  
SRR17520069.3012008  
SRR17520069.3012010  
SRR17520069.3012012  
SRR17520069.3012014  
SRR17520069.3012016  
SRR17520069.3012018  
SRR17520069.3012020  
SRR17520069.3012022  
SRR17520069.3012024  
SRR17520069.3012026  
SRR17520069.3012028  
SRR17520069.3012030  
SRR17520069.3012032  
SRR17520069.3012034  
SRR17520069.3012036  
SRR17520069.3012038  
SRR17520069.3012040  
SRR17520069.3012042  
SRR17520069.3012044  
SRR17520069.3012046  
SRR17520069.3012048  
SRR17520069.3012050  
SRR17520069.3012052  
SRR17520069.3012054  
SRR17520069.3012056  
SRR17520069.3012058  
SRR17520069.3012060  
SRR17520069.3012062  
SRR17520069.3012064  
SRR17520069.3012066  
SRR17520069.3012068  
SRR17520069.3012070  
SRR17520069.3012072  
SRR17520069.3012074  
SRR17520069.3012076

SRR17520069.3012078  
SRR17520069.3012080  
SRR17520069.3012082  
SRR17520069.3012084  
SRR17520069.3012086  
SRR17520069.3012088  
SRR17520069.3012617  
SRR17520069.3012619  
SRR17520069.3017753  
SRR17520069.3017755  
SRR17520069.3017757  
SRR17520069.3017759  
SRR17520069.3017761  
SRR17520069.3017763  
SRR17520069.3017765  
SRR17520069.3017767  
SRR17520069.3017769  
SRR17520069.3017771  
SRR17520069.3017773  
SRR17520069.3017775  
SRR17520069.3017779  
SRR17520069.3017781  
SRR17520069.3017783  
SRR17520069.3017785  
SRR17520069.3017787  
SRR17520069.3017789  
SRR17520069.3017791  
SRR17520069.3017793  
SRR17520069.3017795  
SRR17520069.3017797  
SRR17520069.3017799  
SRR17520069.3017801  
SRR17520069.3017803  
SRR17520069.3017805  
SRR17520069.3017807  
SRR17520069.3017809  
SRR17520069.3017811  
SRR17520069.3017813  
SRR17520069.3017815  
SRR17520069.3017817  
SRR17520069.3017819  
SRR17520069.3017821  
SRR17520069.3017823  
SRR17520069.3017825  
SRR17520069.3017827  
SRR17520069.3017829  
SRR17520069.3017831

SRR17520069. 3017833  
SRR17520069. 3017835  
SRR17520069. 3017837  
SRR17520069. 3017839  
SRR17520069. 3017841  
SRR17520069. 3017843  
SRR17520069. 3017845  
SRR17520069. 3017847  
SRR17520069. 3017849  
SRR17520069. 3017851  
SRR17520069. 3017853  
SRR17520069. 3017855  
SRR17520069. 3017857  
SRR17520069. 3017859  
SRR17520069. 3017861  
SRR17520069. 3017863  
SRR17520069. 3017865  
SRR17520069. 3017867  
SRR17520069. 3017869  
SRR17520069. 3017871  
SRR17520069. 3017873  
SRR17520069. 3017875  
SRR17520069. 3017877  
SRR17520069. 3017879  
SRR17520069. 3020134  
SRR17520069. 3020136  
SRR17520069. 3020138  
SRR17520069. 3020140  
SRR17520069. 3020142  
SRR17520069. 3020144  
SRR17520069. 3020146  
SRR17520069. 3020148  
SRR17520069. 3032050  
SRR17520069. 3032052  
SRR17520069. 3032054  
SRR17520069. 3032056  
SRR17520069. 3032779  
SRR17520069. 3032781  
SRR17520069. 3032783  
SRR17520069. 3032785  
SRR17520069. 3032789  
SRR17520069. 3032791  
SRR17520069. 3032793  
SRR17520069. 3032795  
SRR17520069. 3032797  
SRR17520069. 3032799  
SRR17520069. 3032801

SRR17520069. 3032803  
SRR17520069. 3032805  
SRR17520069. 3032807  
SRR17520069. 3036622  
SRR17520069. 3042220  
SRR17520069. 3042222  
SRR17520069. 3042224  
SRR17520069. 3042226  
SRR17520069. 3042228  
SRR17520069. 3042230  
SRR17520069. 3044016  
SRR17520069. 3044018  
SRR17520069. 3044020  
SRR17520069. 3044022  
SRR17520069. 3044024  
SRR17520069. 3044026  
SRR17520069. 3044028  
SRR17520069. 3044030  
SRR17520069. 3044032  
SRR17520069. 3044034  
SRR17520069. 3044036  
SRR17520069. 3044038  
SRR17520069. 3044040  
SRR17520069. 3044042  
SRR17520069. 3044044  
SRR17520069. 3044046  
SRR17520069. 3044048  
SRR17520069. 3044054  
SRR17520069. 3044058  
SRR17520069. 3044060  
SRR17520069. 3044062  
SRR17520069. 3044064  
SRR17520069. 3044066  
SRR17520069. 3044068  
SRR17520069. 3044070  
SRR17520069. 3044072  
SRR17520069. 3044074  
SRR17520069. 3044076  
SRR17520069. 3044078  
SRR17520069. 3044082  
SRR17520069. 3044084  
SRR17520069. 3044086  
SRR17520069. 3044088  
SRR17520069. 3044090  
SRR17520069. 3044092  
SRR17520069. 3044094  
SRR17520069. 3044096



SRR17520069.3044098  
SRR17520069.3044100  
SRR17520069.3044102  
SRR17520069.3044104  
SRR17520069.3044106  
SRR17520069.3044108  
SRR17520069.3044110  
SRR17520069.3044112  
SRR17520069.3044114  
SRR17520069.3044116  
SRR17520069.3044118  
SRR17520069.3044120  
SRR17520069.3044124  
SRR17520069.3044126  
SRR17520069.3044128  
SRR17520069.3044130  
SRR17520069.3044132  
SRR17520069.3044134  
SRR17520069.3044136  
SRR17520069.3044138  
SRR17520069.3044140  
SRR17520069.3044142  
SRR17520069.3044144  
SRR17520069.3044146  
SRR17520069.3044148  
SRR17520069.3044150  
SRR17520069.3046820  
SRR17520069.3046822  
SRR17520069.3046824  
SRR17520069.3046826  
SRR17520069.3046828  
SRR17520069.3046830  
SRR17520069.3046832  
SRR17520069.3046834  
SRR17520069.3046836  
SRR17520069.3046838  
SRR17520069.3046840  
SRR17520069.3046842  
SRR17520069.3046844  
SRR17520069.3046846  
SRR17520069.3046848  
SRR17520069.3046850  
SRR17520069.3046852  
SRR17520069.3046854  
SRR17520069.3046856  
SRR17520069.3046858  
SRR17520069.3048497

SRR17520069. 3053463  
SRR17520069. 3053465  
SRR17520069. 3053467  
SRR17520069. 3053469  
SRR17520069. 3053471  
SRR17520069. 3053473  
SRR17520069. 3053475  
SRR17520069. 3053477  
SRR17520069. 3053479  
SRR17520069. 3053481  
SRR17520069. 3053483  
SRR17520069. 3053485  
SRR17520069. 3053487  
SRR17520069. 3053489  
SRR17520069. 3055559  
SRR17520069. 3055561  
SRR17520069. 3055563  
SRR17520069. 3055565  
SRR17520069. 3055567  
SRR17520069. 3055569  
SRR17520069. 3055571  
SRR17520069. 3055575  
SRR17520069. 3059867  
SRR17520069. 3068890  
SRR17520069. 3068892  
SRR17520069. 3068894  
SRR17520069. 3068898  
SRR17520069. 3068900  
SRR17520069. 3069497  
SRR17520069. 3069499  
SRR17520069. 3069501  
SRR17520069. 3069503  
SRR17520069. 3069505  
SRR17520069. 3070209  
SRR17520069. 3070211  
SRR17520069. 3070215  
SRR17520069. 3070217  
SRR17520069. 3070219  
SRR17520069. 3070221  
SRR17520069. 3070223  
SRR17520069. 3070225  
SRR17520069. 3070227  
SRR17520069. 3070229  
SRR17520069. 3070231  
SRR17520069. 3070233  
SRR17520069. 3070235  
SRR17520069. 3070237

SRR17520069. 3070239  
SRR17520069. 3070241  
SRR17520069. 3070243  
SRR17520069. 3070245  
SRR17520069. 3070247  
SRR17520069. 3070249  
SRR17520069. 3070251  
SRR17520069. 3070253  
SRR17520069. 3070255  
SRR17520069. 3070257  
SRR17520069. 3080078  
SRR17520069. 3080080  
SRR17520069. 3080082  
SRR17520069. 3080084  
SRR17520069. 3080086  
SRR17520069. 3080088  
SRR17520069. 3080090  
SRR17520069. 3080092  
SRR17520069. 3080094  
SRR17520069. 3080096  
SRR17520069. 3080098  
SRR17520069. 3082618  
SRR17520069. 3082620  
SRR17520069. 3091601  
SRR17520069. 3091667  
SRR17520069. 3093609  
SRR17520069. 3093611  
SRR17520069. 3093613  
SRR17520069. 3093615  
SRR17520069. 3093617  
SRR17520069. 3093619  
SRR17520069. 3093621  
SRR17520069. 3093623  
SRR17520069. 3093625  
SRR17520069. 3093627  
SRR17520069. 3093629  
SRR17520069. 3093631  
SRR17520069. 3093633  
SRR17520069. 3093635  
SRR17520069. 3093637  
SRR17520069. 3097183  
SRR17520069. 3097185  
SRR17520069. 3097187  
SRR17520069. 3097189  
SRR17520069. 3097191  
SRR17520069. 3097193  
SRR17520069. 3097195

SRR17520069. 3097197  
SRR17520069. 3097199  
SRR17520069. 3097201  
SRR17520069. 3097203  
SRR17520069. 3097205  
SRR17520069. 3097207  
SRR17520069. 3097209  
SRR17520069. 3097211  
SRR17520069. 3097213  
SRR17520069. 3097215  
SRR17520069. 3097217  
SRR17520069. 3097219  
SRR17520069. 3097221  
SRR17520069. 3097223  
SRR17520069. 3097225  
SRR17520069. 3097227  
SRR17520069. 3097229  
SRR17520069. 3097231  
SRR17520069. 3097233  
SRR17520069. 3097235  
SRR17520069. 3097237  
SRR17520069. 3097239  
SRR17520069. 3097241  
SRR17520069. 3097243  
SRR17520069. 3097245  
SRR17520069. 3097247  
SRR17520069. 3097249  
SRR17520069. 3097251  
SRR17520069. 3098369  
SRR17520069. 3098371  
SRR17520069. 3098373  
SRR17520069. 3098375  
SRR17520069. 3098377  
SRR17520069. 3098379  
SRR17520069. 3098381  
SRR17520069. 3098383  
SRR17520069. 3098385  
SRR17520069. 3098387  
SRR17520069. 3098389  
SRR17520069. 3098391  
SRR17520069. 3098393  
SRR17520069. 3098395  
SRR17520069. 3098397  
SRR17520069. 3098399  
SRR17520069. 3098401  
SRR17520069. 3098403  
SRR17520069. 3098405

SRR17520069. 3098407  
SRR17520069. 3098409  
SRR17520069. 3098411  
SRR17520069. 3107887  
SRR17520069. 3107889  
SRR17520069. 3107891  
SRR17520069. 3107893  
SRR17520069. 3107895  
SRR17520069. 3112262  
SRR17520069. 3112264  
SRR17520069. 3112266  
SRR17520069. 3112268  
SRR17520069. 3112270  
SRR17520069. 3112272  
SRR17520069. 3112274  
SRR17520069. 3112276  
SRR17520069. 3112278  
SRR17520069. 3112280  
SRR17520069. 3112282  
SRR17520069. 3112284  
SRR17520069. 3112286  
SRR17520069. 3112288  
SRR17520069. 3112290  
SRR17520069. 3112292  
SRR17520069. 3112294  
SRR17520069. 3112296  
SRR17520069. 3112298  
SRR17520069. 3112300  
SRR17520069. 3112302  
SRR17520069. 3112304  
SRR17520069. 3112306  
SRR17520069. 3112308  
SRR17520069. 3112310  
SRR17520069. 3112312  
SRR17520069. 3112314  
SRR17520069. 3112316  
SRR17520069. 3112318  
SRR17520069. 3112320  
SRR17520069. 3112322  
SRR17520069. 3112324  
SRR17520069. 3112326  
SRR17520069. 3112328  
SRR17520069. 3112330  
SRR17520069. 3112334  
SRR17520069. 3112336  
SRR17520069. 3112340  
SRR17520069. 3112342

SRR17520069. 3112344  
SRR17520069. 3112346  
SRR17520069. 3112348  
SRR17520069. 3112350  
SRR17520069. 3112352  
SRR17520069. 3112354  
SRR17520069. 3112356  
SRR17520069. 3112358  
SRR17520069. 3112360  
SRR17520069. 3112362  
SRR17520069. 3112364  
SRR17520069. 3112366  
SRR17520069. 3112368  
SRR17520069. 3112370  
SRR17520069. 3112372  
SRR17520069. 3112374  
SRR17520069. 3112376  
SRR17520069. 3112380  
SRR17520069. 3112382  
SRR17520069. 3112384  
SRR17520069. 3112388  
SRR17520069. 3112390  
SRR17520069. 3112392  
SRR17520069. 3112394  
SRR17520069. 3112396  
SRR17520069. 3112398  
SRR17520069. 3112400  
SRR17520069. 3112402  
SRR17520069. 3112404  
SRR17520069. 3112406  
SRR17520069. 3112412  
SRR17520069. 3112414  
SRR17520069. 3115051  
SRR17520069. 3115055  
SRR17520069. 3115057  
SRR17520069. 3115059  
SRR17520069. 3115061  
SRR17520069. 3115063  
SRR17520069. 3118046  
SRR17520069. 3120445  
SRR17520069. 3120447  
SRR17520069. 3120449  
SRR17520069. 3120451  
SRR17520069. 3120453  
SRR17520069. 3120455  
SRR17520069. 3120457  
SRR17520069. 3120459

SRR17520069. 3120461  
SRR17520069. 3120463  
SRR17520069. 3120465  
SRR17520069. 3120467  
SRR17520069. 3120469  
SRR17520069. 3120471  
SRR17520069. 3132233  
SRR17520069. 3132235  
SRR17520069. 3132237  
SRR17520069. 3132239  
SRR17520069. 3132241  
SRR17520069. 3132243  
SRR17520069. 3132245  
SRR17520069. 3132247  
SRR17520069. 3132249  
SRR17520069. 3137601  
SRR17520069. 3138075  
SRR17520069. 3138077  
SRR17520069. 3138079  
SRR17520069. 3138081  
SRR17520069. 3138083  
SRR17520069. 3138085  
SRR17520069. 3138087  
SRR17520069. 3138089  
SRR17520069. 3138091  
SRR17520069. 3138093  
SRR17520069. 3138095  
SRR17520069. 3138097  
SRR17520069. 3138099  
SRR17520069. 3138101  
SRR17520069. 3138103  
SRR17520069. 3138105  
SRR17520069. 3138107  
SRR17520069. 3138109  
SRR17520069. 3138111  
SRR17520069. 3138113  
SRR17520069. 3138115  
SRR17520069. 3138117  
SRR17520069. 3138119  
SRR17520069. 3138121  
SRR17520069. 3138123  
SRR17520069. 3138125  
SRR17520069. 3138127  
SRR17520069. 3138129  
SRR17520069. 3138131  
SRR17520069. 3138133  
SRR17520069. 3138135

SRR17520069. 3138137  
SRR17520069. 3140525  
SRR17520069. 3146053  
SRR17520069. 3146055  
SRR17520069. 3146065  
SRR17520069. 3146071  
SRR17520069. 3146079  
SRR17520069. 3146081  
SRR17520069. 3152091  
SRR17520069. 3152100  
SRR17520069. 3152110  
SRR17520069. 3156633  
SRR17520069. 3156635  
SRR17520069. 3156637  
SRR17520069. 3156639  
SRR17520069. 3156641  
SRR17520069. 3156643  
SRR17520069. 3156645  
SRR17520069. 3156647  
SRR17520069. 3156649  
SRR17520069. 3156651  
SRR17520069. 3156653  
SRR17520069. 3156655  
SRR17520069. 3156657  
SRR17520069. 3156659  
SRR17520069. 3158726  
SRR17520069. 3158728  
SRR17520069. 3158730  
SRR17520069. 3158732  
SRR17520069. 3158734  
SRR17520069. 3158736  
SRR17520069. 3158738  
SRR17520069. 3158740  
SRR17520069. 3158742  
SRR17520069. 3158744  
SRR17520069. 3158746  
SRR17520069. 3158748  
SRR17520069. 3158750  
SRR17520069. 3158752  
SRR17520069. 3159984  
SRR17520069. 3159986  
SRR17520069. 3159988  
SRR17520069. 3159990  
SRR17520069. 3159992  
SRR17520069. 3161358  
SRR17520069. 3161360  
SRR17520069. 3167282



SRR17520069. 3167284  
SRR17520069. 3167286  
SRR17520069. 3167288  
SRR17520069. 3167290  
SRR17520069. 3167291  
SRR17520069. 3167292  
SRR17520069. 3167294  
SRR17520069. 3167296  
SRR17520069. 3167298  
SRR17520069. 3167300  
SRR17520069. 3167302  
SRR17520069. 3167304  
SRR17520069. 3168712  
SRR17520069. 3168714  
SRR17520069. 3168716  
SRR17520069. 3168718  
SRR17520069. 3168720  
SRR17520069. 3169885  
SRR17520069. 3169887  
SRR17520069. 3169889  
SRR17520069. 3169891  
SRR17520069. 3169893  
SRR17520069. 3169895  
SRR17520069. 3169897  
SRR17520069. 3169899  
SRR17520069. 3169901  
SRR17520069. 3172835  
SRR17520069. 3172837  
SRR17520069. 3172839  
SRR17520069. 3172841  
SRR17520069. 3172843  
SRR17520069. 3172845  
SRR17520069. 3172847  
SRR17520069. 3172849  
SRR17520069. 3172851  
SRR17520069. 3172853  
SRR17520069. 3172855  
SRR17520069. 3172857  
SRR17520069. 3172859  
SRR17520069. 3172861  
SRR17520069. 3172863  
SRR17520069. 3172865  
SRR17520069. 3172867  
SRR17520069. 3172869  
SRR17520069. 3172871  
SRR17520069. 3172873  
SRR17520069. 3172875

SRR17520069. 3172877  
SRR17520069. 3172879  
SRR17520069. 3172881  
SRR17520069. 3172883  
SRR17520069. 3172885  
SRR17520069. 3172887  
SRR17520069. 3172889  
SRR17520069. 3172891  
SRR17520069. 3172893  
SRR17520069. 3172895  
SRR17520069. 3172897  
SRR17520069. 3172899  
SRR17520069. 3172901  
SRR17520069. 3172903  
SRR17520069. 3172905  
SRR17520069. 3172907  
SRR17520069. 3172909  
SRR17520069. 3172911  
SRR17520069. 3172913  
SRR17520069. 3172915  
SRR17520069. 3172917  
SRR17520069. 3172919  
SRR17520069. 3172921  
SRR17520069. 3172923  
SRR17520069. 3172925  
SRR17520069. 3172931  
SRR17520069. 3172933  
SRR17520069. 3172935  
SRR17520069. 3172937  
SRR17520069. 3172941  
SRR17520069. 3172943  
SRR17520069. 3172945  
SRR17520069. 3172947  
SRR17520069. 3172949  
SRR17520069. 3172951  
SRR17520069. 3172953  
SRR17520069. 3172955  
SRR17520069. 3172957  
SRR17520069. 3172959  
SRR17520069. 3172961  
SRR17520069. 3172963  
SRR17520069. 3172967  
SRR17520069. 3172969  
SRR17520069. 3172971  
SRR17520069. 3172973  
SRR17520069. 3172977  
SRR17520069. 3172979

SRR17520069. 3172983  
SRR17520069. 3172985  
SRR17520069. 3172987  
SRR17520069. 3172989  
SRR17520069. 3172991  
SRR17520069. 3172993  
SRR17520069. 3172995  
SRR17520069. 3172997  
SRR17520069. 3172999  
SRR17520069. 3173001  
SRR17520069. 3173003  
SRR17520069. 3173005  
SRR17520069. 3173007  
SRR17520069. 3173009  
SRR17520069. 3173013  
SRR17520069. 3173015  
SRR17520069. 3173017  
SRR17520069. 3181766  
SRR17520069. 3181768  
SRR17520069. 3181770  
SRR17520069. 3181772  
SRR17520069. 3181774  
SRR17520069. 3181778  
SRR17520069. 3181780  
SRR17520069. 3181782  
SRR17520069. 3181784  
SRR17520069. 3181786  
SRR17520069. 3181788  
SRR17520069. 3181792  
SRR17520069. 3181794  
SRR17520069. 3183431  
SRR17520069. 3183433  
SRR17520069. 3183435  
SRR17520069. 3187500  
SRR17520069. 3187502  
SRR17520069. 3187504  
SRR17520069. 3187506  
SRR17520069. 3187508  
SRR17520069. 3187510  
SRR17520069. 3187512  
SRR17520069. 3187514  
SRR17520069. 3187516  
SRR17520069. 3187518  
SRR17520069. 3187520  
SRR17520069. 3187522  
SRR17520069. 3187524  
SRR17520069. 3187526

SRR17520069. 3187528  
SRR17520069. 3187530  
SRR17520069. 3187532  
SRR17520069. 3187534  
SRR17520069. 3187536  
SRR17520069. 3187538  
SRR17520069. 3187540  
SRR17520069. 3187542  
SRR17520069. 3187544  
SRR17520069. 3187546  
SRR17520069. 3187548  
SRR17520069. 3187550  
SRR17520069. 3187552  
SRR17520069. 3187554  
SRR17520069. 3187556  
SRR17520069. 3187558  
SRR17520069. 3187560  
SRR17520069. 3187562  
SRR17520069. 3187564  
SRR17520069. 3187566  
SRR17520069. 3187568  
SRR17520069. 3187570  
SRR17520069. 3187572  
SRR17520069. 3187574  
SRR17520069. 3187576  
SRR17520069. 3187578  
SRR17520069. 3187580  
SRR17520069. 3187582  
SRR17520069. 3187584  
SRR17520069. 3187586  
SRR17520069. 3187588  
SRR17520069. 3187590  
SRR17520069. 3187592  
SRR17520069. 3187594  
SRR17520069. 3187598  
SRR17520069. 3187600  
SRR17520069. 3187602  
SRR17520069. 3187604  
SRR17520069. 3187606  
SRR17520069. 3187608  
SRR17520069. 3187610  
SRR17520069. 3187612  
SRR17520069. 3187614  
SRR17520069. 3187616  
SRR17520069. 3187618  
SRR17520069. 3187620  
SRR17520069. 3187622

SRR17520069. 3187624  
SRR17520069. 3187626  
SRR17520069. 3187630  
SRR17520069. 3187632  
SRR17520069. 3195221  
SRR17520069. 3195223  
SRR17520069. 3195225  
SRR17520069. 3195227  
SRR17520069. 3195229  
SRR17520069. 3195231  
SRR17520069. 3195233  
SRR17520069. 3195235  
SRR17520069. 3195237  
SRR17520069. 3195239  
SRR17520069. 3195241  
SRR17520069. 3195243  
SRR17520069. 3195245  
SRR17520069. 3195423  
SRR17520069. 3195425  
SRR17520069. 3195427  
SRR17520069. 3195429  
SRR17520069. 3195431  
SRR17520069. 3195433  
SRR17520069. 3195435  
SRR17520069. 3195437  
SRR17520069. 3195439  
SRR17520069. 3195441  
SRR17520069. 3195443  
SRR17520069. 3195445  
SRR17520069. 3195451  
SRR17520069. 3195453  
SRR17520069. 3195455  
SRR17520069. 3195461  
SRR17520069. 3195463  
SRR17520069. 3195465  
SRR17520069. 3195467  
SRR17520069. 3195469  
SRR17520069. 3195471  
SRR17520069. 3195473  
SRR17520069. 3195477  
SRR17520069. 3195479  
SRR17520069. 3195481  
SRR17520069. 3195483  
SRR17520069. 3195485  
SRR17520069. 3195489  
SRR17520069. 3195491  
SRR17520069. 3195493

SRR17520069. 3195495  
SRR17520069. 3195497  
SRR17520069. 3195499  
SRR17520069. 3199449  
SRR17520069. 3199451  
SRR17520069. 3199453  
SRR17520069. 3199455  
SRR17520069. 3199457  
SRR17520069. 3199459  
SRR17520069. 3199461  
SRR17520069. 3199463  
SRR17520069. 3199465  
SRR17520069. 3199467  
SRR17520069. 3199469  
SRR17520069. 3199471  
SRR17520069. 3199473  
SRR17520069. 3199475  
SRR17520069. 3199477  
SRR17520069. 3199479  
SRR17520069. 3199481  
SRR17520069. 3199483  
SRR17520069. 3199485  
SRR17520069. 3199487  
SRR17520069. 3199489  
SRR17520069. 3199491  
SRR17520069. 3199493  
SRR17520069. 3199495  
SRR17520069. 3199497  
SRR17520069. 3199499  
SRR17520069. 3199501  
SRR17520069. 3199503  
SRR17520069. 3199505  
SRR17520069. 3199507  
SRR17520069. 3199509  
SRR17520069. 3199511  
SRR17520069. 3199513  
SRR17520069. 3199515  
SRR17520069. 3199517  
SRR17520069. 3199519  
SRR17520069. 3199521  
SRR17520069. 3199523  
SRR17520069. 3199525  
SRR17520069. 3199527  
SRR17520069. 3199529  
SRR17520069. 3199531  
SRR17520069. 3199533  
SRR17520069. 3199535

SRR17520069. 3199804  
SRR17520069. 3199806  
SRR17520069. 3199808  
SRR17520069. 3199810  
SRR17520069. 3199812  
SRR17520069. 3199814  
SRR17520069. 3199816  
SRR17520069. 3199818  
SRR17520069. 3199820  
SRR17520069. 3199822  
SRR17520069. 3199824  
SRR17520069. 3201858  
SRR17520069. 3202752  
SRR17520069. 3202754  
SRR17520069. 3202756  
SRR17520069. 3202758  
SRR17520069. 3202760  
SRR17520069. 3202762  
SRR17520069. 3202764  
SRR17520069. 3202766  
SRR17520069. 3202768  
SRR17520069. 3202770  
SRR17520069. 3202772  
SRR17520069. 3202774  
SRR17520069. 3202776  
SRR17520069. 3202778  
SRR17520069. 3202780  
SRR17520069. 3202782  
SRR17520069. 3202784  
SRR17520069. 3204252  
SRR17520069. 3208940  
SRR17520069. 3208942  
SRR17520069. 3208944  
SRR17520069. 3208946  
SRR17520069. 3209957  
SRR17520069. 3219788  
SRR17520069. 3219790  
SRR17520069. 3219792  
SRR17520069. 3219794  
SRR17520069. 3219796  
SRR17520069. 3219800  
SRR17520069. 3219802  
SRR17520069. 3219804  
SRR17520069. 3219806  
SRR17520069. 3219808  
SRR17520069. 3219810  
SRR17520069. 3219812

SRR17520069. 3219814  
SRR17520069. 3219816  
SRR17520069. 3219818  
SRR17520069. 3220395  
SRR17520069. 3220397  
SRR17520069. 3220399  
SRR17520069. 3220403  
SRR17520069. 3220405  
SRR17520069. 3220407  
SRR17520069. 3220409  
SRR17520069. 3220411  
SRR17520069. 3220413  
SRR17520069. 3220415  
SRR17520069. 3220417  
SRR17520069. 3220419  
SRR17520069. 3220421  
SRR17520069. 3220423  
SRR17520069. 3220425  
SRR17520069. 3220427  
SRR17520069. 3220429  
SRR17520069. 3221668  
SRR17520069. 3221670  
SRR17520069. 3221672  
SRR17520069. 3221674  
SRR17520069. 3221676  
SRR17520069. 3221678  
SRR17520069. 3225526  
SRR17520069. 3225528  
SRR17520069. 3225530  
SRR17520069. 3225532  
SRR17520069. 3225536  
SRR17520069. 3225538  
SRR17520069. 3225540  
SRR17520069. 3225542  
SRR17520069. 3225544  
SRR17520069. 3225546  
SRR17520069. 3225548  
SRR17520069. 3225550  
SRR17520069. 3225552  
SRR17520069. 3225554  
SRR17520069. 3225556  
SRR17520069. 3225558  
SRR17520069. 3225560  
SRR17520069. 3225562  
SRR17520069. 3225566  
SRR17520069. 3225568  
SRR17520069. 3225570



SRR17520069. 3225572  
SRR17520069. 3225576  
SRR17520069. 3225578  
SRR17520069. 3225580  
SRR17520069. 3225582  
SRR17520069. 3225584  
SRR17520069. 3225586  
SRR17520069. 3225588  
SRR17520069. 3225590  
SRR17520069. 3225592  
SRR17520069. 3225594  
SRR17520069. 3225596  
SRR17520069. 3227968  
SRR17520069. 3227970  
SRR17520069. 3227972  
SRR17520069. 3227974  
SRR17520069. 3227978  
SRR17520069. 3227980  
SRR17520069. 3227982  
SRR17520069. 3227984  
SRR17520069. 3227986  
SRR17520069. 3227988  
SRR17520069. 3227990  
SRR17520069. 3227992  
SRR17520069. 3227994  
SRR17520069. 3227996  
SRR17520069. 3227998  
SRR17520069. 3228000  
SRR17520069. 3228002  
SRR17520069. 3228004  
SRR17520069. 3228006  
SRR17520069. 3228008  
SRR17520069. 3228010  
SRR17520069. 3228012  
SRR17520069. 3228014  
SRR17520069. 3228016  
SRR17520069. 3228020  
SRR17520069. 3228022  
SRR17520069. 3228024  
SRR17520069. 3228026  
SRR17520069. 3228028  
SRR17520069. 3228030  
SRR17520069. 3228032  
SRR17520069. 3228034  
SRR17520069. 3228036  
SRR17520069. 3228038  
SRR17520069. 3228040

SRR17520069. 3228042  
SRR17520069. 3228044  
SRR17520069. 3228046  
SRR17520069. 3228048  
SRR17520069. 3228050  
SRR17520069. 3228052  
SRR17520069. 3228054  
SRR17520069. 3228056  
SRR17520069. 3228058  
SRR17520069. 3228060  
SRR17520069. 3228062  
SRR17520069. 3231610  
SRR17520069. 3231614  
SRR17520069. 3231616  
SRR17520069. 3231618  
SRR17520069. 3231620  
SRR17520069. 3235318  
SRR17520069. 3235321  
SRR17520069. 3237061  
SRR17520069. 3237063  
SRR17520069. 3237065  
SRR17520069. 3237067  
SRR17520069. 3237069  
SRR17520069. 3237071  
SRR17520069. 3237073  
SRR17520069. 3237075  
SRR17520069. 3237077  
SRR17520069. 3237079  
SRR17520069. 3237081  
SRR17520069. 3237083  
SRR17520069. 3237085  
SRR17520069. 3237087  
SRR17520069. 3237089  
SRR17520069. 3237091  
SRR17520069. 3237095  
SRR17520069. 3237097  
SRR17520069. 3237099  
SRR17520069. 3239616  
SRR17520069. 3239618  
SRR17520069. 3239620  
SRR17520069. 3239622  
SRR17520069. 3239624  
SRR17520069. 3239626  
SRR17520069. 3239628  
SRR17520069. 3239632  
SRR17520069. 3239634  
SRR17520069. 3239636

SRR17520069. 3239638  
SRR17520069. 3239640  
SRR17520069. 3239642  
SRR17520069. 3239644  
SRR17520069. 3239646  
SRR17520069. 3239648  
SRR17520069. 3239650  
SRR17520069. 3239652  
SRR17520069. 3239654  
SRR17520069. 3239656  
SRR17520069. 3239658  
SRR17520069. 3239660  
SRR17520069. 3239662  
SRR17520069. 3239664  
SRR17520069. 3239666  
SRR17520069. 3239668  
SRR17520069. 3239670  
SRR17520069. 3239672  
SRR17520069. 3239674  
SRR17520069. 3239676  
SRR17520069. 3239678  
SRR17520069. 3239680  
SRR17520069. 3239682  
SRR17520069. 3239684  
SRR17520069. 3239686  
SRR17520069. 3239688  
SRR17520069. 3243604  
SRR17520069. 3243606  
SRR17520069. 3243608  
SRR17520069. 3245857  
SRR17520069. 3245859  
SRR17520069. 3245861  
SRR17520069. 3245865  
SRR17520069. 3245867  
SRR17520069. 3245869  
SRR17520069. 3245871  
SRR17520069. 3245883  
SRR17520069. 3245885  
SRR17520069. 3245887  
SRR17520069. 3245889  
SRR17520069. 3245891  
SRR17520069. 3245893  
SRR17520069. 3245895  
SRR17520069. 3245897  
SRR17520069. 3245899  
SRR17520069. 3245901  
SRR17520069. 3245903

SRR17520069.3245905  
SRR17520069.3245907  
SRR17520069.3245909  
SRR17520069.3245911  
SRR17520069.3245913  
SRR17520069.3245915  
SRR17520069.3245917  
SRR17520069.3245919  
SRR17520069.3245921  
SRR17520069.3245923  
SRR17520069.3245925  
SRR17520069.3245927  
SRR17520069.3245929  
SRR17520069.3245931  
SRR17520069.3245933  
SRR17520069.3245935  
SRR17520069.3245937  
SRR17520069.3245939  
SRR17520069.3245941  
SRR17520069.3245943  
SRR17520069.3245945  
SRR17520069.3245947  
SRR17520069.3245949  
SRR17520069.3245951  
SRR17520069.3245953  
SRR17520069.3245955  
SRR17520069.3245957  
SRR17520069.3245959  
SRR17520069.3245961  
SRR17520069.3245963  
SRR17520069.3245965  
SRR17520069.3245967  
SRR17520069.3245969  
SRR17520069.3245971  
SRR17520069.3245973  
SRR17520069.3245975  
SRR17520069.3245977  
SRR17520069.3245979  
SRR17520069.3245981  
SRR17520069.3245983  
SRR17520069.3245989  
SRR17520069.3245991  
SRR17520069.3245993  
SRR17520069.3245995  
SRR17520069.3245997  
SRR17520069.3245999  
SRR17520069.3246001

SRR17520069. 3246003  
SRR17520069. 3246005  
SRR17520069. 3246007  
SRR17520069. 3246009  
SRR17520069. 3246011  
SRR17520069. 3246013  
SRR17520069. 3246015  
SRR17520069. 3246017  
SRR17520069. 3246019  
SRR17520069. 3246021  
SRR17520069. 3246023  
SRR17520069. 3246025  
SRR17520069. 3246027  
SRR17520069. 3246029  
SRR17520069. 3246031  
SRR17520069. 3246033  
SRR17520069. 3246035  
SRR17520069. 3246037  
SRR17520069. 3246039  
SRR17520069. 3246041  
SRR17520069. 3246043  
SRR17520069. 3246045  
SRR17520069. 3246047  
SRR17520069. 3246049  
SRR17520069. 3246051  
SRR17520069. 3246055  
SRR17520069. 3246057  
SRR17520069. 3246059  
SRR17520069. 3246061  
SRR17520069. 3246063  
SRR17520069. 3246065  
SRR17520069. 3246067  
SRR17520069. 3246069  
SRR17520069. 3246071  
SRR17520069. 3246073  
SRR17520069. 3246075  
SRR17520069. 3246077  
SRR17520069. 3246081  
SRR17520069. 3249812  
SRR17520069. 3249814  
SRR17520069. 3252780  
SRR17520069. 3252782  
SRR17520069. 3252784  
SRR17520069. 3252786  
SRR17520069. 3252792  
SRR17520069. 3252794  
SRR17520069. 3252796

SRR17520069. 3252798  
SRR17520069. 3252800  
SRR17520069. 3252802  
SRR17520069. 3254976  
SRR17520069. 3254978  
SRR17520069. 3254980  
SRR17520069. 3254982  
SRR17520069. 3254984  
SRR17520069. 3254986  
SRR17520069. 3254988  
SRR17520069. 3254990  
SRR17520069. 3254994  
SRR17520069. 3254998  
SRR17520069. 3255000  
SRR17520069. 3255002  
SRR17520069. 3255006  
SRR17520069. 3255008  
SRR17520069. 3255010  
SRR17520069. 3255012  
SRR17520069. 3255014  
SRR17520069. 3255016  
SRR17520069. 3258007  
SRR17520069. 3258009  
SRR17520069. 3258011  
SRR17520069. 3258013  
SRR17520069. 3258015  
SRR17520069. 3258017  
SRR17520069. 3258019  
SRR17520069. 3258021  
SRR17520069. 3258023  
SRR17520069. 3258025  
SRR17520069. 3258027  
SRR17520069. 3258029  
SRR17520069. 3258031  
SRR17520069. 3258033  
SRR17520069. 3258035  
SRR17520069. 3258037  
SRR17520069. 3258039  
SRR17520069. 3258041  
SRR17520069. 3258043  
SRR17520069. 3258045  
SRR17520069. 3258047  
SRR17520069. 3258049  
SRR17520069. 3258051  
SRR17520069. 3258053  
SRR17520069. 3258055  
SRR17520069. 3258057

SRR17520069. 3258059  
SRR17520069. 3258061  
SRR17520069. 3258063  
SRR17520069. 3258065  
SRR17520069. 3258071  
SRR17520069. 3258073  
SRR17520069. 3258077  
SRR17520069. 3258079  
SRR17520069. 3258081  
SRR17520069. 3258083  
SRR17520069. 3258085  
SRR17520069. 3258087  
SRR17520069. 3258089  
SRR17520069. 3258091  
SRR17520069. 3258093  
SRR17520069. 3269516  
SRR17520069. 3271388  
SRR17520069. 3271390  
SRR17520069. 3271392  
SRR17520069. 3271394  
SRR17520069. 3271396  
SRR17520069. 3271398  
SRR17520069. 3271400  
SRR17520069. 3271402  
SRR17520069. 3271404  
SRR17520069. 3273020  
SRR17520069. 3273886  
SRR17520069. 3273888  
SRR17520069. 3273890  
SRR17520069. 3273892  
SRR17520069. 3273894  
SRR17520069. 3273896  
SRR17520069. 3273898  
SRR17520069. 3273900  
SRR17520069. 3273902  
SRR17520069. 3274792  
SRR17520069. 3274794  
SRR17520069. 3274796  
SRR17520069. 3274798  
SRR17520069. 3274800  
SRR17520069. 3274802  
SRR17520069. 3274804  
SRR17520069. 3274806  
SRR17520069. 3274808  
SRR17520069. 3274810  
SRR17520069. 3274812  
SRR17520069. 3274814

SRR17520069. 3274816  
SRR17520069. 3274818  
SRR17520069. 3274820  
SRR17520069. 3274822  
SRR17520069. 3274826  
SRR17520069. 3274830  
SRR17520069. 3274832  
SRR17520069. 3274834  
SRR17520069. 3274836  
SRR17520069. 3274838  
SRR17520069. 3274840  
SRR17520069. 3274842  
SRR17520069. 3274844  
SRR17520069. 3274846  
SRR17520069. 3274848  
SRR17520069. 3274850  
SRR17520069. 3274852  
SRR17520069. 3274854  
SRR17520069. 3274856  
SRR17520069. 3274858  
SRR17520069. 3274860  
SRR17520069. 3274862  
SRR17520069. 3274864  
SRR17520069. 3274868  
SRR17520069. 3274870  
SRR17520069. 3274872  
SRR17520069. 3274874  
SRR17520069. 3275604  
SRR17520069. 3275606  
SRR17520069. 3275608  
SRR17520069. 3279221  
SRR17520069. 3279223  
SRR17520069. 3279225  
SRR17520069. 3279227  
SRR17520069. 3279229  
SRR17520069. 3279233  
SRR17520069. 3279235  
SRR17520069. 3279237  
SRR17520069. 3279243  
SRR17520069. 3279245  
SRR17520069. 3279247  
SRR17520069. 3279249  
SRR17520069. 3279251  
SRR17520069. 3279253  
SRR17520069. 3279255  
SRR17520069. 3279257  
SRR17520069. 3282382



SRR17520069. 3282384  
SRR17520069. 3282386  
SRR17520069. 3282388  
SRR17520069. 3282390  
SRR17520069. 3282392  
SRR17520069. 3282394  
SRR17520069. 3282396  
SRR17520069. 3282398  
SRR17520069. 3282400  
SRR17520069. 3282402  
SRR17520069. 3282404  
SRR17520069. 3282406  
SRR17520069. 3282408  
SRR17520069. 3282410  
SRR17520069. 3282412  
SRR17520069. 3282414  
SRR17520069. 3282416  
SRR17520069. 3282418  
SRR17520069. 3282420  
SRR17520069. 3286612  
SRR17520069. 3286614  
SRR17520069. 3286616  
SRR17520069. 3286618  
SRR17520069. 3286620  
SRR17520069. 3286622  
SRR17520069. 3286624  
SRR17520069. 3286626  
SRR17520069. 3286628  
SRR17520069. 3286630  
SRR17520069. 3286632  
SRR17520069. 3286634  
SRR17520069. 3286636  
SRR17520069. 3286638  
SRR17520069. 3286640  
SRR17520069. 3286642  
SRR17520069. 3286644  
SRR17520069. 3286646  
SRR17520069. 3286648  
SRR17520069. 3286650  
SRR17520069. 3286652  
SRR17520069. 3286654  
SRR17520069. 3286656  
SRR17520069. 3286658  
SRR17520069. 3286660  
SRR17520069. 3286662  
SRR17520069. 3286664  
SRR17520069. 3286666

SRR17520069. 3286668  
SRR17520069. 3286670  
SRR17520069. 3286672  
SRR17520069. 3286674  
SRR17520069. 3292190  
SRR17520069. 3292192  
SRR17520069. 3292194  
SRR17520069. 3292196  
SRR17520069. 3292198  
SRR17520069. 3292200  
SRR17520069. 3292202  
SRR17520069. 3292204  
SRR17520069. 3292206  
SRR17520069. 3292208  
SRR17520069. 3292210  
SRR17520069. 3292212  
SRR17520069. 3292214  
SRR17520069. 3292216  
SRR17520069. 3292218  
SRR17520069. 3292221  
SRR17520069. 3292223  
SRR17520069. 3292225  
SRR17520069. 3292227  
SRR17520069. 3292229  
SRR17520069. 3310804  
SRR17520069. 3310806  
SRR17520069. 3310808  
SRR17520069. 3310810  
SRR17520069. 3310812  
SRR17520069. 3310814  
SRR17520069. 3314012  
SRR17520069. 3314014  
SRR17520069. 3314016  
SRR17520069. 3314018  
SRR17520069. 3314020  
SRR17520069. 3318920  
SRR17520069. 3318922  
SRR17520069. 3318924  
SRR17520069. 3318926  
SRR17520069. 3319923  
SRR17520069. 3319925  
SRR17520069. 3324969  
SRR17520069. 3324971  
SRR17520069. 3324973  
SRR17520069. 3324975  
SRR17520069. 3324977  
SRR17520069. 3324979

SRR17520069. 3324983  
SRR17520069. 3324985  
SRR17520069. 3324987  
SRR17520069. 3324989  
SRR17520069. 3324991  
SRR17520069. 3324993  
SRR17520069. 3324995  
SRR17520069. 3324997  
SRR17520069. 3324999  
SRR17520069. 3325001  
SRR17520069. 3325003  
SRR17520069. 3325005  
SRR17520069. 3325007  
SRR17520069. 3325009  
SRR17520069. 3325011  
SRR17520069. 3325013  
SRR17520069. 3325015  
SRR17520069. 3325017  
SRR17520069. 3325019  
SRR17520069. 3325021  
SRR17520069. 3325023  
SRR17520069. 3325025  
SRR17520069. 3325027  
SRR17520069. 3325029  
SRR17520069. 3325031  
SRR17520069. 3325033  
SRR17520069. 3325035  
SRR17520069. 3325037  
SRR17520069. 3325039  
SRR17520069. 3325041  
SRR17520069. 3325043  
SRR17520069. 3325045  
SRR17520069. 3325047  
SRR17520069. 3325049  
SRR17520069. 3325051  
SRR17520069. 3325053  
SRR17520069. 3325055  
SRR17520069. 3325057  
SRR17520069. 3325059  
SRR17520069. 3325061  
SRR17520069. 3325063  
SRR17520069. 3325065  
SRR17520069. 3325067  
SRR17520069. 3325069  
SRR17520069. 3325071  
SRR17520069. 3325073  
SRR17520069. 3325075

SRR17520069. 3325077  
SRR17520069. 3325079  
SRR17520069. 3325081  
SRR17520069. 3325083  
SRR17520069. 3325085  
SRR17520069. 3327933  
SRR17520069. 3327935  
SRR17520069. 3327937  
SRR17520069. 3327939  
SRR17520069. 3327941  
SRR17520069. 3327943  
SRR17520069. 3327945  
SRR17520069. 3327949  
SRR17520069. 3327953  
SRR17520069. 3327955  
SRR17520069. 3327957  
SRR17520069. 3327959  
SRR17520069. 3327961  
SRR17520069. 3327965  
SRR17520069. 3327967  
SRR17520069. 3327975  
SRR17520069. 3327977  
SRR17520069. 3327979  
SRR17520069. 3327981  
SRR17520069. 3327983  
SRR17520069. 3327985  
SRR17520069. 3327987  
SRR17520069. 3327989  
SRR17520069. 3327993  
SRR17520069. 3327999  
SRR17520069. 3328746  
SRR17520069. 3328748  
SRR17520069. 3328750  
SRR17520069. 3328752  
SRR17520069. 3328754  
SRR17520069. 3328756  
SRR17520069. 3328758  
SRR17520069. 3328760  
SRR17520069. 3328764  
SRR17520069. 3328766  
SRR17520069. 3328768  
SRR17520069. 3328770  
SRR17520069. 3328772  
SRR17520069. 3328774  
SRR17520069. 3328776  
SRR17520069. 3328778  
SRR17520069. 3328780

SRR17520069. 3328782  
SRR17520069. 3328784  
SRR17520069. 3328786  
SRR17520069. 3328788  
SRR17520069. 3328790  
SRR17520069. 3328792  
SRR17520069. 3328794  
SRR17520069. 3328796  
SRR17520069. 3332712  
SRR17520069. 3332714  
SRR17520069. 3332716  
SRR17520069. 3332718  
SRR17520069. 3332720  
SRR17520069. 3332722  
SRR17520069. 3332724  
SRR17520069. 3332733  
SRR17520069. 3335354  
SRR17520069. 3335356  
SRR17520069. 3335358  
SRR17520069. 3335360  
SRR17520069. 3335362  
SRR17520069. 3335366  
SRR17520069. 3335368  
SRR17520069. 3335370  
SRR17520069. 3335372  
SRR17520069. 3335374  
SRR17520069. 3335376  
SRR17520069. 3335378  
SRR17520069. 3335382  
SRR17520069. 3335384  
SRR17520069. 3335386  
SRR17520069. 3335388  
SRR17520069. 3335390  
SRR17520069. 3335392  
SRR17520069. 3335394  
SRR17520069. 3335396  
SRR17520069. 3335398  
SRR17520069. 3335400  
SRR17520069. 3335402  
SRR17520069. 3335404  
SRR17520069. 3335406  
SRR17520069. 3335408  
SRR17520069. 3335410  
SRR17520069. 3335412  
SRR17520069. 3335414  
SRR17520069. 3335416  
SRR17520069. 3335418

SRR17520069. 3335420  
SRR17520069. 3337657  
SRR17520069. 3338060  
SRR17520069. 3338062  
SRR17520069. 3338066  
SRR17520069. 3338068  
SRR17520069. 3338070  
SRR17520069. 3338072  
SRR17520069. 3338074  
SRR17520069. 3338076  
SRR17520069. 3338078  
SRR17520069. 3338080  
SRR17520069. 3338082  
SRR17520069. 3338084  
SRR17520069. 3338086  
SRR17520069. 3338088  
SRR17520069. 3338090  
SRR17520069. 3338092  
SRR17520069. 3338094  
SRR17520069. 3338096  
SRR17520069. 3338098  
SRR17520069. 3338100  
SRR17520069. 3339542  
SRR17520069. 3339544  
SRR17520069. 3339550  
SRR17520069. 3339552  
SRR17520069. 3339554  
SRR17520069. 3339556  
SRR17520069. 3339558  
SRR17520069. 3339560  
SRR17520069. 3339562  
SRR17520069. 3339564  
SRR17520069. 3339566  
SRR17520069. 3339568  
SRR17520069. 3339570  
SRR17520069. 3339572  
SRR17520069. 3339574  
SRR17520069. 3339576  
SRR17520069. 3339578  
SRR17520069. 3339580  
SRR17520069. 3339582  
SRR17520069. 3339584  
SRR17520069. 3339586  
SRR17520069. 3339588  
SRR17520069. 3339590  
SRR17520069. 3339592  
SRR17520069. 3339594

SRR17520069. 3339596  
SRR17520069. 3339598  
SRR17520069. 3339600  
SRR17520069. 3339602  
SRR17520069. 3339604  
SRR17520069. 3339608  
SRR17520069. 3339610  
SRR17520069. 3339612  
SRR17520069. 3339614  
SRR17520069. 3339616  
SRR17520069. 3339618  
SRR17520069. 3339620  
SRR17520069. 3339622  
SRR17520069. 3339624  
SRR17520069. 3339626  
SRR17520069. 3339628  
SRR17520069. 3339630  
SRR17520069. 3339632  
SRR17520069. 3339634  
SRR17520069. 3339636  
SRR17520069. 3339640  
SRR17520069. 3339642  
SRR17520069. 3339644  
SRR17520069. 3339646  
SRR17520069. 3339648  
SRR17520069. 3339650  
SRR17520069. 3339652  
SRR17520069. 3339658  
SRR17520069. 3339660  
SRR17520069. 3339662  
SRR17520069. 3339664  
SRR17520069. 3339666  
SRR17520069. 3339668  
SRR17520069. 3339670  
SRR17520069. 3339672  
SRR17520069. 3339674  
SRR17520069. 3339676  
SRR17520069. 3339680  
SRR17520069. 3339682  
SRR17520069. 3339684  
SRR17520069. 3341527  
SRR17520069. 3341529  
SRR17520069. 3341531  
SRR17520069. 3341533  
SRR17520069. 3341535  
SRR17520069. 3341537  
SRR17520069. 3341539

SRR17520069. 3341541  
SRR17520069. 3341543  
SRR17520069. 3341545  
SRR17520069. 3341547  
SRR17520069. 3341549  
SRR17520069. 3341551  
SRR17520069. 3341553  
SRR17520069. 3341555  
SRR17520069. 3341557  
SRR17520069. 3341559  
SRR17520069. 3341561  
SRR17520069. 3342621  
SRR17520069. 3342661  
SRR17520069. 3345267  
SRR17520069. 3345269  
SRR17520069. 3345271  
SRR17520069. 3345275  
SRR17520069. 3345277  
SRR17520069. 3345279  
SRR17520069. 3345281  
SRR17520069. 3345283  
SRR17520069. 3345285  
SRR17520069. 3345287  
SRR17520069. 3345289  
SRR17520069. 3345291  
SRR17520069. 3345293  
SRR17520069. 3345295  
SRR17520069. 3345297  
SRR17520069. 3345301  
SRR17520069. 3345303  
SRR17520069. 3345305  
SRR17520069. 3345307  
SRR17520069. 3345309  
SRR17520069. 3345311  
SRR17520069. 3345313  
SRR17520069. 3345317  
SRR17520069. 3345319  
SRR17520069. 3345321  
SRR17520069. 3345323  
SRR17520069. 3345325  
SRR17520069. 3345327  
SRR17520069. 3345329  
SRR17520069. 3345331  
SRR17520069. 3345333  
SRR17520069. 3345335  
SRR17520069. 3345337  
SRR17520069. 3345339



SRR17520069. 3345341  
SRR17520069. 3345343  
SRR17520069. 3345345  
SRR17520069. 3345347  
SRR17520069. 3345349  
SRR17520069. 3345351  
SRR17520069. 3345353  
SRR17520069. 3345355  
SRR17520069. 3345357  
SRR17520069. 3345359  
SRR17520069. 3345363  
SRR17520069. 3345365  
SRR17520069. 3345367  
SRR17520069. 3345371  
SRR17520069. 3345373  
SRR17520069. 3345375  
SRR17520069. 3345377  
SRR17520069. 3345379  
SRR17520069. 3346075  
SRR17520069. 3346077  
SRR17520069. 3346079  
SRR17520069. 3346083  
SRR17520069. 3346085  
SRR17520069. 3346349  
SRR17520069. 3346351  
SRR17520069. 3346353  
SRR17520069. 3346357  
SRR17520069. 3346359  
SRR17520069. 3346361  
SRR17520069. 3346363  
SRR17520069. 3346365  
SRR17520069. 3346367  
SRR17520069. 3346371  
SRR17520069. 3346373  
SRR17520069. 3346375  
SRR17520069. 3352761  
SRR17520069. 3352763  
SRR17520069. 3352765  
SRR17520069. 3352767  
SRR17520069. 3352769  
SRR17520069. 3352771  
SRR17520069. 3352773  
SRR17520069. 3352775  
SRR17520069. 3352777  
SRR17520069. 3352779  
SRR17520069. 3352781  
SRR17520069. 3352783

SRR17520069. 3352785  
SRR17520069. 3352787  
SRR17520069. 3352789  
SRR17520069. 3352791  
SRR17520069. 3352793  
SRR17520069. 3352795  
SRR17520069. 3352797  
SRR17520069. 3352799  
SRR17520069. 3352803  
SRR17520069. 3352805  
SRR17520069. 3352807  
SRR17520069. 3352809  
SRR17520069. 3352811  
SRR17520069. 3352813  
SRR17520069. 3352815  
SRR17520069. 3352817  
SRR17520069. 3352819  
SRR17520069. 3352821  
SRR17520069. 3352823  
SRR17520069. 3352825  
SRR17520069. 3352829  
SRR17520069. 3352831  
SRR17520069. 3352833  
SRR17520069. 3352835  
SRR17520069. 3352837  
SRR17520069. 3352839  
SRR17520069. 3352843  
SRR17520069. 3352845  
SRR17520069. 3352847  
SRR17520069. 3352849  
SRR17520069. 3352851  
SRR17520069. 3352853  
SRR17520069. 3352855  
SRR17520069. 3352857  
SRR17520069. 3352859  
SRR17520069. 3352861  
SRR17520069. 3352863  
SRR17520069. 3352865  
SRR17520069. 3352867  
SRR17520069. 3352870  
SRR17520069. 3352872  
SRR17520069. 3352874  
SRR17520069. 3362103  
SRR17520069. 3362105  
SRR17520069. 3362107  
SRR17520069. 3362109  
SRR17520069. 3362113

SRR17520069. 3362115  
SRR17520069. 3366363  
SRR17520069. 3366365  
SRR17520069. 3366367  
SRR17520069. 3366369  
SRR17520069. 3367841  
SRR17520069. 3367843  
SRR17520069. 3375930  
SRR17520069. 3375936  
SRR17520069. 3375950  
SRR17520069. 3375976  
SRR17520069. 3376012  
SRR17520069. 3376020  
SRR17520069. 3376058  
SRR17520069. 3376120  
SRR17520069. 3376124  
SRR17520069. 3376136  
SRR17520069. 3376146  
SRR17520069. 3381329  
SRR17520069. 3381331  
SRR17520069. 3381333  
SRR17520069. 3386649  
SRR17520069. 3386651  
SRR17520069. 3386653  
SRR17520069. 3386655  
SRR17520069. 3386657  
SRR17520069. 3386659  
SRR17520069. 3386661  
SRR17520069. 3386665  
SRR17520069. 3386667  
SRR17520069. 3386669  
SRR17520069. 3391586  
SRR17520069. 3391588  
SRR17520069. 3391590  
SRR17520069. 3391592  
SRR17520069. 3391594  
SRR17520069. 3391596  
SRR17520069. 3391598  
SRR17520069. 3391600  
SRR17520069. 3391602  
SRR17520069. 3391604  
SRR17520069. 3391606  
SRR17520069. 3391608  
SRR17520069. 3391610  
SRR17520069. 3391612  
SRR17520069. 3391614  
SRR17520069. 3399142

SRR17520069. 3399144  
SRR17520069. 3399146  
SRR17520069. 3399148  
SRR17520069. 3399150  
SRR17520069. 3399152  
SRR17520069. 3399154  
SRR17520069. 3399158  
SRR17520069. 3399587  
SRR17520069. 3399591  
SRR17520069. 3399593  
SRR17520069. 3399595  
SRR17520069. 3399597  
SRR17520069. 3399599  
SRR17520069. 3399601  
SRR17520069. 3399603  
SRR17520069. 3399605  
SRR17520069. 3399607  
SRR17520069. 3399609  
SRR17520069. 3399611  
SRR17520069. 3399613  
SRR17520069. 3399615  
SRR17520069. 3399617  
SRR17520069. 3399619  
SRR17520069. 3399621  
SRR17520069. 3399623  
SRR17520069. 3399625  
SRR17520069. 3399627  
SRR17520069. 3399629  
SRR17520069. 3407532  
SRR17520069. 3407552  
SRR17520069. 3407562  
SRR17520069. 3409435  
SRR17520069. 3409966  
SRR17520069. 3409968  
SRR17520069. 3409970  
SRR17520069. 3409972  
SRR17520069. 3409974  
SRR17520069. 3409976  
SRR17520069. 3409978  
SRR17520069. 3409980  
SRR17520069. 3409982  
SRR17520069. 3409984  
SRR17520069. 3409986  
SRR17520069. 3409988  
SRR17520069. 3409990  
SRR17520069. 3409992  
SRR17520069. 3409994

SRR17520069.3409996  
SRR17520069.3409998  
SRR17520069.3410000  
SRR17520069.3410002  
SRR17520069.3410004  
SRR17520069.3410006  
SRR17520069.3410008  
SRR17520069.3410010  
SRR17520069.3410012  
SRR17520069.3410014  
SRR17520069.3410016  
SRR17520069.3410018  
SRR17520069.3413802  
SRR17520069.3413804  
SRR17520069.3413806  
SRR17520069.3413808  
SRR17520069.3413810  
SRR17520069.3413812  
SRR17520069.3413814  
SRR17520069.3413816  
SRR17520069.3413818  
SRR17520069.3413820  
SRR17520069.3413822  
SRR17520069.3413824  
SRR17520069.3413826  
SRR17520069.3413828  
SRR17520069.3413830  
SRR17520069.3413832  
SRR17520069.3413834  
SRR17520069.3413836  
SRR17520069.3413838  
SRR17520069.3413840  
SRR17520069.3413842  
SRR17520069.3413846  
SRR17520069.3421003  
SRR17520069.3421005  
SRR17520069.3421007  
SRR17520069.3421009  
SRR17520069.3421011  
SRR17520069.3421013  
SRR17520069.3421015  
SRR17520069.3421017  
SRR17520069.3428106  
SRR17520069.3428108  
SRR17520069.3428110  
SRR17520069.3430863  
SRR17520069.3430865

SRR17520069. 3430869  
SRR17520069. 3430871  
SRR17520069. 3430875  
SRR17520069. 3430877  
SRR17520069. 3430879  
SRR17520069. 3430883  
SRR17520069. 3430885  
SRR17520069. 3430887  
SRR17520069. 3430889  
SRR17520069. 3430891  
SRR17520069. 3430893  
SRR17520069. 3430895  
SRR17520069. 3430897  
SRR17520069. 3430901  
SRR17520069. 3434681  
SRR17520069. 3434683  
SRR17520069. 3434685  
SRR17520069. 3436395  
SRR17520069. 3437702  
SRR17520069. 3443265  
SRR17520069. 3446123  
SRR17520069. 3446125  
SRR17520069. 3446127  
SRR17520069. 3446129  
SRR17520069. 3446131  
SRR17520069. 3450611  
SRR17520069. 3450613  
SRR17520069. 3462332  
SRR17520069. 3462334  
SRR17520069. 3462336  
SRR17520069. 3462338  
SRR17520069. 3462340  
SRR17520069. 3462342  
SRR17520069. 3462344  
SRR17520069. 3462346  
SRR17520069. 3462348  
SRR17520069. 3462350  
SRR17520069. 3462352  
SRR17520069. 3462354  
SRR17520069. 3462356  
SRR17520069. 3462358  
SRR17520069. 3462360  
SRR17520069. 3462362  
SRR17520069. 3462364  
SRR17520069. 3462366  
SRR17520069. 3462368  
SRR17520069. 3462370

SRR17520069. 3462372  
SRR17520069. 3462374  
SRR17520069. 3462376  
SRR17520069. 3462378  
SRR17520069. 3462380  
SRR17520069. 3463652  
SRR17520069. 3463654  
SRR17520069. 3463656  
SRR17520069. 3463658  
SRR17520069. 3467115  
SRR17520069. 3467117  
SRR17520069. 3467119  
SRR17520069. 3467121  
SRR17520069. 3467123  
SRR17520069. 3467125  
SRR17520069. 3467127  
SRR17520069. 3467129  
SRR17520069. 3467131  
SRR17520069. 3467133  
SRR17520069. 3467135  
SRR17520069. 3467137  
SRR17520069. 3467139  
SRR17520069. 3467141  
SRR17520069. 3467143  
SRR17520069. 3467145  
SRR17520069. 3467147  
SRR17520069. 3467149  
SRR17520069. 3467151  
SRR17520069. 3467153  
SRR17520069. 3467155  
SRR17520069. 3467157  
SRR17520069. 3467159  
SRR17520069. 3467163  
SRR17520069. 3467165  
SRR17520069. 3467167  
SRR17520069. 3467169  
SRR17520069. 3467171  
SRR17520069. 3467173  
SRR17520069. 3467175  
SRR17520069. 3467177  
SRR17520069. 3467181  
SRR17520069. 3467183  
SRR17520069. 3467185  
SRR17520069. 3467187  
SRR17520069. 3467191  
SRR17520069. 3467193  
SRR17520069. 3467195

SRR17520069. 3467197  
SRR17520069. 3469647  
SRR17520069. 3469649  
SRR17520069. 3469651  
SRR17520069. 3469653  
SRR17520069. 3469655  
SRR17520069. 3469657  
SRR17520069. 3474124  
SRR17520069. 3474126  
SRR17520069. 3474128  
SRR17520069. 3474130  
SRR17520069. 3474132  
SRR17520069. 3474134  
SRR17520069. 3474136  
SRR17520069. 3474138  
SRR17520069. 3474140  
SRR17520069. 3474142  
SRR17520069. 3474144  
SRR17520069. 3474146  
SRR17520069. 3474148  
SRR17520069. 3474150  
SRR17520069. 3474152  
SRR17520069. 3474154  
SRR17520069. 3474156  
SRR17520069. 3474158  
SRR17520069. 3474162  
SRR17520069. 3474164  
SRR17520069. 3474166  
SRR17520069. 3474168  
SRR17520069. 3474170  
SRR17520069. 3474172  
SRR17520069. 3474174  
SRR17520069. 3474176  
SRR17520069. 3474178  
SRR17520069. 3474180  
SRR17520069. 3474182  
SRR17520069. 3474184  
SRR17520069. 3474186  
SRR17520069. 3474188  
SRR17520069. 3474190  
SRR17520069. 3476405  
SRR17520069. 3476407  
SRR17520069. 3476409  
SRR17520069. 3476411  
SRR17520069. 3476413  
SRR17520069. 3476415  
SRR17520069. 3476417



SRR17520069. 3476419  
SRR17520069. 3476421  
SRR17520069. 3476423  
SRR17520069. 3476425  
SRR17520069. 3476427  
SRR17520069. 3476431  
SRR17520069. 3476433  
SRR17520069. 3476435  
SRR17520069. 3476437  
SRR17520069. 3476439  
SRR17520069. 3476441  
SRR17520069. 3476443  
SRR17520069. 3476445  
SRR17520069. 3476447  
SRR17520069. 3476449  
SRR17520069. 3476451  
SRR17520069. 3476453  
SRR17520069. 3476455  
SRR17520069. 3476457  
SRR17520069. 3478075  
SRR17520069. 3478077  
SRR17520069. 3478079  
SRR17520069. 3478081  
SRR17520069. 3478083  
SRR17520069. 3478085  
SRR17520069. 3478087  
SRR17520069. 3478089  
SRR17520069. 3478091  
SRR17520069. 3478093  
SRR17520069. 3478095  
SRR17520069. 3478097  
SRR17520069. 3478099  
SRR17520069. 3478101  
SRR17520069. 3478103  
SRR17520069. 3478105  
SRR17520069. 3478107  
SRR17520069. 3478109  
SRR17520069. 3478111  
SRR17520069. 3478113  
SRR17520069. 3478115  
SRR17520069. 3478117  
SRR17520069. 3478119  
SRR17520069. 3480289  
SRR17520069. 3480291  
SRR17520069. 3480293  
SRR17520069. 3480295  
SRR17520069. 3480297

SRR17520069. 3480299  
SRR17520069. 3480301  
SRR17520069. 3480303  
SRR17520069. 3480305  
SRR17520069. 3480307  
SRR17520069. 3480309  
SRR17520069. 3485881  
SRR17520069. 3485883  
SRR17520069. 3485885  
SRR17520069. 3485887  
SRR17520069. 3485889  
SRR17520069. 3485891  
SRR17520069. 3485893  
SRR17520069. 3485895  
SRR17520069. 3485897  
SRR17520069. 3485899  
SRR17520069. 3485901  
SRR17520069. 3485903  
SRR17520069. 3487234  
SRR17520069. 3487236  
SRR17520069. 3487238  
SRR17520069. 3487240  
SRR17520069. 3487242  
SRR17520069. 3487244  
SRR17520069. 3487246  
SRR17520069. 3487248  
SRR17520069. 3487250  
SRR17520069. 3487252  
SRR17520069. 3487254  
SRR17520069. 3487256  
SRR17520069. 3487258  
SRR17520069. 3487260  
SRR17520069. 3487262  
SRR17520069. 3487264  
SRR17520069. 3487266  
SRR17520069. 3488491  
SRR17520069. 3489907  
SRR17520069. 3489909  
SRR17520069. 3489911  
SRR17520069. 3489913  
SRR17520069. 3489915  
SRR17520069. 3489917  
SRR17520069. 3489919  
SRR17520069. 3489921  
SRR17520069. 3489923  
SRR17520069. 3489925  
SRR17520069. 3489927

SRR17520069. 3491548  
SRR17520069. 3491550  
SRR17520069. 3491552  
SRR17520069. 3491556  
SRR17520069. 3491558  
SRR17520069. 3491560  
SRR17520069. 3491562  
SRR17520069. 3491564  
SRR17520069. 3491566  
SRR17520069. 3491568  
SRR17520069. 3491570  
SRR17520069. 3491572  
SRR17520069. 3491574  
SRR17520069. 3491576  
SRR17520069. 3491578  
SRR17520069. 3491580  
SRR17520069. 3491582  
SRR17520069. 3491584  
SRR17520069. 3491586  
SRR17520069. 3491588  
SRR17520069. 3491590  
SRR17520069. 3491592  
SRR17520069. 3491594  
SRR17520069. 3491596  
SRR17520069. 3491598  
SRR17520069. 3491600  
SRR17520069. 3491602  
SRR17520069. 3491604  
SRR17520069. 3491606  
SRR17520069. 3491608  
SRR17520069. 3491610  
SRR17520069. 3491612  
SRR17520069. 3493531  
SRR17520069. 3493533  
SRR17520069. 3493535  
SRR17520069. 3501263  
SRR17520069. 3501265  
SRR17520069. 3501267  
SRR17520069. 3501269  
SRR17520069. 3501271  
SRR17520069. 3501273  
SRR17520069. 3501686  
SRR17520069. 3501688  
SRR17520069. 3501690  
SRR17520069. 3501692  
SRR17520069. 3501694  
SRR17520069. 3501696

SRR17520069.3501698  
SRR17520069.3501700  
SRR17520069.3501702  
SRR17520069.3501704  
SRR17520069.3501706  
SRR17520069.3501708  
SRR17520069.3501710  
SRR17520069.3504714  
SRR17520069.3508286  
SRR17520069.3508288  
SRR17520069.3508290  
SRR17520069.3508292  
SRR17520069.3508294  
SRR17520069.3510559  
SRR17520069.3510561  
SRR17520069.3510563  
SRR17520069.3510565  
SRR17520069.3510567  
SRR17520069.3510569  
SRR17520069.3510575  
SRR17520069.3510579  
SRR17520069.3511631  
SRR17520069.3511633  
SRR17520069.3511635  
SRR17520069.3511637  
SRR17520069.3511639  
SRR17520069.3511641  
SRR17520069.3511643  
SRR17520069.3511647  
SRR17520069.3511649  
SRR17520069.3511651  
SRR17520069.3511653  
SRR17520069.3511655  
SRR17520069.3511659  
SRR17520069.3511661  
SRR17520069.3511663  
SRR17520069.3511665  
SRR17520069.3511667  
SRR17520069.3511669  
SRR17520069.3511671  
SRR17520069.3511673  
SRR17520069.3511675  
SRR17520069.3511677  
SRR17520069.3511679  
SRR17520069.3511683  
SRR17520069.3511687  
SRR17520069.3511691

SRR17520069. 3511693  
SRR17520069. 3511695  
SRR17520069. 3511697  
SRR17520069. 3512252  
SRR17520069. 3513986  
SRR17520069. 3513990  
SRR17520069. 3513992  
SRR17520069. 3513994  
SRR17520069. 3513996  
SRR17520069. 3513998  
SRR17520069. 3514000  
SRR17520069. 3514002  
SRR17520069. 3514004  
SRR17520069. 3514006  
SRR17520069. 3514010  
SRR17520069. 3514012  
SRR17520069. 3514014  
SRR17520069. 3514016  
SRR17520069. 3514018  
SRR17520069. 3514020  
SRR17520069. 3514022  
SRR17520069. 3514024  
SRR17520069. 3514026  
SRR17520069. 3514028  
SRR17520069. 3514030  
SRR17520069. 3514032  
SRR17520069. 3514034  
SRR17520069. 3514036  
SRR17520069. 3514038  
SRR17520069. 3514040  
SRR17520069. 3514042  
SRR17520069. 3514046  
SRR17520069. 3514050  
SRR17520069. 3514052  
SRR17520069. 3514054  
SRR17520069. 3514056  
SRR17520069. 3514058  
SRR17520069. 3514062  
SRR17520069. 3514064  
SRR17520069. 3514066  
SRR17520069. 3514068  
SRR17520069. 3514070  
SRR17520069. 3514072  
SRR17520069. 3514074  
SRR17520069. 3514076  
SRR17520069. 3514078  
SRR17520069. 3521620

SRR17520069. 3521622  
SRR17520069. 3521624  
SRR17520069. 3521626  
SRR17520069. 3521628  
SRR17520069. 3522022  
SRR17520069. 3522024  
SRR17520069. 3522026  
SRR17520069. 3530380  
SRR17520069. 3530382  
SRR17520069. 3530384  
SRR17520069. 3530386  
SRR17520069. 3532375  
SRR17520069. 3532377  
SRR17520069. 3532379  
SRR17520069. 3532381  
SRR17520069. 3532383  
SRR17520069. 3532385  
SRR17520069. 3532387  
SRR17520069. 3532389  
SRR17520069. 3532391  
SRR17520069. 3532393  
SRR17520069. 3532395  
SRR17520069. 3532397  
SRR17520069. 3535951  
SRR17520069. 3535953  
SRR17520069. 3535955  
SRR17520069. 3535957  
SRR17520069. 3535959  
SRR17520069. 3535961  
SRR17520069. 3535963  
SRR17520069. 3535965  
SRR17520069. 3535967  
SRR17520069. 3535969  
SRR17520069. 3535971  
SRR17520069. 3535973  
SRR17520069. 3535975  
SRR17520069. 3535977  
SRR17520069. 3535979  
SRR17520069. 3535981  
SRR17520069. 3535983  
SRR17520069. 3535985  
SRR17520069. 3535987  
SRR17520069. 3535989  
SRR17520069. 3535991  
SRR17520069. 3535993  
SRR17520069. 3535995  
SRR17520069. 3535997

SRR17520069. 3535999  
SRR17520069. 3536001  
SRR17520069. 3536003  
SRR17520069. 3536005  
SRR17520069. 3536007  
SRR17520069. 3536009  
SRR17520069. 3536011  
SRR17520069. 3536013  
SRR17520069. 3536015  
SRR17520069. 3536017  
SRR17520069. 3536019  
SRR17520069. 3536021  
SRR17520069. 3536023  
SRR17520069. 3536025  
SRR17520069. 3536027  
SRR17520069. 3536029  
SRR17520069. 3536031  
SRR17520069. 3536033  
SRR17520069. 3536035  
SRR17520069. 3536037  
SRR17520069. 3536039  
SRR17520069. 3536041  
SRR17520069. 3536055  
SRR17520069. 3536057  
SRR17520069. 3536059  
SRR17520069. 3536061  
SRR17520069. 3539844  
SRR17520069. 3539846  
SRR17520069. 3539848  
SRR17520069. 3539850  
SRR17520069. 3539852  
SRR17520069. 3539854  
SRR17520069. 3539856  
SRR17520069. 3539858  
SRR17520069. 3539860  
SRR17520069. 3539862  
SRR17520069. 3539864  
SRR17520069. 3539866  
SRR17520069. 3539868  
SRR17520069. 3539870  
SRR17520069. 3539872  
SRR17520069. 3539874  
SRR17520069. 3539876  
SRR17520069. 3539878  
SRR17520069. 3539880  
SRR17520069. 3539882  
SRR17520069. 3539884

SRR17520069. 3539886  
SRR17520069. 3539888  
SRR17520069. 3539890  
SRR17520069. 3539892  
SRR17520069. 3539894  
SRR17520069. 3539896  
SRR17520069. 3539898  
SRR17520069. 3539900  
SRR17520069. 3539902  
SRR17520069. 3539906  
SRR17520069. 3539908  
SRR17520069. 3539912  
SRR17520069. 3539914  
SRR17520069. 3539916  
SRR17520069. 3539918  
SRR17520069. 3539920  
SRR17520069. 3539922  
SRR17520069. 3539924  
SRR17520069. 3539926  
SRR17520069. 3539928  
SRR17520069. 3539930  
SRR17520069. 3539932  
SRR17520069. 3539936  
SRR17520069. 3539938  
SRR17520069. 3539940  
SRR17520069. 3539942  
SRR17520069. 3539944  
SRR17520069. 3539946  
SRR17520069. 3539948  
SRR17520069. 3539950  
SRR17520069. 3539954  
SRR17520069. 3539956  
SRR17520069. 3540080  
SRR17520069. 3540087  
SRR17520069. 3542992  
SRR17520069. 3542994  
SRR17520069. 3542996  
SRR17520069. 3542998  
SRR17520069. 3543000  
SRR17520069. 3543002  
SRR17520069. 3543004  
SRR17520069. 3543006  
SRR17520069. 3543008  
SRR17520069. 3543010  
SRR17520069. 3543012  
SRR17520069. 3543014  
SRR17520069. 3543016



SRR17520069.3543018  
SRR17520069.3543020  
SRR17520069.3543022  
SRR17520069.3543024  
SRR17520069.3543026  
SRR17520069.3543028  
SRR17520069.3543030  
SRR17520069.3543032  
SRR17520069.3543034  
SRR17520069.3543036  
SRR17520069.3543038  
SRR17520069.3543040  
SRR17520069.3543042  
SRR17520069.3543044  
SRR17520069.3543046  
SRR17520069.3543048  
SRR17520069.3543050  
SRR17520069.3544103  
SRR17520069.3544105  
SRR17520069.3544107  
SRR17520069.3544109  
SRR17520069.3544111  
SRR17520069.3544119  
SRR17520069.3544121  
SRR17520069.3544123  
SRR17520069.3544125  
SRR17520069.3544127  
SRR17520069.3544129  
SRR17520069.3544131  
SRR17520069.3544133  
SRR17520069.3544135  
SRR17520069.3544137  
SRR17520069.3544139  
SRR17520069.3544162  
SRR17520069.3544631  
SRR17520069.3544633  
SRR17520069.3544635  
SRR17520069.3544637  
SRR17520069.3544639  
SRR17520069.3544641  
SRR17520069.3544643  
SRR17520069.3544645  
SRR17520069.3544647  
SRR17520069.3544651  
SRR17520069.3544653  
SRR17520069.3544655  
SRR17520069.3544657

SRR17520069. 3544659  
SRR17520069. 3544661  
SRR17520069. 3544663  
SRR17520069. 3544667  
SRR17520069. 3544671  
SRR17520069. 3544673  
SRR17520069. 3544675  
SRR17520069. 3544677  
SRR17520069. 3544679  
SRR17520069. 3544681  
SRR17520069. 3544683  
SRR17520069. 3545265  
SRR17520069. 3545269  
SRR17520069. 3545273  
SRR17520069. 3545275  
SRR17520069. 3545277  
SRR17520069. 3545279  
SRR17520069. 3545281  
SRR17520069. 3545283  
SRR17520069. 3545287  
SRR17520069. 3545289  
SRR17520069. 3545293  
SRR17520069. 3545295  
SRR17520069. 3545297  
SRR17520069. 3545299  
SRR17520069. 3545301  
SRR17520069. 3545303  
SRR17520069. 3545305  
SRR17520069. 3545309  
SRR17520069. 3545311  
SRR17520069. 3545313  
SRR17520069. 3545315  
SRR17520069. 3545317  
SRR17520069. 3545319  
SRR17520069. 3545321  
SRR17520069. 3545323  
SRR17520069. 3545325  
SRR17520069. 3545327  
SRR17520069. 3545329  
SRR17520069. 3545331  
SRR17520069. 3545337  
SRR17520069. 3545339  
SRR17520069. 3545341  
SRR17520069. 3545343  
SRR17520069. 3545345  
SRR17520069. 3545349  
SRR17520069. 3545351

SRR17520069.3545353  
SRR17520069.3552366  
SRR17520069.3552368  
SRR17520069.3552370  
SRR17520069.3552372  
SRR17520069.3552374  
SRR17520069.3552378  
SRR17520069.3552380  
SRR17520069.3552382  
SRR17520069.3552384  
SRR17520069.3552386  
SRR17520069.3555578  
SRR17520069.3555580  
SRR17520069.3555582  
SRR17520069.3555584  
SRR17520069.3555586  
SRR17520069.3555588  
SRR17520069.3555590  
SRR17520069.3555592  
SRR17520069.3555596  
SRR17520069.3555598  
SRR17520069.3555600  
SRR17520069.3555602  
SRR17520069.3555604  
SRR17520069.3555606  
SRR17520069.3555608  
SRR17520069.3555610  
SRR17520069.3555612  
SRR17520069.3555614  
SRR17520069.3555616  
SRR17520069.3555618  
SRR17520069.3555620  
SRR17520069.3555624  
SRR17520069.3555626  
SRR17520069.3555628  
SRR17520069.3555630  
SRR17520069.3555632  
SRR17520069.3555634  
SRR17520069.3555636  
SRR17520069.3555638  
SRR17520069.3555640  
SRR17520069.3555642  
SRR17520069.3555644  
SRR17520069.3555646  
SRR17520069.3555648  
SRR17520069.3555650  
SRR17520069.3555652

SRR17520069. 3555654  
SRR17520069. 3555656  
SRR17520069. 3555660  
SRR17520069. 3555662  
SRR17520069. 3555664  
SRR17520069. 3555666  
SRR17520069. 3555668  
SRR17520069. 3555670  
SRR17520069. 3563561  
SRR17520069. 3563563  
SRR17520069. 3563565  
SRR17520069. 3563567  
SRR17520069. 3563569  
SRR17520069. 3563571  
SRR17520069. 3563573  
SRR17520069. 3563575  
SRR17520069. 3563577  
SRR17520069. 3563579  
SRR17520069. 3563581  
SRR17520069. 3563583  
SRR17520069. 3563585  
SRR17520069. 3563587  
SRR17520069. 3563589  
SRR17520069. 3563591  
SRR17520069. 3563593  
SRR17520069. 3563595  
SRR17520069. 3563597  
SRR17520069. 3563599  
SRR17520069. 3563601  
SRR17520069. 3563603  
SRR17520069. 3563605  
SRR17520069. 3563607  
SRR17520069. 3563609  
SRR17520069. 3563611  
SRR17520069. 3563613  
SRR17520069. 3563615  
SRR17520069. 3563617  
SRR17520069. 3563619  
SRR17520069. 3563621  
SRR17520069. 3563623  
SRR17520069. 3563625  
SRR17520069. 3563627  
SRR17520069. 3563631  
SRR17520069. 3563633  
SRR17520069. 3563635  
SRR17520069. 3563637  
SRR17520069. 3563639

SRR17520069. 3563641  
SRR17520069. 3563643  
SRR17520069. 3563645  
SRR17520069. 3563647  
SRR17520069. 3563649  
SRR17520069. 3563651  
SRR17520069. 3563653  
SRR17520069. 3563737  
SRR17520069. 3563739  
SRR17520069. 3563741  
SRR17520069. 3563743  
SRR17520069. 3563745  
SRR17520069. 3563747  
SRR17520069. 3563751  
SRR17520069. 3563753  
SRR17520069. 3563755  
SRR17520069. 3564895  
SRR17520069. 3564898  
SRR17520069. 3564900  
SRR17520069. 3564902  
SRR17520069. 3564904  
SRR17520069. 3564908  
SRR17520069. 3564910  
SRR17520069. 3564912  
SRR17520069. 3564914  
SRR17520069. 3564916  
SRR17520069. 3564920  
SRR17520069. 3564924  
SRR17520069. 3564926  
SRR17520069. 3568926  
SRR17520069. 3568930  
SRR17520069. 3568932  
SRR17520069. 3568934  
SRR17520069. 3568936  
SRR17520069. 3568938  
SRR17520069. 3568940  
SRR17520069. 3568942  
SRR17520069. 3568944  
SRR17520069. 3568946  
SRR17520069. 3568948  
SRR17520069. 3568950  
SRR17520069. 3568952  
SRR17520069. 3568954  
SRR17520069. 3568956  
SRR17520069. 3568958  
SRR17520069. 3568960  
SRR17520069. 3568962

SRR17520069. 3568964  
SRR17520069. 3568966  
SRR17520069. 3568968  
SRR17520069. 3568970  
SRR17520069. 3568972  
SRR17520069. 3568974  
SRR17520069. 3568976  
SRR17520069. 3568978  
SRR17520069. 3568980  
SRR17520069. 3568982  
SRR17520069. 3568984  
SRR17520069. 3568986  
SRR17520069. 3568988  
SRR17520069. 3568990  
SRR17520069. 3568992  
SRR17520069. 3568994  
SRR17520069. 3568996  
SRR17520069. 3568998  
SRR17520069. 3569000  
SRR17520069. 3569002  
SRR17520069. 3569004  
SRR17520069. 3569006  
SRR17520069. 3569008  
SRR17520069. 3569010  
SRR17520069. 3569012  
SRR17520069. 3569014  
SRR17520069. 3569016  
SRR17520069. 3569018  
SRR17520069. 3569020  
SRR17520069. 3569022  
SRR17520069. 3573552  
SRR17520069. 3573554  
SRR17520069. 3573556  
SRR17520069. 3573558  
SRR17520069. 3573560  
SRR17520069. 3573562  
SRR17520069. 3573564  
SRR17520069. 3573566  
SRR17520069. 3573568  
SRR17520069. 3573570  
SRR17520069. 3573572  
SRR17520069. 3573574  
SRR17520069. 3573576  
SRR17520069. 3573578  
SRR17520069. 3573580  
SRR17520069. 3573582  
SRR17520069. 3573584

SRR17520069. 3573586  
SRR17520069. 3573588  
SRR17520069. 3573590  
SRR17520069. 3573592  
SRR17520069. 3573594  
SRR17520069. 3573596  
SRR17520069. 3573598  
SRR17520069. 3573600  
SRR17520069. 3573602  
SRR17520069. 3573604  
SRR17520069. 3573606  
SRR17520069. 3573608  
SRR17520069. 3573610  
SRR17520069. 3573612  
SRR17520069. 3573614  
SRR17520069. 3573616  
SRR17520069. 3573618  
SRR17520069. 3573620  
SRR17520069. 3573622  
SRR17520069. 3573775  
SRR17520069. 3573779  
SRR17520069. 3573783  
SRR17520069. 3578283  
SRR17520069. 3578285  
SRR17520069. 3578287  
SRR17520069. 3578289  
SRR17520069. 3578293  
SRR17520069. 3578295  
SRR17520069. 3578297  
SRR17520069. 3578299  
SRR17520069. 3578301  
SRR17520069. 3578303  
SRR17520069. 3578305  
SRR17520069. 3578307  
SRR17520069. 3578309  
SRR17520069. 3578311  
SRR17520069. 3578313  
SRR17520069. 3578315  
SRR17520069. 3578317  
SRR17520069. 3578319  
SRR17520069. 3578321  
SRR17520069. 3578323  
SRR17520069. 3578325  
SRR17520069. 3578327  
SRR17520069. 3578329  
SRR17520069. 3578331  
SRR17520069. 3578333

SRR17520069. 3578335  
SRR17520069. 3578337  
SRR17520069. 3578341  
SRR17520069. 3578343  
SRR17520069. 3578345  
SRR17520069. 3578347  
SRR17520069. 3578794  
SRR17520069. 3578832  
SRR17520069. 3580941  
SRR17520069. 3580943  
SRR17520069. 3584062  
SRR17520069. 3584064  
SRR17520069. 3584350  
SRR17520069. 3584352  
SRR17520069. 3584354  
SRR17520069. 3584356  
SRR17520069. 3584358  
SRR17520069. 3584360  
SRR17520069. 3584362  
SRR17520069. 3584364  
SRR17520069. 3584366  
SRR17520069. 3584368  
SRR17520069. 3584370  
SRR17520069. 3584372  
SRR17520069. 3584374  
SRR17520069. 3584376  
SRR17520069. 3594518  
SRR17520069. 3594520  
SRR17520069. 3594522  
SRR17520069. 3594524  
SRR17520069. 3602287  
SRR17520069. 3602289  
SRR17520069. 3602291  
SRR17520069. 3602293  
SRR17520069. 3602295  
SRR17520069. 3602297  
SRR17520069. 3602299  
SRR17520069. 3602301  
SRR17520069. 3602303  
SRR17520069. 3602305  
SRR17520069. 3602307  
SRR17520069. 3602309  
SRR17520069. 3602313  
SRR17520069. 3602315  
SRR17520069. 3602317  
SRR17520069. 3608221  
SRR17520069. 3608223



SRR17520069. 3608225  
SRR17520069. 3608229  
SRR17520069. 3608231  
SRR17520069. 3608233  
SRR17520069. 3608235  
SRR17520069. 3608237  
SRR17520069. 3608239  
SRR17520069. 3608314  
SRR17520069. 3608316  
SRR17520069. 3608318  
SRR17520069. 3615895  
SRR17520069. 3615897  
SRR17520069. 3615899  
SRR17520069. 3615901  
SRR17520069. 3615903  
SRR17520069. 3615905  
SRR17520069. 3615907  
SRR17520069. 3615909  
SRR17520069. 3615911  
SRR17520069. 3615913  
SRR17520069. 3615915  
SRR17520069. 3615917  
SRR17520069. 3615919  
SRR17520069. 3615921  
SRR17520069. 3615923  
SRR17520069. 3615925  
SRR17520069. 3615929  
SRR17520069. 3615931  
SRR17520069. 3615933  
SRR17520069. 3615935  
SRR17520069. 3615937  
SRR17520069. 3615939  
SRR17520069. 3615941  
SRR17520069. 3615943  
SRR17520069. 3615945  
SRR17520069. 3615947  
SRR17520069. 3615949  
SRR17520069. 3615951  
SRR17520069. 3615953  
SRR17520069. 3615955  
SRR17520069. 3615957  
SRR17520069. 3615959  
SRR17520069. 3615961  
SRR17520069. 3615963  
SRR17520069. 3615965  
SRR17520069. 3615967  
SRR17520069. 3615969

SRR17520069. 3615971  
SRR17520069. 3627996  
SRR17520069. 3627998  
SRR17520069. 3628002  
SRR17520069. 3628004  
SRR17520069. 3628006  
SRR17520069. 3628008  
SRR17520069. 3628010  
SRR17520069. 3628012  
SRR17520069. 3628014  
SRR17520069. 3628016  
SRR17520069. 3628018  
SRR17520069. 3628022  
SRR17520069. 3628024  
SRR17520069. 3628026  
SRR17520069. 3628030  
SRR17520069. 3628032  
SRR17520069. 3628034  
SRR17520069. 3628036  
SRR17520069. 3628038  
SRR17520069. 3628040  
SRR17520069. 3628042  
SRR17520069. 3628044  
SRR17520069. 3628046  
SRR17520069. 3628048  
SRR17520069. 3628050  
SRR17520069. 3628052  
SRR17520069. 3628056  
SRR17520069. 3630104  
SRR17520069. 3632219  
SRR17520069. 3632221  
SRR17520069. 3632223  
SRR17520069. 3632225  
SRR17520069. 3632227  
SRR17520069. 3632229  
SRR17520069. 3632231  
SRR17520069. 3632233  
SRR17520069. 3632235  
SRR17520069. 3632237  
SRR17520069. 3632239  
SRR17520069. 3632241  
SRR17520069. 3632243  
SRR17520069. 3632245  
SRR17520069. 3632247  
SRR17520069. 3632249  
SRR17520069. 3632251  
SRR17520069. 3632253

SRR17520069. 3633907  
SRR17520069. 3633909  
SRR17520069. 3633911  
SRR17520069. 3633913  
SRR17520069. 3633917  
SRR17520069. 3633919  
SRR17520069. 3633921  
SRR17520069. 3633923  
SRR17520069. 3633925  
SRR17520069. 3633927  
SRR17520069. 3633929  
SRR17520069. 3633931  
SRR17520069. 3633933  
SRR17520069. 3633935  
SRR17520069. 3633937  
SRR17520069. 3633939  
SRR17520069. 3633941  
SRR17520069. 3633943  
SRR17520069. 3633945  
SRR17520069. 3636288  
SRR17520069. 3636290  
SRR17520069. 3636292  
SRR17520069. 3636294  
SRR17520069. 3636296  
SRR17520069. 3636298  
SRR17520069. 3636300  
SRR17520069. 3636302  
SRR17520069. 3636304  
SRR17520069. 3636306  
SRR17520069. 3636308  
SRR17520069. 3636310  
SRR17520069. 3636312  
SRR17520069. 3636314  
SRR17520069. 3636316  
SRR17520069. 3636318  
SRR17520069. 3636320  
SRR17520069. 3636821  
SRR17520069. 3641996  
SRR17520069. 3641998  
SRR17520069. 3642000  
SRR17520069. 3642002  
SRR17520069. 3642004  
SRR17520069. 3642006  
SRR17520069. 3642008  
SRR17520069. 3642010  
SRR17520069. 3642012  
SRR17520069. 3642014

SRR17520069.3642016  
SRR17520069.3642018  
SRR17520069.3642020  
SRR17520069.3642022  
SRR17520069.3642024  
SRR17520069.3642026  
SRR17520069.3642028  
SRR17520069.3642030  
SRR17520069.3642032  
SRR17520069.3642034  
SRR17520069.3642036  
SRR17520069.3642038  
SRR17520069.3642040  
SRR17520069.3642042  
SRR17520069.3642044  
SRR17520069.3642046  
SRR17520069.3642048  
SRR17520069.3642050  
SRR17520069.3642052  
SRR17520069.3642054  
SRR17520069.3642056  
SRR17520069.3642058  
SRR17520069.3642060  
SRR17520069.3642062  
SRR17520069.3642064  
SRR17520069.3642066  
SRR17520069.3642068  
SRR17520069.3642070  
SRR17520069.3642072  
SRR17520069.3642074  
SRR17520069.3642076  
SRR17520069.3642078  
SRR17520069.3642080  
SRR17520069.3642082  
SRR17520069.3642084  
SRR17520069.3642086  
SRR17520069.3642088  
SRR17520069.3642090  
SRR17520069.3643959  
SRR17520069.3643961  
SRR17520069.3644288  
SRR17520069.3644663  
SRR17520069.3644665  
SRR17520069.3644667  
SRR17520069.3644669  
SRR17520069.3644671  
SRR17520069.3644673

SRR17520069. 3644675  
SRR17520069. 3644677  
SRR17520069. 3644679  
SRR17520069. 3644681  
SRR17520069. 3644683  
SRR17520069. 3644685  
SRR17520069. 3644687  
SRR17520069. 3644689  
SRR17520069. 3644691  
SRR17520069. 3644693  
SRR17520069. 3644695  
SRR17520069. 3644697  
SRR17520069. 3645367  
SRR17520069. 3645369  
SRR17520069. 3645371  
SRR17520069. 3645373  
SRR17520069. 3645375  
SRR17520069. 3645377  
SRR17520069. 3645379  
SRR17520069. 3645381  
SRR17520069. 3645383  
SRR17520069. 3645385  
SRR17520069. 3645389  
SRR17520069. 3645391  
SRR17520069. 3645393  
SRR17520069. 3645395  
SRR17520069. 3645397  
SRR17520069. 3645403  
SRR17520069. 3645407  
SRR17520069. 3645409  
SRR17520069. 3645411  
SRR17520069. 3645413  
SRR17520069. 3645415  
SRR17520069. 3645417  
SRR17520069. 3645421  
SRR17520069. 3645423  
SRR17520069. 3645427  
SRR17520069. 3645429  
SRR17520069. 3645437  
SRR17520069. 3645439  
SRR17520069. 3645441  
SRR17520069. 3645445  
SRR17520069. 3649559  
SRR17520069. 3649561  
SRR17520069. 3653659  
SRR17520069. 3653661  
SRR17520069. 3653663

SRR17520069. 3653665  
SRR17520069. 3653667  
SRR17520069. 3653669  
SRR17520069. 3653671  
SRR17520069. 3653673  
SRR17520069. 3653675  
SRR17520069. 3653677  
SRR17520069. 3653679  
SRR17520069. 3653681  
SRR17520069. 3653683  
SRR17520069. 3653685  
SRR17520069. 3657808  
SRR17520069. 3657810  
SRR17520069. 3657812  
SRR17520069. 3657814  
SRR17520069. 3657816  
SRR17520069. 3657818  
SRR17520069. 3657820  
SRR17520069. 3657822  
SRR17520069. 3657824  
SRR17520069. 3657826  
SRR17520069. 3657828  
SRR17520069. 3657830  
SRR17520069. 3657832  
SRR17520069. 3657834  
SRR17520069. 3657836  
SRR17520069. 3657838  
SRR17520069. 3657840  
SRR17520069. 3657842  
SRR17520069. 3657844  
SRR17520069. 3657846  
SRR17520069. 3657848  
SRR17520069. 3657850  
SRR17520069. 3657852  
SRR17520069. 3657854  
SRR17520069. 3657856  
SRR17520069. 3657858  
SRR17520069. 3657860  
SRR17520069. 3657862  
SRR17520069. 3657864  
SRR17520069. 3657866  
SRR17520069. 3657868  
SRR17520069. 3657870  
SRR17520069. 3657872  
SRR17520069. 3657874  
SRR17520069. 3657876  
SRR17520069. 3657878

SRR17520069. 3657880  
SRR17520069. 3657882  
SRR17520069. 3657884  
SRR17520069. 3657886  
SRR17520069. 3657888  
SRR17520069. 3657890  
SRR17520069. 3657892  
SRR17520069. 3662689  
SRR17520069. 3662691  
SRR17520069. 3662693  
SRR17520069. 3662695  
SRR17520069. 3662697  
SRR17520069. 3662699  
SRR17520069. 3662701  
SRR17520069. 3662703  
SRR17520069. 3662705  
SRR17520069. 3662707  
SRR17520069. 3662709  
SRR17520069. 3662711  
SRR17520069. 3662713  
SRR17520069. 3662715  
SRR17520069. 3662717  
SRR17520069. 3662719  
SRR17520069. 3662724  
SRR17520069. 3662726  
SRR17520069. 3662728  
SRR17520069. 3662730  
SRR17520069. 3662732  
SRR17520069. 3662734  
SRR17520069. 3662736  
SRR17520069. 3662738  
SRR17520069. 3662740  
SRR17520069. 3662742  
SRR17520069. 3662744  
SRR17520069. 3662746  
SRR17520069. 3662748  
SRR17520069. 3662750  
SRR17520069. 3662752  
SRR17520069. 3662754  
SRR17520069. 3662756  
SRR17520069. 3662758  
SRR17520069. 3662760  
SRR17520069. 3662762  
SRR17520069. 3662764  
SRR17520069. 3662766  
SRR17520069. 3662768  
SRR17520069. 3662770

SRR17520069. 3662772  
SRR17520069. 3662774  
SRR17520069. 3662776  
SRR17520069. 3662778  
SRR17520069. 3662780  
SRR17520069. 3662782  
SRR17520069. 3662784  
SRR17520069. 3662786  
SRR17520069. 3662788  
SRR17520069. 3662790  
SRR17520069. 3662792  
SRR17520069. 3662794  
SRR17520069. 3662796  
SRR17520069. 3662800  
SRR17520069. 3662802  
SRR17520069. 3662804  
SRR17520069. 3662806  
SRR17520069. 3662808  
SRR17520069. 3662810  
SRR17520069. 3662812  
SRR17520069. 3662814  
SRR17520069. 3662816  
SRR17520069. 3662818  
SRR17520069. 3662820  
SRR17520069. 3662822  
SRR17520069. 3662824  
SRR17520069. 3662826  
SRR17520069. 3662828  
SRR17520069. 3662830  
SRR17520069. 3662832  
SRR17520069. 3662834  
SRR17520069. 3662836  
SRR17520069. 3662838  
SRR17520069. 3662840  
SRR17520069. 3662844  
SRR17520069. 3662846  
SRR17520069. 3662848  
SRR17520069. 3662850  
SRR17520069. 3662852  
SRR17520069. 3662854  
SRR17520069. 3662856  
SRR17520069. 3662860  
SRR17520069. 3662862  
SRR17520069. 3662864  
SRR17520069. 3662866  
SRR17520069. 3662868  
SRR17520069. 3662870



SRR17520069. 3662872  
SRR17520069. 3662874  
SRR17520069. 3662876  
SRR17520069. 3662882  
SRR17520069. 3662884  
SRR17520069. 3662886  
SRR17520069. 3662888  
SRR17520069. 3662890  
SRR17520069. 3662892  
SRR17520069. 3662894  
SRR17520069. 3662896  
SRR17520069. 3663180  
SRR17520069. 3663182  
SRR17520069. 3663184  
SRR17520069. 3663186  
SRR17520069. 3663188  
SRR17520069. 3663190  
SRR17520069. 3663192  
SRR17520069. 3663194  
SRR17520069. 3663196  
SRR17520069. 3663198  
SRR17520069. 3663200  
SRR17520069. 3663202  
SRR17520069. 3663204  
SRR17520069. 3665813  
SRR17520069. 3665815  
SRR17520069. 3665817  
SRR17520069. 3665819  
SRR17520069. 3665821  
SRR17520069. 3665823  
SRR17520069. 3665825  
SRR17520069. 3665827  
SRR17520069. 3665829  
SRR17520069. 3665831  
SRR17520069. 3665833  
SRR17520069. 3665835  
SRR17520069. 3665837  
SRR17520069. 3665839  
SRR17520069. 3665841  
SRR17520069. 3665843  
SRR17520069. 3665845  
SRR17520069. 3665847  
SRR17520069. 3665849  
SRR17520069. 3665851  
SRR17520069. 3665853  
SRR17520069. 3665855  
SRR17520069. 3665857

SRR17520069. 3665859  
SRR17520069. 3665861  
SRR17520069. 3665863  
SRR17520069. 3665865  
SRR17520069. 3665867  
SRR17520069. 3665869  
SRR17520069. 3665871  
SRR17520069. 3665873  
SRR17520069. 3666409  
SRR17520069. 3666411  
SRR17520069. 3666413  
SRR17520069. 3666415  
SRR17520069. 3666417  
SRR17520069. 3666419  
SRR17520069. 3666421  
SRR17520069. 3666423  
SRR17520069. 3666425  
SRR17520069. 3666427  
SRR17520069. 3666429  
SRR17520069. 3666431  
SRR17520069. 3666433  
SRR17520069. 3666435  
SRR17520069. 3666437  
SRR17520069. 3666439  
SRR17520069. 3666441  
SRR17520069. 3666443  
SRR17520069. 3666445  
SRR17520069. 3666447  
SRR17520069. 3666449  
SRR17520069. 3666451  
SRR17520069. 3666453  
SRR17520069. 3666455  
SRR17520069. 3666457  
SRR17520069. 3666459  
SRR17520069. 3666461  
SRR17520069. 3666463  
SRR17520069. 3666465  
SRR17520069. 3666467  
SRR17520069. 3666469  
SRR17520069. 3666471  
SRR17520069. 3667953  
SRR17520069. 3667955  
SRR17520069. 3667957  
SRR17520069. 3667959  
SRR17520069. 3667961  
SRR17520069. 3667963  
SRR17520069. 3667965

SRR17520069. 3667967  
SRR17520069. 3667969  
SRR17520069. 3667971  
SRR17520069. 3667975  
SRR17520069. 3667977  
SRR17520069. 3667979  
SRR17520069. 3667981  
SRR17520069. 3667983  
SRR17520069. 3667985  
SRR17520069. 3667987  
SRR17520069. 3667989  
SRR17520069. 3667991  
SRR17520069. 3667993  
SRR17520069. 3667995  
SRR17520069. 3667997  
SRR17520069. 3667999  
SRR17520069. 3668001  
SRR17520069. 3668003  
SRR17520069. 3668005  
SRR17520069. 3668007  
SRR17520069. 3668009  
SRR17520069. 3668011  
SRR17520069. 3668013  
SRR17520069. 3668015  
SRR17520069. 3668017  
SRR17520069. 3668019  
SRR17520069. 3668021  
SRR17520069. 3668023  
SRR17520069. 3668025  
SRR17520069. 3668027  
SRR17520069. 3668029  
SRR17520069. 3668031  
SRR17520069. 3668033  
SRR17520069. 3668035  
SRR17520069. 3668037  
SRR17520069. 3668472  
SRR17520069. 3668474  
SRR17520069. 3668476  
SRR17520069. 3668478  
SRR17520069. 3668480  
SRR17520069. 3668482  
SRR17520069. 3668484  
SRR17520069. 3668486  
SRR17520069. 3668488  
SRR17520069. 3668490  
SRR17520069. 3668492  
SRR17520069. 3668496

SRR17520069. 3668498  
SRR17520069. 3668500  
SRR17520069. 3668502  
SRR17520069. 3668504  
SRR17520069. 3668506  
SRR17520069. 3668508  
SRR17520069. 3668510  
SRR17520069. 3668512  
SRR17520069. 3668514  
SRR17520069. 3668516  
SRR17520069. 3668518  
SRR17520069. 3668520  
SRR17520069. 3668524  
SRR17520069. 3668526  
SRR17520069. 3668528  
SRR17520069. 3668530  
SRR17520069. 3668532  
SRR17520069. 3668534  
SRR17520069. 3668536  
SRR17520069. 3668538  
SRR17520069. 3668540  
SRR17520069. 3668542  
SRR17520069. 3668544  
SRR17520069. 3668546  
SRR17520069. 3668548  
SRR17520069. 3668550  
SRR17520069. 3668552  
SRR17520069. 3668554  
SRR17520069. 3668556  
SRR17520069. 3668558  
SRR17520069. 3668560  
SRR17520069. 3668562  
SRR17520069. 3668564  
SRR17520069. 3668566  
SRR17520069. 3668568  
SRR17520069. 3668570  
SRR17520069. 3668572  
SRR17520069. 3668574  
SRR17520069. 3668576  
SRR17520069. 3668578  
SRR17520069. 3668580  
SRR17520069. 3668584  
SRR17520069. 3668586  
SRR17520069. 3668588  
SRR17520069. 3668590  
SRR17520069. 3668592  
SRR17520069. 3668594

SRR17520069. 3668596  
SRR17520069. 3668598  
SRR17520069. 3668600  
SRR17520069. 3668602  
SRR17520069. 3668604  
SRR17520069. 3668606  
SRR17520069. 3670952  
SRR17520069. 3670954  
SRR17520069. 3672722  
SRR17520069. 3672724  
SRR17520069. 3672726  
SRR17520069. 3672728  
SRR17520069. 3672730  
SRR17520069. 3672732  
SRR17520069. 3672734  
SRR17520069. 3672736  
SRR17520069. 3672738  
SRR17520069. 3672740  
SRR17520069. 3672742  
SRR17520069. 3672744  
SRR17520069. 3672746  
SRR17520069. 3672748  
SRR17520069. 3672750  
SRR17520069. 3672752  
SRR17520069. 3672754  
SRR17520069. 3672756  
SRR17520069. 3672758  
SRR17520069. 3674697  
SRR17520069. 3674699  
SRR17520069. 3674701  
SRR17520069. 3674703  
SRR17520069. 3674705  
SRR17520069. 3674707  
SRR17520069. 3674709  
SRR17520069. 3674711  
SRR17520069. 3675019  
SRR17520069. 3675021  
SRR17520069. 3675025  
SRR17520069. 3679689  
SRR17520069. 3679691  
SRR17520069. 3679693  
SRR17520069. 3679695  
SRR17520069. 3679697  
SRR17520069. 3679699  
SRR17520069. 3679701  
SRR17520069. 3679703  
SRR17520069. 3679705

SRR17520069. 3679707  
SRR17520069. 3679709  
SRR17520069. 3679711  
SRR17520069. 3679713  
SRR17520069. 3679715  
SRR17520069. 3679717  
SRR17520069. 3679719  
SRR17520069. 3679721  
SRR17520069. 3679725  
SRR17520069. 3679727  
SRR17520069. 3680774  
SRR17520069. 3680776  
SRR17520069. 3680778  
SRR17520069. 3680780  
SRR17520069. 3680782  
SRR17520069. 3680784  
SRR17520069. 3680786  
SRR17520069. 3680792  
SRR17520069. 3680794  
SRR17520069. 3680796  
SRR17520069. 3680798  
SRR17520069. 3680800  
SRR17520069. 3680802  
SRR17520069. 3686566  
SRR17520069. 3686568  
SRR17520069. 3686570  
SRR17520069. 3686572  
SRR17520069. 3686574  
SRR17520069. 3686576  
SRR17520069. 3686578  
SRR17520069. 3686580  
SRR17520069. 3686582  
SRR17520069. 3686584  
SRR17520069. 3686586  
SRR17520069. 3686588  
SRR17520069. 3686590  
SRR17520069. 3686592  
SRR17520069. 3688351  
SRR17520069. 3688353  
SRR17520069. 3688355  
SRR17520069. 3688357  
SRR17520069. 3688359  
SRR17520069. 3688363  
SRR17520069. 3688365  
SRR17520069. 3702736  
SRR17520069. 3702738  
SRR17520069. 3702740

SRR17520069. 3702742  
SRR17520069. 3702744  
SRR17520069. 3702746  
SRR17520069. 3702748  
SRR17520069. 3702750  
SRR17520069. 3702752  
SRR17520069. 3702754  
SRR17520069. 3702756  
SRR17520069. 3702758  
SRR17520069. 3702760  
SRR17520069. 3702762  
SRR17520069. 3702764  
SRR17520069. 3702766  
SRR17520069. 3702768  
SRR17520069. 3702770  
SRR17520069. 3702772  
SRR17520069. 3702774  
SRR17520069. 3702776  
SRR17520069. 3702778  
SRR17520069. 3702780  
SRR17520069. 3702782  
SRR17520069. 3702784  
SRR17520069. 3702786  
SRR17520069. 3702788  
SRR17520069. 3702790  
SRR17520069. 3702792  
SRR17520069. 3702794  
SRR17520069. 3702796  
SRR17520069. 3702798  
SRR17520069. 3702800  
SRR17520069. 3702802  
SRR17520069. 3702804  
SRR17520069. 3702806  
SRR17520069. 3702808  
SRR17520069. 3710416  
SRR17520069. 3710418  
SRR17520069. 3710420  
SRR17520069. 3710422  
SRR17520069. 3710424  
SRR17520069. 3710426  
SRR17520069. 3710428  
SRR17520069. 3710430  
SRR17520069. 3710432  
SRR17520069. 3710434  
SRR17520069. 3710436  
SRR17520069. 3710438  
SRR17520069. 3710440

SRR17520069.3710442  
SRR17520069.3710444  
SRR17520069.3710446  
SRR17520069.3710448  
SRR17520069.3710450  
SRR17520069.3710452  
SRR17520069.3710454  
SRR17520069.3710456  
SRR17520069.3710460  
SRR17520069.3710462  
SRR17520069.3710464  
SRR17520069.3710466  
SRR17520069.3710468  
SRR17520069.3710470  
SRR17520069.3710474  
SRR17520069.3710476  
SRR17520069.3710478  
SRR17520069.3710480  
SRR17520069.3710482  
SRR17520069.3710484  
SRR17520069.3710486  
SRR17520069.3710488  
SRR17520069.3710490  
SRR17520069.3710492  
SRR17520069.3712068  
SRR17520069.3712070  
SRR17520069.3712072  
SRR17520069.3712074  
SRR17520069.3712076  
SRR17520069.3712078  
SRR17520069.3712080  
SRR17520069.3712082  
SRR17520069.3712084  
SRR17520069.3712086  
SRR17520069.3712088  
SRR17520069.3712090  
SRR17520069.3712092  
SRR17520069.3712094  
SRR17520069.3712096  
SRR17520069.3712098  
SRR17520069.3712100  
SRR17520069.3712102  
SRR17520069.3712104  
SRR17520069.3712106  
SRR17520069.3712108  
SRR17520069.3712110  
SRR17520069.3712112



SRR17520069.3712114  
SRR17520069.3712116  
SRR17520069.3712118  
SRR17520069.3712122  
SRR17520069.3712124  
SRR17520069.3712126  
SRR17520069.3712128  
SRR17520069.3712130  
SRR17520069.3712132  
SRR17520069.3712134  
SRR17520069.3715768  
SRR17520069.3715770  
SRR17520069.3715772  
SRR17520069.3715774  
SRR17520069.3715776  
SRR17520069.3715778  
SRR17520069.3715780  
SRR17520069.3715782  
SRR17520069.3715786  
SRR17520069.3715788  
SRR17520069.3716038  
SRR17520069.3722045  
SRR17520069.3722047  
SRR17520069.3722049  
SRR17520069.3722051  
SRR17520069.3722053  
SRR17520069.3722055  
SRR17520069.3722059  
SRR17520069.3722061  
SRR17520069.3722063  
SRR17520069.3722065  
SRR17520069.3722067  
SRR17520069.3722069  
SRR17520069.3722071  
SRR17520069.3722073  
SRR17520069.3722075  
SRR17520069.3722077  
SRR17520069.3726283  
SRR17520069.3726285  
SRR17520069.3726287  
SRR17520069.3726289  
SRR17520069.3726291  
SRR17520069.3726293  
SRR17520069.3726295  
SRR17520069.3726297  
SRR17520069.3726299  
SRR17520069.3726301

SRR17520069. 3726303  
SRR17520069. 3726305  
SRR17520069. 3726307  
SRR17520069. 3726309  
SRR17520069. 3726311  
SRR17520069. 3726313  
SRR17520069. 3726315  
SRR17520069. 3726317  
SRR17520069. 3726319  
SRR17520069. 3726321  
SRR17520069. 3726323  
SRR17520069. 3726325  
SRR17520069. 3726327  
SRR17520069. 3726329  
SRR17520069. 3726331  
SRR17520069. 3726333  
SRR17520069. 3726335  
SRR17520069. 3726337  
SRR17520069. 3726339  
SRR17520069. 3726341  
SRR17520069. 3726343  
SRR17520069. 3726345  
SRR17520069. 3726347  
SRR17520069. 3726349  
SRR17520069. 3726351  
SRR17520069. 3726353  
SRR17520069. 3726355  
SRR17520069. 3726357  
SRR17520069. 3726359  
SRR17520069. 3726361  
SRR17520069. 3726363  
SRR17520069. 3726365  
SRR17520069. 3726370  
SRR17520069. 3726372  
SRR17520069. 3726374  
SRR17520069. 3726376  
SRR17520069. 3726378  
SRR17520069. 3729227  
SRR17520069. 3729229  
SRR17520069. 3729231  
SRR17520069. 3729233  
SRR17520069. 3729235  
SRR17520069. 3729237  
SRR17520069. 3729239  
SRR17520069. 3729241  
SRR17520069. 3729243  
SRR17520069. 3729247

SRR17520069.3730119  
SRR17520069.3730121  
SRR17520069.3730123  
SRR17520069.3730125  
SRR17520069.3730127  
SRR17520069.3730129  
SRR17520069.3730131  
SRR17520069.3730133  
SRR17520069.3730135  
SRR17520069.3730137  
SRR17520069.3730139  
SRR17520069.3730141  
SRR17520069.3730143  
SRR17520069.3730145  
SRR17520069.3730147  
SRR17520069.3730149  
SRR17520069.3730151  
SRR17520069.3730153  
SRR17520069.3730157  
SRR17520069.3730159  
SRR17520069.3730161  
SRR17520069.3730163  
SRR17520069.3730165  
SRR17520069.3730167  
SRR17520069.3730169  
SRR17520069.3730171  
SRR17520069.3730173  
SRR17520069.3730175  
SRR17520069.3730177  
SRR17520069.3730179  
SRR17520069.3730181  
SRR17520069.3730183  
SRR17520069.3730185  
SRR17520069.3730187  
SRR17520069.3730189  
SRR17520069.3730191  
SRR17520069.3730193  
SRR17520069.3730195  
SRR17520069.3730197  
SRR17520069.3730199  
SRR17520069.3730201  
SRR17520069.3730203  
SRR17520069.3730205  
SRR17520069.3730207  
SRR17520069.3730209  
SRR17520069.3730211  
SRR17520069.3730213

SRR17520069.3732787  
SRR17520069.3732789  
SRR17520069.3732791  
SRR17520069.3732793  
SRR17520069.3732795  
SRR17520069.3732797  
SRR17520069.3732799  
SRR17520069.3732801  
SRR17520069.3732803  
SRR17520069.3732805  
SRR17520069.3732807  
SRR17520069.3732809  
SRR17520069.3732811  
SRR17520069.3732813  
SRR17520069.3732815  
SRR17520069.3732817  
SRR17520069.3732819  
SRR17520069.3732821  
SRR17520069.3732823  
SRR17520069.3732825  
SRR17520069.3732827  
SRR17520069.3732829  
SRR17520069.3732831  
SRR17520069.3732833  
SRR17520069.3732835  
SRR17520069.3732837  
SRR17520069.3732839  
SRR17520069.3732841  
SRR17520069.3732843  
SRR17520069.3732847  
SRR17520069.3732849  
SRR17520069.3732851  
SRR17520069.3732853  
SRR17520069.3732855  
SRR17520069.3732857  
SRR17520069.3732859  
SRR17520069.3732861  
SRR17520069.3732863  
SRR17520069.3732865  
SRR17520069.3732867  
SRR17520069.3732869  
SRR17520069.3732871  
SRR17520069.3732873  
SRR17520069.3732875  
SRR17520069.3732877  
SRR17520069.3732879  
SRR17520069.3732883

SRR17520069.3732885  
SRR17520069.3732887  
SRR17520069.3732889  
SRR17520069.3732891  
SRR17520069.3732893  
SRR17520069.3732895  
SRR17520069.3732897  
SRR17520069.3732899  
SRR17520069.3732901  
SRR17520069.3732905  
SRR17520069.3732907  
SRR17520069.3732911  
SRR17520069.3732913  
SRR17520069.3732915  
SRR17520069.3732919  
SRR17520069.3732921  
SRR17520069.3732923  
SRR17520069.3732927  
SRR17520069.3732929  
SRR17520069.3732931  
SRR17520069.3732933  
SRR17520069.3732935  
SRR17520069.3732937  
SRR17520069.3732939  
SRR17520069.3732945  
SRR17520069.3737367  
SRR17520069.3737369  
SRR17520069.3737371  
SRR17520069.3737373  
SRR17520069.3737375  
SRR17520069.3737377  
SRR17520069.3737379  
SRR17520069.3737381  
SRR17520069.3737383  
SRR17520069.3737385  
SRR17520069.3737387  
SRR17520069.3738198  
SRR17520069.3738200  
SRR17520069.3738202  
SRR17520069.3738206  
SRR17520069.3738208  
SRR17520069.3738210  
SRR17520069.3738212  
SRR17520069.3744988  
SRR17520069.3744990  
SRR17520069.3744994  
SRR17520069.3744996

SRR17520069. 3744998  
SRR17520069. 3745000  
SRR17520069. 3745733  
SRR17520069. 3745735  
SRR17520069. 3745737  
SRR17520069. 3745739  
SRR17520069. 3745741  
SRR17520069. 3745743  
SRR17520069. 3745745  
SRR17520069. 3748483  
SRR17520069. 3748485  
SRR17520069. 3751880  
SRR17520069. 3751882  
SRR17520069. 3751884  
SRR17520069. 3751886  
SRR17520069. 3751888  
SRR17520069. 3751890  
SRR17520069. 3751892  
SRR17520069. 3751896  
SRR17520069. 3751898  
SRR17520069. 3751900  
SRR17520069. 3751902  
SRR17520069. 3751904  
SRR17520069. 3751906  
SRR17520069. 3751908  
SRR17520069. 3751910  
SRR17520069. 3751912  
SRR17520069. 3751914  
SRR17520069. 3751916  
SRR17520069. 3751918  
SRR17520069. 3762377  
SRR17520069. 3762379  
SRR17520069. 3762381  
SRR17520069. 3762383  
SRR17520069. 3762385  
SRR17520069. 3762387  
SRR17520069. 3762389  
SRR17520069. 3762391  
SRR17520069. 3762393  
SRR17520069. 3762395  
SRR17520069. 3762397  
SRR17520069. 3762399  
SRR17520069. 3762401  
SRR17520069. 3762403  
SRR17520069. 3762405  
SRR17520069. 3762407  
SRR17520069. 3762409

SRR17520069. 3766735  
SRR17520069. 3766737  
SRR17520069. 3766745  
SRR17520069. 3766747  
SRR17520069. 3766749  
SRR17520069. 3766751  
SRR17520069. 3766753  
SRR17520069. 3766755  
SRR17520069. 3766757  
SRR17520069. 3766759  
SRR17520069. 3766761  
SRR17520069. 3766763  
SRR17520069. 3766765  
SRR17520069. 3766767  
SRR17520069. 3766769  
SRR17520069. 3766771  
SRR17520069. 3766773  
SRR17520069. 3766775  
SRR17520069. 3766777  
SRR17520069. 3766779  
SRR17520069. 3766781  
SRR17520069. 3766783  
SRR17520069. 3766785  
SRR17520069. 3766787  
SRR17520069. 3766789  
SRR17520069. 3766791  
SRR17520069. 3766793  
SRR17520069. 3766795  
SRR17520069. 3766797  
SRR17520069. 3766799  
SRR17520069. 3766801  
SRR17520069. 3766803  
SRR17520069. 3766805  
SRR17520069. 3766807  
SRR17520069. 3766809  
SRR17520069. 3766811  
SRR17520069. 3766813  
SRR17520069. 3766815  
SRR17520069. 3766817  
SRR17520069. 3770144  
SRR17520069. 3770146  
SRR17520069. 3770148  
SRR17520069. 3770150  
SRR17520069. 3770152  
SRR17520069. 3770154  
SRR17520069. 3770158  
SRR17520069. 3770160

SRR17520069.3770162  
SRR17520069.3770164  
SRR17520069.3770166  
SRR17520069.3770168  
SRR17520069.3770170  
SRR17520069.3770172  
SRR17520069.3770174  
SRR17520069.3772233  
SRR17520069.3772235  
SRR17520069.3772237  
SRR17520069.3772239  
SRR17520069.3772241  
SRR17520069.3772243  
SRR17520069.3772245  
SRR17520069.3772432  
SRR17520069.3772434  
SRR17520069.3772436  
SRR17520069.3772438  
SRR17520069.3772440  
SRR17520069.3772442  
SRR17520069.3772444  
SRR17520069.3772446  
SRR17520069.3772448  
SRR17520069.3772450  
SRR17520069.3772452  
SRR17520069.3772454  
SRR17520069.3772456  
SRR17520069.3772458  
SRR17520069.3772460  
SRR17520069.3772462  
SRR17520069.3772464  
SRR17520069.3772468  
SRR17520069.3772470  
SRR17520069.3772472  
SRR17520069.3772474  
SRR17520069.3776258  
SRR17520069.3776260  
SRR17520069.3776262  
SRR17520069.3776264  
SRR17520069.3776266  
SRR17520069.3776268  
SRR17520069.3776270  
SRR17520069.3776272  
SRR17520069.3776274  
SRR17520069.3776276  
SRR17520069.3776278  
SRR17520069.3776280



SRR17520069. 3776282  
SRR17520069. 3776284  
SRR17520069. 3776286  
SRR17520069. 3776288  
SRR17520069. 3776290  
SRR17520069. 3776292  
SRR17520069. 3776294  
SRR17520069. 3776684  
SRR17520069. 3776686  
SRR17520069. 3776688  
SRR17520069. 3776690  
SRR17520069. 3776692  
SRR17520069. 3776694  
SRR17520069. 3776696  
SRR17520069. 3776698  
SRR17520069. 3776918  
SRR17520069. 3776920  
SRR17520069. 3776922  
SRR17520069. 3776924  
SRR17520069. 3776926  
SRR17520069. 3776930  
SRR17520069. 3776932  
SRR17520069. 3776934  
SRR17520069. 3776936  
SRR17520069. 3776938  
SRR17520069. 3776940  
SRR17520069. 3776942  
SRR17520069. 3776944  
SRR17520069. 3776946  
SRR17520069. 3776948  
SRR17520069. 3776950  
SRR17520069. 3776952  
SRR17520069. 3776954  
SRR17520069. 3776956  
SRR17520069. 3776958  
SRR17520069. 3776960  
SRR17520069. 3776962  
SRR17520069. 3776964  
SRR17520069. 3776966  
SRR17520069. 3776968  
SRR17520069. 3776970  
SRR17520069. 3790661  
SRR17520069. 3790663  
SRR17520069. 3790667  
SRR17520069. 3790669  
SRR17520069. 3790671  
SRR17520069. 3790673

SRR17520069. 3790675  
SRR17520069. 3790677  
SRR17520069. 3790679  
SRR17520069. 3790681  
SRR17520069. 3790683  
SRR17520069. 3790685  
SRR17520069. 3790687  
SRR17520069. 3790689  
SRR17520069. 3790691  
SRR17520069. 3793884  
SRR17520069. 3795845  
SRR17520069. 3795847  
SRR17520069. 3795849  
SRR17520069. 3795853  
SRR17520069. 3802103  
SRR17520069. 3802105  
SRR17520069. 3802107  
SRR17520069. 3802109  
SRR17520069. 3802111  
SRR17520069. 3802113  
SRR17520069. 3802115  
SRR17520069. 3802117  
SRR17520069. 3802119  
SRR17520069. 3802121  
SRR17520069. 3802123  
SRR17520069. 3802125  
SRR17520069. 3802127  
SRR17520069. 3802129  
SRR17520069. 3802133  
SRR17520069. 3802135  
SRR17520069. 3802137  
SRR17520069. 3802139  
SRR17520069. 3802141  
SRR17520069. 3802143  
SRR17520069. 3802145  
SRR17520069. 3802147  
SRR17520069. 3802149  
SRR17520069. 3802151  
SRR17520069. 3802319  
SRR17520069. 3802321  
SRR17520069. 3802323  
SRR17520069. 3802325  
SRR17520069. 3802327  
SRR17520069. 3802329  
SRR17520069. 3802331  
SRR17520069. 3802333  
SRR17520069. 3802335

SRR17520069.3802337  
SRR17520069.3802339  
SRR17520069.3802341  
SRR17520069.3802343  
SRR17520069.3802345  
SRR17520069.3802347  
SRR17520069.3802349  
SRR17520069.3802351  
SRR17520069.3802353  
SRR17520069.3802355  
SRR17520069.3802357  
SRR17520069.3802359  
SRR17520069.3802361  
SRR17520069.3803682  
SRR17520069.3803684  
SRR17520069.3803686  
SRR17520069.3803688  
SRR17520069.3803690  
SRR17520069.3803692  
SRR17520069.3803694  
SRR17520069.3803696  
SRR17520069.3803698  
SRR17520069.3803700  
SRR17520069.3803702  
SRR17520069.3803704  
SRR17520069.3803706  
SRR17520069.3803708  
SRR17520069.3803710  
SRR17520069.3803712  
SRR17520069.3803714  
SRR17520069.3803716  
SRR17520069.3803734  
SRR17520069.3803736  
SRR17520069.3803738  
SRR17520069.3803740  
SRR17520069.3803742  
SRR17520069.3803744  
SRR17520069.3803746  
SRR17520069.3803748  
SRR17520069.3803750  
SRR17520069.3803752  
SRR17520069.3803754  
SRR17520069.3803756  
SRR17520069.3803758  
SRR17520069.3803760  
SRR17520069.3803762  
SRR17520069.3803764

SRR17520069.3803766  
SRR17520069.3803768  
SRR17520069.3803770  
SRR17520069.3803772  
SRR17520069.3803774  
SRR17520069.3803776  
SRR17520069.3803778  
SRR17520069.3803780  
SRR17520069.3803782  
SRR17520069.3803784  
SRR17520069.3803786  
SRR17520069.3803788  
SRR17520069.3803790  
SRR17520069.3803792  
SRR17520069.3803794  
SRR17520069.3803796  
SRR17520069.3803798  
SRR17520069.3803800  
SRR17520069.3803802  
SRR17520069.3803804  
SRR17520069.3803806  
SRR17520069.3803808  
SRR17520069.3803810  
SRR17520069.3803812  
SRR17520069.3803814  
SRR17520069.3803818  
SRR17520069.3803820  
SRR17520069.3803824  
SRR17520069.3803826  
SRR17520069.3809382  
SRR17520069.3809384  
SRR17520069.3809386  
SRR17520069.3809388  
SRR17520069.3809390  
SRR17520069.3809392  
SRR17520069.3809394  
SRR17520069.3809398  
SRR17520069.3809400  
SRR17520069.3809402  
SRR17520069.3809406  
SRR17520069.3809408  
SRR17520069.3809410  
SRR17520069.3809412  
SRR17520069.3809414  
SRR17520069.3809418  
SRR17520069.3809420  
SRR17520069.3809422

SRR17520069.3809424  
SRR17520069.3809426  
SRR17520069.3809428  
SRR17520069.3809432  
SRR17520069.3809434  
SRR17520069.3809438  
SRR17520069.3809440  
SRR17520069.3809442  
SRR17520069.3809444  
SRR17520069.3809448  
SRR17520069.3816267  
SRR17520069.3816269  
SRR17520069.3825966  
SRR17520069.3825968  
SRR17520069.3825970  
SRR17520069.3825972  
SRR17520069.3825976  
SRR17520069.3825978  
SRR17520069.3825980  
SRR17520069.3825984  
SRR17520069.3825986  
SRR17520069.3825988  
SRR17520069.3825990  
SRR17520069.3825992  
SRR17520069.3825994  
SRR17520069.3825996  
SRR17520069.3825998  
SRR17520069.3826000  
SRR17520069.3826002  
SRR17520069.3826004  
SRR17520069.3826006  
SRR17520069.3826008  
SRR17520069.3826012  
SRR17520069.3826014  
SRR17520069.3826016  
SRR17520069.3826018  
SRR17520069.3826020  
SRR17520069.3826022  
SRR17520069.3826024  
SRR17520069.3826028  
SRR17520069.3826030  
SRR17520069.3826032  
SRR17520069.3826034  
SRR17520069.3826036  
SRR17520069.3826038  
SRR17520069.3826040  
SRR17520069.3826042

SRR17520069. 3826044  
SRR17520069. 3826046  
SRR17520069. 3826048  
SRR17520069. 3826050  
SRR17520069. 3826052  
SRR17520069. 3826054  
SRR17520069. 3826056  
SRR17520069. 3826058  
SRR17520069. 3826060  
SRR17520069. 3826064  
SRR17520069. 3826066  
SRR17520069. 3826068  
SRR17520069. 3826070  
SRR17520069. 3826072  
SRR17520069. 3826074  
SRR17520069. 3826078  
SRR17520069. 3826080  
SRR17520069. 3826082  
SRR17520069. 3826084  
SRR17520069. 3826088  
SRR17520069. 3826090  
SRR17520069. 3826092  
SRR17520069. 3826094  
SRR17520069. 3826096  
SRR17520069. 3826100  
SRR17520069. 3826102  
SRR17520069. 3826104  
SRR17520069. 3826108  
SRR17520069. 3826110  
SRR17520069. 3826112  
SRR17520069. 3826114  
SRR17520069. 3826116  
SRR17520069. 3826118  
SRR17520069. 3828076  
SRR17520069. 3828078  
SRR17520069. 3828080  
SRR17520069. 3828082  
SRR17520069. 3828084  
SRR17520069. 3828086  
SRR17520069. 3828088  
SRR17520069. 3828090  
SRR17520069. 3828092  
SRR17520069. 3828096  
SRR17520069. 3828098  
SRR17520069. 3828100  
SRR17520069. 3828102  
SRR17520069. 3828106

SRR17520069.3828108  
SRR17520069.3828110  
SRR17520069.3828112  
SRR17520069.3828114  
SRR17520069.3830413  
SRR17520069.3830415  
SRR17520069.3830657  
SRR17520069.3830659  
SRR17520069.3830661  
SRR17520069.3830663  
SRR17520069.3830665  
SRR17520069.3830667  
SRR17520069.3830669  
SRR17520069.3830671  
SRR17520069.3830673  
SRR17520069.3830675  
SRR17520069.3830677  
SRR17520069.3830679  
SRR17520069.3830681  
SRR17520069.3830683  
SRR17520069.3830685  
SRR17520069.3836608  
SRR17520069.3836610  
SRR17520069.3836612  
SRR17520069.3836614  
SRR17520069.3836616  
SRR17520069.3836618  
SRR17520069.3836620  
SRR17520069.3836622  
SRR17520069.3836624  
SRR17520069.3836626  
SRR17520069.3836628  
SRR17520069.3836630  
SRR17520069.3836632  
SRR17520069.3836634  
SRR17520069.3839136  
SRR17520069.3839138  
SRR17520069.3839140  
SRR17520069.3839142  
SRR17520069.3839144  
SRR17520069.3839148  
SRR17520069.3839150  
SRR17520069.3839152  
SRR17520069.3839154  
SRR17520069.3839156  
SRR17520069.3839158  
SRR17520069.3839160

SRR17520069.3839162  
SRR17520069.3839164  
SRR17520069.3839166  
SRR17520069.3839168  
SRR17520069.3839170  
SRR17520069.3839172  
SRR17520069.3839174  
SRR17520069.3839176  
SRR17520069.3839178  
SRR17520069.3839180  
SRR17520069.3839182  
SRR17520069.3839184  
SRR17520069.3839186  
SRR17520069.3839188  
SRR17520069.3839190  
SRR17520069.3839192  
SRR17520069.3839194  
SRR17520069.3839196  
SRR17520069.3839198  
SRR17520069.3843013  
SRR17520069.3843015  
SRR17520069.3843017  
SRR17520069.3843019  
SRR17520069.3843021  
SRR17520069.3843023  
SRR17520069.3843025  
SRR17520069.3843027  
SRR17520069.3843029  
SRR17520069.3843031  
SRR17520069.3843033  
SRR17520069.3843035  
SRR17520069.3843037  
SRR17520069.3843039  
SRR17520069.3843041  
SRR17520069.3843043  
SRR17520069.3843045  
SRR17520069.3843047  
SRR17520069.3843049  
SRR17520069.3843051  
SRR17520069.3843053  
SRR17520069.3843055  
SRR17520069.3843057  
SRR17520069.3843059  
SRR17520069.3849554  
SRR17520069.3849556  
SRR17520069.3849558  
SRR17520069.3849560



SRR17520069. 3849562  
SRR17520069. 3849564  
SRR17520069. 3849566  
SRR17520069. 3849568  
SRR17520069. 3849570  
SRR17520069. 3849572  
SRR17520069. 3849574  
SRR17520069. 3849576  
SRR17520069. 3849578  
SRR17520069. 3849580  
SRR17520069. 3849582  
SRR17520069. 3849584  
SRR17520069. 3849586  
SRR17520069. 3849588  
SRR17520069. 3849590  
SRR17520069. 3849592  
SRR17520069. 3849594  
SRR17520069. 3849596  
SRR17520069. 3849598  
SRR17520069. 3849600  
SRR17520069. 3849602  
SRR17520069. 3849604  
SRR17520069. 3849606  
SRR17520069. 3849608  
SRR17520069. 3849610  
SRR17520069. 3849612  
SRR17520069. 3849614  
SRR17520069. 3858193  
SRR17520069. 3861278  
SRR17520069. 3861280  
SRR17520069. 3861282  
SRR17520069. 3861284  
SRR17520069. 3861286  
SRR17520069. 3861288  
SRR17520069. 3861290  
SRR17520069. 3861292  
SRR17520069. 3861294  
SRR17520069. 3861296  
SRR17520069. 3861298  
SRR17520069. 3861302  
SRR17520069. 3861304  
SRR17520069. 3861306  
SRR17520069. 3861308  
SRR17520069. 3861310  
SRR17520069. 3861312  
SRR17520069. 3861314  
SRR17520069. 3861316

SRR17520069. 3861318  
SRR17520069. 3861320  
SRR17520069. 3861322  
SRR17520069. 3862575  
SRR17520069. 3862577  
SRR17520069. 3862579  
SRR17520069. 3862581  
SRR17520069. 3862583  
SRR17520069. 3862585  
SRR17520069. 3862587  
SRR17520069. 3863449  
SRR17520069. 3863451  
SRR17520069. 3863453  
SRR17520069. 3863457  
SRR17520069. 3863459  
SRR17520069. 3863461  
SRR17520069. 3863463  
SRR17520069. 3863465  
SRR17520069. 3863467  
SRR17520069. 3863469  
SRR17520069. 3863471  
SRR17520069. 3863473  
SRR17520069. 3863475  
SRR17520069. 3863477  
SRR17520069. 3863479  
SRR17520069. 3863481  
SRR17520069. 3863483  
SRR17520069. 3863485  
SRR17520069. 3863487  
SRR17520069. 3863489  
SRR17520069. 3863491  
SRR17520069. 3863493  
SRR17520069. 3863495  
SRR17520069. 3863497  
SRR17520069. 3863499  
SRR17520069. 3863501  
SRR17520069. 3863503  
SRR17520069. 3863505  
SRR17520069. 3863507  
SRR17520069. 3863509  
SRR17520069. 3863511  
SRR17520069. 3863513  
SRR17520069. 3863515  
SRR17520069. 3863517  
SRR17520069. 3863519  
SRR17520069. 3863521  
SRR17520069. 3864817

SRR17520069. 3864819  
SRR17520069. 3864821  
SRR17520069. 3864823  
SRR17520069. 3864825  
SRR17520069. 3864827  
SRR17520069. 3864829  
SRR17520069. 3864831  
SRR17520069. 3864833  
SRR17520069. 3864835  
SRR17520069. 3865268  
SRR17520069. 3865270  
SRR17520069. 3865272  
SRR17520069. 3865274  
SRR17520069. 3865276  
SRR17520069. 3865278  
SRR17520069. 3865280  
SRR17520069. 3873821  
SRR17520069. 3877131  
SRR17520069. 3877133  
SRR17520069. 3877135  
SRR17520069. 3877137  
SRR17520069. 3877139  
SRR17520069. 3877141  
SRR17520069. 3877143  
SRR17520069. 3877145  
SRR17520069. 3877147  
SRR17520069. 3877149  
SRR17520069. 3877151  
SRR17520069. 3881548  
SRR17520069. 3881550  
SRR17520069. 3881552  
SRR17520069. 3881554  
SRR17520069. 3881556  
SRR17520069. 3884386  
SRR17520069. 3884388  
SRR17520069. 3884390  
SRR17520069. 3884392  
SRR17520069. 3884394  
SRR17520069. 3884396  
SRR17520069. 3884398  
SRR17520069. 3884400  
SRR17520069. 3884402  
SRR17520069. 3884404  
SRR17520069. 3884406  
SRR17520069. 3884408  
SRR17520069. 3887065  
SRR17520069. 3887067

SRR17520069. 3887069  
SRR17520069. 3888308  
SRR17520069. 3891837  
SRR17520069. 3891839  
SRR17520069. 3891841  
SRR17520069. 3891843  
SRR17520069. 3891845  
SRR17520069. 3891847  
SRR17520069. 3891849  
SRR17520069. 3891851  
SRR17520069. 3891855  
SRR17520069. 3891857  
SRR17520069. 3891859  
SRR17520069. 3891861  
SRR17520069. 3891863  
SRR17520069. 3891865  
SRR17520069. 3891867  
SRR17520069. 3891869  
SRR17520069. 3891871  
SRR17520069. 3891873  
SRR17520069. 3891875  
SRR17520069. 3891877  
SRR17520069. 3891879  
SRR17520069. 3896496  
SRR17520069. 3896498  
SRR17520069. 3902608  
SRR17520069. 3902610  
SRR17520069. 3902612  
SRR17520069. 3902614  
SRR17520069. 3902616  
SRR17520069. 3902618  
SRR17520069. 3902620  
SRR17520069. 3902622  
SRR17520069. 3902624  
SRR17520069. 3902626  
SRR17520069. 3902628  
SRR17520069. 3902630  
SRR17520069. 3902632  
SRR17520069. 3902634  
SRR17520069. 3902638  
SRR17520069. 3902640  
SRR17520069. 3902642  
SRR17520069. 3902644  
SRR17520069. 3902646  
SRR17520069. 3902648  
SRR17520069. 3902650  
SRR17520069. 3902652

SRR17520069.3902654  
SRR17520069.3902656  
SRR17520069.3902658  
SRR17520069.3902660  
SRR17520069.3903088  
SRR17520069.3903090  
SRR17520069.3903092  
SRR17520069.3903094  
SRR17520069.3903096  
SRR17520069.3903098  
SRR17520069.3903100  
SRR17520069.3903102  
SRR17520069.3903104  
SRR17520069.3903106  
SRR17520069.3903108  
SRR17520069.3903110  
SRR17520069.3903112  
SRR17520069.3903114  
SRR17520069.3903116  
SRR17520069.3903118  
SRR17520069.3903120  
SRR17520069.3903122  
SRR17520069.3904400  
SRR17520069.3904402  
SRR17520069.3904404  
SRR17520069.3907460  
SRR17520069.3907462  
SRR17520069.3907464  
SRR17520069.3907466  
SRR17520069.3907468  
SRR17520069.3908529  
SRR17520069.3908531  
SRR17520069.3908535  
SRR17520069.3908537  
SRR17520069.3908539  
SRR17520069.3908541  
SRR17520069.3908543  
SRR17520069.3908545  
SRR17520069.3908547  
SRR17520069.3908549  
SRR17520069.3908551  
SRR17520069.3908553  
SRR17520069.3908555  
SRR17520069.3908557  
SRR17520069.3908559  
SRR17520069.3908561  
SRR17520069.3908563

SRR17520069.3911381  
SRR17520069.3911383  
SRR17520069.3911385  
SRR17520069.3911387  
SRR17520069.3911389  
SRR17520069.3911391  
SRR17520069.3911395  
SRR17520069.3911397  
SRR17520069.3911399  
SRR17520069.3911401  
SRR17520069.3911403  
SRR17520069.3911405  
SRR17520069.3911407  
SRR17520069.3911409  
SRR17520069.3911411  
SRR17520069.3911413  
SRR17520069.3911415  
SRR17520069.3911417  
SRR17520069.3911419  
SRR17520069.3911421  
SRR17520069.3911423  
SRR17520069.3913872  
SRR17520069.3913874  
SRR17520069.3913876  
SRR17520069.3913878  
SRR17520069.3913880  
SRR17520069.3913882  
SRR17520069.3913884  
SRR17520069.3913886  
SRR17520069.3913888  
SRR17520069.3913890  
SRR17520069.3913892  
SRR17520069.3913894  
SRR17520069.3913898  
SRR17520069.3913900  
SRR17520069.3913902  
SRR17520069.3913904  
SRR17520069.3913906  
SRR17520069.3913908  
SRR17520069.3913910  
SRR17520069.3913912  
SRR17520069.3913914  
SRR17520069.3913916  
SRR17520069.3913918  
SRR17520069.3913920  
SRR17520069.3913922  
SRR17520069.3913924

SRR17520069. 3913926  
SRR17520069. 3913928  
SRR17520069. 3913930  
SRR17520069. 3913932  
SRR17520069. 3913934  
SRR17520069. 3913936  
SRR17520069. 3913938  
SRR17520069. 3913940  
SRR17520069. 3913942  
SRR17520069. 3913944  
SRR17520069. 3913946  
SRR17520069. 3913948  
SRR17520069. 3914530  
SRR17520069. 3914532  
SRR17520069. 3914534  
SRR17520069. 3914536  
SRR17520069. 3914538  
SRR17520069. 3914540  
SRR17520069. 3914542  
SRR17520069. 3914544  
SRR17520069. 3914546  
SRR17520069. 3914548  
SRR17520069. 3914550  
SRR17520069. 3914552  
SRR17520069. 3914554  
SRR17520069. 3914556  
SRR17520069. 3914558  
SRR17520069. 3918979  
SRR17520069. 3918981  
SRR17520069. 3918985  
SRR17520069. 3918987  
SRR17520069. 3918989  
SRR17520069. 3918991  
SRR17520069. 3918993  
SRR17520069. 3918995  
SRR17520069. 3918997  
SRR17520069. 3918999  
SRR17520069. 3919001  
SRR17520069. 3919003  
SRR17520069. 3919005  
SRR17520069. 3919007  
SRR17520069. 3919009  
SRR17520069. 3919011  
SRR17520069. 3919013  
SRR17520069. 3924718  
SRR17520069. 3924720  
SRR17520069. 3924722

SRR17520069. 3924724  
SRR17520069. 3924726  
SRR17520069. 3924728  
SRR17520069. 3924730  
SRR17520069. 3924732  
SRR17520069. 3924734  
SRR17520069. 3924736  
SRR17520069. 3924738  
SRR17520069. 3924740  
SRR17520069. 3924742  
SRR17520069. 3924744  
SRR17520069. 3924748  
SRR17520069. 3924750  
SRR17520069. 3924752  
SRR17520069. 3924754  
SRR17520069. 3924756  
SRR17520069. 3924758  
SRR17520069. 3924760  
SRR17520069. 3924762  
SRR17520069. 3924764  
SRR17520069. 3924766  
SRR17520069. 3924768  
SRR17520069. 3924770  
SRR17520069. 3924772  
SRR17520069. 3924774  
SRR17520069. 3924776  
SRR17520069. 3924778  
SRR17520069. 3924780  
SRR17520069. 3924782  
SRR17520069. 3924784  
SRR17520069. 3924786  
SRR17520069. 3924788  
SRR17520069. 3924790  
SRR17520069. 3924792  
SRR17520069. 3924794  
SRR17520069. 3924796  
SRR17520069. 3924798  
SRR17520069. 3924802  
SRR17520069. 3924804  
SRR17520069. 3924806  
SRR17520069. 3924808  
SRR17520069. 3924810  
SRR17520069. 3924816  
SRR17520069. 3924818  
SRR17520069. 3924820  
SRR17520069. 3924822  
SRR17520069. 3924824



SRR17520069.3930273  
SRR17520069.3930275  
SRR17520069.3930277  
SRR17520069.3930279  
SRR17520069.3930281  
SRR17520069.3930283  
SRR17520069.3930285  
SRR17520069.3930287  
SRR17520069.3930289  
SRR17520069.3930291  
SRR17520069.3930293  
SRR17520069.3930295  
SRR17520069.3930297  
SRR17520069.3930299  
SRR17520069.3930303  
SRR17520069.3930305  
SRR17520069.3930307  
SRR17520069.3930309  
SRR17520069.3930311  
SRR17520069.3930313  
SRR17520069.3930315  
SRR17520069.3930317  
SRR17520069.3930319  
SRR17520069.3930321  
SRR17520069.3930323  
SRR17520069.3930325  
SRR17520069.3930327  
SRR17520069.3930329  
SRR17520069.3930331  
SRR17520069.3930333  
SRR17520069.3942422  
SRR17520069.3942424  
SRR17520069.3942426  
SRR17520069.3942428  
SRR17520069.3942430  
SRR17520069.3946733  
SRR17520069.3946735  
SRR17520069.3946737  
SRR17520069.3946739  
SRR17520069.3949834  
SRR17520069.3949836  
SRR17520069.3949838  
SRR17520069.3949840  
SRR17520069.3949842  
SRR17520069.3949844  
SRR17520069.3949846  
SRR17520069.3949848

SRR17520069. 3949850  
SRR17520069. 3953033  
SRR17520069. 3953035  
SRR17520069. 3953037  
SRR17520069. 3953039  
SRR17520069. 3953041  
SRR17520069. 3953043  
SRR17520069. 3953045  
SRR17520069. 3953047  
SRR17520069. 3953049  
SRR17520069. 3953051  
SRR17520069. 3953053  
SRR17520069. 3953055  
SRR17520069. 3953057  
SRR17520069. 3953059  
SRR17520069. 3953061  
SRR17520069. 3954774  
SRR17520069. 3954776  
SRR17520069. 3954780  
SRR17520069. 3954782  
SRR17520069. 3954784  
SRR17520069. 3954788  
SRR17520069. 3954790  
SRR17520069. 3954794  
SRR17520069. 3954798  
SRR17520069. 3954800  
SRR17520069. 3954802  
SRR17520069. 3954804  
SRR17520069. 3954806  
SRR17520069. 3954810  
SRR17520069. 3954812  
SRR17520069. 3954814  
SRR17520069. 3954816  
SRR17520069. 3954818  
SRR17520069. 3954820  
SRR17520069. 3954822  
SRR17520069. 3954824  
SRR17520069. 3954826  
SRR17520069. 3954828  
SRR17520069. 3954832  
SRR17520069. 3954834  
SRR17520069. 3954836  
SRR17520069. 3954838  
SRR17520069. 3954840  
SRR17520069. 3954842  
SRR17520069. 3954844  
SRR17520069. 3954850

SRR17520069. 3954852  
SRR17520069. 3954854  
SRR17520069. 3954856  
SRR17520069. 3954858  
SRR17520069. 3960570  
SRR17520069. 3960572  
SRR17520069. 3960574  
SRR17520069. 3960576  
SRR17520069. 3960580  
SRR17520069. 3960582  
SRR17520069. 3960584  
SRR17520069. 3960590  
SRR17520069. 3960592  
SRR17520069. 3960594  
SRR17520069. 3960596  
SRR17520069. 3960598  
SRR17520069. 3960600  
SRR17520069. 3960604  
SRR17520069. 3960606  
SRR17520069. 3960608  
SRR17520069. 3960614  
SRR17520069. 3960618  
SRR17520069. 3960620  
SRR17520069. 3960622  
SRR17520069. 3960624  
SRR17520069. 3960626  
SRR17520069. 3960628  
SRR17520069. 3960630  
SRR17520069. 3962077  
SRR17520069. 3962079  
SRR17520069. 3962081  
SRR17520069. 3962083  
SRR17520069. 3962085  
SRR17520069. 3962087  
SRR17520069. 3962089  
SRR17520069. 3962091  
SRR17520069. 3962093  
SRR17520069. 3962095  
SRR17520069. 3962097  
SRR17520069. 3962099  
SRR17520069. 3962101  
SRR17520069. 3962103  
SRR17520069. 3962105  
SRR17520069. 3962107  
SRR17520069. 3962109  
SRR17520069. 3962111  
SRR17520069. 3962113

SRR17520069. 3962115  
SRR17520069. 3962117  
SRR17520069. 3962119  
SRR17520069. 3962121  
SRR17520069. 3962123  
SRR17520069. 3962125  
SRR17520069. 3962127  
SRR17520069. 3962129  
SRR17520069. 3962131  
SRR17520069. 3962133  
SRR17520069. 3962135  
SRR17520069. 3962137  
SRR17520069. 3962139  
SRR17520069. 3962141  
SRR17520069. 3962143  
SRR17520069. 3962145  
SRR17520069. 3962147  
SRR17520069. 3962149  
SRR17520069. 3962151  
SRR17520069. 3962153  
SRR17520069. 3962155  
SRR17520069. 3962157  
SRR17520069. 3962159  
SRR17520069. 3962161  
SRR17520069. 3962163  
SRR17520069. 3962165  
SRR17520069. 3962167  
SRR17520069. 3962169  
SRR17520069. 3962171  
SRR17520069. 3962173  
SRR17520069. 3962175  
SRR17520069. 3962177  
SRR17520069. 3962179  
SRR17520069. 3962181  
SRR17520069. 3962183  
SRR17520069. 3966527  
SRR17520069. 3966529  
SRR17520069. 3966531  
SRR17520069. 3966533  
SRR17520069. 3966535  
SRR17520069. 3966537  
SRR17520069. 3966539  
SRR17520069. 3967024  
SRR17520069. 3968287  
SRR17520069. 3968289  
SRR17520069. 3968291  
SRR17520069. 3968293

SRR17520069. 3968295  
SRR17520069. 3968297  
SRR17520069. 3968299  
SRR17520069. 3968301  
SRR17520069. 3968303  
SRR17520069. 3968305  
SRR17520069. 3968307  
SRR17520069. 3968310  
SRR17520069. 3968312  
SRR17520069. 3968314  
SRR17520069. 3971240  
SRR17520069. 3971242  
SRR17520069. 3973165  
SRR17520069. 3973167  
SRR17520069. 3973169  
SRR17520069. 3973171  
SRR17520069. 3973173  
SRR17520069. 3973175  
SRR17520069. 3973177  
SRR17520069. 3973179  
SRR17520069. 3973181  
SRR17520069. 3973183  
SRR17520069. 3973185  
SRR17520069. 3973187  
SRR17520069. 3973189  
SRR17520069. 3973191  
SRR17520069. 3973193  
SRR17520069. 3973195  
SRR17520069. 3973197  
SRR17520069. 3973199  
SRR17520069. 3973201  
SRR17520069. 3973203  
SRR17520069. 3973205  
SRR17520069. 3973207  
SRR17520069. 3973209  
SRR17520069. 3973211  
SRR17520069. 3973213  
SRR17520069. 3973215  
SRR17520069. 3973217  
SRR17520069. 3975042  
SRR17520069. 3975044  
SRR17520069. 3981274  
SRR17520069. 3981276  
SRR17520069. 3981278  
SRR17520069. 3981280  
SRR17520069. 3981282  
SRR17520069. 3981284

SRR17520069. 3984359  
SRR17520069. 3984361  
SRR17520069. 3984363  
SRR17520069. 3984365  
SRR17520069. 3984367  
SRR17520069. 3984369  
SRR17520069. 3984371  
SRR17520069. 3987302  
SRR17520069. 3987308  
SRR17520069. 3992998  
SRR17520069. 3993000  
SRR17520069. 3993002  
SRR17520069. 3993004  
SRR17520069. 3993006  
SRR17520069. 3993008  
SRR17520069. 3993010  
SRR17520069. 3993012  
SRR17520069. 3993014  
SRR17520069. 3993016  
SRR17520069. 3993018  
SRR17520069. 3996179  
SRR17520069. 3996183  
SRR17520069. 3999780  
SRR17520069. 3999784  
SRR17520069. 3999786  
SRR17520069. 4001607  
SRR17520069. 4001618  
SRR17520069. 4004010  
SRR17520069. 4004012  
SRR17520069. 4004016  
SRR17520069. 4004018  
SRR17520069. 4004020  
SRR17520069. 4004022  
SRR17520069. 4004024  
SRR17520069. 4004026  
SRR17520069. 4004028  
SRR17520069. 4004030  
SRR17520069. 4004032  
SRR17520069. 4004034  
SRR17520069. 4004038  
SRR17520069. 4004342  
SRR17520069. 4004344  
SRR17520069. 4004346  
SRR17520069. 4019662  
SRR17520069. 4019664  
SRR17520069. 4019666  
SRR17520069. 4019668

SRR17520069.4019670  
SRR17520069.4019672  
SRR17520069.4021063  
SRR17520069.4021065  
SRR17520069.4021067  
SRR17520069.4021069  
SRR17520069.4021071  
SRR17520069.4021073  
SRR17520069.4021075  
SRR17520069.4021077  
SRR17520069.4021079  
SRR17520069.4021081  
SRR17520069.4021083  
SRR17520069.4021085  
SRR17520069.4021087  
SRR17520069.4021089  
SRR17520069.4021091  
SRR17520069.4021093  
SRR17520069.4021095  
SRR17520069.4021097  
SRR17520069.4021099  
SRR17520069.4021101  
SRR17520069.4021103  
SRR17520069.4021105  
SRR17520069.4021107  
SRR17520069.4021109  
SRR17520069.4021111  
SRR17520069.4021113  
SRR17520069.4021115  
SRR17520069.4021117  
SRR17520069.4021119  
SRR17520069.4021121  
SRR17520069.4021123  
SRR17520069.4021125  
SRR17520069.4021127  
SRR17520069.4021129  
SRR17520069.4021131  
SRR17520069.4021133  
SRR17520069.4021135  
SRR17520069.4021137  
SRR17520069.4027790  
SRR17520069.4027792  
SRR17520069.4028670  
SRR17520069.4032397  
SRR17520069.4032399  
SRR17520069.4032401  
SRR17520069.4033120

SRR17520069.4039260  
SRR17520069.4039262  
SRR17520069.4039264  
SRR17520069.4039266  
SRR17520069.4039268  
SRR17520069.4039270  
SRR17520069.4039272  
SRR17520069.4039274  
SRR17520069.4039276  
SRR17520069.4039278  
SRR17520069.4039280  
SRR17520069.4039282  
SRR17520069.4039284  
SRR17520069.4039286  
SRR17520069.4039288  
SRR17520069.4039290  
SRR17520069.4039292  
SRR17520069.4039294  
SRR17520069.4039296  
SRR17520069.4039298  
SRR17520069.4039300  
SRR17520069.4039302  
SRR17520069.4039304  
SRR17520069.4039306  
SRR17520069.4039308  
SRR17520069.4039310  
SRR17520069.4039312  
SRR17520069.4039314  
SRR17520069.4039316  
SRR17520069.4039320  
SRR17520069.4039322  
SRR17520069.4039324  
SRR17520069.4039326  
SRR17520069.4039328  
SRR17520069.4039330  
SRR17520069.4039332  
SRR17520069.4039334  
SRR17520069.4039336  
SRR17520069.4039338  
SRR17520069.4039340  
SRR17520069.4039342  
SRR17520069.4039344  
SRR17520069.4039346  
SRR17520069.4039348  
SRR17520069.4039350  
SRR17520069.4039352  
SRR17520069.4039354



SRR17520069.4039356  
SRR17520069.4039358  
SRR17520069.4043585  
SRR17520069.4049572  
SRR17520069.4049574  
SRR17520069.4049576  
SRR17520069.4049578  
SRR17520069.4049580  
SRR17520069.4049582  
SRR17520069.4049586  
SRR17520069.4049588  
SRR17520069.4049590  
SRR17520069.4049592  
SRR17520069.4049594  
SRR17520069.4049598  
SRR17520069.4049600  
SRR17520069.4049602  
SRR17520069.4049604  
SRR17520069.4049606  
SRR17520069.4049608  
SRR17520069.4049610  
SRR17520069.4049612  
SRR17520069.4049614  
SRR17520069.4049616  
SRR17520069.4049618  
SRR17520069.4049620  
SRR17520069.4049622  
SRR17520069.4049624  
SRR17520069.4049626  
SRR17520069.4049628  
SRR17520069.4049630  
SRR17520069.4049632  
SRR17520069.4049634  
SRR17520069.4049636  
SRR17520069.4049638  
SRR17520069.4049640  
SRR17520069.4049642  
SRR17520069.4049646  
SRR17520069.4049648  
SRR17520069.4049650  
SRR17520069.4049652  
SRR17520069.4049654  
SRR17520069.4049656  
SRR17520069.4049658  
SRR17520069.4049660  
SRR17520069.4049662  
SRR17520069.4049664

SRR17520069.4049666  
SRR17520069.4049668  
SRR17520069.4049670  
SRR17520069.4049672  
SRR17520069.4049674  
SRR17520069.4049676  
SRR17520069.4049783  
SRR17520069.4049785  
SRR17520069.4049787  
SRR17520069.4049789  
SRR17520069.4049791  
SRR17520069.4049793  
SRR17520069.4049795  
SRR17520069.4049797  
SRR17520069.4049799  
SRR17520069.4049801  
SRR17520069.4049803  
SRR17520069.4049805  
SRR17520069.4049807  
SRR17520069.4049809  
SRR17520069.4049811  
SRR17520069.4049813  
SRR17520069.4049815  
SRR17520069.4049817  
SRR17520069.4049819  
SRR17520069.4049821  
SRR17520069.4049823  
SRR17520069.4049825  
SRR17520069.4049827  
SRR17520069.4049829  
SRR17520069.4049831  
SRR17520069.4049833  
SRR17520069.4049835  
SRR17520069.4049837  
SRR17520069.4049839  
SRR17520069.4049841  
SRR17520069.4049843  
SRR17520069.4049845  
SRR17520069.4049847  
SRR17520069.4049849  
SRR17520069.4049851  
SRR17520069.4049853  
SRR17520069.4049855  
SRR17520069.4049857  
SRR17520069.4049859  
SRR17520069.4049861  
SRR17520069.4049863

SRR17520069.4049865  
SRR17520069.4049867  
SRR17520069.4049871  
SRR17520069.4049873  
SRR17520069.4049875  
SRR17520069.4049877  
SRR17520069.4049879  
SRR17520069.4049881  
SRR17520069.4049883  
SRR17520069.4049887  
SRR17520069.4049889  
SRR17520069.4049891  
SRR17520069.4049895  
SRR17520069.4049897  
SRR17520069.4049899  
SRR17520069.4049901  
SRR17520069.4049905  
SRR17520069.4049907  
SRR17520069.4049909  
SRR17520069.4049911  
SRR17520069.4049913  
SRR17520069.4051104  
SRR17520069.4051106  
SRR17520069.4051108  
SRR17520069.4051110  
SRR17520069.4051112  
SRR17520069.4051114  
SRR17520069.4051118  
SRR17520069.4051120  
SRR17520069.4051122  
SRR17520069.4051124  
SRR17520069.4051126  
SRR17520069.4051128  
SRR17520069.4051130  
SRR17520069.4051134  
SRR17520069.4053268  
SRR17520069.4053270  
SRR17520069.4053272  
SRR17520069.4053274  
SRR17520069.4053276  
SRR17520069.4053278  
SRR17520069.4053280  
SRR17520069.4053282  
SRR17520069.4053288  
SRR17520069.4053290  
SRR17520069.4053292  
SRR17520069.4053294

SRR17520069.4053296  
SRR17520069.4053298  
SRR17520069.4053300  
SRR17520069.4053520  
SRR17520069.4053522  
SRR17520069.4053524  
SRR17520069.4053526  
SRR17520069.4053528  
SRR17520069.4055528  
SRR17520069.4055530  
SRR17520069.4055532  
SRR17520069.4055534  
SRR17520069.4055536  
SRR17520069.4055538  
SRR17520069.4055540  
SRR17520069.4055542  
SRR17520069.4055544  
SRR17520069.4055546  
SRR17520069.4055548  
SRR17520069.4055550  
SRR17520069.4063072  
SRR17520069.4063074  
SRR17520069.4063076  
SRR17520069.4063078  
SRR17520069.4063082  
SRR17520069.4063084  
SRR17520069.4063086  
SRR17520069.4065724  
SRR17520069.4065726  
SRR17520069.4065728  
SRR17520069.4065730  
SRR17520069.4065732  
SRR17520069.4065734  
SRR17520069.4065736  
SRR17520069.4065738  
SRR17520069.4065740  
SRR17520069.4065742  
SRR17520069.4065744  
SRR17520069.4069851  
SRR17520069.4069853  
SRR17520069.4069855  
SRR17520069.4069857  
SRR17520069.4069885  
SRR17520069.4069887  
SRR17520069.4069889  
SRR17520069.4069891  
SRR17520069.4072205

SRR17520069.4091959  
SRR17520069.4091961  
SRR17520069.4091963  
SRR17520069.4091965  
SRR17520069.4091967  
SRR17520069.4091969  
SRR17520069.4091971  
SRR17520069.4091973  
SRR17520069.4091975  
SRR17520069.4091977  
SRR17520069.4091979  
SRR17520069.4091981  
SRR17520069.4091983  
SRR17520069.4091985  
SRR17520069.4091987  
SRR17520069.4091989  
SRR17520069.4091991  
SRR17520069.4091993  
SRR17520069.4091995  
SRR17520069.4091997  
SRR17520069.4091999  
SRR17520069.4092001  
SRR17520069.4092003  
SRR17520069.4092005  
SRR17520069.4092007  
SRR17520069.4092009  
SRR17520069.4092011  
SRR17520069.4092013  
SRR17520069.4092015  
SRR17520069.4092017  
SRR17520069.4092019  
SRR17520069.4092021  
SRR17520069.4092023  
SRR17520069.4092025  
SRR17520069.4092027  
SRR17520069.4092029  
SRR17520069.4092031  
SRR17520069.4092033  
SRR17520069.4092035  
SRR17520069.4092037  
SRR17520069.4092039  
SRR17520069.4092041  
SRR17520069.4092043  
SRR17520069.4092045  
SRR17520069.4092047  
SRR17520069.4092049  
SRR17520069.4092051

SRR17520069.4092053  
SRR17520069.4092055  
SRR17520069.4092057  
SRR17520069.4092059  
SRR17520069.4092061  
SRR17520069.4092063  
SRR17520069.4092065  
SRR17520069.4092067  
SRR17520069.4092069  
SRR17520069.4092071  
SRR17520069.4092073  
SRR17520069.4096184  
SRR17520069.4096186  
SRR17520069.4096188  
SRR17520069.4096190  
SRR17520069.4096192  
SRR17520069.4096194  
SRR17520069.4096196  
SRR17520069.4096198  
SRR17520069.4096200  
SRR17520069.4096202  
SRR17520069.4096204  
SRR17520069.4096206  
SRR17520069.4096208  
SRR17520069.4096210  
SRR17520069.4096212  
SRR17520069.4096214  
SRR17520069.4096216  
SRR17520069.4096218  
SRR17520069.4096220  
SRR17520069.4096222  
SRR17520069.4096224  
SRR17520069.4096226  
SRR17520069.4096230  
SRR17520069.4098127  
SRR17520069.4098129  
SRR17520069.4098131  
SRR17520069.4098133  
SRR17520069.4098135  
SRR17520069.4098137  
SRR17520069.4098139  
SRR17520069.4098141  
SRR17520069.4098143  
SRR17520069.4098145  
SRR17520069.4098147  
SRR17520069.4098149  
SRR17520069.4098151

SRR17520069.4098155  
SRR17520069.4098663  
SRR17520069.4098665  
SRR17520069.4098667  
SRR17520069.4098669  
SRR17520069.4098671  
SRR17520069.4098673  
SRR17520069.4098675  
SRR17520069.4098677  
SRR17520069.4098679  
SRR17520069.4098681  
SRR17520069.4103216  
SRR17520069.4103218  
SRR17520069.4103220  
SRR17520069.4103222  
SRR17520069.4103224  
SRR17520069.4103226  
SRR17520069.4103228  
SRR17520069.4103230  
SRR17520069.4103232  
SRR17520069.4103234  
SRR17520069.4103236  
SRR17520069.4103238  
SRR17520069.4103240  
SRR17520069.4103242  
SRR17520069.4103244  
SRR17520069.4103246  
SRR17520069.4103248  
SRR17520069.4103250  
SRR17520069.4103252  
SRR17520069.4103254  
SRR17520069.4103256  
SRR17520069.4103258  
SRR17520069.4103260  
SRR17520069.4103262  
SRR17520069.4103264  
SRR17520069.4103266  
SRR17520069.4103268  
SRR17520069.4103270  
SRR17520069.4103272  
SRR17520069.4103274  
SRR17520069.4103276  
SRR17520069.4103280  
SRR17520069.4103282  
SRR17520069.4103284  
SRR17520069.4103286  
SRR17520069.4103288

SRR17520069.4103290  
SRR17520069.4103292  
SRR17520069.4103294  
SRR17520069.4103296  
SRR17520069.4103298  
SRR17520069.4103300  
SRR17520069.4103302  
SRR17520069.4103304  
SRR17520069.4103306  
SRR17520069.4103308  
SRR17520069.4103310  
SRR17520069.4103312  
SRR17520069.4103314  
SRR17520069.4103316  
SRR17520069.4103318  
SRR17520069.4103320  
SRR17520069.4103322  
SRR17520069.4103324  
SRR17520069.4103328  
SRR17520069.4103330  
SRR17520069.4103332  
SRR17520069.4103334  
SRR17520069.4103336  
SRR17520069.4103338  
SRR17520069.4103345  
SRR17520069.4105951  
SRR17520069.4105953  
SRR17520069.4105955  
SRR17520069.4105959  
SRR17520069.4105961  
SRR17520069.4105963  
SRR17520069.4105965  
SRR17520069.4105967  
SRR17520069.4105969  
SRR17520069.4105971  
SRR17520069.4105973  
SRR17520069.4105975  
SRR17520069.4105977  
SRR17520069.4105979  
SRR17520069.4105981  
SRR17520069.4105983  
SRR17520069.4105985  
SRR17520069.4105987  
SRR17520069.4105989  
SRR17520069.4105991  
SRR17520069.4105993  
SRR17520069.4105995



SRR17520069.4105997  
SRR17520069.4105999  
SRR17520069.4106001  
SRR17520069.4106003  
SRR17520069.4106005  
SRR17520069.4106007  
SRR17520069.4106009  
SRR17520069.4106013  
SRR17520069.4106015  
SRR17520069.4106017  
SRR17520069.4106019  
SRR17520069.4106021  
SRR17520069.4106023  
SRR17520069.4106025  
SRR17520069.4106027  
SRR17520069.4106031  
SRR17520069.4106033  
SRR17520069.4107636  
SRR17520069.4108319  
SRR17520069.4108321  
SRR17520069.4108323  
SRR17520069.4108325  
SRR17520069.4108327  
SRR17520069.4108333  
SRR17520069.4108335  
SRR17520069.4110524  
SRR17520069.4111692  
SRR17520069.4111694  
SRR17520069.4111698  
SRR17520069.4111700  
SRR17520069.4111704  
SRR17520069.4111706  
SRR17520069.4111708  
SRR17520069.4111716  
SRR17520069.4111718  
SRR17520069.4111720  
SRR17520069.4111732  
SRR17520069.4111734  
SRR17520069.4111740  
SRR17520069.4111742  
SRR17520069.4111748  
SRR17520069.4111752  
SRR17520069.4111756  
SRR17520069.4112489  
SRR17520069.4112491  
SRR17520069.4112493  
SRR17520069.4113184

SRR17520069.4113186  
SRR17520069.4113188  
SRR17520069.4113190  
SRR17520069.4114809  
SRR17520069.4114811  
SRR17520069.4114813  
SRR17520069.4114815  
SRR17520069.4114817  
SRR17520069.4114819  
SRR17520069.4114821  
SRR17520069.4114827  
SRR17520069.4120018  
SRR17520069.4120020  
SRR17520069.4120022  
SRR17520069.4120029  
SRR17520069.4120031  
SRR17520069.4120033  
SRR17520069.4128533  
SRR17520069.4128535  
SRR17520069.4128537  
SRR17520069.4128539  
SRR17520069.4128541  
SRR17520069.4128543  
SRR17520069.4128547  
SRR17520069.4128549  
SRR17520069.4128551  
SRR17520069.4128553  
SRR17520069.4128555  
SRR17520069.4128557  
SRR17520069.4128559  
SRR17520069.4128561  
SRR17520069.4128563  
SRR17520069.4128565  
SRR17520069.4128567  
SRR17520069.4128569  
SRR17520069.4128571  
SRR17520069.4138501  
SRR17520069.4138503  
SRR17520069.4138505  
SRR17520069.4138507  
SRR17520069.4138509  
SRR17520069.4138511  
SRR17520069.4138513  
SRR17520069.4138515  
SRR17520069.4144726  
SRR17520069.4144728  
SRR17520069.4144730

SRR17520069.4144732  
SRR17520069.4144734  
SRR17520069.4144736  
SRR17520069.4151388  
SRR17520069.4151390  
SRR17520069.4151392  
SRR17520069.4151394  
SRR17520069.4151396  
SRR17520069.4151398  
SRR17520069.4151400  
SRR17520069.4151402  
SRR17520069.4151404  
SRR17520069.4155076  
SRR17520069.4155078  
SRR17520069.4155080  
SRR17520069.4155082  
SRR17520069.4155084  
SRR17520069.4155088  
SRR17520069.4155090  
SRR17520069.4155092  
SRR17520069.4155094  
SRR17520069.4155096  
SRR17520069.4155098  
SRR17520069.4155100  
SRR17520069.4155102  
SRR17520069.4155104  
SRR17520069.4155106  
SRR17520069.4155108  
SRR17520069.4155110  
SRR17520069.4155112  
SRR17520069.4155114  
SRR17520069.4155116  
SRR17520069.4155118  
SRR17520069.4155120  
SRR17520069.4155122  
SRR17520069.4157357  
SRR17520069.4157359  
SRR17520069.4157361  
SRR17520069.4157363  
SRR17520069.4157365  
SRR17520069.4157367  
SRR17520069.4157369  
SRR17520069.4157371  
SRR17520069.4157373  
SRR17520069.4157375  
SRR17520069.4157377  
SRR17520069.4158208

SRR17520069.4158210  
SRR17520069.4158212  
SRR17520069.4158218  
SRR17520069.4158220  
SRR17520069.4158222  
SRR17520069.4158224  
SRR17520069.4158226  
SRR17520069.4158228  
SRR17520069.4158230  
SRR17520069.4158232  
SRR17520069.4158234  
SRR17520069.4158236  
SRR17520069.4158238  
SRR17520069.4158240  
SRR17520069.4158242  
SRR17520069.4158244  
SRR17520069.4158246  
SRR17520069.4158248  
SRR17520069.4158250  
SRR17520069.4158252  
SRR17520069.4158254  
SRR17520069.4158256  
SRR17520069.4158258  
SRR17520069.4158260  
SRR17520069.4158262  
SRR17520069.4158264  
SRR17520069.4158268  
SRR17520069.4158270  
SRR17520069.4158272  
SRR17520069.4158274  
SRR17520069.4158276  
SRR17520069.4158278  
SRR17520069.4158280  
SRR17520069.4158282  
SRR17520069.4158284  
SRR17520069.4158286  
SRR17520069.4158288  
SRR17520069.4158290  
SRR17520069.4158292  
SRR17520069.4158294  
SRR17520069.4158296  
SRR17520069.4158298  
SRR17520069.4158300  
SRR17520069.4158302  
SRR17520069.4158304  
SRR17520069.4158306  
SRR17520069.4158308

SRR17520069.4158310  
SRR17520069.4158312  
SRR17520069.4158314  
SRR17520069.4158316  
SRR17520069.4158318  
SRR17520069.4158320  
SRR17520069.4160319  
SRR17520069.4160321  
SRR17520069.4160323  
SRR17520069.4160325  
SRR17520069.4160327  
SRR17520069.4162533  
SRR17520069.4162535  
SRR17520069.4164824  
SRR17520069.4164826  
SRR17520069.4164828  
SRR17520069.4164830  
SRR17520069.4164832  
SRR17520069.4164834  
SRR17520069.4164836  
SRR17520069.4164838  
SRR17520069.4164840  
SRR17520069.4164842  
SRR17520069.4164844  
SRR17520069.4164846  
SRR17520069.4164848  
SRR17520069.4164850  
SRR17520069.4164852  
SRR17520069.4164854  
SRR17520069.4164856  
SRR17520069.4164858  
SRR17520069.4164860  
SRR17520069.4164862  
SRR17520069.4164864  
SRR17520069.4164866  
SRR17520069.4164868  
SRR17520069.4164870  
SRR17520069.4164872  
SRR17520069.4164874  
SRR17520069.4164876  
SRR17520069.4164878  
SRR17520069.4164880  
SRR17520069.4164882  
SRR17520069.4164886  
SRR17520069.4164888  
SRR17520069.4164890  
SRR17520069.4164892

SRR17520069.4164894  
SRR17520069.4164896  
SRR17520069.4164898  
SRR17520069.4170344  
SRR17520069.4170346  
SRR17520069.4170348  
SRR17520069.4170350  
SRR17520069.4170352  
SRR17520069.4170354  
SRR17520069.4170356  
SRR17520069.4170358  
SRR17520069.4170362  
SRR17520069.4170364  
SRR17520069.4170366  
SRR17520069.4170368  
SRR17520069.4170370  
SRR17520069.4170372  
SRR17520069.4170374  
SRR17520069.4170376  
SRR17520069.4170378  
SRR17520069.4170380  
SRR17520069.4170384  
SRR17520069.4170386  
SRR17520069.4170388  
SRR17520069.4170390  
SRR17520069.4170392  
SRR17520069.4170394  
SRR17520069.4170396  
SRR17520069.4170398  
SRR17520069.4170400  
SRR17520069.4170402  
SRR17520069.4170404  
SRR17520069.4170406  
SRR17520069.4173064  
SRR17520069.4173066  
SRR17520069.4173068  
SRR17520069.4173070  
SRR17520069.4173072  
SRR17520069.4173074  
SRR17520069.4173076  
SRR17520069.4173078  
SRR17520069.4173080  
SRR17520069.4173082  
SRR17520069.4173084  
SRR17520069.4173086  
SRR17520069.4173088  
SRR17520069.4173090

SRR17520069.4173092  
SRR17520069.4173094  
SRR17520069.4173096  
SRR17520069.4173098  
SRR17520069.4173100  
SRR17520069.4173102  
SRR17520069.4173104  
SRR17520069.4173106  
SRR17520069.4173108  
SRR17520069.4173110  
SRR17520069.4173112  
SRR17520069.4173114  
SRR17520069.4173116  
SRR17520069.4173118  
SRR17520069.4178804  
SRR17520069.4178806  
SRR17520069.4178808  
SRR17520069.4178810  
SRR17520069.4178812  
SRR17520069.4178814  
SRR17520069.4183816  
SRR17520069.4183818  
SRR17520069.4183820  
SRR17520069.4183822  
SRR17520069.4183824  
SRR17520069.4183826  
SRR17520069.4183828  
SRR17520069.4189748  
SRR17520069.4189750  
SRR17520069.4189752  
SRR17520069.4189754  
SRR17520069.4189980  
SRR17520069.4189982  
SRR17520069.4189986  
SRR17520069.4189988  
SRR17520069.4189994  
SRR17520069.4189996  
SRR17520069.4190000  
SRR17520069.4190002  
SRR17520069.4190004  
SRR17520069.4190006  
SRR17520069.4190299  
SRR17520069.4190301  
SRR17520069.4190303  
SRR17520069.4190305  
SRR17520069.4190307  
SRR17520069.4190309

SRR17520069.4190311  
SRR17520069.4190313  
SRR17520069.4190315  
SRR17520069.4190317  
SRR17520069.4190319  
SRR17520069.4190321  
SRR17520069.4190323  
SRR17520069.4190325  
SRR17520069.4190327  
SRR17520069.4190329  
SRR17520069.4190331  
SRR17520069.4190333  
SRR17520069.4190337  
SRR17520069.4190339  
SRR17520069.4190341  
SRR17520069.4190343  
SRR17520069.4190345  
SRR17520069.4190347  
SRR17520069.4190349  
SRR17520069.4190351  
SRR17520069.4190353  
SRR17520069.4190355  
SRR17520069.4190357  
SRR17520069.4190359  
SRR17520069.4190361  
SRR17520069.4190363  
SRR17520069.4190365  
SRR17520069.4190367  
SRR17520069.4190369  
SRR17520069.4190371  
SRR17520069.4190373  
SRR17520069.4190375  
SRR17520069.4190377  
SRR17520069.4190379  
SRR17520069.4190381  
SRR17520069.4190383  
SRR17520069.4190385  
SRR17520069.4190387  
SRR17520069.4190389  
SRR17520069.4190391  
SRR17520069.4190393  
SRR17520069.4190395  
SRR17520069.4191667  
SRR17520069.4191669  
SRR17520069.4191671  
SRR17520069.4191673  
SRR17520069.4191675



SRR17520069.4191677  
SRR17520069.4191681  
SRR17520069.4191683  
SRR17520069.4191685  
SRR17520069.4191687  
SRR17520069.4191689  
SRR17520069.4191691  
SRR17520069.4191693  
SRR17520069.4191695  
SRR17520069.4191697  
SRR17520069.4191699  
SRR17520069.4191701  
SRR17520069.4191703  
SRR17520069.4191705  
SRR17520069.4191707  
SRR17520069.4191709  
SRR17520069.4191711  
SRR17520069.4191713  
SRR17520069.4191715  
SRR17520069.4191717  
SRR17520069.4191719  
SRR17520069.4191721  
SRR17520069.4204579  
SRR17520069.4205996  
SRR17520069.4205998  
SRR17520069.4206000  
SRR17520069.4206002  
SRR17520069.4206004  
SRR17520069.4206006  
SRR17520069.4206008  
SRR17520069.4206010  
SRR17520069.4206012  
SRR17520069.4206014  
SRR17520069.4206016  
SRR17520069.4206018  
SRR17520069.4206020  
SRR17520069.4206573  
SRR17520069.4214549  
SRR17520069.4214551  
SRR17520069.4214557  
SRR17520069.4214563  
SRR17520069.4214565  
SRR17520069.4214567  
SRR17520069.4214569  
SRR17520069.4214571  
SRR17520069.4214573  
SRR17520069.4214575

SRR17520069.4214577  
SRR17520069.4214579  
SRR17520069.4214583  
SRR17520069.4214585  
SRR17520069.4215624  
SRR17520069.4215626  
SRR17520069.4215628  
SRR17520069.4215630  
SRR17520069.4215632  
SRR17520069.4215634  
SRR17520069.4215636  
SRR17520069.4215638  
SRR17520069.4215640  
SRR17520069.4215642  
SRR17520069.4215644  
SRR17520069.4215646  
SRR17520069.4215648  
SRR17520069.4217484  
SRR17520069.4217486  
SRR17520069.4217488  
SRR17520069.4217490  
SRR17520069.4217492  
SRR17520069.4217494  
SRR17520069.4217496  
SRR17520069.4217498  
SRR17520069.4217500  
SRR17520069.4217502  
SRR17520069.4217504  
SRR17520069.4217506  
SRR17520069.4217508  
SRR17520069.4217510  
SRR17520069.4217512  
SRR17520069.4217516  
SRR17520069.4217518  
SRR17520069.4217520  
SRR17520069.4217522  
SRR17520069.4217524  
SRR17520069.4217526  
SRR17520069.4217528  
SRR17520069.4217530  
SRR17520069.4217532  
SRR17520069.4217534  
SRR17520069.4217536  
SRR17520069.4217540  
SRR17520069.4217542  
SRR17520069.4217544  
SRR17520069.4217546

SRR17520069.4217548  
SRR17520069.4217550  
SRR17520069.4217552  
SRR17520069.4217554  
SRR17520069.4217556  
SRR17520069.4217558  
SRR17520069.4217560  
SRR17520069.4217562  
SRR17520069.4217564  
SRR17520069.4217566  
SRR17520069.4217568  
SRR17520069.4221315  
SRR17520069.4221317  
SRR17520069.4223171  
SRR17520069.4223173  
SRR17520069.4223175  
SRR17520069.4223177  
SRR17520069.4223179  
SRR17520069.4223181  
SRR17520069.4223183  
SRR17520069.4223185  
SRR17520069.4223187  
SRR17520069.4223189  
SRR17520069.4223191  
SRR17520069.4223193  
SRR17520069.4223195  
SRR17520069.4223197  
SRR17520069.4223199  
SRR17520069.4223201  
SRR17520069.4223203  
SRR17520069.4223205  
SRR17520069.4223207  
SRR17520069.4223209  
SRR17520069.4223211  
SRR17520069.4223213  
SRR17520069.4223215  
SRR17520069.4223217  
SRR17520069.4223219  
SRR17520069.4223221  
SRR17520069.4223223  
SRR17520069.4223225  
SRR17520069.4223229  
SRR17520069.4223231  
SRR17520069.4223233  
SRR17520069.4223235  
SRR17520069.4223237  
SRR17520069.4223239

SRR17520069.4223241  
SRR17520069.4223243  
SRR17520069.4223245  
SRR17520069.4223247  
SRR17520069.4225248  
SRR17520069.4225250  
SRR17520069.4225252  
SRR17520069.4231936  
SRR17520069.4231938  
SRR17520069.4231940  
SRR17520069.4231942  
SRR17520069.4231944  
SRR17520069.4231946  
SRR17520069.4231948  
SRR17520069.4231950  
SRR17520069.4231952  
SRR17520069.4231954  
SRR17520069.4231956  
SRR17520069.4231958  
SRR17520069.4231960  
SRR17520069.4231962  
SRR17520069.4231964  
SRR17520069.4231966  
SRR17520069.4231968  
SRR17520069.4231970  
SRR17520069.4231972  
SRR17520069.4231974  
SRR17520069.4231976  
SRR17520069.4231978  
SRR17520069.4231980  
SRR17520069.4231982  
SRR17520069.4231984  
SRR17520069.4231986  
SRR17520069.4231988  
SRR17520069.4231990  
SRR17520069.4231992  
SRR17520069.4231994  
SRR17520069.4231996  
SRR17520069.4231998  
SRR17520069.4232000  
SRR17520069.4232002  
SRR17520069.4232004  
SRR17520069.4232006  
SRR17520069.4232008  
SRR17520069.4232010  
SRR17520069.4232012  
SRR17520069.4232014

SRR17520069.4232016  
SRR17520069.4232018  
SRR17520069.4232020  
SRR17520069.4232022  
SRR17520069.4232024  
SRR17520069.4232026  
SRR17520069.4232030  
SRR17520069.4232032  
SRR17520069.4232034  
SRR17520069.4232036  
SRR17520069.4232038  
SRR17520069.4232040  
SRR17520069.4232042  
SRR17520069.4232044  
SRR17520069.4232046  
SRR17520069.4232048  
SRR17520069.4232050  
SRR17520069.4232052  
SRR17520069.4232054  
SRR17520069.4232056  
SRR17520069.4232058  
SRR17520069.4232060  
SRR17520069.4232062  
SRR17520069.4232064  
SRR17520069.4232066  
SRR17520069.4232068  
SRR17520069.4232070  
SRR17520069.4232072  
SRR17520069.4232074  
SRR17520069.4232076  
SRR17520069.4232078  
SRR17520069.4232080  
SRR17520069.4232082  
SRR17520069.4232084  
SRR17520069.4232086  
SRR17520069.4232088  
SRR17520069.4232090  
SRR17520069.4232092  
SRR17520069.4232094  
SRR17520069.4232098  
SRR17520069.4232100  
SRR17520069.4233936  
SRR17520069.4233938  
SRR17520069.4233940  
SRR17520069.4233942  
SRR17520069.4233944  
SRR17520069.4233946

SRR17520069. 4234688  
SRR17520069. 4234690  
SRR17520069. 4234692  
SRR17520069. 4234694  
SRR17520069. 4234696  
SRR17520069. 4234698  
SRR17520069. 4234700  
SRR17520069. 4234702  
SRR17520069. 4234704  
SRR17520069. 4234706  
SRR17520069. 4234708  
SRR17520069. 4234710  
SRR17520069. 4234712  
SRR17520069. 4234714  
SRR17520069. 4234752  
SRR17520069. 4234754  
SRR17520069. 4234756  
SRR17520069. 4234758  
SRR17520069. 4234760  
SRR17520069. 4234762  
SRR17520069. 4234764  
SRR17520069. 4234766  
SRR17520069. 4234768  
SRR17520069. 4234770  
SRR17520069. 4234772  
SRR17520069. 4234774  
SRR17520069. 4234776  
SRR17520069. 4234778  
SRR17520069. 4234780  
SRR17520069. 4234782  
SRR17520069. 4234784  
SRR17520069. 4234786  
SRR17520069. 4234788  
SRR17520069. 4234790  
SRR17520069. 4234792  
SRR17520069. 4234794  
SRR17520069. 4234796  
SRR17520069. 4234966  
SRR17520069. 4234968  
SRR17520069. 4234970  
SRR17520069. 4234972  
SRR17520069. 4234974  
SRR17520069. 4234976  
SRR17520069. 4234978  
SRR17520069. 4234980  
SRR17520069. 4234982  
SRR17520069. 4234984

SRR17520069. 4234986  
SRR17520069. 4234988  
SRR17520069. 4234990  
SRR17520069. 4234992  
SRR17520069. 4234994  
SRR17520069. 4234996  
SRR17520069. 4234998  
SRR17520069. 4235419  
SRR17520069. 4235421  
SRR17520069. 4235423  
SRR17520069. 4235425  
SRR17520069. 4235427  
SRR17520069. 4235429  
SRR17520069. 4235431  
SRR17520069. 4235433  
SRR17520069. 4235435  
SRR17520069. 4235437  
SRR17520069. 4235439  
SRR17520069. 4235441  
SRR17520069. 4235445  
SRR17520069. 4235447  
SRR17520069. 4240553  
SRR17520069. 4240555  
SRR17520069. 4240557  
SRR17520069. 4240559  
SRR17520069. 4240561  
SRR17520069. 4240563  
SRR17520069. 4240565  
SRR17520069. 4240567  
SRR17520069. 4240569  
SRR17520069. 4240571  
SRR17520069. 4240573  
SRR17520069. 4240575  
SRR17520069. 4240577  
SRR17520069. 4240579  
SRR17520069. 4240581  
SRR17520069. 4240583  
SRR17520069. 4240766  
SRR17520069. 4240768  
SRR17520069. 4240770  
SRR17520069. 4240772  
SRR17520069. 4240774  
SRR17520069. 4240776  
SRR17520069. 4240778  
SRR17520069. 4240780  
SRR17520069. 4240782  
SRR17520069. 4240784

SRR17520069.4240786  
SRR17520069.4240788  
SRR17520069.4240792  
SRR17520069.4240794  
SRR17520069.4240796  
SRR17520069.4240800  
SRR17520069.4240802  
SRR17520069.4240804  
SRR17520069.4240806  
SRR17520069.4240808  
SRR17520069.4240810  
SRR17520069.4240812  
SRR17520069.4240814  
SRR17520069.4240816  
SRR17520069.4240818  
SRR17520069.4240820  
SRR17520069.4240822  
SRR17520069.4240824  
SRR17520069.4240830  
SRR17520069.4240832  
SRR17520069.4240834  
SRR17520069.4240836  
SRR17520069.4240840  
SRR17520069.4240842  
SRR17520069.4240844  
SRR17520069.4240846  
SRR17520069.4240850  
SRR17520069.4240852  
SRR17520069.4240854  
SRR17520069.4240856  
SRR17520069.4240858  
SRR17520069.4240862  
SRR17520069.4240866  
SRR17520069.4240868  
SRR17520069.4242378  
SRR17520069.4242380  
SRR17520069.4242384  
SRR17520069.4242699  
SRR17520069.4242701  
SRR17520069.4242703  
SRR17520069.4242705  
SRR17520069.4245569  
SRR17520069.4245571  
SRR17520069.4247738  
SRR17520069.4247740  
SRR17520069.4247742  
SRR17520069.4247744



SRR17520069.4247746  
SRR17520069.4247748  
SRR17520069.4247750  
SRR17520069.4247752  
SRR17520069.4247754  
SRR17520069.4247756  
SRR17520069.4247758  
SRR17520069.4247760  
SRR17520069.4247762  
SRR17520069.4247764  
SRR17520069.4247766  
SRR17520069.4247768  
SRR17520069.4247770  
SRR17520069.4247772  
SRR17520069.4247774  
SRR17520069.4247776  
SRR17520069.4247778  
SRR17520069.4247780  
SRR17520069.4247782  
SRR17520069.4247784  
SRR17520069.4248572  
SRR17520069.4248576  
SRR17520069.4248580  
SRR17520069.4248582  
SRR17520069.4248588  
SRR17520069.4248596  
SRR17520069.4248598  
SRR17520069.4248600  
SRR17520069.4248602  
SRR17520069.4248604  
SRR17520069.4248606  
SRR17520069.4248608  
SRR17520069.4256825  
SRR17520069.4256827  
SRR17520069.4256829  
SRR17520069.4256831  
SRR17520069.4256833  
SRR17520069.4256835  
SRR17520069.4256837  
SRR17520069.4256839  
SRR17520069.4256841  
SRR17520069.4256843  
SRR17520069.4256845  
SRR17520069.4256847  
SRR17520069.4259355  
SRR17520069.4259357  
SRR17520069.4259359

SRR17520069.4259361  
SRR17520069.4259363  
SRR17520069.4259365  
SRR17520069.4259367  
SRR17520069.4259369  
SRR17520069.4259371  
SRR17520069.4259373  
SRR17520069.4259375  
SRR17520069.4259377  
SRR17520069.4259379  
SRR17520069.4259381  
SRR17520069.4259383  
SRR17520069.4259385  
SRR17520069.4259387  
SRR17520069.4259389  
SRR17520069.4259391  
SRR17520069.4259393  
SRR17520069.4259395  
SRR17520069.4259397  
SRR17520069.4259399  
SRR17520069.4259401  
SRR17520069.4259403  
SRR17520069.4259405  
SRR17520069.4259407  
SRR17520069.4259409  
SRR17520069.4259411  
SRR17520069.4259413  
SRR17520069.4259415  
SRR17520069.4259417  
SRR17520069.4259419  
SRR17520069.4259421  
SRR17520069.4259423  
SRR17520069.4259425  
SRR17520069.4259427  
SRR17520069.4259429  
SRR17520069.4259431  
SRR17520069.4259433  
SRR17520069.4259435  
SRR17520069.4259437  
SRR17520069.4259439  
SRR17520069.4259441  
SRR17520069.4259443  
SRR17520069.4259445  
SRR17520069.4259447  
SRR17520069.4259449  
SRR17520069.4259451  
SRR17520069.4259453

SRR17520069.4259455  
SRR17520069.4259457  
SRR17520069.4259459  
SRR17520069.4259461  
SRR17520069.4259463  
SRR17520069.4259465  
SRR17520069.4259469  
SRR17520069.4259471  
SRR17520069.4259473  
SRR17520069.4259475  
SRR17520069.4259477  
SRR17520069.4259479  
SRR17520069.4259481  
SRR17520069.4259483  
SRR17520069.4259485  
SRR17520069.4259487  
SRR17520069.4259489  
SRR17520069.4259491  
SRR17520069.4259493  
SRR17520069.4259495  
SRR17520069.4259497  
SRR17520069.4259499  
SRR17520069.4259501  
SRR17520069.4259503  
SRR17520069.4262986  
SRR17520069.4264347  
SRR17520069.4264351  
SRR17520069.4264353  
SRR17520069.4264355  
SRR17520069.4264357  
SRR17520069.4264361  
SRR17520069.4264363  
SRR17520069.4264365  
SRR17520069.4264367  
SRR17520069.4264371  
SRR17520069.4264373  
SRR17520069.4264375  
SRR17520069.4264377  
SRR17520069.4264379  
SRR17520069.4264381  
SRR17520069.4264383  
SRR17520069.4264387  
SRR17520069.4264389  
SRR17520069.4264731  
SRR17520069.4264733  
SRR17520069.4264735  
SRR17520069.4264737

SRR17520069.4264739  
SRR17520069.4264741  
SRR17520069.4264743  
SRR17520069.4264745  
SRR17520069.4264747  
SRR17520069.4264749  
SRR17520069.4264751  
SRR17520069.4264753  
SRR17520069.4272757  
SRR17520069.4272759  
SRR17520069.4272761  
SRR17520069.4272763  
SRR17520069.4272767  
SRR17520069.4272771  
SRR17520069.4274523  
SRR17520069.4277967  
SRR17520069.4277969  
SRR17520069.4277971  
SRR17520069.4289971  
SRR17520069.4289973  
SRR17520069.4289975  
SRR17520069.4289977  
SRR17520069.4289979  
SRR17520069.4289981  
SRR17520069.4289983  
SRR17520069.4289985  
SRR17520069.4289987  
SRR17520069.4289989  
SRR17520069.4289991  
SRR17520069.4289993  
SRR17520069.4289995  
SRR17520069.4289997  
SRR17520069.4289999  
SRR17520069.4290001  
SRR17520069.4290003  
SRR17520069.4290005  
SRR17520069.4290007  
SRR17520069.4290009  
SRR17520069.4290011  
SRR17520069.4290013  
SRR17520069.4290015  
SRR17520069.4290017  
SRR17520069.4290019  
SRR17520069.4290021  
SRR17520069.4290023  
SRR17520069.4290025  
SRR17520069.4290027

SRR17520069.4290029  
SRR17520069.4290031  
SRR17520069.4290033  
SRR17520069.4292474  
SRR17520069.4292476  
SRR17520069.4292480  
SRR17520069.4292484  
SRR17520069.4306276  
SRR17520069.4306280  
SRR17520069.4306282  
SRR17520069.4306286  
SRR17520069.4306288  
SRR17520069.4306290  
SRR17520069.4306294  
SRR17520069.4306298  
SRR17520069.4306300  
SRR17520069.4306302  
SRR17520069.4306304  
SRR17520069.4306306  
SRR17520069.4306308  
SRR17520069.4306310  
SRR17520069.4306312  
SRR17520069.4306314  
SRR17520069.4306316  
SRR17520069.4306318  
SRR17520069.4306320  
SRR17520069.4306322  
SRR17520069.4306324  
SRR17520069.4306326  
SRR17520069.4306328  
SRR17520069.4306330  
SRR17520069.4306332  
SRR17520069.4313852  
SRR17520069.4313854  
SRR17520069.4313858  
SRR17520069.4313860  
SRR17520069.4318140  
SRR17520069.4318142  
SRR17520069.4319782  
SRR17520069.4319784  
SRR17520069.4319786  
SRR17520069.4319788  
SRR17520069.4319790  
SRR17520069.4320020  
SRR17520069.4320022  
SRR17520069.4320026  
SRR17520069.4320028

SRR17520069.4320030  
SRR17520069.4320032  
SRR17520069.4320034  
SRR17520069.4320038  
SRR17520069.4320040  
SRR17520069.4320042  
SRR17520069.4320044  
SRR17520069.4320046  
SRR17520069.4320048  
SRR17520069.4320050  
SRR17520069.4320052  
SRR17520069.4320054  
SRR17520069.4320056  
SRR17520069.4320058  
SRR17520069.4320060  
SRR17520069.4320062  
SRR17520069.4324353  
SRR17520069.4324355  
SRR17520069.4324357  
SRR17520069.4324359  
SRR17520069.4324363  
SRR17520069.4324365  
SRR17520069.4324367  
SRR17520069.4329440  
SRR17520069.4329442  
SRR17520069.4329446  
SRR17520069.4329448  
SRR17520069.4329450  
SRR17520069.4329452  
SRR17520069.4329454  
SRR17520069.4329456  
SRR17520069.4329458  
SRR17520069.4329460  
SRR17520069.4329462  
SRR17520069.4329465  
SRR17520069.4329467  
SRR17520069.4329471  
SRR17520069.4329473  
SRR17520069.4329475  
SRR17520069.4329477  
SRR17520069.4329479  
SRR17520069.4329481  
SRR17520069.4329483  
SRR17520069.4329485  
SRR17520069.4329487  
SRR17520069.4329489  
SRR17520069.4329491

SRR17520069.4329493  
SRR17520069.4329495  
SRR17520069.4329497  
SRR17520069.4329499  
SRR17520069.4329503  
SRR17520069.4329505  
SRR17520069.4329507  
SRR17520069.4329509  
SRR17520069.4329511  
SRR17520069.4329513  
SRR17520069.4329515  
SRR17520069.4329517  
SRR17520069.4329519  
SRR17520069.4329521  
SRR17520069.4329523  
SRR17520069.4329525  
SRR17520069.4329527  
SRR17520069.4329529  
SRR17520069.4329531  
SRR17520069.4329533  
SRR17520069.4329535  
SRR17520069.4329537  
SRR17520069.4329539  
SRR17520069.4329541  
SRR17520069.4329543  
SRR17520069.4329545  
SRR17520069.4329547  
SRR17520069.4329549  
SRR17520069.4329551  
SRR17520069.4329553  
SRR17520069.4329555  
SRR17520069.4329557  
SRR17520069.4329559  
SRR17520069.4329561  
SRR17520069.4329563  
SRR17520069.4329565  
SRR17520069.4329569  
SRR17520069.4329571  
SRR17520069.4329573  
SRR17520069.4329575  
SRR17520069.4329577  
SRR17520069.4329579  
SRR17520069.4329581  
SRR17520069.4329583  
SRR17520069.4329587  
SRR17520069.4329589  
SRR17520069.4329593

SRR17520069.4329595  
SRR17520069.4329597  
SRR17520069.4329599  
SRR17520069.4329601  
SRR17520069.4329603  
SRR17520069.4333505  
SRR17520069.4333507  
SRR17520069.4333509  
SRR17520069.4333511  
SRR17520069.4333513  
SRR17520069.4333515  
SRR17520069.4333517  
SRR17520069.4333519  
SRR17520069.4333521  
SRR17520069.4333523  
SRR17520069.4333525  
SRR17520069.4333527  
SRR17520069.4333529  
SRR17520069.4333531  
SRR17520069.4333533  
SRR17520069.4333535  
SRR17520069.4333537  
SRR17520069.4333539  
SRR17520069.4333541  
SRR17520069.4333543  
SRR17520069.4333545  
SRR17520069.4333547  
SRR17520069.4333549  
SRR17520069.4333553  
SRR17520069.4333555  
SRR17520069.4333557  
SRR17520069.4333559  
SRR17520069.4333970  
SRR17520069.4333972  
SRR17520069.4333974  
SRR17520069.4333976  
SRR17520069.4333978  
SRR17520069.4333980  
SRR17520069.4333982  
SRR17520069.4333984  
SRR17520069.4333986  
SRR17520069.4333988  
SRR17520069.4333990  
SRR17520069.4333992  
SRR17520069.4333994  
SRR17520069.4333996  
SRR17520069.4333998



SRR17520069.4334000  
SRR17520069.4334002  
SRR17520069.4334004  
SRR17520069.4334006  
SRR17520069.4334008  
SRR17520069.4334010  
SRR17520069.4334012  
SRR17520069.4334014  
SRR17520069.4334016  
SRR17520069.4334018  
SRR17520069.4334020  
SRR17520069.4334022  
SRR17520069.4336313  
SRR17520069.4340049  
SRR17520069.4340051  
SRR17520069.4340053  
SRR17520069.4341287  
SRR17520069.4341289  
SRR17520069.4341291  
SRR17520069.4341293  
SRR17520069.4341295  
SRR17520069.4342273  
SRR17520069.4342275  
SRR17520069.4342277  
SRR17520069.4342279  
SRR17520069.4342281  
SRR17520069.4342285  
SRR17520069.4342287  
SRR17520069.4342289  
SRR17520069.4342291  
SRR17520069.4342293  
SRR17520069.4342295  
SRR17520069.4342297  
SRR17520069.4342299  
SRR17520069.4342301  
SRR17520069.4342303  
SRR17520069.4342305  
SRR17520069.4342307  
SRR17520069.4342309  
SRR17520069.4342311  
SRR17520069.4342313  
SRR17520069.4342315  
SRR17520069.4342317  
SRR17520069.4342319  
SRR17520069.4342321  
SRR17520069.4342323  
SRR17520069.4342325

SRR17520069.4342327  
SRR17520069.4342329  
SRR17520069.4342331  
SRR17520069.4342333  
SRR17520069.4342335  
SRR17520069.4342337  
SRR17520069.4342339  
SRR17520069.4342341  
SRR17520069.4342343  
SRR17520069.4342345  
SRR17520069.4342347  
SRR17520069.4342349  
SRR17520069.4342351  
SRR17520069.4342355  
SRR17520069.4342357  
SRR17520069.4342359  
SRR17520069.4355748  
SRR17520069.4355750  
SRR17520069.4355752  
SRR17520069.4355754  
SRR17520069.4355756  
SRR17520069.4355758  
SRR17520069.4355760  
SRR17520069.4355762  
SRR17520069.4355764  
SRR17520069.4355766  
SRR17520069.4355768  
SRR17520069.4355770  
SRR17520069.4355772  
SRR17520069.4355774  
SRR17520069.4355776  
SRR17520069.4355778  
SRR17520069.4355780  
SRR17520069.4355782  
SRR17520069.4355784  
SRR17520069.4355786  
SRR17520069.4355788  
SRR17520069.4355790  
SRR17520069.4355792  
SRR17520069.4355794  
SRR17520069.4355796  
SRR17520069.4355798  
SRR17520069.4355800  
SRR17520069.4355802  
SRR17520069.4355804  
SRR17520069.4355806  
SRR17520069.4355808

SRR17520069.4355810  
SRR17520069.4355812  
SRR17520069.4355814  
SRR17520069.4355816  
SRR17520069.4355818  
SRR17520069.4355820  
SRR17520069.4355822  
SRR17520069.4355826  
SRR17520069.4355828  
SRR17520069.4355830  
SRR17520069.4355832  
SRR17520069.4355834  
SRR17520069.4355836  
SRR17520069.4355838  
SRR17520069.4355840  
SRR17520069.4355842  
SRR17520069.4355844  
SRR17520069.4355846  
SRR17520069.4355848  
SRR17520069.4355850  
SRR17520069.4355852  
SRR17520069.4355854  
SRR17520069.4355856  
SRR17520069.4355858  
SRR17520069.4355860  
SRR17520069.4355862  
SRR17520069.4355864  
SRR17520069.4355866  
SRR17520069.4355868  
SRR17520069.4355870  
SRR17520069.4355872  
SRR17520069.4355874  
SRR17520069.4355876  
SRR17520069.4355878  
SRR17520069.4356682  
SRR17520069.4356684  
SRR17520069.4356868  
SRR17520069.4356870  
SRR17520069.4356872  
SRR17520069.4356876  
SRR17520069.4356878  
SRR17520069.4356880  
SRR17520069.4356882  
SRR17520069.4356888  
SRR17520069.4356890  
SRR17520069.4356892  
SRR17520069.4356894

SRR17520069.4357442  
SRR17520069.4357446  
SRR17520069.4357450  
SRR17520069.4357452  
SRR17520069.4357454  
SRR17520069.4357456  
SRR17520069.4357458  
SRR17520069.4357460  
SRR17520069.4357462  
SRR17520069.4357464  
SRR17520069.4357466  
SRR17520069.4357468  
SRR17520069.4357470  
SRR17520069.4357472  
SRR17520069.4357474  
SRR17520069.4357476  
SRR17520069.4365563  
SRR17520069.4365565  
SRR17520069.4365567  
SRR17520069.4365569  
SRR17520069.4365571  
SRR17520069.4365573  
SRR17520069.4365575  
SRR17520069.4365577  
SRR17520069.4365579  
SRR17520069.4365581  
SRR17520069.4365583  
SRR17520069.4365585  
SRR17520069.4365587  
SRR17520069.4365589  
SRR17520069.4365591  
SRR17520069.4365593  
SRR17520069.4365595  
SRR17520069.4365597  
SRR17520069.4365599  
SRR17520069.4365601  
SRR17520069.4365603  
SRR17520069.4365605  
SRR17520069.4365607  
SRR17520069.4367640  
SRR17520069.4367642  
SRR17520069.4367644  
SRR17520069.4367646  
SRR17520069.4367648  
SRR17520069.4367650  
SRR17520069.4373887  
SRR17520069.4373889

SRR17520069.4373891  
SRR17520069.4373893  
SRR17520069.4373895  
SRR17520069.4373897  
SRR17520069.4373899  
SRR17520069.4373901  
SRR17520069.4373903  
SRR17520069.4373905  
SRR17520069.4373907  
SRR17520069.4373909  
SRR17520069.4373911  
SRR17520069.4383235  
SRR17520069.4383237  
SRR17520069.4383239  
SRR17520069.4383241  
SRR17520069.4385294  
SRR17520069.4385296  
SRR17520069.4385300  
SRR17520069.4385302  
SRR17520069.4385304  
SRR17520069.4385306  
SRR17520069.4385308  
SRR17520069.4385310  
SRR17520069.4385312  
SRR17520069.4385314  
SRR17520069.4385316  
SRR17520069.4385318  
SRR17520069.4385320  
SRR17520069.4385322  
SRR17520069.4385324  
SRR17520069.4385326  
SRR17520069.4385328  
SRR17520069.4414652  
SRR17520069.4414654  
SRR17520069.4414656  
SRR17520069.4416749  
SRR17520069.4416751  
SRR17520069.4416753  
SRR17520069.4416755  
SRR17520069.4416757  
SRR17520069.4416759  
SRR17520069.4416911  
SRR17520069.4416913  
SRR17520069.4416915  
SRR17520069.4416917  
SRR17520069.4416919  
SRR17520069.4416921

SRR17520069.4416923  
SRR17520069.4416925  
SRR17520069.4416927  
SRR17520069.4416929  
SRR17520069.4416931  
SRR17520069.4416933  
SRR17520069.4416935  
SRR17520069.4416937  
SRR17520069.4416939  
SRR17520069.4416941  
SRR17520069.4416943  
SRR17520069.4416945  
SRR17520069.4416947  
SRR17520069.4416949  
SRR17520069.4416951  
SRR17520069.4416953  
SRR17520069.4416955  
SRR17520069.4416957  
SRR17520069.4416959  
SRR17520069.4416961  
SRR17520069.4416963  
SRR17520069.4417073  
SRR17520069.4417081  
SRR17520069.4417083  
SRR17520069.4417085  
SRR17520069.4417087  
SRR17520069.4417089  
SRR17520069.4417091  
SRR17520069.4417141  
SRR17520069.4429372  
SRR17520069.4429374  
SRR17520069.4429376  
SRR17520069.4429378  
SRR17520069.4429380  
SRR17520069.4429382  
SRR17520069.4429384  
SRR17520069.4429386  
SRR17520069.4429388  
SRR17520069.4429390  
SRR17520069.4429392  
SRR17520069.4429394  
SRR17520069.4429396  
SRR17520069.4429398  
SRR17520069.4429400  
SRR17520069.4435811  
SRR17520069.4435813  
SRR17520069.4435815

SRR17520069.4435817  
SRR17520069.4435819  
SRR17520069.4435823  
SRR17520069.4435828  
SRR17520069.4435830  
SRR17520069.4435832  
SRR17520069.4435834  
SRR17520069.4435836  
SRR17520069.4438186  
SRR17520069.4438188  
SRR17520069.4438190  
SRR17520069.4438192  
SRR17520069.4438194  
SRR17520069.4439767  
SRR17520069.4439769  
SRR17520069.4439771  
SRR17520069.4439773  
SRR17520069.4439775  
SRR17520069.4439777  
SRR17520069.4439779  
SRR17520069.4439781  
SRR17520069.4439783  
SRR17520069.4439785  
SRR17520069.4439787  
SRR17520069.4441081  
SRR17520069.4441087  
SRR17520069.4441089  
SRR17520069.4441091  
SRR17520069.4441093  
SRR17520069.4442479  
SRR17520069.4442504  
SRR17520069.4442506  
SRR17520069.4442508  
SRR17520069.4442510  
SRR17520069.4442537  
SRR17520069.4443945  
SRR17520069.4443947  
SRR17520069.4443949  
SRR17520069.4456274  
SRR17520069.4456485  
SRR17520069.4456487  
SRR17520069.4456489  
SRR17520069.4456491  
SRR17520069.4456493  
SRR17520069.4456495  
SRR17520069.4456497  
SRR17520069.4456499

SRR17520069.4456501  
SRR17520069.4456503  
SRR17520069.4456505  
SRR17520069.4462777  
SRR17520069.4462779  
SRR17520069.4462781  
SRR17520069.4462783  
SRR17520069.4462785  
SRR17520069.4462787  
SRR17520069.4462789  
SRR17520069.4462791  
SRR17520069.4468521  
SRR17520069.4471429  
SRR17520069.4471431  
SRR17520069.4471437  
SRR17520069.4471439  
SRR17520069.4474412  
SRR17520069.4474414  
SRR17520069.4474416  
SRR17520069.4474418  
SRR17520069.4474420  
SRR17520069.4474422  
SRR17520069.4474424  
SRR17520069.4474426  
SRR17520069.4474428  
SRR17520069.4474430  
SRR17520069.4474432  
SRR17520069.4474434  
SRR17520069.4474436  
SRR17520069.4474438  
SRR17520069.4474440  
SRR17520069.4474444  
SRR17520069.4474446  
SRR17520069.4474448  
SRR17520069.4474450  
SRR17520069.4474452  
SRR17520069.4475503  
SRR17520069.4475507  
SRR17520069.4475509  
SRR17520069.4475511  
SRR17520069.4475513  
SRR17520069.4475515  
SRR17520069.4475517  
SRR17520069.4475519  
SRR17520069.4475521  
SRR17520069.4475523  
SRR17520069.4475525



SRR17520069.4475527  
SRR17520069.4475529  
SRR17520069.4475531  
SRR17520069.4475533  
SRR17520069.4475535  
SRR17520069.4475537  
SRR17520069.4475539  
SRR17520069.4475541  
SRR17520069.4475543  
SRR17520069.4475545  
SRR17520069.4475547  
SRR17520069.4475549  
SRR17520069.4475551  
SRR17520069.4475553  
SRR17520069.4475555  
SRR17520069.4475557  
SRR17520069.4475559  
SRR17520069.4475561  
SRR17520069.4475563  
SRR17520069.4475565  
SRR17520069.4475567  
SRR17520069.4475569  
SRR17520069.4475571  
SRR17520069.4475573  
SRR17520069.4475575  
SRR17520069.4475577  
SRR17520069.4475579  
SRR17520069.4475581  
SRR17520069.4475583  
SRR17520069.4475585  
SRR17520069.4475587  
SRR17520069.4475589  
SRR17520069.4475591  
SRR17520069.4475593  
SRR17520069.4475595  
SRR17520069.4475597  
SRR17520069.4475599  
SRR17520069.4475601  
SRR17520069.4478681  
SRR17520069.4478685  
SRR17520069.4478687  
SRR17520069.4478689  
SRR17520069.4478691  
SRR17520069.4478693  
SRR17520069.4478695  
SRR17520069.4478697  
SRR17520069.4478699

SRR17520069.4478701  
SRR17520069.4478703  
SRR17520069.4478705  
SRR17520069.4478707  
SRR17520069.4478709  
SRR17520069.4478711  
SRR17520069.4478713  
SRR17520069.4478715  
SRR17520069.4478719  
SRR17520069.4478721  
SRR17520069.4478723  
SRR17520069.4478725  
SRR17520069.4478727  
SRR17520069.4478729  
SRR17520069.4478731  
SRR17520069.4478733  
SRR17520069.4478735  
SRR17520069.4478737  
SRR17520069.4478739  
SRR17520069.4478741  
SRR17520069.4478743  
SRR17520069.4478745  
SRR17520069.4478747  
SRR17520069.4480726  
SRR17520069.4480728  
SRR17520069.4480730  
SRR17520069.4480732  
SRR17520069.4480734  
SRR17520069.4480736  
SRR17520069.4480738  
SRR17520069.4480740  
SRR17520069.4480742  
SRR17520069.4480744  
SRR17520069.4480746  
SRR17520069.4480748  
SRR17520069.4480750  
SRR17520069.4480752  
SRR17520069.4480754  
SRR17520069.4480756  
SRR17520069.4480758  
SRR17520069.4480760  
SRR17520069.4480762  
SRR17520069.4480764  
SRR17520069.4480768  
SRR17520069.4480770  
SRR17520069.4480772  
SRR17520069.4480774

SRR17520069.4480776  
SRR17520069.4480778  
SRR17520069.4480780  
SRR17520069.4480782  
SRR17520069.4480784  
SRR17520069.4480786  
SRR17520069.4480788  
SRR17520069.4480790  
SRR17520069.4480792  
SRR17520069.4480794  
SRR17520069.4480796  
SRR17520069.4480798  
SRR17520069.4480800  
SRR17520069.4480804  
SRR17520069.4480806  
SRR17520069.4480808  
SRR17520069.4480810  
SRR17520069.4480812  
SRR17520069.4481216  
SRR17520069.4481218  
SRR17520069.4481220  
SRR17520069.4481222  
SRR17520069.4481224  
SRR17520069.4481226  
SRR17520069.4481230  
SRR17520069.4481232  
SRR17520069.4481234  
SRR17520069.4481236  
SRR17520069.4481238  
SRR17520069.4481240  
SRR17520069.4481242  
SRR17520069.4481244  
SRR17520069.4481246  
SRR17520069.4481248  
SRR17520069.4481250  
SRR17520069.4481252  
SRR17520069.4481254  
SRR17520069.4481256  
SRR17520069.4481258  
SRR17520069.4481260  
SRR17520069.4481262  
SRR17520069.4481266  
SRR17520069.4481268  
SRR17520069.4481270  
SRR17520069.4481272  
SRR17520069.4481274  
SRR17520069.4481276

SRR17520069.4481278  
SRR17520069.4481280  
SRR17520069.4481282  
SRR17520069.4481284  
SRR17520069.4481286  
SRR17520069.4481288  
SRR17520069.4481290  
SRR17520069.4481292  
SRR17520069.4481294  
SRR17520069.4481296  
SRR17520069.4481298  
SRR17520069.4481300  
SRR17520069.4481302  
SRR17520069.4481304  
SRR17520069.4481306  
SRR17520069.4481308  
SRR17520069.4481310  
SRR17520069.4481312  
SRR17520069.4481314  
SRR17520069.4481316  
SRR17520069.4481318  
SRR17520069.4481320  
SRR17520069.4481322  
SRR17520069.4481324  
SRR17520069.4481326  
SRR17520069.4481328  
SRR17520069.4481330  
SRR17520069.4481332  
SRR17520069.4487446  
SRR17520069.4487448  
SRR17520069.4487450  
SRR17520069.4488849  
SRR17520069.4488851  
SRR17520069.4488853  
SRR17520069.4488855  
SRR17520069.4488857  
SRR17520069.4488859  
SRR17520069.4488861  
SRR17520069.4488863  
SRR17520069.4488865  
SRR17520069.4488867  
SRR17520069.4488869  
SRR17520069.4488871  
SRR17520069.4488873  
SRR17520069.4488875  
SRR17520069.4488877  
SRR17520069.4488879

SRR17520069.4488881  
SRR17520069.4488883  
SRR17520069.4488885  
SRR17520069.4488887  
SRR17520069.4488889  
SRR17520069.4488891  
SRR17520069.4488895  
SRR17520069.4488897  
SRR17520069.4488899  
SRR17520069.4488901  
SRR17520069.4488903  
SRR17520069.4488905  
SRR17520069.4488907  
SRR17520069.4488909  
SRR17520069.4488911  
SRR17520069.4492991  
SRR17520069.4492993  
SRR17520069.4492997  
SRR17520069.4492999  
SRR17520069.4493001  
SRR17520069.4493003  
SRR17520069.4493005  
SRR17520069.4493007  
SRR17520069.4493009  
SRR17520069.4493011  
SRR17520069.4493013  
SRR17520069.4493015  
SRR17520069.4493017  
SRR17520069.4493019  
SRR17520069.4493021  
SRR17520069.4493023  
SRR17520069.4493025  
SRR17520069.4493027  
SRR17520069.4493029  
SRR17520069.4493031  
SRR17520069.4493033  
SRR17520069.4493035  
SRR17520069.4493037  
SRR17520069.4493039  
SRR17520069.4493041  
SRR17520069.4493043  
SRR17520069.4493045  
SRR17520069.4493047  
SRR17520069.4493049  
SRR17520069.4493051  
SRR17520069.4493053  
SRR17520069.4493055

SRR17520069.4493057  
SRR17520069.4493059  
SRR17520069.4493061  
SRR17520069.4493063  
SRR17520069.4493065  
SRR17520069.4493067  
SRR17520069.4493069  
SRR17520069.4503602  
SRR17520069.4503604  
SRR17520069.4503606  
SRR17520069.4503608  
SRR17520069.4503610  
SRR17520069.4503612  
SRR17520069.4503614  
SRR17520069.4503616  
SRR17520069.4503620  
SRR17520069.4503622  
SRR17520069.4503624  
SRR17520069.4503626  
SRR17520069.4503628  
SRR17520069.4503632  
SRR17520069.4503634  
SRR17520069.4503636  
SRR17520069.4503638  
SRR17520069.4503640  
SRR17520069.4503642  
SRR17520069.4503644  
SRR17520069.4503646  
SRR17520069.4503648  
SRR17520069.4503650  
SRR17520069.4503652  
SRR17520069.4503654  
SRR17520069.4503656  
SRR17520069.4503658  
SRR17520069.4503660  
SRR17520069.4503662  
SRR17520069.4503666  
SRR17520069.4503668  
SRR17520069.4503670  
SRR17520069.4503672  
SRR17520069.4503674  
SRR17520069.4503676  
SRR17520069.4505295  
SRR17520069.4505297  
SRR17520069.4506250  
SRR17520069.4506252  
SRR17520069.4506254

SRR17520069.4506256  
SRR17520069.4506258  
SRR17520069.4506260  
SRR17520069.4506262  
SRR17520069.4506264  
SRR17520069.4506681  
SRR17520069.4506683  
SRR17520069.4506685  
SRR17520069.4506687  
SRR17520069.4506689  
SRR17520069.4519141  
SRR17520069.4519143  
SRR17520069.4519145  
SRR17520069.4519147  
SRR17520069.4519363  
SRR17520069.4520523  
SRR17520069.4520525  
SRR17520069.4520527  
SRR17520069.4520529  
SRR17520069.4520531  
SRR17520069.4520539  
SRR17520069.4520541  
SRR17520069.4520543  
SRR17520069.4520545  
SRR17520069.4520547  
SRR17520069.4520549  
SRR17520069.4520555  
SRR17520069.4520557  
SRR17520069.4520559  
SRR17520069.4520561  
SRR17520069.4520563  
SRR17520069.4520565  
SRR17520069.4520567  
SRR17520069.4520569  
SRR17520069.4520571  
SRR17520069.4521322  
SRR17520069.4521324  
SRR17520069.4521326  
SRR17520069.4521328  
SRR17520069.4522959  
SRR17520069.4522961  
SRR17520069.4522963  
SRR17520069.4522965  
SRR17520069.4522971  
SRR17520069.4525735  
SRR17520069.4525737  
SRR17520069.4525739

SRR17520069.4525741  
SRR17520069.4525743  
SRR17520069.4525745  
SRR17520069.4525747  
SRR17520069.4525749  
SRR17520069.4525751  
SRR17520069.4525753  
SRR17520069.4525755  
SRR17520069.4525759  
SRR17520069.4525761  
SRR17520069.4525763  
SRR17520069.4525765  
SRR17520069.4525769  
SRR17520069.4525771  
SRR17520069.4525773  
SRR17520069.4525775  
SRR17520069.4525777  
SRR17520069.4525779  
SRR17520069.4525781  
SRR17520069.4525785  
SRR17520069.4525787  
SRR17520069.4526876  
SRR17520069.4526880  
SRR17520069.4526882  
SRR17520069.4526884  
SRR17520069.4526890  
SRR17520069.4526892  
SRR17520069.4526894  
SRR17520069.4526896  
SRR17520069.4526900  
SRR17520069.4526902  
SRR17520069.4526904  
SRR17520069.4526908  
SRR17520069.4526910  
SRR17520069.4526912  
SRR17520069.4527499  
SRR17520069.4527501  
SRR17520069.4527505  
SRR17520069.4528454  
SRR17520069.4528456  
SRR17520069.4528458  
SRR17520069.4528460  
SRR17520069.4528462  
SRR17520069.4528464  
SRR17520069.4528466  
SRR17520069.4528468  
SRR17520069.4528470



SRR17520069.4528472  
SRR17520069.4528474  
SRR17520069.4528478  
SRR17520069.4528480  
SRR17520069.4528482  
SRR17520069.4528484  
SRR17520069.4528486  
SRR17520069.4528488  
SRR17520069.4528492  
SRR17520069.4528496  
SRR17520069.4528500  
SRR17520069.4528504  
SRR17520069.4528506  
SRR17520069.4528508  
SRR17520069.4528665  
SRR17520069.4528667  
SRR17520069.4528669  
SRR17520069.4528671  
SRR17520069.4528673  
SRR17520069.4528675  
SRR17520069.4528677  
SRR17520069.4528679  
SRR17520069.4528681  
SRR17520069.4528683  
SRR17520069.4528685  
SRR17520069.4528687  
SRR17520069.4528689  
SRR17520069.4528691  
SRR17520069.4528693  
SRR17520069.4528695  
SRR17520069.4528697  
SRR17520069.4528699  
SRR17520069.4528701  
SRR17520069.4528703  
SRR17520069.4528705  
SRR17520069.4529998  
SRR17520069.4530000  
SRR17520069.4530002  
SRR17520069.4530004  
SRR17520069.4530006  
SRR17520069.4530008  
SRR17520069.4530010  
SRR17520069.4530012  
SRR17520069.4530016  
SRR17520069.4530018  
SRR17520069.4530020  
SRR17520069.4530022

SRR17520069.4530024  
SRR17520069.4530026  
SRR17520069.4530028  
SRR17520069.4530030  
SRR17520069.4530032  
SRR17520069.4530034  
SRR17520069.4530038  
SRR17520069.4530040  
SRR17520069.4530042  
SRR17520069.4530044  
SRR17520069.4530046  
SRR17520069.4530048  
SRR17520069.4530050  
SRR17520069.4530052  
SRR17520069.4530054  
SRR17520069.4530056  
SRR17520069.4530058  
SRR17520069.4530060  
SRR17520069.4530062  
SRR17520069.4530064  
SRR17520069.4530066  
SRR17520069.4530068  
SRR17520069.4530070  
SRR17520069.4530072  
SRR17520069.4530074  
SRR17520069.4530076  
SRR17520069.4530078  
SRR17520069.4530080  
SRR17520069.4530082  
SRR17520069.4530084  
SRR17520069.4530086  
SRR17520069.4530088  
SRR17520069.4530090  
SRR17520069.4530092  
SRR17520069.4530094  
SRR17520069.4530096  
SRR17520069.4530098  
SRR17520069.4530100  
SRR17520069.4530102  
SRR17520069.4530104  
SRR17520069.4530106  
SRR17520069.4530108  
SRR17520069.4530110  
SRR17520069.4530112  
SRR17520069.4530114  
SRR17520069.4530116  
SRR17520069.4530118

SRR17520069.4530120  
SRR17520069.4530122  
SRR17520069.4530124  
SRR17520069.4530126  
SRR17520069.4530128  
SRR17520069.4530130  
SRR17520069.4530132  
SRR17520069.4530134  
SRR17520069.4530136  
SRR17520069.4530138  
SRR17520069.4530140  
SRR17520069.4530142  
SRR17520069.4530144  
SRR17520069.4530146  
SRR17520069.4530148  
SRR17520069.4530150  
SRR17520069.4530152  
SRR17520069.4530154  
SRR17520069.4530156  
SRR17520069.4530158  
SRR17520069.4530160  
SRR17520069.4530162  
SRR17520069.4530164  
SRR17520069.4530166  
SRR17520069.4530168  
SRR17520069.4530170  
SRR17520069.4530172  
SRR17520069.4530174  
SRR17520069.4530176  
SRR17520069.4530178  
SRR17520069.4530180  
SRR17520069.4530182  
SRR17520069.4530184  
SRR17520069.4530186  
SRR17520069.4530188  
SRR17520069.4530190  
SRR17520069.4530192  
SRR17520069.4530194  
SRR17520069.4530196  
SRR17520069.4530198  
SRR17520069.4530200  
SRR17520069.4530202  
SRR17520069.4530206  
SRR17520069.4530208  
SRR17520069.4530210  
SRR17520069.4530212  
SRR17520069.4530214

SRR17520069.4530216  
SRR17520069.4530218  
SRR17520069.4530220  
SRR17520069.4530222  
SRR17520069.4530224  
SRR17520069.4530226  
SRR17520069.4530228  
SRR17520069.4530230  
SRR17520069.4530232  
SRR17520069.4530234  
SRR17520069.4530236  
SRR17520069.4530238  
SRR17520069.4530240  
SRR17520069.4530242  
SRR17520069.4530244  
SRR17520069.4530246  
SRR17520069.4530248  
SRR17520069.4530250  
SRR17520069.4530252  
SRR17520069.4531069  
SRR17520069.4531071  
SRR17520069.4531073  
SRR17520069.4531075  
SRR17520069.4531079  
SRR17520069.4531081  
SRR17520069.4531083  
SRR17520069.4531085  
SRR17520069.4544236  
SRR17520069.4544238  
SRR17520069.4544242  
SRR17520069.4544244  
SRR17520069.4544246  
SRR17520069.4544248  
SRR17520069.4544250  
SRR17520069.4544252  
SRR17520069.4544254  
SRR17520069.4544256  
SRR17520069.4544258  
SRR17520069.4544260  
SRR17520069.4544262  
SRR17520069.4544264  
SRR17520069.4544266  
SRR17520069.4544268  
SRR17520069.4544270  
SRR17520069.4544272  
SRR17520069.4544274  
SRR17520069.4544276

SRR17520069.4544278  
SRR17520069.4544280  
SRR17520069.4544282  
SRR17520069.4544284  
SRR17520069.4544286  
SRR17520069.4544288  
SRR17520069.4544292  
SRR17520069.4544294  
SRR17520069.4545204  
SRR17520069.4545206  
SRR17520069.4545208  
SRR17520069.4545210  
SRR17520069.4545212  
SRR17520069.4545214  
SRR17520069.4545216  
SRR17520069.4545218  
SRR17520069.4545220  
SRR17520069.4545222  
SRR17520069.4545224  
SRR17520069.4545226  
SRR17520069.4545228  
SRR17520069.4545230  
SRR17520069.4545232  
SRR17520069.4545234  
SRR17520069.4545236  
SRR17520069.4545238  
SRR17520069.4545240  
SRR17520069.4545244  
SRR17520069.4545248  
SRR17520069.4545250  
SRR17520069.4545252  
SRR17520069.4545254  
SRR17520069.4545258  
SRR17520069.4545260  
SRR17520069.4545262  
SRR17520069.4545264  
SRR17520069.4545266  
SRR17520069.4545268  
SRR17520069.4545270  
SRR17520069.4545272  
SRR17520069.4545274  
SRR17520069.4545276  
SRR17520069.4545278  
SRR17520069.4545280  
SRR17520069.4545282  
SRR17520069.4545284  
SRR17520069.4545286

SRR17520069.4545288  
SRR17520069.4545290  
SRR17520069.4545292  
SRR17520069.4545294  
SRR17520069.4545296  
SRR17520069.4545298  
SRR17520069.4545300  
SRR17520069.4549477  
SRR17520069.4549479  
SRR17520069.4549481  
SRR17520069.4549483  
SRR17520069.4549485  
SRR17520069.4549487  
SRR17520069.4549489  
SRR17520069.4549491  
SRR17520069.4549493  
SRR17520069.4549495  
SRR17520069.4549497  
SRR17520069.4549499  
SRR17520069.4549501  
SRR17520069.4549503  
SRR17520069.4549505  
SRR17520069.4549507  
SRR17520069.4549509  
SRR17520069.4549511  
SRR17520069.4549513  
SRR17520069.4549515  
SRR17520069.4549517  
SRR17520069.4549519  
SRR17520069.4549521  
SRR17520069.4549523  
SRR17520069.4549525  
SRR17520069.4549527  
SRR17520069.4549529  
SRR17520069.4549531  
SRR17520069.4549533  
SRR17520069.4549535  
SRR17520069.4549537  
SRR17520069.4549539  
SRR17520069.4549541  
SRR17520069.4549543  
SRR17520069.4549545  
SRR17520069.4549547  
SRR17520069.4549549  
SRR17520069.4549551  
SRR17520069.4551128  
SRR17520069.4551130

SRR17520069.4551132  
SRR17520069.4551134  
SRR17520069.4551136  
SRR17520069.4551138  
SRR17520069.4551140  
SRR17520069.4551142  
SRR17520069.4551144  
SRR17520069.4551146  
SRR17520069.4551148  
SRR17520069.4551150  
SRR17520069.4551152  
SRR17520069.4551154  
SRR17520069.4551156  
SRR17520069.4551160  
SRR17520069.4551162  
SRR17520069.4551164  
SRR17520069.4551166  
SRR17520069.4551168  
SRR17520069.4551170  
SRR17520069.4551172  
SRR17520069.4551176  
SRR17520069.4551178  
SRR17520069.4551180  
SRR17520069.4551182  
SRR17520069.4551184  
SRR17520069.4551186  
SRR17520069.4551188  
SRR17520069.4551190  
SRR17520069.4551192  
SRR17520069.4551194  
SRR17520069.4551196  
SRR17520069.4551198  
SRR17520069.4551200  
SRR17520069.4551202  
SRR17520069.4551204  
SRR17520069.4551206  
SRR17520069.4551208  
SRR17520069.4551210  
SRR17520069.4551212  
SRR17520069.4551214  
SRR17520069.4551216  
SRR17520069.4551218  
SRR17520069.4551220  
SRR17520069.4551222  
SRR17520069.4551224  
SRR17520069.4551226  
SRR17520069.4551228

SRR17520069.4551230  
SRR17520069.4551232  
SRR17520069.4551234  
SRR17520069.4551236  
SRR17520069.4551238  
SRR17520069.4551240  
SRR17520069.4551242  
SRR17520069.4551244  
SRR17520069.4551246  
SRR17520069.4551248  
SRR17520069.4551250  
SRR17520069.4551252  
SRR17520069.4551254  
SRR17520069.4551256  
SRR17520069.4551260  
SRR17520069.4551262  
SRR17520069.4551264  
SRR17520069.4551266  
SRR17520069.4551268  
SRR17520069.4551270  
SRR17520069.4551933  
SRR17520069.4551935  
SRR17520069.4551937  
SRR17520069.4551939  
SRR17520069.4551941  
SRR17520069.4551943  
SRR17520069.4551945  
SRR17520069.4551947  
SRR17520069.4551949  
SRR17520069.4554413  
SRR17520069.4554415  
SRR17520069.4554417  
SRR17520069.4554419  
SRR17520069.4554421  
SRR17520069.4554423  
SRR17520069.4554425  
SRR17520069.4554427  
SRR17520069.4554429  
SRR17520069.4554431  
SRR17520069.4554433  
SRR17520069.4561521  
SRR17520069.4561523  
SRR17520069.4561525  
SRR17520069.4561527  
SRR17520069.4561529  
SRR17520069.4561531  
SRR17520069.4561533



SRR17520069.4561535  
SRR17520069.4561537  
SRR17520069.4561539  
SRR17520069.4561541  
SRR17520069.4561543  
SRR17520069.4561545  
SRR17520069.4561547  
SRR17520069.4561549  
SRR17520069.4561551  
SRR17520069.4561553  
SRR17520069.4561555  
SRR17520069.4561557  
SRR17520069.4561561  
SRR17520069.4561563  
SRR17520069.4561565  
SRR17520069.4561567  
SRR17520069.4561569  
SRR17520069.4561571  
SRR17520069.4561573  
SRR17520069.4561575  
SRR17520069.4561577  
SRR17520069.4562455  
SRR17520069.4562457  
SRR17520069.4562567  
SRR17520069.4562569  
SRR17520069.4562571  
SRR17520069.4562573  
SRR17520069.4562577  
SRR17520069.4562785  
SRR17520069.4562787  
SRR17520069.4562789  
SRR17520069.4562791  
SRR17520069.4562793  
SRR17520069.4562795  
SRR17520069.4562797  
SRR17520069.4562799  
SRR17520069.4562801  
SRR17520069.4562803  
SRR17520069.4562805  
SRR17520069.4562807  
SRR17520069.4562809  
SRR17520069.4562811  
SRR17520069.4562815  
SRR17520069.4562819  
SRR17520069.4562821  
SRR17520069.4562823  
SRR17520069.4562825

SRR17520069.4562827  
SRR17520069.4562829  
SRR17520069.4562831  
SRR17520069.4562833  
SRR17520069.4562835  
SRR17520069.4562839  
SRR17520069.4562843  
SRR17520069.4562845  
SRR17520069.4562847  
SRR17520069.4562853  
SRR17520069.4563042  
SRR17520069.4563044  
SRR17520069.4563046  
SRR17520069.4563048  
SRR17520069.4563050  
SRR17520069.4563052  
SRR17520069.4565141  
SRR17520069.4565143  
SRR17520069.4565145  
SRR17520069.4565147  
SRR17520069.4565149  
SRR17520069.4565153  
SRR17520069.4565155  
SRR17520069.4565157  
SRR17520069.4565159  
SRR17520069.4565161  
SRR17520069.4565163  
SRR17520069.4565165  
SRR17520069.4565167  
SRR17520069.4565169  
SRR17520069.4565171  
SRR17520069.4565173  
SRR17520069.4565175  
SRR17520069.4565177  
SRR17520069.4565179  
SRR17520069.4565181  
SRR17520069.4565183  
SRR17520069.4565185  
SRR17520069.4565187  
SRR17520069.4565189  
SRR17520069.4565191  
SRR17520069.4565193  
SRR17520069.4565195  
SRR17520069.4565197  
SRR17520069.4565199  
SRR17520069.4565201  
SRR17520069.4565203

SRR17520069.4565205  
SRR17520069.4565207  
SRR17520069.4565649  
SRR17520069.4565651  
SRR17520069.4565653  
SRR17520069.4565655  
SRR17520069.4565657  
SRR17520069.4565661  
SRR17520069.4567281  
SRR17520069.4567283  
SRR17520069.4567285  
SRR17520069.4567287  
SRR17520069.4567289  
SRR17520069.4567291  
SRR17520069.4567293  
SRR17520069.4567295  
SRR17520069.4567297  
SRR17520069.4567299  
SRR17520069.4567301  
SRR17520069.4567303  
SRR17520069.4567305  
SRR17520069.4569013  
SRR17520069.4569015  
SRR17520069.4569017  
SRR17520069.4569019  
SRR17520069.4569021  
SRR17520069.4569023  
SRR17520069.4569025  
SRR17520069.4569027  
SRR17520069.4569029  
SRR17520069.4579196  
SRR17520069.4579198  
SRR17520069.4579200  
SRR17520069.4579202  
SRR17520069.4579204  
SRR17520069.4579206  
SRR17520069.4592967  
SRR17520069.4592969  
SRR17520069.4592971  
SRR17520069.4592973  
SRR17520069.4592975  
SRR17520069.4592977  
SRR17520069.4592979  
SRR17520069.4592981  
SRR17520069.4592985  
SRR17520069.4592987  
SRR17520069.4592989

SRR17520069.4592991  
SRR17520069.4594999  
SRR17520069.4604089  
SRR17520069.4604091  
SRR17520069.4604093  
SRR17520069.4604095  
SRR17520069.4604097  
SRR17520069.4604099  
SRR17520069.4604101  
SRR17520069.4607647  
SRR17520069.4607649  
SRR17520069.4611521  
SRR17520069.4616262  
SRR17520069.4616594  
SRR17520069.4616596  
SRR17520069.4617118  
SRR17520069.4617120  
SRR17520069.4617122  
SRR17520069.4617124  
SRR17520069.4617126  
SRR17520069.4617128  
SRR17520069.4617130  
SRR17520069.4617132  
SRR17520069.4617134  
SRR17520069.4617136  
SRR17520069.4617138  
SRR17520069.4617140  
SRR17520069.4617142  
SRR17520069.4617144  
SRR17520069.4622792  
SRR17520069.4622794  
SRR17520069.4622796  
SRR17520069.4622798  
SRR17520069.4622800  
SRR17520069.4622802  
SRR17520069.4622804  
SRR17520069.4622806  
SRR17520069.4622808  
SRR17520069.4622810  
SRR17520069.4622812  
SRR17520069.4622814  
SRR17520069.4622816  
SRR17520069.4622818  
SRR17520069.4622820  
SRR17520069.4622822  
SRR17520069.4622824  
SRR17520069.4622826

SRR17520069.4622828  
SRR17520069.4622830  
SRR17520069.4622832  
SRR17520069.4622834  
SRR17520069.4622836  
SRR17520069.4622838  
SRR17520069.4622840  
SRR17520069.4622842  
SRR17520069.4622844  
SRR17520069.4622846  
SRR17520069.4622848  
SRR17520069.4622850  
SRR17520069.4626135  
SRR17520069.4626137  
SRR17520069.4626139  
SRR17520069.4626141  
SRR17520069.4626143  
SRR17520069.4626145  
SRR17520069.4626147  
SRR17520069.4626149  
SRR17520069.4626151  
SRR17520069.4626153  
SRR17520069.4626155  
SRR17520069.4626157  
SRR17520069.4626159  
SRR17520069.4626161  
SRR17520069.4626163  
SRR17520069.4626165  
SRR17520069.4626167  
SRR17520069.4626169  
SRR17520069.4626171  
SRR17520069.4626173  
SRR17520069.4626175  
SRR17520069.4626177  
SRR17520069.4626179  
SRR17520069.4626181  
SRR17520069.4626183  
SRR17520069.4626185  
SRR17520069.4626187  
SRR17520069.4626189  
SRR17520069.4629222  
SRR17520069.4629224  
SRR17520069.4629226  
SRR17520069.4629228  
SRR17520069.4629230  
SRR17520069.4629232  
SRR17520069.4629234

SRR17520069.4633157  
SRR17520069.4639505  
SRR17520069.4639507  
SRR17520069.4639509  
SRR17520069.4639511  
SRR17520069.4639513  
SRR17520069.4639517  
SRR17520069.4639519  
SRR17520069.4639521  
SRR17520069.4639523  
SRR17520069.4639525  
SRR17520069.4639527  
SRR17520069.4639529  
SRR17520069.4639531  
SRR17520069.4639533  
SRR17520069.4639535  
SRR17520069.4639537  
SRR17520069.4639539  
SRR17520069.4639541  
SRR17520069.4639543  
SRR17520069.4639545  
SRR17520069.4639547  
SRR17520069.4639549  
SRR17520069.4639553  
SRR17520069.4639555  
SRR17520069.4639557  
SRR17520069.4639563  
SRR17520069.4639565  
SRR17520069.4639567  
SRR17520069.4639569  
SRR17520069.4639571  
SRR17520069.4639573  
SRR17520069.4639575  
SRR17520069.4639577  
SRR17520069.4639579  
SRR17520069.4639581  
SRR17520069.4639583  
SRR17520069.4639585  
SRR17520069.4639587  
SRR17520069.4639589  
SRR17520069.4639591  
SRR17520069.4639593  
SRR17520069.4639595  
SRR17520069.4639597  
SRR17520069.4639599  
SRR17520069.4639601  
SRR17520069.4639603

SRR17520069.4639605  
SRR17520069.4639607  
SRR17520069.4639611  
SRR17520069.4639613  
SRR17520069.4639615  
SRR17520069.4639617  
SRR17520069.4639619  
SRR17520069.4639621  
SRR17520069.4639623  
SRR17520069.4639627  
SRR17520069.4639629  
SRR17520069.4639631  
SRR17520069.4639633  
SRR17520069.4639635  
SRR17520069.4639637  
SRR17520069.4639641  
SRR17520069.4639643  
SRR17520069.4639645  
SRR17520069.4639647  
SRR17520069.4639649  
SRR17520069.4639651  
SRR17520069.4639653  
SRR17520069.4639655  
SRR17520069.4639657  
SRR17520069.4639659  
SRR17520069.4639661  
SRR17520069.4639663  
SRR17520069.4639669  
SRR17520069.4639671  
SRR17520069.4639673  
SRR17520069.4639675  
SRR17520069.4639677  
SRR17520069.4639679  
SRR17520069.4639681  
SRR17520069.4639685  
SRR17520069.4639687  
SRR17520069.4639689  
SRR17520069.4640025  
SRR17520069.4640027  
SRR17520069.4640029  
SRR17520069.4641685  
SRR17520069.4641687  
SRR17520069.4641689  
SRR17520069.4641693  
SRR17520069.4642511  
SRR17520069.4642515  
SRR17520069.4642517

SRR17520069.4642519  
SRR17520069.4642521  
SRR17520069.4642523  
SRR17520069.4642529  
SRR17520069.4642531  
SRR17520069.4642533  
SRR17520069.4642535  
SRR17520069.4642537  
SRR17520069.4642541  
SRR17520069.4642543  
SRR17520069.4642545  
SRR17520069.4642547  
SRR17520069.4642549  
SRR17520069.4642551  
SRR17520069.4642553  
SRR17520069.4642555  
SRR17520069.4642557  
SRR17520069.4642559  
SRR17520069.4642561  
SRR17520069.4642563  
SRR17520069.4642565  
SRR17520069.4642567  
SRR17520069.4642569  
SRR17520069.4642573  
SRR17520069.4642577  
SRR17520069.4642579  
SRR17520069.4642581  
SRR17520069.4642583  
SRR17520069.4642585  
SRR17520069.4642587  
SRR17520069.4642589  
SRR17520069.4642591  
SRR17520069.4642593  
SRR17520069.4642595  
SRR17520069.4642597  
SRR17520069.4642599  
SRR17520069.4642601  
SRR17520069.4642603  
SRR17520069.4642605  
SRR17520069.4642607  
SRR17520069.4642609  
SRR17520069.4642613  
SRR17520069.4642615  
SRR17520069.4645903  
SRR17520069.4655934  
SRR17520069.4655936  
SRR17520069.4655938



SRR17520069.4655940  
SRR17520069.4655942  
SRR17520069.4655944  
SRR17520069.4655946  
SRR17520069.4655948  
SRR17520069.4655950  
SRR17520069.4655952  
SRR17520069.4655954  
SRR17520069.4655956  
SRR17520069.4655958  
SRR17520069.4655960  
SRR17520069.4655962  
SRR17520069.4655964  
SRR17520069.4655966  
SRR17520069.4655968  
SRR17520069.4655970  
SRR17520069.4655972  
SRR17520069.4655974  
SRR17520069.4655976  
SRR17520069.4655978  
SRR17520069.4655980  
SRR17520069.4655982  
SRR17520069.4655984  
SRR17520069.4656915  
SRR17520069.4656917  
SRR17520069.4656919  
SRR17520069.4656921  
SRR17520069.4656923  
SRR17520069.4656925  
SRR17520069.4656927  
SRR17520069.4656929  
SRR17520069.4656931  
SRR17520069.4674856  
SRR17520069.4674858  
SRR17520069.4674860  
SRR17520069.4674862  
SRR17520069.4674864  
SRR17520069.4674866  
SRR17520069.4674868  
SRR17520069.4674870  
SRR17520069.4674872  
SRR17520069.4674874  
SRR17520069.4674876  
SRR17520069.4674878  
SRR17520069.4674880  
SRR17520069.4674882  
SRR17520069.4674884

SRR17520069.4674886  
SRR17520069.4674888  
SRR17520069.4674890  
SRR17520069.4674892  
SRR17520069.4674894  
SRR17520069.4674896  
SRR17520069.4674898  
SRR17520069.4674900  
SRR17520069.4674902  
SRR17520069.4674904  
SRR17520069.4674906  
SRR17520069.4674908  
SRR17520069.4674910  
SRR17520069.4674912  
SRR17520069.4674914  
SRR17520069.4674916  
SRR17520069.4677559  
SRR17520069.4677561  
SRR17520069.4677563  
SRR17520069.4677565  
SRR17520069.4677567  
SRR17520069.4677569  
SRR17520069.4677571  
SRR17520069.4677573  
SRR17520069.4677575  
SRR17520069.4677577  
SRR17520069.4677579  
SRR17520069.4677581  
SRR17520069.4677583  
SRR17520069.4677585  
SRR17520069.4677587  
SRR17520069.4677589  
SRR17520069.4677591  
SRR17520069.4677593  
SRR17520069.4677595  
SRR17520069.4677597  
SRR17520069.4677599  
SRR17520069.4677601  
SRR17520069.4677603  
SRR17520069.4677605  
SRR17520069.4677607  
SRR17520069.4677609  
SRR17520069.4677611  
SRR17520069.4677613  
SRR17520069.4677615  
SRR17520069.4677617  
SRR17520069.4677621

SRR17520069.4677623  
SRR17520069.4677625  
SRR17520069.4677627  
SRR17520069.4677629  
SRR17520069.4677631  
SRR17520069.4677633  
SRR17520069.4677635  
SRR17520069.4677637  
SRR17520069.4677639  
SRR17520069.4679263  
SRR17520069.4679265  
SRR17520069.4679267  
SRR17520069.4679269  
SRR17520069.4679271  
SRR17520069.4679273  
SRR17520069.4679275  
SRR17520069.4679277  
SRR17520069.4679279  
SRR17520069.4679281  
SRR17520069.4679283  
SRR17520069.4679285  
SRR17520069.4679287  
SRR17520069.4679289  
SRR17520069.4679291  
SRR17520069.4679293  
SRR17520069.4679295  
SRR17520069.4679297  
SRR17520069.4679299  
SRR17520069.4679301  
SRR17520069.4679303  
SRR17520069.4679305  
SRR17520069.4679307  
SRR17520069.4679311  
SRR17520069.4679313  
SRR17520069.4679315  
SRR17520069.4679317  
SRR17520069.4684474  
SRR17520069.4684476  
SRR17520069.4684478  
SRR17520069.4684480  
SRR17520069.4684482  
SRR17520069.4684484  
SRR17520069.4684486  
SRR17520069.4684488  
SRR17520069.4684490  
SRR17520069.4684492  
SRR17520069.4684494

SRR17520069.4684496  
SRR17520069.4684500  
SRR17520069.4684502  
SRR17520069.4685138  
SRR17520069.4685140  
SRR17520069.4685142  
SRR17520069.4685144  
SRR17520069.4685146  
SRR17520069.4685950  
SRR17520069.4685952  
SRR17520069.4685954  
SRR17520069.4685956  
SRR17520069.4685958  
SRR17520069.4686714  
SRR17520069.4687170  
SRR17520069.4687172  
SRR17520069.4687174  
SRR17520069.4687176  
SRR17520069.4687178  
SRR17520069.4687180  
SRR17520069.4687182  
SRR17520069.4687184  
SRR17520069.4687186  
SRR17520069.4687188  
SRR17520069.4687190  
SRR17520069.4687192  
SRR17520069.4687194  
SRR17520069.4687196  
SRR17520069.4687198  
SRR17520069.4689789  
SRR17520069.4689791  
SRR17520069.4689793  
SRR17520069.4689795  
SRR17520069.4689797  
SRR17520069.4689799  
SRR17520069.4689801  
SRR17520069.4689803  
SRR17520069.4689805  
SRR17520069.4689807  
SRR17520069.4689809  
SRR17520069.4689811  
SRR17520069.4689813  
SRR17520069.4689815  
SRR17520069.4689817  
SRR17520069.4689819  
SRR17520069.4689821  
SRR17520069.4689823

SRR17520069.4689825  
SRR17520069.4689827  
SRR17520069.4689829  
SRR17520069.4689831  
SRR17520069.4689833  
SRR17520069.4689835  
SRR17520069.4689837  
SRR17520069.4689839  
SRR17520069.4689841  
SRR17520069.4691672  
SRR17520069.4691674  
SRR17520069.4691676  
SRR17520069.4691678  
SRR17520069.4691680  
SRR17520069.4691682  
SRR17520069.4691684  
SRR17520069.4699833  
SRR17520069.4699835  
SRR17520069.4699837  
SRR17520069.4699841  
SRR17520069.4699843  
SRR17520069.4699845  
SRR17520069.4699847  
SRR17520069.4699851  
SRR17520069.4699853  
SRR17520069.4699855  
SRR17520069.4699859  
SRR17520069.4699861  
SRR17520069.4699863  
SRR17520069.4699865  
SRR17520069.4699867  
SRR17520069.4699869  
SRR17520069.4699871  
SRR17520069.4699873  
SRR17520069.4699875  
SRR17520069.4699877  
SRR17520069.4699879  
SRR17520069.4699881  
SRR17520069.4699883  
SRR17520069.4699885  
SRR17520069.4699887  
SRR17520069.4699889  
SRR17520069.4699891  
SRR17520069.4699893  
SRR17520069.4699895  
SRR17520069.4699897  
SRR17520069.4699899

SRR17520069.4699901  
SRR17520069.4699903  
SRR17520069.4699905  
SRR17520069.4699907  
SRR17520069.4699909  
SRR17520069.4699911  
SRR17520069.4699913  
SRR17520069.4699915  
SRR17520069.4699917  
SRR17520069.4699919  
SRR17520069.4699921  
SRR17520069.4703107  
SRR17520069.4703110  
SRR17520069.4703293  
SRR17520069.4703295  
SRR17520069.4703297  
SRR17520069.4703299  
SRR17520069.4703301  
SRR17520069.4703303  
SRR17520069.4703305  
SRR17520069.4703307  
SRR17520069.4703309  
SRR17520069.4703311  
SRR17520069.4703313  
SRR17520069.4703315  
SRR17520069.4703317  
SRR17520069.4703319  
SRR17520069.4703321  
SRR17520069.4703323  
SRR17520069.4703325  
SRR17520069.4703327  
SRR17520069.4703329  
SRR17520069.4703331  
SRR17520069.4703333  
SRR17520069.4705766  
SRR17520069.4705768  
SRR17520069.4705770  
SRR17520069.4705772  
SRR17520069.4705774  
SRR17520069.4705776  
SRR17520069.4705778  
SRR17520069.4705780  
SRR17520069.4705782  
SRR17520069.4705784  
SRR17520069.4705786  
SRR17520069.4705788  
SRR17520069.4705790

SRR17520069.4705792  
SRR17520069.4705794  
SRR17520069.4705796  
SRR17520069.4705798  
SRR17520069.4705800  
SRR17520069.4705802  
SRR17520069.4705804  
SRR17520069.4705806  
SRR17520069.4705808  
SRR17520069.4705810  
SRR17520069.4705812  
SRR17520069.4705814  
SRR17520069.4705816  
SRR17520069.4705818  
SRR17520069.4705822  
SRR17520069.4705824  
SRR17520069.4705826  
SRR17520069.4705828  
SRR17520069.4705830  
SRR17520069.4705832  
SRR17520069.4705834  
SRR17520069.4705838  
SRR17520069.4705844  
SRR17520069.4705846  
SRR17520069.4708683  
SRR17520069.4708685  
SRR17520069.4708687  
SRR17520069.4708689  
SRR17520069.4708691  
SRR17520069.4708693  
SRR17520069.4710329  
SRR17520069.4710331  
SRR17520069.4710333  
SRR17520069.4710335  
SRR17520069.4710337  
SRR17520069.4710339  
SRR17520069.4710341  
SRR17520069.4711507  
SRR17520069.4711522  
SRR17520069.4711524  
SRR17520069.4711526  
SRR17520069.4711528  
SRR17520069.4711530  
SRR17520069.4712583  
SRR17520069.4712585  
SRR17520069.4712587  
SRR17520069.4712589

SRR17520069.4712591  
SRR17520069.4712595  
SRR17520069.4712601  
SRR17520069.4712603  
SRR17520069.4712605  
SRR17520069.4712609  
SRR17520069.4712611  
SRR17520069.4712613  
SRR17520069.4719388  
SRR17520069.4719390  
SRR17520069.4719392  
SRR17520069.4719394  
SRR17520069.4719396  
SRR17520069.4719400  
SRR17520069.4719402  
SRR17520069.4719404  
SRR17520069.4719406  
SRR17520069.4719408  
SRR17520069.4719605  
SRR17520069.4719607  
SRR17520069.4719609  
SRR17520069.4719613  
SRR17520069.4719629  
SRR17520069.4719631  
SRR17520069.4719633  
SRR17520069.4719635  
SRR17520069.4719637  
SRR17520069.4719639  
SRR17520069.4719643  
SRR17520069.4719645  
SRR17520069.4719647  
SRR17520069.4719649  
SRR17520069.4719651  
SRR17520069.4719653  
SRR17520069.4719655  
SRR17520069.4719657  
SRR17520069.4719659  
SRR17520069.4719661  
SRR17520069.4719667  
SRR17520069.4720477  
SRR17520069.4730894  
SRR17520069.4730896  
SRR17520069.4730898  
SRR17520069.4730900  
SRR17520069.4730902  
SRR17520069.4730904  
SRR17520069.4730906



SRR17520069.4730908  
SRR17520069.4730910  
SRR17520069.4730912  
SRR17520069.4730914  
SRR17520069.4738443  
SRR17520069.4738445  
SRR17520069.4738449  
SRR17520069.4738451  
SRR17520069.4738453  
SRR17520069.4738455  
SRR17520069.4738457  
SRR17520069.4738459  
SRR17520069.4738461  
SRR17520069.4738463  
SRR17520069.4738465  
SRR17520069.4738467  
SRR17520069.4738469  
SRR17520069.4738471  
SRR17520069.4738473  
SRR17520069.4741427  
SRR17520069.4741429  
SRR17520069.4741431  
SRR17520069.4741433  
SRR17520069.4741435  
SRR17520069.4741437  
SRR17520069.4741439  
SRR17520069.4741441  
SRR17520069.4741443  
SRR17520069.4741445  
SRR17520069.4741447  
SRR17520069.4741449  
SRR17520069.4741451  
SRR17520069.4741453  
SRR17520069.4741455  
SRR17520069.4741457  
SRR17520069.4741459  
SRR17520069.4741461  
SRR17520069.4741463  
SRR17520069.4741465  
SRR17520069.4741467  
SRR17520069.4741469  
SRR17520069.4741473  
SRR17520069.4741475  
SRR17520069.4741477  
SRR17520069.4741479  
SRR17520069.4741481  
SRR17520069.4741483

SRR17520069.4741485  
SRR17520069.4741487  
SRR17520069.4741489  
SRR17520069.4741493  
SRR17520069.4741495  
SRR17520069.4741497  
SRR17520069.4745742  
SRR17520069.4747942  
SRR17520069.4747944  
SRR17520069.4747946  
SRR17520069.4747948  
SRR17520069.4747950  
SRR17520069.4747952  
SRR17520069.4749459  
SRR17520069.4749461  
SRR17520069.4749463  
SRR17520069.4749465  
SRR17520069.4749467  
SRR17520069.4749469  
SRR17520069.4749471  
SRR17520069.4749473  
SRR17520069.4749475  
SRR17520069.4749477  
SRR17520069.4749479  
SRR17520069.4749481  
SRR17520069.4749483  
SRR17520069.4749488  
SRR17520069.4749490  
SRR17520069.4749492  
SRR17520069.4749494  
SRR17520069.4749496  
SRR17520069.4756758  
SRR17520069.4763367  
SRR17520069.4763369  
SRR17520069.4763371  
SRR17520069.4763832  
SRR17520069.4763834  
SRR17520069.4763836  
SRR17520069.4763840  
SRR17520069.4765225  
SRR17520069.4768317  
SRR17520069.4768319  
SRR17520069.4768321  
SRR17520069.4768323  
SRR17520069.4768325  
SRR17520069.4770516  
SRR17520069.4770518

SRR17520069.4770520  
SRR17520069.4770522  
SRR17520069.4770524  
SRR17520069.4770526  
SRR17520069.4770528  
SRR17520069.4770530  
SRR17520069.4770532  
SRR17520069.4770534  
SRR17520069.4771114  
SRR17520069.4771118  
SRR17520069.4771120  
SRR17520069.4771122  
SRR17520069.4771124  
SRR17520069.4771130  
SRR17520069.4771136  
SRR17520069.4771138  
SRR17520069.4771466  
SRR17520069.4771468  
SRR17520069.4771470  
SRR17520069.4771472  
SRR17520069.4771474  
SRR17520069.4771476  
SRR17520069.4771478  
SRR17520069.4771482  
SRR17520069.4771484  
SRR17520069.4771486  
SRR17520069.4771490  
SRR17520069.4771492  
SRR17520069.4771500  
SRR17520069.4771502  
SRR17520069.4771506  
SRR17520069.4771508  
SRR17520069.4771510  
SRR17520069.4771514  
SRR17520069.4771516  
SRR17520069.4771518  
SRR17520069.4771520  
SRR17520069.4785450  
SRR17520069.4785452  
SRR17520069.4785454  
SRR17520069.4785456  
SRR17520069.4785458  
SRR17520069.4785460  
SRR17520069.4785462  
SRR17520069.4785464  
SRR17520069.4785466  
SRR17520069.4785468

SRR17520069.4785470  
SRR17520069.4785474  
SRR17520069.4785476  
SRR17520069.4785478  
SRR17520069.4785480  
SRR17520069.4785482  
SRR17520069.4785484  
SRR17520069.4785486  
SRR17520069.4785488  
SRR17520069.4785490  
SRR17520069.4785492  
SRR17520069.4785494  
SRR17520069.4785496  
SRR17520069.4785498  
SRR17520069.4785500  
SRR17520069.4785504  
SRR17520069.4785506  
SRR17520069.4785508  
SRR17520069.4785510  
SRR17520069.4785512  
SRR17520069.4785514  
SRR17520069.4785516  
SRR17520069.4785518  
SRR17520069.4785520  
SRR17520069.4785522  
SRR17520069.4785524  
SRR17520069.4785526  
SRR17520069.4785528  
SRR17520069.4785530  
SRR17520069.4785532  
SRR17520069.4785534  
SRR17520069.4785536  
SRR17520069.4785538  
SRR17520069.4785542  
SRR17520069.4785544  
SRR17520069.4785548  
SRR17520069.4785550  
SRR17520069.4785552  
SRR17520069.4785554  
SRR17520069.4785556  
SRR17520069.4785558  
SRR17520069.4785560  
SRR17520069.4785564  
SRR17520069.4785566  
SRR17520069.4785568  
SRR17520069.4785570  
SRR17520069.4785572

SRR17520069.4785574  
SRR17520069.4785576  
SRR17520069.4791378  
SRR17520069.4792216  
SRR17520069.4793279  
SRR17520069.4793281  
SRR17520069.4793283  
SRR17520069.4793285  
SRR17520069.4793287  
SRR17520069.4793289  
SRR17520069.4793291  
SRR17520069.4798391  
SRR17520069.4798393  
SRR17520069.4798395  
SRR17520069.4798397  
SRR17520069.4798399  
SRR17520069.4798401  
SRR17520069.4798403  
SRR17520069.4798405  
SRR17520069.4798407  
SRR17520069.4798409  
SRR17520069.4798411  
SRR17520069.4798413  
SRR17520069.4798415  
SRR17520069.4798417  
SRR17520069.4798419  
SRR17520069.4798421  
SRR17520069.4798423  
SRR17520069.4798425  
SRR17520069.4798427  
SRR17520069.4798429  
SRR17520069.4798431  
SRR17520069.4798433  
SRR17520069.4798435  
SRR17520069.4798437  
SRR17520069.4798439  
SRR17520069.4798441  
SRR17520069.4798443  
SRR17520069.4798445  
SRR17520069.4798447  
SRR17520069.4798449  
SRR17520069.4798451  
SRR17520069.4798453  
SRR17520069.4798455  
SRR17520069.4798457  
SRR17520069.4798459  
SRR17520069.4798461

SRR17520069.4798463  
SRR17520069.4798465  
SRR17520069.4803868  
SRR17520069.4803870  
SRR17520069.4803872  
SRR17520069.4803874  
SRR17520069.4803876  
SRR17520069.4803878  
SRR17520069.4803880  
SRR17520069.4803882  
SRR17520069.4803884  
SRR17520069.4803888  
SRR17520069.4803890  
SRR17520069.4803892  
SRR17520069.4803894  
SRR17520069.4803896  
SRR17520069.4803898  
SRR17520069.4803900  
SRR17520069.4803902  
SRR17520069.4803904  
SRR17520069.4803906  
SRR17520069.4803908  
SRR17520069.4803910  
SRR17520069.4820719  
SRR17520069.4820725  
SRR17520069.4820727  
SRR17520069.4820729  
SRR17520069.4820733  
SRR17520069.4820735  
SRR17520069.4820737  
SRR17520069.4820739  
SRR17520069.4820741  
SRR17520069.4820743  
SRR17520069.4820745  
SRR17520069.4820747  
SRR17520069.4820751  
SRR17520069.4820753  
SRR17520069.4820755  
SRR17520069.4820757  
SRR17520069.4820759  
SRR17520069.4820761  
SRR17520069.4820763  
SRR17520069.4820765  
SRR17520069.4820767  
SRR17520069.4820769  
SRR17520069.4820771  
SRR17520069.4821501

SRR17520069.4826967  
SRR17520069.4826969  
SRR17520069.4826971  
SRR17520069.4826973  
SRR17520069.4826975  
SRR17520069.4826977  
SRR17520069.4826979  
SRR17520069.4826981  
SRR17520069.4826983  
SRR17520069.4826985  
SRR17520069.4826987  
SRR17520069.4826989  
SRR17520069.4826991  
SRR17520069.4826993  
SRR17520069.4826995  
SRR17520069.4826997  
SRR17520069.4826999  
SRR17520069.4827001  
SRR17520069.4827003  
SRR17520069.4827005  
SRR17520069.4827007  
SRR17520069.4827009  
SRR17520069.4827011  
SRR17520069.4827013  
SRR17520069.4827015  
SRR17520069.4827017  
SRR17520069.4827019  
SRR17520069.4827021  
SRR17520069.4827023  
SRR17520069.4829148  
SRR17520069.4829150  
SRR17520069.4829152  
SRR17520069.4829154  
SRR17520069.4829156  
SRR17520069.4829158  
SRR17520069.4829160  
SRR17520069.4829162  
SRR17520069.4829164  
SRR17520069.4829166  
SRR17520069.4829168  
SRR17520069.4829170  
SRR17520069.4829172  
SRR17520069.4829174  
SRR17520069.4829176  
SRR17520069.4829182  
SRR17520069.4829184  
SRR17520069.4829186

SRR17520069.4829188  
SRR17520069.4829190  
SRR17520069.4829192  
SRR17520069.4832396  
SRR17520069.4837739  
SRR17520069.4837741  
SRR17520069.4837743  
SRR17520069.4837745  
SRR17520069.4837747  
SRR17520069.4837749  
SRR17520069.4837751  
SRR17520069.4837753  
SRR17520069.4837755  
SRR17520069.4837757  
SRR17520069.4837759  
SRR17520069.4837761  
SRR17520069.4837763  
SRR17520069.4837765  
SRR17520069.4837767  
SRR17520069.4837769  
SRR17520069.4837771  
SRR17520069.4837773  
SRR17520069.4837775  
SRR17520069.4837777  
SRR17520069.4837779  
SRR17520069.4837781  
SRR17520069.4837783  
SRR17520069.4837785  
SRR17520069.4837787  
SRR17520069.4837789  
SRR17520069.4837791  
SRR17520069.4837793  
SRR17520069.4837795  
SRR17520069.4837797  
SRR17520069.4837799  
SRR17520069.4837801  
SRR17520069.4837803  
SRR17520069.4837805  
SRR17520069.4837807  
SRR17520069.4837809  
SRR17520069.4837811  
SRR17520069.4837813  
SRR17520069.4837815  
SRR17520069.4837817  
SRR17520069.4837819  
SRR17520069.4837821  
SRR17520069.4837823



SRR17520069.4837825  
SRR17520069.4837827  
SRR17520069.4838836  
SRR17520069.4838838  
SRR17520069.4838840  
SRR17520069.4838842  
SRR17520069.4838844  
SRR17520069.4838846  
SRR17520069.4838848  
SRR17520069.4838850  
SRR17520069.4838852  
SRR17520069.4838854  
SRR17520069.4838856  
SRR17520069.4838858  
SRR17520069.4838862  
SRR17520069.4838864  
SRR17520069.4838868  
SRR17520069.4838870  
SRR17520069.4838872  
SRR17520069.4838874  
SRR17520069.4838876  
SRR17520069.4838878  
SRR17520069.4838880  
SRR17520069.4838882  
SRR17520069.4838884  
SRR17520069.4838886  
SRR17520069.4838888  
SRR17520069.4838890  
SRR17520069.4838892  
SRR17520069.4838894  
SRR17520069.4838896  
SRR17520069.4838898  
SRR17520069.4838900  
SRR17520069.4838902  
SRR17520069.4838904  
SRR17520069.4838906  
SRR17520069.4838908  
SRR17520069.4838910  
SRR17520069.4838912  
SRR17520069.4838914  
SRR17520069.4838916  
SRR17520069.4838920  
SRR17520069.4838922  
SRR17520069.4838924  
SRR17520069.4838926  
SRR17520069.4838928  
SRR17520069.4841940

SRR17520069.4841942  
SRR17520069.4841944  
SRR17520069.4841946  
SRR17520069.4841948  
SRR17520069.4841950  
SRR17520069.4841952  
SRR17520069.4841954  
SRR17520069.4841956  
SRR17520069.4841958  
SRR17520069.4841960  
SRR17520069.4842533  
SRR17520069.4842535  
SRR17520069.4842537  
SRR17520069.4842539  
SRR17520069.4842541  
SRR17520069.4842543  
SRR17520069.4842545  
SRR17520069.4842547  
SRR17520069.4842549  
SRR17520069.4842551  
SRR17520069.4842553  
SRR17520069.4842555  
SRR17520069.4842557  
SRR17520069.4842559  
SRR17520069.4842561  
SRR17520069.4842563  
SRR17520069.4842565  
SRR17520069.4842567  
SRR17520069.4842569  
SRR17520069.4842571  
SRR17520069.4842573  
SRR17520069.4842575  
SRR17520069.4842577  
SRR17520069.4842579  
SRR17520069.4842581  
SRR17520069.4842583  
SRR17520069.4842585  
SRR17520069.4842587  
SRR17520069.4842589  
SRR17520069.4842591  
SRR17520069.4842593  
SRR17520069.4842595  
SRR17520069.4842597  
SRR17520069.4842599  
SRR17520069.4842601  
SRR17520069.4842603  
SRR17520069.4842605

SRR17520069.4842607  
SRR17520069.4842609  
SRR17520069.4842611  
SRR17520069.4842613  
SRR17520069.4842615  
SRR17520069.4842617  
SRR17520069.4842619  
SRR17520069.4842621  
SRR17520069.4842623  
SRR17520069.4842625  
SRR17520069.4842627  
SRR17520069.4842629  
SRR17520069.4842631  
SRR17520069.4842633  
SRR17520069.4842635  
SRR17520069.4842637  
SRR17520069.4842639  
SRR17520069.4842641  
SRR17520069.4842643  
SRR17520069.4842645  
SRR17520069.4842647  
SRR17520069.4842649  
SRR17520069.4842651  
SRR17520069.4842653  
SRR17520069.4842655  
SRR17520069.4842657  
SRR17520069.4842659  
SRR17520069.4842661  
SRR17520069.4842663  
SRR17520069.4842665  
SRR17520069.4842667  
SRR17520069.4842669  
SRR17520069.4842671  
SRR17520069.4842673  
SRR17520069.4842675  
SRR17520069.4842677  
SRR17520069.4842679  
SRR17520069.4842681  
SRR17520069.4842683  
SRR17520069.4842687  
SRR17520069.4842689  
SRR17520069.4842691  
SRR17520069.4842693  
SRR17520069.4842695  
SRR17520069.4842699  
SRR17520069.4842701  
SRR17520069.4842703

SRR17520069.4842705  
SRR17520069.4842707  
SRR17520069.4842709  
SRR17520069.4842711  
SRR17520069.4842713  
SRR17520069.4842715  
SRR17520069.4842717  
SRR17520069.4842719  
SRR17520069.4842721  
SRR17520069.4842723  
SRR17520069.4842725  
SRR17520069.4842727  
SRR17520069.4842729  
SRR17520069.4842731  
SRR17520069.4842733  
SRR17520069.4842735  
SRR17520069.4843939  
SRR17520069.4846474  
SRR17520069.4846476  
SRR17520069.4846478  
SRR17520069.4846480  
SRR17520069.4846482  
SRR17520069.4846484  
SRR17520069.4846486  
SRR17520069.4846488  
SRR17520069.4846490  
SRR17520069.4846492  
SRR17520069.4846494  
SRR17520069.4846496  
SRR17520069.4846498  
SRR17520069.4846500  
SRR17520069.4846502  
SRR17520069.4846504  
SRR17520069.4846506  
SRR17520069.4846508  
SRR17520069.4846510  
SRR17520069.4846887  
SRR17520069.4846889  
SRR17520069.4846891  
SRR17520069.4846893  
SRR17520069.4846897  
SRR17520069.4846899  
SRR17520069.4846901  
SRR17520069.4846903  
SRR17520069.4846905  
SRR17520069.4846907  
SRR17520069.4846909

SRR17520069.4846911  
SRR17520069.4846913  
SRR17520069.4846915  
SRR17520069.4846917  
SRR17520069.4846919  
SRR17520069.4848344  
SRR17520069.4848346  
SRR17520069.4848348  
SRR17520069.4848350  
SRR17520069.4848352  
SRR17520069.4848354  
SRR17520069.4848356  
SRR17520069.4848358  
SRR17520069.4848360  
SRR17520069.4848362  
SRR17520069.4848364  
SRR17520069.4848366  
SRR17520069.4848368  
SRR17520069.4848370  
SRR17520069.4848372  
SRR17520069.4848374  
SRR17520069.4848378  
SRR17520069.4848380  
SRR17520069.4849319  
SRR17520069.4849321  
SRR17520069.4849323  
SRR17520069.4849325  
SRR17520069.4849327  
SRR17520069.4849329  
SRR17520069.4849331  
SRR17520069.4849333  
SRR17520069.4849335  
SRR17520069.4849337  
SRR17520069.4849339  
SRR17520069.4849341  
SRR17520069.4849343  
SRR17520069.4849347  
SRR17520069.4849349  
SRR17520069.4849351  
SRR17520069.4853890  
SRR17520069.4853892  
SRR17520069.4853894  
SRR17520069.4853896  
SRR17520069.4853898  
SRR17520069.4853900  
SRR17520069.4853902  
SRR17520069.4853904

SRR17520069.4853906  
SRR17520069.4853908  
SRR17520069.4853910  
SRR17520069.4853912  
SRR17520069.4853914  
SRR17520069.4853918  
SRR17520069.4853920  
SRR17520069.4853922  
SRR17520069.4853924  
SRR17520069.4853926  
SRR17520069.4866760  
SRR17520069.4866762  
SRR17520069.4866764  
SRR17520069.4866766  
SRR17520069.4866768  
SRR17520069.4866770  
SRR17520069.4866772  
SRR17520069.4866774  
SRR17520069.4866776  
SRR17520069.4866778  
SRR17520069.4866780  
SRR17520069.4866782  
SRR17520069.4866784  
SRR17520069.4866786  
SRR17520069.4866788  
SRR17520069.4866790  
SRR17520069.4866792  
SRR17520069.4866794  
SRR17520069.4866796  
SRR17520069.4866798  
SRR17520069.4866800  
SRR17520069.4866802  
SRR17520069.4866804  
SRR17520069.4866806  
SRR17520069.4866808  
SRR17520069.4866810  
SRR17520069.4866812  
SRR17520069.4866814  
SRR17520069.4866816  
SRR17520069.4866818  
SRR17520069.4866820  
SRR17520069.4866822  
SRR17520069.4866824  
SRR17520069.4866826  
SRR17520069.4866828  
SRR17520069.4866830  
SRR17520069.4866832

SRR17520069.4866834  
SRR17520069.4866836  
SRR17520069.4866838  
SRR17520069.4866840  
SRR17520069.4866842  
SRR17520069.4866844  
SRR17520069.4866846  
SRR17520069.4866848  
SRR17520069.4866850  
SRR17520069.4876693  
SRR17520069.4876695  
SRR17520069.4876697  
SRR17520069.4876699  
SRR17520069.4876701  
SRR17520069.4876703  
SRR17520069.4876705  
SRR17520069.4876707  
SRR17520069.4876709  
SRR17520069.4876711  
SRR17520069.4876713  
SRR17520069.4876715  
SRR17520069.4876717  
SRR17520069.4876723  
SRR17520069.4876725  
SRR17520069.4876727  
SRR17520069.4876729  
SRR17520069.4876731  
SRR17520069.4876735  
SRR17520069.4876737  
SRR17520069.4876739  
SRR17520069.4876741  
SRR17520069.4876743  
SRR17520069.4876745  
SRR17520069.4876747  
SRR17520069.4876749  
SRR17520069.4876751  
SRR17520069.4876753  
SRR17520069.4876755  
SRR17520069.4876757  
SRR17520069.4876759  
SRR17520069.4876761  
SRR17520069.4876763  
SRR17520069.4876765  
SRR17520069.4876767  
SRR17520069.4876769  
SRR17520069.4876771  
SRR17520069.4876773

SRR17520069.4876775  
SRR17520069.4876779  
SRR17520069.4876818  
SRR17520069.4876820  
SRR17520069.4879437  
SRR17520069.4879439  
SRR17520069.4879441  
SRR17520069.4879443  
SRR17520069.4879445  
SRR17520069.4879447  
SRR17520069.4879449  
SRR17520069.4879451  
SRR17520069.4879453  
SRR17520069.4879455  
SRR17520069.4879457  
SRR17520069.4879459  
SRR17520069.4879461  
SRR17520069.4879463  
SRR17520069.4879465  
SRR17520069.4879469  
SRR17520069.4879471  
SRR17520069.4879473  
SRR17520069.4879475  
SRR17520069.4879477  
SRR17520069.4879706  
SRR17520069.4879710  
SRR17520069.4879712  
SRR17520069.4879714  
SRR17520069.4879716  
SRR17520069.4879718  
SRR17520069.4879720  
SRR17520069.4879722  
SRR17520069.4879724  
SRR17520069.4879726  
SRR17520069.4879728  
SRR17520069.4879730  
SRR17520069.4879732  
SRR17520069.4879734  
SRR17520069.4879736  
SRR17520069.4879738  
SRR17520069.4879740  
SRR17520069.4879742  
SRR17520069.4879744  
SRR17520069.4879746  
SRR17520069.4879748  
SRR17520069.4879750  
SRR17520069.4879752



SRR17520069.4879754  
SRR17520069.4879756  
SRR17520069.4879758  
SRR17520069.4879760  
SRR17520069.4879762  
SRR17520069.4879764  
SRR17520069.4879766  
SRR17520069.4879770  
SRR17520069.4879772  
SRR17520069.4879774  
SRR17520069.4879776  
SRR17520069.4879778  
SRR17520069.4879780  
SRR17520069.4879782  
SRR17520069.4879784  
SRR17520069.4879786  
SRR17520069.4879788  
SRR17520069.4879790  
SRR17520069.4879794  
SRR17520069.4879796  
SRR17520069.4879798  
SRR17520069.4886076  
SRR17520069.4886080  
SRR17520069.4886082  
SRR17520069.4886084  
SRR17520069.4886086  
SRR17520069.4886088  
SRR17520069.4886090  
SRR17520069.4886092  
SRR17520069.4886094  
SRR17520069.4886096  
SRR17520069.4886098  
SRR17520069.4886100  
SRR17520069.4886102  
SRR17520069.4903274  
SRR17520069.4903276  
SRR17520069.4903278  
SRR17520069.4903280  
SRR17520069.4903282  
SRR17520069.4903284  
SRR17520069.4903286  
SRR17520069.4903288  
SRR17520069.4904565  
SRR17520069.4904567  
SRR17520069.4904569  
SRR17520069.4904571  
SRR17520069.4904573

SRR17520069.4904575  
SRR17520069.4904577  
SRR17520069.4904579  
SRR17520069.4904581  
SRR17520069.4904583  
SRR17520069.4904585  
SRR17520069.4904587  
SRR17520069.4904591  
SRR17520069.4904593  
SRR17520069.4904595  
SRR17520069.4904597  
SRR17520069.4904599  
SRR17520069.4904601  
SRR17520069.4904603  
SRR17520069.4904605  
SRR17520069.4904607  
SRR17520069.4904609  
SRR17520069.4904611  
SRR17520069.4904613  
SRR17520069.4904615  
SRR17520069.4904617  
SRR17520069.4904619  
SRR17520069.4904621  
SRR17520069.4904623  
SRR17520069.4904625  
SRR17520069.4904627  
SRR17520069.4904629  
SRR17520069.4904631  
SRR17520069.4904633  
SRR17520069.4904635  
SRR17520069.4904637  
SRR17520069.4904639  
SRR17520069.4904643  
SRR17520069.4904645  
SRR17520069.4904647  
SRR17520069.4904649  
SRR17520069.4904651  
SRR17520069.4904653  
SRR17520069.4904657  
SRR17520069.4904659  
SRR17520069.4904661  
SRR17520069.4904663  
SRR17520069.4904665  
SRR17520069.4904667  
SRR17520069.4904669  
SRR17520069.4904671  
SRR17520069.4904673

SRR17520069.4904675  
SRR17520069.4904677  
SRR17520069.4904679  
SRR17520069.4904681  
SRR17520069.4904683  
SRR17520069.4904685  
SRR17520069.4904687  
SRR17520069.4904689  
SRR17520069.4904691  
SRR17520069.4904693  
SRR17520069.4904695  
SRR17520069.4904697  
SRR17520069.4904699  
SRR17520069.4904701  
SRR17520069.4904703  
SRR17520069.4904705  
SRR17520069.4904707  
SRR17520069.4904709  
SRR17520069.4904711  
SRR17520069.4904713  
SRR17520069.4904715  
SRR17520069.4904717  
SRR17520069.4904719  
SRR17520069.4904721  
SRR17520069.4904723  
SRR17520069.4904725  
SRR17520069.4904727  
SRR17520069.4904729  
SRR17520069.4904731  
SRR17520069.4904733  
SRR17520069.4904735  
SRR17520069.4904737  
SRR17520069.4904739  
SRR17520069.4904741  
SRR17520069.4904743  
SRR17520069.4905678  
SRR17520069.4905680  
SRR17520069.4905682  
SRR17520069.4905684  
SRR17520069.4905686  
SRR17520069.4913978  
SRR17520069.4921604  
SRR17520069.4921606  
SRR17520069.4921608  
SRR17520069.4921610  
SRR17520069.4921612  
SRR17520069.4921614

SRR17520069.4921618  
SRR17520069.4921620  
SRR17520069.4921624  
SRR17520069.4921626  
SRR17520069.4921628  
SRR17520069.4921630  
SRR17520069.4924383  
SRR17520069.4924385  
SRR17520069.4926848  
SRR17520069.4926853  
SRR17520069.4926855  
SRR17520069.4930332  
SRR17520069.4931232  
SRR17520069.4931234  
SRR17520069.4931236  
SRR17520069.4931238  
SRR17520069.4931242  
SRR17520069.4931244  
SRR17520069.4931246  
SRR17520069.4931248  
SRR17520069.4931250  
SRR17520069.4931252  
SRR17520069.4931256  
SRR17520069.4931258  
SRR17520069.4931260  
SRR17520069.4931264  
SRR17520069.4931268  
SRR17520069.4931270  
SRR17520069.4931272  
SRR17520069.4931274  
SRR17520069.4931276  
SRR17520069.4931278  
SRR17520069.4931280  
SRR17520069.4931282  
SRR17520069.4931284  
SRR17520069.4931286  
SRR17520069.4931288  
SRR17520069.4931290  
SRR17520069.4931292  
SRR17520069.4931294  
SRR17520069.4931296  
SRR17520069.4931298  
SRR17520069.4931300  
SRR17520069.4931302  
SRR17520069.4931304  
SRR17520069.4931306  
SRR17520069.4931313

SRR17520069.4931315  
SRR17520069.4931317  
SRR17520069.4935123  
SRR17520069.4935125  
SRR17520069.4935127  
SRR17520069.4935129  
SRR17520069.4935133  
SRR17520069.4935135  
SRR17520069.4935137  
SRR17520069.4935139  
SRR17520069.4935141  
SRR17520069.4935143  
SRR17520069.4935145  
SRR17520069.4935147  
SRR17520069.4935149  
SRR17520069.4935151  
SRR17520069.4935153  
SRR17520069.4935155  
SRR17520069.4935159  
SRR17520069.4935161  
SRR17520069.4935163  
SRR17520069.4935165  
SRR17520069.4935167  
SRR17520069.4935169  
SRR17520069.4935171  
SRR17520069.4935173  
SRR17520069.4935175  
SRR17520069.4935177  
SRR17520069.4935179  
SRR17520069.4935181  
SRR17520069.4935183  
SRR17520069.4935185  
SRR17520069.4935187  
SRR17520069.4935189  
SRR17520069.4935191  
SRR17520069.4935193  
SRR17520069.4935195  
SRR17520069.4935197  
SRR17520069.4935201  
SRR17520069.4935203  
SRR17520069.4935205  
SRR17520069.4935207  
SRR17520069.4935209  
SRR17520069.4935211  
SRR17520069.4935213  
SRR17520069.4935217  
SRR17520069.4935219

SRR17520069.4935221  
SRR17520069.4943331  
SRR17520069.4943333  
SRR17520069.4943335  
SRR17520069.4943337  
SRR17520069.4943339  
SRR17520069.4943341  
SRR17520069.4943343  
SRR17520069.4943345  
SRR17520069.4943347  
SRR17520069.4943349  
SRR17520069.4943351  
SRR17520069.4943353  
SRR17520069.4943355  
SRR17520069.4943357  
SRR17520069.4943359  
SRR17520069.4943361  
SRR17520069.4943363  
SRR17520069.4943365  
SRR17520069.4943367  
SRR17520069.4943369  
SRR17520069.4943371  
SRR17520069.4943373  
SRR17520069.4943375  
SRR17520069.4943377  
SRR17520069.4943379  
SRR17520069.4943381  
SRR17520069.4943383  
SRR17520069.4943385  
SRR17520069.4943387  
SRR17520069.4943389  
SRR17520069.4943391  
SRR17520069.4943393  
SRR17520069.4949971  
SRR17520069.4949979  
SRR17520069.4952339  
SRR17520069.4952341  
SRR17520069.4952343  
SRR17520069.4952345  
SRR17520069.4952347  
SRR17520069.4952349  
SRR17520069.4952351  
SRR17520069.4952353  
SRR17520069.4952355  
SRR17520069.4952357  
SRR17520069.4952359  
SRR17520069.4952361

SRR17520069.4952363  
SRR17520069.4957858  
SRR17520069.4957860  
SRR17520069.4957862  
SRR17520069.4957864  
SRR17520069.4957866  
SRR17520069.4957870  
SRR17520069.4957872  
SRR17520069.4957874  
SRR17520069.4957876  
SRR17520069.4957878  
SRR17520069.4962922  
SRR17520069.4962924  
SRR17520069.4962926  
SRR17520069.4962928  
SRR17520069.4962930  
SRR17520069.4962932  
SRR17520069.4962934  
SRR17520069.4967554  
SRR17520069.4967558  
SRR17520069.4971372  
SRR17520069.4971374  
SRR17520069.4971376  
SRR17520069.4971378  
SRR17520069.4971380  
SRR17520069.4971382  
SRR17520069.4971384  
SRR17520069.4971386  
SRR17520069.4971388  
SRR17520069.4971390  
SRR17520069.4971392  
SRR17520069.4971394  
SRR17520069.4971396  
SRR17520069.4971398  
SRR17520069.4971402  
SRR17520069.4971404  
SRR17520069.4971406  
SRR17520069.4971408  
SRR17520069.4971410  
SRR17520069.4971412  
SRR17520069.4971414  
SRR17520069.4971416  
SRR17520069.4971418  
SRR17520069.4971420  
SRR17520069.4971422  
SRR17520069.4971424  
SRR17520069.4971426

SRR17520069.4984287  
SRR17520069.4986396  
SRR17520069.4986400  
SRR17520069.4986402  
SRR17520069.4987376  
SRR17520069.4988391  
SRR17520069.4988393  
SRR17520069.4988395  
SRR17520069.4988397  
SRR17520069.4988399  
SRR17520069.4988401  
SRR17520069.4988405  
SRR17520069.4988407  
SRR17520069.4988409  
SRR17520069.4988411  
SRR17520069.4988413  
SRR17520069.4988415  
SRR17520069.4988417  
SRR17520069.4988419  
SRR17520069.4988421  
SRR17520069.4988425  
SRR17520069.4988427  
SRR17520069.4988429  
SRR17520069.4988431  
SRR17520069.4988435  
SRR17520069.4988437  
SRR17520069.4988439  
SRR17520069.4988441  
SRR17520069.4988443  
SRR17520069.4988445  
SRR17520069.4988449  
SRR17520069.4988451  
SRR17520069.4988453  
SRR17520069.4988457  
SRR17520069.4988459  
SRR17520069.4988461  
SRR17520069.4988463  
SRR17520069.4988467  
SRR17520069.4988469  
SRR17520069.4988471  
SRR17520069.4988473  
SRR17520069.4988475  
SRR17520069.4988477  
SRR17520069.4988479  
SRR17520069.4988481  
SRR17520069.4988483  
SRR17520069.4988485



SRR17520069.4988489  
SRR17520069.4988491  
SRR17520069.4988493  
SRR17520069.4988497  
SRR17520069.4988501  
SRR17520069.4988503  
SRR17520069.4988505  
SRR17520069.4988507  
SRR17520069.4993981  
SRR17520069.4993983  
SRR17520069.4993985  
SRR17520069.4993987  
SRR17520069.4993989  
SRR17520069.4993991  
SRR17520069.4993993  
SRR17520069.4993995  
SRR17520069.4993997  
SRR17520069.4993999  
SRR17520069.4994001  
SRR17520069.4994003  
SRR17520069.4994005  
SRR17520069.4994007  
SRR17520069.4994009  
SRR17520069.4994011  
SRR17520069.4994013  
SRR17520069.4994015  
SRR17520069.4994017  
SRR17520069.4996506  
SRR17520069.5000422  
SRR17520069.5000466  
SRR17520069.5004402  
SRR17520069.5004404  
SRR17520069.5004406  
SRR17520069.5004410  
SRR17520069.5004412  
SRR17520069.5004414  
SRR17520069.5004416  
SRR17520069.5006644  
SRR17520069.5011924  
SRR17520069.5011926  
SRR17520069.5011928  
SRR17520069.5011930  
SRR17520069.5011932  
SRR17520069.5011934  
SRR17520069.5011936  
SRR17520069.5011938  
SRR17520069.5011940

SRR17520069.5011942  
SRR17520069.5011944  
SRR17520069.5011946  
SRR17520069.5011948  
SRR17520069.5011950  
SRR17520069.5011952  
SRR17520069.5011954  
SRR17520069.5011956  
SRR17520069.5011958  
SRR17520069.5011960  
SRR17520069.5011962  
SRR17520069.5011964  
SRR17520069.5011966  
SRR17520069.5011968  
SRR17520069.5011970  
SRR17520069.5011972  
SRR17520069.5011974  
SRR17520069.5011976  
SRR17520069.5011978  
SRR17520069.5014728  
SRR17520069.5014730  
SRR17520069.5014732  
SRR17520069.5014734  
SRR17520069.5014736  
SRR17520069.5014738  
SRR17520069.5014740  
SRR17520069.5014742  
SRR17520069.5014744  
SRR17520069.5014746  
SRR17520069.5014750  
SRR17520069.5014752  
SRR17520069.5014754  
SRR17520069.5014756  
SRR17520069.5014758  
SRR17520069.5014760  
SRR17520069.5014762  
SRR17520069.5014854  
SRR17520069.5014856  
SRR17520069.5014858  
SRR17520069.5014860  
SRR17520069.5016473  
SRR17520069.5016475  
SRR17520069.5016477  
SRR17520069.5016479  
SRR17520069.5016481  
SRR17520069.5016483  
SRR17520069.5016485

SRR17520069.5016487  
SRR17520069.5016489  
SRR17520069.5016491  
SRR17520069.5016493  
SRR17520069.5016495  
SRR17520069.5016497  
SRR17520069.5016499  
SRR17520069.5016501  
SRR17520069.5016503  
SRR17520069.5016505  
SRR17520069.5016507  
SRR17520069.5016509  
SRR17520069.5016511  
SRR17520069.5016513  
SRR17520069.5016515  
SRR17520069.5016517  
SRR17520069.5016519  
SRR17520069.5016521  
SRR17520069.5016523  
SRR17520069.5016525  
SRR17520069.5016527  
SRR17520069.5016529  
SRR17520069.5016531  
SRR17520069.5016533  
SRR17520069.5016535  
SRR17520069.5016537  
SRR17520069.5016539  
SRR17520069.5016541  
SRR17520069.5016543  
SRR17520069.5016545  
SRR17520069.5016547  
SRR17520069.5016549  
SRR17520069.5016551  
SRR17520069.5016555  
SRR17520069.5016561  
SRR17520069.5016563  
SRR17520069.5016565  
SRR17520069.5016567  
SRR17520069.5016569  
SRR17520069.5016571  
SRR17520069.5016573  
SRR17520069.5016575  
SRR17520069.5016577  
SRR17520069.5020487  
SRR17520069.5020489  
SRR17520069.5020491  
SRR17520069.5020493

SRR17520069.5020495  
SRR17520069.5020497  
SRR17520069.5020501  
SRR17520069.5020503  
SRR17520069.5020505  
SRR17520069.5020507  
SRR17520069.5026890  
SRR17520069.5026892  
SRR17520069.5026894  
SRR17520069.5026896  
SRR17520069.5026898  
SRR17520069.5031757  
SRR17520069.5031759  
SRR17520069.5031761  
SRR17520069.5031763  
SRR17520069.5031765  
SRR17520069.5032188  
SRR17520069.5032190  
SRR17520069.5039438  
SRR17520069.5045072  
SRR17520069.5045074  
SRR17520069.5045076  
SRR17520069.5045078  
SRR17520069.5045080  
SRR17520069.5045084  
SRR17520069.5045086  
SRR17520069.5045088  
SRR17520069.5045090  
SRR17520069.5045092  
SRR17520069.5045096  
SRR17520069.5045098  
SRR17520069.5045100  
SRR17520069.5045102  
SRR17520069.5045108  
SRR17520069.5045110  
SRR17520069.5045112  
SRR17520069.5045118  
SRR17520069.5045120  
SRR17520069.5045122  
SRR17520069.5045124  
SRR17520069.5045126  
SRR17520069.5049699  
SRR17520069.5051040  
SRR17520069.5052439  
SRR17520069.5052441  
SRR17520069.5052443  
SRR17520069.5052445

SRR17520069.5052447  
SRR17520069.5052449  
SRR17520069.5052453  
SRR17520069.5052455  
SRR17520069.5052457  
SRR17520069.5052459  
SRR17520069.5052461  
SRR17520069.5052463  
SRR17520069.5052465  
SRR17520069.5052467  
SRR17520069.5052469  
SRR17520069.5052471  
SRR17520069.5071510  
SRR17520069.5071512  
SRR17520069.5071514  
SRR17520069.5071518  
SRR17520069.5071520  
SRR17520069.5072838  
SRR17520069.5072842  
SRR17520069.5072844  
SRR17520069.5072846  
SRR17520069.5072848  
SRR17520069.5072850  
SRR17520069.5072852  
SRR17520069.5072854  
SRR17520069.5072856  
SRR17520069.5072860  
SRR17520069.5072862  
SRR17520069.5072864  
SRR17520069.5072866  
SRR17520069.5072868  
SRR17520069.5072872  
SRR17520069.5072874  
SRR17520069.5072876  
SRR17520069.5072878  
SRR17520069.5072884  
SRR17520069.5072886  
SRR17520069.5072888  
SRR17520069.5072890  
SRR17520069.5072898  
SRR17520069.5072900  
SRR17520069.5072904  
SRR17520069.5074987  
SRR17520069.5074989  
SRR17520069.5074991  
SRR17520069.5074993  
SRR17520069.5074995

SRR17520069.5074997  
SRR17520069.5074999  
SRR17520069.5075001  
SRR17520069.5075003  
SRR17520069.5075005  
SRR17520069.5075007  
SRR17520069.5075009  
SRR17520069.5075011  
SRR17520069.5075013  
SRR17520069.5075015  
SRR17520069.5075017  
SRR17520069.5075019  
SRR17520069.5075021  
SRR17520069.5075023  
SRR17520069.5075025  
SRR17520069.5075027  
SRR17520069.5075029  
SRR17520069.5075031  
SRR17520069.5075033  
SRR17520069.5075037  
SRR17520069.5075039  
SRR17520069.5075041  
SRR17520069.5075043  
SRR17520069.5075045  
SRR17520069.5075047  
SRR17520069.5075049  
SRR17520069.5075051  
SRR17520069.5075053  
SRR17520069.5075055  
SRR17520069.5075057  
SRR17520069.5075059  
SRR17520069.5075061  
SRR17520069.5075065  
SRR17520069.5075067  
SRR17520069.5075069  
SRR17520069.5075071  
SRR17520069.5075073  
SRR17520069.5075075  
SRR17520069.5075077  
SRR17520069.5075079  
SRR17520069.5075081  
SRR17520069.5075085  
SRR17520069.5075087  
SRR17520069.5075089  
SRR17520069.5075091  
SRR17520069.5075093  
SRR17520069.5075095

SRR17520069.5075097  
SRR17520069.5080428  
SRR17520069.5080430  
SRR17520069.5080432  
SRR17520069.5080434  
SRR17520069.5080436  
SRR17520069.5080438  
SRR17520069.5080440  
SRR17520069.5080442  
SRR17520069.5083324  
SRR17520069.5083326  
SRR17520069.5083332  
SRR17520069.5083336  
SRR17520069.5083460  
SRR17520069.5083462  
SRR17520069.5083464  
SRR17520069.5083466  
SRR17520069.5083468  
SRR17520069.5083470  
SRR17520069.5083472  
SRR17520069.5083474  
SRR17520069.5083476  
SRR17520069.5083478  
SRR17520069.5083480  
SRR17520069.5083482  
SRR17520069.5083484  
SRR17520069.5083486  
SRR17520069.5083488  
SRR17520069.5083490  
SRR17520069.5083492  
SRR17520069.5083494  
SRR17520069.5083496  
SRR17520069.5085420  
SRR17520069.5085424  
SRR17520069.5085426  
SRR17520069.5085428  
SRR17520069.5085430  
SRR17520069.5085432  
SRR17520069.5085434  
SRR17520069.5085436  
SRR17520069.5085438  
SRR17520069.5085440  
SRR17520069.5085442  
SRR17520069.5085444  
SRR17520069.5085446  
SRR17520069.5085448  
SRR17520069.5085450

SRR17520069. 5085452  
SRR17520069. 5085454  
SRR17520069. 5085456  
SRR17520069. 5085458  
SRR17520069. 5085460  
SRR17520069. 5085462  
SRR17520069. 5085464  
SRR17520069. 5085466  
SRR17520069. 5085468  
SRR17520069. 5085470  
SRR17520069. 5085472  
SRR17520069. 5085474  
SRR17520069. 5085476  
SRR17520069. 5085478  
SRR17520069. 5085480  
SRR17520069. 5085482  
SRR17520069. 5085484  
SRR17520069. 5085486  
SRR17520069. 5085488  
SRR17520069. 5085490  
SRR17520069. 5085492  
SRR17520069. 5087786  
SRR17520069. 5087789  
SRR17520069. 5094854  
SRR17520069. 5094856  
SRR17520069. 5094858  
SRR17520069. 5094860  
SRR17520069. 5094862  
SRR17520069. 5094864  
SRR17520069. 5094866  
SRR17520069. 5094868  
SRR17520069. 5094870  
SRR17520069. 5094872  
SRR17520069. 5094874  
SRR17520069. 5094876  
SRR17520069. 5094878  
SRR17520069. 5094880  
SRR17520069. 5094882  
SRR17520069. 5094884  
SRR17520069. 5094886  
SRR17520069. 5094888  
SRR17520069. 5094890  
SRR17520069. 5094892  
SRR17520069. 5094894  
SRR17520069. 5094896  
SRR17520069. 5094898  
SRR17520069. 5094900



SRR17520069.5094902  
SRR17520069.5094904  
SRR17520069.5094906  
SRR17520069.5094908  
SRR17520069.5094910  
SRR17520069.5094912  
SRR17520069.5094914  
SRR17520069.5094916  
SRR17520069.5094918  
SRR17520069.5094920  
SRR17520069.5094922  
SRR17520069.5094924  
SRR17520069.5094926  
SRR17520069.5094928  
SRR17520069.5094930  
SRR17520069.5094932  
SRR17520069.5094934  
SRR17520069.5094936  
SRR17520069.5094938  
SRR17520069.5094940  
SRR17520069.5094942  
SRR17520069.5094944  
SRR17520069.5094946  
SRR17520069.5095382  
SRR17520069.5095384  
SRR17520069.5095386  
SRR17520069.5095388  
SRR17520069.5098113  
SRR17520069.5098115  
SRR17520069.5098117  
SRR17520069.5098119  
SRR17520069.5098123  
SRR17520069.5098125  
SRR17520069.5098127  
SRR17520069.5098129  
SRR17520069.5098131  
SRR17520069.5098133  
SRR17520069.5098135  
SRR17520069.5100602  
SRR17520069.5100604  
SRR17520069.5100606  
SRR17520069.5100608  
SRR17520069.5100610  
SRR17520069.5100612  
SRR17520069.5100614  
SRR17520069.5100616  
SRR17520069.5100618

SRR17520069.5100622  
SRR17520069.5100624  
SRR17520069.5100626  
SRR17520069.5100628  
SRR17520069.5100630  
SRR17520069.5100632  
SRR17520069.5100634  
SRR17520069.5100636  
SRR17520069.5100642  
SRR17520069.5100644  
SRR17520069.5100646  
SRR17520069.5100648  
SRR17520069.5100652  
SRR17520069.5100654  
SRR17520069.5100656  
SRR17520069.5100658  
SRR17520069.5100660  
SRR17520069.5100662  
SRR17520069.5100664  
SRR17520069.5100666  
SRR17520069.5100668  
SRR17520069.5100670  
SRR17520069.5100672  
SRR17520069.5100674  
SRR17520069.5100676  
SRR17520069.5100678  
SRR17520069.5100680  
SRR17520069.5100682  
SRR17520069.5100684  
SRR17520069.5100686  
SRR17520069.5100688  
SRR17520069.5100690  
SRR17520069.5100692  
SRR17520069.5100694  
SRR17520069.5100696  
SRR17520069.5100698  
SRR17520069.5100700  
SRR17520069.5100706  
SRR17520069.5101471  
SRR17520069.5101473  
SRR17520069.5101475  
SRR17520069.5101477  
SRR17520069.5101479  
SRR17520069.5101483  
SRR17520069.5101485  
SRR17520069.5101487  
SRR17520069.5101490

SRR17520069.5101492  
SRR17520069.5101494  
SRR17520069.5101496  
SRR17520069.5101498  
SRR17520069.5101500  
SRR17520069.5101502  
SRR17520069.5101504  
SRR17520069.5101508  
SRR17520069.5104971  
SRR17520069.5104973  
SRR17520069.5104975  
SRR17520069.5104979  
SRR17520069.5104981  
SRR17520069.5104983  
SRR17520069.5104985  
SRR17520069.5104987  
SRR17520069.5104989  
SRR17520069.5104991  
SRR17520069.5104993  
SRR17520069.5104995  
SRR17520069.5104997  
SRR17520069.5104999  
SRR17520069.5105001  
SRR17520069.5112814  
SRR17520069.5112816  
SRR17520069.5112820  
SRR17520069.5112822  
SRR17520069.5112824  
SRR17520069.5112826  
SRR17520069.5112828  
SRR17520069.5112830  
SRR17520069.5112832  
SRR17520069.5112834  
SRR17520069.5112836  
SRR17520069.5112838  
SRR17520069.5112840  
SRR17520069.5112842  
SRR17520069.5112844  
SRR17520069.5112846  
SRR17520069.5112848  
SRR17520069.5112850  
SRR17520069.5112852  
SRR17520069.5112854  
SRR17520069.5112856  
SRR17520069.5112858  
SRR17520069.5112860  
SRR17520069.5112862

SRR17520069.5112864  
SRR17520069.5112868  
SRR17520069.5112870  
SRR17520069.5112872  
SRR17520069.5112874  
SRR17520069.5112876  
SRR17520069.5112878  
SRR17520069.5112880  
SRR17520069.5112882  
SRR17520069.5112884  
SRR17520069.5112886  
SRR17520069.5112888  
SRR17520069.5112894  
SRR17520069.5112896  
SRR17520069.5112898  
SRR17520069.5112900  
SRR17520069.5112902  
SRR17520069.5112904  
SRR17520069.5112906  
SRR17520069.5112908  
SRR17520069.5112910  
SRR17520069.5112912  
SRR17520069.5112916  
SRR17520069.5112918  
SRR17520069.5112920  
SRR17520069.5112922  
SRR17520069.5112924  
SRR17520069.5112926  
SRR17520069.5112928  
SRR17520069.5112930  
SRR17520069.5112932  
SRR17520069.5112934  
SRR17520069.5112936  
SRR17520069.5112938  
SRR17520069.5112940  
SRR17520069.5112942  
SRR17520069.5112946  
SRR17520069.5112948  
SRR17520069.5112950  
SRR17520069.5112952  
SRR17520069.5112954  
SRR17520069.5112956  
SRR17520069.5112958  
SRR17520069.5112960  
SRR17520069.5112962  
SRR17520069.5112964  
SRR17520069.5112966

SRR17520069.5112968  
SRR17520069.5112970  
SRR17520069.5112974  
SRR17520069.5112976  
SRR17520069.5112978  
SRR17520069.5112980  
SRR17520069.5112982  
SRR17520069.5114237  
SRR17520069.5114239  
SRR17520069.5114241  
SRR17520069.5114243  
SRR17520069.5114245  
SRR17520069.5114247  
SRR17520069.5114249  
SRR17520069.5114251  
SRR17520069.5114253  
SRR17520069.5114255  
SRR17520069.5114257  
SRR17520069.5114259  
SRR17520069.5114261  
SRR17520069.5114263  
SRR17520069.5114265  
SRR17520069.5114267  
SRR17520069.5114272  
SRR17520069.5114274  
SRR17520069.5114276  
SRR17520069.5115169  
SRR17520069.5115171  
SRR17520069.5115173  
SRR17520069.5115175  
SRR17520069.5116358  
SRR17520069.5116362  
SRR17520069.5116364  
SRR17520069.5116366  
SRR17520069.5116368  
SRR17520069.5116370  
SRR17520069.5116372  
SRR17520069.5116374  
SRR17520069.5116376  
SRR17520069.5116378  
SRR17520069.5116380  
SRR17520069.5116382  
SRR17520069.5116384  
SRR17520069.5118613  
SRR17520069.5118615  
SRR17520069.5118617  
SRR17520069.5118619

SRR17520069.5118623  
SRR17520069.5118625  
SRR17520069.5118627  
SRR17520069.5118629  
SRR17520069.5118631  
SRR17520069.5118633  
SRR17520069.5118635  
SRR17520069.5118637  
SRR17520069.5118639  
SRR17520069.5118641  
SRR17520069.5118643  
SRR17520069.5118645  
SRR17520069.5118647  
SRR17520069.5118649  
SRR17520069.5118651  
SRR17520069.5118655  
SRR17520069.5118657  
SRR17520069.5118659  
SRR17520069.5118661  
SRR17520069.5118663  
SRR17520069.5118665  
SRR17520069.5118667  
SRR17520069.5118669  
SRR17520069.5118671  
SRR17520069.5118673  
SRR17520069.5118675  
SRR17520069.5118679  
SRR17520069.5119095  
SRR17520069.5119097  
SRR17520069.5119099  
SRR17520069.5119101  
SRR17520069.5119103  
SRR17520069.5119105  
SRR17520069.5119107  
SRR17520069.5119109  
SRR17520069.5119111  
SRR17520069.5119113  
SRR17520069.5125826  
SRR17520069.5125828  
SRR17520069.5125830  
SRR17520069.5125832  
SRR17520069.5126124  
SRR17520069.5126130  
SRR17520069.5126694  
SRR17520069.5126696  
SRR17520069.5126698  
SRR17520069.5126700

SRR17520069. 5126702  
SRR17520069. 5126704  
SRR17520069. 5126706  
SRR17520069. 5126708  
SRR17520069. 5126710  
SRR17520069. 5126712  
SRR17520069. 5126714  
SRR17520069. 5127380  
SRR17520069. 5132287  
SRR17520069. 5132289  
SRR17520069. 5132291  
SRR17520069. 5132293  
SRR17520069. 5132297  
SRR17520069. 5132301  
SRR17520069. 5132303  
SRR17520069. 5132305  
SRR17520069. 5132307  
SRR17520069. 5132309  
SRR17520069. 5132311  
SRR17520069. 5132315  
SRR17520069. 5132317  
SRR17520069. 5132323  
SRR17520069. 5132325  
SRR17520069. 5132327  
SRR17520069. 5132329  
SRR17520069. 5132331  
SRR17520069. 5132333  
SRR17520069. 5132337  
SRR17520069. 5132341  
SRR17520069. 5133738  
SRR17520069. 5133740  
SRR17520069. 5133742  
SRR17520069. 5133744  
SRR17520069. 5133746  
SRR17520069. 5133748  
SRR17520069. 5154498  
SRR17520069. 5154500  
SRR17520069. 5154502  
SRR17520069. 5154504  
SRR17520069. 5154506  
SRR17520069. 5154508  
SRR17520069. 5154510  
SRR17520069. 5154512  
SRR17520069. 5154514  
SRR17520069. 5154516  
SRR17520069. 5154518  
SRR17520069. 5154520

SRR17520069. 5154522  
SRR17520069. 5154524  
SRR17520069. 5154526  
SRR17520069. 5154528  
SRR17520069. 5154530  
SRR17520069. 5154532  
SRR17520069. 5154534  
SRR17520069. 5154536  
SRR17520069. 5154538  
SRR17520069. 5154540  
SRR17520069. 5154542  
SRR17520069. 5154544  
SRR17520069. 5154548  
SRR17520069. 5154550  
SRR17520069. 5156729  
SRR17520069. 5156731  
SRR17520069. 5156733  
SRR17520069. 5156735  
SRR17520069. 5156737  
SRR17520069. 5156739  
SRR17520069. 5156741  
SRR17520069. 5156743  
SRR17520069. 5156745  
SRR17520069. 5156747  
SRR17520069. 5156749  
SRR17520069. 5156751  
SRR17520069. 5156753  
SRR17520069. 5156755  
SRR17520069. 5156757  
SRR17520069. 5156759  
SRR17520069. 5156761  
SRR17520069. 5156763  
SRR17520069. 5156765  
SRR17520069. 5156767  
SRR17520069. 5156769  
SRR17520069. 5156771  
SRR17520069. 5156773  
SRR17520069. 5156775  
SRR17520069. 5156777  
SRR17520069. 5156779  
SRR17520069. 5156781  
SRR17520069. 5156783  
SRR17520069. 5156785  
SRR17520069. 5156787  
SRR17520069. 5156789  
SRR17520069. 5156791  
SRR17520069. 5156793



SRR17520069. 5156795  
SRR17520069. 5156797  
SRR17520069. 5156799  
SRR17520069. 5156801  
SRR17520069. 5156803  
SRR17520069. 5156805  
SRR17520069. 5156807  
SRR17520069. 5156809  
SRR17520069. 5156811  
SRR17520069. 5156813  
SRR17520069. 5156815  
SRR17520069. 5156817  
SRR17520069. 5156819  
SRR17520069. 5156821  
SRR17520069. 5156823  
SRR17520069. 5156825  
SRR17520069. 5156827  
SRR17520069. 5156829  
SRR17520069. 5156831  
SRR17520069. 5160794  
SRR17520069. 5160796  
SRR17520069. 5160798  
SRR17520069. 5160800  
SRR17520069. 5160802  
SRR17520069. 5160804  
SRR17520069. 5160806  
SRR17520069. 5160808  
SRR17520069. 5160810  
SRR17520069. 5160812  
SRR17520069. 5160814  
SRR17520069. 5160816  
SRR17520069. 5160818  
SRR17520069. 5160820  
SRR17520069. 5160822  
SRR17520069. 5160824  
SRR17520069. 5160826  
SRR17520069. 5160828  
SRR17520069. 5160830  
SRR17520069. 5160832  
SRR17520069. 5160834  
SRR17520069. 5160836  
SRR17520069. 5160838  
SRR17520069. 5160840  
SRR17520069. 5160842  
SRR17520069. 5160844  
SRR17520069. 5160846  
SRR17520069. 5160848

SRR17520069.5160850  
SRR17520069.5160852  
SRR17520069.5160854  
SRR17520069.5160856  
SRR17520069.5173104  
SRR17520069.5173106  
SRR17520069.5173108  
SRR17520069.5173110  
SRR17520069.5173112  
SRR17520069.5173114  
SRR17520069.5173116  
SRR17520069.5173118  
SRR17520069.5173120  
SRR17520069.5175680  
SRR17520069.5175682  
SRR17520069.5175684  
SRR17520069.5175686  
SRR17520069.5175688  
SRR17520069.5175690  
SRR17520069.5175692  
SRR17520069.5175694  
SRR17520069.5175696  
SRR17520069.5175698  
SRR17520069.5175700  
SRR17520069.5175704  
SRR17520069.5175706  
SRR17520069.5175708  
SRR17520069.5175710  
SRR17520069.5175712  
SRR17520069.5175714  
SRR17520069.5175716  
SRR17520069.5175718  
SRR17520069.5175720  
SRR17520069.5175722  
SRR17520069.5175724  
SRR17520069.5175726  
SRR17520069.5175728  
SRR17520069.5175730  
SRR17520069.5175732  
SRR17520069.5175734  
SRR17520069.5175736  
SRR17520069.5175738  
SRR17520069.5175740  
SRR17520069.5175742  
SRR17520069.5175744  
SRR17520069.5175746  
SRR17520069.5175748

SRR17520069. 5175750  
SRR17520069. 5175752  
SRR17520069. 5175754  
SRR17520069. 5175756  
SRR17520069. 5175758  
SRR17520069. 5175760  
SRR17520069. 5175762  
SRR17520069. 5175764  
SRR17520069. 5175766  
SRR17520069. 5175768  
SRR17520069. 5175770  
SRR17520069. 5175772  
SRR17520069. 5175774  
SRR17520069. 5175776  
SRR17520069. 5175778  
SRR17520069. 5175780  
SRR17520069. 5175782  
SRR17520069. 5175784  
SRR17520069. 5175786  
SRR17520069. 5175788  
SRR17520069. 5175790  
SRR17520069. 5175792  
SRR17520069. 5175794  
SRR17520069. 5175796  
SRR17520069. 5175798  
SRR17520069. 5175800  
SRR17520069. 5175802  
SRR17520069. 5175804  
SRR17520069. 5175806  
SRR17520069. 5175808  
SRR17520069. 5175810  
SRR17520069. 5175812  
SRR17520069. 5175814  
SRR17520069. 5176083  
SRR17520069. 5176111  
SRR17520069. 5176135  
SRR17520069. 5176456  
SRR17520069. 5177582  
SRR17520069. 5177584  
SRR17520069. 5177586  
SRR17520069. 5177588  
SRR17520069. 5177590  
SRR17520069. 5177592  
SRR17520069. 5177594  
SRR17520069. 5177596  
SRR17520069. 5177598  
SRR17520069. 5177600

SRR17520069. 5177602  
SRR17520069. 5177604  
SRR17520069. 5177606  
SRR17520069. 5177608  
SRR17520069. 5177610  
SRR17520069. 5177612  
SRR17520069. 5177614  
SRR17520069. 5177616  
SRR17520069. 5177618  
SRR17520069. 5177620  
SRR17520069. 5177622  
SRR17520069. 5177624  
SRR17520069. 5177626  
SRR17520069. 5177628  
SRR17520069. 5177630  
SRR17520069. 5177632  
SRR17520069. 5177634  
SRR17520069. 5177636  
SRR17520069. 5177638  
SRR17520069. 5177640  
SRR17520069. 5177642  
SRR17520069. 5177644  
SRR17520069. 5177646  
SRR17520069. 5177648  
SRR17520069. 5177650  
SRR17520069. 5184228  
SRR17520069. 5184230  
SRR17520069. 5184232  
SRR17520069. 5184234  
SRR17520069. 5184236  
SRR17520069. 5184238  
SRR17520069. 5184240  
SRR17520069. 5184242  
SRR17520069. 5184244  
SRR17520069. 5184246  
SRR17520069. 5184248  
SRR17520069. 5184250  
SRR17520069. 5184252  
SRR17520069. 5184254  
SRR17520069. 5184256  
SRR17520069. 5184258  
SRR17520069. 5184260  
SRR17520069. 5184262  
SRR17520069. 5184264  
SRR17520069. 5184266  
SRR17520069. 5184268  
SRR17520069. 5184270

SRR17520069. 5184272  
SRR17520069. 5184274  
SRR17520069. 5184276  
SRR17520069. 5184278  
SRR17520069. 5184280  
SRR17520069. 5184282  
SRR17520069. 5184284  
SRR17520069. 5184286  
SRR17520069. 5184288  
SRR17520069. 5184290  
SRR17520069. 5184292  
SRR17520069. 5184294  
SRR17520069. 5184296  
SRR17520069. 5184298  
SRR17520069. 5184300  
SRR17520069. 5184302  
SRR17520069. 5184304  
SRR17520069. 5184306  
SRR17520069. 5184308  
SRR17520069. 5184310  
SRR17520069. 5184312  
SRR17520069. 5184314  
SRR17520069. 5184316  
SRR17520069. 5184318  
SRR17520069. 5184320  
SRR17520069. 5184322  
SRR17520069. 5184324  
SRR17520069. 5184326  
SRR17520069. 5184328  
SRR17520069. 5184330  
SRR17520069. 5184332  
SRR17520069. 5194687  
SRR17520069. 5194689  
SRR17520069. 5194691  
SRR17520069. 5194693  
SRR17520069. 5194695  
SRR17520069. 5194697  
SRR17520069. 5194699  
SRR17520069. 5194701  
SRR17520069. 5194703  
SRR17520069. 5194705  
SRR17520069. 5194707  
SRR17520069. 5194709  
SRR17520069. 5199391  
SRR17520069. 5199393  
SRR17520069. 5199395  
SRR17520069. 5199397

SRR17520069. 5199399  
SRR17520069. 5199401  
SRR17520069. 5199403  
SRR17520069. 5199405  
SRR17520069. 5199407  
SRR17520069. 5199409  
SRR17520069. 5199411  
SRR17520069. 5199413  
SRR17520069. 5199415  
SRR17520069. 5199417  
SRR17520069. 5199419  
SRR17520069. 5199421  
SRR17520069. 5199423  
SRR17520069. 5199425  
SRR17520069. 5199427  
SRR17520069. 5199429  
SRR17520069. 5199431  
SRR17520069. 5199433  
SRR17520069. 5199435  
SRR17520069. 5199437  
SRR17520069. 5199439  
SRR17520069. 5199441  
SRR17520069. 5199443  
SRR17520069. 5199445  
SRR17520069. 5199447  
SRR17520069. 5199449  
SRR17520069. 5199451  
SRR17520069. 5200091  
SRR17520069. 5200139  
SRR17520069. 5204911  
SRR17520069. 5204913  
SRR17520069. 5204915  
SRR17520069. 5204917  
SRR17520069. 5204919  
SRR17520069. 5204921  
SRR17520069. 5204923  
SRR17520069. 5204925  
SRR17520069. 5204927  
SRR17520069. 5204929  
SRR17520069. 5204931  
SRR17520069. 5204933  
SRR17520069. 5204935  
SRR17520069. 5204937  
SRR17520069. 5204939  
SRR17520069. 5204941  
SRR17520069. 5204943  
SRR17520069. 5204945

SRR17520069.5204947  
SRR17520069.5204949  
SRR17520069.5204951  
SRR17520069.5204953  
SRR17520069.5204955  
SRR17520069.5204957  
SRR17520069.5204959  
SRR17520069.5204961  
SRR17520069.5204963  
SRR17520069.5204965  
SRR17520069.5204967  
SRR17520069.5204969  
SRR17520069.5204971  
SRR17520069.5204973  
SRR17520069.5204975  
SRR17520069.5204977  
SRR17520069.5204979  
SRR17520069.5204981  
SRR17520069.5204983  
SRR17520069.5204985  
SRR17520069.5204987  
SRR17520069.5207344  
SRR17520069.5207346  
SRR17520069.5207348  
SRR17520069.5207350  
SRR17520069.5207352  
SRR17520069.5207354  
SRR17520069.5207356  
SRR17520069.5207358  
SRR17520069.5207360  
SRR17520069.5207362  
SRR17520069.5207364  
SRR17520069.5207366  
SRR17520069.5207368  
SRR17520069.5207370  
SRR17520069.5207372  
SRR17520069.5207374  
SRR17520069.5207376  
SRR17520069.5207378  
SRR17520069.5207380  
SRR17520069.5207382  
SRR17520069.5207384  
SRR17520069.5207386  
SRR17520069.5207388  
SRR17520069.5207390  
SRR17520069.5207392  
SRR17520069.5207394

SRR17520069. 5207396  
SRR17520069. 5207398  
SRR17520069. 5207400  
SRR17520069. 5207402  
SRR17520069. 5207404  
SRR17520069. 5207406  
SRR17520069. 5207408  
SRR17520069. 5207410  
SRR17520069. 5207412  
SRR17520069. 5207414  
SRR17520069. 5214044  
SRR17520069. 5219526  
SRR17520069. 5219528  
SRR17520069. 5219530  
SRR17520069. 5219532  
SRR17520069. 5219534  
SRR17520069. 5219538  
SRR17520069. 5219540  
SRR17520069. 5219542  
SRR17520069. 5219544  
SRR17520069. 5219546  
SRR17520069. 5219548  
SRR17520069. 5219550  
SRR17520069. 5219552  
SRR17520069. 5219554  
SRR17520069. 5219556  
SRR17520069. 5219560  
SRR17520069. 5219562  
SRR17520069. 5219564  
SRR17520069. 5219566  
SRR17520069. 5219568  
SRR17520069. 5219570  
SRR17520069. 5219572  
SRR17520069. 5219574  
SRR17520069. 5219578  
SRR17520069. 5219580  
SRR17520069. 5219582  
SRR17520069. 5219584  
SRR17520069. 5219586  
SRR17520069. 5219590  
SRR17520069. 5219592  
SRR17520069. 5219594  
SRR17520069. 5219596  
SRR17520069. 5219598  
SRR17520069. 5219600  
SRR17520069. 5219602  
SRR17520069. 5219604



SRR17520069. 5219606  
SRR17520069. 5219608  
SRR17520069. 5219610  
SRR17520069. 5219612  
SRR17520069. 5219614  
SRR17520069. 5219616  
SRR17520069. 5219618  
SRR17520069. 5219620  
SRR17520069. 5219622  
SRR17520069. 5219624  
SRR17520069. 5219626  
SRR17520069. 5219628  
SRR17520069. 5219630  
SRR17520069. 5219632  
SRR17520069. 5219634  
SRR17520069. 5219636  
SRR17520069. 5219638  
SRR17520069. 5219640  
SRR17520069. 5219642  
SRR17520069. 5219644  
SRR17520069. 5219646  
SRR17520069. 5219648  
SRR17520069. 5219650  
SRR17520069. 5219652  
SRR17520069. 5219654  
SRR17520069. 5219658  
SRR17520069. 5219660  
SRR17520069. 5219662  
SRR17520069. 5219664  
SRR17520069. 5219666  
SRR17520069. 5219668  
SRR17520069. 5219672  
SRR17520069. 5219676  
SRR17520069. 5219678  
SRR17520069. 5219680  
SRR17520069. 5219682  
SRR17520069. 5219684  
SRR17520069. 5219686  
SRR17520069. 5219688  
SRR17520069. 5219690  
SRR17520069. 5219692  
SRR17520069. 5219694  
SRR17520069. 5219897  
SRR17520069. 5219899  
SRR17520069. 5219901  
SRR17520069. 5219903  
SRR17520069. 5219905

SRR17520069. 5219907  
SRR17520069. 5219909  
SRR17520069. 5219911  
SRR17520069. 5219913  
SRR17520069. 5219917  
SRR17520069. 5219921  
SRR17520069. 5219923  
SRR17520069. 5219925  
SRR17520069. 5219927  
SRR17520069. 5219929  
SRR17520069. 5219931  
SRR17520069. 5219933  
SRR17520069. 5219935  
SRR17520069. 5219937  
SRR17520069. 5219939  
SRR17520069. 5219941  
SRR17520069. 5219943  
SRR17520069. 5219945  
SRR17520069. 5219947  
SRR17520069. 5219949  
SRR17520069. 5219951  
SRR17520069. 5219953  
SRR17520069. 5219955  
SRR17520069. 5219957  
SRR17520069. 5219959  
SRR17520069. 5219961  
SRR17520069. 5219963  
SRR17520069. 5219965  
SRR17520069. 5223097  
SRR17520069. 5223099  
SRR17520069. 5223101  
SRR17520069. 5223103  
SRR17520069. 5223105  
SRR17520069. 5223107  
SRR17520069. 5223109  
SRR17520069. 5223111  
SRR17520069. 5223113  
SRR17520069. 5223115  
SRR17520069. 5223117  
SRR17520069. 5223119  
SRR17520069. 5223121  
SRR17520069. 5223123  
SRR17520069. 5223125  
SRR17520069. 5223127  
SRR17520069. 5223129  
SRR17520069. 5223131  
SRR17520069. 5223133

SRR17520069. 5223135  
SRR17520069. 5223137  
SRR17520069. 5223139  
SRR17520069. 5223141  
SRR17520069. 5223278  
SRR17520069. 5223280  
SRR17520069. 5223282  
SRR17520069. 5223286  
SRR17520069. 5223288  
SRR17520069. 5223290  
SRR17520069. 5223292  
SRR17520069. 5223294  
SRR17520069. 5223296  
SRR17520069. 5223298  
SRR17520069. 5223300  
SRR17520069. 5223302  
SRR17520069. 5223304  
SRR17520069. 5223306  
SRR17520069. 5223308  
SRR17520069. 5223310  
SRR17520069. 5223312  
SRR17520069. 5223314  
SRR17520069. 5223316  
SRR17520069. 5223318  
SRR17520069. 5223320  
SRR17520069. 5223322  
SRR17520069. 5225577  
SRR17520069. 5225581  
SRR17520069. 5225583  
SRR17520069. 5225585  
SRR17520069. 5225587  
SRR17520069. 5225589  
SRR17520069. 5225591  
SRR17520069. 5225593  
SRR17520069. 5225595  
SRR17520069. 5225597  
SRR17520069. 5233287  
SRR17520069. 5233289  
SRR17520069. 5233291  
SRR17520069. 5233293  
SRR17520069. 5233295  
SRR17520069. 5233297  
SRR17520069. 5233299  
SRR17520069. 5233301  
SRR17520069. 5233303  
SRR17520069. 5233305  
SRR17520069. 5233307

SRR17520069.5233309  
SRR17520069.5233311  
SRR17520069.5233313  
SRR17520069.5233315  
SRR17520069.5233317  
SRR17520069.5233319  
SRR17520069.5233916  
SRR17520069.5233918  
SRR17520069.5233920  
SRR17520069.5233922  
SRR17520069.5233924  
SRR17520069.5233926  
SRR17520069.5233928  
SRR17520069.5233930  
SRR17520069.5233932  
SRR17520069.5233934  
SRR17520069.5233936  
SRR17520069.5233938  
SRR17520069.5233940  
SRR17520069.5233942  
SRR17520069.5233944  
SRR17520069.5233946  
SRR17520069.5233948  
SRR17520069.5233950  
SRR17520069.5233952  
SRR17520069.5233954  
SRR17520069.5233956  
SRR17520069.5233958  
SRR17520069.5233960  
SRR17520069.5233962  
SRR17520069.5233964  
SRR17520069.5233966  
SRR17520069.5233968  
SRR17520069.5233970  
SRR17520069.5233972  
SRR17520069.5238818  
SRR17520069.5238822  
SRR17520069.5238824  
SRR17520069.5238826  
SRR17520069.5238828  
SRR17520069.5238830  
SRR17520069.5240545  
SRR17520069.5240547  
SRR17520069.5240549  
SRR17520069.5240551  
SRR17520069.5240553  
SRR17520069.5240555

SRR17520069.5240557  
SRR17520069.5240559  
SRR17520069.5240561  
SRR17520069.5240567  
SRR17520069.5240569  
SRR17520069.5240571  
SRR17520069.5240573  
SRR17520069.5240577  
SRR17520069.5240579  
SRR17520069.5240581  
SRR17520069.5240583  
SRR17520069.5240585  
SRR17520069.5240587  
SRR17520069.5240591  
SRR17520069.5240593  
SRR17520069.5240595  
SRR17520069.5242350  
SRR17520069.5242352  
SRR17520069.5242354  
SRR17520069.5243410  
SRR17520069.5243412  
SRR17520069.5243414  
SRR17520069.5243416  
SRR17520069.5243418  
SRR17520069.5243420  
SRR17520069.5243422  
SRR17520069.5243424  
SRR17520069.5243426  
SRR17520069.5243428  
SRR17520069.5243430  
SRR17520069.5243434  
SRR17520069.5243438  
SRR17520069.5243440  
SRR17520069.5243442  
SRR17520069.5243444  
SRR17520069.5243446  
SRR17520069.5243448  
SRR17520069.5243450  
SRR17520069.5243454  
SRR17520069.5243456  
SRR17520069.5243458  
SRR17520069.5243460  
SRR17520069.5243462  
SRR17520069.5243464  
SRR17520069.5243466  
SRR17520069.5243470  
SRR17520069.5243472

SRR17520069.5243474  
SRR17520069.5243476  
SRR17520069.5243478  
SRR17520069.5243480  
SRR17520069.5243482  
SRR17520069.5243484  
SRR17520069.5243488  
SRR17520069.5243490  
SRR17520069.5243492  
SRR17520069.5243494  
SRR17520069.5243498  
SRR17520069.5243500  
SRR17520069.5243502  
SRR17520069.5243506  
SRR17520069.5243508  
SRR17520069.5243510  
SRR17520069.5243512  
SRR17520069.5243514  
SRR17520069.5243516  
SRR17520069.5243518  
SRR17520069.5243520  
SRR17520069.5243522  
SRR17520069.5243524  
SRR17520069.5243526  
SRR17520069.5243528  
SRR17520069.5243530  
SRR17520069.5243532  
SRR17520069.5243534  
SRR17520069.5243536  
SRR17520069.5243538  
SRR17520069.5243540  
SRR17520069.5248803  
SRR17520069.5249672  
SRR17520069.5249674  
SRR17520069.5249676  
SRR17520069.5249678  
SRR17520069.5249680  
SRR17520069.5249682  
SRR17520069.5249684  
SRR17520069.5249686  
SRR17520069.5249688  
SRR17520069.5249690  
SRR17520069.5249692  
SRR17520069.5249694  
SRR17520069.5249696  
SRR17520069.5249698  
SRR17520069.5249700

SRR17520069. 5249702  
SRR17520069. 5249704  
SRR17520069. 5249708  
SRR17520069. 5249710  
SRR17520069. 5249712  
SRR17520069. 5249714  
SRR17520069. 5249716  
SRR17520069. 5249718  
SRR17520069. 5249720  
SRR17520069. 5249722  
SRR17520069. 5249724  
SRR17520069. 5249726  
SRR17520069. 5249728  
SRR17520069. 5249730  
SRR17520069. 5249732  
SRR17520069. 5249734  
SRR17520069. 5249736  
SRR17520069. 5249738  
SRR17520069. 5249740  
SRR17520069. 5249742  
SRR17520069. 5249744  
SRR17520069. 5249746  
SRR17520069. 5249748  
SRR17520069. 5249750  
SRR17520069. 5249752  
SRR17520069. 5249754  
SRR17520069. 5249756  
SRR17520069. 5249758  
SRR17520069. 5249760  
SRR17520069. 5249762  
SRR17520069. 5249764  
SRR17520069. 5249766  
SRR17520069. 5249768  
SRR17520069. 5249770  
SRR17520069. 5249772  
SRR17520069. 5249774  
SRR17520069. 5249778  
SRR17520069. 5249780  
SRR17520069. 5249782  
SRR17520069. 5249784  
SRR17520069. 5249786  
SRR17520069. 5249788  
SRR17520069. 5249790  
SRR17520069. 5249792  
SRR17520069. 5249794  
SRR17520069. 5249796  
SRR17520069. 5249798

SRR17520069. 5255626  
SRR17520069. 5255628  
SRR17520069. 5255630  
SRR17520069. 5255634  
SRR17520069. 5255636  
SRR17520069. 5255638  
SRR17520069. 5255640  
SRR17520069. 5255642  
SRR17520069. 5255644  
SRR17520069. 5255646  
SRR17520069. 5255648  
SRR17520069. 5255650  
SRR17520069. 5255652  
SRR17520069. 5255654  
SRR17520069. 5255656  
SRR17520069. 5255658  
SRR17520069. 5255660  
SRR17520069. 5255662  
SRR17520069. 5255664  
SRR17520069. 5270985  
SRR17520069. 5270987  
SRR17520069. 5270989  
SRR17520069. 5270991  
SRR17520069. 5270993  
SRR17520069. 5270997  
SRR17520069. 5270999  
SRR17520069. 5271001  
SRR17520069. 5271003  
SRR17520069. 5271005  
SRR17520069. 5271007  
SRR17520069. 5271009  
SRR17520069. 5271011  
SRR17520069. 5271013  
SRR17520069. 5271015  
SRR17520069. 5271017  
SRR17520069. 5271021  
SRR17520069. 5271023  
SRR17520069. 5271025  
SRR17520069. 5271027  
SRR17520069. 5271029  
SRR17520069. 5271031  
SRR17520069. 5271033  
SRR17520069. 5271035  
SRR17520069. 5271037  
SRR17520069. 5271039  
SRR17520069. 5271043  
SRR17520069. 5271045



SRR17520069. 5271049  
SRR17520069. 5271051  
SRR17520069. 5271053  
SRR17520069. 5271057  
SRR17520069. 5271061  
SRR17520069. 5271063  
SRR17520069. 5276314  
SRR17520069. 5276326  
SRR17520069. 5276342  
SRR17520069. 5276344  
SRR17520069. 5276348  
SRR17520069. 5276352  
SRR17520069. 5276354  
SRR17520069. 5276356  
SRR17520069. 5276360  
SRR17520069. 5276362  
SRR17520069. 5276374  
SRR17520069. 5281086  
SRR17520069. 5281088  
SRR17520069. 5281090  
SRR17520069. 5281092  
SRR17520069. 5286175  
SRR17520069. 5286179  
SRR17520069. 5286181  
SRR17520069. 5286183  
SRR17520069. 5286185  
SRR17520069. 5286187  
SRR17520069. 5286189  
SRR17520069. 5286191  
SRR17520069. 5286193  
SRR17520069. 5286195  
SRR17520069. 5286197  
SRR17520069. 5286199  
SRR17520069. 5297902  
SRR17520069. 5297904  
SRR17520069. 5297908  
SRR17520069. 5303080  
SRR17520069. 5303082  
SRR17520069. 5304724  
SRR17520069. 5304726  
SRR17520069. 5304730  
SRR17520069. 5304732  
SRR17520069. 5304734  
SRR17520069. 5304736  
SRR17520069. 5304738  
SRR17520069. 5304740  
SRR17520069. 5304742

SRR17520069. 5304744  
SRR17520069. 5304746  
SRR17520069. 5305199  
SRR17520069. 5313090  
SRR17520069. 5313092  
SRR17520069. 5313094  
SRR17520069. 5313425  
SRR17520069. 5313429  
SRR17520069. 5313467  
SRR17520069. 5316912  
SRR17520069. 5316914  
SRR17520069. 5316916  
SRR17520069. 5316922  
SRR17520069. 5316924  
SRR17520069. 5316930  
SRR17520069. 5316932  
SRR17520069. 5316936  
SRR17520069. 5316938  
SRR17520069. 5316940  
SRR17520069. 5316942  
SRR17520069. 5316944  
SRR17520069. 5316946  
SRR17520069. 5316948  
SRR17520069. 5316952  
SRR17520069. 5316954  
SRR17520069. 5321506  
SRR17520069. 5321508  
SRR17520069. 5321510  
SRR17520069. 5321512  
SRR17520069. 5321514  
SRR17520069. 5321516  
SRR17520069. 5321518  
SRR17520069. 5321520  
SRR17520069. 5321522  
SRR17520069. 5321524  
SRR17520069. 5321526  
SRR17520069. 5321528  
SRR17520069. 5321530  
SRR17520069. 5321532  
SRR17520069. 5321534  
SRR17520069. 5321536  
SRR17520069. 5321540  
SRR17520069. 5321542  
SRR17520069. 5321546  
SRR17520069. 5321548  
SRR17520069. 5321550  
SRR17520069. 5321554

SRR17520069. 5323003  
SRR17520069. 5323005  
SRR17520069. 5323007  
SRR17520069. 5323009  
SRR17520069. 5323011  
SRR17520069. 5323013  
SRR17520069. 5323015  
SRR17520069. 5323017  
SRR17520069. 5323019  
SRR17520069. 5323023  
SRR17520069. 5323025  
SRR17520069. 5323027  
SRR17520069. 5323029  
SRR17520069. 5323031  
SRR17520069. 5323033  
SRR17520069. 5323035  
SRR17520069. 5323037  
SRR17520069. 5323039  
SRR17520069. 5323043  
SRR17520069. 5323045  
SRR17520069. 5323047  
SRR17520069. 5323049  
SRR17520069. 5323051  
SRR17520069. 5323053  
SRR17520069. 5323057  
SRR17520069. 5323059  
SRR17520069. 5323061  
SRR17520069. 5323063  
SRR17520069. 5323065  
SRR17520069. 5323067  
SRR17520069. 5323069  
SRR17520069. 5323071  
SRR17520069. 5323073  
SRR17520069. 5323075  
SRR17520069. 5323077  
SRR17520069. 5323079  
SRR17520069. 5323081  
SRR17520069. 5323083  
SRR17520069. 5324142  
SRR17520069. 5324144  
SRR17520069. 5324146  
SRR17520069. 5324148  
SRR17520069. 5324150  
SRR17520069. 5324152  
SRR17520069. 5324154  
SRR17520069. 5324228  
SRR17520069. 5324230

SRR17520069. 5324232  
SRR17520069. 5324234  
SRR17520069. 5324236  
SRR17520069. 5324238  
SRR17520069. 5324240  
SRR17520069. 5324242  
SRR17520069. 5324244  
SRR17520069. 5324246  
SRR17520069. 5324248  
SRR17520069. 5324250  
SRR17520069. 5324252  
SRR17520069. 5324254  
SRR17520069. 5324256  
SRR17520069. 5324258  
SRR17520069. 5324260  
SRR17520069. 5324262  
SRR17520069. 5324264  
SRR17520069. 5324266  
SRR17520069. 5324268  
SRR17520069. 5324270  
SRR17520069. 5324272  
SRR17520069. 5324274  
SRR17520069. 5324276  
SRR17520069. 5324278  
SRR17520069. 5324280  
SRR17520069. 5324282  
SRR17520069. 5324284  
SRR17520069. 5324286  
SRR17520069. 5324288  
SRR17520069. 5324292  
SRR17520069. 5324294  
SRR17520069. 5324296  
SRR17520069. 5324298  
SRR17520069. 5324300  
SRR17520069. 5324302  
SRR17520069. 5324304  
SRR17520069. 5324306  
SRR17520069. 5324308  
SRR17520069. 5331039  
SRR17520069. 5331041  
SRR17520069. 5331043  
SRR17520069. 5331045  
SRR17520069. 5331047  
SRR17520069. 5331049  
SRR17520069. 5331051  
SRR17520069. 5331053  
SRR17520069. 5331055

SRR17520069. 5331057  
SRR17520069. 5331059  
SRR17520069. 5331061  
SRR17520069. 5331063  
SRR17520069. 5331065  
SRR17520069. 5331067  
SRR17520069. 5331069  
SRR17520069. 5331071  
SRR17520069. 5331209  
SRR17520069. 5331211  
SRR17520069. 5331213  
SRR17520069. 5331215  
SRR17520069. 5331217  
SRR17520069. 5331219  
SRR17520069. 5331221  
SRR17520069. 5331223  
SRR17520069. 5331225  
SRR17520069. 5331227  
SRR17520069. 5331229  
SRR17520069. 5331231  
SRR17520069. 5331233  
SRR17520069. 5331235  
SRR17520069. 5331237  
SRR17520069. 5331239  
SRR17520069. 5331241  
SRR17520069. 5331243  
SRR17520069. 5331245  
SRR17520069. 5331247  
SRR17520069. 5331249  
SRR17520069. 5331251  
SRR17520069. 5331253  
SRR17520069. 5331255  
SRR17520069. 5331257  
SRR17520069. 5331259  
SRR17520069. 5331261  
SRR17520069. 5331263  
SRR17520069. 5331265  
SRR17520069. 5331267  
SRR17520069. 5331269  
SRR17520069. 5331271  
SRR17520069. 5331273  
SRR17520069. 5331275  
SRR17520069. 5331277  
SRR17520069. 5331279  
SRR17520069. 5331281  
SRR17520069. 5331283  
SRR17520069. 5331285

SRR17520069. 5331287  
SRR17520069. 5331289  
SRR17520069. 5331291  
SRR17520069. 5331293  
SRR17520069. 5331295  
SRR17520069. 5331297  
SRR17520069. 5331301  
SRR17520069. 5331303  
SRR17520069. 5331305  
SRR17520069. 5331307  
SRR17520069. 5331309  
SRR17520069. 5331311  
SRR17520069. 5331313  
SRR17520069. 5331315  
SRR17520069. 5331317  
SRR17520069. 5331319  
SRR17520069. 5340382  
SRR17520069. 5340384  
SRR17520069. 5349152  
SRR17520069. 5349154  
SRR17520069. 5351231  
SRR17520069. 5351233  
SRR17520069. 5351235  
SRR17520069. 5351237  
SRR17520069. 5351239  
SRR17520069. 5351243  
SRR17520069. 5351245  
SRR17520069. 5351247  
SRR17520069. 5351249  
SRR17520069. 5351251  
SRR17520069. 5351253  
SRR17520069. 5351336  
SRR17520069. 5351338  
SRR17520069. 5351340  
SRR17520069. 5351342  
SRR17520069. 5351344  
SRR17520069. 5351346  
SRR17520069. 5351348  
SRR17520069. 5351350  
SRR17520069. 5351352  
SRR17520069. 5351354  
SRR17520069. 5351356  
SRR17520069. 5351358  
SRR17520069. 5351360  
SRR17520069. 5351364  
SRR17520069. 5351366  
SRR17520069. 5351368

SRR17520069. 5351370  
SRR17520069. 5351372  
SRR17520069. 5351374  
SRR17520069. 5351376  
SRR17520069. 5351378  
SRR17520069. 5351380  
SRR17520069. 5351382  
SRR17520069. 5351384  
SRR17520069. 5351386  
SRR17520069. 5351388  
SRR17520069. 5351390  
SRR17520069. 5351392  
SRR17520069. 5351394  
SRR17520069. 5351396  
SRR17520069. 5351398  
SRR17520069. 5351400  
SRR17520069. 5351402  
SRR17520069. 5351404  
SRR17520069. 5351406  
SRR17520069. 5351408  
SRR17520069. 5351410  
SRR17520069. 5351412  
SRR17520069. 5351414  
SRR17520069. 5351416  
SRR17520069. 5351418  
SRR17520069. 5351420  
SRR17520069. 5351422  
SRR17520069. 5351424  
SRR17520069. 5351426  
SRR17520069. 5351428  
SRR17520069. 5351430  
SRR17520069. 5351432  
SRR17520069. 5351434  
SRR17520069. 5351436  
SRR17520069. 5351438  
SRR17520069. 5351440  
SRR17520069. 5351442  
SRR17520069. 5351444  
SRR17520069. 5351446  
SRR17520069. 5351448  
SRR17520069. 5351450  
SRR17520069. 5351452  
SRR17520069. 5351454  
SRR17520069. 5351456  
SRR17520069. 5351458  
SRR17520069. 5351518  
SRR17520069. 5351520

SRR17520069. 5351522  
SRR17520069. 5351526  
SRR17520069. 5351528  
SRR17520069. 5351530  
SRR17520069. 5351532  
SRR17520069. 5351534  
SRR17520069. 5351536  
SRR17520069. 5351538  
SRR17520069. 5351540  
SRR17520069. 5351542  
SRR17520069. 5351544  
SRR17520069. 5351546  
SRR17520069. 5351548  
SRR17520069. 5351550  
SRR17520069. 5351552  
SRR17520069. 5351554  
SRR17520069. 5351556  
SRR17520069. 5351558  
SRR17520069. 5351560  
SRR17520069. 5351562  
SRR17520069. 5351564  
SRR17520069. 5351566  
SRR17520069. 5351568  
SRR17520069. 5351570  
SRR17520069. 5351572  
SRR17520069. 5351574  
SRR17520069. 5351576  
SRR17520069. 5351578  
SRR17520069. 5351580  
SRR17520069. 5351582  
SRR17520069. 5351584  
SRR17520069. 5351586  
SRR17520069. 5351588  
SRR17520069. 5351590  
SRR17520069. 5351592  
SRR17520069. 5351594  
SRR17520069. 5351596  
SRR17520069. 5351598  
SRR17520069. 5351600  
SRR17520069. 5351602  
SRR17520069. 5351604  
SRR17520069. 5351606  
SRR17520069. 5351608  
SRR17520069. 5351610  
SRR17520069. 5351612  
SRR17520069. 5351614  
SRR17520069. 5351616



SRR17520069. 5351618  
SRR17520069. 5353161  
SRR17520069. 5353163  
SRR17520069. 5353165  
SRR17520069. 5353169  
SRR17520069. 5353171  
SRR17520069. 5353173  
SRR17520069. 5353175  
SRR17520069. 5353177  
SRR17520069. 5353179  
SRR17520069. 5353181  
SRR17520069. 5353183  
SRR17520069. 5353185  
SRR17520069. 5353187  
SRR17520069. 5353189  
SRR17520069. 5353193  
SRR17520069. 5353195  
SRR17520069. 5353197  
SRR17520069. 5353199  
SRR17520069. 5353201  
SRR17520069. 5353203  
SRR17520069. 5353207  
SRR17520069. 5353209  
SRR17520069. 5356255  
SRR17520069. 5356257  
SRR17520069. 5356259  
SRR17520069. 5356261  
SRR17520069. 5356263  
SRR17520069. 5356265  
SRR17520069. 5356267  
SRR17520069. 5356269  
SRR17520069. 5356271  
SRR17520069. 5356273  
SRR17520069. 5356275  
SRR17520069. 5356277  
SRR17520069. 5356279  
SRR17520069. 5356281  
SRR17520069. 5356283  
SRR17520069. 5356959  
SRR17520069. 5356963  
SRR17520069. 5356965  
SRR17520069. 5356967  
SRR17520069. 5356969  
SRR17520069. 5356971  
SRR17520069. 5356975  
SRR17520069. 5356977  
SRR17520069. 5356979

SRR17520069. 5356981  
SRR17520069. 5356983  
SRR17520069. 5356985  
SRR17520069. 5356987  
SRR17520069. 5356995  
SRR17520069. 5356997  
SRR17520069. 5356999  
SRR17520069. 5357001  
SRR17520069. 5357003  
SRR17520069. 5357005  
SRR17520069. 5357007  
SRR17520069. 5357009  
SRR17520069. 5357011  
SRR17520069. 5357013  
SRR17520069. 5357015  
SRR17520069. 5358396  
SRR17520069. 5358398  
SRR17520069. 5358400  
SRR17520069. 5358402  
SRR17520069. 5358404  
SRR17520069. 5358406  
SRR17520069. 5358408  
SRR17520069. 5358410  
SRR17520069. 5358412  
SRR17520069. 5358414  
SRR17520069. 5358416  
SRR17520069. 5358418  
SRR17520069. 5358420  
SRR17520069. 5358422  
SRR17520069. 5358424  
SRR17520069. 5358426  
SRR17520069. 5358428  
SRR17520069. 5358430  
SRR17520069. 5358432  
SRR17520069. 5358434  
SRR17520069. 5358436  
SRR17520069. 5358438  
SRR17520069. 5358440  
SRR17520069. 5358442  
SRR17520069. 5358444  
SRR17520069. 5358446  
SRR17520069. 5358448  
SRR17520069. 5358450  
SRR17520069. 5358452  
SRR17520069. 5358454  
SRR17520069. 5358456  
SRR17520069. 5358458

SRR17520069. 5358460  
SRR17520069. 5358462  
SRR17520069. 5358464  
SRR17520069. 5358466  
SRR17520069. 5358468  
SRR17520069. 5358470  
SRR17520069. 5358472  
SRR17520069. 5358474  
SRR17520069. 5358476  
SRR17520069. 5358478  
SRR17520069. 5358480  
SRR17520069. 5358484  
SRR17520069. 5358486  
SRR17520069. 5358488  
SRR17520069. 5358490  
SRR17520069. 5358492  
SRR17520069. 5358494  
SRR17520069. 5358496  
SRR17520069. 5358498  
SRR17520069. 5358500  
SRR17520069. 5358502  
SRR17520069. 5358504  
SRR17520069. 5358506  
SRR17520069. 5358508  
SRR17520069. 5358510  
SRR17520069. 5358512  
SRR17520069. 5358514  
SRR17520069. 5366300  
SRR17520069. 5366302  
SRR17520069. 5366304  
SRR17520069. 5366306  
SRR17520069. 5366308  
SRR17520069. 5366310  
SRR17520069. 5366312  
SRR17520069. 5366314  
SRR17520069. 5366316  
SRR17520069. 5366318  
SRR17520069. 5366320  
SRR17520069. 5366322  
SRR17520069. 5366324  
SRR17520069. 5366326  
SRR17520069. 5366328  
SRR17520069. 5366330  
SRR17520069. 5366332  
SRR17520069. 5379282  
SRR17520069. 5379284  
SRR17520069. 5379286

SRR17520069. 5379288  
SRR17520069. 5379295  
SRR17520069. 5379297  
SRR17520069. 5379299  
SRR17520069. 5379303  
SRR17520069. 5379305  
SRR17520069. 5379307  
SRR17520069. 5379309  
SRR17520069. 5379311  
SRR17520069. 5379313  
SRR17520069. 5379315  
SRR17520069. 5379317  
SRR17520069. 5379319  
SRR17520069. 5379321  
SRR17520069. 5379552  
SRR17520069. 5379556  
SRR17520069. 5379558  
SRR17520069. 5379560  
SRR17520069. 5379562  
SRR17520069. 5379564  
SRR17520069. 5379566  
SRR17520069. 5379568  
SRR17520069. 5379570  
SRR17520069. 5379572  
SRR17520069. 5379574  
SRR17520069. 5379576  
SRR17520069. 5379578  
SRR17520069. 5379580  
SRR17520069. 5379582  
SRR17520069. 5379584  
SRR17520069. 5379586  
SRR17520069. 5379588  
SRR17520069. 5379590  
SRR17520069. 5379592  
SRR17520069. 5379594  
SRR17520069. 5385214  
SRR17520069. 5398541  
SRR17520069. 5398543  
SRR17520069. 5398545  
SRR17520069. 5398547  
SRR17520069. 5398549  
SRR17520069. 5398551  
SRR17520069. 5398553  
SRR17520069. 5398555  
SRR17520069. 5398557  
SRR17520069. 5398559  
SRR17520069. 5398561

SRR17520069. 5398563  
SRR17520069. 5398565  
SRR17520069. 5398567  
SRR17520069. 5398569  
SRR17520069. 5398573  
SRR17520069. 5398575  
SRR17520069. 5398577  
SRR17520069. 5398579  
SRR17520069. 5398581  
SRR17520069. 5398583  
SRR17520069. 5398585  
SRR17520069. 5398587  
SRR17520069. 5402873  
SRR17520069. 5402875  
SRR17520069. 5402877  
SRR17520069. 5402879  
SRR17520069. 5402881  
SRR17520069. 5402883  
SRR17520069. 5402885  
SRR17520069. 5402887  
SRR17520069. 5402889  
SRR17520069. 5402891  
SRR17520069. 5402893  
SRR17520069. 5402895  
SRR17520069. 5402897  
SRR17520069. 5402899  
SRR17520069. 5402901  
SRR17520069. 5402903  
SRR17520069. 5402905  
SRR17520069. 5402907  
SRR17520069. 5402909  
SRR17520069. 5402911  
SRR17520069. 5402913  
SRR17520069. 5402915  
SRR17520069. 5402917  
SRR17520069. 5402919  
SRR17520069. 5402921  
SRR17520069. 5402923  
SRR17520069. 5402925  
SRR17520069. 5402927  
SRR17520069. 5402931  
SRR17520069. 5402933  
SRR17520069. 5402935  
SRR17520069. 5402937  
SRR17520069. 5402939  
SRR17520069. 5402941  
SRR17520069. 5402943

SRR17520069. 5402945  
SRR17520069. 5402947  
SRR17520069. 5402949  
SRR17520069. 5402951  
SRR17520069. 5402953  
SRR17520069. 5414001  
SRR17520069. 5414005  
SRR17520069. 5414007  
SRR17520069. 5414009  
SRR17520069. 5414949  
SRR17520069. 5414951  
SRR17520069. 5414953  
SRR17520069. 5424103  
SRR17520069. 5424115  
SRR17520069. 5424117  
SRR17520069. 5424119  
SRR17520069. 5424121  
SRR17520069. 5424123  
SRR17520069. 5424125  
SRR17520069. 5424127  
SRR17520069. 5424129  
SRR17520069. 5424131  
SRR17520069. 5424133  
SRR17520069. 5424135  
SRR17520069. 5424137  
SRR17520069. 5424139  
SRR17520069. 5424141  
SRR17520069. 5424143  
SRR17520069. 5424145  
SRR17520069. 5424147  
SRR17520069. 5424149  
SRR17520069. 5424151  
SRR17520069. 5424153  
SRR17520069. 5424155  
SRR17520069. 5424157  
SRR17520069. 5424159  
SRR17520069. 5424161  
SRR17520069. 5424163  
SRR17520069. 5424165  
SRR17520069. 5424167  
SRR17520069. 5424169  
SRR17520069. 5424171  
SRR17520069. 5424173  
SRR17520069. 5424175  
SRR17520069. 5424177  
SRR17520069. 5424189  
SRR17520069. 5424191

SRR17520069. 5424193  
SRR17520069. 5424195  
SRR17520069. 5424197  
SRR17520069. 5424199  
SRR17520069. 5424201  
SRR17520069. 5424203  
SRR17520069. 5424205  
SRR17520069. 5424207  
SRR17520069. 5424209  
SRR17520069. 5424211  
SRR17520069. 5424215  
SRR17520069. 5424217  
SRR17520069. 5424219  
SRR17520069. 5424221  
SRR17520069. 5424223  
SRR17520069. 5424225  
SRR17520069. 5424227  
SRR17520069. 5424229  
SRR17520069. 5424231  
SRR17520069. 5424233  
SRR17520069. 5424235  
SRR17520069. 5424237  
SRR17520069. 5424239  
SRR17520069. 5424241  
SRR17520069. 5424243  
SRR17520069. 5424245  
SRR17520069. 5424247  
SRR17520069. 5424249  
SRR17520069. 5424251  
SRR17520069. 5424253  
SRR17520069. 5424255  
SRR17520069. 5424257  
SRR17520069. 5424259  
SRR17520069. 5424261  
SRR17520069. 5424263  
SRR17520069. 5424265  
SRR17520069. 5424267  
SRR17520069. 5424269  
SRR17520069. 5424271  
SRR17520069. 5424273  
SRR17520069. 5424275  
SRR17520069. 5424277  
SRR17520069. 5424279  
SRR17520069. 5424281  
SRR17520069. 5424283  
SRR17520069. 5424285  
SRR17520069. 5424289

SRR17520069. 5424291  
SRR17520069. 5424293  
SRR17520069. 5424295  
SRR17520069. 5424297  
SRR17520069. 5424299  
SRR17520069. 5424301  
SRR17520069. 5424303  
SRR17520069. 5424305  
SRR17520069. 5424307  
SRR17520069. 5424309  
SRR17520069. 5424311  
SRR17520069. 5424313  
SRR17520069. 5424315  
SRR17520069. 5424317  
SRR17520069. 5424319  
SRR17520069. 5424321  
SRR17520069. 5424323  
SRR17520069. 5424325  
SRR17520069. 5424327  
SRR17520069. 5424329  
SRR17520069. 5424331  
SRR17520069. 5424333  
SRR17520069. 5424335  
SRR17520069. 5424337  
SRR17520069. 5424339  
SRR17520069. 5424341  
SRR17520069. 5424343  
SRR17520069. 5424345  
SRR17520069. 5424347  
SRR17520069. 5424349  
SRR17520069. 5424351  
SRR17520069. 5424353  
SRR17520069. 5424355  
SRR17520069. 5433630  
SRR17520069. 5433632  
SRR17520069. 5433634  
SRR17520069. 5433636  
SRR17520069. 5438814  
SRR17520069. 5438816  
SRR17520069. 5438818  
SRR17520069. 5438820  
SRR17520069. 5438822  
SRR17520069. 5438824  
SRR17520069. 5438826  
SRR17520069. 5438828  
SRR17520069. 5438830  
SRR17520069. 5438832



SRR17520069. 5438834  
SRR17520069. 5438836  
SRR17520069. 5438838  
SRR17520069. 5438840  
SRR17520069. 5442533  
SRR17520069. 5442686  
SRR17520069. 5442688  
SRR17520069. 5442690  
SRR17520069. 5442692  
SRR17520069. 5442694  
SRR17520069. 5442696  
SRR17520069. 5442698  
SRR17520069. 5442700  
SRR17520069. 5442702  
SRR17520069. 5442704  
SRR17520069. 5442706  
SRR17520069. 5442708  
SRR17520069. 5442710  
SRR17520069. 5442712  
SRR17520069. 5442716  
SRR17520069. 5442718  
SRR17520069. 5442720  
SRR17520069. 5442724  
SRR17520069. 5442728  
SRR17520069. 5442730  
SRR17520069. 5442732  
SRR17520069. 5446836  
SRR17520069. 5446838  
SRR17520069. 5452794  
SRR17520069. 5457682  
SRR17520069. 5457712  
SRR17520069. 5460121  
SRR17520069. 5460143  
SRR17520069. 5460188  
SRR17520069. 5460190  
SRR17520069. 5460192  
SRR17520069. 5460194  
SRR17520069. 5460196  
SRR17520069. 5460200  
SRR17520069. 5460204  
SRR17520069. 5460206  
SRR17520069. 5460208  
SRR17520069. 5460210  
SRR17520069. 5460212  
SRR17520069. 5460214  
SRR17520069. 5460218  
SRR17520069. 5460220

SRR17520069. 5460222  
SRR17520069. 5460224  
SRR17520069. 5460226  
SRR17520069. 5460228  
SRR17520069. 5460230  
SRR17520069. 5460232  
SRR17520069. 5460234  
SRR17520069. 5460236  
SRR17520069. 5460238  
SRR17520069. 5460240  
SRR17520069. 5460242  
SRR17520069. 5460244  
SRR17520069. 5460246  
SRR17520069. 5460248  
SRR17520069. 5460250  
SRR17520069. 5460252  
SRR17520069. 5460254  
SRR17520069. 5460256  
SRR17520069. 5460258  
SRR17520069. 5460260  
SRR17520069. 5460262  
SRR17520069. 5460264  
SRR17520069. 5460266  
SRR17520069. 5460268  
SRR17520069. 5460270  
SRR17520069. 5460272  
SRR17520069. 5460274  
SRR17520069. 5460276  
SRR17520069. 5460278  
SRR17520069. 5460280  
SRR17520069. 5460282  
SRR17520069. 5460284  
SRR17520069. 5460286  
SRR17520069. 5460288  
SRR17520069. 5460290  
SRR17520069. 5460292  
SRR17520069. 5460294  
SRR17520069. 5460296  
SRR17520069. 5460298  
SRR17520069. 5460300  
SRR17520069. 5460302  
SRR17520069. 5460304  
SRR17520069. 5460306  
SRR17520069. 5460308  
SRR17520069. 5460310  
SRR17520069. 5460312  
SRR17520069. 5460314

SRR17520069.5460316  
SRR17520069.5460318  
SRR17520069.5460320  
SRR17520069.5460322  
SRR17520069.5460324  
SRR17520069.5460326  
SRR17520069.5466018  
SRR17520069.5466020  
SRR17520069.5466022  
SRR17520069.5466024  
SRR17520069.5466026  
SRR17520069.5466028  
SRR17520069.5466030  
SRR17520069.5466032  
SRR17520069.5466034  
SRR17520069.5466038  
SRR17520069.5466040  
SRR17520069.5466042  
SRR17520069.5466044  
SRR17520069.5466046  
SRR17520069.5466048  
SRR17520069.5466050  
SRR17520069.5466052  
SRR17520069.5469884  
SRR17520069.5469886  
SRR17520069.5469888  
SRR17520069.5469890  
SRR17520069.5469892  
SRR17520069.5469894  
SRR17520069.5469896  
SRR17520069.5469898  
SRR17520069.5469900  
SRR17520069.5469902  
SRR17520069.5469904  
SRR17520069.5469906  
SRR17520069.5469908  
SRR17520069.5469912  
SRR17520069.5469914  
SRR17520069.5469916  
SRR17520069.5469918  
SRR17520069.5469920  
SRR17520069.5469924  
SRR17520069.5469926  
SRR17520069.5469928  
SRR17520069.5469930  
SRR17520069.5469932  
SRR17520069.5469934

SRR17520069. 5469936  
SRR17520069. 5469938  
SRR17520069. 5469940  
SRR17520069. 5469944  
SRR17520069. 5469946  
SRR17520069. 5469948  
SRR17520069. 5469950  
SRR17520069. 5469954  
SRR17520069. 5469956  
SRR17520069. 5469958  
SRR17520069. 5469960  
SRR17520069. 5469962  
SRR17520069. 5469964  
SRR17520069. 5469966  
SRR17520069. 5469968  
SRR17520069. 5469970  
SRR17520069. 5469974  
SRR17520069. 5469976  
SRR17520069. 5469978  
SRR17520069. 5469980  
SRR17520069. 5469982  
SRR17520069. 5474054  
SRR17520069. 5489476  
SRR17520069. 5489480  
SRR17520069. 5489482  
SRR17520069. 5489484  
SRR17520069. 5489486  
SRR17520069. 5489488  
SRR17520069. 5489490  
SRR17520069. 5489492  
SRR17520069. 5489494  
SRR17520069. 5489496  
SRR17520069. 5489498  
SRR17520069. 5489500  
SRR17520069. 5489502  
SRR17520069. 5489504  
SRR17520069. 5489506  
SRR17520069. 5489508  
SRR17520069. 5489510  
SRR17520069. 5489512  
SRR17520069. 5489516  
SRR17520069. 5489518  
SRR17520069. 5489520  
SRR17520069. 5490821  
SRR17520069. 5490823  
SRR17520069. 5490829  
SRR17520069. 5490831

SRR17520069.5490833  
SRR17520069.5490835  
SRR17520069.5490837  
SRR17520069.5490839  
SRR17520069.5490843  
SRR17520069.5490847  
SRR17520069.5490849  
SRR17520069.5490851  
SRR17520069.5490853  
SRR17520069.5490855  
SRR17520069.5490857  
SRR17520069.5490859  
SRR17520069.5490861  
SRR17520069.5490863  
SRR17520069.5490865  
SRR17520069.5490867  
SRR17520069.5490869  
SRR17520069.5490871  
SRR17520069.5490873  
SRR17520069.5490875  
SRR17520069.5490877  
SRR17520069.5490879  
SRR17520069.5490881  
SRR17520069.5490885  
SRR17520069.5490891  
SRR17520069.5496365  
SRR17520069.5496367  
SRR17520069.5496375  
SRR17520069.5496377  
SRR17520069.5496381  
SRR17520069.5496383  
SRR17520069.5496385  
SRR17520069.5496387  
SRR17520069.5496389  
SRR17520069.5496391  
SRR17520069.5496393  
SRR17520069.5496395  
SRR17520069.5496397  
SRR17520069.5496399  
SRR17520069.5496401  
SRR17520069.5496403  
SRR17520069.5496405  
SRR17520069.5496407  
SRR17520069.5496409  
SRR17520069.5496411  
SRR17520069.5496413  
SRR17520069.5496415

SRR17520069. 5496417  
SRR17520069. 5496419  
SRR17520069. 5496421  
SRR17520069. 5496423  
SRR17520069. 5496427  
SRR17520069. 5496429  
SRR17520069. 5496431  
SRR17520069. 5496433  
SRR17520069. 5496435  
SRR17520069. 5496437  
SRR17520069. 5496439  
SRR17520069. 5496441  
SRR17520069. 5496443  
SRR17520069. 5496447  
SRR17520069. 5496449  
SRR17520069. 5496451  
SRR17520069. 5496453  
SRR17520069. 5496455  
SRR17520069. 5496457  
SRR17520069. 5496459  
SRR17520069. 5496461  
SRR17520069. 5496463  
SRR17520069. 5496465  
SRR17520069. 5496467  
SRR17520069. 5496469  
SRR17520069. 5496471  
SRR17520069. 5496473  
SRR17520069. 5496475  
SRR17520069. 5496477  
SRR17520069. 5496479  
SRR17520069. 5496481  
SRR17520069. 5496483  
SRR17520069. 5496487  
SRR17520069. 5496489  
SRR17520069. 5496491  
SRR17520069. 5496493  
SRR17520069. 5496497  
SRR17520069. 5496499  
SRR17520069. 5504265  
SRR17520069. 5504267  
SRR17520069. 5504269  
SRR17520069. 5504271  
SRR17520069. 5504273  
SRR17520069. 5504275  
SRR17520069. 5504277  
SRR17520069. 5504279  
SRR17520069. 5504281

SRR17520069.5504283  
SRR17520069.5504285  
SRR17520069.5504287  
SRR17520069.5504289  
SRR17520069.5504291  
SRR17520069.5504295  
SRR17520069.5504299  
SRR17520069.5504301  
SRR17520069.5504305  
SRR17520069.5506190  
SRR17520069.5506192  
SRR17520069.5506196  
SRR17520069.5506198  
SRR17520069.5506200  
SRR17520069.5506202  
SRR17520069.5509865  
SRR17520069.5509867  
SRR17520069.5509869  
SRR17520069.5509871  
SRR17520069.5509873  
SRR17520069.5509875  
SRR17520069.5509877  
SRR17520069.5509879  
SRR17520069.5509881  
SRR17520069.5509883  
SRR17520069.5509885  
SRR17520069.5509887  
SRR17520069.5509889  
SRR17520069.5509891  
SRR17520069.5509893  
SRR17520069.5509895  
SRR17520069.5509899  
SRR17520069.5509903  
SRR17520069.5509905  
SRR17520069.5509907  
SRR17520069.5509909  
SRR17520069.5509911  
SRR17520069.5509913  
SRR17520069.5509915  
SRR17520069.5509917  
SRR17520069.5509919  
SRR17520069.5509921  
SRR17520069.5509923  
SRR17520069.5509925  
SRR17520069.5509927  
SRR17520069.5509929  
SRR17520069.5509931

SRR17520069.5509933  
SRR17520069.5509935  
SRR17520069.5509937  
SRR17520069.5509939  
SRR17520069.5509941  
SRR17520069.5509943  
SRR17520069.5509945  
SRR17520069.5509947  
SRR17520069.5509949  
SRR17520069.5509951  
SRR17520069.5509953  
SRR17520069.5509955  
SRR17520069.5509957  
SRR17520069.5509959  
SRR17520069.5509961  
SRR17520069.5509963  
SRR17520069.5517484  
SRR17520069.5517488  
SRR17520069.5517490  
SRR17520069.5517492  
SRR17520069.5517494  
SRR17520069.5517496  
SRR17520069.5517498  
SRR17520069.5517500  
SRR17520069.5520671  
SRR17520069.5520693  
SRR17520069.5521411  
SRR17520069.5521413  
SRR17520069.5521415  
SRR17520069.5521417  
SRR17520069.5521419  
SRR17520069.5521421  
SRR17520069.5521423  
SRR17520069.5521971  
SRR17520069.5521973  
SRR17520069.5521975  
SRR17520069.5521977  
SRR17520069.5521979  
SRR17520069.5521981  
SRR17520069.5521983  
SRR17520069.5521985  
SRR17520069.5521987  
SRR17520069.5521989  
SRR17520069.5521991  
SRR17520069.5521993  
SRR17520069.5521995  
SRR17520069.5521997



SRR17520069. 5524342  
SRR17520069. 5524344  
SRR17520069. 5524346  
SRR17520069. 5524348  
SRR17520069. 5524350  
SRR17520069. 5524352  
SRR17520069. 5524354  
SRR17520069. 5524356  
SRR17520069. 5524358  
SRR17520069. 5524360  
SRR17520069. 5524362  
SRR17520069. 5524535  
SRR17520069. 5524537  
SRR17520069. 5524539  
SRR17520069. 5524541  
SRR17520069. 5524543  
SRR17520069. 5524545  
SRR17520069. 5524547  
SRR17520069. 5524549  
SRR17520069. 5528434  
SRR17520069. 5530152  
SRR17520069. 5530154  
SRR17520069. 5530156  
SRR17520069. 5530158  
SRR17520069. 5530160  
SRR17520069. 5530162  
SRR17520069. 5530164  
SRR17520069. 5530166  
SRR17520069. 5530168  
SRR17520069. 5530170  
SRR17520069. 5530172  
SRR17520069. 5530174  
SRR17520069. 5530178  
SRR17520069. 5530180  
SRR17520069. 5530182  
SRR17520069. 5530184  
SRR17520069. 5530188  
SRR17520069. 5530190  
SRR17520069. 5530192  
SRR17520069. 5530194  
SRR17520069. 5530198  
SRR17520069. 5530200  
SRR17520069. 5530202  
SRR17520069. 5530208  
SRR17520069. 5530212  
SRR17520069. 5530214  
SRR17520069. 5530216

SRR17520069. 5530218  
SRR17520069. 5530220  
SRR17520069. 5530222  
SRR17520069. 5530224  
SRR17520069. 5530226  
SRR17520069. 5530228  
SRR17520069. 5530230  
SRR17520069. 5531812  
SRR17520069. 5531814  
SRR17520069. 5531816  
SRR17520069. 5531818  
SRR17520069. 5531820  
SRR17520069. 5531822  
SRR17520069. 5531824  
SRR17520069. 5531826  
SRR17520069. 5531828  
SRR17520069. 5531830  
SRR17520069. 5531832  
SRR17520069. 5531836  
SRR17520069. 5531838  
SRR17520069. 5531840  
SRR17520069. 5531842  
SRR17520069. 5531844  
SRR17520069. 5531846  
SRR17520069. 5531848  
SRR17520069. 5531852  
SRR17520069. 5531854  
SRR17520069. 5531858  
SRR17520069. 5532215  
SRR17520069. 5532217  
SRR17520069. 5534454  
SRR17520069. 5538394  
SRR17520069. 5539548  
SRR17520069. 5548605  
SRR17520069. 5548607  
SRR17520069. 5548609  
SRR17520069. 5548613  
SRR17520069. 5548615  
SRR17520069. 5548617  
SRR17520069. 5548619  
SRR17520069. 5548621  
SRR17520069. 5548623  
SRR17520069. 5548625  
SRR17520069. 5548627  
SRR17520069. 5548629  
SRR17520069. 5548631  
SRR17520069. 5548633

SRR17520069. 5551210  
SRR17520069. 5554105  
SRR17520069. 5561778  
SRR17520069. 5561780  
SRR17520069. 5561782  
SRR17520069. 5561784  
SRR17520069. 5561786  
SRR17520069. 5561788  
SRR17520069. 5561790  
SRR17520069. 5561792  
SRR17520069. 5561794  
SRR17520069. 5561796  
SRR17520069. 5561798  
SRR17520069. 5561800  
SRR17520069. 5561802  
SRR17520069. 5561804  
SRR17520069. 5561806  
SRR17520069. 5561808  
SRR17520069. 5561810  
SRR17520069. 5561812  
SRR17520069. 5561814  
SRR17520069. 5562824  
SRR17520069. 5562826  
SRR17520069. 5563194  
SRR17520069. 5563196  
SRR17520069. 5563198  
SRR17520069. 5563200  
SRR17520069. 5563202  
SRR17520069. 5563204  
SRR17520069. 5563206  
SRR17520069. 5563208  
SRR17520069. 5563210  
SRR17520069. 5565572  
SRR17520069. 5565574  
SRR17520069. 5565576  
SRR17520069. 5565578  
SRR17520069. 5565580  
SRR17520069. 5565582  
SRR17520069. 5565584  
SRR17520069. 5565586  
SRR17520069. 5565588  
SRR17520069. 5565590  
SRR17520069. 5565592  
SRR17520069. 5565594  
SRR17520069. 5570402  
SRR17520069. 5570404  
SRR17520069. 5570406

SRR17520069.5570408  
SRR17520069.5573015  
SRR17520069.5573017  
SRR17520069.5573019  
SRR17520069.5573021  
SRR17520069.5573023  
SRR17520069.5573025  
SRR17520069.5573027  
SRR17520069.5573031  
SRR17520069.5573033  
SRR17520069.5573035  
SRR17520069.5573037  
SRR17520069.5573039  
SRR17520069.5573041  
SRR17520069.5573043  
SRR17520069.5573045  
SRR17520069.5573047  
SRR17520069.5573049  
SRR17520069.5573051  
SRR17520069.5573053  
SRR17520069.5573055  
SRR17520069.5573057  
SRR17520069.5573059  
SRR17520069.5573061  
SRR17520069.5573063  
SRR17520069.5573065  
SRR17520069.5573067  
SRR17520069.5573069  
SRR17520069.5573071  
SRR17520069.5573073  
SRR17520069.5573075  
SRR17520069.5573077  
SRR17520069.5573079  
SRR17520069.5573081  
SRR17520069.5573083  
SRR17520069.5573085  
SRR17520069.5573087  
SRR17520069.5573089  
SRR17520069.5573091  
SRR17520069.5573093  
SRR17520069.5573095  
SRR17520069.5573099  
SRR17520069.5573101  
SRR17520069.5573103  
SRR17520069.5573105  
SRR17520069.5573107  
SRR17520069.5573109

SRR17520069.5573111  
SRR17520069.5573115  
SRR17520069.5573117  
SRR17520069.5573119  
SRR17520069.5573121  
SRR17520069.5573123  
SRR17520069.5573125  
SRR17520069.5573129  
SRR17520069.5573131  
SRR17520069.5573133  
SRR17520069.5573135  
SRR17520069.5573137  
SRR17520069.5573139  
SRR17520069.5573141  
SRR17520069.5573145  
SRR17520069.5573149  
SRR17520069.5573151  
SRR17520069.5573155  
SRR17520069.5573157  
SRR17520069.5573159  
SRR17520069.5573161  
SRR17520069.5573163  
SRR17520069.5573165  
SRR17520069.5573167  
SRR17520069.5573169  
SRR17520069.5573171  
SRR17520069.5573173  
SRR17520069.5573175  
SRR17520069.5573177  
SRR17520069.5573179  
SRR17520069.5573181  
SRR17520069.5573183  
SRR17520069.5573185  
SRR17520069.5573187  
SRR17520069.5573189  
SRR17520069.5573191  
SRR17520069.5573193  
SRR17520069.5573195  
SRR17520069.5573197  
SRR17520069.5573199  
SRR17520069.5573201  
SRR17520069.5573203  
SRR17520069.5573205  
SRR17520069.5573207  
SRR17520069.5573209  
SRR17520069.5573211  
SRR17520069.5573213

SRR17520069.5573215  
SRR17520069.5573217  
SRR17520069.5573219  
SRR17520069.5573221  
SRR17520069.5573225  
SRR17520069.5573227  
SRR17520069.5573229  
SRR17520069.5573231  
SRR17520069.5573233  
SRR17520069.5573235  
SRR17520069.5573237  
SRR17520069.5573239  
SRR17520069.5573241  
SRR17520069.5573243  
SRR17520069.5573247  
SRR17520069.5573249  
SRR17520069.5573251  
SRR17520069.5573253  
SRR17520069.5573255  
SRR17520069.5573257  
SRR17520069.5573259  
SRR17520069.5573261  
SRR17520069.5573263  
SRR17520069.5573880  
SRR17520069.5573882  
SRR17520069.5573884  
SRR17520069.5573886  
SRR17520069.5573888  
SRR17520069.5573890  
SRR17520069.5573892  
SRR17520069.5573894  
SRR17520069.5573896  
SRR17520069.5573898  
SRR17520069.5573900  
SRR17520069.5573902  
SRR17520069.5573904  
SRR17520069.5573906  
SRR17520069.5573908  
SRR17520069.5573910  
SRR17520069.5573912  
SRR17520069.5573914  
SRR17520069.5573916  
SRR17520069.5573918  
SRR17520069.5573920  
SRR17520069.5573922  
SRR17520069.5573924  
SRR17520069.5573926

SRR17520069. 5573928  
SRR17520069. 5573930  
SRR17520069. 5573932  
SRR17520069. 5573934  
SRR17520069. 5573936  
SRR17520069. 5573938  
SRR17520069. 5573940  
SRR17520069. 5573942  
SRR17520069. 5573944  
SRR17520069. 5573946  
SRR17520069. 5573948  
SRR17520069. 5573950  
SRR17520069. 5573952  
SRR17520069. 5573954  
SRR17520069. 5573956  
SRR17520069. 5573958  
SRR17520069. 5573960  
SRR17520069. 5573962  
SRR17520069. 5573964  
SRR17520069. 5573966  
SRR17520069. 5573968  
SRR17520069. 5573970  
SRR17520069. 5573972  
SRR17520069. 5573974  
SRR17520069. 5573976  
SRR17520069. 5573978  
SRR17520069. 5573980  
SRR17520069. 5573982  
SRR17520069. 5573984  
SRR17520069. 5573986  
SRR17520069. 5573988  
SRR17520069. 5573990  
SRR17520069. 5573992  
SRR17520069. 5573994  
SRR17520069. 5573996  
SRR17520069. 5573998  
SRR17520069. 5574000  
SRR17520069. 5574002  
SRR17520069. 5574004  
SRR17520069. 5576251  
SRR17520069. 5576253  
SRR17520069. 5576255  
SRR17520069. 5576257  
SRR17520069. 5576259  
SRR17520069. 5576261  
SRR17520069. 5576263  
SRR17520069. 5576265

SRR17520069. 5576267  
SRR17520069. 5576269  
SRR17520069. 5576271  
SRR17520069. 5576273  
SRR17520069. 5576275  
SRR17520069. 5576279  
SRR17520069. 5576281  
SRR17520069. 5576283  
SRR17520069. 5587192  
SRR17520069. 5587194  
SRR17520069. 5587196  
SRR17520069. 5587198  
SRR17520069. 5587200  
SRR17520069. 5587203  
SRR17520069. 5587205  
SRR17520069. 5587207  
SRR17520069. 5587209  
SRR17520069. 5587213  
SRR17520069. 5587219  
SRR17520069. 5587221  
SRR17520069. 5587223  
SRR17520069. 5587225  
SRR17520069. 5587227  
SRR17520069. 5587229  
SRR17520069. 5587231  
SRR17520069. 5587233  
SRR17520069. 5587235  
SRR17520069. 5587237  
SRR17520069. 5587239  
SRR17520069. 5587241  
SRR17520069. 5587243  
SRR17520069. 5587247  
SRR17520069. 5587249  
SRR17520069. 5587251  
SRR17520069. 5587253  
SRR17520069. 5587255  
SRR17520069. 5587257  
SRR17520069. 5587259  
SRR17520069. 5587261  
SRR17520069. 5587263  
SRR17520069. 5587265  
SRR17520069. 5590509  
SRR17520069. 5590511  
SRR17520069. 5590513  
SRR17520069. 5590515  
SRR17520069. 5590517  
SRR17520069. 5609231



SRR17520069. 5609233  
SRR17520069. 5609235  
SRR17520069. 5609237  
SRR17520069. 5609239  
SRR17520069. 5609241  
SRR17520069. 5615713  
SRR17520069. 5615715  
SRR17520069. 5615717  
SRR17520069. 5615719  
SRR17520069. 5615721  
SRR17520069. 5615723  
SRR17520069. 5615725  
SRR17520069. 5615727  
SRR17520069. 5615729  
SRR17520069. 5615731  
SRR17520069. 5615735  
SRR17520069. 5615737  
SRR17520069. 5615739  
SRR17520069. 5615741  
SRR17520069. 5615743  
SRR17520069. 5615747  
SRR17520069. 5615751  
SRR17520069. 5615753  
SRR17520069. 5615755  
SRR17520069. 5615757  
SRR17520069. 5615759  
SRR17520069. 5615761  
SRR17520069. 5615763  
SRR17520069. 5615765  
SRR17520069. 5615767  
SRR17520069. 5615771  
SRR17520069. 5615773  
SRR17520069. 5615775  
SRR17520069. 5615777  
SRR17520069. 5615779  
SRR17520069. 5615781  
SRR17520069. 5615785  
SRR17520069. 5615787  
SRR17520069. 5615789  
SRR17520069. 5615791  
SRR17520069. 5615793  
SRR17520069. 5615795  
SRR17520069. 5615797  
SRR17520069. 5615799  
SRR17520069. 5615801  
SRR17520069. 5615803  
SRR17520069. 5615805

SRR17520069.5615807  
SRR17520069.5615809  
SRR17520069.5615811  
SRR17520069.5615813  
SRR17520069.5615815  
SRR17520069.5615817  
SRR17520069.5615819  
SRR17520069.5615823  
SRR17520069.5615825  
SRR17520069.5615827  
SRR17520069.5616599  
SRR17520069.5616601  
SRR17520069.5616604  
SRR17520069.5616606  
SRR17520069.5616608  
SRR17520069.5616610  
SRR17520069.5616612  
SRR17520069.5616614  
SRR17520069.5616616  
SRR17520069.5616618  
SRR17520069.5618257  
SRR17520069.5618259  
SRR17520069.5618261  
SRR17520069.5618263  
SRR17520069.5618265  
SRR17520069.5618267  
SRR17520069.5618269  
SRR17520069.5618271  
SRR17520069.5618273  
SRR17520069.5618275  
SRR17520069.5625173  
SRR17520069.5625177  
SRR17520069.5625188  
SRR17520069.5625190  
SRR17520069.5625192  
SRR17520069.5625194  
SRR17520069.5625196  
SRR17520069.5625198  
SRR17520069.5625200  
SRR17520069.5625202  
SRR17520069.5625204  
SRR17520069.5625208  
SRR17520069.5625210  
SRR17520069.5631649  
SRR17520069.5631651  
SRR17520069.5631653  
SRR17520069.5631655

SRR17520069. 5631657  
SRR17520069. 5631659  
SRR17520069. 5631661  
SRR17520069. 5631663  
SRR17520069. 5631665  
SRR17520069. 5631667  
SRR17520069. 5631669  
SRR17520069. 5631671  
SRR17520069. 5631673  
SRR17520069. 5631675  
SRR17520069. 5631677  
SRR17520069. 5631679  
SRR17520069. 5631681  
SRR17520069. 5631683  
SRR17520069. 5631685  
SRR17520069. 5631687  
SRR17520069. 5631689  
SRR17520069. 5631691  
SRR17520069. 5631693  
SRR17520069. 5631695  
SRR17520069. 5631697  
SRR17520069. 5631699  
SRR17520069. 5631701  
SRR17520069. 5631703  
SRR17520069. 5631705  
SRR17520069. 5631707  
SRR17520069. 5631709  
SRR17520069. 5631711  
SRR17520069. 5631713  
SRR17520069. 5631717  
SRR17520069. 5631719  
SRR17520069. 5631721  
SRR17520069. 5631723  
SRR17520069. 5631725  
SRR17520069. 5631727  
SRR17520069. 5631729  
SRR17520069. 5631731  
SRR17520069. 5631733  
SRR17520069. 5631735  
SRR17520069. 5631737  
SRR17520069. 5631739  
SRR17520069. 5631741  
SRR17520069. 5631743  
SRR17520069. 5631745  
SRR17520069. 5631747  
SRR17520069. 5631749  
SRR17520069. 5631751

SRR17520069. 5631753  
SRR17520069. 5631755  
SRR17520069. 5631757  
SRR17520069. 5631759  
SRR17520069. 5631761  
SRR17520069. 5631763  
SRR17520069. 5631765  
SRR17520069. 5631767  
SRR17520069. 5631769  
SRR17520069. 5631771  
SRR17520069. 5631773  
SRR17520069. 5631775  
SRR17520069. 5631777  
SRR17520069. 5631779  
SRR17520069. 5631781  
SRR17520069. 5631783  
SRR17520069. 5631785  
SRR17520069. 5631787  
SRR17520069. 5631789  
SRR17520069. 5631791  
SRR17520069. 5631793  
SRR17520069. 5631795  
SRR17520069. 5631797  
SRR17520069. 5631799  
SRR17520069. 5631801  
SRR17520069. 5631803  
SRR17520069. 5631805  
SRR17520069. 5631807  
SRR17520069. 5631809  
SRR17520069. 5631811  
SRR17520069. 5631813  
SRR17520069. 5631815  
SRR17520069. 5631817  
SRR17520069. 5631819  
SRR17520069. 5631821  
SRR17520069. 5631823  
SRR17520069. 5631825  
SRR17520069. 5631827  
SRR17520069. 5631829  
SRR17520069. 5631831  
SRR17520069. 5631833  
SRR17520069. 5631835  
SRR17520069. 5631837  
SRR17520069. 5637236  
SRR17520069. 5637238  
SRR17520069. 5637240  
SRR17520069. 5637242

SRR17520069. 5637246  
SRR17520069. 5637248  
SRR17520069. 5637250  
SRR17520069. 5637252  
SRR17520069. 5637254  
SRR17520069. 5637256  
SRR17520069. 5637258  
SRR17520069. 5637262  
SRR17520069. 5637266  
SRR17520069. 5637268  
SRR17520069. 5637270  
SRR17520069. 5637272  
SRR17520069. 5637274  
SRR17520069. 5637278  
SRR17520069. 5637280  
SRR17520069. 5637284  
SRR17520069. 5637286  
SRR17520069. 5637288  
SRR17520069. 5637290  
SRR17520069. 5637294  
SRR17520069. 5637298  
SRR17520069. 5637302  
SRR17520069. 5637304  
SRR17520069. 5637306  
SRR17520069. 5637308  
SRR17520069. 5637310  
SRR17520069. 5637312  
SRR17520069. 5637314  
SRR17520069. 5639396  
SRR17520069. 5639402  
SRR17520069. 5639404  
SRR17520069. 5639406  
SRR17520069. 5639408  
SRR17520069. 5639410  
SRR17520069. 5639412  
SRR17520069. 5639414  
SRR17520069. 5639416  
SRR17520069. 5639418  
SRR17520069. 5639420  
SRR17520069. 5639422  
SRR17520069. 5639424  
SRR17520069. 5639428  
SRR17520069. 5639430  
SRR17520069. 5639432  
SRR17520069. 5639434  
SRR17520069. 5639436  
SRR17520069. 5639438

SRR17520069. 5639440  
SRR17520069. 5641457  
SRR17520069. 5643510  
SRR17520069. 5643512  
SRR17520069. 5643514  
SRR17520069. 5643516  
SRR17520069. 5643518  
SRR17520069. 5643520  
SRR17520069. 5643522  
SRR17520069. 5643524  
SRR17520069. 5643526  
SRR17520069. 5643528  
SRR17520069. 5643530  
SRR17520069. 5643532  
SRR17520069. 5643534  
SRR17520069. 5643536  
SRR17520069. 5643538  
SRR17520069. 5643540  
SRR17520069. 5643546  
SRR17520069. 5643548  
SRR17520069. 5643550  
SRR17520069. 5643552  
SRR17520069. 5643554  
SRR17520069. 5643556  
SRR17520069. 5643568  
SRR17520069. 5643570  
SRR17520069. 5644726  
SRR17520069. 5644728  
SRR17520069. 5644730  
SRR17520069. 5644732  
SRR17520069. 5644734  
SRR17520069. 5644736  
SRR17520069. 5644738  
SRR17520069. 5644740  
SRR17520069. 5644742  
SRR17520069. 5644744  
SRR17520069. 5644746  
SRR17520069. 5644748  
SRR17520069. 5647341  
SRR17520069. 5647343  
SRR17520069. 5647345  
SRR17520069. 5647347  
SRR17520069. 5647349  
SRR17520069. 5647351  
SRR17520069. 5647353  
SRR17520069. 5647355  
SRR17520069. 5647357

SRR17520069.5647359  
SRR17520069.5647361  
SRR17520069.5647363  
SRR17520069.5647880  
SRR17520069.5647884  
SRR17520069.5647886  
SRR17520069.5647888  
SRR17520069.5652705  
SRR17520069.5652707  
SRR17520069.5652713  
SRR17520069.5652715  
SRR17520069.5652717  
SRR17520069.5652719  
SRR17520069.5652721  
SRR17520069.5652723  
SRR17520069.5652725  
SRR17520069.5652727  
SRR17520069.5652729  
SRR17520069.5663436  
SRR17520069.5663438  
SRR17520069.5663442  
SRR17520069.5676454  
SRR17520069.5676456  
SRR17520069.5676458  
SRR17520069.5676460  
SRR17520069.5676462  
SRR17520069.5676464  
SRR17520069.5676466  
SRR17520069.5676468  
SRR17520069.5676470  
SRR17520069.5678549  
SRR17520069.5678551  
SRR17520069.5678555  
SRR17520069.5678557  
SRR17520069.5678559  
SRR17520069.5678561  
SRR17520069.5678563  
SRR17520069.5678565  
SRR17520069.5678567  
SRR17520069.5678569  
SRR17520069.5678571  
SRR17520069.5678573  
SRR17520069.5678575  
SRR17520069.5678577  
SRR17520069.5678579  
SRR17520069.5678581  
SRR17520069.5678583

SRR17520069.5678585  
SRR17520069.5678587  
SRR17520069.5678589  
SRR17520069.5678591  
SRR17520069.5678593  
SRR17520069.5678595  
SRR17520069.5678597  
SRR17520069.5678599  
SRR17520069.5678601  
SRR17520069.5678603  
SRR17520069.5678605  
SRR17520069.5678607  
SRR17520069.5678609  
SRR17520069.5678611  
SRR17520069.5678878  
SRR17520069.5679011  
SRR17520069.5686856  
SRR17520069.5691389  
SRR17520069.5693917  
SRR17520069.5693919  
SRR17520069.5695415  
SRR17520069.5695417  
SRR17520069.5695419  
SRR17520069.5695421  
SRR17520069.5695423  
SRR17520069.5695425  
SRR17520069.5695427  
SRR17520069.5695429  
SRR17520069.5695431  
SRR17520069.5695433  
SRR17520069.5695435  
SRR17520069.5695523  
SRR17520069.5695525  
SRR17520069.5695527  
SRR17520069.5695529  
SRR17520069.5695531  
SRR17520069.5695533  
SRR17520069.5701803  
SRR17520069.5701807  
SRR17520069.5701809  
SRR17520069.5701811  
SRR17520069.5701815  
SRR17520069.5701819  
SRR17520069.5701821  
SRR17520069.5701825  
SRR17520069.5703701  
SRR17520069.5703705



SRR17520069.5703707  
SRR17520069.5703709  
SRR17520069.5703711  
SRR17520069.5703713  
SRR17520069.5703715  
SRR17520069.5703717  
SRR17520069.5703719  
SRR17520069.5704275  
SRR17520069.5704277  
SRR17520069.5704279  
SRR17520069.5704281  
SRR17520069.5704283  
SRR17520069.5704285  
SRR17520069.5704287  
SRR17520069.5704321  
SRR17520069.5704323  
SRR17520069.5704325  
SRR17520069.5704327  
SRR17520069.5704329  
SRR17520069.5704331  
SRR17520069.5704333  
SRR17520069.5704335  
SRR17520069.5704337  
SRR17520069.5704339  
SRR17520069.5704341  
SRR17520069.5704343  
SRR17520069.5704345  
SRR17520069.5704347  
SRR17520069.5704349  
SRR17520069.5704351  
SRR17520069.5704353  
SRR17520069.5704355  
SRR17520069.5704357  
SRR17520069.5704359  
SRR17520069.5704361  
SRR17520069.5704363  
SRR17520069.5704365  
SRR17520069.5704367  
SRR17520069.5704369  
SRR17520069.5704371  
SRR17520069.5704373  
SRR17520069.5704375  
SRR17520069.5704377  
SRR17520069.5704379  
SRR17520069.5704816  
SRR17520069.5704818  
SRR17520069.5704820

SRR17520069.5704822  
SRR17520069.5704824  
SRR17520069.5704826  
SRR17520069.5704830  
SRR17520069.5704832  
SRR17520069.5704834  
SRR17520069.5704836  
SRR17520069.5704840  
SRR17520069.5704846  
SRR17520069.5704848  
SRR17520069.5711166  
SRR17520069.5711168  
SRR17520069.5711170  
SRR17520069.5714215  
SRR17520069.5714217  
SRR17520069.5714219  
SRR17520069.5714221  
SRR17520069.5715503  
SRR17520069.5715507  
SRR17520069.5715938  
SRR17520069.5715940  
SRR17520069.5715942  
SRR17520069.5715944  
SRR17520069.5715946  
SRR17520069.5715948  
SRR17520069.5715950  
SRR17520069.5715952  
SRR17520069.5715954  
SRR17520069.5715956  
SRR17520069.5715958  
SRR17520069.5715960  
SRR17520069.5715962  
SRR17520069.5715964  
SRR17520069.5715966  
SRR17520069.5715968  
SRR17520069.5715972  
SRR17520069.5715974  
SRR17520069.5715976  
SRR17520069.5715978  
SRR17520069.5715990  
SRR17520069.5715994  
SRR17520069.5715996  
SRR17520069.5715998  
SRR17520069.5716000  
SRR17520069.5721929  
SRR17520069.5721931  
SRR17520069.5721933

SRR17520069.5721935  
SRR17520069.5721937  
SRR17520069.5721939  
SRR17520069.5721941  
SRR17520069.5721943  
SRR17520069.5728998  
SRR17520069.5734190  
SRR17520069.5734192  
SRR17520069.5734194  
SRR17520069.5734196  
SRR17520069.5734198  
SRR17520069.5734202  
SRR17520069.5734204  
SRR17520069.5734206  
SRR17520069.5734208  
SRR17520069.5734210  
SRR17520069.5734212  
SRR17520069.5734214  
SRR17520069.5734216  
SRR17520069.5734218  
SRR17520069.5734220  
SRR17520069.5734222  
SRR17520069.5734224  
SRR17520069.5734226  
SRR17520069.5734228  
SRR17520069.5734230  
SRR17520069.5734232  
SRR17520069.5734234  
SRR17520069.5734236  
SRR17520069.5734238  
SRR17520069.5734240  
SRR17520069.5734242  
SRR17520069.5734244  
SRR17520069.5734246  
SRR17520069.5734248  
SRR17520069.5734250  
SRR17520069.5734252  
SRR17520069.5734254  
SRR17520069.5741101  
SRR17520069.5741103  
SRR17520069.5741105  
SRR17520069.5741107  
SRR17520069.5741109  
SRR17520069.5741111  
SRR17520069.5741113  
SRR17520069.5741115  
SRR17520069.5741117

SRR17520069.5741119  
SRR17520069.5741121  
SRR17520069.5741123  
SRR17520069.5741125  
SRR17520069.5741127  
SRR17520069.5741129  
SRR17520069.5741131  
SRR17520069.5741133  
SRR17520069.5741135  
SRR17520069.5741137  
SRR17520069.5741139  
SRR17520069.5741141  
SRR17520069.5742185  
SRR17520069.5742187  
SRR17520069.5742189  
SRR17520069.5742191  
SRR17520069.5742193  
SRR17520069.5744099  
SRR17520069.5744101  
SRR17520069.5744103  
SRR17520069.5744105  
SRR17520069.5744107  
SRR17520069.5744109  
SRR17520069.5744111  
SRR17520069.5744113  
SRR17520069.5744115  
SRR17520069.5744117  
SRR17520069.5744899  
SRR17520069.5744901  
SRR17520069.5744903  
SRR17520069.5744905  
SRR17520069.5744907  
SRR17520069.5744909  
SRR17520069.5744911  
SRR17520069.5744913  
SRR17520069.5744915  
SRR17520069.5744917  
SRR17520069.5744919  
SRR17520069.5744921  
SRR17520069.5744923  
SRR17520069.5744925  
SRR17520069.5744927  
SRR17520069.5744929  
SRR17520069.5744931  
SRR17520069.5744933  
SRR17520069.5744935  
SRR17520069.5750685

SRR17520069.5750687  
SRR17520069.5750689  
SRR17520069.5750693  
SRR17520069.5753746  
SRR17520069.5753748  
SRR17520069.5753750  
SRR17520069.5753752  
SRR17520069.5753754  
SRR17520069.5753756  
SRR17520069.5753758  
SRR17520069.5753760  
SRR17520069.5753762  
SRR17520069.5753764  
SRR17520069.5753766  
SRR17520069.5753768  
SRR17520069.5753770  
SRR17520069.5753772  
SRR17520069.5753774  
SRR17520069.5753776  
SRR17520069.5753778  
SRR17520069.5753780  
SRR17520069.5753782  
SRR17520069.5753784  
SRR17520069.5753786  
SRR17520069.5753788  
SRR17520069.5753790  
SRR17520069.5753792  
SRR17520069.5753794  
SRR17520069.5753796  
SRR17520069.5753798  
SRR17520069.5753800  
SRR17520069.5753802  
SRR17520069.5753804  
SRR17520069.5753806  
SRR17520069.5753808  
SRR17520069.5753810  
SRR17520069.5760593  
SRR17520069.5760682  
SRR17520069.5760684  
SRR17520069.5760686  
SRR17520069.5760688  
SRR17520069.5760690  
SRR17520069.5762141  
SRR17520069.5762143  
SRR17520069.5762145  
SRR17520069.5762147  
SRR17520069.5762149

SRR17520069. 5762151  
SRR17520069. 5762153  
SRR17520069. 5762155  
SRR17520069. 5762157  
SRR17520069. 5762159  
SRR17520069. 5762161  
SRR17520069. 5762163  
SRR17520069. 5762165  
SRR17520069. 5762167  
SRR17520069. 5762169  
SRR17520069. 5762171  
SRR17520069. 5762173  
SRR17520069. 5762175  
SRR17520069. 5762177  
SRR17520069. 5762179  
SRR17520069. 5762181  
SRR17520069. 5762183  
SRR17520069. 5762185  
SRR17520069. 5762189  
SRR17520069. 5762191  
SRR17520069. 5762195  
SRR17520069. 5762197  
SRR17520069. 5762199  
SRR17520069. 5762201  
SRR17520069. 5762203  
SRR17520069. 5762205  
SRR17520069. 5762207  
SRR17520069. 5762209  
SRR17520069. 5762211  
SRR17520069. 5762213  
SRR17520069. 5762215  
SRR17520069. 5762217  
SRR17520069. 5762219  
SRR17520069. 5762221  
SRR17520069. 5762223  
SRR17520069. 5762225  
SRR17520069. 5762227  
SRR17520069. 5762229  
SRR17520069. 5762231  
SRR17520069. 5762233  
SRR17520069. 5762237  
SRR17520069. 5762239  
SRR17520069. 5762241  
SRR17520069. 5762243  
SRR17520069. 5762245  
SRR17520069. 5780188  
SRR17520069. 5780190

SRR17520069.5780192  
SRR17520069.5780194  
SRR17520069.5780196  
SRR17520069.5780198  
SRR17520069.5780200  
SRR17520069.5780202  
SRR17520069.5780204  
SRR17520069.5780206  
SRR17520069.5780208  
SRR17520069.5780210  
SRR17520069.5780212  
SRR17520069.5783924  
SRR17520069.5783926  
SRR17520069.5783930  
SRR17520069.5783932  
SRR17520069.5783934  
SRR17520069.5783936  
SRR17520069.5783938  
SRR17520069.5783940  
SRR17520069.5783942  
SRR17520069.5783944  
SRR17520069.5783946  
SRR17520069.5783948  
SRR17520069.5783950  
SRR17520069.5783952  
SRR17520069.5783956  
SRR17520069.5783958  
SRR17520069.5783962  
SRR17520069.5783966  
SRR17520069.5783968  
SRR17520069.5783970  
SRR17520069.5783972  
SRR17520069.5783974  
SRR17520069.5783976  
SRR17520069.5783978  
SRR17520069.5783980  
SRR17520069.5783982  
SRR17520069.5783984  
SRR17520069.5783986  
SRR17520069.5783988  
SRR17520069.5783990  
SRR17520069.5783992  
SRR17520069.5783994  
SRR17520069.5783996  
SRR17520069.5783998  
SRR17520069.5784000  
SRR17520069.5784002

SRR17520069.5784004  
SRR17520069.5784006  
SRR17520069.5784008  
SRR17520069.5784010  
SRR17520069.5784012  
SRR17520069.5784014  
SRR17520069.5784016  
SRR17520069.5784018  
SRR17520069.5784020  
SRR17520069.5784022  
SRR17520069.5784024  
SRR17520069.5784026  
SRR17520069.5784028  
SRR17520069.5784032  
SRR17520069.5784034  
SRR17520069.5784036  
SRR17520069.5784038  
SRR17520069.5784040  
SRR17520069.5784044  
SRR17520069.5784046  
SRR17520069.5784048  
SRR17520069.5784050  
SRR17520069.5784052  
SRR17520069.5784054  
SRR17520069.5784056  
SRR17520069.5784058  
SRR17520069.5784060  
SRR17520069.5784068  
SRR17520069.5784070  
SRR17520069.5784072  
SRR17520069.5784074  
SRR17520069.5784076  
SRR17520069.5784078  
SRR17520069.5784080  
SRR17520069.5784082  
SRR17520069.5784357  
SRR17520069.5784359  
SRR17520069.5784361  
SRR17520069.5784363  
SRR17520069.5784365  
SRR17520069.5784367  
SRR17520069.5784369  
SRR17520069.5784371  
SRR17520069.5784373  
SRR17520069.5784375  
SRR17520069.5784377  
SRR17520069.5784379



SRR17520069. 5784381  
SRR17520069. 5784383  
SRR17520069. 5784385  
SRR17520069. 5784387  
SRR17520069. 5784389  
SRR17520069. 5784391  
SRR17520069. 5784393  
SRR17520069. 5785802  
SRR17520069. 5785804  
SRR17520069. 5785806  
SRR17520069. 5785808  
SRR17520069. 5785810  
SRR17520069. 5785812  
SRR17520069. 5785814  
SRR17520069. 5785816  
SRR17520069. 5785818  
SRR17520069. 5785820  
SRR17520069. 5785822  
SRR17520069. 5785824  
SRR17520069. 5785826  
SRR17520069. 5785828  
SRR17520069. 5785830  
SRR17520069. 5785832  
SRR17520069. 5786208  
SRR17520069. 5786210  
SRR17520069. 5786212  
SRR17520069. 5786214  
SRR17520069. 5786216  
SRR17520069. 5786218  
SRR17520069. 5786220  
SRR17520069. 5786222  
SRR17520069. 5786224  
SRR17520069. 5795072  
SRR17520069. 5797450  
SRR17520069. 5800202  
SRR17520069. 5800204  
SRR17520069. 5800206  
SRR17520069. 5800208  
SRR17520069. 5800210  
SRR17520069. 5800212  
SRR17520069. 5800214  
SRR17520069. 5800216  
SRR17520069. 5800280  
SRR17520069. 5800607  
SRR17520069. 5800609  
SRR17520069. 5800611  
SRR17520069. 5800613

SRR17520069.5800615  
SRR17520069.5800617  
SRR17520069.5800619  
SRR17520069.5800621  
SRR17520069.5800623  
SRR17520069.5800625  
SRR17520069.5800627  
SRR17520069.5800629  
SRR17520069.5800631  
SRR17520069.5800633  
SRR17520069.5800635  
SRR17520069.5800637  
SRR17520069.5800639  
SRR17520069.5800641  
SRR17520069.5800643  
SRR17520069.5800645  
SRR17520069.5800647  
SRR17520069.5800649  
SRR17520069.5800653  
SRR17520069.5800655  
SRR17520069.5800657  
SRR17520069.5800659  
SRR17520069.5800661  
SRR17520069.5800663  
SRR17520069.5800665  
SRR17520069.5800667  
SRR17520069.5800669  
SRR17520069.5800671  
SRR17520069.5800673  
SRR17520069.5800675  
SRR17520069.5807937  
SRR17520069.5807939  
SRR17520069.5807941  
SRR17520069.5807943  
SRR17520069.5807945  
SRR17520069.5807949  
SRR17520069.5807951  
SRR17520069.5807953  
SRR17520069.5807955  
SRR17520069.5807957  
SRR17520069.5807959  
SRR17520069.5807961  
SRR17520069.5807963  
SRR17520069.5807965  
SRR17520069.5807967  
SRR17520069.5807969  
SRR17520069.5807971

SRR17520069.5807973  
SRR17520069.5807975  
SRR17520069.5807977  
SRR17520069.5810032  
SRR17520069.5811780  
SRR17520069.5811782  
SRR17520069.5811784  
SRR17520069.5811786  
SRR17520069.5811788  
SRR17520069.5811790  
SRR17520069.5811792  
SRR17520069.5811794  
SRR17520069.5811796  
SRR17520069.5811798  
SRR17520069.5811800  
SRR17520069.5811804  
SRR17520069.5811806  
SRR17520069.5811808  
SRR17520069.5811810  
SRR17520069.5811812  
SRR17520069.5811814  
SRR17520069.5811816  
SRR17520069.5811818  
SRR17520069.5811820  
SRR17520069.5811822  
SRR17520069.5811826  
SRR17520069.5818949  
SRR17520069.5818951  
SRR17520069.5818953  
SRR17520069.5818955  
SRR17520069.5818957  
SRR17520069.5818959  
SRR17520069.5818961  
SRR17520069.5818963  
SRR17520069.5818975  
SRR17520069.5818977  
SRR17520069.5818979  
SRR17520069.5818983  
SRR17520069.5818985  
SRR17520069.5818987  
SRR17520069.5818991  
SRR17520069.5818997  
SRR17520069.5818999  
SRR17520069.5819001  
SRR17520069.5819003  
SRR17520069.5819005  
SRR17520069.5819007

SRR17520069.5819009  
SRR17520069.5819011  
SRR17520069.5819013  
SRR17520069.5819015  
SRR17520069.5819017  
SRR17520069.5819019  
SRR17520069.5819021  
SRR17520069.5819025  
SRR17520069.5819027  
SRR17520069.5819029  
SRR17520069.5819031  
SRR17520069.5819033  
SRR17520069.5819035  
SRR17520069.5819037  
SRR17520069.5819041  
SRR17520069.5819043  
SRR17520069.5819045  
SRR17520069.5819047  
SRR17520069.5819049  
SRR17520069.5819051  
SRR17520069.5819053  
SRR17520069.5819055  
SRR17520069.5819057  
SRR17520069.5819059  
SRR17520069.5819061  
SRR17520069.5819065  
SRR17520069.5822088  
SRR17520069.5822090  
SRR17520069.5822100  
SRR17520069.5822102  
SRR17520069.5822104  
SRR17520069.5822108  
SRR17520069.5822110  
SRR17520069.5822114  
SRR17520069.5822118  
SRR17520069.5822124  
SRR17520069.5832390  
SRR17520069.5832392  
SRR17520069.5832394  
SRR17520069.5832396  
SRR17520069.5832398  
SRR17520069.5832400  
SRR17520069.5832402  
SRR17520069.5832404  
SRR17520069.5832406  
SRR17520069.5832408  
SRR17520069.5834149

SRR17520069.5834151  
SRR17520069.5834153  
SRR17520069.5834155  
SRR17520069.5834157  
SRR17520069.5834163  
SRR17520069.5834165  
SRR17520069.5834167  
SRR17520069.5834173  
SRR17520069.5838243  
SRR17520069.5838247  
SRR17520069.5838249  
SRR17520069.5838919  
SRR17520069.5838921  
SRR17520069.5838923  
SRR17520069.5838925  
SRR17520069.5838927  
SRR17520069.5838929  
SRR17520069.5838931  
SRR17520069.5838933  
SRR17520069.5838935  
SRR17520069.5838937  
SRR17520069.5838939  
SRR17520069.5838941  
SRR17520069.5838943  
SRR17520069.5838945  
SRR17520069.5838947  
SRR17520069.5839944  
SRR17520069.5839946  
SRR17520069.5839948  
SRR17520069.5839950  
SRR17520069.5839952  
SRR17520069.5839954  
SRR17520069.5839956  
SRR17520069.5839960  
SRR17520069.5839962  
SRR17520069.5839964  
SRR17520069.5843626  
SRR17520069.5843628  
SRR17520069.5843630  
SRR17520069.5843632  
SRR17520069.5843634  
SRR17520069.5843636  
SRR17520069.5843638  
SRR17520069.5843640  
SRR17520069.5843642  
SRR17520069.5843644  
SRR17520069.5843646

SRR17520069.5843648  
SRR17520069.5843650  
SRR17520069.5843652  
SRR17520069.5843654  
SRR17520069.5843656  
SRR17520069.5843658  
SRR17520069.5843660  
SRR17520069.5843664  
SRR17520069.5843666  
SRR17520069.5843668  
SRR17520069.5843670  
SRR17520069.5843672  
SRR17520069.5843674  
SRR17520069.5843676  
SRR17520069.5843678  
SRR17520069.5843682  
SRR17520069.5843684  
SRR17520069.5846888  
SRR17520069.5846890  
SRR17520069.5846892  
SRR17520069.5846894  
SRR17520069.5846896  
SRR17520069.5846898  
SRR17520069.5846900  
SRR17520069.5846902  
SRR17520069.5846906  
SRR17520069.5846908  
SRR17520069.5846912  
SRR17520069.5846914  
SRR17520069.5846916  
SRR17520069.5847272  
SRR17520069.5847274  
SRR17520069.5847276  
SRR17520069.5847278  
SRR17520069.5848483  
SRR17520069.5848485  
SRR17520069.5848487  
SRR17520069.5848489  
SRR17520069.5848491  
SRR17520069.5848493  
SRR17520069.5848495  
SRR17520069.5848497  
SRR17520069.5848499  
SRR17520069.5848501  
SRR17520069.5848503  
SRR17520069.5848505  
SRR17520069.5848507

SRR17520069.5848509  
SRR17520069.5848511  
SRR17520069.5848513  
SRR17520069.5848515  
SRR17520069.5848517  
SRR17520069.5848519  
SRR17520069.5848521  
SRR17520069.5848523  
SRR17520069.5848525  
SRR17520069.5848527  
SRR17520069.5848529  
SRR17520069.5848531  
SRR17520069.5848533  
SRR17520069.5848535  
SRR17520069.5848537  
SRR17520069.5848539  
SRR17520069.5848541  
SRR17520069.5848543  
SRR17520069.5848545  
SRR17520069.5848547  
SRR17520069.5848549  
SRR17520069.5848551  
SRR17520069.5848553  
SRR17520069.5848555  
SRR17520069.5848557  
SRR17520069.5848559  
SRR17520069.5848561  
SRR17520069.5848563  
SRR17520069.5848565  
SRR17520069.5848567  
SRR17520069.5848569  
SRR17520069.5848571  
SRR17520069.5848573  
SRR17520069.5848575  
SRR17520069.5848577  
SRR17520069.5848579  
SRR17520069.5848581  
SRR17520069.5848583  
SRR17520069.5848585  
SRR17520069.5848587  
SRR17520069.5848589  
SRR17520069.5848591  
SRR17520069.5848593  
SRR17520069.5848595  
SRR17520069.5848597  
SRR17520069.5848599  
SRR17520069.5848601

SRR17520069.5848603  
SRR17520069.5848605  
SRR17520069.5848607  
SRR17520069.5848948  
SRR17520069.5848950  
SRR17520069.5848952  
SRR17520069.5848954  
SRR17520069.5848956  
SRR17520069.5848958  
SRR17520069.5848960  
SRR17520069.5848962  
SRR17520069.5848964  
SRR17520069.5848966  
SRR17520069.5848968  
SRR17520069.5848972  
SRR17520069.5848974  
SRR17520069.5848976  
SRR17520069.5848978  
SRR17520069.5848980  
SRR17520069.5848982  
SRR17520069.5848984  
SRR17520069.5848988  
SRR17520069.5849691  
SRR17520069.5849693  
SRR17520069.5849695  
SRR17520069.5849697  
SRR17520069.5849699  
SRR17520069.5849701  
SRR17520069.5849703  
SRR17520069.5849707  
SRR17520069.5849709  
SRR17520069.5849711  
SRR17520069.5849713  
SRR17520069.5849715  
SRR17520069.5849717  
SRR17520069.5849719  
SRR17520069.5849721  
SRR17520069.5849723  
SRR17520069.5849725  
SRR17520069.5849727  
SRR17520069.5849729  
SRR17520069.5849731  
SRR17520069.5849733  
SRR17520069.5849735  
SRR17520069.5849737  
SRR17520069.5849739  
SRR17520069.5849741



SRR17520069.5849743  
SRR17520069.5849745  
SRR17520069.5849747  
SRR17520069.5849749  
SRR17520069.5849751  
SRR17520069.5849753  
SRR17520069.5849755  
SRR17520069.5849757  
SRR17520069.5849759  
SRR17520069.5849761  
SRR17520069.5849763  
SRR17520069.5849765  
SRR17520069.5849767  
SRR17520069.5849769  
SRR17520069.5849771  
SRR17520069.5849773  
SRR17520069.5849775  
SRR17520069.5849777  
SRR17520069.5849779  
SRR17520069.5849781  
SRR17520069.5849783  
SRR17520069.5849785  
SRR17520069.5849787  
SRR17520069.5849789  
SRR17520069.5849791  
SRR17520069.5849793  
SRR17520069.5849795  
SRR17520069.5849797  
SRR17520069.5849799  
SRR17520069.5849801  
SRR17520069.5849803  
SRR17520069.5849805  
SRR17520069.5849807  
SRR17520069.5849809  
SRR17520069.5849811  
SRR17520069.5849813  
SRR17520069.5849818  
SRR17520069.5849820  
SRR17520069.5849822  
SRR17520069.5849824  
SRR17520069.5849826  
SRR17520069.5849828  
SRR17520069.5862424  
SRR17520069.5862426  
SRR17520069.5862428  
SRR17520069.5862430  
SRR17520069.5862432

SRR17520069.5862434  
SRR17520069.5862436  
SRR17520069.5864102  
SRR17520069.5869858  
SRR17520069.5869860  
SRR17520069.5869862  
SRR17520069.5869864  
SRR17520069.5869866  
SRR17520069.5869868  
SRR17520069.5869870  
SRR17520069.5869872  
SRR17520069.5869874  
SRR17520069.5869876  
SRR17520069.5869878  
SRR17520069.5869880  
SRR17520069.5869882  
SRR17520069.5869884  
SRR17520069.5869886  
SRR17520069.5869888  
SRR17520069.5869890  
SRR17520069.5869892  
SRR17520069.5869894  
SRR17520069.5869896  
SRR17520069.5869898  
SRR17520069.5869900  
SRR17520069.5869902  
SRR17520069.5869904  
SRR17520069.5869906  
SRR17520069.5869908  
SRR17520069.5869910  
SRR17520069.5869912  
SRR17520069.5869914  
SRR17520069.5869916  
SRR17520069.5869926  
SRR17520069.5869928  
SRR17520069.5871296  
SRR17520069.5871300  
SRR17520069.5871326  
SRR17520069.5871356  
SRR17520069.5871368  
SRR17520069.5871374  
SRR17520069.5871397  
SRR17520069.5873806  
SRR17520069.5876805  
SRR17520069.5876807  
SRR17520069.5876809  
SRR17520069.5876811

SRR17520069.5879983  
SRR17520069.5888593  
SRR17520069.5888595  
SRR17520069.5888597  
SRR17520069.5888599  
SRR17520069.5888601  
SRR17520069.5888603  
SRR17520069.5888605  
SRR17520069.5888607  
SRR17520069.5888609  
SRR17520069.5888611  
SRR17520069.5888613  
SRR17520069.5888615  
SRR17520069.5888617  
SRR17520069.5888619  
SRR17520069.5888621  
SRR17520069.5888623  
SRR17520069.5888625  
SRR17520069.5888627  
SRR17520069.5888629  
SRR17520069.5888631  
SRR17520069.5888633  
SRR17520069.5888635  
SRR17520069.5888637  
SRR17520069.5888639  
SRR17520069.5888641  
SRR17520069.5888643  
SRR17520069.5888645  
SRR17520069.5888647  
SRR17520069.5888649  
SRR17520069.5888651  
SRR17520069.5888653  
SRR17520069.5888655  
SRR17520069.5888657  
SRR17520069.5888659  
SRR17520069.5888661  
SRR17520069.5888663  
SRR17520069.5888665  
SRR17520069.5888667  
SRR17520069.5888669  
SRR17520069.5888671  
SRR17520069.5888673  
SRR17520069.5888675  
SRR17520069.5888677  
SRR17520069.5889112  
SRR17520069.5889114  
SRR17520069.5889122

SRR17520069.5889124  
SRR17520069.5889126  
SRR17520069.5889128  
SRR17520069.5889130  
SRR17520069.5889132  
SRR17520069.5889134  
SRR17520069.5889136  
SRR17520069.5889138  
SRR17520069.5889140  
SRR17520069.5889142  
SRR17520069.5889144  
SRR17520069.5889146  
SRR17520069.5889148  
SRR17520069.5889150  
SRR17520069.5889152  
SRR17520069.5889154  
SRR17520069.5889156  
SRR17520069.5889607  
SRR17520069.5889609  
SRR17520069.5889611  
SRR17520069.5889613  
SRR17520069.5889615  
SRR17520069.5889617  
SRR17520069.5889621  
SRR17520069.5889623  
SRR17520069.5889627  
SRR17520069.5889629  
SRR17520069.5889631  
SRR17520069.5889633  
SRR17520069.5889635  
SRR17520069.5889637  
SRR17520069.5889639  
SRR17520069.5889641  
SRR17520069.5889643  
SRR17520069.5889645  
SRR17520069.5889647  
SRR17520069.5889649  
SRR17520069.5889651  
SRR17520069.5889653  
SRR17520069.5889828  
SRR17520069.5889830  
SRR17520069.5889832  
SRR17520069.5889834  
SRR17520069.5889836  
SRR17520069.5889838  
SRR17520069.5889840  
SRR17520069.5889842

SRR17520069.5889844  
SRR17520069.5889848  
SRR17520069.5889850  
SRR17520069.5889852  
SRR17520069.5889854  
SRR17520069.5889856  
SRR17520069.5889858  
SRR17520069.5889860  
SRR17520069.5889862  
SRR17520069.5889864  
SRR17520069.5889866  
SRR17520069.5889868  
SRR17520069.5889870  
SRR17520069.5889872  
SRR17520069.5889874  
SRR17520069.5889876  
SRR17520069.5889878  
SRR17520069.5889880  
SRR17520069.5889884  
SRR17520069.5889886  
SRR17520069.5889888  
SRR17520069.5889890  
SRR17520069.5889892  
SRR17520069.5889894  
SRR17520069.5889898  
SRR17520069.5889900  
SRR17520069.5889904  
SRR17520069.5889906  
SRR17520069.5889908  
SRR17520069.5889910  
SRR17520069.5889912  
SRR17520069.5889914  
SRR17520069.5889916  
SRR17520069.5889918  
SRR17520069.5889920  
SRR17520069.5889922  
SRR17520069.5889924  
SRR17520069.5891748  
SRR17520069.5891750  
SRR17520069.5891752  
SRR17520069.5891754  
SRR17520069.5891756  
SRR17520069.5891758  
SRR17520069.5891760  
SRR17520069.5891762  
SRR17520069.5891764  
SRR17520069.5891766

SRR17520069.5891768  
SRR17520069.5891770  
SRR17520069.5891772  
SRR17520069.5891774  
SRR17520069.5891776  
SRR17520069.5891783  
SRR17520069.5891785  
SRR17520069.5891787  
SRR17520069.5891789  
SRR17520069.5891791  
SRR17520069.5891793  
SRR17520069.5891795  
SRR17520069.5891797  
SRR17520069.5891799  
SRR17520069.5891801  
SRR17520069.5892331  
SRR17520069.5892333  
SRR17520069.5892335  
SRR17520069.5892337  
SRR17520069.5892339  
SRR17520069.5892343  
SRR17520069.5892349  
SRR17520069.5892351  
SRR17520069.5892353  
SRR17520069.5892355  
SRR17520069.5892359  
SRR17520069.5894140  
SRR17520069.5894142  
SRR17520069.5894144  
SRR17520069.5894146  
SRR17520069.5894150  
SRR17520069.5894152  
SRR17520069.5894154  
SRR17520069.5894156  
SRR17520069.5894158  
SRR17520069.5894160  
SRR17520069.5894162  
SRR17520069.5894164  
SRR17520069.5894166  
SRR17520069.5894170  
SRR17520069.5894172  
SRR17520069.5894174  
SRR17520069.5894176  
SRR17520069.5894178  
SRR17520069.5894184  
SRR17520069.5894186  
SRR17520069.5894188

SRR17520069. 5894192  
SRR17520069. 5894198  
SRR17520069. 5894916  
SRR17520069. 5894918  
SRR17520069. 5894920  
SRR17520069. 5894922  
SRR17520069. 5894924  
SRR17520069. 5894926  
SRR17520069. 5894928  
SRR17520069. 5894930  
SRR17520069. 5894932  
SRR17520069. 5894934  
SRR17520069. 5894936  
SRR17520069. 5894938  
SRR17520069. 5894940  
SRR17520069. 5894942  
SRR17520069. 5894944  
SRR17520069. 5894946  
SRR17520069. 5894948  
SRR17520069. 5894950  
SRR17520069. 5894952  
SRR17520069. 5894954  
SRR17520069. 5894956  
SRR17520069. 5894958  
SRR17520069. 5894960  
SRR17520069. 5894962  
SRR17520069. 5894964  
SRR17520069. 5894966  
SRR17520069. 5894968  
SRR17520069. 5894970  
SRR17520069. 5894972  
SRR17520069. 5894974  
SRR17520069. 5894976  
SRR17520069. 5894978  
SRR17520069. 5894980  
SRR17520069. 5894982  
SRR17520069. 5894984  
SRR17520069. 5894986  
SRR17520069. 5894988  
SRR17520069. 5900739  
SRR17520069. 5900741  
SRR17520069. 5901805  
SRR17520069. 5901807  
SRR17520069. 5901809  
SRR17520069. 5901811  
SRR17520069. 5901813  
SRR17520069. 5901815

SRR17520069.5901817  
SRR17520069.5901819  
SRR17520069.5901821  
SRR17520069.5901823  
SRR17520069.5901825  
SRR17520069.5901827  
SRR17520069.5901829  
SRR17520069.5901831  
SRR17520069.5901833  
SRR17520069.5901835  
SRR17520069.5901837  
SRR17520069.5901839  
SRR17520069.5901841  
SRR17520069.5901843  
SRR17520069.5901845  
SRR17520069.5901847  
SRR17520069.5901849  
SRR17520069.5901851  
SRR17520069.5901853  
SRR17520069.5901855  
SRR17520069.5901857  
SRR17520069.5901859  
SRR17520069.5901861  
SRR17520069.5901863  
SRR17520069.5901865  
SRR17520069.5901867  
SRR17520069.5901869  
SRR17520069.5901871  
SRR17520069.5901873  
SRR17520069.5901875  
SRR17520069.5901877  
SRR17520069.5901879  
SRR17520069.5901881  
SRR17520069.5901883  
SRR17520069.5901885  
SRR17520069.5901887  
SRR17520069.5901889  
SRR17520069.5901891  
SRR17520069.5901893  
SRR17520069.5901895  
SRR17520069.5901897  
SRR17520069.5917750  
SRR17520069.5917754  
SRR17520069.5917756  
SRR17520069.5917758  
SRR17520069.5917760  
SRR17520069.5917764



SRR17520069.5917766  
SRR17520069.5917768  
SRR17520069.5917770  
SRR17520069.5917772  
SRR17520069.5917774  
SRR17520069.5917776  
SRR17520069.5917778  
SRR17520069.5917780  
SRR17520069.5917782  
SRR17520069.5917784  
SRR17520069.5917786  
SRR17520069.5922949  
SRR17520069.5922951  
SRR17520069.5922953  
SRR17520069.5922955  
SRR17520069.5922957  
SRR17520069.5922959  
SRR17520069.5922961  
SRR17520069.5922963  
SRR17520069.5922967  
SRR17520069.5922969  
SRR17520069.5922971  
SRR17520069.5922973  
SRR17520069.5922977  
SRR17520069.5922979  
SRR17520069.5922983  
SRR17520069.5922987  
SRR17520069.5938635  
SRR17520069.5938637  
SRR17520069.5938639  
SRR17520069.5938641  
SRR17520069.5938643  
SRR17520069.5938645  
SRR17520069.5938647  
SRR17520069.5938649  
SRR17520069.5938651  
SRR17520069.5938653  
SRR17520069.5938655  
SRR17520069.5938657  
SRR17520069.5938659  
SRR17520069.5938661  
SRR17520069.5938663  
SRR17520069.5938665  
SRR17520069.5938667  
SRR17520069.5938669  
SRR17520069.5938671  
SRR17520069.5938675

SRR17520069.5938677  
SRR17520069.5938679  
SRR17520069.5938683  
SRR17520069.5938685  
SRR17520069.5938687  
SRR17520069.5938691  
SRR17520069.5938693  
SRR17520069.5938695  
SRR17520069.5938697  
SRR17520069.5938701  
SRR17520069.5938703  
SRR17520069.5938705  
SRR17520069.5938707  
SRR17520069.5938711  
SRR17520069.5938715  
SRR17520069.5947176  
SRR17520069.5947178  
SRR17520069.5947180  
SRR17520069.5947182  
SRR17520069.5947184  
SRR17520069.5947186  
SRR17520069.5947190  
SRR17520069.5947192  
SRR17520069.5947194  
SRR17520069.5947196  
SRR17520069.5947198  
SRR17520069.5947200  
SRR17520069.5947202  
SRR17520069.5947204  
SRR17520069.5947208  
SRR17520069.5952813  
SRR17520069.5952815  
SRR17520069.5952817  
SRR17520069.5952819  
SRR17520069.5952821  
SRR17520069.5952823  
SRR17520069.5952825  
SRR17520069.5952827  
SRR17520069.5952829  
SRR17520069.5952831  
SRR17520069.5952833  
SRR17520069.5952835  
SRR17520069.5952837  
SRR17520069.5952839  
SRR17520069.5952841  
SRR17520069.5952843  
SRR17520069.5952845

SRR17520069.5952847  
SRR17520069.5952849  
SRR17520069.5952851  
SRR17520069.5952853  
SRR17520069.5952855  
SRR17520069.5952857  
SRR17520069.5952859  
SRR17520069.5952861  
SRR17520069.5952863  
SRR17520069.5952865  
SRR17520069.5952867  
SRR17520069.5952869  
SRR17520069.5952871  
SRR17520069.5952873  
SRR17520069.5952875  
SRR17520069.5952877  
SRR17520069.5952879  
SRR17520069.5952881  
SRR17520069.5952883  
SRR17520069.5952885  
SRR17520069.5952887  
SRR17520069.5952889  
SRR17520069.5952891  
SRR17520069.5952893  
SRR17520069.5952895  
SRR17520069.5952897  
SRR17520069.5952899  
SRR17520069.5952901  
SRR17520069.5952903  
SRR17520069.5952905  
SRR17520069.5952907  
SRR17520069.5952909  
SRR17520069.5952911  
SRR17520069.5952913  
SRR17520069.5952915  
SRR17520069.5952917  
SRR17520069.5952919  
SRR17520069.5956280  
SRR17520069.5956282  
SRR17520069.5956284  
SRR17520069.5956288  
SRR17520069.5956290  
SRR17520069.5956292  
SRR17520069.5956294  
SRR17520069.5956296  
SRR17520069.5956298  
SRR17520069.5956300

SRR17520069.5956302  
SRR17520069.5956304  
SRR17520069.5956306  
SRR17520069.5956308  
SRR17520069.5956310  
SRR17520069.5956312  
SRR17520069.5956314  
SRR17520069.5956316  
SRR17520069.5956318  
SRR17520069.5956320  
SRR17520069.5956322  
SRR17520069.5956324  
SRR17520069.5956326  
SRR17520069.5960217  
SRR17520069.5960219  
SRR17520069.5960221  
SRR17520069.5960223  
SRR17520069.5960225  
SRR17520069.5960227  
SRR17520069.5960229  
SRR17520069.5960231  
SRR17520069.5960233  
SRR17520069.5960235  
SRR17520069.5960237  
SRR17520069.5960239  
SRR17520069.5960241  
SRR17520069.5960243  
SRR17520069.5960245  
SRR17520069.5960247  
SRR17520069.5960249  
SRR17520069.5960251  
SRR17520069.5960253  
SRR17520069.5960255  
SRR17520069.5960257  
SRR17520069.5960259  
SRR17520069.5960261  
SRR17520069.5960263  
SRR17520069.5960265  
SRR17520069.5960267  
SRR17520069.5960269  
SRR17520069.5960271  
SRR17520069.5960273  
SRR17520069.5960275  
SRR17520069.5960277  
SRR17520069.5960279  
SRR17520069.5960281  
SRR17520069.5960283

SRR17520069. 5960285  
SRR17520069. 5971826  
SRR17520069. 5971828  
SRR17520069. 5971830  
SRR17520069. 5971832  
SRR17520069. 5971834  
SRR17520069. 5971836  
SRR17520069. 5971838  
SRR17520069. 5971840  
SRR17520069. 5971842  
SRR17520069. 5971844  
SRR17520069. 5982849  
SRR17520069. 5982851  
SRR17520069. 5982853  
SRR17520069. 5982855  
SRR17520069. 5982857  
SRR17520069. 5982859  
SRR17520069. 5982861  
SRR17520069. 5982863  
SRR17520069. 5982865  
SRR17520069. 5982867  
SRR17520069. 5982869  
SRR17520069. 5982871  
SRR17520069. 5982873  
SRR17520069. 5982875  
SRR17520069. 5982877  
SRR17520069. 5982879  
SRR17520069. 5982881  
SRR17520069. 5982883  
SRR17520069. 5982885  
SRR17520069. 5982887  
SRR17520069. 5982889  
SRR17520069. 5982891  
SRR17520069. 5982893  
SRR17520069. 5982895  
SRR17520069. 5982897  
SRR17520069. 5982899  
SRR17520069. 5982901  
SRR17520069. 5982903  
SRR17520069. 5982905  
SRR17520069. 5982907  
SRR17520069. 5982909  
SRR17520069. 5982911  
SRR17520069. 5982913  
SRR17520069. 5982915  
SRR17520069. 5982917  
SRR17520069. 5982919

SRR17520069. 5982921  
SRR17520069. 5982923  
SRR17520069. 5982925  
SRR17520069. 5983583  
SRR17520069. 5983585  
SRR17520069. 5983587  
SRR17520069. 5983589  
SRR17520069. 5983591  
SRR17520069. 5983593  
SRR17520069. 5983595  
SRR17520069. 5983597  
SRR17520069. 5983599  
SRR17520069. 5983601  
SRR17520069. 5983603  
SRR17520069. 5983605  
SRR17520069. 5983607  
SRR17520069. 5983609  
SRR17520069. 5983611  
SRR17520069. 5983613  
SRR17520069. 5983615  
SRR17520069. 5983617  
SRR17520069. 5983619  
SRR17520069. 5983621  
SRR17520069. 5983623  
SRR17520069. 5983625  
SRR17520069. 5983627  
SRR17520069. 5983629  
SRR17520069. 5983631  
SRR17520069. 5983633  
SRR17520069. 5983635  
SRR17520069. 5983637  
SRR17520069. 5983639  
SRR17520069. 5983641  
SRR17520069. 5983643  
SRR17520069. 5983645  
SRR17520069. 5984444  
SRR17520069. 5984446  
SRR17520069. 5984448  
SRR17520069. 5984450  
SRR17520069. 5984452  
SRR17520069. 5984454  
SRR17520069. 5984456  
SRR17520069. 5984458  
SRR17520069. 5984460  
SRR17520069. 5984462  
SRR17520069. 5984464  
SRR17520069. 5984466

SRR17520069. 5984468  
SRR17520069. 5984470  
SRR17520069. 5984472  
SRR17520069. 5984474  
SRR17520069. 5984476  
SRR17520069. 5984478  
SRR17520069. 5984480  
SRR17520069. 5984482  
SRR17520069. 5984484  
SRR17520069. 5984486  
SRR17520069. 5984488  
SRR17520069. 5984490  
SRR17520069. 5984492  
SRR17520069. 5984494  
SRR17520069. 5984496  
SRR17520069. 5984498  
SRR17520069. 5984500  
SRR17520069. 5984502  
SRR17520069. 5984504  
SRR17520069. 5984506  
SRR17520069. 5984508  
SRR17520069. 5984510  
SRR17520069. 5984512  
SRR17520069. 5984514  
SRR17520069. 5984516  
SRR17520069. 5985359  
SRR17520069. 5985361  
SRR17520069. 5985363  
SRR17520069. 5985365  
SRR17520069. 5985367  
SRR17520069. 5985369  
SRR17520069. 5985371  
SRR17520069. 5985373  
SRR17520069. 5985375  
SRR17520069. 5985377  
SRR17520069. 5987748  
SRR17520069. 5987750  
SRR17520069. 5987752  
SRR17520069. 5987754  
SRR17520069. 5987756  
SRR17520069. 5987758  
SRR17520069. 5987760  
SRR17520069. 5987762  
SRR17520069. 5987764  
SRR17520069. 5987766  
SRR17520069. 5987768  
SRR17520069. 5987770

SRR17520069. 5987772  
SRR17520069. 5987774  
SRR17520069. 5987776  
SRR17520069. 5987778  
SRR17520069. 5987780  
SRR17520069. 5987782  
SRR17520069. 5987784  
SRR17520069. 5987786  
SRR17520069. 5987788  
SRR17520069. 5987790  
SRR17520069. 5987794  
SRR17520069. 5987796  
SRR17520069. 5987798  
SRR17520069. 5987800  
SRR17520069. 5987802  
SRR17520069. 5987804  
SRR17520069. 5987806  
SRR17520069. 5987808  
SRR17520069. 5987810  
SRR17520069. 5987812  
SRR17520069. 5987814  
SRR17520069. 5987816  
SRR17520069. 5987818  
SRR17520069. 5987820  
SRR17520069. 5987822  
SRR17520069. 5987824  
SRR17520069. 5987826  
SRR17520069. 5987828  
SRR17520069. 5987830  
SRR17520069. 5987832  
SRR17520069. 5987834  
SRR17520069. 5987836  
SRR17520069. 5987838  
SRR17520069. 5987840  
SRR17520069. 5987842  
SRR17520069. 5987844  
SRR17520069. 5987846  
SRR17520069. 5987848  
SRR17520069. 5988720  
SRR17520069. 5988725  
SRR17520069. 5988727  
SRR17520069. 5988729  
SRR17520069. 5988731  
SRR17520069. 5988733  
SRR17520069. 5988735  
SRR17520069. 5988737  
SRR17520069. 5988739



SRR17520069.5988741  
SRR17520069.5988743  
SRR17520069.5988745  
SRR17520069.5988747  
SRR17520069.5989209  
SRR17520069.5997662  
SRR17520069.5997664  
SRR17520069.5997666  
SRR17520069.5997668  
SRR17520069.5997672  
SRR17520069.5997674  
SRR17520069.5997676  
SRR17520069.5997678  
SRR17520069.5997680  
SRR17520069.5997682  
SRR17520069.5997684  
SRR17520069.5997686  
SRR17520069.5997688  
SRR17520069.5997690  
SRR17520069.5997692  
SRR17520069.5997694  
SRR17520069.5997696  
SRR17520069.5997698  
SRR17520069.5997700  
SRR17520069.5997702  
SRR17520069.5997704  
SRR17520069.5997706  
SRR17520069.5997708  
SRR17520069.5997825  
SRR17520069.5997827  
SRR17520069.5997829  
SRR17520069.5997831  
SRR17520069.5997833  
SRR17520069.5997835  
SRR17520069.5997837  
SRR17520069.5997839  
SRR17520069.5997841  
SRR17520069.6005078  
SRR17520069.6005080  
SRR17520069.6005082  
SRR17520069.6005084  
SRR17520069.6005086  
SRR17520069.6005088  
SRR17520069.6005090  
SRR17520069.6005092  
SRR17520069.6005094  
SRR17520069.6011302

SRR17520069.6011304  
SRR17520069.6011306  
SRR17520069.6011308  
SRR17520069.6011310  
SRR17520069.6011312  
SRR17520069.6011314  
SRR17520069.6011316  
SRR17520069.6011318  
SRR17520069.6011320  
SRR17520069.6015057  
SRR17520069.6015059  
SRR17520069.6015061  
SRR17520069.6015063  
SRR17520069.6015065  
SRR17520069.6015067  
SRR17520069.6015069  
SRR17520069.6015071  
SRR17520069.6015073  
SRR17520069.6015075  
SRR17520069.6015077  
SRR17520069.6015079  
SRR17520069.6015081  
SRR17520069.6015083  
SRR17520069.6015085  
SRR17520069.6015087  
SRR17520069.6015089  
SRR17520069.6015091  
SRR17520069.6015542  
SRR17520069.6015545  
SRR17520069.6016876  
SRR17520069.6021277  
SRR17520069.6021279  
SRR17520069.6021281  
SRR17520069.6027230  
SRR17520069.6027232  
SRR17520069.6027234  
SRR17520069.6027236  
SRR17520069.6027238  
SRR17520069.6027240  
SRR17520069.6027242  
SRR17520069.6027244  
SRR17520069.6027246  
SRR17520069.6027248  
SRR17520069.6027250  
SRR17520069.6027252  
SRR17520069.6027254  
SRR17520069.6027256

SRR17520069.6027258  
SRR17520069.6027260  
SRR17520069.6027262  
SRR17520069.6027264  
SRR17520069.6027266  
SRR17520069.6027268  
SRR17520069.6027270  
SRR17520069.6027272  
SRR17520069.6027274  
SRR17520069.6027276  
SRR17520069.6027278  
SRR17520069.6027280  
SRR17520069.6027282  
SRR17520069.6027284  
SRR17520069.6027286  
SRR17520069.6027288  
SRR17520069.6027290  
SRR17520069.6028450  
SRR17520069.6028452  
SRR17520069.6028454  
SRR17520069.6028456  
SRR17520069.6028458  
SRR17520069.6028460  
SRR17520069.6028462  
SRR17520069.6030376  
SRR17520069.6030378  
SRR17520069.6030380  
SRR17520069.6030384  
SRR17520069.6030386  
SRR17520069.6030388  
SRR17520069.6030390  
SRR17520069.6030392  
SRR17520069.6030394  
SRR17520069.6030396  
SRR17520069.6031857  
SRR17520069.6031859  
SRR17520069.6031861  
SRR17520069.6031863  
SRR17520069.6031865  
SRR17520069.6031867  
SRR17520069.6031869  
SRR17520069.6031871  
SRR17520069.6031873  
SRR17520069.6031886  
SRR17520069.6031888  
SRR17520069.6031892  
SRR17520069.6031894

SRR17520069. 6031896  
SRR17520069. 6031898  
SRR17520069. 6031900  
SRR17520069. 6031902  
SRR17520069. 6031904  
SRR17520069. 6031906  
SRR17520069. 6031908  
SRR17520069. 6031910  
SRR17520069. 6031912  
SRR17520069. 6031914  
SRR17520069. 6031916  
SRR17520069. 6031918  
SRR17520069. 6031920  
SRR17520069. 6031922  
SRR17520069. 6031924  
SRR17520069. 6031926  
SRR17520069. 6031928  
SRR17520069. 6031930  
SRR17520069. 6031932  
SRR17520069. 6031934  
SRR17520069. 6031936  
SRR17520069. 6031940  
SRR17520069. 6031942  
SRR17520069. 6031944  
SRR17520069. 6031946  
SRR17520069. 6031948  
SRR17520069. 6031952  
SRR17520069. 6031954  
SRR17520069. 6031956  
SRR17520069. 6031958  
SRR17520069. 6031960  
SRR17520069. 6032563  
SRR17520069. 6034064  
SRR17520069. 6034066  
SRR17520069. 6034068  
SRR17520069. 6034070  
SRR17520069. 6034072  
SRR17520069. 6034074  
SRR17520069. 6034076  
SRR17520069. 6034078  
SRR17520069. 6034080  
SRR17520069. 6034082  
SRR17520069. 6034084  
SRR17520069. 6034086  
SRR17520069. 6034088  
SRR17520069. 6034090  
SRR17520069. 6034092

SRR17520069.6034094  
SRR17520069.6041366  
SRR17520069.6041368  
SRR17520069.6041370  
SRR17520069.6041372  
SRR17520069.6041374  
SRR17520069.6041376  
SRR17520069.6041378  
SRR17520069.6041380  
SRR17520069.6041382  
SRR17520069.6041384  
SRR17520069.6041386  
SRR17520069.6041388  
SRR17520069.6041390  
SRR17520069.6041392  
SRR17520069.6041523  
SRR17520069.6041527  
SRR17520069.6041531  
SRR17520069.6041533  
SRR17520069.6041535  
SRR17520069.6041537  
SRR17520069.6041539  
SRR17520069.6041541  
SRR17520069.6041543  
SRR17520069.6041545  
SRR17520069.6041547  
SRR17520069.6041549  
SRR17520069.6041551  
SRR17520069.6041553  
SRR17520069.6041557  
SRR17520069.6041559  
SRR17520069.6041561  
SRR17520069.6041563  
SRR17520069.6041565  
SRR17520069.6041569  
SRR17520069.6041571  
SRR17520069.6041573  
SRR17520069.6041575  
SRR17520069.6045230  
SRR17520069.6045765  
SRR17520069.6045767  
SRR17520069.6045769  
SRR17520069.6045771  
SRR17520069.6045773  
SRR17520069.6045775  
SRR17520069.6045777  
SRR17520069.6048685

SRR17520069.6048774  
SRR17520069.6048776  
SRR17520069.6048778  
SRR17520069.6048780  
SRR17520069.6048782  
SRR17520069.6048784  
SRR17520069.6048786  
SRR17520069.6048788  
SRR17520069.6048790  
SRR17520069.6048792  
SRR17520069.6048794  
SRR17520069.6048796  
SRR17520069.6048798  
SRR17520069.6048800  
SRR17520069.6048804  
SRR17520069.6048806  
SRR17520069.6048808  
SRR17520069.6048810  
SRR17520069.6048812  
SRR17520069.6048814  
SRR17520069.6048816  
SRR17520069.6048818  
SRR17520069.6048820  
SRR17520069.6048822  
SRR17520069.6048824  
SRR17520069.6048826  
SRR17520069.6048828  
SRR17520069.6048830  
SRR17520069.6048832  
SRR17520069.6048834  
SRR17520069.6048836  
SRR17520069.6049135  
SRR17520069.6049137  
SRR17520069.6049141  
SRR17520069.6049143  
SRR17520069.6049145  
SRR17520069.6049147  
SRR17520069.6049149  
SRR17520069.6049151  
SRR17520069.6049153  
SRR17520069.6049155  
SRR17520069.6049157  
SRR17520069.6049159  
SRR17520069.6049161  
SRR17520069.6049163  
SRR17520069.6051366  
SRR17520069.6051368

SRR17520069.6051370  
SRR17520069.6051372  
SRR17520069.6051374  
SRR17520069.6051376  
SRR17520069.6051378  
SRR17520069.6054829  
SRR17520069.6056894  
SRR17520069.6056896  
SRR17520069.6056898  
SRR17520069.6056902  
SRR17520069.6056904  
SRR17520069.6056906  
SRR17520069.6056908  
SRR17520069.6056912  
SRR17520069.6057112  
SRR17520069.6058470  
SRR17520069.6058472  
SRR17520069.6058476  
SRR17520069.6058484  
SRR17520069.6058486  
SRR17520069.6058492  
SRR17520069.6058494  
SRR17520069.6058496  
SRR17520069.6058498  
SRR17520069.6058500  
SRR17520069.6058504  
SRR17520069.6058506  
SRR17520069.6058508  
SRR17520069.6067346  
SRR17520069.6072421  
SRR17520069.6072423  
SRR17520069.6072427  
SRR17520069.6072429  
SRR17520069.6072431  
SRR17520069.6072433  
SRR17520069.6072435  
SRR17520069.6072437  
SRR17520069.6072439  
SRR17520069.6072441  
SRR17520069.6072443  
SRR17520069.6072445  
SRR17520069.6072447  
SRR17520069.6072449  
SRR17520069.6072453  
SRR17520069.6072455  
SRR17520069.6072457  
SRR17520069.6072459

SRR17520069.6072463  
SRR17520069.6072465  
SRR17520069.6072467  
SRR17520069.6072469  
SRR17520069.6072475  
SRR17520069.6072477  
SRR17520069.6072479  
SRR17520069.6072483  
SRR17520069.6072485  
SRR17520069.6072489  
SRR17520069.6072491  
SRR17520069.6072495  
SRR17520069.6072497  
SRR17520069.6072499  
SRR17520069.6072501  
SRR17520069.6072503  
SRR17520069.6072505  
SRR17520069.6072507  
SRR17520069.6072509  
SRR17520069.6072511  
SRR17520069.6072513  
SRR17520069.6072515  
SRR17520069.6072521  
SRR17520069.6072523  
SRR17520069.6072525  
SRR17520069.6072529  
SRR17520069.6074406  
SRR17520069.6074408  
SRR17520069.6074410  
SRR17520069.6074414  
SRR17520069.6074416  
SRR17520069.6074420  
SRR17520069.6074422  
SRR17520069.6074424  
SRR17520069.6076848  
SRR17520069.6080165  
SRR17520069.6080167  
SRR17520069.6080171  
SRR17520069.6085056  
SRR17520069.6085058  
SRR17520069.6085060  
SRR17520069.6085062  
SRR17520069.6085064  
SRR17520069.6085066  
SRR17520069.6085068  
SRR17520069.6085074  
SRR17520069.6085076



SRR17520069.6085078  
SRR17520069.6085080  
SRR17520069.6085082  
SRR17520069.6093547  
SRR17520069.6093549  
SRR17520069.6093551  
SRR17520069.6093553  
SRR17520069.6093555  
SRR17520069.6093557  
SRR17520069.6093559  
SRR17520069.6093561  
SRR17520069.6093563  
SRR17520069.6093565  
SRR17520069.6093567  
SRR17520069.6093569  
SRR17520069.6093571  
SRR17520069.6093573  
SRR17520069.6093575  
SRR17520069.6093577  
SRR17520069.6093579  
SRR17520069.6093581  
SRR17520069.6093583  
SRR17520069.6093585  
SRR17520069.6093587  
SRR17520069.6093589  
SRR17520069.6093591  
SRR17520069.6093593  
SRR17520069.6093597  
SRR17520069.6093599  
SRR17520069.6093601  
SRR17520069.6093603  
SRR17520069.6093605  
SRR17520069.6093607  
SRR17520069.6096914  
SRR17520069.6096916  
SRR17520069.6096918  
SRR17520069.6096920  
SRR17520069.6096922  
SRR17520069.6096924  
SRR17520069.6096926  
SRR17520069.6096928  
SRR17520069.6096930  
SRR17520069.6096932  
SRR17520069.6096934  
SRR17520069.6096936  
SRR17520069.6097160  
SRR17520069.6097165

SRR17520069.6097171  
SRR17520069.6097173  
SRR17520069.6097177  
SRR17520069.6097179  
SRR17520069.6097181  
SRR17520069.6097183  
SRR17520069.6097185  
SRR17520069.6097187  
SRR17520069.6097189  
SRR17520069.6097191  
SRR17520069.6097193  
SRR17520069.6097195  
SRR17520069.6097197  
SRR17520069.6097199  
SRR17520069.6097858  
SRR17520069.6097860  
SRR17520069.6097862  
SRR17520069.6097864  
SRR17520069.6097866  
SRR17520069.6097868  
SRR17520069.6097870  
SRR17520069.6097872  
SRR17520069.6097874  
SRR17520069.6099965  
SRR17520069.6099967  
SRR17520069.6099969  
SRR17520069.6099971  
SRR17520069.6099973  
SRR17520069.6099975  
SRR17520069.6099977  
SRR17520069.6099979  
SRR17520069.6099981  
SRR17520069.6099983  
SRR17520069.6099985  
SRR17520069.6099987  
SRR17520069.6099989  
SRR17520069.6099991  
SRR17520069.6099993  
SRR17520069.6099995  
SRR17520069.6099997  
SRR17520069.6099999  
SRR17520069.6100001  
SRR17520069.6100003  
SRR17520069.6100005  
SRR17520069.6100007  
SRR17520069.6100009  
SRR17520069.6100011

SRR17520069.6100013  
SRR17520069.6100015  
SRR17520069.6100019  
SRR17520069.6100021  
SRR17520069.6100023  
SRR17520069.6100025  
SRR17520069.6100027  
SRR17520069.6100029  
SRR17520069.6100031  
SRR17520069.6100033  
SRR17520069.6100035  
SRR17520069.6100039  
SRR17520069.6100041  
SRR17520069.6100043  
SRR17520069.6100045  
SRR17520069.6100047  
SRR17520069.6100049  
SRR17520069.6100051  
SRR17520069.6100053  
SRR17520069.6100055  
SRR17520069.6100057  
SRR17520069.6100059  
SRR17520069.6100061  
SRR17520069.6100063  
SRR17520069.6100065  
SRR17520069.6100067  
SRR17520069.6104390  
SRR17520069.6104392  
SRR17520069.6104394  
SRR17520069.6104396  
SRR17520069.6104398  
SRR17520069.6104400  
SRR17520069.6104402  
SRR17520069.6106359  
SRR17520069.6106361  
SRR17520069.6106363  
SRR17520069.6106365  
SRR17520069.6106367  
SRR17520069.6106369  
SRR17520069.6106371  
SRR17520069.6106373  
SRR17520069.6106375  
SRR17520069.6106377  
SRR17520069.6106379  
SRR17520069.6106381  
SRR17520069.6106383  
SRR17520069.6106385

SRR17520069. 6106387  
SRR17520069. 6106389  
SRR17520069. 6106391  
SRR17520069. 6106393  
SRR17520069. 6106395  
SRR17520069. 6106397  
SRR17520069. 6106399  
SRR17520069. 6106401  
SRR17520069. 6106403  
SRR17520069. 6106405  
SRR17520069. 6106407  
SRR17520069. 6106409  
SRR17520069. 6106411  
SRR17520069. 6106413  
SRR17520069. 6106415  
SRR17520069. 6106417  
SRR17520069. 6106419  
SRR17520069. 6106421  
SRR17520069. 6106423  
SRR17520069. 6106425  
SRR17520069. 6106427  
SRR17520069. 6106429  
SRR17520069. 6106431  
SRR17520069. 6106433  
SRR17520069. 6106435  
SRR17520069. 6106437  
SRR17520069. 6106439  
SRR17520069. 6106441  
SRR17520069. 6106443  
SRR17520069. 6106445  
SRR17520069. 6106447  
SRR17520069. 6106449  
SRR17520069. 6106451  
SRR17520069. 6106453  
SRR17520069. 6106455  
SRR17520069. 6106457  
SRR17520069. 6106459  
SRR17520069. 6106461  
SRR17520069. 6106463  
SRR17520069. 6106465  
SRR17520069. 6106467  
SRR17520069. 6106469  
SRR17520069. 6106471  
SRR17520069. 6106473  
SRR17520069. 6106475  
SRR17520069. 6106477  
SRR17520069. 6106479

SRR17520069.6106481  
SRR17520069.6106483  
SRR17520069.6106485  
SRR17520069.6106487  
SRR17520069.6106489  
SRR17520069.6106491  
SRR17520069.6106493  
SRR17520069.6106495  
SRR17520069.6106497  
SRR17520069.6106499  
SRR17520069.6106501  
SRR17520069.6106503  
SRR17520069.6106505  
SRR17520069.6106507  
SRR17520069.6106509  
SRR17520069.6106511  
SRR17520069.6106513  
SRR17520069.6106515  
SRR17520069.6106517  
SRR17520069.6106519  
SRR17520069.6106521  
SRR17520069.6106525  
SRR17520069.6106527  
SRR17520069.6106529  
SRR17520069.6106531  
SRR17520069.6106533  
SRR17520069.6106535  
SRR17520069.6108740  
SRR17520069.6108744  
SRR17520069.6108746  
SRR17520069.6108748  
SRR17520069.6108752  
SRR17520069.6108756  
SRR17520069.6108760  
SRR17520069.6108764  
SRR17520069.6111304  
SRR17520069.6111308  
SRR17520069.6111310  
SRR17520069.6111312  
SRR17520069.6112671  
SRR17520069.6113947  
SRR17520069.6113949  
SRR17520069.6113951  
SRR17520069.6113953  
SRR17520069.6117525  
SRR17520069.6117527  
SRR17520069.6117529

SRR17520069.6117531  
SRR17520069.6117533  
SRR17520069.6117535  
SRR17520069.6117537  
SRR17520069.6117539  
SRR17520069.6117541  
SRR17520069.6117543  
SRR17520069.6117545  
SRR17520069.6117547  
SRR17520069.6117549  
SRR17520069.6117551  
SRR17520069.6117553  
SRR17520069.6117555  
SRR17520069.6117557  
SRR17520069.6117559  
SRR17520069.6117561  
SRR17520069.6117563  
SRR17520069.6117565  
SRR17520069.6117571  
SRR17520069.6117573  
SRR17520069.6117575  
SRR17520069.6117577  
SRR17520069.6117579  
SRR17520069.6117581  
SRR17520069.6117804  
SRR17520069.6117806  
SRR17520069.6117808  
SRR17520069.6117810  
SRR17520069.6117812  
SRR17520069.6117814  
SRR17520069.6117816  
SRR17520069.6117818  
SRR17520069.6117820  
SRR17520069.6117822  
SRR17520069.6117824  
SRR17520069.6117826  
SRR17520069.6118788  
SRR17520069.6124141  
SRR17520069.6124143  
SRR17520069.6124147  
SRR17520069.6124149  
SRR17520069.6124151  
SRR17520069.6124153  
SRR17520069.6124155  
SRR17520069.6124157  
SRR17520069.6124159  
SRR17520069.6124161

SRR17520069.6124163  
SRR17520069.6124165  
SRR17520069.6124167  
SRR17520069.6124169  
SRR17520069.6124171  
SRR17520069.6124173  
SRR17520069.6124175  
SRR17520069.6124177  
SRR17520069.6124179  
SRR17520069.6124181  
SRR17520069.6124185  
SRR17520069.6124187  
SRR17520069.6124189  
SRR17520069.6124191  
SRR17520069.6124193  
SRR17520069.6124199  
SRR17520069.6124201  
SRR17520069.6124203  
SRR17520069.6124205  
SRR17520069.6124207  
SRR17520069.6124209  
SRR17520069.6124211  
SRR17520069.6124213  
SRR17520069.6124215  
SRR17520069.6124217  
SRR17520069.6124219  
SRR17520069.6124221  
SRR17520069.6124223  
SRR17520069.6124225  
SRR17520069.6124227  
SRR17520069.6124229  
SRR17520069.6124231  
SRR17520069.6124233  
SRR17520069.6124235  
SRR17520069.6127098  
SRR17520069.6127100  
SRR17520069.6127102  
SRR17520069.6127104  
SRR17520069.6127106  
SRR17520069.6127108  
SRR17520069.6127110  
SRR17520069.6127112  
SRR17520069.6127114  
SRR17520069.6127116  
SRR17520069.6127119  
SRR17520069.6127121  
SRR17520069.6127123

SRR17520069.6127125  
SRR17520069.6127127  
SRR17520069.6127129  
SRR17520069.6127417  
SRR17520069.6127419  
SRR17520069.6135011  
SRR17520069.6135013  
SRR17520069.6135015  
SRR17520069.6135017  
SRR17520069.6135019  
SRR17520069.6135021  
SRR17520069.6135023  
SRR17520069.6135025  
SRR17520069.6135027  
SRR17520069.6135029  
SRR17520069.6135031  
SRR17520069.6135035  
SRR17520069.6135037  
SRR17520069.6135039  
SRR17520069.6135041  
SRR17520069.6136275  
SRR17520069.6136297  
SRR17520069.6138140  
SRR17520069.6138142  
SRR17520069.6138144  
SRR17520069.6138146  
SRR17520069.6138148  
SRR17520069.6138150  
SRR17520069.6138152  
SRR17520069.6138154  
SRR17520069.6138156  
SRR17520069.6138158  
SRR17520069.6138950  
SRR17520069.6138952  
SRR17520069.6138954  
SRR17520069.6138956  
SRR17520069.6138958  
SRR17520069.6138960  
SRR17520069.6138962  
SRR17520069.6144126  
SRR17520069.6144128  
SRR17520069.6144132  
SRR17520069.6146889  
SRR17520069.6146891  
SRR17520069.6146893  
SRR17520069.6146895  
SRR17520069.6146897



SRR17520069.6146899  
SRR17520069.6146901  
SRR17520069.6146905  
SRR17520069.6146907  
SRR17520069.6146909  
SRR17520069.6146911  
SRR17520069.6146913  
SRR17520069.6147687  
SRR17520069.6147689  
SRR17520069.6147691  
SRR17520069.6147693  
SRR17520069.6147695  
SRR17520069.6147697  
SRR17520069.6147699  
SRR17520069.6147701  
SRR17520069.6147703  
SRR17520069.6147705  
SRR17520069.6147707  
SRR17520069.6147709  
SRR17520069.6147711  
SRR17520069.6147713  
SRR17520069.6147715  
SRR17520069.6147717  
SRR17520069.6147719  
SRR17520069.6147723  
SRR17520069.6147725  
SRR17520069.6147727  
SRR17520069.6147729  
SRR17520069.6147731  
SRR17520069.6147733  
SRR17520069.6147735  
SRR17520069.6147737  
SRR17520069.6147739  
SRR17520069.6147741  
SRR17520069.6147743  
SRR17520069.6148566  
SRR17520069.6148568  
SRR17520069.6148570  
SRR17520069.6149732  
SRR17520069.6149736  
SRR17520069.6149738  
SRR17520069.6155945  
SRR17520069.6155947  
SRR17520069.6155949  
SRR17520069.6155951  
SRR17520069.6155953  
SRR17520069.6155955

SRR17520069.6155957  
SRR17520069.6155959  
SRR17520069.6155961  
SRR17520069.6155963  
SRR17520069.6155965  
SRR17520069.6155967  
SRR17520069.6155969  
SRR17520069.6155971  
SRR17520069.6155973  
SRR17520069.6155975  
SRR17520069.6155977  
SRR17520069.6155979  
SRR17520069.6155981  
SRR17520069.6155983  
SRR17520069.6155987  
SRR17520069.6155989  
SRR17520069.6155991  
SRR17520069.6155993  
SRR17520069.6155995  
SRR17520069.6155997  
SRR17520069.6155999  
SRR17520069.6156001  
SRR17520069.6156003  
SRR17520069.6156005  
SRR17520069.6156007  
SRR17520069.6156009  
SRR17520069.6156011  
SRR17520069.6156013  
SRR17520069.6156015  
SRR17520069.6156017  
SRR17520069.6156019  
SRR17520069.6162828  
SRR17520069.6162830  
SRR17520069.6162832  
SRR17520069.6162836  
SRR17520069.6162838  
SRR17520069.6162842  
SRR17520069.6162844  
SRR17520069.6164151  
SRR17520069.6164153  
SRR17520069.6164155  
SRR17520069.6164157  
SRR17520069.6164161  
SRR17520069.6164163  
SRR17520069.6164165  
SRR17520069.6164167  
SRR17520069.6164169

SRR17520069.6164171  
SRR17520069.6164173  
SRR17520069.6169733  
SRR17520069.6170523  
SRR17520069.6170592  
SRR17520069.6170594  
SRR17520069.6170596  
SRR17520069.6170598  
SRR17520069.6170600  
SRR17520069.6170602  
SRR17520069.6170604  
SRR17520069.6170606  
SRR17520069.6170608  
SRR17520069.6170610  
SRR17520069.6170612  
SRR17520069.6170614  
SRR17520069.6170616  
SRR17520069.6170618  
SRR17520069.6170620  
SRR17520069.6170622  
SRR17520069.6170624  
SRR17520069.6170626  
SRR17520069.6170628  
SRR17520069.6170630  
SRR17520069.6170632  
SRR17520069.6170634  
SRR17520069.6170636  
SRR17520069.6170638  
SRR17520069.6170640  
SRR17520069.6170642  
SRR17520069.6170644  
SRR17520069.6170646  
SRR17520069.6170648  
SRR17520069.6170650  
SRR17520069.6170652  
SRR17520069.6171244  
SRR17520069.6171246  
SRR17520069.6171248  
SRR17520069.6171250  
SRR17520069.6171252  
SRR17520069.6171254  
SRR17520069.6171256  
SRR17520069.6171258  
SRR17520069.6171260  
SRR17520069.6171262  
SRR17520069.6171264  
SRR17520069.6171266

SRR17520069.6171268  
SRR17520069.6171270  
SRR17520069.6171272  
SRR17520069.6171274  
SRR17520069.6171276  
SRR17520069.6171278  
SRR17520069.6171280  
SRR17520069.6171282  
SRR17520069.6171284  
SRR17520069.6171286  
SRR17520069.6171288  
SRR17520069.6171290  
SRR17520069.6171292  
SRR17520069.6171294  
SRR17520069.6171296  
SRR17520069.6171298  
SRR17520069.6171300  
SRR17520069.6171302  
SRR17520069.6171304  
SRR17520069.6171306  
SRR17520069.6171308  
SRR17520069.6171310  
SRR17520069.6171312  
SRR17520069.6171314  
SRR17520069.6171316  
SRR17520069.6171318  
SRR17520069.6171320  
SRR17520069.6171322  
SRR17520069.6171324  
SRR17520069.6171326  
SRR17520069.6171328  
SRR17520069.6171330  
SRR17520069.6171332  
SRR17520069.6171334  
SRR17520069.6171336  
SRR17520069.6171338  
SRR17520069.6171340  
SRR17520069.6171342  
SRR17520069.6171344  
SRR17520069.6171346  
SRR17520069.6173809  
SRR17520069.6173811  
SRR17520069.6173813  
SRR17520069.6173815  
SRR17520069.6173817  
SRR17520069.6173819  
SRR17520069.6173821

SRR17520069.6173823  
SRR17520069.6173825  
SRR17520069.6173827  
SRR17520069.6173829  
SRR17520069.6173831  
SRR17520069.6173833  
SRR17520069.6173835  
SRR17520069.6182522  
SRR17520069.6185095  
SRR17520069.6185097  
SRR17520069.6185099  
SRR17520069.6185107  
SRR17520069.6185109  
SRR17520069.6188032  
SRR17520069.6188034  
SRR17520069.6188036  
SRR17520069.6188038  
SRR17520069.6188040  
SRR17520069.6188042  
SRR17520069.6188044  
SRR17520069.6188046  
SRR17520069.6188048  
SRR17520069.6188050  
SRR17520069.6188052  
SRR17520069.6188054  
SRR17520069.6188056  
SRR17520069.6188058  
SRR17520069.6188062  
SRR17520069.6188064  
SRR17520069.6188066  
SRR17520069.6188068  
SRR17520069.6188070  
SRR17520069.6188384  
SRR17520069.6188386  
SRR17520069.6188388  
SRR17520069.6188390  
SRR17520069.6188392  
SRR17520069.6188394  
SRR17520069.6188396  
SRR17520069.6188398  
SRR17520069.6188400  
SRR17520069.6188402  
SRR17520069.6188404  
SRR17520069.6188406  
SRR17520069.6188410  
SRR17520069.6188412  
SRR17520069.6188414

SRR17520069.6188416  
SRR17520069.6188418  
SRR17520069.6188420  
SRR17520069.6188422  
SRR17520069.6188424  
SRR17520069.6188426  
SRR17520069.6188428  
SRR17520069.6188430  
SRR17520069.6188432  
SRR17520069.6188434  
SRR17520069.6188436  
SRR17520069.6188438  
SRR17520069.6188440  
SRR17520069.6188442  
SRR17520069.6188444  
SRR17520069.6188446  
SRR17520069.6188448  
SRR17520069.6188450  
SRR17520069.6188452  
SRR17520069.6188454  
SRR17520069.6188456  
SRR17520069.6188458  
SRR17520069.6188460  
SRR17520069.6189059  
SRR17520069.6189061  
SRR17520069.6190215  
SRR17520069.6190217  
SRR17520069.6190219  
SRR17520069.6190221  
SRR17520069.6190223  
SRR17520069.6190225  
SRR17520069.6190227  
SRR17520069.6190229  
SRR17520069.6191612  
SRR17520069.6191614  
SRR17520069.6191616  
SRR17520069.6191618  
SRR17520069.6191620  
SRR17520069.6191622  
SRR17520069.6191624  
SRR17520069.6191626  
SRR17520069.6191628  
SRR17520069.6191630  
SRR17520069.6191634  
SRR17520069.6192439  
SRR17520069.6194924  
SRR17520069.6194926

SRR17520069. 6194928  
SRR17520069. 6194932  
SRR17520069. 6194934  
SRR17520069. 6194936  
SRR17520069. 6194938  
SRR17520069. 6194940  
SRR17520069. 6194942  
SRR17520069. 6194944  
SRR17520069. 6198354  
SRR17520069. 6198356  
SRR17520069. 6198358  
SRR17520069. 6198362  
SRR17520069. 6198364  
SRR17520069. 6198366  
SRR17520069. 6198368  
SRR17520069. 6198370  
SRR17520069. 6198372  
SRR17520069. 6198374  
SRR17520069. 6198378  
SRR17520069. 6198380  
SRR17520069. 6198382  
SRR17520069. 6198384  
SRR17520069. 6198386  
SRR17520069. 6198388  
SRR17520069. 6198390  
SRR17520069. 6198392  
SRR17520069. 6198394  
SRR17520069. 6198396  
SRR17520069. 6198398  
SRR17520069. 6198400  
SRR17520069. 6198402  
SRR17520069. 6198404  
SRR17520069. 6198406  
SRR17520069. 6198410  
SRR17520069. 6198412  
SRR17520069. 6198414  
SRR17520069. 6198416  
SRR17520069. 6198422  
SRR17520069. 6198424  
SRR17520069. 6198426  
SRR17520069. 6198430  
SRR17520069. 6198432  
SRR17520069. 6198436  
SRR17520069. 6198438  
SRR17520069. 6198440  
SRR17520069. 6198442  
SRR17520069. 6198444

SRR17520069. 6198446  
SRR17520069. 6198448  
SRR17520069. 6198450  
SRR17520069. 6198452  
SRR17520069. 6198454  
SRR17520069. 6198456  
SRR17520069. 6198458  
SRR17520069. 6198460  
SRR17520069. 6198462  
SRR17520069. 6198464  
SRR17520069. 6198466  
SRR17520069. 6198468  
SRR17520069. 6198470  
SRR17520069. 6198472  
SRR17520069. 6198476  
SRR17520069. 6198478  
SRR17520069. 6198480  
SRR17520069. 6198482  
SRR17520069. 6198484  
SRR17520069. 6198486  
SRR17520069. 6198488  
SRR17520069. 6198490  
SRR17520069. 6198492  
SRR17520069. 6198494  
SRR17520069. 6198496  
SRR17520069. 6200287  
SRR17520069. 6200289  
SRR17520069. 6200291  
SRR17520069. 6200293  
SRR17520069. 6200295  
SRR17520069. 6200297  
SRR17520069. 6200299  
SRR17520069. 6200301  
SRR17520069. 6200303  
SRR17520069. 6200305  
SRR17520069. 6200307  
SRR17520069. 6200309  
SRR17520069. 6200311  
SRR17520069. 6200313  
SRR17520069. 6200315  
SRR17520069. 6200317  
SRR17520069. 6200319  
SRR17520069. 6200321  
SRR17520069. 6200323  
SRR17520069. 6200325  
SRR17520069. 6200327  
SRR17520069. 6200329



SRR17520069. 6200331  
SRR17520069. 6200333  
SRR17520069. 6200335  
SRR17520069. 6200337  
SRR17520069. 6200339  
SRR17520069. 6200343  
SRR17520069. 6200345  
SRR17520069. 6200347  
SRR17520069. 6200349  
SRR17520069. 6200351  
SRR17520069. 6200353  
SRR17520069. 6200355  
SRR17520069. 6200357  
SRR17520069. 6200359  
SRR17520069. 6200361  
SRR17520069. 6200363  
SRR17520069. 6200365  
SRR17520069. 6200367  
SRR17520069. 6200369  
SRR17520069. 6200371  
SRR17520069. 6200373  
SRR17520069. 6200375  
SRR17520069. 6200377  
SRR17520069. 6200379  
SRR17520069. 6200381  
SRR17520069. 6200383  
SRR17520069. 6200385  
SRR17520069. 6200387  
SRR17520069. 6200389  
SRR17520069. 6200391  
SRR17520069. 6200393  
SRR17520069. 6200397  
SRR17520069. 6200399  
SRR17520069. 6200401  
SRR17520069. 6200403  
SRR17520069. 6200405  
SRR17520069. 6200407  
SRR17520069. 6200409  
SRR17520069. 6200411  
SRR17520069. 6200413  
SRR17520069. 6200415  
SRR17520069. 6200417  
SRR17520069. 6200421  
SRR17520069. 6200425  
SRR17520069. 6200427  
SRR17520069. 6200429  
SRR17520069. 6200431

SRR17520069.6200433  
SRR17520069.6200435  
SRR17520069.6200437  
SRR17520069.6200439  
SRR17520069.6200441  
SRR17520069.6200443  
SRR17520069.6200445  
SRR17520069.6200447  
SRR17520069.6200449  
SRR17520069.6200451  
SRR17520069.6200453  
SRR17520069.6200455  
SRR17520069.6200459  
SRR17520069.6200461  
SRR17520069.6200463  
SRR17520069.6203225  
SRR17520069.6203227  
SRR17520069.6203229  
SRR17520069.6203231  
SRR17520069.6203233  
SRR17520069.6203235  
SRR17520069.6203237  
SRR17520069.6203239  
SRR17520069.6203241  
SRR17520069.6203243  
SRR17520069.6203245  
SRR17520069.6203247  
SRR17520069.6203249  
SRR17520069.6203251  
SRR17520069.6203253  
SRR17520069.6203255  
SRR17520069.6203257  
SRR17520069.6203259  
SRR17520069.6203261  
SRR17520069.6203263  
SRR17520069.6203265  
SRR17520069.6203267  
SRR17520069.6208866  
SRR17520069.6208868  
SRR17520069.6208870  
SRR17520069.6208872  
SRR17520069.6208874  
SRR17520069.6208876  
SRR17520069.6208878  
SRR17520069.6208880  
SRR17520069.6208882  
SRR17520069.6208884

SRR17520069.6208886  
SRR17520069.6208888  
SRR17520069.6208890  
SRR17520069.6208892  
SRR17520069.6208894  
SRR17520069.6208896  
SRR17520069.6208898  
SRR17520069.6208900  
SRR17520069.6208902  
SRR17520069.6208904  
SRR17520069.6208906  
SRR17520069.6208908  
SRR17520069.6208910  
SRR17520069.6208912  
SRR17520069.6208914  
SRR17520069.6208916  
SRR17520069.6208918  
SRR17520069.6209462  
SRR17520069.6209464  
SRR17520069.6209466  
SRR17520069.6209468  
SRR17520069.6210957  
SRR17520069.6210959  
SRR17520069.6210961  
SRR17520069.6210963  
SRR17520069.6210965  
SRR17520069.6210967  
SRR17520069.6210969  
SRR17520069.6210971  
SRR17520069.6210973  
SRR17520069.6210975  
SRR17520069.6210977  
SRR17520069.6210979  
SRR17520069.6210981  
SRR17520069.6210983  
SRR17520069.6210985  
SRR17520069.6210987  
SRR17520069.6210989  
SRR17520069.6210991  
SRR17520069.6210993  
SRR17520069.6210995  
SRR17520069.6210997  
SRR17520069.6210999  
SRR17520069.6211001  
SRR17520069.6219186  
SRR17520069.6220644  
SRR17520069.6220646

SRR17520069.6222462  
SRR17520069.6222464  
SRR17520069.6222466  
SRR17520069.6222468  
SRR17520069.6222470  
SRR17520069.6222472  
SRR17520069.6222474  
SRR17520069.6222476  
SRR17520069.6222478  
SRR17520069.6222480  
SRR17520069.6222482  
SRR17520069.6222484  
SRR17520069.6222486  
SRR17520069.6222488  
SRR17520069.6222490  
SRR17520069.6222492  
SRR17520069.6222494  
SRR17520069.6222496  
SRR17520069.6222498  
SRR17520069.6222500  
SRR17520069.6222502  
SRR17520069.6222504  
SRR17520069.6222506  
SRR17520069.6222508  
SRR17520069.6222510  
SRR17520069.6222512  
SRR17520069.6222514  
SRR17520069.6222516  
SRR17520069.6222518  
SRR17520069.6222520  
SRR17520069.6222522  
SRR17520069.6222524  
SRR17520069.6222526  
SRR17520069.6222528  
SRR17520069.6222530  
SRR17520069.6222532  
SRR17520069.6222534  
SRR17520069.6222536  
SRR17520069.6222538  
SRR17520069.6222540  
SRR17520069.6222542  
SRR17520069.6222544  
SRR17520069.6222548  
SRR17520069.6222550  
SRR17520069.6222552  
SRR17520069.6222554  
SRR17520069.6222556

SRR17520069.6222558  
SRR17520069.6222560  
SRR17520069.6222562  
SRR17520069.6222564  
SRR17520069.6222566  
SRR17520069.6222568  
SRR17520069.6222572  
SRR17520069.6222574  
SRR17520069.6222576  
SRR17520069.6222578  
SRR17520069.6222580  
SRR17520069.6222582  
SRR17520069.6222584  
SRR17520069.6222586  
SRR17520069.6222588  
SRR17520069.6222590  
SRR17520069.6222592  
SRR17520069.6222594  
SRR17520069.6222596  
SRR17520069.6222598  
SRR17520069.6222600  
SRR17520069.6222602  
SRR17520069.6222604  
SRR17520069.6222608  
SRR17520069.6222610  
SRR17520069.6222612  
SRR17520069.6222614  
SRR17520069.6222616  
SRR17520069.6222618  
SRR17520069.6225472  
SRR17520069.6225749  
SRR17520069.6225751  
SRR17520069.6225753  
SRR17520069.6225755  
SRR17520069.6225757  
SRR17520069.6225759  
SRR17520069.6225761  
SRR17520069.6225763  
SRR17520069.6225765  
SRR17520069.6225767  
SRR17520069.6225769  
SRR17520069.6225771  
SRR17520069.6225773  
SRR17520069.6225775  
SRR17520069.6225777  
SRR17520069.6225779  
SRR17520069.6225781

SRR17520069.6225783  
SRR17520069.6225785  
SRR17520069.6225787  
SRR17520069.6225789  
SRR17520069.6225791  
SRR17520069.6225793  
SRR17520069.6225795  
SRR17520069.6225797  
SRR17520069.6225799  
SRR17520069.6225801  
SRR17520069.6225803  
SRR17520069.6225805  
SRR17520069.6225807  
SRR17520069.6226997  
SRR17520069.6226999  
SRR17520069.6228486  
SRR17520069.6228488  
SRR17520069.6228490  
SRR17520069.6228492  
SRR17520069.6228494  
SRR17520069.6228496  
SRR17520069.6228498  
SRR17520069.6228500  
SRR17520069.6228502  
SRR17520069.6228504  
SRR17520069.6228506  
SRR17520069.6228508  
SRR17520069.6228510  
SRR17520069.6228512  
SRR17520069.6228946  
SRR17520069.6228948  
SRR17520069.6228950  
SRR17520069.6228952  
SRR17520069.6228954  
SRR17520069.6228956  
SRR17520069.6228958  
SRR17520069.6228960  
SRR17520069.6228962  
SRR17520069.6228964  
SRR17520069.6228966  
SRR17520069.6228968  
SRR17520069.6228970  
SRR17520069.6228972  
SRR17520069.6228974  
SRR17520069.6228976  
SRR17520069.6228978  
SRR17520069.6228980

SRR17520069. 6228982  
SRR17520069. 6228984  
SRR17520069. 6228986  
SRR17520069. 6228988  
SRR17520069. 6228990  
SRR17520069. 6228992  
SRR17520069. 6228994  
SRR17520069. 6228996  
SRR17520069. 6228998  
SRR17520069. 6229000  
SRR17520069. 6229002  
SRR17520069. 6232477  
SRR17520069. 6232481  
SRR17520069. 6232483  
SRR17520069. 6232487  
SRR17520069. 6232489  
SRR17520069. 6232491  
SRR17520069. 6232493  
SRR17520069. 6232495  
SRR17520069. 6232499  
SRR17520069. 6232501  
SRR17520069. 6232505  
SRR17520069. 6232507  
SRR17520069. 6232509  
SRR17520069. 6232511  
SRR17520069. 6232513  
SRR17520069. 6232515  
SRR17520069. 6232517  
SRR17520069. 6232519  
SRR17520069. 6232521  
SRR17520069. 6232523  
SRR17520069. 6232525  
SRR17520069. 6232527  
SRR17520069. 6232529  
SRR17520069. 6232531  
SRR17520069. 6232533  
SRR17520069. 6232535  
SRR17520069. 6232537  
SRR17520069. 6232539  
SRR17520069. 6232543  
SRR17520069. 6232545  
SRR17520069. 6232547  
SRR17520069. 6237034  
SRR17520069. 6237036  
SRR17520069. 6237038  
SRR17520069. 6237040  
SRR17520069. 6237042

SRR17520069. 6237048  
SRR17520069. 6237052  
SRR17520069. 6237054  
SRR17520069. 6237056  
SRR17520069. 6237058  
SRR17520069. 6237060  
SRR17520069. 6237062  
SRR17520069. 6237066  
SRR17520069. 6237068  
SRR17520069. 6237070  
SRR17520069. 6237072  
SRR17520069. 6237074  
SRR17520069. 6237076  
SRR17520069. 6237078  
SRR17520069. 6237080  
SRR17520069. 6237082  
SRR17520069. 6237086  
SRR17520069. 6237088  
SRR17520069. 6237090  
SRR17520069. 6237092  
SRR17520069. 6246965  
SRR17520069. 6248935  
SRR17520069. 6248937  
SRR17520069. 6248939  
SRR17520069. 6248941  
SRR17520069. 6248943  
SRR17520069. 6248945  
SRR17520069. 6248947  
SRR17520069. 6248949  
SRR17520069. 6248951  
SRR17520069. 6248953  
SRR17520069. 6248955  
SRR17520069. 6248957  
SRR17520069. 6248959  
SRR17520069. 6248961  
SRR17520069. 6248963  
SRR17520069. 6248965  
SRR17520069. 6248967  
SRR17520069. 6248969  
SRR17520069. 6252364  
SRR17520069. 6252366  
SRR17520069. 6252368  
SRR17520069. 6252370  
SRR17520069. 6252372  
SRR17520069. 6252374  
SRR17520069. 6252376  
SRR17520069. 6252378



SRR17520069. 6252380  
SRR17520069. 6252382  
SRR17520069. 6252384  
SRR17520069. 6252386  
SRR17520069. 6252388  
SRR17520069. 6252390  
SRR17520069. 6252392  
SRR17520069. 6252394  
SRR17520069. 6252396  
SRR17520069. 6252398  
SRR17520069. 6252400  
SRR17520069. 6252402  
SRR17520069. 6252404  
SRR17520069. 6252406  
SRR17520069. 6252408  
SRR17520069. 6252410  
SRR17520069. 6252412  
SRR17520069. 6252414  
SRR17520069. 6252416  
SRR17520069. 6252420  
SRR17520069. 6252422  
SRR17520069. 6252424  
SRR17520069. 6252426  
SRR17520069. 6252428  
SRR17520069. 6252430  
SRR17520069. 6252432  
SRR17520069. 6252434  
SRR17520069. 6252436  
SRR17520069. 6252438  
SRR17520069. 6252440  
SRR17520069. 6252442  
SRR17520069. 6252444  
SRR17520069. 6252446  
SRR17520069. 6252448  
SRR17520069. 6252450  
SRR17520069. 6252454  
SRR17520069. 6252456  
SRR17520069. 6252458  
SRR17520069. 6252460  
SRR17520069. 6252462  
SRR17520069. 6252464  
SRR17520069. 6262466  
SRR17520069. 6262468  
SRR17520069. 6262470  
SRR17520069. 6262472  
SRR17520069. 6262474  
SRR17520069. 6262476

SRR17520069.6262478  
SRR17520069.6271868  
SRR17520069.6271870  
SRR17520069.6271872  
SRR17520069.6271874  
SRR17520069.6271876  
SRR17520069.6271878  
SRR17520069.6271880  
SRR17520069.6271885  
SRR17520069.6271889  
SRR17520069.6271891  
SRR17520069.6271899  
SRR17520069.6271903  
SRR17520069.6278851  
SRR17520069.6278853  
SRR17520069.6278855  
SRR17520069.6283356  
SRR17520069.6283358  
SRR17520069.6283360  
SRR17520069.6283362  
SRR17520069.6283364  
SRR17520069.6283366  
SRR17520069.6283372  
SRR17520069.6283374  
SRR17520069.6283380  
SRR17520069.6283382  
SRR17520069.6283384  
SRR17520069.6283388  
SRR17520069.6283392  
SRR17520069.6283394  
SRR17520069.6283396  
SRR17520069.6283398  
SRR17520069.6283400  
SRR17520069.6283402  
SRR17520069.6283404  
SRR17520069.6283406  
SRR17520069.6283410  
SRR17520069.6283412  
SRR17520069.6283414  
SRR17520069.6283416  
SRR17520069.6283420  
SRR17520069.6283422  
SRR17520069.6286889  
SRR17520069.6286891  
SRR17520069.6286893  
SRR17520069.6286895  
SRR17520069.6286897

SRR17520069.6286899  
SRR17520069.6286901  
SRR17520069.6286903  
SRR17520069.6286905  
SRR17520069.6286907  
SRR17520069.6286909  
SRR17520069.6286911  
SRR17520069.6288632  
SRR17520069.6289449  
SRR17520069.6289451  
SRR17520069.6289453  
SRR17520069.6289455  
SRR17520069.6289457  
SRR17520069.6289459  
SRR17520069.6289461  
SRR17520069.6289463  
SRR17520069.6289465  
SRR17520069.6289467  
SRR17520069.6289469  
SRR17520069.6289471  
SRR17520069.6289473  
SRR17520069.6289475  
SRR17520069.6289477  
SRR17520069.6289479  
SRR17520069.6289481  
SRR17520069.6289483  
SRR17520069.6289485  
SRR17520069.6289487  
SRR17520069.6289489  
SRR17520069.6289491  
SRR17520069.6289493  
SRR17520069.6289495  
SRR17520069.6289497  
SRR17520069.6289499  
SRR17520069.6289501  
SRR17520069.6289503  
SRR17520069.6289505  
SRR17520069.6289507  
SRR17520069.6289509  
SRR17520069.6289511  
SRR17520069.6289513  
SRR17520069.6289941  
SRR17520069.6291724  
SRR17520069.6291726  
SRR17520069.6291728  
SRR17520069.6291730  
SRR17520069.6291732

SRR17520069.6291734  
SRR17520069.6291736  
SRR17520069.6291738  
SRR17520069.6291740  
SRR17520069.6291742  
SRR17520069.6291744  
SRR17520069.6291746  
SRR17520069.6291748  
SRR17520069.6291750  
SRR17520069.6291754  
SRR17520069.6291756  
SRR17520069.6291758  
SRR17520069.6291760  
SRR17520069.6291762  
SRR17520069.6291764  
SRR17520069.6291766  
SRR17520069.6291774  
SRR17520069.6291776  
SRR17520069.6294103  
SRR17520069.6296567  
SRR17520069.6296569  
SRR17520069.6296571  
SRR17520069.6296575  
SRR17520069.6296577  
SRR17520069.6296579  
SRR17520069.6296581  
SRR17520069.6296583  
SRR17520069.6296585  
SRR17520069.6296587  
SRR17520069.6296593  
SRR17520069.6296597  
SRR17520069.6296599  
SRR17520069.6298939  
SRR17520069.6298941  
SRR17520069.6298943  
SRR17520069.6298945  
SRR17520069.6298947  
SRR17520069.6298949  
SRR17520069.6298951  
SRR17520069.6298953  
SRR17520069.6298955  
SRR17520069.6298957  
SRR17520069.6298959  
SRR17520069.6298961  
SRR17520069.6298963  
SRR17520069.6298965  
SRR17520069.6298967

SRR17520069. 6298969  
SRR17520069. 6302991  
SRR17520069. 6302993  
SRR17520069. 6302995  
SRR17520069. 6302999  
SRR17520069. 6303001  
SRR17520069. 6303003  
SRR17520069. 6303005  
SRR17520069. 6303007  
SRR17520069. 6303009  
SRR17520069. 6303011  
SRR17520069. 6303013  
SRR17520069. 6303015  
SRR17520069. 6303017  
SRR17520069. 6316687  
SRR17520069. 6316689  
SRR17520069. 6323520  
SRR17520069. 6323522  
SRR17520069. 6323524  
SRR17520069. 6323526  
SRR17520069. 6323528  
SRR17520069. 6323530  
SRR17520069. 6323532  
SRR17520069. 6323534  
SRR17520069. 6323536  
SRR17520069. 6323538  
SRR17520069. 6323540  
SRR17520069. 6323542  
SRR17520069. 6323544  
SRR17520069. 6323546  
SRR17520069. 6323548  
SRR17520069. 6323550  
SRR17520069. 6323552  
SRR17520069. 6323554  
SRR17520069. 6323556  
SRR17520069. 6323558  
SRR17520069. 6323560  
SRR17520069. 6323562  
SRR17520069. 6323564  
SRR17520069. 6323566  
SRR17520069. 6323568  
SRR17520069. 6323570  
SRR17520069. 6323572  
SRR17520069. 6323574  
SRR17520069. 6323576  
SRR17520069. 6323578  
SRR17520069. 6323580

SRR17520069. 6323582  
SRR17520069. 6323584  
SRR17520069. 6323586  
SRR17520069. 6323588  
SRR17520069. 6323590  
SRR17520069. 6323592  
SRR17520069. 6323594  
SRR17520069. 6323596  
SRR17520069. 6323598  
SRR17520069. 6323602  
SRR17520069. 6323604  
SRR17520069. 6323606  
SRR17520069. 6323608  
SRR17520069. 6323610  
SRR17520069. 6323612  
SRR17520069. 6323614  
SRR17520069. 6323616  
SRR17520069. 6323618  
SRR17520069. 6339566  
SRR17520069. 6339572  
SRR17520069. 6341485  
SRR17520069. 6341487  
SRR17520069. 6341491  
SRR17520069. 6341493  
SRR17520069. 6341495  
SRR17520069. 6341497  
SRR17520069. 6341499  
SRR17520069. 6341501  
SRR17520069. 6341503  
SRR17520069. 6341505  
SRR17520069. 6341507  
SRR17520069. 6341509  
SRR17520069. 6341511  
SRR17520069. 6341513  
SRR17520069. 6341515  
SRR17520069. 6341517  
SRR17520069. 6341519  
SRR17520069. 6341521  
SRR17520069. 6341523  
SRR17520069. 6341525  
SRR17520069. 6341527  
SRR17520069. 6341529  
SRR17520069. 6341531  
SRR17520069. 6341533  
SRR17520069. 6341535  
SRR17520069. 6341537  
SRR17520069. 6341541

SRR17520069. 6341543  
SRR17520069. 6341545  
SRR17520069. 6341547  
SRR17520069. 6341549  
SRR17520069. 6341551  
SRR17520069. 6341553  
SRR17520069. 6341555  
SRR17520069. 6341557  
SRR17520069. 6341559  
SRR17520069. 6342825  
SRR17520069. 6342829  
SRR17520069. 6342831  
SRR17520069. 6342833  
SRR17520069. 6342835  
SRR17520069. 6343663  
SRR17520069. 6343665  
SRR17520069. 6343667  
SRR17520069. 6343669  
SRR17520069. 6343671  
SRR17520069. 6343673  
SRR17520069. 6343675  
SRR17520069. 6343677  
SRR17520069. 6343679  
SRR17520069. 6343681  
SRR17520069. 6343683  
SRR17520069. 6343687  
SRR17520069. 6343689  
SRR17520069. 6343691  
SRR17520069. 6343693  
SRR17520069. 6343695  
SRR17520069. 6343697  
SRR17520069. 6343699  
SRR17520069. 6343701  
SRR17520069. 6343703  
SRR17520069. 6343707  
SRR17520069. 6343709  
SRR17520069. 6343711  
SRR17520069. 6343713  
SRR17520069. 6343715  
SRR17520069. 6343717  
SRR17520069. 6343719  
SRR17520069. 6343721  
SRR17520069. 6343725  
SRR17520069. 6343727  
SRR17520069. 6349865  
SRR17520069. 6350190  
SRR17520069. 6350196

SRR17520069.6350198  
SRR17520069.6350200  
SRR17520069.6350202  
SRR17520069.6350204  
SRR17520069.6350206  
SRR17520069.6350208  
SRR17520069.6350210  
SRR17520069.6350212  
SRR17520069.6350214  
SRR17520069.6350216  
SRR17520069.6353903  
SRR17520069.6353907  
SRR17520069.6353909  
SRR17520069.6353915  
SRR17520069.6353917  
SRR17520069.6353923  
SRR17520069.6353925  
SRR17520069.6353927  
SRR17520069.6353929  
SRR17520069.6353931  
SRR17520069.6353933  
SRR17520069.6353937  
SRR17520069.6353941  
SRR17520069.6353943  
SRR17520069.6353947  
SRR17520069.6354698  
SRR17520069.6354700  
SRR17520069.6354702  
SRR17520069.6354706  
SRR17520069.6354708  
SRR17520069.6354710  
SRR17520069.6354712  
SRR17520069.6354714  
SRR17520069.6359090  
SRR17520069.6359096  
SRR17520069.6359098  
SRR17520069.6359100  
SRR17520069.6359102  
SRR17520069.6359104  
SRR17520069.6359106  
SRR17520069.6359108  
SRR17520069.6359110  
SRR17520069.6359114  
SRR17520069.6359116  
SRR17520069.6359118  
SRR17520069.6359120  
SRR17520069.6359122



SRR17520069. 6359124  
SRR17520069. 6359126  
SRR17520069. 6359128  
SRR17520069. 6359130  
SRR17520069. 6359132  
SRR17520069. 6359134  
SRR17520069. 6359136  
SRR17520069. 6359138  
SRR17520069. 6359140  
SRR17520069. 6359142  
SRR17520069. 6359146  
SRR17520069. 6359148  
SRR17520069. 6359150  
SRR17520069. 6359154  
SRR17520069. 6359156  
SRR17520069. 6359158  
SRR17520069. 6359160  
SRR17520069. 6359162  
SRR17520069. 6359164  
SRR17520069. 6359166  
SRR17520069. 6359168  
SRR17520069. 6360061  
SRR17520069. 6360063  
SRR17520069. 6360065  
SRR17520069. 6360067  
SRR17520069. 6360069  
SRR17520069. 6360071  
SRR17520069. 6360073  
SRR17520069. 6360075  
SRR17520069. 6360077  
SRR17520069. 6360079  
SRR17520069. 6368215  
SRR17520069. 6368217  
SRR17520069. 6368219  
SRR17520069. 6368221  
SRR17520069. 6368227  
SRR17520069. 6368229  
SRR17520069. 6368231  
SRR17520069. 6368233  
SRR17520069. 6368235  
SRR17520069. 6368237  
SRR17520069. 6368239  
SRR17520069. 6368241  
SRR17520069. 6368243  
SRR17520069. 6368245  
SRR17520069. 6368247  
SRR17520069. 6368249

SRR17520069. 6368251  
SRR17520069. 6368253  
SRR17520069. 6368255  
SRR17520069. 6368257  
SRR17520069. 6368259  
SRR17520069. 6368261  
SRR17520069. 6368263  
SRR17520069. 6368265  
SRR17520069. 6368267  
SRR17520069. 6368269  
SRR17520069. 6368271  
SRR17520069. 6368273  
SRR17520069. 6368275  
SRR17520069. 6368277  
SRR17520069. 6368281  
SRR17520069. 6368283  
SRR17520069. 6368285  
SRR17520069. 6368287  
SRR17520069. 6368289  
SRR17520069. 6368291  
SRR17520069. 6368293  
SRR17520069. 6368295  
SRR17520069. 6368297  
SRR17520069. 6368299  
SRR17520069. 6368301  
SRR17520069. 6375000  
SRR17520069. 6375002  
SRR17520069. 6378039  
SRR17520069. 6378041  
SRR17520069. 6378043  
SRR17520069. 6378045  
SRR17520069. 6378047  
SRR17520069. 6378049  
SRR17520069. 6378051  
SRR17520069. 6378053  
SRR17520069. 6378055  
SRR17520069. 6378059  
SRR17520069. 6378061  
SRR17520069. 6378063  
SRR17520069. 6378065  
SRR17520069. 6378067  
SRR17520069. 6378069  
SRR17520069. 6378071  
SRR17520069. 6378075  
SRR17520069. 6378077  
SRR17520069. 6378079  
SRR17520069. 6379756

SRR17520069. 6379758  
SRR17520069. 6379760  
SRR17520069. 6379762  
SRR17520069. 6379764  
SRR17520069. 6379766  
SRR17520069. 6379768  
SRR17520069. 6379770  
SRR17520069. 6379772  
SRR17520069. 6379774  
SRR17520069. 6379776  
SRR17520069. 6379778  
SRR17520069. 6379780  
SRR17520069. 6379782  
SRR17520069. 6379784  
SRR17520069. 6379786  
SRR17520069. 6379790  
SRR17520069. 6379792  
SRR17520069. 6379794  
SRR17520069. 6379796  
SRR17520069. 6379798  
SRR17520069. 6379800  
SRR17520069. 6382159  
SRR17520069. 6382161  
SRR17520069. 6382163  
SRR17520069. 6382165  
SRR17520069. 6382167  
SRR17520069. 6382169  
SRR17520069. 6382171  
SRR17520069. 6382173  
SRR17520069. 6382175  
SRR17520069. 6382177  
SRR17520069. 6382179  
SRR17520069. 6382181  
SRR17520069. 6382183  
SRR17520069. 6382185  
SRR17520069. 6382187  
SRR17520069. 6382189  
SRR17520069. 6382191  
SRR17520069. 6382193  
SRR17520069. 6382195  
SRR17520069. 6382197  
SRR17520069. 6382199  
SRR17520069. 6382201  
SRR17520069. 6382203  
SRR17520069. 6382205  
SRR17520069. 6382207  
SRR17520069. 6382209

SRR17520069. 6382211  
SRR17520069. 6382213  
SRR17520069. 6382215  
SRR17520069. 6382217  
SRR17520069. 6382219  
SRR17520069. 6382221  
SRR17520069. 6382223  
SRR17520069. 6382225  
SRR17520069. 6382227  
SRR17520069. 6382229  
SRR17520069. 6382231  
SRR17520069. 6382233  
SRR17520069. 6382235  
SRR17520069. 6382237  
SRR17520069. 6382239  
SRR17520069. 6383705  
SRR17520069. 6383707  
SRR17520069. 6383709  
SRR17520069. 6383711  
SRR17520069. 6383713  
SRR17520069. 6383715  
SRR17520069. 6383717  
SRR17520069. 6383719  
SRR17520069. 6383721  
SRR17520069. 6383723  
SRR17520069. 6383725  
SRR17520069. 6383727  
SRR17520069. 6387517  
SRR17520069. 6387740  
SRR17520069. 6387742  
SRR17520069. 6387744  
SRR17520069. 6388289  
SRR17520069. 6388291  
SRR17520069. 6388293  
SRR17520069. 6388295  
SRR17520069. 6389060  
SRR17520069. 6389062  
SRR17520069. 6389068  
SRR17520069. 6389070  
SRR17520069. 6389072  
SRR17520069. 6389074  
SRR17520069. 6389076  
SRR17520069. 6389078  
SRR17520069. 6389080  
SRR17520069. 6392325  
SRR17520069. 6392327  
SRR17520069. 6392329

SRR17520069. 6392331  
SRR17520069. 6392333  
SRR17520069. 6392335  
SRR17520069. 6392337  
SRR17520069. 6399263  
SRR17520069. 6399265  
SRR17520069. 6399267  
SRR17520069. 6399916  
SRR17520069. 6399918  
SRR17520069. 6399920  
SRR17520069. 6399922  
SRR17520069. 6399924  
SRR17520069. 6399926  
SRR17520069. 6401956  
SRR17520069. 6401958  
SRR17520069. 6401960  
SRR17520069. 6401962  
SRR17520069. 6401964  
SRR17520069. 6401966  
SRR17520069. 6401968  
SRR17520069. 6401970  
SRR17520069. 6401972  
SRR17520069. 6401974  
SRR17520069. 6401976  
SRR17520069. 6401978  
SRR17520069. 6401982  
SRR17520069. 6401984  
SRR17520069. 6401986  
SRR17520069. 6401988  
SRR17520069. 6401990  
SRR17520069. 6401992  
SRR17520069. 6401994  
SRR17520069. 6407888  
SRR17520069. 6407890  
SRR17520069. 6408019  
SRR17520069. 6408109  
SRR17520069. 6408111  
SRR17520069. 6408113  
SRR17520069. 6408115  
SRR17520069. 6408494  
SRR17520069. 6408496  
SRR17520069. 6408498  
SRR17520069. 6408500  
SRR17520069. 6408502  
SRR17520069. 6408504  
SRR17520069. 6408506  
SRR17520069. 6408508

SRR17520069.6408510  
SRR17520069.6408512  
SRR17520069.6408514  
SRR17520069.6408516  
SRR17520069.6408518  
SRR17520069.6408520  
SRR17520069.6408522  
SRR17520069.6408524  
SRR17520069.6408526  
SRR17520069.6408528  
SRR17520069.6408530  
SRR17520069.6408746  
SRR17520069.6408752  
SRR17520069.6408755  
SRR17520069.6414953  
SRR17520069.6414955  
SRR17520069.6414958  
SRR17520069.6414962  
SRR17520069.6418303  
SRR17520069.6419701  
SRR17520069.6419703  
SRR17520069.6421043  
SRR17520069.6421171  
SRR17520069.6421173  
SRR17520069.6421175  
SRR17520069.6421177  
SRR17520069.6421179  
SRR17520069.6421181  
SRR17520069.6421183  
SRR17520069.6421185  
SRR17520069.6421187  
SRR17520069.6421189  
SRR17520069.6421191  
SRR17520069.6421193  
SRR17520069.6421195  
SRR17520069.6421197  
SRR17520069.6421199  
SRR17520069.6421201  
SRR17520069.6421205  
SRR17520069.6428909  
SRR17520069.6428911  
SRR17520069.6428913  
SRR17520069.6428915  
SRR17520069.6428917  
SRR17520069.6429286  
SRR17520069.6429288  
SRR17520069.6438087

SRR17520069.6438089  
SRR17520069.6438093  
SRR17520069.6443863  
SRR17520069.6443865  
SRR17520069.6443867  
SRR17520069.6446021  
SRR17520069.6448984  
SRR17520069.6449005  
SRR17520069.6457927  
SRR17520069.6457929  
SRR17520069.6463927  
SRR17520069.6463929  
SRR17520069.6463931  
SRR17520069.6463933  
SRR17520069.6463935  
SRR17520069.6463937  
SRR17520069.6463939  
SRR17520069.6463941  
SRR17520069.6463943  
SRR17520069.6463945  
SRR17520069.6466422  
SRR17520069.6466424  
SRR17520069.6466426  
SRR17520069.6466428  
SRR17520069.6466430  
SRR17520069.6466432  
SRR17520069.6466434  
SRR17520069.6466436  
SRR17520069.6466438  
SRR17520069.6466440  
SRR17520069.6466442  
SRR17520069.6466444  
SRR17520069.6466446  
SRR17520069.6466448  
SRR17520069.6466450  
SRR17520069.6466452  
SRR17520069.6466454  
SRR17520069.6466456  
SRR17520069.6466458  
SRR17520069.6466460  
SRR17520069.6466462  
SRR17520069.6466464  
SRR17520069.6466466  
SRR17520069.6466468  
SRR17520069.6466470  
SRR17520069.6466472  
SRR17520069.6466474

SRR17520069. 6466476  
SRR17520069. 6466478  
SRR17520069. 6466480  
SRR17520069. 6466482  
SRR17520069. 6466484  
SRR17520069. 6466486  
SRR17520069. 6466488  
SRR17520069. 6466490  
SRR17520069. 6466492  
SRR17520069. 6466494  
SRR17520069. 6466496  
SRR17520069. 6466498  
SRR17520069. 6466500  
SRR17520069. 6466502  
SRR17520069. 6466504  
SRR17520069. 6466506  
SRR17520069. 6466508  
SRR17520069. 6466510  
SRR17520069. 6466512  
SRR17520069. 6466514  
SRR17520069. 6466516  
SRR17520069. 6466518  
SRR17520069. 6466520  
SRR17520069. 6466522  
SRR17520069. 6466524  
SRR17520069. 6466526  
SRR17520069. 6466528  
SRR17520069. 6466530  
SRR17520069. 6466532  
SRR17520069. 6466534  
SRR17520069. 6466536  
SRR17520069. 6466538  
SRR17520069. 6466540  
SRR17520069. 6466542  
SRR17520069. 6466544  
SRR17520069. 6466546  
SRR17520069. 6466548  
SRR17520069. 6466550  
SRR17520069. 6466552  
SRR17520069. 6466554  
SRR17520069. 6466556  
SRR17520069. 6466558  
SRR17520069. 6466560  
SRR17520069. 6466562  
SRR17520069. 6466564  
SRR17520069. 6472815  
SRR17520069. 6472817



SRR17520069. 6472821  
SRR17520069. 6472823  
SRR17520069. 6472825  
SRR17520069. 6472827  
SRR17520069. 6472829  
SRR17520069. 6472831  
SRR17520069. 6472833  
SRR17520069. 6472835  
SRR17520069. 6472837  
SRR17520069. 6472839  
SRR17520069. 6472841  
SRR17520069. 6472843  
SRR17520069. 6472845  
SRR17520069. 6472849  
SRR17520069. 6472851  
SRR17520069. 6472853  
SRR17520069. 6472855  
SRR17520069. 6472857  
SRR17520069. 6472859  
SRR17520069. 6472861  
SRR17520069. 6472863  
SRR17520069. 6472865  
SRR17520069. 6472867  
SRR17520069. 6472869  
SRR17520069. 6472871  
SRR17520069. 6472873  
SRR17520069. 6472875  
SRR17520069. 6472877  
SRR17520069. 6472879  
SRR17520069. 6472881  
SRR17520069. 6472883  
SRR17520069. 6479570  
SRR17520069. 6479572  
SRR17520069. 6479574  
SRR17520069. 6480943  
SRR17520069. 6480945  
SRR17520069. 6480947  
SRR17520069. 6480949  
SRR17520069. 6480951  
SRR17520069. 6480953  
SRR17520069. 6480955  
SRR17520069. 6480957  
SRR17520069. 6482641  
SRR17520069. 6482643  
SRR17520069. 6482645  
SRR17520069. 6482647  
SRR17520069. 6482649

SRR17520069. 6482651  
SRR17520069. 6482653  
SRR17520069. 6482655  
SRR17520069. 6482657  
SRR17520069. 6482659  
SRR17520069. 6482661  
SRR17520069. 6482663  
SRR17520069. 6482665  
SRR17520069. 6482667  
SRR17520069. 6482669  
SRR17520069. 6482671  
SRR17520069. 6482673  
SRR17520069. 6482675  
SRR17520069. 6482677  
SRR17520069. 6482679  
SRR17520069. 6482681  
SRR17520069. 6482683  
SRR17520069. 6482685  
SRR17520069. 6482687  
SRR17520069. 6482689  
SRR17520069. 6482691  
SRR17520069. 6482693  
SRR17520069. 6482695  
SRR17520069. 6482697  
SRR17520069. 6482699  
SRR17520069. 6482701  
SRR17520069. 6482703  
SRR17520069. 6482705  
SRR17520069. 6482707  
SRR17520069. 6482709  
SRR17520069. 6482711  
SRR17520069. 6482713  
SRR17520069. 6482715  
SRR17520069. 6482717  
SRR17520069. 6482719  
SRR17520069. 6482721  
SRR17520069. 6482723  
SRR17520069. 6482725  
SRR17520069. 6482727  
SRR17520069. 6482729  
SRR17520069. 6482731  
SRR17520069. 6482733  
SRR17520069. 6482735  
SRR17520069. 6482737  
SRR17520069. 6482739  
SRR17520069. 6482741  
SRR17520069. 6482743

SRR17520069. 6482745  
SRR17520069. 6482747  
SRR17520069. 6482749  
SRR17520069. 6482751  
SRR17520069. 6482753  
SRR17520069. 6482755  
SRR17520069. 6482757  
SRR17520069. 6482759  
SRR17520069. 6482761  
SRR17520069. 6482763  
SRR17520069. 6482765  
SRR17520069. 6482767  
SRR17520069. 6482769  
SRR17520069. 6482771  
SRR17520069. 6485736  
SRR17520069. 6485738  
SRR17520069. 6485740  
SRR17520069. 6485742  
SRR17520069. 6485744  
SRR17520069. 6485746  
SRR17520069. 6485748  
SRR17520069. 6485750  
SRR17520069. 6485752  
SRR17520069. 6485754  
SRR17520069. 6485756  
SRR17520069. 6485758  
SRR17520069. 6485760  
SRR17520069. 6485762  
SRR17520069. 6485764  
SRR17520069. 6485766  
SRR17520069. 6485768  
SRR17520069. 6485770  
SRR17520069. 6485772  
SRR17520069. 6485774  
SRR17520069. 6485778  
SRR17520069. 6485780  
SRR17520069. 6485782  
SRR17520069. 6485784  
SRR17520069. 6485786  
SRR17520069. 6485788  
SRR17520069. 6485790  
SRR17520069. 6485792  
SRR17520069. 6485794  
SRR17520069. 6485796  
SRR17520069. 6485800  
SRR17520069. 6485802  
SRR17520069. 6485804

SRR17520069.6485808  
SRR17520069.6485810  
SRR17520069.6485812  
SRR17520069.6499575  
SRR17520069.6499577  
SRR17520069.6499579  
SRR17520069.6499581  
SRR17520069.6499583  
SRR17520069.6499585  
SRR17520069.6505286  
SRR17520069.6505288  
SRR17520069.6505290  
SRR17520069.6505292  
SRR17520069.6505649  
SRR17520069.6508835  
SRR17520069.6508837  
SRR17520069.6508839  
SRR17520069.6508841  
SRR17520069.6508843  
SRR17520069.6510820  
SRR17520069.6510822  
SRR17520069.6510824  
SRR17520069.6510826  
SRR17520069.6510828  
SRR17520069.6511912  
SRR17520069.6517398  
SRR17520069.6517400  
SRR17520069.6517402  
SRR17520069.6517404  
SRR17520069.6517406  
SRR17520069.6517408  
SRR17520069.6517410  
SRR17520069.6517412  
SRR17520069.6517414  
SRR17520069.6517416  
SRR17520069.6517418  
SRR17520069.6517420  
SRR17520069.6517422  
SRR17520069.6518368  
SRR17520069.6518370  
SRR17520069.6525759  
SRR17520069.6527528  
SRR17520069.6527530  
SRR17520069.6527532  
SRR17520069.6527534  
SRR17520069.6527536  
SRR17520069.6527538

SRR17520069.6527540  
SRR17520069.6527542  
SRR17520069.6527544  
SRR17520069.6528705  
SRR17520069.6535190  
SRR17520069.6538599  
SRR17520069.6538601  
SRR17520069.6538603  
SRR17520069.6538605  
SRR17520069.6538607  
SRR17520069.6538609  
SRR17520069.6538611  
SRR17520069.6538613  
SRR17520069.6538615  
SRR17520069.6538617  
SRR17520069.6538621  
SRR17520069.6538623  
SRR17520069.6538627  
SRR17520069.6538631  
SRR17520069.6538633  
SRR17520069.6538635  
SRR17520069.6538637  
SRR17520069.6538639  
SRR17520069.6538641  
SRR17520069.6538643  
SRR17520069.6538645  
SRR17520069.6538647  
SRR17520069.6538649  
SRR17520069.6538651  
SRR17520069.6540333  
SRR17520069.6540335  
SRR17520069.6540337  
SRR17520069.6540339  
SRR17520069.6540341  
SRR17520069.6540343  
SRR17520069.6540345  
SRR17520069.6540347  
SRR17520069.6540349  
SRR17520069.6540351  
SRR17520069.6540353  
SRR17520069.6540355  
SRR17520069.6545515  
SRR17520069.6545517  
SRR17520069.6551424  
SRR17520069.6554108  
SRR17520069.6554142  
SRR17520069.6557153

SRR17520069.6557155  
SRR17520069.6557157  
SRR17520069.6557159  
SRR17520069.6557161  
SRR17520069.6557163  
SRR17520069.6557165  
SRR17520069.6557167  
SRR17520069.6557169  
SRR17520069.6557171  
SRR17520069.6557173  
SRR17520069.6557175  
SRR17520069.6557177  
SRR17520069.6557179  
SRR17520069.6557181  
SRR17520069.6557183  
SRR17520069.6557185  
SRR17520069.6557187  
SRR17520069.6557189  
SRR17520069.6557191  
SRR17520069.6557193  
SRR17520069.6557195  
SRR17520069.6557197  
SRR17520069.6557199  
SRR17520069.6557201  
SRR17520069.6557203  
SRR17520069.6557205  
SRR17520069.6557207  
SRR17520069.6557209  
SRR17520069.6557211  
SRR17520069.6557213  
SRR17520069.6557215  
SRR17520069.6557217  
SRR17520069.6557219  
SRR17520069.6557221  
SRR17520069.6557223  
SRR17520069.6557225  
SRR17520069.6557227  
SRR17520069.6557229  
SRR17520069.6557231  
SRR17520069.6557233  
SRR17520069.6557235  
SRR17520069.6557237  
SRR17520069.6557239  
SRR17520069.6557241  
SRR17520069.6557243  
SRR17520069.6557245  
SRR17520069.6557247

SRR17520069.6557249  
SRR17520069.6557251  
SRR17520069.6557253  
SRR17520069.6557255  
SRR17520069.6557257  
SRR17520069.6557259  
SRR17520069.6557261  
SRR17520069.6557263  
SRR17520069.6557265  
SRR17520069.6557267  
SRR17520069.6557269  
SRR17520069.6557271  
SRR17520069.6557273  
SRR17520069.6557275  
SRR17520069.6557277  
SRR17520069.6558939  
SRR17520069.6558941  
SRR17520069.6558943  
SRR17520069.6558945  
SRR17520069.6561788  
SRR17520069.6561790  
SRR17520069.6561792  
SRR17520069.6561794  
SRR17520069.6561796  
SRR17520069.6561798  
SRR17520069.6561800  
SRR17520069.6564881  
SRR17520069.6564883  
SRR17520069.6564885  
SRR17520069.6564887  
SRR17520069.6564889  
SRR17520069.6564891  
SRR17520069.6564893  
SRR17520069.6564895  
SRR17520069.6564897  
SRR17520069.6564899  
SRR17520069.6564901  
SRR17520069.6564903  
SRR17520069.6564905  
SRR17520069.6565297  
SRR17520069.6565299  
SRR17520069.6565301  
SRR17520069.6565303  
SRR17520069.6565305  
SRR17520069.6565307  
SRR17520069.6565309  
SRR17520069.6565311

SRR17520069. 6565313  
SRR17520069. 6565315  
SRR17520069. 6565317  
SRR17520069. 6565319  
SRR17520069. 6565321  
SRR17520069. 6565323  
SRR17520069. 6565325  
SRR17520069. 6565327  
SRR17520069. 6565329  
SRR17520069. 6565331  
SRR17520069. 6565333  
SRR17520069. 6565335  
SRR17520069. 6565337  
SRR17520069. 6565339  
SRR17520069. 6565341  
SRR17520069. 6565343  
SRR17520069. 6565345  
SRR17520069. 6565347  
SRR17520069. 6565349  
SRR17520069. 6565351  
SRR17520069. 6565353  
SRR17520069. 6565355  
SRR17520069. 6565357  
SRR17520069. 6565359  
SRR17520069. 6565361  
SRR17520069. 6565363  
SRR17520069. 6565365  
SRR17520069. 6565367  
SRR17520069. 6565369  
SRR17520069. 6565371  
SRR17520069. 6565373  
SRR17520069. 6565375  
SRR17520069. 6565377  
SRR17520069. 6565379  
SRR17520069. 6565381  
SRR17520069. 6565383  
SRR17520069. 6565385  
SRR17520069. 6565387  
SRR17520069. 6565389  
SRR17520069. 6565391  
SRR17520069. 6565393  
SRR17520069. 6565395  
SRR17520069. 6565397  
SRR17520069. 6565399  
SRR17520069. 6565401  
SRR17520069. 6565403  
SRR17520069. 6565405



SRR17520069. 6565407  
SRR17520069. 6565409  
SRR17520069. 6565411  
SRR17520069. 6565413  
SRR17520069. 6565415  
SRR17520069. 6565417  
SRR17520069. 6565419  
SRR17520069. 6565421  
SRR17520069. 6565423  
SRR17520069. 6565425  
SRR17520069. 6565427  
SRR17520069. 6565429  
SRR17520069. 6565431  
SRR17520069. 6573950  
SRR17520069. 6573952  
SRR17520069. 6573954  
SRR17520069. 6573956  
SRR17520069. 6573958  
SRR17520069. 6573960  
SRR17520069. 6573962  
SRR17520069. 6573964  
SRR17520069. 6573966  
SRR17520069. 6573968  
SRR17520069. 6573970  
SRR17520069. 6573972  
SRR17520069. 6573974  
SRR17520069. 6573976  
SRR17520069. 6573978  
SRR17520069. 6573980  
SRR17520069. 6573982  
SRR17520069. 6573984  
SRR17520069. 6573986  
SRR17520069. 6573988  
SRR17520069. 6573990  
SRR17520069. 6573992  
SRR17520069. 6573994  
SRR17520069. 6573996  
SRR17520069. 6573998  
SRR17520069. 6574000  
SRR17520069. 6574002  
SRR17520069. 6574004  
SRR17520069. 6574006  
SRR17520069. 6574008  
SRR17520069. 6574010  
SRR17520069. 6574012  
SRR17520069. 6574014  
SRR17520069. 6574016

SRR17520069. 6574020  
SRR17520069. 6574022  
SRR17520069. 6574024  
SRR17520069. 6574026  
SRR17520069. 6574028  
SRR17520069. 6574030  
SRR17520069. 6574032  
SRR17520069. 6574034  
SRR17520069. 6574036  
SRR17520069. 6574038  
SRR17520069. 6574040  
SRR17520069. 6574042  
SRR17520069. 6574044  
SRR17520069. 6574046  
SRR17520069. 6574050  
SRR17520069. 6574052  
SRR17520069. 6574054  
SRR17520069. 6574056  
SRR17520069. 6574058  
SRR17520069. 6574060  
SRR17520069. 6574062  
SRR17520069. 6574066  
SRR17520069. 6574068  
SRR17520069. 6574070  
SRR17520069. 6574072  
SRR17520069. 6574074  
SRR17520069. 6574076  
SRR17520069. 6574078  
SRR17520069. 6574080  
SRR17520069. 6574082  
SRR17520069. 6574084  
SRR17520069. 6574086  
SRR17520069. 6574088  
SRR17520069. 6574090  
SRR17520069. 6574092  
SRR17520069. 6574094  
SRR17520069. 6574096  
SRR17520069. 6574098  
SRR17520069. 6574100  
SRR17520069. 6574102  
SRR17520069. 6574104  
SRR17520069. 6574106  
SRR17520069. 6574108  
SRR17520069. 6574110  
SRR17520069. 6574112  
SRR17520069. 6574114  
SRR17520069. 6574118

SRR17520069.6574120  
SRR17520069.6577900  
SRR17520069.6577902  
SRR17520069.6577904  
SRR17520069.6577906  
SRR17520069.6577908  
SRR17520069.6577910  
SRR17520069.6577912  
SRR17520069.6577914  
SRR17520069.6577916  
SRR17520069.6577918  
SRR17520069.6577920  
SRR17520069.6578641  
SRR17520069.6578643  
SRR17520069.6578645  
SRR17520069.6578647  
SRR17520069.6578651  
SRR17520069.6578653  
SRR17520069.6578655  
SRR17520069.6578657  
SRR17520069.6578659  
SRR17520069.6578661  
SRR17520069.6578663  
SRR17520069.6578667  
SRR17520069.6578669  
SRR17520069.6578671  
SRR17520069.6578673  
SRR17520069.6578675  
SRR17520069.6578677  
SRR17520069.6578679  
SRR17520069.6578686  
SRR17520069.6578692  
SRR17520069.6578694  
SRR17520069.6578696  
SRR17520069.6578698  
SRR17520069.6578700  
SRR17520069.6578702  
SRR17520069.6578704  
SRR17520069.6578706  
SRR17520069.6578708  
SRR17520069.6578710  
SRR17520069.6578712  
SRR17520069.6578714  
SRR17520069.6578716  
SRR17520069.6578718  
SRR17520069.6578722  
SRR17520069.6578724

SRR17520069. 6578726  
SRR17520069. 6578728  
SRR17520069. 6578730  
SRR17520069. 6578732  
SRR17520069. 6578736  
SRR17520069. 6578738  
SRR17520069. 6578740  
SRR17520069. 6578742  
SRR17520069. 6578746  
SRR17520069. 6578748  
SRR17520069. 6578750  
SRR17520069. 6578752  
SRR17520069. 6578756  
SRR17520069. 6578758  
SRR17520069. 6578760  
SRR17520069. 6578762  
SRR17520069. 6578764  
SRR17520069. 6578766  
SRR17520069. 6578768  
SRR17520069. 6578770  
SRR17520069. 6578774  
SRR17520069. 6578776  
SRR17520069. 6578778  
SRR17520069. 6578780  
SRR17520069. 6578784  
SRR17520069. 6578790  
SRR17520069. 6578792  
SRR17520069. 6578794  
SRR17520069. 6578796  
SRR17520069. 6578800  
SRR17520069. 6578802  
SRR17520069. 6579269  
SRR17520069. 6579271  
SRR17520069. 6579273  
SRR17520069. 6579275  
SRR17520069. 6579277  
SRR17520069. 6579279  
SRR17520069. 6588605  
SRR17520069. 6588607  
SRR17520069. 6589313  
SRR17520069. 6589315  
SRR17520069. 6589317  
SRR17520069. 6589319  
SRR17520069. 6589321  
SRR17520069. 6589323  
SRR17520069. 6589325  
SRR17520069. 6589327

SRR17520069.6589329  
SRR17520069.6589331  
SRR17520069.6589333  
SRR17520069.6589335  
SRR17520069.6594626  
SRR17520069.6597155  
SRR17520069.6597157  
SRR17520069.6598054  
SRR17520069.6598057  
SRR17520069.6598059  
SRR17520069.6598061  
SRR17520069.6598063  
SRR17520069.6598067  
SRR17520069.6598069  
SRR17520069.6598071  
SRR17520069.6598073  
SRR17520069.6598075  
SRR17520069.6598077  
SRR17520069.6598079  
SRR17520069.6598081  
SRR17520069.6598083  
SRR17520069.6598085  
SRR17520069.6598087  
SRR17520069.6598089  
SRR17520069.6598091  
SRR17520069.6598093  
SRR17520069.6598095  
SRR17520069.6598101  
SRR17520069.6599743  
SRR17520069.6599745  
SRR17520069.6599747  
SRR17520069.6599749  
SRR17520069.6613090  
SRR17520069.6613092  
SRR17520069.6613094  
SRR17520069.6613096  
SRR17520069.6613098  
SRR17520069.6613100  
SRR17520069.6615100  
SRR17520069.6615102  
SRR17520069.6615104  
SRR17520069.6615106  
SRR17520069.6615108  
SRR17520069.6615110  
SRR17520069.6615112  
SRR17520069.6615114  
SRR17520069.6615116

SRR17520069.6615118  
SRR17520069.6615120  
SRR17520069.6615122  
SRR17520069.6615126  
SRR17520069.6615128  
SRR17520069.6615130  
SRR17520069.6615132  
SRR17520069.6615134  
SRR17520069.6622699  
SRR17520069.6622701  
SRR17520069.6632163  
SRR17520069.6632167  
SRR17520069.6632169  
SRR17520069.6632171  
SRR17520069.6632173  
SRR17520069.6632175  
SRR17520069.6632177  
SRR17520069.6632179  
SRR17520069.6632181  
SRR17520069.6632183  
SRR17520069.6632185  
SRR17520069.6632187  
SRR17520069.6632189  
SRR17520069.6632191  
SRR17520069.6632317  
SRR17520069.6632319  
SRR17520069.6632321  
SRR17520069.6632323  
SRR17520069.6632325  
SRR17520069.6632327  
SRR17520069.6632329  
SRR17520069.6632331  
SRR17520069.6632333  
SRR17520069.6632335  
SRR17520069.6632337  
SRR17520069.6632339  
SRR17520069.6632341  
SRR17520069.6632345  
SRR17520069.6632347  
SRR17520069.6632349  
SRR17520069.6632351  
SRR17520069.6632353  
SRR17520069.6632355  
SRR17520069.6632357  
SRR17520069.6632359  
SRR17520069.6632361  
SRR17520069.6632363

SRR17520069. 6632367  
SRR17520069. 6632369  
SRR17520069. 6632371  
SRR17520069. 6632373  
SRR17520069. 6632375  
SRR17520069. 6632377  
SRR17520069. 6632379  
SRR17520069. 6632381  
SRR17520069. 6632383  
SRR17520069. 6632385  
SRR17520069. 6632387  
SRR17520069. 6632389  
SRR17520069. 6632391  
SRR17520069. 6632393  
SRR17520069. 6632397  
SRR17520069. 6632399  
SRR17520069. 6634451  
SRR17520069. 6634453  
SRR17520069. 6634455  
SRR17520069. 6634457  
SRR17520069. 6634459  
SRR17520069. 6634461  
SRR17520069. 6634463  
SRR17520069. 6634465  
SRR17520069. 6634467  
SRR17520069. 6634469  
SRR17520069. 6634471  
SRR17520069. 6634473  
SRR17520069. 6634475  
SRR17520069. 6634477  
SRR17520069. 6634479  
SRR17520069. 6634481  
SRR17520069. 6634483  
SRR17520069. 6634485  
SRR17520069. 6636042  
SRR17520069. 6636044  
SRR17520069. 6636046  
SRR17520069. 6636048  
SRR17520069. 6636050  
SRR17520069. 6636052  
SRR17520069. 6636054  
SRR17520069. 6636056  
SRR17520069. 6636058  
SRR17520069. 6636060  
SRR17520069. 6636062  
SRR17520069. 6636064  
SRR17520069. 6636066

SRR17520069. 6636068  
SRR17520069. 6636070  
SRR17520069. 6636072  
SRR17520069. 6636074  
SRR17520069. 6636076  
SRR17520069. 6636078  
SRR17520069. 6636080  
SRR17520069. 6636082  
SRR17520069. 6636084  
SRR17520069. 6636086  
SRR17520069. 6636088  
SRR17520069. 6636090  
SRR17520069. 6636092  
SRR17520069. 6636094  
SRR17520069. 6636096  
SRR17520069. 6636098  
SRR17520069. 6636100  
SRR17520069. 6636102  
SRR17520069. 6636104  
SRR17520069. 6636106  
SRR17520069. 6636108  
SRR17520069. 6636110  
SRR17520069. 6636112  
SRR17520069. 6636114  
SRR17520069. 6636116  
SRR17520069. 6636118  
SRR17520069. 6636120  
SRR17520069. 6636122  
SRR17520069. 6636124  
SRR17520069. 6636126  
SRR17520069. 6636128  
SRR17520069. 6636130  
SRR17520069. 6636132  
SRR17520069. 6636134  
SRR17520069. 6636136  
SRR17520069. 6636138  
SRR17520069. 6636140  
SRR17520069. 6636142  
SRR17520069. 6638329  
SRR17520069. 6638331  
SRR17520069. 6640581  
SRR17520069. 6640583  
SRR17520069. 6640585  
SRR17520069. 6640587  
SRR17520069. 6640589  
SRR17520069. 6640591  
SRR17520069. 6640593



SRR17520069.6640595  
SRR17520069.6640597  
SRR17520069.6640599  
SRR17520069.6640601  
SRR17520069.6640603  
SRR17520069.6640605  
SRR17520069.6640607  
SRR17520069.6640609  
SRR17520069.6640611  
SRR17520069.6640613  
SRR17520069.6640615  
SRR17520069.6640617  
SRR17520069.6640619  
SRR17520069.6640621  
SRR17520069.6640623  
SRR17520069.6640625  
SRR17520069.6640627  
SRR17520069.6640629  
SRR17520069.6640631  
SRR17520069.6640633  
SRR17520069.6640635  
SRR17520069.6640637  
SRR17520069.6640639  
SRR17520069.6643610  
SRR17520069.6643612  
SRR17520069.6643614  
SRR17520069.6643616  
SRR17520069.6643618  
SRR17520069.6643620  
SRR17520069.6643622  
SRR17520069.6643624  
SRR17520069.6643626  
SRR17520069.6643628  
SRR17520069.6643630  
SRR17520069.6643632  
SRR17520069.6643634  
SRR17520069.6643638  
SRR17520069.6643640  
SRR17520069.6643642  
SRR17520069.6643644  
SRR17520069.6643646  
SRR17520069.6643648  
SRR17520069.6643650  
SRR17520069.6643654  
SRR17520069.6643656  
SRR17520069.6643658  
SRR17520069.6643660

SRR17520069.6643662  
SRR17520069.6643664  
SRR17520069.6643666  
SRR17520069.6643668  
SRR17520069.6643670  
SRR17520069.6643672  
SRR17520069.6643674  
SRR17520069.6643676  
SRR17520069.6644947  
SRR17520069.6644949  
SRR17520069.6644953  
SRR17520069.6644957  
SRR17520069.6644959  
SRR17520069.6644961  
SRR17520069.6644963  
SRR17520069.6644965  
SRR17520069.6644967  
SRR17520069.6644969  
SRR17520069.6644971  
SRR17520069.6644973  
SRR17520069.6644977  
SRR17520069.6644979  
SRR17520069.6644981  
SRR17520069.6644983  
SRR17520069.6644985  
SRR17520069.6644987  
SRR17520069.6644989  
SRR17520069.6644991  
SRR17520069.6646805  
SRR17520069.6646807  
SRR17520069.6646809  
SRR17520069.6646811  
SRR17520069.6648819  
SRR17520069.6648821  
SRR17520069.6648823  
SRR17520069.6648825  
SRR17520069.6648827  
SRR17520069.6648829  
SRR17520069.6648831  
SRR17520069.6648833  
SRR17520069.6648835  
SRR17520069.6648837  
SRR17520069.6648839  
SRR17520069.6648841  
SRR17520069.6648843  
SRR17520069.6648845  
SRR17520069.6648847

SRR17520069. 6648849  
SRR17520069. 6648851  
SRR17520069. 6648853  
SRR17520069. 6648855  
SRR17520069. 6648857  
SRR17520069. 6648859  
SRR17520069. 6648861  
SRR17520069. 6648863  
SRR17520069. 6648865  
SRR17520069. 6648867  
SRR17520069. 6648869  
SRR17520069. 6648871  
SRR17520069. 6648873  
SRR17520069. 6648875  
SRR17520069. 6648877  
SRR17520069. 6648879  
SRR17520069. 6648881  
SRR17520069. 6648883  
SRR17520069. 6648887  
SRR17520069. 6648889  
SRR17520069. 6648891  
SRR17520069. 6648893  
SRR17520069. 6648895  
SRR17520069. 6648897  
SRR17520069. 6657669  
SRR17520069. 6657671  
SRR17520069. 6657673  
SRR17520069. 6657675  
SRR17520069. 6657677  
SRR17520069. 6657679  
SRR17520069. 6657681  
SRR17520069. 6657683  
SRR17520069. 6657685  
SRR17520069. 6657687  
SRR17520069. 6657689  
SRR17520069. 6657691  
SRR17520069. 6657693  
SRR17520069. 6657695  
SRR17520069. 6657697  
SRR17520069. 6657699  
SRR17520069. 6657701  
SRR17520069. 6657703  
SRR17520069. 6657707  
SRR17520069. 6657709  
SRR17520069. 6657711  
SRR17520069. 6657713  
SRR17520069. 6657715

SRR17520069. 6657717  
SRR17520069. 6657719  
SRR17520069. 6657721  
SRR17520069. 6657723  
SRR17520069. 6657725  
SRR17520069. 6657727  
SRR17520069. 6657731  
SRR17520069. 6657733  
SRR17520069. 6657735  
SRR17520069. 6657737  
SRR17520069. 6657739  
SRR17520069. 6657741  
SRR17520069. 6657743  
SRR17520069. 6657745  
SRR17520069. 6657747  
SRR17520069. 6657749  
SRR17520069. 6657751  
SRR17520069. 6657753  
SRR17520069. 6657755  
SRR17520069. 6657757  
SRR17520069. 6657759  
SRR17520069. 6657761  
SRR17520069. 6657763  
SRR17520069. 6657765  
SRR17520069. 6657767  
SRR17520069. 6657769  
SRR17520069. 6657771  
SRR17520069. 6659488  
SRR17520069. 6660074  
SRR17520069. 6660076  
SRR17520069. 6660078  
SRR17520069. 6660080  
SRR17520069. 6660082  
SRR17520069. 6660084  
SRR17520069. 6665943  
SRR17520069. 6665945  
SRR17520069. 6665947  
SRR17520069. 6665949  
SRR17520069. 6665951  
SRR17520069. 6665953  
SRR17520069. 6665955  
SRR17520069. 6665957  
SRR17520069. 6665959  
SRR17520069. 6665961  
SRR17520069. 6665963  
SRR17520069. 6665965  
SRR17520069. 6665967

SRR17520069. 6665969  
SRR17520069. 6665971  
SRR17520069. 6665973  
SRR17520069. 6665975  
SRR17520069. 6665977  
SRR17520069. 6665979  
SRR17520069. 6665981  
SRR17520069. 6665983  
SRR17520069. 6665985  
SRR17520069. 6665987  
SRR17520069. 6665989  
SRR17520069. 6665991  
SRR17520069. 6665993  
SRR17520069. 6665995  
SRR17520069. 6665997  
SRR17520069. 6665999  
SRR17520069. 6666001  
SRR17520069. 6666003  
SRR17520069. 6666005  
SRR17520069. 6666007  
SRR17520069. 6666009  
SRR17520069. 6666011  
SRR17520069. 6666013  
SRR17520069. 6666019  
SRR17520069. 6666025  
SRR17520069. 6666033  
SRR17520069. 6666039  
SRR17520069. 6666041  
SRR17520069. 6666043  
SRR17520069. 6666049  
SRR17520069. 6666067  
SRR17520069. 6666069  
SRR17520069. 6666071  
SRR17520069. 6666077  
SRR17520069. 6666079  
SRR17520069. 6666083  
SRR17520069. 6668158  
SRR17520069. 6668164  
SRR17520069. 6668186  
SRR17520069. 6668196  
SRR17520069. 6668208  
SRR17520069. 6672888  
SRR17520069. 6672890  
SRR17520069. 6672892  
SRR17520069. 6672894  
SRR17520069. 6672896  
SRR17520069. 6672900

SRR17520069. 6672902  
SRR17520069. 6672904  
SRR17520069. 6672906  
SRR17520069. 6672908  
SRR17520069. 6672910  
SRR17520069. 6672912  
SRR17520069. 6672914  
SRR17520069. 6672916  
SRR17520069. 6672920  
SRR17520069. 6672922  
SRR17520069. 6677503  
SRR17520069. 6677505  
SRR17520069. 6677507  
SRR17520069. 6678574  
SRR17520069. 6679342  
SRR17520069. 6679346  
SRR17520069. 6685401  
SRR17520069. 6685421  
SRR17520069. 6685423  
SRR17520069. 6685425  
SRR17520069. 6685427  
SRR17520069. 6685830  
SRR17520069. 6685832  
SRR17520069. 6685834  
SRR17520069. 6685836  
SRR17520069. 6685838  
SRR17520069. 6685840  
SRR17520069. 6685842  
SRR17520069. 6685844  
SRR17520069. 6685846  
SRR17520069. 6685850  
SRR17520069. 6685852  
SRR17520069. 6685854  
SRR17520069. 6685856  
SRR17520069. 6685858  
SRR17520069. 6685860  
SRR17520069. 6685862  
SRR17520069. 6685864  
SRR17520069. 6685866  
SRR17520069. 6685868  
SRR17520069. 6685870  
SRR17520069. 6685872  
SRR17520069. 6685874  
SRR17520069. 6685876  
SRR17520069. 6685878  
SRR17520069. 6686536  
SRR17520069. 6689404

SRR17520069.6689757  
SRR17520069.6689759  
SRR17520069.6689761  
SRR17520069.6689763  
SRR17520069.6689765  
SRR17520069.6691489  
SRR17520069.6691491  
SRR17520069.6691493  
SRR17520069.6691495  
SRR17520069.6691497  
SRR17520069.6691499  
SRR17520069.6691501  
SRR17520069.6691503  
SRR17520069.6691505  
SRR17520069.6691507  
SRR17520069.6691509  
SRR17520069.6691511  
SRR17520069.6700651  
SRR17520069.6700653  
SRR17520069.6700655  
SRR17520069.6700657  
SRR17520069.6700659  
SRR17520069.6701430  
SRR17520069.6701432  
SRR17520069.6701434  
SRR17520069.6701438  
SRR17520069.6701440  
SRR17520069.6701442  
SRR17520069.6701444  
SRR17520069.6701446  
SRR17520069.6701448  
SRR17520069.6701450  
SRR17520069.6701454  
SRR17520069.6701456  
SRR17520069.6701458  
SRR17520069.6701460  
SRR17520069.6701462  
SRR17520069.6701464  
SRR17520069.6701466  
SRR17520069.6701468  
SRR17520069.6701470  
SRR17520069.6701472  
SRR17520069.6701474  
SRR17520069.6701476  
SRR17520069.6701478  
SRR17520069.6701480  
SRR17520069.6701482

SRR17520069.6701484  
SRR17520069.6701486  
SRR17520069.6701490  
SRR17520069.6701492  
SRR17520069.6701494  
SRR17520069.6701498  
SRR17520069.6701500  
SRR17520069.6701502  
SRR17520069.6701504  
SRR17520069.6704009  
SRR17520069.6710152  
SRR17520069.6710154  
SRR17520069.6710156  
SRR17520069.6710158  
SRR17520069.6710160  
SRR17520069.6711902  
SRR17520069.6711904  
SRR17520069.6712702  
SRR17520069.6712704  
SRR17520069.6712706  
SRR17520069.6712708  
SRR17520069.6712710  
SRR17520069.6712714  
SRR17520069.6712716  
SRR17520069.6712718  
SRR17520069.6712720  
SRR17520069.6712722  
SRR17520069.6719209  
SRR17520069.6721590  
SRR17520069.6721592  
SRR17520069.6721594  
SRR17520069.6721596  
SRR17520069.6721598  
SRR17520069.6721600  
SRR17520069.6721602  
SRR17520069.6721604  
SRR17520069.6721606  
SRR17520069.6721608  
SRR17520069.6721610  
SRR17520069.6721612  
SRR17520069.6730185  
SRR17520069.6730187  
SRR17520069.6730191  
SRR17520069.6730193  
SRR17520069.6730195  
SRR17520069.6744181  
SRR17520069.6744510



SRR17520069. 6744512  
SRR17520069. 6744514  
SRR17520069. 6744516  
SRR17520069. 6744518  
SRR17520069. 6744522  
SRR17520069. 6744524  
SRR17520069. 6744528  
SRR17520069. 6744530  
SRR17520069. 6744532  
SRR17520069. 6744534  
SRR17520069. 6744536  
SRR17520069. 6744538  
SRR17520069. 6744540  
SRR17520069. 6744542  
SRR17520069. 6744544  
SRR17520069. 6744546  
SRR17520069. 6744548  
SRR17520069. 6744550  
SRR17520069. 6744552  
SRR17520069. 6744554  
SRR17520069. 6744556  
SRR17520069. 6744558  
SRR17520069. 6744560  
SRR17520069. 6744562  
SRR17520069. 6744564  
SRR17520069. 6744566  
SRR17520069. 6744568  
SRR17520069. 6744570  
SRR17520069. 6744572  
SRR17520069. 6744574  
SRR17520069. 6744576  
SRR17520069. 6744578  
SRR17520069. 6744580  
SRR17520069. 6744582  
SRR17520069. 6744584  
SRR17520069. 6744586  
SRR17520069. 6752370  
SRR17520069. 6752372  
SRR17520069. 6752374  
SRR17520069. 6752376  
SRR17520069. 6752378  
SRR17520069. 6752380  
SRR17520069. 6762428  
SRR17520069. 6762430  
SRR17520069. 6766301  
SRR17520069. 6768526  
SRR17520069. 6768528

SRR17520069. 6768530  
SRR17520069. 6768532  
SRR17520069. 6768534  
SRR17520069. 6768536  
SRR17520069. 6768538  
SRR17520069. 6768540  
SRR17520069. 6768542  
SRR17520069. 6768544  
SRR17520069. 6768546  
SRR17520069. 6768548  
SRR17520069. 6768550  
SRR17520069. 6768552  
SRR17520069. 6768554  
SRR17520069. 6768556  
SRR17520069. 6768558  
SRR17520069. 6768560  
SRR17520069. 6768562  
SRR17520069. 6768564  
SRR17520069. 6768566  
SRR17520069. 6768568  
SRR17520069. 6768570  
SRR17520069. 6768572  
SRR17520069. 6768574  
SRR17520069. 6768576  
SRR17520069. 6768578  
SRR17520069. 6768580  
SRR17520069. 6768582  
SRR17520069. 6768584  
SRR17520069. 6768586  
SRR17520069. 6768588  
SRR17520069. 6768590  
SRR17520069. 6768592  
SRR17520069. 6768594  
SRR17520069. 6768596  
SRR17520069. 6768598  
SRR17520069. 6768600  
SRR17520069. 6768602  
SRR17520069. 6768604  
SRR17520069. 6768606  
SRR17520069. 6768608  
SRR17520069. 6768610  
SRR17520069. 6768612  
SRR17520069. 6768614  
SRR17520069. 6768616  
SRR17520069. 6768618  
SRR17520069. 6768620  
SRR17520069. 6768622

SRR17520069. 6768624  
SRR17520069. 6768626  
SRR17520069. 6768628  
SRR17520069. 6768630  
SRR17520069. 6768632  
SRR17520069. 6768634  
SRR17520069. 6768636  
SRR17520069. 6768638  
SRR17520069. 6768640  
SRR17520069. 6768642  
SRR17520069. 6768644  
SRR17520069. 6768646  
SRR17520069. 6768648  
SRR17520069. 6768650  
SRR17520069. 6768652  
SRR17520069. 6768654  
SRR17520069. 6768656  
SRR17520069. 6768658  
SRR17520069. 6768660  
SRR17520069. 6768662  
SRR17520069. 6768664  
SRR17520069. 6768666  
SRR17520069. 6768668  
SRR17520069. 6768670  
SRR17520069. 6768672  
SRR17520069. 6768674  
SRR17520069. 6768676  
SRR17520069. 6768678  
SRR17520069. 6768680  
SRR17520069. 6768682  
SRR17520069. 6768684  
SRR17520069. 6768686  
SRR17520069. 6768688  
SRR17520069. 6768690  
SRR17520069. 6768692  
SRR17520069. 6768694  
SRR17520069. 6768696  
SRR17520069. 6768698  
SRR17520069. 6768700  
SRR17520069. 6768702  
SRR17520069. 6768704  
SRR17520069. 6768706  
SRR17520069. 6768708  
SRR17520069. 6768710  
SRR17520069. 6768712  
SRR17520069. 6768714  
SRR17520069. 6768716

SRR17520069. 6768718  
SRR17520069. 6768720  
SRR17520069. 6768722  
SRR17520069. 6768724  
SRR17520069. 6768726  
SRR17520069. 6768728  
SRR17520069. 6768730  
SRR17520069. 6768732  
SRR17520069. 6768734  
SRR17520069. 6768736  
SRR17520069. 6768738  
SRR17520069. 6768742  
SRR17520069. 6768744  
SRR17520069. 6768746  
SRR17520069. 6768748  
SRR17520069. 6768750  
SRR17520069. 6768752  
SRR17520069. 6768754  
SRR17520069. 6768756  
SRR17520069. 6768758  
SRR17520069. 6768760  
SRR17520069. 6768762  
SRR17520069. 6768764  
SRR17520069. 6768766  
SRR17520069. 6768768  
SRR17520069. 6768770  
SRR17520069. 6768772  
SRR17520069. 6768774  
SRR17520069. 6768776  
SRR17520069. 6768778  
SRR17520069. 6768780  
SRR17520069. 6780208  
SRR17520069. 6780212  
SRR17520069. 6780322  
SRR17520069. 6780324  
SRR17520069. 6780326  
SRR17520069. 6780328  
SRR17520069. 6780330  
SRR17520069. 6780332  
SRR17520069. 6780334  
SRR17520069. 6780336  
SRR17520069. 6780338  
SRR17520069. 6780340  
SRR17520069. 6780342  
SRR17520069. 6780344  
SRR17520069. 6780346  
SRR17520069. 6780348

SRR17520069.6780350  
SRR17520069.6780352  
SRR17520069.6780354  
SRR17520069.6780356  
SRR17520069.6780358  
SRR17520069.6780360  
SRR17520069.6780362  
SRR17520069.6780364  
SRR17520069.6780366  
SRR17520069.6780368  
SRR17520069.6780370  
SRR17520069.6780372  
SRR17520069.6780374  
SRR17520069.6780376  
SRR17520069.6780378  
SRR17520069.6780380  
SRR17520069.6780382  
SRR17520069.6780384  
SRR17520069.6780386  
SRR17520069.6780388  
SRR17520069.6780390  
SRR17520069.6780392  
SRR17520069.6780394  
SRR17520069.6780396  
SRR17520069.6780398  
SRR17520069.6780400  
SRR17520069.6781818  
SRR17520069.6783036  
SRR17520069.6783038  
SRR17520069.6783040  
SRR17520069.6783042  
SRR17520069.6784325  
SRR17520069.6784329  
SRR17520069.6784331  
SRR17520069.6784333  
SRR17520069.6784335  
SRR17520069.6784337  
SRR17520069.6784339  
SRR17520069.6784341  
SRR17520069.6784343  
SRR17520069.6784345  
SRR17520069.6785051  
SRR17520069.6785053  
SRR17520069.6785055  
SRR17520069.6785057  
SRR17520069.6785059  
SRR17520069.6787708

SRR17520069.6787710  
SRR17520069.6787712  
SRR17520069.6787714  
SRR17520069.6787716  
SRR17520069.6787718  
SRR17520069.6787720  
SRR17520069.6787722  
SRR17520069.6787724  
SRR17520069.6787726  
SRR17520069.6787728  
SRR17520069.6787730  
SRR17520069.6787732  
SRR17520069.6787734  
SRR17520069.6787736  
SRR17520069.6787738  
SRR17520069.6787740  
SRR17520069.6787742  
SRR17520069.6787744  
SRR17520069.6787746  
SRR17520069.6787748  
SRR17520069.6787750  
SRR17520069.6792165  
SRR17520069.6792167  
SRR17520069.6792169  
SRR17520069.6792877  
SRR17520069.6792879  
SRR17520069.6792881  
SRR17520069.6792883  
SRR17520069.6792885  
SRR17520069.6792887  
SRR17520069.6792889  
SRR17520069.6792891  
SRR17520069.6792893  
SRR17520069.6792895  
SRR17520069.6795694  
SRR17520069.6795696  
SRR17520069.6795698  
SRR17520069.6795700  
SRR17520069.6795702  
SRR17520069.6795704  
SRR17520069.6795706  
SRR17520069.6795710  
SRR17520069.6795712  
SRR17520069.6795714  
SRR17520069.6795716  
SRR17520069.6795718  
SRR17520069.6795720

SRR17520069.6795722  
SRR17520069.6795724  
SRR17520069.6795726  
SRR17520069.6795728  
SRR17520069.6795730  
SRR17520069.6795732  
SRR17520069.6795734  
SRR17520069.6795736  
SRR17520069.6795738  
SRR17520069.6795740  
SRR17520069.6795742  
SRR17520069.6795744  
SRR17520069.6795746  
SRR17520069.6795748  
SRR17520069.6795750  
SRR17520069.6795752  
SRR17520069.6795754  
SRR17520069.6795756  
SRR17520069.6795758  
SRR17520069.6795760  
SRR17520069.6795762  
SRR17520069.6795764  
SRR17520069.6795766  
SRR17520069.6801172  
SRR17520069.6801174  
SRR17520069.6801176  
SRR17520069.6801178  
SRR17520069.6801180  
SRR17520069.6801182  
SRR17520069.6801184  
SRR17520069.6801186  
SRR17520069.6801188  
SRR17520069.6801190  
SRR17520069.6801192  
SRR17520069.6801194  
SRR17520069.6801196  
SRR17520069.6801198  
SRR17520069.6801200  
SRR17520069.6801202  
SRR17520069.6801204  
SRR17520069.6801206  
SRR17520069.6801208  
SRR17520069.6801210  
SRR17520069.6801212  
SRR17520069.6801214  
SRR17520069.6801216  
SRR17520069.6801218

SRR17520069.6801220  
SRR17520069.6801222  
SRR17520069.6801224  
SRR17520069.6801226  
SRR17520069.6801228  
SRR17520069.6801230  
SRR17520069.6801232  
SRR17520069.6801234  
SRR17520069.6801236  
SRR17520069.6801238  
SRR17520069.6801240  
SRR17520069.6801242  
SRR17520069.6801244  
SRR17520069.6801246  
SRR17520069.6801248  
SRR17520069.6801250  
SRR17520069.6801252  
SRR17520069.6801254  
SRR17520069.6801256  
SRR17520069.6801258  
SRR17520069.6801260  
SRR17520069.6801262  
SRR17520069.6801264  
SRR17520069.6810397  
SRR17520069.6810399  
SRR17520069.6810401  
SRR17520069.6810403  
SRR17520069.6810405  
SRR17520069.6810407  
SRR17520069.6810409  
SRR17520069.6810411  
SRR17520069.6810413  
SRR17520069.6810415  
SRR17520069.6810417  
SRR17520069.6810419  
SRR17520069.6810667  
SRR17520069.6810669  
SRR17520069.6810671  
SRR17520069.6810673  
SRR17520069.6810675  
SRR17520069.6810677  
SRR17520069.6810679  
SRR17520069.6810681  
SRR17520069.6810683  
SRR17520069.6810685  
SRR17520069.6810687  
SRR17520069.6810689



SRR17520069.6810691  
SRR17520069.6810693  
SRR17520069.6810695  
SRR17520069.6810697  
SRR17520069.6810699  
SRR17520069.6810701  
SRR17520069.6810703  
SRR17520069.6810705  
SRR17520069.6810707  
SRR17520069.6810709  
SRR17520069.6810711  
SRR17520069.6810713  
SRR17520069.6810715  
SRR17520069.6810717  
SRR17520069.6810719  
SRR17520069.6810721  
SRR17520069.6810723  
SRR17520069.6810725  
SRR17520069.6810727  
SRR17520069.6810729  
SRR17520069.6810731  
SRR17520069.6810733  
SRR17520069.6810735  
SRR17520069.6810739  
SRR17520069.6810741  
SRR17520069.6810743  
SRR17520069.6810745  
SRR17520069.6810747  
SRR17520069.6810749  
SRR17520069.6810751  
SRR17520069.6810753  
SRR17520069.6810755  
SRR17520069.6812318  
SRR17520069.6812320  
SRR17520069.6812322  
SRR17520069.6812324  
SRR17520069.6812326  
SRR17520069.6812328  
SRR17520069.6812332  
SRR17520069.6812334  
SRR17520069.6812336  
SRR17520069.6812338  
SRR17520069.6812340  
SRR17520069.6812342  
SRR17520069.6812344  
SRR17520069.6812346  
SRR17520069.6812348

SRR17520069.6812350  
SRR17520069.6812352  
SRR17520069.6812354  
SRR17520069.6812356  
SRR17520069.6812358  
SRR17520069.6812360  
SRR17520069.6812362  
SRR17520069.6812364  
SRR17520069.6812366  
SRR17520069.6812368  
SRR17520069.6812370  
SRR17520069.6812372  
SRR17520069.6812374  
SRR17520069.6812376  
SRR17520069.6812378  
SRR17520069.6812380  
SRR17520069.6812382  
SRR17520069.6812384  
SRR17520069.6812386  
SRR17520069.6812388  
SRR17520069.6812390  
SRR17520069.6812392  
SRR17520069.6812394  
SRR17520069.6812396  
SRR17520069.6812398  
SRR17520069.6812400  
SRR17520069.6812402  
SRR17520069.6812404  
SRR17520069.6812406  
SRR17520069.6812408  
SRR17520069.6812410  
SRR17520069.6812412  
SRR17520069.6812414  
SRR17520069.6812416  
SRR17520069.6812418  
SRR17520069.6812420  
SRR17520069.6812422  
SRR17520069.6812424  
SRR17520069.6812426  
SRR17520069.6812428  
SRR17520069.6812430  
SRR17520069.6812432  
SRR17520069.6812434  
SRR17520069.6812436  
SRR17520069.6812438  
SRR17520069.6812440  
SRR17520069.6812442

SRR17520069.6812444  
SRR17520069.6812446  
SRR17520069.6812448  
SRR17520069.6812450  
SRR17520069.6812452  
SRR17520069.6812454  
SRR17520069.6812456  
SRR17520069.6820170  
SRR17520069.6820172  
SRR17520069.6820597  
SRR17520069.6820599  
SRR17520069.6820601  
SRR17520069.6820603  
SRR17520069.6820605  
SRR17520069.6821139  
SRR17520069.6821141  
SRR17520069.6821143  
SRR17520069.6821145  
SRR17520069.6821149  
SRR17520069.6821151  
SRR17520069.6821153  
SRR17520069.6821155  
SRR17520069.6821157  
SRR17520069.6821159  
SRR17520069.6821161  
SRR17520069.6821165  
SRR17520069.6821169  
SRR17520069.6821171  
SRR17520069.6821173  
SRR17520069.6821175  
SRR17520069.6821177  
SRR17520069.6821179  
SRR17520069.6821181  
SRR17520069.6821183  
SRR17520069.6821185  
SRR17520069.6821187  
SRR17520069.6821189  
SRR17520069.6821191  
SRR17520069.6821193  
SRR17520069.6821195  
SRR17520069.6821197  
SRR17520069.6821199  
SRR17520069.6821201  
SRR17520069.6821203  
SRR17520069.6821205  
SRR17520069.6821207  
SRR17520069.6821209

SRR17520069.6821211  
SRR17520069.6821213  
SRR17520069.6821215  
SRR17520069.6821217  
SRR17520069.6821219  
SRR17520069.6821221  
SRR17520069.6821349  
SRR17520069.6821351  
SRR17520069.6821353  
SRR17520069.6821355  
SRR17520069.6821357  
SRR17520069.6821359  
SRR17520069.6821361  
SRR17520069.6824867  
SRR17520069.6824869  
SRR17520069.6824871  
SRR17520069.6824873  
SRR17520069.6824875  
SRR17520069.6824877  
SRR17520069.6824879  
SRR17520069.6824881  
SRR17520069.6824883  
SRR17520069.6824885  
SRR17520069.6824887  
SRR17520069.6824889  
SRR17520069.6824891  
SRR17520069.6824893  
SRR17520069.6824895  
SRR17520069.6824897  
SRR17520069.6824899  
SRR17520069.6824901  
SRR17520069.6824903  
SRR17520069.6824905  
SRR17520069.6824907  
SRR17520069.6826078  
SRR17520069.6835682  
SRR17520069.6838797  
SRR17520069.6838799  
SRR17520069.6844561  
SRR17520069.6844563  
SRR17520069.6844565  
SRR17520069.6844567  
SRR17520069.6844569  
SRR17520069.6844571  
SRR17520069.6844573  
SRR17520069.6844575  
SRR17520069.6844577

SRR17520069.6844579  
SRR17520069.6844581  
SRR17520069.6844585  
SRR17520069.6844587  
SRR17520069.6844589  
SRR17520069.6844591  
SRR17520069.6844593  
SRR17520069.6844595  
SRR17520069.6844597  
SRR17520069.6844599  
SRR17520069.6844601  
SRR17520069.6844603  
SRR17520069.6844605  
SRR17520069.6854663  
SRR17520069.6857962  
SRR17520069.6857964  
SRR17520069.6857966  
SRR17520069.6857970  
SRR17520069.6857973  
SRR17520069.6857975  
SRR17520069.6857977  
SRR17520069.6857979  
SRR17520069.6857981  
SRR17520069.6857983  
SRR17520069.6857985  
SRR17520069.6857989  
SRR17520069.6857991  
SRR17520069.6857993  
SRR17520069.6857995  
SRR17520069.6857997  
SRR17520069.6857999  
SRR17520069.6858001  
SRR17520069.6858003  
SRR17520069.6858005  
SRR17520069.6858007  
SRR17520069.6858009  
SRR17520069.6858011  
SRR17520069.6858013  
SRR17520069.6858015  
SRR17520069.6858017  
SRR17520069.6858021  
SRR17520069.6858023  
SRR17520069.6858025  
SRR17520069.6858027  
SRR17520069.6858029  
SRR17520069.6858031  
SRR17520069.6858033

SRR17520069.6858037  
SRR17520069.6858039  
SRR17520069.6858041  
SRR17520069.6858043  
SRR17520069.6858045  
SRR17520069.6858047  
SRR17520069.6858049  
SRR17520069.6858051  
SRR17520069.6858053  
SRR17520069.6858055  
SRR17520069.6858057  
SRR17520069.6858059  
SRR17520069.6858061  
SRR17520069.6858063  
SRR17520069.6858065  
SRR17520069.6858067  
SRR17520069.6858069  
SRR17520069.6858071  
SRR17520069.6858073  
SRR17520069.6858075  
SRR17520069.6858077  
SRR17520069.6858079  
SRR17520069.6858081  
SRR17520069.6858083  
SRR17520069.6858085  
SRR17520069.6858087  
SRR17520069.6858089  
SRR17520069.6858091  
SRR17520069.6858093  
SRR17520069.6858097  
SRR17520069.6858099  
SRR17520069.6858101  
SRR17520069.6858103  
SRR17520069.6858109  
SRR17520069.6858111  
SRR17520069.6858113  
SRR17520069.6858115  
SRR17520069.6858117  
SRR17520069.6858119  
SRR17520069.6858121  
SRR17520069.6858123  
SRR17520069.6862876  
SRR17520069.6862878  
SRR17520069.6862880  
SRR17520069.6862882  
SRR17520069.6862884  
SRR17520069.6862886

SRR17520069. 6862888  
SRR17520069. 6862890  
SRR17520069. 6862892  
SRR17520069. 6862894  
SRR17520069. 6862896  
SRR17520069. 6862898  
SRR17520069. 6862900  
SRR17520069. 6862902  
SRR17520069. 6862904  
SRR17520069. 6862906  
SRR17520069. 6862908  
SRR17520069. 6862910  
SRR17520069. 6862912  
SRR17520069. 6862914  
SRR17520069. 6862916  
SRR17520069. 6862918  
SRR17520069. 6862920  
SRR17520069. 6862922  
SRR17520069. 6862924  
SRR17520069. 6862926  
SRR17520069. 6862928  
SRR17520069. 6862930  
SRR17520069. 6862932  
SRR17520069. 6862934  
SRR17520069. 6862936  
SRR17520069. 6862938  
SRR17520069. 6862940  
SRR17520069. 6862942  
SRR17520069. 6862944  
SRR17520069. 6862946  
SRR17520069. 6862948  
SRR17520069. 6862950  
SRR17520069. 6862952  
SRR17520069. 6862954  
SRR17520069. 6863157  
SRR17520069. 6867034  
SRR17520069. 6867036  
SRR17520069. 6867038  
SRR17520069. 6867040  
SRR17520069. 6867042  
SRR17520069. 6867044  
SRR17520069. 6867046  
SRR17520069. 6867048  
SRR17520069. 6867050  
SRR17520069. 6867052  
SRR17520069. 6867054  
SRR17520069. 6867056

SRR17520069.6867058  
SRR17520069.6867060  
SRR17520069.6867062  
SRR17520069.6867064  
SRR17520069.6867066  
SRR17520069.6867068  
SRR17520069.6867070  
SRR17520069.6867072  
SRR17520069.6867074  
SRR17520069.6867076  
SRR17520069.6867078  
SRR17520069.6876332  
SRR17520069.6880147  
SRR17520069.6880149  
SRR17520069.6880151  
SRR17520069.6880153  
SRR17520069.6903062  
SRR17520069.6903064  
SRR17520069.6903066  
SRR17520069.6903068  
SRR17520069.6903072  
SRR17520069.6903074  
SRR17520069.6903076  
SRR17520069.6903078  
SRR17520069.6903080  
SRR17520069.6903082  
SRR17520069.6903594  
SRR17520069.6903596  
SRR17520069.6903598  
SRR17520069.6903600  
SRR17520069.6903602  
SRR17520069.6903604  
SRR17520069.6903606  
SRR17520069.6903608  
SRR17520069.6903610  
SRR17520069.6903614  
SRR17520069.6903616  
SRR17520069.6903622  
SRR17520069.6903626  
SRR17520069.6905196  
SRR17520069.6905198  
SRR17520069.6905200  
SRR17520069.6905202  
SRR17520069.6905204  
SRR17520069.6905206  
SRR17520069.6905208  
SRR17520069.6905210



SRR17520069.6905212  
SRR17520069.6905214  
SRR17520069.6905216  
SRR17520069.6905218  
SRR17520069.6905220  
SRR17520069.6905222  
SRR17520069.6905224  
SRR17520069.6905226  
SRR17520069.6905228  
SRR17520069.6905230  
SRR17520069.6907160  
SRR17520069.6907162  
SRR17520069.6907164  
SRR17520069.6907166  
SRR17520069.6907168  
SRR17520069.6907170  
SRR17520069.6907172  
SRR17520069.6907174  
SRR17520069.6907176  
SRR17520069.6907180  
SRR17520069.6907182  
SRR17520069.6907184  
SRR17520069.6907186  
SRR17520069.6907188  
SRR17520069.6907190  
SRR17520069.6907192  
SRR17520069.6907194  
SRR17520069.6907196  
SRR17520069.6907198  
SRR17520069.6907200  
SRR17520069.6911690  
SRR17520069.6911692  
SRR17520069.6911696  
SRR17520069.6911698  
SRR17520069.6911702  
SRR17520069.6911704  
SRR17520069.6911706  
SRR17520069.6911708  
SRR17520069.6911710  
SRR17520069.6911712  
SRR17520069.6911714  
SRR17520069.6911716  
SRR17520069.6911718  
SRR17520069.6911720  
SRR17520069.6911722  
SRR17520069.6911724  
SRR17520069.6911726

SRR17520069.6911728  
SRR17520069.6911730  
SRR17520069.6911732  
SRR17520069.6911734  
SRR17520069.6911738  
SRR17520069.6911740  
SRR17520069.6911744  
SRR17520069.6911746  
SRR17520069.6911748  
SRR17520069.6911750  
SRR17520069.6911752  
SRR17520069.6911754  
SRR17520069.6911756  
SRR17520069.6911758  
SRR17520069.6911760  
SRR17520069.6921186  
SRR17520069.6921188  
SRR17520069.6921190  
SRR17520069.6925396  
SRR17520069.6927888  
SRR17520069.6927890  
SRR17520069.6927892  
SRR17520069.6927894  
SRR17520069.6927896  
SRR17520069.6927898  
SRR17520069.6927900  
SRR17520069.6927902  
SRR17520069.6927904  
SRR17520069.6927906  
SRR17520069.6927908  
SRR17520069.6931694  
SRR17520069.6931696  
SRR17520069.6931698  
SRR17520069.6931700  
SRR17520069.6931702  
SRR17520069.6931704  
SRR17520069.6931706  
SRR17520069.6931708  
SRR17520069.6931710  
SRR17520069.6931712  
SRR17520069.6931714  
SRR17520069.6931716  
SRR17520069.6931718  
SRR17520069.6931720  
SRR17520069.6931722  
SRR17520069.6931724  
SRR17520069.6931726

SRR17520069.6931728  
SRR17520069.6931730  
SRR17520069.6931732  
SRR17520069.6931734  
SRR17520069.6931736  
SRR17520069.6931738  
SRR17520069.6933570  
SRR17520069.6933572  
SRR17520069.6933574  
SRR17520069.6933576  
SRR17520069.6933578  
SRR17520069.6933580  
SRR17520069.6933582  
SRR17520069.6933584  
SRR17520069.6933586  
SRR17520069.6933588  
SRR17520069.6933590  
SRR17520069.6933592  
SRR17520069.6935422  
SRR17520069.6935424  
SRR17520069.6935426  
SRR17520069.6936107  
SRR17520069.6936109  
SRR17520069.6936111  
SRR17520069.6936113  
SRR17520069.6936115  
SRR17520069.6936117  
SRR17520069.6936119  
SRR17520069.6936121  
SRR17520069.6936123  
SRR17520069.6936125  
SRR17520069.6936127  
SRR17520069.6936129  
SRR17520069.6936131  
SRR17520069.6936133  
SRR17520069.6936135  
SRR17520069.6936137  
SRR17520069.6936139  
SRR17520069.6936143  
SRR17520069.6936145  
SRR17520069.6936147  
SRR17520069.6936149  
SRR17520069.6936151  
SRR17520069.6936153  
SRR17520069.6936155  
SRR17520069.6936157  
SRR17520069.6936159

SRR17520069. 6936163  
SRR17520069. 6936165  
SRR17520069. 6936167  
SRR17520069. 6936169  
SRR17520069. 6936171  
SRR17520069. 6936173  
SRR17520069. 6936175  
SRR17520069. 6936177  
SRR17520069. 6936179  
SRR17520069. 6936181  
SRR17520069. 6936183  
SRR17520069. 6936185  
SRR17520069. 6936187  
SRR17520069. 6936189  
SRR17520069. 6936587  
SRR17520069. 6936589  
SRR17520069. 6936591  
SRR17520069. 6936593  
SRR17520069. 6936595  
SRR17520069. 6936597  
SRR17520069. 6936599  
SRR17520069. 6936601  
SRR17520069. 6936603  
SRR17520069. 6936605  
SRR17520069. 6936610  
SRR17520069. 6936612  
SRR17520069. 6936614  
SRR17520069. 6936616  
SRR17520069. 6936618  
SRR17520069. 6936620  
SRR17520069. 6936622  
SRR17520069. 6936624  
SRR17520069. 6936628  
SRR17520069. 6936630  
SRR17520069. 6936632  
SRR17520069. 6936634  
SRR17520069. 6936636  
SRR17520069. 6936638  
SRR17520069. 6936640  
SRR17520069. 6936644  
SRR17520069. 6936646  
SRR17520069. 6936648  
SRR17520069. 6936650  
SRR17520069. 6936654  
SRR17520069. 6936656  
SRR17520069. 6936658  
SRR17520069. 6936662

SRR17520069.6936664  
SRR17520069.6943937  
SRR17520069.6943939  
SRR17520069.6943941  
SRR17520069.6943943  
SRR17520069.6943945  
SRR17520069.6943947  
SRR17520069.6943949  
SRR17520069.6943951  
SRR17520069.6943953  
SRR17520069.6943955  
SRR17520069.6943957  
SRR17520069.6943959  
SRR17520069.6943961  
SRR17520069.6943963  
SRR17520069.6943965  
SRR17520069.6943967  
SRR17520069.6943969  
SRR17520069.6943971  
SRR17520069.6943973  
SRR17520069.6943975  
SRR17520069.6943977  
SRR17520069.6943979  
SRR17520069.6943981  
SRR17520069.6943983  
SRR17520069.6943985  
SRR17520069.6943987  
SRR17520069.6943989  
SRR17520069.6943991  
SRR17520069.6943993  
SRR17520069.6943997  
SRR17520069.6943999  
SRR17520069.6944001  
SRR17520069.6944003  
SRR17520069.6944005  
SRR17520069.6944007  
SRR17520069.6944011  
SRR17520069.6944013  
SRR17520069.6944015  
SRR17520069.6944017  
SRR17520069.6944019  
SRR17520069.6944021  
SRR17520069.6944023  
SRR17520069.6944024  
SRR17520069.6944025  
SRR17520069.6944027  
SRR17520069.6944029

SRR17520069.6944031  
SRR17520069.6944712  
SRR17520069.6944714  
SRR17520069.6944716  
SRR17520069.6944718  
SRR17520069.6947613  
SRR17520069.6947617  
SRR17520069.6947619  
SRR17520069.6947621  
SRR17520069.6947623  
SRR17520069.6947625  
SRR17520069.6947627  
SRR17520069.6947629  
SRR17520069.6947631  
SRR17520069.6947633  
SRR17520069.6947635  
SRR17520069.6947637  
SRR17520069.6947639  
SRR17520069.6947641  
SRR17520069.6947643  
SRR17520069.6947645  
SRR17520069.6947647  
SRR17520069.6947649  
SRR17520069.6947651  
SRR17520069.6947653  
SRR17520069.6947655  
SRR17520069.6947657  
SRR17520069.6947661  
SRR17520069.6947663  
SRR17520069.6947665  
SRR17520069.6947667  
SRR17520069.6947669  
SRR17520069.6947671  
SRR17520069.6947673  
SRR17520069.6947675  
SRR17520069.6947677  
SRR17520069.6947679  
SRR17520069.6947681  
SRR17520069.6947687  
SRR17520069.6947691  
SRR17520069.6953145  
SRR17520069.6953147  
SRR17520069.6953149  
SRR17520069.6953151  
SRR17520069.6953153  
SRR17520069.6953155  
SRR17520069.6953157

SRR17520069.6953163  
SRR17520069.6953165  
SRR17520069.6953167  
SRR17520069.6953171  
SRR17520069.6953177  
SRR17520069.6953179  
SRR17520069.6953187  
SRR17520069.6964098  
SRR17520069.6964100  
SRR17520069.6964102  
SRR17520069.6964351  
SRR17520069.6964353  
SRR17520069.6965143  
SRR17520069.6965145  
SRR17520069.6965149  
SRR17520069.6965151  
SRR17520069.6965153  
SRR17520069.6965155  
SRR17520069.6965161  
SRR17520069.6965163  
SRR17520069.6965165  
SRR17520069.6965167  
SRR17520069.6965169  
SRR17520069.6965171  
SRR17520069.6965173  
SRR17520069.6965175  
SRR17520069.6965177  
SRR17520069.6965179  
SRR17520069.6965181  
SRR17520069.6965183  
SRR17520069.6965185  
SRR17520069.6965187  
SRR17520069.6965189  
SRR17520069.6965191  
SRR17520069.6965193  
SRR17520069.6965197  
SRR17520069.6965199  
SRR17520069.6965203  
SRR17520069.6965205  
SRR17520069.6965207  
SRR17520069.6965209  
SRR17520069.6967624  
SRR17520069.6967626  
SRR17520069.6967628  
SRR17520069.6967630  
SRR17520069.6967632  
SRR17520069.6967634

SRR17520069. 6974714  
SRR17520069. 6980805  
SRR17520069. 6980807  
SRR17520069. 6980809  
SRR17520069. 6980811  
SRR17520069. 6980813  
SRR17520069. 6981925  
SRR17520069. 6984248  
SRR17520069. 6984252  
SRR17520069. 6984254  
SRR17520069. 6984256  
SRR17520069. 6984258  
SRR17520069. 6984264  
SRR17520069. 6984268  
SRR17520069. 6984270  
SRR17520069. 6984272  
SRR17520069. 6984274  
SRR17520069. 6984276  
SRR17520069. 6984280  
SRR17520069. 6984284  
SRR17520069. 6984288  
SRR17520069. 6984290  
SRR17520069. 6984292  
SRR17520069. 6984294  
SRR17520069. 6984296  
SRR17520069. 6984774  
SRR17520069. 6984788  
SRR17520069. 6984790  
SRR17520069. 6984792  
SRR17520069. 6990774  
SRR17520069. 6990776  
SRR17520069. 6990778  
SRR17520069. 6990780  
SRR17520069. 6990782  
SRR17520069. 6990784  
SRR17520069. 6990786  
SRR17520069. 6990788  
SRR17520069. 6990790  
SRR17520069. 6990792  
SRR17520069. 6990794  
SRR17520069. 6990796  
SRR17520069. 6990798  
SRR17520069. 6990800  
SRR17520069. 6990802  
SRR17520069. 6990804  
SRR17520069. 6990806  
SRR17520069. 6990810



SRR17520069. 6990812  
SRR17520069. 6990814  
SRR17520069. 6990816  
SRR17520069. 6990818  
SRR17520069. 6990820  
SRR17520069. 6990822  
SRR17520069. 6990824  
SRR17520069. 6990826  
SRR17520069. 6990828  
SRR17520069. 6990830  
SRR17520069. 6990832  
SRR17520069. 6990834  
SRR17520069. 6990836  
SRR17520069. 6990838  
SRR17520069. 6990840  
SRR17520069. 6990842  
SRR17520069. 6990844  
SRR17520069. 6990846  
SRR17520069. 6990848  
SRR17520069. 6990850  
SRR17520069. 6990852  
SRR17520069. 6990854  
SRR17520069. 6990856  
SRR17520069. 6990858  
SRR17520069. 6990860  
SRR17520069. 6990862  
SRR17520069. 6990864  
SRR17520069. 6990866  
SRR17520069. 6990868  
SRR17520069. 6990870  
SRR17520069. 6990872  
SRR17520069. 6990874  
SRR17520069. 6990876  
SRR17520069. 6990878  
SRR17520069. 6990880  
SRR17520069. 6990882  
SRR17520069. 6990884  
SRR17520069. 6990886  
SRR17520069. 6990888  
SRR17520069. 6991883  
SRR17520069. 6991885  
SRR17520069. 6991887  
SRR17520069. 6991889  
SRR17520069. 6991891  
SRR17520069. 6991893  
SRR17520069. 6991895  
SRR17520069. 6991897

SRR17520069.6991899  
SRR17520069.6991901  
SRR17520069.6991903  
SRR17520069.6991905  
SRR17520069.6991907  
SRR17520069.6991909  
SRR17520069.6991911  
SRR17520069.6991913  
SRR17520069.6991915  
SRR17520069.6992700  
SRR17520069.6992702  
SRR17520069.6992704  
SRR17520069.6992706  
SRR17520069.6992708  
SRR17520069.6995111  
SRR17520069.6995965  
SRR17520069.6995967  
SRR17520069.6995969  
SRR17520069.6995971  
SRR17520069.6995973  
SRR17520069.6995975  
SRR17520069.6995977  
SRR17520069.6995979  
SRR17520069.6995981  
SRR17520069.6995983  
SRR17520069.6995985  
SRR17520069.6995987  
SRR17520069.6995989  
SRR17520069.6995991  
SRR17520069.6995993  
SRR17520069.6995995  
SRR17520069.6995997  
SRR17520069.6995999  
SRR17520069.6996001  
SRR17520069.6996003  
SRR17520069.6996005  
SRR17520069.6996007  
SRR17520069.6996009  
SRR17520069.6996011  
SRR17520069.6996013  
SRR17520069.6996015  
SRR17520069.7000493  
SRR17520069.7000495  
SRR17520069.7000497  
SRR17520069.7000499  
SRR17520069.7000501  
SRR17520069.7009864

SRR17520069.7012710  
SRR17520069.7013859  
SRR17520069.7013861  
SRR17520069.7013863  
SRR17520069.7013865  
SRR17520069.7013867  
SRR17520069.7013869  
SRR17520069.7013871  
SRR17520069.7013873  
SRR17520069.7013875  
SRR17520069.7013877  
SRR17520069.7013879  
SRR17520069.7013881  
SRR17520069.7013883  
SRR17520069.7013885  
SRR17520069.7013887  
SRR17520069.7013889  
SRR17520069.7013891  
SRR17520069.7016066  
SRR17520069.7016068  
SRR17520069.7016070  
SRR17520069.7016072  
SRR17520069.7016074  
SRR17520069.7016078  
SRR17520069.7016080  
SRR17520069.7016082  
SRR17520069.7016084  
SRR17520069.7016086  
SRR17520069.7016781  
SRR17520069.7016783  
SRR17520069.7020950  
SRR17520069.7020952  
SRR17520069.7020954  
SRR17520069.7020956  
SRR17520069.7020958  
SRR17520069.7020960  
SRR17520069.7020962  
SRR17520069.7020964  
SRR17520069.7020966  
SRR17520069.7020968  
SRR17520069.7020970  
SRR17520069.7020972  
SRR17520069.7020974  
SRR17520069.7020976  
SRR17520069.7020978  
SRR17520069.7020980  
SRR17520069.7020982

SRR17520069.7020984  
SRR17520069.7020986  
SRR17520069.7020988  
SRR17520069.7020990  
SRR17520069.7020992  
SRR17520069.7020994  
SRR17520069.7020996  
SRR17520069.7020998  
SRR17520069.7021000  
SRR17520069.7021002  
SRR17520069.7021004  
SRR17520069.7021006  
SRR17520069.7021008  
SRR17520069.7021010  
SRR17520069.7021012  
SRR17520069.7021014  
SRR17520069.7021016  
SRR17520069.7021018  
SRR17520069.7021020  
SRR17520069.7021022  
SRR17520069.7021024  
SRR17520069.7021444  
SRR17520069.7021446  
SRR17520069.7021448  
SRR17520069.7021452  
SRR17520069.7021454  
SRR17520069.7021456  
SRR17520069.7021458  
SRR17520069.7021460  
SRR17520069.7021462  
SRR17520069.7021464  
SRR17520069.7021466  
SRR17520069.7021468  
SRR17520069.7021470  
SRR17520069.7021472  
SRR17520069.7021474  
SRR17520069.7021476  
SRR17520069.7021478  
SRR17520069.7021480  
SRR17520069.7021482  
SRR17520069.7021484  
SRR17520069.7021486  
SRR17520069.7021488  
SRR17520069.7021490  
SRR17520069.7033394  
SRR17520069.7033396  
SRR17520069.7033398

SRR17520069.7033400  
SRR17520069.7033402  
SRR17520069.7033404  
SRR17520069.7033406  
SRR17520069.7033408  
SRR17520069.7033410  
SRR17520069.7033412  
SRR17520069.7033414  
SRR17520069.7033416  
SRR17520069.7033418  
SRR17520069.7033420  
SRR17520069.7040885  
SRR17520069.7040887  
SRR17520069.7040889  
SRR17520069.7040891  
SRR17520069.7042213  
SRR17520069.7042215  
SRR17520069.7042217  
SRR17520069.7042219  
SRR17520069.7042221  
SRR17520069.7042223  
SRR17520069.7050686  
SRR17520069.7050688  
SRR17520069.7052885  
SRR17520069.7052887  
SRR17520069.7052889  
SRR17520069.7052891  
SRR17520069.7052893  
SRR17520069.7052895  
SRR17520069.7052897  
SRR17520069.7052899  
SRR17520069.7052901  
SRR17520069.7052903  
SRR17520069.7052905  
SRR17520069.7052907  
SRR17520069.7052909  
SRR17520069.7052911  
SRR17520069.7052915  
SRR17520069.7052917  
SRR17520069.7052919  
SRR17520069.7052921  
SRR17520069.7052925  
SRR17520069.7052927  
SRR17520069.7052937  
SRR17520069.7062497  
SRR17520069.7062501  
SRR17520069.7062503

SRR17520069.7062507  
SRR17520069.7062511  
SRR17520069.7062513  
SRR17520069.7062515  
SRR17520069.7062517  
SRR17520069.7062519  
SRR17520069.7062521  
SRR17520069.7062523  
SRR17520069.7062525  
SRR17520069.7062527  
SRR17520069.7062529  
SRR17520069.7062531  
SRR17520069.7062533  
SRR17520069.7062535  
SRR17520069.7062537  
SRR17520069.7062539  
SRR17520069.7062541  
SRR17520069.7062543  
SRR17520069.7062545  
SRR17520069.7062547  
SRR17520069.7062549  
SRR17520069.7062551  
SRR17520069.7062553  
SRR17520069.7062555  
SRR17520069.7062557  
SRR17520069.7062559  
SRR17520069.7062561  
SRR17520069.7062563  
SRR17520069.7062565  
SRR17520069.7062567  
SRR17520069.7062569  
SRR17520069.7062571  
SRR17520069.7062573  
SRR17520069.7062575  
SRR17520069.7062577  
SRR17520069.7062579  
SRR17520069.7062581  
SRR17520069.7062583  
SRR17520069.7062585  
SRR17520069.7062587  
SRR17520069.7062589  
SRR17520069.7062591  
SRR17520069.7062593  
SRR17520069.7062595  
SRR17520069.7062597  
SRR17520069.7062599  
SRR17520069.7062601

SRR17520069. 7062603  
SRR17520069. 7063738  
SRR17520069. 7063740  
SRR17520069. 7063742  
SRR17520069. 7063746  
SRR17520069. 7063748  
SRR17520069. 7063750  
SRR17520069. 7063752  
SRR17520069. 7063754  
SRR17520069. 7063756  
SRR17520069. 7063758  
SRR17520069. 7063760  
SRR17520069. 7063762  
SRR17520069. 7063764  
SRR17520069. 7063766  
SRR17520069. 7063768  
SRR17520069. 7063770  
SRR17520069. 7063772  
SRR17520069. 7063774  
SRR17520069. 7063776  
SRR17520069. 7063778  
SRR17520069. 7063780  
SRR17520069. 7063782  
SRR17520069. 7063784  
SRR17520069. 7063786  
SRR17520069. 7063788  
SRR17520069. 7063790  
SRR17520069. 7063792  
SRR17520069. 7063794  
SRR17520069. 7063796  
SRR17520069. 7064116  
SRR17520069. 7064118  
SRR17520069. 7064120  
SRR17520069. 7064122  
SRR17520069. 7064124  
SRR17520069. 7064126  
SRR17520069. 7064128  
SRR17520069. 7064130  
SRR17520069. 7064132  
SRR17520069. 7064134  
SRR17520069. 7064136  
SRR17520069. 7064138  
SRR17520069. 7064140  
SRR17520069. 7064142  
SRR17520069. 7064144  
SRR17520069. 7064146  
SRR17520069. 7064148

SRR17520069.7064150  
SRR17520069.7064152  
SRR17520069.7064154  
SRR17520069.7064156  
SRR17520069.7064158  
SRR17520069.7064160  
SRR17520069.7064164  
SRR17520069.7064166  
SRR17520069.7064168  
SRR17520069.7064170  
SRR17520069.7064172  
SRR17520069.7064174  
SRR17520069.7064176  
SRR17520069.7064178  
SRR17520069.7064180  
SRR17520069.7073382  
SRR17520069.7073384  
SRR17520069.7074365  
SRR17520069.7074367  
SRR17520069.7074369  
SRR17520069.7074371  
SRR17520069.7074373  
SRR17520069.7080584  
SRR17520069.7080586  
SRR17520069.7080588  
SRR17520069.7080590  
SRR17520069.7080592  
SRR17520069.7080594  
SRR17520069.7080596  
SRR17520069.7080598  
SRR17520069.7082056  
SRR17520069.7084500  
SRR17520069.7084502  
SRR17520069.7084504  
SRR17520069.7089414  
SRR17520069.7101941  
SRR17520069.7101943  
SRR17520069.7101945  
SRR17520069.7101947  
SRR17520069.7101949  
SRR17520069.7101951  
SRR17520069.7101953  
SRR17520069.7101955  
SRR17520069.7101957  
SRR17520069.7101959  
SRR17520069.7101961  
SRR17520069.7101963



SRR17520069.7101965  
SRR17520069.7102346  
SRR17520069.7102348  
SRR17520069.7102350  
SRR17520069.7102352  
SRR17520069.7102354  
SRR17520069.7102356  
SRR17520069.7102358  
SRR17520069.7102360  
SRR17520069.7102362  
SRR17520069.7102364  
SRR17520069.7102366  
SRR17520069.7102368  
SRR17520069.7102370  
SRR17520069.7102372  
SRR17520069.7102374  
SRR17520069.7103569  
SRR17520069.7103571  
SRR17520069.7107263  
SRR17520069.7120361  
SRR17520069.7120363  
SRR17520069.7120365  
SRR17520069.7120367  
SRR17520069.7120369  
SRR17520069.7120371  
SRR17520069.7120373  
SRR17520069.7120375  
SRR17520069.7120377  
SRR17520069.7134333  
SRR17520069.7134335  
SRR17520069.7134872  
SRR17520069.7134875  
SRR17520069.7146874  
SRR17520069.7146876  
SRR17520069.7146878  
SRR17520069.7146882  
SRR17520069.7146884  
SRR17520069.7146886  
SRR17520069.7146888  
SRR17520069.7149141  
SRR17520069.7149145  
SRR17520069.7149147  
SRR17520069.7149151  
SRR17520069.7149153  
SRR17520069.7149159  
SRR17520069.7149161  
SRR17520069.7149163

SRR17520069.7149165  
SRR17520069.7149167  
SRR17520069.7149169  
SRR17520069.7149171  
SRR17520069.7149173  
SRR17520069.7149175  
SRR17520069.7149177  
SRR17520069.7149179  
SRR17520069.7149181  
SRR17520069.7149183  
SRR17520069.7149185  
SRR17520069.7149187  
SRR17520069.7149189  
SRR17520069.7149191  
SRR17520069.7149193  
SRR17520069.7149195  
SRR17520069.7155331  
SRR17520069.7155333  
SRR17520069.7155335  
SRR17520069.7165723  
SRR17520069.7165725  
SRR17520069.7165727  
SRR17520069.7165729  
SRR17520069.7165731  
SRR17520069.7165733  
SRR17520069.7165735  
SRR17520069.7165737  
SRR17520069.7165739  
SRR17520069.7165741  
SRR17520069.7165745  
SRR17520069.7165747  
SRR17520069.7165749  
SRR17520069.7165751  
SRR17520069.7165753  
SRR17520069.7165755  
SRR17520069.7165757  
SRR17520069.7165759  
SRR17520069.7165761  
SRR17520069.7165763  
SRR17520069.7165765  
SRR17520069.7165767  
SRR17520069.7165769  
SRR17520069.7165771  
SRR17520069.7165773  
SRR17520069.7165775  
SRR17520069.7165777  
SRR17520069.7168383

SRR17520069.7168385  
SRR17520069.7168387  
SRR17520069.7168389  
SRR17520069.7168391  
SRR17520069.7168393  
SRR17520069.7168395  
SRR17520069.7169075  
SRR17520069.7173584  
SRR17520069.7173586  
SRR17520069.7173588  
SRR17520069.7173590  
SRR17520069.7173592  
SRR17520069.7173594  
SRR17520069.7173596  
SRR17520069.7173598  
SRR17520069.7173600  
SRR17520069.7173602  
SRR17520069.7173604  
SRR17520069.7173606  
SRR17520069.7173608  
SRR17520069.7173610  
SRR17520069.7178850  
SRR17520069.7178852  
SRR17520069.7178854  
SRR17520069.7178856  
SRR17520069.7178858  
SRR17520069.7178860  
SRR17520069.7178862  
SRR17520069.7178864  
SRR17520069.7178866  
SRR17520069.7178868  
SRR17520069.7178870  
SRR17520069.7178872  
SRR17520069.7178874  
SRR17520069.7178876  
SRR17520069.7178878  
SRR17520069.7178880  
SRR17520069.7178882  
SRR17520069.7178884  
SRR17520069.7178886  
SRR17520069.7178888  
SRR17520069.7178890  
SRR17520069.7178892  
SRR17520069.7178894  
SRR17520069.7178896  
SRR17520069.7178898  
SRR17520069.7178900

SRR17520069.7178902  
SRR17520069.7178904  
SRR17520069.7178906  
SRR17520069.7178908  
SRR17520069.7178910  
SRR17520069.7178912  
SRR17520069.7178914  
SRR17520069.7178916  
SRR17520069.7178918  
SRR17520069.7178920  
SRR17520069.7178922  
SRR17520069.7178924  
SRR17520069.7180780  
SRR17520069.7180782  
SRR17520069.7180784  
SRR17520069.7180786  
SRR17520069.7180788  
SRR17520069.7180790  
SRR17520069.7180792  
SRR17520069.7180794  
SRR17520069.7180796  
SRR17520069.7180798  
SRR17520069.7180800  
SRR17520069.7180802  
SRR17520069.7192070  
SRR17520069.7192072  
SRR17520069.7192074  
SRR17520069.7192076  
SRR17520069.7192078  
SRR17520069.7192082  
SRR17520069.7192086  
SRR17520069.7192090  
SRR17520069.7192094  
SRR17520069.7192096  
SRR17520069.7192098  
SRR17520069.7192102  
SRR17520069.7192104  
SRR17520069.7192108  
SRR17520069.7192110  
SRR17520069.7192112  
SRR17520069.7192114  
SRR17520069.7192116  
SRR17520069.7192118  
SRR17520069.7192120  
SRR17520069.7192122  
SRR17520069.7197557  
SRR17520069.7197559

SRR17520069. 7197563  
SRR17520069. 7197565  
SRR17520069. 7197567  
SRR17520069. 7198595  
SRR17520069. 7202364  
SRR17520069. 7202366  
SRR17520069. 7202368  
SRR17520069. 7202370  
SRR17520069. 7202372  
SRR17520069. 7202374  
SRR17520069. 7202376  
SRR17520069. 7202378  
SRR17520069. 7202380  
SRR17520069. 7202382  
SRR17520069. 7202384  
SRR17520069. 7202386  
SRR17520069. 7202388  
SRR17520069. 7202390  
SRR17520069. 7202392  
SRR17520069. 7202394  
SRR17520069. 7202396  
SRR17520069. 7202398  
SRR17520069. 7202400  
SRR17520069. 7202402  
SRR17520069. 7202404  
SRR17520069. 7202406  
SRR17520069. 7205301  
SRR17520069. 7205303  
SRR17520069. 7205305  
SRR17520069. 7205307  
SRR17520069. 7205309  
SRR17520069. 7205311  
SRR17520069. 7205313  
SRR17520069. 7205315  
SRR17520069. 7205317  
SRR17520069. 7205319  
SRR17520069. 7205321  
SRR17520069. 7205323  
SRR17520069. 7205325  
SRR17520069. 7205327  
SRR17520069. 7205329  
SRR17520069. 7205331  
SRR17520069. 7205333  
SRR17520069. 7205335  
SRR17520069. 7205337  
SRR17520069. 7205339  
SRR17520069. 7206915

SRR17520069.7206917  
SRR17520069.7211634  
SRR17520069.7211636  
SRR17520069.7211638  
SRR17520069.7211640  
SRR17520069.7211642  
SRR17520069.7211644  
SRR17520069.7211646  
SRR17520069.7211648  
SRR17520069.7211650  
SRR17520069.7211652  
SRR17520069.7211654  
SRR17520069.7211656  
SRR17520069.7211658  
SRR17520069.7211660  
SRR17520069.7211662  
SRR17520069.7211664  
SRR17520069.7211666  
SRR17520069.7211668  
SRR17520069.7211670  
SRR17520069.7211672  
SRR17520069.7211674  
SRR17520069.7211676  
SRR17520069.7215788  
SRR17520069.7215790  
SRR17520069.7215792  
SRR17520069.7215794  
SRR17520069.7215796  
SRR17520069.7216881  
SRR17520069.7216883  
SRR17520069.7216885  
SRR17520069.7216887  
SRR17520069.7216889  
SRR17520069.7216893  
SRR17520069.7216895  
SRR17520069.7220385  
SRR17520069.7220387  
SRR17520069.7220389  
SRR17520069.7220391  
SRR17520069.7220393  
SRR17520069.7220395  
SRR17520069.7220397  
SRR17520069.7220399  
SRR17520069.7220401  
SRR17520069.7220403  
SRR17520069.7220405  
SRR17520069.7220407

SRR17520069. 7220409  
SRR17520069. 7220411  
SRR17520069. 7220413  
SRR17520069. 7220415  
SRR17520069. 7220417  
SRR17520069. 7220419  
SRR17520069. 7220421  
SRR17520069. 7220423  
SRR17520069. 7220425  
SRR17520069. 7220427  
SRR17520069. 7220429  
SRR17520069. 7220431  
SRR17520069. 7220433  
SRR17520069. 7220435  
SRR17520069. 7220437  
SRR17520069. 7220439  
SRR17520069. 7220441  
SRR17520069. 7220443  
SRR17520069. 7220445  
SRR17520069. 7220447  
SRR17520069. 7220449  
SRR17520069. 7220451  
SRR17520069. 7220453  
SRR17520069. 7220457  
SRR17520069. 7220459  
SRR17520069. 7220461  
SRR17520069. 7220463  
SRR17520069. 7220465  
SRR17520069. 7220467  
SRR17520069. 7220715  
SRR17520069. 7220717  
SRR17520069. 7220719  
SRR17520069. 7220721  
SRR17520069. 7220723  
SRR17520069. 7220725  
SRR17520069. 7221187  
SRR17520069. 7221191  
SRR17520069. 7221193  
SRR17520069. 7221195  
SRR17520069. 7221197  
SRR17520069. 7221199  
SRR17520069. 7221201  
SRR17520069. 7221203  
SRR17520069. 7221205  
SRR17520069. 7221207  
SRR17520069. 7221209  
SRR17520069. 7221211

SRR17520069. 7221213  
SRR17520069. 7221215  
SRR17520069. 7221217  
SRR17520069. 7221219  
SRR17520069. 7221221  
SRR17520069. 7228017  
SRR17520069. 7228987  
SRR17520069. 7228989  
SRR17520069. 7228993  
SRR17520069. 7228995  
SRR17520069. 7228997  
SRR17520069. 7228999  
SRR17520069. 7229001  
SRR17520069. 7229005  
SRR17520069. 7229007  
SRR17520069. 7229009  
SRR17520069. 7229013  
SRR17520069. 7231850  
SRR17520069. 7231852  
SRR17520069. 7231858  
SRR17520069. 7231860  
SRR17520069. 7231862  
SRR17520069. 7231864  
SRR17520069. 7231868  
SRR17520069. 7231870  
SRR17520069. 7231872  
SRR17520069. 7231874  
SRR17520069. 7231876  
SRR17520069. 7231878  
SRR17520069. 7231880  
SRR17520069. 7231882  
SRR17520069. 7231884  
SRR17520069. 7231886  
SRR17520069. 7231888  
SRR17520069. 7231890  
SRR17520069. 7231894  
SRR17520069. 7231896  
SRR17520069. 7231898  
SRR17520069. 7231900  
SRR17520069. 7231902  
SRR17520069. 7231904  
SRR17520069. 7231908  
SRR17520069. 7231912  
SRR17520069. 7231914  
SRR17520069. 7231916  
SRR17520069. 7231918  
SRR17520069. 7231920



SRR17520069. 7231924  
SRR17520069. 7231926  
SRR17520069. 7231928  
SRR17520069. 7231930  
SRR17520069. 7231932  
SRR17520069. 7231934  
SRR17520069. 7231936  
SRR17520069. 7231938  
SRR17520069. 7231940  
SRR17520069. 7231942  
SRR17520069. 7231944  
SRR17520069. 7231946  
SRR17520069. 7231948  
SRR17520069. 7231950  
SRR17520069. 7231952  
SRR17520069. 7231954  
SRR17520069. 7231956  
SRR17520069. 7231958  
SRR17520069. 7231960  
SRR17520069. 7231962  
SRR17520069. 7231964  
SRR17520069. 7231966  
SRR17520069. 7231968  
SRR17520069. 7231970  
SRR17520069. 7231972  
SRR17520069. 7231974  
SRR17520069. 7231976  
SRR17520069. 7231982  
SRR17520069. 7231984  
SRR17520069. 7231986  
SRR17520069. 7231990  
SRR17520069. 7231992  
SRR17520069. 7231994  
SRR17520069. 7231996  
SRR17520069. 7231998  
SRR17520069. 7232000  
SRR17520069. 7232002  
SRR17520069. 7232004  
SRR17520069. 7232006  
SRR17520069. 7232010  
SRR17520069. 7232012  
SRR17520069. 7232014  
SRR17520069. 7232016  
SRR17520069. 7232018  
SRR17520069. 7232020  
SRR17520069. 7232022  
SRR17520069. 7232024

SRR17520069. 7232026  
SRR17520069. 7232028  
SRR17520069. 7232030  
SRR17520069. 7232032  
SRR17520069. 7232034  
SRR17520069. 7232036  
SRR17520069. 7232038  
SRR17520069. 7232040  
SRR17520069. 7232042  
SRR17520069. 7232044  
SRR17520069. 7232046  
SRR17520069. 7232048  
SRR17520069. 7232050  
SRR17520069. 7232052  
SRR17520069. 7232054  
SRR17520069. 7232056  
SRR17520069. 7232058  
SRR17520069. 7232060  
SRR17520069. 7232062  
SRR17520069. 7232064  
SRR17520069. 7236068  
SRR17520069. 7236070  
SRR17520069. 7236072  
SRR17520069. 7236074  
SRR17520069. 7236078  
SRR17520069. 7236080  
SRR17520069. 7236082  
SRR17520069. 7236084  
SRR17520069. 7236090  
SRR17520069. 7236092  
SRR17520069. 7236094  
SRR17520069. 7236096  
SRR17520069. 7236098  
SRR17520069. 7236100  
SRR17520069. 7236102  
SRR17520069. 7236104  
SRR17520069. 7236106  
SRR17520069. 7236108  
SRR17520069. 7236110  
SRR17520069. 7236112  
SRR17520069. 7236114  
SRR17520069. 7236116  
SRR17520069. 7236118  
SRR17520069. 7236120  
SRR17520069. 7236122  
SRR17520069. 7237133  
SRR17520069. 7237135

SRR17520069. 7237137  
SRR17520069. 7237139  
SRR17520069. 7237141  
SRR17520069. 7237143  
SRR17520069. 7237145  
SRR17520069. 7237147  
SRR17520069. 7237149  
SRR17520069. 7239677  
SRR17520069. 7251141  
SRR17520069. 7251143  
SRR17520069. 7251145  
SRR17520069. 7251147  
SRR17520069. 7251149  
SRR17520069. 7251151  
SRR17520069. 7251153  
SRR17520069. 7251467  
SRR17520069. 7251469  
SRR17520069. 7251471  
SRR17520069. 7251473  
SRR17520069. 7251475  
SRR17520069. 7251477  
SRR17520069. 7251479  
SRR17520069. 7251481  
SRR17520069. 7251483  
SRR17520069. 7251485  
SRR17520069. 7251487  
SRR17520069. 7251489  
SRR17520069. 7251491  
SRR17520069. 7251493  
SRR17520069. 7251495  
SRR17520069. 7253734  
SRR17520069. 7253736  
SRR17520069. 7253738  
SRR17520069. 7253740  
SRR17520069. 7253742  
SRR17520069. 7253744  
SRR17520069. 7253746  
SRR17520069. 7253748  
SRR17520069. 7253750  
SRR17520069. 7253752  
SRR17520069. 7253754  
SRR17520069. 7253756  
SRR17520069. 7253758  
SRR17520069. 7253760  
SRR17520069. 7253762  
SRR17520069. 7253764  
SRR17520069. 7253766

SRR17520069.7253768  
SRR17520069.7253770  
SRR17520069.7253772  
SRR17520069.7253774  
SRR17520069.7253776  
SRR17520069.7253778  
SRR17520069.7253780  
SRR17520069.7253782  
SRR17520069.7253784  
SRR17520069.7253786  
SRR17520069.7253788  
SRR17520069.7253790  
SRR17520069.7253792  
SRR17520069.7253794  
SRR17520069.7253796  
SRR17520069.7253798  
SRR17520069.7253800  
SRR17520069.7253802  
SRR17520069.7253804  
SRR17520069.7253806  
SRR17520069.7253808  
SRR17520069.7253810  
SRR17520069.7253812  
SRR17520069.7253814  
SRR17520069.7253816  
SRR17520069.7253818  
SRR17520069.7253820  
SRR17520069.7253822  
SRR17520069.7254119  
SRR17520069.7254123  
SRR17520069.7254125  
SRR17520069.7254127  
SRR17520069.7254129  
SRR17520069.7258258  
SRR17520069.7258260  
SRR17520069.7258262  
SRR17520069.7258264  
SRR17520069.7258266  
SRR17520069.7258268  
SRR17520069.7258270  
SRR17520069.7258272  
SRR17520069.7258274  
SRR17520069.7258276  
SRR17520069.7258278  
SRR17520069.7258280  
SRR17520069.7258282  
SRR17520069.7258284

SRR17520069. 7258286  
SRR17520069. 7258288  
SRR17520069. 7258290  
SRR17520069. 7258292  
SRR17520069. 7258294  
SRR17520069. 7258296  
SRR17520069. 7258298  
SRR17520069. 7258300  
SRR17520069. 7258302  
SRR17520069. 7258304  
SRR17520069. 7258306  
SRR17520069. 7258308  
SRR17520069. 7258312  
SRR17520069. 7258316  
SRR17520069. 7258318  
SRR17520069. 7258320  
SRR17520069. 7258322  
SRR17520069. 7258326  
SRR17520069. 7258330  
SRR17520069. 7258332  
SRR17520069. 7258336  
SRR17520069. 7258338  
SRR17520069. 7258342  
SRR17520069. 7261948  
SRR17520069. 7261950  
SRR17520069. 7267095  
SRR17520069. 7267097  
SRR17520069. 7267099  
SRR17520069. 7267101  
SRR17520069. 7270462  
SRR17520069. 7270464  
SRR17520069. 7270466  
SRR17520069. 7270468  
SRR17520069. 7270470  
SRR17520069. 7270472  
SRR17520069. 7270474  
SRR17520069. 7270476  
SRR17520069. 7270478  
SRR17520069. 7270480  
SRR17520069. 7270482  
SRR17520069. 7274567  
SRR17520069. 7274569  
SRR17520069. 7274571  
SRR17520069. 7274573  
SRR17520069. 7274575  
SRR17520069. 7274577  
SRR17520069. 7274579

SRR17520069. 7274581  
SRR17520069. 7274583  
SRR17520069. 7274585  
SRR17520069. 7274587  
SRR17520069. 7274589  
SRR17520069. 7274591  
SRR17520069. 7274593  
SRR17520069. 7274595  
SRR17520069. 7274597  
SRR17520069. 7274599  
SRR17520069. 7274601  
SRR17520069. 7274603  
SRR17520069. 7274605  
SRR17520069. 7274607  
SRR17520069. 7274609  
SRR17520069. 7274611  
SRR17520069. 7284356  
SRR17520069. 7284358  
SRR17520069. 7284360  
SRR17520069. 7284362  
SRR17520069. 7284364  
SRR17520069. 7284368  
SRR17520069. 7284370  
SRR17520069. 7284372  
SRR17520069. 7284374  
SRR17520069. 7284376  
SRR17520069. 7284378  
SRR17520069. 7284380  
SRR17520069. 7284382  
SRR17520069. 7284384  
SRR17520069. 7284386  
SRR17520069. 7284388  
SRR17520069. 7284390  
SRR17520069. 7284392  
SRR17520069. 7284394  
SRR17520069. 7284396  
SRR17520069. 7284398  
SRR17520069. 7284400  
SRR17520069. 7284402  
SRR17520069. 7284404  
SRR17520069. 7284406  
SRR17520069. 7284408  
SRR17520069. 7284410  
SRR17520069. 7284412  
SRR17520069. 7284414  
SRR17520069. 7284416  
SRR17520069. 7284418

SRR17520069. 7284420  
SRR17520069. 7284422  
SRR17520069. 7284424  
SRR17520069. 7284426  
SRR17520069. 7284428  
SRR17520069. 7284430  
SRR17520069. 7284432  
SRR17520069. 7284434  
SRR17520069. 7284436  
SRR17520069. 7284438  
SRR17520069. 7284440  
SRR17520069. 7284442  
SRR17520069. 7284446  
SRR17520069. 7284448  
SRR17520069. 7284450  
SRR17520069. 7285559  
SRR17520069. 7285561  
SRR17520069. 7285563  
SRR17520069. 7285565  
SRR17520069. 7285567  
SRR17520069. 7285569  
SRR17520069. 7285571  
SRR17520069. 7285573  
SRR17520069. 7285575  
SRR17520069. 7285577  
SRR17520069. 7285579  
SRR17520069. 7285581  
SRR17520069. 7285583  
SRR17520069. 7285585  
SRR17520069. 7285589  
SRR17520069. 7285591  
SRR17520069. 7285593  
SRR17520069. 7285595  
SRR17520069. 7285597  
SRR17520069. 7285599  
SRR17520069. 7285601  
SRR17520069. 7285603  
SRR17520069. 7285605  
SRR17520069. 7285804  
SRR17520069. 7285806  
SRR17520069. 7285808  
SRR17520069. 7285810  
SRR17520069. 7285812  
SRR17520069. 7285814  
SRR17520069. 7285816  
SRR17520069. 7285818  
SRR17520069. 7299625

SRR17520069. 7299627  
SRR17520069. 7299629  
SRR17520069. 7299633  
SRR17520069. 7299635  
SRR17520069. 7299637  
SRR17520069. 7299639  
SRR17520069. 7299641  
SRR17520069. 7299643  
SRR17520069. 7299645  
SRR17520069. 7299647  
SRR17520069. 7299649  
SRR17520069. 7299651  
SRR17520069. 7299653  
SRR17520069. 7299655  
SRR17520069. 7299657  
SRR17520069. 7299659  
SRR17520069. 7299661  
SRR17520069. 7299663  
SRR17520069. 7299665  
SRR17520069. 7299667  
SRR17520069. 7299669  
SRR17520069. 7299671  
SRR17520069. 7299673  
SRR17520069. 7299675  
SRR17520069. 7299677  
SRR17520069. 7299679  
SRR17520069. 7299681  
SRR17520069. 7299683  
SRR17520069. 7299685  
SRR17520069. 7299687  
SRR17520069. 7299689  
SRR17520069. 7299691  
SRR17520069. 7299693  
SRR17520069. 7299695  
SRR17520069. 7299697  
SRR17520069. 7299699  
SRR17520069. 7299701  
SRR17520069. 7299703  
SRR17520069. 7299705  
SRR17520069. 7300560  
SRR17520069. 7307302  
SRR17520069. 7308712  
SRR17520069. 7308714  
SRR17520069. 7311052  
SRR17520069. 7311054  
SRR17520069. 7311056  
SRR17520069. 7311058



SRR17520069. 7311060  
SRR17520069. 7311062  
SRR17520069. 7311064  
SRR17520069. 7311066  
SRR17520069. 7311068  
SRR17520069. 7311070  
SRR17520069. 7311072  
SRR17520069. 7311074  
SRR17520069. 7311076  
SRR17520069. 7311078  
SRR17520069. 7311080  
SRR17520069. 7311082  
SRR17520069. 7311084  
SRR17520069. 7311086  
SRR17520069. 7311092  
SRR17520069. 7311094  
SRR17520069. 7312225  
SRR17520069. 7318818  
SRR17520069. 7318820  
SRR17520069. 7318824  
SRR17520069. 7318828  
SRR17520069. 7318830  
SRR17520069. 7318832  
SRR17520069. 7318834  
SRR17520069. 7318836  
SRR17520069. 7318838  
SRR17520069. 7318840  
SRR17520069. 7318842  
SRR17520069. 7318844  
SRR17520069. 7318846  
SRR17520069. 7318848  
SRR17520069. 7318850  
SRR17520069. 7318854  
SRR17520069. 7318856  
SRR17520069. 7318858  
SRR17520069. 7318860  
SRR17520069. 7318862  
SRR17520069. 7318864  
SRR17520069. 7318871  
SRR17520069. 7318873  
SRR17520069. 7318875  
SRR17520069. 7318877  
SRR17520069. 7318879  
SRR17520069. 7318881  
SRR17520069. 7318883  
SRR17520069. 7318885  
SRR17520069. 7318887

SRR17520069. 7318889  
SRR17520069. 7318891  
SRR17520069. 7318893  
SRR17520069. 7318895  
SRR17520069. 7318897  
SRR17520069. 7318899  
SRR17520069. 7318901  
SRR17520069. 7318903  
SRR17520069. 7318905  
SRR17520069. 7318907  
SRR17520069. 7318909  
SRR17520069. 7325655  
SRR17520069. 7325657  
SRR17520069. 7325659  
SRR17520069. 7325661  
SRR17520069. 7325663  
SRR17520069. 7325665  
SRR17520069. 7325667  
SRR17520069. 7325669  
SRR17520069. 7325671  
SRR17520069. 7325673  
SRR17520069. 7325675  
SRR17520069. 7325677  
SRR17520069. 7325679  
SRR17520069. 7325681  
SRR17520069. 7325683  
SRR17520069. 7325685  
SRR17520069. 7325687  
SRR17520069. 7325689  
SRR17520069. 7325691  
SRR17520069. 7325693  
SRR17520069. 7325695  
SRR17520069. 7325697  
SRR17520069. 7325699  
SRR17520069. 7325701  
SRR17520069. 7325703  
SRR17520069. 7325705  
SRR17520069. 7325707  
SRR17520069. 7325709  
SRR17520069. 7325711  
SRR17520069. 7325713  
SRR17520069. 7325715  
SRR17520069. 7325717  
SRR17520069. 7325719  
SRR17520069. 7325721  
SRR17520069. 7325723  
SRR17520069. 7325725

SRR17520069. 7325727  
SRR17520069. 7325729  
SRR17520069. 7325731  
SRR17520069. 7325733  
SRR17520069. 7325735  
SRR17520069. 7325737  
SRR17520069. 7325739  
SRR17520069. 7325741  
SRR17520069. 7325743  
SRR17520069. 7325745  
SRR17520069. 7325747  
SRR17520069. 7325749  
SRR17520069. 7325751  
SRR17520069. 7325753  
SRR17520069. 7325755  
SRR17520069. 7325757  
SRR17520069. 7325759  
SRR17520069. 7325761  
SRR17520069. 7325763  
SRR17520069. 7325765  
SRR17520069. 7325767  
SRR17520069. 7325769  
SRR17520069. 7325771  
SRR17520069. 7325773  
SRR17520069. 7325775  
SRR17520069. 7325777  
SRR17520069. 7325779  
SRR17520069. 7325781  
SRR17520069. 7325783  
SRR17520069. 7325785  
SRR17520069. 7325787  
SRR17520069. 7327694  
SRR17520069. 7327696  
SRR17520069. 7327698  
SRR17520069. 7327700  
SRR17520069. 7327702  
SRR17520069. 7327704  
SRR17520069. 7327706  
SRR17520069. 7327710  
SRR17520069. 7327712  
SRR17520069. 7327714  
SRR17520069. 7327716  
SRR17520069. 7327718  
SRR17520069. 7327720  
SRR17520069. 7327722  
SRR17520069. 7327724  
SRR17520069. 7327726

SRR17520069. 7327730  
SRR17520069. 7327732  
SRR17520069. 7327734  
SRR17520069. 7327736  
SRR17520069. 7327738  
SRR17520069. 7327740  
SRR17520069. 7327742  
SRR17520069. 7327744  
SRR17520069. 7327746  
SRR17520069. 7327748  
SRR17520069. 7327750  
SRR17520069. 7327752  
SRR17520069. 7327754  
SRR17520069. 7327756  
SRR17520069. 7327758  
SRR17520069. 7327760  
SRR17520069. 7327762  
SRR17520069. 7327764  
SRR17520069. 7327766  
SRR17520069. 7327768  
SRR17520069. 7327770  
SRR17520069. 7327772  
SRR17520069. 7327791  
SRR17520069. 7327793  
SRR17520069. 7327799  
SRR17520069. 7327801  
SRR17520069. 7327805  
SRR17520069. 7327807  
SRR17520069. 7327809  
SRR17520069. 7327811  
SRR17520069. 7327813  
SRR17520069. 7327815  
SRR17520069. 7327817  
SRR17520069. 7327819  
SRR17520069. 7327821  
SRR17520069. 7327823  
SRR17520069. 7327825  
SRR17520069. 7327829  
SRR17520069. 7327831  
SRR17520069. 7327833  
SRR17520069. 7327835  
SRR17520069. 7327837  
SRR17520069. 7327839  
SRR17520069. 7327841  
SRR17520069. 7327843  
SRR17520069. 7327845  
SRR17520069. 7327847

SRR17520069. 7327849  
SRR17520069. 7327853  
SRR17520069. 7327855  
SRR17520069. 7327857  
SRR17520069. 7327859  
SRR17520069. 7327861  
SRR17520069. 7327863  
SRR17520069. 7327865  
SRR17520069. 7327867  
SRR17520069. 7327869  
SRR17520069. 7327871  
SRR17520069. 7327873  
SRR17520069. 7327875  
SRR17520069. 7328952  
SRR17520069. 7328954  
SRR17520069. 7328956  
SRR17520069. 7329841  
SRR17520069. 7329843  
SRR17520069. 7329845  
SRR17520069. 7329847  
SRR17520069. 7329849  
SRR17520069. 7329851  
SRR17520069. 7329853  
SRR17520069. 7329855  
SRR17520069. 7329857  
SRR17520069. 7329859  
SRR17520069. 7330441  
SRR17520069. 7330443  
SRR17520069. 7330445  
SRR17520069. 7330447  
SRR17520069. 7344682  
SRR17520069. 7344684  
SRR17520069. 7344686  
SRR17520069. 7344688  
SRR17520069. 7344690  
SRR17520069. 7344692  
SRR17520069. 7344694  
SRR17520069. 7344696  
SRR17520069. 7344698  
SRR17520069. 7344700  
SRR17520069. 7344702  
SRR17520069. 7344704  
SRR17520069. 7344706  
SRR17520069. 7344708  
SRR17520069. 7344710  
SRR17520069. 7344712  
SRR17520069. 7344714

SRR17520069. 7344716  
SRR17520069. 7344718  
SRR17520069. 7344720  
SRR17520069. 7344722  
SRR17520069. 7344724  
SRR17520069. 7344726  
SRR17520069. 7344728  
SRR17520069. 7344730  
SRR17520069. 7344732  
SRR17520069. 7344734  
SRR17520069. 7344736  
SRR17520069. 7344738  
SRR17520069. 7344740  
SRR17520069. 7344742  
SRR17520069. 7344744  
SRR17520069. 7344746  
SRR17520069. 7344748  
SRR17520069. 7344750  
SRR17520069. 7344752  
SRR17520069. 7344754  
SRR17520069. 7344756  
SRR17520069. 7344758  
SRR17520069. 7344760  
SRR17520069. 7344762  
SRR17520069. 7345311  
SRR17520069. 7345313  
SRR17520069. 7345315  
SRR17520069. 7345317  
SRR17520069. 7345319  
SRR17520069. 7345321  
SRR17520069. 7345323  
SRR17520069. 7345325  
SRR17520069. 7345327  
SRR17520069. 7345329  
SRR17520069. 7345331  
SRR17520069. 7345333  
SRR17520069. 7345335  
SRR17520069. 7345337  
SRR17520069. 7345339  
SRR17520069. 7345341  
SRR17520069. 7345357  
SRR17520069. 7345359  
SRR17520069. 7345361  
SRR17520069. 7345363  
SRR17520069. 7345365  
SRR17520069. 7345367  
SRR17520069. 7345369

SRR17520069. 7345371  
SRR17520069. 7345373  
SRR17520069. 7345375  
SRR17520069. 7345377  
SRR17520069. 7345379  
SRR17520069. 7345381  
SRR17520069. 7345383  
SRR17520069. 7345385  
SRR17520069. 7345387  
SRR17520069. 7345389  
SRR17520069. 7345391  
SRR17520069. 7345393  
SRR17520069. 7345395  
SRR17520069. 7345397  
SRR17520069. 7345399  
SRR17520069. 7345401  
SRR17520069. 7345403  
SRR17520069. 7345405  
SRR17520069. 7345407  
SRR17520069. 7345409  
SRR17520069. 7345411  
SRR17520069. 7345413  
SRR17520069. 7345415  
SRR17520069. 7345417  
SRR17520069. 7345419  
SRR17520069. 7345421  
SRR17520069. 7345423  
SRR17520069. 7345425  
SRR17520069. 7345427  
SRR17520069. 7345429  
SRR17520069. 7345431  
SRR17520069. 7345433  
SRR17520069. 7345435  
SRR17520069. 7345437  
SRR17520069. 7345439  
SRR17520069. 7345441  
SRR17520069. 7345443  
SRR17520069. 7345445  
SRR17520069. 7345447  
SRR17520069. 7345449  
SRR17520069. 7345451  
SRR17520069. 7345453  
SRR17520069. 7345455  
SRR17520069. 7345457  
SRR17520069. 7345459  
SRR17520069. 7345461  
SRR17520069. 7345463

SRR17520069. 7345465  
SRR17520069. 7345467  
SRR17520069. 7345469  
SRR17520069. 7346872  
SRR17520069. 7346874  
SRR17520069. 7346876  
SRR17520069. 7346878  
SRR17520069. 7346880  
SRR17520069. 7346882  
SRR17520069. 7351686  
SRR17520069. 7351688  
SRR17520069. 7351690  
SRR17520069. 7351692  
SRR17520069. 7351694  
SRR17520069. 7351696  
SRR17520069. 7351698  
SRR17520069. 7351700  
SRR17520069. 7351702  
SRR17520069. 7351704  
SRR17520069. 7351706  
SRR17520069. 7351708  
SRR17520069. 7351710  
SRR17520069. 7351712  
SRR17520069. 7351714  
SRR17520069. 7351716  
SRR17520069. 7351718  
SRR17520069. 7351720  
SRR17520069. 7351722  
SRR17520069. 7351724  
SRR17520069. 7351726  
SRR17520069. 7351728  
SRR17520069. 7351730  
SRR17520069. 7351732  
SRR17520069. 7351734  
SRR17520069. 7351736  
SRR17520069. 7351738  
SRR17520069. 7351740  
SRR17520069. 7351742  
SRR17520069. 7351744  
SRR17520069. 7351746  
SRR17520069. 7351748  
SRR17520069. 7351750  
SRR17520069. 7351752  
SRR17520069. 7353562  
SRR17520069. 7357001  
SRR17520069. 7357003  
SRR17520069. 7357005



SRR17520069. 7357007  
SRR17520069. 7357009  
SRR17520069. 7357011  
SRR17520069. 7357013  
SRR17520069. 7357015  
SRR17520069. 7357017  
SRR17520069. 7357019  
SRR17520069. 7357021  
SRR17520069. 7357023  
SRR17520069. 7357025  
SRR17520069. 7357027  
SRR17520069. 7357029  
SRR17520069. 7357031  
SRR17520069. 7357033  
SRR17520069. 7357035  
SRR17520069. 7357037  
SRR17520069. 7357039  
SRR17520069. 7357041  
SRR17520069. 7357043  
SRR17520069. 7357045  
SRR17520069. 7357047  
SRR17520069. 7357049  
SRR17520069. 7362520  
SRR17520069. 7362522  
SRR17520069. 7362524  
SRR17520069. 7362526  
SRR17520069. 7370271  
SRR17520069. 7370273  
SRR17520069. 7370275  
SRR17520069. 7370277  
SRR17520069. 7370279  
SRR17520069. 7370281  
SRR17520069. 7370283  
SRR17520069. 7370287  
SRR17520069. 7370289  
SRR17520069. 7370291  
SRR17520069. 7370293  
SRR17520069. 7370295  
SRR17520069. 7370297  
SRR17520069. 7370988  
SRR17520069. 7370990  
SRR17520069. 7370992  
SRR17520069. 7370994  
SRR17520069. 7370998  
SRR17520069. 7371000  
SRR17520069. 7371002  
SRR17520069. 7371004

SRR17520069. 7371006  
SRR17520069. 7371008  
SRR17520069. 7371010  
SRR17520069. 7371012  
SRR17520069. 7371014  
SRR17520069. 7371016  
SRR17520069. 7371018  
SRR17520069. 7371020  
SRR17520069. 7371022  
SRR17520069. 7371024  
SRR17520069. 7371026  
SRR17520069. 7371028  
SRR17520069. 7371030  
SRR17520069. 7371032  
SRR17520069. 7371034  
SRR17520069. 7371036  
SRR17520069. 7371038  
SRR17520069. 7371040  
SRR17520069. 7371042  
SRR17520069. 7371044  
SRR17520069. 7371046  
SRR17520069. 7371048  
SRR17520069. 7371050  
SRR17520069. 7371052  
SRR17520069. 7376216  
SRR17520069. 7376218  
SRR17520069. 7376220  
SRR17520069. 7376222  
SRR17520069. 7376224  
SRR17520069. 7376226  
SRR17520069. 7376228  
SRR17520069. 7376230  
SRR17520069. 7376232  
SRR17520069. 7376234  
SRR17520069. 7376236  
SRR17520069. 7376238  
SRR17520069. 7376240  
SRR17520069. 7376242  
SRR17520069. 7376244  
SRR17520069. 7376246  
SRR17520069. 7376248  
SRR17520069. 7376250  
SRR17520069. 7376252  
SRR17520069. 7376254  
SRR17520069. 7376256  
SRR17520069. 7376258  
SRR17520069. 7376260

SRR17520069. 7387967  
SRR17520069. 7388039  
SRR17520069. 7388086  
SRR17520069. 7388096  
SRR17520069. 7389645  
SRR17520069. 7389647  
SRR17520069. 7389649  
SRR17520069. 7389651  
SRR17520069. 7389653  
SRR17520069. 7389655  
SRR17520069. 7389657  
SRR17520069. 7389659  
SRR17520069. 7389661  
SRR17520069. 7389663  
SRR17520069. 7389665  
SRR17520069. 7389667  
SRR17520069. 7389669  
SRR17520069. 7389673  
SRR17520069. 7389675  
SRR17520069. 7389677  
SRR17520069. 7389679  
SRR17520069. 7389681  
SRR17520069. 7392714  
SRR17520069. 7392716  
SRR17520069. 7392718  
SRR17520069. 7392720  
SRR17520069. 7392722  
SRR17520069. 7392724  
SRR17520069. 7392726  
SRR17520069. 7394919  
SRR17520069. 7394921  
SRR17520069. 7394925  
SRR17520069. 7394927  
SRR17520069. 7394929  
SRR17520069. 7394931  
SRR17520069. 7394933  
SRR17520069. 7394935  
SRR17520069. 7394939  
SRR17520069. 7394941  
SRR17520069. 7394943  
SRR17520069. 7394945  
SRR17520069. 7394947  
SRR17520069. 7394949  
SRR17520069. 7394951  
SRR17520069. 7394955  
SRR17520069. 7394957  
SRR17520069. 7394959

SRR17520069. 7394961  
SRR17520069. 7394963  
SRR17520069. 7394969  
SRR17520069. 7394973  
SRR17520069. 7394975  
SRR17520069. 7394977  
SRR17520069. 7394979  
SRR17520069. 7394981  
SRR17520069. 7394983  
SRR17520069. 7394985  
SRR17520069. 7394987  
SRR17520069. 7394989  
SRR17520069. 7394991  
SRR17520069. 7394993  
SRR17520069. 7394995  
SRR17520069. 7394997  
SRR17520069. 7395001  
SRR17520069. 7395003  
SRR17520069. 7395005  
SRR17520069. 7395007  
SRR17520069. 7395009  
SRR17520069. 7395011  
SRR17520069. 7395013  
SRR17520069. 7395015  
SRR17520069. 7395017  
SRR17520069. 7395019  
SRR17520069. 7395021  
SRR17520069. 7395023  
SRR17520069. 7395025  
SRR17520069. 7395442  
SRR17520069. 7395444  
SRR17520069. 7395446  
SRR17520069. 7395448  
SRR17520069. 7395450  
SRR17520069. 7395452  
SRR17520069. 7398480  
SRR17520069. 7398482  
SRR17520069. 7398486  
SRR17520069. 7398488  
SRR17520069. 7398490  
SRR17520069. 7398492  
SRR17520069. 7398494  
SRR17520069. 7398496  
SRR17520069. 7398498  
SRR17520069. 7398500  
SRR17520069. 7398502  
SRR17520069. 7398504

SRR17520069. 7398506  
SRR17520069. 7398508  
SRR17520069. 7398510  
SRR17520069. 7398512  
SRR17520069. 7398514  
SRR17520069. 7398516  
SRR17520069. 7398518  
SRR17520069. 7398520  
SRR17520069. 7398522  
SRR17520069. 7400362  
SRR17520069. 7400364  
SRR17520069. 7400366  
SRR17520069. 7400368  
SRR17520069. 7400370  
SRR17520069. 7400372  
SRR17520069. 7400374  
SRR17520069. 7401753  
SRR17520069. 7401755  
SRR17520069. 7401757  
SRR17520069. 7401761  
SRR17520069. 7401765  
SRR17520069. 7401767  
SRR17520069. 7401769  
SRR17520069. 7401771  
SRR17520069. 7401773  
SRR17520069. 7401775  
SRR17520069. 7401779  
SRR17520069. 7401781  
SRR17520069. 7401783  
SRR17520069. 7401785  
SRR17520069. 7401787  
SRR17520069. 7401789  
SRR17520069. 7401791  
SRR17520069. 7401793  
SRR17520069. 7401797  
SRR17520069. 7401803  
SRR17520069. 7401805  
SRR17520069. 7401807  
SRR17520069. 7401809  
SRR17520069. 7401811  
SRR17520069. 7401813  
SRR17520069. 7401815  
SRR17520069. 7401817  
SRR17520069. 7401820  
SRR17520069. 7401822  
SRR17520069. 7401824  
SRR17520069. 7401826

SRR17520069. 7401828  
SRR17520069. 7401830  
SRR17520069. 7401832  
SRR17520069. 7401834  
SRR17520069. 7401836  
SRR17520069. 7401838  
SRR17520069. 7401840  
SRR17520069. 7401842  
SRR17520069. 7401844  
SRR17520069. 7401846  
SRR17520069. 7401848  
SRR17520069. 7401850  
SRR17520069. 7401852  
SRR17520069. 7401854  
SRR17520069. 7401856  
SRR17520069. 7401858  
SRR17520069. 7401860  
SRR17520069. 7401864  
SRR17520069. 7401866  
SRR17520069. 7401870  
SRR17520069. 7401872  
SRR17520069. 7401874  
SRR17520069. 7401876  
SRR17520069. 7401878  
SRR17520069. 7401880  
SRR17520069. 7401882  
SRR17520069. 7401884  
SRR17520069. 7401888  
SRR17520069. 7401892  
SRR17520069. 7401894  
SRR17520069. 7401896  
SRR17520069. 7401898  
SRR17520069. 7401900  
SRR17520069. 7401902  
SRR17520069. 7401904  
SRR17520069. 7401906  
SRR17520069. 7401908  
SRR17520069. 7401910  
SRR17520069. 7401912  
SRR17520069. 7401914  
SRR17520069. 7409925  
SRR17520069. 7409927  
SRR17520069. 7420551  
SRR17520069. 7420553  
SRR17520069. 7420555  
SRR17520069. 7420557  
SRR17520069. 7420559

SRR17520069. 7420561  
SRR17520069. 7420563  
SRR17520069. 7420565  
SRR17520069. 7420567  
SRR17520069. 7420569  
SRR17520069. 7420571  
SRR17520069. 7420573  
SRR17520069. 7420575  
SRR17520069. 7420577  
SRR17520069. 7420579  
SRR17520069. 7420581  
SRR17520069. 7420583  
SRR17520069. 7420585  
SRR17520069. 7420587  
SRR17520069. 7420589  
SRR17520069. 7420591  
SRR17520069. 7420593  
SRR17520069. 7420595  
SRR17520069. 7420597  
SRR17520069. 7420599  
SRR17520069. 7420601  
SRR17520069. 7420603  
SRR17520069. 7420605  
SRR17520069. 7420607  
SRR17520069. 7420609  
SRR17520069. 7420611  
SRR17520069. 7424572  
SRR17520069. 7424574  
SRR17520069. 7430133  
SRR17520069. 7430135  
SRR17520069. 7430137  
SRR17520069. 7430139  
SRR17520069. 7430141  
SRR17520069. 7430143  
SRR17520069. 7430145  
SRR17520069. 7430147  
SRR17520069. 7430149  
SRR17520069. 7430151  
SRR17520069. 7430153  
SRR17520069. 7430155  
SRR17520069. 7430157  
SRR17520069. 7430159  
SRR17520069. 7430161  
SRR17520069. 7430163  
SRR17520069. 7430165  
SRR17520069. 7430167  
SRR17520069. 7430169

SRR17520069.7430171  
SRR17520069.7430173  
SRR17520069.7430175  
SRR17520069.7430179  
SRR17520069.7430181  
SRR17520069.7430183  
SRR17520069.7430185  
SRR17520069.7430187  
SRR17520069.7430189  
SRR17520069.7430191  
SRR17520069.7430193  
SRR17520069.7430195  
SRR17520069.7430197  
SRR17520069.7430199  
SRR17520069.7430201  
SRR17520069.7432604  
SRR17520069.7432610  
SRR17520069.7432612  
SRR17520069.7432614  
SRR17520069.7432616  
SRR17520069.7432618  
SRR17520069.7432620  
SRR17520069.7432622  
SRR17520069.7432624  
SRR17520069.7432628  
SRR17520069.7432630  
SRR17520069.7432632  
SRR17520069.7432634  
SRR17520069.7432636  
SRR17520069.7432638  
SRR17520069.7432640  
SRR17520069.7432642  
SRR17520069.7432644  
SRR17520069.7432646  
SRR17520069.7432648  
SRR17520069.7432654  
SRR17520069.7432656  
SRR17520069.7432658  
SRR17520069.7432660  
SRR17520069.7432662  
SRR17520069.7432664  
SRR17520069.7432666  
SRR17520069.7432668  
SRR17520069.7432670  
SRR17520069.7432672  
SRR17520069.7432674  
SRR17520069.7432676



SRR17520069. 7432678  
SRR17520069. 7432680  
SRR17520069. 7432682  
SRR17520069. 7432684  
SRR17520069. 7432686  
SRR17520069. 7432688  
SRR17520069. 7432690  
SRR17520069. 7432692  
SRR17520069. 7432694  
SRR17520069. 7432696  
SRR17520069. 7432698  
SRR17520069. 7432700  
SRR17520069. 7432702  
SRR17520069. 7432704  
SRR17520069. 7432706  
SRR17520069. 7432708  
SRR17520069. 7432710  
SRR17520069. 7432714  
SRR17520069. 7432716  
SRR17520069. 7432718  
SRR17520069. 7450977  
SRR17520069. 7450979  
SRR17520069. 7450981  
SRR17520069. 7450983  
SRR17520069. 7450985  
SRR17520069. 7450989  
SRR17520069. 7450991  
SRR17520069. 7450993  
SRR17520069. 7450995  
SRR17520069. 7450997  
SRR17520069. 7450999  
SRR17520069. 7451001  
SRR17520069. 7451003  
SRR17520069. 7451007  
SRR17520069. 7451009  
SRR17520069. 7451011  
SRR17520069. 7451013  
SRR17520069. 7451015  
SRR17520069. 7451017  
SRR17520069. 7451019  
SRR17520069. 7451021  
SRR17520069. 7451023  
SRR17520069. 7451025  
SRR17520069. 7452140  
SRR17520069. 7452142  
SRR17520069. 7452144  
SRR17520069. 7452146

SRR17520069.7452148  
SRR17520069.7452150  
SRR17520069.7452152  
SRR17520069.7452154  
SRR17520069.7452156  
SRR17520069.7452158  
SRR17520069.7452160  
SRR17520069.7455642  
SRR17520069.7455646  
SRR17520069.7455648  
SRR17520069.7455650  
SRR17520069.7455652  
SRR17520069.7456575  
SRR17520069.7456577  
SRR17520069.7456579  
SRR17520069.7456581  
SRR17520069.7456583  
SRR17520069.7456585  
SRR17520069.7456587  
SRR17520069.7456589  
SRR17520069.7456591  
SRR17520069.7456593  
SRR17520069.7456595  
SRR17520069.7456597  
SRR17520069.7456599  
SRR17520069.7456601  
SRR17520069.7456603  
SRR17520069.7456605  
SRR17520069.7456607  
SRR17520069.7456609  
SRR17520069.7456611  
SRR17520069.7456613  
SRR17520069.7456615  
SRR17520069.7456617  
SRR17520069.7456619  
SRR17520069.7456621  
SRR17520069.7456623  
SRR17520069.7456625  
SRR17520069.7456627  
SRR17520069.7456629  
SRR17520069.7456631  
SRR17520069.7456633  
SRR17520069.7456635  
SRR17520069.7456637  
SRR17520069.7456639  
SRR17520069.7456641  
SRR17520069.7456643

SRR17520069.7456645  
SRR17520069.7456647  
SRR17520069.7457644  
SRR17520069.7457646  
SRR17520069.7457648  
SRR17520069.7457650  
SRR17520069.7457652  
SRR17520069.7457654  
SRR17520069.7457656  
SRR17520069.7457658  
SRR17520069.7457660  
SRR17520069.7457662  
SRR17520069.7457664  
SRR17520069.7457666  
SRR17520069.7457668  
SRR17520069.7457670  
SRR17520069.7457672  
SRR17520069.7457674  
SRR17520069.7457676  
SRR17520069.7457678  
SRR17520069.7457680  
SRR17520069.7457682  
SRR17520069.7457684  
SRR17520069.7457686  
SRR17520069.7457688  
SRR17520069.7457690  
SRR17520069.7457692  
SRR17520069.7457694  
SRR17520069.7457696  
SRR17520069.7457698  
SRR17520069.7457700  
SRR17520069.7457702  
SRR17520069.7457704  
SRR17520069.7457706  
SRR17520069.7457708  
SRR17520069.7457710  
SRR17520069.7457712  
SRR17520069.7457714  
SRR17520069.7457716  
SRR17520069.7457718  
SRR17520069.7457720  
SRR17520069.7457722  
SRR17520069.7457724  
SRR17520069.7457726  
SRR17520069.7457728  
SRR17520069.7457730  
SRR17520069.7457732

SRR17520069.7457734  
SRR17520069.7458621  
SRR17520069.7458623  
SRR17520069.7458625  
SRR17520069.7458627  
SRR17520069.7458629  
SRR17520069.7458631  
SRR17520069.7458633  
SRR17520069.7458635  
SRR17520069.7458637  
SRR17520069.7458639  
SRR17520069.7458641  
SRR17520069.7458643  
SRR17520069.7458645  
SRR17520069.7458647  
SRR17520069.7458649  
SRR17520069.7458651  
SRR17520069.7458653  
SRR17520069.7458655  
SRR17520069.7463534  
SRR17520069.7463536  
SRR17520069.7463538  
SRR17520069.7463540  
SRR17520069.7463542  
SRR17520069.7463544  
SRR17520069.7463546  
SRR17520069.7463550  
SRR17520069.7463552  
SRR17520069.7463554  
SRR17520069.7463556  
SRR17520069.7463558  
SRR17520069.7463560  
SRR17520069.7463562  
SRR17520069.7463564  
SRR17520069.7463566  
SRR17520069.7463568  
SRR17520069.7463570  
SRR17520069.7463572  
SRR17520069.7463574  
SRR17520069.7463576  
SRR17520069.7463578  
SRR17520069.7463580  
SRR17520069.7463582  
SRR17520069.7463584  
SRR17520069.7463586  
SRR17520069.7463588  
SRR17520069.7463590

SRR17520069.7470018  
SRR17520069.7470020  
SRR17520069.7470022  
SRR17520069.7470024  
SRR17520069.7470026  
SRR17520069.7470028  
SRR17520069.7470030  
SRR17520069.7470032  
SRR17520069.7470034  
SRR17520069.7470036  
SRR17520069.7470038  
SRR17520069.7470040  
SRR17520069.7470042  
SRR17520069.7470044  
SRR17520069.7470046  
SRR17520069.7470048  
SRR17520069.7470050  
SRR17520069.7470052  
SRR17520069.7470054  
SRR17520069.7470056  
SRR17520069.7470058  
SRR17520069.7470486  
SRR17520069.7470488  
SRR17520069.7470490  
SRR17520069.7470492  
SRR17520069.7470494  
SRR17520069.7470496  
SRR17520069.7470498  
SRR17520069.7470500  
SRR17520069.7470502  
SRR17520069.7470504  
SRR17520069.7470506  
SRR17520069.7470508  
SRR17520069.7470510  
SRR17520069.7470512  
SRR17520069.7470514  
SRR17520069.7471813  
SRR17520069.7471815  
SRR17520069.7471817  
SRR17520069.7472356  
SRR17520069.7472358  
SRR17520069.7472360  
SRR17520069.7472362  
SRR17520069.7472364  
SRR17520069.7472366  
SRR17520069.7472368  
SRR17520069.7472370

SRR17520069. 7472372  
SRR17520069. 7472374  
SRR17520069. 7472376  
SRR17520069. 7472474  
SRR17520069. 7472476  
SRR17520069. 7472478  
SRR17520069. 7472480  
SRR17520069. 7472482  
SRR17520069. 7475309  
SRR17520069. 7475311  
SRR17520069. 7475313  
SRR17520069. 7475315  
SRR17520069. 7476391  
SRR17520069. 7476393  
SRR17520069. 7476395  
SRR17520069. 7476480  
SRR17520069. 7476482  
SRR17520069. 7476484  
SRR17520069. 7476486  
SRR17520069. 7476488  
SRR17520069. 7476490  
SRR17520069. 7476492  
SRR17520069. 7476494  
SRR17520069. 7476496  
SRR17520069. 7476498  
SRR17520069. 7476500  
SRR17520069. 7476502  
SRR17520069. 7476504  
SRR17520069. 7476506  
SRR17520069. 7476508  
SRR17520069. 7476510  
SRR17520069. 7476512  
SRR17520069. 7476514  
SRR17520069. 7476516  
SRR17520069. 7476518  
SRR17520069. 7476520  
SRR17520069. 7476522  
SRR17520069. 7476524  
SRR17520069. 7476526  
SRR17520069. 7476528  
SRR17520069. 7476530  
SRR17520069. 7476532  
SRR17520069. 7476534  
SRR17520069. 7476536  
SRR17520069. 7476538  
SRR17520069. 7476540  
SRR17520069. 7478597

SRR17520069.7478599  
SRR17520069.7478601  
SRR17520069.7478605  
SRR17520069.7478607  
SRR17520069.7478609  
SRR17520069.7478611  
SRR17520069.7478613  
SRR17520069.7478615  
SRR17520069.7478617  
SRR17520069.7478619  
SRR17520069.7478621  
SRR17520069.7478623  
SRR17520069.7478625  
SRR17520069.7479491  
SRR17520069.7479493  
SRR17520069.7479495  
SRR17520069.7479497  
SRR17520069.7479499  
SRR17520069.7479501  
SRR17520069.7479503  
SRR17520069.7479505  
SRR17520069.7479507  
SRR17520069.7479509  
SRR17520069.7479511  
SRR17520069.7479513  
SRR17520069.7479515  
SRR17520069.7479517  
SRR17520069.7479519  
SRR17520069.7479521  
SRR17520069.7479523  
SRR17520069.7479656  
SRR17520069.7479658  
SRR17520069.7479660  
SRR17520069.7479662  
SRR17520069.7479664  
SRR17520069.7479666  
SRR17520069.7479668  
SRR17520069.7479670  
SRR17520069.7479672  
SRR17520069.7479674  
SRR17520069.7479676  
SRR17520069.7479678  
SRR17520069.7479680  
SRR17520069.7479682  
SRR17520069.7479684  
SRR17520069.7479686  
SRR17520069.7479688

SRR17520069.7479690  
SRR17520069.7479692  
SRR17520069.7479696  
SRR17520069.7479698  
SRR17520069.7479700  
SRR17520069.7479702  
SRR17520069.7479704  
SRR17520069.7479706  
SRR17520069.7479710  
SRR17520069.7479712  
SRR17520069.7479714  
SRR17520069.7479716  
SRR17520069.7479718  
SRR17520069.7479720  
SRR17520069.7479722  
SRR17520069.7479724  
SRR17520069.7479726  
SRR17520069.7479728  
SRR17520069.7479730  
SRR17520069.7479732  
SRR17520069.7479734  
SRR17520069.7479736  
SRR17520069.7479738  
SRR17520069.7483025  
SRR17520069.7483027  
SRR17520069.7483029  
SRR17520069.7483031  
SRR17520069.7483033  
SRR17520069.7483035  
SRR17520069.7483039  
SRR17520069.7483041  
SRR17520069.7483043  
SRR17520069.7483045  
SRR17520069.7483047  
SRR17520069.7483049  
SRR17520069.7483051  
SRR17520069.7483053  
SRR17520069.7483055  
SRR17520069.7488993  
SRR17520069.7488995  
SRR17520069.7488997  
SRR17520069.7490493  
SRR17520069.7490495  
SRR17520069.7490497  
SRR17520069.7490499  
SRR17520069.7490501  
SRR17520069.7490503



SRR17520069. 7490505  
SRR17520069. 7490507  
SRR17520069. 7490509  
SRR17520069. 7490511  
SRR17520069. 7490513  
SRR17520069. 7490515  
SRR17520069. 7490517  
SRR17520069. 7490519  
SRR17520069. 7490521  
SRR17520069. 7490523  
SRR17520069. 7490525  
SRR17520069. 7490527  
SRR17520069. 7490529  
SRR17520069. 7490531  
SRR17520069. 7490533  
SRR17520069. 7490535  
SRR17520069. 7490537  
SRR17520069. 7490539  
SRR17520069. 7490541  
SRR17520069. 7490543  
SRR17520069. 7490545  
SRR17520069. 7490547  
SRR17520069. 7490549  
SRR17520069. 7490551  
SRR17520069. 7490553  
SRR17520069. 7490555  
SRR17520069. 7490557  
SRR17520069. 7490559  
SRR17520069. 7490561  
SRR17520069. 7490563  
SRR17520069. 7490565  
SRR17520069. 7490567  
SRR17520069. 7490569  
SRR17520069. 7490571  
SRR17520069. 7490573  
SRR17520069. 7490575  
SRR17520069. 7490577  
SRR17520069. 7490579  
SRR17520069. 7490581  
SRR17520069. 7490583  
SRR17520069. 7490585  
SRR17520069. 7490587  
SRR17520069. 7490589  
SRR17520069. 7490591  
SRR17520069. 7490593  
SRR17520069. 7490595  
SRR17520069. 7490597

SRR17520069. 7490599  
SRR17520069. 7490601  
SRR17520069. 7490603  
SRR17520069. 7490605  
SRR17520069. 7490607  
SRR17520069. 7490609  
SRR17520069. 7490611  
SRR17520069. 7490613  
SRR17520069. 7490615  
SRR17520069. 7490617  
SRR17520069. 7490619  
SRR17520069. 7490621  
SRR17520069. 7490623  
SRR17520069. 7490625  
SRR17520069. 7490627  
SRR17520069. 7490629  
SRR17520069. 7490631  
SRR17520069. 7490633  
SRR17520069. 7490635  
SRR17520069. 7490637  
SRR17520069. 7490639  
SRR17520069. 7490641  
SRR17520069. 7490643  
SRR17520069. 7490645  
SRR17520069. 7490647  
SRR17520069. 7490649  
SRR17520069. 7490651  
SRR17520069. 7490653  
SRR17520069. 7490655  
SRR17520069. 7490657  
SRR17520069. 7490659  
SRR17520069. 7490661  
SRR17520069. 7490663  
SRR17520069. 7491922  
SRR17520069. 7491924  
SRR17520069. 7491926  
SRR17520069. 7491928  
SRR17520069. 7491930  
SRR17520069. 7491932  
SRR17520069. 7491934  
SRR17520069. 7491936  
SRR17520069. 7491938  
SRR17520069. 7491940  
SRR17520069. 7491944  
SRR17520069. 7491946  
SRR17520069. 7491948  
SRR17520069. 7491950

SRR17520069.7491952  
SRR17520069.7491954  
SRR17520069.7491956  
SRR17520069.7491958  
SRR17520069.7491960  
SRR17520069.7491962  
SRR17520069.7491964  
SRR17520069.7491966  
SRR17520069.7491968  
SRR17520069.7491970  
SRR17520069.7491972  
SRR17520069.7491974  
SRR17520069.7497821  
SRR17520069.7497823  
SRR17520069.7497825  
SRR17520069.7500971  
SRR17520069.7515213  
SRR17520069.7516544  
SRR17520069.7516546  
SRR17520069.7516548  
SRR17520069.7516550  
SRR17520069.7516552  
SRR17520069.7516554  
SRR17520069.7516556  
SRR17520069.7516558  
SRR17520069.7516560  
SRR17520069.7516562  
SRR17520069.7520799  
SRR17520069.7520801  
SRR17520069.7520803  
SRR17520069.7520805  
SRR17520069.7520807  
SRR17520069.7520809  
SRR17520069.7520811  
SRR17520069.7520813  
SRR17520069.7520815  
SRR17520069.7520817  
SRR17520069.7524824  
SRR17520069.7524826  
SRR17520069.7524828  
SRR17520069.7524830  
SRR17520069.7524832  
SRR17520069.7524834  
SRR17520069.7524836  
SRR17520069.7524838  
SRR17520069.7524840  
SRR17520069.7524842

SRR17520069. 7524844  
SRR17520069. 7524846  
SRR17520069. 7524848  
SRR17520069. 7524850  
SRR17520069. 7524852  
SRR17520069. 7524854  
SRR17520069. 7524856  
SRR17520069. 7524858  
SRR17520069. 7524860  
SRR17520069. 7524862  
SRR17520069. 7524864  
SRR17520069. 7524866  
SRR17520069. 7524868  
SRR17520069. 7524870  
SRR17520069. 7524872  
SRR17520069. 7524874  
SRR17520069. 7524876  
SRR17520069. 7524878  
SRR17520069. 7524880  
SRR17520069. 7524882  
SRR17520069. 7524884  
SRR17520069. 7524886  
SRR17520069. 7529718  
SRR17520069. 7529720  
SRR17520069. 7529722  
SRR17520069. 7529724  
SRR17520069. 7529726  
SRR17520069. 7529728  
SRR17520069. 7529730  
SRR17520069. 7529732  
SRR17520069. 7529734  
SRR17520069. 7529738  
SRR17520069. 7529740  
SRR17520069. 7529742  
SRR17520069. 7529744  
SRR17520069. 7529746  
SRR17520069. 7529748  
SRR17520069. 7529750  
SRR17520069. 7529752  
SRR17520069. 7529754  
SRR17520069. 7529756  
SRR17520069. 7529758  
SRR17520069. 7529760  
SRR17520069. 7529762  
SRR17520069. 7529764  
SRR17520069. 7529766  
SRR17520069. 7529768

SRR17520069. 7529770  
SRR17520069. 7529772  
SRR17520069. 7529774  
SRR17520069. 7529776  
SRR17520069. 7529778  
SRR17520069. 7529780  
SRR17520069. 7529782  
SRR17520069. 7529784  
SRR17520069. 7529786  
SRR17520069. 7529788  
SRR17520069. 7529790  
SRR17520069. 7529792  
SRR17520069. 7529794  
SRR17520069. 7529796  
SRR17520069. 7529798  
SRR17520069. 7529800  
SRR17520069. 7529802  
SRR17520069. 7529804  
SRR17520069. 7529806  
SRR17520069. 7529808  
SRR17520069. 7529810  
SRR17520069. 7529812  
SRR17520069. 7529814  
SRR17520069. 7529816  
SRR17520069. 7529818  
SRR17520069. 7535333  
SRR17520069. 7535335  
SRR17520069. 7535337  
SRR17520069. 7535339  
SRR17520069. 7535341  
SRR17520069. 7535343  
SRR17520069. 7535345  
SRR17520069. 7535349  
SRR17520069. 7535351  
SRR17520069. 7535353  
SRR17520069. 7535355  
SRR17520069. 7535357  
SRR17520069. 7535359  
SRR17520069. 7535361  
SRR17520069. 7535363  
SRR17520069. 7535365  
SRR17520069. 7535367  
SRR17520069. 7535369  
SRR17520069. 7535371  
SRR17520069. 7535373  
SRR17520069. 7535375  
SRR17520069. 7544995

SRR17520069.7544997  
SRR17520069.7544999  
SRR17520069.7545001  
SRR17520069.7545003  
SRR17520069.7545005  
SRR17520069.7545007  
SRR17520069.7545009  
SRR17520069.7545011  
SRR17520069.7545013  
SRR17520069.7545015  
SRR17520069.7545017  
SRR17520069.7545019  
SRR17520069.7545021  
SRR17520069.7545023  
SRR17520069.7545025  
SRR17520069.7545027  
SRR17520069.7545029  
SRR17520069.7545031  
SRR17520069.7545033  
SRR17520069.7545035  
SRR17520069.7545037  
SRR17520069.7545039  
SRR17520069.7545041  
SRR17520069.7545043  
SRR17520069.7545045  
SRR17520069.7545047  
SRR17520069.7545049  
SRR17520069.7545051  
SRR17520069.7545053  
SRR17520069.7545055  
SRR17520069.7545057  
SRR17520069.7545059  
SRR17520069.7545061  
SRR17520069.7545063  
SRR17520069.7545065  
SRR17520069.7545067  
SRR17520069.7545069  
SRR17520069.7545071  
SRR17520069.7545073  
SRR17520069.7545361  
SRR17520069.7545363  
SRR17520069.7545365  
SRR17520069.7545367  
SRR17520069.7545369  
SRR17520069.7545371  
SRR17520069.7545373  
SRR17520069.7545375

SRR17520069.7545377  
SRR17520069.7545379  
SRR17520069.7545381  
SRR17520069.7545383  
SRR17520069.7545385  
SRR17520069.7545387  
SRR17520069.7545389  
SRR17520069.7545391  
SRR17520069.7545393  
SRR17520069.7545395  
SRR17520069.7545397  
SRR17520069.7545399  
SRR17520069.7545401  
SRR17520069.7545403  
SRR17520069.7545405  
SRR17520069.7545407  
SRR17520069.7545409  
SRR17520069.7545411  
SRR17520069.7545413  
SRR17520069.7545415  
SRR17520069.7545417  
SRR17520069.7545419  
SRR17520069.7545421  
SRR17520069.7545423  
SRR17520069.7545425  
SRR17520069.7545427  
SRR17520069.7545429  
SRR17520069.7545431  
SRR17520069.7545433  
SRR17520069.7545435  
SRR17520069.7545437  
SRR17520069.7545439  
SRR17520069.7545441  
SRR17520069.7545443  
SRR17520069.7545445  
SRR17520069.7545447  
SRR17520069.7545449  
SRR17520069.7545451  
SRR17520069.7545453  
SRR17520069.7545455  
SRR17520069.7545457  
SRR17520069.7545459  
SRR17520069.7545461  
SRR17520069.7545463  
SRR17520069.7545465  
SRR17520069.7545467  
SRR17520069.7545469

SRR17520069.7545471  
SRR17520069.7545473  
SRR17520069.7545475  
SRR17520069.7545477  
SRR17520069.7545479  
SRR17520069.7545481  
SRR17520069.7545483  
SRR17520069.7545485  
SRR17520069.7545487  
SRR17520069.7545489  
SRR17520069.7545491  
SRR17520069.7545493  
SRR17520069.7545495  
SRR17520069.7545497  
SRR17520069.7545499  
SRR17520069.7545501  
SRR17520069.7545503  
SRR17520069.7545505  
SRR17520069.7545507  
SRR17520069.7545509  
SRR17520069.7545511  
SRR17520069.7545513  
SRR17520069.7545515  
SRR17520069.7545517  
SRR17520069.7545519  
SRR17520069.7545521  
SRR17520069.7549749  
SRR17520069.7549751  
SRR17520069.7551466  
SRR17520069.7551468  
SRR17520069.7551470  
SRR17520069.7551472  
SRR17520069.7551474  
SRR17520069.7551476  
SRR17520069.7551478  
SRR17520069.7551480  
SRR17520069.7551482  
SRR17520069.7551484  
SRR17520069.7556115  
SRR17520069.7557124  
SRR17520069.7557126  
SRR17520069.7557128  
SRR17520069.7557130  
SRR17520069.7557132  
SRR17520069.7557134  
SRR17520069.7557136  
SRR17520069.7557138



SRR17520069.7557140  
SRR17520069.7557142  
SRR17520069.7557144  
SRR17520069.7557146  
SRR17520069.7557148  
SRR17520069.7557150  
SRR17520069.7557152  
SRR17520069.7557243  
SRR17520069.7557245  
SRR17520069.7557247  
SRR17520069.7557249  
SRR17520069.7557251  
SRR17520069.7557253  
SRR17520069.7557255  
SRR17520069.7557257  
SRR17520069.7557259  
SRR17520069.7557261  
SRR17520069.7557263  
SRR17520069.7557265  
SRR17520069.7557267  
SRR17520069.7557269  
SRR17520069.7557271  
SRR17520069.7557273  
SRR17520069.7557275  
SRR17520069.7557277  
SRR17520069.7557279  
SRR17520069.7557281  
SRR17520069.7557283  
SRR17520069.7557285  
SRR17520069.7557287  
SRR17520069.7557289  
SRR17520069.7557291  
SRR17520069.7557293  
SRR17520069.7557295  
SRR17520069.7557297  
SRR17520069.7557299  
SRR17520069.7557301  
SRR17520069.7557303  
SRR17520069.7557305  
SRR17520069.7557307  
SRR17520069.7557309  
SRR17520069.7557311  
SRR17520069.7557313  
SRR17520069.7557315  
SRR17520069.7557317  
SRR17520069.7557319  
SRR17520069.7557321

SRR17520069. 7557323  
SRR17520069. 7559525  
SRR17520069. 7559527  
SRR17520069. 7559768  
SRR17520069. 7562664  
SRR17520069. 7562666  
SRR17520069. 7562668  
SRR17520069. 7562670  
SRR17520069. 7562672  
SRR17520069. 7564621  
SRR17520069. 7564623  
SRR17520069. 7564625  
SRR17520069. 7564627  
SRR17520069. 7564629  
SRR17520069. 7564631  
SRR17520069. 7564633  
SRR17520069. 7564635  
SRR17520069. 7564637  
SRR17520069. 7564639  
SRR17520069. 7564641  
SRR17520069. 7564643  
SRR17520069. 7564645  
SRR17520069. 7564647  
SRR17520069. 7564649  
SRR17520069. 7564651  
SRR17520069. 7564653  
SRR17520069. 7564655  
SRR17520069. 7564657  
SRR17520069. 7564659  
SRR17520069. 7564661  
SRR17520069. 7564663  
SRR17520069. 7564667  
SRR17520069. 7564669  
SRR17520069. 7564671  
SRR17520069. 7564673  
SRR17520069. 7564675  
SRR17520069. 7564677  
SRR17520069. 7564679  
SRR17520069. 7564681  
SRR17520069. 7564683  
SRR17520069. 7564685  
SRR17520069. 7564687  
SRR17520069. 7564689  
SRR17520069. 7564691  
SRR17520069. 7564693  
SRR17520069. 7564695  
SRR17520069. 7564697

SRR17520069. 7564699  
SRR17520069. 7564703  
SRR17520069. 7564705  
SRR17520069. 7564707  
SRR17520069. 7564709  
SRR17520069. 7566129  
SRR17520069. 7566131  
SRR17520069. 7569771  
SRR17520069. 7579420  
SRR17520069. 7579422  
SRR17520069. 7579424  
SRR17520069. 7579426  
SRR17520069. 7579428  
SRR17520069. 7579430  
SRR17520069. 7579432  
SRR17520069. 7579434  
SRR17520069. 7579436  
SRR17520069. 7579438  
SRR17520069. 7579440  
SRR17520069. 7579442  
SRR17520069. 7579444  
SRR17520069. 7579446  
SRR17520069. 7579448  
SRR17520069. 7579450  
SRR17520069. 7579452  
SRR17520069. 7579454  
SRR17520069. 7579456  
SRR17520069. 7579458  
SRR17520069. 7579460  
SRR17520069. 7579462  
SRR17520069. 7579464  
SRR17520069. 7579466  
SRR17520069. 7579468  
SRR17520069. 7579470  
SRR17520069. 7579472  
SRR17520069. 7579474  
SRR17520069. 7579476  
SRR17520069. 7579478  
SRR17520069. 7579480  
SRR17520069. 7579482  
SRR17520069. 7579484  
SRR17520069. 7579488  
SRR17520069. 7579490  
SRR17520069. 7579492  
SRR17520069. 7579496  
SRR17520069. 7579498  
SRR17520069. 7579500

SRR17520069.7579502  
SRR17520069.7579504  
SRR17520069.7579506  
SRR17520069.7579508  
SRR17520069.7579510  
SRR17520069.7579512  
SRR17520069.7579514  
SRR17520069.7579516  
SRR17520069.7579518  
SRR17520069.7579520  
SRR17520069.7579524  
SRR17520069.7579526  
SRR17520069.7579528  
SRR17520069.7579530  
SRR17520069.7579532  
SRR17520069.7579534  
SRR17520069.7579536  
SRR17520069.7579538  
SRR17520069.7579540  
SRR17520069.7579542  
SRR17520069.7579544  
SRR17520069.7579546  
SRR17520069.7579548  
SRR17520069.7579550  
SRR17520069.7579552  
SRR17520069.7579554  
SRR17520069.7579556  
SRR17520069.7579558  
SRR17520069.7579560  
SRR17520069.7579562  
SRR17520069.7579564  
SRR17520069.7579566  
SRR17520069.7579568  
SRR17520069.7589597  
SRR17520069.7589599  
SRR17520069.7589601  
SRR17520069.7589603  
SRR17520069.7589605  
SRR17520069.7589609  
SRR17520069.7589611  
SRR17520069.7589613  
SRR17520069.7589615  
SRR17520069.7589617  
SRR17520069.7589619  
SRR17520069.7589621  
SRR17520069.7589623  
SRR17520069.7589625

SRR17520069.7589627  
SRR17520069.7589629  
SRR17520069.7589631  
SRR17520069.7589633  
SRR17520069.7589635  
SRR17520069.7589637  
SRR17520069.7589639  
SRR17520069.7589641  
SRR17520069.7592331  
SRR17520069.7592333  
SRR17520069.7592335  
SRR17520069.7592337  
SRR17520069.7592339  
SRR17520069.7592341  
SRR17520069.7592343  
SRR17520069.7597160  
SRR17520069.7597162  
SRR17520069.7597164  
SRR17520069.7597166  
SRR17520069.7599225  
SRR17520069.7599227  
SRR17520069.7599229  
SRR17520069.7600587  
SRR17520069.7600589  
SRR17520069.7600591  
SRR17520069.7600593  
SRR17520069.7600595  
SRR17520069.7600597  
SRR17520069.7600599  
SRR17520069.7600601  
SRR17520069.7600603  
SRR17520069.7600605  
SRR17520069.7600607  
SRR17520069.7600609  
SRR17520069.7600611  
SRR17520069.7600613  
SRR17520069.7600615  
SRR17520069.7600617  
SRR17520069.7600619  
SRR17520069.7600621  
SRR17520069.7600623  
SRR17520069.7600625  
SRR17520069.7600627  
SRR17520069.7600629  
SRR17520069.7600631  
SRR17520069.7600633  
SRR17520069.7600635

SRR17520069. 7600637  
SRR17520069. 7600639  
SRR17520069. 7600641  
SRR17520069. 7600643  
SRR17520069. 7600645  
SRR17520069. 7600647  
SRR17520069. 7600649  
SRR17520069. 7600651  
SRR17520069. 7600653  
SRR17520069. 7600655  
SRR17520069. 7600657  
SRR17520069. 7600659  
SRR17520069. 7600661  
SRR17520069. 7600663  
SRR17520069. 7600665  
SRR17520069. 7600667  
SRR17520069. 7600669  
SRR17520069. 7600671  
SRR17520069. 7600673  
SRR17520069. 7600675  
SRR17520069. 7600677  
SRR17520069. 7600679  
SRR17520069. 7600681  
SRR17520069. 7600683  
SRR17520069. 7600685  
SRR17520069. 7600687  
SRR17520069. 7600689  
SRR17520069. 7600691  
SRR17520069. 7600693  
SRR17520069. 7600695  
SRR17520069. 7600697  
SRR17520069. 7600699  
SRR17520069. 7600701  
SRR17520069. 7600703  
SRR17520069. 7600705  
SRR17520069. 7600707  
SRR17520069. 7604372  
SRR17520069. 7605647  
SRR17520069. 7605649  
SRR17520069. 7605651  
SRR17520069. 7605653  
SRR17520069. 7605655  
SRR17520069. 7605657  
SRR17520069. 7605659  
SRR17520069. 7605661  
SRR17520069. 7605663  
SRR17520069. 7605665

SRR17520069.7605667  
SRR17520069.7605669  
SRR17520069.7605671  
SRR17520069.7605673  
SRR17520069.7605675  
SRR17520069.7612990  
SRR17520069.7612992  
SRR17520069.7612994  
SRR17520069.7612996  
SRR17520069.7612998  
SRR17520069.7613000  
SRR17520069.7613002  
SRR17520069.7613004  
SRR17520069.7613006  
SRR17520069.7613008  
SRR17520069.7613010  
SRR17520069.7613012  
SRR17520069.7613014  
SRR17520069.7613016  
SRR17520069.7613018  
SRR17520069.7613020  
SRR17520069.7613022  
SRR17520069.7613024  
SRR17520069.7613026  
SRR17520069.7613028  
SRR17520069.7613030  
SRR17520069.7613032  
SRR17520069.7613034  
SRR17520069.7613036  
SRR17520069.7613038  
SRR17520069.7613040  
SRR17520069.7613042  
SRR17520069.7613044  
SRR17520069.7613046  
SRR17520069.7613048  
SRR17520069.7613050  
SRR17520069.7613052  
SRR17520069.7613054  
SRR17520069.7613056  
SRR17520069.7613058  
SRR17520069.7613060  
SRR17520069.7613062  
SRR17520069.7613064  
SRR17520069.7613066  
SRR17520069.7613068  
SRR17520069.7613070  
SRR17520069.7613072

SRR17520069.7613074  
SRR17520069.7613078  
SRR17520069.7613080  
SRR17520069.7613082  
SRR17520069.7613084  
SRR17520069.7613086  
SRR17520069.7613088  
SRR17520069.7613090  
SRR17520069.7613092  
SRR17520069.7613094  
SRR17520069.7613096  
SRR17520069.7613098  
SRR17520069.7613100  
SRR17520069.7613103  
SRR17520069.7613105  
SRR17520069.7613107  
SRR17520069.7613109  
SRR17520069.7613111  
SRR17520069.7613113  
SRR17520069.7613115  
SRR17520069.7613117  
SRR17520069.7613119  
SRR17520069.7613121  
SRR17520069.7613123  
SRR17520069.7613125  
SRR17520069.7613127  
SRR17520069.7613129  
SRR17520069.7613131  
SRR17520069.7613133  
SRR17520069.7614399  
SRR17520069.7614401  
SRR17520069.7614405  
SRR17520069.7614407  
SRR17520069.7614409  
SRR17520069.7614411  
SRR17520069.7614413  
SRR17520069.7615607  
SRR17520069.7615611  
SRR17520069.7615613  
SRR17520069.7615615  
SRR17520069.7615617  
SRR17520069.7615619  
SRR17520069.7615621  
SRR17520069.7615623  
SRR17520069.7615625  
SRR17520069.7615627  
SRR17520069.7615629



SRR17520069. 7619477  
SRR17520069. 7619479  
SRR17520069. 7619481  
SRR17520069. 7619483  
SRR17520069. 7619485  
SRR17520069. 7619487  
SRR17520069. 7619489  
SRR17520069. 7619491  
SRR17520069. 7619493  
SRR17520069. 7619495  
SRR17520069. 7619497  
SRR17520069. 7619499  
SRR17520069. 7619501  
SRR17520069. 7619503  
SRR17520069. 7619505  
SRR17520069. 7619507  
SRR17520069. 7619509  
SRR17520069. 7619511  
SRR17520069. 7619513  
SRR17520069. 7619515  
SRR17520069. 7619517  
SRR17520069. 7619519  
SRR17520069. 7619521  
SRR17520069. 7630992  
SRR17520069. 7630994  
SRR17520069. 7630996  
SRR17520069. 7630998  
SRR17520069. 7631168  
SRR17520069. 7631170  
SRR17520069. 7631172  
SRR17520069. 7631174  
SRR17520069. 7631176  
SRR17520069. 7631178  
SRR17520069. 7631180  
SRR17520069. 7631182  
SRR17520069. 7631184  
SRR17520069. 7631186  
SRR17520069. 7631188  
SRR17520069. 7631190  
SRR17520069. 7631192  
SRR17520069. 7631194  
SRR17520069. 7631196  
SRR17520069. 7631198  
SRR17520069. 7631200  
SRR17520069. 7631202  
SRR17520069. 7631204  
SRR17520069. 7631206

SRR17520069. 7631208  
SRR17520069. 7631210  
SRR17520069. 7631212  
SRR17520069. 7631214  
SRR17520069. 7631216  
SRR17520069. 7631218  
SRR17520069. 7631220  
SRR17520069. 7631222  
SRR17520069. 7631224  
SRR17520069. 7631226  
SRR17520069. 7631228  
SRR17520069. 7631230  
SRR17520069. 7631232  
SRR17520069. 7631234  
SRR17520069. 7631236  
SRR17520069. 7631240  
SRR17520069. 7631242  
SRR17520069. 7637040  
SRR17520069. 7637042  
SRR17520069. 7637044  
SRR17520069. 7637048  
SRR17520069. 7637050  
SRR17520069. 7637052  
SRR17520069. 7637054  
SRR17520069. 7637056  
SRR17520069. 7637058  
SRR17520069. 7637060  
SRR17520069. 7637062  
SRR17520069. 7637064  
SRR17520069. 7637066  
SRR17520069. 7637070  
SRR17520069. 7637072  
SRR17520069. 7637074  
SRR17520069. 7637076  
SRR17520069. 7637078  
SRR17520069. 7637080  
SRR17520069. 7637082  
SRR17520069. 7637084  
SRR17520069. 7637086  
SRR17520069. 7637088  
SRR17520069. 7637090  
SRR17520069. 7637092  
SRR17520069. 7637094  
SRR17520069. 7637096  
SRR17520069. 7637098  
SRR17520069. 7637100  
SRR17520069. 7637102

SRR17520069.7637104  
SRR17520069.7637108  
SRR17520069.7637110  
SRR17520069.7637112  
SRR17520069.7637114  
SRR17520069.7637116  
SRR17520069.7637118  
SRR17520069.7637120  
SRR17520069.7637122  
SRR17520069.7637124  
SRR17520069.7637126  
SRR17520069.7642563  
SRR17520069.7642565  
SRR17520069.7642567  
SRR17520069.7642569  
SRR17520069.7642571  
SRR17520069.7642573  
SRR17520069.7642575  
SRR17520069.7642577  
SRR17520069.7642579  
SRR17520069.7642581  
SRR17520069.7642583  
SRR17520069.7642585  
SRR17520069.7642587  
SRR17520069.7642589  
SRR17520069.7642591  
SRR17520069.7642593  
SRR17520069.7642595  
SRR17520069.7642597  
SRR17520069.7642599  
SRR17520069.7642601  
SRR17520069.7642603  
SRR17520069.7642605  
SRR17520069.7655647  
SRR17520069.7655649  
SRR17520069.7655651  
SRR17520069.7655653  
SRR17520069.7655655  
SRR17520069.7655657  
SRR17520069.7655659  
SRR17520069.7655661  
SRR17520069.7655663  
SRR17520069.7655665  
SRR17520069.7655667  
SRR17520069.7655669  
SRR17520069.7655671  
SRR17520069.7655673

SRR17520069.7655675  
SRR17520069.7658520  
SRR17520069.7658522  
SRR17520069.7658524  
SRR17520069.7658526  
SRR17520069.7658528  
SRR17520069.7658532  
SRR17520069.7658534  
SRR17520069.7658536  
SRR17520069.7658538  
SRR17520069.7658540  
SRR17520069.7658542  
SRR17520069.7658544  
SRR17520069.7658546  
SRR17520069.7658548  
SRR17520069.7658550  
SRR17520069.7658552  
SRR17520069.7658556  
SRR17520069.7658560  
SRR17520069.7658562  
SRR17520069.7658564  
SRR17520069.7658566  
SRR17520069.7658568  
SRR17520069.7658570  
SRR17520069.7658572  
SRR17520069.7658574  
SRR17520069.7658576  
SRR17520069.7658578  
SRR17520069.7658580  
SRR17520069.7658582  
SRR17520069.7658584  
SRR17520069.7658586  
SRR17520069.7658588  
SRR17520069.7658590  
SRR17520069.7658592  
SRR17520069.7658594  
SRR17520069.7658596  
SRR17520069.7658598  
SRR17520069.7658600  
SRR17520069.7658602  
SRR17520069.7658604  
SRR17520069.7658606  
SRR17520069.7658608  
SRR17520069.7658610  
SRR17520069.7658612  
SRR17520069.7658616  
SRR17520069.7658618

SRR17520069.7658620  
SRR17520069.7658622  
SRR17520069.7658624  
SRR17520069.7662586  
SRR17520069.7662588  
SRR17520069.7662590  
SRR17520069.7662592  
SRR17520069.7662596  
SRR17520069.7662598  
SRR17520069.7662600  
SRR17520069.7662602  
SRR17520069.7662604  
SRR17520069.7662606  
SRR17520069.7662608  
SRR17520069.7662610  
SRR17520069.7662612  
SRR17520069.7662614  
SRR17520069.7662616  
SRR17520069.7667017  
SRR17520069.7667019  
SRR17520069.7667021  
SRR17520069.7667027  
SRR17520069.7667029  
SRR17520069.7667031  
SRR17520069.7667033  
SRR17520069.7667035  
SRR17520069.7667037  
SRR17520069.7667039  
SRR17520069.7667041  
SRR17520069.7668016  
SRR17520069.7668018  
SRR17520069.7668020  
SRR17520069.7668022  
SRR17520069.7668024  
SRR17520069.7668026  
SRR17520069.7671915  
SRR17520069.7671917  
SRR17520069.7671919  
SRR17520069.7671921  
SRR17520069.7671923  
SRR17520069.7671925  
SRR17520069.7671927  
SRR17520069.7671929  
SRR17520069.7671931  
SRR17520069.7671933  
SRR17520069.7671935  
SRR17520069.7671937

SRR17520069.7671939  
SRR17520069.7671941  
SRR17520069.7671943  
SRR17520069.7671945  
SRR17520069.7671947  
SRR17520069.7671949  
SRR17520069.7671951  
SRR17520069.7672156  
SRR17520069.7672158  
SRR17520069.7672162  
SRR17520069.7672164  
SRR17520069.7672166  
SRR17520069.7672168  
SRR17520069.7672170  
SRR17520069.7672172  
SRR17520069.7672174  
SRR17520069.7672176  
SRR17520069.7672178  
SRR17520069.7672180  
SRR17520069.7672182  
SRR17520069.7672184  
SRR17520069.7672186  
SRR17520069.7672188  
SRR17520069.7672190  
SRR17520069.7672192  
SRR17520069.7672194  
SRR17520069.7672196  
SRR17520069.7672198  
SRR17520069.7672200  
SRR17520069.7672202  
SRR17520069.7672204  
SRR17520069.7672206  
SRR17520069.7672208  
SRR17520069.7672210  
SRR17520069.7672212  
SRR17520069.7672214  
SRR17520069.7672216  
SRR17520069.7672218  
SRR17520069.7672220  
SRR17520069.7672222  
SRR17520069.7672224  
SRR17520069.7672226  
SRR17520069.7672228  
SRR17520069.7672230  
SRR17520069.7672232  
SRR17520069.7672234  
SRR17520069.7672236

SRR17520069.7672238  
SRR17520069.7672240  
SRR17520069.7672242  
SRR17520069.7672244  
SRR17520069.7672246  
SRR17520069.7672248  
SRR17520069.7672250  
SRR17520069.7672252  
SRR17520069.7672254  
SRR17520069.7672256  
SRR17520069.7672258  
SRR17520069.7672260  
SRR17520069.7672262  
SRR17520069.7672264  
SRR17520069.7674765  
SRR17520069.7674767  
SRR17520069.7674769  
SRR17520069.7679105  
SRR17520069.7679107  
SRR17520069.7679109  
SRR17520069.7679111  
SRR17520069.7679113  
SRR17520069.7679115  
SRR17520069.7679117  
SRR17520069.7679119  
SRR17520069.7679121  
SRR17520069.7679123  
SRR17520069.7679125  
SRR17520069.7679127  
SRR17520069.7679129  
SRR17520069.7679131  
SRR17520069.7679133  
SRR17520069.7679135  
SRR17520069.7679137  
SRR17520069.7679139  
SRR17520069.7679141  
SRR17520069.7679143  
SRR17520069.7679440  
SRR17520069.7679444  
SRR17520069.7679446  
SRR17520069.7679448  
SRR17520069.7679450  
SRR17520069.7679452  
SRR17520069.7679454  
SRR17520069.7679456  
SRR17520069.7679458  
SRR17520069.7679460

SRR17520069.7679462  
SRR17520069.7679464  
SRR17520069.7679466  
SRR17520069.7679468  
SRR17520069.7679472  
SRR17520069.7679474  
SRR17520069.7679476  
SRR17520069.7679478  
SRR17520069.7679482  
SRR17520069.7679484  
SRR17520069.7679486  
SRR17520069.7679488  
SRR17520069.7679490  
SRR17520069.7679492  
SRR17520069.7679494  
SRR17520069.7679496  
SRR17520069.7679498  
SRR17520069.7679500  
SRR17520069.7679502  
SRR17520069.7679504  
SRR17520069.7679506  
SRR17520069.7679508  
SRR17520069.7679510  
SRR17520069.7679512  
SRR17520069.7679514  
SRR17520069.7679516  
SRR17520069.7679518  
SRR17520069.7679520  
SRR17520069.7679522  
SRR17520069.7679524  
SRR17520069.7679526  
SRR17520069.7679528  
SRR17520069.7679908  
SRR17520069.7689291  
SRR17520069.7689308  
SRR17520069.7689321  
SRR17520069.7689355  
SRR17520069.7689361  
SRR17520069.7689367  
SRR17520069.7689721  
SRR17520069.7689725  
SRR17520069.7690023  
SRR17520069.7694501  
SRR17520069.7694503  
SRR17520069.7694505  
SRR17520069.7694507  
SRR17520069.7694509



SRR17520069.7694511  
SRR17520069.7694513  
SRR17520069.7694515  
SRR17520069.7694517  
SRR17520069.7694519  
SRR17520069.7701371  
SRR17520069.7701375  
SRR17520069.7701377  
SRR17520069.7701379  
SRR17520069.7701381  
SRR17520069.7701383  
SRR17520069.7703296  
SRR17520069.7703300  
SRR17520069.7703302  
SRR17520069.7703304  
SRR17520069.7703308  
SRR17520069.7703310  
SRR17520069.7703312  
SRR17520069.7703314  
SRR17520069.7703316  
SRR17520069.7703318  
SRR17520069.7703320  
SRR17520069.7703322  
SRR17520069.7703324  
SRR17520069.7703326  
SRR17520069.7703328  
SRR17520069.7703330  
SRR17520069.7703332  
SRR17520069.7703334  
SRR17520069.7703336  
SRR17520069.7703338  
SRR17520069.7703340  
SRR17520069.7703342  
SRR17520069.7703344  
SRR17520069.7703346  
SRR17520069.7703348  
SRR17520069.7703350  
SRR17520069.7703352  
SRR17520069.7703354  
SRR17520069.7703356  
SRR17520069.7703358  
SRR17520069.7703362  
SRR17520069.7703364  
SRR17520069.7703366  
SRR17520069.7703370  
SRR17520069.7703372  
SRR17520069.7703374

SRR17520069.7703376  
SRR17520069.7704682  
SRR17520069.7704684  
SRR17520069.7704686  
SRR17520069.7704690  
SRR17520069.7704692  
SRR17520069.7704694  
SRR17520069.7704696  
SRR17520069.7704698  
SRR17520069.7704700  
SRR17520069.7704702  
SRR17520069.7706069  
SRR17520069.7706071  
SRR17520069.7706073  
SRR17520069.7706075  
SRR17520069.7706077  
SRR17520069.7707597  
SRR17520069.7707599  
SRR17520069.7707601  
SRR17520069.7707603  
SRR17520069.7707605  
SRR17520069.7707607  
SRR17520069.7707609  
SRR17520069.7707611  
SRR17520069.7707613  
SRR17520069.7707615  
SRR17520069.7707617  
SRR17520069.7707619  
SRR17520069.7707964  
SRR17520069.7707966  
SRR17520069.7707968  
SRR17520069.7707970  
SRR17520069.7707972  
SRR17520069.7707974  
SRR17520069.7707976  
SRR17520069.7707978  
SRR17520069.7707980  
SRR17520069.7707982  
SRR17520069.7707984  
SRR17520069.7707986  
SRR17520069.7707988  
SRR17520069.7707990  
SRR17520069.7707992  
SRR17520069.7707994  
SRR17520069.7707996  
SRR17520069.7707998  
SRR17520069.7708000

SRR17520069.7708002  
SRR17520069.7708004  
SRR17520069.7708006  
SRR17520069.7708008  
SRR17520069.7708010  
SRR17520069.7708012  
SRR17520069.7708014  
SRR17520069.7708016  
SRR17520069.7708018  
SRR17520069.7708020  
SRR17520069.7708022  
SRR17520069.7708024  
SRR17520069.7708026  
SRR17520069.7708028  
SRR17520069.7708032  
SRR17520069.7708034  
SRR17520069.7708036  
SRR17520069.7708038  
SRR17520069.7708040  
SRR17520069.7708042  
SRR17520069.7708044  
SRR17520069.7708046  
SRR17520069.7708048  
SRR17520069.7714321  
SRR17520069.7714323  
SRR17520069.7714325  
SRR17520069.7714327  
SRR17520069.7714329  
SRR17520069.7714331  
SRR17520069.7714333  
SRR17520069.7714335  
SRR17520069.7714337  
SRR17520069.7714339  
SRR17520069.7714341  
SRR17520069.7714343  
SRR17520069.7714345  
SRR17520069.7714347  
SRR17520069.7714349  
SRR17520069.7714351  
SRR17520069.7714353  
SRR17520069.7714355  
SRR17520069.7714983  
SRR17520069.7714985  
SRR17520069.7715231  
SRR17520069.7715233  
SRR17520069.7715235  
SRR17520069.7715237

SRR17520069.7715239  
SRR17520069.7715241  
SRR17520069.7715243  
SRR17520069.7715245  
SRR17520069.7715247  
SRR17520069.7721247  
SRR17520069.7733858  
SRR17520069.7738379  
SRR17520069.7738669  
SRR17520069.7738671  
SRR17520069.7738673  
SRR17520069.7738675  
SRR17520069.7738677  
SRR17520069.7743112  
SRR17520069.7743114  
SRR17520069.7743116  
SRR17520069.7743118  
SRR17520069.7743120  
SRR17520069.7743122  
SRR17520069.7743124  
SRR17520069.7743126  
SRR17520069.7743128  
SRR17520069.7743130  
SRR17520069.7743132  
SRR17520069.7743134  
SRR17520069.7743136  
SRR17520069.7743138  
SRR17520069.7743140  
SRR17520069.7744049  
SRR17520069.7750452  
SRR17520069.7750454  
SRR17520069.7750456  
SRR17520069.7750458  
SRR17520069.7750460  
SRR17520069.7750462  
SRR17520069.7750464  
SRR17520069.7750466  
SRR17520069.7750468  
SRR17520069.7750470  
SRR17520069.7750472  
SRR17520069.7750474  
SRR17520069.7750476  
SRR17520069.7754768  
SRR17520069.7754770  
SRR17520069.7754772  
SRR17520069.7754774  
SRR17520069.7754776

SRR17520069.7754778  
SRR17520069.7754780  
SRR17520069.7754782  
SRR17520069.7754784  
SRR17520069.7754786  
SRR17520069.7754788  
SRR17520069.7754790  
SRR17520069.7754792  
SRR17520069.7754794  
SRR17520069.7754796  
SRR17520069.7754798  
SRR17520069.7754800  
SRR17520069.7754802  
SRR17520069.7754804  
SRR17520069.7754808  
SRR17520069.7754810  
SRR17520069.7754812  
SRR17520069.7754814  
SRR17520069.7754816  
SRR17520069.7754818  
SRR17520069.7754820  
SRR17520069.7754822  
SRR17520069.7754824  
SRR17520069.7754826  
SRR17520069.7754828  
SRR17520069.7754830  
SRR17520069.7754832  
SRR17520069.7754836  
SRR17520069.7754838  
SRR17520069.7754842  
SRR17520069.7754846  
SRR17520069.7754848  
SRR17520069.7754850  
SRR17520069.7754852  
SRR17520069.7754854  
SRR17520069.7754856  
SRR17520069.7754858  
SRR17520069.7754860  
SRR17520069.7754862  
SRR17520069.7754864  
SRR17520069.7754866  
SRR17520069.7754868  
SRR17520069.7754870  
SRR17520069.7754872  
SRR17520069.7754874  
SRR17520069.7754876  
SRR17520069.7754878

SRR17520069.7754880  
SRR17520069.7754882  
SRR17520069.7754884  
SRR17520069.7754886  
SRR17520069.7754888  
SRR17520069.7754890  
SRR17520069.7754892  
SRR17520069.7755026  
SRR17520069.7755030  
SRR17520069.7755034  
SRR17520069.7755044  
SRR17520069.7755054  
SRR17520069.7755056  
SRR17520069.7755058  
SRR17520069.7756471  
SRR17520069.7756473  
SRR17520069.7756477  
SRR17520069.7756479  
SRR17520069.7756481  
SRR17520069.7756483  
SRR17520069.7756485  
SRR17520069.7756487  
SRR17520069.7764933  
SRR17520069.7764935  
SRR17520069.7764937  
SRR17520069.7764939  
SRR17520069.7764941  
SRR17520069.7764943  
SRR17520069.7764945  
SRR17520069.7764949  
SRR17520069.7764951  
SRR17520069.7764953  
SRR17520069.7766829  
SRR17520069.7766833  
SRR17520069.7786996  
SRR17520069.7787001  
SRR17520069.7787003  
SRR17520069.7787005  
SRR17520069.7787007  
SRR17520069.7787011  
SRR17520069.7787013  
SRR17520069.7787015  
SRR17520069.7787017  
SRR17520069.7787019  
SRR17520069.7787021  
SRR17520069.7787023  
SRR17520069.7787025

SRR17520069.7787027  
SRR17520069.7787031  
SRR17520069.7787033  
SRR17520069.7787035  
SRR17520069.7787037  
SRR17520069.7787039  
SRR17520069.7787041  
SRR17520069.7787043  
SRR17520069.7787045  
SRR17520069.7789481  
SRR17520069.7789483  
SRR17520069.7789485  
SRR17520069.7789487  
SRR17520069.7790508  
SRR17520069.7790510  
SRR17520069.7792609  
SRR17520069.7792611  
SRR17520069.7792615  
SRR17520069.7792617  
SRR17520069.7792619  
SRR17520069.7792623  
SRR17520069.7792697  
SRR17520069.7792699  
SRR17520069.7792701  
SRR17520069.7792703  
SRR17520069.7792705  
SRR17520069.7792707  
SRR17520069.7792709  
SRR17520069.7792711  
SRR17520069.7792713  
SRR17520069.7792715  
SRR17520069.7792717  
SRR17520069.7792719  
SRR17520069.7792723  
SRR17520069.7799328  
SRR17520069.7799330  
SRR17520069.7799332  
SRR17520069.7799334  
SRR17520069.7799336  
SRR17520069.7799338  
SRR17520069.7799340  
SRR17520069.7799342  
SRR17520069.7799344  
SRR17520069.7799346  
SRR17520069.7799348  
SRR17520069.7799350  
SRR17520069.7799352

SRR17520069. 7799354  
SRR17520069. 7799356  
SRR17520069. 7799358  
SRR17520069. 7799360  
SRR17520069. 7799362  
SRR17520069. 7799366  
SRR17520069. 7799370  
SRR17520069. 7799372  
SRR17520069. 7799374  
SRR17520069. 7799378  
SRR17520069. 7799380  
SRR17520069. 7799382  
SRR17520069. 7799384  
SRR17520069. 7799386  
SRR17520069. 7799388  
SRR17520069. 7799390  
SRR17520069. 7799392  
SRR17520069. 7799394  
SRR17520069. 7799396  
SRR17520069. 7799398  
SRR17520069. 7799400  
SRR17520069. 7799402  
SRR17520069. 7799404  
SRR17520069. 7799406  
SRR17520069. 7799408  
SRR17520069. 7799410  
SRR17520069. 7799412  
SRR17520069. 7799414  
SRR17520069. 7799416  
SRR17520069. 7799418  
SRR17520069. 7799420  
SRR17520069. 7799422  
SRR17520069. 7799424  
SRR17520069. 7799740  
SRR17520069. 7799742  
SRR17520069. 7799746  
SRR17520069. 7799750  
SRR17520069. 7799752  
SRR17520069. 7799754  
SRR17520069. 7799760  
SRR17520069. 7799762  
SRR17520069. 7799766  
SRR17520069. 7799768  
SRR17520069. 7799770  
SRR17520069. 7799772  
SRR17520069. 7799774  
SRR17520069. 7799776



SRR17520069. 7799778  
SRR17520069. 7799780  
SRR17520069. 7799782  
SRR17520069. 7799784  
SRR17520069. 7799786  
SRR17520069. 7799788  
SRR17520069. 7799790  
SRR17520069. 7799792  
SRR17520069. 7799794  
SRR17520069. 7799796  
SRR17520069. 7799798  
SRR17520069. 7799800  
SRR17520069. 7799802  
SRR17520069. 7799804  
SRR17520069. 7799806  
SRR17520069. 7799808  
SRR17520069. 7799812  
SRR17520069. 7799814  
SRR17520069. 7799816  
SRR17520069. 7799818  
SRR17520069. 7799820  
SRR17520069. 7799822  
SRR17520069. 7799824  
SRR17520069. 7799826  
SRR17520069. 7799828  
SRR17520069. 7799830  
SRR17520069. 7799834  
SRR17520069. 7799838  
SRR17520069. 7799840  
SRR17520069. 7799842  
SRR17520069. 7799844  
SRR17520069. 7799846  
SRR17520069. 7799848  
SRR17520069. 7799850  
SRR17520069. 7799852  
SRR17520069. 7799854  
SRR17520069. 7799856  
SRR17520069. 7799858  
SRR17520069. 7799860  
SRR17520069. 7799862  
SRR17520069. 7799864  
SRR17520069. 7799866  
SRR17520069. 7799868  
SRR17520069. 7802912  
SRR17520069. 7802914  
SRR17520069. 7802916  
SRR17520069. 7802918

SRR17520069. 7802920  
SRR17520069. 7802922  
SRR17520069. 7802924  
SRR17520069. 7802926  
SRR17520069. 7806337  
SRR17520069. 7806339  
SRR17520069. 7806341  
SRR17520069. 7806343  
SRR17520069. 7806345  
SRR17520069. 7806347  
SRR17520069. 7806349  
SRR17520069. 7806351  
SRR17520069. 7806353  
SRR17520069. 7806355  
SRR17520069. 7806357  
SRR17520069. 7806359  
SRR17520069. 7806361  
SRR17520069. 7806363  
SRR17520069. 7806365  
SRR17520069. 7806367  
SRR17520069. 7806369  
SRR17520069. 7806371  
SRR17520069. 7806373  
SRR17520069. 7806377  
SRR17520069. 7806379  
SRR17520069. 7806381  
SRR17520069. 7806383  
SRR17520069. 7806385  
SRR17520069. 7806387  
SRR17520069. 7806389  
SRR17520069. 7806391  
SRR17520069. 7806393  
SRR17520069. 7806395  
SRR17520069. 7806397  
SRR17520069. 7806399  
SRR17520069. 7806401  
SRR17520069. 7806403  
SRR17520069. 7806405  
SRR17520069. 7806407  
SRR17520069. 7806409  
SRR17520069. 7806411  
SRR17520069. 7806413  
SRR17520069. 7806415  
SRR17520069. 7806419  
SRR17520069. 7807160  
SRR17520069. 7807162  
SRR17520069. 7807164

SRR17520069.7807166  
SRR17520069.7807168  
SRR17520069.7807170  
SRR17520069.7807172  
SRR17520069.7807174  
SRR17520069.7807176  
SRR17520069.7807178  
SRR17520069.7807180  
SRR17520069.7807182  
SRR17520069.7807184  
SRR17520069.7807186  
SRR17520069.7807188  
SRR17520069.7807190  
SRR17520069.7807192  
SRR17520069.7807194  
SRR17520069.7807196  
SRR17520069.7807198  
SRR17520069.7807200  
SRR17520069.7807202  
SRR17520069.7807204  
SRR17520069.7807206  
SRR17520069.7807208  
SRR17520069.7807210  
SRR17520069.7807212  
SRR17520069.7807214  
SRR17520069.7807216  
SRR17520069.7807218  
SRR17520069.7807220  
SRR17520069.7807222  
SRR17520069.7807224  
SRR17520069.7809558  
SRR17520069.7811434  
SRR17520069.7813598  
SRR17520069.7813600  
SRR17520069.7813602  
SRR17520069.7813604  
SRR17520069.7813606  
SRR17520069.7813608  
SRR17520069.7813610  
SRR17520069.7813612  
SRR17520069.7813614  
SRR17520069.7813616  
SRR17520069.7813618  
SRR17520069.7813620  
SRR17520069.7813622  
SRR17520069.7813624  
SRR17520069.7813626

SRR17520069. 7813628  
SRR17520069. 7813630  
SRR17520069. 7813632  
SRR17520069. 7813634  
SRR17520069. 7813636  
SRR17520069. 7813638  
SRR17520069. 7813640  
SRR17520069. 7813642  
SRR17520069. 7813644  
SRR17520069. 7813646  
SRR17520069. 7813648  
SRR17520069. 7813650  
SRR17520069. 7813652  
SRR17520069. 7813654  
SRR17520069. 7813656  
SRR17520069. 7813658  
SRR17520069. 7813660  
SRR17520069. 7813662  
SRR17520069. 7813664  
SRR17520069. 7813666  
SRR17520069. 7813668  
SRR17520069. 7813670  
SRR17520069. 7813672  
SRR17520069. 7813674  
SRR17520069. 7813676  
SRR17520069. 7813678  
SRR17520069. 7813680  
SRR17520069. 7813682  
SRR17520069. 7813684  
SRR17520069. 7813686  
SRR17520069. 7813688  
SRR17520069. 7813690  
SRR17520069. 7813692  
SRR17520069. 7813694  
SRR17520069. 7813696  
SRR17520069. 7813698  
SRR17520069. 7813700  
SRR17520069. 7813702  
SRR17520069. 7813704  
SRR17520069. 7813706  
SRR17520069. 7814319  
SRR17520069. 7814321  
SRR17520069. 7814323  
SRR17520069. 7816166  
SRR17520069. 7816168  
SRR17520069. 7826755  
SRR17520069. 7826757

SRR17520069. 7826759  
SRR17520069. 7826763  
SRR17520069. 7826765  
SRR17520069. 7826767  
SRR17520069. 7826769  
SRR17520069. 7826771  
SRR17520069. 7826773  
SRR17520069. 7826775  
SRR17520069. 7826781  
SRR17520069. 7826783  
SRR17520069. 7826785  
SRR17520069. 7826787  
SRR17520069. 7826789  
SRR17520069. 7826791  
SRR17520069. 7826793  
SRR17520069. 7826795  
SRR17520069. 7826797  
SRR17520069. 7826799  
SRR17520069. 7826803  
SRR17520069. 7826805  
SRR17520069. 7826807  
SRR17520069. 7826809  
SRR17520069. 7826811  
SRR17520069. 7826813  
SRR17520069. 7826815  
SRR17520069. 7827361  
SRR17520069. 7829141  
SRR17520069. 7835357  
SRR17520069. 7835361  
SRR17520069. 7835363  
SRR17520069. 7835365  
SRR17520069. 7835369  
SRR17520069. 7835371  
SRR17520069. 7835373  
SRR17520069. 7835375  
SRR17520069. 7835706  
SRR17520069. 7835708  
SRR17520069. 7835710  
SRR17520069. 7835712  
SRR17520069. 7835714  
SRR17520069. 7835716  
SRR17520069. 7835720  
SRR17520069. 7835722  
SRR17520069. 7835724  
SRR17520069. 7835726  
SRR17520069. 7835728  
SRR17520069. 7835730

SRR17520069. 7835732  
SRR17520069. 7835734  
SRR17520069. 7835736  
SRR17520069. 7835738  
SRR17520069. 7835740  
SRR17520069. 7835742  
SRR17520069. 7835744  
SRR17520069. 7835746  
SRR17520069. 7835748  
SRR17520069. 7835750  
SRR17520069. 7835752  
SRR17520069. 7835754  
SRR17520069. 7835756  
SRR17520069. 7835758  
SRR17520069. 7835760  
SRR17520069. 7835764  
SRR17520069. 7835766  
SRR17520069. 7835768  
SRR17520069. 7835772  
SRR17520069. 7835774  
SRR17520069. 7835778  
SRR17520069. 7836145  
SRR17520069. 7836147  
SRR17520069. 7836149  
SRR17520069. 7836151  
SRR17520069. 7836153  
SRR17520069. 7836155  
SRR17520069. 7836157  
SRR17520069. 7836159  
SRR17520069. 7836161  
SRR17520069. 7836163  
SRR17520069. 7844621  
SRR17520069. 7844623  
SRR17520069. 7844625  
SRR17520069. 7844627  
SRR17520069. 7844629  
SRR17520069. 7844631  
SRR17520069. 7844633  
SRR17520069. 7844635  
SRR17520069. 7844637  
SRR17520069. 7847258  
SRR17520069. 7847260  
SRR17520069. 7847262  
SRR17520069. 7847264  
SRR17520069. 7847268  
SRR17520069. 7847270  
SRR17520069. 7847272

SRR17520069.7848284  
SRR17520069.7848286  
SRR17520069.7848288  
SRR17520069.7848290  
SRR17520069.7848292  
SRR17520069.7848294  
SRR17520069.7848296  
SRR17520069.7848298  
SRR17520069.7848300  
SRR17520069.7848302  
SRR17520069.7848304  
SRR17520069.7848306  
SRR17520069.7848308  
SRR17520069.7848312  
SRR17520069.7848314  
SRR17520069.7848834  
SRR17520069.7848836  
SRR17520069.7848838  
SRR17520069.7848842  
SRR17520069.7848844  
SRR17520069.7848846  
SRR17520069.7848848  
SRR17520069.7848850  
SRR17520069.7848856  
SRR17520069.7848858  
SRR17520069.7848860  
SRR17520069.7848862  
SRR17520069.7848864  
SRR17520069.7848868  
SRR17520069.7848870  
SRR17520069.7848872  
SRR17520069.7848874  
SRR17520069.7848876  
SRR17520069.7848949  
SRR17520069.7848951  
SRR17520069.7848953  
SRR17520069.7848955  
SRR17520069.7848957  
SRR17520069.7848959  
SRR17520069.7848961  
SRR17520069.7848963  
SRR17520069.7848965  
SRR17520069.7848967  
SRR17520069.7848969  
SRR17520069.7848971  
SRR17520069.7848973  
SRR17520069.7848975

SRR17520069.7848977  
SRR17520069.7848979  
SRR17520069.7848981  
SRR17520069.7857296  
SRR17520069.7857298  
SRR17520069.7857302  
SRR17520069.7857305  
SRR17520069.7857307  
SRR17520069.7857311  
SRR17520069.7857313  
SRR17520069.7857315  
SRR17520069.7857317  
SRR17520069.7857319  
SRR17520069.7857321  
SRR17520069.7857323  
SRR17520069.7857325  
SRR17520069.7857327  
SRR17520069.7857331  
SRR17520069.7857333  
SRR17520069.7857335  
SRR17520069.7857337  
SRR17520069.7857339  
SRR17520069.7857341  
SRR17520069.7857343  
SRR17520069.7857345  
SRR17520069.7857347  
SRR17520069.7857349  
SRR17520069.7857351  
SRR17520069.7857353  
SRR17520069.7857355  
SRR17520069.7857357  
SRR17520069.7857359  
SRR17520069.7857361  
SRR17520069.7857363  
SRR17520069.7857365  
SRR17520069.7857367  
SRR17520069.7857369  
SRR17520069.7857371  
SRR17520069.7857373  
SRR17520069.7857375  
SRR17520069.7857377  
SRR17520069.7857379  
SRR17520069.7857381  
SRR17520069.7857383  
SRR17520069.7857385  
SRR17520069.7857387  
SRR17520069.7857389



SRR17520069. 7857391  
SRR17520069. 7857393  
SRR17520069. 7857395  
SRR17520069. 7857397  
SRR17520069. 7857399  
SRR17520069. 7857401  
SRR17520069. 7857403  
SRR17520069. 7857405  
SRR17520069. 7857407  
SRR17520069. 7857409  
SRR17520069. 7857411  
SRR17520069. 7857413  
SRR17520069. 7857415  
SRR17520069. 7857417  
SRR17520069. 7857419  
SRR17520069. 7857421  
SRR17520069. 7857423  
SRR17520069. 7857425  
SRR17520069. 7857427  
SRR17520069. 7857429  
SRR17520069. 7857431  
SRR17520069. 7857433  
SRR17520069. 7857435  
SRR17520069. 7857437  
SRR17520069. 7857439  
SRR17520069. 7857441  
SRR17520069. 7857443  
SRR17520069. 7857445  
SRR17520069. 7857447  
SRR17520069. 7857449  
SRR17520069. 7857451  
SRR17520069. 7857453  
SRR17520069. 7857455  
SRR17520069. 7857457  
SRR17520069. 7857459  
SRR17520069. 7857461  
SRR17520069. 7857463  
SRR17520069. 7857465  
SRR17520069. 7857467  
SRR17520069. 7865676  
SRR17520069. 7865678  
SRR17520069. 7865680  
SRR17520069. 7865682  
SRR17520069. 7865684  
SRR17520069. 7870139  
SRR17520069. 7870141  
SRR17520069. 7870143

SRR17520069. 7870145  
SRR17520069. 7870147  
SRR17520069. 7870149  
SRR17520069. 7870151  
SRR17520069. 7870155  
SRR17520069. 7870157  
SRR17520069. 7870159  
SRR17520069. 7871861  
SRR17520069. 7871863  
SRR17520069. 7871865  
SRR17520069. 7871867  
SRR17520069. 7871869  
SRR17520069. 7871871  
SRR17520069. 7871873  
SRR17520069. 7871875  
SRR17520069. 7871877  
SRR17520069. 7871879  
SRR17520069. 7871881  
SRR17520069. 7871883  
SRR17520069. 7871885  
SRR17520069. 7871887  
SRR17520069. 7871889  
SRR17520069. 7871891  
SRR17520069. 7871893  
SRR17520069. 7871895  
SRR17520069. 7871897  
SRR17520069. 7871899  
SRR17520069. 7871901  
SRR17520069. 7871903  
SRR17520069. 7871905  
SRR17520069. 7871907  
SRR17520069. 7871909  
SRR17520069. 7871911  
SRR17520069. 7871913  
SRR17520069. 7871915  
SRR17520069. 7871917  
SRR17520069. 7871919  
SRR17520069. 7871921  
SRR17520069. 7871923  
SRR17520069. 7871925  
SRR17520069. 7871929  
SRR17520069. 7876461  
SRR17520069. 7876463  
SRR17520069. 7876465  
SRR17520069. 7889176  
SRR17520069. 7889180  
SRR17520069. 7889182

SRR17520069.7889184  
SRR17520069.7889187  
SRR17520069.7889189  
SRR17520069.7889191  
SRR17520069.7889193  
SRR17520069.7889195  
SRR17520069.7889197  
SRR17520069.7889199  
SRR17520069.7889201  
SRR17520069.7889203  
SRR17520069.7889205  
SRR17520069.7889207  
SRR17520069.7889209  
SRR17520069.7889211  
SRR17520069.7889213  
SRR17520069.7889215  
SRR17520069.7889217  
SRR17520069.7889219  
SRR17520069.7889221  
SRR17520069.7889223  
SRR17520069.7889225  
SRR17520069.7889227  
SRR17520069.7889229  
SRR17520069.7889231  
SRR17520069.7889233  
SRR17520069.7889235  
SRR17520069.7889237  
SRR17520069.7889239  
SRR17520069.7889241  
SRR17520069.7889243  
SRR17520069.7889245  
SRR17520069.7889247  
SRR17520069.7889249  
SRR17520069.7889251  
SRR17520069.7889253  
SRR17520069.7889255  
SRR17520069.7889257  
SRR17520069.7889259  
SRR17520069.7889261  
SRR17520069.7889263  
SRR17520069.7889265  
SRR17520069.7889267  
SRR17520069.7889269  
SRR17520069.7889271  
SRR17520069.7889273  
SRR17520069.7889275  
SRR17520069.7889277

SRR17520069. 7889279  
SRR17520069. 7891291  
SRR17520069. 7891293  
SRR17520069. 7891295  
SRR17520069. 7891297  
SRR17520069. 7891299  
SRR17520069. 7891303  
SRR17520069. 7891305  
SRR17520069. 7891307  
SRR17520069. 7891309  
SRR17520069. 7891311  
SRR17520069. 7891315  
SRR17520069. 7891319  
SRR17520069. 7891321  
SRR17520069. 7891323  
SRR17520069. 7891325  
SRR17520069. 7891327  
SRR17520069. 7891329  
SRR17520069. 7891331  
SRR17520069. 7891333  
SRR17520069. 7891335  
SRR17520069. 7891337  
SRR17520069. 7891339  
SRR17520069. 7891343  
SRR17520069. 7891345  
SRR17520069. 7891347  
SRR17520069. 7891349  
SRR17520069. 7892865  
SRR17520069. 7892867  
SRR17520069. 7892869  
SRR17520069. 7892871  
SRR17520069. 7892873  
SRR17520069. 7892875  
SRR17520069. 7892877  
SRR17520069. 7893156  
SRR17520069. 7894663  
SRR17520069. 7894665  
SRR17520069. 7894667  
SRR17520069. 7894669  
SRR17520069. 7894671  
SRR17520069. 7894673  
SRR17520069. 7894675  
SRR17520069. 7894677  
SRR17520069. 7894679  
SRR17520069. 7894681  
SRR17520069. 7894683  
SRR17520069. 7894685

SRR17520069.7894687  
SRR17520069.7894689  
SRR17520069.7894691  
SRR17520069.7894693  
SRR17520069.7895687  
SRR17520069.7895689  
SRR17520069.7895691  
SRR17520069.7895693  
SRR17520069.7895695  
SRR17520069.7895697  
SRR17520069.7895699  
SRR17520069.7895701  
SRR17520069.7895703  
SRR17520069.7895705  
SRR17520069.7895707  
SRR17520069.7895709  
SRR17520069.7895711  
SRR17520069.7895713  
SRR17520069.7895715  
SRR17520069.7895717  
SRR17520069.7895719  
SRR17520069.7895721  
SRR17520069.7895723  
SRR17520069.7895725  
SRR17520069.7895727  
SRR17520069.7895729  
SRR17520069.7895731  
SRR17520069.7895733  
SRR17520069.7895735  
SRR17520069.7895737  
SRR17520069.7895739  
SRR17520069.7895741  
SRR17520069.7895743  
SRR17520069.7895745  
SRR17520069.7895747  
SRR17520069.7895751  
SRR17520069.7897228  
SRR17520069.7897230  
SRR17520069.7898337  
SRR17520069.7898339  
SRR17520069.7898341  
SRR17520069.7898343  
SRR17520069.7898345  
SRR17520069.7898347  
SRR17520069.7898349  
SRR17520069.7898351  
SRR17520069.7898353

SRR17520069.7898355  
SRR17520069.7898622  
SRR17520069.7900668  
SRR17520069.7900670  
SRR17520069.7900672  
SRR17520069.7900674  
SRR17520069.7900676  
SRR17520069.7900678  
SRR17520069.7900680  
SRR17520069.7900682  
SRR17520069.7900684  
SRR17520069.7900686  
SRR17520069.7900688  
SRR17520069.7900692  
SRR17520069.7900694  
SRR17520069.7900696  
SRR17520069.7900698  
SRR17520069.7900700  
SRR17520069.7903008  
SRR17520069.7903010  
SRR17520069.7903014  
SRR17520069.7903016  
SRR17520069.7903018  
SRR17520069.7903020  
SRR17520069.7903022  
SRR17520069.7903024  
SRR17520069.7903026  
SRR17520069.7903028  
SRR17520069.7903030  
SRR17520069.7903032  
SRR17520069.7903034  
SRR17520069.7903038  
SRR17520069.7903040  
SRR17520069.7903042  
SRR17520069.7903046  
SRR17520069.7903048  
SRR17520069.7903050  
SRR17520069.7903052  
SRR17520069.7903054  
SRR17520069.7903056  
SRR17520069.7903058  
SRR17520069.7903062  
SRR17520069.7903064  
SRR17520069.7903066  
SRR17520069.7903068  
SRR17520069.7903070  
SRR17520069.7903072

SRR17520069.7903074  
SRR17520069.7903076  
SRR17520069.7903082  
SRR17520069.7903084  
SRR17520069.7903086  
SRR17520069.7903088  
SRR17520069.7905292  
SRR17520069.7905294  
SRR17520069.7905296  
SRR17520069.7906127  
SRR17520069.7906129  
SRR17520069.7906131  
SRR17520069.7906133  
SRR17520069.7906135  
SRR17520069.7906137  
SRR17520069.7906139  
SRR17520069.7906141  
SRR17520069.7906143  
SRR17520069.7906145  
SRR17520069.7906147  
SRR17520069.7906149  
SRR17520069.7906151  
SRR17520069.7906153  
SRR17520069.7906155  
SRR17520069.7906157  
SRR17520069.7906159  
SRR17520069.7906161  
SRR17520069.7906163  
SRR17520069.7906165  
SRR17520069.7906167  
SRR17520069.7907785  
SRR17520069.7907787  
SRR17520069.7907789  
SRR17520069.7907791  
SRR17520069.7907797  
SRR17520069.7907799  
SRR17520069.7907803  
SRR17520069.7907805  
SRR17520069.7907807  
SRR17520069.7907809  
SRR17520069.7907813  
SRR17520069.7907815  
SRR17520069.7907817  
SRR17520069.7907819  
SRR17520069.7907821  
SRR17520069.7907825  
SRR17520069.7907827

SRR17520069.7907829  
SRR17520069.7907831  
SRR17520069.7907833  
SRR17520069.7907835  
SRR17520069.7907837  
SRR17520069.7907839  
SRR17520069.7907841  
SRR17520069.7907843  
SRR17520069.7907845  
SRR17520069.7907847  
SRR17520069.7907849  
SRR17520069.7907853  
SRR17520069.7907855  
SRR17520069.7908379  
SRR17520069.7908381  
SRR17520069.7908383  
SRR17520069.7922004  
SRR17520069.7922006  
SRR17520069.7922008  
SRR17520069.7922010  
SRR17520069.7922012  
SRR17520069.7922014  
SRR17520069.7922016  
SRR17520069.7922018  
SRR17520069.7922020  
SRR17520069.7922022  
SRR17520069.7922024  
SRR17520069.7922026  
SRR17520069.7922028  
SRR17520069.7922030  
SRR17520069.7922032  
SRR17520069.7929148  
SRR17520069.7929150  
SRR17520069.7929152  
SRR17520069.7929154  
SRR17520069.7929156  
SRR17520069.7929158  
SRR17520069.7929160  
SRR17520069.7929162  
SRR17520069.7929164  
SRR17520069.7929166  
SRR17520069.7929168  
SRR17520069.7929170  
SRR17520069.7929172  
SRR17520069.7929174  
SRR17520069.7929176  
SRR17520069.7929178



SRR17520069.7929180  
SRR17520069.7929182  
SRR17520069.7936574  
SRR17520069.7936576  
SRR17520069.7936578  
SRR17520069.7936580  
SRR17520069.7942724  
SRR17520069.7942726  
SRR17520069.7942728  
SRR17520069.7942730  
SRR17520069.7942732  
SRR17520069.7942734  
SRR17520069.7942736  
SRR17520069.7950254  
SRR17520069.7950256  
SRR17520069.7950258  
SRR17520069.7950260  
SRR17520069.7950262  
SRR17520069.7950264  
SRR17520069.7950266  
SRR17520069.7950268  
SRR17520069.7950270  
SRR17520069.7950272  
SRR17520069.7950274  
SRR17520069.7950276  
SRR17520069.7950278  
SRR17520069.7950280  
SRR17520069.7950282  
SRR17520069.7950284  
SRR17520069.7950286  
SRR17520069.7950288  
SRR17520069.7950290  
SRR17520069.7950292  
SRR17520069.7950294  
SRR17520069.7950296  
SRR17520069.7950298  
SRR17520069.7950300  
SRR17520069.7950302  
SRR17520069.7952336  
SRR17520069.7952342  
SRR17520069.7952344  
SRR17520069.7952346  
SRR17520069.7952348  
SRR17520069.7964047  
SRR17520069.7964049  
SRR17520069.7964051  
SRR17520069.7964053

SRR17520069. 7964055  
SRR17520069. 7964057  
SRR17520069. 7964061  
SRR17520069. 7964063  
SRR17520069. 7964065  
SRR17520069. 7964067  
SRR17520069. 7964071  
SRR17520069. 7964073  
SRR17520069. 7964077  
SRR17520069. 7964079  
SRR17520069. 7964081  
SRR17520069. 7964083  
SRR17520069. 7964085  
SRR17520069. 7964087  
SRR17520069. 7964095  
SRR17520069. 7964097  
SRR17520069. 7964099  
SRR17520069. 7964101  
SRR17520069. 7964103  
SRR17520069. 7964105  
SRR17520069. 7964107  
SRR17520069. 7964109  
SRR17520069. 7964111  
SRR17520069. 7964113  
SRR17520069. 7964115  
SRR17520069. 7964117  
SRR17520069. 7964119  
SRR17520069. 7964121  
SRR17520069. 7964123  
SRR17520069. 7964125  
SRR17520069. 7964129  
SRR17520069. 7964133  
SRR17520069. 7964135  
SRR17520069. 7964137  
SRR17520069. 7964139  
SRR17520069. 7964141  
SRR17520069. 7964143  
SRR17520069. 7964148  
SRR17520069. 7964150  
SRR17520069. 7964152  
SRR17520069. 7964157  
SRR17520069. 7964161  
SRR17520069. 7964165  
SRR17520069. 7964167  
SRR17520069. 7964169  
SRR17520069. 7964171  
SRR17520069. 7964175

SRR17520069.7964177  
SRR17520069.7964179  
SRR17520069.7964181  
SRR17520069.7964183  
SRR17520069.7964185  
SRR17520069.7964187  
SRR17520069.7964189  
SRR17520069.7964191  
SRR17520069.7964193  
SRR17520069.7964195  
SRR17520069.7964197  
SRR17520069.7964199  
SRR17520069.7964201  
SRR17520069.7964203  
SRR17520069.7964207  
SRR17520069.7964209  
SRR17520069.7964211  
SRR17520069.7964213  
SRR17520069.7964217  
SRR17520069.7964221  
SRR17520069.7964223  
SRR17520069.7964225  
SRR17520069.7964227  
SRR17520069.7964229  
SRR17520069.7964231  
SRR17520069.7964233  
SRR17520069.7964235  
SRR17520069.7964237  
SRR17520069.7964239  
SRR17520069.7964241  
SRR17520069.7964243  
SRR17520069.7964245  
SRR17520069.7964251  
SRR17520069.7964253  
SRR17520069.7964255  
SRR17520069.7964257  
SRR17520069.7964259  
SRR17520069.7964261  
SRR17520069.7964263  
SRR17520069.7964265  
SRR17520069.7964269  
SRR17520069.7964273  
SRR17520069.7964275  
SRR17520069.7964277  
SRR17520069.7964279  
SRR17520069.7964281  
SRR17520069.7964283

SRR17520069.7964285  
SRR17520069.7964736  
SRR17520069.7964738  
SRR17520069.7964742  
SRR17520069.7964744  
SRR17520069.7964746  
SRR17520069.7964750  
SRR17520069.7964752  
SRR17520069.7964754  
SRR17520069.7964756  
SRR17520069.7966449  
SRR17520069.7966453  
SRR17520069.7966455  
SRR17520069.7966457  
SRR17520069.7966459  
SRR17520069.7966461  
SRR17520069.7966465  
SRR17520069.7966467  
SRR17520069.7966469  
SRR17520069.7966471  
SRR17520069.7966475  
SRR17520069.7966477  
SRR17520069.7976153  
SRR17520069.7976155  
SRR17520069.7976157  
SRR17520069.7976159  
SRR17520069.7976161  
SRR17520069.7976163  
SRR17520069.7976165  
SRR17520069.7976167  
SRR17520069.7976169  
SRR17520069.7976171  
SRR17520069.7976173  
SRR17520069.7976175  
SRR17520069.7976177  
SRR17520069.7976179  
SRR17520069.7976181  
SRR17520069.7976183  
SRR17520069.7976185  
SRR17520069.7976187  
SRR17520069.7976189  
SRR17520069.7976191  
SRR17520069.7976193  
SRR17520069.7976195  
SRR17520069.7976197  
SRR17520069.7976199  
SRR17520069.7976201

SRR17520069.7978212  
SRR17520069.7978214  
SRR17520069.7978216  
SRR17520069.7978218  
SRR17520069.7978220  
SRR17520069.7978222  
SRR17520069.7978224  
SRR17520069.7978226  
SRR17520069.7978230  
SRR17520069.7978232  
SRR17520069.7978234  
SRR17520069.7978236  
SRR17520069.7978238  
SRR17520069.7978242  
SRR17520069.7978244  
SRR17520069.7978246  
SRR17520069.7978248  
SRR17520069.7978250  
SRR17520069.7978252  
SRR17520069.7978254  
SRR17520069.7978256  
SRR17520069.7978258  
SRR17520069.7978260  
SRR17520069.7978994  
SRR17520069.7978996  
SRR17520069.7978998  
SRR17520069.7979000  
SRR17520069.7979002  
SRR17520069.7979004  
SRR17520069.7979006  
SRR17520069.7980154  
SRR17520069.7980156  
SRR17520069.7980158  
SRR17520069.7980160  
SRR17520069.7980162  
SRR17520069.7980164  
SRR17520069.7983385  
SRR17520069.7983387  
SRR17520069.7983389  
SRR17520069.7983391  
SRR17520069.7983393  
SRR17520069.7983395  
SRR17520069.7983397  
SRR17520069.7984318  
SRR17520069.7984320  
SRR17520069.7984322  
SRR17520069.7984324

SRR17520069. 7984326  
SRR17520069. 7984328  
SRR17520069. 7984330  
SRR17520069. 7984332  
SRR17520069. 7984334  
SRR17520069. 7984336  
SRR17520069. 7984338  
SRR17520069. 7984340  
SRR17520069. 7984342  
SRR17520069. 7984344  
SRR17520069. 7984346  
SRR17520069. 7984348  
SRR17520069. 7984350  
SRR17520069. 7984352  
SRR17520069. 7984354  
SRR17520069. 7984356  
SRR17520069. 7984358  
SRR17520069. 7984360  
SRR17520069. 7984362  
SRR17520069. 7984364  
SRR17520069. 7984366  
SRR17520069. 7984368  
SRR17520069. 7984370  
SRR17520069. 7984372  
SRR17520069. 7984374  
SRR17520069. 7984376  
SRR17520069. 7984378  
SRR17520069. 7984380  
SRR17520069. 7984382  
SRR17520069. 7984384  
SRR17520069. 7984386  
SRR17520069. 7984388  
SRR17520069. 7984390  
SRR17520069. 7984392  
SRR17520069. 7984394  
SRR17520069. 7984396  
SRR17520069. 7984398  
SRR17520069. 7984400  
SRR17520069. 7986303  
SRR17520069. 7986305  
SRR17520069. 7986309  
SRR17520069. 7986311  
SRR17520069. 7986313  
SRR17520069. 7986315  
SRR17520069. 7986317  
SRR17520069. 7986319  
SRR17520069. 7986321

SRR17520069.7986325  
SRR17520069.7986327  
SRR17520069.7986331  
SRR17520069.7986333  
SRR17520069.7986335  
SRR17520069.7986337  
SRR17520069.7986339  
SRR17520069.7986341  
SRR17520069.7986345  
SRR17520069.7986347  
SRR17520069.7986349  
SRR17520069.7986351  
SRR17520069.7986355  
SRR17520069.7986357  
SRR17520069.7986359  
SRR17520069.7986361  
SRR17520069.7986363  
SRR17520069.7990652  
SRR17520069.7990654  
SRR17520069.7990658  
SRR17520069.7990660  
SRR17520069.7990662  
SRR17520069.7990666  
SRR17520069.7995489  
SRR17520069.7995491  
SRR17520069.7995493  
SRR17520069.7995495  
SRR17520069.7995497  
SRR17520069.7995499  
SRR17520069.7995501  
SRR17520069.7995503  
SRR17520069.7995505  
SRR17520069.7995507  
SRR17520069.7995509  
SRR17520069.7995511  
SRR17520069.7995513  
SRR17520069.7995515  
SRR17520069.7995517  
SRR17520069.7995519  
SRR17520069.7995521  
SRR17520069.7995523  
SRR17520069.7995525  
SRR17520069.7995527  
SRR17520069.7995529  
SRR17520069.7995531  
SRR17520069.7995533  
SRR17520069.7995535

SRR17520069.7998573  
SRR17520069.7998575  
SRR17520069.7998577  
SRR17520069.7998583  
SRR17520069.7998585  
SRR17520069.7998587  
SRR17520069.7998589  
SRR17520069.7998591  
SRR17520069.8002623  
SRR17520069.8002625  
SRR17520069.8002627  
SRR17520069.8002629  
SRR17520069.8002631  
SRR17520069.8002633  
SRR17520069.8002635  
SRR17520069.8002637  
SRR17520069.8002639  
SRR17520069.8002643  
SRR17520069.8002645  
SRR17520069.8002647  
SRR17520069.8002649  
SRR17520069.8002651  
SRR17520069.8002653  
SRR17520069.8002655  
SRR17520069.8002657  
SRR17520069.8002659  
SRR17520069.8007332  
SRR17520069.8007334  
SRR17520069.8007336  
SRR17520069.8007340  
SRR17520069.8007346  
SRR17520069.8007348  
SRR17520069.8007350  
SRR17520069.8007352  
SRR17520069.8007358  
SRR17520069.8007360  
SRR17520069.8007364  
SRR17520069.8007368  
SRR17520069.8007370  
SRR17520069.8007372  
SRR17520069.8014652  
SRR17520069.8014654  
SRR17520069.8014656  
SRR17520069.8014658  
SRR17520069.8014660  
SRR17520069.8014662  
SRR17520069.8014664



SRR17520069.8014666  
SRR17520069.8014668  
SRR17520069.8014670  
SRR17520069.8014672  
SRR17520069.8014674  
SRR17520069.8014676  
SRR17520069.8014678  
SRR17520069.8014680  
SRR17520069.8014682  
SRR17520069.8014684  
SRR17520069.8014686  
SRR17520069.8014688  
SRR17520069.8014690  
SRR17520069.8014692  
SRR17520069.8014694  
SRR17520069.8014696  
SRR17520069.8014698  
SRR17520069.8014700  
SRR17520069.8014702  
SRR17520069.8014704  
SRR17520069.8014706  
SRR17520069.8014708  
SRR17520069.8014710  
SRR17520069.8014712  
SRR17520069.8014714  
SRR17520069.8014716  
SRR17520069.8014718  
SRR17520069.8014720  
SRR17520069.8014722  
SRR17520069.8014726  
SRR17520069.8014728  
SRR17520069.8014730  
SRR17520069.8014732  
SRR17520069.8014734  
SRR17520069.8014736  
SRR17520069.8014738  
SRR17520069.8014740  
SRR17520069.8014742  
SRR17520069.8014744  
SRR17520069.8014746  
SRR17520069.8014748  
SRR17520069.8014750  
SRR17520069.8014752  
SRR17520069.8014754  
SRR17520069.8014756  
SRR17520069.8014758  
SRR17520069.8014760

SRR17520069.8014762  
SRR17520069.8014764  
SRR17520069.8014766  
SRR17520069.8014768  
SRR17520069.8014770  
SRR17520069.8014772  
SRR17520069.8014774  
SRR17520069.8014776  
SRR17520069.8014778  
SRR17520069.8014780  
SRR17520069.8014782  
SRR17520069.8014784  
SRR17520069.8014786  
SRR17520069.8014788  
SRR17520069.8014790  
SRR17520069.8014792  
SRR17520069.8014794  
SRR17520069.8014796  
SRR17520069.8015583  
SRR17520069.8015585  
SRR17520069.8015587  
SRR17520069.8015589  
SRR17520069.8015591  
SRR17520069.8015593  
SRR17520069.8015595  
SRR17520069.8015597  
SRR17520069.8018769  
SRR17520069.8023017  
SRR17520069.8023019  
SRR17520069.8023021  
SRR17520069.8023023  
SRR17520069.8026590  
SRR17520069.8026592  
SRR17520069.8026594  
SRR17520069.8026596  
SRR17520069.8026600  
SRR17520069.8026602  
SRR17520069.8026604  
SRR17520069.8026606  
SRR17520069.8026608  
SRR17520069.8026610  
SRR17520069.8026614  
SRR17520069.8026616  
SRR17520069.8026618  
SRR17520069.8026620  
SRR17520069.8026622  
SRR17520069.8026624

SRR17520069.8026626  
SRR17520069.8026628  
SRR17520069.8026630  
SRR17520069.8047279  
SRR17520069.8047281  
SRR17520069.8047283  
SRR17520069.8047285  
SRR17520069.8047287  
SRR17520069.8047289  
SRR17520069.8047291  
SRR17520069.8047293  
SRR17520069.8048606  
SRR17520069.8048608  
SRR17520069.8048610  
SRR17520069.8048612  
SRR17520069.8048614  
SRR17520069.8048616  
SRR17520069.8056839  
SRR17520069.8056841  
SRR17520069.8056843  
SRR17520069.8056845  
SRR17520069.8056847  
SRR17520069.8056849  
SRR17520069.8056851  
SRR17520069.8062990  
SRR17520069.8062992  
SRR17520069.8062994  
SRR17520069.8062996  
SRR17520069.8062998  
SRR17520069.8063000  
SRR17520069.8063002  
SRR17520069.8063004  
SRR17520069.8063006  
SRR17520069.8063008  
SRR17520069.8063010  
SRR17520069.8063012  
SRR17520069.8063014  
SRR17520069.8063016  
SRR17520069.8063018  
SRR17520069.8063020  
SRR17520069.8063022  
SRR17520069.8063024  
SRR17520069.8063026  
SRR17520069.8063028  
SRR17520069.8063030  
SRR17520069.8063032  
SRR17520069.8063034

SRR17520069.8063036  
SRR17520069.8063038  
SRR17520069.8063040  
SRR17520069.8063044  
SRR17520069.8063046  
SRR17520069.8063048  
SRR17520069.8063050  
SRR17520069.8063052  
SRR17520069.8063054  
SRR17520069.8063056  
SRR17520069.8063058  
SRR17520069.8063062  
SRR17520069.8063064  
SRR17520069.8063066  
SRR17520069.8063068  
SRR17520069.8063070  
SRR17520069.8063072  
SRR17520069.8063074  
SRR17520069.8063076  
SRR17520069.8063078  
SRR17520069.8063080  
SRR17520069.8063082  
SRR17520069.8063084  
SRR17520069.8063086  
SRR17520069.8063088  
SRR17520069.8063090  
SRR17520069.8063092  
SRR17520069.8063094  
SRR17520069.8063096  
SRR17520069.8063098  
SRR17520069.8063100  
SRR17520069.8063102  
SRR17520069.8063104  
SRR17520069.8067360  
SRR17520069.8067366  
SRR17520069.8067374  
SRR17520069.8067384  
SRR17520069.8067386  
SRR17520069.8067390  
SRR17520069.8067392  
SRR17520069.8067394  
SRR17520069.8067396  
SRR17520069.8067398  
SRR17520069.8067400  
SRR17520069.8067402  
SRR17520069.8067404  
SRR17520069.8067406

SRR17520069.8067408  
SRR17520069.8074438  
SRR17520069.8074442  
SRR17520069.8074444  
SRR17520069.8074446  
SRR17520069.8074450  
SRR17520069.8074454  
SRR17520069.8074458  
SRR17520069.8077652  
SRR17520069.8077654  
SRR17520069.8077656  
SRR17520069.8077658  
SRR17520069.8077660  
SRR17520069.8077662  
SRR17520069.8077664  
SRR17520069.8077666  
SRR17520069.8077668  
SRR17520069.8077670  
SRR17520069.8077674  
SRR17520069.8077676  
SRR17520069.8077678  
SRR17520069.8077680  
SRR17520069.8077682  
SRR17520069.8077684  
SRR17520069.8077686  
SRR17520069.8077688  
SRR17520069.8077690  
SRR17520069.8083564  
SRR17520069.8084586  
SRR17520069.8084588  
SRR17520069.8084590  
SRR17520069.8084592  
SRR17520069.8084594  
SRR17520069.8084596  
SRR17520069.8084598  
SRR17520069.8084600  
SRR17520069.8084602  
SRR17520069.8084604  
SRR17520069.8084606  
SRR17520069.8084608  
SRR17520069.8084610  
SRR17520069.8084612  
SRR17520069.8084614  
SRR17520069.8084616  
SRR17520069.8084618  
SRR17520069.8084620  
SRR17520069.8084622

SRR17520069.8084624  
SRR17520069.8084626  
SRR17520069.8084628  
SRR17520069.8084630  
SRR17520069.8084632  
SRR17520069.8084634  
SRR17520069.8084636  
SRR17520069.8084638  
SRR17520069.8084640  
SRR17520069.8084817  
SRR17520069.8084819  
SRR17520069.8084821  
SRR17520069.8084823  
SRR17520069.8084825  
SRR17520069.8084827  
SRR17520069.8084829  
SRR17520069.8084831  
SRR17520069.8084833  
SRR17520069.8085882  
SRR17520069.8085884  
SRR17520069.8085886  
SRR17520069.8085888  
SRR17520069.8085890  
SRR17520069.8085892  
SRR17520069.8086041  
SRR17520069.8086043  
SRR17520069.8087921  
SRR17520069.8087923  
SRR17520069.8087925  
SRR17520069.8087929  
SRR17520069.8087931  
SRR17520069.8087933  
SRR17520069.8087935  
SRR17520069.8087937  
SRR17520069.8087939  
SRR17520069.8087941  
SRR17520069.8087943  
SRR17520069.8087945  
SRR17520069.8087947  
SRR17520069.8087949  
SRR17520069.8087951  
SRR17520069.8088030  
SRR17520069.8088032  
SRR17520069.8088034  
SRR17520069.8088036  
SRR17520069.8088038  
SRR17520069.8088040

SRR17520069.8088042  
SRR17520069.8088044  
SRR17520069.8088046  
SRR17520069.8093571  
SRR17520069.8093573  
SRR17520069.8093575  
SRR17520069.8093577  
SRR17520069.8093579  
SRR17520069.8093581  
SRR17520069.8093583  
SRR17520069.8093585  
SRR17520069.8093587  
SRR17520069.8093589  
SRR17520069.8093591  
SRR17520069.8093593  
SRR17520069.8093595  
SRR17520069.8093597  
SRR17520069.8093599  
SRR17520069.8093603  
SRR17520069.8107077  
SRR17520069.8107928  
SRR17520069.8107930  
SRR17520069.8107932  
SRR17520069.8107936  
SRR17520069.8107938  
SRR17520069.8107940  
SRR17520069.8107942  
SRR17520069.8107944  
SRR17520069.8107946  
SRR17520069.8107948  
SRR17520069.8107950  
SRR17520069.8107954  
SRR17520069.8107956  
SRR17520069.8107958  
SRR17520069.8107960  
SRR17520069.8107962  
SRR17520069.8107964  
SRR17520069.8107966  
SRR17520069.8107968  
SRR17520069.8107970  
SRR17520069.8107972  
SRR17520069.8112417  
SRR17520069.8112419  
SRR17520069.8112421  
SRR17520069.8112423  
SRR17520069.8112425  
SRR17520069.8112427

SRR17520069.8112429  
SRR17520069.8112431  
SRR17520069.8112433  
SRR17520069.8112435  
SRR17520069.8112437  
SRR17520069.8124719  
SRR17520069.8124721  
SRR17520069.8124723  
SRR17520069.8124725  
SRR17520069.8124727  
SRR17520069.8124729  
SRR17520069.8124731  
SRR17520069.8124733  
SRR17520069.8124735  
SRR17520069.8124737  
SRR17520069.8124739  
SRR17520069.8126487  
SRR17520069.8126489  
SRR17520069.8126491  
SRR17520069.8126495  
SRR17520069.8126497  
SRR17520069.8126499  
SRR17520069.8136670  
SRR17520069.8136672  
SRR17520069.8136674  
SRR17520069.8136676  
SRR17520069.8136678  
SRR17520069.8136680  
SRR17520069.8136682  
SRR17520069.8136684  
SRR17520069.8136686  
SRR17520069.8136688  
SRR17520069.8136690  
SRR17520069.8136692  
SRR17520069.8136694  
SRR17520069.8136696  
SRR17520069.8136698  
SRR17520069.8136700  
SRR17520069.8136702  
SRR17520069.8136704  
SRR17520069.8136706  
SRR17520069.8136708  
SRR17520069.8136710  
SRR17520069.8136712  
SRR17520069.8136714  
SRR17520069.8136716  
SRR17520069.8136718



SRR17520069.8136720  
SRR17520069.8136722  
SRR17520069.8136724  
SRR17520069.8136726  
SRR17520069.8136728  
SRR17520069.8136730  
SRR17520069.8136732  
SRR17520069.8136734  
SRR17520069.8136736  
SRR17520069.8136738  
SRR17520069.8136740  
SRR17520069.8136742  
SRR17520069.8136744  
SRR17520069.8136746  
SRR17520069.8136748  
SRR17520069.8136750  
SRR17520069.8136752  
SRR17520069.8136754  
SRR17520069.8136756  
SRR17520069.8136758  
SRR17520069.8136760  
SRR17520069.8136762  
SRR17520069.8136764  
SRR17520069.8136766  
SRR17520069.8136768  
SRR17520069.8136770  
SRR17520069.8136772  
SRR17520069.8136774  
SRR17520069.8136776  
SRR17520069.8136778  
SRR17520069.8136780  
SRR17520069.8136782  
SRR17520069.8136784  
SRR17520069.8136786  
SRR17520069.8136788  
SRR17520069.8136790  
SRR17520069.8136792  
SRR17520069.8136794  
SRR17520069.8136796  
SRR17520069.8136798  
SRR17520069.8136800  
SRR17520069.8136802  
SRR17520069.8136804  
SRR17520069.8136806  
SRR17520069.8136808  
SRR17520069.8136810  
SRR17520069.8136812

SRR17520069.8136814  
SRR17520069.8136816  
SRR17520069.8136818  
SRR17520069.8136822  
SRR17520069.8136824  
SRR17520069.8136826  
SRR17520069.8136828  
SRR17520069.8136830  
SRR17520069.8145705  
SRR17520069.8145707  
SRR17520069.8145709  
SRR17520069.8145711  
SRR17520069.8145713  
SRR17520069.8145715  
SRR17520069.8145717  
SRR17520069.8147607  
SRR17520069.8147609  
SRR17520069.8147611  
SRR17520069.8147613  
SRR17520069.8147615  
SRR17520069.8147617  
SRR17520069.8147619  
SRR17520069.8147623  
SRR17520069.8147625  
SRR17520069.8147627  
SRR17520069.8147631  
SRR17520069.8147633  
SRR17520069.8147635  
SRR17520069.8147637  
SRR17520069.8147639  
SRR17520069.8147641  
SRR17520069.8147643  
SRR17520069.8147645  
SRR17520069.8147647  
SRR17520069.8147649  
SRR17520069.8147651  
SRR17520069.8147653  
SRR17520069.8147655  
SRR17520069.8147657  
SRR17520069.8148268  
SRR17520069.8148270  
SRR17520069.8148274  
SRR17520069.8148276  
SRR17520069.8148278  
SRR17520069.8148280  
SRR17520069.8148282  
SRR17520069.8151324

SRR17520069.8151326  
SRR17520069.8151328  
SRR17520069.8151330  
SRR17520069.8151332  
SRR17520069.8151334  
SRR17520069.8151336  
SRR17520069.8151338  
SRR17520069.8151340  
SRR17520069.8151342  
SRR17520069.8151344  
SRR17520069.8151346  
SRR17520069.8151348  
SRR17520069.8158657  
SRR17520069.8158659  
SRR17520069.8158661  
SRR17520069.8161999  
SRR17520069.8162001  
SRR17520069.8162327  
SRR17520069.8162329  
SRR17520069.8163569  
SRR17520069.8174465  
SRR17520069.8174467  
SRR17520069.8174469  
SRR17520069.8174471  
SRR17520069.8174473  
SRR17520069.8174475  
SRR17520069.8174477  
SRR17520069.8174479  
SRR17520069.8174481  
SRR17520069.8174483  
SRR17520069.8174485  
SRR17520069.8174487  
SRR17520069.8174489  
SRR17520069.8174491  
SRR17520069.8174493  
SRR17520069.8174495  
SRR17520069.8174497  
SRR17520069.8174499  
SRR17520069.8174501  
SRR17520069.8174503  
SRR17520069.8174505  
SRR17520069.8174507  
SRR17520069.8174509  
SRR17520069.8174511  
SRR17520069.8174513  
SRR17520069.8174515  
SRR17520069.8174517

SRR17520069.8174519  
SRR17520069.8174521  
SRR17520069.8174523  
SRR17520069.8174525  
SRR17520069.8174527  
SRR17520069.8174529  
SRR17520069.8174531  
SRR17520069.8174533  
SRR17520069.8174535  
SRR17520069.8174537  
SRR17520069.8174539  
SRR17520069.8179811  
SRR17520069.8179814  
SRR17520069.8184355  
SRR17520069.8184357  
SRR17520069.8184359  
SRR17520069.8184361  
SRR17520069.8184363  
SRR17520069.8184365  
SRR17520069.8184367  
SRR17520069.8184369  
SRR17520069.8184371  
SRR17520069.8184373  
SRR17520069.8184375  
SRR17520069.8184377  
SRR17520069.8184379  
SRR17520069.8184381  
SRR17520069.8184383  
SRR17520069.8184385  
SRR17520069.8184387  
SRR17520069.8184389  
SRR17520069.8184391  
SRR17520069.8184393  
SRR17520069.8184395  
SRR17520069.8184397  
SRR17520069.8184399  
SRR17520069.8184401  
SRR17520069.8184403  
SRR17520069.8184405  
SRR17520069.8184407  
SRR17520069.8184409  
SRR17520069.8184411  
SRR17520069.8184413  
SRR17520069.8184415  
SRR17520069.8184417  
SRR17520069.8184419  
SRR17520069.8184421

SRR17520069.8184423  
SRR17520069.8184425  
SRR17520069.8184427  
SRR17520069.8184429  
SRR17520069.8184431  
SRR17520069.8184433  
SRR17520069.8184435  
SRR17520069.8184437  
SRR17520069.8184439  
SRR17520069.8184441  
SRR17520069.8184914  
SRR17520069.8184916  
SRR17520069.8184918  
SRR17520069.8184920  
SRR17520069.8184924  
SRR17520069.8184928  
SRR17520069.8184930  
SRR17520069.8184932  
SRR17520069.8190728  
SRR17520069.8190730  
SRR17520069.8190732  
SRR17520069.8190734  
SRR17520069.8190736  
SRR17520069.8196869  
SRR17520069.8196871  
SRR17520069.8196873  
SRR17520069.8196875  
SRR17520069.8196877  
SRR17520069.8196879  
SRR17520069.8196881  
SRR17520069.8196883  
SRR17520069.8196885  
SRR17520069.8196887  
SRR17520069.8196889  
SRR17520069.8196891  
SRR17520069.8196893  
SRR17520069.8196895  
SRR17520069.8196897  
SRR17520069.8196899  
SRR17520069.8196901  
SRR17520069.8196903  
SRR17520069.8196905  
SRR17520069.8196907  
SRR17520069.8196909  
SRR17520069.8196911  
SRR17520069.8196913  
SRR17520069.8196915

SRR17520069.8196917  
SRR17520069.8196919  
SRR17520069.8196921  
SRR17520069.8200414  
SRR17520069.8200416  
SRR17520069.8200418  
SRR17520069.8200420  
SRR17520069.8200422  
SRR17520069.8204413  
SRR17520069.8204834  
SRR17520069.8204836  
SRR17520069.8204838  
SRR17520069.8204840  
SRR17520069.8204842  
SRR17520069.8204844  
SRR17520069.8204846  
SRR17520069.8204848  
SRR17520069.8204850  
SRR17520069.8204852  
SRR17520069.8206665  
SRR17520069.8206667  
SRR17520069.8206669  
SRR17520069.8206671  
SRR17520069.8206673  
SRR17520069.8206675  
SRR17520069.8206679  
SRR17520069.8206681  
SRR17520069.8206683  
SRR17520069.8206685  
SRR17520069.8206687  
SRR17520069.8206689  
SRR17520069.8206691  
SRR17520069.8206693  
SRR17520069.8206695  
SRR17520069.8206697  
SRR17520069.8206701  
SRR17520069.8206703  
SRR17520069.8206705  
SRR17520069.8206709  
SRR17520069.8209421  
SRR17520069.8209423  
SRR17520069.8209425  
SRR17520069.8209427  
SRR17520069.8209429  
SRR17520069.8209431  
SRR17520069.8209433  
SRR17520069.8209435

SRR17520069.8209437  
SRR17520069.8209439  
SRR17520069.8209441  
SRR17520069.8209443  
SRR17520069.8209445  
SRR17520069.8209447  
SRR17520069.8209449  
SRR17520069.8209451  
SRR17520069.8209453  
SRR17520069.8209455  
SRR17520069.8209457  
SRR17520069.8209459  
SRR17520069.8209461  
SRR17520069.8209463  
SRR17520069.8209465  
SRR17520069.8209467  
SRR17520069.8209469  
SRR17520069.8209471  
SRR17520069.8209473  
SRR17520069.8213006  
SRR17520069.8215777  
SRR17520069.8215779  
SRR17520069.8215781  
SRR17520069.8215783  
SRR17520069.8215785  
SRR17520069.8215787  
SRR17520069.8215789  
SRR17520069.8215791  
SRR17520069.8215793  
SRR17520069.8215795  
SRR17520069.8215797  
SRR17520069.8215801  
SRR17520069.8215803  
SRR17520069.8215805  
SRR17520069.8215807  
SRR17520069.8215809  
SRR17520069.8215811  
SRR17520069.8215813  
SRR17520069.8215815  
SRR17520069.8215817  
SRR17520069.8215819  
SRR17520069.8215821  
SRR17520069.8215823  
SRR17520069.8215825  
SRR17520069.8215827  
SRR17520069.8215829  
SRR17520069.8215831

SRR17520069.8215833  
SRR17520069.8215835  
SRR17520069.8215837  
SRR17520069.8215839  
SRR17520069.8215841  
SRR17520069.8215843  
SRR17520069.8215845  
SRR17520069.8215847  
SRR17520069.8215849  
SRR17520069.8215851  
SRR17520069.8215853  
SRR17520069.8215855  
SRR17520069.8215857  
SRR17520069.8215859  
SRR17520069.8215861  
SRR17520069.8215863  
SRR17520069.8215865  
SRR17520069.8216747  
SRR17520069.8216749  
SRR17520069.8216751  
SRR17520069.8216753  
SRR17520069.8216755  
SRR17520069.8216759  
SRR17520069.8216761  
SRR17520069.8216763  
SRR17520069.8216765  
SRR17520069.8216767  
SRR17520069.8216769  
SRR17520069.8216771  
SRR17520069.8216773  
SRR17520069.8216775  
SRR17520069.8216777  
SRR17520069.8216779  
SRR17520069.8222514  
SRR17520069.8222516  
SRR17520069.8222518  
SRR17520069.8222520  
SRR17520069.8222522  
SRR17520069.8222526  
SRR17520069.8222530  
SRR17520069.8222532  
SRR17520069.8222534  
SRR17520069.8222536  
SRR17520069.8222538  
SRR17520069.8222540  
SRR17520069.8222542  
SRR17520069.8222544



SRR17520069.8222546  
SRR17520069.8222548  
SRR17520069.8222550  
SRR17520069.8222552  
SRR17520069.8222554  
SRR17520069.8222556  
SRR17520069.8222558  
SRR17520069.8222560  
SRR17520069.8222562  
SRR17520069.8222564  
SRR17520069.8222566  
SRR17520069.8222568  
SRR17520069.8222570  
SRR17520069.8224242  
SRR17520069.8224244  
SRR17520069.8225025  
SRR17520069.8227328  
SRR17520069.8227330  
SRR17520069.8227332  
SRR17520069.8227334  
SRR17520069.8227336  
SRR17520069.8227338  
SRR17520069.8227340  
SRR17520069.8227342  
SRR17520069.8227344  
SRR17520069.8227346  
SRR17520069.8227348  
SRR17520069.8227350  
SRR17520069.8227352  
SRR17520069.8227354  
SRR17520069.8227356  
SRR17520069.8227358  
SRR17520069.8227360  
SRR17520069.8227362  
SRR17520069.8227419  
SRR17520069.8227421  
SRR17520069.8227423  
SRR17520069.8232966  
SRR17520069.8232968  
SRR17520069.8232970  
SRR17520069.8232972  
SRR17520069.8232974  
SRR17520069.8232976  
SRR17520069.8232980  
SRR17520069.8232982  
SRR17520069.8232984  
SRR17520069.8232986

SRR17520069.8232990  
SRR17520069.8232992  
SRR17520069.8232996  
SRR17520069.8232998  
SRR17520069.8233002  
SRR17520069.8233004  
SRR17520069.8233006  
SRR17520069.8233008  
SRR17520069.8233010  
SRR17520069.8234642  
SRR17520069.8234644  
SRR17520069.8234646  
SRR17520069.8234648  
SRR17520069.8234650  
SRR17520069.8234652  
SRR17520069.8234654  
SRR17520069.8234656  
SRR17520069.8234658  
SRR17520069.8234660  
SRR17520069.8234662  
SRR17520069.8234664  
SRR17520069.8234666  
SRR17520069.8234668  
SRR17520069.8234670  
SRR17520069.8234672  
SRR17520069.8234674  
SRR17520069.8234676  
SRR17520069.8234678  
SRR17520069.8234680  
SRR17520069.8234682  
SRR17520069.8234684  
SRR17520069.8234686  
SRR17520069.8234688  
SRR17520069.8234690  
SRR17520069.8236109  
SRR17520069.8236111  
SRR17520069.8236113  
SRR17520069.8236115  
SRR17520069.8236117  
SRR17520069.8236119  
SRR17520069.8236121  
SRR17520069.8236123  
SRR17520069.8236125  
SRR17520069.8236127  
SRR17520069.8236129  
SRR17520069.8236131  
SRR17520069.8236133

SRR17520069.8236135  
SRR17520069.8236137  
SRR17520069.8236139  
SRR17520069.8236141  
SRR17520069.8236143  
SRR17520069.8236145  
SRR17520069.8236147  
SRR17520069.8236149  
SRR17520069.8236151  
SRR17520069.8236153  
SRR17520069.8236155  
SRR17520069.8236157  
SRR17520069.8236159  
SRR17520069.8236161  
SRR17520069.8236163  
SRR17520069.8236165  
SRR17520069.8236167  
SRR17520069.8236169  
SRR17520069.8236171  
SRR17520069.8236173  
SRR17520069.8236175  
SRR17520069.8236177  
SRR17520069.8236179  
SRR17520069.8243365  
SRR17520069.8243367  
SRR17520069.8243369  
SRR17520069.8243371  
SRR17520069.8243373  
SRR17520069.8243375  
SRR17520069.8243377  
SRR17520069.8243379  
SRR17520069.8243381  
SRR17520069.8243383  
SRR17520069.8243385  
SRR17520069.8243387  
SRR17520069.8243389  
SRR17520069.8243391  
SRR17520069.8243393  
SRR17520069.8243395  
SRR17520069.8243397  
SRR17520069.8243399  
SRR17520069.8243401  
SRR17520069.8243403  
SRR17520069.8243405  
SRR17520069.8243407  
SRR17520069.8243409  
SRR17520069.8243411

SRR17520069.8243413  
SRR17520069.8243415  
SRR17520069.8243417  
SRR17520069.8243419  
SRR17520069.8243421  
SRR17520069.8243423  
SRR17520069.8243425  
SRR17520069.8243427  
SRR17520069.8243429  
SRR17520069.8243431  
SRR17520069.8243433  
SRR17520069.8243435  
SRR17520069.8243437  
SRR17520069.8243439  
SRR17520069.8243441  
SRR17520069.8243443  
SRR17520069.8243445  
SRR17520069.8243447  
SRR17520069.8243449  
SRR17520069.8243451  
SRR17520069.8243453  
SRR17520069.8243455  
SRR17520069.8243457  
SRR17520069.8243459  
SRR17520069.8243461  
SRR17520069.8243463  
SRR17520069.8243465  
SRR17520069.8243467  
SRR17520069.8243469  
SRR17520069.8243471  
SRR17520069.8243473  
SRR17520069.8243475  
SRR17520069.8243477  
SRR17520069.8243479  
SRR17520069.8243481  
SRR17520069.8243483  
SRR17520069.8243485  
SRR17520069.8243487  
SRR17520069.8243489  
SRR17520069.8243491  
SRR17520069.8243493  
SRR17520069.8243495  
SRR17520069.8243497  
SRR17520069.8243499  
SRR17520069.8243501  
SRR17520069.8243503  
SRR17520069.8243505

SRR17520069.8243509  
SRR17520069.8243511  
SRR17520069.8243513  
SRR17520069.8243515  
SRR17520069.8243517  
SRR17520069.8243519  
SRR17520069.8243521  
SRR17520069.8243523  
SRR17520069.8243525  
SRR17520069.8243527  
SRR17520069.8243529  
SRR17520069.8243531  
SRR17520069.8243533  
SRR17520069.8243535  
SRR17520069.8243537  
SRR17520069.8243539  
SRR17520069.8243541  
SRR17520069.8243543  
SRR17520069.8243545  
SRR17520069.8243547  
SRR17520069.8243549  
SRR17520069.8243551  
SRR17520069.8243553  
SRR17520069.8243555  
SRR17520069.8244328  
SRR17520069.8244330  
SRR17520069.8244332  
SRR17520069.8244334  
SRR17520069.8244336  
SRR17520069.8244338  
SRR17520069.8244340  
SRR17520069.8244342  
SRR17520069.8244346  
SRR17520069.8244348  
SRR17520069.8245483  
SRR17520069.8253288  
SRR17520069.8253290  
SRR17520069.8253292  
SRR17520069.8253296  
SRR17520069.8253298  
SRR17520069.8253300  
SRR17520069.8253302  
SRR17520069.8253304  
SRR17520069.8253306  
SRR17520069.8253308  
SRR17520069.8253310  
SRR17520069.8253312

SRR17520069.8253314  
SRR17520069.8253316  
SRR17520069.8253318  
SRR17520069.8253320  
SRR17520069.8253322  
SRR17520069.8253324  
SRR17520069.8253326  
SRR17520069.8253328  
SRR17520069.8253330  
SRR17520069.8253332  
SRR17520069.8253334  
SRR17520069.8253336  
SRR17520069.8253338  
SRR17520069.8253340  
SRR17520069.8253342  
SRR17520069.8253344  
SRR17520069.8253346  
SRR17520069.8253348  
SRR17520069.8253350  
SRR17520069.8253352  
SRR17520069.8253354  
SRR17520069.8253356  
SRR17520069.8253358  
SRR17520069.8253360  
SRR17520069.8253362  
SRR17520069.8253364  
SRR17520069.8253366  
SRR17520069.8253368  
SRR17520069.8253370  
SRR17520069.8253372  
SRR17520069.8253374  
SRR17520069.8253376  
SRR17520069.8253378  
SRR17520069.8253380  
SRR17520069.8253386  
SRR17520069.8253391  
SRR17520069.8255040  
SRR17520069.8255054  
SRR17520069.8258190  
SRR17520069.8258192  
SRR17520069.8258194  
SRR17520069.8258196  
SRR17520069.8258200  
SRR17520069.8258202  
SRR17520069.8258204  
SRR17520069.8258208  
SRR17520069.8258210

SRR17520069.8258212  
SRR17520069.8258214  
SRR17520069.8258216  
SRR17520069.8258218  
SRR17520069.8258220  
SRR17520069.8258222  
SRR17520069.8258224  
SRR17520069.8258226  
SRR17520069.8258230  
SRR17520069.8258232  
SRR17520069.8258234  
SRR17520069.8258236  
SRR17520069.8258238  
SRR17520069.8258240  
SRR17520069.8258242  
SRR17520069.8258244  
SRR17520069.8258246  
SRR17520069.8258248  
SRR17520069.8258250  
SRR17520069.8258252  
SRR17520069.8258254  
SRR17520069.8258256  
SRR17520069.8258258  
SRR17520069.8258260  
SRR17520069.8258262  
SRR17520069.8258264  
SRR17520069.8258266  
SRR17520069.8258268  
SRR17520069.8258270  
SRR17520069.8258272  
SRR17520069.8258274  
SRR17520069.8258276  
SRR17520069.8258278  
SRR17520069.8258280  
SRR17520069.8258282  
SRR17520069.8258284  
SRR17520069.8258286  
SRR17520069.8258288  
SRR17520069.8258290  
SRR17520069.8258292  
SRR17520069.8258294  
SRR17520069.8258296  
SRR17520069.8258298  
SRR17520069.8260344  
SRR17520069.8260346  
SRR17520069.8260348  
SRR17520069.8260350

SRR17520069.8260352  
SRR17520069.8264524  
SRR17520069.8267508  
SRR17520069.8267510  
SRR17520069.8267512  
SRR17520069.8269079  
SRR17520069.8269081  
SRR17520069.8269083  
SRR17520069.8269085  
SRR17520069.8269087  
SRR17520069.8269089  
SRR17520069.8269091  
SRR17520069.8269093  
SRR17520069.8269095  
SRR17520069.8269097  
SRR17520069.8269099  
SRR17520069.8269101  
SRR17520069.8275908  
SRR17520069.8275910  
SRR17520069.8275912  
SRR17520069.8288265  
SRR17520069.8288267  
SRR17520069.8288269  
SRR17520069.8288271  
SRR17520069.8288273  
SRR17520069.8288275  
SRR17520069.8288277  
SRR17520069.8288279  
SRR17520069.8288281  
SRR17520069.8288283  
SRR17520069.8288285  
SRR17520069.8288287  
SRR17520069.8288289  
SRR17520069.8289673  
SRR17520069.8289675  
SRR17520069.8289677  
SRR17520069.8289679  
SRR17520069.8289681  
SRR17520069.8289683  
SRR17520069.8289685  
SRR17520069.8289687  
SRR17520069.8290276  
SRR17520069.8291648  
SRR17520069.8291650  
SRR17520069.8291652  
SRR17520069.8291654  
SRR17520069.8291656



SRR17520069.8291658  
SRR17520069.8299376  
SRR17520069.8299378  
SRR17520069.8299380  
SRR17520069.8299382  
SRR17520069.8299384  
SRR17520069.8299386  
SRR17520069.8299388  
SRR17520069.8299390  
SRR17520069.8299392  
SRR17520069.8299394  
SRR17520069.8299396  
SRR17520069.8299398  
SRR17520069.8299400  
SRR17520069.8299402  
SRR17520069.8299404  
SRR17520069.8299406  
SRR17520069.8299408  
SRR17520069.8299410  
SRR17520069.8299412  
SRR17520069.8299414  
SRR17520069.8299416  
SRR17520069.8299418  
SRR17520069.8299420  
SRR17520069.8299422  
SRR17520069.8299424  
SRR17520069.8299426  
SRR17520069.8299428  
SRR17520069.8299430  
SRR17520069.8299432  
SRR17520069.8299434  
SRR17520069.8299436  
SRR17520069.8299438  
SRR17520069.8299442  
SRR17520069.8299444  
SRR17520069.8299446  
SRR17520069.8299448  
SRR17520069.8299452  
SRR17520069.8299454  
SRR17520069.8299456  
SRR17520069.8299458  
SRR17520069.8299460  
SRR17520069.8299462  
SRR17520069.8299464  
SRR17520069.8299466  
SRR17520069.8299468  
SRR17520069.8299470

SRR17520069.8299474  
SRR17520069.8299476  
SRR17520069.8299478  
SRR17520069.8299480  
SRR17520069.8299482  
SRR17520069.8299484  
SRR17520069.8299490  
SRR17520069.8299492  
SRR17520069.8299494  
SRR17520069.8299496  
SRR17520069.8299498  
SRR17520069.8299500  
SRR17520069.8299502  
SRR17520069.8302025  
SRR17520069.8302028  
SRR17520069.8302032  
SRR17520069.8302034  
SRR17520069.8302036  
SRR17520069.8302038  
SRR17520069.8302040  
SRR17520069.8302042  
SRR17520069.8302044  
SRR17520069.8302046  
SRR17520069.8302048  
SRR17520069.8302050  
SRR17520069.8302052  
SRR17520069.8302054  
SRR17520069.8302056  
SRR17520069.8302058  
SRR17520069.8302060  
SRR17520069.8302062  
SRR17520069.8302064  
SRR17520069.8302066  
SRR17520069.8302068  
SRR17520069.8302070  
SRR17520069.8302072  
SRR17520069.8302074  
SRR17520069.8302076  
SRR17520069.8302078  
SRR17520069.8306444  
SRR17520069.8306481  
SRR17520069.8308088  
SRR17520069.8308090  
SRR17520069.8308092  
SRR17520069.8308094  
SRR17520069.8308096  
SRR17520069.8308098

SRR17520069.8315770  
SRR17520069.8315778  
SRR17520069.8315780  
SRR17520069.8315782  
SRR17520069.8315784  
SRR17520069.8315786  
SRR17520069.8315788  
SRR17520069.8315790  
SRR17520069.8315792  
SRR17520069.8315794  
SRR17520069.8315796  
SRR17520069.8315798  
SRR17520069.8315800  
SRR17520069.8315802  
SRR17520069.8315804  
SRR17520069.8315806  
SRR17520069.8315808  
SRR17520069.8315810  
SRR17520069.8315812  
SRR17520069.8315814  
SRR17520069.8315816  
SRR17520069.8315818  
SRR17520069.8315820  
SRR17520069.8315822  
SRR17520069.8315824  
SRR17520069.8315826  
SRR17520069.8315828  
SRR17520069.8315830  
SRR17520069.8315832  
SRR17520069.8315834  
SRR17520069.8315836  
SRR17520069.8315838  
SRR17520069.8315840  
SRR17520069.8315842  
SRR17520069.8315844  
SRR17520069.8315846  
SRR17520069.8315848  
SRR17520069.8315850  
SRR17520069.8315852  
SRR17520069.8315854  
SRR17520069.8315856  
SRR17520069.8315858  
SRR17520069.8315860  
SRR17520069.8315862  
SRR17520069.8317622  
SRR17520069.8317624  
SRR17520069.8327820

SRR17520069. 8327822  
SRR17520069. 8327824  
SRR17520069. 8327826  
SRR17520069. 8327828  
SRR17520069. 8327830  
SRR17520069. 8327832  
SRR17520069. 8327834  
SRR17520069. 8327836  
SRR17520069. 8327838  
SRR17520069. 8327840  
SRR17520069. 8327844  
SRR17520069. 8327846  
SRR17520069. 8327848  
SRR17520069. 8327850  
SRR17520069. 8327852  
SRR17520069. 8327854  
SRR17520069. 8327856  
SRR17520069. 8327858  
SRR17520069. 8327860  
SRR17520069. 8327862  
SRR17520069. 8327864  
SRR17520069. 8327866  
SRR17520069. 8327868  
SRR17520069. 8327870  
SRR17520069. 8327872  
SRR17520069. 8327874  
SRR17520069. 8327876  
SRR17520069. 8327878  
SRR17520069. 8327880  
SRR17520069. 8327882  
SRR17520069. 8327884  
SRR17520069. 8327886  
SRR17520069. 8327888  
SRR17520069. 8327892  
SRR17520069. 8327894  
SRR17520069. 8327896  
SRR17520069. 8327898  
SRR17520069. 8327900  
SRR17520069. 8327902  
SRR17520069. 8327904  
SRR17520069. 8327906  
SRR17520069. 8327908  
SRR17520069. 8327910  
SRR17520069. 8327912  
SRR17520069. 8327914  
SRR17520069. 8327916  
SRR17520069. 8327918

SRR17520069.8327920  
SRR17520069.8327922  
SRR17520069.8327924  
SRR17520069.8327926  
SRR17520069.8327928  
SRR17520069.8327930  
SRR17520069.8327932  
SRR17520069.8327934  
SRR17520069.8327936  
SRR17520069.8327938  
SRR17520069.8327940  
SRR17520069.8327942  
SRR17520069.8327944  
SRR17520069.8327946  
SRR17520069.8327948  
SRR17520069.8327950  
SRR17520069.8327952  
SRR17520069.8327954  
SRR17520069.8327956  
SRR17520069.8327958  
SRR17520069.8327960  
SRR17520069.8327962  
SRR17520069.8327964  
SRR17520069.8327966  
SRR17520069.8327968  
SRR17520069.8329260  
SRR17520069.8329262  
SRR17520069.8329264  
SRR17520069.8329268  
SRR17520069.8329270  
SRR17520069.8329272  
SRR17520069.8329274  
SRR17520069.8329276  
SRR17520069.8329278  
SRR17520069.8329280  
SRR17520069.8329282  
SRR17520069.8329284  
SRR17520069.8329286  
SRR17520069.8329288  
SRR17520069.8329290  
SRR17520069.8329292  
SRR17520069.8329294  
SRR17520069.8329296  
SRR17520069.8329298  
SRR17520069.8329300  
SRR17520069.8329302  
SRR17520069.8329304

SRR17520069.8329306  
SRR17520069.8329308  
SRR17520069.8329310  
SRR17520069.8329312  
SRR17520069.8329314  
SRR17520069.8329316  
SRR17520069.8329318  
SRR17520069.8329320  
SRR17520069.8329322  
SRR17520069.8329324  
SRR17520069.8329326  
SRR17520069.8329328  
SRR17520069.8329330  
SRR17520069.8329332  
SRR17520069.8329334  
SRR17520069.8329336  
SRR17520069.8329338  
SRR17520069.8329340  
SRR17520069.8329342  
SRR17520069.8329344  
SRR17520069.8329346  
SRR17520069.8329348  
SRR17520069.8329350  
SRR17520069.8329352  
SRR17520069.8329354  
SRR17520069.8329356  
SRR17520069.8329358  
SRR17520069.8329360  
SRR17520069.8329362  
SRR17520069.8329364  
SRR17520069.8329366  
SRR17520069.8329368  
SRR17520069.8329606  
SRR17520069.8329608  
SRR17520069.8329610  
SRR17520069.8329612  
SRR17520069.8329614  
SRR17520069.8329618  
SRR17520069.8332394  
SRR17520069.8333857  
SRR17520069.8333859  
SRR17520069.8333861  
SRR17520069.8333863  
SRR17520069.8333865  
SRR17520069.8333867  
SRR17520069.8333869  
SRR17520069.8333871

SRR17520069.8333873  
SRR17520069.8333875  
SRR17520069.8333877  
SRR17520069.8333879  
SRR17520069.8333881  
SRR17520069.8333883  
SRR17520069.8333885  
SRR17520069.8333887  
SRR17520069.8333889  
SRR17520069.8335263  
SRR17520069.8335265  
SRR17520069.8335267  
SRR17520069.8335269  
SRR17520069.8335271  
SRR17520069.8335711  
SRR17520069.8335713  
SRR17520069.8335715  
SRR17520069.8335717  
SRR17520069.8335719  
SRR17520069.8335721  
SRR17520069.8335723  
SRR17520069.8338202  
SRR17520069.8338204  
SRR17520069.8338206  
SRR17520069.8338208  
SRR17520069.8338210  
SRR17520069.8344739  
SRR17520069.8347115  
SRR17520069.8347117  
SRR17520069.8348165  
SRR17520069.8348167  
SRR17520069.8348169  
SRR17520069.8348171  
SRR17520069.8348173  
SRR17520069.8348175  
SRR17520069.8348177  
SRR17520069.8348179  
SRR17520069.8348181  
SRR17520069.8348183  
SRR17520069.8348185  
SRR17520069.8348187  
SRR17520069.8348189  
SRR17520069.8348191  
SRR17520069.8348193  
SRR17520069.8348195  
SRR17520069.8348197  
SRR17520069.8348199

SRR17520069.8348201  
SRR17520069.8348203  
SRR17520069.8348205  
SRR17520069.8348207  
SRR17520069.8348209  
SRR17520069.8348211  
SRR17520069.8348213  
SRR17520069.8348215  
SRR17520069.8348217  
SRR17520069.8348219  
SRR17520069.8348221  
SRR17520069.8348223  
SRR17520069.8348225  
SRR17520069.8348227  
SRR17520069.8348229  
SRR17520069.8348231  
SRR17520069.8348233  
SRR17520069.8348235  
SRR17520069.8348237  
SRR17520069.8348239  
SRR17520069.8354524  
SRR17520069.8354526  
SRR17520069.8354528  
SRR17520069.8354530  
SRR17520069.8354532  
SRR17520069.8354534  
SRR17520069.8354536  
SRR17520069.8354538  
SRR17520069.8354540  
SRR17520069.8354542  
SRR17520069.8354544  
SRR17520069.8354546  
SRR17520069.8354548  
SRR17520069.8354550  
SRR17520069.8354552  
SRR17520069.8354554  
SRR17520069.8354558  
SRR17520069.8354560  
SRR17520069.8354562  
SRR17520069.8360324  
SRR17520069.8360326  
SRR17520069.8360328  
SRR17520069.8360330  
SRR17520069.8360332  
SRR17520069.8360334  
SRR17520069.8360336  
SRR17520069.8360338



SRR17520069.8360340  
SRR17520069.8360342  
SRR17520069.8360344  
SRR17520069.8360346  
SRR17520069.8360348  
SRR17520069.8360350  
SRR17520069.8360352  
SRR17520069.8360354  
SRR17520069.8360356  
SRR17520069.8360358  
SRR17520069.8360360  
SRR17520069.8360362  
SRR17520069.8360364  
SRR17520069.8360366  
SRR17520069.8360368  
SRR17520069.8360370  
SRR17520069.8360372  
SRR17520069.8360374  
SRR17520069.8360376  
SRR17520069.8360378  
SRR17520069.8360380  
SRR17520069.8360382  
SRR17520069.8360384  
SRR17520069.8360386  
SRR17520069.8360388  
SRR17520069.8360390  
SRR17520069.8360392  
SRR17520069.8360394  
SRR17520069.8360396  
SRR17520069.8360398  
SRR17520069.8360400  
SRR17520069.8360402  
SRR17520069.8360404  
SRR17520069.8360406  
SRR17520069.8360408  
SRR17520069.8360410  
SRR17520069.8360412  
SRR17520069.8360414  
SRR17520069.8360416  
SRR17520069.8360418  
SRR17520069.8360420  
SRR17520069.8360422  
SRR17520069.8360424  
SRR17520069.8360426  
SRR17520069.8360428  
SRR17520069.8360430  
SRR17520069.8360432

SRR17520069.8360434  
SRR17520069.8360438  
SRR17520069.8360440  
SRR17520069.8360442  
SRR17520069.8360444  
SRR17520069.8360446  
SRR17520069.8360448  
SRR17520069.8360450  
SRR17520069.8360452  
SRR17520069.8360454  
SRR17520069.8360456  
SRR17520069.8360458  
SRR17520069.8360460  
SRR17520069.8360462  
SRR17520069.8362235  
SRR17520069.8363960  
SRR17520069.8363962  
SRR17520069.8364035  
SRR17520069.8364037  
SRR17520069.8364039  
SRR17520069.8364041  
SRR17520069.8364043  
SRR17520069.8364045  
SRR17520069.8364047  
SRR17520069.8364049  
SRR17520069.8364051  
SRR17520069.8364053  
SRR17520069.8364055  
SRR17520069.8365036  
SRR17520069.8365038  
SRR17520069.8365040  
SRR17520069.8365042  
SRR17520069.8365044  
SRR17520069.8365046  
SRR17520069.8365048  
SRR17520069.8365050  
SRR17520069.8365052  
SRR17520069.8365054  
SRR17520069.8365056  
SRR17520069.8365058  
SRR17520069.8365060  
SRR17520069.8365062  
SRR17520069.8365064  
SRR17520069.8365066  
SRR17520069.8365068  
SRR17520069.8365070  
SRR17520069.8365074

SRR17520069.8365076  
SRR17520069.8365078  
SRR17520069.8365080  
SRR17520069.8365085  
SRR17520069.8365089  
SRR17520069.8365091  
SRR17520069.8365093  
SRR17520069.8365095  
SRR17520069.8365097  
SRR17520069.8365099  
SRR17520069.8365101  
SRR17520069.8365103  
SRR17520069.8365105  
SRR17520069.8365107  
SRR17520069.8365111  
SRR17520069.8365113  
SRR17520069.8365117  
SRR17520069.8365119  
SRR17520069.8365121  
SRR17520069.8365123  
SRR17520069.8365125  
SRR17520069.8365127  
SRR17520069.8365129  
SRR17520069.8365131  
SRR17520069.8365133  
SRR17520069.8365135  
SRR17520069.8365137  
SRR17520069.8368815  
SRR17520069.8368817  
SRR17520069.8368821  
SRR17520069.8368823  
SRR17520069.8368825  
SRR17520069.8368827  
SRR17520069.8368829  
SRR17520069.8368831  
SRR17520069.8368833  
SRR17520069.8368835  
SRR17520069.8368837  
SRR17520069.8368839  
SRR17520069.8368841  
SRR17520069.8368843  
SRR17520069.8368845  
SRR17520069.8368847  
SRR17520069.8368849  
SRR17520069.8368851  
SRR17520069.8368853  
SRR17520069.8368855

SRR17520069.8368857  
SRR17520069.8368859  
SRR17520069.8368861  
SRR17520069.8368863  
SRR17520069.8368865  
SRR17520069.8374697  
SRR17520069.8374699  
SRR17520069.8378552  
SRR17520069.8378912  
SRR17520069.8378914  
SRR17520069.8379822  
SRR17520069.8379824  
SRR17520069.8379826  
SRR17520069.8379828  
SRR17520069.8379830  
SRR17520069.8379832  
SRR17520069.8379834  
SRR17520069.8379836  
SRR17520069.8379838  
SRR17520069.8379840  
SRR17520069.8379842  
SRR17520069.8379844  
SRR17520069.8379846  
SRR17520069.8379848  
SRR17520069.8379850  
SRR17520069.8379852  
SRR17520069.8379854  
SRR17520069.8379856  
SRR17520069.8379858  
SRR17520069.8379860  
SRR17520069.8379862  
SRR17520069.8379864  
SRR17520069.8379866  
SRR17520069.8379868  
SRR17520069.8379870  
SRR17520069.8379872  
SRR17520069.8379874  
SRR17520069.8379876  
SRR17520069.8379878  
SRR17520069.8379880  
SRR17520069.8379882  
SRR17520069.8379884  
SRR17520069.8379886  
SRR17520069.8379890  
SRR17520069.8379892  
SRR17520069.8379894  
SRR17520069.8379896

SRR17520069.8379898  
SRR17520069.8379900  
SRR17520069.8379902  
SRR17520069.8379904  
SRR17520069.8379906  
SRR17520069.8379908  
SRR17520069.8379910  
SRR17520069.8379912  
SRR17520069.8379914  
SRR17520069.8379916  
SRR17520069.8379918  
SRR17520069.8379920  
SRR17520069.8379922  
SRR17520069.8384121  
SRR17520069.8384123  
SRR17520069.8384125  
SRR17520069.8384127  
SRR17520069.8384129  
SRR17520069.8384131  
SRR17520069.8384133  
SRR17520069.8384135  
SRR17520069.8384137  
SRR17520069.8384139  
SRR17520069.8384586  
SRR17520069.8384588  
SRR17520069.8384590  
SRR17520069.8384592  
SRR17520069.8384594  
SRR17520069.8384596  
SRR17520069.8384598  
SRR17520069.8384600  
SRR17520069.8384602  
SRR17520069.8384604  
SRR17520069.8384606  
SRR17520069.8388095  
SRR17520069.8388097  
SRR17520069.8388099  
SRR17520069.8388101  
SRR17520069.8389973  
SRR17520069.8389975  
SRR17520069.8389977  
SRR17520069.8389979  
SRR17520069.8389981  
SRR17520069.8389983  
SRR17520069.8389985  
SRR17520069.8389987  
SRR17520069.8389989

SRR17520069.8389991  
SRR17520069.8389993  
SRR17520069.8389995  
SRR17520069.8389997  
SRR17520069.8389999  
SRR17520069.8390001  
SRR17520069.8390003  
SRR17520069.8390005  
SRR17520069.8390558  
SRR17520069.8390560  
SRR17520069.8394387  
SRR17520069.8394389  
SRR17520069.8394391  
SRR17520069.8394393  
SRR17520069.8394395  
SRR17520069.8394397  
SRR17520069.8394399  
SRR17520069.8394401  
SRR17520069.8394403  
SRR17520069.8394405  
SRR17520069.8394407  
SRR17520069.8394409  
SRR17520069.8404808  
SRR17520069.8404810  
SRR17520069.8404812  
SRR17520069.8404814  
SRR17520069.8404816  
SRR17520069.8404820  
SRR17520069.8404822  
SRR17520069.8404826  
SRR17520069.8404828  
SRR17520069.8404830  
SRR17520069.8404832  
SRR17520069.8404834  
SRR17520069.8404836  
SRR17520069.8404838  
SRR17520069.8404840  
SRR17520069.8404842  
SRR17520069.8404846  
SRR17520069.8404848  
SRR17520069.8404850  
SRR17520069.8404852  
SRR17520069.8404854  
SRR17520069.8404856  
SRR17520069.8404858  
SRR17520069.8404860  
SRR17520069.8404862

SRR17520069.8404864  
SRR17520069.8404866  
SRR17520069.8404868  
SRR17520069.8404870  
SRR17520069.8404872  
SRR17520069.8404874  
SRR17520069.8404876  
SRR17520069.8404878  
SRR17520069.8405107  
SRR17520069.8406529  
SRR17520069.8406531  
SRR17520069.8406533  
SRR17520069.8406535  
SRR17520069.8406537  
SRR17520069.8406539  
SRR17520069.8406541  
SRR17520069.8406543  
SRR17520069.8406545  
SRR17520069.8406547  
SRR17520069.8406549  
SRR17520069.8406551  
SRR17520069.8406553  
SRR17520069.8406555  
SRR17520069.8406557  
SRR17520069.8406559  
SRR17520069.8406561  
SRR17520069.8406563  
SRR17520069.8406565  
SRR17520069.8406567  
SRR17520069.8406569  
SRR17520069.8406571  
SRR17520069.8410390  
SRR17520069.8410392  
SRR17520069.8410394  
SRR17520069.8410396  
SRR17520069.8410398  
SRR17520069.8410400  
SRR17520069.8410402  
SRR17520069.8410404  
SRR17520069.8410406  
SRR17520069.8410408  
SRR17520069.8410410  
SRR17520069.8410412  
SRR17520069.8410414  
SRR17520069.8410416  
SRR17520069.8410418  
SRR17520069.8410420

SRR17520069.8410422  
SRR17520069.8410424  
SRR17520069.8410426  
SRR17520069.8410428  
SRR17520069.8410430  
SRR17520069.8410432  
SRR17520069.8410434  
SRR17520069.8410436  
SRR17520069.8410438  
SRR17520069.8410440  
SRR17520069.8410442  
SRR17520069.8410444  
SRR17520069.8410446  
SRR17520069.8410448  
SRR17520069.8410450  
SRR17520069.8410452  
SRR17520069.8410454  
SRR17520069.8410456  
SRR17520069.8410458  
SRR17520069.8410460  
SRR17520069.8410462  
SRR17520069.8410464  
SRR17520069.8410466  
SRR17520069.8410468  
SRR17520069.8410470  
SRR17520069.8410472  
SRR17520069.8410474  
SRR17520069.8423466  
SRR17520069.8423468  
SRR17520069.8423470  
SRR17520069.8423472  
SRR17520069.8423474  
SRR17520069.8423476  
SRR17520069.8423478  
SRR17520069.8432822  
SRR17520069.8432826  
SRR17520069.8432828  
SRR17520069.8432830  
SRR17520069.8432832  
SRR17520069.8432834  
SRR17520069.8432838  
SRR17520069.8432840  
SRR17520069.8432842  
SRR17520069.8432844  
SRR17520069.8432846  
SRR17520069.8432848  
SRR17520069.8432850



SRR17520069.8432852  
SRR17520069.8432854  
SRR17520069.8432856  
SRR17520069.8432858  
SRR17520069.8432860  
SRR17520069.8432862  
SRR17520069.8432864  
SRR17520069.8432866  
SRR17520069.8432868  
SRR17520069.8432870  
SRR17520069.8432872  
SRR17520069.8439785  
SRR17520069.8439787  
SRR17520069.8439789  
SRR17520069.8439791  
SRR17520069.8439793  
SRR17520069.8441896  
SRR17520069.8441898  
SRR17520069.8442509  
SRR17520069.8442511  
SRR17520069.8442513  
SRR17520069.8442515  
SRR17520069.8442517  
SRR17520069.8442519  
SRR17520069.8442521  
SRR17520069.8442523  
SRR17520069.8442525  
SRR17520069.8442527  
SRR17520069.8443900  
SRR17520069.8443902  
SRR17520069.8443904  
SRR17520069.8443906  
SRR17520069.8443908  
SRR17520069.8443910  
SRR17520069.8443912  
SRR17520069.8443914  
SRR17520069.8443916  
SRR17520069.8443918  
SRR17520069.8443920  
SRR17520069.8443922  
SRR17520069.8443926  
SRR17520069.8443928  
SRR17520069.8443930  
SRR17520069.8443932  
SRR17520069.8443934  
SRR17520069.8443936  
SRR17520069.8443938

SRR17520069.8443940  
SRR17520069.8443944  
SRR17520069.8443946  
SRR17520069.8443948  
SRR17520069.8443950  
SRR17520069.8443952  
SRR17520069.8443954  
SRR17520069.8443956  
SRR17520069.8443958  
SRR17520069.8443960  
SRR17520069.8447245  
SRR17520069.8447247  
SRR17520069.8447249  
SRR17520069.8447253  
SRR17520069.8447255  
SRR17520069.8447257  
SRR17520069.8447259  
SRR17520069.8447261  
SRR17520069.8449506  
SRR17520069.8449508  
SRR17520069.8449510  
SRR17520069.8449512  
SRR17520069.8449514  
SRR17520069.8449516  
SRR17520069.8449518  
SRR17520069.8449522  
SRR17520069.8452858  
SRR17520069.8452860  
SRR17520069.8452862  
SRR17520069.8452864  
SRR17520069.8452866  
SRR17520069.8452870  
SRR17520069.8452872  
SRR17520069.8452874  
SRR17520069.8452876  
SRR17520069.8452878  
SRR17520069.8452880  
SRR17520069.8452882  
SRR17520069.8452884  
SRR17520069.8452886  
SRR17520069.8452888  
SRR17520069.8452890  
SRR17520069.8452892  
SRR17520069.8452894  
SRR17520069.8452896  
SRR17520069.8452898  
SRR17520069.8452900

SRR17520069.8452902  
SRR17520069.8452904  
SRR17520069.8452906  
SRR17520069.8452908  
SRR17520069.8452910  
SRR17520069.8452912  
SRR17520069.8452914  
SRR17520069.8452916  
SRR17520069.8452918  
SRR17520069.8452920  
SRR17520069.8452922  
SRR17520069.8452924  
SRR17520069.8452926  
SRR17520069.8452928  
SRR17520069.8452930  
SRR17520069.8452932  
SRR17520069.8452934  
SRR17520069.8452936  
SRR17520069.8452938  
SRR17520069.8452940  
SRR17520069.8452942  
SRR17520069.8452944  
SRR17520069.8453209  
SRR17520069.8453211  
SRR17520069.8453213  
SRR17520069.8453215  
SRR17520069.8453217  
SRR17520069.8453219  
SRR17520069.8453221  
SRR17520069.8453223  
SRR17520069.8453225  
SRR17520069.8453227  
SRR17520069.8453229  
SRR17520069.8453231  
SRR17520069.8453233  
SRR17520069.8453235  
SRR17520069.8453237  
SRR17520069.8453239  
SRR17520069.8453241  
SRR17520069.8453243  
SRR17520069.8453245  
SRR17520069.8453247  
SRR17520069.8453249  
SRR17520069.8453251  
SRR17520069.8453253  
SRR17520069.8453255  
SRR17520069.8453257

SRR17520069.8453259  
SRR17520069.8453261  
SRR17520069.8453263  
SRR17520069.8453265  
SRR17520069.8453267  
SRR17520069.8453269  
SRR17520069.8453271  
SRR17520069.8453273  
SRR17520069.8453275  
SRR17520069.8454102  
SRR17520069.8454104  
SRR17520069.8454106  
SRR17520069.8454108  
SRR17520069.8454110  
SRR17520069.8454112  
SRR17520069.8454114  
SRR17520069.8454116  
SRR17520069.8454118  
SRR17520069.8454120  
SRR17520069.8454122  
SRR17520069.8454124  
SRR17520069.8462232  
SRR17520069.8462234  
SRR17520069.8462236  
SRR17520069.8462238  
SRR17520069.8462240  
SRR17520069.8462242  
SRR17520069.8462244  
SRR17520069.8462246  
SRR17520069.8462248  
SRR17520069.8462250  
SRR17520069.8462252  
SRR17520069.8462254  
SRR17520069.8462256  
SRR17520069.8462258  
SRR17520069.8462260  
SRR17520069.8462262  
SRR17520069.8462264  
SRR17520069.8462266  
SRR17520069.8462268  
SRR17520069.8462270  
SRR17520069.8462272  
SRR17520069.8462274  
SRR17520069.8462276  
SRR17520069.8462278  
SRR17520069.8463729  
SRR17520069.8463731

SRR17520069.8463733  
SRR17520069.8463735  
SRR17520069.8463737  
SRR17520069.8463739  
SRR17520069.8463741  
SRR17520069.8463743  
SRR17520069.8463745  
SRR17520069.8463747  
SRR17520069.8463749  
SRR17520069.8463751  
SRR17520069.8463753  
SRR17520069.8463755  
SRR17520069.8463757  
SRR17520069.8463759  
SRR17520069.8463761  
SRR17520069.8464070  
SRR17520069.8464072  
SRR17520069.8464074  
SRR17520069.8464076  
SRR17520069.8464078  
SRR17520069.8464080  
SRR17520069.8464082  
SRR17520069.8464084  
SRR17520069.8464086  
SRR17520069.8464088  
SRR17520069.8464090  
SRR17520069.8464092  
SRR17520069.8464094  
SRR17520069.8464096  
SRR17520069.8464098  
SRR17520069.8464100  
SRR17520069.8464102  
SRR17520069.8464104  
SRR17520069.8464106  
SRR17520069.8464108  
SRR17520069.8464110  
SRR17520069.8464112  
SRR17520069.8464114  
SRR17520069.8464116  
SRR17520069.8464118  
SRR17520069.8464122  
SRR17520069.8464124  
SRR17520069.8464126  
SRR17520069.8464128  
SRR17520069.8464130  
SRR17520069.8464132  
SRR17520069.8464134

SRR17520069.8464136  
SRR17520069.8464138  
SRR17520069.8464140  
SRR17520069.8464142  
SRR17520069.8464144  
SRR17520069.8464146  
SRR17520069.8464148  
SRR17520069.8464150  
SRR17520069.8464152  
SRR17520069.8464154  
SRR17520069.8464156  
SRR17520069.8464158  
SRR17520069.8464160  
SRR17520069.8464162  
SRR17520069.8464164  
SRR17520069.8464166  
SRR17520069.8464168  
SRR17520069.8464170  
SRR17520069.8464172  
SRR17520069.8464174  
SRR17520069.8464176  
SRR17520069.8464178  
SRR17520069.8464180  
SRR17520069.8464182  
SRR17520069.8464184  
SRR17520069.8464186  
SRR17520069.8464188  
SRR17520069.8464190  
SRR17520069.8464192  
SRR17520069.8467193  
SRR17520069.8467195  
SRR17520069.8467199  
SRR17520069.8467203  
SRR17520069.8467205  
SRR17520069.8467215  
SRR17520069.8467217  
SRR17520069.8467219  
SRR17520069.8467223  
SRR17520069.8467227  
SRR17520069.8468367  
SRR17520069.8468369  
SRR17520069.8468373  
SRR17520069.8468375  
SRR17520069.8468377  
SRR17520069.8468379  
SRR17520069.8468381  
SRR17520069.8468383

SRR17520069.8468385  
SRR17520069.8468387  
SRR17520069.8468391  
SRR17520069.8468393  
SRR17520069.8468395  
SRR17520069.8468397  
SRR17520069.8468399  
SRR17520069.8468401  
SRR17520069.8468403  
SRR17520069.8468405  
SRR17520069.8468407  
SRR17520069.8472628  
SRR17520069.8472630  
SRR17520069.8472632  
SRR17520069.8472634  
SRR17520069.8472636  
SRR17520069.8472640  
SRR17520069.8472642  
SRR17520069.8472646  
SRR17520069.8472648  
SRR17520069.8472650  
SRR17520069.8472652  
SRR17520069.8472658  
SRR17520069.8472660  
SRR17520069.8472662  
SRR17520069.8472664  
SRR17520069.8472666  
SRR17520069.8472668  
SRR17520069.8472670  
SRR17520069.8472672  
SRR17520069.8473165  
SRR17520069.8473167  
SRR17520069.8473169  
SRR17520069.8473171  
SRR17520069.8473173  
SRR17520069.8473177  
SRR17520069.8473179  
SRR17520069.8481307  
SRR17520069.8481309  
SRR17520069.8481311  
SRR17520069.8481313  
SRR17520069.8481315  
SRR17520069.8481317  
SRR17520069.8481319  
SRR17520069.8481321  
SRR17520069.8481323  
SRR17520069.8481325

SRR17520069.8481329  
SRR17520069.8481331  
SRR17520069.8481333  
SRR17520069.8481335  
SRR17520069.8483921  
SRR17520069.8483923  
SRR17520069.8483925  
SRR17520069.8483927  
SRR17520069.8483931  
SRR17520069.8483935  
SRR17520069.8483937  
SRR17520069.8483939  
SRR17520069.8483941  
SRR17520069.8483943  
SRR17520069.8483945  
SRR17520069.8483947  
SRR17520069.8483949  
SRR17520069.8483951  
SRR17520069.8483955  
SRR17520069.8483957  
SRR17520069.8483959  
SRR17520069.8483961  
SRR17520069.8484901  
SRR17520069.8486110  
SRR17520069.8486112  
SRR17520069.8486114  
SRR17520069.8486116  
SRR17520069.8486118  
SRR17520069.8486120  
SRR17520069.8486122  
SRR17520069.8486124  
SRR17520069.8486126  
SRR17520069.8486128  
SRR17520069.8486130  
SRR17520069.8486132  
SRR17520069.8486134  
SRR17520069.8486136  
SRR17520069.8486140  
SRR17520069.8486142  
SRR17520069.8486144  
SRR17520069.8486148  
SRR17520069.8486150  
SRR17520069.8486152  
SRR17520069.8486154  
SRR17520069.8486156  
SRR17520069.8486158  
SRR17520069.8486160



SRR17520069.8486162  
SRR17520069.8486164  
SRR17520069.8486166  
SRR17520069.8486168  
SRR17520069.8486170  
SRR17520069.8486172  
SRR17520069.8486174  
SRR17520069.8486176  
SRR17520069.8486178  
SRR17520069.8486180  
SRR17520069.8486182  
SRR17520069.8486623  
SRR17520069.8489452  
SRR17520069.8489454  
SRR17520069.8489456  
SRR17520069.8489458  
SRR17520069.8489460  
SRR17520069.8489462  
SRR17520069.8489464  
SRR17520069.8489466  
SRR17520069.8489468  
SRR17520069.8489470  
SRR17520069.8496334  
SRR17520069.8496336  
SRR17520069.8496338  
SRR17520069.8497753  
SRR17520069.8497755  
SRR17520069.8497757  
SRR17520069.8497759  
SRR17520069.8497761  
SRR17520069.8497763  
SRR17520069.8497765  
SRR17520069.8497767  
SRR17520069.8497769  
SRR17520069.8497771  
SRR17520069.8497773  
SRR17520069.8497775  
SRR17520069.8497777  
SRR17520069.8497779  
SRR17520069.8497781  
SRR17520069.8497783  
SRR17520069.8497785  
SRR17520069.8497787  
SRR17520069.8497789  
SRR17520069.8497791  
SRR17520069.8497793  
SRR17520069.8497795

SRR17520069.8499540  
SRR17520069.8499542  
SRR17520069.8499544  
SRR17520069.8499546  
SRR17520069.8499548  
SRR17520069.8499550  
SRR17520069.8511746  
SRR17520069.8511748  
SRR17520069.8511750  
SRR17520069.8511752  
SRR17520069.8511754  
SRR17520069.8511756  
SRR17520069.8514044  
SRR17520069.8514046  
SRR17520069.8514048  
SRR17520069.8514050  
SRR17520069.8515245  
SRR17520069.8515247  
SRR17520069.8515249  
SRR17520069.8515251  
SRR17520069.8515253  
SRR17520069.8515255  
SRR17520069.8515257  
SRR17520069.8515259  
SRR17520069.8515261  
SRR17520069.8515263  
SRR17520069.8515265  
SRR17520069.8515267  
SRR17520069.8515269  
SRR17520069.8515271  
SRR17520069.8515273  
SRR17520069.8515275  
SRR17520069.8515277  
SRR17520069.8515279  
SRR17520069.8515281  
SRR17520069.8515283  
SRR17520069.8515285  
SRR17520069.8515287  
SRR17520069.8515289  
SRR17520069.8515291  
SRR17520069.8515293  
SRR17520069.8515295  
SRR17520069.8515297  
SRR17520069.8515299  
SRR17520069.8515301  
SRR17520069.8515303  
SRR17520069.8515305

SRR17520069.8515307  
SRR17520069.8515309  
SRR17520069.8515311  
SRR17520069.8515313  
SRR17520069.8515315  
SRR17520069.8515317  
SRR17520069.8515319  
SRR17520069.8515321  
SRR17520069.8515323  
SRR17520069.8515327  
SRR17520069.8515329  
SRR17520069.8515331  
SRR17520069.8515333  
SRR17520069.8517838  
SRR17520069.8517840  
SRR17520069.8517844  
SRR17520069.8517846  
SRR17520069.8522651  
SRR17520069.8522655  
SRR17520069.8522661  
SRR17520069.8522663  
SRR17520069.8522665  
SRR17520069.8522667  
SRR17520069.8522669  
SRR17520069.8522673  
SRR17520069.8522675  
SRR17520069.8522677  
SRR17520069.8522681  
SRR17520069.8522685  
SRR17520069.8522687  
SRR17520069.8522689  
SRR17520069.8522691  
SRR17520069.8522693  
SRR17520069.8522695  
SRR17520069.8522699  
SRR17520069.8522701  
SRR17520069.8522703  
SRR17520069.8522705  
SRR17520069.8522707  
SRR17520069.8522709  
SRR17520069.8525829  
SRR17520069.8526688  
SRR17520069.8527150  
SRR17520069.8527152  
SRR17520069.8527154  
SRR17520069.8527156  
SRR17520069.8527158

SRR17520069.8527160  
SRR17520069.8527162  
SRR17520069.8527164  
SRR17520069.8527166  
SRR17520069.8531191  
SRR17520069.8531193  
SRR17520069.8531195  
SRR17520069.8531197  
SRR17520069.8531199  
SRR17520069.8531201  
SRR17520069.8531203  
SRR17520069.8531205  
SRR17520069.8531207  
SRR17520069.8531209  
SRR17520069.8531211  
SRR17520069.8531213  
SRR17520069.8531215  
SRR17520069.8531219  
SRR17520069.8531221  
SRR17520069.8531223  
SRR17520069.8531225  
SRR17520069.8531227  
SRR17520069.8531229  
SRR17520069.8531231  
SRR17520069.8531233  
SRR17520069.8531235  
SRR17520069.8531237  
SRR17520069.8531239  
SRR17520069.8531241  
SRR17520069.8531243  
SRR17520069.8531245  
SRR17520069.8531247  
SRR17520069.8531249  
SRR17520069.8531251  
SRR17520069.8531253  
SRR17520069.8531255  
SRR17520069.8536539  
SRR17520069.8536541  
SRR17520069.8544738  
SRR17520069.8544740  
SRR17520069.8544742  
SRR17520069.8544744  
SRR17520069.8544746  
SRR17520069.8544748  
SRR17520069.8544750  
SRR17520069.8544752  
SRR17520069.8544754

SRR17520069.8544756  
SRR17520069.8544758  
SRR17520069.8544760  
SRR17520069.8544762  
SRR17520069.8544764  
SRR17520069.8544766  
SRR17520069.8544768  
SRR17520069.8544770  
SRR17520069.8551175  
SRR17520069.8551177  
SRR17520069.8551181  
SRR17520069.8551183  
SRR17520069.8551185  
SRR17520069.8551187  
SRR17520069.8551189  
SRR17520069.8551191  
SRR17520069.8551193  
SRR17520069.8551195  
SRR17520069.8551197  
SRR17520069.8551199  
SRR17520069.8551201  
SRR17520069.8551203  
SRR17520069.8551205  
SRR17520069.8551207  
SRR17520069.8551209  
SRR17520069.8551211  
SRR17520069.8551213  
SRR17520069.8551215  
SRR17520069.8551217  
SRR17520069.8551219  
SRR17520069.8551221  
SRR17520069.8551223  
SRR17520069.8551225  
SRR17520069.8551227  
SRR17520069.8551229  
SRR17520069.8551231  
SRR17520069.8551233  
SRR17520069.8551235  
SRR17520069.8551237  
SRR17520069.8551239  
SRR17520069.8551241  
SRR17520069.8551243  
SRR17520069.8551245  
SRR17520069.8551247  
SRR17520069.8551249  
SRR17520069.8551251  
SRR17520069.8551253

SRR17520069.8551255  
SRR17520069.8551257  
SRR17520069.8551259  
SRR17520069.8551261  
SRR17520069.8551512  
SRR17520069.8551514  
SRR17520069.8551516  
SRR17520069.8551518  
SRR17520069.8551520  
SRR17520069.8551522  
SRR17520069.8551524  
SRR17520069.8552648  
SRR17520069.8552650  
SRR17520069.8552652  
SRR17520069.8552654  
SRR17520069.8552656  
SRR17520069.8552658  
SRR17520069.8552660  
SRR17520069.8552662  
SRR17520069.8552664  
SRR17520069.8552666  
SRR17520069.8552668  
SRR17520069.8552670  
SRR17520069.8552672  
SRR17520069.8552674  
SRR17520069.8552676  
SRR17520069.8554330  
SRR17520069.8554332  
SRR17520069.8554336  
SRR17520069.8554338  
SRR17520069.8554340  
SRR17520069.8554342  
SRR17520069.8554344  
SRR17520069.8554346  
SRR17520069.8554348  
SRR17520069.8554396  
SRR17520069.8554398  
SRR17520069.8554400  
SRR17520069.8554402  
SRR17520069.8554404  
SRR17520069.8554406  
SRR17520069.8554408  
SRR17520069.8554410  
SRR17520069.8554412  
SRR17520069.8554414  
SRR17520069.8554416  
SRR17520069.8564216

SRR17520069.8564218  
SRR17520069.8564220  
SRR17520069.8564222  
SRR17520069.8564224  
SRR17520069.8564226  
SRR17520069.8564228  
SRR17520069.8564230  
SRR17520069.8564232  
SRR17520069.8564234  
SRR17520069.8564236  
SRR17520069.8564238  
SRR17520069.8564240  
SRR17520069.8564242  
SRR17520069.8564298  
SRR17520069.8564300  
SRR17520069.8564302  
SRR17520069.8564304  
SRR17520069.8564306  
SRR17520069.8564308  
SRR17520069.8564310  
SRR17520069.8564314  
SRR17520069.8564316  
SRR17520069.8564318  
SRR17520069.8564322  
SRR17520069.8564324  
SRR17520069.8564326  
SRR17520069.8564328  
SRR17520069.8564330  
SRR17520069.8564332  
SRR17520069.8564334  
SRR17520069.8564336  
SRR17520069.8564338  
SRR17520069.8564342  
SRR17520069.8564344  
SRR17520069.8564346  
SRR17520069.8564348  
SRR17520069.8564350  
SRR17520069.8564352  
SRR17520069.8564354  
SRR17520069.8564356  
SRR17520069.8564358  
SRR17520069.8564360  
SRR17520069.8564362  
SRR17520069.8564364  
SRR17520069.8564366  
SRR17520069.8564368  
SRR17520069.8564370

SRR17520069.8564372  
SRR17520069.8564374  
SRR17520069.8564376  
SRR17520069.8564378  
SRR17520069.8564380  
SRR17520069.8564382  
SRR17520069.8564384  
SRR17520069.8564386  
SRR17520069.8564388  
SRR17520069.8564390  
SRR17520069.8565969  
SRR17520069.8565971  
SRR17520069.8565973  
SRR17520069.8577171  
SRR17520069.8577173  
SRR17520069.8577175  
SRR17520069.8577177  
SRR17520069.8577179  
SRR17520069.8577181  
SRR17520069.8577183  
SRR17520069.8577185  
SRR17520069.8577187  
SRR17520069.8577189  
SRR17520069.8578344  
SRR17520069.8578346  
SRR17520069.8578348  
SRR17520069.8585895  
SRR17520069.8585897  
SRR17520069.8585899  
SRR17520069.8591766  
SRR17520069.8591768  
SRR17520069.8591770  
SRR17520069.8591772  
SRR17520069.8591774  
SRR17520069.8591776  
SRR17520069.8591778  
SRR17520069.8591780  
SRR17520069.8593773  
SRR17520069.8595826  
SRR17520069.8595828  
SRR17520069.8595830  
SRR17520069.8595832  
SRR17520069.8595834  
SRR17520069.8595836  
SRR17520069.8595838  
SRR17520069.8595840  
SRR17520069.8595842



SRR17520069.8595844  
SRR17520069.8595846  
SRR17520069.8595848  
SRR17520069.8595850  
SRR17520069.8595852  
SRR17520069.8595854  
SRR17520069.8595856  
SRR17520069.8595858  
SRR17520069.8595860  
SRR17520069.8595862  
SRR17520069.8595864  
SRR17520069.8595866  
SRR17520069.8595868  
SRR17520069.8595870  
SRR17520069.8595872  
SRR17520069.8599907  
SRR17520069.8599909  
SRR17520069.8599911  
SRR17520069.8599913  
SRR17520069.8599915  
SRR17520069.8599917  
SRR17520069.8599919  
SRR17520069.8599921  
SRR17520069.8599923  
SRR17520069.8599925  
SRR17520069.8599927  
SRR17520069.8599929  
SRR17520069.8599931  
SRR17520069.8599933  
SRR17520069.8599935  
SRR17520069.8602280  
SRR17520069.8602282  
SRR17520069.8602284  
SRR17520069.8602286  
SRR17520069.8602288  
SRR17520069.8602290  
SRR17520069.8602292  
SRR17520069.8602294  
SRR17520069.8602296  
SRR17520069.8603812  
SRR17520069.8603816  
SRR17520069.8603818  
SRR17520069.8603820  
SRR17520069.8603822  
SRR17520069.8603824  
SRR17520069.8603826  
SRR17520069.8603828

SRR17520069.8603830  
SRR17520069.8603834  
SRR17520069.8603836  
SRR17520069.8603838  
SRR17520069.8603840  
SRR17520069.8603844  
SRR17520069.8607381  
SRR17520069.8607383  
SRR17520069.8607385  
SRR17520069.8607387  
SRR17520069.8607389  
SRR17520069.8607391  
SRR17520069.8607395  
SRR17520069.8607397  
SRR17520069.8607399  
SRR17520069.8607401  
SRR17520069.8607403  
SRR17520069.8607405  
SRR17520069.8607407  
SRR17520069.8607409  
SRR17520069.8607411  
SRR17520069.8607413  
SRR17520069.8608500  
SRR17520069.8608502  
SRR17520069.8608506  
SRR17520069.8608508  
SRR17520069.8608512  
SRR17520069.8608514  
SRR17520069.8608518  
SRR17520069.8608520  
SRR17520069.8611066  
SRR17520069.8611068  
SRR17520069.8611070  
SRR17520069.8611072  
SRR17520069.8613822  
SRR17520069.8613824  
SRR17520069.8613826  
SRR17520069.8613828  
SRR17520069.8613830  
SRR17520069.8613832  
SRR17520069.8613834  
SRR17520069.8613836  
SRR17520069.8613838  
SRR17520069.8613840  
SRR17520069.8613842  
SRR17520069.8613844  
SRR17520069.8613846

SRR17520069.8613848  
SRR17520069.8613850  
SRR17520069.8613852  
SRR17520069.8613854  
SRR17520069.8613856  
SRR17520069.8613858  
SRR17520069.8613860  
SRR17520069.8613862  
SRR17520069.8613864  
SRR17520069.8613866  
SRR17520069.8613868  
SRR17520069.8613870  
SRR17520069.8613872  
SRR17520069.8613874  
SRR17520069.8613876  
SRR17520069.8613878  
SRR17520069.8613880  
SRR17520069.8613882  
SRR17520069.8613884  
SRR17520069.8613886  
SRR17520069.8613888  
SRR17520069.8613890  
SRR17520069.8613892  
SRR17520069.8613894  
SRR17520069.8613896  
SRR17520069.8613898  
SRR17520069.8613900  
SRR17520069.8613902  
SRR17520069.8613904  
SRR17520069.8613906  
SRR17520069.8613908  
SRR17520069.8613910  
SRR17520069.8613912  
SRR17520069.8613914  
SRR17520069.8613916  
SRR17520069.8613918  
SRR17520069.8613920  
SRR17520069.8613922  
SRR17520069.8613924  
SRR17520069.8613926  
SRR17520069.8613928  
SRR17520069.8617209  
SRR17520069.8617211  
SRR17520069.8617213  
SRR17520069.8617217  
SRR17520069.8617219  
SRR17520069.8617221

SRR17520069.8617223  
SRR17520069.8617225  
SRR17520069.8617229  
SRR17520069.8617231  
SRR17520069.8617233  
SRR17520069.8617235  
SRR17520069.8617237  
SRR17520069.8617239  
SRR17520069.8617241  
SRR17520069.8617243  
SRR17520069.8617247  
SRR17520069.8617249  
SRR17520069.8617251  
SRR17520069.8617253  
SRR17520069.8617255  
SRR17520069.8617259  
SRR17520069.8617261  
SRR17520069.8617263  
SRR17520069.8617265  
SRR17520069.8617267  
SRR17520069.8617269  
SRR17520069.8617271  
SRR17520069.8617275  
SRR17520069.8617277  
SRR17520069.8617279  
SRR17520069.8617281  
SRR17520069.8617283  
SRR17520069.8617285  
SRR17520069.8617287  
SRR17520069.8617289  
SRR17520069.8617291  
SRR17520069.8617293  
SRR17520069.8618192  
SRR17520069.8618194  
SRR17520069.8618196  
SRR17520069.8618198  
SRR17520069.8618200  
SRR17520069.8618202  
SRR17520069.8618204  
SRR17520069.8618206  
SRR17520069.8618208  
SRR17520069.8618212  
SRR17520069.8618214  
SRR17520069.8618216  
SRR17520069.8618218  
SRR17520069.8618220  
SRR17520069.8618222

SRR17520069.8618224  
SRR17520069.8618226  
SRR17520069.8618228  
SRR17520069.8618230  
SRR17520069.8618232  
SRR17520069.8618234  
SRR17520069.8618236  
SRR17520069.8618238  
SRR17520069.8618240  
SRR17520069.8618242  
SRR17520069.8618244  
SRR17520069.8618246  
SRR17520069.8618248  
SRR17520069.8618250  
SRR17520069.8618252  
SRR17520069.8618254  
SRR17520069.8618256  
SRR17520069.8618258  
SRR17520069.8618260  
SRR17520069.8618262  
SRR17520069.8618264  
SRR17520069.8626288  
SRR17520069.8626290  
SRR17520069.8626292  
SRR17520069.8626294  
SRR17520069.8626296  
SRR17520069.8626298  
SRR17520069.8626300  
SRR17520069.8626302  
SRR17520069.8626304  
SRR17520069.8626306  
SRR17520069.8626308  
SRR17520069.8626310  
SRR17520069.8626312  
SRR17520069.8626314  
SRR17520069.8626316  
SRR17520069.8626318  
SRR17520069.8626320  
SRR17520069.8630175  
SRR17520069.8630177  
SRR17520069.8630179  
SRR17520069.8630181  
SRR17520069.8630183  
SRR17520069.8630185  
SRR17520069.8630187  
SRR17520069.8630189  
SRR17520069.8630191

SRR17520069.8630193  
SRR17520069.8630195  
SRR17520069.8630197  
SRR17520069.8630199  
SRR17520069.8630201  
SRR17520069.8630203  
SRR17520069.8630205  
SRR17520069.8630209  
SRR17520069.8630211  
SRR17520069.8630213  
SRR17520069.8630215  
SRR17520069.8630219  
SRR17520069.8630221  
SRR17520069.8630223  
SRR17520069.8630225  
SRR17520069.8630227  
SRR17520069.8630229  
SRR17520069.8630231  
SRR17520069.8630233  
SRR17520069.8630235  
SRR17520069.8630239  
SRR17520069.8630241  
SRR17520069.8630243  
SRR17520069.8630245  
SRR17520069.8630247  
SRR17520069.8630249  
SRR17520069.8630251  
SRR17520069.8630253  
SRR17520069.8630255  
SRR17520069.8630257  
SRR17520069.8630259  
SRR17520069.8630263  
SRR17520069.8630265  
SRR17520069.8630267  
SRR17520069.8630269  
SRR17520069.8639788  
SRR17520069.8639790  
SRR17520069.8639792  
SRR17520069.8639794  
SRR17520069.8639796  
SRR17520069.8639798  
SRR17520069.8639800  
SRR17520069.8639802  
SRR17520069.8640738  
SRR17520069.8640740  
SRR17520069.8640742  
SRR17520069.8640744

SRR17520069.8640746  
SRR17520069.8640748  
SRR17520069.8640750  
SRR17520069.8640752  
SRR17520069.8640754  
SRR17520069.8640756  
SRR17520069.8640758  
SRR17520069.8640760  
SRR17520069.8640762  
SRR17520069.8640764  
SRR17520069.8640766  
SRR17520069.8640768  
SRR17520069.8640770  
SRR17520069.8642365  
SRR17520069.8642367  
SRR17520069.8645627  
SRR17520069.8645629  
SRR17520069.8645631  
SRR17520069.8645633  
SRR17520069.8645635  
SRR17520069.8645637  
SRR17520069.8645639  
SRR17520069.8645641  
SRR17520069.8645643  
SRR17520069.8645645  
SRR17520069.8645647  
SRR17520069.8645649  
SRR17520069.8645651  
SRR17520069.8645655  
SRR17520069.8645657  
SRR17520069.8645659  
SRR17520069.8645661  
SRR17520069.8645663  
SRR17520069.8645665  
SRR17520069.8645667  
SRR17520069.8645669  
SRR17520069.8645671  
SRR17520069.8645673  
SRR17520069.8645675  
SRR17520069.8645677  
SRR17520069.8645679  
SRR17520069.8645681  
SRR17520069.8645683  
SRR17520069.8645685  
SRR17520069.8645687  
SRR17520069.8645689  
SRR17520069.8645691

SRR17520069.8650805  
SRR17520069.8650807  
SRR17520069.8650809  
SRR17520069.8650811  
SRR17520069.8650813  
SRR17520069.8650815  
SRR17520069.8650817  
SRR17520069.8650819  
SRR17520069.8650821  
SRR17520069.8650823  
SRR17520069.8657344  
SRR17520069.8657346  
SRR17520069.8657348  
SRR17520069.8657350  
SRR17520069.8657352  
SRR17520069.8657354  
SRR17520069.8657356  
SRR17520069.8657358  
SRR17520069.8657360  
SRR17520069.8657362  
SRR17520069.8657364  
SRR17520069.8657366  
SRR17520069.8657368  
SRR17520069.8657370  
SRR17520069.8657598  
SRR17520069.8657600  
SRR17520069.8657602  
SRR17520069.8657604  
SRR17520069.8657606  
SRR17520069.8657608  
SRR17520069.8657610  
SRR17520069.8657612  
SRR17520069.8657614  
SRR17520069.8657616  
SRR17520069.8657618  
SRR17520069.8657620  
SRR17520069.8657622  
SRR17520069.8657624  
SRR17520069.8657626  
SRR17520069.8657628  
SRR17520069.8657630  
SRR17520069.8657632  
SRR17520069.8657634  
SRR17520069.8657636  
SRR17520069.8657638  
SRR17520069.8657640  
SRR17520069.8657642



SRR17520069.8657644  
SRR17520069.8657646  
SRR17520069.8657648  
SRR17520069.8657650  
SRR17520069.8657652  
SRR17520069.8657654  
SRR17520069.8657656  
SRR17520069.8657658  
SRR17520069.8657660  
SRR17520069.8657662  
SRR17520069.8657664  
SRR17520069.8657666  
SRR17520069.8657668  
SRR17520069.8657670  
SRR17520069.8657672  
SRR17520069.8657674  
SRR17520069.8657676  
SRR17520069.8657678  
SRR17520069.8657680  
SRR17520069.8657682  
SRR17520069.8657684  
SRR17520069.8657686  
SRR17520069.8657688  
SRR17520069.8657690  
SRR17520069.8657817  
SRR17520069.8657819  
SRR17520069.8657821  
SRR17520069.8657823  
SRR17520069.8657825  
SRR17520069.8657827  
SRR17520069.8657829  
SRR17520069.8657831  
SRR17520069.8657833  
SRR17520069.8657837  
SRR17520069.8657839  
SRR17520069.8657841  
SRR17520069.8657843  
SRR17520069.8657845  
SRR17520069.8657847  
SRR17520069.8662397  
SRR17520069.8662401  
SRR17520069.8662403  
SRR17520069.8662405  
SRR17520069.8662407  
SRR17520069.8662409  
SRR17520069.8662411  
SRR17520069.8662413

SRR17520069.8662417  
SRR17520069.8662419  
SRR17520069.8662421  
SRR17520069.8662423  
SRR17520069.8662427  
SRR17520069.8662429  
SRR17520069.8662431  
SRR17520069.8662433  
SRR17520069.8662435  
SRR17520069.8662437  
SRR17520069.8662439  
SRR17520069.8662443  
SRR17520069.8662445  
SRR17520069.8662447  
SRR17520069.8662449  
SRR17520069.8662451  
SRR17520069.8662453  
SRR17520069.8662455  
SRR17520069.8662457  
SRR17520069.8662459  
SRR17520069.8662461  
SRR17520069.8662463  
SRR17520069.8662465  
SRR17520069.8662467  
SRR17520069.8662469  
SRR17520069.8662473  
SRR17520069.8662475  
SRR17520069.8662477  
SRR17520069.8672328  
SRR17520069.8672839  
SRR17520069.8675770  
SRR17520069.8675772  
SRR17520069.8675774  
SRR17520069.8675776  
SRR17520069.8675778  
SRR17520069.8675780  
SRR17520069.8675782  
SRR17520069.8675784  
SRR17520069.8675786  
SRR17520069.8675788  
SRR17520069.8675790  
SRR17520069.8675792  
SRR17520069.8675794  
SRR17520069.8675796  
SRR17520069.8675798  
SRR17520069.8675800  
SRR17520069.8675804

SRR17520069.8676549  
SRR17520069.8676551  
SRR17520069.8676553  
SRR17520069.8676557  
SRR17520069.8676559  
SRR17520069.8676561  
SRR17520069.8676563  
SRR17520069.8676565  
SRR17520069.8676567  
SRR17520069.8676569  
SRR17520069.8676571  
SRR17520069.8676573  
SRR17520069.8676575  
SRR17520069.8676577  
SRR17520069.8676579  
SRR17520069.8676581  
SRR17520069.8676583  
SRR17520069.8676585  
SRR17520069.8676587  
SRR17520069.8676589  
SRR17520069.8676591  
SRR17520069.8678567  
SRR17520069.8678569  
SRR17520069.8678571  
SRR17520069.8678573  
SRR17520069.8678575  
SRR17520069.8678577  
SRR17520069.8678579  
SRR17520069.8678581  
SRR17520069.8678583  
SRR17520069.8678585  
SRR17520069.8678587  
SRR17520069.8678589  
SRR17520069.8678591  
SRR17520069.8678593  
SRR17520069.8678595  
SRR17520069.8678597  
SRR17520069.8678599  
SRR17520069.8680317  
SRR17520069.8680319  
SRR17520069.8680321  
SRR17520069.8680323  
SRR17520069.8680325  
SRR17520069.8680327  
SRR17520069.8680329  
SRR17520069.8680331  
SRR17520069.8680333

SRR17520069.8680337  
SRR17520069.8680341  
SRR17520069.8680343  
SRR17520069.8680345  
SRR17520069.8680347  
SRR17520069.8680349  
SRR17520069.8680351  
SRR17520069.8680353  
SRR17520069.8680355  
SRR17520069.8680357  
SRR17520069.8680359  
SRR17520069.8680361  
SRR17520069.8680363  
SRR17520069.8680365  
SRR17520069.8680367  
SRR17520069.8680369  
SRR17520069.8680371  
SRR17520069.8680373  
SRR17520069.8680375  
SRR17520069.8680377  
SRR17520069.8680379  
SRR17520069.8680381  
SRR17520069.8680383  
SRR17520069.8680385  
SRR17520069.8680387  
SRR17520069.8680391  
SRR17520069.8680395  
SRR17520069.8680397  
SRR17520069.8680399  
SRR17520069.8680401  
SRR17520069.8680403  
SRR17520069.8680405  
SRR17520069.8680410  
SRR17520069.8680412  
SRR17520069.8680414  
SRR17520069.8680416  
SRR17520069.8680418  
SRR17520069.8680420  
SRR17520069.8680422  
SRR17520069.8680424  
SRR17520069.8680426  
SRR17520069.8680428  
SRR17520069.8680430  
SRR17520069.8680432  
SRR17520069.8680434  
SRR17520069.8680436  
SRR17520069.8680438

SRR17520069.8680442  
SRR17520069.8680444  
SRR17520069.8680446  
SRR17520069.8680448  
SRR17520069.8680450  
SRR17520069.8680452  
SRR17520069.8680454  
SRR17520069.8680456  
SRR17520069.8680458  
SRR17520069.8680460  
SRR17520069.8680462  
SRR17520069.8680464  
SRR17520069.8684135  
SRR17520069.8684137  
SRR17520069.8684139  
SRR17520069.8684141  
SRR17520069.8684143  
SRR17520069.8684145  
SRR17520069.8684147  
SRR17520069.8684149  
SRR17520069.8684151  
SRR17520069.8684153  
SRR17520069.8684155  
SRR17520069.8684157  
SRR17520069.8684159  
SRR17520069.8684161  
SRR17520069.8684163  
SRR17520069.8684165  
SRR17520069.8684167  
SRR17520069.8684169  
SRR17520069.8684171  
SRR17520069.8684173  
SRR17520069.8684175  
SRR17520069.8684177  
SRR17520069.8684179  
SRR17520069.8684181  
SRR17520069.8684183  
SRR17520069.8684185  
SRR17520069.8684187  
SRR17520069.8684189  
SRR17520069.8684191  
SRR17520069.8684193  
SRR17520069.8684195  
SRR17520069.8684197  
SRR17520069.8684199  
SRR17520069.8684201  
SRR17520069.8684203

SRR17520069.8684205  
SRR17520069.8684207  
SRR17520069.8684209  
SRR17520069.8684211  
SRR17520069.8684213  
SRR17520069.8686519  
SRR17520069.8686521  
SRR17520069.8689717  
SRR17520069.8689719  
SRR17520069.8689721  
SRR17520069.8689723  
SRR17520069.8689725  
SRR17520069.8689727  
SRR17520069.8689729  
SRR17520069.8692576  
SRR17520069.8698678  
SRR17520069.8700346  
SRR17520069.8700348  
SRR17520069.8700350  
SRR17520069.8700352  
SRR17520069.8700354  
SRR17520069.8700356  
SRR17520069.8700358  
SRR17520069.8700360  
SRR17520069.8700362  
SRR17520069.8700364  
SRR17520069.8700366  
SRR17520069.8700368  
SRR17520069.8700370  
SRR17520069.8700372  
SRR17520069.8700374  
SRR17520069.8700376  
SRR17520069.8700382  
SRR17520069.8700386  
SRR17520069.8700388  
SRR17520069.8700390  
SRR17520069.8700392  
SRR17520069.8700394  
SRR17520069.8700398  
SRR17520069.8700402  
SRR17520069.8700404  
SRR17520069.8700406  
SRR17520069.8700408  
SRR17520069.8700412  
SRR17520069.8700414  
SRR17520069.8700416  
SRR17520069.8700420

SRR17520069.8700422  
SRR17520069.8700424  
SRR17520069.8700426  
SRR17520069.8700560  
SRR17520069.8700562  
SRR17520069.8700564  
SRR17520069.8700566  
SRR17520069.8700568  
SRR17520069.8700570  
SRR17520069.8700572  
SRR17520069.8700574  
SRR17520069.8700576  
SRR17520069.8700578  
SRR17520069.8700580  
SRR17520069.8700582  
SRR17520069.8700584  
SRR17520069.8700586  
SRR17520069.8700590  
SRR17520069.8700592  
SRR17520069.8700594  
SRR17520069.8700596  
SRR17520069.8700598  
SRR17520069.8700600  
SRR17520069.8700602  
SRR17520069.8700604  
SRR17520069.8700606  
SRR17520069.8700608  
SRR17520069.8700610  
SRR17520069.8700612  
SRR17520069.8700614  
SRR17520069.8700616  
SRR17520069.8700618  
SRR17520069.8700620  
SRR17520069.8700622  
SRR17520069.8700624  
SRR17520069.8700626  
SRR17520069.8700628  
SRR17520069.8700630  
SRR17520069.8700632  
SRR17520069.8700634  
SRR17520069.8700636  
SRR17520069.8700638  
SRR17520069.8700640  
SRR17520069.8700642  
SRR17520069.8700644  
SRR17520069.8700646  
SRR17520069.8705189

SRR17520069.8705199  
SRR17520069.8705201  
SRR17520069.8705205  
SRR17520069.8707110  
SRR17520069.8707112  
SRR17520069.8707114  
SRR17520069.8707116  
SRR17520069.8707118  
SRR17520069.8707120  
SRR17520069.8707122  
SRR17520069.8707124  
SRR17520069.8707126  
SRR17520069.8707128  
SRR17520069.8707130  
SRR17520069.8707132  
SRR17520069.8707134  
SRR17520069.8707136  
SRR17520069.8707138  
SRR17520069.8707140  
SRR17520069.8707142  
SRR17520069.8707144  
SRR17520069.8707146  
SRR17520069.8707148  
SRR17520069.8707150  
SRR17520069.8707152  
SRR17520069.8707154  
SRR17520069.8707156  
SRR17520069.8707158  
SRR17520069.8716208  
SRR17520069.8718012  
SRR17520069.8718014  
SRR17520069.8718016  
SRR17520069.8718018  
SRR17520069.8718022  
SRR17520069.8718024  
SRR17520069.8718026  
SRR17520069.8718028  
SRR17520069.8718030  
SRR17520069.8718032  
SRR17520069.8718034  
SRR17520069.8718036  
SRR17520069.8718038  
SRR17520069.8718040  
SRR17520069.8718042  
SRR17520069.8718044  
SRR17520069.8718046  
SRR17520069.8718048



SRR17520069.8718050  
SRR17520069.8718052  
SRR17520069.8718054  
SRR17520069.8718056  
SRR17520069.8718060  
SRR17520069.8718062  
SRR17520069.8718064  
SRR17520069.8718066  
SRR17520069.8718068  
SRR17520069.8720355  
SRR17520069.8720357  
SRR17520069.8720359  
SRR17520069.8720361  
SRR17520069.8720363  
SRR17520069.8720365  
SRR17520069.8720367  
SRR17520069.8720369  
SRR17520069.8720371  
SRR17520069.8720373  
SRR17520069.8720375  
SRR17520069.8720377  
SRR17520069.8720379  
SRR17520069.8720381  
SRR17520069.8720383  
SRR17520069.8720387  
SRR17520069.8720389  
SRR17520069.8720391  
SRR17520069.8720393  
SRR17520069.8720395  
SRR17520069.8720397  
SRR17520069.8720399  
SRR17520069.8720401  
SRR17520069.8720403  
SRR17520069.8720405  
SRR17520069.8723305  
SRR17520069.8723331  
SRR17520069.8723364  
SRR17520069.8724754  
SRR17520069.8724758  
SRR17520069.8724760  
SRR17520069.8724762  
SRR17520069.8724766  
SRR17520069.8724770  
SRR17520069.8724772  
SRR17520069.8724774  
SRR17520069.8724776  
SRR17520069.8724778

SRR17520069.8724782  
SRR17520069.8724784  
SRR17520069.8724786  
SRR17520069.8724788  
SRR17520069.8724790  
SRR17520069.8724792  
SRR17520069.8724794  
SRR17520069.8724796  
SRR17520069.8724800  
SRR17520069.8724802  
SRR17520069.8724804  
SRR17520069.8724806  
SRR17520069.8724808  
SRR17520069.8724810  
SRR17520069.8724812  
SRR17520069.8724814  
SRR17520069.8724816  
SRR17520069.8724822  
SRR17520069.8724824  
SRR17520069.8724826  
SRR17520069.8724828  
SRR17520069.8724830  
SRR17520069.8726179  
SRR17520069.8726181  
SRR17520069.8726183  
SRR17520069.8726185  
SRR17520069.8726187  
SRR17520069.8726189  
SRR17520069.8726191  
SRR17520069.8726193  
SRR17520069.8726195  
SRR17520069.8726197  
SRR17520069.8726199  
SRR17520069.8726627  
SRR17520069.8726629  
SRR17520069.8726631  
SRR17520069.8726633  
SRR17520069.8726637  
SRR17520069.8726639  
SRR17520069.8726641  
SRR17520069.8726643  
SRR17520069.8726645  
SRR17520069.8726647  
SRR17520069.8726649  
SRR17520069.8726651  
SRR17520069.8730332  
SRR17520069.8730334

SRR17520069.8730336  
SRR17520069.8730338  
SRR17520069.8730340  
SRR17520069.8730342  
SRR17520069.8730344  
SRR17520069.8730346  
SRR17520069.8730348  
SRR17520069.8730350  
SRR17520069.8730352  
SRR17520069.8730354  
SRR17520069.8730356  
SRR17520069.8730358  
SRR17520069.8730360  
SRR17520069.8730362  
SRR17520069.8730364  
SRR17520069.8730366  
SRR17520069.8730368  
SRR17520069.8730370  
SRR17520069.8730372  
SRR17520069.8730374  
SRR17520069.8730376  
SRR17520069.8730378  
SRR17520069.8730380  
SRR17520069.8730382  
SRR17520069.8730384  
SRR17520069.8730386  
SRR17520069.8730388  
SRR17520069.8730390  
SRR17520069.8730392  
SRR17520069.8730394  
SRR17520069.8730396  
SRR17520069.8730398  
SRR17520069.8730400  
SRR17520069.8730402  
SRR17520069.8730404  
SRR17520069.8730406  
SRR17520069.8730408  
SRR17520069.8730410  
SRR17520069.8730414  
SRR17520069.8730416  
SRR17520069.8730418  
SRR17520069.8730420  
SRR17520069.8730422  
SRR17520069.8730424  
SRR17520069.8730426  
SRR17520069.8730428  
SRR17520069.8730430

SRR17520069.8730432  
SRR17520069.8730434  
SRR17520069.8730436  
SRR17520069.8731396  
SRR17520069.8731398  
SRR17520069.8731400  
SRR17520069.8731402  
SRR17520069.8731406  
SRR17520069.8731408  
SRR17520069.8731410  
SRR17520069.8731412  
SRR17520069.8731414  
SRR17520069.8731416  
SRR17520069.8731418  
SRR17520069.8731422  
SRR17520069.8731424  
SRR17520069.8731426  
SRR17520069.8731428  
SRR17520069.8731430  
SRR17520069.8731432  
SRR17520069.8731434  
SRR17520069.8731436  
SRR17520069.8731438  
SRR17520069.8731440  
SRR17520069.8731442  
SRR17520069.8731444  
SRR17520069.8731446  
SRR17520069.8731448  
SRR17520069.8731452  
SRR17520069.8731454  
SRR17520069.8731458  
SRR17520069.8731460  
SRR17520069.8731462  
SRR17520069.8731464  
SRR17520069.8731466  
SRR17520069.8731468  
SRR17520069.8731472  
SRR17520069.8731474  
SRR17520069.8731476  
SRR17520069.8731480  
SRR17520069.8731482  
SRR17520069.8731484  
SRR17520069.8735525  
SRR17520069.8735527  
SRR17520069.8735529  
SRR17520069.8735531  
SRR17520069.8735533

SRR17520069.8735535  
SRR17520069.8735537  
SRR17520069.8735540  
SRR17520069.8735542  
SRR17520069.8738800  
SRR17520069.8738802  
SRR17520069.8738804  
SRR17520069.8738806  
SRR17520069.8738808  
SRR17520069.8738810  
SRR17520069.8738812  
SRR17520069.8738814  
SRR17520069.8738816  
SRR17520069.8738818  
SRR17520069.8738820  
SRR17520069.8738822  
SRR17520069.8738824  
SRR17520069.8738826  
SRR17520069.8738828  
SRR17520069.8738830  
SRR17520069.8738832  
SRR17520069.8738834  
SRR17520069.8738836  
SRR17520069.8738838  
SRR17520069.8738842  
SRR17520069.8738844  
SRR17520069.8738846  
SRR17520069.8738848  
SRR17520069.8738850  
SRR17520069.8738852  
SRR17520069.8738854  
SRR17520069.8738856  
SRR17520069.8738858  
SRR17520069.8738860  
SRR17520069.8738862  
SRR17520069.8738866  
SRR17520069.8738868  
SRR17520069.8738870  
SRR17520069.8738872  
SRR17520069.8738874  
SRR17520069.8738876  
SRR17520069.8738878  
SRR17520069.8738880  
SRR17520069.8738882  
SRR17520069.8738884  
SRR17520069.8738888  
SRR17520069.8738890

SRR17520069.8738892  
SRR17520069.8738894  
SRR17520069.8738896  
SRR17520069.8738898  
SRR17520069.8738900  
SRR17520069.8738902  
SRR17520069.8738904  
SRR17520069.8738906  
SRR17520069.8746208  
SRR17520069.8746210  
SRR17520069.8746212  
SRR17520069.8746214  
SRR17520069.8746216  
SRR17520069.8746218  
SRR17520069.8746220  
SRR17520069.8746222  
SRR17520069.8746224  
SRR17520069.8746226  
SRR17520069.8751699  
SRR17520069.8751705  
SRR17520069.8751707  
SRR17520069.8751709  
SRR17520069.8751711  
SRR17520069.8751713  
SRR17520069.8751715  
SRR17520069.8751717  
SRR17520069.8751719  
SRR17520069.8751721  
SRR17520069.8751725  
SRR17520069.8751727  
SRR17520069.8751729  
SRR17520069.8751733  
SRR17520069.8751739  
SRR17520069.8751741  
SRR17520069.8751743  
SRR17520069.8753526  
SRR17520069.8753528  
SRR17520069.8753530  
SRR17520069.8753532  
SRR17520069.8753534  
SRR17520069.8753536  
SRR17520069.8753538  
SRR17520069.8758671  
SRR17520069.8758673  
SRR17520069.8758675  
SRR17520069.8758677  
SRR17520069.8758679

SRR17520069.8758683  
SRR17520069.8758685  
SRR17520069.8758687  
SRR17520069.8758689  
SRR17520069.8758691  
SRR17520069.8758693  
SRR17520069.8758695  
SRR17520069.8758697  
SRR17520069.8758699  
SRR17520069.8758701  
SRR17520069.8758705  
SRR17520069.8769176  
SRR17520069.8769178  
SRR17520069.8769180  
SRR17520069.8772119  
SRR17520069.8772121  
SRR17520069.8772123  
SRR17520069.8772481  
SRR17520069.8772483  
SRR17520069.8772485  
SRR17520069.8772487  
SRR17520069.8772489  
SRR17520069.8772491  
SRR17520069.8772493  
SRR17520069.8772495  
SRR17520069.8773266  
SRR17520069.8773268  
SRR17520069.8773270  
SRR17520069.8773272  
SRR17520069.8773274  
SRR17520069.8773276  
SRR17520069.8773278  
SRR17520069.8773280  
SRR17520069.8773282  
SRR17520069.8773284  
SRR17520069.8774582  
SRR17520069.8774584  
SRR17520069.8774586  
SRR17520069.8791140  
SRR17520069.8791142  
SRR17520069.8791144  
SRR17520069.8791146  
SRR17520069.8791148  
SRR17520069.8791150  
SRR17520069.8791152  
SRR17520069.8791154  
SRR17520069.8791156

SRR17520069.8791158  
SRR17520069.8791162  
SRR17520069.8791164  
SRR17520069.8791166  
SRR17520069.8791168  
SRR17520069.8791170  
SRR17520069.8791172  
SRR17520069.8791174  
SRR17520069.8791176  
SRR17520069.8791178  
SRR17520069.8791180  
SRR17520069.8791182  
SRR17520069.8791186  
SRR17520069.8791188  
SRR17520069.8791190  
SRR17520069.8791192  
SRR17520069.8791194  
SRR17520069.8791196  
SRR17520069.8791198  
SRR17520069.8791200  
SRR17520069.8791202  
SRR17520069.8791204  
SRR17520069.8791206  
SRR17520069.8791208  
SRR17520069.8791210  
SRR17520069.8791212  
SRR17520069.8791218  
SRR17520069.8791220  
SRR17520069.8791222  
SRR17520069.8791224  
SRR17520069.8791226  
SRR17520069.8791228  
SRR17520069.8791230  
SRR17520069.8791232  
SRR17520069.8791234  
SRR17520069.8791236  
SRR17520069.8791238  
SRR17520069.8791240  
SRR17520069.8793043  
SRR17520069.8793045  
SRR17520069.8793047  
SRR17520069.8793049  
SRR17520069.8793051  
SRR17520069.8793053  
SRR17520069.8793055  
SRR17520069.8797789  
SRR17520069.8797791



SRR17520069.8797793  
SRR17520069.8797795  
SRR17520069.8797797  
SRR17520069.8797799  
SRR17520069.8797801  
SRR17520069.8797803  
SRR17520069.8797805  
SRR17520069.8797807  
SRR17520069.8797809  
SRR17520069.8797811  
SRR17520069.8797813  
SRR17520069.8797815  
SRR17520069.8797817  
SRR17520069.8797819  
SRR17520069.8797821  
SRR17520069.8797823  
SRR17520069.8797825  
SRR17520069.8797827  
SRR17520069.8797829  
SRR17520069.8797831  
SRR17520069.8797833  
SRR17520069.8797835  
SRR17520069.8797837  
SRR17520069.8797839  
SRR17520069.8797841  
SRR17520069.8797843  
SRR17520069.8797845  
SRR17520069.8797847  
SRR17520069.8797849  
SRR17520069.8797851  
SRR17520069.8797853  
SRR17520069.8797855  
SRR17520069.8797857  
SRR17520069.8797859  
SRR17520069.8797861  
SRR17520069.8797863  
SRR17520069.8797865  
SRR17520069.8797867  
SRR17520069.8797869  
SRR17520069.8797871  
SRR17520069.8797873  
SRR17520069.8797875  
SRR17520069.8797877  
SRR17520069.8797879  
SRR17520069.8797881  
SRR17520069.8797883  
SRR17520069.8797885

SRR17520069.8797887  
SRR17520069.8798194  
SRR17520069.8798196  
SRR17520069.8798198  
SRR17520069.8798200  
SRR17520069.8798202  
SRR17520069.8798204  
SRR17520069.8798206  
SRR17520069.8798208  
SRR17520069.8798210  
SRR17520069.8798212  
SRR17520069.8800716  
SRR17520069.8815383  
SRR17520069.8815385  
SRR17520069.8815387  
SRR17520069.8815389  
SRR17520069.8817327  
SRR17520069.8821803  
SRR17520069.8821805  
SRR17520069.8821807  
SRR17520069.8821809  
SRR17520069.8836920  
SRR17520069.8840029  
SRR17520069.8840031  
SRR17520069.8840033  
SRR17520069.8840035  
SRR17520069.8840037  
SRR17520069.8840039  
SRR17520069.8840041  
SRR17520069.8840043  
SRR17520069.8840045  
SRR17520069.8843152  
SRR17520069.8843154  
SRR17520069.8843156  
SRR17520069.8843158  
SRR17520069.8843160  
SRR17520069.8843162  
SRR17520069.8843166  
SRR17520069.8843168  
SRR17520069.8843170  
SRR17520069.8843174  
SRR17520069.8843178  
SRR17520069.8843180  
SRR17520069.8843182  
SRR17520069.8843184  
SRR17520069.8843186  
SRR17520069.8843188

SRR17520069.8843190  
SRR17520069.8843192  
SRR17520069.8843194  
SRR17520069.8843196  
SRR17520069.8843198  
SRR17520069.8843328  
SRR17520069.8843330  
SRR17520069.8843332  
SRR17520069.8843334  
SRR17520069.8843336  
SRR17520069.8843338  
SRR17520069.8843340  
SRR17520069.8843342  
SRR17520069.8843346  
SRR17520069.8843348  
SRR17520069.8843350  
SRR17520069.8843352  
SRR17520069.8843354  
SRR17520069.8843356  
SRR17520069.8843358  
SRR17520069.8848329  
SRR17520069.8848331  
SRR17520069.8848333  
SRR17520069.8848335  
SRR17520069.8848337  
SRR17520069.8848339  
SRR17520069.8848341  
SRR17520069.8848343  
SRR17520069.8848345  
SRR17520069.8848347  
SRR17520069.8848349  
SRR17520069.8848351  
SRR17520069.8848353  
SRR17520069.8848355  
SRR17520069.8848357  
SRR17520069.8848359  
SRR17520069.8848361  
SRR17520069.8848363  
SRR17520069.8848365  
SRR17520069.8848367  
SRR17520069.8848369  
SRR17520069.8848371  
SRR17520069.8848373  
SRR17520069.8857365  
SRR17520069.8857381  
SRR17520069.8859414  
SRR17520069.8859416

SRR17520069.8859420  
SRR17520069.8859422  
SRR17520069.8859424  
SRR17520069.8859426  
SRR17520069.8859428  
SRR17520069.8859430  
SRR17520069.8859432  
SRR17520069.8859434  
SRR17520069.8859436  
SRR17520069.8859438  
SRR17520069.8859440  
SRR17520069.8859442  
SRR17520069.8859444  
SRR17520069.8859446  
SRR17520069.8859448  
SRR17520069.8859450  
SRR17520069.8859452  
SRR17520069.8859454  
SRR17520069.8859456  
SRR17520069.8859458  
SRR17520069.8859460  
SRR17520069.8861454  
SRR17520069.8861458  
SRR17520069.8861461  
SRR17520069.8861463  
SRR17520069.8861465  
SRR17520069.8861467  
SRR17520069.8861469  
SRR17520069.8861471  
SRR17520069.8861473  
SRR17520069.8861475  
SRR17520069.8861477  
SRR17520069.8861481  
SRR17520069.8861483  
SRR17520069.8861485  
SRR17520069.8861487  
SRR17520069.8861489  
SRR17520069.8861491  
SRR17520069.8861493  
SRR17520069.8861495  
SRR17520069.8861497  
SRR17520069.8861499  
SRR17520069.8861501  
SRR17520069.8861503  
SRR17520069.8861505  
SRR17520069.8861507  
SRR17520069.8861511

SRR17520069.8861513  
SRR17520069.8861515  
SRR17520069.8861517  
SRR17520069.8861519  
SRR17520069.8861521  
SRR17520069.8861523  
SRR17520069.8861525  
SRR17520069.8861527  
SRR17520069.8861529  
SRR17520069.8861531  
SRR17520069.8861533  
SRR17520069.8861535  
SRR17520069.8861537  
SRR17520069.8861539  
SRR17520069.8861543  
SRR17520069.8861547  
SRR17520069.8861549  
SRR17520069.8874287  
SRR17520069.8874289  
SRR17520069.8874291  
SRR17520069.8874645  
SRR17520069.8874647  
SRR17520069.8874649  
SRR17520069.8874651  
SRR17520069.8874653  
SRR17520069.8874655  
SRR17520069.8874657  
SRR17520069.8874659  
SRR17520069.8874661  
SRR17520069.8874663  
SRR17520069.8874665  
SRR17520069.8874667  
SRR17520069.8876029  
SRR17520069.8876031  
SRR17520069.8876033  
SRR17520069.8876037  
SRR17520069.8876039  
SRR17520069.8876041  
SRR17520069.8876043  
SRR17520069.8876045  
SRR17520069.8876047  
SRR17520069.8876051  
SRR17520069.8876053  
SRR17520069.8876055  
SRR17520069.8876057  
SRR17520069.8876059  
SRR17520069.8876061

SRR17520069.8876063  
SRR17520069.8876065  
SRR17520069.8876067  
SRR17520069.8876069  
SRR17520069.8876071  
SRR17520069.8876073  
SRR17520069.8876075  
SRR17520069.8876077  
SRR17520069.8876079  
SRR17520069.8876081  
SRR17520069.8876083  
SRR17520069.8876085  
SRR17520069.8876087  
SRR17520069.8876089  
SRR17520069.8876091  
SRR17520069.8876093  
SRR17520069.8876095  
SRR17520069.8876097  
SRR17520069.8876099  
SRR17520069.8876101  
SRR17520069.8876103  
SRR17520069.8876105  
SRR17520069.8876107  
SRR17520069.8888165  
SRR17520069.8888167  
SRR17520069.8888169  
SRR17520069.8888171  
SRR17520069.8888175  
SRR17520069.8897423  
SRR17520069.8897425  
SRR17520069.8897427  
SRR17520069.8897429  
SRR17520069.8897431  
SRR17520069.8897433  
SRR17520069.8897435  
SRR17520069.8897437  
SRR17520069.8897439  
SRR17520069.8902973  
SRR17520069.8902975  
SRR17520069.8902977  
SRR17520069.8909390  
SRR17520069.8909392  
SRR17520069.8909394  
SRR17520069.8909396  
SRR17520069.8909398  
SRR17520069.8909400  
SRR17520069.8909402

SRR17520069.8909404  
SRR17520069.8909406  
SRR17520069.8909408  
SRR17520069.8909410  
SRR17520069.8909412  
SRR17520069.8909414  
SRR17520069.8909416  
SRR17520069.8909418  
SRR17520069.8909420  
SRR17520069.8909422  
SRR17520069.8909424  
SRR17520069.8909426  
SRR17520069.8909432  
SRR17520069.8909434  
SRR17520069.8909436  
SRR17520069.8909438  
SRR17520069.8909440  
SRR17520069.8909442  
SRR17520069.8909444  
SRR17520069.8909448  
SRR17520069.8909450  
SRR17520069.8909452  
SRR17520069.8909454  
SRR17520069.8909456  
SRR17520069.8909458  
SRR17520069.8909460  
SRR17520069.8909462  
SRR17520069.8909464  
SRR17520069.8909466  
SRR17520069.8909468  
SRR17520069.8909470  
SRR17520069.8909472  
SRR17520069.8909474  
SRR17520069.8909476  
SRR17520069.8910561  
SRR17520069.8910563  
SRR17520069.8910565  
SRR17520069.8910567  
SRR17520069.8910569  
SRR17520069.8910571  
SRR17520069.8910573  
SRR17520069.8910577  
SRR17520069.8910581  
SRR17520069.8910583  
SRR17520069.8910585  
SRR17520069.8910587  
SRR17520069.8910589

SRR17520069.8910591  
SRR17520069.8910593  
SRR17520069.8910595  
SRR17520069.8910597  
SRR17520069.8910599  
SRR17520069.8910601  
SRR17520069.8910603  
SRR17520069.8910605  
SRR17520069.8910607  
SRR17520069.8910609  
SRR17520069.8910611  
SRR17520069.8910613  
SRR17520069.8910615  
SRR17520069.8910617  
SRR17520069.8910619  
SRR17520069.8910621  
SRR17520069.8910623  
SRR17520069.8910625  
SRR17520069.8910627  
SRR17520069.8910629  
SRR17520069.8910631  
SRR17520069.8910633  
SRR17520069.8910635  
SRR17520069.8912114  
SRR17520069.8912116  
SRR17520069.8912118  
SRR17520069.8912120  
SRR17520069.8912122  
SRR17520069.8912124  
SRR17520069.8912126  
SRR17520069.8912128  
SRR17520069.8912132  
SRR17520069.8912134  
SRR17520069.8912352  
SRR17520069.8922575  
SRR17520069.8922577  
SRR17520069.8922579  
SRR17520069.8922581  
SRR17520069.8922583  
SRR17520069.8922585  
SRR17520069.8922587  
SRR17520069.8922589  
SRR17520069.8922591  
SRR17520069.8922593  
SRR17520069.8922595  
SRR17520069.8922597  
SRR17520069.8922599



SRR17520069.8922601  
SRR17520069.8922603  
SRR17520069.8922605  
SRR17520069.8922607  
SRR17520069.8922609  
SRR17520069.8927821  
SRR17520069.8927823  
SRR17520069.8927825  
SRR17520069.8927827  
SRR17520069.8927829  
SRR17520069.8933337  
SRR17520069.8933339  
SRR17520069.8933341  
SRR17520069.8933343  
SRR17520069.8933345  
SRR17520069.8933347  
SRR17520069.8933351  
SRR17520069.8933353  
SRR17520069.8933355  
SRR17520069.8933357  
SRR17520069.8933359  
SRR17520069.8933363  
SRR17520069.8933365  
SRR17520069.8933367  
SRR17520069.8933371  
SRR17520069.8933373  
SRR17520069.8933375  
SRR17520069.8933379  
SRR17520069.8933381  
SRR17520069.8933383  
SRR17520069.8933385  
SRR17520069.8933387  
SRR17520069.8933389  
SRR17520069.8933391  
SRR17520069.8933393  
SRR17520069.8933395  
SRR17520069.8933397  
SRR17520069.8933399  
SRR17520069.8933401  
SRR17520069.8933403  
SRR17520069.8933405  
SRR17520069.8933407  
SRR17520069.8933409  
SRR17520069.8933411  
SRR17520069.8933413  
SRR17520069.8933417  
SRR17520069.8933419

SRR17520069.8933421  
SRR17520069.8933423  
SRR17520069.8933425  
SRR17520069.8933529  
SRR17520069.8933531  
SRR17520069.8933533  
SRR17520069.8933535  
SRR17520069.8933537  
SRR17520069.8933539  
SRR17520069.8939441  
SRR17520069.8939443  
SRR17520069.8939445  
SRR17520069.8939447  
SRR17520069.8939449  
SRR17520069.8939451  
SRR17520069.8939453  
SRR17520069.8939459  
SRR17520069.8939461  
SRR17520069.8939463  
SRR17520069.8939959  
SRR17520069.8940478  
SRR17520069.8940480  
SRR17520069.8940482  
SRR17520069.8940484  
SRR17520069.8940486  
SRR17520069.8945338  
SRR17520069.8945340  
SRR17520069.8945342  
SRR17520069.8945344  
SRR17520069.8945346  
SRR17520069.8945348  
SRR17520069.8945350  
SRR17520069.8945352  
SRR17520069.8945354  
SRR17520069.8945356  
SRR17520069.8945358  
SRR17520069.8945360  
SRR17520069.8945362  
SRR17520069.8946679  
SRR17520069.8946681  
SRR17520069.8946683  
SRR17520069.8946687  
SRR17520069.8946695  
SRR17520069.8946697  
SRR17520069.8946699  
SRR17520069.8946701  
SRR17520069.8946703

SRR17520069.8946705  
SRR17520069.8946707  
SRR17520069.8946709  
SRR17520069.8946711  
SRR17520069.8947173  
SRR17520069.8947177  
SRR17520069.8948445  
SRR17520069.8948447  
SRR17520069.8948449  
SRR17520069.8950472  
SRR17520069.8950474  
SRR17520069.8950476  
SRR17520069.8950478  
SRR17520069.8950482  
SRR17520069.8950484  
SRR17520069.8950490  
SRR17520069.8950492  
SRR17520069.8959038  
SRR17520069.8964845  
SRR17520069.8964847  
SRR17520069.8964849  
SRR17520069.8964851  
SRR17520069.8964853  
SRR17520069.8964855  
SRR17520069.8964857  
SRR17520069.8964859  
SRR17520069.8964861  
SRR17520069.8964863  
SRR17520069.8964865  
SRR17520069.8967592  
SRR17520069.8967594  
SRR17520069.8967598  
SRR17520069.8967600  
SRR17520069.8967602  
SRR17520069.8967606  
SRR17520069.8967883  
SRR17520069.8967885  
SRR17520069.8967887  
SRR17520069.8967889  
SRR17520069.8967891  
SRR17520069.8967893  
SRR17520069.8967895  
SRR17520069.8967897  
SRR17520069.8967899  
SRR17520069.8967901  
SRR17520069.8967903  
SRR17520069.8967905

SRR17520069.8967907  
SRR17520069.8967909  
SRR17520069.8967911  
SRR17520069.8967913  
SRR17520069.8967915  
SRR17520069.8967917  
SRR17520069.8967919  
SRR17520069.8967921  
SRR17520069.8967923  
SRR17520069.8967925  
SRR17520069.8967927  
SRR17520069.8967929  
SRR17520069.8967931  
SRR17520069.8967933  
SRR17520069.8967935  
SRR17520069.8967937  
SRR17520069.8967939  
SRR17520069.8967941  
SRR17520069.8967943  
SRR17520069.8967945  
SRR17520069.8967947  
SRR17520069.8967949  
SRR17520069.8967951  
SRR17520069.8967953  
SRR17520069.8967955  
SRR17520069.8967957  
SRR17520069.8967962  
SRR17520069.8967964  
SRR17520069.8967966  
SRR17520069.8967968  
SRR17520069.8967970  
SRR17520069.8967972  
SRR17520069.8967974  
SRR17520069.8967976  
SRR17520069.8967978  
SRR17520069.8967980  
SRR17520069.8967982  
SRR17520069.8967984  
SRR17520069.8967986  
SRR17520069.8967988  
SRR17520069.8967992  
SRR17520069.8967994  
SRR17520069.8967996  
SRR17520069.8967998  
SRR17520069.8968000  
SRR17520069.8968002  
SRR17520069.8968004

SRR17520069.8971220  
SRR17520069.8971222  
SRR17520069.8971224  
SRR17520069.8971230  
SRR17520069.8971232  
SRR17520069.8971234  
SRR17520069.8971236  
SRR17520069.8971238  
SRR17520069.8971240  
SRR17520069.8971242  
SRR17520069.8974380  
SRR17520069.8974382  
SRR17520069.8974384  
SRR17520069.8974386  
SRR17520069.8974388  
SRR17520069.8974390  
SRR17520069.8974392  
SRR17520069.8974394  
SRR17520069.8974396  
SRR17520069.8974449  
SRR17520069.8974451  
SRR17520069.8974453  
SRR17520069.8974455  
SRR17520069.8974457  
SRR17520069.8974459  
SRR17520069.8974461  
SRR17520069.8974463  
SRR17520069.8974465  
SRR17520069.8974467  
SRR17520069.8974469  
SRR17520069.8974471  
SRR17520069.8974473  
SRR17520069.8974475  
SRR17520069.8974477  
SRR17520069.8974479  
SRR17520069.8974481  
SRR17520069.8974483  
SRR17520069.8974485  
SRR17520069.8974487  
SRR17520069.8974489  
SRR17520069.8975864  
SRR17520069.8975866  
SRR17520069.8975868  
SRR17520069.8982727  
SRR17520069.8982729  
SRR17520069.8982731  
SRR17520069.8982733

SRR17520069.8982735  
SRR17520069.8982737  
SRR17520069.8982739  
SRR17520069.8982741  
SRR17520069.8982743  
SRR17520069.8982745  
SRR17520069.8982747  
SRR17520069.8982749  
SRR17520069.8982751  
SRR17520069.8982753  
SRR17520069.8982755  
SRR17520069.8982757  
SRR17520069.8996853  
SRR17520069.8996855  
SRR17520069.8996857  
SRR17520069.8996859  
SRR17520069.8996861  
SRR17520069.8996863  
SRR17520069.8996865  
SRR17520069.8996867  
SRR17520069.8996869  
SRR17520069.8996871  
SRR17520069.8996873  
SRR17520069.8996875  
SRR17520069.8996877  
SRR17520069.8999147  
SRR17520069.9006123  
SRR17520069.9006125  
SRR17520069.9006127  
SRR17520069.9006129  
SRR17520069.9006131  
SRR17520069.9006133  
SRR17520069.9006135  
SRR17520069.9006137  
SRR17520069.9006139  
SRR17520069.9006141  
SRR17520069.9006143  
SRR17520069.9006145  
SRR17520069.9006147  
SRR17520069.9006149  
SRR17520069.9006151  
SRR17520069.9006153  
SRR17520069.9006155  
SRR17520069.9006157  
SRR17520069.9006159  
SRR17520069.9006161  
SRR17520069.9006163

SRR17520069.9006165  
SRR17520069.9006167  
SRR17520069.9006169  
SRR17520069.9006171  
SRR17520069.9006173  
SRR17520069.9006175  
SRR17520069.9006177  
SRR17520069.9006179  
SRR17520069.9006181  
SRR17520069.9006185  
SRR17520069.9006187  
SRR17520069.9006189  
SRR17520069.9006191  
SRR17520069.9006193  
SRR17520069.9006195  
SRR17520069.9006197  
SRR17520069.9006199  
SRR17520069.9006201  
SRR17520069.9006203  
SRR17520069.9006205  
SRR17520069.9006207  
SRR17520069.9006209  
SRR17520069.9006211  
SRR17520069.9006215  
SRR17520069.9006217  
SRR17520069.9006219  
SRR17520069.9006221  
SRR17520069.9006223  
SRR17520069.9006225  
SRR17520069.9006227  
SRR17520069.9006229  
SRR17520069.9006231  
SRR17520069.9006233  
SRR17520069.9006235  
SRR17520069.9006237  
SRR17520069.9006239  
SRR17520069.9006241  
SRR17520069.9006245  
SRR17520069.9006247  
SRR17520069.9006249  
SRR17520069.9006251  
SRR17520069.9006253  
SRR17520069.9006255  
SRR17520069.9006257  
SRR17520069.9006259  
SRR17520069.9006261  
SRR17520069.9006263

SRR17520069. 9006265  
SRR17520069. 9006267  
SRR17520069. 9006269  
SRR17520069. 9006271  
SRR17520069. 9006273  
SRR17520069. 9006275  
SRR17520069. 9006277  
SRR17520069. 9006279  
SRR17520069. 9006281  
SRR17520069. 9006283  
SRR17520069. 9006285  
SRR17520069. 9006287  
SRR17520069. 9006289  
SRR17520069. 9006291  
SRR17520069. 9006293  
SRR17520069. 9006295  
SRR17520069. 9006297  
SRR17520069. 9007076  
SRR17520069. 9007078  
SRR17520069. 9007080  
SRR17520069. 9007082  
SRR17520069. 9007084  
SRR17520069. 9007086  
SRR17520069. 9007088  
SRR17520069. 9008567  
SRR17520069. 9008569  
SRR17520069. 9008571  
SRR17520069. 9008573  
SRR17520069. 9008575  
SRR17520069. 9008577  
SRR17520069. 9008579  
SRR17520069. 9008581  
SRR17520069. 9008583  
SRR17520069. 9008585  
SRR17520069. 9008587  
SRR17520069. 9008589  
SRR17520069. 9008591  
SRR17520069. 9008593  
SRR17520069. 9008595  
SRR17520069. 9008597  
SRR17520069. 9008599  
SRR17520069. 9008601  
SRR17520069. 9008603  
SRR17520069. 9008605  
SRR17520069. 9008607  
SRR17520069. 9008609  
SRR17520069. 9008611



SRR17520069.9008613  
SRR17520069.9008615  
SRR17520069.9008617  
SRR17520069.9008619  
SRR17520069.9008621  
SRR17520069.9008623  
SRR17520069.9008625  
SRR17520069.9008627  
SRR17520069.9008629  
SRR17520069.9008631  
SRR17520069.9008633  
SRR17520069.9008635  
SRR17520069.9008637  
SRR17520069.9008639  
SRR17520069.9008641  
SRR17520069.9008643  
SRR17520069.9008645  
SRR17520069.9008647  
SRR17520069.9008649  
SRR17520069.9008651  
SRR17520069.9008653  
SRR17520069.9008655  
SRR17520069.9008659  
SRR17520069.9008661  
SRR17520069.9008663  
SRR17520069.9008665  
SRR17520069.9008667  
SRR17520069.9008669  
SRR17520069.9008671  
SRR17520069.9008673  
SRR17520069.9011391  
SRR17520069.9011393  
SRR17520069.9011395  
SRR17520069.9011855  
SRR17520069.9011920  
SRR17520069.9011922  
SRR17520069.9011924  
SRR17520069.9011926  
SRR17520069.9011930  
SRR17520069.9011934  
SRR17520069.9011936  
SRR17520069.9011938  
SRR17520069.9011940  
SRR17520069.9011942  
SRR17520069.9011944  
SRR17520069.9011946  
SRR17520069.9011948

SRR17520069.9011950  
SRR17520069.9011952  
SRR17520069.9011954  
SRR17520069.9011956  
SRR17520069.9011960  
SRR17520069.9011962  
SRR17520069.9011964  
SRR17520069.9011966  
SRR17520069.9011968  
SRR17520069.9011970  
SRR17520069.9011972  
SRR17520069.9011976  
SRR17520069.9011978  
SRR17520069.9011980  
SRR17520069.9011982  
SRR17520069.9011984  
SRR17520069.9011986  
SRR17520069.9011988  
SRR17520069.9011990  
SRR17520069.9011992  
SRR17520069.9011994  
SRR17520069.9011996  
SRR17520069.9011998  
SRR17520069.9012000  
SRR17520069.9012002  
SRR17520069.9012004  
SRR17520069.9012006  
SRR17520069.9012008  
SRR17520069.9012010  
SRR17520069.9012012  
SRR17520069.9012014  
SRR17520069.9012016  
SRR17520069.9024617  
SRR17520069.9024619  
SRR17520069.9024621  
SRR17520069.9024623  
SRR17520069.9024625  
SRR17520069.9024627  
SRR17520069.9024629  
SRR17520069.9024631  
SRR17520069.9024633  
SRR17520069.9024635  
SRR17520069.9024637  
SRR17520069.9024639  
SRR17520069.9024641  
SRR17520069.9024643  
SRR17520069.9024645

SRR17520069. 9024647  
SRR17520069. 9024649  
SRR17520069. 9024651  
SRR17520069. 9024653  
SRR17520069. 9024655  
SRR17520069. 9024657  
SRR17520069. 9024659  
SRR17520069. 9024661  
SRR17520069. 9024663  
SRR17520069. 9024665  
SRR17520069. 9024667  
SRR17520069. 9024669  
SRR17520069. 9024671  
SRR17520069. 9024673  
SRR17520069. 9024675  
SRR17520069. 9024677  
SRR17520069. 9024679  
SRR17520069. 9024681  
SRR17520069. 9024683  
SRR17520069. 9024685  
SRR17520069. 9024687  
SRR17520069. 9024689  
SRR17520069. 9024691  
SRR17520069. 9024693  
SRR17520069. 9024695  
SRR17520069. 9024697  
SRR17520069. 9024699  
SRR17520069. 9024701  
SRR17520069. 9024703  
SRR17520069. 9024705  
SRR17520069. 9024707  
SRR17520069. 9024709  
SRR17520069. 9024711  
SRR17520069. 9024713  
SRR17520069. 9024715  
SRR17520069. 9024717  
SRR17520069. 9024719  
SRR17520069. 9024721  
SRR17520069. 9024723  
SRR17520069. 9024725  
SRR17520069. 9024727  
SRR17520069. 9024729  
SRR17520069. 9024731  
SRR17520069. 9024733  
SRR17520069. 9024735  
SRR17520069. 9024737  
SRR17520069. 9024739

SRR17520069. 9024741  
SRR17520069. 9024743  
SRR17520069. 9024745  
SRR17520069. 9024747  
SRR17520069. 9024749  
SRR17520069. 9024751  
SRR17520069. 9024753  
SRR17520069. 9024755  
SRR17520069. 9024757  
SRR17520069. 9024759  
SRR17520069. 9024761  
SRR17520069. 9024763  
SRR17520069. 9024765  
SRR17520069. 9024767  
SRR17520069. 9024769  
SRR17520069. 9024771  
SRR17520069. 9024773  
SRR17520069. 9024775  
SRR17520069. 9026714  
SRR17520069. 9026716  
SRR17520069. 9026718  
SRR17520069. 9026720  
SRR17520069. 9026722  
SRR17520069. 9026724  
SRR17520069. 9026726  
SRR17520069. 9026728  
SRR17520069. 9026730  
SRR17520069. 9026732  
SRR17520069. 9026734  
SRR17520069. 9026736  
SRR17520069. 9026738  
SRR17520069. 9026740  
SRR17520069. 9026742  
SRR17520069. 9026744  
SRR17520069. 9026746  
SRR17520069. 9026748  
SRR17520069. 9026750  
SRR17520069. 9026752  
SRR17520069. 9026754  
SRR17520069. 9026756  
SRR17520069. 9026758  
SRR17520069. 9026760  
SRR17520069. 9026762  
SRR17520069. 9026764  
SRR17520069. 9026766  
SRR17520069. 9026768  
SRR17520069. 9026770

SRR17520069. 9026772  
SRR17520069. 9026774  
SRR17520069. 9026776  
SRR17520069. 9026778  
SRR17520069. 9026780  
SRR17520069. 9026782  
SRR17520069. 9026784  
SRR17520069. 9026786  
SRR17520069. 9026788  
SRR17520069. 9026790  
SRR17520069. 9026792  
SRR17520069. 9026794  
SRR17520069. 9026796  
SRR17520069. 9026798  
SRR17520069. 9026800  
SRR17520069. 9026802  
SRR17520069. 9026804  
SRR17520069. 9026806  
SRR17520069. 9026808  
SRR17520069. 9026810  
SRR17520069. 9026814  
SRR17520069. 9026816  
SRR17520069. 9026821  
SRR17520069. 9026823  
SRR17520069. 9026825  
SRR17520069. 9026827  
SRR17520069. 9026829  
SRR17520069. 9026831  
SRR17520069. 9026833  
SRR17520069. 9026835  
SRR17520069. 9026837  
SRR17520069. 9026839  
SRR17520069. 9026841  
SRR17520069. 9026843  
SRR17520069. 9026845  
SRR17520069. 9026847  
SRR17520069. 9026849  
SRR17520069. 9026851  
SRR17520069. 9026853  
SRR17520069. 9026855  
SRR17520069. 9026857  
SRR17520069. 9026859  
SRR17520069. 9027894  
SRR17520069. 9027896  
SRR17520069. 9027898  
SRR17520069. 9027900  
SRR17520069. 9027902

SRR17520069.9027908  
SRR17520069.9027910  
SRR17520069.9027912  
SRR17520069.9027914  
SRR17520069.9027916  
SRR17520069.9027918  
SRR17520069.9027920  
SRR17520069.9027922  
SRR17520069.9027924  
SRR17520069.9027926  
SRR17520069.9027928  
SRR17520069.9027930  
SRR17520069.9027932  
SRR17520069.9027934  
SRR17520069.9027936  
SRR17520069.9027938  
SRR17520069.9027940  
SRR17520069.9027942  
SRR17520069.9031275  
SRR17520069.9031279  
SRR17520069.9031281  
SRR17520069.9031283  
SRR17520069.9039547  
SRR17520069.9039549  
SRR17520069.9039551  
SRR17520069.9039553  
SRR17520069.9039555  
SRR17520069.9039557  
SRR17520069.9039559  
SRR17520069.9039561  
SRR17520069.9039563  
SRR17520069.9039565  
SRR17520069.9039567  
SRR17520069.9039569  
SRR17520069.9039571  
SRR17520069.9039573  
SRR17520069.9039575  
SRR17520069.9040698  
SRR17520069.9040700  
SRR17520069.9040702  
SRR17520069.9040898  
SRR17520069.9040900  
SRR17520069.9040902  
SRR17520069.9040906  
SRR17520069.9040908  
SRR17520069.9040910  
SRR17520069.9043911

SRR17520069.9047118  
SRR17520069.9047120  
SRR17520069.9047122  
SRR17520069.9052493  
SRR17520069.9052495  
SRR17520069.9052497  
SRR17520069.9052499  
SRR17520069.9052501  
SRR17520069.9052503  
SRR17520069.9052505  
SRR17520069.9052507  
SRR17520069.9052509  
SRR17520069.9052511  
SRR17520069.9052515  
SRR17520069.9052517  
SRR17520069.9052519  
SRR17520069.9052521  
SRR17520069.9052523  
SRR17520069.9052527  
SRR17520069.9053651  
SRR17520069.9053653  
SRR17520069.9053655  
SRR17520069.9053657  
SRR17520069.9053659  
SRR17520069.9053661  
SRR17520069.9053663  
SRR17520069.9053665  
SRR17520069.9053667  
SRR17520069.9053669  
SRR17520069.9053671  
SRR17520069.9053673  
SRR17520069.9053675  
SRR17520069.9053677  
SRR17520069.9053679  
SRR17520069.9053681  
SRR17520069.9053683  
SRR17520069.9053685  
SRR17520069.9053687  
SRR17520069.9053689  
SRR17520069.9060648  
SRR17520069.9061522  
SRR17520069.9061524  
SRR17520069.9061528  
SRR17520069.9061530  
SRR17520069.9061532  
SRR17520069.9061534  
SRR17520069.9061536

SRR17520069. 9061538  
SRR17520069. 9061540  
SRR17520069. 9061542  
SRR17520069. 9061544  
SRR17520069. 9061546  
SRR17520069. 9061548  
SRR17520069. 9061550  
SRR17520069. 9061552  
SRR17520069. 9061554  
SRR17520069. 9061556  
SRR17520069. 9061558  
SRR17520069. 9061560  
SRR17520069. 9061562  
SRR17520069. 9061564  
SRR17520069. 9061566  
SRR17520069. 9061568  
SRR17520069. 9061570  
SRR17520069. 9061572  
SRR17520069. 9061574  
SRR17520069. 9061576  
SRR17520069. 9061578  
SRR17520069. 9061580  
SRR17520069. 9061582  
SRR17520069. 9061584  
SRR17520069. 9061586  
SRR17520069. 9061588  
SRR17520069. 9061590  
SRR17520069. 9061592  
SRR17520069. 9061594  
SRR17520069. 9061596  
SRR17520069. 9061598  
SRR17520069. 9061600  
SRR17520069. 9061602  
SRR17520069. 9061604  
SRR17520069. 9061606  
SRR17520069. 9061608  
SRR17520069. 9061610  
SRR17520069. 9061612  
SRR17520069. 9061614  
SRR17520069. 9061616  
SRR17520069. 9061618  
SRR17520069. 9061620  
SRR17520069. 9061622  
SRR17520069. 9061624  
SRR17520069. 9061626  
SRR17520069. 9061628  
SRR17520069. 9061630



SRR17520069.9061632  
SRR17520069.9061634  
SRR17520069.9061636  
SRR17520069.9061638  
SRR17520069.9061640  
SRR17520069.9068186  
SRR17520069.9068190  
SRR17520069.9068192  
SRR17520069.9068194  
SRR17520069.9068196  
SRR17520069.9068200  
SRR17520069.9068202  
SRR17520069.9068204  
SRR17520069.9068206  
SRR17520069.9068208  
SRR17520069.9068210  
SRR17520069.9068212  
SRR17520069.9072203  
SRR17520069.9072205  
SRR17520069.9072207  
SRR17520069.9072209  
SRR17520069.9072211  
SRR17520069.9072213  
SRR17520069.9072215  
SRR17520069.9072217  
SRR17520069.9077261  
SRR17520069.9077263  
SRR17520069.9077812  
SRR17520069.9077814  
SRR17520069.9077816  
SRR17520069.9077818  
SRR17520069.9077820  
SRR17520069.9077822  
SRR17520069.9077824  
SRR17520069.9077826  
SRR17520069.9077828  
SRR17520069.9081287  
SRR17520069.9081289  
SRR17520069.9081291  
SRR17520069.9081293  
SRR17520069.9081295  
SRR17520069.9081297  
SRR17520069.9081299  
SRR17520069.9081301  
SRR17520069.9081303  
SRR17520069.9081305  
SRR17520069.9081307

SRR17520069.9081309  
SRR17520069.9081311  
SRR17520069.9081313  
SRR17520069.9081315  
SRR17520069.9081317  
SRR17520069.9081319  
SRR17520069.9081321  
SRR17520069.9081323  
SRR17520069.9081325  
SRR17520069.9081327  
SRR17520069.9081329  
SRR17520069.9081331  
SRR17520069.9081333  
SRR17520069.9081335  
SRR17520069.9081337  
SRR17520069.9081339  
SRR17520069.9081343  
SRR17520069.9081345  
SRR17520069.9081347  
SRR17520069.9081349  
SRR17520069.9081351  
SRR17520069.9081353  
SRR17520069.9081355  
SRR17520069.9081357  
SRR17520069.9081359  
SRR17520069.9081361  
SRR17520069.9081363  
SRR17520069.9081365  
SRR17520069.9081367  
SRR17520069.9081369  
SRR17520069.9081371  
SRR17520069.9081373  
SRR17520069.9081377  
SRR17520069.9081379  
SRR17520069.9081381  
SRR17520069.9081383  
SRR17520069.9081385  
SRR17520069.9081387  
SRR17520069.9081389  
SRR17520069.9081391  
SRR17520069.9081393  
SRR17520069.9081395  
SRR17520069.9081397  
SRR17520069.9081399  
SRR17520069.9081401  
SRR17520069.9081404  
SRR17520069.9081406

SRR17520069.9081408  
SRR17520069.9081410  
SRR17520069.9081414  
SRR17520069.9081416  
SRR17520069.9081418  
SRR17520069.9081420  
SRR17520069.9081422  
SRR17520069.9083300  
SRR17520069.9084261  
SRR17520069.9084263  
SRR17520069.9084265  
SRR17520069.9084267  
SRR17520069.9084269  
SRR17520069.9084271  
SRR17520069.9084275  
SRR17520069.9084277  
SRR17520069.9084279  
SRR17520069.9084281  
SRR17520069.9084285  
SRR17520069.9084287  
SRR17520069.9084289  
SRR17520069.9084291  
SRR17520069.9084293  
SRR17520069.9084297  
SRR17520069.9084299  
SRR17520069.9084301  
SRR17520069.9084303  
SRR17520069.9084305  
SRR17520069.9084307  
SRR17520069.9084309  
SRR17520069.9084311  
SRR17520069.9084313  
SRR17520069.9088065  
SRR17520069.9088067  
SRR17520069.9088069  
SRR17520069.9088071  
SRR17520069.9088073  
SRR17520069.9089019  
SRR17520069.9089021  
SRR17520069.9089023  
SRR17520069.9089025  
SRR17520069.9089027  
SRR17520069.9089029  
SRR17520069.9089031  
SRR17520069.9090808  
SRR17520069.9090810  
SRR17520069.9090812

SRR17520069.9090814  
SRR17520069.9090816  
SRR17520069.9090818  
SRR17520069.9090820  
SRR17520069.9090822  
SRR17520069.9090824  
SRR17520069.9090826  
SRR17520069.9090828  
SRR17520069.9090830  
SRR17520069.9090834  
SRR17520069.9090836  
SRR17520069.9090838  
SRR17520069.9090840  
SRR17520069.9090842  
SRR17520069.9090844  
SRR17520069.9090846  
SRR17520069.9090848  
SRR17520069.9090852  
SRR17520069.9090997  
SRR17520069.9090999  
SRR17520069.9091001  
SRR17520069.9091003  
SRR17520069.9091005  
SRR17520069.9091012  
SRR17520069.9091016  
SRR17520069.9094620  
SRR17520069.9094622  
SRR17520069.9094624  
SRR17520069.9094626  
SRR17520069.9094628  
SRR17520069.9094630  
SRR17520069.9100811  
SRR17520069.9100813  
SRR17520069.9100815  
SRR17520069.9100817  
SRR17520069.9100819  
SRR17520069.9102612  
SRR17520069.9104896  
SRR17520069.9104900  
SRR17520069.9104902  
SRR17520069.9108935  
SRR17520069.9108937  
SRR17520069.9108939  
SRR17520069.9108943  
SRR17520069.9108945  
SRR17520069.9108947  
SRR17520069.9108949

SRR17520069.9108951  
SRR17520069.9108953  
SRR17520069.9108955  
SRR17520069.9108957  
SRR17520069.9108959  
SRR17520069.9108961  
SRR17520069.9108963  
SRR17520069.9108965  
SRR17520069.9108967  
SRR17520069.9108969  
SRR17520069.9108971  
SRR17520069.9108973  
SRR17520069.9108975  
SRR17520069.9114647  
SRR17520069.9114649  
SRR17520069.9114651  
SRR17520069.9114653  
SRR17520069.9114655  
SRR17520069.9114657  
SRR17520069.9114659  
SRR17520069.9114661  
SRR17520069.9114663  
SRR17520069.9114665  
SRR17520069.9115435  
SRR17520069.9120201  
SRR17520069.9120203  
SRR17520069.9120205  
SRR17520069.9120207  
SRR17520069.9120209  
SRR17520069.9120211  
SRR17520069.9120213  
SRR17520069.9120217  
SRR17520069.9120221  
SRR17520069.9120223  
SRR17520069.9120225  
SRR17520069.9120227  
SRR17520069.9120229  
SRR17520069.9120231  
SRR17520069.9120233  
SRR17520069.9120235  
SRR17520069.9120237  
SRR17520069.9120239  
SRR17520069.9120241  
SRR17520069.9120243  
SRR17520069.9120245  
SRR17520069.9120247  
SRR17520069.9120249

SRR17520069.9120251  
SRR17520069.9120253  
SRR17520069.9120255  
SRR17520069.9120257  
SRR17520069.9120259  
SRR17520069.9120261  
SRR17520069.9120263  
SRR17520069.9120265  
SRR17520069.9123878  
SRR17520069.9123880  
SRR17520069.9123882  
SRR17520069.9123884  
SRR17520069.9123886  
SRR17520069.9123888  
SRR17520069.9123890  
SRR17520069.9123892  
SRR17520069.9123894  
SRR17520069.9123896  
SRR17520069.9123898  
SRR17520069.9123902  
SRR17520069.9123904  
SRR17520069.9123906  
SRR17520069.9123908  
SRR17520069.9123910  
SRR17520069.9123912  
SRR17520069.9123914  
SRR17520069.9123916  
SRR17520069.9123918  
SRR17520069.9123920  
SRR17520069.9123922  
SRR17520069.9123924  
SRR17520069.9125185  
SRR17520069.9125187  
SRR17520069.9126822  
SRR17520069.9126824  
SRR17520069.9126826  
SRR17520069.9126828  
SRR17520069.9126830  
SRR17520069.9126832  
SRR17520069.9126834  
SRR17520069.9126836  
SRR17520069.9126838  
SRR17520069.9126840  
SRR17520069.9126842  
SRR17520069.9126844  
SRR17520069.9126846  
SRR17520069.9126848

SRR17520069.9126850  
SRR17520069.9126852  
SRR17520069.9126854  
SRR17520069.9126856  
SRR17520069.9126858  
SRR17520069.9126860  
SRR17520069.9126862  
SRR17520069.9126864  
SRR17520069.9126866  
SRR17520069.9126868  
SRR17520069.9126870  
SRR17520069.9126872  
SRR17520069.9131311  
SRR17520069.9131313  
SRR17520069.9131315  
SRR17520069.9131317  
SRR17520069.9131319  
SRR17520069.9134557  
SRR17520069.9134559  
SRR17520069.9134561  
SRR17520069.9134563  
SRR17520069.9134565  
SRR17520069.9134567  
SRR17520069.9134569  
SRR17520069.9134571  
SRR17520069.9134573  
SRR17520069.9134575  
SRR17520069.9134577  
SRR17520069.9134579  
SRR17520069.9134709  
SRR17520069.9140592  
SRR17520069.9140594  
SRR17520069.9140596  
SRR17520069.9140598  
SRR17520069.9140600  
SRR17520069.9140602  
SRR17520069.9140604  
SRR17520069.9140606  
SRR17520069.9140608  
SRR17520069.9140610  
SRR17520069.9140612  
SRR17520069.9140614  
SRR17520069.9140616  
SRR17520069.9140618  
SRR17520069.9140620  
SRR17520069.9140622  
SRR17520069.9140624

SRR17520069.9140626  
SRR17520069.9140628  
SRR17520069.9140630  
SRR17520069.9140634  
SRR17520069.9140636  
SRR17520069.9140638  
SRR17520069.9140640  
SRR17520069.9140642  
SRR17520069.9140644  
SRR17520069.9140646  
SRR17520069.9140648  
SRR17520069.9140650  
SRR17520069.9140652  
SRR17520069.9140654  
SRR17520069.9140656  
SRR17520069.9140658  
SRR17520069.9140660  
SRR17520069.9140662  
SRR17520069.9140664  
SRR17520069.9140668  
SRR17520069.9145151  
SRR17520069.9148474  
SRR17520069.9148478  
SRR17520069.9148480  
SRR17520069.9148482  
SRR17520069.9148484  
SRR17520069.9148486  
SRR17520069.9148488  
SRR17520069.9148490  
SRR17520069.9148492  
SRR17520069.9148494  
SRR17520069.9148496  
SRR17520069.9148498  
SRR17520069.9148500  
SRR17520069.9148502  
SRR17520069.9148504  
SRR17520069.9148506  
SRR17520069.9148508  
SRR17520069.9148510  
SRR17520069.9148512  
SRR17520069.9148514  
SRR17520069.9148516  
SRR17520069.9148518  
SRR17520069.9148520  
SRR17520069.9148522  
SRR17520069.9148524  
SRR17520069.9148526



SRR17520069.9148528  
SRR17520069.9148530  
SRR17520069.9148532  
SRR17520069.9148534  
SRR17520069.9148536  
SRR17520069.9149432  
SRR17520069.9149434  
SRR17520069.9149436  
SRR17520069.9149438  
SRR17520069.9149440  
SRR17520069.9149442  
SRR17520069.9149444  
SRR17520069.9149446  
SRR17520069.9149448  
SRR17520069.9149450  
SRR17520069.9149452  
SRR17520069.9149454  
SRR17520069.9149456  
SRR17520069.9149458  
SRR17520069.9149460  
SRR17520069.9149462  
SRR17520069.9149464  
SRR17520069.9149466  
SRR17520069.9149468  
SRR17520069.9149470  
SRR17520069.9149472  
SRR17520069.9149474  
SRR17520069.9149476  
SRR17520069.9149478  
SRR17520069.9157151  
SRR17520069.9157153  
SRR17520069.9157155  
SRR17520069.9157157  
SRR17520069.9157159  
SRR17520069.9157161  
SRR17520069.9157163  
SRR17520069.9157165  
SRR17520069.9157174  
SRR17520069.9157176  
SRR17520069.9157178  
SRR17520069.9157180  
SRR17520069.9157182  
SRR17520069.9157186  
SRR17520069.9157188  
SRR17520069.9157190  
SRR17520069.9157192  
SRR17520069.9157194

SRR17520069.9157196  
SRR17520069.9157198  
SRR17520069.9157202  
SRR17520069.9157204  
SRR17520069.9157206  
SRR17520069.9157208  
SRR17520069.9157210  
SRR17520069.9157212  
SRR17520069.9157214  
SRR17520069.9157216  
SRR17520069.9157218  
SRR17520069.9157220  
SRR17520069.9157222  
SRR17520069.9157224  
SRR17520069.9157226  
SRR17520069.9157230  
SRR17520069.9157232  
SRR17520069.9157234  
SRR17520069.9157236  
SRR17520069.9157238  
SRR17520069.9157240  
SRR17520069.9157242  
SRR17520069.9157244  
SRR17520069.9157246  
SRR17520069.9157248  
SRR17520069.9157250  
SRR17520069.9157252  
SRR17520069.9159719  
SRR17520069.9160959  
SRR17520069.9160961  
SRR17520069.9160963  
SRR17520069.9160965  
SRR17520069.9160967  
SRR17520069.9160969  
SRR17520069.9160971  
SRR17520069.9160973  
SRR17520069.9160975  
SRR17520069.9160977  
SRR17520069.9160979  
SRR17520069.9160981  
SRR17520069.9160983  
SRR17520069.9160985  
SRR17520069.9160987  
SRR17520069.9160989  
SRR17520069.9160991  
SRR17520069.9160995  
SRR17520069.9160997

SRR17520069.9160999  
SRR17520069.9161001  
SRR17520069.9161003  
SRR17520069.9161005  
SRR17520069.9161007  
SRR17520069.9161009  
SRR17520069.9161011  
SRR17520069.9161013  
SRR17520069.9161015  
SRR17520069.9161017  
SRR17520069.9161019  
SRR17520069.9161021  
SRR17520069.9161023  
SRR17520069.9161025  
SRR17520069.9161027  
SRR17520069.9161029  
SRR17520069.9161031  
SRR17520069.9161033  
SRR17520069.9161035  
SRR17520069.9161037  
SRR17520069.9161817  
SRR17520069.9161819  
SRR17520069.9162343  
SRR17520069.9162345  
SRR17520069.9162347  
SRR17520069.9162349  
SRR17520069.9162351  
SRR17520069.9162353  
SRR17520069.9162355  
SRR17520069.9162357  
SRR17520069.9162359  
SRR17520069.9162361  
SRR17520069.9162363  
SRR17520069.9162365  
SRR17520069.9162367  
SRR17520069.9162369  
SRR17520069.9162371  
SRR17520069.9162373  
SRR17520069.9166977  
SRR17520069.9166981  
SRR17520069.9166983  
SRR17520069.9166987  
SRR17520069.9166989  
SRR17520069.9166993  
SRR17520069.9166997  
SRR17520069.9167003  
SRR17520069.9167005

SRR17520069.9170562  
SRR17520069.9170564  
SRR17520069.9170566  
SRR17520069.9170570  
SRR17520069.9170574  
SRR17520069.9170576  
SRR17520069.9170578  
SRR17520069.9170582  
SRR17520069.9170584  
SRR17520069.9170586  
SRR17520069.9170588  
SRR17520069.9170592  
SRR17520069.9170594  
SRR17520069.9170596  
SRR17520069.9173163  
SRR17520069.9173165  
SRR17520069.9173167  
SRR17520069.9173169  
SRR17520069.9173173  
SRR17520069.9173175  
SRR17520069.9173177  
SRR17520069.9174204  
SRR17520069.9174206  
SRR17520069.9174208  
SRR17520069.9174210  
SRR17520069.9174212  
SRR17520069.9174214  
SRR17520069.9174216  
SRR17520069.9174218  
SRR17520069.9174220  
SRR17520069.9174222  
SRR17520069.9174224  
SRR17520069.9174226  
SRR17520069.9174228  
SRR17520069.9174230  
SRR17520069.9174232  
SRR17520069.9174234  
SRR17520069.9174236  
SRR17520069.9174238  
SRR17520069.9174240  
SRR17520069.9174242  
SRR17520069.9174244  
SRR17520069.9174246  
SRR17520069.9174248  
SRR17520069.9174250  
SRR17520069.9174252  
SRR17520069.9174254

SRR17520069.9174256  
SRR17520069.9174258  
SRR17520069.9174260  
SRR17520069.9174262  
SRR17520069.9174264  
SRR17520069.9174266  
SRR17520069.9174270  
SRR17520069.9174272  
SRR17520069.9174274  
SRR17520069.9174276  
SRR17520069.9174278  
SRR17520069.9176872  
SRR17520069.9176874  
SRR17520069.9176876  
SRR17520069.9176878  
SRR17520069.9176880  
SRR17520069.9176882  
SRR17520069.9176884  
SRR17520069.9176886  
SRR17520069.9176888  
SRR17520069.9176890  
SRR17520069.9176892  
SRR17520069.9176894  
SRR17520069.9176896  
SRR17520069.9176898  
SRR17520069.9176900  
SRR17520069.9176902  
SRR17520069.9184351  
SRR17520069.9184353  
SRR17520069.9187369  
SRR17520069.9187389  
SRR17520069.9187397  
SRR17520069.9187411  
SRR17520069.9187413  
SRR17520069.9187427  
SRR17520069.9187433  
SRR17520069.9187435  
SRR17520069.9187455  
SRR17520069.9187465  
SRR17520069.9188162  
SRR17520069.9188164  
SRR17520069.9188166  
SRR17520069.9188168  
SRR17520069.9188170  
SRR17520069.9188172  
SRR17520069.9188174  
SRR17520069.9188180

SRR17520069.9188182  
SRR17520069.9188184  
SRR17520069.9188186  
SRR17520069.9188188  
SRR17520069.9188190  
SRR17520069.9188192  
SRR17520069.9188194  
SRR17520069.9188196  
SRR17520069.9188198  
SRR17520069.9188200  
SRR17520069.9188202  
SRR17520069.9188204  
SRR17520069.9188206  
SRR17520069.9188210  
SRR17520069.9188212  
SRR17520069.9188214  
SRR17520069.9188218  
SRR17520069.9188222  
SRR17520069.9188224  
SRR17520069.9188226  
SRR17520069.9188228  
SRR17520069.9188230  
SRR17520069.9188232  
SRR17520069.9188236  
SRR17520069.9188238  
SRR17520069.9188240  
SRR17520069.9188242  
SRR17520069.9188244  
SRR17520069.9188311  
SRR17520069.9188313  
SRR17520069.9188315  
SRR17520069.9188317  
SRR17520069.9188319  
SRR17520069.9188835  
SRR17520069.9188837  
SRR17520069.9190774  
SRR17520069.9190776  
SRR17520069.9190778  
SRR17520069.9190780  
SRR17520069.9190782  
SRR17520069.9190784  
SRR17520069.9198270  
SRR17520069.9198272  
SRR17520069.9198274  
SRR17520069.9198276  
SRR17520069.9198278  
SRR17520069.9198280

SRR17520069. 9198282  
SRR17520069. 9198284  
SRR17520069. 9198286  
SRR17520069. 9198288  
SRR17520069. 9198290  
SRR17520069. 9198292  
SRR17520069. 9198298  
SRR17520069. 9198300  
SRR17520069. 9198304  
SRR17520069. 9198306  
SRR17520069. 9198308  
SRR17520069. 9198310  
SRR17520069. 9198312  
SRR17520069. 9198314  
SRR17520069. 9198316  
SRR17520069. 9198318  
SRR17520069. 9198320  
SRR17520069. 9198322  
SRR17520069. 9198324  
SRR17520069. 9198326  
SRR17520069. 9198328  
SRR17520069. 9198330  
SRR17520069. 9198332  
SRR17520069. 9198334  
SRR17520069. 9198338  
SRR17520069. 9198340  
SRR17520069. 9200707  
SRR17520069. 9200709  
SRR17520069. 9200711  
SRR17520069. 9200713  
SRR17520069. 9200715  
SRR17520069. 9200717  
SRR17520069. 9200719  
SRR17520069. 9200721  
SRR17520069. 9200754  
SRR17520069. 9200800  
SRR17520069. 9200858  
SRR17520069. 9202182  
SRR17520069. 9202185  
SRR17520069. 9202187  
SRR17520069. 9202189  
SRR17520069. 9202191  
SRR17520069. 9202193  
SRR17520069. 9202195  
SRR17520069. 9202197  
SRR17520069. 9202199  
SRR17520069. 9202201

SRR17520069. 9202203  
SRR17520069. 9202205  
SRR17520069. 9202207  
SRR17520069. 9202209  
SRR17520069. 9202211  
SRR17520069. 9202213  
SRR17520069. 9202215  
SRR17520069. 9202217  
SRR17520069. 9202703  
SRR17520069. 9202705  
SRR17520069. 9202707  
SRR17520069. 9202709  
SRR17520069. 9202711  
SRR17520069. 9202713  
SRR17520069. 9202715  
SRR17520069. 9202717  
SRR17520069. 9202719  
SRR17520069. 9202721  
SRR17520069. 9202723  
SRR17520069. 9202725  
SRR17520069. 9202727  
SRR17520069. 9202729  
SRR17520069. 9202731  
SRR17520069. 9202733  
SRR17520069. 9202735  
SRR17520069. 9202737  
SRR17520069. 9202739  
SRR17520069. 9202741  
SRR17520069. 9202743  
SRR17520069. 9202745  
SRR17520069. 9202747  
SRR17520069. 9202751  
SRR17520069. 9202753  
SRR17520069. 9202755  
SRR17520069. 9202757  
SRR17520069. 9202759  
SRR17520069. 9202761  
SRR17520069. 9202763  
SRR17520069. 9202765  
SRR17520069. 9202767  
SRR17520069. 9202769  
SRR17520069. 9202771  
SRR17520069. 9202773  
SRR17520069. 9202775  
SRR17520069. 9202777  
SRR17520069. 9202779  
SRR17520069. 9202783



SRR17520069. 9202785  
SRR17520069. 9202787  
SRR17520069. 9202789  
SRR17520069. 9202791  
SRR17520069. 9202793  
SRR17520069. 9202795  
SRR17520069. 9202797  
SRR17520069. 9202799  
SRR17520069. 9202801  
SRR17520069. 9202803  
SRR17520069. 9205565  
SRR17520069. 9205567  
SRR17520069. 9205569  
SRR17520069. 9205573  
SRR17520069. 9205575  
SRR17520069. 9205577  
SRR17520069. 9205579  
SRR17520069. 9205583  
SRR17520069. 9205585  
SRR17520069. 9205589  
SRR17520069. 9205591  
SRR17520069. 9205593  
SRR17520069. 9205599  
SRR17520069. 9205601  
SRR17520069. 9205603  
SRR17520069. 9205605  
SRR17520069. 9205607  
SRR17520069. 9205609  
SRR17520069. 9205704  
SRR17520069. 9210559  
SRR17520069. 9210561  
SRR17520069. 9210563  
SRR17520069. 9210565  
SRR17520069. 9210567  
SRR17520069. 9210569  
SRR17520069. 9210571  
SRR17520069. 9210573  
SRR17520069. 9210575  
SRR17520069. 9210577  
SRR17520069. 9210579  
SRR17520069. 9210581  
SRR17520069. 9210583  
SRR17520069. 9210585  
SRR17520069. 9210589  
SRR17520069. 9210591  
SRR17520069. 9210593  
SRR17520069. 9210595

SRR17520069. 9210597  
SRR17520069. 9210599  
SRR17520069. 9210601  
SRR17520069. 9210603  
SRR17520069. 9210605  
SRR17520069. 9210607  
SRR17520069. 9210609  
SRR17520069. 9210611  
SRR17520069. 9210613  
SRR17520069. 9210615  
SRR17520069. 9210617  
SRR17520069. 9210619  
SRR17520069. 9210621  
SRR17520069. 9210623  
SRR17520069. 9210625  
SRR17520069. 9210627  
SRR17520069. 9210629  
SRR17520069. 9210631  
SRR17520069. 9210633  
SRR17520069. 9210635  
SRR17520069. 9213105  
SRR17520069. 9213107  
SRR17520069. 9213109  
SRR17520069. 9213111  
SRR17520069. 9213113  
SRR17520069. 9213115  
SRR17520069. 9213117  
SRR17520069. 9213119  
SRR17520069. 9213121  
SRR17520069. 9213123  
SRR17520069. 9213125  
SRR17520069. 9213127  
SRR17520069. 9213129  
SRR17520069. 9213131  
SRR17520069. 9213133  
SRR17520069. 9215366  
SRR17520069. 9215368  
SRR17520069. 9215370  
SRR17520069. 9215372  
SRR17520069. 9215374  
SRR17520069. 9215376  
SRR17520069. 9215378  
SRR17520069. 9215380  
SRR17520069. 9215382  
SRR17520069. 9219029  
SRR17520069. 9222369  
SRR17520069. 9222371

SRR17520069. 9222375  
SRR17520069. 9222377  
SRR17520069. 9222379  
SRR17520069. 9222383  
SRR17520069. 9222385  
SRR17520069. 9222387  
SRR17520069. 9222389  
SRR17520069. 9222391  
SRR17520069. 9222393  
SRR17520069. 9222395  
SRR17520069. 9222397  
SRR17520069. 9222399  
SRR17520069. 9222401  
SRR17520069. 9222403  
SRR17520069. 9223058  
SRR17520069. 9223060  
SRR17520069. 9223062  
SRR17520069. 9223064  
SRR17520069. 9223068  
SRR17520069. 9229568  
SRR17520069. 9229570  
SRR17520069. 9229572  
SRR17520069. 9229574  
SRR17520069. 9229576  
SRR17520069. 9229578  
SRR17520069. 9229580  
SRR17520069. 9229582  
SRR17520069. 9229584  
SRR17520069. 9229586  
SRR17520069. 9229590  
SRR17520069. 9229592  
SRR17520069. 9229594  
SRR17520069. 9237827  
SRR17520069. 9237829  
SRR17520069. 9237831  
SRR17520069. 9237833  
SRR17520069. 9238099  
SRR17520069. 9238101  
SRR17520069. 9238103  
SRR17520069. 9238105  
SRR17520069. 9238107  
SRR17520069. 9238109  
SRR17520069. 9238113  
SRR17520069. 9238115  
SRR17520069. 9238117  
SRR17520069. 9238119  
SRR17520069. 9238121

SRR17520069. 9238123  
SRR17520069. 9238127  
SRR17520069. 9238129  
SRR17520069. 9238131  
SRR17520069. 9238133  
SRR17520069. 9238135  
SRR17520069. 9238137  
SRR17520069. 9244917  
SRR17520069. 9244919  
SRR17520069. 9244921  
SRR17520069. 9244923  
SRR17520069. 9245476  
SRR17520069. 9245478  
SRR17520069. 9245480  
SRR17520069. 9245482  
SRR17520069. 9245484  
SRR17520069. 9245486  
SRR17520069. 9245488  
SRR17520069. 9245490  
SRR17520069. 9245492  
SRR17520069. 9245494  
SRR17520069. 9245496  
SRR17520069. 9245498  
SRR17520069. 9245500  
SRR17520069. 9245502  
SRR17520069. 9245504  
SRR17520069. 9245506  
SRR17520069. 9248560  
SRR17520069. 9248562  
SRR17520069. 9248564  
SRR17520069. 9248566  
SRR17520069. 9248568  
SRR17520069. 9248570  
SRR17520069. 9248572  
SRR17520069. 9248574  
SRR17520069. 9248576  
SRR17520069. 9248578  
SRR17520069. 9248580  
SRR17520069. 9248582  
SRR17520069. 9248584  
SRR17520069. 9248586  
SRR17520069. 9248588  
SRR17520069. 9248590  
SRR17520069. 9248592  
SRR17520069. 9248594  
SRR17520069. 9248596  
SRR17520069. 9248598

SRR17520069. 9248600  
SRR17520069. 9248602  
SRR17520069. 9248604  
SRR17520069. 9248606  
SRR17520069. 9248608  
SRR17520069. 9248610  
SRR17520069. 9248612  
SRR17520069. 9248614  
SRR17520069. 9248616  
SRR17520069. 9248618  
SRR17520069. 9248620  
SRR17520069. 9248622  
SRR17520069. 9248627  
SRR17520069. 9248629  
SRR17520069. 9248631  
SRR17520069. 9248633  
SRR17520069. 9248637  
SRR17520069. 9248639  
SRR17520069. 9248643  
SRR17520069. 9248647  
SRR17520069. 9248649  
SRR17520069. 9248651  
SRR17520069. 9248653  
SRR17520069. 9248655  
SRR17520069. 9248659  
SRR17520069. 9248661  
SRR17520069. 9248663  
SRR17520069. 9248665  
SRR17520069. 9248667  
SRR17520069. 9248669  
SRR17520069. 9248671  
SRR17520069. 9248675  
SRR17520069. 9248677  
SRR17520069. 9248679  
SRR17520069. 9251414  
SRR17520069. 9251416  
SRR17520069. 9251418  
SRR17520069. 9251420  
SRR17520069. 9251424  
SRR17520069. 9251426  
SRR17520069. 9251428  
SRR17520069. 9251430  
SRR17520069. 9251432  
SRR17520069. 9251434  
SRR17520069. 9251436  
SRR17520069. 9251438  
SRR17520069. 9251440

SRR17520069. 9251442  
SRR17520069. 9251444  
SRR17520069. 9251446  
SRR17520069. 9251448  
SRR17520069. 9251450  
SRR17520069. 9251452  
SRR17520069. 9251454  
SRR17520069. 9251456  
SRR17520069. 9251458  
SRR17520069. 9251460  
SRR17520069. 9251462  
SRR17520069. 9251464  
SRR17520069. 9251466  
SRR17520069. 9251468  
SRR17520069. 9251470  
SRR17520069. 9251472  
SRR17520069. 9251474  
SRR17520069. 9251476  
SRR17520069. 9251478  
SRR17520069. 9251480  
SRR17520069. 9251482  
SRR17520069. 9251484  
SRR17520069. 9251486  
SRR17520069. 9251488  
SRR17520069. 9251490  
SRR17520069. 9251492  
SRR17520069. 9251494  
SRR17520069. 9251496  
SRR17520069. 9251498  
SRR17520069. 9251500  
SRR17520069. 9251502  
SRR17520069. 9251504  
SRR17520069. 9251506  
SRR17520069. 9251508  
SRR17520069. 9251510  
SRR17520069. 9251512  
SRR17520069. 9251514  
SRR17520069. 9251516  
SRR17520069. 9251518  
SRR17520069. 9251520  
SRR17520069. 9251522  
SRR17520069. 9251524  
SRR17520069. 9251526  
SRR17520069. 9251528  
SRR17520069. 9251530  
SRR17520069. 9251532  
SRR17520069. 9251534

SRR17520069. 9251536  
SRR17520069. 9251538  
SRR17520069. 9251542  
SRR17520069. 9251544  
SRR17520069. 9251546  
SRR17520069. 9251548  
SRR17520069. 9251550  
SRR17520069. 9251552  
SRR17520069. 9251554  
SRR17520069. 9251556  
SRR17520069. 9251558  
SRR17520069. 9251560  
SRR17520069. 9251704  
SRR17520069. 9252394  
SRR17520069. 9252396  
SRR17520069. 9252398  
SRR17520069. 9252400  
SRR17520069. 9252402  
SRR17520069. 9252404  
SRR17520069. 9252406  
SRR17520069. 9252408  
SRR17520069. 9252410  
SRR17520069. 9252412  
SRR17520069. 9252414  
SRR17520069. 9252416  
SRR17520069. 9252418  
SRR17520069. 9252420  
SRR17520069. 9252422  
SRR17520069. 9252424  
SRR17520069. 9252426  
SRR17520069. 9252428  
SRR17520069. 9252430  
SRR17520069. 9252432  
SRR17520069. 9252434  
SRR17520069. 9252436  
SRR17520069. 9252438  
SRR17520069. 9252440  
SRR17520069. 9254755  
SRR17520069. 9254757  
SRR17520069. 9254759  
SRR17520069. 9254761  
SRR17520069. 9254763  
SRR17520069. 9254767  
SRR17520069. 9254769  
SRR17520069. 9254771  
SRR17520069. 9254773  
SRR17520069. 9254775

SRR17520069. 9254777  
SRR17520069. 9254779  
SRR17520069. 9254781  
SRR17520069. 9254783  
SRR17520069. 9254785  
SRR17520069. 9254787  
SRR17520069. 9256866  
SRR17520069. 9268847  
SRR17520069. 9268849  
SRR17520069. 9268851  
SRR17520069. 9268853  
SRR17520069. 9268855  
SRR17520069. 9268857  
SRR17520069. 9268859  
SRR17520069. 9268861  
SRR17520069. 9268863  
SRR17520069. 9268865  
SRR17520069. 9268867  
SRR17520069. 9273435  
SRR17520069. 9273437  
SRR17520069. 9273439  
SRR17520069. 9273441  
SRR17520069. 9273443  
SRR17520069. 9273445  
SRR17520069. 9273447  
SRR17520069. 9273449  
SRR17520069. 9273451  
SRR17520069. 9273453  
SRR17520069. 9273455  
SRR17520069. 9274095  
SRR17520069. 9274097  
SRR17520069. 9274099  
SRR17520069. 9274101  
SRR17520069. 9274103  
SRR17520069. 9274105  
SRR17520069. 9274107  
SRR17520069. 9274109  
SRR17520069. 9274113  
SRR17520069. 9274115  
SRR17520069. 9274117  
SRR17520069. 9274119  
SRR17520069. 9274121  
SRR17520069. 9274123  
SRR17520069. 9274125  
SRR17520069. 9274127  
SRR17520069. 9274129  
SRR17520069. 9274131



SRR17520069. 9274241  
SRR17520069. 9274245  
SRR17520069. 9274247  
SRR17520069. 9274249  
SRR17520069. 9274251  
SRR17520069. 9274253  
SRR17520069. 9274255  
SRR17520069. 9274259  
SRR17520069. 9274261  
SRR17520069. 9274263  
SRR17520069. 9274265  
SRR17520069. 9274533  
SRR17520069. 9274535  
SRR17520069. 9274537  
SRR17520069. 9274539  
SRR17520069. 9274541  
SRR17520069. 9274543  
SRR17520069. 9274545  
SRR17520069. 9274547  
SRR17520069. 9274549  
SRR17520069. 9275524  
SRR17520069. 9275526  
SRR17520069. 9275528  
SRR17520069. 9275530  
SRR17520069. 9275532  
SRR17520069. 9275534  
SRR17520069. 9275536  
SRR17520069. 9275538  
SRR17520069. 9275540  
SRR17520069. 9275542  
SRR17520069. 9275544  
SRR17520069. 9275548  
SRR17520069. 9275550  
SRR17520069. 9275552  
SRR17520069. 9275554  
SRR17520069. 9275556  
SRR17520069. 9275558  
SRR17520069. 9275560  
SRR17520069. 9275562  
SRR17520069. 9275564  
SRR17520069. 9275566  
SRR17520069. 9275568  
SRR17520069. 9275570  
SRR17520069. 9275572  
SRR17520069. 9275574  
SRR17520069. 9275576  
SRR17520069. 9275578

SRR17520069. 9275580  
SRR17520069. 9275582  
SRR17520069. 9275584  
SRR17520069. 9275586  
SRR17520069. 9275588  
SRR17520069. 9278817  
SRR17520069. 9278819  
SRR17520069. 9278821  
SRR17520069. 9278823  
SRR17520069. 9278825  
SRR17520069. 9278827  
SRR17520069. 9278829  
SRR17520069. 9278831  
SRR17520069. 9278833  
SRR17520069. 9279364  
SRR17520069. 9279366  
SRR17520069. 9279368  
SRR17520069. 9279370  
SRR17520069. 9279374  
SRR17520069. 9279376  
SRR17520069. 9279378  
SRR17520069. 9279380  
SRR17520069. 9279382  
SRR17520069. 9279384  
SRR17520069. 9279386  
SRR17520069. 9279388  
SRR17520069. 9279481  
SRR17520069. 9279485  
SRR17520069. 9279487  
SRR17520069. 9279491  
SRR17520069. 9279493  
SRR17520069. 9279495  
SRR17520069. 9279497  
SRR17520069. 9279499  
SRR17520069. 9279501  
SRR17520069. 9279503  
SRR17520069. 9279505  
SRR17520069. 9279507  
SRR17520069. 9279511  
SRR17520069. 9279513  
SRR17520069. 9279515  
SRR17520069. 9279957  
SRR17520069. 9282435  
SRR17520069. 9282437  
SRR17520069. 9282439  
SRR17520069. 9282441  
SRR17520069. 9282443

SRR17520069. 9282445  
SRR17520069. 9282447  
SRR17520069. 9282449  
SRR17520069. 9284811  
SRR17520069. 9284813  
SRR17520069. 9284815  
SRR17520069. 9284817  
SRR17520069. 9284819  
SRR17520069. 9284821  
SRR17520069. 9284823  
SRR17520069. 9284825  
SRR17520069. 9284827  
SRR17520069. 9284829  
SRR17520069. 9284831  
SRR17520069. 9284833  
SRR17520069. 9284835  
SRR17520069. 9284837  
SRR17520069. 9284839  
SRR17520069. 9284841  
SRR17520069. 9284843  
SRR17520069. 9284845  
SRR17520069. 9284847  
SRR17520069. 9284849  
SRR17520069. 9284851  
SRR17520069. 9284853  
SRR17520069. 9284855  
SRR17520069. 9284857  
SRR17520069. 9284859  
SRR17520069. 9284861  
SRR17520069. 9284863  
SRR17520069. 9284865  
SRR17520069. 9284869  
SRR17520069. 9284871  
SRR17520069. 9284873  
SRR17520069. 9284875  
SRR17520069. 9284877  
SRR17520069. 9284879  
SRR17520069. 9284881  
SRR17520069. 9284883  
SRR17520069. 9284885  
SRR17520069. 9284887  
SRR17520069. 9284889  
SRR17520069. 9284895  
SRR17520069. 9284897  
SRR17520069. 9284899  
SRR17520069. 9284901  
SRR17520069. 9284903

SRR17520069. 9284905  
SRR17520069. 9284907  
SRR17520069. 9284909  
SRR17520069. 9284911  
SRR17520069. 9284913  
SRR17520069. 9284915  
SRR17520069. 9288318  
SRR17520069. 9288320  
SRR17520069. 9288322  
SRR17520069. 9288324  
SRR17520069. 9288326  
SRR17520069. 9288328  
SRR17520069. 9288330  
SRR17520069. 9288332  
SRR17520069. 9288334  
SRR17520069. 9288336  
SRR17520069. 9288338  
SRR17520069. 9288340  
SRR17520069. 9288342  
SRR17520069. 9288344  
SRR17520069. 9288346  
SRR17520069. 9288348  
SRR17520069. 9288350  
SRR17520069. 9288352  
SRR17520069. 9288354  
SRR17520069. 9288356  
SRR17520069. 9288358  
SRR17520069. 9288360  
SRR17520069. 9288362  
SRR17520069. 9288364  
SRR17520069. 9288366  
SRR17520069. 9288368  
SRR17520069. 9288370  
SRR17520069. 9288372  
SRR17520069. 9288374  
SRR17520069. 9288376  
SRR17520069. 9288378  
SRR17520069. 9288380  
SRR17520069. 9288382  
SRR17520069. 9288384  
SRR17520069. 9288386  
SRR17520069. 9289307  
SRR17520069. 9289309  
SRR17520069. 9289313  
SRR17520069. 9289707  
SRR17520069. 9289709  
SRR17520069. 9289711

SRR17520069.9289713  
SRR17520069.9289715  
SRR17520069.9289717  
SRR17520069.9289719  
SRR17520069.9289721  
SRR17520069.9289723  
SRR17520069.9289725  
SRR17520069.9297661  
SRR17520069.9297663  
SRR17520069.9297665  
SRR17520069.9297667  
SRR17520069.9297669  
SRR17520069.9297671  
SRR17520069.9297675  
SRR17520069.9297677  
SRR17520069.9302691  
SRR17520069.9302693  
SRR17520069.9302695  
SRR17520069.9302697  
SRR17520069.9302699  
SRR17520069.9302701  
SRR17520069.9302703  
SRR17520069.9302705  
SRR17520069.9302707  
SRR17520069.9302709  
SRR17520069.9302711  
SRR17520069.9302713  
SRR17520069.9302715  
SRR17520069.9305418  
SRR17520069.9305420  
SRR17520069.9305422  
SRR17520069.9305426  
SRR17520069.9305428  
SRR17520069.9305430  
SRR17520069.9305434  
SRR17520069.9305436  
SRR17520069.9305438  
SRR17520069.9305440  
SRR17520069.9305442  
SRR17520069.9305444  
SRR17520069.9305446  
SRR17520069.9305448  
SRR17520069.9305450  
SRR17520069.9305452  
SRR17520069.9310132  
SRR17520069.9310280  
SRR17520069.9310282

SRR17520069.9310284  
SRR17520069.9312224  
SRR17520069.9312226  
SRR17520069.9312228  
SRR17520069.9312230  
SRR17520069.9312232  
SRR17520069.9312236  
SRR17520069.9312238  
SRR17520069.9312240  
SRR17520069.9312242  
SRR17520069.9312244  
SRR17520069.9312246  
SRR17520069.9312248  
SRR17520069.9312250  
SRR17520069.9312252  
SRR17520069.9312256  
SRR17520069.9312258  
SRR17520069.9312260  
SRR17520069.9312262  
SRR17520069.9312264  
SRR17520069.9312266  
SRR17520069.9312268  
SRR17520069.9312270  
SRR17520069.9312272  
SRR17520069.9312274  
SRR17520069.9314086  
SRR17520069.9314088  
SRR17520069.9314090  
SRR17520069.9314092  
SRR17520069.9314096  
SRR17520069.9314098  
SRR17520069.9314100  
SRR17520069.9314102  
SRR17520069.9314104  
SRR17520069.9314106  
SRR17520069.9314108  
SRR17520069.9314110  
SRR17520069.9314112  
SRR17520069.9314114  
SRR17520069.9314116  
SRR17520069.9314118  
SRR17520069.9314120  
SRR17520069.9314122  
SRR17520069.9314124  
SRR17520069.9314126  
SRR17520069.9314128  
SRR17520069.9314130

SRR17520069. 9314132  
SRR17520069. 9314134  
SRR17520069. 9314136  
SRR17520069. 9314138  
SRR17520069. 9314140  
SRR17520069. 9314142  
SRR17520069. 9314144  
SRR17520069. 9314146  
SRR17520069. 9314148  
SRR17520069. 9314150  
SRR17520069. 9314152  
SRR17520069. 9314154  
SRR17520069. 9314156  
SRR17520069. 9316350  
SRR17520069. 9316352  
SRR17520069. 9316354  
SRR17520069. 9316356  
SRR17520069. 9316358  
SRR17520069. 9316360  
SRR17520069. 9316362  
SRR17520069. 9316364  
SRR17520069. 9316366  
SRR17520069. 9316368  
SRR17520069. 9316370  
SRR17520069. 9316372  
SRR17520069. 9328331  
SRR17520069. 9328333  
SRR17520069. 9328335  
SRR17520069. 9328339  
SRR17520069. 9328341  
SRR17520069. 9328343  
SRR17520069. 9328345  
SRR17520069. 9328347  
SRR17520069. 9328349  
SRR17520069. 9328351  
SRR17520069. 9328352  
SRR17520069. 9328354  
SRR17520069. 9328358  
SRR17520069. 9328360  
SRR17520069. 9328362  
SRR17520069. 9328364  
SRR17520069. 9328366  
SRR17520069. 9328368  
SRR17520069. 9328370  
SRR17520069. 9328374  
SRR17520069. 9328376  
SRR17520069. 9328378

SRR17520069. 9328382  
SRR17520069. 9328384  
SRR17520069. 9328386  
SRR17520069. 9328388  
SRR17520069. 9328390  
SRR17520069. 9328392  
SRR17520069. 9328394  
SRR17520069. 9328398  
SRR17520069. 9328400  
SRR17520069. 9334419  
SRR17520069. 9334421  
SRR17520069. 9334423  
SRR17520069. 9334425  
SRR17520069. 9338671  
SRR17520069. 9340561  
SRR17520069. 9340563  
SRR17520069. 9340565  
SRR17520069. 9340567  
SRR17520069. 9340569  
SRR17520069. 9340571  
SRR17520069. 9340573  
SRR17520069. 9340575  
SRR17520069. 9340577  
SRR17520069. 9340579  
SRR17520069. 9340581  
SRR17520069. 9340583  
SRR17520069. 9340585  
SRR17520069. 9340587  
SRR17520069. 9340591  
SRR17520069. 9340593  
SRR17520069. 9340595  
SRR17520069. 9340597  
SRR17520069. 9340599  
SRR17520069. 9340601  
SRR17520069. 9340603  
SRR17520069. 9340605  
SRR17520069. 9340607  
SRR17520069. 9340609  
SRR17520069. 9340611  
SRR17520069. 9340613  
SRR17520069. 9340615  
SRR17520069. 9340617  
SRR17520069. 9340619  
SRR17520069. 9340621  
SRR17520069. 9340623  
SRR17520069. 9340625  
SRR17520069. 9340627



SRR17520069. 9340629  
SRR17520069. 9340631  
SRR17520069. 9340633  
SRR17520069. 9340635  
SRR17520069. 9340637  
SRR17520069. 9340639  
SRR17520069. 9340641  
SRR17520069. 9340643  
SRR17520069. 9340645  
SRR17520069. 9354494  
SRR17520069. 9354496  
SRR17520069. 9354498  
SRR17520069. 9354500  
SRR17520069. 9354502  
SRR17520069. 9354504  
SRR17520069. 9354506  
SRR17520069. 9354508  
SRR17520069. 9354510  
SRR17520069. 9354512  
SRR17520069. 9354514  
SRR17520069. 9354516  
SRR17520069. 9357933  
SRR17520069. 9357937  
SRR17520069. 9367526  
SRR17520069. 9367528  
SRR17520069. 9367530  
SRR17520069. 9367532  
SRR17520069. 9367534  
SRR17520069. 9367536  
SRR17520069. 9367538  
SRR17520069. 9367542  
SRR17520069. 9367544  
SRR17520069. 9367546  
SRR17520069. 9367548  
SRR17520069. 9367550  
SRR17520069. 9367552  
SRR17520069. 9367554  
SRR17520069. 9367556  
SRR17520069. 9367558  
SRR17520069. 9367560  
SRR17520069. 9367562  
SRR17520069. 9367564  
SRR17520069. 9367566  
SRR17520069. 9367568  
SRR17520069. 9367570  
SRR17520069. 9367573  
SRR17520069. 9367575

SRR17520069. 9367577  
SRR17520069. 9367579  
SRR17520069. 9367581  
SRR17520069. 9367583  
SRR17520069. 9367585  
SRR17520069. 9367587  
SRR17520069. 9367589  
SRR17520069. 9367591  
SRR17520069. 9367593  
SRR17520069. 9367595  
SRR17520069. 9367597  
SRR17520069. 9367599  
SRR17520069. 9367601  
SRR17520069. 9367603  
SRR17520069. 9367605  
SRR17520069. 9367607  
SRR17520069. 9367609  
SRR17520069. 9367611  
SRR17520069. 9367613  
SRR17520069. 9367615  
SRR17520069. 9367617  
SRR17520069. 9367619  
SRR17520069. 9367621  
SRR17520069. 9367623  
SRR17520069. 9367625  
SRR17520069. 9369625  
SRR17520069. 9369627  
SRR17520069. 9370456  
SRR17520069. 9370458  
SRR17520069. 9377510  
SRR17520069. 9377512  
SRR17520069. 9377514  
SRR17520069. 9377516  
SRR17520069. 9377518  
SRR17520069. 9377520  
SRR17520069. 9377522  
SRR17520069. 9377524  
SRR17520069. 9377526  
SRR17520069. 9377528  
SRR17520069. 9377530  
SRR17520069. 9377532  
SRR17520069. 9377534  
SRR17520069. 9377536  
SRR17520069. 9377538  
SRR17520069. 9377540  
SRR17520069. 9377542  
SRR17520069. 9377544

SRR17520069. 9377546  
SRR17520069. 9377548  
SRR17520069. 9380223  
SRR17520069. 9380225  
SRR17520069. 9380227  
SRR17520069. 9380975  
SRR17520069. 9380977  
SRR17520069. 9380979  
SRR17520069. 9380981  
SRR17520069. 9380983  
SRR17520069. 9380985  
SRR17520069. 9382639  
SRR17520069. 9382641  
SRR17520069. 9382643  
SRR17520069. 9382645  
SRR17520069. 9382647  
SRR17520069. 9388561  
SRR17520069. 9388563  
SRR17520069. 9388565  
SRR17520069. 9388567  
SRR17520069. 9388569  
SRR17520069. 9388571  
SRR17520069. 9388573  
SRR17520069. 9388575  
SRR17520069. 9388577  
SRR17520069. 9390944  
SRR17520069. 9390946  
SRR17520069. 9390948  
SRR17520069. 9390950  
SRR17520069. 9390952  
SRR17520069. 9390954  
SRR17520069. 9390956  
SRR17520069. 9390958  
SRR17520069. 9390960  
SRR17520069. 9390962  
SRR17520069. 9390964  
SRR17520069. 9390966  
SRR17520069. 9390968  
SRR17520069. 9390970  
SRR17520069. 9390972  
SRR17520069. 9390974  
SRR17520069. 9390976  
SRR17520069. 9390978  
SRR17520069. 9403822  
SRR17520069. 9403824  
SRR17520069. 9403826  
SRR17520069. 9403834

SRR17520069.9403836  
SRR17520069.9403838  
SRR17520069.9403840  
SRR17520069.9403844  
SRR17520069.9403846  
SRR17520069.9403848  
SRR17520069.9403850  
SRR17520069.9403852  
SRR17520069.9403854  
SRR17520069.9403856  
SRR17520069.9404991  
SRR17520069.9409348  
SRR17520069.9409350  
SRR17520069.9409352  
SRR17520069.9428802  
SRR17520069.9428804  
SRR17520069.9428807  
SRR17520069.9428809  
SRR17520069.9428811  
SRR17520069.9428813  
SRR17520069.9428815  
SRR17520069.9428817  
SRR17520069.9428819  
SRR17520069.9428821  
SRR17520069.9428823  
SRR17520069.9428825  
SRR17520069.9445028  
SRR17520069.9445030  
SRR17520069.9445032  
SRR17520069.9445034  
SRR17520069.9445036  
SRR17520069.9445038  
SRR17520069.9445040  
SRR17520069.9445042  
SRR17520069.9445044  
SRR17520069.9445046  
SRR17520069.9445048  
SRR17520069.9445050  
SRR17520069.9445052  
SRR17520069.9445054  
SRR17520069.9445056  
SRR17520069.9445058  
SRR17520069.9445060  
SRR17520069.9451320  
SRR17520069.9451322  
SRR17520069.9451324  
SRR17520069.9451326

SRR17520069.9451328  
SRR17520069.9451330  
SRR17520069.9451332  
SRR17520069.9451334  
SRR17520069.9451336  
SRR17520069.9451338  
SRR17520069.9451340  
SRR17520069.9451342  
SRR17520069.9451344  
SRR17520069.9451346  
SRR17520069.9451348  
SRR17520069.9451350  
SRR17520069.9451352  
SRR17520069.9451354  
SRR17520069.9451356  
SRR17520069.9451358  
SRR17520069.9451360  
SRR17520069.9451362  
SRR17520069.9451364  
SRR17520069.9451366  
SRR17520069.9451368  
SRR17520069.9451370  
SRR17520069.9451372  
SRR17520069.9451374  
SRR17520069.9451376  
SRR17520069.9451378  
SRR17520069.9451380  
SRR17520069.9451382  
SRR17520069.9453021  
SRR17520069.9453023  
SRR17520069.9453025  
SRR17520069.9466505  
SRR17520069.9466507  
SRR17520069.9466509  
SRR17520069.9466511  
SRR17520069.9466513  
SRR17520069.9466517  
SRR17520069.9466519  
SRR17520069.9466521  
SRR17520069.9466523  
SRR17520069.9466525  
SRR17520069.9466527  
SRR17520069.9466529  
SRR17520069.9466531  
SRR17520069.9466533  
SRR17520069.9466535  
SRR17520069.9466537

SRR17520069. 9466539  
SRR17520069. 9466541  
SRR17520069. 9466543  
SRR17520069. 9466545  
SRR17520069. 9466547  
SRR17520069. 9466549  
SRR17520069. 9466551  
SRR17520069. 9466553  
SRR17520069. 9466555  
SRR17520069. 9466557  
SRR17520069. 9466559  
SRR17520069. 9466563  
SRR17520069. 9466565  
SRR17520069. 9466567  
SRR17520069. 9466569  
SRR17520069. 9466571  
SRR17520069. 9466573  
SRR17520069. 9466575  
SRR17520069. 9466577  
SRR17520069. 9466579  
SRR17520069. 9466581  
SRR17520069. 9466583  
SRR17520069. 9466585  
SRR17520069. 9466587  
SRR17520069. 9466589  
SRR17520069. 9466591  
SRR17520069. 9466593  
SRR17520069. 9466595  
SRR17520069. 9466597  
SRR17520069. 9466599  
SRR17520069. 9466601  
SRR17520069. 9466603  
SRR17520069. 9466605  
SRR17520069. 9466607  
SRR17520069. 9466609  
SRR17520069. 9466611  
SRR17520069. 9466613  
SRR17520069. 9466615  
SRR17520069. 9466617  
SRR17520069. 9466619  
SRR17520069. 9471270  
SRR17520069. 9471272  
SRR17520069. 9471274  
SRR17520069. 9471276  
SRR17520069. 9471280  
SRR17520069. 9471282  
SRR17520069. 9471284

SRR17520069.9471286  
SRR17520069.9471288  
SRR17520069.9471290  
SRR17520069.9471292  
SRR17520069.9471294  
SRR17520069.9471296  
SRR17520069.9471298  
SRR17520069.9471300  
SRR17520069.9471302  
SRR17520069.9471304  
SRR17520069.9471308  
SRR17520069.9471310  
SRR17520069.9471312  
SRR17520069.9471314  
SRR17520069.9471316  
SRR17520069.9471318  
SRR17520069.9471320  
SRR17520069.9471322  
SRR17520069.9471324  
SRR17520069.9471326  
SRR17520069.9471328  
SRR17520069.9471330  
SRR17520069.9471332  
SRR17520069.9471334  
SRR17520069.9471336  
SRR17520069.9471338  
SRR17520069.9471340  
SRR17520069.9471342  
SRR17520069.9471344  
SRR17520069.9471346  
SRR17520069.9471348  
SRR17520069.9471350  
SRR17520069.9471352  
SRR17520069.9471354  
SRR17520069.9471356  
SRR17520069.9471358  
SRR17520069.9471360  
SRR17520069.9471362  
SRR17520069.9471364  
SRR17520069.9471366  
SRR17520069.9471368  
SRR17520069.9471370  
SRR17520069.9471372  
SRR17520069.9471374  
SRR17520069.9471376  
SRR17520069.9471378  
SRR17520069.9471380

SRR17520069.9471382  
SRR17520069.9471384  
SRR17520069.9471386  
SRR17520069.9471388  
SRR17520069.9471390  
SRR17520069.9471392  
SRR17520069.9471394  
SRR17520069.9471396  
SRR17520069.9471398  
SRR17520069.9471400  
SRR17520069.9471402  
SRR17520069.9471404  
SRR17520069.9471406  
SRR17520069.9471408  
SRR17520069.9471410  
SRR17520069.9471412  
SRR17520069.9471414  
SRR17520069.9471416  
SRR17520069.9471418  
SRR17520069.9471420  
SRR17520069.9471424  
SRR17520069.9471426  
SRR17520069.9471428  
SRR17520069.9471430  
SRR17520069.9471432  
SRR17520069.9471434  
SRR17520069.9471436  
SRR17520069.9471438  
SRR17520069.9471440  
SRR17520069.9471442  
SRR17520069.9472182  
SRR17520069.9472184  
SRR17520069.9472186  
SRR17520069.9472188  
SRR17520069.9472190  
SRR17520069.9472192  
SRR17520069.9472194  
SRR17520069.9472196  
SRR17520069.9472198  
SRR17520069.9472200  
SRR17520069.9472202  
SRR17520069.9472204  
SRR17520069.9472206  
SRR17520069.9472208  
SRR17520069.9472210  
SRR17520069.9472212  
SRR17520069.9472214



SRR17520069.9472216  
SRR17520069.9472218  
SRR17520069.9472220  
SRR17520069.9472222  
SRR17520069.9472224  
SRR17520069.9479134  
SRR17520069.9479136  
SRR17520069.9479138  
SRR17520069.9479140  
SRR17520069.9479142  
SRR17520069.9479144  
SRR17520069.9479146  
SRR17520069.9479148  
SRR17520069.9479150  
SRR17520069.9479152  
SRR17520069.9479154  
SRR17520069.9479156  
SRR17520069.9479158  
SRR17520069.9479160  
SRR17520069.9479162  
SRR17520069.9479164  
SRR17520069.9479166  
SRR17520069.9479168  
SRR17520069.9479170  
SRR17520069.9479172  
SRR17520069.9479174  
SRR17520069.9479178  
SRR17520069.9479180  
SRR17520069.9479182  
SRR17520069.9479184  
SRR17520069.9479186  
SRR17520069.9479188  
SRR17520069.9479190  
SRR17520069.9479192  
SRR17520069.9479194  
SRR17520069.9479196  
SRR17520069.9479198  
SRR17520069.9479200  
SRR17520069.9479202  
SRR17520069.9479204  
SRR17520069.9479206  
SRR17520069.9479208  
SRR17520069.9479210  
SRR17520069.9479212  
SRR17520069.9479214  
SRR17520069.9479216  
SRR17520069.9479218

SRR17520069.9479220  
SRR17520069.9479222  
SRR17520069.9479883  
SRR17520069.9479885  
SRR17520069.9487158  
SRR17520069.9487160  
SRR17520069.9487162  
SRR17520069.9487164  
SRR17520069.9487168  
SRR17520069.9487170  
SRR17520069.9487172  
SRR17520069.9487174  
SRR17520069.9489379  
SRR17520069.9490074  
SRR17520069.9491404  
SRR17520069.9491406  
SRR17520069.9491408  
SRR17520069.9491410  
SRR17520069.9491412  
SRR17520069.9491414  
SRR17520069.9491416  
SRR17520069.9491418  
SRR17520069.9491422  
SRR17520069.9491490  
SRR17520069.9491492  
SRR17520069.9491494  
SRR17520069.9491498  
SRR17520069.9491502  
SRR17520069.9491504  
SRR17520069.9491508  
SRR17520069.9491510  
SRR17520069.9491512  
SRR17520069.9491514  
SRR17520069.9491516  
SRR17520069.9491518  
SRR17520069.9491520  
SRR17520069.9491522  
SRR17520069.9491524  
SRR17520069.9491526  
SRR17520069.9491528  
SRR17520069.9491530  
SRR17520069.9491532  
SRR17520069.9491534  
SRR17520069.9491536  
SRR17520069.9491538  
SRR17520069.9491540  
SRR17520069.9491542

SRR17520069.9491544  
SRR17520069.9491546  
SRR17520069.9491548  
SRR17520069.9491550  
SRR17520069.9491552  
SRR17520069.9491554  
SRR17520069.9491556  
SRR17520069.9491558  
SRR17520069.9491560  
SRR17520069.9491562  
SRR17520069.9491564  
SRR17520069.9491566  
SRR17520069.9492310  
SRR17520069.9492312  
SRR17520069.9492314  
SRR17520069.9492316  
SRR17520069.9492320  
SRR17520069.9492322  
SRR17520069.9492324  
SRR17520069.9492326  
SRR17520069.9492328  
SRR17520069.9492330  
SRR17520069.9492332  
SRR17520069.9492334  
SRR17520069.9492336  
SRR17520069.9492338  
SRR17520069.9492340  
SRR17520069.9492342  
SRR17520069.9492344  
SRR17520069.9492346  
SRR17520069.9492348  
SRR17520069.9492352  
SRR17520069.9492354  
SRR17520069.9492356  
SRR17520069.9492358  
SRR17520069.9492360  
SRR17520069.9492362  
SRR17520069.9492364  
SRR17520069.9492366  
SRR17520069.9492368  
SRR17520069.9492624  
SRR17520069.9492626  
SRR17520069.9492630  
SRR17520069.9492632  
SRR17520069.9492634  
SRR17520069.9492636  
SRR17520069.9492640

SRR17520069.9497167  
SRR17520069.9497169  
SRR17520069.9497171  
SRR17520069.9497173  
SRR17520069.9497175  
SRR17520069.9497177  
SRR17520069.9497179  
SRR17520069.9497181  
SRR17520069.9498778  
SRR17520069.9498780  
SRR17520069.9498782  
SRR17520069.9498784  
SRR17520069.9498786  
SRR17520069.9498788  
SRR17520069.9498790  
SRR17520069.9498792  
SRR17520069.9498794  
SRR17520069.9498796  
SRR17520069.9498798  
SRR17520069.9498800  
SRR17520069.9498802  
SRR17520069.9498804  
SRR17520069.9498806  
SRR17520069.9498808  
SRR17520069.9498810  
SRR17520069.9498812  
SRR17520069.9498814  
SRR17520069.9498816  
SRR17520069.9498818  
SRR17520069.9498820  
SRR17520069.9498822  
SRR17520069.9498824  
SRR17520069.9498826  
SRR17520069.9498828  
SRR17520069.9498830  
SRR17520069.9498832  
SRR17520069.9498834  
SRR17520069.9498836  
SRR17520069.9498838  
SRR17520069.9498840  
SRR17520069.9498842  
SRR17520069.9498844  
SRR17520069.9498846  
SRR17520069.9498848  
SRR17520069.9498850  
SRR17520069.9498852  
SRR17520069.9498854

SRR17520069.9498856  
SRR17520069.9498858  
SRR17520069.9498860  
SRR17520069.9498862  
SRR17520069.9498864  
SRR17520069.9498866  
SRR17520069.9498868  
SRR17520069.9498870  
SRR17520069.9498874  
SRR17520069.9498876  
SRR17520069.9498878  
SRR17520069.9498880  
SRR17520069.9500779  
SRR17520069.9500781  
SRR17520069.9500783  
SRR17520069.9500785  
SRR17520069.9500787  
SRR17520069.9500789  
SRR17520069.9500791  
SRR17520069.9500793  
SRR17520069.9500795  
SRR17520069.9500797  
SRR17520069.9500799  
SRR17520069.9500803  
SRR17520069.9500805  
SRR17520069.9500807  
SRR17520069.9500809  
SRR17520069.9500811  
SRR17520069.9500813  
SRR17520069.9500815  
SRR17520069.9500819  
SRR17520069.9500821  
SRR17520069.9501587  
SRR17520069.9501589  
SRR17520069.9501591  
SRR17520069.9501593  
SRR17520069.9501595  
SRR17520069.9501597  
SRR17520069.9501599  
SRR17520069.9501601  
SRR17520069.9501603  
SRR17520069.9501605  
SRR17520069.9501607  
SRR17520069.9501609  
SRR17520069.9501611  
SRR17520069.9501613  
SRR17520069.9501615

SRR17520069.9501617  
SRR17520069.9501619  
SRR17520069.9501621  
SRR17520069.9501623  
SRR17520069.9501625  
SRR17520069.9501627  
SRR17520069.9501629  
SRR17520069.9501631  
SRR17520069.9501633  
SRR17520069.9501635  
SRR17520069.9505251  
SRR17520069.9507524  
SRR17520069.9507526  
SRR17520069.9507528  
SRR17520069.9507530  
SRR17520069.9507532  
SRR17520069.9507534  
SRR17520069.9507536  
SRR17520069.9507538  
SRR17520069.9510328  
SRR17520069.9519339  
SRR17520069.9519341  
SRR17520069.9519343  
SRR17520069.9519345  
SRR17520069.9519347  
SRR17520069.9522501  
SRR17520069.9522503  
SRR17520069.9522505  
SRR17520069.9522507  
SRR17520069.9522509  
SRR17520069.9522511  
SRR17520069.9522513  
SRR17520069.9522515  
SRR17520069.9522517  
SRR17520069.9522519  
SRR17520069.9522521  
SRR17520069.9522523  
SRR17520069.9522525  
SRR17520069.9522527  
SRR17520069.9522529  
SRR17520069.9522531  
SRR17520069.9522533  
SRR17520069.9522535  
SRR17520069.9522537  
SRR17520069.9522539  
SRR17520069.9522541  
SRR17520069.9522543

SRR17520069.9522545  
SRR17520069.9522547  
SRR17520069.9522549  
SRR17520069.9522551  
SRR17520069.9522553  
SRR17520069.9522557  
SRR17520069.9522559  
SRR17520069.9522561  
SRR17520069.9522563  
SRR17520069.9522565  
SRR17520069.9522567  
SRR17520069.9522569  
SRR17520069.9522571  
SRR17520069.9522573  
SRR17520069.9522575  
SRR17520069.9522577  
SRR17520069.9522579  
SRR17520069.9522581  
SRR17520069.9522583  
SRR17520069.9522585  
SRR17520069.9522587  
SRR17520069.9522589  
SRR17520069.9522591  
SRR17520069.9522593  
SRR17520069.9522595  
SRR17520069.9522597  
SRR17520069.9522599  
SRR17520069.9522601  
SRR17520069.9522603  
SRR17520069.9522605  
SRR17520069.9522607  
SRR17520069.9522609  
SRR17520069.9522611  
SRR17520069.9522613  
SRR17520069.9522615  
SRR17520069.9522617  
SRR17520069.9522619  
SRR17520069.9522621  
SRR17520069.9522623  
SRR17520069.9522625  
SRR17520069.9522627  
SRR17520069.9522629  
SRR17520069.9522631  
SRR17520069.9522633  
SRR17520069.9522635  
SRR17520069.9522637  
SRR17520069.9522639

SRR17520069.9522641  
SRR17520069.9522643  
SRR17520069.9525354  
SRR17520069.9525356  
SRR17520069.9525358  
SRR17520069.9525360  
SRR17520069.9525362  
SRR17520069.9525364  
SRR17520069.9525366  
SRR17520069.9525368  
SRR17520069.9525614  
SRR17520069.9525616  
SRR17520069.9525620  
SRR17520069.9525622  
SRR17520069.9525624  
SRR17520069.9525626  
SRR17520069.9525628  
SRR17520069.9525630  
SRR17520069.9525632  
SRR17520069.9525634  
SRR17520069.9525636  
SRR17520069.9525638  
SRR17520069.9525640  
SRR17520069.9525642  
SRR17520069.9525644  
SRR17520069.9525646  
SRR17520069.9525648  
SRR17520069.9525650  
SRR17520069.9525652  
SRR17520069.9525654  
SRR17520069.9525658  
SRR17520069.9525660  
SRR17520069.9525662  
SRR17520069.9525666  
SRR17520069.9525668  
SRR17520069.9531140  
SRR17520069.9531142  
SRR17520069.9531144  
SRR17520069.9531146  
SRR17520069.9531148  
SRR17520069.9531150  
SRR17520069.9531844  
SRR17520069.9531846  
SRR17520069.9531848  
SRR17520069.9531850  
SRR17520069.9531852  
SRR17520069.9531854



SRR17520069.9531856  
SRR17520069.9531858  
SRR17520069.9531860  
SRR17520069.9531862  
SRR17520069.9531864  
SRR17520069.9531866  
SRR17520069.9537282  
SRR17520069.9537369  
SRR17520069.9538565  
SRR17520069.9538569  
SRR17520069.9538573  
SRR17520069.9539751  
SRR17520069.9539753  
SRR17520069.9539755  
SRR17520069.9539757  
SRR17520069.9539759  
SRR17520069.9539761  
SRR17520069.9539763  
SRR17520069.9539765  
SRR17520069.9539767  
SRR17520069.9539769  
SRR17520069.9539771  
SRR17520069.9539773  
SRR17520069.9539775  
SRR17520069.9539777  
SRR17520069.9539779  
SRR17520069.9539781  
SRR17520069.9539783  
SRR17520069.9539785  
SRR17520069.9539787  
SRR17520069.9539789  
SRR17520069.9539791  
SRR17520069.9539793  
SRR17520069.9539795  
SRR17520069.9539797  
SRR17520069.9539801  
SRR17520069.9539803  
SRR17520069.9539805  
SRR17520069.9539807  
SRR17520069.9539809  
SRR17520069.9539811  
SRR17520069.9539813  
SRR17520069.9539815  
SRR17520069.9539817  
SRR17520069.9539819  
SRR17520069.9539821  
SRR17520069.9539823

SRR17520069.9539825  
SRR17520069.9539827  
SRR17520069.9539829  
SRR17520069.9539831  
SRR17520069.9539833  
SRR17520069.9539835  
SRR17520069.9539837  
SRR17520069.9539839  
SRR17520069.9539841  
SRR17520069.9539843  
SRR17520069.9539845  
SRR17520069.9539847  
SRR17520069.9539849  
SRR17520069.9539851  
SRR17520069.9540611  
SRR17520069.9540613  
SRR17520069.9540615  
SRR17520069.9540617  
SRR17520069.9540619  
SRR17520069.9540768  
SRR17520069.9541760  
SRR17520069.9541762  
SRR17520069.9541764  
SRR17520069.9541766  
SRR17520069.9541768  
SRR17520069.9541770  
SRR17520069.9541772  
SRR17520069.9541774  
SRR17520069.9541776  
SRR17520069.9541778  
SRR17520069.9541780  
SRR17520069.9541782  
SRR17520069.9541784  
SRR17520069.9541786  
SRR17520069.9541788  
SRR17520069.9541790  
SRR17520069.9541792  
SRR17520069.9541794  
SRR17520069.9541796  
SRR17520069.9541798  
SRR17520069.9541800  
SRR17520069.9541802  
SRR17520069.9541804  
SRR17520069.9541806  
SRR17520069.9541808  
SRR17520069.9541810  
SRR17520069.9541812

SRR17520069.9541814  
SRR17520069.9541816  
SRR17520069.9541818  
SRR17520069.9541820  
SRR17520069.9541822  
SRR17520069.9541824  
SRR17520069.9541826  
SRR17520069.9541828  
SRR17520069.9541830  
SRR17520069.9541832  
SRR17520069.9541834  
SRR17520069.9541836  
SRR17520069.9541838  
SRR17520069.9541840  
SRR17520069.9541842  
SRR17520069.9541844  
SRR17520069.9541846  
SRR17520069.9541852  
SRR17520069.9541854  
SRR17520069.9541856  
SRR17520069.9541858  
SRR17520069.9541860  
SRR17520069.9541862  
SRR17520069.9541864  
SRR17520069.9541866  
SRR17520069.9541868  
SRR17520069.9541870  
SRR17520069.9541872  
SRR17520069.9541874  
SRR17520069.9541878  
SRR17520069.9541880  
SRR17520069.9541882  
SRR17520069.9541884  
SRR17520069.9541886  
SRR17520069.9541888  
SRR17520069.9541890  
SRR17520069.9541892  
SRR17520069.9541894  
SRR17520069.9541896  
SRR17520069.9541898  
SRR17520069.9541900  
SRR17520069.9541902  
SRR17520069.9541904  
SRR17520069.9541906  
SRR17520069.9541908  
SRR17520069.9541910  
SRR17520069.9544660

SRR17520069.9544662  
SRR17520069.9544666  
SRR17520069.9544668  
SRR17520069.9544670  
SRR17520069.9544672  
SRR17520069.9544674  
SRR17520069.9544676  
SRR17520069.9544678  
SRR17520069.9544680  
SRR17520069.9544682  
SRR17520069.9544684  
SRR17520069.9544686  
SRR17520069.9544690  
SRR17520069.9544692  
SRR17520069.9544694  
SRR17520069.9544696  
SRR17520069.9544698  
SRR17520069.9544700  
SRR17520069.9544702  
SRR17520069.9560678  
SRR17520069.9560680  
SRR17520069.9560682  
SRR17520069.9560684  
SRR17520069.9560686  
SRR17520069.9560688  
SRR17520069.9560690  
SRR17520069.9560692  
SRR17520069.9560694  
SRR17520069.9560696  
SRR17520069.9560698  
SRR17520069.9560700  
SRR17520069.9560702  
SRR17520069.9560704  
SRR17520069.9560706  
SRR17520069.9560708  
SRR17520069.9560710  
SRR17520069.9560714  
SRR17520069.9560720  
SRR17520069.9560722  
SRR17520069.9560724  
SRR17520069.9560726  
SRR17520069.9560728  
SRR17520069.9560732  
SRR17520069.9560736  
SRR17520069.9560738  
SRR17520069.9560742  
SRR17520069.9560744

SRR17520069.9560746  
SRR17520069.9563494  
SRR17520069.9563496  
SRR17520069.9563498  
SRR17520069.9568335  
SRR17520069.9568337  
SRR17520069.9568341  
SRR17520069.9568343  
SRR17520069.9568345  
SRR17520069.9568347  
SRR17520069.9568349  
SRR17520069.9568351  
SRR17520069.9568353  
SRR17520069.9568355  
SRR17520069.9568357  
SRR17520069.9568359  
SRR17520069.9568361  
SRR17520069.9568363  
SRR17520069.9571577  
SRR17520069.9571579  
SRR17520069.9571581  
SRR17520069.9571583  
SRR17520069.9571585  
SRR17520069.9571587  
SRR17520069.9571589  
SRR17520069.9571591  
SRR17520069.9571593  
SRR17520069.9571595  
SRR17520069.9571597  
SRR17520069.9571599  
SRR17520069.9571601  
SRR17520069.9571603  
SRR17520069.9571605  
SRR17520069.9571607  
SRR17520069.9571609  
SRR17520069.9571611  
SRR17520069.9571613  
SRR17520069.9571615  
SRR17520069.9571617  
SRR17520069.9571619  
SRR17520069.9571621  
SRR17520069.9571623  
SRR17520069.9571625  
SRR17520069.9571627  
SRR17520069.9571629  
SRR17520069.9571631  
SRR17520069.9571633

SRR17520069.9571635  
SRR17520069.9571637  
SRR17520069.9571639  
SRR17520069.9571641  
SRR17520069.9571643  
SRR17520069.9571645  
SRR17520069.9571647  
SRR17520069.9571649  
SRR17520069.9571651  
SRR17520069.9571653  
SRR17520069.9571655  
SRR17520069.9571657  
SRR17520069.9571659  
SRR17520069.9571661  
SRR17520069.9571663  
SRR17520069.9571665  
SRR17520069.9571667  
SRR17520069.9571669  
SRR17520069.9571671  
SRR17520069.9571673  
SRR17520069.9571675  
SRR17520069.9571677  
SRR17520069.9571679  
SRR17520069.9571681  
SRR17520069.9571683  
SRR17520069.9571685  
SRR17520069.9571687  
SRR17520069.9571689  
SRR17520069.9571691  
SRR17520069.9571693  
SRR17520069.9571695  
SRR17520069.9571697  
SRR17520069.9571699  
SRR17520069.9571701  
SRR17520069.9571703  
SRR17520069.9571705  
SRR17520069.9571707  
SRR17520069.9571709  
SRR17520069.9571711  
SRR17520069.9571713  
SRR17520069.9571715  
SRR17520069.9571719  
SRR17520069.9571721  
SRR17520069.9571723  
SRR17520069.9571725  
SRR17520069.9571727  
SRR17520069.9576663

SRR17520069.9583105  
SRR17520069.9583107  
SRR17520069.9583111  
SRR17520069.9583113  
SRR17520069.9583115  
SRR17520069.9583117  
SRR17520069.9583119  
SRR17520069.9583121  
SRR17520069.9583123  
SRR17520069.9583125  
SRR17520069.9583127  
SRR17520069.9583129  
SRR17520069.9583131  
SRR17520069.9583133  
SRR17520069.9583135  
SRR17520069.9583137  
SRR17520069.9583139  
SRR17520069.9583141  
SRR17520069.9583145  
SRR17520069.9583147  
SRR17520069.9583149  
SRR17520069.9583151  
SRR17520069.9583153  
SRR17520069.9583155  
SRR17520069.9583157  
SRR17520069.9583159  
SRR17520069.9583161  
SRR17520069.9583163  
SRR17520069.9583167  
SRR17520069.9583171  
SRR17520069.9587301  
SRR17520069.9587303  
SRR17520069.9590263  
SRR17520069.9590265  
SRR17520069.9590267  
SRR17520069.9590273  
SRR17520069.9590275  
SRR17520069.9590279  
SRR17520069.9590283  
SRR17520069.9590287  
SRR17520069.9590289  
SRR17520069.9590291  
SRR17520069.9592425  
SRR17520069.9592427  
SRR17520069.9592429  
SRR17520069.9592433  
SRR17520069.9592439

SRR17520069.9592441  
SRR17520069.9592443  
SRR17520069.9592445  
SRR17520069.9592447  
SRR17520069.9592449  
SRR17520069.9593307  
SRR17520069.9593309  
SRR17520069.9593311  
SRR17520069.9593313  
SRR17520069.9593315  
SRR17520069.9593317  
SRR17520069.9593319  
SRR17520069.9593321  
SRR17520069.9593323  
SRR17520069.9593325  
SRR17520069.9593327  
SRR17520069.9594142  
SRR17520069.9594144  
SRR17520069.9594146  
SRR17520069.9594148  
SRR17520069.9594150  
SRR17520069.9594152  
SRR17520069.9594156  
SRR17520069.9594158  
SRR17520069.9594162  
SRR17520069.9598462  
SRR17520069.9598464  
SRR17520069.9598466  
SRR17520069.9598468  
SRR17520069.9598470  
SRR17520069.9598472  
SRR17520069.9598474  
SRR17520069.9598476  
SRR17520069.9598596  
SRR17520069.9601228  
SRR17520069.9601230  
SRR17520069.9601232  
SRR17520069.9601234  
SRR17520069.9601236  
SRR17520069.9601238  
SRR17520069.9601240  
SRR17520069.9601242  
SRR17520069.9601244  
SRR17520069.9601246  
SRR17520069.9601248  
SRR17520069.9601250  
SRR17520069.9601258



SRR17520069.9601260  
SRR17520069.9601262  
SRR17520069.9601264  
SRR17520069.9601266  
SRR17520069.9601268  
SRR17520069.9601270  
SRR17520069.9601272  
SRR17520069.9601274  
SRR17520069.9601278  
SRR17520069.9601282  
SRR17520069.9601284  
SRR17520069.9601286  
SRR17520069.9601290  
SRR17520069.9603976  
SRR17520069.9603978  
SRR17520069.9603980  
SRR17520069.9606591  
SRR17520069.9606593  
SRR17520069.9606595  
SRR17520069.9606597  
SRR17520069.9606599  
SRR17520069.9606601  
SRR17520069.9606603  
SRR17520069.9606607  
SRR17520069.9606609  
SRR17520069.9606611  
SRR17520069.9606613  
SRR17520069.9606615  
SRR17520069.9606617  
SRR17520069.9606619  
SRR17520069.9606621  
SRR17520069.9606623  
SRR17520069.9606625  
SRR17520069.9606627  
SRR17520069.9606629  
SRR17520069.9606631  
SRR17520069.9606635  
SRR17520069.9606637  
SRR17520069.9606639  
SRR17520069.9606641  
SRR17520069.9606643  
SRR17520069.9606645  
SRR17520069.9606647  
SRR17520069.9606651  
SRR17520069.9606653  
SRR17520069.9606655  
SRR17520069.9606657

SRR17520069. 9606659  
SRR17520069. 9606661  
SRR17520069. 9606663  
SRR17520069. 9606667  
SRR17520069. 9606669  
SRR17520069. 9606671  
SRR17520069. 9606675  
SRR17520069. 9606677  
SRR17520069. 9606681  
SRR17520069. 9606683  
SRR17520069. 9606685  
SRR17520069. 9606687  
SRR17520069. 9606689  
SRR17520069. 9606691  
SRR17520069. 9606693  
SRR17520069. 9606695  
SRR17520069. 9606697  
SRR17520069. 9606699  
SRR17520069. 9606701  
SRR17520069. 9606703  
SRR17520069. 9606705  
SRR17520069. 9606707  
SRR17520069. 9606711  
SRR17520069. 9606713  
SRR17520069. 9606715  
SRR17520069. 9606717  
SRR17520069. 9606719  
SRR17520069. 9606721  
SRR17520069. 9606723  
SRR17520069. 9606725  
SRR17520069. 9606727  
SRR17520069. 9606729  
SRR17520069. 9606731  
SRR17520069. 9606733  
SRR17520069. 9606737  
SRR17520069. 9606739  
SRR17520069. 9606741  
SRR17520069. 9606743  
SRR17520069. 9606745  
SRR17520069. 9606747  
SRR17520069. 9608590  
SRR17520069. 9608592  
SRR17520069. 9608594  
SRR17520069. 9608596  
SRR17520069. 9609062  
SRR17520069. 9609064  
SRR17520069. 9609066

SRR17520069.9609068  
SRR17520069.9609070  
SRR17520069.9609072  
SRR17520069.9609074  
SRR17520069.9609076  
SRR17520069.9609078  
SRR17520069.9609080  
SRR17520069.9609082  
SRR17520069.9609084  
SRR17520069.9609086  
SRR17520069.9610307  
SRR17520069.9613084  
SRR17520069.9613086  
SRR17520069.9613088  
SRR17520069.9613090  
SRR17520069.9613092  
SRR17520069.9613094  
SRR17520069.9613096  
SRR17520069.9613098  
SRR17520069.9623031  
SRR17520069.9623033  
SRR17520069.9623035  
SRR17520069.9623037  
SRR17520069.9623039  
SRR17520069.9623041  
SRR17520069.9623043  
SRR17520069.9623045  
SRR17520069.9623047  
SRR17520069.9623049  
SRR17520069.9623051  
SRR17520069.9623053  
SRR17520069.9623055  
SRR17520069.9623057  
SRR17520069.9623059  
SRR17520069.9623061  
SRR17520069.9623063  
SRR17520069.9623065  
SRR17520069.9623067  
SRR17520069.9623069  
SRR17520069.9623071  
SRR17520069.9623073  
SRR17520069.9623075  
SRR17520069.9623077  
SRR17520069.9623079  
SRR17520069.9623081  
SRR17520069.9623083  
SRR17520069.9623085

SRR17520069.9623087  
SRR17520069.9634142  
SRR17520069.9634144  
SRR17520069.9634146  
SRR17520069.9634148  
SRR17520069.9634150  
SRR17520069.9634152  
SRR17520069.9634154  
SRR17520069.9637836  
SRR17520069.9637838  
SRR17520069.9637840  
SRR17520069.9637842  
SRR17520069.9641630  
SRR17520069.9641632  
SRR17520069.9642178  
SRR17520069.9642180  
SRR17520069.9642182  
SRR17520069.9642184  
SRR17520069.9642186  
SRR17520069.9642188  
SRR17520069.9642190  
SRR17520069.9642192  
SRR17520069.9642194  
SRR17520069.9642196  
SRR17520069.9642198  
SRR17520069.9642200  
SRR17520069.9642202  
SRR17520069.9642204  
SRR17520069.9642208  
SRR17520069.9642210  
SRR17520069.9642212  
SRR17520069.9642214  
SRR17520069.9642216  
SRR17520069.9642218  
SRR17520069.9642220  
SRR17520069.9642222  
SRR17520069.9645759  
SRR17520069.9645761  
SRR17520069.9645763  
SRR17520069.9645765  
SRR17520069.9645996  
SRR17520069.9645998  
SRR17520069.9646000  
SRR17520069.9646002  
SRR17520069.9646004  
SRR17520069.9646006  
SRR17520069.9648594

SRR17520069.9648598  
SRR17520069.9648602  
SRR17520069.9648606  
SRR17520069.9648610  
SRR17520069.9648614  
SRR17520069.9648616  
SRR17520069.9648618  
SRR17520069.9648620  
SRR17520069.9648624  
SRR17520069.9648626  
SRR17520069.9648628  
SRR17520069.9648630  
SRR17520069.9650846  
SRR17520069.9650848  
SRR17520069.9650850  
SRR17520069.9650852  
SRR17520069.9650854  
SRR17520069.9650858  
SRR17520069.9650860  
SRR17520069.9650862  
SRR17520069.9650864  
SRR17520069.9650866  
SRR17520069.9650868  
SRR17520069.9650870  
SRR17520069.9650872  
SRR17520069.9651740  
SRR17520069.9656170  
SRR17520069.9656172  
SRR17520069.9656174  
SRR17520069.9656176  
SRR17520069.9656178  
SRR17520069.9656180  
SRR17520069.9656182  
SRR17520069.9656186  
SRR17520069.9656188  
SRR17520069.9656190  
SRR17520069.9656192  
SRR17520069.9656194  
SRR17520069.9656196  
SRR17520069.9656198  
SRR17520069.9656200  
SRR17520069.9657899  
SRR17520069.9657903  
SRR17520069.9657905  
SRR17520069.9657907  
SRR17520069.9657909  
SRR17520069.9657911

SRR17520069.9657913  
SRR17520069.9657915  
SRR17520069.9657917  
SRR17520069.9659561  
SRR17520069.9659563  
SRR17520069.9659565  
SRR17520069.9659567  
SRR17520069.9659638  
SRR17520069.9659640  
SRR17520069.9659642  
SRR17520069.9659644  
SRR17520069.9659646  
SRR17520069.9659648  
SRR17520069.9659650  
SRR17520069.9659652  
SRR17520069.9663041  
SRR17520069.9663043  
SRR17520069.9663045  
SRR17520069.9663047  
SRR17520069.9663049  
SRR17520069.9663053  
SRR17520069.9663055  
SRR17520069.9663057  
SRR17520069.9663059  
SRR17520069.9663061  
SRR17520069.9663063  
SRR17520069.9663065  
SRR17520069.9663067  
SRR17520069.9663069  
SRR17520069.9663071  
SRR17520069.9663073  
SRR17520069.9663075  
SRR17520069.9663077  
SRR17520069.9663079  
SRR17520069.9663081  
SRR17520069.9663083  
SRR17520069.9663085  
SRR17520069.9663087  
SRR17520069.9663089  
SRR17520069.9663091  
SRR17520069.9663093  
SRR17520069.9663095  
SRR17520069.9663097  
SRR17520069.9663099  
SRR17520069.9663101  
SRR17520069.9663103  
SRR17520069.9663105

SRR17520069.9663107  
SRR17520069.9663109  
SRR17520069.9666669  
SRR17520069.9666671  
SRR17520069.9666673  
SRR17520069.9667880  
SRR17520069.9677003  
SRR17520069.9677005  
SRR17520069.9677007  
SRR17520069.9677009  
SRR17520069.9677011  
SRR17520069.9677013  
SRR17520069.9677017  
SRR17520069.9680835  
SRR17520069.9680837  
SRR17520069.9680839  
SRR17520069.9680841  
SRR17520069.9682805  
SRR17520069.9682807  
SRR17520069.9682809  
SRR17520069.9682811  
SRR17520069.9687813  
SRR17520069.9687815  
SRR17520069.9687817  
SRR17520069.9687819  
SRR17520069.9687821  
SRR17520069.9687823  
SRR17520069.9687825  
SRR17520069.9687827  
SRR17520069.9687831  
SRR17520069.9687833  
SRR17520069.9687835  
SRR17520069.9687837  
SRR17520069.9687839  
SRR17520069.9687841  
SRR17520069.9687843  
SRR17520069.9687845  
SRR17520069.9688560  
SRR17520069.9688562  
SRR17520069.9688564  
SRR17520069.9688566  
SRR17520069.9688568  
SRR17520069.9688570  
SRR17520069.9688572  
SRR17520069.9688574  
SRR17520069.9688580  
SRR17520069.9688584

SRR17520069.9688586  
SRR17520069.9689269  
SRR17520069.9689271  
SRR17520069.9689273  
SRR17520069.9689275  
SRR17520069.9689277  
SRR17520069.9689279  
SRR17520069.9689281  
SRR17520069.9689283  
SRR17520069.9689285  
SRR17520069.9689287  
SRR17520069.9689289  
SRR17520069.9689291  
SRR17520069.9689293  
SRR17520069.9689295  
SRR17520069.9689297  
SRR17520069.9689299  
SRR17520069.9689301  
SRR17520069.9689303  
SRR17520069.9699117  
SRR17520069.9699119  
SRR17520069.9699121  
SRR17520069.9699123  
SRR17520069.9699125  
SRR17520069.9699127  
SRR17520069.9699129  
SRR17520069.9699131  
SRR17520069.9699133  
SRR17520069.9699135  
SRR17520069.9699137  
SRR17520069.9699139  
SRR17520069.9699141  
SRR17520069.9699143  
SRR17520069.9699145  
SRR17520069.9699147  
SRR17520069.9699151  
SRR17520069.9699153  
SRR17520069.9700063  
SRR17520069.9700065  
SRR17520069.9700067  
SRR17520069.9700069  
SRR17520069.9700071  
SRR17520069.9700073  
SRR17520069.9700075  
SRR17520069.9700077  
SRR17520069.9700079  
SRR17520069.9700081



SRR17520069.9700083  
SRR17520069.9706614  
SRR17520069.9706616  
SRR17520069.9706618  
SRR17520069.9706620  
SRR17520069.9706622  
SRR17520069.9706624  
SRR17520069.9706628  
SRR17520069.9706630  
SRR17520069.9706632  
SRR17520069.9706634  
SRR17520069.9706636  
SRR17520069.9706638  
SRR17520069.9706640  
SRR17520069.9706642  
SRR17520069.9706644  
SRR17520069.9706950  
SRR17520069.9706952  
SRR17520069.9710107  
SRR17520069.9710109  
SRR17520069.9712187  
SRR17520069.9712189  
SRR17520069.9712191  
SRR17520069.9712193  
SRR17520069.9712195  
SRR17520069.9712197  
SRR17520069.9712199  
SRR17520069.9712201  
SRR17520069.9712203  
SRR17520069.9712205  
SRR17520069.9712207  
SRR17520069.9712209  
SRR17520069.9712211  
SRR17520069.9712213  
SRR17520069.9712215  
SRR17520069.9713262  
SRR17520069.9713264  
SRR17520069.9713266  
SRR17520069.9713268  
SRR17520069.9713270  
SRR17520069.9713272  
SRR17520069.9713274  
SRR17520069.9713276  
SRR17520069.9713278  
SRR17520069.9713280  
SRR17520069.9713282  
SRR17520069.9713284

SRR17520069.9713286  
SRR17520069.9713288  
SRR17520069.9713290  
SRR17520069.9713292  
SRR17520069.9713294  
SRR17520069.9713296  
SRR17520069.9713298  
SRR17520069.9713300  
SRR17520069.9713302  
SRR17520069.9713304  
SRR17520069.9713306  
SRR17520069.9713308  
SRR17520069.9713310  
SRR17520069.9713312  
SRR17520069.9713314  
SRR17520069.9713316  
SRR17520069.9713318  
SRR17520069.9713320  
SRR17520069.9713322  
SRR17520069.9713324  
SRR17520069.9713326  
SRR17520069.9713328  
SRR17520069.9713330  
SRR17520069.9713332  
SRR17520069.9713334  
SRR17520069.9713336  
SRR17520069.9713338  
SRR17520069.9713340  
SRR17520069.9713342  
SRR17520069.9713344  
SRR17520069.9713346  
SRR17520069.9713348  
SRR17520069.9713350  
SRR17520069.9715781  
SRR17520069.9715783  
SRR17520069.9715785  
SRR17520069.9716568  
SRR17520069.9716570  
SRR17520069.9720267  
SRR17520069.9720269  
SRR17520069.9720271  
SRR17520069.9720273  
SRR17520069.9720275  
SRR17520069.9720277  
SRR17520069.9720279  
SRR17520069.9720281  
SRR17520069.9720283

SRR17520069.9722996  
SRR17520069.9722998  
SRR17520069.9723000  
SRR17520069.9723002  
SRR17520069.9723004  
SRR17520069.9723006  
SRR17520069.9723008  
SRR17520069.9723010  
SRR17520069.9723012  
SRR17520069.9723014  
SRR17520069.9723016  
SRR17520069.9723018  
SRR17520069.9723020  
SRR17520069.9723024  
SRR17520069.9723026  
SRR17520069.9723028  
SRR17520069.9723030  
SRR17520069.9723032  
SRR17520069.9723034  
SRR17520069.9723036  
SRR17520069.9723038  
SRR17520069.9723040  
SRR17520069.9723042  
SRR17520069.9723044  
SRR17520069.9723046  
SRR17520069.9723048  
SRR17520069.9723050  
SRR17520069.9723052  
SRR17520069.9723054  
SRR17520069.9723056  
SRR17520069.9723058  
SRR17520069.9723060  
SRR17520069.9723062  
SRR17520069.9723064  
SRR17520069.9723066  
SRR17520069.9723068  
SRR17520069.9723070  
SRR17520069.9723072  
SRR17520069.9723074  
SRR17520069.9723076  
SRR17520069.9723078  
SRR17520069.9731003  
SRR17520069.9731005  
SRR17520069.9731007  
SRR17520069.9731009  
SRR17520069.9731011  
SRR17520069.9731013

SRR17520069.9731251  
SRR17520069.9731253  
SRR17520069.9731255  
SRR17520069.9731259  
SRR17520069.9731261  
SRR17520069.9731263  
SRR17520069.9731265  
SRR17520069.9731267  
SRR17520069.9731269  
SRR17520069.9731271  
SRR17520069.9731273  
SRR17520069.9731275  
SRR17520069.9731277  
SRR17520069.9732362  
SRR17520069.9735219  
SRR17520069.9735647  
SRR17520069.9735649  
SRR17520069.9735651  
SRR17520069.9735653  
SRR17520069.9735655  
SRR17520069.9735657  
SRR17520069.9735659  
SRR17520069.9735661  
SRR17520069.9735663  
SRR17520069.9735665  
SRR17520069.9735979  
SRR17520069.9735981  
SRR17520069.9735983  
SRR17520069.9735985  
SRR17520069.9735987  
SRR17520069.9735989  
SRR17520069.9735991  
SRR17520069.9735993  
SRR17520069.9735995  
SRR17520069.9735997  
SRR17520069.9735999  
SRR17520069.9736001  
SRR17520069.9736003  
SRR17520069.9736005  
SRR17520069.9736007  
SRR17520069.9736009  
SRR17520069.9736011  
SRR17520069.9736013  
SRR17520069.9736015  
SRR17520069.9736017  
SRR17520069.9736019  
SRR17520069.9736021

SRR17520069.9736726  
SRR17520069.9736728  
SRR17520069.9736730  
SRR17520069.9736732  
SRR17520069.9738500  
SRR17520069.9738502  
SRR17520069.9738504  
SRR17520069.9738506  
SRR17520069.9738508  
SRR17520069.9738510  
SRR17520069.9738512  
SRR17520069.9738514  
SRR17520069.9738516  
SRR17520069.9738518  
SRR17520069.9742294  
SRR17520069.9742296  
SRR17520069.9742298  
SRR17520069.9742300  
SRR17520069.9742302  
SRR17520069.9742304  
SRR17520069.9742306  
SRR17520069.9742308  
SRR17520069.9742310  
SRR17520069.9742312  
SRR17520069.9742314  
SRR17520069.9742316  
SRR17520069.9742318  
SRR17520069.9742320  
SRR17520069.9742326  
SRR17520069.9742330  
SRR17520069.9742332  
SRR17520069.9742334  
SRR17520069.9742336  
SRR17520069.9742338  
SRR17520069.9742340  
SRR17520069.9742342  
SRR17520069.9742344  
SRR17520069.9742346  
SRR17520069.9742348  
SRR17520069.9742350  
SRR17520069.9742352  
SRR17520069.9742354  
SRR17520069.9742356  
SRR17520069.9742358  
SRR17520069.9742360  
SRR17520069.9742362  
SRR17520069.9742364

SRR17520069.9742366  
SRR17520069.9742368  
SRR17520069.9742370  
SRR17520069.9742376  
SRR17520069.9742378  
SRR17520069.9742380  
SRR17520069.9742382  
SRR17520069.9742384  
SRR17520069.9742386  
SRR17520069.9742390  
SRR17520069.9742392  
SRR17520069.9742394  
SRR17520069.9742396  
SRR17520069.9742398  
SRR17520069.9742400  
SRR17520069.9742402  
SRR17520069.9742404  
SRR17520069.9742406  
SRR17520069.9742408  
SRR17520069.9742410  
SRR17520069.9742412  
SRR17520069.9742414  
SRR17520069.9742416  
SRR17520069.9742418  
SRR17520069.9742420  
SRR17520069.9742424  
SRR17520069.9742426  
SRR17520069.9742428  
SRR17520069.9742430  
SRR17520069.9742432  
SRR17520069.9742434  
SRR17520069.9742436  
SRR17520069.9742440  
SRR17520069.9742442  
SRR17520069.9742444  
SRR17520069.9742446  
SRR17520069.9742448  
SRR17520069.9742450  
SRR17520069.9742452  
SRR17520069.9742454  
SRR17520069.9742456  
SRR17520069.9742458  
SRR17520069.9742460  
SRR17520069.9742462  
SRR17520069.9742464  
SRR17520069.9742466  
SRR17520069.9742468

SRR17520069.9742470  
SRR17520069.9742472  
SRR17520069.9742474  
SRR17520069.9742476  
SRR17520069.9742478  
SRR17520069.9742480  
SRR17520069.9742482  
SRR17520069.9742484  
SRR17520069.9742486  
SRR17520069.9742488  
SRR17520069.9742492  
SRR17520069.9742494  
SRR17520069.9742913  
SRR17520069.9742915  
SRR17520069.9742917  
SRR17520069.9742919  
SRR17520069.9742921  
SRR17520069.9742923  
SRR17520069.9745547  
SRR17520069.9745549  
SRR17520069.9745551  
SRR17520069.9745553  
SRR17520069.9745555  
SRR17520069.9753242  
SRR17520069.9753244  
SRR17520069.9753246  
SRR17520069.9754308  
SRR17520069.9754310  
SRR17520069.9754312  
SRR17520069.9754314  
SRR17520069.9754316  
SRR17520069.9754318  
SRR17520069.9754320  
SRR17520069.9754324  
SRR17520069.9755612  
SRR17520069.9755614  
SRR17520069.9755616  
SRR17520069.9755618  
SRR17520069.9755620  
SRR17520069.9755622  
SRR17520069.9755624  
SRR17520069.9755626  
SRR17520069.9755628  
SRR17520069.9755630  
SRR17520069.9755632  
SRR17520069.9755634  
SRR17520069.9755636

SRR17520069.9755638  
SRR17520069.9755640  
SRR17520069.9755642  
SRR17520069.9755644  
SRR17520069.9755646  
SRR17520069.9755648  
SRR17520069.9755650  
SRR17520069.9755652  
SRR17520069.9755654  
SRR17520069.9755656  
SRR17520069.9755658  
SRR17520069.9759574  
SRR17520069.9759576  
SRR17520069.9759578  
SRR17520069.9759580  
SRR17520069.9759584  
SRR17520069.9759586  
SRR17520069.9759588  
SRR17520069.9759590  
SRR17520069.9759592  
SRR17520069.9759594  
SRR17520069.9759596  
SRR17520069.9760737  
SRR17520069.9760739  
SRR17520069.9760741  
SRR17520069.9760743  
SRR17520069.9760745  
SRR17520069.9760747  
SRR17520069.9760749  
SRR17520069.9760751  
SRR17520069.9760753  
SRR17520069.9760755  
SRR17520069.9760757  
SRR17520069.9760759  
SRR17520069.9760761  
SRR17520069.9760763  
SRR17520069.9760765  
SRR17520069.9760767  
SRR17520069.9760769  
SRR17520069.9760771  
SRR17520069.9760773  
SRR17520069.9760777  
SRR17520069.9760779  
SRR17520069.9760781  
SRR17520069.9760783  
SRR17520069.9760785  
SRR17520069.9764813



SRR17520069.9764815  
SRR17520069.9764817  
SRR17520069.9764819  
SRR17520069.9764821  
SRR17520069.9764823  
SRR17520069.9764825  
SRR17520069.9764827  
SRR17520069.9764829  
SRR17520069.9764831  
SRR17520069.9764833  
SRR17520069.9764835  
SRR17520069.9764837  
SRR17520069.9764839  
SRR17520069.9764841  
SRR17520069.9764843  
SRR17520069.9764845  
SRR17520069.9764847  
SRR17520069.9764849  
SRR17520069.9764851  
SRR17520069.9764853  
SRR17520069.9764855  
SRR17520069.9764857  
SRR17520069.9764859  
SRR17520069.9764861  
SRR17520069.9764863  
SRR17520069.9764865  
SRR17520069.9764867  
SRR17520069.9764869  
SRR17520069.9764871  
SRR17520069.9764873  
SRR17520069.9764875  
SRR17520069.9764879  
SRR17520069.9764881  
SRR17520069.9764883  
SRR17520069.9764885  
SRR17520069.9764887  
SRR17520069.9764889  
SRR17520069.9764891  
SRR17520069.9764893  
SRR17520069.9764895  
SRR17520069.9764897  
SRR17520069.9764899  
SRR17520069.9764901  
SRR17520069.9764903  
SRR17520069.9764905  
SRR17520069.9764907  
SRR17520069.9764909

SRR17520069.9764911  
SRR17520069.9764913  
SRR17520069.9764915  
SRR17520069.9766555  
SRR17520069.9766557  
SRR17520069.9766559  
SRR17520069.9766561  
SRR17520069.9766563  
SRR17520069.9766565  
SRR17520069.9766567  
SRR17520069.9766569  
SRR17520069.9766571  
SRR17520069.9766573  
SRR17520069.9766575  
SRR17520069.9766579  
SRR17520069.9766581  
SRR17520069.9766583  
SRR17520069.9766585  
SRR17520069.9766587  
SRR17520069.9766591  
SRR17520069.9766593  
SRR17520069.9772639  
SRR17520069.9772641  
SRR17520069.9772643  
SRR17520069.9772645  
SRR17520069.9772647  
SRR17520069.9772649  
SRR17520069.9772651  
SRR17520069.9772653  
SRR17520069.9772655  
SRR17520069.9772657  
SRR17520069.9772659  
SRR17520069.9772661  
SRR17520069.9772663  
SRR17520069.9772665  
SRR17520069.9772667  
SRR17520069.9772669  
SRR17520069.9772671  
SRR17520069.9772677  
SRR17520069.9772679  
SRR17520069.9772681  
SRR17520069.9772683  
SRR17520069.9772685  
SRR17520069.9772687  
SRR17520069.9772689  
SRR17520069.9772691  
SRR17520069.9772693

SRR17520069.9772697  
SRR17520069.9772699  
SRR17520069.9772701  
SRR17520069.9772703  
SRR17520069.9772705  
SRR17520069.9772707  
SRR17520069.9772709  
SRR17520069.9772711  
SRR17520069.9772713  
SRR17520069.9772715  
SRR17520069.9772717  
SRR17520069.9772719  
SRR17520069.9772723  
SRR17520069.9772725  
SRR17520069.9772727  
SRR17520069.9772729  
SRR17520069.9772731  
SRR17520069.9772733  
SRR17520069.9772735  
SRR17520069.9772737  
SRR17520069.9772872  
SRR17520069.9772892  
SRR17520069.9772900  
SRR17520069.9772908  
SRR17520069.9778465  
SRR17520069.9778467  
SRR17520069.9778469  
SRR17520069.9778471  
SRR17520069.9778473  
SRR17520069.9778475  
SRR17520069.9778477  
SRR17520069.9778481  
SRR17520069.9778483  
SRR17520069.9778485  
SRR17520069.9778487  
SRR17520069.9778489  
SRR17520069.9778491  
SRR17520069.9778493  
SRR17520069.9778495  
SRR17520069.9778499  
SRR17520069.9778501  
SRR17520069.9778503  
SRR17520069.9778505  
SRR17520069.9779155  
SRR17520069.9779388  
SRR17520069.9779390  
SRR17520069.9779392

SRR17520069.9779394  
SRR17520069.9779396  
SRR17520069.9781857  
SRR17520069.9781859  
SRR17520069.9781861  
SRR17520069.9781863  
SRR17520069.9781865  
SRR17520069.9781867  
SRR17520069.9781869  
SRR17520069.9781871  
SRR17520069.9781873  
SRR17520069.9781875  
SRR17520069.9781877  
SRR17520069.9781879  
SRR17520069.9781881  
SRR17520069.9781883  
SRR17520069.9781885  
SRR17520069.9781887  
SRR17520069.9781889  
SRR17520069.9781891  
SRR17520069.9781893  
SRR17520069.9781895  
SRR17520069.9781897  
SRR17520069.9781899  
SRR17520069.9781901  
SRR17520069.9783824  
SRR17520069.9783826  
SRR17520069.9783828  
SRR17520069.9783830  
SRR17520069.9783832  
SRR17520069.9783834  
SRR17520069.9783836  
SRR17520069.9783838  
SRR17520069.9783840  
SRR17520069.9783846  
SRR17520069.9783848  
SRR17520069.9783850  
SRR17520069.9783852  
SRR17520069.9783854  
SRR17520069.9783856  
SRR17520069.9783858  
SRR17520069.9783860  
SRR17520069.9783862  
SRR17520069.9783864  
SRR17520069.9783866  
SRR17520069.9783868  
SRR17520069.9783870

SRR17520069.9783872  
SRR17520069.9783874  
SRR17520069.9783876  
SRR17520069.9783878  
SRR17520069.9783880  
SRR17520069.9783882  
SRR17520069.9783886  
SRR17520069.9783888  
SRR17520069.9783890  
SRR17520069.9783894  
SRR17520069.9783896  
SRR17520069.9783898  
SRR17520069.9783900  
SRR17520069.9783902  
SRR17520069.9783904  
SRR17520069.9783906  
SRR17520069.9783908  
SRR17520069.9783910  
SRR17520069.9783912  
SRR17520069.9783914  
SRR17520069.9783916  
SRR17520069.9783918  
SRR17520069.9783920  
SRR17520069.9783922  
SRR17520069.9783924  
SRR17520069.9783926  
SRR17520069.9783930  
SRR17520069.9783932  
SRR17520069.9783934  
SRR17520069.9783936  
SRR17520069.9783938  
SRR17520069.9783940  
SRR17520069.9783942  
SRR17520069.9783944  
SRR17520069.9783946  
SRR17520069.9783948  
SRR17520069.9783950  
SRR17520069.9783952  
SRR17520069.9783956  
SRR17520069.9783958  
SRR17520069.9783960  
SRR17520069.9783962  
SRR17520069.9783964  
SRR17520069.9783968  
SRR17520069.9783970  
SRR17520069.9783972  
SRR17520069.9783974

SRR17520069.9783976  
SRR17520069.9783980  
SRR17520069.9783982  
SRR17520069.9783984  
SRR17520069.9783986  
SRR17520069.9789810  
SRR17520069.9789812  
SRR17520069.9789814  
SRR17520069.9789818  
SRR17520069.9789820  
SRR17520069.9789822  
SRR17520069.9789824  
SRR17520069.9789826  
SRR17520069.9789828  
SRR17520069.9789830  
SRR17520069.9789834  
SRR17520069.9789836  
SRR17520069.9789838  
SRR17520069.9792846  
SRR17520069.9792848  
SRR17520069.9793119  
SRR17520069.9793121  
SRR17520069.9793123  
SRR17520069.9793125  
SRR17520069.9793127  
SRR17520069.9793129  
SRR17520069.9802235  
SRR17520069.9802237  
SRR17520069.9802241  
SRR17520069.9802243  
SRR17520069.9802245  
SRR17520069.9802247  
SRR17520069.9802249  
SRR17520069.9802251  
SRR17520069.9802253  
SRR17520069.9802255  
SRR17520069.9802257  
SRR17520069.9802259  
SRR17520069.9802261  
SRR17520069.9802263  
SRR17520069.9802265  
SRR17520069.9802267  
SRR17520069.9802269  
SRR17520069.9802271  
SRR17520069.9802273  
SRR17520069.9802275  
SRR17520069.9802277

SRR17520069.9802279  
SRR17520069.9802281  
SRR17520069.9802283  
SRR17520069.9802285  
SRR17520069.9802287  
SRR17520069.9802289  
SRR17520069.9802291  
SRR17520069.9802293  
SRR17520069.9802295  
SRR17520069.9802297  
SRR17520069.9802299  
SRR17520069.9802301  
SRR17520069.9802305  
SRR17520069.9802307  
SRR17520069.9802309  
SRR17520069.9802311  
SRR17520069.9802313  
SRR17520069.9802315  
SRR17520069.9802317  
SRR17520069.9802319  
SRR17520069.9802321  
SRR17520069.9802323  
SRR17520069.9802325  
SRR17520069.9802327  
SRR17520069.9802329  
SRR17520069.9802331  
SRR17520069.9802335  
SRR17520069.9802337  
SRR17520069.9802339  
SRR17520069.9802341  
SRR17520069.9802343  
SRR17520069.9802347  
SRR17520069.9802349  
SRR17520069.9802351  
SRR17520069.9802353  
SRR17520069.9802355  
SRR17520069.9802357  
SRR17520069.9802359  
SRR17520069.9802361  
SRR17520069.9802363  
SRR17520069.9802367  
SRR17520069.9802369  
SRR17520069.9809370  
SRR17520069.9809372  
SRR17520069.9809374  
SRR17520069.9809376  
SRR17520069.9809378

SRR17520069.9809380  
SRR17520069.9809382  
SRR17520069.9809384  
SRR17520069.9809386  
SRR17520069.9809388  
SRR17520069.9809390  
SRR17520069.9809394  
SRR17520069.9809398  
SRR17520069.9809400  
SRR17520069.9809402  
SRR17520069.9809404  
SRR17520069.9830917  
SRR17520069.9830919  
SRR17520069.9830921  
SRR17520069.9830923  
SRR17520069.9830925  
SRR17520069.9830927  
SRR17520069.9830929  
SRR17520069.9830931  
SRR17520069.9831432  
SRR17520069.9842261  
SRR17520069.9842263  
SRR17520069.9842265  
SRR17520069.9842267  
SRR17520069.9842269  
SRR17520069.9842271  
SRR17520069.9842273  
SRR17520069.9842275  
SRR17520069.9842277  
SRR17520069.9842279  
SRR17520069.9842281  
SRR17520069.9842283  
SRR17520069.9842285  
SRR17520069.9842287  
SRR17520069.9848943  
SRR17520069.9848950  
SRR17520069.9853858  
SRR17520069.9853862  
SRR17520069.9853864  
SRR17520069.9853866  
SRR17520069.9853868  
SRR17520069.9853870  
SRR17520069.9853874  
SRR17520069.9853876  
SRR17520069.9854889  
SRR17520069.9854891  
SRR17520069.9854893



SRR17520069.9854895  
SRR17520069.9854897  
SRR17520069.9854899  
SRR17520069.9854901  
SRR17520069.9854903  
SRR17520069.9854905  
SRR17520069.9857944  
SRR17520069.9857946  
SRR17520069.9857984  
SRR17520069.9857986  
SRR17520069.9857988  
SRR17520069.9857990  
SRR17520069.9857992  
SRR17520069.9857994  
SRR17520069.9857996  
SRR17520069.9858000  
SRR17520069.9858002  
SRR17520069.9858004  
SRR17520069.9858006  
SRR17520069.9858008  
SRR17520069.9858010  
SRR17520069.9858012  
SRR17520069.9859937  
SRR17520069.9859939  
SRR17520069.9859941  
SRR17520069.9859943  
SRR17520069.9859945  
SRR17520069.9859947  
SRR17520069.9859949  
SRR17520069.9859951  
SRR17520069.9859953  
SRR17520069.9859955  
SRR17520069.9859957  
SRR17520069.9859959  
SRR17520069.9859961  
SRR17520069.9859963  
SRR17520069.9859965  
SRR17520069.9859967  
SRR17520069.9859969  
SRR17520069.9859971  
SRR17520069.9859973  
SRR17520069.9859975  
SRR17520069.9859977  
SRR17520069.9859981  
SRR17520069.9859983  
SRR17520069.9859985  
SRR17520069.9870740

SRR17520069.9870742  
SRR17520069.9870744  
SRR17520069.9872883  
SRR17520069.9872885  
SRR17520069.9872887  
SRR17520069.9872890  
SRR17520069.9872894  
SRR17520069.9872896  
SRR17520069.9872898  
SRR17520069.9872900  
SRR17520069.9873088  
SRR17520069.9874384  
SRR17520069.9874386  
SRR17520069.9874388  
SRR17520069.9874392  
SRR17520069.9874394  
SRR17520069.9874396  
SRR17520069.9874670  
SRR17520069.9874672  
SRR17520069.9874674  
SRR17520069.9874676  
SRR17520069.9874678  
SRR17520069.9874680  
SRR17520069.9874682  
SRR17520069.9874684  
SRR17520069.9874686  
SRR17520069.9874688  
SRR17520069.9885548  
SRR17520069.9885554  
SRR17520069.9885556  
SRR17520069.9885558  
SRR17520069.9888883  
SRR17520069.9888885  
SRR17520069.9888887  
SRR17520069.9888891  
SRR17520069.9888893  
SRR17520069.9888895  
SRR17520069.9888897  
SRR17520069.9888899  
SRR17520069.9888901  
SRR17520069.9888903  
SRR17520069.9888905  
SRR17520069.9888907  
SRR17520069.9888909  
SRR17520069.9888911  
SRR17520069.9888913  
SRR17520069.9888915

SRR17520069.9888917  
SRR17520069.9888919  
SRR17520069.9889581  
SRR17520069.9889583  
SRR17520069.9889585  
SRR17520069.9889587  
SRR17520069.9889589  
SRR17520069.9889591  
SRR17520069.9889593  
SRR17520069.9889595  
SRR17520069.9889597  
SRR17520069.9889599  
SRR17520069.9889601  
SRR17520069.9889603  
SRR17520069.9889605  
SRR17520069.9892522  
SRR17520069.9892524  
SRR17520069.9892526  
SRR17520069.9892528  
SRR17520069.9892947  
SRR17520069.9892949  
SRR17520069.9892951  
SRR17520069.9892953  
SRR17520069.9892955  
SRR17520069.9892957  
SRR17520069.9892959  
SRR17520069.9892961  
SRR17520069.9892963  
SRR17520069.9892965  
SRR17520069.9892967  
SRR17520069.9892969  
SRR17520069.9892971  
SRR17520069.9892973  
SRR17520069.9892975  
SRR17520069.9892977  
SRR17520069.9892979  
SRR17520069.9892981  
SRR17520069.9892983  
SRR17520069.9892985  
SRR17520069.9892987  
SRR17520069.9892989  
SRR17520069.9892991  
SRR17520069.9892993  
SRR17520069.9892995  
SRR17520069.9892997  
SRR17520069.9892999  
SRR17520069.9893001

SRR17520069.9893003  
SRR17520069.9893005  
SRR17520069.9893007  
SRR17520069.9893009  
SRR17520069.9893011  
SRR17520069.9893013  
SRR17520069.9893015  
SRR17520069.9893017  
SRR17520069.9893019  
SRR17520069.9893021  
SRR17520069.9893023  
SRR17520069.9893025  
SRR17520069.9893027  
SRR17520069.9893029  
SRR17520069.9893031  
SRR17520069.9893033  
SRR17520069.9893035  
SRR17520069.9893037  
SRR17520069.9893039  
SRR17520069.9893041  
SRR17520069.9893043  
SRR17520069.9893045  
SRR17520069.9893047  
SRR17520069.9893049  
SRR17520069.9899494  
SRR17520069.9899496  
SRR17520069.9899498  
SRR17520069.9899500  
SRR17520069.9899502  
SRR17520069.9900929  
SRR17520069.9902702  
SRR17520069.9903765  
SRR17520069.9903767  
SRR17520069.9903769  
SRR17520069.9903771  
SRR17520069.9903773  
SRR17520069.9903777  
SRR17520069.9903779  
SRR17520069.9903781  
SRR17520069.9903783  
SRR17520069.9903787  
SRR17520069.9903789  
SRR17520069.9903791  
SRR17520069.9903793  
SRR17520069.9903795  
SRR17520069.9903797  
SRR17520069.9903799

SRR17520069.9903801  
SRR17520069.9903803  
SRR17520069.9903805  
SRR17520069.9903807  
SRR17520069.9903811  
SRR17520069.9903813  
SRR17520069.9903815  
SRR17520069.9903817  
SRR17520069.9903819  
SRR17520069.9903821  
SRR17520069.9903825  
SRR17520069.9903829  
SRR17520069.9905446  
SRR17520069.9905450  
SRR17520069.9905452  
SRR17520069.9905454  
SRR17520069.9905456  
SRR17520069.9905458  
SRR17520069.9905460  
SRR17520069.9905462  
SRR17520069.9905464  
SRR17520069.9905466  
SRR17520069.9905468  
SRR17520069.9905470  
SRR17520069.9905472  
SRR17520069.9905476  
SRR17520069.9905478  
SRR17520069.9905480  
SRR17520069.9905482  
SRR17520069.9905484  
SRR17520069.9905486  
SRR17520069.9905488  
SRR17520069.9905490  
SRR17520069.9905492  
SRR17520069.9905494  
SRR17520069.9905496  
SRR17520069.9905498  
SRR17520069.9905500  
SRR17520069.9905502  
SRR17520069.9905506  
SRR17520069.9905510  
SRR17520069.9905512  
SRR17520069.9905514  
SRR17520069.9905516  
SRR17520069.9905518  
SRR17520069.9905520  
SRR17520069.9905524

SRR17520069.9905526  
SRR17520069.9905528  
SRR17520069.9905530  
SRR17520069.9905532  
SRR17520069.9905534  
SRR17520069.9905536  
SRR17520069.9905538  
SRR17520069.9905540  
SRR17520069.9905542  
SRR17520069.9905544  
SRR17520069.9905546  
SRR17520069.9905550  
SRR17520069.9905554  
SRR17520069.9905556  
SRR17520069.9905558  
SRR17520069.9905560  
SRR17520069.9905564  
SRR17520069.9905566  
SRR17520069.9905568  
SRR17520069.9905570  
SRR17520069.9905572  
SRR17520069.9905574  
SRR17520069.9905576  
SRR17520069.9905578  
SRR17520069.9905580  
SRR17520069.9905582  
SRR17520069.9905588  
SRR17520069.9905590  
SRR17520069.9905592  
SRR17520069.9905594  
SRR17520069.9905596  
SRR17520069.9905600  
SRR17520069.9905602  
SRR17520069.9905604  
SRR17520069.9905606  
SRR17520069.9905610  
SRR17520069.9908547  
SRR17520069.9908549  
SRR17520069.9908551  
SRR17520069.9908553  
SRR17520069.9908555  
SRR17520069.9908557  
SRR17520069.9908559  
SRR17520069.9908561  
SRR17520069.9908563  
SRR17520069.9908565  
SRR17520069.9908567

SRR17520069.9908569  
SRR17520069.9910909  
SRR17520069.9910913  
SRR17520069.9910915  
SRR17520069.9910917  
SRR17520069.9910919  
SRR17520069.9910921  
SRR17520069.9910923  
SRR17520069.9910925  
SRR17520069.9910927  
SRR17520069.9910929  
SRR17520069.9910931  
SRR17520069.9910933  
SRR17520069.9910935  
SRR17520069.9910937  
SRR17520069.9910939  
SRR17520069.9910941  
SRR17520069.9911162  
SRR17520069.9911165  
SRR17520069.9911167  
SRR17520069.9911169  
SRR17520069.9911173  
SRR17520069.9911177  
SRR17520069.9911179  
SRR17520069.9911181  
SRR17520069.9911183  
SRR17520069.9911185  
SRR17520069.9911187  
SRR17520069.9911189  
SRR17520069.9911191  
SRR17520069.9914492  
SRR17520069.9914494  
SRR17520069.9914496  
SRR17520069.9914498  
SRR17520069.9914500  
SRR17520069.9914502  
SRR17520069.9914504  
SRR17520069.9917975  
SRR17520069.9917977  
SRR17520069.9917979  
SRR17520069.9919201  
SRR17520069.9919203  
SRR17520069.9919205  
SRR17520069.9919207  
SRR17520069.9919209  
SRR17520069.9919211  
SRR17520069.9919213

SRR17520069.9922364  
SRR17520069.9922366  
SRR17520069.9922368  
SRR17520069.9922370  
SRR17520069.9922611  
SRR17520069.9922613  
SRR17520069.9922615  
SRR17520069.9922617  
SRR17520069.9922619  
SRR17520069.9922621  
SRR17520069.9922623  
SRR17520069.9922625  
SRR17520069.9922627  
SRR17520069.9922629  
SRR17520069.9922631  
SRR17520069.9922633  
SRR17520069.9922635  
SRR17520069.9922637  
SRR17520069.9922639  
SRR17520069.9922641  
SRR17520069.9922643  
SRR17520069.9922645  
SRR17520069.9922647  
SRR17520069.9922649  
SRR17520069.9922651  
SRR17520069.9922653  
SRR17520069.9922655  
SRR17520069.9922657  
SRR17520069.9922659  
SRR17520069.9922661  
SRR17520069.9922663  
SRR17520069.9922665  
SRR17520069.9922667  
SRR17520069.9922669  
SRR17520069.9922671  
SRR17520069.9922673  
SRR17520069.9922675  
SRR17520069.9922677  
SRR17520069.9923601  
SRR17520069.9923603  
SRR17520069.9923605  
SRR17520069.9923607  
SRR17520069.9923609  
SRR17520069.9923611  
SRR17520069.9923613  
SRR17520069.9923615  
SRR17520069.9923617



SRR17520069.9923619  
SRR17520069.9923621  
SRR17520069.9923623  
SRR17520069.9923625  
SRR17520069.9923627  
SRR17520069.9924939  
SRR17520069.9924941  
SRR17520069.9924943  
SRR17520069.9924945  
SRR17520069.9924949  
SRR17520069.9924951  
SRR17520069.9924953  
SRR17520069.9924955  
SRR17520069.9924957  
SRR17520069.9924959  
SRR17520069.9924961  
SRR17520069.9924963  
SRR17520069.9924965  
SRR17520069.9924967  
SRR17520069.9924971  
SRR17520069.9924973  
SRR17520069.9924977  
SRR17520069.9924979  
SRR17520069.9924981  
SRR17520069.9924983  
SRR17520069.9924985  
SRR17520069.9924987  
SRR17520069.9924989  
SRR17520069.9924991  
SRR17520069.9924993  
SRR17520069.9924995  
SRR17520069.9924997  
SRR17520069.9924999  
SRR17520069.9925001  
SRR17520069.9925003  
SRR17520069.9925005  
SRR17520069.9925007  
SRR17520069.9925009  
SRR17520069.9925013  
SRR17520069.9930200  
SRR17520069.9934536  
SRR17520069.9934538  
SRR17520069.9934540  
SRR17520069.9934542  
SRR17520069.9934544  
SRR17520069.9934546  
SRR17520069.9934548

SRR17520069.9934550  
SRR17520069.9934552  
SRR17520069.9934554  
SRR17520069.9934556  
SRR17520069.9934558  
SRR17520069.9938771  
SRR17520069.9938773  
SRR17520069.9938775  
SRR17520069.9946895  
SRR17520069.9946899  
SRR17520069.9946901  
SRR17520069.9946905  
SRR17520069.9946907  
SRR17520069.9946909  
SRR17520069.9946911  
SRR17520069.9946913  
SRR17520069.9946915  
SRR17520069.9946917  
SRR17520069.9946919  
SRR17520069.9946921  
SRR17520069.9946923  
SRR17520069.9946925  
SRR17520069.9946929  
SRR17520069.9946931  
SRR17520069.9953913  
SRR17520069.9953915  
SRR17520069.9953917  
SRR17520069.9953919  
SRR17520069.9953921  
SRR17520069.9953923  
SRR17520069.9953925  
SRR17520069.9953927  
SRR17520069.9953929  
SRR17520069.9953931  
SRR17520069.9953933  
SRR17520069.9953935  
SRR17520069.9953937  
SRR17520069.9953939  
SRR17520069.9953941  
SRR17520069.9953943  
SRR17520069.9956291  
SRR17520069.9958233  
SRR17520069.9958235  
SRR17520069.9958237  
SRR17520069.9958239  
SRR17520069.9958241  
SRR17520069.9958243

SRR17520069.9958245  
SRR17520069.9958247  
SRR17520069.9958249  
SRR17520069.9958251  
SRR17520069.9958253  
SRR17520069.9958255  
SRR17520069.9958257  
SRR17520069.9958261  
SRR17520069.9958263  
SRR17520069.9958265  
SRR17520069.9958267  
SRR17520069.9958269  
SRR17520069.9958271  
SRR17520069.9958273  
SRR17520069.9958275  
SRR17520069.9958277  
SRR17520069.9958279  
SRR17520069.9958281  
SRR17520069.9958283  
SRR17520069.9959261  
SRR17520069.9959263  
SRR17520069.9959265  
SRR17520069.9959267  
SRR17520069.9959269  
SRR17520069.9959271  
SRR17520069.9959273  
SRR17520069.9959275  
SRR17520069.9959277  
SRR17520069.9971585  
SRR17520069.9971587  
SRR17520069.9971589  
SRR17520069.9971591  
SRR17520069.9971593  
SRR17520069.9971595  
SRR17520069.9971597  
SRR17520069.9971599  
SRR17520069.9971601  
SRR17520069.9971603  
SRR17520069.9971605  
SRR17520069.9971607  
SRR17520069.9971609  
SRR17520069.9971611  
SRR17520069.9971750  
SRR17520069.9971752  
SRR17520069.9971754  
SRR17520069.9971756  
SRR17520069.9971758

SRR17520069.9971760  
SRR17520069.9971762  
SRR17520069.9971764  
SRR17520069.9971766  
SRR17520069.9971768  
SRR17520069.9971770  
SRR17520069.9971772  
SRR17520069.9971774  
SRR17520069.9971776  
SRR17520069.9971778  
SRR17520069.9971780  
SRR17520069.9971782  
SRR17520069.9971784  
SRR17520069.9971786  
SRR17520069.9971788  
SRR17520069.9971790  
SRR17520069.9971792  
SRR17520069.9971794  
SRR17520069.9980578  
SRR17520069.9980580  
SRR17520069.9980582  
SRR17520069.9980584  
SRR17520069.9980586  
SRR17520069.9980588  
SRR17520069.9980590  
SRR17520069.9980592  
SRR17520069.9980594  
SRR17520069.9980596  
SRR17520069.9980598  
SRR17520069.9980600  
SRR17520069.9980602  
SRR17520069.9980604  
SRR17520069.9980606  
SRR17520069.9980608  
SRR17520069.9980917  
SRR17520069.9980919  
SRR17520069.9980921  
SRR17520069.9980923  
SRR17520069.9980925  
SRR17520069.9980927  
SRR17520069.9980929  
SRR17520069.9980931  
SRR17520069.9980933  
SRR17520069.9980935  
SRR17520069.9980937  
SRR17520069.9980939  
SRR17520069.9980941

SRR17520069.9980945  
SRR17520069.9980947  
SRR17520069.9980949  
SRR17520069.9982504  
SRR17520069.9982506  
SRR17520069.9982508  
SRR17520069.9982510  
SRR17520069.9982512  
SRR17520069.9982514  
SRR17520069.9982516  
SRR17520069.9982518  
SRR17520069.9982520  
SRR17520069.9982522  
SRR17520069.9982524  
SRR17520069.9982526  
SRR17520069.9982528  
SRR17520069.9982530  
SRR17520069.9982532  
SRR17520069.9982534  
SRR17520069.9982536  
SRR17520069.9982538  
SRR17520069.9982540  
SRR17520069.9982542  
SRR17520069.9982544  
SRR17520069.9982546  
SRR17520069.9982550  
SRR17520069.9982552  
SRR17520069.9982554  
SRR17520069.9982556  
SRR17520069.9982558  
SRR17520069.9982560  
SRR17520069.9982562  
SRR17520069.9982564  
SRR17520069.9983764  
SRR17520069.9983979  
SRR17520069.9983981  
SRR17520069.9983985  
SRR17520069.9983987  
SRR17520069.9983989  
SRR17520069.9983993  
SRR17520069.9987146  
SRR17520069.9989512  
SRR17520069.9989514  
SRR17520069.9989516  
SRR17520069.9989518  
SRR17520069.9991306  
SRR17520069.9991308

SRR17520069.9991310  
SRR17520069.9991312  
SRR17520069.9991314  
SRR17520069.9991316  
SRR17520069.9991318  
SRR17520069.9991320  
SRR17520069.9991322  
SRR17520069.9991324  
SRR17520069.9991326  
SRR17520069.9991328  
SRR17520069.9991330  
SRR17520069.9992007  
SRR17520069.9992009  
SRR17520069.9993814  
SRR17520069.9993816  
SRR17520069.9996790  
SRR17520069.9997130  
SRR17520069.10000906  
SRR17520069.10000908  
SRR17520069.10000910  
SRR17520069.10000916  
SRR17520069.10000920  
SRR17520069.10000924  
SRR17520069.10000926  
SRR17520069.10000928  
SRR17520069.10000934  
SRR17520069.10000936  
SRR17520069.10000938  
SRR17520069.10001806  
SRR17520069.10001808  
SRR17520069.10001810  
SRR17520069.10001812  
SRR17520069.10001814  
SRR17520069.10001816  
SRR17520069.10001818  
SRR17520069.10001820  
SRR17520069.10001822  
SRR17520069.10001824  
SRR17520069.10001826  
SRR17520069.10001828  
SRR17520069.10001830  
SRR17520069.10001832  
SRR17520069.10001834  
SRR17520069.10001836  
SRR17520069.10001838  
SRR17520069.10001840  
SRR17520069.10001842

SRR17520069.10001844  
SRR17520069.10001846  
SRR17520069.10001848  
SRR17520069.10001850  
SRR17520069.10001852  
SRR17520069.10001854  
SRR17520069.10001856  
SRR17520069.10001858  
SRR17520069.10001860  
SRR17520069.10001862  
SRR17520069.10001864  
SRR17520069.10001866  
SRR17520069.10001868  
SRR17520069.10001870  
SRR17520069.10001872  
SRR17520069.10007729  
SRR17520069.10007731  
SRR17520069.10007733  
SRR17520069.10007735  
SRR17520069.10007739  
SRR17520069.10007741  
SRR17520069.10007743  
SRR17520069.10007745  
SRR17520069.10007747  
SRR17520069.10007749  
SRR17520069.10007751  
SRR17520069.10007753  
SRR17520069.10007755  
SRR17520069.10007759  
SRR17520069.10007761  
SRR17520069.10007763  
SRR17520069.10007765  
SRR17520069.10007767  
SRR17520069.10007769  
SRR17520069.10007771  
SRR17520069.10007773  
SRR17520069.10007775  
SRR17520069.10007777  
SRR17520069.10007779  
SRR17520069.10007781  
SRR17520069.10007783  
SRR17520069.10008702  
SRR17520069.10008704  
SRR17520069.10008706  
SRR17520069.10008708  
SRR17520069.10008710  
SRR17520069.10008712

SRR17520069.10008714  
SRR17520069.10008716  
SRR17520069.10008718  
SRR17520069.10008720  
SRR17520069.10008722  
SRR17520069.10009018  
SRR17520069.10011098  
SRR17520069.10011100  
SRR17520069.10011102  
SRR17520069.10011104  
SRR17520069.10011106  
SRR17520069.10011108  
SRR17520069.10011110  
SRR17520069.10011116  
SRR17520069.10011118  
SRR17520069.10014142  
SRR17520069.10017384  
SRR17520069.10017386  
SRR17520069.10017388  
SRR17520069.10017392  
SRR17520069.10017394  
SRR17520069.10017396  
SRR17520069.10017398  
SRR17520069.10017400  
SRR17520069.10017402  
SRR17520069.10017404  
SRR17520069.10017406  
SRR17520069.10017408  
SRR17520069.10017412  
SRR17520069.10017420  
SRR17520069.10017422  
SRR17520069.10017424  
SRR17520069.10017426  
SRR17520069.10017428  
SRR17520069.10017430  
SRR17520069.10017432  
SRR17520069.10017434  
SRR17520069.10017436  
SRR17520069.10017438  
SRR17520069.10017440  
SRR17520069.10017442  
SRR17520069.10017444  
SRR17520069.10017446  
SRR17520069.10017448  
SRR17520069.10017450  
SRR17520069.10017452  
SRR17520069.10017454



SRR17520069.10017456  
SRR17520069.10017458  
SRR17520069.10017462  
SRR17520069.10019081  
SRR17520069.10020863  
SRR17520069.10020865  
SRR17520069.10020867  
SRR17520069.10029978  
SRR17520069.10029980  
SRR17520069.10033012  
SRR17520069.10033014  
SRR17520069.10033016  
SRR17520069.10035228  
SRR17520069.10035230  
SRR17520069.10035232  
SRR17520069.10035234  
SRR17520069.10035236  
SRR17520069.10035238  
SRR17520069.10037514  
SRR17520069.10037516  
SRR17520069.10037518  
SRR17520069.10037520  
SRR17520069.10037522  
SRR17520069.10037524  
SRR17520069.10037526  
SRR17520069.10037528  
SRR17520069.10037530  
SRR17520069.10037532  
SRR17520069.10037534  
SRR17520069.10037536  
SRR17520069.10037538  
SRR17520069.10037540  
SRR17520069.10037542  
SRR17520069.10037544  
SRR17520069.10037546  
SRR17520069.10037548  
SRR17520069.10037550  
SRR17520069.10037552  
SRR17520069.10037554  
SRR17520069.10037556  
SRR17520069.10039963  
SRR17520069.10039965  
SRR17520069.10039967  
SRR17520069.10039969  
SRR17520069.10039971  
SRR17520069.10039977  
SRR17520069.10039979

SRR17520069.10039981  
SRR17520069.10039983  
SRR17520069.10039985  
SRR17520069.10039987  
SRR17520069.10039989  
SRR17520069.10039991  
SRR17520069.10039993  
SRR17520069.10039995  
SRR17520069.10039999  
SRR17520069.10040001  
SRR17520069.10040003  
SRR17520069.10040005  
SRR17520069.10040007  
SRR17520069.10040009  
SRR17520069.10040011  
SRR17520069.10040013  
SRR17520069.10040015  
SRR17520069.10040017  
SRR17520069.10040019  
SRR17520069.10040021  
SRR17520069.10040023  
SRR17520069.10040025  
SRR17520069.10040027  
SRR17520069.10040029  
SRR17520069.10040890  
SRR17520069.10040892  
SRR17520069.10040894  
SRR17520069.10040896  
SRR17520069.10040898  
SRR17520069.10040900  
SRR17520069.10040902  
SRR17520069.10040904  
SRR17520069.10040906  
SRR17520069.10040908  
SRR17520069.10040910  
SRR17520069.10040912  
SRR17520069.10041302  
SRR17520069.10041304  
SRR17520069.10041306  
SRR17520069.10041308  
SRR17520069.10041310  
SRR17520069.10041312  
SRR17520069.10041314  
SRR17520069.10041316  
SRR17520069.10041318  
SRR17520069.10041320  
SRR17520069.10041322

SRR17520069.10041324  
SRR17520069.10041326  
SRR17520069.10041328  
SRR17520069.10041332  
SRR17520069.10041334  
SRR17520069.10041336  
SRR17520069.10042384  
SRR17520069.10042807  
SRR17520069.10049242  
SRR17520069.10050992  
SRR17520069.10050994  
SRR17520069.10050996  
SRR17520069.10051000  
SRR17520069.10051002  
SRR17520069.10051004  
SRR17520069.10051006  
SRR17520069.10051008  
SRR17520069.10053109  
SRR17520069.10053111  
SRR17520069.10053113  
SRR17520069.10053115  
SRR17520069.10053119  
SRR17520069.10053121  
SRR17520069.10053123  
SRR17520069.10053125  
SRR17520069.10053127  
SRR17520069.10053129  
SRR17520069.10053131  
SRR17520069.10053133  
SRR17520069.10053137  
SRR17520069.10053139  
SRR17520069.10053141  
SRR17520069.10053143  
SRR17520069.10053145  
SRR17520069.10053147  
SRR17520069.10053149  
SRR17520069.10053458  
SRR17520069.10053493  
SRR17520069.10053495  
SRR17520069.10053497  
SRR17520069.10053499  
SRR17520069.10053501  
SRR17520069.10053503  
SRR17520069.10053505  
SRR17520069.10057209  
SRR17520069.10057211  
SRR17520069.10057213

SRR17520069.10057215  
SRR17520069.10057219  
SRR17520069.10057221  
SRR17520069.10057223  
SRR17520069.10057225  
SRR17520069.10057227  
SRR17520069.10057229  
SRR17520069.10057233  
SRR17520069.10057235  
SRR17520069.10057237  
SRR17520069.10057239  
SRR17520069.10057241  
SRR17520069.10057243  
SRR17520069.10057249  
SRR17520069.10057253  
SRR17520069.10057255  
SRR17520069.10057257  
SRR17520069.10057259  
SRR17520069.10057261  
SRR17520069.10057263  
SRR17520069.10057265  
SRR17520069.10057267  
SRR17520069.10057269  
SRR17520069.10057271  
SRR17520069.10057273  
SRR17520069.10065737  
SRR17520069.10065739  
SRR17520069.10065741  
SRR17520069.10065743  
SRR17520069.10065745  
SRR17520069.10065747  
SRR17520069.10065749  
SRR17520069.10067454  
SRR17520069.10067462  
SRR17520069.10067464  
SRR17520069.10067466  
SRR17520069.10067578  
SRR17520069.10067580  
SRR17520069.10067582  
SRR17520069.10067584  
SRR17520069.10068764  
SRR17520069.10068766  
SRR17520069.10068768  
SRR17520069.10068770  
SRR17520069.10068772  
SRR17520069.10068774  
SRR17520069.10068776

SRR17520069.10068778  
SRR17520069.10068780  
SRR17520069.10068782  
SRR17520069.10068784  
SRR17520069.10071769  
SRR17520069.10081674  
SRR17520069.10081676  
SRR17520069.10081678  
SRR17520069.10081680  
SRR17520069.10081682  
SRR17520069.10081684  
SRR17520069.10081686  
SRR17520069.10081688  
SRR17520069.10081692  
SRR17520069.10081694  
SRR17520069.10081696  
SRR17520069.10081825  
SRR17520069.10081827  
SRR17520069.10081831  
SRR17520069.10081833  
SRR17520069.10081835  
SRR17520069.10081837  
SRR17520069.10081839  
SRR17520069.10081841  
SRR17520069.10081843  
SRR17520069.10081845  
SRR17520069.10081847  
SRR17520069.10081849  
SRR17520069.10081851  
SRR17520069.10081853  
SRR17520069.10081855  
SRR17520069.10081857  
SRR17520069.10081859  
SRR17520069.10081861  
SRR17520069.10081863  
SRR17520069.10081865  
SRR17520069.10081867  
SRR17520069.10085489  
SRR17520069.10085491  
SRR17520069.10085493  
SRR17520069.10085495  
SRR17520069.10085497  
SRR17520069.10085499  
SRR17520069.10085501  
SRR17520069.10085503  
SRR17520069.10085505  
SRR17520069.10085507

SRR17520069.10085509  
SRR17520069.10085511  
SRR17520069.10085513  
SRR17520069.10085515  
SRR17520069.10085517  
SRR17520069.10091207  
SRR17520069.10091209  
SRR17520069.10091211  
SRR17520069.10091215  
SRR17520069.10091217  
SRR17520069.10091219  
SRR17520069.10091221  
SRR17520069.10091223  
SRR17520069.10091225  
SRR17520069.10091227  
SRR17520069.10091229  
SRR17520069.10091231  
SRR17520069.10091233  
SRR17520069.10091235  
SRR17520069.10091237  
SRR17520069.10091239  
SRR17520069.10091241  
SRR17520069.10095069  
SRR17520069.10095071  
SRR17520069.10095073  
SRR17520069.10095075  
SRR17520069.10095077  
SRR17520069.10095079  
SRR17520069.10095081  
SRR17520069.10095083  
SRR17520069.10095085  
SRR17520069.10095087  
SRR17520069.10095089  
SRR17520069.10095091  
SRR17520069.10095093  
SRR17520069.10095095  
SRR17520069.10095097  
SRR17520069.10095099  
SRR17520069.10095101  
SRR17520069.10095103  
SRR17520069.10095105  
SRR17520069.10095107  
SRR17520069.10095109  
SRR17520069.10097349  
SRR17520069.10102744  
SRR17520069.10102748  
SRR17520069.10102750

SRR17520069.10102752  
SRR17520069.10102754  
SRR17520069.10102756  
SRR17520069.10102758  
SRR17520069.10102760  
SRR17520069.10102762  
SRR17520069.10102764  
SRR17520069.10102766  
SRR17520069.10102768  
SRR17520069.10102770  
SRR17520069.10102772  
SRR17520069.10102774  
SRR17520069.10102776  
SRR17520069.10102778  
SRR17520069.10102782  
SRR17520069.10102784  
SRR17520069.10102786  
SRR17520069.10102788  
SRR17520069.10102790  
SRR17520069.10102792  
SRR17520069.10102794  
SRR17520069.10102796  
SRR17520069.10102798  
SRR17520069.10102800  
SRR17520069.10102802  
SRR17520069.10102804  
SRR17520069.10102806  
SRR17520069.10102808  
SRR17520069.10102810  
SRR17520069.10102812  
SRR17520069.10102814  
SRR17520069.10102816  
SRR17520069.10102820  
SRR17520069.10102822  
SRR17520069.10102824  
SRR17520069.10102828  
SRR17520069.10102830  
SRR17520069.10102832  
SRR17520069.10102834  
SRR17520069.10104929  
SRR17520069.10104933  
SRR17520069.10104935  
SRR17520069.10104937  
SRR17520069.10111494  
SRR17520069.10111496  
SRR17520069.10111498  
SRR17520069.10111500

SRR17520069.10111502  
SRR17520069.10111504  
SRR17520069.10111506  
SRR17520069.10111508  
SRR17520069.10111510  
SRR17520069.10111512  
SRR17520069.10111514  
SRR17520069.10111516  
SRR17520069.10111518  
SRR17520069.10111520  
SRR17520069.10111522  
SRR17520069.10112117  
SRR17520069.10113880  
SRR17520069.10113884  
SRR17520069.10113886  
SRR17520069.10113888  
SRR17520069.10113892  
SRR17520069.10113894  
SRR17520069.10113896  
SRR17520069.10113898  
SRR17520069.10113900  
SRR17520069.10113902  
SRR17520069.10113904  
SRR17520069.10113906  
SRR17520069.10113908  
SRR17520069.10113910  
SRR17520069.10113912  
SRR17520069.10113914  
SRR17520069.10113916  
SRR17520069.10113918  
SRR17520069.10113920  
SRR17520069.10113922  
SRR17520069.10113928  
SRR17520069.10113930  
SRR17520069.10113932  
SRR17520069.10113934  
SRR17520069.10113936  
SRR17520069.10113938  
SRR17520069.10113940  
SRR17520069.10113942  
SRR17520069.10113944  
SRR17520069.10113946  
SRR17520069.10113950  
SRR17520069.10113952  
SRR17520069.10113954  
SRR17520069.10113956  
SRR17520069.10113958



SRR17520069.10113960  
SRR17520069.10113962  
SRR17520069.10113964  
SRR17520069.10113966  
SRR17520069.10113968  
SRR17520069.10113970  
SRR17520069.10113972  
SRR17520069.10113974  
SRR17520069.10113976  
SRR17520069.10113978  
SRR17520069.10113980  
SRR17520069.10113982  
SRR17520069.10113984  
SRR17520069.10113986  
SRR17520069.10113988  
SRR17520069.10113990  
SRR17520069.10113992  
SRR17520069.10113994  
SRR17520069.10113996  
SRR17520069.10113998  
SRR17520069.10114000  
SRR17520069.10114002  
SRR17520069.10114004  
SRR17520069.10114006  
SRR17520069.10114008  
SRR17520069.10114010  
SRR17520069.10114012  
SRR17520069.10114014  
SRR17520069.10114016  
SRR17520069.10114018  
SRR17520069.10114020  
SRR17520069.10114022  
SRR17520069.10114024  
SRR17520069.10114026  
SRR17520069.10114028  
SRR17520069.10114030  
SRR17520069.10114032  
SRR17520069.10114034  
SRR17520069.10114036  
SRR17520069.10116994  
SRR17520069.10116996  
SRR17520069.10116998  
SRR17520069.10117078  
SRR17520069.10117080  
SRR17520069.10117082  
SRR17520069.10120688  
SRR17520069.10120690

SRR17520069.10124078  
SRR17520069.10124080  
SRR17520069.10124082  
SRR17520069.10124084  
SRR17520069.10124086  
SRR17520069.10124088  
SRR17520069.10124090  
SRR17520069.10124092  
SRR17520069.10124094  
SRR17520069.10124096  
SRR17520069.10124098  
SRR17520069.10124100  
SRR17520069.10124102  
SRR17520069.10124104  
SRR17520069.10124106  
SRR17520069.10124108  
SRR17520069.10124110  
SRR17520069.10124112  
SRR17520069.10124114  
SRR17520069.10124116  
SRR17520069.10124118  
SRR17520069.10124120  
SRR17520069.10124124  
SRR17520069.10124126  
SRR17520069.10124128  
SRR17520069.10124130  
SRR17520069.10124132  
SRR17520069.10124134  
SRR17520069.10124136  
SRR17520069.10124138  
SRR17520069.10124140  
SRR17520069.10124142  
SRR17520069.10124144  
SRR17520069.10124146  
SRR17520069.10124148  
SRR17520069.10124150  
SRR17520069.10124152  
SRR17520069.10124154  
SRR17520069.10124156  
SRR17520069.10124158  
SRR17520069.10124160  
SRR17520069.10124162  
SRR17520069.10124164  
SRR17520069.10124166  
SRR17520069.10124168  
SRR17520069.10124170  
SRR17520069.10124172

SRR17520069.10124174  
SRR17520069.10124176  
SRR17520069.10124178  
SRR17520069.10124180  
SRR17520069.10124182  
SRR17520069.10124184  
SRR17520069.10124186  
SRR17520069.10124188  
SRR17520069.10124190  
SRR17520069.10124192  
SRR17520069.10124194  
SRR17520069.10124196  
SRR17520069.10124198  
SRR17520069.10124200  
SRR17520069.10124202  
SRR17520069.10124204  
SRR17520069.10124206  
SRR17520069.10128155  
SRR17520069.10128157  
SRR17520069.10128159  
SRR17520069.10128161  
SRR17520069.10128163  
SRR17520069.10128165  
SRR17520069.10128167  
SRR17520069.10128169  
SRR17520069.10128171  
SRR17520069.10128173  
SRR17520069.10128175  
SRR17520069.10128177  
SRR17520069.10128179  
SRR17520069.10128181  
SRR17520069.10128183  
SRR17520069.10128185  
SRR17520069.10128187  
SRR17520069.10128189  
SRR17520069.10128191  
SRR17520069.10128193  
SRR17520069.10128195  
SRR17520069.10128197  
SRR17520069.10128199  
SRR17520069.10128201  
SRR17520069.10128203  
SRR17520069.10128205  
SRR17520069.10128491  
SRR17520069.10128493  
SRR17520069.10128495  
SRR17520069.10128499

SRR17520069.10128501  
SRR17520069.10128960  
SRR17520069.10128966  
SRR17520069.10128968  
SRR17520069.10128970  
SRR17520069.10128972  
SRR17520069.10128974  
SRR17520069.10128976  
SRR17520069.10128978  
SRR17520069.10128980  
SRR17520069.10128986  
SRR17520069.10128988  
SRR17520069.10128990  
SRR17520069.10128992  
SRR17520069.10128994  
SRR17520069.10141682  
SRR17520069.10141684  
SRR17520069.10142794  
SRR17520069.10142796  
SRR17520069.10142798  
SRR17520069.10142800  
SRR17520069.10142802  
SRR17520069.10142804  
SRR17520069.10142806  
SRR17520069.10142808  
SRR17520069.10142810  
SRR17520069.10142812  
SRR17520069.10142814  
SRR17520069.10142816  
SRR17520069.10142818  
SRR17520069.10142820  
SRR17520069.10142822  
SRR17520069.10142824  
SRR17520069.10142826  
SRR17520069.10142828  
SRR17520069.10142830  
SRR17520069.10142832  
SRR17520069.10142834  
SRR17520069.10142836  
SRR17520069.10142838  
SRR17520069.10142840  
SRR17520069.10142842  
SRR17520069.10142844  
SRR17520069.10142846  
SRR17520069.10142848  
SRR17520069.10142850  
SRR17520069.10142854

SRR17520069.10142856  
SRR17520069.10142858  
SRR17520069.10142860  
SRR17520069.10142862  
SRR17520069.10142864  
SRR17520069.10142866  
SRR17520069.10142868  
SRR17520069.10142870  
SRR17520069.10142872  
SRR17520069.10142874  
SRR17520069.10142876  
SRR17520069.10142878  
SRR17520069.10142880  
SRR17520069.10142882  
SRR17520069.10142884  
SRR17520069.10142886  
SRR17520069.10142888  
SRR17520069.10142890  
SRR17520069.10142892  
SRR17520069.10142894  
SRR17520069.10142896  
SRR17520069.10142898  
SRR17520069.10142900  
SRR17520069.10146605  
SRR17520069.10146614  
SRR17520069.10148022  
SRR17520069.10154851  
SRR17520069.10154860  
SRR17520069.10154862  
SRR17520069.10154864  
SRR17520069.10154866  
SRR17520069.10154868  
SRR17520069.10154875  
SRR17520069.10154883  
SRR17520069.10154885  
SRR17520069.10154891  
SRR17520069.10154893  
SRR17520069.10154897  
SRR17520069.10154901  
SRR17520069.10154903  
SRR17520069.10154905  
SRR17520069.10154907  
SRR17520069.10154909  
SRR17520069.10154911  
SRR17520069.10154913  
SRR17520069.10154915  
SRR17520069.10154917

SRR17520069.10154919  
SRR17520069.10154921  
SRR17520069.10154923  
SRR17520069.10154925  
SRR17520069.10154927  
SRR17520069.10154929  
SRR17520069.10154931  
SRR17520069.10154933  
SRR17520069.10154935  
SRR17520069.10154937  
SRR17520069.10154939  
SRR17520069.10154941  
SRR17520069.10154943  
SRR17520069.10154945  
SRR17520069.10154947  
SRR17520069.10154949  
SRR17520069.10154951  
SRR17520069.10154953  
SRR17520069.10154955  
SRR17520069.10154957  
SRR17520069.10154959  
SRR17520069.10154961  
SRR17520069.10154963  
SRR17520069.10154965  
SRR17520069.10154967  
SRR17520069.10154969  
SRR17520069.10154971  
SRR17520069.10154973  
SRR17520069.10154975  
SRR17520069.10154977  
SRR17520069.10154979  
SRR17520069.10154981  
SRR17520069.10154983  
SRR17520069.10154985  
SRR17520069.10155029  
SRR17520069.10155031  
SRR17520069.10155033  
SRR17520069.10155035  
SRR17520069.10155037  
SRR17520069.10155039  
SRR17520069.10155043  
SRR17520069.10156020  
SRR17520069.10156022  
SRR17520069.10156024  
SRR17520069.10156026  
SRR17520069.10156028  
SRR17520069.10156030

SRR17520069.10156032  
SRR17520069.10156034  
SRR17520069.10156036  
SRR17520069.10156038  
SRR17520069.10160467  
SRR17520069.10160469  
SRR17520069.10160471  
SRR17520069.10160473  
SRR17520069.10160475  
SRR17520069.10160477  
SRR17520069.10160479  
SRR17520069.10160481  
SRR17520069.10160483  
SRR17520069.10160485  
SRR17520069.10160487  
SRR17520069.10160489  
SRR17520069.10160491  
SRR17520069.10160493  
SRR17520069.10160495  
SRR17520069.10160497  
SRR17520069.10160499  
SRR17520069.10160501  
SRR17520069.10160505  
SRR17520069.10160507  
SRR17520069.10160509  
SRR17520069.10160511  
SRR17520069.10160513  
SRR17520069.10160515  
SRR17520069.10160517  
SRR17520069.10160519  
SRR17520069.10160521  
SRR17520069.10160523  
SRR17520069.10160525  
SRR17520069.10160527  
SRR17520069.10160529  
SRR17520069.10160531  
SRR17520069.10160533  
SRR17520069.10160535  
SRR17520069.10160537  
SRR17520069.10160539  
SRR17520069.10160541  
SRR17520069.10160543  
SRR17520069.10160545  
SRR17520069.10160547  
SRR17520069.10160549  
SRR17520069.10160551  
SRR17520069.10160553

SRR17520069.10160555  
SRR17520069.10160557  
SRR17520069.10160559  
SRR17520069.10160561  
SRR17520069.10160563  
SRR17520069.10160565  
SRR17520069.10160567  
SRR17520069.10160569  
SRR17520069.10160571  
SRR17520069.10160573  
SRR17520069.10160575  
SRR17520069.10160577  
SRR17520069.10160579  
SRR17520069.10160581  
SRR17520069.10160583  
SRR17520069.10160585  
SRR17520069.10160587  
SRR17520069.10160589  
SRR17520069.10160591  
SRR17520069.10160593  
SRR17520069.10160595  
SRR17520069.10160597  
SRR17520069.10160599  
SRR17520069.10160601  
SRR17520069.10160603  
SRR17520069.10160605  
SRR17520069.10160607  
SRR17520069.10160609  
SRR17520069.10160611  
SRR17520069.10160613  
SRR17520069.10160615  
SRR17520069.10160617  
SRR17520069.10160619  
SRR17520069.10160621  
SRR17520069.10160623  
SRR17520069.10160625  
SRR17520069.10161471  
SRR17520069.10161473  
SRR17520069.10161475  
SRR17520069.10161667  
SRR17520069.10161669  
SRR17520069.10166391  
SRR17520069.10166395  
SRR17520069.10171872  
SRR17520069.10178761  
SRR17520069.10178763  
SRR17520069.10178765



SRR17520069.10178767  
SRR17520069.10178769  
SRR17520069.10182004  
SRR17520069.10182006  
SRR17520069.10182464  
SRR17520069.10182466  
SRR17520069.10182468  
SRR17520069.10182470  
SRR17520069.10182472  
SRR17520069.10185668  
SRR17520069.10189177  
SRR17520069.10189179  
SRR17520069.10189183  
SRR17520069.10189185  
SRR17520069.10189187  
SRR17520069.10189189  
SRR17520069.10189191  
SRR17520069.10189193  
SRR17520069.10189195  
SRR17520069.10189197  
SRR17520069.10189199  
SRR17520069.10189201  
SRR17520069.10189203  
SRR17520069.10189209  
SRR17520069.10199030  
SRR17520069.10199032  
SRR17520069.10199034  
SRR17520069.10199036  
SRR17520069.10199038  
SRR17520069.10199040  
SRR17520069.10199042  
SRR17520069.10199044  
SRR17520069.10199046  
SRR17520069.10199048  
SRR17520069.10199050  
SRR17520069.10199997  
SRR17520069.10199999  
SRR17520069.10200001  
SRR17520069.10200003  
SRR17520069.10200005  
SRR17520069.10200007  
SRR17520069.10200009  
SRR17520069.10200011  
SRR17520069.10200013  
SRR17520069.10200099  
SRR17520069.10200101  
SRR17520069.10200103

SRR17520069.10200105  
SRR17520069.10200111  
SRR17520069.10200117  
SRR17520069.10203379  
SRR17520069.10203381  
SRR17520069.10203383  
SRR17520069.10203385  
SRR17520069.10203387  
SRR17520069.10203389  
SRR17520069.10203391  
SRR17520069.10203393  
SRR17520069.10203397  
SRR17520069.10203399  
SRR17520069.10203401  
SRR17520069.10203405  
SRR17520069.10203407  
SRR17520069.10203409  
SRR17520069.10203411  
SRR17520069.10203413  
SRR17520069.10203415  
SRR17520069.10203417  
SRR17520069.10203419  
SRR17520069.10203421  
SRR17520069.10203423  
SRR17520069.10203425  
SRR17520069.10203427  
SRR17520069.10203429  
SRR17520069.10203431  
SRR17520069.10203433  
SRR17520069.10203435  
SRR17520069.10203439  
SRR17520069.10203441  
SRR17520069.10203443  
SRR17520069.10203445  
SRR17520069.10203447  
SRR17520069.10203449  
SRR17520069.10203451  
SRR17520069.10203453  
SRR17520069.10203455  
SRR17520069.10203457  
SRR17520069.10203459  
SRR17520069.10203461  
SRR17520069.10203463  
SRR17520069.10203465  
SRR17520069.10203467  
SRR17520069.10203469  
SRR17520069.10203471

SRR17520069.10203473  
SRR17520069.10203477  
SRR17520069.10203479  
SRR17520069.10203481  
SRR17520069.10203483  
SRR17520069.10203485  
SRR17520069.10203487  
SRR17520069.10203489  
SRR17520069.10203491  
SRR17520069.10203493  
SRR17520069.10203495  
SRR17520069.10203497  
SRR17520069.10203499  
SRR17520069.10203501  
SRR17520069.10203503  
SRR17520069.10203505  
SRR17520069.10203507  
SRR17520069.10203509  
SRR17520069.10203511  
SRR17520069.10203515  
SRR17520069.10203519  
SRR17520069.10203521  
SRR17520069.10203523  
SRR17520069.10203525  
SRR17520069.10203527  
SRR17520069.10203529  
SRR17520069.10203531  
SRR17520069.10203533  
SRR17520069.10203537  
SRR17520069.10203539  
SRR17520069.10203541  
SRR17520069.10203543  
SRR17520069.10203545  
SRR17520069.10203547  
SRR17520069.10203551  
SRR17520069.10203555  
SRR17520069.10203559  
SRR17520069.10203561  
SRR17520069.10203565  
SRR17520069.10203567  
SRR17520069.10208485  
SRR17520069.10208487  
SRR17520069.10208489  
SRR17520069.10208491  
SRR17520069.10208493  
SRR17520069.10208495  
SRR17520069.10208497

SRR17520069.10208499  
SRR17520069.10208501  
SRR17520069.10208503  
SRR17520069.10208505  
SRR17520069.10208507  
SRR17520069.10208509  
SRR17520069.10208511  
SRR17520069.10208513  
SRR17520069.10208515  
SRR17520069.10208517  
SRR17520069.10208519  
SRR17520069.10208521  
SRR17520069.10208523  
SRR17520069.10208525  
SRR17520069.10208527  
SRR17520069.10208529  
SRR17520069.10208531  
SRR17520069.10208533  
SRR17520069.10208535  
SRR17520069.10208537  
SRR17520069.10208539  
SRR17520069.10208717  
SRR17520069.10208719  
SRR17520069.10208723  
SRR17520069.10208725  
SRR17520069.10208727  
SRR17520069.10208729  
SRR17520069.10208731  
SRR17520069.10208733  
SRR17520069.10208735  
SRR17520069.10208737  
SRR17520069.10208739  
SRR17520069.10208741  
SRR17520069.10208743  
SRR17520069.10208745  
SRR17520069.10208747  
SRR17520069.10208749  
SRR17520069.10208751  
SRR17520069.10208753  
SRR17520069.10208755  
SRR17520069.10208757  
SRR17520069.10208759  
SRR17520069.10208761  
SRR17520069.10208767  
SRR17520069.10208769  
SRR17520069.10208771  
SRR17520069.10209737

SRR17520069.10209739  
SRR17520069.10209741  
SRR17520069.10209743  
SRR17520069.10220454  
SRR17520069.10220456  
SRR17520069.10220458  
SRR17520069.10220460  
SRR17520069.10220462  
SRR17520069.10220464  
SRR17520069.10220466  
SRR17520069.10220912  
SRR17520069.10220914  
SRR17520069.10220916  
SRR17520069.10220918  
SRR17520069.10220920  
SRR17520069.10220922  
SRR17520069.10220924  
SRR17520069.10220926  
SRR17520069.10220928  
SRR17520069.10220930  
SRR17520069.10220932  
SRR17520069.10228842  
SRR17520069.10228855  
SRR17520069.10235670  
SRR17520069.10235672  
SRR17520069.10235674  
SRR17520069.10235676  
SRR17520069.10235678  
SRR17520069.10235680  
SRR17520069.10235682  
SRR17520069.10235684  
SRR17520069.10235686  
SRR17520069.10235688  
SRR17520069.10235690  
SRR17520069.10235692  
SRR17520069.10235694  
SRR17520069.10235696  
SRR17520069.10235698  
SRR17520069.10235700  
SRR17520069.10235702  
SRR17520069.10241497  
SRR17520069.10241499  
SRR17520069.10241501  
SRR17520069.10241503  
SRR17520069.10245371  
SRR17520069.10245373  
SRR17520069.10245375

SRR17520069. 10245379  
SRR17520069. 10245381  
SRR17520069. 10245383  
SRR17520069. 10245385  
SRR17520069. 10245387  
SRR17520069. 10245389  
SRR17520069. 10245391  
SRR17520069. 10245393  
SRR17520069. 10245395  
SRR17520069. 10245397  
SRR17520069. 10245399  
SRR17520069. 10245401  
SRR17520069. 10245403  
SRR17520069. 10245405  
SRR17520069. 10245407  
SRR17520069. 10245409  
SRR17520069. 10245411  
SRR17520069. 10245413  
SRR17520069. 10248394  
SRR17520069. 10248396  
SRR17520069. 10248398  
SRR17520069. 10248400  
SRR17520069. 10248402  
SRR17520069. 10248404  
SRR17520069. 10248406  
SRR17520069. 10248408  
SRR17520069. 10248410  
SRR17520069. 10248412  
SRR17520069. 10248414  
SRR17520069. 10248416  
SRR17520069. 10248418  
SRR17520069. 10248420  
SRR17520069. 10248422  
SRR17520069. 10248424  
SRR17520069. 10248426  
SRR17520069. 10248428  
SRR17520069. 10248430  
SRR17520069. 10248432  
SRR17520069. 10248434  
SRR17520069. 10248436  
SRR17520069. 10248438  
SRR17520069. 10248440  
SRR17520069. 10248442  
SRR17520069. 10248444  
SRR17520069. 10248446  
SRR17520069. 10248448  
SRR17520069. 10248450

SRR17520069.10248452  
SRR17520069.10248454  
SRR17520069.10248456  
SRR17520069.10248458  
SRR17520069.10248460  
SRR17520069.10248462  
SRR17520069.10248464  
SRR17520069.10248466  
SRR17520069.10248468  
SRR17520069.10248470  
SRR17520069.10248472  
SRR17520069.10256901  
SRR17520069.10256903  
SRR17520069.10256905  
SRR17520069.10256907  
SRR17520069.10256909  
SRR17520069.10256911  
SRR17520069.10256913  
SRR17520069.10257810  
SRR17520069.10257814  
SRR17520069.10257816  
SRR17520069.10257818  
SRR17520069.10257820  
SRR17520069.10257822  
SRR17520069.10257824  
SRR17520069.10257826  
SRR17520069.10257828  
SRR17520069.10257830  
SRR17520069.10257832  
SRR17520069.10257834  
SRR17520069.10257836  
SRR17520069.10257838  
SRR17520069.10257840  
SRR17520069.10257842  
SRR17520069.10257844  
SRR17520069.10257846  
SRR17520069.10266160  
SRR17520069.10266162  
SRR17520069.10266164  
SRR17520069.10266166  
SRR17520069.10266168  
SRR17520069.10266170  
SRR17520069.10266172  
SRR17520069.10266174  
SRR17520069.10266176  
SRR17520069.10266178  
SRR17520069.10266180

SRR17520069.10266182  
SRR17520069.10266184  
SRR17520069.10266186  
SRR17520069.10266188  
SRR17520069.10266190  
SRR17520069.10266192  
SRR17520069.10266194  
SRR17520069.10266196  
SRR17520069.10266198  
SRR17520069.10266202  
SRR17520069.10266204  
SRR17520069.10266206  
SRR17520069.10266210  
SRR17520069.10266212  
SRR17520069.10266214  
SRR17520069.10266216  
SRR17520069.10266218  
SRR17520069.10266220  
SRR17520069.10266222  
SRR17520069.10266224  
SRR17520069.10266226  
SRR17520069.10266228  
SRR17520069.10266230  
SRR17520069.10266232  
SRR17520069.10266234  
SRR17520069.10266236  
SRR17520069.10266238  
SRR17520069.10266240  
SRR17520069.10266242  
SRR17520069.10266244  
SRR17520069.10266246  
SRR17520069.10266248  
SRR17520069.10266250  
SRR17520069.10266252  
SRR17520069.10266254  
SRR17520069.10266256  
SRR17520069.10271786  
SRR17520069.10271820  
SRR17520069.10271822  
SRR17520069.10271824  
SRR17520069.10271826  
SRR17520069.10271828  
SRR17520069.10271832  
SRR17520069.10271834  
SRR17520069.10274254  
SRR17520069.10275682  
SRR17520069.10275684



SRR17520069.10275686  
SRR17520069.10275688  
SRR17520069.10275690  
SRR17520069.10275692  
SRR17520069.10275694  
SRR17520069.10275696  
SRR17520069.10275698  
SRR17520069.10275700  
SRR17520069.10275702  
SRR17520069.10275704  
SRR17520069.10275708  
SRR17520069.10275710  
SRR17520069.10275714  
SRR17520069.10275716  
SRR17520069.10275718  
SRR17520069.10275720  
SRR17520069.10275722  
SRR17520069.10275730  
SRR17520069.10275732  
SRR17520069.10275736  
SRR17520069.10275738  
SRR17520069.10285749  
SRR17520069.10290392  
SRR17520069.10290396  
SRR17520069.10290398  
SRR17520069.10290403  
SRR17520069.10290405  
SRR17520069.10290407  
SRR17520069.10290409  
SRR17520069.10290413  
SRR17520069.10290415  
SRR17520069.10290417  
SRR17520069.10290419  
SRR17520069.10290421  
SRR17520069.10290423  
SRR17520069.10290425  
SRR17520069.10290427  
SRR17520069.10290429  
SRR17520069.10290431  
SRR17520069.10290435  
SRR17520069.10290439  
SRR17520069.10290441  
SRR17520069.10290443  
SRR17520069.10290445  
SRR17520069.10290447  
SRR17520069.10290449  
SRR17520069.10290451

SRR17520069. 10290453  
SRR17520069. 10290455  
SRR17520069. 10290457  
SRR17520069. 10290459  
SRR17520069. 10290461  
SRR17520069. 10290463  
SRR17520069. 10290465  
SRR17520069. 10290467  
SRR17520069. 10290469  
SRR17520069. 10290471  
SRR17520069. 10290473  
SRR17520069. 10290477  
SRR17520069. 10290479  
SRR17520069. 10290481  
SRR17520069. 10290483  
SRR17520069. 10290485  
SRR17520069. 10290487  
SRR17520069. 10290489  
SRR17520069. 10290491  
SRR17520069. 10290493  
SRR17520069. 10290495  
SRR17520069. 10290497  
SRR17520069. 10290499  
SRR17520069. 10290501  
SRR17520069. 10290503  
SRR17520069. 10290505  
SRR17520069. 10290507  
SRR17520069. 10290509  
SRR17520069. 10290511  
SRR17520069. 10290513  
SRR17520069. 10290515  
SRR17520069. 10290517  
SRR17520069. 10290519  
SRR17520069. 10290521  
SRR17520069. 10290523  
SRR17520069. 10290525  
SRR17520069. 10290527  
SRR17520069. 10290529  
SRR17520069. 10290531  
SRR17520069. 10290533  
SRR17520069. 10290535  
SRR17520069. 10290537  
SRR17520069. 10290539  
SRR17520069. 10290541  
SRR17520069. 10290545  
SRR17520069. 10290549  
SRR17520069. 10290551

SRR17520069.10290553  
SRR17520069.10290555  
SRR17520069.10290557  
SRR17520069.10290559  
SRR17520069.10290561  
SRR17520069.10290563  
SRR17520069.10290565  
SRR17520069.10290567  
SRR17520069.10290569  
SRR17520069.10290571  
SRR17520069.10290573  
SRR17520069.10290575  
SRR17520069.10290885  
SRR17520069.10290887  
SRR17520069.10290889  
SRR17520069.10290891  
SRR17520069.10290893  
SRR17520069.10290895  
SRR17520069.10290897  
SRR17520069.10290899  
SRR17520069.10290901  
SRR17520069.10290903  
SRR17520069.10290905  
SRR17520069.10290907  
SRR17520069.10290909  
SRR17520069.10293142  
SRR17520069.10293146  
SRR17520069.10294127  
SRR17520069.10294129  
SRR17520069.10294131  
SRR17520069.10294133  
SRR17520069.10294135  
SRR17520069.10294137  
SRR17520069.10294139  
SRR17520069.10294141  
SRR17520069.10294143  
SRR17520069.10294145  
SRR17520069.10294147  
SRR17520069.10294149  
SRR17520069.10294151  
SRR17520069.10294153  
SRR17520069.10299825  
SRR17520069.10299827  
SRR17520069.10299829  
SRR17520069.10299831  
SRR17520069.10299833  
SRR17520069.10299835

SRR17520069. 10299837  
SRR17520069. 10299839  
SRR17520069. 10299841  
SRR17520069. 10299843  
SRR17520069. 10299845  
SRR17520069. 10299847  
SRR17520069. 10299849  
SRR17520069. 10299851  
SRR17520069. 10299853  
SRR17520069. 10299855  
SRR17520069. 10299857  
SRR17520069. 10299859  
SRR17520069. 10299876  
SRR17520069. 10299878  
SRR17520069. 10299880  
SRR17520069. 10299882  
SRR17520069. 10299884  
SRR17520069. 10299886  
SRR17520069. 10299888  
SRR17520069. 10299890  
SRR17520069. 10299892  
SRR17520069. 10299894  
SRR17520069. 10299896  
SRR17520069. 10299898  
SRR17520069. 10299900  
SRR17520069. 10299902  
SRR17520069. 10299904  
SRR17520069. 10304193  
SRR17520069. 10304195  
SRR17520069. 10304197  
SRR17520069. 10304201  
SRR17520069. 10304203  
SRR17520069. 10304205  
SRR17520069. 10304209  
SRR17520069. 10304211  
SRR17520069. 10305263  
SRR17520069. 10305265  
SRR17520069. 10305267  
SRR17520069. 10305269  
SRR17520069. 10305271  
SRR17520069. 10305273  
SRR17520069. 10305275  
SRR17520069. 10305277  
SRR17520069. 10305279  
SRR17520069. 10305281  
SRR17520069. 10305283  
SRR17520069. 10305285

SRR17520069. 10305968  
SRR17520069. 10305970  
SRR17520069. 10305972  
SRR17520069. 10305974  
SRR17520069. 10305976  
SRR17520069. 10305982  
SRR17520069. 10305984  
SRR17520069. 10305986  
SRR17520069. 10305988  
SRR17520069. 10305990  
SRR17520069. 10305992  
SRR17520069. 10305994  
SRR17520069. 10305996  
SRR17520069. 10305998  
SRR17520069. 10314407  
SRR17520069. 10314409  
SRR17520069. 10314411  
SRR17520069. 10314415  
SRR17520069. 10314417  
SRR17520069. 10314419  
SRR17520069. 10314421  
SRR17520069. 10314423  
SRR17520069. 10314425  
SRR17520069. 10314427  
SRR17520069. 10315354  
SRR17520069. 10315356  
SRR17520069. 10315358  
SRR17520069. 10315360  
SRR17520069. 10315362  
SRR17520069. 10315364  
SRR17520069. 10315366  
SRR17520069. 10315368  
SRR17520069. 10315370  
SRR17520069. 10315372  
SRR17520069. 10315374  
SRR17520069. 10315376  
SRR17520069. 10315701  
SRR17520069. 10316727  
SRR17520069. 10316733  
SRR17520069. 10316735  
SRR17520069. 10316737  
SRR17520069. 10316739  
SRR17520069. 10316741  
SRR17520069. 10316743  
SRR17520069. 10316745  
SRR17520069. 10316747  
SRR17520069. 10316749

SRR17520069.10316751  
SRR17520069.10316753  
SRR17520069.10316755  
SRR17520069.10316757  
SRR17520069.10316759  
SRR17520069.10316761  
SRR17520069.10316763  
SRR17520069.10316765  
SRR17520069.10316767  
SRR17520069.10316769  
SRR17520069.10316771  
SRR17520069.10316773  
SRR17520069.10316775  
SRR17520069.10316777  
SRR17520069.10316779  
SRR17520069.10317652  
SRR17520069.10317654  
SRR17520069.10317656  
SRR17520069.10317660  
SRR17520069.10317662  
SRR17520069.10317664  
SRR17520069.10317666  
SRR17520069.10317668  
SRR17520069.10317670  
SRR17520069.10317672  
SRR17520069.10317674  
SRR17520069.10317678  
SRR17520069.10317680  
SRR17520069.10317682  
SRR17520069.10317684  
SRR17520069.10317686  
SRR17520069.10317688  
SRR17520069.10317690  
SRR17520069.10317692  
SRR17520069.10327152  
SRR17520069.10327154  
SRR17520069.10327156  
SRR17520069.10327158  
SRR17520069.10327160  
SRR17520069.10327162  
SRR17520069.10327164  
SRR17520069.10327166  
SRR17520069.10327168  
SRR17520069.10327170  
SRR17520069.10327172  
SRR17520069.10327174  
SRR17520069.10327176

SRR17520069.10327178  
SRR17520069.10327180  
SRR17520069.10327182  
SRR17520069.10327184  
SRR17520069.10334264  
SRR17520069.10334266  
SRR17520069.10334268  
SRR17520069.10334270  
SRR17520069.10334274  
SRR17520069.10334276  
SRR17520069.10334278  
SRR17520069.10336190  
SRR17520069.10336192  
SRR17520069.10336257  
SRR17520069.10337332  
SRR17520069.10337334  
SRR17520069.10337336  
SRR17520069.10337338  
SRR17520069.10337340  
SRR17520069.10337342  
SRR17520069.10337344  
SRR17520069.10337346  
SRR17520069.10337348  
SRR17520069.10337350  
SRR17520069.10337352  
SRR17520069.10337354  
SRR17520069.10337356  
SRR17520069.10337358  
SRR17520069.10337360  
SRR17520069.10337362  
SRR17520069.10337364  
SRR17520069.10337366  
SRR17520069.10337368  
SRR17520069.10337370  
SRR17520069.10337372  
SRR17520069.10337374  
SRR17520069.10337376  
SRR17520069.10337378  
SRR17520069.10337380  
SRR17520069.10337382  
SRR17520069.10337384  
SRR17520069.10337386  
SRR17520069.10337388  
SRR17520069.10337392  
SRR17520069.10337394  
SRR17520069.10337396  
SRR17520069.10337398

SRR17520069. 10337400  
SRR17520069. 10337402  
SRR17520069. 10337404  
SRR17520069. 10337406  
SRR17520069. 10337408  
SRR17520069. 10337410  
SRR17520069. 10337412  
SRR17520069. 10337414  
SRR17520069. 10337416  
SRR17520069. 10337418  
SRR17520069. 10337420  
SRR17520069. 10339161  
SRR17520069. 10339163  
SRR17520069. 10341246  
SRR17520069. 10341248  
SRR17520069. 10341250  
SRR17520069. 10341252  
SRR17520069. 10341254  
SRR17520069. 10341256  
SRR17520069. 10341258  
SRR17520069. 10341260  
SRR17520069. 10341262  
SRR17520069. 10341264  
SRR17520069. 10341266  
SRR17520069. 10341268  
SRR17520069. 10344939  
SRR17520069. 10344941  
SRR17520069. 10344943  
SRR17520069. 10344945  
SRR17520069. 10344947  
SRR17520069. 10344949  
SRR17520069. 10344951  
SRR17520069. 10344953  
SRR17520069. 10344955  
SRR17520069. 10344957  
SRR17520069. 10344959  
SRR17520069. 10344961  
SRR17520069. 10344963  
SRR17520069. 10348494  
SRR17520069. 10348496  
SRR17520069. 10348498  
SRR17520069. 10348500  
SRR17520069. 10348502  
SRR17520069. 10348504  
SRR17520069. 10348506  
SRR17520069. 10348508  
SRR17520069. 10348510



SRR17520069. 10348512  
SRR17520069. 10348514  
SRR17520069. 10348516  
SRR17520069. 10348518  
SRR17520069. 10348520  
SRR17520069. 10348524  
SRR17520069. 10348526  
SRR17520069. 10348528  
SRR17520069. 10348530  
SRR17520069. 10348532  
SRR17520069. 10348534  
SRR17520069. 10348536  
SRR17520069. 10348538  
SRR17520069. 10348557  
SRR17520069. 10348559  
SRR17520069. 10348561  
SRR17520069. 10348563  
SRR17520069. 10348565  
SRR17520069. 10348567  
SRR17520069. 10348569  
SRR17520069. 10348571  
SRR17520069. 10348575  
SRR17520069. 10348577  
SRR17520069. 10348579  
SRR17520069. 10348581  
SRR17520069. 10348585  
SRR17520069. 10348587  
SRR17520069. 10348589  
SRR17520069. 10348593  
SRR17520069. 10348595  
SRR17520069. 10348597  
SRR17520069. 10348599  
SRR17520069. 10348601  
SRR17520069. 10348603  
SRR17520069. 10348605  
SRR17520069. 10348718  
SRR17520069. 10348720  
SRR17520069. 10348722  
SRR17520069. 10348724  
SRR17520069. 10349718  
SRR17520069. 10349720  
SRR17520069. 10349722  
SRR17520069. 10349724  
SRR17520069. 10349726  
SRR17520069. 10349728  
SRR17520069. 10349730  
SRR17520069. 10349732

SRR17520069.10349734  
SRR17520069.10349736  
SRR17520069.10349738  
SRR17520069.10349740  
SRR17520069.10349744  
SRR17520069.10350559  
SRR17520069.10350561  
SRR17520069.10350563  
SRR17520069.10350565  
SRR17520069.10350567  
SRR17520069.10350569  
SRR17520069.10350571  
SRR17520069.10350573  
SRR17520069.10350575  
SRR17520069.10353223  
SRR17520069.10353227  
SRR17520069.10353229  
SRR17520069.10353231  
SRR17520069.10353235  
SRR17520069.10353237  
SRR17520069.10353239  
SRR17520069.10353241  
SRR17520069.10353243  
SRR17520069.10353245  
SRR17520069.10353247  
SRR17520069.10353249  
SRR17520069.10353251  
SRR17520069.10353253  
SRR17520069.10353255  
SRR17520069.10353257  
SRR17520069.10353259  
SRR17520069.10353777  
SRR17520069.10353779  
SRR17520069.10353781  
SRR17520069.10353783  
SRR17520069.10353785  
SRR17520069.10353787  
SRR17520069.10353789  
SRR17520069.10353791  
SRR17520069.10353793  
SRR17520069.10353795  
SRR17520069.10353797  
SRR17520069.10353799  
SRR17520069.10353801  
SRR17520069.10353803  
SRR17520069.10353805  
SRR17520069.10353807

SRR17520069.10353809  
SRR17520069.10353811  
SRR17520069.10353813  
SRR17520069.10353815  
SRR17520069.10353817  
SRR17520069.10353819  
SRR17520069.10353821  
SRR17520069.10353823  
SRR17520069.10353825  
SRR17520069.10353827  
SRR17520069.10353829  
SRR17520069.10353831  
SRR17520069.10353833  
SRR17520069.10353835  
SRR17520069.10358832  
SRR17520069.10363160  
SRR17520069.10363162  
SRR17520069.10363164  
SRR17520069.10363166  
SRR17520069.10363168  
SRR17520069.10363170  
SRR17520069.10363172  
SRR17520069.10363174  
SRR17520069.10363176  
SRR17520069.10363178  
SRR17520069.10363180  
SRR17520069.10363182  
SRR17520069.10363184  
SRR17520069.10363186  
SRR17520069.10363188  
SRR17520069.10363190  
SRR17520069.10363192  
SRR17520069.10363194  
SRR17520069.10363196  
SRR17520069.10363198  
SRR17520069.10363677  
SRR17520069.10363679  
SRR17520069.10363681  
SRR17520069.10365064  
SRR17520069.10365066  
SRR17520069.10365068  
SRR17520069.10365070  
SRR17520069.10365072  
SRR17520069.10365074  
SRR17520069.10365076  
SRR17520069.10365078  
SRR17520069.10365080

SRR17520069. 10365082  
SRR17520069. 10365084  
SRR17520069. 10365086  
SRR17520069. 10365090  
SRR17520069. 10365092  
SRR17520069. 10365094  
SRR17520069. 10365096  
SRR17520069. 10365098  
SRR17520069. 10365100  
SRR17520069. 10365102  
SRR17520069. 10365104  
SRR17520069. 10365106  
SRR17520069. 10365108  
SRR17520069. 10365110  
SRR17520069. 10365112  
SRR17520069. 10365114  
SRR17520069. 10365116  
SRR17520069. 10365118  
SRR17520069. 10365120  
SRR17520069. 10365122  
SRR17520069. 10365124  
SRR17520069. 10365126  
SRR17520069. 10365128  
SRR17520069. 10365130  
SRR17520069. 10365210  
SRR17520069. 10366699  
SRR17520069. 10373877  
SRR17520069. 10376120  
SRR17520069. 10376122  
SRR17520069. 10376124  
SRR17520069. 10376126  
SRR17520069. 10376128  
SRR17520069. 10376130  
SRR17520069. 10376132  
SRR17520069. 10376134  
SRR17520069. 10376136  
SRR17520069. 10376138  
SRR17520069. 10376140  
SRR17520069. 10376142  
SRR17520069. 10376144  
SRR17520069. 10376146  
SRR17520069. 10376148  
SRR17520069. 10376150  
SRR17520069. 10376358  
SRR17520069. 10376360  
SRR17520069. 10376362  
SRR17520069. 10376364

SRR17520069. 10376366  
SRR17520069. 10376368  
SRR17520069. 10376370  
SRR17520069. 10376372  
SRR17520069. 10376374  
SRR17520069. 10376376  
SRR17520069. 10376378  
SRR17520069. 10376380  
SRR17520069. 10376382  
SRR17520069. 10376384  
SRR17520069. 10376386  
SRR17520069. 10376388  
SRR17520069. 10376390  
SRR17520069. 10376392  
SRR17520069. 10376394  
SRR17520069. 10376398  
SRR17520069. 10376400  
SRR17520069. 10376402  
SRR17520069. 10376404  
SRR17520069. 10376406  
SRR17520069. 10376408  
SRR17520069. 10376410  
SRR17520069. 10376412  
SRR17520069. 10376414  
SRR17520069. 10376416  
SRR17520069. 10376418  
SRR17520069. 10376420  
SRR17520069. 10376422  
SRR17520069. 10376424  
SRR17520069. 10376426  
SRR17520069. 10376428  
SRR17520069. 10376430  
SRR17520069. 10378563  
SRR17520069. 10378565  
SRR17520069. 10378567  
SRR17520069. 10378569  
SRR17520069. 10378571  
SRR17520069. 10378573  
SRR17520069. 10378575  
SRR17520069. 10378577  
SRR17520069. 10378579  
SRR17520069. 10378581  
SRR17520069. 10378583  
SRR17520069. 10378585  
SRR17520069. 10378587  
SRR17520069. 10378589  
SRR17520069. 10378591

SRR17520069. 10378593  
SRR17520069. 10378595  
SRR17520069. 10378597  
SRR17520069. 10378599  
SRR17520069. 10378601  
SRR17520069. 10378603  
SRR17520069. 10378605  
SRR17520069. 10378607  
SRR17520069. 10378609  
SRR17520069. 10378611  
SRR17520069. 10378613  
SRR17520069. 10378615  
SRR17520069. 10378617  
SRR17520069. 10378619  
SRR17520069. 10378621  
SRR17520069. 10378623  
SRR17520069. 10378625  
SRR17520069. 10378627  
SRR17520069. 10378629  
SRR17520069. 10382079  
SRR17520069. 10382081  
SRR17520069. 10382083  
SRR17520069. 10382085  
SRR17520069. 10382087  
SRR17520069. 10382089  
SRR17520069. 10382091  
SRR17520069. 10382093  
SRR17520069. 10382095  
SRR17520069. 10382097  
SRR17520069. 10382099  
SRR17520069. 10382101  
SRR17520069. 10382103  
SRR17520069. 10382105  
SRR17520069. 10382107  
SRR17520069. 10382109  
SRR17520069. 10382111  
SRR17520069. 10382113  
SRR17520069. 10382115  
SRR17520069. 10382117  
SRR17520069. 10382119  
SRR17520069. 10382121  
SRR17520069. 10382123  
SRR17520069. 10382125  
SRR17520069. 10382127  
SRR17520069. 10382129  
SRR17520069. 10382131  
SRR17520069. 10382133

SRR17520069. 10382135  
SRR17520069. 10382137  
SRR17520069. 10382139  
SRR17520069. 10382141  
SRR17520069. 10382143  
SRR17520069. 10382147  
SRR17520069. 10382149  
SRR17520069. 10382151  
SRR17520069. 10382153  
SRR17520069. 10382155  
SRR17520069. 10382157  
SRR17520069. 10382159  
SRR17520069. 10382161  
SRR17520069. 10382163  
SRR17520069. 10382165  
SRR17520069. 10382167  
SRR17520069. 10382169  
SRR17520069. 10382171  
SRR17520069. 10382173  
SRR17520069. 10382175  
SRR17520069. 10382179  
SRR17520069. 10382181  
SRR17520069. 10382183  
SRR17520069. 10382185  
SRR17520069. 10382187  
SRR17520069. 10382189  
SRR17520069. 10382191  
SRR17520069. 10382193  
SRR17520069. 10382195  
SRR17520069. 10382197  
SRR17520069. 10382199  
SRR17520069. 10382203  
SRR17520069. 10382205  
SRR17520069. 10382207  
SRR17520069. 10382209  
SRR17520069. 10382211  
SRR17520069. 10382213  
SRR17520069. 10382215  
SRR17520069. 10382217  
SRR17520069. 10382219  
SRR17520069. 10382221  
SRR17520069. 10382225  
SRR17520069. 10382227  
SRR17520069. 10382229  
SRR17520069. 10382233  
SRR17520069. 10382235  
SRR17520069. 10382237

SRR17520069.10382239  
SRR17520069.10382241  
SRR17520069.10382243  
SRR17520069.10382245  
SRR17520069.10386901  
SRR17520069.10386903  
SRR17520069.10386905  
SRR17520069.10386907  
SRR17520069.10386909  
SRR17520069.10386911  
SRR17520069.10386913  
SRR17520069.10386915  
SRR17520069.10386917  
SRR17520069.10386919  
SRR17520069.10386921  
SRR17520069.10386923  
SRR17520069.10386925  
SRR17520069.10386927  
SRR17520069.10388139  
SRR17520069.10388141  
SRR17520069.10388143  
SRR17520069.10388145  
SRR17520069.10388147  
SRR17520069.10388149  
SRR17520069.10388151  
SRR17520069.10388153  
SRR17520069.10388155  
SRR17520069.10388157  
SRR17520069.10388159  
SRR17520069.10388161  
SRR17520069.10389933  
SRR17520069.10389935  
SRR17520069.10389937  
SRR17520069.10389939  
SRR17520069.10389941  
SRR17520069.10389943  
SRR17520069.10389945  
SRR17520069.10389947  
SRR17520069.10389949  
SRR17520069.10389953  
SRR17520069.10389955  
SRR17520069.10389957  
SRR17520069.10389959  
SRR17520069.10389961  
SRR17520069.10389963  
SRR17520069.10389965  
SRR17520069.10389967



SRR17520069.10389969  
SRR17520069.10389971  
SRR17520069.10389975  
SRR17520069.10389980  
SRR17520069.10389982  
SRR17520069.10389984  
SRR17520069.10389986  
SRR17520069.10389988  
SRR17520069.10389990  
SRR17520069.10389992  
SRR17520069.10389994  
SRR17520069.10389996  
SRR17520069.10389998  
SRR17520069.10390000  
SRR17520069.10390002  
SRR17520069.10390004  
SRR17520069.10390006  
SRR17520069.10390008  
SRR17520069.10390010  
SRR17520069.10393240  
SRR17520069.10393242  
SRR17520069.10393244  
SRR17520069.10393246  
SRR17520069.10393248  
SRR17520069.10394205  
SRR17520069.10404586  
SRR17520069.10404588  
SRR17520069.10404590  
SRR17520069.10404592  
SRR17520069.10404594  
SRR17520069.10404596  
SRR17520069.10404598  
SRR17520069.10404600  
SRR17520069.10404602  
SRR17520069.10404604  
SRR17520069.10404606  
SRR17520069.10404608  
SRR17520069.10404610  
SRR17520069.10404612  
SRR17520069.10404614  
SRR17520069.10404616  
SRR17520069.10404618  
SRR17520069.10404620  
SRR17520069.10404622  
SRR17520069.10404624  
SRR17520069.10404626  
SRR17520069.10404628

SRR17520069. 10404630  
SRR17520069. 10404634  
SRR17520069. 10404636  
SRR17520069. 10404638  
SRR17520069. 10404640  
SRR17520069. 10404642  
SRR17520069. 10404644  
SRR17520069. 10404646  
SRR17520069. 10404648  
SRR17520069. 10404650  
SRR17520069. 10404652  
SRR17520069. 10404654  
SRR17520069. 10404656  
SRR17520069. 10404658  
SRR17520069. 10404660  
SRR17520069. 10404662  
SRR17520069. 10404664  
SRR17520069. 10404666  
SRR17520069. 10404668  
SRR17520069. 10404670  
SRR17520069. 10404672  
SRR17520069. 10404674  
SRR17520069. 10404676  
SRR17520069. 10404678  
SRR17520069. 10404680  
SRR17520069. 10404682  
SRR17520069. 10404684  
SRR17520069. 10404686  
SRR17520069. 10404688  
SRR17520069. 10404690  
SRR17520069. 10404692  
SRR17520069. 10404694  
SRR17520069. 10404696  
SRR17520069. 10404698  
SRR17520069. 10404700  
SRR17520069. 10404702  
SRR17520069. 10404704  
SRR17520069. 10404706  
SRR17520069. 10404708  
SRR17520069. 10404710  
SRR17520069. 10404712  
SRR17520069. 10404714  
SRR17520069. 10404716  
SRR17520069. 10404718  
SRR17520069. 10404720  
SRR17520069. 10404722  
SRR17520069. 10412159

SRR17520069. 10412161  
SRR17520069. 10412163  
SRR17520069. 10412165  
SRR17520069. 10412167  
SRR17520069. 10412169  
SRR17520069. 10412171  
SRR17520069. 10412173  
SRR17520069. 10412175  
SRR17520069. 10412177  
SRR17520069. 10412179  
SRR17520069. 10412181  
SRR17520069. 10412183  
SRR17520069. 10412185  
SRR17520069. 10412187  
SRR17520069. 10412189  
SRR17520069. 10412191  
SRR17520069. 10412193  
SRR17520069. 10412195  
SRR17520069. 10412197  
SRR17520069. 10412199  
SRR17520069. 10412201  
SRR17520069. 10412203  
SRR17520069. 10412205  
SRR17520069. 10412207  
SRR17520069. 10412209  
SRR17520069. 10412211  
SRR17520069. 10412213  
SRR17520069. 10412215  
SRR17520069. 10412217  
SRR17520069. 10412219  
SRR17520069. 10412221  
SRR17520069. 10412223  
SRR17520069. 10412225  
SRR17520069. 10412227  
SRR17520069. 10412229  
SRR17520069. 10412231  
SRR17520069. 10412233  
SRR17520069. 10412235  
SRR17520069. 10412237  
SRR17520069. 10412239  
SRR17520069. 10412241  
SRR17520069. 10412243  
SRR17520069. 10412245  
SRR17520069. 10412247  
SRR17520069. 10412249  
SRR17520069. 10412251  
SRR17520069. 10412253

SRR17520069.10412255  
SRR17520069.10412257  
SRR17520069.10412259  
SRR17520069.10422267  
SRR17520069.10422269  
SRR17520069.10422273  
SRR17520069.10422275  
SRR17520069.10422277  
SRR17520069.10422281  
SRR17520069.10422285  
SRR17520069.10422287  
SRR17520069.10425873  
SRR17520069.10425875  
SRR17520069.10425877  
SRR17520069.10425879  
SRR17520069.10425881  
SRR17520069.10425883  
SRR17520069.10425885  
SRR17520069.10425887  
SRR17520069.10425889  
SRR17520069.10425891  
SRR17520069.10425893  
SRR17520069.10425895  
SRR17520069.10425897  
SRR17520069.10425899  
SRR17520069.10426008  
SRR17520069.10426010  
SRR17520069.10426012  
SRR17520069.10426014  
SRR17520069.10426016  
SRR17520069.10426018  
SRR17520069.10426020  
SRR17520069.10429214  
SRR17520069.10429216  
SRR17520069.10429218  
SRR17520069.10429222  
SRR17520069.10431165  
SRR17520069.10431167  
SRR17520069.10431169  
SRR17520069.10431171  
SRR17520069.10431173  
SRR17520069.10431177  
SRR17520069.10431179  
SRR17520069.10431181  
SRR17520069.10431183  
SRR17520069.10431185  
SRR17520069.10431187

SRR17520069. 10431189  
SRR17520069. 10431191  
SRR17520069. 10431193  
SRR17520069. 10431195  
SRR17520069. 10431197  
SRR17520069. 10431199  
SRR17520069. 10431201  
SRR17520069. 10431203  
SRR17520069. 10431205  
SRR17520069. 10431207  
SRR17520069. 10431209  
SRR17520069. 10431213  
SRR17520069. 10431215  
SRR17520069. 10431217  
SRR17520069. 10431219  
SRR17520069. 10431221  
SRR17520069. 10431223  
SRR17520069. 10431225  
SRR17520069. 10431227  
SRR17520069. 10431229  
SRR17520069. 10431231  
SRR17520069. 10431233  
SRR17520069. 10432316  
SRR17520069. 10432318  
SRR17520069. 10432320  
SRR17520069. 10432322  
SRR17520069. 10432324  
SRR17520069. 10432326  
SRR17520069. 10432328  
SRR17520069. 10432330  
SRR17520069. 10432332  
SRR17520069. 10432334  
SRR17520069. 10432336  
SRR17520069. 10432338  
SRR17520069. 10432340  
SRR17520069. 10432342  
SRR17520069. 10432344  
SRR17520069. 10432346  
SRR17520069. 10432348  
SRR17520069. 10432350  
SRR17520069. 10432352  
SRR17520069. 10432354  
SRR17520069. 10432356  
SRR17520069. 10432358  
SRR17520069. 10432360  
SRR17520069. 10432362  
SRR17520069. 10432364

SRR17520069. 10432366  
SRR17520069. 10432368  
SRR17520069. 10432370  
SRR17520069. 10432372  
SRR17520069. 10432374  
SRR17520069. 10432376  
SRR17520069. 10432378  
SRR17520069. 10432380  
SRR17520069. 10432382  
SRR17520069. 10432384  
SRR17520069. 10432386  
SRR17520069. 10432388  
SRR17520069. 10432390  
SRR17520069. 10432392  
SRR17520069. 10432394  
SRR17520069. 10432398  
SRR17520069. 10432739  
SRR17520069. 10448448  
SRR17520069. 10448454  
SRR17520069. 10448651  
SRR17520069. 10448653  
SRR17520069. 10448655  
SRR17520069. 10448657  
SRR17520069. 10448659  
SRR17520069. 10448661  
SRR17520069. 10448663  
SRR17520069. 10448665  
SRR17520069. 10448667  
SRR17520069. 10448669  
SRR17520069. 10448671  
SRR17520069. 10448673  
SRR17520069. 10448675  
SRR17520069. 10448679  
SRR17520069. 10448681  
SRR17520069. 10455189  
SRR17520069. 10455191  
SRR17520069. 10455193  
SRR17520069. 10456355  
SRR17520069. 10456357  
SRR17520069. 10456359  
SRR17520069. 10456361  
SRR17520069. 10456363  
SRR17520069. 10456365  
SRR17520069. 10456367  
SRR17520069. 10456369  
SRR17520069. 10456371  
SRR17520069. 10456373

SRR17520069. 10456375  
SRR17520069. 10456377  
SRR17520069. 10456379  
SRR17520069. 10456381  
SRR17520069. 10456383  
SRR17520069. 10456385  
SRR17520069. 10456387  
SRR17520069. 10456389  
SRR17520069. 10456391  
SRR17520069. 10456393  
SRR17520069. 10456395  
SRR17520069. 10456397  
SRR17520069. 10456399  
SRR17520069. 10456401  
SRR17520069. 10456403  
SRR17520069. 10456405  
SRR17520069. 10456407  
SRR17520069. 10456409  
SRR17520069. 10456411  
SRR17520069. 10456413  
SRR17520069. 10456415  
SRR17520069. 10456417  
SRR17520069. 10456419  
SRR17520069. 10456421  
SRR17520069. 10456423  
SRR17520069. 10456425  
SRR17520069. 10456427  
SRR17520069. 10456429  
SRR17520069. 10456431  
SRR17520069. 10456433  
SRR17520069. 10456435  
SRR17520069. 10456437  
SRR17520069. 10456439  
SRR17520069. 10456443  
SRR17520069. 10456445  
SRR17520069. 10456447  
SRR17520069. 10457526  
SRR17520069. 10457528  
SRR17520069. 10457530  
SRR17520069. 10457532  
SRR17520069. 10457534  
SRR17520069. 10457536  
SRR17520069. 10457538  
SRR17520069. 10457540  
SRR17520069. 10457544  
SRR17520069. 10457546  
SRR17520069. 10457548

SRR17520069. 10457550  
SRR17520069. 10457552  
SRR17520069. 10457556  
SRR17520069. 10457558  
SRR17520069. 10457560  
SRR17520069. 10457562  
SRR17520069. 10457564  
SRR17520069. 10457566  
SRR17520069. 10457568  
SRR17520069. 10457570  
SRR17520069. 10457572  
SRR17520069. 10457574  
SRR17520069. 10457576  
SRR17520069. 10457578  
SRR17520069. 10457580  
SRR17520069. 10457582  
SRR17520069. 10457584  
SRR17520069. 10457586  
SRR17520069. 10457588  
SRR17520069. 10457590  
SRR17520069. 10457592  
SRR17520069. 10457594  
SRR17520069. 10457596  
SRR17520069. 10457598  
SRR17520069. 10457600  
SRR17520069. 10457602  
SRR17520069. 10457604  
SRR17520069. 10457608  
SRR17520069. 10457610  
SRR17520069. 10457612  
SRR17520069. 10457614  
SRR17520069. 10457616  
SRR17520069. 10457618  
SRR17520069. 10457620  
SRR17520069. 10457622  
SRR17520069. 10457624  
SRR17520069. 10457626  
SRR17520069. 10457628  
SRR17520069. 10457630  
SRR17520069. 10457632  
SRR17520069. 10457634  
SRR17520069. 10457636  
SRR17520069. 10457638  
SRR17520069. 10457640  
SRR17520069. 10457642  
SRR17520069. 10457644  
SRR17520069. 10457646



SRR17520069. 10457648  
SRR17520069. 10457650  
SRR17520069. 10457652  
SRR17520069. 10457654  
SRR17520069. 10462786  
SRR17520069. 10462788  
SRR17520069. 10462790  
SRR17520069. 10462792  
SRR17520069. 10462794  
SRR17520069. 10462796  
SRR17520069. 10464940  
SRR17520069. 10464942  
SRR17520069. 10464944  
SRR17520069. 10464946  
SRR17520069. 10465974  
SRR17520069. 10465976  
SRR17520069. 10465978  
SRR17520069. 10465980  
SRR17520069. 10465982  
SRR17520069. 10465984  
SRR17520069. 10465986  
SRR17520069. 10465988  
SRR17520069. 10465990  
SRR17520069. 10465992  
SRR17520069. 10465994  
SRR17520069. 10465996  
SRR17520069. 10465998  
SRR17520069. 10466000  
SRR17520069. 10466002  
SRR17520069. 10470598  
SRR17520069. 10472451  
SRR17520069. 10472455  
SRR17520069. 10473659  
SRR17520069. 10476817  
SRR17520069. 10476819  
SRR17520069. 10476821  
SRR17520069. 10476823  
SRR17520069. 10476825  
SRR17520069. 10476827  
SRR17520069. 10476829  
SRR17520069. 10476831  
SRR17520069. 10476833  
SRR17520069. 10476835  
SRR17520069. 10476837  
SRR17520069. 10476841  
SRR17520069. 10476843  
SRR17520069. 10476845

SRR17520069. 10476847  
SRR17520069. 10476849  
SRR17520069. 10476851  
SRR17520069. 10476855  
SRR17520069. 10476857  
SRR17520069. 10476859  
SRR17520069. 10476861  
SRR17520069. 10476863  
SRR17520069. 10476865  
SRR17520069. 10476867  
SRR17520069. 10476871  
SRR17520069. 10476873  
SRR17520069. 10476875  
SRR17520069. 10476877  
SRR17520069. 10476879  
SRR17520069. 10476881  
SRR17520069. 10476883  
SRR17520069. 10476885  
SRR17520069. 10476887  
SRR17520069. 10476889  
SRR17520069. 10476891  
SRR17520069. 10476893  
SRR17520069. 10476895  
SRR17520069. 10476897  
SRR17520069. 10476899  
SRR17520069. 10476927  
SRR17520069. 10476929  
SRR17520069. 10476931  
SRR17520069. 10476933  
SRR17520069. 10476935  
SRR17520069. 10476937  
SRR17520069. 10476939  
SRR17520069. 10476941  
SRR17520069. 10476943  
SRR17520069. 10476945  
SRR17520069. 10490805  
SRR17520069. 10490807  
SRR17520069. 10490809  
SRR17520069. 10490811  
SRR17520069. 10490813  
SRR17520069. 10490815  
SRR17520069. 10490817  
SRR17520069. 10490819  
SRR17520069. 10490821  
SRR17520069. 10490823  
SRR17520069. 10490825  
SRR17520069. 10490827

SRR17520069.10490829  
SRR17520069.10490831  
SRR17520069.10490833  
SRR17520069.10490835  
SRR17520069.10490837  
SRR17520069.10490839  
SRR17520069.10490841  
SRR17520069.10490843  
SRR17520069.10490845  
SRR17520069.10491624  
SRR17520069.10491626  
SRR17520069.10491628  
SRR17520069.10491630  
SRR17520069.10491632  
SRR17520069.10491636  
SRR17520069.10491638  
SRR17520069.10491640  
SRR17520069.10491642  
SRR17520069.10491644  
SRR17520069.10491646  
SRR17520069.10491648  
SRR17520069.10491650  
SRR17520069.10491652  
SRR17520069.10491658  
SRR17520069.10491660  
SRR17520069.10491662  
SRR17520069.10491664  
SRR17520069.10491666  
SRR17520069.10491668  
SRR17520069.10491670  
SRR17520069.10491672  
SRR17520069.10491674  
SRR17520069.10491676  
SRR17520069.10491678  
SRR17520069.10491680  
SRR17520069.10491682  
SRR17520069.10491684  
SRR17520069.10491688  
SRR17520069.10491690  
SRR17520069.10491692  
SRR17520069.10491694  
SRR17520069.10491696  
SRR17520069.10491700  
SRR17520069.10491702  
SRR17520069.10491704  
SRR17520069.10491706  
SRR17520069.10498996

SRR17520069.10498998  
SRR17520069.10499000  
SRR17520069.10499002  
SRR17520069.10499004  
SRR17520069.10499006  
SRR17520069.10499008  
SRR17520069.10499010  
SRR17520069.10499012  
SRR17520069.10499014  
SRR17520069.10499016  
SRR17520069.10499018  
SRR17520069.10499020  
SRR17520069.10499022  
SRR17520069.10505734  
SRR17520069.10505736  
SRR17520069.10505738  
SRR17520069.10505740  
SRR17520069.10505742  
SRR17520069.10505744  
SRR17520069.10505746  
SRR17520069.10505748  
SRR17520069.10505750  
SRR17520069.10513295  
SRR17520069.10513297  
SRR17520069.10513299  
SRR17520069.10513301  
SRR17520069.10513303  
SRR17520069.10513307  
SRR17520069.10515475  
SRR17520069.10515477  
SRR17520069.10515479  
SRR17520069.10515481  
SRR17520069.10515487  
SRR17520069.10515489  
SRR17520069.10515491  
SRR17520069.10515493  
SRR17520069.10515497  
SRR17520069.10515499  
SRR17520069.10518598  
SRR17520069.10518600  
SRR17520069.10518602  
SRR17520069.10518604  
SRR17520069.10518606  
SRR17520069.10518608  
SRR17520069.10518610  
SRR17520069.10518612  
SRR17520069.10518616

SRR17520069.10518622  
SRR17520069.10518626  
SRR17520069.10518628  
SRR17520069.10518630  
SRR17520069.10518632  
SRR17520069.10520564  
SRR17520069.10520570  
SRR17520069.10527926  
SRR17520069.10527928  
SRR17520069.10527930  
SRR17520069.10527932  
SRR17520069.10527934  
SRR17520069.10527936  
SRR17520069.10527938  
SRR17520069.10527940  
SRR17520069.10527942  
SRR17520069.10527944  
SRR17520069.10527946  
SRR17520069.10527948  
SRR17520069.10527950  
SRR17520069.10527952  
SRR17520069.10527954  
SRR17520069.10527956  
SRR17520069.10527958  
SRR17520069.10527960  
SRR17520069.10527962  
SRR17520069.10527964  
SRR17520069.10527966  
SRR17520069.10527970  
SRR17520069.10527972  
SRR17520069.10527974  
SRR17520069.10530137  
SRR17520069.10530139  
SRR17520069.10530141  
SRR17520069.10530143  
SRR17520069.10530145  
SRR17520069.10530147  
SRR17520069.10530149  
SRR17520069.10530151  
SRR17520069.10530155  
SRR17520069.10530157  
SRR17520069.10530159  
SRR17520069.10530161  
SRR17520069.10530163  
SRR17520069.10530165  
SRR17520069.10530167  
SRR17520069.10530169

SRR17520069.10530171  
SRR17520069.10530173  
SRR17520069.10530175  
SRR17520069.10530177  
SRR17520069.10530179  
SRR17520069.10530181  
SRR17520069.10530183  
SRR17520069.10530185  
SRR17520069.10530187  
SRR17520069.10530189  
SRR17520069.10530191  
SRR17520069.10530193  
SRR17520069.10530195  
SRR17520069.10530197  
SRR17520069.10530199  
SRR17520069.10530201  
SRR17520069.10530203  
SRR17520069.10530205  
SRR17520069.10530209  
SRR17520069.10530211  
SRR17520069.10530213  
SRR17520069.10530215  
SRR17520069.10530217  
SRR17520069.10530219  
SRR17520069.10530221  
SRR17520069.10530223  
SRR17520069.10530225  
SRR17520069.10530227  
SRR17520069.10530229  
SRR17520069.10530231  
SRR17520069.10530233  
SRR17520069.10530235  
SRR17520069.10530237  
SRR17520069.10530239  
SRR17520069.10530241  
SRR17520069.10530243  
SRR17520069.10530245  
SRR17520069.10530247  
SRR17520069.10530249  
SRR17520069.10530251  
SRR17520069.10530253  
SRR17520069.10530255  
SRR17520069.10530257  
SRR17520069.10530259  
SRR17520069.10530261  
SRR17520069.10530263  
SRR17520069.10530265

SRR17520069.10530267  
SRR17520069.10530269  
SRR17520069.10530271  
SRR17520069.10530273  
SRR17520069.10530275  
SRR17520069.10530277  
SRR17520069.10530279  
SRR17520069.10530281  
SRR17520069.10536721  
SRR17520069.10536723  
SRR17520069.10536725  
SRR17520069.10536729  
SRR17520069.10536731  
SRR17520069.10536735  
SRR17520069.10536737  
SRR17520069.10536739  
SRR17520069.10536741  
SRR17520069.10549811  
SRR17520069.10549813  
SRR17520069.10549815  
SRR17520069.10549817  
SRR17520069.10549819  
SRR17520069.10549821  
SRR17520069.10549823  
SRR17520069.10549825  
SRR17520069.10549827  
SRR17520069.10549829  
SRR17520069.10549831  
SRR17520069.10549833  
SRR17520069.10549835  
SRR17520069.10549837  
SRR17520069.10549839  
SRR17520069.10549841  
SRR17520069.10549843  
SRR17520069.10549845  
SRR17520069.10551053  
SRR17520069.10551055  
SRR17520069.10551057  
SRR17520069.10551059  
SRR17520069.10551065  
SRR17520069.10551067  
SRR17520069.10551069  
SRR17520069.10551071  
SRR17520069.10551073  
SRR17520069.10551077  
SRR17520069.10551081  
SRR17520069.10551091

SRR17520069.10551093  
SRR17520069.10551095  
SRR17520069.10551097  
SRR17520069.10551099  
SRR17520069.10551103  
SRR17520069.10556660  
SRR17520069.10556662  
SRR17520069.10556664  
SRR17520069.10558386  
SRR17520069.10558388  
SRR17520069.10558390  
SRR17520069.10558392  
SRR17520069.10558394  
SRR17520069.10558396  
SRR17520069.10558398  
SRR17520069.10558400  
SRR17520069.10558402  
SRR17520069.10558404  
SRR17520069.10558406  
SRR17520069.10558408  
SRR17520069.10558410  
SRR17520069.10558412  
SRR17520069.10558414  
SRR17520069.10558416  
SRR17520069.10558418  
SRR17520069.10558420  
SRR17520069.10558422  
SRR17520069.10558424  
SRR17520069.10558426  
SRR17520069.10558428  
SRR17520069.10559921  
SRR17520069.10559923  
SRR17520069.10559929  
SRR17520069.10559933  
SRR17520069.10559935  
SRR17520069.10559937  
SRR17520069.10559939  
SRR17520069.10559941  
SRR17520069.10559943  
SRR17520069.10559945  
SRR17520069.10559947  
SRR17520069.10559949  
SRR17520069.10559951  
SRR17520069.10559953  
SRR17520069.10559959  
SRR17520069.10559961  
SRR17520069.10559963



SRR17520069.10559965  
SRR17520069.10559967  
SRR17520069.10559969  
SRR17520069.10559971  
SRR17520069.10559973  
SRR17520069.10559979  
SRR17520069.10559981  
SRR17520069.10559983  
SRR17520069.10559985  
SRR17520069.10559991  
SRR17520069.10559993  
SRR17520069.10559995  
SRR17520069.10559997  
SRR17520069.10559999  
SRR17520069.10560001  
SRR17520069.10560005  
SRR17520069.10560007  
SRR17520069.10560011  
SRR17520069.10560013  
SRR17520069.10560015  
SRR17520069.10560017  
SRR17520069.10560019  
SRR17520069.10560021  
SRR17520069.10560023  
SRR17520069.10560025  
SRR17520069.10560027  
SRR17520069.10560029  
SRR17520069.10560031  
SRR17520069.10560033  
SRR17520069.10560039  
SRR17520069.10560041  
SRR17520069.10560047  
SRR17520069.10560049  
SRR17520069.10560051  
SRR17520069.10560053  
SRR17520069.10560057  
SRR17520069.10560059  
SRR17520069.10560063  
SRR17520069.10568321  
SRR17520069.10570498  
SRR17520069.10570500  
SRR17520069.10570502  
SRR17520069.10570504  
SRR17520069.10570506  
SRR17520069.10570508  
SRR17520069.10570510  
SRR17520069.10570512

SRR17520069.10580013  
SRR17520069.10580015  
SRR17520069.10580017  
SRR17520069.10580019  
SRR17520069.10580021  
SRR17520069.10580985  
SRR17520069.10580987  
SRR17520069.10580989  
SRR17520069.10580991  
SRR17520069.10580993  
SRR17520069.10580995  
SRR17520069.10580997  
SRR17520069.10580999  
SRR17520069.10581001  
SRR17520069.10581003  
SRR17520069.10581005  
SRR17520069.10581007  
SRR17520069.10581009  
SRR17520069.10581011  
SRR17520069.10581013  
SRR17520069.10581015  
SRR17520069.10581017  
SRR17520069.10581019  
SRR17520069.10581021  
SRR17520069.10581023  
SRR17520069.10581025  
SRR17520069.10581027  
SRR17520069.10581029  
SRR17520069.10581031  
SRR17520069.10581033  
SRR17520069.10581035  
SRR17520069.10581037  
SRR17520069.10581039  
SRR17520069.10581041  
SRR17520069.10588624  
SRR17520069.10588626  
SRR17520069.10588628  
SRR17520069.10588630  
SRR17520069.10588632  
SRR17520069.10588634  
SRR17520069.10588636  
SRR17520069.10588638  
SRR17520069.10588640  
SRR17520069.10588642  
SRR17520069.10588644  
SRR17520069.10588646  
SRR17520069.10588648

SRR17520069.10588650  
SRR17520069.10588652  
SRR17520069.10588654  
SRR17520069.10588656  
SRR17520069.10588658  
SRR17520069.10588660  
SRR17520069.10588662  
SRR17520069.10588664  
SRR17520069.10588666  
SRR17520069.10588668  
SRR17520069.10588670  
SRR17520069.10588672  
SRR17520069.10588674  
SRR17520069.10588676  
SRR17520069.10588678  
SRR17520069.10588680  
SRR17520069.10588682  
SRR17520069.10588684  
SRR17520069.10588686  
SRR17520069.10588688  
SRR17520069.10588690  
SRR17520069.10588692  
SRR17520069.10588694  
SRR17520069.10588696  
SRR17520069.10588698  
SRR17520069.10588700  
SRR17520069.10588702  
SRR17520069.10588704  
SRR17520069.10588706  
SRR17520069.10588708  
SRR17520069.10588710  
SRR17520069.10588712  
SRR17520069.10588714  
SRR17520069.10588716  
SRR17520069.10588718  
SRR17520069.10588720  
SRR17520069.10588722  
SRR17520069.10588724  
SRR17520069.10588726  
SRR17520069.10588728  
SRR17520069.10588730  
SRR17520069.10588732  
SRR17520069.10588734  
SRR17520069.10588736  
SRR17520069.10588738  
SRR17520069.10588740  
SRR17520069.10588742

SRR17520069.10588744  
SRR17520069.10588746  
SRR17520069.10588748  
SRR17520069.10588750  
SRR17520069.10588752  
SRR17520069.10588754  
SRR17520069.10588758  
SRR17520069.10588760  
SRR17520069.10588762  
SRR17520069.10588764  
SRR17520069.10588766  
SRR17520069.10588768  
SRR17520069.10588770  
SRR17520069.10588772  
SRR17520069.10588774  
SRR17520069.10588776  
SRR17520069.10588778  
SRR17520069.10588780  
SRR17520069.10588782  
SRR17520069.10588784  
SRR17520069.10588786  
SRR17520069.10588788  
SRR17520069.10588790  
SRR17520069.10588792  
SRR17520069.10588794  
SRR17520069.10588798  
SRR17520069.10588800  
SRR17520069.10588802  
SRR17520069.10588804  
SRR17520069.10588806  
SRR17520069.10588808  
SRR17520069.10588810  
SRR17520069.10588812  
SRR17520069.10588814  
SRR17520069.10588816  
SRR17520069.10588818  
SRR17520069.10588820  
SRR17520069.10588822  
SRR17520069.10588826  
SRR17520069.10588828  
SRR17520069.10588830  
SRR17520069.10588832  
SRR17520069.10588834  
SRR17520069.10588836  
SRR17520069.10588838  
SRR17520069.10588840  
SRR17520069.10588842

SRR17520069.10588844  
SRR17520069.10588846  
SRR17520069.10593953  
SRR17520069.10593955  
SRR17520069.10593959  
SRR17520069.10593961  
SRR17520069.10593963  
SRR17520069.10593965  
SRR17520069.10593967  
SRR17520069.10593969  
SRR17520069.10593973  
SRR17520069.10593975  
SRR17520069.10593977  
SRR17520069.10593981  
SRR17520069.10593983  
SRR17520069.10593987  
SRR17520069.10593989  
SRR17520069.10593993  
SRR17520069.10593997  
SRR17520069.10593999  
SRR17520069.10594003  
SRR17520069.10594005  
SRR17520069.10594007  
SRR17520069.10594009  
SRR17520069.10594015  
SRR17520069.10594017  
SRR17520069.10594021  
SRR17520069.10594023  
SRR17520069.10594027  
SRR17520069.10594029  
SRR17520069.10594033  
SRR17520069.10594041  
SRR17520069.10597036  
SRR17520069.10597038  
SRR17520069.10597040  
SRR17520069.10597042  
SRR17520069.10597046  
SRR17520069.10597048  
SRR17520069.10597050  
SRR17520069.10597052  
SRR17520069.10599930  
SRR17520069.10599932  
SRR17520069.10599934  
SRR17520069.10599936  
SRR17520069.10599938  
SRR17520069.10599940  
SRR17520069.10599942

SRR17520069.10599944  
SRR17520069.10599946  
SRR17520069.10599948  
SRR17520069.10599950  
SRR17520069.10599952  
SRR17520069.10599954  
SRR17520069.10599956  
SRR17520069.10599958  
SRR17520069.10599960  
SRR17520069.10599962  
SRR17520069.10599964  
SRR17520069.10599966  
SRR17520069.10599968  
SRR17520069.10599970  
SRR17520069.10599972  
SRR17520069.10599974  
SRR17520069.10599976  
SRR17520069.10599978  
SRR17520069.10599980  
SRR17520069.10599982  
SRR17520069.10599984  
SRR17520069.10599986  
SRR17520069.10599988  
SRR17520069.10599990  
SRR17520069.10599992  
SRR17520069.10599994  
SRR17520069.10599996  
SRR17520069.10599998  
SRR17520069.10600000  
SRR17520069.10600002  
SRR17520069.10600006  
SRR17520069.10600008  
SRR17520069.10600010  
SRR17520069.10600012  
SRR17520069.10600014  
SRR17520069.10600016  
SRR17520069.10600018  
SRR17520069.10600020  
SRR17520069.10600022  
SRR17520069.10600024  
SRR17520069.10601084  
SRR17520069.10602228  
SRR17520069.10602230  
SRR17520069.10602232  
SRR17520069.10602234  
SRR17520069.10602236  
SRR17520069.10602238

SRR17520069.10602240  
SRR17520069.10602242  
SRR17520069.10603509  
SRR17520069.10603511  
SRR17520069.10603513  
SRR17520069.10603515  
SRR17520069.10603517  
SRR17520069.10603519  
SRR17520069.10603521  
SRR17520069.10603523  
SRR17520069.10603525  
SRR17520069.10603527  
SRR17520069.10603529  
SRR17520069.10603531  
SRR17520069.10603533  
SRR17520069.10603535  
SRR17520069.10603537  
SRR17520069.10604675  
SRR17520069.10604677  
SRR17520069.10604679  
SRR17520069.10604934  
SRR17520069.10604936  
SRR17520069.10604938  
SRR17520069.10604940  
SRR17520069.10604942  
SRR17520069.10604944  
SRR17520069.10604946  
SRR17520069.10604948  
SRR17520069.10604950  
SRR17520069.10609184  
SRR17520069.10609186  
SRR17520069.10609188  
SRR17520069.10609190  
SRR17520069.10609192  
SRR17520069.10609194  
SRR17520069.10609196  
SRR17520069.10609198  
SRR17520069.10609200  
SRR17520069.10609202  
SRR17520069.10609204  
SRR17520069.10609206  
SRR17520069.10609208  
SRR17520069.10609212  
SRR17520069.10609214  
SRR17520069.10609216  
SRR17520069.10609218  
SRR17520069.10609220

SRR17520069.10609222  
SRR17520069.10609224  
SRR17520069.10609226  
SRR17520069.10609228  
SRR17520069.10609230  
SRR17520069.10609232  
SRR17520069.10609234  
SRR17520069.10609482  
SRR17520069.10611081  
SRR17520069.10611932  
SRR17520069.10611934  
SRR17520069.10611936  
SRR17520069.10611938  
SRR17520069.10611940  
SRR17520069.10611942  
SRR17520069.10611944  
SRR17520069.10611946  
SRR17520069.10611948  
SRR17520069.10611950  
SRR17520069.10611952  
SRR17520069.10611954  
SRR17520069.10614382  
SRR17520069.10614384  
SRR17520069.10616823  
SRR17520069.10618929  
SRR17520069.10618931  
SRR17520069.10618933  
SRR17520069.10618935  
SRR17520069.10618937  
SRR17520069.10618939  
SRR17520069.10618941  
SRR17520069.10618943  
SRR17520069.10618945  
SRR17520069.10618947  
SRR17520069.10618949  
SRR17520069.10618951  
SRR17520069.10618953  
SRR17520069.10618955  
SRR17520069.10618957  
SRR17520069.10618959  
SRR17520069.10618961  
SRR17520069.10618963  
SRR17520069.10618965  
SRR17520069.10618967  
SRR17520069.10621165  
SRR17520069.10621167  
SRR17520069.10621169



SRR17520069.10621171  
SRR17520069.10629481  
SRR17520069.10629483  
SRR17520069.10629485  
SRR17520069.10635097  
SRR17520069.10635099  
SRR17520069.10635101  
SRR17520069.10635105  
SRR17520069.10635107  
SRR17520069.10635109  
SRR17520069.10635111  
SRR17520069.10635113  
SRR17520069.10635115  
SRR17520069.10635117  
SRR17520069.10635119  
SRR17520069.10635121  
SRR17520069.10635123  
SRR17520069.10635220  
SRR17520069.10635222  
SRR17520069.10635224  
SRR17520069.10635226  
SRR17520069.10635228  
SRR17520069.10635230  
SRR17520069.10635232  
SRR17520069.10635234  
SRR17520069.10635236  
SRR17520069.10635238  
SRR17520069.10635240  
SRR17520069.10635244  
SRR17520069.10635246  
SRR17520069.10635248  
SRR17520069.10635250  
SRR17520069.10635252  
SRR17520069.10635254  
SRR17520069.10635256  
SRR17520069.10635258  
SRR17520069.10635260  
SRR17520069.10635262  
SRR17520069.10635264  
SRR17520069.10635266  
SRR17520069.10635268  
SRR17520069.10635270  
SRR17520069.10635272  
SRR17520069.10635274  
SRR17520069.10636854  
SRR17520069.10636856  
SRR17520069.10636858

SRR17520069.10636860  
SRR17520069.10636862  
SRR17520069.10636864  
SRR17520069.10636866  
SRR17520069.10636868  
SRR17520069.10637701  
SRR17520069.10637705  
SRR17520069.10637707  
SRR17520069.10637709  
SRR17520069.10637711  
SRR17520069.10637713  
SRR17520069.10637715  
SRR17520069.10637717  
SRR17520069.10637719  
SRR17520069.10637721  
SRR17520069.10637723  
SRR17520069.10637725  
SRR17520069.10637727  
SRR17520069.10637729  
SRR17520069.10637733  
SRR17520069.10637735  
SRR17520069.10637737  
SRR17520069.10637739  
SRR17520069.10637741  
SRR17520069.10637743  
SRR17520069.10637745  
SRR17520069.10637747  
SRR17520069.10637749  
SRR17520069.10637751  
SRR17520069.10637753  
SRR17520069.10637755  
SRR17520069.10638857  
SRR17520069.10643207  
SRR17520069.10643209  
SRR17520069.10643211  
SRR17520069.10643213  
SRR17520069.10645063  
SRR17520069.10648202  
SRR17520069.10649050  
SRR17520069.10649052  
SRR17520069.10649054  
SRR17520069.10649058  
SRR17520069.10649060  
SRR17520069.10649062  
SRR17520069.10649064  
SRR17520069.10649066  
SRR17520069.10649068

SRR17520069.10649070  
SRR17520069.10649072  
SRR17520069.10649074  
SRR17520069.10649076  
SRR17520069.10649078  
SRR17520069.10649080  
SRR17520069.10649082  
SRR17520069.10649084  
SRR17520069.10649086  
SRR17520069.10654668  
SRR17520069.10654670  
SRR17520069.10656226  
SRR17520069.10656228  
SRR17520069.10656230  
SRR17520069.10656232  
SRR17520069.10656234  
SRR17520069.10656236  
SRR17520069.10656238  
SRR17520069.10656240  
SRR17520069.10656242  
SRR17520069.10656244  
SRR17520069.10658791  
SRR17520069.10658793  
SRR17520069.10658795  
SRR17520069.10658797  
SRR17520069.10658799  
SRR17520069.10658801  
SRR17520069.10658803  
SRR17520069.10658805  
SRR17520069.10658807  
SRR17520069.10658809  
SRR17520069.10658811  
SRR17520069.10658813  
SRR17520069.10658815  
SRR17520069.10658817  
SRR17520069.10658819  
SRR17520069.10658821  
SRR17520069.10658823  
SRR17520069.10658825  
SRR17520069.10658827  
SRR17520069.10658829  
SRR17520069.10658831  
SRR17520069.10658833  
SRR17520069.10658835  
SRR17520069.10658837  
SRR17520069.10658839  
SRR17520069.10658841

SRR17520069.10658843  
SRR17520069.10658845  
SRR17520069.10658847  
SRR17520069.10658849  
SRR17520069.10658851  
SRR17520069.10658853  
SRR17520069.10658855  
SRR17520069.10658857  
SRR17520069.10658859  
SRR17520069.10658861  
SRR17520069.10658863  
SRR17520069.10658865  
SRR17520069.10658867  
SRR17520069.10658869  
SRR17520069.10658871  
SRR17520069.10658873  
SRR17520069.10658875  
SRR17520069.10658877  
SRR17520069.10658879  
SRR17520069.10658881  
SRR17520069.10658883  
SRR17520069.10662540  
SRR17520069.10662542  
SRR17520069.10662544  
SRR17520069.10662546  
SRR17520069.10662548  
SRR17520069.10662550  
SRR17520069.10662554  
SRR17520069.10662556  
SRR17520069.10662558  
SRR17520069.10662560  
SRR17520069.10662564  
SRR17520069.10662566  
SRR17520069.10662568  
SRR17520069.10662570  
SRR17520069.10662572  
SRR17520069.10662574  
SRR17520069.10662576  
SRR17520069.10662578  
SRR17520069.10662582  
SRR17520069.10662584  
SRR17520069.10662588  
SRR17520069.10662590  
SRR17520069.10662592  
SRR17520069.10662594  
SRR17520069.10662596  
SRR17520069.10662600

SRR17520069.10662604  
SRR17520069.10662606  
SRR17520069.10662608  
SRR17520069.10662610  
SRR17520069.10662612  
SRR17520069.10662614  
SRR17520069.10662616  
SRR17520069.10662618  
SRR17520069.10662620  
SRR17520069.10662622  
SRR17520069.10662624  
SRR17520069.10662626  
SRR17520069.10662628  
SRR17520069.10662630  
SRR17520069.10662632  
SRR17520069.10662634  
SRR17520069.10662636  
SRR17520069.10663153  
SRR17520069.10663155  
SRR17520069.10663157  
SRR17520069.10663159  
SRR17520069.10663161  
SRR17520069.10663163  
SRR17520069.10663165  
SRR17520069.10663167  
SRR17520069.10663169  
SRR17520069.10663171  
SRR17520069.10663173  
SRR17520069.10663175  
SRR17520069.10663177  
SRR17520069.10663179  
SRR17520069.10663181  
SRR17520069.10663183  
SRR17520069.10663185  
SRR17520069.10663187  
SRR17520069.10663189  
SRR17520069.10663191  
SRR17520069.10663193  
SRR17520069.10663195  
SRR17520069.10663197  
SRR17520069.10663199  
SRR17520069.10663201  
SRR17520069.10663203  
SRR17520069.10663205  
SRR17520069.10663207  
SRR17520069.10663209  
SRR17520069.10663211

SRR17520069.10663213  
SRR17520069.10663908  
SRR17520069.10663910  
SRR17520069.10663912  
SRR17520069.10663914  
SRR17520069.10663916  
SRR17520069.10663918  
SRR17520069.10663920  
SRR17520069.10663922  
SRR17520069.10663924  
SRR17520069.10663926  
SRR17520069.10663928  
SRR17520069.10663930  
SRR17520069.10663932  
SRR17520069.10663934  
SRR17520069.10663936  
SRR17520069.10663938  
SRR17520069.10663940  
SRR17520069.10663942  
SRR17520069.10663944  
SRR17520069.10663946  
SRR17520069.10663948  
SRR17520069.10666478  
SRR17520069.10666480  
SRR17520069.10673349  
SRR17520069.10673351  
SRR17520069.10673353  
SRR17520069.10673355  
SRR17520069.10673357  
SRR17520069.10673359  
SRR17520069.10673361  
SRR17520069.10673363  
SRR17520069.10673365  
SRR17520069.10673367  
SRR17520069.10673371  
SRR17520069.10673373  
SRR17520069.10673375  
SRR17520069.10673377  
SRR17520069.10673379  
SRR17520069.10673381  
SRR17520069.10673383  
SRR17520069.10673387  
SRR17520069.10678577  
SRR17520069.10681989  
SRR17520069.10681991  
SRR17520069.10683579  
SRR17520069.10683581

SRR17520069.10683583  
SRR17520069.10683585  
SRR17520069.10683587  
SRR17520069.10683589  
SRR17520069.10683591  
SRR17520069.10683593  
SRR17520069.10683595  
SRR17520069.10683597  
SRR17520069.10683599  
SRR17520069.10683601  
SRR17520069.10683603  
SRR17520069.10683605  
SRR17520069.10683607  
SRR17520069.10683609  
SRR17520069.10683611  
SRR17520069.10683613  
SRR17520069.10683615  
SRR17520069.10683617  
SRR17520069.10683619  
SRR17520069.10683621  
SRR17520069.10683623  
SRR17520069.10683625  
SRR17520069.10683627  
SRR17520069.10683629  
SRR17520069.10683631  
SRR17520069.10683633  
SRR17520069.10683635  
SRR17520069.10683637  
SRR17520069.10683639  
SRR17520069.10683641  
SRR17520069.10683643  
SRR17520069.10683645  
SRR17520069.10683647  
SRR17520069.10683649  
SRR17520069.10683651  
SRR17520069.10683653  
SRR17520069.10683655  
SRR17520069.10683657  
SRR17520069.10683659  
SRR17520069.10683661  
SRR17520069.10683663  
SRR17520069.10683665  
SRR17520069.10683667  
SRR17520069.10683669  
SRR17520069.10683671  
SRR17520069.10683673  
SRR17520069.10683675

SRR17520069.10683677  
SRR17520069.10683679  
SRR17520069.10683681  
SRR17520069.10683683  
SRR17520069.10683685  
SRR17520069.10683687  
SRR17520069.10683689  
SRR17520069.10683691  
SRR17520069.10683693  
SRR17520069.10683695  
SRR17520069.10683697  
SRR17520069.10686426  
SRR17520069.10690048  
SRR17520069.10690872  
SRR17520069.10690874  
SRR17520069.10690876  
SRR17520069.10690878  
SRR17520069.10690880  
SRR17520069.10690882  
SRR17520069.10690884  
SRR17520069.10698275  
SRR17520069.10698277  
SRR17520069.10698279  
SRR17520069.10698281  
SRR17520069.10698283  
SRR17520069.10698285  
SRR17520069.10698287  
SRR17520069.10699129  
SRR17520069.10699131  
SRR17520069.10699134  
SRR17520069.10699136  
SRR17520069.10699138  
SRR17520069.10699140  
SRR17520069.10699142  
SRR17520069.10699144  
SRR17520069.10699146  
SRR17520069.10699148  
SRR17520069.10699150  
SRR17520069.10699152  
SRR17520069.10699154  
SRR17520069.10699156  
SRR17520069.10699158  
SRR17520069.10699160  
SRR17520069.10699162  
SRR17520069.10699164  
SRR17520069.10699166  
SRR17520069.10699168



SRR17520069.10699170  
SRR17520069.10699172  
SRR17520069.10699174  
SRR17520069.10699176  
SRR17520069.10699178  
SRR17520069.10699180  
SRR17520069.10699182  
SRR17520069.10699184  
SRR17520069.10699186  
SRR17520069.10699188  
SRR17520069.10699190  
SRR17520069.10699192  
SRR17520069.10699194  
SRR17520069.10699196  
SRR17520069.10707491  
SRR17520069.10707493  
SRR17520069.10707495  
SRR17520069.10707497  
SRR17520069.10707499  
SRR17520069.10707501  
SRR17520069.10707503  
SRR17520069.10707505  
SRR17520069.10707507  
SRR17520069.10707509  
SRR17520069.10707511  
SRR17520069.10707513  
SRR17520069.10707515  
SRR17520069.10707517  
SRR17520069.10707519  
SRR17520069.10707521  
SRR17520069.10707523  
SRR17520069.10709324  
SRR17520069.10709326  
SRR17520069.10709328  
SRR17520069.10709330  
SRR17520069.10709332  
SRR17520069.10709334  
SRR17520069.10709336  
SRR17520069.10709338  
SRR17520069.10709340  
SRR17520069.10709342  
SRR17520069.10709344  
SRR17520069.10709346  
SRR17520069.10709350  
SRR17520069.10712582  
SRR17520069.10712584  
SRR17520069.10712586

SRR17520069.10712588  
SRR17520069.10712590  
SRR17520069.10717005  
SRR17520069.10717007  
SRR17520069.10717009  
SRR17520069.10717011  
SRR17520069.10717013  
SRR17520069.10717402  
SRR17520069.10717404  
SRR17520069.10717406  
SRR17520069.10717408  
SRR17520069.10717410  
SRR17520069.10717412  
SRR17520069.10721185  
SRR17520069.10721187  
SRR17520069.10721189  
SRR17520069.10721191  
SRR17520069.10721193  
SRR17520069.10721195  
SRR17520069.10721197  
SRR17520069.10721199  
SRR17520069.10721201  
SRR17520069.10721203  
SRR17520069.10721205  
SRR17520069.10721207  
SRR17520069.10721209  
SRR17520069.10721211  
SRR17520069.10721213  
SRR17520069.10721215  
SRR17520069.10721217  
SRR17520069.10721219  
SRR17520069.10721221  
SRR17520069.10721223  
SRR17520069.10721225  
SRR17520069.10721227  
SRR17520069.10721229  
SRR17520069.10721231  
SRR17520069.10721233  
SRR17520069.10721235  
SRR17520069.10721237  
SRR17520069.10721241  
SRR17520069.10721243  
SRR17520069.10721245  
SRR17520069.10721247  
SRR17520069.10721249  
SRR17520069.10721251  
SRR17520069.10721253

SRR17520069.10721255  
SRR17520069.10721257  
SRR17520069.10721259  
SRR17520069.10721261  
SRR17520069.10721263  
SRR17520069.10721265  
SRR17520069.10721267  
SRR17520069.10721269  
SRR17520069.10721271  
SRR17520069.10721273  
SRR17520069.10721275  
SRR17520069.10721277  
SRR17520069.10721279  
SRR17520069.10721281  
SRR17520069.10721285  
SRR17520069.10721287  
SRR17520069.10721289  
SRR17520069.10724199  
SRR17520069.10724201  
SRR17520069.10724203  
SRR17520069.10724205  
SRR17520069.10724207  
SRR17520069.10724209  
SRR17520069.10724211  
SRR17520069.10724213  
SRR17520069.10724215  
SRR17520069.10724217  
SRR17520069.10724219  
SRR17520069.10727905  
SRR17520069.10727907  
SRR17520069.10727911  
SRR17520069.10727913  
SRR17520069.10727915  
SRR17520069.10727917  
SRR17520069.10727919  
SRR17520069.10727921  
SRR17520069.10727925  
SRR17520069.10727927  
SRR17520069.10727929  
SRR17520069.10727931  
SRR17520069.10727933  
SRR17520069.10727944  
SRR17520069.10727975  
SRR17520069.10736987  
SRR17520069.10736989  
SRR17520069.10736993  
SRR17520069.10736995

SRR17520069.10736997  
SRR17520069.10736999  
SRR17520069.10737001  
SRR17520069.10737003  
SRR17520069.10737005  
SRR17520069.10737007  
SRR17520069.10737009  
SRR17520069.10737011  
SRR17520069.10739903  
SRR17520069.10739905  
SRR17520069.10739907  
SRR17520069.10739909  
SRR17520069.10739911  
SRR17520069.10739913  
SRR17520069.10739915  
SRR17520069.10739917  
SRR17520069.10739919  
SRR17520069.10739921  
SRR17520069.10744071  
SRR17520069.10744073  
SRR17520069.10744075  
SRR17520069.10744077  
SRR17520069.10744081  
SRR17520069.10744083  
SRR17520069.10744085  
SRR17520069.10744087  
SRR17520069.10744091  
SRR17520069.10744093  
SRR17520069.10744095  
SRR17520069.10744099  
SRR17520069.10744101  
SRR17520069.10744103  
SRR17520069.10744105  
SRR17520069.10744111  
SRR17520069.10744113  
SRR17520069.10744115  
SRR17520069.10744117  
SRR17520069.10744119  
SRR17520069.10744121  
SRR17520069.10745126  
SRR17520069.10745128  
SRR17520069.10745130  
SRR17520069.10745132  
SRR17520069.10745134  
SRR17520069.10745136  
SRR17520069.10745140  
SRR17520069.10745142

SRR17520069.10745144  
SRR17520069.10745146  
SRR17520069.10745148  
SRR17520069.10745150  
SRR17520069.10745152  
SRR17520069.10745154  
SRR17520069.10745156  
SRR17520069.10745158  
SRR17520069.10745160  
SRR17520069.10745162  
SRR17520069.10745164  
SRR17520069.10745166  
SRR17520069.10745168  
SRR17520069.10745170  
SRR17520069.10745172  
SRR17520069.10745174  
SRR17520069.10745176  
SRR17520069.10745178  
SRR17520069.10745180  
SRR17520069.10745182  
SRR17520069.10745184  
SRR17520069.10745186  
SRR17520069.10745188  
SRR17520069.10747922  
SRR17520069.10747924  
SRR17520069.10747926  
SRR17520069.10747928  
SRR17520069.10747930  
SRR17520069.10747932  
SRR17520069.10747934  
SRR17520069.10747938  
SRR17520069.10747940  
SRR17520069.10747942  
SRR17520069.10747944  
SRR17520069.10747946  
SRR17520069.10747948  
SRR17520069.10747950  
SRR17520069.10747952  
SRR17520069.10747954  
SRR17520069.10747956  
SRR17520069.10747958  
SRR17520069.10747960  
SRR17520069.10747962  
SRR17520069.10747964  
SRR17520069.10747966  
SRR17520069.10747968  
SRR17520069.10749899

SRR17520069. 10749901  
SRR17520069. 10749903  
SRR17520069. 10749905  
SRR17520069. 10749907  
SRR17520069. 10749909  
SRR17520069. 10749911  
SRR17520069. 10749913  
SRR17520069. 10749915  
SRR17520069. 10749917  
SRR17520069. 10749919  
SRR17520069. 10749921  
SRR17520069. 10752461  
SRR17520069. 10752463  
SRR17520069. 10752467  
SRR17520069. 10752469  
SRR17520069. 10752825  
SRR17520069. 10752827  
SRR17520069. 10752829  
SRR17520069. 10752831  
SRR17520069. 10752833  
SRR17520069. 10752835  
SRR17520069. 10754103  
SRR17520069. 10757892  
SRR17520069. 10757894  
SRR17520069. 10757896  
SRR17520069. 10757900  
SRR17520069. 10757902  
SRR17520069. 10757904  
SRR17520069. 10757906  
SRR17520069. 10757908  
SRR17520069. 10757910  
SRR17520069. 10757912  
SRR17520069. 10757914  
SRR17520069. 10757916  
SRR17520069. 10757918  
SRR17520069. 10757920  
SRR17520069. 10757922  
SRR17520069. 10757924  
SRR17520069. 10757926  
SRR17520069. 10757928  
SRR17520069. 10757930  
SRR17520069. 10757932  
SRR17520069. 10757934  
SRR17520069. 10757936  
SRR17520069. 10760260  
SRR17520069. 10760262  
SRR17520069. 10760264

SRR17520069. 10760266  
SRR17520069. 10761762  
SRR17520069. 10761764  
SRR17520069. 10761766  
SRR17520069. 10761768  
SRR17520069. 10761770  
SRR17520069. 10761772  
SRR17520069. 10761774  
SRR17520069. 10761776  
SRR17520069. 10761778  
SRR17520069. 10761780  
SRR17520069. 10761782  
SRR17520069. 10761784  
SRR17520069. 10761786  
SRR17520069. 10761788  
SRR17520069. 10761790  
SRR17520069. 10761792  
SRR17520069. 10761796  
SRR17520069. 10761798  
SRR17520069. 10761800  
SRR17520069. 10761802  
SRR17520069. 10761804  
SRR17520069. 10764573  
SRR17520069. 10764575  
SRR17520069. 10764577  
SRR17520069. 10764579  
SRR17520069. 10764583  
SRR17520069. 10765454  
SRR17520069. 10765456  
SRR17520069. 10765458  
SRR17520069. 10765460  
SRR17520069. 10765462  
SRR17520069. 10765464  
SRR17520069. 10765466  
SRR17520069. 10765468  
SRR17520069. 10765470  
SRR17520069. 10765472  
SRR17520069. 10765474  
SRR17520069. 10765476  
SRR17520069. 10765478  
SRR17520069. 10765480  
SRR17520069. 10765482  
SRR17520069. 10765484  
SRR17520069. 10765486  
SRR17520069. 10765488  
SRR17520069. 10765490  
SRR17520069. 10765492

SRR17520069.10765494  
SRR17520069.10765496  
SRR17520069.10765498  
SRR17520069.10765500  
SRR17520069.10765502  
SRR17520069.10765504  
SRR17520069.10765506  
SRR17520069.10765508  
SRR17520069.10765510  
SRR17520069.10765512  
SRR17520069.10765514  
SRR17520069.10765516  
SRR17520069.10765518  
SRR17520069.10765520  
SRR17520069.10765522  
SRR17520069.10765524  
SRR17520069.10765526  
SRR17520069.10765528  
SRR17520069.10765530  
SRR17520069.10765532  
SRR17520069.10765534  
SRR17520069.10765536  
SRR17520069.10765538  
SRR17520069.10768643  
SRR17520069.10768645  
SRR17520069.10768647  
SRR17520069.10768649  
SRR17520069.10768651  
SRR17520069.10768653  
SRR17520069.10768655  
SRR17520069.10768657  
SRR17520069.10768659  
SRR17520069.10768661  
SRR17520069.10768663  
SRR17520069.10768665  
SRR17520069.10768667  
SRR17520069.10768669  
SRR17520069.10768671  
SRR17520069.10768673  
SRR17520069.10769617  
SRR17520069.10769621  
SRR17520069.10769623  
SRR17520069.10769625  
SRR17520069.10769627  
SRR17520069.10769629  
SRR17520069.10769631  
SRR17520069.10769633



SRR17520069. 10769635  
SRR17520069. 10769637  
SRR17520069. 10771272  
SRR17520069. 10771274  
SRR17520069. 10771276  
SRR17520069. 10771278  
SRR17520069. 10771280  
SRR17520069. 10771282  
SRR17520069. 10771284  
SRR17520069. 10771286  
SRR17520069. 10771288  
SRR17520069. 10771290  
SRR17520069. 10771292  
SRR17520069. 10771294  
SRR17520069. 10771296  
SRR17520069. 10771300  
SRR17520069. 10771302  
SRR17520069. 10771306  
SRR17520069. 10771308  
SRR17520069. 10771310  
SRR17520069. 10771312  
SRR17520069. 10771314  
SRR17520069. 10771316  
SRR17520069. 10771318  
SRR17520069. 10771320  
SRR17520069. 10772578  
SRR17520069. 10774691  
SRR17520069. 10774693  
SRR17520069. 10774695  
SRR17520069. 10774697  
SRR17520069. 10774699  
SRR17520069. 10774701  
SRR17520069. 10774703  
SRR17520069. 10774705  
SRR17520069. 10774707  
SRR17520069. 10774711  
SRR17520069. 10774713  
SRR17520069. 10774715  
SRR17520069. 10774717  
SRR17520069. 10774719  
SRR17520069. 10774721  
SRR17520069. 10774723  
SRR17520069. 10774725  
SRR17520069. 10774727  
SRR17520069. 10774729  
SRR17520069. 10774731  
SRR17520069. 10774733

SRR17520069.10774735  
SRR17520069.10774737  
SRR17520069.10774739  
SRR17520069.10774743  
SRR17520069.10774745  
SRR17520069.10774747  
SRR17520069.10774749  
SRR17520069.10774751  
SRR17520069.10777331  
SRR17520069.10779010  
SRR17520069.10779012  
SRR17520069.10779014  
SRR17520069.10779016  
SRR17520069.10779018  
SRR17520069.10779020  
SRR17520069.10779022  
SRR17520069.10779024  
SRR17520069.10779026  
SRR17520069.10779028  
SRR17520069.10779030  
SRR17520069.10779032  
SRR17520069.10779034  
SRR17520069.10779036  
SRR17520069.10779038  
SRR17520069.10779040  
SRR17520069.10779042  
SRR17520069.10779044  
SRR17520069.10779046  
SRR17520069.10779048  
SRR17520069.10779050  
SRR17520069.10779054  
SRR17520069.10779056  
SRR17520069.10779058  
SRR17520069.10779060  
SRR17520069.10779062  
SRR17520069.10779064  
SRR17520069.10779066  
SRR17520069.10779068  
SRR17520069.10779070  
SRR17520069.10779072  
SRR17520069.10779074  
SRR17520069.10779076  
SRR17520069.10781223  
SRR17520069.10781225  
SRR17520069.10781227  
SRR17520069.10781229  
SRR17520069.10781231

SRR17520069.10791216  
SRR17520069.10791218  
SRR17520069.10791220  
SRR17520069.10791222  
SRR17520069.10791224  
SRR17520069.10791226  
SRR17520069.10791228  
SRR17520069.10791230  
SRR17520069.10791232  
SRR17520069.10791234  
SRR17520069.10791236  
SRR17520069.10791238  
SRR17520069.10791240  
SRR17520069.10791242  
SRR17520069.10791244  
SRR17520069.10791246  
SRR17520069.10791248  
SRR17520069.10791250  
SRR17520069.10791252  
SRR17520069.10791254  
SRR17520069.10793730  
SRR17520069.10793732  
SRR17520069.10793734  
SRR17520069.10793736  
SRR17520069.10793738  
SRR17520069.10793740  
SRR17520069.10793742  
SRR17520069.10793744  
SRR17520069.10793746  
SRR17520069.10793748  
SRR17520069.10800019  
SRR17520069.10800021  
SRR17520069.10800023  
SRR17520069.10800025  
SRR17520069.10800027  
SRR17520069.10800029  
SRR17520069.10800031  
SRR17520069.10800033  
SRR17520069.10800035  
SRR17520069.10800037  
SRR17520069.10809773  
SRR17520069.10809775  
SRR17520069.10809777  
SRR17520069.10809779  
SRR17520069.10809781  
SRR17520069.10809783  
SRR17520069.10809785

SRR17520069.10809787  
SRR17520069.10809789  
SRR17520069.10809791  
SRR17520069.10809793  
SRR17520069.10809795  
SRR17520069.10809797  
SRR17520069.10809799  
SRR17520069.10809801  
SRR17520069.10809805  
SRR17520069.10809807  
SRR17520069.10812765  
SRR17520069.10812767  
SRR17520069.10812769  
SRR17520069.10812771  
SRR17520069.10812773  
SRR17520069.10812775  
SRR17520069.10812777  
SRR17520069.10812779  
SRR17520069.10812781  
SRR17520069.10812783  
SRR17520069.10812785  
SRR17520069.10812787  
SRR17520069.10812789  
SRR17520069.10812791  
SRR17520069.10812793  
SRR17520069.10812797  
SRR17520069.10812801  
SRR17520069.10812803  
SRR17520069.10813544  
SRR17520069.10813546  
SRR17520069.10813548  
SRR17520069.10813550  
SRR17520069.10813552  
SRR17520069.10813554  
SRR17520069.10813556  
SRR17520069.10813558  
SRR17520069.10813560  
SRR17520069.10813562  
SRR17520069.10813564  
SRR17520069.10813566  
SRR17520069.10813568  
SRR17520069.10813570  
SRR17520069.10813572  
SRR17520069.10813574  
SRR17520069.10813576  
SRR17520069.10813578  
SRR17520069.10813580

SRR17520069.10813582  
SRR17520069.10813584  
SRR17520069.10813586  
SRR17520069.10813588  
SRR17520069.10813590  
SRR17520069.10813592  
SRR17520069.10813594  
SRR17520069.10813596  
SRR17520069.10813598  
SRR17520069.10813600  
SRR17520069.10813602  
SRR17520069.10813604  
SRR17520069.10813606  
SRR17520069.10813610  
SRR17520069.10813612  
SRR17520069.10813616  
SRR17520069.10813618  
SRR17520069.10813620  
SRR17520069.10813622  
SRR17520069.10813624  
SRR17520069.10813626  
SRR17520069.10813628  
SRR17520069.10813630  
SRR17520069.10813632  
SRR17520069.10813634  
SRR17520069.10813636  
SRR17520069.10813638  
SRR17520069.10819059  
SRR17520069.10819061  
SRR17520069.10824109  
SRR17520069.10824111  
SRR17520069.10824113  
SRR17520069.10824115  
SRR17520069.10824117  
SRR17520069.10824426  
SRR17520069.10824428  
SRR17520069.10824430  
SRR17520069.10824432  
SRR17520069.10824434  
SRR17520069.10824436  
SRR17520069.10824438  
SRR17520069.10824440  
SRR17520069.10824442  
SRR17520069.10824444  
SRR17520069.10824446  
SRR17520069.10824448  
SRR17520069.10824450

SRR17520069.10824452  
SRR17520069.10824454  
SRR17520069.10824456  
SRR17520069.10824458  
SRR17520069.10824460  
SRR17520069.10824462  
SRR17520069.10824464  
SRR17520069.10824466  
SRR17520069.10824468  
SRR17520069.10824470  
SRR17520069.10831522  
SRR17520069.10831524  
SRR17520069.10831526  
SRR17520069.10837366  
SRR17520069.10837368  
SRR17520069.10837370  
SRR17520069.10841574  
SRR17520069.10841576  
SRR17520069.10841578  
SRR17520069.10841580  
SRR17520069.10841582  
SRR17520069.10841584  
SRR17520069.10841586  
SRR17520069.10841588  
SRR17520069.10841590  
SRR17520069.10841592  
SRR17520069.10841594  
SRR17520069.10841596  
SRR17520069.10841599  
SRR17520069.10841601  
SRR17520069.10841603  
SRR17520069.10841605  
SRR17520069.10841607  
SRR17520069.10841609  
SRR17520069.10841611  
SRR17520069.10841613  
SRR17520069.10841615  
SRR17520069.10841617  
SRR17520069.10841619  
SRR17520069.10841621  
SRR17520069.10841623  
SRR17520069.10841625  
SRR17520069.10841627  
SRR17520069.10841629  
SRR17520069.10848951  
SRR17520069.10848953  
SRR17520069.10848955

SRR17520069.10852273  
SRR17520069.10852275  
SRR17520069.10852277  
SRR17520069.10852279  
SRR17520069.10852281  
SRR17520069.10852283  
SRR17520069.10852285  
SRR17520069.10852287  
SRR17520069.10852289  
SRR17520069.10852291  
SRR17520069.10852293  
SRR17520069.10852295  
SRR17520069.10852299  
SRR17520069.10852301  
SRR17520069.10852303  
SRR17520069.10852305  
SRR17520069.10852307  
SRR17520069.10852309  
SRR17520069.10852311  
SRR17520069.10852313  
SRR17520069.10852973  
SRR17520069.10852975  
SRR17520069.10852977  
SRR17520069.10852979  
SRR17520069.10852981  
SRR17520069.10852983  
SRR17520069.10852985  
SRR17520069.10852987  
SRR17520069.10852989  
SRR17520069.10852991  
SRR17520069.10852993  
SRR17520069.10852995  
SRR17520069.10852997  
SRR17520069.10853015  
SRR17520069.10853017  
SRR17520069.10853019  
SRR17520069.10853021  
SRR17520069.10853025  
SRR17520069.10853027  
SRR17520069.10853029  
SRR17520069.10853031  
SRR17520069.10853033  
SRR17520069.10853035  
SRR17520069.10853037  
SRR17520069.10853039  
SRR17520069.10853041  
SRR17520069.10853043

SRR17520069.10853045  
SRR17520069.10853047  
SRR17520069.10853049  
SRR17520069.10853051  
SRR17520069.10853053  
SRR17520069.10853055  
SRR17520069.10853057  
SRR17520069.10853059  
SRR17520069.10853061  
SRR17520069.10853063  
SRR17520069.10853065  
SRR17520069.10858990  
SRR17520069.10858992  
SRR17520069.10858994  
SRR17520069.10858996  
SRR17520069.10858998  
SRR17520069.10859000  
SRR17520069.10859002  
SRR17520069.10859004  
SRR17520069.10859006  
SRR17520069.10859008  
SRR17520069.10859010  
SRR17520069.10859012  
SRR17520069.10859014  
SRR17520069.10859016  
SRR17520069.10859018  
SRR17520069.10859020  
SRR17520069.10859022  
SRR17520069.10859024  
SRR17520069.10859026  
SRR17520069.10859028  
SRR17520069.10859030  
SRR17520069.10859032  
SRR17520069.10859034  
SRR17520069.10859036  
SRR17520069.10859040  
SRR17520069.10859042  
SRR17520069.10859044  
SRR17520069.10859046  
SRR17520069.10859048  
SRR17520069.10859050  
SRR17520069.10859052  
SRR17520069.10859054  
SRR17520069.10859056  
SRR17520069.10859058  
SRR17520069.10859060  
SRR17520069.10859062



SRR17520069.10859064  
SRR17520069.10859066  
SRR17520069.10859068  
SRR17520069.10859070  
SRR17520069.10859072  
SRR17520069.10859074  
SRR17520069.10859076  
SRR17520069.10859078  
SRR17520069.10859080  
SRR17520069.10861850  
SRR17520069.10861852  
SRR17520069.10861854  
SRR17520069.10861856  
SRR17520069.10861858  
SRR17520069.10861860  
SRR17520069.10861862  
SRR17520069.10861864  
SRR17520069.10861870  
SRR17520069.10861872  
SRR17520069.10861874  
SRR17520069.10869496  
SRR17520069.10870327  
SRR17520069.10870331  
SRR17520069.10870333  
SRR17520069.10870335  
SRR17520069.10870337  
SRR17520069.10870339  
SRR17520069.10870341  
SRR17520069.10870343  
SRR17520069.10870347  
SRR17520069.10870349  
SRR17520069.10870351  
SRR17520069.10870353  
SRR17520069.10875404  
SRR17520069.10877028  
SRR17520069.10877030  
SRR17520069.10877032  
SRR17520069.10877034  
SRR17520069.10877036  
SRR17520069.10877038  
SRR17520069.10877040  
SRR17520069.10877044  
SRR17520069.10877046  
SRR17520069.10877048  
SRR17520069.10877050  
SRR17520069.10877052  
SRR17520069.10877054

SRR17520069.10877056  
SRR17520069.10877058  
SRR17520069.10877060  
SRR17520069.10877062  
SRR17520069.10877064  
SRR17520069.10877066  
SRR17520069.10878072  
SRR17520069.10878074  
SRR17520069.10878076  
SRR17520069.10878078  
SRR17520069.10878080  
SRR17520069.10878082  
SRR17520069.10878084  
SRR17520069.10878086  
SRR17520069.10878088  
SRR17520069.10878090  
SRR17520069.10878092  
SRR17520069.10878094  
SRR17520069.10878096  
SRR17520069.10878098  
SRR17520069.10878100  
SRR17520069.10878102  
SRR17520069.10878104  
SRR17520069.10878106  
SRR17520069.10884854  
SRR17520069.10884856  
SRR17520069.10884858  
SRR17520069.10884860  
SRR17520069.10884862  
SRR17520069.10884864  
SRR17520069.10884866  
SRR17520069.10884868  
SRR17520069.10884870  
SRR17520069.10884872  
SRR17520069.10884874  
SRR17520069.10884876  
SRR17520069.10884878  
SRR17520069.10884880  
SRR17520069.10884882  
SRR17520069.10884884  
SRR17520069.10884886  
SRR17520069.10884888  
SRR17520069.10884890  
SRR17520069.10884892  
SRR17520069.10884894  
SRR17520069.10884896  
SRR17520069.10884898

SRR17520069.10884902  
SRR17520069.10884904  
SRR17520069.10884906  
SRR17520069.10884908  
SRR17520069.10884910  
SRR17520069.10885939  
SRR17520069.10885941  
SRR17520069.10885943  
SRR17520069.10885945  
SRR17520069.10885947  
SRR17520069.10885949  
SRR17520069.10885951  
SRR17520069.10885953  
SRR17520069.10885955  
SRR17520069.10885957  
SRR17520069.10885959  
SRR17520069.10885961  
SRR17520069.10885963  
SRR17520069.10885965  
SRR17520069.10885967  
SRR17520069.10885969  
SRR17520069.10885971  
SRR17520069.10885973  
SRR17520069.10885975  
SRR17520069.10885977  
SRR17520069.10885979  
SRR17520069.10885981  
SRR17520069.10885983  
SRR17520069.10885987  
SRR17520069.10885989  
SRR17520069.10885991  
SRR17520069.10885993  
SRR17520069.10885995  
SRR17520069.10885997  
SRR17520069.10885999  
SRR17520069.10886001  
SRR17520069.10886003  
SRR17520069.10886005  
SRR17520069.10886007  
SRR17520069.10886009  
SRR17520069.10886011  
SRR17520069.10886013  
SRR17520069.10886015  
SRR17520069.10886017  
SRR17520069.10886019  
SRR17520069.10886021  
SRR17520069.10897160

SRR17520069.10897162  
SRR17520069.10897164  
SRR17520069.10897166  
SRR17520069.10897168  
SRR17520069.10897170  
SRR17520069.10897172  
SRR17520069.10897174  
SRR17520069.10897176  
SRR17520069.10897178  
SRR17520069.10897180  
SRR17520069.10897182  
SRR17520069.10897184  
SRR17520069.10897186  
SRR17520069.10898097  
SRR17520069.10898099  
SRR17520069.10898101  
SRR17520069.10898103  
SRR17520069.10898105  
SRR17520069.10898107  
SRR17520069.10898109  
SRR17520069.10898113  
SRR17520069.10898115  
SRR17520069.10898117  
SRR17520069.10898119  
SRR17520069.10898121  
SRR17520069.10898123  
SRR17520069.10898125  
SRR17520069.10898127  
SRR17520069.10898129  
SRR17520069.10898131  
SRR17520069.10898133  
SRR17520069.10898135  
SRR17520069.10898137  
SRR17520069.10898141  
SRR17520069.10898143  
SRR17520069.10898145  
SRR17520069.10898147  
SRR17520069.10898149  
SRR17520069.10898151  
SRR17520069.10898153  
SRR17520069.10900044  
SRR17520069.10900046  
SRR17520069.10900048  
SRR17520069.10900050  
SRR17520069.10900052  
SRR17520069.10900054  
SRR17520069.10900056

SRR17520069.10900058  
SRR17520069.10900060  
SRR17520069.10900062  
SRR17520069.10900064  
SRR17520069.10900066  
SRR17520069.10900068  
SRR17520069.10900070  
SRR17520069.10900072  
SRR17520069.10900074  
SRR17520069.10900076  
SRR17520069.10900078  
SRR17520069.10900080  
SRR17520069.10900082  
SRR17520069.10900084  
SRR17520069.10900086  
SRR17520069.10900088  
SRR17520069.10900090  
SRR17520069.10900092  
SRR17520069.10900094  
SRR17520069.10900096  
SRR17520069.10900098  
SRR17520069.10900100  
SRR17520069.10900102  
SRR17520069.10900104  
SRR17520069.10900106  
SRR17520069.10900108  
SRR17520069.10900110  
SRR17520069.10900112  
SRR17520069.10900114  
SRR17520069.10900116  
SRR17520069.10900118  
SRR17520069.10900120  
SRR17520069.10900122  
SRR17520069.10900124  
SRR17520069.10900128  
SRR17520069.10900717  
SRR17520069.10900719  
SRR17520069.10900721  
SRR17520069.10900723  
SRR17520069.10900725  
SRR17520069.10900727  
SRR17520069.10900729  
SRR17520069.10900731  
SRR17520069.10900733  
SRR17520069.10900735  
SRR17520069.10900737  
SRR17520069.10900739

SRR17520069.10900741  
SRR17520069.10901679  
SRR17520069.10901681  
SRR17520069.10901683  
SRR17520069.10901685  
SRR17520069.10901687  
SRR17520069.10901691  
SRR17520069.10901693  
SRR17520069.10901695  
SRR17520069.10901697  
SRR17520069.10901699  
SRR17520069.10901701  
SRR17520069.10901703  
SRR17520069.10901705  
SRR17520069.10903824  
SRR17520069.10903826  
SRR17520069.10903828  
SRR17520069.10903830  
SRR17520069.10903832  
SRR17520069.10903834  
SRR17520069.10903836  
SRR17520069.10903838  
SRR17520069.10903840  
SRR17520069.10903842  
SRR17520069.10903844  
SRR17520069.10903846  
SRR17520069.10903848  
SRR17520069.10903850  
SRR17520069.10903852  
SRR17520069.10903854  
SRR17520069.10903856  
SRR17520069.10903858  
SRR17520069.10903860  
SRR17520069.10909300  
SRR17520069.10909302  
SRR17520069.10909304  
SRR17520069.10909306  
SRR17520069.10909308  
SRR17520069.10909310  
SRR17520069.10909312  
SRR17520069.10909314  
SRR17520069.10909316  
SRR17520069.10909318  
SRR17520069.10909320  
SRR17520069.10909322  
SRR17520069.10909324  
SRR17520069.10909326

SRR17520069.10909328  
SRR17520069.10909330  
SRR17520069.10909332  
SRR17520069.10909334  
SRR17520069.10909336  
SRR17520069.10909338  
SRR17520069.10909340  
SRR17520069.10909342  
SRR17520069.10909344  
SRR17520069.10909346  
SRR17520069.10909348  
SRR17520069.10909352  
SRR17520069.10909354  
SRR17520069.10909356  
SRR17520069.10909358  
SRR17520069.10909362  
SRR17520069.10909364  
SRR17520069.10909366  
SRR17520069.10909368  
SRR17520069.10909372  
SRR17520069.10909374  
SRR17520069.10909376  
SRR17520069.10909378  
SRR17520069.10909380  
SRR17520069.10909382  
SRR17520069.10909384  
SRR17520069.10909386  
SRR17520069.10909390  
SRR17520069.10909392  
SRR17520069.10909394  
SRR17520069.10909396  
SRR17520069.10909398  
SRR17520069.10909400  
SRR17520069.10909402  
SRR17520069.10909404  
SRR17520069.10909406  
SRR17520069.10909408  
SRR17520069.10909410  
SRR17520069.10909412  
SRR17520069.10909414  
SRR17520069.10909418  
SRR17520069.10909420  
SRR17520069.10909422  
SRR17520069.10909424  
SRR17520069.10909426  
SRR17520069.10909428  
SRR17520069.10917168

SRR17520069.10917170  
SRR17520069.10917172  
SRR17520069.10917174  
SRR17520069.10917176  
SRR17520069.10917178  
SRR17520069.10917180  
SRR17520069.10917182  
SRR17520069.10917184  
SRR17520069.10917186  
SRR17520069.10917188  
SRR17520069.10917190  
SRR17520069.10917192  
SRR17520069.10917194  
SRR17520069.10917196  
SRR17520069.10917198  
SRR17520069.10917200  
SRR17520069.10917202  
SRR17520069.10917204  
SRR17520069.10917206  
SRR17520069.10917208  
SRR17520069.10917210  
SRR17520069.10917212  
SRR17520069.10917214  
SRR17520069.10917216  
SRR17520069.10917218  
SRR17520069.10917220  
SRR17520069.10917222  
SRR17520069.10917224  
SRR17520069.10917226  
SRR17520069.10917228  
SRR17520069.10917230  
SRR17520069.10917232  
SRR17520069.10917234  
SRR17520069.10917241  
SRR17520069.10917243  
SRR17520069.10917245  
SRR17520069.10917249  
SRR17520069.10917251  
SRR17520069.10917253  
SRR17520069.10917255  
SRR17520069.10917257  
SRR17520069.10917259  
SRR17520069.10917261  
SRR17520069.10917263  
SRR17520069.10917265  
SRR17520069.10917267  
SRR17520069.10917269



SRR17520069.10917271  
SRR17520069.10921408  
SRR17520069.10921410  
SRR17520069.10921412  
SRR17520069.10921414  
SRR17520069.10921416  
SRR17520069.10921418  
SRR17520069.10921420  
SRR17520069.10921422  
SRR17520069.10921424  
SRR17520069.10921428  
SRR17520069.10921430  
SRR17520069.10921434  
SRR17520069.10921436  
SRR17520069.10921438  
SRR17520069.10921440  
SRR17520069.10921442  
SRR17520069.10921444  
SRR17520069.10921446  
SRR17520069.10921448  
SRR17520069.10921450  
SRR17520069.10921452  
SRR17520069.10921454  
SRR17520069.10921456  
SRR17520069.10921458  
SRR17520069.10921460  
SRR17520069.10921462  
SRR17520069.10921464  
SRR17520069.10921466  
SRR17520069.10932062  
SRR17520069.10932064  
SRR17520069.10932066  
SRR17520069.10932068  
SRR17520069.10932070  
SRR17520069.10932072  
SRR17520069.10932074  
SRR17520069.10932076  
SRR17520069.10932078  
SRR17520069.10933624  
SRR17520069.10933626  
SRR17520069.10933628  
SRR17520069.10933630  
SRR17520069.10933632  
SRR17520069.10933634  
SRR17520069.10933636  
SRR17520069.10933638  
SRR17520069.10933644

SRR17520069.10933648  
SRR17520069.10933650  
SRR17520069.10933652  
SRR17520069.10933654  
SRR17520069.10933656  
SRR17520069.10933660  
SRR17520069.10933662  
SRR17520069.10933664  
SRR17520069.10933666  
SRR17520069.10933668  
SRR17520069.10933674  
SRR17520069.10933678  
SRR17520069.10933680  
SRR17520069.10933682  
SRR17520069.10935435  
SRR17520069.10935437  
SRR17520069.10935439  
SRR17520069.10935441  
SRR17520069.10935443  
SRR17520069.10935445  
SRR17520069.10935447  
SRR17520069.10935449  
SRR17520069.10935451  
SRR17520069.10935453  
SRR17520069.10935455  
SRR17520069.10938557  
SRR17520069.10938559  
SRR17520069.10938561  
SRR17520069.10938563  
SRR17520069.10938565  
SRR17520069.10938567  
SRR17520069.10938569  
SRR17520069.10938571  
SRR17520069.10938573  
SRR17520069.10938575  
SRR17520069.10938577  
SRR17520069.10938579  
SRR17520069.10938581  
SRR17520069.10938583  
SRR17520069.10938585  
SRR17520069.10938587  
SRR17520069.10938589  
SRR17520069.10938591  
SRR17520069.10938593  
SRR17520069.10938595  
SRR17520069.10939536  
SRR17520069.10939538

SRR17520069.10939540  
SRR17520069.10939542  
SRR17520069.10939544  
SRR17520069.10939546  
SRR17520069.10939550  
SRR17520069.10939552  
SRR17520069.10939554  
SRR17520069.10956676  
SRR17520069.10956678  
SRR17520069.10956680  
SRR17520069.10956682  
SRR17520069.10956684  
SRR17520069.10956686  
SRR17520069.10956688  
SRR17520069.10956690  
SRR17520069.10956692  
SRR17520069.10956694  
SRR17520069.10956696  
SRR17520069.10956698  
SRR17520069.10956700  
SRR17520069.10956702  
SRR17520069.10956704  
SRR17520069.10956706  
SRR17520069.10956708  
SRR17520069.10956710  
SRR17520069.10956712  
SRR17520069.10956714  
SRR17520069.10956716  
SRR17520069.10956718  
SRR17520069.10960137  
SRR17520069.10960139  
SRR17520069.10960141  
SRR17520069.10960143  
SRR17520069.10960145  
SRR17520069.10960147  
SRR17520069.10960149  
SRR17520069.10960151  
SRR17520069.10960153  
SRR17520069.10960155  
SRR17520069.10960157  
SRR17520069.10960159  
SRR17520069.10960161  
SRR17520069.10960163  
SRR17520069.10960165  
SRR17520069.10960167  
SRR17520069.10960169  
SRR17520069.10960171

SRR17520069.10960173  
SRR17520069.10960175  
SRR17520069.10960177  
SRR17520069.10960179  
SRR17520069.10960181  
SRR17520069.10960183  
SRR17520069.10960185  
SRR17520069.10960187  
SRR17520069.10960189  
SRR17520069.10960191  
SRR17520069.10960193  
SRR17520069.10960195  
SRR17520069.10960197  
SRR17520069.10960199  
SRR17520069.10960201  
SRR17520069.10960203  
SRR17520069.10960205  
SRR17520069.10960207  
SRR17520069.10960213  
SRR17520069.10960215  
SRR17520069.10960217  
SRR17520069.10960219  
SRR17520069.10960221  
SRR17520069.10960223  
SRR17520069.10960225  
SRR17520069.10960227  
SRR17520069.10960229  
SRR17520069.10960231  
SRR17520069.10960233  
SRR17520069.10960235  
SRR17520069.10960237  
SRR17520069.10964840  
SRR17520069.10964842  
SRR17520069.10964844  
SRR17520069.10964846  
SRR17520069.10964848  
SRR17520069.10964850  
SRR17520069.10964852  
SRR17520069.10964854  
SRR17520069.10964856  
SRR17520069.10966427  
SRR17520069.10966429  
SRR17520069.10966431  
SRR17520069.10966433  
SRR17520069.10966435  
SRR17520069.10966437  
SRR17520069.10966439

SRR17520069.10966441  
SRR17520069.10966443  
SRR17520069.10966445  
SRR17520069.10966447  
SRR17520069.10966449  
SRR17520069.10966451  
SRR17520069.10966453  
SRR17520069.10966455  
SRR17520069.10966457  
SRR17520069.10966459  
SRR17520069.10966461  
SRR17520069.10966463  
SRR17520069.10966465  
SRR17520069.10966467  
SRR17520069.10966469  
SRR17520069.10966471  
SRR17520069.10966473  
SRR17520069.10966475  
SRR17520069.10966477  
SRR17520069.10966479  
SRR17520069.10966481  
SRR17520069.10966483  
SRR17520069.10966485  
SRR17520069.10966487  
SRR17520069.10966491  
SRR17520069.10966493  
SRR17520069.10966495  
SRR17520069.10966497  
SRR17520069.10966499  
SRR17520069.10966501  
SRR17520069.10966503  
SRR17520069.10966505  
SRR17520069.10966507  
SRR17520069.10966509  
SRR17520069.10966511  
SRR17520069.10966513  
SRR17520069.10966780  
SRR17520069.10967383  
SRR17520069.10967385  
SRR17520069.10967387  
SRR17520069.10967389  
SRR17520069.10967391  
SRR17520069.10967393  
SRR17520069.10967395  
SRR17520069.10967397  
SRR17520069.10967399  
SRR17520069.10967401

SRR17520069. 10967403  
SRR17520069. 10967405  
SRR17520069. 10967409  
SRR17520069. 10967411  
SRR17520069. 10968401  
SRR17520069. 10968403  
SRR17520069. 10968405  
SRR17520069. 10968407  
SRR17520069. 10968409  
SRR17520069. 10968411  
SRR17520069. 10968413  
SRR17520069. 10968415  
SRR17520069. 10968417  
SRR17520069. 10968419  
SRR17520069. 10968421  
SRR17520069. 10968423  
SRR17520069. 10968425  
SRR17520069. 10968427  
SRR17520069. 10968429  
SRR17520069. 10968431  
SRR17520069. 10968433  
SRR17520069. 10968435  
SRR17520069. 10968437  
SRR17520069. 10971161  
SRR17520069. 10971163  
SRR17520069. 10971165  
SRR17520069. 10971167  
SRR17520069. 10971169  
SRR17520069. 10971171  
SRR17520069. 10971173  
SRR17520069. 10971175  
SRR17520069. 10971177  
SRR17520069. 10972912  
SRR17520069. 10975802  
SRR17520069. 10975804  
SRR17520069. 10976774  
SRR17520069. 10976776  
SRR17520069. 10976778  
SRR17520069. 10976780  
SRR17520069. 10976782  
SRR17520069. 10976784  
SRR17520069. 10976786  
SRR17520069. 10976788  
SRR17520069. 10976790  
SRR17520069. 10980400  
SRR17520069. 10980402  
SRR17520069. 10980404

SRR17520069.10980406  
SRR17520069.10980408  
SRR17520069.10980412  
SRR17520069.10980414  
SRR17520069.10980416  
SRR17520069.10980418  
SRR17520069.10980420  
SRR17520069.10980422  
SRR17520069.10980424  
SRR17520069.10980428  
SRR17520069.10980430  
SRR17520069.10980432  
SRR17520069.10980434  
SRR17520069.10980436  
SRR17520069.10980440  
SRR17520069.10980442  
SRR17520069.10980444  
SRR17520069.10980446  
SRR17520069.10980448  
SRR17520069.10984242  
SRR17520069.10984244  
SRR17520069.10984246  
SRR17520069.10984248  
SRR17520069.10984250  
SRR17520069.10984252  
SRR17520069.10984254  
SRR17520069.10984258  
SRR17520069.10984260  
SRR17520069.10984262  
SRR17520069.10984264  
SRR17520069.10984266  
SRR17520069.10986004  
SRR17520069.10986006  
SRR17520069.10986008  
SRR17520069.10986010  
SRR17520069.10986012  
SRR17520069.10986014  
SRR17520069.10986016  
SRR17520069.10986018  
SRR17520069.10986022  
SRR17520069.10988104  
SRR17520069.10988106  
SRR17520069.10988112  
SRR17520069.10988114  
SRR17520069.10988116  
SRR17520069.10988118  
SRR17520069.10988120

SRR17520069.10988122  
SRR17520069.10988124  
SRR17520069.10988126  
SRR17520069.10988128  
SRR17520069.10988130  
SRR17520069.10988132  
SRR17520069.10988134  
SRR17520069.10988136  
SRR17520069.10988138  
SRR17520069.10988140  
SRR17520069.10988142  
SRR17520069.10988144  
SRR17520069.10988146  
SRR17520069.10988148  
SRR17520069.10988150  
SRR17520069.10988152  
SRR17520069.10988154  
SRR17520069.10988156  
SRR17520069.10992105  
SRR17520069.10992107  
SRR17520069.10992109  
SRR17520069.10992111  
SRR17520069.10999059  
SRR17520069.11003523  
SRR17520069.11007871  
SRR17520069.11007873  
SRR17520069.11007875  
SRR17520069.11007877  
SRR17520069.11007879  
SRR17520069.11007881  
SRR17520069.11007883  
SRR17520069.11007885  
SRR17520069.11007887  
SRR17520069.11007889  
SRR17520069.11007891  
SRR17520069.11007893  
SRR17520069.11007895  
SRR17520069.11007897  
SRR17520069.11007899  
SRR17520069.11007901  
SRR17520069.11007903  
SRR17520069.11007905  
SRR17520069.11007907  
SRR17520069.11007909  
SRR17520069.11007911  
SRR17520069.11007913  
SRR17520069.11007915



SRR17520069.11007917  
SRR17520069.11007919  
SRR17520069.11007921  
SRR17520069.11007923  
SRR17520069.11007925  
SRR17520069.11007927  
SRR17520069.11007929  
SRR17520069.11007931  
SRR17520069.11007935  
SRR17520069.11007937  
SRR17520069.11007939  
SRR17520069.11007941  
SRR17520069.11007943  
SRR17520069.11007945  
SRR17520069.11007947  
SRR17520069.11009212  
SRR17520069.11009214  
SRR17520069.11009216  
SRR17520069.11009218  
SRR17520069.11009220  
SRR17520069.11009222  
SRR17520069.11009224  
SRR17520069.11009226  
SRR17520069.11009228  
SRR17520069.11009230  
SRR17520069.11009232  
SRR17520069.11009234  
SRR17520069.11009236  
SRR17520069.11009238  
SRR17520069.11009240  
SRR17520069.11009242  
SRR17520069.11009244  
SRR17520069.11009246  
SRR17520069.11009248  
SRR17520069.11011709  
SRR17520069.11011711  
SRR17520069.11011713  
SRR17520069.11011715  
SRR17520069.11011717  
SRR17520069.11011719  
SRR17520069.11011721  
SRR17520069.11011723  
SRR17520069.11011725  
SRR17520069.11011727  
SRR17520069.11011729  
SRR17520069.11011731  
SRR17520069.11011733

SRR17520069.11011735  
SRR17520069.11011737  
SRR17520069.11011739  
SRR17520069.11011741  
SRR17520069.11011745  
SRR17520069.11011747  
SRR17520069.11011749  
SRR17520069.11011753  
SRR17520069.11011755  
SRR17520069.11012453  
SRR17520069.11014982  
SRR17520069.11014984  
SRR17520069.11014986  
SRR17520069.11014988  
SRR17520069.11014990  
SRR17520069.11014992  
SRR17520069.11014994  
SRR17520069.11014996  
SRR17520069.11014998  
SRR17520069.11015000  
SRR17520069.11015002  
SRR17520069.11015004  
SRR17520069.11015006  
SRR17520069.11015008  
SRR17520069.11015010  
SRR17520069.11015012  
SRR17520069.11015014  
SRR17520069.11015016  
SRR17520069.11015018  
SRR17520069.11015020  
SRR17520069.11015024  
SRR17520069.11015026  
SRR17520069.11015028  
SRR17520069.11015030  
SRR17520069.11015036  
SRR17520069.11015038  
SRR17520069.11015040  
SRR17520069.11015042  
SRR17520069.11015044  
SRR17520069.11015046  
SRR17520069.11015050  
SRR17520069.11015054  
SRR17520069.11015058  
SRR17520069.11017353  
SRR17520069.11017359  
SRR17520069.11017367  
SRR17520069.11017824

SRR17520069.11017826  
SRR17520069.11017828  
SRR17520069.11017830  
SRR17520069.11017832  
SRR17520069.11017834  
SRR17520069.11017836  
SRR17520069.11017838  
SRR17520069.11017840  
SRR17520069.11017842  
SRR17520069.11017844  
SRR17520069.11017846  
SRR17520069.11017848  
SRR17520069.11017852  
SRR17520069.11017854  
SRR17520069.11017856  
SRR17520069.11017858  
SRR17520069.11018044  
SRR17520069.11018046  
SRR17520069.11018048  
SRR17520069.11018050  
SRR17520069.11018052  
SRR17520069.11018054  
SRR17520069.11018056  
SRR17520069.11018058  
SRR17520069.11018060  
SRR17520069.11018062  
SRR17520069.11018064  
SRR17520069.11018066  
SRR17520069.11018068  
SRR17520069.11018070  
SRR17520069.11018072  
SRR17520069.11018074  
SRR17520069.11018076  
SRR17520069.11018078  
SRR17520069.11018080  
SRR17520069.11018082  
SRR17520069.11018084  
SRR17520069.11018086  
SRR17520069.11018088  
SRR17520069.11018090  
SRR17520069.11018092  
SRR17520069.11018094  
SRR17520069.11018096  
SRR17520069.11018098  
SRR17520069.11018100  
SRR17520069.11018102  
SRR17520069.11018104

SRR17520069.11018106  
SRR17520069.11018108  
SRR17520069.11018110  
SRR17520069.11018112  
SRR17520069.11018114  
SRR17520069.11018116  
SRR17520069.11018118  
SRR17520069.11018120  
SRR17520069.11018122  
SRR17520069.11018124  
SRR17520069.11018126  
SRR17520069.11018128  
SRR17520069.11018130  
SRR17520069.11018132  
SRR17520069.11018134  
SRR17520069.11018138  
SRR17520069.11018140  
SRR17520069.11018142  
SRR17520069.11018144  
SRR17520069.11019378  
SRR17520069.11019380  
SRR17520069.11024815  
SRR17520069.11024817  
SRR17520069.11024819  
SRR17520069.11024821  
SRR17520069.11024823  
SRR17520069.11024825  
SRR17520069.11024827  
SRR17520069.11024829  
SRR17520069.11024831  
SRR17520069.11024833  
SRR17520069.11024835  
SRR17520069.11024837  
SRR17520069.11024839  
SRR17520069.11024841  
SRR17520069.11024843  
SRR17520069.11036137  
SRR17520069.11036139  
SRR17520069.11036143  
SRR17520069.11036145  
SRR17520069.11036147  
SRR17520069.11036149  
SRR17520069.11036151  
SRR17520069.11036153  
SRR17520069.11036159  
SRR17520069.11036161  
SRR17520069.11036163

SRR17520069.11036165  
SRR17520069.11036167  
SRR17520069.11036169  
SRR17520069.11036171  
SRR17520069.11036173  
SRR17520069.11036175  
SRR17520069.11036177  
SRR17520069.11036179  
SRR17520069.11036181  
SRR17520069.11036183  
SRR17520069.11036185  
SRR17520069.11036187  
SRR17520069.11036189  
SRR17520069.11036191  
SRR17520069.11036193  
SRR17520069.11036195  
SRR17520069.11036197  
SRR17520069.11036199  
SRR17520069.11036710  
SRR17520069.11046015  
SRR17520069.11046017  
SRR17520069.11046019  
SRR17520069.11046023  
SRR17520069.11046029  
SRR17520069.11046031  
SRR17520069.11046033  
SRR17520069.11046035  
SRR17520069.11046037  
SRR17520069.11046041  
SRR17520069.11046043  
SRR17520069.11046047  
SRR17520069.11054929  
SRR17520069.11054931  
SRR17520069.11054933  
SRR17520069.11054935  
SRR17520069.11054937  
SRR17520069.11054939  
SRR17520069.11054941  
SRR17520069.11054943  
SRR17520069.11054945  
SRR17520069.11054947  
SRR17520069.11054949  
SRR17520069.11054951  
SRR17520069.11055074  
SRR17520069.11055076  
SRR17520069.11055078  
SRR17520069.11055080

SRR17520069.11055082  
SRR17520069.11058199  
SRR17520069.11058201  
SRR17520069.11062794  
SRR17520069.11062796  
SRR17520069.11062798  
SRR17520069.11076045  
SRR17520069.11076047  
SRR17520069.11076049  
SRR17520069.11076051  
SRR17520069.11076053  
SRR17520069.11076055  
SRR17520069.11076059  
SRR17520069.11076061  
SRR17520069.11076063  
SRR17520069.11077661  
SRR17520069.11077663  
SRR17520069.11077665  
SRR17520069.11077667  
SRR17520069.11077669  
SRR17520069.11077671  
SRR17520069.11077673  
SRR17520069.11077675  
SRR17520069.11077677  
SRR17520069.11077679  
SRR17520069.11077681  
SRR17520069.11077683  
SRR17520069.11077685  
SRR17520069.11077687  
SRR17520069.11077689  
SRR17520069.11077691  
SRR17520069.11077693  
SRR17520069.11077695  
SRR17520069.11077697  
SRR17520069.11077699  
SRR17520069.11077701  
SRR17520069.11077703  
SRR17520069.11077705  
SRR17520069.11077707  
SRR17520069.11077709  
SRR17520069.11080687  
SRR17520069.11080689  
SRR17520069.11082019  
SRR17520069.11082021  
SRR17520069.11082023  
SRR17520069.11082025  
SRR17520069.11082027

SRR17520069.11082029  
SRR17520069.11082031  
SRR17520069.11082033  
SRR17520069.11082035  
SRR17520069.11082037  
SRR17520069.11082039  
SRR17520069.11082041  
SRR17520069.11082043  
SRR17520069.11082045  
SRR17520069.11082047  
SRR17520069.11082049  
SRR17520069.11082051  
SRR17520069.11082053  
SRR17520069.11082055  
SRR17520069.11082057  
SRR17520069.11082059  
SRR17520069.11082061  
SRR17520069.11082063  
SRR17520069.11086121  
SRR17520069.11086123  
SRR17520069.11086125  
SRR17520069.11086127  
SRR17520069.11086129  
SRR17520069.11086131  
SRR17520069.11086133  
SRR17520069.11086135  
SRR17520069.11086137  
SRR17520069.11086412  
SRR17520069.11086416  
SRR17520069.11086418  
SRR17520069.11086420  
SRR17520069.11087143  
SRR17520069.11087145  
SRR17520069.11087149  
SRR17520069.11087151  
SRR17520069.11087153  
SRR17520069.11087155  
SRR17520069.11087157  
SRR17520069.11087161  
SRR17520069.11087163  
SRR17520069.11087165  
SRR17520069.11087167  
SRR17520069.11087169  
SRR17520069.11087171  
SRR17520069.11087173  
SRR17520069.11087175  
SRR17520069.11087177

SRR17520069.11087179  
SRR17520069.11087181  
SRR17520069.11087183  
SRR17520069.11087185  
SRR17520069.11087187  
SRR17520069.11087189  
SRR17520069.11087191  
SRR17520069.11087193  
SRR17520069.11087195  
SRR17520069.11090800  
SRR17520069.11090802  
SRR17520069.11090804  
SRR17520069.11090806  
SRR17520069.11090808  
SRR17520069.11091928  
SRR17520069.11091930  
SRR17520069.11091932  
SRR17520069.11091934  
SRR17520069.11091936  
SRR17520069.11091940  
SRR17520069.11091942  
SRR17520069.11091944  
SRR17520069.11091946  
SRR17520069.11091948  
SRR17520069.11091950  
SRR17520069.11091952  
SRR17520069.11091954  
SRR17520069.11092450  
SRR17520069.11092452  
SRR17520069.11096494  
SRR17520069.11096496  
SRR17520069.11096498  
SRR17520069.11096502  
SRR17520069.11096504  
SRR17520069.11096506  
SRR17520069.11096508  
SRR17520069.11096510  
SRR17520069.11096512  
SRR17520069.11096514  
SRR17520069.11096516  
SRR17520069.11096518  
SRR17520069.11096520  
SRR17520069.11096522  
SRR17520069.11096524  
SRR17520069.11096526  
SRR17520069.11096528  
SRR17520069.11096530



SRR17520069.11096532  
SRR17520069.11096534  
SRR17520069.11103993  
SRR17520069.11103995  
SRR17520069.11103997  
SRR17520069.11103999  
SRR17520069.11104001  
SRR17520069.11104003  
SRR17520069.11104005  
SRR17520069.11104007  
SRR17520069.11104011  
SRR17520069.11104013  
SRR17520069.11104015  
SRR17520069.11104017  
SRR17520069.11104019  
SRR17520069.11104021  
SRR17520069.11104023  
SRR17520069.11104025  
SRR17520069.11104027  
SRR17520069.11104029  
SRR17520069.11104031  
SRR17520069.11104033  
SRR17520069.11104035  
SRR17520069.11104037  
SRR17520069.11104039  
SRR17520069.11104041  
SRR17520069.11104043  
SRR17520069.11104045  
SRR17520069.11104047  
SRR17520069.11104049  
SRR17520069.11104051  
SRR17520069.11104053  
SRR17520069.11104055  
SRR17520069.11104057  
SRR17520069.11104059  
SRR17520069.11104061  
SRR17520069.11105369  
SRR17520069.11105371  
SRR17520069.11112167  
SRR17520069.11112169  
SRR17520069.11112171  
SRR17520069.11112173  
SRR17520069.11112175  
SRR17520069.11112177  
SRR17520069.11112179  
SRR17520069.11112181  
SRR17520069.11112183

SRR17520069.11112185  
SRR17520069.11112187  
SRR17520069.11112189  
SRR17520069.11112191  
SRR17520069.11112193  
SRR17520069.11112195  
SRR17520069.11112197  
SRR17520069.11112199  
SRR17520069.11112201  
SRR17520069.11112203  
SRR17520069.11112205  
SRR17520069.11112207  
SRR17520069.11112209  
SRR17520069.11112211  
SRR17520069.11112213  
SRR17520069.11112215  
SRR17520069.11112217  
SRR17520069.11112219  
SRR17520069.11112221  
SRR17520069.11112223  
SRR17520069.11112225  
SRR17520069.11112227  
SRR17520069.11112229  
SRR17520069.11112231  
SRR17520069.11112233  
SRR17520069.11112235  
SRR17520069.11112237  
SRR17520069.11112239  
SRR17520069.11112241  
SRR17520069.11112243  
SRR17520069.11112245  
SRR17520069.11112247  
SRR17520069.11112249  
SRR17520069.11112251  
SRR17520069.11112253  
SRR17520069.11112255  
SRR17520069.11112257  
SRR17520069.11112259  
SRR17520069.11112261  
SRR17520069.11112263  
SRR17520069.11112265  
SRR17520069.11112267  
SRR17520069.11112269  
SRR17520069.11112273  
SRR17520069.11112275  
SRR17520069.11112277  
SRR17520069.11112279

SRR17520069.11112281  
SRR17520069.11112283  
SRR17520069.11112285  
SRR17520069.11112287  
SRR17520069.11112289  
SRR17520069.11112291  
SRR17520069.11112293  
SRR17520069.11112295  
SRR17520069.11112297  
SRR17520069.11112299  
SRR17520069.11112301  
SRR17520069.11112303  
SRR17520069.11112305  
SRR17520069.11112307  
SRR17520069.11112309  
SRR17520069.11112311  
SRR17520069.11112313  
SRR17520069.11112315  
SRR17520069.11112317  
SRR17520069.11112319  
SRR17520069.11112321  
SRR17520069.11112323  
SRR17520069.11112325  
SRR17520069.11112327  
SRR17520069.11112329  
SRR17520069.11112331  
SRR17520069.11112333  
SRR17520069.11112335  
SRR17520069.11112337  
SRR17520069.11112339  
SRR17520069.11112341  
SRR17520069.11112343  
SRR17520069.11112345  
SRR17520069.11112347  
SRR17520069.11112349  
SRR17520069.11112351  
SRR17520069.11112355  
SRR17520069.11112357  
SRR17520069.11112359  
SRR17520069.11114758  
SRR17520069.11114760  
SRR17520069.11114762  
SRR17520069.11114764  
SRR17520069.11114766  
SRR17520069.11114768  
SRR17520069.11116224  
SRR17520069.11116260

SRR17520069.11116262  
SRR17520069.11116264  
SRR17520069.11116266  
SRR17520069.11116268  
SRR17520069.11117181  
SRR17520069.11117183  
SRR17520069.11117185  
SRR17520069.11117187  
SRR17520069.11118324  
SRR17520069.11118326  
SRR17520069.11118328  
SRR17520069.11118330  
SRR17520069.11118332  
SRR17520069.11118334  
SRR17520069.11118336  
SRR17520069.11118338  
SRR17520069.11118340  
SRR17520069.11118342  
SRR17520069.11118344  
SRR17520069.11118346  
SRR17520069.11118348  
SRR17520069.11118350  
SRR17520069.11118352  
SRR17520069.11118354  
SRR17520069.11118356  
SRR17520069.11118358  
SRR17520069.11118360  
SRR17520069.11118372  
SRR17520069.11118374  
SRR17520069.11118958  
SRR17520069.11118960  
SRR17520069.11118962  
SRR17520069.11118964  
SRR17520069.11118966  
SRR17520069.11118968  
SRR17520069.11118970  
SRR17520069.11118972  
SRR17520069.11118976  
SRR17520069.11118978  
SRR17520069.11118980  
SRR17520069.11118982  
SRR17520069.11118984  
SRR17520069.11118986  
SRR17520069.11118988  
SRR17520069.11118990  
SRR17520069.11118992  
SRR17520069.11118994

SRR17520069.11119000  
SRR17520069.11119002  
SRR17520069.11119004  
SRR17520069.11119006  
SRR17520069.11119008  
SRR17520069.11119012  
SRR17520069.11119014  
SRR17520069.11119016  
SRR17520069.11119018  
SRR17520069.11119020  
SRR17520069.11119022  
SRR17520069.11119024  
SRR17520069.11119026  
SRR17520069.11119028  
SRR17520069.11119030  
SRR17520069.11119032  
SRR17520069.11119034  
SRR17520069.11119036  
SRR17520069.11119038  
SRR17520069.11119040  
SRR17520069.11119042  
SRR17520069.11119044  
SRR17520069.11119046  
SRR17520069.11119048  
SRR17520069.11119050  
SRR17520069.11119052  
SRR17520069.11119054  
SRR17520069.11119056  
SRR17520069.11119058  
SRR17520069.11119060  
SRR17520069.11119062  
SRR17520069.11119064  
SRR17520069.11119066  
SRR17520069.11119068  
SRR17520069.11119070  
SRR17520069.11119072  
SRR17520069.11119074  
SRR17520069.11119076  
SRR17520069.11119078  
SRR17520069.11119080  
SRR17520069.11119082  
SRR17520069.11119084  
SRR17520069.11119086  
SRR17520069.11119088  
SRR17520069.11119090  
SRR17520069.11119092  
SRR17520069.11119094

SRR17520069.11119096  
SRR17520069.11119098  
SRR17520069.11122269  
SRR17520069.11122271  
SRR17520069.11122273  
SRR17520069.11122275  
SRR17520069.11122277  
SRR17520069.11122279  
SRR17520069.11122281  
SRR17520069.11122283  
SRR17520069.11122285  
SRR17520069.11122287  
SRR17520069.11122289  
SRR17520069.11122291  
SRR17520069.11122293  
SRR17520069.11122295  
SRR17520069.11122297  
SRR17520069.11122299  
SRR17520069.11122301  
SRR17520069.11122303  
SRR17520069.11122305  
SRR17520069.11122307  
SRR17520069.11122309  
SRR17520069.11122311  
SRR17520069.11122313  
SRR17520069.11122315  
SRR17520069.11122317  
SRR17520069.11122319  
SRR17520069.11122321  
SRR17520069.11122323  
SRR17520069.11122325  
SRR17520069.11122327  
SRR17520069.11122329  
SRR17520069.11122331  
SRR17520069.11122333  
SRR17520069.11122335  
SRR17520069.11122337  
SRR17520069.11122339  
SRR17520069.11122341  
SRR17520069.11122343  
SRR17520069.11123861  
SRR17520069.11123863  
SRR17520069.11123865  
SRR17520069.11123867  
SRR17520069.11123869  
SRR17520069.11123871  
SRR17520069.11123873

SRR17520069.11123875  
SRR17520069.11123877  
SRR17520069.11123879  
SRR17520069.11123881  
SRR17520069.11123883  
SRR17520069.11123885  
SRR17520069.11123887  
SRR17520069.11123889  
SRR17520069.11123891  
SRR17520069.11123893  
SRR17520069.11123895  
SRR17520069.11123897  
SRR17520069.11123899  
SRR17520069.11123903  
SRR17520069.11123905  
SRR17520069.11123907  
SRR17520069.11123909  
SRR17520069.11123911  
SRR17520069.11123913  
SRR17520069.11123915  
SRR17520069.11123917  
SRR17520069.11123919  
SRR17520069.11123921  
SRR17520069.11123923  
SRR17520069.11123925  
SRR17520069.11123927  
SRR17520069.11123929  
SRR17520069.11123931  
SRR17520069.11123933  
SRR17520069.11124638  
SRR17520069.11124640  
SRR17520069.11124644  
SRR17520069.11124648  
SRR17520069.11124650  
SRR17520069.11124654  
SRR17520069.11126170  
SRR17520069.11133997  
SRR17520069.11133999  
SRR17520069.11134001  
SRR17520069.11134003  
SRR17520069.11134005  
SRR17520069.11135930  
SRR17520069.11135932  
SRR17520069.11135934  
SRR17520069.11135936  
SRR17520069.11135938  
SRR17520069.11135940

SRR17520069. 11135942  
SRR17520069. 11135944  
SRR17520069. 11135946  
SRR17520069. 11135948  
SRR17520069. 11135950  
SRR17520069. 11135952  
SRR17520069. 11135954  
SRR17520069. 11135956  
SRR17520069. 11135958  
SRR17520069. 11135960  
SRR17520069. 11135962  
SRR17520069. 11135964  
SRR17520069. 11135966  
SRR17520069. 11135972  
SRR17520069. 11135974  
SRR17520069. 11135976  
SRR17520069. 11135978  
SRR17520069. 11135980  
SRR17520069. 11135982  
SRR17520069. 11135984  
SRR17520069. 11135986  
SRR17520069. 11135988  
SRR17520069. 11135990  
SRR17520069. 11135992  
SRR17520069. 11135994  
SRR17520069. 11135996  
SRR17520069. 11135998  
SRR17520069. 11136000  
SRR17520069. 11136002  
SRR17520069. 11136004  
SRR17520069. 11136006  
SRR17520069. 11136008  
SRR17520069. 11136010  
SRR17520069. 11136012  
SRR17520069. 11136014  
SRR17520069. 11136016  
SRR17520069. 11136018  
SRR17520069. 11136020  
SRR17520069. 11136022  
SRR17520069. 11136024  
SRR17520069. 11136026  
SRR17520069. 11136028  
SRR17520069. 11136030  
SRR17520069. 11136032  
SRR17520069. 11136034  
SRR17520069. 11136036  
SRR17520069. 11136038



SRR17520069.11136040  
SRR17520069.11136042  
SRR17520069.11136044  
SRR17520069.11136046  
SRR17520069.11136048  
SRR17520069.11136050  
SRR17520069.11136052  
SRR17520069.11136054  
SRR17520069.11136056  
SRR17520069.11136058  
SRR17520069.11136060  
SRR17520069.11136062  
SRR17520069.11136064  
SRR17520069.11136066  
SRR17520069.11136068  
SRR17520069.11136070  
SRR17520069.11136072  
SRR17520069.11136074  
SRR17520069.11136076  
SRR17520069.11136078  
SRR17520069.11136080  
SRR17520069.11136082  
SRR17520069.11136084  
SRR17520069.11136086  
SRR17520069.11136088  
SRR17520069.11136090  
SRR17520069.11136092  
SRR17520069.11136094  
SRR17520069.11136096  
SRR17520069.11136098  
SRR17520069.11136100  
SRR17520069.11136102  
SRR17520069.11136104  
SRR17520069.11136106  
SRR17520069.11136108  
SRR17520069.11136110  
SRR17520069.11136112  
SRR17520069.11136114  
SRR17520069.11136116  
SRR17520069.11137361  
SRR17520069.11137363  
SRR17520069.11137365  
SRR17520069.11137367  
SRR17520069.11137369  
SRR17520069.11137371  
SRR17520069.11137373  
SRR17520069.11137375

SRR17520069.11137377  
SRR17520069.11137379  
SRR17520069.11137381  
SRR17520069.11137383  
SRR17520069.11137385  
SRR17520069.11137387  
SRR17520069.11137389  
SRR17520069.11137391  
SRR17520069.11137393  
SRR17520069.11139354  
SRR17520069.11139356  
SRR17520069.11139358  
SRR17520069.11139360  
SRR17520069.11139362  
SRR17520069.11139364  
SRR17520069.11139366  
SRR17520069.11139368  
SRR17520069.11139372  
SRR17520069.11139374  
SRR17520069.11139376  
SRR17520069.11139378  
SRR17520069.11139380  
SRR17520069.11139382  
SRR17520069.11139384  
SRR17520069.11139386  
SRR17520069.11139388  
SRR17520069.11139390  
SRR17520069.11139392  
SRR17520069.11139398  
SRR17520069.11139400  
SRR17520069.11139402  
SRR17520069.11139404  
SRR17520069.11139408  
SRR17520069.11139410  
SRR17520069.11139412  
SRR17520069.11139414  
SRR17520069.11139416  
SRR17520069.11139418  
SRR17520069.11139420  
SRR17520069.11139422  
SRR17520069.11139424  
SRR17520069.11139426  
SRR17520069.11139428  
SRR17520069.11139430  
SRR17520069.11139432  
SRR17520069.11139434  
SRR17520069.11139436

SRR17520069.11139438  
SRR17520069.11139440  
SRR17520069.11139442  
SRR17520069.11139444  
SRR17520069.11139446  
SRR17520069.11139448  
SRR17520069.11139450  
SRR17520069.11139452  
SRR17520069.11139454  
SRR17520069.11139456  
SRR17520069.11139458  
SRR17520069.11139460  
SRR17520069.11139462  
SRR17520069.11139464  
SRR17520069.11139466  
SRR17520069.11139470  
SRR17520069.11139472  
SRR17520069.11139474  
SRR17520069.11139476  
SRR17520069.11140190  
SRR17520069.11144430  
SRR17520069.11144432  
SRR17520069.11144434  
SRR17520069.11144436  
SRR17520069.11144438  
SRR17520069.11144440  
SRR17520069.11144442  
SRR17520069.11144444  
SRR17520069.11144446  
SRR17520069.11144448  
SRR17520069.11144450  
SRR17520069.11144452  
SRR17520069.11144454  
SRR17520069.11144456  
SRR17520069.11144458  
SRR17520069.11144460  
SRR17520069.11144462  
SRR17520069.11144464  
SRR17520069.11144466  
SRR17520069.11144468  
SRR17520069.11144470  
SRR17520069.11144472  
SRR17520069.11144474  
SRR17520069.11144476  
SRR17520069.11144478  
SRR17520069.11144480  
SRR17520069.11144482

SRR17520069.11144484  
SRR17520069.11144486  
SRR17520069.11144488  
SRR17520069.11144490  
SRR17520069.11144492  
SRR17520069.11144494  
SRR17520069.11144496  
SRR17520069.11144498  
SRR17520069.11144500  
SRR17520069.11144502  
SRR17520069.11144504  
SRR17520069.11151754  
SRR17520069.11151756  
SRR17520069.11151758  
SRR17520069.11151760  
SRR17520069.11151762  
SRR17520069.11151764  
SRR17520069.11151766  
SRR17520069.11151768  
SRR17520069.11151770  
SRR17520069.11151772  
SRR17520069.11151774  
SRR17520069.11151776  
SRR17520069.11151778  
SRR17520069.11151780  
SRR17520069.11151782  
SRR17520069.11151784  
SRR17520069.11153978  
SRR17520069.11153980  
SRR17520069.11153982  
SRR17520069.11153984  
SRR17520069.11153986  
SRR17520069.11153988  
SRR17520069.11153990  
SRR17520069.11153992  
SRR17520069.11153994  
SRR17520069.11153998  
SRR17520069.11154000  
SRR17520069.11154004  
SRR17520069.11154006  
SRR17520069.11154008  
SRR17520069.11154010  
SRR17520069.11154014  
SRR17520069.11154016  
SRR17520069.11154018  
SRR17520069.11154020  
SRR17520069.11154022

SRR17520069.11154024  
SRR17520069.11154026  
SRR17520069.11154028  
SRR17520069.11160579  
SRR17520069.11160606  
SRR17520069.11160633  
SRR17520069.11160637  
SRR17520069.11166226  
SRR17520069.11166228  
SRR17520069.11166230  
SRR17520069.11166232  
SRR17520069.11166234  
SRR17520069.11166236  
SRR17520069.11166238  
SRR17520069.11166240  
SRR17520069.11166242  
SRR17520069.11166244  
SRR17520069.11166246  
SRR17520069.11166248  
SRR17520069.11166250  
SRR17520069.11166252  
SRR17520069.11166254  
SRR17520069.11166256  
SRR17520069.11166258  
SRR17520069.11166260  
SRR17520069.11166262  
SRR17520069.11166264  
SRR17520069.11166266  
SRR17520069.11166268  
SRR17520069.11166270  
SRR17520069.11166272  
SRR17520069.11166274  
SRR17520069.11174017  
SRR17520069.11174019  
SRR17520069.11174021  
SRR17520069.11174025  
SRR17520069.11174027  
SRR17520069.11174029  
SRR17520069.11174031  
SRR17520069.11174033  
SRR17520069.11174035  
SRR17520069.11174037  
SRR17520069.11174039  
SRR17520069.11174041  
SRR17520069.11174043  
SRR17520069.11174045  
SRR17520069.11174047

SRR17520069.11174049  
SRR17520069.11174051  
SRR17520069.11174053  
SRR17520069.11175844  
SRR17520069.11175846  
SRR17520069.11176785  
SRR17520069.11176787  
SRR17520069.11176789  
SRR17520069.11176791  
SRR17520069.11176793  
SRR17520069.11176795  
SRR17520069.11176797  
SRR17520069.11176799  
SRR17520069.11176801  
SRR17520069.11176803  
SRR17520069.11176805  
SRR17520069.11176807  
SRR17520069.11176809  
SRR17520069.11176811  
SRR17520069.11176813  
SRR17520069.11176815  
SRR17520069.11176817  
SRR17520069.11176819  
SRR17520069.11185569  
SRR17520069.11187282  
SRR17520069.11187284  
SRR17520069.11187286  
SRR17520069.11187288  
SRR17520069.11187290  
SRR17520069.11187292  
SRR17520069.11187294  
SRR17520069.11187296  
SRR17520069.11187298  
SRR17520069.11187300  
SRR17520069.11187302  
SRR17520069.11187304  
SRR17520069.11187306  
SRR17520069.11187308  
SRR17520069.11187310  
SRR17520069.11187312  
SRR17520069.11187314  
SRR17520069.11187316  
SRR17520069.11187318  
SRR17520069.11187320  
SRR17520069.11187322  
SRR17520069.11187324  
SRR17520069.11187326

SRR17520069.11187328  
SRR17520069.11187330  
SRR17520069.11187332  
SRR17520069.11187334  
SRR17520069.11187336  
SRR17520069.11187338  
SRR17520069.11187340  
SRR17520069.11187342  
SRR17520069.11187344  
SRR17520069.11187346  
SRR17520069.11187348  
SRR17520069.11187350  
SRR17520069.11187352  
SRR17520069.11187354  
SRR17520069.11187356  
SRR17520069.11187358  
SRR17520069.11187360  
SRR17520069.11187362  
SRR17520069.11187364  
SRR17520069.11187366  
SRR17520069.11187368  
SRR17520069.11187992  
SRR17520069.11187994  
SRR17520069.11187996  
SRR17520069.11187998  
SRR17520069.11188000  
SRR17520069.11188002  
SRR17520069.11188004  
SRR17520069.11188006  
SRR17520069.11188008  
SRR17520069.11188010  
SRR17520069.11188012  
SRR17520069.11188014  
SRR17520069.11188016  
SRR17520069.11188018  
SRR17520069.11188020  
SRR17520069.11188022  
SRR17520069.11188024  
SRR17520069.11188026  
SRR17520069.11188028  
SRR17520069.11188030  
SRR17520069.11188032  
SRR17520069.11188034  
SRR17520069.11188036  
SRR17520069.11188044  
SRR17520069.11188050  
SRR17520069.11191342

SRR17520069.11194411  
SRR17520069.11194413  
SRR17520069.11194415  
SRR17520069.11194417  
SRR17520069.11194419  
SRR17520069.11194421  
SRR17520069.11194423  
SRR17520069.11194425  
SRR17520069.11194427  
SRR17520069.11194429  
SRR17520069.11194431  
SRR17520069.11194433  
SRR17520069.11194435  
SRR17520069.11194437  
SRR17520069.11194441  
SRR17520069.11194443  
SRR17520069.11197902  
SRR17520069.11197904  
SRR17520069.11197906  
SRR17520069.11197908  
SRR17520069.11197910  
SRR17520069.11197912  
SRR17520069.11197914  
SRR17520069.11197916  
SRR17520069.11197918  
SRR17520069.11197920  
SRR17520069.11197922  
SRR17520069.11197924  
SRR17520069.11197926  
SRR17520069.11197928  
SRR17520069.11197930  
SRR17520069.11197932  
SRR17520069.11197934  
SRR17520069.11197936  
SRR17520069.11197938  
SRR17520069.11197940  
SRR17520069.11197942  
SRR17520069.11197944  
SRR17520069.11197946  
SRR17520069.11197948  
SRR17520069.11197950  
SRR17520069.11197952  
SRR17520069.11197954  
SRR17520069.11197956  
SRR17520069.11197958  
SRR17520069.11197960  
SRR17520069.11197962



SRR17520069.11197964  
SRR17520069.11197966  
SRR17520069.11206050  
SRR17520069.11206052  
SRR17520069.11206054  
SRR17520069.11206056  
SRR17520069.11206058  
SRR17520069.11206060  
SRR17520069.11206062  
SRR17520069.11206064  
SRR17520069.11206066  
SRR17520069.11206068  
SRR17520069.11206070  
SRR17520069.11206072  
SRR17520069.11206074  
SRR17520069.11206076  
SRR17520069.11206078  
SRR17520069.11206080  
SRR17520069.11206082  
SRR17520069.11206084  
SRR17520069.11206086  
SRR17520069.11206088  
SRR17520069.11207613  
SRR17520069.11207615  
SRR17520069.11207617  
SRR17520069.11207619  
SRR17520069.11207621  
SRR17520069.11207623  
SRR17520069.11207625  
SRR17520069.11207627  
SRR17520069.11207629  
SRR17520069.11207631  
SRR17520069.11207633  
SRR17520069.11207635  
SRR17520069.11207639  
SRR17520069.11207641  
SRR17520069.11207645  
SRR17520069.11207647  
SRR17520069.11207649  
SRR17520069.11207651  
SRR17520069.11207653  
SRR17520069.11208067  
SRR17520069.11208069  
SRR17520069.11208071  
SRR17520069.11208073  
SRR17520069.11208075  
SRR17520069.11208077

SRR17520069.11208079  
SRR17520069.11208085  
SRR17520069.11208087  
SRR17520069.11208089  
SRR17520069.11208091  
SRR17520069.11208093  
SRR17520069.11208095  
SRR17520069.11208097  
SRR17520069.11208099  
SRR17520069.11208101  
SRR17520069.11208103  
SRR17520069.11208105  
SRR17520069.11208107  
SRR17520069.11208113  
SRR17520069.11208117  
SRR17520069.11208119  
SRR17520069.11208121  
SRR17520069.11208123  
SRR17520069.11208125  
SRR17520069.11208133  
SRR17520069.11208135  
SRR17520069.11208137  
SRR17520069.11208139  
SRR17520069.11208141  
SRR17520069.11208143  
SRR17520069.11208147  
SRR17520069.11208149  
SRR17520069.11208153  
SRR17520069.11208155  
SRR17520069.11208157  
SRR17520069.11208159  
SRR17520069.11208163  
SRR17520069.11208165  
SRR17520069.11208167  
SRR17520069.11208169  
SRR17520069.11208171  
SRR17520069.11208173  
SRR17520069.11208177  
SRR17520069.11208179  
SRR17520069.11208181  
SRR17520069.11208183  
SRR17520069.11208187  
SRR17520069.11208189  
SRR17520069.11208191  
SRR17520069.11208193  
SRR17520069.11208195  
SRR17520069.11208197

SRR17520069.11208264  
SRR17520069.11208266  
SRR17520069.11208268  
SRR17520069.11208270  
SRR17520069.11208272  
SRR17520069.11208274  
SRR17520069.11208276  
SRR17520069.11208278  
SRR17520069.11208280  
SRR17520069.11208282  
SRR17520069.11208284  
SRR17520069.11208286  
SRR17520069.11208288  
SRR17520069.11208290  
SRR17520069.11208292  
SRR17520069.11208294  
SRR17520069.11208296  
SRR17520069.11208298  
SRR17520069.11212829  
SRR17520069.11216299  
SRR17520069.11216303  
SRR17520069.11216305  
SRR17520069.11216307  
SRR17520069.11216309  
SRR17520069.11216311  
SRR17520069.11216313  
SRR17520069.11216315  
SRR17520069.11216319  
SRR17520069.11216321  
SRR17520069.11216323  
SRR17520069.11216325  
SRR17520069.11216327  
SRR17520069.11216329  
SRR17520069.11216331  
SRR17520069.11216333  
SRR17520069.11216335  
SRR17520069.11219447  
SRR17520069.11219449  
SRR17520069.11219451  
SRR17520069.11219453  
SRR17520069.11219455  
SRR17520069.11219457  
SRR17520069.11219459  
SRR17520069.11219461  
SRR17520069.11219463  
SRR17520069.11219465  
SRR17520069.11219467

SRR17520069.11219469  
SRR17520069.11219471  
SRR17520069.11219473  
SRR17520069.11219475  
SRR17520069.11219477  
SRR17520069.11219479  
SRR17520069.11219481  
SRR17520069.11219483  
SRR17520069.11232084  
SRR17520069.11232086  
SRR17520069.11232088  
SRR17520069.11232090  
SRR17520069.11232092  
SRR17520069.11232094  
SRR17520069.11232096  
SRR17520069.11232098  
SRR17520069.11232102  
SRR17520069.11232108  
SRR17520069.11232110  
SRR17520069.11241783  
SRR17520069.11241785  
SRR17520069.11241787  
SRR17520069.11241789  
SRR17520069.11241791  
SRR17520069.11241793  
SRR17520069.11241795  
SRR17520069.11241797  
SRR17520069.11241799  
SRR17520069.11241801  
SRR17520069.11241803  
SRR17520069.11241805  
SRR17520069.11241807  
SRR17520069.11241809  
SRR17520069.11241811  
SRR17520069.11241813  
SRR17520069.11241815  
SRR17520069.11241817  
SRR17520069.11241819  
SRR17520069.11241823  
SRR17520069.11242629  
SRR17520069.11242631  
SRR17520069.11242633  
SRR17520069.11242635  
SRR17520069.11242637  
SRR17520069.11242639  
SRR17520069.11242643  
SRR17520069.11242647

SRR17520069.11242649  
SRR17520069.11242651  
SRR17520069.11242653  
SRR17520069.11242655  
SRR17520069.11242657  
SRR17520069.11242661  
SRR17520069.11242663  
SRR17520069.11242665  
SRR17520069.11242791  
SRR17520069.11242793  
SRR17520069.11243593  
SRR17520069.11243595  
SRR17520069.11243597  
SRR17520069.11243599  
SRR17520069.11243601  
SRR17520069.11243603  
SRR17520069.11243605  
SRR17520069.11243607  
SRR17520069.11243609  
SRR17520069.11243611  
SRR17520069.11243615  
SRR17520069.11243617  
SRR17520069.11243619  
SRR17520069.11243621  
SRR17520069.11243623  
SRR17520069.11243625  
SRR17520069.11243665  
SRR17520069.11243667  
SRR17520069.11249007  
SRR17520069.11249009  
SRR17520069.11249011  
SRR17520069.11249013  
SRR17520069.11249017  
SRR17520069.11249021  
SRR17520069.11249023  
SRR17520069.11249025  
SRR17520069.11249027  
SRR17520069.11249029  
SRR17520069.11249031  
SRR17520069.11249033  
SRR17520069.11249035  
SRR17520069.11249037  
SRR17520069.11249039  
SRR17520069.11249041  
SRR17520069.11249043  
SRR17520069.11249045  
SRR17520069.11249047

SRR17520069.11249049  
SRR17520069.11249051  
SRR17520069.11249053  
SRR17520069.11249055  
SRR17520069.11249057  
SRR17520069.11249059  
SRR17520069.11249061  
SRR17520069.11249063  
SRR17520069.11249067  
SRR17520069.11249069  
SRR17520069.11249071  
SRR17520069.11249073  
SRR17520069.11249075  
SRR17520069.11249077  
SRR17520069.11249079  
SRR17520069.11249083  
SRR17520069.11249085  
SRR17520069.11249087  
SRR17520069.11249089  
SRR17520069.11249091  
SRR17520069.11250922  
SRR17520069.11250924  
SRR17520069.11250926  
SRR17520069.11250928  
SRR17520069.11250930  
SRR17520069.11250932  
SRR17520069.11250934  
SRR17520069.11250936  
SRR17520069.11250938  
SRR17520069.11250940  
SRR17520069.11250942  
SRR17520069.11250944  
SRR17520069.11250946  
SRR17520069.11250948  
SRR17520069.11256635  
SRR17520069.11256637  
SRR17520069.11256639  
SRR17520069.11256641  
SRR17520069.11256643  
SRR17520069.11256645  
SRR17520069.11256649  
SRR17520069.11256651  
SRR17520069.11265749  
SRR17520069.11265751  
SRR17520069.11265753  
SRR17520069.11265755  
SRR17520069.11265757

SRR17520069.11265759  
SRR17520069.11265761  
SRR17520069.11265763  
SRR17520069.11265765  
SRR17520069.11265767  
SRR17520069.11265769  
SRR17520069.11265771  
SRR17520069.11265773  
SRR17520069.11265775  
SRR17520069.11268336  
SRR17520069.11268338  
SRR17520069.11268340  
SRR17520069.11268342  
SRR17520069.11268344  
SRR17520069.11268346  
SRR17520069.11268348  
SRR17520069.11268350  
SRR17520069.11268352  
SRR17520069.11268356  
SRR17520069.11268358  
SRR17520069.11268360  
SRR17520069.11268362  
SRR17520069.11268366  
SRR17520069.11268368  
SRR17520069.11268370  
SRR17520069.11268372  
SRR17520069.11268374  
SRR17520069.11268376  
SRR17520069.11268378  
SRR17520069.11268380  
SRR17520069.11268382  
SRR17520069.11271772  
SRR17520069.11271774  
SRR17520069.11271776  
SRR17520069.11271778  
SRR17520069.11271780  
SRR17520069.11271782  
SRR17520069.11271788  
SRR17520069.11271790  
SRR17520069.11271792  
SRR17520069.11271794  
SRR17520069.11271796  
SRR17520069.11271798  
SRR17520069.11271800  
SRR17520069.11271802  
SRR17520069.11271804  
SRR17520069.11271808

SRR17520069.11271810  
SRR17520069.11271812  
SRR17520069.11271814  
SRR17520069.11271816  
SRR17520069.11271818  
SRR17520069.11272600  
SRR17520069.11272602  
SRR17520069.11272604  
SRR17520069.11272606  
SRR17520069.11272608  
SRR17520069.11272610  
SRR17520069.11272612  
SRR17520069.11272614  
SRR17520069.11272616  
SRR17520069.11272620  
SRR17520069.11272622  
SRR17520069.11272624  
SRR17520069.11272626  
SRR17520069.11272628  
SRR17520069.11272630  
SRR17520069.11272632  
SRR17520069.11272634  
SRR17520069.11272636  
SRR17520069.11272638  
SRR17520069.11272640  
SRR17520069.11272642  
SRR17520069.11272646  
SRR17520069.11272648  
SRR17520069.11272650  
SRR17520069.11272652  
SRR17520069.11272654  
SRR17520069.11276115  
SRR17520069.11276117  
SRR17520069.11276119  
SRR17520069.11276123  
SRR17520069.11276125  
SRR17520069.11276127  
SRR17520069.11276129  
SRR17520069.11276131  
SRR17520069.11276133  
SRR17520069.11276135  
SRR17520069.11276137  
SRR17520069.11276139  
SRR17520069.11276141  
SRR17520069.11276143  
SRR17520069.11276145  
SRR17520069.11276147



SRR17520069.11276149  
SRR17520069.11276151  
SRR17520069.11276153  
SRR17520069.11276155  
SRR17520069.11276157  
SRR17520069.11276159  
SRR17520069.11276165  
SRR17520069.11276167  
SRR17520069.11276169  
SRR17520069.11276171  
SRR17520069.11276383  
SRR17520069.11276385  
SRR17520069.11276387  
SRR17520069.11276389  
SRR17520069.11276391  
SRR17520069.11276393  
SRR17520069.11276395  
SRR17520069.11276397  
SRR17520069.11276401  
SRR17520069.11276403  
SRR17520069.11276405  
SRR17520069.11276407  
SRR17520069.11276409  
SRR17520069.11276411  
SRR17520069.11276413  
SRR17520069.11276415  
SRR17520069.11276419  
SRR17520069.11276421  
SRR17520069.11276423  
SRR17520069.11276425  
SRR17520069.11276427  
SRR17520069.11276429  
SRR17520069.11276431  
SRR17520069.11278417  
SRR17520069.11278419  
SRR17520069.11278965  
SRR17520069.11278967  
SRR17520069.11278969  
SRR17520069.11278971  
SRR17520069.11278973  
SRR17520069.11278975  
SRR17520069.11278977  
SRR17520069.11278981  
SRR17520069.11278983  
SRR17520069.11278987  
SRR17520069.11278991  
SRR17520069.11278993

SRR17520069.11278995  
SRR17520069.11281283  
SRR17520069.11281285  
SRR17520069.11281287  
SRR17520069.11281289  
SRR17520069.11281291  
SRR17520069.11281293  
SRR17520069.11281295  
SRR17520069.11281297  
SRR17520069.11281299  
SRR17520069.11281303  
SRR17520069.11281305  
SRR17520069.11281307  
SRR17520069.11281309  
SRR17520069.11281311  
SRR17520069.11281313  
SRR17520069.11281315  
SRR17520069.11281317  
SRR17520069.11281319  
SRR17520069.11283001  
SRR17520069.11283003  
SRR17520069.11283005  
SRR17520069.11283009  
SRR17520069.11283013  
SRR17520069.11289334  
SRR17520069.11289336  
SRR17520069.11289338  
SRR17520069.11289340  
SRR17520069.11289342  
SRR17520069.11289344  
SRR17520069.11289346  
SRR17520069.11289348  
SRR17520069.11289350  
SRR17520069.11289352  
SRR17520069.11289354  
SRR17520069.11289356  
SRR17520069.11289358  
SRR17520069.11289360  
SRR17520069.11289362  
SRR17520069.11289364  
SRR17520069.11289366  
SRR17520069.11289368  
SRR17520069.11289370  
SRR17520069.11289372  
SRR17520069.11289374  
SRR17520069.11289376  
SRR17520069.11289378

SRR17520069.11289380  
SRR17520069.11289382  
SRR17520069.11289384  
SRR17520069.11289386  
SRR17520069.11289388  
SRR17520069.11289390  
SRR17520069.11289392  
SRR17520069.11289394  
SRR17520069.11289396  
SRR17520069.11289398  
SRR17520069.11289400  
SRR17520069.11289402  
SRR17520069.11289404  
SRR17520069.11289406  
SRR17520069.11289408  
SRR17520069.11289410  
SRR17520069.11289412  
SRR17520069.11289414  
SRR17520069.11289416  
SRR17520069.11289418  
SRR17520069.11289422  
SRR17520069.11289424  
SRR17520069.11289426  
SRR17520069.11289428  
SRR17520069.11289430  
SRR17520069.11289432  
SRR17520069.11289434  
SRR17520069.11291036  
SRR17520069.11291038  
SRR17520069.11291040  
SRR17520069.11291042  
SRR17520069.11291044  
SRR17520069.11291046  
SRR17520069.11291048  
SRR17520069.11291050  
SRR17520069.11291052  
SRR17520069.11291054  
SRR17520069.11291056  
SRR17520069.11291058  
SRR17520069.11291060  
SRR17520069.11291062  
SRR17520069.11291064  
SRR17520069.11291066  
SRR17520069.11291068  
SRR17520069.11291070  
SRR17520069.11291072  
SRR17520069.11291074

SRR17520069.11291076  
SRR17520069.11291078  
SRR17520069.11291080  
SRR17520069.11291082  
SRR17520069.11291084  
SRR17520069.11291086  
SRR17520069.11291088  
SRR17520069.11291090  
SRR17520069.11291092  
SRR17520069.11291094  
SRR17520069.11291096  
SRR17520069.11291098  
SRR17520069.11291100  
SRR17520069.11291102  
SRR17520069.11291104  
SRR17520069.11291106  
SRR17520069.11291110  
SRR17520069.11291112  
SRR17520069.11291114  
SRR17520069.11292085  
SRR17520069.11292087  
SRR17520069.11292089  
SRR17520069.11292091  
SRR17520069.11292093  
SRR17520069.11292095  
SRR17520069.11296685  
SRR17520069.11296687  
SRR17520069.11296689  
SRR17520069.11296691  
SRR17520069.11297572  
SRR17520069.11297574  
SRR17520069.11297576  
SRR17520069.11297578  
SRR17520069.11297580  
SRR17520069.11297582  
SRR17520069.11297584  
SRR17520069.11297586  
SRR17520069.11297588  
SRR17520069.11297590  
SRR17520069.11297592  
SRR17520069.11297594  
SRR17520069.11297596  
SRR17520069.11297598  
SRR17520069.11297600  
SRR17520069.11297602  
SRR17520069.11299697  
SRR17520069.11299699

SRR17520069.11299701  
SRR17520069.11299703  
SRR17520069.11299705  
SRR17520069.11299707  
SRR17520069.11299709  
SRR17520069.11299711  
SRR17520069.11299713  
SRR17520069.11299715  
SRR17520069.11299717  
SRR17520069.11299719  
SRR17520069.11299721  
SRR17520069.11299723  
SRR17520069.11299725  
SRR17520069.11299727  
SRR17520069.11299729  
SRR17520069.11299731  
SRR17520069.11299733  
SRR17520069.11299735  
SRR17520069.11299737  
SRR17520069.11299739  
SRR17520069.11299741  
SRR17520069.11299743  
SRR17520069.11299745  
SRR17520069.11299747  
SRR17520069.11299749  
SRR17520069.11299751  
SRR17520069.11299753  
SRR17520069.11299755  
SRR17520069.11299757  
SRR17520069.11299759  
SRR17520069.11299761  
SRR17520069.11299763  
SRR17520069.11300375  
SRR17520069.11300377  
SRR17520069.11300381  
SRR17520069.11300383  
SRR17520069.11300385  
SRR17520069.11300387  
SRR17520069.11300389  
SRR17520069.11300391  
SRR17520069.11300397  
SRR17520069.11300399  
SRR17520069.11300401  
SRR17520069.11300403  
SRR17520069.11300405  
SRR17520069.11300407  
SRR17520069.11300409

SRR17520069.11300411  
SRR17520069.11300413  
SRR17520069.11300415  
SRR17520069.11300417  
SRR17520069.11300419  
SRR17520069.11300421  
SRR17520069.11300423  
SRR17520069.11300425  
SRR17520069.11300427  
SRR17520069.11300429  
SRR17520069.11300431  
SRR17520069.11300433  
SRR17520069.11300435  
SRR17520069.11300437  
SRR17520069.11300443  
SRR17520069.11300446  
SRR17520069.11300448  
SRR17520069.11300450  
SRR17520069.11300452  
SRR17520069.11300454  
SRR17520069.11300456  
SRR17520069.11300458  
SRR17520069.11300460  
SRR17520069.11300462  
SRR17520069.11300464  
SRR17520069.11300466  
SRR17520069.11300468  
SRR17520069.11300470  
SRR17520069.11300472  
SRR17520069.11300474  
SRR17520069.11300476  
SRR17520069.11300478  
SRR17520069.11300480  
SRR17520069.11300482  
SRR17520069.11300484  
SRR17520069.11300486  
SRR17520069.11300488  
SRR17520069.11300490  
SRR17520069.11301985  
SRR17520069.11301991  
SRR17520069.11303035  
SRR17520069.11303037  
SRR17520069.11303039  
SRR17520069.11303041  
SRR17520069.11303043  
SRR17520069.11303045  
SRR17520069.11303047

SRR17520069.11303049  
SRR17520069.11303051  
SRR17520069.11303053  
SRR17520069.11303055  
SRR17520069.11303057  
SRR17520069.11303059  
SRR17520069.11303061  
SRR17520069.11303063  
SRR17520069.11303065  
SRR17520069.11310918  
SRR17520069.11310920  
SRR17520069.11310922  
SRR17520069.11310924  
SRR17520069.11310926  
SRR17520069.11310928  
SRR17520069.11310930  
SRR17520069.11310932  
SRR17520069.11310934  
SRR17520069.11310936  
SRR17520069.11310938  
SRR17520069.11310940  
SRR17520069.11310942  
SRR17520069.11310944  
SRR17520069.11310946  
SRR17520069.11310948  
SRR17520069.11310950  
SRR17520069.11310952  
SRR17520069.11310954  
SRR17520069.11310956  
SRR17520069.11310958  
SRR17520069.11310960  
SRR17520069.11310962  
SRR17520069.11310964  
SRR17520069.11310966  
SRR17520069.11310968  
SRR17520069.11323459  
SRR17520069.11323461  
SRR17520069.11323463  
SRR17520069.11323465  
SRR17520069.11323467  
SRR17520069.11323469  
SRR17520069.11323471  
SRR17520069.11323473  
SRR17520069.11323475  
SRR17520069.11323477  
SRR17520069.11323479  
SRR17520069.11323481

SRR17520069. 11323483  
SRR17520069. 11323485  
SRR17520069. 11323487  
SRR17520069. 11323489  
SRR17520069. 11323491  
SRR17520069. 11323493  
SRR17520069. 11323495  
SRR17520069. 11323497  
SRR17520069. 11323499  
SRR17520069. 11323501  
SRR17520069. 11323503  
SRR17520069. 11323505  
SRR17520069. 11323507  
SRR17520069. 11323509  
SRR17520069. 11323511  
SRR17520069. 11323513  
SRR17520069. 11323755  
SRR17520069. 11323757  
SRR17520069. 11323759  
SRR17520069. 11327965  
SRR17520069. 11327967  
SRR17520069. 11327969  
SRR17520069. 11327971  
SRR17520069. 11327973  
SRR17520069. 11327975  
SRR17520069. 11327977  
SRR17520069. 11327979  
SRR17520069. 11327981  
SRR17520069. 11327983  
SRR17520069. 11327985  
SRR17520069. 11327987  
SRR17520069. 11327989  
SRR17520069. 11327991  
SRR17520069. 11327993  
SRR17520069. 11327995  
SRR17520069. 11327997  
SRR17520069. 11327999  
SRR17520069. 11328001  
SRR17520069. 11331333  
SRR17520069. 11331335  
SRR17520069. 11331343  
SRR17520069. 11331345  
SRR17520069. 11331347  
SRR17520069. 11331349  
SRR17520069. 11331351  
SRR17520069. 11331353  
SRR17520069. 11331355



SRR17520069. 11331357  
SRR17520069. 11331359  
SRR17520069. 11331361  
SRR17520069. 11331363  
SRR17520069. 11331365  
SRR17520069. 11331367  
SRR17520069. 11331369  
SRR17520069. 11331371  
SRR17520069. 11331373  
SRR17520069. 11331375  
SRR17520069. 11331377  
SRR17520069. 11331379  
SRR17520069. 11331381  
SRR17520069. 11331383  
SRR17520069. 11331385  
SRR17520069. 11331387  
SRR17520069. 11331389  
SRR17520069. 11331391  
SRR17520069. 11331393  
SRR17520069. 11331395  
SRR17520069. 11331397  
SRR17520069. 11331399  
SRR17520069. 11331401  
SRR17520069. 11331407  
SRR17520069. 11331411  
SRR17520069. 11331415  
SRR17520069. 11331417  
SRR17520069. 11331419  
SRR17520069. 11331421  
SRR17520069. 11331423  
SRR17520069. 11331425  
SRR17520069. 11335036  
SRR17520069. 11336709  
SRR17520069. 11336711  
SRR17520069. 11336713  
SRR17520069. 11336717  
SRR17520069. 11336719  
SRR17520069. 11336721  
SRR17520069. 11336723  
SRR17520069. 11336725  
SRR17520069. 11338648  
SRR17520069. 11338650  
SRR17520069. 11338652  
SRR17520069. 11338654  
SRR17520069. 11338656  
SRR17520069. 11338658  
SRR17520069. 11338660

SRR17520069. 11338662  
SRR17520069. 11338664  
SRR17520069. 11338666  
SRR17520069. 11338668  
SRR17520069. 11338670  
SRR17520069. 11338672  
SRR17520069. 11338674  
SRR17520069. 11338676  
SRR17520069. 11338678  
SRR17520069. 11338680  
SRR17520069. 11341550  
SRR17520069. 11341552  
SRR17520069. 11341554  
SRR17520069. 11341556  
SRR17520069. 11341558  
SRR17520069. 11341560  
SRR17520069. 11341562  
SRR17520069. 11341564  
SRR17520069. 11341566  
SRR17520069. 11341568  
SRR17520069. 11341570  
SRR17520069. 11341572  
SRR17520069. 11341574  
SRR17520069. 11341576  
SRR17520069. 11341578  
SRR17520069. 11341580  
SRR17520069. 11341582  
SRR17520069. 11341584  
SRR17520069. 11341586  
SRR17520069. 11341588  
SRR17520069. 11341590  
SRR17520069. 11341592  
SRR17520069. 11341594  
SRR17520069. 11341596  
SRR17520069. 11341598  
SRR17520069. 11341600  
SRR17520069. 11341602  
SRR17520069. 11341604  
SRR17520069. 11341606  
SRR17520069. 11341608  
SRR17520069. 11341610  
SRR17520069. 11341612  
SRR17520069. 11341614  
SRR17520069. 11341616  
SRR17520069. 11341618  
SRR17520069. 11341620  
SRR17520069. 11341622

SRR17520069.11341624  
SRR17520069.11341626  
SRR17520069.11341628  
SRR17520069.11341630  
SRR17520069.11341632  
SRR17520069.11342872  
SRR17520069.11342874  
SRR17520069.11342876  
SRR17520069.11342878  
SRR17520069.11342880  
SRR17520069.11342882  
SRR17520069.11342884  
SRR17520069.11342886  
SRR17520069.11342888  
SRR17520069.11342890  
SRR17520069.11342892  
SRR17520069.11344610  
SRR17520069.11344612  
SRR17520069.11344614  
SRR17520069.11344616  
SRR17520069.11344618  
SRR17520069.11344620  
SRR17520069.11344622  
SRR17520069.11344624  
SRR17520069.11344626  
SRR17520069.11344628  
SRR17520069.11344630  
SRR17520069.11344632  
SRR17520069.11344634  
SRR17520069.11344636  
SRR17520069.11344638  
SRR17520069.11344640  
SRR17520069.11344642  
SRR17520069.11344644  
SRR17520069.11344648  
SRR17520069.11344650  
SRR17520069.11344652  
SRR17520069.11344654  
SRR17520069.11344656  
SRR17520069.11344658  
SRR17520069.11344662  
SRR17520069.11344664  
SRR17520069.11344666  
SRR17520069.11344668  
SRR17520069.11344670  
SRR17520069.11344672  
SRR17520069.11344676

SRR17520069. 11344678  
SRR17520069. 11344682  
SRR17520069. 11344684  
SRR17520069. 11344686  
SRR17520069. 11344690  
SRR17520069. 11344692  
SRR17520069. 11344694  
SRR17520069. 11344696  
SRR17520069. 11344698  
SRR17520069. 11344700  
SRR17520069. 11344702  
SRR17520069. 11344704  
SRR17520069. 11344706  
SRR17520069. 11344708  
SRR17520069. 11344710  
SRR17520069. 11344712  
SRR17520069. 11344716  
SRR17520069. 11344718  
SRR17520069. 11344720  
SRR17520069. 11344722  
SRR17520069. 11344726  
SRR17520069. 11344728  
SRR17520069. 11344730  
SRR17520069. 11344732  
SRR17520069. 11344736  
SRR17520069. 11344738  
SRR17520069. 11344740  
SRR17520069. 11344742  
SRR17520069. 11344744  
SRR17520069. 11344746  
SRR17520069. 11344748  
SRR17520069. 11344750  
SRR17520069. 11344752  
SRR17520069. 11344754  
SRR17520069. 11344756  
SRR17520069. 11344758  
SRR17520069. 11344760  
SRR17520069. 11344762  
SRR17520069. 11344764  
SRR17520069. 11344766  
SRR17520069. 11344770  
SRR17520069. 11344772  
SRR17520069. 11344776  
SRR17520069. 11344778  
SRR17520069. 11344780  
SRR17520069. 11344782  
SRR17520069. 11344784

SRR17520069. 11344786  
SRR17520069. 11344788  
SRR17520069. 11344790  
SRR17520069. 11344792  
SRR17520069. 11344794  
SRR17520069. 11344796  
SRR17520069. 11344798  
SRR17520069. 11344800  
SRR17520069. 11344802  
SRR17520069. 11344804  
SRR17520069. 11344806  
SRR17520069. 11344808  
SRR17520069. 11344810  
SRR17520069. 11344812  
SRR17520069. 11344814  
SRR17520069. 11344816  
SRR17520069. 11344818  
SRR17520069. 11344820  
SRR17520069. 11344822  
SRR17520069. 11344824  
SRR17520069. 11344826  
SRR17520069. 11344828  
SRR17520069. 11344830  
SRR17520069. 11344832  
SRR17520069. 11344834  
SRR17520069. 11344836  
SRR17520069. 11344838  
SRR17520069. 11344840  
SRR17520069. 11344842  
SRR17520069. 11344844  
SRR17520069. 11344846  
SRR17520069. 11344848  
SRR17520069. 11344850  
SRR17520069. 11344852  
SRR17520069. 11344854  
SRR17520069. 11344856  
SRR17520069. 11349341  
SRR17520069. 11349343  
SRR17520069. 11349345  
SRR17520069. 11349347  
SRR17520069. 11349349  
SRR17520069. 11349351  
SRR17520069. 11349353  
SRR17520069. 11349355  
SRR17520069. 11349357  
SRR17520069. 11349359  
SRR17520069. 11349361

SRR17520069. 11349363  
SRR17520069. 11349367  
SRR17520069. 11349369  
SRR17520069. 11349371  
SRR17520069. 11349373  
SRR17520069. 11349375  
SRR17520069. 11349377  
SRR17520069. 11349379  
SRR17520069. 11349381  
SRR17520069. 11349383  
SRR17520069. 11349385  
SRR17520069. 11349387  
SRR17520069. 11349389  
SRR17520069. 11349391  
SRR17520069. 11349393  
SRR17520069. 11349395  
SRR17520069. 11349397  
SRR17520069. 11349399  
SRR17520069. 11349401  
SRR17520069. 11349403  
SRR17520069. 11349405  
SRR17520069. 11349407  
SRR17520069. 11349409  
SRR17520069. 11349411  
SRR17520069. 11349413  
SRR17520069. 11349415  
SRR17520069. 11349417  
SRR17520069. 11349419  
SRR17520069. 11349421  
SRR17520069. 11349423  
SRR17520069. 11349425  
SRR17520069. 11349427  
SRR17520069. 11349429  
SRR17520069. 11349433  
SRR17520069. 11349435  
SRR17520069. 11349437  
SRR17520069. 11349439  
SRR17520069. 11349441  
SRR17520069. 11349443  
SRR17520069. 11349445  
SRR17520069. 11349447  
SRR17520069. 11349449  
SRR17520069. 11349451  
SRR17520069. 11349453  
SRR17520069. 11349455  
SRR17520069. 11349457  
SRR17520069. 11349459

SRR17520069.11349461  
SRR17520069.11349463  
SRR17520069.11349465  
SRR17520069.11349467  
SRR17520069.11349469  
SRR17520069.11349471  
SRR17520069.11349473  
SRR17520069.11349475  
SRR17520069.11353127  
SRR17520069.11353138  
SRR17520069.11356203  
SRR17520069.11356205  
SRR17520069.11356207  
SRR17520069.11356209  
SRR17520069.11356211  
SRR17520069.11356213  
SRR17520069.11356215  
SRR17520069.11356217  
SRR17520069.11356219  
SRR17520069.11356221  
SRR17520069.11356223  
SRR17520069.11356225  
SRR17520069.11356227  
SRR17520069.11356229  
SRR17520069.11356231  
SRR17520069.11356233  
SRR17520069.11356235  
SRR17520069.11356237  
SRR17520069.11356239  
SRR17520069.11356241  
SRR17520069.11356243  
SRR17520069.11356245  
SRR17520069.11356247  
SRR17520069.11356249  
SRR17520069.11356251  
SRR17520069.11356253  
SRR17520069.11356255  
SRR17520069.11356257  
SRR17520069.11356259  
SRR17520069.11356261  
SRR17520069.11356263  
SRR17520069.11356265  
SRR17520069.11356267  
SRR17520069.11356269  
SRR17520069.11356271  
SRR17520069.11356273  
SRR17520069.11356275

SRR17520069. 11356277  
SRR17520069. 11356333  
SRR17520069. 11356335  
SRR17520069. 11356337  
SRR17520069. 11356341  
SRR17520069. 11356343  
SRR17520069. 11356345  
SRR17520069. 11358268  
SRR17520069. 11358270  
SRR17520069. 11358272  
SRR17520069. 11358274  
SRR17520069. 11358280  
SRR17520069. 11358282  
SRR17520069. 11358284  
SRR17520069. 11358286  
SRR17520069. 11358290  
SRR17520069. 11358292  
SRR17520069. 11358294  
SRR17520069. 11358296  
SRR17520069. 11358298  
SRR17520069. 11358300  
SRR17520069. 11358302  
SRR17520069. 11358304  
SRR17520069. 11358306  
SRR17520069. 11358308  
SRR17520069. 11358310  
SRR17520069. 11358312  
SRR17520069. 11358314  
SRR17520069. 11358316  
SRR17520069. 11358318  
SRR17520069. 11358322  
SRR17520069. 11358324  
SRR17520069. 11358326  
SRR17520069. 11358328  
SRR17520069. 11358330  
SRR17520069. 11358332  
SRR17520069. 11358334  
SRR17520069. 11358336  
SRR17520069. 11358338  
SRR17520069. 11358340  
SRR17520069. 11358342  
SRR17520069. 11358344  
SRR17520069. 11358346  
SRR17520069. 11358348  
SRR17520069. 11358350  
SRR17520069. 11358352  
SRR17520069. 11358354



SRR17520069. 11358356  
SRR17520069. 11358358  
SRR17520069. 11358360  
SRR17520069. 11358362  
SRR17520069. 11358366  
SRR17520069. 11361990  
SRR17520069. 11362047  
SRR17520069. 11377413  
SRR17520069. 11377415  
SRR17520069. 11377417  
SRR17520069. 11377419  
SRR17520069. 11377423  
SRR17520069. 11377425  
SRR17520069. 11377429  
SRR17520069. 11377431  
SRR17520069. 11377433  
SRR17520069. 11379071  
SRR17520069. 11379073  
SRR17520069. 11379075  
SRR17520069. 11379077  
SRR17520069. 11379079  
SRR17520069. 11379081  
SRR17520069. 11379083  
SRR17520069. 11379085  
SRR17520069. 11379087  
SRR17520069. 11379089  
SRR17520069. 11379091  
SRR17520069. 11379095  
SRR17520069. 11379097  
SRR17520069. 11379099  
SRR17520069. 11379101  
SRR17520069. 11379103  
SRR17520069. 11379105  
SRR17520069. 11379107  
SRR17520069. 11379109  
SRR17520069. 11379111  
SRR17520069. 11379113  
SRR17520069. 11379115  
SRR17520069. 11379117  
SRR17520069. 11379119  
SRR17520069. 11379121  
SRR17520069. 11379123  
SRR17520069. 11379125  
SRR17520069. 11379127  
SRR17520069. 11379129  
SRR17520069. 11379131  
SRR17520069. 11383415

SRR17520069. 11383417  
SRR17520069. 11383419  
SRR17520069. 11383421  
SRR17520069. 11383423  
SRR17520069. 11383425  
SRR17520069. 11383427  
SRR17520069. 11383429  
SRR17520069. 11383431  
SRR17520069. 11383433  
SRR17520069. 11383435  
SRR17520069. 11383437  
SRR17520069. 11383439  
SRR17520069. 11383441  
SRR17520069. 11383443  
SRR17520069. 11383445  
SRR17520069. 11383447  
SRR17520069. 11383449  
SRR17520069. 11383451  
SRR17520069. 11383453  
SRR17520069. 11383455  
SRR17520069. 11383457  
SRR17520069. 11383459  
SRR17520069. 11383463  
SRR17520069. 11392870  
SRR17520069. 11392872  
SRR17520069. 11392874  
SRR17520069. 11392876  
SRR17520069. 11392878  
SRR17520069. 11392880  
SRR17520069. 11392882  
SRR17520069. 11392884  
SRR17520069. 11392886  
SRR17520069. 11392888  
SRR17520069. 11392890  
SRR17520069. 11392892  
SRR17520069. 11392894  
SRR17520069. 11392896  
SRR17520069. 11392898  
SRR17520069. 11392900  
SRR17520069. 11392902  
SRR17520069. 11392906  
SRR17520069. 11392908  
SRR17520069. 11392910  
SRR17520069. 11392912  
SRR17520069. 11392914  
SRR17520069. 11392916  
SRR17520069. 11397409

SRR17520069.11397411  
SRR17520069.11404562  
SRR17520069.11404564  
SRR17520069.11404566  
SRR17520069.11404568  
SRR17520069.11404570  
SRR17520069.11406363  
SRR17520069.11406365  
SRR17520069.11406369  
SRR17520069.11406371  
SRR17520069.11406373  
SRR17520069.11406375  
SRR17520069.11406377  
SRR17520069.11406381  
SRR17520069.11406383  
SRR17520069.11406385  
SRR17520069.11406387  
SRR17520069.11406389  
SRR17520069.11406391  
SRR17520069.11406393  
SRR17520069.11406395  
SRR17520069.11406415  
SRR17520069.11406417  
SRR17520069.11406419  
SRR17520069.11406421  
SRR17520069.11406423  
SRR17520069.11406425  
SRR17520069.11406427  
SRR17520069.11406429  
SRR17520069.11406431  
SRR17520069.11406433  
SRR17520069.11406435  
SRR17520069.11406437  
SRR17520069.11406439  
SRR17520069.11406441  
SRR17520069.11406443  
SRR17520069.11406445  
SRR17520069.11406447  
SRR17520069.11406449  
SRR17520069.11406451  
SRR17520069.11406453  
SRR17520069.11406455  
SRR17520069.11406457  
SRR17520069.11406459  
SRR17520069.11406463  
SRR17520069.11406465  
SRR17520069.11406467

SRR17520069.11406469  
SRR17520069.11406471  
SRR17520069.11406473  
SRR17520069.11406475  
SRR17520069.11406477  
SRR17520069.11406479  
SRR17520069.11406481  
SRR17520069.11406483  
SRR17520069.11406485  
SRR17520069.11406487  
SRR17520069.11406489  
SRR17520069.11406491  
SRR17520069.11406493  
SRR17520069.11406495  
SRR17520069.11406497  
SRR17520069.11406499  
SRR17520069.11406501  
SRR17520069.11406503  
SRR17520069.11406505  
SRR17520069.11406507  
SRR17520069.11406509  
SRR17520069.11406511  
SRR17520069.11406513  
SRR17520069.11406515  
SRR17520069.11406517  
SRR17520069.11406519  
SRR17520069.11406521  
SRR17520069.11406523  
SRR17520069.11406525  
SRR17520069.11406527  
SRR17520069.11406529  
SRR17520069.11406531  
SRR17520069.11406533  
SRR17520069.11406535  
SRR17520069.11406537  
SRR17520069.11406539  
SRR17520069.11406541  
SRR17520069.11406543  
SRR17520069.11406545  
SRR17520069.11406547  
SRR17520069.11406549  
SRR17520069.11408541  
SRR17520069.11408543  
SRR17520069.11408545  
SRR17520069.11408547  
SRR17520069.11408549  
SRR17520069.11408551

SRR17520069.11408553  
SRR17520069.11408555  
SRR17520069.11408557  
SRR17520069.11408559  
SRR17520069.11408561  
SRR17520069.11408563  
SRR17520069.11408565  
SRR17520069.11408567  
SRR17520069.11408569  
SRR17520069.11408571  
SRR17520069.11408573  
SRR17520069.11408575  
SRR17520069.11408577  
SRR17520069.11408579  
SRR17520069.11414745  
SRR17520069.11414747  
SRR17520069.11414751  
SRR17520069.11414755  
SRR17520069.11414757  
SRR17520069.11414759  
SRR17520069.11414763  
SRR17520069.11414765  
SRR17520069.11415101  
SRR17520069.11415103  
SRR17520069.11415105  
SRR17520069.11415107  
SRR17520069.11415109  
SRR17520069.11415111  
SRR17520069.11415113  
SRR17520069.11415115  
SRR17520069.11415117  
SRR17520069.11415119  
SRR17520069.11415121  
SRR17520069.11415123  
SRR17520069.11415125  
SRR17520069.11415129  
SRR17520069.11415131  
SRR17520069.11415133  
SRR17520069.11415135  
SRR17520069.11415137  
SRR17520069.11415139  
SRR17520069.11415141  
SRR17520069.11415143  
SRR17520069.11415145  
SRR17520069.11415147  
SRR17520069.11415149  
SRR17520069.11415151

SRR17520069.11415153  
SRR17520069.11415155  
SRR17520069.11415157  
SRR17520069.11415159  
SRR17520069.11415161  
SRR17520069.11415163  
SRR17520069.11415165  
SRR17520069.11415167  
SRR17520069.11415169  
SRR17520069.11415171  
SRR17520069.11415173  
SRR17520069.11415175  
SRR17520069.11415177  
SRR17520069.11415179  
SRR17520069.11415181  
SRR17520069.11415183  
SRR17520069.11421724  
SRR17520069.11421726  
SRR17520069.11421728  
SRR17520069.11421730  
SRR17520069.11421734  
SRR17520069.11423463  
SRR17520069.11423680  
SRR17520069.11423682  
SRR17520069.11423684  
SRR17520069.11423686  
SRR17520069.11423688  
SRR17520069.11423690  
SRR17520069.11423692  
SRR17520069.11423694  
SRR17520069.11423696  
SRR17520069.11423698  
SRR17520069.11423700  
SRR17520069.11423702  
SRR17520069.11423704  
SRR17520069.11423706  
SRR17520069.11423710  
SRR17520069.11423712  
SRR17520069.11423714  
SRR17520069.11423716  
SRR17520069.11423718  
SRR17520069.11423720  
SRR17520069.11423722  
SRR17520069.11423724  
SRR17520069.11425549  
SRR17520069.11425551  
SRR17520069.11425633

SRR17520069.11425635  
SRR17520069.11425637  
SRR17520069.11425639  
SRR17520069.11425705  
SRR17520069.11425707  
SRR17520069.11425709  
SRR17520069.11425713  
SRR17520069.11425715  
SRR17520069.11425717  
SRR17520069.11430114  
SRR17520069.11430116  
SRR17520069.11430118  
SRR17520069.11430120  
SRR17520069.11433270  
SRR17520069.11433272  
SRR17520069.11433274  
SRR17520069.11433276  
SRR17520069.11433278  
SRR17520069.11433280  
SRR17520069.11433282  
SRR17520069.11433284  
SRR17520069.11433286  
SRR17520069.11433288  
SRR17520069.11433290  
SRR17520069.11433292  
SRR17520069.11433294  
SRR17520069.11433296  
SRR17520069.11434278  
SRR17520069.11434282  
SRR17520069.11434288  
SRR17520069.11434290  
SRR17520069.11434292  
SRR17520069.11434294  
SRR17520069.11434296  
SRR17520069.11434298  
SRR17520069.11434300  
SRR17520069.11434302  
SRR17520069.11434304  
SRR17520069.11434306  
SRR17520069.11434308  
SRR17520069.11434310  
SRR17520069.11434312  
SRR17520069.11434314  
SRR17520069.11434316  
SRR17520069.11434318  
SRR17520069.11434320  
SRR17520069.11434322

SRR17520069.11434324  
SRR17520069.11434326  
SRR17520069.11434328  
SRR17520069.11434330  
SRR17520069.11434332  
SRR17520069.11434334  
SRR17520069.11434336  
SRR17520069.11434338  
SRR17520069.11434340  
SRR17520069.11434342  
SRR17520069.11434344  
SRR17520069.11438273  
SRR17520069.11440004  
SRR17520069.11440006  
SRR17520069.11440008  
SRR17520069.11440010  
SRR17520069.11440012  
SRR17520069.11440014  
SRR17520069.11440016  
SRR17520069.11440018  
SRR17520069.11440020  
SRR17520069.11444745  
SRR17520069.11444747  
SRR17520069.11444749  
SRR17520069.11444751  
SRR17520069.11444753  
SRR17520069.11444755  
SRR17520069.11444757  
SRR17520069.11444759  
SRR17520069.11444761  
SRR17520069.11444763  
SRR17520069.11444765  
SRR17520069.11444767  
SRR17520069.11444769  
SRR17520069.11444771  
SRR17520069.11444773  
SRR17520069.11444775  
SRR17520069.11444777  
SRR17520069.11444779  
SRR17520069.11444781  
SRR17520069.11444783  
SRR17520069.11444785  
SRR17520069.11444787  
SRR17520069.11444789  
SRR17520069.11444791  
SRR17520069.11444793  
SRR17520069.11444795



SRR17520069.11444797  
SRR17520069.11444799  
SRR17520069.11444801  
SRR17520069.11444803  
SRR17520069.11444805  
SRR17520069.11444807  
SRR17520069.11444809  
SRR17520069.11444811  
SRR17520069.11444813  
SRR17520069.11444815  
SRR17520069.11444817  
SRR17520069.11444819  
SRR17520069.11444821  
SRR17520069.11444823  
SRR17520069.11444825  
SRR17520069.11444827  
SRR17520069.11444829  
SRR17520069.11444833  
SRR17520069.11444835  
SRR17520069.11444837  
SRR17520069.11444839  
SRR17520069.11444841  
SRR17520069.11444843  
SRR17520069.11444845  
SRR17520069.11444998  
SRR17520069.11450544  
SRR17520069.11450549  
SRR17520069.11450551  
SRR17520069.11451966  
SRR17520069.11451968  
SRR17520069.11451970  
SRR17520069.11451972  
SRR17520069.11451974  
SRR17520069.11451976  
SRR17520069.11451978  
SRR17520069.11451980  
SRR17520069.11451982  
SRR17520069.11451984  
SRR17520069.11451986  
SRR17520069.11451988  
SRR17520069.11451990  
SRR17520069.11451992  
SRR17520069.11451994  
SRR17520069.11451996  
SRR17520069.11451998  
SRR17520069.11452000  
SRR17520069.11452082

SRR17520069.11452084  
SRR17520069.11452086  
SRR17520069.11452088  
SRR17520069.11452090  
SRR17520069.11452092  
SRR17520069.11452094  
SRR17520069.11452096  
SRR17520069.11452098  
SRR17520069.11452100  
SRR17520069.11452102  
SRR17520069.11452104  
SRR17520069.11452106  
SRR17520069.11452108  
SRR17520069.11452110  
SRR17520069.11452112  
SRR17520069.11452114  
SRR17520069.11452116  
SRR17520069.11452118  
SRR17520069.11452120  
SRR17520069.11452122  
SRR17520069.11460260  
SRR17520069.11460262  
SRR17520069.11460264  
SRR17520069.11460266  
SRR17520069.11460268  
SRR17520069.11460270  
SRR17520069.11460272  
SRR17520069.11460274  
SRR17520069.11460276  
SRR17520069.11462760  
SRR17520069.11462762  
SRR17520069.11462764  
SRR17520069.11462766  
SRR17520069.11462768  
SRR17520069.11462770  
SRR17520069.11462772  
SRR17520069.11462774  
SRR17520069.11462776  
SRR17520069.11462778  
SRR17520069.11465857  
SRR17520069.11468690  
SRR17520069.11468692  
SRR17520069.11468694  
SRR17520069.11468696  
SRR17520069.11468698  
SRR17520069.11468702  
SRR17520069.11468704

SRR17520069.11468706  
SRR17520069.11468708  
SRR17520069.11468710  
SRR17520069.11468712  
SRR17520069.11468714  
SRR17520069.11468716  
SRR17520069.11468718  
SRR17520069.11468720  
SRR17520069.11468722  
SRR17520069.11468724  
SRR17520069.11468726  
SRR17520069.11468728  
SRR17520069.11468730  
SRR17520069.11468732  
SRR17520069.11469212  
SRR17520069.11469214  
SRR17520069.11469216  
SRR17520069.11469218  
SRR17520069.11469220  
SRR17520069.11469222  
SRR17520069.11469224  
SRR17520069.11469226  
SRR17520069.11469228  
SRR17520069.11469230  
SRR17520069.11469232  
SRR17520069.11469234  
SRR17520069.11469236  
SRR17520069.11469238  
SRR17520069.11477045  
SRR17520069.11477047  
SRR17520069.11477049  
SRR17520069.11477051  
SRR17520069.11477053  
SRR17520069.11477055  
SRR17520069.11477057  
SRR17520069.11477059  
SRR17520069.11477879  
SRR17520069.11477881  
SRR17520069.11477883  
SRR17520069.11477885  
SRR17520069.11477887  
SRR17520069.11477889  
SRR17520069.11477893  
SRR17520069.11477895  
SRR17520069.11477897  
SRR17520069.11477899  
SRR17520069.11477999

SRR17520069.11478001  
SRR17520069.11478003  
SRR17520069.11478005  
SRR17520069.11478007  
SRR17520069.11478009  
SRR17520069.11478011  
SRR17520069.11478013  
SRR17520069.11478015  
SRR17520069.11478017  
SRR17520069.11478019  
SRR17520069.11478021  
SRR17520069.11478023  
SRR17520069.11478025  
SRR17520069.11478029  
SRR17520069.11478031  
SRR17520069.11478236  
SRR17520069.11478238  
SRR17520069.11478240  
SRR17520069.11478242  
SRR17520069.11478244  
SRR17520069.11478246  
SRR17520069.11478248  
SRR17520069.11478250  
SRR17520069.11478252  
SRR17520069.11478254  
SRR17520069.11478258  
SRR17520069.11478260  
SRR17520069.11478262  
SRR17520069.11478264  
SRR17520069.11478266  
SRR17520069.11478268  
SRR17520069.11478270  
SRR17520069.11478272  
SRR17520069.11478274  
SRR17520069.11478276  
SRR17520069.11478278  
SRR17520069.11478280  
SRR17520069.11478282  
SRR17520069.11478284  
SRR17520069.11478288  
SRR17520069.11478290  
SRR17520069.11478292  
SRR17520069.11478294  
SRR17520069.11478296  
SRR17520069.11478300  
SRR17520069.11481268  
SRR17520069.11494207

SRR17520069.11494209  
SRR17520069.11494213  
SRR17520069.11494215  
SRR17520069.11494217  
SRR17520069.11494219  
SRR17520069.11494221  
SRR17520069.11494223  
SRR17520069.11494225  
SRR17520069.11494227  
SRR17520069.11494229  
SRR17520069.11494231  
SRR17520069.11494233  
SRR17520069.11494235  
SRR17520069.11494237  
SRR17520069.11494239  
SRR17520069.11494241  
SRR17520069.11494243  
SRR17520069.11501418  
SRR17520069.11502046  
SRR17520069.11502048  
SRR17520069.11502050  
SRR17520069.11502052  
SRR17520069.11502054  
SRR17520069.11502058  
SRR17520069.11502060  
SRR17520069.11502062  
SRR17520069.11502064  
SRR17520069.11502066  
SRR17520069.11502068  
SRR17520069.11502072  
SRR17520069.11502074  
SRR17520069.11502076  
SRR17520069.11502078  
SRR17520069.11502080  
SRR17520069.11502082  
SRR17520069.11502084  
SRR17520069.11502086  
SRR17520069.11502088  
SRR17520069.11502090  
SRR17520069.11502094  
SRR17520069.11502096  
SRR17520069.11502098  
SRR17520069.11502100  
SRR17520069.11502102  
SRR17520069.11502106  
SRR17520069.11502108  
SRR17520069.11502112

SRR17520069.11502114  
SRR17520069.11502116  
SRR17520069.11502118  
SRR17520069.11502122  
SRR17520069.11502124  
SRR17520069.11502126  
SRR17520069.11502128  
SRR17520069.11502130  
SRR17520069.11502132  
SRR17520069.11502134  
SRR17520069.11502136  
SRR17520069.11502138  
SRR17520069.11502142  
SRR17520069.11502146  
SRR17520069.11502148  
SRR17520069.11502150  
SRR17520069.11502152  
SRR17520069.11502158  
SRR17520069.11502160  
SRR17520069.11502162  
SRR17520069.11502164  
SRR17520069.11502166  
SRR17520069.11502168  
SRR17520069.11502170  
SRR17520069.11502172  
SRR17520069.11502174  
SRR17520069.11502176  
SRR17520069.11502178  
SRR17520069.11502180  
SRR17520069.11502182  
SRR17520069.11502184  
SRR17520069.11502186  
SRR17520069.11502188  
SRR17520069.11502190  
SRR17520069.11502192  
SRR17520069.11502194  
SRR17520069.11502196  
SRR17520069.11502200  
SRR17520069.11502202  
SRR17520069.11502204  
SRR17520069.11502206  
SRR17520069.11502208  
SRR17520069.11502210  
SRR17520069.11502212  
SRR17520069.11502214  
SRR17520069.11502216  
SRR17520069.11509193

SRR17520069.11509195  
SRR17520069.11509197  
SRR17520069.11509201  
SRR17520069.11509203  
SRR17520069.11509205  
SRR17520069.11509207  
SRR17520069.11509209  
SRR17520069.11509211  
SRR17520069.11509213  
SRR17520069.11509215  
SRR17520069.11509219  
SRR17520069.11509221  
SRR17520069.11509223  
SRR17520069.11509225  
SRR17520069.11509227  
SRR17520069.11509229  
SRR17520069.11509231  
SRR17520069.11509233  
SRR17520069.11509235  
SRR17520069.11509239  
SRR17520069.11509241  
SRR17520069.11509243  
SRR17520069.11509245  
SRR17520069.11509247  
SRR17520069.11509249  
SRR17520069.11509251  
SRR17520069.11509253  
SRR17520069.11509255  
SRR17520069.11509257  
SRR17520069.11509261  
SRR17520069.11509263  
SRR17520069.11509265  
SRR17520069.11509267  
SRR17520069.11509269  
SRR17520069.11509271  
SRR17520069.11509273  
SRR17520069.11509275  
SRR17520069.11509277  
SRR17520069.11509285  
SRR17520069.11509287  
SRR17520069.11509289  
SRR17520069.11509291  
SRR17520069.11509293  
SRR17520069.11509295  
SRR17520069.11509297  
SRR17520069.11509299  
SRR17520069.11509301

SRR17520069.11509303  
SRR17520069.11509305  
SRR17520069.11509307  
SRR17520069.11509309  
SRR17520069.11509311  
SRR17520069.11509313  
SRR17520069.11509315  
SRR17520069.11509317  
SRR17520069.11509319  
SRR17520069.11509321  
SRR17520069.11509323  
SRR17520069.11509325  
SRR17520069.11509327  
SRR17520069.11509329  
SRR17520069.11509331  
SRR17520069.11509333  
SRR17520069.11509335  
SRR17520069.11509337  
SRR17520069.11509339  
SRR17520069.11509341  
SRR17520069.11509343  
SRR17520069.11509345  
SRR17520069.11509347  
SRR17520069.11509349  
SRR17520069.11509351  
SRR17520069.11509353  
SRR17520069.11509355  
SRR17520069.11509357  
SRR17520069.11509359  
SRR17520069.11509361  
SRR17520069.11510281  
SRR17520069.11510283  
SRR17520069.11510285  
SRR17520069.11510287  
SRR17520069.11510289  
SRR17520069.11510291  
SRR17520069.11510293  
SRR17520069.11510295  
SRR17520069.11510297  
SRR17520069.11510299  
SRR17520069.11510301  
SRR17520069.11510303  
SRR17520069.11510307  
SRR17520069.11510309  
SRR17520069.11510311  
SRR17520069.11510313  
SRR17520069.11510315



SRR17520069.11510317  
SRR17520069.11510319  
SRR17520069.11510321  
SRR17520069.11510323  
SRR17520069.11511738  
SRR17520069.11513198  
SRR17520069.11513200  
SRR17520069.11513202  
SRR17520069.11513204  
SRR17520069.11513206  
SRR17520069.11513208  
SRR17520069.11513210  
SRR17520069.11513212  
SRR17520069.11513214  
SRR17520069.11513216  
SRR17520069.11513218  
SRR17520069.11513222  
SRR17520069.11513224  
SRR17520069.11513226  
SRR17520069.11513228  
SRR17520069.11513230  
SRR17520069.11513232  
SRR17520069.11513234  
SRR17520069.11513236  
SRR17520069.11513238  
SRR17520069.11513240  
SRR17520069.11513242  
SRR17520069.11513244  
SRR17520069.11513246  
SRR17520069.11513248  
SRR17520069.11513250  
SRR17520069.11513252  
SRR17520069.11513254  
SRR17520069.11513256  
SRR17520069.11513258  
SRR17520069.11513260  
SRR17520069.11513262  
SRR17520069.11513264  
SRR17520069.11513268  
SRR17520069.11513270  
SRR17520069.11513272  
SRR17520069.11513274  
SRR17520069.11526328  
SRR17520069.11529866  
SRR17520069.11529874  
SRR17520069.11529899  
SRR17520069.11529912

SRR17520069.11530746  
SRR17520069.11530750  
SRR17520069.11530752  
SRR17520069.11530754  
SRR17520069.11530756  
SRR17520069.11530758  
SRR17520069.11530760  
SRR17520069.11530762  
SRR17520069.11534507  
SRR17520069.11534509  
SRR17520069.11534511  
SRR17520069.11534513  
SRR17520069.11534515  
SRR17520069.11534517  
SRR17520069.11534519  
SRR17520069.11535177  
SRR17520069.11535179  
SRR17520069.11535181  
SRR17520069.11535183  
SRR17520069.11535185  
SRR17520069.11535187  
SRR17520069.11535189  
SRR17520069.11535191  
SRR17520069.11535193  
SRR17520069.11535195  
SRR17520069.11535197  
SRR17520069.11535199  
SRR17520069.11535201  
SRR17520069.11535203  
SRR17520069.11535205  
SRR17520069.11535207  
SRR17520069.11537037  
SRR17520069.11537039  
SRR17520069.11537041  
SRR17520069.11537043  
SRR17520069.11537045  
SRR17520069.11537049  
SRR17520069.11537051  
SRR17520069.11537053  
SRR17520069.11537055  
SRR17520069.11537057  
SRR17520069.11537059  
SRR17520069.11537061  
SRR17520069.11537063  
SRR17520069.11537067  
SRR17520069.11537069  
SRR17520069.11537071

SRR17520069.11537073  
SRR17520069.11537077  
SRR17520069.11537079  
SRR17520069.11537081  
SRR17520069.11537083  
SRR17520069.11537085  
SRR17520069.11537087  
SRR17520069.11537089  
SRR17520069.11537091  
SRR17520069.11537093  
SRR17520069.11537095  
SRR17520069.11537097  
SRR17520069.11537099  
SRR17520069.11537101  
SRR17520069.11537103  
SRR17520069.11537105  
SRR17520069.11537107  
SRR17520069.11537109  
SRR17520069.11537111  
SRR17520069.11542091  
SRR17520069.11542093  
SRR17520069.11542095  
SRR17520069.11542097  
SRR17520069.11542099  
SRR17520069.11542101  
SRR17520069.11543338  
SRR17520069.11543340  
SRR17520069.11543342  
SRR17520069.11543344  
SRR17520069.11543346  
SRR17520069.11548347  
SRR17520069.11548349  
SRR17520069.11560357  
SRR17520069.11560359  
SRR17520069.11560361  
SRR17520069.11563000  
SRR17520069.11569361  
SRR17520069.11569363  
SRR17520069.11569365  
SRR17520069.11569367  
SRR17520069.11569369  
SRR17520069.11569371  
SRR17520069.11569373  
SRR17520069.11569375  
SRR17520069.11569377  
SRR17520069.11569379  
SRR17520069.11569381

SRR17520069.11569383  
SRR17520069.11569385  
SRR17520069.11569387  
SRR17520069.11569389  
SRR17520069.11569391  
SRR17520069.11569393  
SRR17520069.11569397  
SRR17520069.11569399  
SRR17520069.11569401  
SRR17520069.11569403  
SRR17520069.11569405  
SRR17520069.11569407  
SRR17520069.11569409  
SRR17520069.11569411  
SRR17520069.11569413  
SRR17520069.11569415  
SRR17520069.11569417  
SRR17520069.11569419  
SRR17520069.11569421  
SRR17520069.11569423  
SRR17520069.11569425  
SRR17520069.11569427  
SRR17520069.11569429  
SRR17520069.11569431  
SRR17520069.11569433  
SRR17520069.11569435  
SRR17520069.11569437  
SRR17520069.11569439  
SRR17520069.11569441  
SRR17520069.11569443  
SRR17520069.11569445  
SRR17520069.11569447  
SRR17520069.11569449  
SRR17520069.11569451  
SRR17520069.11569453  
SRR17520069.11569455  
SRR17520069.11569457  
SRR17520069.11569461  
SRR17520069.11569463  
SRR17520069.11569465  
SRR17520069.11569467  
SRR17520069.11569469  
SRR17520069.11569471  
SRR17520069.11569473  
SRR17520069.11569475  
SRR17520069.11569477  
SRR17520069.11569479

SRR17520069.11569481  
SRR17520069.11569483  
SRR17520069.11569485  
SRR17520069.11569487  
SRR17520069.11569489  
SRR17520069.11569491  
SRR17520069.11569493  
SRR17520069.11569495  
SRR17520069.11569497  
SRR17520069.11569499  
SRR17520069.11569501  
SRR17520069.11569503  
SRR17520069.11569505  
SRR17520069.11573146  
SRR17520069.11573148  
SRR17520069.11574005  
SRR17520069.11574007  
SRR17520069.11574009  
SRR17520069.11587695  
SRR17520069.11587697  
SRR17520069.11587699  
SRR17520069.11588751  
SRR17520069.11588753  
SRR17520069.11588755  
SRR17520069.11588757  
SRR17520069.11603519  
SRR17520069.11603521  
SRR17520069.11603523  
SRR17520069.11603525  
SRR17520069.11603527  
SRR17520069.11603529  
SRR17520069.11603531  
SRR17520069.11603533  
SRR17520069.11603535  
SRR17520069.11603537  
SRR17520069.11603539  
SRR17520069.11603541  
SRR17520069.11603543  
SRR17520069.11603545  
SRR17520069.11603547  
SRR17520069.11603549  
SRR17520069.11603551  
SRR17520069.11603553  
SRR17520069.11603555  
SRR17520069.11603557  
SRR17520069.11603559  
SRR17520069.11603561

SRR17520069.11603563  
SRR17520069.11603565  
SRR17520069.11603567  
SRR17520069.11603569  
SRR17520069.11603571  
SRR17520069.11603573  
SRR17520069.11603575  
SRR17520069.11603577  
SRR17520069.11603579  
SRR17520069.11603581  
SRR17520069.11603583  
SRR17520069.11603585  
SRR17520069.11603587  
SRR17520069.11603589  
SRR17520069.11603591  
SRR17520069.11603593  
SRR17520069.11603595  
SRR17520069.11603597  
SRR17520069.11603599  
SRR17520069.11603601  
SRR17520069.11603603  
SRR17520069.11603605  
SRR17520069.11603607  
SRR17520069.11603609  
SRR17520069.11603611  
SRR17520069.11603613  
SRR17520069.11603615  
SRR17520069.11603617  
SRR17520069.11604235  
SRR17520069.11604237  
SRR17520069.11604239  
SRR17520069.11604241  
SRR17520069.11604243  
SRR17520069.11604245  
SRR17520069.11604247  
SRR17520069.11604249  
SRR17520069.11604251  
SRR17520069.11604253  
SRR17520069.11604255  
SRR17520069.11604257  
SRR17520069.11604259  
SRR17520069.11604261  
SRR17520069.11604263  
SRR17520069.11604265  
SRR17520069.11604267  
SRR17520069.11604269  
SRR17520069.11604271

SRR17520069.11604273  
SRR17520069.11604275  
SRR17520069.11604277  
SRR17520069.11604279  
SRR17520069.11604281  
SRR17520069.11604283  
SRR17520069.11608151  
SRR17520069.11608153  
SRR17520069.11608159  
SRR17520069.11608161  
SRR17520069.11608163  
SRR17520069.11608165  
SRR17520069.11614865  
SRR17520069.11615843  
SRR17520069.11615845  
SRR17520069.11615849  
SRR17520069.11615851  
SRR17520069.11616695  
SRR17520069.11620908  
SRR17520069.11620910  
SRR17520069.11620912  
SRR17520069.11620914  
SRR17520069.11620916  
SRR17520069.11620918  
SRR17520069.11620920  
SRR17520069.11620922  
SRR17520069.11624688  
SRR17520069.11624690  
SRR17520069.11624692  
SRR17520069.11624694  
SRR17520069.11624696  
SRR17520069.11624698  
SRR17520069.11624700  
SRR17520069.11624702  
SRR17520069.11624704  
SRR17520069.11624706  
SRR17520069.11624708  
SRR17520069.11624710  
SRR17520069.11624712  
SRR17520069.11624714  
SRR17520069.11624716  
SRR17520069.11624718  
SRR17520069.11624720  
SRR17520069.11624722  
SRR17520069.11624724  
SRR17520069.11624726  
SRR17520069.11624728

SRR17520069.11624730  
SRR17520069.11624732  
SRR17520069.11624734  
SRR17520069.11624736  
SRR17520069.11638539  
SRR17520069.11638836  
SRR17520069.11638838  
SRR17520069.11638840  
SRR17520069.11638842  
SRR17520069.11638844  
SRR17520069.11638846  
SRR17520069.11638848  
SRR17520069.11638850  
SRR17520069.11638852  
SRR17520069.11638854  
SRR17520069.11638856  
SRR17520069.11638858  
SRR17520069.11638860  
SRR17520069.11638862  
SRR17520069.11638864  
SRR17520069.11638866  
SRR17520069.11638868  
SRR17520069.11638870  
SRR17520069.11638872  
SRR17520069.11638874  
SRR17520069.11638876  
SRR17520069.11638878  
SRR17520069.11638880  
SRR17520069.11638882  
SRR17520069.11638884  
SRR17520069.11638886  
SRR17520069.11638888  
SRR17520069.11638890  
SRR17520069.11638892  
SRR17520069.11638894  
SRR17520069.11638896  
SRR17520069.11638898  
SRR17520069.11638900  
SRR17520069.11638902  
SRR17520069.11638904  
SRR17520069.11638906  
SRR17520069.11638908  
SRR17520069.11638910  
SRR17520069.11638912  
SRR17520069.11638914  
SRR17520069.11638916  
SRR17520069.11638918



SRR17520069.11638920  
SRR17520069.11638922  
SRR17520069.11638924  
SRR17520069.11638926  
SRR17520069.11638928  
SRR17520069.11638930  
SRR17520069.11638932  
SRR17520069.11638934  
SRR17520069.11638936  
SRR17520069.11638938  
SRR17520069.11638940  
SRR17520069.11638942  
SRR17520069.11638944  
SRR17520069.11638946  
SRR17520069.11638948  
SRR17520069.11638950  
SRR17520069.11638952  
SRR17520069.11638954  
SRR17520069.11638956  
SRR17520069.11638958  
SRR17520069.11638960  
SRR17520069.11638962  
SRR17520069.11638964  
SRR17520069.11638966  
SRR17520069.11638968  
SRR17520069.11638970  
SRR17520069.11638972  
SRR17520069.11638974  
SRR17520069.11638976  
SRR17520069.11638978  
SRR17520069.11638980  
SRR17520069.11638982  
SRR17520069.11638984  
SRR17520069.11650691  
SRR17520069.11650693  
SRR17520069.11650695  
SRR17520069.11650697  
SRR17520069.11650699  
SRR17520069.11650701  
SRR17520069.11650703  
SRR17520069.11650705  
SRR17520069.11650707  
SRR17520069.11650709  
SRR17520069.11650713  
SRR17520069.11650715  
SRR17520069.11650717  
SRR17520069.11650719

SRR17520069.11650721  
SRR17520069.11650723  
SRR17520069.11650725  
SRR17520069.11650727  
SRR17520069.11650729  
SRR17520069.11650731  
SRR17520069.11650733  
SRR17520069.11650992  
SRR17520069.11661220  
SRR17520069.11661222  
SRR17520069.11661224  
SRR17520069.11661226  
SRR17520069.11661228  
SRR17520069.11661232  
SRR17520069.11661234  
SRR17520069.11661236  
SRR17520069.11661238  
SRR17520069.11661240  
SRR17520069.11661242  
SRR17520069.11661244  
SRR17520069.11661246  
SRR17520069.11661248  
SRR17520069.11661250  
SRR17520069.11661252  
SRR17520069.11661254  
SRR17520069.11661256  
SRR17520069.11661258  
SRR17520069.11661260  
SRR17520069.11661262  
SRR17520069.11661264  
SRR17520069.11661266  
SRR17520069.11661268  
SRR17520069.11661270  
SRR17520069.11661272  
SRR17520069.11661274  
SRR17520069.11661276  
SRR17520069.11661278  
SRR17520069.11661280  
SRR17520069.11661282  
SRR17520069.11661284  
SRR17520069.11661286  
SRR17520069.11661288  
SRR17520069.11661290  
SRR17520069.11661292  
SRR17520069.11661294  
SRR17520069.11661296  
SRR17520069.11661298

SRR17520069.11661300  
SRR17520069.11661302  
SRR17520069.11661304  
SRR17520069.11661306  
SRR17520069.11661308  
SRR17520069.11661310  
SRR17520069.11661312  
SRR17520069.11661314  
SRR17520069.11661316  
SRR17520069.11661318  
SRR17520069.11661320  
SRR17520069.11661322  
SRR17520069.11661324  
SRR17520069.11661326  
SRR17520069.11661328  
SRR17520069.11664225  
SRR17520069.11664227  
SRR17520069.11670317  
SRR17520069.11670321  
SRR17520069.11670323  
SRR17520069.11670325  
SRR17520069.11670327  
SRR17520069.11670329  
SRR17520069.11670331  
SRR17520069.11670333  
SRR17520069.11670335  
SRR17520069.11670337  
SRR17520069.11670339  
SRR17520069.11670341  
SRR17520069.11670343  
SRR17520069.11670347  
SRR17520069.11670349  
SRR17520069.11670351  
SRR17520069.11670353  
SRR17520069.11670355  
SRR17520069.11670359  
SRR17520069.11670361  
SRR17520069.11670363  
SRR17520069.11670365  
SRR17520069.11670367  
SRR17520069.11670369  
SRR17520069.11670371  
SRR17520069.11670373  
SRR17520069.11670375  
SRR17520069.11679412  
SRR17520069.11679414  
SRR17520069.11679416

SRR17520069.11679418  
SRR17520069.11679420  
SRR17520069.11679422  
SRR17520069.11679424  
SRR17520069.11679426  
SRR17520069.11679428  
SRR17520069.11679430  
SRR17520069.11679432  
SRR17520069.11679434  
SRR17520069.11679436  
SRR17520069.11680451  
SRR17520069.11680453  
SRR17520069.11680457  
SRR17520069.11680461  
SRR17520069.11680463  
SRR17520069.11680465  
SRR17520069.11680760  
SRR17520069.11680772  
SRR17520069.11680774  
SRR17520069.11680776  
SRR17520069.11680778  
SRR17520069.11680780  
SRR17520069.11680782  
SRR17520069.11680784  
SRR17520069.11680786  
SRR17520069.11680788  
SRR17520069.11680790  
SRR17520069.11680792  
SRR17520069.11680794  
SRR17520069.11680796  
SRR17520069.11680798  
SRR17520069.11680802  
SRR17520069.11680804  
SRR17520069.11680806  
SRR17520069.11680808  
SRR17520069.11680810  
SRR17520069.11680812  
SRR17520069.11680814  
SRR17520069.11680816  
SRR17520069.11680818  
SRR17520069.11680822  
SRR17520069.11680824  
SRR17520069.11680826  
SRR17520069.11680828  
SRR17520069.11684449  
SRR17520069.11684453  
SRR17520069.11684455

SRR17520069.11684457  
SRR17520069.11692133  
SRR17520069.11692137  
SRR17520069.11692139  
SRR17520069.11698820  
SRR17520069.11698826  
SRR17520069.11698828  
SRR17520069.11698830  
SRR17520069.11698832  
SRR17520069.11701262  
SRR17520069.11701264  
SRR17520069.11701266  
SRR17520069.11707936  
SRR17520069.11707938  
SRR17520069.11707940  
SRR17520069.11707942  
SRR17520069.11707944  
SRR17520069.11707946  
SRR17520069.11707948  
SRR17520069.11707950  
SRR17520069.11707952  
SRR17520069.11707954  
SRR17520069.11707955  
SRR17520069.11707956  
SRR17520069.11707958  
SRR17520069.11707960  
SRR17520069.11707962  
SRR17520069.11707964  
SRR17520069.11707966  
SRR17520069.11707968  
SRR17520069.11707970  
SRR17520069.11707972  
SRR17520069.11707974  
SRR17520069.11707976  
SRR17520069.11707978  
SRR17520069.11707982  
SRR17520069.11707984  
SRR17520069.11707986  
SRR17520069.11707988  
SRR17520069.11707990  
SRR17520069.11707992  
SRR17520069.11707994  
SRR17520069.11707996  
SRR17520069.11707998  
SRR17520069.11708000  
SRR17520069.11708002  
SRR17520069.11708004

SRR17520069.11708006  
SRR17520069.11708008  
SRR17520069.11708010  
SRR17520069.11708012  
SRR17520069.11708016  
SRR17520069.11708018  
SRR17520069.11708020  
SRR17520069.11708022  
SRR17520069.11708024  
SRR17520069.11708026  
SRR17520069.11708028  
SRR17520069.11708030  
SRR17520069.11708032  
SRR17520069.11708034  
SRR17520069.11708036  
SRR17520069.11708038  
SRR17520069.11708040  
SRR17520069.11708042  
SRR17520069.11714602  
SRR17520069.11714604  
SRR17520069.11714608  
SRR17520069.11714610  
SRR17520069.11714612  
SRR17520069.11714616  
SRR17520069.11714618  
SRR17520069.11714622  
SRR17520069.11714624  
SRR17520069.11714628  
SRR17520069.11714630  
SRR17520069.11714632  
SRR17520069.11714634  
SRR17520069.11714636  
SRR17520069.11714638  
SRR17520069.11714640  
SRR17520069.11716761  
SRR17520069.11716763  
SRR17520069.11716765  
SRR17520069.11716767  
SRR17520069.11716769  
SRR17520069.11716864  
SRR17520069.11716866  
SRR17520069.11716868  
SRR17520069.11717067  
SRR17520069.11717071  
SRR17520069.11717073  
SRR17520069.11717075  
SRR17520069.11717159

SRR17520069.11717161  
SRR17520069.11729418  
SRR17520069.11735047  
SRR17520069.11735049  
SRR17520069.11735051  
SRR17520069.11735053  
SRR17520069.11735055  
SRR17520069.11736197  
SRR17520069.11736199  
SRR17520069.11736201  
SRR17520069.11736205  
SRR17520069.11736209  
SRR17520069.11736211  
SRR17520069.11736215  
SRR17520069.11736217  
SRR17520069.11736219  
SRR17520069.11736221  
SRR17520069.11736223  
SRR17520069.11736225  
SRR17520069.11736227  
SRR17520069.11736229  
SRR17520069.11736231  
SRR17520069.11736235  
SRR17520069.11736237  
SRR17520069.11736239  
SRR17520069.11736241  
SRR17520069.11736243  
SRR17520069.11736245  
SRR17520069.11736247  
SRR17520069.11736249  
SRR17520069.11736251  
SRR17520069.11736253  
SRR17520069.11736255  
SRR17520069.11736257  
SRR17520069.11736259  
SRR17520069.11736261  
SRR17520069.11736263  
SRR17520069.11736265  
SRR17520069.11736267  
SRR17520069.11736269  
SRR17520069.11736271  
SRR17520069.11736273  
SRR17520069.11736275  
SRR17520069.11736277  
SRR17520069.11736279  
SRR17520069.11736283  
SRR17520069.11736285

SRR17520069.11736287  
SRR17520069.11736289  
SRR17520069.11736291  
SRR17520069.11736293  
SRR17520069.11736295  
SRR17520069.11736297  
SRR17520069.11736299  
SRR17520069.11736301  
SRR17520069.11736305  
SRR17520069.11736307  
SRR17520069.11736309  
SRR17520069.11736311  
SRR17520069.11736313  
SRR17520069.11736315  
SRR17520069.11736317  
SRR17520069.11736319  
SRR17520069.11736321  
SRR17520069.11736323  
SRR17520069.11736325  
SRR17520069.11736327  
SRR17520069.11736329  
SRR17520069.11736331  
SRR17520069.11736333  
SRR17520069.11736335  
SRR17520069.11736337  
SRR17520069.11736339  
SRR17520069.11736341  
SRR17520069.11736343  
SRR17520069.11736345  
SRR17520069.11736349  
SRR17520069.11736351  
SRR17520069.11736353  
SRR17520069.11736355  
SRR17520069.11736357  
SRR17520069.11736359  
SRR17520069.11736361  
SRR17520069.11736365  
SRR17520069.11736367  
SRR17520069.11736369  
SRR17520069.11736371  
SRR17520069.11736373  
SRR17520069.11736375  
SRR17520069.11736379  
SRR17520069.11736381  
SRR17520069.11736383  
SRR17520069.11736385  
SRR17520069.11736387



SRR17520069.11736389  
SRR17520069.11736391  
SRR17520069.11736393  
SRR17520069.11736395  
SRR17520069.11736397  
SRR17520069.11742005  
SRR17520069.11742007  
SRR17520069.11742009  
SRR17520069.11742011  
SRR17520069.11742015  
SRR17520069.11742019  
SRR17520069.11742021  
SRR17520069.11742023  
SRR17520069.11742025  
SRR17520069.11742027  
SRR17520069.11742029  
SRR17520069.11748312  
SRR17520069.11748316  
SRR17520069.11748318  
SRR17520069.11748320  
SRR17520069.11748322  
SRR17520069.11748324  
SRR17520069.11748326  
SRR17520069.11748328  
SRR17520069.11748330  
SRR17520069.11748332  
SRR17520069.11748334  
SRR17520069.11748336  
SRR17520069.11748338  
SRR17520069.11748340  
SRR17520069.11748342  
SRR17520069.11748344  
SRR17520069.11748346  
SRR17520069.11748348  
SRR17520069.11748350  
SRR17520069.11748352  
SRR17520069.11748354  
SRR17520069.11748356  
SRR17520069.11748358  
SRR17520069.11748360  
SRR17520069.11748362  
SRR17520069.11748364  
SRR17520069.11748366  
SRR17520069.11748368  
SRR17520069.11748370  
SRR17520069.11748372  
SRR17520069.11748374

SRR17520069.11748376  
SRR17520069.11748378  
SRR17520069.11748380  
SRR17520069.11748382  
SRR17520069.11748384  
SRR17520069.11748386  
SRR17520069.11748388  
SRR17520069.11751626  
SRR17520069.11751628  
SRR17520069.11751630  
SRR17520069.11751632  
SRR17520069.11751634  
SRR17520069.11751636  
SRR17520069.11751638  
SRR17520069.11751640  
SRR17520069.11751642  
SRR17520069.11755465  
SRR17520069.11764782  
SRR17520069.11766077  
SRR17520069.11775344  
SRR17520069.11775346  
SRR17520069.11775348  
SRR17520069.11775350  
SRR17520069.11775352  
SRR17520069.11775354  
SRR17520069.11775358  
SRR17520069.11775360  
SRR17520069.11775362  
SRR17520069.11775364  
SRR17520069.11775366  
SRR17520069.11775368  
SRR17520069.11775370  
SRR17520069.11775372  
SRR17520069.11775374  
SRR17520069.11775376  
SRR17520069.11775378  
SRR17520069.11780120  
SRR17520069.11780122  
SRR17520069.11780124  
SRR17520069.11780126  
SRR17520069.11789942  
SRR17520069.11789944  
SRR17520069.11789948  
SRR17520069.11789950  
SRR17520069.11789952  
SRR17520069.11789954  
SRR17520069.11789956

SRR17520069.11789958  
SRR17520069.11789960  
SRR17520069.11789962  
SRR17520069.11789964  
SRR17520069.11789966  
SRR17520069.11789968  
SRR17520069.11789975  
SRR17520069.11789977  
SRR17520069.11789979  
SRR17520069.11789981  
SRR17520069.11789983  
SRR17520069.11789985  
SRR17520069.11789987  
SRR17520069.11789989  
SRR17520069.11789991  
SRR17520069.11789993  
SRR17520069.11789995  
SRR17520069.11789997  
SRR17520069.11790001  
SRR17520069.11790003  
SRR17520069.11790005  
SRR17520069.11790007  
SRR17520069.11790011  
SRR17520069.11790013  
SRR17520069.11790015  
SRR17520069.11790019  
SRR17520069.11790021  
SRR17520069.11790023  
SRR17520069.11790025  
SRR17520069.11790027  
SRR17520069.11790029  
SRR17520069.11790031  
SRR17520069.11790033  
SRR17520069.11790035  
SRR17520069.11790037  
SRR17520069.11790039  
SRR17520069.11790041  
SRR17520069.11790043  
SRR17520069.11790045  
SRR17520069.11790047  
SRR17520069.11790049  
SRR17520069.11790053  
SRR17520069.11790055  
SRR17520069.11790057  
SRR17520069.11790059  
SRR17520069.11790061  
SRR17520069.11790063

SRR17520069.11790065  
SRR17520069.11790067  
SRR17520069.11790069  
SRR17520069.11790071  
SRR17520069.11790073  
SRR17520069.11790215  
SRR17520069.11790217  
SRR17520069.11790219  
SRR17520069.11790221  
SRR17520069.11790223  
SRR17520069.11790225  
SRR17520069.11790227  
SRR17520069.11790229  
SRR17520069.11790231  
SRR17520069.11790233  
SRR17520069.11790235  
SRR17520069.11790237  
SRR17520069.11790239  
SRR17520069.11790241  
SRR17520069.11790243  
SRR17520069.11790245  
SRR17520069.11790247  
SRR17520069.11790249  
SRR17520069.11790251  
SRR17520069.11790253  
SRR17520069.11792372  
SRR17520069.11792374  
SRR17520069.11792376  
SRR17520069.11792378  
SRR17520069.11808671  
SRR17520069.11808673  
SRR17520069.11808675  
SRR17520069.11812308  
SRR17520069.11812310  
SRR17520069.11812312  
SRR17520069.11812314  
SRR17520069.11812318  
SRR17520069.11812320  
SRR17520069.11812322  
SRR17520069.11812324  
SRR17520069.11812765  
SRR17520069.11812767  
SRR17520069.11823637  
SRR17520069.11823639  
SRR17520069.11823643  
SRR17520069.11823645  
SRR17520069.11823647

SRR17520069. 11823653  
SRR17520069. 11823655  
SRR17520069. 11823657  
SRR17520069. 11823659  
SRR17520069. 11823661  
SRR17520069. 11823663  
SRR17520069. 11823665  
SRR17520069. 11823667  
SRR17520069. 11823669  
SRR17520069. 11823671  
SRR17520069. 11823673  
SRR17520069. 11823675  
SRR17520069. 11823677  
SRR17520069. 11823679  
SRR17520069. 11823681  
SRR17520069. 11823683  
SRR17520069. 11823685  
SRR17520069. 11823687  
SRR17520069. 11823689  
SRR17520069. 11823691  
SRR17520069. 11823693  
SRR17520069. 11823695  
SRR17520069. 11823697  
SRR17520069. 11823699  
SRR17520069. 11823701  
SRR17520069. 11823703  
SRR17520069. 11823705  
SRR17520069. 11823707  
SRR17520069. 11823709  
SRR17520069. 11823711  
SRR17520069. 11823713  
SRR17520069. 11823715  
SRR17520069. 11823717  
SRR17520069. 11823719  
SRR17520069. 11823721  
SRR17520069. 11823723  
SRR17520069. 11823725  
SRR17520069. 11823727  
SRR17520069. 11823729  
SRR17520069. 11823731  
SRR17520069. 11823733  
SRR17520069. 11823737  
SRR17520069. 11823739  
SRR17520069. 11823741  
SRR17520069. 11824684  
SRR17520069. 11832521  
SRR17520069. 11832523

SRR17520069.11832525  
SRR17520069.11832527  
SRR17520069.11832529  
SRR17520069.11832531  
SRR17520069.11832533  
SRR17520069.11832535  
SRR17520069.11832537  
SRR17520069.11832539  
SRR17520069.11832541  
SRR17520069.11833778  
SRR17520069.11833780  
SRR17520069.11833782  
SRR17520069.11833784  
SRR17520069.11833786  
SRR17520069.11833788  
SRR17520069.11833790  
SRR17520069.11833794  
SRR17520069.11833798  
SRR17520069.11833800  
SRR17520069.11833804  
SRR17520069.11843603  
SRR17520069.11844673  
SRR17520069.11844675  
SRR17520069.11844677  
SRR17520069.11844679  
SRR17520069.11844681  
SRR17520069.11844683  
SRR17520069.11844685  
SRR17520069.11844689  
SRR17520069.11844691  
SRR17520069.11844693  
SRR17520069.11844695  
SRR17520069.11844697  
SRR17520069.11844699  
SRR17520069.11844701  
SRR17520069.11844703  
SRR17520069.11844705  
SRR17520069.11844707  
SRR17520069.11844709  
SRR17520069.11844711  
SRR17520069.11844713  
SRR17520069.11844715  
SRR17520069.11844717  
SRR17520069.11844719  
SRR17520069.11844721  
SRR17520069.11844723  
SRR17520069.11844725

SRR17520069.11844727  
SRR17520069.11844729  
SRR17520069.11844731  
SRR17520069.11844733  
SRR17520069.11844735  
SRR17520069.11844737  
SRR17520069.11844739  
SRR17520069.11844741  
SRR17520069.11844743  
SRR17520069.11844745  
SRR17520069.11844747  
SRR17520069.11844749  
SRR17520069.11844751  
SRR17520069.11844753  
SRR17520069.11844755  
SRR17520069.11844757  
SRR17520069.11844761  
SRR17520069.11844763  
SRR17520069.11844765  
SRR17520069.11845994  
SRR17520069.11845996  
SRR17520069.11845998  
SRR17520069.11846000  
SRR17520069.11846002  
SRR17520069.11846004  
SRR17520069.11846006  
SRR17520069.11846008  
SRR17520069.11846010  
SRR17520069.11846012  
SRR17520069.11846014  
SRR17520069.11846016  
SRR17520069.11846018  
SRR17520069.11846020  
SRR17520069.11846022  
SRR17520069.11850121  
SRR17520069.11850123  
SRR17520069.11850125  
SRR17520069.11850127  
SRR17520069.11850129  
SRR17520069.11850131  
SRR17520069.11853445  
SRR17520069.11861396  
SRR17520069.11861398  
SRR17520069.11861400  
SRR17520069.11861402  
SRR17520069.11861404  
SRR17520069.11861406

SRR17520069.11861408  
SRR17520069.11863504  
SRR17520069.11863506  
SRR17520069.11863508  
SRR17520069.11863510  
SRR17520069.11863512  
SRR17520069.11863514  
SRR17520069.11864892  
SRR17520069.11864894  
SRR17520069.11864896  
SRR17520069.11864898  
SRR17520069.11864900  
SRR17520069.11864926  
SRR17520069.11864928  
SRR17520069.11864930  
SRR17520069.11864934  
SRR17520069.11864936  
SRR17520069.11864938  
SRR17520069.11864940  
SRR17520069.11864942  
SRR17520069.11864944  
SRR17520069.11864946  
SRR17520069.11864948  
SRR17520069.11864950  
SRR17520069.11864952  
SRR17520069.11864954  
SRR17520069.11864956  
SRR17520069.11864958  
SRR17520069.11864960  
SRR17520069.11864964  
SRR17520069.11864966  
SRR17520069.11864968  
SRR17520069.11864972  
SRR17520069.11864974  
SRR17520069.11864976  
SRR17520069.11864978  
SRR17520069.11864980  
SRR17520069.11864982  
SRR17520069.11864984  
SRR17520069.11864986  
SRR17520069.11864988  
SRR17520069.11864990  
SRR17520069.11864992  
SRR17520069.11864994  
SRR17520069.11864996  
SRR17520069.11864998  
SRR17520069.11865000



SRR17520069.11866981  
SRR17520069.11872089  
SRR17520069.11872091  
SRR17520069.11872093  
SRR17520069.11872095  
SRR17520069.11872097  
SRR17520069.11872099  
SRR17520069.11875468  
SRR17520069.11875470  
SRR17520069.11875472  
SRR17520069.11875474  
SRR17520069.11875476  
SRR17520069.11875478  
SRR17520069.11875480  
SRR17520069.11875482  
SRR17520069.11875484  
SRR17520069.11875486  
SRR17520069.11882417  
SRR17520069.11882419  
SRR17520069.11882421  
SRR17520069.11882423  
SRR17520069.11882425  
SRR17520069.11882427  
SRR17520069.11882429  
SRR17520069.11882431  
SRR17520069.11882433  
SRR17520069.11882435  
SRR17520069.11882437  
SRR17520069.11882439  
SRR17520069.11882441  
SRR17520069.11882443  
SRR17520069.11882445  
SRR17520069.11882447  
SRR17520069.11882449  
SRR17520069.11882451  
SRR17520069.11882453  
SRR17520069.11882455  
SRR17520069.11882457  
SRR17520069.11882459  
SRR17520069.11882461  
SRR17520069.11882463  
SRR17520069.11882465  
SRR17520069.11882467  
SRR17520069.11882469  
SRR17520069.11882471  
SRR17520069.11882473  
SRR17520069.11882475

SRR17520069.11882477  
SRR17520069.11882479  
SRR17520069.11882481  
SRR17520069.11882483  
SRR17520069.11882485  
SRR17520069.11883702  
SRR17520069.11883704  
SRR17520069.11883706  
SRR17520069.11885933  
SRR17520069.11885935  
SRR17520069.11885937  
SRR17520069.11885939  
SRR17520069.11885941  
SRR17520069.11885943  
SRR17520069.11885945  
SRR17520069.11885947  
SRR17520069.11885949  
SRR17520069.11885951  
SRR17520069.11885953  
SRR17520069.11885955  
SRR17520069.11885957  
SRR17520069.11885959  
SRR17520069.11885961  
SRR17520069.11885963  
SRR17520069.11885965  
SRR17520069.11885967  
SRR17520069.11885969  
SRR17520069.11885971  
SRR17520069.11885973  
SRR17520069.11885975  
SRR17520069.11885977  
SRR17520069.11885979  
SRR17520069.11885981  
SRR17520069.11885983  
SRR17520069.11885985  
SRR17520069.11885987  
SRR17520069.11885989  
SRR17520069.11885991  
SRR17520069.11885993  
SRR17520069.11885995  
SRR17520069.11885997  
SRR17520069.11885999  
SRR17520069.11886001  
SRR17520069.11886003  
SRR17520069.11886005  
SRR17520069.11886007  
SRR17520069.11886009

SRR17520069.11886011  
SRR17520069.11886013  
SRR17520069.11886015  
SRR17520069.11886017  
SRR17520069.11886019  
SRR17520069.11886021  
SRR17520069.11886023  
SRR17520069.11886025  
SRR17520069.11886027  
SRR17520069.11886029  
SRR17520069.11886031  
SRR17520069.11886033  
SRR17520069.11886035  
SRR17520069.11886037  
SRR17520069.11886039  
SRR17520069.11886041  
SRR17520069.11886043  
SRR17520069.11886045  
SRR17520069.11886047  
SRR17520069.11886049  
SRR17520069.11886051  
SRR17520069.11891084  
SRR17520069.11891086  
SRR17520069.11891088  
SRR17520069.11891090  
SRR17520069.11891092  
SRR17520069.11891094  
SRR17520069.11891096  
SRR17520069.11891098  
SRR17520069.11891100  
SRR17520069.11891102  
SRR17520069.11891104  
SRR17520069.11891106  
SRR17520069.11906956  
SRR17520069.11906958  
SRR17520069.11906960  
SRR17520069.11906962  
SRR17520069.11906964  
SRR17520069.11906966  
SRR17520069.11906968  
SRR17520069.11906970  
SRR17520069.11906972  
SRR17520069.11906974  
SRR17520069.11906976  
SRR17520069.11906978  
SRR17520069.11906980  
SRR17520069.11906982

SRR17520069.11906984  
SRR17520069.11906986  
SRR17520069.11906988  
SRR17520069.11906990  
SRR17520069.11906992  
SRR17520069.11906994  
SRR17520069.11906996  
SRR17520069.11906998  
SRR17520069.11907000  
SRR17520069.11907002  
SRR17520069.11907004  
SRR17520069.11907006  
SRR17520069.11907010  
SRR17520069.11907012  
SRR17520069.11907014  
SRR17520069.11907016  
SRR17520069.11907018  
SRR17520069.11907020  
SRR17520069.11907022  
SRR17520069.11907024  
SRR17520069.11907026  
SRR17520069.11907028  
SRR17520069.11907030  
SRR17520069.11907032  
SRR17520069.11907034  
SRR17520069.11907036  
SRR17520069.11907038  
SRR17520069.11907042  
SRR17520069.11907044  
SRR17520069.11907046  
SRR17520069.11907048  
SRR17520069.11907050  
SRR17520069.11907052  
SRR17520069.11907054  
SRR17520069.11907056  
SRR17520069.11907058  
SRR17520069.11907060  
SRR17520069.11907062  
SRR17520069.11907064  
SRR17520069.11907066  
SRR17520069.11907068  
SRR17520069.11907070  
SRR17520069.11907072  
SRR17520069.11907074  
SRR17520069.11907076  
SRR17520069.11907078  
SRR17520069.11907080

SRR17520069.11907082  
SRR17520069.11914011  
SRR17520069.11914026  
SRR17520069.11914043  
SRR17520069.11920137  
SRR17520069.11920139  
SRR17520069.11920141  
SRR17520069.11920145  
SRR17520069.11920147  
SRR17520069.11920149  
SRR17520069.11920151  
SRR17520069.11920153  
SRR17520069.11920155  
SRR17520069.11920159  
SRR17520069.11920161  
SRR17520069.11920163  
SRR17520069.11920165  
SRR17520069.11920169  
SRR17520069.11924568  
SRR17520069.11924570  
SRR17520069.11924572  
SRR17520069.11924574  
SRR17520069.11924576  
SRR17520069.11924580  
SRR17520069.11924582  
SRR17520069.11924584  
SRR17520069.11924586  
SRR17520069.11924588  
SRR17520069.11924590  
SRR17520069.11924592  
SRR17520069.11924594  
SRR17520069.11924596  
SRR17520069.11924600  
SRR17520069.11924602  
SRR17520069.11924604  
SRR17520069.11924606  
SRR17520069.11924608  
SRR17520069.11924610  
SRR17520069.11924612  
SRR17520069.11924614  
SRR17520069.11924616  
SRR17520069.11924620  
SRR17520069.11924622  
SRR17520069.11924624  
SRR17520069.11924626  
SRR17520069.11924628  
SRR17520069.11924630

SRR17520069. 11924632  
SRR17520069. 11924634  
SRR17520069. 11924636  
SRR17520069. 11924638  
SRR17520069. 11924640  
SRR17520069. 11924642  
SRR17520069. 11924644  
SRR17520069. 11924646  
SRR17520069. 11924648  
SRR17520069. 11924650  
SRR17520069. 11924652  
SRR17520069. 11924654  
SRR17520069. 11924656  
SRR17520069. 11924658  
SRR17520069. 11924660  
SRR17520069. 11924662  
SRR17520069. 11924664  
SRR17520069. 11924666  
SRR17520069. 11924668  
SRR17520069. 11924670  
SRR17520069. 11924672  
SRR17520069. 11924674  
SRR17520069. 11924676  
SRR17520069. 11924678  
SRR17520069. 11924680  
SRR17520069. 11924682  
SRR17520069. 11924684  
SRR17520069. 11924686  
SRR17520069. 11924688  
SRR17520069. 11924690  
SRR17520069. 11924692  
SRR17520069. 11927461  
SRR17520069. 11927465  
SRR17520069. 11929438  
SRR17520069. 11929461  
SRR17520069. 11932013  
SRR17520069. 11932383  
SRR17520069. 11932385  
SRR17520069. 11932387  
SRR17520069. 11932389  
SRR17520069. 11932391  
SRR17520069. 11932393  
SRR17520069. 11932395  
SRR17520069. 11932397  
SRR17520069. 11932402  
SRR17520069. 11933402  
SRR17520069. 11933404

SRR17520069.11933406  
SRR17520069.11933408  
SRR17520069.11933410  
SRR17520069.11933412  
SRR17520069.11933414  
SRR17520069.11933416  
SRR17520069.11933418  
SRR17520069.11933420  
SRR17520069.11933422  
SRR17520069.11933424  
SRR17520069.11933426  
SRR17520069.11933428  
SRR17520069.11933430  
SRR17520069.11933432  
SRR17520069.11933434  
SRR17520069.11933436  
SRR17520069.11933438  
SRR17520069.11933440  
SRR17520069.11933442  
SRR17520069.11933444  
SRR17520069.11933446  
SRR17520069.11933448  
SRR17520069.11933450  
SRR17520069.11933452  
SRR17520069.11933454  
SRR17520069.11933456  
SRR17520069.11933458  
SRR17520069.11938708  
SRR17520069.11938710  
SRR17520069.11938712  
SRR17520069.11938714  
SRR17520069.11938716  
SRR17520069.11938718  
SRR17520069.11939728  
SRR17520069.11945217  
SRR17520069.11945221  
SRR17520069.11945225  
SRR17520069.11945227  
SRR17520069.11945229  
SRR17520069.11945231  
SRR17520069.11945233  
SRR17520069.11945237  
SRR17520069.11945241  
SRR17520069.11945243  
SRR17520069.11945247  
SRR17520069.11945249  
SRR17520069.11945251

SRR17520069.11945253  
SRR17520069.11945255  
SRR17520069.11945257  
SRR17520069.11945259  
SRR17520069.11945263  
SRR17520069.11945265  
SRR17520069.11946380  
SRR17520069.11946382  
SRR17520069.11946386  
SRR17520069.11948225  
SRR17520069.11948227  
SRR17520069.11948229  
SRR17520069.11948231  
SRR17520069.11948233  
SRR17520069.11948235  
SRR17520069.11948237  
SRR17520069.11948239  
SRR17520069.11948241  
SRR17520069.11948243  
SRR17520069.11948245  
SRR17520069.11948247  
SRR17520069.11948251  
SRR17520069.11948253  
SRR17520069.11948255  
SRR17520069.11948257  
SRR17520069.11948259  
SRR17520069.11948261  
SRR17520069.11948263  
SRR17520069.11948265  
SRR17520069.11948267  
SRR17520069.11959108  
SRR17520069.11980983  
SRR17520069.11980985  
SRR17520069.11980987  
SRR17520069.11980989  
SRR17520069.11980991  
SRR17520069.11980993  
SRR17520069.11980995  
SRR17520069.11980997  
SRR17520069.11980999  
SRR17520069.11981001  
SRR17520069.11981003  
SRR17520069.11981005  
SRR17520069.11981007  
SRR17520069.11981009  
SRR17520069.11981011  
SRR17520069.11981013



SRR17520069.11981015  
SRR17520069.11981017  
SRR17520069.11981019  
SRR17520069.11981021  
SRR17520069.11981023  
SRR17520069.11981025  
SRR17520069.11981027  
SRR17520069.11981029  
SRR17520069.11981031  
SRR17520069.11981033  
SRR17520069.11981035  
SRR17520069.11981037  
SRR17520069.11981039  
SRR17520069.11981041  
SRR17520069.11981043  
SRR17520069.11981045  
SRR17520069.11981047  
SRR17520069.11981049  
SRR17520069.11981051  
SRR17520069.11981053  
SRR17520069.11981055  
SRR17520069.11981057  
SRR17520069.11981059  
SRR17520069.11981061  
SRR17520069.11981063  
SRR17520069.11981065  
SRR17520069.11981067  
SRR17520069.11981069  
SRR17520069.11981071  
SRR17520069.11981073  
SRR17520069.11981075  
SRR17520069.11981077  
SRR17520069.11981079  
SRR17520069.11981081  
SRR17520069.11981083  
SRR17520069.11981085  
SRR17520069.11981087  
SRR17520069.11981806  
SRR17520069.11982590  
SRR17520069.11982594  
SRR17520069.11982596  
SRR17520069.11982598  
SRR17520069.11982600  
SRR17520069.11982602  
SRR17520069.11982604  
SRR17520069.11982606  
SRR17520069.11982610

SRR17520069.11983612  
SRR17520069.11983614  
SRR17520069.11983616  
SRR17520069.11983618  
SRR17520069.11983620  
SRR17520069.11983622  
SRR17520069.11983624  
SRR17520069.11983626  
SRR17520069.11983628  
SRR17520069.11983632  
SRR17520069.11983634  
SRR17520069.11988517  
SRR17520069.11988540  
SRR17520069.11989075  
SRR17520069.11989077  
SRR17520069.11989079  
SRR17520069.11989081  
SRR17520069.11989083  
SRR17520069.11989085  
SRR17520069.11989087  
SRR17520069.11989089  
SRR17520069.11989091  
SRR17520069.11989093  
SRR17520069.11989095  
SRR17520069.11989097  
SRR17520069.11989099  
SRR17520069.11989101  
SRR17520069.11989103  
SRR17520069.11989105  
SRR17520069.11989107  
SRR17520069.11989109  
SRR17520069.11989111  
SRR17520069.11989113  
SRR17520069.11989115  
SRR17520069.11989117  
SRR17520069.11989119  
SRR17520069.11989121  
SRR17520069.11989123  
SRR17520069.11989125  
SRR17520069.11989127  
SRR17520069.11989129  
SRR17520069.11989131  
SRR17520069.11989133  
SRR17520069.11989387  
SRR17520069.11989389  
SRR17520069.11989391  
SRR17520069.11989393

SRR17520069.11993197  
SRR17520069.11993199  
SRR17520069.11993201  
SRR17520069.11993203  
SRR17520069.11993205  
SRR17520069.11993207  
SRR17520069.11993209  
SRR17520069.11993211  
SRR17520069.11993213  
SRR17520069.11993215  
SRR17520069.11993217  
SRR17520069.11993219  
SRR17520069.11993221  
SRR17520069.11993223  
SRR17520069.11993225  
SRR17520069.11993227  
SRR17520069.11993229  
SRR17520069.11993231  
SRR17520069.11993233  
SRR17520069.11993235  
SRR17520069.11993237  
SRR17520069.11993239  
SRR17520069.11993241  
SRR17520069.11993245  
SRR17520069.11993249  
SRR17520069.11993251  
SRR17520069.11993253  
SRR17520069.11993255  
SRR17520069.11993257  
SRR17520069.11993259  
SRR17520069.11993261  
SRR17520069.11993263  
SRR17520069.11993265  
SRR17520069.11993267  
SRR17520069.11993271  
SRR17520069.11993273  
SRR17520069.11993275  
SRR17520069.11993277  
SRR17520069.11999056  
SRR17520069.11999058  
SRR17520069.11999060  
SRR17520069.11999062  
SRR17520069.11999064  
SRR17520069.11999066  
SRR17520069.11999068  
SRR17520069.11999070  
SRR17520069.11999072

SRR17520069.11999074  
SRR17520069.11999076  
SRR17520069.11999078  
SRR17520069.11999080  
SRR17520069.11999082  
SRR17520069.12008626  
SRR17520069.12008628  
SRR17520069.12008630  
SRR17520069.12008632  
SRR17520069.12008634  
SRR17520069.12008636  
SRR17520069.12008638  
SRR17520069.12008640  
SRR17520069.12008642  
SRR17520069.12008985  
SRR17520069.12008987  
SRR17520069.12008989  
SRR17520069.12008991  
SRR17520069.12008993  
SRR17520069.12008995  
SRR17520069.12008997  
SRR17520069.12008999  
SRR17520069.12010910  
SRR17520069.12010914  
SRR17520069.12010916  
SRR17520069.12010918  
SRR17520069.12010922  
SRR17520069.12010924  
SRR17520069.12010926  
SRR17520069.12010928  
SRR17520069.12010930  
SRR17520069.12014909  
SRR17520069.12014911  
SRR17520069.12014915  
SRR17520069.12014917  
SRR17520069.12014919  
SRR17520069.12014921  
SRR17520069.12014923  
SRR17520069.12014925  
SRR17520069.12014927  
SRR17520069.12014929  
SRR17520069.12014931  
SRR17520069.12014933  
SRR17520069.12014937  
SRR17520069.12014939  
SRR17520069.12014941  
SRR17520069.12014943

SRR17520069.12014945  
SRR17520069.12014947  
SRR17520069.12014949  
SRR17520069.12014951  
SRR17520069.12014953  
SRR17520069.12014955  
SRR17520069.12014957  
SRR17520069.12014959  
SRR17520069.12014961  
SRR17520069.12014963  
SRR17520069.12014965  
SRR17520069.12014967  
SRR17520069.12014969  
SRR17520069.12014971  
SRR17520069.12014973  
SRR17520069.12014975  
SRR17520069.12014977  
SRR17520069.12014979  
SRR17520069.12014981  
SRR17520069.12014983  
SRR17520069.12014985  
SRR17520069.12014987  
SRR17520069.12014991  
SRR17520069.12027282  
SRR17520069.12029148  
SRR17520069.12029150  
SRR17520069.12029152  
SRR17520069.12029156  
SRR17520069.12029158  
SRR17520069.12029160  
SRR17520069.12029162  
SRR17520069.12029164  
SRR17520069.12029166  
SRR17520069.12029168  
SRR17520069.12029170  
SRR17520069.12029172  
SRR17520069.12029174  
SRR17520069.12029176  
SRR17520069.12029178  
SRR17520069.12029182  
SRR17520069.12029184  
SRR17520069.12029186  
SRR17520069.12029188  
SRR17520069.12029190  
SRR17520069.12029192  
SRR17520069.12029194  
SRR17520069.12029196

SRR17520069.12029198  
SRR17520069.12029200  
SRR17520069.12029202  
SRR17520069.12029204  
SRR17520069.12029206  
SRR17520069.12029208  
SRR17520069.12029210  
SRR17520069.12029212  
SRR17520069.12029214  
SRR17520069.12029216  
SRR17520069.12029218  
SRR17520069.12029220  
SRR17520069.12029222  
SRR17520069.12029224  
SRR17520069.12029226  
SRR17520069.12029228  
SRR17520069.12029232  
SRR17520069.12029234  
SRR17520069.12029238  
SRR17520069.12029240  
SRR17520069.12029242  
SRR17520069.12029244  
SRR17520069.12029246  
SRR17520069.12029248  
SRR17520069.12029250  
SRR17520069.12029254  
SRR17520069.12029256  
SRR17520069.12029258  
SRR17520069.12029260  
SRR17520069.12029262  
SRR17520069.12029264  
SRR17520069.12029266  
SRR17520069.12029268  
SRR17520069.12029270  
SRR17520069.12029272  
SRR17520069.12029274  
SRR17520069.12029276  
SRR17520069.12029278  
SRR17520069.12029280  
SRR17520069.12029282  
SRR17520069.12029284  
SRR17520069.12029286  
SRR17520069.12029288  
SRR17520069.12029292  
SRR17520069.12029294  
SRR17520069.12029296  
SRR17520069.12029298

SRR17520069.12029300  
SRR17520069.12029302  
SRR17520069.12029306  
SRR17520069.12029310  
SRR17520069.12029312  
SRR17520069.12029314  
SRR17520069.12038752  
SRR17520069.12038754  
SRR17520069.12038756  
SRR17520069.12038758  
SRR17520069.12038760  
SRR17520069.12038762  
SRR17520069.12038764  
SRR17520069.12038766  
SRR17520069.12039432  
SRR17520069.12040656  
SRR17520069.12040658  
SRR17520069.12040660  
SRR17520069.12040662  
SRR17520069.12040664  
SRR17520069.12040666  
SRR17520069.12040670  
SRR17520069.12040672  
SRR17520069.12040674  
SRR17520069.12040676  
SRR17520069.12040678  
SRR17520069.12041190  
SRR17520069.12041192  
SRR17520069.12041194  
SRR17520069.12041196  
SRR17520069.12041198  
SRR17520069.12041200  
SRR17520069.12041202  
SRR17520069.12041204  
SRR17520069.12041206  
SRR17520069.12041208  
SRR17520069.12041210  
SRR17520069.12041212  
SRR17520069.12041214  
SRR17520069.12041216  
SRR17520069.12041218  
SRR17520069.12042478  
SRR17520069.12042480  
SRR17520069.12042482  
SRR17520069.12042484  
SRR17520069.12042486  
SRR17520069.12042488

SRR17520069.12042490  
SRR17520069.12042492  
SRR17520069.12042494  
SRR17520069.12042496  
SRR17520069.12042498  
SRR17520069.12042500  
SRR17520069.12042502  
SRR17520069.12042504  
SRR17520069.12042506  
SRR17520069.12042510  
SRR17520069.12042512  
SRR17520069.12042514  
SRR17520069.12042516  
SRR17520069.12042518  
SRR17520069.12042520  
SRR17520069.12042522  
SRR17520069.12042524  
SRR17520069.12042526  
SRR17520069.12042528  
SRR17520069.12042530  
SRR17520069.12042532  
SRR17520069.12042534  
SRR17520069.12042536  
SRR17520069.12042538  
SRR17520069.12042540  
SRR17520069.12042542  
SRR17520069.12042544  
SRR17520069.12042546  
SRR17520069.12042548  
SRR17520069.12042550  
SRR17520069.12042552  
SRR17520069.12042554  
SRR17520069.12042556  
SRR17520069.12042558  
SRR17520069.12042560  
SRR17520069.12042562  
SRR17520069.12042564  
SRR17520069.12042566  
SRR17520069.12042568  
SRR17520069.12042570  
SRR17520069.12042572  
SRR17520069.12042574  
SRR17520069.12042576  
SRR17520069.12043662  
SRR17520069.12043664  
SRR17520069.12043666  
SRR17520069.12043668



SRR17520069.12043672  
SRR17520069.12043674  
SRR17520069.12043676  
SRR17520069.12046891  
SRR17520069.12046893  
SRR17520069.12048800  
SRR17520069.12048802  
SRR17520069.12048804  
SRR17520069.12048806  
SRR17520069.12048808  
SRR17520069.12048810  
SRR17520069.12048812  
SRR17520069.12048814  
SRR17520069.12048816  
SRR17520069.12048818  
SRR17520069.12048820  
SRR17520069.12048822  
SRR17520069.12051762  
SRR17520069.12051764  
SRR17520069.12051766  
SRR17520069.12051768  
SRR17520069.12051770  
SRR17520069.12051772  
SRR17520069.12051774  
SRR17520069.12051776  
SRR17520069.12051778  
SRR17520069.12051780  
SRR17520069.12051782  
SRR17520069.12051784  
SRR17520069.12051786  
SRR17520069.12051788  
SRR17520069.12051790  
SRR17520069.12051794  
SRR17520069.12051796  
SRR17520069.12051798  
SRR17520069.12051800  
SRR17520069.12051802  
SRR17520069.12051804  
SRR17520069.12051806  
SRR17520069.12051808  
SRR17520069.12051810  
SRR17520069.12051812  
SRR17520069.12051814  
SRR17520069.12051818  
SRR17520069.12051820  
SRR17520069.12051822  
SRR17520069.12051824

SRR17520069. 12051828  
SRR17520069. 12051830  
SRR17520069. 12051832  
SRR17520069. 12051834  
SRR17520069. 12051836  
SRR17520069. 12051840  
SRR17520069. 12051842  
SRR17520069. 12051844  
SRR17520069. 12051846  
SRR17520069. 12051848  
SRR17520069. 12051850  
SRR17520069. 12051852  
SRR17520069. 12051854  
SRR17520069. 12051858  
SRR17520069. 12051860  
SRR17520069. 12056187  
SRR17520069. 12056191  
SRR17520069. 12056193  
SRR17520069. 12056195  
SRR17520069. 12056197  
SRR17520069. 12056199  
SRR17520069. 12056203  
SRR17520069. 12056205  
SRR17520069. 12056207  
SRR17520069. 12056209  
SRR17520069. 12056211  
SRR17520069. 12057692  
SRR17520069. 12057694  
SRR17520069. 12057696  
SRR17520069. 12057698  
SRR17520069. 12057700  
SRR17520069. 12057704  
SRR17520069. 12057706  
SRR17520069. 12057708  
SRR17520069. 12057710  
SRR17520069. 12057712  
SRR17520069. 12057714  
SRR17520069. 12057716  
SRR17520069. 12057718  
SRR17520069. 12057720  
SRR17520069. 12057722  
SRR17520069. 12057724  
SRR17520069. 12057726  
SRR17520069. 12057728  
SRR17520069. 12057730  
SRR17520069. 12057732  
SRR17520069. 12057734

SRR17520069.12057736  
SRR17520069.12057738  
SRR17520069.12057740  
SRR17520069.12057742  
SRR17520069.12057744  
SRR17520069.12057746  
SRR17520069.12057748  
SRR17520069.12057750  
SRR17520069.12057752  
SRR17520069.12057754  
SRR17520069.12057756  
SRR17520069.12057758  
SRR17520069.12057760  
SRR17520069.12057762  
SRR17520069.12057764  
SRR17520069.12057766  
SRR17520069.12057768  
SRR17520069.12057770  
SRR17520069.12065144  
SRR17520069.12068055  
SRR17520069.12068057  
SRR17520069.12068059  
SRR17520069.12068061  
SRR17520069.12068063  
SRR17520069.12068065  
SRR17520069.12068067  
SRR17520069.12068069  
SRR17520069.12068071  
SRR17520069.12068073  
SRR17520069.12068075  
SRR17520069.12068077  
SRR17520069.12068079  
SRR17520069.12068081  
SRR17520069.12068083  
SRR17520069.12068085  
SRR17520069.12071552  
SRR17520069.12071554  
SRR17520069.12071556  
SRR17520069.12071558  
SRR17520069.12071560  
SRR17520069.12071562  
SRR17520069.12071564  
SRR17520069.12072827  
SRR17520069.12072829  
SRR17520069.12072831  
SRR17520069.12072833  
SRR17520069.12072835

SRR17520069.12079227  
SRR17520069.12079229  
SRR17520069.12079231  
SRR17520069.12079233  
SRR17520069.12079235  
SRR17520069.12079237  
SRR17520069.12079239  
SRR17520069.12083476  
SRR17520069.12083649  
SRR17520069.12083651  
SRR17520069.12083653  
SRR17520069.12083655  
SRR17520069.12083657  
SRR17520069.12083659  
SRR17520069.12083661  
SRR17520069.12083663  
SRR17520069.12083665  
SRR17520069.12083667  
SRR17520069.12083669  
SRR17520069.12083671  
SRR17520069.12083673  
SRR17520069.12083675  
SRR17520069.12083677  
SRR17520069.12083679  
SRR17520069.12083681  
SRR17520069.12083683  
SRR17520069.12083685  
SRR17520069.12083687  
SRR17520069.12083689  
SRR17520069.12083691  
SRR17520069.12083693  
SRR17520069.12083695  
SRR17520069.12083697  
SRR17520069.12083699  
SRR17520069.12083701  
SRR17520069.12083703  
SRR17520069.12083705  
SRR17520069.12083707  
SRR17520069.12083709  
SRR17520069.12083711  
SRR17520069.12083713  
SRR17520069.12083715  
SRR17520069.12083717  
SRR17520069.12083719  
SRR17520069.12083721  
SRR17520069.12083723  
SRR17520069.12083725

SRR17520069.12084082  
SRR17520069.12084084  
SRR17520069.12089030  
SRR17520069.12089032  
SRR17520069.12089034  
SRR17520069.12089036  
SRR17520069.12089040  
SRR17520069.12089042  
SRR17520069.12096993  
SRR17520069.12096995  
SRR17520069.12096997  
SRR17520069.12096999  
SRR17520069.12097001  
SRR17520069.12097003  
SRR17520069.12098551  
SRR17520069.12098553  
SRR17520069.12098555  
SRR17520069.12098557  
SRR17520069.12098559  
SRR17520069.12098561  
SRR17520069.12098565  
SRR17520069.12098567  
SRR17520069.12102347  
SRR17520069.12103333  
SRR17520069.12103335  
SRR17520069.12103337  
SRR17520069.12107737  
SRR17520069.12107739  
SRR17520069.12107743  
SRR17520069.12107745  
SRR17520069.12107747  
SRR17520069.12110430  
SRR17520069.12110432  
SRR17520069.12110434  
SRR17520069.12110436  
SRR17520069.12110438  
SRR17520069.12110440  
SRR17520069.12110442  
SRR17520069.12110444  
SRR17520069.12110446  
SRR17520069.12110448  
SRR17520069.12110450  
SRR17520069.12110452  
SRR17520069.12110456  
SRR17520069.12110458  
SRR17520069.12110460  
SRR17520069.12110464

SRR17520069.12110466  
SRR17520069.12110468  
SRR17520069.12110470  
SRR17520069.12110472  
SRR17520069.12110474  
SRR17520069.12110476  
SRR17520069.12116682  
SRR17520069.12116684  
SRR17520069.12116686  
SRR17520069.12116688  
SRR17520069.12116690  
SRR17520069.12116692  
SRR17520069.12116694  
SRR17520069.12116696  
SRR17520069.12116698  
SRR17520069.12127754  
SRR17520069.12127756  
SRR17520069.12127758  
SRR17520069.12127760  
SRR17520069.12127762  
SRR17520069.12127764  
SRR17520069.12127766  
SRR17520069.12127768  
SRR17520069.12127772  
SRR17520069.12127774  
SRR17520069.12127776  
SRR17520069.12127778  
SRR17520069.12127780  
SRR17520069.12127782  
SRR17520069.12127784  
SRR17520069.12127786  
SRR17520069.12127788  
SRR17520069.12129041  
SRR17520069.12129043  
SRR17520069.12129045  
SRR17520069.12129047  
SRR17520069.12129049  
SRR17520069.12129051  
SRR17520069.12129057  
SRR17520069.12129059  
SRR17520069.12129061  
SRR17520069.12129063  
SRR17520069.12129065  
SRR17520069.12129067  
SRR17520069.12129069  
SRR17520069.12129071  
SRR17520069.12129073

SRR17520069.12129077  
SRR17520069.12129079  
SRR17520069.12129081  
SRR17520069.12129083  
SRR17520069.12129085  
SRR17520069.12129087  
SRR17520069.12129089  
SRR17520069.12129091  
SRR17520069.12129093  
SRR17520069.12129095  
SRR17520069.12129097  
SRR17520069.12129099  
SRR17520069.12129101  
SRR17520069.12129103  
SRR17520069.12129105  
SRR17520069.12129107  
SRR17520069.12129109  
SRR17520069.12129111  
SRR17520069.12129113  
SRR17520069.12129115  
SRR17520069.12129117  
SRR17520069.12129121  
SRR17520069.12129123  
SRR17520069.12129125  
SRR17520069.12129127  
SRR17520069.12129129  
SRR17520069.12129131  
SRR17520069.12129133  
SRR17520069.12129135  
SRR17520069.12129139  
SRR17520069.12129141  
SRR17520069.12129143  
SRR17520069.12129145  
SRR17520069.12129147  
SRR17520069.12129151  
SRR17520069.12129153  
SRR17520069.12129155  
SRR17520069.12129157  
SRR17520069.12129159  
SRR17520069.12129161  
SRR17520069.12129163  
SRR17520069.12129165  
SRR17520069.12129167  
SRR17520069.12129169  
SRR17520069.12129171  
SRR17520069.12129173  
SRR17520069.12137555

SRR17520069. 12137557  
SRR17520069. 12137559  
SRR17520069. 12137561  
SRR17520069. 12137563  
SRR17520069. 12137565  
SRR17520069. 12137567  
SRR17520069. 12137569  
SRR17520069. 12137571  
SRR17520069. 12137573  
SRR17520069. 12137575  
SRR17520069. 12137577  
SRR17520069. 12137583  
SRR17520069. 12137585  
SRR17520069. 12137587  
SRR17520069. 12137589  
SRR17520069. 12137591  
SRR17520069. 12137593  
SRR17520069. 12137597  
SRR17520069. 12137599  
SRR17520069. 12137603  
SRR17520069. 12137605  
SRR17520069. 12137613  
SRR17520069. 12137615  
SRR17520069. 12137617  
SRR17520069. 12137619  
SRR17520069. 12137621  
SRR17520069. 12137623  
SRR17520069. 12137625  
SRR17520069. 12137627  
SRR17520069. 12137629  
SRR17520069. 12137631  
SRR17520069. 12137633  
SRR17520069. 12137635  
SRR17520069. 12137641  
SRR17520069. 12137643  
SRR17520069. 12137645  
SRR17520069. 12137647  
SRR17520069. 12137649  
SRR17520069. 12137651  
SRR17520069. 12137653  
SRR17520069. 12137655  
SRR17520069. 12137659  
SRR17520069. 12137661  
SRR17520069. 12137663  
SRR17520069. 12137665  
SRR17520069. 12137667  
SRR17520069. 12137669



SRR17520069.12142950  
SRR17520069.12142954  
SRR17520069.12142956  
SRR17520069.12142958  
SRR17520069.12142960  
SRR17520069.12142962  
SRR17520069.12143730  
SRR17520069.12143732  
SRR17520069.12143734  
SRR17520069.12143736  
SRR17520069.12143738  
SRR17520069.12143740  
SRR17520069.12143742  
SRR17520069.12143744  
SRR17520069.12143746  
SRR17520069.12143748  
SRR17520069.12143750  
SRR17520069.12143752  
SRR17520069.12143754  
SRR17520069.12143756  
SRR17520069.12143758  
SRR17520069.12143760  
SRR17520069.12143764  
SRR17520069.12143766  
SRR17520069.12143768  
SRR17520069.12143770  
SRR17520069.12143774  
SRR17520069.12143776  
SRR17520069.12144616  
SRR17520069.12144618  
SRR17520069.12144620  
SRR17520069.12144622  
SRR17520069.12144624  
SRR17520069.12144626  
SRR17520069.12144628  
SRR17520069.12144630  
SRR17520069.12144632  
SRR17520069.12144634  
SRR17520069.12144642  
SRR17520069.12144644  
SRR17520069.12144646  
SRR17520069.12144648  
SRR17520069.12152114  
SRR17520069.12152116  
SRR17520069.12152713  
SRR17520069.12152715  
SRR17520069.12152717

SRR17520069. 12152719  
SRR17520069. 12152721  
SRR17520069. 12152723  
SRR17520069. 12152725  
SRR17520069. 12152729  
SRR17520069. 12152731  
SRR17520069. 12152733  
SRR17520069. 12152735  
SRR17520069. 12152737  
SRR17520069. 12152739  
SRR17520069. 12152741  
SRR17520069. 12152743  
SRR17520069. 12152745  
SRR17520069. 12152747  
SRR17520069. 12152749  
SRR17520069. 12152751  
SRR17520069. 12152753  
SRR17520069. 12152755  
SRR17520069. 12152757  
SRR17520069. 12152759  
SRR17520069. 12152761  
SRR17520069. 12152763  
SRR17520069. 12152765  
SRR17520069. 12152767  
SRR17520069. 12152769  
SRR17520069. 12152771  
SRR17520069. 12152773  
SRR17520069. 12152775  
SRR17520069. 12152777  
SRR17520069. 12152779  
SRR17520069. 12152781  
SRR17520069. 12152783  
SRR17520069. 12152785  
SRR17520069. 12152787  
SRR17520069. 12152789  
SRR17520069. 12154909  
SRR17520069. 12154911  
SRR17520069. 12154915  
SRR17520069. 12155294  
SRR17520069. 12155296  
SRR17520069. 12155298  
SRR17520069. 12155300  
SRR17520069. 12155302  
SRR17520069. 12155306  
SRR17520069. 12155308  
SRR17520069. 12155310  
SRR17520069. 12155312

SRR17520069. 12155314  
SRR17520069. 12155316  
SRR17520069. 12155318  
SRR17520069. 12155320  
SRR17520069. 12155322  
SRR17520069. 12155324  
SRR17520069. 12155328  
SRR17520069. 12155330  
SRR17520069. 12155332  
SRR17520069. 12155334  
SRR17520069. 12155336  
SRR17520069. 12155338  
SRR17520069. 12155340  
SRR17520069. 12155342  
SRR17520069. 12155344  
SRR17520069. 12155348  
SRR17520069. 12155350  
SRR17520069. 12155352  
SRR17520069. 12155354  
SRR17520069. 12155358  
SRR17520069. 12155360  
SRR17520069. 12155362  
SRR17520069. 12155364  
SRR17520069. 12155366  
SRR17520069. 12155368  
SRR17520069. 12155370  
SRR17520069. 12155372  
SRR17520069. 12155374  
SRR17520069. 12155376  
SRR17520069. 12155378  
SRR17520069. 12155382  
SRR17520069. 12155384  
SRR17520069. 12155386  
SRR17520069. 12155390  
SRR17520069. 12155392  
SRR17520069. 12155396  
SRR17520069. 12155398  
SRR17520069. 12155400  
SRR17520069. 12155402  
SRR17520069. 12155404  
SRR17520069. 12155406  
SRR17520069. 12155408  
SRR17520069. 12155410  
SRR17520069. 12155414  
SRR17520069. 12155416  
SRR17520069. 12155418  
SRR17520069. 12155420

SRR17520069. 12155422  
SRR17520069. 12157125  
SRR17520069. 12157127  
SRR17520069. 12157129  
SRR17520069. 12157131  
SRR17520069. 12157133  
SRR17520069. 12157135  
SRR17520069. 12157137  
SRR17520069. 12157139  
SRR17520069. 12157141  
SRR17520069. 12157143  
SRR17520069. 12164057  
SRR17520069. 12164059  
SRR17520069. 12164061  
SRR17520069. 12164063  
SRR17520069. 12164065  
SRR17520069. 12164067  
SRR17520069. 12164069  
SRR17520069. 12164071  
SRR17520069. 12164073  
SRR17520069. 12164077  
SRR17520069. 12164079  
SRR17520069. 12164081  
SRR17520069. 12164083  
SRR17520069. 12164085  
SRR17520069. 12164087  
SRR17520069. 12164089  
SRR17520069. 12164091  
SRR17520069. 12164093  
SRR17520069. 12173575  
SRR17520069. 12173577  
SRR17520069. 12173579  
SRR17520069. 12173581  
SRR17520069. 12173583  
SRR17520069. 12173585  
SRR17520069. 12173587  
SRR17520069. 12173589  
SRR17520069. 12173591  
SRR17520069. 12173593  
SRR17520069. 12173595  
SRR17520069. 12173597  
SRR17520069. 12173599  
SRR17520069. 12173601  
SRR17520069. 12173603  
SRR17520069. 12173605  
SRR17520069. 12173607  
SRR17520069. 12173609

SRR17520069.12173611  
SRR17520069.12173613  
SRR17520069.12173617  
SRR17520069.12173619  
SRR17520069.12173621  
SRR17520069.12173623  
SRR17520069.12173625  
SRR17520069.12173627  
SRR17520069.12173629  
SRR17520069.12173631  
SRR17520069.12173633  
SRR17520069.12173635  
SRR17520069.12173637  
SRR17520069.12173639  
SRR17520069.12173641  
SRR17520069.12173643  
SRR17520069.12173645  
SRR17520069.12173647  
SRR17520069.12173649  
SRR17520069.12173651  
SRR17520069.12173653  
SRR17520069.12173655  
SRR17520069.12173657  
SRR17520069.12173659  
SRR17520069.12173661  
SRR17520069.12173663  
SRR17520069.12173665  
SRR17520069.12173667  
SRR17520069.12185067  
SRR17520069.12185069  
SRR17520069.12185071  
SRR17520069.12185073  
SRR17520069.12185075  
SRR17520069.12185077  
SRR17520069.12185079  
SRR17520069.12185081  
SRR17520069.12185083  
SRR17520069.12185085  
SRR17520069.12185087  
SRR17520069.12185089  
SRR17520069.12185091  
SRR17520069.12185095  
SRR17520069.12185097  
SRR17520069.12185099  
SRR17520069.12185101  
SRR17520069.12185314  
SRR17520069.12187187

SRR17520069.12187189  
SRR17520069.12187191  
SRR17520069.12187193  
SRR17520069.12187195  
SRR17520069.12187197  
SRR17520069.12188067  
SRR17520069.12188069  
SRR17520069.12188071  
SRR17520069.12188073  
SRR17520069.12188075  
SRR17520069.12188077  
SRR17520069.12188079  
SRR17520069.12188081  
SRR17520069.12188083  
SRR17520069.12188085  
SRR17520069.12188087  
SRR17520069.12188089  
SRR17520069.12188095  
SRR17520069.12188097  
SRR17520069.12188099  
SRR17520069.12188103  
SRR17520069.12188105  
SRR17520069.12188107  
SRR17520069.12188109  
SRR17520069.12188111  
SRR17520069.12188113  
SRR17520069.12190924  
SRR17520069.12190926  
SRR17520069.12190928  
SRR17520069.12190930  
SRR17520069.12190932  
SRR17520069.12190934  
SRR17520069.12190936  
SRR17520069.12190938  
SRR17520069.12190940  
SRR17520069.12190942  
SRR17520069.12190944  
SRR17520069.12191167  
SRR17520069.12191169  
SRR17520069.12195622  
SRR17520069.12195624  
SRR17520069.12195653  
SRR17520069.12195655  
SRR17520069.12195657  
SRR17520069.12195659  
SRR17520069.12195661  
SRR17520069.12195663

SRR17520069. 12195665  
SRR17520069. 12195667  
SRR17520069. 12195669  
SRR17520069. 12195671  
SRR17520069. 12199846  
SRR17520069. 12199848  
SRR17520069. 12199850  
SRR17520069. 12199852  
SRR17520069. 12200872  
SRR17520069. 12201189  
SRR17520069. 12201191  
SRR17520069. 12201197  
SRR17520069. 12201199  
SRR17520069. 12201201  
SRR17520069. 12201203  
SRR17520069. 12201207  
SRR17520069. 12201209  
SRR17520069. 12201215  
SRR17520069. 12201221  
SRR17520069. 12201223  
SRR17520069. 12201225  
SRR17520069. 12201231  
SRR17520069. 12201233  
SRR17520069. 12201235  
SRR17520069. 12201237  
SRR17520069. 12201239  
SRR17520069. 12201241  
SRR17520069. 12201245  
SRR17520069. 12201251  
SRR17520069. 12201255  
SRR17520069. 12201257  
SRR17520069. 12201261  
SRR17520069. 12201269  
SRR17520069. 12201273  
SRR17520069. 12201275  
SRR17520069. 12201277  
SRR17520069. 12201279  
SRR17520069. 12201281  
SRR17520069. 12201283  
SRR17520069. 12201285  
SRR17520069. 12201289  
SRR17520069. 12201295  
SRR17520069. 12201297  
SRR17520069. 12201677  
SRR17520069. 12201679  
SRR17520069. 12201681  
SRR17520069. 12201683

SRR17520069. 12201685  
SRR17520069. 12201687  
SRR17520069. 12201689  
SRR17520069. 12201691  
SRR17520069. 12201693  
SRR17520069. 12201695  
SRR17520069. 12201697  
SRR17520069. 12201699  
SRR17520069. 12201701  
SRR17520069. 12201703  
SRR17520069. 12201705  
SRR17520069. 12201707  
SRR17520069. 12201709  
SRR17520069. 12201711  
SRR17520069. 12201713  
SRR17520069. 12201715  
SRR17520069. 12201717  
SRR17520069. 12201719  
SRR17520069. 12201721  
SRR17520069. 12201723  
SRR17520069. 12201725  
SRR17520069. 12201727  
SRR17520069. 12201729  
SRR17520069. 12201731  
SRR17520069. 12201733  
SRR17520069. 12201735  
SRR17520069. 12201737  
SRR17520069. 12201739  
SRR17520069. 12201741  
SRR17520069. 12201743  
SRR17520069. 12201745  
SRR17520069. 12201747  
SRR17520069. 12201749  
SRR17520069. 12201751  
SRR17520069. 12201753  
SRR17520069. 12201755  
SRR17520069. 12201757  
SRR17520069. 12201759  
SRR17520069. 12201761  
SRR17520069. 12201763  
SRR17520069. 12201765  
SRR17520069. 12201767  
SRR17520069. 12201769  
SRR17520069. 12201771  
SRR17520069. 12201773  
SRR17520069. 12201775  
SRR17520069. 12201777



SRR17520069.12201779  
SRR17520069.12201781  
SRR17520069.12201783  
SRR17520069.12201785  
SRR17520069.12201787  
SRR17520069.12201789  
SRR17520069.12201791  
SRR17520069.12201793  
SRR17520069.12201795  
SRR17520069.12201797  
SRR17520069.12201799  
SRR17520069.12201801  
SRR17520069.12201803  
SRR17520069.12201805  
SRR17520069.12201807  
SRR17520069.12201809  
SRR17520069.12201811  
SRR17520069.12201813  
SRR17520069.12201815  
SRR17520069.12201817  
SRR17520069.12201819  
SRR17520069.12201821  
SRR17520069.12201823  
SRR17520069.12201825  
SRR17520069.12201827  
SRR17520069.12201829  
SRR17520069.12201831  
SRR17520069.12204031  
SRR17520069.12204033  
SRR17520069.12204035  
SRR17520069.12204037  
SRR17520069.12204039  
SRR17520069.12204041  
SRR17520069.12204043  
SRR17520069.12204045  
SRR17520069.12204047  
SRR17520069.12204049  
SRR17520069.12204051  
SRR17520069.12204053  
SRR17520069.12204057  
SRR17520069.12204059  
SRR17520069.12204061  
SRR17520069.12204063  
SRR17520069.12210809  
SRR17520069.12220278  
SRR17520069.12223849  
SRR17520069.12223851

SRR17520069. 12223853  
SRR17520069. 12223855  
SRR17520069. 12223857  
SRR17520069. 12223859  
SRR17520069. 12223861  
SRR17520069. 12223863  
SRR17520069. 12223865  
SRR17520069. 12223867  
SRR17520069. 12223869  
SRR17520069. 12223871  
SRR17520069. 12225348  
SRR17520069. 12225350  
SRR17520069. 12225352  
SRR17520069. 12225354  
SRR17520069. 12225358  
SRR17520069. 12225360  
SRR17520069. 12225364  
SRR17520069. 12225366  
SRR17520069. 12225370  
SRR17520069. 12225372  
SRR17520069. 12225376  
SRR17520069. 12225378  
SRR17520069. 12225380  
SRR17520069. 12225382  
SRR17520069. 12225386  
SRR17520069. 12225388  
SRR17520069. 12225390  
SRR17520069. 12225392  
SRR17520069. 12225396  
SRR17520069. 12225398  
SRR17520069. 12225400  
SRR17520069. 12225402  
SRR17520069. 12225404  
SRR17520069. 12225406  
SRR17520069. 12225408  
SRR17520069. 12225410  
SRR17520069. 12225412  
SRR17520069. 12225414  
SRR17520069. 12225416  
SRR17520069. 12225418  
SRR17520069. 12225420  
SRR17520069. 12225422  
SRR17520069. 12225424  
SRR17520069. 12225426  
SRR17520069. 12225428  
SRR17520069. 12225430  
SRR17520069. 12225432

SRR17520069. 12225434  
SRR17520069. 12225436  
SRR17520069. 12225438  
SRR17520069. 12225440  
SRR17520069. 12225442  
SRR17520069. 12225444  
SRR17520069. 12225446  
SRR17520069. 12225448  
SRR17520069. 12225450  
SRR17520069. 12225452  
SRR17520069. 12225454  
SRR17520069. 12233820  
SRR17520069. 12233822  
SRR17520069. 12233824  
SRR17520069. 12233826  
SRR17520069. 12233828  
SRR17520069. 12233830  
SRR17520069. 12233832  
SRR17520069. 12233834  
SRR17520069. 12233836  
SRR17520069. 12233838  
SRR17520069. 12233840  
SRR17520069. 12233842  
SRR17520069. 12233844  
SRR17520069. 12233846  
SRR17520069. 12233848  
SRR17520069. 12233850  
SRR17520069. 12233854  
SRR17520069. 12233856  
SRR17520069. 12233858  
SRR17520069. 12233860  
SRR17520069. 12233862  
SRR17520069. 12233864  
SRR17520069. 12233866  
SRR17520069. 12233868  
SRR17520069. 12233870  
SRR17520069. 12233872  
SRR17520069. 12233874  
SRR17520069. 12233876  
SRR17520069. 12233878  
SRR17520069. 12233880  
SRR17520069. 12233882  
SRR17520069. 12233884  
SRR17520069. 12233886  
SRR17520069. 12233888  
SRR17520069. 12233890  
SRR17520069. 12233892

SRR17520069.12233894  
SRR17520069.12233896  
SRR17520069.12233898  
SRR17520069.12233900  
SRR17520069.12233902  
SRR17520069.12233904  
SRR17520069.12233906  
SRR17520069.12233908  
SRR17520069.12233910  
SRR17520069.12233912  
SRR17520069.12233914  
SRR17520069.12233916  
SRR17520069.12233918  
SRR17520069.12233920  
SRR17520069.12233922  
SRR17520069.12233924  
SRR17520069.12233926  
SRR17520069.12233928  
SRR17520069.12233930  
SRR17520069.12233932  
SRR17520069.12233934  
SRR17520069.12237649  
SRR17520069.12237651  
SRR17520069.12237653  
SRR17520069.12237655  
SRR17520069.12237657  
SRR17520069.12237659  
SRR17520069.12237661  
SRR17520069.12237663  
SRR17520069.12237665  
SRR17520069.12237667  
SRR17520069.12237669  
SRR17520069.12237671  
SRR17520069.12237673  
SRR17520069.12237675  
SRR17520069.12237677  
SRR17520069.12237679  
SRR17520069.12237683  
SRR17520069.12237685  
SRR17520069.12237687  
SRR17520069.12237689  
SRR17520069.12237691  
SRR17520069.12237693  
SRR17520069.12237695  
SRR17520069.12237697  
SRR17520069.12237699  
SRR17520069.12237701

SRR17520069. 12237703  
SRR17520069. 12237705  
SRR17520069. 12237707  
SRR17520069. 12237709  
SRR17520069. 12237711  
SRR17520069. 12237713  
SRR17520069. 12237715  
SRR17520069. 12237717  
SRR17520069. 12237719  
SRR17520069. 12237721  
SRR17520069. 12237723  
SRR17520069. 12237725  
SRR17520069. 12237727  
SRR17520069. 12237729  
SRR17520069. 12237731  
SRR17520069. 12237733  
SRR17520069. 12237735  
SRR17520069. 12237737  
SRR17520069. 12237739  
SRR17520069. 12237741  
SRR17520069. 12237743  
SRR17520069. 12237745  
SRR17520069. 12237747  
SRR17520069. 12237749  
SRR17520069. 12237751  
SRR17520069. 12237753  
SRR17520069. 12237755  
SRR17520069. 12237757  
SRR17520069. 12237759  
SRR17520069. 12237761  
SRR17520069. 12237763  
SRR17520069. 12237765  
SRR17520069. 12237767  
SRR17520069. 12237769  
SRR17520069. 12237771  
SRR17520069. 12240842  
SRR17520069. 12240844  
SRR17520069. 12240846  
SRR17520069. 12240848  
SRR17520069. 12245693  
SRR17520069. 12245695  
SRR17520069. 12245697  
SRR17520069. 12245699  
SRR17520069. 12245701  
SRR17520069. 12245703  
SRR17520069. 12245705  
SRR17520069. 12245707

SRR17520069.12245709  
SRR17520069.12245711  
SRR17520069.12245713  
SRR17520069.12245715  
SRR17520069.12245717  
SRR17520069.12245719  
SRR17520069.12245721  
SRR17520069.12245723  
SRR17520069.12245725  
SRR17520069.12245727  
SRR17520069.12245729  
SRR17520069.12245731  
SRR17520069.12245733  
SRR17520069.12247753  
SRR17520069.12247755  
SRR17520069.12247757  
SRR17520069.12247759  
SRR17520069.12247761  
SRR17520069.12247763  
SRR17520069.12247765  
SRR17520069.12247767  
SRR17520069.12247769  
SRR17520069.12247771  
SRR17520069.12247773  
SRR17520069.12247775  
SRR17520069.12247777  
SRR17520069.12247779  
SRR17520069.12247781  
SRR17520069.12247783  
SRR17520069.12247785  
SRR17520069.12248980  
SRR17520069.12248982  
SRR17520069.12248984  
SRR17520069.12248986  
SRR17520069.12248988  
SRR17520069.12248990  
SRR17520069.12248992  
SRR17520069.12248994  
SRR17520069.12248996  
SRR17520069.12248998  
SRR17520069.12249000  
SRR17520069.12249002  
SRR17520069.12249058  
SRR17520069.12249060  
SRR17520069.12249062  
SRR17520069.12249064  
SRR17520069.12249066

SRR17520069.12249068  
SRR17520069.12249070  
SRR17520069.12249072  
SRR17520069.12249074  
SRR17520069.12249076  
SRR17520069.12249078  
SRR17520069.12249080  
SRR17520069.12249082  
SRR17520069.12249084  
SRR17520069.12249086  
SRR17520069.12249088  
SRR17520069.12249090  
SRR17520069.12249092  
SRR17520069.12249094  
SRR17520069.12249096  
SRR17520069.12249098  
SRR17520069.12249100  
SRR17520069.12249102  
SRR17520069.12249106  
SRR17520069.12249108  
SRR17520069.12249110  
SRR17520069.12249112  
SRR17520069.12249114  
SRR17520069.12249116  
SRR17520069.12249118  
SRR17520069.12249120  
SRR17520069.12249122  
SRR17520069.12249124  
SRR17520069.12249126  
SRR17520069.12249128  
SRR17520069.12249130  
SRR17520069.12249132  
SRR17520069.12249134  
SRR17520069.12249136  
SRR17520069.12249138  
SRR17520069.12249140  
SRR17520069.12249142  
SRR17520069.12249144  
SRR17520069.12249146  
SRR17520069.12249148  
SRR17520069.12249150  
SRR17520069.12249152  
SRR17520069.12249154  
SRR17520069.12249156  
SRR17520069.12249158  
SRR17520069.12249160  
SRR17520069.12249162

SRR17520069. 12249164  
SRR17520069. 12249166  
SRR17520069. 12249168  
SRR17520069. 12249170  
SRR17520069. 12249172  
SRR17520069. 12249174  
SRR17520069. 12249176  
SRR17520069. 12252764  
SRR17520069. 12252766  
SRR17520069. 12252768  
SRR17520069. 12252770  
SRR17520069. 12252774  
SRR17520069. 12252776  
SRR17520069. 12252778  
SRR17520069. 12252780  
SRR17520069. 12252782  
SRR17520069. 12252784  
SRR17520069. 12252786  
SRR17520069. 12252792  
SRR17520069. 12252794  
SRR17520069. 12252796  
SRR17520069. 12252800  
SRR17520069. 12252802  
SRR17520069. 12252806  
SRR17520069. 12252808  
SRR17520069. 12252810  
SRR17520069. 12252812  
SRR17520069. 12252814  
SRR17520069. 12252816  
SRR17520069. 12252818  
SRR17520069. 12253692  
SRR17520069. 12253694  
SRR17520069. 12253696  
SRR17520069. 12253698  
SRR17520069. 12253700  
SRR17520069. 12253702  
SRR17520069. 12253704  
SRR17520069. 12253708  
SRR17520069. 12253712  
SRR17520069. 12253714  
SRR17520069. 12253716  
SRR17520069. 12262294  
SRR17520069. 12262296  
SRR17520069. 12262298  
SRR17520069. 12262300  
SRR17520069. 12262302  
SRR17520069. 12262304



SRR17520069. 12262306  
SRR17520069. 12262308  
SRR17520069. 12262310  
SRR17520069. 12262312  
SRR17520069. 12262314  
SRR17520069. 12262316  
SRR17520069. 12262318  
SRR17520069. 12262320  
SRR17520069. 12262322  
SRR17520069. 12262324  
SRR17520069. 12262326  
SRR17520069. 12262330  
SRR17520069. 12262332  
SRR17520069. 12262334  
SRR17520069. 12262336  
SRR17520069. 12262338  
SRR17520069. 12262340  
SRR17520069. 12262342  
SRR17520069. 12262344  
SRR17520069. 12262346  
SRR17520069. 12262348  
SRR17520069. 12262350  
SRR17520069. 12265503  
SRR17520069. 12265505  
SRR17520069. 12265507  
SRR17520069. 12265509  
SRR17520069. 12265511  
SRR17520069. 12265513  
SRR17520069. 12265515  
SRR17520069. 12265517  
SRR17520069. 12265519  
SRR17520069. 12265521  
SRR17520069. 12265523  
SRR17520069. 12265525  
SRR17520069. 12265527  
SRR17520069. 12265529  
SRR17520069. 12265531  
SRR17520069. 12265533  
SRR17520069. 12265535  
SRR17520069. 12265955  
SRR17520069. 12265957  
SRR17520069. 12265959  
SRR17520069. 12265961  
SRR17520069. 12265963  
SRR17520069. 12265965  
SRR17520069. 12265967  
SRR17520069. 12265969

SRR17520069.12265971  
SRR17520069.12265973  
SRR17520069.12265975  
SRR17520069.12265977  
SRR17520069.12265979  
SRR17520069.12265981  
SRR17520069.12265983  
SRR17520069.12265985  
SRR17520069.12265987  
SRR17520069.12265989  
SRR17520069.12265991  
SRR17520069.12265993  
SRR17520069.12265995  
SRR17520069.12265997  
SRR17520069.12265999  
SRR17520069.12266001  
SRR17520069.12266003  
SRR17520069.12269748  
SRR17520069.12269768  
SRR17520069.12269774  
SRR17520069.12269776  
SRR17520069.12269778  
SRR17520069.12269780  
SRR17520069.12269782  
SRR17520069.12269784  
SRR17520069.12269786  
SRR17520069.12269788  
SRR17520069.12269790  
SRR17520069.12269792  
SRR17520069.12269794  
SRR17520069.12269796  
SRR17520069.12269798  
SRR17520069.12269800  
SRR17520069.12269802  
SRR17520069.12269804  
SRR17520069.12269806  
SRR17520069.12269808  
SRR17520069.12269810  
SRR17520069.12269812  
SRR17520069.12269814  
SRR17520069.12269816  
SRR17520069.12269820  
SRR17520069.12269822  
SRR17520069.12269824  
SRR17520069.12269826  
SRR17520069.12269828  
SRR17520069.12269830

SRR17520069. 12269832  
SRR17520069. 12269834  
SRR17520069. 12269836  
SRR17520069. 12269838  
SRR17520069. 12280046  
SRR17520069. 12280048  
SRR17520069. 12280050  
SRR17520069. 12280052  
SRR17520069. 12280054  
SRR17520069. 12280056  
SRR17520069. 12280058  
SRR17520069. 12280060  
SRR17520069. 12280062  
SRR17520069. 12280064  
SRR17520069. 12280066  
SRR17520069. 12280068  
SRR17520069. 12280070  
SRR17520069. 12280072  
SRR17520069. 12280074  
SRR17520069. 12280076  
SRR17520069. 12280078  
SRR17520069. 12280080  
SRR17520069. 12280082  
SRR17520069. 12280084  
SRR17520069. 12280086  
SRR17520069. 12280923  
SRR17520069. 12280925  
SRR17520069. 12280927  
SRR17520069. 12280929  
SRR17520069. 12280931  
SRR17520069. 12280933  
SRR17520069. 12280937  
SRR17520069. 12280939  
SRR17520069. 12280941  
SRR17520069. 12280943  
SRR17520069. 12280945  
SRR17520069. 12280947  
SRR17520069. 12280949  
SRR17520069. 12280951  
SRR17520069. 12280953  
SRR17520069. 12280955  
SRR17520069. 12280957  
SRR17520069. 12280959  
SRR17520069. 12280961  
SRR17520069. 12280963  
SRR17520069. 12280965  
SRR17520069. 12280967

SRR17520069.12280969  
SRR17520069.12280971  
SRR17520069.12280973  
SRR17520069.12280975  
SRR17520069.12280977  
SRR17520069.12280979  
SRR17520069.12280981  
SRR17520069.12280983  
SRR17520069.12280985  
SRR17520069.12280987  
SRR17520069.12280989  
SRR17520069.12280991  
SRR17520069.12280993  
SRR17520069.12280995  
SRR17520069.12280997  
SRR17520069.12280999  
SRR17520069.12281001  
SRR17520069.12281003  
SRR17520069.12281005  
SRR17520069.12281007  
SRR17520069.12281009  
SRR17520069.12281011  
SRR17520069.12281013  
SRR17520069.12282133  
SRR17520069.12282135  
SRR17520069.12282143  
SRR17520069.12282145  
SRR17520069.12282147  
SRR17520069.12282149  
SRR17520069.12283322  
SRR17520069.12285464  
SRR17520069.12285466  
SRR17520069.12285468  
SRR17520069.12285470  
SRR17520069.12285472  
SRR17520069.12285474  
SRR17520069.12285476  
SRR17520069.12285478  
SRR17520069.12286333  
SRR17520069.12286335  
SRR17520069.12286337  
SRR17520069.12286339  
SRR17520069.12286341  
SRR17520069.12286343  
SRR17520069.12286345  
SRR17520069.12289435  
SRR17520069.12289437

SRR17520069.12289439  
SRR17520069.12289441  
SRR17520069.12289443  
SRR17520069.12289445  
SRR17520069.12289447  
SRR17520069.12289449  
SRR17520069.12289451  
SRR17520069.12289453  
SRR17520069.12289455  
SRR17520069.12289457  
SRR17520069.12289461  
SRR17520069.12289463  
SRR17520069.12289465  
SRR17520069.12289469  
SRR17520069.12289471  
SRR17520069.12289475  
SRR17520069.12289477  
SRR17520069.12289479  
SRR17520069.12289481  
SRR17520069.12289483  
SRR17520069.12289485  
SRR17520069.12289487  
SRR17520069.12289489  
SRR17520069.12289493  
SRR17520069.12289495  
SRR17520069.12289497  
SRR17520069.12289499  
SRR17520069.12289505  
SRR17520069.12289507  
SRR17520069.12289509  
SRR17520069.12289511  
SRR17520069.12289513  
SRR17520069.12289515  
SRR17520069.12289517  
SRR17520069.12289519  
SRR17520069.12289521  
SRR17520069.12289523  
SRR17520069.12289525  
SRR17520069.12289527  
SRR17520069.12289529  
SRR17520069.12289533  
SRR17520069.12289535  
SRR17520069.12289537  
SRR17520069.12289539  
SRR17520069.12289541  
SRR17520069.12289543  
SRR17520069.12289545

SRR17520069.12289547  
SRR17520069.12289549  
SRR17520069.12289551  
SRR17520069.12289553  
SRR17520069.12289555  
SRR17520069.12289557  
SRR17520069.12289559  
SRR17520069.12289561  
SRR17520069.12289563  
SRR17520069.12289565  
SRR17520069.12289567  
SRR17520069.12289569  
SRR17520069.12289571  
SRR17520069.12289573  
SRR17520069.12289575  
SRR17520069.12289577  
SRR17520069.12289579  
SRR17520069.12289581  
SRR17520069.12289587  
SRR17520069.12289589  
SRR17520069.12289591  
SRR17520069.12289593  
SRR17520069.12289595  
SRR17520069.12289597  
SRR17520069.12289599  
SRR17520069.12289603  
SRR17520069.12289605  
SRR17520069.12289607  
SRR17520069.12289609  
SRR17520069.12289611  
SRR17520069.12289613  
SRR17520069.12289615  
SRR17520069.12289617  
SRR17520069.12289619  
SRR17520069.12289621  
SRR17520069.12289623  
SRR17520069.12289625  
SRR17520069.12289627  
SRR17520069.12289631  
SRR17520069.12294663  
SRR17520069.12294665  
SRR17520069.12294667  
SRR17520069.12294669  
SRR17520069.12294671  
SRR17520069.12294673  
SRR17520069.12294675  
SRR17520069.12294677

SRR17520069. 12294679  
SRR17520069. 12294681  
SRR17520069. 12294683  
SRR17520069. 12294685  
SRR17520069. 12294687  
SRR17520069. 12294689  
SRR17520069. 12294691  
SRR17520069. 12294693  
SRR17520069. 12294695  
SRR17520069. 12294697  
SRR17520069. 12294699  
SRR17520069. 12294701  
SRR17520069. 12294703  
SRR17520069. 12294705  
SRR17520069. 12294707  
SRR17520069. 12294709  
SRR17520069. 12294711  
SRR17520069. 12294713  
SRR17520069. 12294715  
SRR17520069. 12294717  
SRR17520069. 12294719  
SRR17520069. 12294721  
SRR17520069. 12294723  
SRR17520069. 12294725  
SRR17520069. 12294727  
SRR17520069. 12294729  
SRR17520069. 12294731  
SRR17520069. 12294733  
SRR17520069. 12294735  
SRR17520069. 12297115  
SRR17520069. 12297117  
SRR17520069. 12297119  
SRR17520069. 12297121  
SRR17520069. 12297123  
SRR17520069. 12297125  
SRR17520069. 12297127  
SRR17520069. 12297129  
SRR17520069. 12297131  
SRR17520069. 12297133  
SRR17520069. 12297135  
SRR17520069. 12297137  
SRR17520069. 12297139  
SRR17520069. 12297141  
SRR17520069. 12297143  
SRR17520069. 12297145  
SRR17520069. 12297147  
SRR17520069. 12297149

SRR17520069. 12297151  
SRR17520069. 12297153  
SRR17520069. 12297155  
SRR17520069. 12297157  
SRR17520069. 12297159  
SRR17520069. 12297161  
SRR17520069. 12297163  
SRR17520069. 12297167  
SRR17520069. 12300327  
SRR17520069. 12300329  
SRR17520069. 12300331  
SRR17520069. 12303432  
SRR17520069. 12303434  
SRR17520069. 12303436  
SRR17520069. 12303438  
SRR17520069. 12303440  
SRR17520069. 12303444  
SRR17520069. 12303446  
SRR17520069. 12303450  
SRR17520069. 12303452  
SRR17520069. 12303454  
SRR17520069. 12303456  
SRR17520069. 12303462  
SRR17520069. 12303466  
SRR17520069. 12303468  
SRR17520069. 12310907  
SRR17520069. 12310909  
SRR17520069. 12310911  
SRR17520069. 12310913  
SRR17520069. 12310915  
SRR17520069. 12310917  
SRR17520069. 12310919  
SRR17520069. 12310921  
SRR17520069. 12310923  
SRR17520069. 12310925  
SRR17520069. 12312352  
SRR17520069. 12312354  
SRR17520069. 12312358  
SRR17520069. 12312360  
SRR17520069. 12312362  
SRR17520069. 12312364  
SRR17520069. 12312366  
SRR17520069. 12312368  
SRR17520069. 12312370  
SRR17520069. 12312372  
SRR17520069. 12312374  
SRR17520069. 12312376



SRR17520069. 12312378  
SRR17520069. 12312380  
SRR17520069. 12312382  
SRR17520069. 12316272  
SRR17520069. 12316274  
SRR17520069. 12316276  
SRR17520069. 12316278  
SRR17520069. 12316280  
SRR17520069. 12316282  
SRR17520069. 12316284  
SRR17520069. 12316288  
SRR17520069. 12316290  
SRR17520069. 12316292  
SRR17520069. 12316296  
SRR17520069. 12316298  
SRR17520069. 12316300  
SRR17520069. 12316302  
SRR17520069. 12316304  
SRR17520069. 12316306  
SRR17520069. 12316308  
SRR17520069. 12316310  
SRR17520069. 12316314  
SRR17520069. 12316316  
SRR17520069. 12316318  
SRR17520069. 12316322  
SRR17520069. 12316324  
SRR17520069. 12316326  
SRR17520069. 12316328  
SRR17520069. 12316330  
SRR17520069. 12316332  
SRR17520069. 12316334  
SRR17520069. 12316336  
SRR17520069. 12316338  
SRR17520069. 12316340  
SRR17520069. 12316342  
SRR17520069. 12316344  
SRR17520069. 12316346  
SRR17520069. 12316348  
SRR17520069. 12316350  
SRR17520069. 12316352  
SRR17520069. 12316354  
SRR17520069. 12316356  
SRR17520069. 12316358  
SRR17520069. 12316360  
SRR17520069. 12316362  
SRR17520069. 12316364  
SRR17520069. 12316366

SRR17520069. 12316368  
SRR17520069. 12316370  
SRR17520069. 12316372  
SRR17520069. 12316374  
SRR17520069. 12316376  
SRR17520069. 12316378  
SRR17520069. 12316380  
SRR17520069. 12316384  
SRR17520069. 12316386  
SRR17520069. 12316388  
SRR17520069. 12316390  
SRR17520069. 12316392  
SRR17520069. 12316394  
SRR17520069. 12316396  
SRR17520069. 12316398  
SRR17520069. 12316400  
SRR17520069. 12316402  
SRR17520069. 12316404  
SRR17520069. 12316406  
SRR17520069. 12316408  
SRR17520069. 12316410  
SRR17520069. 12316412  
SRR17520069. 12316414  
SRR17520069. 12316416  
SRR17520069. 12316418  
SRR17520069. 12316420  
SRR17520069. 12317755  
SRR17520069. 12317757  
SRR17520069. 12317759  
SRR17520069. 12317761  
SRR17520069. 12317763  
SRR17520069. 12317765  
SRR17520069. 12317769  
SRR17520069. 12317771  
SRR17520069. 12317773  
SRR17520069. 12317775  
SRR17520069. 12317779  
SRR17520069. 12317781  
SRR17520069. 12317783  
SRR17520069. 12317785  
SRR17520069. 12317787  
SRR17520069. 12322478  
SRR17520069. 12322480  
SRR17520069. 12322482  
SRR17520069. 12322484  
SRR17520069. 12322486  
SRR17520069. 12322488

SRR17520069. 12322490  
SRR17520069. 12322492  
SRR17520069. 12322494  
SRR17520069. 12322496  
SRR17520069. 12322498  
SRR17520069. 12322500  
SRR17520069. 12322502  
SRR17520069. 12322504  
SRR17520069. 12322506  
SRR17520069. 12322508  
SRR17520069. 12322510  
SRR17520069. 12322512  
SRR17520069. 12322514  
SRR17520069. 12322516  
SRR17520069. 12322518  
SRR17520069. 12322520  
SRR17520069. 12322522  
SRR17520069. 12322524  
SRR17520069. 12322526  
SRR17520069. 12322528  
SRR17520069. 12322530  
SRR17520069. 12322532  
SRR17520069. 12322534  
SRR17520069. 12322536  
SRR17520069. 12322538  
SRR17520069. 12322540  
SRR17520069. 12322542  
SRR17520069. 12322544  
SRR17520069. 12322546  
SRR17520069. 12322548  
SRR17520069. 12322550  
SRR17520069. 12322552  
SRR17520069. 12322554  
SRR17520069. 12322556  
SRR17520069. 12322558  
SRR17520069. 12322560  
SRR17520069. 12322562  
SRR17520069. 12322564  
SRR17520069. 12322566  
SRR17520069. 12322568  
SRR17520069. 12322570  
SRR17520069. 12322572  
SRR17520069. 12322574  
SRR17520069. 12322576  
SRR17520069. 12322578  
SRR17520069. 12322580  
SRR17520069. 12322582

SRR17520069. 12322584  
SRR17520069. 12322586  
SRR17520069. 12322588  
SRR17520069. 12322590  
SRR17520069. 12322592  
SRR17520069. 12322594  
SRR17520069. 12322596  
SRR17520069. 12322598  
SRR17520069. 12322600  
SRR17520069. 12322602  
SRR17520069. 12322604  
SRR17520069. 12322606  
SRR17520069. 12322608  
SRR17520069. 12322610  
SRR17520069. 12322612  
SRR17520069. 12322614  
SRR17520069. 12322616  
SRR17520069. 12322618  
SRR17520069. 12323159  
SRR17520069. 12323161  
SRR17520069. 12323163  
SRR17520069. 12323165  
SRR17520069. 12323167  
SRR17520069. 12323169  
SRR17520069. 12323171  
SRR17520069. 12323173  
SRR17520069. 12323175  
SRR17520069. 12323177  
SRR17520069. 12323179  
SRR17520069. 12323181  
SRR17520069. 12323183  
SRR17520069. 12323185  
SRR17520069. 12323187  
SRR17520069. 12323193  
SRR17520069. 12323195  
SRR17520069. 12323197  
SRR17520069. 12323199  
SRR17520069. 12323201  
SRR17520069. 12323203  
SRR17520069. 12323205  
SRR17520069. 12323207  
SRR17520069. 12323209  
SRR17520069. 12323211  
SRR17520069. 12323213  
SRR17520069. 12323215  
SRR17520069. 12323219  
SRR17520069. 12323221

SRR17520069. 12323223  
SRR17520069. 12323225  
SRR17520069. 12323227  
SRR17520069. 12323229  
SRR17520069. 12323231  
SRR17520069. 12323233  
SRR17520069. 12323235  
SRR17520069. 12323237  
SRR17520069. 12323239  
SRR17520069. 12323243  
SRR17520069. 12323245  
SRR17520069. 12323247  
SRR17520069. 12323249  
SRR17520069. 12323251  
SRR17520069. 12323253  
SRR17520069. 12323255  
SRR17520069. 12323257  
SRR17520069. 12323261  
SRR17520069. 12323263  
SRR17520069. 12323265  
SRR17520069. 12323267  
SRR17520069. 12323269  
SRR17520069. 12323273  
SRR17520069. 12323275  
SRR17520069. 12323277  
SRR17520069. 12323279  
SRR17520069. 12323281  
SRR17520069. 12323283  
SRR17520069. 12323285  
SRR17520069. 12323287  
SRR17520069. 12323291  
SRR17520069. 12323293  
SRR17520069. 12323295  
SRR17520069. 12323297  
SRR17520069. 12323299  
SRR17520069. 12328901  
SRR17520069. 12328903  
SRR17520069. 12328907  
SRR17520069. 12328909  
SRR17520069. 12328911  
SRR17520069. 12328913  
SRR17520069. 12328915  
SRR17520069. 12328917  
SRR17520069. 12328919  
SRR17520069. 12328921  
SRR17520069. 12328923  
SRR17520069. 12328925

SRR17520069. 12328927  
SRR17520069. 12328929  
SRR17520069. 12328931  
SRR17520069. 12328933  
SRR17520069. 12328935  
SRR17520069. 12328937  
SRR17520069. 12328939  
SRR17520069. 12335479  
SRR17520069. 12335481  
SRR17520069. 12335483  
SRR17520069. 12335485  
SRR17520069. 12335487  
SRR17520069. 12335489  
SRR17520069. 12335493  
SRR17520069. 12335495  
SRR17520069. 12335497  
SRR17520069. 12336584  
SRR17520069. 12336586  
SRR17520069. 12336588  
SRR17520069. 12336593  
SRR17520069. 12336941  
SRR17520069. 12339959  
SRR17520069. 12339961  
SRR17520069. 12348075  
SRR17520069. 12348077  
SRR17520069. 12348079  
SRR17520069. 12348081  
SRR17520069. 12348083  
SRR17520069. 12348085  
SRR17520069. 12348087  
SRR17520069. 12348089  
SRR17520069. 12348091  
SRR17520069. 12348093  
SRR17520069. 12348097  
SRR17520069. 12348099  
SRR17520069. 12348103  
SRR17520069. 12348105  
SRR17520069. 12348107  
SRR17520069. 12356914  
SRR17520069. 12356916  
SRR17520069. 12356918  
SRR17520069. 12356920  
SRR17520069. 12356922  
SRR17520069. 12356924  
SRR17520069. 12356926  
SRR17520069. 12356928  
SRR17520069. 12356930

SRR17520069. 12356932  
SRR17520069. 12356934  
SRR17520069. 12356936  
SRR17520069. 12356938  
SRR17520069. 12356940  
SRR17520069. 12356942  
SRR17520069. 12356944  
SRR17520069. 12356946  
SRR17520069. 12356948  
SRR17520069. 12356950  
SRR17520069. 12356952  
SRR17520069. 12356954  
SRR17520069. 12356956  
SRR17520069. 12356958  
SRR17520069. 12356960  
SRR17520069. 12356962  
SRR17520069. 12356970  
SRR17520069. 12356972  
SRR17520069. 12356974  
SRR17520069. 12356976  
SRR17520069. 12356978  
SRR17520069. 12356984  
SRR17520069. 12356986  
SRR17520069. 12356988  
SRR17520069. 12356990  
SRR17520069. 12356994  
SRR17520069. 12356996  
SRR17520069. 12356998  
SRR17520069. 12357000  
SRR17520069. 12358315  
SRR17520069. 12358317  
SRR17520069. 12358319  
SRR17520069. 12358321  
SRR17520069. 12358323  
SRR17520069. 12358338  
SRR17520069. 12358340  
SRR17520069. 12358342  
SRR17520069. 12358346  
SRR17520069. 12358348  
SRR17520069. 12358350  
SRR17520069. 12358352  
SRR17520069. 12358354  
SRR17520069. 12358356  
SRR17520069. 12358358  
SRR17520069. 12358360  
SRR17520069. 12358362  
SRR17520069. 12358364

SRR17520069. 12358366  
SRR17520069. 12358368  
SRR17520069. 12358370  
SRR17520069. 12358372  
SRR17520069. 12358374  
SRR17520069. 12358376  
SRR17520069. 12358378  
SRR17520069. 12358380  
SRR17520069. 12358382  
SRR17520069. 12358384  
SRR17520069. 12358386  
SRR17520069. 12358388  
SRR17520069. 12362115  
SRR17520069. 12362117  
SRR17520069. 12362119  
SRR17520069. 12362121  
SRR17520069. 12362123  
SRR17520069. 12362125  
SRR17520069. 12362127  
SRR17520069. 12362129  
SRR17520069. 12362131  
SRR17520069. 12362133  
SRR17520069. 12362135  
SRR17520069. 12362137  
SRR17520069. 12362139  
SRR17520069. 12362141  
SRR17520069. 12362143  
SRR17520069. 12362145  
SRR17520069. 12362147  
SRR17520069. 12365996  
SRR17520069. 12365998  
SRR17520069. 12366000  
SRR17520069. 12366002  
SRR17520069. 12366006  
SRR17520069. 12366008  
SRR17520069. 12366010  
SRR17520069. 12366012  
SRR17520069. 12366014  
SRR17520069. 12366016  
SRR17520069. 12366018  
SRR17520069. 12366020  
SRR17520069. 12366022  
SRR17520069. 12366024  
SRR17520069. 12366026  
SRR17520069. 12366028  
SRR17520069. 12366030  
SRR17520069. 12366032



SRR17520069. 12366034  
SRR17520069. 12366036  
SRR17520069. 12366357  
SRR17520069. 12366359  
SRR17520069. 12366361  
SRR17520069. 12366363  
SRR17520069. 12366365  
SRR17520069. 12366369  
SRR17520069. 12366371  
SRR17520069. 12366373  
SRR17520069. 12366375  
SRR17520069. 12366377  
SRR17520069. 12366379  
SRR17520069. 12366381  
SRR17520069. 12366397  
SRR17520069. 12366399  
SRR17520069. 12367733  
SRR17520069. 12367894  
SRR17520069. 12367896  
SRR17520069. 12367898  
SRR17520069. 12367900  
SRR17520069. 12367902  
SRR17520069. 12367904  
SRR17520069. 12367906  
SRR17520069. 12367908  
SRR17520069. 12367910  
SRR17520069. 12367912  
SRR17520069. 12367914  
SRR17520069. 12367916  
SRR17520069. 12367918  
SRR17520069. 12367920  
SRR17520069. 12367922  
SRR17520069. 12367924  
SRR17520069. 12369669  
SRR17520069. 12369671  
SRR17520069. 12369673  
SRR17520069. 12369675  
SRR17520069. 12369677  
SRR17520069. 12369679  
SRR17520069. 12369681  
SRR17520069. 12369683  
SRR17520069. 12369685  
SRR17520069. 12369687  
SRR17520069. 12369689  
SRR17520069. 12369691  
SRR17520069. 12369693  
SRR17520069. 12369695

SRR17520069. 12369697  
SRR17520069. 12369699  
SRR17520069. 12369701  
SRR17520069. 12369703  
SRR17520069. 12369705  
SRR17520069. 12369707  
SRR17520069. 12369709  
SRR17520069. 12369711  
SRR17520069. 12369713  
SRR17520069. 12369715  
SRR17520069. 12369717  
SRR17520069. 12369719  
SRR17520069. 12369721  
SRR17520069. 12369723  
SRR17520069. 12369725  
SRR17520069. 12369727  
SRR17520069. 12369729  
SRR17520069. 12369731  
SRR17520069. 12369733  
SRR17520069. 12369735  
SRR17520069. 12369737  
SRR17520069. 12369739  
SRR17520069. 12369741  
SRR17520069. 12369743  
SRR17520069. 12369745  
SRR17520069. 12374099  
SRR17520069. 12380911  
SRR17520069. 12380913  
SRR17520069. 12380915  
SRR17520069. 12380917  
SRR17520069. 12380919  
SRR17520069. 12380921  
SRR17520069. 12380923  
SRR17520069. 12380925  
SRR17520069. 12380927  
SRR17520069. 12380929  
SRR17520069. 12380931  
SRR17520069. 12380933  
SRR17520069. 12380935  
SRR17520069. 12380937  
SRR17520069. 12380939  
SRR17520069. 12380941  
SRR17520069. 12380943  
SRR17520069. 12380945  
SRR17520069. 12380947  
SRR17520069. 12380953  
SRR17520069. 12380955

SRR17520069. 12380957  
SRR17520069. 12380959  
SRR17520069. 12380961  
SRR17520069. 12380965  
SRR17520069. 12380967  
SRR17520069. 12380969  
SRR17520069. 12390566  
SRR17520069. 12393274  
SRR17520069. 12393276  
SRR17520069. 12393278  
SRR17520069. 12393280  
SRR17520069. 12393282  
SRR17520069. 12393284  
SRR17520069. 12393286  
SRR17520069. 12393288  
SRR17520069. 12393290  
SRR17520069. 12393292  
SRR17520069. 12393294  
SRR17520069. 12393296  
SRR17520069. 12393298  
SRR17520069. 12393300  
SRR17520069. 12393302  
SRR17520069. 12393304  
SRR17520069. 12393306  
SRR17520069. 12393308  
SRR17520069. 12393310  
SRR17520069. 12393312  
SRR17520069. 12393314  
SRR17520069. 12395227  
SRR17520069. 12395229  
SRR17520069. 12395231  
SRR17520069. 12395233  
SRR17520069. 12395235  
SRR17520069. 12395237  
SRR17520069. 12395239  
SRR17520069. 12395241  
SRR17520069. 12395243  
SRR17520069. 12395245  
SRR17520069. 12395247  
SRR17520069. 12395249  
SRR17520069. 12395251  
SRR17520069. 12395253  
SRR17520069. 12395255  
SRR17520069. 12395257  
SRR17520069. 12395259  
SRR17520069. 12395261  
SRR17520069. 12395263

SRR17520069. 12395265  
SRR17520069. 12395267  
SRR17520069. 12395269  
SRR17520069. 12395271  
SRR17520069. 12395273  
SRR17520069. 12395275  
SRR17520069. 12395277  
SRR17520069. 12395279  
SRR17520069. 12395281  
SRR17520069. 12395283  
SRR17520069. 12395285  
SRR17520069. 12395287  
SRR17520069. 12395289  
SRR17520069. 12395291  
SRR17520069. 12395293  
SRR17520069. 12395295  
SRR17520069. 12395297  
SRR17520069. 12395299  
SRR17520069. 12395301  
SRR17520069. 12395303  
SRR17520069. 12395305  
SRR17520069. 12395307  
SRR17520069. 12395309  
SRR17520069. 12395311  
SRR17520069. 12395313  
SRR17520069. 12395315  
SRR17520069. 12395317  
SRR17520069. 12395319  
SRR17520069. 12395321  
SRR17520069. 12395323  
SRR17520069. 12395325  
SRR17520069. 12395327  
SRR17520069. 12395329  
SRR17520069. 12395331  
SRR17520069. 12395333  
SRR17520069. 12395335  
SRR17520069. 12395337  
SRR17520069. 12395339  
SRR17520069. 12395341  
SRR17520069. 12395343  
SRR17520069. 12404886  
SRR17520069. 12404888  
SRR17520069. 12404890  
SRR17520069. 12404892  
SRR17520069. 12404894  
SRR17520069. 12404896  
SRR17520069. 12404898

SRR17520069. 12404900  
SRR17520069. 12404902  
SRR17520069. 12404904  
SRR17520069. 12404906  
SRR17520069. 12404908  
SRR17520069. 12404910  
SRR17520069. 12404912  
SRR17520069. 12404914  
SRR17520069. 12404916  
SRR17520069. 12404918  
SRR17520069. 12404920  
SRR17520069. 12404922  
SRR17520069. 12404924  
SRR17520069. 12404926  
SRR17520069. 12404928  
SRR17520069. 12404930  
SRR17520069. 12404932  
SRR17520069. 12404934  
SRR17520069. 12404936  
SRR17520069. 12404938  
SRR17520069. 12404940  
SRR17520069. 12404942  
SRR17520069. 12404944  
SRR17520069. 12404946  
SRR17520069. 12404948  
SRR17520069. 12404950  
SRR17520069. 12404952  
SRR17520069. 12404954  
SRR17520069. 12404956  
SRR17520069. 12404958  
SRR17520069. 12405428  
SRR17520069. 12405432  
SRR17520069. 12405436  
SRR17520069. 12405438  
SRR17520069. 12405440  
SRR17520069. 12405442  
SRR17520069. 12405444  
SRR17520069. 12405446  
SRR17520069. 12405448  
SRR17520069. 12405450  
SRR17520069. 12405452  
SRR17520069. 12405454  
SRR17520069. 12405456  
SRR17520069. 12405458  
SRR17520069. 12405460  
SRR17520069. 12405462  
SRR17520069. 12405464

SRR17520069. 12405466  
SRR17520069. 12405468  
SRR17520069. 12414327  
SRR17520069. 12414329  
SRR17520069. 12414331  
SRR17520069. 12420463  
SRR17520069. 12420465  
SRR17520069. 12420467  
SRR17520069. 12420469  
SRR17520069. 12420471  
SRR17520069. 12420473  
SRR17520069. 12420475  
SRR17520069. 12420477  
SRR17520069. 12420479  
SRR17520069. 12420481  
SRR17520069. 12420483  
SRR17520069. 12420485  
SRR17520069. 12420487  
SRR17520069. 12420489  
SRR17520069. 12420491  
SRR17520069. 12420493  
SRR17520069. 12420495  
SRR17520069. 12420497  
SRR17520069. 12420499  
SRR17520069. 12420501  
SRR17520069. 12420503  
SRR17520069. 12420505  
SRR17520069. 12420507  
SRR17520069. 12424367  
SRR17520069. 12424369  
SRR17520069. 12424371  
SRR17520069. 12424373  
SRR17520069. 12424375  
SRR17520069. 12424377  
SRR17520069. 12424379  
SRR17520069. 12424381  
SRR17520069. 12425035  
SRR17520069. 12425037  
SRR17520069. 12425039  
SRR17520069. 12425041  
SRR17520069. 12425043  
SRR17520069. 12425045  
SRR17520069. 12425047  
SRR17520069. 12425049  
SRR17520069. 12426378  
SRR17520069. 12426380  
SRR17520069. 12426382

SRR17520069. 12426384  
SRR17520069. 12426386  
SRR17520069. 12426388  
SRR17520069. 12426390  
SRR17520069. 12426392  
SRR17520069. 12426394  
SRR17520069. 12426396  
SRR17520069. 12426398  
SRR17520069. 12426400  
SRR17520069. 12426402  
SRR17520069. 12426404  
SRR17520069. 12426406  
SRR17520069. 12426408  
SRR17520069. 12426410  
SRR17520069. 12426412  
SRR17520069. 12426414  
SRR17520069. 12426416  
SRR17520069. 12426418  
SRR17520069. 12426420  
SRR17520069. 12426422  
SRR17520069. 12426424  
SRR17520069. 12426426  
SRR17520069. 12426428  
SRR17520069. 12426430  
SRR17520069. 12426432  
SRR17520069. 12426434  
SRR17520069. 12426436  
SRR17520069. 12426438  
SRR17520069. 12426440  
SRR17520069. 12426442  
SRR17520069. 12426444  
SRR17520069. 12426446  
SRR17520069. 12426448  
SRR17520069. 12426450  
SRR17520069. 12426452  
SRR17520069. 12426454  
SRR17520069. 12426456  
SRR17520069. 12426458  
SRR17520069. 12426460  
SRR17520069. 12426462  
SRR17520069. 12426464  
SRR17520069. 12426466  
SRR17520069. 12426468  
SRR17520069. 12426470  
SRR17520069. 12426472  
SRR17520069. 12426474  
SRR17520069. 12426476

SRR17520069. 12426478  
SRR17520069. 12426480  
SRR17520069. 12426482  
SRR17520069. 12429102  
SRR17520069. 12429104  
SRR17520069. 12429108  
SRR17520069. 12429110  
SRR17520069. 12429112  
SRR17520069. 12429114  
SRR17520069. 12429116  
SRR17520069. 12429118  
SRR17520069. 12429120  
SRR17520069. 12429122  
SRR17520069. 12429124  
SRR17520069. 12429128  
SRR17520069. 12430271  
SRR17520069. 12430273  
SRR17520069. 12434423  
SRR17520069. 12434425  
SRR17520069. 12434427  
SRR17520069. 12434784  
SRR17520069. 12434786  
SRR17520069. 12434788  
SRR17520069. 12434794  
SRR17520069. 12434796  
SRR17520069. 12434798  
SRR17520069. 12448486  
SRR17520069. 12448488  
SRR17520069. 12448490  
SRR17520069. 12448494  
SRR17520069. 12448496  
SRR17520069. 12448498  
SRR17520069. 12448502  
SRR17520069. 12448504  
SRR17520069. 12448506  
SRR17520069. 12448508  
SRR17520069. 12448510  
SRR17520069. 12448512  
SRR17520069. 12448516  
SRR17520069. 12448518  
SRR17520069. 12448520  
SRR17520069. 12448524  
SRR17520069. 12449836  
SRR17520069. 12449838  
SRR17520069. 12449840  
SRR17520069. 12449842  
SRR17520069. 12449844



SRR17520069. 12449846  
SRR17520069. 12449848  
SRR17520069. 12453983  
SRR17520069. 12453985  
SRR17520069. 12453987  
SRR17520069. 12453989  
SRR17520069. 12453991  
SRR17520069. 12453993  
SRR17520069. 12453995  
SRR17520069. 12453997  
SRR17520069. 12453999  
SRR17520069. 12454001  
SRR17520069. 12454003  
SRR17520069. 12454005  
SRR17520069. 12454007  
SRR17520069. 12454009  
SRR17520069. 12454013  
SRR17520069. 12454017  
SRR17520069. 12454019  
SRR17520069. 12454021  
SRR17520069. 12454023  
SRR17520069. 12454025  
SRR17520069. 12454027  
SRR17520069. 12454029  
SRR17520069. 12454031  
SRR17520069. 12456249  
SRR17520069. 12456251  
SRR17520069. 12456253  
SRR17520069. 12456257  
SRR17520069. 12456259  
SRR17520069. 12456261  
SRR17520069. 12456263  
SRR17520069. 12456265  
SRR17520069. 12456267  
SRR17520069. 12456269  
SRR17520069. 12456271  
SRR17520069. 12456273  
SRR17520069. 12456275  
SRR17520069. 12456277  
SRR17520069. 12456279  
SRR17520069. 12456281  
SRR17520069. 12456283  
SRR17520069. 12456285  
SRR17520069. 12456287  
SRR17520069. 12456289  
SRR17520069. 12456291  
SRR17520069. 12456293

SRR17520069. 12456295  
SRR17520069. 12456297  
SRR17520069. 12456299  
SRR17520069. 12456301  
SRR17520069. 12456303  
SRR17520069. 12456305  
SRR17520069. 12456307  
SRR17520069. 12456309  
SRR17520069. 12456311  
SRR17520069. 12462933  
SRR17520069. 12462935  
SRR17520069. 12464852  
SRR17520069. 12464854  
SRR17520069. 12464856  
SRR17520069. 12464858  
SRR17520069. 12464860  
SRR17520069. 12464862  
SRR17520069. 12464864  
SRR17520069. 12464866  
SRR17520069. 12464868  
SRR17520069. 12464870  
SRR17520069. 12464872  
SRR17520069. 12464874  
SRR17520069. 12469965  
SRR17520069. 12474957  
SRR17520069. 12474959  
SRR17520069. 12474961  
SRR17520069. 12474963  
SRR17520069. 12474965  
SRR17520069. 12474969  
SRR17520069. 12474971  
SRR17520069. 12474973  
SRR17520069. 12474975  
SRR17520069. 12474977  
SRR17520069. 12474979  
SRR17520069. 12474981  
SRR17520069. 12474983  
SRR17520069. 12474985  
SRR17520069. 12474987  
SRR17520069. 12474989  
SRR17520069. 12474991  
SRR17520069. 12474993  
SRR17520069. 12474995  
SRR17520069. 12474997  
SRR17520069. 12474999  
SRR17520069. 12475001  
SRR17520069. 12475003

SRR17520069. 12475005  
SRR17520069. 12475007  
SRR17520069. 12475009  
SRR17520069. 12479222  
SRR17520069. 12479224  
SRR17520069. 12479226  
SRR17520069. 12479228  
SRR17520069. 12479230  
SRR17520069. 12479232  
SRR17520069. 12479234  
SRR17520069. 12479236  
SRR17520069. 12479238  
SRR17520069. 12479242  
SRR17520069. 12479244  
SRR17520069. 12479246  
SRR17520069. 12479248  
SRR17520069. 12479252  
SRR17520069. 12479254  
SRR17520069. 12479256  
SRR17520069. 12479258  
SRR17520069. 12479260  
SRR17520069. 12479262  
SRR17520069. 12479264  
SRR17520069. 12479266  
SRR17520069. 12479268  
SRR17520069. 12479270  
SRR17520069. 12479272  
SRR17520069. 12479274  
SRR17520069. 12479276  
SRR17520069. 12479278  
SRR17520069. 12479280  
SRR17520069. 12479282  
SRR17520069. 12479284  
SRR17520069. 12479286  
SRR17520069. 12479288  
SRR17520069. 12479290  
SRR17520069. 12479292  
SRR17520069. 12479296  
SRR17520069. 12479300  
SRR17520069. 12480486  
SRR17520069. 12480488  
SRR17520069. 12483343  
SRR17520069. 12483345  
SRR17520069. 12484350  
SRR17520069. 12484352  
SRR17520069. 12484354  
SRR17520069. 12484356

SRR17520069. 12484358  
SRR17520069. 12484360  
SRR17520069. 12484362  
SRR17520069. 12484364  
SRR17520069. 12484366  
SRR17520069. 12484368  
SRR17520069. 12484370  
SRR17520069. 12484372  
SRR17520069. 12484374  
SRR17520069. 12484376  
SRR17520069. 12484378  
SRR17520069. 12505582  
SRR17520069. 12505584  
SRR17520069. 12505586  
SRR17520069. 12505588  
SRR17520069. 12505590  
SRR17520069. 12506511  
SRR17520069. 12506513  
SRR17520069. 12506515  
SRR17520069. 12506517  
SRR17520069. 12510781  
SRR17520069. 12519115  
SRR17520069. 12519117  
SRR17520069. 12519119  
SRR17520069. 12519121  
SRR17520069. 12519123  
SRR17520069. 12519125  
SRR17520069. 12519129  
SRR17520069. 12519131  
SRR17520069. 12519133  
SRR17520069. 12519135  
SRR17520069. 12519137  
SRR17520069. 12519139  
SRR17520069. 12519141  
SRR17520069. 12519143  
SRR17520069. 12519145  
SRR17520069. 12519147  
SRR17520069. 12519149  
SRR17520069. 12519151  
SRR17520069. 12519153  
SRR17520069. 12519155  
SRR17520069. 12519157  
SRR17520069. 12519159  
SRR17520069. 12519161  
SRR17520069. 12519163  
SRR17520069. 12519165  
SRR17520069. 12519167

SRR17520069.12519169  
SRR17520069.12519171  
SRR17520069.12519173  
SRR17520069.12519175  
SRR17520069.12519179  
SRR17520069.12519181  
SRR17520069.12519183  
SRR17520069.12519185  
SRR17520069.12519187  
SRR17520069.12519189  
SRR17520069.12519191  
SRR17520069.12519193  
SRR17520069.12519195  
SRR17520069.12519197  
SRR17520069.12519199  
SRR17520069.12519201  
SRR17520069.12519203  
SRR17520069.12519207  
SRR17520069.12519209  
SRR17520069.12519211  
SRR17520069.12519213  
SRR17520069.12519215  
SRR17520069.12519217  
SRR17520069.12519219  
SRR17520069.12519221  
SRR17520069.12519223  
SRR17520069.12519225  
SRR17520069.12519227  
SRR17520069.12519229  
SRR17520069.12519231  
SRR17520069.12519233  
SRR17520069.12519235  
SRR17520069.12519237  
SRR17520069.12519239  
SRR17520069.12519241  
SRR17520069.12519243  
SRR17520069.12519245  
SRR17520069.12519247  
SRR17520069.12519249  
SRR17520069.12519251  
SRR17520069.12519253  
SRR17520069.12519255  
SRR17520069.12519257  
SRR17520069.12519259  
SRR17520069.12519261  
SRR17520069.12519263  
SRR17520069.12519265

SRR17520069. 12519267  
SRR17520069. 12519269  
SRR17520069. 12519271  
SRR17520069. 12519273  
SRR17520069. 12519275  
SRR17520069. 12519279  
SRR17520069. 12519281  
SRR17520069. 12519283  
SRR17520069. 12519285  
SRR17520069. 12519287  
SRR17520069. 12519289  
SRR17520069. 12519291  
SRR17520069. 12519293  
SRR17520069. 12519295  
SRR17520069. 12519297  
SRR17520069. 12519299  
SRR17520069. 12519301  
SRR17520069. 12519303  
SRR17520069. 12519305  
SRR17520069. 12519307  
SRR17520069. 12519309  
SRR17520069. 12519311  
SRR17520069. 12519313  
SRR17520069. 12519315  
SRR17520069. 12519317  
SRR17520069. 12519319  
SRR17520069. 12519321  
SRR17520069. 12519323  
SRR17520069. 12519325  
SRR17520069. 12519327  
SRR17520069. 12519329  
SRR17520069. 12519331  
SRR17520069. 12519333  
SRR17520069. 12519335  
SRR17520069. 12519337  
SRR17520069. 12519339  
SRR17520069. 12519341  
SRR17520069. 12519343  
SRR17520069. 12519345  
SRR17520069. 12519347  
SRR17520069. 12519349  
SRR17520069. 12519351  
SRR17520069. 12519353  
SRR17520069. 12519355  
SRR17520069. 12519357  
SRR17520069. 12519359  
SRR17520069. 12519361

SRR17520069. 12519363  
SRR17520069. 12519367  
SRR17520069. 12519371  
SRR17520069. 12519373  
SRR17520069. 12519375  
SRR17520069. 12519379  
SRR17520069. 12519381  
SRR17520069. 12519383  
SRR17520069. 12519385  
SRR17520069. 12519387  
SRR17520069. 12520024  
SRR17520069. 12520026  
SRR17520069. 12520028  
SRR17520069. 12520030  
SRR17520069. 12520032  
SRR17520069. 12520036  
SRR17520069. 12520038  
SRR17520069. 12520040  
SRR17520069. 12520042  
SRR17520069. 12520044  
SRR17520069. 12520046  
SRR17520069. 12520048  
SRR17520069. 12520050  
SRR17520069. 12520052  
SRR17520069. 12520054  
SRR17520069. 12520056  
SRR17520069. 12520058  
SRR17520069. 12520060  
SRR17520069. 12520062  
SRR17520069. 12520064  
SRR17520069. 12520066  
SRR17520069. 12520068  
SRR17520069. 12520070  
SRR17520069. 12520072  
SRR17520069. 12520074  
SRR17520069. 12520076  
SRR17520069. 12520078  
SRR17520069. 12520080  
SRR17520069. 12520082  
SRR17520069. 12520084  
SRR17520069. 12520086  
SRR17520069. 12520088  
SRR17520069. 12520090  
SRR17520069. 12520092  
SRR17520069. 12520094  
SRR17520069. 12520096  
SRR17520069. 12520707

SRR17520069.12529769  
SRR17520069.12529771  
SRR17520069.12529773  
SRR17520069.12529775  
SRR17520069.12529777  
SRR17520069.12529779  
SRR17520069.12529781  
SRR17520069.12529783  
SRR17520069.12529785  
SRR17520069.12529787  
SRR17520069.12529791  
SRR17520069.12529795  
SRR17520069.12529797  
SRR17520069.12529799  
SRR17520069.12529809  
SRR17520069.12529811  
SRR17520069.12529813  
SRR17520069.12529948  
SRR17520069.12529950  
SRR17520069.12529952  
SRR17520069.12529954  
SRR17520069.12529956  
SRR17520069.12529958  
SRR17520069.12529960  
SRR17520069.12529962  
SRR17520069.12529964  
SRR17520069.12530522  
SRR17520069.12530526  
SRR17520069.12535674  
SRR17520069.12535676  
SRR17520069.12535678  
SRR17520069.12535680  
SRR17520069.12535684  
SRR17520069.12535686  
SRR17520069.12535690  
SRR17520069.12535692  
SRR17520069.12535694  
SRR17520069.12535696  
SRR17520069.12535698  
SRR17520069.12535700  
SRR17520069.12535704  
SRR17520069.12535706  
SRR17520069.12535708  
SRR17520069.12535710  
SRR17520069.12535714  
SRR17520069.12535716  
SRR17520069.12535718



SRR17520069.12535720  
SRR17520069.12535724  
SRR17520069.12535726  
SRR17520069.12535728  
SRR17520069.12535730  
SRR17520069.12535732  
SRR17520069.12535734  
SRR17520069.12535736  
SRR17520069.12535738  
SRR17520069.12535740  
SRR17520069.12535742  
SRR17520069.12536242  
SRR17520069.12536244  
SRR17520069.12536246  
SRR17520069.12536248  
SRR17520069.12536250  
SRR17520069.12536252  
SRR17520069.12536254  
SRR17520069.12536256  
SRR17520069.12536258  
SRR17520069.12536260  
SRR17520069.12536262  
SRR17520069.12536264  
SRR17520069.12536266  
SRR17520069.12536268  
SRR17520069.12536270  
SRR17520069.12536272  
SRR17520069.12536274  
SRR17520069.12536276  
SRR17520069.12536278  
SRR17520069.12536280  
SRR17520069.12536282  
SRR17520069.12536284  
SRR17520069.12536286  
SRR17520069.12536288  
SRR17520069.12536290  
SRR17520069.12536292  
SRR17520069.12536294  
SRR17520069.12536296  
SRR17520069.12536298  
SRR17520069.12536300  
SRR17520069.12536302  
SRR17520069.12536304  
SRR17520069.12536306  
SRR17520069.12536308  
SRR17520069.12536310  
SRR17520069.12536312

SRR17520069.12536314  
SRR17520069.12536316  
SRR17520069.12536318  
SRR17520069.12536320  
SRR17520069.12536322  
SRR17520069.12536324  
SRR17520069.12536326  
SRR17520069.12536328  
SRR17520069.12536330  
SRR17520069.12536332  
SRR17520069.12536334  
SRR17520069.12536338  
SRR17520069.12536340  
SRR17520069.12536342  
SRR17520069.12536344  
SRR17520069.12536346  
SRR17520069.12536348  
SRR17520069.12536350  
SRR17520069.12536352  
SRR17520069.12536354  
SRR17520069.12536356  
SRR17520069.12536358  
SRR17520069.12536360  
SRR17520069.12536362  
SRR17520069.12536364  
SRR17520069.12536366  
SRR17520069.12536368  
SRR17520069.12536370  
SRR17520069.12536372  
SRR17520069.12536374  
SRR17520069.12536376  
SRR17520069.12536378  
SRR17520069.12536380  
SRR17520069.12536382  
SRR17520069.12536384  
SRR17520069.12536386  
SRR17520069.12536388  
SRR17520069.12536390  
SRR17520069.12536392  
SRR17520069.12536394  
SRR17520069.12536396  
SRR17520069.12536398  
SRR17520069.12536400  
SRR17520069.12536402  
SRR17520069.12536404  
SRR17520069.12536406  
SRR17520069.12536813

SRR17520069.12536815  
SRR17520069.12536817  
SRR17520069.12536819  
SRR17520069.12539750  
SRR17520069.12539752  
SRR17520069.12539754  
SRR17520069.12539756  
SRR17520069.12539758  
SRR17520069.12539760  
SRR17520069.12539762  
SRR17520069.12539764  
SRR17520069.12539766  
SRR17520069.12539768  
SRR17520069.12539770  
SRR17520069.12539775  
SRR17520069.12539777  
SRR17520069.12539779  
SRR17520069.12539781  
SRR17520069.12539783  
SRR17520069.12539785  
SRR17520069.12539787  
SRR17520069.12539789  
SRR17520069.12539791  
SRR17520069.12542850  
SRR17520069.12548499  
SRR17520069.12548502  
SRR17520069.12548504  
SRR17520069.12548506  
SRR17520069.12548508  
SRR17520069.12548510  
SRR17520069.12551235  
SRR17520069.12551237  
SRR17520069.12551239  
SRR17520069.12551241  
SRR17520069.12551243  
SRR17520069.12551245  
SRR17520069.12551247  
SRR17520069.12551249  
SRR17520069.12551251  
SRR17520069.12551253  
SRR17520069.12551255  
SRR17520069.12551257  
SRR17520069.12551259  
SRR17520069.12551261  
SRR17520069.12551263  
SRR17520069.12551265  
SRR17520069.12551267

SRR17520069.12551269  
SRR17520069.12551271  
SRR17520069.12551273  
SRR17520069.12551275  
SRR17520069.12551277  
SRR17520069.12552488  
SRR17520069.12552490  
SRR17520069.12552492  
SRR17520069.12552494  
SRR17520069.12552496  
SRR17520069.12552498  
SRR17520069.12552500  
SRR17520069.12552502  
SRR17520069.12552504  
SRR17520069.12552506  
SRR17520069.12552508  
SRR17520069.12552510  
SRR17520069.12552512  
SRR17520069.12552514  
SRR17520069.12552516  
SRR17520069.12552518  
SRR17520069.12552520  
SRR17520069.12552522  
SRR17520069.12552524  
SRR17520069.12552526  
SRR17520069.12552528  
SRR17520069.12552530  
SRR17520069.12552532  
SRR17520069.12552534  
SRR17520069.12552536  
SRR17520069.12552538  
SRR17520069.12552540  
SRR17520069.12552542  
SRR17520069.12552544  
SRR17520069.12552546  
SRR17520069.12552548  
SRR17520069.12552550  
SRR17520069.12552552  
SRR17520069.12552554  
SRR17520069.12552556  
SRR17520069.12552558  
SRR17520069.12552560  
SRR17520069.12552562  
SRR17520069.12552564  
SRR17520069.12552566  
SRR17520069.12552568  
SRR17520069.12552570

SRR17520069.12552572  
SRR17520069.12552574  
SRR17520069.12552576  
SRR17520069.12552578  
SRR17520069.12552580  
SRR17520069.12552582  
SRR17520069.12552584  
SRR17520069.12552586  
SRR17520069.12552588  
SRR17520069.12552590  
SRR17520069.12552592  
SRR17520069.12552594  
SRR17520069.12552596  
SRR17520069.12552680  
SRR17520069.12552682  
SRR17520069.12552684  
SRR17520069.12552686  
SRR17520069.12552688  
SRR17520069.12552690  
SRR17520069.12552692  
SRR17520069.12552694  
SRR17520069.12552696  
SRR17520069.12552787  
SRR17520069.12552789  
SRR17520069.12552791  
SRR17520069.12552793  
SRR17520069.12552795  
SRR17520069.12552797  
SRR17520069.12552799  
SRR17520069.12552801  
SRR17520069.12552803  
SRR17520069.12552805  
SRR17520069.12552807  
SRR17520069.12552809  
SRR17520069.12552811  
SRR17520069.12552813  
SRR17520069.12552815  
SRR17520069.12552817  
SRR17520069.12552819  
SRR17520069.12552821  
SRR17520069.12552823  
SRR17520069.12552825  
SRR17520069.12552827  
SRR17520069.12552829  
SRR17520069.12552831  
SRR17520069.12552833  
SRR17520069.12552835

SRR17520069.12552837  
SRR17520069.12552839  
SRR17520069.12552841  
SRR17520069.12554404  
SRR17520069.12554413  
SRR17520069.12554415  
SRR17520069.12554417  
SRR17520069.12554419  
SRR17520069.12554421  
SRR17520069.12554423  
SRR17520069.12554425  
SRR17520069.12554427  
SRR17520069.12554429  
SRR17520069.12554431  
SRR17520069.12554433  
SRR17520069.12554435  
SRR17520069.12554437  
SRR17520069.12554439  
SRR17520069.12554441  
SRR17520069.12554443  
SRR17520069.12554445  
SRR17520069.12554447  
SRR17520069.12554449  
SRR17520069.12554451  
SRR17520069.12554453  
SRR17520069.12554455  
SRR17520069.12554457  
SRR17520069.12554459  
SRR17520069.12554463  
SRR17520069.12554465  
SRR17520069.12554467  
SRR17520069.12554469  
SRR17520069.12558929  
SRR17520069.12558931  
SRR17520069.12558933  
SRR17520069.12558935  
SRR17520069.12558937  
SRR17520069.12558943  
SRR17520069.12559295  
SRR17520069.12559297  
SRR17520069.12559299  
SRR17520069.12562729  
SRR17520069.12562731  
SRR17520069.12562733  
SRR17520069.12562735  
SRR17520069.12562737  
SRR17520069.12562739

SRR17520069. 12562741  
SRR17520069. 12562743  
SRR17520069. 12562745  
SRR17520069. 12562747  
SRR17520069. 12565364  
SRR17520069. 12565366  
SRR17520069. 12565368  
SRR17520069. 12565370  
SRR17520069. 12565372  
SRR17520069. 12565374  
SRR17520069. 12565376  
SRR17520069. 12565378  
SRR17520069. 12565380  
SRR17520069. 12565384  
SRR17520069. 12565386  
SRR17520069. 12565388  
SRR17520069. 12565896  
SRR17520069. 12565898  
SRR17520069. 12565900  
SRR17520069. 12565902  
SRR17520069. 12565904  
SRR17520069. 12565906  
SRR17520069. 12565908  
SRR17520069. 12565911  
SRR17520069. 12565913  
SRR17520069. 12565915  
SRR17520069. 12565917  
SRR17520069. 12565919  
SRR17520069. 12565921  
SRR17520069. 12565923  
SRR17520069. 12565927  
SRR17520069. 12565929  
SRR17520069. 12565931  
SRR17520069. 12565933  
SRR17520069. 12565935  
SRR17520069. 12565937  
SRR17520069. 12565939  
SRR17520069. 12565941  
SRR17520069. 12565943  
SRR17520069. 12565945  
SRR17520069. 12565947  
SRR17520069. 12565949  
SRR17520069. 12565951  
SRR17520069. 12565953  
SRR17520069. 12565957  
SRR17520069. 12565959  
SRR17520069. 12565961

SRR17520069. 12565963  
SRR17520069. 12565965  
SRR17520069. 12577464  
SRR17520069. 12577466  
SRR17520069. 12577468  
SRR17520069. 12577470  
SRR17520069. 12577474  
SRR17520069. 12577476  
SRR17520069. 12577478  
SRR17520069. 12577480  
SRR17520069. 12577482  
SRR17520069. 12577484  
SRR17520069. 12577486  
SRR17520069. 12577488  
SRR17520069. 12577490  
SRR17520069. 12577492  
SRR17520069. 12577494  
SRR17520069. 12577496  
SRR17520069. 12577498  
SRR17520069. 12577500  
SRR17520069. 12577502  
SRR17520069. 12577504  
SRR17520069. 12577506  
SRR17520069. 12577508  
SRR17520069. 12577510  
SRR17520069. 12577512  
SRR17520069. 12577514  
SRR17520069. 12577516  
SRR17520069. 12577518  
SRR17520069. 12577520  
SRR17520069. 12577878  
SRR17520069. 12578175  
SRR17520069. 12578177  
SRR17520069. 12578179  
SRR17520069. 12578181  
SRR17520069. 12578183  
SRR17520069. 12578185  
SRR17520069. 12578189  
SRR17520069. 12578191  
SRR17520069. 12578193  
SRR17520069. 12578195  
SRR17520069. 12578197  
SRR17520069. 12578199  
SRR17520069. 12578201  
SRR17520069. 12578203  
SRR17520069. 12578205  
SRR17520069. 12578207



SRR17520069.12578209  
SRR17520069.12578211  
SRR17520069.12578213  
SRR17520069.12580745  
SRR17520069.12580747  
SRR17520069.12580751  
SRR17520069.12580755  
SRR17520069.12580759  
SRR17520069.12584144  
SRR17520069.12584146  
SRR17520069.12584148  
SRR17520069.12584150  
SRR17520069.12584152  
SRR17520069.12584154  
SRR17520069.12584156  
SRR17520069.12584160  
SRR17520069.12584162  
SRR17520069.12584164  
SRR17520069.12584572  
SRR17520069.12584574  
SRR17520069.12584576  
SRR17520069.12584578  
SRR17520069.12584580  
SRR17520069.12584584  
SRR17520069.12584586  
SRR17520069.12584588  
SRR17520069.12584590  
SRR17520069.12584592  
SRR17520069.12584594  
SRR17520069.12584596  
SRR17520069.12584600  
SRR17520069.12584602  
SRR17520069.12584604  
SRR17520069.12584606  
SRR17520069.12584608  
SRR17520069.12584610  
SRR17520069.12584612  
SRR17520069.12584614  
SRR17520069.12584616  
SRR17520069.12584620  
SRR17520069.12584622  
SRR17520069.12584624  
SRR17520069.12584626  
SRR17520069.12588705  
SRR17520069.12588707  
SRR17520069.12588709  
SRR17520069.12588711

SRR17520069.12588713  
SRR17520069.12588715  
SRR17520069.12588717  
SRR17520069.12588719  
SRR17520069.12589427  
SRR17520069.12589429  
SRR17520069.12589431  
SRR17520069.12589433  
SRR17520069.12589435  
SRR17520069.12589437  
SRR17520069.12589439  
SRR17520069.12589443  
SRR17520069.12589445  
SRR17520069.12589447  
SRR17520069.12589449  
SRR17520069.12589451  
SRR17520069.12589453  
SRR17520069.12589455  
SRR17520069.12589457  
SRR17520069.12589459  
SRR17520069.12589461  
SRR17520069.12589463  
SRR17520069.12589465  
SRR17520069.12589467  
SRR17520069.12589469  
SRR17520069.12589471  
SRR17520069.12589473  
SRR17520069.12589475  
SRR17520069.12589477  
SRR17520069.12589479  
SRR17520069.12589481  
SRR17520069.12589483  
SRR17520069.12589485  
SRR17520069.12589487  
SRR17520069.12589489  
SRR17520069.12589491  
SRR17520069.12589493  
SRR17520069.12589495  
SRR17520069.12589497  
SRR17520069.12589499  
SRR17520069.12589501  
SRR17520069.12589503  
SRR17520069.12589505  
SRR17520069.12589507  
SRR17520069.12589509  
SRR17520069.12589511  
SRR17520069.12589513

SRR17520069.12589515  
SRR17520069.12589517  
SRR17520069.12589519  
SRR17520069.12589521  
SRR17520069.12589523  
SRR17520069.12589525  
SRR17520069.12589527  
SRR17520069.12589529  
SRR17520069.12589531  
SRR17520069.12589533  
SRR17520069.12589535  
SRR17520069.12589537  
SRR17520069.12589539  
SRR17520069.12589541  
SRR17520069.12589543  
SRR17520069.12589545  
SRR17520069.12590595  
SRR17520069.12590597  
SRR17520069.12590599  
SRR17520069.12590601  
SRR17520069.12590603  
SRR17520069.12590605  
SRR17520069.12590607  
SRR17520069.12590609  
SRR17520069.12590611  
SRR17520069.12590613  
SRR17520069.12590615  
SRR17520069.12590617  
SRR17520069.12590619  
SRR17520069.12590621  
SRR17520069.12590623  
SRR17520069.12590625  
SRR17520069.12590627  
SRR17520069.12590629  
SRR17520069.12590631  
SRR17520069.12590633  
SRR17520069.12590635  
SRR17520069.12590637  
SRR17520069.12590639  
SRR17520069.12590641  
SRR17520069.12590643  
SRR17520069.12590645  
SRR17520069.12590647  
SRR17520069.12590651  
SRR17520069.12590653  
SRR17520069.12590655  
SRR17520069.12590657

SRR17520069. 12602735  
SRR17520069. 12602737  
SRR17520069. 12602739  
SRR17520069. 12602741  
SRR17520069. 12602743  
SRR17520069. 12602745  
SRR17520069. 12602747  
SRR17520069. 12602749  
SRR17520069. 12602751  
SRR17520069. 12602753  
SRR17520069. 12604741  
SRR17520069. 12604747  
SRR17520069. 12604749  
SRR17520069. 12604751  
SRR17520069. 12604753  
SRR17520069. 12613923  
SRR17520069. 12613925  
SRR17520069. 12614062  
SRR17520069. 12619728  
SRR17520069. 12619730  
SRR17520069. 12619732  
SRR17520069. 12619734  
SRR17520069. 12621088  
SRR17520069. 12621090  
SRR17520069. 12621092  
SRR17520069. 12621094  
SRR17520069. 12621096  
SRR17520069. 12621098  
SRR17520069. 12621100  
SRR17520069. 12621102  
SRR17520069. 12621104  
SRR17520069. 12621106  
SRR17520069. 12621108  
SRR17520069. 12621110  
SRR17520069. 12621112  
SRR17520069. 12621114  
SRR17520069. 12621116  
SRR17520069. 12621118  
SRR17520069. 12621120  
SRR17520069. 12621122  
SRR17520069. 12621124  
SRR17520069. 12621126  
SRR17520069. 12621128  
SRR17520069. 12621130  
SRR17520069. 12621132  
SRR17520069. 12621134  
SRR17520069. 12621136

SRR17520069. 12621138  
SRR17520069. 12621140  
SRR17520069. 12621142  
SRR17520069. 12621144  
SRR17520069. 12621146  
SRR17520069. 12621148  
SRR17520069. 12621150  
SRR17520069. 12621152  
SRR17520069. 12621154  
SRR17520069. 12621156  
SRR17520069. 12621158  
SRR17520069. 12621160  
SRR17520069. 12621162  
SRR17520069. 12621164  
SRR17520069. 12621587  
SRR17520069. 12621589  
SRR17520069. 12621591  
SRR17520069. 12621593  
SRR17520069. 12621597  
SRR17520069. 12621599  
SRR17520069. 12621601  
SRR17520069. 12621603  
SRR17520069. 12621605  
SRR17520069. 12621607  
SRR17520069. 12630263  
SRR17520069. 12630267  
SRR17520069. 12630269  
SRR17520069. 12630273  
SRR17520069. 12630275  
SRR17520069. 12630279  
SRR17520069. 12630283  
SRR17520069. 12630285  
SRR17520069. 12630287  
SRR17520069. 12630289  
SRR17520069. 12638979  
SRR17520069. 12638981  
SRR17520069. 12638983  
SRR17520069. 12638985  
SRR17520069. 12638987  
SRR17520069. 12638989  
SRR17520069. 12638991  
SRR17520069. 12638993  
SRR17520069. 12638995  
SRR17520069. 12638997  
SRR17520069. 12638999  
SRR17520069. 12639001  
SRR17520069. 12639003

SRR17520069.12639005  
SRR17520069.12639007  
SRR17520069.12639009  
SRR17520069.12639011  
SRR17520069.12639013  
SRR17520069.12639015  
SRR17520069.12639017  
SRR17520069.12639019  
SRR17520069.12639021  
SRR17520069.12639023  
SRR17520069.12639025  
SRR17520069.12639027  
SRR17520069.12639759  
SRR17520069.12639761  
SRR17520069.12639763  
SRR17520069.12639765  
SRR17520069.12639767  
SRR17520069.12639769  
SRR17520069.12639771  
SRR17520069.12639773  
SRR17520069.12639775  
SRR17520069.12639777  
SRR17520069.12639779  
SRR17520069.12639781  
SRR17520069.12639783  
SRR17520069.12639785  
SRR17520069.12639787  
SRR17520069.12639789  
SRR17520069.12639791  
SRR17520069.12639793  
SRR17520069.12639795  
SRR17520069.12639797  
SRR17520069.12639799  
SRR17520069.12639801  
SRR17520069.12639803  
SRR17520069.12639805  
SRR17520069.12639807  
SRR17520069.12639809  
SRR17520069.12639811  
SRR17520069.12639813  
SRR17520069.12639815  
SRR17520069.12639817  
SRR17520069.12639819  
SRR17520069.12639821  
SRR17520069.12639823  
SRR17520069.12639825  
SRR17520069.12639827

SRR17520069. 12639829  
SRR17520069. 12639831  
SRR17520069. 12644680  
SRR17520069. 12644682  
SRR17520069. 12644684  
SRR17520069. 12644686  
SRR17520069. 12644688  
SRR17520069. 12644690  
SRR17520069. 12644692  
SRR17520069. 12644694  
SRR17520069. 12644696  
SRR17520069. 12644698  
SRR17520069. 12644700  
SRR17520069. 12644702  
SRR17520069. 12644704  
SRR17520069. 12644706  
SRR17520069. 12644708  
SRR17520069. 12644710  
SRR17520069. 12644712  
SRR17520069. 12644714  
SRR17520069. 12644716  
SRR17520069. 12644718  
SRR17520069. 12644720  
SRR17520069. 12644722  
SRR17520069. 12644724  
SRR17520069. 12644726  
SRR17520069. 12644728  
SRR17520069. 12644730  
SRR17520069. 12644732  
SRR17520069. 12644734  
SRR17520069. 12644736  
SRR17520069. 12644738  
SRR17520069. 12644742  
SRR17520069. 12644744  
SRR17520069. 12644746  
SRR17520069. 12644748  
SRR17520069. 12644750  
SRR17520069. 12644752  
SRR17520069. 12644754  
SRR17520069. 12644756  
SRR17520069. 12644758  
SRR17520069. 12644762  
SRR17520069. 12644764  
SRR17520069. 12644766  
SRR17520069. 12644770  
SRR17520069. 12644772  
SRR17520069. 12644774

SRR17520069. 12644776  
SRR17520069. 12644780  
SRR17520069. 12644782  
SRR17520069. 12644784  
SRR17520069. 12644786  
SRR17520069. 12644788  
SRR17520069. 12644790  
SRR17520069. 12644792  
SRR17520069. 12644794  
SRR17520069. 12644796  
SRR17520069. 12644798  
SRR17520069. 12644802  
SRR17520069. 12644804  
SRR17520069. 12644806  
SRR17520069. 12644808  
SRR17520069. 12644810  
SRR17520069. 12644812  
SRR17520069. 12644814  
SRR17520069. 12644816  
SRR17520069. 12644818  
SRR17520069. 12644820  
SRR17520069. 12644822  
SRR17520069. 12644824  
SRR17520069. 12644828  
SRR17520069. 12644830  
SRR17520069. 12644832  
SRR17520069. 12644834  
SRR17520069. 12644838  
SRR17520069. 12644840  
SRR17520069. 12644842  
SRR17520069. 12644844  
SRR17520069. 12644846  
SRR17520069. 12644848  
SRR17520069. 12644850  
SRR17520069. 12644852  
SRR17520069. 12644854  
SRR17520069. 12644856  
SRR17520069. 12644858  
SRR17520069. 12644860  
SRR17520069. 12645605  
SRR17520069. 12647853  
SRR17520069. 12647861  
SRR17520069. 12647863  
SRR17520069. 12647867  
SRR17520069. 12647871  
SRR17520069. 12647873  
SRR17520069. 12647875



SRR17520069.12647877  
SRR17520069.12655043  
SRR17520069.12655045  
SRR17520069.12655049  
SRR17520069.12655053  
SRR17520069.12655057  
SRR17520069.12655059  
SRR17520069.12655061  
SRR17520069.12655063  
SRR17520069.12655065  
SRR17520069.12655067  
SRR17520069.12655069  
SRR17520069.12655071  
SRR17520069.12655073  
SRR17520069.12655075  
SRR17520069.12655077  
SRR17520069.12655079  
SRR17520069.12655081  
SRR17520069.12655083  
SRR17520069.12655085  
SRR17520069.12655087  
SRR17520069.12655089  
SRR17520069.12655091  
SRR17520069.12655093  
SRR17520069.12655095  
SRR17520069.12655097  
SRR17520069.12655099  
SRR17520069.12655101  
SRR17520069.12655103  
SRR17520069.12657587  
SRR17520069.12657589  
SRR17520069.12661990  
SRR17520069.12665796  
SRR17520069.12665798  
SRR17520069.12665800  
SRR17520069.12665802  
SRR17520069.12665804  
SRR17520069.12665806  
SRR17520069.12665808  
SRR17520069.12665810  
SRR17520069.12665812  
SRR17520069.12665814  
SRR17520069.12665816  
SRR17520069.12667026  
SRR17520069.12667028  
SRR17520069.12667030  
SRR17520069.12667032

SRR17520069. 12667034  
SRR17520069. 12667036  
SRR17520069. 12667038  
SRR17520069. 12667040  
SRR17520069. 12667042  
SRR17520069. 12667044  
SRR17520069. 12667046  
SRR17520069. 12667048  
SRR17520069. 12667050  
SRR17520069. 12667052  
SRR17520069. 12667054  
SRR17520069. 12667056  
SRR17520069. 12667058  
SRR17520069. 12667060  
SRR17520069. 12667062  
SRR17520069. 12667064  
SRR17520069. 12667068  
SRR17520069. 12667070  
SRR17520069. 12669258  
SRR17520069. 12674855  
SRR17520069. 12674857  
SRR17520069. 12674859  
SRR17520069. 12674861  
SRR17520069. 12678289  
SRR17520069. 12678291  
SRR17520069. 12682050  
SRR17520069. 12683725  
SRR17520069. 12683727  
SRR17520069. 12683729  
SRR17520069. 12683731  
SRR17520069. 12683733  
SRR17520069. 12683735  
SRR17520069. 12683737  
SRR17520069. 12683739  
SRR17520069. 12683741  
SRR17520069. 12683743  
SRR17520069. 12683745  
SRR17520069. 12683747  
SRR17520069. 12683749  
SRR17520069. 12683751  
SRR17520069. 12683753  
SRR17520069. 12683755  
SRR17520069. 12683757  
SRR17520069. 12683759  
SRR17520069. 12683761  
SRR17520069. 12683763  
SRR17520069. 12683765

SRR17520069. 12683767  
SRR17520069. 12683769  
SRR17520069. 12683771  
SRR17520069. 12683773  
SRR17520069. 12683775  
SRR17520069. 12683777  
SRR17520069. 12683781  
SRR17520069. 12683783  
SRR17520069. 12683785  
SRR17520069. 12683787  
SRR17520069. 12685422  
SRR17520069. 12685424  
SRR17520069. 12685426  
SRR17520069. 12685428  
SRR17520069. 12685430  
SRR17520069. 12685432  
SRR17520069. 12685434  
SRR17520069. 12685436  
SRR17520069. 12685438  
SRR17520069. 12685440  
SRR17520069. 12685442  
SRR17520069. 12685444  
SRR17520069. 12685446  
SRR17520069. 12685448  
SRR17520069. 12685450  
SRR17520069. 12685452  
SRR17520069. 12685454  
SRR17520069. 12685456  
SRR17520069. 12685458  
SRR17520069. 12685460  
SRR17520069. 12688408  
SRR17520069. 12688410  
SRR17520069. 12688414  
SRR17520069. 12688416  
SRR17520069. 12688418  
SRR17520069. 12688420  
SRR17520069. 12688422  
SRR17520069. 12688424  
SRR17520069. 12688426  
SRR17520069. 12688428  
SRR17520069. 12692674  
SRR17520069. 12692678  
SRR17520069. 12692680  
SRR17520069. 12692682  
SRR17520069. 12692684  
SRR17520069. 12692686  
SRR17520069. 12696523

SRR17520069. 12696525  
SRR17520069. 12696527  
SRR17520069. 12696529  
SRR17520069. 12696531  
SRR17520069. 12696533  
SRR17520069. 12696535  
SRR17520069. 12696537  
SRR17520069. 12696539  
SRR17520069. 12696541  
SRR17520069. 12696543  
SRR17520069. 12697441  
SRR17520069. 12697443  
SRR17520069. 12697445  
SRR17520069. 12697447  
SRR17520069. 12697449  
SRR17520069. 12697451  
SRR17520069. 12697453  
SRR17520069. 12697455  
SRR17520069. 12697457  
SRR17520069. 12697459  
SRR17520069. 12698797  
SRR17520069. 12698799  
SRR17520069. 12698801  
SRR17520069. 12698803  
SRR17520069. 12698805  
SRR17520069. 12698807  
SRR17520069. 12698809  
SRR17520069. 12698811  
SRR17520069. 12698815  
SRR17520069. 12698817  
SRR17520069. 12698821  
SRR17520069. 12698823  
SRR17520069. 12698825  
SRR17520069. 12698827  
SRR17520069. 12698829  
SRR17520069. 12699698  
SRR17520069. 12699743  
SRR17520069. 12703147  
SRR17520069. 12703149  
SRR17520069. 12703151  
SRR17520069. 12703153  
SRR17520069. 12703155  
SRR17520069. 12703157  
SRR17520069. 12703159  
SRR17520069. 12703161  
SRR17520069. 12703163  
SRR17520069. 12703165

SRR17520069.12703167  
SRR17520069.12703169  
SRR17520069.12703171  
SRR17520069.12703173  
SRR17520069.12703175  
SRR17520069.12703177  
SRR17520069.12703179  
SRR17520069.12703181  
SRR17520069.12703183  
SRR17520069.12703185  
SRR17520069.12703187  
SRR17520069.12703189  
SRR17520069.12703191  
SRR17520069.12703193  
SRR17520069.12703195  
SRR17520069.12703197  
SRR17520069.12703199  
SRR17520069.12703201  
SRR17520069.12703203  
SRR17520069.12703205  
SRR17520069.12703207  
SRR17520069.12703209  
SRR17520069.12703211  
SRR17520069.12712741  
SRR17520069.12716623  
SRR17520069.12716625  
SRR17520069.12716627  
SRR17520069.12716629  
SRR17520069.12716631  
SRR17520069.12716633  
SRR17520069.12716635  
SRR17520069.12716637  
SRR17520069.12716639  
SRR17520069.12716641  
SRR17520069.12716643  
SRR17520069.12716647  
SRR17520069.12716649  
SRR17520069.12716651  
SRR17520069.12716653  
SRR17520069.12716655  
SRR17520069.12716657  
SRR17520069.12720346  
SRR17520069.12720348  
SRR17520069.12720350  
SRR17520069.12720352  
SRR17520069.12720354  
SRR17520069.12720356

SRR17520069. 12720358  
SRR17520069. 12720360  
SRR17520069. 12720362  
SRR17520069. 12720364  
SRR17520069. 12720366  
SRR17520069. 12720368  
SRR17520069. 12720370  
SRR17520069. 12720372  
SRR17520069. 12720374  
SRR17520069. 12720376  
SRR17520069. 12720378  
SRR17520069. 12720380  
SRR17520069. 12720382  
SRR17520069. 12720384  
SRR17520069. 12720386  
SRR17520069. 12720388  
SRR17520069. 12720390  
SRR17520069. 12720392  
SRR17520069. 12720394  
SRR17520069. 12720396  
SRR17520069. 12720398  
SRR17520069. 12720402  
SRR17520069. 12720404  
SRR17520069. 12720406  
SRR17520069. 12720408  
SRR17520069. 12720410  
SRR17520069. 12720412  
SRR17520069. 12720414  
SRR17520069. 12720416  
SRR17520069. 12720418  
SRR17520069. 12720420  
SRR17520069. 12720422  
SRR17520069. 12721561  
SRR17520069. 12721563  
SRR17520069. 12722395  
SRR17520069. 12722397  
SRR17520069. 12722399  
SRR17520069. 12722401  
SRR17520069. 12722403  
SRR17520069. 12722405  
SRR17520069. 12722407  
SRR17520069. 12722409  
SRR17520069. 12722411  
SRR17520069. 12722413  
SRR17520069. 12722415  
SRR17520069. 12722417  
SRR17520069. 12722419

SRR17520069. 12722421  
SRR17520069. 12722423  
SRR17520069. 12722425  
SRR17520069. 12722427  
SRR17520069. 12726756  
SRR17520069. 12726758  
SRR17520069. 12726760  
SRR17520069. 12726762  
SRR17520069. 12729911  
SRR17520069. 12729913  
SRR17520069. 12729915  
SRR17520069. 12729917  
SRR17520069. 12729919  
SRR17520069. 12729921  
SRR17520069. 12729923  
SRR17520069. 12729925  
SRR17520069. 12729927  
SRR17520069. 12729929  
SRR17520069. 12729931  
SRR17520069. 12729933  
SRR17520069. 12729935  
SRR17520069. 12729937  
SRR17520069. 12729939  
SRR17520069. 12729941  
SRR17520069. 12729943  
SRR17520069. 12729945  
SRR17520069. 12729947  
SRR17520069. 12729949  
SRR17520069. 12729951  
SRR17520069. 12729953  
SRR17520069. 12729955  
SRR17520069. 12731561  
SRR17520069. 12731565  
SRR17520069. 12731567  
SRR17520069. 12731569  
SRR17520069. 12731571  
SRR17520069. 12731573  
SRR17520069. 12731575  
SRR17520069. 12731577  
SRR17520069. 12731579  
SRR17520069. 12731581  
SRR17520069. 12731583  
SRR17520069. 12731585  
SRR17520069. 12731587  
SRR17520069. 12731589  
SRR17520069. 12731591  
SRR17520069. 12731593

SRR17520069. 12731595  
SRR17520069. 12731597  
SRR17520069. 12731599  
SRR17520069. 12731601  
SRR17520069. 12731603  
SRR17520069. 12731607  
SRR17520069. 12731609  
SRR17520069. 12731613  
SRR17520069. 12735479  
SRR17520069. 12735481  
SRR17520069. 12735483  
SRR17520069. 12735485  
SRR17520069. 12735487  
SRR17520069. 12735489  
SRR17520069. 12735491  
SRR17520069. 12735493  
SRR17520069. 12735495  
SRR17520069. 12735497  
SRR17520069. 12735499  
SRR17520069. 12735501  
SRR17520069. 12735503  
SRR17520069. 12735505  
SRR17520069. 12735507  
SRR17520069. 12735509  
SRR17520069. 12735511  
SRR17520069. 12735517  
SRR17520069. 12735519  
SRR17520069. 12735523  
SRR17520069. 12735525  
SRR17520069. 12735527  
SRR17520069. 12735529  
SRR17520069. 12735531  
SRR17520069. 12735533  
SRR17520069. 12735535  
SRR17520069. 12735537  
SRR17520069. 12735539  
SRR17520069. 12735541  
SRR17520069. 12735543  
SRR17520069. 12735545  
SRR17520069. 12735547  
SRR17520069. 12735549  
SRR17520069. 12735551  
SRR17520069. 12735553  
SRR17520069. 12735555  
SRR17520069. 12735557  
SRR17520069. 12735561  
SRR17520069. 12735563



SRR17520069. 12735565  
SRR17520069. 12735567  
SRR17520069. 12736851  
SRR17520069. 12736853  
SRR17520069. 12736855  
SRR17520069. 12736857  
SRR17520069. 12736859  
SRR17520069. 12736861  
SRR17520069. 12736863  
SRR17520069. 12736865  
SRR17520069. 12736867  
SRR17520069. 12736869  
SRR17520069. 12736871  
SRR17520069. 12736873  
SRR17520069. 12736875  
SRR17520069. 12736879  
SRR17520069. 12736881  
SRR17520069. 12736883  
SRR17520069. 12736885  
SRR17520069. 12736887  
SRR17520069. 12736889  
SRR17520069. 12736891  
SRR17520069. 12736893  
SRR17520069. 12736895  
SRR17520069. 12736897  
SRR17520069. 12736899  
SRR17520069. 12736901  
SRR17520069. 12736903  
SRR17520069. 12736905  
SRR17520069. 12736907  
SRR17520069. 12736909  
SRR17520069. 12736911  
SRR17520069. 12736913  
SRR17520069. 12736915  
SRR17520069. 12736917  
SRR17520069. 12736919  
SRR17520069. 12736921  
SRR17520069. 12736923  
SRR17520069. 12736925  
SRR17520069. 12736927  
SRR17520069. 12736932  
SRR17520069. 12736934  
SRR17520069. 12737435  
SRR17520069. 12737437  
SRR17520069. 12737439  
SRR17520069. 12737441  
SRR17520069. 12737443

SRR17520069. 12737445  
SRR17520069. 12737447  
SRR17520069. 12739248  
SRR17520069. 12740587  
SRR17520069. 12740589  
SRR17520069. 12740591  
SRR17520069. 12740593  
SRR17520069. 12740595  
SRR17520069. 12740597  
SRR17520069. 12740601  
SRR17520069. 12744490  
SRR17520069. 12744492  
SRR17520069. 12744494  
SRR17520069. 12747403  
SRR17520069. 12747405  
SRR17520069. 12747407  
SRR17520069. 12747409  
SRR17520069. 12747411  
SRR17520069. 12747413  
SRR17520069. 12747415  
SRR17520069. 12747417  
SRR17520069. 12747419  
SRR17520069. 12747421  
SRR17520069. 12757064  
SRR17520069. 12757066  
SRR17520069. 12757068  
SRR17520069. 12757070  
SRR17520069. 12757072  
SRR17520069. 12757074  
SRR17520069. 12757076  
SRR17520069. 12757078  
SRR17520069. 12757080  
SRR17520069. 12757082  
SRR17520069. 12757084  
SRR17520069. 12757086  
SRR17520069. 12757088  
SRR17520069. 12757090  
SRR17520069. 12757092  
SRR17520069. 12757094  
SRR17520069. 12757096  
SRR17520069. 12757098  
SRR17520069. 12757100  
SRR17520069. 12757102  
SRR17520069. 12757104  
SRR17520069. 12757106  
SRR17520069. 12757108  
SRR17520069. 12758408

SRR17520069. 12759110  
SRR17520069. 12759112  
SRR17520069. 12759114  
SRR17520069. 12759116  
SRR17520069. 12759118  
SRR17520069. 12759120  
SRR17520069. 12759122  
SRR17520069. 12759124  
SRR17520069. 12759128  
SRR17520069. 12759130  
SRR17520069. 12760007  
SRR17520069. 12760009  
SRR17520069. 12760011  
SRR17520069. 12760013  
SRR17520069. 12760015  
SRR17520069. 12760017  
SRR17520069. 12760019  
SRR17520069. 12760021  
SRR17520069. 12760023  
SRR17520069. 12760025  
SRR17520069. 12760899  
SRR17520069. 12760901  
SRR17520069. 12760903  
SRR17520069. 12760905  
SRR17520069. 12760907  
SRR17520069. 12762818  
SRR17520069. 12762820  
SRR17520069. 12762822  
SRR17520069. 12762824  
SRR17520069. 12762826  
SRR17520069. 12762828  
SRR17520069. 12762830  
SRR17520069. 12762832  
SRR17520069. 12762834  
SRR17520069. 12762836  
SRR17520069. 12762838  
SRR17520069. 12762840  
SRR17520069. 12762842  
SRR17520069. 12762844  
SRR17520069. 12767094  
SRR17520069. 12767096  
SRR17520069. 12767098  
SRR17520069. 12767100  
SRR17520069. 12767102  
SRR17520069. 12767104  
SRR17520069. 12768353  
SRR17520069. 12768355

SRR17520069. 12768357  
SRR17520069. 12768359  
SRR17520069. 12768361  
SRR17520069. 12768363  
SRR17520069. 12768365  
SRR17520069. 12768367  
SRR17520069. 12768369  
SRR17520069. 12768371  
SRR17520069. 12768373  
SRR17520069. 12768375  
SRR17520069. 12768377  
SRR17520069. 12768379  
SRR17520069. 12768381  
SRR17520069. 12768383  
SRR17520069. 12768385  
SRR17520069. 12768387  
SRR17520069. 12768389  
SRR17520069. 12768391  
SRR17520069. 12768393  
SRR17520069. 12768395  
SRR17520069. 12768397  
SRR17520069. 12768399  
SRR17520069. 12768401  
SRR17520069. 12768403  
SRR17520069. 12768405  
SRR17520069. 12768407  
SRR17520069. 12768409  
SRR17520069. 12768411  
SRR17520069. 12768413  
SRR17520069. 12768415  
SRR17520069. 12768417  
SRR17520069. 12768419  
SRR17520069. 12768421  
SRR17520069. 12768423  
SRR17520069. 12768425  
SRR17520069. 12768427  
SRR17520069. 12768429  
SRR17520069. 12768431  
SRR17520069. 12768433  
SRR17520069. 12768435  
SRR17520069. 12768437  
SRR17520069. 12768439  
SRR17520069. 12768441  
SRR17520069. 12768443  
SRR17520069. 12768445  
SRR17520069. 12768447  
SRR17520069. 12768449

SRR17520069. 12768451  
SRR17520069. 12768453  
SRR17520069. 12768455  
SRR17520069. 12768457  
SRR17520069. 12768459  
SRR17520069. 12768461  
SRR17520069. 12768463  
SRR17520069. 12768467  
SRR17520069. 12768469  
SRR17520069. 12768471  
SRR17520069. 12768473  
SRR17520069. 12768475  
SRR17520069. 12768477  
SRR17520069. 12768479  
SRR17520069. 12768481  
SRR17520069. 12768483  
SRR17520069. 12768485  
SRR17520069. 12768487  
SRR17520069. 12768489  
SRR17520069. 12768491  
SRR17520069. 12768493  
SRR17520069. 12768495  
SRR17520069. 12768497  
SRR17520069. 12768499  
SRR17520069. 12768501  
SRR17520069. 12768503  
SRR17520069. 12768505  
SRR17520069. 12768507  
SRR17520069. 12768509  
SRR17520069. 12768511  
SRR17520069. 12768513  
SRR17520069. 12768515  
SRR17520069. 12768517  
SRR17520069. 12770480  
SRR17520069. 12770482  
SRR17520069. 12770484  
SRR17520069. 12770486  
SRR17520069. 12770488  
SRR17520069. 12770490  
SRR17520069. 12778266  
SRR17520069. 12778270  
SRR17520069. 12784244  
SRR17520069. 12784246  
SRR17520069. 12784248  
SRR17520069. 12784250  
SRR17520069. 12784252  
SRR17520069. 12784254

SRR17520069. 12784256  
SRR17520069. 12784258  
SRR17520069. 12784260  
SRR17520069. 12784262  
SRR17520069. 12784264  
SRR17520069. 12784266  
SRR17520069. 12784268  
SRR17520069. 12784270  
SRR17520069. 12784272  
SRR17520069. 12784274  
SRR17520069. 12784276  
SRR17520069. 12784278  
SRR17520069. 12784280  
SRR17520069. 12784284  
SRR17520069. 12784286  
SRR17520069. 12784288  
SRR17520069. 12784290  
SRR17520069. 12784292  
SRR17520069. 12784294  
SRR17520069. 12784296  
SRR17520069. 12784298  
SRR17520069. 12784300  
SRR17520069. 12784302  
SRR17520069. 12784304  
SRR17520069. 12784306  
SRR17520069. 12784308  
SRR17520069. 12784310  
SRR17520069. 12784312  
SRR17520069. 12784314  
SRR17520069. 12784316  
SRR17520069. 12784318  
SRR17520069. 12784320  
SRR17520069. 12784322  
SRR17520069. 12784324  
SRR17520069. 12784326  
SRR17520069. 12784328  
SRR17520069. 12784330  
SRR17520069. 12784332  
SRR17520069. 12784334  
SRR17520069. 12784336  
SRR17520069. 12784338  
SRR17520069. 12785040  
SRR17520069. 12785044  
SRR17520069. 12785046  
SRR17520069. 12785048  
SRR17520069. 12785050  
SRR17520069. 12785052

SRR17520069. 12785054  
SRR17520069. 12785360  
SRR17520069. 12785362  
SRR17520069. 12785364  
SRR17520069. 12785366  
SRR17520069. 12785368  
SRR17520069. 12785370  
SRR17520069. 12785372  
SRR17520069. 12785374  
SRR17520069. 12785376  
SRR17520069. 12785378  
SRR17520069. 12785380  
SRR17520069. 12785382  
SRR17520069. 12785384  
SRR17520069. 12785388  
SRR17520069. 12785390  
SRR17520069. 12785394  
SRR17520069. 12785396  
SRR17520069. 12785398  
SRR17520069. 12785400  
SRR17520069. 12785402  
SRR17520069. 12785404  
SRR17520069. 12785406  
SRR17520069. 12785408  
SRR17520069. 12785410  
SRR17520069. 12785412  
SRR17520069. 12785414  
SRR17520069. 12785416  
SRR17520069. 12785418  
SRR17520069. 12785424  
SRR17520069. 12785426  
SRR17520069. 12785428  
SRR17520069. 12785430  
SRR17520069. 12787685  
SRR17520069. 12787689  
SRR17520069. 12787693  
SRR17520069. 12787696  
SRR17520069. 12787698  
SRR17520069. 12787700  
SRR17520069. 12787702  
SRR17520069. 12787704  
SRR17520069. 12787706  
SRR17520069. 12787708  
SRR17520069. 12787710  
SRR17520069. 12787712  
SRR17520069. 12787714  
SRR17520069. 12787718

SRR17520069. 12787720  
SRR17520069. 12787722  
SRR17520069. 12787878  
SRR17520069. 12787880  
SRR17520069. 12787882  
SRR17520069. 12787884  
SRR17520069. 12787886  
SRR17520069. 12787888  
SRR17520069. 12787892  
SRR17520069. 12787894  
SRR17520069. 12787896  
SRR17520069. 12787898  
SRR17520069. 12787900  
SRR17520069. 12787902  
SRR17520069. 12787904  
SRR17520069. 12787906  
SRR17520069. 12787908  
SRR17520069. 12787910  
SRR17520069. 12787912  
SRR17520069. 12787914  
SRR17520069. 12787916  
SRR17520069. 12787918  
SRR17520069. 12787920  
SRR17520069. 12787922  
SRR17520069. 12787926  
SRR17520069. 12787928  
SRR17520069. 12787930  
SRR17520069. 12787932  
SRR17520069. 12787934  
SRR17520069. 12787936  
SRR17520069. 12787938  
SRR17520069. 12787940  
SRR17520069. 12791337  
SRR17520069. 12797185  
SRR17520069. 12797187  
SRR17520069. 12797189  
SRR17520069. 12797191  
SRR17520069. 12797193  
SRR17520069. 12797195  
SRR17520069. 12797197  
SRR17520069. 12797199  
SRR17520069. 12797201  
SRR17520069. 12797203  
SRR17520069. 12807852  
SRR17520069. 12814971  
SRR17520069. 12820045  
SRR17520069. 12822313



SRR17520069.12822315  
SRR17520069.12822317  
SRR17520069.12822319  
SRR17520069.12822321  
SRR17520069.12822323  
SRR17520069.12822325  
SRR17520069.12822327  
SRR17520069.12822329  
SRR17520069.12822331  
SRR17520069.12822333  
SRR17520069.12822335  
SRR17520069.12822337  
SRR17520069.12822339  
SRR17520069.12825554  
SRR17520069.12825556  
SRR17520069.12825558  
SRR17520069.12825562  
SRR17520069.12825564  
SRR17520069.12825566  
SRR17520069.12825568  
SRR17520069.12825570  
SRR17520069.12825574  
SRR17520069.12825576  
SRR17520069.12825578  
SRR17520069.12825580  
SRR17520069.12825582  
SRR17520069.12829805  
SRR17520069.12829807  
SRR17520069.12829809  
SRR17520069.12836003  
SRR17520069.12836005  
SRR17520069.12836007  
SRR17520069.12836009  
SRR17520069.12836011  
SRR17520069.12836013  
SRR17520069.12836015  
SRR17520069.12836017  
SRR17520069.12836019  
SRR17520069.12836021  
SRR17520069.12836023  
SRR17520069.12837107  
SRR17520069.12837109  
SRR17520069.12837111  
SRR17520069.12837113  
SRR17520069.12837115  
SRR17520069.12837117  
SRR17520069.12837119

SRR17520069.12837121  
SRR17520069.12837123  
SRR17520069.12837125  
SRR17520069.12837127  
SRR17520069.12837129  
SRR17520069.12837131  
SRR17520069.12837133  
SRR17520069.12837135  
SRR17520069.12837137  
SRR17520069.12837139  
SRR17520069.12837141  
SRR17520069.12837143  
SRR17520069.12837145  
SRR17520069.12837147  
SRR17520069.12837149  
SRR17520069.12837151  
SRR17520069.12837153  
SRR17520069.12837155  
SRR17520069.12837157  
SRR17520069.12837159  
SRR17520069.12837161  
SRR17520069.12837163  
SRR17520069.12837165  
SRR17520069.12837167  
SRR17520069.12837169  
SRR17520069.12837171  
SRR17520069.12837173  
SRR17520069.12837175  
SRR17520069.12837177  
SRR17520069.12837179  
SRR17520069.12837181  
SRR17520069.12837183  
SRR17520069.12837185  
SRR17520069.12837187  
SRR17520069.12837189  
SRR17520069.12837191  
SRR17520069.12837193  
SRR17520069.12837195  
SRR17520069.12837197  
SRR17520069.12837199  
SRR17520069.12837201  
SRR17520069.12837203  
SRR17520069.12837205  
SRR17520069.12837207  
SRR17520069.12837209  
SRR17520069.12837211  
SRR17520069.12837213

SRR17520069. 12837215  
SRR17520069. 12837217  
SRR17520069. 12837219  
SRR17520069. 12837221  
SRR17520069. 12837223  
SRR17520069. 12837225  
SRR17520069. 12837227  
SRR17520069. 12837229  
SRR17520069. 12837231  
SRR17520069. 12837233  
SRR17520069. 12837235  
SRR17520069. 12837237  
SRR17520069. 12837239  
SRR17520069. 12837243  
SRR17520069. 12837245  
SRR17520069. 12837247  
SRR17520069. 12837249  
SRR17520069. 12837251  
SRR17520069. 12837253  
SRR17520069. 12837255  
SRR17520069. 12837257  
SRR17520069. 12837259  
SRR17520069. 12837261  
SRR17520069. 12837263  
SRR17520069. 12837265  
SRR17520069. 12837267  
SRR17520069. 12837269  
SRR17520069. 12837271  
SRR17520069. 12837273  
SRR17520069. 12837275  
SRR17520069. 12837277  
SRR17520069. 12837279  
SRR17520069. 12837281  
SRR17520069. 12837283  
SRR17520069. 12837285  
SRR17520069. 12837287  
SRR17520069. 12837289  
SRR17520069. 12837291  
SRR17520069. 12837293  
SRR17520069. 12837295  
SRR17520069. 12837297  
SRR17520069. 12837299  
SRR17520069. 12837301  
SRR17520069. 12837303  
SRR17520069. 12837305  
SRR17520069. 12837307  
SRR17520069. 12837309

SRR17520069.12837311  
SRR17520069.12837313  
SRR17520069.12837315  
SRR17520069.12837317  
SRR17520069.12841026  
SRR17520069.12841028  
SRR17520069.12841030  
SRR17520069.12841032  
SRR17520069.12841034  
SRR17520069.12841036  
SRR17520069.12841038  
SRR17520069.12841040  
SRR17520069.12841044  
SRR17520069.12841046  
SRR17520069.12841048  
SRR17520069.12841052  
SRR17520069.12841054  
SRR17520069.12841056  
SRR17520069.12841058  
SRR17520069.12841060  
SRR17520069.12841062  
SRR17520069.12841064  
SRR17520069.12841066  
SRR17520069.12841068  
SRR17520069.12841070  
SRR17520069.12841072  
SRR17520069.12841074  
SRR17520069.12841076  
SRR17520069.12841078  
SRR17520069.12841080  
SRR17520069.12841082  
SRR17520069.12841084  
SRR17520069.12841086  
SRR17520069.12841088  
SRR17520069.12841090  
SRR17520069.12841092  
SRR17520069.12841094  
SRR17520069.12841096  
SRR17520069.12841098  
SRR17520069.12841100  
SRR17520069.12841102  
SRR17520069.12841104  
SRR17520069.12841106  
SRR17520069.12841108  
SRR17520069.12841110  
SRR17520069.12841112  
SRR17520069.12841114

SRR17520069.12841116  
SRR17520069.12841118  
SRR17520069.12841120  
SRR17520069.12841122  
SRR17520069.12841124  
SRR17520069.12841126  
SRR17520069.12841128  
SRR17520069.12841130  
SRR17520069.12841132  
SRR17520069.12841134  
SRR17520069.12841136  
SRR17520069.12841138  
SRR17520069.12841140  
SRR17520069.12841142  
SRR17520069.12841144  
SRR17520069.12841146  
SRR17520069.12850007  
SRR17520069.12850009  
SRR17520069.12852844  
SRR17520069.12852846  
SRR17520069.12852848  
SRR17520069.12852850  
SRR17520069.12852854  
SRR17520069.12852856  
SRR17520069.12854019  
SRR17520069.12854021  
SRR17520069.12854023  
SRR17520069.12854025  
SRR17520069.12854027  
SRR17520069.12854029  
SRR17520069.12854283  
SRR17520069.12854285  
SRR17520069.12854287  
SRR17520069.12854289  
SRR17520069.12854938  
SRR17520069.12854940  
SRR17520069.12854944  
SRR17520069.12854948  
SRR17520069.12854950  
SRR17520069.12854952  
SRR17520069.12854954  
SRR17520069.12860898  
SRR17520069.12860900  
SRR17520069.12860902  
SRR17520069.12860904  
SRR17520069.12860906  
SRR17520069.12860910

SRR17520069.12860912  
SRR17520069.12860914  
SRR17520069.12860916  
SRR17520069.12871670  
SRR17520069.12871672  
SRR17520069.12871674  
SRR17520069.12871676  
SRR17520069.12871678  
SRR17520069.12871680  
SRR17520069.12871682  
SRR17520069.12871688  
SRR17520069.12871690  
SRR17520069.12871692  
SRR17520069.12871694  
SRR17520069.12880129  
SRR17520069.12880131  
SRR17520069.12880133  
SRR17520069.12880135  
SRR17520069.12880137  
SRR17520069.12880139  
SRR17520069.12880141  
SRR17520069.12880143  
SRR17520069.12880145  
SRR17520069.12880147  
SRR17520069.12880149  
SRR17520069.12880151  
SRR17520069.12880153  
SRR17520069.12880155  
SRR17520069.12880157  
SRR17520069.12880159  
SRR17520069.12881895  
SRR17520069.12885772  
SRR17520069.12885774  
SRR17520069.12885776  
SRR17520069.12885780  
SRR17520069.12885782  
SRR17520069.12885784  
SRR17520069.12885786  
SRR17520069.12885788  
SRR17520069.12885790  
SRR17520069.12885792  
SRR17520069.12885794  
SRR17520069.12885796  
SRR17520069.12885798  
SRR17520069.12885800  
SRR17520069.12885802  
SRR17520069.12885804

SRR17520069.12885806  
SRR17520069.12885808  
SRR17520069.12885810  
SRR17520069.12885812  
SRR17520069.12885814  
SRR17520069.12885816  
SRR17520069.12885818  
SRR17520069.12885820  
SRR17520069.12885822  
SRR17520069.12885824  
SRR17520069.12885826  
SRR17520069.12885828  
SRR17520069.12885830  
SRR17520069.12885832  
SRR17520069.12890448  
SRR17520069.12890450  
SRR17520069.12890452  
SRR17520069.12890454  
SRR17520069.12892588  
SRR17520069.12892590  
SRR17520069.12896347  
SRR17520069.12896349  
SRR17520069.12896351  
SRR17520069.12896353  
SRR17520069.12896355  
SRR17520069.12896357  
SRR17520069.12896359  
SRR17520069.12896361  
SRR17520069.12896363  
SRR17520069.12896365  
SRR17520069.12896367  
SRR17520069.12896369  
SRR17520069.12896371  
SRR17520069.12896373  
SRR17520069.12896375  
SRR17520069.12896377  
SRR17520069.12896379  
SRR17520069.12896381  
SRR17520069.12896383  
SRR17520069.12896385  
SRR17520069.12896387  
SRR17520069.12896389  
SRR17520069.12896391  
SRR17520069.12896393  
SRR17520069.12896395  
SRR17520069.12896397  
SRR17520069.12896399

SRR17520069. 12896401  
SRR17520069. 12896403  
SRR17520069. 12896405  
SRR17520069. 12896407  
SRR17520069. 12896409  
SRR17520069. 12896411  
SRR17520069. 12896413  
SRR17520069. 12896415  
SRR17520069. 12896417  
SRR17520069. 12896419  
SRR17520069. 12896421  
SRR17520069. 12896423  
SRR17520069. 12896425  
SRR17520069. 12896427  
SRR17520069. 12896429  
SRR17520069. 12896431  
SRR17520069. 12896433  
SRR17520069. 12896435  
SRR17520069. 12897111  
SRR17520069. 12897115  
SRR17520069. 12897117  
SRR17520069. 12897119  
SRR17520069. 12897121  
SRR17520069. 12897123  
SRR17520069. 12897125  
SRR17520069. 12897127  
SRR17520069. 12897129  
SRR17520069. 12897131  
SRR17520069. 12897133  
SRR17520069. 12897135  
SRR17520069. 12897137  
SRR17520069. 12897139  
SRR17520069. 12897141  
SRR17520069. 12897143  
SRR17520069. 12897145  
SRR17520069. 12897147  
SRR17520069. 12897149  
SRR17520069. 12897151  
SRR17520069. 12899081  
SRR17520069. 12899083  
SRR17520069. 12899087  
SRR17520069. 12899089  
SRR17520069. 12899091  
SRR17520069. 12899093  
SRR17520069. 12899095  
SRR17520069. 12899099  
SRR17520069. 12905122



SRR17520069. 12905128  
SRR17520069. 12905130  
SRR17520069. 12905132  
SRR17520069. 12905134  
SRR17520069. 12905136  
SRR17520069. 12905138  
SRR17520069. 12905255  
SRR17520069. 12905257  
SRR17520069. 12905259  
SRR17520069. 12905261  
SRR17520069. 12905263  
SRR17520069. 12905265  
SRR17520069. 12905267  
SRR17520069. 12905269  
SRR17520069. 12905271  
SRR17520069. 12905273  
SRR17520069. 12905275  
SRR17520069. 12905277  
SRR17520069. 12905279  
SRR17520069. 12905281  
SRR17520069. 12905283  
SRR17520069. 12905285  
SRR17520069. 12905287  
SRR17520069. 12905289  
SRR17520069. 12905291  
SRR17520069. 12905293  
SRR17520069. 12905295  
SRR17520069. 12905297  
SRR17520069. 12905299  
SRR17520069. 12905301  
SRR17520069. 12905305  
SRR17520069. 12905307  
SRR17520069. 12905309  
SRR17520069. 12905311  
SRR17520069. 12905313  
SRR17520069. 12906919  
SRR17520069. 12906921  
SRR17520069. 12906923  
SRR17520069. 12906925  
SRR17520069. 12906927  
SRR17520069. 12906929  
SRR17520069. 12906931  
SRR17520069. 12906933  
SRR17520069. 12906935  
SRR17520069. 12906937  
SRR17520069. 12906939  
SRR17520069. 12910363

SRR17520069. 12911084  
SRR17520069. 12911086  
SRR17520069. 12911088  
SRR17520069. 12911092  
SRR17520069. 12911094  
SRR17520069. 12911096  
SRR17520069. 12911098  
SRR17520069. 12911100  
SRR17520069. 12911102  
SRR17520069. 12911104  
SRR17520069. 12912936  
SRR17520069. 12912938  
SRR17520069. 12912940  
SRR17520069. 12912942  
SRR17520069. 12912944  
SRR17520069. 12912946  
SRR17520069. 12912948  
SRR17520069. 12912950  
SRR17520069. 12912952  
SRR17520069. 12912954  
SRR17520069. 12912956  
SRR17520069. 12912958  
SRR17520069. 12912960  
SRR17520069. 12912962  
SRR17520069. 12918046  
SRR17520069. 12918048  
SRR17520069. 12918050  
SRR17520069. 12918052  
SRR17520069. 12918054  
SRR17520069. 12918056  
SRR17520069. 12918058  
SRR17520069. 12918060  
SRR17520069. 12919662  
SRR17520069. 12919664  
SRR17520069. 12919666  
SRR17520069. 12919668  
SRR17520069. 12919670  
SRR17520069. 12919672  
SRR17520069. 12919674  
SRR17520069. 12919676  
SRR17520069. 12919678  
SRR17520069. 12919680  
SRR17520069. 12919682  
SRR17520069. 12919684  
SRR17520069. 12919686  
SRR17520069. 12919688  
SRR17520069. 12919690

SRR17520069. 12919692  
SRR17520069. 12920389  
SRR17520069. 12920391  
SRR17520069. 12921374  
SRR17520069. 12921376  
SRR17520069. 12921378  
SRR17520069. 12921380  
SRR17520069. 12921382  
SRR17520069. 12921384  
SRR17520069. 12921386  
SRR17520069. 12921388  
SRR17520069. 12921390  
SRR17520069. 12921392  
SRR17520069. 12921394  
SRR17520069. 12921396  
SRR17520069. 12921398  
SRR17520069. 12921400  
SRR17520069. 12921402  
SRR17520069. 12921404  
SRR17520069. 12921406  
SRR17520069. 12921408  
SRR17520069. 12921410  
SRR17520069. 12921412  
SRR17520069. 12921821  
SRR17520069. 12921823  
SRR17520069. 12921828  
SRR17520069. 12921830  
SRR17520069. 12921832  
SRR17520069. 12921834  
SRR17520069. 12921836  
SRR17520069. 12921838  
SRR17520069. 12921840  
SRR17520069. 12921842  
SRR17520069. 12921844  
SRR17520069. 12921846  
SRR17520069. 12921848  
SRR17520069. 12921850  
SRR17520069. 12921852  
SRR17520069. 12921854  
SRR17520069. 12921856  
SRR17520069. 12921858  
SRR17520069. 12927537  
SRR17520069. 12927539  
SRR17520069. 12927543  
SRR17520069. 12927545  
SRR17520069. 12927547  
SRR17520069. 12927549

SRR17520069. 12927551  
SRR17520069. 12927553  
SRR17520069. 12927555  
SRR17520069. 12927557  
SRR17520069. 12927559  
SRR17520069. 12927561  
SRR17520069. 12927563  
SRR17520069. 12927566  
SRR17520069. 12927818  
SRR17520069. 12927820  
SRR17520069. 12927822  
SRR17520069. 12927824  
SRR17520069. 12927826  
SRR17520069. 12932295  
SRR17520069. 12932297  
SRR17520069. 12932299  
SRR17520069. 12932301  
SRR17520069. 12932303  
SRR17520069. 12932307  
SRR17520069. 12932309  
SRR17520069. 12932311  
SRR17520069. 12932313  
SRR17520069. 12932315  
SRR17520069. 12932317  
SRR17520069. 12932319  
SRR17520069. 12932321  
SRR17520069. 12932327  
SRR17520069. 12932329  
SRR17520069. 12932341  
SRR17520069. 12932349  
SRR17520069. 12941811  
SRR17520069. 12941813  
SRR17520069. 12941815  
SRR17520069. 12941817  
SRR17520069. 12941819  
SRR17520069. 12941821  
SRR17520069. 12941823  
SRR17520069. 12941825  
SRR17520069. 12941827  
SRR17520069. 12941829  
SRR17520069. 12941831  
SRR17520069. 12941833  
SRR17520069. 12941835  
SRR17520069. 12941837  
SRR17520069. 12941839  
SRR17520069. 12941841  
SRR17520069. 12941843

SRR17520069. 12941845  
SRR17520069. 12941847  
SRR17520069. 12944090  
SRR17520069. 12944092  
SRR17520069. 12944094  
SRR17520069. 12944096  
SRR17520069. 12944098  
SRR17520069. 12944100  
SRR17520069. 12944102  
SRR17520069. 12944106  
SRR17520069. 12944108  
SRR17520069. 12944110  
SRR17520069. 12944112  
SRR17520069. 12944114  
SRR17520069. 12944116  
SRR17520069. 12944118  
SRR17520069. 12944120  
SRR17520069. 12944122  
SRR17520069. 12944124  
SRR17520069. 12944126  
SRR17520069. 12944128  
SRR17520069. 12944130  
SRR17520069. 12944132  
SRR17520069. 12944134  
SRR17520069. 12944136  
SRR17520069. 12944138  
SRR17520069. 12944140  
SRR17520069. 12944142  
SRR17520069. 12944144  
SRR17520069. 12944146  
SRR17520069. 12944148  
SRR17520069. 12944150  
SRR17520069. 12944152  
SRR17520069. 12944154  
SRR17520069. 12944156  
SRR17520069. 12944158  
SRR17520069. 12944160  
SRR17520069. 12944162  
SRR17520069. 12944164  
SRR17520069. 12944166  
SRR17520069. 12944168  
SRR17520069. 12944170  
SRR17520069. 12944172  
SRR17520069. 12944174  
SRR17520069. 12944176  
SRR17520069. 12944178  
SRR17520069. 12944182

SRR17520069. 12944184  
SRR17520069. 12944186  
SRR17520069. 12944188  
SRR17520069. 12944190  
SRR17520069. 12944192  
SRR17520069. 12944194  
SRR17520069. 12944196  
SRR17520069. 12944198  
SRR17520069. 12944200  
SRR17520069. 12944204  
SRR17520069. 12948221  
SRR17520069. 12948223  
SRR17520069. 12948225  
SRR17520069. 12948227  
SRR17520069. 12948229  
SRR17520069. 12948231  
SRR17520069. 12948233  
SRR17520069. 12948235  
SRR17520069. 12948237  
SRR17520069. 12948239  
SRR17520069. 12948241  
SRR17520069. 12948243  
SRR17520069. 12948245  
SRR17520069. 12948249  
SRR17520069. 12948251  
SRR17520069. 12948253  
SRR17520069. 12948255  
SRR17520069. 12948257  
SRR17520069. 12948259  
SRR17520069. 12948261  
SRR17520069. 12948263  
SRR17520069. 12948265  
SRR17520069. 12948267  
SRR17520069. 12948269  
SRR17520069. 12948271  
SRR17520069. 12948273  
SRR17520069. 12948275  
SRR17520069. 12948277  
SRR17520069. 12948279  
SRR17520069. 12948281  
SRR17520069. 12948283  
SRR17520069. 12952553  
SRR17520069. 12952555  
SRR17520069. 12952557  
SRR17520069. 12952559  
SRR17520069. 12953234  
SRR17520069. 12953236

SRR17520069. 12953238  
SRR17520069. 12953240  
SRR17520069. 12953242  
SRR17520069. 12953244  
SRR17520069. 12953246  
SRR17520069. 12953248  
SRR17520069. 12953250  
SRR17520069. 12953252  
SRR17520069. 12953254  
SRR17520069. 12953256  
SRR17520069. 12953258  
SRR17520069. 12953260  
SRR17520069. 12953262  
SRR17520069. 12953264  
SRR17520069. 12953266  
SRR17520069. 12953268  
SRR17520069. 12953270  
SRR17520069. 12953272  
SRR17520069. 12953274  
SRR17520069. 12953278  
SRR17520069. 12953280  
SRR17520069. 12953282  
SRR17520069. 12953284  
SRR17520069. 12953286  
SRR17520069. 12953290  
SRR17520069. 12953294  
SRR17520069. 12953296  
SRR17520069. 12953298  
SRR17520069. 12953300  
SRR17520069. 12953304  
SRR17520069. 12953308  
SRR17520069. 12953310  
SRR17520069. 12957781  
SRR17520069. 12957783  
SRR17520069. 12957785  
SRR17520069. 12957787  
SRR17520069. 12957791  
SRR17520069. 12957793  
SRR17520069. 12957795  
SRR17520069. 12957797  
SRR17520069. 12957799  
SRR17520069. 12957801  
SRR17520069. 12957803  
SRR17520069. 12957807  
SRR17520069. 12957809  
SRR17520069. 12957811  
SRR17520069. 12957813

SRR17520069. 12957815  
SRR17520069. 12957817  
SRR17520069. 12957819  
SRR17520069. 12957821  
SRR17520069. 12957823  
SRR17520069. 12957825  
SRR17520069. 12957829  
SRR17520069. 12957831  
SRR17520069. 12957833  
SRR17520069. 12957835  
SRR17520069. 12957837  
SRR17520069. 12957839  
SRR17520069. 12957841  
SRR17520069. 12957843  
SRR17520069. 12957845  
SRR17520069. 12957847  
SRR17520069. 12957849  
SRR17520069. 12957851  
SRR17520069. 12959274  
SRR17520069. 12959276  
SRR17520069. 12959278  
SRR17520069. 12959280  
SRR17520069. 12959282  
SRR17520069. 12959284  
SRR17520069. 12959286  
SRR17520069. 12959288  
SRR17520069. 12959290  
SRR17520069. 12959292  
SRR17520069. 12959294  
SRR17520069. 12959296  
SRR17520069. 12959298  
SRR17520069. 12959300  
SRR17520069. 12959302  
SRR17520069. 12959304  
SRR17520069. 12959306  
SRR17520069. 12959308  
SRR17520069. 12959310  
SRR17520069. 12959312  
SRR17520069. 12959314  
SRR17520069. 12959316  
SRR17520069. 12959318  
SRR17520069. 12959320  
SRR17520069. 12959322  
SRR17520069. 12959324  
SRR17520069. 12959326  
SRR17520069. 12959328  
SRR17520069. 12959330



SRR17520069. 12959332  
SRR17520069. 12959334  
SRR17520069. 12959336  
SRR17520069. 12959338  
SRR17520069. 12959340  
SRR17520069. 12959342  
SRR17520069. 12959344  
SRR17520069. 12959346  
SRR17520069. 12959348  
SRR17520069. 12959350  
SRR17520069. 12959352  
SRR17520069. 12959354  
SRR17520069. 12959356  
SRR17520069. 12959358  
SRR17520069. 12959360  
SRR17520069. 12959362  
SRR17520069. 12959364  
SRR17520069. 12959366  
SRR17520069. 12959368  
SRR17520069. 12959370  
SRR17520069. 12959372  
SRR17520069. 12959374  
SRR17520069. 12959376  
SRR17520069. 12959378  
SRR17520069. 12959380  
SRR17520069. 12959382  
SRR17520069. 12959384  
SRR17520069. 12959386  
SRR17520069. 12959388  
SRR17520069. 12959390  
SRR17520069. 12959392  
SRR17520069. 12959394  
SRR17520069. 12959396  
SRR17520069. 12959398  
SRR17520069. 12959792  
SRR17520069. 12959794  
SRR17520069. 12959796  
SRR17520069. 12959798  
SRR17520069. 12959802  
SRR17520069. 12959804  
SRR17520069. 12959806  
SRR17520069. 12959808  
SRR17520069. 12959810  
SRR17520069. 12959812  
SRR17520069. 12959814  
SRR17520069. 12959816  
SRR17520069. 12959818

SRR17520069. 12959820  
SRR17520069. 12959822  
SRR17520069. 12963304  
SRR17520069. 12963306  
SRR17520069. 12963308  
SRR17520069. 12963310  
SRR17520069. 12963312  
SRR17520069. 12963314  
SRR17520069. 12963316  
SRR17520069. 12963318  
SRR17520069. 12963320  
SRR17520069. 12964183  
SRR17520069. 12964185  
SRR17520069. 12964187  
SRR17520069. 12964189  
SRR17520069. 12964191  
SRR17520069. 12964193  
SRR17520069. 12964195  
SRR17520069. 12964197  
SRR17520069. 12964199  
SRR17520069. 12964201  
SRR17520069. 12964203  
SRR17520069. 12964205  
SRR17520069. 12964207  
SRR17520069. 12964209  
SRR17520069. 12964211  
SRR17520069. 12964213  
SRR17520069. 12964215  
SRR17520069. 12964217  
SRR17520069. 12964219  
SRR17520069. 12964221  
SRR17520069. 12964223  
SRR17520069. 12964225  
SRR17520069. 12964227  
SRR17520069. 12964229  
SRR17520069. 12964231  
SRR17520069. 12964233  
SRR17520069. 12964235  
SRR17520069. 12964237  
SRR17520069. 12965413  
SRR17520069. 12965415  
SRR17520069. 12965417  
SRR17520069. 12965419  
SRR17520069. 12965421  
SRR17520069. 12965423  
SRR17520069. 12965425  
SRR17520069. 12965427

SRR17520069. 12969491  
SRR17520069. 12969493  
SRR17520069. 12969495  
SRR17520069. 12969497  
SRR17520069. 12969499  
SRR17520069. 12969501  
SRR17520069. 12969503  
SRR17520069. 12969505  
SRR17520069. 12969507  
SRR17520069. 12969509  
SRR17520069. 12969511  
SRR17520069. 12969513  
SRR17520069. 12969515  
SRR17520069. 12969517  
SRR17520069. 12969519  
SRR17520069. 12978678  
SRR17520069. 12978680  
SRR17520069. 12978682  
SRR17520069. 12978684  
SRR17520069. 12978688  
SRR17520069. 12978692  
SRR17520069. 12978694  
SRR17520069. 12978696  
SRR17520069. 12985223  
SRR17520069. 12985225  
SRR17520069. 12985229  
SRR17520069. 12985231  
SRR17520069. 12985233  
SRR17520069. 12985235  
SRR17520069. 12985241  
SRR17520069. 12985243  
SRR17520069. 12985245  
SRR17520069. 12985247  
SRR17520069. 12985249  
SRR17520069. 12985251  
SRR17520069. 12985253  
SRR17520069. 12985255  
SRR17520069. 12985257  
SRR17520069. 12985259  
SRR17520069. 12985261  
SRR17520069. 12985263  
SRR17520069. 12985269  
SRR17520069. 12985271  
SRR17520069. 12985273  
SRR17520069. 12985275  
SRR17520069. 12985277  
SRR17520069. 12985279

SRR17520069. 12985281  
SRR17520069. 12985283  
SRR17520069. 12985287  
SRR17520069. 12985289  
SRR17520069. 12985291  
SRR17520069. 12985293  
SRR17520069. 12985295  
SRR17520069. 12985297  
SRR17520069. 12985299  
SRR17520069. 12985301  
SRR17520069. 12985303  
SRR17520069. 12985305  
SRR17520069. 12985307  
SRR17520069. 12985311  
SRR17520069. 12985313  
SRR17520069. 12985315  
SRR17520069. 12985319  
SRR17520069. 12985321  
SRR17520069. 12985323  
SRR17520069. 12985325  
SRR17520069. 12985327  
SRR17520069. 12985329  
SRR17520069. 12985331  
SRR17520069. 12985333  
SRR17520069. 12985335  
SRR17520069. 12985337  
SRR17520069. 12985339  
SRR17520069. 12987714  
SRR17520069. 12987716  
SRR17520069. 12987718  
SRR17520069. 12987720  
SRR17520069. 12987722  
SRR17520069. 12987724  
SRR17520069. 12987726  
SRR17520069. 12987728  
SRR17520069. 12987730  
SRR17520069. 12987732  
SRR17520069. 12987736  
SRR17520069. 12987740  
SRR17520069. 12987742  
SRR17520069. 12987744  
SRR17520069. 12987746  
SRR17520069. 12987748  
SRR17520069. 12987750  
SRR17520069. 12987752  
SRR17520069. 12987754  
SRR17520069. 12987756

SRR17520069.12987758  
SRR17520069.12995198  
SRR17520069.12995200  
SRR17520069.12995202  
SRR17520069.12995204  
SRR17520069.12995206  
SRR17520069.12995208  
SRR17520069.12995210  
SRR17520069.12995212  
SRR17520069.12995214  
SRR17520069.13004247  
SRR17520069.13004249  
SRR17520069.13004251  
SRR17520069.13015680  
SRR17520069.13015682  
SRR17520069.13015684  
SRR17520069.13026440  
SRR17520069.13026442  
SRR17520069.13026444  
SRR17520069.13031060  
SRR17520069.13031074  
SRR17520069.13038434  
SRR17520069.13038436  
SRR17520069.13038438  
SRR17520069.13038440  
SRR17520069.13043681  
SRR17520069.13052500  
SRR17520069.13052523  
SRR17520069.13056284  
SRR17520069.13056286  
SRR17520069.13056288  
SRR17520069.13056290  
SRR17520069.13056292  
SRR17520069.13056294  
SRR17520069.13056296  
SRR17520069.13056298  
SRR17520069.13056300  
SRR17520069.13056302  
SRR17520069.13056304  
SRR17520069.13056306  
SRR17520069.13056308  
SRR17520069.13056310  
SRR17520069.13056312  
SRR17520069.13056316  
SRR17520069.13056320  
SRR17520069.13056322  
SRR17520069.13056324

SRR17520069. 13056326  
SRR17520069. 13056328  
SRR17520069. 13056330  
SRR17520069. 13056332  
SRR17520069. 13056334  
SRR17520069. 13056336  
SRR17520069. 13056338  
SRR17520069. 13056340  
SRR17520069. 13056342  
SRR17520069. 13056344  
SRR17520069. 13056346  
SRR17520069. 13056348  
SRR17520069. 13056350  
SRR17520069. 13056352  
SRR17520069. 13056354  
SRR17520069. 13056356  
SRR17520069. 13056358  
SRR17520069. 13056360  
SRR17520069. 13056362  
SRR17520069. 13056364  
SRR17520069. 13056366  
SRR17520069. 13056368  
SRR17520069. 13056370  
SRR17520069. 13056372  
SRR17520069. 13056374  
SRR17520069. 13056376  
SRR17520069. 13056378  
SRR17520069. 13056380  
SRR17520069. 13056382  
SRR17520069. 13056384  
SRR17520069. 13056386  
SRR17520069. 13056388  
SRR17520069. 13056390  
SRR17520069. 13056392  
SRR17520069. 13056394  
SRR17520069. 13056396  
SRR17520069. 13056398  
SRR17520069. 13056400  
SRR17520069. 13056402  
SRR17520069. 13056404  
SRR17520069. 13056406  
SRR17520069. 13056408  
SRR17520069. 13056410  
SRR17520069. 13058133  
SRR17520069. 13058135  
SRR17520069. 13058137  
SRR17520069. 13058139

SRR17520069. 13058141  
SRR17520069. 13058143  
SRR17520069. 13058145  
SRR17520069. 13058147  
SRR17520069. 13058149  
SRR17520069. 13058151  
SRR17520069. 13058155  
SRR17520069. 13058157  
SRR17520069. 13058159  
SRR17520069. 13058161  
SRR17520069. 13058163  
SRR17520069. 13058165  
SRR17520069. 13058167  
SRR17520069. 13058169  
SRR17520069. 13058171  
SRR17520069. 13058173  
SRR17520069. 13058175  
SRR17520069. 13058179  
SRR17520069. 13058181  
SRR17520069. 13058183  
SRR17520069. 13058185  
SRR17520069. 13058187  
SRR17520069. 13058191  
SRR17520069. 13058193  
SRR17520069. 13060876  
SRR17520069. 13060878  
SRR17520069. 13060880  
SRR17520069. 13060882  
SRR17520069. 13060884  
SRR17520069. 13060886  
SRR17520069. 13060888  
SRR17520069. 13060890  
SRR17520069. 13060892  
SRR17520069. 13060894  
SRR17520069. 13060896  
SRR17520069. 13060898  
SRR17520069. 13060900  
SRR17520069. 13060902  
SRR17520069. 13060904  
SRR17520069. 13060906  
SRR17520069. 13060908  
SRR17520069. 13060910  
SRR17520069. 13060912  
SRR17520069. 13060914  
SRR17520069. 13060918  
SRR17520069. 13060920  
SRR17520069. 13060922

SRR17520069. 13060924  
SRR17520069. 13060926  
SRR17520069. 13060928  
SRR17520069. 13060930  
SRR17520069. 13060932  
SRR17520069. 13060934  
SRR17520069. 13060936  
SRR17520069. 13060938  
SRR17520069. 13060940  
SRR17520069. 13060942  
SRR17520069. 13060944  
SRR17520069. 13060946  
SRR17520069. 13060948  
SRR17520069. 13060950  
SRR17520069. 13060952  
SRR17520069. 13060954  
SRR17520069. 13060956  
SRR17520069. 13064297  
SRR17520069. 13064299  
SRR17520069. 13064301  
SRR17520069. 13064303  
SRR17520069. 13064305  
SRR17520069. 13064307  
SRR17520069. 13064309  
SRR17520069. 13064311  
SRR17520069. 13064313  
SRR17520069. 13064315  
SRR17520069. 13064317  
SRR17520069. 13064319  
SRR17520069. 13064321  
SRR17520069. 13064323  
SRR17520069. 13064325  
SRR17520069. 13064327  
SRR17520069. 13064329  
SRR17520069. 13064331  
SRR17520069. 13064333  
SRR17520069. 13064335  
SRR17520069. 13064337  
SRR17520069. 13064339  
SRR17520069. 13064341  
SRR17520069. 13064343  
SRR17520069. 13064345  
SRR17520069. 13064347  
SRR17520069. 13064349  
SRR17520069. 13064351  
SRR17520069. 13064353  
SRR17520069. 13064355



SRR17520069. 13064357  
SRR17520069. 13064359  
SRR17520069. 13064361  
SRR17520069. 13064363  
SRR17520069. 13064365  
SRR17520069. 13064367  
SRR17520069. 13064369  
SRR17520069. 13064371  
SRR17520069. 13064373  
SRR17520069. 13064375  
SRR17520069. 13064377  
SRR17520069. 13064379  
SRR17520069. 13064383  
SRR17520069. 13064385  
SRR17520069. 13064387  
SRR17520069. 13064389  
SRR17520069. 13070681  
SRR17520069. 13070683  
SRR17520069. 13070685  
SRR17520069. 13070687  
SRR17520069. 13070689  
SRR17520069. 13070691  
SRR17520069. 13070693  
SRR17520069. 13070695  
SRR17520069. 13070697  
SRR17520069. 13070699  
SRR17520069. 13070701  
SRR17520069. 13070703  
SRR17520069. 13070705  
SRR17520069. 13070709  
SRR17520069. 13070711  
SRR17520069. 13070713  
SRR17520069. 13070715  
SRR17520069. 13070717  
SRR17520069. 13070719  
SRR17520069. 13070721  
SRR17520069. 13070723  
SRR17520069. 13073711  
SRR17520069. 13073713  
SRR17520069. 13073715  
SRR17520069. 13073717  
SRR17520069. 13073719  
SRR17520069. 13073721  
SRR17520069. 13073723  
SRR17520069. 13073725  
SRR17520069. 13073727  
SRR17520069. 13073729

SRR17520069. 13073731  
SRR17520069. 13073733  
SRR17520069. 13073735  
SRR17520069. 13073737  
SRR17520069. 13073739  
SRR17520069. 13073741  
SRR17520069. 13073743  
SRR17520069. 13073745  
SRR17520069. 13073747  
SRR17520069. 13073749  
SRR17520069. 13073751  
SRR17520069. 13073753  
SRR17520069. 13073755  
SRR17520069. 13073757  
SRR17520069. 13073759  
SRR17520069. 13075409  
SRR17520069. 13092553  
SRR17520069. 13092555  
SRR17520069. 13092557  
SRR17520069. 13092559  
SRR17520069. 13092561  
SRR17520069. 13092563  
SRR17520069. 13092565  
SRR17520069. 13092567  
SRR17520069. 13092569  
SRR17520069. 13092571  
SRR17520069. 13092573  
SRR17520069. 13092575  
SRR17520069. 13092577  
SRR17520069. 13092579  
SRR17520069. 13092581  
SRR17520069. 13092585  
SRR17520069. 13092587  
SRR17520069. 13092589  
SRR17520069. 13092591  
SRR17520069. 13092593  
SRR17520069. 13092595  
SRR17520069. 13092597  
SRR17520069. 13092599  
SRR17520069. 13092601  
SRR17520069. 13092603  
SRR17520069. 13092605  
SRR17520069. 13092607  
SRR17520069. 13092611  
SRR17520069. 13092613  
SRR17520069. 13092615  
SRR17520069. 13092617

SRR17520069. 13092619  
SRR17520069. 13092621  
SRR17520069. 13092623  
SRR17520069. 13092625  
SRR17520069. 13092627  
SRR17520069. 13092629  
SRR17520069. 13092633  
SRR17520069. 13092635  
SRR17520069. 13092637  
SRR17520069. 13092639  
SRR17520069. 13092641  
SRR17520069. 13092687  
SRR17520069. 13092689  
SRR17520069. 13092693  
SRR17520069. 13092697  
SRR17520069. 13092699  
SRR17520069. 13092701  
SRR17520069. 13092703  
SRR17520069. 13092705  
SRR17520069. 13092707  
SRR17520069. 13092711  
SRR17520069. 13092713  
SRR17520069. 13092719  
SRR17520069. 13092721  
SRR17520069. 13092723  
SRR17520069. 13092725  
SRR17520069. 13092727  
SRR17520069. 13092729  
SRR17520069. 13092731  
SRR17520069. 13092733  
SRR17520069. 13098013  
SRR17520069. 13098015  
SRR17520069. 13098017  
SRR17520069. 13098019  
SRR17520069. 13098021  
SRR17520069. 13098023  
SRR17520069. 13098025  
SRR17520069. 13098027  
SRR17520069. 13099766  
SRR17520069. 13099768  
SRR17520069. 13099772  
SRR17520069. 13099774  
SRR17520069. 13099776  
SRR17520069. 13099778  
SRR17520069. 13099780  
SRR17520069. 13099784  
SRR17520069. 13099786

SRR17520069.13099788  
SRR17520069.13099790  
SRR17520069.13099792  
SRR17520069.13103301  
SRR17520069.13103303  
SRR17520069.13103305  
SRR17520069.13103307  
SRR17520069.13103309  
SRR17520069.13103311  
SRR17520069.13103313  
SRR17520069.13103315  
SRR17520069.13103317  
SRR17520069.13103319  
SRR17520069.13103321  
SRR17520069.13103323  
SRR17520069.13103325  
SRR17520069.13107037  
SRR17520069.13107039  
SRR17520069.13107041  
SRR17520069.13107043  
SRR17520069.13107045  
SRR17520069.13107047  
SRR17520069.13107049  
SRR17520069.13107051  
SRR17520069.13107053  
SRR17520069.13107055  
SRR17520069.13107057  
SRR17520069.13107059  
SRR17520069.13107061  
SRR17520069.13107063  
SRR17520069.13107065  
SRR17520069.13107067  
SRR17520069.13107069  
SRR17520069.13107071  
SRR17520069.13107073  
SRR17520069.13107075  
SRR17520069.13107077  
SRR17520069.13107079  
SRR17520069.13107081  
SRR17520069.13107083  
SRR17520069.13107085  
SRR17520069.13107087  
SRR17520069.13107089  
SRR17520069.13107091  
SRR17520069.13107093  
SRR17520069.13107095  
SRR17520069.13107099

SRR17520069.13107101  
SRR17520069.13107103  
SRR17520069.13107105  
SRR17520069.13107107  
SRR17520069.13107109  
SRR17520069.13107111  
SRR17520069.13107113  
SRR17520069.13107115  
SRR17520069.13107117  
SRR17520069.13107119  
SRR17520069.13107121  
SRR17520069.13107123  
SRR17520069.13107125  
SRR17520069.13107127  
SRR17520069.13107129  
SRR17520069.13107131  
SRR17520069.13107133  
SRR17520069.13107135  
SRR17520069.13107137  
SRR17520069.13116891  
SRR17520069.13116893  
SRR17520069.13116895  
SRR17520069.13116897  
SRR17520069.13116899  
SRR17520069.13116901  
SRR17520069.13116903  
SRR17520069.13126061  
SRR17520069.13126065  
SRR17520069.13126067  
SRR17520069.13126069  
SRR17520069.13126071  
SRR17520069.13126073  
SRR17520069.13126075  
SRR17520069.13126077  
SRR17520069.13126079  
SRR17520069.13126081  
SRR17520069.13126083  
SRR17520069.13126085  
SRR17520069.13133136  
SRR17520069.13133138  
SRR17520069.13133142  
SRR17520069.13133144  
SRR17520069.13133146  
SRR17520069.13133148  
SRR17520069.13133150  
SRR17520069.13133154  
SRR17520069.13133156

SRR17520069. 13133158  
SRR17520069. 13133160  
SRR17520069. 13133162  
SRR17520069. 13133164  
SRR17520069. 13133166  
SRR17520069. 13133168  
SRR17520069. 13133170  
SRR17520069. 13133172  
SRR17520069. 13133174  
SRR17520069. 13133178  
SRR17520069. 13133180  
SRR17520069. 13133182  
SRR17520069. 13133184  
SRR17520069. 13133186  
SRR17520069. 13133188  
SRR17520069. 13133190  
SRR17520069. 13133192  
SRR17520069. 13133194  
SRR17520069. 13133196  
SRR17520069. 13133198  
SRR17520069. 13133200  
SRR17520069. 13133202  
SRR17520069. 13133204  
SRR17520069. 13133206  
SRR17520069. 13133208  
SRR17520069. 13133210  
SRR17520069. 13133212  
SRR17520069. 13133214  
SRR17520069. 13133216  
SRR17520069. 13133218  
SRR17520069. 13133222  
SRR17520069. 13133224  
SRR17520069. 13133226  
SRR17520069. 13133228  
SRR17520069. 13133230  
SRR17520069. 13133232  
SRR17520069. 13141146  
SRR17520069. 13141148  
SRR17520069. 13141150  
SRR17520069. 13141152  
SRR17520069. 13141154  
SRR17520069. 13141156  
SRR17520069. 13141160  
SRR17520069. 13141165  
SRR17520069. 13141167  
SRR17520069. 13141169  
SRR17520069. 13141171

SRR17520069.13141173  
SRR17520069.13141175  
SRR17520069.13141177  
SRR17520069.13141179  
SRR17520069.13141181  
SRR17520069.13141183  
SRR17520069.13141185  
SRR17520069.13141187  
SRR17520069.13141189  
SRR17520069.13141193  
SRR17520069.13141195  
SRR17520069.13141197  
SRR17520069.13141199  
SRR17520069.13141201  
SRR17520069.13141203  
SRR17520069.13141205  
SRR17520069.13141244  
SRR17520069.13141246  
SRR17520069.13141248  
SRR17520069.13141250  
SRR17520069.13141252  
SRR17520069.13141254  
SRR17520069.13141256  
SRR17520069.13141258  
SRR17520069.13141260  
SRR17520069.13141262  
SRR17520069.13141264  
SRR17520069.13141266  
SRR17520069.13141268  
SRR17520069.13141270  
SRR17520069.13141272  
SRR17520069.13141274  
SRR17520069.13143344  
SRR17520069.13143346  
SRR17520069.13143350  
SRR17520069.13143352  
SRR17520069.13143354  
SRR17520069.13143356  
SRR17520069.13143358  
SRR17520069.13143360  
SRR17520069.13143364  
SRR17520069.13143366  
SRR17520069.13143368  
SRR17520069.13143370  
SRR17520069.13143372  
SRR17520069.13143374  
SRR17520069.13143376

SRR17520069. 13143380  
SRR17520069. 13143382  
SRR17520069. 13143384  
SRR17520069. 13143386  
SRR17520069. 13143388  
SRR17520069. 13143392  
SRR17520069. 13143394  
SRR17520069. 13143396  
SRR17520069. 13143400  
SRR17520069. 13143402  
SRR17520069. 13144795  
SRR17520069. 13144797  
SRR17520069. 13144799  
SRR17520069. 13144801  
SRR17520069. 13144803  
SRR17520069. 13144805  
SRR17520069. 13144807  
SRR17520069. 13154255  
SRR17520069. 13154257  
SRR17520069. 13154259  
SRR17520069. 13154261  
SRR17520069. 13154263  
SRR17520069. 13154265  
SRR17520069. 13154267  
SRR17520069. 13154269  
SRR17520069. 13154271  
SRR17520069. 13154273  
SRR17520069. 13154275  
SRR17520069. 13154277  
SRR17520069. 13154279  
SRR17520069. 13154281  
SRR17520069. 13154283  
SRR17520069. 13154285  
SRR17520069. 13154287  
SRR17520069. 13154289  
SRR17520069. 13154291  
SRR17520069. 13154293  
SRR17520069. 13154295  
SRR17520069. 13154297  
SRR17520069. 13154303  
SRR17520069. 13154305  
SRR17520069. 13154307  
SRR17520069. 13154309  
SRR17520069. 13154311  
SRR17520069. 13154313  
SRR17520069. 13154315  
SRR17520069. 13154317



SRR17520069. 13154319  
SRR17520069. 13154321  
SRR17520069. 13154323  
SRR17520069. 13154325  
SRR17520069. 13154327  
SRR17520069. 13154329  
SRR17520069. 13154331  
SRR17520069. 13154333  
SRR17520069. 13154335  
SRR17520069. 13154337  
SRR17520069. 13154339  
SRR17520069. 13154341  
SRR17520069. 13154343  
SRR17520069. 13154345  
SRR17520069. 13154347  
SRR17520069. 13154349  
SRR17520069. 13154351  
SRR17520069. 13154353  
SRR17520069. 13154355  
SRR17520069. 13154357  
SRR17520069. 13154359  
SRR17520069. 13154361  
SRR17520069. 13154363  
SRR17520069. 13154365  
SRR17520069. 13154367  
SRR17520069. 13154369  
SRR17520069. 13154371  
SRR17520069. 13154373  
SRR17520069. 13154375  
SRR17520069. 13154377  
SRR17520069. 13154379  
SRR17520069. 13154381  
SRR17520069. 13154383  
SRR17520069. 13154385  
SRR17520069. 13154387  
SRR17520069. 13154389  
SRR17520069. 13154391  
SRR17520069. 13158901  
SRR17520069. 13158905  
SRR17520069. 13158907  
SRR17520069. 13161266  
SRR17520069. 13161268  
SRR17520069. 13161270  
SRR17520069. 13161272  
SRR17520069. 13161274  
SRR17520069. 13161276  
SRR17520069. 13161278

SRR17520069.13161280  
SRR17520069.13161284  
SRR17520069.13161286  
SRR17520069.13161288  
SRR17520069.13161318  
SRR17520069.13161320  
SRR17520069.13161322  
SRR17520069.13161324  
SRR17520069.13161326  
SRR17520069.13161330  
SRR17520069.13161332  
SRR17520069.13161334  
SRR17520069.13161338  
SRR17520069.13161340  
SRR17520069.13161342  
SRR17520069.13161344  
SRR17520069.13161350  
SRR17520069.13161352  
SRR17520069.13161354  
SRR17520069.13161356  
SRR17520069.13161358  
SRR17520069.13161360  
SRR17520069.13161362  
SRR17520069.13169526  
SRR17520069.13169528  
SRR17520069.13170514  
SRR17520069.13170516  
SRR17520069.13170518  
SRR17520069.13170520  
SRR17520069.13173188  
SRR17520069.13173240  
SRR17520069.13173258  
SRR17520069.13173267  
SRR17520069.13175329  
SRR17520069.13175331  
SRR17520069.13175333  
SRR17520069.13175335  
SRR17520069.13175337  
SRR17520069.13175339  
SRR17520069.13189742  
SRR17520069.13189905  
SRR17520069.13190217  
SRR17520069.13202793  
SRR17520069.13202795  
SRR17520069.13202797  
SRR17520069.13202799  
SRR17520069.13207434

SRR17520069. 13207436  
SRR17520069. 13213570  
SRR17520069. 13213579  
SRR17520069. 13214369  
SRR17520069. 13214371  
SRR17520069. 13214373  
SRR17520069. 13214375  
SRR17520069. 13214377  
SRR17520069. 13233921  
SRR17520069. 13233923  
SRR17520069. 13233925  
SRR17520069. 13233927  
SRR17520069. 13233929  
SRR17520069. 13233931  
SRR17520069. 13233933  
SRR17520069. 13233935  
SRR17520069. 13233937  
SRR17520069. 13233939  
SRR17520069. 13233941  
SRR17520069. 13233943  
SRR17520069. 13233945  
SRR17520069. 13233947  
SRR17520069. 13233949  
SRR17520069. 13233951  
SRR17520069. 13233953  
SRR17520069. 13233955  
SRR17520069. 13233957  
SRR17520069. 13233959  
SRR17520069. 13233961  
SRR17520069. 13233963  
SRR17520069. 13233965  
SRR17520069. 13233967  
SRR17520069. 13233969  
SRR17520069. 13233971  
SRR17520069. 13233973  
SRR17520069. 13233975  
SRR17520069. 13233977  
SRR17520069. 13233979  
SRR17520069. 13233981  
SRR17520069. 13233983  
SRR17520069. 13233985  
SRR17520069. 13233989  
SRR17520069. 13233991  
SRR17520069. 13233993  
SRR17520069. 13233995  
SRR17520069. 13233997  
SRR17520069. 13236604

SRR17520069.13236606  
SRR17520069.13236608  
SRR17520069.13236610  
SRR17520069.13236612  
SRR17520069.13236614  
SRR17520069.13236616  
SRR17520069.13236618  
SRR17520069.13236620  
SRR17520069.13236622  
SRR17520069.13236624  
SRR17520069.13236626  
SRR17520069.13236628  
SRR17520069.13239879  
SRR17520069.13239881  
SRR17520069.13239883  
SRR17520069.13241685  
SRR17520069.13241687  
SRR17520069.13241689  
SRR17520069.13241691  
SRR17520069.13241693  
SRR17520069.13241695  
SRR17520069.13241697  
SRR17520069.13241699  
SRR17520069.13241701  
SRR17520069.13241703  
SRR17520069.13241705  
SRR17520069.13241707  
SRR17520069.13241709  
SRR17520069.13241711  
SRR17520069.13241713  
SRR17520069.13241715  
SRR17520069.13241717  
SRR17520069.13242201  
SRR17520069.13242203  
SRR17520069.13242205  
SRR17520069.13242207  
SRR17520069.13242209  
SRR17520069.13242211  
SRR17520069.13242213  
SRR17520069.13244632  
SRR17520069.13244642  
SRR17520069.13244643  
SRR17520069.13245925  
SRR17520069.13245927  
SRR17520069.13245929  
SRR17520069.13245931  
SRR17520069.13245933

SRR17520069. 13245935  
SRR17520069. 13245937  
SRR17520069. 13245939  
SRR17520069. 13245941  
SRR17520069. 13245943  
SRR17520069. 13245945  
SRR17520069. 13245947  
SRR17520069. 13245949  
SRR17520069. 13245951  
SRR17520069. 13245953  
SRR17520069. 13245955  
SRR17520069. 13245957  
SRR17520069. 13245959  
SRR17520069. 13245961  
SRR17520069. 13247024  
SRR17520069. 13247026  
SRR17520069. 13247028  
SRR17520069. 13247030  
SRR17520069. 13247032  
SRR17520069. 13247034  
SRR17520069. 13247036  
SRR17520069. 13247038  
SRR17520069. 13247040  
SRR17520069. 13247042  
SRR17520069. 13247044  
SRR17520069. 13247046  
SRR17520069. 13247048  
SRR17520069. 13247050  
SRR17520069. 13247052  
SRR17520069. 13247054  
SRR17520069. 13247056  
SRR17520069. 13247058  
SRR17520069. 13247062  
SRR17520069. 13247064  
SRR17520069. 13247066  
SRR17520069. 13247068  
SRR17520069. 13247070  
SRR17520069. 13247072  
SRR17520069. 13247074  
SRR17520069. 13247076  
SRR17520069. 13247078  
SRR17520069. 13247080  
SRR17520069. 13247082  
SRR17520069. 13247084  
SRR17520069. 13247086  
SRR17520069. 13247088  
SRR17520069. 13247090

SRR17520069. 13251719  
SRR17520069. 13251721  
SRR17520069. 13251723  
SRR17520069. 13261794  
SRR17520069. 13261796  
SRR17520069. 13261798  
SRR17520069. 13261800  
SRR17520069. 13261802  
SRR17520069. 13261804  
SRR17520069. 13261806  
SRR17520069. 13261808  
SRR17520069. 13261810  
SRR17520069. 13261812  
SRR17520069. 13261816  
SRR17520069. 13261818  
SRR17520069. 13261820  
SRR17520069. 13261822  
SRR17520069. 13261824  
SRR17520069. 13261826  
SRR17520069. 13261830  
SRR17520069. 13261832  
SRR17520069. 13261834  
SRR17520069. 13261836  
SRR17520069. 13261838  
SRR17520069. 13261840  
SRR17520069. 13261842  
SRR17520069. 13261846  
SRR17520069. 13261848  
SRR17520069. 13261850  
SRR17520069. 13261852  
SRR17520069. 13261854  
SRR17520069. 13261856  
SRR17520069. 13261858  
SRR17520069. 13261860  
SRR17520069. 13261865  
SRR17520069. 13261868  
SRR17520069. 13261870  
SRR17520069. 13262045  
SRR17520069. 13262905  
SRR17520069. 13262946  
SRR17520069. 13273036  
SRR17520069. 13273038  
SRR17520069. 13273040  
SRR17520069. 13273042  
SRR17520069. 13273044  
SRR17520069. 13273046  
SRR17520069. 13273048

SRR17520069. 13273050  
SRR17520069. 13273052  
SRR17520069. 13273054  
SRR17520069. 13273056  
SRR17520069. 13273058  
SRR17520069. 13273060  
SRR17520069. 13273062  
SRR17520069. 13273064  
SRR17520069. 13273066  
SRR17520069. 13273068  
SRR17520069. 13273070  
SRR17520069. 13273072  
SRR17520069. 13273074  
SRR17520069. 13273076  
SRR17520069. 13273078  
SRR17520069. 13273080  
SRR17520069. 13273082  
SRR17520069. 13273084  
SRR17520069. 13273086  
SRR17520069. 13273088  
SRR17520069. 13273090  
SRR17520069. 13273092  
SRR17520069. 13273094  
SRR17520069. 13273096  
SRR17520069. 13273098  
SRR17520069. 13273100  
SRR17520069. 13273102  
SRR17520069. 13273104  
SRR17520069. 13273106  
SRR17520069. 13273108  
SRR17520069. 13273110  
SRR17520069. 13273112  
SRR17520069. 13273114  
SRR17520069. 13277011  
SRR17520069. 13277013  
SRR17520069. 13277015  
SRR17520069. 13277017  
SRR17520069. 13277019  
SRR17520069. 13277021  
SRR17520069. 13277023  
SRR17520069. 13277025  
SRR17520069. 13277027  
SRR17520069. 13277031  
SRR17520069. 13277033  
SRR17520069. 13277035  
SRR17520069. 13277037  
SRR17520069. 13277039

SRR17520069.13277041  
SRR17520069.13277043  
SRR17520069.13277045  
SRR17520069.13277047  
SRR17520069.13277049  
SRR17520069.13277051  
SRR17520069.13277053  
SRR17520069.13277055  
SRR17520069.13277057  
SRR17520069.13278610  
SRR17520069.13278612  
SRR17520069.13278614  
SRR17520069.13278616  
SRR17520069.13278618  
SRR17520069.13278620  
SRR17520069.13278622  
SRR17520069.13278624  
SRR17520069.13278626  
SRR17520069.13278628  
SRR17520069.13278630  
SRR17520069.13278632  
SRR17520069.13278634  
SRR17520069.13278638  
SRR17520069.13278640  
SRR17520069.13279973  
SRR17520069.13280233  
SRR17520069.13280235  
SRR17520069.13280237  
SRR17520069.13280239  
SRR17520069.13280241  
SRR17520069.13280243  
SRR17520069.13280245  
SRR17520069.13282106  
SRR17520069.13282108  
SRR17520069.13282112  
SRR17520069.13282114  
SRR17520069.13282116  
SRR17520069.13282118  
SRR17520069.13282120  
SRR17520069.13282122  
SRR17520069.13282124  
SRR17520069.13282126  
SRR17520069.13282128  
SRR17520069.13282460  
SRR17520069.13282462  
SRR17520069.13282464  
SRR17520069.13282466



SRR17520069. 13282468  
SRR17520069. 13286189  
SRR17520069. 13286191  
SRR17520069. 13286193  
SRR17520069. 13286195  
SRR17520069. 13286197  
SRR17520069. 13286199  
SRR17520069. 13286201  
SRR17520069. 13286203  
SRR17520069. 13286205  
SRR17520069. 13286207  
SRR17520069. 13286209  
SRR17520069. 13286211  
SRR17520069. 13286213  
SRR17520069. 13286215  
SRR17520069. 13286217  
SRR17520069. 13286219  
SRR17520069. 13286221  
SRR17520069. 13286223  
SRR17520069. 13286225  
SRR17520069. 13286227  
SRR17520069. 13286229  
SRR17520069. 13286231  
SRR17520069. 13286233  
SRR17520069. 13286235  
SRR17520069. 13286237  
SRR17520069. 13286239  
SRR17520069. 13286241  
SRR17520069. 13286243  
SRR17520069. 13286245  
SRR17520069. 13286247  
SRR17520069. 13286249  
SRR17520069. 13286251  
SRR17520069. 13286253  
SRR17520069. 13286255  
SRR17520069. 13286257  
SRR17520069. 13286259  
SRR17520069. 13286261  
SRR17520069. 13286263  
SRR17520069. 13286265  
SRR17520069. 13286267  
SRR17520069. 13286269  
SRR17520069. 13286271  
SRR17520069. 13286273  
SRR17520069. 13286275  
SRR17520069. 13286277  
SRR17520069. 13286279

SRR17520069. 13286281  
SRR17520069. 13286283  
SRR17520069. 13286285  
SRR17520069. 13286287  
SRR17520069. 13290962  
SRR17520069. 13290964  
SRR17520069. 13290966  
SRR17520069. 13290968  
SRR17520069. 13290970  
SRR17520069. 13290972  
SRR17520069. 13290974  
SRR17520069. 13290976  
SRR17520069. 13294965  
SRR17520069. 13294967  
SRR17520069. 13294969  
SRR17520069. 13294971  
SRR17520069. 13294973  
SRR17520069. 13294975  
SRR17520069. 13294977  
SRR17520069. 13294979  
SRR17520069. 13294981  
SRR17520069. 13294983  
SRR17520069. 13294985  
SRR17520069. 13294987  
SRR17520069. 13294989  
SRR17520069. 13294991  
SRR17520069. 13294993  
SRR17520069. 13294995  
SRR17520069. 13295501  
SRR17520069. 13295503  
SRR17520069. 13295505  
SRR17520069. 13295507  
SRR17520069. 13295803  
SRR17520069. 13296006  
SRR17520069. 13296008  
SRR17520069. 13296010  
SRR17520069. 13297322  
SRR17520069. 13297324  
SRR17520069. 13297326  
SRR17520069. 13297328  
SRR17520069. 13297334  
SRR17520069. 13297338  
SRR17520069. 13297342  
SRR17520069. 13297344  
SRR17520069. 13297346  
SRR17520069. 13297348  
SRR17520069. 13297350

SRR17520069. 13297352  
SRR17520069. 13297354  
SRR17520069. 13297356  
SRR17520069. 13297358  
SRR17520069. 13297360  
SRR17520069. 13297362  
SRR17520069. 13297364  
SRR17520069. 13297366  
SRR17520069. 13297368  
SRR17520069. 13297372  
SRR17520069. 13297374  
SRR17520069. 13297376  
SRR17520069. 13297378  
SRR17520069. 13297380  
SRR17520069. 13297382  
SRR17520069. 13297384  
SRR17520069. 13297386  
SRR17520069. 13297388  
SRR17520069. 13297390  
SRR17520069. 13297392  
SRR17520069. 13297394  
SRR17520069. 13297396  
SRR17520069. 13297398  
SRR17520069. 13297400  
SRR17520069. 13297887  
SRR17520069. 13297889  
SRR17520069. 13297891  
SRR17520069. 13304226  
SRR17520069. 13304228  
SRR17520069. 13304230  
SRR17520069. 13304232  
SRR17520069. 13304234  
SRR17520069. 13304236  
SRR17520069. 13304238  
SRR17520069. 13304240  
SRR17520069. 13304242  
SRR17520069. 13304244  
SRR17520069. 13304246  
SRR17520069. 13304248  
SRR17520069. 13304250  
SRR17520069. 13304252  
SRR17520069. 13304254  
SRR17520069. 13304256  
SRR17520069. 13304258  
SRR17520069. 13304260  
SRR17520069. 13304262  
SRR17520069. 13304264

SRR17520069. 13304266  
SRR17520069. 13304268  
SRR17520069. 13304270  
SRR17520069. 13304272  
SRR17520069. 13304274  
SRR17520069. 13304276  
SRR17520069. 13304278  
SRR17520069. 13304280  
SRR17520069. 13304284  
SRR17520069. 13304286  
SRR17520069. 13304288  
SRR17520069. 13304290  
SRR17520069. 13304292  
SRR17520069. 13304294  
SRR17520069. 13304296  
SRR17520069. 13304298  
SRR17520069. 13304300  
SRR17520069. 13304302  
SRR17520069. 13304304  
SRR17520069. 13304306  
SRR17520069. 13304308  
SRR17520069. 13304310  
SRR17520069. 13304312  
SRR17520069. 13304314  
SRR17520069. 13304316  
SRR17520069. 13304318  
SRR17520069. 13304320  
SRR17520069. 13304322  
SRR17520069. 13304324  
SRR17520069. 13306041  
SRR17520069. 13311321  
SRR17520069. 13311323  
SRR17520069. 13311325  
SRR17520069. 13311327  
SRR17520069. 13311329  
SRR17520069. 13311331  
SRR17520069. 13311333  
SRR17520069. 13311335  
SRR17520069. 13311337  
SRR17520069. 13311339  
SRR17520069. 13311341  
SRR17520069. 13311343  
SRR17520069. 13311345  
SRR17520069. 13311347  
SRR17520069. 13311349  
SRR17520069. 13311351  
SRR17520069. 13311353

SRR17520069. 13311355  
SRR17520069. 13311357  
SRR17520069. 13311359  
SRR17520069. 13311361  
SRR17520069. 13311363  
SRR17520069. 13311365  
SRR17520069. 13311367  
SRR17520069. 13311369  
SRR17520069. 13311371  
SRR17520069. 13311373  
SRR17520069. 13311375  
SRR17520069. 13311377  
SRR17520069. 13311379  
SRR17520069. 13311381  
SRR17520069. 13311383  
SRR17520069. 13311385  
SRR17520069. 13311387  
SRR17520069. 13311389  
SRR17520069. 13311391  
SRR17520069. 13311393  
SRR17520069. 13311395  
SRR17520069. 13311397  
SRR17520069. 13311399  
SRR17520069. 13311401  
SRR17520069. 13311403  
SRR17520069. 13311405  
SRR17520069. 13311407  
SRR17520069. 13311415  
SRR17520069. 13311433  
SRR17520069. 13311435  
SRR17520069. 13311437  
SRR17520069. 13311441  
SRR17520069. 13311443  
SRR17520069. 13311445  
SRR17520069. 13316957  
SRR17520069. 13316959  
SRR17520069. 13316961  
SRR17520069. 13316963  
SRR17520069. 13316965  
SRR17520069. 13316967  
SRR17520069. 13316969  
SRR17520069. 13316971  
SRR17520069. 13316973  
SRR17520069. 13316975  
SRR17520069. 13316977  
SRR17520069. 13316979  
SRR17520069. 13316981

SRR17520069. 13316983  
SRR17520069. 13316985  
SRR17520069. 13316987  
SRR17520069. 13316989  
SRR17520069. 13316991  
SRR17520069. 13316993  
SRR17520069. 13316995  
SRR17520069. 13316997  
SRR17520069. 13316999  
SRR17520069. 13317001  
SRR17520069. 13317003  
SRR17520069. 13317005  
SRR17520069. 13317007  
SRR17520069. 13317009  
SRR17520069. 13317011  
SRR17520069. 13317013  
SRR17520069. 13317015  
SRR17520069. 13317017  
SRR17520069. 13317019  
SRR17520069. 13317021  
SRR17520069. 13317023  
SRR17520069. 13317025  
SRR17520069. 13317027  
SRR17520069. 13317029  
SRR17520069. 13317031  
SRR17520069. 13317033  
SRR17520069. 13317035  
SRR17520069. 13317037  
SRR17520069. 13317039  
SRR17520069. 13317041  
SRR17520069. 13317043  
SRR17520069. 13317045  
SRR17520069. 13317047  
SRR17520069. 13317049  
SRR17520069. 13317051  
SRR17520069. 13317053  
SRR17520069. 13317055  
SRR17520069. 13317057  
SRR17520069. 13317059  
SRR17520069. 13317061  
SRR17520069. 13317063  
SRR17520069. 13317065  
SRR17520069. 13317067  
SRR17520069. 13317069  
SRR17520069. 13318257  
SRR17520069. 13321653  
SRR17520069. 13321655

SRR17520069.13321657  
SRR17520069.13321659  
SRR17520069.13321661  
SRR17520069.13321663  
SRR17520069.13321665  
SRR17520069.13321667  
SRR17520069.13321669  
SRR17520069.13321671  
SRR17520069.13321673  
SRR17520069.13329376  
SRR17520069.13329378  
SRR17520069.13329380  
SRR17520069.13329382  
SRR17520069.13329384  
SRR17520069.13329386  
SRR17520069.13329388  
SRR17520069.13329390  
SRR17520069.13329392  
SRR17520069.13329394  
SRR17520069.13329396  
SRR17520069.13329398  
SRR17520069.13329400  
SRR17520069.13329402  
SRR17520069.13329404  
SRR17520069.13329406  
SRR17520069.13329408  
SRR17520069.13329410  
SRR17520069.13329412  
SRR17520069.13329414  
SRR17520069.13329416  
SRR17520069.13329418  
SRR17520069.13329420  
SRR17520069.13329422  
SRR17520069.13329424  
SRR17520069.13329426  
SRR17520069.13329428  
SRR17520069.13329430  
SRR17520069.13329432  
SRR17520069.13329434  
SRR17520069.13329436  
SRR17520069.13341622  
SRR17520069.13341624  
SRR17520069.13341626  
SRR17520069.13341628  
SRR17520069.13341630  
SRR17520069.13341632  
SRR17520069.13341634

SRR17520069. 13341636  
SRR17520069. 13341638  
SRR17520069. 13341640  
SRR17520069. 13341642  
SRR17520069. 13341644  
SRR17520069. 13341646  
SRR17520069. 13341648  
SRR17520069. 13341650  
SRR17520069. 13345251  
SRR17520069. 13345253  
SRR17520069. 13345255  
SRR17520069. 13345257  
SRR17520069. 13345395  
SRR17520069. 13345397  
SRR17520069. 13345399  
SRR17520069. 13345401  
SRR17520069. 13345403  
SRR17520069. 13345405  
SRR17520069. 13345407  
SRR17520069. 13345409  
SRR17520069. 13345411  
SRR17520069. 13345413  
SRR17520069. 13345415  
SRR17520069. 13345417  
SRR17520069. 13345419  
SRR17520069. 13345421  
SRR17520069. 13345423  
SRR17520069. 13345425  
SRR17520069. 13345427  
SRR17520069. 13345429  
SRR17520069. 13345431  
SRR17520069. 13345433  
SRR17520069. 13345435  
SRR17520069. 13345437  
SRR17520069. 13345439  
SRR17520069. 13345441  
SRR17520069. 13345443  
SRR17520069. 13345445  
SRR17520069. 13345447  
SRR17520069. 13345449  
SRR17520069. 13345451  
SRR17520069. 13345453  
SRR17520069. 13345455  
SRR17520069. 13345457  
SRR17520069. 13345459  
SRR17520069. 13345461  
SRR17520069. 13345463



SRR17520069. 13345465  
SRR17520069. 13345467  
SRR17520069. 13345469  
SRR17520069. 13345471  
SRR17520069. 13345473  
SRR17520069. 13345475  
SRR17520069. 13345477  
SRR17520069. 13345479  
SRR17520069. 13345481  
SRR17520069. 13345483  
SRR17520069. 13345485  
SRR17520069. 13345487  
SRR17520069. 13345489  
SRR17520069. 13345491  
SRR17520069. 13345493  
SRR17520069. 13345495  
SRR17520069. 13345497  
SRR17520069. 13345499  
SRR17520069. 13345501  
SRR17520069. 13345503  
SRR17520069. 13345505  
SRR17520069. 13345507  
SRR17520069. 13345509  
SRR17520069. 13345511  
SRR17520069. 13345513  
SRR17520069. 13345515  
SRR17520069. 13345517  
SRR17520069. 13345519  
SRR17520069. 13345521  
SRR17520069. 13345523  
SRR17520069. 13345525  
SRR17520069. 13345527  
SRR17520069. 13345529  
SRR17520069. 13345531  
SRR17520069. 13348621  
SRR17520069. 13348623  
SRR17520069. 13348627  
SRR17520069. 13354148  
SRR17520069. 13354384  
SRR17520069. 13354386  
SRR17520069. 13354388  
SRR17520069. 13354390  
SRR17520069. 13354392  
SRR17520069. 13354394  
SRR17520069. 13354396  
SRR17520069. 13354400  
SRR17520069. 13354404

SRR17520069. 13354406  
SRR17520069. 13354408  
SRR17520069. 13354410  
SRR17520069. 13354412  
SRR17520069. 13354414  
SRR17520069. 13354416  
SRR17520069. 13354418  
SRR17520069. 13354420  
SRR17520069. 13354422  
SRR17520069. 13354426  
SRR17520069. 13354428  
SRR17520069. 13354761  
SRR17520069. 13355989  
SRR17520069. 13355991  
SRR17520069. 13376183  
SRR17520069. 13395028  
SRR17520069. 13395030  
SRR17520069. 13396463  
SRR17520069. 13396465  
SRR17520069. 13396467  
SRR17520069. 13396469  
SRR17520069. 13396471  
SRR17520069. 13396473  
SRR17520069. 13396475  
SRR17520069. 13396477  
SRR17520069. 13396479  
SRR17520069. 13396481  
SRR17520069. 13396483  
SRR17520069. 13396485  
SRR17520069. 13396487  
SRR17520069. 13396489  
SRR17520069. 13396491  
SRR17520069. 13396493  
SRR17520069. 13396495  
SRR17520069. 13396497  
SRR17520069. 13396499  
SRR17520069. 13396501  
SRR17520069. 13396503  
SRR17520069. 13396505  
SRR17520069. 13396507  
SRR17520069. 13396509  
SRR17520069. 13396511  
SRR17520069. 13396513  
SRR17520069. 13396515  
SRR17520069. 13396517  
SRR17520069. 13396519  
SRR17520069. 13396521

SRR17520069. 13396523  
SRR17520069. 13396525  
SRR17520069. 13396527  
SRR17520069. 13396529  
SRR17520069. 13396531  
SRR17520069. 13396533  
SRR17520069. 13396535  
SRR17520069. 13396537  
SRR17520069. 13396539  
SRR17520069. 13396541  
SRR17520069. 13396543  
SRR17520069. 13396545  
SRR17520069. 13396547  
SRR17520069. 13396549  
SRR17520069. 13396551  
SRR17520069. 13396553  
SRR17520069. 13396555  
SRR17520069. 13396557  
SRR17520069. 13397724  
SRR17520069. 13397726  
SRR17520069. 13397728  
SRR17520069. 13397730  
SRR17520069. 13397732  
SRR17520069. 13397734  
SRR17520069. 13397736  
SRR17520069. 13397738  
SRR17520069. 13397740  
SRR17520069. 13400922  
SRR17520069. 13400925  
SRR17520069. 13400927  
SRR17520069. 13400929  
SRR17520069. 13400931  
SRR17520069. 13400933  
SRR17520069. 13400935  
SRR17520069. 13400937  
SRR17520069. 13400939  
SRR17520069. 13400941  
SRR17520069. 13400943  
SRR17520069. 13400945  
SRR17520069. 13400947  
SRR17520069. 13400949  
SRR17520069. 13400951  
SRR17520069. 13400953  
SRR17520069. 13400955  
SRR17520069. 13400957  
SRR17520069. 13400959  
SRR17520069. 13400961

SRR17520069.13400963  
SRR17520069.13400965  
SRR17520069.13400967  
SRR17520069.13400969  
SRR17520069.13400971  
SRR17520069.13400973  
SRR17520069.13400975  
SRR17520069.13400977  
SRR17520069.13400979  
SRR17520069.13400981  
SRR17520069.13400983  
SRR17520069.13400985  
SRR17520069.13400987  
SRR17520069.13400989  
SRR17520069.13400993  
SRR17520069.13400995  
SRR17520069.13400999  
SRR17520069.13401001  
SRR17520069.13401003  
SRR17520069.13401474  
SRR17520069.13401476  
SRR17520069.13406125  
SRR17520069.13406129  
SRR17520069.13406131  
SRR17520069.13406133  
SRR17520069.13406135  
SRR17520069.13406137  
SRR17520069.13406139  
SRR17520069.13406141  
SRR17520069.13406143  
SRR17520069.13406145  
SRR17520069.13406147  
SRR17520069.13406149  
SRR17520069.13406151  
SRR17520069.13406153  
SRR17520069.13406157  
SRR17520069.13406159  
SRR17520069.13406161  
SRR17520069.13406163  
SRR17520069.13406165  
SRR17520069.13406167  
SRR17520069.13406169  
SRR17520069.13406171  
SRR17520069.13406173  
SRR17520069.13406175  
SRR17520069.13406177  
SRR17520069.13406179

SRR17520069. 13406181  
SRR17520069. 13406183  
SRR17520069. 13406185  
SRR17520069. 13406187  
SRR17520069. 13406189  
SRR17520069. 13406191  
SRR17520069. 13406193  
SRR17520069. 13406195  
SRR17520069. 13406197  
SRR17520069. 13409652  
SRR17520069. 13409654  
SRR17520069. 13409656  
SRR17520069. 13409658  
SRR17520069. 13409660  
SRR17520069. 13409662  
SRR17520069. 13409664  
SRR17520069. 13409666  
SRR17520069. 13409668  
SRR17520069. 13409670  
SRR17520069. 13409672  
SRR17520069. 13409674  
SRR17520069. 13409676  
SRR17520069. 13409678  
SRR17520069. 13409680  
SRR17520069. 13409682  
SRR17520069. 13409684  
SRR17520069. 13409686  
SRR17520069. 13409688  
SRR17520069. 13409690  
SRR17520069. 13409692  
SRR17520069. 13409694  
SRR17520069. 13409696  
SRR17520069. 13409698  
SRR17520069. 13409700  
SRR17520069. 13409702  
SRR17520069. 13409704  
SRR17520069. 13409706  
SRR17520069. 13409708  
SRR17520069. 13409710  
SRR17520069. 13409712  
SRR17520069. 13409714  
SRR17520069. 13409716  
SRR17520069. 13409718  
SRR17520069. 13409720  
SRR17520069. 13409722  
SRR17520069. 13409724  
SRR17520069. 13409726

SRR17520069. 13409728  
SRR17520069. 13409730  
SRR17520069. 13409732  
SRR17520069. 13411960  
SRR17520069. 13411962  
SRR17520069. 13411964  
SRR17520069. 13411966  
SRR17520069. 13411968  
SRR17520069. 13411970  
SRR17520069. 13411972  
SRR17520069. 13411974  
SRR17520069. 13411976  
SRR17520069. 13411978  
SRR17520069. 13411980  
SRR17520069. 13411982  
SRR17520069. 13411984  
SRR17520069. 13411986  
SRR17520069. 13411990  
SRR17520069. 13411992  
SRR17520069. 13411996  
SRR17520069. 13411998  
SRR17520069. 13412000  
SRR17520069. 13412002  
SRR17520069. 13412004  
SRR17520069. 13412006  
SRR17520069. 13412008  
SRR17520069. 13412010  
SRR17520069. 13412012  
SRR17520069. 13412014  
SRR17520069. 13412016  
SRR17520069. 13412018  
SRR17520069. 13412020  
SRR17520069. 13412022  
SRR17520069. 13412024  
SRR17520069. 13412026  
SRR17520069. 13412028  
SRR17520069. 13412030  
SRR17520069. 13412032  
SRR17520069. 13412034  
SRR17520069. 13412036  
SRR17520069. 13412038  
SRR17520069. 13412040  
SRR17520069. 13412042  
SRR17520069. 13412044  
SRR17520069. 13412046  
SRR17520069. 13412048  
SRR17520069. 13412050

SRR17520069. 13412052  
SRR17520069. 13412054  
SRR17520069. 13412056  
SRR17520069. 13412058  
SRR17520069. 13412060  
SRR17520069. 13412062  
SRR17520069. 13412064  
SRR17520069. 13412066  
SRR17520069. 13412070  
SRR17520069. 13412072  
SRR17520069. 13412074  
SRR17520069. 13412076  
SRR17520069. 13412078  
SRR17520069. 13412080  
SRR17520069. 13412082  
SRR17520069. 13412084  
SRR17520069. 13412086  
SRR17520069. 13412088  
SRR17520069. 13412090  
SRR17520069. 13412092  
SRR17520069. 13412094  
SRR17520069. 13412096  
SRR17520069. 13412098  
SRR17520069. 13412100  
SRR17520069. 13412102  
SRR17520069. 13412104  
SRR17520069. 13412106  
SRR17520069. 13412108  
SRR17520069. 13415297  
SRR17520069. 13415299  
SRR17520069. 13415301  
SRR17520069. 13415303  
SRR17520069. 13415305  
SRR17520069. 13415307  
SRR17520069. 13415309  
SRR17520069. 13415311  
SRR17520069. 13415315  
SRR17520069. 13415317  
SRR17520069. 13415319  
SRR17520069. 13415321  
SRR17520069. 13415323  
SRR17520069. 13415325  
SRR17520069. 13415329  
SRR17520069. 13415331  
SRR17520069. 13415333  
SRR17520069. 13415335  
SRR17520069. 13415337

SRR17520069. 13415339  
SRR17520069. 13415341  
SRR17520069. 13415343  
SRR17520069. 13415345  
SRR17520069. 13415347  
SRR17520069. 13415349  
SRR17520069. 13415351  
SRR17520069. 13415353  
SRR17520069. 13415355  
SRR17520069. 13415357  
SRR17520069. 13415359  
SRR17520069. 13415361  
SRR17520069. 13415363  
SRR17520069. 13415365  
SRR17520069. 13415367  
SRR17520069. 13415369  
SRR17520069. 13415371  
SRR17520069. 13415862  
SRR17520069. 13415866  
SRR17520069. 13415868  
SRR17520069. 13428552  
SRR17520069. 13428554  
SRR17520069. 13428556  
SRR17520069. 13428558  
SRR17520069. 13428560  
SRR17520069. 13428562  
SRR17520069. 13428564  
SRR17520069. 13428566  
SRR17520069. 13429712  
SRR17520069. 13429714  
SRR17520069. 13429720  
SRR17520069. 13429722  
SRR17520069. 13429724  
SRR17520069. 13430960  
SRR17520069. 13430962  
SRR17520069. 13430964  
SRR17520069. 13430966  
SRR17520069. 13430968  
SRR17520069. 13430970  
SRR17520069. 13430972  
SRR17520069. 13430974  
SRR17520069. 13430976  
SRR17520069. 13430978  
SRR17520069. 13430982  
SRR17520069. 13430984  
SRR17520069. 13430994  
SRR17520069. 13430998



SRR17520069. 13436723  
SRR17520069. 13436725  
SRR17520069. 13436727  
SRR17520069. 13436729  
SRR17520069. 13444231  
SRR17520069. 13445277  
SRR17520069. 13445279  
SRR17520069. 13445281  
SRR17520069. 13445283  
SRR17520069. 13445285  
SRR17520069. 13445287  
SRR17520069. 13445289  
SRR17520069. 13445291  
SRR17520069. 13445293  
SRR17520069. 13445295  
SRR17520069. 13445297  
SRR17520069. 13445299  
SRR17520069. 13445301  
SRR17520069. 13445303  
SRR17520069. 13445305  
SRR17520069. 13445307  
SRR17520069. 13445309  
SRR17520069. 13445311  
SRR17520069. 13445313  
SRR17520069. 13445315  
SRR17520069. 13445317  
SRR17520069. 13445319  
SRR17520069. 13445321  
SRR17520069. 13445323  
SRR17520069. 13445327  
SRR17520069. 13445329  
SRR17520069. 13445331  
SRR17520069. 13445333  
SRR17520069. 13445337  
SRR17520069. 13445341  
SRR17520069. 13445343  
SRR17520069. 13445345  
SRR17520069. 13448303  
SRR17520069. 13448826  
SRR17520069. 13448828  
SRR17520069. 13448830  
SRR17520069. 13448832  
SRR17520069. 13448834  
SRR17520069. 13448836  
SRR17520069. 13448838  
SRR17520069. 13448840  
SRR17520069. 13448842

SRR17520069. 13448844  
SRR17520069. 13448846  
SRR17520069. 13448848  
SRR17520069. 13448850  
SRR17520069. 13448854  
SRR17520069. 13448856  
SRR17520069. 13448858  
SRR17520069. 13448860  
SRR17520069. 13448862  
SRR17520069. 13448864  
SRR17520069. 13459755  
SRR17520069. 13459757  
SRR17520069. 13459759  
SRR17520069. 13459761  
SRR17520069. 13459763  
SRR17520069. 13459765  
SRR17520069. 13459767  
SRR17520069. 13459769  
SRR17520069. 13459771  
SRR17520069. 13459773  
SRR17520069. 13459775  
SRR17520069. 13459777  
SRR17520069. 13459781  
SRR17520069. 13459783  
SRR17520069. 13459785  
SRR17520069. 13459787  
SRR17520069. 13459789  
SRR17520069. 13459791  
SRR17520069. 13459793  
SRR17520069. 13459795  
SRR17520069. 13459799  
SRR17520069. 13459801  
SRR17520069. 13459803  
SRR17520069. 13459805  
SRR17520069. 13459807  
SRR17520069. 13459809  
SRR17520069. 13463360  
SRR17520069. 13463362  
SRR17520069. 13463364  
SRR17520069. 13463366  
SRR17520069. 13463368  
SRR17520069. 13463370  
SRR17520069. 13463372  
SRR17520069. 13463374  
SRR17520069. 13463376  
SRR17520069. 13463378  
SRR17520069. 13463380

SRR17520069. 13463382  
SRR17520069. 13463384  
SRR17520069. 13463386  
SRR17520069. 13463388  
SRR17520069. 13463390  
SRR17520069. 13463392  
SRR17520069. 13463394  
SRR17520069. 13463396  
SRR17520069. 13463398  
SRR17520069. 13463400  
SRR17520069. 13463402  
SRR17520069. 13463404  
SRR17520069. 13463406  
SRR17520069. 13463408  
SRR17520069. 13463410  
SRR17520069. 13463412  
SRR17520069. 13463414  
SRR17520069. 13463416  
SRR17520069. 13463418  
SRR17520069. 13463420  
SRR17520069. 13463422  
SRR17520069. 13463424  
SRR17520069. 13463426  
SRR17520069. 13463428  
SRR17520069. 13463430  
SRR17520069. 13463432  
SRR17520069. 13463434  
SRR17520069. 13463436  
SRR17520069. 13463438  
SRR17520069. 13463440  
SRR17520069. 13463442  
SRR17520069. 13463444  
SRR17520069. 13463446  
SRR17520069. 13463520  
SRR17520069. 13463522  
SRR17520069. 13463526  
SRR17520069. 13463528  
SRR17520069. 13463530  
SRR17520069. 13463532  
SRR17520069. 13463534  
SRR17520069. 13463538  
SRR17520069. 13463540  
SRR17520069. 13463542  
SRR17520069. 13463544  
SRR17520069. 13463546  
SRR17520069. 13463548  
SRR17520069. 13463550

SRR17520069. 13463552  
SRR17520069. 13463554  
SRR17520069. 13463556  
SRR17520069. 13463560  
SRR17520069. 13463562  
SRR17520069. 13463564  
SRR17520069. 13463566  
SRR17520069. 13463568  
SRR17520069. 13463570  
SRR17520069. 13463574  
SRR17520069. 13463578  
SRR17520069. 13463580  
SRR17520069. 13463584  
SRR17520069. 13463590  
SRR17520069. 13463594  
SRR17520069. 13463596  
SRR17520069. 13463598  
SRR17520069. 13463600  
SRR17520069. 13463602  
SRR17520069. 13463604  
SRR17520069. 13463606  
SRR17520069. 13463608  
SRR17520069. 13463610  
SRR17520069. 13463612  
SRR17520069. 13463614  
SRR17520069. 13463616  
SRR17520069. 13463618  
SRR17520069. 13463620  
SRR17520069. 13463622  
SRR17520069. 13463624  
SRR17520069. 13463626  
SRR17520069. 13463628  
SRR17520069. 13463630  
SRR17520069. 13463632  
SRR17520069. 13463634  
SRR17520069. 13463638  
SRR17520069. 13463640  
SRR17520069. 13463642  
SRR17520069. 13463644  
SRR17520069. 13463646  
SRR17520069. 13469543  
SRR17520069. 13469545  
SRR17520069. 13469547  
SRR17520069. 13469549  
SRR17520069. 13469551  
SRR17520069. 13469553  
SRR17520069. 13469555

SRR17520069. 13469557  
SRR17520069. 13469561  
SRR17520069. 13470277  
SRR17520069. 13470279  
SRR17520069. 13470281  
SRR17520069. 13470283  
SRR17520069. 13470285  
SRR17520069. 13470287  
SRR17520069. 13470289  
SRR17520069. 13470291  
SRR17520069. 13470293  
SRR17520069. 13470295  
SRR17520069. 13470297  
SRR17520069. 13470299  
SRR17520069. 13470301  
SRR17520069. 13470303  
SRR17520069. 13470305  
SRR17520069. 13470307  
SRR17520069. 13470309  
SRR17520069. 13470311  
SRR17520069. 13470313  
SRR17520069. 13470315  
SRR17520069. 13470317  
SRR17520069. 13470319  
SRR17520069. 13470321  
SRR17520069. 13470323  
SRR17520069. 13470325  
SRR17520069. 13470327  
SRR17520069. 13470329  
SRR17520069. 13470331  
SRR17520069. 13470333  
SRR17520069. 13470335  
SRR17520069. 13470337  
SRR17520069. 13470339  
SRR17520069. 13471201  
SRR17520069. 13473201  
SRR17520069. 13473203  
SRR17520069. 13473205  
SRR17520069. 13473207  
SRR17520069. 13477073  
SRR17520069. 13477075  
SRR17520069. 13477077  
SRR17520069. 13477079  
SRR17520069. 13477081  
SRR17520069. 13477083  
SRR17520069. 13477085  
SRR17520069. 13477087

SRR17520069. 13477089  
SRR17520069. 13477091  
SRR17520069. 13477093  
SRR17520069. 13477095  
SRR17520069. 13477097  
SRR17520069. 13477099  
SRR17520069. 13477101  
SRR17520069. 13477103  
SRR17520069. 13477105  
SRR17520069. 13477107  
SRR17520069. 13477109  
SRR17520069. 13477111  
SRR17520069. 13477113  
SRR17520069. 13477115  
SRR17520069. 13477117  
SRR17520069. 13477119  
SRR17520069. 13477121  
SRR17520069. 13477123  
SRR17520069. 13477125  
SRR17520069. 13477127  
SRR17520069. 13477129  
SRR17520069. 13477131  
SRR17520069. 13477133  
SRR17520069. 13477135  
SRR17520069. 13477137  
SRR17520069. 13477139  
SRR17520069. 13477141  
SRR17520069. 13477143  
SRR17520069. 13477145  
SRR17520069. 13477147  
SRR17520069. 13477149  
SRR17520069. 13477151  
SRR17520069. 13477153  
SRR17520069. 13477155  
SRR17520069. 13477157  
SRR17520069. 13477159  
SRR17520069. 13478230  
SRR17520069. 13478232  
SRR17520069. 13478234  
SRR17520069. 13478236  
SRR17520069. 13478238  
SRR17520069. 13478240  
SRR17520069. 13478242  
SRR17520069. 13478244  
SRR17520069. 13478248  
SRR17520069. 13478250  
SRR17520069. 13478252

SRR17520069. 13478254  
SRR17520069. 13478256  
SRR17520069. 13478260  
SRR17520069. 13478262  
SRR17520069. 13478264  
SRR17520069. 13478268  
SRR17520069. 13478270  
SRR17520069. 13478277  
SRR17520069. 13478279  
SRR17520069. 13478281  
SRR17520069. 13478283  
SRR17520069. 13478285  
SRR17520069. 13478287  
SRR17520069. 13478289  
SRR17520069. 13478291  
SRR17520069. 13478293  
SRR17520069. 13478295  
SRR17520069. 13478299  
SRR17520069. 13478301  
SRR17520069. 13478303  
SRR17520069. 13478305  
SRR17520069. 13478307  
SRR17520069. 13478309  
SRR17520069. 13478311  
SRR17520069. 13478313  
SRR17520069. 13478315  
SRR17520069. 13478317  
SRR17520069. 13478319  
SRR17520069. 13482356  
SRR17520069. 13484693  
SRR17520069. 13484695  
SRR17520069. 13484697  
SRR17520069. 13484699  
SRR17520069. 13484701  
SRR17520069. 13484703  
SRR17520069. 13484705  
SRR17520069. 13484707  
SRR17520069. 13484711  
SRR17520069. 13484713  
SRR17520069. 13484715  
SRR17520069. 13484717  
SRR17520069. 13484719  
SRR17520069. 13484721  
SRR17520069. 13484723  
SRR17520069. 13484725  
SRR17520069. 13484727  
SRR17520069. 13484731

SRR17520069. 13484733  
SRR17520069. 13484735  
SRR17520069. 13484737  
SRR17520069. 13484739  
SRR17520069. 13484741  
SRR17520069. 13484745  
SRR17520069. 13484747  
SRR17520069. 13484749  
SRR17520069. 13484751  
SRR17520069. 13484753  
SRR17520069. 13484755  
SRR17520069. 13484759  
SRR17520069. 13484763  
SRR17520069. 13484765  
SRR17520069. 13484769  
SRR17520069. 13484773  
SRR17520069. 13484775  
SRR17520069. 13484777  
SRR17520069. 13484779  
SRR17520069. 13484781  
SRR17520069. 13484785  
SRR17520069. 13484787  
SRR17520069. 13490850  
SRR17520069. 13490852  
SRR17520069. 13490854  
SRR17520069. 13490858  
SRR17520069. 13490862  
SRR17520069. 13490864  
SRR17520069. 13490866  
SRR17520069. 13490868  
SRR17520069. 13490870  
SRR17520069. 13490872  
SRR17520069. 13490874  
SRR17520069. 13490876  
SRR17520069. 13490878  
SRR17520069. 13490880  
SRR17520069. 13490882  
SRR17520069. 13490884  
SRR17520069. 13490886  
SRR17520069. 13490888  
SRR17520069. 13490890  
SRR17520069. 13490892  
SRR17520069. 13490894  
SRR17520069. 13490896  
SRR17520069. 13490898  
SRR17520069. 13490900  
SRR17520069. 13494570



SRR17520069. 13498795  
SRR17520069. 13498797  
SRR17520069. 13498801  
SRR17520069. 13498803  
SRR17520069. 13498805  
SRR17520069. 13498807  
SRR17520069. 13498811  
SRR17520069. 13498817  
SRR17520069. 13498821  
SRR17520069. 13498823  
SRR17520069. 13498825  
SRR17520069. 13498827  
SRR17520069. 13498829  
SRR17520069. 13498831  
SRR17520069. 13498833  
SRR17520069. 13498835  
SRR17520069. 13498837  
SRR17520069. 13498839  
SRR17520069. 13498841  
SRR17520069. 13498843  
SRR17520069. 13498845  
SRR17520069. 13498847  
SRR17520069. 13498849  
SRR17520069. 13498851  
SRR17520069. 13498853  
SRR17520069. 13498855  
SRR17520069. 13498857  
SRR17520069. 13498859  
SRR17520069. 13498861  
SRR17520069. 13498863  
SRR17520069. 13498865  
SRR17520069. 13498867  
SRR17520069. 13498869  
SRR17520069. 13498871  
SRR17520069. 13498875  
SRR17520069. 13498877  
SRR17520069. 13498879  
SRR17520069. 13498883  
SRR17520069. 13498885  
SRR17520069. 13498887  
SRR17520069. 13498889  
SRR17520069. 13498893  
SRR17520069. 13498895  
SRR17520069. 13498897  
SRR17520069. 13498899  
SRR17520069. 13498901  
SRR17520069. 13498903

SRR17520069. 13498905  
SRR17520069. 13501606  
SRR17520069. 13501608  
SRR17520069. 13501610  
SRR17520069. 13501612  
SRR17520069. 13501614  
SRR17520069. 13501713  
SRR17520069. 13501715  
SRR17520069. 13501717  
SRR17520069. 13501719  
SRR17520069. 13501721  
SRR17520069. 13504454  
SRR17520069. 13504456  
SRR17520069. 13504458  
SRR17520069. 13504460  
SRR17520069. 13504462  
SRR17520069. 13504464  
SRR17520069. 13504466  
SRR17520069. 13504468  
SRR17520069. 13504470  
SRR17520069. 13504472  
SRR17520069. 13504474  
SRR17520069. 13507379  
SRR17520069. 13507606  
SRR17520069. 13507608  
SRR17520069. 13507610  
SRR17520069. 13507612  
SRR17520069. 13507614  
SRR17520069. 13507616  
SRR17520069. 13511367  
SRR17520069. 13511369  
SRR17520069. 13511371  
SRR17520069. 13511373  
SRR17520069. 13511375  
SRR17520069. 13511377  
SRR17520069. 13511379  
SRR17520069. 13511381  
SRR17520069. 13511383  
SRR17520069. 13527558  
SRR17520069. 13527560  
SRR17520069. 13527564  
SRR17520069. 13527570  
SRR17520069. 13529111  
SRR17520069. 13529616  
SRR17520069. 13529618  
SRR17520069. 13529620  
SRR17520069. 13529624

SRR17520069. 13529626  
SRR17520069. 13529628  
SRR17520069. 13529630  
SRR17520069. 13529632  
SRR17520069. 13529634  
SRR17520069. 13529638  
SRR17520069. 13529640  
SRR17520069. 13529642  
SRR17520069. 13529644  
SRR17520069. 13529646  
SRR17520069. 13529648  
SRR17520069. 13529650  
SRR17520069. 13529652  
SRR17520069. 13529654  
SRR17520069. 13529658  
SRR17520069. 13529660  
SRR17520069. 13529662  
SRR17520069. 13529666  
SRR17520069. 13529668  
SRR17520069. 13529670  
SRR17520069. 13529674  
SRR17520069. 13529676  
SRR17520069. 13539813  
SRR17520069. 13539817  
SRR17520069. 13539821  
SRR17520069. 13539823  
SRR17520069. 13539825  
SRR17520069. 13539829  
SRR17520069. 13542970  
SRR17520069. 13542972  
SRR17520069. 13542974  
SRR17520069. 13542976  
SRR17520069. 13542978  
SRR17520069. 13542980  
SRR17520069. 13542982  
SRR17520069. 13542984  
SRR17520069. 13542986  
SRR17520069. 13542988  
SRR17520069. 13542990  
SRR17520069. 13542992  
SRR17520069. 13542994  
SRR17520069. 13542996  
SRR17520069. 13542998  
SRR17520069. 13543000  
SRR17520069. 13543002  
SRR17520069. 13543004  
SRR17520069. 13543006

SRR17520069. 13545839  
SRR17520069. 13545841  
SRR17520069. 13545843  
SRR17520069. 13550753  
SRR17520069. 13554877  
SRR17520069. 13564227  
SRR17520069. 13565686  
SRR17520069. 13565688  
SRR17520069. 13565690  
SRR17520069. 13565692  
SRR17520069. 13565694  
SRR17520069. 13565696  
SRR17520069. 13565698  
SRR17520069. 13565700  
SRR17520069. 13565702  
SRR17520069. 13565704  
SRR17520069. 13565706  
SRR17520069. 13565708  
SRR17520069. 13565712  
SRR17520069. 13565714  
SRR17520069. 13565716  
SRR17520069. 13565720  
SRR17520069. 13565722  
SRR17520069. 13565724  
SRR17520069. 13565726  
SRR17520069. 13565728  
SRR17520069. 13565730  
SRR17520069. 13565732  
SRR17520069. 13565734  
SRR17520069. 13565736  
SRR17520069. 13565738  
SRR17520069. 13565740  
SRR17520069. 13565742  
SRR17520069. 13565744  
SRR17520069. 13565746  
SRR17520069. 13565748  
SRR17520069. 13565750  
SRR17520069. 13565752  
SRR17520069. 13565754  
SRR17520069. 13565756  
SRR17520069. 13565758  
SRR17520069. 13565760  
SRR17520069. 13570222  
SRR17520069. 13570224  
SRR17520069. 13570226  
SRR17520069. 13570228  
SRR17520069. 13570230

SRR17520069. 13570232  
SRR17520069. 13570234  
SRR17520069. 13570236  
SRR17520069. 13570238  
SRR17520069. 13570242  
SRR17520069. 13570244  
SRR17520069. 13570246  
SRR17520069. 13570248  
SRR17520069. 13573282  
SRR17520069. 13573284  
SRR17520069. 13573286  
SRR17520069. 13573288  
SRR17520069. 13573290  
SRR17520069. 13573292  
SRR17520069. 13573294  
SRR17520069. 13573296  
SRR17520069. 13573298  
SRR17520069. 13573300  
SRR17520069. 13573302  
SRR17520069. 13573304  
SRR17520069. 13573306  
SRR17520069. 13573308  
SRR17520069. 13573310  
SRR17520069. 13573312  
SRR17520069. 13573314  
SRR17520069. 13582673  
SRR17520069. 13582675  
SRR17520069. 13582677  
SRR17520069. 13582679  
SRR17520069. 13582681  
SRR17520069. 13582683  
SRR17520069. 13582685  
SRR17520069. 13582687  
SRR17520069. 13582689  
SRR17520069. 13582691  
SRR17520069. 13582693  
SRR17520069. 13582695  
SRR17520069. 13582701  
SRR17520069. 13582703  
SRR17520069. 13582705  
SRR17520069. 13582707  
SRR17520069. 13582709  
SRR17520069. 13582711  
SRR17520069. 13582713  
SRR17520069. 13582715  
SRR17520069. 13582717  
SRR17520069. 13582719

SRR17520069. 13582721  
SRR17520069. 13582723  
SRR17520069. 13584089  
SRR17520069. 13584128  
SRR17520069. 13585617  
SRR17520069. 13585619  
SRR17520069. 13585621  
SRR17520069. 13585623  
SRR17520069. 13585625  
SRR17520069. 13585627  
SRR17520069. 13585629  
SRR17520069. 13592130  
SRR17520069. 13592132  
SRR17520069. 13592134  
SRR17520069. 13592136  
SRR17520069. 13592138  
SRR17520069. 13592140  
SRR17520069. 13592142  
SRR17520069. 13592144  
SRR17520069. 13592146  
SRR17520069. 13592148  
SRR17520069. 13592152  
SRR17520069. 13592154  
SRR17520069. 13592156  
SRR17520069. 13596660  
SRR17520069. 13597082  
SRR17520069. 13597084  
SRR17520069. 13597086  
SRR17520069. 13597088  
SRR17520069. 13597090  
SRR17520069. 13597092  
SRR17520069. 13597094  
SRR17520069. 13597096  
SRR17520069. 13597098  
SRR17520069. 13597308  
SRR17520069. 13597310  
SRR17520069. 13597314  
SRR17520069. 13597316  
SRR17520069. 13597318  
SRR17520069. 13597320  
SRR17520069. 13597322  
SRR17520069. 13597324  
SRR17520069. 13597326  
SRR17520069. 13597328  
SRR17520069. 13597330  
SRR17520069. 13597334  
SRR17520069. 13597336

SRR17520069. 13597338  
SRR17520069. 13597340  
SRR17520069. 13597342  
SRR17520069. 13597344  
SRR17520069. 13597346  
SRR17520069. 13597348  
SRR17520069. 13597350  
SRR17520069. 13597354  
SRR17520069. 13597356  
SRR17520069. 13597358  
SRR17520069. 13605110  
SRR17520069. 13605112  
SRR17520069. 13605114  
SRR17520069. 13605116  
SRR17520069. 13605118  
SRR17520069. 13605120  
SRR17520069. 13605122  
SRR17520069. 13605124  
SRR17520069. 13605126  
SRR17520069. 13605128  
SRR17520069. 13605130  
SRR17520069. 13605132  
SRR17520069. 13605134  
SRR17520069. 13605136  
SRR17520069. 13605138  
SRR17520069. 13605140  
SRR17520069. 13605142  
SRR17520069. 13605144  
SRR17520069. 13605146  
SRR17520069. 13605148  
SRR17520069. 13605150  
SRR17520069. 13605152  
SRR17520069. 13605154  
SRR17520069. 13605156  
SRR17520069. 13605158  
SRR17520069. 13605160  
SRR17520069. 13605162  
SRR17520069. 13605164  
SRR17520069. 13605166  
SRR17520069. 13605168  
SRR17520069. 13605170  
SRR17520069. 13605172  
SRR17520069. 13605174  
SRR17520069. 13605176  
SRR17520069. 13605178  
SRR17520069. 13606777  
SRR17520069. 13606779

SRR17520069. 13606781  
SRR17520069. 13606783  
SRR17520069. 13606785  
SRR17520069. 13606787  
SRR17520069. 13606791  
SRR17520069. 13606793  
SRR17520069. 13606795  
SRR17520069. 13606797  
SRR17520069. 13606799  
SRR17520069. 13606801  
SRR17520069. 13606803  
SRR17520069. 13606805  
SRR17520069. 13606807  
SRR17520069. 13608191  
SRR17520069. 13608656  
SRR17520069. 13608658  
SRR17520069. 13608660  
SRR17520069. 13608662  
SRR17520069. 13608664  
SRR17520069. 13608668  
SRR17520069. 13608950  
SRR17520069. 13608952  
SRR17520069. 13608954  
SRR17520069. 13608956  
SRR17520069. 13610505  
SRR17520069. 13610507  
SRR17520069. 13610509  
SRR17520069. 13616856  
SRR17520069. 13618935  
SRR17520069. 13625278  
SRR17520069. 13625280  
SRR17520069. 13625282  
SRR17520069. 13625284  
SRR17520069. 13625286  
SRR17520069. 13625288  
SRR17520069. 13625290  
SRR17520069. 13625292  
SRR17520069. 13625294  
SRR17520069. 13625296  
SRR17520069. 13625298  
SRR17520069. 13627812  
SRR17520069. 13627814  
SRR17520069. 13633600  
SRR17520069. 13633602  
SRR17520069. 13636171  
SRR17520069. 13637151  
SRR17520069. 13637153



SRR17520069. 13638490  
SRR17520069. 13638492  
SRR17520069. 13638494  
SRR17520069. 13638496  
SRR17520069. 13638498  
SRR17520069. 13638500  
SRR17520069. 13638502  
SRR17520069. 13638504  
SRR17520069. 13638506  
SRR17520069. 13638508  
SRR17520069. 13638512  
SRR17520069. 13638514  
SRR17520069. 13638516  
SRR17520069. 13638518  
SRR17520069. 13638520  
SRR17520069. 13638522  
SRR17520069. 13638524  
SRR17520069. 13638526  
SRR17520069. 13638528  
SRR17520069. 13638530  
SRR17520069. 13638532  
SRR17520069. 13638534  
SRR17520069. 13638536  
SRR17520069. 13638538  
SRR17520069. 13638540  
SRR17520069. 13644157  
SRR17520069. 13644159  
SRR17520069. 13644161  
SRR17520069. 13644163  
SRR17520069. 13644165  
SRR17520069. 13644167  
SRR17520069. 13644169  
SRR17520069. 13644171  
SRR17520069. 13644173  
SRR17520069. 13644175  
SRR17520069. 13644177  
SRR17520069. 13644179  
SRR17520069. 13644181  
SRR17520069. 13644183  
SRR17520069. 13644185  
SRR17520069. 13644187  
SRR17520069. 13644189  
SRR17520069. 13644191  
SRR17520069. 13644193  
SRR17520069. 13644197  
SRR17520069. 13644199  
SRR17520069. 13644201

SRR17520069. 13644203  
SRR17520069. 13644205  
SRR17520069. 13644207  
SRR17520069. 13644209  
SRR17520069. 13649730  
SRR17520069. 13649732  
SRR17520069. 13649734  
SRR17520069. 13649736  
SRR17520069. 13649738  
SRR17520069. 13649740  
SRR17520069. 13649742  
SRR17520069. 13649744  
SRR17520069. 13649746  
SRR17520069. 13649748  
SRR17520069. 13649750  
SRR17520069. 13649752  
SRR17520069. 13654265  
SRR17520069. 13654267  
SRR17520069. 13654269  
SRR17520069. 13654271  
SRR17520069. 13654273  
SRR17520069. 13654275  
SRR17520069. 13655860  
SRR17520069. 13655862  
SRR17520069. 13655864  
SRR17520069. 13655866  
SRR17520069. 13655868  
SRR17520069. 13655870  
SRR17520069. 13655872  
SRR17520069. 13656591  
SRR17520069. 13656593  
SRR17520069. 13658947  
SRR17520069. 13658949  
SRR17520069. 13658951  
SRR17520069. 13658953  
SRR17520069. 13658955  
SRR17520069. 13658957  
SRR17520069. 13658959  
SRR17520069. 13658961  
SRR17520069. 13658963  
SRR17520069. 13658965  
SRR17520069. 13658967  
SRR17520069. 13658969  
SRR17520069. 13658971  
SRR17520069. 13658973  
SRR17520069. 13667500  
SRR17520069. 13667502

SRR17520069. 13667504  
SRR17520069. 13667506  
SRR17520069. 13667508  
SRR17520069. 13667510  
SRR17520069. 13667516  
SRR17520069. 13667518  
SRR17520069. 13667524  
SRR17520069. 13667526  
SRR17520069. 13668366  
SRR17520069. 13668368  
SRR17520069. 13668370  
SRR17520069. 13668372  
SRR17520069. 13668374  
SRR17520069. 13668376  
SRR17520069. 13668378  
SRR17520069. 13668380  
SRR17520069. 13668382  
SRR17520069. 13668384  
SRR17520069. 13668860  
SRR17520069. 13668862  
SRR17520069. 13668864  
SRR17520069. 13668866  
SRR17520069. 13668868  
SRR17520069. 13668870  
SRR17520069. 13668872  
SRR17520069. 13668874  
SRR17520069. 13668876  
SRR17520069. 13676075  
SRR17520069. 13676077  
SRR17520069. 13676079  
SRR17520069. 13676081  
SRR17520069. 13676083  
SRR17520069. 13676085  
SRR17520069. 13676087  
SRR17520069. 13676089  
SRR17520069. 13676091  
SRR17520069. 13676093  
SRR17520069. 13676097  
SRR17520069. 13676099  
SRR17520069. 13676101  
SRR17520069. 13676103  
SRR17520069. 13676105  
SRR17520069. 13676109  
SRR17520069. 13676111  
SRR17520069. 13676115  
SRR17520069. 13676117  
SRR17520069. 13676119

SRR17520069. 13676121  
SRR17520069. 13676123  
SRR17520069. 13676125  
SRR17520069. 13676127  
SRR17520069. 13676129  
SRR17520069. 13676131  
SRR17520069. 13676133  
SRR17520069. 13676135  
SRR17520069. 13676137  
SRR17520069. 13676139  
SRR17520069. 13676141  
SRR17520069. 13676143  
SRR17520069. 13676145  
SRR17520069. 13676147  
SRR17520069. 13676149  
SRR17520069. 13676151  
SRR17520069. 13676153  
SRR17520069. 13676155  
SRR17520069. 13676157  
SRR17520069. 13676159  
SRR17520069. 13676291  
SRR17520069. 13676293  
SRR17520069. 13676295  
SRR17520069. 13676297  
SRR17520069. 13676299  
SRR17520069. 13676301  
SRR17520069. 13676305  
SRR17520069. 13676307  
SRR17520069. 13676309  
SRR17520069. 13676311  
SRR17520069. 13676313  
SRR17520069. 13676315  
SRR17520069. 13676317  
SRR17520069. 13676321  
SRR17520069. 13676323  
SRR17520069. 13676325  
SRR17520069. 13676327  
SRR17520069. 13676329  
SRR17520069. 13676331  
SRR17520069. 13676335  
SRR17520069. 13676337  
SRR17520069. 13676339  
SRR17520069. 13676341  
SRR17520069. 13676343  
SRR17520069. 13676347  
SRR17520069. 13676349  
SRR17520069. 13676351

SRR17520069. 13676353  
SRR17520069. 13676355  
SRR17520069. 13676357  
SRR17520069. 13676359  
SRR17520069. 13676361  
SRR17520069. 13676363  
SRR17520069. 13676365  
SRR17520069. 13676367  
SRR17520069. 13676369  
SRR17520069. 13677748  
SRR17520069. 13677752  
SRR17520069. 13677754  
SRR17520069. 13677756  
SRR17520069. 13677758  
SRR17520069. 13677760  
SRR17520069. 13677762  
SRR17520069. 13678971  
SRR17520069. 13678973  
SRR17520069. 13678975  
SRR17520069. 13678977  
SRR17520069. 13678979  
SRR17520069. 13678981  
SRR17520069. 13683127  
SRR17520069. 13683129  
SRR17520069. 13683131  
SRR17520069. 13683133  
SRR17520069. 13683135  
SRR17520069. 13683139  
SRR17520069. 13683141  
SRR17520069. 13683143  
SRR17520069. 13683145  
SRR17520069. 13683147  
SRR17520069. 13684464  
SRR17520069. 13684538  
SRR17520069. 13684547  
SRR17520069. 13685203  
SRR17520069. 13688056  
SRR17520069. 13688060  
SRR17520069. 13688062  
SRR17520069. 13688064  
SRR17520069. 13688066  
SRR17520069. 13688068  
SRR17520069. 13688070  
SRR17520069. 13688072  
SRR17520069. 13688074  
SRR17520069. 13688076  
SRR17520069. 13688078

SRR17520069. 13688080  
SRR17520069. 13688084  
SRR17520069. 13688088  
SRR17520069. 13688090  
SRR17520069. 13688092  
SRR17520069. 13688094  
SRR17520069. 13688096  
SRR17520069. 13688098  
SRR17520069. 13688100  
SRR17520069. 13689130  
SRR17520069. 13689132  
SRR17520069. 13689134  
SRR17520069. 13689136  
SRR17520069. 13689138  
SRR17520069. 13689140  
SRR17520069. 13689142  
SRR17520069. 13689144  
SRR17520069. 13689146  
SRR17520069. 13689148  
SRR17520069. 13689150  
SRR17520069. 13689152  
SRR17520069. 13689154  
SRR17520069. 13689156  
SRR17520069. 13689158  
SRR17520069. 13689160  
SRR17520069. 13689162  
SRR17520069. 13689164  
SRR17520069. 13689166  
SRR17520069. 13689168  
SRR17520069. 13689170  
SRR17520069. 13689172  
SRR17520069. 13689174  
SRR17520069. 13689176  
SRR17520069. 13689178  
SRR17520069. 13689180  
SRR17520069. 13689182  
SRR17520069. 13689184  
SRR17520069. 13689186  
SRR17520069. 13689188  
SRR17520069. 13689190  
SRR17520069. 13689192  
SRR17520069. 13689194  
SRR17520069. 13689196  
SRR17520069. 13689198  
SRR17520069. 13689200  
SRR17520069. 13691450  
SRR17520069. 13691452

SRR17520069. 13691454  
SRR17520069. 13691456  
SRR17520069. 13691838  
SRR17520069. 13691840  
SRR17520069. 13691842  
SRR17520069. 13691844  
SRR17520069. 13691846  
SRR17520069. 13691848  
SRR17520069. 13691850  
SRR17520069. 13691852  
SRR17520069. 13691854  
SRR17520069. 13691858  
SRR17520069. 13691862  
SRR17520069. 13691864  
SRR17520069. 13691868  
SRR17520069. 13691870  
SRR17520069. 13691872  
SRR17520069. 13691874  
SRR17520069. 13691876  
SRR17520069. 13691878  
SRR17520069. 13691880  
SRR17520069. 13691882  
SRR17520069. 13691886  
SRR17520069. 13691888  
SRR17520069. 13691890  
SRR17520069. 13691892  
SRR17520069. 13691894  
SRR17520069. 13691896  
SRR17520069. 13691898  
SRR17520069. 13691900  
SRR17520069. 13691902  
SRR17520069. 13691904  
SRR17520069. 13691906  
SRR17520069. 13691910  
SRR17520069. 13691912  
SRR17520069. 13691914  
SRR17520069. 13691916  
SRR17520069. 13691918  
SRR17520069. 13691920  
SRR17520069. 13691924  
SRR17520069. 13691926  
SRR17520069. 13691928  
SRR17520069. 13691930  
SRR17520069. 13691932  
SRR17520069. 13691934  
SRR17520069. 13691936  
SRR17520069. 13694249

SRR17520069. 13694251  
SRR17520069. 13694253  
SRR17520069. 13694255  
SRR17520069. 13694957  
SRR17520069. 13695680  
SRR17520069. 13695682  
SRR17520069. 13695684  
SRR17520069. 13695686  
SRR17520069. 13695688  
SRR17520069. 13695690  
SRR17520069. 13698181  
SRR17520069. 13701648  
SRR17520069. 13701650  
SRR17520069. 13701652  
SRR17520069. 13701654  
SRR17520069. 13701656  
SRR17520069. 13701658  
SRR17520069. 13701660  
SRR17520069. 13701662  
SRR17520069. 13701664  
SRR17520069. 13701668  
SRR17520069. 13701670  
SRR17520069. 13701672  
SRR17520069. 13701674  
SRR17520069. 13701676  
SRR17520069. 13701678  
SRR17520069. 13701682  
SRR17520069. 13701684  
SRR17520069. 13701686  
SRR17520069. 13701690  
SRR17520069. 13701692  
SRR17520069. 13701694  
SRR17520069. 13701696  
SRR17520069. 13701698  
SRR17520069. 13701700  
SRR17520069. 13701702  
SRR17520069. 13701704  
SRR17520069. 13701706  
SRR17520069. 13701708  
SRR17520069. 13701710  
SRR17520069. 13701712  
SRR17520069. 13701714  
SRR17520069. 13701716  
SRR17520069. 13701720  
SRR17520069. 13701722  
SRR17520069. 13701724  
SRR17520069. 13701726



SRR17520069. 13701728  
SRR17520069. 13701730  
SRR17520069. 13701732  
SRR17520069. 13701734  
SRR17520069. 13701736  
SRR17520069. 13701738  
SRR17520069. 13701740  
SRR17520069. 13701742  
SRR17520069. 13701744  
SRR17520069. 13713847  
SRR17520069. 13713849  
SRR17520069. 13713851  
SRR17520069. 13715634  
SRR17520069. 13715636  
SRR17520069. 13715638  
SRR17520069. 13715640  
SRR17520069. 13715642  
SRR17520069. 13715644  
SRR17520069. 13715646  
SRR17520069. 13715648  
SRR17520069. 13715650  
SRR17520069. 13715652  
SRR17520069. 13715654  
SRR17520069. 13715656  
SRR17520069. 13715658  
SRR17520069. 13715662  
SRR17520069. 13715664  
SRR17520069. 13715666  
SRR17520069. 13715668  
SRR17520069. 13715672  
SRR17520069. 13715674  
SRR17520069. 13715676  
SRR17520069. 13715678  
SRR17520069. 13715680  
SRR17520069. 13718768  
SRR17520069. 13718770  
SRR17520069. 13718772  
SRR17520069. 13718774  
SRR17520069. 13718776  
SRR17520069. 13718778  
SRR17520069. 13718780  
SRR17520069. 13718782  
SRR17520069. 13718784  
SRR17520069. 13722145  
SRR17520069. 13722147  
SRR17520069. 13722149  
SRR17520069. 13722151

SRR17520069. 13722153  
SRR17520069. 13722155  
SRR17520069. 13722157  
SRR17520069. 13722159  
SRR17520069. 13722161  
SRR17520069. 13722163  
SRR17520069. 13722165  
SRR17520069. 13722167  
SRR17520069. 13722169  
SRR17520069. 13722171  
SRR17520069. 13722173  
SRR17520069. 13722175  
SRR17520069. 13722177  
SRR17520069. 13722179  
SRR17520069. 13722181  
SRR17520069. 13722183  
SRR17520069. 13722185  
SRR17520069. 13724722  
SRR17520069. 13724734  
SRR17520069. 13724738  
SRR17520069. 13724744  
SRR17520069. 13724746  
SRR17520069. 13724748  
SRR17520069. 13727683  
SRR17520069. 13727685  
SRR17520069. 13727687  
SRR17520069. 13727689  
SRR17520069. 13727691  
SRR17520069. 13727693  
SRR17520069. 13727695  
SRR17520069. 13727697  
SRR17520069. 13727699  
SRR17520069. 13727701  
SRR17520069. 13727703  
SRR17520069. 13727705  
SRR17520069. 13727707  
SRR17520069. 13729978  
SRR17520069. 13730249  
SRR17520069. 13730251  
SRR17520069. 13730253  
SRR17520069. 13730255  
SRR17520069. 13742385  
SRR17520069. 13742387  
SRR17520069. 13742389  
SRR17520069. 13742391  
SRR17520069. 13742393  
SRR17520069. 13742401

SRR17520069. 13742403  
SRR17520069. 13742405  
SRR17520069. 13742407  
SRR17520069. 13742409  
SRR17520069. 13742411  
SRR17520069. 13742413  
SRR17520069. 13742415  
SRR17520069. 13742417  
SRR17520069. 13743036  
SRR17520069. 13750203  
SRR17520069. 13750205  
SRR17520069. 13750207  
SRR17520069. 13750209  
SRR17520069. 13750211  
SRR17520069. 13750213  
SRR17520069. 13750215  
SRR17520069. 13750217  
SRR17520069. 13750219  
SRR17520069. 13750221  
SRR17520069. 13750223  
SRR17520069. 13750225  
SRR17520069. 13750227  
SRR17520069. 13750229  
SRR17520069. 13750231  
SRR17520069. 13750233  
SRR17520069. 13750235  
SRR17520069. 13750237  
SRR17520069. 13750239  
SRR17520069. 13750241  
SRR17520069. 13750243  
SRR17520069. 13751678  
SRR17520069. 13751680  
SRR17520069. 13751682  
SRR17520069. 13751684  
SRR17520069. 13751686  
SRR17520069. 13757356  
SRR17520069. 13757358  
SRR17520069. 13759939  
SRR17520069. 13759941  
SRR17520069. 13759943  
SRR17520069. 13759945  
SRR17520069. 13759947  
SRR17520069. 13759949  
SRR17520069. 13759951  
SRR17520069. 13759953  
SRR17520069. 13759955  
SRR17520069. 13759957

SRR17520069. 13759961  
SRR17520069. 13759965  
SRR17520069. 13759967  
SRR17520069. 13759969  
SRR17520069. 13759971  
SRR17520069. 13759973  
SRR17520069. 13759975  
SRR17520069. 13759977  
SRR17520069. 13759979  
SRR17520069. 13759981  
SRR17520069. 13759983  
SRR17520069. 13759985  
SRR17520069. 13759987  
SRR17520069. 13759989  
SRR17520069. 13759991  
SRR17520069. 13759993  
SRR17520069. 13759995  
SRR17520069. 13759997  
SRR17520069. 13759999  
SRR17520069. 13760001  
SRR17520069. 13760003  
SRR17520069. 13760005  
SRR17520069. 13760007  
SRR17520069. 13760009  
SRR17520069. 13760011  
SRR17520069. 13760013  
SRR17520069. 13760017  
SRR17520069. 13760019  
SRR17520069. 13760021  
SRR17520069. 13760023  
SRR17520069. 13760025  
SRR17520069. 13760027  
SRR17520069. 13760029  
SRR17520069. 13760031  
SRR17520069. 13760033  
SRR17520069. 13760035  
SRR17520069. 13760037  
SRR17520069. 13760039  
SRR17520069. 13760041  
SRR17520069. 13760043  
SRR17520069. 13760045  
SRR17520069. 13760049  
SRR17520069. 13760051  
SRR17520069. 13760053  
SRR17520069. 13760055  
SRR17520069. 13760059  
SRR17520069. 13760061

SRR17520069. 13760063  
SRR17520069. 13760065  
SRR17520069. 13760067  
SRR17520069. 13760069  
SRR17520069. 13760071  
SRR17520069. 13760073  
SRR17520069. 13760075  
SRR17520069. 13760077  
SRR17520069. 13760796  
SRR17520069. 13761412  
SRR17520069. 13761414  
SRR17520069. 13761416  
SRR17520069. 13761418  
SRR17520069. 13761420  
SRR17520069. 13761422  
SRR17520069. 13761424  
SRR17520069. 13761426  
SRR17520069. 13761428  
SRR17520069. 13761430  
SRR17520069. 13761432  
SRR17520069. 13761434  
SRR17520069. 13761436  
SRR17520069. 13761438  
SRR17520069. 13761440  
SRR17520069. 13761442  
SRR17520069. 13761444  
SRR17520069. 13761446  
SRR17520069. 13761448  
SRR17520069. 13761450  
SRR17520069. 13761452  
SRR17520069. 13761454  
SRR17520069. 13761456  
SRR17520069. 13761458  
SRR17520069. 13761460  
SRR17520069. 13761462  
SRR17520069. 13761464  
SRR17520069. 13761466  
SRR17520069. 13761468  
SRR17520069. 13761470  
SRR17520069. 13761472  
SRR17520069. 13761474  
SRR17520069. 13761476  
SRR17520069. 13761478  
SRR17520069. 13761480  
SRR17520069. 13761482  
SRR17520069. 13761484  
SRR17520069. 13761486

SRR17520069. 13761488  
SRR17520069. 13761490  
SRR17520069. 13761492  
SRR17520069. 13761494  
SRR17520069. 13761496  
SRR17520069. 13761498  
SRR17520069. 13761500  
SRR17520069. 13761502  
SRR17520069. 13761504  
SRR17520069. 13761506  
SRR17520069. 13761508  
SRR17520069. 13761510  
SRR17520069. 13761512  
SRR17520069. 13761514  
SRR17520069. 13761516  
SRR17520069. 13761518  
SRR17520069. 13761520  
SRR17520069. 13761522  
SRR17520069. 13761524  
SRR17520069. 13761526  
SRR17520069. 13761528  
SRR17520069. 13761532  
SRR17520069. 13761534  
SRR17520069. 13761536  
SRR17520069. 13761538  
SRR17520069. 13761540  
SRR17520069. 13763942  
SRR17520069. 13763944  
SRR17520069. 13763946  
SRR17520069. 13763948  
SRR17520069. 13763950  
SRR17520069. 13763952  
SRR17520069. 13763956  
SRR17520069. 13763958  
SRR17520069. 13763960  
SRR17520069. 13763964  
SRR17520069. 13763968  
SRR17520069. 13763970  
SRR17520069. 13763972  
SRR17520069. 13763974  
SRR17520069. 13763976  
SRR17520069. 13764108  
SRR17520069. 13764110  
SRR17520069. 13764112  
SRR17520069. 13764114  
SRR17520069. 13766763  
SRR17520069. 13766765

SRR17520069. 13766767  
SRR17520069. 13766769  
SRR17520069. 13766771  
SRR17520069. 13766773  
SRR17520069. 13773853  
SRR17520069. 13773855  
SRR17520069. 13773857  
SRR17520069. 13773859  
SRR17520069. 13773861  
SRR17520069. 13773863  
SRR17520069. 13773865  
SRR17520069. 13775501  
SRR17520069. 13775503  
SRR17520069. 13775505  
SRR17520069. 13775507  
SRR17520069. 13775509  
SRR17520069. 13775511  
SRR17520069. 13775515  
SRR17520069. 13775517  
SRR17520069. 13775519  
SRR17520069. 13775521  
SRR17520069. 13775523  
SRR17520069. 13775525  
SRR17520069. 13775527  
SRR17520069. 13775529  
SRR17520069. 13775531  
SRR17520069. 13775533  
SRR17520069. 13775535  
SRR17520069. 13775537  
SRR17520069. 13775539  
SRR17520069. 13775541  
SRR17520069. 13776220  
SRR17520069. 13776222  
SRR17520069. 13776224  
SRR17520069. 13776226  
SRR17520069. 13776228  
SRR17520069. 13776230  
SRR17520069. 13776232  
SRR17520069. 13776234  
SRR17520069. 13776236  
SRR17520069. 13776238  
SRR17520069. 13776240  
SRR17520069. 13776242  
SRR17520069. 13776244  
SRR17520069. 13776246  
SRR17520069. 13776248  
SRR17520069. 13776250

SRR17520069. 13776252  
SRR17520069. 13776254  
SRR17520069. 13776256  
SRR17520069. 13776258  
SRR17520069. 13776260  
SRR17520069. 13776262  
SRR17520069. 13776264  
SRR17520069. 13776266  
SRR17520069. 13776268  
SRR17520069. 13776270  
SRR17520069. 13776272  
SRR17520069. 13776274  
SRR17520069. 13776276  
SRR17520069. 13776278  
SRR17520069. 13776280  
SRR17520069. 13776282  
SRR17520069. 13776284  
SRR17520069. 13776286  
SRR17520069. 13776525  
SRR17520069. 13776527  
SRR17520069. 13776529  
SRR17520069. 13776531  
SRR17520069. 13776533  
SRR17520069. 13776535  
SRR17520069. 13776537  
SRR17520069. 13776539  
SRR17520069. 13776541  
SRR17520069. 13776543  
SRR17520069. 13776545  
SRR17520069. 13776547  
SRR17520069. 13776549  
SRR17520069. 13776551  
SRR17520069. 13776553  
SRR17520069. 13776557  
SRR17520069. 13776559  
SRR17520069. 13776561  
SRR17520069. 13776563  
SRR17520069. 13776565  
SRR17520069. 13776567  
SRR17520069. 13776569  
SRR17520069. 13776571  
SRR17520069. 13779060  
SRR17520069. 13779062  
SRR17520069. 13779064  
SRR17520069. 13779066  
SRR17520069. 13779068  
SRR17520069. 13779072



SRR17520069. 13781552  
SRR17520069. 13781554  
SRR17520069. 13781556  
SRR17520069. 13781558  
SRR17520069. 13781560  
SRR17520069. 13781562  
SRR17520069. 13781564  
SRR17520069. 13781566  
SRR17520069. 13781568  
SRR17520069. 13781570  
SRR17520069. 13781572  
SRR17520069. 13781574  
SRR17520069. 13781576  
SRR17520069. 13781578  
SRR17520069. 13781580  
SRR17520069. 13781582  
SRR17520069. 13781584  
SRR17520069. 13781586  
SRR17520069. 13781588  
SRR17520069. 13781590  
SRR17520069. 13781592  
SRR17520069. 13781594  
SRR17520069. 13781596  
SRR17520069. 13781598  
SRR17520069. 13781600  
SRR17520069. 13781602  
SRR17520069. 13781604  
SRR17520069. 13781606  
SRR17520069. 13781608  
SRR17520069. 13781610  
SRR17520069. 13781612  
SRR17520069. 13781614  
SRR17520069. 13781616  
SRR17520069. 13781618  
SRR17520069. 13781620  
SRR17520069. 13781622  
SRR17520069. 13781624  
SRR17520069. 13781626  
SRR17520069. 13781628  
SRR17520069. 13781630  
SRR17520069. 13781632  
SRR17520069. 13781634  
SRR17520069. 13781636  
SRR17520069. 13791322  
SRR17520069. 13791324  
SRR17520069. 13791326  
SRR17520069. 13791328

SRR17520069. 13793495  
SRR17520069. 13793497  
SRR17520069. 13793499  
SRR17520069. 13793501  
SRR17520069. 13793503  
SRR17520069. 13793505  
SRR17520069. 13793507  
SRR17520069. 13793511  
SRR17520069. 13793513  
SRR17520069. 13793515  
SRR17520069. 13793517  
SRR17520069. 13793519  
SRR17520069. 13793521  
SRR17520069. 13793523  
SRR17520069. 13793525  
SRR17520069. 13793527  
SRR17520069. 13793529  
SRR17520069. 13793531  
SRR17520069. 13793533  
SRR17520069. 13793535  
SRR17520069. 13795265  
SRR17520069. 13795267  
SRR17520069. 13795269  
SRR17520069. 13795271  
SRR17520069. 13795273  
SRR17520069. 13795275  
SRR17520069. 13795277  
SRR17520069. 13795279  
SRR17520069. 13796489  
SRR17520069. 13796491  
SRR17520069. 13796493  
SRR17520069. 13796495  
SRR17520069. 13796497  
SRR17520069. 13798290  
SRR17520069. 13798292  
SRR17520069. 13798294  
SRR17520069. 13798296  
SRR17520069. 13798298  
SRR17520069. 13798300  
SRR17520069. 13799815  
SRR17520069. 13799817  
SRR17520069. 13799819  
SRR17520069. 13799821  
SRR17520069. 13799825  
SRR17520069. 13799827  
SRR17520069. 13799829  
SRR17520069. 13799831

SRR17520069. 13799833  
SRR17520069. 13799835  
SRR17520069. 13799837  
SRR17520069. 13799839  
SRR17520069. 13799841  
SRR17520069. 13799843  
SRR17520069. 13799845  
SRR17520069. 13799847  
SRR17520069. 13799849  
SRR17520069. 13799851  
SRR17520069. 13799853  
SRR17520069. 13799855  
SRR17520069. 13799857  
SRR17520069. 13799861  
SRR17520069. 13799863  
SRR17520069. 13801153  
SRR17520069. 13801155  
SRR17520069. 13801157  
SRR17520069. 13801159  
SRR17520069. 13801161  
SRR17520069. 13801163  
SRR17520069. 13801165  
SRR17520069. 13801167  
SRR17520069. 13801169  
SRR17520069. 13801173  
SRR17520069. 13801175  
SRR17520069. 13801177  
SRR17520069. 13801179  
SRR17520069. 13801181  
SRR17520069. 13801183  
SRR17520069. 13801185  
SRR17520069. 13801187  
SRR17520069. 13801189  
SRR17520069. 13801193  
SRR17520069. 13801195  
SRR17520069. 13801197  
SRR17520069. 13801201  
SRR17520069. 13801203  
SRR17520069. 13801205  
SRR17520069. 13801207  
SRR17520069. 13801209  
SRR17520069. 13801213  
SRR17520069. 13801217  
SRR17520069. 13801219  
SRR17520069. 13801223  
SRR17520069. 13801225  
SRR17520069. 13801227

SRR17520069. 13801345  
SRR17520069. 13801347  
SRR17520069. 13801349  
SRR17520069. 13801351  
SRR17520069. 13801353  
SRR17520069. 13801355  
SRR17520069. 13801357  
SRR17520069. 13801359  
SRR17520069. 13801361  
SRR17520069. 13801363  
SRR17520069. 13801365  
SRR17520069. 13801367  
SRR17520069. 13801371  
SRR17520069. 13801373  
SRR17520069. 13801375  
SRR17520069. 13801377  
SRR17520069. 13801379  
SRR17520069. 13801381  
SRR17520069. 13801383  
SRR17520069. 13801385  
SRR17520069. 13801387  
SRR17520069. 13801389  
SRR17520069. 13801391  
SRR17520069. 13801393  
SRR17520069. 13801395  
SRR17520069. 13801397  
SRR17520069. 13801399  
SRR17520069. 13801401  
SRR17520069. 13801935  
SRR17520069. 13802031  
SRR17520069. 13809111  
SRR17520069. 13809113  
SRR17520069. 13809115  
SRR17520069. 13809117  
SRR17520069. 13809119  
SRR17520069. 13809121  
SRR17520069. 13809123  
SRR17520069. 13809125  
SRR17520069. 13810255  
SRR17520069. 13810257  
SRR17520069. 13810259  
SRR17520069. 13810261  
SRR17520069. 13810263  
SRR17520069. 13810265  
SRR17520069. 13810267  
SRR17520069. 13810269  
SRR17520069. 13810271

SRR17520069.13810273  
SRR17520069.13810275  
SRR17520069.13810277  
SRR17520069.13816062  
SRR17520069.13816064  
SRR17520069.13816066  
SRR17520069.13816068  
SRR17520069.13816070  
SRR17520069.13816072  
SRR17520069.13816074  
SRR17520069.13816076  
SRR17520069.13816078  
SRR17520069.13816080  
SRR17520069.13816082  
SRR17520069.13816084  
SRR17520069.13816086  
SRR17520069.13816088  
SRR17520069.13816090  
SRR17520069.13816092  
SRR17520069.13816094  
SRR17520069.13816096  
SRR17520069.13816098  
SRR17520069.13816100  
SRR17520069.13816102  
SRR17520069.13816104  
SRR17520069.13816106  
SRR17520069.13816108  
SRR17520069.13821445  
SRR17520069.13821447  
SRR17520069.13822871  
SRR17520069.13822873  
SRR17520069.13822875  
SRR17520069.13822877  
SRR17520069.13822879  
SRR17520069.13822881  
SRR17520069.13822883  
SRR17520069.13822885  
SRR17520069.13822887  
SRR17520069.13822889  
SRR17520069.13822891  
SRR17520069.13822893  
SRR17520069.13822895  
SRR17520069.13822897  
SRR17520069.13822899  
SRR17520069.13822901  
SRR17520069.13822903  
SRR17520069.13822905

SRR17520069.13822907  
SRR17520069.13822909  
SRR17520069.13822911  
SRR17520069.13822913  
SRR17520069.13822915  
SRR17520069.13822917  
SRR17520069.13822919  
SRR17520069.13822921  
SRR17520069.13822923  
SRR17520069.13822925  
SRR17520069.13822927  
SRR17520069.13822929  
SRR17520069.13822931  
SRR17520069.13822933  
SRR17520069.13822935  
SRR17520069.13822937  
SRR17520069.13822941  
SRR17520069.13822943  
SRR17520069.13822945  
SRR17520069.13822947  
SRR17520069.13822949  
SRR17520069.13822951  
SRR17520069.13822953  
SRR17520069.13822957  
SRR17520069.13822959  
SRR17520069.13822961  
SRR17520069.13822963  
SRR17520069.13822965  
SRR17520069.13822967  
SRR17520069.13822969  
SRR17520069.13822971  
SRR17520069.13822975  
SRR17520069.13822977  
SRR17520069.13822979  
SRR17520069.13822981  
SRR17520069.13822983  
SRR17520069.13822987  
SRR17520069.13822989  
SRR17520069.13822991  
SRR17520069.13822993  
SRR17520069.13829348  
SRR17520069.13829350  
SRR17520069.13835603  
SRR17520069.13835605  
SRR17520069.13835607  
SRR17520069.13841727  
SRR17520069.13841729

SRR17520069. 13841731  
SRR17520069. 13841733  
SRR17520069. 13841735  
SRR17520069. 13841737  
SRR17520069. 13841739  
SRR17520069. 13841741  
SRR17520069. 13841745  
SRR17520069. 13841747  
SRR17520069. 13841749  
SRR17520069. 13841751  
SRR17520069. 13841753  
SRR17520069. 13841755  
SRR17520069. 13841757  
SRR17520069. 13841759  
SRR17520069. 13841761  
SRR17520069. 13848859  
SRR17520069. 13848861  
SRR17520069. 13848863  
SRR17520069. 13848865  
SRR17520069. 13848867  
SRR17520069. 13848869  
SRR17520069. 13848871  
SRR17520069. 13848873  
SRR17520069. 13848875  
SRR17520069. 13848877  
SRR17520069. 13848879  
SRR17520069. 13848881  
SRR17520069. 13848883  
SRR17520069. 13848885  
SRR17520069. 13848887  
SRR17520069. 13848889  
SRR17520069. 13848891  
SRR17520069. 13848893  
SRR17520069. 13857104  
SRR17520069. 13857106  
SRR17520069. 13861938  
SRR17520069. 13861940  
SRR17520069. 13861942  
SRR17520069. 13861946  
SRR17520069. 13861948  
SRR17520069. 13861950  
SRR17520069. 13861952  
SRR17520069. 13861954  
SRR17520069. 13861956  
SRR17520069. 13861958  
SRR17520069. 13861960  
SRR17520069. 13861962

SRR17520069. 13861964  
SRR17520069. 13861966  
SRR17520069. 13861968  
SRR17520069. 13861970  
SRR17520069. 13861974  
SRR17520069. 13861976  
SRR17520069. 13862484  
SRR17520069. 13865727  
SRR17520069. 13865731  
SRR17520069. 13865735  
SRR17520069. 13865737  
SRR17520069. 13865739  
SRR17520069. 13865741  
SRR17520069. 13865743  
SRR17520069. 13865745  
SRR17520069. 13865747  
SRR17520069. 13866497  
SRR17520069. 13866499  
SRR17520069. 13866501  
SRR17520069. 13869921  
SRR17520069. 13869923  
SRR17520069. 13869925  
SRR17520069. 13869927  
SRR17520069. 13869929  
SRR17520069. 13869931  
SRR17520069. 13869933  
SRR17520069. 13869935  
SRR17520069. 13879013  
SRR17520069. 13879015  
SRR17520069. 13879017  
SRR17520069. 13879019  
SRR17520069. 13879027  
SRR17520069. 13879029  
SRR17520069. 13879031  
SRR17520069. 13879033  
SRR17520069. 13879035  
SRR17520069. 13879037  
SRR17520069. 13879039  
SRR17520069. 13879041  
SRR17520069. 13879043  
SRR17520069. 13879045  
SRR17520069. 13879047  
SRR17520069. 13879049  
SRR17520069. 13879051  
SRR17520069. 13879053  
SRR17520069. 13879055  
SRR17520069. 13879793



SRR17520069. 13879795  
SRR17520069. 13879797  
SRR17520069. 13879799  
SRR17520069. 13879801  
SRR17520069. 13879803  
SRR17520069. 13879805  
SRR17520069. 13879807  
SRR17520069. 13879809  
SRR17520069. 13879811  
SRR17520069. 13879813  
SRR17520069. 13887334  
SRR17520069. 13887336  
SRR17520069. 13887338  
SRR17520069. 13887340  
SRR17520069. 13887342  
SRR17520069. 13887344  
SRR17520069. 13887346  
SRR17520069. 13887348  
SRR17520069. 13887350  
SRR17520069. 13887352  
SRR17520069. 13887354  
SRR17520069. 13887356  
SRR17520069. 13887358  
SRR17520069. 13887360  
SRR17520069. 13887362  
SRR17520069. 13898706  
SRR17520069. 13898708  
SRR17520069. 13898710  
SRR17520069. 13898712  
SRR17520069. 13898714  
SRR17520069. 13898716  
SRR17520069. 13898718  
SRR17520069. 13898720  
SRR17520069. 13898722  
SRR17520069. 13898724  
SRR17520069. 13898726  
SRR17520069. 13898728  
SRR17520069. 13898730  
SRR17520069. 13898732  
SRR17520069. 13898734  
SRR17520069. 13898738  
SRR17520069. 13898740  
SRR17520069. 13898742  
SRR17520069. 13898744  
SRR17520069. 13898746  
SRR17520069. 13898748  
SRR17520069. 13898750

SRR17520069. 13898752  
SRR17520069. 13898754  
SRR17520069. 13898756  
SRR17520069. 13898758  
SRR17520069. 13898760  
SRR17520069. 13898762  
SRR17520069. 13898764  
SRR17520069. 13898766  
SRR17520069. 13898768  
SRR17520069. 13898770  
SRR17520069. 13898772  
SRR17520069. 13898774  
SRR17520069. 13898776  
SRR17520069. 13898778  
SRR17520069. 13898784  
SRR17520069. 13898786  
SRR17520069. 13898788  
SRR17520069. 13898790  
SRR17520069. 13898792  
SRR17520069. 13898794  
SRR17520069. 13898796  
SRR17520069. 13898798  
SRR17520069. 13898800  
SRR17520069. 13898802  
SRR17520069. 13898804  
SRR17520069. 13898806  
SRR17520069. 13898808  
SRR17520069. 13898810  
SRR17520069. 13898812  
SRR17520069. 13898814  
SRR17520069. 13898816  
SRR17520069. 13898818  
SRR17520069. 13899247  
SRR17520069. 13899249  
SRR17520069. 13899251  
SRR17520069. 13899253  
SRR17520069. 13899255  
SRR17520069. 13899257  
SRR17520069. 13899259  
SRR17520069. 13899261  
SRR17520069. 13899263  
SRR17520069. 13899265  
SRR17520069. 13899267  
SRR17520069. 13899269  
SRR17520069. 13899338  
SRR17520069. 13910750  
SRR17520069. 13910752

SRR17520069. 13910754  
SRR17520069. 13910756  
SRR17520069. 13910758  
SRR17520069. 13910760  
SRR17520069. 13910762  
SRR17520069. 13910764  
SRR17520069. 13910766  
SRR17520069. 13910768  
SRR17520069. 13910770  
SRR17520069. 13910772  
SRR17520069. 13910774  
SRR17520069. 13910776  
SRR17520069. 13910778  
SRR17520069. 13910780  
SRR17520069. 13910782  
SRR17520069. 13910784  
SRR17520069. 13910786  
SRR17520069. 13910788  
SRR17520069. 13910790  
SRR17520069. 13910792  
SRR17520069. 13910794  
SRR17520069. 13910796  
SRR17520069. 13910798  
SRR17520069. 13910800  
SRR17520069. 13910802  
SRR17520069. 13910804  
SRR17520069. 13910806  
SRR17520069. 13910808  
SRR17520069. 13910810  
SRR17520069. 13910812  
SRR17520069. 13910816  
SRR17520069. 13910818  
SRR17520069. 13910820  
SRR17520069. 13910822  
SRR17520069. 13910824  
SRR17520069. 13910826  
SRR17520069. 13910828  
SRR17520069. 13910830  
SRR17520069. 13910832  
SRR17520069. 13910834  
SRR17520069. 13910836  
SRR17520069. 13910838  
SRR17520069. 13910840  
SRR17520069. 13910842  
SRR17520069. 13910844  
SRR17520069. 13910846  
SRR17520069. 13910848

SRR17520069. 13910850  
SRR17520069. 13910852  
SRR17520069. 13910854  
SRR17520069. 13910856  
SRR17520069. 13910858  
SRR17520069. 13910860  
SRR17520069. 13917644  
SRR17520069. 13917646  
SRR17520069. 13917648  
SRR17520069. 13917650  
SRR17520069. 13937815  
SRR17520069. 13937817  
SRR17520069. 13937819  
SRR17520069. 13937821  
SRR17520069. 13937823  
SRR17520069. 13937825  
SRR17520069. 13937827  
SRR17520069. 13937829  
SRR17520069. 13937831  
SRR17520069. 13937833  
SRR17520069. 13937835  
SRR17520069. 13937837  
SRR17520069. 13937839  
SRR17520069. 13937841  
SRR17520069. 13937843  
SRR17520069. 13937847  
SRR17520069. 13937849  
SRR17520069. 13937853  
SRR17520069. 13937855  
SRR17520069. 13937857  
SRR17520069. 13937859  
SRR17520069. 13937861  
SRR17520069. 13937863  
SRR17520069. 13937865  
SRR17520069. 13937867  
SRR17520069. 13937869  
SRR17520069. 13937871  
SRR17520069. 13937873  
SRR17520069. 13940617  
SRR17520069. 13940619  
SRR17520069. 13958535  
SRR17520069. 13958537  
SRR17520069. 13958539  
SRR17520069. 13971028  
SRR17520069. 13971030  
SRR17520069. 13971032  
SRR17520069. 13971034

SRR17520069. 13971036  
SRR17520069. 13971038  
SRR17520069. 13971040  
SRR17520069. 13971042  
SRR17520069. 13971044  
SRR17520069. 13971046  
SRR17520069. 13971048  
SRR17520069. 13971050  
SRR17520069. 13971052  
SRR17520069. 13971054  
SRR17520069. 13971056  
SRR17520069. 13971058  
SRR17520069. 13971060  
SRR17520069. 13971062  
SRR17520069. 13971064  
SRR17520069. 13971066  
SRR17520069. 13971068  
SRR17520069. 13971070  
SRR17520069. 13971072  
SRR17520069. 13971074  
SRR17520069. 13971076  
SRR17520069. 13971078  
SRR17520069. 13971080  
SRR17520069. 13971082  
SRR17520069. 13971084  
SRR17520069. 13971086  
SRR17520069. 13971088  
SRR17520069. 13971090  
SRR17520069. 13971092  
SRR17520069. 13971094  
SRR17520069. 13971096  
SRR17520069. 13971098  
SRR17520069. 13978360  
SRR17520069. 13978362  
SRR17520069. 13978364  
SRR17520069. 13978366  
SRR17520069. 13978368  
SRR17520069. 13978370  
SRR17520069. 13978372  
SRR17520069. 13978374  
SRR17520069. 13978376  
SRR17520069. 13978378  
SRR17520069. 13978380  
SRR17520069. 13978382  
SRR17520069. 13978384  
SRR17520069. 13978386  
SRR17520069. 13978388

SRR17520069. 13978390  
SRR17520069. 13978392  
SRR17520069. 13978394  
SRR17520069. 13978396  
SRR17520069. 13987360  
SRR17520069. 13987362  
SRR17520069. 13987364  
SRR17520069. 13987366  
SRR17520069. 13987368  
SRR17520069. 13987372  
SRR17520069. 13987374  
SRR17520069. 13987376  
SRR17520069. 13987378  
SRR17520069. 13987380  
SRR17520069. 13987382  
SRR17520069. 13987558  
SRR17520069. 13987560  
SRR17520069. 13993087  
SRR17520069. 13993089  
SRR17520069. 13993091  
SRR17520069. 13993093  
SRR17520069. 13993095  
SRR17520069. 13993099  
SRR17520069. 13993101  
SRR17520069. 13993103  
SRR17520069. 13993105  
SRR17520069. 13993107  
SRR17520069. 13993109  
SRR17520069. 13993111  
SRR17520069. 13993113  
SRR17520069. 13993115  
SRR17520069. 13993117  
SRR17520069. 13993119  
SRR17520069. 13993121  
SRR17520069. 13993123  
SRR17520069. 13993125  
SRR17520069. 13993127  
SRR17520069. 13993129  
SRR17520069. 13993131  
SRR17520069. 13993133  
SRR17520069. 13993135  
SRR17520069. 13993137  
SRR17520069. 13993139  
SRR17520069. 13993143  
SRR17520069. 13993145  
SRR17520069. 13993147  
SRR17520069. 13993155

SRR17520069. 13993157  
SRR17520069. 13993159  
SRR17520069. 13993161  
SRR17520069. 13993163  
SRR17520069. 13993165  
SRR17520069. 13993167  
SRR17520069. 13993169  
SRR17520069. 13993171  
SRR17520069. 13993173  
SRR17520069. 13993175  
SRR17520069. 13993177  
SRR17520069. 13993179  
SRR17520069. 13993181  
SRR17520069. 13993183  
SRR17520069. 13993185  
SRR17520069. 13993187  
SRR17520069. 13993189  
SRR17520069. 13993191  
SRR17520069. 13993195  
SRR17520069. 13993197  
SRR17520069. 13993199  
SRR17520069. 13993201  
SRR17520069. 13993203  
SRR17520069. 13993205  
SRR17520069. 13993207  
SRR17520069. 13993210  
SRR17520069. 13993212  
SRR17520069. 13993214  
SRR17520069. 13993216  
SRR17520069. 13993218  
SRR17520069. 13993220  
SRR17520069. 13993226  
SRR17520069. 13993228  
SRR17520069. 13993230  
SRR17520069. 13993232  
SRR17520069. 13993234  
SRR17520069. 13993236  
SRR17520069. 13993238  
SRR17520069. 13993240  
SRR17520069. 13993242  
SRR17520069. 13993244  
SRR17520069. 13993246  
SRR17520069. 13993248  
SRR17520069. 13993250  
SRR17520069. 13993254  
SRR17520069. 13993256  
SRR17520069. 13993258

SRR17520069. 13993260  
SRR17520069. 13993262  
SRR17520069. 13993264  
SRR17520069. 13993266  
SRR17520069. 13993268  
SRR17520069. 13993270  
SRR17520069. 13993272  
SRR17520069. 13993274  
SRR17520069. 13993276  
SRR17520069. 13993278  
SRR17520069. 13993280  
SRR17520069. 13993282  
SRR17520069. 13993284  
SRR17520069. 13993286  
SRR17520069. 13993288  
SRR17520069. 13993290  
SRR17520069. 13993292  
SRR17520069. 13993294  
SRR17520069. 13993296  
SRR17520069. 13993298  
SRR17520069. 13993300  
SRR17520069. 13993302  
SRR17520069. 13993304  
SRR17520069. 13993306  
SRR17520069. 13993308  
SRR17520069. 13993310  
SRR17520069. 13993312  
SRR17520069. 13993314  
SRR17520069. 13993316  
SRR17520069. 13993318  
SRR17520069. 13993320  
SRR17520069. 13993322  
SRR17520069. 13993324  
SRR17520069. 13993326  
SRR17520069. 13993328  
SRR17520069. 13994536  
SRR17520069. 13994540  
SRR17520069. 13994542  
SRR17520069. 13995915  
SRR17520069. 13995917  
SRR17520069. 13995919  
SRR17520069. 13995921  
SRR17520069. 13995923  
SRR17520069. 13997214  
SRR17520069. 14002154  
SRR17520069. 14002156  
SRR17520069. 14002158



SRR17520069.14002160  
SRR17520069.14002162  
SRR17520069.14002164  
SRR17520069.14002168  
SRR17520069.14002170  
SRR17520069.14002172  
SRR17520069.14002174  
SRR17520069.14002176  
SRR17520069.14002178  
SRR17520069.14002180  
SRR17520069.14002182  
SRR17520069.14002184  
SRR17520069.14002186  
SRR17520069.14002188  
SRR17520069.14002190  
SRR17520069.14002192  
SRR17520069.14002194  
SRR17520069.14002196  
SRR17520069.14002198  
SRR17520069.14002200  
SRR17520069.14002202  
SRR17520069.14002204  
SRR17520069.14002206  
SRR17520069.14002208  
SRR17520069.14002210  
SRR17520069.14002212  
SRR17520069.14002214  
SRR17520069.14002218  
SRR17520069.14002220  
SRR17520069.14002222  
SRR17520069.14002224  
SRR17520069.14002226  
SRR17520069.14002228  
SRR17520069.14009027  
SRR17520069.14009029  
SRR17520069.14009031  
SRR17520069.14009033  
SRR17520069.14009035  
SRR17520069.14009037  
SRR17520069.14009039  
SRR17520069.14009041  
SRR17520069.14009043  
SRR17520069.14009045  
SRR17520069.14009047  
SRR17520069.14009049  
SRR17520069.14009051  
SRR17520069.14009053

SRR17520069.14009055  
SRR17520069.14009057  
SRR17520069.14009059  
SRR17520069.14009061  
SRR17520069.14009063  
SRR17520069.14009065  
SRR17520069.14009067  
SRR17520069.14009069  
SRR17520069.14009071  
SRR17520069.14009073  
SRR17520069.14009077  
SRR17520069.14009079  
SRR17520069.14009081  
SRR17520069.14009083  
SRR17520069.14009085  
SRR17520069.14009087  
SRR17520069.14009091  
SRR17520069.14009093  
SRR17520069.14009095  
SRR17520069.14009097  
SRR17520069.14009099  
SRR17520069.14009101  
SRR17520069.14009103  
SRR17520069.14009105  
SRR17520069.14009107  
SRR17520069.14009109  
SRR17520069.14009111  
SRR17520069.14009113  
SRR17520069.14009115  
SRR17520069.14009117  
SRR17520069.14009119  
SRR17520069.14009121  
SRR17520069.14009123  
SRR17520069.14009125  
SRR17520069.14009127  
SRR17520069.14009129  
SRR17520069.14009131  
SRR17520069.14009133  
SRR17520069.14009135  
SRR17520069.14009137  
SRR17520069.14009139  
SRR17520069.14009141  
SRR17520069.14009143  
SRR17520069.14009145  
SRR17520069.14009147  
SRR17520069.14009149  
SRR17520069.14009151

SRR17520069.14009153  
SRR17520069.14009155  
SRR17520069.14009157  
SRR17520069.14009159  
SRR17520069.14012509  
SRR17520069.14012511  
SRR17520069.14012513  
SRR17520069.14012515  
SRR17520069.14012519  
SRR17520069.14012521  
SRR17520069.14012523  
SRR17520069.14012525  
SRR17520069.14012527  
SRR17520069.14012529  
SRR17520069.14012531  
SRR17520069.14012533  
SRR17520069.14012535  
SRR17520069.14012537  
SRR17520069.14012541  
SRR17520069.14012543  
SRR17520069.14012545  
SRR17520069.14012547  
SRR17520069.14012549  
SRR17520069.14012551  
SRR17520069.14012553  
SRR17520069.14012555  
SRR17520069.14012557  
SRR17520069.14012559  
SRR17520069.14012561  
SRR17520069.14012563  
SRR17520069.14012565  
SRR17520069.14012567  
SRR17520069.14012569  
SRR17520069.14012571  
SRR17520069.14012573  
SRR17520069.14012575  
SRR17520069.14012577  
SRR17520069.14012579  
SRR17520069.14012581  
SRR17520069.14012583  
SRR17520069.14012585  
SRR17520069.14013064  
SRR17520069.14013066  
SRR17520069.14013068  
SRR17520069.14013070  
SRR17520069.14013072  
SRR17520069.14013074

SRR17520069.14013076  
SRR17520069.14013078  
SRR17520069.14013080  
SRR17520069.14013082  
SRR17520069.14013084  
SRR17520069.14013086  
SRR17520069.14013088  
SRR17520069.14013090  
SRR17520069.14013092  
SRR17520069.14013094  
SRR17520069.14013096  
SRR17520069.14013098  
SRR17520069.14013100  
SRR17520069.14013102  
SRR17520069.14013104  
SRR17520069.14013106  
SRR17520069.14013108  
SRR17520069.14013110  
SRR17520069.14013112  
SRR17520069.14013114  
SRR17520069.14013116  
SRR17520069.14013118  
SRR17520069.14013120  
SRR17520069.14013122  
SRR17520069.14013124  
SRR17520069.14013126  
SRR17520069.14013128  
SRR17520069.14013130  
SRR17520069.14016189  
SRR17520069.14016191  
SRR17520069.14016193  
SRR17520069.14018652  
SRR17520069.14018654  
SRR17520069.14018656  
SRR17520069.14018658  
SRR17520069.14018660  
SRR17520069.14018662  
SRR17520069.14018664  
SRR17520069.14018666  
SRR17520069.14018668  
SRR17520069.14020328  
SRR17520069.14020330  
SRR17520069.14020332  
SRR17520069.14020334  
SRR17520069.14020336  
SRR17520069.14020338  
SRR17520069.14020340

SRR17520069.14020342  
SRR17520069.14020344  
SRR17520069.14020346  
SRR17520069.14020348  
SRR17520069.14020350  
SRR17520069.14020352  
SRR17520069.14020354  
SRR17520069.14020360  
SRR17520069.14021117  
SRR17520069.14021119  
SRR17520069.14021121  
SRR17520069.14021123  
SRR17520069.14021125  
SRR17520069.14021127  
SRR17520069.14021129  
SRR17520069.14021131  
SRR17520069.14021133  
SRR17520069.14021135  
SRR17520069.14027973  
SRR17520069.14027975  
SRR17520069.14027977  
SRR17520069.14027979  
SRR17520069.14027981  
SRR17520069.14034180  
SRR17520069.14034182  
SRR17520069.14034184  
SRR17520069.14034186  
SRR17520069.14034190  
SRR17520069.14034194  
SRR17520069.14034196  
SRR17520069.14034339  
SRR17520069.14039852  
SRR17520069.14039854  
SRR17520069.14039856  
SRR17520069.14039858  
SRR17520069.14040063  
SRR17520069.14040065  
SRR17520069.14040067  
SRR17520069.14040069  
SRR17520069.14040071  
SRR17520069.14040075  
SRR17520069.14040077  
SRR17520069.14040079  
SRR17520069.14040081  
SRR17520069.14040083  
SRR17520069.14040085  
SRR17520069.14040087

SRR17520069.14040089  
SRR17520069.14040091  
SRR17520069.14040093  
SRR17520069.14040095  
SRR17520069.14040097  
SRR17520069.14040099  
SRR17520069.14040101  
SRR17520069.14040103  
SRR17520069.14040105  
SRR17520069.14041793  
SRR17520069.14047299  
SRR17520069.14047301  
SRR17520069.14047303  
SRR17520069.14047305  
SRR17520069.14047307  
SRR17520069.14047309  
SRR17520069.14047313  
SRR17520069.14047315  
SRR17520069.14047317  
SRR17520069.14047319  
SRR17520069.14047321  
SRR17520069.14047323  
SRR17520069.14047325  
SRR17520069.14047327  
SRR17520069.14047329  
SRR17520069.14047331  
SRR17520069.14047333  
SRR17520069.14048253  
SRR17520069.14048255  
SRR17520069.14048257  
SRR17520069.14048259  
SRR17520069.14048261  
SRR17520069.14048263  
SRR17520069.14048265  
SRR17520069.14048267  
SRR17520069.14048269  
SRR17520069.14048271  
SRR17520069.14050215  
SRR17520069.14050217  
SRR17520069.14051508  
SRR17520069.14051510  
SRR17520069.14051512  
SRR17520069.14051514  
SRR17520069.14051516  
SRR17520069.14051518  
SRR17520069.14051520  
SRR17520069.14051522

SRR17520069.14051524  
SRR17520069.14051526  
SRR17520069.14051528  
SRR17520069.14051530  
SRR17520069.14051532  
SRR17520069.14051534  
SRR17520069.14051536  
SRR17520069.14051538  
SRR17520069.14052418  
SRR17520069.14052420  
SRR17520069.14052422  
SRR17520069.14052424  
SRR17520069.14052426  
SRR17520069.14052428  
SRR17520069.14052430  
SRR17520069.14052432  
SRR17520069.14052434  
SRR17520069.14052436  
SRR17520069.14052438  
SRR17520069.14052440  
SRR17520069.14052442  
SRR17520069.14052444  
SRR17520069.14052446  
SRR17520069.14052448  
SRR17520069.14052450  
SRR17520069.14052452  
SRR17520069.14052454  
SRR17520069.14052456  
SRR17520069.14052458  
SRR17520069.14052460  
SRR17520069.14052462  
SRR17520069.14052466  
SRR17520069.14052468  
SRR17520069.14052470  
SRR17520069.14052472  
SRR17520069.14052474  
SRR17520069.14052476  
SRR17520069.14052478  
SRR17520069.14052480  
SRR17520069.14052482  
SRR17520069.14052484  
SRR17520069.14052486  
SRR17520069.14052488  
SRR17520069.14052490  
SRR17520069.14052492  
SRR17520069.14052494  
SRR17520069.14052496

SRR17520069.14052498  
SRR17520069.14052500  
SRR17520069.14052502  
SRR17520069.14052504  
SRR17520069.14052506  
SRR17520069.14052559  
SRR17520069.14057958  
SRR17520069.14057960  
SRR17520069.14057962  
SRR17520069.14057964  
SRR17520069.14058402  
SRR17520069.14064722  
SRR17520069.14070604  
SRR17520069.14070606  
SRR17520069.14070608  
SRR17520069.14070610  
SRR17520069.14070612  
SRR17520069.14070614  
SRR17520069.14070616  
SRR17520069.14070618  
SRR17520069.14070620  
SRR17520069.14070622  
SRR17520069.14070624  
SRR17520069.14070626  
SRR17520069.14070628  
SRR17520069.14070630  
SRR17520069.14070632  
SRR17520069.14070634  
SRR17520069.14070636  
SRR17520069.14070638  
SRR17520069.14070640  
SRR17520069.14070642  
SRR17520069.14070644  
SRR17520069.14070646  
SRR17520069.14070648  
SRR17520069.14070650  
SRR17520069.14070652  
SRR17520069.14070654  
SRR17520069.14070656  
SRR17520069.14070658  
SRR17520069.14070660  
SRR17520069.14070662  
SRR17520069.14070664  
SRR17520069.14070666  
SRR17520069.14070668  
SRR17520069.14070670  
SRR17520069.14070672



SRR17520069.14070674  
SRR17520069.14070676  
SRR17520069.14070678  
SRR17520069.14070682  
SRR17520069.14070684  
SRR17520069.14070686  
SRR17520069.14070688  
SRR17520069.14070690  
SRR17520069.14070692  
SRR17520069.14070694  
SRR17520069.14070696  
SRR17520069.14070698  
SRR17520069.14070700  
SRR17520069.14079163  
SRR17520069.14079165  
SRR17520069.14079167  
SRR17520069.14079169  
SRR17520069.14079171  
SRR17520069.14079173  
SRR17520069.14079508  
SRR17520069.14079510  
SRR17520069.14079512  
SRR17520069.14079514  
SRR17520069.14079516  
SRR17520069.14079518  
SRR17520069.14079520  
SRR17520069.14079522  
SRR17520069.14079524  
SRR17520069.14088953  
SRR17520069.14088955  
SRR17520069.14088957  
SRR17520069.14088959  
SRR17520069.14088961  
SRR17520069.14088963  
SRR17520069.14088965  
SRR17520069.14088967  
SRR17520069.14088969  
SRR17520069.14088971  
SRR17520069.14088973  
SRR17520069.14088975  
SRR17520069.14088977  
SRR17520069.14088979  
SRR17520069.14088983  
SRR17520069.14088985  
SRR17520069.14088987  
SRR17520069.14088989  
SRR17520069.14088991

SRR17520069.14088993  
SRR17520069.14088995  
SRR17520069.14088997  
SRR17520069.14088999  
SRR17520069.14089001  
SRR17520069.14089003  
SRR17520069.14089005  
SRR17520069.14089007  
SRR17520069.14089009  
SRR17520069.14089011  
SRR17520069.14089013  
SRR17520069.14089015  
SRR17520069.14089017  
SRR17520069.14089019  
SRR17520069.14089021  
SRR17520069.14089023  
SRR17520069.14089025  
SRR17520069.14089457  
SRR17520069.14092162  
SRR17520069.14092166  
SRR17520069.14092168  
SRR17520069.14092170  
SRR17520069.14093460  
SRR17520069.14096409  
SRR17520069.14100156  
SRR17520069.14100158  
SRR17520069.14100162  
SRR17520069.14100164  
SRR17520069.14100166  
SRR17520069.14100170  
SRR17520069.14100172  
SRR17520069.14100174  
SRR17520069.14100176  
SRR17520069.14108092  
SRR17520069.14108094  
SRR17520069.14108096  
SRR17520069.14108098  
SRR17520069.14108100  
SRR17520069.14108102  
SRR17520069.14108104  
SRR17520069.14108106  
SRR17520069.14108108  
SRR17520069.14108110  
SRR17520069.14108112  
SRR17520069.14108114  
SRR17520069.14108116  
SRR17520069.14108118

SRR17520069.14109836  
SRR17520069.14109840  
SRR17520069.14109847  
SRR17520069.14109849  
SRR17520069.14109851  
SRR17520069.14109853  
SRR17520069.14109855  
SRR17520069.14109857  
SRR17520069.14109861  
SRR17520069.14115330  
SRR17520069.14115332  
SRR17520069.14115334  
SRR17520069.14115336  
SRR17520069.14115342  
SRR17520069.14115344  
SRR17520069.14115346  
SRR17520069.14115350  
SRR17520069.14115354  
SRR17520069.14115356  
SRR17520069.14115358  
SRR17520069.14115360  
SRR17520069.14115362  
SRR17520069.14115364  
SRR17520069.14115366  
SRR17520069.14115368  
SRR17520069.14115370  
SRR17520069.14115372  
SRR17520069.14115374  
SRR17520069.14115376  
SRR17520069.14115378  
SRR17520069.14115380  
SRR17520069.14115382  
SRR17520069.14115384  
SRR17520069.14115386  
SRR17520069.14115388  
SRR17520069.14115390  
SRR17520069.14115392  
SRR17520069.14115396  
SRR17520069.14115398  
SRR17520069.14115400  
SRR17520069.14115402  
SRR17520069.14115404  
SRR17520069.14115406  
SRR17520069.14115408  
SRR17520069.14115410  
SRR17520069.14115412  
SRR17520069.14115414

SRR17520069.14115416  
SRR17520069.14115418  
SRR17520069.14115420  
SRR17520069.14115422  
SRR17520069.14115424  
SRR17520069.14115426  
SRR17520069.14115428  
SRR17520069.14119675  
SRR17520069.14119677  
SRR17520069.14119679  
SRR17520069.14119681  
SRR17520069.14119683  
SRR17520069.14119685  
SRR17520069.14119687  
SRR17520069.14119689  
SRR17520069.14119691  
SRR17520069.14119693  
SRR17520069.14119699  
SRR17520069.14119701  
SRR17520069.14119703  
SRR17520069.14119705  
SRR17520069.14119707  
SRR17520069.14119709  
SRR17520069.14119711  
SRR17520069.14119715  
SRR17520069.14119717  
SRR17520069.14119719  
SRR17520069.14119721  
SRR17520069.14119723  
SRR17520069.14119725  
SRR17520069.14119727  
SRR17520069.14119729  
SRR17520069.14119731  
SRR17520069.14119733  
SRR17520069.14123311  
SRR17520069.14123313  
SRR17520069.14123315  
SRR17520069.14123317  
SRR17520069.14123319  
SRR17520069.14123321  
SRR17520069.14123323  
SRR17520069.14123325  
SRR17520069.14123327  
SRR17520069.14123329  
SRR17520069.14123331  
SRR17520069.14123333  
SRR17520069.14123335

SRR17520069.14123337  
SRR17520069.14123339  
SRR17520069.14123341  
SRR17520069.14123343  
SRR17520069.14123345  
SRR17520069.14123347  
SRR17520069.14123349  
SRR17520069.14123351  
SRR17520069.14123355  
SRR17520069.14123357  
SRR17520069.14123359  
SRR17520069.14123361  
SRR17520069.14132050  
SRR17520069.14132052  
SRR17520069.14132054  
SRR17520069.14132056  
SRR17520069.14132058  
SRR17520069.14132060  
SRR17520069.14132062  
SRR17520069.14132064  
SRR17520069.14132066  
SRR17520069.14132068  
SRR17520069.14132070  
SRR17520069.14132072  
SRR17520069.14132074  
SRR17520069.14132076  
SRR17520069.14132078  
SRR17520069.14132082  
SRR17520069.14132088  
SRR17520069.14132090  
SRR17520069.14132094  
SRR17520069.14132096  
SRR17520069.14132098  
SRR17520069.14132100  
SRR17520069.14132102  
SRR17520069.14132104  
SRR17520069.14132106  
SRR17520069.14132108  
SRR17520069.14132110  
SRR17520069.14132112  
SRR17520069.14132114  
SRR17520069.14132116  
SRR17520069.14132118  
SRR17520069.14132120  
SRR17520069.14132122  
SRR17520069.14132124  
SRR17520069.14132128

SRR17520069.14132130  
SRR17520069.14132132  
SRR17520069.14132134  
SRR17520069.14132136  
SRR17520069.14132138  
SRR17520069.14132140  
SRR17520069.14132142  
SRR17520069.14132146  
SRR17520069.14132148  
SRR17520069.14132150  
SRR17520069.14132152  
SRR17520069.14132154  
SRR17520069.14132156  
SRR17520069.14132158  
SRR17520069.14132160  
SRR17520069.14132162  
SRR17520069.14132164  
SRR17520069.14132166  
SRR17520069.14132168  
SRR17520069.14132170  
SRR17520069.14132172  
SRR17520069.14132174  
SRR17520069.14132178  
SRR17520069.14132180  
SRR17520069.14132182  
SRR17520069.14132184  
SRR17520069.14132186  
SRR17520069.14132188  
SRR17520069.14145661  
SRR17520069.14145663  
SRR17520069.14145665  
SRR17520069.14145667  
SRR17520069.14145669  
SRR17520069.14145671  
SRR17520069.14145673  
SRR17520069.14145675  
SRR17520069.14145677  
SRR17520069.14145679  
SRR17520069.14145681  
SRR17520069.14145683  
SRR17520069.14145685  
SRR17520069.14145687  
SRR17520069.14145689  
SRR17520069.14145691  
SRR17520069.14145693  
SRR17520069.14145695  
SRR17520069.14145697

SRR17520069.14145699  
SRR17520069.14145701  
SRR17520069.14145703  
SRR17520069.14145705  
SRR17520069.14145707  
SRR17520069.14145709  
SRR17520069.14145711  
SRR17520069.14145713  
SRR17520069.14145715  
SRR17520069.14145717  
SRR17520069.14145719  
SRR17520069.14145721  
SRR17520069.14145723  
SRR17520069.14145725  
SRR17520069.14145727  
SRR17520069.14145729  
SRR17520069.14145731  
SRR17520069.14145733  
SRR17520069.14145735  
SRR17520069.14145737  
SRR17520069.14145739  
SRR17520069.14145741  
SRR17520069.14145743  
SRR17520069.14145745  
SRR17520069.14145747  
SRR17520069.14145749  
SRR17520069.14145751  
SRR17520069.14145753  
SRR17520069.14145755  
SRR17520069.14145757  
SRR17520069.14145759  
SRR17520069.14145761  
SRR17520069.14145763  
SRR17520069.14145765  
SRR17520069.14145767  
SRR17520069.14149098  
SRR17520069.14149100  
SRR17520069.14149102  
SRR17520069.14149104  
SRR17520069.14149106  
SRR17520069.14149108  
SRR17520069.14149110  
SRR17520069.14149112  
SRR17520069.14149114  
SRR17520069.14149116  
SRR17520069.14156509  
SRR17520069.14157173

SRR17520069.14157175  
SRR17520069.14159704  
SRR17520069.14159706  
SRR17520069.14159708  
SRR17520069.14159710  
SRR17520069.14159712  
SRR17520069.14159714  
SRR17520069.14159716  
SRR17520069.14159718  
SRR17520069.14159720  
SRR17520069.14159722  
SRR17520069.14159724  
SRR17520069.14159726  
SRR17520069.14159728  
SRR17520069.14159730  
SRR17520069.14159732  
SRR17520069.14159734  
SRR17520069.14160401  
SRR17520069.14160403  
SRR17520069.14160405  
SRR17520069.14160407  
SRR17520069.14160411  
SRR17520069.14171223  
SRR17520069.14171225  
SRR17520069.14171227  
SRR17520069.14171229  
SRR17520069.14171231  
SRR17520069.14171233  
SRR17520069.14171235  
SRR17520069.14171237  
SRR17520069.14171239  
SRR17520069.14171241  
SRR17520069.14171243  
SRR17520069.14171245  
SRR17520069.14171247  
SRR17520069.14171251  
SRR17520069.14171253  
SRR17520069.14171255  
SRR17520069.14171257  
SRR17520069.14174094  
SRR17520069.14174104  
SRR17520069.14174112  
SRR17520069.14174114  
SRR17520069.14174118  
SRR17520069.14174122  
SRR17520069.14174124  
SRR17520069.14174126



SRR17520069.14174128  
SRR17520069.14174130  
SRR17520069.14174132  
SRR17520069.14174134  
SRR17520069.14174136  
SRR17520069.14174138  
SRR17520069.14174140  
SRR17520069.14174142  
SRR17520069.14174144  
SRR17520069.14176288  
SRR17520069.14176290  
SRR17520069.14176292  
SRR17520069.14176294  
SRR17520069.14176296  
SRR17520069.14176298  
SRR17520069.14176300  
SRR17520069.14176302  
SRR17520069.14176304  
SRR17520069.14176310  
SRR17520069.14176312  
SRR17520069.14176314  
SRR17520069.14176316  
SRR17520069.14176318  
SRR17520069.14176320  
SRR17520069.14176322  
SRR17520069.14176324  
SRR17520069.14176326  
SRR17520069.14176328  
SRR17520069.14176330  
SRR17520069.14176332  
SRR17520069.14176334  
SRR17520069.14176336  
SRR17520069.14176338  
SRR17520069.14176340  
SRR17520069.14176342  
SRR17520069.14176344  
SRR17520069.14176346  
SRR17520069.14176350  
SRR17520069.14176352  
SRR17520069.14176354  
SRR17520069.14176356  
SRR17520069.14176358  
SRR17520069.14176360  
SRR17520069.14176362  
SRR17520069.14176364  
SRR17520069.14176366  
SRR17520069.14176368

SRR17520069.14176370  
SRR17520069.14178388  
SRR17520069.14178390  
SRR17520069.14178392  
SRR17520069.14178394  
SRR17520069.14178398  
SRR17520069.14178400  
SRR17520069.14178402  
SRR17520069.14178404  
SRR17520069.14178406  
SRR17520069.14178408  
SRR17520069.14178412  
SRR17520069.14178414  
SRR17520069.14178416  
SRR17520069.14178418  
SRR17520069.14178420  
SRR17520069.14178422  
SRR17520069.14178424  
SRR17520069.14178426  
SRR17520069.14178428  
SRR17520069.14178430  
SRR17520069.14178432  
SRR17520069.14178434  
SRR17520069.14178438  
SRR17520069.14178440  
SRR17520069.14178442  
SRR17520069.14178444  
SRR17520069.14178446  
SRR17520069.14178448  
SRR17520069.14178450  
SRR17520069.14178452  
SRR17520069.14178454  
SRR17520069.14183877  
SRR17520069.14183879  
SRR17520069.14183881  
SRR17520069.14183883  
SRR17520069.14183885  
SRR17520069.14183887  
SRR17520069.14183889  
SRR17520069.14183891  
SRR17520069.14183893  
SRR17520069.14183895  
SRR17520069.14183897  
SRR17520069.14183899  
SRR17520069.14183901  
SRR17520069.14183903  
SRR17520069.14183905

SRR17520069.14183909  
SRR17520069.14183911  
SRR17520069.14183913  
SRR17520069.14183915  
SRR17520069.14183917  
SRR17520069.14183919  
SRR17520069.14183921  
SRR17520069.14183923  
SRR17520069.14183925  
SRR17520069.14183927  
SRR17520069.14183929  
SRR17520069.14183931  
SRR17520069.14183933  
SRR17520069.14183935  
SRR17520069.14183937  
SRR17520069.14183939  
SRR17520069.14183941  
SRR17520069.14183943  
SRR17520069.14183945  
SRR17520069.14183947  
SRR17520069.14183949  
SRR17520069.14183951  
SRR17520069.14183953  
SRR17520069.14183955  
SRR17520069.14183959  
SRR17520069.14183961  
SRR17520069.14183963  
SRR17520069.14183965  
SRR17520069.14183967  
SRR17520069.14183969  
SRR17520069.14183971  
SRR17520069.14187210  
SRR17520069.14187212  
SRR17520069.14187214  
SRR17520069.14187216  
SRR17520069.14187218  
SRR17520069.14187220  
SRR17520069.14187222  
SRR17520069.14187224  
SRR17520069.14187226  
SRR17520069.14187228  
SRR17520069.14187230  
SRR17520069.14187232  
SRR17520069.14187234  
SRR17520069.14187236  
SRR17520069.14187238  
SRR17520069.14187240

SRR17520069.14187242  
SRR17520069.14187244  
SRR17520069.14196122  
SRR17520069.14196124  
SRR17520069.14205264  
SRR17520069.14219013  
SRR17520069.14227407  
SRR17520069.14227411  
SRR17520069.14227417  
SRR17520069.14227419  
SRR17520069.14227421  
SRR17520069.14227423  
SRR17520069.14227429  
SRR17520069.14227437  
SRR17520069.14227447  
SRR17520069.14227453  
SRR17520069.14232576  
SRR17520069.14232578  
SRR17520069.14232580  
SRR17520069.14233223  
SRR17520069.14236812  
SRR17520069.14236814  
SRR17520069.14236816  
SRR17520069.14236818  
SRR17520069.14236820  
SRR17520069.14236822  
SRR17520069.14236824  
SRR17520069.14236826  
SRR17520069.14236828  
SRR17520069.14236830  
SRR17520069.14236832  
SRR17520069.14236834  
SRR17520069.14243614  
SRR17520069.14243616  
SRR17520069.14243618  
SRR17520069.14243622  
SRR17520069.14243624  
SRR17520069.14243626  
SRR17520069.14243628  
SRR17520069.14243630  
SRR17520069.14243632  
SRR17520069.14251537  
SRR17520069.14251539  
SRR17520069.14251541  
SRR17520069.14251543  
SRR17520069.14251545  
SRR17520069.14251547

SRR17520069. 14251549  
SRR17520069. 14251551  
SRR17520069. 14251553  
SRR17520069. 14251555  
SRR17520069. 14251557  
SRR17520069. 14251559  
SRR17520069. 14251561  
SRR17520069. 14251563  
SRR17520069. 14251565  
SRR17520069. 14251567  
SRR17520069. 14251569  
SRR17520069. 14251571  
SRR17520069. 14251573  
SRR17520069. 14251575  
SRR17520069. 14251577  
SRR17520069. 14251579  
SRR17520069. 14251581  
SRR17520069. 14251583  
SRR17520069. 14251585  
SRR17520069. 14251587  
SRR17520069. 14251589  
SRR17520069. 14251591  
SRR17520069. 14251593  
SRR17520069. 14251595  
SRR17520069. 14251597  
SRR17520069. 14251599  
SRR17520069. 14251603  
SRR17520069. 14251605  
SRR17520069. 14251607  
SRR17520069. 14251611  
SRR17520069. 14251613  
SRR17520069. 14251615  
SRR17520069. 14251617  
SRR17520069. 14251619  
SRR17520069. 14251623  
SRR17520069. 14251625  
SRR17520069. 14251627  
SRR17520069. 14251629  
SRR17520069. 14251633  
SRR17520069. 14251635  
SRR17520069. 14266915  
SRR17520069. 14266917  
SRR17520069. 14266919  
SRR17520069. 14266921  
SRR17520069. 14266923  
SRR17520069. 14266925  
SRR17520069. 14267154

SRR17520069.14267156  
SRR17520069.14267158  
SRR17520069.14268542  
SRR17520069.14268544  
SRR17520069.14268546  
SRR17520069.14268548  
SRR17520069.14268550  
SRR17520069.14268863  
SRR17520069.14268865  
SRR17520069.14268867  
SRR17520069.14268869  
SRR17520069.14268871  
SRR17520069.14268873  
SRR17520069.14268877  
SRR17520069.14277983  
SRR17520069.14279527  
SRR17520069.14279529  
SRR17520069.14279531  
SRR17520069.14279533  
SRR17520069.14279535  
SRR17520069.14279537  
SRR17520069.14279539  
SRR17520069.14279541  
SRR17520069.14279543  
SRR17520069.14279545  
SRR17520069.14279549  
SRR17520069.14279551  
SRR17520069.14279553  
SRR17520069.14279555  
SRR17520069.14279557  
SRR17520069.14279559  
SRR17520069.14279561  
SRR17520069.14279563  
SRR17520069.14279565  
SRR17520069.14279567  
SRR17520069.14279569  
SRR17520069.14279571  
SRR17520069.14279573  
SRR17520069.14279575  
SRR17520069.14279577  
SRR17520069.14279579  
SRR17520069.14279581  
SRR17520069.14279583  
SRR17520069.14279585  
SRR17520069.14279587  
SRR17520069.14279589  
SRR17520069.14279591

SRR17520069. 14279593  
SRR17520069. 14279595  
SRR17520069. 14279597  
SRR17520069. 14279599  
SRR17520069. 14284513  
SRR17520069. 14284515  
SRR17520069. 14284517  
SRR17520069. 14284519  
SRR17520069. 14284521  
SRR17520069. 14284523  
SRR17520069. 14284525  
SRR17520069. 14284527  
SRR17520069. 14284529  
SRR17520069. 14284531  
SRR17520069. 14284533  
SRR17520069. 14284535  
SRR17520069. 14284537  
SRR17520069. 14284539  
SRR17520069. 14284541  
SRR17520069. 14284543  
SRR17520069. 14284545  
SRR17520069. 14284547  
SRR17520069. 14284549  
SRR17520069. 14284551  
SRR17520069. 14284553  
SRR17520069. 14284555  
SRR17520069. 14284557  
SRR17520069. 14284559  
SRR17520069. 14284561  
SRR17520069. 14284563  
SRR17520069. 14284565  
SRR17520069. 14284567  
SRR17520069. 14284569  
SRR17520069. 14284571  
SRR17520069. 14284573  
SRR17520069. 14284575  
SRR17520069. 14290842  
SRR17520069. 14290844  
SRR17520069. 14290848  
SRR17520069. 14290850  
SRR17520069. 14290852  
SRR17520069. 14290854  
SRR17520069. 14290856  
SRR17520069. 14290860  
SRR17520069. 14290862  
SRR17520069. 14296575  
SRR17520069. 14296579

SRR17520069.14296581  
SRR17520069.14296583  
SRR17520069.14296585  
SRR17520069.14296587  
SRR17520069.14296589  
SRR17520069.14296591  
SRR17520069.14296593  
SRR17520069.14296595  
SRR17520069.14296597  
SRR17520069.14296599  
SRR17520069.14296601  
SRR17520069.14296603  
SRR17520069.14296605  
SRR17520069.14296609  
SRR17520069.14296611  
SRR17520069.14298027  
SRR17520069.14298031  
SRR17520069.14298033  
SRR17520069.14298035  
SRR17520069.14298037  
SRR17520069.14299208  
SRR17520069.14299210  
SRR17520069.14299212  
SRR17520069.14299214  
SRR17520069.14299216  
SRR17520069.14299218  
SRR17520069.14299220  
SRR17520069.14299222  
SRR17520069.14299224  
SRR17520069.14299226  
SRR17520069.14299228  
SRR17520069.14299230  
SRR17520069.14299232  
SRR17520069.14299234  
SRR17520069.14304679  
SRR17520069.14307865  
SRR17520069.14307867  
SRR17520069.14307869  
SRR17520069.14307871  
SRR17520069.14307873  
SRR17520069.14307875  
SRR17520069.14307877  
SRR17520069.14307879  
SRR17520069.14307881  
SRR17520069.14307883  
SRR17520069.14307885  
SRR17520069.14307887



SRR17520069.14307889  
SRR17520069.14307891  
SRR17520069.14307893  
SRR17520069.14307895  
SRR17520069.14309799  
SRR17520069.14309801  
SRR17520069.14309803  
SRR17520069.14309805  
SRR17520069.14309807  
SRR17520069.14309809  
SRR17520069.14309811  
SRR17520069.14309813  
SRR17520069.14309815  
SRR17520069.14309817  
SRR17520069.14309819  
SRR17520069.14309821  
SRR17520069.14309823  
SRR17520069.14313666  
SRR17520069.14313668  
SRR17520069.14313670  
SRR17520069.14313672  
SRR17520069.14313674  
SRR17520069.14313676  
SRR17520069.14313678  
SRR17520069.14313680  
SRR17520069.14313682  
SRR17520069.14313684  
SRR17520069.14313686  
SRR17520069.14313688  
SRR17520069.14313690  
SRR17520069.14313692  
SRR17520069.14313694  
SRR17520069.14313696  
SRR17520069.14313698  
SRR17520069.14313700  
SRR17520069.14313702  
SRR17520069.14313704  
SRR17520069.14313706  
SRR17520069.14313708  
SRR17520069.14313710  
SRR17520069.14313712  
SRR17520069.14313714  
SRR17520069.14313716  
SRR17520069.14313718  
SRR17520069.14313720  
SRR17520069.14313722  
SRR17520069.14313724

SRR17520069.14313726  
SRR17520069.14313728  
SRR17520069.14319073  
SRR17520069.14319077  
SRR17520069.14319079  
SRR17520069.14319081  
SRR17520069.14319083  
SRR17520069.14326700  
SRR17520069.14326702  
SRR17520069.14326704  
SRR17520069.14326706  
SRR17520069.14326708  
SRR17520069.14326710  
SRR17520069.14326712  
SRR17520069.14326714  
SRR17520069.14326716  
SRR17520069.14326718  
SRR17520069.14326720  
SRR17520069.14326722  
SRR17520069.14326724  
SRR17520069.14326726  
SRR17520069.14326728  
SRR17520069.14326730  
SRR17520069.14326732  
SRR17520069.14326734  
SRR17520069.14326736  
SRR17520069.14326738  
SRR17520069.14326740  
SRR17520069.14326742  
SRR17520069.14326828  
SRR17520069.14326830  
SRR17520069.14326832  
SRR17520069.14326834  
SRR17520069.14326836  
SRR17520069.14326838  
SRR17520069.14326840  
SRR17520069.14326842  
SRR17520069.14326844  
SRR17520069.14326846  
SRR17520069.14326848  
SRR17520069.14326850  
SRR17520069.14326852  
SRR17520069.14326854  
SRR17520069.14326856  
SRR17520069.14326858  
SRR17520069.14326860  
SRR17520069.14326862

SRR17520069. 14326864  
SRR17520069. 14326868  
SRR17520069. 14326872  
SRR17520069. 14326876  
SRR17520069. 14326878  
SRR17520069. 14326880  
SRR17520069. 14326882  
SRR17520069. 14326884  
SRR17520069. 14326886  
SRR17520069. 14326888  
SRR17520069. 14326890  
SRR17520069. 14326892  
SRR17520069. 14327310  
SRR17520069. 14327778  
SRR17520069. 14327782  
SRR17520069. 14327784  
SRR17520069. 14331496  
SRR17520069. 14331498  
SRR17520069. 14331500  
SRR17520069. 14331502  
SRR17520069. 14331504  
SRR17520069. 14331506  
SRR17520069. 14331508  
SRR17520069. 14331510  
SRR17520069. 14331512  
SRR17520069. 14339349  
SRR17520069. 14339351  
SRR17520069. 14339353  
SRR17520069. 14339355  
SRR17520069. 14339357  
SRR17520069. 14339359  
SRR17520069. 14339361  
SRR17520069. 14340122  
SRR17520069. 14340124  
SRR17520069. 14340126  
SRR17520069. 14340128  
SRR17520069. 14340130  
SRR17520069. 14340132  
SRR17520069. 14340134  
SRR17520069. 14340136  
SRR17520069. 14340138  
SRR17520069. 14340140  
SRR17520069. 14340142  
SRR17520069. 14340144  
SRR17520069. 14340146  
SRR17520069. 14340148  
SRR17520069. 14340150

SRR17520069.14340152  
SRR17520069.14340154  
SRR17520069.14340156  
SRR17520069.14340158  
SRR17520069.14340160  
SRR17520069.14340162  
SRR17520069.14340164  
SRR17520069.14340166  
SRR17520069.14340168  
SRR17520069.14340170  
SRR17520069.14344176  
SRR17520069.14344178  
SRR17520069.14344180  
SRR17520069.14344182  
SRR17520069.14344184  
SRR17520069.14344186  
SRR17520069.14344188  
SRR17520069.14344190  
SRR17520069.14344192  
SRR17520069.14344194  
SRR17520069.14344196  
SRR17520069.14344198  
SRR17520069.14344200  
SRR17520069.14344202  
SRR17520069.14344204  
SRR17520069.14344208  
SRR17520069.14344210  
SRR17520069.14344212  
SRR17520069.14344214  
SRR17520069.14344216  
SRR17520069.14344218  
SRR17520069.14344220  
SRR17520069.14344222  
SRR17520069.14344224  
SRR17520069.14344226  
SRR17520069.14344228  
SRR17520069.14344230  
SRR17520069.14344232  
SRR17520069.14344234  
SRR17520069.14344236  
SRR17520069.14344238  
SRR17520069.14344240  
SRR17520069.14344242  
SRR17520069.14344244  
SRR17520069.14344246  
SRR17520069.14344248  
SRR17520069.14344250

SRR17520069. 14344252  
SRR17520069. 14344254  
SRR17520069. 14344256  
SRR17520069. 14357317  
SRR17520069. 14357319  
SRR17520069. 14357323  
SRR17520069. 14357325  
SRR17520069. 14357327  
SRR17520069. 14357329  
SRR17520069. 14357331  
SRR17520069. 14357333  
SRR17520069. 14359347  
SRR17520069. 14359349  
SRR17520069. 14359351  
SRR17520069. 14359353  
SRR17520069. 14359355  
SRR17520069. 14359357  
SRR17520069. 14359359  
SRR17520069. 14359361  
SRR17520069. 14359363  
SRR17520069. 14359365  
SRR17520069. 14359367  
SRR17520069. 14359369  
SRR17520069. 14359371  
SRR17520069. 14359373  
SRR17520069. 14359375  
SRR17520069. 14359377  
SRR17520069. 14359379  
SRR17520069. 14359381  
SRR17520069. 14359383  
SRR17520069. 14359385  
SRR17520069. 14359387  
SRR17520069. 14359389  
SRR17520069. 14359391  
SRR17520069. 14359393  
SRR17520069. 14359395  
SRR17520069. 14359397  
SRR17520069. 14359399  
SRR17520069. 14359401  
SRR17520069. 14359403  
SRR17520069. 14359405  
SRR17520069. 14359409  
SRR17520069. 14359411  
SRR17520069. 14359413  
SRR17520069. 14359415  
SRR17520069. 14359417  
SRR17520069. 14359419

SRR17520069. 14359421  
SRR17520069. 14359423  
SRR17520069. 14359425  
SRR17520069. 14359427  
SRR17520069. 14359429  
SRR17520069. 14359431  
SRR17520069. 14359433  
SRR17520069. 14359435  
SRR17520069. 14359437  
SRR17520069. 14359439  
SRR17520069. 14359441  
SRR17520069. 14359767  
SRR17520069. 14361470  
SRR17520069. 14361472  
SRR17520069. 14361474  
SRR17520069. 14361476  
SRR17520069. 14361478  
SRR17520069. 14361480  
SRR17520069. 14361482  
SRR17520069. 14361484  
SRR17520069. 14361486  
SRR17520069. 14361489  
SRR17520069. 14361491  
SRR17520069. 14361495  
SRR17520069. 14361497  
SRR17520069. 14361499  
SRR17520069. 14361501  
SRR17520069. 14361503  
SRR17520069. 14361505  
SRR17520069. 14361509  
SRR17520069. 14361511  
SRR17520069. 14361513  
SRR17520069. 14361515  
SRR17520069. 14361517  
SRR17520069. 14361519  
SRR17520069. 14361521  
SRR17520069. 14361523  
SRR17520069. 14361525  
SRR17520069. 14361527  
SRR17520069. 14361529  
SRR17520069. 14363222  
SRR17520069. 14363224  
SRR17520069. 14363226  
SRR17520069. 14363228  
SRR17520069. 14363230  
SRR17520069. 14363232  
SRR17520069. 14363234

SRR17520069. 14363236  
SRR17520069. 14363238  
SRR17520069. 14363240  
SRR17520069. 14363242  
SRR17520069. 14363244  
SRR17520069. 14363246  
SRR17520069. 14363248  
SRR17520069. 14363250  
SRR17520069. 14370574  
SRR17520069. 14370576  
SRR17520069. 14370580  
SRR17520069. 14370582  
SRR17520069. 14370584  
SRR17520069. 14370586  
SRR17520069. 14370588  
SRR17520069. 14370590  
SRR17520069. 14370592  
SRR17520069. 14373320  
SRR17520069. 14373322  
SRR17520069. 14373324  
SRR17520069. 14376458  
SRR17520069. 14376460  
SRR17520069. 14376464  
SRR17520069. 14376466  
SRR17520069. 14377484  
SRR17520069. 14380659  
SRR17520069. 14380661  
SRR17520069. 14380663  
SRR17520069. 14380665  
SRR17520069. 14380667  
SRR17520069. 14380669  
SRR17520069. 14380671  
SRR17520069. 14380673  
SRR17520069. 14380675  
SRR17520069. 14380677  
SRR17520069. 14380679  
SRR17520069. 14380681  
SRR17520069. 14380683  
SRR17520069. 14380685  
SRR17520069. 14380687  
SRR17520069. 14380689  
SRR17520069. 14380691  
SRR17520069. 14380693  
SRR17520069. 14380695  
SRR17520069. 14380697  
SRR17520069. 14380699  
SRR17520069. 14380701

SRR17520069.14380703  
SRR17520069.14380705  
SRR17520069.14380707  
SRR17520069.14380709  
SRR17520069.14380711  
SRR17520069.14380713  
SRR17520069.14380715  
SRR17520069.14380719  
SRR17520069.14380721  
SRR17520069.14380723  
SRR17520069.14380725  
SRR17520069.14380727  
SRR17520069.14380729  
SRR17520069.14380731  
SRR17520069.14380733  
SRR17520069.14380735  
SRR17520069.14380737  
SRR17520069.14380739  
SRR17520069.14380741  
SRR17520069.14380743  
SRR17520069.14380745  
SRR17520069.14380747  
SRR17520069.14380749  
SRR17520069.14380751  
SRR17520069.14380753  
SRR17520069.14380755  
SRR17520069.14384426  
SRR17520069.14384428  
SRR17520069.14384430  
SRR17520069.14384432  
SRR17520069.14392699  
SRR17520069.14392701  
SRR17520069.14392703  
SRR17520069.14392705  
SRR17520069.14392707  
SRR17520069.14392709  
SRR17520069.14392711  
SRR17520069.14392713  
SRR17520069.14392715  
SRR17520069.14392717  
SRR17520069.14392719  
SRR17520069.14392721  
SRR17520069.14392723  
SRR17520069.14392725  
SRR17520069.14392727  
SRR17520069.14392729  
SRR17520069.14392731



SRR17520069. 14397127  
SRR17520069. 14397309  
SRR17520069. 14397311  
SRR17520069. 14397957  
SRR17520069. 14397959  
SRR17520069. 14397961  
SRR17520069. 14397963  
SRR17520069. 14397965  
SRR17520069. 14397967  
SRR17520069. 14397969  
SRR17520069. 14397971  
SRR17520069. 14397973  
SRR17520069. 14397975  
SRR17520069. 14397977  
SRR17520069. 14397979  
SRR17520069. 14397981  
SRR17520069. 14398639  
SRR17520069. 14398641  
SRR17520069. 14398643  
SRR17520069. 14398645  
SRR17520069. 14398647  
SRR17520069. 14398649  
SRR17520069. 14398651  
SRR17520069. 14398655  
SRR17520069. 14399826  
SRR17520069. 14399910  
SRR17520069. 14404330  
SRR17520069. 14404332  
SRR17520069. 14404336  
SRR17520069. 14404338  
SRR17520069. 14404340  
SRR17520069. 14404342  
SRR17520069. 14404344  
SRR17520069. 14406352  
SRR17520069. 14406354  
SRR17520069. 14406356  
SRR17520069. 14407929  
SRR17520069. 14407931  
SRR17520069. 14407933  
SRR17520069. 14407935  
SRR17520069. 14407937  
SRR17520069. 14407939  
SRR17520069. 14407941  
SRR17520069. 14407943  
SRR17520069. 14407945  
SRR17520069. 14407947  
SRR17520069. 14407949

SRR17520069.14407951  
SRR17520069.14407953  
SRR17520069.14407955  
SRR17520069.14407957  
SRR17520069.14407959  
SRR17520069.14407961  
SRR17520069.14407963  
SRR17520069.14407965  
SRR17520069.14407967  
SRR17520069.14407969  
SRR17520069.14407971  
SRR17520069.14407973  
SRR17520069.14407975  
SRR17520069.14407977  
SRR17520069.14407979  
SRR17520069.14407981  
SRR17520069.14407983  
SRR17520069.14407985  
SRR17520069.14407987  
SRR17520069.14410838  
SRR17520069.14410840  
SRR17520069.14410842  
SRR17520069.14410844  
SRR17520069.14410846  
SRR17520069.14410848  
SRR17520069.14410850  
SRR17520069.14410852  
SRR17520069.14410854  
SRR17520069.14410856  
SRR17520069.14410858  
SRR17520069.14410860  
SRR17520069.14410862  
SRR17520069.14410864  
SRR17520069.14410866  
SRR17520069.14410868  
SRR17520069.14410870  
SRR17520069.14410872  
SRR17520069.14411193  
SRR17520069.14411195  
SRR17520069.14411197  
SRR17520069.14411199  
SRR17520069.14411201  
SRR17520069.14411203  
SRR17520069.14411207  
SRR17520069.14411209  
SRR17520069.14411211  
SRR17520069.14411213

SRR17520069.14411217  
SRR17520069.14411219  
SRR17520069.14411221  
SRR17520069.14426617  
SRR17520069.14426619  
SRR17520069.14426623  
SRR17520069.14426625  
SRR17520069.14426629  
SRR17520069.14430041  
SRR17520069.14430043  
SRR17520069.14430045  
SRR17520069.14430047  
SRR17520069.14430049  
SRR17520069.14430051  
SRR17520069.14430053  
SRR17520069.14430055  
SRR17520069.14430057  
SRR17520069.14430059  
SRR17520069.14430061  
SRR17520069.14441534  
SRR17520069.14441536  
SRR17520069.14441538  
SRR17520069.14441540  
SRR17520069.14446317  
SRR17520069.14446319  
SRR17520069.14446321  
SRR17520069.14446323  
SRR17520069.14446325  
SRR17520069.14446327  
SRR17520069.14446329  
SRR17520069.14446331  
SRR17520069.14446333  
SRR17520069.14446335  
SRR17520069.14446337  
SRR17520069.14446339  
SRR17520069.14446341  
SRR17520069.14446347  
SRR17520069.14446349  
SRR17520069.14446351  
SRR17520069.14446353  
SRR17520069.14446355  
SRR17520069.14446357  
SRR17520069.14446359  
SRR17520069.14446363  
SRR17520069.14446365  
SRR17520069.14446367  
SRR17520069.14446369

SRR17520069.14446371  
SRR17520069.14446373  
SRR17520069.14446375  
SRR17520069.14446377  
SRR17520069.14446379  
SRR17520069.14446381  
SRR17520069.14446383  
SRR17520069.14446385  
SRR17520069.14446387  
SRR17520069.14446389  
SRR17520069.14446393  
SRR17520069.14446395  
SRR17520069.14446397  
SRR17520069.14446401  
SRR17520069.14446403  
SRR17520069.14446405  
SRR17520069.14446407  
SRR17520069.14446409  
SRR17520069.14446411  
SRR17520069.14446413  
SRR17520069.14446415  
SRR17520069.14446417  
SRR17520069.14446419  
SRR17520069.14446423  
SRR17520069.14446425  
SRR17520069.14446427  
SRR17520069.14446429  
SRR17520069.14446431  
SRR17520069.14446433  
SRR17520069.14446435  
SRR17520069.14446437  
SRR17520069.14446439  
SRR17520069.14446441  
SRR17520069.14446443  
SRR17520069.14446445  
SRR17520069.14446447  
SRR17520069.14446449  
SRR17520069.14446454  
SRR17520069.14446456  
SRR17520069.14446458  
SRR17520069.14446460  
SRR17520069.14446462  
SRR17520069.14446464  
SRR17520069.14446466  
SRR17520069.14446468  
SRR17520069.14446470  
SRR17520069.14446472

SRR17520069.14446474  
SRR17520069.14446478  
SRR17520069.14446482  
SRR17520069.14446484  
SRR17520069.14446486  
SRR17520069.14448760  
SRR17520069.14456499  
SRR17520069.14456503  
SRR17520069.14456505  
SRR17520069.14456507  
SRR17520069.14456509  
SRR17520069.14456511  
SRR17520069.14456513  
SRR17520069.14456515  
SRR17520069.14456517  
SRR17520069.14456519  
SRR17520069.14468505  
SRR17520069.14468511  
SRR17520069.14468517  
SRR17520069.14479648  
SRR17520069.14479650  
SRR17520069.14479652  
SRR17520069.14479654  
SRR17520069.14479656  
SRR17520069.14479658  
SRR17520069.14482298  
SRR17520069.14482300  
SRR17520069.14482302  
SRR17520069.14482304  
SRR17520069.14482306  
SRR17520069.14482308  
SRR17520069.14482310  
SRR17520069.14482312  
SRR17520069.14484893  
SRR17520069.14484895  
SRR17520069.14484897  
SRR17520069.14484899  
SRR17520069.14484901  
SRR17520069.14484903  
SRR17520069.14484907  
SRR17520069.14484909  
SRR17520069.14484911  
SRR17520069.14484913  
SRR17520069.14484915  
SRR17520069.14484917  
SRR17520069.14484919  
SRR17520069.14484921

SRR17520069.14484923  
SRR17520069.14484925  
SRR17520069.14484927  
SRR17520069.14484929  
SRR17520069.14484931  
SRR17520069.14484933  
SRR17520069.14484935  
SRR17520069.14484937  
SRR17520069.14484939  
SRR17520069.14484941  
SRR17520069.14484943  
SRR17520069.14484945  
SRR17520069.14484947  
SRR17520069.14484949  
SRR17520069.14484951  
SRR17520069.14484953  
SRR17520069.14484955  
SRR17520069.14484957  
SRR17520069.14484959  
SRR17520069.14484961  
SRR17520069.14484963  
SRR17520069.14484965  
SRR17520069.14484967  
SRR17520069.14484969  
SRR17520069.14484971  
SRR17520069.14484973  
SRR17520069.14484975  
SRR17520069.14484977  
SRR17520069.14484979  
SRR17520069.14484983  
SRR17520069.14484985  
SRR17520069.14484987  
SRR17520069.14484989  
SRR17520069.14484991  
SRR17520069.14484993  
SRR17520069.14484995  
SRR17520069.14484997  
SRR17520069.14484999  
SRR17520069.14485001  
SRR17520069.14485003  
SRR17520069.14485005  
SRR17520069.14485007  
SRR17520069.14485009  
SRR17520069.14485011  
SRR17520069.14485013  
SRR17520069.14485015  
SRR17520069.14485017

SRR17520069.14485019  
SRR17520069.14485021  
SRR17520069.14485023  
SRR17520069.14485025  
SRR17520069.14485027  
SRR17520069.14485029  
SRR17520069.14485031  
SRR17520069.14485033  
SRR17520069.14485035  
SRR17520069.14485037  
SRR17520069.14485041  
SRR17520069.14485043  
SRR17520069.14485045  
SRR17520069.14485047  
SRR17520069.14485049  
SRR17520069.14485051  
SRR17520069.14485053  
SRR17520069.14485055  
SRR17520069.14485057  
SRR17520069.14485059  
SRR17520069.14485061  
SRR17520069.14485063  
SRR17520069.14485065  
SRR17520069.14485067  
SRR17520069.14485069  
SRR17520069.14486087  
SRR17520069.14486093  
SRR17520069.14486095  
SRR17520069.14486099  
SRR17520069.14486103  
SRR17520069.14497204  
SRR17520069.14497208  
SRR17520069.14498421  
SRR17520069.14498423  
SRR17520069.14498425  
SRR17520069.14498427  
SRR17520069.14498429  
SRR17520069.14498431  
SRR17520069.14498433  
SRR17520069.14498435  
SRR17520069.14498437  
SRR17520069.14498439  
SRR17520069.14498447  
SRR17520069.14498449  
SRR17520069.14498451  
SRR17520069.14498453  
SRR17520069.14498455

SRR17520069.14498457  
SRR17520069.14498459  
SRR17520069.14498461  
SRR17520069.14498463  
SRR17520069.14498465  
SRR17520069.14498467  
SRR17520069.14498469  
SRR17520069.14498471  
SRR17520069.14498473  
SRR17520069.14498475  
SRR17520069.14498477  
SRR17520069.14498479  
SRR17520069.14498481  
SRR17520069.14498483  
SRR17520069.14498485  
SRR17520069.14498487  
SRR17520069.14498489  
SRR17520069.14498493  
SRR17520069.14498495  
SRR17520069.14498497  
SRR17520069.14498501  
SRR17520069.14498503  
SRR17520069.14498505  
SRR17520069.14498509  
SRR17520069.14498511  
SRR17520069.14498513  
SRR17520069.14500585  
SRR17520069.14500587  
SRR17520069.14501604  
SRR17520069.14501606  
SRR17520069.14501608  
SRR17520069.14501612  
SRR17520069.14501614  
SRR17520069.14501616  
SRR17520069.14501618  
SRR17520069.14502971  
SRR17520069.14502973  
SRR17520069.14502975  
SRR17520069.14502977  
SRR17520069.14502979  
SRR17520069.14502981  
SRR17520069.14502983  
SRR17520069.14502985  
SRR17520069.14502989  
SRR17520069.14502991  
SRR17520069.14502993  
SRR17520069.14502995



SRR17520069.14502997  
SRR17520069.14502999  
SRR17520069.14503001  
SRR17520069.14503003  
SRR17520069.14503005  
SRR17520069.14503007  
SRR17520069.14503009  
SRR17520069.14503011  
SRR17520069.14503013  
SRR17520069.14503017  
SRR17520069.14503019  
SRR17520069.14503021  
SRR17520069.14503023  
SRR17520069.14503025  
SRR17520069.14503027  
SRR17520069.14503029  
SRR17520069.14503031  
SRR17520069.14503033  
SRR17520069.14503037  
SRR17520069.14503039  
SRR17520069.14503041  
SRR17520069.14503043  
SRR17520069.14503045  
SRR17520069.14504706  
SRR17520069.14504708  
SRR17520069.14504710  
SRR17520069.14504712  
SRR17520069.14504716  
SRR17520069.14504718  
SRR17520069.14504720  
SRR17520069.14504722  
SRR17520069.14504724  
SRR17520069.14504728  
SRR17520069.14504730  
SRR17520069.14504734  
SRR17520069.14504738  
SRR17520069.14508674  
SRR17520069.14508676  
SRR17520069.14508678  
SRR17520069.14508680  
SRR17520069.14508682  
SRR17520069.14508684  
SRR17520069.14508686  
SRR17520069.14508688  
SRR17520069.14508690  
SRR17520069.14508692  
SRR17520069.14508694

SRR17520069.14508696  
SRR17520069.14508698  
SRR17520069.14508700  
SRR17520069.14508702  
SRR17520069.14508704  
SRR17520069.14508706  
SRR17520069.14508708  
SRR17520069.14508710  
SRR17520069.14508712  
SRR17520069.14508714  
SRR17520069.14508716  
SRR17520069.14508718  
SRR17520069.14508722  
SRR17520069.14514597  
SRR17520069.14514599  
SRR17520069.14514601  
SRR17520069.14514603  
SRR17520069.14514605  
SRR17520069.14514607  
SRR17520069.14514609  
SRR17520069.14514611  
SRR17520069.14514613  
SRR17520069.14514615  
SRR17520069.14514617  
SRR17520069.14514619  
SRR17520069.14514621  
SRR17520069.14514623  
SRR17520069.14514625  
SRR17520069.14514627  
SRR17520069.14514766  
SRR17520069.14514768  
SRR17520069.14514894  
SRR17520069.14514898  
SRR17520069.14514900  
SRR17520069.14514902  
SRR17520069.14514904  
SRR17520069.14514906  
SRR17520069.14514908  
SRR17520069.14514910  
SRR17520069.14514912  
SRR17520069.14514914  
SRR17520069.14514916  
SRR17520069.14514918  
SRR17520069.14514920  
SRR17520069.14514922  
SRR17520069.14514924  
SRR17520069.14514926

SRR17520069. 14514928  
SRR17520069. 14514930  
SRR17520069. 14514932  
SRR17520069. 14514934  
SRR17520069. 14514936  
SRR17520069. 14514938  
SRR17520069. 14514940  
SRR17520069. 14515888  
SRR17520069. 14515890  
SRR17520069. 14515892  
SRR17520069. 14515894  
SRR17520069. 14515896  
SRR17520069. 14515898  
SRR17520069. 14515900  
SRR17520069. 14515902  
SRR17520069. 14515904  
SRR17520069. 14515906  
SRR17520069. 14515908  
SRR17520069. 14515910  
SRR17520069. 14515912  
SRR17520069. 14515914  
SRR17520069. 14515916  
SRR17520069. 14515918  
SRR17520069. 14515920  
SRR17520069. 14515922  
SRR17520069. 14515924  
SRR17520069. 14515926  
SRR17520069. 14515928  
SRR17520069. 14515930  
SRR17520069. 14515932  
SRR17520069. 14515934  
SRR17520069. 14515938  
SRR17520069. 14515940  
SRR17520069. 14515942  
SRR17520069. 14515944  
SRR17520069. 14515946  
SRR17520069. 14515948  
SRR17520069. 14515952  
SRR17520069. 14515954  
SRR17520069. 14515956  
SRR17520069. 14521898  
SRR17520069. 14521900  
SRR17520069. 14521902  
SRR17520069. 14521904  
SRR17520069. 14521906  
SRR17520069. 14521908  
SRR17520069. 14521910

SRR17520069.14521912  
SRR17520069.14521914  
SRR17520069.14521916  
SRR17520069.14521918  
SRR17520069.14528617  
SRR17520069.14528619  
SRR17520069.14528623  
SRR17520069.14528625  
SRR17520069.14528627  
SRR17520069.14528629  
SRR17520069.14528631  
SRR17520069.14528633  
SRR17520069.14528635  
SRR17520069.14528637  
SRR17520069.14528639  
SRR17520069.14532224  
SRR17520069.14532226  
SRR17520069.14539775  
SRR17520069.14539777  
SRR17520069.14539779  
SRR17520069.14539781  
SRR17520069.14539783  
SRR17520069.14539785  
SRR17520069.14539787  
SRR17520069.14539789  
SRR17520069.14539791  
SRR17520069.14539793  
SRR17520069.14539795  
SRR17520069.14539797  
SRR17520069.14539799  
SRR17520069.14539801  
SRR17520069.14539803  
SRR17520069.14539805  
SRR17520069.14539807  
SRR17520069.14539809  
SRR17520069.14539811  
SRR17520069.14539813  
SRR17520069.14539815  
SRR17520069.14539817  
SRR17520069.14539819  
SRR17520069.14539821  
SRR17520069.14539823  
SRR17520069.14539825  
SRR17520069.14539827  
SRR17520069.14539829  
SRR17520069.14539831  
SRR17520069.14539833

SRR17520069.14539835  
SRR17520069.14539837  
SRR17520069.14539839  
SRR17520069.14539841  
SRR17520069.14539843  
SRR17520069.14539845  
SRR17520069.14539847  
SRR17520069.14539849  
SRR17520069.14539851  
SRR17520069.14539853  
SRR17520069.14539855  
SRR17520069.14539857  
SRR17520069.14539859  
SRR17520069.14539861  
SRR17520069.14539863  
SRR17520069.14539865  
SRR17520069.14539867  
SRR17520069.14539869  
SRR17520069.14539871  
SRR17520069.14539873  
SRR17520069.14539875  
SRR17520069.14539877  
SRR17520069.14539879  
SRR17520069.14539881  
SRR17520069.14539883  
SRR17520069.14539885  
SRR17520069.14539887  
SRR17520069.14539889  
SRR17520069.14539891  
SRR17520069.14539893  
SRR17520069.14539895  
SRR17520069.14539897  
SRR17520069.14539899  
SRR17520069.14539901  
SRR17520069.14539903  
SRR17520069.14539905  
SRR17520069.14539907  
SRR17520069.14539909  
SRR17520069.14539911  
SRR17520069.14539913  
SRR17520069.14539915  
SRR17520069.14539917  
SRR17520069.14539919  
SRR17520069.14539921  
SRR17520069.14539923  
SRR17520069.14539925  
SRR17520069.14539927

SRR17520069.14539929  
SRR17520069.14539931  
SRR17520069.14539933  
SRR17520069.14539935  
SRR17520069.14539937  
SRR17520069.14539939  
SRR17520069.14539941  
SRR17520069.14540185  
SRR17520069.14540255  
SRR17520069.14543991  
SRR17520069.14543993  
SRR17520069.14543995  
SRR17520069.14543997  
SRR17520069.14543999  
SRR17520069.14544001  
SRR17520069.14544003  
SRR17520069.14544005  
SRR17520069.14544007  
SRR17520069.14544009  
SRR17520069.14544011  
SRR17520069.14544013  
SRR17520069.14544015  
SRR17520069.14544017  
SRR17520069.14544019  
SRR17520069.14544021  
SRR17520069.14544023  
SRR17520069.14544025  
SRR17520069.14544027  
SRR17520069.14544029  
SRR17520069.14544031  
SRR17520069.14544033  
SRR17520069.14544035  
SRR17520069.14544037  
SRR17520069.14544039  
SRR17520069.14544041  
SRR17520069.14544043  
SRR17520069.14544045  
SRR17520069.14544047  
SRR17520069.14544049  
SRR17520069.14544051  
SRR17520069.14544053  
SRR17520069.14544055  
SRR17520069.14547395  
SRR17520069.14554911  
SRR17520069.14554913  
SRR17520069.14554915  
SRR17520069.14554917

SRR17520069.14554919  
SRR17520069.14554921  
SRR17520069.14554923  
SRR17520069.14554925  
SRR17520069.14554927  
SRR17520069.14554929  
SRR17520069.14554931  
SRR17520069.14554933  
SRR17520069.14560649  
SRR17520069.14560651  
SRR17520069.14560653  
SRR17520069.14560655  
SRR17520069.14560657  
SRR17520069.14560659  
SRR17520069.14560661  
SRR17520069.14560663  
SRR17520069.14560665  
SRR17520069.14560667  
SRR17520069.14560669  
SRR17520069.14560671  
SRR17520069.14560673  
SRR17520069.14560675  
SRR17520069.14560677  
SRR17520069.14560679  
SRR17520069.14560681  
SRR17520069.14560683  
SRR17520069.14563250  
SRR17520069.14563254  
SRR17520069.14563256  
SRR17520069.14563258  
SRR17520069.14563260  
SRR17520069.14564562  
SRR17520069.14564564  
SRR17520069.14564566  
SRR17520069.14567225  
SRR17520069.14567227  
SRR17520069.14567229  
SRR17520069.14567231  
SRR17520069.14567233  
SRR17520069.14567235  
SRR17520069.14567237  
SRR17520069.14567239  
SRR17520069.14567241  
SRR17520069.14567243  
SRR17520069.14567245  
SRR17520069.14567247  
SRR17520069.14567249

SRR17520069. 14567251  
SRR17520069. 14567253  
SRR17520069. 14567255  
SRR17520069. 14567257  
SRR17520069. 14567259  
SRR17520069. 14567261  
SRR17520069. 14567263  
SRR17520069. 14567265  
SRR17520069. 14567267  
SRR17520069. 14567269  
SRR17520069. 14567271  
SRR17520069. 14567273  
SRR17520069. 14567275  
SRR17520069. 14567277  
SRR17520069. 14567279  
SRR17520069. 14567281  
SRR17520069. 14567283  
SRR17520069. 14567285  
SRR17520069. 14567287  
SRR17520069. 14567289  
SRR17520069. 14567291  
SRR17520069. 14567293  
SRR17520069. 14567295  
SRR17520069. 14567297  
SRR17520069. 14567299  
SRR17520069. 14567301  
SRR17520069. 14567303  
SRR17520069. 14567305  
SRR17520069. 14567307  
SRR17520069. 14567309  
SRR17520069. 14567311  
SRR17520069. 14567313  
SRR17520069. 14567315  
SRR17520069. 14567317  
SRR17520069. 14567319  
SRR17520069. 14567321  
SRR17520069. 14567323  
SRR17520069. 14567325  
SRR17520069. 14567327  
SRR17520069. 14567329  
SRR17520069. 14567331  
SRR17520069. 14567333  
SRR17520069. 14567335  
SRR17520069. 14567337  
SRR17520069. 14567339  
SRR17520069. 14567341  
SRR17520069. 14567343



SRR17520069.14567345  
SRR17520069.14567347  
SRR17520069.14567349  
SRR17520069.14567351  
SRR17520069.14567353  
SRR17520069.14567355  
SRR17520069.14568544  
SRR17520069.14568546  
SRR17520069.14568548  
SRR17520069.14568550  
SRR17520069.14568552  
SRR17520069.14568554  
SRR17520069.14568556  
SRR17520069.14568558  
SRR17520069.14568560  
SRR17520069.14568562  
SRR17520069.14568564  
SRR17520069.14568566  
SRR17520069.14568568  
SRR17520069.14568570  
SRR17520069.14568572  
SRR17520069.14568574  
SRR17520069.14568576  
SRR17520069.14568578  
SRR17520069.14568580  
SRR17520069.14568582  
SRR17520069.14568584  
SRR17520069.14568586  
SRR17520069.14568588  
SRR17520069.14568590  
SRR17520069.14568592  
SRR17520069.14568594  
SRR17520069.14569948  
SRR17520069.14569950  
SRR17520069.14569952  
SRR17520069.14569954  
SRR17520069.14569956  
SRR17520069.14569958  
SRR17520069.14569960  
SRR17520069.14569962  
SRR17520069.14569964  
SRR17520069.14569966  
SRR17520069.14569968  
SRR17520069.14569970  
SRR17520069.14569972  
SRR17520069.14569974  
SRR17520069.14569976

SRR17520069.14569978  
SRR17520069.14569980  
SRR17520069.14569982  
SRR17520069.14569984  
SRR17520069.14569986  
SRR17520069.14569988  
SRR17520069.14569990  
SRR17520069.14569992  
SRR17520069.14569994  
SRR17520069.14571758  
SRR17520069.14571760  
SRR17520069.14571762  
SRR17520069.14571764  
SRR17520069.14571766  
SRR17520069.14573371  
SRR17520069.14573373  
SRR17520069.14573375  
SRR17520069.14573377  
SRR17520069.14573379  
SRR17520069.14573381  
SRR17520069.14573383  
SRR17520069.14573385  
SRR17520069.14573387  
SRR17520069.14573389  
SRR17520069.14573391  
SRR17520069.14573395  
SRR17520069.14573397  
SRR17520069.14575354  
SRR17520069.14575356  
SRR17520069.14575358  
SRR17520069.14580263  
SRR17520069.14580265  
SRR17520069.14580267  
SRR17520069.14580269  
SRR17520069.14580271  
SRR17520069.14580273  
SRR17520069.14580275  
SRR17520069.14580277  
SRR17520069.14580279  
SRR17520069.14580281  
SRR17520069.14580283  
SRR17520069.14580285  
SRR17520069.14580287  
SRR17520069.14580289  
SRR17520069.14580291  
SRR17520069.14580293  
SRR17520069.14580295

SRR17520069.14580297  
SRR17520069.14580299  
SRR17520069.14588447  
SRR17520069.14588449  
SRR17520069.14588458  
SRR17520069.14588460  
SRR17520069.14588464  
SRR17520069.14588466  
SRR17520069.14588468  
SRR17520069.14588470  
SRR17520069.14588472  
SRR17520069.14588474  
SRR17520069.14588476  
SRR17520069.14588478  
SRR17520069.14588480  
SRR17520069.14588482  
SRR17520069.14588484  
SRR17520069.14588486  
SRR17520069.14588488  
SRR17520069.14588490  
SRR17520069.14588492  
SRR17520069.14589859  
SRR17520069.14589861  
SRR17520069.14589863  
SRR17520069.14589865  
SRR17520069.14589867  
SRR17520069.14589869  
SRR17520069.14589871  
SRR17520069.14592103  
SRR17520069.14592105  
SRR17520069.14592107  
SRR17520069.14592109  
SRR17520069.14592111  
SRR17520069.14592113  
SRR17520069.14592115  
SRR17520069.14592117  
SRR17520069.14592119  
SRR17520069.14592121  
SRR17520069.14592123  
SRR17520069.14592125  
SRR17520069.14592127  
SRR17520069.14592129  
SRR17520069.14592131  
SRR17520069.14592133  
SRR17520069.14592135  
SRR17520069.14592137  
SRR17520069.14592139

SRR17520069.14592141  
SRR17520069.14592143  
SRR17520069.14592145  
SRR17520069.14592147  
SRR17520069.14592149  
SRR17520069.14592151  
SRR17520069.14592153  
SRR17520069.14592155  
SRR17520069.14592157  
SRR17520069.14592159  
SRR17520069.14592161  
SRR17520069.14592163  
SRR17520069.14592165  
SRR17520069.14594166  
SRR17520069.14594268  
SRR17520069.14594270  
SRR17520069.14594272  
SRR17520069.14594274  
SRR17520069.14594276  
SRR17520069.14599813  
SRR17520069.14599815  
SRR17520069.14599817  
SRR17520069.14599819  
SRR17520069.14599821  
SRR17520069.14599823  
SRR17520069.14599825  
SRR17520069.14599827  
SRR17520069.14599829  
SRR17520069.14599831  
SRR17520069.14599833  
SRR17520069.14599835  
SRR17520069.14599837  
SRR17520069.14599839  
SRR17520069.14599841  
SRR17520069.14599843  
SRR17520069.14599845  
SRR17520069.14599847  
SRR17520069.14599849  
SRR17520069.14599851  
SRR17520069.14599853  
SRR17520069.14599855  
SRR17520069.14599857  
SRR17520069.14599859  
SRR17520069.14599861  
SRR17520069.14599863  
SRR17520069.14599865  
SRR17520069.14599867

SRR17520069.14599869  
SRR17520069.14599871  
SRR17520069.14599873  
SRR17520069.14599875  
SRR17520069.14599877  
SRR17520069.14599879  
SRR17520069.14599881  
SRR17520069.14599883  
SRR17520069.14599885  
SRR17520069.14599887  
SRR17520069.14599889  
SRR17520069.14599891  
SRR17520069.14599893  
SRR17520069.14599895  
SRR17520069.14599897  
SRR17520069.14599899  
SRR17520069.14599901  
SRR17520069.14599903  
SRR17520069.14599905  
SRR17520069.14599907  
SRR17520069.14599909  
SRR17520069.14599911  
SRR17520069.14599913  
SRR17520069.14599915  
SRR17520069.14599917  
SRR17520069.14599919  
SRR17520069.14599921  
SRR17520069.14599923  
SRR17520069.14599925  
SRR17520069.14599927  
SRR17520069.14599929  
SRR17520069.14599931  
SRR17520069.14599933  
SRR17520069.14599935  
SRR17520069.14599937  
SRR17520069.14599939  
SRR17520069.14599941  
SRR17520069.14599943  
SRR17520069.14599945  
SRR17520069.14599947  
SRR17520069.14599949  
SRR17520069.14599951  
SRR17520069.14599953  
SRR17520069.14599955  
SRR17520069.14599957  
SRR17520069.14599959  
SRR17520069.14599961

SRR17520069.14599963  
SRR17520069.14599965  
SRR17520069.14605642  
SRR17520069.14605644  
SRR17520069.14605646  
SRR17520069.14609712  
SRR17520069.14610749  
SRR17520069.14610751  
SRR17520069.14610753  
SRR17520069.14610755  
SRR17520069.14610757  
SRR17520069.14610759  
SRR17520069.14610761  
SRR17520069.14610763  
SRR17520069.14610765  
SRR17520069.14610767  
SRR17520069.14610769  
SRR17520069.14612640  
SRR17520069.14612642  
SRR17520069.14612644  
SRR17520069.14612646  
SRR17520069.14612648  
SRR17520069.14612652  
SRR17520069.14612654  
SRR17520069.14612656  
SRR17520069.14612658  
SRR17520069.14612660  
SRR17520069.14612662  
SRR17520069.14612664  
SRR17520069.14612668  
SRR17520069.14612670  
SRR17520069.14612674  
SRR17520069.14612676  
SRR17520069.14612678  
SRR17520069.14612680  
SRR17520069.14612682  
SRR17520069.14612684  
SRR17520069.14612686  
SRR17520069.14612688  
SRR17520069.14612690  
SRR17520069.14612692  
SRR17520069.14612696  
SRR17520069.14612698  
SRR17520069.14612704  
SRR17520069.14612706  
SRR17520069.14612708  
SRR17520069.14612710

SRR17520069. 14612712  
SRR17520069. 14612714  
SRR17520069. 14612716  
SRR17520069. 14612718  
SRR17520069. 14612722  
SRR17520069. 14612724  
SRR17520069. 14612728  
SRR17520069. 14612730  
SRR17520069. 14612732  
SRR17520069. 14612734  
SRR17520069. 14612736  
SRR17520069. 14612738  
SRR17520069. 14612740  
SRR17520069. 14612742  
SRR17520069. 14612744  
SRR17520069. 14612746  
SRR17520069. 14612748  
SRR17520069. 14612750  
SRR17520069. 14612752  
SRR17520069. 14612754  
SRR17520069. 14612756  
SRR17520069. 14612758  
SRR17520069. 14612760  
SRR17520069. 14612762  
SRR17520069. 14612764  
SRR17520069. 14612766  
SRR17520069. 14612770  
SRR17520069. 14612772  
SRR17520069. 14612774  
SRR17520069. 14612778  
SRR17520069. 14612780  
SRR17520069. 14612782  
SRR17520069. 14612784  
SRR17520069. 14612786  
SRR17520069. 14612788  
SRR17520069. 14612790  
SRR17520069. 14612792  
SRR17520069. 14612794  
SRR17520069. 14612796  
SRR17520069. 14612798  
SRR17520069. 14612800  
SRR17520069. 14612802  
SRR17520069. 14612804  
SRR17520069. 14612806  
SRR17520069. 14612808  
SRR17520069. 14612810  
SRR17520069. 14612814

SRR17520069. 14612816  
SRR17520069. 14612818  
SRR17520069. 14612820  
SRR17520069. 14612822  
SRR17520069. 14612824  
SRR17520069. 14612826  
SRR17520069. 14612828  
SRR17520069. 14612830  
SRR17520069. 14612832  
SRR17520069. 14612834  
SRR17520069. 14612836  
SRR17520069. 14612838  
SRR17520069. 14612840  
SRR17520069. 14612842  
SRR17520069. 14612844  
SRR17520069. 14616206  
SRR17520069. 14616208  
SRR17520069. 14616210  
SRR17520069. 14616212  
SRR17520069. 14616214  
SRR17520069. 14616216  
SRR17520069. 14616218  
SRR17520069. 14616222  
SRR17520069. 14616224  
SRR17520069. 14616226  
SRR17520069. 14616230  
SRR17520069. 14616232  
SRR17520069. 14616234  
SRR17520069. 14616236  
SRR17520069. 14616238  
SRR17520069. 14616240  
SRR17520069. 14616242  
SRR17520069. 14616244  
SRR17520069. 14616246  
SRR17520069. 14616248  
SRR17520069. 14616250  
SRR17520069. 14616254  
SRR17520069. 14616258  
SRR17520069. 14616260  
SRR17520069. 14616262  
SRR17520069. 14616264  
SRR17520069. 14616266  
SRR17520069. 14622902  
SRR17520069. 14622904  
SRR17520069. 14622906  
SRR17520069. 14622908  
SRR17520069. 14622910



SRR17520069.14622912  
SRR17520069.14622914  
SRR17520069.14622916  
SRR17520069.14622918  
SRR17520069.14622920  
SRR17520069.14622922  
SRR17520069.14622924  
SRR17520069.14622926  
SRR17520069.14622928  
SRR17520069.14622930  
SRR17520069.14622932  
SRR17520069.14622934  
SRR17520069.14622936  
SRR17520069.14623716  
SRR17520069.14623718  
SRR17520069.14623720  
SRR17520069.14623722  
SRR17520069.14623724  
SRR17520069.14623726  
SRR17520069.14623728  
SRR17520069.14623730  
SRR17520069.14623732  
SRR17520069.14623734  
SRR17520069.14623736  
SRR17520069.14623738  
SRR17520069.14626105  
SRR17520069.14626107  
SRR17520069.14629707  
SRR17520069.14629709  
SRR17520069.14629711  
SRR17520069.14629713  
SRR17520069.14629719  
SRR17520069.14629721  
SRR17520069.14629723  
SRR17520069.14629727  
SRR17520069.14629729  
SRR17520069.14629731  
SRR17520069.14629733  
SRR17520069.14629735  
SRR17520069.14629737  
SRR17520069.14629739  
SRR17520069.14629741  
SRR17520069.14629743  
SRR17520069.14629745  
SRR17520069.14629747  
SRR17520069.14629749  
SRR17520069.14630059

SRR17520069.14630061  
SRR17520069.14630067  
SRR17520069.14631048  
SRR17520069.14631050  
SRR17520069.14631052  
SRR17520069.14631054  
SRR17520069.14631056  
SRR17520069.14631058  
SRR17520069.14631060  
SRR17520069.14631062  
SRR17520069.14631064  
SRR17520069.14631066  
SRR17520069.14631068  
SRR17520069.14631070  
SRR17520069.14631072  
SRR17520069.14631074  
SRR17520069.14631076  
SRR17520069.14631078  
SRR17520069.14631080  
SRR17520069.14631082  
SRR17520069.14631084  
SRR17520069.14631086  
SRR17520069.14631088  
SRR17520069.14631090  
SRR17520069.14631092  
SRR17520069.14631094  
SRR17520069.14631096  
SRR17520069.14631100  
SRR17520069.14631102  
SRR17520069.14631104  
SRR17520069.14631106  
SRR17520069.14631108  
SRR17520069.14631110  
SRR17520069.14631112  
SRR17520069.14631114  
SRR17520069.14631116  
SRR17520069.14631118  
SRR17520069.14631120  
SRR17520069.14631122  
SRR17520069.14631124  
SRR17520069.14631126  
SRR17520069.14631138  
SRR17520069.14631147  
SRR17520069.14641303  
SRR17520069.14641305  
SRR17520069.14641307  
SRR17520069.14641309

SRR17520069.14641311  
SRR17520069.14641313  
SRR17520069.14641315  
SRR17520069.14641317  
SRR17520069.14641319  
SRR17520069.14641321  
SRR17520069.14641323  
SRR17520069.14641325  
SRR17520069.14641327  
SRR17520069.14641329  
SRR17520069.14641331  
SRR17520069.14641333  
SRR17520069.14641335  
SRR17520069.14641337  
SRR17520069.14641339  
SRR17520069.14641341  
SRR17520069.14641343  
SRR17520069.14641345  
SRR17520069.14641347  
SRR17520069.14641349  
SRR17520069.14641351  
SRR17520069.14641353  
SRR17520069.14641355  
SRR17520069.14641357  
SRR17520069.14641359  
SRR17520069.14641361  
SRR17520069.14641363  
SRR17520069.14641365  
SRR17520069.14641367  
SRR17520069.14641369  
SRR17520069.14641371  
SRR17520069.14641373  
SRR17520069.14641375  
SRR17520069.14641377  
SRR17520069.14641379  
SRR17520069.14641381  
SRR17520069.14641383  
SRR17520069.14641385  
SRR17520069.14641387  
SRR17520069.14641389  
SRR17520069.14641391  
SRR17520069.14641393  
SRR17520069.14641395  
SRR17520069.14641397  
SRR17520069.14641399  
SRR17520069.14641401  
SRR17520069.14641403

SRR17520069.14641405  
SRR17520069.14641407  
SRR17520069.14641409  
SRR17520069.14641411  
SRR17520069.14641413  
SRR17520069.14641415  
SRR17520069.14641417  
SRR17520069.14641419  
SRR17520069.14641421  
SRR17520069.14641423  
SRR17520069.14641425  
SRR17520069.14641427  
SRR17520069.14641429  
SRR17520069.14641431  
SRR17520069.14641433  
SRR17520069.14641435  
SRR17520069.14641437  
SRR17520069.14641439  
SRR17520069.14641441  
SRR17520069.14641443  
SRR17520069.14641445  
SRR17520069.14641447  
SRR17520069.14641449  
SRR17520069.14641451  
SRR17520069.14641453  
SRR17520069.14641455  
SRR17520069.14641457  
SRR17520069.14641459  
SRR17520069.14641461  
SRR17520069.14641463  
SRR17520069.14641465  
SRR17520069.14641467  
SRR17520069.14641469  
SRR17520069.14641471  
SRR17520069.14641473  
SRR17520069.14641475  
SRR17520069.14641477  
SRR17520069.14641479  
SRR17520069.14644695  
SRR17520069.14644697  
SRR17520069.14644699  
SRR17520069.14644701  
SRR17520069.14644703  
SRR17520069.14644707  
SRR17520069.14644711  
SRR17520069.14644713  
SRR17520069.14644715

SRR17520069.14644717  
SRR17520069.14644721  
SRR17520069.14644723  
SRR17520069.14647094  
SRR17520069.14647096  
SRR17520069.14647098  
SRR17520069.14647100  
SRR17520069.14653699  
SRR17520069.14653701  
SRR17520069.14653703  
SRR17520069.14653705  
SRR17520069.14653707  
SRR17520069.14653709  
SRR17520069.14653711  
SRR17520069.14653713  
SRR17520069.14653715  
SRR17520069.14653717  
SRR17520069.14653719  
SRR17520069.14653721  
SRR17520069.14653727  
SRR17520069.14653729  
SRR17520069.14653731  
SRR17520069.14653733  
SRR17520069.14653735  
SRR17520069.14653737  
SRR17520069.14653739  
SRR17520069.14653741  
SRR17520069.14653743  
SRR17520069.14653745  
SRR17520069.14653747  
SRR17520069.14653749  
SRR17520069.14653751  
SRR17520069.14653755  
SRR17520069.14653757  
SRR17520069.14663828  
SRR17520069.14663830  
SRR17520069.14663832  
SRR17520069.14663834  
SRR17520069.14663836  
SRR17520069.14663838  
SRR17520069.14663840  
SRR17520069.14663842  
SRR17520069.14663844  
SRR17520069.14663846  
SRR17520069.14663848  
SRR17520069.14663850  
SRR17520069.14663852

SRR17520069.14663854  
SRR17520069.14663856  
SRR17520069.14663858  
SRR17520069.14663860  
SRR17520069.14663862  
SRR17520069.14663864  
SRR17520069.14663866  
SRR17520069.14663868  
SRR17520069.14663870  
SRR17520069.14663872  
SRR17520069.14663876  
SRR17520069.14663878  
SRR17520069.14663911  
SRR17520069.14663913  
SRR17520069.14663944  
SRR17520069.14663946  
SRR17520069.14663948  
SRR17520069.14663950  
SRR17520069.14665384  
SRR17520069.14665386  
SRR17520069.14665388  
SRR17520069.14665390  
SRR17520069.14665392  
SRR17520069.14665394  
SRR17520069.14665396  
SRR17520069.14665398  
SRR17520069.14665400  
SRR17520069.14665402  
SRR17520069.14665404  
SRR17520069.14665406  
SRR17520069.14665408  
SRR17520069.14665410  
SRR17520069.14665412  
SRR17520069.14665414  
SRR17520069.14665416  
SRR17520069.14665418  
SRR17520069.14665420  
SRR17520069.14665422  
SRR17520069.14665424  
SRR17520069.14665426  
SRR17520069.14665428  
SRR17520069.14665430  
SRR17520069.14665434  
SRR17520069.14669422  
SRR17520069.14669424  
SRR17520069.14669426  
SRR17520069.14669428

SRR17520069.14669430  
SRR17520069.14669432  
SRR17520069.14669434  
SRR17520069.14669436  
SRR17520069.14669438  
SRR17520069.14669440  
SRR17520069.14669442  
SRR17520069.14669444  
SRR17520069.14669446  
SRR17520069.14669450  
SRR17520069.14669452  
SRR17520069.14669454  
SRR17520069.14669456  
SRR17520069.14669458  
SRR17520069.14669460  
SRR17520069.14669462  
SRR17520069.14669466  
SRR17520069.14669468  
SRR17520069.14669470  
SRR17520069.14669474  
SRR17520069.14669480  
SRR17520069.14669482  
SRR17520069.14669484  
SRR17520069.14669486  
SRR17520069.14669488  
SRR17520069.14669862  
SRR17520069.14669864  
SRR17520069.14669866  
SRR17520069.14669868  
SRR17520069.14669870  
SRR17520069.14669872  
SRR17520069.14669874  
SRR17520069.14669876  
SRR17520069.14669878  
SRR17520069.14669880  
SRR17520069.14669882  
SRR17520069.14669884  
SRR17520069.14669886  
SRR17520069.14669888  
SRR17520069.14669890  
SRR17520069.14669892  
SRR17520069.14677011  
SRR17520069.14677013  
SRR17520069.14677015  
SRR17520069.14677017  
SRR17520069.14677019  
SRR17520069.14677021

SRR17520069.14677023  
SRR17520069.14677025  
SRR17520069.14677027  
SRR17520069.14677029  
SRR17520069.14677031  
SRR17520069.14677033  
SRR17520069.14677035  
SRR17520069.14677037  
SRR17520069.14677039  
SRR17520069.14677041  
SRR17520069.14677043  
SRR17520069.14677045  
SRR17520069.14677047  
SRR17520069.14677049  
SRR17520069.14680302  
SRR17520069.14680304  
SRR17520069.14683905  
SRR17520069.14683907  
SRR17520069.14683909  
SRR17520069.14683911  
SRR17520069.14683913  
SRR17520069.14683915  
SRR17520069.14683917  
SRR17520069.14685468  
SRR17520069.14685470  
SRR17520069.14685472  
SRR17520069.14685474  
SRR17520069.14685476  
SRR17520069.14685478  
SRR17520069.14685480  
SRR17520069.14685482  
SRR17520069.14685484  
SRR17520069.14685486  
SRR17520069.14685488  
SRR17520069.14685490  
SRR17520069.14685492  
SRR17520069.14685494  
SRR17520069.14685496  
SRR17520069.14685498  
SRR17520069.14685500  
SRR17520069.14685502  
SRR17520069.14685504  
SRR17520069.14685506  
SRR17520069.14685508  
SRR17520069.14685510  
SRR17520069.14685512  
SRR17520069.14685514



SRR17520069.14685516  
SRR17520069.14685518  
SRR17520069.14685520  
SRR17520069.14685522  
SRR17520069.14685524  
SRR17520069.14685526  
SRR17520069.14685528  
SRR17520069.14685530  
SRR17520069.14685532  
SRR17520069.14685534  
SRR17520069.14685536  
SRR17520069.14685538  
SRR17520069.14685540  
SRR17520069.14685542  
SRR17520069.14685544  
SRR17520069.14685546  
SRR17520069.14685548  
SRR17520069.14685550  
SRR17520069.14685552  
SRR17520069.14685554  
SRR17520069.14685556  
SRR17520069.14685558  
SRR17520069.14685560  
SRR17520069.14685562  
SRR17520069.14686173  
SRR17520069.14686175  
SRR17520069.14686177  
SRR17520069.14686179  
SRR17520069.14686181  
SRR17520069.14686183  
SRR17520069.14686185  
SRR17520069.14686187  
SRR17520069.14686189  
SRR17520069.14686191  
SRR17520069.14686193  
SRR17520069.14686195  
SRR17520069.14686197  
SRR17520069.14686199  
SRR17520069.14686201  
SRR17520069.14686205  
SRR17520069.14686207  
SRR17520069.14686209  
SRR17520069.14686211  
SRR17520069.14686213  
SRR17520069.14686215  
SRR17520069.14686217  
SRR17520069.14686219

SRR17520069.14686221  
SRR17520069.14686223  
SRR17520069.14686225  
SRR17520069.14686227  
SRR17520069.14686229  
SRR17520069.14686231  
SRR17520069.14686233  
SRR17520069.14686235  
SRR17520069.14686239  
SRR17520069.14686241  
SRR17520069.14686243  
SRR17520069.14686245  
SRR17520069.14686247  
SRR17520069.14686249  
SRR17520069.14686251  
SRR17520069.14686253  
SRR17520069.14686255  
SRR17520069.14686257  
SRR17520069.14686259  
SRR17520069.14686261  
SRR17520069.14686263  
SRR17520069.14686265  
SRR17520069.14686267  
SRR17520069.14686269  
SRR17520069.14686271  
SRR17520069.14686273  
SRR17520069.14686275  
SRR17520069.14686277  
SRR17520069.14686279  
SRR17520069.14686281  
SRR17520069.14686283  
SRR17520069.14686285  
SRR17520069.14686287  
SRR17520069.14686289  
SRR17520069.14686291  
SRR17520069.14686293  
SRR17520069.14686295  
SRR17520069.14686297  
SRR17520069.14686299  
SRR17520069.14686301  
SRR17520069.14686303  
SRR17520069.14687040  
SRR17520069.14687042  
SRR17520069.14687046  
SRR17520069.14687048  
SRR17520069.14687050  
SRR17520069.14687052

SRR17520069.14687054  
SRR17520069.14687056  
SRR17520069.14687058  
SRR17520069.14687060  
SRR17520069.14687062  
SRR17520069.14687066  
SRR17520069.14687068  
SRR17520069.14687070  
SRR17520069.14687072  
SRR17520069.14687074  
SRR17520069.14687076  
SRR17520069.14687078  
SRR17520069.14687080  
SRR17520069.14687082  
SRR17520069.14687084  
SRR17520069.14687086  
SRR17520069.14687088  
SRR17520069.14687090  
SRR17520069.14687092  
SRR17520069.14690783  
SRR17520069.14690785  
SRR17520069.14690787  
SRR17520069.14690791  
SRR17520069.14690793  
SRR17520069.14690795  
SRR17520069.14690797  
SRR17520069.14690799  
SRR17520069.14690801  
SRR17520069.14690803  
SRR17520069.14690805  
SRR17520069.14690807  
SRR17520069.14690809  
SRR17520069.14690811  
SRR17520069.14690813  
SRR17520069.14690815  
SRR17520069.14690817  
SRR17520069.14690819  
SRR17520069.14690821  
SRR17520069.14690823  
SRR17520069.14690825  
SRR17520069.14690827  
SRR17520069.14690829  
SRR17520069.14690831  
SRR17520069.14690833  
SRR17520069.14690835  
SRR17520069.14690837  
SRR17520069.14690839

SRR17520069.14690841  
SRR17520069.14690843  
SRR17520069.14690845  
SRR17520069.14690847  
SRR17520069.14690849  
SRR17520069.14690851  
SRR17520069.14690853  
SRR17520069.14690857  
SRR17520069.14690859  
SRR17520069.14690861  
SRR17520069.14690863  
SRR17520069.14690865  
SRR17520069.14690867  
SRR17520069.14690869  
SRR17520069.14690871  
SRR17520069.14690873  
SRR17520069.14690875  
SRR17520069.14690877  
SRR17520069.14690879  
SRR17520069.14690881  
SRR17520069.14690883  
SRR17520069.14690885  
SRR17520069.14690887  
SRR17520069.14690889  
SRR17520069.14690891  
SRR17520069.14690893  
SRR17520069.14690895  
SRR17520069.14690897  
SRR17520069.14690899  
SRR17520069.14690901  
SRR17520069.14690903  
SRR17520069.14690905  
SRR17520069.14690907  
SRR17520069.14690909  
SRR17520069.14690911  
SRR17520069.14690913  
SRR17520069.14690915  
SRR17520069.14690917  
SRR17520069.14690921  
SRR17520069.14690923  
SRR17520069.14690925  
SRR17520069.14690927  
SRR17520069.14690929  
SRR17520069.14690931  
SRR17520069.14690933  
SRR17520069.14690935  
SRR17520069.14690937

SRR17520069.14690939  
SRR17520069.14690941  
SRR17520069.14690943  
SRR17520069.14690945  
SRR17520069.14690949  
SRR17520069.14690951  
SRR17520069.14690953  
SRR17520069.14690955  
SRR17520069.14690957  
SRR17520069.14693819  
SRR17520069.14693821  
SRR17520069.14693823  
SRR17520069.14697078  
SRR17520069.14697080  
SRR17520069.14705685  
SRR17520069.14705687  
SRR17520069.14705689  
SRR17520069.14705691  
SRR17520069.14705693  
SRR17520069.14705695  
SRR17520069.14705697  
SRR17520069.14705699  
SRR17520069.14705701  
SRR17520069.14705707  
SRR17520069.14705709  
SRR17520069.14705711  
SRR17520069.14705713  
SRR17520069.14705715  
SRR17520069.14705717  
SRR17520069.14705719  
SRR17520069.14705721  
SRR17520069.14705723  
SRR17520069.14705725  
SRR17520069.14705727  
SRR17520069.14705729  
SRR17520069.14705731  
SRR17520069.14705733  
SRR17520069.14705735  
SRR17520069.14707730  
SRR17520069.14707732  
SRR17520069.14707734  
SRR17520069.14707736  
SRR17520069.14707738  
SRR17520069.14707740  
SRR17520069.14707742  
SRR17520069.14707744  
SRR17520069.14707746

SRR17520069.14707748  
SRR17520069.14707750  
SRR17520069.14707752  
SRR17520069.14707754  
SRR17520069.14707756  
SRR17520069.14707758  
SRR17520069.14707760  
SRR17520069.14707762  
SRR17520069.14707764  
SRR17520069.14707766  
SRR17520069.14707768  
SRR17520069.14707770  
SRR17520069.14710158  
SRR17520069.14710166  
SRR17520069.14710677  
SRR17520069.14710679  
SRR17520069.14710681  
SRR17520069.14710683  
SRR17520069.14711614  
SRR17520069.14711616  
SRR17520069.14731678  
SRR17520069.14731680  
SRR17520069.14731682  
SRR17520069.14731684  
SRR17520069.14731686  
SRR17520069.14731688  
SRR17520069.14734129  
SRR17520069.14734131  
SRR17520069.14734133  
SRR17520069.14734135  
SRR17520069.14734137  
SRR17520069.14734139  
SRR17520069.14734141  
SRR17520069.14734143  
SRR17520069.14734145  
SRR17520069.14734147  
SRR17520069.14734149  
SRR17520069.14734151  
SRR17520069.14734153  
SRR17520069.14734155  
SRR17520069.14734157  
SRR17520069.14734159  
SRR17520069.14734161  
SRR17520069.14734163  
SRR17520069.14734165  
SRR17520069.14734167  
SRR17520069.14734169

SRR17520069.14734171  
SRR17520069.14734173  
SRR17520069.14734175  
SRR17520069.14734177  
SRR17520069.14734179  
SRR17520069.14734181  
SRR17520069.14734183  
SRR17520069.14734185  
SRR17520069.14734187  
SRR17520069.14734189  
SRR17520069.14734191  
SRR17520069.14734193  
SRR17520069.14734195  
SRR17520069.14734197  
SRR17520069.14734199  
SRR17520069.14734201  
SRR17520069.14734203  
SRR17520069.14734205  
SRR17520069.14734207  
SRR17520069.14734209  
SRR17520069.14734211  
SRR17520069.14734213  
SRR17520069.14734215  
SRR17520069.14734217  
SRR17520069.14734219  
SRR17520069.14734967  
SRR17520069.14734969  
SRR17520069.14746754  
SRR17520069.14746756  
SRR17520069.14746758  
SRR17520069.14746760  
SRR17520069.14746762  
SRR17520069.14746764  
SRR17520069.14746766  
SRR17520069.14746768  
SRR17520069.14746772  
SRR17520069.14746774  
SRR17520069.14746776  
SRR17520069.14746778  
SRR17520069.14746780  
SRR17520069.14746782  
SRR17520069.14746784  
SRR17520069.14746788  
SRR17520069.14746790  
SRR17520069.14746792  
SRR17520069.14746794  
SRR17520069.14752806

SRR17520069.14752808  
SRR17520069.14755673  
SRR17520069.14755675  
SRR17520069.14755677  
SRR17520069.14755679  
SRR17520069.14755681  
SRR17520069.14755683  
SRR17520069.14755685  
SRR17520069.14755687  
SRR17520069.14755689  
SRR17520069.14755691  
SRR17520069.14758923  
SRR17520069.14758925  
SRR17520069.14758927  
SRR17520069.14758929  
SRR17520069.14758931  
SRR17520069.14758933  
SRR17520069.14758935  
SRR17520069.14758937  
SRR17520069.14758939  
SRR17520069.14758941  
SRR17520069.14758943  
SRR17520069.14758945  
SRR17520069.14758947  
SRR17520069.14758949  
SRR17520069.14758951  
SRR17520069.14758953  
SRR17520069.14758955  
SRR17520069.14758957  
SRR17520069.14758959  
SRR17520069.14758961  
SRR17520069.14758963  
SRR17520069.14758965  
SRR17520069.14758967  
SRR17520069.14758969  
SRR17520069.14758971  
SRR17520069.14758973  
SRR17520069.14758975  
SRR17520069.14758977  
SRR17520069.14758979  
SRR17520069.14758981  
SRR17520069.14758983  
SRR17520069.14758985  
SRR17520069.14758987  
SRR17520069.14758989  
SRR17520069.14758991  
SRR17520069.14758993



SRR17520069. 14758995  
SRR17520069. 14758997  
SRR17520069. 14758999  
SRR17520069. 14759001  
SRR17520069. 14759003  
SRR17520069. 14759005  
SRR17520069. 14759007  
SRR17520069. 14759009  
SRR17520069. 14759011  
SRR17520069. 14759013  
SRR17520069. 14759015  
SRR17520069. 14759017  
SRR17520069. 14759019  
SRR17520069. 14759431  
SRR17520069. 14759433  
SRR17520069. 14759435  
SRR17520069. 14759437  
SRR17520069. 14764138  
SRR17520069. 14767057  
SRR17520069. 14767059  
SRR17520069. 14767061  
SRR17520069. 14767063  
SRR17520069. 14767065  
SRR17520069. 14767067  
SRR17520069. 14767069  
SRR17520069. 14767071  
SRR17520069. 14767073  
SRR17520069. 14767075  
SRR17520069. 14767077  
SRR17520069. 14767079  
SRR17520069. 14767081  
SRR17520069. 14767083  
SRR17520069. 14767085  
SRR17520069. 14767087  
SRR17520069. 14767089  
SRR17520069. 14767091  
SRR17520069. 14767093  
SRR17520069. 14767095  
SRR17520069. 14767097  
SRR17520069. 14767099  
SRR17520069. 14767101  
SRR17520069. 14767103  
SRR17520069. 14767105  
SRR17520069. 14767107  
SRR17520069. 14767111  
SRR17520069. 14767113  
SRR17520069. 14767115

SRR17520069. 14767117  
SRR17520069. 14767119  
SRR17520069. 14767121  
SRR17520069. 14767123  
SRR17520069. 14767125  
SRR17520069. 14767127  
SRR17520069. 14767129  
SRR17520069. 14767131  
SRR17520069. 14767133  
SRR17520069. 14767135  
SRR17520069. 14767137  
SRR17520069. 14767139  
SRR17520069. 14767141  
SRR17520069. 14767143  
SRR17520069. 14767145  
SRR17520069. 14767147  
SRR17520069. 14767149  
SRR17520069. 14767151  
SRR17520069. 14767153  
SRR17520069. 14767155  
SRR17520069. 14767157  
SRR17520069. 14767159  
SRR17520069. 14767161  
SRR17520069. 14767163  
SRR17520069. 14767165  
SRR17520069. 14767167  
SRR17520069. 14767171  
SRR17520069. 14767173  
SRR17520069. 14767175  
SRR17520069. 14767177  
SRR17520069. 14767179  
SRR17520069. 14767181  
SRR17520069. 14767183  
SRR17520069. 14767185  
SRR17520069. 14767187  
SRR17520069. 14767189  
SRR17520069. 14767191  
SRR17520069. 14767193  
SRR17520069. 14767195  
SRR17520069. 14767197  
SRR17520069. 14767199  
SRR17520069. 14767201  
SRR17520069. 14767203  
SRR17520069. 14767205  
SRR17520069. 14767207  
SRR17520069. 14767209  
SRR17520069. 14767211

SRR17520069. 14767213  
SRR17520069. 14767215  
SRR17520069. 14767217  
SRR17520069. 14767219  
SRR17520069. 14767221  
SRR17520069. 14767305  
SRR17520069. 14767307  
SRR17520069. 14767309  
SRR17520069. 14767311  
SRR17520069. 14767313  
SRR17520069. 14767315  
SRR17520069. 14767317  
SRR17520069. 14767319  
SRR17520069. 14767321  
SRR17520069. 14767323  
SRR17520069. 14767325  
SRR17520069. 14767327  
SRR17520069. 14767329  
SRR17520069. 14767331  
SRR17520069. 14773712  
SRR17520069. 14773714  
SRR17520069. 14780685  
SRR17520069. 14780687  
SRR17520069. 14780689  
SRR17520069. 14780691  
SRR17520069. 14780693  
SRR17520069. 14780695  
SRR17520069. 14782149  
SRR17520069. 14782151  
SRR17520069. 14782153  
SRR17520069. 14782157  
SRR17520069. 14782161  
SRR17520069. 14782163  
SRR17520069. 14782169  
SRR17520069. 14782171  
SRR17520069. 14782181  
SRR17520069. 14789869  
SRR17520069. 14789871  
SRR17520069. 14789877  
SRR17520069. 14789883  
SRR17520069. 14792674  
SRR17520069. 14792678  
SRR17520069. 14792680  
SRR17520069. 14792682  
SRR17520069. 14792684  
SRR17520069. 14792686  
SRR17520069. 14792688

SRR17520069. 14792690  
SRR17520069. 14792692  
SRR17520069. 14792694  
SRR17520069. 14792696  
SRR17520069. 14792698  
SRR17520069. 14792700  
SRR17520069. 14792702  
SRR17520069. 14792704  
SRR17520069. 14792706  
SRR17520069. 14793998  
SRR17520069. 14794000  
SRR17520069. 14794002  
SRR17520069. 14794004  
SRR17520069. 14794006  
SRR17520069. 14794008  
SRR17520069. 14794010  
SRR17520069. 14794012  
SRR17520069. 14794014  
SRR17520069. 14794016  
SRR17520069. 14794018  
SRR17520069. 14794020  
SRR17520069. 14794022  
SRR17520069. 14794024  
SRR17520069. 14796678  
SRR17520069. 14796680  
SRR17520069. 14798084  
SRR17520069. 14798086  
SRR17520069. 14798088  
SRR17520069. 14798090  
SRR17520069. 14798092  
SRR17520069. 14798094  
SRR17520069. 14798096  
SRR17520069. 14798098  
SRR17520069. 14798100  
SRR17520069. 14798102  
SRR17520069. 14798104  
SRR17520069. 14798106  
SRR17520069. 14805165  
SRR17520069. 14805167  
SRR17520069. 14805169  
SRR17520069. 14805171  
SRR17520069. 14805173  
SRR17520069. 14805175  
SRR17520069. 14805177  
SRR17520069. 14805179  
SRR17520069. 14805181  
SRR17520069. 14805183

SRR17520069.14805185  
SRR17520069.14805187  
SRR17520069.14814627  
SRR17520069.14814629  
SRR17520069.14814631  
SRR17520069.14814635  
SRR17520069.14814637  
SRR17520069.14814639  
SRR17520069.14814641  
SRR17520069.14814643  
SRR17520069.14814647  
SRR17520069.14817213  
SRR17520069.14817215  
SRR17520069.14817217  
SRR17520069.14817219  
SRR17520069.14817221  
SRR17520069.14817223  
SRR17520069.14817225  
SRR17520069.14817227  
SRR17520069.14817229  
SRR17520069.14817231  
SRR17520069.14817233  
SRR17520069.14817235  
SRR17520069.14817237  
SRR17520069.14817239  
SRR17520069.14817241  
SRR17520069.14817243  
SRR17520069.14817245  
SRR17520069.14817247  
SRR17520069.14817249  
SRR17520069.14817251  
SRR17520069.14817253  
SRR17520069.14822247  
SRR17520069.14822249  
SRR17520069.14822251  
SRR17520069.14822253  
SRR17520069.14822255  
SRR17520069.14822259  
SRR17520069.14822261  
SRR17520069.14822263  
SRR17520069.14822265  
SRR17520069.14822267  
SRR17520069.14822269  
SRR17520069.14822271  
SRR17520069.14822273  
SRR17520069.14822275  
SRR17520069.14822277

SRR17520069.14824787  
SRR17520069.14824789  
SRR17520069.14824791  
SRR17520069.14824793  
SRR17520069.14824795  
SRR17520069.14824797  
SRR17520069.14824799  
SRR17520069.14824803  
SRR17520069.14824805  
SRR17520069.14824807  
SRR17520069.14824809  
SRR17520069.14824811  
SRR17520069.14824813  
SRR17520069.14824815  
SRR17520069.14824817  
SRR17520069.14824819  
SRR17520069.14824821  
SRR17520069.14824823  
SRR17520069.14826619  
SRR17520069.14831870  
SRR17520069.14831872  
SRR17520069.14831874  
SRR17520069.14834372  
SRR17520069.14834374  
SRR17520069.14834376  
SRR17520069.14834378  
SRR17520069.14834380  
SRR17520069.14834382  
SRR17520069.14834384  
SRR17520069.14834386  
SRR17520069.14834388  
SRR17520069.14834390  
SRR17520069.14834392  
SRR17520069.14834394  
SRR17520069.14834396  
SRR17520069.14834398  
SRR17520069.14834400  
SRR17520069.14834402  
SRR17520069.14834404  
SRR17520069.14834406  
SRR17520069.14834408  
SRR17520069.14834410  
SRR17520069.14834412  
SRR17520069.14834414  
SRR17520069.14834416  
SRR17520069.14834418  
SRR17520069.14834420

SRR17520069.14834422  
SRR17520069.14834424  
SRR17520069.14834426  
SRR17520069.14836681  
SRR17520069.14836683  
SRR17520069.14836685  
SRR17520069.14836687  
SRR17520069.14836689  
SRR17520069.14836691  
SRR17520069.14836693  
SRR17520069.14836697  
SRR17520069.14845697  
SRR17520069.14848216  
SRR17520069.14848218  
SRR17520069.14848220  
SRR17520069.14848222  
SRR17520069.14848224  
SRR17520069.14848226  
SRR17520069.14848228  
SRR17520069.14848230  
SRR17520069.14848232  
SRR17520069.14848234  
SRR17520069.14848236  
SRR17520069.14848238  
SRR17520069.14848240  
SRR17520069.14848242  
SRR17520069.14848244  
SRR17520069.14848246  
SRR17520069.14848248  
SRR17520069.14848250  
SRR17520069.14848252  
SRR17520069.14848254  
SRR17520069.14848256  
SRR17520069.14848258  
SRR17520069.14848260  
SRR17520069.14848262  
SRR17520069.14848264  
SRR17520069.14848266  
SRR17520069.14848268  
SRR17520069.14848270  
SRR17520069.14848272  
SRR17520069.14848274  
SRR17520069.14848276  
SRR17520069.14848278  
SRR17520069.14848280  
SRR17520069.14848282  
SRR17520069.14848284

SRR17520069.14848286  
SRR17520069.14848288  
SRR17520069.14848290  
SRR17520069.14848292  
SRR17520069.14848294  
SRR17520069.14848296  
SRR17520069.14848298  
SRR17520069.14848300  
SRR17520069.14848302  
SRR17520069.14848304  
SRR17520069.14848306  
SRR17520069.14848308  
SRR17520069.14848310  
SRR17520069.14848312  
SRR17520069.14848314  
SRR17520069.14848316  
SRR17520069.14848318  
SRR17520069.14848320  
SRR17520069.14848322  
SRR17520069.14848324  
SRR17520069.14848326  
SRR17520069.14848330  
SRR17520069.14848332  
SRR17520069.14848334  
SRR17520069.14848336  
SRR17520069.14848338  
SRR17520069.14848340  
SRR17520069.14848342  
SRR17520069.14848344  
SRR17520069.14848346  
SRR17520069.14848348  
SRR17520069.14848350  
SRR17520069.14848352  
SRR17520069.14848354  
SRR17520069.14848356  
SRR17520069.14848358  
SRR17520069.14848360  
SRR17520069.14848362  
SRR17520069.14848366  
SRR17520069.14848368  
SRR17520069.14848370  
SRR17520069.14848374  
SRR17520069.14848376  
SRR17520069.14848378  
SRR17520069.14848380  
SRR17520069.14848382  
SRR17520069.14849614



SRR17520069.14849616  
SRR17520069.14849618  
SRR17520069.14849620  
SRR17520069.14849622  
SRR17520069.14849624  
SRR17520069.14849626  
SRR17520069.14850479  
SRR17520069.14850481  
SRR17520069.14850483  
SRR17520069.14850485  
SRR17520069.14850487  
SRR17520069.14850489  
SRR17520069.14850491  
SRR17520069.14850493  
SRR17520069.14850495  
SRR17520069.14850497  
SRR17520069.14850499  
SRR17520069.14850501  
SRR17520069.14850503  
SRR17520069.14850505  
SRR17520069.14850507  
SRR17520069.14854797  
SRR17520069.14854799  
SRR17520069.14854801  
SRR17520069.14854803  
SRR17520069.14856048  
SRR17520069.14856054  
SRR17520069.14856056  
SRR17520069.14856058  
SRR17520069.14856060  
SRR17520069.14856062  
SRR17520069.14856064  
SRR17520069.14856066  
SRR17520069.14856068  
SRR17520069.14856070  
SRR17520069.14856076  
SRR17520069.14856078  
SRR17520069.14856080  
SRR17520069.14856082  
SRR17520069.14856084  
SRR17520069.14856086  
SRR17520069.14856088  
SRR17520069.14856090  
SRR17520069.14856092  
SRR17520069.14856094  
SRR17520069.14856096  
SRR17520069.14856098

SRR17520069.14856100  
SRR17520069.14856102  
SRR17520069.14856104  
SRR17520069.14856106  
SRR17520069.14856108  
SRR17520069.14874187  
SRR17520069.14880143  
SRR17520069.14880145  
SRR17520069.14880147  
SRR17520069.14881893  
SRR17520069.14881895  
SRR17520069.14881897  
SRR17520069.14881899  
SRR17520069.14881901  
SRR17520069.14882745  
SRR17520069.14882747  
SRR17520069.14882749  
SRR17520069.14882751  
SRR17520069.14882753  
SRR17520069.14882755  
SRR17520069.14882757  
SRR17520069.14882759  
SRR17520069.14884140  
SRR17520069.14884142  
SRR17520069.14884144  
SRR17520069.14884146  
SRR17520069.14884148  
SRR17520069.14884150  
SRR17520069.14884152  
SRR17520069.14884154  
SRR17520069.14884156  
SRR17520069.14884158  
SRR17520069.14884160  
SRR17520069.14884162  
SRR17520069.14884164  
SRR17520069.14884166  
SRR17520069.14884168  
SRR17520069.14884170  
SRR17520069.14884172  
SRR17520069.14884174  
SRR17520069.14884176  
SRR17520069.14884178  
SRR17520069.14884180  
SRR17520069.14884182  
SRR17520069.14884184  
SRR17520069.14884186  
SRR17520069.14884188

SRR17520069.14884190  
SRR17520069.14884192  
SRR17520069.14884194  
SRR17520069.14884196  
SRR17520069.14884198  
SRR17520069.14884200  
SRR17520069.14884202  
SRR17520069.14884204  
SRR17520069.14884206  
SRR17520069.14884208  
SRR17520069.14884210  
SRR17520069.14884212  
SRR17520069.14884214  
SRR17520069.14884216  
SRR17520069.14884218  
SRR17520069.14884220  
SRR17520069.14884222  
SRR17520069.14892552  
SRR17520069.14892554  
SRR17520069.14892556  
SRR17520069.14892558  
SRR17520069.14892560  
SRR17520069.14892562  
SRR17520069.14892564  
SRR17520069.14892566  
SRR17520069.14892568  
SRR17520069.14892570  
SRR17520069.14892572  
SRR17520069.14892574  
SRR17520069.14892576  
SRR17520069.14892578  
SRR17520069.14892580  
SRR17520069.14892582  
SRR17520069.14892584  
SRR17520069.14892586  
SRR17520069.14892588  
SRR17520069.14892590  
SRR17520069.14892592  
SRR17520069.14892594  
SRR17520069.14892596  
SRR17520069.14892600  
SRR17520069.14892602  
SRR17520069.14892604  
SRR17520069.14892606  
SRR17520069.14892608  
SRR17520069.14892610  
SRR17520069.14892612

SRR17520069.14892614  
SRR17520069.14892616  
SRR17520069.14892618  
SRR17520069.14892620  
SRR17520069.14892622  
SRR17520069.14892624  
SRR17520069.14892626  
SRR17520069.14892628  
SRR17520069.14892630  
SRR17520069.14892632  
SRR17520069.14892634  
SRR17520069.14892636  
SRR17520069.14892638  
SRR17520069.14892640  
SRR17520069.14892642  
SRR17520069.14892646  
SRR17520069.14892648  
SRR17520069.14892650  
SRR17520069.14892652  
SRR17520069.14892654  
SRR17520069.14892656  
SRR17520069.14892658  
SRR17520069.14892660  
SRR17520069.14895789  
SRR17520069.14895791  
SRR17520069.14895793  
SRR17520069.14895795  
SRR17520069.14895797  
SRR17520069.14895799  
SRR17520069.14895801  
SRR17520069.14895803  
SRR17520069.14895805  
SRR17520069.14895807  
SRR17520069.14895809  
SRR17520069.14895811  
SRR17520069.14895813  
SRR17520069.14895815  
SRR17520069.14895817  
SRR17520069.14895819  
SRR17520069.14895821  
SRR17520069.14895823  
SRR17520069.14895825  
SRR17520069.14895827  
SRR17520069.14895829  
SRR17520069.14895831  
SRR17520069.14895833  
SRR17520069.14895835

SRR17520069.14895837  
SRR17520069.14895839  
SRR17520069.14895841  
SRR17520069.14895843  
SRR17520069.14895845  
SRR17520069.14895847  
SRR17520069.14895849  
SRR17520069.14895851  
SRR17520069.14895853  
SRR17520069.14895855  
SRR17520069.14897083  
SRR17520069.14897085  
SRR17520069.14897087  
SRR17520069.14897089  
SRR17520069.14897091  
SRR17520069.14897093  
SRR17520069.14897095  
SRR17520069.14897097  
SRR17520069.14897099  
SRR17520069.14897103  
SRR17520069.14897105  
SRR17520069.14897107  
SRR17520069.14897109  
SRR17520069.14897113  
SRR17520069.14897115  
SRR17520069.14897117  
SRR17520069.14897123  
SRR17520069.14897125  
SRR17520069.14897127  
SRR17520069.14899829  
SRR17520069.14899831  
SRR17520069.14900687  
SRR17520069.14914771  
SRR17520069.14914773  
SRR17520069.14914775  
SRR17520069.14914777  
SRR17520069.14914779  
SRR17520069.14914781  
SRR17520069.14914783  
SRR17520069.14914785  
SRR17520069.14914787  
SRR17520069.14914789  
SRR17520069.14914791  
SRR17520069.14914793  
SRR17520069.14914795  
SRR17520069.14914797  
SRR17520069.14914799

SRR17520069.14914801  
SRR17520069.14914803  
SRR17520069.14914805  
SRR17520069.14914807  
SRR17520069.14917508  
SRR17520069.14917510  
SRR17520069.14918162  
SRR17520069.14918164  
SRR17520069.14918166  
SRR17520069.14918168  
SRR17520069.14918170  
SRR17520069.14918172  
SRR17520069.14918240  
SRR17520069.14918242  
SRR17520069.14918244  
SRR17520069.14918246  
SRR17520069.14918248  
SRR17520069.14918252  
SRR17520069.14918254  
SRR17520069.14920364  
SRR17520069.14920366  
SRR17520069.14920368  
SRR17520069.14920370  
SRR17520069.14920372  
SRR17520069.14920374  
SRR17520069.14920376  
SRR17520069.14920378  
SRR17520069.14920380  
SRR17520069.14920382  
SRR17520069.14920384  
SRR17520069.14920386  
SRR17520069.14920388  
SRR17520069.14920390  
SRR17520069.14920392  
SRR17520069.14927070  
SRR17520069.14927072  
SRR17520069.14927074  
SRR17520069.14927076  
SRR17520069.14927078  
SRR17520069.14927080  
SRR17520069.14927082  
SRR17520069.14927084  
SRR17520069.14927086  
SRR17520069.14927088  
SRR17520069.14927090  
SRR17520069.14927092  
SRR17520069.14927094

SRR17520069.14927096  
SRR17520069.14927098  
SRR17520069.14927100  
SRR17520069.14927102  
SRR17520069.14927104  
SRR17520069.14927106  
SRR17520069.14927108  
SRR17520069.14927110  
SRR17520069.14927112  
SRR17520069.14927114  
SRR17520069.14927116  
SRR17520069.14927118  
SRR17520069.14927120  
SRR17520069.14927122  
SRR17520069.14927124  
SRR17520069.14927126  
SRR17520069.14927128  
SRR17520069.14927130  
SRR17520069.14928316  
SRR17520069.14928318  
SRR17520069.14928320  
SRR17520069.14936065  
SRR17520069.14936067  
SRR17520069.14936069  
SRR17520069.14936071  
SRR17520069.14936073  
SRR17520069.14936075  
SRR17520069.14936077  
SRR17520069.14936079  
SRR17520069.14936081  
SRR17520069.14937796  
SRR17520069.14937798  
SRR17520069.14937802  
SRR17520069.14937804  
SRR17520069.14937806  
SRR17520069.14937808  
SRR17520069.14937810  
SRR17520069.14937812  
SRR17520069.14937814  
SRR17520069.14937816  
SRR17520069.14937818  
SRR17520069.14937820  
SRR17520069.14937822  
SRR17520069.14937824  
SRR17520069.14937826  
SRR17520069.14937828  
SRR17520069.14937830

SRR17520069.14937832  
SRR17520069.14937834  
SRR17520069.14937836  
SRR17520069.14937838  
SRR17520069.14949023  
SRR17520069.14949025  
SRR17520069.14951871  
SRR17520069.14958067  
SRR17520069.14958069  
SRR17520069.14958071  
SRR17520069.14958073  
SRR17520069.14958077  
SRR17520069.14958079  
SRR17520069.14958503  
SRR17520069.14958505  
SRR17520069.14958507  
SRR17520069.14958509  
SRR17520069.14958511  
SRR17520069.14958517  
SRR17520069.14958519  
SRR17520069.14958521  
SRR17520069.14958523  
SRR17520069.14958525  
SRR17520069.14958527  
SRR17520069.14958529  
SRR17520069.14958531  
SRR17520069.14958533  
SRR17520069.14958535  
SRR17520069.14958537  
SRR17520069.14958539  
SRR17520069.14958543  
SRR17520069.14958545  
SRR17520069.14958549  
SRR17520069.14958551  
SRR17520069.14958553  
SRR17520069.14958557  
SRR17520069.14958559  
SRR17520069.14958563  
SRR17520069.14958565  
SRR17520069.14958569  
SRR17520069.14958571  
SRR17520069.14958573  
SRR17520069.14958575  
SRR17520069.14965467  
SRR17520069.14965469  
SRR17520069.14965471  
SRR17520069.14965473



SRR17520069.14973160  
SRR17520069.14973162  
SRR17520069.14973164  
SRR17520069.14973166  
SRR17520069.14973168  
SRR17520069.14973170  
SRR17520069.14973172  
SRR17520069.14973174  
SRR17520069.14973176  
SRR17520069.14973178  
SRR17520069.14973180  
SRR17520069.14973182  
SRR17520069.14973184  
SRR17520069.14973186  
SRR17520069.14973188  
SRR17520069.14973190  
SRR17520069.14973192  
SRR17520069.14973194  
SRR17520069.14973196  
SRR17520069.14973198  
SRR17520069.14973200  
SRR17520069.14973202  
SRR17520069.14973204  
SRR17520069.14973206  
SRR17520069.14973208  
SRR17520069.14973210  
SRR17520069.14973212  
SRR17520069.14973214  
SRR17520069.14973216  
SRR17520069.14973218  
SRR17520069.14973220  
SRR17520069.14973222  
SRR17520069.14973224  
SRR17520069.14973226  
SRR17520069.14973228  
SRR17520069.14973230  
SRR17520069.14973232  
SRR17520069.14973234  
SRR17520069.14973236  
SRR17520069.14973238  
SRR17520069.14973240  
SRR17520069.14973242  
SRR17520069.14973244  
SRR17520069.14973246  
SRR17520069.14973248  
SRR17520069.14973250  
SRR17520069.14973252

SRR17520069.14973254  
SRR17520069.14973256  
SRR17520069.14973258  
SRR17520069.14973260  
SRR17520069.14973264  
SRR17520069.14973266  
SRR17520069.14973268  
SRR17520069.14973270  
SRR17520069.14973272  
SRR17520069.14973274  
SRR17520069.14973276  
SRR17520069.14973278  
SRR17520069.14973280  
SRR17520069.14973282  
SRR17520069.14973284  
SRR17520069.14975051  
SRR17520069.14975053  
SRR17520069.14975055  
SRR17520069.14975057  
SRR17520069.14975059  
SRR17520069.14975061  
SRR17520069.14975973  
SRR17520069.14975975  
SRR17520069.14975977  
SRR17520069.14975981  
SRR17520069.14975983  
SRR17520069.14975987  
SRR17520069.14975989  
SRR17520069.14975991  
SRR17520069.14975993  
SRR17520069.14975995  
SRR17520069.14983261  
SRR17520069.14988964  
SRR17520069.14988966  
SRR17520069.14988968  
SRR17520069.14988970  
SRR17520069.14988972  
SRR17520069.14988974  
SRR17520069.14988976  
SRR17520069.14988978  
SRR17520069.14988980  
SRR17520069.14988982  
SRR17520069.14988984  
SRR17520069.14988986  
SRR17520069.14988988  
SRR17520069.14988990  
SRR17520069.14988992

SRR17520069.14991172  
SRR17520069.14991174  
SRR17520069.14991176  
SRR17520069.14991178  
SRR17520069.14991180  
SRR17520069.14991182  
SRR17520069.14994941  
SRR17520069.14994943  
SRR17520069.14994947  
SRR17520069.14994951  
SRR17520069.14994953  
SRR17520069.14994955  
SRR17520069.14994959  
SRR17520069.14994963  
SRR17520069.14999329  
SRR17520069.14999331  
SRR17520069.14999333  
SRR17520069.14999335  
SRR17520069.14999337  
SRR17520069.15007697  
SRR17520069.15007699  
SRR17520069.15007701  
SRR17520069.15007703  
SRR17520069.15016772  
SRR17520069.15016774  
SRR17520069.15016776  
SRR17520069.15016780  
SRR17520069.15016782  
SRR17520069.15016784  
SRR17520069.15016786  
SRR17520069.15016788  
SRR17520069.15016790  
SRR17520069.15016794  
SRR17520069.15016796  
SRR17520069.15016798  
SRR17520069.15016800  
SRR17520069.15016802  
SRR17520069.15016804  
SRR17520069.15016806  
SRR17520069.15016808  
SRR17520069.15016810  
SRR17520069.15016812  
SRR17520069.15043863  
SRR17520069.15043865  
SRR17520069.15043867  
SRR17520069.15043869  
SRR17520069.15043871

SRR17520069. 15045559  
SRR17520069. 15045561  
SRR17520069. 15045563  
SRR17520069. 15045565  
SRR17520069. 15045569  
SRR17520069. 15045571  
SRR17520069. 15045573  
SRR17520069. 15045575  
SRR17520069. 15045577  
SRR17520069. 15045579  
SRR17520069. 15045581  
SRR17520069. 15045583  
SRR17520069. 15045585  
SRR17520069. 15045587  
SRR17520069. 15045589  
SRR17520069. 15045591  
SRR17520069. 15045593  
SRR17520069. 15045597  
SRR17520069. 15045599  
SRR17520069. 15045601  
SRR17520069. 15045603  
SRR17520069. 15045605  
SRR17520069. 15045607  
SRR17520069. 15045609  
SRR17520069. 15045613  
SRR17520069. 15045972  
SRR17520069. 15045974  
SRR17520069. 15045976  
SRR17520069. 15045978  
SRR17520069. 15045980  
SRR17520069. 15045982  
SRR17520069. 15045984  
SRR17520069. 15045986  
SRR17520069. 15045988  
SRR17520069. 15045990  
SRR17520069. 15045992  
SRR17520069. 15045994  
SRR17520069. 15045996  
SRR17520069. 15045998  
SRR17520069. 15046000  
SRR17520069. 15046002  
SRR17520069. 15046004  
SRR17520069. 15057948  
SRR17520069. 15057950  
SRR17520069. 15057952  
SRR17520069. 15062991  
SRR17520069. 15062993

SRR17520069. 15062995  
SRR17520069. 15062997  
SRR17520069. 15062999  
SRR17520069. 15063001  
SRR17520069. 15063003  
SRR17520069. 15063007  
SRR17520069. 15063009  
SRR17520069. 15063011  
SRR17520069. 15063013  
SRR17520069. 15063015  
SRR17520069. 15063017  
SRR17520069. 15063019  
SRR17520069. 15063021  
SRR17520069. 15063023  
SRR17520069. 15063025  
SRR17520069. 15063027  
SRR17520069. 15063029  
SRR17520069. 15063031  
SRR17520069. 15063033  
SRR17520069. 15063035  
SRR17520069. 15063037  
SRR17520069. 15063039  
SRR17520069. 15063041  
SRR17520069. 15063043  
SRR17520069. 15063047  
SRR17520069. 15063049  
SRR17520069. 15063051  
SRR17520069. 15063053  
SRR17520069. 15063055  
SRR17520069. 15063057  
SRR17520069. 15063059  
SRR17520069. 15063061  
SRR17520069. 15063063  
SRR17520069. 15063065  
SRR17520069. 15063067  
SRR17520069. 15063069  
SRR17520069. 15063071  
SRR17520069. 15063073  
SRR17520069. 15063075  
SRR17520069. 15063077  
SRR17520069. 15063079  
SRR17520069. 15063081  
SRR17520069. 15063083  
SRR17520069. 15063550  
SRR17520069. 15063552  
SRR17520069. 15065496  
SRR17520069. 15065498

SRR17520069. 15065500  
SRR17520069. 15068884  
SRR17520069. 15068886  
SRR17520069. 15068888  
SRR17520069. 15068890  
SRR17520069. 15068892  
SRR17520069. 15068894  
SRR17520069. 15068896  
SRR17520069. 15068898  
SRR17520069. 15074033  
SRR17520069. 15074035  
SRR17520069. 15074038  
SRR17520069. 15074040  
SRR17520069. 15074042  
SRR17520069. 15074044  
SRR17520069. 15074048  
SRR17520069. 15074050  
SRR17520069. 15074052  
SRR17520069. 15074054  
SRR17520069. 15074056  
SRR17520069. 15074058  
SRR17520069. 15074060  
SRR17520069. 15074062  
SRR17520069. 15074064  
SRR17520069. 15074066  
SRR17520069. 15074068  
SRR17520069. 15074070  
SRR17520069. 15074072  
SRR17520069. 15074074  
SRR17520069. 15074076  
SRR17520069. 15074078  
SRR17520069. 15074080  
SRR17520069. 15074082  
SRR17520069. 15074084  
SRR17520069. 15074086  
SRR17520069. 15074088  
SRR17520069. 15074090  
SRR17520069. 15074092  
SRR17520069. 15074096  
SRR17520069. 15074098  
SRR17520069. 15074100  
SRR17520069. 15074102  
SRR17520069. 15074104  
SRR17520069. 15074106  
SRR17520069. 15074108  
SRR17520069. 15074110  
SRR17520069. 15074112

SRR17520069. 15074114  
SRR17520069. 15074116  
SRR17520069. 15076376  
SRR17520069. 15076378  
SRR17520069. 15076380  
SRR17520069. 15076382  
SRR17520069. 15076384  
SRR17520069. 15076386  
SRR17520069. 15076388  
SRR17520069. 15076390  
SRR17520069. 15076392  
SRR17520069. 15076394  
SRR17520069. 15076396  
SRR17520069. 15076398  
SRR17520069. 15076400  
SRR17520069. 15076402  
SRR17520069. 15076404  
SRR17520069. 15076406  
SRR17520069. 15076408  
SRR17520069. 15076410  
SRR17520069. 15076412  
SRR17520069. 15076414  
SRR17520069. 15076416  
SRR17520069. 15076418  
SRR17520069. 15076420  
SRR17520069. 15076422  
SRR17520069. 15076424  
SRR17520069. 15076426  
SRR17520069. 15076428  
SRR17520069. 15076430  
SRR17520069. 15076432  
SRR17520069. 15076990  
SRR17520069. 15076992  
SRR17520069. 15076994  
SRR17520069. 15076996  
SRR17520069. 15076998  
SRR17520069. 15077000  
SRR17520069. 15079255  
SRR17520069. 15079257  
SRR17520069. 15079259  
SRR17520069. 15079261  
SRR17520069. 15079263  
SRR17520069. 15079265  
SRR17520069. 15079267  
SRR17520069. 15079269  
SRR17520069. 15079271  
SRR17520069. 15079273

SRR17520069. 15079275  
SRR17520069. 15079277  
SRR17520069. 15079279  
SRR17520069. 15079281  
SRR17520069. 15079283  
SRR17520069. 15079285  
SRR17520069. 15079287  
SRR17520069. 15079289  
SRR17520069. 15079291  
SRR17520069. 15079293  
SRR17520069. 15079295  
SRR17520069. 15079297  
SRR17520069. 15079299  
SRR17520069. 15079301  
SRR17520069. 15079303  
SRR17520069. 15079305  
SRR17520069. 15079307  
SRR17520069. 15079309  
SRR17520069. 15079311  
SRR17520069. 15079313  
SRR17520069. 15079315  
SRR17520069. 15079317  
SRR17520069. 15079319  
SRR17520069. 15079321  
SRR17520069. 15079323  
SRR17520069. 15079325  
SRR17520069. 15079327  
SRR17520069. 15079329  
SRR17520069. 15079331  
SRR17520069. 15079333  
SRR17520069. 15079335  
SRR17520069. 15079337  
SRR17520069. 15079339  
SRR17520069. 15079341  
SRR17520069. 15079343  
SRR17520069. 15079345  
SRR17520069. 15079347  
SRR17520069. 15079349  
SRR17520069. 15079351  
SRR17520069. 15079353  
SRR17520069. 15079355  
SRR17520069. 15079357  
SRR17520069. 15079359  
SRR17520069. 15079361  
SRR17520069. 15079363  
SRR17520069. 15079365  
SRR17520069. 15079367



SRR17520069. 15079369  
SRR17520069. 15079371  
SRR17520069. 15079373  
SRR17520069. 15079375  
SRR17520069. 15079377  
SRR17520069. 15079379  
SRR17520069. 15079381  
SRR17520069. 15079383  
SRR17520069. 15079385  
SRR17520069. 15079387  
SRR17520069. 15079389  
SRR17520069. 15079391  
SRR17520069. 15079395  
SRR17520069. 15079397  
SRR17520069. 15079399  
SRR17520069. 15080615  
SRR17520069. 15080617  
SRR17520069. 15080619  
SRR17520069. 15080621  
SRR17520069. 15080623  
SRR17520069. 15080625  
SRR17520069. 15080627  
SRR17520069. 15080629  
SRR17520069. 15080631  
SRR17520069. 15080633  
SRR17520069. 15080635  
SRR17520069. 15084514  
SRR17520069. 15084516  
SRR17520069. 15084518  
SRR17520069. 15084520  
SRR17520069. 15084522  
SRR17520069. 15084524  
SRR17520069. 15085442  
SRR17520069. 15085444  
SRR17520069. 15085446  
SRR17520069. 15085807  
SRR17520069. 15085809  
SRR17520069. 15085811  
SRR17520069. 15085813  
SRR17520069. 15085815  
SRR17520069. 15085817  
SRR17520069. 15085819  
SRR17520069. 15085821  
SRR17520069. 15085823  
SRR17520069. 15085825  
SRR17520069. 15085827  
SRR17520069. 15085829

SRR17520069. 15085831  
SRR17520069. 15085833  
SRR17520069. 15085835  
SRR17520069. 15085837  
SRR17520069. 15085839  
SRR17520069. 15085841  
SRR17520069. 15085843  
SRR17520069. 15091255  
SRR17520069. 15091257  
SRR17520069. 15091259  
SRR17520069. 15091261  
SRR17520069. 15091263  
SRR17520069. 15091265  
SRR17520069. 15091267  
SRR17520069. 15091269  
SRR17520069. 15091271  
SRR17520069. 15091273  
SRR17520069. 15091275  
SRR17520069. 15091277  
SRR17520069. 15091279  
SRR17520069. 15091281  
SRR17520069. 15091283  
SRR17520069. 15091285  
SRR17520069. 15091287  
SRR17520069. 15091289  
SRR17520069. 15091291  
SRR17520069. 15091293  
SRR17520069. 15091295  
SRR17520069. 15091297  
SRR17520069. 15091299  
SRR17520069. 15091301  
SRR17520069. 15091303  
SRR17520069. 15091305  
SRR17520069. 15097054  
SRR17520069. 15097056  
SRR17520069. 15097058  
SRR17520069. 15097060  
SRR17520069. 15097064  
SRR17520069. 15097066  
SRR17520069. 15097475  
SRR17520069. 15097477  
SRR17520069. 15097479  
SRR17520069. 15097481  
SRR17520069. 15097483  
SRR17520069. 15097485  
SRR17520069. 15097487  
SRR17520069. 15097489

SRR17520069. 15097491  
SRR17520069. 15097493  
SRR17520069. 15097495  
SRR17520069. 15097497  
SRR17520069. 15097499  
SRR17520069. 15097501  
SRR17520069. 15097503  
SRR17520069. 15097505  
SRR17520069. 15097507  
SRR17520069. 15097509  
SRR17520069. 15097511  
SRR17520069. 15097513  
SRR17520069. 15097515  
SRR17520069. 15097517  
SRR17520069. 15097519  
SRR17520069. 15097521  
SRR17520069. 15097523  
SRR17520069. 15097525  
SRR17520069. 15097527  
SRR17520069. 15097529  
SRR17520069. 15097531  
SRR17520069. 15097533  
SRR17520069. 15097535  
SRR17520069. 15097537  
SRR17520069. 15097539  
SRR17520069. 15109952  
SRR17520069. 15109954  
SRR17520069. 15109956  
SRR17520069. 15109958  
SRR17520069. 15115157  
SRR17520069. 15115159  
SRR17520069. 15115161  
SRR17520069. 15115163  
SRR17520069. 15117871  
SRR17520069. 15117873  
SRR17520069. 15117875  
SRR17520069. 15117881  
SRR17520069. 15117883  
SRR17520069. 15117885  
SRR17520069. 15117887  
SRR17520069. 15117889  
SRR17520069. 15117891  
SRR17520069. 15117895  
SRR17520069. 15117897  
SRR17520069. 15117899  
SRR17520069. 15117903  
SRR17520069. 15117905

SRR17520069.15117907  
SRR17520069.15117909  
SRR17520069.15117911  
SRR17520069.15117913  
SRR17520069.15117915  
SRR17520069.15117917  
SRR17520069.15117919  
SRR17520069.15117921  
SRR17520069.15117923  
SRR17520069.15117927  
SRR17520069.15117929  
SRR17520069.15117931  
SRR17520069.15117935  
SRR17520069.15117937  
SRR17520069.15117939  
SRR17520069.15117941  
SRR17520069.15117943  
SRR17520069.15117945  
SRR17520069.15117947  
SRR17520069.15117949  
SRR17520069.15117951  
SRR17520069.15117953  
SRR17520069.15117955  
SRR17520069.15117957  
SRR17520069.15117961  
SRR17520069.15117963  
SRR17520069.15117965  
SRR17520069.15117967  
SRR17520069.15117969  
SRR17520069.15117971  
SRR17520069.15117973  
SRR17520069.15117975  
SRR17520069.15117977  
SRR17520069.15117979  
SRR17520069.15117981  
SRR17520069.15117983  
SRR17520069.15118242  
SRR17520069.15118244  
SRR17520069.15118246  
SRR17520069.15118250  
SRR17520069.15118252  
SRR17520069.15118254  
SRR17520069.15120518  
SRR17520069.15120520  
SRR17520069.15120522  
SRR17520069.15120524  
SRR17520069.15120526

SRR17520069. 15120528  
SRR17520069. 15120530  
SRR17520069. 15120532  
SRR17520069. 15120534  
SRR17520069. 15120536  
SRR17520069. 15120538  
SRR17520069. 15120540  
SRR17520069. 15122165  
SRR17520069. 15122169  
SRR17520069. 15122171  
SRR17520069. 15122173  
SRR17520069. 15122175  
SRR17520069. 15122177  
SRR17520069. 15122179  
SRR17520069. 15122181  
SRR17520069. 15122183  
SRR17520069. 15122185  
SRR17520069. 15122187  
SRR17520069. 15122189  
SRR17520069. 15122191  
SRR17520069. 15122193  
SRR17520069. 15122195  
SRR17520069. 15122197  
SRR17520069. 15122199  
SRR17520069. 15122201  
SRR17520069. 15122203  
SRR17520069. 15122205  
SRR17520069. 15122207  
SRR17520069. 15122209  
SRR17520069. 15122211  
SRR17520069. 15122215  
SRR17520069. 15122217  
SRR17520069. 15122219  
SRR17520069. 15122221  
SRR17520069. 15122223  
SRR17520069. 15122225  
SRR17520069. 15122227  
SRR17520069. 15122229  
SRR17520069. 15122231  
SRR17520069. 15122311  
SRR17520069. 15122313  
SRR17520069. 15122315  
SRR17520069. 15122317  
SRR17520069. 15122319  
SRR17520069. 15122321  
SRR17520069. 15122323  
SRR17520069. 15122325

SRR17520069. 15122327  
SRR17520069. 15122329  
SRR17520069. 15122331  
SRR17520069. 15122333  
SRR17520069. 15122335  
SRR17520069. 15122337  
SRR17520069. 15122339  
SRR17520069. 15122343  
SRR17520069. 15122345  
SRR17520069. 15122347  
SRR17520069. 15122349  
SRR17520069. 15122351  
SRR17520069. 15122353  
SRR17520069. 15122357  
SRR17520069. 15122359  
SRR17520069. 15122361  
SRR17520069. 15122363  
SRR17520069. 15122365  
SRR17520069. 15122367  
SRR17520069. 15122371  
SRR17520069. 15122373  
SRR17520069. 15122375  
SRR17520069. 15122377  
SRR17520069. 15122379  
SRR17520069. 15122381  
SRR17520069. 15122383  
SRR17520069. 15122385  
SRR17520069. 15127475  
SRR17520069. 15127477  
SRR17520069. 15127479  
SRR17520069. 15127481  
SRR17520069. 15127483  
SRR17520069. 15127485  
SRR17520069. 15127487  
SRR17520069. 15127489  
SRR17520069. 15127491  
SRR17520069. 15127493  
SRR17520069. 15127495  
SRR17520069. 15127497  
SRR17520069. 15127499  
SRR17520069. 15127501  
SRR17520069. 15127503  
SRR17520069. 15127505  
SRR17520069. 15127509  
SRR17520069. 15127511  
SRR17520069. 15127513  
SRR17520069. 15127515

SRR17520069. 15127517  
SRR17520069. 15127519  
SRR17520069. 15127521  
SRR17520069. 15127523  
SRR17520069. 15127525  
SRR17520069. 15127527  
SRR17520069. 15127529  
SRR17520069. 15127531  
SRR17520069. 15127533  
SRR17520069. 15127535  
SRR17520069. 15127537  
SRR17520069. 15127577  
SRR17520069. 15127579  
SRR17520069. 15127581  
SRR17520069. 15127583  
SRR17520069. 15127585  
SRR17520069. 15127587  
SRR17520069. 15127589  
SRR17520069. 15127591  
SRR17520069. 15127593  
SRR17520069. 15127595  
SRR17520069. 15127597  
SRR17520069. 15127599  
SRR17520069. 15127601  
SRR17520069. 15127603  
SRR17520069. 15127605  
SRR17520069. 15127607  
SRR17520069. 15127609  
SRR17520069. 15127611  
SRR17520069. 15127613  
SRR17520069. 15127615  
SRR17520069. 15127617  
SRR17520069. 15127619  
SRR17520069. 15127621  
SRR17520069. 15127623  
SRR17520069. 15127625  
SRR17520069. 15127627  
SRR17520069. 15127629  
SRR17520069. 15127631  
SRR17520069. 15127633  
SRR17520069. 15127635  
SRR17520069. 15127637  
SRR17520069. 15127767  
SRR17520069. 15127769  
SRR17520069. 15127771  
SRR17520069. 15127773  
SRR17520069. 15127775

SRR17520069. 15127777  
SRR17520069. 15127779  
SRR17520069. 15127781  
SRR17520069. 15127783  
SRR17520069. 15127785  
SRR17520069. 15127787  
SRR17520069. 15127789  
SRR17520069. 15127791  
SRR17520069. 15127793  
SRR17520069. 15128179  
SRR17520069. 15128181  
SRR17520069. 15128185  
SRR17520069. 15128187  
SRR17520069. 15128189  
SRR17520069. 15128191  
SRR17520069. 15128193  
SRR17520069. 15128195  
SRR17520069. 15128197  
SRR17520069. 15128199  
SRR17520069. 15128201  
SRR17520069. 15128203  
SRR17520069. 15128205  
SRR17520069. 15128207  
SRR17520069. 15128209  
SRR17520069. 15128211  
SRR17520069. 15128213  
SRR17520069. 15128215  
SRR17520069. 15128217  
SRR17520069. 15128219  
SRR17520069. 15128221  
SRR17520069. 15128223  
SRR17520069. 15128225  
SRR17520069. 15128227  
SRR17520069. 15128229  
SRR17520069. 15128231  
SRR17520069. 15128233  
SRR17520069. 15128235  
SRR17520069. 15128237  
SRR17520069. 15128239  
SRR17520069. 15128241  
SRR17520069. 15128245  
SRR17520069. 15128247  
SRR17520069. 15128249  
SRR17520069. 15128251  
SRR17520069. 15128253  
SRR17520069. 15128257  
SRR17520069. 15128259



SRR17520069. 15128261  
SRR17520069. 15128263  
SRR17520069. 15128265  
SRR17520069. 15128267  
SRR17520069. 15128269  
SRR17520069. 15128271  
SRR17520069. 15132380  
SRR17520069. 15132382  
SRR17520069. 15132384  
SRR17520069. 15132386  
SRR17520069. 15134091  
SRR17520069. 15134093  
SRR17520069. 15134095  
SRR17520069. 15134099  
SRR17520069. 15134101  
SRR17520069. 15141034  
SRR17520069. 15141036  
SRR17520069. 15141042  
SRR17520069. 15141044  
SRR17520069. 15141046  
SRR17520069. 15141052  
SRR17520069. 15141054  
SRR17520069. 15141056  
SRR17520069. 15141058  
SRR17520069. 15141060  
SRR17520069. 15141062  
SRR17520069. 15141064  
SRR17520069. 15141066  
SRR17520069. 15141068  
SRR17520069. 15141070  
SRR17520069. 15141072  
SRR17520069. 15142541  
SRR17520069. 15142543  
SRR17520069. 15142545  
SRR17520069. 15142547  
SRR17520069. 15142549  
SRR17520069. 15142557  
SRR17520069. 15142559  
SRR17520069. 15142561  
SRR17520069. 15142563  
SRR17520069. 15147982  
SRR17520069. 15147984  
SRR17520069. 15147986  
SRR17520069. 15147988  
SRR17520069. 15147990  
SRR17520069. 15147992  
SRR17520069. 15150268

SRR17520069. 15150270  
SRR17520069. 15150272  
SRR17520069. 15150274  
SRR17520069. 15150276  
SRR17520069. 15150278  
SRR17520069. 15150280  
SRR17520069. 15150282  
SRR17520069. 15150284  
SRR17520069. 15150286  
SRR17520069. 15150288  
SRR17520069. 15150290  
SRR17520069. 15150292  
SRR17520069. 15150294  
SRR17520069. 15150296  
SRR17520069. 15150298  
SRR17520069. 15150300  
SRR17520069. 15150302  
SRR17520069. 15150304  
SRR17520069. 15160295  
SRR17520069. 15160297  
SRR17520069. 15160299  
SRR17520069. 15160301  
SRR17520069. 15160303  
SRR17520069. 15160305  
SRR17520069. 15160307  
SRR17520069. 15160311  
SRR17520069. 15160315  
SRR17520069. 15160916  
SRR17520069. 15160918  
SRR17520069. 15160920  
SRR17520069. 15160922  
SRR17520069. 15160924  
SRR17520069. 15160926  
SRR17520069. 15160928  
SRR17520069. 15160930  
SRR17520069. 15160932  
SRR17520069. 15160934  
SRR17520069. 15160936  
SRR17520069. 15160938  
SRR17520069. 15160940  
SRR17520069. 15160942  
SRR17520069. 15167729  
SRR17520069. 15167731  
SRR17520069. 15167733  
SRR17520069. 15167735  
SRR17520069. 15167737  
SRR17520069. 15167739

SRR17520069. 15167741  
SRR17520069. 15167743  
SRR17520069. 15167745  
SRR17520069. 15167749  
SRR17520069. 15167751  
SRR17520069. 15174128  
SRR17520069. 15174130  
SRR17520069. 15174132  
SRR17520069. 15182309  
SRR17520069. 15182313  
SRR17520069. 15182315  
SRR17520069. 15182317  
SRR17520069. 15182319  
SRR17520069. 15182323  
SRR17520069. 15182329  
SRR17520069. 15182331  
SRR17520069. 15182333  
SRR17520069. 15182742  
SRR17520069. 15182759  
SRR17520069. 15193643  
SRR17520069. 15193645  
SRR17520069. 15193647  
SRR17520069. 15193649  
SRR17520069. 15193651  
SRR17520069. 15193653  
SRR17520069. 15193655  
SRR17520069. 15193657  
SRR17520069. 15193659  
SRR17520069. 15193661  
SRR17520069. 15193663  
SRR17520069. 15194048  
SRR17520069. 15194050  
SRR17520069. 15194052  
SRR17520069. 15194054  
SRR17520069. 15194056  
SRR17520069. 15194058  
SRR17520069. 15194060  
SRR17520069. 15194062  
SRR17520069. 15194064  
SRR17520069. 15194066  
SRR17520069. 15194068  
SRR17520069. 15194070  
SRR17520069. 15194072  
SRR17520069. 15194074  
SRR17520069. 15194076  
SRR17520069. 15194078  
SRR17520069. 15194080

SRR17520069. 15194082  
SRR17520069. 15194084  
SRR17520069. 15194086  
SRR17520069. 15194088  
SRR17520069. 15194090  
SRR17520069. 15194092  
SRR17520069. 15194094  
SRR17520069. 15194096  
SRR17520069. 15194098  
SRR17520069. 15201767  
SRR17520069. 15208153  
SRR17520069. 15211494  
SRR17520069. 15211496  
SRR17520069. 15211498  
SRR17520069. 15211500  
SRR17520069. 15211502  
SRR17520069. 15215472  
SRR17520069. 15215474  
SRR17520069. 15215476  
SRR17520069. 15215478  
SRR17520069. 15215480  
SRR17520069. 15215482  
SRR17520069. 15215484  
SRR17520069. 15215486  
SRR17520069. 15215488  
SRR17520069. 15215490  
SRR17520069. 15215492  
SRR17520069. 15215494  
SRR17520069. 15215496  
SRR17520069. 15215498  
SRR17520069. 15215500  
SRR17520069. 15215502  
SRR17520069. 15215504  
SRR17520069. 15215506  
SRR17520069. 15215508  
SRR17520069. 15215510  
SRR17520069. 15215512  
SRR17520069. 15215514  
SRR17520069. 15215516  
SRR17520069. 15215518  
SRR17520069. 15215520  
SRR17520069. 15215522  
SRR17520069. 15215524  
SRR17520069. 15215526  
SRR17520069. 15215528  
SRR17520069. 15215530  
SRR17520069. 15215532

SRR17520069. 15215534  
SRR17520069. 15215536  
SRR17520069. 15215538  
SRR17520069. 15215540  
SRR17520069. 15215544  
SRR17520069. 15215546  
SRR17520069. 15215548  
SRR17520069. 15215550  
SRR17520069. 15215552  
SRR17520069. 15215554  
SRR17520069. 15215556  
SRR17520069. 15215558  
SRR17520069. 15233125  
SRR17520069. 15233127  
SRR17520069. 15233129  
SRR17520069. 15233131  
SRR17520069. 15233134  
SRR17520069. 15233136  
SRR17520069. 15233138  
SRR17520069. 15233140  
SRR17520069. 15233142  
SRR17520069. 15233144  
SRR17520069. 15233146  
SRR17520069. 15233150  
SRR17520069. 15233152  
SRR17520069. 15233154  
SRR17520069. 15233156  
SRR17520069. 15233158  
SRR17520069. 15233160  
SRR17520069. 15233162  
SRR17520069. 15233164  
SRR17520069. 15233166  
SRR17520069. 15233168  
SRR17520069. 15233170  
SRR17520069. 15233172  
SRR17520069. 15233174  
SRR17520069. 15233176  
SRR17520069. 15233178  
SRR17520069. 15233180  
SRR17520069. 15233182  
SRR17520069. 15233184  
SRR17520069. 15233186  
SRR17520069. 15233188  
SRR17520069. 15233190  
SRR17520069. 15233192  
SRR17520069. 15233194  
SRR17520069. 15233196

SRR17520069. 15233198  
SRR17520069. 15233200  
SRR17520069. 15233202  
SRR17520069. 15234995  
SRR17520069. 15234997  
SRR17520069. 15234999  
SRR17520069. 15235001  
SRR17520069. 15235003  
SRR17520069. 15235005  
SRR17520069. 15236171  
SRR17520069. 15236173  
SRR17520069. 15236175  
SRR17520069. 15236177  
SRR17520069. 15236179  
SRR17520069. 15236181  
SRR17520069. 15236183  
SRR17520069. 15236185  
SRR17520069. 15236187  
SRR17520069. 15236189  
SRR17520069. 15236191  
SRR17520069. 15236193  
SRR17520069. 15236195  
SRR17520069. 15236199  
SRR17520069. 15236203  
SRR17520069. 15236207  
SRR17520069. 15236209  
SRR17520069. 15236211  
SRR17520069. 15236213  
SRR17520069. 15236215  
SRR17520069. 15236217  
SRR17520069. 15236219  
SRR17520069. 15236221  
SRR17520069. 15236223  
SRR17520069. 15236225  
SRR17520069. 15236227  
SRR17520069. 15236229  
SRR17520069. 15236231  
SRR17520069. 15236233  
SRR17520069. 15236235  
SRR17520069. 15236271  
SRR17520069. 15236273  
SRR17520069. 15237146  
SRR17520069. 15237615  
SRR17520069. 15238325  
SRR17520069. 15238327  
SRR17520069. 15238329  
SRR17520069. 15238331

SRR17520069. 15238333  
SRR17520069. 15238335  
SRR17520069. 15238339  
SRR17520069. 15238341  
SRR17520069. 15238343  
SRR17520069. 15238345  
SRR17520069. 15238347  
SRR17520069. 15238349  
SRR17520069. 15238351  
SRR17520069. 15238353  
SRR17520069. 15238355  
SRR17520069. 15238357  
SRR17520069. 15238359  
SRR17520069. 15238361  
SRR17520069. 15238363  
SRR17520069. 15238365  
SRR17520069. 15238367  
SRR17520069. 15239732  
SRR17520069. 15239734  
SRR17520069. 15239736  
SRR17520069. 15241307  
SRR17520069. 15241309  
SRR17520069. 15241311  
SRR17520069. 15241313  
SRR17520069. 15241315  
SRR17520069. 15241317  
SRR17520069. 15241319  
SRR17520069. 15244174  
SRR17520069. 15244176  
SRR17520069. 15244178  
SRR17520069. 15244180  
SRR17520069. 15244182  
SRR17520069. 15244184  
SRR17520069. 15244186  
SRR17520069. 15255452  
SRR17520069. 15255454  
SRR17520069. 15255456  
SRR17520069. 15255458  
SRR17520069. 15255460  
SRR17520069. 15260538  
SRR17520069. 15260540  
SRR17520069. 15260544  
SRR17520069. 15260546  
SRR17520069. 15260548  
SRR17520069. 15260550  
SRR17520069. 15260552  
SRR17520069. 15260554

SRR17520069. 15260556  
SRR17520069. 15260558  
SRR17520069. 15260560  
SRR17520069. 15261417  
SRR17520069. 15261419  
SRR17520069. 15261421  
SRR17520069. 15261423  
SRR17520069. 15261425  
SRR17520069. 15264118  
SRR17520069. 15264120  
SRR17520069. 15264122  
SRR17520069. 15264124  
SRR17520069. 15264126  
SRR17520069. 15264128  
SRR17520069. 15264130  
SRR17520069. 15264132  
SRR17520069. 15264134  
SRR17520069. 15264136  
SRR17520069. 15264138  
SRR17520069. 15264140  
SRR17520069. 15264142  
SRR17520069. 15264144  
SRR17520069. 15264146  
SRR17520069. 15264148  
SRR17520069. 15264150  
SRR17520069. 15264152  
SRR17520069. 15264154  
SRR17520069. 15264156  
SRR17520069. 15264158  
SRR17520069. 15264160  
SRR17520069. 15264162  
SRR17520069. 15270038  
SRR17520069. 15271348  
SRR17520069. 15271350  
SRR17520069. 15271352  
SRR17520069. 15271354  
SRR17520069. 15271356  
SRR17520069. 15271358  
SRR17520069. 15271360  
SRR17520069. 15271362  
SRR17520069. 15271364  
SRR17520069. 15271366  
SRR17520069. 15271368  
SRR17520069. 15271370  
SRR17520069. 15271372  
SRR17520069. 15271374  
SRR17520069. 15271376



SRR17520069. 15271378  
SRR17520069. 15271380  
SRR17520069. 15271382  
SRR17520069. 15271384  
SRR17520069. 15271386  
SRR17520069. 15271388  
SRR17520069. 15271390  
SRR17520069. 15271392  
SRR17520069. 15271394  
SRR17520069. 15271396  
SRR17520069. 15271398  
SRR17520069. 15271400  
SRR17520069. 15271402  
SRR17520069. 15271404  
SRR17520069. 15271406  
SRR17520069. 15272041  
SRR17520069. 15272043  
SRR17520069. 15272045  
SRR17520069. 15272047  
SRR17520069. 15272049  
SRR17520069. 15272051  
SRR17520069. 15272053  
SRR17520069. 15272055  
SRR17520069. 15272057  
SRR17520069. 15272059  
SRR17520069. 15272063  
SRR17520069. 15272065  
SRR17520069. 15273568  
SRR17520069. 15273570  
SRR17520069. 15274543  
SRR17520069. 15274545  
SRR17520069. 15274547  
SRR17520069. 15274549  
SRR17520069. 15274551  
SRR17520069. 15278295  
SRR17520069. 15278299  
SRR17520069. 15278301  
SRR17520069. 15278303  
SRR17520069. 15278305  
SRR17520069. 15278307  
SRR17520069. 15278309  
SRR17520069. 15278311  
SRR17520069. 15278313  
SRR17520069. 15278315  
SRR17520069. 15278317  
SRR17520069. 15278319  
SRR17520069. 15278321

SRR17520069. 15278327  
SRR17520069. 15278329  
SRR17520069. 15278331  
SRR17520069. 15278333  
SRR17520069. 15278335  
SRR17520069. 15278337  
SRR17520069. 15278339  
SRR17520069. 15278341  
SRR17520069. 15278343  
SRR17520069. 15278345  
SRR17520069. 15278347  
SRR17520069. 15278349  
SRR17520069. 15278351  
SRR17520069. 15278353  
SRR17520069. 15278355  
SRR17520069. 15278357  
SRR17520069. 15278359  
SRR17520069. 15278361  
SRR17520069. 15278363  
SRR17520069. 15278365  
SRR17520069. 15278367  
SRR17520069. 15278369  
SRR17520069. 15278371  
SRR17520069. 15278373  
SRR17520069. 15279856  
SRR17520069. 15279858  
SRR17520069. 15279860  
SRR17520069. 15279862  
SRR17520069. 15279864  
SRR17520069. 15279866  
SRR17520069. 15279868  
SRR17520069. 15279870  
SRR17520069. 15279872  
SRR17520069. 15279874  
SRR17520069. 15279876  
SRR17520069. 15279878  
SRR17520069. 15279880  
SRR17520069. 15279882  
SRR17520069. 15284466  
SRR17520069. 15284468  
SRR17520069. 15284470  
SRR17520069. 15284472  
SRR17520069. 15284474  
SRR17520069. 15284476  
SRR17520069. 15285696  
SRR17520069. 15285698  
SRR17520069. 15293872

SRR17520069. 15293874  
SRR17520069. 15293876  
SRR17520069. 15293878  
SRR17520069. 15296443  
SRR17520069. 15296445  
SRR17520069. 15296447  
SRR17520069. 15296449  
SRR17520069. 15296451  
SRR17520069. 15296455  
SRR17520069. 15296457  
SRR17520069. 15296459  
SRR17520069. 15296461  
SRR17520069. 15296463  
SRR17520069. 15296465  
SRR17520069. 15296467  
SRR17520069. 15296469  
SRR17520069. 15296471  
SRR17520069. 15296473  
SRR17520069. 15296475  
SRR17520069. 15296477  
SRR17520069. 15296479  
SRR17520069. 15296481  
SRR17520069. 15296483  
SRR17520069. 15296485  
SRR17520069. 15296487  
SRR17520069. 15296489  
SRR17520069. 15296491  
SRR17520069. 15296493  
SRR17520069. 15296495  
SRR17520069. 15296497  
SRR17520069. 15296499  
SRR17520069. 15296501  
SRR17520069. 15296503  
SRR17520069. 15296505  
SRR17520069. 15296507  
SRR17520069. 15296509  
SRR17520069. 15296511  
SRR17520069. 15296513  
SRR17520069. 15296515  
SRR17520069. 15296517  
SRR17520069. 15296519  
SRR17520069. 15296521  
SRR17520069. 15296523  
SRR17520069. 15296525  
SRR17520069. 15296528  
SRR17520069. 15296530  
SRR17520069. 15296532

SRR17520069. 15296534  
SRR17520069. 15296536  
SRR17520069. 15296538  
SRR17520069. 15296540  
SRR17520069. 15296542  
SRR17520069. 15296544  
SRR17520069. 15296546  
SRR17520069. 15296548  
SRR17520069. 15296550  
SRR17520069. 15296552  
SRR17520069. 15296554  
SRR17520069. 15296556  
SRR17520069. 15296558  
SRR17520069. 15296560  
SRR17520069. 15296562  
SRR17520069. 15296564  
SRR17520069. 15296566  
SRR17520069. 15296568  
SRR17520069. 15296570  
SRR17520069. 15296572  
SRR17520069. 15296574  
SRR17520069. 15296576  
SRR17520069. 15296578  
SRR17520069. 15296580  
SRR17520069. 15297231  
SRR17520069. 15297238  
SRR17520069. 15297240  
SRR17520069. 15297242  
SRR17520069. 15297244  
SRR17520069. 15297246  
SRR17520069. 15297248  
SRR17520069. 15297250  
SRR17520069. 15297252  
SRR17520069. 15297254  
SRR17520069. 15298788  
SRR17520069. 15298790  
SRR17520069. 15298792  
SRR17520069. 15302658  
SRR17520069. 15302660  
SRR17520069. 15302662  
SRR17520069. 15302664  
SRR17520069. 15302666  
SRR17520069. 15302668  
SRR17520069. 15302670  
SRR17520069. 15302672  
SRR17520069. 15302674  
SRR17520069. 15302676

SRR17520069. 15302680  
SRR17520069. 15302682  
SRR17520069. 15302684  
SRR17520069. 15302686  
SRR17520069. 15302706  
SRR17520069. 15302708  
SRR17520069. 15302710  
SRR17520069. 15302712  
SRR17520069. 15302714  
SRR17520069. 15302716  
SRR17520069. 15302718  
SRR17520069. 15302720  
SRR17520069. 15302722  
SRR17520069. 15302724  
SRR17520069. 15302726  
SRR17520069. 15302728  
SRR17520069. 15302730  
SRR17520069. 15302732  
SRR17520069. 15303295  
SRR17520069. 15303299  
SRR17520069. 15303301  
SRR17520069. 15303303  
SRR17520069. 15303305  
SRR17520069. 15303307  
SRR17520069. 15303309  
SRR17520069. 15303311  
SRR17520069. 15303313  
SRR17520069. 15303315  
SRR17520069. 15303317  
SRR17520069. 15303657  
SRR17520069. 15303659  
SRR17520069. 15303663  
SRR17520069. 15303665  
SRR17520069. 15303669  
SRR17520069. 15303671  
SRR17520069. 15303673  
SRR17520069. 15303675  
SRR17520069. 15303677  
SRR17520069. 15303679  
SRR17520069. 15303681  
SRR17520069. 15303683  
SRR17520069. 15303685  
SRR17520069. 15303687  
SRR17520069. 15303689  
SRR17520069. 15303691  
SRR17520069. 15303693  
SRR17520069. 15303695

SRR17520069. 15303697  
SRR17520069. 15303699  
SRR17520069. 15303701  
SRR17520069. 15303703  
SRR17520069. 15303705  
SRR17520069. 15303707  
SRR17520069. 15309178  
SRR17520069. 15309180  
SRR17520069. 15309182  
SRR17520069. 15309184  
SRR17520069. 15309186  
SRR17520069. 15309188  
SRR17520069. 15309190  
SRR17520069. 15309192  
SRR17520069. 15309194  
SRR17520069. 15309196  
SRR17520069. 15309198  
SRR17520069. 15309200  
SRR17520069. 15309202  
SRR17520069. 15309204  
SRR17520069. 15309206  
SRR17520069. 15309208  
SRR17520069. 15309210  
SRR17520069. 15309212  
SRR17520069. 15309214  
SRR17520069. 15309216  
SRR17520069. 15309218  
SRR17520069. 15309220  
SRR17520069. 15309222  
SRR17520069. 15309224  
SRR17520069. 15309226  
SRR17520069. 15309228  
SRR17520069. 15309230  
SRR17520069. 15309232  
SRR17520069. 15309234  
SRR17520069. 15309236  
SRR17520069. 15309238  
SRR17520069. 15309240  
SRR17520069. 15309244  
SRR17520069. 15309246  
SRR17520069. 15309250  
SRR17520069. 15315506  
SRR17520069. 15315508  
SRR17520069. 15315510  
SRR17520069. 15315512  
SRR17520069. 15315514  
SRR17520069. 15315516

SRR17520069. 15315518  
SRR17520069. 15315520  
SRR17520069. 15315522  
SRR17520069. 15315524  
SRR17520069. 15315526  
SRR17520069. 15315528  
SRR17520069. 15315532  
SRR17520069. 15323130  
SRR17520069. 15323132  
SRR17520069. 15323134  
SRR17520069. 15323138  
SRR17520069. 15323140  
SRR17520069. 15323142  
SRR17520069. 15323144  
SRR17520069. 15323146  
SRR17520069. 15323148  
SRR17520069. 15323150  
SRR17520069. 15325691  
SRR17520069. 15325695  
SRR17520069. 15325697  
SRR17520069. 15325699  
SRR17520069. 15325701  
SRR17520069. 15325703  
SRR17520069. 15325705  
SRR17520069. 15325707  
SRR17520069. 15325709  
SRR17520069. 15325711  
SRR17520069. 15325713  
SRR17520069. 15325715  
SRR17520069. 15325717  
SRR17520069. 15325719  
SRR17520069. 15325721  
SRR17520069. 15325723  
SRR17520069. 15325725  
SRR17520069. 15325727  
SRR17520069. 15325729  
SRR17520069. 15325731  
SRR17520069. 15325733  
SRR17520069. 15325735  
SRR17520069. 15325737  
SRR17520069. 15325739  
SRR17520069. 15325741  
SRR17520069. 15325743  
SRR17520069. 15325745  
SRR17520069. 15325747  
SRR17520069. 15326132  
SRR17520069. 15326134

SRR17520069. 15326136  
SRR17520069. 15326138  
SRR17520069. 15326140  
SRR17520069. 15326142  
SRR17520069. 15326146  
SRR17520069. 15326148  
SRR17520069. 15326150  
SRR17520069. 15326152  
SRR17520069. 15326154  
SRR17520069. 15326156  
SRR17520069. 15326158  
SRR17520069. 15326160  
SRR17520069. 15326162  
SRR17520069. 15326164  
SRR17520069. 15326166  
SRR17520069. 15326168  
SRR17520069. 15326170  
SRR17520069. 15326172  
SRR17520069. 15326174  
SRR17520069. 15326176  
SRR17520069. 15326178  
SRR17520069. 15326180  
SRR17520069. 15326295  
SRR17520069. 15326301  
SRR17520069. 15326303  
SRR17520069. 15326305  
SRR17520069. 15327008  
SRR17520069. 15327010  
SRR17520069. 15332948  
SRR17520069. 15332950  
SRR17520069. 15332952  
SRR17520069. 15332954  
SRR17520069. 15332956  
SRR17520069. 15332958  
SRR17520069. 15332960  
SRR17520069. 15332962  
SRR17520069. 15332964  
SRR17520069. 15332966  
SRR17520069. 15332968  
SRR17520069. 15332970  
SRR17520069. 15332972  
SRR17520069. 15332974  
SRR17520069. 15332976  
SRR17520069. 15332978  
SRR17520069. 15332980  
SRR17520069. 15332982  
SRR17520069. 15335395



SRR17520069. 15335397  
SRR17520069. 15335399  
SRR17520069. 15339308  
SRR17520069. 15340045  
SRR17520069. 15340047  
SRR17520069. 15340049  
SRR17520069. 15340051  
SRR17520069. 15340053  
SRR17520069. 15340055  
SRR17520069. 15340057  
SRR17520069. 15340059  
SRR17520069. 15340061  
SRR17520069. 15340063  
SRR17520069. 15340065  
SRR17520069. 15340067  
SRR17520069. 15340069  
SRR17520069. 15340071  
SRR17520069. 15340075  
SRR17520069. 15340077  
SRR17520069. 15340079  
SRR17520069. 15340081  
SRR17520069. 15340083  
SRR17520069. 15340085  
SRR17520069. 15340087  
SRR17520069. 15340089  
SRR17520069. 15340091  
SRR17520069. 15340093  
SRR17520069. 15340095  
SRR17520069. 15340097  
SRR17520069. 15340099  
SRR17520069. 15340101  
SRR17520069. 15340103  
SRR17520069. 15340105  
SRR17520069. 15340109  
SRR17520069. 15342426  
SRR17520069. 15342428  
SRR17520069. 15342430  
SRR17520069. 15342432  
SRR17520069. 15342434  
SRR17520069. 15342436  
SRR17520069. 15342438  
SRR17520069. 15342440  
SRR17520069. 15342442  
SRR17520069. 15342444  
SRR17520069. 15342446  
SRR17520069. 15342448  
SRR17520069. 15342452

SRR17520069. 15342460  
SRR17520069. 15345774  
SRR17520069. 15345778  
SRR17520069. 15345780  
SRR17520069. 15345782  
SRR17520069. 15345784  
SRR17520069. 15345790  
SRR17520069. 15345792  
SRR17520069. 15345794  
SRR17520069. 15345796  
SRR17520069. 15345798  
SRR17520069. 15345800  
SRR17520069. 15345804  
SRR17520069. 15345806  
SRR17520069. 15345808  
SRR17520069. 15345810  
SRR17520069. 15345812  
SRR17520069. 15345814  
SRR17520069. 15347184  
SRR17520069. 15347186  
SRR17520069. 15347188  
SRR17520069. 15347190  
SRR17520069. 15347198  
SRR17520069. 15347200  
SRR17520069. 15347202  
SRR17520069. 15347206  
SRR17520069. 15347208  
SRR17520069. 15347210  
SRR17520069. 15347212  
SRR17520069. 15347214  
SRR17520069. 15347216  
SRR17520069. 15349762  
SRR17520069. 15352379  
SRR17520069. 15352381  
SRR17520069. 15352385  
SRR17520069. 15352387  
SRR17520069. 15352389  
SRR17520069. 15352391  
SRR17520069. 15352393  
SRR17520069. 15352395  
SRR17520069. 15352397  
SRR17520069. 15352399  
SRR17520069. 15352401  
SRR17520069. 15352403  
SRR17520069. 15352405  
SRR17520069. 15352407  
SRR17520069. 15352409

SRR17520069. 15352411  
SRR17520069. 15352415  
SRR17520069. 15352417  
SRR17520069. 15352419  
SRR17520069. 15352421  
SRR17520069. 15352423  
SRR17520069. 15359178  
SRR17520069. 15359180  
SRR17520069. 15359182  
SRR17520069. 15359184  
SRR17520069. 15359186  
SRR17520069. 15359188  
SRR17520069. 15359190  
SRR17520069. 15359192  
SRR17520069. 15359194  
SRR17520069. 15359196  
SRR17520069. 15359198  
SRR17520069. 15359200  
SRR17520069. 15359202  
SRR17520069. 15362086  
SRR17520069. 15362088  
SRR17520069. 15362090  
SRR17520069. 15362092  
SRR17520069. 15362096  
SRR17520069. 15362098  
SRR17520069. 15362100  
SRR17520069. 15362104  
SRR17520069. 15362106  
SRR17520069. 15362110  
SRR17520069. 15362509  
SRR17520069. 15362511  
SRR17520069. 15372122  
SRR17520069. 15372124  
SRR17520069. 15372126  
SRR17520069. 15372128  
SRR17520069. 15372130  
SRR17520069. 15372132  
SRR17520069. 15372134  
SRR17520069. 15372136  
SRR17520069. 15372138  
SRR17520069. 15372140  
SRR17520069. 15372144  
SRR17520069. 15372146  
SRR17520069. 15372148  
SRR17520069. 15372150  
SRR17520069. 15372152  
SRR17520069. 15372154

SRR17520069. 15372156  
SRR17520069. 15372657  
SRR17520069. 15372659  
SRR17520069. 15372661  
SRR17520069. 15372663  
SRR17520069. 15372665  
SRR17520069. 15372667  
SRR17520069. 15372669  
SRR17520069. 15372671  
SRR17520069. 15372673  
SRR17520069. 15372675  
SRR17520069. 15372677  
SRR17520069. 15372679  
SRR17520069. 15372681  
SRR17520069. 15372683  
SRR17520069. 15372685  
SRR17520069. 15372687  
SRR17520069. 15372689  
SRR17520069. 15372691  
SRR17520069. 15372693  
SRR17520069. 15372695  
SRR17520069. 15372697  
SRR17520069. 15372699  
SRR17520069. 15372701  
SRR17520069. 15372703  
SRR17520069. 15372705  
SRR17520069. 15372707  
SRR17520069. 15372709  
SRR17520069. 15372711  
SRR17520069. 15372713  
SRR17520069. 15372715  
SRR17520069. 15372717  
SRR17520069. 15372719  
SRR17520069. 15372721  
SRR17520069. 15372723  
SRR17520069. 15372725  
SRR17520069. 15372727  
SRR17520069. 15372729  
SRR17520069. 15372731  
SRR17520069. 15372733  
SRR17520069. 15376917  
SRR17520069. 15376919  
SRR17520069. 15376921  
SRR17520069. 15376923  
SRR17520069. 15376925  
SRR17520069. 15376927  
SRR17520069. 15376929

SRR17520069. 15376931  
SRR17520069. 15376933  
SRR17520069. 15376935  
SRR17520069. 15376937  
SRR17520069. 15376939  
SRR17520069. 15376941  
SRR17520069. 15376943  
SRR17520069. 15376945  
SRR17520069. 15376947  
SRR17520069. 15376949  
SRR17520069. 15376951  
SRR17520069. 15376953  
SRR17520069. 15376955  
SRR17520069. 15380406  
SRR17520069. 15380408  
SRR17520069. 15380410  
SRR17520069. 15380412  
SRR17520069. 15380414  
SRR17520069. 15380416  
SRR17520069. 15380418  
SRR17520069. 15380420  
SRR17520069. 15380422  
SRR17520069. 15380424  
SRR17520069. 15380426  
SRR17520069. 15380428  
SRR17520069. 15380430  
SRR17520069. 15380432  
SRR17520069. 15380434  
SRR17520069. 15380436  
SRR17520069. 15380438  
SRR17520069. 15380440  
SRR17520069. 15380442  
SRR17520069. 15380444  
SRR17520069. 15380446  
SRR17520069. 15380448  
SRR17520069. 15380450  
SRR17520069. 15380452  
SRR17520069. 15380454  
SRR17520069. 15380456  
SRR17520069. 15380458  
SRR17520069. 15380460  
SRR17520069. 15380462  
SRR17520069. 15380464  
SRR17520069. 15380466  
SRR17520069. 15380468  
SRR17520069. 15380470  
SRR17520069. 15380472

SRR17520069. 15380474  
SRR17520069. 15380476  
SRR17520069. 15380478  
SRR17520069. 15380480  
SRR17520069. 15380482  
SRR17520069. 15380484  
SRR17520069. 15380486  
SRR17520069. 15380488  
SRR17520069. 15380490  
SRR17520069. 15380492  
SRR17520069. 15380496  
SRR17520069. 15380498  
SRR17520069. 15380500  
SRR17520069. 15380502  
SRR17520069. 15381755  
SRR17520069. 15385927  
SRR17520069. 15385929  
SRR17520069. 15385931  
SRR17520069. 15385933  
SRR17520069. 15385935  
SRR17520069. 15385939  
SRR17520069. 15385941  
SRR17520069. 15385943  
SRR17520069. 15385945  
SRR17520069. 15385947  
SRR17520069. 15385949  
SRR17520069. 15385951  
SRR17520069. 15385953  
SRR17520069. 15385955  
SRR17520069. 15385957  
SRR17520069. 15385959  
SRR17520069. 15385961  
SRR17520069. 15385963  
SRR17520069. 15385965  
SRR17520069. 15385967  
SRR17520069. 15385969  
SRR17520069. 15385971  
SRR17520069. 15385973  
SRR17520069. 15385975  
SRR17520069. 15385977  
SRR17520069. 15385979  
SRR17520069. 15385981  
SRR17520069. 15385983  
SRR17520069. 15385985  
SRR17520069. 15385987  
SRR17520069. 15385989  
SRR17520069. 15385991

SRR17520069. 15385993  
SRR17520069. 15385995  
SRR17520069. 15385997  
SRR17520069. 15385999  
SRR17520069. 15386001  
SRR17520069. 15386003  
SRR17520069. 15386005  
SRR17520069. 15386007  
SRR17520069. 15389672  
SRR17520069. 15389674  
SRR17520069. 15389676  
SRR17520069. 15393117  
SRR17520069. 15393119  
SRR17520069. 15393121  
SRR17520069. 15393123  
SRR17520069. 15393125  
SRR17520069. 15397169  
SRR17520069. 15397171  
SRR17520069. 15397173  
SRR17520069. 15397175  
SRR17520069. 15397177  
SRR17520069. 15397179  
SRR17520069. 15397181  
SRR17520069. 15397183  
SRR17520069. 15397185  
SRR17520069. 15397187  
SRR17520069. 15397189  
SRR17520069. 15397191  
SRR17520069. 15397193  
SRR17520069. 15397195  
SRR17520069. 15397197  
SRR17520069. 15397199  
SRR17520069. 15397201  
SRR17520069. 15397203  
SRR17520069. 15397205  
SRR17520069. 15397207  
SRR17520069. 15399022  
SRR17520069. 15400935  
SRR17520069. 15402289  
SRR17520069. 15402291  
SRR17520069. 15402299  
SRR17520069. 15413204  
SRR17520069. 15414714  
SRR17520069. 15414716  
SRR17520069. 15414718  
SRR17520069. 15415250  
SRR17520069. 15415252

SRR17520069. 15415254  
SRR17520069. 15417982  
SRR17520069. 15417984  
SRR17520069. 15417988  
SRR17520069. 15417990  
SRR17520069. 15417992  
SRR17520069. 15417994  
SRR17520069. 15417996  
SRR17520069. 15417998  
SRR17520069. 15418000  
SRR17520069. 15418004  
SRR17520069. 15418006  
SRR17520069. 15418008  
SRR17520069. 15418010  
SRR17520069. 15418012  
SRR17520069. 15418014  
SRR17520069. 15418016  
SRR17520069. 15418018  
SRR17520069. 15418020  
SRR17520069. 15418022  
SRR17520069. 15418026  
SRR17520069. 15418028  
SRR17520069. 15424530  
SRR17520069. 15424532  
SRR17520069. 15424534  
SRR17520069. 15424536  
SRR17520069. 15424538  
SRR17520069. 15424540  
SRR17520069. 15424542  
SRR17520069. 15424544  
SRR17520069. 15424546  
SRR17520069. 15424548  
SRR17520069. 15424550  
SRR17520069. 15424552  
SRR17520069. 15424554  
SRR17520069. 15424556  
SRR17520069. 15424558  
SRR17520069. 15424560  
SRR17520069. 15424562  
SRR17520069. 15424564  
SRR17520069. 15424566  
SRR17520069. 15424568  
SRR17520069. 15424570  
SRR17520069. 15424572  
SRR17520069. 15424574  
SRR17520069. 15424576  
SRR17520069. 15424578



SRR17520069. 15424580  
SRR17520069. 15424582  
SRR17520069. 15425799  
SRR17520069. 15425801  
SRR17520069. 15425803  
SRR17520069. 15435980  
SRR17520069. 15435982  
SRR17520069. 15435984  
SRR17520069. 15435986  
SRR17520069. 15435988  
SRR17520069. 15436246  
SRR17520069. 15451764  
SRR17520069. 15451766  
SRR17520069. 15451768  
SRR17520069. 15451770  
SRR17520069. 15451772  
SRR17520069. 15451774  
SRR17520069. 15451776  
SRR17520069. 15451778  
SRR17520069. 15451780  
SRR17520069. 15451782  
SRR17520069. 15451784  
SRR17520069. 15451786  
SRR17520069. 15451788  
SRR17520069. 15451790  
SRR17520069. 15451792  
SRR17520069. 15453004  
SRR17520069. 15454478  
SRR17520069. 15458582  
SRR17520069. 15458584  
SRR17520069. 15458586  
SRR17520069. 15458588  
SRR17520069. 15458590  
SRR17520069. 15458592  
SRR17520069. 15458594  
SRR17520069. 15458598  
SRR17520069. 15464369  
SRR17520069. 15464371  
SRR17520069. 15464373  
SRR17520069. 15464375  
SRR17520069. 15464377  
SRR17520069. 15464379  
SRR17520069. 15464381  
SRR17520069. 15464383  
SRR17520069. 15464385  
SRR17520069. 15464387  
SRR17520069. 15464389

SRR17520069. 15464393  
SRR17520069. 15464395  
SRR17520069. 15464397  
SRR17520069. 15464399  
SRR17520069. 15464401  
SRR17520069. 15464403  
SRR17520069. 15464405  
SRR17520069. 15464407  
SRR17520069. 15464409  
SRR17520069. 15464411  
SRR17520069. 15464413  
SRR17520069. 15464415  
SRR17520069. 15464417  
SRR17520069. 15464419  
SRR17520069. 15464421  
SRR17520069. 15464423  
SRR17520069. 15464425  
SRR17520069. 15464427  
SRR17520069. 15464429  
SRR17520069. 15464431  
SRR17520069. 15464433  
SRR17520069. 15464435  
SRR17520069. 15464437  
SRR17520069. 15464439  
SRR17520069. 15464443  
SRR17520069. 15464445  
SRR17520069. 15464447  
SRR17520069. 15464449  
SRR17520069. 15464451  
SRR17520069. 15464453  
SRR17520069. 15468841  
SRR17520069. 15468843  
SRR17520069. 15468845  
SRR17520069. 15468847  
SRR17520069. 15468849  
SRR17520069. 15468851  
SRR17520069. 15468853  
SRR17520069. 15468855  
SRR17520069. 15468857  
SRR17520069. 15468859  
SRR17520069. 15468861  
SRR17520069. 15468863  
SRR17520069. 15468865  
SRR17520069. 15468867  
SRR17520069. 15468869  
SRR17520069. 15468871  
SRR17520069. 15468873

SRR17520069. 15468875  
SRR17520069. 15468877  
SRR17520069. 15468879  
SRR17520069. 15468881  
SRR17520069. 15468883  
SRR17520069. 15468885  
SRR17520069. 15468887  
SRR17520069. 15468889  
SRR17520069. 15468891  
SRR17520069. 15468893  
SRR17520069. 15468895  
SRR17520069. 15468897  
SRR17520069. 15468899  
SRR17520069. 15468901  
SRR17520069. 15468903  
SRR17520069. 15470078  
SRR17520069. 15472352  
SRR17520069. 15472354  
SRR17520069. 15472356  
SRR17520069. 15472358  
SRR17520069. 15472360  
SRR17520069. 15472362  
SRR17520069. 15472364  
SRR17520069. 15472366  
SRR17520069. 15472368  
SRR17520069. 15472370  
SRR17520069. 15472372  
SRR17520069. 15472374  
SRR17520069. 15472376  
SRR17520069. 15477699  
SRR17520069. 15477701  
SRR17520069. 15477703  
SRR17520069. 15477705  
SRR17520069. 15477707  
SRR17520069. 15477709  
SRR17520069. 15477711  
SRR17520069. 15477713  
SRR17520069. 15477715  
SRR17520069. 15477717  
SRR17520069. 15477719  
SRR17520069. 15477721  
SRR17520069. 15477723  
SRR17520069. 15477725  
SRR17520069. 15477727  
SRR17520069. 15477729  
SRR17520069. 15477733  
SRR17520069. 15481322

SRR17520069. 15481324  
SRR17520069. 15481326  
SRR17520069. 15481328  
SRR17520069. 15481330  
SRR17520069. 15481332  
SRR17520069. 15481334  
SRR17520069. 15481336  
SRR17520069. 15481338  
SRR17520069. 15481342  
SRR17520069. 15481344  
SRR17520069. 15481346  
SRR17520069. 15481348  
SRR17520069. 15481354  
SRR17520069. 15481356  
SRR17520069. 15481358  
SRR17520069. 15481360  
SRR17520069. 15481362  
SRR17520069. 15481364  
SRR17520069. 15481366  
SRR17520069. 15481368  
SRR17520069. 15481370  
SRR17520069. 15481374  
SRR17520069. 15481376  
SRR17520069. 15481378  
SRR17520069. 15481380  
SRR17520069. 15481382  
SRR17520069. 15481384  
SRR17520069. 15481386  
SRR17520069. 15496595  
SRR17520069. 15496597  
SRR17520069. 15496599  
SRR17520069. 15496601  
SRR17520069. 15496603  
SRR17520069. 15496605  
SRR17520069. 15496607  
SRR17520069. 15496609  
SRR17520069. 15496611  
SRR17520069. 15496613  
SRR17520069. 15498251  
SRR17520069. 15498253  
SRR17520069. 15498255  
SRR17520069. 15498257  
SRR17520069. 15498259  
SRR17520069. 15498261  
SRR17520069. 15498263  
SRR17520069. 15498265  
SRR17520069. 15498267

SRR17520069. 15498269  
SRR17520069. 15498271  
SRR17520069. 15498273  
SRR17520069. 15498275  
SRR17520069. 15498277  
SRR17520069. 15498279  
SRR17520069. 15498281  
SRR17520069. 15498283  
SRR17520069. 15498285  
SRR17520069. 15498287  
SRR17520069. 15498289  
SRR17520069. 15498291  
SRR17520069. 15498293  
SRR17520069. 15498295  
SRR17520069. 15498297  
SRR17520069. 15498299  
SRR17520069. 15498301  
SRR17520069. 15498303  
SRR17520069. 15498305  
SRR17520069. 15498307  
SRR17520069. 15498309  
SRR17520069. 15498311  
SRR17520069. 15500355  
SRR17520069. 15500357  
SRR17520069. 15500359  
SRR17520069. 15500361  
SRR17520069. 15500363  
SRR17520069. 15500365  
SRR17520069. 15500367  
SRR17520069. 15500369  
SRR17520069. 15500371  
SRR17520069. 15500373  
SRR17520069. 15500375  
SRR17520069. 15500377  
SRR17520069. 15500379  
SRR17520069. 15500381  
SRR17520069. 15500383  
SRR17520069. 15500385  
SRR17520069. 15500387  
SRR17520069. 15500389  
SRR17520069. 15500391  
SRR17520069. 15500393  
SRR17520069. 15500395  
SRR17520069. 15500397  
SRR17520069. 15500399  
SRR17520069. 15500401  
SRR17520069. 15500403

SRR17520069. 15500405  
SRR17520069. 15500407  
SRR17520069. 15500409  
SRR17520069. 15500411  
SRR17520069. 15500413  
SRR17520069. 15500415  
SRR17520069. 15500417  
SRR17520069. 15500419  
SRR17520069. 15500421  
SRR17520069. 15500423  
SRR17520069. 15500425  
SRR17520069. 15500427  
SRR17520069. 15500429  
SRR17520069. 15500431  
SRR17520069. 15500433  
SRR17520069. 15500435  
SRR17520069. 15500437  
SRR17520069. 15500439  
SRR17520069. 15500441  
SRR17520069. 15500443  
SRR17520069. 15500447  
SRR17520069. 15501752  
SRR17520069. 15501754  
SRR17520069. 15509351  
SRR17520069. 15509353  
SRR17520069. 15509355  
SRR17520069. 15514260  
SRR17520069. 15514262  
SRR17520069. 15514264  
SRR17520069. 15514268  
SRR17520069. 15514272  
SRR17520069. 15514274  
SRR17520069. 15514276  
SRR17520069. 15514278  
SRR17520069. 15514280  
SRR17520069. 15514282  
SRR17520069. 15514284  
SRR17520069. 15514286  
SRR17520069. 15514288  
SRR17520069. 15514290  
SRR17520069. 15514292  
SRR17520069. 15514294  
SRR17520069. 15514296  
SRR17520069. 15514298  
SRR17520069. 15514300  
SRR17520069. 15514302  
SRR17520069. 15514304

SRR17520069. 15519286  
SRR17520069. 15519288  
SRR17520069. 15519290  
SRR17520069. 15519292  
SRR17520069. 15519294  
SRR17520069. 15519298  
SRR17520069. 15519300  
SRR17520069. 15519302  
SRR17520069. 15519304  
SRR17520069. 15519306  
SRR17520069. 15519308  
SRR17520069. 15519310  
SRR17520069. 15519312  
SRR17520069. 15519314  
SRR17520069. 15519316  
SRR17520069. 15519318  
SRR17520069. 15519320  
SRR17520069. 15519322  
SRR17520069. 15524212  
SRR17520069. 15524214  
SRR17520069. 15524216  
SRR17520069. 15524218  
SRR17520069. 15524220  
SRR17520069. 15524222  
SRR17520069. 15524224  
SRR17520069. 15524226  
SRR17520069. 15524228  
SRR17520069. 15524230  
SRR17520069. 15524232  
SRR17520069. 15524234  
SRR17520069. 15524236  
SRR17520069. 15524238  
SRR17520069. 15525490  
SRR17520069. 15530614  
SRR17520069. 15530616  
SRR17520069. 15530618  
SRR17520069. 15530620  
SRR17520069. 15530622  
SRR17520069. 15530624  
SRR17520069. 15530626  
SRR17520069. 15530628  
SRR17520069. 15530630  
SRR17520069. 15530632  
SRR17520069. 15530634  
SRR17520069. 15530636  
SRR17520069. 15530638  
SRR17520069. 15530640

SRR17520069. 15530642  
SRR17520069. 15530644  
SRR17520069. 15530646  
SRR17520069. 15530648  
SRR17520069. 15530650  
SRR17520069. 15530652  
SRR17520069. 15530654  
SRR17520069. 15530656  
SRR17520069. 15530658  
SRR17520069. 15530660  
SRR17520069. 15530662  
SRR17520069. 15530664  
SRR17520069. 15530666  
SRR17520069. 15535442  
SRR17520069. 15535444  
SRR17520069. 15535446  
SRR17520069. 15535448  
SRR17520069. 15535450  
SRR17520069. 15535452  
SRR17520069. 15535454  
SRR17520069. 15535456  
SRR17520069. 15546044  
SRR17520069. 15546046  
SRR17520069. 15546048  
SRR17520069. 15546050  
SRR17520069. 15546052  
SRR17520069. 15546054  
SRR17520069. 15546056  
SRR17520069. 15546058  
SRR17520069. 15546060  
SRR17520069. 15546062  
SRR17520069. 15546064  
SRR17520069. 15546066  
SRR17520069. 15546068  
SRR17520069. 15546070  
SRR17520069. 15546072  
SRR17520069. 15546074  
SRR17520069. 15546076  
SRR17520069. 15546078  
SRR17520069. 15546082  
SRR17520069. 15546084  
SRR17520069. 15546086  
SRR17520069. 15546088  
SRR17520069. 15546090  
SRR17520069. 15546092  
SRR17520069. 15546094  
SRR17520069. 15546096



SRR17520069. 15546098  
SRR17520069. 15549533  
SRR17520069. 15549535  
SRR17520069. 15549537  
SRR17520069. 15549539  
SRR17520069. 15549541  
SRR17520069. 15549543  
SRR17520069. 15552588  
SRR17520069. 15552590  
SRR17520069. 15552592  
SRR17520069. 15552594  
SRR17520069. 15552596  
SRR17520069. 15552598  
SRR17520069. 15552600  
SRR17520069. 15552602  
SRR17520069. 15552604  
SRR17520069. 15552608  
SRR17520069. 15552610  
SRR17520069. 15552612  
SRR17520069. 15552614  
SRR17520069. 15552616  
SRR17520069. 15552618  
SRR17520069. 15552620  
SRR17520069. 15552622  
SRR17520069. 15552624  
SRR17520069. 15552626  
SRR17520069. 15553435  
SRR17520069. 15553437  
SRR17520069. 15553439  
SRR17520069. 15553441  
SRR17520069. 15553443  
SRR17520069. 15553445  
SRR17520069. 15553447  
SRR17520069. 15553449  
SRR17520069. 15553451  
SRR17520069. 15553453  
SRR17520069. 15553457  
SRR17520069. 15553459  
SRR17520069. 15553461  
SRR17520069. 15553463  
SRR17520069. 15553465  
SRR17520069. 15553467  
SRR17520069. 15553471  
SRR17520069. 15553473  
SRR17520069. 15553475  
SRR17520069. 15553477  
SRR17520069. 15553479

SRR17520069. 15553481  
SRR17520069. 15553485  
SRR17520069. 15553487  
SRR17520069. 15553489  
SRR17520069. 15553491  
SRR17520069. 15553493  
SRR17520069. 15553495  
SRR17520069. 15553497  
SRR17520069. 15553499  
SRR17520069. 15553501  
SRR17520069. 15553503  
SRR17520069. 15563218  
SRR17520069. 15563220  
SRR17520069. 15563222  
SRR17520069. 15563224  
SRR17520069. 15564255  
SRR17520069. 15564257  
SRR17520069. 15564259  
SRR17520069. 15564261  
SRR17520069. 15564263  
SRR17520069. 15564265  
SRR17520069. 15564267  
SRR17520069. 15564269  
SRR17520069. 15564271  
SRR17520069. 15564273  
SRR17520069. 15564275  
SRR17520069. 15564277  
SRR17520069. 15564279  
SRR17520069. 15564281  
SRR17520069. 15564283  
SRR17520069. 15564285  
SRR17520069. 15567414  
SRR17520069. 15567416  
SRR17520069. 15567418  
SRR17520069. 15567420  
SRR17520069. 15567422  
SRR17520069. 15567424  
SRR17520069. 15567426  
SRR17520069. 15567430  
SRR17520069. 15567432  
SRR17520069. 15567434  
SRR17520069. 15567436  
SRR17520069. 15569090  
SRR17520069. 15574838  
SRR17520069. 15574840  
SRR17520069. 15574842  
SRR17520069. 15574844

SRR17520069. 15574846  
SRR17520069. 15574848  
SRR17520069. 15574850  
SRR17520069. 15574852  
SRR17520069. 15574854  
SRR17520069. 15574856  
SRR17520069. 15574858  
SRR17520069. 15574860  
SRR17520069. 15574862  
SRR17520069. 15574864  
SRR17520069. 15574866  
SRR17520069. 15574868  
SRR17520069. 15574870  
SRR17520069. 15574872  
SRR17520069. 15574874  
SRR17520069. 15574876  
SRR17520069. 15574878  
SRR17520069. 15574880  
SRR17520069. 15574882  
SRR17520069. 15574884  
SRR17520069. 15574886  
SRR17520069. 15574888  
SRR17520069. 15574890  
SRR17520069. 15574892  
SRR17520069. 15574894  
SRR17520069. 15574896  
SRR17520069. 15574898  
SRR17520069. 15574900  
SRR17520069. 15574902  
SRR17520069. 15574904  
SRR17520069. 15574906  
SRR17520069. 15574908  
SRR17520069. 15574910  
SRR17520069. 15574912  
SRR17520069. 15576316  
SRR17520069. 15577418  
SRR17520069. 15577420  
SRR17520069. 15577422  
SRR17520069. 15577424  
SRR17520069. 15577426  
SRR17520069. 15577428  
SRR17520069. 15577430  
SRR17520069. 15577432  
SRR17520069. 15577434  
SRR17520069. 15577436  
SRR17520069. 15577438  
SRR17520069. 15577440

SRR17520069. 15577442  
SRR17520069. 15577444  
SRR17520069. 15577446  
SRR17520069. 15577448  
SRR17520069. 15577452  
SRR17520069. 15577454  
SRR17520069. 15577456  
SRR17520069. 15577458  
SRR17520069. 15577460  
SRR17520069. 15577462  
SRR17520069. 15577464  
SRR17520069. 15577466  
SRR17520069. 15577468  
SRR17520069. 15577470  
SRR17520069. 15577472  
SRR17520069. 15577474  
SRR17520069. 15577476  
SRR17520069. 15577480  
SRR17520069. 15577482  
SRR17520069. 15577571  
SRR17520069. 15577626  
SRR17520069. 15577628  
SRR17520069. 15577630  
SRR17520069. 15577632  
SRR17520069. 15577634  
SRR17520069. 15577636  
SRR17520069. 15577638  
SRR17520069. 15577640  
SRR17520069. 15577642  
SRR17520069. 15577644  
SRR17520069. 15577646  
SRR17520069. 15577648  
SRR17520069. 15577650  
SRR17520069. 15577652  
SRR17520069. 15577654  
SRR17520069. 15577656  
SRR17520069. 15577658  
SRR17520069. 15577660  
SRR17520069. 15577662  
SRR17520069. 15577664  
SRR17520069. 15577666  
SRR17520069. 15577668  
SRR17520069. 15577670  
SRR17520069. 15577672  
SRR17520069. 15577674  
SRR17520069. 15577676  
SRR17520069. 15577678

SRR17520069. 15577680  
SRR17520069. 15577682  
SRR17520069. 15577684  
SRR17520069. 15577686  
SRR17520069. 15577688  
SRR17520069. 15577690  
SRR17520069. 15577692  
SRR17520069. 15577694  
SRR17520069. 15577696  
SRR17520069. 15577698  
SRR17520069. 15577700  
SRR17520069. 15577702  
SRR17520069. 15577704  
SRR17520069. 15577706  
SRR17520069. 15577708  
SRR17520069. 15577710  
SRR17520069. 15577712  
SRR17520069. 15577714  
SRR17520069. 15577716  
SRR17520069. 15577718  
SRR17520069. 15577720  
SRR17520069. 15577722  
SRR17520069. 15577724  
SRR17520069. 15577726  
SRR17520069. 15577728  
SRR17520069. 15577730  
SRR17520069. 15577732  
SRR17520069. 15577734  
SRR17520069. 15577736  
SRR17520069. 15577738  
SRR17520069. 15577742  
SRR17520069. 15577744  
SRR17520069. 15577746  
SRR17520069. 15577748  
SRR17520069. 15577750  
SRR17520069. 15577752  
SRR17520069. 15577754  
SRR17520069. 15577756  
SRR17520069. 15577758  
SRR17520069. 15577760  
SRR17520069. 15577762  
SRR17520069. 15577764  
SRR17520069. 15577766  
SRR17520069. 15577768  
SRR17520069. 15577770  
SRR17520069. 15577772  
SRR17520069. 15578311

SRR17520069. 15578313  
SRR17520069. 15578315  
SRR17520069. 15578317  
SRR17520069. 15578319  
SRR17520069. 15578323  
SRR17520069. 15578383  
SRR17520069. 15578387  
SRR17520069. 15578389  
SRR17520069. 15578391  
SRR17520069. 15578393  
SRR17520069. 15578397  
SRR17520069. 15578399  
SRR17520069. 15578401  
SRR17520069. 15578403  
SRR17520069. 15578405  
SRR17520069. 15578407  
SRR17520069. 15578411  
SRR17520069. 15578413  
SRR17520069. 15578415  
SRR17520069. 15578417  
SRR17520069. 15578419  
SRR17520069. 15578421  
SRR17520069. 15578423  
SRR17520069. 15578425  
SRR17520069. 15578427  
SRR17520069. 15578429  
SRR17520069. 15578431  
SRR17520069. 15578433  
SRR17520069. 15578684  
SRR17520069. 15578686  
SRR17520069. 15581329  
SRR17520069. 15581331  
SRR17520069. 15581333  
SRR17520069. 15581335  
SRR17520069. 15581337  
SRR17520069. 15581339  
SRR17520069. 15581341  
SRR17520069. 15581343  
SRR17520069. 15581345  
SRR17520069. 15581347  
SRR17520069. 15581349  
SRR17520069. 15581351  
SRR17520069. 15581353  
SRR17520069. 15581355  
SRR17520069. 15581357  
SRR17520069. 15581359  
SRR17520069. 15581361

SRR17520069. 15581363  
SRR17520069. 15581365  
SRR17520069. 15581367  
SRR17520069. 15581369  
SRR17520069. 15581371  
SRR17520069. 15581373  
SRR17520069. 15581375  
SRR17520069. 15581377  
SRR17520069. 15581379  
SRR17520069. 15581381  
SRR17520069. 15581383  
SRR17520069. 15581385  
SRR17520069. 15581387  
SRR17520069. 15581389  
SRR17520069. 15581391  
SRR17520069. 15581393  
SRR17520069. 15581395  
SRR17520069. 15581397  
SRR17520069. 15581401  
SRR17520069. 15581403  
SRR17520069. 15581405  
SRR17520069. 15581407  
SRR17520069. 15584986  
SRR17520069. 15584990  
SRR17520069. 15584992  
SRR17520069. 15584994  
SRR17520069. 15584996  
SRR17520069. 15584998  
SRR17520069. 15585002  
SRR17520069. 15585004  
SRR17520069. 15585006  
SRR17520069. 15585008  
SRR17520069. 15585010  
SRR17520069. 15585012  
SRR17520069. 15585014  
SRR17520069. 15585016  
SRR17520069. 15585018  
SRR17520069. 15590175  
SRR17520069. 15590177  
SRR17520069. 15590179  
SRR17520069. 15590181  
SRR17520069. 15590183  
SRR17520069. 15590185  
SRR17520069. 15590187  
SRR17520069. 15590189  
SRR17520069. 15590191  
SRR17520069. 15590193

SRR17520069. 15590195  
SRR17520069. 15590197  
SRR17520069. 15590199  
SRR17520069. 15590201  
SRR17520069. 15590203  
SRR17520069. 15590205  
SRR17520069. 15590207  
SRR17520069. 15590209  
SRR17520069. 15590211  
SRR17520069. 15590213  
SRR17520069. 15590217  
SRR17520069. 15590219  
SRR17520069. 15590221  
SRR17520069. 15590223  
SRR17520069. 15590225  
SRR17520069. 15590227  
SRR17520069. 15590229  
SRR17520069. 15590231  
SRR17520069. 15590233  
SRR17520069. 15590235  
SRR17520069. 15590237  
SRR17520069. 15590239  
SRR17520069. 15590241  
SRR17520069. 15590243  
SRR17520069. 15590245  
SRR17520069. 15590247  
SRR17520069. 15590249  
SRR17520069. 15590251  
SRR17520069. 15590253  
SRR17520069. 15590255  
SRR17520069. 15590257  
SRR17520069. 15590259  
SRR17520069. 15590261  
SRR17520069. 15590263  
SRR17520069. 15590265  
SRR17520069. 15590267  
SRR17520069. 15590269  
SRR17520069. 15590271  
SRR17520069. 15590273  
SRR17520069. 15590275  
SRR17520069. 15590277  
SRR17520069. 15590279  
SRR17520069. 15590281  
SRR17520069. 15590283  
SRR17520069. 15590285  
SRR17520069. 15590287  
SRR17520069. 15590289



SRR17520069. 15590293  
SRR17520069. 15590295  
SRR17520069. 15590297  
SRR17520069. 15590299  
SRR17520069. 15599219  
SRR17520069. 15600571  
SRR17520069. 15600573  
SRR17520069. 15600575  
SRR17520069. 15600577  
SRR17520069. 15600579  
SRR17520069. 15600581  
SRR17520069. 15600583  
SRR17520069. 15600585  
SRR17520069. 15600587  
SRR17520069. 15600589  
SRR17520069. 15600591  
SRR17520069. 15600593  
SRR17520069. 15600595  
SRR17520069. 15602629  
SRR17520069. 15602631  
SRR17520069. 15606654  
SRR17520069. 15606656  
SRR17520069. 15606658  
SRR17520069. 15606660  
SRR17520069. 15606662  
SRR17520069. 15606664  
SRR17520069. 15606666  
SRR17520069. 15606668  
SRR17520069. 15606670  
SRR17520069. 15606672  
SRR17520069. 15606674  
SRR17520069. 15606676  
SRR17520069. 15606678  
SRR17520069. 15606680  
SRR17520069. 15606682  
SRR17520069. 15606684  
SRR17520069. 15606686  
SRR17520069. 15606688  
SRR17520069. 15606690  
SRR17520069. 15607437  
SRR17520069. 15607441  
SRR17520069. 15607443  
SRR17520069. 15607445  
SRR17520069. 15607449  
SRR17520069. 15607451  
SRR17520069. 15607453  
SRR17520069. 15607455

SRR17520069. 15607457  
SRR17520069. 15613057  
SRR17520069. 15613059  
SRR17520069. 15613061  
SRR17520069. 15613063  
SRR17520069. 15613065  
SRR17520069. 15613067  
SRR17520069. 15613069  
SRR17520069. 15613071  
SRR17520069. 15613073  
SRR17520069. 15613075  
SRR17520069. 15613077  
SRR17520069. 15613079  
SRR17520069. 15613081  
SRR17520069. 15613083  
SRR17520069. 15613085  
SRR17520069. 15613087  
SRR17520069. 15613089  
SRR17520069. 15613091  
SRR17520069. 15613093  
SRR17520069. 15613095  
SRR17520069. 15613097  
SRR17520069. 15613704  
SRR17520069. 15613706  
SRR17520069. 15613708  
SRR17520069. 15613710  
SRR17520069. 15613712  
SRR17520069. 15613716  
SRR17520069. 15615234  
SRR17520069. 15615236  
SRR17520069. 15615238  
SRR17520069. 15615240  
SRR17520069. 15615242  
SRR17520069. 15616892  
SRR17520069. 15617621  
SRR17520069. 15617623  
SRR17520069. 15617625  
SRR17520069. 15617627  
SRR17520069. 15617629  
SRR17520069. 15617631  
SRR17520069. 15617633  
SRR17520069. 15617635  
SRR17520069. 15617637  
SRR17520069. 15617639  
SRR17520069. 15617641  
SRR17520069. 15617643  
SRR17520069. 15618318

SRR17520069. 15618320  
SRR17520069. 15618322  
SRR17520069. 15618324  
SRR17520069. 15618326  
SRR17520069. 15618328  
SRR17520069. 15618330  
SRR17520069. 15618332  
SRR17520069. 15618334  
SRR17520069. 15618336  
SRR17520069. 15618340  
SRR17520069. 15618342  
SRR17520069. 15618344  
SRR17520069. 15618346  
SRR17520069. 15618348  
SRR17520069. 15618350  
SRR17520069. 15618352  
SRR17520069. 15618354  
SRR17520069. 15618356  
SRR17520069. 15618358  
SRR17520069. 15618360  
SRR17520069. 15618362  
SRR17520069. 15618364  
SRR17520069. 15618366  
SRR17520069. 15618368  
SRR17520069. 15618370  
SRR17520069. 15618372  
SRR17520069. 15618374  
SRR17520069. 15618376  
SRR17520069. 15618378  
SRR17520069. 15618380  
SRR17520069. 15619103  
SRR17520069. 15619105  
SRR17520069. 15619107  
SRR17520069. 15619109  
SRR17520069. 15619111  
SRR17520069. 15619113  
SRR17520069. 15619115  
SRR17520069. 15619117  
SRR17520069. 15619119  
SRR17520069. 15619121  
SRR17520069. 15619123  
SRR17520069. 15619125  
SRR17520069. 15619127  
SRR17520069. 15619129  
SRR17520069. 15619131  
SRR17520069. 15619133  
SRR17520069. 15619135

SRR17520069. 15619137  
SRR17520069. 15619139  
SRR17520069. 15619141  
SRR17520069. 15619143  
SRR17520069. 15619145  
SRR17520069. 15619147  
SRR17520069. 15619149  
SRR17520069. 15619151  
SRR17520069. 15619153  
SRR17520069. 15619155  
SRR17520069. 15619159  
SRR17520069. 15619161  
SRR17520069. 15619163  
SRR17520069. 15619165  
SRR17520069. 15619167  
SRR17520069. 15619169  
SRR17520069. 15619171  
SRR17520069. 15619173  
SRR17520069. 15619175  
SRR17520069. 15619177  
SRR17520069. 15619181  
SRR17520069. 15619183  
SRR17520069. 15619185  
SRR17520069. 15619187  
SRR17520069. 15619189  
SRR17520069. 15619191  
SRR17520069. 15619193  
SRR17520069. 15619195  
SRR17520069. 15619197  
SRR17520069. 15619199  
SRR17520069. 15619201  
SRR17520069. 15619205  
SRR17520069. 15619207  
SRR17520069. 15619209  
SRR17520069. 15619211  
SRR17520069. 15619213  
SRR17520069. 15619460  
SRR17520069. 15620177  
SRR17520069. 15620179  
SRR17520069. 15620181  
SRR17520069. 15620183  
SRR17520069. 15620185  
SRR17520069. 15620187  
SRR17520069. 15620191  
SRR17520069. 15620193  
SRR17520069. 15621602  
SRR17520069. 15621604

SRR17520069. 15621606  
SRR17520069. 15621608  
SRR17520069. 15621610  
SRR17520069. 15621612  
SRR17520069. 15621614  
SRR17520069. 15621616  
SRR17520069. 15621618  
SRR17520069. 15621620  
SRR17520069. 15621622  
SRR17520069. 15621624  
SRR17520069. 15621626  
SRR17520069. 15621628  
SRR17520069. 15622888  
SRR17520069. 15622890  
SRR17520069. 15624320  
SRR17520069. 15624322  
SRR17520069. 15626807  
SRR17520069. 15626809  
SRR17520069. 15628567  
SRR17520069. 15632439  
SRR17520069. 15632441  
SRR17520069. 15632443  
SRR17520069. 15632445  
SRR17520069. 15634446  
SRR17520069. 15634448  
SRR17520069. 15634450  
SRR17520069. 15634452  
SRR17520069. 15634454  
SRR17520069. 15634456  
SRR17520069. 15634458  
SRR17520069. 15634460  
SRR17520069. 15634462  
SRR17520069. 15634464  
SRR17520069. 15634466  
SRR17520069. 15634468  
SRR17520069. 15634470  
SRR17520069. 15634472  
SRR17520069. 15634474  
SRR17520069. 15634476  
SRR17520069. 15634478  
SRR17520069. 15634480  
SRR17520069. 15634482  
SRR17520069. 15634484  
SRR17520069. 15634486  
SRR17520069. 15634488  
SRR17520069. 15634492  
SRR17520069. 15634494

SRR17520069. 15634496  
SRR17520069. 15634498  
SRR17520069. 15634500  
SRR17520069. 15634502  
SRR17520069. 15634504  
SRR17520069. 15634508  
SRR17520069. 15638354  
SRR17520069. 15640124  
SRR17520069. 15640126  
SRR17520069. 15640128  
SRR17520069. 15640130  
SRR17520069. 15640132  
SRR17520069. 15640134  
SRR17520069. 15640136  
SRR17520069. 15640138  
SRR17520069. 15640140  
SRR17520069. 15640142  
SRR17520069. 15640144  
SRR17520069. 15640146  
SRR17520069. 15640148  
SRR17520069. 15640150  
SRR17520069. 15640152  
SRR17520069. 15640154  
SRR17520069. 15640156  
SRR17520069. 15640158  
SRR17520069. 15640160  
SRR17520069. 15640162  
SRR17520069. 15640164  
SRR17520069. 15640166  
SRR17520069. 15640168  
SRR17520069. 15640170  
SRR17520069. 15640172  
SRR17520069. 15640174  
SRR17520069. 15640176  
SRR17520069. 15640178  
SRR17520069. 15641034  
SRR17520069. 15641036  
SRR17520069. 15641038  
SRR17520069. 15641040  
SRR17520069. 15641044  
SRR17520069. 15641046  
SRR17520069. 15641048  
SRR17520069. 15641050  
SRR17520069. 15641052  
SRR17520069. 15641060  
SRR17520069. 15641062  
SRR17520069. 15641064

SRR17520069. 15641066  
SRR17520069. 15641070  
SRR17520069. 15641072  
SRR17520069. 15641074  
SRR17520069. 15641076  
SRR17520069. 15641078  
SRR17520069. 15641082  
SRR17520069. 15641084  
SRR17520069. 15641086  
SRR17520069. 15641088  
SRR17520069. 15641090  
SRR17520069. 15641092  
SRR17520069. 15641094  
SRR17520069. 15641096  
SRR17520069. 15643354  
SRR17520069. 15644963  
SRR17520069. 15644965  
SRR17520069. 15644967  
SRR17520069. 15644969  
SRR17520069. 15644971  
SRR17520069. 15644973  
SRR17520069. 15644979  
SRR17520069. 15645466  
SRR17520069. 15645468  
SRR17520069. 15645690  
SRR17520069. 15645692  
SRR17520069. 15645694  
SRR17520069. 15645696  
SRR17520069. 15645698  
SRR17520069. 15645700  
SRR17520069. 15645702  
SRR17520069. 15645704  
SRR17520069. 15645706  
SRR17520069. 15645708  
SRR17520069. 15645710  
SRR17520069. 15645712  
SRR17520069. 15645714  
SRR17520069. 15645716  
SRR17520069. 15645718  
SRR17520069. 15645720  
SRR17520069. 15645724  
SRR17520069. 15645726  
SRR17520069. 15645728  
SRR17520069. 15650644  
SRR17520069. 15658307  
SRR17520069. 15659178  
SRR17520069. 15659180

SRR17520069. 15659182  
SRR17520069. 15659186  
SRR17520069. 15659188  
SRR17520069. 15659190  
SRR17520069. 15659192  
SRR17520069. 15659194  
SRR17520069. 15659196  
SRR17520069. 15659198  
SRR17520069. 15659200  
SRR17520069. 15659204  
SRR17520069. 15659206  
SRR17520069. 15659208  
SRR17520069. 15659210  
SRR17520069. 15662085  
SRR17520069. 15662089  
SRR17520069. 15662091  
SRR17520069. 15662093  
SRR17520069. 15662095  
SRR17520069. 15662097  
SRR17520069. 15662099  
SRR17520069. 15662101  
SRR17520069. 15662103  
SRR17520069. 15662105  
SRR17520069. 15662107  
SRR17520069. 15662109  
SRR17520069. 15662111  
SRR17520069. 15662113  
SRR17520069. 15662115  
SRR17520069. 15662117  
SRR17520069. 15662119  
SRR17520069. 15662121  
SRR17520069. 15662123  
SRR17520069. 15662125  
SRR17520069. 15662129  
SRR17520069. 15662131  
SRR17520069. 15662133  
SRR17520069. 15662135  
SRR17520069. 15662137  
SRR17520069. 15662139  
SRR17520069. 15662141  
SRR17520069. 15662143  
SRR17520069. 15662145  
SRR17520069. 15662147  
SRR17520069. 15662149  
SRR17520069. 15662151  
SRR17520069. 15662153  
SRR17520069. 15663887



SRR17520069. 15663889  
SRR17520069. 15665095  
SRR17520069. 15665097  
SRR17520069. 15665099  
SRR17520069. 15665103  
SRR17520069. 15665105  
SRR17520069. 15665107  
SRR17520069. 15665109  
SRR17520069. 15665111  
SRR17520069. 15665113  
SRR17520069. 15665115  
SRR17520069. 15665117  
SRR17520069. 15665119  
SRR17520069. 15665589  
SRR17520069. 15665591  
SRR17520069. 15665593  
SRR17520069. 15665595  
SRR17520069. 15665597  
SRR17520069. 15665599  
SRR17520069. 15665601  
SRR17520069. 15665603  
SRR17520069. 15668166  
SRR17520069. 15668168  
SRR17520069. 15668170  
SRR17520069. 15668172  
SRR17520069. 15668176  
SRR17520069. 15668178  
SRR17520069. 15668180  
SRR17520069. 15668182  
SRR17520069. 15668184  
SRR17520069. 15668186  
SRR17520069. 15668188  
SRR17520069. 15668192  
SRR17520069. 15668194  
SRR17520069. 15668196  
SRR17520069. 15668198  
SRR17520069. 15668200  
SRR17520069. 15668202  
SRR17520069. 15668204  
SRR17520069. 15668206  
SRR17520069. 15668208  
SRR17520069. 15668210  
SRR17520069. 15668212  
SRR17520069. 15668214  
SRR17520069. 15668216  
SRR17520069. 15668218  
SRR17520069. 15668220

SRR17520069. 15668222  
SRR17520069. 15671012  
SRR17520069. 15671014  
SRR17520069. 15671016  
SRR17520069. 15671018  
SRR17520069. 15671020  
SRR17520069. 15671022  
SRR17520069. 15671024  
SRR17520069. 15671026  
SRR17520069. 15671028  
SRR17520069. 15671030  
SRR17520069. 15671032  
SRR17520069. 15671034  
SRR17520069. 15671036  
SRR17520069. 15671038  
SRR17520069. 15671040  
SRR17520069. 15671042  
SRR17520069. 15671044  
SRR17520069. 15671046  
SRR17520069. 15671048  
SRR17520069. 15671052  
SRR17520069. 15671054  
SRR17520069. 15671056  
SRR17520069. 15671060  
SRR17520069. 15671062  
SRR17520069. 15671064  
SRR17520069. 15671066  
SRR17520069. 15671068  
SRR17520069. 15671070  
SRR17520069. 15671072  
SRR17520069. 15671074  
SRR17520069. 15671076  
SRR17520069. 15671078  
SRR17520069. 15671082  
SRR17520069. 15671086  
SRR17520069. 15671088  
SRR17520069. 15671090  
SRR17520069. 15671092  
SRR17520069. 15671094  
SRR17520069. 15671096  
SRR17520069. 15671098  
SRR17520069. 15671100  
SRR17520069. 15671102  
SRR17520069. 15671104  
SRR17520069. 15671106  
SRR17520069. 15671108  
SRR17520069. 15671110

SRR17520069. 15671112  
SRR17520069. 15671114  
SRR17520069. 15671116  
SRR17520069. 15671118  
SRR17520069. 15674090  
SRR17520069. 15674092  
SRR17520069. 15674094  
SRR17520069. 15674096  
SRR17520069. 15674098  
SRR17520069. 15674100  
SRR17520069. 15674102  
SRR17520069. 15674104  
SRR17520069. 15674106  
SRR17520069. 15676481  
SRR17520069. 15676483  
SRR17520069. 15676485  
SRR17520069. 15676487  
SRR17520069. 15676489  
SRR17520069. 15676491  
SRR17520069. 15676493  
SRR17520069. 15679407  
SRR17520069. 15679409  
SRR17520069. 15679411  
SRR17520069. 15679413  
SRR17520069. 15679415  
SRR17520069. 15679417  
SRR17520069. 15679419  
SRR17520069. 15679421  
SRR17520069. 15679423  
SRR17520069. 15682724  
SRR17520069. 15682726  
SRR17520069. 15682728  
SRR17520069. 15682730  
SRR17520069. 15682732  
SRR17520069. 15682734  
SRR17520069. 15682736  
SRR17520069. 15682738  
SRR17520069. 15682740  
SRR17520069. 15682742  
SRR17520069. 15682744  
SRR17520069. 15682746  
SRR17520069. 15682748  
SRR17520069. 15682750  
SRR17520069. 15682752  
SRR17520069. 15682754  
SRR17520069. 15682756  
SRR17520069. 15682758

SRR17520069. 15682762  
SRR17520069. 15682764  
SRR17520069. 15682766  
SRR17520069. 15682768  
SRR17520069. 15682770  
SRR17520069. 15682772  
SRR17520069. 15682774  
SRR17520069. 15682776  
SRR17520069. 15682778  
SRR17520069. 15682782  
SRR17520069. 15682784  
SRR17520069. 15682786  
SRR17520069. 15682788  
SRR17520069. 15682790  
SRR17520069. 15682792  
SRR17520069. 15682794  
SRR17520069. 15682796  
SRR17520069. 15682800  
SRR17520069. 15682802  
SRR17520069. 15682804  
SRR17520069. 15682806  
SRR17520069. 15682808  
SRR17520069. 15682810  
SRR17520069. 15682812  
SRR17520069. 15682814  
SRR17520069. 15682816  
SRR17520069. 15682818  
SRR17520069. 15682820  
SRR17520069. 15682822  
SRR17520069. 15682824  
SRR17520069. 15682826  
SRR17520069. 15682828  
SRR17520069. 15682830  
SRR17520069. 15682832  
SRR17520069. 15682834  
SRR17520069. 15682838  
SRR17520069. 15682840  
SRR17520069. 15682842  
SRR17520069. 15682844  
SRR17520069. 15682846  
SRR17520069. 15682848  
SRR17520069. 15682850  
SRR17520069. 15682852  
SRR17520069. 15682854  
SRR17520069. 15682856  
SRR17520069. 15682858  
SRR17520069. 15682860

SRR17520069. 15682862  
SRR17520069. 15682864  
SRR17520069. 15682866  
SRR17520069. 15682868  
SRR17520069. 15682870  
SRR17520069. 15682872  
SRR17520069. 15682874  
SRR17520069. 15682876  
SRR17520069. 15682878  
SRR17520069. 15682880  
SRR17520069. 15682882  
SRR17520069. 15682884  
SRR17520069. 15682886  
SRR17520069. 15682888  
SRR17520069. 15682890  
SRR17520069. 15683045  
SRR17520069. 15683047  
SRR17520069. 15683049  
SRR17520069. 15683051  
SRR17520069. 15683053  
SRR17520069. 15683055  
SRR17520069. 15683057  
SRR17520069. 15683059  
SRR17520069. 15683061  
SRR17520069. 15683063  
SRR17520069. 15683065  
SRR17520069. 15683069  
SRR17520069. 15683071  
SRR17520069. 15683073  
SRR17520069. 15683075  
SRR17520069. 15683077  
SRR17520069. 15683079  
SRR17520069. 15683081  
SRR17520069. 15683083  
SRR17520069. 15683085  
SRR17520069. 15683089  
SRR17520069. 15683091  
SRR17520069. 15683093  
SRR17520069. 15683095  
SRR17520069. 15683097  
SRR17520069. 15683099  
SRR17520069. 15683101  
SRR17520069. 15684198  
SRR17520069. 15684236  
SRR17520069. 15684935  
SRR17520069. 15684937  
SRR17520069. 15684939

SRR17520069. 15684941  
SRR17520069. 15684943  
SRR17520069. 15684945  
SRR17520069. 15684947  
SRR17520069. 15684949  
SRR17520069. 15684951  
SRR17520069. 15684953  
SRR17520069. 15684955  
SRR17520069. 15684957  
SRR17520069. 15684959  
SRR17520069. 15684961  
SRR17520069. 15684963  
SRR17520069. 15684965  
SRR17520069. 15684967  
SRR17520069. 15684969  
SRR17520069. 15684971  
SRR17520069. 15684973  
SRR17520069. 15684975  
SRR17520069. 15684977  
SRR17520069. 15685358  
SRR17520069. 15685521  
SRR17520069. 15685523  
SRR17520069. 15685525  
SRR17520069. 15685527  
SRR17520069. 15685529  
SRR17520069. 15685531  
SRR17520069. 15685533  
SRR17520069. 15685535  
SRR17520069. 15685537  
SRR17520069. 15685539  
SRR17520069. 15685541  
SRR17520069. 15685543  
SRR17520069. 15685545  
SRR17520069. 15685547  
SRR17520069. 15685549  
SRR17520069. 15685551  
SRR17520069. 15685553  
SRR17520069. 15685555  
SRR17520069. 15685557  
SRR17520069. 15685559  
SRR17520069. 15685561  
SRR17520069. 15685563  
SRR17520069. 15685565  
SRR17520069. 15685567  
SRR17520069. 15685569  
SRR17520069. 15685573  
SRR17520069. 15685575

SRR17520069. 15685577  
SRR17520069. 15685579  
SRR17520069. 15685581  
SRR17520069. 15685583  
SRR17520069. 15685585  
SRR17520069. 15685587  
SRR17520069. 15685589  
SRR17520069. 15685591  
SRR17520069. 15685593  
SRR17520069. 15685595  
SRR17520069. 15685597  
SRR17520069. 15685599  
SRR17520069. 15685601  
SRR17520069. 15687328  
SRR17520069. 15687330  
SRR17520069. 15687332  
SRR17520069. 15687334  
SRR17520069. 15690241  
SRR17520069. 15690243  
SRR17520069. 15690245  
SRR17520069. 15690247  
SRR17520069. 15690251  
SRR17520069. 15690253  
SRR17520069. 15690255  
SRR17520069. 15690257  
SRR17520069. 15690259  
SRR17520069. 15691675  
SRR17520069. 15691677  
SRR17520069. 15691679  
SRR17520069. 15691681  
SRR17520069. 15691683  
SRR17520069. 15691685  
SRR17520069. 15691687  
SRR17520069. 15691689  
SRR17520069. 15691691  
SRR17520069. 15691693  
SRR17520069. 15691695  
SRR17520069. 15691697  
SRR17520069. 15691699  
SRR17520069. 15691701  
SRR17520069. 15691703  
SRR17520069. 15691705  
SRR17520069. 15691707  
SRR17520069. 15691709  
SRR17520069. 15691711  
SRR17520069. 15691715  
SRR17520069. 15691717

SRR17520069. 15691719  
SRR17520069. 15691721  
SRR17520069. 15691723  
SRR17520069. 15691725  
SRR17520069. 15697238  
SRR17520069. 15697240  
SRR17520069. 15697242  
SRR17520069. 15697244  
SRR17520069. 15697246  
SRR17520069. 15697248  
SRR17520069. 15697250  
SRR17520069. 15701438  
SRR17520069. 15702059  
SRR17520069. 15702061  
SRR17520069. 15704521  
SRR17520069. 15704523  
SRR17520069. 15704528  
SRR17520069. 15704530  
SRR17520069. 15704532  
SRR17520069. 15704534  
SRR17520069. 15704536  
SRR17520069. 15704538  
SRR17520069. 15704540  
SRR17520069. 15704542  
SRR17520069. 15704544  
SRR17520069. 15704546  
SRR17520069. 15704548  
SRR17520069. 15704550  
SRR17520069. 15704552  
SRR17520069. 15704554  
SRR17520069. 15704556  
SRR17520069. 15704558  
SRR17520069. 15704560  
SRR17520069. 15704562  
SRR17520069. 15704564  
SRR17520069. 15704566  
SRR17520069. 15704568  
SRR17520069. 15704570  
SRR17520069. 15706387  
SRR17520069. 15706389  
SRR17520069. 15706391  
SRR17520069. 15706393  
SRR17520069. 15706395  
SRR17520069. 15706397  
SRR17520069. 15706399  
SRR17520069. 15706401  
SRR17520069. 15706403



SRR17520069. 15706405  
SRR17520069. 15706407  
SRR17520069. 15706409  
SRR17520069. 15706411  
SRR17520069. 15706413  
SRR17520069. 15706415  
SRR17520069. 15706417  
SRR17520069. 15706419  
SRR17520069. 15706423  
SRR17520069. 15706425  
SRR17520069. 15706427  
SRR17520069. 15706429  
SRR17520069. 15706431  
SRR17520069. 15706433  
SRR17520069. 15706435  
SRR17520069. 15706437  
SRR17520069. 15706441  
SRR17520069. 15706443  
SRR17520069. 15706445  
SRR17520069. 15706447  
SRR17520069. 15706449  
SRR17520069. 15706451  
SRR17520069. 15706453  
SRR17520069. 15706455  
SRR17520069. 15706457  
SRR17520069. 15706459  
SRR17520069. 15706461  
SRR17520069. 15706463  
SRR17520069. 15706467  
SRR17520069. 15706469  
SRR17520069. 15706471  
SRR17520069. 15706473  
SRR17520069. 15706475  
SRR17520069. 15706477  
SRR17520069. 15706479  
SRR17520069. 15706481  
SRR17520069. 15706483  
SRR17520069. 15706485  
SRR17520069. 15706487  
SRR17520069. 15706489  
SRR17520069. 15706491  
SRR17520069. 15707774  
SRR17520069. 15707776  
SRR17520069. 15707778  
SRR17520069. 15707780  
SRR17520069. 15707782  
SRR17520069. 15707788

SRR17520069. 15707790  
SRR17520069. 15707792  
SRR17520069. 15707794  
SRR17520069. 15707796  
SRR17520069. 15707798  
SRR17520069. 15707800  
SRR17520069. 15707802  
SRR17520069. 15707804  
SRR17520069. 15707806  
SRR17520069. 15707808  
SRR17520069. 15707810  
SRR17520069. 15707812  
SRR17520069. 15707814  
SRR17520069. 15707816  
SRR17520069. 15707818  
SRR17520069. 15707820  
SRR17520069. 15707822  
SRR17520069. 15707824  
SRR17520069. 15707826  
SRR17520069. 15707828  
SRR17520069. 15707830  
SRR17520069. 15707832  
SRR17520069. 15712715  
SRR17520069. 15713492  
SRR17520069. 15713494  
SRR17520069. 15713496  
SRR17520069. 15713498  
SRR17520069. 15713502  
SRR17520069. 15713504  
SRR17520069. 15713506  
SRR17520069. 15713508  
SRR17520069. 15713510  
SRR17520069. 15713512  
SRR17520069. 15713514  
SRR17520069. 15713516  
SRR17520069. 15713518  
SRR17520069. 15714835  
SRR17520069. 15714837  
SRR17520069. 15714841  
SRR17520069. 15714843  
SRR17520069. 15714845  
SRR17520069. 15714847  
SRR17520069. 15714849  
SRR17520069. 15714851  
SRR17520069. 15714853  
SRR17520069. 15714855  
SRR17520069. 15714857

SRR17520069. 15714859  
SRR17520069. 15714861  
SRR17520069. 15714863  
SRR17520069. 15714867  
SRR17520069. 15714869  
SRR17520069. 15714871  
SRR17520069. 15714873  
SRR17520069. 15714875  
SRR17520069. 15714877  
SRR17520069. 15714879  
SRR17520069. 15714883  
SRR17520069. 15714885  
SRR17520069. 15714889  
SRR17520069. 15714891  
SRR17520069. 15714893  
SRR17520069. 15714926  
SRR17520069. 15714928  
SRR17520069. 15714930  
SRR17520069. 15714932  
SRR17520069. 15714934  
SRR17520069. 15714936  
SRR17520069. 15714938  
SRR17520069. 15714940  
SRR17520069. 15714942  
SRR17520069. 15714944  
SRR17520069. 15714946  
SRR17520069. 15714948  
SRR17520069. 15714950  
SRR17520069. 15714952  
SRR17520069. 15717984  
SRR17520069. 15717986  
SRR17520069. 15717988  
SRR17520069. 15717990  
SRR17520069. 15717992  
SRR17520069. 15717994  
SRR17520069. 15717996  
SRR17520069. 15717998  
SRR17520069. 15718000  
SRR17520069. 15718002  
SRR17520069. 15718004  
SRR17520069. 15718006  
SRR17520069. 15718008  
SRR17520069. 15718010  
SRR17520069. 15718012  
SRR17520069. 15718014  
SRR17520069. 15718016  
SRR17520069. 15718018

SRR17520069. 15718020  
SRR17520069. 15718022  
SRR17520069. 15718024  
SRR17520069. 15718026  
SRR17520069. 15722051  
SRR17520069. 15722053  
SRR17520069. 15722055  
SRR17520069. 15722057  
SRR17520069. 15722059  
SRR17520069. 15722061  
SRR17520069. 15722063  
SRR17520069. 15722065  
SRR17520069. 15722067  
SRR17520069. 15722069  
SRR17520069. 15722071  
SRR17520069. 15722073  
SRR17520069. 15722075  
SRR17520069. 15722077  
SRR17520069. 15722079  
SRR17520069. 15725769  
SRR17520069. 15725771  
SRR17520069. 15725773  
SRR17520069. 15725775  
SRR17520069. 15725777  
SRR17520069. 15725781  
SRR17520069. 15725783  
SRR17520069. 15725785  
SRR17520069. 15725787  
SRR17520069. 15725789  
SRR17520069. 15725791  
SRR17520069. 15725793  
SRR17520069. 15725795  
SRR17520069. 15725797  
SRR17520069. 15725799  
SRR17520069. 15725801  
SRR17520069. 15727850  
SRR17520069. 15727852  
SRR17520069. 15727854  
SRR17520069. 15727856  
SRR17520069. 15727858  
SRR17520069. 15727860  
SRR17520069. 15727862  
SRR17520069. 15727864  
SRR17520069. 15727866  
SRR17520069. 15727868  
SRR17520069. 15727870  
SRR17520069. 15727872

SRR17520069. 15727874  
SRR17520069. 15727876  
SRR17520069. 15730015  
SRR17520069. 15730017  
SRR17520069. 15730019  
SRR17520069. 15730021  
SRR17520069. 15730023  
SRR17520069. 15730027  
SRR17520069. 15730031  
SRR17520069. 15730033  
SRR17520069. 15730035  
SRR17520069. 15730037  
SRR17520069. 15730041  
SRR17520069. 15730043  
SRR17520069. 15730049  
SRR17520069. 15730051  
SRR17520069. 15730053  
SRR17520069. 15730055  
SRR17520069. 15730057  
SRR17520069. 15730059  
SRR17520069. 15730061  
SRR17520069. 15730063  
SRR17520069. 15730065  
SRR17520069. 15730069  
SRR17520069. 15730071  
SRR17520069. 15730073  
SRR17520069. 15730075  
SRR17520069. 15730077  
SRR17520069. 15730079  
SRR17520069. 15730081  
SRR17520069. 15733768  
SRR17520069. 15733770  
SRR17520069. 15733772  
SRR17520069. 15733774  
SRR17520069. 15737182  
SRR17520069. 15740136  
SRR17520069. 15740138  
SRR17520069. 15740140  
SRR17520069. 15740142  
SRR17520069. 15740144  
SRR17520069. 15740146  
SRR17520069. 15740148  
SRR17520069. 15740150  
SRR17520069. 15740152  
SRR17520069. 15740154  
SRR17520069. 15740156  
SRR17520069. 15740158

SRR17520069. 15740160  
SRR17520069. 15740162  
SRR17520069. 15740164  
SRR17520069. 15740166  
SRR17520069. 15740168  
SRR17520069. 15740170  
SRR17520069. 15740172  
SRR17520069. 15740174  
SRR17520069. 15743896  
SRR17520069. 15743898  
SRR17520069. 15743900  
SRR17520069. 15743902  
SRR17520069. 15748066  
SRR17520069. 15748068  
SRR17520069. 15748070  
SRR17520069. 15748072  
SRR17520069. 15748074  
SRR17520069. 15748076  
SRR17520069. 15749142  
SRR17520069. 15749144  
SRR17520069. 15749146  
SRR17520069. 15749148  
SRR17520069. 15749150  
SRR17520069. 15749152  
SRR17520069. 15749154  
SRR17520069. 15749156  
SRR17520069. 15749158  
SRR17520069. 15749160  
SRR17520069. 15749164  
SRR17520069. 15749166  
SRR17520069. 15749168  
SRR17520069. 15749170  
SRR17520069. 15749172  
SRR17520069. 15749174  
SRR17520069. 15749176  
SRR17520069. 15749180  
SRR17520069. 15749182  
SRR17520069. 15752673  
SRR17520069. 15752675  
SRR17520069. 15752677  
SRR17520069. 15752679  
SRR17520069. 15752681  
SRR17520069. 15752683  
SRR17520069. 15752685  
SRR17520069. 15752687  
SRR17520069. 15752689  
SRR17520069. 15752691

SRR17520069. 15752693  
SRR17520069. 15752695  
SRR17520069. 15752697  
SRR17520069. 15752699  
SRR17520069. 15752701  
SRR17520069. 15752703  
SRR17520069. 15752705  
SRR17520069. 15752707  
SRR17520069. 15752709  
SRR17520069. 15752711  
SRR17520069. 15752713  
SRR17520069. 15752715  
SRR17520069. 15752717  
SRR17520069. 15752719  
SRR17520069. 15752721  
SRR17520069. 15752723  
SRR17520069. 15752725  
SRR17520069. 15752727  
SRR17520069. 15752729  
SRR17520069. 15754221  
SRR17520069. 15754223  
SRR17520069. 15754225  
SRR17520069. 15754227  
SRR17520069. 15754229  
SRR17520069. 15754231  
SRR17520069. 15754233  
SRR17520069. 15754235  
SRR17520069. 15757729  
SRR17520069. 15757731  
SRR17520069. 15757733  
SRR17520069. 15757735  
SRR17520069. 15757737  
SRR17520069. 15757739  
SRR17520069. 15757741  
SRR17520069. 15757743  
SRR17520069. 15757745  
SRR17520069. 15757747  
SRR17520069. 15757749  
SRR17520069. 15757751  
SRR17520069. 15757753  
SRR17520069. 15757755  
SRR17520069. 15757757  
SRR17520069. 15757759  
SRR17520069. 15757761  
SRR17520069. 15757763  
SRR17520069. 15761706  
SRR17520069. 15764472

SRR17520069. 15764474  
SRR17520069. 15764476  
SRR17520069. 15764478  
SRR17520069. 15764480  
SRR17520069. 15764482  
SRR17520069. 15764484  
SRR17520069. 15764486  
SRR17520069. 15764488  
SRR17520069. 15764490  
SRR17520069. 15764492  
SRR17520069. 15764494  
SRR17520069. 15764496  
SRR17520069. 15764498  
SRR17520069. 15764500  
SRR17520069. 15764502  
SRR17520069. 15764504  
SRR17520069. 15764506  
SRR17520069. 15764508  
SRR17520069. 15764510  
SRR17520069. 15764512  
SRR17520069. 15764514  
SRR17520069. 15764516  
SRR17520069. 15764518  
SRR17520069. 15764520  
SRR17520069. 15764522  
SRR17520069. 15764524  
SRR17520069. 15764526  
SRR17520069. 15764528  
SRR17520069. 15764530  
SRR17520069. 15764532  
SRR17520069. 15764534  
SRR17520069. 15764536  
SRR17520069. 15764538  
SRR17520069. 15764540  
SRR17520069. 15764542  
SRR17520069. 15764544  
SRR17520069. 15764546  
SRR17520069. 15764548  
SRR17520069. 15765169  
SRR17520069. 15765171  
SRR17520069. 15765173  
SRR17520069. 15765175  
SRR17520069. 15765177  
SRR17520069. 15765179  
SRR17520069. 15765181  
SRR17520069. 15765183  
SRR17520069. 15765185



SRR17520069. 15765187  
SRR17520069. 15765189  
SRR17520069. 15765191  
SRR17520069. 15765193  
SRR17520069. 15765195  
SRR17520069. 15767776  
SRR17520069. 15768235  
SRR17520069. 15768237  
SRR17520069. 15768239  
SRR17520069. 15768241  
SRR17520069. 15768243  
SRR17520069. 15768247  
SRR17520069. 15768249  
SRR17520069. 15768251  
SRR17520069. 15768253  
SRR17520069. 15768255  
SRR17520069. 15768257  
SRR17520069. 15768259  
SRR17520069. 15768261  
SRR17520069. 15770870  
SRR17520069. 15777718  
SRR17520069. 15777720  
SRR17520069. 15777722  
SRR17520069. 15777724  
SRR17520069. 15777726  
SRR17520069. 15779113  
SRR17520069. 15779119  
SRR17520069. 15779121  
SRR17520069. 15779125  
SRR17520069. 15779127  
SRR17520069. 15779129  
SRR17520069. 15779131  
SRR17520069. 15779133  
SRR17520069. 15779135  
SRR17520069. 15779137  
SRR17520069. 15782098  
SRR17520069. 15782100  
SRR17520069. 15791476  
SRR17520069. 15791478  
SRR17520069. 15791480  
SRR17520069. 15791482  
SRR17520069. 15791484  
SRR17520069. 15791486  
SRR17520069. 15791488  
SRR17520069. 15791490  
SRR17520069. 15791492  
SRR17520069. 15791494

SRR17520069. 15791496  
SRR17520069. 15792392  
SRR17520069. 15792394  
SRR17520069. 15792396  
SRR17520069. 15792400  
SRR17520069. 15792402  
SRR17520069. 15795721  
SRR17520069. 15795723  
SRR17520069. 15795725  
SRR17520069. 15795727  
SRR17520069. 15800925  
SRR17520069. 15808747  
SRR17520069. 15808749  
SRR17520069. 15808751  
SRR17520069. 15808753  
SRR17520069. 15808755  
SRR17520069. 15808757  
SRR17520069. 15808759  
SRR17520069. 15808761  
SRR17520069. 15808763  
SRR17520069. 15808765  
SRR17520069. 15808767  
SRR17520069. 15808769  
SRR17520069. 15808771  
SRR17520069. 15808773  
SRR17520069. 15808775  
SRR17520069. 15808777  
SRR17520069. 15808779  
SRR17520069. 15808781  
SRR17520069. 15808783  
SRR17520069. 15808785  
SRR17520069. 15808787  
SRR17520069. 15808789  
SRR17520069. 15808791  
SRR17520069. 15808793  
SRR17520069. 15808795  
SRR17520069. 15808797  
SRR17520069. 15808799  
SRR17520069. 15808801  
SRR17520069. 15808805  
SRR17520069. 15808807  
SRR17520069. 15808809  
SRR17520069. 15808811  
SRR17520069. 15808813  
SRR17520069. 15808815  
SRR17520069. 15809409  
SRR17520069. 15809411

SRR17520069. 15809413  
SRR17520069. 15809415  
SRR17520069. 15809417  
SRR17520069. 15809419  
SRR17520069. 15809421  
SRR17520069. 15809423  
SRR17520069. 15809425  
SRR17520069. 15818677  
SRR17520069. 15818679  
SRR17520069. 15818681  
SRR17520069. 15818683  
SRR17520069. 15818685  
SRR17520069. 15818687  
SRR17520069. 15818689  
SRR17520069. 15818691  
SRR17520069. 15818693  
SRR17520069. 15818695  
SRR17520069. 15818697  
SRR17520069. 15821228  
SRR17520069. 15821230  
SRR17520069. 15821234  
SRR17520069. 15824017  
SRR17520069. 15824019  
SRR17520069. 15824021  
SRR17520069. 15824023  
SRR17520069. 15824025  
SRR17520069. 15824027  
SRR17520069. 15824029  
SRR17520069. 15824031  
SRR17520069. 15824033  
SRR17520069. 15824035  
SRR17520069. 15824037  
SRR17520069. 15824039  
SRR17520069. 15824041  
SRR17520069. 15824043  
SRR17520069. 15824045  
SRR17520069. 15824047  
SRR17520069. 15824049  
SRR17520069. 15824051  
SRR17520069. 15824053  
SRR17520069. 15824055  
SRR17520069. 15824057  
SRR17520069. 15824059  
SRR17520069. 15824061  
SRR17520069. 15824063  
SRR17520069. 15824065  
SRR17520069. 15824067

SRR17520069. 15824069  
SRR17520069. 15824071  
SRR17520069. 15824073  
SRR17520069. 15824075  
SRR17520069. 15824077  
SRR17520069. 15824079  
SRR17520069. 15824081  
SRR17520069. 15824083  
SRR17520069. 15824085  
SRR17520069. 15824087  
SRR17520069. 15824089  
SRR17520069. 15824091  
SRR17520069. 15824093  
SRR17520069. 15824095  
SRR17520069. 15824097  
SRR17520069. 15824099  
SRR17520069. 15824101  
SRR17520069. 15824103  
SRR17520069. 15824105  
SRR17520069. 15824107  
SRR17520069. 15824109  
SRR17520069. 15824111  
SRR17520069. 15824113  
SRR17520069. 15824117  
SRR17520069. 15824119  
SRR17520069. 15824121  
SRR17520069. 15824123  
SRR17520069. 15824125  
SRR17520069. 15824127  
SRR17520069. 15824129  
SRR17520069. 15824131  
SRR17520069. 15824133  
SRR17520069. 15824135  
SRR17520069. 15824137  
SRR17520069. 15824139  
SRR17520069. 15824141  
SRR17520069. 15824143  
SRR17520069. 15824145  
SRR17520069. 15833435  
SRR17520069. 15833879  
SRR17520069. 15833881  
SRR17520069. 15833883  
SRR17520069. 15833885  
SRR17520069. 15833887  
SRR17520069. 15833889  
SRR17520069. 15833891  
SRR17520069. 15833895

SRR17520069. 15833897  
SRR17520069. 15833899  
SRR17520069. 15833901  
SRR17520069. 15833903  
SRR17520069. 15833905  
SRR17520069. 15833907  
SRR17520069. 15833909  
SRR17520069. 15833911  
SRR17520069. 15833913  
SRR17520069. 15833915  
SRR17520069. 15833917  
SRR17520069. 15833919  
SRR17520069. 15833921  
SRR17520069. 15833923  
SRR17520069. 15833925  
SRR17520069. 15835451  
SRR17520069. 15835453  
SRR17520069. 15835455  
SRR17520069. 15837621  
SRR17520069. 15837625  
SRR17520069. 15837627  
SRR17520069. 15837629  
SRR17520069. 15837631  
SRR17520069. 15837633  
SRR17520069. 15837635  
SRR17520069. 15837637  
SRR17520069. 15837639  
SRR17520069. 15840290  
SRR17520069. 15840292  
SRR17520069. 15840294  
SRR17520069. 15840296  
SRR17520069. 15840298  
SRR17520069. 15840300  
SRR17520069. 15840302  
SRR17520069. 15840304  
SRR17520069. 15840306  
SRR17520069. 15840308  
SRR17520069. 15844240  
SRR17520069. 15844242  
SRR17520069. 15845667  
SRR17520069. 15845669  
SRR17520069. 15845671  
SRR17520069. 15845673  
SRR17520069. 15845675  
SRR17520069. 15845677  
SRR17520069. 15845679  
SRR17520069. 15845683

SRR17520069. 15845685  
SRR17520069. 15845687  
SRR17520069. 15845689  
SRR17520069. 15845691  
SRR17520069. 15845693  
SRR17520069. 15845695  
SRR17520069. 15845697  
SRR17520069. 15845699  
SRR17520069. 15845701  
SRR17520069. 15845703  
SRR17520069. 15846351  
SRR17520069. 15846353  
SRR17520069. 15846357  
SRR17520069. 15847238  
SRR17520069. 15847548  
SRR17520069. 15847550  
SRR17520069. 15847552  
SRR17520069. 15847554  
SRR17520069. 15847556  
SRR17520069. 15847558  
SRR17520069. 15847560  
SRR17520069. 15847562  
SRR17520069. 15847564  
SRR17520069. 15847566  
SRR17520069. 15847568  
SRR17520069. 15848350  
SRR17520069. 15853794  
SRR17520069. 15853796  
SRR17520069. 15853798  
SRR17520069. 15853953  
SRR17520069. 15853955  
SRR17520069. 15853957  
SRR17520069. 15853959  
SRR17520069. 15853961  
SRR17520069. 15853963  
SRR17520069. 15853965  
SRR17520069. 15853967  
SRR17520069. 15853969  
SRR17520069. 15853971  
SRR17520069. 15853973  
SRR17520069. 15853975  
SRR17520069. 15853979  
SRR17520069. 15853981  
SRR17520069. 15853985  
SRR17520069. 15853987  
SRR17520069. 15853989  
SRR17520069. 15853991

SRR17520069. 15853993  
SRR17520069. 15853997  
SRR17520069. 15853999  
SRR17520069. 15854001  
SRR17520069. 15854003  
SRR17520069. 15854005  
SRR17520069. 15854007  
SRR17520069. 15854009  
SRR17520069. 15854011  
SRR17520069. 15854013  
SRR17520069. 15856371  
SRR17520069. 15856373  
SRR17520069. 15856375  
SRR17520069. 15856377  
SRR17520069. 15856379  
SRR17520069. 15856381  
SRR17520069. 15856383  
SRR17520069. 15856385  
SRR17520069. 15856387  
SRR17520069. 15856389  
SRR17520069. 15856391  
SRR17520069. 15856393  
SRR17520069. 15856395  
SRR17520069. 15856397  
SRR17520069. 15856399  
SRR17520069. 15856401  
SRR17520069. 15856403  
SRR17520069. 15856405  
SRR17520069. 15856409  
SRR17520069. 15856411  
SRR17520069. 15856413  
SRR17520069. 15856415  
SRR17520069. 15856417  
SRR17520069. 15856419  
SRR17520069. 15856421  
SRR17520069. 15856425  
SRR17520069. 15856427  
SRR17520069. 15856429  
SRR17520069. 15856431  
SRR17520069. 15856433  
SRR17520069. 15856435  
SRR17520069. 15856437  
SRR17520069. 15856439  
SRR17520069. 15856441  
SRR17520069. 15856443  
SRR17520069. 15856445  
SRR17520069. 15856447

SRR17520069. 15856449  
SRR17520069. 15856451  
SRR17520069. 15856453  
SRR17520069. 15856455  
SRR17520069. 15856457  
SRR17520069. 15856459  
SRR17520069. 15856461  
SRR17520069. 15856463  
SRR17520069. 15856465  
SRR17520069. 15856467  
SRR17520069. 15859643  
SRR17520069. 15859984  
SRR17520069. 15859986  
SRR17520069. 15859988  
SRR17520069. 15859990  
SRR17520069. 15859992  
SRR17520069. 15859994  
SRR17520069. 15859996  
SRR17520069. 15860000  
SRR17520069. 15860002  
SRR17520069. 15860004  
SRR17520069. 15860006  
SRR17520069. 15863207  
SRR17520069. 15863209  
SRR17520069. 15863211  
SRR17520069. 15863213  
SRR17520069. 15863215  
SRR17520069. 15863217  
SRR17520069. 15863219  
SRR17520069. 15863221  
SRR17520069. 15863223  
SRR17520069. 15863225  
SRR17520069. 15863227  
SRR17520069. 15863229  
SRR17520069. 15863231  
SRR17520069. 15863233  
SRR17520069. 15863235  
SRR17520069. 15863237  
SRR17520069. 15863239  
SRR17520069. 15863241  
SRR17520069. 15863243  
SRR17520069. 15863245  
SRR17520069. 15863247  
SRR17520069. 15863249  
SRR17520069. 15863251  
SRR17520069. 15863253  
SRR17520069. 15863255



SRR17520069. 15863257  
SRR17520069. 15863259  
SRR17520069. 15863261  
SRR17520069. 15866836  
SRR17520069. 15866838  
SRR17520069. 15866840  
SRR17520069. 15866842  
SRR17520069. 15866844  
SRR17520069. 15866848  
SRR17520069. 15866850  
SRR17520069. 15866852  
SRR17520069. 15866854  
SRR17520069. 15866856  
SRR17520069. 15866858  
SRR17520069. 15866860  
SRR17520069. 15866864  
SRR17520069. 15866866  
SRR17520069. 15866868  
SRR17520069. 15866870  
SRR17520069. 15866872  
SRR17520069. 15866874  
SRR17520069. 15866876  
SRR17520069. 15866878  
SRR17520069. 15866880  
SRR17520069. 15866882  
SRR17520069. 15866884  
SRR17520069. 15866886  
SRR17520069. 15866888  
SRR17520069. 15866890  
SRR17520069. 15866892  
SRR17520069. 15866894  
SRR17520069. 15872218  
SRR17520069. 15872220  
SRR17520069. 15872222  
SRR17520069. 15872224  
SRR17520069. 15872226  
SRR17520069. 15872228  
SRR17520069. 15872230  
SRR17520069. 15872232  
SRR17520069. 15872234  
SRR17520069. 15872236  
SRR17520069. 15872238  
SRR17520069. 15872240  
SRR17520069. 15872242  
SRR17520069. 15872244  
SRR17520069. 15872246  
SRR17520069. 15872248

SRR17520069. 15872250  
SRR17520069. 15872252  
SRR17520069. 15872254  
SRR17520069. 15872256  
SRR17520069. 15872258  
SRR17520069. 15872260  
SRR17520069. 15872262  
SRR17520069. 15872264  
SRR17520069. 15872266  
SRR17520069. 15872268  
SRR17520069. 15872270  
SRR17520069. 15873755  
SRR17520069. 15873757  
SRR17520069. 15873759  
SRR17520069. 15873761  
SRR17520069. 15873763  
SRR17520069. 15873765  
SRR17520069. 15873767  
SRR17520069. 15873769  
SRR17520069. 15876525  
SRR17520069. 15876527  
SRR17520069. 15876529  
SRR17520069. 15876531  
SRR17520069. 15876533  
SRR17520069. 15876535  
SRR17520069. 15876537  
SRR17520069. 15876539  
SRR17520069. 15876541  
SRR17520069. 15876543  
SRR17520069. 15876545  
SRR17520069. 15876547  
SRR17520069. 15876549  
SRR17520069. 15876551  
SRR17520069. 15876553  
SRR17520069. 15876555  
SRR17520069. 15876557  
SRR17520069. 15876559  
SRR17520069. 15876561  
SRR17520069. 15876563  
SRR17520069. 15876565  
SRR17520069. 15876567  
SRR17520069. 15876569  
SRR17520069. 15876571  
SRR17520069. 15876573  
SRR17520069. 15876575  
SRR17520069. 15876577  
SRR17520069. 15876579

SRR17520069. 15876581  
SRR17520069. 15876583  
SRR17520069. 15876585  
SRR17520069. 15876587  
SRR17520069. 15876589  
SRR17520069. 15876591  
SRR17520069. 15876593  
SRR17520069. 15876595  
SRR17520069. 15876597  
SRR17520069. 15876599  
SRR17520069. 15876601  
SRR17520069. 15876603  
SRR17520069. 15876605  
SRR17520069. 15876607  
SRR17520069. 15876609  
SRR17520069. 15876611  
SRR17520069. 15876613  
SRR17520069. 15876615  
SRR17520069. 15879095  
SRR17520069. 15879099  
SRR17520069. 15879101  
SRR17520069. 15879103  
SRR17520069. 15879105  
SRR17520069. 15879107  
SRR17520069. 15879109  
SRR17520069. 15879111  
SRR17520069. 15879113  
SRR17520069. 15879115  
SRR17520069. 15879117  
SRR17520069. 15879121  
SRR17520069. 15879125  
SRR17520069. 15879127  
SRR17520069. 15879129  
SRR17520069. 15879131  
SRR17520069. 15879133  
SRR17520069. 15879135  
SRR17520069. 15879137  
SRR17520069. 15879139  
SRR17520069. 15879141  
SRR17520069. 15879143  
SRR17520069. 15879145  
SRR17520069. 15879147  
SRR17520069. 15879149  
SRR17520069. 15879151  
SRR17520069. 15879153  
SRR17520069. 15879155  
SRR17520069. 15879157

SRR17520069. 15879159  
SRR17520069. 15879161  
SRR17520069. 15879163  
SRR17520069. 15879165  
SRR17520069. 15879167  
SRR17520069. 15879169  
SRR17520069. 15879171  
SRR17520069. 15879173  
SRR17520069. 15879175  
SRR17520069. 15879177  
SRR17520069. 15879179  
SRR17520069. 15879181  
SRR17520069. 15879183  
SRR17520069. 15879185  
SRR17520069. 15879187  
SRR17520069. 15879189  
SRR17520069. 15879193  
SRR17520069. 15879195  
SRR17520069. 15879197  
SRR17520069. 15879199  
SRR17520069. 15880108  
SRR17520069. 15880110  
SRR17520069. 15880112  
SRR17520069. 15880114  
SRR17520069. 15880116  
SRR17520069. 15880118  
SRR17520069. 15880120  
SRR17520069. 15880122  
SRR17520069. 15880124  
SRR17520069. 15880126  
SRR17520069. 15880128  
SRR17520069. 15880130  
SRR17520069. 15880132  
SRR17520069. 15880134  
SRR17520069. 15880136  
SRR17520069. 15880138  
SRR17520069. 15880140  
SRR17520069. 15880142  
SRR17520069. 15880144  
SRR17520069. 15880146  
SRR17520069. 15880148  
SRR17520069. 15880150  
SRR17520069. 15880152  
SRR17520069. 15880154  
SRR17520069. 15880156  
SRR17520069. 15880158  
SRR17520069. 15880160

SRR17520069. 15880162  
SRR17520069. 15880164  
SRR17520069. 15880166  
SRR17520069. 15880168  
SRR17520069. 15880170  
SRR17520069. 15880172  
SRR17520069. 15880174  
SRR17520069. 15880176  
SRR17520069. 15880178  
SRR17520069. 15880180  
SRR17520069. 15880182  
SRR17520069. 15880184  
SRR17520069. 15880186  
SRR17520069. 15880188  
SRR17520069. 15884098  
SRR17520069. 15884100  
SRR17520069. 15884102  
SRR17520069. 15884104  
SRR17520069. 15884106  
SRR17520069. 15884110  
SRR17520069. 15884112  
SRR17520069. 15884114  
SRR17520069. 15884116  
SRR17520069. 15884118  
SRR17520069. 15884120  
SRR17520069. 15884122  
SRR17520069. 15884124  
SRR17520069. 15885779  
SRR17520069. 15885781  
SRR17520069. 15885783  
SRR17520069. 15885785  
SRR17520069. 15885787  
SRR17520069. 15885789  
SRR17520069. 15885791  
SRR17520069. 15885793  
SRR17520069. 15885795  
SRR17520069. 15885797  
SRR17520069. 15885799  
SRR17520069. 15885801  
SRR17520069. 15885803  
SRR17520069. 15885805  
SRR17520069. 15885807  
SRR17520069. 15885809  
SRR17520069. 15885811  
SRR17520069. 15885813  
SRR17520069. 15885815  
SRR17520069. 15885817

SRR17520069. 15885819  
SRR17520069. 15885821  
SRR17520069. 15890388  
SRR17520069. 15890390  
SRR17520069. 15890392  
SRR17520069. 15890394  
SRR17520069. 15894355  
SRR17520069. 15894357  
SRR17520069. 15894623  
SRR17520069. 15894625  
SRR17520069. 15894627  
SRR17520069. 15894629  
SRR17520069. 15894631  
SRR17520069. 15894633  
SRR17520069. 15894635  
SRR17520069. 15894639  
SRR17520069. 15894641  
SRR17520069. 15894643  
SRR17520069. 15894645  
SRR17520069. 15894647  
SRR17520069. 15894649  
SRR17520069. 15894653  
SRR17520069. 15894655  
SRR17520069. 15894799  
SRR17520069. 15899587  
SRR17520069. 15899589  
SRR17520069. 15899591  
SRR17520069. 15899593  
SRR17520069. 15899595  
SRR17520069. 15899597  
SRR17520069. 15899599  
SRR17520069. 15899601  
SRR17520069. 15899603  
SRR17520069. 15899605  
SRR17520069. 15899607  
SRR17520069. 15899609  
SRR17520069. 15899611  
SRR17520069. 15899613  
SRR17520069. 15899615  
SRR17520069. 15899617  
SRR17520069. 15899619  
SRR17520069. 15899621  
SRR17520069. 15902961  
SRR17520069. 15902963  
SRR17520069. 15902965  
SRR17520069. 15902967  
SRR17520069. 15902969

SRR17520069. 15902971  
SRR17520069. 15902973  
SRR17520069. 15902975  
SRR17520069. 15902977  
SRR17520069. 15902979  
SRR17520069. 15902981  
SRR17520069. 15902983  
SRR17520069. 15902985  
SRR17520069. 15902987  
SRR17520069. 15902989  
SRR17520069. 15902991  
SRR17520069. 15902993  
SRR17520069. 15904120  
SRR17520069. 15904122  
SRR17520069. 15904124  
SRR17520069. 15905750  
SRR17520069. 15905752  
SRR17520069. 15905754  
SRR17520069. 15905756  
SRR17520069. 15905758  
SRR17520069. 15905762  
SRR17520069. 15905764  
SRR17520069. 15905766  
SRR17520069. 15905768  
SRR17520069. 15908514  
SRR17520069. 15908516  
SRR17520069. 15908518  
SRR17520069. 15908520  
SRR17520069. 15908522  
SRR17520069. 15908526  
SRR17520069. 15908528  
SRR17520069. 15914859  
SRR17520069. 15914861  
SRR17520069. 15914863  
SRR17520069. 15914865  
SRR17520069. 15914867  
SRR17520069. 15914869  
SRR17520069. 15914871  
SRR17520069. 15914873  
SRR17520069. 15914875  
SRR17520069. 15914877  
SRR17520069. 15914879  
SRR17520069. 15914881  
SRR17520069. 15914883  
SRR17520069. 15914885  
SRR17520069. 15914887  
SRR17520069. 15914889

SRR17520069. 15914891  
SRR17520069. 15914893  
SRR17520069. 15914895  
SRR17520069. 15914897  
SRR17520069. 15914899  
SRR17520069. 15914901  
SRR17520069. 15914903  
SRR17520069. 15914905  
SRR17520069. 15914907  
SRR17520069. 15914909  
SRR17520069. 15914911  
SRR17520069. 15914913  
SRR17520069. 15914915  
SRR17520069. 15914917  
SRR17520069. 15914919  
SRR17520069. 15914921  
SRR17520069. 15914923  
SRR17520069. 15914925  
SRR17520069. 15914927  
SRR17520069. 15914929  
SRR17520069. 15915544  
SRR17520069. 15918837  
SRR17520069. 15918839  
SRR17520069. 15918841  
SRR17520069. 15918843  
SRR17520069. 15918845  
SRR17520069. 15918847  
SRR17520069. 15918849  
SRR17520069. 15918851  
SRR17520069. 15918853  
SRR17520069. 15918855  
SRR17520069. 15918857  
SRR17520069. 15918859  
SRR17520069. 15918861  
SRR17520069. 15918863  
SRR17520069. 15918865  
SRR17520069. 15918867  
SRR17520069. 15918869  
SRR17520069. 15918871  
SRR17520069. 15918873  
SRR17520069. 15918875  
SRR17520069. 15918877  
SRR17520069. 15918879  
SRR17520069. 15918881  
SRR17520069. 15918883  
SRR17520069. 15918885  
SRR17520069. 15918887



SRR17520069. 15918889  
SRR17520069. 15918891  
SRR17520069. 15918893  
SRR17520069. 15918895  
SRR17520069. 15918897  
SRR17520069. 15918901  
SRR17520069. 15918903  
SRR17520069. 15918905  
SRR17520069. 15920761  
SRR17520069. 15920763  
SRR17520069. 15920765  
SRR17520069. 15920767  
SRR17520069. 15920769  
SRR17520069. 15920771  
SRR17520069. 15920773  
SRR17520069. 15920775  
SRR17520069. 15920777  
SRR17520069. 15920779  
SRR17520069. 15920781  
SRR17520069. 15920783  
SRR17520069. 15920785  
SRR17520069. 15920787  
SRR17520069. 15920789  
SRR17520069. 15920791  
SRR17520069. 15920793  
SRR17520069. 15920795  
SRR17520069. 15920797  
SRR17520069. 15920799  
SRR17520069. 15920801  
SRR17520069. 15920803  
SRR17520069. 15920805  
SRR17520069. 15920807  
SRR17520069. 15920809  
SRR17520069. 15920811  
SRR17520069. 15920813  
SRR17520069. 15920815  
SRR17520069. 15920817  
SRR17520069. 15920819  
SRR17520069. 15920821  
SRR17520069. 15920823  
SRR17520069. 15920825  
SRR17520069. 15920829  
SRR17520069. 15920831  
SRR17520069. 15920833  
SRR17520069. 15920889  
SRR17520069. 15920891  
SRR17520069. 15920893

SRR17520069. 15920895  
SRR17520069. 15920897  
SRR17520069. 15920899  
SRR17520069. 15920901  
SRR17520069. 15920903  
SRR17520069. 15920905  
SRR17520069. 15920907  
SRR17520069. 15920909  
SRR17520069. 15920911  
SRR17520069. 15920913  
SRR17520069. 15920915  
SRR17520069. 15920917  
SRR17520069. 15920919  
SRR17520069. 15920921  
SRR17520069. 15920923  
SRR17520069. 15920925  
SRR17520069. 15920927  
SRR17520069. 15920929  
SRR17520069. 15920931  
SRR17520069. 15920933  
SRR17520069. 15920935  
SRR17520069. 15932657  
SRR17520069. 15932659  
SRR17520069. 15932661  
SRR17520069. 15932663  
SRR17520069. 15932665  
SRR17520069. 15932667  
SRR17520069. 15932669  
SRR17520069. 15932671  
SRR17520069. 15932673  
SRR17520069. 15932675  
SRR17520069. 15932677  
SRR17520069. 15932679  
SRR17520069. 15932681  
SRR17520069. 15932683  
SRR17520069. 15933361  
SRR17520069. 15933363  
SRR17520069. 15933367  
SRR17520069. 15933369  
SRR17520069. 15933373  
SRR17520069. 15933375  
SRR17520069. 15933379  
SRR17520069. 15933381  
SRR17520069. 15933383  
SRR17520069. 15933385  
SRR17520069. 15933387  
SRR17520069. 15938348

SRR17520069. 15938350  
SRR17520069. 15938352  
SRR17520069. 15938354  
SRR17520069. 15938356  
SRR17520069. 15938358  
SRR17520069. 15938360  
SRR17520069. 15938362  
SRR17520069. 15938364  
SRR17520069. 15938366  
SRR17520069. 15938368  
SRR17520069. 15938370  
SRR17520069. 15938372  
SRR17520069. 15938374  
SRR17520069. 15938376  
SRR17520069. 15938378  
SRR17520069. 15938380  
SRR17520069. 15938382  
SRR17520069. 15938384  
SRR17520069. 15938386  
SRR17520069. 15938388  
SRR17520069. 15938390  
SRR17520069. 15938392  
SRR17520069. 15938394  
SRR17520069. 15938396  
SRR17520069. 15938398  
SRR17520069. 15938400  
SRR17520069. 15938402  
SRR17520069. 15938404  
SRR17520069. 15938406  
SRR17520069. 15938408  
SRR17520069. 15938410  
SRR17520069. 15938412  
SRR17520069. 15938414  
SRR17520069. 15938416  
SRR17520069. 15938418  
SRR17520069. 15938420  
SRR17520069. 15938422  
SRR17520069. 15938424  
SRR17520069. 15938426  
SRR17520069. 15938428  
SRR17520069. 15938430  
SRR17520069. 15938432  
SRR17520069. 15938434  
SRR17520069. 15948866  
SRR17520069. 15948868  
SRR17520069. 15948870  
SRR17520069. 15948872

SRR17520069. 15948874  
SRR17520069. 15948876  
SRR17520069. 15948878  
SRR17520069. 15948880  
SRR17520069. 15948882  
SRR17520069. 15948884  
SRR17520069. 15948886  
SRR17520069. 15948888  
SRR17520069. 15948890  
SRR17520069. 15948892  
SRR17520069. 15948894  
SRR17520069. 15948896  
SRR17520069. 15948898  
SRR17520069. 15948900  
SRR17520069. 15948902  
SRR17520069. 15948904  
SRR17520069. 15948906  
SRR17520069. 15949802  
SRR17520069. 15949804  
SRR17520069. 15949808  
SRR17520069. 15949810  
SRR17520069. 15949812  
SRR17520069. 15949814  
SRR17520069. 15949816  
SRR17520069. 15949818  
SRR17520069. 15949820  
SRR17520069. 15949822  
SRR17520069. 15949824  
SRR17520069. 15949826  
SRR17520069. 15949828  
SRR17520069. 15949830  
SRR17520069. 15949832  
SRR17520069. 15949834  
SRR17520069. 15949836  
SRR17520069. 15949838  
SRR17520069. 15949840  
SRR17520069. 15949842  
SRR17520069. 15949844  
SRR17520069. 15949846  
SRR17520069. 15949848  
SRR17520069. 15949850  
SRR17520069. 15949852  
SRR17520069. 15949854  
SRR17520069. 15949856  
SRR17520069. 15949858  
SRR17520069. 15949860  
SRR17520069. 15949862

SRR17520069. 15949866  
SRR17520069. 15949868  
SRR17520069. 15949870  
SRR17520069. 15949872  
SRR17520069. 15949876  
SRR17520069. 15949878  
SRR17520069. 15949880  
SRR17520069. 15949882  
SRR17520069. 15949884  
SRR17520069. 15949886  
SRR17520069. 15949888  
SRR17520069. 15949890  
SRR17520069. 15949894  
SRR17520069. 15949896  
SRR17520069. 15949898  
SRR17520069. 15949900  
SRR17520069. 15949902  
SRR17520069. 15949904  
SRR17520069. 15949906  
SRR17520069. 15949908  
SRR17520069. 15949910  
SRR17520069. 15949912  
SRR17520069. 15949914  
SRR17520069. 15949916  
SRR17520069. 15949918  
SRR17520069. 15949920  
SRR17520069. 15949922  
SRR17520069. 15949924  
SRR17520069. 15955634  
SRR17520069. 15955636  
SRR17520069. 15955640  
SRR17520069. 15955642  
SRR17520069. 15955644  
SRR17520069. 15956971  
SRR17520069. 15956973  
SRR17520069. 15956975  
SRR17520069. 15956979  
SRR17520069. 15956981  
SRR17520069. 15956983  
SRR17520069. 15956985  
SRR17520069. 15956987  
SRR17520069. 15956989  
SRR17520069. 15956993  
SRR17520069. 15956995  
SRR17520069. 15956997  
SRR17520069. 15956999  
SRR17520069. 15969844

SRR17520069. 15969852  
SRR17520069. 15969882  
SRR17520069. 15969884  
SRR17520069. 15969888  
SRR17520069. 15969890  
SRR17520069. 15969892  
SRR17520069. 15969898  
SRR17520069. 15969900  
SRR17520069. 15969902  
SRR17520069. 15969912  
SRR17520069. 15969920  
SRR17520069. 15969922  
SRR17520069. 15969930  
SRR17520069. 15970221  
SRR17520069. 15970223  
SRR17520069. 15970225  
SRR17520069. 15970227  
SRR17520069. 15970229  
SRR17520069. 15970231  
SRR17520069. 15970233  
SRR17520069. 15970235  
SRR17520069. 15970237  
SRR17520069. 15970239  
SRR17520069. 15970241  
SRR17520069. 15970243  
SRR17520069. 15970245  
SRR17520069. 15970247  
SRR17520069. 15970249  
SRR17520069. 15970251  
SRR17520069. 15970253  
SRR17520069. 15970255  
SRR17520069. 15970257  
SRR17520069. 15970259  
SRR17520069. 15970261  
SRR17520069. 15970263  
SRR17520069. 15970265  
SRR17520069. 15970396  
SRR17520069. 15975345  
SRR17520069. 15975347  
SRR17520069. 15975349  
SRR17520069. 15975351  
SRR17520069. 15975353  
SRR17520069. 15975355  
SRR17520069. 15975357  
SRR17520069. 15975359  
SRR17520069. 15975361  
SRR17520069. 15975363

SRR17520069. 15975365  
SRR17520069. 15975367  
SRR17520069. 15975369  
SRR17520069. 15975371  
SRR17520069. 15976478  
SRR17520069. 15983075  
SRR17520069. 15983077  
SRR17520069. 15983079  
SRR17520069. 15983081  
SRR17520069. 15983083  
SRR17520069. 15983085  
SRR17520069. 15983087  
SRR17520069. 15983089  
SRR17520069. 15983091  
SRR17520069. 15983093  
SRR17520069. 15983095  
SRR17520069. 15983097  
SRR17520069. 15983101  
SRR17520069. 15983103  
SRR17520069. 15983105  
SRR17520069. 15983107  
SRR17520069. 15983109  
SRR17520069. 15983111  
SRR17520069. 15983113  
SRR17520069. 15983115  
SRR17520069. 15983117  
SRR17520069. 15983119  
SRR17520069. 15983121  
SRR17520069. 15983123  
SRR17520069. 15983127  
SRR17520069. 15983129  
SRR17520069. 15983131  
SRR17520069. 15983133  
SRR17520069. 15983135  
SRR17520069. 15983137  
SRR17520069. 15983139  
SRR17520069. 15983141  
SRR17520069. 15983143  
SRR17520069. 15983145  
SRR17520069. 15983147  
SRR17520069. 15983149  
SRR17520069. 15983151  
SRR17520069. 15983153  
SRR17520069. 15983155  
SRR17520069. 15983157  
SRR17520069. 15983159  
SRR17520069. 15983161

SRR17520069. 15983163  
SRR17520069. 15983165  
SRR17520069. 15983167  
SRR17520069. 15983169  
SRR17520069. 15983173  
SRR17520069. 15983175  
SRR17520069. 15983177  
SRR17520069. 15983179  
SRR17520069. 15983181  
SRR17520069. 15983183  
SRR17520069. 15983185  
SRR17520069. 15983187  
SRR17520069. 15983189  
SRR17520069. 15983191  
SRR17520069. 15983193  
SRR17520069. 15983195  
SRR17520069. 15983197  
SRR17520069. 15983199  
SRR17520069. 15983201  
SRR17520069. 15983203  
SRR17520069. 15987344  
SRR17520069. 15987346  
SRR17520069. 15987348  
SRR17520069. 15987350  
SRR17520069. 15987352  
SRR17520069. 15987354  
SRR17520069. 15987356  
SRR17520069. 15987358  
SRR17520069. 15987360  
SRR17520069. 15987362  
SRR17520069. 15990610  
SRR17520069. 15990612  
SRR17520069. 15990614  
SRR17520069. 15990616  
SRR17520069. 15990618  
SRR17520069. 15990620  
SRR17520069. 15990622  
SRR17520069. 15990624  
SRR17520069. 15990626  
SRR17520069. 15990628  
SRR17520069. 15990630  
SRR17520069. 15990632  
SRR17520069. 15990634  
SRR17520069. 15990636  
SRR17520069. 15990638  
SRR17520069. 15990640  
SRR17520069. 15990642



SRR17520069. 15990644  
SRR17520069. 15990646  
SRR17520069. 15990648  
SRR17520069. 15990650  
SRR17520069. 15990652  
SRR17520069. 15991154  
SRR17520069. 15991156  
SRR17520069. 15991158  
SRR17520069. 15991160  
SRR17520069. 15991162  
SRR17520069. 15991164  
SRR17520069. 15991166  
SRR17520069. 15991168  
SRR17520069. 15991170  
SRR17520069. 15991172  
SRR17520069. 15991174  
SRR17520069. 15991176  
SRR17520069. 15991178  
SRR17520069. 15991180  
SRR17520069. 15991182  
SRR17520069. 15991184  
SRR17520069. 16001513  
SRR17520069. 16001515  
SRR17520069. 16001517  
SRR17520069. 16001519  
SRR17520069. 16001521  
SRR17520069. 16001523  
SRR17520069. 16001525  
SRR17520069. 16001527  
SRR17520069. 16001529  
SRR17520069. 16001531  
SRR17520069. 16001533  
SRR17520069. 16001535  
SRR17520069. 16001537  
SRR17520069. 16001541  
SRR17520069. 16001543  
SRR17520069. 16001545  
SRR17520069. 16001547  
SRR17520069. 16001549  
SRR17520069. 16001551  
SRR17520069. 16001553  
SRR17520069. 16001555  
SRR17520069. 16001557  
SRR17520069. 16001559  
SRR17520069. 16001561  
SRR17520069. 16001563  
SRR17520069. 16001565

SRR17520069. 16001567  
SRR17520069. 16001569  
SRR17520069. 16001571  
SRR17520069. 16001573  
SRR17520069. 16001575  
SRR17520069. 16001577  
SRR17520069. 16001579  
SRR17520069. 16001581  
SRR17520069. 16001583  
SRR17520069. 16001585  
SRR17520069. 16001587  
SRR17520069. 16001589  
SRR17520069. 16001591  
SRR17520069. 16001593  
SRR17520069. 16001595  
SRR17520069. 16001597  
SRR17520069. 16002673  
SRR17520069. 16002675  
SRR17520069. 16002677  
SRR17520069. 16002679  
SRR17520069. 16002681  
SRR17520069. 16002683  
SRR17520069. 16002685  
SRR17520069. 16002687  
SRR17520069. 16002689  
SRR17520069. 16002691  
SRR17520069. 16002693  
SRR17520069. 16002695  
SRR17520069. 16002697  
SRR17520069. 16002699  
SRR17520069. 16002701  
SRR17520069. 16002703  
SRR17520069. 16002705  
SRR17520069. 16002707  
SRR17520069. 16002709  
SRR17520069. 16002711  
SRR17520069. 16002713  
SRR17520069. 16002715  
SRR17520069. 16002717  
SRR17520069. 16002719  
SRR17520069. 16002721  
SRR17520069. 16002723  
SRR17520069. 16002725  
SRR17520069. 16002727  
SRR17520069. 16002729  
SRR17520069. 16002731  
SRR17520069. 16002733

SRR17520069. 16002735  
SRR17520069. 16002737  
SRR17520069. 16002739  
SRR17520069. 16002741  
SRR17520069. 16002743  
SRR17520069. 16002745  
SRR17520069. 16002747  
SRR17520069. 16002749  
SRR17520069. 16002751  
SRR17520069. 16002753  
SRR17520069. 16002755  
SRR17520069. 16002757  
SRR17520069. 16002759  
SRR17520069. 16002761  
SRR17520069. 16002763  
SRR17520069. 16002765  
SRR17520069. 16002767  
SRR17520069. 16002769  
SRR17520069. 16002771  
SRR17520069. 16002773  
SRR17520069. 16002775  
SRR17520069. 16002777  
SRR17520069. 16002779  
SRR17520069. 16002781  
SRR17520069. 16002783  
SRR17520069. 16002785  
SRR17520069. 16002787  
SRR17520069. 16002789  
SRR17520069. 16002791  
SRR17520069. 16002793  
SRR17520069. 16002795  
SRR17520069. 16003873  
SRR17520069. 16003875  
SRR17520069. 16003877  
SRR17520069. 16003879  
SRR17520069. 16003881  
SRR17520069. 16003883  
SRR17520069. 16003885  
SRR17520069. 16003887  
SRR17520069. 16003889  
SRR17520069. 16003891  
SRR17520069. 16003893  
SRR17520069. 16003895  
SRR17520069. 16003897  
SRR17520069. 16003899  
SRR17520069. 16003901  
SRR17520069. 16003903

SRR17520069. 16003905  
SRR17520069. 16003907  
SRR17520069. 16003909  
SRR17520069. 16003911  
SRR17520069. 16003913  
SRR17520069. 16003915  
SRR17520069. 16003917  
SRR17520069. 16003919  
SRR17520069. 16003921  
SRR17520069. 16003923  
SRR17520069. 16003925  
SRR17520069. 16003927  
SRR17520069. 16003929  
SRR17520069. 16003931  
SRR17520069. 16003933  
SRR17520069. 16009964  
SRR17520069. 16009966  
SRR17520069. 16009968  
SRR17520069. 16009970  
SRR17520069. 16009972  
SRR17520069. 16009974  
SRR17520069. 16009976  
SRR17520069. 16009978  
SRR17520069. 16011138  
SRR17520069. 16011140  
SRR17520069. 16011142  
SRR17520069. 16011144  
SRR17520069. 16011146  
SRR17520069. 16011148  
SRR17520069. 16011150  
SRR17520069. 16011152  
SRR17520069. 16011154  
SRR17520069. 16011156  
SRR17520069. 16011158  
SRR17520069. 16011160  
SRR17520069. 16011162  
SRR17520069. 16011164  
SRR17520069. 16011166  
SRR17520069. 16011168  
SRR17520069. 16011170  
SRR17520069. 16011172  
SRR17520069. 16011174  
SRR17520069. 16011176  
SRR17520069. 16011178  
SRR17520069. 16011180  
SRR17520069. 16011182  
SRR17520069. 16011184

SRR17520069. 16011186  
SRR17520069. 16011188  
SRR17520069. 16011190  
SRR17520069. 16011192  
SRR17520069. 16011194  
SRR17520069. 16011196  
SRR17520069. 16011198  
SRR17520069. 16011200  
SRR17520069. 16011202  
SRR17520069. 16011204  
SRR17520069. 16011206  
SRR17520069. 16011208  
SRR17520069. 16011210  
SRR17520069. 16011212  
SRR17520069. 16011214  
SRR17520069. 16011216  
SRR17520069. 16011218  
SRR17520069. 16011220  
SRR17520069. 16011222  
SRR17520069. 16011224  
SRR17520069. 16011226  
SRR17520069. 16011228  
SRR17520069. 16011230  
SRR17520069. 16011232  
SRR17520069. 16011234  
SRR17520069. 16011236  
SRR17520069. 16011238  
SRR17520069. 16011240  
SRR17520069. 16011242  
SRR17520069. 16011244  
SRR17520069. 16011246  
SRR17520069. 16011248  
SRR17520069. 16011250  
SRR17520069. 16011252  
SRR17520069. 16011256  
SRR17520069. 16011258  
SRR17520069. 16011260  
SRR17520069. 16011262  
SRR17520069. 16011264  
SRR17520069. 16011266  
SRR17520069. 16011268  
SRR17520069. 16011270  
SRR17520069. 16012507  
SRR17520069. 16012509  
SRR17520069. 16012511  
SRR17520069. 16012513  
SRR17520069. 16012515

SRR17520069.16012517  
SRR17520069.16012519  
SRR17520069.16012521  
SRR17520069.16012523  
SRR17520069.16012525  
SRR17520069.16012527  
SRR17520069.16012529  
SRR17520069.16012531  
SRR17520069.16012533  
SRR17520069.16012535  
SRR17520069.16012537  
SRR17520069.16012539  
SRR17520069.16012541  
SRR17520069.16012543  
SRR17520069.16012545  
SRR17520069.16012549  
SRR17520069.16012551  
SRR17520069.16012553  
SRR17520069.16012555  
SRR17520069.16012557  
SRR17520069.16012559  
SRR17520069.16012561  
SRR17520069.16012563  
SRR17520069.16012565  
SRR17520069.16012567  
SRR17520069.16012569  
SRR17520069.16012571  
SRR17520069.16012573  
SRR17520069.16015786  
SRR17520069.16015862  
SRR17520069.16015864  
SRR17520069.16015866  
SRR17520069.16015868  
SRR17520069.16015870  
SRR17520069.16015872  
SRR17520069.16015874  
SRR17520069.16015876  
SRR17520069.16015878  
SRR17520069.16015880  
SRR17520069.16015884  
SRR17520069.16015886  
SRR17520069.16015888  
SRR17520069.16015890  
SRR17520069.16015892  
SRR17520069.16021791  
SRR17520069.16021793  
SRR17520069.16021795

SRR17520069.16021797  
SRR17520069.16021799  
SRR17520069.16021803  
SRR17520069.16021805  
SRR17520069.16021807  
SRR17520069.16021809  
SRR17520069.16021811  
SRR17520069.16021813  
SRR17520069.16021815  
SRR17520069.16021817  
SRR17520069.16021819  
SRR17520069.16021821  
SRR17520069.16021823  
SRR17520069.16021825  
SRR17520069.16021827  
SRR17520069.16021829  
SRR17520069.16021831  
SRR17520069.16021833  
SRR17520069.16021835  
SRR17520069.16024449  
SRR17520069.16024451  
SRR17520069.16024453  
SRR17520069.16024455  
SRR17520069.16024457  
SRR17520069.16024459  
SRR17520069.16024461  
SRR17520069.16024463  
SRR17520069.16024465  
SRR17520069.16024467  
SRR17520069.16024469  
SRR17520069.16024471  
SRR17520069.16024473  
SRR17520069.16026293  
SRR17520069.16026295  
SRR17520069.16026297  
SRR17520069.16026299  
SRR17520069.16026301  
SRR17520069.16034190  
SRR17520069.16034194  
SRR17520069.16034196  
SRR17520069.16034200  
SRR17520069.16034202  
SRR17520069.16034204  
SRR17520069.16034206  
SRR17520069.16034208  
SRR17520069.16034210  
SRR17520069.16034212

SRR17520069. 16034214  
SRR17520069. 16034216  
SRR17520069. 16034218  
SRR17520069. 16034220  
SRR17520069. 16034222  
SRR17520069. 16034224  
SRR17520069. 16034226  
SRR17520069. 16034228  
SRR17520069. 16034230  
SRR17520069. 16034232  
SRR17520069. 16034234  
SRR17520069. 16034236  
SRR17520069. 16034238  
SRR17520069. 16034240  
SRR17520069. 16034244  
SRR17520069. 16034246  
SRR17520069. 16034250  
SRR17520069. 16034252  
SRR17520069. 16034256  
SRR17520069. 16034258  
SRR17520069. 16034260  
SRR17520069. 16034262  
SRR17520069. 16034264  
SRR17520069. 16034266  
SRR17520069. 16034268  
SRR17520069. 16034270  
SRR17520069. 16034272  
SRR17520069. 16034274  
SRR17520069. 16034276  
SRR17520069. 16034278  
SRR17520069. 16034282  
SRR17520069. 16034284  
SRR17520069. 16034286  
SRR17520069. 16034288  
SRR17520069. 16034290  
SRR17520069. 16034292  
SRR17520069. 16034296  
SRR17520069. 16034298  
SRR17520069. 16034344  
SRR17520069. 16034346  
SRR17520069. 16034348  
SRR17520069. 16034350  
SRR17520069. 16034352  
SRR17520069. 16034354  
SRR17520069. 16034356  
SRR17520069. 16034358  
SRR17520069. 16034360



SRR17520069. 16034362  
SRR17520069. 16034364  
SRR17520069. 16034366  
SRR17520069. 16034368  
SRR17520069. 16034370  
SRR17520069. 16034372  
SRR17520069. 16034374  
SRR17520069. 16034376  
SRR17520069. 16034378  
SRR17520069. 16034380  
SRR17520069. 16034382  
SRR17520069. 16034384  
SRR17520069. 16034386  
SRR17520069. 16034388  
SRR17520069. 16034390  
SRR17520069. 16034392  
SRR17520069. 16034684  
SRR17520069. 16039095  
SRR17520069. 16039097  
SRR17520069. 16039099  
SRR17520069. 16039101  
SRR17520069. 16039103  
SRR17520069. 16039105  
SRR17520069. 16039107  
SRR17520069. 16039109  
SRR17520069. 16039111  
SRR17520069. 16039113  
SRR17520069. 16039115  
SRR17520069. 16039121  
SRR17520069. 16039123  
SRR17520069. 16039125  
SRR17520069. 16039127  
SRR17520069. 16039129  
SRR17520069. 16039131  
SRR17520069. 16041886  
SRR17520069. 16041888  
SRR17520069. 16041892  
SRR17520069. 16042506  
SRR17520069. 16042508  
SRR17520069. 16042510  
SRR17520069. 16042512  
SRR17520069. 16042514  
SRR17520069. 16042516  
SRR17520069. 16042518  
SRR17520069. 16042520  
SRR17520069. 16042522  
SRR17520069. 16042524

SRR17520069. 16042526  
SRR17520069. 16042528  
SRR17520069. 16042530  
SRR17520069. 16042532  
SRR17520069. 16045243  
SRR17520069. 16045245  
SRR17520069. 16045247  
SRR17520069. 16045249  
SRR17520069. 16045251  
SRR17520069. 16045253  
SRR17520069. 16045938  
SRR17520069. 16045940  
SRR17520069. 16045942  
SRR17520069. 16045944  
SRR17520069. 16045946  
SRR17520069. 16045948  
SRR17520069. 16045950  
SRR17520069. 16045952  
SRR17520069. 16045954  
SRR17520069. 16045956  
SRR17520069. 16045958  
SRR17520069. 16045960  
SRR17520069. 16045964  
SRR17520069. 16045966  
SRR17520069. 16045968  
SRR17520069. 16045972  
SRR17520069. 16045976  
SRR17520069. 16045978  
SRR17520069. 16045980  
SRR17520069. 16045982  
SRR17520069. 16045984  
SRR17520069. 16045986  
SRR17520069. 16045988  
SRR17520069. 16045990  
SRR17520069. 16045992  
SRR17520069. 16045994  
SRR17520069. 16045996  
SRR17520069. 16045998  
SRR17520069. 16046000  
SRR17520069. 16046002  
SRR17520069. 16046006  
SRR17520069. 16046008  
SRR17520069. 16046010  
SRR17520069. 16046012  
SRR17520069. 16046014  
SRR17520069. 16046018  
SRR17520069. 16046020

SRR17520069. 16046022  
SRR17520069. 16046026  
SRR17520069. 16046028  
SRR17520069. 16046030  
SRR17520069. 16046606  
SRR17520069. 16046608  
SRR17520069. 16046610  
SRR17520069. 16046612  
SRR17520069. 16046614  
SRR17520069. 16046616  
SRR17520069. 16046618  
SRR17520069. 16046620  
SRR17520069. 16046622  
SRR17520069. 16047369  
SRR17520069. 16047371  
SRR17520069. 16048815  
SRR17520069. 16049794  
SRR17520069. 16049796  
SRR17520069. 16049798  
SRR17520069. 16049800  
SRR17520069. 16049802  
SRR17520069. 16049804  
SRR17520069. 16049806  
SRR17520069. 16049808  
SRR17520069. 16049810  
SRR17520069. 16049812  
SRR17520069. 16049814  
SRR17520069. 16060171  
SRR17520069. 16060264  
SRR17520069. 16060266  
SRR17520069. 16060268  
SRR17520069. 16060270  
SRR17520069. 16060272  
SRR17520069. 16060280  
SRR17520069. 16060286  
SRR17520069. 16063512  
SRR17520069. 16063514  
SRR17520069. 16063516  
SRR17520069. 16063518  
SRR17520069. 16063520  
SRR17520069. 16063522  
SRR17520069. 16063524  
SRR17520069. 16063528  
SRR17520069. 16063532  
SRR17520069. 16063534  
SRR17520069. 16063536  
SRR17520069. 16063538

SRR17520069. 16063540  
SRR17520069. 16063544  
SRR17520069. 16063546  
SRR17520069. 16063548  
SRR17520069. 16063550  
SRR17520069. 16063552  
SRR17520069. 16063554  
SRR17520069. 16063556  
SRR17520069. 16063558  
SRR17520069. 16063560  
SRR17520069. 16064443  
SRR17520069. 16064445  
SRR17520069. 16064449  
SRR17520069. 16064451  
SRR17520069. 16064453  
SRR17520069. 16064455  
SRR17520069. 16064457  
SRR17520069. 16064459  
SRR17520069. 16064461  
SRR17520069. 16064463  
SRR17520069. 16064465  
SRR17520069. 16064467  
SRR17520069. 16064469  
SRR17520069. 16066960  
SRR17520069. 16067188  
SRR17520069. 16067190  
SRR17520069. 16077901  
SRR17520069. 16077903  
SRR17520069. 16077905  
SRR17520069. 16077907  
SRR17520069. 16077909  
SRR17520069. 16077913  
SRR17520069. 16077915  
SRR17520069. 16077917  
SRR17520069. 16077919  
SRR17520069. 16077921  
SRR17520069. 16077923  
SRR17520069. 16077925  
SRR17520069. 16077927  
SRR17520069. 16077929  
SRR17520069. 16077931  
SRR17520069. 16077933  
SRR17520069. 16077935  
SRR17520069. 16077937  
SRR17520069. 16077939  
SRR17520069. 16077941  
SRR17520069. 16077943

SRR17520069. 16077945  
SRR17520069. 16077949  
SRR17520069. 16077951  
SRR17520069. 16077953  
SRR17520069. 16077955  
SRR17520069. 16077957  
SRR17520069. 16077959  
SRR17520069. 16077961  
SRR17520069. 16082650  
SRR17520069. 16082652  
SRR17520069. 16082654  
SRR17520069. 16082656  
SRR17520069. 16082658  
SRR17520069. 16082660  
SRR17520069. 16082662  
SRR17520069. 16082664  
SRR17520069. 16082666  
SRR17520069. 16082668  
SRR17520069. 16082670  
SRR17520069. 16082674  
SRR17520069. 16082676  
SRR17520069. 16082680  
SRR17520069. 16082682  
SRR17520069. 16082684  
SRR17520069. 16082688  
SRR17520069. 16082690  
SRR17520069. 16082692  
SRR17520069. 16082694  
SRR17520069. 16082698  
SRR17520069. 16082700  
SRR17520069. 16082702  
SRR17520069. 16082704  
SRR17520069. 16082706  
SRR17520069. 16086528  
SRR17520069. 16087071  
SRR17520069. 16087073  
SRR17520069. 16087075  
SRR17520069. 16087077  
SRR17520069. 16087079  
SRR17520069. 16091477  
SRR17520069. 16091479  
SRR17520069. 16091481  
SRR17520069. 16091483  
SRR17520069. 16091485  
SRR17520069. 16091487  
SRR17520069. 16091489  
SRR17520069. 16091493

SRR17520069.16091495  
SRR17520069.16091497  
SRR17520069.16091499  
SRR17520069.16091501  
SRR17520069.16091503  
SRR17520069.16091505  
SRR17520069.16091507  
SRR17520069.16091509  
SRR17520069.16091511  
SRR17520069.16091513  
SRR17520069.16091515  
SRR17520069.16091517  
SRR17520069.16091519  
SRR17520069.16091521  
SRR17520069.16091523  
SRR17520069.16091525  
SRR17520069.16091527  
SRR17520069.16091529  
SRR17520069.16091531  
SRR17520069.16091533  
SRR17520069.16091535  
SRR17520069.16091537  
SRR17520069.16091539  
SRR17520069.16091541  
SRR17520069.16091543  
SRR17520069.16091545  
SRR17520069.16091547  
SRR17520069.16091549  
SRR17520069.16091551  
SRR17520069.16091553  
SRR17520069.16091555  
SRR17520069.16091557  
SRR17520069.16091559  
SRR17520069.16091561  
SRR17520069.16091563  
SRR17520069.16091565  
SRR17520069.16091567  
SRR17520069.16091569  
SRR17520069.16091571  
SRR17520069.16093378  
SRR17520069.16093380  
SRR17520069.16093382  
SRR17520069.16093384  
SRR17520069.16093386  
SRR17520069.16093388  
SRR17520069.16093390  
SRR17520069.16093392

SRR17520069. 16094461  
SRR17520069. 16094463  
SRR17520069. 16094465  
SRR17520069. 16094467  
SRR17520069. 16094469  
SRR17520069. 16094471  
SRR17520069. 16094473  
SRR17520069. 16094475  
SRR17520069. 16094477  
SRR17520069. 16094479  
SRR17520069. 16094481  
SRR17520069. 16094483  
SRR17520069. 16094485  
SRR17520069. 16094487  
SRR17520069. 16094489  
SRR17520069. 16094491  
SRR17520069. 16094493  
SRR17520069. 16094495  
SRR17520069. 16094499  
SRR17520069. 16094501  
SRR17520069. 16094503  
SRR17520069. 16094505  
SRR17520069. 16094507  
SRR17520069. 16094509  
SRR17520069. 16094511  
SRR17520069. 16094513  
SRR17520069. 16094515  
SRR17520069. 16094517  
SRR17520069. 16094519  
SRR17520069. 16094521  
SRR17520069. 16094523  
SRR17520069. 16094525  
SRR17520069. 16094527  
SRR17520069. 16094529  
SRR17520069. 16096005  
SRR17520069. 16096007  
SRR17520069. 16096009  
SRR17520069. 16096011  
SRR17520069. 16096013  
SRR17520069. 16096015  
SRR17520069. 16096017  
SRR17520069. 16096019  
SRR17520069. 16096021  
SRR17520069. 16096023  
SRR17520069. 16096025  
SRR17520069. 16096029  
SRR17520069. 16096031

SRR17520069. 16096033  
SRR17520069. 16096035  
SRR17520069. 16096039  
SRR17520069. 16096041  
SRR17520069. 16096043  
SRR17520069. 16096045  
SRR17520069. 16096047  
SRR17520069. 16096049  
SRR17520069. 16096051  
SRR17520069. 16096053  
SRR17520069. 16096055  
SRR17520069. 16096057  
SRR17520069. 16096063  
SRR17520069. 16096065  
SRR17520069. 16096067  
SRR17520069. 16096069  
SRR17520069. 16096071  
SRR17520069. 16096073  
SRR17520069. 16096075  
SRR17520069. 16096079  
SRR17520069. 16096081  
SRR17520069. 16096083  
SRR17520069. 16096085  
SRR17520069. 16096087  
SRR17520069. 16096089  
SRR17520069. 16096093  
SRR17520069. 16096095  
SRR17520069. 16096097  
SRR17520069. 16096099  
SRR17520069. 16096101  
SRR17520069. 16096103  
SRR17520069. 16096105  
SRR17520069. 16096107  
SRR17520069. 16096109  
SRR17520069. 16104458  
SRR17520069. 16104460  
SRR17520069. 16104462  
SRR17520069. 16104464  
SRR17520069. 16104466  
SRR17520069. 16105422  
SRR17520069. 16105424  
SRR17520069. 16105426  
SRR17520069. 16105428  
SRR17520069. 16105430  
SRR17520069. 16105432  
SRR17520069. 16105434  
SRR17520069. 16105436



SRR17520069. 16105438  
SRR17520069. 16105440  
SRR17520069. 16105442  
SRR17520069. 16105444  
SRR17520069. 16105446  
SRR17520069. 16105448  
SRR17520069. 16105450  
SRR17520069. 16105452  
SRR17520069. 16105454  
SRR17520069. 16106813  
SRR17520069. 16106815  
SRR17520069. 16106817  
SRR17520069. 16106819  
SRR17520069. 16106821  
SRR17520069. 16106823  
SRR17520069. 16106825  
SRR17520069. 16106827  
SRR17520069. 16106829  
SRR17520069. 16106831  
SRR17520069. 16106833  
SRR17520069. 16106835  
SRR17520069. 16106837  
SRR17520069. 16106839  
SRR17520069. 16106841  
SRR17520069. 16106843  
SRR17520069. 16106845  
SRR17520069. 16106847  
SRR17520069. 16106849  
SRR17520069. 16106851  
SRR17520069. 16106853  
SRR17520069. 16106855  
SRR17520069. 16106857  
SRR17520069. 16106861  
SRR17520069. 16112429  
SRR17520069. 16112431  
SRR17520069. 16112433  
SRR17520069. 16115970  
SRR17520069. 16115972  
SRR17520069. 16115974  
SRR17520069. 16115976  
SRR17520069. 16115978  
SRR17520069. 16115980  
SRR17520069. 16115982  
SRR17520069. 16115984  
SRR17520069. 16115986  
SRR17520069. 16115988  
SRR17520069. 16115990

SRR17520069. 16115992  
SRR17520069. 16115994  
SRR17520069. 16115996  
SRR17520069. 16116000  
SRR17520069. 16116002  
SRR17520069. 16116004  
SRR17520069. 16116947  
SRR17520069. 16116949  
SRR17520069. 16116951  
SRR17520069. 16116953  
SRR17520069. 16116955  
SRR17520069. 16116957  
SRR17520069. 16116959  
SRR17520069. 16116961  
SRR17520069. 16116963  
SRR17520069. 16116965  
SRR17520069. 16116967  
SRR17520069. 16116969  
SRR17520069. 16116971  
SRR17520069. 16116975  
SRR17520069. 16116977  
SRR17520069. 16116979  
SRR17520069. 16116981  
SRR17520069. 16116983  
SRR17520069. 16116985  
SRR17520069. 16116987  
SRR17520069. 16116989  
SRR17520069. 16116991  
SRR17520069. 16116993  
SRR17520069. 16116995  
SRR17520069. 16116997  
SRR17520069. 16116999  
SRR17520069. 16117001  
SRR17520069. 16117003  
SRR17520069. 16117005  
SRR17520069. 16117009  
SRR17520069. 16117011  
SRR17520069. 16117013  
SRR17520069. 16117015  
SRR17520069. 16117017  
SRR17520069. 16117019  
SRR17520069. 16117021  
SRR17520069. 16117023  
SRR17520069. 16117025  
SRR17520069. 16117027  
SRR17520069. 16117029  
SRR17520069. 16120418

SRR17520069. 16120420  
SRR17520069. 16120424  
SRR17520069. 16120426  
SRR17520069. 16120428  
SRR17520069. 16120430  
SRR17520069. 16120432  
SRR17520069. 16120434  
SRR17520069. 16120436  
SRR17520069. 16120438  
SRR17520069. 16120442  
SRR17520069. 16120444  
SRR17520069. 16120446  
SRR17520069. 16120450  
SRR17520069. 16120452  
SRR17520069. 16120454  
SRR17520069. 16120456  
SRR17520069. 16120458  
SRR17520069. 16120460  
SRR17520069. 16120462  
SRR17520069. 16120464  
SRR17520069. 16120466  
SRR17520069. 16120468  
SRR17520069. 16120470  
SRR17520069. 16120474  
SRR17520069. 16120476  
SRR17520069. 16120480  
SRR17520069. 16120482  
SRR17520069. 16120484  
SRR17520069. 16120486  
SRR17520069. 16120488  
SRR17520069. 16120490  
SRR17520069. 16120492  
SRR17520069. 16120494  
SRR17520069. 16120498  
SRR17520069. 16120500  
SRR17520069. 16120502  
SRR17520069. 16120504  
SRR17520069. 16120506  
SRR17520069. 16120510  
SRR17520069. 16120512  
SRR17520069. 16120514  
SRR17520069. 16120518  
SRR17520069. 16120520  
SRR17520069. 16120522  
SRR17520069. 16120524  
SRR17520069. 16120526  
SRR17520069. 16120528

SRR17520069. 16120530  
SRR17520069. 16125155  
SRR17520069. 16125157  
SRR17520069. 16125159  
SRR17520069. 16125161  
SRR17520069. 16125163  
SRR17520069. 16125165  
SRR17520069. 16125167  
SRR17520069. 16125169  
SRR17520069. 16125171  
SRR17520069. 16125173  
SRR17520069. 16125175  
SRR17520069. 16125177  
SRR17520069. 16125179  
SRR17520069. 16125181  
SRR17520069. 16125183  
SRR17520069. 16125185  
SRR17520069. 16125187  
SRR17520069. 16125189  
SRR17520069. 16125191  
SRR17520069. 16125193  
SRR17520069. 16125195  
SRR17520069. 16125197  
SRR17520069. 16125199  
SRR17520069. 16125201  
SRR17520069. 16125203  
SRR17520069. 16125205  
SRR17520069. 16125207  
SRR17520069. 16125209  
SRR17520069. 16125211  
SRR17520069. 16125213  
SRR17520069. 16125215  
SRR17520069. 16125217  
SRR17520069. 16125219  
SRR17520069. 16128549  
SRR17520069. 16128551  
SRR17520069. 16128553  
SRR17520069. 16128555  
SRR17520069. 16128557  
SRR17520069. 16130021  
SRR17520069. 16141154  
SRR17520069. 16141283  
SRR17520069. 16141285  
SRR17520069. 16141289  
SRR17520069. 16141291  
SRR17520069. 16141293  
SRR17520069. 16141297

SRR17520069. 16141299  
SRR17520069. 16141301  
SRR17520069. 16141303  
SRR17520069. 16141307  
SRR17520069. 16145160  
SRR17520069. 16145162  
SRR17520069. 16145164  
SRR17520069. 16145166  
SRR17520069. 16147764  
SRR17520069. 16149999  
SRR17520069. 16157706  
SRR17520069. 16157708  
SRR17520069. 16157710  
SRR17520069. 16157712  
SRR17520069. 16157714  
SRR17520069. 16157716  
SRR17520069. 16157718  
SRR17520069. 16157720  
SRR17520069. 16157722  
SRR17520069. 16157724  
SRR17520069. 16157726  
SRR17520069. 16157728  
SRR17520069. 16157730  
SRR17520069. 16157732  
SRR17520069. 16157734  
SRR17520069. 16157736  
SRR17520069. 16157738  
SRR17520069. 16157740  
SRR17520069. 16157742  
SRR17520069. 16157744  
SRR17520069. 16157746  
SRR17520069. 16157748  
SRR17520069. 16157750  
SRR17520069. 16157752  
SRR17520069. 16157754  
SRR17520069. 16157756  
SRR17520069. 16157758  
SRR17520069. 16157762  
SRR17520069. 16157764  
SRR17520069. 16157766  
SRR17520069. 16157770  
SRR17520069. 16158190  
SRR17520069. 16158192  
SRR17520069. 16158194  
SRR17520069. 16158196  
SRR17520069. 16158198  
SRR17520069. 16158200

SRR17520069. 16158202  
SRR17520069. 16158204  
SRR17520069. 16158206  
SRR17520069. 16158208  
SRR17520069. 16158210  
SRR17520069. 16158212  
SRR17520069. 16158214  
SRR17520069. 16158216  
SRR17520069. 16158218  
SRR17520069. 16158220  
SRR17520069. 16158222  
SRR17520069. 16158224  
SRR17520069. 16158226  
SRR17520069. 16158230  
SRR17520069. 16158232  
SRR17520069. 16158234  
SRR17520069. 16158236  
SRR17520069. 16158238  
SRR17520069. 16158240  
SRR17520069. 16163171  
SRR17520069. 16163173  
SRR17520069. 16163175  
SRR17520069. 16163177  
SRR17520069. 16163179  
SRR17520069. 16163181  
SRR17520069. 16163183  
SRR17520069. 16163185  
SRR17520069. 16163187  
SRR17520069. 16163189  
SRR17520069. 16163191  
SRR17520069. 16163193  
SRR17520069. 16163195  
SRR17520069. 16163197  
SRR17520069. 16163201  
SRR17520069. 16163203  
SRR17520069. 16169136  
SRR17520069. 16169140  
SRR17520069. 16169142  
SRR17520069. 16169144  
SRR17520069. 16169146  
SRR17520069. 16169148  
SRR17520069. 16169150  
SRR17520069. 16169152  
SRR17520069. 16169154  
SRR17520069. 16169156  
SRR17520069. 16169158  
SRR17520069. 16169160

SRR17520069. 16169162  
SRR17520069. 16169164  
SRR17520069. 16169166  
SRR17520069. 16169168  
SRR17520069. 16169170  
SRR17520069. 16169172  
SRR17520069. 16169174  
SRR17520069. 16169176  
SRR17520069. 16169178  
SRR17520069. 16169180  
SRR17520069. 16181164  
SRR17520069. 16181166  
SRR17520069. 16181168  
SRR17520069. 16181170  
SRR17520069. 16181172  
SRR17520069. 16181174  
SRR17520069. 16181176  
SRR17520069. 16181178  
SRR17520069. 16181180  
SRR17520069. 16186186  
SRR17520069. 16186188  
SRR17520069. 16186190  
SRR17520069. 16186192  
SRR17520069. 16186194  
SRR17520069. 16186196  
SRR17520069. 16186198  
SRR17520069. 16186200  
SRR17520069. 16186202  
SRR17520069. 16186204  
SRR17520069. 16186206  
SRR17520069. 16186208  
SRR17520069. 16186210  
SRR17520069. 16186212  
SRR17520069. 16186214  
SRR17520069. 16186216  
SRR17520069. 16186218  
SRR17520069. 16186220  
SRR17520069. 16186222  
SRR17520069. 16186224  
SRR17520069. 16186226  
SRR17520069. 16186228  
SRR17520069. 16186230  
SRR17520069. 16186232  
SRR17520069. 16186234  
SRR17520069. 16186236  
SRR17520069. 16186238  
SRR17520069. 16186240

SRR17520069. 16186242  
SRR17520069. 16186244  
SRR17520069. 16186246  
SRR17520069. 16186248  
SRR17520069. 16188055  
SRR17520069. 16188057  
SRR17520069. 16188059  
SRR17520069. 16188061  
SRR17520069. 16188063  
SRR17520069. 16188065  
SRR17520069. 16188067  
SRR17520069. 16188069  
SRR17520069. 16188071  
SRR17520069. 16188073  
SRR17520069. 16188075  
SRR17520069. 16188077  
SRR17520069. 16188079  
SRR17520069. 16188081  
SRR17520069. 16188083  
SRR17520069. 16188085  
SRR17520069. 16188087  
SRR17520069. 16188089  
SRR17520069. 16188091  
SRR17520069. 16188093  
SRR17520069. 16188095  
SRR17520069. 16188097  
SRR17520069. 16188099  
SRR17520069. 16188101  
SRR17520069. 16188103  
SRR17520069. 16188105  
SRR17520069. 16188107  
SRR17520069. 16188109  
SRR17520069. 16188111  
SRR17520069. 16188113  
SRR17520069. 16188115  
SRR17520069. 16188117  
SRR17520069. 16188119  
SRR17520069. 16188121  
SRR17520069. 16188123  
SRR17520069. 16188125  
SRR17520069. 16188127  
SRR17520069. 16188129  
SRR17520069. 16188131  
SRR17520069. 16190063  
SRR17520069. 16190087  
SRR17520069. 16190102  
SRR17520069. 16190107



SRR17520069. 16190116  
SRR17520069. 16191630  
SRR17520069. 16200106  
SRR17520069. 16201742  
SRR17520069. 16209572  
SRR17520069. 16209575  
SRR17520069. 16211791  
SRR17520069. 16211793  
SRR17520069. 16211795  
SRR17520069. 16217634  
SRR17520069. 16217636  
SRR17520069. 16217638  
SRR17520069. 16217640  
SRR17520069. 16217642  
SRR17520069. 16217644  
SRR17520069. 16217646  
SRR17520069. 16217648  
SRR17520069. 16217650  
SRR17520069. 16217652  
SRR17520069. 16217654  
SRR17520069. 16217656  
SRR17520069. 16217658  
SRR17520069. 16217660  
SRR17520069. 16217662  
SRR17520069. 16217664  
SRR17520069. 16217666  
SRR17520069. 16217668  
SRR17520069. 16217670  
SRR17520069. 16217672  
SRR17520069. 16217674  
SRR17520069. 16217676  
SRR17520069. 16217678  
SRR17520069. 16217680  
SRR17520069. 16217684  
SRR17520069. 16217686  
SRR17520069. 16217688  
SRR17520069. 16217690  
SRR17520069. 16217692  
SRR17520069. 16217694  
SRR17520069. 16217701  
SRR17520069. 16217703  
SRR17520069. 16217705  
SRR17520069. 16217707  
SRR17520069. 16217711  
SRR17520069. 16217713  
SRR17520069. 16217715  
SRR17520069. 16217717

SRR17520069. 16217719  
SRR17520069. 16217723  
SRR17520069. 16217725  
SRR17520069. 16217727  
SRR17520069. 16217734  
SRR17520069. 16217888  
SRR17520069. 16217890  
SRR17520069. 16217892  
SRR17520069. 16217894  
SRR17520069. 16217896  
SRR17520069. 16222668  
SRR17520069. 16225716  
SRR17520069. 16225718  
SRR17520069. 16225720  
SRR17520069. 16225722  
SRR17520069. 16225724  
SRR17520069. 16225726  
SRR17520069. 16225728  
SRR17520069. 16225730  
SRR17520069. 16225734  
SRR17520069. 16225736  
SRR17520069. 16225738  
SRR17520069. 16225740  
SRR17520069. 16225744  
SRR17520069. 16225746  
SRR17520069. 16238075  
SRR17520069. 16238077  
SRR17520069. 16238079  
SRR17520069. 16238081  
SRR17520069. 16238083  
SRR17520069. 16238085  
SRR17520069. 16238087  
SRR17520069. 16238089  
SRR17520069. 16238091  
SRR17520069. 16239403  
SRR17520069. 16239445  
SRR17520069. 16239501  
SRR17520069. 16239519  
SRR17520069. 16239523  
SRR17520069. 16240112  
SRR17520069. 16240691  
SRR17520069. 16240693  
SRR17520069. 16240695  
SRR17520069. 16240697  
SRR17520069. 16240699  
SRR17520069. 16240701  
SRR17520069. 16240703

SRR17520069. 16240705  
SRR17520069. 16240707  
SRR17520069. 16240709  
SRR17520069. 16240711  
SRR17520069. 16240713  
SRR17520069. 16240715  
SRR17520069. 16240717  
SRR17520069. 16240719  
SRR17520069. 16240721  
SRR17520069. 16240723  
SRR17520069. 16240725  
SRR17520069. 16240727  
SRR17520069. 16240729  
SRR17520069. 16240731  
SRR17520069. 16240733  
SRR17520069. 16240735  
SRR17520069. 16240737  
SRR17520069. 16240739  
SRR17520069. 16240741  
SRR17520069. 16240743  
SRR17520069. 16240745  
SRR17520069. 16240747  
SRR17520069. 16240749  
SRR17520069. 16240751  
SRR17520069. 16240753  
SRR17520069. 16240755  
SRR17520069. 16240757  
SRR17520069. 16240759  
SRR17520069. 16240761  
SRR17520069. 16240763  
SRR17520069. 16240765  
SRR17520069. 16242753  
SRR17520069. 16242755  
SRR17520069. 16242757  
SRR17520069. 16242759  
SRR17520069. 16242761  
SRR17520069. 16242763  
SRR17520069. 16242765  
SRR17520069. 16242767  
SRR17520069. 16242769  
SRR17520069. 16242773  
SRR17520069. 16242775  
SRR17520069. 16242777  
SRR17520069. 16242779  
SRR17520069. 16242781  
SRR17520069. 16242783  
SRR17520069. 16242785

SRR17520069. 16242787  
SRR17520069. 16242851  
SRR17520069. 16242853  
SRR17520069. 16242857  
SRR17520069. 16245836  
SRR17520069. 16245838  
SRR17520069. 16245840  
SRR17520069. 16245842  
SRR17520069. 16245844  
SRR17520069. 16245846  
SRR17520069. 16245848  
SRR17520069. 16247078  
SRR17520069. 16247080  
SRR17520069. 16247082  
SRR17520069. 16247084  
SRR17520069. 16247086  
SRR17520069. 16247090  
SRR17520069. 16247092  
SRR17520069. 16247094  
SRR17520069. 16247098  
SRR17520069. 16247100  
SRR17520069. 16247102  
SRR17520069. 16247104  
SRR17520069. 16247106  
SRR17520069. 16247108  
SRR17520069. 16247110  
SRR17520069. 16248335  
SRR17520069. 16248337  
SRR17520069. 16248339  
SRR17520069. 16248341  
SRR17520069. 16248345  
SRR17520069. 16248347  
SRR17520069. 16248349  
SRR17520069. 16248351  
SRR17520069. 16248353  
SRR17520069. 16248355  
SRR17520069. 16248357  
SRR17520069. 16248359  
SRR17520069. 16248361  
SRR17520069. 16248363  
SRR17520069. 16248365  
SRR17520069. 16248367  
SRR17520069. 16248369  
SRR17520069. 16248371  
SRR17520069. 16248373  
SRR17520069. 16248375  
SRR17520069. 16248377

SRR17520069. 16248379  
SRR17520069. 16248381  
SRR17520069. 16248383  
SRR17520069. 16248385  
SRR17520069. 16248387  
SRR17520069. 16248389  
SRR17520069. 16248391  
SRR17520069. 16248393  
SRR17520069. 16248395  
SRR17520069. 16248397  
SRR17520069. 16248399  
SRR17520069. 16248401  
SRR17520069. 16248403  
SRR17520069. 16248405  
SRR17520069. 16249269  
SRR17520069. 16249271  
SRR17520069. 16249273  
SRR17520069. 16249275  
SRR17520069. 16249277  
SRR17520069. 16249279  
SRR17520069. 16249281  
SRR17520069. 16249283  
SRR17520069. 16249285  
SRR17520069. 16249287  
SRR17520069. 16249289  
SRR17520069. 16249291  
SRR17520069. 16249293  
SRR17520069. 16249295  
SRR17520069. 16249297  
SRR17520069. 16249301  
SRR17520069. 16249303  
SRR17520069. 16249305  
SRR17520069. 16249307  
SRR17520069. 16249309  
SRR17520069. 16249311  
SRR17520069. 16249315  
SRR17520069. 16249317  
SRR17520069. 16249319  
SRR17520069. 16249321  
SRR17520069. 16249323  
SRR17520069. 16249325  
SRR17520069. 16249327  
SRR17520069. 16249329  
SRR17520069. 16249331  
SRR17520069. 16249333  
SRR17520069. 16249335  
SRR17520069. 16249337

SRR17520069. 16249339  
SRR17520069. 16249341  
SRR17520069. 16249343  
SRR17520069. 16249345  
SRR17520069. 16249841  
SRR17520069. 16249843  
SRR17520069. 16249847  
SRR17520069. 16249849  
SRR17520069. 16249851  
SRR17520069. 16249853  
SRR17520069. 16249855  
SRR17520069. 16249857  
SRR17520069. 16249859  
SRR17520069. 16259803  
SRR17520069. 16259807  
SRR17520069. 16259809  
SRR17520069. 16259811  
SRR17520069. 16261816  
SRR17520069. 16261831  
SRR17520069. 16261833  
SRR17520069. 16261835  
SRR17520069. 16261837  
SRR17520069. 16261839  
SRR17520069. 16261841  
SRR17520069. 16261842  
SRR17520069. 16268450  
SRR17520069. 16268452  
SRR17520069. 16268454  
SRR17520069. 16268456  
SRR17520069. 16268458  
SRR17520069. 16268460  
SRR17520069. 16268462  
SRR17520069. 16273399  
SRR17520069. 16273401  
SRR17520069. 16273420  
SRR17520069. 16273422  
SRR17520069. 16273424  
SRR17520069. 16273426  
SRR17520069. 16273428  
SRR17520069. 16273430  
SRR17520069. 16273432  
SRR17520069. 16273434  
SRR17520069. 16273436  
SRR17520069. 16273438  
SRR17520069. 16273440  
SRR17520069. 16273442  
SRR17520069. 16273444

SRR17520069. 16273446  
SRR17520069. 16273448  
SRR17520069. 16273450  
SRR17520069. 16273452  
SRR17520069. 16273454  
SRR17520069. 16273456  
SRR17520069. 16273458  
SRR17520069. 16273460  
SRR17520069. 16273462  
SRR17520069. 16273464  
SRR17520069. 16273466  
SRR17520069. 16273468  
SRR17520069. 16273470  
SRR17520069. 16273472  
SRR17520069. 16273474  
SRR17520069. 16273476  
SRR17520069. 16273478  
SRR17520069. 16273482  
SRR17520069. 16273484  
SRR17520069. 16273486  
SRR17520069. 16273488  
SRR17520069. 16273490  
SRR17520069. 16273492  
SRR17520069. 16273494  
SRR17520069. 16273496  
SRR17520069. 16273498  
SRR17520069. 16273500  
SRR17520069. 16273502  
SRR17520069. 16273504  
SRR17520069. 16273506  
SRR17520069. 16273508  
SRR17520069. 16273510  
SRR17520069. 16273512  
SRR17520069. 16273514  
SRR17520069. 16273516  
SRR17520069. 16273518  
SRR17520069. 16273520  
SRR17520069. 16273522  
SRR17520069. 16273524  
SRR17520069. 16273526  
SRR17520069. 16282083  
SRR17520069. 16282218  
SRR17520069. 16286000  
SRR17520069. 16286002  
SRR17520069. 16286006  
SRR17520069. 16286008  
SRR17520069. 16286010

SRR17520069. 16298574  
SRR17520069. 16298576  
SRR17520069. 16298578  
SRR17520069. 16298580  
SRR17520069. 16303073  
SRR17520069. 16303075  
SRR17520069. 16303077  
SRR17520069. 16303079  
SRR17520069. 16303081  
SRR17520069. 16303083  
SRR17520069. 16303085  
SRR17520069. 16303087  
SRR17520069. 16303089  
SRR17520069. 16303091  
SRR17520069. 16303093  
SRR17520069. 16303095  
SRR17520069. 16303097  
SRR17520069. 16303099  
SRR17520069. 16303101  
SRR17520069. 16303103  
SRR17520069. 16303105  
SRR17520069. 16303107  
SRR17520069. 16303109  
SRR17520069. 16303111  
SRR17520069. 16303115  
SRR17520069. 16303117  
SRR17520069. 16303119  
SRR17520069. 16303121  
SRR17520069. 16303123  
SRR17520069. 16303127  
SRR17520069. 16304245  
SRR17520069. 16304247  
SRR17520069. 16304249  
SRR17520069. 16304251  
SRR17520069. 16304253  
SRR17520069. 16304255  
SRR17520069. 16304257  
SRR17520069. 16304259  
SRR17520069. 16304261  
SRR17520069. 16304263  
SRR17520069. 16304265  
SRR17520069. 16304267  
SRR17520069. 16304269  
SRR17520069. 16304271  
SRR17520069. 16304273  
SRR17520069. 16304275  
SRR17520069. 16304277



SRR17520069. 16304279  
SRR17520069. 16304281  
SRR17520069. 16304283  
SRR17520069. 16304285  
SRR17520069. 16305542  
SRR17520069. 16305544  
SRR17520069. 16305546  
SRR17520069. 16305550  
SRR17520069. 16305552  
SRR17520069. 16305554  
SRR17520069. 16305556  
SRR17520069. 16305558  
SRR17520069. 16305560  
SRR17520069. 16305562  
SRR17520069. 16305564  
SRR17520069. 16305572  
SRR17520069. 16305574  
SRR17520069. 16305576  
SRR17520069. 16305580  
SRR17520069. 16305582  
SRR17520069. 16305584  
SRR17520069. 16305586  
SRR17520069. 16305588  
SRR17520069. 16305590  
SRR17520069. 16305592  
SRR17520069. 16311808  
SRR17520069. 16311810  
SRR17520069. 16311812  
SRR17520069. 16311814  
SRR17520069. 16312755  
SRR17520069. 16312757  
SRR17520069. 16312759  
SRR17520069. 16312761  
SRR17520069. 16312763  
SRR17520069. 16312765  
SRR17520069. 16313210  
SRR17520069. 16313212  
SRR17520069. 16313214  
SRR17520069. 16313219  
SRR17520069. 16313221  
SRR17520069. 16313223  
SRR17520069. 16313225  
SRR17520069. 16313227  
SRR17520069. 16313229  
SRR17520069. 16313231  
SRR17520069. 16313233  
SRR17520069. 16313235

SRR17520069. 16313237  
SRR17520069. 16313239  
SRR17520069. 16313243  
SRR17520069. 16313245  
SRR17520069. 16313247  
SRR17520069. 16313249  
SRR17520069. 16313251  
SRR17520069. 16313253  
SRR17520069. 16313255  
SRR17520069. 16313257  
SRR17520069. 16313259  
SRR17520069. 16313261  
SRR17520069. 16313263  
SRR17520069. 16313265  
SRR17520069. 16313267  
SRR17520069. 16313269  
SRR17520069. 16313271  
SRR17520069. 16313273  
SRR17520069. 16313275  
SRR17520069. 16313277  
SRR17520069. 16313279  
SRR17520069. 16313281  
SRR17520069. 16313283  
SRR17520069. 16313285  
SRR17520069. 16313287  
SRR17520069. 16313289  
SRR17520069. 16313291  
SRR17520069. 16313293  
SRR17520069. 16313295  
SRR17520069. 16313297  
SRR17520069. 16313299  
SRR17520069. 16313301  
SRR17520069. 16313303  
SRR17520069. 16313305  
SRR17520069. 16320117  
SRR17520069. 16320119  
SRR17520069. 16320121  
SRR17520069. 16320123  
SRR17520069. 16320125  
SRR17520069. 16320231  
SRR17520069. 16320233  
SRR17520069. 16320235  
SRR17520069. 16320237  
SRR17520069. 16320239  
SRR17520069. 16320241  
SRR17520069. 16320247  
SRR17520069. 16320249

SRR17520069. 16320251  
SRR17520069. 16320253  
SRR17520069. 16320255  
SRR17520069. 16320257  
SRR17520069. 16320259  
SRR17520069. 16320261  
SRR17520069. 16320263  
SRR17520069. 16320267  
SRR17520069. 16320269  
SRR17520069. 16320271  
SRR17520069. 16320273  
SRR17520069. 16320283  
SRR17520069. 16320285  
SRR17520069. 16320287  
SRR17520069. 16320293  
SRR17520069. 16320295  
SRR17520069. 16320297  
SRR17520069. 16320299  
SRR17520069. 16320301  
SRR17520069. 16320303  
SRR17520069. 16320305  
SRR17520069. 16320307  
SRR17520069. 16320309  
SRR17520069. 16320311  
SRR17520069. 16320313  
SRR17520069. 16320315  
SRR17520069. 16320317  
SRR17520069. 16322112  
SRR17520069. 16322114  
SRR17520069. 16322116  
SRR17520069. 16322118  
SRR17520069. 16324014  
SRR17520069. 16324016  
SRR17520069. 16324018  
SRR17520069. 16324020  
SRR17520069. 16324022  
SRR17520069. 16324024  
SRR17520069. 16324026  
SRR17520069. 16324028  
SRR17520069. 16324033  
SRR17520069. 16324035  
SRR17520069. 16324037  
SRR17520069. 16324039  
SRR17520069. 16324041  
SRR17520069. 16324043  
SRR17520069. 16324045  
SRR17520069. 16324047

SRR17520069. 16324049  
SRR17520069. 16324051  
SRR17520069. 16327498  
SRR17520069. 16327500  
SRR17520069. 16327502  
SRR17520069. 16327504  
SRR17520069. 16327506  
SRR17520069. 16327508  
SRR17520069. 16327510  
SRR17520069. 16327512  
SRR17520069. 16327514  
SRR17520069. 16327516  
SRR17520069. 16327518  
SRR17520069. 16327520  
SRR17520069. 16328945  
SRR17520069. 16328951  
SRR17520069. 16328953  
SRR17520069. 16331469  
SRR17520069. 16331473  
SRR17520069. 16331477  
SRR17520069. 16331479  
SRR17520069. 16331481  
SRR17520069. 16331483  
SRR17520069. 16331485  
SRR17520069. 16331487  
SRR17520069. 16331489  
SRR17520069. 16342760  
SRR17520069. 16347024  
SRR17520069. 16347026  
SRR17520069. 16347028  
SRR17520069. 16347030  
SRR17520069. 16347032  
SRR17520069. 16347034  
SRR17520069. 16349210  
SRR17520069. 16349212  
SRR17520069. 16349214  
SRR17520069. 16349216  
SRR17520069. 16349992  
SRR17520069. 16349994  
SRR17520069. 16349996  
SRR17520069. 16349998  
SRR17520069. 16350000  
SRR17520069. 16350002  
SRR17520069. 16350004  
SRR17520069. 16350006  
SRR17520069. 16350008  
SRR17520069. 16350012

SRR17520069.16350014  
SRR17520069.16350016  
SRR17520069.16350018  
SRR17520069.16350020  
SRR17520069.16350022  
SRR17520069.16350024  
SRR17520069.16350026  
SRR17520069.16352159  
SRR17520069.16352163  
SRR17520069.16352165  
SRR17520069.16352169  
SRR17520069.16352171  
SRR17520069.16352173  
SRR17520069.16352175  
SRR17520069.16352177  
SRR17520069.16352179  
SRR17520069.16352181  
SRR17520069.16352183  
SRR17520069.16352185  
SRR17520069.16352187  
SRR17520069.16352189  
SRR17520069.16352191  
SRR17520069.16352193  
SRR17520069.16352195  
SRR17520069.16352197  
SRR17520069.16352199  
SRR17520069.16352201  
SRR17520069.16352203  
SRR17520069.16352205  
SRR17520069.16352207  
SRR17520069.16352209  
SRR17520069.16352213  
SRR17520069.16352215  
SRR17520069.16352217  
SRR17520069.16352219  
SRR17520069.16352221  
SRR17520069.16352223  
SRR17520069.16352225  
SRR17520069.16352227  
SRR17520069.16352229  
SRR17520069.16352233  
SRR17520069.16352235  
SRR17520069.16352237  
SRR17520069.16352239  
SRR17520069.16352241  
SRR17520069.16352243  
SRR17520069.16352245

SRR17520069. 16352247  
SRR17520069. 16352249  
SRR17520069. 16352251  
SRR17520069. 16352253  
SRR17520069. 16352255  
SRR17520069. 16352257  
SRR17520069. 16352259  
SRR17520069. 16352261  
SRR17520069. 16352263  
SRR17520069. 16352265  
SRR17520069. 16352267  
SRR17520069. 16352269  
SRR17520069. 16352271  
SRR17520069. 16352273  
SRR17520069. 16352275  
SRR17520069. 16352277  
SRR17520069. 16352279  
SRR17520069. 16352281  
SRR17520069. 16352283  
SRR17520069. 16352285  
SRR17520069. 16352287  
SRR17520069. 16352289  
SRR17520069. 16352291  
SRR17520069. 16352293  
SRR17520069. 16352295  
SRR17520069. 16352297  
SRR17520069. 16352299  
SRR17520069. 16352301  
SRR17520069. 16352303  
SRR17520069. 16352305  
SRR17520069. 16352307  
SRR17520069. 16352309  
SRR17520069. 16352313  
SRR17520069. 16352315  
SRR17520069. 16352317  
SRR17520069. 16352319  
SRR17520069. 16352321  
SRR17520069. 16352323  
SRR17520069. 16352325  
SRR17520069. 16352327  
SRR17520069. 16352329  
SRR17520069. 16352331  
SRR17520069. 16352333  
SRR17520069. 16352335  
SRR17520069. 16352337  
SRR17520069. 16352339  
SRR17520069. 16356734

SRR17520069. 16361195  
SRR17520069. 16362935  
SRR17520069. 16362937  
SRR17520069. 16362939  
SRR17520069. 16362941  
SRR17520069. 16362943  
SRR17520069. 16362945  
SRR17520069. 16362947  
SRR17520069. 16362951  
SRR17520069. 16362953  
SRR17520069. 16362955  
SRR17520069. 16366589  
SRR17520069. 16366591  
SRR17520069. 16366593  
SRR17520069. 16366595  
SRR17520069. 16366597  
SRR17520069. 16366599  
SRR17520069. 16366601  
SRR17520069. 16366603  
SRR17520069. 16366605  
SRR17520069. 16366607  
SRR17520069. 16366609  
SRR17520069. 16366611  
SRR17520069. 16366613  
SRR17520069. 16366615  
SRR17520069. 16372745  
SRR17520069. 16372747  
SRR17520069. 16372749  
SRR17520069. 16372751  
SRR17520069. 16372753  
SRR17520069. 16372755  
SRR17520069. 16372757  
SRR17520069. 16372759  
SRR17520069. 16382147  
SRR17520069. 16382775  
SRR17520069. 16382777  
SRR17520069. 16382779  
SRR17520069. 16382781  
SRR17520069. 16382783  
SRR17520069. 16382785  
SRR17520069. 16382787  
SRR17520069. 16382789  
SRR17520069. 16382791  
SRR17520069. 16382795  
SRR17520069. 16382797  
SRR17520069. 16382799  
SRR17520069. 16382803

SRR17520069. 16382805  
SRR17520069. 16382807  
SRR17520069. 16382809  
SRR17520069. 16382811  
SRR17520069. 16382813  
SRR17520069. 16382815  
SRR17520069. 16382817  
SRR17520069. 16382819  
SRR17520069. 16382821  
SRR17520069. 16382823  
SRR17520069. 16382825  
SRR17520069. 16382827  
SRR17520069. 16382829  
SRR17520069. 16382831  
SRR17520069. 16382833  
SRR17520069. 16382835  
SRR17520069. 16382837  
SRR17520069. 16382839  
SRR17520069. 16382841  
SRR17520069. 16383925  
SRR17520069. 16383927  
SRR17520069. 16383929  
SRR17520069. 16383931  
SRR17520069. 16383933  
SRR17520069. 16383935  
SRR17520069. 16383937  
SRR17520069. 16383941  
SRR17520069. 16383943  
SRR17520069. 16383945  
SRR17520069. 16383947  
SRR17520069. 16383949  
SRR17520069. 16383951  
SRR17520069. 16383953  
SRR17520069. 16394447  
SRR17520069. 16394449  
SRR17520069. 16394451  
SRR17520069. 16394453  
SRR17520069. 16394455  
SRR17520069. 16394457  
SRR17520069. 16394459  
SRR17520069. 16394461  
SRR17520069. 16394463  
SRR17520069. 16394465  
SRR17520069. 16394467  
SRR17520069. 16394469  
SRR17520069. 16394471  
SRR17520069. 16396064



SRR17520069. 16396066  
SRR17520069. 16396068  
SRR17520069. 16398666  
SRR17520069. 16398668  
SRR17520069. 16398670  
SRR17520069. 16398672  
SRR17520069. 16398674  
SRR17520069. 16398676  
SRR17520069. 16398678  
SRR17520069. 16398682  
SRR17520069. 16398684  
SRR17520069. 16400224  
SRR17520069. 16400226  
SRR17520069. 16400228  
SRR17520069. 16400230  
SRR17520069. 16400232  
SRR17520069. 16400234  
SRR17520069. 16403595  
SRR17520069. 16403597  
SRR17520069. 16403599  
SRR17520069. 16403601  
SRR17520069. 16403603  
SRR17520069. 16403605  
SRR17520069. 16403607  
SRR17520069. 16403609  
SRR17520069. 16407349  
SRR17520069. 16407351  
SRR17520069. 16407353  
SRR17520069. 16407355  
SRR17520069. 16407357  
SRR17520069. 16407359  
SRR17520069. 16407363  
SRR17520069. 16407365  
SRR17520069. 16407367  
SRR17520069. 16410207  
SRR17520069. 16413943  
SRR17520069. 16413945  
SRR17520069. 16413947  
SRR17520069. 16413949  
SRR17520069. 16413951  
SRR17520069. 16413953  
SRR17520069. 16413955  
SRR17520069. 16413957  
SRR17520069. 16413959  
SRR17520069. 16413961  
SRR17520069. 16413963  
SRR17520069. 16413965

SRR17520069. 16413967  
SRR17520069. 16413969  
SRR17520069. 16413971  
SRR17520069. 16413973  
SRR17520069. 16413975  
SRR17520069. 16413977  
SRR17520069. 16413979  
SRR17520069. 16413981  
SRR17520069. 16413983  
SRR17520069. 16413985  
SRR17520069. 16413987  
SRR17520069. 16413989  
SRR17520069. 16413991  
SRR17520069. 16413993  
SRR17520069. 16413995  
SRR17520069. 16413997  
SRR17520069. 16414001  
SRR17520069. 16414003  
SRR17520069. 16414005  
SRR17520069. 16414007  
SRR17520069. 16414009  
SRR17520069. 16414013  
SRR17520069. 16414015  
SRR17520069. 16414017  
SRR17520069. 16414019  
SRR17520069. 16414021  
SRR17520069. 16414023  
SRR17520069. 16414025  
SRR17520069. 16414027  
SRR17520069. 16414029  
SRR17520069. 16414031  
SRR17520069. 16414033  
SRR17520069. 16414035  
SRR17520069. 16414037  
SRR17520069. 16414039  
SRR17520069. 16414041  
SRR17520069. 16414043  
SRR17520069. 16414045  
SRR17520069. 16414047  
SRR17520069. 16414049  
SRR17520069. 16414051  
SRR17520069. 16414053  
SRR17520069. 16414055  
SRR17520069. 16414057  
SRR17520069. 16414059  
SRR17520069. 16414061  
SRR17520069. 16414063

SRR17520069. 16414065  
SRR17520069. 16414067  
SRR17520069. 16414069  
SRR17520069. 16414071  
SRR17520069. 16414073  
SRR17520069. 16414075  
SRR17520069. 16414077  
SRR17520069. 16414079  
SRR17520069. 16414081  
SRR17520069. 16414083  
SRR17520069. 16414085  
SRR17520069. 16414087  
SRR17520069. 16414091  
SRR17520069. 16414093  
SRR17520069. 16414095  
SRR17520069. 16414097  
SRR17520069. 16414099  
SRR17520069. 16414101  
SRR17520069. 16414103  
SRR17520069. 16414105  
SRR17520069. 16414107  
SRR17520069. 16414109  
SRR17520069. 16414111  
SRR17520069. 16414113  
SRR17520069. 16414115  
SRR17520069. 16414117  
SRR17520069. 16414119  
SRR17520069. 16414121  
SRR17520069. 16414123  
SRR17520069. 16414125  
SRR17520069. 16414127  
SRR17520069. 16414129  
SRR17520069. 16414131  
SRR17520069. 16414133  
SRR17520069. 16414135  
SRR17520069. 16418167  
SRR17520069. 16418169  
SRR17520069. 16418171  
SRR17520069. 16418173  
SRR17520069. 16418175  
SRR17520069. 16418179  
SRR17520069. 16418181  
SRR17520069. 16418183  
SRR17520069. 16418185  
SRR17520069. 16418187  
SRR17520069. 16418189  
SRR17520069. 16422658

SRR17520069. 16422660  
SRR17520069. 16427346  
SRR17520069. 16440018  
SRR17520069. 16440323  
SRR17520069. 16441357  
SRR17520069. 16441359  
SRR17520069. 16441361  
SRR17520069. 16441363  
SRR17520069. 16441365  
SRR17520069. 16441367  
SRR17520069. 16441369  
SRR17520069. 16441371  
SRR17520069. 16441373  
SRR17520069. 16441375  
SRR17520069. 16441377  
SRR17520069. 16441379  
SRR17520069. 16441381  
SRR17520069. 16441383  
SRR17520069. 16441385  
SRR17520069. 16441387  
SRR17520069. 16441389  
SRR17520069. 16441391  
SRR17520069. 16441393  
SRR17520069. 16441395  
SRR17520069. 16441397  
SRR17520069. 16441399  
SRR17520069. 16441401  
SRR17520069. 16441403  
SRR17520069. 16441405  
SRR17520069. 16441407  
SRR17520069. 16441409  
SRR17520069. 16441411  
SRR17520069. 16441413  
SRR17520069. 16441415  
SRR17520069. 16441417  
SRR17520069. 16441419  
SRR17520069. 16441421  
SRR17520069. 16441423  
SRR17520069. 16443073  
SRR17520069. 16443075  
SRR17520069. 16443077  
SRR17520069. 16443079  
SRR17520069. 16443081  
SRR17520069. 16443083  
SRR17520069. 16443085  
SRR17520069. 16443087  
SRR17520069. 16443091

SRR17520069.16443093  
SRR17520069.16443095  
SRR17520069.16443097  
SRR17520069.16443099  
SRR17520069.16443101  
SRR17520069.16443103  
SRR17520069.16443105  
SRR17520069.16443107  
SRR17520069.16443109  
SRR17520069.16443111  
SRR17520069.16447976  
SRR17520069.16447978  
SRR17520069.16447980  
SRR17520069.16450326  
SRR17520069.16450328  
SRR17520069.16450330  
SRR17520069.16450332  
SRR17520069.16450334  
SRR17520069.16450336  
SRR17520069.16450338  
SRR17520069.16450340  
SRR17520069.16450342  
SRR17520069.16450344  
SRR17520069.16450346  
SRR17520069.16450348  
SRR17520069.16450350  
SRR17520069.16450352  
SRR17520069.16450354  
SRR17520069.16450356  
SRR17520069.16450358  
SRR17520069.16450360  
SRR17520069.16450362  
SRR17520069.16450364  
SRR17520069.16450366  
SRR17520069.16450368  
SRR17520069.16450370  
SRR17520069.16450372  
SRR17520069.16450374  
SRR17520069.16450376  
SRR17520069.16450378  
SRR17520069.16450380  
SRR17520069.16450382  
SRR17520069.16450384  
SRR17520069.16450386  
SRR17520069.16450388  
SRR17520069.16450390  
SRR17520069.16450392

SRR17520069. 16453471  
SRR17520069. 16453473  
SRR17520069. 16453475  
SRR17520069. 16453477  
SRR17520069. 16457968  
SRR17520069. 16457970  
SRR17520069. 16457972  
SRR17520069. 16457974  
SRR17520069. 16457976  
SRR17520069. 16457978  
SRR17520069. 16457980  
SRR17520069. 16457982  
SRR17520069. 16457984  
SRR17520069. 16457986  
SRR17520069. 16457988  
SRR17520069. 16457990  
SRR17520069. 16457992  
SRR17520069. 16457994  
SRR17520069. 16457996  
SRR17520069. 16457998  
SRR17520069. 16458000  
SRR17520069. 16458002  
SRR17520069. 16458004  
SRR17520069. 16458006  
SRR17520069. 16458008  
SRR17520069. 16458010  
SRR17520069. 16458012  
SRR17520069. 16458014  
SRR17520069. 16458016  
SRR17520069. 16458018  
SRR17520069. 16458020  
SRR17520069. 16458022  
SRR17520069. 16458024  
SRR17520069. 16458026  
SRR17520069. 16458028  
SRR17520069. 16458030  
SRR17520069. 16458032  
SRR17520069. 16458034  
SRR17520069. 16458036  
SRR17520069. 16458038  
SRR17520069. 16458040  
SRR17520069. 16458042  
SRR17520069. 16458044  
SRR17520069. 16458046  
SRR17520069. 16458048  
SRR17520069. 16458050  
SRR17520069. 16458052

SRR17520069. 16458054  
SRR17520069. 16458056  
SRR17520069. 16458548  
SRR17520069. 16458550  
SRR17520069. 16458552  
SRR17520069. 16458554  
SRR17520069. 16458556  
SRR17520069. 16458558  
SRR17520069. 16458560  
SRR17520069. 16458564  
SRR17520069. 16460492  
SRR17520069. 16460494  
SRR17520069. 16460498  
SRR17520069. 16460500  
SRR17520069. 16460502  
SRR17520069. 16460506  
SRR17520069. 16460508  
SRR17520069. 16460510  
SRR17520069. 16460512  
SRR17520069. 16460514  
SRR17520069. 16460516  
SRR17520069. 16460518  
SRR17520069. 16460520  
SRR17520069. 16460522  
SRR17520069. 16460526  
SRR17520069. 16460528  
SRR17520069. 16460530  
SRR17520069. 16460532  
SRR17520069. 16460534  
SRR17520069. 16460536  
SRR17520069. 16460538  
SRR17520069. 16460540  
SRR17520069. 16460542  
SRR17520069. 16460544  
SRR17520069. 16460546  
SRR17520069. 16460548  
SRR17520069. 16463127  
SRR17520069. 16463129  
SRR17520069. 16463131  
SRR17520069. 16463133  
SRR17520069. 16463135  
SRR17520069. 16463137  
SRR17520069. 16463139  
SRR17520069. 16463141  
SRR17520069. 16463143  
SRR17520069. 16463145  
SRR17520069. 16463147

SRR17520069. 16463149  
SRR17520069. 16463151  
SRR17520069. 16463153  
SRR17520069. 16463155  
SRR17520069. 16463157  
SRR17520069. 16463159  
SRR17520069. 16463161  
SRR17520069. 16463163  
SRR17520069. 16463165  
SRR17520069. 16463167  
SRR17520069. 16463169  
SRR17520069. 16463171  
SRR17520069. 16463173  
SRR17520069. 16463175  
SRR17520069. 16463177  
SRR17520069. 16463179  
SRR17520069. 16463181  
SRR17520069. 16467112  
SRR17520069. 16469515  
SRR17520069. 16469517  
SRR17520069. 16469519  
SRR17520069. 16469521  
SRR17520069. 16469523  
SRR17520069. 16469525  
SRR17520069. 16469527  
SRR17520069. 16469529  
SRR17520069. 16469531  
SRR17520069. 16469533  
SRR17520069. 16469535  
SRR17520069. 16469537  
SRR17520069. 16469539  
SRR17520069. 16469541  
SRR17520069. 16469543  
SRR17520069. 16469545  
SRR17520069. 16469547  
SRR17520069. 16469549  
SRR17520069. 16469551  
SRR17520069. 16469553  
SRR17520069. 16469555  
SRR17520069. 16469557  
SRR17520069. 16469559  
SRR17520069. 16469561  
SRR17520069. 16469563  
SRR17520069. 16469565  
SRR17520069. 16469567  
SRR17520069. 16469569  
SRR17520069. 16478232



SRR17520069. 16478234  
SRR17520069. 16478236  
SRR17520069. 16478238  
SRR17520069. 16478240  
SRR17520069. 16478242  
SRR17520069. 16478244  
SRR17520069. 16478246  
SRR17520069. 16478248  
SRR17520069. 16486476  
SRR17520069. 16486478  
SRR17520069. 16486480  
SRR17520069. 16486484  
SRR17520069. 16486486  
SRR17520069. 16486488  
SRR17520069. 16486490  
SRR17520069. 16486492  
SRR17520069. 16486494  
SRR17520069. 16486496  
SRR17520069. 16486498  
SRR17520069. 16486500  
SRR17520069. 16486502  
SRR17520069. 16486504  
SRR17520069. 16486506  
SRR17520069. 16486508  
SRR17520069. 16486510  
SRR17520069. 16486512  
SRR17520069. 16486514  
SRR17520069. 16486516  
SRR17520069. 16486518  
SRR17520069. 16486520  
SRR17520069. 16486522  
SRR17520069. 16486526  
SRR17520069. 16486528  
SRR17520069. 16486530  
SRR17520069. 16486532  
SRR17520069. 16486534  
SRR17520069. 16486536  
SRR17520069. 16486538  
SRR17520069. 16486540  
SRR17520069. 16486542  
SRR17520069. 16493047  
SRR17520069. 16493049  
SRR17520069. 16493051  
SRR17520069. 16493053  
SRR17520069. 16493055  
SRR17520069. 16493057  
SRR17520069. 16493059

SRR17520069.16493061  
SRR17520069.16493063  
SRR17520069.16493065  
SRR17520069.16493067  
SRR17520069.16493069  
SRR17520069.16493071  
SRR17520069.16493073  
SRR17520069.16493075  
SRR17520069.16493077  
SRR17520069.16493079  
SRR17520069.16493081  
SRR17520069.16493083  
SRR17520069.16493085  
SRR17520069.16493087  
SRR17520069.16493091  
SRR17520069.16493093  
SRR17520069.16493095  
SRR17520069.16493097  
SRR17520069.16493099  
SRR17520069.16493101  
SRR17520069.16493103  
SRR17520069.16493105  
SRR17520069.16493107  
SRR17520069.16493109  
SRR17520069.16493111  
SRR17520069.16493113  
SRR17520069.16493115  
SRR17520069.16493117  
SRR17520069.16493119  
SRR17520069.16493121  
SRR17520069.16493123  
SRR17520069.16493125  
SRR17520069.16493127  
SRR17520069.16493129  
SRR17520069.16493131  
SRR17520069.16493133  
SRR17520069.16493135  
SRR17520069.16493137  
SRR17520069.16493139  
SRR17520069.16493141  
SRR17520069.16493143  
SRR17520069.16493145  
SRR17520069.16493147  
SRR17520069.16493149  
SRR17520069.16493151  
SRR17520069.16493153  
SRR17520069.16493155

SRR17520069. 16493157  
SRR17520069. 16493159  
SRR17520069. 16493161  
SRR17520069. 16493163  
SRR17520069. 16493165  
SRR17520069. 16493167  
SRR17520069. 16493169  
SRR17520069. 16493171  
SRR17520069. 16497760  
SRR17520069. 16497762  
SRR17520069. 16497764  
SRR17520069. 16497766  
SRR17520069. 16497768  
SRR17520069. 16497770  
SRR17520069. 16497772  
SRR17520069. 16497774  
SRR17520069. 16497776  
SRR17520069. 16497778  
SRR17520069. 16497780  
SRR17520069. 16497782  
SRR17520069. 16497784  
SRR17520069. 16497786  
SRR17520069. 16497788  
SRR17520069. 16497790  
SRR17520069. 16497792  
SRR17520069. 16497794  
SRR17520069. 16498222  
SRR17520069. 16498224  
SRR17520069. 16498226  
SRR17520069. 16498228  
SRR17520069. 16498230  
SRR17520069. 16498232  
SRR17520069. 16498234  
SRR17520069. 16498236  
SRR17520069. 16498238  
SRR17520069. 16498240  
SRR17520069. 16498242  
SRR17520069. 16498244  
SRR17520069. 16498246  
SRR17520069. 16498248  
SRR17520069. 16498250  
SRR17520069. 16498252  
SRR17520069. 16498258  
SRR17520069. 16498260  
SRR17520069. 16498262  
SRR17520069. 16498264  
SRR17520069. 16498266

SRR17520069. 16498268  
SRR17520069. 16498270  
SRR17520069. 16498272  
SRR17520069. 16498274  
SRR17520069. 16498276  
SRR17520069. 16498278  
SRR17520069. 16498280  
SRR17520069. 16498695  
SRR17520069. 16498697  
SRR17520069. 16498699  
SRR17520069. 16498701  
SRR17520069. 16498703  
SRR17520069. 16498886  
SRR17520069. 16498888  
SRR17520069. 16498890  
SRR17520069. 16498892  
SRR17520069. 16498894  
SRR17520069. 16498896  
SRR17520069. 16498898  
SRR17520069. 16498900  
SRR17520069. 16498902  
SRR17520069. 16498904  
SRR17520069. 16498906  
SRR17520069. 16498908  
SRR17520069. 16498910  
SRR17520069. 16498912  
SRR17520069. 16498914  
SRR17520069. 16498916  
SRR17520069. 16498918  
SRR17520069. 16499114  
SRR17520069. 16499116  
SRR17520069. 16499118  
SRR17520069. 16499120  
SRR17520069. 16499122  
SRR17520069. 16499124  
SRR17520069. 16501760  
SRR17520069. 16509911  
SRR17520069. 16509913  
SRR17520069. 16509915  
SRR17520069. 16509917  
SRR17520069. 16509919  
SRR17520069. 16509921  
SRR17520069. 16509923  
SRR17520069. 16509925  
SRR17520069. 16515109  
SRR17520069. 16515460  
SRR17520069. 16515462

SRR17520069. 16515464  
SRR17520069. 16515466  
SRR17520069. 16515468  
SRR17520069. 16515470  
SRR17520069. 16515472  
SRR17520069. 16515474  
SRR17520069. 16515478  
SRR17520069. 16515480  
SRR17520069. 16515482  
SRR17520069. 16515484  
SRR17520069. 16515486  
SRR17520069. 16515488  
SRR17520069. 16515490  
SRR17520069. 16515492  
SRR17520069. 16515494  
SRR17520069. 16515498  
SRR17520069. 16515500  
SRR17520069. 16515502  
SRR17520069. 16515506  
SRR17520069. 16515508  
SRR17520069. 16515514  
SRR17520069. 16515516  
SRR17520069. 16515518  
SRR17520069. 16515520  
SRR17520069. 16515522  
SRR17520069. 16515524  
SRR17520069. 16515526  
SRR17520069. 16515528  
SRR17520069. 16515530  
SRR17520069. 16515532  
SRR17520069. 16515534  
SRR17520069. 16515536  
SRR17520069. 16515538  
SRR17520069. 16515540  
SRR17520069. 16515542  
SRR17520069. 16515544  
SRR17520069. 16515546  
SRR17520069. 16515548  
SRR17520069. 16515550  
SRR17520069. 16515554  
SRR17520069. 16515556  
SRR17520069. 16515558  
SRR17520069. 16515560  
SRR17520069. 16515562  
SRR17520069. 16515566  
SRR17520069. 16515568  
SRR17520069. 16521400

SRR17520069. 16521402  
SRR17520069. 16521404  
SRR17520069. 16521406  
SRR17520069. 16521408  
SRR17520069. 16521410  
SRR17520069. 16521412  
SRR17520069. 16521414  
SRR17520069. 16521416  
SRR17520069. 16521418  
SRR17520069. 16521420  
SRR17520069. 16521422  
SRR17520069. 16521424  
SRR17520069. 16521426  
SRR17520069. 16521428  
SRR17520069. 16521430  
SRR17520069. 16521432  
SRR17520069. 16521434  
SRR17520069. 16521436  
SRR17520069. 16521438  
SRR17520069. 16521440  
SRR17520069. 16521442  
SRR17520069. 16521444  
SRR17520069. 16521446  
SRR17520069. 16521448  
SRR17520069. 16521450  
SRR17520069. 16521452  
SRR17520069. 16521454  
SRR17520069. 16521456  
SRR17520069. 16521458  
SRR17520069. 16521462  
SRR17520069. 16521464  
SRR17520069. 16521468  
SRR17520069. 16521470  
SRR17520069. 16521472  
SRR17520069. 16521474  
SRR17520069. 16521476  
SRR17520069. 16521478  
SRR17520069. 16522324  
SRR17520069. 16522326  
SRR17520069. 16522328  
SRR17520069. 16522330  
SRR17520069. 16522332  
SRR17520069. 16522334  
SRR17520069. 16522336  
SRR17520069. 16522338  
SRR17520069. 16522340  
SRR17520069. 16522342

SRR17520069. 16522344  
SRR17520069. 16522346  
SRR17520069. 16522348  
SRR17520069. 16522350  
SRR17520069. 16522352  
SRR17520069. 16522354  
SRR17520069. 16522356  
SRR17520069. 16522358  
SRR17520069. 16522360  
SRR17520069. 16522362  
SRR17520069. 16522364  
SRR17520069. 16522366  
SRR17520069. 16522368  
SRR17520069. 16522370  
SRR17520069. 16522372  
SRR17520069. 16522374  
SRR17520069. 16522376  
SRR17520069. 16522378  
SRR17520069. 16522380  
SRR17520069. 16522382  
SRR17520069. 16522384  
SRR17520069. 16522386  
SRR17520069. 16522388  
SRR17520069. 16522390  
SRR17520069. 16522392  
SRR17520069. 16522394  
SRR17520069. 16522396  
SRR17520069. 16522398  
SRR17520069. 16522400  
SRR17520069. 16522402  
SRR17520069. 16522404  
SRR17520069. 16522406  
SRR17520069. 16522408  
SRR17520069. 16522410  
SRR17520069. 16522412  
SRR17520069. 16522414  
SRR17520069. 16522416  
SRR17520069. 16522448  
SRR17520069. 16531396  
SRR17520069. 16538563  
SRR17520069. 16538565  
SRR17520069. 16538567  
SRR17520069. 16538569  
SRR17520069. 16538571  
SRR17520069. 16538575  
SRR17520069. 16538577  
SRR17520069. 16538581

SRR17520069. 16538583  
SRR17520069. 16540789  
SRR17520069. 16540791  
SRR17520069. 16540795  
SRR17520069. 16540797  
SRR17520069. 16540801  
SRR17520069. 16540803  
SRR17520069. 16540805  
SRR17520069. 16540807  
SRR17520069. 16540809  
SRR17520069. 16547780  
SRR17520069. 16547782  
SRR17520069. 16547784  
SRR17520069. 16547786  
SRR17520069. 16547788  
SRR17520069. 16547790  
SRR17520069. 16547792  
SRR17520069. 16547794  
SRR17520069. 16547796  
SRR17520069. 16547798  
SRR17520069. 16547800  
SRR17520069. 16547802  
SRR17520069. 16547804  
SRR17520069. 16547806  
SRR17520069. 16547808  
SRR17520069. 16547810  
SRR17520069. 16547812  
SRR17520069. 16547814  
SRR17520069. 16547816  
SRR17520069. 16547818  
SRR17520069. 16547820  
SRR17520069. 16547822  
SRR17520069. 16547824  
SRR17520069. 16547826  
SRR17520069. 16547828  
SRR17520069. 16547830  
SRR17520069. 16547832  
SRR17520069. 16547834  
SRR17520069. 16559379  
SRR17520069. 16559381  
SRR17520069. 16559383  
SRR17520069. 16559387  
SRR17520069. 16559389  
SRR17520069. 16559391  
SRR17520069. 16559393  
SRR17520069. 16559395  
SRR17520069. 16559397



SRR17520069.16559399  
SRR17520069.16559401  
SRR17520069.16559403  
SRR17520069.16559405  
SRR17520069.16559407  
SRR17520069.16559409  
SRR17520069.16559411  
SRR17520069.16559413  
SRR17520069.16559415  
SRR17520069.16559417  
SRR17520069.16559421  
SRR17520069.16559423  
SRR17520069.16559425  
SRR17520069.16559427  
SRR17520069.16559429  
SRR17520069.16559433  
SRR17520069.16559435  
SRR17520069.16559437  
SRR17520069.16559439  
SRR17520069.16559441  
SRR17520069.16559443  
SRR17520069.16559445  
SRR17520069.16559447  
SRR17520069.16559449  
SRR17520069.16559453  
SRR17520069.16559455  
SRR17520069.16559457  
SRR17520069.16562743  
SRR17520069.16562745  
SRR17520069.16562747  
SRR17520069.16562749  
SRR17520069.16562751  
SRR17520069.16562753  
SRR17520069.16562755  
SRR17520069.16562757  
SRR17520069.16562759  
SRR17520069.16562763  
SRR17520069.16562765  
SRR17520069.16562767  
SRR17520069.16562769  
SRR17520069.16562771  
SRR17520069.16562773  
SRR17520069.16573030  
SRR17520069.16573032  
SRR17520069.16573034  
SRR17520069.16573036  
SRR17520069.16573038

SRR17520069. 16573040  
SRR17520069. 16573042  
SRR17520069. 16573044  
SRR17520069. 16573046  
SRR17520069. 16573048  
SRR17520069. 16573617  
SRR17520069. 16575850  
SRR17520069. 16575852  
SRR17520069. 16575854  
SRR17520069. 16575856  
SRR17520069. 16575858  
SRR17520069. 16575860  
SRR17520069. 16575862  
SRR17520069. 16575864  
SRR17520069. 16575866  
SRR17520069. 16575868  
SRR17520069. 16575870  
SRR17520069. 16575872  
SRR17520069. 16575874  
SRR17520069. 16575876  
SRR17520069. 16575878  
SRR17520069. 16575880  
SRR17520069. 16575882  
SRR17520069. 16575884  
SRR17520069. 16575886  
SRR17520069. 16575888  
SRR17520069. 16575890  
SRR17520069. 16575892  
SRR17520069. 16575894  
SRR17520069. 16575896  
SRR17520069. 16575898  
SRR17520069. 16575900  
SRR17520069. 16575902  
SRR17520069. 16575904  
SRR17520069. 16575906  
SRR17520069. 16575908  
SRR17520069. 16575910  
SRR17520069. 16575912  
SRR17520069. 16575916  
SRR17520069. 16575918  
SRR17520069. 16575920  
SRR17520069. 16575924  
SRR17520069. 16575926  
SRR17520069. 16575928  
SRR17520069. 16575930  
SRR17520069. 16575932  
SRR17520069. 16575934

SRR17520069. 16575936  
SRR17520069. 16575938  
SRR17520069. 16575942  
SRR17520069. 16575944  
SRR17520069. 16575946  
SRR17520069. 16575948  
SRR17520069. 16575960  
SRR17520069. 16575962  
SRR17520069. 16575964  
SRR17520069. 16575966  
SRR17520069. 16575968  
SRR17520069. 16575970  
SRR17520069. 16575972  
SRR17520069. 16575974  
SRR17520069. 16575976  
SRR17520069. 16575978  
SRR17520069. 16575980  
SRR17520069. 16585015  
SRR17520069. 16585017  
SRR17520069. 16585019  
SRR17520069. 16585021  
SRR17520069. 16585023  
SRR17520069. 16585025  
SRR17520069. 16585027  
SRR17520069. 16585029  
SRR17520069. 16585031  
SRR17520069. 16585033  
SRR17520069. 16585035  
SRR17520069. 16585039  
SRR17520069. 16585041  
SRR17520069. 16585043  
SRR17520069. 16585045  
SRR17520069. 16585047  
SRR17520069. 16585049  
SRR17520069. 16585051  
SRR17520069. 16585273  
SRR17520069. 16585275  
SRR17520069. 16589188  
SRR17520069. 16589190  
SRR17520069. 16589192  
SRR17520069. 16589194  
SRR17520069. 16589196  
SRR17520069. 16590935  
SRR17520069. 16590937  
SRR17520069. 16590939  
SRR17520069. 16590941  
SRR17520069. 16590943

SRR17520069. 16591197  
SRR17520069. 16591199  
SRR17520069. 16591201  
SRR17520069. 16591203  
SRR17520069. 16591205  
SRR17520069. 16591207  
SRR17520069. 16591209  
SRR17520069. 16591211  
SRR17520069. 16591215  
SRR17520069. 16591217  
SRR17520069. 16597327  
SRR17520069. 16597328  
SRR17520069. 16597344  
SRR17520069. 16597380  
SRR17520069. 16598332  
SRR17520069. 16598334  
SRR17520069. 16598336  
SRR17520069. 16598338  
SRR17520069. 16598340  
SRR17520069. 16598342  
SRR17520069. 16598344  
SRR17520069. 16598346  
SRR17520069. 16598348  
SRR17520069. 16598350  
SRR17520069. 16598352  
SRR17520069. 16598354  
SRR17520069. 16598356  
SRR17520069. 16598358  
SRR17520069. 16598360  
SRR17520069. 16598362  
SRR17520069. 16598364  
SRR17520069. 16598366  
SRR17520069. 16598368  
SRR17520069. 16599823  
SRR17520069. 16599825  
SRR17520069. 16599827  
SRR17520069. 16599829  
SRR17520069. 16599831  
SRR17520069. 16599833  
SRR17520069. 16599835  
SRR17520069. 16599837  
SRR17520069. 16599839  
SRR17520069. 16599841  
SRR17520069. 16599843  
SRR17520069. 16599845  
SRR17520069. 16599847  
SRR17520069. 16599849

SRR17520069.16599851  
SRR17520069.16599853  
SRR17520069.16599855  
SRR17520069.16599857  
SRR17520069.16599861  
SRR17520069.16599865  
SRR17520069.16605686  
SRR17520069.16605688  
SRR17520069.16605690  
SRR17520069.16605692  
SRR17520069.16605694  
SRR17520069.16605696  
SRR17520069.16609661  
SRR17520069.16609663  
SRR17520069.16610451  
SRR17520069.16612780  
SRR17520069.16620234  
SRR17520069.16620236  
SRR17520069.16620238  
SRR17520069.16620240  
SRR17520069.16620242  
SRR17520069.16620244  
SRR17520069.16625807  
SRR17520069.16625809  
SRR17520069.16625811  
SRR17520069.16625815  
SRR17520069.16625817  
SRR17520069.16630385  
SRR17520069.16630387  
SRR17520069.16630389  
SRR17520069.16630391  
SRR17520069.16630393  
SRR17520069.16630395  
SRR17520069.16630397  
SRR17520069.16630399  
SRR17520069.16630401  
SRR17520069.16636548  
SRR17520069.16636552  
SRR17520069.16636554  
SRR17520069.16636556  
SRR17520069.16636560  
SRR17520069.16636562  
SRR17520069.16643639  
SRR17520069.16643679  
SRR17520069.16644280  
SRR17520069.16644282  
SRR17520069.16644284

SRR17520069.16644286  
SRR17520069.16644288  
SRR17520069.16644290  
SRR17520069.16644292  
SRR17520069.16644294  
SRR17520069.16644296  
SRR17520069.16644298  
SRR17520069.16644300  
SRR17520069.16644302  
SRR17520069.16644304  
SRR17520069.16644306  
SRR17520069.16644308  
SRR17520069.16644310  
SRR17520069.16644312  
SRR17520069.16644314  
SRR17520069.16644316  
SRR17520069.16644318  
SRR17520069.16644320  
SRR17520069.16644322  
SRR17520069.16644324  
SRR17520069.16644326  
SRR17520069.16644328  
SRR17520069.16644330  
SRR17520069.16644332  
SRR17520069.16644334  
SRR17520069.16644336  
SRR17520069.16644338  
SRR17520069.16644340  
SRR17520069.16644342  
SRR17520069.16644346  
SRR17520069.16644348  
SRR17520069.16644350  
SRR17520069.16644352  
SRR17520069.16644354  
SRR17520069.16644356  
SRR17520069.16644358  
SRR17520069.16644360  
SRR17520069.16644362  
SRR17520069.16644364  
SRR17520069.16644366  
SRR17520069.16644706  
SRR17520069.16646560  
SRR17520069.16646562  
SRR17520069.16646564  
SRR17520069.16646566  
SRR17520069.16646570  
SRR17520069.16646572

SRR17520069. 16646574  
SRR17520069. 16646576  
SRR17520069. 16646578  
SRR17520069. 16646580  
SRR17520069. 16646582  
SRR17520069. 16646584  
SRR17520069. 16646586  
SRR17520069. 16646588  
SRR17520069. 16663568  
SRR17520069. 16663570  
SRR17520069. 16663572  
SRR17520069. 16684274  
SRR17520069. 16684276  
SRR17520069. 16684278  
SRR17520069. 16684280  
SRR17520069. 16684282  
SRR17520069. 16684284  
SRR17520069. 16684286  
SRR17520069. 16684288  
SRR17520069. 16684290  
SRR17520069. 16684292  
SRR17520069. 16684294  
SRR17520069. 16684296  
SRR17520069. 16684298  
SRR17520069. 16684300  
SRR17520069. 16684302  
SRR17520069. 16684304  
SRR17520069. 16684306  
SRR17520069. 16684308  
SRR17520069. 16684310  
SRR17520069. 16690378  
SRR17520069. 16690380  
SRR17520069. 16690382  
SRR17520069. 16690384  
SRR17520069. 16690386  
SRR17520069. 16690388  
SRR17520069. 16690390  
SRR17520069. 16690392  
SRR17520069. 16690394  
SRR17520069. 16690396  
SRR17520069. 16690398  
SRR17520069. 16690400  
SRR17520069. 16690402  
SRR17520069. 16690406  
SRR17520069. 16690408  
SRR17520069. 16690410  
SRR17520069. 16690412

SRR17520069.16690414  
SRR17520069.16690416  
SRR17520069.16690418  
SRR17520069.16690420  
SRR17520069.16690422  
SRR17520069.16690886  
SRR17520069.16690888  
SRR17520069.16690890  
SRR17520069.16690892  
SRR17520069.16690894  
SRR17520069.16690896  
SRR17520069.16690898  
SRR17520069.16692440  
SRR17520069.16692442  
SRR17520069.16692444  
SRR17520069.16692446  
SRR17520069.16692448  
SRR17520069.16692450  
SRR17520069.16692452  
SRR17520069.16692454  
SRR17520069.16692456  
SRR17520069.16692458  
SRR17520069.16692462  
SRR17520069.16697802  
SRR17520069.16697804  
SRR17520069.16702325  
SRR17520069.16702327  
SRR17520069.16702329  
SRR17520069.16702335  
SRR17520069.16702339  
SRR17520069.16702341  
SRR17520069.16702343  
SRR17520069.16702345  
SRR17520069.16702347  
SRR17520069.16702349  
SRR17520069.16702351  
SRR17520069.16702353  
SRR17520069.16702355  
SRR17520069.16702357  
SRR17520069.16702359  
SRR17520069.16702361  
SRR17520069.16702363  
SRR17520069.16702365  
SRR17520069.16702367  
SRR17520069.16702369  
SRR17520069.16702371  
SRR17520069.16702373



SRR17520069. 16702375  
SRR17520069. 16702377  
SRR17520069. 16702379  
SRR17520069. 16706336  
SRR17520069. 16706338  
SRR17520069. 16706340  
SRR17520069. 16706342  
SRR17520069. 16707123  
SRR17520069. 16707125  
SRR17520069. 16707127  
SRR17520069. 16707129  
SRR17520069. 16707133  
SRR17520069. 16707135  
SRR17520069. 16707137  
SRR17520069. 16707139  
SRR17520069. 16707141  
SRR17520069. 16707143  
SRR17520069. 16707145  
SRR17520069. 16707147  
SRR17520069. 16707151  
SRR17520069. 16707153  
SRR17520069. 16707155  
SRR17520069. 16707157  
SRR17520069. 16707161  
SRR17520069. 16707163  
SRR17520069. 16707165  
SRR17520069. 16707167  
SRR17520069. 16707169  
SRR17520069. 16707171  
SRR17520069. 16707173  
SRR17520069. 16707175  
SRR17520069. 16707177  
SRR17520069. 16707179  
SRR17520069. 16707181  
SRR17520069. 16707183  
SRR17520069. 16707185  
SRR17520069. 16707187  
SRR17520069. 16707189  
SRR17520069. 16707191  
SRR17520069. 16707193  
SRR17520069. 16707195  
SRR17520069. 16707197  
SRR17520069. 16707199  
SRR17520069. 16707203  
SRR17520069. 16707205  
SRR17520069. 16707207  
SRR17520069. 16707209

SRR17520069. 16707211  
SRR17520069. 16707213  
SRR17520069. 16707215  
SRR17520069. 16707217  
SRR17520069. 16707219  
SRR17520069. 16707221  
SRR17520069. 16707223  
SRR17520069. 16707225  
SRR17520069. 16707627  
SRR17520069. 16707629  
SRR17520069. 16707631  
SRR17520069. 16707633  
SRR17520069. 16707637  
SRR17520069. 16707639  
SRR17520069. 16707641  
SRR17520069. 16707643  
SRR17520069. 16707645  
SRR17520069. 16707647  
SRR17520069. 16707649  
SRR17520069. 16707651  
SRR17520069. 16707653  
SRR17520069. 16707655  
SRR17520069. 16707657  
SRR17520069. 16707659  
SRR17520069. 16707661  
SRR17520069. 16707663  
SRR17520069. 16707665  
SRR17520069. 16707667  
SRR17520069. 16707669  
SRR17520069. 16707673  
SRR17520069. 16707675  
SRR17520069. 16707677  
SRR17520069. 16713576  
SRR17520069. 16713578  
SRR17520069. 16713580  
SRR17520069. 16713582  
SRR17520069. 16713584  
SRR17520069. 16713586  
SRR17520069. 16713588  
SRR17520069. 16713590  
SRR17520069. 16713592  
SRR17520069. 16713594  
SRR17520069. 16713596  
SRR17520069. 16713598  
SRR17520069. 16713600  
SRR17520069. 16713602  
SRR17520069. 16713604

SRR17520069. 16713606  
SRR17520069. 16713608  
SRR17520069. 16713610  
SRR17520069. 16713612  
SRR17520069. 16713614  
SRR17520069. 16713616  
SRR17520069. 16713618  
SRR17520069. 16713620  
SRR17520069. 16713622  
SRR17520069. 16713624  
SRR17520069. 16713626  
SRR17520069. 16713628  
SRR17520069. 16713630  
SRR17520069. 16713632  
SRR17520069. 16713634  
SRR17520069. 16713636  
SRR17520069. 16713638  
SRR17520069. 16713640  
SRR17520069. 16713642  
SRR17520069. 16713644  
SRR17520069. 16713646  
SRR17520069. 16713648  
SRR17520069. 16713650  
SRR17520069. 16713652  
SRR17520069. 16713654  
SRR17520069. 16713656  
SRR17520069. 16713658  
SRR17520069. 16713660  
SRR17520069. 16713662  
SRR17520069. 16713664  
SRR17520069. 16713666  
SRR17520069. 16713668  
SRR17520069. 16713670  
SRR17520069. 16713672  
SRR17520069. 16713674  
SRR17520069. 16713676  
SRR17520069. 16713678  
SRR17520069. 16713680  
SRR17520069. 16713682  
SRR17520069. 16713684  
SRR17520069. 16713686  
SRR17520069. 16713688  
SRR17520069. 16713690  
SRR17520069. 16713692  
SRR17520069. 16713694  
SRR17520069. 16713696  
SRR17520069. 16713698

SRR17520069. 16713700  
SRR17520069. 16713702  
SRR17520069. 16713704  
SRR17520069. 16713706  
SRR17520069. 16713708  
SRR17520069. 16713710  
SRR17520069. 16713712  
SRR17520069. 16713714  
SRR17520069. 16713716  
SRR17520069. 16713718  
SRR17520069. 16713720  
SRR17520069. 16713722  
SRR17520069. 16713724  
SRR17520069. 16713726  
SRR17520069. 16713728  
SRR17520069. 16714712  
SRR17520069. 16714714  
SRR17520069. 16714716  
SRR17520069. 16714720  
SRR17520069. 16714722  
SRR17520069. 16714724  
SRR17520069. 16714726  
SRR17520069. 16714728  
SRR17520069. 16714730  
SRR17520069. 16714732  
SRR17520069. 16714734  
SRR17520069. 16714736  
SRR17520069. 16714738  
SRR17520069. 16714740  
SRR17520069. 16714742  
SRR17520069. 16714744  
SRR17520069. 16714746  
SRR17520069. 16714748  
SRR17520069. 16714750  
SRR17520069. 16714752  
SRR17520069. 16714754  
SRR17520069. 16714756  
SRR17520069. 16714758  
SRR17520069. 16714760  
SRR17520069. 16714762  
SRR17520069. 16714764  
SRR17520069. 16714766  
SRR17520069. 16714768  
SRR17520069. 16714770  
SRR17520069. 16714772  
SRR17520069. 16714774  
SRR17520069. 16714776

SRR17520069. 16714778  
SRR17520069. 16714780  
SRR17520069. 16714782  
SRR17520069. 16714784  
SRR17520069. 16714786  
SRR17520069. 16714788  
SRR17520069. 16714790  
SRR17520069. 16714792  
SRR17520069. 16714794  
SRR17520069. 16714796  
SRR17520069. 16714798  
SRR17520069. 16714800  
SRR17520069. 16714802  
SRR17520069. 16714804  
SRR17520069. 16714806  
SRR17520069. 16714808  
SRR17520069. 16714810  
SRR17520069. 16714812  
SRR17520069. 16714816  
SRR17520069. 16714818  
SRR17520069. 16714820  
SRR17520069. 16714822  
SRR17520069. 16714824  
SRR17520069. 16714826  
SRR17520069. 16714828  
SRR17520069. 16714830  
SRR17520069. 16714832  
SRR17520069. 16714834  
SRR17520069. 16714836  
SRR17520069. 16714838  
SRR17520069. 16714840  
SRR17520069. 16714842  
SRR17520069. 16714844  
SRR17520069. 16714846  
SRR17520069. 16714848  
SRR17520069. 16714850  
SRR17520069. 16714852  
SRR17520069. 16714854  
SRR17520069. 16714856  
SRR17520069. 16714858  
SRR17520069. 16714860  
SRR17520069. 16714862  
SRR17520069. 16714864  
SRR17520069. 16714866  
SRR17520069. 16714868  
SRR17520069. 16714870  
SRR17520069. 16714872

SRR17520069. 16714874  
SRR17520069. 16714876  
SRR17520069. 16714878  
SRR17520069. 16714880  
SRR17520069. 16714882  
SRR17520069. 16714884  
SRR17520069. 16714886  
SRR17520069. 16714888  
SRR17520069. 16714890  
SRR17520069. 16714892  
SRR17520069. 16714894  
SRR17520069. 16714896  
SRR17520069. 16714898  
SRR17520069. 16714900  
SRR17520069. 16714902  
SRR17520069. 16714906  
SRR17520069. 16714908  
SRR17520069. 16714910  
SRR17520069. 16714912  
SRR17520069. 16714914  
SRR17520069. 16714916  
SRR17520069. 16714918  
SRR17520069. 16714920  
SRR17520069. 16714922  
SRR17520069. 16714924  
SRR17520069. 16714926  
SRR17520069. 16714928  
SRR17520069. 16714930  
SRR17520069. 16714932  
SRR17520069. 16714934  
SRR17520069. 16714936  
SRR17520069. 16714940  
SRR17520069. 16714942  
SRR17520069. 16714944  
SRR17520069. 16720439  
SRR17520069. 16720441  
SRR17520069. 16720443  
SRR17520069. 16720445  
SRR17520069. 16720447  
SRR17520069. 16720451  
SRR17520069. 16720453  
SRR17520069. 16720455  
SRR17520069. 16720459  
SRR17520069. 16721479  
SRR17520069. 16721481  
SRR17520069. 16721483  
SRR17520069. 16721485

SRR17520069. 16721487  
SRR17520069. 16721489  
SRR17520069. 16721491  
SRR17520069. 16721493  
SRR17520069. 16721495  
SRR17520069. 16721497  
SRR17520069. 16721499  
SRR17520069. 16721501  
SRR17520069. 16721503  
SRR17520069. 16721505  
SRR17520069. 16721507  
SRR17520069. 16721509  
SRR17520069. 16721511  
SRR17520069. 16721513  
SRR17520069. 16721515  
SRR17520069. 16721517  
SRR17520069. 16721519  
SRR17520069. 16721521  
SRR17520069. 16721523  
SRR17520069. 16721525  
SRR17520069. 16721527  
SRR17520069. 16721529  
SRR17520069. 16721531  
SRR17520069. 16721533  
SRR17520069. 16722075  
SRR17520069. 16722077  
SRR17520069. 16722079  
SRR17520069. 16722081  
SRR17520069. 16722083  
SRR17520069. 16722085  
SRR17520069. 16722087  
SRR17520069. 16722089  
SRR17520069. 16722091  
SRR17520069. 16722093  
SRR17520069. 16722095  
SRR17520069. 16722097  
SRR17520069. 16722099  
SRR17520069. 16722101  
SRR17520069. 16722103  
SRR17520069. 16722105  
SRR17520069. 16722107  
SRR17520069. 16722109  
SRR17520069. 16722111  
SRR17520069. 16722113  
SRR17520069. 16722115  
SRR17520069. 16722117  
SRR17520069. 16722119

SRR17520069. 16722121  
SRR17520069. 16722123  
SRR17520069. 16722125  
SRR17520069. 16722127  
SRR17520069. 16722129  
SRR17520069. 16722131  
SRR17520069. 16722133  
SRR17520069. 16722135  
SRR17520069. 16722137  
SRR17520069. 16722139  
SRR17520069. 16722141  
SRR17520069. 16722143  
SRR17520069. 16722145  
SRR17520069. 16722147  
SRR17520069. 16722149  
SRR17520069. 16722151  
SRR17520069. 16722153  
SRR17520069. 16722155  
SRR17520069. 16722157  
SRR17520069. 16722159  
SRR17520069. 16722161  
SRR17520069. 16722163  
SRR17520069. 16722165  
SRR17520069. 16722167  
SRR17520069. 16722169  
SRR17520069. 16722171  
SRR17520069. 16722173  
SRR17520069. 16722175  
SRR17520069. 16722177  
SRR17520069. 16722179  
SRR17520069. 16722181  
SRR17520069. 16722183  
SRR17520069. 16722185  
SRR17520069. 16722187  
SRR17520069. 16722191  
SRR17520069. 16722193  
SRR17520069. 16722195  
SRR17520069. 16729326  
SRR17520069. 16729328  
SRR17520069. 16729332  
SRR17520069. 16729336  
SRR17520069. 16729338  
SRR17520069. 16729340  
SRR17520069. 16729342  
SRR17520069. 16729344  
SRR17520069. 16729346  
SRR17520069. 16729348



SRR17520069. 16729350  
SRR17520069. 16729352  
SRR17520069. 16729354  
SRR17520069. 16729356  
SRR17520069. 16729358  
SRR17520069. 16729360  
SRR17520069. 16729362  
SRR17520069. 16729364  
SRR17520069. 16729366  
SRR17520069. 16729368  
SRR17520069. 16729370  
SRR17520069. 16729372  
SRR17520069. 16729374  
SRR17520069. 16729376  
SRR17520069. 16729378  
SRR17520069. 16729380  
SRR17520069. 16729382  
SRR17520069. 16729386  
SRR17520069. 16729390  
SRR17520069. 16729392  
SRR17520069. 16729396  
SRR17520069. 16729398  
SRR17520069. 16729400  
SRR17520069. 16729402  
SRR17520069. 16729404  
SRR17520069. 16729406  
SRR17520069. 16729408  
SRR17520069. 16729410  
SRR17520069. 16729412  
SRR17520069. 16729414  
SRR17520069. 16729416  
SRR17520069. 16729418  
SRR17520069. 16729420  
SRR17520069. 16729422  
SRR17520069. 16729424  
SRR17520069. 16729426  
SRR17520069. 16729428  
SRR17520069. 16729432  
SRR17520069. 16729436  
SRR17520069. 16729438  
SRR17520069. 16729440  
SRR17520069. 16729442  
SRR17520069. 16729446  
SRR17520069. 16729448  
SRR17520069. 16729450  
SRR17520069. 16729452  
SRR17520069. 16729454

SRR17520069. 16729456  
SRR17520069. 16729458  
SRR17520069. 16729460  
SRR17520069. 16729462  
SRR17520069. 16737732  
SRR17520069. 16737734  
SRR17520069. 16737736  
SRR17520069. 16737738  
SRR17520069. 16737740  
SRR17520069. 16737742  
SRR17520069. 16737744  
SRR17520069. 16737746  
SRR17520069. 16737748  
SRR17520069. 16737750  
SRR17520069. 16737752  
SRR17520069. 16737754  
SRR17520069. 16737756  
SRR17520069. 16737758  
SRR17520069. 16737760  
SRR17520069. 16737762  
SRR17520069. 16737764  
SRR17520069. 16737766  
SRR17520069. 16737768  
SRR17520069. 16737770  
SRR17520069. 16737772  
SRR17520069. 16737774  
SRR17520069. 16737776  
SRR17520069. 16737778  
SRR17520069. 16737780  
SRR17520069. 16737782  
SRR17520069. 16737784  
SRR17520069. 16737786  
SRR17520069. 16737788  
SRR17520069. 16737792  
SRR17520069. 16737794  
SRR17520069. 16737796  
SRR17520069. 16737798  
SRR17520069. 16737800  
SRR17520069. 16737802  
SRR17520069. 16737804  
SRR17520069. 16737806  
SRR17520069. 16737808  
SRR17520069. 16737810  
SRR17520069. 16737812  
SRR17520069. 16737814  
SRR17520069. 16737818  
SRR17520069. 16742966

SRR17520069. 16742968  
SRR17520069. 16742970  
SRR17520069. 16742974  
SRR17520069. 16742976  
SRR17520069. 16742978  
SRR17520069. 16742980  
SRR17520069. 16742982  
SRR17520069. 16742988  
SRR17520069. 16742990  
SRR17520069. 16742992  
SRR17520069. 16742994  
SRR17520069. 16742998  
SRR17520069. 16743000  
SRR17520069. 16743002  
SRR17520069. 16743004  
SRR17520069. 16748654  
SRR17520069. 16748658  
SRR17520069. 16748660  
SRR17520069. 16748662  
SRR17520069. 16748664  
SRR17520069. 16748666  
SRR17520069. 16748668  
SRR17520069. 16748670  
SRR17520069. 16748672  
SRR17520069. 16748674  
SRR17520069. 16748676  
SRR17520069. 16748678  
SRR17520069. 16748680  
SRR17520069. 16748682  
SRR17520069. 16748684  
SRR17520069. 16748686  
SRR17520069. 16748688  
SRR17520069. 16748690  
SRR17520069. 16748692  
SRR17520069. 16748694  
SRR17520069. 16748696  
SRR17520069. 16748698  
SRR17520069. 16748700  
SRR17520069. 16748702  
SRR17520069. 16748704  
SRR17520069. 16748706  
SRR17520069. 16748708  
SRR17520069. 16748710  
SRR17520069. 16748712  
SRR17520069. 16748714  
SRR17520069. 16748716  
SRR17520069. 16748718

SRR17520069. 16748720  
SRR17520069. 16748722  
SRR17520069. 16748724  
SRR17520069. 16748726  
SRR17520069. 16748728  
SRR17520069. 16748730  
SRR17520069. 16751295  
SRR17520069. 16751297  
SRR17520069. 16751299  
SRR17520069. 16751301  
SRR17520069. 16751303  
SRR17520069. 16751305  
SRR17520069. 16751307  
SRR17520069. 16751309  
SRR17520069. 16751311  
SRR17520069. 16751313  
SRR17520069. 16751315  
SRR17520069. 16751317  
SRR17520069. 16751319  
SRR17520069. 16751321  
SRR17520069. 16751323  
SRR17520069. 16751325  
SRR17520069. 16751327  
SRR17520069. 16751329  
SRR17520069. 16751331  
SRR17520069. 16751337  
SRR17520069. 16751339  
SRR17520069. 16751341  
SRR17520069. 16751343  
SRR17520069. 16751345  
SRR17520069. 16751347  
SRR17520069. 16751349  
SRR17520069. 16751351  
SRR17520069. 16751353  
SRR17520069. 16751355  
SRR17520069. 16751357  
SRR17520069. 16751359  
SRR17520069. 16751361  
SRR17520069. 16751363  
SRR17520069. 16751365  
SRR17520069. 16751367  
SRR17520069. 16751369  
SRR17520069. 16751371  
SRR17520069. 16752857  
SRR17520069. 16753821  
SRR17520069. 16753823  
SRR17520069. 16753825

SRR17520069. 16753827  
SRR17520069. 16753829  
SRR17520069. 16753831  
SRR17520069. 16753833  
SRR17520069. 16753835  
SRR17520069. 16753837  
SRR17520069. 16753839  
SRR17520069. 16753847  
SRR17520069. 16753851  
SRR17520069. 16753853  
SRR17520069. 16753855  
SRR17520069. 16753857  
SRR17520069. 16753859  
SRR17520069. 16753861  
SRR17520069. 16753863  
SRR17520069. 16753865  
SRR17520069. 16753867  
SRR17520069. 16753869  
SRR17520069. 16753871  
SRR17520069. 16753873  
SRR17520069. 16753875  
SRR17520069. 16753877  
SRR17520069. 16753879  
SRR17520069. 16753881  
SRR17520069. 16753883  
SRR17520069. 16754225  
SRR17520069. 16754227  
SRR17520069. 16754233  
SRR17520069. 16754237  
SRR17520069. 16754239  
SRR17520069. 16754241  
SRR17520069. 16754243  
SRR17520069. 16754245  
SRR17520069. 16758037  
SRR17520069. 16758039  
SRR17520069. 16758041  
SRR17520069. 16758047  
SRR17520069. 16758049  
SRR17520069. 16758051  
SRR17520069. 16758053  
SRR17520069. 16758055  
SRR17520069. 16758057  
SRR17520069. 16758059  
SRR17520069. 16758061  
SRR17520069. 16758063  
SRR17520069. 16758065  
SRR17520069. 16758067

SRR17520069. 16758069  
SRR17520069. 16758071  
SRR17520069. 16758075  
SRR17520069. 16758077  
SRR17520069. 16758079  
SRR17520069. 16758081  
SRR17520069. 16758083  
SRR17520069. 16758085  
SRR17520069. 16758087  
SRR17520069. 16758089  
SRR17520069. 16758091  
SRR17520069. 16758093  
SRR17520069. 16758095  
SRR17520069. 16758097  
SRR17520069. 16758099  
SRR17520069. 16758101  
SRR17520069. 16758103  
SRR17520069. 16758105  
SRR17520069. 16758107  
SRR17520069. 16758109  
SRR17520069. 16758113  
SRR17520069. 16758117  
SRR17520069. 16758119  
SRR17520069. 16758121  
SRR17520069. 16758123  
SRR17520069. 16758125  
SRR17520069. 16758127  
SRR17520069. 16758129  
SRR17520069. 16758131  
SRR17520069. 16758135  
SRR17520069. 16758137  
SRR17520069. 16758139  
SRR17520069. 16758141  
SRR17520069. 16769500  
SRR17520069. 16769502  
SRR17520069. 16769504  
SRR17520069. 16769506  
SRR17520069. 16769508  
SRR17520069. 16769510  
SRR17520069. 16769512  
SRR17520069. 16770319  
SRR17520069. 16770321  
SRR17520069. 16770323  
SRR17520069. 16770325  
SRR17520069. 16770327  
SRR17520069. 16770329  
SRR17520069. 16770331

SRR17520069. 16770333  
SRR17520069. 16770335  
SRR17520069. 16770337  
SRR17520069. 16772961  
SRR17520069. 16773194  
SRR17520069. 16773196  
SRR17520069. 16777678  
SRR17520069. 16777680  
SRR17520069. 16777682  
SRR17520069. 16777684  
SRR17520069. 16777688  
SRR17520069. 16777692  
SRR17520069. 16777694  
SRR17520069. 16777696  
SRR17520069. 16777698  
SRR17520069. 16777702  
SRR17520069. 16777704  
SRR17520069. 16777706  
SRR17520069. 16777708  
SRR17520069. 16777710  
SRR17520069. 16777712  
SRR17520069. 16777714  
SRR17520069. 16777716  
SRR17520069. 16777720  
SRR17520069. 16777722  
SRR17520069. 16777724  
SRR17520069. 16777726  
SRR17520069. 16777728  
SRR17520069. 16777730  
SRR17520069. 16785579  
SRR17520069. 16785581  
SRR17520069. 16785583  
SRR17520069. 16785585  
SRR17520069. 16785587  
SRR17520069. 16785589  
SRR17520069. 16785591  
SRR17520069. 16785593  
SRR17520069. 16785595  
SRR17520069. 16785597  
SRR17520069. 16787052  
SRR17520069. 16787054  
SRR17520069. 16790818  
SRR17520069. 16791275  
SRR17520069. 16791277  
SRR17520069. 16791281  
SRR17520069. 16795454  
SRR17520069. 16795455

SRR17520069. 16796128  
SRR17520069. 16798437  
SRR17520069. 16798439  
SRR17520069. 16798441  
SRR17520069. 16798443  
SRR17520069. 16798445  
SRR17520069. 16798451  
SRR17520069. 16798453  
SRR17520069. 16798455  
SRR17520069. 16798457  
SRR17520069. 16798459  
SRR17520069. 16798461  
SRR17520069. 16798463  
SRR17520069. 16798465  
SRR17520069. 16798467  
SRR17520069. 16798469  
SRR17520069. 16798471  
SRR17520069. 16798473  
SRR17520069. 16798475  
SRR17520069. 16798477  
SRR17520069. 16798481  
SRR17520069. 16798483  
SRR17520069. 16798485  
SRR17520069. 16805341  
SRR17520069. 16805343  
SRR17520069. 16805345  
SRR17520069. 16805347  
SRR17520069. 16805349  
SRR17520069. 16805351  
SRR17520069. 16805353  
SRR17520069. 16805355  
SRR17520069. 16805357  
SRR17520069. 16805359  
SRR17520069. 16808605  
SRR17520069. 16817756  
SRR17520069. 16817856  
SRR17520069. 16817858  
SRR17520069. 16817860  
SRR17520069. 16817862  
SRR17520069. 16817864  
SRR17520069. 16817866  
SRR17520069. 16817868  
SRR17520069. 16817870  
SRR17520069. 16817872  
SRR17520069. 16817874  
SRR17520069. 16817876  
SRR17520069. 16817878



SRR17520069. 16817880  
SRR17520069. 16817882  
SRR17520069. 16817884  
SRR17520069. 16817886  
SRR17520069. 16817888  
SRR17520069. 16817890  
SRR17520069. 16817892  
SRR17520069. 16817894  
SRR17520069. 16817898  
SRR17520069. 16817900  
SRR17520069. 16817902  
SRR17520069. 16817904  
SRR17520069. 16817906  
SRR17520069. 16817908  
SRR17520069. 16817910  
SRR17520069. 16817912  
SRR17520069. 16817914  
SRR17520069. 16817916  
SRR17520069. 16817918  
SRR17520069. 16817920  
SRR17520069. 16817922  
SRR17520069. 16823404  
SRR17520069. 16823406  
SRR17520069. 16823410  
SRR17520069. 16823412  
SRR17520069. 16823414  
SRR17520069. 16823416  
SRR17520069. 16823418  
SRR17520069. 16823420  
SRR17520069. 16823641  
SRR17520069. 16830295  
SRR17520069. 16830297  
SRR17520069. 16830299  
SRR17520069. 16830301  
SRR17520069. 16830303  
SRR17520069. 16830305  
SRR17520069. 16830307  
SRR17520069. 16830309  
SRR17520069. 16830311  
SRR17520069. 16830313  
SRR17520069. 16830315  
SRR17520069. 16830317  
SRR17520069. 16830319  
SRR17520069. 16830321  
SRR17520069. 16830323  
SRR17520069. 16830325  
SRR17520069. 16830327

SRR17520069.16830329  
SRR17520069.16830331  
SRR17520069.16830333  
SRR17520069.16830335  
SRR17520069.16830337  
SRR17520069.16830339  
SRR17520069.16830341  
SRR17520069.16830343  
SRR17520069.16830345  
SRR17520069.16830347  
SRR17520069.16830349  
SRR17520069.16830351  
SRR17520069.16830353  
SRR17520069.16830355  
SRR17520069.16830357  
SRR17520069.16830361  
SRR17520069.16830363  
SRR17520069.16830365  
SRR17520069.16830367  
SRR17520069.16830369  
SRR17520069.16830373  
SRR17520069.16830375  
SRR17520069.16830377  
SRR17520069.16830379  
SRR17520069.16830381  
SRR17520069.16830383  
SRR17520069.16830385  
SRR17520069.16830387  
SRR17520069.16830389  
SRR17520069.16830391  
SRR17520069.16830393  
SRR17520069.16830395  
SRR17520069.16830397  
SRR17520069.16839838  
SRR17520069.16839840  
SRR17520069.16839844  
SRR17520069.16839846  
SRR17520069.16839848  
SRR17520069.16839850  
SRR17520069.16839852  
SRR17520069.16839854  
SRR17520069.16839856  
SRR17520069.16839858  
SRR17520069.16839860  
SRR17520069.16839862  
SRR17520069.16839864  
SRR17520069.16839866

SRR17520069. 16839868  
SRR17520069. 16839870  
SRR17520069. 16839872  
SRR17520069. 16839874  
SRR17520069. 16839876  
SRR17520069. 16839878  
SRR17520069. 16839880  
SRR17520069. 16839882  
SRR17520069. 16839884  
SRR17520069. 16839886  
SRR17520069. 16839888  
SRR17520069. 16839894  
SRR17520069. 16839896  
SRR17520069. 16839898  
SRR17520069. 16839902  
SRR17520069. 16839904  
SRR17520069. 16839906  
SRR17520069. 16839908  
SRR17520069. 16839910  
SRR17520069. 16839912  
SRR17520069. 16839914  
SRR17520069. 16839916  
SRR17520069. 16839918  
SRR17520069. 16839920  
SRR17520069. 16839922  
SRR17520069. 16839926  
SRR17520069. 16839928  
SRR17520069. 16848659  
SRR17520069. 16848661  
SRR17520069. 16848663  
SRR17520069. 16848665  
SRR17520069. 16848667  
SRR17520069. 16848669  
SRR17520069. 16848671  
SRR17520069. 16848673  
SRR17520069. 16848675  
SRR17520069. 16848677  
SRR17520069. 16848679  
SRR17520069. 16848681  
SRR17520069. 16848683  
SRR17520069. 16848685  
SRR17520069. 16850953  
SRR17520069. 16850955  
SRR17520069. 16850957  
SRR17520069. 16850959  
SRR17520069. 16850961  
SRR17520069. 16850963

SRR17520069.16850965  
SRR17520069.16850967  
SRR17520069.16850969  
SRR17520069.16850971  
SRR17520069.16850973  
SRR17520069.16850975  
SRR17520069.16852271  
SRR17520069.16852273  
SRR17520069.16852275  
SRR17520069.16852277  
SRR17520069.16852279  
SRR17520069.16852281  
SRR17520069.16852283  
SRR17520069.16852285  
SRR17520069.16852287  
SRR17520069.16852289  
SRR17520069.16852291  
SRR17520069.16852293  
SRR17520069.16852295  
SRR17520069.16852297  
SRR17520069.16852299  
SRR17520069.16852301  
SRR17520069.16852303  
SRR17520069.16852305  
SRR17520069.16852307  
SRR17520069.16852309  
SRR17520069.16852311  
SRR17520069.16852676  
SRR17520069.16852678  
SRR17520069.16852680  
SRR17520069.16852684  
SRR17520069.16852686  
SRR17520069.16852688  
SRR17520069.16852690  
SRR17520069.16852692  
SRR17520069.16852694  
SRR17520069.16852696  
SRR17520069.16852698  
SRR17520069.16852700  
SRR17520069.16852702  
SRR17520069.16852704  
SRR17520069.16852706  
SRR17520069.16852708  
SRR17520069.16852710  
SRR17520069.16852712  
SRR17520069.16867536  
SRR17520069.16867602

SRR17520069. 16867604  
SRR17520069. 16867606  
SRR17520069. 16867608  
SRR17520069. 16867610  
SRR17520069. 16867614  
SRR17520069. 16867616  
SRR17520069. 16867618  
SRR17520069. 16867620  
SRR17520069. 16867622  
SRR17520069. 16867624  
SRR17520069. 16867626  
SRR17520069. 16867628  
SRR17520069. 16867630  
SRR17520069. 16867632  
SRR17520069. 16867634  
SRR17520069. 16867636  
SRR17520069. 16867638  
SRR17520069. 16867640  
SRR17520069. 16867642  
SRR17520069. 16867644  
SRR17520069. 16867646  
SRR17520069. 16867648  
SRR17520069. 16867650  
SRR17520069. 16867652  
SRR17520069. 16867654  
SRR17520069. 16867656  
SRR17520069. 16867658  
SRR17520069. 16867660  
SRR17520069. 16867662  
SRR17520069. 16867664  
SRR17520069. 16867752  
SRR17520069. 16867754  
SRR17520069. 16867756  
SRR17520069. 16867760  
SRR17520069. 16867762  
SRR17520069. 16867764  
SRR17520069. 16867766  
SRR17520069. 16867768  
SRR17520069. 16867770  
SRR17520069. 16867772  
SRR17520069. 16867774  
SRR17520069. 16867776  
SRR17520069. 16867778  
SRR17520069. 16867780  
SRR17520069. 16867782  
SRR17520069. 16867784  
SRR17520069. 16867786

SRR17520069. 16867788  
SRR17520069. 16867790  
SRR17520069. 16867792  
SRR17520069. 16867794  
SRR17520069. 16867796  
SRR17520069. 16867798  
SRR17520069. 16867800  
SRR17520069. 16867802  
SRR17520069. 16867804  
SRR17520069. 16867806  
SRR17520069. 16867808  
SRR17520069. 16867810  
SRR17520069. 16867812  
SRR17520069. 16867816  
SRR17520069. 16867818  
SRR17520069. 16867820  
SRR17520069. 16867822  
SRR17520069. 16867824  
SRR17520069. 16867826  
SRR17520069. 16867828  
SRR17520069. 16867830  
SRR17520069. 16867832  
SRR17520069. 16867834  
SRR17520069. 16867836  
SRR17520069. 16867838  
SRR17520069. 16867840  
SRR17520069. 16867842  
SRR17520069. 16867844  
SRR17520069. 16867846  
SRR17520069. 16867848  
SRR17520069. 16867850  
SRR17520069. 16867852  
SRR17520069. 16871099  
SRR17520069. 16871101  
SRR17520069. 16871103  
SRR17520069. 16871105  
SRR17520069. 16871107  
SRR17520069. 16871109  
SRR17520069. 16871111  
SRR17520069. 16871113  
SRR17520069. 16871115  
SRR17520069. 16871117  
SRR17520069. 16871119  
SRR17520069. 16871121  
SRR17520069. 16871123  
SRR17520069. 16871125  
SRR17520069. 16871127

SRR17520069. 16871129  
SRR17520069. 16871131  
SRR17520069. 16871133  
SRR17520069. 16871135  
SRR17520069. 16871137  
SRR17520069. 16871139  
SRR17520069. 16871141  
SRR17520069. 16871143  
SRR17520069. 16871145  
SRR17520069. 16871147  
SRR17520069. 16871149  
SRR17520069. 16871151  
SRR17520069. 16871153  
SRR17520069. 16871155  
SRR17520069. 16871157  
SRR17520069. 16871159  
SRR17520069. 16871161  
SRR17520069. 16871163  
SRR17520069. 16871165  
SRR17520069. 16871167  
SRR17520069. 16871169  
SRR17520069. 16877348  
SRR17520069. 16877350  
SRR17520069. 16877352  
SRR17520069. 16877354  
SRR17520069. 16878389  
SRR17520069. 16878393  
SRR17520069. 16879305  
SRR17520069. 16879307  
SRR17520069. 16879309  
SRR17520069. 16879311  
SRR17520069. 16879313  
SRR17520069. 16879315  
SRR17520069. 16879317  
SRR17520069. 16879319  
SRR17520069. 16879321  
SRR17520069. 16879323  
SRR17520069. 16879325  
SRR17520069. 16879327  
SRR17520069. 16879329  
SRR17520069. 16879331  
SRR17520069. 16879333  
SRR17520069. 16879335  
SRR17520069. 16879337  
SRR17520069. 16879339  
SRR17520069. 16879341  
SRR17520069. 16879343

SRR17520069. 16879345  
SRR17520069. 16879347  
SRR17520069. 16879349  
SRR17520069. 16879351  
SRR17520069. 16880073  
SRR17520069. 16880075  
SRR17520069. 16880077  
SRR17520069. 16880079  
SRR17520069. 16882683  
SRR17520069. 16882685  
SRR17520069. 16882687  
SRR17520069. 16882689  
SRR17520069. 16882691  
SRR17520069. 16882693  
SRR17520069. 16886551  
SRR17520069. 16886553  
SRR17520069. 16886555  
SRR17520069. 16886559  
SRR17520069. 16886561  
SRR17520069. 16886563  
SRR17520069. 16886565  
SRR17520069. 16886567  
SRR17520069. 16886569  
SRR17520069. 16886571  
SRR17520069. 16886573  
SRR17520069. 16886575  
SRR17520069. 16886577  
SRR17520069. 16886579  
SRR17520069. 16886581  
SRR17520069. 16886583  
SRR17520069. 16886585  
SRR17520069. 16886587  
SRR17520069. 16886589  
SRR17520069. 16889754  
SRR17520069. 16889756  
SRR17520069. 16889758  
SRR17520069. 16889760  
SRR17520069. 16889762  
SRR17520069. 16889764  
SRR17520069. 16889766  
SRR17520069. 16889768  
SRR17520069. 16889770  
SRR17520069. 16889772  
SRR17520069. 16889774  
SRR17520069. 16889776  
SRR17520069. 16889778  
SRR17520069. 16889780



SRR17520069.16889782  
SRR17520069.16889784  
SRR17520069.16889786  
SRR17520069.16889790  
SRR17520069.16889792  
SRR17520069.16890443  
SRR17520069.16893222  
SRR17520069.16893224  
SRR17520069.16893226  
SRR17520069.16893228  
SRR17520069.16893230  
SRR17520069.16893232  
SRR17520069.16893234  
SRR17520069.16893236  
SRR17520069.16893238  
SRR17520069.16893240  
SRR17520069.16893242  
SRR17520069.16893244  
SRR17520069.16894887  
SRR17520069.16894889  
SRR17520069.16894891  
SRR17520069.16894893  
SRR17520069.16894895  
SRR17520069.16894897  
SRR17520069.16894899  
SRR17520069.16896936  
SRR17520069.16896938  
SRR17520069.16896940  
SRR17520069.16896942  
SRR17520069.16896944  
SRR17520069.16896946  
SRR17520069.16896948  
SRR17520069.16896950  
SRR17520069.16896952  
SRR17520069.16896954  
SRR17520069.16896956  
SRR17520069.16896958  
SRR17520069.16896960  
SRR17520069.16896962  
SRR17520069.16896964  
SRR17520069.16896966  
SRR17520069.16896968  
SRR17520069.16896970  
SRR17520069.16896972  
SRR17520069.16896974  
SRR17520069.16896976  
SRR17520069.16897226

SRR17520069. 16897228  
SRR17520069. 16897230  
SRR17520069. 16897232  
SRR17520069. 16897234  
SRR17520069. 16897236  
SRR17520069. 16897238  
SRR17520069. 16897240  
SRR17520069. 16897242  
SRR17520069. 16897244  
SRR17520069. 16897246  
SRR17520069. 16897248  
SRR17520069. 16897250  
SRR17520069. 16897252  
SRR17520069. 16897254  
SRR17520069. 16897256  
SRR17520069. 16897258  
SRR17520069. 16897260  
SRR17520069. 16897262  
SRR17520069. 16897264  
SRR17520069. 16897266  
SRR17520069. 16897268  
SRR17520069. 16897270  
SRR17520069. 16897272  
SRR17520069. 16897274  
SRR17520069. 16897276  
SRR17520069. 16897278  
SRR17520069. 16897280  
SRR17520069. 16897282  
SRR17520069. 16897284  
SRR17520069. 16897286  
SRR17520069. 16897288  
SRR17520069. 16897290  
SRR17520069. 16897292  
SRR17520069. 16897294  
SRR17520069. 16897296  
SRR17520069. 16897298  
SRR17520069. 16897300  
SRR17520069. 16897302  
SRR17520069. 16897304  
SRR17520069. 16897306  
SRR17520069. 16897308  
SRR17520069. 16897310  
SRR17520069. 16897312  
SRR17520069. 16897314  
SRR17520069. 16897316  
SRR17520069. 16897318  
SRR17520069. 16897320

SRR17520069. 16897322  
SRR17520069. 16897324  
SRR17520069. 16897326  
SRR17520069. 16897328  
SRR17520069. 16897330  
SRR17520069. 16897332  
SRR17520069. 16897334  
SRR17520069. 16897336  
SRR17520069. 16897338  
SRR17520069. 16897340  
SRR17520069. 16897342  
SRR17520069. 16897344  
SRR17520069. 16897346  
SRR17520069. 16897348  
SRR17520069. 16897352  
SRR17520069. 16897354  
SRR17520069. 16897356  
SRR17520069. 16897358  
SRR17520069. 16897360  
SRR17520069. 16897362  
SRR17520069. 16897364  
SRR17520069. 16897366  
SRR17520069. 16897368  
SRR17520069. 16897370  
SRR17520069. 16897372  
SRR17520069. 16897374  
SRR17520069. 16897376  
SRR17520069. 16897378  
SRR17520069. 16897380  
SRR17520069. 16897382  
SRR17520069. 16897384  
SRR17520069. 16897386  
SRR17520069. 16897388  
SRR17520069. 16897390  
SRR17520069. 16897392  
SRR17520069. 16897394  
SRR17520069. 16897396  
SRR17520069. 16897398  
SRR17520069. 16897400  
SRR17520069. 16897402  
SRR17520069. 16897404  
SRR17520069. 16897406  
SRR17520069. 16897408  
SRR17520069. 16897410  
SRR17520069. 16897412  
SRR17520069. 16897414  
SRR17520069. 16897416

SRR17520069. 16897418  
SRR17520069. 16897420  
SRR17520069. 16897422  
SRR17520069. 16897424  
SRR17520069. 16897426  
SRR17520069. 16897428  
SRR17520069. 16897430  
SRR17520069. 16897432  
SRR17520069. 16897434  
SRR17520069. 16897436  
SRR17520069. 16897438  
SRR17520069. 16897440  
SRR17520069. 16897442  
SRR17520069. 16897444  
SRR17520069. 16897446  
SRR17520069. 16897448  
SRR17520069. 16897450  
SRR17520069. 16897452  
SRR17520069. 16897454  
SRR17520069. 16897456  
SRR17520069. 16897458  
SRR17520069. 16897460  
SRR17520069. 16897462  
SRR17520069. 16897464  
SRR17520069. 16897466  
SRR17520069. 16897468  
SRR17520069. 16897470  
SRR17520069. 16897472  
SRR17520069. 16897474  
SRR17520069. 16897476  
SRR17520069. 16897478  
SRR17520069. 16897480  
SRR17520069. 16897482  
SRR17520069. 16897484  
SRR17520069. 16897486  
SRR17520069. 16897488  
SRR17520069. 16897490  
SRR17520069. 16898167  
SRR17520069. 16898169  
SRR17520069. 16899742  
SRR17520069. 16899744  
SRR17520069. 16899746  
SRR17520069. 16901597  
SRR17520069. 16901599  
SRR17520069. 16901601  
SRR17520069. 16901603  
SRR17520069. 16901605

SRR17520069. 16901607  
SRR17520069. 16901609  
SRR17520069. 16901611  
SRR17520069. 16901613  
SRR17520069. 16901615  
SRR17520069. 16901617  
SRR17520069. 16901619  
SRR17520069. 16903349  
SRR17520069. 16903351  
SRR17520069. 16903353  
SRR17520069. 16903355  
SRR17520069. 16903357  
SRR17520069. 16903359  
SRR17520069. 16903361  
SRR17520069. 16903363  
SRR17520069. 16903365  
SRR17520069. 16903367  
SRR17520069. 16906477  
SRR17520069. 16906479  
SRR17520069. 16906481  
SRR17520069. 16906483  
SRR17520069. 16906485  
SRR17520069. 16906487  
SRR17520069. 16906489  
SRR17520069. 16906491  
SRR17520069. 16906493  
SRR17520069. 16913301  
SRR17520069. 16913303  
SRR17520069. 16913305  
SRR17520069. 16913307  
SRR17520069. 16913309  
SRR17520069. 16913311  
SRR17520069. 16913313  
SRR17520069. 16913315  
SRR17520069. 16913317  
SRR17520069. 16913319  
SRR17520069. 16913321  
SRR17520069. 16913323  
SRR17520069. 16913325  
SRR17520069. 16920381  
SRR17520069. 16920383  
SRR17520069. 16920385  
SRR17520069. 16920387  
SRR17520069. 16920389  
SRR17520069. 16920391  
SRR17520069. 16920393  
SRR17520069. 16920395

SRR17520069. 16920397  
SRR17520069. 16920399  
SRR17520069. 16920401  
SRR17520069. 16920403  
SRR17520069. 16920405  
SRR17520069. 16920407  
SRR17520069. 16920409  
SRR17520069. 16920411  
SRR17520069. 16920413  
SRR17520069. 16920415  
SRR17520069. 16920417  
SRR17520069. 16920419  
SRR17520069. 16920421  
SRR17520069. 16920423  
SRR17520069. 16920425  
SRR17520069. 16920427  
SRR17520069. 16920429  
SRR17520069. 16920431  
SRR17520069. 16920433  
SRR17520069. 16920435  
SRR17520069. 16920437  
SRR17520069. 16920439  
SRR17520069. 16920441  
SRR17520069. 16920443  
SRR17520069. 16920445  
SRR17520069. 16920447  
SRR17520069. 16920449  
SRR17520069. 16920451  
SRR17520069. 16920453  
SRR17520069. 16920455  
SRR17520069. 16920457  
SRR17520069. 16920459  
SRR17520069. 16925834  
SRR17520069. 16925840  
SRR17520069. 16925842  
SRR17520069. 16925844  
SRR17520069. 16925846  
SRR17520069. 16925854  
SRR17520069. 16925859  
SRR17520069. 16925861  
SRR17520069. 16925863  
SRR17520069. 16925865  
SRR17520069. 16925867  
SRR17520069. 16925869  
SRR17520069. 16925871  
SRR17520069. 16925873  
SRR17520069. 16925875

SRR17520069. 16925877  
SRR17520069. 16925879  
SRR17520069. 16925881  
SRR17520069. 16925883  
SRR17520069. 16925885  
SRR17520069. 16925887  
SRR17520069. 16925889  
SRR17520069. 16925891  
SRR17520069. 16925893  
SRR17520069. 16925895  
SRR17520069. 16927386  
SRR17520069. 16927388  
SRR17520069. 16927390  
SRR17520069. 16927392  
SRR17520069. 16927394  
SRR17520069. 16927396  
SRR17520069. 16927398  
SRR17520069. 16927400  
SRR17520069. 16927402  
SRR17520069. 16927406  
SRR17520069. 16927408  
SRR17520069. 16927410  
SRR17520069. 16927412  
SRR17520069. 16927414  
SRR17520069. 16927416  
SRR17520069. 16927418  
SRR17520069. 16927420  
SRR17520069. 16927422  
SRR17520069. 16927424  
SRR17520069. 16927426  
SRR17520069. 16927428  
SRR17520069. 16932711  
SRR17520069. 16932713  
SRR17520069. 16932715  
SRR17520069. 16932717  
SRR17520069. 16932719  
SRR17520069. 16932721  
SRR17520069. 16932723  
SRR17520069. 16932725  
SRR17520069. 16932729  
SRR17520069. 16935771  
SRR17520069. 16940128  
SRR17520069. 16940130  
SRR17520069. 16940132  
SRR17520069. 16940136  
SRR17520069. 16940138  
SRR17520069. 16940142

SRR17520069. 16940144  
SRR17520069. 16940146  
SRR17520069. 16944394  
SRR17520069. 16944396  
SRR17520069. 16944398  
SRR17520069. 16944400  
SRR17520069. 16944402  
SRR17520069. 16944404  
SRR17520069. 16944406  
SRR17520069. 16944408  
SRR17520069. 16944410  
SRR17520069. 16944412  
SRR17520069. 16944414  
SRR17520069. 16944416  
SRR17520069. 16944418  
SRR17520069. 16944420  
SRR17520069. 16944422  
SRR17520069. 16944424  
SRR17520069. 16944426  
SRR17520069. 16944428  
SRR17520069. 16944430  
SRR17520069. 16944432  
SRR17520069. 16944434  
SRR17520069. 16944436  
SRR17520069. 16944438  
SRR17520069. 16944440  
SRR17520069. 16944442  
SRR17520069. 16944444  
SRR17520069. 16944446  
SRR17520069. 16944448  
SRR17520069. 16944450  
SRR17520069. 16944452  
SRR17520069. 16944454  
SRR17520069. 16944456  
SRR17520069. 16944458  
SRR17520069. 16944460  
SRR17520069. 16944462  
SRR17520069. 16944464  
SRR17520069. 16944466  
SRR17520069. 16945458  
SRR17520069. 16945460  
SRR17520069. 16945462  
SRR17520069. 16945464  
SRR17520069. 16945466  
SRR17520069. 16945468  
SRR17520069. 16945470  
SRR17520069. 16945472



SRR17520069. 16945474  
SRR17520069. 16945476  
SRR17520069. 16945478  
SRR17520069. 16945480  
SRR17520069. 16945482  
SRR17520069. 16945484  
SRR17520069. 16945486  
SRR17520069. 16945488  
SRR17520069. 16945490  
SRR17520069. 16945492  
SRR17520069. 16945494  
SRR17520069. 16945496  
SRR17520069. 16945498  
SRR17520069. 16945500  
SRR17520069. 16945502  
SRR17520069. 16945504  
SRR17520069. 16945506  
SRR17520069. 16945508  
SRR17520069. 16945510  
SRR17520069. 16945512  
SRR17520069. 16945514  
SRR17520069. 16947209  
SRR17520069. 16947211  
SRR17520069. 16947213  
SRR17520069. 16947215  
SRR17520069. 16947217  
SRR17520069. 16947219  
SRR17520069. 16947223  
SRR17520069. 16947225  
SRR17520069. 16948499  
SRR17520069. 16948556  
SRR17520069. 16948883  
SRR17520069. 16948885  
SRR17520069. 16948887  
SRR17520069. 16948889  
SRR17520069. 16948891  
SRR17520069. 16948893  
SRR17520069. 16948895  
SRR17520069. 16948897  
SRR17520069. 16960296  
SRR17520069. 16960298  
SRR17520069. 16960300  
SRR17520069. 16960304  
SRR17520069. 16960306  
SRR17520069. 16960308  
SRR17520069. 16960310  
SRR17520069. 16960312

SRR17520069. 16960314  
SRR17520069. 16960318  
SRR17520069. 16960320  
SRR17520069. 16960322  
SRR17520069. 16960324  
SRR17520069. 16960326  
SRR17520069. 16960328  
SRR17520069. 16960330  
SRR17520069. 16960332  
SRR17520069. 16960336  
SRR17520069. 16960338  
SRR17520069. 16960340  
SRR17520069. 16960342  
SRR17520069. 16960514  
SRR17520069. 16960516  
SRR17520069. 16960518  
SRR17520069. 16960520  
SRR17520069. 16960522  
SRR17520069. 16960524  
SRR17520069. 16960526  
SRR17520069. 16960528  
SRR17520069. 16960530  
SRR17520069. 16960532  
SRR17520069. 16960534  
SRR17520069. 16962972  
SRR17520069. 16962974  
SRR17520069. 16962976  
SRR17520069. 16962978  
SRR17520069. 16962980  
SRR17520069. 16962982  
SRR17520069. 16962984  
SRR17520069. 16962986  
SRR17520069. 16962988  
SRR17520069. 16962990  
SRR17520069. 16962992  
SRR17520069. 16962994  
SRR17520069. 16967508  
SRR17520069. 16967510  
SRR17520069. 16967512  
SRR17520069. 16967514  
SRR17520069. 16967516  
SRR17520069. 16967518  
SRR17520069. 16967520  
SRR17520069. 16967522  
SRR17520069. 16967524  
SRR17520069. 16967526  
SRR17520069. 16967528

SRR17520069. 16967530  
SRR17520069. 16967532  
SRR17520069. 16967534  
SRR17520069. 16967536  
SRR17520069. 16967538  
SRR17520069. 16967540  
SRR17520069. 16967542  
SRR17520069. 16967544  
SRR17520069. 16967546  
SRR17520069. 16967548  
SRR17520069. 16967550  
SRR17520069. 16967552  
SRR17520069. 16967554  
SRR17520069. 16967556  
SRR17520069. 16967558  
SRR17520069. 16967560  
SRR17520069. 16967562  
SRR17520069. 16967564  
SRR17520069. 16967566  
SRR17520069. 16967568  
SRR17520069. 16967570  
SRR17520069. 16967572  
SRR17520069. 16968641  
SRR17520069. 16968883  
SRR17520069. 16968885  
SRR17520069. 16968887  
SRR17520069. 16968889  
SRR17520069. 16968891  
SRR17520069. 16968893  
SRR17520069. 16968895  
SRR17520069. 16968897  
SRR17520069. 16968899  
SRR17520069. 16968901  
SRR17520069. 16968903  
SRR17520069. 16968905  
SRR17520069. 16968907  
SRR17520069. 16968909  
SRR17520069. 16968911  
SRR17520069. 16968913  
SRR17520069. 16976283  
SRR17520069. 16978596  
SRR17520069. 16978598  
SRR17520069. 16978600  
SRR17520069. 16978602  
SRR17520069. 16978604  
SRR17520069. 16981708  
SRR17520069. 16981710

SRR17520069. 16981712  
SRR17520069. 16981714  
SRR17520069. 16981716  
SRR17520069. 16981720  
SRR17520069. 16981722  
SRR17520069. 16981724  
SRR17520069. 16981726  
SRR17520069. 16981728  
SRR17520069. 16981730  
SRR17520069. 16981732  
SRR17520069. 16981734  
SRR17520069. 16981736  
SRR17520069. 16981740  
SRR17520069. 16981742  
SRR17520069. 16981744  
SRR17520069. 16981746  
SRR17520069. 16983854  
SRR17520069. 16983856  
SRR17520069. 16988779  
SRR17520069. 16988781  
SRR17520069. 16991339  
SRR17520069. 16991341  
SRR17520069. 16991343  
SRR17520069. 16991345  
SRR17520069. 16991347  
SRR17520069. 16991349  
SRR17520069. 16991351  
SRR17520069. 16991353  
SRR17520069. 16991355  
SRR17520069. 16991357  
SRR17520069. 16991359  
SRR17520069. 16991361  
SRR17520069. 16991363  
SRR17520069. 16991365  
SRR17520069. 16991367  
SRR17520069. 16991369  
SRR17520069. 16991371  
SRR17520069. 16991373  
SRR17520069. 16991375  
SRR17520069. 16991377  
SRR17520069. 16991379  
SRR17520069. 16991381  
SRR17520069. 16991383  
SRR17520069. 16991385  
SRR17520069. 16991387  
SRR17520069. 16991389  
SRR17520069. 16991391

SRR17520069.16991393  
SRR17520069.16991395  
SRR17520069.16991397  
SRR17520069.16991399  
SRR17520069.16991401  
SRR17520069.16991403  
SRR17520069.16991405  
SRR17520069.16991610  
SRR17520069.16991612  
SRR17520069.16991616  
SRR17520069.16991618  
SRR17520069.16991620  
SRR17520069.16991622  
SRR17520069.16991624  
SRR17520069.16991626  
SRR17520069.16991628  
SRR17520069.16991630  
SRR17520069.16991632  
SRR17520069.16991634  
SRR17520069.16993272  
SRR17520069.16993274  
SRR17520069.16993276  
SRR17520069.16993278  
SRR17520069.16993280  
SRR17520069.16993282  
SRR17520069.16993284  
SRR17520069.16993288  
SRR17520069.16993290  
SRR17520069.16993292  
SRR17520069.16993294  
SRR17520069.16993296  
SRR17520069.16993298  
SRR17520069.16993300  
SRR17520069.16993378  
SRR17520069.16993380  
SRR17520069.16993382  
SRR17520069.16993384  
SRR17520069.16993386  
SRR17520069.16993390  
SRR17520069.16993392  
SRR17520069.16993394  
SRR17520069.16993396  
SRR17520069.16993398  
SRR17520069.16993400  
SRR17520069.16993402  
SRR17520069.16993404  
SRR17520069.16993406

SRR17520069. 16993408  
SRR17520069. 16993410  
SRR17520069. 16993412  
SRR17520069. 16993414  
SRR17520069. 16993416  
SRR17520069. 16993418  
SRR17520069. 16993420  
SRR17520069. 16994183  
SRR17520069. 16994185  
SRR17520069. 16994189  
SRR17520069. 16994193  
SRR17520069. 16994195  
SRR17520069. 16994197  
SRR17520069. 16994199  
SRR17520069. 16994201  
SRR17520069. 16994203  
SRR17520069. 16994205  
SRR17520069. 16994207  
SRR17520069. 16994209  
SRR17520069. 16994211  
SRR17520069. 16994213  
SRR17520069. 16994215  
SRR17520069. 16994217  
SRR17520069. 16994219  
SRR17520069. 16994221  
SRR17520069. 16994223  
SRR17520069. 16994225  
SRR17520069. 16994227  
SRR17520069. 16994231  
SRR17520069. 16994233  
SRR17520069. 16994235  
SRR17520069. 16994237  
SRR17520069. 16994239  
SRR17520069. 16994241  
SRR17520069. 16994243  
SRR17520069. 16994245  
SRR17520069. 16994806  
SRR17520069. 16994808  
SRR17520069. 16994810  
SRR17520069. 16994812  
SRR17520069. 16994814  
SRR17520069. 16994816  
SRR17520069. 16994818  
SRR17520069. 16994820  
SRR17520069. 16994822  
SRR17520069. 16994824  
SRR17520069. 16994826

SRR17520069. 16995168  
SRR17520069. 16995170  
SRR17520069. 16997008  
SRR17520069. 16997012  
SRR17520069. 16997014  
SRR17520069. 16997018  
SRR17520069. 16997030  
SRR17520069. 16997032  
SRR17520069. 16997036  
SRR17520069. 16997046  
SRR17520069. 16997048  
SRR17520069. 16997054  
SRR17520069. 16997056  
SRR17520069. 16997058  
SRR17520069. 16997060  
SRR17520069. 16997062  
SRR17520069. 16997072  
SRR17520069. 16997074  
SRR17520069. 16997076  
SRR17520069. 16997078  
SRR17520069. 16997080  
SRR17520069. 16997082  
SRR17520069. 16997084  
SRR17520069. 16997086  
SRR17520069. 16997088  
SRR17520069. 16997090  
SRR17520069. 16997094  
SRR17520069. 16997100  
SRR17520069. 16997102  
SRR17520069. 16997106  
SRR17520069. 16997108  
SRR17520069. 16997110  
SRR17520069. 16997112  
SRR17520069. 16997114  
SRR17520069. 16997120  
SRR17520069. 17002022  
SRR17520069. 17002024  
SRR17520069. 17002028  
SRR17520069. 17002032  
SRR17520069. 17002034  
SRR17520069. 17002036  
SRR17520069. 17002038  
SRR17520069. 17002040  
SRR17520069. 17002042  
SRR17520069. 17002044  
SRR17520069. 17002046  
SRR17520069. 17002048

SRR17520069.17002052  
SRR17520069.17002054  
SRR17520069.17002056  
SRR17520069.17002058  
SRR17520069.17002060  
SRR17520069.17002062  
SRR17520069.17002064  
SRR17520069.17002068  
SRR17520069.17002070  
SRR17520069.17002072  
SRR17520069.17002074  
SRR17520069.17002080  
SRR17520069.17002082  
SRR17520069.17002084  
SRR17520069.17002086  
SRR17520069.17002088  
SRR17520069.17002090  
SRR17520069.17002094  
SRR17520069.17002096  
SRR17520069.17002098  
SRR17520069.17002104  
SRR17520069.17002108  
SRR17520069.17002110  
SRR17520069.17002112  
SRR17520069.17002914  
SRR17520069.17002916  
SRR17520069.17002918  
SRR17520069.17002920  
SRR17520069.17002922  
SRR17520069.17002924  
SRR17520069.17002926  
SRR17520069.17002928  
SRR17520069.17002930  
SRR17520069.17004324  
SRR17520069.17004326  
SRR17520069.17004328  
SRR17520069.17004330  
SRR17520069.17004332  
SRR17520069.17004334  
SRR17520069.17006662  
SRR17520069.17006664  
SRR17520069.17006666  
SRR17520069.17006668  
SRR17520069.17006670  
SRR17520069.17006672  
SRR17520069.17006674  
SRR17520069.17006676



SRR17520069.17006678  
SRR17520069.17006680  
SRR17520069.17006682  
SRR17520069.17006684  
SRR17520069.17006686  
SRR17520069.17006688  
SRR17520069.17006690  
SRR17520069.17006692  
SRR17520069.17006694  
SRR17520069.17006696  
SRR17520069.17006698  
SRR17520069.17006700  
SRR17520069.17006702  
SRR17520069.17006704  
SRR17520069.17006706  
SRR17520069.17006708  
SRR17520069.17017745  
SRR17520069.17017747  
SRR17520069.17017749  
SRR17520069.17021921  
SRR17520069.17025302  
SRR17520069.17025304  
SRR17520069.17025306  
SRR17520069.17025310  
SRR17520069.17025315  
SRR17520069.17025317  
SRR17520069.17025323  
SRR17520069.17025325  
SRR17520069.17025327  
SRR17520069.17025333  
SRR17520069.17025335  
SRR17520069.17025337  
SRR17520069.17025339  
SRR17520069.17025341  
SRR17520069.17025345  
SRR17520069.17025349  
SRR17520069.17025351  
SRR17520069.17025353  
SRR17520069.17025355  
SRR17520069.17025357  
SRR17520069.17025359  
SRR17520069.17025361  
SRR17520069.17025363  
SRR17520069.17025365  
SRR17520069.17025367  
SRR17520069.17025369  
SRR17520069.17025375

SRR17520069. 17025379  
SRR17520069. 17025383  
SRR17520069. 17025385  
SRR17520069. 17025387  
SRR17520069. 17025389  
SRR17520069. 17025391  
SRR17520069. 17025393  
SRR17520069. 17025395  
SRR17520069. 17025397  
SRR17520069. 17025399  
SRR17520069. 17025401  
SRR17520069. 17025403  
SRR17520069. 17025405  
SRR17520069. 17025417  
SRR17520069. 17025421  
SRR17520069. 17025425  
SRR17520069. 17025427  
SRR17520069. 17025429  
SRR17520069. 17025433  
SRR17520069. 17025435  
SRR17520069. 17025437  
SRR17520069. 17025439  
SRR17520069. 17025441  
SRR17520069. 17025443  
SRR17520069. 17025445  
SRR17520069. 17025447  
SRR17520069. 17025451  
SRR17520069. 17025453  
SRR17520069. 17025455  
SRR17520069. 17025457  
SRR17520069. 17028155  
SRR17520069. 17028157  
SRR17520069. 17028159  
SRR17520069. 17028161  
SRR17520069. 17028163  
SRR17520069. 17028165  
SRR17520069. 17028169  
SRR17520069. 17028171  
SRR17520069. 17028173  
SRR17520069. 17028175  
SRR17520069. 17028177  
SRR17520069. 17028179  
SRR17520069. 17028181  
SRR17520069. 17028187  
SRR17520069. 17028189  
SRR17520069. 17028191  
SRR17520069. 17028193

SRR17520069.17028195  
SRR17520069.17028197  
SRR17520069.17028199  
SRR17520069.17028201  
SRR17520069.17028203  
SRR17520069.17028205  
SRR17520069.17028207  
SRR17520069.17028209  
SRR17520069.17028211  
SRR17520069.17028213  
SRR17520069.17028215  
SRR17520069.17028217  
SRR17520069.17028219  
SRR17520069.17028221  
SRR17520069.17028223  
SRR17520069.17028225  
SRR17520069.17029638  
SRR17520069.17029640  
SRR17520069.17029642  
SRR17520069.17029644  
SRR17520069.17029646  
SRR17520069.17029648  
SRR17520069.17038188  
SRR17520069.17038192  
SRR17520069.17038194  
SRR17520069.17038198  
SRR17520069.17038200  
SRR17520069.17038202  
SRR17520069.17038204  
SRR17520069.17038206  
SRR17520069.17038208  
SRR17520069.17038210  
SRR17520069.17038212  
SRR17520069.17038214  
SRR17520069.17038216  
SRR17520069.17038218  
SRR17520069.17038220  
SRR17520069.17038222  
SRR17520069.17038224  
SRR17520069.17038226  
SRR17520069.17038230  
SRR17520069.17038232  
SRR17520069.17038391  
SRR17520069.17038395  
SRR17520069.17038397  
SRR17520069.17038399  
SRR17520069.17038401

SRR17520069.17040840  
SRR17520069.17040842  
SRR17520069.17040844  
SRR17520069.17040846  
SRR17520069.17040848  
SRR17520069.17040850  
SRR17520069.17040852  
SRR17520069.17040854  
SRR17520069.17040856  
SRR17520069.17040858  
SRR17520069.17040860  
SRR17520069.17040862  
SRR17520069.17040864  
SRR17520069.17040866  
SRR17520069.17041724  
SRR17520069.17041726  
SRR17520069.17041728  
SRR17520069.17041730  
SRR17520069.17042178  
SRR17520069.17042180  
SRR17520069.17042182  
SRR17520069.17044308  
SRR17520069.17044310  
SRR17520069.17044312  
SRR17520069.17044314  
SRR17520069.17044316  
SRR17520069.17047526  
SRR17520069.17047528  
SRR17520069.17047530  
SRR17520069.17047532  
SRR17520069.17047534  
SRR17520069.17047536  
SRR17520069.17047538  
SRR17520069.17047540  
SRR17520069.17047542  
SRR17520069.17047544  
SRR17520069.17047546  
SRR17520069.17047548  
SRR17520069.17047554  
SRR17520069.17047556  
SRR17520069.17047558  
SRR17520069.17047564  
SRR17520069.17047566  
SRR17520069.17047568  
SRR17520069.17047570  
SRR17520069.17047572  
SRR17520069.17047574

SRR17520069.17047576  
SRR17520069.17050228  
SRR17520069.17050230  
SRR17520069.17050232  
SRR17520069.17050234  
SRR17520069.17050236  
SRR17520069.17050238  
SRR17520069.17050240  
SRR17520069.17051869  
SRR17520069.17051871  
SRR17520069.17051873  
SRR17520069.17051875  
SRR17520069.17051877  
SRR17520069.17051879  
SRR17520069.17051881  
SRR17520069.17051883  
SRR17520069.17051885  
SRR17520069.17051887  
SRR17520069.17051889  
SRR17520069.17051891  
SRR17520069.17051893  
SRR17520069.17051895  
SRR17520069.17051897  
SRR17520069.17051899  
SRR17520069.17051901  
SRR17520069.17051903  
SRR17520069.17051905  
SRR17520069.17051907  
SRR17520069.17051909  
SRR17520069.17051911  
SRR17520069.17054097  
SRR17520069.17054099  
SRR17520069.17054101  
SRR17520069.17054103  
SRR17520069.17054105  
SRR17520069.17054107  
SRR17520069.17054109  
SRR17520069.17054113  
SRR17520069.17054115  
SRR17520069.17054117  
SRR17520069.17054119  
SRR17520069.17054121  
SRR17520069.17054123  
SRR17520069.17054125  
SRR17520069.17063122  
SRR17520069.17063857  
SRR17520069.17063859

SRR17520069.17063861  
SRR17520069.17063863  
SRR17520069.17065878  
SRR17520069.17065880  
SRR17520069.17065882  
SRR17520069.17065884  
SRR17520069.17065886  
SRR17520069.17065888  
SRR17520069.17065890  
SRR17520069.17065892  
SRR17520069.17065894  
SRR17520069.17065896  
SRR17520069.17065898  
SRR17520069.17065900  
SRR17520069.17065902  
SRR17520069.17065904  
SRR17520069.17065906  
SRR17520069.17065908  
SRR17520069.17065910  
SRR17520069.17065912  
SRR17520069.17065914  
SRR17520069.17065916  
SRR17520069.17065918  
SRR17520069.17065920  
SRR17520069.17065922  
SRR17520069.17065924  
SRR17520069.17065926  
SRR17520069.17065928  
SRR17520069.17065930  
SRR17520069.17065932  
SRR17520069.17065934  
SRR17520069.17065936  
SRR17520069.17065938  
SRR17520069.17065940  
SRR17520069.17065942  
SRR17520069.17065946  
SRR17520069.17065948  
SRR17520069.17065950  
SRR17520069.17065952  
SRR17520069.17065954  
SRR17520069.17065956  
SRR17520069.17065958  
SRR17520069.17065960  
SRR17520069.17065962  
SRR17520069.17065964  
SRR17520069.17070973  
SRR17520069.17070975

SRR17520069.17070977  
SRR17520069.17070979  
SRR17520069.17070981  
SRR17520069.17070983  
SRR17520069.17070985  
SRR17520069.17070987  
SRR17520069.17070989  
SRR17520069.17070991  
SRR17520069.17070993  
SRR17520069.17070995  
SRR17520069.17070997  
SRR17520069.17070999  
SRR17520069.17075012  
SRR17520069.17077138  
SRR17520069.17078460  
SRR17520069.17078462  
SRR17520069.17078464  
SRR17520069.17078466  
SRR17520069.17078468  
SRR17520069.17078470  
SRR17520069.17078472  
SRR17520069.17078474  
SRR17520069.17078476  
SRR17520069.17078478  
SRR17520069.17078480  
SRR17520069.17078482  
SRR17520069.17078484  
SRR17520069.17078486  
SRR17520069.17078488  
SRR17520069.17078490  
SRR17520069.17078492  
SRR17520069.17078494  
SRR17520069.17078496  
SRR17520069.17078504  
SRR17520069.17078508  
SRR17520069.17087544  
SRR17520069.17087546  
SRR17520069.17087548  
SRR17520069.17087550  
SRR17520069.17087552  
SRR17520069.17087554  
SRR17520069.17087556  
SRR17520069.17099022  
SRR17520069.17099026  
SRR17520069.17099028  
SRR17520069.17099034  
SRR17520069.17099036

SRR17520069.17099042  
SRR17520069.17099050  
SRR17520069.17099052  
SRR17520069.17099054  
SRR17520069.17099056  
SRR17520069.17099058  
SRR17520069.17113455  
SRR17520069.17113457  
SRR17520069.17113459  
SRR17520069.17113461  
SRR17520069.17113463  
SRR17520069.17113465  
SRR17520069.17113467  
SRR17520069.17113469  
SRR17520069.17113471  
SRR17520069.17113473  
SRR17520069.17113475  
SRR17520069.17113477  
SRR17520069.17113479  
SRR17520069.17115201  
SRR17520069.17115203  
SRR17520069.17115205  
SRR17520069.17115207  
SRR17520069.17115209  
SRR17520069.17117739  
SRR17520069.17119915  
SRR17520069.17119917  
SRR17520069.17119919  
SRR17520069.17119921  
SRR17520069.17119923  
SRR17520069.17119925  
SRR17520069.17119927  
SRR17520069.17119929  
SRR17520069.17119931  
SRR17520069.17119933  
SRR17520069.17119935  
SRR17520069.17119937  
SRR17520069.17119939  
SRR17520069.17119941  
SRR17520069.17119945  
SRR17520069.17119947  
SRR17520069.17119949  
SRR17520069.17119951  
SRR17520069.17119953  
SRR17520069.17119955  
SRR17520069.17119957  
SRR17520069.17119959



SRR17520069. 17134603  
SRR17520069. 17134644  
SRR17520069. 17135029  
SRR17520069. 17137980  
SRR17520069. 17137982  
SRR17520069. 17137984  
SRR17520069. 17137986  
SRR17520069. 17137988  
SRR17520069. 17137990  
SRR17520069. 17137992  
SRR17520069. 17137996  
SRR17520069. 17137998  
SRR17520069. 17138000  
SRR17520069. 17138002  
SRR17520069. 17138004  
SRR17520069. 17138006  
SRR17520069. 17138008  
SRR17520069. 17138010  
SRR17520069. 17138012  
SRR17520069. 17138014  
SRR17520069. 17138016  
SRR17520069. 17138018  
SRR17520069. 17138020  
SRR17520069. 17138022  
SRR17520069. 17138024  
SRR17520069. 17138026  
SRR17520069. 17138030  
SRR17520069. 17138032  
SRR17520069. 17138034  
SRR17520069. 17138036  
SRR17520069. 17138038  
SRR17520069. 17138040  
SRR17520069. 17138042  
SRR17520069. 17138044  
SRR17520069. 17138046  
SRR17520069. 17138048  
SRR17520069. 17138050  
SRR17520069. 17138052  
SRR17520069. 17138054  
SRR17520069. 17138056  
SRR17520069. 17138058  
SRR17520069. 17138060  
SRR17520069. 17138062  
SRR17520069. 17138610  
SRR17520069. 17138612  
SRR17520069. 17138614  
SRR17520069. 17138616

SRR17520069. 17138618  
SRR17520069. 17138620  
SRR17520069. 17142034  
SRR17520069. 17142036  
SRR17520069. 17142038  
SRR17520069. 17142040  
SRR17520069. 17142042  
SRR17520069. 17142044  
SRR17520069. 17142046  
SRR17520069. 17142048  
SRR17520069. 17142050  
SRR17520069. 17142052  
SRR17520069. 17142054  
SRR17520069. 17142056  
SRR17520069. 17142058  
SRR17520069. 17142060  
SRR17520069. 17142062  
SRR17520069. 17142064  
SRR17520069. 17142066  
SRR17520069. 17142068  
SRR17520069. 17142070  
SRR17520069. 17142072  
SRR17520069. 17142074  
SRR17520069. 17163292  
SRR17520069. 17163294  
SRR17520069. 17163296  
SRR17520069. 17163298  
SRR17520069. 17163300  
SRR17520069. 17164774  
SRR17520069. 17164776  
SRR17520069. 17164780  
SRR17520069. 17164782  
SRR17520069. 17164784  
SRR17520069. 17164786  
SRR17520069. 17164788  
SRR17520069. 17164790  
SRR17520069. 17166074  
SRR17520069. 17166076  
SRR17520069. 17166078  
SRR17520069. 17166080  
SRR17520069. 17166082  
SRR17520069. 17166084  
SRR17520069. 17166086  
SRR17520069. 17166088  
SRR17520069. 17166090  
SRR17520069. 17166092  
SRR17520069. 17166096

SRR17520069. 17166098  
SRR17520069. 17166100  
SRR17520069. 17166102  
SRR17520069. 17166104  
SRR17520069. 17168345  
SRR17520069. 17168347  
SRR17520069. 17168349  
SRR17520069. 17168351  
SRR17520069. 17168353  
SRR17520069. 17168355  
SRR17520069. 17168357  
SRR17520069. 17168359  
SRR17520069. 17168361  
SRR17520069. 17168363  
SRR17520069. 17168365  
SRR17520069. 17168367  
SRR17520069. 17168369  
SRR17520069. 17168371  
SRR17520069. 17173197  
SRR17520069. 17173199  
SRR17520069. 17173201  
SRR17520069. 17173203  
SRR17520069. 17173205  
SRR17520069. 17173207  
SRR17520069. 17173209  
SRR17520069. 17173211  
SRR17520069. 17173213  
SRR17520069. 17173215  
SRR17520069. 17175645  
SRR17520069. 17175647  
SRR17520069. 17175649  
SRR17520069. 17175651  
SRR17520069. 17175653  
SRR17520069. 17175655  
SRR17520069. 17175657  
SRR17520069. 17175661  
SRR17520069. 17175663  
SRR17520069. 17175665  
SRR17520069. 17175671  
SRR17520069. 17175675  
SRR17520069. 17175677  
SRR17520069. 17175679  
SRR17520069. 17175681  
SRR17520069. 17175683  
SRR17520069. 17175685  
SRR17520069. 17175687  
SRR17520069. 17175689

SRR17520069.17175691  
SRR17520069.17175693  
SRR17520069.17175695  
SRR17520069.17175697  
SRR17520069.17175699  
SRR17520069.17175701  
SRR17520069.17175703  
SRR17520069.17181843  
SRR17520069.17181845  
SRR17520069.17181847  
SRR17520069.17181849  
SRR17520069.17181851  
SRR17520069.17181853  
SRR17520069.17181855  
SRR17520069.17181857  
SRR17520069.17181859  
SRR17520069.17181861  
SRR17520069.17181863  
SRR17520069.17181865  
SRR17520069.17181867  
SRR17520069.17181869  
SRR17520069.17181871  
SRR17520069.17181873  
SRR17520069.17181875  
SRR17520069.17181877  
SRR17520069.17181879  
SRR17520069.17181881  
SRR17520069.17181883  
SRR17520069.17181885  
SRR17520069.17181887  
SRR17520069.17181889  
SRR17520069.17181891  
SRR17520069.17181893  
SRR17520069.17181895  
SRR17520069.17181897  
SRR17520069.17181899  
SRR17520069.17183326  
SRR17520069.17183328  
SRR17520069.17183330  
SRR17520069.17183332  
SRR17520069.17183334  
SRR17520069.17183336  
SRR17520069.17183338  
SRR17520069.17183340  
SRR17520069.17183342  
SRR17520069.17183935  
SRR17520069.17183937

SRR17520069. 17183939  
SRR17520069. 17183943  
SRR17520069. 17187328  
SRR17520069. 17187330  
SRR17520069. 17187332  
SRR17520069. 17187334  
SRR17520069. 17187336  
SRR17520069. 17194444  
SRR17520069. 17194446  
SRR17520069. 17194448  
SRR17520069. 17194450  
SRR17520069. 17194452  
SRR17520069. 17194454  
SRR17520069. 17194456  
SRR17520069. 17194458  
SRR17520069. 17194462  
SRR17520069. 17195301  
SRR17520069. 17195303  
SRR17520069. 17195305  
SRR17520069. 17195307  
SRR17520069. 17195309  
SRR17520069. 17195311  
SRR17520069. 17195313  
SRR17520069. 17195315  
SRR17520069. 17196171  
SRR17520069. 17202682  
SRR17520069. 17202684  
SRR17520069. 17202686  
SRR17520069. 17202688  
SRR17520069. 17202690  
SRR17520069. 17202692  
SRR17520069. 17202694  
SRR17520069. 17202696  
SRR17520069. 17202698  
SRR17520069. 17202700  
SRR17520069. 17202702  
SRR17520069. 17202704  
SRR17520069. 17202706  
SRR17520069. 17202708  
SRR17520069. 17203921  
SRR17520069. 17203923  
SRR17520069. 17203925  
SRR17520069. 17203927  
SRR17520069. 17203929  
SRR17520069. 17203931  
SRR17520069. 17203939  
SRR17520069. 17203941

SRR17520069. 17203943  
SRR17520069. 17203945  
SRR17520069. 17203947  
SRR17520069. 17203949  
SRR17520069. 17204123  
SRR17520069. 17204125  
SRR17520069. 17204127  
SRR17520069. 17204129  
SRR17520069. 17204131  
SRR17520069. 17204133  
SRR17520069. 17204135  
SRR17520069. 17204137  
SRR17520069. 17204139  
SRR17520069. 17204141  
SRR17520069. 17204143  
SRR17520069. 17204145  
SRR17520069. 17204147  
SRR17520069. 17204351  
SRR17520069. 17207667  
SRR17520069. 17207669  
SRR17520069. 17207671  
SRR17520069. 17207673  
SRR17520069. 17207675  
SRR17520069. 17207677  
SRR17520069. 17207679  
SRR17520069. 17207681  
SRR17520069. 17207685  
SRR17520069. 17207687  
SRR17520069. 17207689  
SRR17520069. 17207691  
SRR17520069. 17207693  
SRR17520069. 17207695  
SRR17520069. 17207697  
SRR17520069. 17207699  
SRR17520069. 17207701  
SRR17520069. 17207703  
SRR17520069. 17207705  
SRR17520069. 17207707  
SRR17520069. 17207709  
SRR17520069. 17207711  
SRR17520069. 17207713  
SRR17520069. 17207715  
SRR17520069. 17207717  
SRR17520069. 17207719  
SRR17520069. 17207721  
SRR17520069. 17207723  
SRR17520069. 17207725

SRR17520069.17207727  
SRR17520069.17207729  
SRR17520069.17207731  
SRR17520069.17207733  
SRR17520069.17207735  
SRR17520069.17207737  
SRR17520069.17207741  
SRR17520069.17207743  
SRR17520069.17207745  
SRR17520069.17207747  
SRR17520069.17207749  
SRR17520069.17207751  
SRR17520069.17207753  
SRR17520069.17207755  
SRR17520069.17207757  
SRR17520069.17207759  
SRR17520069.17212951  
SRR17520069.17212953  
SRR17520069.17212955  
SRR17520069.17212957  
SRR17520069.17212961  
SRR17520069.17212963  
SRR17520069.17212965  
SRR17520069.17212967  
SRR17520069.17212969  
SRR17520069.17212971  
SRR17520069.17212973  
SRR17520069.17214847  
SRR17520069.17214851  
SRR17520069.17215655  
SRR17520069.17215657  
SRR17520069.17215659  
SRR17520069.17215661  
SRR17520069.17215665  
SRR17520069.17215667  
SRR17520069.17215669  
SRR17520069.17223134  
SRR17520069.17223136  
SRR17520069.17224922  
SRR17520069.17229096  
SRR17520069.17229098  
SRR17520069.17229100  
SRR17520069.17229102  
SRR17520069.17229104  
SRR17520069.17229106  
SRR17520069.17229108  
SRR17520069.17229110

SRR17520069.17229112  
SRR17520069.17229114  
SRR17520069.17230893  
SRR17520069.17230895  
SRR17520069.17230897  
SRR17520069.17230899  
SRR17520069.17230901  
SRR17520069.17230903  
SRR17520069.17230905  
SRR17520069.17230907  
SRR17520069.17230909  
SRR17520069.17230911  
SRR17520069.17230913  
SRR17520069.17230915  
SRR17520069.17230917  
SRR17520069.17230919  
SRR17520069.17230921  
SRR17520069.17230923  
SRR17520069.17230925  
SRR17520069.17230927  
SRR17520069.17230929  
SRR17520069.17235652  
SRR17520069.17235654  
SRR17520069.17235656  
SRR17520069.17235658  
SRR17520069.17235660  
SRR17520069.17235662  
SRR17520069.17235664  
SRR17520069.17235666  
SRR17520069.17235668  
SRR17520069.17235670  
SRR17520069.17235674  
SRR17520069.17235676  
SRR17520069.17235678  
SRR17520069.17235680  
SRR17520069.17237360  
SRR17520069.17237362  
SRR17520069.17237364  
SRR17520069.17237366  
SRR17520069.17237368  
SRR17520069.17237370  
SRR17520069.17237372  
SRR17520069.17237374  
SRR17520069.17237376  
SRR17520069.17237378  
SRR17520069.17237380  
SRR17520069.17237382



SRR17520069. 17237386  
SRR17520069. 17237388  
SRR17520069. 17237390  
SRR17520069. 17237392  
SRR17520069. 17237394  
SRR17520069. 17237396  
SRR17520069. 17237398  
SRR17520069. 17237400  
SRR17520069. 17237402  
SRR17520069. 17237406  
SRR17520069. 17251706  
SRR17520069. 17251708  
SRR17520069. 17251710  
SRR17520069. 17251712  
SRR17520069. 17251714  
SRR17520069. 17251716  
SRR17520069. 17251718  
SRR17520069. 17251720  
SRR17520069. 17251724  
SRR17520069. 17251730  
SRR17520069. 17251732  
SRR17520069. 17251734  
SRR17520069. 17251736  
SRR17520069. 17251738  
SRR17520069. 17251740  
SRR17520069. 17251742  
SRR17520069. 17251744  
SRR17520069. 17251746  
SRR17520069. 17251748  
SRR17520069. 17251750  
SRR17520069. 17251752  
SRR17520069. 17251754  
SRR17520069. 17251756  
SRR17520069. 17251758  
SRR17520069. 17251760  
SRR17520069. 17251762  
SRR17520069. 17254382  
SRR17520069. 17254384  
SRR17520069. 17254386  
SRR17520069. 17254388  
SRR17520069. 17254390  
SRR17520069. 17254392  
SRR17520069. 17254394  
SRR17520069. 17254396  
SRR17520069. 17254398  
SRR17520069. 17256267  
SRR17520069. 17256269

SRR17520069. 17256271  
SRR17520069. 17256275  
SRR17520069. 17256281  
SRR17520069. 17256283  
SRR17520069. 17256285  
SRR17520069. 17256287  
SRR17520069. 17256289  
SRR17520069. 17256291  
SRR17520069. 17256293  
SRR17520069. 17256295  
SRR17520069. 17256297  
SRR17520069. 17256299  
SRR17520069. 17256301  
SRR17520069. 17256303  
SRR17520069. 17256305  
SRR17520069. 17274979  
SRR17520069. 17274983  
SRR17520069. 17274985  
SRR17520069. 17274987  
SRR17520069. 17274989  
SRR17520069. 17274991  
SRR17520069. 17274993  
SRR17520069. 17274995  
SRR17520069. 17278065  
SRR17520069. 17278069  
SRR17520069. 17278071  
SRR17520069. 17278073  
SRR17520069. 17278075  
SRR17520069. 17278077  
SRR17520069. 17278079  
SRR17520069. 17278081  
SRR17520069. 17278083  
SRR17520069. 17278085  
SRR17520069. 17278087  
SRR17520069. 17278089  
SRR17520069. 17278091  
SRR17520069. 17278093  
SRR17520069. 17278095  
SRR17520069. 17278097  
SRR17520069. 17278099  
SRR17520069. 17278101  
SRR17520069. 17278103  
SRR17520069. 17278105  
SRR17520069. 17278107  
SRR17520069. 17278109  
SRR17520069. 17278111  
SRR17520069. 17278113

SRR17520069. 17278115  
SRR17520069. 17278117  
SRR17520069. 17278119  
SRR17520069. 17278121  
SRR17520069. 17278123  
SRR17520069. 17278125  
SRR17520069. 17278129  
SRR17520069. 17278131  
SRR17520069. 17278133  
SRR17520069. 17278135  
SRR17520069. 17278137  
SRR17520069. 17278139  
SRR17520069. 17278141  
SRR17520069. 17278143  
SRR17520069. 17278145  
SRR17520069. 17278147  
SRR17520069. 17278149  
SRR17520069. 17278151  
SRR17520069. 17278153  
SRR17520069. 17278155  
SRR17520069. 17278157  
SRR17520069. 17284762  
SRR17520069. 17284764  
SRR17520069. 17285149  
SRR17520069. 17285151  
SRR17520069. 17285153  
SRR17520069. 17285155  
SRR17520069. 17285157  
SRR17520069. 17285159  
SRR17520069. 17285161  
SRR17520069. 17285163  
SRR17520069. 17285165  
SRR17520069. 17285167  
SRR17520069. 17285169  
SRR17520069. 17285171  
SRR17520069. 17285173  
SRR17520069. 17285175  
SRR17520069. 17285177  
SRR17520069. 17285179  
SRR17520069. 17285181  
SRR17520069. 17285183  
SRR17520069. 17285185  
SRR17520069. 17285187  
SRR17520069. 17285189  
SRR17520069. 17285191  
SRR17520069. 17285193  
SRR17520069. 17285195

SRR17520069. 17285197  
SRR17520069. 17285199  
SRR17520069. 17285201  
SRR17520069. 17285203  
SRR17520069. 17285207  
SRR17520069. 17285209  
SRR17520069. 17285211  
SRR17520069. 17285213  
SRR17520069. 17285215  
SRR17520069. 17285217  
SRR17520069. 17285219  
SRR17520069. 17285221  
SRR17520069. 17285223  
SRR17520069. 17285225  
SRR17520069. 17285227  
SRR17520069. 17285229  
SRR17520069. 17285231  
SRR17520069. 17285233  
SRR17520069. 17285235  
SRR17520069. 17285237  
SRR17520069. 17285239  
SRR17520069. 17285241  
SRR17520069. 17285243  
SRR17520069. 17285245  
SRR17520069. 17285247  
SRR17520069. 17285249  
SRR17520069. 17285251  
SRR17520069. 17285253  
SRR17520069. 17285255  
SRR17520069. 17285257  
SRR17520069. 17285259  
SRR17520069. 17285261  
SRR17520069. 17285263  
SRR17520069. 17285265  
SRR17520069. 17285267  
SRR17520069. 17285269  
SRR17520069. 17285273  
SRR17520069. 17285275  
SRR17520069. 17285277  
SRR17520069. 17285279  
SRR17520069. 17285281  
SRR17520069. 17285283  
SRR17520069. 17285285  
SRR17520069. 17285287  
SRR17520069. 17285289  
SRR17520069. 17285538  
SRR17520069. 17287951

SRR17520069. 17287953  
SRR17520069. 17287955  
SRR17520069. 17287959  
SRR17520069. 17287961  
SRR17520069. 17287963  
SRR17520069. 17287965  
SRR17520069. 17287967  
SRR17520069. 17287969  
SRR17520069. 17287971  
SRR17520069. 17287973  
SRR17520069. 17287975  
SRR17520069. 17287977  
SRR17520069. 17287979  
SRR17520069. 17287981  
SRR17520069. 17287983  
SRR17520069. 17287985  
SRR17520069. 17287987  
SRR17520069. 17287989  
SRR17520069. 17287993  
SRR17520069. 17287995  
SRR17520069. 17287997  
SRR17520069. 17288001  
SRR17520069. 17288003  
SRR17520069. 17288005  
SRR17520069. 17288007  
SRR17520069. 17288009  
SRR17520069. 17288011  
SRR17520069. 17288013  
SRR17520069. 17288015  
SRR17520069. 17288017  
SRR17520069. 17288019  
SRR17520069. 17288021  
SRR17520069. 17288023  
SRR17520069. 17288025  
SRR17520069. 17288027  
SRR17520069. 17288029  
SRR17520069. 17288031  
SRR17520069. 17288033  
SRR17520069. 17288035  
SRR17520069. 17288037  
SRR17520069. 17288039  
SRR17520069. 17288041  
SRR17520069. 17288043  
SRR17520069. 17288045  
SRR17520069. 17288047  
SRR17520069. 17288051  
SRR17520069. 17288053

SRR17520069. 17288057  
SRR17520069. 17288059  
SRR17520069. 17288061  
SRR17520069. 17288063  
SRR17520069. 17288065  
SRR17520069. 17288069  
SRR17520069. 17288071  
SRR17520069. 17288073  
SRR17520069. 17288075  
SRR17520069. 17288077  
SRR17520069. 17288079  
SRR17520069. 17288081  
SRR17520069. 17288083  
SRR17520069. 17288085  
SRR17520069. 17288087  
SRR17520069. 17288089  
SRR17520069. 17288093  
SRR17520069. 17288095  
SRR17520069. 17288097  
SRR17520069. 17288099  
SRR17520069. 17288101  
SRR17520069. 17288103  
SRR17520069. 17288105  
SRR17520069. 17288109  
SRR17520069. 17288111  
SRR17520069. 17288113  
SRR17520069. 17288115  
SRR17520069. 17288117  
SRR17520069. 17288119  
SRR17520069. 17288121  
SRR17520069. 17288123  
SRR17520069. 17288125  
SRR17520069. 17288127  
SRR17520069. 17288129  
SRR17520069. 17288131  
SRR17520069. 17288133  
SRR17520069. 17288135  
SRR17520069. 17290794  
SRR17520069. 17290796  
SRR17520069. 17290798  
SRR17520069. 17290800  
SRR17520069. 17290802  
SRR17520069. 17290804  
SRR17520069. 17290806  
SRR17520069. 17290808  
SRR17520069. 17290810  
SRR17520069. 17290812

SRR17520069. 17290814  
SRR17520069. 17290816  
SRR17520069. 17290819  
SRR17520069. 17290821  
SRR17520069. 17290823  
SRR17520069. 17290825  
SRR17520069. 17290827  
SRR17520069. 17290829  
SRR17520069. 17290831  
SRR17520069. 17290835  
SRR17520069. 17290837  
SRR17520069. 17290841  
SRR17520069. 17290843  
SRR17520069. 17290845  
SRR17520069. 17290847  
SRR17520069. 17292767  
SRR17520069. 17292771  
SRR17520069. 17292773  
SRR17520069. 17292775  
SRR17520069. 17292777  
SRR17520069. 17294440  
SRR17520069. 17294442  
SRR17520069. 17294444  
SRR17520069. 17294446  
SRR17520069. 17294532  
SRR17520069. 17294534  
SRR17520069. 17294538  
SRR17520069. 17294540  
SRR17520069. 17294542  
SRR17520069. 17294544  
SRR17520069. 17294548  
SRR17520069. 17294550  
SRR17520069. 17294552  
SRR17520069. 17294554  
SRR17520069. 17294556  
SRR17520069. 17294558  
SRR17520069. 17294562  
SRR17520069. 17294564  
SRR17520069. 17294566  
SRR17520069. 17294568  
SRR17520069. 17295600  
SRR17520069. 17295602  
SRR17520069. 17295604  
SRR17520069. 17295606  
SRR17520069. 17295608  
SRR17520069. 17303108  
SRR17520069. 17304046

SRR17520069. 17304048  
SRR17520069. 17304052  
SRR17520069. 17304054  
SRR17520069. 17304056  
SRR17520069. 17304058  
SRR17520069. 17304060  
SRR17520069. 17304062  
SRR17520069. 17304064  
SRR17520069. 17304066  
SRR17520069. 17304068  
SRR17520069. 17304070  
SRR17520069. 17304072  
SRR17520069. 17304074  
SRR17520069. 17304076  
SRR17520069. 17304078  
SRR17520069. 17304080  
SRR17520069. 17304084  
SRR17520069. 17304086  
SRR17520069. 17304088  
SRR17520069. 17304090  
SRR17520069. 17304092  
SRR17520069. 17304094  
SRR17520069. 17304096  
SRR17520069. 17304098  
SRR17520069. 17304100  
SRR17520069. 17304102  
SRR17520069. 17304104  
SRR17520069. 17306354  
SRR17520069. 17306411  
SRR17520069. 17306413  
SRR17520069. 17306415  
SRR17520069. 17306417  
SRR17520069. 17306419  
SRR17520069. 17306421  
SRR17520069. 17306423  
SRR17520069. 17306425  
SRR17520069. 17306427  
SRR17520069. 17306429  
SRR17520069. 17306431  
SRR17520069. 17306435  
SRR17520069. 17306437  
SRR17520069. 17306439  
SRR17520069. 17306441  
SRR17520069. 17306443  
SRR17520069. 17306447  
SRR17520069. 17306449  
SRR17520069. 17306451



SRR17520069. 17306453  
SRR17520069. 17306457  
SRR17520069. 17306459  
SRR17520069. 17306461  
SRR17520069. 17306463  
SRR17520069. 17306569  
SRR17520069. 17306571  
SRR17520069. 17306573  
SRR17520069. 17306575  
SRR17520069. 17306577  
SRR17520069. 17306579  
SRR17520069. 17306581  
SRR17520069. 17306583  
SRR17520069. 17306585  
SRR17520069. 17306587  
SRR17520069. 17306589  
SRR17520069. 17306591  
SRR17520069. 17306593  
SRR17520069. 17306595  
SRR17520069. 17306597  
SRR17520069. 17307938  
SRR17520069. 17307940  
SRR17520069. 17307942  
SRR17520069. 17307944  
SRR17520069. 17307946  
SRR17520069. 17307948  
SRR17520069. 17307950  
SRR17520069. 17307952  
SRR17520069. 17307954  
SRR17520069. 17307956  
SRR17520069. 17307958  
SRR17520069. 17307960  
SRR17520069. 17307962  
SRR17520069. 17307964  
SRR17520069. 17307966  
SRR17520069. 17307968  
SRR17520069. 17307970  
SRR17520069. 17307972  
SRR17520069. 17307974  
SRR17520069. 17307976  
SRR17520069. 17307978  
SRR17520069. 17307980  
SRR17520069. 17307982  
SRR17520069. 17307984  
SRR17520069. 17307986  
SRR17520069. 17307988  
SRR17520069. 17307990

SRR17520069. 17307992  
SRR17520069. 17307994  
SRR17520069. 17307996  
SRR17520069. 17307998  
SRR17520069. 17308000  
SRR17520069. 17308002  
SRR17520069. 17308004  
SRR17520069. 17308556  
SRR17520069. 17308558  
SRR17520069. 17308560  
SRR17520069. 17308562  
SRR17520069. 17308566  
SRR17520069. 17308568  
SRR17520069. 17308570  
SRR17520069. 17308572  
SRR17520069. 17308574  
SRR17520069. 17308576  
SRR17520069. 17308578  
SRR17520069. 17308580  
SRR17520069. 17308584  
SRR17520069. 17308586  
SRR17520069. 17308588  
SRR17520069. 17308590  
SRR17520069. 17308592  
SRR17520069. 17308594  
SRR17520069. 17308596  
SRR17520069. 17308598  
SRR17520069. 17308600  
SRR17520069. 17308602  
SRR17520069. 17308604  
SRR17520069. 17322247  
SRR17520069. 17322249  
SRR17520069. 17322251  
SRR17520069. 17322253  
SRR17520069. 17322255  
SRR17520069. 17322257  
SRR17520069. 17322259  
SRR17520069. 17322261  
SRR17520069. 17322263  
SRR17520069. 17322265  
SRR17520069. 17322269  
SRR17520069. 17322271  
SRR17520069. 17322273  
SRR17520069. 17322275  
SRR17520069. 17322277  
SRR17520069. 17322279  
SRR17520069. 17322281

SRR17520069. 17322283  
SRR17520069. 17322285  
SRR17520069. 17322287  
SRR17520069. 17322289  
SRR17520069. 17322291  
SRR17520069. 17322293  
SRR17520069. 17322295  
SRR17520069. 17322299  
SRR17520069. 17322301  
SRR17520069. 17322303  
SRR17520069. 17322305  
SRR17520069. 17322307  
SRR17520069. 17322309  
SRR17520069. 17322311  
SRR17520069. 17322313  
SRR17520069. 17322315  
SRR17520069. 17322317  
SRR17520069. 17322319  
SRR17520069. 17322321  
SRR17520069. 17322323  
SRR17520069. 17322325  
SRR17520069. 17322327  
SRR17520069. 17323165  
SRR17520069. 17324339  
SRR17520069. 17324341  
SRR17520069. 17324343  
SRR17520069. 17324345  
SRR17520069. 17324347  
SRR17520069. 17324349  
SRR17520069. 17324351  
SRR17520069. 17324353  
SRR17520069. 17324355  
SRR17520069. 17324357  
SRR17520069. 17324359  
SRR17520069. 17324361  
SRR17520069. 17324363  
SRR17520069. 17324365  
SRR17520069. 17324367  
SRR17520069. 17324369  
SRR17520069. 17324371  
SRR17520069. 17324373  
SRR17520069. 17324375  
SRR17520069. 17324377  
SRR17520069. 17324379  
SRR17520069. 17332673  
SRR17520069. 17332675  
SRR17520069. 17332677

SRR17520069. 17332679  
SRR17520069. 17332681  
SRR17520069. 17332683  
SRR17520069. 17332685  
SRR17520069. 17332687  
SRR17520069. 17332689  
SRR17520069. 17332691  
SRR17520069. 17332693  
SRR17520069. 17332695  
SRR17520069. 17332697  
SRR17520069. 17332701  
SRR17520069. 17332703  
SRR17520069. 17333855  
SRR17520069. 17333857  
SRR17520069. 17333861  
SRR17520069. 17333863  
SRR17520069. 17333908  
SRR17520069. 17333910  
SRR17520069. 17333912  
SRR17520069. 17336468  
SRR17520069. 17336470  
SRR17520069. 17336472  
SRR17520069. 17336474  
SRR17520069. 17336476  
SRR17520069. 17336478  
SRR17520069. 17336480  
SRR17520069. 17336482  
SRR17520069. 17336486  
SRR17520069. 17336490  
SRR17520069. 17336492  
SRR17520069. 17336494  
SRR17520069. 17336496  
SRR17520069. 17336498  
SRR17520069. 17336500  
SRR17520069. 17336502  
SRR17520069. 17336504  
SRR17520069. 17336506  
SRR17520069. 17336508  
SRR17520069. 17336510  
SRR17520069. 17336512  
SRR17520069. 17336514  
SRR17520069. 17336516  
SRR17520069. 17338643  
SRR17520069. 17338645  
SRR17520069. 17338649  
SRR17520069. 17338651  
SRR17520069. 17338653

SRR17520069. 17338657  
SRR17520069. 17338659  
SRR17520069. 17338661  
SRR17520069. 17338663  
SRR17520069. 17338669  
SRR17520069. 17338673  
SRR17520069. 17338677  
SRR17520069. 17338679  
SRR17520069. 17338683  
SRR17520069. 17339076  
SRR17520069. 17339078  
SRR17520069. 17339080  
SRR17520069. 17339082  
SRR17520069. 17339084  
SRR17520069. 17339086  
SRR17520069. 17339088  
SRR17520069. 17339090  
SRR17520069. 17339092  
SRR17520069. 17339094  
SRR17520069. 17339098  
SRR17520069. 17343820  
SRR17520069. 17344961  
SRR17520069. 17344963  
SRR17520069. 17344965  
SRR17520069. 17344967  
SRR17520069. 17345570  
SRR17520069. 17345572  
SRR17520069. 17345574  
SRR17520069. 17345576  
SRR17520069. 17345578  
SRR17520069. 17345580  
SRR17520069. 17345582  
SRR17520069. 17345584  
SRR17520069. 17345586  
SRR17520069. 17345588  
SRR17520069. 17345590  
SRR17520069. 17345592  
SRR17520069. 17345594  
SRR17520069. 17357056  
SRR17520069. 17357058  
SRR17520069. 17357060  
SRR17520069. 17357548  
SRR17520069. 17357550  
SRR17520069. 17357552  
SRR17520069. 17357554  
SRR17520069. 17357556  
SRR17520069. 17357558

SRR17520069. 17357560  
SRR17520069. 17357562  
SRR17520069. 17357564  
SRR17520069. 17357566  
SRR17520069. 17357568  
SRR17520069. 17357570  
SRR17520069. 17357572  
SRR17520069. 17357574  
SRR17520069. 17357576  
SRR17520069. 17357578  
SRR17520069. 17357580  
SRR17520069. 17357582  
SRR17520069. 17357584  
SRR17520069. 17357587  
SRR17520069. 17357589  
SRR17520069. 17357591  
SRR17520069. 17357593  
SRR17520069. 17357595  
SRR17520069. 17357597  
SRR17520069. 17357599  
SRR17520069. 17357601  
SRR17520069. 17357603  
SRR17520069. 17357605  
SRR17520069. 17357607  
SRR17520069. 17357609  
SRR17520069. 17357611  
SRR17520069. 17357613  
SRR17520069. 17357615  
SRR17520069. 17357617  
SRR17520069. 17357619  
SRR17520069. 17357621  
SRR17520069. 17357623  
SRR17520069. 17357625  
SRR17520069. 17357627  
SRR17520069. 17357629  
SRR17520069. 17357631  
SRR17520069. 17357633  
SRR17520069. 17357635  
SRR17520069. 17357637  
SRR17520069. 17357639  
SRR17520069. 17357641  
SRR17520069. 17357643  
SRR17520069. 17357645  
SRR17520069. 17357647  
SRR17520069. 17357649  
SRR17520069. 17357651  
SRR17520069. 17357653

SRR17520069. 17357655  
SRR17520069. 17357657  
SRR17520069. 17357659  
SRR17520069. 17357661  
SRR17520069. 17357663  
SRR17520069. 17357665  
SRR17520069. 17357667  
SRR17520069. 17357669  
SRR17520069. 17357671  
SRR17520069. 17357673  
SRR17520069. 17357675  
SRR17520069. 17357677  
SRR17520069. 17357679  
SRR17520069. 17357681  
SRR17520069. 17357683  
SRR17520069. 17357685  
SRR17520069. 17357687  
SRR17520069. 17357689  
SRR17520069. 17357691  
SRR17520069. 17357693  
SRR17520069. 17357695  
SRR17520069. 17357697  
SRR17520069. 17357699  
SRR17520069. 17357701  
SRR17520069. 17357703  
SRR17520069. 17357705  
SRR17520069. 17357707  
SRR17520069. 17357709  
SRR17520069. 17357711  
SRR17520069. 17357713  
SRR17520069. 17357715  
SRR17520069. 17357717  
SRR17520069. 17357719  
SRR17520069. 17357721  
SRR17520069. 17357723  
SRR17520069. 17357725  
SRR17520069. 17357727  
SRR17520069. 17357729  
SRR17520069. 17357731  
SRR17520069. 17359066  
SRR17520069. 17359070  
SRR17520069. 17359072  
SRR17520069. 17359074  
SRR17520069. 17359076  
SRR17520069. 17362873  
SRR17520069. 17362875  
SRR17520069. 17362877

SRR17520069. 17362879  
SRR17520069. 17362881  
SRR17520069. 17362883  
SRR17520069. 17362885  
SRR17520069. 17362887  
SRR17520069. 17362889  
SRR17520069. 17362891  
SRR17520069. 17362893  
SRR17520069. 17362895  
SRR17520069. 17368716  
SRR17520069. 17368718  
SRR17520069. 17368720  
SRR17520069. 17368724  
SRR17520069. 17368726  
SRR17520069. 17368730  
SRR17520069. 17372410  
SRR17520069. 17372412  
SRR17520069. 17372414  
SRR17520069. 17372416  
SRR17520069. 17372418  
SRR17520069. 17372420  
SRR17520069. 17372422  
SRR17520069. 17372424  
SRR17520069. 17372426  
SRR17520069. 17372428  
SRR17520069. 17372430  
SRR17520069. 17372432  
SRR17520069. 17372434  
SRR17520069. 17372436  
SRR17520069. 17372438  
SRR17520069. 17372440  
SRR17520069. 17372442  
SRR17520069. 17372444  
SRR17520069. 17372446  
SRR17520069. 17372448  
SRR17520069. 17372450  
SRR17520069. 17372452  
SRR17520069. 17372454  
SRR17520069. 17372687  
SRR17520069. 17372689  
SRR17520069. 17372691  
SRR17520069. 17372693  
SRR17520069. 17372697  
SRR17520069. 17372701  
SRR17520069. 17372703  
SRR17520069. 17372705  
SRR17520069. 17372707



SRR17520069. 17372709  
SRR17520069. 17372711  
SRR17520069. 17374359  
SRR17520069. 17374361  
SRR17520069. 17374363  
SRR17520069. 17374365  
SRR17520069. 17374367  
SRR17520069. 17381651  
SRR17520069. 17381653  
SRR17520069. 17381655  
SRR17520069. 17381657  
SRR17520069. 17381659  
SRR17520069. 17381661  
SRR17520069. 17381663  
SRR17520069. 17381665  
SRR17520069. 17381667  
SRR17520069. 17381669  
SRR17520069. 17381671  
SRR17520069. 17381673  
SRR17520069. 17381677  
SRR17520069. 17381679  
SRR17520069. 17381681  
SRR17520069. 17381686  
SRR17520069. 17381688  
SRR17520069. 17381690  
SRR17520069. 17381692  
SRR17520069. 17381694  
SRR17520069. 17381696  
SRR17520069. 17381698  
SRR17520069. 17381700  
SRR17520069. 17381702  
SRR17520069. 17381704  
SRR17520069. 17381706  
SRR17520069. 17381708  
SRR17520069. 17381710  
SRR17520069. 17381712  
SRR17520069. 17381716  
SRR17520069. 17381720  
SRR17520069. 17381722  
SRR17520069. 17381724  
SRR17520069. 17381726  
SRR17520069. 17381728  
SRR17520069. 17381730  
SRR17520069. 17381732  
SRR17520069. 17381734  
SRR17520069. 17381736  
SRR17520069. 17381738

SRR17520069. 17381740  
SRR17520069. 17381742  
SRR17520069. 17381744  
SRR17520069. 17381748  
SRR17520069. 17381750  
SRR17520069. 17381752  
SRR17520069. 17381756  
SRR17520069. 17381758  
SRR17520069. 17381760  
SRR17520069. 17381762  
SRR17520069. 17381764  
SRR17520069. 17383540  
SRR17520069. 17383542  
SRR17520069. 17383544  
SRR17520069. 17383546  
SRR17520069. 17383548  
SRR17520069. 17383550  
SRR17520069. 17383552  
SRR17520069. 17383554  
SRR17520069. 17383556  
SRR17520069. 17383558  
SRR17520069. 17383560  
SRR17520069. 17383562  
SRR17520069. 17383564  
SRR17520069. 17383566  
SRR17520069. 17383568  
SRR17520069. 17383570  
SRR17520069. 17383572  
SRR17520069. 17383574  
SRR17520069. 17383576  
SRR17520069. 17383578  
SRR17520069. 17383580  
SRR17520069. 17386066  
SRR17520069. 17386580  
SRR17520069. 17386582  
SRR17520069. 17386584  
SRR17520069. 17386586  
SRR17520069. 17386588  
SRR17520069. 17386590  
SRR17520069. 17386592  
SRR17520069. 17386594  
SRR17520069. 17386596  
SRR17520069. 17386598  
SRR17520069. 17386600  
SRR17520069. 17386602  
SRR17520069. 17386604  
SRR17520069. 17386606

SRR17520069. 17386608  
SRR17520069. 17386610  
SRR17520069. 17386612  
SRR17520069. 17386614  
SRR17520069. 17386616  
SRR17520069. 17386618  
SRR17520069. 17386620  
SRR17520069. 17386622  
SRR17520069. 17386624  
SRR17520069. 17386626  
SRR17520069. 17386628  
SRR17520069. 17386630  
SRR17520069. 17386632  
SRR17520069. 17387698  
SRR17520069. 17387700  
SRR17520069. 17387702  
SRR17520069. 17387704  
SRR17520069. 17387706  
SRR17520069. 17387708  
SRR17520069. 17387710  
SRR17520069. 17387712  
SRR17520069. 17387714  
SRR17520069. 17387716  
SRR17520069. 17387718  
SRR17520069. 17387720  
SRR17520069. 17387722  
SRR17520069. 17387724  
SRR17520069. 17387726  
SRR17520069. 17387728  
SRR17520069. 17387730  
SRR17520069. 17387732  
SRR17520069. 17387734  
SRR17520069. 17387736  
SRR17520069. 17387738  
SRR17520069. 17387740  
SRR17520069. 17399326  
SRR17520069. 17399328  
SRR17520069. 17399332  
SRR17520069. 17399334  
SRR17520069. 17399336  
SRR17520069. 17399338  
SRR17520069. 17399340  
SRR17520069. 17399342  
SRR17520069. 17399344  
SRR17520069. 17399346  
SRR17520069. 17399348  
SRR17520069. 17399350

SRR17520069. 17399352  
SRR17520069. 17399354  
SRR17520069. 17399356  
SRR17520069. 17399358  
SRR17520069. 17399360  
SRR17520069. 17399362  
SRR17520069. 17399364  
SRR17520069. 17399366  
SRR17520069. 17400210  
SRR17520069. 17400212  
SRR17520069. 17400214  
SRR17520069. 17400216  
SRR17520069. 17400218  
SRR17520069. 17400220  
SRR17520069. 17400222  
SRR17520069. 17400224  
SRR17520069. 17403708  
SRR17520069. 17403710  
SRR17520069. 17403712  
SRR17520069. 17403714  
SRR17520069. 17403716  
SRR17520069. 17403718  
SRR17520069. 17403720  
SRR17520069. 17403722  
SRR17520069. 17403724  
SRR17520069. 17403726  
SRR17520069. 17403728  
SRR17520069. 17403730  
SRR17520069. 17403732  
SRR17520069. 17403734  
SRR17520069. 17403736  
SRR17520069. 17403738  
SRR17520069. 17403740  
SRR17520069. 17403743  
SRR17520069. 17403745  
SRR17520069. 17403747  
SRR17520069. 17403749  
SRR17520069. 17403751  
SRR17520069. 17403755  
SRR17520069. 17403757  
SRR17520069. 17403759  
SRR17520069. 17403761  
SRR17520069. 17403763  
SRR17520069. 17403765  
SRR17520069. 17403767  
SRR17520069. 17403769  
SRR17520069. 17403771

SRR17520069.17403775  
SRR17520069.17403777  
SRR17520069.17403779  
SRR17520069.17403781  
SRR17520069.17403783  
SRR17520069.17403785  
SRR17520069.17403787  
SRR17520069.17403789  
SRR17520069.17403791  
SRR17520069.17403793  
SRR17520069.17403795  
SRR17520069.17403797  
SRR17520069.17407545  
SRR17520069.17407547  
SRR17520069.17407549  
SRR17520069.17407551  
SRR17520069.17407553  
SRR17520069.17407555  
SRR17520069.17407557  
SRR17520069.17407559  
SRR17520069.17407561  
SRR17520069.17407563  
SRR17520069.17407565  
SRR17520069.17407567  
SRR17520069.17407569  
SRR17520069.17407571  
SRR17520069.17407573  
SRR17520069.17407575  
SRR17520069.17407579  
SRR17520069.17407581  
SRR17520069.17407583  
SRR17520069.17407585  
SRR17520069.17407587  
SRR17520069.17407589  
SRR17520069.17407591  
SRR17520069.17407593  
SRR17520069.17407595  
SRR17520069.17407597  
SRR17520069.17407599  
SRR17520069.17407601  
SRR17520069.17407603  
SRR17520069.17407605  
SRR17520069.17407607  
SRR17520069.17407609  
SRR17520069.17407611  
SRR17520069.17407613  
SRR17520069.17407615

SRR17520069. 17407617  
SRR17520069. 17407619  
SRR17520069. 17407621  
SRR17520069. 17407623  
SRR17520069. 17407625  
SRR17520069. 17407627  
SRR17520069. 17407631  
SRR17520069. 17407633  
SRR17520069. 17407635  
SRR17520069. 17407637  
SRR17520069. 17407639  
SRR17520069. 17407641  
SRR17520069. 17407643  
SRR17520069. 17407645  
SRR17520069. 17407647  
SRR17520069. 17407649  
SRR17520069. 17407651  
SRR17520069. 17407653  
SRR17520069. 17407655  
SRR17520069. 17407657  
SRR17520069. 17407659  
SRR17520069. 17407661  
SRR17520069. 17407663  
SRR17520069. 17407665  
SRR17520069. 17407667  
SRR17520069. 17407669  
SRR17520069. 17407671  
SRR17520069. 17407673  
SRR17520069. 17407675  
SRR17520069. 17407677  
SRR17520069. 17407679  
SRR17520069. 17407681  
SRR17520069. 17407683  
SRR17520069. 17407685  
SRR17520069. 17407687  
SRR17520069. 17407689  
SRR17520069. 17407691  
SRR17520069. 17407693  
SRR17520069. 17407695  
SRR17520069. 17407697  
SRR17520069. 17407699  
SRR17520069. 17407703  
SRR17520069. 17407705  
SRR17520069. 17407707  
SRR17520069. 17407709  
SRR17520069. 17407711  
SRR17520069. 17407713

SRR17520069.17407717  
SRR17520069.17407719  
SRR17520069.17407721  
SRR17520069.17407723  
SRR17520069.17410309  
SRR17520069.17411672  
SRR17520069.17411674  
SRR17520069.17411676  
SRR17520069.17411678  
SRR17520069.17411680  
SRR17520069.17411682  
SRR17520069.17411684  
SRR17520069.17411686  
SRR17520069.17411688  
SRR17520069.17411690  
SRR17520069.17411692  
SRR17520069.17411694  
SRR17520069.17411696  
SRR17520069.17418359  
SRR17520069.17418361  
SRR17520069.17418363  
SRR17520069.17418365  
SRR17520069.17418367  
SRR17520069.17418369  
SRR17520069.17418371  
SRR17520069.17418373  
SRR17520069.17418375  
SRR17520069.17418377  
SRR17520069.17418379  
SRR17520069.17418381  
SRR17520069.17418383  
SRR17520069.17418385  
SRR17520069.17418387  
SRR17520069.17418389  
SRR17520069.17418391  
SRR17520069.17418393  
SRR17520069.17418395  
SRR17520069.17418397  
SRR17520069.17418399  
SRR17520069.17418401  
SRR17520069.17418403  
SRR17520069.17418405  
SRR17520069.17418409  
SRR17520069.17418411  
SRR17520069.17418413  
SRR17520069.17418415  
SRR17520069.17418417

SRR17520069. 17418419  
SRR17520069. 17418421  
SRR17520069. 17418423  
SRR17520069. 17418425  
SRR17520069. 17418427  
SRR17520069. 17418429  
SRR17520069. 17418431  
SRR17520069. 17418433  
SRR17520069. 17418435  
SRR17520069. 17418437  
SRR17520069. 17418439  
SRR17520069. 17418441  
SRR17520069. 17418443  
SRR17520069. 17418445  
SRR17520069. 17418447  
SRR17520069. 17418449  
SRR17520069. 17418451  
SRR17520069. 17418453  
SRR17520069. 17418455  
SRR17520069. 17418457  
SRR17520069. 17418459  
SRR17520069. 17418461  
SRR17520069. 17418463  
SRR17520069. 17418465  
SRR17520069. 17418467  
SRR17520069. 17418469  
SRR17520069. 17418471  
SRR17520069. 17418473  
SRR17520069. 17418475  
SRR17520069. 17418477  
SRR17520069. 17418479  
SRR17520069. 17418481  
SRR17520069. 17418483  
SRR17520069. 17418485  
SRR17520069. 17418487  
SRR17520069. 17418489  
SRR17520069. 17418491  
SRR17520069. 17418493  
SRR17520069. 17418497  
SRR17520069. 17418499  
SRR17520069. 17418501  
SRR17520069. 17418503  
SRR17520069. 17418505  
SRR17520069. 17418507  
SRR17520069. 17418509  
SRR17520069. 17418511  
SRR17520069. 17418513



SRR17520069.17418515  
SRR17520069.17418517  
SRR17520069.17418521  
SRR17520069.17418523  
SRR17520069.17418525  
SRR17520069.17418527  
SRR17520069.17418529  
SRR17520069.17418531  
SRR17520069.17418533  
SRR17520069.17418535  
SRR17520069.17418537  
SRR17520069.17418539  
SRR17520069.17418541  
SRR17520069.17418543  
SRR17520069.17418545  
SRR17520069.17418547  
SRR17520069.17418549  
SRR17520069.17418551  
SRR17520069.17418553  
SRR17520069.17418555  
SRR17520069.17418557  
SRR17520069.17418559  
SRR17520069.17418561  
SRR17520069.17418563  
SRR17520069.17418565  
SRR17520069.17418567  
SRR17520069.17418569  
SRR17520069.17418571  
SRR17520069.17418573  
SRR17520069.17418575  
SRR17520069.17418577  
SRR17520069.17427400  
SRR17520069.17427464  
SRR17520069.17430339  
SRR17520069.17430341  
SRR17520069.17430343  
SRR17520069.17430345  
SRR17520069.17430347  
SRR17520069.17430349  
SRR17520069.17430351  
SRR17520069.17430353  
SRR17520069.17430355  
SRR17520069.17430357  
SRR17520069.17430359  
SRR17520069.17430361  
SRR17520069.17430363  
SRR17520069.17430365

SRR17520069.17430367  
SRR17520069.17430369  
SRR17520069.17430371  
SRR17520069.17430373  
SRR17520069.17430375  
SRR17520069.17430377  
SRR17520069.17430379  
SRR17520069.17430381  
SRR17520069.17430383  
SRR17520069.17430385  
SRR17520069.17430387  
SRR17520069.17430389  
SRR17520069.17430391  
SRR17520069.17430393  
SRR17520069.17430395  
SRR17520069.17432515  
SRR17520069.17432517  
SRR17520069.17432519  
SRR17520069.17432521  
SRR17520069.17432523  
SRR17520069.17432525  
SRR17520069.17432527  
SRR17520069.17432529  
SRR17520069.17432531  
SRR17520069.17432533  
SRR17520069.17432535  
SRR17520069.17432537  
SRR17520069.17432539  
SRR17520069.17432541  
SRR17520069.17432543  
SRR17520069.17432547  
SRR17520069.17432549  
SRR17520069.17432551  
SRR17520069.17432553  
SRR17520069.17432557  
SRR17520069.17432559  
SRR17520069.17432561  
SRR17520069.17432565  
SRR17520069.17432567  
SRR17520069.17432569  
SRR17520069.17432571  
SRR17520069.17432573  
SRR17520069.17432575  
SRR17520069.17432577  
SRR17520069.17432579  
SRR17520069.17432581  
SRR17520069.17432583

SRR17520069. 17432585  
SRR17520069. 17432589  
SRR17520069. 17432591  
SRR17520069. 17432593  
SRR17520069. 17432595  
SRR17520069. 17432597  
SRR17520069. 17432599  
SRR17520069. 17432601  
SRR17520069. 17432603  
SRR17520069. 17432605  
SRR17520069. 17432607  
SRR17520069. 17432609  
SRR17520069. 17432611  
SRR17520069. 17432613  
SRR17520069. 17432615  
SRR17520069. 17432617  
SRR17520069. 17432619  
SRR17520069. 17432621  
SRR17520069. 17432623  
SRR17520069. 17432627  
SRR17520069. 17432629  
SRR17520069. 17432631  
SRR17520069. 17434691  
SRR17520069. 17434693  
SRR17520069. 17434695  
SRR17520069. 17434697  
SRR17520069. 17434699  
SRR17520069. 17434701  
SRR17520069. 17434703  
SRR17520069. 17434705  
SRR17520069. 17434707  
SRR17520069. 17434709  
SRR17520069. 17434711  
SRR17520069. 17435437  
SRR17520069. 17435441  
SRR17520069. 17435443  
SRR17520069. 17435445  
SRR17520069. 17435451  
SRR17520069. 17435455  
SRR17520069. 17436687  
SRR17520069. 17446666  
SRR17520069. 17446668  
SRR17520069. 17446670  
SRR17520069. 17446672  
SRR17520069. 17446674  
SRR17520069. 17446676  
SRR17520069. 17446678

SRR17520069. 17446682  
SRR17520069. 17446684  
SRR17520069. 17446686  
SRR17520069. 17446688  
SRR17520069. 17446690  
SRR17520069. 17446692  
SRR17520069. 17446694  
SRR17520069. 17446696  
SRR17520069. 17446698  
SRR17520069. 17446700  
SRR17520069. 17462824  
SRR17520069. 17462826  
SRR17520069. 17464600  
SRR17520069. 17464602  
SRR17520069. 17472111  
SRR17520069. 17472113  
SRR17520069. 17472115  
SRR17520069. 17472117  
SRR17520069. 17472119  
SRR17520069. 17472121  
SRR17520069. 17472123  
SRR17520069. 17472125  
SRR17520069. 17472127  
SRR17520069. 17472129  
SRR17520069. 17472131  
SRR17520069. 17472133  
SRR17520069. 17472135  
SRR17520069. 17472137  
SRR17520069. 17472139  
SRR17520069. 17472141  
SRR17520069. 17472705  
SRR17520069. 17473176  
SRR17520069. 17473178  
SRR17520069. 17473180  
SRR17520069. 17473182  
SRR17520069. 17473184  
SRR17520069. 17473186  
SRR17520069. 17473188  
SRR17520069. 17473190  
SRR17520069. 17473192  
SRR17520069. 17478261  
SRR17520069. 17478263  
SRR17520069. 17478265  
SRR17520069. 17478267  
SRR17520069. 17478269  
SRR17520069. 17478271  
SRR17520069. 17486984

SRR17520069. 17486986  
SRR17520069. 17486988  
SRR17520069. 17486990  
SRR17520069. 17486992  
SRR17520069. 17486994  
SRR17520069. 17486996  
SRR17520069. 17486998  
SRR17520069. 17487000  
SRR17520069. 17487002  
SRR17520069. 17487004  
SRR17520069. 17487006  
SRR17520069. 17487008  
SRR17520069. 17487010  
SRR17520069. 17487012  
SRR17520069. 17487014  
SRR17520069. 17487016  
SRR17520069. 17487018  
SRR17520069. 17487020  
SRR17520069. 17487022  
SRR17520069. 17487024  
SRR17520069. 17487026  
SRR17520069. 17487028  
SRR17520069. 17487030  
SRR17520069. 17487032  
SRR17520069. 17487034  
SRR17520069. 17487038  
SRR17520069. 17492835  
SRR17520069. 17494969  
SRR17520069. 17494971  
SRR17520069. 17494973  
SRR17520069. 17496231  
SRR17520069. 17496233  
SRR17520069. 17496235  
SRR17520069. 17496237  
SRR17520069. 17496239  
SRR17520069. 17496241  
SRR17520069. 17496243  
SRR17520069. 17496245  
SRR17520069. 17496247  
SRR17520069. 17510003  
SRR17520069. 17510005  
SRR17520069. 17510007  
SRR17520069. 17510009  
SRR17520069. 17510011  
SRR17520069. 17510013  
SRR17520069. 17510015  
SRR17520069. 17510017

SRR17520069.17510019  
SRR17520069.17510021  
SRR17520069.17510023  
SRR17520069.17510027  
SRR17520069.17510029  
SRR17520069.17510031  
SRR17520069.17511610  
SRR17520069.17511612  
SRR17520069.17511614  
SRR17520069.17511616  
SRR17520069.17511618  
SRR17520069.17511620  
SRR17520069.17511622  
SRR17520069.17511624  
SRR17520069.17511626  
SRR17520069.17511628  
SRR17520069.17511630  
SRR17520069.17511633  
SRR17520069.17511635  
SRR17520069.17511637  
SRR17520069.17511639  
SRR17520069.17511641  
SRR17520069.17511643  
SRR17520069.17511647  
SRR17520069.17511649  
SRR17520069.17511651  
SRR17520069.17511653  
SRR17520069.17511655  
SRR17520069.17511657  
SRR17520069.17511659  
SRR17520069.17511661  
SRR17520069.17511663  
SRR17520069.17511665  
SRR17520069.17511667  
SRR17520069.17511669  
SRR17520069.17511671  
SRR17520069.17511674  
SRR17520069.17511676  
SRR17520069.17511678  
SRR17520069.17511680  
SRR17520069.17511682  
SRR17520069.17511684  
SRR17520069.17511686  
SRR17520069.17511688  
SRR17520069.17511690  
SRR17520069.17511692  
SRR17520069.17511694

SRR17520069.17511696  
SRR17520069.17511698  
SRR17520069.17511700  
SRR17520069.17511702  
SRR17520069.17511704  
SRR17520069.17511706  
SRR17520069.17511708  
SRR17520069.17511710  
SRR17520069.17511712  
SRR17520069.17511714  
SRR17520069.17511716  
SRR17520069.17511718  
SRR17520069.17511720  
SRR17520069.17511722  
SRR17520069.17511724  
SRR17520069.17511726  
SRR17520069.17511728  
SRR17520069.17511730  
SRR17520069.17511732  
SRR17520069.17511734  
SRR17520069.17511736  
SRR17520069.17511738  
SRR17520069.17511740  
SRR17520069.17511742  
SRR17520069.17511744  
SRR17520069.17511746  
SRR17520069.17511748  
SRR17520069.17511750  
SRR17520069.17511754  
SRR17520069.17511756  
SRR17520069.17511758  
SRR17520069.17511760  
SRR17520069.17511762  
SRR17520069.17511764  
SRR17520069.17511766  
SRR17520069.17511768  
SRR17520069.17515016  
SRR17520069.17515018  
SRR17520069.17515020  
SRR17520069.17515022  
SRR17520069.17515024  
SRR17520069.17515026  
SRR17520069.17515028  
SRR17520069.17515030  
SRR17520069.17515032  
SRR17520069.17515034  
SRR17520069.17515036

SRR17520069. 17515038  
SRR17520069. 17515040  
SRR17520069. 17515042  
SRR17520069. 17515044  
SRR17520069. 17515046  
SRR17520069. 17515048  
SRR17520069. 17515050  
SRR17520069. 17515052  
SRR17520069. 17515054  
SRR17520069. 17515056  
SRR17520069. 17515058  
SRR17520069. 17515060  
SRR17520069. 17515062  
SRR17520069. 17515064  
SRR17520069. 17515066  
SRR17520069. 17515068  
SRR17520069. 17515070  
SRR17520069. 17515072  
SRR17520069. 17515074  
SRR17520069. 17515076  
SRR17520069. 17515078  
SRR17520069. 17515080  
SRR17520069. 17515082  
SRR17520069. 17515084  
SRR17520069. 17515086  
SRR17520069. 17515088  
SRR17520069. 17515090  
SRR17520069. 17515092  
SRR17520069. 17515094  
SRR17520069. 17515096  
SRR17520069. 17515098  
SRR17520069. 17515100  
SRR17520069. 17519975  
SRR17520069. 17519977  
SRR17520069. 17519979  
SRR17520069. 17519981  
SRR17520069. 17519983  
SRR17520069. 17519985  
SRR17520069. 17519987  
SRR17520069. 17519989  
SRR17520069. 17519991  
SRR17520069. 17519993  
SRR17520069. 17519995  
SRR17520069. 17519997  
SRR17520069. 17519999  
SRR17520069. 17520001  
SRR17520069. 17520142



SRR17520069.17520144  
SRR17520069.17520146  
SRR17520069.17520148  
SRR17520069.17520150  
SRR17520069.17520152  
SRR17520069.17520154  
SRR17520069.17520156  
SRR17520069.17520158  
SRR17520069.17520160  
SRR17520069.17520164  
SRR17520069.17520168  
SRR17520069.17520170  
SRR17520069.17520172  
SRR17520069.17520174  
SRR17520069.17520176  
SRR17520069.17520178  
SRR17520069.17520180  
SRR17520069.17520182  
SRR17520069.17520184  
SRR17520069.17520186  
SRR17520069.17520188  
SRR17520069.17520190  
SRR17520069.17520192  
SRR17520069.17520194  
SRR17520069.17520196  
SRR17520069.17520198  
SRR17520069.17520200  
SRR17520069.17520202  
SRR17520069.17520204  
SRR17520069.17520206  
SRR17520069.17520208  
SRR17520069.17520210  
SRR17520069.17521636  
SRR17520069.17521638  
SRR17520069.17521640  
SRR17520069.17521642  
SRR17520069.17521644  
SRR17520069.17521646  
SRR17520069.17521648  
SRR17520069.17521650  
SRR17520069.17521652  
SRR17520069.17521654  
SRR17520069.17521656  
SRR17520069.17521658  
SRR17520069.17521660  
SRR17520069.17521662  
SRR17520069.17521664

SRR17520069. 17522844  
SRR17520069. 17522846  
SRR17520069. 17522848  
SRR17520069. 17522850  
SRR17520069. 17522852  
SRR17520069. 17522854  
SRR17520069. 17522856  
SRR17520069. 17522858  
SRR17520069. 17522860  
SRR17520069. 17522862  
SRR17520069. 17522864  
SRR17520069. 17522866  
SRR17520069. 17522868  
SRR17520069. 17522870  
SRR17520069. 17522872  
SRR17520069. 17522874  
SRR17520069. 17522876  
SRR17520069. 17522878  
SRR17520069. 17522880  
SRR17520069. 17522882  
SRR17520069. 17524494  
SRR17520069. 17524496  
SRR17520069. 17526102  
SRR17520069. 17526104  
SRR17520069. 17526106  
SRR17520069. 17526110  
SRR17520069. 17526112  
SRR17520069. 17526114  
SRR17520069. 17526118  
SRR17520069. 17526120  
SRR17520069. 17526122  
SRR17520069. 17526124  
SRR17520069. 17526126  
SRR17520069. 17531204  
SRR17520069. 17531206  
SRR17520069. 17531208  
SRR17520069. 17531210  
SRR17520069. 17531212  
SRR17520069. 17531214  
SRR17520069. 17531216  
SRR17520069. 17531218  
SRR17520069. 17531220  
SRR17520069. 17531222  
SRR17520069. 17531224  
SRR17520069. 17531226  
SRR17520069. 17531228  
SRR17520069. 17531230

SRR17520069.17531232  
SRR17520069.17531234  
SRR17520069.17531236  
SRR17520069.17531238  
SRR17520069.17531240  
SRR17520069.17532810  
SRR17520069.17532812  
SRR17520069.17532814  
SRR17520069.17532816  
SRR17520069.17532818  
SRR17520069.17532820  
SRR17520069.17532822  
SRR17520069.17532824  
SRR17520069.17532826  
SRR17520069.17532828  
SRR17520069.17532830  
SRR17520069.17532832  
SRR17520069.17532834  
SRR17520069.17532836  
SRR17520069.17532838  
SRR17520069.17532842  
SRR17520069.17532844  
SRR17520069.17532846  
SRR17520069.17532848  
SRR17520069.17532850  
SRR17520069.17532852  
SRR17520069.17532854  
SRR17520069.17532856  
SRR17520069.17532858  
SRR17520069.17532860  
SRR17520069.17532862  
SRR17520069.17532864  
SRR17520069.17532866  
SRR17520069.17532868  
SRR17520069.17532870  
SRR17520069.17532872  
SRR17520069.17532874  
SRR17520069.17532876  
SRR17520069.17532878  
SRR17520069.17532880  
SRR17520069.17532882  
SRR17520069.17532884  
SRR17520069.17532886  
SRR17520069.17532888  
SRR17520069.17532890  
SRR17520069.17532892  
SRR17520069.17532894

SRR17520069. 17532896  
SRR17520069. 17532898  
SRR17520069. 17532900  
SRR17520069. 17532902  
SRR17520069. 17532904  
SRR17520069. 17532906  
SRR17520069. 17532908  
SRR17520069. 17532910  
SRR17520069. 17532912  
SRR17520069. 17532914  
SRR17520069. 17532916  
SRR17520069. 17532918  
SRR17520069. 17532920  
SRR17520069. 17532922  
SRR17520069. 17532924  
SRR17520069. 17532926  
SRR17520069. 17532928  
SRR17520069. 17532930  
SRR17520069. 17532932  
SRR17520069. 17532934  
SRR17520069. 17532936  
SRR17520069. 17532938  
SRR17520069. 17534612  
SRR17520069. 17534614  
SRR17520069. 17534616  
SRR17520069. 17534618  
SRR17520069. 17534620  
SRR17520069. 17534622  
SRR17520069. 17535579  
SRR17520069. 17535581  
SRR17520069. 17535583  
SRR17520069. 17535585  
SRR17520069. 17535587  
SRR17520069. 17535589  
SRR17520069. 17535591  
SRR17520069. 17535593  
SRR17520069. 17535595  
SRR17520069. 17535597  
SRR17520069. 17538584  
SRR17520069. 17538586  
SRR17520069. 17538588  
SRR17520069. 17538590  
SRR17520069. 17538592  
SRR17520069. 17540029  
SRR17520069. 17540031  
SRR17520069. 17540033  
SRR17520069. 17540035

SRR17520069. 17540037  
SRR17520069. 17540039  
SRR17520069. 17540860  
SRR17520069. 17540862  
SRR17520069. 17546346  
SRR17520069. 17546348  
SRR17520069. 17546352  
SRR17520069. 17546354  
SRR17520069. 17546356  
SRR17520069. 17546362  
SRR17520069. 17546364  
SRR17520069. 17546366  
SRR17520069. 17546368  
SRR17520069. 17546370  
SRR17520069. 17546372  
SRR17520069. 17546374  
SRR17520069. 17556474  
SRR17520069. 17556476  
SRR17520069. 17556478  
SRR17520069. 17556480  
SRR17520069. 17556482  
SRR17520069. 17556484  
SRR17520069. 17556486  
SRR17520069. 17556488  
SRR17520069. 17556490  
SRR17520069. 17556492  
SRR17520069. 17556494  
SRR17520069. 17556496  
SRR17520069. 17556498  
SRR17520069. 17556500  
SRR17520069. 17556502  
SRR17520069. 17556504  
SRR17520069. 17556506  
SRR17520069. 17556508  
SRR17520069. 17556510  
SRR17520069. 17556512  
SRR17520069. 17556514  
SRR17520069. 17556516  
SRR17520069. 17556518  
SRR17520069. 17556520  
SRR17520069. 17556522  
SRR17520069. 17556524  
SRR17520069. 17556526  
SRR17520069. 17556528  
SRR17520069. 17556530  
SRR17520069. 17556532  
SRR17520069. 17556534

SRR17520069. 17556536  
SRR17520069. 17561077  
SRR17520069. 17561079  
SRR17520069. 17561081  
SRR17520069. 17561083  
SRR17520069. 17566685  
SRR17520069. 17566687  
SRR17520069. 17566689  
SRR17520069. 17566691  
SRR17520069. 17566693  
SRR17520069. 17566695  
SRR17520069. 17566697  
SRR17520069. 17566699  
SRR17520069. 17566703  
SRR17520069. 17566705  
SRR17520069. 17566707  
SRR17520069. 17566709  
SRR17520069. 17566711  
SRR17520069. 17566713  
SRR17520069. 17566715  
SRR17520069. 17566717  
SRR17520069. 17566719  
SRR17520069. 17566721  
SRR17520069. 17566723  
SRR17520069. 17566725  
SRR17520069. 17566727  
SRR17520069. 17566729  
SRR17520069. 17566731  
SRR17520069. 17566733  
SRR17520069. 17566735  
SRR17520069. 17566737  
SRR17520069. 17566739  
SRR17520069. 17566741  
SRR17520069. 17566743  
SRR17520069. 17566745  
SRR17520069. 17566747  
SRR17520069. 17566749  
SRR17520069. 17566751  
SRR17520069. 17566753  
SRR17520069. 17566755  
SRR17520069. 17566757  
SRR17520069. 17566759  
SRR17520069. 17566761  
SRR17520069. 17566763  
SRR17520069. 17566765  
SRR17520069. 17566767  
SRR17520069. 17573998

SRR17520069. 17574000  
SRR17520069. 17574002  
SRR17520069. 17574004  
SRR17520069. 17574006  
SRR17520069. 17574008  
SRR17520069. 17574010  
SRR17520069. 17574012  
SRR17520069. 17574014  
SRR17520069. 17574016  
SRR17520069. 17574018  
SRR17520069. 17574020  
SRR17520069. 17574022  
SRR17520069. 17574024  
SRR17520069. 17574026  
SRR17520069. 17574028  
SRR17520069. 17574030  
SRR17520069. 17574032  
SRR17520069. 17574036  
SRR17520069. 17574038  
SRR17520069. 17574040  
SRR17520069. 17574042  
SRR17520069. 17574044  
SRR17520069. 17574046  
SRR17520069. 17574048  
SRR17520069. 17574050  
SRR17520069. 17574052  
SRR17520069. 17574054  
SRR17520069. 17574056  
SRR17520069. 17574058  
SRR17520069. 17574060  
SRR17520069. 17574062  
SRR17520069. 17574064  
SRR17520069. 17574066  
SRR17520069. 17574068  
SRR17520069. 17574070  
SRR17520069. 17574073  
SRR17520069. 17574075  
SRR17520069. 17574077  
SRR17520069. 17574079  
SRR17520069. 17574081  
SRR17520069. 17574083  
SRR17520069. 17574085  
SRR17520069. 17574087  
SRR17520069. 17574089  
SRR17520069. 17574091  
SRR17520069. 17574093  
SRR17520069. 17574095

SRR17520069. 17576480  
SRR17520069. 17576482  
SRR17520069. 17576484  
SRR17520069. 17576486  
SRR17520069. 17576488  
SRR17520069. 17576490  
SRR17520069. 17576492  
SRR17520069. 17576494  
SRR17520069. 17576496  
SRR17520069. 17576498  
SRR17520069. 17576500  
SRR17520069. 17576502  
SRR17520069. 17577191  
SRR17520069. 17577193  
SRR17520069. 17577195  
SRR17520069. 17577197  
SRR17520069. 17577199  
SRR17520069. 17577203  
SRR17520069. 17577205  
SRR17520069. 17577207  
SRR17520069. 17577209  
SRR17520069. 17577211  
SRR17520069. 17577213  
SRR17520069. 17577215  
SRR17520069. 17577217  
SRR17520069. 17577219  
SRR17520069. 17577221  
SRR17520069. 17577225  
SRR17520069. 17577227  
SRR17520069. 17577229  
SRR17520069. 17577231  
SRR17520069. 17577233  
SRR17520069. 17577235  
SRR17520069. 17577237  
SRR17520069. 17577239  
SRR17520069. 17577241  
SRR17520069. 17577243  
SRR17520069. 17577245  
SRR17520069. 17577247  
SRR17520069. 17577249  
SRR17520069. 17577251  
SRR17520069. 17579057  
SRR17520069. 17579059  
SRR17520069. 17579061  
SRR17520069. 17579063  
SRR17520069. 17579065  
SRR17520069. 17581364



SRR17520069. 17581366  
SRR17520069. 17581368  
SRR17520069. 17581376  
SRR17520069. 17581378  
SRR17520069. 17581380  
SRR17520069. 17581382  
SRR17520069. 17581384  
SRR17520069. 17582439  
SRR17520069. 17582441  
SRR17520069. 17582443  
SRR17520069. 17582445  
SRR17520069. 17582447  
SRR17520069. 17582451  
SRR17520069. 17582453  
SRR17520069. 17582455  
SRR17520069. 17582457  
SRR17520069. 17582459  
SRR17520069. 17582461  
SRR17520069. 17582463  
SRR17520069. 17582465  
SRR17520069. 17582467  
SRR17520069. 17582469  
SRR17520069. 17582471  
SRR17520069. 17582473  
SRR17520069. 17582475  
SRR17520069. 17582477  
SRR17520069. 17582479  
SRR17520069. 17582481  
SRR17520069. 17582483  
SRR17520069. 17582485  
SRR17520069. 17582487  
SRR17520069. 17582489  
SRR17520069. 17582491  
SRR17520069. 17582493  
SRR17520069. 17582495  
SRR17520069. 17582497  
SRR17520069. 17582499  
SRR17520069. 17582501  
SRR17520069. 17582503  
SRR17520069. 17582505  
SRR17520069. 17582509  
SRR17520069. 17582511  
SRR17520069. 17582513  
SRR17520069. 17582515  
SRR17520069. 17582517  
SRR17520069. 17582519  
SRR17520069. 17582521

SRR17520069. 17582523  
SRR17520069. 17582525  
SRR17520069. 17582527  
SRR17520069. 17582529  
SRR17520069. 17582533  
SRR17520069. 17582535  
SRR17520069. 17582537  
SRR17520069. 17582539  
SRR17520069. 17583257  
SRR17520069. 17584622  
SRR17520069. 17584624  
SRR17520069. 17584626  
SRR17520069. 17584629  
SRR17520069. 17584631  
SRR17520069. 17584633  
SRR17520069. 17584635  
SRR17520069. 17584637  
SRR17520069. 17584639  
SRR17520069. 17584641  
SRR17520069. 17584643  
SRR17520069. 17584645  
SRR17520069. 17584647  
SRR17520069. 17584649  
SRR17520069. 17584651  
SRR17520069. 17584653  
SRR17520069. 17584655  
SRR17520069. 17584657  
SRR17520069. 17584659  
SRR17520069. 17584661  
SRR17520069. 17584663  
SRR17520069. 17584665  
SRR17520069. 17584667  
SRR17520069. 17584669  
SRR17520069. 17584671  
SRR17520069. 17586292  
SRR17520069. 17586294  
SRR17520069. 17586298  
SRR17520069. 17586300  
SRR17520069. 17586306  
SRR17520069. 17586308  
SRR17520069. 17586310  
SRR17520069. 17586314  
SRR17520069. 17586316  
SRR17520069. 17586320  
SRR17520069. 17586322  
SRR17520069. 17586324  
SRR17520069. 17586326

SRR17520069. 17586328  
SRR17520069. 17586330  
SRR17520069. 17586332  
SRR17520069. 17586334  
SRR17520069. 17586336  
SRR17520069. 17588437  
SRR17520069. 17588439  
SRR17520069. 17588441  
SRR17520069. 17588443  
SRR17520069. 17588445  
SRR17520069. 17588447  
SRR17520069. 17589235  
SRR17520069. 17589972  
SRR17520069. 17589974  
SRR17520069. 17589976  
SRR17520069. 17589978  
SRR17520069. 17589980  
SRR17520069. 17589982  
SRR17520069. 17589984  
SRR17520069. 17593271  
SRR17520069. 17593273  
SRR17520069. 17593275  
SRR17520069. 17593277  
SRR17520069. 17593281  
SRR17520069. 17593283  
SRR17520069. 17593285  
SRR17520069. 17593287  
SRR17520069. 17593289  
SRR17520069. 17593291  
SRR17520069. 17593295  
SRR17520069. 17593297  
SRR17520069. 17593299  
SRR17520069. 17593356  
SRR17520069. 17595690  
SRR17520069. 17595692  
SRR17520069. 17595696  
SRR17520069. 17595698  
SRR17520069. 17595702  
SRR17520069. 17595704  
SRR17520069. 17595706  
SRR17520069. 17595708  
SRR17520069. 17595710  
SRR17520069. 17595712  
SRR17520069. 17595714  
SRR17520069. 17595716  
SRR17520069. 17595718  
SRR17520069. 17595720

SRR17520069.17595722  
SRR17520069.17595724  
SRR17520069.17595726  
SRR17520069.17595728  
SRR17520069.17595730  
SRR17520069.17595732  
SRR17520069.17595734  
SRR17520069.17595738  
SRR17520069.17595740  
SRR17520069.17595742  
SRR17520069.17595744  
SRR17520069.17595746  
SRR17520069.17595748  
SRR17520069.17602654  
SRR17520069.17603644  
SRR17520069.17603646  
SRR17520069.17603648  
SRR17520069.17603650  
SRR17520069.17603652  
SRR17520069.17603654  
SRR17520069.17603656  
SRR17520069.17603658  
SRR17520069.17603660  
SRR17520069.17603662  
SRR17520069.17603664  
SRR17520069.17603666  
SRR17520069.17603668  
SRR17520069.17603670  
SRR17520069.17603672  
SRR17520069.17603674  
SRR17520069.17603676  
SRR17520069.17603678  
SRR17520069.17603680  
SRR17520069.17609933  
SRR17520069.17609935  
SRR17520069.17609942  
SRR17520069.17609944  
SRR17520069.17609946  
SRR17520069.17609948  
SRR17520069.17609950  
SRR17520069.17609952  
SRR17520069.17609954  
SRR17520069.17609956  
SRR17520069.17609958  
SRR17520069.17609960  
SRR17520069.17624226  
SRR17520069.17628455

SRR17520069. 17628457  
SRR17520069. 17628459  
SRR17520069. 17628461  
SRR17520069. 17628463  
SRR17520069. 17628465  
SRR17520069. 17628467  
SRR17520069. 17628469  
SRR17520069. 17628471  
SRR17520069. 17628473  
SRR17520069. 17628475  
SRR17520069. 17628477  
SRR17520069. 17628479  
SRR17520069. 17628481  
SRR17520069. 17628483  
SRR17520069. 17628485  
SRR17520069. 17628487  
SRR17520069. 17628489  
SRR17520069. 17628491  
SRR17520069. 17628493  
SRR17520069. 17628495  
SRR17520069. 17628497  
SRR17520069. 17628499  
SRR17520069. 17628501  
SRR17520069. 17628503  
SRR17520069. 17628505  
SRR17520069. 17628507  
SRR17520069. 17628509  
SRR17520069. 17628511  
SRR17520069. 17628513  
SRR17520069. 17628515  
SRR17520069. 17628517  
SRR17520069. 17628519  
SRR17520069. 17628521  
SRR17520069. 17628523  
SRR17520069. 17628525  
SRR17520069. 17628527  
SRR17520069. 17628529  
SRR17520069. 17628531  
SRR17520069. 17628535  
SRR17520069. 17628537  
SRR17520069. 17628539  
SRR17520069. 17628541  
SRR17520069. 17628543  
SRR17520069. 17628545  
SRR17520069. 17628547  
SRR17520069. 17628549  
SRR17520069. 17628551

SRR17520069. 17628553  
SRR17520069. 17628557  
SRR17520069. 17628559  
SRR17520069. 17628561  
SRR17520069. 17628563  
SRR17520069. 17628565  
SRR17520069. 17628567  
SRR17520069. 17628573  
SRR17520069. 17628575  
SRR17520069. 17628577  
SRR17520069. 17628579  
SRR17520069. 17628581  
SRR17520069. 17634058  
SRR17520069. 17634060  
SRR17520069. 17634062  
SRR17520069. 17634064  
SRR17520069. 17634068  
SRR17520069. 17634070  
SRR17520069. 17634072  
SRR17520069. 17634074  
SRR17520069. 17634076  
SRR17520069. 17637516  
SRR17520069. 17637518  
SRR17520069. 17637520  
SRR17520069. 17637522  
SRR17520069. 17637524  
SRR17520069. 17637526  
SRR17520069. 17637528  
SRR17520069. 17637530  
SRR17520069. 17637534  
SRR17520069. 17637536  
SRR17520069. 17637538  
SRR17520069. 17637540  
SRR17520069. 17637542  
SRR17520069. 17637544  
SRR17520069. 17637546  
SRR17520069. 17637548  
SRR17520069. 17637550  
SRR17520069. 17637552  
SRR17520069. 17643768  
SRR17520069. 17643770  
SRR17520069. 17643772  
SRR17520069. 17643774  
SRR17520069. 17643776  
SRR17520069. 17643778  
SRR17520069. 17643780  
SRR17520069. 17643782

SRR17520069. 17643784  
SRR17520069. 17643786  
SRR17520069. 17647856  
SRR17520069. 17647858  
SRR17520069. 17647860  
SRR17520069. 17647866  
SRR17520069. 17647870  
SRR17520069. 17647872  
SRR17520069. 17647874  
SRR17520069. 17647878  
SRR17520069. 17647880  
SRR17520069. 17647882  
SRR17520069. 17647884  
SRR17520069. 17647886  
SRR17520069. 17647888  
SRR17520069. 17657712  
SRR17520069. 17657714  
SRR17520069. 17657716  
SRR17520069. 17661466  
SRR17520069. 17661468  
SRR17520069. 17662820  
SRR17520069. 17662822  
SRR17520069. 17666646  
SRR17520069. 17666648  
SRR17520069. 17666650  
SRR17520069. 17666652  
SRR17520069. 17666654  
SRR17520069. 17666656  
SRR17520069. 17666658  
SRR17520069. 17666660  
SRR17520069. 17666662  
SRR17520069. 17666664  
SRR17520069. 17666666  
SRR17520069. 17666668  
SRR17520069. 17666670  
SRR17520069. 17666672  
SRR17520069. 17667509  
SRR17520069. 17667511  
SRR17520069. 17667513  
SRR17520069. 17667580  
SRR17520069. 17667582  
SRR17520069. 17667584  
SRR17520069. 17667586  
SRR17520069. 17667588  
SRR17520069. 17667590  
SRR17520069. 17667592  
SRR17520069. 17667594

SRR17520069. 17667596  
SRR17520069. 17667598  
SRR17520069. 17667600  
SRR17520069. 17667602  
SRR17520069. 17667604  
SRR17520069. 17667606  
SRR17520069. 17667608  
SRR17520069. 17667610  
SRR17520069. 17667612  
SRR17520069. 17667614  
SRR17520069. 17667616  
SRR17520069. 17668160  
SRR17520069. 17668162  
SRR17520069. 17668164  
SRR17520069. 17668168  
SRR17520069. 17674892  
SRR17520069. 17674894  
SRR17520069. 17674896  
SRR17520069. 17674898  
SRR17520069. 17674900  
SRR17520069. 17674902  
SRR17520069. 17674904  
SRR17520069. 17674906  
SRR17520069. 17680369  
SRR17520069. 17680373  
SRR17520069. 17680375  
SRR17520069. 17680377  
SRR17520069. 17680379  
SRR17520069. 17682675  
SRR17520069. 17682677  
SRR17520069. 17682679  
SRR17520069. 17682681  
SRR17520069. 17682683  
SRR17520069. 17682685  
SRR17520069. 17682687  
SRR17520069. 17682689  
SRR17520069. 17682691  
SRR17520069. 17682693  
SRR17520069. 17682697  
SRR17520069. 17682699  
SRR17520069. 17682701  
SRR17520069. 17682703  
SRR17520069. 17682705  
SRR17520069. 17682707  
SRR17520069. 17682709  
SRR17520069. 17682711  
SRR17520069. 17682713



SRR17520069.17682715  
SRR17520069.17682717  
SRR17520069.17682719  
SRR17520069.17682721  
SRR17520069.17682723  
SRR17520069.17682725  
SRR17520069.17682727  
SRR17520069.17684159  
SRR17520069.17684161  
SRR17520069.17684163  
SRR17520069.17684165  
SRR17520069.17684167  
SRR17520069.17684169  
SRR17520069.17684171  
SRR17520069.17684173  
SRR17520069.17684175  
SRR17520069.17684177  
SRR17520069.17684179  
SRR17520069.17684181  
SRR17520069.17684183  
SRR17520069.17684185  
SRR17520069.17684187  
SRR17520069.17684189  
SRR17520069.17689231  
SRR17520069.17689233  
SRR17520069.17689235  
SRR17520069.17689237  
SRR17520069.17689239  
SRR17520069.17689241  
SRR17520069.17689243  
SRR17520069.17689245  
SRR17520069.17689247  
SRR17520069.17689249  
SRR17520069.17689251  
SRR17520069.17689253  
SRR17520069.17689255  
SRR17520069.17689257  
SRR17520069.17689259  
SRR17520069.17689261  
SRR17520069.17692129  
SRR17520069.17696390  
SRR17520069.17696392  
SRR17520069.17704000  
SRR17520069.17704002  
SRR17520069.17704004  
SRR17520069.17704006  
SRR17520069.17704008

SRR17520069.17704010  
SRR17520069.17704012  
SRR17520069.17704014  
SRR17520069.17704016  
SRR17520069.17704018  
SRR17520069.17704020  
SRR17520069.17704022  
SRR17520069.17704024  
SRR17520069.17704026  
SRR17520069.17704028  
SRR17520069.17704030  
SRR17520069.17704032  
SRR17520069.17704034  
SRR17520069.17704036  
SRR17520069.17704038  
SRR17520069.17704040  
SRR17520069.17704042  
SRR17520069.17704044  
SRR17520069.17704046  
SRR17520069.17704048  
SRR17520069.17704050  
SRR17520069.17704052  
SRR17520069.17704054  
SRR17520069.17704056  
SRR17520069.17704058  
SRR17520069.17704060  
SRR17520069.17704062  
SRR17520069.17704064  
SRR17520069.17704066  
SRR17520069.17704068  
SRR17520069.17709396  
SRR17520069.17710981  
SRR17520069.17710983  
SRR17520069.17710985  
SRR17520069.17710987  
SRR17520069.17710989  
SRR17520069.17710991  
SRR17520069.17710993  
SRR17520069.17711089  
SRR17520069.17711091  
SRR17520069.17711093  
SRR17520069.17711095  
SRR17520069.17711097  
SRR17520069.17711099  
SRR17520069.17711101  
SRR17520069.17711103  
SRR17520069.17711105

SRR17520069.17711107  
SRR17520069.17711109  
SRR17520069.17711843  
SRR17520069.17711845  
SRR17520069.17711847  
SRR17520069.17711851  
SRR17520069.17711853  
SRR17520069.17711855  
SRR17520069.17711859  
SRR17520069.17711861  
SRR17520069.17711863  
SRR17520069.17715237  
SRR17520069.17715239  
SRR17520069.17715241  
SRR17520069.17715243  
SRR17520069.17715245  
SRR17520069.17715247  
SRR17520069.17715249  
SRR17520069.17715251  
SRR17520069.17715253  
SRR17520069.17715255  
SRR17520069.17715257  
SRR17520069.17715259  
SRR17520069.17715261  
SRR17520069.17715263  
SRR17520069.17715265  
SRR17520069.17715267  
SRR17520069.17715269  
SRR17520069.17715271  
SRR17520069.17715273  
SRR17520069.17715277  
SRR17520069.17715279  
SRR17520069.17715281  
SRR17520069.17715283  
SRR17520069.17715285  
SRR17520069.17715287  
SRR17520069.17715291  
SRR17520069.17715293  
SRR17520069.17715295  
SRR17520069.17715297  
SRR17520069.17715299  
SRR17520069.17715301  
SRR17520069.17715303  
SRR17520069.17715305  
SRR17520069.17715307  
SRR17520069.17715309  
SRR17520069.17715311

SRR17520069.17716333  
SRR17520069.17716335  
SRR17520069.17716337  
SRR17520069.17716339  
SRR17520069.17716341  
SRR17520069.17716343  
SRR17520069.17716345  
SRR17520069.17716347  
SRR17520069.17716349  
SRR17520069.17716351  
SRR17520069.17716353  
SRR17520069.17716355  
SRR17520069.17716357  
SRR17520069.17716359  
SRR17520069.17716361  
SRR17520069.17716363  
SRR17520069.17716365  
SRR17520069.17716367  
SRR17520069.17716369  
SRR17520069.17716371  
SRR17520069.17716373  
SRR17520069.17716375  
SRR17520069.17716377  
SRR17520069.17716379  
SRR17520069.17716381  
SRR17520069.17716383  
SRR17520069.17716385  
SRR17520069.17716387  
SRR17520069.17716389  
SRR17520069.17716391  
SRR17520069.17716393  
SRR17520069.17716395  
SRR17520069.17716397  
SRR17520069.17716399  
SRR17520069.17716403  
SRR17520069.17716405  
SRR17520069.17716407  
SRR17520069.17716409  
SRR17520069.17716411  
SRR17520069.17716413  
SRR17520069.17716415  
SRR17520069.17716417  
SRR17520069.17716419  
SRR17520069.17716421  
SRR17520069.17716423  
SRR17520069.17716425  
SRR17520069.17716427

SRR17520069.17716429  
SRR17520069.17716431  
SRR17520069.17717257  
SRR17520069.17717261  
SRR17520069.17717263  
SRR17520069.17717265  
SRR17520069.17717267  
SRR17520069.17717269  
SRR17520069.17717271  
SRR17520069.17717273  
SRR17520069.17717275  
SRR17520069.17717277  
SRR17520069.17717279  
SRR17520069.17717281  
SRR17520069.17717283  
SRR17520069.17717285  
SRR17520069.17717287  
SRR17520069.17717289  
SRR17520069.17717291  
SRR17520069.17717293  
SRR17520069.17717295  
SRR17520069.17717297  
SRR17520069.17717299  
SRR17520069.17717301  
SRR17520069.17717303  
SRR17520069.17717305  
SRR17520069.17717307  
SRR17520069.17717309  
SRR17520069.17717311  
SRR17520069.17717313  
SRR17520069.17717318  
SRR17520069.17717320  
SRR17520069.17717322  
SRR17520069.17717324  
SRR17520069.17717326  
SRR17520069.17717328  
SRR17520069.17717330  
SRR17520069.17717332  
SRR17520069.17717334  
SRR17520069.17717336  
SRR17520069.17717340  
SRR17520069.17717342  
SRR17520069.17717344  
SRR17520069.17717346  
SRR17520069.17717348  
SRR17520069.17717350  
SRR17520069.17717352

SRR17520069.17717354  
SRR17520069.17717356  
SRR17520069.17717358  
SRR17520069.17717360  
SRR17520069.17717362  
SRR17520069.17717364  
SRR17520069.17717366  
SRR17520069.17717368  
SRR17520069.17717370  
SRR17520069.17717372  
SRR17520069.17717376  
SRR17520069.17717378  
SRR17520069.17717380  
SRR17520069.17717382  
SRR17520069.17717384  
SRR17520069.17717386  
SRR17520069.17717388  
SRR17520069.17717390  
SRR17520069.17717392  
SRR17520069.17717396  
SRR17520069.17717398  
SRR17520069.17717400  
SRR17520069.17717402  
SRR17520069.17717404  
SRR17520069.17717406  
SRR17520069.17717408  
SRR17520069.17717410  
SRR17520069.17717412  
SRR17520069.17717416  
SRR17520069.17717418  
SRR17520069.17717422  
SRR17520069.17717989  
SRR17520069.17717991  
SRR17520069.17719956  
SRR17520069.17719958  
SRR17520069.17719960  
SRR17520069.17747586  
SRR17520069.17747588  
SRR17520069.17747590  
SRR17520069.17747592  
SRR17520069.17747594  
SRR17520069.17747596  
SRR17520069.17747598  
SRR17520069.17747600  
SRR17520069.17747602  
SRR17520069.17747604  
SRR17520069.17747606

SRR17520069. 17749626  
SRR17520069. 17749630  
SRR17520069. 17749632  
SRR17520069. 17749634  
SRR17520069. 17749636  
SRR17520069. 17749638  
SRR17520069. 17749640  
SRR17520069. 17749642  
SRR17520069. 17749644  
SRR17520069. 17749646  
SRR17520069. 17749648  
SRR17520069. 17749650  
SRR17520069. 17749652  
SRR17520069. 17749654  
SRR17520069. 17749656  
SRR17520069. 17749660  
SRR17520069. 17752422  
SRR17520069. 17752424  
SRR17520069. 17760740  
SRR17520069. 17760742  
SRR17520069. 17760744  
SRR17520069. 17760746  
SRR17520069. 17760748  
SRR17520069. 17760750  
SRR17520069. 17760752  
SRR17520069. 17760754  
SRR17520069. 17760756  
SRR17520069. 17760758  
SRR17520069. 17760760  
SRR17520069. 17760762  
SRR17520069. 17760764  
SRR17520069. 17760766  
SRR17520069. 17760768  
SRR17520069. 17760770  
SRR17520069. 17760772  
SRR17520069. 17760776  
SRR17520069. 17760778  
SRR17520069. 17760782  
SRR17520069. 17760784  
SRR17520069. 17760788  
SRR17520069. 17760790  
SRR17520069. 17760792  
SRR17520069. 17760794  
SRR17520069. 17760796  
SRR17520069. 17760798  
SRR17520069. 17760800  
SRR17520069. 17760802

SRR17520069. 17760804  
SRR17520069. 17760806  
SRR17520069. 17760808  
SRR17520069. 17763012  
SRR17520069. 17763016  
SRR17520069. 17763020  
SRR17520069. 17763022  
SRR17520069. 17763024  
SRR17520069. 17763026  
SRR17520069. 17763028  
SRR17520069. 17763032  
SRR17520069. 17763034  
SRR17520069. 17763036  
SRR17520069. 17766387  
SRR17520069. 17768177  
SRR17520069. 17768181  
SRR17520069. 17769994  
SRR17520069. 17769996  
SRR17520069. 17769998  
SRR17520069. 17770000  
SRR17520069. 17770002  
SRR17520069. 17770004  
SRR17520069. 17774213  
SRR17520069. 17774215  
SRR17520069. 17778335  
SRR17520069. 17784468  
SRR17520069. 17784470  
SRR17520069. 17784472  
SRR17520069. 17784474  
SRR17520069. 17784476  
SRR17520069. 17784478  
SRR17520069. 17784480  
SRR17520069. 17784482  
SRR17520069. 17784484  
SRR17520069. 17784486  
SRR17520069. 17784488  
SRR17520069. 17784490  
SRR17520069. 17784492  
SRR17520069. 17784494  
SRR17520069. 17784496  
SRR17520069. 17784498  
SRR17520069. 17784500  
SRR17520069. 17784502  
SRR17520069. 17784504  
SRR17520069. 17784506  
SRR17520069. 17784508  
SRR17520069. 17784510



SRR17520069. 17784512  
SRR17520069. 17784514  
SRR17520069. 17784516  
SRR17520069. 17784518  
SRR17520069. 17784520  
SRR17520069. 17784522  
SRR17520069. 17784524  
SRR17520069. 17784526  
SRR17520069. 17784528  
SRR17520069. 17784530  
SRR17520069. 17784532  
SRR17520069. 17784534  
SRR17520069. 17784536  
SRR17520069. 17784538  
SRR17520069. 17784540  
SRR17520069. 17784542  
SRR17520069. 17784544  
SRR17520069. 17784546  
SRR17520069. 17784548  
SRR17520069. 17784550  
SRR17520069. 17784552  
SRR17520069. 17784554  
SRR17520069. 17784556  
SRR17520069. 17784560  
SRR17520069. 17784562  
SRR17520069. 17784564  
SRR17520069. 17784566  
SRR17520069. 17784568  
SRR17520069. 17784570  
SRR17520069. 17784572  
SRR17520069. 17784574  
SRR17520069. 17784576  
SRR17520069. 17784578  
SRR17520069. 17784580  
SRR17520069. 17784582  
SRR17520069. 17791014  
SRR17520069. 17791016  
SRR17520069. 17791020  
SRR17520069. 17791022  
SRR17520069. 17791024  
SRR17520069. 17791026  
SRR17520069. 17791028  
SRR17520069. 17791030  
SRR17520069. 17791032  
SRR17520069. 17791034  
SRR17520069. 17791036  
SRR17520069. 17791038

SRR17520069.17791042  
SRR17520069.17791044  
SRR17520069.17791046  
SRR17520069.17791048  
SRR17520069.17791050  
SRR17520069.17791052  
SRR17520069.17791054  
SRR17520069.17791056  
SRR17520069.17791060  
SRR17520069.17791062  
SRR17520069.17791064  
SRR17520069.17791066  
SRR17520069.17791068  
SRR17520069.17791072  
SRR17520069.17791074  
SRR17520069.17791076  
SRR17520069.17791078  
SRR17520069.17791080  
SRR17520069.17791082  
SRR17520069.17791084  
SRR17520069.17791086  
SRR17520069.17791088  
SRR17520069.17791090  
SRR17520069.17791092  
SRR17520069.17791094  
SRR17520069.17791096  
SRR17520069.17791652  
SRR17520069.17791654  
SRR17520069.17791656  
SRR17520069.17791658  
SRR17520069.17791660  
SRR17520069.17791662  
SRR17520069.17791664  
SRR17520069.17791666  
SRR17520069.17791668  
SRR17520069.17791670  
SRR17520069.17791672  
SRR17520069.17791674  
SRR17520069.17791676  
SRR17520069.17791678  
SRR17520069.17791680  
SRR17520069.17791682  
SRR17520069.17791684  
SRR17520069.17791686  
SRR17520069.17791688  
SRR17520069.17791690  
SRR17520069.17791692

SRR17520069. 17791694  
SRR17520069. 17791696  
SRR17520069. 17791698  
SRR17520069. 17791700  
SRR17520069. 17791702  
SRR17520069. 17791704  
SRR17520069. 17791706  
SRR17520069. 17791708  
SRR17520069. 17791710  
SRR17520069. 17791712  
SRR17520069. 17791714  
SRR17520069. 17791716  
SRR17520069. 17791718  
SRR17520069. 17791720  
SRR17520069. 17791837  
SRR17520069. 17794184  
SRR17520069. 17794186  
SRR17520069. 17794188  
SRR17520069. 17794190  
SRR17520069. 17794192  
SRR17520069. 17794194  
SRR17520069. 17794196  
SRR17520069. 17794198  
SRR17520069. 17794200  
SRR17520069. 17794204  
SRR17520069. 17794206  
SRR17520069. 17809126  
SRR17520069. 17809128  
SRR17520069. 17809130  
SRR17520069. 17809132  
SRR17520069. 17809134  
SRR17520069. 17809136  
SRR17520069. 17809140  
SRR17520069. 17809142  
SRR17520069. 17809144  
SRR17520069. 17809148  
SRR17520069. 17809150  
SRR17520069. 17809152  
SRR17520069. 17809156  
SRR17520069. 17809158  
SRR17520069. 17809160  
SRR17520069. 17809162  
SRR17520069. 17809164  
SRR17520069. 17809166  
SRR17520069. 17809168  
SRR17520069. 17809170  
SRR17520069. 17820164

SRR17520069.17820166  
SRR17520069.17820168  
SRR17520069.17820170  
SRR17520069.17820172  
SRR17520069.17820174  
SRR17520069.17820176  
SRR17520069.17820178  
SRR17520069.17820180  
SRR17520069.17831450  
SRR17520069.17831452  
SRR17520069.17841219  
SRR17520069.17841221  
SRR17520069.17841223  
SRR17520069.17841225  
SRR17520069.17841227  
SRR17520069.17841229  
SRR17520069.17841231  
SRR17520069.17841233  
SRR17520069.17841235  
SRR17520069.17841237  
SRR17520069.17841239  
SRR17520069.17841241  
SRR17520069.17841243  
SRR17520069.17841245  
SRR17520069.17841247  
SRR17520069.17841249  
SRR17520069.17841251  
SRR17520069.17841253  
SRR17520069.17841255  
SRR17520069.17841257  
SRR17520069.17841259  
SRR17520069.17841261  
SRR17520069.17841263  
SRR17520069.17841265  
SRR17520069.17841267  
SRR17520069.17841269  
SRR17520069.17841271  
SRR17520069.17841273  
SRR17520069.17841275  
SRR17520069.17841277  
SRR17520069.17841279  
SRR17520069.17841281  
SRR17520069.17841283  
SRR17520069.17841285  
SRR17520069.17841287  
SRR17520069.17841289  
SRR17520069.17841291

SRR17520069. 17841293  
SRR17520069. 17841295  
SRR17520069. 17841297  
SRR17520069. 17841299  
SRR17520069. 17841301  
SRR17520069. 17841303  
SRR17520069. 17846726  
SRR17520069. 17846728  
SRR17520069. 17846730  
SRR17520069. 17846732  
SRR17520069. 17846734  
SRR17520069. 17846738  
SRR17520069. 17846740  
SRR17520069. 17846742  
SRR17520069. 17846744  
SRR17520069. 17850959  
SRR17520069. 17852437  
SRR17520069. 17852441  
SRR17520069. 17852443  
SRR17520069. 17852445  
SRR17520069. 17852447  
SRR17520069. 17852449  
SRR17520069. 17852451  
SRR17520069. 17852453  
SRR17520069. 17852455  
SRR17520069. 17852457  
SRR17520069. 17852459  
SRR17520069. 17852461  
SRR17520069. 17852463  
SRR17520069. 17852465  
SRR17520069. 17852467  
SRR17520069. 17852469  
SRR17520069. 17852471  
SRR17520069. 17855115  
SRR17520069. 17855117  
SRR17520069. 17855119  
SRR17520069. 17855121  
SRR17520069. 17855123  
SRR17520069. 17855125  
SRR17520069. 17855127  
SRR17520069. 17855129  
SRR17520069. 17855131  
SRR17520069. 17855133  
SRR17520069. 17855135  
SRR17520069. 17855137  
SRR17520069. 17855139  
SRR17520069. 17855141

SRR17520069.17855143  
SRR17520069.17855145  
SRR17520069.17855147  
SRR17520069.17855149  
SRR17520069.17855151  
SRR17520069.17855153  
SRR17520069.17855155  
SRR17520069.17855157  
SRR17520069.17855159  
SRR17520069.17855161  
SRR17520069.17855163  
SRR17520069.17855165  
SRR17520069.17855167  
SRR17520069.17855169  
SRR17520069.17855171  
SRR17520069.17855173  
SRR17520069.17855175  
SRR17520069.17855177  
SRR17520069.17858447  
SRR17520069.17858449  
SRR17520069.17858451  
SRR17520069.17858453  
SRR17520069.17858455  
SRR17520069.17858457  
SRR17520069.17858459  
SRR17520069.17858461  
SRR17520069.17858463  
SRR17520069.17858465  
SRR17520069.17858467  
SRR17520069.17858469  
SRR17520069.17858471  
SRR17520069.17873887  
SRR17520069.17873891  
SRR17520069.17873893  
SRR17520069.17873895  
SRR17520069.17873897  
SRR17520069.17873899  
SRR17520069.17874453  
SRR17520069.17874455  
SRR17520069.17874457  
SRR17520069.17874459  
SRR17520069.17874461  
SRR17520069.17874463  
SRR17520069.17874465  
SRR17520069.17874467  
SRR17520069.17874469  
SRR17520069.17874471

SRR17520069.17874473  
SRR17520069.17874475  
SRR17520069.17874477  
SRR17520069.17874479  
SRR17520069.17878940  
SRR17520069.17878942  
SRR17520069.17878944  
SRR17520069.17878946  
SRR17520069.17879773  
SRR17520069.17879775  
SRR17520069.17879777  
SRR17520069.17880440  
SRR17520069.17880442  
SRR17520069.17880444  
SRR17520069.17880446  
SRR17520069.17880448  
SRR17520069.17880450  
SRR17520069.17880452  
SRR17520069.17880454  
SRR17520069.17880456  
SRR17520069.17880458  
SRR17520069.17880460  
SRR17520069.17880462  
SRR17520069.17880464  
SRR17520069.17880466  
SRR17520069.17880468  
SRR17520069.17880470  
SRR17520069.17880472  
SRR17520069.17880474  
SRR17520069.17880476  
SRR17520069.17880478  
SRR17520069.17880480  
SRR17520069.17880482  
SRR17520069.17880484  
SRR17520069.17880486  
SRR17520069.17880488  
SRR17520069.17880490  
SRR17520069.17880492  
SRR17520069.17880494  
SRR17520069.17880496  
SRR17520069.17880500  
SRR17520069.17880502  
SRR17520069.17880504  
SRR17520069.17880506  
SRR17520069.17880508  
SRR17520069.17880510  
SRR17520069.17880512

SRR17520069.17880514  
SRR17520069.17880516  
SRR17520069.17880518  
SRR17520069.17880520  
SRR17520069.17883356  
SRR17520069.17883358  
SRR17520069.17883360  
SRR17520069.17883910  
SRR17520069.17883914  
SRR17520069.17883916  
SRR17520069.17883918  
SRR17520069.17883920  
SRR17520069.17883922  
SRR17520069.17883924  
SRR17520069.17883926  
SRR17520069.17883928  
SRR17520069.17883930  
SRR17520069.17883932  
SRR17520069.17883934  
SRR17520069.17883936  
SRR17520069.17883938  
SRR17520069.17883940  
SRR17520069.17883944  
SRR17520069.17883946  
SRR17520069.17890713  
SRR17520069.17890715  
SRR17520069.17890717  
SRR17520069.17890719  
SRR17520069.17890721  
SRR17520069.17890723  
SRR17520069.17890727  
SRR17520069.17890729  
SRR17520069.17890731  
SRR17520069.17890733  
SRR17520069.17890735  
SRR17520069.17890737  
SRR17520069.17890739  
SRR17520069.17890741  
SRR17520069.17890743  
SRR17520069.17890745  
SRR17520069.17890747  
SRR17520069.17891040  
SRR17520069.17891042  
SRR17520069.17891050  
SRR17520069.17891052  
SRR17520069.17891054  
SRR17520069.17891056



SRR17520069. 17891058  
SRR17520069. 17891060  
SRR17520069. 17891062  
SRR17520069. 17891064  
SRR17520069. 17891066  
SRR17520069. 17891068  
SRR17520069. 17891070  
SRR17520069. 17891072  
SRR17520069. 17896862  
SRR17520069. 17896864  
SRR17520069. 17896866  
SRR17520069. 17896868  
SRR17520069. 17896870  
SRR17520069. 17901649  
SRR17520069. 17901651  
SRR17520069. 17901653  
SRR17520069. 17901655  
SRR17520069. 17901657  
SRR17520069. 17901659  
SRR17520069. 17901661  
SRR17520069. 17901663  
SRR17520069. 17901667  
SRR17520069. 17901669  
SRR17520069. 17903027  
SRR17520069. 17903031  
SRR17520069. 17906450  
SRR17520069. 17906452  
SRR17520069. 17906454  
SRR17520069. 17906456  
SRR17520069. 17906458  
SRR17520069. 17906460  
SRR17520069. 17906462  
SRR17520069. 17906464  
SRR17520069. 17906466  
SRR17520069. 17908190  
SRR17520069. 17909885  
SRR17520069. 17909887  
SRR17520069. 17913682  
SRR17520069. 17913684  
SRR17520069. 17913686  
SRR17520069. 17913688  
SRR17520069. 17913690  
SRR17520069. 17913692  
SRR17520069. 17913694  
SRR17520069. 17913696  
SRR17520069. 17913698  
SRR17520069. 17913700

SRR17520069.17913702  
SRR17520069.17913704  
SRR17520069.17913706  
SRR17520069.17913708  
SRR17520069.17913710  
SRR17520069.17913712  
SRR17520069.17913714  
SRR17520069.17913716  
SRR17520069.17913718  
SRR17520069.17913720  
SRR17520069.17913778  
SRR17520069.17913780  
SRR17520069.17914116  
SRR17520069.17914118  
SRR17520069.17914120  
SRR17520069.17914122  
SRR17520069.17914124  
SRR17520069.17914126  
SRR17520069.17914128  
SRR17520069.17914130  
SRR17520069.17914132  
SRR17520069.17914134  
SRR17520069.17914136  
SRR17520069.17914140  
SRR17520069.17914142  
SRR17520069.17914144  
SRR17520069.17921500  
SRR17520069.17921506  
SRR17520069.17921508  
SRR17520069.17921510  
SRR17520069.17921514  
SRR17520069.17921516  
SRR17520069.17921518  
SRR17520069.17921520  
SRR17520069.17921522  
SRR17520069.17921524  
SRR17520069.17921526  
SRR17520069.17921528  
SRR17520069.17928641  
SRR17520069.17928643  
SRR17520069.17928645  
SRR17520069.17928647  
SRR17520069.17928651  
SRR17520069.17928653  
SRR17520069.17928655  
SRR17520069.17928657  
SRR17520069.17928659

SRR17520069.17932897  
SRR17520069.17932899  
SRR17520069.17932901  
SRR17520069.17932903  
SRR17520069.17932905  
SRR17520069.17932907  
SRR17520069.17934911  
SRR17520069.17934913  
SRR17520069.17934915  
SRR17520069.17934917  
SRR17520069.17934919  
SRR17520069.17934921  
SRR17520069.17934923  
SRR17520069.17934925  
SRR17520069.17934927  
SRR17520069.17934929  
SRR17520069.17934931  
SRR17520069.17934933  
SRR17520069.17934935  
SRR17520069.17934937  
SRR17520069.17934941  
SRR17520069.17934943  
SRR17520069.17934945  
SRR17520069.17934947  
SRR17520069.17935135  
SRR17520069.17935137  
SRR17520069.17935139  
SRR17520069.17935141  
SRR17520069.17935143  
SRR17520069.17935145  
SRR17520069.17935147  
SRR17520069.17935149  
SRR17520069.17935151  
SRR17520069.17935153  
SRR17520069.17935157  
SRR17520069.17935159  
SRR17520069.17935161  
SRR17520069.17935163  
SRR17520069.17935165  
SRR17520069.17935167  
SRR17520069.17935169  
SRR17520069.17935171  
SRR17520069.17935173  
SRR17520069.17935175  
SRR17520069.17935177  
SRR17520069.17935179  
SRR17520069.17935183

SRR17520069.17935185  
SRR17520069.17935421  
SRR17520069.17939989  
SRR17520069.17939991  
SRR17520069.17939993  
SRR17520069.17939995  
SRR17520069.17939997  
SRR17520069.17940001  
SRR17520069.17940003  
SRR17520069.17940005  
SRR17520069.17940007  
SRR17520069.17940009  
SRR17520069.17940015  
SRR17520069.17940017  
SRR17520069.17940019  
SRR17520069.17940021  
SRR17520069.17940023  
SRR17520069.17940025  
SRR17520069.17940029  
SRR17520069.17940031  
SRR17520069.17940033  
SRR17520069.17940035  
SRR17520069.17940037  
SRR17520069.17940039  
SRR17520069.17940041  
SRR17520069.17940043  
SRR17520069.17940045  
SRR17520069.17940047  
SRR17520069.17940049  
SRR17520069.17940051  
SRR17520069.17940053  
SRR17520069.17941333  
SRR17520069.17941335  
SRR17520069.17941337  
SRR17520069.17941339  
SRR17520069.17941341  
SRR17520069.17942943  
SRR17520069.17942945  
SRR17520069.17942947  
SRR17520069.17942949  
SRR17520069.17942951  
SRR17520069.17942953  
SRR17520069.17942955  
SRR17520069.17942957  
SRR17520069.17942959  
SRR17520069.17942961  
SRR17520069.17942963

SRR17520069. 17942965  
SRR17520069. 17942967  
SRR17520069. 17942969  
SRR17520069. 17942971  
SRR17520069. 17942973  
SRR17520069. 17942975  
SRR17520069. 17942977  
SRR17520069. 17942981  
SRR17520069. 17942983  
SRR17520069. 17942985  
SRR17520069. 17942987  
SRR17520069. 17942989  
SRR17520069. 17942991  
SRR17520069. 17942993  
SRR17520069. 17942995  
SRR17520069. 17942997  
SRR17520069. 17942999  
SRR17520069. 17943001  
SRR17520069. 17943003  
SRR17520069. 17943007  
SRR17520069. 17943009  
SRR17520069. 17943011  
SRR17520069. 17943013  
SRR17520069. 17943015  
SRR17520069. 17943017  
SRR17520069. 17944049  
SRR17520069. 17944051  
SRR17520069. 17944053  
SRR17520069. 17944055  
SRR17520069. 17944057  
SRR17520069. 17944059  
SRR17520069. 17944061  
SRR17520069. 17944063  
SRR17520069. 17944065  
SRR17520069. 17944067  
SRR17520069. 17944069  
SRR17520069. 17944071  
SRR17520069. 17944073  
SRR17520069. 17944075  
SRR17520069. 17944077  
SRR17520069. 17944079  
SRR17520069. 17944081  
SRR17520069. 17944083  
SRR17520069. 17944085  
SRR17520069. 17944087  
SRR17520069. 17944089  
SRR17520069. 17944091

SRR17520069.17944093  
SRR17520069.17944095  
SRR17520069.17944097  
SRR17520069.17944099  
SRR17520069.17944101  
SRR17520069.17944103  
SRR17520069.17944105  
SRR17520069.17944107  
SRR17520069.17944109  
SRR17520069.17944111  
SRR17520069.17944113  
SRR17520069.17944115  
SRR17520069.17944117  
SRR17520069.17944119  
SRR17520069.17944121  
SRR17520069.17944123  
SRR17520069.17944125  
SRR17520069.17944127  
SRR17520069.17944129  
SRR17520069.17944131  
SRR17520069.17944133  
SRR17520069.17944135  
SRR17520069.17944137  
SRR17520069.17944139  
SRR17520069.17948609  
SRR17520069.17948611  
SRR17520069.17948613  
SRR17520069.17948615  
SRR17520069.17948617  
SRR17520069.17948619  
SRR17520069.17949038  
SRR17520069.17949040  
SRR17520069.17949042  
SRR17520069.17949044  
SRR17520069.17949046  
SRR17520069.17949048  
SRR17520069.17949050  
SRR17520069.17949052  
SRR17520069.17949054  
SRR17520069.17949056  
SRR17520069.17949058  
SRR17520069.17949060  
SRR17520069.17949062  
SRR17520069.17949067  
SRR17520069.17949069  
SRR17520069.17949071  
SRR17520069.17949073

SRR17520069.17949075  
SRR17520069.17949077  
SRR17520069.17949079  
SRR17520069.17949081  
SRR17520069.17949083  
SRR17520069.17949085  
SRR17520069.17949087  
SRR17520069.17949089  
SRR17520069.17949093  
SRR17520069.17949095  
SRR17520069.17949097  
SRR17520069.17949200  
SRR17520069.17949208  
SRR17520069.17952308  
SRR17520069.17952310  
SRR17520069.17952312  
SRR17520069.17952314  
SRR17520069.17952316  
SRR17520069.17952318  
SRR17520069.17952320  
SRR17520069.17952322  
SRR17520069.17952324  
SRR17520069.17952326  
SRR17520069.17952328  
SRR17520069.17952330  
SRR17520069.17952332  
SRR17520069.17952334  
SRR17520069.17955576  
SRR17520069.17955578  
SRR17520069.17955580  
SRR17520069.17955582  
SRR17520069.17955584  
SRR17520069.17955586  
SRR17520069.17955588  
SRR17520069.17955590  
SRR17520069.17955592  
SRR17520069.17955674  
SRR17520069.17955678  
SRR17520069.17955680  
SRR17520069.17957609  
SRR17520069.17957611  
SRR17520069.17957613  
SRR17520069.17957615  
SRR17520069.17957617  
SRR17520069.17957619  
SRR17520069.17957621  
SRR17520069.17965554

SRR17520069. 17965789  
SRR17520069. 17965791  
SRR17520069. 17965793  
SRR17520069. 17966795  
SRR17520069. 17979043  
SRR17520069. 17979045  
SRR17520069. 17979047  
SRR17520069. 17979049  
SRR17520069. 17979051  
SRR17520069. 17979053  
SRR17520069. 17979055  
SRR17520069. 17983538  
SRR17520069. 17983540  
SRR17520069. 17983542  
SRR17520069. 17983544  
SRR17520069. 17983548  
SRR17520069. 17983550  
SRR17520069. 17989754  
SRR17520069. 17989756  
SRR17520069. 17989758  
SRR17520069. 17989760  
SRR17520069. 17989762  
SRR17520069. 17989764  
SRR17520069. 17989766  
SRR17520069. 17989768  
SRR17520069. 17989770  
SRR17520069. 17989772  
SRR17520069. 17989774  
SRR17520069. 17989776  
SRR17520069. 17989778  
SRR17520069. 17989780  
SRR17520069. 17989782  
SRR17520069. 17989784  
SRR17520069. 17989786  
SRR17520069. 17989788  
SRR17520069. 17989790  
SRR17520069. 17989792  
SRR17520069. 17989796  
SRR17520069. 17989798  
SRR17520069. 17989800  
SRR17520069. 17989802  
SRR17520069. 17989804  
SRR17520069. 17989806  
SRR17520069. 17989808  
SRR17520069. 17989810  
SRR17520069. 17989812  
SRR17520069. 17989814



SRR17520069. 17989816  
SRR17520069. 17989818  
SRR17520069. 17989820  
SRR17520069. 17989822  
SRR17520069. 17989824  
SRR17520069. 17989826  
SRR17520069. 17989828  
SRR17520069. 17989830  
SRR17520069. 17989832  
SRR17520069. 17989834  
SRR17520069. 17989836  
SRR17520069. 17989838  
SRR17520069. 17989840  
SRR17520069. 17989842  
SRR17520069. 17989844  
SRR17520069. 17989969  
SRR17520069. 17989971  
SRR17520069. 17989973  
SRR17520069. 17989975  
SRR17520069. 17993364  
SRR17520069. 17993366  
SRR17520069. 17993368  
SRR17520069. 17993370  
SRR17520069. 17993372  
SRR17520069. 17993374  
SRR17520069. 17993376  
SRR17520069. 17993378  
SRR17520069. 17993380  
SRR17520069. 17993382  
SRR17520069. 17993384  
SRR17520069. 17993386  
SRR17520069. 17993388  
SRR17520069. 17993390  
SRR17520069. 17993392  
SRR17520069. 17993394  
SRR17520069. 17993396  
SRR17520069. 17993398  
SRR17520069. 17993625  
SRR17520069. 17993629  
SRR17520069. 17993637  
SRR17520069. 17993639  
SRR17520069. 17993641  
SRR17520069. 17993647  
SRR17520069. 18001529  
SRR17520069. 18004750  
SRR17520069. 18004752  
SRR17520069. 18004754

SRR17520069. 18004756  
SRR17520069. 18004758  
SRR17520069. 18004760  
SRR17520069. 18004762  
SRR17520069. 18004764  
SRR17520069. 18004766  
SRR17520069. 18004768  
SRR17520069. 18004770  
SRR17520069. 18004772  
SRR17520069. 18004774  
SRR17520069. 18004776  
SRR17520069. 18004778  
SRR17520069. 18004780  
SRR17520069. 18004782  
SRR17520069. 18004784  
SRR17520069. 18004786  
SRR17520069. 18004788  
SRR17520069. 18004790  
SRR17520069. 18004792  
SRR17520069. 18004794  
SRR17520069. 18004796  
SRR17520069. 18004798  
SRR17520069. 18004800  
SRR17520069. 18004804  
SRR17520069. 18004806  
SRR17520069. 18004808  
SRR17520069. 18004810  
SRR17520069. 18004812  
SRR17520069. 18004814  
SRR17520069. 18004816  
SRR17520069. 18004818  
SRR17520069. 18004820  
SRR17520069. 18004822  
SRR17520069. 18004824  
SRR17520069. 18004826  
SRR17520069. 18004828  
SRR17520069. 18004830  
SRR17520069. 18004832  
SRR17520069. 18004834  
SRR17520069. 18004836  
SRR17520069. 18004838  
SRR17520069. 18004840  
SRR17520069. 18004842  
SRR17520069. 18004844  
SRR17520069. 18004846  
SRR17520069. 18004848  
SRR17520069. 18004850

SRR17520069.18004852  
SRR17520069.18004854  
SRR17520069.18004856  
SRR17520069.18004858  
SRR17520069.18004860  
SRR17520069.18004862  
SRR17520069.18004864  
SRR17520069.18004866  
SRR17520069.18004868  
SRR17520069.18004870  
SRR17520069.18004872  
SRR17520069.18004874  
SRR17520069.18004876  
SRR17520069.18010428  
SRR17520069.18010432  
SRR17520069.18010434  
SRR17520069.18010436  
SRR17520069.18010444  
SRR17520069.18010446  
SRR17520069.18010454  
SRR17520069.18010456  
SRR17520069.18010458  
SRR17520069.18010460  
SRR17520069.18010462  
SRR17520069.18010464  
SRR17520069.18010466  
SRR17520069.18010468  
SRR17520069.18010470  
SRR17520069.18010472  
SRR17520069.18010474  
SRR17520069.18010476  
SRR17520069.18010478  
SRR17520069.18010480  
SRR17520069.18010482  
SRR17520069.18010484  
SRR17520069.18010486  
SRR17520069.18010488  
SRR17520069.18010490  
SRR17520069.18010492  
SRR17520069.18010494  
SRR17520069.18010496  
SRR17520069.18010498  
SRR17520069.18022260  
SRR17520069.18022262  
SRR17520069.18022264  
SRR17520069.18022266  
SRR17520069.18022268

SRR17520069.18022270  
SRR17520069.18022272  
SRR17520069.18022274  
SRR17520069.18022276  
SRR17520069.18022278  
SRR17520069.18022280  
SRR17520069.18022282  
SRR17520069.18022284  
SRR17520069.18022286  
SRR17520069.18022288  
SRR17520069.18025286  
SRR17520069.18025288  
SRR17520069.18025292  
SRR17520069.18025294  
SRR17520069.18025296  
SRR17520069.18025300  
SRR17520069.18025302  
SRR17520069.18025306  
SRR17520069.18025308  
SRR17520069.18025310  
SRR17520069.18025312  
SRR17520069.18025314  
SRR17520069.18025316  
SRR17520069.18025318  
SRR17520069.18025320  
SRR17520069.18025322  
SRR17520069.18025324  
SRR17520069.18025326  
SRR17520069.18025328  
SRR17520069.18025330  
SRR17520069.18025332  
SRR17520069.18025336  
SRR17520069.18025404  
SRR17520069.18025406  
SRR17520069.18025408  
SRR17520069.18025410  
SRR17520069.18025412  
SRR17520069.18025414  
SRR17520069.18025416  
SRR17520069.18025418  
SRR17520069.18025420  
SRR17520069.18025422  
SRR17520069.18025424  
SRR17520069.18025426  
SRR17520069.18025428  
SRR17520069.18025430  
SRR17520069.18025432

SRR17520069. 18025436  
SRR17520069. 18025438  
SRR17520069. 18025440  
SRR17520069. 18025442  
SRR17520069. 18025444  
SRR17520069. 18025446  
SRR17520069. 18025448  
SRR17520069. 18028171  
SRR17520069. 18028173  
SRR17520069. 18028175  
SRR17520069. 18028177  
SRR17520069. 18028179  
SRR17520069. 18028181  
SRR17520069. 18028183  
SRR17520069. 18028185  
SRR17520069. 18028187  
SRR17520069. 18028189  
SRR17520069. 18028191  
SRR17520069. 18028193  
SRR17520069. 18028195  
SRR17520069. 18028197  
SRR17520069. 18028199  
SRR17520069. 18028201  
SRR17520069. 18028203  
SRR17520069. 18028205  
SRR17520069. 18028207  
SRR17520069. 18028209  
SRR17520069. 18028211  
SRR17520069. 18028213  
SRR17520069. 18028215  
SRR17520069. 18028217  
SRR17520069. 18028219  
SRR17520069. 18029602  
SRR17520069. 18029604  
SRR17520069. 18029606  
SRR17520069. 18029608  
SRR17520069. 18029610  
SRR17520069. 18029612  
SRR17520069. 18029614  
SRR17520069. 18029618  
SRR17520069. 18029620  
SRR17520069. 18029622  
SRR17520069. 18033612  
SRR17520069. 18033614  
SRR17520069. 18033616  
SRR17520069. 18033618  
SRR17520069. 18033620

SRR17520069. 18033622  
SRR17520069. 18033624  
SRR17520069. 18033626  
SRR17520069. 18033628  
SRR17520069. 18033630  
SRR17520069. 18033634  
SRR17520069. 18033636  
SRR17520069. 18033638  
SRR17520069. 18033640  
SRR17520069. 18033644  
SRR17520069. 18033646  
SRR17520069. 18033650  
SRR17520069. 18033652  
SRR17520069. 18033654  
SRR17520069. 18033656  
SRR17520069. 18033658  
SRR17520069. 18033660  
SRR17520069. 18034555  
SRR17520069. 18034557  
SRR17520069. 18034559  
SRR17520069. 18034561  
SRR17520069. 18034563  
SRR17520069. 18034565  
SRR17520069. 18034567  
SRR17520069. 18034569  
SRR17520069. 18034571  
SRR17520069. 18034573  
SRR17520069. 18034575  
SRR17520069. 18034577  
SRR17520069. 18034579  
SRR17520069. 18034581  
SRR17520069. 18034583  
SRR17520069. 18034585  
SRR17520069. 18034587  
SRR17520069. 18034589  
SRR17520069. 18034591  
SRR17520069. 18034593  
SRR17520069. 18034595  
SRR17520069. 18034597  
SRR17520069. 18034599  
SRR17520069. 18034601  
SRR17520069. 18034603  
SRR17520069. 18034605  
SRR17520069. 18034607  
SRR17520069. 18034609  
SRR17520069. 18034611  
SRR17520069. 18034613

SRR17520069.18034615  
SRR17520069.18034617  
SRR17520069.18034619  
SRR17520069.18034621  
SRR17520069.18034623  
SRR17520069.18034625  
SRR17520069.18034627  
SRR17520069.18034629  
SRR17520069.18034631  
SRR17520069.18034633  
SRR17520069.18034635  
SRR17520069.18034637  
SRR17520069.18034641  
SRR17520069.18034643  
SRR17520069.18034645  
SRR17520069.18034647  
SRR17520069.18034649  
SRR17520069.18034651  
SRR17520069.18034653  
SRR17520069.18034655  
SRR17520069.18034657  
SRR17520069.18034659  
SRR17520069.18034661  
SRR17520069.18034663  
SRR17520069.18034665  
SRR17520069.18035804  
SRR17520069.18035806  
SRR17520069.18035810  
SRR17520069.18035812  
SRR17520069.18035814  
SRR17520069.18035816  
SRR17520069.18035818  
SRR17520069.18035820  
SRR17520069.18035822  
SRR17520069.18036393  
SRR17520069.18036395  
SRR17520069.18036397  
SRR17520069.18036399  
SRR17520069.18036401  
SRR17520069.18036403  
SRR17520069.18036405  
SRR17520069.18036407  
SRR17520069.18036409  
SRR17520069.18036411  
SRR17520069.18036413  
SRR17520069.18036415  
SRR17520069.18036417

SRR17520069. 18036419  
SRR17520069. 18036421  
SRR17520069. 18036423  
SRR17520069. 18036425  
SRR17520069. 18036427  
SRR17520069. 18036429  
SRR17520069. 18036431  
SRR17520069. 18036433  
SRR17520069. 18036435  
SRR17520069. 18036437  
SRR17520069. 18036439  
SRR17520069. 18036441  
SRR17520069. 18036443  
SRR17520069. 18036445  
SRR17520069. 18036447  
SRR17520069. 18036449  
SRR17520069. 18036453  
SRR17520069. 18036455  
SRR17520069. 18036457  
SRR17520069. 18036459  
SRR17520069. 18036461  
SRR17520069. 18036463  
SRR17520069. 18036465  
SRR17520069. 18036467  
SRR17520069. 18036469  
SRR17520069. 18036471  
SRR17520069. 18036473  
SRR17520069. 18036475  
SRR17520069. 18036477  
SRR17520069. 18058205  
SRR17520069. 18058207  
SRR17520069. 18058209  
SRR17520069. 18058211  
SRR17520069. 18058213  
SRR17520069. 18058217  
SRR17520069. 18058219  
SRR17520069. 18058221  
SRR17520069. 18058223  
SRR17520069. 18058225  
SRR17520069. 18058227  
SRR17520069. 18058229  
SRR17520069. 18058231  
SRR17520069. 18061812  
SRR17520069. 18061814  
SRR17520069. 18061816  
SRR17520069. 18063119  
SRR17520069. 18063123



SRR17520069. 18063125  
SRR17520069. 18063127  
SRR17520069. 18064112  
SRR17520069. 18064114  
SRR17520069. 18064116  
SRR17520069. 18064118  
SRR17520069. 18064120  
SRR17520069. 18064122  
SRR17520069. 18064124  
SRR17520069. 18064126  
SRR17520069. 18064128  
SRR17520069. 18064130  
SRR17520069. 18064132  
SRR17520069. 18064134  
SRR17520069. 18064136  
SRR17520069. 18064138  
SRR17520069. 18064142  
SRR17520069. 18064144  
SRR17520069. 18064146  
SRR17520069. 18064148  
SRR17520069. 18064150  
SRR17520069. 18064152  
SRR17520069. 18064154  
SRR17520069. 18064156  
SRR17520069. 18064158  
SRR17520069. 18064160  
SRR17520069. 18064162  
SRR17520069. 18064164  
SRR17520069. 18064166  
SRR17520069. 18064168  
SRR17520069. 18064170  
SRR17520069. 18064172  
SRR17520069. 18064174  
SRR17520069. 18064176  
SRR17520069. 18064178  
SRR17520069. 18064180  
SRR17520069. 18064182  
SRR17520069. 18064184  
SRR17520069. 18064186  
SRR17520069. 18064188  
SRR17520069. 18064190  
SRR17520069. 18064192  
SRR17520069. 18064194  
SRR17520069. 18064196  
SRR17520069. 18074673  
SRR17520069. 18083051  
SRR17520069. 18083053

SRR17520069.18083055  
SRR17520069.18083057  
SRR17520069.18083059  
SRR17520069.18083061  
SRR17520069.18083063  
SRR17520069.18083067  
SRR17520069.18083069  
SRR17520069.18083071  
SRR17520069.18083073  
SRR17520069.18083075  
SRR17520069.18083077  
SRR17520069.18083079  
SRR17520069.18083081  
SRR17520069.18083083  
SRR17520069.18083085  
SRR17520069.18095429  
SRR17520069.18095431  
SRR17520069.18095433  
SRR17520069.18095742  
SRR17520069.18095744  
SRR17520069.18095746  
SRR17520069.18095748  
SRR17520069.18095750  
SRR17520069.18095752  
SRR17520069.18095754  
SRR17520069.18095756  
SRR17520069.18095758  
SRR17520069.18095760  
SRR17520069.18095762  
SRR17520069.18095764  
SRR17520069.18095766  
SRR17520069.18095768  
SRR17520069.18095770  
SRR17520069.18099517  
SRR17520069.18102699  
SRR17520069.18106883  
SRR17520069.18106885  
SRR17520069.18106887  
SRR17520069.18106889  
SRR17520069.18106891  
SRR17520069.18106893  
SRR17520069.18106895  
SRR17520069.18106897  
SRR17520069.18106899  
SRR17520069.18106901  
SRR17520069.18106903  
SRR17520069.18106907

SRR17520069. 18106909  
SRR17520069. 18106911  
SRR17520069. 18106913  
SRR17520069. 18106915  
SRR17520069. 18116332  
SRR17520069. 18116334  
SRR17520069. 18116336  
SRR17520069. 18116338  
SRR17520069. 18116340  
SRR17520069. 18116342  
SRR17520069. 18116344  
SRR17520069. 18116346  
SRR17520069. 18116348  
SRR17520069. 18116350  
SRR17520069. 18116352  
SRR17520069. 18116354  
SRR17520069. 18116356  
SRR17520069. 18116358  
SRR17520069. 18116360  
SRR17520069. 18116362  
SRR17520069. 18121465  
SRR17520069. 18122551  
SRR17520069. 18122553  
SRR17520069. 18122555  
SRR17520069. 18122848  
SRR17520069. 18122850  
SRR17520069. 18125068  
SRR17520069. 18125070  
SRR17520069. 18125072  
SRR17520069. 18126288  
SRR17520069. 18126290  
SRR17520069. 18126292  
SRR17520069. 18126294  
SRR17520069. 18126296  
SRR17520069. 18126298  
SRR17520069. 18126300  
SRR17520069. 18126302  
SRR17520069. 18126304  
SRR17520069. 18126306  
SRR17520069. 18126308  
SRR17520069. 18126310  
SRR17520069. 18126312  
SRR17520069. 18126314  
SRR17520069. 18126316  
SRR17520069. 18126318  
SRR17520069. 18126320  
SRR17520069. 18126322

SRR17520069. 18126324  
SRR17520069. 18126328  
SRR17520069. 18126330  
SRR17520069. 18126332  
SRR17520069. 18126334  
SRR17520069. 18126336  
SRR17520069. 18126338  
SRR17520069. 18126340  
SRR17520069. 18133012  
SRR17520069. 18133014  
SRR17520069. 18133016  
SRR17520069. 18133018  
SRR17520069. 18133020  
SRR17520069. 18133022  
SRR17520069. 18133024  
SRR17520069. 18133026  
SRR17520069. 18133028  
SRR17520069. 18133030  
SRR17520069. 18133032  
SRR17520069. 18133034  
SRR17520069. 18133036  
SRR17520069. 18133038  
SRR17520069. 18133040  
SRR17520069. 18133042  
SRR17520069. 18133044  
SRR17520069. 18133046  
SRR17520069. 18133048  
SRR17520069. 18133050  
SRR17520069. 18133052  
SRR17520069. 18133054  
SRR17520069. 18133056  
SRR17520069. 18133058  
SRR17520069. 18133060  
SRR17520069. 18133062  
SRR17520069. 18133064  
SRR17520069. 18133066  
SRR17520069. 18133068  
SRR17520069. 18133070  
SRR17520069. 18133072  
SRR17520069. 18133074  
SRR17520069. 18133076  
SRR17520069. 18133078  
SRR17520069. 18133080  
SRR17520069. 18133082  
SRR17520069. 18133084  
SRR17520069. 18133322  
SRR17520069. 18133324

SRR17520069. 18133326  
SRR17520069. 18133328  
SRR17520069. 18133332  
SRR17520069. 18133334  
SRR17520069. 18133336  
SRR17520069. 18133338  
SRR17520069. 18133340  
SRR17520069. 18133342  
SRR17520069. 18133344  
SRR17520069. 18133346  
SRR17520069. 18133348  
SRR17520069. 18152748  
SRR17520069. 18152750  
SRR17520069. 18152752  
SRR17520069. 18152754  
SRR17520069. 18152756  
SRR17520069. 18152760  
SRR17520069. 18152763  
SRR17520069. 18152766  
SRR17520069. 18152770  
SRR17520069. 18152779  
SRR17520069. 18156302  
SRR17520069. 18166282  
SRR17520069. 18166284  
SRR17520069. 18166286  
SRR17520069. 18166288  
SRR17520069. 18166290  
SRR17520069. 18166292  
SRR17520069. 18166294  
SRR17520069. 18166296  
SRR17520069. 18166298  
SRR17520069. 18166300  
SRR17520069. 18166302  
SRR17520069. 18166304  
SRR17520069. 18166306  
SRR17520069. 18166308  
SRR17520069. 18166310  
SRR17520069. 18166312  
SRR17520069. 18166314  
SRR17520069. 18166316  
SRR17520069. 18166318  
SRR17520069. 18166320  
SRR17520069. 18166322  
SRR17520069. 18166324  
SRR17520069. 18166326  
SRR17520069. 18166328  
SRR17520069. 18166330

SRR17520069. 18166332  
SRR17520069. 18166334  
SRR17520069. 18166336  
SRR17520069. 18166338  
SRR17520069. 18166340  
SRR17520069. 18166342  
SRR17520069. 18166344  
SRR17520069. 18166346  
SRR17520069. 18166348  
SRR17520069. 18166350  
SRR17520069. 18169010  
SRR17520069. 18175671  
SRR17520069. 18175673  
SRR17520069. 18175675  
SRR17520069. 18175677  
SRR17520069. 18175679  
SRR17520069. 18180234  
SRR17520069. 18180236  
SRR17520069. 18180238  
SRR17520069. 18180240  
SRR17520069. 18180242  
SRR17520069. 18180244  
SRR17520069. 18180246  
SRR17520069. 18180248  
SRR17520069. 18180250  
SRR17520069. 18180252  
SRR17520069. 18180254  
SRR17520069. 18180256  
SRR17520069. 18180258  
SRR17520069. 18180260  
SRR17520069. 18180262  
SRR17520069. 18180264  
SRR17520069. 18180266  
SRR17520069. 18180268  
SRR17520069. 18180270  
SRR17520069. 18180272  
SRR17520069. 18180274  
SRR17520069. 18180278  
SRR17520069. 18180280  
SRR17520069. 18180282  
SRR17520069. 18180284  
SRR17520069. 18180286  
SRR17520069. 18183471  
SRR17520069. 18187324  
SRR17520069. 18187326  
SRR17520069. 18187328  
SRR17520069. 18187330

SRR17520069. 18187332  
SRR17520069. 18187334  
SRR17520069. 18187336  
SRR17520069. 18187338  
SRR17520069. 18189798  
SRR17520069. 18191653  
SRR17520069. 18191655  
SRR17520069. 18191657  
SRR17520069. 18191659  
SRR17520069. 18191661  
SRR17520069. 18191663  
SRR17520069. 18191665  
SRR17520069. 18191667  
SRR17520069. 18191669  
SRR17520069. 18191675  
SRR17520069. 18191677  
SRR17520069. 18191685  
SRR17520069. 18191693  
SRR17520069. 18191695  
SRR17520069. 18192165  
SRR17520069. 18192167  
SRR17520069. 18192169  
SRR17520069. 18192171  
SRR17520069. 18192173  
SRR17520069. 18192175  
SRR17520069. 18192177  
SRR17520069. 18192179  
SRR17520069. 18192181  
SRR17520069. 18192183  
SRR17520069. 18192185  
SRR17520069. 18192187  
SRR17520069. 18192189  
SRR17520069. 18192191  
SRR17520069. 18197580  
SRR17520069. 18197582  
SRR17520069. 18197584  
SRR17520069. 18197586  
SRR17520069. 18197588  
SRR17520069. 18197590  
SRR17520069. 18197592  
SRR17520069. 18197596  
SRR17520069. 18197598  
SRR17520069. 18197600  
SRR17520069. 18197602  
SRR17520069. 18197604  
SRR17520069. 18197606  
SRR17520069. 18197608

SRR17520069. 18197612  
SRR17520069. 18197614  
SRR17520069. 18197616  
SRR17520069. 18197618  
SRR17520069. 18197620  
SRR17520069. 18197622  
SRR17520069. 18197624  
SRR17520069. 18197626  
SRR17520069. 18197628  
SRR17520069. 18197630  
SRR17520069. 18197632  
SRR17520069. 18197634  
SRR17520069. 18197636  
SRR17520069. 18197638  
SRR17520069. 18197640  
SRR17520069. 18197642  
SRR17520069. 18197646  
SRR17520069. 18197648  
SRR17520069. 18197650  
SRR17520069. 18197652  
SRR17520069. 18197656  
SRR17520069. 18197658  
SRR17520069. 18197660  
SRR17520069. 18197662  
SRR17520069. 18197666  
SRR17520069. 18199244  
SRR17520069. 18199246  
SRR17520069. 18199248  
SRR17520069. 18199252  
SRR17520069. 18199254  
SRR17520069. 18199256  
SRR17520069. 18199258  
SRR17520069. 18199260  
SRR17520069. 18199262  
SRR17520069. 18199264  
SRR17520069. 18199266  
SRR17520069. 18199268  
SRR17520069. 18199270  
SRR17520069. 18199272  
SRR17520069. 18199274  
SRR17520069. 18199276  
SRR17520069. 18199278  
SRR17520069. 18199280  
SRR17520069. 18199282  
SRR17520069. 18199284  
SRR17520069. 18199286  
SRR17520069. 18199288



SRR17520069. 18199290  
SRR17520069. 18199292  
SRR17520069. 18199294  
SRR17520069. 18199296  
SRR17520069. 18199298  
SRR17520069. 18199300  
SRR17520069. 18199302  
SRR17520069. 18199304  
SRR17520069. 18199308  
SRR17520069. 18199310  
SRR17520069. 18199312  
SRR17520069. 18199314  
SRR17520069. 18199316  
SRR17520069. 18199318  
SRR17520069. 18201966  
SRR17520069. 18202445  
SRR17520069. 18202447  
SRR17520069. 18202449  
SRR17520069. 18202451  
SRR17520069. 18202453  
SRR17520069. 18202455  
SRR17520069. 18202459  
SRR17520069. 18202461  
SRR17520069. 18202463  
SRR17520069. 18202465  
SRR17520069. 18202469  
SRR17520069. 18202471  
SRR17520069. 18202473  
SRR17520069. 18202477  
SRR17520069. 18202479  
SRR17520069. 18202481  
SRR17520069. 18203171  
SRR17520069. 18203173  
SRR17520069. 18203177  
SRR17520069. 18203179  
SRR17520069. 18203181  
SRR17520069. 18203183  
SRR17520069. 18203185  
SRR17520069. 18203187  
SRR17520069. 18203189  
SRR17520069. 18207981  
SRR17520069. 18207983  
SRR17520069. 18207985  
SRR17520069. 18207987  
SRR17520069. 18207989  
SRR17520069. 18207991  
SRR17520069. 18207993

SRR17520069. 18207995  
SRR17520069. 18207997  
SRR17520069. 18207999  
SRR17520069. 18208001  
SRR17520069. 18208003  
SRR17520069. 18208005  
SRR17520069. 18208007  
SRR17520069. 18208009  
SRR17520069. 18208011  
SRR17520069. 18208013  
SRR17520069. 18208307  
SRR17520069. 18208309  
SRR17520069. 18208311  
SRR17520069. 18208313  
SRR17520069. 18208315  
SRR17520069. 18208317  
SRR17520069. 18208319  
SRR17520069. 18208321  
SRR17520069. 18208323  
SRR17520069. 18208325  
SRR17520069. 18208327  
SRR17520069. 18208329  
SRR17520069. 18208331  
SRR17520069. 18208333  
SRR17520069. 18208335  
SRR17520069. 18208337  
SRR17520069. 18208339  
SRR17520069. 18214483  
SRR17520069. 18224344  
SRR17520069. 18224346  
SRR17520069. 18224350  
SRR17520069. 18232259  
SRR17520069. 18232333  
SRR17520069. 18232335  
SRR17520069. 18232337  
SRR17520069. 18232339  
SRR17520069. 18232341  
SRR17520069. 18232343  
SRR17520069. 18232345  
SRR17520069. 18232347  
SRR17520069. 18232349  
SRR17520069. 18232351  
SRR17520069. 18232353  
SRR17520069. 18232355  
SRR17520069. 18232357  
SRR17520069. 18232359  
SRR17520069. 18232361

SRR17520069. 18232363  
SRR17520069. 18232365  
SRR17520069. 18232367  
SRR17520069. 18232369  
SRR17520069. 18232371  
SRR17520069. 18232373  
SRR17520069. 18232375  
SRR17520069. 18232377  
SRR17520069. 18232379  
SRR17520069. 18232381  
SRR17520069. 18232383  
SRR17520069. 18232385  
SRR17520069. 18232387  
SRR17520069. 18232393  
SRR17520069. 18232395  
SRR17520069. 18232397  
SRR17520069. 18232399  
SRR17520069. 18232401  
SRR17520069. 18232403  
SRR17520069. 18232405  
SRR17520069. 18232407  
SRR17520069. 18232409  
SRR17520069. 18232411  
SRR17520069. 18232413  
SRR17520069. 18232415  
SRR17520069. 18232417  
SRR17520069. 18232419  
SRR17520069. 18232421  
SRR17520069. 18232425  
SRR17520069. 18232427  
SRR17520069. 18232429  
SRR17520069. 18232431  
SRR17520069. 18232433  
SRR17520069. 18232435  
SRR17520069. 18232437  
SRR17520069. 18232439  
SRR17520069. 18232441  
SRR17520069. 18232443  
SRR17520069. 18232445  
SRR17520069. 18232447  
SRR17520069. 18232449  
SRR17520069. 18232451  
SRR17520069. 18232453  
SRR17520069. 18232455  
SRR17520069. 18232457  
SRR17520069. 18232459  
SRR17520069. 18232461

SRR17520069. 18232463  
SRR17520069. 18232465  
SRR17520069. 18232467  
SRR17520069. 18232469  
SRR17520069. 18232471  
SRR17520069. 18232473  
SRR17520069. 18232640  
SRR17520069. 18232642  
SRR17520069. 18232644  
SRR17520069. 18232646  
SRR17520069. 18236781  
SRR17520069. 18236783  
SRR17520069. 18236785  
SRR17520069. 18236787  
SRR17520069. 18236789  
SRR17520069. 18236791  
SRR17520069. 18236795  
SRR17520069. 18236797  
SRR17520069. 18236799  
SRR17520069. 18236803  
SRR17520069. 18236805  
SRR17520069. 18236807  
SRR17520069. 18236811  
SRR17520069. 18236813  
SRR17520069. 18236817  
SRR17520069. 18236819  
SRR17520069. 18236821  
SRR17520069. 18236823  
SRR17520069. 18236825  
SRR17520069. 18236827  
SRR17520069. 18236829  
SRR17520069. 18236831  
SRR17520069. 18236833  
SRR17520069. 18236835  
SRR17520069. 18236837  
SRR17520069. 18236839  
SRR17520069. 18238237  
SRR17520069. 18238239  
SRR17520069. 18238241  
SRR17520069. 18238243  
SRR17520069. 18238245  
SRR17520069. 18238247  
SRR17520069. 18238249  
SRR17520069. 18238251  
SRR17520069. 18238253  
SRR17520069. 18238257  
SRR17520069. 18238259

SRR17520069. 18238261  
SRR17520069. 18238263  
SRR17520069. 18238265  
SRR17520069. 18238267  
SRR17520069. 18238269  
SRR17520069. 18238271  
SRR17520069. 18238273  
SRR17520069. 18238275  
SRR17520069. 18238277  
SRR17520069. 18238279  
SRR17520069. 18238281  
SRR17520069. 18238283  
SRR17520069. 18238285  
SRR17520069. 18238287  
SRR17520069. 18238289  
SRR17520069. 18238291  
SRR17520069. 18238293  
SRR17520069. 18238295  
SRR17520069. 18246366  
SRR17520069. 18246368  
SRR17520069. 18246370  
SRR17520069. 18246372  
SRR17520069. 18246374  
SRR17520069. 18246376  
SRR17520069. 18246378  
SRR17520069. 18246380  
SRR17520069. 18246382  
SRR17520069. 18246384  
SRR17520069. 18246386  
SRR17520069. 18246388  
SRR17520069. 18246390  
SRR17520069. 18246392  
SRR17520069. 18246394  
SRR17520069. 18246396  
SRR17520069. 18246398  
SRR17520069. 18246400  
SRR17520069. 18246402  
SRR17520069. 18246404  
SRR17520069. 18247337  
SRR17520069. 18247339  
SRR17520069. 18247341  
SRR17520069. 18247343  
SRR17520069. 18247345  
SRR17520069. 18247347  
SRR17520069. 18247349  
SRR17520069. 18247351  
SRR17520069. 18247353

SRR17520069. 18247355  
SRR17520069. 18247357  
SRR17520069. 18247359  
SRR17520069. 18247361  
SRR17520069. 18247363  
SRR17520069. 18247365  
SRR17520069. 18247367  
SRR17520069. 18247369  
SRR17520069. 18247371  
SRR17520069. 18247373  
SRR17520069. 18247375  
SRR17520069. 18247380  
SRR17520069. 18247382  
SRR17520069. 18247384  
SRR17520069. 18247386  
SRR17520069. 18250793  
SRR17520069. 18250795  
SRR17520069. 18250797  
SRR17520069. 18250799  
SRR17520069. 18250801  
SRR17520069. 18250803  
SRR17520069. 18250805  
SRR17520069. 18250807  
SRR17520069. 18250809  
SRR17520069. 18250811  
SRR17520069. 18250813  
SRR17520069. 18250815  
SRR17520069. 18250817  
SRR17520069. 18250819  
SRR17520069. 18250821  
SRR17520069. 18250823  
SRR17520069. 18250825  
SRR17520069. 18250827  
SRR17520069. 18250829  
SRR17520069. 18250831  
SRR17520069. 18250833  
SRR17520069. 18250835  
SRR17520069. 18250837  
SRR17520069. 18250839  
SRR17520069. 18250841  
SRR17520069. 18250843  
SRR17520069. 18250845  
SRR17520069. 18250847  
SRR17520069. 18250849  
SRR17520069. 18250851  
SRR17520069. 18250853  
SRR17520069. 18250855

SRR17520069. 18250857  
SRR17520069. 18250859  
SRR17520069. 18250861  
SRR17520069. 18250863  
SRR17520069. 18250865  
SRR17520069. 18250867  
SRR17520069. 18250869  
SRR17520069. 18250871  
SRR17520069. 18250873  
SRR17520069. 18250875  
SRR17520069. 18250877  
SRR17520069. 18250879  
SRR17520069. 18250881  
SRR17520069. 18250883  
SRR17520069. 18250885  
SRR17520069. 18250887  
SRR17520069. 18250889  
SRR17520069. 18250891  
SRR17520069. 18250893  
SRR17520069. 18250897  
SRR17520069. 18250899  
SRR17520069. 18250901  
SRR17520069. 18250903  
SRR17520069. 18250905  
SRR17520069. 18250907  
SRR17520069. 18250909  
SRR17520069. 18250911  
SRR17520069. 18250913  
SRR17520069. 18250915  
SRR17520069. 18250917  
SRR17520069. 18250919  
SRR17520069. 18250921  
SRR17520069. 18250923  
SRR17520069. 18250925  
SRR17520069. 18250927  
SRR17520069. 18250929  
SRR17520069. 18250931  
SRR17520069. 18250933  
SRR17520069. 18250935  
SRR17520069. 18250937  
SRR17520069. 18250939  
SRR17520069. 18250941  
SRR17520069. 18250943  
SRR17520069. 18250945  
SRR17520069. 18250947  
SRR17520069. 18250949  
SRR17520069. 18250951

SRR17520069. 18250953  
SRR17520069. 18250955  
SRR17520069. 18250957  
SRR17520069. 18250959  
SRR17520069. 18250961  
SRR17520069. 18250963  
SRR17520069. 18250965  
SRR17520069. 18250967  
SRR17520069. 18250969  
SRR17520069. 18250971  
SRR17520069. 18250973  
SRR17520069. 18250975  
SRR17520069. 18250977  
SRR17520069. 18250979  
SRR17520069. 18250981  
SRR17520069. 18250983  
SRR17520069. 18253350  
SRR17520069. 18258395  
SRR17520069. 18258953  
SRR17520069. 18272647  
SRR17520069. 18272649  
SRR17520069. 18272651  
SRR17520069. 18273108  
SRR17520069. 18273110  
SRR17520069. 18273112  
SRR17520069. 18273114  
SRR17520069. 18273116  
SRR17520069. 18273118  
SRR17520069. 18273120  
SRR17520069. 18273122  
SRR17520069. 18273124  
SRR17520069. 18273126  
SRR17520069. 18273128  
SRR17520069. 18273130  
SRR17520069. 18273132  
SRR17520069. 18273134  
SRR17520069. 18273136  
SRR17520069. 18273138  
SRR17520069. 18273140  
SRR17520069. 18273142  
SRR17520069. 18273144  
SRR17520069. 18273146  
SRR17520069. 18273148  
SRR17520069. 18273150  
SRR17520069. 18273152  
SRR17520069. 18273154  
SRR17520069. 18273156



SRR17520069. 18273158  
SRR17520069. 18273160  
SRR17520069. 18273162  
SRR17520069. 18273164  
SRR17520069. 18273166  
SRR17520069. 18273168  
SRR17520069. 18273170  
SRR17520069. 18273172  
SRR17520069. 18273174  
SRR17520069. 18273176  
SRR17520069. 18273178  
SRR17520069. 18273180  
SRR17520069. 18273182  
SRR17520069. 18273184  
SRR17520069. 18273186  
SRR17520069. 18273188  
SRR17520069. 18273190  
SRR17520069. 18273192  
SRR17520069. 18273194  
SRR17520069. 18273196  
SRR17520069. 18273198  
SRR17520069. 18273200  
SRR17520069. 18273202  
SRR17520069. 18273204  
SRR17520069. 18273206  
SRR17520069. 18273208  
SRR17520069. 18273210  
SRR17520069. 18273212  
SRR17520069. 18273214  
SRR17520069. 18273216  
SRR17520069. 18273218  
SRR17520069. 18273220  
SRR17520069. 18273222  
SRR17520069. 18273224  
SRR17520069. 18273226  
SRR17520069. 18273228  
SRR17520069. 18273230  
SRR17520069. 18276165  
SRR17520069. 18276167  
SRR17520069. 18276169  
SRR17520069. 18276171  
SRR17520069. 18276173  
SRR17520069. 18276175  
SRR17520069. 18276177  
SRR17520069. 18276179  
SRR17520069. 18276181  
SRR17520069. 18276183

SRR17520069. 18276185  
SRR17520069. 18276189  
SRR17520069. 18276193  
SRR17520069. 18276195  
SRR17520069. 18276197  
SRR17520069. 18276199  
SRR17520069. 18276201  
SRR17520069. 18276203  
SRR17520069. 18276205  
SRR17520069. 18276207  
SRR17520069. 18276209  
SRR17520069. 18276211  
SRR17520069. 18276213  
SRR17520069. 18276215  
SRR17520069. 18276217  
SRR17520069. 18280438  
SRR17520069. 18280440  
SRR17520069. 18280442  
SRR17520069. 18280444  
SRR17520069. 18280446  
SRR17520069. 18280448  
SRR17520069. 18280450  
SRR17520069. 18280452  
SRR17520069. 18280454  
SRR17520069. 18280456  
SRR17520069. 18280458  
SRR17520069. 18281258  
SRR17520069. 18281260  
SRR17520069. 18281262  
SRR17520069. 18283446  
SRR17520069. 18284109  
SRR17520069. 18284111  
SRR17520069. 18284113  
SRR17520069. 18284115  
SRR17520069. 18284117  
SRR17520069. 18284119  
SRR17520069. 18284121  
SRR17520069. 18284123  
SRR17520069. 18284125  
SRR17520069. 18284127  
SRR17520069. 18284129  
SRR17520069. 18284131  
SRR17520069. 18284133  
SRR17520069. 18284135  
SRR17520069. 18284137  
SRR17520069. 18284139  
SRR17520069. 18284141

SRR17520069. 18284143  
SRR17520069. 18284145  
SRR17520069. 18284147  
SRR17520069. 18284149  
SRR17520069. 18284151  
SRR17520069. 18284153  
SRR17520069. 18284155  
SRR17520069. 18284157  
SRR17520069. 18284159  
SRR17520069. 18284161  
SRR17520069. 18284163  
SRR17520069. 18284165  
SRR17520069. 18284167  
SRR17520069. 18284169  
SRR17520069. 18284171  
SRR17520069. 18284173  
SRR17520069. 18284175  
SRR17520069. 18289426  
SRR17520069. 18289430  
SRR17520069. 18289432  
SRR17520069. 18289434  
SRR17520069. 18289436  
SRR17520069. 18289438  
SRR17520069. 18289440  
SRR17520069. 18289442  
SRR17520069. 18289444  
SRR17520069. 18290789  
SRR17520069. 18290791  
SRR17520069. 18290793  
SRR17520069. 18290795  
SRR17520069. 18290797  
SRR17520069. 18290799  
SRR17520069. 18290801  
SRR17520069. 18290803  
SRR17520069. 18290817  
SRR17520069. 18290827  
SRR17520069. 18290829  
SRR17520069. 18290831  
SRR17520069. 18293843  
SRR17520069. 18293987  
SRR17520069. 18301450  
SRR17520069. 18301452  
SRR17520069. 18301454  
SRR17520069. 18301456  
SRR17520069. 18301458  
SRR17520069. 18301460  
SRR17520069. 18301462

SRR17520069. 18301464  
SRR17520069. 18301466  
SRR17520069. 18301468  
SRR17520069. 18301470  
SRR17520069. 18301472  
SRR17520069. 18301474  
SRR17520069. 18301478  
SRR17520069. 18301480  
SRR17520069. 18301482  
SRR17520069. 18301484  
SRR17520069. 18301486  
SRR17520069. 18301488  
SRR17520069. 18301490  
SRR17520069. 18301492  
SRR17520069. 18301498  
SRR17520069. 18301500  
SRR17520069. 18301502  
SRR17520069. 18301504  
SRR17520069. 18301506  
SRR17520069. 18301508  
SRR17520069. 18301509  
SRR17520069. 18301510  
SRR17520069. 18301512  
SRR17520069. 18301514  
SRR17520069. 18301516  
SRR17520069. 18301518  
SRR17520069. 18301520  
SRR17520069. 18301522  
SRR17520069. 18301524  
SRR17520069. 18301526  
SRR17520069. 18301528  
SRR17520069. 18301530  
SRR17520069. 18301532  
SRR17520069. 18301534  
SRR17520069. 18301536  
SRR17520069. 18301538  
SRR17520069. 18301540  
SRR17520069. 18301542  
SRR17520069. 18301544  
SRR17520069. 18301546  
SRR17520069. 18301548  
SRR17520069. 18301550  
SRR17520069. 18301552  
SRR17520069. 18301554  
SRR17520069. 18301556  
SRR17520069. 18301558  
SRR17520069. 18301560

SRR17520069. 18301562  
SRR17520069. 18301564  
SRR17520069. 18303728  
SRR17520069. 18303730  
SRR17520069. 18304614  
SRR17520069. 18304618  
SRR17520069. 18304620  
SRR17520069. 18304622  
SRR17520069. 18304624  
SRR17520069. 18304626  
SRR17520069. 18312843  
SRR17520069. 18312845  
SRR17520069. 18312847  
SRR17520069. 18312851  
SRR17520069. 18312853  
SRR17520069. 18317972  
SRR17520069. 18317974  
SRR17520069. 18317976  
SRR17520069. 18317978  
SRR17520069. 18317982  
SRR17520069. 18320471  
SRR17520069. 18320473  
SRR17520069. 18320475  
SRR17520069. 18320477  
SRR17520069. 18320479  
SRR17520069. 18320481  
SRR17520069. 18320483  
SRR17520069. 18320485  
SRR17520069. 18320489  
SRR17520069. 18320491  
SRR17520069. 18320493  
SRR17520069. 18323995  
SRR17520069. 18323997  
SRR17520069. 18323999  
SRR17520069. 18324003  
SRR17520069. 18324005  
SRR17520069. 18324007  
SRR17520069. 18324009  
SRR17520069. 18324011  
SRR17520069. 18324013  
SRR17520069. 18324015  
SRR17520069. 18324017  
SRR17520069. 18324019  
SRR17520069. 18324021  
SRR17520069. 18324023  
SRR17520069. 18324025  
SRR17520069. 18327288

SRR17520069. 18332853  
SRR17520069. 18332855  
SRR17520069. 18332857  
SRR17520069. 18332859  
SRR17520069. 18332861  
SRR17520069. 18332863  
SRR17520069. 18332865  
SRR17520069. 18332867  
SRR17520069. 18332869  
SRR17520069. 18332871  
SRR17520069. 18332873  
SRR17520069. 18332875  
SRR17520069. 18332877  
SRR17520069. 18332879  
SRR17520069. 18332881  
SRR17520069. 18332883  
SRR17520069. 18332885  
SRR17520069. 18332887  
SRR17520069. 18332889  
SRR17520069. 18332891  
SRR17520069. 18332893  
SRR17520069. 18333997  
SRR17520069. 18333999  
SRR17520069. 18334001  
SRR17520069. 18334003  
SRR17520069. 18334007  
SRR17520069. 18334009  
SRR17520069. 18334011  
SRR17520069. 18334013  
SRR17520069. 18334015  
SRR17520069. 18334020  
SRR17520069. 18334022  
SRR17520069. 18334024  
SRR17520069. 18334028  
SRR17520069. 18334032  
SRR17520069. 18334034  
SRR17520069. 18334036  
SRR17520069. 18334038  
SRR17520069. 18334040  
SRR17520069. 18334042  
SRR17520069. 18334044  
SRR17520069. 18334046  
SRR17520069. 18334946  
SRR17520069. 18334948  
SRR17520069. 18334954  
SRR17520069. 18334956  
SRR17520069. 18337555

SRR17520069. 18337557  
SRR17520069. 18337559  
SRR17520069. 18338461  
SRR17520069. 18338463  
SRR17520069. 18338465  
SRR17520069. 18338467  
SRR17520069. 18338469  
SRR17520069. 18340153  
SRR17520069. 18348721  
SRR17520069. 18348723  
SRR17520069. 18348725  
SRR17520069. 18348727  
SRR17520069. 18348729  
SRR17520069. 18348731  
SRR17520069. 18348733  
SRR17520069. 18348735  
SRR17520069. 18348737  
SRR17520069. 18348739  
SRR17520069. 18348741  
SRR17520069. 18348743  
SRR17520069. 18348745  
SRR17520069. 18348747  
SRR17520069. 18348749  
SRR17520069. 18348751  
SRR17520069. 18348753  
SRR17520069. 18348755  
SRR17520069. 18353766  
SRR17520069. 18353768  
SRR17520069. 18353770  
SRR17520069. 18353772  
SRR17520069. 18353774  
SRR17520069. 18356237  
SRR17520069. 18356239  
SRR17520069. 18356241  
SRR17520069. 18356243  
SRR17520069. 18356245  
SRR17520069. 18356247  
SRR17520069. 18356249  
SRR17520069. 18356251  
SRR17520069. 18356253  
SRR17520069. 18356257  
SRR17520069. 18356259  
SRR17520069. 18356261  
SRR17520069. 18356263  
SRR17520069. 18356265  
SRR17520069. 18356267  
SRR17520069. 18356269

SRR17520069. 18356273  
SRR17520069. 18356281  
SRR17520069. 18356285  
SRR17520069. 18356289  
SRR17520069. 18356291  
SRR17520069. 18356293  
SRR17520069. 18357219  
SRR17520069. 18357221  
SRR17520069. 18357223  
SRR17520069. 18357225  
SRR17520069. 18357227  
SRR17520069. 18357229  
SRR17520069. 18357231  
SRR17520069. 18357233  
SRR17520069. 18357235  
SRR17520069. 18357237  
SRR17520069. 18357239  
SRR17520069. 18357241  
SRR17520069. 18357243  
SRR17520069. 18357245  
SRR17520069. 18357247  
SRR17520069. 18357249  
SRR17520069. 18357251  
SRR17520069. 18357253  
SRR17520069. 18357255  
SRR17520069. 18357257  
SRR17520069. 18357259  
SRR17520069. 18357261  
SRR17520069. 18357263  
SRR17520069. 18357265  
SRR17520069. 18357267  
SRR17520069. 18357269  
SRR17520069. 18357271  
SRR17520069. 18362559  
SRR17520069. 18368369  
SRR17520069. 18368371  
SRR17520069. 18368373  
SRR17520069. 18368375  
SRR17520069. 18368377  
SRR17520069. 18368379  
SRR17520069. 18368383  
SRR17520069. 18368385  
SRR17520069. 18368387  
SRR17520069. 18368389  
SRR17520069. 18368391  
SRR17520069. 18368393  
SRR17520069. 18368395



SRR17520069. 18368397  
SRR17520069. 18368399  
SRR17520069. 18368401  
SRR17520069. 18368403  
SRR17520069. 18368405  
SRR17520069. 18368407  
SRR17520069. 18368409  
SRR17520069. 18369237  
SRR17520069. 18369239  
SRR17520069. 18373734  
SRR17520069. 18376039  
SRR17520069. 18376041  
SRR17520069. 18378935  
SRR17520069. 18378937  
SRR17520069. 18378939  
SRR17520069. 18378941  
SRR17520069. 18378943  
SRR17520069. 18378945  
SRR17520069. 18378947  
SRR17520069. 18378949  
SRR17520069. 18378951  
SRR17520069. 18378953  
SRR17520069. 18378955  
SRR17520069. 18378957  
SRR17520069. 18378959  
SRR17520069. 18378961  
SRR17520069. 18378963  
SRR17520069. 18378965  
SRR17520069. 18378967  
SRR17520069. 18378969  
SRR17520069. 18378971  
SRR17520069. 18378973  
SRR17520069. 18378975  
SRR17520069. 18378977  
SRR17520069. 18378979  
SRR17520069. 18378981  
SRR17520069. 18378983  
SRR17520069. 18378985  
SRR17520069. 18378987  
SRR17520069. 18378989  
SRR17520069. 18378991  
SRR17520069. 18378993  
SRR17520069. 18378995  
SRR17520069. 18378997  
SRR17520069. 18378999  
SRR17520069. 18379001  
SRR17520069. 18379003

SRR17520069. 18379005  
SRR17520069. 18379007  
SRR17520069. 18379009  
SRR17520069. 18379011  
SRR17520069. 18379013  
SRR17520069. 18379015  
SRR17520069. 18379017  
SRR17520069. 18379019  
SRR17520069. 18379021  
SRR17520069. 18379023  
SRR17520069. 18379025  
SRR17520069. 18379027  
SRR17520069. 18379029  
SRR17520069. 18379031  
SRR17520069. 18379033  
SRR17520069. 18379037  
SRR17520069. 18379039  
SRR17520069. 18379041  
SRR17520069. 18379043  
SRR17520069. 18379045  
SRR17520069. 18379047  
SRR17520069. 18379049  
SRR17520069. 18379051  
SRR17520069. 18379053  
SRR17520069. 18383505  
SRR17520069. 18383507  
SRR17520069. 18383509  
SRR17520069. 18383511  
SRR17520069. 18383513  
SRR17520069. 18383515  
SRR17520069. 18383517  
SRR17520069. 18383519  
SRR17520069. 18383523  
SRR17520069. 18383525  
SRR17520069. 18383527  
SRR17520069. 18383529  
SRR17520069. 18383531  
SRR17520069. 18383533  
SRR17520069. 18383535  
SRR17520069. 18383537  
SRR17520069. 18383539  
SRR17520069. 18383541  
SRR17520069. 18383543  
SRR17520069. 18383545  
SRR17520069. 18383547  
SRR17520069. 18383549  
SRR17520069. 18383551

SRR17520069. 18391304  
SRR17520069. 18391306  
SRR17520069. 18391308  
SRR17520069. 18391310  
SRR17520069. 18391312  
SRR17520069. 18391314  
SRR17520069. 18391316  
SRR17520069. 18391320  
SRR17520069. 18391322  
SRR17520069. 18391324  
SRR17520069. 18391326  
SRR17520069. 18391328  
SRR17520069. 18391330  
SRR17520069. 18391332  
SRR17520069. 18391334  
SRR17520069. 18391336  
SRR17520069. 18391338  
SRR17520069. 18391340  
SRR17520069. 18391342  
SRR17520069. 18391344  
SRR17520069. 18391346  
SRR17520069. 18391348  
SRR17520069. 18391350  
SRR17520069. 18391352  
SRR17520069. 18391354  
SRR17520069. 18391356  
SRR17520069. 18391358  
SRR17520069. 18391360  
SRR17520069. 18391362  
SRR17520069. 18391364  
SRR17520069. 18391366  
SRR17520069. 18391368  
SRR17520069. 18391370  
SRR17520069. 18391372  
SRR17520069. 18391374  
SRR17520069. 18391376  
SRR17520069. 18391378  
SRR17520069. 18391380  
SRR17520069. 18391382  
SRR17520069. 18391385  
SRR17520069. 18391387  
SRR17520069. 18391389  
SRR17520069. 18391391  
SRR17520069. 18391393  
SRR17520069. 18391395  
SRR17520069. 18391397  
SRR17520069. 18391399

SRR17520069. 18391401  
SRR17520069. 18391403  
SRR17520069. 18391407  
SRR17520069. 18391409  
SRR17520069. 18391411  
SRR17520069. 18391413  
SRR17520069. 18391415  
SRR17520069. 18391419  
SRR17520069. 18391421  
SRR17520069. 18391423  
SRR17520069. 18391425  
SRR17520069. 18391427  
SRR17520069. 18391429  
SRR17520069. 18391433  
SRR17520069. 18391435  
SRR17520069. 18391437  
SRR17520069. 18391439  
SRR17520069. 18391441  
SRR17520069. 18391443  
SRR17520069. 18391445  
SRR17520069. 18391447  
SRR17520069. 18391449  
SRR17520069. 18391451  
SRR17520069. 18391453  
SRR17520069. 18391455  
SRR17520069. 18391457  
SRR17520069. 18391459  
SRR17520069. 18391461  
SRR17520069. 18391463  
SRR17520069. 18391465  
SRR17520069. 18391467  
SRR17520069. 18391469  
SRR17520069. 18393058  
SRR17520069. 18393060  
SRR17520069. 18393062  
SRR17520069. 18393064  
SRR17520069. 18393066  
SRR17520069. 18393068  
SRR17520069. 18393070  
SRR17520069. 18393072  
SRR17520069. 18393074  
SRR17520069. 18393076  
SRR17520069. 18393078  
SRR17520069. 18393080  
SRR17520069. 18393082  
SRR17520069. 18393084  
SRR17520069. 18393086

SRR17520069. 18393088  
SRR17520069. 18393090  
SRR17520069. 18393092  
SRR17520069. 18393094  
SRR17520069. 18393096  
SRR17520069. 18393098  
SRR17520069. 18393100  
SRR17520069. 18393102  
SRR17520069. 18393106  
SRR17520069. 18393108  
SRR17520069. 18393110  
SRR17520069. 18393112  
SRR17520069. 18393114  
SRR17520069. 18393116  
SRR17520069. 18393118  
SRR17520069. 18393120  
SRR17520069. 18393122  
SRR17520069. 18393124  
SRR17520069. 18393126  
SRR17520069. 18393128  
SRR17520069. 18393130  
SRR17520069. 18393132  
SRR17520069. 18393134  
SRR17520069. 18393136  
SRR17520069. 18393140  
SRR17520069. 18396427  
SRR17520069. 18396431  
SRR17520069. 18396433  
SRR17520069. 18396437  
SRR17520069. 18407548  
SRR17520069. 18407550  
SRR17520069. 18407552  
SRR17520069. 18407554  
SRR17520069. 18407556  
SRR17520069. 18407558  
SRR17520069. 18407560  
SRR17520069. 18407562  
SRR17520069. 18407564  
SRR17520069. 18407566  
SRR17520069. 18407568  
SRR17520069. 18407570  
SRR17520069. 18407572  
SRR17520069. 18407574  
SRR17520069. 18407576  
SRR17520069. 18407578  
SRR17520069. 18407580  
SRR17520069. 18407582

SRR17520069. 18407584  
SRR17520069. 18407586  
SRR17520069. 18407588  
SRR17520069. 18407590  
SRR17520069. 18407592  
SRR17520069. 18407594  
SRR17520069. 18407596  
SRR17520069. 18407598  
SRR17520069. 18407600  
SRR17520069. 18407602  
SRR17520069. 18407604  
SRR17520069. 18407606  
SRR17520069. 18407608  
SRR17520069. 18407610  
SRR17520069. 18407612  
SRR17520069. 18407614  
SRR17520069. 18407616  
SRR17520069. 18407618  
SRR17520069. 18407620  
SRR17520069. 18407622  
SRR17520069. 18407624  
SRR17520069. 18407626  
SRR17520069. 18407628  
SRR17520069. 18407630  
SRR17520069. 18407632  
SRR17520069. 18407634  
SRR17520069. 18407636  
SRR17520069. 18407638  
SRR17520069. 18407640  
SRR17520069. 18407642  
SRR17520069. 18407644  
SRR17520069. 18407646  
SRR17520069. 18407648  
SRR17520069. 18407650  
SRR17520069. 18407652  
SRR17520069. 18407654  
SRR17520069. 18407656  
SRR17520069. 18407658  
SRR17520069. 18407660  
SRR17520069. 18407662  
SRR17520069. 18407664  
SRR17520069. 18407666  
SRR17520069. 18407668  
SRR17520069. 18407670  
SRR17520069. 18407672  
SRR17520069. 18407674  
SRR17520069. 18410574

SRR17520069.18410576  
SRR17520069.18410578  
SRR17520069.18410580  
SRR17520069.18410582  
SRR17520069.18417104  
SRR17520069.18417106  
SRR17520069.18431179  
SRR17520069.18431181  
SRR17520069.18431183  
SRR17520069.18431185  
SRR17520069.18431187  
SRR17520069.18431189  
SRR17520069.18431191  
SRR17520069.18431193  
SRR17520069.18431199  
SRR17520069.18431201  
SRR17520069.18432392  
SRR17520069.18432394  
SRR17520069.18438988  
SRR17520069.18438990  
SRR17520069.18438992  
SRR17520069.18438994  
SRR17520069.18443325  
SRR17520069.18443327  
SRR17520069.18443329  
SRR17520069.18443331  
SRR17520069.18443333  
SRR17520069.18443335  
SRR17520069.18443337  
SRR17520069.18443339  
SRR17520069.18443341  
SRR17520069.18443343  
SRR17520069.18443345  
SRR17520069.18443347  
SRR17520069.18443349  
SRR17520069.18443353  
SRR17520069.18443355  
SRR17520069.18443357  
SRR17520069.18443359  
SRR17520069.18443361  
SRR17520069.18443363  
SRR17520069.18443365  
SRR17520069.18443367  
SRR17520069.18443369  
SRR17520069.18443371  
SRR17520069.18443375  
SRR17520069.18443377

SRR17520069. 18443379  
SRR17520069. 18443381  
SRR17520069. 18443383  
SRR17520069. 18443385  
SRR17520069. 18443387  
SRR17520069. 18443389  
SRR17520069. 18443391  
SRR17520069. 18443393  
SRR17520069. 18443395  
SRR17520069. 18443397  
SRR17520069. 18443399  
SRR17520069. 18443401  
SRR17520069. 18443403  
SRR17520069. 18443405  
SRR17520069. 18443407  
SRR17520069. 18443409  
SRR17520069. 18443411  
SRR17520069. 18443413  
SRR17520069. 18443415  
SRR17520069. 18443417  
SRR17520069. 18443419  
SRR17520069. 18443421  
SRR17520069. 18443423  
SRR17520069. 18443425  
SRR17520069. 18443427  
SRR17520069. 18443429  
SRR17520069. 18443431  
SRR17520069. 18444248  
SRR17520069. 18444250  
SRR17520069. 18444252  
SRR17520069. 18444254  
SRR17520069. 18444256  
SRR17520069. 18444258  
SRR17520069. 18444260  
SRR17520069. 18444262  
SRR17520069. 18444264  
SRR17520069. 18444266  
SRR17520069. 18444268  
SRR17520069. 18444272  
SRR17520069. 18444274  
SRR17520069. 18444276  
SRR17520069. 18444278  
SRR17520069. 18444280  
SRR17520069. 18444282  
SRR17520069. 18444284  
SRR17520069. 18444286  
SRR17520069. 18444288



SRR17520069.18447230  
SRR17520069.18447232  
SRR17520069.18447234  
SRR17520069.18447236  
SRR17520069.18447238  
SRR17520069.18447240  
SRR17520069.18447242  
SRR17520069.18447244  
SRR17520069.18447655  
SRR17520069.18447657  
SRR17520069.18447659  
SRR17520069.18447661  
SRR17520069.18447663  
SRR17520069.18447665  
SRR17520069.18447667  
SRR17520069.18447669  
SRR17520069.18447671  
SRR17520069.18447673  
SRR17520069.18447675  
SRR17520069.18447677  
SRR17520069.18447679  
SRR17520069.18447681  
SRR17520069.18447685  
SRR17520069.18447687  
SRR17520069.18447689  
SRR17520069.18447691  
SRR17520069.18447693  
SRR17520069.18447695  
SRR17520069.18447697  
SRR17520069.18447699  
SRR17520069.18447701  
SRR17520069.18456563  
SRR17520069.18456565  
SRR17520069.18456569  
SRR17520069.18456571  
SRR17520069.18456573  
SRR17520069.18456575  
SRR17520069.18456577  
SRR17520069.18462579  
SRR17520069.18462581  
SRR17520069.18464337  
SRR17520069.18464339  
SRR17520069.18464341  
SRR17520069.18464343  
SRR17520069.18464345  
SRR17520069.18464347  
SRR17520069.18464349

SRR17520069. 18464351  
SRR17520069. 18464353  
SRR17520069. 18464355  
SRR17520069. 18464357  
SRR17520069. 18464359  
SRR17520069. 18464361  
SRR17520069. 18464363  
SRR17520069. 18464365  
SRR17520069. 18464367  
SRR17520069. 18464369  
SRR17520069. 18464371  
SRR17520069. 18464373  
SRR17520069. 18464375  
SRR17520069. 18464377  
SRR17520069. 18464379  
SRR17520069. 18464381  
SRR17520069. 18464383  
SRR17520069. 18464385  
SRR17520069. 18464387  
SRR17520069. 18464389  
SRR17520069. 18464391  
SRR17520069. 18464393  
SRR17520069. 18464395  
SRR17520069. 18464397  
SRR17520069. 18464399  
SRR17520069. 18464401  
SRR17520069. 18464403  
SRR17520069. 18464405  
SRR17520069. 18466310  
SRR17520069. 18466312  
SRR17520069. 18469595  
SRR17520069. 18469597  
SRR17520069. 18469603  
SRR17520069. 18469605  
SRR17520069. 18469612  
SRR17520069. 18471078  
SRR17520069. 18471080  
SRR17520069. 18471082  
SRR17520069. 18471084  
SRR17520069. 18471086  
SRR17520069. 18471088  
SRR17520069. 18471090  
SRR17520069. 18471092  
SRR17520069. 18471094  
SRR17520069. 18471096  
SRR17520069. 18471098  
SRR17520069. 18471100

SRR17520069.18471102  
SRR17520069.18471104  
SRR17520069.18471106  
SRR17520069.18471108  
SRR17520069.18471110  
SRR17520069.18490390  
SRR17520069.18490392  
SRR17520069.18490394  
SRR17520069.18490396  
SRR17520069.18490398  
SRR17520069.18490400  
SRR17520069.18490402  
SRR17520069.18490404  
SRR17520069.18490406  
SRR17520069.18490408  
SRR17520069.18490410  
SRR17520069.18490412  
SRR17520069.18490414  
SRR17520069.18490416  
SRR17520069.18490418  
SRR17520069.18490420  
SRR17520069.18490422  
SRR17520069.18490424  
SRR17520069.18490426  
SRR17520069.18490428  
SRR17520069.18492621  
SRR17520069.18492623  
SRR17520069.18492625  
SRR17520069.18492627  
SRR17520069.18492629  
SRR17520069.18492631  
SRR17520069.18492633  
SRR17520069.18492635  
SRR17520069.18492637  
SRR17520069.18496603  
SRR17520069.18496605  
SRR17520069.18502962  
SRR17520069.18502964  
SRR17520069.18502966  
SRR17520069.18502970  
SRR17520069.18506507  
SRR17520069.18506509  
SRR17520069.18506511  
SRR17520069.18506513  
SRR17520069.18506515  
SRR17520069.18506517  
SRR17520069.18506519

SRR17520069. 18506521  
SRR17520069. 18506523  
SRR17520069. 18506525  
SRR17520069. 18506527  
SRR17520069. 18506529  
SRR17520069. 18506531  
SRR17520069. 18506533  
SRR17520069. 18506535  
SRR17520069. 18506537  
SRR17520069. 18506539  
SRR17520069. 18506541  
SRR17520069. 18506543  
SRR17520069. 18506545  
SRR17520069. 18506547  
SRR17520069. 18506549  
SRR17520069. 18506551  
SRR17520069. 18507936  
SRR17520069. 18512318  
SRR17520069. 18513836  
SRR17520069. 18513838  
SRR17520069. 18517529  
SRR17520069. 18517531  
SRR17520069. 18517533  
SRR17520069. 18517535  
SRR17520069. 18517537  
SRR17520069. 18517539  
SRR17520069. 18517541  
SRR17520069. 18517543  
SRR17520069. 18517545  
SRR17520069. 18517547  
SRR17520069. 18517549  
SRR17520069. 18517551  
SRR17520069. 18517553  
SRR17520069. 18517555  
SRR17520069. 18517557  
SRR17520069. 18517559  
SRR17520069. 18517561  
SRR17520069. 18517563  
SRR17520069. 18517565  
SRR17520069. 18517567  
SRR17520069. 18517569  
SRR17520069. 18517571  
SRR17520069. 18519635  
SRR17520069. 18519637  
SRR17520069. 18519639  
SRR17520069. 18519641  
SRR17520069. 18519643

SRR17520069. 18519645  
SRR17520069. 18519647  
SRR17520069. 18519649  
SRR17520069. 18519651  
SRR17520069. 18519653  
SRR17520069. 18519655  
SRR17520069. 18519657  
SRR17520069. 18519659  
SRR17520069. 18519661  
SRR17520069. 18519663  
SRR17520069. 18519665  
SRR17520069. 18519667  
SRR17520069. 18519669  
SRR17520069. 18519671  
SRR17520069. 18519675  
SRR17520069. 18519677  
SRR17520069. 18519679  
SRR17520069. 18519681  
SRR17520069. 18519683  
SRR17520069. 18519685  
SRR17520069. 18519687  
SRR17520069. 18519689  
SRR17520069. 18519946  
SRR17520069. 18519948  
SRR17520069. 18519950  
SRR17520069. 18519952  
SRR17520069. 18519954  
SRR17520069. 18519956  
SRR17520069. 18519958  
SRR17520069. 18519960  
SRR17520069. 18519962  
SRR17520069. 18519964  
SRR17520069. 18519966  
SRR17520069. 18519970  
SRR17520069. 18519974  
SRR17520069. 18519978  
SRR17520069. 18519980  
SRR17520069. 18519991  
SRR17520069. 18519993  
SRR17520069. 18519995  
SRR17520069. 18520121  
SRR17520069. 18520123  
SRR17520069. 18520125  
SRR17520069. 18520127  
SRR17520069. 18520129  
SRR17520069. 18520131  
SRR17520069. 18520133

SRR17520069. 18522931  
SRR17520069. 18522933  
SRR17520069. 18522935  
SRR17520069. 18522937  
SRR17520069. 18522939  
SRR17520069. 18522941  
SRR17520069. 18522943  
SRR17520069. 18522945  
SRR17520069. 18522947  
SRR17520069. 18522949  
SRR17520069. 18522951  
SRR17520069. 18522953  
SRR17520069. 18522955  
SRR17520069. 18522957  
SRR17520069. 18522959  
SRR17520069. 18522961  
SRR17520069. 18522963  
SRR17520069. 18522965  
SRR17520069. 18522967  
SRR17520069. 18522969  
SRR17520069. 18522971  
SRR17520069. 18522973  
SRR17520069. 18522975  
SRR17520069. 18522977  
SRR17520069. 18522979  
SRR17520069. 18522981  
SRR17520069. 18522983  
SRR17520069. 18522985  
SRR17520069. 18522987  
SRR17520069. 18522989  
SRR17520069. 18522991  
SRR17520069. 18522993  
SRR17520069. 18522995  
SRR17520069. 18522997  
SRR17520069. 18522999  
SRR17520069. 18523236  
SRR17520069. 18523238  
SRR17520069. 18523240  
SRR17520069. 18523244  
SRR17520069. 18523246  
SRR17520069. 18523248  
SRR17520069. 18523250  
SRR17520069. 18523252  
SRR17520069. 18523256  
SRR17520069. 18523258  
SRR17520069. 18523262  
SRR17520069. 18523266

SRR17520069. 18523268  
SRR17520069. 18524895  
SRR17520069. 18524897  
SRR17520069. 18524899  
SRR17520069. 18524901  
SRR17520069. 18524903  
SRR17520069. 18524905  
SRR17520069. 18524907  
SRR17520069. 18524909  
SRR17520069. 18524911  
SRR17520069. 18524913  
SRR17520069. 18524915  
SRR17520069. 18524917  
SRR17520069. 18524919  
SRR17520069. 18524921  
SRR17520069. 18524923  
SRR17520069. 18524925  
SRR17520069. 18524927  
SRR17520069. 18524929  
SRR17520069. 18524931  
SRR17520069. 18524933  
SRR17520069. 18524935  
SRR17520069. 18524937  
SRR17520069. 18524939  
SRR17520069. 18524941  
SRR17520069. 18524943  
SRR17520069. 18524945  
SRR17520069. 18524947  
SRR17520069. 18524949  
SRR17520069. 18524951  
SRR17520069. 18524953  
SRR17520069. 18524955  
SRR17520069. 18524957  
SRR17520069. 18524959  
SRR17520069. 18524961  
SRR17520069. 18524963  
SRR17520069. 18524965  
SRR17520069. 18524967  
SRR17520069. 18524969  
SRR17520069. 18524971  
SRR17520069. 18524973  
SRR17520069. 18524975  
SRR17520069. 18524977  
SRR17520069. 18524979  
SRR17520069. 18524981  
SRR17520069. 18524983  
SRR17520069. 18524985

SRR17520069. 18524987  
SRR17520069. 18524989  
SRR17520069. 18524991  
SRR17520069. 18524993  
SRR17520069. 18524995  
SRR17520069. 18524997  
SRR17520069. 18524999  
SRR17520069. 18525001  
SRR17520069. 18525003  
SRR17520069. 18525005  
SRR17520069. 18525007  
SRR17520069. 18525009  
SRR17520069. 18525011  
SRR17520069. 18525013  
SRR17520069. 18525015  
SRR17520069. 18525017  
SRR17520069. 18525019  
SRR17520069. 18525021  
SRR17520069. 18525023  
SRR17520069. 18525025  
SRR17520069. 18525027  
SRR17520069. 18525029  
SRR17520069. 18525031  
SRR17520069. 18525033  
SRR17520069. 18527104  
SRR17520069. 18527106  
SRR17520069. 18527108  
SRR17520069. 18527110  
SRR17520069. 18527112  
SRR17520069. 18527114  
SRR17520069. 18527116  
SRR17520069. 18527118  
SRR17520069. 18527120  
SRR17520069. 18527122  
SRR17520069. 18527124  
SRR17520069. 18527126  
SRR17520069. 18527128  
SRR17520069. 18527130  
SRR17520069. 18527132  
SRR17520069. 18527134  
SRR17520069. 18527136  
SRR17520069. 18527138  
SRR17520069. 18527140  
SRR17520069. 18527142  
SRR17520069. 18527144  
SRR17520069. 18527146  
SRR17520069. 18527148



SRR17520069. 18527150  
SRR17520069. 18527152  
SRR17520069. 18527158  
SRR17520069. 18527160  
SRR17520069. 18527162  
SRR17520069. 18527164  
SRR17520069. 18527166  
SRR17520069. 18527168  
SRR17520069. 18527172  
SRR17520069. 18527174  
SRR17520069. 18527176  
SRR17520069. 18527178  
SRR17520069. 18527180  
SRR17520069. 18527182  
SRR17520069. 18527184  
SRR17520069. 18527186  
SRR17520069. 18527188  
SRR17520069. 18527190  
SRR17520069. 18527192  
SRR17520069. 18527194  
SRR17520069. 18527196  
SRR17520069. 18527198  
SRR17520069. 18527200  
SRR17520069. 18527202  
SRR17520069. 18527204  
SRR17520069. 18527206  
SRR17520069. 18527208  
SRR17520069. 18527212  
SRR17520069. 18527214  
SRR17520069. 18527216  
SRR17520069. 18527218  
SRR17520069. 18527222  
SRR17520069. 18540612  
SRR17520069. 18552936  
SRR17520069. 18560152  
SRR17520069. 18560154  
SRR17520069. 18560156  
SRR17520069. 18560158  
SRR17520069. 18560160  
SRR17520069. 18560162  
SRR17520069. 18560164  
SRR17520069. 18560166  
SRR17520069. 18560168  
SRR17520069. 18560170  
SRR17520069. 18560172  
SRR17520069. 18560174  
SRR17520069. 18560176

SRR17520069. 18560178  
SRR17520069. 18560180  
SRR17520069. 18560182  
SRR17520069. 18560184  
SRR17520069. 18569530  
SRR17520069. 18569532  
SRR17520069. 18569798  
SRR17520069. 18569800  
SRR17520069. 18569802  
SRR17520069. 18569804  
SRR17520069. 18569806  
SRR17520069. 18569808  
SRR17520069. 18571343  
SRR17520069. 18576557  
SRR17520069. 18576561  
SRR17520069. 18576565  
SRR17520069. 18576567  
SRR17520069. 18576569  
SRR17520069. 18576571  
SRR17520069. 18576573  
SRR17520069. 18576575  
SRR17520069. 18576577  
SRR17520069. 18576579  
SRR17520069. 18576581  
SRR17520069. 18576583  
SRR17520069. 18577651  
SRR17520069. 18577653  
SRR17520069. 18577655  
SRR17520069. 18577657  
SRR17520069. 18577659  
SRR17520069. 18577661  
SRR17520069. 18577665  
SRR17520069. 18577667  
SRR17520069. 18577669  
SRR17520069. 18577671  
SRR17520069. 18577673  
SRR17520069. 18577675  
SRR17520069. 18577677  
SRR17520069. 18577679  
SRR17520069. 18577681  
SRR17520069. 18577683  
SRR17520069. 18577970  
SRR17520069. 18577972  
SRR17520069. 18577974  
SRR17520069. 18577976  
SRR17520069. 18577978  
SRR17520069. 18581387

SRR17520069. 18581389  
SRR17520069. 18581391  
SRR17520069. 18581393  
SRR17520069. 18581395  
SRR17520069. 18581397  
SRR17520069. 18581399  
SRR17520069. 18581401  
SRR17520069. 18581405  
SRR17520069. 18581407  
SRR17520069. 18581409  
SRR17520069. 18581411  
SRR17520069. 18581413  
SRR17520069. 18581415  
SRR17520069. 18581417  
SRR17520069. 18581419  
SRR17520069. 18581421  
SRR17520069. 18581423  
SRR17520069. 18581425  
SRR17520069. 18581427  
SRR17520069. 18581429  
SRR17520069. 18581431  
SRR17520069. 18581572  
SRR17520069. 18581576  
SRR17520069. 18581580  
SRR17520069. 18581582  
SRR17520069. 18581584  
SRR17520069. 18581586  
SRR17520069. 18581588  
SRR17520069. 18581590  
SRR17520069. 18581592  
SRR17520069. 18582235  
SRR17520069. 18582239  
SRR17520069. 18582241  
SRR17520069. 18582245  
SRR17520069. 18587803  
SRR17520069. 18587807  
SRR17520069. 18587809  
SRR17520069. 18587811  
SRR17520069. 18592531  
SRR17520069. 18592533  
SRR17520069. 18592535  
SRR17520069. 18592537  
SRR17520069. 18592539  
SRR17520069. 18592541  
SRR17520069. 18592543  
SRR17520069. 18592545  
SRR17520069. 18592547

SRR17520069. 18592549  
SRR17520069. 18592551  
SRR17520069. 18592553  
SRR17520069. 18592555  
SRR17520069. 18592557  
SRR17520069. 18592559  
SRR17520069. 18592561  
SRR17520069. 18592563  
SRR17520069. 18592565  
SRR17520069. 18592567  
SRR17520069. 18592569  
SRR17520069. 18592571  
SRR17520069. 18592573  
SRR17520069. 18592575  
SRR17520069. 18595946  
SRR17520069. 18595948  
SRR17520069. 18595950  
SRR17520069. 18595952  
SRR17520069. 18595954  
SRR17520069. 18595956  
SRR17520069. 18595958  
SRR17520069. 18595960  
SRR17520069. 18595962  
SRR17520069. 18595964  
SRR17520069. 18595966  
SRR17520069. 18595968  
SRR17520069. 18595970  
SRR17520069. 18595972  
SRR17520069. 18595974  
SRR17520069. 18595976  
SRR17520069. 18595978  
SRR17520069. 18595980  
SRR17520069. 18595984  
SRR17520069. 18595986  
SRR17520069. 18595988  
SRR17520069. 18595990  
SRR17520069. 18595992  
SRR17520069. 18595994  
SRR17520069. 18600251  
SRR17520069. 18608546  
SRR17520069. 18608548  
SRR17520069. 18614271  
SRR17520069. 18614273  
SRR17520069. 18614275  
SRR17520069. 18614277  
SRR17520069. 18614279  
SRR17520069. 18623300

SRR17520069. 18623304  
SRR17520069. 18623306  
SRR17520069. 18623308  
SRR17520069. 18623310  
SRR17520069. 18623312  
SRR17520069. 18623882  
SRR17520069. 18623884  
SRR17520069. 18623886  
SRR17520069. 18623888  
SRR17520069. 18623890  
SRR17520069. 18623892  
SRR17520069. 18623894  
SRR17520069. 18623896  
SRR17520069. 18623898  
SRR17520069. 18623902  
SRR17520069. 18624943  
SRR17520069. 18624945  
SRR17520069. 18626593  
SRR17520069. 18626595  
SRR17520069. 18626597  
SRR17520069. 18626599  
SRR17520069. 18626601  
SRR17520069. 18626603  
SRR17520069. 18626605  
SRR17520069. 18626607  
SRR17520069. 18626609  
SRR17520069. 18626611  
SRR17520069. 18626613  
SRR17520069. 18626615  
SRR17520069. 18626617  
SRR17520069. 18626619  
SRR17520069. 18626621  
SRR17520069. 18626623  
SRR17520069. 18626625  
SRR17520069. 18626627  
SRR17520069. 18626629  
SRR17520069. 18626631  
SRR17520069. 18626633  
SRR17520069. 18626635  
SRR17520069. 18626637  
SRR17520069. 18629087  
SRR17520069. 18629089  
SRR17520069. 18629091  
SRR17520069. 18634079  
SRR17520069. 18636637  
SRR17520069. 18636639  
SRR17520069. 18636641

SRR17520069. 18636643  
SRR17520069. 18636645  
SRR17520069. 18636647  
SRR17520069. 18636649  
SRR17520069. 18636651  
SRR17520069. 18636653  
SRR17520069. 18636655  
SRR17520069. 18636657  
SRR17520069. 18636659  
SRR17520069. 18636661  
SRR17520069. 18636663  
SRR17520069. 18636665  
SRR17520069. 18636667  
SRR17520069. 18636669  
SRR17520069. 18636671  
SRR17520069. 18636673  
SRR17520069. 18636675  
SRR17520069. 18636677  
SRR17520069. 18636679  
SRR17520069. 18636681  
SRR17520069. 18636683  
SRR17520069. 18636685  
SRR17520069. 18636687  
SRR17520069. 18636689  
SRR17520069. 18636691  
SRR17520069. 18636693  
SRR17520069. 18638672  
SRR17520069. 18638674  
SRR17520069. 18638676  
SRR17520069. 18638678  
SRR17520069. 18638680  
SRR17520069. 18638682  
SRR17520069. 18638684  
SRR17520069. 18638686  
SRR17520069. 18638688  
SRR17520069. 18640339  
SRR17520069. 18640341  
SRR17520069. 18640345  
SRR17520069. 18640347  
SRR17520069. 18640349  
SRR17520069. 18640351  
SRR17520069. 18640353  
SRR17520069. 18640355  
SRR17520069. 18640357  
SRR17520069. 18640359  
SRR17520069. 18640623  
SRR17520069. 18640625

SRR17520069.18640627  
SRR17520069.18640629  
SRR17520069.18640631  
SRR17520069.18640633  
SRR17520069.18640635  
SRR17520069.18640637  
SRR17520069.18644114  
SRR17520069.18644116  
SRR17520069.18644118  
SRR17520069.18651747  
SRR17520069.18651749  
SRR17520069.18651751  
SRR17520069.18651753  
SRR17520069.18651755  
SRR17520069.18651757  
SRR17520069.18651759  
SRR17520069.18651761  
SRR17520069.18651763  
SRR17520069.18651765  
SRR17520069.18651767  
SRR17520069.18651769  
SRR17520069.18651771  
SRR17520069.18651773  
SRR17520069.18651775  
SRR17520069.18651777  
SRR17520069.18651779  
SRR17520069.18651781  
SRR17520069.18651783  
SRR17520069.18651785  
SRR17520069.18651787  
SRR17520069.18651789  
SRR17520069.18651791  
SRR17520069.18652374  
SRR17520069.18665283  
SRR17520069.18665285  
SRR17520069.18665287  
SRR17520069.18665289  
SRR17520069.18665291  
SRR17520069.18665293  
SRR17520069.18665295  
SRR17520069.18665297  
SRR17520069.18665299  
SRR17520069.18665301  
SRR17520069.18670647  
SRR17520069.18670649  
SRR17520069.18670651  
SRR17520069.18670653

SRR17520069. 18670655  
SRR17520069. 18670657  
SRR17520069. 18670659  
SRR17520069. 18670661  
SRR17520069. 18670663  
SRR17520069. 18670665  
SRR17520069. 18670667  
SRR17520069. 18670669  
SRR17520069. 18670673  
SRR17520069. 18670675  
SRR17520069. 18670677  
SRR17520069. 18670679  
SRR17520069. 18670681  
SRR17520069. 18670683  
SRR17520069. 18670685  
SRR17520069. 18670687  
SRR17520069. 18670689  
SRR17520069. 18670691  
SRR17520069. 18670693  
SRR17520069. 18670695  
SRR17520069. 18670697  
SRR17520069. 18670699  
SRR17520069. 18670701  
SRR17520069. 18670703  
SRR17520069. 18670705  
SRR17520069. 18673497  
SRR17520069. 18673499  
SRR17520069. 18673501  
SRR17520069. 18673503  
SRR17520069. 18673505  
SRR17520069. 18673507  
SRR17520069. 18673509  
SRR17520069. 18673511  
SRR17520069. 18673513  
SRR17520069. 18673515  
SRR17520069. 18673517  
SRR17520069. 18673519  
SRR17520069. 18673521  
SRR17520069. 18673523  
SRR17520069. 18673525  
SRR17520069. 18673527  
SRR17520069. 18673529  
SRR17520069. 18673531  
SRR17520069. 18673533  
SRR17520069. 18673535  
SRR17520069. 18673537  
SRR17520069. 18673539



SRR17520069. 18673541  
SRR17520069. 18673543  
SRR17520069. 18673545  
SRR17520069. 18673547  
SRR17520069. 18673549  
SRR17520069. 18673551  
SRR17520069. 18673553  
SRR17520069. 18673555  
SRR17520069. 18684889  
SRR17520069. 18684891  
SRR17520069. 18684895  
SRR17520069. 18684897  
SRR17520069. 18689229  
SRR17520069. 18689231  
SRR17520069. 18689233  
SRR17520069. 18689235  
SRR17520069. 18689237  
SRR17520069. 18689239  
SRR17520069. 18689241  
SRR17520069. 18689243  
SRR17520069. 18689319  
SRR17520069. 18689321  
SRR17520069. 18689323  
SRR17520069. 18689325  
SRR17520069. 18689327  
SRR17520069. 18689329  
SRR17520069. 18689331  
SRR17520069. 18689333  
SRR17520069. 18689335  
SRR17520069. 18689337  
SRR17520069. 18689339  
SRR17520069. 18689341  
SRR17520069. 18689343  
SRR17520069. 18689345  
SRR17520069. 18689347  
SRR17520069. 18689349  
SRR17520069. 18689351  
SRR17520069. 18689353  
SRR17520069. 18689355  
SRR17520069. 18689357  
SRR17520069. 18689361  
SRR17520069. 18689363  
SRR17520069. 18689365  
SRR17520069. 18689367  
SRR17520069. 18690320  
SRR17520069. 18690322  
SRR17520069. 18690324

SRR17520069. 18691545  
SRR17520069. 18691547  
SRR17520069. 18691549  
SRR17520069. 18691551  
SRR17520069. 18691553  
SRR17520069. 18691555  
SRR17520069. 18691557  
SRR17520069. 18691559  
SRR17520069. 18691561  
SRR17520069. 18693972  
SRR17520069. 18693974  
SRR17520069. 18693976  
SRR17520069. 18693978  
SRR17520069. 18693980  
SRR17520069. 18697164  
SRR17520069. 18697168  
SRR17520069. 18697170  
SRR17520069. 18697172  
SRR17520069. 18703540  
SRR17520069. 18703542  
SRR17520069. 18703544  
SRR17520069. 18703546  
SRR17520069. 18703548  
SRR17520069. 18703556  
SRR17520069. 18703560  
SRR17520069. 18703562  
SRR17520069. 18703564  
SRR17520069. 18703566  
SRR17520069. 18704129  
SRR17520069. 18704131  
SRR17520069. 18704133  
SRR17520069. 18704135  
SRR17520069. 18704137  
SRR17520069. 18704139  
SRR17520069. 18704141  
SRR17520069. 18704147  
SRR17520069. 18704149  
SRR17520069. 18704151  
SRR17520069. 18704153  
SRR17520069. 18704155  
SRR17520069. 18704157  
SRR17520069. 18704159  
SRR17520069. 18704161  
SRR17520069. 18704163  
SRR17520069. 18704165  
SRR17520069. 18704167  
SRR17520069. 18704169

SRR17520069. 18709211  
SRR17520069. 18709213  
SRR17520069. 18710328  
SRR17520069. 18710330  
SRR17520069. 18710332  
SRR17520069. 18710334  
SRR17520069. 18710336  
SRR17520069. 18710338  
SRR17520069. 18710340  
SRR17520069. 18710342  
SRR17520069. 18710344  
SRR17520069. 18710346  
SRR17520069. 18710348  
SRR17520069. 18710350  
SRR17520069. 18710352  
SRR17520069. 18710354  
SRR17520069. 18710356  
SRR17520069. 18710358  
SRR17520069. 18710360  
SRR17520069. 18710362  
SRR17520069. 18710364  
SRR17520069. 18710366  
SRR17520069. 18710368  
SRR17520069. 18710370  
SRR17520069. 18710372  
SRR17520069. 18710374  
SRR17520069. 18710376  
SRR17520069. 18710378  
SRR17520069. 18710382  
SRR17520069. 18710384  
SRR17520069. 18710386  
SRR17520069. 18710388  
SRR17520069. 18710390  
SRR17520069. 18710392  
SRR17520069. 18710394  
SRR17520069. 18710396  
SRR17520069. 18710398  
SRR17520069. 18710400  
SRR17520069. 18710402  
SRR17520069. 18710404  
SRR17520069. 18710406  
SRR17520069. 18710408  
SRR17520069. 18710410  
SRR17520069. 18710412  
SRR17520069. 18711637  
SRR17520069. 18711639  
SRR17520069. 18711641

SRR17520069. 18711643  
SRR17520069. 18711645  
SRR17520069. 18711647  
SRR17520069. 18711649  
SRR17520069. 18711651  
SRR17520069. 18711653  
SRR17520069. 18711655  
SRR17520069. 18711657  
SRR17520069. 18711659  
SRR17520069. 18711661  
SRR17520069. 18711663  
SRR17520069. 18711665  
SRR17520069. 18711667  
SRR17520069. 18711669  
SRR17520069. 18711671  
SRR17520069. 18711673  
SRR17520069. 18711675  
SRR17520069. 18711677  
SRR17520069. 18711679  
SRR17520069. 18711681  
SRR17520069. 18711683  
SRR17520069. 18711685  
SRR17520069. 18711687  
SRR17520069. 18711689  
SRR17520069. 18717370  
SRR17520069. 18717372  
SRR17520069. 18717374  
SRR17520069. 18717376  
SRR17520069. 18717378  
SRR17520069. 18718232  
SRR17520069. 18718234  
SRR17520069. 18718236  
SRR17520069. 18718238  
SRR17520069. 18718246  
SRR17520069. 18720426  
SRR17520069. 18720428  
SRR17520069. 18720430  
SRR17520069. 18720432  
SRR17520069. 18720434  
SRR17520069. 18720436  
SRR17520069. 18720438  
SRR17520069. 18720440  
SRR17520069. 18720442  
SRR17520069. 18720444  
SRR17520069. 18720446  
SRR17520069. 18720448  
SRR17520069. 18720450

SRR17520069. 18720452  
SRR17520069. 18720454  
SRR17520069. 18720456  
SRR17520069. 18720458  
SRR17520069. 18720460  
SRR17520069. 18720462  
SRR17520069. 18720464  
SRR17520069. 18720466  
SRR17520069. 18720468  
SRR17520069. 18720470  
SRR17520069. 18720472  
SRR17520069. 18720474  
SRR17520069. 18720476  
SRR17520069. 18720478  
SRR17520069. 18720480  
SRR17520069. 18720482  
SRR17520069. 18720484  
SRR17520069. 18720486  
SRR17520069. 18720488  
SRR17520069. 18720490  
SRR17520069. 18720492  
SRR17520069. 18720494  
SRR17520069. 18720496  
SRR17520069. 18720498  
SRR17520069. 18720500  
SRR17520069. 18720502  
SRR17520069. 18720504  
SRR17520069. 18720506  
SRR17520069. 18720508  
SRR17520069. 18720510  
SRR17520069. 18720512  
SRR17520069. 18720514  
SRR17520069. 18720516  
SRR17520069. 18720518  
SRR17520069. 18720520  
SRR17520069. 18720524  
SRR17520069. 18720526  
SRR17520069. 18720528  
SRR17520069. 18720530  
SRR17520069. 18720930  
SRR17520069. 18720932  
SRR17520069. 18720934  
SRR17520069. 18720936  
SRR17520069. 18720938  
SRR17520069. 18720940  
SRR17520069. 18720942  
SRR17520069. 18720944

SRR17520069. 18720946  
SRR17520069. 18720948  
SRR17520069. 18720950  
SRR17520069. 18720952  
SRR17520069. 18720954  
SRR17520069. 18720956  
SRR17520069. 18720958  
SRR17520069. 18720960  
SRR17520069. 18720962  
SRR17520069. 18720964  
SRR17520069. 18720966  
SRR17520069. 18720968  
SRR17520069. 18720970  
SRR17520069. 18720972  
SRR17520069. 18720974  
SRR17520069. 18720976  
SRR17520069. 18720978  
SRR17520069. 18720980  
SRR17520069. 18720982  
SRR17520069. 18720986  
SRR17520069. 18720988  
SRR17520069. 18720990  
SRR17520069. 18720994  
SRR17520069. 18720996  
SRR17520069. 18720998  
SRR17520069. 18721000  
SRR17520069. 18721002  
SRR17520069. 18721004  
SRR17520069. 18721006  
SRR17520069. 18721008  
SRR17520069. 18721010  
SRR17520069. 18721012  
SRR17520069. 18721014  
SRR17520069. 18721016  
SRR17520069. 18721018  
SRR17520069. 18721297  
SRR17520069. 18721299  
SRR17520069. 18721301  
SRR17520069. 18721303  
SRR17520069. 18721305  
SRR17520069. 18721307  
SRR17520069. 18721309  
SRR17520069. 18721311  
SRR17520069. 18721313  
SRR17520069. 18721315  
SRR17520069. 18721317  
SRR17520069. 18722707

SRR17520069. 18727880  
SRR17520069. 18727882  
SRR17520069. 18727884  
SRR17520069. 18727886  
SRR17520069. 18727890  
SRR17520069. 18727892  
SRR17520069. 18727894  
SRR17520069. 18727896  
SRR17520069. 18733502  
SRR17520069. 18733504  
SRR17520069. 18733506  
SRR17520069. 18733508  
SRR17520069. 18733510  
SRR17520069. 18733512  
SRR17520069. 18733514  
SRR17520069. 18733516  
SRR17520069. 18733518  
SRR17520069. 18733520  
SRR17520069. 18733522  
SRR17520069. 18733524  
SRR17520069. 18733526  
SRR17520069. 18733528  
SRR17520069. 18733530  
SRR17520069. 18733532  
SRR17520069. 18733534  
SRR17520069. 18733536  
SRR17520069. 18733538  
SRR17520069. 18733540  
SRR17520069. 18733542  
SRR17520069. 18733544  
SRR17520069. 18733546  
SRR17520069. 18733548  
SRR17520069. 18733550  
SRR17520069. 18733552  
SRR17520069. 18733554  
SRR17520069. 18733556  
SRR17520069. 18733558  
SRR17520069. 18733560  
SRR17520069. 18733562  
SRR17520069. 18733564  
SRR17520069. 18733566  
SRR17520069. 18733568  
SRR17520069. 18733570  
SRR17520069. 18733572  
SRR17520069. 18733574  
SRR17520069. 18733576  
SRR17520069. 18733578

SRR17520069. 18733580  
SRR17520069. 18733582  
SRR17520069. 18733584  
SRR17520069. 18733586  
SRR17520069. 18733588  
SRR17520069. 18733590  
SRR17520069. 18733592  
SRR17520069. 18733594  
SRR17520069. 18733596  
SRR17520069. 18733598  
SRR17520069. 18733600  
SRR17520069. 18733602  
SRR17520069. 18733604  
SRR17520069. 18733606  
SRR17520069. 18733608  
SRR17520069. 18733610  
SRR17520069. 18733612  
SRR17520069. 18733614  
SRR17520069. 18733616  
SRR17520069. 18733618  
SRR17520069. 18733620  
SRR17520069. 18733622  
SRR17520069. 18733624  
SRR17520069. 18733626  
SRR17520069. 18733628  
SRR17520069. 18733630  
SRR17520069. 18733632  
SRR17520069. 18733634  
SRR17520069. 18733638  
SRR17520069. 18733640  
SRR17520069. 18733642  
SRR17520069. 18733644  
SRR17520069. 18733646  
SRR17520069. 18733648  
SRR17520069. 18733650  
SRR17520069. 18733652  
SRR17520069. 18733654  
SRR17520069. 18733656  
SRR17520069. 18733658  
SRR17520069. 18733660  
SRR17520069. 18733662  
SRR17520069. 18733664  
SRR17520069. 18733666  
SRR17520069. 18733668  
SRR17520069. 18733887  
SRR17520069. 18733889  
SRR17520069. 18733891



SRR17520069. 18733893  
SRR17520069. 18733895  
SRR17520069. 18733897  
SRR17520069. 18733899  
SRR17520069. 18733901  
SRR17520069. 18733903  
SRR17520069. 18733905  
SRR17520069. 18733907  
SRR17520069. 18738638  
SRR17520069. 18738965  
SRR17520069. 18738967  
SRR17520069. 18738971  
SRR17520069. 18738973  
SRR17520069. 18743207  
SRR17520069. 18743209  
SRR17520069. 18743211  
SRR17520069. 18743213  
SRR17520069. 18743215  
SRR17520069. 18743217  
SRR17520069. 18743219  
SRR17520069. 18743221  
SRR17520069. 18743223  
SRR17520069. 18743225  
SRR17520069. 18743227  
SRR17520069. 18743229  
SRR17520069. 18743231  
SRR17520069. 18743233  
SRR17520069. 18743235  
SRR17520069. 18743237  
SRR17520069. 18743239  
SRR17520069. 18743241  
SRR17520069. 18743243  
SRR17520069. 18743245  
SRR17520069. 18743247  
SRR17520069. 18744608  
SRR17520069. 18744610  
SRR17520069. 18744957  
SRR17520069. 18747021  
SRR17520069. 18747023  
SRR17520069. 18747025  
SRR17520069. 18748119  
SRR17520069. 18748121  
SRR17520069. 18748123  
SRR17520069. 18748125  
SRR17520069. 18748127  
SRR17520069. 18749854  
SRR17520069. 18749856

SRR17520069. 18749858  
SRR17520069. 18749860  
SRR17520069. 18749862  
SRR17520069. 18751451  
SRR17520069. 18756372  
SRR17520069. 18756374  
SRR17520069. 18756376  
SRR17520069. 18756378  
SRR17520069. 18756380  
SRR17520069. 18756384  
SRR17520069. 18756386  
SRR17520069. 18758863  
SRR17520069. 18758865  
SRR17520069. 18758867  
SRR17520069. 18758869  
SRR17520069. 18758871  
SRR17520069. 18758873  
SRR17520069. 18758875  
SRR17520069. 18758877  
SRR17520069. 18758879  
SRR17520069. 18758881  
SRR17520069. 18758883  
SRR17520069. 18758885  
SRR17520069. 18758892  
SRR17520069. 18758894  
SRR17520069. 18758896  
SRR17520069. 18758900  
SRR17520069. 18758902  
SRR17520069. 18758904  
SRR17520069. 18758906  
SRR17520069. 18758908  
SRR17520069. 18758910  
SRR17520069. 18758912  
SRR17520069. 18758914  
SRR17520069. 18758916  
SRR17520069. 18758918  
SRR17520069. 18758920  
SRR17520069. 18758922  
SRR17520069. 18758924  
SRR17520069. 18758926  
SRR17520069. 18758928  
SRR17520069. 18758930  
SRR17520069. 18763804  
SRR17520069. 18763812  
SRR17520069. 18764102  
SRR17520069. 18764104  
SRR17520069. 18764106

SRR17520069. 18764110  
SRR17520069. 18764112  
SRR17520069. 18764114  
SRR17520069. 18764116  
SRR17520069. 18764118  
SRR17520069. 18764120  
SRR17520069. 18764122  
SRR17520069. 18764124  
SRR17520069. 18764126  
SRR17520069. 18764128  
SRR17520069. 18764130  
SRR17520069. 18765137  
SRR17520069. 18765139  
SRR17520069. 18765141  
SRR17520069. 18765143  
SRR17520069. 18765145  
SRR17520069. 18765147  
SRR17520069. 18765149  
SRR17520069. 18765151  
SRR17520069. 18765153  
SRR17520069. 18765155  
SRR17520069. 18765157  
SRR17520069. 18765159  
SRR17520069. 18765161  
SRR17520069. 18765163  
SRR17520069. 18765165  
SRR17520069. 18765167  
SRR17520069. 18765169  
SRR17520069. 18765171  
SRR17520069. 18765173  
SRR17520069. 18765175  
SRR17520069. 18765177  
SRR17520069. 18765179  
SRR17520069. 18765181  
SRR17520069. 18765183  
SRR17520069. 18765185  
SRR17520069. 18765187  
SRR17520069. 18765189  
SRR17520069. 18765191  
SRR17520069. 18765193  
SRR17520069. 18765195  
SRR17520069. 18765197  
SRR17520069. 18765199  
SRR17520069. 18765201  
SRR17520069. 18765203  
SRR17520069. 18765205  
SRR17520069. 18765207

SRR17520069. 18765209  
SRR17520069. 18765211  
SRR17520069. 18765213  
SRR17520069. 18765215  
SRR17520069. 18765217  
SRR17520069. 18765219  
SRR17520069. 18765221  
SRR17520069. 18765223  
SRR17520069. 18765225  
SRR17520069. 18765227  
SRR17520069. 18765229  
SRR17520069. 18765231  
SRR17520069. 18765233  
SRR17520069. 18765235  
SRR17520069. 18765237  
SRR17520069. 18765239  
SRR17520069. 18765241  
SRR17520069. 18765243  
SRR17520069. 18765245  
SRR17520069. 18765247  
SRR17520069. 18765249  
SRR17520069. 18765251  
SRR17520069. 18765253  
SRR17520069. 18765255  
SRR17520069. 18765257  
SRR17520069. 18765259  
SRR17520069. 18765261  
SRR17520069. 18765263  
SRR17520069. 18765265  
SRR17520069. 18769385  
SRR17520069. 18769387  
SRR17520069. 18769389  
SRR17520069. 18769391  
SRR17520069. 18769393  
SRR17520069. 18769395  
SRR17520069. 18769397  
SRR17520069. 18769399  
SRR17520069. 18769403  
SRR17520069. 18769405  
SRR17520069. 18769407  
SRR17520069. 18769413  
SRR17520069. 18769415  
SRR17520069. 18769417  
SRR17520069. 18769419  
SRR17520069. 18769421  
SRR17520069. 18769423  
SRR17520069. 18769425

SRR17520069. 18769427  
SRR17520069. 18769429  
SRR17520069. 18769431  
SRR17520069. 18769433  
SRR17520069. 18769435  
SRR17520069. 18769437  
SRR17520069. 18769439  
SRR17520069. 18769441  
SRR17520069. 18769443  
SRR17520069. 18769445  
SRR17520069. 18769447  
SRR17520069. 18769449  
SRR17520069. 18769451  
SRR17520069. 18769453  
SRR17520069. 18769455  
SRR17520069. 18769457  
SRR17520069. 18769459  
SRR17520069. 18769461  
SRR17520069. 18769463  
SRR17520069. 18769465  
SRR17520069. 18769467  
SRR17520069. 18769469  
SRR17520069. 18769471  
SRR17520069. 18769473  
SRR17520069. 18769475  
SRR17520069. 18769477  
SRR17520069. 18772542  
SRR17520069. 18773938  
SRR17520069. 18773940  
SRR17520069. 18773942  
SRR17520069. 18773944  
SRR17520069. 18773946  
SRR17520069. 18773948  
SRR17520069. 18773950  
SRR17520069. 18773952  
SRR17520069. 18773954  
SRR17520069. 18773956  
SRR17520069. 18773958  
SRR17520069. 18773960  
SRR17520069. 18773962  
SRR17520069. 18776623  
SRR17520069. 18776625  
SRR17520069. 18776627  
SRR17520069. 18776631  
SRR17520069. 18776973  
SRR17520069. 18776975  
SRR17520069. 18776977

SRR17520069. 18776979  
SRR17520069. 18776981  
SRR17520069. 18776983  
SRR17520069. 18776985  
SRR17520069. 18776987  
SRR17520069. 18776989  
SRR17520069. 18776991  
SRR17520069. 18776993  
SRR17520069. 18776995  
SRR17520069. 18776997  
SRR17520069. 18776999  
SRR17520069. 18777001  
SRR17520069. 18777003  
SRR17520069. 18777005  
SRR17520069. 18777007  
SRR17520069. 18777009  
SRR17520069. 18777011  
SRR17520069. 18777013  
SRR17520069. 18777015  
SRR17520069. 18777017  
SRR17520069. 18778075  
SRR17520069. 18778077  
SRR17520069. 18778079  
SRR17520069. 18778081  
SRR17520069. 18778083  
SRR17520069. 18778085  
SRR17520069. 18778087  
SRR17520069. 18778089  
SRR17520069. 18778091  
SRR17520069. 18778093  
SRR17520069. 18778095  
SRR17520069. 18778097  
SRR17520069. 18778099  
SRR17520069. 18778101  
SRR17520069. 18778103  
SRR17520069. 18778105  
SRR17520069. 18778107  
SRR17520069. 18778109  
SRR17520069. 18778111  
SRR17520069. 18778113  
SRR17520069. 18778115  
SRR17520069. 18778117  
SRR17520069. 18778119  
SRR17520069. 18778121  
SRR17520069. 18778123  
SRR17520069. 18778125  
SRR17520069. 18778127

SRR17520069. 18778129  
SRR17520069. 18778131  
SRR17520069. 18778133  
SRR17520069. 18778135  
SRR17520069. 18778137  
SRR17520069. 18778139  
SRR17520069. 18778141  
SRR17520069. 18778143  
SRR17520069. 18781831  
SRR17520069. 18781833  
SRR17520069. 18781835  
SRR17520069. 18781837  
SRR17520069. 18781839  
SRR17520069. 18781841  
SRR17520069. 18781843  
SRR17520069. 18781845  
SRR17520069. 18781847  
SRR17520069. 18781849  
SRR17520069. 18781851  
SRR17520069. 18781853  
SRR17520069. 18781855  
SRR17520069. 18781857  
SRR17520069. 18781859  
SRR17520069. 18786057  
SRR17520069. 18786059  
SRR17520069. 18786061  
SRR17520069. 18786063  
SRR17520069. 18786065  
SRR17520069. 18786067  
SRR17520069. 18786069  
SRR17520069. 18786071  
SRR17520069. 18786073  
SRR17520069. 18786075  
SRR17520069. 18786077  
SRR17520069. 18786079  
SRR17520069. 18786081  
SRR17520069. 18786083  
SRR17520069. 18787665  
SRR17520069. 18790731  
SRR17520069. 18790733  
SRR17520069. 18790735  
SRR17520069. 18790737  
SRR17520069. 18790739  
SRR17520069. 18790741  
SRR17520069. 18790743  
SRR17520069. 18790745  
SRR17520069. 18790747

SRR17520069. 18790749  
SRR17520069. 18790751  
SRR17520069. 18790753  
SRR17520069. 18790755  
SRR17520069. 18790757  
SRR17520069. 18790759  
SRR17520069. 18790761  
SRR17520069. 18790763  
SRR17520069. 18790765  
SRR17520069. 18790767  
SRR17520069. 18790771  
SRR17520069. 18790773  
SRR17520069. 18795726  
SRR17520069. 18795728  
SRR17520069. 18795730  
SRR17520069. 18799777  
SRR17520069. 18799781  
SRR17520069. 18799785  
SRR17520069. 18804104  
SRR17520069. 18804106  
SRR17520069. 18804108  
SRR17520069. 18804110  
SRR17520069. 18804112  
SRR17520069. 18804114  
SRR17520069. 18804116  
SRR17520069. 18804118  
SRR17520069. 18804120  
SRR17520069. 18804122  
SRR17520069. 18804124  
SRR17520069. 18804126  
SRR17520069. 18804128  
SRR17520069. 18804130  
SRR17520069. 18804132  
SRR17520069. 18804134  
SRR17520069. 18804136  
SRR17520069. 18804138  
SRR17520069. 18804140  
SRR17520069. 18804142  
SRR17520069. 18804144  
SRR17520069. 18804146  
SRR17520069. 18804148  
SRR17520069. 18804150  
SRR17520069. 18804152  
SRR17520069. 18804154  
SRR17520069. 18804156  
SRR17520069. 18804158  
SRR17520069. 18804160



SRR17520069.18804776  
SRR17520069.18807222  
SRR17520069.18807224  
SRR17520069.18807226  
SRR17520069.18807228  
SRR17520069.18807230  
SRR17520069.18807232  
SRR17520069.18807234  
SRR17520069.18807236  
SRR17520069.18807238  
SRR17520069.18807240  
SRR17520069.18807242  
SRR17520069.18807244  
SRR17520069.18807246  
SRR17520069.18807248  
SRR17520069.18807250  
SRR17520069.18807252  
SRR17520069.18807254  
SRR17520069.18807256  
SRR17520069.18807258  
SRR17520069.18807260  
SRR17520069.18810707  
SRR17520069.18810709  
SRR17520069.18810711  
SRR17520069.18810713  
SRR17520069.18810715  
SRR17520069.18810717  
SRR17520069.18810719  
SRR17520069.18810721  
SRR17520069.18810723  
SRR17520069.18810725  
SRR17520069.18810727  
SRR17520069.18810729  
SRR17520069.18810731  
SRR17520069.18810735  
SRR17520069.18810737  
SRR17520069.18810739  
SRR17520069.18810741  
SRR17520069.18810743  
SRR17520069.18810747  
SRR17520069.18810749  
SRR17520069.18810751  
SRR17520069.18810753  
SRR17520069.18810755  
SRR17520069.18810757  
SRR17520069.18810765  
SRR17520069.18810769

SRR17520069.18810773  
SRR17520069.18810775  
SRR17520069.18810779  
SRR17520069.18810781  
SRR17520069.18810783  
SRR17520069.18810785  
SRR17520069.18810791  
SRR17520069.18810793  
SRR17520069.18810795  
SRR17520069.18810797  
SRR17520069.18810799  
SRR17520069.18810801  
SRR17520069.18810803  
SRR17520069.18810805  
SRR17520069.18810807  
SRR17520069.18810809  
SRR17520069.18810811  
SRR17520069.18810813  
SRR17520069.18810815  
SRR17520069.18810817  
SRR17520069.18810819  
SRR17520069.18810821  
SRR17520069.18810823  
SRR17520069.18810827  
SRR17520069.18810829  
SRR17520069.18813018  
SRR17520069.18813020  
SRR17520069.18813022  
SRR17520069.18813024  
SRR17520069.18813026  
SRR17520069.18813028  
SRR17520069.18813030  
SRR17520069.18813032  
SRR17520069.18813034  
SRR17520069.18817475  
SRR17520069.18817717  
SRR17520069.18817719  
SRR17520069.18817721  
SRR17520069.18817725  
SRR17520069.18817727  
SRR17520069.18817733  
SRR17520069.18817735  
SRR17520069.18817737  
SRR17520069.18817739  
SRR17520069.18817741  
SRR17520069.18817743  
SRR17520069.18817745

SRR17520069.18817747  
SRR17520069.18817749  
SRR17520069.18817751  
SRR17520069.18817753  
SRR17520069.18817755  
SRR17520069.18817759  
SRR17520069.18817761  
SRR17520069.18818206  
SRR17520069.18818208  
SRR17520069.18818210  
SRR17520069.18818212  
SRR17520069.18818214  
SRR17520069.18818216  
SRR17520069.18818218  
SRR17520069.18818220  
SRR17520069.18818224  
SRR17520069.18818226  
SRR17520069.18818228  
SRR17520069.18823349  
SRR17520069.18823353  
SRR17520069.18823357  
SRR17520069.18823359  
SRR17520069.18823361  
SRR17520069.18823363  
SRR17520069.18823367  
SRR17520069.18823369  
SRR17520069.18823371  
SRR17520069.18823373  
SRR17520069.18823375  
SRR17520069.18823377  
SRR17520069.18823379  
SRR17520069.18823381  
SRR17520069.18823383  
SRR17520069.18823385  
SRR17520069.18823387  
SRR17520069.18823389  
SRR17520069.18823391  
SRR17520069.18823393  
SRR17520069.18823395  
SRR17520069.18823397  
SRR17520069.18823399  
SRR17520069.18823401  
SRR17520069.18823403  
SRR17520069.18823405  
SRR17520069.18823407  
SRR17520069.18823409  
SRR17520069.18823411

SRR17520069.18823415  
SRR17520069.18823417  
SRR17520069.18823419  
SRR17520069.18823421  
SRR17520069.18823423  
SRR17520069.18823425  
SRR17520069.18823427  
SRR17520069.18823429  
SRR17520069.18823948  
SRR17520069.18823950  
SRR17520069.18823952  
SRR17520069.18823954  
SRR17520069.18823956  
SRR17520069.18823958  
SRR17520069.18823960  
SRR17520069.18823962  
SRR17520069.18823964  
SRR17520069.18823966  
SRR17520069.18823968  
SRR17520069.18823970  
SRR17520069.18823972  
SRR17520069.18823974  
SRR17520069.18823976  
SRR17520069.18823978  
SRR17520069.18823980  
SRR17520069.18823982  
SRR17520069.18823984  
SRR17520069.18823986  
SRR17520069.18823988  
SRR17520069.18823990  
SRR17520069.18823992  
SRR17520069.18823994  
SRR17520069.18823996  
SRR17520069.18823998  
SRR17520069.18824000  
SRR17520069.18824002  
SRR17520069.18824004  
SRR17520069.18824008  
SRR17520069.18824010  
SRR17520069.18824012  
SRR17520069.18824014  
SRR17520069.18824016  
SRR17520069.18824018  
SRR17520069.18824020  
SRR17520069.18824022  
SRR17520069.18824024  
SRR17520069.18824026

SRR17520069.18824028  
SRR17520069.18824030  
SRR17520069.18824032  
SRR17520069.18824034  
SRR17520069.18824036  
SRR17520069.18824038  
SRR17520069.18824040  
SRR17520069.18824042  
SRR17520069.18824044  
SRR17520069.18824046  
SRR17520069.18824048  
SRR17520069.18824050  
SRR17520069.18824052  
SRR17520069.18824054  
SRR17520069.18824056  
SRR17520069.18824058  
SRR17520069.18824060  
SRR17520069.18824062  
SRR17520069.18824064  
SRR17520069.18824066  
SRR17520069.18824068  
SRR17520069.18824070  
SRR17520069.18824072  
SRR17520069.18824076  
SRR17520069.18824078  
SRR17520069.18824080  
SRR17520069.18824082  
SRR17520069.18824084  
SRR17520069.18824086  
SRR17520069.18824088  
SRR17520069.18824090  
SRR17520069.18824092  
SRR17520069.18824094  
SRR17520069.18824096  
SRR17520069.18824098  
SRR17520069.18824100  
SRR17520069.18824102  
SRR17520069.18824104  
SRR17520069.18824106  
SRR17520069.18824936  
SRR17520069.18824938  
SRR17520069.18824940  
SRR17520069.18824942  
SRR17520069.18831266  
SRR17520069.18831268  
SRR17520069.18831270  
SRR17520069.18831272

SRR17520069.18831274  
SRR17520069.18831557  
SRR17520069.18831559  
SRR17520069.18831561  
SRR17520069.18831563  
SRR17520069.18831565  
SRR17520069.18831567  
SRR17520069.18835330  
SRR17520069.18835332  
SRR17520069.18835334  
SRR17520069.18835336  
SRR17520069.18835338  
SRR17520069.18835340  
SRR17520069.18835342  
SRR17520069.18835344  
SRR17520069.18835346  
SRR17520069.18835348  
SRR17520069.18835350  
SRR17520069.18835352  
SRR17520069.18835354  
SRR17520069.18835356  
SRR17520069.18835358  
SRR17520069.18835360  
SRR17520069.18835362  
SRR17520069.18835364  
SRR17520069.18835366  
SRR17520069.18835368  
SRR17520069.18835372  
SRR17520069.18835374  
SRR17520069.18835376  
SRR17520069.18836502  
SRR17520069.18836504  
SRR17520069.18836506  
SRR17520069.18836508  
SRR17520069.18836510  
SRR17520069.18836512  
SRR17520069.18836514  
SRR17520069.18836516  
SRR17520069.18836518  
SRR17520069.18836520  
SRR17520069.18836522  
SRR17520069.18836524  
SRR17520069.18836526  
SRR17520069.18836528  
SRR17520069.18836530  
SRR17520069.18836532  
SRR17520069.18836534

SRR17520069.18836536  
SRR17520069.18836538  
SRR17520069.18836540  
SRR17520069.18836542  
SRR17520069.18836544  
SRR17520069.18836546  
SRR17520069.18836548  
SRR17520069.18836550  
SRR17520069.18836552  
SRR17520069.18836554  
SRR17520069.18836556  
SRR17520069.18836558  
SRR17520069.18836560  
SRR17520069.18836562  
SRR17520069.18836564  
SRR17520069.18836566  
SRR17520069.18837317  
SRR17520069.18837319  
SRR17520069.18837323  
SRR17520069.18837325  
SRR17520069.18837327  
SRR17520069.18837329  
SRR17520069.18837331  
SRR17520069.18837333  
SRR17520069.18839101  
SRR17520069.18839103  
SRR17520069.18839105  
SRR17520069.18839107  
SRR17520069.18839109  
SRR17520069.18839111  
SRR17520069.18839113  
SRR17520069.18839115  
SRR17520069.18839117  
SRR17520069.18839119  
SRR17520069.18839121  
SRR17520069.18839123  
SRR17520069.18839125  
SRR17520069.18839127  
SRR17520069.18839129  
SRR17520069.18839131  
SRR17520069.18839133  
SRR17520069.18839135  
SRR17520069.18839139  
SRR17520069.18839141  
SRR17520069.18839143  
SRR17520069.18839145  
SRR17520069.18839147

SRR17520069.18839149  
SRR17520069.18839151  
SRR17520069.18839153  
SRR17520069.18839155  
SRR17520069.18839157  
SRR17520069.18839161  
SRR17520069.18839163  
SRR17520069.18839165  
SRR17520069.18839167  
SRR17520069.18839169  
SRR17520069.18839171  
SRR17520069.18839173  
SRR17520069.18839175  
SRR17520069.18839177  
SRR17520069.18839179  
SRR17520069.18839181  
SRR17520069.18839183  
SRR17520069.18839185  
SRR17520069.18839187  
SRR17520069.18839189  
SRR17520069.18839191  
SRR17520069.18839193  
SRR17520069.18839195  
SRR17520069.18839197  
SRR17520069.18839199  
SRR17520069.18839203  
SRR17520069.18839205  
SRR17520069.18839207  
SRR17520069.18839209  
SRR17520069.18839211  
SRR17520069.18839213  
SRR17520069.18839215  
SRR17520069.18839217  
SRR17520069.18839219  
SRR17520069.18839221  
SRR17520069.18839223  
SRR17520069.18839225  
SRR17520069.18839227  
SRR17520069.18845072  
SRR17520069.18845074  
SRR17520069.18845076  
SRR17520069.18845078  
SRR17520069.18845080  
SRR17520069.18845082  
SRR17520069.18845084  
SRR17520069.18845086  
SRR17520069.18845088



SRR17520069.18845090  
SRR17520069.18845092  
SRR17520069.18845094  
SRR17520069.18845096  
SRR17520069.18845098  
SRR17520069.18845100  
SRR17520069.18845102  
SRR17520069.18845104  
SRR17520069.18845106  
SRR17520069.18845108  
SRR17520069.18845110  
SRR17520069.18845112  
SRR17520069.18845114  
SRR17520069.18845116  
SRR17520069.18845118  
SRR17520069.18845120  
SRR17520069.18845122  
SRR17520069.18845124  
SRR17520069.18845126  
SRR17520069.18845128  
SRR17520069.18845130  
SRR17520069.18845132  
SRR17520069.18845134  
SRR17520069.18845136  
SRR17520069.18845138  
SRR17520069.18845140  
SRR17520069.18845142  
SRR17520069.18845144  
SRR17520069.18845146  
SRR17520069.18845148  
SRR17520069.18845150  
SRR17520069.18845152  
SRR17520069.18845154  
SRR17520069.18848480  
SRR17520069.18848482  
SRR17520069.18848484  
SRR17520069.18854055  
SRR17520069.18854057  
SRR17520069.18854059  
SRR17520069.18854061  
SRR17520069.18854063  
SRR17520069.18854065  
SRR17520069.18854067  
SRR17520069.18861674  
SRR17520069.18861676  
SRR17520069.18861678  
SRR17520069.18861680

SRR17520069. 18861682  
SRR17520069. 18861684  
SRR17520069. 18861686  
SRR17520069. 18861688  
SRR17520069. 18861690  
SRR17520069. 18861692  
SRR17520069. 18861694  
SRR17520069. 18861696  
SRR17520069. 18861700  
SRR17520069. 18861704  
SRR17520069. 18861706  
SRR17520069. 18861708  
SRR17520069. 18861710  
SRR17520069. 18861712  
SRR17520069. 18861714  
SRR17520069. 18884761  
SRR17520069. 18892039  
SRR17520069. 18892041  
SRR17520069. 18892045  
SRR17520069. 18892047  
SRR17520069. 18892049  
SRR17520069. 18892051  
SRR17520069. 18892053  
SRR17520069. 18892055  
SRR17520069. 18892057  
SRR17520069. 18892059  
SRR17520069. 18898134  
SRR17520069. 18898136  
SRR17520069. 18906447  
SRR17520069. 18906449  
SRR17520069. 18906451  
SRR17520069. 18906455  
SRR17520069. 18906457  
SRR17520069. 18906459  
SRR17520069. 18906461  
SRR17520069. 18906463  
SRR17520069. 18906465  
SRR17520069. 18906467  
SRR17520069. 18906469  
SRR17520069. 18906471  
SRR17520069. 18906475  
SRR17520069. 18906477  
SRR17520069. 18906479  
SRR17520069. 18906481  
SRR17520069. 18906483  
SRR17520069. 18906487  
SRR17520069. 18906491

SRR17520069. 18906493  
SRR17520069. 18906495  
SRR17520069. 18906497  
SRR17520069. 18906499  
SRR17520069. 18906501  
SRR17520069. 18906503  
SRR17520069. 18906505  
SRR17520069. 18906507  
SRR17520069. 18906509  
SRR17520069. 18906511  
SRR17520069. 18906513  
SRR17520069. 18906515  
SRR17520069. 18906517  
SRR17520069. 18906519  
SRR17520069. 18906521  
SRR17520069. 18906523  
SRR17520069. 18906525  
SRR17520069. 18906527  
SRR17520069. 18912664  
SRR17520069. 18912666  
SRR17520069. 18912668  
SRR17520069. 18912670  
SRR17520069. 18912672  
SRR17520069. 18912674  
SRR17520069. 18912676  
SRR17520069. 18912678  
SRR17520069. 18912680  
SRR17520069. 18912682  
SRR17520069. 18912684  
SRR17520069. 18912686  
SRR17520069. 18915101  
SRR17520069. 18915103  
SRR17520069. 18915105  
SRR17520069. 18915109  
SRR17520069. 18915111  
SRR17520069. 18915113  
SRR17520069. 18915115  
SRR17520069. 18915119  
SRR17520069. 18915121  
SRR17520069. 18915125  
SRR17520069. 18917385  
SRR17520069. 18917387  
SRR17520069. 18917389  
SRR17520069. 18917393  
SRR17520069. 18917395  
SRR17520069. 18917397  
SRR17520069. 18917399

SRR17520069. 18917401  
SRR17520069. 18917403  
SRR17520069. 18917405  
SRR17520069. 18917407  
SRR17520069. 18917409  
SRR17520069. 18917411  
SRR17520069. 18917413  
SRR17520069. 18917415  
SRR17520069. 18917417  
SRR17520069. 18917419  
SRR17520069. 18917421  
SRR17520069. 18917425  
SRR17520069. 18919228  
SRR17520069. 18919230  
SRR17520069. 18919232  
SRR17520069. 18919234  
SRR17520069. 18919236  
SRR17520069. 18919238  
SRR17520069. 18919242  
SRR17520069. 18919244  
SRR17520069. 18919246  
SRR17520069. 18919248  
SRR17520069. 18919250  
SRR17520069. 18919252  
SRR17520069. 18919254  
SRR17520069. 18919256  
SRR17520069. 18919258  
SRR17520069. 18919260  
SRR17520069. 18919262  
SRR17520069. 18919264  
SRR17520069. 18919266  
SRR17520069. 18919268  
SRR17520069. 18919270  
SRR17520069. 18919272  
SRR17520069. 18919274  
SRR17520069. 18919276  
SRR17520069. 18919278  
SRR17520069. 18919280  
SRR17520069. 18919282  
SRR17520069. 18919284  
SRR17520069. 18919286  
SRR17520069. 18919288  
SRR17520069. 18919290  
SRR17520069. 18919292  
SRR17520069. 18919294  
SRR17520069. 18919296  
SRR17520069. 18919298

SRR17520069. 18919300  
SRR17520069. 18919302  
SRR17520069. 18919304  
SRR17520069. 18919306  
SRR17520069. 18919308  
SRR17520069. 18919310  
SRR17520069. 18919312  
SRR17520069. 18919314  
SRR17520069. 18919316  
SRR17520069. 18919318  
SRR17520069. 18919320  
SRR17520069. 18919322  
SRR17520069. 18919324  
SRR17520069. 18919326  
SRR17520069. 18919328  
SRR17520069. 18919330  
SRR17520069. 18919332  
SRR17520069. 18919334  
SRR17520069. 18919336  
SRR17520069. 18919338  
SRR17520069. 18919340  
SRR17520069. 18919342  
SRR17520069. 18919344  
SRR17520069. 18919346  
SRR17520069. 18919348  
SRR17520069. 18919350  
SRR17520069. 18919352  
SRR17520069. 18919354  
SRR17520069. 18919356  
SRR17520069. 18919358  
SRR17520069. 18919360  
SRR17520069. 18919362  
SRR17520069. 18919364  
SRR17520069. 18919366  
SRR17520069. 18919368  
SRR17520069. 18919370  
SRR17520069. 18919372  
SRR17520069. 18919374  
SRR17520069. 18919376  
SRR17520069. 18919378  
SRR17520069. 18919380  
SRR17520069. 18919382  
SRR17520069. 18919384  
SRR17520069. 18919386  
SRR17520069. 18919388  
SRR17520069. 18919390  
SRR17520069. 18919392

SRR17520069. 18919394  
SRR17520069. 18923996  
SRR17520069. 18924539  
SRR17520069. 18935047  
SRR17520069. 18935049  
SRR17520069. 18935053  
SRR17520069. 18935055  
SRR17520069. 18935057  
SRR17520069. 18935059  
SRR17520069. 18935061  
SRR17520069. 18935063  
SRR17520069. 18935069  
SRR17520069. 18935073  
SRR17520069. 18935077  
SRR17520069. 18935083  
SRR17520069. 18935085  
SRR17520069. 18935091  
SRR17520069. 18935097  
SRR17520069. 18935099  
SRR17520069. 18935103  
SRR17520069. 18935107  
SRR17520069. 18935111  
SRR17520069. 18940368  
SRR17520069. 18940370  
SRR17520069. 18940372  
SRR17520069. 18945075  
SRR17520069. 18945077  
SRR17520069. 18945079  
SRR17520069. 18945081  
SRR17520069. 18945083  
SRR17520069. 18945085  
SRR17520069. 18945087  
SRR17520069. 18945089  
SRR17520069. 18945091  
SRR17520069. 18945093  
SRR17520069. 18945095  
SRR17520069. 18945097  
SRR17520069. 18945099  
SRR17520069. 18945101  
SRR17520069. 18945103  
SRR17520069. 18945105  
SRR17520069. 18945107  
SRR17520069. 18945109  
SRR17520069. 18945113  
SRR17520069. 18945115  
SRR17520069. 18945117  
SRR17520069. 18945119

SRR17520069. 18945121  
SRR17520069. 18945123  
SRR17520069. 18945125  
SRR17520069. 18945127  
SRR17520069. 18945129  
SRR17520069. 18948001  
SRR17520069. 18948003  
SRR17520069. 18948005  
SRR17520069. 18948007  
SRR17520069. 18948009  
SRR17520069. 18948011  
SRR17520069. 18948013  
SRR17520069. 18948015  
SRR17520069. 18948017  
SRR17520069. 18948019  
SRR17520069. 18948021  
SRR17520069. 18948023  
SRR17520069. 18948025  
SRR17520069. 18948027  
SRR17520069. 18948029  
SRR17520069. 18948031  
SRR17520069. 18948033  
SRR17520069. 18948035  
SRR17520069. 18948037  
SRR17520069. 18948039  
SRR17520069. 18948041  
SRR17520069. 18948043  
SRR17520069. 18948045  
SRR17520069. 18948047  
SRR17520069. 18948049  
SRR17520069. 18948053  
SRR17520069. 18948055  
SRR17520069. 18948057  
SRR17520069. 18948059  
SRR17520069. 18948061  
SRR17520069. 18948063  
SRR17520069. 18948065  
SRR17520069. 18948067  
SRR17520069. 18948069  
SRR17520069. 18948071  
SRR17520069. 18948073  
SRR17520069. 18948075  
SRR17520069. 18948077  
SRR17520069. 18948079  
SRR17520069. 18948520  
SRR17520069. 18948522  
SRR17520069. 18948524

SRR17520069. 18948526  
SRR17520069. 18948528  
SRR17520069. 18948530  
SRR17520069. 18948532  
SRR17520069. 18948538  
SRR17520069. 18948540  
SRR17520069. 18948546  
SRR17520069. 18948548  
SRR17520069. 18948550  
SRR17520069. 18948552  
SRR17520069. 18948556  
SRR17520069. 18948558  
SRR17520069. 18948560  
SRR17520069. 18948564  
SRR17520069. 18948566  
SRR17520069. 18948568  
SRR17520069. 18948572  
SRR17520069. 18948574  
SRR17520069. 18948576  
SRR17520069. 18948578  
SRR17520069. 18949142  
SRR17520069. 18949146  
SRR17520069. 18949148  
SRR17520069. 18949150  
SRR17520069. 18949152  
SRR17520069. 18949154  
SRR17520069. 18949156  
SRR17520069. 18949158  
SRR17520069. 18949160  
SRR17520069. 18949162  
SRR17520069. 18949170  
SRR17520069. 18949172  
SRR17520069. 18949174  
SRR17520069. 18949178  
SRR17520069. 18959729  
SRR17520069. 18959731  
SRR17520069. 18959733  
SRR17520069. 18959735  
SRR17520069. 18961654  
SRR17520069. 18961656  
SRR17520069. 18961658  
SRR17520069. 18961660  
SRR17520069. 18961662  
SRR17520069. 18961664  
SRR17520069. 18961666  
SRR17520069. 18961668  
SRR17520069. 18961670



SRR17520069. 18961672  
SRR17520069. 18961674  
SRR17520069. 18961676  
SRR17520069. 18961678  
SRR17520069. 18961680  
SRR17520069. 18961682  
SRR17520069. 18961684  
SRR17520069. 18961686  
SRR17520069. 18961688  
SRR17520069. 18961690  
SRR17520069. 18961692  
SRR17520069. 18961694  
SRR17520069. 18961696  
SRR17520069. 18961698  
SRR17520069. 18961700  
SRR17520069. 18961702  
SRR17520069. 18961704  
SRR17520069. 18961706  
SRR17520069. 18961708  
SRR17520069. 18961710  
SRR17520069. 18961712  
SRR17520069. 18961714  
SRR17520069. 18961716  
SRR17520069. 18961718  
SRR17520069. 18961720  
SRR17520069. 18961722  
SRR17520069. 18961724  
SRR17520069. 18961726  
SRR17520069. 18961728  
SRR17520069. 18961730  
SRR17520069. 18961732  
SRR17520069. 18961734  
SRR17520069. 18961736  
SRR17520069. 18961740  
SRR17520069. 18961746  
SRR17520069. 18961748  
SRR17520069. 18961750  
SRR17520069. 18961752  
SRR17520069. 18961754  
SRR17520069. 18962175  
SRR17520069. 18962177  
SRR17520069. 18962179  
SRR17520069. 18962181  
SRR17520069. 18962183  
SRR17520069. 18962185  
SRR17520069. 18962187  
SRR17520069. 18962189

SRR17520069. 18962191  
SRR17520069. 18962193  
SRR17520069. 18962195  
SRR17520069. 18962197  
SRR17520069. 18962199  
SRR17520069. 18962268  
SRR17520069. 18962270  
SRR17520069. 18962274  
SRR17520069. 18962276  
SRR17520069. 18962278  
SRR17520069. 18962280  
SRR17520069. 18962282  
SRR17520069. 18962284  
SRR17520069. 18962286  
SRR17520069. 18962288  
SRR17520069. 18962290  
SRR17520069. 18962292  
SRR17520069. 18962294  
SRR17520069. 18962296  
SRR17520069. 18962298  
SRR17520069. 18962300  
SRR17520069. 18962302  
SRR17520069. 18962304  
SRR17520069. 18962306  
SRR17520069. 18962308  
SRR17520069. 18962310  
SRR17520069. 18962312  
SRR17520069. 18962314  
SRR17520069. 18962320  
SRR17520069. 18962326  
SRR17520069. 18962330  
SRR17520069. 18962332  
SRR17520069. 18962334  
SRR17520069. 18962336  
SRR17520069. 18962338  
SRR17520069. 18962340  
SRR17520069. 18962342  
SRR17520069. 18962344  
SRR17520069. 18962346  
SRR17520069. 18962348  
SRR17520069. 18962350  
SRR17520069. 18962352  
SRR17520069. 18962356  
SRR17520069. 18962358  
SRR17520069. 18962360  
SRR17520069. 18962362  
SRR17520069. 18962364

SRR17520069. 18962366  
SRR17520069. 18962368  
SRR17520069. 18962370  
SRR17520069. 18962598  
SRR17520069. 18962600  
SRR17520069. 18963257  
SRR17520069. 18963259  
SRR17520069. 18963261  
SRR17520069. 18963263  
SRR17520069. 18963265  
SRR17520069. 18963267  
SRR17520069. 18963269  
SRR17520069. 18963271  
SRR17520069. 18963273  
SRR17520069. 18963275  
SRR17520069. 18963277  
SRR17520069. 18963281  
SRR17520069. 18963283  
SRR17520069. 18963285  
SRR17520069. 18963287  
SRR17520069. 18963289  
SRR17520069. 18963291  
SRR17520069. 18963293  
SRR17520069. 18963295  
SRR17520069. 18963297  
SRR17520069. 18963299  
SRR17520069. 18963301  
SRR17520069. 18963303  
SRR17520069. 18963305  
SRR17520069. 18963307  
SRR17520069. 18963309  
SRR17520069. 18963311  
SRR17520069. 18963313  
SRR17520069. 18963315  
SRR17520069. 18963317  
SRR17520069. 18963319  
SRR17520069. 18963321  
SRR17520069. 18963323  
SRR17520069. 18963325  
SRR17520069. 18963327  
SRR17520069. 18963329  
SRR17520069. 18963331  
SRR17520069. 18969062  
SRR17520069. 18969917  
SRR17520069. 18969919  
SRR17520069. 18969921  
SRR17520069. 18969923

SRR17520069. 18969925  
SRR17520069. 18972666  
SRR17520069. 18972668  
SRR17520069. 18977980  
SRR17520069. 18977982  
SRR17520069. 18977986  
SRR17520069. 18977988  
SRR17520069. 18977990  
SRR17520069. 18977992  
SRR17520069. 18977994  
SRR17520069. 18978000  
SRR17520069. 18978002  
SRR17520069. 18978004  
SRR17520069. 18978006  
SRR17520069. 18978012  
SRR17520069. 18978014  
SRR17520069. 18985974  
SRR17520069. 18985978  
SRR17520069. 18985980  
SRR17520069. 18985982  
SRR17520069. 18985984  
SRR17520069. 18985986  
SRR17520069. 18985988  
SRR17520069. 18985990  
SRR17520069. 18985992  
SRR17520069. 18985994  
SRR17520069. 18985996  
SRR17520069. 18985998  
SRR17520069. 18986002  
SRR17520069. 18987223  
SRR17520069. 18987225  
SRR17520069. 18987227  
SRR17520069. 18987229  
SRR17520069. 18987231  
SRR17520069. 18987233  
SRR17520069. 18987235  
SRR17520069. 18987237  
SRR17520069. 18987239  
SRR17520069. 18987241  
SRR17520069. 18987243  
SRR17520069. 18987245  
SRR17520069. 18987247  
SRR17520069. 18987249  
SRR17520069. 18987251  
SRR17520069. 18987253  
SRR17520069. 18987255  
SRR17520069. 18987257

SRR17520069. 18987259  
SRR17520069. 18987261  
SRR17520069. 18987263  
SRR17520069. 18987265  
SRR17520069. 18987267  
SRR17520069. 18987269  
SRR17520069. 18987271  
SRR17520069. 18987273  
SRR17520069. 18987275  
SRR17520069. 18987912  
SRR17520069. 18987914  
SRR17520069. 18987916  
SRR17520069. 18987918  
SRR17520069. 18987920  
SRR17520069. 18987922  
SRR17520069. 18987924  
SRR17520069. 18987926  
SRR17520069. 18987928  
SRR17520069. 18987930  
SRR17520069. 18987932  
SRR17520069. 18987934  
SRR17520069. 18987936  
SRR17520069. 18987938  
SRR17520069. 18987940  
SRR17520069. 18987942  
SRR17520069. 18987944  
SRR17520069. 18987946  
SRR17520069. 18987948  
SRR17520069. 18987950  
SRR17520069. 18987952  
SRR17520069. 18987954  
SRR17520069. 18987956  
SRR17520069. 18987958  
SRR17520069. 18987960  
SRR17520069. 18987962  
SRR17520069. 18987964  
SRR17520069. 18987966  
SRR17520069. 18987968  
SRR17520069. 18987970  
SRR17520069. 18987972  
SRR17520069. 18987974  
SRR17520069. 18987976  
SRR17520069. 18987978  
SRR17520069. 18987980  
SRR17520069. 18987982  
SRR17520069. 18987984  
SRR17520069. 18987986

SRR17520069. 18987988  
SRR17520069. 18987990  
SRR17520069. 18987992  
SRR17520069. 18987994  
SRR17520069. 18987996  
SRR17520069. 18987998  
SRR17520069. 18988000  
SRR17520069. 18988002  
SRR17520069. 18988004  
SRR17520069. 18988006  
SRR17520069. 18988008  
SRR17520069. 18988010  
SRR17520069. 18988012  
SRR17520069. 18988014  
SRR17520069. 18988016  
SRR17520069. 18990651  
SRR17520069. 18990653  
SRR17520069. 18990655  
SRR17520069. 18990657  
SRR17520069. 18990659  
SRR17520069. 18990661  
SRR17520069. 18990665  
SRR17520069. 18990667  
SRR17520069. 18990669  
SRR17520069. 18990671  
SRR17520069. 18990673  
SRR17520069. 18990675  
SRR17520069. 18990677  
SRR17520069. 18990679  
SRR17520069. 18990681  
SRR17520069. 18998572  
SRR17520069. 18998574  
SRR17520069. 18998576  
SRR17520069. 18998580  
SRR17520069. 18998584  
SRR17520069. 18998586  
SRR17520069. 18998588  
SRR17520069. 18998590  
SRR17520069. 18998592  
SRR17520069. 18998594  
SRR17520069. 18998596  
SRR17520069. 18998598  
SRR17520069. 18998600  
SRR17520069. 18998602  
SRR17520069. 18998604  
SRR17520069. 18998606  
SRR17520069. 18998608

SRR17520069.18999822  
SRR17520069.18999824  
SRR17520069.18999826  
SRR17520069.18999828  
SRR17520069.18999830  
SRR17520069.18999832  
SRR17520069.18999834  
SRR17520069.18999836  
SRR17520069.18999838  
SRR17520069.18999840  
SRR17520069.18999842  
SRR17520069.18999844  
SRR17520069.18999846  
SRR17520069.18999848  
SRR17520069.18999850  
SRR17520069.18999852  
SRR17520069.18999854  
SRR17520069.18999856  
SRR17520069.18999858  
SRR17520069.18999860  
SRR17520069.18999862  
SRR17520069.18999864  
SRR17520069.18999866  
SRR17520069.18999868  
SRR17520069.18999870  
SRR17520069.18999872  
SRR17520069.18999874  
SRR17520069.18999876  
SRR17520069.18999878  
SRR17520069.18999880  
SRR17520069.18999882  
SRR17520069.19001248  
SRR17520069.19001250  
SRR17520069.19005686  
SRR17520069.19005688  
SRR17520069.19005690  
SRR17520069.19005692  
SRR17520069.19005694  
SRR17520069.19005696  
SRR17520069.19005698  
SRR17520069.19005700  
SRR17520069.19005702  
SRR17520069.19005704  
SRR17520069.19005706  
SRR17520069.19005708  
SRR17520069.19005710  
SRR17520069.19005712

SRR17520069.19005714  
SRR17520069.19005716  
SRR17520069.19005718  
SRR17520069.19005720  
SRR17520069.19005722  
SRR17520069.19005724  
SRR17520069.19005726  
SRR17520069.19005728  
SRR17520069.19006847  
SRR17520069.19006849  
SRR17520069.19006851  
SRR17520069.19006853  
SRR17520069.19006855  
SRR17520069.19006857  
SRR17520069.19006861  
SRR17520069.19006863  
SRR17520069.19010376  
SRR17520069.19010378  
SRR17520069.19010380  
SRR17520069.19010382  
SRR17520069.19010384  
SRR17520069.19010386  
SRR17520069.19010388  
SRR17520069.19010390  
SRR17520069.19010392  
SRR17520069.19010394  
SRR17520069.19010396  
SRR17520069.19010402  
SRR17520069.19010404  
SRR17520069.19010408  
SRR17520069.19015899  
SRR17520069.19015901  
SRR17520069.19015907  
SRR17520069.19015909  
SRR17520069.19015921  
SRR17520069.19015923  
SRR17520069.19015925  
SRR17520069.19015927  
SRR17520069.19015929  
SRR17520069.19015933  
SRR17520069.19015935  
SRR17520069.19015937  
SRR17520069.19015941  
SRR17520069.19015943  
SRR17520069.19015945  
SRR17520069.19015949  
SRR17520069.19015951



SRR17520069.19015953  
SRR17520069.19015955  
SRR17520069.19021160  
SRR17520069.19021188  
SRR17520069.19027789  
SRR17520069.19027791  
SRR17520069.19027793  
SRR17520069.19031367  
SRR17520069.19031369  
SRR17520069.19031371  
SRR17520069.19031373  
SRR17520069.19031375  
SRR17520069.19031377  
SRR17520069.19032041  
SRR17520069.19032043  
SRR17520069.19032045  
SRR17520069.19032047  
SRR17520069.19039157  
SRR17520069.19039159  
SRR17520069.19039161  
SRR17520069.19039163  
SRR17520069.19039165  
SRR17520069.19039167  
SRR17520069.19039169  
SRR17520069.19039171  
SRR17520069.19039173  
SRR17520069.19039175  
SRR17520069.19043870  
SRR17520069.19043872  
SRR17520069.19043874  
SRR17520069.19043878  
SRR17520069.19043880  
SRR17520069.19043882  
SRR17520069.19043884  
SRR17520069.19043886  
SRR17520069.19043888  
SRR17520069.19043890  
SRR17520069.19043892  
SRR17520069.19043895  
SRR17520069.19043897  
SRR17520069.19043899  
SRR17520069.19043901  
SRR17520069.19048841  
SRR17520069.19048843  
SRR17520069.19048845  
SRR17520069.19048847  
SRR17520069.19048849

SRR17520069.19048851  
SRR17520069.19048853  
SRR17520069.19048855  
SRR17520069.19048857  
SRR17520069.19048859  
SRR17520069.19048861  
SRR17520069.19048863  
SRR17520069.19048865  
SRR17520069.19048867  
SRR17520069.19048869  
SRR17520069.19048873  
SRR17520069.19049944  
SRR17520069.19049946  
SRR17520069.19049948  
SRR17520069.19049950  
SRR17520069.19049952  
SRR17520069.19049954  
SRR17520069.19053760  
SRR17520069.19053762  
SRR17520069.19053764  
SRR17520069.19053766  
SRR17520069.19053768  
SRR17520069.19053770  
SRR17520069.19053772  
SRR17520069.19053774  
SRR17520069.19053776  
SRR17520069.19053778  
SRR17520069.19058640  
SRR17520069.19058642  
SRR17520069.19058644  
SRR17520069.19058646  
SRR17520069.19058648  
SRR17520069.19058650  
SRR17520069.19058652  
SRR17520069.19058654  
SRR17520069.19061626  
SRR17520069.19061628  
SRR17520069.19061630  
SRR17520069.19061632  
SRR17520069.19065963  
SRR17520069.19065981  
SRR17520069.19065983  
SRR17520069.19065985  
SRR17520069.19065987  
SRR17520069.19065989  
SRR17520069.19065991  
SRR17520069.19065993

SRR17520069.19065995  
SRR17520069.19065997  
SRR17520069.19065999  
SRR17520069.19066001  
SRR17520069.19066003  
SRR17520069.19066005  
SRR17520069.19066007  
SRR17520069.19066009  
SRR17520069.19066011  
SRR17520069.19066013  
SRR17520069.19066015  
SRR17520069.19066017  
SRR17520069.19066019  
SRR17520069.19066021  
SRR17520069.19066023  
SRR17520069.19066025  
SRR17520069.19066027  
SRR17520069.19066029  
SRR17520069.19066031  
SRR17520069.19066035  
SRR17520069.19066037  
SRR17520069.19066041  
SRR17520069.19066171  
SRR17520069.19066183  
SRR17520069.19066243  
SRR17520069.19066251  
SRR17520069.19066304  
SRR17520069.19066348  
SRR17520069.19068215  
SRR17520069.19068217  
SRR17520069.19076128  
SRR17520069.19076130  
SRR17520069.19076132  
SRR17520069.19076134  
SRR17520069.19076136  
SRR17520069.19076138  
SRR17520069.19076142  
SRR17520069.19076144  
SRR17520069.19076146  
SRR17520069.19076148  
SRR17520069.19076150  
SRR17520069.19076152  
SRR17520069.19076156  
SRR17520069.19076158  
SRR17520069.19076162  
SRR17520069.19076164  
SRR17520069.19076575

SRR17520069.19076577  
SRR17520069.19076579  
SRR17520069.19076583  
SRR17520069.19076585  
SRR17520069.19076587  
SRR17520069.19076589  
SRR17520069.19076595  
SRR17520069.19076599  
SRR17520069.19076601  
SRR17520069.19076603  
SRR17520069.19076605  
SRR17520069.19076607  
SRR17520069.19076609  
SRR17520069.19076611  
SRR17520069.19080882  
SRR17520069.19080884  
SRR17520069.19080886  
SRR17520069.19080888  
SRR17520069.19080890  
SRR17520069.19080892  
SRR17520069.19080894  
SRR17520069.19080896  
SRR17520069.19080898  
SRR17520069.19080900  
SRR17520069.19080902  
SRR17520069.19080906  
SRR17520069.19080908  
SRR17520069.19080910  
SRR17520069.19080912  
SRR17520069.19080914  
SRR17520069.19080916  
SRR17520069.19080918  
SRR17520069.19080920  
SRR17520069.19080922  
SRR17520069.19080924  
SRR17520069.19080926  
SRR17520069.19080928  
SRR17520069.19080930  
SRR17520069.19080932  
SRR17520069.19080934  
SRR17520069.19081855  
SRR17520069.19081857  
SRR17520069.19081859  
SRR17520069.19081861  
SRR17520069.19081863  
SRR17520069.19081865  
SRR17520069.19081867

SRR17520069. 19081871  
SRR17520069. 19081881  
SRR17520069. 19081885  
SRR17520069. 19081887  
SRR17520069. 19081891  
SRR17520069. 19081897  
SRR17520069. 19081901  
SRR17520069. 19081903  
SRR17520069. 19081907  
SRR17520069. 19081909  
SRR17520069. 19081911  
SRR17520069. 19081913  
SRR17520069. 19081915  
SRR17520069. 19081919  
SRR17520069. 19081921  
SRR17520069. 19081923  
SRR17520069. 19081925  
SRR17520069. 19081927  
SRR17520069. 19081931  
SRR17520069. 19081935  
SRR17520069. 19081937  
SRR17520069. 19081939  
SRR17520069. 19081943  
SRR17520069. 19081945  
SRR17520069. 19081949  
SRR17520069. 19092523  
SRR17520069. 19092525  
SRR17520069. 19092527  
SRR17520069. 19092529  
SRR17520069. 19092531  
SRR17520069. 19092533  
SRR17520069. 19092535  
SRR17520069. 19092537  
SRR17520069. 19092539  
SRR17520069. 19092541  
SRR17520069. 19092543  
SRR17520069. 19092545  
SRR17520069. 19092547  
SRR17520069. 19092549  
SRR17520069. 19092551  
SRR17520069. 19092553  
SRR17520069. 19092555  
SRR17520069. 19092557  
SRR17520069. 19092559  
SRR17520069. 19092561  
SRR17520069. 19092563  
SRR17520069. 19092565

SRR17520069.19092567  
SRR17520069.19092569  
SRR17520069.19092571  
SRR17520069.19092573  
SRR17520069.19092575  
SRR17520069.19092577  
SRR17520069.19092579  
SRR17520069.19092581  
SRR17520069.19092583  
SRR17520069.19092585  
SRR17520069.19092587  
SRR17520069.19092589  
SRR17520069.19092591  
SRR17520069.19092593  
SRR17520069.19092595  
SRR17520069.19092597  
SRR17520069.19092599  
SRR17520069.19092601  
SRR17520069.19092603  
SRR17520069.19092605  
SRR17520069.19092607  
SRR17520069.19092609  
SRR17520069.19092611  
SRR17520069.19092613  
SRR17520069.19092615  
SRR17520069.19092617  
SRR17520069.19092619  
SRR17520069.19092621  
SRR17520069.19092623  
SRR17520069.19092625  
SRR17520069.19092627  
SRR17520069.19092629  
SRR17520069.19092631  
SRR17520069.19092633  
SRR17520069.19092635  
SRR17520069.19092637  
SRR17520069.19092639  
SRR17520069.19092641  
SRR17520069.19092643  
SRR17520069.19092645  
SRR17520069.19092647  
SRR17520069.19098519  
SRR17520069.19098521  
SRR17520069.19098523  
SRR17520069.19098525  
SRR17520069.19098527  
SRR17520069.19099197

SRR17520069.19099199  
SRR17520069.19099201  
SRR17520069.19099203  
SRR17520069.19099205  
SRR17520069.19099207  
SRR17520069.19099209  
SRR17520069.19099213  
SRR17520069.19099217  
SRR17520069.19099219  
SRR17520069.19099221  
SRR17520069.19099784  
SRR17520069.19099786  
SRR17520069.19099788  
SRR17520069.19099790  
SRR17520069.19099792  
SRR17520069.19099794  
SRR17520069.19099800  
SRR17520069.19099802  
SRR17520069.19099804  
SRR17520069.19099806  
SRR17520069.19099808  
SRR17520069.19099810  
SRR17520069.19099812  
SRR17520069.19099814  
SRR17520069.19099816  
SRR17520069.19099818  
SRR17520069.19099820  
SRR17520069.19103080  
SRR17520069.19103082  
SRR17520069.19103084  
SRR17520069.19103086  
SRR17520069.19103088  
SRR17520069.19103090  
SRR17520069.19103092  
SRR17520069.19103094  
SRR17520069.19103096  
SRR17520069.19103098  
SRR17520069.19103100  
SRR17520069.19103102  
SRR17520069.19103104  
SRR17520069.19103106  
SRR17520069.19103108  
SRR17520069.19103638  
SRR17520069.19103640  
SRR17520069.19103642  
SRR17520069.19103644  
SRR17520069.19103646

SRR17520069. 19103648  
SRR17520069. 19103650  
SRR17520069. 19103652  
SRR17520069. 19103654  
SRR17520069. 19103656  
SRR17520069. 19103658  
SRR17520069. 19103660  
SRR17520069. 19103662  
SRR17520069. 19103664  
SRR17520069. 19103666  
SRR17520069. 19103668  
SRR17520069. 19103670  
SRR17520069. 19103672  
SRR17520069. 19103674  
SRR17520069. 19103676  
SRR17520069. 19103678  
SRR17520069. 19103680  
SRR17520069. 19103682  
SRR17520069. 19103684  
SRR17520069. 19103686  
SRR17520069. 19103688  
SRR17520069. 19103690  
SRR17520069. 19103692  
SRR17520069. 19103694  
SRR17520069. 19103696  
SRR17520069. 19103698  
SRR17520069. 19103700  
SRR17520069. 19103702  
SRR17520069. 19103704  
SRR17520069. 19103722  
SRR17520069. 19103724  
SRR17520069. 19103726  
SRR17520069. 19103728  
SRR17520069. 19103730  
SRR17520069. 19103732  
SRR17520069. 19103734  
SRR17520069. 19103736  
SRR17520069. 19103738  
SRR17520069. 19103740  
SRR17520069. 19103742  
SRR17520069. 19103744  
SRR17520069. 19103746  
SRR17520069. 19103748  
SRR17520069. 19103750  
SRR17520069. 19103752  
SRR17520069. 19103754  
SRR17520069. 19103756



SRR17520069.19103758  
SRR17520069.19103760  
SRR17520069.19103764  
SRR17520069.19103766  
SRR17520069.19103768  
SRR17520069.19103770  
SRR17520069.19103774  
SRR17520069.19104589  
SRR17520069.19104591  
SRR17520069.19104593  
SRR17520069.19104595  
SRR17520069.19104597  
SRR17520069.19104599  
SRR17520069.19104601  
SRR17520069.19104603  
SRR17520069.19104605  
SRR17520069.19104607  
SRR17520069.19104611  
SRR17520069.19104613  
SRR17520069.19104615  
SRR17520069.19104617  
SRR17520069.19104619  
SRR17520069.19104621  
SRR17520069.19104623  
SRR17520069.19104627  
SRR17520069.19104629  
SRR17520069.19104631  
SRR17520069.19110185  
SRR17520069.19110187  
SRR17520069.19110189  
SRR17520069.19110191  
SRR17520069.19110193  
SRR17520069.19110195  
SRR17520069.19110197  
SRR17520069.19110199  
SRR17520069.19110201  
SRR17520069.19110203  
SRR17520069.19110205  
SRR17520069.19110207  
SRR17520069.19110209  
SRR17520069.19110211  
SRR17520069.19110213  
SRR17520069.19110215  
SRR17520069.19110217  
SRR17520069.19110219  
SRR17520069.19110221  
SRR17520069.19110223

SRR17520069.19110225  
SRR17520069.19110227  
SRR17520069.19110229  
SRR17520069.19110231  
SRR17520069.19110233  
SRR17520069.19113251  
SRR17520069.19113253  
SRR17520069.19113255  
SRR17520069.19113257  
SRR17520069.19113259  
SRR17520069.19113261  
SRR17520069.19113263  
SRR17520069.19113265  
SRR17520069.19113267  
SRR17520069.19113269  
SRR17520069.19113271  
SRR17520069.19113273  
SRR17520069.19113275  
SRR17520069.19113277  
SRR17520069.19113279  
SRR17520069.19113281  
SRR17520069.19113283  
SRR17520069.19113285  
SRR17520069.19113287  
SRR17520069.19113289  
SRR17520069.19113291  
SRR17520069.19114607  
SRR17520069.19121841  
SRR17520069.19121843  
SRR17520069.19121845  
SRR17520069.19124422  
SRR17520069.19124424  
SRR17520069.19124426  
SRR17520069.19124428  
SRR17520069.19124430  
SRR17520069.19124432  
SRR17520069.19124434  
SRR17520069.19124538  
SRR17520069.19124540  
SRR17520069.19124542  
SRR17520069.19124544  
SRR17520069.19132871  
SRR17520069.19138019  
SRR17520069.19138021  
SRR17520069.19138023  
SRR17520069.19138025  
SRR17520069.19138027

SRR17520069. 19138365  
SRR17520069. 19138367  
SRR17520069. 19138369  
SRR17520069. 19138371  
SRR17520069. 19138373  
SRR17520069. 19138375  
SRR17520069. 19138377  
SRR17520069. 19138379  
SRR17520069. 19138381  
SRR17520069. 19138383  
SRR17520069. 19140160  
SRR17520069. 19140162  
SRR17520069. 19140164  
SRR17520069. 19140166  
SRR17520069. 19140168  
SRR17520069. 19140170  
SRR17520069. 19140172  
SRR17520069. 19140176  
SRR17520069. 19140178  
SRR17520069. 19140180  
SRR17520069. 19140182  
SRR17520069. 19140184  
SRR17520069. 19140186  
SRR17520069. 19140188  
SRR17520069. 19140190  
SRR17520069. 19140192  
SRR17520069. 19140194  
SRR17520069. 19140196  
SRR17520069. 19140200  
SRR17520069. 19140202  
SRR17520069. 19140204  
SRR17520069. 19140206  
SRR17520069. 19140208  
SRR17520069. 19140210  
SRR17520069. 19140212  
SRR17520069. 19140214  
SRR17520069. 19140216  
SRR17520069. 19140218  
SRR17520069. 19140220  
SRR17520069. 19140222  
SRR17520069. 19144366  
SRR17520069. 19145092  
SRR17520069. 19145094  
SRR17520069. 19145096  
SRR17520069. 19145098  
SRR17520069. 19145100  
SRR17520069. 19145805

SRR17520069.19145807  
SRR17520069.19145809  
SRR17520069.19145811  
SRR17520069.19145813  
SRR17520069.19145815  
SRR17520069.19145817  
SRR17520069.19145819  
SRR17520069.19145821  
SRR17520069.19145823  
SRR17520069.19145825  
SRR17520069.19145827  
SRR17520069.19145829  
SRR17520069.19145831  
SRR17520069.19145833  
SRR17520069.19145835  
SRR17520069.19145837  
SRR17520069.19145839  
SRR17520069.19145841  
SRR17520069.19145843  
SRR17520069.19145845  
SRR17520069.19145847  
SRR17520069.19145849  
SRR17520069.19145851  
SRR17520069.19145853  
SRR17520069.19145855  
SRR17520069.19145857  
SRR17520069.19145859  
SRR17520069.19145861  
SRR17520069.19145863  
SRR17520069.19145865  
SRR17520069.19145867  
SRR17520069.19145869  
SRR17520069.19145871  
SRR17520069.19152076  
SRR17520069.19152080  
SRR17520069.19152082  
SRR17520069.19152084  
SRR17520069.19152086  
SRR17520069.19152088  
SRR17520069.19152090  
SRR17520069.19152092  
SRR17520069.19152094  
SRR17520069.19152096  
SRR17520069.19152100  
SRR17520069.19152104  
SRR17520069.19152106  
SRR17520069.19152108

SRR17520069.19152110  
SRR17520069.19152112  
SRR17520069.19152114  
SRR17520069.19152116  
SRR17520069.19152120  
SRR17520069.19152122  
SRR17520069.19152124  
SRR17520069.19153994  
SRR17520069.19153996  
SRR17520069.19154000  
SRR17520069.19154002  
SRR17520069.19154004  
SRR17520069.19154006  
SRR17520069.19154008  
SRR17520069.19154010  
SRR17520069.19154012  
SRR17520069.19154014  
SRR17520069.19154016  
SRR17520069.19154018  
SRR17520069.19154020  
SRR17520069.19154022  
SRR17520069.19154024  
SRR17520069.19154026  
SRR17520069.19154028  
SRR17520069.19154032  
SRR17520069.19154034  
SRR17520069.19154036  
SRR17520069.19154038  
SRR17520069.19154040  
SRR17520069.19154042  
SRR17520069.19154044  
SRR17520069.19154046  
SRR17520069.19161370  
SRR17520069.19161372  
SRR17520069.19161374  
SRR17520069.19161376  
SRR17520069.19161378  
SRR17520069.19161380  
SRR17520069.19161382  
SRR17520069.19161384  
SRR17520069.19161386  
SRR17520069.19161388  
SRR17520069.19161390  
SRR17520069.19161392  
SRR17520069.19161394  
SRR17520069.19161396  
SRR17520069.19161398

SRR17520069. 19161400  
SRR17520069. 19161402  
SRR17520069. 19161404  
SRR17520069. 19161406  
SRR17520069. 19161408  
SRR17520069. 19161410  
SRR17520069. 19161412  
SRR17520069. 19161414  
SRR17520069. 19161416  
SRR17520069. 19161418  
SRR17520069. 19161420  
SRR17520069. 19161422  
SRR17520069. 19161424  
SRR17520069. 19161426  
SRR17520069. 19161428  
SRR17520069. 19161430  
SRR17520069. 19161432  
SRR17520069. 19161434  
SRR17520069. 19161436  
SRR17520069. 19161438  
SRR17520069. 19161440  
SRR17520069. 19161442  
SRR17520069. 19161444  
SRR17520069. 19161446  
SRR17520069. 19161448  
SRR17520069. 19161450  
SRR17520069. 19161452  
SRR17520069. 19163207  
SRR17520069. 19166190  
SRR17520069. 19166192  
SRR17520069. 19166198  
SRR17520069. 19166202  
SRR17520069. 19166204  
SRR17520069. 19166206  
SRR17520069. 19166210  
SRR17520069. 19166214  
SRR17520069. 19166216  
SRR17520069. 19166220  
SRR17520069. 19166224  
SRR17520069. 19166226  
SRR17520069. 19175890  
SRR17520069. 19175892  
SRR17520069. 19175894  
SRR17520069. 19175896  
SRR17520069. 19175898  
SRR17520069. 19175900  
SRR17520069. 19175902

SRR17520069.19178850  
SRR17520069.19182994  
SRR17520069.19182996  
SRR17520069.19182998  
SRR17520069.19183000  
SRR17520069.19183002  
SRR17520069.19183004  
SRR17520069.19183008  
SRR17520069.19183010  
SRR17520069.19183012  
SRR17520069.19183017  
SRR17520069.19183019  
SRR17520069.19184829  
SRR17520069.19184831  
SRR17520069.19184833  
SRR17520069.19184835  
SRR17520069.19184837  
SRR17520069.19184839  
SRR17520069.19184841  
SRR17520069.19184843  
SRR17520069.19184845  
SRR17520069.19184847  
SRR17520069.19184849  
SRR17520069.19184851  
SRR17520069.19184853  
SRR17520069.19184855  
SRR17520069.19184857  
SRR17520069.19184859  
SRR17520069.19184861  
SRR17520069.19184863  
SRR17520069.19184865  
SRR17520069.19184867  
SRR17520069.19184869  
SRR17520069.19184871  
SRR17520069.19184873  
SRR17520069.19184875  
SRR17520069.19184877  
SRR17520069.19184879  
SRR17520069.19184881  
SRR17520069.19184883  
SRR17520069.19184885  
SRR17520069.19184887  
SRR17520069.19184889  
SRR17520069.19184891  
SRR17520069.19184893  
SRR17520069.19184895  
SRR17520069.19184897

SRR17520069.19184899  
SRR17520069.19184901  
SRR17520069.19184903  
SRR17520069.19184905  
SRR17520069.19184907  
SRR17520069.19184909  
SRR17520069.19184911  
SRR17520069.19184913  
SRR17520069.19184915  
SRR17520069.19184917  
SRR17520069.19184919  
SRR17520069.19184921  
SRR17520069.19184923  
SRR17520069.19184925  
SRR17520069.19184927  
SRR17520069.19184929  
SRR17520069.19184931  
SRR17520069.19184933  
SRR17520069.19184935  
SRR17520069.19184937  
SRR17520069.19184939  
SRR17520069.19184941  
SRR17520069.19184943  
SRR17520069.19184945  
SRR17520069.19184947  
SRR17520069.19184949  
SRR17520069.19184951  
SRR17520069.19184953  
SRR17520069.19184955  
SRR17520069.19184957  
SRR17520069.19184959  
SRR17520069.19184961  
SRR17520069.19184963  
SRR17520069.19184967  
SRR17520069.19184969  
SRR17520069.19184971  
SRR17520069.19184973  
SRR17520069.19184975  
SRR17520069.19184977  
SRR17520069.19184979  
SRR17520069.19184981  
SRR17520069.19184983  
SRR17520069.19184985  
SRR17520069.19184987  
SRR17520069.19184991  
SRR17520069.19184993  
SRR17520069.19184995



SRR17520069.19184997  
SRR17520069.19184999  
SRR17520069.19185001  
SRR17520069.19185003  
SRR17520069.19185005  
SRR17520069.19185007  
SRR17520069.19185009  
SRR17520069.19185011  
SRR17520069.19185013  
SRR17520069.19185015  
SRR17520069.19185017  
SRR17520069.19185019  
SRR17520069.19185021  
SRR17520069.19185023  
SRR17520069.19185025  
SRR17520069.19185027  
SRR17520069.19185029  
SRR17520069.19185031  
SRR17520069.19185033  
SRR17520069.19185035  
SRR17520069.19185037  
SRR17520069.19185039  
SRR17520069.19185041  
SRR17520069.19185043  
SRR17520069.19185045  
SRR17520069.19185047  
SRR17520069.19185049  
SRR17520069.19185051  
SRR17520069.19185053  
SRR17520069.19185055  
SRR17520069.19185057  
SRR17520069.19185059  
SRR17520069.19185061  
SRR17520069.19185063  
SRR17520069.19185065  
SRR17520069.19185067  
SRR17520069.19187346  
SRR17520069.19187348  
SRR17520069.19187350  
SRR17520069.19187352  
SRR17520069.19187354  
SRR17520069.19187356  
SRR17520069.19187358  
SRR17520069.19187360  
SRR17520069.19187362  
SRR17520069.19198940  
SRR17520069.19201563

SRR17520069. 19201565  
SRR17520069. 19201567  
SRR17520069. 19201569  
SRR17520069. 19201571  
SRR17520069. 19201573  
SRR17520069. 19201575  
SRR17520069. 19201577  
SRR17520069. 19201579  
SRR17520069. 19201581  
SRR17520069. 19201585  
SRR17520069. 19201587  
SRR17520069. 19201589  
SRR17520069. 19201591  
SRR17520069. 19201593  
SRR17520069. 19201595  
SRR17520069. 19201599  
SRR17520069. 19201603  
SRR17520069. 19201605  
SRR17520069. 19201611  
SRR17520069. 19201613  
SRR17520069. 19201615  
SRR17520069. 19201617  
SRR17520069. 19201619  
SRR17520069. 19201621  
SRR17520069. 19201623  
SRR17520069. 19201625  
SRR17520069. 19201627  
SRR17520069. 19201629  
SRR17520069. 19201631  
SRR17520069. 19201633  
SRR17520069. 19201635  
SRR17520069. 19201637  
SRR17520069. 19201639  
SRR17520069. 19201641  
SRR17520069. 19201643  
SRR17520069. 19201645  
SRR17520069. 19201647  
SRR17520069. 19201649  
SRR17520069. 19201651  
SRR17520069. 19201653  
SRR17520069. 19201655  
SRR17520069. 19201657  
SRR17520069. 19201661  
SRR17520069. 19201663  
SRR17520069. 19201665  
SRR17520069. 19201667  
SRR17520069. 19201669

SRR17520069. 19201671  
SRR17520069. 19201673  
SRR17520069. 19201675  
SRR17520069. 19201677  
SRR17520069. 19201679  
SRR17520069. 19201681  
SRR17520069. 19201683  
SRR17520069. 19201685  
SRR17520069. 19201687  
SRR17520069. 19201689  
SRR17520069. 19201691  
SRR17520069. 19201693  
SRR17520069. 19201695  
SRR17520069. 19201697  
SRR17520069. 19201701  
SRR17520069. 19201703  
SRR17520069. 19201705  
SRR17520069. 19201707  
SRR17520069. 19201709  
SRR17520069. 19201711  
SRR17520069. 19201713  
SRR17520069. 19201715  
SRR17520069. 19201717  
SRR17520069. 19201719  
SRR17520069. 19201721  
SRR17520069. 19201723  
SRR17520069. 19201725  
SRR17520069. 19201727  
SRR17520069. 19201729  
SRR17520069. 19201731  
SRR17520069. 19201733  
SRR17520069. 19201735  
SRR17520069. 19201737  
SRR17520069. 19201739  
SRR17520069. 19201741  
SRR17520069. 19201743  
SRR17520069. 19201747  
SRR17520069. 19201749  
SRR17520069. 19201751  
SRR17520069. 19201753  
SRR17520069. 19201755  
SRR17520069. 19201757  
SRR17520069. 19201759  
SRR17520069. 19201761  
SRR17520069. 19205954  
SRR17520069. 19205956  
SRR17520069. 19205958

SRR17520069. 19205960  
SRR17520069. 19205962  
SRR17520069. 19205964  
SRR17520069. 19205968  
SRR17520069. 19205970  
SRR17520069. 19205972  
SRR17520069. 19205976  
SRR17520069. 19205978  
SRR17520069. 19205980  
SRR17520069. 19205982  
SRR17520069. 19205984  
SRR17520069. 19205986  
SRR17520069. 19205988  
SRR17520069. 19205990  
SRR17520069. 19205992  
SRR17520069. 19205994  
SRR17520069. 19205996  
SRR17520069. 19205998  
SRR17520069. 19206000  
SRR17520069. 19206002  
SRR17520069. 19206004  
SRR17520069. 19206006  
SRR17520069. 19206008  
SRR17520069. 19206010  
SRR17520069. 19206012  
SRR17520069. 19206016  
SRR17520069. 19206018  
SRR17520069. 19206020  
SRR17520069. 19206022  
SRR17520069. 19206024  
SRR17520069. 19206026  
SRR17520069. 19206030  
SRR17520069. 19206032  
SRR17520069. 19206034  
SRR17520069. 19206036  
SRR17520069. 19206038  
SRR17520069. 19206040  
SRR17520069. 19206044  
SRR17520069. 19206046  
SRR17520069. 19206048  
SRR17520069. 19206050  
SRR17520069. 19206052  
SRR17520069. 19206054  
SRR17520069. 19206056  
SRR17520069. 19206058  
SRR17520069. 19206060  
SRR17520069. 19206062

SRR17520069. 19208463  
SRR17520069. 19208465  
SRR17520069. 19208467  
SRR17520069. 19208469  
SRR17520069. 19221106  
SRR17520069. 19221108  
SRR17520069. 19221110  
SRR17520069. 19221112  
SRR17520069. 19221114  
SRR17520069. 19221116  
SRR17520069. 19221118  
SRR17520069. 19221120  
SRR17520069. 19221122  
SRR17520069. 19221124  
SRR17520069. 19221126  
SRR17520069. 19221128  
SRR17520069. 19221130  
SRR17520069. 19221134  
SRR17520069. 19226628  
SRR17520069. 19226630  
SRR17520069. 19226632  
SRR17520069. 19232853  
SRR17520069. 19232855  
SRR17520069. 19232857  
SRR17520069. 19232859  
SRR17520069. 19232861  
SRR17520069. 19232863  
SRR17520069. 19232865  
SRR17520069. 19232867  
SRR17520069. 19232869  
SRR17520069. 19232871  
SRR17520069. 19232873  
SRR17520069. 19244519  
SRR17520069. 19244521  
SRR17520069. 19244523  
SRR17520069. 19244525  
SRR17520069. 19244527  
SRR17520069. 19244529  
SRR17520069. 19246954  
SRR17520069. 19246956  
SRR17520069. 19246960  
SRR17520069. 19246962  
SRR17520069. 19246964  
SRR17520069. 19246966  
SRR17520069. 19246968  
SRR17520069. 19246970  
SRR17520069. 19246972

SRR17520069. 19246974  
SRR17520069. 19246976  
SRR17520069. 19246982  
SRR17520069. 19246984  
SRR17520069. 19246986  
SRR17520069. 19246988  
SRR17520069. 19246990  
SRR17520069. 19246992  
SRR17520069. 19246994  
SRR17520069. 19246996  
SRR17520069. 19246998  
SRR17520069. 19247000  
SRR17520069. 19247002  
SRR17520069. 19247004  
SRR17520069. 19247006  
SRR17520069. 19247008  
SRR17520069. 19247012  
SRR17520069. 19247014  
SRR17520069. 19247016  
SRR17520069. 19247018  
SRR17520069. 19247020  
SRR17520069. 19247026  
SRR17520069. 19247028  
SRR17520069. 19247030  
SRR17520069. 19247032  
SRR17520069. 19247034  
SRR17520069. 19247036  
SRR17520069. 19247038  
SRR17520069. 19247040  
SRR17520069. 19247042  
SRR17520069. 19247044  
SRR17520069. 19247046  
SRR17520069. 19247048  
SRR17520069. 19247050  
SRR17520069. 19247081  
SRR17520069. 19247083  
SRR17520069. 19247085  
SRR17520069. 19247087  
SRR17520069. 19247089  
SRR17520069. 19247091  
SRR17520069. 19247093  
SRR17520069. 19247095  
SRR17520069. 19247097  
SRR17520069. 19247099  
SRR17520069. 19249172  
SRR17520069. 19249174  
SRR17520069. 19249176

SRR17520069. 19252732  
SRR17520069. 19252734  
SRR17520069. 19252736  
SRR17520069. 19252738  
SRR17520069. 19252740  
SRR17520069. 19252742  
SRR17520069. 19252744  
SRR17520069. 19252746  
SRR17520069. 19252748  
SRR17520069. 19252750  
SRR17520069. 19252752  
SRR17520069. 19252754  
SRR17520069. 19252756  
SRR17520069. 19252758  
SRR17520069. 19252760  
SRR17520069. 19252762  
SRR17520069. 19252764  
SRR17520069. 19252766  
SRR17520069. 19252768  
SRR17520069. 19252770  
SRR17520069. 19252772  
SRR17520069. 19252774  
SRR17520069. 19252776  
SRR17520069. 19252778  
SRR17520069. 19252780  
SRR17520069. 19252782  
SRR17520069. 19255415  
SRR17520069. 19255417  
SRR17520069. 19255419  
SRR17520069. 19255421  
SRR17520069. 19255423  
SRR17520069. 19255427  
SRR17520069. 19255429  
SRR17520069. 19255431  
SRR17520069. 19255433  
SRR17520069. 19257064  
SRR17520069. 19257066  
SRR17520069. 19257068  
SRR17520069. 19257070  
SRR17520069. 19257072  
SRR17520069. 19257074  
SRR17520069. 19257076  
SRR17520069. 19257078  
SRR17520069. 19257080  
SRR17520069. 19257082  
SRR17520069. 19257084  
SRR17520069. 19257086

SRR17520069. 19257475  
SRR17520069. 19257483  
SRR17520069. 19257503  
SRR17520069. 19257515  
SRR17520069. 19259318  
SRR17520069. 19259320  
SRR17520069. 19259322  
SRR17520069. 19259324  
SRR17520069. 19259326  
SRR17520069. 19259328  
SRR17520069. 19259330  
SRR17520069. 19259332  
SRR17520069. 19259334  
SRR17520069. 19259336  
SRR17520069. 19259340  
SRR17520069. 19259342  
SRR17520069. 19259344  
SRR17520069. 19263325  
SRR17520069. 19263327  
SRR17520069. 19263899  
SRR17520069. 19263901  
SRR17520069. 19263903  
SRR17520069. 19263905  
SRR17520069. 19263907  
SRR17520069. 19263909  
SRR17520069. 19263911  
SRR17520069. 19263913  
SRR17520069. 19263915  
SRR17520069. 19263917  
SRR17520069. 19263919  
SRR17520069. 19263921  
SRR17520069. 19263923  
SRR17520069. 19263925  
SRR17520069. 19263927  
SRR17520069. 19263929  
SRR17520069. 19263931  
SRR17520069. 19263933  
SRR17520069. 19264442  
SRR17520069. 19264444  
SRR17520069. 19264446  
SRR17520069. 19264448  
SRR17520069. 19264450  
SRR17520069. 19264452  
SRR17520069. 19264454  
SRR17520069. 19264458  
SRR17520069. 19264460  
SRR17520069. 19264462



SRR17520069. 19264464  
SRR17520069. 19264466  
SRR17520069. 19264468  
SRR17520069. 19264470  
SRR17520069. 19264472  
SRR17520069. 19264474  
SRR17520069. 19264476  
SRR17520069. 19264478  
SRR17520069. 19264480  
SRR17520069. 19264482  
SRR17520069. 19271684  
SRR17520069. 19271686  
SRR17520069. 19271688  
SRR17520069. 19271690  
SRR17520069. 19271692  
SRR17520069. 19271694  
SRR17520069. 19271696  
SRR17520069. 19271698  
SRR17520069. 19271700  
SRR17520069. 19271702  
SRR17520069. 19271704  
SRR17520069. 19271706  
SRR17520069. 19271708  
SRR17520069. 19271710  
SRR17520069. 19271712  
SRR17520069. 19271714  
SRR17520069. 19271716  
SRR17520069. 19271718  
SRR17520069. 19271720  
SRR17520069. 19271722  
SRR17520069. 19271724  
SRR17520069. 19271726  
SRR17520069. 19271730  
SRR17520069. 19274165  
SRR17520069. 19274167  
SRR17520069. 19274169  
SRR17520069. 19274171  
SRR17520069. 19274173  
SRR17520069. 19274175  
SRR17520069. 19274179  
SRR17520069. 19274181  
SRR17520069. 19274183  
SRR17520069. 19274187  
SRR17520069. 19274193  
SRR17520069. 19274821  
SRR17520069. 19274823  
SRR17520069. 19274825

SRR17520069. 19274827  
SRR17520069. 19274829  
SRR17520069. 19274831  
SRR17520069. 19274833  
SRR17520069. 19274835  
SRR17520069. 19274837  
SRR17520069. 19274839  
SRR17520069. 19274841  
SRR17520069. 19274843  
SRR17520069. 19274845  
SRR17520069. 19274847  
SRR17520069. 19274849  
SRR17520069. 19274851  
SRR17520069. 19274853  
SRR17520069. 19274855  
SRR17520069. 19274857  
SRR17520069. 19274859  
SRR17520069. 19274861  
SRR17520069. 19274863  
SRR17520069. 19274865  
SRR17520069. 19274867  
SRR17520069. 19274869  
SRR17520069. 19274873  
SRR17520069. 19274875  
SRR17520069. 19274877  
SRR17520069. 19274879  
SRR17520069. 19274881  
SRR17520069. 19274883  
SRR17520069. 19274885  
SRR17520069. 19274889  
SRR17520069. 19274891  
SRR17520069. 19274893  
SRR17520069. 19274895  
SRR17520069. 19274897  
SRR17520069. 19274899  
SRR17520069. 19274901  
SRR17520069. 19274903  
SRR17520069. 19274905  
SRR17520069. 19274907  
SRR17520069. 19274909  
SRR17520069. 19274911  
SRR17520069. 19274913  
SRR17520069. 19279419  
SRR17520069. 19279421  
SRR17520069. 19279425  
SRR17520069. 19279427  
SRR17520069. 19279429

SRR17520069. 19279431  
SRR17520069. 19279433  
SRR17520069. 19279435  
SRR17520069. 19279437  
SRR17520069. 19279439  
SRR17520069. 19279443  
SRR17520069. 19279447  
SRR17520069. 19279449  
SRR17520069. 19279451  
SRR17520069. 19279453  
SRR17520069. 19279457  
SRR17520069. 19279459  
SRR17520069. 19279463  
SRR17520069. 19279467  
SRR17520069. 19279469  
SRR17520069. 19279471  
SRR17520069. 19279473  
SRR17520069. 19279475  
SRR17520069. 19279477  
SRR17520069. 19279479  
SRR17520069. 19279481  
SRR17520069. 19279483  
SRR17520069. 19279485  
SRR17520069. 19279487  
SRR17520069. 19279489  
SRR17520069. 19279491  
SRR17520069. 19279493  
SRR17520069. 19279495  
SRR17520069. 19279497  
SRR17520069. 19279499  
SRR17520069. 19279501  
SRR17520069. 19279503  
SRR17520069. 19279505  
SRR17520069. 19279507  
SRR17520069. 19279509  
SRR17520069. 19279511  
SRR17520069. 19279513  
SRR17520069. 19279515  
SRR17520069. 19279517  
SRR17520069. 19279519  
SRR17520069. 19279521  
SRR17520069. 19279523  
SRR17520069. 19279525  
SRR17520069. 19279527  
SRR17520069. 19279529  
SRR17520069. 19279882  
SRR17520069. 19279884

SRR17520069.19279886  
SRR17520069.19279888  
SRR17520069.19279890  
SRR17520069.19279892  
SRR17520069.19280512  
SRR17520069.19280514  
SRR17520069.19280516  
SRR17520069.19280518  
SRR17520069.19280520  
SRR17520069.19280522  
SRR17520069.19280524  
SRR17520069.19280526  
SRR17520069.19280528  
SRR17520069.19280530  
SRR17520069.19280532  
SRR17520069.19280534  
SRR17520069.19280536  
SRR17520069.19299215  
SRR17520069.19299217  
SRR17520069.19299221  
SRR17520069.19299223  
SRR17520069.19299225  
SRR17520069.19299227  
SRR17520069.19305620  
SRR17520069.19305622  
SRR17520069.19305624  
SRR17520069.19305626  
SRR17520069.19306985  
SRR17520069.19306987  
SRR17520069.19308833  
SRR17520069.19311487  
SRR17520069.19324067  
SRR17520069.19324069  
SRR17520069.19324071  
SRR17520069.19324073  
SRR17520069.19324075  
SRR17520069.19324077  
SRR17520069.19324079  
SRR17520069.19324081  
SRR17520069.19324083  
SRR17520069.19324085  
SRR17520069.19324087  
SRR17520069.19324089  
SRR17520069.19324091  
SRR17520069.19324093  
SRR17520069.19324095  
SRR17520069.19324097

SRR17520069. 19324099  
SRR17520069. 19324101  
SRR17520069. 19324103  
SRR17520069. 19324105  
SRR17520069. 19324107  
SRR17520069. 19324109  
SRR17520069. 19324111  
SRR17520069. 19324113  
SRR17520069. 19324115  
SRR17520069. 19324117  
SRR17520069. 19324119  
SRR17520069. 19324121  
SRR17520069. 19324123  
SRR17520069. 19324125  
SRR17520069. 19324129  
SRR17520069. 19324131  
SRR17520069. 19324133  
SRR17520069. 19324135  
SRR17520069. 19324137  
SRR17520069. 19324139  
SRR17520069. 19324141  
SRR17520069. 19324143  
SRR17520069. 19324145  
SRR17520069. 19324147  
SRR17520069. 19324149  
SRR17520069. 19324151  
SRR17520069. 19324153  
SRR17520069. 19324155  
SRR17520069. 19324157  
SRR17520069. 19324159  
SRR17520069. 19324161  
SRR17520069. 19324163  
SRR17520069. 19324165  
SRR17520069. 19324167  
SRR17520069. 19324169  
SRR17520069. 19324171  
SRR17520069. 19324173  
SRR17520069. 19324175  
SRR17520069. 19324177  
SRR17520069. 19324179  
SRR17520069. 19324181  
SRR17520069. 19324183  
SRR17520069. 19324185  
SRR17520069. 19324187  
SRR17520069. 19324189  
SRR17520069. 19324191  
SRR17520069. 19324193

SRR17520069.19324195  
SRR17520069.19324197  
SRR17520069.19324231  
SRR17520069.19324233  
SRR17520069.19325952  
SRR17520069.19329330  
SRR17520069.19329332  
SRR17520069.19329334  
SRR17520069.19329336  
SRR17520069.19329338  
SRR17520069.19329340  
SRR17520069.19329342  
SRR17520069.19329344  
SRR17520069.19329346  
SRR17520069.19329348  
SRR17520069.19329350  
SRR17520069.19329352  
SRR17520069.19329354  
SRR17520069.19329356  
SRR17520069.19329358  
SRR17520069.19329360  
SRR17520069.19329362  
SRR17520069.19329364  
SRR17520069.19329366  
SRR17520069.19329368  
SRR17520069.19329370  
SRR17520069.19329372  
SRR17520069.19329374  
SRR17520069.19329376  
SRR17520069.19329378  
SRR17520069.19329380  
SRR17520069.19329382  
SRR17520069.19329384  
SRR17520069.19329386  
SRR17520069.19329388  
SRR17520069.19329390  
SRR17520069.19329392  
SRR17520069.19329394  
SRR17520069.19329396  
SRR17520069.19329398  
SRR17520069.19329400  
SRR17520069.19329402  
SRR17520069.19329404  
SRR17520069.19329408  
SRR17520069.19329412  
SRR17520069.19329414  
SRR17520069.19329416

SRR17520069. 19329418  
SRR17520069. 19329420  
SRR17520069. 19329422  
SRR17520069. 19329424  
SRR17520069. 19329426  
SRR17520069. 19329428  
SRR17520069. 19329430  
SRR17520069. 19329432  
SRR17520069. 19329434  
SRR17520069. 19329436  
SRR17520069. 19329438  
SRR17520069. 19329440  
SRR17520069. 19329442  
SRR17520069. 19329444  
SRR17520069. 19329446  
SRR17520069. 19329448  
SRR17520069. 19329450  
SRR17520069. 19329452  
SRR17520069. 19329454  
SRR17520069. 19329456  
SRR17520069. 19329458  
SRR17520069. 19330370  
SRR17520069. 19330372  
SRR17520069. 19330374  
SRR17520069. 19334642  
SRR17520069. 19334644  
SRR17520069. 19337300  
SRR17520069. 19337302  
SRR17520069. 19337304  
SRR17520069. 19337306  
SRR17520069. 19337308  
SRR17520069. 19337310  
SRR17520069. 19337312  
SRR17520069. 19337314  
SRR17520069. 19337316  
SRR17520069. 19337318  
SRR17520069. 19337320  
SRR17520069. 19337322  
SRR17520069. 19337324  
SRR17520069. 19337326  
SRR17520069. 19337328  
SRR17520069. 19337330  
SRR17520069. 19337332  
SRR17520069. 19337334  
SRR17520069. 19337336  
SRR17520069. 19337338  
SRR17520069. 19337340

SRR17520069. 19337344  
SRR17520069. 19337346  
SRR17520069. 19337352  
SRR17520069. 19337354  
SRR17520069. 19337356  
SRR17520069. 19337358  
SRR17520069. 19337362  
SRR17520069. 19337364  
SRR17520069. 19337368  
SRR17520069. 19337372  
SRR17520069. 19337374  
SRR17520069. 19337376  
SRR17520069. 19337378  
SRR17520069. 19337380  
SRR17520069. 19337384  
SRR17520069. 19337386  
SRR17520069. 19337388  
SRR17520069. 19337392  
SRR17520069. 19337394  
SRR17520069. 19337398  
SRR17520069. 19337402  
SRR17520069. 19337408  
SRR17520069. 19337410  
SRR17520069. 19337412  
SRR17520069. 19337414  
SRR17520069. 19337416  
SRR17520069. 19337418  
SRR17520069. 19337422  
SRR17520069. 19337424  
SRR17520069. 19337426  
SRR17520069. 19337430  
SRR17520069. 19337432  
SRR17520069. 19337434  
SRR17520069. 19337436  
SRR17520069. 19337438  
SRR17520069. 19337440  
SRR17520069. 19337442  
SRR17520069. 19337444  
SRR17520069. 19337456  
SRR17520069. 19337460  
SRR17520069. 19337462  
SRR17520069. 19337466  
SRR17520069. 19337468  
SRR17520069. 19337470  
SRR17520069. 19337472  
SRR17520069. 19339060  
SRR17520069. 19339062



SRR17520069. 19339064  
SRR17520069. 19339066  
SRR17520069. 19339070  
SRR17520069. 19339072  
SRR17520069. 19339074  
SRR17520069. 19339076  
SRR17520069. 19339078  
SRR17520069. 19339080  
SRR17520069. 19339082  
SRR17520069. 19339084  
SRR17520069. 19339086  
SRR17520069. 19339088  
SRR17520069. 19339090  
SRR17520069. 19339092  
SRR17520069. 19339094  
SRR17520069. 19339096  
SRR17520069. 19339098  
SRR17520069. 19339100  
SRR17520069. 19339102  
SRR17520069. 19339104  
SRR17520069. 19339106  
SRR17520069. 19339108  
SRR17520069. 19339110  
SRR17520069. 19339112  
SRR17520069. 19339114  
SRR17520069. 19339116  
SRR17520069. 19339118  
SRR17520069. 19339120  
SRR17520069. 19341304  
SRR17520069. 19341306  
SRR17520069. 19341308  
SRR17520069. 19341310  
SRR17520069. 19341312  
SRR17520069. 19341314  
SRR17520069. 19341316  
SRR17520069. 19341318  
SRR17520069. 19341320  
SRR17520069. 19341322  
SRR17520069. 19341324  
SRR17520069. 19341326  
SRR17520069. 19341328  
SRR17520069. 19341330  
SRR17520069. 19341332  
SRR17520069. 19341334  
SRR17520069. 19341336  
SRR17520069. 19341338  
SRR17520069. 19341340

SRR17520069. 19342472  
SRR17520069. 19342476  
SRR17520069. 19357235  
SRR17520069. 19357237  
SRR17520069. 19357239  
SRR17520069. 19357241  
SRR17520069. 19357243  
SRR17520069. 19357245  
SRR17520069. 19357247  
SRR17520069. 19357249  
SRR17520069. 19357251  
SRR17520069. 19357253  
SRR17520069. 19357255  
SRR17520069. 19357257  
SRR17520069. 19357259  
SRR17520069. 19357261  
SRR17520069. 19357263  
SRR17520069. 19357265  
SRR17520069. 19357267  
SRR17520069. 19357269  
SRR17520069. 19357271  
SRR17520069. 19357273  
SRR17520069. 19357275  
SRR17520069. 19357277  
SRR17520069. 19357279  
SRR17520069. 19357281  
SRR17520069. 19357283  
SRR17520069. 19357285  
SRR17520069. 19357287  
SRR17520069. 19357289  
SRR17520069. 19357291  
SRR17520069. 19357293  
SRR17520069. 19357295  
SRR17520069. 19357297  
SRR17520069. 19357299  
SRR17520069. 19357301  
SRR17520069. 19357303  
SRR17520069. 19359526  
SRR17520069. 19359528  
SRR17520069. 19359530  
SRR17520069. 19359532  
SRR17520069. 19359534  
SRR17520069. 19359536  
SRR17520069. 19359538  
SRR17520069. 19359540  
SRR17520069. 19359542  
SRR17520069. 19359544

SRR17520069. 19360998  
SRR17520069. 19361000  
SRR17520069. 19361002  
SRR17520069. 19361004  
SRR17520069. 19361006  
SRR17520069. 19361008  
SRR17520069. 19361010  
SRR17520069. 19361012  
SRR17520069. 19361014  
SRR17520069. 19361016  
SRR17520069. 19361018  
SRR17520069. 19361020  
SRR17520069. 19361022  
SRR17520069. 19361024  
SRR17520069. 19361455  
SRR17520069. 19361457  
SRR17520069. 19361459  
SRR17520069. 19361461  
SRR17520069. 19361463  
SRR17520069. 19361465  
SRR17520069. 19361467  
SRR17520069. 19361469  
SRR17520069. 19361471  
SRR17520069. 19361473  
SRR17520069. 19361475  
SRR17520069. 19361477  
SRR17520069. 19361479  
SRR17520069. 19361481  
SRR17520069. 19361483  
SRR17520069. 19361485  
SRR17520069. 19361487  
SRR17520069. 19361489  
SRR17520069. 19361491  
SRR17520069. 19361493  
SRR17520069. 19361495  
SRR17520069. 19361497  
SRR17520069. 19361499  
SRR17520069. 19362815  
SRR17520069. 19362817  
SRR17520069. 19362819  
SRR17520069. 19362821  
SRR17520069. 19362823  
SRR17520069. 19362825  
SRR17520069. 19362827  
SRR17520069. 19362829  
SRR17520069. 19362831  
SRR17520069. 19362833

SRR17520069. 19362835  
SRR17520069. 19362837  
SRR17520069. 19362839  
SRR17520069. 19362841  
SRR17520069. 19364631  
SRR17520069. 19364633  
SRR17520069. 19364635  
SRR17520069. 19364637  
SRR17520069. 19368268  
SRR17520069. 19368270  
SRR17520069. 19368272  
SRR17520069. 19368274  
SRR17520069. 19368276  
SRR17520069. 19368280  
SRR17520069. 19368282  
SRR17520069. 19368284  
SRR17520069. 19368286  
SRR17520069. 19368288  
SRR17520069. 19368290  
SRR17520069. 19368292  
SRR17520069. 19368294  
SRR17520069. 19368296  
SRR17520069. 19368300  
SRR17520069. 19368302  
SRR17520069. 19368304  
SRR17520069. 19368306  
SRR17520069. 19368308  
SRR17520069. 19368310  
SRR17520069. 19368312  
SRR17520069. 19368314  
SRR17520069. 19368316  
SRR17520069. 19368318  
SRR17520069. 19368320  
SRR17520069. 19368322  
SRR17520069. 19368324  
SRR17520069. 19368328  
SRR17520069. 19368330  
SRR17520069. 19368332  
SRR17520069. 19368334  
SRR17520069. 19368336  
SRR17520069. 19368338  
SRR17520069. 19368340  
SRR17520069. 19368342  
SRR17520069. 19368344  
SRR17520069. 19368348  
SRR17520069. 19368350  
SRR17520069. 19368352

SRR17520069. 19368819  
SRR17520069. 19368821  
SRR17520069. 19368823  
SRR17520069. 19368825  
SRR17520069. 19368827  
SRR17520069. 19368829  
SRR17520069. 19368831  
SRR17520069. 19368833  
SRR17520069. 19368835  
SRR17520069. 19368837  
SRR17520069. 19368839  
SRR17520069. 19368841  
SRR17520069. 19368843  
SRR17520069. 19368845  
SRR17520069. 19368847  
SRR17520069. 19368849  
SRR17520069. 19368853  
SRR17520069. 19368855  
SRR17520069. 19368857  
SRR17520069. 19368859  
SRR17520069. 19368861  
SRR17520069. 19368863  
SRR17520069. 19368865  
SRR17520069. 19368867  
SRR17520069. 19368869  
SRR17520069. 19368871  
SRR17520069. 19368873  
SRR17520069. 19368875  
SRR17520069. 19368877  
SRR17520069. 19368879  
SRR17520069. 19368881  
SRR17520069. 19368883  
SRR17520069. 19368885  
SRR17520069. 19368889  
SRR17520069. 19368891  
SRR17520069. 19372772  
SRR17520069. 19383143  
SRR17520069. 19383145  
SRR17520069. 19383147  
SRR17520069. 19383149  
SRR17520069. 19383151  
SRR17520069. 19383153  
SRR17520069. 19383155  
SRR17520069. 19383157  
SRR17520069. 19383159  
SRR17520069. 19383163  
SRR17520069. 19383165

SRR17520069. 19383167  
SRR17520069. 19383169  
SRR17520069. 19383171  
SRR17520069. 19383173  
SRR17520069. 19383175  
SRR17520069. 19383177  
SRR17520069. 19383179  
SRR17520069. 19383181  
SRR17520069. 19383183  
SRR17520069. 19383185  
SRR17520069. 19383187  
SRR17520069. 19383189  
SRR17520069. 19383191  
SRR17520069. 19383193  
SRR17520069. 19383195  
SRR17520069. 19383199  
SRR17520069. 19383201  
SRR17520069. 19383203  
SRR17520069. 19383205  
SRR17520069. 19383207  
SRR17520069. 19383209  
SRR17520069. 19383211  
SRR17520069. 19383213  
SRR17520069. 19383215  
SRR17520069. 19383217  
SRR17520069. 19383219  
SRR17520069. 19383221  
SRR17520069. 19383554  
SRR17520069. 19383556  
SRR17520069. 19383558  
SRR17520069. 19389754  
SRR17520069. 19389756  
SRR17520069. 19389758  
SRR17520069. 19389760  
SRR17520069. 19389762  
SRR17520069. 19389764  
SRR17520069. 19389766  
SRR17520069. 19394516  
SRR17520069. 19394518  
SRR17520069. 19394520  
SRR17520069. 19394522  
SRR17520069. 19394524  
SRR17520069. 19394526  
SRR17520069. 19394528  
SRR17520069. 19394530  
SRR17520069. 19394532  
SRR17520069. 19394534

SRR17520069. 19394536  
SRR17520069. 19394538  
SRR17520069. 19394540  
SRR17520069. 19394542  
SRR17520069. 19394544  
SRR17520069. 19394546  
SRR17520069. 19394548  
SRR17520069. 19394550  
SRR17520069. 19394552  
SRR17520069. 19394554  
SRR17520069. 19394556  
SRR17520069. 19394558  
SRR17520069. 19394560  
SRR17520069. 19394562  
SRR17520069. 19394564  
SRR17520069. 19394566  
SRR17520069. 19394568  
SRR17520069. 19394570  
SRR17520069. 19394572  
SRR17520069. 19394574  
SRR17520069. 19394576  
SRR17520069. 19394578  
SRR17520069. 19394580  
SRR17520069. 19394582  
SRR17520069. 19394584  
SRR17520069. 19394586  
SRR17520069. 19394588  
SRR17520069. 19394590  
SRR17520069. 19394592  
SRR17520069. 19394594  
SRR17520069. 19394596  
SRR17520069. 19400254  
SRR17520069. 19402583  
SRR17520069. 19402585  
SRR17520069. 19402587  
SRR17520069. 19402593  
SRR17520069. 19402595  
SRR17520069. 19402597  
SRR17520069. 19402599  
SRR17520069. 19402601  
SRR17520069. 19402603  
SRR17520069. 19402605  
SRR17520069. 19402607  
SRR17520069. 19402609  
SRR17520069. 19402611  
SRR17520069. 19402613  
SRR17520069. 19402617

SRR17520069. 19402619  
SRR17520069. 19402621  
SRR17520069. 19402623  
SRR17520069. 19402625  
SRR17520069. 19402627  
SRR17520069. 19402629  
SRR17520069. 19402631  
SRR17520069. 19402633  
SRR17520069. 19402637  
SRR17520069. 19402639  
SRR17520069. 19402641  
SRR17520069. 19402643  
SRR17520069. 19402645  
SRR17520069. 19402647  
SRR17520069. 19402649  
SRR17520069. 19402651  
SRR17520069. 19402653  
SRR17520069. 19402655  
SRR17520069. 19402657  
SRR17520069. 19402659  
SRR17520069. 19402661  
SRR17520069. 19402663  
SRR17520069. 19402665  
SRR17520069. 19402667  
SRR17520069. 19402669  
SRR17520069. 19402671  
SRR17520069. 19402673  
SRR17520069. 19402675  
SRR17520069. 19402677  
SRR17520069. 19402679  
SRR17520069. 19402681  
SRR17520069. 19402683  
SRR17520069. 19402689  
SRR17520069. 19402693  
SRR17520069. 19402695  
SRR17520069. 19402697  
SRR17520069. 19402699  
SRR17520069. 19402701  
SRR17520069. 19402703  
SRR17520069. 19402705  
SRR17520069. 19402707  
SRR17520069. 19402709  
SRR17520069. 19402711  
SRR17520069. 19402713  
SRR17520069. 19402715  
SRR17520069. 19402717  
SRR17520069. 19402719



SRR17520069. 19421092  
SRR17520069. 19421094  
SRR17520069. 19424644  
SRR17520069. 19424646  
SRR17520069. 19424648  
SRR17520069. 19424650  
SRR17520069. 19424652  
SRR17520069. 19424654  
SRR17520069. 19424656  
SRR17520069. 19424658  
SRR17520069. 19424660  
SRR17520069. 19424662  
SRR17520069. 19424664  
SRR17520069. 19424668  
SRR17520069. 19424670  
SRR17520069. 19424672  
SRR17520069. 19424674  
SRR17520069. 19429313  
SRR17520069. 19429315  
SRR17520069. 19429317  
SRR17520069. 19435601  
SRR17520069. 19435603  
SRR17520069. 19435605  
SRR17520069. 19435609  
SRR17520069. 19435611  
SRR17520069. 19435613  
SRR17520069. 19435615  
SRR17520069. 19435617  
SRR17520069. 19435619  
SRR17520069. 19435621  
SRR17520069. 19435627  
SRR17520069. 19435629  
SRR17520069. 19435631  
SRR17520069. 19435635  
SRR17520069. 19435637  
SRR17520069. 19435639  
SRR17520069. 19435641  
SRR17520069. 19443138  
SRR17520069. 19443140  
SRR17520069. 19443142  
SRR17520069. 19443144  
SRR17520069. 19443146  
SRR17520069. 19443148  
SRR17520069. 19443152  
SRR17520069. 19443154  
SRR17520069. 19443156  
SRR17520069. 19443158

SRR17520069.19443160  
SRR17520069.19443162  
SRR17520069.19443164  
SRR17520069.19443166  
SRR17520069.19443168  
SRR17520069.19443170  
SRR17520069.19443172  
SRR17520069.19443174  
SRR17520069.19443176  
SRR17520069.19443178  
SRR17520069.19443180  
SRR17520069.19443182  
SRR17520069.19443184  
SRR17520069.19443186  
SRR17520069.19443188  
SRR17520069.19443190  
SRR17520069.19443192  
SRR17520069.19443194  
SRR17520069.19443196  
SRR17520069.19443198  
SRR17520069.19443200  
SRR17520069.19443202  
SRR17520069.19443206  
SRR17520069.19443208  
SRR17520069.19443210  
SRR17520069.19443212  
SRR17520069.19443214  
SRR17520069.19443216  
SRR17520069.19443218  
SRR17520069.19443220  
SRR17520069.19443222  
SRR17520069.19443224  
SRR17520069.19443226  
SRR17520069.19443228  
SRR17520069.19443230  
SRR17520069.19443232  
SRR17520069.19443234  
SRR17520069.19443236  
SRR17520069.19443238  
SRR17520069.19443240  
SRR17520069.19443242  
SRR17520069.19443244  
SRR17520069.19443246  
SRR17520069.19443248  
SRR17520069.19443250  
SRR17520069.19443252  
SRR17520069.19443254

SRR17520069. 19443256  
SRR17520069. 19443258  
SRR17520069. 19443260  
SRR17520069. 19443262  
SRR17520069. 19443264  
SRR17520069. 19443266  
SRR17520069. 19443268  
SRR17520069. 19443270  
SRR17520069. 19443272  
SRR17520069. 19458954  
SRR17520069. 19458956  
SRR17520069. 19458958  
SRR17520069. 19458960  
SRR17520069. 19458962  
SRR17520069. 19458964  
SRR17520069. 19458966  
SRR17520069. 19458968  
SRR17520069. 19458970  
SRR17520069. 19458972  
SRR17520069. 19458974  
SRR17520069. 19458976  
SRR17520069. 19458978  
SRR17520069. 19458980  
SRR17520069. 19458982  
SRR17520069. 19458984  
SRR17520069. 19460318  
SRR17520069. 19460320  
SRR17520069. 19460322  
SRR17520069. 19460324  
SRR17520069. 19462688  
SRR17520069. 19462690  
SRR17520069. 19462692  
SRR17520069. 19462694  
SRR17520069. 19462696  
SRR17520069. 19462698  
SRR17520069. 19462700  
SRR17520069. 19462702  
SRR17520069. 19462704  
SRR17520069. 19462706  
SRR17520069. 19462708  
SRR17520069. 19462710  
SRR17520069. 19462712  
SRR17520069. 19462714  
SRR17520069. 19462718  
SRR17520069. 19462720  
SRR17520069. 19462722  
SRR17520069. 19462724

SRR17520069. 19462726  
SRR17520069. 19462728  
SRR17520069. 19462730  
SRR17520069. 19462732  
SRR17520069. 19462734  
SRR17520069. 19462736  
SRR17520069. 19462738  
SRR17520069. 19462740  
SRR17520069. 19462744  
SRR17520069. 19462746  
SRR17520069. 19462748  
SRR17520069. 19462752  
SRR17520069. 19471506  
SRR17520069. 19471508  
SRR17520069. 19471512  
SRR17520069. 19471514  
SRR17520069. 19471516  
SRR17520069. 19473802  
SRR17520069. 19473804  
SRR17520069. 19484263  
SRR17520069. 19484265  
SRR17520069. 19484267  
SRR17520069. 19484269  
SRR17520069. 19484271  
SRR17520069. 19484273  
SRR17520069. 19484275  
SRR17520069. 19484277  
SRR17520069. 19484279  
SRR17520069. 19484281  
SRR17520069. 19484283  
SRR17520069. 19484285  
SRR17520069. 19484287  
SRR17520069. 19484289  
SRR17520069. 19485547  
SRR17520069. 19485549  
SRR17520069. 19485551  
SRR17520069. 19485553  
SRR17520069. 19485555  
SRR17520069. 19485557  
SRR17520069. 19485559  
SRR17520069. 19485561  
SRR17520069. 19485563  
SRR17520069. 19485565  
SRR17520069. 19499409  
SRR17520069. 19499411  
SRR17520069. 19499413  
SRR17520069. 19499415

SRR17520069. 19499417  
SRR17520069. 19499857  
SRR17520069. 19499859  
SRR17520069. 19500559  
SRR17520069. 19500561  
SRR17520069. 19500563  
SRR17520069. 19500565  
SRR17520069. 19500567  
SRR17520069. 19500569  
SRR17520069. 19500571  
SRR17520069. 19500573  
SRR17520069. 19500575  
SRR17520069. 19500577  
SRR17520069. 19500579  
SRR17520069. 19500581  
SRR17520069. 19500583  
SRR17520069. 19500585  
SRR17520069. 19503482  
SRR17520069. 19503558  
SRR17520069. 19517119  
SRR17520069. 19528896  
SRR17520069. 19528898  
SRR17520069. 19528900  
SRR17520069. 19528902  
SRR17520069. 19528904  
SRR17520069. 19528906  
SRR17520069. 19528908  
SRR17520069. 19528910  
SRR17520069. 19528912  
SRR17520069. 19528916  
SRR17520069. 19528920  
SRR17520069. 19537117  
SRR17520069. 19537119  
SRR17520069. 19537121  
SRR17520069. 19537123  
SRR17520069. 19537125  
SRR17520069. 19537127  
SRR17520069. 19537131  
SRR17520069. 19537135  
SRR17520069. 19537137  
SRR17520069. 19537139  
SRR17520069. 19537143  
SRR17520069. 19537145  
SRR17520069. 19537149  
SRR17520069. 19537163  
SRR17520069. 19543592  
SRR17520069. 19543594

SRR17520069. 19543596  
SRR17520069. 19543598  
SRR17520069. 19543600  
SRR17520069. 19543602  
SRR17520069. 19545020  
SRR17520069. 19545022  
SRR17520069. 19545024  
SRR17520069. 19545026  
SRR17520069. 19545030  
SRR17520069. 19545032  
SRR17520069. 19545034  
SRR17520069. 19545036  
SRR17520069. 19545038  
SRR17520069. 19545040  
SRR17520069. 19545042  
SRR17520069. 19545044  
SRR17520069. 19545046  
SRR17520069. 19545048  
SRR17520069. 19548649  
SRR17520069. 19548651  
SRR17520069. 19548653  
SRR17520069. 19548655  
SRR17520069. 19548659  
SRR17520069. 19548661  
SRR17520069. 19548663  
SRR17520069. 19548665  
SRR17520069. 19548667  
SRR17520069. 19548671  
SRR17520069. 19548967  
SRR17520069. 19548969  
SRR17520069. 19553257  
SRR17520069. 19553259  
SRR17520069. 19553261  
SRR17520069. 19553263  
SRR17520069. 19553265  
SRR17520069. 19553267  
SRR17520069. 19553269  
SRR17520069. 19553271  
SRR17520069. 19556077  
SRR17520069. 19556079  
SRR17520069. 19556081  
SRR17520069. 19556083  
SRR17520069. 19556085  
SRR17520069. 19556087  
SRR17520069. 19556089  
SRR17520069. 19556091  
SRR17520069. 19556093

SRR17520069. 19556095  
SRR17520069. 19556097  
SRR17520069. 19556099  
SRR17520069. 19557623  
SRR17520069. 19557625  
SRR17520069. 19557627  
SRR17520069. 19557629  
SRR17520069. 19557631  
SRR17520069. 19557633  
SRR17520069. 19557635  
SRR17520069. 19557637  
SRR17520069. 19557639  
SRR17520069. 19557641  
SRR17520069. 19557643  
SRR17520069. 19557645  
SRR17520069. 19557647  
SRR17520069. 19557649  
SRR17520069. 19557651  
SRR17520069. 19557653  
SRR17520069. 19557655  
SRR17520069. 19557657  
SRR17520069. 19557659  
SRR17520069. 19557661  
SRR17520069. 19557663  
SRR17520069. 19557665  
SRR17520069. 19557667  
SRR17520069. 19557669  
SRR17520069. 19557671  
SRR17520069. 19557673  
SRR17520069. 19557675  
SRR17520069. 19557677  
SRR17520069. 1027  
SRR17520069. 1029  
SRR17520069. 1031  
SRR17520069. 1033  
SRR17520069. 1035  
SRR17520069. 1037  
SRR17520069. 1039  
SRR17520069. 2810  
SRR17520069. 2812  
SRR17520069. 2814  
SRR17520069. 2816  
SRR17520069. 2818  
SRR17520069. 2820  
SRR17520069. 2822  
SRR17520069. 2824  
SRR17520069. 2826

SRR17520069. 2828  
SRR17520069. 2830  
SRR17520069. 2832  
SRR17520069. 2836  
SRR17520069. 2840  
SRR17520069. 2842  
SRR17520069. 2844  
SRR17520069. 2846  
SRR17520069. 2848  
SRR17520069. 2850  
SRR17520069. 2852  
SRR17520069. 2854  
SRR17520069. 2856  
SRR17520069. 2858  
SRR17520069. 2860  
SRR17520069. 2862  
SRR17520069. 2864  
SRR17520069. 2866  
SRR17520069. 2870  
SRR17520069. 2872  
SRR17520069. 2874  
SRR17520069. 2876  
SRR17520069. 2878  
SRR17520069. 5316  
SRR17520069. 5318  
SRR17520069. 5320  
SRR17520069. 5322  
SRR17520069. 5324  
SRR17520069. 5326  
SRR17520069. 7614  
SRR17520069. 7616  
SRR17520069. 7618  
SRR17520069. 7620  
SRR17520069. 7622  
SRR17520069. 7624  
SRR17520069. 7626  
SRR17520069. 7628  
SRR17520069. 7630  
SRR17520069. 7632  
SRR17520069. 7634  
SRR17520069. 7636  
SRR17520069. 7638  
SRR17520069. 7640  
SRR17520069. 7642  
SRR17520069. 7644  
SRR17520069. 7646  
SRR17520069. 7648



SRR17520069. 7650  
SRR17520069. 7656  
SRR17520069. 7658  
SRR17520069. 7660  
SRR17520069. 7662  
SRR17520069. 7664  
SRR17520069. 7666  
SRR17520069. 7668  
SRR17520069. 7670  
SRR17520069. 7672  
SRR17520069. 7674  
SRR17520069. 7678  
SRR17520069. 7680  
SRR17520069. 7682  
SRR17520069. 7684  
SRR17520069. 7686  
SRR17520069. 9785  
SRR17520069. 9787  
SRR17520069. 9789  
SRR17520069. 9791  
SRR17520069. 9793  
SRR17520069. 9795  
SRR17520069. 9797  
SRR17520069. 13807  
SRR17520069. 13809  
SRR17520069. 13811  
SRR17520069. 23543  
SRR17520069. 23545  
SRR17520069. 23547  
SRR17520069. 23549  
SRR17520069. 23551  
SRR17520069. 23553  
SRR17520069. 23555  
SRR17520069. 23557  
SRR17520069. 23559  
SRR17520069. 23561  
SRR17520069. 23563  
SRR17520069. 23565  
SRR17520069. 23567  
SRR17520069. 23569  
SRR17520069. 23571  
SRR17520069. 23804  
SRR17520069. 23806  
SRR17520069. 23808  
SRR17520069. 23810  
SRR17520069. 23812  
SRR17520069. 23814

SRR17520069.23816  
SRR17520069.23818  
SRR17520069.23820  
SRR17520069.23822  
SRR17520069.23824  
SRR17520069.23828  
SRR17520069.23830  
SRR17520069.23832  
SRR17520069.23834  
SRR17520069.23836  
SRR17520069.23838  
SRR17520069.23846  
SRR17520069.23848  
SRR17520069.23850  
SRR17520069.23854  
SRR17520069.25661  
SRR17520069.30010  
SRR17520069.30012  
SRR17520069.30014  
SRR17520069.30016  
SRR17520069.30018  
SRR17520069.30020  
SRR17520069.30022  
SRR17520069.30024  
SRR17520069.30026  
SRR17520069.30028  
SRR17520069.30030  
SRR17520069.30032  
SRR17520069.30034  
SRR17520069.30036  
SRR17520069.30038  
SRR17520069.30040  
SRR17520069.30042  
SRR17520069.30044  
SRR17520069.30046  
SRR17520069.30048  
SRR17520069.30050  
SRR17520069.30052  
SRR17520069.30054  
SRR17520069.30056  
SRR17520069.30058  
SRR17520069.30060  
SRR17520069.30062  
SRR17520069.30064  
SRR17520069.30066  
SRR17520069.30068  
SRR17520069.30070

SRR17520069. 30072  
SRR17520069. 30074  
SRR17520069. 30076  
SRR17520069. 36683  
SRR17520069. 36685  
SRR17520069. 36687  
SRR17520069. 36689  
SRR17520069. 36691  
SRR17520069. 36693  
SRR17520069. 36695  
SRR17520069. 36697  
SRR17520069. 36699  
SRR17520069. 36701  
SRR17520069. 36703  
SRR17520069. 53632  
SRR17520069. 53634  
SRR17520069. 53636  
SRR17520069. 53638  
SRR17520069. 53640  
SRR17520069. 53642  
SRR17520069. 53644  
SRR17520069. 53646  
SRR17520069. 53648  
SRR17520069. 53650  
SRR17520069. 53652  
SRR17520069. 53654  
SRR17520069. 53656  
SRR17520069. 53658  
SRR17520069. 53660  
SRR17520069. 53662  
SRR17520069. 53664  
SRR17520069. 53666  
SRR17520069. 53668  
SRR17520069. 53670  
SRR17520069. 53672  
SRR17520069. 53674  
SRR17520069. 53676  
SRR17520069. 53678  
SRR17520069. 53682  
SRR17520069. 53684  
SRR17520069. 53686  
SRR17520069. 53690  
SRR17520069. 53692  
SRR17520069. 53694  
SRR17520069. 53696  
SRR17520069. 53698  
SRR17520069. 53700

SRR17520069. 53702  
SRR17520069. 53704  
SRR17520069. 53706  
SRR17520069. 53708  
SRR17520069. 53710  
SRR17520069. 53712  
SRR17520069. 53714  
SRR17520069. 53716  
SRR17520069. 53718  
SRR17520069. 53720  
SRR17520069. 53722  
SRR17520069. 53724  
SRR17520069. 53726  
SRR17520069. 53728  
SRR17520069. 53730  
SRR17520069. 53732  
SRR17520069. 53736  
SRR17520069. 53738  
SRR17520069. 53740  
SRR17520069. 53742  
SRR17520069. 53744  
SRR17520069. 53746  
SRR17520069. 53748  
SRR17520069. 53750  
SRR17520069. 53752  
SRR17520069. 53754  
SRR17520069. 53756  
SRR17520069. 53758  
SRR17520069. 53760  
SRR17520069. 53762  
SRR17520069. 53764  
SRR17520069. 53766  
SRR17520069. 53768  
SRR17520069. 53770  
SRR17520069. 53772  
SRR17520069. 53774  
SRR17520069. 53778  
SRR17520069. 53780  
SRR17520069. 53784  
SRR17520069. 53786  
SRR17520069. 53788  
SRR17520069. 53790  
SRR17520069. 53792  
SRR17520069. 53794  
SRR17520069. 53796  
SRR17520069. 53800  
SRR17520069. 53802

SRR17520069. 53804  
SRR17520069. 53806  
SRR17520069. 53810  
SRR17520069. 53812  
SRR17520069. 53814  
SRR17520069. 53816  
SRR17520069. 53818  
SRR17520069. 53820  
SRR17520069. 53822  
SRR17520069. 53824  
SRR17520069. 53826  
SRR17520069. 53828  
SRR17520069. 56895  
SRR17520069. 56897  
SRR17520069. 56899  
SRR17520069. 56901  
SRR17520069. 56903  
SRR17520069. 56905  
SRR17520069. 56907  
SRR17520069. 56909  
SRR17520069. 56911  
SRR17520069. 56913  
SRR17520069. 56915  
SRR17520069. 56917  
SRR17520069. 56919  
SRR17520069. 56921  
SRR17520069. 56923  
SRR17520069. 56925  
SRR17520069. 57814  
SRR17520069. 60631  
SRR17520069. 60633  
SRR17520069. 60635  
SRR17520069. 60637  
SRR17520069. 60639  
SRR17520069. 60641  
SRR17520069. 60643  
SRR17520069. 60645  
SRR17520069. 60647  
SRR17520069. 60649  
SRR17520069. 60651  
SRR17520069. 60653  
SRR17520069. 60655  
SRR17520069. 60657  
SRR17520069. 60659  
SRR17520069. 60661  
SRR17520069. 62483  
SRR17520069. 62485

SRR17520069. 62487  
SRR17520069. 62489  
SRR17520069. 62491  
SRR17520069. 62493  
SRR17520069. 62495  
SRR17520069. 62497  
SRR17520069. 62499  
SRR17520069. 62501  
SRR17520069. 62503  
SRR17520069. 62505  
SRR17520069. 62507  
SRR17520069. 64164  
SRR17520069. 64166  
SRR17520069. 64168  
SRR17520069. 64170  
SRR17520069. 64172  
SRR17520069. 64174  
SRR17520069. 64176  
SRR17520069. 64178  
SRR17520069. 64180  
SRR17520069. 64182  
SRR17520069. 64184  
SRR17520069. 64186  
SRR17520069. 64188  
SRR17520069. 64190  
SRR17520069. 65388  
SRR17520069. 65390  
SRR17520069. 65392  
SRR17520069. 65394  
SRR17520069. 65398  
SRR17520069. 65400  
SRR17520069. 65402  
SRR17520069. 65406  
SRR17520069. 65408  
SRR17520069. 65410  
SRR17520069. 65412  
SRR17520069. 79063  
SRR17520069. 79067  
SRR17520069. 79069  
SRR17520069. 79071  
SRR17520069. 79073  
SRR17520069. 79077  
SRR17520069. 79079  
SRR17520069. 79081  
SRR17520069. 79083  
SRR17520069. 82630  
SRR17520069. 103874

SRR17520069. 103876  
SRR17520069. 103878  
SRR17520069. 103880  
SRR17520069. 103882  
SRR17520069. 103884  
SRR17520069. 103886  
SRR17520069. 103888  
SRR17520069. 103892  
SRR17520069. 106220  
SRR17520069. 106222  
SRR17520069. 106224  
SRR17520069. 106226  
SRR17520069. 106228  
SRR17520069. 108455  
SRR17520069. 108457  
SRR17520069. 108459  
SRR17520069. 108461  
SRR17520069. 108463  
SRR17520069. 108465  
SRR17520069. 108467  
SRR17520069. 108469  
SRR17520069. 108471  
SRR17520069. 114736  
SRR17520069. 114738  
SRR17520069. 114740  
SRR17520069. 114742  
SRR17520069. 114744  
SRR17520069. 114746  
SRR17520069. 114748  
SRR17520069. 114750  
SRR17520069. 114752  
SRR17520069. 114754  
SRR17520069. 114756  
SRR17520069. 114758  
SRR17520069. 114760  
SRR17520069. 114762  
SRR17520069. 114764  
SRR17520069. 114766  
SRR17520069. 114768  
SRR17520069. 114770  
SRR17520069. 114772  
SRR17520069. 114774  
SRR17520069. 114776  
SRR17520069. 114778  
SRR17520069. 114780  
SRR17520069. 114782  
SRR17520069. 114784

SRR17520069. 114786  
SRR17520069. 114788  
SRR17520069. 114792  
SRR17520069. 114794  
SRR17520069. 114796  
SRR17520069. 114798  
SRR17520069. 114800  
SRR17520069. 114802  
SRR17520069. 123345  
SRR17520069. 123351  
SRR17520069. 124711  
SRR17520069. 124713  
SRR17520069. 124715  
SRR17520069. 124717  
SRR17520069. 124719  
SRR17520069. 124721  
SRR17520069. 124723  
SRR17520069. 124725  
SRR17520069. 124727  
SRR17520069. 124729  
SRR17520069. 124731  
SRR17520069. 124733  
SRR17520069. 124735  
SRR17520069. 124737  
SRR17520069. 124739  
SRR17520069. 124741  
SRR17520069. 124743  
SRR17520069. 124745  
SRR17520069. 124747  
SRR17520069. 124751  
SRR17520069. 124753  
SRR17520069. 124755  
SRR17520069. 124759  
SRR17520069. 124761  
SRR17520069. 124763  
SRR17520069. 125361  
SRR17520069. 126943  
SRR17520069. 126945  
SRR17520069. 126947  
SRR17520069. 126949  
SRR17520069. 126951  
SRR17520069. 126953  
SRR17520069. 126955  
SRR17520069. 126957  
SRR17520069. 131660  
SRR17520069. 131662  
SRR17520069. 131664



SRR17520069. 131666  
SRR17520069. 131668  
SRR17520069. 131670  
SRR17520069. 131672  
SRR17520069. 131674  
SRR17520069. 131676  
SRR17520069. 131678  
SRR17520069. 131680  
SRR17520069. 131682  
SRR17520069. 131684  
SRR17520069. 131686  
SRR17520069. 131688  
SRR17520069. 131690  
SRR17520069. 131692  
SRR17520069. 131694  
SRR17520069. 131696  
SRR17520069. 145014  
SRR17520069. 145016  
SRR17520069. 145454  
SRR17520069. 145456  
SRR17520069. 145458  
SRR17520069. 145460  
SRR17520069. 145462  
SRR17520069. 145464  
SRR17520069. 145466  
SRR17520069. 145468  
SRR17520069. 145470  
SRR17520069. 145472  
SRR17520069. 145474  
SRR17520069. 145476  
SRR17520069. 145478  
SRR17520069. 145480  
SRR17520069. 145482  
SRR17520069. 145484  
SRR17520069. 145486  
SRR17520069. 145490  
SRR17520069. 145492  
SRR17520069. 145494  
SRR17520069. 145496  
SRR17520069. 145498  
SRR17520069. 145500  
SRR17520069. 145502  
SRR17520069. 145504  
SRR17520069. 145506  
SRR17520069. 145508  
SRR17520069. 145510  
SRR17520069. 145512

SRR17520069.145514  
SRR17520069.145516  
SRR17520069.145518  
SRR17520069.145520  
SRR17520069.145522  
SRR17520069.145524  
SRR17520069.145526  
SRR17520069.145528  
SRR17520069.145530  
SRR17520069.145532  
SRR17520069.145534  
SRR17520069.145536  
SRR17520069.145538  
SRR17520069.145540  
SRR17520069.145542  
SRR17520069.145544  
SRR17520069.145546  
SRR17520069.145548  
SRR17520069.145550  
SRR17520069.145552  
SRR17520069.145554  
SRR17520069.145556  
SRR17520069.145558  
SRR17520069.145560  
SRR17520069.145562  
SRR17520069.145564  
SRR17520069.145566  
SRR17520069.145568  
SRR17520069.145570  
SRR17520069.145572  
SRR17520069.145574  
SRR17520069.145576  
SRR17520069.145578  
SRR17520069.145580  
SRR17520069.145582  
SRR17520069.145584  
SRR17520069.145586  
SRR17520069.145590  
SRR17520069.145592  
SRR17520069.145594  
SRR17520069.145596  
SRR17520069.145600  
SRR17520069.145604  
SRR17520069.148113  
SRR17520069.148115  
SRR17520069.148117  
SRR17520069.148119

SRR17520069. 148121  
SRR17520069. 148123  
SRR17520069. 148125  
SRR17520069. 148127  
SRR17520069. 148129  
SRR17520069. 148131  
SRR17520069. 148133  
SRR17520069. 148137  
SRR17520069. 148139  
SRR17520069. 148141  
SRR17520069. 148143  
SRR17520069. 148145  
SRR17520069. 148147  
SRR17520069. 148149  
SRR17520069. 148151  
SRR17520069. 148155  
SRR17520069. 148157  
SRR17520069. 148159  
SRR17520069. 148161  
SRR17520069. 148163  
SRR17520069. 148165  
SRR17520069. 148167  
SRR17520069. 148169  
SRR17520069. 148171  
SRR17520069. 148175  
SRR17520069. 148177  
SRR17520069. 148179  
SRR17520069. 148181  
SRR17520069. 148185  
SRR17520069. 148187  
SRR17520069. 148189  
SRR17520069. 148191  
SRR17520069. 148193  
SRR17520069. 151532  
SRR17520069. 151534  
SRR17520069. 151536  
SRR17520069. 151538  
SRR17520069. 151540  
SRR17520069. 151544  
SRR17520069. 151546  
SRR17520069. 151548  
SRR17520069. 151550  
SRR17520069. 151552  
SRR17520069. 151554  
SRR17520069. 151556  
SRR17520069. 151558  
SRR17520069. 151560

SRR17520069. 151562  
SRR17520069. 151564  
SRR17520069. 151566  
SRR17520069. 151568  
SRR17520069. 151570  
SRR17520069. 151572  
SRR17520069. 151574  
SRR17520069. 151576  
SRR17520069. 151578  
SRR17520069. 151580  
SRR17520069. 151582  
SRR17520069. 151584  
SRR17520069. 151586  
SRR17520069. 151588  
SRR17520069. 151590  
SRR17520069. 154632  
SRR17520069. 154634  
SRR17520069. 154636  
SRR17520069. 154638  
SRR17520069. 154640  
SRR17520069. 154642  
SRR17520069. 154644  
SRR17520069. 154646  
SRR17520069. 154648  
SRR17520069. 154650  
SRR17520069. 154652  
SRR17520069. 154654  
SRR17520069. 154658  
SRR17520069. 154660  
SRR17520069. 154662  
SRR17520069. 154664  
SRR17520069. 154666  
SRR17520069. 154668  
SRR17520069. 154670  
SRR17520069. 154674  
SRR17520069. 154676  
SRR17520069. 154678  
SRR17520069. 154680  
SRR17520069. 154682  
SRR17520069. 154684  
SRR17520069. 154686  
SRR17520069. 154688  
SRR17520069. 154690  
SRR17520069. 154692  
SRR17520069. 154694  
SRR17520069. 154696  
SRR17520069. 154698

SRR17520069. 154702  
SRR17520069. 154704  
SRR17520069. 154706  
SRR17520069. 154708  
SRR17520069. 154714  
SRR17520069. 154716  
SRR17520069. 154718  
SRR17520069. 155713  
SRR17520069. 155715  
SRR17520069. 155717  
SRR17520069. 155719  
SRR17520069. 155721  
SRR17520069. 155723  
SRR17520069. 155725  
SRR17520069. 155727  
SRR17520069. 155729  
SRR17520069. 155731  
SRR17520069. 155733  
SRR17520069. 155735  
SRR17520069. 155737  
SRR17520069. 155739  
SRR17520069. 155741  
SRR17520069. 155743  
SRR17520069. 155745  
SRR17520069. 155747  
SRR17520069. 155751  
SRR17520069. 155753  
SRR17520069. 155755  
SRR17520069. 155757  
SRR17520069. 155759  
SRR17520069. 155761  
SRR17520069. 155763  
SRR17520069. 155767  
SRR17520069. 155769  
SRR17520069. 155771  
SRR17520069. 155773  
SRR17520069. 155775  
SRR17520069. 155777  
SRR17520069. 155779  
SRR17520069. 155781  
SRR17520069. 155783  
SRR17520069. 155785  
SRR17520069. 155787  
SRR17520069. 155789  
SRR17520069. 155791  
SRR17520069. 155793  
SRR17520069. 155795

SRR17520069. 155797  
SRR17520069. 155799  
SRR17520069. 155801  
SRR17520069. 155803  
SRR17520069. 155805  
SRR17520069. 155807  
SRR17520069. 155809  
SRR17520069. 155811  
SRR17520069. 155814  
SRR17520069. 155816  
SRR17520069. 155818  
SRR17520069. 155820  
SRR17520069. 155822  
SRR17520069. 160704  
SRR17520069. 160706  
SRR17520069. 160708  
SRR17520069. 160710  
SRR17520069. 160712  
SRR17520069. 160714  
SRR17520069. 160716  
SRR17520069. 160718  
SRR17520069. 160720  
SRR17520069. 160724  
SRR17520069. 160726  
SRR17520069. 160728  
SRR17520069. 160730  
SRR17520069. 160734  
SRR17520069. 160952  
SRR17520069. 160954  
SRR17520069. 160956  
SRR17520069. 160958  
SRR17520069. 160960  
SRR17520069. 160962  
SRR17520069. 160964  
SRR17520069. 160966  
SRR17520069. 160968  
SRR17520069. 160970  
SRR17520069. 160972  
SRR17520069. 160974  
SRR17520069. 160976  
SRR17520069. 160978  
SRR17520069. 160980  
SRR17520069. 160982  
SRR17520069. 160984  
SRR17520069. 160986  
SRR17520069. 160988  
SRR17520069. 160990

SRR17520069.160992  
SRR17520069.160994  
SRR17520069.160996  
SRR17520069.160998  
SRR17520069.161000  
SRR17520069.161002  
SRR17520069.161004  
SRR17520069.161008  
SRR17520069.161010  
SRR17520069.161012  
SRR17520069.162875  
SRR17520069.162877  
SRR17520069.162879  
SRR17520069.162881  
SRR17520069.162883  
SRR17520069.162887  
SRR17520069.162891  
SRR17520069.162893  
SRR17520069.162895  
SRR17520069.162897  
SRR17520069.162899  
SRR17520069.162901  
SRR17520069.162903  
SRR17520069.162907  
SRR17520069.162909  
SRR17520069.162911  
SRR17520069.162913  
SRR17520069.162915  
SRR17520069.162917  
SRR17520069.162919  
SRR17520069.162921  
SRR17520069.165366  
SRR17520069.165368  
SRR17520069.165370  
SRR17520069.165372  
SRR17520069.165374  
SRR17520069.165378  
SRR17520069.165380  
SRR17520069.165382  
SRR17520069.165384  
SRR17520069.167701  
SRR17520069.167703  
SRR17520069.167705  
SRR17520069.167707  
SRR17520069.167709  
SRR17520069.167711  
SRR17520069.176813

SRR17520069. 176815  
SRR17520069. 176817  
SRR17520069. 176819  
SRR17520069. 176821  
SRR17520069. 176823  
SRR17520069. 176825  
SRR17520069. 176827  
SRR17520069. 176829  
SRR17520069. 176831  
SRR17520069. 176833  
SRR17520069. 176835  
SRR17520069. 176837  
SRR17520069. 176839  
SRR17520069. 176841  
SRR17520069. 176843  
SRR17520069. 176845  
SRR17520069. 176847  
SRR17520069. 176849  
SRR17520069. 176853  
SRR17520069. 176855  
SRR17520069. 176857  
SRR17520069. 176859  
SRR17520069. 176861  
SRR17520069. 176865  
SRR17520069. 176867  
SRR17520069. 176869  
SRR17520069. 176871  
SRR17520069. 176873  
SRR17520069. 176875  
SRR17520069. 176877  
SRR17520069. 176879  
SRR17520069. 176881  
SRR17520069. 179472  
SRR17520069. 179474  
SRR17520069. 179476  
SRR17520069. 179478  
SRR17520069. 179480  
SRR17520069. 179482  
SRR17520069. 179486  
SRR17520069. 179488  
SRR17520069. 179490  
SRR17520069. 179492  
SRR17520069. 179494  
SRR17520069. 179496  
SRR17520069. 179498  
SRR17520069. 179500  
SRR17520069. 179502



SRR17520069. 179506  
SRR17520069. 179508  
SRR17520069. 179510  
SRR17520069. 179512  
SRR17520069. 179514  
SRR17520069. 180910  
SRR17520069. 186014  
SRR17520069. 186016  
SRR17520069. 186018  
SRR17520069. 186020  
SRR17520069. 186022  
SRR17520069. 186024  
SRR17520069. 186026  
SRR17520069. 186028  
SRR17520069. 186030  
SRR17520069. 186032  
SRR17520069. 186036  
SRR17520069. 186038  
SRR17520069. 186043  
SRR17520069. 187326  
SRR17520069. 187328  
SRR17520069. 187900  
SRR17520069. 187902  
SRR17520069. 187904  
SRR17520069. 187906  
SRR17520069. 187908  
SRR17520069. 187910  
SRR17520069. 187912  
SRR17520069. 187914  
SRR17520069. 187916  
SRR17520069. 187918  
SRR17520069. 187920  
SRR17520069. 187922  
SRR17520069. 187924  
SRR17520069. 187926  
SRR17520069. 187930  
SRR17520069. 187932  
SRR17520069. 187934  
SRR17520069. 187938  
SRR17520069. 187940  
SRR17520069. 189175  
SRR17520069. 189177  
SRR17520069. 193995  
SRR17520069. 193997  
SRR17520069. 193999  
SRR17520069. 194001  
SRR17520069. 194003

SRR17520069. 194007  
SRR17520069. 194009  
SRR17520069. 194011  
SRR17520069. 194013  
SRR17520069. 194015  
SRR17520069. 194017  
SRR17520069. 194019  
SRR17520069. 194021  
SRR17520069. 194023  
SRR17520069. 194025  
SRR17520069. 194027  
SRR17520069. 194029  
SRR17520069. 194031  
SRR17520069. 194033  
SRR17520069. 194035  
SRR17520069. 194037  
SRR17520069. 194039  
SRR17520069. 194041  
SRR17520069. 194043  
SRR17520069. 194045  
SRR17520069. 194047  
SRR17520069. 194049  
SRR17520069. 196774  
SRR17520069. 196776  
SRR17520069. 196778  
SRR17520069. 196780  
SRR17520069. 197774  
SRR17520069. 198012  
SRR17520069. 198014  
SRR17520069. 198016  
SRR17520069. 198018  
SRR17520069. 198020  
SRR17520069. 198022  
SRR17520069. 198024  
SRR17520069. 198026  
SRR17520069. 198028  
SRR17520069. 198030  
SRR17520069. 198032  
SRR17520069. 198034  
SRR17520069. 200666  
SRR17520069. 200668  
SRR17520069. 200670  
SRR17520069. 202080  
SRR17520069. 202082  
SRR17520069. 202084  
SRR17520069. 202086  
SRR17520069. 202088

SRR17520069.204630  
SRR17520069.204632  
SRR17520069.204636  
SRR17520069.204638  
SRR17520069.207500  
SRR17520069.207502  
SRR17520069.207504  
SRR17520069.207506  
SRR17520069.207508  
SRR17520069.207510  
SRR17520069.207512  
SRR17520069.207514  
SRR17520069.214462  
SRR17520069.217814  
SRR17520069.217816  
SRR17520069.217818  
SRR17520069.217820  
SRR17520069.217822  
SRR17520069.217824  
SRR17520069.217826  
SRR17520069.218069  
SRR17520069.218071  
SRR17520069.218073  
SRR17520069.218075  
SRR17520069.218077  
SRR17520069.218079  
SRR17520069.218081  
SRR17520069.218083  
SRR17520069.218085  
SRR17520069.218087  
SRR17520069.218089  
SRR17520069.218091  
SRR17520069.218093  
SRR17520069.218095  
SRR17520069.218097  
SRR17520069.218099  
SRR17520069.218101  
SRR17520069.218103  
SRR17520069.218105  
SRR17520069.218107  
SRR17520069.218109  
SRR17520069.218111  
SRR17520069.218113  
SRR17520069.218117  
SRR17520069.218119  
SRR17520069.218121  
SRR17520069.218123

SRR17520069.218125  
SRR17520069.218127  
SRR17520069.218129  
SRR17520069.218131  
SRR17520069.218133  
SRR17520069.218135  
SRR17520069.218137  
SRR17520069.218139  
SRR17520069.218141  
SRR17520069.218143  
SRR17520069.218145  
SRR17520069.218147  
SRR17520069.218149  
SRR17520069.218151  
SRR17520069.218153  
SRR17520069.218155  
SRR17520069.218157  
SRR17520069.218159  
SRR17520069.218161  
SRR17520069.218163  
SRR17520069.218165  
SRR17520069.218167  
SRR17520069.218169  
SRR17520069.218171  
SRR17520069.218173  
SRR17520069.218175  
SRR17520069.218177  
SRR17520069.218179  
SRR17520069.218181  
SRR17520069.218183  
SRR17520069.218185  
SRR17520069.218187  
SRR17520069.218189  
SRR17520069.224651  
SRR17520069.224653  
SRR17520069.224655  
SRR17520069.224660  
SRR17520069.224662  
SRR17520069.224664  
SRR17520069.224666  
SRR17520069.224668  
SRR17520069.224670  
SRR17520069.224672  
SRR17520069.224674  
SRR17520069.224676  
SRR17520069.224678  
SRR17520069.224680

SRR17520069.224682  
SRR17520069.224684  
SRR17520069.224686  
SRR17520069.225174  
SRR17520069.225176  
SRR17520069.225178  
SRR17520069.225180  
SRR17520069.225182  
SRR17520069.225184  
SRR17520069.225186  
SRR17520069.225188  
SRR17520069.225190  
SRR17520069.225192  
SRR17520069.225202  
SRR17520069.227276  
SRR17520069.227278  
SRR17520069.227280  
SRR17520069.227282  
SRR17520069.227284  
SRR17520069.227286  
SRR17520069.227288  
SRR17520069.227290  
SRR17520069.227292  
SRR17520069.227294  
SRR17520069.227296  
SRR17520069.227298  
SRR17520069.234127  
SRR17520069.234129  
SRR17520069.234131  
SRR17520069.234133  
SRR17520069.234135  
SRR17520069.234137  
SRR17520069.234139  
SRR17520069.234141  
SRR17520069.234143  
SRR17520069.234145  
SRR17520069.234147  
SRR17520069.234149  
SRR17520069.234151  
SRR17520069.234153  
SRR17520069.234157  
SRR17520069.234159  
SRR17520069.234161  
SRR17520069.234163  
SRR17520069.234165  
SRR17520069.234167  
SRR17520069.234169

SRR17520069.234171  
SRR17520069.234173  
SRR17520069.234175  
SRR17520069.234177  
SRR17520069.234179  
SRR17520069.234181  
SRR17520069.234183  
SRR17520069.234185  
SRR17520069.234189  
SRR17520069.234191  
SRR17520069.234193  
SRR17520069.234195  
SRR17520069.234199  
SRR17520069.234201  
SRR17520069.234207  
SRR17520069.234209  
SRR17520069.234211  
SRR17520069.234213  
SRR17520069.234215  
SRR17520069.234217  
SRR17520069.234219  
SRR17520069.234221  
SRR17520069.234223  
SRR17520069.234834  
SRR17520069.234836  
SRR17520069.234838  
SRR17520069.234840  
SRR17520069.234846  
SRR17520069.234848  
SRR17520069.234850  
SRR17520069.234852  
SRR17520069.234854  
SRR17520069.234856  
SRR17520069.234858  
SRR17520069.234860  
SRR17520069.234862  
SRR17520069.234864  
SRR17520069.234866  
SRR17520069.234870  
SRR17520069.234872  
SRR17520069.234874  
SRR17520069.234876  
SRR17520069.234882  
SRR17520069.234884  
SRR17520069.234886  
SRR17520069.234892  
SRR17520069.234894

SRR17520069.234896  
SRR17520069.234898  
SRR17520069.234900  
SRR17520069.234904  
SRR17520069.234906  
SRR17520069.234908  
SRR17520069.234910  
SRR17520069.234912  
SRR17520069.234914  
SRR17520069.234916  
SRR17520069.234918  
SRR17520069.234920  
SRR17520069.238200  
SRR17520069.238202  
SRR17520069.238204  
SRR17520069.238206  
SRR17520069.238208  
SRR17520069.238210  
SRR17520069.238212  
SRR17520069.238214  
SRR17520069.238216  
SRR17520069.238218  
SRR17520069.238220  
SRR17520069.238222  
SRR17520069.238224  
SRR17520069.238226  
SRR17520069.238228  
SRR17520069.238230  
SRR17520069.238232  
SRR17520069.238234  
SRR17520069.238236  
SRR17520069.239536  
SRR17520069.245529  
SRR17520069.245531  
SRR17520069.245533  
SRR17520069.245535  
SRR17520069.245537  
SRR17520069.245539  
SRR17520069.245541  
SRR17520069.245543  
SRR17520069.245545  
SRR17520069.245547  
SRR17520069.245549  
SRR17520069.245551  
SRR17520069.245553  
SRR17520069.245555  
SRR17520069.245557

SRR17520069.245559  
SRR17520069.245561  
SRR17520069.245563  
SRR17520069.245565  
SRR17520069.245567  
SRR17520069.245569  
SRR17520069.245571  
SRR17520069.245573  
SRR17520069.245575  
SRR17520069.245577  
SRR17520069.245579  
SRR17520069.245581  
SRR17520069.245583  
SRR17520069.245585  
SRR17520069.245587  
SRR17520069.245589  
SRR17520069.245591  
SRR17520069.245593  
SRR17520069.245595  
SRR17520069.245597  
SRR17520069.245599  
SRR17520069.245601  
SRR17520069.245603  
SRR17520069.245605  
SRR17520069.245609  
SRR17520069.245611  
SRR17520069.245613  
SRR17520069.245615  
SRR17520069.245617  
SRR17520069.245619  
SRR17520069.245621  
SRR17520069.245627  
SRR17520069.245629  
SRR17520069.245631  
SRR17520069.245633  
SRR17520069.245635  
SRR17520069.245637  
SRR17520069.245639  
SRR17520069.245641  
SRR17520069.245645  
SRR17520069.252219  
SRR17520069.252221  
SRR17520069.252223  
SRR17520069.252225  
SRR17520069.252227  
SRR17520069.252229  
SRR17520069.252231



SRR17520069.252233  
SRR17520069.252235  
SRR17520069.252237  
SRR17520069.252239  
SRR17520069.252241  
SRR17520069.252243  
SRR17520069.252245  
SRR17520069.253753  
SRR17520069.253755  
SRR17520069.257194  
SRR17520069.257196  
SRR17520069.257198  
SRR17520069.257200  
SRR17520069.257202  
SRR17520069.257204  
SRR17520069.257206  
SRR17520069.257208  
SRR17520069.257212  
SRR17520069.257214  
SRR17520069.257216  
SRR17520069.257218  
SRR17520069.257220  
SRR17520069.257222  
SRR17520069.257224  
SRR17520069.257226  
SRR17520069.257228  
SRR17520069.261599  
SRR17520069.261601  
SRR17520069.261603  
SRR17520069.261607  
SRR17520069.261609  
SRR17520069.262415  
SRR17520069.262417  
SRR17520069.262419  
SRR17520069.262421  
SRR17520069.262423  
SRR17520069.262425  
SRR17520069.262427  
SRR17520069.262429  
SRR17520069.263615  
SRR17520069.263617  
SRR17520069.263619  
SRR17520069.263621  
SRR17520069.263623  
SRR17520069.263625  
SRR17520069.263627  
SRR17520069.263629

SRR17520069.263631  
SRR17520069.265517  
SRR17520069.265519  
SRR17520069.265521  
SRR17520069.265523  
SRR17520069.265525  
SRR17520069.265527  
SRR17520069.265529  
SRR17520069.265533  
SRR17520069.265535  
SRR17520069.266053  
SRR17520069.266191  
SRR17520069.266193  
SRR17520069.266195  
SRR17520069.266197  
SRR17520069.266199  
SRR17520069.266203  
SRR17520069.266205  
SRR17520069.266207  
SRR17520069.266209  
SRR17520069.266211  
SRR17520069.266213  
SRR17520069.266215  
SRR17520069.266217  
SRR17520069.266219  
SRR17520069.266223  
SRR17520069.266225  
SRR17520069.266231  
SRR17520069.266233  
SRR17520069.274666  
SRR17520069.274668  
SRR17520069.274670  
SRR17520069.274672  
SRR17520069.274674  
SRR17520069.274676  
SRR17520069.274678  
SRR17520069.274680  
SRR17520069.274682  
SRR17520069.274686  
SRR17520069.274688  
SRR17520069.274690  
SRR17520069.274692  
SRR17520069.274696  
SRR17520069.274698  
SRR17520069.274700  
SRR17520069.274702  
SRR17520069.274704

SRR17520069.274706  
SRR17520069.274708  
SRR17520069.274710  
SRR17520069.274712  
SRR17520069.274714  
SRR17520069.274716  
SRR17520069.274718  
SRR17520069.274720  
SRR17520069.274722  
SRR17520069.279417  
SRR17520069.279419  
SRR17520069.279421  
SRR17520069.279423  
SRR17520069.279425  
SRR17520069.279427  
SRR17520069.279431  
SRR17520069.279433  
SRR17520069.279435  
SRR17520069.279437  
SRR17520069.279439  
SRR17520069.279441  
SRR17520069.279443  
SRR17520069.279445  
SRR17520069.279447  
SRR17520069.279449  
SRR17520069.279451  
SRR17520069.279453  
SRR17520069.279455  
SRR17520069.279457  
SRR17520069.279459  
SRR17520069.279461  
SRR17520069.279463  
SRR17520069.279465  
SRR17520069.279467  
SRR17520069.279469  
SRR17520069.279471  
SRR17520069.279473  
SRR17520069.279475  
SRR17520069.279477  
SRR17520069.279479  
SRR17520069.279481  
SRR17520069.279483  
SRR17520069.279485  
SRR17520069.279487  
SRR17520069.279489  
SRR17520069.279491  
SRR17520069.279493

SRR17520069.279497  
SRR17520069.279499  
SRR17520069.279501  
SRR17520069.279503  
SRR17520069.279505  
SRR17520069.279507  
SRR17520069.279509  
SRR17520069.279511  
SRR17520069.279513  
SRR17520069.279515  
SRR17520069.279517  
SRR17520069.279519  
SRR17520069.279521  
SRR17520069.279523  
SRR17520069.288286  
SRR17520069.288288  
SRR17520069.288290  
SRR17520069.288292  
SRR17520069.288294  
SRR17520069.288296  
SRR17520069.288298  
SRR17520069.288300  
SRR17520069.288302  
SRR17520069.288304  
SRR17520069.288308  
SRR17520069.288310  
SRR17520069.288312  
SRR17520069.288314  
SRR17520069.288316  
SRR17520069.288318  
SRR17520069.288320  
SRR17520069.288322  
SRR17520069.288324  
SRR17520069.288326  
SRR17520069.288328  
SRR17520069.288330  
SRR17520069.288332  
SRR17520069.288334  
SRR17520069.288336  
SRR17520069.288338  
SRR17520069.288340  
SRR17520069.288342  
SRR17520069.288344  
SRR17520069.288346  
SRR17520069.288348  
SRR17520069.288350  
SRR17520069.288352

SRR17520069. 293494  
SRR17520069. 293496  
SRR17520069. 293498  
SRR17520069. 293500  
SRR17520069. 293502  
SRR17520069. 293506  
SRR17520069. 293508  
SRR17520069. 293512  
SRR17520069. 293514  
SRR17520069. 293516  
SRR17520069. 293518  
SRR17520069. 293520  
SRR17520069. 293522  
SRR17520069. 293524  
SRR17520069. 293528  
SRR17520069. 293530  
SRR17520069. 293532  
SRR17520069. 293534  
SRR17520069. 293536  
SRR17520069. 293540  
SRR17520069. 293542  
SRR17520069. 297415  
SRR17520069. 297417  
SRR17520069. 297419  
SRR17520069. 297421  
SRR17520069. 297423  
SRR17520069. 297425  
SRR17520069. 297427  
SRR17520069. 297429  
SRR17520069. 297431  
SRR17520069. 297433  
SRR17520069. 297435  
SRR17520069. 297437  
SRR17520069. 297439  
SRR17520069. 297441  
SRR17520069. 297443  
SRR17520069. 298534  
SRR17520069. 298538  
SRR17520069. 298540  
SRR17520069. 298542  
SRR17520069. 298544  
SRR17520069. 298546  
SRR17520069. 298548  
SRR17520069. 298550  
SRR17520069. 298552  
SRR17520069. 298554  
SRR17520069. 298556

SRR17520069. 298558  
SRR17520069. 298560  
SRR17520069. 298562  
SRR17520069. 300866  
SRR17520069. 300868  
SRR17520069. 300870  
SRR17520069. 300872  
SRR17520069. 300874  
SRR17520069. 300876  
SRR17520069. 300878  
SRR17520069. 300880  
SRR17520069. 300882  
SRR17520069. 300884  
SRR17520069. 300886  
SRR17520069. 300888  
SRR17520069. 300890  
SRR17520069. 300892  
SRR17520069. 300894  
SRR17520069. 300896  
SRR17520069. 301024  
SRR17520069. 301028  
SRR17520069. 301030  
SRR17520069. 301032  
SRR17520069. 301034  
SRR17520069. 301038  
SRR17520069. 301040  
SRR17520069. 301042  
SRR17520069. 301044  
SRR17520069. 301046  
SRR17520069. 301048  
SRR17520069. 301050  
SRR17520069. 305949  
SRR17520069. 305951  
SRR17520069. 305953  
SRR17520069. 305957  
SRR17520069. 305959  
SRR17520069. 311484  
SRR17520069. 311486  
SRR17520069. 311488  
SRR17520069. 311490  
SRR17520069. 311492  
SRR17520069. 311494  
SRR17520069. 311498  
SRR17520069. 311502  
SRR17520069. 311504  
SRR17520069. 311506  
SRR17520069. 311508

SRR17520069.311512  
SRR17520069.311514  
SRR17520069.311516  
SRR17520069.311518  
SRR17520069.311520  
SRR17520069.311522  
SRR17520069.311524  
SRR17520069.311526  
SRR17520069.311528  
SRR17520069.311530  
SRR17520069.311532  
SRR17520069.311534  
SRR17520069.311536  
SRR17520069.311538  
SRR17520069.311540  
SRR17520069.311542  
SRR17520069.311544  
SRR17520069.311546  
SRR17520069.311548  
SRR17520069.311550  
SRR17520069.311552  
SRR17520069.311554  
SRR17520069.311556  
SRR17520069.311558  
SRR17520069.311560  
SRR17520069.311564  
SRR17520069.311566  
SRR17520069.311574  
SRR17520069.311576  
SRR17520069.311580  
SRR17520069.311582  
SRR17520069.311584  
SRR17520069.311586  
SRR17520069.311588  
SRR17520069.311590  
SRR17520069.311592  
SRR17520069.311596  
SRR17520069.311598  
SRR17520069.311600  
SRR17520069.311602  
SRR17520069.311604  
SRR17520069.311606  
SRR17520069.311608  
SRR17520069.311610  
SRR17520069.311612  
SRR17520069.311614  
SRR17520069.311616

SRR17520069.311618  
SRR17520069.311620  
SRR17520069.311622  
SRR17520069.311624  
SRR17520069.311626  
SRR17520069.311628  
SRR17520069.311630  
SRR17520069.311632  
SRR17520069.312858  
SRR17520069.312860  
SRR17520069.312862  
SRR17520069.312864  
SRR17520069.312866  
SRR17520069.312868  
SRR17520069.312870  
SRR17520069.312872  
SRR17520069.312876  
SRR17520069.312878  
SRR17520069.312880  
SRR17520069.312882  
SRR17520069.312884  
SRR17520069.312886  
SRR17520069.312888  
SRR17520069.312890  
SRR17520069.312892  
SRR17520069.312894  
SRR17520069.312896  
SRR17520069.312898  
SRR17520069.312900  
SRR17520069.312902  
SRR17520069.312904  
SRR17520069.312906  
SRR17520069.312908  
SRR17520069.312910  
SRR17520069.312912  
SRR17520069.312914  
SRR17520069.312916  
SRR17520069.312918  
SRR17520069.312920  
SRR17520069.312922  
SRR17520069.312924  
SRR17520069.312926  
SRR17520069.312928  
SRR17520069.312930  
SRR17520069.312932  
SRR17520069.312934  
SRR17520069.312936



SRR17520069. 312938  
SRR17520069. 312940  
SRR17520069. 312942  
SRR17520069. 312944  
SRR17520069. 312946  
SRR17520069. 312948  
SRR17520069. 312950  
SRR17520069. 312952  
SRR17520069. 312954  
SRR17520069. 312956  
SRR17520069. 312958  
SRR17520069. 312960  
SRR17520069. 312962  
SRR17520069. 312964  
SRR17520069. 312966  
SRR17520069. 312968  
SRR17520069. 312970  
SRR17520069. 312972  
SRR17520069. 312974  
SRR17520069. 312976  
SRR17520069. 312978  
SRR17520069. 312980  
SRR17520069. 313963  
SRR17520069. 313965  
SRR17520069. 313967  
SRR17520069. 313971  
SRR17520069. 313975  
SRR17520069. 313977  
SRR17520069. 317263  
SRR17520069. 317267  
SRR17520069. 321122  
SRR17520069. 321124  
SRR17520069. 321126  
SRR17520069. 321128  
SRR17520069. 321130  
SRR17520069. 321132  
SRR17520069. 321134  
SRR17520069. 321136  
SRR17520069. 321138  
SRR17520069. 321142  
SRR17520069. 321144  
SRR17520069. 321146  
SRR17520069. 321148  
SRR17520069. 321150  
SRR17520069. 321152  
SRR17520069. 321154  
SRR17520069. 321156

SRR17520069. 321160  
SRR17520069. 321162  
SRR17520069. 325790  
SRR17520069. 325792  
SRR17520069. 325794  
SRR17520069. 325796  
SRR17520069. 325798  
SRR17520069. 325800  
SRR17520069. 325802  
SRR17520069. 325804  
SRR17520069. 325806  
SRR17520069. 325808  
SRR17520069. 325810  
SRR17520069. 328763  
SRR17520069. 328765  
SRR17520069. 328767  
SRR17520069. 328769  
SRR17520069. 328771  
SRR17520069. 328773  
SRR17520069. 328775  
SRR17520069. 328777  
SRR17520069. 328779  
SRR17520069. 332880  
SRR17520069. 332882  
SRR17520069. 332884  
SRR17520069. 332886  
SRR17520069. 332888  
SRR17520069. 332890  
SRR17520069. 332892  
SRR17520069. 332894  
SRR17520069. 332896  
SRR17520069. 332898  
SRR17520069. 332900  
SRR17520069. 332902  
SRR17520069. 332904  
SRR17520069. 332906  
SRR17520069. 332908  
SRR17520069. 332910  
SRR17520069. 332912  
SRR17520069. 332914  
SRR17520069. 341052  
SRR17520069. 341054  
SRR17520069. 341056  
SRR17520069. 341058  
SRR17520069. 341060  
SRR17520069. 341062  
SRR17520069. 341064

SRR17520069. 341066  
SRR17520069. 341068  
SRR17520069. 341072  
SRR17520069. 341074  
SRR17520069. 341078  
SRR17520069. 341082  
SRR17520069. 341084  
SRR17520069. 343407  
SRR17520069. 343409  
SRR17520069. 343411  
SRR17520069. 344369  
SRR17520069. 344371  
SRR17520069. 347174  
SRR17520069. 347176  
SRR17520069. 347178  
SRR17520069. 348566  
SRR17520069. 348568  
SRR17520069. 348570  
SRR17520069. 348572  
SRR17520069. 348574  
SRR17520069. 348576  
SRR17520069. 348578  
SRR17520069. 348580  
SRR17520069. 348582  
SRR17520069. 348584  
SRR17520069. 348588  
SRR17520069. 348590  
SRR17520069. 348989  
SRR17520069. 348991  
SRR17520069. 354059  
SRR17520069. 354061  
SRR17520069. 354063  
SRR17520069. 354065  
SRR17520069. 354067  
SRR17520069. 354069  
SRR17520069. 354071  
SRR17520069. 354073  
SRR17520069. 354075  
SRR17520069. 359987  
SRR17520069. 359989  
SRR17520069. 359991  
SRR17520069. 359993  
SRR17520069. 359995  
SRR17520069. 359997  
SRR17520069. 359999  
SRR17520069. 360001  
SRR17520069. 360005

SRR17520069.360007  
SRR17520069.360011  
SRR17520069.360013  
SRR17520069.360015  
SRR17520069.360017  
SRR17520069.360019  
SRR17520069.360021  
SRR17520069.360025  
SRR17520069.360027  
SRR17520069.360031  
SRR17520069.360033  
SRR17520069.360035  
SRR17520069.360037  
SRR17520069.360039  
SRR17520069.360041  
SRR17520069.360043  
SRR17520069.360045  
SRR17520069.363296  
SRR17520069.366206  
SRR17520069.366208  
SRR17520069.366210  
SRR17520069.366212  
SRR17520069.366214  
SRR17520069.366216  
SRR17520069.366218  
SRR17520069.366220  
SRR17520069.366222  
SRR17520069.366224  
SRR17520069.366226  
SRR17520069.366228  
SRR17520069.366230  
SRR17520069.366232  
SRR17520069.366234  
SRR17520069.366236  
SRR17520069.366238  
SRR17520069.366240  
SRR17520069.366242  
SRR17520069.366244  
SRR17520069.366246  
SRR17520069.366248  
SRR17520069.366250  
SRR17520069.366252  
SRR17520069.366256  
SRR17520069.366258  
SRR17520069.366260  
SRR17520069.366262  
SRR17520069.366264

SRR17520069. 366266  
SRR17520069. 366268  
SRR17520069. 366270  
SRR17520069. 366272  
SRR17520069. 366274  
SRR17520069. 366276  
SRR17520069. 366278  
SRR17520069. 366280  
SRR17520069. 366282  
SRR17520069. 366284  
SRR17520069. 366286  
SRR17520069. 366288  
SRR17520069. 366290  
SRR17520069. 366292  
SRR17520069. 366294  
SRR17520069. 366296  
SRR17520069. 366298  
SRR17520069. 366300  
SRR17520069. 366677  
SRR17520069. 366681  
SRR17520069. 366683  
SRR17520069. 366685  
SRR17520069. 366687  
SRR17520069. 366689  
SRR17520069. 366691  
SRR17520069. 366829  
SRR17520069. 366831  
SRR17520069. 366833  
SRR17520069. 366835  
SRR17520069. 366837  
SRR17520069. 366841  
SRR17520069. 366843  
SRR17520069. 366845  
SRR17520069. 366847  
SRR17520069. 366849  
SRR17520069. 366851  
SRR17520069. 366853  
SRR17520069. 366855  
SRR17520069. 366857  
SRR17520069. 366861  
SRR17520069. 366863  
SRR17520069. 366865  
SRR17520069. 366867  
SRR17520069. 366869  
SRR17520069. 366871  
SRR17520069. 366873  
SRR17520069. 366875

SRR17520069. 366877  
SRR17520069. 366879  
SRR17520069. 366881  
SRR17520069. 366883  
SRR17520069. 366887  
SRR17520069. 366889  
SRR17520069. 366891  
SRR17520069. 366893  
SRR17520069. 366895  
SRR17520069. 366897  
SRR17520069. 366899  
SRR17520069. 366901  
SRR17520069. 366903  
SRR17520069. 366905  
SRR17520069. 366907  
SRR17520069. 366909  
SRR17520069. 366911  
SRR17520069. 366913  
SRR17520069. 366915  
SRR17520069. 366917  
SRR17520069. 366919  
SRR17520069. 366921  
SRR17520069. 366923  
SRR17520069. 366925  
SRR17520069. 366927  
SRR17520069. 366929  
SRR17520069. 366931  
SRR17520069. 366933  
SRR17520069. 366935  
SRR17520069. 366937  
SRR17520069. 366939  
SRR17520069. 366941  
SRR17520069. 366943  
SRR17520069. 366945  
SRR17520069. 366947  
SRR17520069. 366949  
SRR17520069. 366951  
SRR17520069. 366953  
SRR17520069. 366955  
SRR17520069. 366959  
SRR17520069. 366961  
SRR17520069. 366963  
SRR17520069. 366965  
SRR17520069. 366967  
SRR17520069. 366969  
SRR17520069. 366971  
SRR17520069. 366973

SRR17520069. 366975  
SRR17520069. 366977  
SRR17520069. 366979  
SRR17520069. 366981  
SRR17520069. 366983  
SRR17520069. 366987  
SRR17520069. 366989  
SRR17520069. 366991  
SRR17520069. 366993  
SRR17520069. 366995  
SRR17520069. 366997  
SRR17520069. 366999  
SRR17520069. 367001  
SRR17520069. 367003  
SRR17520069. 367005  
SRR17520069. 367007  
SRR17520069. 367009  
SRR17520069. 367011  
SRR17520069. 367013  
SRR17520069. 367015  
SRR17520069. 367017  
SRR17520069. 367019  
SRR17520069. 367021  
SRR17520069. 367023  
SRR17520069. 367025  
SRR17520069. 367027  
SRR17520069. 367029  
SRR17520069. 367033  
SRR17520069. 367035  
SRR17520069. 367037  
SRR17520069. 367039  
SRR17520069. 368216  
SRR17520069. 368218  
SRR17520069. 368220  
SRR17520069. 368222  
SRR17520069. 368224  
SRR17520069. 368226  
SRR17520069. 368228  
SRR17520069. 368230  
SRR17520069. 368232  
SRR17520069. 368234  
SRR17520069. 368236  
SRR17520069. 368238  
SRR17520069. 368240  
SRR17520069. 368242  
SRR17520069. 368244  
SRR17520069. 368246

SRR17520069. 368248  
SRR17520069. 368250  
SRR17520069. 368252  
SRR17520069. 368254  
SRR17520069. 368256  
SRR17520069. 368258  
SRR17520069. 368260  
SRR17520069. 368262  
SRR17520069. 368264  
SRR17520069. 368266  
SRR17520069. 368270  
SRR17520069. 368272  
SRR17520069. 368274  
SRR17520069. 368276  
SRR17520069. 368278  
SRR17520069. 368280  
SRR17520069. 368282  
SRR17520069. 368284  
SRR17520069. 368286  
SRR17520069. 368288  
SRR17520069. 368290  
SRR17520069. 368292  
SRR17520069. 368294  
SRR17520069. 368296  
SRR17520069. 368298  
SRR17520069. 368300  
SRR17520069. 368302  
SRR17520069. 368304  
SRR17520069. 368306  
SRR17520069. 368308  
SRR17520069. 368310  
SRR17520069. 368312  
SRR17520069. 368314  
SRR17520069. 368316  
SRR17520069. 368318  
SRR17520069. 368320  
SRR17520069. 368322  
SRR17520069. 368324  
SRR17520069. 368326  
SRR17520069. 368328  
SRR17520069. 368330  
SRR17520069. 368332  
SRR17520069. 368334  
SRR17520069. 368336  
SRR17520069. 368340  
SRR17520069. 368342  
SRR17520069. 368344



SRR17520069. 368346  
SRR17520069. 368348  
SRR17520069. 371545  
SRR17520069. 371547  
SRR17520069. 371549  
SRR17520069. 371551  
SRR17520069. 371553  
SRR17520069. 371555  
SRR17520069. 371557  
SRR17520069. 371559  
SRR17520069. 371561  
SRR17520069. 372399  
SRR17520069. 372401  
SRR17520069. 372405  
SRR17520069. 372407  
SRR17520069. 372409  
SRR17520069. 372411  
SRR17520069. 372417  
SRR17520069. 372419  
SRR17520069. 372421  
SRR17520069. 372423  
SRR17520069. 373153  
SRR17520069. 373155  
SRR17520069. 373157  
SRR17520069. 373159  
SRR17520069. 373161  
SRR17520069. 373163  
SRR17520069. 373165  
SRR17520069. 373167  
SRR17520069. 373169  
SRR17520069. 373171  
SRR17520069. 373173  
SRR17520069. 373175  
SRR17520069. 373177  
SRR17520069. 373179  
SRR17520069. 373181  
SRR17520069. 373183  
SRR17520069. 373185  
SRR17520069. 373187  
SRR17520069. 373189  
SRR17520069. 373191  
SRR17520069. 373193  
SRR17520069. 373195  
SRR17520069. 373197  
SRR17520069. 373199  
SRR17520069. 373201  
SRR17520069. 373203

SRR17520069. 373205  
SRR17520069. 373207  
SRR17520069. 373209  
SRR17520069. 373211  
SRR17520069. 373213  
SRR17520069. 373215  
SRR17520069. 373217  
SRR17520069. 373219  
SRR17520069. 373221  
SRR17520069. 373223  
SRR17520069. 373225  
SRR17520069. 373227  
SRR17520069. 373229  
SRR17520069. 373231  
SRR17520069. 373233  
SRR17520069. 373235  
SRR17520069. 373237  
SRR17520069. 373239  
SRR17520069. 373241  
SRR17520069. 373243  
SRR17520069. 373245  
SRR17520069. 373247  
SRR17520069. 373249  
SRR17520069. 381849  
SRR17520069. 381851  
SRR17520069. 381853  
SRR17520069. 381855  
SRR17520069. 381857  
SRR17520069. 381859  
SRR17520069. 381861  
SRR17520069. 381863  
SRR17520069. 381865  
SRR17520069. 381867  
SRR17520069. 381869  
SRR17520069. 381871  
SRR17520069. 381873  
SRR17520069. 381875  
SRR17520069. 381877  
SRR17520069. 381879  
SRR17520069. 381881  
SRR17520069. 381883  
SRR17520069. 381885  
SRR17520069. 381887  
SRR17520069. 381889  
SRR17520069. 381891  
SRR17520069. 381893  
SRR17520069. 381895

SRR17520069. 381897  
SRR17520069. 381899  
SRR17520069. 381901  
SRR17520069. 381903  
SRR17520069. 381905  
SRR17520069. 381907  
SRR17520069. 381909  
SRR17520069. 381911  
SRR17520069. 381913  
SRR17520069. 381915  
SRR17520069. 381917  
SRR17520069. 381919  
SRR17520069. 383639  
SRR17520069. 383641  
SRR17520069. 383643  
SRR17520069. 383645  
SRR17520069. 383647  
SRR17520069. 383649  
SRR17520069. 383651  
SRR17520069. 383653  
SRR17520069. 383655  
SRR17520069. 383657  
SRR17520069. 383659  
SRR17520069. 383661  
SRR17520069. 383663  
SRR17520069. 383665  
SRR17520069. 383667  
SRR17520069. 383669  
SRR17520069. 383671  
SRR17520069. 383673  
SRR17520069. 383675  
SRR17520069. 383677  
SRR17520069. 383679  
SRR17520069. 383681  
SRR17520069. 383683  
SRR17520069. 383685  
SRR17520069. 383687  
SRR17520069. 383689  
SRR17520069. 383691  
SRR17520069. 383693  
SRR17520069. 383695  
SRR17520069. 383697  
SRR17520069. 383699  
SRR17520069. 383701  
SRR17520069. 383703  
SRR17520069. 383705  
SRR17520069. 383707

SRR17520069.383709  
SRR17520069.383711  
SRR17520069.383715  
SRR17520069.383717  
SRR17520069.383719  
SRR17520069.390298  
SRR17520069.390300  
SRR17520069.390415  
SRR17520069.390417  
SRR17520069.390419  
SRR17520069.390421  
SRR17520069.390423  
SRR17520069.390425  
SRR17520069.390427  
SRR17520069.390431  
SRR17520069.390433  
SRR17520069.390435  
SRR17520069.390439  
SRR17520069.390441  
SRR17520069.390443  
SRR17520069.390445  
SRR17520069.390447  
SRR17520069.390449  
SRR17520069.392351  
SRR17520069.392353  
SRR17520069.392355  
SRR17520069.392357  
SRR17520069.392359  
SRR17520069.392361  
SRR17520069.392363  
SRR17520069.392365  
SRR17520069.392367  
SRR17520069.392369  
SRR17520069.392371  
SRR17520069.392373  
SRR17520069.392375  
SRR17520069.392377  
SRR17520069.392379  
SRR17520069.392381  
SRR17520069.392383  
SRR17520069.392385  
SRR17520069.392387  
SRR17520069.392389  
SRR17520069.392391  
SRR17520069.392393  
SRR17520069.392395  
SRR17520069.392397

SRR17520069. 392399  
SRR17520069. 392401  
SRR17520069. 392403  
SRR17520069. 392405  
SRR17520069. 392407  
SRR17520069. 392409  
SRR17520069. 392411  
SRR17520069. 392413  
SRR17520069. 392415  
SRR17520069. 392417  
SRR17520069. 392419  
SRR17520069. 392421  
SRR17520069. 395155  
SRR17520069. 395157  
SRR17520069. 395159  
SRR17520069. 395161  
SRR17520069. 395163  
SRR17520069. 395165  
SRR17520069. 395169  
SRR17520069. 395171  
SRR17520069. 395173  
SRR17520069. 395175  
SRR17520069. 395177  
SRR17520069. 395179  
SRR17520069. 395181  
SRR17520069. 395185  
SRR17520069. 395187  
SRR17520069. 395189  
SRR17520069. 395191  
SRR17520069. 395193  
SRR17520069. 395195  
SRR17520069. 395197  
SRR17520069. 395199  
SRR17520069. 396360  
SRR17520069. 396362  
SRR17520069. 397653  
SRR17520069. 397657  
SRR17520069. 397659  
SRR17520069. 397661  
SRR17520069. 397663  
SRR17520069. 397665  
SRR17520069. 403103  
SRR17520069. 403105  
SRR17520069. 415808  
SRR17520069. 415810  
SRR17520069. 415812  
SRR17520069. 415814

SRR17520069.416117  
SRR17520069.416119  
SRR17520069.416121  
SRR17520069.420362  
SRR17520069.420364  
SRR17520069.420366  
SRR17520069.420368  
SRR17520069.420370  
SRR17520069.420372  
SRR17520069.420376  
SRR17520069.429194  
SRR17520069.429196  
SRR17520069.429198  
SRR17520069.429200  
SRR17520069.429202  
SRR17520069.429206  
SRR17520069.429208  
SRR17520069.429212  
SRR17520069.429214  
SRR17520069.429216  
SRR17520069.429218  
SRR17520069.429220  
SRR17520069.429222  
SRR17520069.429224  
SRR17520069.429228  
SRR17520069.429230  
SRR17520069.429232  
SRR17520069.429234  
SRR17520069.429236  
SRR17520069.429238  
SRR17520069.429240  
SRR17520069.429242  
SRR17520069.429244  
SRR17520069.429246  
SRR17520069.429248  
SRR17520069.429250  
SRR17520069.429252  
SRR17520069.429254  
SRR17520069.429258  
SRR17520069.429260  
SRR17520069.429262  
SRR17520069.429264  
SRR17520069.429266  
SRR17520069.432426  
SRR17520069.432428  
SRR17520069.432430  
SRR17520069.433543

SRR17520069.433545  
SRR17520069.433549  
SRR17520069.433551  
SRR17520069.433553  
SRR17520069.433555  
SRR17520069.433557  
SRR17520069.433559  
SRR17520069.433561  
SRR17520069.433563  
SRR17520069.433565  
SRR17520069.433567  
SRR17520069.433569  
SRR17520069.433571  
SRR17520069.433573  
SRR17520069.433575  
SRR17520069.433579  
SRR17520069.433581  
SRR17520069.433583  
SRR17520069.433587  
SRR17520069.433589  
SRR17520069.433593  
SRR17520069.433595  
SRR17520069.433597  
SRR17520069.433599  
SRR17520069.433601  
SRR17520069.433603  
SRR17520069.433605  
SRR17520069.433607  
SRR17520069.433609  
SRR17520069.433611  
SRR17520069.433613  
SRR17520069.433615  
SRR17520069.433617  
SRR17520069.433619  
SRR17520069.433621  
SRR17520069.433623  
SRR17520069.433625  
SRR17520069.434645  
SRR17520069.435047  
SRR17520069.442095  
SRR17520069.442097  
SRR17520069.442099  
SRR17520069.442101  
SRR17520069.442103  
SRR17520069.442105  
SRR17520069.442625  
SRR17520069.442627

SRR17520069.442629  
SRR17520069.442631  
SRR17520069.442633  
SRR17520069.442635  
SRR17520069.442637  
SRR17520069.442639  
SRR17520069.442641  
SRR17520069.442643  
SRR17520069.442645  
SRR17520069.442647  
SRR17520069.442649  
SRR17520069.442651  
SRR17520069.442653  
SRR17520069.442655  
SRR17520069.442657  
SRR17520069.442659  
SRR17520069.442661  
SRR17520069.442663  
SRR17520069.442665  
SRR17520069.442667  
SRR17520069.442669  
SRR17520069.442671  
SRR17520069.442673  
SRR17520069.442677  
SRR17520069.442679  
SRR17520069.442681  
SRR17520069.445449  
SRR17520069.445451  
SRR17520069.445453  
SRR17520069.445455  
SRR17520069.445457  
SRR17520069.445459  
SRR17520069.445461  
SRR17520069.445463  
SRR17520069.445465  
SRR17520069.445467  
SRR17520069.445469  
SRR17520069.446105  
SRR17520069.446123  
SRR17520069.450358  
SRR17520069.450360  
SRR17520069.450362  
SRR17520069.450364  
SRR17520069.450366  
SRR17520069.450368  
SRR17520069.450370  
SRR17520069.450372



SRR17520069.450374  
SRR17520069.450376  
SRR17520069.450378  
SRR17520069.450380  
SRR17520069.450382  
SRR17520069.450384  
SRR17520069.450386  
SRR17520069.450388  
SRR17520069.450390  
SRR17520069.450392  
SRR17520069.450394  
SRR17520069.450396  
SRR17520069.450398  
SRR17520069.450400  
SRR17520069.450402  
SRR17520069.450404  
SRR17520069.450406  
SRR17520069.450408  
SRR17520069.450410  
SRR17520069.450412  
SRR17520069.450416  
SRR17520069.450418  
SRR17520069.450420  
SRR17520069.450422  
SRR17520069.450424  
SRR17520069.450426  
SRR17520069.450428  
SRR17520069.450430  
SRR17520069.450432  
SRR17520069.450434  
SRR17520069.450621  
SRR17520069.450623  
SRR17520069.450625  
SRR17520069.450627  
SRR17520069.450629  
SRR17520069.450631  
SRR17520069.450633  
SRR17520069.450635  
SRR17520069.452113  
SRR17520069.452115  
SRR17520069.452117  
SRR17520069.452119  
SRR17520069.452121  
SRR17520069.452123  
SRR17520069.452125  
SRR17520069.452127  
SRR17520069.452129

SRR17520069.452131  
SRR17520069.452133  
SRR17520069.452135  
SRR17520069.452137  
SRR17520069.452139  
SRR17520069.452141  
SRR17520069.452143  
SRR17520069.452145  
SRR17520069.452147  
SRR17520069.452149  
SRR17520069.452151  
SRR17520069.452153  
SRR17520069.452155  
SRR17520069.452157  
SRR17520069.452159  
SRR17520069.452161  
SRR17520069.452163  
SRR17520069.458649  
SRR17520069.458651  
SRR17520069.458653  
SRR17520069.458655  
SRR17520069.458657  
SRR17520069.458659  
SRR17520069.471472  
SRR17520069.471474  
SRR17520069.471476  
SRR17520069.471478  
SRR17520069.471480  
SRR17520069.471482  
SRR17520069.471484  
SRR17520069.471486  
SRR17520069.471488  
SRR17520069.471490  
SRR17520069.471492  
SRR17520069.471494  
SRR17520069.471496  
SRR17520069.471498  
SRR17520069.471886  
SRR17520069.472620  
SRR17520069.472622  
SRR17520069.472624  
SRR17520069.472626  
SRR17520069.472628  
SRR17520069.472630  
SRR17520069.472632  
SRR17520069.472636  
SRR17520069.472638

SRR17520069.472640  
SRR17520069.472642  
SRR17520069.472644  
SRR17520069.472646  
SRR17520069.472650  
SRR17520069.472652  
SRR17520069.472654  
SRR17520069.472658  
SRR17520069.472660  
SRR17520069.472662  
SRR17520069.472664  
SRR17520069.472666  
SRR17520069.472668  
SRR17520069.472670  
SRR17520069.472672  
SRR17520069.472674  
SRR17520069.472676  
SRR17520069.472678  
SRR17520069.472680  
SRR17520069.472682  
SRR17520069.472684  
SRR17520069.472686  
SRR17520069.472688  
SRR17520069.472690  
SRR17520069.472692  
SRR17520069.472694  
SRR17520069.472696  
SRR17520069.472698  
SRR17520069.472700  
SRR17520069.472702  
SRR17520069.472704  
SRR17520069.472706  
SRR17520069.472710  
SRR17520069.472712  
SRR17520069.472714  
SRR17520069.472716  
SRR17520069.472718  
SRR17520069.472722  
SRR17520069.472724  
SRR17520069.472726  
SRR17520069.472728  
SRR17520069.472730  
SRR17520069.472732  
SRR17520069.475107  
SRR17520069.475109  
SRR17520069.475111  
SRR17520069.475113

SRR17520069.475117  
SRR17520069.475119  
SRR17520069.475121  
SRR17520069.475123  
SRR17520069.475125  
SRR17520069.475127  
SRR17520069.475129  
SRR17520069.475131  
SRR17520069.475133  
SRR17520069.475135  
SRR17520069.475137  
SRR17520069.475139  
SRR17520069.475141  
SRR17520069.476806  
SRR17520069.476808  
SRR17520069.476812  
SRR17520069.476814  
SRR17520069.491404  
SRR17520069.491406  
SRR17520069.491410  
SRR17520069.491412  
SRR17520069.491414  
SRR17520069.491416  
SRR17520069.491418  
SRR17520069.491420  
SRR17520069.491422  
SRR17520069.491424  
SRR17520069.491426  
SRR17520069.491428  
SRR17520069.491430  
SRR17520069.491432  
SRR17520069.491434  
SRR17520069.491436  
SRR17520069.491438  
SRR17520069.491440  
SRR17520069.491442  
SRR17520069.491444  
SRR17520069.491446  
SRR17520069.491448  
SRR17520069.491450  
SRR17520069.500898  
SRR17520069.501528  
SRR17520069.501530  
SRR17520069.501534  
SRR17520069.501536  
SRR17520069.501538  
SRR17520069.501540

SRR17520069.501542  
SRR17520069.501546  
SRR17520069.501548  
SRR17520069.501550  
SRR17520069.501552  
SRR17520069.501554  
SRR17520069.501556  
SRR17520069.504403  
SRR17520069.504405  
SRR17520069.504407  
SRR17520069.504409  
SRR17520069.508121  
SRR17520069.508123  
SRR17520069.508125  
SRR17520069.508127  
SRR17520069.508131  
SRR17520069.508133  
SRR17520069.508135  
SRR17520069.508137  
SRR17520069.514052  
SRR17520069.514054  
SRR17520069.514056  
SRR17520069.514058  
SRR17520069.514060  
SRR17520069.514062  
SRR17520069.514064  
SRR17520069.514066  
SRR17520069.514068  
SRR17520069.514070  
SRR17520069.514072  
SRR17520069.514074  
SRR17520069.514076  
SRR17520069.514078  
SRR17520069.514080  
SRR17520069.514082  
SRR17520069.514084  
SRR17520069.514086  
SRR17520069.514088  
SRR17520069.514090  
SRR17520069.514092  
SRR17520069.514094  
SRR17520069.514096  
SRR17520069.514098  
SRR17520069.514100  
SRR17520069.514102  
SRR17520069.521936  
SRR17520069.521938

SRR17520069. 521940  
SRR17520069. 521942  
SRR17520069. 521944  
SRR17520069. 521946  
SRR17520069. 521950  
SRR17520069. 521952  
SRR17520069. 521954  
SRR17520069. 521956  
SRR17520069. 521958  
SRR17520069. 533918  
SRR17520069. 533922  
SRR17520069. 533924  
SRR17520069. 533926  
SRR17520069. 533928  
SRR17520069. 533930  
SRR17520069. 533932  
SRR17520069. 533934  
SRR17520069. 533936  
SRR17520069. 533938  
SRR17520069. 533940  
SRR17520069. 533942  
SRR17520069. 533944  
SRR17520069. 533946  
SRR17520069. 533948  
SRR17520069. 533950  
SRR17520069. 533952  
SRR17520069. 533954  
SRR17520069. 537949  
SRR17520069. 537951  
SRR17520069. 537953  
SRR17520069. 537955  
SRR17520069. 537957  
SRR17520069. 537959  
SRR17520069. 537961  
SRR17520069. 538210  
SRR17520069. 538212  
SRR17520069. 538214  
SRR17520069. 538216  
SRR17520069. 538218  
SRR17520069. 538222  
SRR17520069. 538224  
SRR17520069. 538228  
SRR17520069. 544134  
SRR17520069. 544136  
SRR17520069. 544138  
SRR17520069. 544140  
SRR17520069. 544142

SRR17520069.544144  
SRR17520069.544146  
SRR17520069.544148  
SRR17520069.544150  
SRR17520069.544152  
SRR17520069.544156  
SRR17520069.544158  
SRR17520069.544160  
SRR17520069.544162  
SRR17520069.544164  
SRR17520069.544166  
SRR17520069.544168  
SRR17520069.544170  
SRR17520069.544172  
SRR17520069.544176  
SRR17520069.544178  
SRR17520069.544180  
SRR17520069.544182  
SRR17520069.544184  
SRR17520069.544186  
SRR17520069.544188  
SRR17520069.544190  
SRR17520069.544192  
SRR17520069.544194  
SRR17520069.544196  
SRR17520069.544198  
SRR17520069.544200  
SRR17520069.544202  
SRR17520069.544204  
SRR17520069.544206  
SRR17520069.544210  
SRR17520069.544212  
SRR17520069.544214  
SRR17520069.544216  
SRR17520069.544218  
SRR17520069.544220  
SRR17520069.544222  
SRR17520069.544224  
SRR17520069.544226  
SRR17520069.544228  
SRR17520069.544230  
SRR17520069.544232  
SRR17520069.544234  
SRR17520069.544236  
SRR17520069.544946  
SRR17520069.544948  
SRR17520069.544950

SRR17520069.544952  
SRR17520069.544954  
SRR17520069.544956  
SRR17520069.545729  
SRR17520069.545731  
SRR17520069.545733  
SRR17520069.545735  
SRR17520069.545737  
SRR17520069.545739  
SRR17520069.545741  
SRR17520069.545743  
SRR17520069.545745  
SRR17520069.545747  
SRR17520069.545749  
SRR17520069.545753  
SRR17520069.545755  
SRR17520069.545757  
SRR17520069.545759  
SRR17520069.545761  
SRR17520069.545763  
SRR17520069.545767  
SRR17520069.545769  
SRR17520069.545771  
SRR17520069.545773  
SRR17520069.545775  
SRR17520069.545777  
SRR17520069.545779  
SRR17520069.545781  
SRR17520069.545783  
SRR17520069.545785  
SRR17520069.545787  
SRR17520069.545789  
SRR17520069.545791  
SRR17520069.545793  
SRR17520069.545795  
SRR17520069.545797  
SRR17520069.545799  
SRR17520069.545801  
SRR17520069.545803  
SRR17520069.545805  
SRR17520069.545807  
SRR17520069.545809  
SRR17520069.545811  
SRR17520069.545813  
SRR17520069.545815  
SRR17520069.545817  
SRR17520069.545819



SRR17520069.545821  
SRR17520069.545823  
SRR17520069.545825  
SRR17520069.545827  
SRR17520069.552322  
SRR17520069.552324  
SRR17520069.552326  
SRR17520069.552328  
SRR17520069.552330  
SRR17520069.552332  
SRR17520069.552334  
SRR17520069.552336  
SRR17520069.552338  
SRR17520069.552346  
SRR17520069.552348  
SRR17520069.552350  
SRR17520069.552352  
SRR17520069.556345  
SRR17520069.556347  
SRR17520069.556349  
SRR17520069.556351  
SRR17520069.556353  
SRR17520069.556355  
SRR17520069.561097  
SRR17520069.561099  
SRR17520069.561101  
SRR17520069.561103  
SRR17520069.561105  
SRR17520069.561107  
SRR17520069.561109  
SRR17520069.561111  
SRR17520069.561113  
SRR17520069.561115  
SRR17520069.561117  
SRR17520069.561119  
SRR17520069.561121  
SRR17520069.561123  
SRR17520069.561125  
SRR17520069.561127  
SRR17520069.561129  
SRR17520069.561131  
SRR17520069.569770  
SRR17520069.569772  
SRR17520069.569774  
SRR17520069.569776  
SRR17520069.569778  
SRR17520069.569888

SRR17520069.569890  
SRR17520069.569892  
SRR17520069.569894  
SRR17520069.569896  
SRR17520069.569898  
SRR17520069.569900  
SRR17520069.569902  
SRR17520069.569904  
SRR17520069.569906  
SRR17520069.569908  
SRR17520069.569910  
SRR17520069.569912  
SRR17520069.569914  
SRR17520069.569916  
SRR17520069.569918  
SRR17520069.569920  
SRR17520069.569922  
SRR17520069.569924  
SRR17520069.569926  
SRR17520069.569928  
SRR17520069.569930  
SRR17520069.569932  
SRR17520069.569934  
SRR17520069.569936  
SRR17520069.569938  
SRR17520069.569942  
SRR17520069.569944  
SRR17520069.569946  
SRR17520069.569948  
SRR17520069.569950  
SRR17520069.569952  
SRR17520069.569954  
SRR17520069.569956  
SRR17520069.569958  
SRR17520069.569960  
SRR17520069.569962  
SRR17520069.572376  
SRR17520069.572378  
SRR17520069.572380  
SRR17520069.572382  
SRR17520069.572384  
SRR17520069.572386  
SRR17520069.572388  
SRR17520069.572390  
SRR17520069.572392  
SRR17520069.572394  
SRR17520069.572396

SRR17520069.572398  
SRR17520069.572400  
SRR17520069.572402  
SRR17520069.572404  
SRR17520069.572406  
SRR17520069.572408  
SRR17520069.572410  
SRR17520069.572412  
SRR17520069.572414  
SRR17520069.572416  
SRR17520069.572418  
SRR17520069.572420  
SRR17520069.573116  
SRR17520069.576273  
SRR17520069.578636  
SRR17520069.578638  
SRR17520069.578640  
SRR17520069.578642  
SRR17520069.578644  
SRR17520069.578646  
SRR17520069.578648  
SRR17520069.578650  
SRR17520069.578652  
SRR17520069.578654  
SRR17520069.578656  
SRR17520069.578658  
SRR17520069.578660  
SRR17520069.578662  
SRR17520069.578664  
SRR17520069.578666  
SRR17520069.578668  
SRR17520069.578672  
SRR17520069.578841  
SRR17520069.578843  
SRR17520069.584292  
SRR17520069.584294  
SRR17520069.584296  
SRR17520069.584298  
SRR17520069.584300  
SRR17520069.584302  
SRR17520069.584304  
SRR17520069.584306  
SRR17520069.584308  
SRR17520069.585078  
SRR17520069.585377  
SRR17520069.585379  
SRR17520069.585381

SRR17520069.585383  
SRR17520069.585385  
SRR17520069.589027  
SRR17520069.589029  
SRR17520069.589031  
SRR17520069.589033  
SRR17520069.589035  
SRR17520069.589037  
SRR17520069.589039  
SRR17520069.589041  
SRR17520069.589043  
SRR17520069.589045  
SRR17520069.589047  
SRR17520069.592044  
SRR17520069.592046  
SRR17520069.592048  
SRR17520069.592050  
SRR17520069.592052  
SRR17520069.592054  
SRR17520069.592056  
SRR17520069.592058  
SRR17520069.592060  
SRR17520069.592062  
SRR17520069.592064  
SRR17520069.592066  
SRR17520069.592070  
SRR17520069.592072  
SRR17520069.592074  
SRR17520069.592076  
SRR17520069.592078  
SRR17520069.592080  
SRR17520069.592881  
SRR17520069.592883  
SRR17520069.592885  
SRR17520069.592887  
SRR17520069.592889  
SRR17520069.592891  
SRR17520069.592893  
SRR17520069.592895  
SRR17520069.592897  
SRR17520069.592899  
SRR17520069.592901  
SRR17520069.592903  
SRR17520069.592905  
SRR17520069.592907  
SRR17520069.592909  
SRR17520069.592911

SRR17520069. 592913  
SRR17520069. 592915  
SRR17520069. 592917  
SRR17520069. 592919  
SRR17520069. 592921  
SRR17520069. 592923  
SRR17520069. 592925  
SRR17520069. 592927  
SRR17520069. 592929  
SRR17520069. 592931  
SRR17520069. 592933  
SRR17520069. 592935  
SRR17520069. 592937  
SRR17520069. 592939  
SRR17520069. 592941  
SRR17520069. 592943  
SRR17520069. 592945  
SRR17520069. 592947  
SRR17520069. 592949  
SRR17520069. 592951  
SRR17520069. 592953  
SRR17520069. 592955  
SRR17520069. 592957  
SRR17520069. 592959  
SRR17520069. 592961  
SRR17520069. 592963  
SRR17520069. 592965  
SRR17520069. 592967  
SRR17520069. 592969  
SRR17520069. 592973  
SRR17520069. 592975  
SRR17520069. 592977  
SRR17520069. 592979  
SRR17520069. 592981  
SRR17520069. 592983  
SRR17520069. 592985  
SRR17520069. 592987  
SRR17520069. 592989  
SRR17520069. 592991  
SRR17520069. 592993  
SRR17520069. 592995  
SRR17520069. 592997  
SRR17520069. 592999  
SRR17520069. 593001  
SRR17520069. 593003  
SRR17520069. 593005  
SRR17520069. 593007

SRR17520069.593009  
SRR17520069.593011  
SRR17520069.593013  
SRR17520069.593015  
SRR17520069.593017  
SRR17520069.593019  
SRR17520069.593021  
SRR17520069.593023  
SRR17520069.593025  
SRR17520069.593027  
SRR17520069.593029  
SRR17520069.593031  
SRR17520069.593033  
SRR17520069.593035  
SRR17520069.593037  
SRR17520069.593039  
SRR17520069.593041  
SRR17520069.593043  
SRR17520069.593045  
SRR17520069.593047  
SRR17520069.593049  
SRR17520069.593051  
SRR17520069.593053  
SRR17520069.593055  
SRR17520069.593057  
SRR17520069.593059  
SRR17520069.593061  
SRR17520069.593063  
SRR17520069.593065  
SRR17520069.593067  
SRR17520069.593069  
SRR17520069.593071  
SRR17520069.593073  
SRR17520069.593075  
SRR17520069.594763  
SRR17520069.594765  
SRR17520069.594767  
SRR17520069.594769  
SRR17520069.594771  
SRR17520069.594775  
SRR17520069.594777  
SRR17520069.594779  
SRR17520069.594781  
SRR17520069.594783  
SRR17520069.594785  
SRR17520069.594787  
SRR17520069.594789

SRR17520069.594791  
SRR17520069.594793  
SRR17520069.594795  
SRR17520069.594799  
SRR17520069.594803  
SRR17520069.594805  
SRR17520069.594807  
SRR17520069.594809  
SRR17520069.594811  
SRR17520069.594813  
SRR17520069.594815  
SRR17520069.598190  
SRR17520069.607525  
SRR17520069.607527  
SRR17520069.607529  
SRR17520069.607531  
SRR17520069.607533  
SRR17520069.607535  
SRR17520069.607537  
SRR17520069.607539  
SRR17520069.610032  
SRR17520069.610034  
SRR17520069.610038  
SRR17520069.610040  
SRR17520069.610042  
SRR17520069.610044  
SRR17520069.610046  
SRR17520069.610048  
SRR17520069.610050  
SRR17520069.610052  
SRR17520069.610054  
SRR17520069.610056  
SRR17520069.610058  
SRR17520069.610060  
SRR17520069.610062  
SRR17520069.610064  
SRR17520069.610066  
SRR17520069.610068  
SRR17520069.610070  
SRR17520069.610072  
SRR17520069.610074  
SRR17520069.610076  
SRR17520069.610078  
SRR17520069.610080  
SRR17520069.610082  
SRR17520069.610084  
SRR17520069.610086

SRR17520069.610088  
SRR17520069.610090  
SRR17520069.610092  
SRR17520069.610094  
SRR17520069.610096  
SRR17520069.610098  
SRR17520069.610100  
SRR17520069.610102  
SRR17520069.610104  
SRR17520069.610106  
SRR17520069.610108  
SRR17520069.610110  
SRR17520069.610112  
SRR17520069.610114  
SRR17520069.610116  
SRR17520069.610120  
SRR17520069.610122  
SRR17520069.610124  
SRR17520069.610126  
SRR17520069.610128  
SRR17520069.610130  
SRR17520069.610132  
SRR17520069.610134  
SRR17520069.610136  
SRR17520069.610138  
SRR17520069.610140  
SRR17520069.610142  
SRR17520069.610144  
SRR17520069.610146  
SRR17520069.610148  
SRR17520069.610150  
SRR17520069.610152  
SRR17520069.610154  
SRR17520069.610156  
SRR17520069.610158  
SRR17520069.610160  
SRR17520069.610164  
SRR17520069.610166  
SRR17520069.610168  
SRR17520069.610170  
SRR17520069.610172  
SRR17520069.610174  
SRR17520069.615345  
SRR17520069.615347  
SRR17520069.615349  
SRR17520069.615351  
SRR17520069.615353



SRR17520069.615357  
SRR17520069.615359  
SRR17520069.615361  
SRR17520069.615363  
SRR17520069.615365  
SRR17520069.615367  
SRR17520069.615369  
SRR17520069.615371  
SRR17520069.615373  
SRR17520069.615375  
SRR17520069.615377  
SRR17520069.624526  
SRR17520069.624530  
SRR17520069.624532  
SRR17520069.624534  
SRR17520069.624536  
SRR17520069.624538  
SRR17520069.624540  
SRR17520069.624542  
SRR17520069.624544  
SRR17520069.624546  
SRR17520069.624548  
SRR17520069.624550  
SRR17520069.624552  
SRR17520069.624554  
SRR17520069.624558  
SRR17520069.624560  
SRR17520069.624562  
SRR17520069.624564  
SRR17520069.624566  
SRR17520069.624568  
SRR17520069.624570  
SRR17520069.624572  
SRR17520069.624574  
SRR17520069.624576  
SRR17520069.624580  
SRR17520069.624582  
SRR17520069.624584  
SRR17520069.624586  
SRR17520069.624590  
SRR17520069.624592  
SRR17520069.624594  
SRR17520069.624596  
SRR17520069.624598  
SRR17520069.624600  
SRR17520069.624602  
SRR17520069.624604

SRR17520069.624606  
SRR17520069.624608  
SRR17520069.624610  
SRR17520069.624612  
SRR17520069.624614  
SRR17520069.624616  
SRR17520069.624618  
SRR17520069.624620  
SRR17520069.624622  
SRR17520069.624624  
SRR17520069.624626  
SRR17520069.624628  
SRR17520069.624630  
SRR17520069.624632  
SRR17520069.624636  
SRR17520069.624638  
SRR17520069.624640  
SRR17520069.624642  
SRR17520069.624644  
SRR17520069.624646  
SRR17520069.624648  
SRR17520069.624650  
SRR17520069.624652  
SRR17520069.624654  
SRR17520069.624656  
SRR17520069.624658  
SRR17520069.624660  
SRR17520069.624664  
SRR17520069.624666  
SRR17520069.624668  
SRR17520069.624670  
SRR17520069.624672  
SRR17520069.624674  
SRR17520069.624676  
SRR17520069.624678  
SRR17520069.624680  
SRR17520069.624682  
SRR17520069.624684  
SRR17520069.624686  
SRR17520069.624688  
SRR17520069.624690  
SRR17520069.624692  
SRR17520069.624696  
SRR17520069.630623  
SRR17520069.630625  
SRR17520069.630627  
SRR17520069.630629

SRR17520069. 630631  
SRR17520069. 630633  
SRR17520069. 630637  
SRR17520069. 630641  
SRR17520069. 630643  
SRR17520069. 630645  
SRR17520069. 630649  
SRR17520069. 630653  
SRR17520069. 630655  
SRR17520069. 630657  
SRR17520069. 630659  
SRR17520069. 630663  
SRR17520069. 630665  
SRR17520069. 630667  
SRR17520069. 630671  
SRR17520069. 630685  
SRR17520069. 630691  
SRR17520069. 630693  
SRR17520069. 630697  
SRR17520069. 630699  
SRR17520069. 630703  
SRR17520069. 630707  
SRR17520069. 630709  
SRR17520069. 630711  
SRR17520069. 630713  
SRR17520069. 630715  
SRR17520069. 630721  
SRR17520069. 630723  
SRR17520069. 630725  
SRR17520069. 630729  
SRR17520069. 630731  
SRR17520069. 630733  
SRR17520069. 630735  
SRR17520069. 630737  
SRR17520069. 630739  
SRR17520069. 630741  
SRR17520069. 630743  
SRR17520069. 630745  
SRR17520069. 630747  
SRR17520069. 630749  
SRR17520069. 630751  
SRR17520069. 634856  
SRR17520069. 634858  
SRR17520069. 634860  
SRR17520069. 634862  
SRR17520069. 634864  
SRR17520069. 634866

SRR17520069. 634868  
SRR17520069. 634870  
SRR17520069. 634872  
SRR17520069. 634874  
SRR17520069. 634876  
SRR17520069. 634878  
SRR17520069. 634880  
SRR17520069. 634882  
SRR17520069. 634884  
SRR17520069. 634886  
SRR17520069. 634888  
SRR17520069. 634890  
SRR17520069. 634892  
SRR17520069. 634894  
SRR17520069. 634896  
SRR17520069. 634898  
SRR17520069. 634900  
SRR17520069. 634902  
SRR17520069. 634904  
SRR17520069. 634906  
SRR17520069. 634908  
SRR17520069. 634910  
SRR17520069. 634912  
SRR17520069. 634914  
SRR17520069. 634916  
SRR17520069. 634918  
SRR17520069. 634920  
SRR17520069. 634922  
SRR17520069. 635741  
SRR17520069. 635743  
SRR17520069. 635745  
SRR17520069. 635747  
SRR17520069. 635749  
SRR17520069. 635751  
SRR17520069. 635753  
SRR17520069. 635755  
SRR17520069. 635757  
SRR17520069. 635759  
SRR17520069. 635761  
SRR17520069. 635763  
SRR17520069. 635765  
SRR17520069. 635767  
SRR17520069. 635769  
SRR17520069. 635771  
SRR17520069. 635773  
SRR17520069. 635775  
SRR17520069. 635777

SRR17520069.635779  
SRR17520069.635781  
SRR17520069.635783  
SRR17520069.635785  
SRR17520069.635787  
SRR17520069.635789  
SRR17520069.635791  
SRR17520069.635793  
SRR17520069.635795  
SRR17520069.635797  
SRR17520069.635799  
SRR17520069.640430  
SRR17520069.640432  
SRR17520069.640434  
SRR17520069.640436  
SRR17520069.640438  
SRR17520069.640440  
SRR17520069.640442  
SRR17520069.641407  
SRR17520069.641409  
SRR17520069.641411  
SRR17520069.641413  
SRR17520069.641415  
SRR17520069.641417  
SRR17520069.641419  
SRR17520069.641421  
SRR17520069.641423  
SRR17520069.641425  
SRR17520069.641427  
SRR17520069.641429  
SRR17520069.641431  
SRR17520069.641433  
SRR17520069.641435  
SRR17520069.641437  
SRR17520069.641439  
SRR17520069.641441  
SRR17520069.641443  
SRR17520069.641445  
SRR17520069.641447  
SRR17520069.641449  
SRR17520069.641451  
SRR17520069.641453  
SRR17520069.641455  
SRR17520069.641457  
SRR17520069.641459  
SRR17520069.641461  
SRR17520069.641463

SRR17520069.641467  
SRR17520069.641469  
SRR17520069.641473  
SRR17520069.641475  
SRR17520069.641477  
SRR17520069.641479  
SRR17520069.641481  
SRR17520069.641483  
SRR17520069.641485  
SRR17520069.641487  
SRR17520069.641489  
SRR17520069.641491  
SRR17520069.641493  
SRR17520069.641495  
SRR17520069.641497  
SRR17520069.641499  
SRR17520069.641501  
SRR17520069.641503  
SRR17520069.641505  
SRR17520069.641507  
SRR17520069.641509  
SRR17520069.641513  
SRR17520069.644563  
SRR17520069.644565  
SRR17520069.644567  
SRR17520069.644569  
SRR17520069.644571  
SRR17520069.644573  
SRR17520069.644575  
SRR17520069.644577  
SRR17520069.644579  
SRR17520069.644581  
SRR17520069.654116  
SRR17520069.654118  
SRR17520069.654120  
SRR17520069.654122  
SRR17520069.654124  
SRR17520069.654126  
SRR17520069.654128  
SRR17520069.654130  
SRR17520069.654132  
SRR17520069.654134  
SRR17520069.654136  
SRR17520069.654138  
SRR17520069.654140  
SRR17520069.654142  
SRR17520069.654144

SRR17520069.654146  
SRR17520069.654148  
SRR17520069.654150  
SRR17520069.654152  
SRR17520069.654154  
SRR17520069.654156  
SRR17520069.654158  
SRR17520069.654160  
SRR17520069.654162  
SRR17520069.654164  
SRR17520069.654166  
SRR17520069.654168  
SRR17520069.654170  
SRR17520069.654172  
SRR17520069.654174  
SRR17520069.654176  
SRR17520069.654178  
SRR17520069.654180  
SRR17520069.654182  
SRR17520069.654184  
SRR17520069.654186  
SRR17520069.654188  
SRR17520069.654190  
SRR17520069.654192  
SRR17520069.654194  
SRR17520069.654196  
SRR17520069.654198  
SRR17520069.654200  
SRR17520069.654202  
SRR17520069.654204  
SRR17520069.654206  
SRR17520069.654208  
SRR17520069.654210  
SRR17520069.654212  
SRR17520069.654214  
SRR17520069.663311  
SRR17520069.663313  
SRR17520069.663315  
SRR17520069.663317  
SRR17520069.663319  
SRR17520069.663321  
SRR17520069.663323  
SRR17520069.663325  
SRR17520069.663327  
SRR17520069.663329  
SRR17520069.663331  
SRR17520069.663333

SRR17520069.663335  
SRR17520069.663337  
SRR17520069.663339  
SRR17520069.663341  
SRR17520069.663343  
SRR17520069.663345  
SRR17520069.663347  
SRR17520069.663349  
SRR17520069.663351  
SRR17520069.663353  
SRR17520069.663355  
SRR17520069.663357  
SRR17520069.663359  
SRR17520069.663361  
SRR17520069.663363  
SRR17520069.663367  
SRR17520069.663369  
SRR17520069.663371  
SRR17520069.663373  
SRR17520069.663375  
SRR17520069.663377  
SRR17520069.663379  
SRR17520069.663381  
SRR17520069.663383  
SRR17520069.663385  
SRR17520069.663387  
SRR17520069.663389  
SRR17520069.663391  
SRR17520069.663393  
SRR17520069.663395  
SRR17520069.663397  
SRR17520069.663399  
SRR17520069.663401  
SRR17520069.663403  
SRR17520069.663405  
SRR17520069.663407  
SRR17520069.663409  
SRR17520069.663411  
SRR17520069.663413  
SRR17520069.663415  
SRR17520069.663417  
SRR17520069.663419  
SRR17520069.663421  
SRR17520069.663423  
SRR17520069.663425  
SRR17520069.663427  
SRR17520069.663429



SRR17520069. 663431  
SRR17520069. 663433  
SRR17520069. 663435  
SRR17520069. 663437  
SRR17520069. 663439  
SRR17520069. 663441  
SRR17520069. 663443  
SRR17520069. 663445  
SRR17520069. 663447  
SRR17520069. 663449  
SRR17520069. 663451  
SRR17520069. 663453  
SRR17520069. 663455  
SRR17520069. 663457  
SRR17520069. 663459  
SRR17520069. 663461  
SRR17520069. 663463  
SRR17520069. 663465  
SRR17520069. 663469  
SRR17520069. 664523  
SRR17520069. 664525  
SRR17520069. 664527  
SRR17520069. 664529  
SRR17520069. 664531  
SRR17520069. 664533  
SRR17520069. 664535  
SRR17520069. 664537  
SRR17520069. 664539  
SRR17520069. 664541  
SRR17520069. 664543  
SRR17520069. 664545  
SRR17520069. 664547  
SRR17520069. 664549  
SRR17520069. 664551  
SRR17520069. 664553  
SRR17520069. 664555  
SRR17520069. 664557  
SRR17520069. 664559  
SRR17520069. 664561  
SRR17520069. 664563  
SRR17520069. 664565  
SRR17520069. 664567  
SRR17520069. 664569  
SRR17520069. 664571  
SRR17520069. 664573  
SRR17520069. 664575  
SRR17520069. 664577

SRR17520069.664579  
SRR17520069.664581  
SRR17520069.664583  
SRR17520069.664585  
SRR17520069.664587  
SRR17520069.664589  
SRR17520069.664591  
SRR17520069.664593  
SRR17520069.664595  
SRR17520069.664597  
SRR17520069.664599  
SRR17520069.664601  
SRR17520069.664603  
SRR17520069.664605  
SRR17520069.664607  
SRR17520069.664609  
SRR17520069.666789  
SRR17520069.671727  
SRR17520069.672446  
SRR17520069.672448  
SRR17520069.679660  
SRR17520069.679662  
SRR17520069.679664  
SRR17520069.680885  
SRR17520069.680887  
SRR17520069.680889  
SRR17520069.680891  
SRR17520069.680893  
SRR17520069.680895  
SRR17520069.680897  
SRR17520069.680899  
SRR17520069.680901  
SRR17520069.680903  
SRR17520069.680905  
SRR17520069.680907  
SRR17520069.680909  
SRR17520069.680911  
SRR17520069.680913  
SRR17520069.680915  
SRR17520069.680917  
SRR17520069.680919  
SRR17520069.680921  
SRR17520069.680923  
SRR17520069.680925  
SRR17520069.686054  
SRR17520069.686056  
SRR17520069.686058

SRR17520069.686060  
SRR17520069.686062  
SRR17520069.686064  
SRR17520069.686066  
SRR17520069.686068  
SRR17520069.686070  
SRR17520069.686074  
SRR17520069.686076  
SRR17520069.686078  
SRR17520069.686080  
SRR17520069.688739  
SRR17520069.690281  
SRR17520069.695247  
SRR17520069.695249  
SRR17520069.695251  
SRR17520069.695253  
SRR17520069.695255  
SRR17520069.695257  
SRR17520069.695259  
SRR17520069.695261  
SRR17520069.695263  
SRR17520069.695265  
SRR17520069.695267  
SRR17520069.695269  
SRR17520069.695271  
SRR17520069.695273  
SRR17520069.695275  
SRR17520069.695277  
SRR17520069.695279  
SRR17520069.695281  
SRR17520069.695283  
SRR17520069.695285  
SRR17520069.695287  
SRR17520069.695291  
SRR17520069.695293  
SRR17520069.695295  
SRR17520069.695297  
SRR17520069.695299  
SRR17520069.695301  
SRR17520069.695303  
SRR17520069.695305  
SRR17520069.695307  
SRR17520069.695309  
SRR17520069.695311  
SRR17520069.695315  
SRR17520069.695317  
SRR17520069.695319

SRR17520069.695321  
SRR17520069.695325  
SRR17520069.696132  
SRR17520069.696134  
SRR17520069.696138  
SRR17520069.696140  
SRR17520069.696142  
SRR17520069.696144  
SRR17520069.696146  
SRR17520069.696148  
SRR17520069.696150  
SRR17520069.696152  
SRR17520069.696154  
SRR17520069.696156  
SRR17520069.696158  
SRR17520069.696160  
SRR17520069.696162  
SRR17520069.696164  
SRR17520069.696166  
SRR17520069.696168  
SRR17520069.696170  
SRR17520069.701317  
SRR17520069.701319  
SRR17520069.701321  
SRR17520069.701323  
SRR17520069.701325  
SRR17520069.701327  
SRR17520069.701329  
SRR17520069.701331  
SRR17520069.701333  
SRR17520069.702942  
SRR17520069.702944  
SRR17520069.702946  
SRR17520069.708908  
SRR17520069.708910  
SRR17520069.708912  
SRR17520069.708914  
SRR17520069.708916  
SRR17520069.708918  
SRR17520069.711087  
SRR17520069.711089  
SRR17520069.711091  
SRR17520069.711093  
SRR17520069.711095  
SRR17520069.715829  
SRR17520069.715831  
SRR17520069.715833

SRR17520069. 715835  
SRR17520069. 715837  
SRR17520069. 715839  
SRR17520069. 715841  
SRR17520069. 715843  
SRR17520069. 715845  
SRR17520069. 715847  
SRR17520069. 715849  
SRR17520069. 715851  
SRR17520069. 715853  
SRR17520069. 715857  
SRR17520069. 715859  
SRR17520069. 715861  
SRR17520069. 715863  
SRR17520069. 715865  
SRR17520069. 715867  
SRR17520069. 715869  
SRR17520069. 715871  
SRR17520069. 715873  
SRR17520069. 715875  
SRR17520069. 715877  
SRR17520069. 715881  
SRR17520069. 715883  
SRR17520069. 715885  
SRR17520069. 715887  
SRR17520069. 715889  
SRR17520069. 715891  
SRR17520069. 715893  
SRR17520069. 715895  
SRR17520069. 715897  
SRR17520069. 715899  
SRR17520069. 719550  
SRR17520069. 721062  
SRR17520069. 721064  
SRR17520069. 721066  
SRR17520069. 721068  
SRR17520069. 721070  
SRR17520069. 721072  
SRR17520069. 721074  
SRR17520069. 721076  
SRR17520069. 721078  
SRR17520069. 721080  
SRR17520069. 721082  
SRR17520069. 721084  
SRR17520069. 725658  
SRR17520069. 725660  
SRR17520069. 725662

SRR17520069. 725664  
SRR17520069. 725666  
SRR17520069. 725668  
SRR17520069. 729522  
SRR17520069. 732266  
SRR17520069. 732270  
SRR17520069. 732272  
SRR17520069. 732274  
SRR17520069. 732276  
SRR17520069. 732278  
SRR17520069. 732282  
SRR17520069. 732284  
SRR17520069. 732286  
SRR17520069. 732294  
SRR17520069. 732296  
SRR17520069. 732298  
SRR17520069. 732300  
SRR17520069. 732304  
SRR17520069. 732306  
SRR17520069. 732308  
SRR17520069. 732310  
SRR17520069. 732312  
SRR17520069. 732314  
SRR17520069. 732316  
SRR17520069. 732318  
SRR17520069. 732320  
SRR17520069. 732326  
SRR17520069. 733446  
SRR17520069. 733448  
SRR17520069. 733450  
SRR17520069. 733452  
SRR17520069. 733454  
SRR17520069. 733456  
SRR17520069. 733460  
SRR17520069. 733464  
SRR17520069. 733466  
SRR17520069. 733468  
SRR17520069. 733470  
SRR17520069. 733472  
SRR17520069. 733474  
SRR17520069. 733476  
SRR17520069. 733478  
SRR17520069. 733480  
SRR17520069. 733482  
SRR17520069. 733486  
SRR17520069. 733488  
SRR17520069. 733490

SRR17520069.733492  
SRR17520069.733494  
SRR17520069.733496  
SRR17520069.737564  
SRR17520069.737566  
SRR17520069.739316  
SRR17520069.739322  
SRR17520069.739366  
SRR17520069.739368  
SRR17520069.739370  
SRR17520069.739372  
SRR17520069.739374  
SRR17520069.739376  
SRR17520069.739378  
SRR17520069.739380  
SRR17520069.739382  
SRR17520069.739384  
SRR17520069.739386  
SRR17520069.739388  
SRR17520069.739390  
SRR17520069.739392  
SRR17520069.739394  
SRR17520069.739396  
SRR17520069.739398  
SRR17520069.739400  
SRR17520069.739402  
SRR17520069.739404  
SRR17520069.739406  
SRR17520069.739408  
SRR17520069.739410  
SRR17520069.739412  
SRR17520069.739414  
SRR17520069.739416  
SRR17520069.739418  
SRR17520069.739420  
SRR17520069.739422  
SRR17520069.739426  
SRR17520069.745373  
SRR17520069.751542  
SRR17520069.751544  
SRR17520069.751548  
SRR17520069.751550  
SRR17520069.751552  
SRR17520069.751554  
SRR17520069.751556  
SRR17520069.751558  
SRR17520069.751560

SRR17520069.751562  
SRR17520069.751564  
SRR17520069.751566  
SRR17520069.751568  
SRR17520069.751570  
SRR17520069.751572  
SRR17520069.751574  
SRR17520069.751576  
SRR17520069.751578  
SRR17520069.751580  
SRR17520069.751582  
SRR17520069.751584  
SRR17520069.751588  
SRR17520069.751590  
SRR17520069.751592  
SRR17520069.751594  
SRR17520069.751596  
SRR17520069.751598  
SRR17520069.751600  
SRR17520069.751602  
SRR17520069.751604  
SRR17520069.751606  
SRR17520069.751608  
SRR17520069.751612  
SRR17520069.751616  
SRR17520069.752014  
SRR17520069.752016  
SRR17520069.752018  
SRR17520069.752020  
SRR17520069.752022  
SRR17520069.752024  
SRR17520069.752026  
SRR17520069.752028  
SRR17520069.752030  
SRR17520069.752032  
SRR17520069.752036  
SRR17520069.752038  
SRR17520069.752040  
SRR17520069.752042  
SRR17520069.752044  
SRR17520069.752363  
SRR17520069.752367  
SRR17520069.753437  
SRR17520069.753439  
SRR17520069.753441  
SRR17520069.753443  
SRR17520069.753445



SRR17520069.753447  
SRR17520069.753454  
SRR17520069.753456  
SRR17520069.753458  
SRR17520069.755228  
SRR17520069.755230  
SRR17520069.755232  
SRR17520069.755234  
SRR17520069.755236  
SRR17520069.755238  
SRR17520069.755240  
SRR17520069.755242  
SRR17520069.755244  
SRR17520069.755246  
SRR17520069.755248  
SRR17520069.755250  
SRR17520069.755252  
SRR17520069.755254  
SRR17520069.755256  
SRR17520069.755258  
SRR17520069.755260  
SRR17520069.755262  
SRR17520069.755264  
SRR17520069.755266  
SRR17520069.755268  
SRR17520069.755270  
SRR17520069.755272  
SRR17520069.755274  
SRR17520069.755276  
SRR17520069.755280  
SRR17520069.755282  
SRR17520069.755284  
SRR17520069.755286  
SRR17520069.755288  
SRR17520069.755290  
SRR17520069.755292  
SRR17520069.755294  
SRR17520069.755296  
SRR17520069.755298  
SRR17520069.755300  
SRR17520069.764124  
SRR17520069.764126  
SRR17520069.764128  
SRR17520069.764130  
SRR17520069.764132  
SRR17520069.764134  
SRR17520069.764136

SRR17520069. 764138  
SRR17520069. 764140  
SRR17520069. 764142  
SRR17520069. 764144  
SRR17520069. 764146  
SRR17520069. 764148  
SRR17520069. 764150  
SRR17520069. 764152  
SRR17520069. 764154  
SRR17520069. 764156  
SRR17520069. 764158  
SRR17520069. 764160  
SRR17520069. 764162  
SRR17520069. 764164  
SRR17520069. 764166  
SRR17520069. 764168  
SRR17520069. 764170  
SRR17520069. 764172  
SRR17520069. 764174  
SRR17520069. 764176  
SRR17520069. 764178  
SRR17520069. 764180  
SRR17520069. 764182  
SRR17520069. 764184  
SRR17520069. 764186  
SRR17520069. 764190  
SRR17520069. 766995  
SRR17520069. 766997  
SRR17520069. 766999  
SRR17520069. 767001  
SRR17520069. 767003  
SRR17520069. 767005  
SRR17520069. 767007  
SRR17520069. 767009  
SRR17520069. 767011  
SRR17520069. 767013  
SRR17520069. 767015  
SRR17520069. 769573  
SRR17520069. 769575  
SRR17520069. 769579  
SRR17520069. 769581  
SRR17520069. 769583  
SRR17520069. 769585  
SRR17520069. 769587  
SRR17520069. 769589  
SRR17520069. 769591  
SRR17520069. 769593

SRR17520069. 769595  
SRR17520069. 769597  
SRR17520069. 769599  
SRR17520069. 769601  
SRR17520069. 771141  
SRR17520069. 771143  
SRR17520069. 771145  
SRR17520069. 771147  
SRR17520069. 771149  
SRR17520069. 771151  
SRR17520069. 771153  
SRR17520069. 771155  
SRR17520069. 771157  
SRR17520069. 771159  
SRR17520069. 771161  
SRR17520069. 771163  
SRR17520069. 771167  
SRR17520069. 771169  
SRR17520069. 771171  
SRR17520069. 771173  
SRR17520069. 771175  
SRR17520069. 771177  
SRR17520069. 771179  
SRR17520069. 773983  
SRR17520069. 773985  
SRR17520069. 773987  
SRR17520069. 773989  
SRR17520069. 773991  
SRR17520069. 773993  
SRR17520069. 773997  
SRR17520069. 773999  
SRR17520069. 774001  
SRR17520069. 774005  
SRR17520069. 774007  
SRR17520069. 774009  
SRR17520069. 774011  
SRR17520069. 774013  
SRR17520069. 774015  
SRR17520069. 774017  
SRR17520069. 774019  
SRR17520069. 774021  
SRR17520069. 774023  
SRR17520069. 774025  
SRR17520069. 774027  
SRR17520069. 774029  
SRR17520069. 774031  
SRR17520069. 774035

SRR17520069.774037  
SRR17520069.774039  
SRR17520069.774041  
SRR17520069.774043  
SRR17520069.774045  
SRR17520069.777882  
SRR17520069.777884  
SRR17520069.777886  
SRR17520069.777888  
SRR17520069.777890  
SRR17520069.777892  
SRR17520069.777894  
SRR17520069.777896  
SRR17520069.777898  
SRR17520069.777900  
SRR17520069.777902  
SRR17520069.777904  
SRR17520069.777906  
SRR17520069.777908  
SRR17520069.777910  
SRR17520069.777912  
SRR17520069.777914  
SRR17520069.785442  
SRR17520069.785444  
SRR17520069.785449  
SRR17520069.785451  
SRR17520069.785453  
SRR17520069.785455  
SRR17520069.785457  
SRR17520069.785459  
SRR17520069.789387  
SRR17520069.789389  
SRR17520069.789391  
SRR17520069.789393  
SRR17520069.789395  
SRR17520069.789397  
SRR17520069.789399  
SRR17520069.789401  
SRR17520069.789403  
SRR17520069.789405  
SRR17520069.789407  
SRR17520069.789409  
SRR17520069.789411  
SRR17520069.789417  
SRR17520069.789419  
SRR17520069.791379  
SRR17520069.791381

SRR17520069.791383  
SRR17520069.791385  
SRR17520069.791387  
SRR17520069.791391  
SRR17520069.791393  
SRR17520069.791395  
SRR17520069.791397  
SRR17520069.791399  
SRR17520069.791401  
SRR17520069.791403  
SRR17520069.791405  
SRR17520069.791407  
SRR17520069.791409  
SRR17520069.791411  
SRR17520069.791413  
SRR17520069.791415  
SRR17520069.792179  
SRR17520069.793884  
SRR17520069.793886  
SRR17520069.793888  
SRR17520069.793890  
SRR17520069.793892  
SRR17520069.793896  
SRR17520069.793898  
SRR17520069.798130  
SRR17520069.805849  
SRR17520069.805851  
SRR17520069.805853  
SRR17520069.805855  
SRR17520069.805857  
SRR17520069.805859  
SRR17520069.805861  
SRR17520069.805863  
SRR17520069.805865  
SRR17520069.805867  
SRR17520069.805869  
SRR17520069.805871  
SRR17520069.805873  
SRR17520069.805875  
SRR17520069.805877  
SRR17520069.805879  
SRR17520069.805881  
SRR17520069.805883  
SRR17520069.805885  
SRR17520069.805887  
SRR17520069.805889  
SRR17520069.805891

SRR17520069.805893  
SRR17520069.805895  
SRR17520069.805897  
SRR17520069.805899  
SRR17520069.813862  
SRR17520069.813864  
SRR17520069.813868  
SRR17520069.813870  
SRR17520069.813872  
SRR17520069.813874  
SRR17520069.813876  
SRR17520069.813878  
SRR17520069.813880  
SRR17520069.813882  
SRR17520069.813884  
SRR17520069.813886  
SRR17520069.816149  
SRR17520069.816151  
SRR17520069.816153  
SRR17520069.816155  
SRR17520069.816157  
SRR17520069.816159  
SRR17520069.816161  
SRR17520069.816163  
SRR17520069.816165  
SRR17520069.816167  
SRR17520069.816169  
SRR17520069.816171  
SRR17520069.816173  
SRR17520069.816177  
SRR17520069.816179  
SRR17520069.818302  
SRR17520069.821111  
SRR17520069.821113  
SRR17520069.821115  
SRR17520069.821117  
SRR17520069.821119  
SRR17520069.821121  
SRR17520069.821123  
SRR17520069.821125  
SRR17520069.821127  
SRR17520069.821129  
SRR17520069.821131  
SRR17520069.821133  
SRR17520069.821135  
SRR17520069.821137  
SRR17520069.821139

SRR17520069.826692  
SRR17520069.826694  
SRR17520069.826696  
SRR17520069.826698  
SRR17520069.826700  
SRR17520069.826702  
SRR17520069.839508  
SRR17520069.839510  
SRR17520069.839512  
SRR17520069.839514  
SRR17520069.839516  
SRR17520069.839518  
SRR17520069.847127  
SRR17520069.847129  
SRR17520069.847131  
SRR17520069.847133  
SRR17520069.847135  
SRR17520069.847137  
SRR17520069.847141  
SRR17520069.847143  
SRR17520069.847145  
SRR17520069.847147  
SRR17520069.847149  
SRR17520069.847151  
SRR17520069.847153  
SRR17520069.847155  
SRR17520069.847157  
SRR17520069.847159  
SRR17520069.847161  
SRR17520069.847163  
SRR17520069.847165  
SRR17520069.847167  
SRR17520069.847169  
SRR17520069.847171  
SRR17520069.847173  
SRR17520069.847175  
SRR17520069.847177  
SRR17520069.847179  
SRR17520069.847181  
SRR17520069.847183  
SRR17520069.847185  
SRR17520069.847187  
SRR17520069.847189  
SRR17520069.849596  
SRR17520069.849598  
SRR17520069.849600  
SRR17520069.855368

SRR17520069.855370  
SRR17520069.855372  
SRR17520069.855374  
SRR17520069.855376  
SRR17520069.855378  
SRR17520069.855380  
SRR17520069.855382  
SRR17520069.855384  
SRR17520069.855386  
SRR17520069.855388  
SRR17520069.855390  
SRR17520069.855392  
SRR17520069.855394  
SRR17520069.855396  
SRR17520069.855398  
SRR17520069.855400  
SRR17520069.855402  
SRR17520069.855404  
SRR17520069.855406  
SRR17520069.855408  
SRR17520069.855410  
SRR17520069.855412  
SRR17520069.855414  
SRR17520069.855416  
SRR17520069.855418  
SRR17520069.855420  
SRR17520069.855424  
SRR17520069.855426  
SRR17520069.855428  
SRR17520069.855430  
SRR17520069.855432  
SRR17520069.855434  
SRR17520069.855436  
SRR17520069.855438  
SRR17520069.855440  
SRR17520069.855442  
SRR17520069.863490  
SRR17520069.863492  
SRR17520069.863494  
SRR17520069.863496  
SRR17520069.863498  
SRR17520069.863500  
SRR17520069.863502  
SRR17520069.863504  
SRR17520069.863506  
SRR17520069.863508  
SRR17520069.863510



SRR17520069.863512  
SRR17520069.863514  
SRR17520069.863516  
SRR17520069.863518  
SRR17520069.863520  
SRR17520069.863522  
SRR17520069.863524  
SRR17520069.865666  
SRR17520069.865668  
SRR17520069.865670  
SRR17520069.865672  
SRR17520069.865674  
SRR17520069.865678  
SRR17520069.865680  
SRR17520069.865682  
SRR17520069.865684  
SRR17520069.865686  
SRR17520069.865688  
SRR17520069.865690  
SRR17520069.865692  
SRR17520069.865694  
SRR17520069.865696  
SRR17520069.865700  
SRR17520069.865702  
SRR17520069.865704  
SRR17520069.865706  
SRR17520069.865708  
SRR17520069.865710  
SRR17520069.865712  
SRR17520069.865714  
SRR17520069.865718  
SRR17520069.865720  
SRR17520069.865722  
SRR17520069.865724  
SRR17520069.865726  
SRR17520069.865728  
SRR17520069.865730  
SRR17520069.865732  
SRR17520069.865734  
SRR17520069.865740  
SRR17520069.865742  
SRR17520069.865744  
SRR17520069.865746  
SRR17520069.865748  
SRR17520069.865750  
SRR17520069.865752  
SRR17520069.865754

SRR17520069.865756  
SRR17520069.865758  
SRR17520069.865760  
SRR17520069.865762  
SRR17520069.865764  
SRR17520069.865766  
SRR17520069.865768  
SRR17520069.865770  
SRR17520069.865772  
SRR17520069.865774  
SRR17520069.865776  
SRR17520069.865778  
SRR17520069.865780  
SRR17520069.865782  
SRR17520069.865784  
SRR17520069.865786  
SRR17520069.865788  
SRR17520069.867374  
SRR17520069.867442  
SRR17520069.867444  
SRR17520069.867446  
SRR17520069.868443  
SRR17520069.868447  
SRR17520069.868449  
SRR17520069.868451  
SRR17520069.868453  
SRR17520069.868455  
SRR17520069.868713  
SRR17520069.868715  
SRR17520069.868717  
SRR17520069.868719  
SRR17520069.868729  
SRR17520069.868731  
SRR17520069.868733  
SRR17520069.868737  
SRR17520069.868739  
SRR17520069.868741  
SRR17520069.868743  
SRR17520069.868745  
SRR17520069.868747  
SRR17520069.868749  
SRR17520069.871635  
SRR17520069.871637  
SRR17520069.871639  
SRR17520069.871641  
SRR17520069.871643  
SRR17520069.871645

SRR17520069.871647  
SRR17520069.871649  
SRR17520069.871651  
SRR17520069.871653  
SRR17520069.871655  
SRR17520069.871657  
SRR17520069.873011  
SRR17520069.873013  
SRR17520069.873015  
SRR17520069.873017  
SRR17520069.873019  
SRR17520069.873021  
SRR17520069.873023  
SRR17520069.876984  
SRR17520069.876986  
SRR17520069.876988  
SRR17520069.876990  
SRR17520069.876992  
SRR17520069.876994  
SRR17520069.876996  
SRR17520069.876998  
SRR17520069.877000  
SRR17520069.877002  
SRR17520069.877004  
SRR17520069.877006  
SRR17520069.877008  
SRR17520069.877010  
SRR17520069.877012  
SRR17520069.877014  
SRR17520069.877016  
SRR17520069.877018  
SRR17520069.877020  
SRR17520069.877022  
SRR17520069.877024  
SRR17520069.877026  
SRR17520069.877028  
SRR17520069.877030  
SRR17520069.877032  
SRR17520069.877034  
SRR17520069.877036  
SRR17520069.877038  
SRR17520069.877040  
SRR17520069.877044  
SRR17520069.877046  
SRR17520069.877048  
SRR17520069.877050  
SRR17520069.877052

SRR17520069.877054  
SRR17520069.877056  
SRR17520069.877058  
SRR17520069.877060  
SRR17520069.877449  
SRR17520069.877451  
SRR17520069.877453  
SRR17520069.877455  
SRR17520069.877457  
SRR17520069.877459  
SRR17520069.882279  
SRR17520069.882281  
SRR17520069.882283  
SRR17520069.882285  
SRR17520069.882287  
SRR17520069.882289  
SRR17520069.882291  
SRR17520069.882293  
SRR17520069.882295  
SRR17520069.882297  
SRR17520069.882299  
SRR17520069.882508  
SRR17520069.882510  
SRR17520069.882512  
SRR17520069.882514  
SRR17520069.882516  
SRR17520069.882518  
SRR17520069.882520  
SRR17520069.882522  
SRR17520069.882524  
SRR17520069.882526  
SRR17520069.882528  
SRR17520069.882530  
SRR17520069.882532  
SRR17520069.882534  
SRR17520069.882536  
SRR17520069.882538  
SRR17520069.882540  
SRR17520069.882542  
SRR17520069.882546  
SRR17520069.882548  
SRR17520069.882550  
SRR17520069.882552  
SRR17520069.882554  
SRR17520069.882556  
SRR17520069.882558  
SRR17520069.882560

SRR17520069.882562  
SRR17520069.882566  
SRR17520069.882568  
SRR17520069.882570  
SRR17520069.882572  
SRR17520069.882574  
SRR17520069.882576  
SRR17520069.882578  
SRR17520069.882580  
SRR17520069.882582  
SRR17520069.882584  
SRR17520069.882586  
SRR17520069.882588  
SRR17520069.882590  
SRR17520069.882592  
SRR17520069.882594  
SRR17520069.882596  
SRR17520069.882598  
SRR17520069.882600  
SRR17520069.882604  
SRR17520069.882606  
SRR17520069.882608  
SRR17520069.882610  
SRR17520069.882612  
SRR17520069.882614  
SRR17520069.883122  
SRR17520069.883126  
SRR17520069.883128  
SRR17520069.883132  
SRR17520069.885697  
SRR17520069.885699  
SRR17520069.885701  
SRR17520069.885703  
SRR17520069.885705  
SRR17520069.885707  
SRR17520069.885709  
SRR17520069.885711  
SRR17520069.885713  
SRR17520069.885715  
SRR17520069.885717  
SRR17520069.885719  
SRR17520069.885721  
SRR17520069.885723  
SRR17520069.885725  
SRR17520069.885820  
SRR17520069.885822  
SRR17520069.885824

SRR17520069.885826  
SRR17520069.885828  
SRR17520069.885830  
SRR17520069.885832  
SRR17520069.885834  
SRR17520069.885836  
SRR17520069.885838  
SRR17520069.885840  
SRR17520069.885842  
SRR17520069.885844  
SRR17520069.885846  
SRR17520069.885848  
SRR17520069.885850  
SRR17520069.885852  
SRR17520069.885854  
SRR17520069.885856  
SRR17520069.885858  
SRR17520069.885862  
SRR17520069.885864  
SRR17520069.885868  
SRR17520069.885872  
SRR17520069.885874  
SRR17520069.885876  
SRR17520069.885878  
SRR17520069.885882  
SRR17520069.885884  
SRR17520069.885886  
SRR17520069.885888  
SRR17520069.885892  
SRR17520069.887588  
SRR17520069.887590  
SRR17520069.887592  
SRR17520069.887594  
SRR17520069.887596  
SRR17520069.887600  
SRR17520069.887602  
SRR17520069.887604  
SRR17520069.887606  
SRR17520069.887608  
SRR17520069.887610  
SRR17520069.887612  
SRR17520069.887614  
SRR17520069.887616  
SRR17520069.887618  
SRR17520069.887620  
SRR17520069.887622  
SRR17520069.887624

SRR17520069.887626  
SRR17520069.887628  
SRR17520069.887630  
SRR17520069.887632  
SRR17520069.887634  
SRR17520069.887636  
SRR17520069.888404  
SRR17520069.888406  
SRR17520069.888408  
SRR17520069.888410  
SRR17520069.888412  
SRR17520069.896944  
SRR17520069.896946  
SRR17520069.896948  
SRR17520069.896950  
SRR17520069.896952  
SRR17520069.896954  
SRR17520069.896956  
SRR17520069.896958  
SRR17520069.896962  
SRR17520069.896997  
SRR17520069.896999  
SRR17520069.909563  
SRR17520069.909565  
SRR17520069.909567  
SRR17520069.909569  
SRR17520069.909571  
SRR17520069.909573  
SRR17520069.909575  
SRR17520069.909577  
SRR17520069.909579  
SRR17520069.909581  
SRR17520069.909583  
SRR17520069.909585  
SRR17520069.909587  
SRR17520069.909589  
SRR17520069.909593  
SRR17520069.912190  
SRR17520069.912192  
SRR17520069.912194  
SRR17520069.912196  
SRR17520069.912198  
SRR17520069.912200  
SRR17520069.912202  
SRR17520069.913348  
SRR17520069.913354  
SRR17520069.913356

SRR17520069. 929988  
SRR17520069. 929990  
SRR17520069. 929992  
SRR17520069. 930351  
SRR17520069. 930353  
SRR17520069. 930355  
SRR17520069. 930357  
SRR17520069. 930359  
SRR17520069. 930361  
SRR17520069. 930363  
SRR17520069. 930365  
SRR17520069. 930367  
SRR17520069. 930369  
SRR17520069. 930371  
SRR17520069. 930373  
SRR17520069. 930375  
SRR17520069. 930377  
SRR17520069. 930379  
SRR17520069. 930381  
SRR17520069. 930383  
SRR17520069. 930385  
SRR17520069. 930387  
SRR17520069. 930389  
SRR17520069. 930391  
SRR17520069. 930393  
SRR17520069. 930395  
SRR17520069. 930397  
SRR17520069. 930399  
SRR17520069. 930401  
SRR17520069. 930403  
SRR17520069. 930405  
SRR17520069. 930407  
SRR17520069. 930409  
SRR17520069. 930411  
SRR17520069. 930413  
SRR17520069. 930415  
SRR17520069. 930417  
SRR17520069. 930419  
SRR17520069. 930421  
SRR17520069. 930423  
SRR17520069. 930425  
SRR17520069. 930427  
SRR17520069. 930429  
SRR17520069. 930431  
SRR17520069. 930433  
SRR17520069. 930435  
SRR17520069. 930441



SRR17520069. 930443  
SRR17520069. 930445  
SRR17520069. 930447  
SRR17520069. 930769  
SRR17520069. 930771  
SRR17520069. 930773  
SRR17520069. 930775  
SRR17520069. 930777  
SRR17520069. 930779  
SRR17520069. 930781  
SRR17520069. 930783  
SRR17520069. 930785  
SRR17520069. 930787  
SRR17520069. 930789  
SRR17520069. 930791  
SRR17520069. 930793  
SRR17520069. 930795  
SRR17520069. 930797  
SRR17520069. 931754  
SRR17520069. 931758  
SRR17520069. 931760  
SRR17520069. 931762  
SRR17520069. 931764  
SRR17520069. 931766  
SRR17520069. 931768  
SRR17520069. 931770  
SRR17520069. 931772  
SRR17520069. 931776  
SRR17520069. 931778  
SRR17520069. 931780  
SRR17520069. 931782  
SRR17520069. 931784  
SRR17520069. 931786  
SRR17520069. 931788  
SRR17520069. 931790  
SRR17520069. 931792  
SRR17520069. 931794  
SRR17520069. 931798  
SRR17520069. 937417  
SRR17520069. 937419  
SRR17520069. 937421  
SRR17520069. 937423  
SRR17520069. 937425  
SRR17520069. 937427  
SRR17520069. 937429  
SRR17520069. 937636  
SRR17520069. 937638

SRR17520069.937640  
SRR17520069.937645  
SRR17520069.937647  
SRR17520069.937649  
SRR17520069.937651  
SRR17520069.937653  
SRR17520069.937655  
SRR17520069.937657  
SRR17520069.937659  
SRR17520069.937661  
SRR17520069.937663  
SRR17520069.937665  
SRR17520069.937667  
SRR17520069.937669  
SRR17520069.937671  
SRR17520069.937673  
SRR17520069.948056  
SRR17520069.948058  
SRR17520069.948062  
SRR17520069.948064  
SRR17520069.948068  
SRR17520069.948070  
SRR17520069.948072  
SRR17520069.948074  
SRR17520069.948076  
SRR17520069.948078  
SRR17520069.951319  
SRR17520069.957734  
SRR17520069.957736  
SRR17520069.957738  
SRR17520069.957742  
SRR17520069.957744  
SRR17520069.958194  
SRR17520069.958196  
SRR17520069.958198  
SRR17520069.958200  
SRR17520069.958202  
SRR17520069.961034  
SRR17520069.961036  
SRR17520069.961038  
SRR17520069.961040  
SRR17520069.961042  
SRR17520069.961044  
SRR17520069.961046  
SRR17520069.961048  
SRR17520069.961050  
SRR17520069.961052

SRR17520069.961054  
SRR17520069.961056  
SRR17520069.961058  
SRR17520069.961060  
SRR17520069.961062  
SRR17520069.961064  
SRR17520069.961066  
SRR17520069.961068  
SRR17520069.961070  
SRR17520069.961072  
SRR17520069.961074  
SRR17520069.961076  
SRR17520069.961078  
SRR17520069.961080  
SRR17520069.961082  
SRR17520069.961084  
SRR17520069.961086  
SRR17520069.961088  
SRR17520069.961090  
SRR17520069.961092  
SRR17520069.961096  
SRR17520069.961098  
SRR17520069.961100  
SRR17520069.961102  
SRR17520069.961104  
SRR17520069.961106  
SRR17520069.963857  
SRR17520069.963859  
SRR17520069.963861  
SRR17520069.963863  
SRR17520069.963865  
SRR17520069.963867  
SRR17520069.963869  
SRR17520069.963871  
SRR17520069.963873  
SRR17520069.963875  
SRR17520069.963877  
SRR17520069.963879  
SRR17520069.963881  
SRR17520069.963883  
SRR17520069.963885  
SRR17520069.963887  
SRR17520069.963889  
SRR17520069.963891  
SRR17520069.963893  
SRR17520069.963895  
SRR17520069.963897

SRR17520069.963899  
SRR17520069.963901  
SRR17520069.963903  
SRR17520069.963905  
SRR17520069.963907  
SRR17520069.963909  
SRR17520069.963911  
SRR17520069.963913  
SRR17520069.963915  
SRR17520069.963917  
SRR17520069.963919  
SRR17520069.963921  
SRR17520069.963923  
SRR17520069.963925  
SRR17520069.963927  
SRR17520069.963931  
SRR17520069.963933  
SRR17520069.963935  
SRR17520069.963937  
SRR17520069.963939  
SRR17520069.963941  
SRR17520069.963943  
SRR17520069.963945  
SRR17520069.963947  
SRR17520069.964022  
SRR17520069.964024  
SRR17520069.965211  
SRR17520069.965213  
SRR17520069.965215  
SRR17520069.965217  
SRR17520069.965219  
SRR17520069.965221  
SRR17520069.965223  
SRR17520069.965225  
SRR17520069.971869  
SRR17520069.971873  
SRR17520069.971875  
SRR17520069.971877  
SRR17520069.971879  
SRR17520069.971881  
SRR17520069.971883  
SRR17520069.971885  
SRR17520069.971887  
SRR17520069.978161  
SRR17520069.981101  
SRR17520069.981103  
SRR17520069.981105

SRR17520069.981107  
SRR17520069.981109  
SRR17520069.981111  
SRR17520069.981115  
SRR17520069.981117  
SRR17520069.981119  
SRR17520069.981121  
SRR17520069.985450  
SRR17520069.988105  
SRR17520069.988107  
SRR17520069.988109  
SRR17520069.988111  
SRR17520069.988115  
SRR17520069.988117  
SRR17520069.988119  
SRR17520069.988121  
SRR17520069.988123  
SRR17520069.988125  
SRR17520069.988127  
SRR17520069.988129  
SRR17520069.998915  
SRR17520069.998917  
SRR17520069.998919  
SRR17520069.998921  
SRR17520069.998929  
SRR17520069.998931  
SRR17520069.998933  
SRR17520069.998935  
SRR17520069.998937  
SRR17520069.998939  
SRR17520069.998941  
SRR17520069.998943  
SRR17520069.1000220  
SRR17520069.1000222  
SRR17520069.1000224  
SRR17520069.1000226  
SRR17520069.1000228  
SRR17520069.1000230  
SRR17520069.1000232  
SRR17520069.1000234  
SRR17520069.1000236  
SRR17520069.1000238  
SRR17520069.1000240  
SRR17520069.1000242  
SRR17520069.1000244  
SRR17520069.1000246  
SRR17520069.1000248

SRR17520069.1000250  
SRR17520069.1000252  
SRR17520069.1000254  
SRR17520069.1000256  
SRR17520069.1000258  
SRR17520069.1000260  
SRR17520069.1000262  
SRR17520069.1000264  
SRR17520069.1001890  
SRR17520069.1004747  
SRR17520069.1004749  
SRR17520069.1004751  
SRR17520069.1004753  
SRR17520069.1004755  
SRR17520069.1004757  
SRR17520069.1017668  
SRR17520069.1017670  
SRR17520069.1022721  
SRR17520069.1022723  
SRR17520069.1022725  
SRR17520069.1022727  
SRR17520069.1022729  
SRR17520069.1022731  
SRR17520069.1022733  
SRR17520069.1022735  
SRR17520069.1022737  
SRR17520069.1022739  
SRR17520069.1022741  
SRR17520069.1022743  
SRR17520069.1022745  
SRR17520069.1022749  
SRR17520069.1022751  
SRR17520069.1022753  
SRR17520069.1022755  
SRR17520069.1022757  
SRR17520069.1022759  
SRR17520069.1022761  
SRR17520069.1022763  
SRR17520069.1022765  
SRR17520069.1022767  
SRR17520069.1022769  
SRR17520069.1022771  
SRR17520069.1022773  
SRR17520069.1022775  
SRR17520069.1022777  
SRR17520069.1022781  
SRR17520069.1022783

SRR17520069.1022785  
SRR17520069.1022787  
SRR17520069.1022789  
SRR17520069.1032916  
SRR17520069.1032918  
SRR17520069.1032920  
SRR17520069.1032922  
SRR17520069.1032924  
SRR17520069.1032928  
SRR17520069.1032930  
SRR17520069.1032932  
SRR17520069.1032934  
SRR17520069.1032938  
SRR17520069.1032940  
SRR17520069.1032942  
SRR17520069.1032944  
SRR17520069.1032946  
SRR17520069.1038516  
SRR17520069.1039084  
SRR17520069.1039086  
SRR17520069.1039088  
SRR17520069.1039090  
SRR17520069.1039092  
SRR17520069.1039094  
SRR17520069.1039096  
SRR17520069.1039098  
SRR17520069.1039100  
SRR17520069.1039102  
SRR17520069.1039104  
SRR17520069.1039106  
SRR17520069.1039108  
SRR17520069.1039110  
SRR17520069.1039112  
SRR17520069.1039114  
SRR17520069.1039116  
SRR17520069.1039118  
SRR17520069.1039120  
SRR17520069.1039122  
SRR17520069.1039124  
SRR17520069.1039126  
SRR17520069.1039128  
SRR17520069.1039130  
SRR17520069.1039132  
SRR17520069.1039134  
SRR17520069.1039136  
SRR17520069.1039138  
SRR17520069.1039146

SRR17520069. 1039148  
SRR17520069. 1039150  
SRR17520069. 1039152  
SRR17520069. 1039162  
SRR17520069. 1039166  
SRR17520069. 1039170  
SRR17520069. 1039172  
SRR17520069. 1039176  
SRR17520069. 1039178  
SRR17520069. 1039182  
SRR17520069. 1039184  
SRR17520069. 1039186  
SRR17520069. 1039188  
SRR17520069. 1039190  
SRR17520069. 1039192  
SRR17520069. 1039194  
SRR17520069. 1039196  
SRR17520069. 1039200  
SRR17520069. 1039202  
SRR17520069. 1039204  
SRR17520069. 1039206  
SRR17520069. 1040322  
SRR17520069. 1040324  
SRR17520069. 1040326  
SRR17520069. 1040328  
SRR17520069. 1040330  
SRR17520069. 1040332  
SRR17520069. 1041354  
SRR17520069. 1043003  
SRR17520069. 1043005  
SRR17520069. 1043007  
SRR17520069. 1043009  
SRR17520069. 1043011  
SRR17520069. 1043013  
SRR17520069. 1043015  
SRR17520069. 1043017  
SRR17520069. 1043019  
SRR17520069. 1043021  
SRR17520069. 1043023  
SRR17520069. 1043025  
SRR17520069. 1043027  
SRR17520069. 1043029  
SRR17520069. 1043031  
SRR17520069. 1043033  
SRR17520069. 1043035  
SRR17520069. 1043037  
SRR17520069. 1043039



SRR17520069.1043041  
SRR17520069.1043043  
SRR17520069.1043045  
SRR17520069.1043047  
SRR17520069.1043049  
SRR17520069.1043051  
SRR17520069.1043053  
SRR17520069.1043055  
SRR17520069.1043057  
SRR17520069.1043059  
SRR17520069.1043061  
SRR17520069.1043063  
SRR17520069.1043065  
SRR17520069.1043067  
SRR17520069.1043069  
SRR17520069.1043071  
SRR17520069.1043075  
SRR17520069.1043077  
SRR17520069.1043079  
SRR17520069.1043081  
SRR17520069.1043083  
SRR17520069.1043085  
SRR17520069.1043087  
SRR17520069.1043089  
SRR17520069.1043091  
SRR17520069.1043093  
SRR17520069.1043095  
SRR17520069.1043097  
SRR17520069.1043099  
SRR17520069.1043101  
SRR17520069.1043103  
SRR17520069.1043107  
SRR17520069.1043109  
SRR17520069.1043111  
SRR17520069.1043113  
SRR17520069.1043115  
SRR17520069.1043117  
SRR17520069.1043119  
SRR17520069.1044895  
SRR17520069.1044897  
SRR17520069.1044899  
SRR17520069.1044901  
SRR17520069.1044903  
SRR17520069.1044905  
SRR17520069.1044907  
SRR17520069.1044909  
SRR17520069.1044911

SRR17520069.1044915  
SRR17520069.1044917  
SRR17520069.1044919  
SRR17520069.1044921  
SRR17520069.1044923  
SRR17520069.1044925  
SRR17520069.1044927  
SRR17520069.1051457  
SRR17520069.1051459  
SRR17520069.1051461  
SRR17520069.1065393  
SRR17520069.1065395  
SRR17520069.1065397  
SRR17520069.1065399  
SRR17520069.1065401  
SRR17520069.1065403  
SRR17520069.1065405  
SRR17520069.1065407  
SRR17520069.1065409  
SRR17520069.1065411  
SRR17520069.1065413  
SRR17520069.1065415  
SRR17520069.1065417  
SRR17520069.1065419  
SRR17520069.1071922  
SRR17520069.1071924  
SRR17520069.1071926  
SRR17520069.1071928  
SRR17520069.1071930  
SRR17520069.1071932  
SRR17520069.1071934  
SRR17520069.1071936  
SRR17520069.1071938  
SRR17520069.1071940  
SRR17520069.1071942  
SRR17520069.1071944  
SRR17520069.1071946  
SRR17520069.1071948  
SRR17520069.1071950  
SRR17520069.1071952  
SRR17520069.1071954  
SRR17520069.1071956  
SRR17520069.1071958  
SRR17520069.1071960  
SRR17520069.1071962  
SRR17520069.1071964  
SRR17520069.1071966

SRR17520069.1071968  
SRR17520069.1071970  
SRR17520069.1071972  
SRR17520069.1071974  
SRR17520069.1071976  
SRR17520069.1071978  
SRR17520069.1077133  
SRR17520069.1078079  
SRR17520069.1078081  
SRR17520069.1078083  
SRR17520069.1078085  
SRR17520069.1078087  
SRR17520069.1078091  
SRR17520069.1078093  
SRR17520069.1078095  
SRR17520069.1078097  
SRR17520069.1078099  
SRR17520069.1078101  
SRR17520069.1078103  
SRR17520069.1078105  
SRR17520069.1078107  
SRR17520069.1078111  
SRR17520069.1078113  
SRR17520069.1078115  
SRR17520069.1078117  
SRR17520069.1078119  
SRR17520069.1078121  
SRR17520069.1078123  
SRR17520069.1078125  
SRR17520069.1078127  
SRR17520069.1078133  
SRR17520069.1078135  
SRR17520069.1081003  
SRR17520069.1081005  
SRR17520069.1081007  
SRR17520069.1081009  
SRR17520069.1081011  
SRR17520069.1081013  
SRR17520069.1081015  
SRR17520069.1081017  
SRR17520069.1081019  
SRR17520069.1081021  
SRR17520069.1081023  
SRR17520069.1090518  
SRR17520069.1093378  
SRR17520069.1093380  
SRR17520069.1093382

SRR17520069.1093386  
SRR17520069.1093388  
SRR17520069.1093390  
SRR17520069.1093392  
SRR17520069.1093394  
SRR17520069.1093396  
SRR17520069.1093398  
SRR17520069.1093400  
SRR17520069.1093402  
SRR17520069.1093404  
SRR17520069.1093406  
SRR17520069.1104027  
SRR17520069.1104029  
SRR17520069.1104031  
SRR17520069.1104033  
SRR17520069.1104035  
SRR17520069.1104037  
SRR17520069.1104039  
SRR17520069.1104041  
SRR17520069.1104043  
SRR17520069.1104045  
SRR17520069.1104047  
SRR17520069.1104049  
SRR17520069.1104051  
SRR17520069.1104053  
SRR17520069.1104055  
SRR17520069.1104057  
SRR17520069.1104059  
SRR17520069.1104061  
SRR17520069.1104063  
SRR17520069.1104065  
SRR17520069.1104067  
SRR17520069.1104071  
SRR17520069.1104073  
SRR17520069.1104621  
SRR17520069.1104623  
SRR17520069.1104625  
SRR17520069.1104627  
SRR17520069.1104629  
SRR17520069.1104631  
SRR17520069.1105630  
SRR17520069.1105632  
SRR17520069.1105634  
SRR17520069.1105636  
SRR17520069.1105638  
SRR17520069.1109449  
SRR17520069.1109451

SRR17520069.1109453  
SRR17520069.1109455  
SRR17520069.1109457  
SRR17520069.1110975  
SRR17520069.1110983  
SRR17520069.1110985  
SRR17520069.1110987  
SRR17520069.1110989  
SRR17520069.1110991  
SRR17520069.1110993  
SRR17520069.1110995  
SRR17520069.1110997  
SRR17520069.1110999  
SRR17520069.1111001  
SRR17520069.1111003  
SRR17520069.1111005  
SRR17520069.1111007  
SRR17520069.1111009  
SRR17520069.1111011  
SRR17520069.1111013  
SRR17520069.1111015  
SRR17520069.1111017  
SRR17520069.1111019  
SRR17520069.1111021  
SRR17520069.1111025  
SRR17520069.1111027  
SRR17520069.1111029  
SRR17520069.1111031  
SRR17520069.1111033  
SRR17520069.1111035  
SRR17520069.1111037  
SRR17520069.1111039  
SRR17520069.1111041  
SRR17520069.1111043  
SRR17520069.1111045  
SRR17520069.1112021  
SRR17520069.1112023  
SRR17520069.1112025  
SRR17520069.1112027  
SRR17520069.1112031  
SRR17520069.1112033  
SRR17520069.1112037  
SRR17520069.1112039  
SRR17520069.1112041  
SRR17520069.1112043  
SRR17520069.1112045  
SRR17520069.1112047

SRR17520069.1112049  
SRR17520069.1115601  
SRR17520069.1115603  
SRR17520069.1115605  
SRR17520069.1115607  
SRR17520069.1115609  
SRR17520069.1115611  
SRR17520069.1115613  
SRR17520069.1115962  
SRR17520069.1115964  
SRR17520069.1115966  
SRR17520069.1115968  
SRR17520069.1115970  
SRR17520069.1115972  
SRR17520069.1115974  
SRR17520069.1115976  
SRR17520069.1116150  
SRR17520069.1116152  
SRR17520069.1116154  
SRR17520069.1116156  
SRR17520069.1116158  
SRR17520069.1116160  
SRR17520069.1116162  
SRR17520069.1116164  
SRR17520069.1116166  
SRR17520069.1116168  
SRR17520069.1116170  
SRR17520069.1116172  
SRR17520069.1116176  
SRR17520069.1116178  
SRR17520069.1116180  
SRR17520069.1116182  
SRR17520069.1116186  
SRR17520069.1116188  
SRR17520069.1116190  
SRR17520069.1116192  
SRR17520069.1116194  
SRR17520069.1116196  
SRR17520069.1116198  
SRR17520069.1116200  
SRR17520069.1116202  
SRR17520069.1116204  
SRR17520069.1116206  
SRR17520069.1116208  
SRR17520069.1116210  
SRR17520069.1116212  
SRR17520069.1116214

SRR17520069.1116216  
SRR17520069.1116218  
SRR17520069.1116220  
SRR17520069.1116222  
SRR17520069.1116224  
SRR17520069.1116226  
SRR17520069.1121238  
SRR17520069.1121240  
SRR17520069.1121242  
SRR17520069.1121246  
SRR17520069.1121248  
SRR17520069.1124713  
SRR17520069.1125348  
SRR17520069.1125352  
SRR17520069.1128343  
SRR17520069.1128345  
SRR17520069.1128347  
SRR17520069.1128349  
SRR17520069.1128351  
SRR17520069.1128353  
SRR17520069.1128355  
SRR17520069.1128357  
SRR17520069.1128729  
SRR17520069.1128755  
SRR17520069.1128787  
SRR17520069.1136715  
SRR17520069.1136717  
SRR17520069.1136719  
SRR17520069.1136721  
SRR17520069.1136723  
SRR17520069.1136725  
SRR17520069.1136727  
SRR17520069.1136729  
SRR17520069.1136731  
SRR17520069.1136733  
SRR17520069.1136735  
SRR17520069.1136737  
SRR17520069.1136739  
SRR17520069.1136741  
SRR17520069.1136743  
SRR17520069.1136745  
SRR17520069.1136747  
SRR17520069.1136751  
SRR17520069.1136753  
SRR17520069.1136755  
SRR17520069.1136757  
SRR17520069.1136759

SRR17520069.1136761  
SRR17520069.1136763  
SRR17520069.1136765  
SRR17520069.1141610  
SRR17520069.1141612  
SRR17520069.1141614  
SRR17520069.1141616  
SRR17520069.1141618  
SRR17520069.1141620  
SRR17520069.1141622  
SRR17520069.1141624  
SRR17520069.1141626  
SRR17520069.1141628  
SRR17520069.1141630  
SRR17520069.1141632  
SRR17520069.1141634  
SRR17520069.1141636  
SRR17520069.1141638  
SRR17520069.1141640  
SRR17520069.1141642  
SRR17520069.1141644  
SRR17520069.1141646  
SRR17520069.1141648  
SRR17520069.1141650  
SRR17520069.1141652  
SRR17520069.1141654  
SRR17520069.1141656  
SRR17520069.1141658  
SRR17520069.1141660  
SRR17520069.1141662  
SRR17520069.1141664  
SRR17520069.1141666  
SRR17520069.1141668  
SRR17520069.1141670  
SRR17520069.1141672  
SRR17520069.1141674  
SRR17520069.1141676  
SRR17520069.1141678  
SRR17520069.1141680  
SRR17520069.1141682  
SRR17520069.1141684  
SRR17520069.1141686  
SRR17520069.1141688  
SRR17520069.1141690  
SRR17520069.1141692  
SRR17520069.1141694  
SRR17520069.1141696



SRR17520069.1141698  
SRR17520069.1141700  
SRR17520069.1141702  
SRR17520069.1141704  
SRR17520069.1149343  
SRR17520069.1149345  
SRR17520069.1149347  
SRR17520069.1154407  
SRR17520069.1154409  
SRR17520069.1154411  
SRR17520069.1154413  
SRR17520069.1154417  
SRR17520069.1155976  
SRR17520069.1155978  
SRR17520069.1155980  
SRR17520069.1155984  
SRR17520069.1155986  
SRR17520069.1155988  
SRR17520069.1155990  
SRR17520069.1155992  
SRR17520069.1155994  
SRR17520069.1155996  
SRR17520069.1155998  
SRR17520069.1156000  
SRR17520069.1156002  
SRR17520069.1156006  
SRR17520069.1156008  
SRR17520069.1156010  
SRR17520069.1156012  
SRR17520069.1156014  
SRR17520069.1156016  
SRR17520069.1156018  
SRR17520069.1170093  
SRR17520069.1170095  
SRR17520069.1170097  
SRR17520069.1173490  
SRR17520069.1173492  
SRR17520069.1173494  
SRR17520069.1173496  
SRR17520069.1173498  
SRR17520069.1173500  
SRR17520069.1173502  
SRR17520069.1173504  
SRR17520069.1173506  
SRR17520069.1173508  
SRR17520069.1173510  
SRR17520069.1173512

SRR17520069.1173514  
SRR17520069.1173516  
SRR17520069.1173518  
SRR17520069.1173520  
SRR17520069.1173522  
SRR17520069.1173524  
SRR17520069.1173526  
SRR17520069.1173528  
SRR17520069.1173530  
SRR17520069.1173532  
SRR17520069.1173534  
SRR17520069.1173536  
SRR17520069.1173538  
SRR17520069.1178128  
SRR17520069.1178130  
SRR17520069.1182972  
SRR17520069.1182974  
SRR17520069.1182976  
SRR17520069.1182978  
SRR17520069.1182980  
SRR17520069.1182982  
SRR17520069.1182984  
SRR17520069.1182986  
SRR17520069.1182988  
SRR17520069.1182990  
SRR17520069.1182992  
SRR17520069.1182994  
SRR17520069.1182998  
SRR17520069.1183000  
SRR17520069.1183002  
SRR17520069.1183004  
SRR17520069.1183006  
SRR17520069.1183008  
SRR17520069.1183010  
SRR17520069.1183012  
SRR17520069.1183014  
SRR17520069.1183016  
SRR17520069.1183018  
SRR17520069.1183020  
SRR17520069.1183022  
SRR17520069.1183024  
SRR17520069.1183026  
SRR17520069.1183028  
SRR17520069.1183030  
SRR17520069.1183032  
SRR17520069.1183034  
SRR17520069.1183036

SRR17520069.1183038  
SRR17520069.1183040  
SRR17520069.1183042  
SRR17520069.1183044  
SRR17520069.1183046  
SRR17520069.1183048  
SRR17520069.1183050  
SRR17520069.1183052  
SRR17520069.1183054  
SRR17520069.1183056  
SRR17520069.1183058  
SRR17520069.1183060  
SRR17520069.1183062  
SRR17520069.1183064  
SRR17520069.1183068  
SRR17520069.1183070  
SRR17520069.1183072  
SRR17520069.1183074  
SRR17520069.1183076  
SRR17520069.1183078  
SRR17520069.1183080  
SRR17520069.1183082  
SRR17520069.1183084  
SRR17520069.1185829  
SRR17520069.1185831  
SRR17520069.1185835  
SRR17520069.1185837  
SRR17520069.1185839  
SRR17520069.1185841  
SRR17520069.1187422  
SRR17520069.1187424  
SRR17520069.1187426  
SRR17520069.1187428  
SRR17520069.1187430  
SRR17520069.1187432  
SRR17520069.1187434  
SRR17520069.1187436  
SRR17520069.1187438  
SRR17520069.1187440  
SRR17520069.1187442  
SRR17520069.1187444  
SRR17520069.1187446  
SRR17520069.1187448  
SRR17520069.1187450  
SRR17520069.1187452  
SRR17520069.1187454  
SRR17520069.1187456

SRR17520069.1187458  
SRR17520069.1187460  
SRR17520069.1187462  
SRR17520069.1187466  
SRR17520069.1187468  
SRR17520069.1187470  
SRR17520069.1187472  
SRR17520069.1187474  
SRR17520069.1187476  
SRR17520069.1187478  
SRR17520069.1187480  
SRR17520069.1187482  
SRR17520069.1187484  
SRR17520069.1187486  
SRR17520069.1187490  
SRR17520069.1187492  
SRR17520069.1187494  
SRR17520069.1188073  
SRR17520069.1188075  
SRR17520069.1188630  
SRR17520069.1188634  
SRR17520069.1188636  
SRR17520069.1188638  
SRR17520069.1188640  
SRR17520069.1201710  
SRR17520069.1205150  
SRR17520069.1205152  
SRR17520069.1205154  
SRR17520069.1205156  
SRR17520069.1205158  
SRR17520069.1205160  
SRR17520069.1205162  
SRR17520069.1205164  
SRR17520069.1205166  
SRR17520069.1205168  
SRR17520069.1205170  
SRR17520069.1205172  
SRR17520069.1205174  
SRR17520069.1205176  
SRR17520069.1205178  
SRR17520069.1205180  
SRR17520069.1205182  
SRR17520069.1205184  
SRR17520069.1205186  
SRR17520069.1205188  
SRR17520069.1208150  
SRR17520069.1208154

SRR17520069.1208156  
SRR17520069.1209639  
SRR17520069.1209641  
SRR17520069.1209643  
SRR17520069.1214755  
SRR17520069.1214757  
SRR17520069.1214759  
SRR17520069.1214761  
SRR17520069.1214763  
SRR17520069.1214765  
SRR17520069.1214767  
SRR17520069.1214769  
SRR17520069.1214771  
SRR17520069.1216338  
SRR17520069.1216340  
SRR17520069.1216342  
SRR17520069.1216346  
SRR17520069.1217347  
SRR17520069.1225957  
SRR17520069.1225959  
SRR17520069.1225961  
SRR17520069.1225963  
SRR17520069.1225965  
SRR17520069.1225967  
SRR17520069.1225969  
SRR17520069.1225971  
SRR17520069.1225973  
SRR17520069.1225975  
SRR17520069.1225977  
SRR17520069.1225979  
SRR17520069.1225981  
SRR17520069.1225983  
SRR17520069.1225985  
SRR17520069.1228930  
SRR17520069.1228932  
SRR17520069.1228934  
SRR17520069.1228936  
SRR17520069.1228938  
SRR17520069.1228940  
SRR17520069.1228942  
SRR17520069.1228944  
SRR17520069.1228946  
SRR17520069.1228948  
SRR17520069.1228950  
SRR17520069.1228952  
SRR17520069.1228954  
SRR17520069.1228956

SRR17520069. 1228958  
SRR17520069. 1228960  
SRR17520069. 1228962  
SRR17520069. 1228964  
SRR17520069. 1228966  
SRR17520069. 1228968  
SRR17520069. 1228970  
SRR17520069. 1235383  
SRR17520069. 1235385  
SRR17520069. 1235387  
SRR17520069. 1235389  
SRR17520069. 1235391  
SRR17520069. 1235393  
SRR17520069. 1235395  
SRR17520069. 1237661  
SRR17520069. 1237663  
SRR17520069. 1237665  
SRR17520069. 1237667  
SRR17520069. 1237669  
SRR17520069. 1237671  
SRR17520069. 1237675  
SRR17520069. 1237677  
SRR17520069. 1238648  
SRR17520069. 1238650  
SRR17520069. 1238652  
SRR17520069. 1238654  
SRR17520069. 1238656  
SRR17520069. 1238658  
SRR17520069. 1238660  
SRR17520069. 1238662  
SRR17520069. 1243687  
SRR17520069. 1243689  
SRR17520069. 1243691  
SRR17520069. 1243693  
SRR17520069. 1243695  
SRR17520069. 1243697  
SRR17520069. 1243699  
SRR17520069. 1243701  
SRR17520069. 1243703  
SRR17520069. 1243705  
SRR17520069. 1243710  
SRR17520069. 1243712  
SRR17520069. 1243714  
SRR17520069. 1243718  
SRR17520069. 1243720  
SRR17520069. 1243722  
SRR17520069. 1243724

SRR17520069. 1243726  
SRR17520069. 1243728  
SRR17520069. 1249507  
SRR17520069. 1249509  
SRR17520069. 1249511  
SRR17520069. 1249513  
SRR17520069. 1249515  
SRR17520069. 1249517  
SRR17520069. 1249519  
SRR17520069. 1249521  
SRR17520069. 1249523  
SRR17520069. 1249525  
SRR17520069. 1249527  
SRR17520069. 1249529  
SRR17520069. 1249531  
SRR17520069. 1249533  
SRR17520069. 1249535  
SRR17520069. 1249539  
SRR17520069. 1249541  
SRR17520069. 1249545  
SRR17520069. 1249547  
SRR17520069. 1249551  
SRR17520069. 1249555  
SRR17520069. 1249557  
SRR17520069. 1249559  
SRR17520069. 1249561  
SRR17520069. 1249563  
SRR17520069. 1249565  
SRR17520069. 1249567  
SRR17520069. 1249569  
SRR17520069. 1249571  
SRR17520069. 1249573  
SRR17520069. 1249575  
SRR17520069. 1249581  
SRR17520069. 1249585  
SRR17520069. 1249587  
SRR17520069. 1249589  
SRR17520069. 1249591  
SRR17520069. 1249593  
SRR17520069. 1249595  
SRR17520069. 1249597  
SRR17520069. 1249599  
SRR17520069. 1256947  
SRR17520069. 1257632  
SRR17520069. 1258182  
SRR17520069. 1258184  
SRR17520069. 1258186

SRR17520069. 1258188  
SRR17520069. 1258190  
SRR17520069. 1258192  
SRR17520069. 1258194  
SRR17520069. 1258754  
SRR17520069. 1258756  
SRR17520069. 1258758  
SRR17520069. 1258760  
SRR17520069. 1258762  
SRR17520069. 1258764  
SRR17520069. 1258766  
SRR17520069. 1258768  
SRR17520069. 1258770  
SRR17520069. 1258772  
SRR17520069. 1258774  
SRR17520069. 1258776  
SRR17520069. 1258778  
SRR17520069. 1258780  
SRR17520069. 1258782  
SRR17520069. 1258784  
SRR17520069. 1258786  
SRR17520069. 1266116  
SRR17520069. 1267957  
SRR17520069. 1267959  
SRR17520069. 1267961  
SRR17520069. 1267963  
SRR17520069. 1267965  
SRR17520069. 1267967  
SRR17520069. 1267969  
SRR17520069. 1267971  
SRR17520069. 1278769  
SRR17520069. 1278771  
SRR17520069. 1278773  
SRR17520069. 1278775  
SRR17520069. 1278777  
SRR17520069. 1278779  
SRR17520069. 1278781  
SRR17520069. 1278783  
SRR17520069. 1278785  
SRR17520069. 1278787  
SRR17520069. 1278789  
SRR17520069. 1278791  
SRR17520069. 1278793  
SRR17520069. 1278795  
SRR17520069. 1278797  
SRR17520069. 1278799  
SRR17520069. 1278801



SRR17520069. 1278803  
SRR17520069. 1278805  
SRR17520069. 1278807  
SRR17520069. 1278809  
SRR17520069. 1278813  
SRR17520069. 1278815  
SRR17520069. 1278817  
SRR17520069. 1278821  
SRR17520069. 1278823  
SRR17520069. 1278825  
SRR17520069. 1278827  
SRR17520069. 1278829  
SRR17520069. 1278831  
SRR17520069. 1278833  
SRR17520069. 1278835  
SRR17520069. 1278837  
SRR17520069. 1278839  
SRR17520069. 1278841  
SRR17520069. 1278843  
SRR17520069. 1278845  
SRR17520069. 1278847  
SRR17520069. 1278849  
SRR17520069. 1278851  
SRR17520069. 1278853  
SRR17520069. 1278855  
SRR17520069. 1278859  
SRR17520069. 1278861  
SRR17520069. 1278863  
SRR17520069. 1278865  
SRR17520069. 1278867  
SRR17520069. 1278871  
SRR17520069. 1278873  
SRR17520069. 1278875  
SRR17520069. 1278877  
SRR17520069. 1278879  
SRR17520069. 1278881  
SRR17520069. 1278883  
SRR17520069. 1278885  
SRR17520069. 1278887  
SRR17520069. 1278889  
SRR17520069. 1278891  
SRR17520069. 1278899  
SRR17520069. 1278902  
SRR17520069. 1278904  
SRR17520069. 1278906  
SRR17520069. 1278908  
SRR17520069. 1278914

SRR17520069.1278922  
SRR17520069.1278924  
SRR17520069.1282101  
SRR17520069.1282103  
SRR17520069.1282105  
SRR17520069.1287108  
SRR17520069.1287110  
SRR17520069.1288019  
SRR17520069.1288021  
SRR17520069.1288023  
SRR17520069.1288025  
SRR17520069.1288027  
SRR17520069.1288029  
SRR17520069.1288031  
SRR17520069.1288033  
SRR17520069.1288035  
SRR17520069.1288037  
SRR17520069.1288039  
SRR17520069.1288041  
SRR17520069.1288043  
SRR17520069.1288045  
SRR17520069.1288047  
SRR17520069.1288049  
SRR17520069.1288051  
SRR17520069.1288053  
SRR17520069.1288055  
SRR17520069.1288057  
SRR17520069.1288059  
SRR17520069.1288063  
SRR17520069.1288065  
SRR17520069.1288067  
SRR17520069.1288069  
SRR17520069.1288071  
SRR17520069.1288073  
SRR17520069.1288075  
SRR17520069.1288077  
SRR17520069.1288079  
SRR17520069.1288081  
SRR17520069.1288083  
SRR17520069.1288085  
SRR17520069.1288087  
SRR17520069.1288089  
SRR17520069.1288091  
SRR17520069.1288093  
SRR17520069.1288095  
SRR17520069.1288097  
SRR17520069.1288099

SRR17520069.1288101  
SRR17520069.1288103  
SRR17520069.1288105  
SRR17520069.1291973  
SRR17520069.1291975  
SRR17520069.1291977  
SRR17520069.1291979  
SRR17520069.1291981  
SRR17520069.1291983  
SRR17520069.1291985  
SRR17520069.1291987  
SRR17520069.1291989  
SRR17520069.1291991  
SRR17520069.1291993  
SRR17520069.1291995  
SRR17520069.1291997  
SRR17520069.1292001  
SRR17520069.1292003  
SRR17520069.1292005  
SRR17520069.1292009  
SRR17520069.1292011  
SRR17520069.1292013  
SRR17520069.1292015  
SRR17520069.1292017  
SRR17520069.1292019  
SRR17520069.1292021  
SRR17520069.1292023  
SRR17520069.1292025  
SRR17520069.1292027  
SRR17520069.1292029  
SRR17520069.1292031  
SRR17520069.1292033  
SRR17520069.1292035  
SRR17520069.1292037  
SRR17520069.1292039  
SRR17520069.1292041  
SRR17520069.1292043  
SRR17520069.1292873  
SRR17520069.1292875  
SRR17520069.1292877  
SRR17520069.1292879  
SRR17520069.1292881  
SRR17520069.1292883  
SRR17520069.1292885  
SRR17520069.1292887  
SRR17520069.1292889  
SRR17520069.1292891

SRR17520069. 1292893  
SRR17520069. 1292897  
SRR17520069. 1293831  
SRR17520069. 1293833  
SRR17520069. 1293835  
SRR17520069. 1295398  
SRR17520069. 1295400  
SRR17520069. 1295402  
SRR17520069. 1295406  
SRR17520069. 1295408  
SRR17520069. 1295410  
SRR17520069. 1295412  
SRR17520069. 1296436  
SRR17520069. 1296438  
SRR17520069. 1296440  
SRR17520069. 1296442  
SRR17520069. 1296444  
SRR17520069. 1296446  
SRR17520069. 1296448  
SRR17520069. 1296450  
SRR17520069. 1298477  
SRR17520069. 1298479  
SRR17520069. 1298481  
SRR17520069. 1298483  
SRR17520069. 1298485  
SRR17520069. 1299052  
SRR17520069. 1299054  
SRR17520069. 1299056  
SRR17520069. 1299058  
SRR17520069. 1299060  
SRR17520069. 1299064  
SRR17520069. 1299066  
SRR17520069. 1299068  
SRR17520069. 1299070  
SRR17520069. 1299579  
SRR17520069. 1299581  
SRR17520069. 1299583  
SRR17520069. 1299585  
SRR17520069. 1299587  
SRR17520069. 1299589  
SRR17520069. 1299591  
SRR17520069. 1299593  
SRR17520069. 1299595  
SRR17520069. 1299597  
SRR17520069. 1302834  
SRR17520069. 1302836  
SRR17520069. 1302838

SRR17520069. 1302840  
SRR17520069. 1302842  
SRR17520069. 1302844  
SRR17520069. 1302846  
SRR17520069. 1302848  
SRR17520069. 1307455  
SRR17520069. 1307457  
SRR17520069. 1316784  
SRR17520069. 1320280  
SRR17520069. 1322945  
SRR17520069. 1322947  
SRR17520069. 1322949  
SRR17520069. 1322951  
SRR17520069. 1322953  
SRR17520069. 1322955  
SRR17520069. 1322957  
SRR17520069. 1322959  
SRR17520069. 1322961  
SRR17520069. 1322963  
SRR17520069. 1322965  
SRR17520069. 1322967  
SRR17520069. 1322969  
SRR17520069. 1322971  
SRR17520069. 1322973  
SRR17520069. 1322975  
SRR17520069. 1322977  
SRR17520069. 1322979  
SRR17520069. 1329759  
SRR17520069. 1332795  
SRR17520069. 1332797  
SRR17520069. 1332799  
SRR17520069. 1332803  
SRR17520069. 1332805  
SRR17520069. 1332807  
SRR17520069. 1332809  
SRR17520069. 1332811  
SRR17520069. 1332813  
SRR17520069. 1332815  
SRR17520069. 1332817  
SRR17520069. 1332819  
SRR17520069. 1332821  
SRR17520069. 1334563  
SRR17520069. 1334565  
SRR17520069. 1334569  
SRR17520069. 1334571  
SRR17520069. 1334573  
SRR17520069. 1334575

SRR17520069. 1334579  
SRR17520069. 1335976  
SRR17520069. 1335978  
SRR17520069. 1335980  
SRR17520069. 1335982  
SRR17520069. 1335984  
SRR17520069. 1335986  
SRR17520069. 1335988  
SRR17520069. 1335990  
SRR17520069. 1335992  
SRR17520069. 1335994  
SRR17520069. 1335996  
SRR17520069. 1335998  
SRR17520069. 1336000  
SRR17520069. 1336002  
SRR17520069. 1336004  
SRR17520069. 1336006  
SRR17520069. 1336008  
SRR17520069. 1336010  
SRR17520069. 1336012  
SRR17520069. 1336014  
SRR17520069. 1336016  
SRR17520069. 1336018  
SRR17520069. 1336020  
SRR17520069. 1336022  
SRR17520069. 1336024  
SRR17520069. 1336026  
SRR17520069. 1336028  
SRR17520069. 1336030  
SRR17520069. 1336032  
SRR17520069. 1336034  
SRR17520069. 1336036  
SRR17520069. 1336040  
SRR17520069. 1336042  
SRR17520069. 1336044  
SRR17520069. 1336046  
SRR17520069. 1336048  
SRR17520069. 1336050  
SRR17520069. 1336052  
SRR17520069. 1336054  
SRR17520069. 1336056  
SRR17520069. 1336058  
SRR17520069. 1336060  
SRR17520069. 1336062  
SRR17520069. 1336064  
SRR17520069. 1336066  
SRR17520069. 1341611

SRR17520069.1341613  
SRR17520069.1341615  
SRR17520069.1342003  
SRR17520069.1342005  
SRR17520069.1342007  
SRR17520069.1342009  
SRR17520069.1342011  
SRR17520069.1342013  
SRR17520069.1342015  
SRR17520069.1342017  
SRR17520069.1342019  
SRR17520069.1342021  
SRR17520069.1342023  
SRR17520069.1342025  
SRR17520069.1342027  
SRR17520069.1342029  
SRR17520069.1342031  
SRR17520069.1342033  
SRR17520069.1342035  
SRR17520069.1342037  
SRR17520069.1342039  
SRR17520069.1342041  
SRR17520069.1342043  
SRR17520069.1342045  
SRR17520069.1342047  
SRR17520069.1342049  
SRR17520069.1342053  
SRR17520069.1342055  
SRR17520069.1342057  
SRR17520069.1342059  
SRR17520069.1342061  
SRR17520069.1342063  
SRR17520069.1342065  
SRR17520069.1342067  
SRR17520069.1342069  
SRR17520069.1342071  
SRR17520069.1342073  
SRR17520069.1342075  
SRR17520069.1342077  
SRR17520069.1342079  
SRR17520069.1342081  
SRR17520069.1342083  
SRR17520069.1342085  
SRR17520069.1342087  
SRR17520069.1347313  
SRR17520069.1347344  
SRR17520069.1351647

SRR17520069. 1351649  
SRR17520069. 1351651  
SRR17520069. 1351653  
SRR17520069. 1351655  
SRR17520069. 1351657  
SRR17520069. 1352027  
SRR17520069. 1352029  
SRR17520069. 1352031  
SRR17520069. 1352033  
SRR17520069. 1352035  
SRR17520069. 1352041  
SRR17520069. 1352043  
SRR17520069. 1352045  
SRR17520069. 1352047  
SRR17520069. 1352049  
SRR17520069. 1352053  
SRR17520069. 1352055  
SRR17520069. 1352057  
SRR17520069. 1352059  
SRR17520069. 1352061  
SRR17520069. 1352065  
SRR17520069. 1352067  
SRR17520069. 1352069  
SRR17520069. 1352073  
SRR17520069. 1352075  
SRR17520069. 1352077  
SRR17520069. 1352079  
SRR17520069. 1352083  
SRR17520069. 1352085  
SRR17520069. 1352087  
SRR17520069. 1352091  
SRR17520069. 1352093  
SRR17520069. 1352095  
SRR17520069. 1352097  
SRR17520069. 1357469  
SRR17520069. 1357471  
SRR17520069. 1357473  
SRR17520069. 1357475  
SRR17520069. 1357477  
SRR17520069. 1357479  
SRR17520069. 1357481  
SRR17520069. 1357483  
SRR17520069. 1357485  
SRR17520069. 1357487  
SRR17520069. 1357489  
SRR17520069. 1357491  
SRR17520069. 1357493



SRR17520069. 1357495  
SRR17520069. 1357497  
SRR17520069. 1357499  
SRR17520069. 1357501  
SRR17520069. 1357503  
SRR17520069. 1357505  
SRR17520069. 1357507  
SRR17520069. 1357509  
SRR17520069. 1357511  
SRR17520069. 1357513  
SRR17520069. 1357515  
SRR17520069. 1357517  
SRR17520069. 1357519  
SRR17520069. 1357521  
SRR17520069. 1357523  
SRR17520069. 1357525  
SRR17520069. 1357527  
SRR17520069. 1357529  
SRR17520069. 1357531  
SRR17520069. 1357533  
SRR17520069. 1357535  
SRR17520069. 1357537  
SRR17520069. 1357539  
SRR17520069. 1357541  
SRR17520069. 1357543  
SRR17520069. 1357545  
SRR17520069. 1357547  
SRR17520069. 1357549  
SRR17520069. 1357551  
SRR17520069. 1357553  
SRR17520069. 1357555  
SRR17520069. 1357557  
SRR17520069. 1357559  
SRR17520069. 1357561  
SRR17520069. 1357563  
SRR17520069. 1357565  
SRR17520069. 1358095  
SRR17520069. 1358097  
SRR17520069. 1358099  
SRR17520069. 1358101  
SRR17520069. 1358103  
SRR17520069. 1358105  
SRR17520069. 1358107  
SRR17520069. 1358109  
SRR17520069. 1358111  
SRR17520069. 1358113  
SRR17520069. 1358115

SRR17520069. 1358117  
SRR17520069. 1358119  
SRR17520069. 1358121  
SRR17520069. 1358123  
SRR17520069. 1358125  
SRR17520069. 1358127  
SRR17520069. 1358129  
SRR17520069. 1358131  
SRR17520069. 1358133  
SRR17520069. 1358135  
SRR17520069. 1358137  
SRR17520069. 1358139  
SRR17520069. 1358141  
SRR17520069. 1362507  
SRR17520069. 1362511  
SRR17520069. 1362513  
SRR17520069. 1362515  
SRR17520069. 1362517  
SRR17520069. 1362519  
SRR17520069. 1362521  
SRR17520069. 1362523  
SRR17520069. 1362525  
SRR17520069. 1362527  
SRR17520069. 1362531  
SRR17520069. 1364219  
SRR17520069. 1364221  
SRR17520069. 1364223  
SRR17520069. 1364225  
SRR17520069. 1364227  
SRR17520069. 1364231  
SRR17520069. 1364233  
SRR17520069. 1364235  
SRR17520069. 1364239  
SRR17520069. 1364241  
SRR17520069. 1364243  
SRR17520069. 1364245  
SRR17520069. 1364247  
SRR17520069. 1364249  
SRR17520069. 1364251  
SRR17520069. 1364253  
SRR17520069. 1364255  
SRR17520069. 1364257  
SRR17520069. 1364259  
SRR17520069. 1364261  
SRR17520069. 1364265  
SRR17520069. 1364267  
SRR17520069. 1364269

SRR17520069. 1364273  
SRR17520069. 1364275  
SRR17520069. 1364277  
SRR17520069. 1364279  
SRR17520069. 1364281  
SRR17520069. 1364283  
SRR17520069. 1364285  
SRR17520069. 1364287  
SRR17520069. 1364289  
SRR17520069. 1364291  
SRR17520069. 1364293  
SRR17520069. 1364295  
SRR17520069. 1364297  
SRR17520069. 1364301  
SRR17520069. 1364303  
SRR17520069. 1364305  
SRR17520069. 1364307  
SRR17520069. 1364309  
SRR17520069. 1364311  
SRR17520069. 1364313  
SRR17520069. 1364315  
SRR17520069. 1364317  
SRR17520069. 1364319  
SRR17520069. 1367224  
SRR17520069. 1367226  
SRR17520069. 1367228  
SRR17520069. 1367230  
SRR17520069. 1367232  
SRR17520069. 1367234  
SRR17520069. 1367236  
SRR17520069. 1367238  
SRR17520069. 1367240  
SRR17520069. 1368184  
SRR17520069. 1368188  
SRR17520069. 1368190  
SRR17520069. 1368192  
SRR17520069. 1368194  
SRR17520069. 1368196  
SRR17520069. 1368198  
SRR17520069. 1368200  
SRR17520069. 1368204  
SRR17520069. 1368206  
SRR17520069. 1368208  
SRR17520069. 1368210  
SRR17520069. 1368214  
SRR17520069. 1368216  
SRR17520069. 1368218

SRR17520069. 1368220  
SRR17520069. 1368222  
SRR17520069. 1368224  
SRR17520069. 1368226  
SRR17520069. 1368228  
SRR17520069. 1368230  
SRR17520069. 1368232  
SRR17520069. 1368234  
SRR17520069. 1368236  
SRR17520069. 1381085  
SRR17520069. 1381087  
SRR17520069. 1381089  
SRR17520069. 1381091  
SRR17520069. 1381093  
SRR17520069. 1388991  
SRR17520069. 1388993  
SRR17520069. 1388995  
SRR17520069. 1389001  
SRR17520069. 1389003  
SRR17520069. 1389005  
SRR17520069. 1390014  
SRR17520069. 1390018  
SRR17520069. 1390020  
SRR17520069. 1390022  
SRR17520069. 1390024  
SRR17520069. 1390026  
SRR17520069. 1390028  
SRR17520069. 1390030  
SRR17520069. 1390032  
SRR17520069. 1392519  
SRR17520069. 1392521  
SRR17520069. 1392523  
SRR17520069. 1394566  
SRR17520069. 1394568  
SRR17520069. 1394570  
SRR17520069. 1394572  
SRR17520069. 1394574  
SRR17520069. 1394576  
SRR17520069. 1394578  
SRR17520069. 1394580  
SRR17520069. 1394582  
SRR17520069. 1394961  
SRR17520069. 1394963  
SRR17520069. 1394965  
SRR17520069. 1394967  
SRR17520069. 1394969  
SRR17520069. 1394971

SRR17520069. 1394973  
SRR17520069. 1394975  
SRR17520069. 1396739  
SRR17520069. 1396741  
SRR17520069. 1396745  
SRR17520069. 1396747  
SRR17520069. 1396749  
SRR17520069. 1396751  
SRR17520069. 1396753  
SRR17520069. 1396755  
SRR17520069. 1396759  
SRR17520069. 1396761  
SRR17520069. 1396763  
SRR17520069. 1396765  
SRR17520069. 1396767  
SRR17520069. 1396769  
SRR17520069. 1396771  
SRR17520069. 1396773  
SRR17520069. 1396775  
SRR17520069. 1396777  
SRR17520069. 1396779  
SRR17520069. 1396781  
SRR17520069. 1396783  
SRR17520069. 1396785  
SRR17520069. 1396787  
SRR17520069. 1396789  
SRR17520069. 1396791  
SRR17520069. 1396793  
SRR17520069. 1396795  
SRR17520069. 1396797  
SRR17520069. 1396799  
SRR17520069. 1396801  
SRR17520069. 1396803  
SRR17520069. 1396805  
SRR17520069. 1396807  
SRR17520069. 1396809  
SRR17520069. 1396811  
SRR17520069. 1396813  
SRR17520069. 1396817  
SRR17520069. 1396819  
SRR17520069. 1396823  
SRR17520069. 1396827  
SRR17520069. 1396829  
SRR17520069. 1396831  
SRR17520069. 1396833  
SRR17520069. 1396835  
SRR17520069. 1396837

SRR17520069. 1396839  
SRR17520069. 1396841  
SRR17520069. 1396843  
SRR17520069. 1396845  
SRR17520069. 1396847  
SRR17520069. 1396849  
SRR17520069. 1396851  
SRR17520069. 1396853  
SRR17520069. 1396855  
SRR17520069. 1396857  
SRR17520069. 1396859  
SRR17520069. 1396861  
SRR17520069. 1396863  
SRR17520069. 1396865  
SRR17520069. 1396867  
SRR17520069. 1396869  
SRR17520069. 1396871  
SRR17520069. 1396873  
SRR17520069. 1396875  
SRR17520069. 1396877  
SRR17520069. 1396879  
SRR17520069. 1396881  
SRR17520069. 1396883  
SRR17520069. 1396885  
SRR17520069. 1396887  
SRR17520069. 1396889  
SRR17520069. 1396891  
SRR17520069. 1396893  
SRR17520069. 1396895  
SRR17520069. 1396897  
SRR17520069. 1396899  
SRR17520069. 1396901  
SRR17520069. 1396903  
SRR17520069. 1396905  
SRR17520069. 1396907  
SRR17520069. 1396909  
SRR17520069. 1396911  
SRR17520069. 1396913  
SRR17520069. 1396915  
SRR17520069. 1396917  
SRR17520069. 1396919  
SRR17520069. 1400491  
SRR17520069. 1406291  
SRR17520069. 1406293  
SRR17520069. 1406390  
SRR17520069. 1409713  
SRR17520069. 1409715

SRR17520069.1409717  
SRR17520069.1409719  
SRR17520069.1409721  
SRR17520069.1409725  
SRR17520069.1409727  
SRR17520069.1409729  
SRR17520069.1409731  
SRR17520069.1409733  
SRR17520069.1409735  
SRR17520069.1409737  
SRR17520069.1409739  
SRR17520069.1409741  
SRR17520069.1409743  
SRR17520069.1409745  
SRR17520069.1412760  
SRR17520069.1418512  
SRR17520069.1418514  
SRR17520069.1418516  
SRR17520069.1418518  
SRR17520069.1419544  
SRR17520069.1419546  
SRR17520069.1419548  
SRR17520069.1419550  
SRR17520069.1419552  
SRR17520069.1419554  
SRR17520069.1419558  
SRR17520069.1433202  
SRR17520069.1433204  
SRR17520069.1433206  
SRR17520069.1433208  
SRR17520069.1433210  
SRR17520069.1433212  
SRR17520069.1433214  
SRR17520069.1433216  
SRR17520069.1433218  
SRR17520069.1433220  
SRR17520069.1433222  
SRR17520069.1436073  
SRR17520069.1436075  
SRR17520069.1436077  
SRR17520069.1436079  
SRR17520069.1436081  
SRR17520069.1436083  
SRR17520069.1436087  
SRR17520069.1436089  
SRR17520069.1436091  
SRR17520069.1436093

SRR17520069.1436095  
SRR17520069.1436099  
SRR17520069.1436101  
SRR17520069.1436103  
SRR17520069.1436105  
SRR17520069.1436107  
SRR17520069.1436109  
SRR17520069.1436111  
SRR17520069.1436113  
SRR17520069.1436115  
SRR17520069.1436117  
SRR17520069.1436121  
SRR17520069.1436123  
SRR17520069.1436125  
SRR17520069.1436161  
SRR17520069.1436163  
SRR17520069.1442189  
SRR17520069.1442191  
SRR17520069.1442193  
SRR17520069.1442195  
SRR17520069.1442197  
SRR17520069.1442199  
SRR17520069.1442201  
SRR17520069.1444607  
SRR17520069.1444609  
SRR17520069.1444611  
SRR17520069.1444613  
SRR17520069.1444615  
SRR17520069.1444617  
SRR17520069.1444619  
SRR17520069.1444621  
SRR17520069.1445866  
SRR17520069.1445868  
SRR17520069.1445870  
SRR17520069.1445872  
SRR17520069.1445874  
SRR17520069.1445876  
SRR17520069.1445880  
SRR17520069.1445882  
SRR17520069.1445884  
SRR17520069.1445886  
SRR17520069.1445888  
SRR17520069.1446737  
SRR17520069.1446739  
SRR17520069.1446741  
SRR17520069.1446743  
SRR17520069.1446745



SRR17520069.1446747  
SRR17520069.1446749  
SRR17520069.1446751  
SRR17520069.1446753  
SRR17520069.1446755  
SRR17520069.1446757  
SRR17520069.1446759  
SRR17520069.1446761  
SRR17520069.1446763  
SRR17520069.1446767  
SRR17520069.1446769  
SRR17520069.1446771  
SRR17520069.1446775  
SRR17520069.1446777  
SRR17520069.1446779  
SRR17520069.1446781  
SRR17520069.1446783  
SRR17520069.1446785  
SRR17520069.1446787  
SRR17520069.1446789  
SRR17520069.1446791  
SRR17520069.1446793  
SRR17520069.1446795  
SRR17520069.1446797  
SRR17520069.1446801  
SRR17520069.1446803  
SRR17520069.1446805  
SRR17520069.1446807  
SRR17520069.1446809  
SRR17520069.1446811  
SRR17520069.1446813  
SRR17520069.1446815  
SRR17520069.1446819  
SRR17520069.1446821  
SRR17520069.1446823  
SRR17520069.1446825  
SRR17520069.1446827  
SRR17520069.1446829  
SRR17520069.1446831  
SRR17520069.1446835  
SRR17520069.1446837  
SRR17520069.1446839  
SRR17520069.1446841  
SRR17520069.1446843  
SRR17520069.1446845  
SRR17520069.1446847  
SRR17520069.1446849

SRR17520069.1446851  
SRR17520069.1446853  
SRR17520069.1446855  
SRR17520069.1446857  
SRR17520069.1446859  
SRR17520069.1446861  
SRR17520069.1446863  
SRR17520069.1452526  
SRR17520069.1452528  
SRR17520069.1452530  
SRR17520069.1452532  
SRR17520069.1458489  
SRR17520069.1458491  
SRR17520069.1458493  
SRR17520069.1458495  
SRR17520069.1458497  
SRR17520069.1458499  
SRR17520069.1458501  
SRR17520069.1458503  
SRR17520069.1458505  
SRR17520069.1458507  
SRR17520069.1458509  
SRR17520069.1458511  
SRR17520069.1458513  
SRR17520069.1470936  
SRR17520069.1470938  
SRR17520069.1478634  
SRR17520069.1478636  
SRR17520069.1478640  
SRR17520069.1478644  
SRR17520069.1478646  
SRR17520069.1478648  
SRR17520069.1478650  
SRR17520069.1478652  
SRR17520069.1478654  
SRR17520069.1478656  
SRR17520069.1478658  
SRR17520069.1478660  
SRR17520069.1478662  
SRR17520069.1478664  
SRR17520069.1478666  
SRR17520069.1478668  
SRR17520069.1478670  
SRR17520069.1478672  
SRR17520069.1478674  
SRR17520069.1478676  
SRR17520069.1478678

SRR17520069. 1478680  
SRR17520069. 1478682  
SRR17520069. 1478684  
SRR17520069. 1478686  
SRR17520069. 1478688  
SRR17520069. 1478690  
SRR17520069. 1478692  
SRR17520069. 1478694  
SRR17520069. 1478696  
SRR17520069. 1478698  
SRR17520069. 1478700  
SRR17520069. 1478702  
SRR17520069. 1478704  
SRR17520069. 1478706  
SRR17520069. 1478708  
SRR17520069. 1478710  
SRR17520069. 1478712  
SRR17520069. 1478714  
SRR17520069. 1478716  
SRR17520069. 1478718  
SRR17520069. 1478720  
SRR17520069. 1478722  
SRR17520069. 1478724  
SRR17520069. 1478726  
SRR17520069. 1478728  
SRR17520069. 1478730  
SRR17520069. 1478732  
SRR17520069. 1478734  
SRR17520069. 1478736  
SRR17520069. 1478738  
SRR17520069. 1478740  
SRR17520069. 1478742  
SRR17520069. 1478744  
SRR17520069. 1478746  
SRR17520069. 1478748  
SRR17520069. 1478750  
SRR17520069. 1478752  
SRR17520069. 1478754  
SRR17520069. 1478756  
SRR17520069. 1478758  
SRR17520069. 1478760  
SRR17520069. 1478762  
SRR17520069. 1478764  
SRR17520069. 1478766  
SRR17520069. 1478768  
SRR17520069. 1478770  
SRR17520069. 1478772

SRR17520069.1478774  
SRR17520069.1478776  
SRR17520069.1478778  
SRR17520069.1478780  
SRR17520069.1478782  
SRR17520069.1478784  
SRR17520069.1478786  
SRR17520069.1478788  
SRR17520069.1478790  
SRR17520069.1478792  
SRR17520069.1478794  
SRR17520069.1478796  
SRR17520069.1478798  
SRR17520069.1478800  
SRR17520069.1478802  
SRR17520069.1478804  
SRR17520069.1478806  
SRR17520069.1478808  
SRR17520069.1478810  
SRR17520069.1478812  
SRR17520069.1478816  
SRR17520069.1478818  
SRR17520069.1478820  
SRR17520069.1478822  
SRR17520069.1478824  
SRR17520069.1478826  
SRR17520069.1478828  
SRR17520069.1478830  
SRR17520069.1478832  
SRR17520069.1478834  
SRR17520069.1478836  
SRR17520069.1478840  
SRR17520069.1478842  
SRR17520069.1478844  
SRR17520069.1478846  
SRR17520069.1478848  
SRR17520069.1478850  
SRR17520069.1478852  
SRR17520069.1478854  
SRR17520069.1478856  
SRR17520069.1478858  
SRR17520069.1478860  
SRR17520069.1478862  
SRR17520069.1478864  
SRR17520069.1478866  
SRR17520069.1478868  
SRR17520069.1478870

SRR17520069. 1478872  
SRR17520069. 1478876  
SRR17520069. 1478878  
SRR17520069. 1478880  
SRR17520069. 1478882  
SRR17520069. 1478884  
SRR17520069. 1478886  
SRR17520069. 1478888  
SRR17520069. 1478890  
SRR17520069. 1478892  
SRR17520069. 1478894  
SRR17520069. 1478896  
SRR17520069. 1478898  
SRR17520069. 1478900  
SRR17520069. 1478902  
SRR17520069. 1478904  
SRR17520069. 1478908  
SRR17520069. 1478910  
SRR17520069. 1478912  
SRR17520069. 1478914  
SRR17520069. 1478916  
SRR17520069. 1478918  
SRR17520069. 1478920  
SRR17520069. 1478922  
SRR17520069. 1478924  
SRR17520069. 1478926  
SRR17520069. 1478928  
SRR17520069. 1478930  
SRR17520069. 1478932  
SRR17520069. 1478934  
SRR17520069. 1478936  
SRR17520069. 1478938  
SRR17520069. 1478940  
SRR17520069. 1478942  
SRR17520069. 1478944  
SRR17520069. 1478946  
SRR17520069. 1478948  
SRR17520069. 1478950  
SRR17520069. 1478952  
SRR17520069. 1478954  
SRR17520069. 1478956  
SRR17520069. 1478958  
SRR17520069. 1478960  
SRR17520069. 1478962  
SRR17520069. 1478964  
SRR17520069. 1478966  
SRR17520069. 1478968

SRR17520069. 1478970  
SRR17520069. 1478972  
SRR17520069. 1478974  
SRR17520069. 1478976  
SRR17520069. 1478978  
SRR17520069. 1478980  
SRR17520069. 1486180  
SRR17520069. 1486182  
SRR17520069. 1486184  
SRR17520069. 1486186  
SRR17520069. 1494141  
SRR17520069. 1494143  
SRR17520069. 1494145  
SRR17520069. 1494147  
SRR17520069. 1494149  
SRR17520069. 1494151  
SRR17520069. 1494153  
SRR17520069. 1494155  
SRR17520069. 1494157  
SRR17520069. 1494159  
SRR17520069. 1494161  
SRR17520069. 1494163  
SRR17520069. 1494167  
SRR17520069. 1494169  
SRR17520069. 1494171  
SRR17520069. 1494173  
SRR17520069. 1494175  
SRR17520069. 1494177  
SRR17520069. 1494179  
SRR17520069. 1494181  
SRR17520069. 1494183  
SRR17520069. 1494185  
SRR17520069. 1494187  
SRR17520069. 1494189  
SRR17520069. 1494191  
SRR17520069. 1494193  
SRR17520069. 1494195  
SRR17520069. 1494197  
SRR17520069. 1494199  
SRR17520069. 1494201  
SRR17520069. 1494203  
SRR17520069. 1494205  
SRR17520069. 1496186  
SRR17520069. 1496188  
SRR17520069. 1496190  
SRR17520069. 1496192  
SRR17520069. 1496194

SRR17520069. 1496196  
SRR17520069. 1496198  
SRR17520069. 1496200  
SRR17520069. 1496202  
SRR17520069. 1496204  
SRR17520069. 1496206  
SRR17520069. 1496208  
SRR17520069. 1496210  
SRR17520069. 1496212  
SRR17520069. 1496214  
SRR17520069. 1496216  
SRR17520069. 1496218  
SRR17520069. 1496220  
SRR17520069. 1496222  
SRR17520069. 1496224  
SRR17520069. 1496226  
SRR17520069. 1496228  
SRR17520069. 1496230  
SRR17520069. 1496236  
SRR17520069. 1496238  
SRR17520069. 1496240  
SRR17520069. 1496242  
SRR17520069. 1496244  
SRR17520069. 1496246  
SRR17520069. 1496248  
SRR17520069. 1496250  
SRR17520069. 1496252  
SRR17520069. 1496254  
SRR17520069. 1496256  
SRR17520069. 1496258  
SRR17520069. 1496260  
SRR17520069. 1496264  
SRR17520069. 1496266  
SRR17520069. 1496268  
SRR17520069. 1496270  
SRR17520069. 1496272  
SRR17520069. 1496274  
SRR17520069. 1496276  
SRR17520069. 1496278  
SRR17520069. 1496280  
SRR17520069. 1496282  
SRR17520069. 1496284  
SRR17520069. 1496286  
SRR17520069. 1496288  
SRR17520069. 1496290  
SRR17520069. 1496292  
SRR17520069. 1496294

SRR17520069. 1496296  
SRR17520069. 1496298  
SRR17520069. 1496300  
SRR17520069. 1496302  
SRR17520069. 1496304  
SRR17520069. 1496306  
SRR17520069. 1496308  
SRR17520069. 1496310  
SRR17520069. 1496314  
SRR17520069. 1496316  
SRR17520069. 1496318  
SRR17520069. 1496320  
SRR17520069. 1496322  
SRR17520069. 1496324  
SRR17520069. 1496326  
SRR17520069. 1496328  
SRR17520069. 1496330  
SRR17520069. 1496332  
SRR17520069. 1496334  
SRR17520069. 1496336  
SRR17520069. 1496338  
SRR17520069. 1496340  
SRR17520069. 1496342  
SRR17520069. 1496344  
SRR17520069. 1496346  
SRR17520069. 1496350  
SRR17520069. 1496352  
SRR17520069. 1496354  
SRR17520069. 1496356  
SRR17520069. 1496360  
SRR17520069. 1496362  
SRR17520069. 1496366  
SRR17520069. 1496368  
SRR17520069. 1496370  
SRR17520069. 1496372  
SRR17520069. 1496374  
SRR17520069. 1496376  
SRR17520069. 1496378  
SRR17520069. 1496380  
SRR17520069. 1496382  
SRR17520069. 1496386  
SRR17520069. 1496388  
SRR17520069. 1496390  
SRR17520069. 1496394  
SRR17520069. 1496396  
SRR17520069. 1496398  
SRR17520069. 1496400



SRR17520069. 1496402  
SRR17520069. 1496406  
SRR17520069. 1496408  
SRR17520069. 1496410  
SRR17520069. 1500506  
SRR17520069. 1500508  
SRR17520069. 1500510  
SRR17520069. 1500512  
SRR17520069. 1500514  
SRR17520069. 1501712  
SRR17520069. 1503309  
SRR17520069. 1503311  
SRR17520069. 1505159  
SRR17520069. 1505161  
SRR17520069. 1505163  
SRR17520069. 1505165  
SRR17520069. 1505169  
SRR17520069. 1505171  
SRR17520069. 1505173  
SRR17520069. 1505175  
SRR17520069. 1505177  
SRR17520069. 1505179  
SRR17520069. 1505181  
SRR17520069. 1505183  
SRR17520069. 1505185  
SRR17520069. 1505187  
SRR17520069. 1505189  
SRR17520069. 1505191  
SRR17520069. 1505193  
SRR17520069. 1505195  
SRR17520069. 1505197  
SRR17520069. 1505199  
SRR17520069. 1505201  
SRR17520069. 1505871  
SRR17520069. 1505873  
SRR17520069. 1505875  
SRR17520069. 1505877  
SRR17520069. 1505879  
SRR17520069. 1505881  
SRR17520069. 1505883  
SRR17520069. 1505887  
SRR17520069. 1505889  
SRR17520069. 1505891  
SRR17520069. 1505893  
SRR17520069. 1505895  
SRR17520069. 1505897  
SRR17520069. 1505899

SRR17520069.1505903  
SRR17520069.1505905  
SRR17520069.1505907  
SRR17520069.1505909  
SRR17520069.1505911  
SRR17520069.1505913  
SRR17520069.1505915  
SRR17520069.1505917  
SRR17520069.1505919  
SRR17520069.1505921  
SRR17520069.1505923  
SRR17520069.1505925  
SRR17520069.1505927  
SRR17520069.1505929  
SRR17520069.1505935  
SRR17520069.1505937  
SRR17520069.1505941  
SRR17520069.1505943  
SRR17520069.1505945  
SRR17520069.1505947  
SRR17520069.1505949  
SRR17520069.1505951  
SRR17520069.1505953  
SRR17520069.1505955  
SRR17520069.1505957  
SRR17520069.1505959  
SRR17520069.1505961  
SRR17520069.1505963  
SRR17520069.1505965  
SRR17520069.1505967  
SRR17520069.1505969  
SRR17520069.1505971  
SRR17520069.1505973  
SRR17520069.1505975  
SRR17520069.1505977  
SRR17520069.1505979  
SRR17520069.1505981  
SRR17520069.1505983  
SRR17520069.1505985  
SRR17520069.1505987  
SRR17520069.1505989  
SRR17520069.1505991  
SRR17520069.1505993  
SRR17520069.1505995  
SRR17520069.1505997  
SRR17520069.1505999  
SRR17520069.1506001

SRR17520069. 1506005  
SRR17520069. 1506007  
SRR17520069. 1506009  
SRR17520069. 1506011  
SRR17520069. 1506013  
SRR17520069. 1506015  
SRR17520069. 1506017  
SRR17520069. 1506019  
SRR17520069. 1506021  
SRR17520069. 1506023  
SRR17520069. 1506025  
SRR17520069. 1506902  
SRR17520069. 1506904  
SRR17520069. 1506906  
SRR17520069. 1506908  
SRR17520069. 1508023  
SRR17520069. 1508025  
SRR17520069. 1508027  
SRR17520069. 1508029  
SRR17520069. 1508031  
SRR17520069. 1508033  
SRR17520069. 1508035  
SRR17520069. 1508037  
SRR17520069. 1508039  
SRR17520069. 1508041  
SRR17520069. 1508043  
SRR17520069. 1508045  
SRR17520069. 1508047  
SRR17520069. 1508049  
SRR17520069. 1508051  
SRR17520069. 1508053  
SRR17520069. 1508055  
SRR17520069. 1508057  
SRR17520069. 1508059  
SRR17520069. 1508061  
SRR17520069. 1508063  
SRR17520069. 1508065  
SRR17520069. 1508067  
SRR17520069. 1508069  
SRR17520069. 1508071  
SRR17520069. 1508073  
SRR17520069. 1508075  
SRR17520069. 1516439  
SRR17520069. 1516441  
SRR17520069. 1516443  
SRR17520069. 1516447  
SRR17520069. 1516449

SRR17520069. 1516451  
SRR17520069. 1516453  
SRR17520069. 1516455  
SRR17520069. 1516457  
SRR17520069. 1516461  
SRR17520069. 1516463  
SRR17520069. 1516465  
SRR17520069. 1516467  
SRR17520069. 1516469  
SRR17520069. 1516471  
SRR17520069. 1516473  
SRR17520069. 1516475  
SRR17520069. 1516477  
SRR17520069. 1516479  
SRR17520069. 1516481  
SRR17520069. 1516483  
SRR17520069. 1516485  
SRR17520069. 1516487  
SRR17520069. 1516489  
SRR17520069. 1516493  
SRR17520069. 1516495  
SRR17520069. 1516497  
SRR17520069. 1516499  
SRR17520069. 1516501  
SRR17520069. 1516503  
SRR17520069. 1516505  
SRR17520069. 1516507  
SRR17520069. 1516509  
SRR17520069. 1516511  
SRR17520069. 1516513  
SRR17520069. 1516515  
SRR17520069. 1517148  
SRR17520069. 1517150  
SRR17520069. 1517152  
SRR17520069. 1517154  
SRR17520069. 1517156  
SRR17520069. 1517158  
SRR17520069. 1517160  
SRR17520069. 1517162  
SRR17520069. 1517164  
SRR17520069. 1517166  
SRR17520069. 1517168  
SRR17520069. 1517170  
SRR17520069. 1517172  
SRR17520069. 1517174  
SRR17520069. 1517176  
SRR17520069. 1517178

SRR17520069. 1517180  
SRR17520069. 1517182  
SRR17520069. 1517184  
SRR17520069. 1517186  
SRR17520069. 1518838  
SRR17520069. 1518842  
SRR17520069. 1518844  
SRR17520069. 1518846  
SRR17520069. 1518848  
SRR17520069. 1518850  
SRR17520069. 1518852  
SRR17520069. 1518854  
SRR17520069. 1518856  
SRR17520069. 1518858  
SRR17520069. 1518862  
SRR17520069. 1518864  
SRR17520069. 1518866  
SRR17520069. 1518868  
SRR17520069. 1518870  
SRR17520069. 1518872  
SRR17520069. 1518874  
SRR17520069. 1518876  
SRR17520069. 1518878  
SRR17520069. 1518880  
SRR17520069. 1518882  
SRR17520069. 1518884  
SRR17520069. 1518886  
SRR17520069. 1518888  
SRR17520069. 1518890  
SRR17520069. 1518892  
SRR17520069. 1518894  
SRR17520069. 1518896  
SRR17520069. 1518898  
SRR17520069. 1518900  
SRR17520069. 1518902  
SRR17520069. 1518904  
SRR17520069. 1518906  
SRR17520069. 1518908  
SRR17520069. 1518910  
SRR17520069. 1518912  
SRR17520069. 1518914  
SRR17520069. 1518916  
SRR17520069. 1518918  
SRR17520069. 1518920  
SRR17520069. 1518922  
SRR17520069. 1518924  
SRR17520069. 1518926

SRR17520069. 1518930  
SRR17520069. 1518932  
SRR17520069. 1518934  
SRR17520069. 1518936  
SRR17520069. 1518938  
SRR17520069. 1518940  
SRR17520069. 1518942  
SRR17520069. 1521108  
SRR17520069. 1521110  
SRR17520069. 1521112  
SRR17520069. 1521114  
SRR17520069. 1521116  
SRR17520069. 1521118  
SRR17520069. 1521120  
SRR17520069. 1521122  
SRR17520069. 1521124  
SRR17520069. 1521126  
SRR17520069. 1521128  
SRR17520069. 1521130  
SRR17520069. 1521132  
SRR17520069. 1521134  
SRR17520069. 1521136  
SRR17520069. 1521138  
SRR17520069. 1521140  
SRR17520069. 1521144  
SRR17520069. 1521146  
SRR17520069. 1521148  
SRR17520069. 1521150  
SRR17520069. 1521152  
SRR17520069. 1521154  
SRR17520069. 1521156  
SRR17520069. 1521158  
SRR17520069. 1521160  
SRR17520069. 1521162  
SRR17520069. 1521164  
SRR17520069. 1521166  
SRR17520069. 1521168  
SRR17520069. 1521170  
SRR17520069. 1521172  
SRR17520069. 1522094  
SRR17520069. 1533083  
SRR17520069. 1533085  
SRR17520069. 1533087  
SRR17520069. 1533089  
SRR17520069. 1533091  
SRR17520069. 1533093  
SRR17520069. 1533095

SRR17520069. 1533097  
SRR17520069. 1533099  
SRR17520069. 1535771  
SRR17520069. 1535775  
SRR17520069. 1535777  
SRR17520069. 1535779  
SRR17520069. 1535781  
SRR17520069. 1535783  
SRR17520069. 1536991  
SRR17520069. 1540095  
SRR17520069. 1540097  
SRR17520069. 1540099  
SRR17520069. 1540101  
SRR17520069. 1542236  
SRR17520069. 1542244  
SRR17520069. 1542246  
SRR17520069. 1554109  
SRR17520069. 1556178  
SRR17520069. 1556184  
SRR17520069. 1556186  
SRR17520069. 1556188  
SRR17520069. 1556190  
SRR17520069. 1556192  
SRR17520069. 1556194  
SRR17520069. 1556198  
SRR17520069. 1556200  
SRR17520069. 1556202  
SRR17520069. 1556204  
SRR17520069. 1556206  
SRR17520069. 1566132  
SRR17520069. 1566136  
SRR17520069. 1566138  
SRR17520069. 1566140  
SRR17520069. 1566142  
SRR17520069. 1566146  
SRR17520069. 1566148  
SRR17520069. 1566150  
SRR17520069. 1566152  
SRR17520069. 1566154  
SRR17520069. 1570990  
SRR17520069. 1572750  
SRR17520069. 1572752  
SRR17520069. 1572754  
SRR17520069. 1572756  
SRR17520069. 1572758  
SRR17520069. 1572760  
SRR17520069. 1572762

SRR17520069. 1572764  
SRR17520069. 1572766  
SRR17520069. 1572768  
SRR17520069. 1572770  
SRR17520069. 1572772  
SRR17520069. 1572774  
SRR17520069. 1572776  
SRR17520069. 1572778  
SRR17520069. 1572780  
SRR17520069. 1572782  
SRR17520069. 1572784  
SRR17520069. 1572786  
SRR17520069. 1572788  
SRR17520069. 1572790  
SRR17520069. 1572792  
SRR17520069. 1572794  
SRR17520069. 1572796  
SRR17520069. 1572798  
SRR17520069. 1572800  
SRR17520069. 1572802  
SRR17520069. 1572804  
SRR17520069. 1572806  
SRR17520069. 1572808  
SRR17520069. 1572812  
SRR17520069. 1575687  
SRR17520069. 1575737  
SRR17520069. 1578058  
SRR17520069. 1578060  
SRR17520069. 1578062  
SRR17520069. 1578064  
SRR17520069. 1578066  
SRR17520069. 1578068  
SRR17520069. 1578070  
SRR17520069. 1578072  
SRR17520069. 1578074  
SRR17520069. 1578076  
SRR17520069. 1578078  
SRR17520069. 1578080  
SRR17520069. 1578082  
SRR17520069. 1578086  
SRR17520069. 1578088  
SRR17520069. 1578090  
SRR17520069. 1578092  
SRR17520069. 1578094  
SRR17520069. 1578096  
SRR17520069. 1578098  
SRR17520069. 1578100



SRR17520069. 1578104  
SRR17520069. 1578106  
SRR17520069. 1578252  
SRR17520069. 1578254  
SRR17520069. 1578256  
SRR17520069. 1578258  
SRR17520069. 1578260  
SRR17520069. 1578262  
SRR17520069. 1578264  
SRR17520069. 1578266  
SRR17520069. 1578268  
SRR17520069. 1578270  
SRR17520069. 1578272  
SRR17520069. 1578274  
SRR17520069. 1578276  
SRR17520069. 1578278  
SRR17520069. 1578280  
SRR17520069. 1578282  
SRR17520069. 1578284  
SRR17520069. 1578286  
SRR17520069. 1578288  
SRR17520069. 1589941  
SRR17520069. 1589943  
SRR17520069. 1589945  
SRR17520069. 1589947  
SRR17520069. 1589949  
SRR17520069. 1589951  
SRR17520069. 1589953  
SRR17520069. 1589955  
SRR17520069. 1589957  
SRR17520069. 1589959  
SRR17520069. 1589961  
SRR17520069. 1589963  
SRR17520069. 1592649  
SRR17520069. 1592651  
SRR17520069. 1592653  
SRR17520069. 1592655  
SRR17520069. 1592657  
SRR17520069. 1592659  
SRR17520069. 1592661  
SRR17520069. 1592663  
SRR17520069. 1592665  
SRR17520069. 1596620  
SRR17520069. 1596622  
SRR17520069. 1596624  
SRR17520069. 1596626  
SRR17520069. 1596628

SRR17520069. 1596630  
SRR17520069. 1596632  
SRR17520069. 1596634  
SRR17520069. 1596640  
SRR17520069. 1596642  
SRR17520069. 1596646  
SRR17520069. 1596648  
SRR17520069. 1596650  
SRR17520069. 1596654  
SRR17520069. 1596656  
SRR17520069. 1596660  
SRR17520069. 1596668  
SRR17520069. 1596670  
SRR17520069. 1596672  
SRR17520069. 1596674  
SRR17520069. 1596676  
SRR17520069. 1608007  
SRR17520069. 1608009  
SRR17520069. 1608011  
SRR17520069. 1608013  
SRR17520069. 1608015  
SRR17520069. 1608017  
SRR17520069. 1608019  
SRR17520069. 1608021  
SRR17520069. 1608023  
SRR17520069. 1608025  
SRR17520069. 1608027  
SRR17520069. 1608029  
SRR17520069. 1608031  
SRR17520069. 1608035  
SRR17520069. 1608037  
SRR17520069. 1608039  
SRR17520069. 1608041  
SRR17520069. 1608045  
SRR17520069. 1608047  
SRR17520069. 1608049  
SRR17520069. 1608053  
SRR17520069. 1608055  
SRR17520069. 1608057  
SRR17520069. 1608059  
SRR17520069. 1608063  
SRR17520069. 1608065  
SRR17520069. 1608067  
SRR17520069. 1608069  
SRR17520069. 1608071  
SRR17520069. 1608073  
SRR17520069. 1608075

SRR17520069. 1608077  
SRR17520069. 1608079  
SRR17520069. 1608081  
SRR17520069. 1608083  
SRR17520069. 1608085  
SRR17520069. 1608087  
SRR17520069. 1608089  
SRR17520069. 1608091  
SRR17520069. 1608093  
SRR17520069. 1608095  
SRR17520069. 1608097  
SRR17520069. 1608101  
SRR17520069. 1608103  
SRR17520069. 1608105  
SRR17520069. 1608107  
SRR17520069. 1608109  
SRR17520069. 1608111  
SRR17520069. 1608113  
SRR17520069. 1608115  
SRR17520069. 1608117  
SRR17520069. 1608119  
SRR17520069. 1608121  
SRR17520069. 1608123  
SRR17520069. 1608131  
SRR17520069. 1608133  
SRR17520069. 1608135  
SRR17520069. 1608137  
SRR17520069. 1608139  
SRR17520069. 1608141  
SRR17520069. 1608143  
SRR17520069. 1608145  
SRR17520069. 1608147  
SRR17520069. 1608149  
SRR17520069. 1608151  
SRR17520069. 1608155  
SRR17520069. 1608157  
SRR17520069. 1608159  
SRR17520069. 1608161  
SRR17520069. 1608163  
SRR17520069. 1608165  
SRR17520069. 1608167  
SRR17520069. 1608171  
SRR17520069. 1608177  
SRR17520069. 1608179  
SRR17520069. 1608181  
SRR17520069. 1611248  
SRR17520069. 1614297

SRR17520069. 1631634  
SRR17520069. 1631636  
SRR17520069. 1631638  
SRR17520069. 1631640  
SRR17520069. 1631642  
SRR17520069. 1631644  
SRR17520069. 1631646  
SRR17520069. 1631648  
SRR17520069. 1631650  
SRR17520069. 1631652  
SRR17520069. 1631654  
SRR17520069. 1631656  
SRR17520069. 1631658  
SRR17520069. 1631660  
SRR17520069. 1631662  
SRR17520069. 1631666  
SRR17520069. 1631668  
SRR17520069. 1631670  
SRR17520069. 1631672  
SRR17520069. 1631674  
SRR17520069. 1631676  
SRR17520069. 1631678  
SRR17520069. 1631680  
SRR17520069. 1631682  
SRR17520069. 1631684  
SRR17520069. 1631686  
SRR17520069. 1631688  
SRR17520069. 1631690  
SRR17520069. 1631692  
SRR17520069. 1631694  
SRR17520069. 1631696  
SRR17520069. 1631698  
SRR17520069. 1631700  
SRR17520069. 1631702  
SRR17520069. 1631704  
SRR17520069. 1637055  
SRR17520069. 1640967  
SRR17520069. 1640969  
SRR17520069. 1640971  
SRR17520069. 1640973  
SRR17520069. 1640975  
SRR17520069. 1640977  
SRR17520069. 1640979  
SRR17520069. 1640981  
SRR17520069. 1642994  
SRR17520069. 1642996  
SRR17520069. 1642998

SRR17520069.1643000  
SRR17520069.1643002  
SRR17520069.1643004  
SRR17520069.1643006  
SRR17520069.1643008  
SRR17520069.1643010  
SRR17520069.1643012  
SRR17520069.1643014  
SRR17520069.1643016  
SRR17520069.1643018  
SRR17520069.1643020  
SRR17520069.1643022  
SRR17520069.1643024  
SRR17520069.1643026  
SRR17520069.1643028  
SRR17520069.1643030  
SRR17520069.1643034  
SRR17520069.1643036  
SRR17520069.1643038  
SRR17520069.1643040  
SRR17520069.1650479  
SRR17520069.1650481  
SRR17520069.1650483  
SRR17520069.1650485  
SRR17520069.1650487  
SRR17520069.1650489  
SRR17520069.1650491  
SRR17520069.1650493  
SRR17520069.1650495  
SRR17520069.1650497  
SRR17520069.1650499  
SRR17520069.1650501  
SRR17520069.1650503  
SRR17520069.1650505  
SRR17520069.1650507  
SRR17520069.1650509  
SRR17520069.1650511  
SRR17520069.1650513  
SRR17520069.1650515  
SRR17520069.1650517  
SRR17520069.1650519  
SRR17520069.1650521  
SRR17520069.1650523  
SRR17520069.1650525  
SRR17520069.1650529  
SRR17520069.1650531  
SRR17520069.1650535

SRR17520069.1650539  
SRR17520069.1650541  
SRR17520069.1650543  
SRR17520069.1650547  
SRR17520069.1650549  
SRR17520069.1650551  
SRR17520069.1650553  
SRR17520069.1650555  
SRR17520069.1650557  
SRR17520069.1650559  
SRR17520069.1650563  
SRR17520069.1650565  
SRR17520069.1650567  
SRR17520069.1650569  
SRR17520069.1650571  
SRR17520069.1650573  
SRR17520069.1650575  
SRR17520069.1650577  
SRR17520069.1650579  
SRR17520069.1650581  
SRR17520069.1650583  
SRR17520069.1650585  
SRR17520069.1650587  
SRR17520069.1650589  
SRR17520069.1650591  
SRR17520069.1650593  
SRR17520069.1650595  
SRR17520069.1650597  
SRR17520069.1650599  
SRR17520069.1650601  
SRR17520069.1650603  
SRR17520069.1650605  
SRR17520069.1656126  
SRR17520069.1656128  
SRR17520069.1656130  
SRR17520069.1656132  
SRR17520069.1656134  
SRR17520069.1656136  
SRR17520069.1656138  
SRR17520069.1656142  
SRR17520069.1656144  
SRR17520069.1656146  
SRR17520069.1656148  
SRR17520069.1656150  
SRR17520069.1656154  
SRR17520069.1656156  
SRR17520069.1656158

SRR17520069.1656160  
SRR17520069.1656162  
SRR17520069.1656164  
SRR17520069.1656170  
SRR17520069.1656172  
SRR17520069.1656174  
SRR17520069.1659464  
SRR17520069.1659466  
SRR17520069.1659468  
SRR17520069.1660905  
SRR17520069.1660907  
SRR17520069.1660909  
SRR17520069.1660911  
SRR17520069.1660913  
SRR17520069.1660915  
SRR17520069.1660917  
SRR17520069.1660919  
SRR17520069.1660921  
SRR17520069.1660923  
SRR17520069.1660925  
SRR17520069.1660927  
SRR17520069.1660929  
SRR17520069.1660931  
SRR17520069.1660933  
SRR17520069.1660935  
SRR17520069.1660937  
SRR17520069.1660939  
SRR17520069.1660941  
SRR17520069.1660943  
SRR17520069.1660945  
SRR17520069.1660947  
SRR17520069.1660949  
SRR17520069.1660951  
SRR17520069.1660953  
SRR17520069.1660955  
SRR17520069.1660957  
SRR17520069.1660959  
SRR17520069.1663910  
SRR17520069.1663912  
SRR17520069.1663916  
SRR17520069.1663918  
SRR17520069.1663920  
SRR17520069.1663922  
SRR17520069.1663924  
SRR17520069.1663926  
SRR17520069.1663928  
SRR17520069.1663930

SRR17520069. 1663932  
SRR17520069. 1663934  
SRR17520069. 1663936  
SRR17520069. 1663938  
SRR17520069. 1663940  
SRR17520069. 1663942  
SRR17520069. 1663944  
SRR17520069. 1663946  
SRR17520069. 1663948  
SRR17520069. 1663950  
SRR17520069. 1663952  
SRR17520069. 1663954  
SRR17520069. 1663956  
SRR17520069. 1663958  
SRR17520069. 1663960  
SRR17520069. 1663962  
SRR17520069. 1663964  
SRR17520069. 1663966  
SRR17520069. 1663968  
SRR17520069. 1663970  
SRR17520069. 1663972  
SRR17520069. 1663974  
SRR17520069. 1663976  
SRR17520069. 1663978  
SRR17520069. 1663980  
SRR17520069. 1663982  
SRR17520069. 1663984  
SRR17520069. 1663986  
SRR17520069. 1663988  
SRR17520069. 1663990  
SRR17520069. 1663992  
SRR17520069. 1663994  
SRR17520069. 1663996  
SRR17520069. 1663998  
SRR17520069. 1664000  
SRR17520069. 1664002  
SRR17520069. 1664004  
SRR17520069. 1664006  
SRR17520069. 1664008  
SRR17520069. 1664010  
SRR17520069. 1664012  
SRR17520069. 1664014  
SRR17520069. 1664016  
SRR17520069. 1664018  
SRR17520069. 1664020  
SRR17520069. 1664022  
SRR17520069. 1664812



SRR17520069. 1664814  
SRR17520069. 1664816  
SRR17520069. 1664818  
SRR17520069. 1664820  
SRR17520069. 1664822  
SRR17520069. 1664824  
SRR17520069. 1664826  
SRR17520069. 1664828  
SRR17520069. 1664830  
SRR17520069. 1664832  
SRR17520069. 1664834  
SRR17520069. 1664836  
SRR17520069. 1664838  
SRR17520069. 1664840  
SRR17520069. 1667929  
SRR17520069. 1667931  
SRR17520069. 1667933  
SRR17520069. 1667935  
SRR17520069. 1667937  
SRR17520069. 1667939  
SRR17520069. 1667941  
SRR17520069. 1667943  
SRR17520069. 1667945  
SRR17520069. 1667947  
SRR17520069. 1667949  
SRR17520069. 1667951  
SRR17520069. 1667953  
SRR17520069. 1667959  
SRR17520069. 1667961  
SRR17520069. 1667963  
SRR17520069. 1667965  
SRR17520069. 1667967  
SRR17520069. 1667969  
SRR17520069. 1667971  
SRR17520069. 1667973  
SRR17520069. 1667975  
SRR17520069. 1667977  
SRR17520069. 1667979  
SRR17520069. 1667981  
SRR17520069. 1667983  
SRR17520069. 1667985  
SRR17520069. 1667987  
SRR17520069. 1667989  
SRR17520069. 1667991  
SRR17520069. 1667993  
SRR17520069. 1667997  
SRR17520069. 1667999

SRR17520069. 1668001  
SRR17520069. 1668003  
SRR17520069. 1668005  
SRR17520069. 1668007  
SRR17520069. 1668009  
SRR17520069. 1668011  
SRR17520069. 1668013  
SRR17520069. 1668015  
SRR17520069. 1671350  
SRR17520069. 1671352  
SRR17520069. 1671354  
SRR17520069. 1671356  
SRR17520069. 1671358  
SRR17520069. 1671360  
SRR17520069. 1671362  
SRR17520069. 1671364  
SRR17520069. 1671366  
SRR17520069. 1671368  
SRR17520069. 1671370  
SRR17520069. 1671372  
SRR17520069. 1671374  
SRR17520069. 1671376  
SRR17520069. 1671378  
SRR17520069. 1671380  
SRR17520069. 1671382  
SRR17520069. 1671384  
SRR17520069. 1671386  
SRR17520069. 1671388  
SRR17520069. 1671390  
SRR17520069. 1671392  
SRR17520069. 1671394  
SRR17520069. 1672189  
SRR17520069. 1672191  
SRR17520069. 1672195  
SRR17520069. 1672940  
SRR17520069. 1672942  
SRR17520069. 1672944  
SRR17520069. 1672946  
SRR17520069. 1672948  
SRR17520069. 1672950  
SRR17520069. 1672952  
SRR17520069. 1672954  
SRR17520069. 1672956  
SRR17520069. 1674643  
SRR17520069. 1674645  
SRR17520069. 1674647  
SRR17520069. 1674649

SRR17520069. 1674651  
SRR17520069. 1674653  
SRR17520069. 1674655  
SRR17520069. 1674657  
SRR17520069. 1674659  
SRR17520069. 1674661  
SRR17520069. 1674663  
SRR17520069. 1674665  
SRR17520069. 1674667  
SRR17520069. 1674669  
SRR17520069. 1674671  
SRR17520069. 1674673  
SRR17520069. 1674675  
SRR17520069. 1674677  
SRR17520069. 1674679  
SRR17520069. 1674681  
SRR17520069. 1674683  
SRR17520069. 1674685  
SRR17520069. 1674687  
SRR17520069. 1674689  
SRR17520069. 1674691  
SRR17520069. 1678501  
SRR17520069. 1678503  
SRR17520069. 1678507  
SRR17520069. 1678509  
SRR17520069. 1678511  
SRR17520069. 1678513  
SRR17520069. 1678515  
SRR17520069. 1678517  
SRR17520069. 1678519  
SRR17520069. 1678521  
SRR17520069. 1678523  
SRR17520069. 1678525  
SRR17520069. 1678996  
SRR17520069. 1678998  
SRR17520069. 1679000  
SRR17520069. 1679002  
SRR17520069. 1679004  
SRR17520069. 1679006  
SRR17520069. 1679008  
SRR17520069. 1679010  
SRR17520069. 1679012  
SRR17520069. 1679014  
SRR17520069. 1679016  
SRR17520069. 1679018  
SRR17520069. 1679020  
SRR17520069. 1679022

SRR17520069. 1679024  
SRR17520069. 1679026  
SRR17520069. 1679028  
SRR17520069. 1679030  
SRR17520069. 1679032  
SRR17520069. 1679034  
SRR17520069. 1679036  
SRR17520069. 1679038  
SRR17520069. 1679040  
SRR17520069. 1679042  
SRR17520069. 1679044  
SRR17520069. 1679046  
SRR17520069. 1679048  
SRR17520069. 1679050  
SRR17520069. 1679052  
SRR17520069. 1679054  
SRR17520069. 1679056  
SRR17520069. 1679058  
SRR17520069. 1679060  
SRR17520069. 1679062  
SRR17520069. 1679064  
SRR17520069. 1679066  
SRR17520069. 1679068  
SRR17520069. 1679070  
SRR17520069. 1679072  
SRR17520069. 1679074  
SRR17520069. 1679076  
SRR17520069. 1679078  
SRR17520069. 1679080  
SRR17520069. 1679082  
SRR17520069. 1679084  
SRR17520069. 1679086  
SRR17520069. 1679088  
SRR17520069. 1679090  
SRR17520069. 1679092  
SRR17520069. 1679094  
SRR17520069. 1679096  
SRR17520069. 1680823  
SRR17520069. 1680825  
SRR17520069. 1680827  
SRR17520069. 1680829  
SRR17520069. 1680831  
SRR17520069. 1680833  
SRR17520069. 1680835  
SRR17520069. 1680837  
SRR17520069. 1680839  
SRR17520069. 1680841

SRR17520069. 1680843  
SRR17520069. 1680845  
SRR17520069. 1680847  
SRR17520069. 1680849  
SRR17520069. 1680853  
SRR17520069. 1680855  
SRR17520069. 1680857  
SRR17520069. 1680859  
SRR17520069. 1680861  
SRR17520069. 1680863  
SRR17520069. 1680867  
SRR17520069. 1680869  
SRR17520069. 1680871  
SRR17520069. 1680873  
SRR17520069. 1680875  
SRR17520069. 1680877  
SRR17520069. 1680883  
SRR17520069. 1680885  
SRR17520069. 1680887  
SRR17520069. 1680889  
SRR17520069. 1680891  
SRR17520069. 1680893  
SRR17520069. 1680895  
SRR17520069. 1686216  
SRR17520069. 1686220  
SRR17520069. 1686224  
SRR17520069. 1686226  
SRR17520069. 1686228  
SRR17520069. 1686572  
SRR17520069. 1686574  
SRR17520069. 1690329  
SRR17520069. 1690331  
SRR17520069. 1690333  
SRR17520069. 1690335  
SRR17520069. 1690337  
SRR17520069. 1690339  
SRR17520069. 1690341  
SRR17520069. 1690343  
SRR17520069. 1690345  
SRR17520069. 1690347  
SRR17520069. 1690349  
SRR17520069. 1700484  
SRR17520069. 1700486  
SRR17520069. 1700488  
SRR17520069. 1700490  
SRR17520069. 1700492  
SRR17520069. 1700494

SRR17520069.1700496  
SRR17520069.1702401  
SRR17520069.1702405  
SRR17520069.1702407  
SRR17520069.1702409  
SRR17520069.1702411  
SRR17520069.1702413  
SRR17520069.1702415  
SRR17520069.1702417  
SRR17520069.1702419  
SRR17520069.1702421  
SRR17520069.1704796  
SRR17520069.1704800  
SRR17520069.1704802  
SRR17520069.1704804  
SRR17520069.1704806  
SRR17520069.1704808  
SRR17520069.1704810  
SRR17520069.1704812  
SRR17520069.1704814  
SRR17520069.1704816  
SRR17520069.1704818  
SRR17520069.1704820  
SRR17520069.1704822  
SRR17520069.1704824  
SRR17520069.1704826  
SRR17520069.1704830  
SRR17520069.1704832  
SRR17520069.1705724  
SRR17520069.1705726  
SRR17520069.1705728  
SRR17520069.1705730  
SRR17520069.1705732  
SRR17520069.1705734  
SRR17520069.1705736  
SRR17520069.1705738  
SRR17520069.1705740  
SRR17520069.1705742  
SRR17520069.1705744  
SRR17520069.1709419  
SRR17520069.1709423  
SRR17520069.1709425  
SRR17520069.1709427  
SRR17520069.1709429  
SRR17520069.1709431  
SRR17520069.1709433  
SRR17520069.1709435

SRR17520069.1709437  
SRR17520069.1709439  
SRR17520069.1709441  
SRR17520069.1709443  
SRR17520069.1709445  
SRR17520069.1709447  
SRR17520069.1709449  
SRR17520069.1709451  
SRR17520069.1709453  
SRR17520069.1709455  
SRR17520069.1709457  
SRR17520069.1709459  
SRR17520069.1709461  
SRR17520069.1709463  
SRR17520069.1716220  
SRR17520069.1716222  
SRR17520069.1716224  
SRR17520069.1716226  
SRR17520069.1716228  
SRR17520069.1716230  
SRR17520069.1716232  
SRR17520069.1716234  
SRR17520069.1716236  
SRR17520069.1716240  
SRR17520069.1716242  
SRR17520069.1716244  
SRR17520069.1716246  
SRR17520069.1718503  
SRR17520069.1718505  
SRR17520069.1718507  
SRR17520069.1718509  
SRR17520069.1718511  
SRR17520069.1718513  
SRR17520069.1718515  
SRR17520069.1718517  
SRR17520069.1718519  
SRR17520069.1718521  
SRR17520069.1718523  
SRR17520069.1718525  
SRR17520069.1718527  
SRR17520069.1718529  
SRR17520069.1718531  
SRR17520069.1718535  
SRR17520069.1718537  
SRR17520069.1718539  
SRR17520069.1718541  
SRR17520069.1718543

SRR17520069.1718545  
SRR17520069.1718547  
SRR17520069.1718549  
SRR17520069.1718551  
SRR17520069.1718553  
SRR17520069.1718555  
SRR17520069.1718557  
SRR17520069.1726599  
SRR17520069.1726601  
SRR17520069.1726603  
SRR17520069.1726605  
SRR17520069.1726607  
SRR17520069.1726609  
SRR17520069.1726611  
SRR17520069.1726613  
SRR17520069.1726615  
SRR17520069.1726617  
SRR17520069.1726619  
SRR17520069.1726621  
SRR17520069.1726623  
SRR17520069.1726625  
SRR17520069.1726627  
SRR17520069.1726629  
SRR17520069.1726631  
SRR17520069.1740900  
SRR17520069.1740902  
SRR17520069.1740904  
SRR17520069.1740906  
SRR17520069.1750481  
SRR17520069.1750485  
SRR17520069.1750487  
SRR17520069.1750491  
SRR17520069.1751718  
SRR17520069.1751720  
SRR17520069.1751722  
SRR17520069.1751724  
SRR17520069.1751726  
SRR17520069.1751728  
SRR17520069.1751730  
SRR17520069.1751732  
SRR17520069.1751734  
SRR17520069.1751736  
SRR17520069.1751738  
SRR17520069.1751740  
SRR17520069.1751744  
SRR17520069.1751746  
SRR17520069.1751748



SRR17520069. 1751750  
SRR17520069. 1751752  
SRR17520069. 1751754  
SRR17520069. 1751756  
SRR17520069. 1751758  
SRR17520069. 1751760  
SRR17520069. 1751762  
SRR17520069. 1751766  
SRR17520069. 1751768  
SRR17520069. 1751770  
SRR17520069. 1751772  
SRR17520069. 1751774  
SRR17520069. 1752747  
SRR17520069. 1752749  
SRR17520069. 1752751  
SRR17520069. 1752753  
SRR17520069. 1752755  
SRR17520069. 1752757  
SRR17520069. 1752759  
SRR17520069. 1752761  
SRR17520069. 1752763  
SRR17520069. 1752765  
SRR17520069. 1752767  
SRR17520069. 1752769  
SRR17520069. 1757739  
SRR17520069. 1757741  
SRR17520069. 1757743  
SRR17520069. 1757745  
SRR17520069. 1757747  
SRR17520069. 1759634  
SRR17520069. 1759636  
SRR17520069. 1759638  
SRR17520069. 1759640  
SRR17520069. 1759642  
SRR17520069. 1759644  
SRR17520069. 1759646  
SRR17520069. 1759648  
SRR17520069. 1759650  
SRR17520069. 1759652  
SRR17520069. 1759654  
SRR17520069. 1759656  
SRR17520069. 1759658  
SRR17520069. 1759660  
SRR17520069. 1759664  
SRR17520069. 1759666  
SRR17520069. 1759668  
SRR17520069. 1766101

SRR17520069.1766103  
SRR17520069.1766105  
SRR17520069.1766107  
SRR17520069.1766109  
SRR17520069.1766111  
SRR17520069.1766113  
SRR17520069.1766115  
SRR17520069.1766117  
SRR17520069.1766119  
SRR17520069.1766121  
SRR17520069.1769633  
SRR17520069.1769635  
SRR17520069.1769637  
SRR17520069.1769639  
SRR17520069.1769641  
SRR17520069.1769643  
SRR17520069.1769645  
SRR17520069.1769647  
SRR17520069.1769649  
SRR17520069.1769651  
SRR17520069.1769653  
SRR17520069.1769655  
SRR17520069.1769657  
SRR17520069.1769659  
SRR17520069.1769663  
SRR17520069.1769665  
SRR17520069.1769667  
SRR17520069.1769669  
SRR17520069.1769671  
SRR17520069.1769673  
SRR17520069.1769675  
SRR17520069.1769677  
SRR17520069.1769679  
SRR17520069.1769681  
SRR17520069.1769683  
SRR17520069.1769685  
SRR17520069.1769687  
SRR17520069.1769689  
SRR17520069.1769691  
SRR17520069.1769693  
SRR17520069.1769695  
SRR17520069.1769697  
SRR17520069.1769699  
SRR17520069.1769701  
SRR17520069.1769705  
SRR17520069.1769707  
SRR17520069.1769709

SRR17520069. 1769713  
SRR17520069. 1769715  
SRR17520069. 1769717  
SRR17520069. 1769719  
SRR17520069. 1769721  
SRR17520069. 1769723  
SRR17520069. 1769725  
SRR17520069. 1769727  
SRR17520069. 1769729  
SRR17520069. 1769731  
SRR17520069. 1769733  
SRR17520069. 1769735  
SRR17520069. 1769737  
SRR17520069. 1769739  
SRR17520069. 1769741  
SRR17520069. 1769743  
SRR17520069. 1769745  
SRR17520069. 1769747  
SRR17520069. 1769749  
SRR17520069. 1769751  
SRR17520069. 1770386  
SRR17520069. 1770388  
SRR17520069. 1770390  
SRR17520069. 1770392  
SRR17520069. 1770394  
SRR17520069. 1770396  
SRR17520069. 1770398  
SRR17520069. 1770402  
SRR17520069. 1770404  
SRR17520069. 1770406  
SRR17520069. 1774376  
SRR17520069. 1774378  
SRR17520069. 1774380  
SRR17520069. 1774382  
SRR17520069. 1774384  
SRR17520069. 1774386  
SRR17520069. 1774388  
SRR17520069. 1774390  
SRR17520069. 1774392  
SRR17520069. 1774394  
SRR17520069. 1774396  
SRR17520069. 1774398  
SRR17520069. 1788147  
SRR17520069. 1788149  
SRR17520069. 1788151  
SRR17520069. 1788153  
SRR17520069. 1788155

SRR17520069. 1796512  
SRR17520069. 1796516  
SRR17520069. 1796518  
SRR17520069. 1796520  
SRR17520069. 1796522  
SRR17520069. 1796524  
SRR17520069. 1796526  
SRR17520069. 1796528  
SRR17520069. 1796530  
SRR17520069. 1796532  
SRR17520069. 1796534  
SRR17520069. 1796536  
SRR17520069. 1796538  
SRR17520069. 1796540  
SRR17520069. 1796542  
SRR17520069. 1796544  
SRR17520069. 1796546  
SRR17520069. 1796548  
SRR17520069. 1796550  
SRR17520069. 1796552  
SRR17520069. 1796554  
SRR17520069. 1796556  
SRR17520069. 1796558  
SRR17520069. 1796560  
SRR17520069. 1796562  
SRR17520069. 1796564  
SRR17520069. 1796566  
SRR17520069. 1796568  
SRR17520069. 1796570  
SRR17520069. 1796572  
SRR17520069. 1796574  
SRR17520069. 1796576  
SRR17520069. 1796578  
SRR17520069. 1796580  
SRR17520069. 1796582  
SRR17520069. 1796584  
SRR17520069. 1796586  
SRR17520069. 1796588  
SRR17520069. 1796590  
SRR17520069. 1796592  
SRR17520069. 1796594  
SRR17520069. 1796596  
SRR17520069. 1796598  
SRR17520069. 1796600  
SRR17520069. 1796602  
SRR17520069. 1796604  
SRR17520069. 1796606

SRR17520069.1796608  
SRR17520069.1796610  
SRR17520069.1796612  
SRR17520069.1796614  
SRR17520069.1796620  
SRR17520069.1797811  
SRR17520069.1797813  
SRR17520069.1797815  
SRR17520069.1797817  
SRR17520069.1797819  
SRR17520069.1797821  
SRR17520069.1797823  
SRR17520069.1797825  
SRR17520069.1797827  
SRR17520069.1797829  
SRR17520069.1797831  
SRR17520069.1797833  
SRR17520069.1797835  
SRR17520069.1797837  
SRR17520069.1797839  
SRR17520069.1799144  
SRR17520069.1799146  
SRR17520069.1799150  
SRR17520069.1799152  
SRR17520069.1799154  
SRR17520069.1799156  
SRR17520069.1799158  
SRR17520069.1799160  
SRR17520069.1799162  
SRR17520069.1799164  
SRR17520069.1799166  
SRR17520069.1799168  
SRR17520069.1799170  
SRR17520069.1799172  
SRR17520069.1799174  
SRR17520069.1799176  
SRR17520069.1799178  
SRR17520069.1799180  
SRR17520069.1799182  
SRR17520069.1799184  
SRR17520069.1799186  
SRR17520069.1799188  
SRR17520069.1799190  
SRR17520069.1799192  
SRR17520069.1799194  
SRR17520069.1799196  
SRR17520069.1799198

SRR17520069.1799200  
SRR17520069.1799202  
SRR17520069.1799204  
SRR17520069.1799206  
SRR17520069.1799208  
SRR17520069.1799210  
SRR17520069.1799212  
SRR17520069.1799214  
SRR17520069.1799216  
SRR17520069.1799218  
SRR17520069.1799220  
SRR17520069.1799222  
SRR17520069.1799224  
SRR17520069.1799226  
SRR17520069.1799228  
SRR17520069.1799230  
SRR17520069.1799232  
SRR17520069.1799234  
SRR17520069.1799238  
SRR17520069.1799240  
SRR17520069.1799242  
SRR17520069.1799244  
SRR17520069.1799246  
SRR17520069.1799248  
SRR17520069.1799250  
SRR17520069.1799252  
SRR17520069.1799254  
SRR17520069.1799256  
SRR17520069.1799260  
SRR17520069.1799262  
SRR17520069.1799264  
SRR17520069.1799266  
SRR17520069.1799268  
SRR17520069.1799270  
SRR17520069.1799272  
SRR17520069.1799274  
SRR17520069.1799276  
SRR17520069.1799278  
SRR17520069.1799280  
SRR17520069.1799282  
SRR17520069.1799284  
SRR17520069.1799286  
SRR17520069.1799288  
SRR17520069.1799290  
SRR17520069.1799292  
SRR17520069.1799294  
SRR17520069.1799296

SRR17520069. 1799298  
SRR17520069. 1799300  
SRR17520069. 1799302  
SRR17520069. 1799304  
SRR17520069. 1799306  
SRR17520069. 1799308  
SRR17520069. 1799312  
SRR17520069. 1799314  
SRR17520069. 1799316  
SRR17520069. 1799318  
SRR17520069. 1799320  
SRR17520069. 1799322  
SRR17520069. 1799324  
SRR17520069. 1799326  
SRR17520069. 1799328  
SRR17520069. 1799330  
SRR17520069. 1799332  
SRR17520069. 1799334  
SRR17520069. 1799336  
SRR17520069. 1799338  
SRR17520069. 1799340  
SRR17520069. 1799342  
SRR17520069. 1799344  
SRR17520069. 1799346  
SRR17520069. 1799348  
SRR17520069. 1804858  
SRR17520069. 1804860  
SRR17520069. 1804862  
SRR17520069. 1804864  
SRR17520069. 1804866  
SRR17520069. 1804868  
SRR17520069. 1804870  
SRR17520069. 1804872  
SRR17520069. 1804874  
SRR17520069. 1804876  
SRR17520069. 1804878  
SRR17520069. 1804880  
SRR17520069. 1805322  
SRR17520069. 1805324  
SRR17520069. 1805328  
SRR17520069. 1805332  
SRR17520069. 1805334  
SRR17520069. 1805336  
SRR17520069. 1805338  
SRR17520069. 1809679  
SRR17520069. 1809681  
SRR17520069. 1809683

SRR17520069.1810015  
SRR17520069.1810017  
SRR17520069.1810019  
SRR17520069.1810021  
SRR17520069.1810023  
SRR17520069.1810025  
SRR17520069.1810027  
SRR17520069.1810029  
SRR17520069.1810031  
SRR17520069.1810183  
SRR17520069.1810185  
SRR17520069.1810187  
SRR17520069.1831518  
SRR17520069.1831520  
SRR17520069.1831522  
SRR17520069.1831524  
SRR17520069.1831526  
SRR17520069.1831528  
SRR17520069.1831530  
SRR17520069.1831532  
SRR17520069.1831534  
SRR17520069.1831536  
SRR17520069.1831538  
SRR17520069.1831540  
SRR17520069.1831542  
SRR17520069.1831544  
SRR17520069.1831546  
SRR17520069.1831548  
SRR17520069.1831550  
SRR17520069.1831552  
SRR17520069.1831554  
SRR17520069.1831556  
SRR17520069.1831558  
SRR17520069.1831560  
SRR17520069.1831562  
SRR17520069.1831564  
SRR17520069.1831566  
SRR17520069.1831568  
SRR17520069.1831570  
SRR17520069.1831572  
SRR17520069.1831574  
SRR17520069.1831576  
SRR17520069.1831578  
SRR17520069.1831580  
SRR17520069.1831582  
SRR17520069.1831584  
SRR17520069.1831586



SRR17520069. 1831588  
SRR17520069. 1831590  
SRR17520069. 1831592  
SRR17520069. 1831594  
SRR17520069. 1831596  
SRR17520069. 1831669  
SRR17520069. 1831671  
SRR17520069. 1831673  
SRR17520069. 1831675  
SRR17520069. 1831677  
SRR17520069. 1831679  
SRR17520069. 1831681  
SRR17520069. 1831683  
SRR17520069. 1831687  
SRR17520069. 1831689  
SRR17520069. 1831691  
SRR17520069. 1831693  
SRR17520069. 1831695  
SRR17520069. 1831697  
SRR17520069. 1831699  
SRR17520069. 1831701  
SRR17520069. 1831703  
SRR17520069. 1831705  
SRR17520069. 1831707  
SRR17520069. 1831709  
SRR17520069. 1831711  
SRR17520069. 1831713  
SRR17520069. 1831715  
SRR17520069. 1831717  
SRR17520069. 1831719  
SRR17520069. 1831721  
SRR17520069. 1833297  
SRR17520069. 1833299  
SRR17520069. 1833301  
SRR17520069. 1833303  
SRR17520069. 1833305  
SRR17520069. 1833307  
SRR17520069. 1833309  
SRR17520069. 1833311  
SRR17520069. 1833313  
SRR17520069. 1833315  
SRR17520069. 1833317  
SRR17520069. 1833319  
SRR17520069. 1833323  
SRR17520069. 1833325  
SRR17520069. 1833329  
SRR17520069. 1833331

SRR17520069. 1833333  
SRR17520069. 1833335  
SRR17520069. 1833337  
SRR17520069. 1833339  
SRR17520069. 1833343  
SRR17520069. 1833345  
SRR17520069. 1833347  
SRR17520069. 1833349  
SRR17520069. 1833351  
SRR17520069. 1833353  
SRR17520069. 1833355  
SRR17520069. 1833357  
SRR17520069. 1833359  
SRR17520069. 1833361  
SRR17520069. 1833363  
SRR17520069. 1833365  
SRR17520069. 1833367  
SRR17520069. 1833369  
SRR17520069. 1833373  
SRR17520069. 1833375  
SRR17520069. 1833377  
SRR17520069. 1833379  
SRR17520069. 1833381  
SRR17520069. 1833383  
SRR17520069. 1833385  
SRR17520069. 1833387  
SRR17520069. 1833393  
SRR17520069. 1833395  
SRR17520069. 1833397  
SRR17520069. 1833399  
SRR17520069. 1833401  
SRR17520069. 1833403  
SRR17520069. 1833407  
SRR17520069. 1833409  
SRR17520069. 1833411  
SRR17520069. 1833413  
SRR17520069. 1833415  
SRR17520069. 1833417  
SRR17520069. 1833419  
SRR17520069. 1833423  
SRR17520069. 1833425  
SRR17520069. 1833427  
SRR17520069. 1833429  
SRR17520069. 1833431  
SRR17520069. 1833435  
SRR17520069. 1833439  
SRR17520069. 1833441

SRR17520069. 1833443  
SRR17520069. 1833445  
SRR17520069. 1833447  
SRR17520069. 1833449  
SRR17520069. 1833453  
SRR17520069. 1833459  
SRR17520069. 1833461  
SRR17520069. 1833463  
SRR17520069. 1833465  
SRR17520069. 1833467  
SRR17520069. 1833469  
SRR17520069. 1833471  
SRR17520069. 1841479  
SRR17520069. 1841487  
SRR17520069. 1841489  
SRR17520069. 1841985  
SRR17520069. 1841987  
SRR17520069. 1841989  
SRR17520069. 1841991  
SRR17520069. 1841993  
SRR17520069. 1841995  
SRR17520069. 1841997  
SRR17520069. 1841999  
SRR17520069. 1842001  
SRR17520069. 1842003  
SRR17520069. 1845664  
SRR17520069. 1845666  
SRR17520069. 1845668  
SRR17520069. 1845670  
SRR17520069. 1845672  
SRR17520069. 1845674  
SRR17520069. 1845676  
SRR17520069. 1845678  
SRR17520069. 1845680  
SRR17520069. 1845682  
SRR17520069. 1845684  
SRR17520069. 1845686  
SRR17520069. 1845688  
SRR17520069. 1847355  
SRR17520069. 1847357  
SRR17520069. 1847359  
SRR17520069. 1847361  
SRR17520069. 1847365  
SRR17520069. 1847367  
SRR17520069. 1847369  
SRR17520069. 1847371  
SRR17520069. 1847375

SRR17520069. 1847377  
SRR17520069. 1847379  
SRR17520069. 1847381  
SRR17520069. 1847383  
SRR17520069. 1847385  
SRR17520069. 1847387  
SRR17520069. 1847389  
SRR17520069. 1847391  
SRR17520069. 1847393  
SRR17520069. 1847395  
SRR17520069. 1847399  
SRR17520069. 1847401  
SRR17520069. 1847403  
SRR17520069. 1847405  
SRR17520069. 1847407  
SRR17520069. 1847409  
SRR17520069. 1847411  
SRR17520069. 1848460  
SRR17520069. 1848462  
SRR17520069. 1848464  
SRR17520069. 1848466  
SRR17520069. 1848468  
SRR17520069. 1848470  
SRR17520069. 1848472  
SRR17520069. 1848474  
SRR17520069. 1848476  
SRR17520069. 1848478  
SRR17520069. 1848480  
SRR17520069. 1848482  
SRR17520069. 1848484  
SRR17520069. 1848486  
SRR17520069. 1848488  
SRR17520069. 1848490  
SRR17520069. 1848492  
SRR17520069. 1848494  
SRR17520069. 1848496  
SRR17520069. 1848498  
SRR17520069. 1848500  
SRR17520069. 1848502  
SRR17520069. 1848504  
SRR17520069. 1848506  
SRR17520069. 1848508  
SRR17520069. 1848510  
SRR17520069. 1848512  
SRR17520069. 1848514  
SRR17520069. 1848516  
SRR17520069. 1848518

SRR17520069. 1848520  
SRR17520069. 1848522  
SRR17520069. 1848524  
SRR17520069. 1848526  
SRR17520069. 1848528  
SRR17520069. 1848530  
SRR17520069. 1848532  
SRR17520069. 1848534  
SRR17520069. 1848536  
SRR17520069. 1848538  
SRR17520069. 1848540  
SRR17520069. 1848542  
SRR17520069. 1848548  
SRR17520069. 1848550  
SRR17520069. 1848552  
SRR17520069. 1848554  
SRR17520069. 1848556  
SRR17520069. 1848558  
SRR17520069. 1848560  
SRR17520069. 1848562  
SRR17520069. 1848564  
SRR17520069. 1848566  
SRR17520069. 1848568  
SRR17520069. 1848570  
SRR17520069. 1848572  
SRR17520069. 1848574  
SRR17520069. 1848576  
SRR17520069. 1848578  
SRR17520069. 1848580  
SRR17520069. 1848582  
SRR17520069. 1848584  
SRR17520069. 1848586  
SRR17520069. 1848591  
SRR17520069. 1848593  
SRR17520069. 1848595  
SRR17520069. 1848597  
SRR17520069. 1848599  
SRR17520069. 1848601  
SRR17520069. 1848603  
SRR17520069. 1848605  
SRR17520069. 1848607  
SRR17520069. 1848609  
SRR17520069. 1848611  
SRR17520069. 1848613  
SRR17520069. 1848615  
SRR17520069. 1848617  
SRR17520069. 1848619

SRR17520069. 1848621  
SRR17520069. 1848623  
SRR17520069. 1848625  
SRR17520069. 1848627  
SRR17520069. 1848629  
SRR17520069. 1848631  
SRR17520069. 1849584  
SRR17520069. 1849586  
SRR17520069. 1849588  
SRR17520069. 1854319  
SRR17520069. 1854321  
SRR17520069. 1854323  
SRR17520069. 1854325  
SRR17520069. 1854327  
SRR17520069. 1854329  
SRR17520069. 1854331  
SRR17520069. 1854333  
SRR17520069. 1854335  
SRR17520069. 1854337  
SRR17520069. 1854339  
SRR17520069. 1854341  
SRR17520069. 1854343  
SRR17520069. 1854345  
SRR17520069. 1854347  
SRR17520069. 1854349  
SRR17520069. 1854351  
SRR17520069. 1854353  
SRR17520069. 1854355  
SRR17520069. 1854357  
SRR17520069. 1854359  
SRR17520069. 1854361  
SRR17520069. 1854363  
SRR17520069. 1854365  
SRR17520069. 1854367  
SRR17520069. 1854369  
SRR17520069. 1854371  
SRR17520069. 1854373  
SRR17520069. 1854375  
SRR17520069. 1857591  
SRR17520069. 1857593  
SRR17520069. 1857597  
SRR17520069. 1857601  
SRR17520069. 1857603  
SRR17520069. 1857607  
SRR17520069. 1860742  
SRR17520069. 1860744  
SRR17520069. 1860746

SRR17520069. 1860748  
SRR17520069. 1860750  
SRR17520069. 1860752  
SRR17520069. 1860754  
SRR17520069. 1860756  
SRR17520069. 1860758  
SRR17520069. 1860760  
SRR17520069. 1860762  
SRR17520069. 1860764  
SRR17520069. 1860766  
SRR17520069. 1860768  
SRR17520069. 1860770  
SRR17520069. 1860772  
SRR17520069. 1860774  
SRR17520069. 1860776  
SRR17520069. 1860778  
SRR17520069. 1860782  
SRR17520069. 1860784  
SRR17520069. 1860786  
SRR17520069. 1860788  
SRR17520069. 1860790  
SRR17520069. 1860792  
SRR17520069. 1860794  
SRR17520069. 1860796  
SRR17520069. 1860798  
SRR17520069. 1860800  
SRR17520069. 1860802  
SRR17520069. 1860804  
SRR17520069. 1860806  
SRR17520069. 1860808  
SRR17520069. 1860810  
SRR17520069. 1860812  
SRR17520069. 1860814  
SRR17520069. 1860816  
SRR17520069. 1860818  
SRR17520069. 1860820  
SRR17520069. 1860824  
SRR17520069. 1860826  
SRR17520069. 1860828  
SRR17520069. 1860830  
SRR17520069. 1866389  
SRR17520069. 1866391  
SRR17520069. 1866393  
SRR17520069. 1866395  
SRR17520069. 1866397  
SRR17520069. 1866399  
SRR17520069. 1866401

SRR17520069. 1866403  
SRR17520069. 1866405  
SRR17520069. 1866407  
SRR17520069. 1866409  
SRR17520069. 1870886  
SRR17520069. 1870888  
SRR17520069. 1870890  
SRR17520069. 1870892  
SRR17520069. 1870894  
SRR17520069. 1870896  
SRR17520069. 1870898  
SRR17520069. 1870900  
SRR17520069. 1870902  
SRR17520069. 1870904  
SRR17520069. 1870906  
SRR17520069. 1870908  
SRR17520069. 1870910  
SRR17520069. 1870912  
SRR17520069. 1870914  
SRR17520069. 1870916  
SRR17520069. 1870918  
SRR17520069. 1870920  
SRR17520069. 1870922  
SRR17520069. 1870924  
SRR17520069. 1870926  
SRR17520069. 1870928  
SRR17520069. 1870930  
SRR17520069. 1870932  
SRR17520069. 1870934  
SRR17520069. 1870936  
SRR17520069. 1870938  
SRR17520069. 1878928  
SRR17520069. 1879965  
SRR17520069. 1879967  
SRR17520069. 1879969  
SRR17520069. 1879971  
SRR17520069. 1879973  
SRR17520069. 1879975  
SRR17520069. 1879977  
SRR17520069. 1879979  
SRR17520069. 1879981  
SRR17520069. 1879983  
SRR17520069. 1879985  
SRR17520069. 1879987  
SRR17520069. 1879989  
SRR17520069. 1879991  
SRR17520069. 1879993



SRR17520069. 1879995  
SRR17520069. 1879997  
SRR17520069. 1880001  
SRR17520069. 1880003  
SRR17520069. 1881306  
SRR17520069. 1881308  
SRR17520069. 1881312  
SRR17520069. 1881314  
SRR17520069. 1881316  
SRR17520069. 1881318  
SRR17520069. 1881320  
SRR17520069. 1881324  
SRR17520069. 1881326  
SRR17520069. 1881328  
SRR17520069. 1881330  
SRR17520069. 1881332  
SRR17520069. 1881334  
SRR17520069. 1881336  
SRR17520069. 1881338  
SRR17520069. 1881340  
SRR17520069. 1881342  
SRR17520069. 1881344  
SRR17520069. 1881346  
SRR17520069. 1881348  
SRR17520069. 1881350  
SRR17520069. 1881352  
SRR17520069. 1881354  
SRR17520069. 1881356  
SRR17520069. 1881358  
SRR17520069. 1881360  
SRR17520069. 1881362  
SRR17520069. 1881366  
SRR17520069. 1881368  
SRR17520069. 1881370  
SRR17520069. 1881372  
SRR17520069. 1881374  
SRR17520069. 1881376  
SRR17520069. 1881378  
SRR17520069. 1881380  
SRR17520069. 1881382  
SRR17520069. 1881384  
SRR17520069. 1881386  
SRR17520069. 1881388  
SRR17520069. 1881390  
SRR17520069. 1881392  
SRR17520069. 1881394  
SRR17520069. 1881396

SRR17520069. 1881398  
SRR17520069. 1881400  
SRR17520069. 1881402  
SRR17520069. 1881404  
SRR17520069. 1881406  
SRR17520069. 1881408  
SRR17520069. 1881410  
SRR17520069. 1881412  
SRR17520069. 1881414  
SRR17520069. 1881416  
SRR17520069. 1881418  
SRR17520069. 1881420  
SRR17520069. 1881422  
SRR17520069. 1881424  
SRR17520069. 1881426  
SRR17520069. 1881428  
SRR17520069. 1881430  
SRR17520069. 1881432  
SRR17520069. 1881434  
SRR17520069. 1881436  
SRR17520069. 1881438  
SRR17520069. 1881440  
SRR17520069. 1881442  
SRR17520069. 1881444  
SRR17520069. 1881446  
SRR17520069. 1881450  
SRR17520069. 1881452  
SRR17520069. 1881454  
SRR17520069. 1881456  
SRR17520069. 1881458  
SRR17520069. 1881460  
SRR17520069. 1881462  
SRR17520069. 1881464  
SRR17520069. 1881466  
SRR17520069. 1881468  
SRR17520069. 1881470  
SRR17520069. 1881472  
SRR17520069. 1881474  
SRR17520069. 1881476  
SRR17520069. 1881478  
SRR17520069. 1881480  
SRR17520069. 1881482  
SRR17520069. 1881484  
SRR17520069. 1881486  
SRR17520069. 1881488  
SRR17520069. 1881490  
SRR17520069. 1881492

SRR17520069.1881494  
SRR17520069.1885095  
SRR17520069.1885097  
SRR17520069.1885099  
SRR17520069.1885101  
SRR17520069.1885103  
SRR17520069.1885105  
SRR17520069.1885107  
SRR17520069.1887370  
SRR17520069.1887372  
SRR17520069.1887374  
SRR17520069.1887376  
SRR17520069.1887378  
SRR17520069.1887380  
SRR17520069.1887382  
SRR17520069.1887384  
SRR17520069.1887386  
SRR17520069.1887388  
SRR17520069.1887390  
SRR17520069.1887392  
SRR17520069.1887394  
SRR17520069.1887396  
SRR17520069.1887398  
SRR17520069.1887400  
SRR17520069.1887402  
SRR17520069.1887404  
SRR17520069.1887406  
SRR17520069.1887408  
SRR17520069.1887410  
SRR17520069.1887412  
SRR17520069.1887414  
SRR17520069.1887416  
SRR17520069.1887418  
SRR17520069.1887420  
SRR17520069.1887422  
SRR17520069.1887424  
SRR17520069.1887426  
SRR17520069.1887430  
SRR17520069.1887432  
SRR17520069.1890048  
SRR17520069.1890050  
SRR17520069.1890993  
SRR17520069.1890995  
SRR17520069.1890997  
SRR17520069.1890999  
SRR17520069.1891001  
SRR17520069.1891003

SRR17520069. 1891005  
SRR17520069. 1891007  
SRR17520069. 1891009  
SRR17520069. 1891011  
SRR17520069. 1891013  
SRR17520069. 1891017  
SRR17520069. 1891019  
SRR17520069. 1891021  
SRR17520069. 1891023  
SRR17520069. 1891025  
SRR17520069. 1891027  
SRR17520069. 1891029  
SRR17520069. 1891031  
SRR17520069. 1891033  
SRR17520069. 1891035  
SRR17520069. 1891037  
SRR17520069. 1891039  
SRR17520069. 1891041  
SRR17520069. 1891043  
SRR17520069. 1891045  
SRR17520069. 1891047  
SRR17520069. 1891049  
SRR17520069. 1891051  
SRR17520069. 1891053  
SRR17520069. 1891055  
SRR17520069. 1891057  
SRR17520069. 1891059  
SRR17520069. 1891061  
SRR17520069. 1891063  
SRR17520069. 1891065  
SRR17520069. 1891067  
SRR17520069. 1891069  
SRR17520069. 1891071  
SRR17520069. 1891073  
SRR17520069. 1891075  
SRR17520069. 1891077  
SRR17520069. 1891079  
SRR17520069. 1891081  
SRR17520069. 1891083  
SRR17520069. 1891085  
SRR17520069. 1891087  
SRR17520069. 1891089  
SRR17520069. 1891091  
SRR17520069. 1891093  
SRR17520069. 1891095  
SRR17520069. 1891097  
SRR17520069. 1891099

SRR17520069. 1891101  
SRR17520069. 1891103  
SRR17520069. 1891105  
SRR17520069. 1891107  
SRR17520069. 1892108  
SRR17520069. 1892110  
SRR17520069. 1892112  
SRR17520069. 1892114  
SRR17520069. 1892116  
SRR17520069. 1892118  
SRR17520069. 1892120  
SRR17520069. 1892122  
SRR17520069. 1892124  
SRR17520069. 1892126  
SRR17520069. 1892128  
SRR17520069. 1892130  
SRR17520069. 1892132  
SRR17520069. 1892134  
SRR17520069. 1892136  
SRR17520069. 1892138  
SRR17520069. 1892140  
SRR17520069. 1892142  
SRR17520069. 1892144  
SRR17520069. 1892146  
SRR17520069. 1892148  
SRR17520069. 1892150  
SRR17520069. 1892152  
SRR17520069. 1892154  
SRR17520069. 1892156  
SRR17520069. 1892158  
SRR17520069. 1892160  
SRR17520069. 1892162  
SRR17520069. 1892164  
SRR17520069. 1892166  
SRR17520069. 1892168  
SRR17520069. 1892170  
SRR17520069. 1892172  
SRR17520069. 1892174  
SRR17520069. 1892176  
SRR17520069. 1895965  
SRR17520069. 1895967  
SRR17520069. 1895969  
SRR17520069. 1895971  
SRR17520069. 1895973  
SRR17520069. 1895975  
SRR17520069. 1895977  
SRR17520069. 1895979

SRR17520069. 1895981  
SRR17520069. 1895983  
SRR17520069. 1895985  
SRR17520069. 1895987  
SRR17520069. 1895989  
SRR17520069. 1895991  
SRR17520069. 1895993  
SRR17520069. 1895995  
SRR17520069. 1895997  
SRR17520069. 1895999  
SRR17520069. 1896001  
SRR17520069. 1896003  
SRR17520069. 1896005  
SRR17520069. 1896007  
SRR17520069. 1896009  
SRR17520069. 1896011  
SRR17520069. 1896013  
SRR17520069. 1896015  
SRR17520069. 1896017  
SRR17520069. 1896019  
SRR17520069. 1896021  
SRR17520069. 1896023  
SRR17520069. 1896025  
SRR17520069. 1896027  
SRR17520069. 1896029  
SRR17520069. 1896031  
SRR17520069. 1896033  
SRR17520069. 1896035  
SRR17520069. 1896039  
SRR17520069. 1896041  
SRR17520069. 1896043  
SRR17520069. 1896045  
SRR17520069. 1896047  
SRR17520069. 1896049  
SRR17520069. 1896051  
SRR17520069. 1896053  
SRR17520069. 1896055  
SRR17520069. 1899903  
SRR17520069. 1899905  
SRR17520069. 1899907  
SRR17520069. 1899909  
SRR17520069. 1899911  
SRR17520069. 1903354  
SRR17520069. 1903356  
SRR17520069. 1903358  
SRR17520069. 1903360  
SRR17520069. 1903362

SRR17520069.1903364  
SRR17520069.1903366  
SRR17520069.1904477  
SRR17520069.1905385  
SRR17520069.1905387  
SRR17520069.1905389  
SRR17520069.1905391  
SRR17520069.1905393  
SRR17520069.1905395  
SRR17520069.1905397  
SRR17520069.1905399  
SRR17520069.1905401  
SRR17520069.1905403  
SRR17520069.1905407  
SRR17520069.1905409  
SRR17520069.1905413  
SRR17520069.1905415  
SRR17520069.1905417  
SRR17520069.1905419  
SRR17520069.1917898  
SRR17520069.1917900  
SRR17520069.1917902  
SRR17520069.1917904  
SRR17520069.1917906  
SRR17520069.1917908  
SRR17520069.1917910  
SRR17520069.1917912  
SRR17520069.1917914  
SRR17520069.1917916  
SRR17520069.1917918  
SRR17520069.1917920  
SRR17520069.1917922  
SRR17520069.1917924  
SRR17520069.1917926  
SRR17520069.1917928  
SRR17520069.1917930  
SRR17520069.1917932  
SRR17520069.1917934  
SRR17520069.1917936  
SRR17520069.1917938  
SRR17520069.1917940  
SRR17520069.1917942  
SRR17520069.1917946  
SRR17520069.1917948  
SRR17520069.1917950  
SRR17520069.1917952  
SRR17520069.1917954

SRR17520069. 1917959  
SRR17520069. 1917961  
SRR17520069. 1917963  
SRR17520069. 1917965  
SRR17520069. 1917967  
SRR17520069. 1917969  
SRR17520069. 1917973  
SRR17520069. 1917975  
SRR17520069. 1917977  
SRR17520069. 1917979  
SRR17520069. 1917981  
SRR17520069. 1917983  
SRR17520069. 1917985  
SRR17520069. 1917987  
SRR17520069. 1917989  
SRR17520069. 1917991  
SRR17520069. 1917993  
SRR17520069. 1917995  
SRR17520069. 1917997  
SRR17520069. 1917999  
SRR17520069. 1918003  
SRR17520069. 1918005  
SRR17520069. 1918007  
SRR17520069. 1918009  
SRR17520069. 1918011  
SRR17520069. 1918013  
SRR17520069. 1918015  
SRR17520069. 1918017  
SRR17520069. 1921238  
SRR17520069. 1921240  
SRR17520069. 1921242  
SRR17520069. 1921244  
SRR17520069. 1921246  
SRR17520069. 1921248  
SRR17520069. 1921250  
SRR17520069. 1921252  
SRR17520069. 1921254  
SRR17520069. 1921256  
SRR17520069. 1921665  
SRR17520069. 1921669  
SRR17520069. 1921671  
SRR17520069. 1921673  
SRR17520069. 1921675  
SRR17520069. 1921677  
SRR17520069. 1921679  
SRR17520069. 1921681  
SRR17520069. 1921683



SRR17520069. 1921685  
SRR17520069. 1921687  
SRR17520069. 1921689  
SRR17520069. 1921691  
SRR17520069. 1921693  
SRR17520069. 1921695  
SRR17520069. 1921697  
SRR17520069. 1921818  
SRR17520069. 1921820  
SRR17520069. 1921822  
SRR17520069. 1921824  
SRR17520069. 1921826  
SRR17520069. 1923431  
SRR17520069. 1923433  
SRR17520069. 1923435  
SRR17520069. 1923437  
SRR17520069. 1923439  
SRR17520069. 1923441  
SRR17520069. 1923443  
SRR17520069. 1923445  
SRR17520069. 1923683  
SRR17520069. 1923685  
SRR17520069. 1923687  
SRR17520069. 1923689  
SRR17520069. 1923691  
SRR17520069. 1923693  
SRR17520069. 1923695  
SRR17520069. 1923697  
SRR17520069. 1923699  
SRR17520069. 1923701  
SRR17520069. 1923703  
SRR17520069. 1923705  
SRR17520069. 1923707  
SRR17520069. 1923709  
SRR17520069. 1923711  
SRR17520069. 1923713  
SRR17520069. 1923715  
SRR17520069. 1923717  
SRR17520069. 1923719  
SRR17520069. 1923721  
SRR17520069. 1923723  
SRR17520069. 1923725  
SRR17520069. 1926775  
SRR17520069. 1926777  
SRR17520069. 1926779  
SRR17520069. 1926781  
SRR17520069. 1926783

SRR17520069. 1926785  
SRR17520069. 1926787  
SRR17520069. 1926789  
SRR17520069. 1926791  
SRR17520069. 1926793  
SRR17520069. 1926795  
SRR17520069. 1926797  
SRR17520069. 1926799  
SRR17520069. 1926801  
SRR17520069. 1926803  
SRR17520069. 1926805  
SRR17520069. 1926807  
SRR17520069. 1926811  
SRR17520069. 1926813  
SRR17520069. 1926817  
SRR17520069. 1926819  
SRR17520069. 1926821  
SRR17520069. 1926823  
SRR17520069. 1926827  
SRR17520069. 1926829  
SRR17520069. 1926831  
SRR17520069. 1926833  
SRR17520069. 1926835  
SRR17520069. 1926837  
SRR17520069. 1926839  
SRR17520069. 1937397  
SRR17520069. 1937399  
SRR17520069. 1937401  
SRR17520069. 1937403  
SRR17520069. 1937405  
SRR17520069. 1938392  
SRR17520069. 1938394  
SRR17520069. 1938396  
SRR17520069. 1938398  
SRR17520069. 1938400  
SRR17520069. 1942011  
SRR17520069. 1942013  
SRR17520069. 1942015  
SRR17520069. 1942019  
SRR17520069. 1942021  
SRR17520069. 1942025  
SRR17520069. 1951532  
SRR17520069. 1951534  
SRR17520069. 1951536  
SRR17520069. 1951542  
SRR17520069. 1951544  
SRR17520069. 1951546

SRR17520069. 1951548  
SRR17520069. 1951550  
SRR17520069. 1951552  
SRR17520069. 1951554  
SRR17520069. 1951556  
SRR17520069. 1951558  
SRR17520069. 1951560  
SRR17520069. 1951562  
SRR17520069. 1951564  
SRR17520069. 1951566  
SRR17520069. 1951568  
SRR17520069. 1951570  
SRR17520069. 1951572  
SRR17520069. 1951574  
SRR17520069. 1951576  
SRR17520069. 1951578  
SRR17520069. 1951580  
SRR17520069. 1951582  
SRR17520069. 1951584  
SRR17520069. 1951586  
SRR17520069. 1951588  
SRR17520069. 1951590  
SRR17520069. 1951592  
SRR17520069. 1951594  
SRR17520069. 1951596  
SRR17520069. 1951598  
SRR17520069. 1951600  
SRR17520069. 1951602  
SRR17520069. 1951604  
SRR17520069. 1951606  
SRR17520069. 1951608  
SRR17520069. 1951610  
SRR17520069. 1951612  
SRR17520069. 1951614  
SRR17520069. 1951616  
SRR17520069. 1951618  
SRR17520069. 1951620  
SRR17520069. 1951622  
SRR17520069. 1951624  
SRR17520069. 1951626  
SRR17520069. 1951628  
SRR17520069. 1957132  
SRR17520069. 1957134  
SRR17520069. 1957136  
SRR17520069. 1962144  
SRR17520069. 1962146  
SRR17520069. 1962148

SRR17520069. 1962150  
SRR17520069. 1971698  
SRR17520069. 1971700  
SRR17520069. 1971702  
SRR17520069. 1971704  
SRR17520069. 1971706  
SRR17520069. 1971708  
SRR17520069. 1971710  
SRR17520069. 1971712  
SRR17520069. 1971714  
SRR17520069. 1971718  
SRR17520069. 1971720  
SRR17520069. 1977177  
SRR17520069. 1977179  
SRR17520069. 1977181  
SRR17520069. 1977183  
SRR17520069. 1977185  
SRR17520069. 1977187  
SRR17520069. 1977189  
SRR17520069. 1977191  
SRR17520069. 1977193  
SRR17520069. 1977195  
SRR17520069. 1977197  
SRR17520069. 1977199  
SRR17520069. 1977201  
SRR17520069. 1977203  
SRR17520069. 1977205  
SRR17520069. 1977207  
SRR17520069. 1977209  
SRR17520069. 1977211  
SRR17520069. 1977213  
SRR17520069. 1977215  
SRR17520069. 1977217  
SRR17520069. 1977219  
SRR17520069. 1977221  
SRR17520069. 1977223  
SRR17520069. 1977225  
SRR17520069. 1977227  
SRR17520069. 1977229  
SRR17520069. 1977231  
SRR17520069. 1977233  
SRR17520069. 1977235  
SRR17520069. 1977237  
SRR17520069. 1977239  
SRR17520069. 1977241  
SRR17520069. 1977245  
SRR17520069. 1977247

SRR17520069. 1977249  
SRR17520069. 1977251  
SRR17520069. 1977253  
SRR17520069. 1977255  
SRR17520069. 1977257  
SRR17520069. 1977259  
SRR17520069. 1977261  
SRR17520069. 1977263  
SRR17520069. 1977265  
SRR17520069. 1977267  
SRR17520069. 1977539  
SRR17520069. 1978383  
SRR17520069. 1978385  
SRR17520069. 1978387  
SRR17520069. 1978389  
SRR17520069. 1978391  
SRR17520069. 1978393  
SRR17520069. 1978398  
SRR17520069. 1978400  
SRR17520069. 1978402  
SRR17520069. 1978404  
SRR17520069. 1978406  
SRR17520069. 1978408  
SRR17520069. 1978410  
SRR17520069. 1978412  
SRR17520069. 1978414  
SRR17520069. 1978416  
SRR17520069. 1978418  
SRR17520069. 1978420  
SRR17520069. 1978422  
SRR17520069. 1978424  
SRR17520069. 1978426  
SRR17520069. 1978428  
SRR17520069. 1978430  
SRR17520069. 1978432  
SRR17520069. 1978434  
SRR17520069. 1978436  
SRR17520069. 1978438  
SRR17520069. 1978440  
SRR17520069. 1978442  
SRR17520069. 1978444  
SRR17520069. 1978446  
SRR17520069. 1978448  
SRR17520069. 1978450  
SRR17520069. 1978452  
SRR17520069. 1978454  
SRR17520069. 1978456

SRR17520069. 1978458  
SRR17520069. 1978460  
SRR17520069. 1978462  
SRR17520069. 1978464  
SRR17520069. 1978466  
SRR17520069. 1978468  
SRR17520069. 1978636  
SRR17520069. 1978638  
SRR17520069. 1978640  
SRR17520069. 1978642  
SRR17520069. 1978644  
SRR17520069. 1978646  
SRR17520069. 1978648  
SRR17520069. 1978650  
SRR17520069. 1978658  
SRR17520069. 1978660  
SRR17520069. 1978662  
SRR17520069. 1978664  
SRR17520069. 1978666  
SRR17520069. 1978668  
SRR17520069. 1978670  
SRR17520069. 1978672  
SRR17520069. 1978674  
SRR17520069. 1978678  
SRR17520069. 1978680  
SRR17520069. 1978682  
SRR17520069. 1978684  
SRR17520069. 1980875  
SRR17520069. 1980879  
SRR17520069. 1980881  
SRR17520069. 1980883  
SRR17520069. 1980885  
SRR17520069. 1980887  
SRR17520069. 1980889  
SRR17520069. 1980891  
SRR17520069. 1980893  
SRR17520069. 1980895  
SRR17520069. 1980897  
SRR17520069. 1980899  
SRR17520069. 1980901  
SRR17520069. 1980903  
SRR17520069. 1980905  
SRR17520069. 1980907  
SRR17520069. 1980909  
SRR17520069. 1980913  
SRR17520069. 1980915  
SRR17520069. 1980917

SRR17520069. 1980919  
SRR17520069. 1980921  
SRR17520069. 1980923  
SRR17520069. 1980925  
SRR17520069. 1980927  
SRR17520069. 1980929  
SRR17520069. 1980931  
SRR17520069. 1980933  
SRR17520069. 1980935  
SRR17520069. 1980937  
SRR17520069. 1980941  
SRR17520069. 1980943  
SRR17520069. 1980945  
SRR17520069. 1980947  
SRR17520069. 1980949  
SRR17520069. 1980951  
SRR17520069. 1980953  
SRR17520069. 1980955  
SRR17520069. 1980957  
SRR17520069. 1980959  
SRR17520069. 1980961  
SRR17520069. 1980963  
SRR17520069. 1980965  
SRR17520069. 1980967  
SRR17520069. 1980969  
SRR17520069. 1980971  
SRR17520069. 1980973  
SRR17520069. 1980975  
SRR17520069. 1980977  
SRR17520069. 1980979  
SRR17520069. 1980981  
SRR17520069. 1980983  
SRR17520069. 1980985  
SRR17520069. 1980987  
SRR17520069. 1980991  
SRR17520069. 1981003  
SRR17520069. 1981005  
SRR17520069. 1981007  
SRR17520069. 1981011  
SRR17520069. 1981015  
SRR17520069. 1981017  
SRR17520069. 1983070  
SRR17520069. 1983072  
SRR17520069. 1983074  
SRR17520069. 1983076  
SRR17520069. 1983078  
SRR17520069. 1983080

SRR17520069. 1983082  
SRR17520069. 1983084  
SRR17520069. 1983086  
SRR17520069. 1983088  
SRR17520069. 1983090  
SRR17520069. 1983092  
SRR17520069. 1983094  
SRR17520069. 1983096  
SRR17520069. 1983098  
SRR17520069. 1983100  
SRR17520069. 1983102  
SRR17520069. 1983104  
SRR17520069. 1983106  
SRR17520069. 1983108  
SRR17520069. 1983112  
SRR17520069. 1983114  
SRR17520069. 1983116  
SRR17520069. 1983118  
SRR17520069. 1983120  
SRR17520069. 1983122  
SRR17520069. 1983124  
SRR17520069. 1983126  
SRR17520069. 1983128  
SRR17520069. 1983130  
SRR17520069. 1983132  
SRR17520069. 1983134  
SRR17520069. 1983136  
SRR17520069. 1983138  
SRR17520069. 1983140  
SRR17520069. 1983142  
SRR17520069. 1983144  
SRR17520069. 1983146  
SRR17520069. 1983148  
SRR17520069. 1983150  
SRR17520069. 1983152  
SRR17520069. 1983154  
SRR17520069. 1983156  
SRR17520069. 1983158  
SRR17520069. 1983160  
SRR17520069. 1983162  
SRR17520069. 1983164  
SRR17520069. 1983166  
SRR17520069. 1983791  
SRR17520069. 1985080  
SRR17520069. 1985082  
SRR17520069. 1985084  
SRR17520069. 1985086



SRR17520069. 1985088  
SRR17520069. 1985090  
SRR17520069. 1985092  
SRR17520069. 1985094  
SRR17520069. 1985096  
SRR17520069. 1985098  
SRR17520069. 1985100  
SRR17520069. 1993954  
SRR17520069. 1993956  
SRR17520069. 1993958  
SRR17520069. 1993960  
SRR17520069. 1993962  
SRR17520069. 1993964  
SRR17520069. 1993966  
SRR17520069. 1995130  
SRR17520069. 1995132  
SRR17520069. 1995134  
SRR17520069. 1995136  
SRR17520069. 1995138  
SRR17520069. 1995140  
SRR17520069. 1995142  
SRR17520069. 1995144  
SRR17520069. 1995146  
SRR17520069. 1995148  
SRR17520069. 1995150  
SRR17520069. 1995152  
SRR17520069. 1998132  
SRR17520069. 1998134  
SRR17520069. 1998136  
SRR17520069. 1998138  
SRR17520069. 1998140  
SRR17520069. 1998142  
SRR17520069. 1998144  
SRR17520069. 1998146  
SRR17520069. 1998148  
SRR17520069. 1998150  
SRR17520069. 1998152  
SRR17520069. 1998154  
SRR17520069. 1998156  
SRR17520069. 1998158  
SRR17520069. 1998160  
SRR17520069. 1998162  
SRR17520069. 1998164  
SRR17520069. 1998166  
SRR17520069. 1998168  
SRR17520069. 1998170  
SRR17520069. 1998172

SRR17520069. 1998174  
SRR17520069. 1998176  
SRR17520069. 1998178  
SRR17520069. 1998180  
SRR17520069. 1998182  
SRR17520069. 1998184  
SRR17520069. 1998186  
SRR17520069. 1998188  
SRR17520069. 1998190  
SRR17520069. 1998194  
SRR17520069. 1998196  
SRR17520069. 1998198  
SRR17520069. 1998200  
SRR17520069. 1998202  
SRR17520069. 1998204  
SRR17520069. 1998206  
SRR17520069. 1998210  
SRR17520069. 1998212  
SRR17520069. 1998214  
SRR17520069. 1998216  
SRR17520069. 1998218  
SRR17520069. 1998220  
SRR17520069. 1998222  
SRR17520069. 1998224  
SRR17520069. 1998226  
SRR17520069. 1998228  
SRR17520069. 1998230  
SRR17520069. 1998232  
SRR17520069. 1998234  
SRR17520069. 1998238  
SRR17520069. 1998240  
SRR17520069. 1998242  
SRR17520069. 1998244  
SRR17520069. 1998248  
SRR17520069. 1998250  
SRR17520069. 1998252  
SRR17520069. 1998254  
SRR17520069. 2004397  
SRR17520069. 2004399  
SRR17520069. 2004401  
SRR17520069. 2004405  
SRR17520069. 2004407  
SRR17520069. 2004409  
SRR17520069. 2004411  
SRR17520069. 2004413  
SRR17520069. 2004415  
SRR17520069. 2004417

SRR17520069.2006831  
SRR17520069.2006833  
SRR17520069.2006835  
SRR17520069.2006837  
SRR17520069.2006839  
SRR17520069.2006841  
SRR17520069.2006843  
SRR17520069.2006845  
SRR17520069.2006847  
SRR17520069.2006849  
SRR17520069.2006851  
SRR17520069.2006853  
SRR17520069.2006855  
SRR17520069.2006857  
SRR17520069.2014513  
SRR17520069.2014515  
SRR17520069.2014517  
SRR17520069.2014519  
SRR17520069.2014521  
SRR17520069.2014523  
SRR17520069.2014525  
SRR17520069.2014527  
SRR17520069.2014529  
SRR17520069.2014531  
SRR17520069.2014533  
SRR17520069.2014535  
SRR17520069.2014537  
SRR17520069.2014539  
SRR17520069.2014541  
SRR17520069.2014543  
SRR17520069.2014545  
SRR17520069.2014547  
SRR17520069.2014549  
SRR17520069.2014553  
SRR17520069.2014555  
SRR17520069.2014557  
SRR17520069.2014559  
SRR17520069.2014561  
SRR17520069.2014563  
SRR17520069.2014565  
SRR17520069.2014567  
SRR17520069.2014569  
SRR17520069.2014571  
SRR17520069.2014573  
SRR17520069.2014575  
SRR17520069.2014577  
SRR17520069.2014579

SRR17520069.2014581  
SRR17520069.2014583  
SRR17520069.2014585  
SRR17520069.2014587  
SRR17520069.2014589  
SRR17520069.2014591  
SRR17520069.2014593  
SRR17520069.2014595  
SRR17520069.2014597  
SRR17520069.2014599  
SRR17520069.2014601  
SRR17520069.2014603  
SRR17520069.2014605  
SRR17520069.2014607  
SRR17520069.2014609  
SRR17520069.2014611  
SRR17520069.2014613  
SRR17520069.2015899  
SRR17520069.2015901  
SRR17520069.2015903  
SRR17520069.2015905  
SRR17520069.2015907  
SRR17520069.2015909  
SRR17520069.2015911  
SRR17520069.2015913  
SRR17520069.2015915  
SRR17520069.2015917  
SRR17520069.2015919  
SRR17520069.2015921  
SRR17520069.2015923  
SRR17520069.2015925  
SRR17520069.2015927  
SRR17520069.2015929  
SRR17520069.2015933  
SRR17520069.2015935  
SRR17520069.2015937  
SRR17520069.2015939  
SRR17520069.2015941  
SRR17520069.2015943  
SRR17520069.2015945  
SRR17520069.2015949  
SRR17520069.2015951  
SRR17520069.2015953  
SRR17520069.2015955  
SRR17520069.2015957  
SRR17520069.2015959  
SRR17520069.2015961

SRR17520069.2016955  
SRR17520069.2016959  
SRR17520069.2016961  
SRR17520069.2016965  
SRR17520069.2016967  
SRR17520069.2016969  
SRR17520069.2016971  
SRR17520069.2016973  
SRR17520069.2016975  
SRR17520069.2016977  
SRR17520069.2017507  
SRR17520069.2017509  
SRR17520069.2017511  
SRR17520069.2017960  
SRR17520069.2017962  
SRR17520069.2017964  
SRR17520069.2017966  
SRR17520069.2017970  
SRR17520069.2017974  
SRR17520069.2017976  
SRR17520069.2017978  
SRR17520069.2017980  
SRR17520069.2017982  
SRR17520069.2017984  
SRR17520069.2017986  
SRR17520069.2017988  
SRR17520069.2017990  
SRR17520069.2017992  
SRR17520069.2017994  
SRR17520069.2017998  
SRR17520069.2018000  
SRR17520069.2018002  
SRR17520069.2018006  
SRR17520069.2018008  
SRR17520069.2018010  
SRR17520069.2018012  
SRR17520069.2018014  
SRR17520069.2018016  
SRR17520069.2023941  
SRR17520069.2023943  
SRR17520069.2023945  
SRR17520069.2023947  
SRR17520069.2023949  
SRR17520069.2023953  
SRR17520069.2024222  
SRR17520069.2024224  
SRR17520069.2024226

SRR17520069. 2024228  
SRR17520069. 2024230  
SRR17520069. 2024232  
SRR17520069. 2024234  
SRR17520069. 2024236  
SRR17520069. 2024238  
SRR17520069. 2024240  
SRR17520069. 2024242  
SRR17520069. 2024244  
SRR17520069. 2032875  
SRR17520069. 2032877  
SRR17520069. 2032879  
SRR17520069. 2032881  
SRR17520069. 2032883  
SRR17520069. 2032885  
SRR17520069. 2032887  
SRR17520069. 2032889  
SRR17520069. 2032891  
SRR17520069. 2032893  
SRR17520069. 2032895  
SRR17520069. 2032897  
SRR17520069. 2032899  
SRR17520069. 2032901  
SRR17520069. 2034168  
SRR17520069. 2034170  
SRR17520069. 2034172  
SRR17520069. 2034174  
SRR17520069. 2034176  
SRR17520069. 2034178  
SRR17520069. 2034180  
SRR17520069. 2034182  
SRR17520069. 2034184  
SRR17520069. 2034186  
SRR17520069. 2034188  
SRR17520069. 2034190  
SRR17520069. 2034192  
SRR17520069. 2034194  
SRR17520069. 2034196  
SRR17520069. 2034198  
SRR17520069. 2034200  
SRR17520069. 2034202  
SRR17520069. 2034204  
SRR17520069. 2034206  
SRR17520069. 2034208  
SRR17520069. 2034210  
SRR17520069. 2034212  
SRR17520069. 2034214

SRR17520069. 2034216  
SRR17520069. 2034220  
SRR17520069. 2034222  
SRR17520069. 2034224  
SRR17520069. 2034226  
SRR17520069. 2034228  
SRR17520069. 2034230  
SRR17520069. 2034232  
SRR17520069. 2034234  
SRR17520069. 2034238  
SRR17520069. 2034240  
SRR17520069. 2034242  
SRR17520069. 2034244  
SRR17520069. 2034246  
SRR17520069. 2034248  
SRR17520069. 2034252  
SRR17520069. 2034254  
SRR17520069. 2035363  
SRR17520069. 2035365  
SRR17520069. 2035367  
SRR17520069. 2035369  
SRR17520069. 2035371  
SRR17520069. 2035373  
SRR17520069. 2035375  
SRR17520069. 2035377  
SRR17520069. 2035379  
SRR17520069. 2035381  
SRR17520069. 2035383  
SRR17520069. 2035385  
SRR17520069. 2035387  
SRR17520069. 2035389  
SRR17520069. 2035391  
SRR17520069. 2035393  
SRR17520069. 2035395  
SRR17520069. 2035401  
SRR17520069. 2035403  
SRR17520069. 2035405  
SRR17520069. 2035407  
SRR17520069. 2035409  
SRR17520069. 2035411  
SRR17520069. 2035413  
SRR17520069. 2035415  
SRR17520069. 2035417  
SRR17520069. 2035419  
SRR17520069. 2035421  
SRR17520069. 2038349  
SRR17520069. 2038351

SRR17520069. 2038353  
SRR17520069. 2038355  
SRR17520069. 2038357  
SRR17520069. 2038359  
SRR17520069. 2038361  
SRR17520069. 2038363  
SRR17520069. 2038365  
SRR17520069. 2041869  
SRR17520069. 2041871  
SRR17520069. 2041873  
SRR17520069. 2041875  
SRR17520069. 2041877  
SRR17520069. 2041879  
SRR17520069. 2041881  
SRR17520069. 2041883  
SRR17520069. 2041885  
SRR17520069. 2041887  
SRR17520069. 2041889  
SRR17520069. 2041891  
SRR17520069. 2041893  
SRR17520069. 2041895  
SRR17520069. 2041897  
SRR17520069. 2041899  
SRR17520069. 2041901  
SRR17520069. 2044967  
SRR17520069. 2044969  
SRR17520069. 2044971  
SRR17520069. 2044973  
SRR17520069. 2044975  
SRR17520069. 2044977  
SRR17520069. 2044979  
SRR17520069. 2044981  
SRR17520069. 2044983  
SRR17520069. 2044985  
SRR17520069. 2044987  
SRR17520069. 2044989  
SRR17520069. 2044991  
SRR17520069. 2044993  
SRR17520069. 2044995  
SRR17520069. 2044997  
SRR17520069. 2044999  
SRR17520069. 2045001  
SRR17520069. 2045003  
SRR17520069. 2045005  
SRR17520069. 2045007  
SRR17520069. 2045009  
SRR17520069. 2045011



SRR17520069.2045013  
SRR17520069.2045015  
SRR17520069.2045017  
SRR17520069.2045019  
SRR17520069.2045021  
SRR17520069.2045023  
SRR17520069.2045025  
SRR17520069.2045027  
SRR17520069.2045031  
SRR17520069.2045033  
SRR17520069.2045035  
SRR17520069.2045037  
SRR17520069.2045039  
SRR17520069.2045041  
SRR17520069.2045043  
SRR17520069.2045045  
SRR17520069.2045047  
SRR17520069.2045049  
SRR17520069.2045051  
SRR17520069.2045053  
SRR17520069.2045055  
SRR17520069.2045057  
SRR17520069.2045568  
SRR17520069.2045570  
SRR17520069.2045572  
SRR17520069.2045574  
SRR17520069.2048047  
SRR17520069.2048049  
SRR17520069.2048051  
SRR17520069.2048053  
SRR17520069.2052290  
SRR17520069.2052292  
SRR17520069.2052294  
SRR17520069.2052296  
SRR17520069.2052298  
SRR17520069.2052300  
SRR17520069.2052302  
SRR17520069.2052304  
SRR17520069.2052306  
SRR17520069.2052308  
SRR17520069.2052310  
SRR17520069.2052312  
SRR17520069.2052314  
SRR17520069.2052316  
SRR17520069.2052318  
SRR17520069.2052320  
SRR17520069.2052322

SRR17520069.2052324  
SRR17520069.2052326  
SRR17520069.2052328  
SRR17520069.2052330  
SRR17520069.2060680  
SRR17520069.2060682  
SRR17520069.2060684  
SRR17520069.2060686  
SRR17520069.2066656  
SRR17520069.2066658  
SRR17520069.2066660  
SRR17520069.2066662  
SRR17520069.2066664  
SRR17520069.2066666  
SRR17520069.2066668  
SRR17520069.2066670  
SRR17520069.2066672  
SRR17520069.2066674  
SRR17520069.2066676  
SRR17520069.2066678  
SRR17520069.2066680  
SRR17520069.2066682  
SRR17520069.2066684  
SRR17520069.2066686  
SRR17520069.2066688  
SRR17520069.2066690  
SRR17520069.2066692  
SRR17520069.2073929  
SRR17520069.2073931  
SRR17520069.2073933  
SRR17520069.2073935  
SRR17520069.2073937  
SRR17520069.2073939  
SRR17520069.2073943  
SRR17520069.2073947  
SRR17520069.2073949  
SRR17520069.2073951  
SRR17520069.2073953  
SRR17520069.2073955  
SRR17520069.2073957  
SRR17520069.2073959  
SRR17520069.2073963  
SRR17520069.2073965  
SRR17520069.2073967  
SRR17520069.2073969  
SRR17520069.2073971  
SRR17520069.2073973

SRR17520069.2073975  
SRR17520069.2073977  
SRR17520069.2073979  
SRR17520069.2073981  
SRR17520069.2073983  
SRR17520069.2073985  
SRR17520069.2073987  
SRR17520069.2073989  
SRR17520069.2076539  
SRR17520069.2076541  
SRR17520069.2076543  
SRR17520069.2076545  
SRR17520069.2076547  
SRR17520069.2076549  
SRR17520069.2076551  
SRR17520069.2076553  
SRR17520069.2076555  
SRR17520069.2076557  
SRR17520069.2076559  
SRR17520069.2076561  
SRR17520069.2076563  
SRR17520069.2076565  
SRR17520069.2076567  
SRR17520069.2076569  
SRR17520069.2076571  
SRR17520069.2076573  
SRR17520069.2076575  
SRR17520069.2076577  
SRR17520069.2076579  
SRR17520069.2076581  
SRR17520069.2076583  
SRR17520069.2076585  
SRR17520069.2076587  
SRR17520069.2076589  
SRR17520069.2076591  
SRR17520069.2076593  
SRR17520069.2076595  
SRR17520069.2076597  
SRR17520069.2076599  
SRR17520069.2076601  
SRR17520069.2076603  
SRR17520069.2076605  
SRR17520069.2076607  
SRR17520069.2076609  
SRR17520069.2076611  
SRR17520069.2076613  
SRR17520069.2076615

SRR17520069.2076617  
SRR17520069.2076619  
SRR17520069.2076621  
SRR17520069.2076623  
SRR17520069.2076625  
SRR17520069.2076627  
SRR17520069.2076629  
SRR17520069.2076631  
SRR17520069.2076633  
SRR17520069.2076635  
SRR17520069.2076637  
SRR17520069.2076639  
SRR17520069.2076641  
SRR17520069.2076643  
SRR17520069.2076645  
SRR17520069.2076647  
SRR17520069.2076651  
SRR17520069.2076653  
SRR17520069.2076655  
SRR17520069.2076657  
SRR17520069.2076659  
SRR17520069.2076661  
SRR17520069.2076663  
SRR17520069.2076665  
SRR17520069.2076667  
SRR17520069.2076669  
SRR17520069.2076671  
SRR17520069.2076673  
SRR17520069.2076675  
SRR17520069.2076677  
SRR17520069.2076679  
SRR17520069.2076681  
SRR17520069.2076683  
SRR17520069.2076687  
SRR17520069.2079031  
SRR17520069.2079033  
SRR17520069.2079035  
SRR17520069.2079953  
SRR17520069.2079957  
SRR17520069.2079959  
SRR17520069.2079961  
SRR17520069.2079963  
SRR17520069.2079965  
SRR17520069.2079967  
SRR17520069.2079969  
SRR17520069.2079971  
SRR17520069.2079975

SRR17520069.2079977  
SRR17520069.2079979  
SRR17520069.2079981  
SRR17520069.2079983  
SRR17520069.2079985  
SRR17520069.2079987  
SRR17520069.2079989  
SRR17520069.2079991  
SRR17520069.2079993  
SRR17520069.2079995  
SRR17520069.2079997  
SRR17520069.2079999  
SRR17520069.2080001  
SRR17520069.2080003  
SRR17520069.2080005  
SRR17520069.2080007  
SRR17520069.2080009  
SRR17520069.2080011  
SRR17520069.2080013  
SRR17520069.2080015  
SRR17520069.2080017  
SRR17520069.2080019  
SRR17520069.2080021  
SRR17520069.2080491  
SRR17520069.2080493  
SRR17520069.2080495  
SRR17520069.2080497  
SRR17520069.2080499  
SRR17520069.2080501  
SRR17520069.2080503  
SRR17520069.2080505  
SRR17520069.2080507  
SRR17520069.2080509  
SRR17520069.2080511  
SRR17520069.2080513  
SRR17520069.2080515  
SRR17520069.2080517  
SRR17520069.2080519  
SRR17520069.2080521  
SRR17520069.2080523  
SRR17520069.2080525  
SRR17520069.2080527  
SRR17520069.2080529  
SRR17520069.2080531  
SRR17520069.2080533  
SRR17520069.2080535  
SRR17520069.2080537

SRR17520069.2080539  
SRR17520069.2080541  
SRR17520069.2087780  
SRR17520069.2087782  
SRR17520069.2087784  
SRR17520069.2087786  
SRR17520069.2087788  
SRR17520069.2087790  
SRR17520069.2087792  
SRR17520069.2087794  
SRR17520069.2087796  
SRR17520069.2087798  
SRR17520069.2087800  
SRR17520069.2087802  
SRR17520069.2087804  
SRR17520069.2087806  
SRR17520069.2087808  
SRR17520069.2087810  
SRR17520069.2087812  
SRR17520069.2087814  
SRR17520069.2087816  
SRR17520069.2087818  
SRR17520069.2087820  
SRR17520069.2087822  
SRR17520069.2087824  
SRR17520069.2087826  
SRR17520069.2087828  
SRR17520069.2087830  
SRR17520069.2087832  
SRR17520069.2087834  
SRR17520069.2087836  
SRR17520069.2087838  
SRR17520069.2087840  
SRR17520069.2087842  
SRR17520069.2087844  
SRR17520069.2087846  
SRR17520069.2087848  
SRR17520069.2087850  
SRR17520069.2087852  
SRR17520069.2087854  
SRR17520069.2087856  
SRR17520069.2087858  
SRR17520069.2087860  
SRR17520069.2087862  
SRR17520069.2087864  
SRR17520069.2087866  
SRR17520069.2087868

SRR17520069.2087870  
SRR17520069.2087872  
SRR17520069.2087874  
SRR17520069.2087876  
SRR17520069.2097232  
SRR17520069.2098221  
SRR17520069.2098223  
SRR17520069.2098225  
SRR17520069.2098227  
SRR17520069.2098229  
SRR17520069.2098231  
SRR17520069.2101511  
SRR17520069.2101513  
SRR17520069.2101521  
SRR17520069.2101523  
SRR17520069.2101525  
SRR17520069.2101527  
SRR17520069.2101529  
SRR17520069.2101531  
SRR17520069.2101533  
SRR17520069.2101535  
SRR17520069.2101537  
SRR17520069.2101541  
SRR17520069.2101543  
SRR17520069.2101545  
SRR17520069.2101547  
SRR17520069.2101549  
SRR17520069.2101553  
SRR17520069.2101555  
SRR17520069.2101557  
SRR17520069.2101559  
SRR17520069.2101563  
SRR17520069.2101565  
SRR17520069.2101567  
SRR17520069.2101569  
SRR17520069.2101571  
SRR17520069.2101573  
SRR17520069.2101575  
SRR17520069.2101577  
SRR17520069.2101579  
SRR17520069.2106132  
SRR17520069.2106134  
SRR17520069.2106136  
SRR17520069.2106138  
SRR17520069.2106140  
SRR17520069.2106142  
SRR17520069.2106585

SRR17520069.2106587  
SRR17520069.2106589  
SRR17520069.2106591  
SRR17520069.2106593  
SRR17520069.2106595  
SRR17520069.2106597  
SRR17520069.2106599  
SRR17520069.2106601  
SRR17520069.2106603  
SRR17520069.2106605  
SRR17520069.2106607  
SRR17520069.2106609  
SRR17520069.2106611  
SRR17520069.2106613  
SRR17520069.2106615  
SRR17520069.2106617  
SRR17520069.2106619  
SRR17520069.2106621  
SRR17520069.2106623  
SRR17520069.2106625  
SRR17520069.2106627  
SRR17520069.2106629  
SRR17520069.2106631  
SRR17520069.2106633  
SRR17520069.2106635  
SRR17520069.2107403  
SRR17520069.2107405  
SRR17520069.2107407  
SRR17520069.2107409  
SRR17520069.2107411  
SRR17520069.2107413  
SRR17520069.2107415  
SRR17520069.2107417  
SRR17520069.2107419  
SRR17520069.2107421  
SRR17520069.2110841  
SRR17520069.2110843  
SRR17520069.2110845  
SRR17520069.2110847  
SRR17520069.2110849  
SRR17520069.2110851  
SRR17520069.2110855  
SRR17520069.2110857  
SRR17520069.2110859  
SRR17520069.2110861  
SRR17520069.2110863  
SRR17520069.2110865



SRR17520069.2110867  
SRR17520069.2110869  
SRR17520069.2110871  
SRR17520069.2113410  
SRR17520069.2113412  
SRR17520069.2113414  
SRR17520069.2113416  
SRR17520069.2113418  
SRR17520069.2113420  
SRR17520069.2113720  
SRR17520069.2113722  
SRR17520069.2113724  
SRR17520069.2113726  
SRR17520069.2113728  
SRR17520069.2113730  
SRR17520069.2125173  
SRR17520069.2125175  
SRR17520069.2125177  
SRR17520069.2125185  
SRR17520069.2125790  
SRR17520069.2127074  
SRR17520069.2128827  
SRR17520069.2128829  
SRR17520069.2128831  
SRR17520069.2134825  
SRR17520069.2134827  
SRR17520069.2134829  
SRR17520069.2134831  
SRR17520069.2134833  
SRR17520069.2134835  
SRR17520069.2134837  
SRR17520069.2134839  
SRR17520069.2134843  
SRR17520069.2134845  
SRR17520069.2134847  
SRR17520069.2134849  
SRR17520069.2134851  
SRR17520069.2135079  
SRR17520069.2136607  
SRR17520069.2136609  
SRR17520069.2136611  
SRR17520069.2136613  
SRR17520069.2136615  
SRR17520069.2136617  
SRR17520069.2136619  
SRR17520069.2136621  
SRR17520069.2136623

SRR17520069. 2136625  
SRR17520069. 2136627  
SRR17520069. 2136629  
SRR17520069. 2136631  
SRR17520069. 2136633  
SRR17520069. 2136635  
SRR17520069. 2136637  
SRR17520069. 2136639  
SRR17520069. 2136641  
SRR17520069. 2136643  
SRR17520069. 2136645  
SRR17520069. 2136647  
SRR17520069. 2136649  
SRR17520069. 2136651  
SRR17520069. 2136653  
SRR17520069. 2136655  
SRR17520069. 2136657  
SRR17520069. 2136659  
SRR17520069. 2136661  
SRR17520069. 2136663  
SRR17520069. 2136665  
SRR17520069. 2137114  
SRR17520069. 2137116  
SRR17520069. 2137118  
SRR17520069. 2137120  
SRR17520069. 2137122  
SRR17520069. 2137124  
SRR17520069. 2141495  
SRR17520069. 2141497  
SRR17520069. 2141499  
SRR17520069. 2142911  
SRR17520069. 2142913  
SRR17520069. 2142915  
SRR17520069. 2143719  
SRR17520069. 2143721  
SRR17520069. 2143723  
SRR17520069. 2143725  
SRR17520069. 2143727  
SRR17520069. 2143729  
SRR17520069. 2143731  
SRR17520069. 2145038  
SRR17520069. 2145040  
SRR17520069. 2145042  
SRR17520069. 2145044  
SRR17520069. 2145046  
SRR17520069. 2145048  
SRR17520069. 2145050

SRR17520069.2145052  
SRR17520069.2145054  
SRR17520069.2145056  
SRR17520069.2145058  
SRR17520069.2145060  
SRR17520069.2145062  
SRR17520069.2145066  
SRR17520069.2145068  
SRR17520069.2145070  
SRR17520069.2145072  
SRR17520069.2148927  
SRR17520069.2148929  
SRR17520069.2148935  
SRR17520069.2148939  
SRR17520069.2148941  
SRR17520069.2148943  
SRR17520069.2160473  
SRR17520069.2160475  
SRR17520069.2160477  
SRR17520069.2167597  
SRR17520069.2170040  
SRR17520069.2170042  
SRR17520069.2170044  
SRR17520069.2170046  
SRR17520069.2170048  
SRR17520069.2170050  
SRR17520069.2175265  
SRR17520069.2175267  
SRR17520069.2175269  
SRR17520069.2175271  
SRR17520069.2175273  
SRR17520069.2175275  
SRR17520069.2175277  
SRR17520069.2175279  
SRR17520069.2175281  
SRR17520069.2175283  
SRR17520069.2175285  
SRR17520069.2175287  
SRR17520069.2175289  
SRR17520069.2175291  
SRR17520069.2175295  
SRR17520069.2175297  
SRR17520069.2175299  
SRR17520069.2175301  
SRR17520069.2175303  
SRR17520069.2175305  
SRR17520069.2175307

SRR17520069.2175311  
SRR17520069.2175313  
SRR17520069.2175315  
SRR17520069.2175317  
SRR17520069.2175319  
SRR17520069.2175321  
SRR17520069.2175325  
SRR17520069.2175327  
SRR17520069.2175329  
SRR17520069.2176622  
SRR17520069.2176624  
SRR17520069.2176626  
SRR17520069.2176628  
SRR17520069.2176630  
SRR17520069.2176632  
SRR17520069.2176634  
SRR17520069.2176636  
SRR17520069.2176638  
SRR17520069.2176640  
SRR17520069.2176642  
SRR17520069.2176644  
SRR17520069.2176646  
SRR17520069.2176648  
SRR17520069.2181541  
SRR17520069.2181543  
SRR17520069.2181545  
SRR17520069.2181547  
SRR17520069.2181549  
SRR17520069.2181551  
SRR17520069.2181553  
SRR17520069.2181555  
SRR17520069.2181557  
SRR17520069.2181559  
SRR17520069.2181561  
SRR17520069.2181563  
SRR17520069.2188652  
SRR17520069.2188654  
SRR17520069.2188656  
SRR17520069.2188658  
SRR17520069.2188660  
SRR17520069.2188662  
SRR17520069.2188664  
SRR17520069.2188666  
SRR17520069.2188670  
SRR17520069.2188672  
SRR17520069.2188674  
SRR17520069.2188676

SRR17520069.2188678  
SRR17520069.2188682  
SRR17520069.2188688  
SRR17520069.2188692  
SRR17520069.2188694  
SRR17520069.2188696  
SRR17520069.2188698  
SRR17520069.2188700  
SRR17520069.2188702  
SRR17520069.2188704  
SRR17520069.2188706  
SRR17520069.2188708  
SRR17520069.2188710  
SRR17520069.2188712  
SRR17520069.2188714  
SRR17520069.2188716  
SRR17520069.2188718  
SRR17520069.2190731  
SRR17520069.2190733  
SRR17520069.2190735  
SRR17520069.2190737  
SRR17520069.2190739  
SRR17520069.2202763  
SRR17520069.2202765  
SRR17520069.2202767  
SRR17520069.2202769  
SRR17520069.2209802  
SRR17520069.2209804  
SRR17520069.2209806  
SRR17520069.2209808  
SRR17520069.2209810  
SRR17520069.2209812  
SRR17520069.2209814  
SRR17520069.2209816  
SRR17520069.2209818  
SRR17520069.2209820  
SRR17520069.2209822  
SRR17520069.2209824  
SRR17520069.2209826  
SRR17520069.2209828  
SRR17520069.2209830  
SRR17520069.2209832  
SRR17520069.2209834  
SRR17520069.2209836  
SRR17520069.2209838  
SRR17520069.2209840  
SRR17520069.2209842

SRR17520069. 2209844  
SRR17520069. 2209846  
SRR17520069. 2209848  
SRR17520069. 2209850  
SRR17520069. 2209852  
SRR17520069. 2209854  
SRR17520069. 2209856  
SRR17520069. 2209858  
SRR17520069. 2209860  
SRR17520069. 2209862  
SRR17520069. 2209864  
SRR17520069. 2209866  
SRR17520069. 2209868  
SRR17520069. 2209870  
SRR17520069. 2209872  
SRR17520069. 2209874  
SRR17520069. 2209876  
SRR17520069. 2209878  
SRR17520069. 2209880  
SRR17520069. 2209882  
SRR17520069. 2209884  
SRR17520069. 2209886  
SRR17520069. 2209888  
SRR17520069. 2209890  
SRR17520069. 2209892  
SRR17520069. 2209894  
SRR17520069. 2209896  
SRR17520069. 2209922  
SRR17520069. 2209924  
SRR17520069. 2209926  
SRR17520069. 2209928  
SRR17520069. 2209930  
SRR17520069. 2209932  
SRR17520069. 2209934  
SRR17520069. 2209936  
SRR17520069. 2209938  
SRR17520069. 2209940  
SRR17520069. 2209942  
SRR17520069. 2209944  
SRR17520069. 2223816  
SRR17520069. 2228853  
SRR17520069. 2228855  
SRR17520069. 2230239  
SRR17520069. 2230241  
SRR17520069. 2230243  
SRR17520069. 2230245  
SRR17520069. 2230247

SRR17520069. 2230249  
SRR17520069. 2230251  
SRR17520069. 2230253  
SRR17520069. 2230255  
SRR17520069. 2230257  
SRR17520069. 2230259  
SRR17520069. 2230263  
SRR17520069. 2230265  
SRR17520069. 2230267  
SRR17520069. 2230271  
SRR17520069. 2230273  
SRR17520069. 2230275  
SRR17520069. 2230277  
SRR17520069. 2230281  
SRR17520069. 2230283  
SRR17520069. 2230285  
SRR17520069. 2230287  
SRR17520069. 2230289  
SRR17520069. 2230291  
SRR17520069. 2230293  
SRR17520069. 2230295  
SRR17520069. 2230297  
SRR17520069. 2230299  
SRR17520069. 2230301  
SRR17520069. 2230303  
SRR17520069. 2230305  
SRR17520069. 2230307  
SRR17520069. 2230309  
SRR17520069. 2230311  
SRR17520069. 2230313  
SRR17520069. 2230315  
SRR17520069. 2230317  
SRR17520069. 2230319  
SRR17520069. 2230321  
SRR17520069. 2230323  
SRR17520069. 2230325  
SRR17520069. 2230327  
SRR17520069. 2230329  
SRR17520069. 2230331  
SRR17520069. 2230333  
SRR17520069. 2230335  
SRR17520069. 2230337  
SRR17520069. 2230339  
SRR17520069. 2230341  
SRR17520069. 2230343  
SRR17520069. 2230345  
SRR17520069. 2235063

SRR17520069.2235065  
SRR17520069.2235067  
SRR17520069.2235069  
SRR17520069.2235071  
SRR17520069.2235073  
SRR17520069.2248852  
SRR17520069.2248856  
SRR17520069.2248860  
SRR17520069.2248866  
SRR17520069.2248868  
SRR17520069.2248870  
SRR17520069.2248872  
SRR17520069.2248874  
SRR17520069.2248876  
SRR17520069.2252031  
SRR17520069.2252033  
SRR17520069.2252035  
SRR17520069.2252037  
SRR17520069.2252039  
SRR17520069.2252041  
SRR17520069.2252043  
SRR17520069.2252047  
SRR17520069.2252049  
SRR17520069.2252051  
SRR17520069.2252053  
SRR17520069.2252055  
SRR17520069.2252057  
SRR17520069.2252059  
SRR17520069.2252061  
SRR17520069.2252063  
SRR17520069.2256994  
SRR17520069.2256996  
SRR17520069.2256998  
SRR17520069.2257000  
SRR17520069.2257002  
SRR17520069.2257004  
SRR17520069.2257006  
SRR17520069.2257008  
SRR17520069.2257010  
SRR17520069.2257012  
SRR17520069.2257014  
SRR17520069.2257016  
SRR17520069.2257018  
SRR17520069.2257020  
SRR17520069.2257022  
SRR17520069.2261308  
SRR17520069.2262162



SRR17520069.2262164  
SRR17520069.2262166  
SRR17520069.2279525  
SRR17520069.2279527  
SRR17520069.2279531  
SRR17520069.2279533  
SRR17520069.2279539  
SRR17520069.2279543  
SRR17520069.2280985  
SRR17520069.2280987  
SRR17520069.2280989  
SRR17520069.2280991  
SRR17520069.2280993  
SRR17520069.2280995  
SRR17520069.2280997  
SRR17520069.2280999  
SRR17520069.2281001  
SRR17520069.2281003  
SRR17520069.2281005  
SRR17520069.2281007  
SRR17520069.2281009  
SRR17520069.2281011  
SRR17520069.2281013  
SRR17520069.2281017  
SRR17520069.2281019  
SRR17520069.2281021  
SRR17520069.2281023  
SRR17520069.2282013  
SRR17520069.2282015  
SRR17520069.2282021  
SRR17520069.2282025  
SRR17520069.2286360  
SRR17520069.2305247  
SRR17520069.2305249  
SRR17520069.2305251  
SRR17520069.2305253  
SRR17520069.2310071  
SRR17520069.2310073  
SRR17520069.2310075  
SRR17520069.2310077  
SRR17520069.2310079  
SRR17520069.2310081  
SRR17520069.2310083  
SRR17520069.2310085  
SRR17520069.2310087  
SRR17520069.2310089  
SRR17520069.2310091

SRR17520069.2310093  
SRR17520069.2310095  
SRR17520069.2310097  
SRR17520069.2310099  
SRR17520069.2310101  
SRR17520069.2310103  
SRR17520069.2310105  
SRR17520069.2310107  
SRR17520069.2310109  
SRR17520069.2310111  
SRR17520069.2314531  
SRR17520069.2316721  
SRR17520069.2321482  
SRR17520069.2321484  
SRR17520069.2321486  
SRR17520069.2323261  
SRR17520069.2323265  
SRR17520069.2323267  
SRR17520069.2323269  
SRR17520069.2323271  
SRR17520069.2323273  
SRR17520069.2323275  
SRR17520069.2323279  
SRR17520069.2323281  
SRR17520069.2323283  
SRR17520069.2323285  
SRR17520069.2323287  
SRR17520069.2323289  
SRR17520069.2328030  
SRR17520069.2328032  
SRR17520069.2328034  
SRR17520069.2328036  
SRR17520069.2328038  
SRR17520069.2328040  
SRR17520069.2328044  
SRR17520069.2328046  
SRR17520069.2328048  
SRR17520069.2328050  
SRR17520069.2328052  
SRR17520069.2328054  
SRR17520069.2328056  
SRR17520069.2328058  
SRR17520069.2328060  
SRR17520069.2328062  
SRR17520069.2328064  
SRR17520069.2328066  
SRR17520069.2328068

SRR17520069. 2328070  
SRR17520069. 2328074  
SRR17520069. 2328076  
SRR17520069. 2328078  
SRR17520069. 2328080  
SRR17520069. 2328082  
SRR17520069. 2328084  
SRR17520069. 2328086  
SRR17520069. 2328088  
SRR17520069. 2328093  
SRR17520069. 2328095  
SRR17520069. 2328097  
SRR17520069. 2328099  
SRR17520069. 2328101  
SRR17520069. 2328103  
SRR17520069. 2328105  
SRR17520069. 2328107  
SRR17520069. 2336079  
SRR17520069. 2336081  
SRR17520069. 2336083  
SRR17520069. 2336085  
SRR17520069. 2336089  
SRR17520069. 2336091  
SRR17520069. 2336093  
SRR17520069. 2336095  
SRR17520069. 2336097  
SRR17520069. 2336099  
SRR17520069. 2336101  
SRR17520069. 2336103  
SRR17520069. 2336105  
SRR17520069. 2336107  
SRR17520069. 2336109  
SRR17520069. 2336111  
SRR17520069. 2336113  
SRR17520069. 2336115  
SRR17520069. 2336117  
SRR17520069. 2336119  
SRR17520069. 2336121  
SRR17520069. 2340345  
SRR17520069. 2340349  
SRR17520069. 2340351  
SRR17520069. 2340353  
SRR17520069. 2340355  
SRR17520069. 2340357  
SRR17520069. 2340363  
SRR17520069. 2340365  
SRR17520069. 2340367

SRR17520069. 2340369  
SRR17520069. 2340371  
SRR17520069. 2340373  
SRR17520069. 2340375  
SRR17520069. 2340381  
SRR17520069. 2340383  
SRR17520069. 2340385  
SRR17520069. 2340387  
SRR17520069. 2340389  
SRR17520069. 2340391  
SRR17520069. 2340393  
SRR17520069. 2340395  
SRR17520069. 2340397  
SRR17520069. 2340399  
SRR17520069. 2340401  
SRR17520069. 2340403  
SRR17520069. 2340405  
SRR17520069. 2340407  
SRR17520069. 2340409  
SRR17520069. 2340411  
SRR17520069. 2340415  
SRR17520069. 2340417  
SRR17520069. 2345405  
SRR17520069. 2345407  
SRR17520069. 2345409  
SRR17520069. 2345411  
SRR17520069. 2345413  
SRR17520069. 2345415  
SRR17520069. 2345419  
SRR17520069. 2345421  
SRR17520069. 2345423  
SRR17520069. 2345425  
SRR17520069. 2345427  
SRR17520069. 2345429  
SRR17520069. 2345431  
SRR17520069. 2345435  
SRR17520069. 2345439  
SRR17520069. 2345441  
SRR17520069. 2345443  
SRR17520069. 2345445  
SRR17520069. 2345447  
SRR17520069. 2345449  
SRR17520069. 2345451  
SRR17520069. 2345453  
SRR17520069. 2357981  
SRR17520069. 2357983  
SRR17520069. 2357985

SRR17520069. 2357987  
SRR17520069. 2363263  
SRR17520069. 2363265  
SRR17520069. 2363267  
SRR17520069. 2363269  
SRR17520069. 2363271  
SRR17520069. 2363273  
SRR17520069. 2363275  
SRR17520069. 2363277  
SRR17520069. 2363279  
SRR17520069. 2363283  
SRR17520069. 2363285  
SRR17520069. 2363287  
SRR17520069. 2363289  
SRR17520069. 2363291  
SRR17520069. 2363293  
SRR17520069. 2363295  
SRR17520069. 2363297  
SRR17520069. 2363299  
SRR17520069. 2363301  
SRR17520069. 2363303  
SRR17520069. 2363305  
SRR17520069. 2363307  
SRR17520069. 2363309  
SRR17520069. 2363311  
SRR17520069. 2363313  
SRR17520069. 2363315  
SRR17520069. 2363317  
SRR17520069. 2363319  
SRR17520069. 2363321  
SRR17520069. 2363323  
SRR17520069. 2363329  
SRR17520069. 2363331  
SRR17520069. 2363333  
SRR17520069. 2363335  
SRR17520069. 2363337  
SRR17520069. 2363339  
SRR17520069. 2363341  
SRR17520069. 2363343  
SRR17520069. 2363345  
SRR17520069. 2363347  
SRR17520069. 2363349  
SRR17520069. 2363351  
SRR17520069. 2363353  
SRR17520069. 2363355  
SRR17520069. 2363357  
SRR17520069. 2363359

SRR17520069. 2363361  
SRR17520069. 2363363  
SRR17520069. 2363365  
SRR17520069. 2363367  
SRR17520069. 2363369  
SRR17520069. 2363371  
SRR17520069. 2363373  
SRR17520069. 2363375  
SRR17520069. 2363487  
SRR17520069. 2363489  
SRR17520069. 2363491  
SRR17520069. 2363493  
SRR17520069. 2363495  
SRR17520069. 2363499  
SRR17520069. 2363501  
SRR17520069. 2363503  
SRR17520069. 2363505  
SRR17520069. 2363507  
SRR17520069. 2363509  
SRR17520069. 2363511  
SRR17520069. 2363513  
SRR17520069. 2363515  
SRR17520069. 2363517  
SRR17520069. 2363519  
SRR17520069. 2363521  
SRR17520069. 2363523  
SRR17520069. 2363525  
SRR17520069. 2363527  
SRR17520069. 2363531  
SRR17520069. 2363537  
SRR17520069. 2364209  
SRR17520069. 2364211  
SRR17520069. 2364213  
SRR17520069. 2364215  
SRR17520069. 2364217  
SRR17520069. 2364219  
SRR17520069. 2364221  
SRR17520069. 2364223  
SRR17520069. 2364225  
SRR17520069. 2366358  
SRR17520069. 2366360  
SRR17520069. 2366362  
SRR17520069. 2366364  
SRR17520069. 2366366  
SRR17520069. 2366368  
SRR17520069. 2366372  
SRR17520069. 2366374

SRR17520069. 2366376  
SRR17520069. 2366378  
SRR17520069. 2366380  
SRR17520069. 2366382  
SRR17520069. 2366384  
SRR17520069. 2366386  
SRR17520069. 2366388  
SRR17520069. 2366390  
SRR17520069. 2366392  
SRR17520069. 2377103  
SRR17520069. 2377105  
SRR17520069. 2377107  
SRR17520069. 2377109  
SRR17520069. 2377111  
SRR17520069. 2377115  
SRR17520069. 2377117  
SRR17520069. 2377119  
SRR17520069. 2377121  
SRR17520069. 2377123  
SRR17520069. 2377125  
SRR17520069. 2377127  
SRR17520069. 2377129  
SRR17520069. 2377131  
SRR17520069. 2377133  
SRR17520069. 2377135  
SRR17520069. 2377137  
SRR17520069. 2377139  
SRR17520069. 2377141  
SRR17520069. 2377143  
SRR17520069. 2377145  
SRR17520069. 2377147  
SRR17520069. 2377149  
SRR17520069. 2377153  
SRR17520069. 2377155  
SRR17520069. 2377157  
SRR17520069. 2377159  
SRR17520069. 2377161  
SRR17520069. 2377163  
SRR17520069. 2377165  
SRR17520069. 2377167  
SRR17520069. 2377995  
SRR17520069. 2378039  
SRR17520069. 2378041  
SRR17520069. 2381319  
SRR17520069. 2381321  
SRR17520069. 2381323  
SRR17520069. 2385599

SRR17520069.2385601  
SRR17520069.2385603  
SRR17520069.2385605  
SRR17520069.2385607  
SRR17520069.2385609  
SRR17520069.2385611  
SRR17520069.2385613  
SRR17520069.2385615  
SRR17520069.2385617  
SRR17520069.2385619  
SRR17520069.2385621  
SRR17520069.2385623  
SRR17520069.2385625  
SRR17520069.2385627  
SRR17520069.2385629  
SRR17520069.2385631  
SRR17520069.2385633  
SRR17520069.2385635  
SRR17520069.2385637  
SRR17520069.2385639  
SRR17520069.2385641  
SRR17520069.2385643  
SRR17520069.2385645  
SRR17520069.2385647  
SRR17520069.2385651  
SRR17520069.2385653  
SRR17520069.2385655  
SRR17520069.2385657  
SRR17520069.2385659  
SRR17520069.2385661  
SRR17520069.2385663  
SRR17520069.2385665  
SRR17520069.2385667  
SRR17520069.2385669  
SRR17520069.2385671  
SRR17520069.2385673  
SRR17520069.2385675  
SRR17520069.2385677  
SRR17520069.2385679  
SRR17520069.2388460  
SRR17520069.2388462  
SRR17520069.2388464  
SRR17520069.2388466  
SRR17520069.2388468  
SRR17520069.2388470  
SRR17520069.2388472  
SRR17520069.2388474



SRR17520069.2388478  
SRR17520069.2388480  
SRR17520069.2388482  
SRR17520069.2388486  
SRR17520069.2388488  
SRR17520069.2388490  
SRR17520069.2388492  
SRR17520069.2388494  
SRR17520069.2388496  
SRR17520069.2388498  
SRR17520069.2388500  
SRR17520069.2388502  
SRR17520069.2388504  
SRR17520069.2388506  
SRR17520069.2388508  
SRR17520069.2388510  
SRR17520069.2388512  
SRR17520069.2388514  
SRR17520069.2388516  
SRR17520069.2388518  
SRR17520069.2388520  
SRR17520069.2388522  
SRR17520069.2388524  
SRR17520069.2388526  
SRR17520069.2388528  
SRR17520069.2388530  
SRR17520069.2388532  
SRR17520069.2388534  
SRR17520069.2388536  
SRR17520069.2388538  
SRR17520069.2388540  
SRR17520069.2388542  
SRR17520069.2388544  
SRR17520069.2388546  
SRR17520069.2388548  
SRR17520069.2388550  
SRR17520069.2388552  
SRR17520069.2388554  
SRR17520069.2388556  
SRR17520069.2388558  
SRR17520069.2388560  
SRR17520069.2388562  
SRR17520069.2388566  
SRR17520069.2388568  
SRR17520069.2388570  
SRR17520069.2388572  
SRR17520069.2388574

SRR17520069.2388576  
SRR17520069.2388578  
SRR17520069.2388580  
SRR17520069.2388582  
SRR17520069.2388584  
SRR17520069.2388586  
SRR17520069.2388594  
SRR17520069.2388600  
SRR17520069.2388606  
SRR17520069.2388610  
SRR17520069.2388618  
SRR17520069.2388622  
SRR17520069.2391403  
SRR17520069.2391405  
SRR17520069.2391407  
SRR17520069.2391409  
SRR17520069.2391411  
SRR17520069.2391413  
SRR17520069.2391415  
SRR17520069.2394980  
SRR17520069.2394982  
SRR17520069.2394984  
SRR17520069.2394986  
SRR17520069.2394988  
SRR17520069.2394990  
SRR17520069.2394994  
SRR17520069.2394996  
SRR17520069.2394998  
SRR17520069.2395000  
SRR17520069.2395002  
SRR17520069.2395004  
SRR17520069.2395008  
SRR17520069.2395010  
SRR17520069.2395012  
SRR17520069.2395014  
SRR17520069.2395016  
SRR17520069.2395018  
SRR17520069.2395020  
SRR17520069.2395022  
SRR17520069.2395024  
SRR17520069.2395026  
SRR17520069.2395028  
SRR17520069.2395030  
SRR17520069.2395032  
SRR17520069.2395034  
SRR17520069.2395036  
SRR17520069.2395040

SRR17520069.2395042  
SRR17520069.2395044  
SRR17520069.2395046  
SRR17520069.2395048  
SRR17520069.2395050  
SRR17520069.2395052  
SRR17520069.2395054  
SRR17520069.2395056  
SRR17520069.2395058  
SRR17520069.2395060  
SRR17520069.2395062  
SRR17520069.2395064  
SRR17520069.2395066  
SRR17520069.2395068  
SRR17520069.2395072  
SRR17520069.2395074  
SRR17520069.2395080  
SRR17520069.2395082  
SRR17520069.2395084  
SRR17520069.2395090  
SRR17520069.2395094  
SRR17520069.2395096  
SRR17520069.2398353  
SRR17520069.2398355  
SRR17520069.2398357  
SRR17520069.2398359  
SRR17520069.2398361  
SRR17520069.2398363  
SRR17520069.2398365  
SRR17520069.2398367  
SRR17520069.2398369  
SRR17520069.2398371  
SRR17520069.2398373  
SRR17520069.2398375  
SRR17520069.2398377  
SRR17520069.2398379  
SRR17520069.2398381  
SRR17520069.2398383  
SRR17520069.2398385  
SRR17520069.2398387  
SRR17520069.2398389  
SRR17520069.2398391  
SRR17520069.2398393  
SRR17520069.2398395  
SRR17520069.2398397  
SRR17520069.2398399  
SRR17520069.2398401

SRR17520069. 2398403  
SRR17520069. 2398405  
SRR17520069. 2398407  
SRR17520069. 2398409  
SRR17520069. 2398411  
SRR17520069. 2398413  
SRR17520069. 2398415  
SRR17520069. 2398417  
SRR17520069. 2398419  
SRR17520069. 2398421  
SRR17520069. 2398423  
SRR17520069. 2398425  
SRR17520069. 2398427  
SRR17520069. 2398429  
SRR17520069. 2398431  
SRR17520069. 2398435  
SRR17520069. 2398437  
SRR17520069. 2398439  
SRR17520069. 2398441  
SRR17520069. 2398446  
SRR17520069. 2402400  
SRR17520069. 2402404  
SRR17520069. 2402406  
SRR17520069. 2402408  
SRR17520069. 2402410  
SRR17520069. 2402412  
SRR17520069. 2402414  
SRR17520069. 2402416  
SRR17520069. 2402418  
SRR17520069. 2402420  
SRR17520069. 2402422  
SRR17520069. 2402424  
SRR17520069. 2402426  
SRR17520069. 2402428  
SRR17520069. 2402432  
SRR17520069. 2402434  
SRR17520069. 2402436  
SRR17520069. 2402438  
SRR17520069. 2402440  
SRR17520069. 2402442  
SRR17520069. 2402444  
SRR17520069. 2402446  
SRR17520069. 2402448  
SRR17520069. 2402450  
SRR17520069. 2402452  
SRR17520069. 2402454  
SRR17520069. 2402456

SRR17520069. 2402458  
SRR17520069. 2402460  
SRR17520069. 2402462  
SRR17520069. 2402464  
SRR17520069. 2402466  
SRR17520069. 2402468  
SRR17520069. 2402470  
SRR17520069. 2402472  
SRR17520069. 2402474  
SRR17520069. 2402476  
SRR17520069. 2402478  
SRR17520069. 2402480  
SRR17520069. 2402482  
SRR17520069. 2402484  
SRR17520069. 2402486  
SRR17520069. 2402488  
SRR17520069. 2402490  
SRR17520069. 2402492  
SRR17520069. 2402494  
SRR17520069. 2402496  
SRR17520069. 2402877  
SRR17520069. 2402879  
SRR17520069. 2402881  
SRR17520069. 2402883  
SRR17520069. 2402885  
SRR17520069. 2402889  
SRR17520069. 2402893  
SRR17520069. 2402895  
SRR17520069. 2402910  
SRR17520069. 2408370  
SRR17520069. 2408372  
SRR17520069. 2408374  
SRR17520069. 2408376  
SRR17520069. 2408378  
SRR17520069. 2408380  
SRR17520069. 2408382  
SRR17520069. 2408384  
SRR17520069. 2408386  
SRR17520069. 2408388  
SRR17520069. 2408390  
SRR17520069. 2408392  
SRR17520069. 2408394  
SRR17520069. 2408396  
SRR17520069. 2408398  
SRR17520069. 2408400  
SRR17520069. 2408402  
SRR17520069. 2408404

SRR17520069.2408406  
SRR17520069.2408408  
SRR17520069.2408410  
SRR17520069.2417733  
SRR17520069.2417737  
SRR17520069.2417739  
SRR17520069.2417741  
SRR17520069.2417743  
SRR17520069.2417745  
SRR17520069.2417747  
SRR17520069.2417749  
SRR17520069.2417751  
SRR17520069.2417753  
SRR17520069.2417755  
SRR17520069.2417757  
SRR17520069.2417759  
SRR17520069.2417761  
SRR17520069.2417763  
SRR17520069.2417765  
SRR17520069.2417767  
SRR17520069.2417769  
SRR17520069.2417771  
SRR17520069.2425181  
SRR17520069.2425183  
SRR17520069.2425185  
SRR17520069.2425187  
SRR17520069.2431810  
SRR17520069.2431812  
SRR17520069.2431814  
SRR17520069.2431818  
SRR17520069.2431820  
SRR17520069.2431822  
SRR17520069.2431824  
SRR17520069.2431826  
SRR17520069.2431828  
SRR17520069.2431830  
SRR17520069.2431832  
SRR17520069.2431834  
SRR17520069.2431836  
SRR17520069.2431838  
SRR17520069.2431840  
SRR17520069.2431842  
SRR17520069.2431844  
SRR17520069.2431846  
SRR17520069.2432687  
SRR17520069.2432689  
SRR17520069.2432691

SRR17520069. 2432693  
SRR17520069. 2432695  
SRR17520069. 2435224  
SRR17520069. 2435228  
SRR17520069. 2435230  
SRR17520069. 2435232  
SRR17520069. 2435234  
SRR17520069. 2435236  
SRR17520069. 2435238  
SRR17520069. 2435248  
SRR17520069. 2435252  
SRR17520069. 2435264  
SRR17520069. 2435266  
SRR17520069. 2435268  
SRR17520069. 2435270  
SRR17520069. 2435272  
SRR17520069. 2435274  
SRR17520069. 2435276  
SRR17520069. 2435278  
SRR17520069. 2435282  
SRR17520069. 2435284  
SRR17520069. 2438286  
SRR17520069. 2438288  
SRR17520069. 2438290  
SRR17520069. 2438292  
SRR17520069. 2438294  
SRR17520069. 2438296  
SRR17520069. 2438298  
SRR17520069. 2438300  
SRR17520069. 2438304  
SRR17520069. 2438306  
SRR17520069. 2438308  
SRR17520069. 2438312  
SRR17520069. 2438314  
SRR17520069. 2438316  
SRR17520069. 2438318  
SRR17520069. 2438320  
SRR17520069. 2438445  
SRR17520069. 2438447  
SRR17520069. 2438449  
SRR17520069. 2438451  
SRR17520069. 2438453  
SRR17520069. 2438455  
SRR17520069. 2439116  
SRR17520069. 2440390  
SRR17520069. 2443704  
SRR17520069. 2443706

SRR17520069.2443708  
SRR17520069.2448850  
SRR17520069.2448852  
SRR17520069.2448854  
SRR17520069.2448856  
SRR17520069.2448858  
SRR17520069.2448860  
SRR17520069.2448862  
SRR17520069.2448864  
SRR17520069.2448866  
SRR17520069.2448868  
SRR17520069.2448870  
SRR17520069.2448872  
SRR17520069.2448874  
SRR17520069.2448876  
SRR17520069.2448878  
SRR17520069.2448880  
SRR17520069.2448882  
SRR17520069.2448884  
SRR17520069.2448886  
SRR17520069.2448888  
SRR17520069.2448890  
SRR17520069.2448892  
SRR17520069.2448894  
SRR17520069.2448896  
SRR17520069.2448898  
SRR17520069.2448900  
SRR17520069.2448902  
SRR17520069.2448904  
SRR17520069.2448906  
SRR17520069.2448908  
SRR17520069.2448910  
SRR17520069.2448912  
SRR17520069.2448914  
SRR17520069.2448916  
SRR17520069.2448918  
SRR17520069.2448920  
SRR17520069.2448922  
SRR17520069.2454526  
SRR17520069.2454528  
SRR17520069.2454530  
SRR17520069.2454532  
SRR17520069.2454534  
SRR17520069.2454536  
SRR17520069.2454538  
SRR17520069.2454540  
SRR17520069.2454542



SRR17520069. 2454544  
SRR17520069. 2454546  
SRR17520069. 2454548  
SRR17520069. 2454550  
SRR17520069. 2454552  
SRR17520069. 2454554  
SRR17520069. 2454558  
SRR17520069. 2454560  
SRR17520069. 2454562  
SRR17520069. 2454566  
SRR17520069. 2454568  
SRR17520069. 2454570  
SRR17520069. 2454572  
SRR17520069. 2454574  
SRR17520069. 2454576  
SRR17520069. 2454578  
SRR17520069. 2454580  
SRR17520069. 2454582  
SRR17520069. 2454584  
SRR17520069. 2454586  
SRR17520069. 2454588  
SRR17520069. 2462056  
SRR17520069. 2462058  
SRR17520069. 2462060  
SRR17520069. 2462066  
SRR17520069. 2462068  
SRR17520069. 2462070  
SRR17520069. 2462072  
SRR17520069. 2462074  
SRR17520069. 2462076  
SRR17520069. 2462078  
SRR17520069. 2462080  
SRR17520069. 2462082  
SRR17520069. 2462084  
SRR17520069. 2462086  
SRR17520069. 2462088  
SRR17520069. 2462090  
SRR17520069. 2462545  
SRR17520069. 2462547  
SRR17520069. 2462549  
SRR17520069. 2462551  
SRR17520069. 2462553  
SRR17520069. 2462555  
SRR17520069. 2462557  
SRR17520069. 2462559  
SRR17520069. 2462561  
SRR17520069. 2462563

SRR17520069.2463284  
SRR17520069.2463286  
SRR17520069.2463288  
SRR17520069.2463290  
SRR17520069.2463292  
SRR17520069.2463294  
SRR17520069.2464938  
SRR17520069.2464940  
SRR17520069.2464942  
SRR17520069.2464944  
SRR17520069.2464946  
SRR17520069.2464948  
SRR17520069.2485112  
SRR17520069.2485116  
SRR17520069.2485118  
SRR17520069.2485120  
SRR17520069.2489158  
SRR17520069.2489160  
SRR17520069.2489162  
SRR17520069.2489164  
SRR17520069.2489166  
SRR17520069.2489168  
SRR17520069.2489170  
SRR17520069.2489172  
SRR17520069.2489174  
SRR17520069.2489176  
SRR17520069.2489178  
SRR17520069.2489182  
SRR17520069.2489184  
SRR17520069.2489186  
SRR17520069.2489188  
SRR17520069.2489190  
SRR17520069.2489192  
SRR17520069.2489194  
SRR17520069.2489196  
SRR17520069.2489198  
SRR17520069.2489200  
SRR17520069.2489202  
SRR17520069.2489204  
SRR17520069.2489206  
SRR17520069.2489208  
SRR17520069.2489210  
SRR17520069.2489212  
SRR17520069.2489214  
SRR17520069.2489216  
SRR17520069.2489218  
SRR17520069.2489220

SRR17520069.2489222  
SRR17520069.2489224  
SRR17520069.2489226  
SRR17520069.2489228  
SRR17520069.2489230  
SRR17520069.2489232  
SRR17520069.2489234  
SRR17520069.2489236  
SRR17520069.2489238  
SRR17520069.2489240  
SRR17520069.2489242  
SRR17520069.2489244  
SRR17520069.2489246  
SRR17520069.2489248  
SRR17520069.2489250  
SRR17520069.2489252  
SRR17520069.2489254  
SRR17520069.2489256  
SRR17520069.2489258  
SRR17520069.2489260  
SRR17520069.2489262  
SRR17520069.2489264  
SRR17520069.2489266  
SRR17520069.2489268  
SRR17520069.2489270  
SRR17520069.2489272  
SRR17520069.2489274  
SRR17520069.2489276  
SRR17520069.2489278  
SRR17520069.2489280  
SRR17520069.2489284  
SRR17520069.2489286  
SRR17520069.2489288  
SRR17520069.2489290  
SRR17520069.2489292  
SRR17520069.2489294  
SRR17520069.2489296  
SRR17520069.2489298  
SRR17520069.2489300  
SRR17520069.2489302  
SRR17520069.2489304  
SRR17520069.2489306  
SRR17520069.2489308  
SRR17520069.2489310  
SRR17520069.2489312  
SRR17520069.2489314  
SRR17520069.2490001

SRR17520069.2490003  
SRR17520069.2490005  
SRR17520069.2490007  
SRR17520069.2490009  
SRR17520069.2490011  
SRR17520069.2490013  
SRR17520069.2490015  
SRR17520069.2490017  
SRR17520069.2490019  
SRR17520069.2490021  
SRR17520069.2490023  
SRR17520069.2490025  
SRR17520069.2490027  
SRR17520069.2490029  
SRR17520069.2490031  
SRR17520069.2490033  
SRR17520069.2490035  
SRR17520069.2495027  
SRR17520069.2495029  
SRR17520069.2495031  
SRR17520069.2495033  
SRR17520069.2495035  
SRR17520069.2495037  
SRR17520069.2495039  
SRR17520069.2495041  
SRR17520069.2495043  
SRR17520069.2495045  
SRR17520069.2495047  
SRR17520069.2495049  
SRR17520069.2495051  
SRR17520069.2495053  
SRR17520069.2495055  
SRR17520069.2495057  
SRR17520069.2495059  
SRR17520069.2495075  
SRR17520069.2495077  
SRR17520069.2495079  
SRR17520069.2495081  
SRR17520069.2495083  
SRR17520069.2497850  
SRR17520069.2497852  
SRR17520069.2497854  
SRR17520069.2497856  
SRR17520069.2497858  
SRR17520069.2497862  
SRR17520069.2497864  
SRR17520069.2497866

SRR17520069. 2497868  
SRR17520069. 2497870  
SRR17520069. 2497872  
SRR17520069. 2497874  
SRR17520069. 2497876  
SRR17520069. 2497878  
SRR17520069. 2497880  
SRR17520069. 2497882  
SRR17520069. 2497884  
SRR17520069. 2497888  
SRR17520069. 2497890  
SRR17520069. 2497894  
SRR17520069. 2497896  
SRR17520069. 2497898  
SRR17520069. 2501453  
SRR17520069. 2501455  
SRR17520069. 2501457  
SRR17520069. 2501459  
SRR17520069. 2501461  
SRR17520069. 2501463  
SRR17520069. 2501465  
SRR17520069. 2501467  
SRR17520069. 2501469  
SRR17520069. 2501471  
SRR17520069. 2501473  
SRR17520069. 2501475  
SRR17520069. 2501477  
SRR17520069. 2501479  
SRR17520069. 2501481  
SRR17520069. 2501483  
SRR17520069. 2501485  
SRR17520069. 2505963  
SRR17520069. 2505967  
SRR17520069. 2505971  
SRR17520069. 2505977  
SRR17520069. 2505981  
SRR17520069. 2505983  
SRR17520069. 2505985  
SRR17520069. 2505993  
SRR17520069. 2505997  
SRR17520069. 2505999  
SRR17520069. 2506001  
SRR17520069. 2506003  
SRR17520069. 2506005  
SRR17520069. 2506007  
SRR17520069. 2506009  
SRR17520069. 2506011

SRR17520069.2506013  
SRR17520069.2506015  
SRR17520069.2506017  
SRR17520069.2506019  
SRR17520069.2506025  
SRR17520069.2506027  
SRR17520069.2506029  
SRR17520069.2506031  
SRR17520069.2506033  
SRR17520069.2506035  
SRR17520069.2506037  
SRR17520069.2506039  
SRR17520069.2506041  
SRR17520069.2506043  
SRR17520069.2506045  
SRR17520069.2506047  
SRR17520069.2506051  
SRR17520069.2506053  
SRR17520069.2506057  
SRR17520069.2506059  
SRR17520069.2514526  
SRR17520069.2514528  
SRR17520069.2514530  
SRR17520069.2514532  
SRR17520069.2514534  
SRR17520069.2514536  
SRR17520069.2514538  
SRR17520069.2514540  
SRR17520069.2514542  
SRR17520069.2514544  
SRR17520069.2514546  
SRR17520069.2514548  
SRR17520069.2514550  
SRR17520069.2514552  
SRR17520069.2514554  
SRR17520069.2514556  
SRR17520069.2514558  
SRR17520069.2514560  
SRR17520069.2514562  
SRR17520069.2514564  
SRR17520069.2514566  
SRR17520069.2514568  
SRR17520069.2514570  
SRR17520069.2514572  
SRR17520069.2514574  
SRR17520069.2514576  
SRR17520069.2514578

SRR17520069.2514580  
SRR17520069.2514582  
SRR17520069.2514584  
SRR17520069.2514586  
SRR17520069.2514588  
SRR17520069.2514590  
SRR17520069.2514594  
SRR17520069.2514596  
SRR17520069.2514598  
SRR17520069.2514600  
SRR17520069.2514602  
SRR17520069.2514604  
SRR17520069.2514606  
SRR17520069.2520966  
SRR17520069.2520968  
SRR17520069.2520970  
SRR17520069.2520972  
SRR17520069.2520974  
SRR17520069.2520976  
SRR17520069.2520978  
SRR17520069.2520980  
SRR17520069.2520982  
SRR17520069.2520984  
SRR17520069.2520986  
SRR17520069.2520988  
SRR17520069.2520990  
SRR17520069.2520992  
SRR17520069.2520994  
SRR17520069.2520996  
SRR17520069.2520998  
SRR17520069.2521000  
SRR17520069.2521002  
SRR17520069.2521004  
SRR17520069.2521006  
SRR17520069.2524058  
SRR17520069.2524062  
SRR17520069.2524064  
SRR17520069.2524066  
SRR17520069.2524068  
SRR17520069.2524070  
SRR17520069.2524072  
SRR17520069.2524074  
SRR17520069.2524076  
SRR17520069.2524078  
SRR17520069.2524080  
SRR17520069.2524082  
SRR17520069.2524084

SRR17520069. 2524086  
SRR17520069. 2524088  
SRR17520069. 2524090  
SRR17520069. 2524092  
SRR17520069. 2524094  
SRR17520069. 2524096  
SRR17520069. 2524098  
SRR17520069. 2524100  
SRR17520069. 2524102  
SRR17520069. 2524104  
SRR17520069. 2524106  
SRR17520069. 2524108  
SRR17520069. 2524110  
SRR17520069. 2524112  
SRR17520069. 2524114  
SRR17520069. 2524116  
SRR17520069. 2524118  
SRR17520069. 2524120  
SRR17520069. 2524122  
SRR17520069. 2524124  
SRR17520069. 2524126  
SRR17520069. 2524128  
SRR17520069. 2524130  
SRR17520069. 2524132  
SRR17520069. 2524134  
SRR17520069. 2526005  
SRR17520069. 2526007  
SRR17520069. 2526009  
SRR17520069. 2526011  
SRR17520069. 2526013  
SRR17520069. 2526015  
SRR17520069. 2526017  
SRR17520069. 2526019  
SRR17520069. 2526021  
SRR17520069. 2526023  
SRR17520069. 2526025  
SRR17520069. 2526027  
SRR17520069. 2526029  
SRR17520069. 2526031  
SRR17520069. 2526033  
SRR17520069. 2526035  
SRR17520069. 2526037  
SRR17520069. 2526039  
SRR17520069. 2526041  
SRR17520069. 2526043  
SRR17520069. 2526045  
SRR17520069. 2526047



SRR17520069. 2526049  
SRR17520069. 2526051  
SRR17520069. 2526053  
SRR17520069. 2526055  
SRR17520069. 2526057  
SRR17520069. 2526059  
SRR17520069. 2526061  
SRR17520069. 2526063  
SRR17520069. 2526065  
SRR17520069. 2526067  
SRR17520069. 2526069  
SRR17520069. 2526071  
SRR17520069. 2526073  
SRR17520069. 2526075  
SRR17520069. 2526079  
SRR17520069. 2526081  
SRR17520069. 2526083  
SRR17520069. 2526085  
SRR17520069. 2526087  
SRR17520069. 2526089  
SRR17520069. 2526091  
SRR17520069. 2526093  
SRR17520069. 2526095  
SRR17520069. 2526097  
SRR17520069. 2526099  
SRR17520069. 2526101  
SRR17520069. 2526103  
SRR17520069. 2526105  
SRR17520069. 2526107  
SRR17520069. 2526109  
SRR17520069. 2526111  
SRR17520069. 2526113  
SRR17520069. 2526115  
SRR17520069. 2526117  
SRR17520069. 2526119  
SRR17520069. 2526121  
SRR17520069. 2526123  
SRR17520069. 2526125  
SRR17520069. 2526127  
SRR17520069. 2532767  
SRR17520069. 2532769  
SRR17520069. 2532771  
SRR17520069. 2532775  
SRR17520069. 2532777  
SRR17520069. 2532779  
SRR17520069. 2532781  
SRR17520069. 2532783

SRR17520069.2532785  
SRR17520069.2532787  
SRR17520069.2532789  
SRR17520069.2532791  
SRR17520069.2532793  
SRR17520069.2532795  
SRR17520069.2532797  
SRR17520069.2532799  
SRR17520069.2532801  
SRR17520069.2532803  
SRR17520069.2532805  
SRR17520069.2532807  
SRR17520069.2532809  
SRR17520069.2532811  
SRR17520069.2532813  
SRR17520069.2532815  
SRR17520069.2532817  
SRR17520069.2532819  
SRR17520069.2532821  
SRR17520069.2532825  
SRR17520069.2532827  
SRR17520069.2532829  
SRR17520069.2532831  
SRR17520069.2532833  
SRR17520069.2532835  
SRR17520069.2532837  
SRR17520069.2532839  
SRR17520069.2532841  
SRR17520069.2532843  
SRR17520069.2542070  
SRR17520069.2542072  
SRR17520069.2542074  
SRR17520069.2542076  
SRR17520069.2542078  
SRR17520069.2542080  
SRR17520069.2542082  
SRR17520069.2542084  
SRR17520069.2542086  
SRR17520069.2542088  
SRR17520069.2542090  
SRR17520069.2542092  
SRR17520069.2542094  
SRR17520069.2542096  
SRR17520069.2542098  
SRR17520069.2542100  
SRR17520069.2542102  
SRR17520069.2542104

SRR17520069.2542106  
SRR17520069.2542108  
SRR17520069.2542110  
SRR17520069.2542112  
SRR17520069.2542114  
SRR17520069.2542116  
SRR17520069.2542118  
SRR17520069.2542120  
SRR17520069.2542122  
SRR17520069.2542124  
SRR17520069.2542126  
SRR17520069.2542128  
SRR17520069.2543528  
SRR17520069.2543530  
SRR17520069.2543532  
SRR17520069.2543534  
SRR17520069.2543536  
SRR17520069.2543540  
SRR17520069.2545276  
SRR17520069.2545278  
SRR17520069.2545280  
SRR17520069.2545282  
SRR17520069.2545284  
SRR17520069.2545286  
SRR17520069.2545288  
SRR17520069.2545290  
SRR17520069.2545292  
SRR17520069.2545294  
SRR17520069.2545298  
SRR17520069.2545302  
SRR17520069.2545304  
SRR17520069.2545306  
SRR17520069.2545308  
SRR17520069.2545310  
SRR17520069.2545312  
SRR17520069.2545314  
SRR17520069.2545316  
SRR17520069.2545320  
SRR17520069.2550475  
SRR17520069.2550477  
SRR17520069.2550479  
SRR17520069.2550481  
SRR17520069.2550483  
SRR17520069.2550485  
SRR17520069.2550487  
SRR17520069.2550489  
SRR17520069.2550491

SRR17520069.2550493  
SRR17520069.2550495  
SRR17520069.2550497  
SRR17520069.2550499  
SRR17520069.2550501  
SRR17520069.2550503  
SRR17520069.2550505  
SRR17520069.2550507  
SRR17520069.2550509  
SRR17520069.2550511  
SRR17520069.2550513  
SRR17520069.2550515  
SRR17520069.2550517  
SRR17520069.2550519  
SRR17520069.2550521  
SRR17520069.2550523  
SRR17520069.2550525  
SRR17520069.2550527  
SRR17520069.2550529  
SRR17520069.2550533  
SRR17520069.2550535  
SRR17520069.2550537  
SRR17520069.2550539  
SRR17520069.2550541  
SRR17520069.2550543  
SRR17520069.2550545  
SRR17520069.2550547  
SRR17520069.2550549  
SRR17520069.2550551  
SRR17520069.2550553  
SRR17520069.2550555  
SRR17520069.2550557  
SRR17520069.2550559  
SRR17520069.2550561  
SRR17520069.2550563  
SRR17520069.2550565  
SRR17520069.2550567  
SRR17520069.2550569  
SRR17520069.2550571  
SRR17520069.2550573  
SRR17520069.2550575  
SRR17520069.2550577  
SRR17520069.2550579  
SRR17520069.2550581  
SRR17520069.2550583  
SRR17520069.2550585  
SRR17520069.2550587

SRR17520069.2550589  
SRR17520069.2550591  
SRR17520069.2550593  
SRR17520069.2555256  
SRR17520069.2555258  
SRR17520069.2555260  
SRR17520069.2555262  
SRR17520069.2555264  
SRR17520069.2555266  
SRR17520069.2555268  
SRR17520069.2555270  
SRR17520069.2555272  
SRR17520069.2555274  
SRR17520069.2555276  
SRR17520069.2555278  
SRR17520069.2555280  
SRR17520069.2555282  
SRR17520069.2555284  
SRR17520069.2555286  
SRR17520069.2555288  
SRR17520069.2555290  
SRR17520069.2556254  
SRR17520069.2556256  
SRR17520069.2556258  
SRR17520069.2556260  
SRR17520069.2556262  
SRR17520069.2556266  
SRR17520069.2563341  
SRR17520069.2563343  
SRR17520069.2563345  
SRR17520069.2563347  
SRR17520069.2563349  
SRR17520069.2563351  
SRR17520069.2563353  
SRR17520069.2563355  
SRR17520069.2563357  
SRR17520069.2563359  
SRR17520069.2563361  
SRR17520069.2564236  
SRR17520069.2564238  
SRR17520069.2564240  
SRR17520069.2564242  
SRR17520069.2564244  
SRR17520069.2564246  
SRR17520069.2567030  
SRR17520069.2567032  
SRR17520069.2567034

SRR17520069.2567036  
SRR17520069.2567038  
SRR17520069.2567040  
SRR17520069.2567042  
SRR17520069.2567044  
SRR17520069.2567046  
SRR17520069.2567048  
SRR17520069.2567050  
SRR17520069.2567052  
SRR17520069.2567054  
SRR17520069.2567056  
SRR17520069.2567060  
SRR17520069.2567062  
SRR17520069.2567064  
SRR17520069.2567066  
SRR17520069.2567068  
SRR17520069.2567070  
SRR17520069.2567072  
SRR17520069.2567074  
SRR17520069.2567076  
SRR17520069.2567078  
SRR17520069.2567080  
SRR17520069.2567082  
SRR17520069.2575942  
SRR17520069.2575944  
SRR17520069.2577857  
SRR17520069.2577859  
SRR17520069.2577861  
SRR17520069.2577863  
SRR17520069.2597337  
SRR17520069.2597339  
SRR17520069.2597341  
SRR17520069.2597343  
SRR17520069.2597345  
SRR17520069.2597349  
SRR17520069.2597351  
SRR17520069.2597353  
SRR17520069.2597355  
SRR17520069.2597357  
SRR17520069.2597359  
SRR17520069.2597361  
SRR17520069.2597363  
SRR17520069.2597365  
SRR17520069.2597367  
SRR17520069.2597369  
SRR17520069.2597371  
SRR17520069.2597373

SRR17520069.2597375  
SRR17520069.2597377  
SRR17520069.2597379  
SRR17520069.2597381  
SRR17520069.2597383  
SRR17520069.2597385  
SRR17520069.2597387  
SRR17520069.2597389  
SRR17520069.2597391  
SRR17520069.2597393  
SRR17520069.2597395  
SRR17520069.2597397  
SRR17520069.2597399  
SRR17520069.2597401  
SRR17520069.2597403  
SRR17520069.2597405  
SRR17520069.2597407  
SRR17520069.2597409  
SRR17520069.2597411  
SRR17520069.2600632  
SRR17520069.2600634  
SRR17520069.2600636  
SRR17520069.2600640  
SRR17520069.2600642  
SRR17520069.2600644  
SRR17520069.2600646  
SRR17520069.2600648  
SRR17520069.2600650  
SRR17520069.2600652  
SRR17520069.2600654  
SRR17520069.2604780  
SRR17520069.2604782  
SRR17520069.2604784  
SRR17520069.2604786  
SRR17520069.2604788  
SRR17520069.2604792  
SRR17520069.2604794  
SRR17520069.2604796  
SRR17520069.2604798  
SRR17520069.2604802  
SRR17520069.2604804  
SRR17520069.2604806  
SRR17520069.2604808  
SRR17520069.2604810  
SRR17520069.2604812  
SRR17520069.2604814  
SRR17520069.2604816

SRR17520069.2604818  
SRR17520069.2604820  
SRR17520069.2604822  
SRR17520069.2604828  
SRR17520069.2604830  
SRR17520069.2604832  
SRR17520069.2609905  
SRR17520069.2609907  
SRR17520069.2609909  
SRR17520069.2609911  
SRR17520069.2611785  
SRR17520069.2611787  
SRR17520069.2611789  
SRR17520069.2611793  
SRR17520069.2611795  
SRR17520069.2611797  
SRR17520069.2611799  
SRR17520069.2611801  
SRR17520069.2611805  
SRR17520069.2611809  
SRR17520069.2611811  
SRR17520069.2611813  
SRR17520069.2611817  
SRR17520069.2611819  
SRR17520069.2611821  
SRR17520069.2614046  
SRR17520069.2614048  
SRR17520069.2614052  
SRR17520069.2614054  
SRR17520069.2614056  
SRR17520069.2614058  
SRR17520069.2614060  
SRR17520069.2614062  
SRR17520069.2614064  
SRR17520069.2614066  
SRR17520069.2614068  
SRR17520069.2614070  
SRR17520069.2614072  
SRR17520069.2614074  
SRR17520069.2614076  
SRR17520069.2614078  
SRR17520069.2614080  
SRR17520069.2614082  
SRR17520069.2614084  
SRR17520069.2614086  
SRR17520069.2614088  
SRR17520069.2614090



SRR17520069. 2614092  
SRR17520069. 2614094  
SRR17520069. 2614098  
SRR17520069. 2614102  
SRR17520069. 2614104  
SRR17520069. 2614106  
SRR17520069. 2614108  
SRR17520069. 2614110  
SRR17520069. 2614112  
SRR17520069. 2614114  
SRR17520069. 2614116  
SRR17520069. 2614118  
SRR17520069. 2614120  
SRR17520069. 2614122  
SRR17520069. 2614124  
SRR17520069. 2614126  
SRR17520069. 2614128  
SRR17520069. 2614130  
SRR17520069. 2614132  
SRR17520069. 2614134  
SRR17520069. 2614136  
SRR17520069. 2614138  
SRR17520069. 2614140  
SRR17520069. 2614142  
SRR17520069. 2614146  
SRR17520069. 2614148  
SRR17520069. 2614150  
SRR17520069. 2614152  
SRR17520069. 2614154  
SRR17520069. 2614156  
SRR17520069. 2614158  
SRR17520069. 2614160  
SRR17520069. 2614162  
SRR17520069. 2614164  
SRR17520069. 2614166  
SRR17520069. 2614168  
SRR17520069. 2614170  
SRR17520069. 2614172  
SRR17520069. 2614174  
SRR17520069. 2614289  
SRR17520069. 2614291  
SRR17520069. 2614293  
SRR17520069. 2614295  
SRR17520069. 2614297  
SRR17520069. 2614299  
SRR17520069. 2614301  
SRR17520069. 2614303

SRR17520069.2614305  
SRR17520069.2614309  
SRR17520069.2614311  
SRR17520069.2614313  
SRR17520069.2614315  
SRR17520069.2614317  
SRR17520069.2614319  
SRR17520069.2614321  
SRR17520069.2614323  
SRR17520069.2614325  
SRR17520069.2614327  
SRR17520069.2614329  
SRR17520069.2614331  
SRR17520069.2614333  
SRR17520069.2625498  
SRR17520069.2625502  
SRR17520069.2626865  
SRR17520069.2626867  
SRR17520069.2626869  
SRR17520069.2626871  
SRR17520069.2626873  
SRR17520069.2626875  
SRR17520069.2626877  
SRR17520069.2626879  
SRR17520069.2626881  
SRR17520069.2626883  
SRR17520069.2626885  
SRR17520069.2629024  
SRR17520069.2630243  
SRR17520069.2630245  
SRR17520069.2633391  
SRR17520069.2634991  
SRR17520069.2636932  
SRR17520069.2636934  
SRR17520069.2636936  
SRR17520069.2636938  
SRR17520069.2636942  
SRR17520069.2636944  
SRR17520069.2636946  
SRR17520069.2636950  
SRR17520069.2636954  
SRR17520069.2636956  
SRR17520069.2636960  
SRR17520069.2636962  
SRR17520069.2636964  
SRR17520069.2636966  
SRR17520069.2636968

SRR17520069. 2636970  
SRR17520069. 2636972  
SRR17520069. 2636974  
SRR17520069. 2636976  
SRR17520069. 2636978  
SRR17520069. 2636980  
SRR17520069. 2636982  
SRR17520069. 2636984  
SRR17520069. 2636986  
SRR17520069. 2636988  
SRR17520069. 2636990  
SRR17520069. 2636994  
SRR17520069. 2636996  
SRR17520069. 2638866  
SRR17520069. 2638868  
SRR17520069. 2638870  
SRR17520069. 2638872  
SRR17520069. 2638874  
SRR17520069. 2638876  
SRR17520069. 2638878  
SRR17520069. 2638880  
SRR17520069. 2638882  
SRR17520069. 2638884  
SRR17520069. 2638886  
SRR17520069. 2638888  
SRR17520069. 2638890  
SRR17520069. 2638892  
SRR17520069. 2638894  
SRR17520069. 2638896  
SRR17520069. 2638898  
SRR17520069. 2638900  
SRR17520069. 2638902  
SRR17520069. 2638904  
SRR17520069. 2638906  
SRR17520069. 2638908  
SRR17520069. 2638910  
SRR17520069. 2638912  
SRR17520069. 2638914  
SRR17520069. 2638916  
SRR17520069. 2638918  
SRR17520069. 2638920  
SRR17520069. 2638922  
SRR17520069. 2638924  
SRR17520069. 2638926  
SRR17520069. 2638928  
SRR17520069. 2638932  
SRR17520069. 2638934

SRR17520069. 2638936  
SRR17520069. 2638938  
SRR17520069. 2638940  
SRR17520069. 2638942  
SRR17520069. 2638944  
SRR17520069. 2638946  
SRR17520069. 2638948  
SRR17520069. 2638950  
SRR17520069. 2638952  
SRR17520069. 2638954  
SRR17520069. 2638956  
SRR17520069. 2638958  
SRR17520069. 2638960  
SRR17520069. 2638962  
SRR17520069. 2638964  
SRR17520069. 2638966  
SRR17520069. 2638968  
SRR17520069. 2638970  
SRR17520069. 2638972  
SRR17520069. 2638974  
SRR17520069. 2638976  
SRR17520069. 2638978  
SRR17520069. 2638980  
SRR17520069. 2638982  
SRR17520069. 2642411  
SRR17520069. 2642413  
SRR17520069. 2642415  
SRR17520069. 2642417  
SRR17520069. 2642419  
SRR17520069. 2642421  
SRR17520069. 2642423  
SRR17520069. 2642425  
SRR17520069. 2642427  
SRR17520069. 2642429  
SRR17520069. 2642431  
SRR17520069. 2642433  
SRR17520069. 2642435  
SRR17520069. 2642437  
SRR17520069. 2642439  
SRR17520069. 2642441  
SRR17520069. 2642445  
SRR17520069. 2642447  
SRR17520069. 2642449  
SRR17520069. 2642451  
SRR17520069. 2642455  
SRR17520069. 2642457  
SRR17520069. 2642459

SRR17520069.2642461  
SRR17520069.2642463  
SRR17520069.2642465  
SRR17520069.2642467  
SRR17520069.2642692  
SRR17520069.2642694  
SRR17520069.2642696  
SRR17520069.2642698  
SRR17520069.2642700  
SRR17520069.2642702  
SRR17520069.2642704  
SRR17520069.2642706  
SRR17520069.2642708  
SRR17520069.2645429  
SRR17520069.2645431  
SRR17520069.2645433  
SRR17520069.2645435  
SRR17520069.2645437  
SRR17520069.2645439  
SRR17520069.2645441  
SRR17520069.2645445  
SRR17520069.2645447  
SRR17520069.2645449  
SRR17520069.2645451  
SRR17520069.2649973  
SRR17520069.2649975  
SRR17520069.2649977  
SRR17520069.2649979  
SRR17520069.2649981  
SRR17520069.2651266  
SRR17520069.2651268  
SRR17520069.2651272  
SRR17520069.2651274  
SRR17520069.2654314  
SRR17520069.2654316  
SRR17520069.2654318  
SRR17520069.2654320  
SRR17520069.2654322  
SRR17520069.2654324  
SRR17520069.2654326  
SRR17520069.2654328  
SRR17520069.2654330  
SRR17520069.2654332  
SRR17520069.2654334  
SRR17520069.2654336  
SRR17520069.2654338  
SRR17520069.2654340

SRR17520069.2654342  
SRR17520069.2654344  
SRR17520069.2654346  
SRR17520069.2654348  
SRR17520069.2654350  
SRR17520069.2654352  
SRR17520069.2654354  
SRR17520069.2654356  
SRR17520069.2654358  
SRR17520069.2654362  
SRR17520069.2654364  
SRR17520069.2654366  
SRR17520069.2654368  
SRR17520069.2654370  
SRR17520069.2654372  
SRR17520069.2654374  
SRR17520069.2654376  
SRR17520069.2654378  
SRR17520069.2654380  
SRR17520069.2654382  
SRR17520069.2672074  
SRR17520069.2672076  
SRR17520069.2672078  
SRR17520069.2672080  
SRR17520069.2672082  
SRR17520069.2672084  
SRR17520069.2687113  
SRR17520069.2687115  
SRR17520069.2687117  
SRR17520069.2687119  
SRR17520069.2687121  
SRR17520069.2687123  
SRR17520069.2687125  
SRR17520069.2687127  
SRR17520069.2687129  
SRR17520069.2687131  
SRR17520069.2687133  
SRR17520069.2687135  
SRR17520069.2687137  
SRR17520069.2687139  
SRR17520069.2687141  
SRR17520069.2687143  
SRR17520069.2687145  
SRR17520069.2687147  
SRR17520069.2687149  
SRR17520069.2687151  
SRR17520069.2687270

SRR17520069.2687272  
SRR17520069.2687274  
SRR17520069.2687276  
SRR17520069.2687280  
SRR17520069.2690625  
SRR17520069.2690627  
SRR17520069.2690629  
SRR17520069.2690631  
SRR17520069.2690633  
SRR17520069.2690635  
SRR17520069.2690637  
SRR17520069.2690639  
SRR17520069.2690641  
SRR17520069.2690643  
SRR17520069.2690645  
SRR17520069.2690647  
SRR17520069.2690649  
SRR17520069.2690651  
SRR17520069.2690653  
SRR17520069.2690655  
SRR17520069.2690657  
SRR17520069.2690659  
SRR17520069.2690661  
SRR17520069.2690663  
SRR17520069.2690665  
SRR17520069.2690667  
SRR17520069.2690669  
SRR17520069.2690671  
SRR17520069.2690673  
SRR17520069.2690675  
SRR17520069.2690677  
SRR17520069.2690679  
SRR17520069.2690681  
SRR17520069.2690683  
SRR17520069.2690685  
SRR17520069.2690687  
SRR17520069.2690689  
SRR17520069.2690691  
SRR17520069.2690693  
SRR17520069.2690695  
SRR17520069.2690697  
SRR17520069.2690699  
SRR17520069.2690701  
SRR17520069.2690703  
SRR17520069.2690705  
SRR17520069.2690707  
SRR17520069.2690709

SRR17520069.2690711  
SRR17520069.2690713  
SRR17520069.2690715  
SRR17520069.2690717  
SRR17520069.2690719  
SRR17520069.2690721  
SRR17520069.2690723  
SRR17520069.2690725  
SRR17520069.2690727  
SRR17520069.2690729  
SRR17520069.2690731  
SRR17520069.2690733  
SRR17520069.2690735  
SRR17520069.2690737  
SRR17520069.2690739  
SRR17520069.2690741  
SRR17520069.2690743  
SRR17520069.2690745  
SRR17520069.2690747  
SRR17520069.2690749  
SRR17520069.2690751  
SRR17520069.2690753  
SRR17520069.2690755  
SRR17520069.2690757  
SRR17520069.2690759  
SRR17520069.2690761  
SRR17520069.2690763  
SRR17520069.2690765  
SRR17520069.2690767  
SRR17520069.2690769  
SRR17520069.2690771  
SRR17520069.2693259  
SRR17520069.2693261  
SRR17520069.2693263  
SRR17520069.2693265  
SRR17520069.2693267  
SRR17520069.2693269  
SRR17520069.2693271  
SRR17520069.2693273  
SRR17520069.2693275  
SRR17520069.2693709  
SRR17520069.2693711  
SRR17520069.2693713  
SRR17520069.2693715  
SRR17520069.2693717  
SRR17520069.2693719  
SRR17520069.2693721



SRR17520069. 2693723  
SRR17520069. 2693725  
SRR17520069. 2693727  
SRR17520069. 2693729  
SRR17520069. 2693731  
SRR17520069. 2693733  
SRR17520069. 2693735  
SRR17520069. 2693737  
SRR17520069. 2693739  
SRR17520069. 2693741  
SRR17520069. 2693743  
SRR17520069. 2693745  
SRR17520069. 2693747  
SRR17520069. 2693749  
SRR17520069. 2693751  
SRR17520069. 2693753  
SRR17520069. 2693759  
SRR17520069. 2693761  
SRR17520069. 2693763  
SRR17520069. 2693765  
SRR17520069. 2693767  
SRR17520069. 2693769  
SRR17520069. 2693771  
SRR17520069. 2693773  
SRR17520069. 2693775  
SRR17520069. 2693777  
SRR17520069. 2693779  
SRR17520069. 2693781  
SRR17520069. 2695719  
SRR17520069. 2695721  
SRR17520069. 2695723  
SRR17520069. 2695725  
SRR17520069. 2695727  
SRR17520069. 2695729  
SRR17520069. 2695731  
SRR17520069. 2695733  
SRR17520069. 2695735  
SRR17520069. 2695737  
SRR17520069. 2695739  
SRR17520069. 2695741  
SRR17520069. 2695743  
SRR17520069. 2695745  
SRR17520069. 2695747  
SRR17520069. 2695749  
SRR17520069. 2695751  
SRR17520069. 2695753  
SRR17520069. 2695755

SRR17520069.2695757  
SRR17520069.2695759  
SRR17520069.2695761  
SRR17520069.2695763  
SRR17520069.2695765  
SRR17520069.2695767  
SRR17520069.2695769  
SRR17520069.2695771  
SRR17520069.2700320  
SRR17520069.2700322  
SRR17520069.2702924  
SRR17520069.2702926  
SRR17520069.2702928  
SRR17520069.2702930  
SRR17520069.2702932  
SRR17520069.2702934  
SRR17520069.2702936  
SRR17520069.2702938  
SRR17520069.2702940  
SRR17520069.2702942  
SRR17520069.2702944  
SRR17520069.2702946  
SRR17520069.2702948  
SRR17520069.2702952  
SRR17520069.2702954  
SRR17520069.2702956  
SRR17520069.2702958  
SRR17520069.2702960  
SRR17520069.2702962  
SRR17520069.2702964  
SRR17520069.2702966  
SRR17520069.2702968  
SRR17520069.2702970  
SRR17520069.2702972  
SRR17520069.2705260  
SRR17520069.2709440  
SRR17520069.2709442  
SRR17520069.2709444  
SRR17520069.2709446  
SRR17520069.2710416  
SRR17520069.2715465  
SRR17520069.2715467  
SRR17520069.2715469  
SRR17520069.2715471  
SRR17520069.2715473  
SRR17520069.2715475  
SRR17520069.2715477

SRR17520069.2715479  
SRR17520069.2715481  
SRR17520069.2715483  
SRR17520069.2717370  
SRR17520069.2717372  
SRR17520069.2717374  
SRR17520069.2717376  
SRR17520069.2717380  
SRR17520069.2717382  
SRR17520069.2717384  
SRR17520069.2717386  
SRR17520069.2717390  
SRR17520069.2717718  
SRR17520069.2717720  
SRR17520069.2717722  
SRR17520069.2717724  
SRR17520069.2717726  
SRR17520069.2717728  
SRR17520069.2717730  
SRR17520069.2717732  
SRR17520069.2717734  
SRR17520069.2717736  
SRR17520069.2719112  
SRR17520069.2731046  
SRR17520069.2731048  
SRR17520069.2733813  
SRR17520069.2733815  
SRR17520069.2733817  
SRR17520069.2733821  
SRR17520069.2733823  
SRR17520069.2733825  
SRR17520069.2733827  
SRR17520069.2733829  
SRR17520069.2733833  
SRR17520069.2733835  
SRR17520069.2733837  
SRR17520069.2733839  
SRR17520069.2733843  
SRR17520069.2733845  
SRR17520069.2733847  
SRR17520069.2733849  
SRR17520069.2733851  
SRR17520069.2733853  
SRR17520069.2742436  
SRR17520069.2742438  
SRR17520069.2742440  
SRR17520069.2742442

SRR17520069.2742444  
SRR17520069.2742446  
SRR17520069.2742448  
SRR17520069.2742450  
SRR17520069.2742452  
SRR17520069.2742454  
SRR17520069.2742456  
SRR17520069.2742458  
SRR17520069.2742460  
SRR17520069.2742462  
SRR17520069.2742464  
SRR17520069.2742466  
SRR17520069.2742468  
SRR17520069.2742470  
SRR17520069.2742472  
SRR17520069.2742474  
SRR17520069.2742476  
SRR17520069.2742478  
SRR17520069.2743875  
SRR17520069.2743877  
SRR17520069.2743879  
SRR17520069.2743881  
SRR17520069.2743883  
SRR17520069.2743885  
SRR17520069.2743887  
SRR17520069.2743889  
SRR17520069.2743891  
SRR17520069.2743893  
SRR17520069.2743895  
SRR17520069.2743897  
SRR17520069.2743899  
SRR17520069.2743901  
SRR17520069.2743903  
SRR17520069.2743905  
SRR17520069.2743907  
SRR17520069.2743909  
SRR17520069.2743911  
SRR17520069.2748843  
SRR17520069.2748845  
SRR17520069.2748847  
SRR17520069.2748849  
SRR17520069.2748851  
SRR17520069.2748853  
SRR17520069.2748855  
SRR17520069.2748857  
SRR17520069.2748859  
SRR17520069.2748861

SRR17520069.2748863  
SRR17520069.2748865  
SRR17520069.2748867  
SRR17520069.2748869  
SRR17520069.2748871  
SRR17520069.2748873  
SRR17520069.2748875  
SRR17520069.2748877  
SRR17520069.2748879  
SRR17520069.2748881  
SRR17520069.2748883  
SRR17520069.2748885  
SRR17520069.2748887  
SRR17520069.2748889  
SRR17520069.2748891  
SRR17520069.2748893  
SRR17520069.2748895  
SRR17520069.2748897  
SRR17520069.2748899  
SRR17520069.2748901  
SRR17520069.2748903  
SRR17520069.2748905  
SRR17520069.2748909  
SRR17520069.2748911  
SRR17520069.2748913  
SRR17520069.2748915  
SRR17520069.2748917  
SRR17520069.2748919  
SRR17520069.2748921  
SRR17520069.2748923  
SRR17520069.2748925  
SRR17520069.2748927  
SRR17520069.2748929  
SRR17520069.2748931  
SRR17520069.2748933  
SRR17520069.2748935  
SRR17520069.2748937  
SRR17520069.2752815  
SRR17520069.2754323  
SRR17520069.2754325  
SRR17520069.2754327  
SRR17520069.2754329  
SRR17520069.2754331  
SRR17520069.2754333  
SRR17520069.2754335  
SRR17520069.2754337  
SRR17520069.2754339

SRR17520069.2754341  
SRR17520069.2754343  
SRR17520069.2754345  
SRR17520069.2754347  
SRR17520069.2754349  
SRR17520069.2754351  
SRR17520069.2758387  
SRR17520069.2758389  
SRR17520069.2758391  
SRR17520069.2758393  
SRR17520069.2758395  
SRR17520069.2758397  
SRR17520069.2758399  
SRR17520069.2758401  
SRR17520069.2758403  
SRR17520069.2758405  
SRR17520069.2758407  
SRR17520069.2758411  
SRR17520069.2758413  
SRR17520069.2758415  
SRR17520069.2758417  
SRR17520069.2758419  
SRR17520069.2758421  
SRR17520069.2758423  
SRR17520069.2758425  
SRR17520069.2758427  
SRR17520069.2758429  
SRR17520069.2758431  
SRR17520069.2758433  
SRR17520069.2758435  
SRR17520069.2758437  
SRR17520069.2758439  
SRR17520069.2758441  
SRR17520069.2758443  
SRR17520069.2758445  
SRR17520069.2758447  
SRR17520069.2758449  
SRR17520069.2758451  
SRR17520069.2758453  
SRR17520069.2758455  
SRR17520069.2758457  
SRR17520069.2758459  
SRR17520069.2758461  
SRR17520069.2758463  
SRR17520069.2758465  
SRR17520069.2758467  
SRR17520069.2758469

SRR17520069.2760954  
SRR17520069.2760956  
SRR17520069.2760958  
SRR17520069.2760960  
SRR17520069.2760962  
SRR17520069.2769158  
SRR17520069.2773399  
SRR17520069.2773401  
SRR17520069.2773403  
SRR17520069.2773433  
SRR17520069.2773435  
SRR17520069.2773437  
SRR17520069.2773439  
SRR17520069.2773441  
SRR17520069.2773443  
SRR17520069.2773445  
SRR17520069.2773447  
SRR17520069.2773449  
SRR17520069.2773451  
SRR17520069.2773453  
SRR17520069.2773455  
SRR17520069.2773457  
SRR17520069.2773459  
SRR17520069.2773461  
SRR17520069.2773463  
SRR17520069.2773465  
SRR17520069.2773467  
SRR17520069.2773469  
SRR17520069.2773471  
SRR17520069.2773473  
SRR17520069.2773475  
SRR17520069.2773477  
SRR17520069.2777384  
SRR17520069.2777386  
SRR17520069.2777388  
SRR17520069.2777390  
SRR17520069.2777392  
SRR17520069.2777394  
SRR17520069.2777396  
SRR17520069.2777398  
SRR17520069.2777400  
SRR17520069.2777402  
SRR17520069.2777404  
SRR17520069.2777406  
SRR17520069.2777408  
SRR17520069.2778824  
SRR17520069.2778826

SRR17520069.2778828  
SRR17520069.2778830  
SRR17520069.2778832  
SRR17520069.2778834  
SRR17520069.2778836  
SRR17520069.2778838  
SRR17520069.2778840  
SRR17520069.2778842  
SRR17520069.2778844  
SRR17520069.2778846  
SRR17520069.2778848  
SRR17520069.2778850  
SRR17520069.2778852  
SRR17520069.2778854  
SRR17520069.2778856  
SRR17520069.2778858  
SRR17520069.2778860  
SRR17520069.2778862  
SRR17520069.2778864  
SRR17520069.2778866  
SRR17520069.2778868  
SRR17520069.2778870  
SRR17520069.2778872  
SRR17520069.2778874  
SRR17520069.2778876  
SRR17520069.2778878  
SRR17520069.2778880  
SRR17520069.2778882  
SRR17520069.2778884  
SRR17520069.2778886  
SRR17520069.2778888  
SRR17520069.2778890  
SRR17520069.2778892  
SRR17520069.2778894  
SRR17520069.2778896  
SRR17520069.2778898  
SRR17520069.2778900  
SRR17520069.2778902  
SRR17520069.2778904  
SRR17520069.2778906  
SRR17520069.2778908  
SRR17520069.2778910  
SRR17520069.2778912  
SRR17520069.2778914  
SRR17520069.2778916  
SRR17520069.2780698  
SRR17520069.2781765



SRR17520069.2781767  
SRR17520069.2781769  
SRR17520069.2781771  
SRR17520069.2781773  
SRR17520069.2781806  
SRR17520069.2781808  
SRR17520069.2781810  
SRR17520069.2781812  
SRR17520069.2781814  
SRR17520069.2781816  
SRR17520069.2781818  
SRR17520069.2781820  
SRR17520069.2781822  
SRR17520069.2781824  
SRR17520069.2781826  
SRR17520069.2781828  
SRR17520069.2781830  
SRR17520069.2781832  
SRR17520069.2781834  
SRR17520069.2782894  
SRR17520069.2782896  
SRR17520069.2782898  
SRR17520069.2782900  
SRR17520069.2785655  
SRR17520069.2785657  
SRR17520069.2785659  
SRR17520069.2785661  
SRR17520069.2785663  
SRR17520069.2785665  
SRR17520069.2785667  
SRR17520069.2785669  
SRR17520069.2785671  
SRR17520069.2785673  
SRR17520069.2785675  
SRR17520069.2785677  
SRR17520069.2785679  
SRR17520069.2785681  
SRR17520069.2785683  
SRR17520069.2785685  
SRR17520069.2785687  
SRR17520069.2785689  
SRR17520069.2785691  
SRR17520069.2785693  
SRR17520069.2785695  
SRR17520069.2785697  
SRR17520069.2785699  
SRR17520069.2785701

SRR17520069.2785703  
SRR17520069.2785705  
SRR17520069.2785707  
SRR17520069.2785709  
SRR17520069.2785711  
SRR17520069.2785713  
SRR17520069.2785715  
SRR17520069.2785717  
SRR17520069.2785719  
SRR17520069.2785721  
SRR17520069.2785723  
SRR17520069.2790825  
SRR17520069.2790827  
SRR17520069.2790829  
SRR17520069.2790831  
SRR17520069.2790833  
SRR17520069.2790835  
SRR17520069.2790837  
SRR17520069.2790839  
SRR17520069.2790841  
SRR17520069.2790843  
SRR17520069.2790845  
SRR17520069.2790847  
SRR17520069.2790849  
SRR17520069.2790851  
SRR17520069.2790853  
SRR17520069.2790855  
SRR17520069.2790857  
SRR17520069.2790859  
SRR17520069.2790861  
SRR17520069.2790863  
SRR17520069.2790865  
SRR17520069.2790867  
SRR17520069.2790869  
SRR17520069.2790871  
SRR17520069.2814135  
SRR17520069.2814139  
SRR17520069.2814141  
SRR17520069.2814143  
SRR17520069.2814145  
SRR17520069.2814147  
SRR17520069.2814149  
SRR17520069.2814151  
SRR17520069.2814153  
SRR17520069.2814155  
SRR17520069.2814157  
SRR17520069.2814159

SRR17520069.2814161  
SRR17520069.2814163  
SRR17520069.2814165  
SRR17520069.2814167  
SRR17520069.2814169  
SRR17520069.2814171  
SRR17520069.2814173  
SRR17520069.2814175  
SRR17520069.2814177  
SRR17520069.2814179  
SRR17520069.2814181  
SRR17520069.2814183  
SRR17520069.2814185  
SRR17520069.2814187  
SRR17520069.2814189  
SRR17520069.2814191  
SRR17520069.2814193  
SRR17520069.2814195  
SRR17520069.2814197  
SRR17520069.2814199  
SRR17520069.2814201  
SRR17520069.2814205  
SRR17520069.2816632  
SRR17520069.2823736  
SRR17520069.2823738  
SRR17520069.2823740  
SRR17520069.2823742  
SRR17520069.2823744  
SRR17520069.2823746  
SRR17520069.2836144  
SRR17520069.2836146  
SRR17520069.2836148  
SRR17520069.2836150  
SRR17520069.2845383  
SRR17520069.2845385  
SRR17520069.2845387  
SRR17520069.2845389  
SRR17520069.2845391  
SRR17520069.2845393  
SRR17520069.2845395  
SRR17520069.2845397  
SRR17520069.2845399  
SRR17520069.2845401  
SRR17520069.2845403  
SRR17520069.2845405  
SRR17520069.2845407  
SRR17520069.2845409

SRR17520069.2845411  
SRR17520069.2845413  
SRR17520069.2845415  
SRR17520069.2845417  
SRR17520069.2845419  
SRR17520069.2845423  
SRR17520069.2845425  
SRR17520069.2845427  
SRR17520069.2845429  
SRR17520069.2845431  
SRR17520069.2845433  
SRR17520069.2845435  
SRR17520069.2845437  
SRR17520069.2845439  
SRR17520069.2845441  
SRR17520069.2845443  
SRR17520069.2845447  
SRR17520069.2845449  
SRR17520069.2845451  
SRR17520069.2845453  
SRR17520069.2845455  
SRR17520069.2845459  
SRR17520069.2845461  
SRR17520069.2845463  
SRR17520069.2845465  
SRR17520069.2845467  
SRR17520069.2845469  
SRR17520069.2845471  
SRR17520069.2845473  
SRR17520069.2845475  
SRR17520069.2847033  
SRR17520069.2847035  
SRR17520069.2847037  
SRR17520069.2847039  
SRR17520069.2847043  
SRR17520069.2847045  
SRR17520069.2847047  
SRR17520069.2847049  
SRR17520069.2847051  
SRR17520069.2847053  
SRR17520069.2847055  
SRR17520069.2847057  
SRR17520069.2847059  
SRR17520069.2847061  
SRR17520069.2847063  
SRR17520069.2847065  
SRR17520069.2847067

SRR17520069.2847069  
SRR17520069.2847071  
SRR17520069.2847073  
SRR17520069.2847075  
SRR17520069.2847081  
SRR17520069.2855072  
SRR17520069.2856967  
SRR17520069.2858005  
SRR17520069.2858007  
SRR17520069.2858009  
SRR17520069.2858011  
SRR17520069.2858013  
SRR17520069.2858017  
SRR17520069.2858019  
SRR17520069.2858021  
SRR17520069.2858023  
SRR17520069.2858027  
SRR17520069.2858029  
SRR17520069.2858031  
SRR17520069.2858035  
SRR17520069.2858037  
SRR17520069.2858039  
SRR17520069.2858041  
SRR17520069.2858043  
SRR17520069.2858045  
SRR17520069.2858047  
SRR17520069.2858049  
SRR17520069.2858051  
SRR17520069.2858053  
SRR17520069.2858055  
SRR17520069.2858057  
SRR17520069.2858059  
SRR17520069.2861589  
SRR17520069.2861750  
SRR17520069.2861752  
SRR17520069.2861754  
SRR17520069.2861756  
SRR17520069.2861758  
SRR17520069.2861760  
SRR17520069.2861762  
SRR17520069.2861764  
SRR17520069.2861766  
SRR17520069.2861768  
SRR17520069.2861770  
SRR17520069.2861772  
SRR17520069.2861774  
SRR17520069.2861776

SRR17520069. 2861778  
SRR17520069. 2861780  
SRR17520069. 2861782  
SRR17520069. 2861784  
SRR17520069. 2861786  
SRR17520069. 2861788  
SRR17520069. 2861790  
SRR17520069. 2861792  
SRR17520069. 2861794  
SRR17520069. 2861796  
SRR17520069. 2861798  
SRR17520069. 2861800  
SRR17520069. 2861802  
SRR17520069. 2861804  
SRR17520069. 2861806  
SRR17520069. 2861808  
SRR17520069. 2861810  
SRR17520069. 2861812  
SRR17520069. 2861814  
SRR17520069. 2861816  
SRR17520069. 2861818  
SRR17520069. 2862870  
SRR17520069. 2862874  
SRR17520069. 2862876  
SRR17520069. 2862878  
SRR17520069. 2862882  
SRR17520069. 2862884  
SRR17520069. 2862886  
SRR17520069. 2871348  
SRR17520069. 2871350  
SRR17520069. 2871352  
SRR17520069. 2871354  
SRR17520069. 2871358  
SRR17520069. 2871360  
SRR17520069. 2871362  
SRR17520069. 2873141  
SRR17520069. 2873143  
SRR17520069. 2873145  
SRR17520069. 2873149  
SRR17520069. 2873151  
SRR17520069. 2873153  
SRR17520069. 2873155  
SRR17520069. 2873157  
SRR17520069. 2873159  
SRR17520069. 2873161  
SRR17520069. 2873163  
SRR17520069. 2873165

SRR17520069.2873167  
SRR17520069.2873169  
SRR17520069.2873171  
SRR17520069.2873173  
SRR17520069.2873175  
SRR17520069.2873177  
SRR17520069.2873179  
SRR17520069.2873181  
SRR17520069.2873183  
SRR17520069.2873185  
SRR17520069.2873187  
SRR17520069.2873189  
SRR17520069.2873191  
SRR17520069.2873193  
SRR17520069.2873195  
SRR17520069.2873197  
SRR17520069.2873199  
SRR17520069.2873201  
SRR17520069.2873203  
SRR17520069.2873205  
SRR17520069.2875002  
SRR17520069.2875004  
SRR17520069.2875006  
SRR17520069.2875008  
SRR17520069.2875010  
SRR17520069.2875012  
SRR17520069.2875014  
SRR17520069.2875016  
SRR17520069.2875018  
SRR17520069.2875020  
SRR17520069.2875022  
SRR17520069.2875024  
SRR17520069.2875026  
SRR17520069.2875028  
SRR17520069.2875030  
SRR17520069.2875032  
SRR17520069.2875034  
SRR17520069.2875036  
SRR17520069.2875038  
SRR17520069.2875040  
SRR17520069.2875042  
SRR17520069.2875044  
SRR17520069.2875046  
SRR17520069.2875048  
SRR17520069.2877841  
SRR17520069.2877843  
SRR17520069.2877845

SRR17520069.2877849  
SRR17520069.2877851  
SRR17520069.2877853  
SRR17520069.2877855  
SRR17520069.2877857  
SRR17520069.2877859  
SRR17520069.2877861  
SRR17520069.2877863  
SRR17520069.2877865  
SRR17520069.2877867  
SRR17520069.2877869  
SRR17520069.2877871  
SRR17520069.2877873  
SRR17520069.2877875  
SRR17520069.2877877  
SRR17520069.2877879  
SRR17520069.2877881  
SRR17520069.2877883  
SRR17520069.2877885  
SRR17520069.2877887  
SRR17520069.2877889  
SRR17520069.2877893  
SRR17520069.2877895  
SRR17520069.2877897  
SRR17520069.2877899  
SRR17520069.2877901  
SRR17520069.2877903  
SRR17520069.2878699  
SRR17520069.2878701  
SRR17520069.2878703  
SRR17520069.2880657  
SRR17520069.2880659  
SRR17520069.2880661  
SRR17520069.2880663  
SRR17520069.2889371  
SRR17520069.2889377  
SRR17520069.2889379  
SRR17520069.2891108  
SRR17520069.2891110  
SRR17520069.2891112  
SRR17520069.2891114  
SRR17520069.2891116  
SRR17520069.2891118  
SRR17520069.2891120  
SRR17520069.2891122  
SRR17520069.2891124  
SRR17520069.2891126



SRR17520069.2891128  
SRR17520069.2891130  
SRR17520069.2891132  
SRR17520069.2891134  
SRR17520069.2891136  
SRR17520069.2891138  
SRR17520069.2891140  
SRR17520069.2891142  
SRR17520069.2891144  
SRR17520069.2891148  
SRR17520069.2891150  
SRR17520069.2891152  
SRR17520069.2891154  
SRR17520069.2891158  
SRR17520069.2891160  
SRR17520069.2891162  
SRR17520069.2891164  
SRR17520069.2891166  
SRR17520069.2891168  
SRR17520069.2891170  
SRR17520069.2891172  
SRR17520069.2891813  
SRR17520069.2891815  
SRR17520069.2891817  
SRR17520069.2891819  
SRR17520069.2891823  
SRR17520069.2891825  
SRR17520069.2891827  
SRR17520069.2891829  
SRR17520069.2891833  
SRR17520069.2891835  
SRR17520069.2891837  
SRR17520069.2891839  
SRR17520069.2891841  
SRR17520069.2891843  
SRR17520069.2891845  
SRR17520069.2891847  
SRR17520069.2891849  
SRR17520069.2891851  
SRR17520069.2891853  
SRR17520069.2891855  
SRR17520069.2892495  
SRR17520069.2892497  
SRR17520069.2892499  
SRR17520069.2892501  
SRR17520069.2894207  
SRR17520069.2894209

SRR17520069.2894211  
SRR17520069.2895601  
SRR17520069.2895603  
SRR17520069.2895605  
SRR17520069.2895607  
SRR17520069.2895609  
SRR17520069.2895611  
SRR17520069.2895613  
SRR17520069.2895615  
SRR17520069.2895617  
SRR17520069.2895619  
SRR17520069.2895621  
SRR17520069.2895623  
SRR17520069.2895625  
SRR17520069.2895629  
SRR17520069.2895631  
SRR17520069.2895633  
SRR17520069.2895635  
SRR17520069.2895637  
SRR17520069.2895639  
SRR17520069.2895641  
SRR17520069.2895643  
SRR17520069.2895645  
SRR17520069.2898292  
SRR17520069.2898561  
SRR17520069.2898563  
SRR17520069.2898565  
SRR17520069.2898567  
SRR17520069.2898569  
SRR17520069.2898571  
SRR17520069.2898573  
SRR17520069.2898575  
SRR17520069.2898577  
SRR17520069.2898579  
SRR17520069.2904834  
SRR17520069.2904836  
SRR17520069.2908920  
SRR17520069.2908922  
SRR17520069.2908926  
SRR17520069.2908928  
SRR17520069.2908930  
SRR17520069.2908932  
SRR17520069.2908934  
SRR17520069.2908938  
SRR17520069.2908940  
SRR17520069.2908944  
SRR17520069.2908946

SRR17520069.2908948  
SRR17520069.2908950  
SRR17520069.2908956  
SRR17520069.2908960  
SRR17520069.2908962  
SRR17520069.2908964  
SRR17520069.2908966  
SRR17520069.2908968  
SRR17520069.2908970  
SRR17520069.2908972  
SRR17520069.2908974  
SRR17520069.2908976  
SRR17520069.2908978  
SRR17520069.2908980  
SRR17520069.2908982  
SRR17520069.2908984  
SRR17520069.2908988  
SRR17520069.2908990  
SRR17520069.2908992  
SRR17520069.2908996  
SRR17520069.2908998  
SRR17520069.2909002  
SRR17520069.2909004  
SRR17520069.2909006  
SRR17520069.2909008  
SRR17520069.2909010  
SRR17520069.2911488  
SRR17520069.2911490  
SRR17520069.2911492  
SRR17520069.2911494  
SRR17520069.2911496  
SRR17520069.2911498  
SRR17520069.2911500  
SRR17520069.2911502  
SRR17520069.2911504  
SRR17520069.2911506  
SRR17520069.2911508  
SRR17520069.2911510  
SRR17520069.2911512  
SRR17520069.2913974  
SRR17520069.2913976  
SRR17520069.2913978  
SRR17520069.2913980  
SRR17520069.2913982  
SRR17520069.2913984  
SRR17520069.2913986  
SRR17520069.2913988

SRR17520069.2913990  
SRR17520069.2913992  
SRR17520069.2913994  
SRR17520069.2913996  
SRR17520069.2913998  
SRR17520069.2914000  
SRR17520069.2914002  
SRR17520069.2914004  
SRR17520069.2914006  
SRR17520069.2914008  
SRR17520069.2914010  
SRR17520069.2914012  
SRR17520069.2914014  
SRR17520069.2914016  
SRR17520069.2914018  
SRR17520069.2914020  
SRR17520069.2914022  
SRR17520069.2914024  
SRR17520069.2914026  
SRR17520069.2914028  
SRR17520069.2914030  
SRR17520069.2914034  
SRR17520069.2914038  
SRR17520069.2914040  
SRR17520069.2914042  
SRR17520069.2914044  
SRR17520069.2914046  
SRR17520069.2914048  
SRR17520069.2914050  
SRR17520069.2914052  
SRR17520069.2914054  
SRR17520069.2914056  
SRR17520069.2914058  
SRR17520069.2914060  
SRR17520069.2914062  
SRR17520069.2914064  
SRR17520069.2914066  
SRR17520069.2914068  
SRR17520069.2914070  
SRR17520069.2914072  
SRR17520069.2914074  
SRR17520069.2914076  
SRR17520069.2914078  
SRR17520069.2914080  
SRR17520069.2915193  
SRR17520069.2915195  
SRR17520069.2915197

SRR17520069.2915199  
SRR17520069.2915201  
SRR17520069.2915203  
SRR17520069.2915205  
SRR17520069.2915209  
SRR17520069.2915211  
SRR17520069.2915213  
SRR17520069.2915215  
SRR17520069.2915217  
SRR17520069.2915219  
SRR17520069.2915221  
SRR17520069.2915223  
SRR17520069.2915225  
SRR17520069.2915227  
SRR17520069.2915229  
SRR17520069.2915231  
SRR17520069.2915233  
SRR17520069.2915235  
SRR17520069.2915237  
SRR17520069.2915239  
SRR17520069.2915241  
SRR17520069.2915243  
SRR17520069.2915245  
SRR17520069.2915247  
SRR17520069.2915251  
SRR17520069.2915253  
SRR17520069.2916772  
SRR17520069.2916774  
SRR17520069.2916776  
SRR17520069.2916778  
SRR17520069.2916780  
SRR17520069.2916782  
SRR17520069.2916786  
SRR17520069.2916788  
SRR17520069.2916790  
SRR17520069.2916792  
SRR17520069.2916794  
SRR17520069.2916796  
SRR17520069.2916798  
SRR17520069.2916802  
SRR17520069.2916804  
SRR17520069.2916806  
SRR17520069.2916808  
SRR17520069.2916810  
SRR17520069.2916812  
SRR17520069.2916814  
SRR17520069.2916816

SRR17520069.2916818  
SRR17520069.2916820  
SRR17520069.2916822  
SRR17520069.2916824  
SRR17520069.2916826  
SRR17520069.2916828  
SRR17520069.2916830  
SRR17520069.2916832  
SRR17520069.2916834  
SRR17520069.2916836  
SRR17520069.2916838  
SRR17520069.2916840  
SRR17520069.2916842  
SRR17520069.2916844  
SRR17520069.2916846  
SRR17520069.2916850  
SRR17520069.2916852  
SRR17520069.2916854  
SRR17520069.2916856  
SRR17520069.2916858  
SRR17520069.2916860  
SRR17520069.2916862  
SRR17520069.2917994  
SRR17520069.2917996  
SRR17520069.2917998  
SRR17520069.2918000  
SRR17520069.2918002  
SRR17520069.2918004  
SRR17520069.2918006  
SRR17520069.2918008  
SRR17520069.2918010  
SRR17520069.2923273  
SRR17520069.2925672  
SRR17520069.2925674  
SRR17520069.2925676  
SRR17520069.2925678  
SRR17520069.2925680  
SRR17520069.2925682  
SRR17520069.2925684  
SRR17520069.2925686  
SRR17520069.2925688  
SRR17520069.2925690  
SRR17520069.2925692  
SRR17520069.2925694  
SRR17520069.2925696  
SRR17520069.2925698  
SRR17520069.2925700

SRR17520069.2927334  
SRR17520069.2932277  
SRR17520069.2932279  
SRR17520069.2932281  
SRR17520069.2932283  
SRR17520069.2932285  
SRR17520069.2932287  
SRR17520069.2932289  
SRR17520069.2932293  
SRR17520069.2932297  
SRR17520069.2932299  
SRR17520069.2932301  
SRR17520069.2932303  
SRR17520069.2932305  
SRR17520069.2932307  
SRR17520069.2932309  
SRR17520069.2932311  
SRR17520069.2932313  
SRR17520069.2932315  
SRR17520069.2932317  
SRR17520069.2932319  
SRR17520069.2932321  
SRR17520069.2932323  
SRR17520069.2932325  
SRR17520069.2932327  
SRR17520069.2932329  
SRR17520069.2932331  
SRR17520069.2932333  
SRR17520069.2932335  
SRR17520069.2932337  
SRR17520069.2932339  
SRR17520069.2932341  
SRR17520069.2932343  
SRR17520069.2932345  
SRR17520069.2935161  
SRR17520069.2935163  
SRR17520069.2935165  
SRR17520069.2935167  
SRR17520069.2935171  
SRR17520069.2935173  
SRR17520069.2935175  
SRR17520069.2935177  
SRR17520069.2935179  
SRR17520069.2935181  
SRR17520069.2935183  
SRR17520069.2935185  
SRR17520069.2935187

SRR17520069. 2935189  
SRR17520069. 2935191  
SRR17520069. 2935193  
SRR17520069. 2936116  
SRR17520069. 2936118  
SRR17520069. 2936120  
SRR17520069. 2936122  
SRR17520069. 2936124  
SRR17520069. 2936126  
SRR17520069. 2936128  
SRR17520069. 2936130  
SRR17520069. 2936132  
SRR17520069. 2936134  
SRR17520069. 2936136  
SRR17520069. 2936138  
SRR17520069. 2936140  
SRR17520069. 2936142  
SRR17520069. 2938058  
SRR17520069. 2938060  
SRR17520069. 2938062  
SRR17520069. 2938606  
SRR17520069. 2938608  
SRR17520069. 2938610  
SRR17520069. 2943896  
SRR17520069. 2943898  
SRR17520069. 2943900  
SRR17520069. 2943902  
SRR17520069. 2943904  
SRR17520069. 2943906  
SRR17520069. 2943908  
SRR17520069. 2943910  
SRR17520069. 2943912  
SRR17520069. 2943914  
SRR17520069. 2943916  
SRR17520069. 2943918  
SRR17520069. 2943920  
SRR17520069. 2943922  
SRR17520069. 2943924  
SRR17520069. 2943926  
SRR17520069. 2943928  
SRR17520069. 2943930  
SRR17520069. 2943932  
SRR17520069. 2943934  
SRR17520069. 2943936  
SRR17520069. 2943938  
SRR17520069. 2943940  
SRR17520069. 2943942



SRR17520069.2943946  
SRR17520069.2943948  
SRR17520069.2943950  
SRR17520069.2943954  
SRR17520069.2943956  
SRR17520069.2943958  
SRR17520069.2943960  
SRR17520069.2943962  
SRR17520069.2943964  
SRR17520069.2943966  
SRR17520069.2943968  
SRR17520069.2943970  
SRR17520069.2943972  
SRR17520069.2943974  
SRR17520069.2943976  
SRR17520069.2943978  
SRR17520069.2943980  
SRR17520069.2943982  
SRR17520069.2943984  
SRR17520069.2943986  
SRR17520069.2943988  
SRR17520069.2943990  
SRR17520069.2943992  
SRR17520069.2943994  
SRR17520069.2943996  
SRR17520069.2947976  
SRR17520069.2947978  
SRR17520069.2947980  
SRR17520069.2953553  
SRR17520069.2953555  
SRR17520069.2953561  
SRR17520069.2953563  
SRR17520069.2953565  
SRR17520069.2953567  
SRR17520069.2953571  
SRR17520069.2953575  
SRR17520069.2953577  
SRR17520069.2957106  
SRR17520069.2957108  
SRR17520069.2957110  
SRR17520069.2957112  
SRR17520069.2957114  
SRR17520069.2957116  
SRR17520069.2957118  
SRR17520069.2957120  
SRR17520069.2957122  
SRR17520069.2957124

SRR17520069.2957126  
SRR17520069.2957128  
SRR17520069.2957130  
SRR17520069.2957132  
SRR17520069.2957134  
SRR17520069.2957136  
SRR17520069.2957138  
SRR17520069.2957140  
SRR17520069.2957144  
SRR17520069.2957150  
SRR17520069.2957152  
SRR17520069.2964950  
SRR17520069.2964952  
SRR17520069.2965832  
SRR17520069.2965836  
SRR17520069.2965838  
SRR17520069.2965840  
SRR17520069.2965842  
SRR17520069.2965846  
SRR17520069.2965848  
SRR17520069.2965850  
SRR17520069.2965854  
SRR17520069.2965856  
SRR17520069.2965858  
SRR17520069.2965860  
SRR17520069.2965862  
SRR17520069.2965864  
SRR17520069.2965866  
SRR17520069.2965868  
SRR17520069.2965870  
SRR17520069.2965872  
SRR17520069.2965874  
SRR17520069.2965876  
SRR17520069.2965878  
SRR17520069.2965880  
SRR17520069.2965882  
SRR17520069.2965884  
SRR17520069.2965886  
SRR17520069.2965888  
SRR17520069.2965890  
SRR17520069.2965892  
SRR17520069.2965894  
SRR17520069.2965896  
SRR17520069.2965898  
SRR17520069.2965900  
SRR17520069.2965906  
SRR17520069.2965908

SRR17520069.2965910  
SRR17520069.2965912  
SRR17520069.2965914  
SRR17520069.2965916  
SRR17520069.2965918  
SRR17520069.2965920  
SRR17520069.2965922  
SRR17520069.2965924  
SRR17520069.2965926  
SRR17520069.2965928  
SRR17520069.2965930  
SRR17520069.2965932  
SRR17520069.2965934  
SRR17520069.2965936  
SRR17520069.2965938  
SRR17520069.2965940  
SRR17520069.2965942  
SRR17520069.2965944  
SRR17520069.2965946  
SRR17520069.2965948  
SRR17520069.2967914  
SRR17520069.2967916  
SRR17520069.2967920  
SRR17520069.2967922  
SRR17520069.2967924  
SRR17520069.2967926  
SRR17520069.2967928  
SRR17520069.2967930  
SRR17520069.2967932  
SRR17520069.2967934  
SRR17520069.2967936  
SRR17520069.2967938  
SRR17520069.2967940  
SRR17520069.2967942  
SRR17520069.2967944  
SRR17520069.2967946  
SRR17520069.2967948  
SRR17520069.2967950  
SRR17520069.2967952  
SRR17520069.2967954  
SRR17520069.2967956  
SRR17520069.2981337  
SRR17520069.2981339  
SRR17520069.2985836  
SRR17520069.2985838  
SRR17520069.2985840  
SRR17520069.2985842

SRR17520069. 2985844  
SRR17520069. 2985846  
SRR17520069. 2985848  
SRR17520069. 2986135  
SRR17520069. 2986137  
SRR17520069. 2986139  
SRR17520069. 2986141  
SRR17520069. 2986143  
SRR17520069. 2986145  
SRR17520069. 2986147  
SRR17520069. 2986149  
SRR17520069. 2986151  
SRR17520069. 2986153  
SRR17520069. 2986155  
SRR17520069. 2986157  
SRR17520069. 2986159  
SRR17520069. 2986161  
SRR17520069. 2999867  
SRR17520069. 2999871  
SRR17520069. 2999873  
SRR17520069. 2999875  
SRR17520069. 2999877  
SRR17520069. 2999879  
SRR17520069. 2999881  
SRR17520069. 2999883  
SRR17520069. 2999885  
SRR17520069. 2999887  
SRR17520069. 2999889  
SRR17520069. 2999891  
SRR17520069. 2999893  
SRR17520069. 2999895  
SRR17520069. 2999897  
SRR17520069. 2999899  
SRR17520069. 2999901  
SRR17520069. 2999903  
SRR17520069. 2999905  
SRR17520069. 3006788  
SRR17520069. 3006790  
SRR17520069. 3006792  
SRR17520069. 3006794  
SRR17520069. 3006796  
SRR17520069. 3006798  
SRR17520069. 3006800  
SRR17520069. 3006804  
SRR17520069. 3006814  
SRR17520069. 3006816  
SRR17520069. 3006834

SRR17520069.3007317  
SRR17520069.3007319  
SRR17520069.3007321  
SRR17520069.3007323  
SRR17520069.3007325  
SRR17520069.3007327  
SRR17520069.3007329  
SRR17520069.3007331  
SRR17520069.3007333  
SRR17520069.3010149  
SRR17520069.3011189  
SRR17520069.3011191  
SRR17520069.3011193  
SRR17520069.3011195  
SRR17520069.3011197  
SRR17520069.3011199  
SRR17520069.3011201  
SRR17520069.3011205  
SRR17520069.3011207  
SRR17520069.3011209  
SRR17520069.3011211  
SRR17520069.3011213  
SRR17520069.3011215  
SRR17520069.3011217  
SRR17520069.3011219  
SRR17520069.3011221  
SRR17520069.3011223  
SRR17520069.3011227  
SRR17520069.3011229  
SRR17520069.3011231  
SRR17520069.3011233  
SRR17520069.3011235  
SRR17520069.3011237  
SRR17520069.3011239  
SRR17520069.3011241  
SRR17520069.3011243  
SRR17520069.3011245  
SRR17520069.3011247  
SRR17520069.3011249  
SRR17520069.3011251  
SRR17520069.3011253  
SRR17520069.3011255  
SRR17520069.3011259  
SRR17520069.3011261  
SRR17520069.3011263  
SRR17520069.3011265  
SRR17520069.3011267

SRR17520069.3011269  
SRR17520069.3011271  
SRR17520069.3011273  
SRR17520069.3011275  
SRR17520069.3011991  
SRR17520069.3011993  
SRR17520069.3011995  
SRR17520069.3011997  
SRR17520069.3011999  
SRR17520069.3012001  
SRR17520069.3012003  
SRR17520069.3012005  
SRR17520069.3012007  
SRR17520069.3012009  
SRR17520069.3012011  
SRR17520069.3012013  
SRR17520069.3012015  
SRR17520069.3012017  
SRR17520069.3012019  
SRR17520069.3012021  
SRR17520069.3012023  
SRR17520069.3012025  
SRR17520069.3012027  
SRR17520069.3012029  
SRR17520069.3012031  
SRR17520069.3012033  
SRR17520069.3012035  
SRR17520069.3012037  
SRR17520069.3012039  
SRR17520069.3012041  
SRR17520069.3012043  
SRR17520069.3012045  
SRR17520069.3012047  
SRR17520069.3012049  
SRR17520069.3012051  
SRR17520069.3012053  
SRR17520069.3012055  
SRR17520069.3012057  
SRR17520069.3012059  
SRR17520069.3012061  
SRR17520069.3012063  
SRR17520069.3012065  
SRR17520069.3012067  
SRR17520069.3012069  
SRR17520069.3012071  
SRR17520069.3012073  
SRR17520069.3012075

SRR17520069.3012077  
SRR17520069.3012079  
SRR17520069.3012083  
SRR17520069.3012085  
SRR17520069.3012087  
SRR17520069.3012616  
SRR17520069.3012618  
SRR17520069.3012620  
SRR17520069.3017752  
SRR17520069.3017754  
SRR17520069.3017756  
SRR17520069.3017758  
SRR17520069.3017760  
SRR17520069.3017762  
SRR17520069.3017764  
SRR17520069.3017766  
SRR17520069.3017768  
SRR17520069.3017770  
SRR17520069.3017772  
SRR17520069.3017774  
SRR17520069.3017776  
SRR17520069.3017778  
SRR17520069.3017780  
SRR17520069.3017782  
SRR17520069.3017784  
SRR17520069.3017786  
SRR17520069.3017788  
SRR17520069.3017790  
SRR17520069.3017792  
SRR17520069.3017794  
SRR17520069.3017796  
SRR17520069.3017798  
SRR17520069.3017800  
SRR17520069.3017802  
SRR17520069.3017804  
SRR17520069.3017806  
SRR17520069.3017808  
SRR17520069.3017810  
SRR17520069.3017812  
SRR17520069.3017814  
SRR17520069.3017816  
SRR17520069.3017818  
SRR17520069.3017820  
SRR17520069.3017824  
SRR17520069.3017828  
SRR17520069.3017830  
SRR17520069.3017832

SRR17520069. 3017834  
SRR17520069. 3017836  
SRR17520069. 3017838  
SRR17520069. 3017840  
SRR17520069. 3017842  
SRR17520069. 3017844  
SRR17520069. 3017848  
SRR17520069. 3017850  
SRR17520069. 3017852  
SRR17520069. 3017854  
SRR17520069. 3017856  
SRR17520069. 3017858  
SRR17520069. 3017860  
SRR17520069. 3017862  
SRR17520069. 3017864  
SRR17520069. 3017866  
SRR17520069. 3017868  
SRR17520069. 3017870  
SRR17520069. 3017872  
SRR17520069. 3017874  
SRR17520069. 3017876  
SRR17520069. 3017878  
SRR17520069. 3017880  
SRR17520069. 3020133  
SRR17520069. 3020135  
SRR17520069. 3020137  
SRR17520069. 3020139  
SRR17520069. 3020141  
SRR17520069. 3020143  
SRR17520069. 3020145  
SRR17520069. 3020147  
SRR17520069. 3020149  
SRR17520069. 3032051  
SRR17520069. 3032053  
SRR17520069. 3032055  
SRR17520069. 3032780  
SRR17520069. 3032782  
SRR17520069. 3032784  
SRR17520069. 3032786  
SRR17520069. 3032788  
SRR17520069. 3032790  
SRR17520069. 3032792  
SRR17520069. 3032794  
SRR17520069. 3032796  
SRR17520069. 3032798  
SRR17520069. 3032800  
SRR17520069. 3032802



SRR17520069. 3032804  
SRR17520069. 3032806  
SRR17520069. 3032808  
SRR17520069. 3042221  
SRR17520069. 3042223  
SRR17520069. 3042225  
SRR17520069. 3042227  
SRR17520069. 3042229  
SRR17520069. 3042231  
SRR17520069. 3044015  
SRR17520069. 3044017  
SRR17520069. 3044019  
SRR17520069. 3044021  
SRR17520069. 3044023  
SRR17520069. 3044025  
SRR17520069. 3044027  
SRR17520069. 3044029  
SRR17520069. 3044031  
SRR17520069. 3044033  
SRR17520069. 3044035  
SRR17520069. 3044037  
SRR17520069. 3044039  
SRR17520069. 3044041  
SRR17520069. 3044043  
SRR17520069. 3044045  
SRR17520069. 3044047  
SRR17520069. 3044049  
SRR17520069. 3044057  
SRR17520069. 3044061  
SRR17520069. 3044063  
SRR17520069. 3044065  
SRR17520069. 3044067  
SRR17520069. 3044069  
SRR17520069. 3044071  
SRR17520069. 3044073  
SRR17520069. 3044077  
SRR17520069. 3044079  
SRR17520069. 3044081  
SRR17520069. 3044083  
SRR17520069. 3044085  
SRR17520069. 3044087  
SRR17520069. 3044089  
SRR17520069. 3044091  
SRR17520069. 3044093  
SRR17520069. 3044095  
SRR17520069. 3044097  
SRR17520069. 3044099

SRR17520069. 3044101  
SRR17520069. 3044103  
SRR17520069. 3044105  
SRR17520069. 3044107  
SRR17520069. 3044109  
SRR17520069. 3044111  
SRR17520069. 3044113  
SRR17520069. 3044115  
SRR17520069. 3044117  
SRR17520069. 3044119  
SRR17520069. 3044121  
SRR17520069. 3044123  
SRR17520069. 3044125  
SRR17520069. 3044127  
SRR17520069. 3044129  
SRR17520069. 3044131  
SRR17520069. 3044133  
SRR17520069. 3044135  
SRR17520069. 3044137  
SRR17520069. 3044139  
SRR17520069. 3044141  
SRR17520069. 3044143  
SRR17520069. 3044145  
SRR17520069. 3044147  
SRR17520069. 3044149  
SRR17520069. 3046819  
SRR17520069. 3046821  
SRR17520069. 3046823  
SRR17520069. 3046825  
SRR17520069. 3046827  
SRR17520069. 3046829  
SRR17520069. 3046831  
SRR17520069. 3046833  
SRR17520069. 3046835  
SRR17520069. 3046837  
SRR17520069. 3046839  
SRR17520069. 3046841  
SRR17520069. 3046843  
SRR17520069. 3046845  
SRR17520069. 3046847  
SRR17520069. 3046849  
SRR17520069. 3046851  
SRR17520069. 3046853  
SRR17520069. 3046855  
SRR17520069. 3046857  
SRR17520069. 3053464  
SRR17520069. 3053466

SRR17520069. 3053468  
SRR17520069. 3053470  
SRR17520069. 3053472  
SRR17520069. 3053474  
SRR17520069. 3053476  
SRR17520069. 3053478  
SRR17520069. 3053480  
SRR17520069. 3053482  
SRR17520069. 3053484  
SRR17520069. 3053486  
SRR17520069. 3053488  
SRR17520069. 3055558  
SRR17520069. 3055560  
SRR17520069. 3055562  
SRR17520069. 3055564  
SRR17520069. 3055566  
SRR17520069. 3055568  
SRR17520069. 3055570  
SRR17520069. 3055572  
SRR17520069. 3055574  
SRR17520069. 3068893  
SRR17520069. 3068895  
SRR17520069. 3068897  
SRR17520069. 3068899  
SRR17520069. 3068901  
SRR17520069. 3069496  
SRR17520069. 3069498  
SRR17520069. 3069500  
SRR17520069. 3069502  
SRR17520069. 3069504  
SRR17520069. 3070208  
SRR17520069. 3070210  
SRR17520069. 3070212  
SRR17520069. 3070216  
SRR17520069. 3070218  
SRR17520069. 3070220  
SRR17520069. 3070222  
SRR17520069. 3070224  
SRR17520069. 3070226  
SRR17520069. 3070228  
SRR17520069. 3070230  
SRR17520069. 3070232  
SRR17520069. 3070234  
SRR17520069. 3070236  
SRR17520069. 3070238  
SRR17520069. 3070240  
SRR17520069. 3070242

SRR17520069. 3070244  
SRR17520069. 3070246  
SRR17520069. 3070248  
SRR17520069. 3070250  
SRR17520069. 3070252  
SRR17520069. 3070254  
SRR17520069. 3070256  
SRR17520069. 3080077  
SRR17520069. 3080079  
SRR17520069. 3080081  
SRR17520069. 3080083  
SRR17520069. 3080085  
SRR17520069. 3080087  
SRR17520069. 3080089  
SRR17520069. 3080091  
SRR17520069. 3080093  
SRR17520069. 3080095  
SRR17520069. 3080097  
SRR17520069. 3082619  
SRR17520069. 3082621  
SRR17520069. 3093610  
SRR17520069. 3093612  
SRR17520069. 3093614  
SRR17520069. 3093616  
SRR17520069. 3093618  
SRR17520069. 3093620  
SRR17520069. 3093622  
SRR17520069. 3093624  
SRR17520069. 3093626  
SRR17520069. 3093628  
SRR17520069. 3093630  
SRR17520069. 3093632  
SRR17520069. 3093634  
SRR17520069. 3093636  
SRR17520069. 3097182  
SRR17520069. 3097184  
SRR17520069. 3097186  
SRR17520069. 3097188  
SRR17520069. 3097190  
SRR17520069. 3097192  
SRR17520069. 3097194  
SRR17520069. 3097198  
SRR17520069. 3097202  
SRR17520069. 3097204  
SRR17520069. 3097206  
SRR17520069. 3097208  
SRR17520069. 3097210

SRR17520069. 3097212  
SRR17520069. 3097214  
SRR17520069. 3097216  
SRR17520069. 3097218  
SRR17520069. 3097220  
SRR17520069. 3097222  
SRR17520069. 3097224  
SRR17520069. 3097226  
SRR17520069. 3097228  
SRR17520069. 3097230  
SRR17520069. 3097232  
SRR17520069. 3097234  
SRR17520069. 3097236  
SRR17520069. 3097238  
SRR17520069. 3097240  
SRR17520069. 3097242  
SRR17520069. 3097244  
SRR17520069. 3097246  
SRR17520069. 3097248  
SRR17520069. 3097250  
SRR17520069. 3097252  
SRR17520069. 3098368  
SRR17520069. 3098370  
SRR17520069. 3098372  
SRR17520069. 3098374  
SRR17520069. 3098376  
SRR17520069. 3098378  
SRR17520069. 3098380  
SRR17520069. 3098382  
SRR17520069. 3098384  
SRR17520069. 3098386  
SRR17520069. 3098388  
SRR17520069. 3098390  
SRR17520069. 3098392  
SRR17520069. 3098394  
SRR17520069. 3098396  
SRR17520069. 3098398  
SRR17520069. 3098400  
SRR17520069. 3098402  
SRR17520069. 3098404  
SRR17520069. 3098406  
SRR17520069. 3098408  
SRR17520069. 3098410  
SRR17520069. 3098412  
SRR17520069. 3107888  
SRR17520069. 3107890  
SRR17520069. 3107892

SRR17520069.3107894  
SRR17520069.3107896  
SRR17520069.3112261  
SRR17520069.3112263  
SRR17520069.3112265  
SRR17520069.3112267  
SRR17520069.3112269  
SRR17520069.3112271  
SRR17520069.3112273  
SRR17520069.3112275  
SRR17520069.3112277  
SRR17520069.3112279  
SRR17520069.3112281  
SRR17520069.3112283  
SRR17520069.3112285  
SRR17520069.3112287  
SRR17520069.3112289  
SRR17520069.3112291  
SRR17520069.3112293  
SRR17520069.3112295  
SRR17520069.3112297  
SRR17520069.3112299  
SRR17520069.3112301  
SRR17520069.3112303  
SRR17520069.3112305  
SRR17520069.3112307  
SRR17520069.3112309  
SRR17520069.3112311  
SRR17520069.3112313  
SRR17520069.3112315  
SRR17520069.3112317  
SRR17520069.3112319  
SRR17520069.3112321  
SRR17520069.3112323  
SRR17520069.3112325  
SRR17520069.3112327  
SRR17520069.3112329  
SRR17520069.3112331  
SRR17520069.3112333  
SRR17520069.3112335  
SRR17520069.3112337  
SRR17520069.3112339  
SRR17520069.3112341  
SRR17520069.3112343  
SRR17520069.3112345  
SRR17520069.3112347  
SRR17520069.3112349

SRR17520069.3112351  
SRR17520069.3112353  
SRR17520069.3112355  
SRR17520069.3112357  
SRR17520069.3112359  
SRR17520069.3112361  
SRR17520069.3112363  
SRR17520069.3112365  
SRR17520069.3112367  
SRR17520069.3112369  
SRR17520069.3112371  
SRR17520069.3112373  
SRR17520069.3112375  
SRR17520069.3112377  
SRR17520069.3112379  
SRR17520069.3112381  
SRR17520069.3112383  
SRR17520069.3112385  
SRR17520069.3112387  
SRR17520069.3112389  
SRR17520069.3112391  
SRR17520069.3112393  
SRR17520069.3112395  
SRR17520069.3112397  
SRR17520069.3112399  
SRR17520069.3112401  
SRR17520069.3112403  
SRR17520069.3112405  
SRR17520069.3112407  
SRR17520069.3112409  
SRR17520069.3112411  
SRR17520069.3112413  
SRR17520069.3115054  
SRR17520069.3115056  
SRR17520069.3115060  
SRR17520069.3115062  
SRR17520069.3115064  
SRR17520069.3120446  
SRR17520069.3120448  
SRR17520069.3120450  
SRR17520069.3120452  
SRR17520069.3120454  
SRR17520069.3120456  
SRR17520069.3120458  
SRR17520069.3120460  
SRR17520069.3120462  
SRR17520069.3120464

SRR17520069. 3120466  
SRR17520069. 3120468  
SRR17520069. 3120470  
SRR17520069. 3120472  
SRR17520069. 3132234  
SRR17520069. 3132236  
SRR17520069. 3132238  
SRR17520069. 3132242  
SRR17520069. 3132244  
SRR17520069. 3132246  
SRR17520069. 3132248  
SRR17520069. 3132250  
SRR17520069. 3137600  
SRR17520069. 3137602  
SRR17520069. 3138074  
SRR17520069. 3138078  
SRR17520069. 3138080  
SRR17520069. 3138082  
SRR17520069. 3138084  
SRR17520069. 3138086  
SRR17520069. 3138088  
SRR17520069. 3138090  
SRR17520069. 3138092  
SRR17520069. 3138094  
SRR17520069. 3138096  
SRR17520069. 3138098  
SRR17520069. 3138100  
SRR17520069. 3138102  
SRR17520069. 3138104  
SRR17520069. 3138106  
SRR17520069. 3138108  
SRR17520069. 3138110  
SRR17520069. 3138112  
SRR17520069. 3138114  
SRR17520069. 3138116  
SRR17520069. 3138118  
SRR17520069. 3138120  
SRR17520069. 3138122  
SRR17520069. 3138124  
SRR17520069. 3138126  
SRR17520069. 3138128  
SRR17520069. 3138130  
SRR17520069. 3138132  
SRR17520069. 3138134  
SRR17520069. 3138136  
SRR17520069. 3146054  
SRR17520069. 3146056



SRR17520069. 3146058  
SRR17520069. 3146060  
SRR17520069. 3146062  
SRR17520069. 3146064  
SRR17520069. 3146066  
SRR17520069. 3146068  
SRR17520069. 3146070  
SRR17520069. 3146072  
SRR17520069. 3146074  
SRR17520069. 3146076  
SRR17520069. 3146078  
SRR17520069. 3146080  
SRR17520069. 3146082  
SRR17520069. 3156004  
SRR17520069. 3156632  
SRR17520069. 3156634  
SRR17520069. 3156636  
SRR17520069. 3156638  
SRR17520069. 3156640  
SRR17520069. 3156642  
SRR17520069. 3156644  
SRR17520069. 3156646  
SRR17520069. 3156648  
SRR17520069. 3156650  
SRR17520069. 3156652  
SRR17520069. 3156654  
SRR17520069. 3156656  
SRR17520069. 3156658  
SRR17520069. 3158727  
SRR17520069. 3158729  
SRR17520069. 3158731  
SRR17520069. 3158733  
SRR17520069. 3158735  
SRR17520069. 3158737  
SRR17520069. 3158739  
SRR17520069. 3158741  
SRR17520069. 3158743  
SRR17520069. 3158745  
SRR17520069. 3158749  
SRR17520069. 3158751  
SRR17520069. 3159985  
SRR17520069. 3159987  
SRR17520069. 3159989  
SRR17520069. 3159991  
SRR17520069. 3159993  
SRR17520069. 3161359  
SRR17520069. 3167281

SRR17520069. 3167283  
SRR17520069. 3167285  
SRR17520069. 3167287  
SRR17520069. 3167289  
SRR17520069. 3167293  
SRR17520069. 3167295  
SRR17520069. 3167297  
SRR17520069. 3167299  
SRR17520069. 3167301  
SRR17520069. 3167303  
SRR17520069. 3168711  
SRR17520069. 3168713  
SRR17520069. 3168715  
SRR17520069. 3168717  
SRR17520069. 3168721  
SRR17520069. 3169884  
SRR17520069. 3169886  
SRR17520069. 3169888  
SRR17520069. 3169890  
SRR17520069. 3169892  
SRR17520069. 3169894  
SRR17520069. 3169896  
SRR17520069. 3169898  
SRR17520069. 3169900  
SRR17520069. 3172834  
SRR17520069. 3172836  
SRR17520069. 3172838  
SRR17520069. 3172840  
SRR17520069. 3172842  
SRR17520069. 3172846  
SRR17520069. 3172848  
SRR17520069. 3172850  
SRR17520069. 3172852  
SRR17520069. 3172854  
SRR17520069. 3172856  
SRR17520069. 3172858  
SRR17520069. 3172860  
SRR17520069. 3172862  
SRR17520069. 3172864  
SRR17520069. 3172866  
SRR17520069. 3172868  
SRR17520069. 3172870  
SRR17520069. 3172872  
SRR17520069. 3172874  
SRR17520069. 3172878  
SRR17520069. 3172880  
SRR17520069. 3172882

SRR17520069. 3172884  
SRR17520069. 3172886  
SRR17520069. 3172888  
SRR17520069. 3172890  
SRR17520069. 3172892  
SRR17520069. 3172894  
SRR17520069. 3172896  
SRR17520069. 3172898  
SRR17520069. 3172900  
SRR17520069. 3172902  
SRR17520069. 3172904  
SRR17520069. 3172906  
SRR17520069. 3172908  
SRR17520069. 3172910  
SRR17520069. 3172912  
SRR17520069. 3172914  
SRR17520069. 3172916  
SRR17520069. 3172918  
SRR17520069. 3172920  
SRR17520069. 3172922  
SRR17520069. 3172924  
SRR17520069. 3172926  
SRR17520069. 3172928  
SRR17520069. 3172930  
SRR17520069. 3172932  
SRR17520069. 3172934  
SRR17520069. 3172936  
SRR17520069. 3172940  
SRR17520069. 3172944  
SRR17520069. 3172946  
SRR17520069. 3172948  
SRR17520069. 3172950  
SRR17520069. 3172952  
SRR17520069. 3172954  
SRR17520069. 3172956  
SRR17520069. 3172962  
SRR17520069. 3172964  
SRR17520069. 3172966  
SRR17520069. 3172968  
SRR17520069. 3172970  
SRR17520069. 3172972  
SRR17520069. 3172974  
SRR17520069. 3172976  
SRR17520069. 3172978  
SRR17520069. 3172980  
SRR17520069. 3172982  
SRR17520069. 3172984

SRR17520069. 3172986  
SRR17520069. 3172988  
SRR17520069. 3172990  
SRR17520069. 3172992  
SRR17520069. 3172996  
SRR17520069. 3172998  
SRR17520069. 3173000  
SRR17520069. 3173002  
SRR17520069. 3173004  
SRR17520069. 3173008  
SRR17520069. 3173012  
SRR17520069. 3173014  
SRR17520069. 3173016  
SRR17520069. 3181765  
SRR17520069. 3181767  
SRR17520069. 3181769  
SRR17520069. 3181771  
SRR17520069. 3181773  
SRR17520069. 3181775  
SRR17520069. 3181777  
SRR17520069. 3181779  
SRR17520069. 3181781  
SRR17520069. 3181783  
SRR17520069. 3181785  
SRR17520069. 3181787  
SRR17520069. 3181789  
SRR17520069. 3181791  
SRR17520069. 3181793  
SRR17520069. 3183432  
SRR17520069. 3183434  
SRR17520069. 3187501  
SRR17520069. 3187503  
SRR17520069. 3187505  
SRR17520069. 3187507  
SRR17520069. 3187509  
SRR17520069. 3187511  
SRR17520069. 3187513  
SRR17520069. 3187517  
SRR17520069. 3187521  
SRR17520069. 3187525  
SRR17520069. 3187527  
SRR17520069. 3187529  
SRR17520069. 3187531  
SRR17520069. 3187533  
SRR17520069. 3187535  
SRR17520069. 3187537  
SRR17520069. 3187539

SRR17520069. 3187541  
SRR17520069. 3187543  
SRR17520069. 3187545  
SRR17520069. 3187547  
SRR17520069. 3187549  
SRR17520069. 3187551  
SRR17520069. 3187553  
SRR17520069. 3187555  
SRR17520069. 3187557  
SRR17520069. 3187559  
SRR17520069. 3187561  
SRR17520069. 3187563  
SRR17520069. 3187565  
SRR17520069. 3187567  
SRR17520069. 3187569  
SRR17520069. 3187571  
SRR17520069. 3187573  
SRR17520069. 3187575  
SRR17520069. 3187577  
SRR17520069. 3187579  
SRR17520069. 3187581  
SRR17520069. 3187583  
SRR17520069. 3187585  
SRR17520069. 3187587  
SRR17520069. 3187589  
SRR17520069. 3187591  
SRR17520069. 3187593  
SRR17520069. 3187595  
SRR17520069. 3187597  
SRR17520069. 3187601  
SRR17520069. 3187605  
SRR17520069. 3187607  
SRR17520069. 3187609  
SRR17520069. 3187611  
SRR17520069. 3187613  
SRR17520069. 3187615  
SRR17520069. 3187617  
SRR17520069. 3187619  
SRR17520069. 3187621  
SRR17520069. 3187623  
SRR17520069. 3187625  
SRR17520069. 3187627  
SRR17520069. 3187629  
SRR17520069. 3187631  
SRR17520069. 3187633  
SRR17520069. 3195222  
SRR17520069. 3195224

SRR17520069. 3195226  
SRR17520069. 3195228  
SRR17520069. 3195230  
SRR17520069. 3195232  
SRR17520069. 3195234  
SRR17520069. 3195236  
SRR17520069. 3195238  
SRR17520069. 3195240  
SRR17520069. 3195242  
SRR17520069. 3195244  
SRR17520069. 3195246  
SRR17520069. 3195426  
SRR17520069. 3195428  
SRR17520069. 3195430  
SRR17520069. 3195432  
SRR17520069. 3195434  
SRR17520069. 3195436  
SRR17520069. 3195440  
SRR17520069. 3195442  
SRR17520069. 3195444  
SRR17520069. 3195446  
SRR17520069. 3195450  
SRR17520069. 3195452  
SRR17520069. 3195454  
SRR17520069. 3195456  
SRR17520069. 3195458  
SRR17520069. 3195460  
SRR17520069. 3195462  
SRR17520069. 3195464  
SRR17520069. 3195470  
SRR17520069. 3195472  
SRR17520069. 3195474  
SRR17520069. 3195476  
SRR17520069. 3195478  
SRR17520069. 3195480  
SRR17520069. 3195482  
SRR17520069. 3195484  
SRR17520069. 3195486  
SRR17520069. 3195488  
SRR17520069. 3195490  
SRR17520069. 3195492  
SRR17520069. 3195494  
SRR17520069. 3195496  
SRR17520069. 3195498  
SRR17520069. 3199448  
SRR17520069. 3199450  
SRR17520069. 3199452

SRR17520069. 3199454  
SRR17520069. 3199456  
SRR17520069. 3199458  
SRR17520069. 3199460  
SRR17520069. 3199462  
SRR17520069. 3199464  
SRR17520069. 3199466  
SRR17520069. 3199468  
SRR17520069. 3199472  
SRR17520069. 3199474  
SRR17520069. 3199476  
SRR17520069. 3199478  
SRR17520069. 3199480  
SRR17520069. 3199482  
SRR17520069. 3199484  
SRR17520069. 3199486  
SRR17520069. 3199488  
SRR17520069. 3199492  
SRR17520069. 3199494  
SRR17520069. 3199496  
SRR17520069. 3199498  
SRR17520069. 3199500  
SRR17520069. 3199502  
SRR17520069. 3199504  
SRR17520069. 3199508  
SRR17520069. 3199510  
SRR17520069. 3199512  
SRR17520069. 3199514  
SRR17520069. 3199516  
SRR17520069. 3199518  
SRR17520069. 3199520  
SRR17520069. 3199522  
SRR17520069. 3199524  
SRR17520069. 3199526  
SRR17520069. 3199530  
SRR17520069. 3199532  
SRR17520069. 3199534  
SRR17520069. 3199805  
SRR17520069. 3199807  
SRR17520069. 3199809  
SRR17520069. 3199811  
SRR17520069. 3199813  
SRR17520069. 3199815  
SRR17520069. 3199817  
SRR17520069. 3199819  
SRR17520069. 3199821  
SRR17520069. 3199823

SRR17520069. 3199825  
SRR17520069. 3201859  
SRR17520069. 3202751  
SRR17520069. 3202753  
SRR17520069. 3202755  
SRR17520069. 3202757  
SRR17520069. 3202759  
SRR17520069. 3202761  
SRR17520069. 3202763  
SRR17520069. 3202765  
SRR17520069. 3202767  
SRR17520069. 3202769  
SRR17520069. 3202771  
SRR17520069. 3202773  
SRR17520069. 3202775  
SRR17520069. 3202777  
SRR17520069. 3202779  
SRR17520069. 3202781  
SRR17520069. 3202783  
SRR17520069. 3208941  
SRR17520069. 3208943  
SRR17520069. 3208945  
SRR17520069. 3208947  
SRR17520069. 3219789  
SRR17520069. 3219791  
SRR17520069. 3219793  
SRR17520069. 3219795  
SRR17520069. 3219797  
SRR17520069. 3219799  
SRR17520069. 3219801  
SRR17520069. 3219803  
SRR17520069. 3219805  
SRR17520069. 3219807  
SRR17520069. 3219809  
SRR17520069. 3219811  
SRR17520069. 3219815  
SRR17520069. 3219817  
SRR17520069. 3220153  
SRR17520069. 3220396  
SRR17520069. 3220398  
SRR17520069. 3220400  
SRR17520069. 3220402  
SRR17520069. 3220404  
SRR17520069. 3220406  
SRR17520069. 3220408  
SRR17520069. 3220410  
SRR17520069. 3220412



SRR17520069. 3220414  
SRR17520069. 3220416  
SRR17520069. 3220418  
SRR17520069. 3220420  
SRR17520069. 3220422  
SRR17520069. 3220424  
SRR17520069. 3220426  
SRR17520069. 3220428  
SRR17520069. 3220430  
SRR17520069. 3221667  
SRR17520069. 3221669  
SRR17520069. 3221671  
SRR17520069. 3221673  
SRR17520069. 3221675  
SRR17520069. 3221677  
SRR17520069. 3225527  
SRR17520069. 3225529  
SRR17520069. 3225531  
SRR17520069. 3225533  
SRR17520069. 3225535  
SRR17520069. 3225537  
SRR17520069. 3225541  
SRR17520069. 3225543  
SRR17520069. 3225545  
SRR17520069. 3225547  
SRR17520069. 3225549  
SRR17520069. 3225551  
SRR17520069. 3225553  
SRR17520069. 3225555  
SRR17520069. 3225557  
SRR17520069. 3225559  
SRR17520069. 3225561  
SRR17520069. 3225563  
SRR17520069. 3225565  
SRR17520069. 3225567  
SRR17520069. 3225569  
SRR17520069. 3225571  
SRR17520069. 3225573  
SRR17520069. 3225575  
SRR17520069. 3225577  
SRR17520069. 3225579  
SRR17520069. 3225581  
SRR17520069. 3225583  
SRR17520069. 3225585  
SRR17520069. 3225587  
SRR17520069. 3225589  
SRR17520069. 3225591

SRR17520069. 3225593  
SRR17520069. 3225595  
SRR17520069. 3227967  
SRR17520069. 3227969  
SRR17520069. 3227971  
SRR17520069. 3227973  
SRR17520069. 3227975  
SRR17520069. 3227977  
SRR17520069. 3227979  
SRR17520069. 3227981  
SRR17520069. 3227983  
SRR17520069. 3227985  
SRR17520069. 3227987  
SRR17520069. 3227989  
SRR17520069. 3227991  
SRR17520069. 3227993  
SRR17520069. 3227995  
SRR17520069. 3227997  
SRR17520069. 3227999  
SRR17520069. 3228001  
SRR17520069. 3228003  
SRR17520069. 3228005  
SRR17520069. 3228007  
SRR17520069. 3228009  
SRR17520069. 3228011  
SRR17520069. 3228013  
SRR17520069. 3228015  
SRR17520069. 3228017  
SRR17520069. 3228019  
SRR17520069. 3228021  
SRR17520069. 3228023  
SRR17520069. 3228025  
SRR17520069. 3228027  
SRR17520069. 3228029  
SRR17520069. 3228031  
SRR17520069. 3228033  
SRR17520069. 3228035  
SRR17520069. 3228037  
SRR17520069. 3228039  
SRR17520069. 3228041  
SRR17520069. 3228043  
SRR17520069. 3228045  
SRR17520069. 3228047  
SRR17520069. 3228049  
SRR17520069. 3228051  
SRR17520069. 3228053  
SRR17520069. 3228055

SRR17520069. 3228057  
SRR17520069. 3228059  
SRR17520069. 3228061  
SRR17520069. 3228063  
SRR17520069. 3231609  
SRR17520069. 3231611  
SRR17520069. 3231613  
SRR17520069. 3231615  
SRR17520069. 3231617  
SRR17520069. 3231619  
SRR17520069. 3237062  
SRR17520069. 3237064  
SRR17520069. 3237066  
SRR17520069. 3237068  
SRR17520069. 3237070  
SRR17520069. 3237074  
SRR17520069. 3237076  
SRR17520069. 3237078  
SRR17520069. 3237080  
SRR17520069. 3237082  
SRR17520069. 3237084  
SRR17520069. 3237086  
SRR17520069. 3237088  
SRR17520069. 3237090  
SRR17520069. 3237092  
SRR17520069. 3237094  
SRR17520069. 3237096  
SRR17520069. 3237100  
SRR17520069. 3239615  
SRR17520069. 3239617  
SRR17520069. 3239619  
SRR17520069. 3239621  
SRR17520069. 3239623  
SRR17520069. 3239625  
SRR17520069. 3239627  
SRR17520069. 3239629  
SRR17520069. 3239631  
SRR17520069. 3239633  
SRR17520069. 3239635  
SRR17520069. 3239637  
SRR17520069. 3239639  
SRR17520069. 3239641  
SRR17520069. 3239643  
SRR17520069. 3239645  
SRR17520069. 3239647  
SRR17520069. 3239649  
SRR17520069. 3239651

SRR17520069. 3239653  
SRR17520069. 3239655  
SRR17520069. 3239657  
SRR17520069. 3239659  
SRR17520069. 3239661  
SRR17520069. 3239663  
SRR17520069. 3239667  
SRR17520069. 3239669  
SRR17520069. 3239671  
SRR17520069. 3239673  
SRR17520069. 3239675  
SRR17520069. 3239677  
SRR17520069. 3239679  
SRR17520069. 3239681  
SRR17520069. 3239683  
SRR17520069. 3239685  
SRR17520069. 3239687  
SRR17520069. 3239689  
SRR17520069. 3243605  
SRR17520069. 3243607  
SRR17520069. 3245856  
SRR17520069. 3245858  
SRR17520069. 3245860  
SRR17520069. 3245862  
SRR17520069. 3245864  
SRR17520069. 3245866  
SRR17520069. 3245868  
SRR17520069. 3245882  
SRR17520069. 3245884  
SRR17520069. 3245886  
SRR17520069. 3245888  
SRR17520069. 3245892  
SRR17520069. 3245894  
SRR17520069. 3245896  
SRR17520069. 3245898  
SRR17520069. 3245900  
SRR17520069. 3245902  
SRR17520069. 3245904  
SRR17520069. 3245906  
SRR17520069. 3245908  
SRR17520069. 3245910  
SRR17520069. 3245912  
SRR17520069. 3245914  
SRR17520069. 3245916  
SRR17520069. 3245918  
SRR17520069. 3245920  
SRR17520069. 3245922

SRR17520069. 3245924  
SRR17520069. 3245926  
SRR17520069. 3245928  
SRR17520069. 3245930  
SRR17520069. 3245932  
SRR17520069. 3245934  
SRR17520069. 3245936  
SRR17520069. 3245938  
SRR17520069. 3245940  
SRR17520069. 3245942  
SRR17520069. 3245944  
SRR17520069. 3245946  
SRR17520069. 3245948  
SRR17520069. 3245950  
SRR17520069. 3245952  
SRR17520069. 3245954  
SRR17520069. 3245958  
SRR17520069. 3245960  
SRR17520069. 3245962  
SRR17520069. 3245964  
SRR17520069. 3245968  
SRR17520069. 3245970  
SRR17520069. 3245972  
SRR17520069. 3245976  
SRR17520069. 3245978  
SRR17520069. 3245980  
SRR17520069. 3245982  
SRR17520069. 3245984  
SRR17520069. 3245986  
SRR17520069. 3245988  
SRR17520069. 3245990  
SRR17520069. 3245992  
SRR17520069. 3245994  
SRR17520069. 3245996  
SRR17520069. 3245998  
SRR17520069. 3246000  
SRR17520069. 3246002  
SRR17520069. 3246004  
SRR17520069. 3246006  
SRR17520069. 3246008  
SRR17520069. 3246010  
SRR17520069. 3246012  
SRR17520069. 3246014  
SRR17520069. 3246016  
SRR17520069. 3246018  
SRR17520069. 3246020  
SRR17520069. 3246022

SRR17520069. 3246024  
SRR17520069. 3246026  
SRR17520069. 3246028  
SRR17520069. 3246030  
SRR17520069. 3246032  
SRR17520069. 3246034  
SRR17520069. 3246036  
SRR17520069. 3246038  
SRR17520069. 3246040  
SRR17520069. 3246042  
SRR17520069. 3246044  
SRR17520069. 3246046  
SRR17520069. 3246050  
SRR17520069. 3246052  
SRR17520069. 3246056  
SRR17520069. 3246058  
SRR17520069. 3246060  
SRR17520069. 3246064  
SRR17520069. 3246066  
SRR17520069. 3246068  
SRR17520069. 3246070  
SRR17520069. 3246072  
SRR17520069. 3246074  
SRR17520069. 3246076  
SRR17520069. 3246078  
SRR17520069. 3246082  
SRR17520069. 3249813  
SRR17520069. 3249815  
SRR17520069. 3252779  
SRR17520069. 3252781  
SRR17520069. 3252783  
SRR17520069. 3252785  
SRR17520069. 3252791  
SRR17520069. 3252793  
SRR17520069. 3252795  
SRR17520069. 3252797  
SRR17520069. 3252799  
SRR17520069. 3252801  
SRR17520069. 3252803  
SRR17520069. 3254977  
SRR17520069. 3254979  
SRR17520069. 3254981  
SRR17520069. 3254983  
SRR17520069. 3254985  
SRR17520069. 3254987  
SRR17520069. 3254989  
SRR17520069. 3254991

SRR17520069.3254993  
SRR17520069.3254995  
SRR17520069.3254997  
SRR17520069.3254999  
SRR17520069.3255001  
SRR17520069.3255003  
SRR17520069.3255005  
SRR17520069.3255007  
SRR17520069.3255009  
SRR17520069.3255011  
SRR17520069.3255013  
SRR17520069.3255015  
SRR17520069.3255017  
SRR17520069.3258008  
SRR17520069.3258010  
SRR17520069.3258012  
SRR17520069.3258014  
SRR17520069.3258016  
SRR17520069.3258018  
SRR17520069.3258022  
SRR17520069.3258024  
SRR17520069.3258026  
SRR17520069.3258028  
SRR17520069.3258030  
SRR17520069.3258032  
SRR17520069.3258034  
SRR17520069.3258036  
SRR17520069.3258038  
SRR17520069.3258040  
SRR17520069.3258042  
SRR17520069.3258044  
SRR17520069.3258050  
SRR17520069.3258052  
SRR17520069.3258054  
SRR17520069.3258056  
SRR17520069.3258058  
SRR17520069.3258060  
SRR17520069.3258062  
SRR17520069.3258064  
SRR17520069.3258066  
SRR17520069.3258070  
SRR17520069.3258072  
SRR17520069.3258074  
SRR17520069.3258076  
SRR17520069.3258078  
SRR17520069.3258080  
SRR17520069.3258082

SRR17520069. 3258084  
SRR17520069. 3258086  
SRR17520069. 3258088  
SRR17520069. 3258090  
SRR17520069. 3258092  
SRR17520069. 3269515  
SRR17520069. 3269517  
SRR17520069. 3271387  
SRR17520069. 3271389  
SRR17520069. 3271391  
SRR17520069. 3271393  
SRR17520069. 3271395  
SRR17520069. 3271397  
SRR17520069. 3271399  
SRR17520069. 3271401  
SRR17520069. 3271403  
SRR17520069. 3271405  
SRR17520069. 3273887  
SRR17520069. 3273889  
SRR17520069. 3273891  
SRR17520069. 3273893  
SRR17520069. 3273895  
SRR17520069. 3273897  
SRR17520069. 3273899  
SRR17520069. 3273901  
SRR17520069. 3273903  
SRR17520069. 3274592  
SRR17520069. 3274793  
SRR17520069. 3274795  
SRR17520069. 3274797  
SRR17520069. 3274799  
SRR17520069. 3274801  
SRR17520069. 3274803  
SRR17520069. 3274805  
SRR17520069. 3274807  
SRR17520069. 3274809  
SRR17520069. 3274811  
SRR17520069. 3274813  
SRR17520069. 3274815  
SRR17520069. 3274817  
SRR17520069. 3274819  
SRR17520069. 3274821  
SRR17520069. 3274823  
SRR17520069. 3274825  
SRR17520069. 3274827  
SRR17520069. 3274829  
SRR17520069. 3274831



SRR17520069. 3274833  
SRR17520069. 3274835  
SRR17520069. 3274837  
SRR17520069. 3274839  
SRR17520069. 3274841  
SRR17520069. 3274843  
SRR17520069. 3274845  
SRR17520069. 3274847  
SRR17520069. 3274849  
SRR17520069. 3274851  
SRR17520069. 3274853  
SRR17520069. 3274855  
SRR17520069. 3274857  
SRR17520069. 3274859  
SRR17520069. 3274861  
SRR17520069. 3274863  
SRR17520069. 3274865  
SRR17520069. 3274867  
SRR17520069. 3274869  
SRR17520069. 3274871  
SRR17520069. 3274873  
SRR17520069. 3274875  
SRR17520069. 3275603  
SRR17520069. 3275605  
SRR17520069. 3279220  
SRR17520069. 3279222  
SRR17520069. 3279224  
SRR17520069. 3279226  
SRR17520069. 3279228  
SRR17520069. 3279230  
SRR17520069. 3279232  
SRR17520069. 3279234  
SRR17520069. 3279236  
SRR17520069. 3279238  
SRR17520069. 3279240  
SRR17520069. 3279242  
SRR17520069. 3279244  
SRR17520069. 3279246  
SRR17520069. 3279248  
SRR17520069. 3279250  
SRR17520069. 3279252  
SRR17520069. 3279254  
SRR17520069. 3279256  
SRR17520069. 3282383  
SRR17520069. 3282385  
SRR17520069. 3282387  
SRR17520069. 3282389

SRR17520069. 3282391  
SRR17520069. 3282393  
SRR17520069. 3282395  
SRR17520069. 3282397  
SRR17520069. 3282399  
SRR17520069. 3282401  
SRR17520069. 3282403  
SRR17520069. 3282405  
SRR17520069. 3282407  
SRR17520069. 3282409  
SRR17520069. 3282411  
SRR17520069. 3282413  
SRR17520069. 3282415  
SRR17520069. 3282417  
SRR17520069. 3282419  
SRR17520069. 3282421  
SRR17520069. 3286611  
SRR17520069. 3286613  
SRR17520069. 3286615  
SRR17520069. 3286617  
SRR17520069. 3286619  
SRR17520069. 3286621  
SRR17520069. 3286623  
SRR17520069. 3286625  
SRR17520069. 3286627  
SRR17520069. 3286629  
SRR17520069. 3286631  
SRR17520069. 3286633  
SRR17520069. 3286635  
SRR17520069. 3286637  
SRR17520069. 3286639  
SRR17520069. 3286641  
SRR17520069. 3286643  
SRR17520069. 3286645  
SRR17520069. 3286647  
SRR17520069. 3286649  
SRR17520069. 3286651  
SRR17520069. 3286653  
SRR17520069. 3286655  
SRR17520069. 3286657  
SRR17520069. 3286659  
SRR17520069. 3286661  
SRR17520069. 3286663  
SRR17520069. 3286665  
SRR17520069. 3286667  
SRR17520069. 3286669  
SRR17520069. 3286671

SRR17520069. 3286673  
SRR17520069. 3292189  
SRR17520069. 3292191  
SRR17520069. 3292195  
SRR17520069. 3292197  
SRR17520069. 3292199  
SRR17520069. 3292201  
SRR17520069. 3292203  
SRR17520069. 3292205  
SRR17520069. 3292207  
SRR17520069. 3292209  
SRR17520069. 3292211  
SRR17520069. 3292213  
SRR17520069. 3292215  
SRR17520069. 3292217  
SRR17520069. 3292220  
SRR17520069. 3292222  
SRR17520069. 3292224  
SRR17520069. 3292226  
SRR17520069. 3292228  
SRR17520069. 3310805  
SRR17520069. 3310807  
SRR17520069. 3310809  
SRR17520069. 3310811  
SRR17520069. 3310813  
SRR17520069. 3314013  
SRR17520069. 3314015  
SRR17520069. 3314017  
SRR17520069. 3314019  
SRR17520069. 3314021  
SRR17520069. 3318917  
SRR17520069. 3318919  
SRR17520069. 3318923  
SRR17520069. 3318925  
SRR17520069. 3319924  
SRR17520069. 3319926  
SRR17520069. 3324970  
SRR17520069. 3324972  
SRR17520069. 3324974  
SRR17520069. 3324976  
SRR17520069. 3324978  
SRR17520069. 3324980  
SRR17520069. 3324982  
SRR17520069. 3324984  
SRR17520069. 3324986  
SRR17520069. 3324988  
SRR17520069. 3324990

SRR17520069. 3324992  
SRR17520069. 3324994  
SRR17520069. 3324996  
SRR17520069. 3324998  
SRR17520069. 3325000  
SRR17520069. 3325002  
SRR17520069. 3325004  
SRR17520069. 3325006  
SRR17520069. 3325008  
SRR17520069. 3325010  
SRR17520069. 3325012  
SRR17520069. 3325014  
SRR17520069. 3325016  
SRR17520069. 3325018  
SRR17520069. 3325020  
SRR17520069. 3325022  
SRR17520069. 3325024  
SRR17520069. 3325026  
SRR17520069. 3325028  
SRR17520069. 3325030  
SRR17520069. 3325032  
SRR17520069. 3325034  
SRR17520069. 3325036  
SRR17520069. 3325038  
SRR17520069. 3325040  
SRR17520069. 3325042  
SRR17520069. 3325044  
SRR17520069. 3325046  
SRR17520069. 3325048  
SRR17520069. 3325050  
SRR17520069. 3325052  
SRR17520069. 3325054  
SRR17520069. 3325056  
SRR17520069. 3325058  
SRR17520069. 3325060  
SRR17520069. 3325062  
SRR17520069. 3325064  
SRR17520069. 3325066  
SRR17520069. 3325068  
SRR17520069. 3325070  
SRR17520069. 3325072  
SRR17520069. 3325074  
SRR17520069. 3325076  
SRR17520069. 3325078  
SRR17520069. 3325080  
SRR17520069. 3325082  
SRR17520069. 3325084

SRR17520069. 3325086  
SRR17520069. 3327932  
SRR17520069. 3327934  
SRR17520069. 3327936  
SRR17520069. 3327938  
SRR17520069. 3327942  
SRR17520069. 3327944  
SRR17520069. 3327946  
SRR17520069. 3327950  
SRR17520069. 3327952  
SRR17520069. 3327954  
SRR17520069. 3327956  
SRR17520069. 3327958  
SRR17520069. 3327960  
SRR17520069. 3327962  
SRR17520069. 3327964  
SRR17520069. 3327966  
SRR17520069. 3327968  
SRR17520069. 3327970  
SRR17520069. 3327974  
SRR17520069. 3327976  
SRR17520069. 3327978  
SRR17520069. 3327980  
SRR17520069. 3327982  
SRR17520069. 3327984  
SRR17520069. 3327986  
SRR17520069. 3327988  
SRR17520069. 3327992  
SRR17520069. 3327994  
SRR17520069. 3327996  
SRR17520069. 3328745  
SRR17520069. 3328747  
SRR17520069. 3328749  
SRR17520069. 3328751  
SRR17520069. 3328753  
SRR17520069. 3328755  
SRR17520069. 3328757  
SRR17520069. 3328759  
SRR17520069. 3328761  
SRR17520069. 3328763  
SRR17520069. 3328765  
SRR17520069. 3328767  
SRR17520069. 3328769  
SRR17520069. 3328771  
SRR17520069. 3328773  
SRR17520069. 3328775  
SRR17520069. 3328777

SRR17520069. 3328779  
SRR17520069. 3328781  
SRR17520069. 3328783  
SRR17520069. 3328785  
SRR17520069. 3328789  
SRR17520069. 3328791  
SRR17520069. 3328793  
SRR17520069. 3328795  
SRR17520069. 3332711  
SRR17520069. 3332713  
SRR17520069. 3332715  
SRR17520069. 3332717  
SRR17520069. 3332719  
SRR17520069. 3332721  
SRR17520069. 3332723  
SRR17520069. 3332725  
SRR17520069. 3335355  
SRR17520069. 3335357  
SRR17520069. 3335359  
SRR17520069. 3335361  
SRR17520069. 3335363  
SRR17520069. 3335365  
SRR17520069. 3335367  
SRR17520069. 3335371  
SRR17520069. 3335373  
SRR17520069. 3335375  
SRR17520069. 3335377  
SRR17520069. 3335381  
SRR17520069. 3335383  
SRR17520069. 3335385  
SRR17520069. 3335389  
SRR17520069. 3335391  
SRR17520069. 3335393  
SRR17520069. 3335395  
SRR17520069. 3335397  
SRR17520069. 3335399  
SRR17520069. 3335401  
SRR17520069. 3335403  
SRR17520069. 3335405  
SRR17520069. 3335407  
SRR17520069. 3335409  
SRR17520069. 3335411  
SRR17520069. 3335413  
SRR17520069. 3335415  
SRR17520069. 3335417  
SRR17520069. 3335419  
SRR17520069. 3337656

SRR17520069. 3338061  
SRR17520069. 3338063  
SRR17520069. 3338067  
SRR17520069. 3338069  
SRR17520069. 3338071  
SRR17520069. 3338073  
SRR17520069. 3338075  
SRR17520069. 3338077  
SRR17520069. 3338079  
SRR17520069. 3338081  
SRR17520069. 3338083  
SRR17520069. 3338085  
SRR17520069. 3338087  
SRR17520069. 3338089  
SRR17520069. 3338091  
SRR17520069. 3338093  
SRR17520069. 3338095  
SRR17520069. 3338097  
SRR17520069. 3338099  
SRR17520069. 3339541  
SRR17520069. 3339543  
SRR17520069. 3339545  
SRR17520069. 3339547  
SRR17520069. 3339549  
SRR17520069. 3339551  
SRR17520069. 3339553  
SRR17520069. 3339555  
SRR17520069. 3339557  
SRR17520069. 3339559  
SRR17520069. 3339561  
SRR17520069. 3339563  
SRR17520069. 3339565  
SRR17520069. 3339567  
SRR17520069. 3339569  
SRR17520069. 3339571  
SRR17520069. 3339573  
SRR17520069. 3339575  
SRR17520069. 3339577  
SRR17520069. 3339579  
SRR17520069. 3339581  
SRR17520069. 3339583  
SRR17520069. 3339585  
SRR17520069. 3339587  
SRR17520069. 3339589  
SRR17520069. 3339593  
SRR17520069. 3339595  
SRR17520069. 3339597

SRR17520069. 3339599  
SRR17520069. 3339601  
SRR17520069. 3339603  
SRR17520069. 3339605  
SRR17520069. 3339607  
SRR17520069. 3339609  
SRR17520069. 3339611  
SRR17520069. 3339613  
SRR17520069. 3339615  
SRR17520069. 3339617  
SRR17520069. 3339619  
SRR17520069. 3339621  
SRR17520069. 3339623  
SRR17520069. 3339625  
SRR17520069. 3339627  
SRR17520069. 3339629  
SRR17520069. 3339633  
SRR17520069. 3339635  
SRR17520069. 3339637  
SRR17520069. 3339639  
SRR17520069. 3339641  
SRR17520069. 3339643  
SRR17520069. 3339645  
SRR17520069. 3339647  
SRR17520069. 3339649  
SRR17520069. 3339651  
SRR17520069. 3339653  
SRR17520069. 3339655  
SRR17520069. 3339657  
SRR17520069. 3339659  
SRR17520069. 3339661  
SRR17520069. 3339663  
SRR17520069. 3339667  
SRR17520069. 3339671  
SRR17520069. 3339673  
SRR17520069. 3339675  
SRR17520069. 3339677  
SRR17520069. 3339679  
SRR17520069. 3339681  
SRR17520069. 3339683  
SRR17520069. 3339685  
SRR17520069. 3341528  
SRR17520069. 3341530  
SRR17520069. 3341532  
SRR17520069. 3341534  
SRR17520069. 3341536  
SRR17520069. 3341538



SRR17520069. 3341540  
SRR17520069. 3341542  
SRR17520069. 3341544  
SRR17520069. 3341546  
SRR17520069. 3341548  
SRR17520069. 3341550  
SRR17520069. 3341552  
SRR17520069. 3341554  
SRR17520069. 3341556  
SRR17520069. 3341560  
SRR17520069. 3341562  
SRR17520069. 3345266  
SRR17520069. 3345268  
SRR17520069. 3345270  
SRR17520069. 3345272  
SRR17520069. 3345274  
SRR17520069. 3345278  
SRR17520069. 3345280  
SRR17520069. 3345282  
SRR17520069. 3345284  
SRR17520069. 3345286  
SRR17520069. 3345288  
SRR17520069. 3345290  
SRR17520069. 3345292  
SRR17520069. 3345294  
SRR17520069. 3345296  
SRR17520069. 3345298  
SRR17520069. 3345300  
SRR17520069. 3345302  
SRR17520069. 3345304  
SRR17520069. 3345306  
SRR17520069. 3345310  
SRR17520069. 3345312  
SRR17520069. 3345314  
SRR17520069. 3345316  
SRR17520069. 3345318  
SRR17520069. 3345324  
SRR17520069. 3345328  
SRR17520069. 3345330  
SRR17520069. 3345332  
SRR17520069. 3345334  
SRR17520069. 3345336  
SRR17520069. 3345338  
SRR17520069. 3345340  
SRR17520069. 3345342  
SRR17520069. 3345344  
SRR17520069. 3345346

SRR17520069. 3345350  
SRR17520069. 3345352  
SRR17520069. 3345354  
SRR17520069. 3345356  
SRR17520069. 3345358  
SRR17520069. 3345360  
SRR17520069. 3345362  
SRR17520069. 3345364  
SRR17520069. 3345366  
SRR17520069. 3345368  
SRR17520069. 3345370  
SRR17520069. 3345372  
SRR17520069. 3345374  
SRR17520069. 3345376  
SRR17520069. 3345378  
SRR17520069. 3346074  
SRR17520069. 3346078  
SRR17520069. 3346080  
SRR17520069. 3346348  
SRR17520069. 3346356  
SRR17520069. 3346358  
SRR17520069. 3346360  
SRR17520069. 3346362  
SRR17520069. 3346364  
SRR17520069. 3346368  
SRR17520069. 3346372  
SRR17520069. 3346374  
SRR17520069. 3352762  
SRR17520069. 3352764  
SRR17520069. 3352766  
SRR17520069. 3352768  
SRR17520069. 3352770  
SRR17520069. 3352774  
SRR17520069. 3352776  
SRR17520069. 3352778  
SRR17520069. 3352780  
SRR17520069. 3352782  
SRR17520069. 3352784  
SRR17520069. 3352786  
SRR17520069. 3352788  
SRR17520069. 3352790  
SRR17520069. 3352792  
SRR17520069. 3352794  
SRR17520069. 3352796  
SRR17520069. 3352798  
SRR17520069. 3352800  
SRR17520069. 3352802

SRR17520069. 3352804  
SRR17520069. 3352806  
SRR17520069. 3352808  
SRR17520069. 3352810  
SRR17520069. 3352812  
SRR17520069. 3352814  
SRR17520069. 3352816  
SRR17520069. 3352818  
SRR17520069. 3352820  
SRR17520069. 3352822  
SRR17520069. 3352824  
SRR17520069. 3352826  
SRR17520069. 3352830  
SRR17520069. 3352832  
SRR17520069. 3352834  
SRR17520069. 3352836  
SRR17520069. 3352838  
SRR17520069. 3352840  
SRR17520069. 3352842  
SRR17520069. 3352844  
SRR17520069. 3352846  
SRR17520069. 3352848  
SRR17520069. 3352850  
SRR17520069. 3352852  
SRR17520069. 3352854  
SRR17520069. 3352856  
SRR17520069. 3352858  
SRR17520069. 3352860  
SRR17520069. 3352862  
SRR17520069. 3352864  
SRR17520069. 3352866  
SRR17520069. 3352868  
SRR17520069. 3352871  
SRR17520069. 3352873  
SRR17520069. 3352877  
SRR17520069. 3362104  
SRR17520069. 3362106  
SRR17520069. 3362108  
SRR17520069. 3362110  
SRR17520069. 3362112  
SRR17520069. 3362114  
SRR17520069. 3362116  
SRR17520069. 3366364  
SRR17520069. 3366366  
SRR17520069. 3366368  
SRR17520069. 3367840  
SRR17520069. 3375969

SRR17520069. 3376043  
SRR17520069. 3376113  
SRR17520069. 3376145  
SRR17520069. 3376157  
SRR17520069. 3381328  
SRR17520069. 3381330  
SRR17520069. 3381332  
SRR17520069. 3381334  
SRR17520069. 3386648  
SRR17520069. 3386650  
SRR17520069. 3386652  
SRR17520069. 3386654  
SRR17520069. 3386658  
SRR17520069. 3386660  
SRR17520069. 3386662  
SRR17520069. 3386664  
SRR17520069. 3386666  
SRR17520069. 3386668  
SRR17520069. 3391585  
SRR17520069. 3391587  
SRR17520069. 3391589  
SRR17520069. 3391591  
SRR17520069. 3391593  
SRR17520069. 3391595  
SRR17520069. 3391597  
SRR17520069. 3391599  
SRR17520069. 3391601  
SRR17520069. 3391603  
SRR17520069. 3391605  
SRR17520069. 3391607  
SRR17520069. 3391611  
SRR17520069. 3391613  
SRR17520069. 3391615  
SRR17520069. 3399141  
SRR17520069. 3399143  
SRR17520069. 3399145  
SRR17520069. 3399147  
SRR17520069. 3399149  
SRR17520069. 3399151  
SRR17520069. 3399153  
SRR17520069. 3399155  
SRR17520069. 3399157  
SRR17520069. 3399586  
SRR17520069. 3399590  
SRR17520069. 3399592  
SRR17520069. 3399594  
SRR17520069. 3399596

SRR17520069. 3399598  
SRR17520069. 3399600  
SRR17520069. 3399602  
SRR17520069. 3399604  
SRR17520069. 3399606  
SRR17520069. 3399608  
SRR17520069. 3399610  
SRR17520069. 3399612  
SRR17520069. 3399614  
SRR17520069. 3399616  
SRR17520069. 3399618  
SRR17520069. 3399620  
SRR17520069. 3399622  
SRR17520069. 3399624  
SRR17520069. 3399626  
SRR17520069. 3399628  
SRR17520069. 3399630  
SRR17520069. 3409967  
SRR17520069. 3409969  
SRR17520069. 3409971  
SRR17520069. 3409973  
SRR17520069. 3409975  
SRR17520069. 3409977  
SRR17520069. 3409979  
SRR17520069. 3409981  
SRR17520069. 3409983  
SRR17520069. 3409985  
SRR17520069. 3409987  
SRR17520069. 3409989  
SRR17520069. 3409991  
SRR17520069. 3409993  
SRR17520069. 3409995  
SRR17520069. 3409997  
SRR17520069. 3410001  
SRR17520069. 3410003  
SRR17520069. 3410005  
SRR17520069. 3410007  
SRR17520069. 3410009  
SRR17520069. 3410011  
SRR17520069. 3410013  
SRR17520069. 3410015  
SRR17520069. 3410017  
SRR17520069. 3410019  
SRR17520069. 3413803  
SRR17520069. 3413805  
SRR17520069. 3413807  
SRR17520069. 3413809

SRR17520069. 3413811  
SRR17520069. 3413813  
SRR17520069. 3413815  
SRR17520069. 3413817  
SRR17520069. 3413819  
SRR17520069. 3413821  
SRR17520069. 3413823  
SRR17520069. 3413825  
SRR17520069. 3413827  
SRR17520069. 3413829  
SRR17520069. 3413831  
SRR17520069. 3413833  
SRR17520069. 3413835  
SRR17520069. 3413837  
SRR17520069. 3413839  
SRR17520069. 3413841  
SRR17520069. 3413843  
SRR17520069. 3413845  
SRR17520069. 3413847  
SRR17520069. 3421002  
SRR17520069. 3421004  
SRR17520069. 3421006  
SRR17520069. 3421008  
SRR17520069. 3421010  
SRR17520069. 3421012  
SRR17520069. 3421014  
SRR17520069. 3421016  
SRR17520069. 3421018  
SRR17520069. 3428105  
SRR17520069. 3428107  
SRR17520069. 3428109  
SRR17520069. 3428111  
SRR17520069. 3430862  
SRR17520069. 3430882  
SRR17520069. 3430884  
SRR17520069. 3430890  
SRR17520069. 3430892  
SRR17520069. 3430898  
SRR17520069. 3430900  
SRR17520069. 3430902  
SRR17520069. 3434680  
SRR17520069. 3434684  
SRR17520069. 3436394  
SRR17520069. 3437703  
SRR17520069. 3446122  
SRR17520069. 3446126  
SRR17520069. 3446128

SRR17520069. 3446130  
SRR17520069. 3450612  
SRR17520069. 3462331  
SRR17520069. 3462333  
SRR17520069. 3462335  
SRR17520069. 3462337  
SRR17520069. 3462339  
SRR17520069. 3462341  
SRR17520069. 3462343  
SRR17520069. 3462345  
SRR17520069. 3462347  
SRR17520069. 3462349  
SRR17520069. 3462351  
SRR17520069. 3462353  
SRR17520069. 3462355  
SRR17520069. 3462357  
SRR17520069. 3462359  
SRR17520069. 3462361  
SRR17520069. 3462363  
SRR17520069. 3462365  
SRR17520069. 3462367  
SRR17520069. 3462369  
SRR17520069. 3462371  
SRR17520069. 3462373  
SRR17520069. 3462375  
SRR17520069. 3462377  
SRR17520069. 3463653  
SRR17520069. 3463655  
SRR17520069. 3463657  
SRR17520069. 3467112  
SRR17520069. 3467114  
SRR17520069. 3467116  
SRR17520069. 3467118  
SRR17520069. 3467120  
SRR17520069. 3467122  
SRR17520069. 3467124  
SRR17520069. 3467126  
SRR17520069. 3467128  
SRR17520069. 3467130  
SRR17520069. 3467132  
SRR17520069. 3467134  
SRR17520069. 3467136  
SRR17520069. 3467138  
SRR17520069. 3467140  
SRR17520069. 3467142  
SRR17520069. 3467144  
SRR17520069. 3467146

SRR17520069. 3467148  
SRR17520069. 3467150  
SRR17520069. 3467152  
SRR17520069. 3467154  
SRR17520069. 3467156  
SRR17520069. 3467158  
SRR17520069. 3467160  
SRR17520069. 3467162  
SRR17520069. 3467166  
SRR17520069. 3467168  
SRR17520069. 3467172  
SRR17520069. 3467174  
SRR17520069. 3467176  
SRR17520069. 3467178  
SRR17520069. 3467180  
SRR17520069. 3467182  
SRR17520069. 3467184  
SRR17520069. 3467186  
SRR17520069. 3467188  
SRR17520069. 3467190  
SRR17520069. 3467192  
SRR17520069. 3467194  
SRR17520069. 3467196  
SRR17520069. 3467198  
SRR17520069. 3469648  
SRR17520069. 3469654  
SRR17520069. 3469656  
SRR17520069. 3474125  
SRR17520069. 3474127  
SRR17520069. 3474129  
SRR17520069. 3474131  
SRR17520069. 3474133  
SRR17520069. 3474135  
SRR17520069. 3474137  
SRR17520069. 3474139  
SRR17520069. 3474141  
SRR17520069. 3474143  
SRR17520069. 3474145  
SRR17520069. 3474149  
SRR17520069. 3474151  
SRR17520069. 3474153  
SRR17520069. 3474155  
SRR17520069. 3474157  
SRR17520069. 3474159  
SRR17520069. 3474161  
SRR17520069. 3474165  
SRR17520069. 3474167



SRR17520069. 3474169  
SRR17520069. 3474171  
SRR17520069. 3474173  
SRR17520069. 3474175  
SRR17520069. 3474177  
SRR17520069. 3474179  
SRR17520069. 3474181  
SRR17520069. 3474183  
SRR17520069. 3474185  
SRR17520069. 3474187  
SRR17520069. 3474189  
SRR17520069. 3476404  
SRR17520069. 3476406  
SRR17520069. 3476408  
SRR17520069. 3476410  
SRR17520069. 3476412  
SRR17520069. 3476414  
SRR17520069. 3476416  
SRR17520069. 3476418  
SRR17520069. 3476420  
SRR17520069. 3476422  
SRR17520069. 3476424  
SRR17520069. 3476426  
SRR17520069. 3476428  
SRR17520069. 3476430  
SRR17520069. 3476432  
SRR17520069. 3476434  
SRR17520069. 3476436  
SRR17520069. 3476438  
SRR17520069. 3476440  
SRR17520069. 3476442  
SRR17520069. 3476444  
SRR17520069. 3476446  
SRR17520069. 3476448  
SRR17520069. 3476450  
SRR17520069. 3476452  
SRR17520069. 3476454  
SRR17520069. 3476456  
SRR17520069. 3478074  
SRR17520069. 3478076  
SRR17520069. 3478078  
SRR17520069. 3478080  
SRR17520069. 3478082  
SRR17520069. 3478086  
SRR17520069. 3478090  
SRR17520069. 3478092  
SRR17520069. 3478096

SRR17520069. 3478098  
SRR17520069. 3478100  
SRR17520069. 3478102  
SRR17520069. 3478104  
SRR17520069. 3478106  
SRR17520069. 3478108  
SRR17520069. 3478110  
SRR17520069. 3478112  
SRR17520069. 3478114  
SRR17520069. 3478116  
SRR17520069. 3478118  
SRR17520069. 3478120  
SRR17520069. 3480290  
SRR17520069. 3480292  
SRR17520069. 3480294  
SRR17520069. 3480296  
SRR17520069. 3480300  
SRR17520069. 3480302  
SRR17520069. 3480304  
SRR17520069. 3480306  
SRR17520069. 3480310  
SRR17520069. 3485882  
SRR17520069. 3485884  
SRR17520069. 3485886  
SRR17520069. 3485888  
SRR17520069. 3485890  
SRR17520069. 3485894  
SRR17520069. 3485896  
SRR17520069. 3485898  
SRR17520069. 3485900  
SRR17520069. 3485902  
SRR17520069. 3487235  
SRR17520069. 3487237  
SRR17520069. 3487239  
SRR17520069. 3487241  
SRR17520069. 3487243  
SRR17520069. 3487245  
SRR17520069. 3487247  
SRR17520069. 3487249  
SRR17520069. 3487251  
SRR17520069. 3487253  
SRR17520069. 3487255  
SRR17520069. 3487257  
SRR17520069. 3487259  
SRR17520069. 3487261  
SRR17520069. 3487263  
SRR17520069. 3487265

SRR17520069. 3487267  
SRR17520069. 3489906  
SRR17520069. 3489908  
SRR17520069. 3489910  
SRR17520069. 3489912  
SRR17520069. 3489914  
SRR17520069. 3489916  
SRR17520069. 3489918  
SRR17520069. 3489920  
SRR17520069. 3489922  
SRR17520069. 3489924  
SRR17520069. 3489926  
SRR17520069. 3489928  
SRR17520069. 3491547  
SRR17520069. 3491549  
SRR17520069. 3491551  
SRR17520069. 3491553  
SRR17520069. 3491555  
SRR17520069. 3491557  
SRR17520069. 3491559  
SRR17520069. 3491561  
SRR17520069. 3491563  
SRR17520069. 3491565  
SRR17520069. 3491567  
SRR17520069. 3491569  
SRR17520069. 3491571  
SRR17520069. 3491573  
SRR17520069. 3491575  
SRR17520069. 3491577  
SRR17520069. 3491579  
SRR17520069. 3491581  
SRR17520069. 3491583  
SRR17520069. 3491585  
SRR17520069. 3491587  
SRR17520069. 3491589  
SRR17520069. 3491591  
SRR17520069. 3491593  
SRR17520069. 3491595  
SRR17520069. 3491597  
SRR17520069. 3491599  
SRR17520069. 3491601  
SRR17520069. 3491603  
SRR17520069. 3491605  
SRR17520069. 3491607  
SRR17520069. 3491609  
SRR17520069. 3491611  
SRR17520069. 3491613

SRR17520069. 3493532  
SRR17520069. 3493534  
SRR17520069. 3501264  
SRR17520069. 3501266  
SRR17520069. 3501268  
SRR17520069. 3501270  
SRR17520069. 3501272  
SRR17520069. 3501274  
SRR17520069. 3501687  
SRR17520069. 3501689  
SRR17520069. 3501691  
SRR17520069. 3501693  
SRR17520069. 3501695  
SRR17520069. 3501697  
SRR17520069. 3501699  
SRR17520069. 3501701  
SRR17520069. 3501703  
SRR17520069. 3501705  
SRR17520069. 3501707  
SRR17520069. 3501709  
SRR17520069. 3508287  
SRR17520069. 3508289  
SRR17520069. 3508291  
SRR17520069. 3508293  
SRR17520069. 3510558  
SRR17520069. 3510560  
SRR17520069. 3510564  
SRR17520069. 3510566  
SRR17520069. 3510568  
SRR17520069. 3510570  
SRR17520069. 3510572  
SRR17520069. 3510574  
SRR17520069. 3510576  
SRR17520069. 3510578  
SRR17520069. 3510580  
SRR17520069. 3511634  
SRR17520069. 3511636  
SRR17520069. 3511638  
SRR17520069. 3511642  
SRR17520069. 3511648  
SRR17520069. 3511650  
SRR17520069. 3511652  
SRR17520069. 3511654  
SRR17520069. 3511660  
SRR17520069. 3511662  
SRR17520069. 3511668  
SRR17520069. 3511670

SRR17520069. 3511672  
SRR17520069. 3511674  
SRR17520069. 3511676  
SRR17520069. 3511682  
SRR17520069. 3511686  
SRR17520069. 3511688  
SRR17520069. 3511694  
SRR17520069. 3511698  
SRR17520069. 3513981  
SRR17520069. 3513985  
SRR17520069. 3513987  
SRR17520069. 3513993  
SRR17520069. 3513995  
SRR17520069. 3513997  
SRR17520069. 3513999  
SRR17520069. 3514001  
SRR17520069. 3514003  
SRR17520069. 3514005  
SRR17520069. 3514009  
SRR17520069. 3514011  
SRR17520069. 3514013  
SRR17520069. 3514015  
SRR17520069. 3514017  
SRR17520069. 3514021  
SRR17520069. 3514023  
SRR17520069. 3514027  
SRR17520069. 3514029  
SRR17520069. 3514031  
SRR17520069. 3514033  
SRR17520069. 3514035  
SRR17520069. 3514037  
SRR17520069. 3514039  
SRR17520069. 3514041  
SRR17520069. 3514043  
SRR17520069. 3514045  
SRR17520069. 3514047  
SRR17520069. 3514049  
SRR17520069. 3514051  
SRR17520069. 3514053  
SRR17520069. 3514055  
SRR17520069. 3514057  
SRR17520069. 3514059  
SRR17520069. 3514063  
SRR17520069. 3514065  
SRR17520069. 3514067  
SRR17520069. 3514069  
SRR17520069. 3514071

SRR17520069. 3514075  
SRR17520069. 3514385  
SRR17520069. 3521619  
SRR17520069. 3521621  
SRR17520069. 3521623  
SRR17520069. 3521625  
SRR17520069. 3521629  
SRR17520069. 3522025  
SRR17520069. 3530379  
SRR17520069. 3530381  
SRR17520069. 3530383  
SRR17520069. 3530385  
SRR17520069. 3530387  
SRR17520069. 3532372  
SRR17520069. 3532374  
SRR17520069. 3532376  
SRR17520069. 3532378  
SRR17520069. 3532380  
SRR17520069. 3532382  
SRR17520069. 3532384  
SRR17520069. 3532386  
SRR17520069. 3532388  
SRR17520069. 3532390  
SRR17520069. 3532392  
SRR17520069. 3532394  
SRR17520069. 3532396  
SRR17520069. 3535950  
SRR17520069. 3535952  
SRR17520069. 3535954  
SRR17520069. 3535956  
SRR17520069. 3535958  
SRR17520069. 3535960  
SRR17520069. 3535962  
SRR17520069. 3535964  
SRR17520069. 3535966  
SRR17520069. 3535968  
SRR17520069. 3535972  
SRR17520069. 3535974  
SRR17520069. 3535976  
SRR17520069. 3535978  
SRR17520069. 3535980  
SRR17520069. 3535984  
SRR17520069. 3535986  
SRR17520069. 3535988  
SRR17520069. 3535990  
SRR17520069. 3535992  
SRR17520069. 3535994

SRR17520069. 3535996  
SRR17520069. 3535998  
SRR17520069. 3536000  
SRR17520069. 3536002  
SRR17520069. 3536004  
SRR17520069. 3536008  
SRR17520069. 3536010  
SRR17520069. 3536012  
SRR17520069. 3536014  
SRR17520069. 3536016  
SRR17520069. 3536018  
SRR17520069. 3536020  
SRR17520069. 3536022  
SRR17520069. 3536026  
SRR17520069. 3536028  
SRR17520069. 3536030  
SRR17520069. 3536032  
SRR17520069. 3536036  
SRR17520069. 3536038  
SRR17520069. 3536040  
SRR17520069. 3536058  
SRR17520069. 3536062  
SRR17520069. 3539841  
SRR17520069. 3539843  
SRR17520069. 3539845  
SRR17520069. 3539847  
SRR17520069. 3539849  
SRR17520069. 3539851  
SRR17520069. 3539853  
SRR17520069. 3539855  
SRR17520069. 3539857  
SRR17520069. 3539859  
SRR17520069. 3539861  
SRR17520069. 3539863  
SRR17520069. 3539865  
SRR17520069. 3539867  
SRR17520069. 3539869  
SRR17520069. 3539871  
SRR17520069. 3539873  
SRR17520069. 3539875  
SRR17520069. 3539877  
SRR17520069. 3539879  
SRR17520069. 3539881  
SRR17520069. 3539883  
SRR17520069. 3539885  
SRR17520069. 3539887  
SRR17520069. 3539889

SRR17520069. 3539891  
SRR17520069. 3539893  
SRR17520069. 3539895  
SRR17520069. 3539897  
SRR17520069. 3539899  
SRR17520069. 3539901  
SRR17520069. 3539903  
SRR17520069. 3539905  
SRR17520069. 3539907  
SRR17520069. 3539909  
SRR17520069. 3539911  
SRR17520069. 3539913  
SRR17520069. 3539915  
SRR17520069. 3539917  
SRR17520069. 3539919  
SRR17520069. 3539921  
SRR17520069. 3539923  
SRR17520069. 3539927  
SRR17520069. 3539929  
SRR17520069. 3539931  
SRR17520069. 3539933  
SRR17520069. 3539935  
SRR17520069. 3539937  
SRR17520069. 3539939  
SRR17520069. 3539941  
SRR17520069. 3539943  
SRR17520069. 3539945  
SRR17520069. 3539947  
SRR17520069. 3539949  
SRR17520069. 3539951  
SRR17520069. 3539953  
SRR17520069. 3539955  
SRR17520069. 3540086  
SRR17520069. 3542991  
SRR17520069. 3542993  
SRR17520069. 3542995  
SRR17520069. 3542997  
SRR17520069. 3542999  
SRR17520069. 3543001  
SRR17520069. 3543003  
SRR17520069. 3543005  
SRR17520069. 3543007  
SRR17520069. 3543009  
SRR17520069. 3543011  
SRR17520069. 3543013  
SRR17520069. 3543015  
SRR17520069. 3543017



SRR17520069.3543019  
SRR17520069.3543021  
SRR17520069.3543023  
SRR17520069.3543025  
SRR17520069.3543027  
SRR17520069.3543029  
SRR17520069.3543031  
SRR17520069.3543033  
SRR17520069.3543035  
SRR17520069.3543037  
SRR17520069.3543039  
SRR17520069.3543041  
SRR17520069.3543043  
SRR17520069.3543045  
SRR17520069.3543047  
SRR17520069.3543049  
SRR17520069.3543051  
SRR17520069.3543055  
SRR17520069.3544106  
SRR17520069.3544108  
SRR17520069.3544110  
SRR17520069.3544112  
SRR17520069.3544114  
SRR17520069.3544116  
SRR17520069.3544118  
SRR17520069.3544120  
SRR17520069.3544122  
SRR17520069.3544124  
SRR17520069.3544126  
SRR17520069.3544128  
SRR17520069.3544130  
SRR17520069.3544132  
SRR17520069.3544134  
SRR17520069.3544136  
SRR17520069.3544138  
SRR17520069.3544161  
SRR17520069.3544630  
SRR17520069.3544632  
SRR17520069.3544634  
SRR17520069.3544638  
SRR17520069.3544640  
SRR17520069.3544642  
SRR17520069.3544644  
SRR17520069.3544648  
SRR17520069.3544650  
SRR17520069.3544652  
SRR17520069.3544654

SRR17520069. 3544656  
SRR17520069. 3544658  
SRR17520069. 3544662  
SRR17520069. 3544664  
SRR17520069. 3544666  
SRR17520069. 3544668  
SRR17520069. 3544670  
SRR17520069. 3544672  
SRR17520069. 3544674  
SRR17520069. 3544676  
SRR17520069. 3544678  
SRR17520069. 3544682  
SRR17520069. 3544684  
SRR17520069. 3545264  
SRR17520069. 3545272  
SRR17520069. 3545274  
SRR17520069. 3545276  
SRR17520069. 3545278  
SRR17520069. 3545282  
SRR17520069. 3545284  
SRR17520069. 3545286  
SRR17520069. 3545288  
SRR17520069. 3545290  
SRR17520069. 3545292  
SRR17520069. 3545294  
SRR17520069. 3545296  
SRR17520069. 3545298  
SRR17520069. 3545300  
SRR17520069. 3545304  
SRR17520069. 3545308  
SRR17520069. 3545310  
SRR17520069. 3545312  
SRR17520069. 3545314  
SRR17520069. 3545316  
SRR17520069. 3545318  
SRR17520069. 3545320  
SRR17520069. 3545322  
SRR17520069. 3545324  
SRR17520069. 3545328  
SRR17520069. 3545330  
SRR17520069. 3545332  
SRR17520069. 3545336  
SRR17520069. 3545338  
SRR17520069. 3545342  
SRR17520069. 3545344  
SRR17520069. 3545346  
SRR17520069. 3545352

SRR17520069.3552367  
SRR17520069.3552371  
SRR17520069.3552373  
SRR17520069.3552375  
SRR17520069.3552377  
SRR17520069.3552379  
SRR17520069.3552381  
SRR17520069.3552383  
SRR17520069.3552385  
SRR17520069.3555577  
SRR17520069.3555579  
SRR17520069.3555581  
SRR17520069.3555583  
SRR17520069.3555585  
SRR17520069.3555587  
SRR17520069.3555589  
SRR17520069.3555591  
SRR17520069.3555593  
SRR17520069.3555595  
SRR17520069.3555597  
SRR17520069.3555599  
SRR17520069.3555601  
SRR17520069.3555603  
SRR17520069.3555605  
SRR17520069.3555607  
SRR17520069.3555609  
SRR17520069.3555611  
SRR17520069.3555613  
SRR17520069.3555615  
SRR17520069.3555617  
SRR17520069.3555619  
SRR17520069.3555621  
SRR17520069.3555623  
SRR17520069.3555625  
SRR17520069.3555627  
SRR17520069.3555629  
SRR17520069.3555631  
SRR17520069.3555633  
SRR17520069.3555635  
SRR17520069.3555637  
SRR17520069.3555639  
SRR17520069.3555643  
SRR17520069.3555645  
SRR17520069.3555647  
SRR17520069.3555649  
SRR17520069.3555651  
SRR17520069.3555653

SRR17520069. 3555655  
SRR17520069. 3555657  
SRR17520069. 3555659  
SRR17520069. 3555661  
SRR17520069. 3555663  
SRR17520069. 3555665  
SRR17520069. 3555667  
SRR17520069. 3555669  
SRR17520069. 3563562  
SRR17520069. 3563564  
SRR17520069. 3563566  
SRR17520069. 3563568  
SRR17520069. 3563570  
SRR17520069. 3563572  
SRR17520069. 3563574  
SRR17520069. 3563576  
SRR17520069. 3563578  
SRR17520069. 3563580  
SRR17520069. 3563582  
SRR17520069. 3563584  
SRR17520069. 3563586  
SRR17520069. 3563588  
SRR17520069. 3563590  
SRR17520069. 3563592  
SRR17520069. 3563594  
SRR17520069. 3563596  
SRR17520069. 3563598  
SRR17520069. 3563600  
SRR17520069. 3563602  
SRR17520069. 3563604  
SRR17520069. 3563606  
SRR17520069. 3563608  
SRR17520069. 3563610  
SRR17520069. 3563612  
SRR17520069. 3563614  
SRR17520069. 3563616  
SRR17520069. 3563618  
SRR17520069. 3563620  
SRR17520069. 3563622  
SRR17520069. 3563624  
SRR17520069. 3563626  
SRR17520069. 3563628  
SRR17520069. 3563630  
SRR17520069. 3563632  
SRR17520069. 3563634  
SRR17520069. 3563636  
SRR17520069. 3563638

SRR17520069. 3563640  
SRR17520069. 3563642  
SRR17520069. 3563644  
SRR17520069. 3563646  
SRR17520069. 3563648  
SRR17520069. 3563650  
SRR17520069. 3563652  
SRR17520069. 3563736  
SRR17520069. 3563738  
SRR17520069. 3563740  
SRR17520069. 3563742  
SRR17520069. 3563744  
SRR17520069. 3563746  
SRR17520069. 3563748  
SRR17520069. 3563750  
SRR17520069. 3563752  
SRR17520069. 3563754  
SRR17520069. 3563756  
SRR17520069. 3564894  
SRR17520069. 3564901  
SRR17520069. 3564903  
SRR17520069. 3564905  
SRR17520069. 3564907  
SRR17520069. 3564909  
SRR17520069. 3564911  
SRR17520069. 3564913  
SRR17520069. 3564915  
SRR17520069. 3564917  
SRR17520069. 3564919  
SRR17520069. 3564921  
SRR17520069. 3564923  
SRR17520069. 3564925  
SRR17520069. 3568927  
SRR17520069. 3568929  
SRR17520069. 3568931  
SRR17520069. 3568933  
SRR17520069. 3568935  
SRR17520069. 3568937  
SRR17520069. 3568939  
SRR17520069. 3568941  
SRR17520069. 3568943  
SRR17520069. 3568945  
SRR17520069. 3568949  
SRR17520069. 3568951  
SRR17520069. 3568953  
SRR17520069. 3568957  
SRR17520069. 3568959

SRR17520069. 3568961  
SRR17520069. 3568963  
SRR17520069. 3568965  
SRR17520069. 3568967  
SRR17520069. 3568969  
SRR17520069. 3568971  
SRR17520069. 3568973  
SRR17520069. 3568975  
SRR17520069. 3568977  
SRR17520069. 3568979  
SRR17520069. 3568981  
SRR17520069. 3568983  
SRR17520069. 3568985  
SRR17520069. 3568987  
SRR17520069. 3568989  
SRR17520069. 3568991  
SRR17520069. 3568993  
SRR17520069. 3568995  
SRR17520069. 3568997  
SRR17520069. 3568999  
SRR17520069. 3569001  
SRR17520069. 3569003  
SRR17520069. 3569005  
SRR17520069. 3569007  
SRR17520069. 3569009  
SRR17520069. 3569011  
SRR17520069. 3569013  
SRR17520069. 3569015  
SRR17520069. 3569017  
SRR17520069. 3569019  
SRR17520069. 3569021  
SRR17520069. 3569023  
SRR17520069. 3573553  
SRR17520069. 3573555  
SRR17520069. 3573557  
SRR17520069. 3573559  
SRR17520069. 3573561  
SRR17520069. 3573563  
SRR17520069. 3573565  
SRR17520069. 3573567  
SRR17520069. 3573569  
SRR17520069. 3573571  
SRR17520069. 3573573  
SRR17520069. 3573575  
SRR17520069. 3573577  
SRR17520069. 3573579  
SRR17520069. 3573581

SRR17520069. 3573583  
SRR17520069. 3573585  
SRR17520069. 3573587  
SRR17520069. 3573589  
SRR17520069. 3573591  
SRR17520069. 3573593  
SRR17520069. 3573595  
SRR17520069. 3573597  
SRR17520069. 3573599  
SRR17520069. 3573603  
SRR17520069. 3573605  
SRR17520069. 3573607  
SRR17520069. 3573609  
SRR17520069. 3573611  
SRR17520069. 3573613  
SRR17520069. 3573615  
SRR17520069. 3573617  
SRR17520069. 3573619  
SRR17520069. 3573621  
SRR17520069. 3573776  
SRR17520069. 3573778  
SRR17520069. 3573780  
SRR17520069. 3573784  
SRR17520069. 3578284  
SRR17520069. 3578286  
SRR17520069. 3578288  
SRR17520069. 3578290  
SRR17520069. 3578292  
SRR17520069. 3578294  
SRR17520069. 3578296  
SRR17520069. 3578298  
SRR17520069. 3578300  
SRR17520069. 3578302  
SRR17520069. 3578304  
SRR17520069. 3578306  
SRR17520069. 3578308  
SRR17520069. 3578310  
SRR17520069. 3578312  
SRR17520069. 3578314  
SRR17520069. 3578316  
SRR17520069. 3578320  
SRR17520069. 3578322  
SRR17520069. 3578324  
SRR17520069. 3578326  
SRR17520069. 3578328  
SRR17520069. 3578332  
SRR17520069. 3578334

SRR17520069. 3578336  
SRR17520069. 3578340  
SRR17520069. 3578342  
SRR17520069. 3578344  
SRR17520069. 3578346  
SRR17520069. 3578348  
SRR17520069. 3580940  
SRR17520069. 3580942  
SRR17520069. 3580944  
SRR17520069. 3584061  
SRR17520069. 3584063  
SRR17520069. 3584349  
SRR17520069. 3584351  
SRR17520069. 3584353  
SRR17520069. 3584355  
SRR17520069. 3584359  
SRR17520069. 3584361  
SRR17520069. 3584363  
SRR17520069. 3584365  
SRR17520069. 3584367  
SRR17520069. 3584369  
SRR17520069. 3584371  
SRR17520069. 3584373  
SRR17520069. 3584375  
SRR17520069. 3594517  
SRR17520069. 3594519  
SRR17520069. 3594521  
SRR17520069. 3594523  
SRR17520069. 3594525  
SRR17520069. 3602288  
SRR17520069. 3602290  
SRR17520069. 3602292  
SRR17520069. 3602294  
SRR17520069. 3602296  
SRR17520069. 3602298  
SRR17520069. 3602300  
SRR17520069. 3602302  
SRR17520069. 3602304  
SRR17520069. 3602306  
SRR17520069. 3602308  
SRR17520069. 3602310  
SRR17520069. 3602312  
SRR17520069. 3602314  
SRR17520069. 3602316  
SRR17520069. 3608220  
SRR17520069. 3608222  
SRR17520069. 3608224



SRR17520069. 3608226  
SRR17520069. 3608228  
SRR17520069. 3608230  
SRR17520069. 3608232  
SRR17520069. 3608234  
SRR17520069. 3608236  
SRR17520069. 3608238  
SRR17520069. 3608313  
SRR17520069. 3608315  
SRR17520069. 3615896  
SRR17520069. 3615898  
SRR17520069. 3615900  
SRR17520069. 3615902  
SRR17520069. 3615904  
SRR17520069. 3615906  
SRR17520069. 3615908  
SRR17520069. 3615910  
SRR17520069. 3615912  
SRR17520069. 3615914  
SRR17520069. 3615916  
SRR17520069. 3615918  
SRR17520069. 3615920  
SRR17520069. 3615922  
SRR17520069. 3615924  
SRR17520069. 3615926  
SRR17520069. 3615928  
SRR17520069. 3615930  
SRR17520069. 3615932  
SRR17520069. 3615934  
SRR17520069. 3615936  
SRR17520069. 3615938  
SRR17520069. 3615940  
SRR17520069. 3615942  
SRR17520069. 3615944  
SRR17520069. 3615946  
SRR17520069. 3615948  
SRR17520069. 3615950  
SRR17520069. 3615952  
SRR17520069. 3615954  
SRR17520069. 3615956  
SRR17520069. 3615958  
SRR17520069. 3615960  
SRR17520069. 3615962  
SRR17520069. 3615964  
SRR17520069. 3615966  
SRR17520069. 3615968  
SRR17520069. 3615970

SRR17520069. 3627993  
SRR17520069. 3627995  
SRR17520069. 3627997  
SRR17520069. 3627999  
SRR17520069. 3628003  
SRR17520069. 3628005  
SRR17520069. 3628007  
SRR17520069. 3628009  
SRR17520069. 3628011  
SRR17520069. 3628013  
SRR17520069. 3628015  
SRR17520069. 3628017  
SRR17520069. 3628019  
SRR17520069. 3628021  
SRR17520069. 3628023  
SRR17520069. 3628025  
SRR17520069. 3628027  
SRR17520069. 3628029  
SRR17520069. 3628031  
SRR17520069. 3628033  
SRR17520069. 3628035  
SRR17520069. 3628037  
SRR17520069. 3628039  
SRR17520069. 3628041  
SRR17520069. 3628043  
SRR17520069. 3628045  
SRR17520069. 3628049  
SRR17520069. 3628051  
SRR17520069. 3628053  
SRR17520069. 3628057  
SRR17520069. 3631540  
SRR17520069. 3632218  
SRR17520069. 3632220  
SRR17520069. 3632222  
SRR17520069. 3632224  
SRR17520069. 3632226  
SRR17520069. 3632228  
SRR17520069. 3632230  
SRR17520069. 3632232  
SRR17520069. 3632234  
SRR17520069. 3632236  
SRR17520069. 3632238  
SRR17520069. 3632240  
SRR17520069. 3632242  
SRR17520069. 3632244  
SRR17520069. 3632246  
SRR17520069. 3632248

SRR17520069. 3632250  
SRR17520069. 3632252  
SRR17520069. 3633906  
SRR17520069. 3633908  
SRR17520069. 3633910  
SRR17520069. 3633912  
SRR17520069. 3633914  
SRR17520069. 3633916  
SRR17520069. 3633918  
SRR17520069. 3633920  
SRR17520069. 3633922  
SRR17520069. 3633924  
SRR17520069. 3633926  
SRR17520069. 3633928  
SRR17520069. 3633930  
SRR17520069. 3633932  
SRR17520069. 3633934  
SRR17520069. 3633936  
SRR17520069. 3633938  
SRR17520069. 3633940  
SRR17520069. 3633942  
SRR17520069. 3633944  
SRR17520069. 3636287  
SRR17520069. 3636289  
SRR17520069. 3636291  
SRR17520069. 3636293  
SRR17520069. 3636295  
SRR17520069. 3636297  
SRR17520069. 3636299  
SRR17520069. 3636301  
SRR17520069. 3636303  
SRR17520069. 3636307  
SRR17520069. 3636309  
SRR17520069. 3636311  
SRR17520069. 3636313  
SRR17520069. 3636315  
SRR17520069. 3636317  
SRR17520069. 3636319  
SRR17520069. 3641995  
SRR17520069. 3641997  
SRR17520069. 3641999  
SRR17520069. 3642001  
SRR17520069. 3642003  
SRR17520069. 3642005  
SRR17520069. 3642007  
SRR17520069. 3642009  
SRR17520069. 3642011

SRR17520069. 3642013  
SRR17520069. 3642015  
SRR17520069. 3642017  
SRR17520069. 3642019  
SRR17520069. 3642021  
SRR17520069. 3642023  
SRR17520069. 3642025  
SRR17520069. 3642027  
SRR17520069. 3642029  
SRR17520069. 3642031  
SRR17520069. 3642033  
SRR17520069. 3642035  
SRR17520069. 3642037  
SRR17520069. 3642039  
SRR17520069. 3642041  
SRR17520069. 3642043  
SRR17520069. 3642045  
SRR17520069. 3642047  
SRR17520069. 3642049  
SRR17520069. 3642051  
SRR17520069. 3642053  
SRR17520069. 3642055  
SRR17520069. 3642057  
SRR17520069. 3642059  
SRR17520069. 3642061  
SRR17520069. 3642063  
SRR17520069. 3642067  
SRR17520069. 3642069  
SRR17520069. 3642071  
SRR17520069. 3642073  
SRR17520069. 3642077  
SRR17520069. 3642079  
SRR17520069. 3642081  
SRR17520069. 3642083  
SRR17520069. 3642085  
SRR17520069. 3642087  
SRR17520069. 3642089  
SRR17520069. 3642091  
SRR17520069. 3643960  
SRR17520069. 3643962  
SRR17520069. 3644664  
SRR17520069. 3644666  
SRR17520069. 3644668  
SRR17520069. 3644670  
SRR17520069. 3644672  
SRR17520069. 3644674  
SRR17520069. 3644676

SRR17520069. 3644678  
SRR17520069. 3644680  
SRR17520069. 3644682  
SRR17520069. 3644684  
SRR17520069. 3644686  
SRR17520069. 3644690  
SRR17520069. 3644692  
SRR17520069. 3644694  
SRR17520069. 3644696  
SRR17520069. 3645366  
SRR17520069. 3645368  
SRR17520069. 3645370  
SRR17520069. 3645374  
SRR17520069. 3645376  
SRR17520069. 3645378  
SRR17520069. 3645380  
SRR17520069. 3645382  
SRR17520069. 3645384  
SRR17520069. 3645386  
SRR17520069. 3645388  
SRR17520069. 3645390  
SRR17520069. 3645392  
SRR17520069. 3645394  
SRR17520069. 3645396  
SRR17520069. 3645398  
SRR17520069. 3645400  
SRR17520069. 3645402  
SRR17520069. 3645404  
SRR17520069. 3645408  
SRR17520069. 3645410  
SRR17520069. 3645412  
SRR17520069. 3645414  
SRR17520069. 3645416  
SRR17520069. 3645418  
SRR17520069. 3645420  
SRR17520069. 3645422  
SRR17520069. 3645424  
SRR17520069. 3645428  
SRR17520069. 3645430  
SRR17520069. 3645432  
SRR17520069. 3645434  
SRR17520069. 3645438  
SRR17520069. 3645440  
SRR17520069. 3645442  
SRR17520069. 3645446  
SRR17520069. 3649558  
SRR17520069. 3649560

SRR17520069. 3649562  
SRR17520069. 3653658  
SRR17520069. 3653660  
SRR17520069. 3653662  
SRR17520069. 3653664  
SRR17520069. 3653666  
SRR17520069. 3653668  
SRR17520069. 3653670  
SRR17520069. 3653672  
SRR17520069. 3653674  
SRR17520069. 3653676  
SRR17520069. 3653678  
SRR17520069. 3653680  
SRR17520069. 3653682  
SRR17520069. 3653684  
SRR17520069. 3657807  
SRR17520069. 3657809  
SRR17520069. 3657811  
SRR17520069. 3657813  
SRR17520069. 3657815  
SRR17520069. 3657817  
SRR17520069. 3657819  
SRR17520069. 3657821  
SRR17520069. 3657823  
SRR17520069. 3657825  
SRR17520069. 3657827  
SRR17520069. 3657829  
SRR17520069. 3657831  
SRR17520069. 3657833  
SRR17520069. 3657835  
SRR17520069. 3657837  
SRR17520069. 3657839  
SRR17520069. 3657841  
SRR17520069. 3657843  
SRR17520069. 3657845  
SRR17520069. 3657847  
SRR17520069. 3657849  
SRR17520069. 3657851  
SRR17520069. 3657853  
SRR17520069. 3657857  
SRR17520069. 3657859  
SRR17520069. 3657863  
SRR17520069. 3657865  
SRR17520069. 3657867  
SRR17520069. 3657869  
SRR17520069. 3657871  
SRR17520069. 3657873

SRR17520069. 3657875  
SRR17520069. 3657877  
SRR17520069. 3657879  
SRR17520069. 3657881  
SRR17520069. 3657883  
SRR17520069. 3657885  
SRR17520069. 3657887  
SRR17520069. 3657889  
SRR17520069. 3657891  
SRR17520069. 3662690  
SRR17520069. 3662692  
SRR17520069. 3662694  
SRR17520069. 3662696  
SRR17520069. 3662698  
SRR17520069. 3662700  
SRR17520069. 3662704  
SRR17520069. 3662706  
SRR17520069. 3662708  
SRR17520069. 3662710  
SRR17520069. 3662712  
SRR17520069. 3662714  
SRR17520069. 3662716  
SRR17520069. 3662718  
SRR17520069. 3662720  
SRR17520069. 3662727  
SRR17520069. 3662729  
SRR17520069. 3662731  
SRR17520069. 3662733  
SRR17520069. 3662735  
SRR17520069. 3662737  
SRR17520069. 3662739  
SRR17520069. 3662741  
SRR17520069. 3662743  
SRR17520069. 3662745  
SRR17520069. 3662747  
SRR17520069. 3662749  
SRR17520069. 3662751  
SRR17520069. 3662753  
SRR17520069. 3662755  
SRR17520069. 3662757  
SRR17520069. 3662759  
SRR17520069. 3662761  
SRR17520069. 3662763  
SRR17520069. 3662765  
SRR17520069. 3662767  
SRR17520069. 3662769  
SRR17520069. 3662771

SRR17520069. 3662773  
SRR17520069. 3662775  
SRR17520069. 3662777  
SRR17520069. 3662779  
SRR17520069. 3662781  
SRR17520069. 3662783  
SRR17520069. 3662785  
SRR17520069. 3662787  
SRR17520069. 3662789  
SRR17520069. 3662791  
SRR17520069. 3662793  
SRR17520069. 3662795  
SRR17520069. 3662797  
SRR17520069. 3662799  
SRR17520069. 3662801  
SRR17520069. 3662805  
SRR17520069. 3662807  
SRR17520069. 3662809  
SRR17520069. 3662811  
SRR17520069. 3662813  
SRR17520069. 3662815  
SRR17520069. 3662817  
SRR17520069. 3662819  
SRR17520069. 3662821  
SRR17520069. 3662823  
SRR17520069. 3662825  
SRR17520069. 3662827  
SRR17520069. 3662831  
SRR17520069. 3662833  
SRR17520069. 3662835  
SRR17520069. 3662837  
SRR17520069. 3662839  
SRR17520069. 3662843  
SRR17520069. 3662845  
SRR17520069. 3662847  
SRR17520069. 3662849  
SRR17520069. 3662851  
SRR17520069. 3662857  
SRR17520069. 3662859  
SRR17520069. 3662861  
SRR17520069. 3662863  
SRR17520069. 3662865  
SRR17520069. 3662867  
SRR17520069. 3662869  
SRR17520069. 3662871  
SRR17520069. 3662873  
SRR17520069. 3662875



SRR17520069. 3662877  
SRR17520069. 3662879  
SRR17520069. 3662881  
SRR17520069. 3662883  
SRR17520069. 3662885  
SRR17520069. 3662887  
SRR17520069. 3662891  
SRR17520069. 3662893  
SRR17520069. 3662895  
SRR17520069. 3663181  
SRR17520069. 3663183  
SRR17520069. 3663185  
SRR17520069. 3663187  
SRR17520069. 3663189  
SRR17520069. 3663191  
SRR17520069. 3663195  
SRR17520069. 3663197  
SRR17520069. 3663199  
SRR17520069. 3663201  
SRR17520069. 3663203  
SRR17520069. 3663205  
SRR17520069. 3665812  
SRR17520069. 3665814  
SRR17520069. 3665816  
SRR17520069. 3665818  
SRR17520069. 3665820  
SRR17520069. 3665822  
SRR17520069. 3665824  
SRR17520069. 3665826  
SRR17520069. 3665828  
SRR17520069. 3665830  
SRR17520069. 3665832  
SRR17520069. 3665834  
SRR17520069. 3665836  
SRR17520069. 3665838  
SRR17520069. 3665840  
SRR17520069. 3665842  
SRR17520069. 3665844  
SRR17520069. 3665846  
SRR17520069. 3665848  
SRR17520069. 3665850  
SRR17520069. 3665852  
SRR17520069. 3665854  
SRR17520069. 3665856  
SRR17520069. 3665858  
SRR17520069. 3665860  
SRR17520069. 3665862

SRR17520069. 3665864  
SRR17520069. 3665866  
SRR17520069. 3665868  
SRR17520069. 3665870  
SRR17520069. 3665872  
SRR17520069. 3665874  
SRR17520069. 3666408  
SRR17520069. 3666410  
SRR17520069. 3666412  
SRR17520069. 3666414  
SRR17520069. 3666416  
SRR17520069. 3666418  
SRR17520069. 3666420  
SRR17520069. 3666422  
SRR17520069. 3666424  
SRR17520069. 3666426  
SRR17520069. 3666428  
SRR17520069. 3666430  
SRR17520069. 3666432  
SRR17520069. 3666434  
SRR17520069. 3666436  
SRR17520069. 3666438  
SRR17520069. 3666440  
SRR17520069. 3666442  
SRR17520069. 3666444  
SRR17520069. 3666446  
SRR17520069. 3666448  
SRR17520069. 3666450  
SRR17520069. 3666454  
SRR17520069. 3666456  
SRR17520069. 3666458  
SRR17520069. 3666460  
SRR17520069. 3666462  
SRR17520069. 3666464  
SRR17520069. 3666466  
SRR17520069. 3666468  
SRR17520069. 3666470  
SRR17520069. 3666472  
SRR17520069. 3667954  
SRR17520069. 3667956  
SRR17520069. 3667958  
SRR17520069. 3667960  
SRR17520069. 3667962  
SRR17520069. 3667964  
SRR17520069. 3667966  
SRR17520069. 3667968  
SRR17520069. 3667970

SRR17520069. 3667972  
SRR17520069. 3667974  
SRR17520069. 3667976  
SRR17520069. 3667978  
SRR17520069. 3667980  
SRR17520069. 3667982  
SRR17520069. 3667984  
SRR17520069. 3667986  
SRR17520069. 3667988  
SRR17520069. 3667990  
SRR17520069. 3667992  
SRR17520069. 3667994  
SRR17520069. 3667996  
SRR17520069. 3667998  
SRR17520069. 3668000  
SRR17520069. 3668002  
SRR17520069. 3668004  
SRR17520069. 3668006  
SRR17520069. 3668008  
SRR17520069. 3668010  
SRR17520069. 3668012  
SRR17520069. 3668014  
SRR17520069. 3668016  
SRR17520069. 3668018  
SRR17520069. 3668020  
SRR17520069. 3668022  
SRR17520069. 3668024  
SRR17520069. 3668026  
SRR17520069. 3668028  
SRR17520069. 3668030  
SRR17520069. 3668034  
SRR17520069. 3668036  
SRR17520069. 3668038  
SRR17520069. 3668471  
SRR17520069. 3668473  
SRR17520069. 3668475  
SRR17520069. 3668477  
SRR17520069. 3668479  
SRR17520069. 3668481  
SRR17520069. 3668483  
SRR17520069. 3668485  
SRR17520069. 3668487  
SRR17520069. 3668489  
SRR17520069. 3668493  
SRR17520069. 3668495  
SRR17520069. 3668497  
SRR17520069. 3668499

SRR17520069. 3668501  
SRR17520069. 3668503  
SRR17520069. 3668505  
SRR17520069. 3668509  
SRR17520069. 3668513  
SRR17520069. 3668515  
SRR17520069. 3668517  
SRR17520069. 3668519  
SRR17520069. 3668521  
SRR17520069. 3668523  
SRR17520069. 3668525  
SRR17520069. 3668529  
SRR17520069. 3668531  
SRR17520069. 3668535  
SRR17520069. 3668537  
SRR17520069. 3668539  
SRR17520069. 3668541  
SRR17520069. 3668543  
SRR17520069. 3668545  
SRR17520069. 3668547  
SRR17520069. 3668549  
SRR17520069. 3668551  
SRR17520069. 3668553  
SRR17520069. 3668555  
SRR17520069. 3668557  
SRR17520069. 3668559  
SRR17520069. 3668561  
SRR17520069. 3668563  
SRR17520069. 3668565  
SRR17520069. 3668567  
SRR17520069. 3668569  
SRR17520069. 3668571  
SRR17520069. 3668573  
SRR17520069. 3668575  
SRR17520069. 3668577  
SRR17520069. 3668579  
SRR17520069. 3668581  
SRR17520069. 3668583  
SRR17520069. 3668585  
SRR17520069. 3668587  
SRR17520069. 3668589  
SRR17520069. 3668591  
SRR17520069. 3668593  
SRR17520069. 3668595  
SRR17520069. 3668597  
SRR17520069. 3668599  
SRR17520069. 3668601

SRR17520069. 3668603  
SRR17520069. 3668605  
SRR17520069. 3668607  
SRR17520069. 3670948  
SRR17520069. 3672723  
SRR17520069. 3672725  
SRR17520069. 3672727  
SRR17520069. 3672729  
SRR17520069. 3672731  
SRR17520069. 3672733  
SRR17520069. 3672737  
SRR17520069. 3672741  
SRR17520069. 3672743  
SRR17520069. 3672745  
SRR17520069. 3672747  
SRR17520069. 3672749  
SRR17520069. 3672751  
SRR17520069. 3672753  
SRR17520069. 3672755  
SRR17520069. 3672757  
SRR17520069. 3672759  
SRR17520069. 3674696  
SRR17520069. 3674698  
SRR17520069. 3674700  
SRR17520069. 3674702  
SRR17520069. 3674704  
SRR17520069. 3674706  
SRR17520069. 3674708  
SRR17520069. 3674710  
SRR17520069. 3675018  
SRR17520069. 3675020  
SRR17520069. 3675024  
SRR17520069. 3679690  
SRR17520069. 3679692  
SRR17520069. 3679694  
SRR17520069. 3679696  
SRR17520069. 3679698  
SRR17520069. 3679700  
SRR17520069. 3679702  
SRR17520069. 3679704  
SRR17520069. 3679706  
SRR17520069. 3679708  
SRR17520069. 3679710  
SRR17520069. 3679712  
SRR17520069. 3679714  
SRR17520069. 3679716  
SRR17520069. 3679718

SRR17520069. 3679720  
SRR17520069. 3679722  
SRR17520069. 3679724  
SRR17520069. 3680773  
SRR17520069. 3680775  
SRR17520069. 3680777  
SRR17520069. 3680779  
SRR17520069. 3680781  
SRR17520069. 3680783  
SRR17520069. 3680785  
SRR17520069. 3680787  
SRR17520069. 3680789  
SRR17520069. 3680791  
SRR17520069. 3680793  
SRR17520069. 3680795  
SRR17520069. 3680797  
SRR17520069. 3680801  
SRR17520069. 3686567  
SRR17520069. 3686569  
SRR17520069. 3686571  
SRR17520069. 3686573  
SRR17520069. 3686575  
SRR17520069. 3686577  
SRR17520069. 3686579  
SRR17520069. 3686581  
SRR17520069. 3686583  
SRR17520069. 3686585  
SRR17520069. 3686587  
SRR17520069. 3686589  
SRR17520069. 3686593  
SRR17520069. 3688352  
SRR17520069. 3688354  
SRR17520069. 3688356  
SRR17520069. 3688358  
SRR17520069. 3688360  
SRR17520069. 3688362  
SRR17520069. 3688366  
SRR17520069. 3695898  
SRR17520069. 3702735  
SRR17520069. 3702737  
SRR17520069. 3702739  
SRR17520069. 3702741  
SRR17520069. 3702743  
SRR17520069. 3702745  
SRR17520069. 3702747  
SRR17520069. 3702749  
SRR17520069. 3702751

SRR17520069. 3702753  
SRR17520069. 3702755  
SRR17520069. 3702761  
SRR17520069. 3702763  
SRR17520069. 3702765  
SRR17520069. 3702767  
SRR17520069. 3702769  
SRR17520069. 3702771  
SRR17520069. 3702773  
SRR17520069. 3702775  
SRR17520069. 3702779  
SRR17520069. 3702781  
SRR17520069. 3702783  
SRR17520069. 3702785  
SRR17520069. 3702787  
SRR17520069. 3702789  
SRR17520069. 3702791  
SRR17520069. 3702793  
SRR17520069. 3702795  
SRR17520069. 3702797  
SRR17520069. 3702799  
SRR17520069. 3702801  
SRR17520069. 3702803  
SRR17520069. 3702805  
SRR17520069. 3702807  
SRR17520069. 3710417  
SRR17520069. 3710421  
SRR17520069. 3710423  
SRR17520069. 3710425  
SRR17520069. 3710427  
SRR17520069. 3710429  
SRR17520069. 3710431  
SRR17520069. 3710433  
SRR17520069. 3710435  
SRR17520069. 3710437  
SRR17520069. 3710439  
SRR17520069. 3710441  
SRR17520069. 3710443  
SRR17520069. 3710445  
SRR17520069. 3710447  
SRR17520069. 3710449  
SRR17520069. 3710451  
SRR17520069. 3710453  
SRR17520069. 3710455  
SRR17520069. 3710457  
SRR17520069. 3710459  
SRR17520069. 3710461

SRR17520069.3710463  
SRR17520069.3710465  
SRR17520069.3710467  
SRR17520069.3710471  
SRR17520069.3710473  
SRR17520069.3710475  
SRR17520069.3710477  
SRR17520069.3710479  
SRR17520069.3710481  
SRR17520069.3710483  
SRR17520069.3710485  
SRR17520069.3710487  
SRR17520069.3710489  
SRR17520069.3710491  
SRR17520069.3712067  
SRR17520069.3712069  
SRR17520069.3712071  
SRR17520069.3712073  
SRR17520069.3712075  
SRR17520069.3712077  
SRR17520069.3712079  
SRR17520069.3712081  
SRR17520069.3712083  
SRR17520069.3712085  
SRR17520069.3712087  
SRR17520069.3712089  
SRR17520069.3712091  
SRR17520069.3712093  
SRR17520069.3712095  
SRR17520069.3712097  
SRR17520069.3712099  
SRR17520069.3712101  
SRR17520069.3712103  
SRR17520069.3712105  
SRR17520069.3712107  
SRR17520069.3712109  
SRR17520069.3712111  
SRR17520069.3712113  
SRR17520069.3712115  
SRR17520069.3712117  
SRR17520069.3712119  
SRR17520069.3712121  
SRR17520069.3712123  
SRR17520069.3712125  
SRR17520069.3712127  
SRR17520069.3712129  
SRR17520069.3712131



SRR17520069.3712133  
SRR17520069.3715767  
SRR17520069.3715769  
SRR17520069.3715771  
SRR17520069.3715773  
SRR17520069.3715775  
SRR17520069.3715777  
SRR17520069.3715779  
SRR17520069.3715781  
SRR17520069.3715783  
SRR17520069.3715785  
SRR17520069.3715787  
SRR17520069.3715789  
SRR17520069.3722044  
SRR17520069.3722046  
SRR17520069.3722048  
SRR17520069.3722050  
SRR17520069.3722052  
SRR17520069.3722054  
SRR17520069.3722056  
SRR17520069.3722058  
SRR17520069.3722060  
SRR17520069.3722062  
SRR17520069.3722064  
SRR17520069.3722066  
SRR17520069.3722068  
SRR17520069.3722070  
SRR17520069.3722072  
SRR17520069.3722074  
SRR17520069.3722076  
SRR17520069.3726284  
SRR17520069.3726286  
SRR17520069.3726288  
SRR17520069.3726290  
SRR17520069.3726292  
SRR17520069.3726294  
SRR17520069.3726296  
SRR17520069.3726298  
SRR17520069.3726300  
SRR17520069.3726302  
SRR17520069.3726304  
SRR17520069.3726306  
SRR17520069.3726308  
SRR17520069.3726310  
SRR17520069.3726312  
SRR17520069.3726314  
SRR17520069.3726316

SRR17520069. 3726318  
SRR17520069. 3726320  
SRR17520069. 3726322  
SRR17520069. 3726324  
SRR17520069. 3726326  
SRR17520069. 3726328  
SRR17520069. 3726330  
SRR17520069. 3726332  
SRR17520069. 3726334  
SRR17520069. 3726336  
SRR17520069. 3726338  
SRR17520069. 3726340  
SRR17520069. 3726342  
SRR17520069. 3726344  
SRR17520069. 3726346  
SRR17520069. 3726348  
SRR17520069. 3726350  
SRR17520069. 3726352  
SRR17520069. 3726354  
SRR17520069. 3726356  
SRR17520069. 3726358  
SRR17520069. 3726360  
SRR17520069. 3726362  
SRR17520069. 3726364  
SRR17520069. 3726366  
SRR17520069. 3726369  
SRR17520069. 3726371  
SRR17520069. 3726373  
SRR17520069. 3726375  
SRR17520069. 3726377  
SRR17520069. 3726379  
SRR17520069. 3729226  
SRR17520069. 3729228  
SRR17520069. 3729230  
SRR17520069. 3729232  
SRR17520069. 3729234  
SRR17520069. 3729236  
SRR17520069. 3729238  
SRR17520069. 3729240  
SRR17520069. 3729242  
SRR17520069. 3729244  
SRR17520069. 3729246  
SRR17520069. 3730120  
SRR17520069. 3730122  
SRR17520069. 3730124  
SRR17520069. 3730126  
SRR17520069. 3730128

SRR17520069. 3730130  
SRR17520069. 3730132  
SRR17520069. 3730134  
SRR17520069. 3730136  
SRR17520069. 3730138  
SRR17520069. 3730140  
SRR17520069. 3730142  
SRR17520069. 3730144  
SRR17520069. 3730146  
SRR17520069. 3730148  
SRR17520069. 3730150  
SRR17520069. 3730152  
SRR17520069. 3730154  
SRR17520069. 3730156  
SRR17520069. 3730158  
SRR17520069. 3730160  
SRR17520069. 3730162  
SRR17520069. 3730164  
SRR17520069. 3730166  
SRR17520069. 3730168  
SRR17520069. 3730170  
SRR17520069. 3730172  
SRR17520069. 3730174  
SRR17520069. 3730176  
SRR17520069. 3730178  
SRR17520069. 3730180  
SRR17520069. 3730182  
SRR17520069. 3730184  
SRR17520069. 3730186  
SRR17520069. 3730188  
SRR17520069. 3730190  
SRR17520069. 3730192  
SRR17520069. 3730194  
SRR17520069. 3730196  
SRR17520069. 3730198  
SRR17520069. 3730200  
SRR17520069. 3730202  
SRR17520069. 3730204  
SRR17520069. 3730206  
SRR17520069. 3730210  
SRR17520069. 3730212  
SRR17520069. 3730214  
SRR17520069. 3732788  
SRR17520069. 3732790  
SRR17520069. 3732792  
SRR17520069. 3732794  
SRR17520069. 3732796

SRR17520069. 3732800  
SRR17520069. 3732802  
SRR17520069. 3732804  
SRR17520069. 3732806  
SRR17520069. 3732808  
SRR17520069. 3732810  
SRR17520069. 3732812  
SRR17520069. 3732814  
SRR17520069. 3732816  
SRR17520069. 3732818  
SRR17520069. 3732820  
SRR17520069. 3732822  
SRR17520069. 3732824  
SRR17520069. 3732826  
SRR17520069. 3732828  
SRR17520069. 3732830  
SRR17520069. 3732832  
SRR17520069. 3732834  
SRR17520069. 3732838  
SRR17520069. 3732840  
SRR17520069. 3732842  
SRR17520069. 3732844  
SRR17520069. 3732846  
SRR17520069. 3732850  
SRR17520069. 3732852  
SRR17520069. 3732854  
SRR17520069. 3732856  
SRR17520069. 3732858  
SRR17520069. 3732860  
SRR17520069. 3732862  
SRR17520069. 3732864  
SRR17520069. 3732866  
SRR17520069. 3732868  
SRR17520069. 3732870  
SRR17520069. 3732872  
SRR17520069. 3732874  
SRR17520069. 3732876  
SRR17520069. 3732878  
SRR17520069. 3732880  
SRR17520069. 3732882  
SRR17520069. 3732884  
SRR17520069. 3732888  
SRR17520069. 3732890  
SRR17520069. 3732892  
SRR17520069. 3732894  
SRR17520069. 3732896  
SRR17520069. 3732898

SRR17520069. 3732900  
SRR17520069. 3732902  
SRR17520069. 3732904  
SRR17520069. 3732906  
SRR17520069. 3732908  
SRR17520069. 3732910  
SRR17520069. 3732912  
SRR17520069. 3732914  
SRR17520069. 3732916  
SRR17520069. 3732918  
SRR17520069. 3732920  
SRR17520069. 3732922  
SRR17520069. 3732924  
SRR17520069. 3732926  
SRR17520069. 3732928  
SRR17520069. 3732930  
SRR17520069. 3732932  
SRR17520069. 3732934  
SRR17520069. 3732936  
SRR17520069. 3732938  
SRR17520069. 3732940  
SRR17520069. 3732942  
SRR17520069. 3732944  
SRR17520069. 3737366  
SRR17520069. 3737368  
SRR17520069. 3737370  
SRR17520069. 3737372  
SRR17520069. 3737374  
SRR17520069. 3737376  
SRR17520069. 3737378  
SRR17520069. 3737380  
SRR17520069. 3737382  
SRR17520069. 3737384  
SRR17520069. 3737386  
SRR17520069. 3737388  
SRR17520069. 3738199  
SRR17520069. 3738201  
SRR17520069. 3738203  
SRR17520069. 3738205  
SRR17520069. 3738207  
SRR17520069. 3738209  
SRR17520069. 3738211  
SRR17520069. 3738213  
SRR17520069. 3744989  
SRR17520069. 3744991  
SRR17520069. 3744993  
SRR17520069. 3744997

SRR17520069.3745732  
SRR17520069.3745734  
SRR17520069.3745736  
SRR17520069.3745738  
SRR17520069.3745740  
SRR17520069.3745742  
SRR17520069.3745744  
SRR17520069.3748484  
SRR17520069.3751879  
SRR17520069.3751881  
SRR17520069.3751883  
SRR17520069.3751885  
SRR17520069.3751887  
SRR17520069.3751889  
SRR17520069.3751891  
SRR17520069.3751895  
SRR17520069.3751897  
SRR17520069.3751899  
SRR17520069.3751901  
SRR17520069.3751903  
SRR17520069.3751905  
SRR17520069.3751907  
SRR17520069.3751909  
SRR17520069.3751911  
SRR17520069.3751913  
SRR17520069.3751915  
SRR17520069.3751917  
SRR17520069.3762376  
SRR17520069.3762378  
SRR17520069.3762380  
SRR17520069.3762382  
SRR17520069.3762384  
SRR17520069.3762386  
SRR17520069.3762388  
SRR17520069.3762390  
SRR17520069.3762392  
SRR17520069.3762394  
SRR17520069.3762396  
SRR17520069.3762398  
SRR17520069.3762400  
SRR17520069.3762402  
SRR17520069.3762404  
SRR17520069.3762406  
SRR17520069.3762408  
SRR17520069.3762410  
SRR17520069.3766738  
SRR17520069.3766740

SRR17520069. 3766742  
SRR17520069. 3766744  
SRR17520069. 3766746  
SRR17520069. 3766748  
SRR17520069. 3766750  
SRR17520069. 3766752  
SRR17520069. 3766754  
SRR17520069. 3766756  
SRR17520069. 3766758  
SRR17520069. 3766760  
SRR17520069. 3766762  
SRR17520069. 3766764  
SRR17520069. 3766766  
SRR17520069. 3766768  
SRR17520069. 3766770  
SRR17520069. 3766772  
SRR17520069. 3766774  
SRR17520069. 3766776  
SRR17520069. 3766778  
SRR17520069. 3766780  
SRR17520069. 3766782  
SRR17520069. 3766784  
SRR17520069. 3766786  
SRR17520069. 3766788  
SRR17520069. 3766790  
SRR17520069. 3766792  
SRR17520069. 3766794  
SRR17520069. 3766796  
SRR17520069. 3766798  
SRR17520069. 3766800  
SRR17520069. 3766802  
SRR17520069. 3766804  
SRR17520069. 3766806  
SRR17520069. 3766808  
SRR17520069. 3766810  
SRR17520069. 3766814  
SRR17520069. 3766816  
SRR17520069. 3766818  
SRR17520069. 3767297  
SRR17520069. 3770145  
SRR17520069. 3770147  
SRR17520069. 3770151  
SRR17520069. 3770153  
SRR17520069. 3770155  
SRR17520069. 3770157  
SRR17520069. 3770159  
SRR17520069. 3770161

SRR17520069.3770163  
SRR17520069.3770165  
SRR17520069.3770167  
SRR17520069.3770169  
SRR17520069.3770171  
SRR17520069.3770173  
SRR17520069.3770175  
SRR17520069.3770177  
SRR17520069.3772232  
SRR17520069.3772234  
SRR17520069.3772236  
SRR17520069.3772238  
SRR17520069.3772240  
SRR17520069.3772242  
SRR17520069.3772244  
SRR17520069.3772246  
SRR17520069.3772431  
SRR17520069.3772433  
SRR17520069.3772435  
SRR17520069.3772437  
SRR17520069.3772439  
SRR17520069.3772441  
SRR17520069.3772445  
SRR17520069.3772447  
SRR17520069.3772449  
SRR17520069.3772451  
SRR17520069.3772453  
SRR17520069.3772455  
SRR17520069.3772457  
SRR17520069.3772459  
SRR17520069.3772461  
SRR17520069.3772463  
SRR17520069.3772465  
SRR17520069.3772467  
SRR17520069.3772469  
SRR17520069.3772471  
SRR17520069.3772473  
SRR17520069.3776259  
SRR17520069.3776261  
SRR17520069.3776263  
SRR17520069.3776265  
SRR17520069.3776267  
SRR17520069.3776269  
SRR17520069.3776271  
SRR17520069.3776273  
SRR17520069.3776275  
SRR17520069.3776277



SRR17520069. 3776279  
SRR17520069. 3776281  
SRR17520069. 3776283  
SRR17520069. 3776285  
SRR17520069. 3776287  
SRR17520069. 3776289  
SRR17520069. 3776291  
SRR17520069. 3776293  
SRR17520069. 3776685  
SRR17520069. 3776687  
SRR17520069. 3776689  
SRR17520069. 3776691  
SRR17520069. 3776693  
SRR17520069. 3776695  
SRR17520069. 3776697  
SRR17520069. 3776699  
SRR17520069. 3776919  
SRR17520069. 3776921  
SRR17520069. 3776923  
SRR17520069. 3776925  
SRR17520069. 3776927  
SRR17520069. 3776929  
SRR17520069. 3776931  
SRR17520069. 3776933  
SRR17520069. 3776935  
SRR17520069. 3776937  
SRR17520069. 3776939  
SRR17520069. 3776941  
SRR17520069. 3776943  
SRR17520069. 3776945  
SRR17520069. 3776947  
SRR17520069. 3776949  
SRR17520069. 3776951  
SRR17520069. 3776953  
SRR17520069. 3776955  
SRR17520069. 3776957  
SRR17520069. 3776959  
SRR17520069. 3776961  
SRR17520069. 3776963  
SRR17520069. 3776965  
SRR17520069. 3776967  
SRR17520069. 3776969  
SRR17520069. 3790660  
SRR17520069. 3790662  
SRR17520069. 3790664  
SRR17520069. 3790666  
SRR17520069. 3790668

SRR17520069. 3790670  
SRR17520069. 3790672  
SRR17520069. 3790674  
SRR17520069. 3790676  
SRR17520069. 3790678  
SRR17520069. 3790680  
SRR17520069. 3790682  
SRR17520069. 3790686  
SRR17520069. 3790688  
SRR17520069. 3790690  
SRR17520069. 3790692  
SRR17520069. 3793883  
SRR17520069. 3795844  
SRR17520069. 3802102  
SRR17520069. 3802104  
SRR17520069. 3802106  
SRR17520069. 3802108  
SRR17520069. 3802110  
SRR17520069. 3802112  
SRR17520069. 3802114  
SRR17520069. 3802116  
SRR17520069. 3802118  
SRR17520069. 3802120  
SRR17520069. 3802122  
SRR17520069. 3802124  
SRR17520069. 3802126  
SRR17520069. 3802128  
SRR17520069. 3802130  
SRR17520069. 3802132  
SRR17520069. 3802134  
SRR17520069. 3802136  
SRR17520069. 3802138  
SRR17520069. 3802140  
SRR17520069. 3802142  
SRR17520069. 3802144  
SRR17520069. 3802146  
SRR17520069. 3802148  
SRR17520069. 3802150  
SRR17520069. 3802320  
SRR17520069. 3802322  
SRR17520069. 3802324  
SRR17520069. 3802326  
SRR17520069. 3802328  
SRR17520069. 3802330  
SRR17520069. 3802332  
SRR17520069. 3802334  
SRR17520069. 3802336

SRR17520069. 3802338  
SRR17520069. 3802340  
SRR17520069. 3802342  
SRR17520069. 3802344  
SRR17520069. 3802346  
SRR17520069. 3802348  
SRR17520069. 3802350  
SRR17520069. 3802352  
SRR17520069. 3802354  
SRR17520069. 3802356  
SRR17520069. 3802358  
SRR17520069. 3802360  
SRR17520069. 3803683  
SRR17520069. 3803685  
SRR17520069. 3803687  
SRR17520069. 3803689  
SRR17520069. 3803691  
SRR17520069. 3803693  
SRR17520069. 3803697  
SRR17520069. 3803699  
SRR17520069. 3803701  
SRR17520069. 3803703  
SRR17520069. 3803705  
SRR17520069. 3803707  
SRR17520069. 3803709  
SRR17520069. 3803711  
SRR17520069. 3803713  
SRR17520069. 3803715  
SRR17520069. 3803717  
SRR17520069. 3803733  
SRR17520069. 3803735  
SRR17520069. 3803737  
SRR17520069. 3803739  
SRR17520069. 3803743  
SRR17520069. 3803745  
SRR17520069. 3803747  
SRR17520069. 3803749  
SRR17520069. 3803751  
SRR17520069. 3803753  
SRR17520069. 3803755  
SRR17520069. 3803757  
SRR17520069. 3803759  
SRR17520069. 3803761  
SRR17520069. 3803763  
SRR17520069. 3803765  
SRR17520069. 3803767  
SRR17520069. 3803769

SRR17520069.3803771  
SRR17520069.3803773  
SRR17520069.3803775  
SRR17520069.3803777  
SRR17520069.3803779  
SRR17520069.3803781  
SRR17520069.3803783  
SRR17520069.3803785  
SRR17520069.3803787  
SRR17520069.3803789  
SRR17520069.3803791  
SRR17520069.3803793  
SRR17520069.3803795  
SRR17520069.3803797  
SRR17520069.3803799  
SRR17520069.3803801  
SRR17520069.3803803  
SRR17520069.3803805  
SRR17520069.3803807  
SRR17520069.3803809  
SRR17520069.3803811  
SRR17520069.3803813  
SRR17520069.3803815  
SRR17520069.3803817  
SRR17520069.3803819  
SRR17520069.3803821  
SRR17520069.3803823  
SRR17520069.3803825  
SRR17520069.3809381  
SRR17520069.3809383  
SRR17520069.3809387  
SRR17520069.3809389  
SRR17520069.3809393  
SRR17520069.3809395  
SRR17520069.3809397  
SRR17520069.3809399  
SRR17520069.3809401  
SRR17520069.3809403  
SRR17520069.3809405  
SRR17520069.3809407  
SRR17520069.3809411  
SRR17520069.3809413  
SRR17520069.3809415  
SRR17520069.3809417  
SRR17520069.3809419  
SRR17520069.3809421  
SRR17520069.3809423

SRR17520069.3809425  
SRR17520069.3809427  
SRR17520069.3809429  
SRR17520069.3809431  
SRR17520069.3809433  
SRR17520069.3809435  
SRR17520069.3809437  
SRR17520069.3809439  
SRR17520069.3809441  
SRR17520069.3809443  
SRR17520069.3809445  
SRR17520069.3816266  
SRR17520069.3816268  
SRR17520069.3825965  
SRR17520069.3825967  
SRR17520069.3825969  
SRR17520069.3825971  
SRR17520069.3825973  
SRR17520069.3825975  
SRR17520069.3825977  
SRR17520069.3825979  
SRR17520069.3825981  
SRR17520069.3825983  
SRR17520069.3825985  
SRR17520069.3825987  
SRR17520069.3825989  
SRR17520069.3825991  
SRR17520069.3825993  
SRR17520069.3825995  
SRR17520069.3825997  
SRR17520069.3825999  
SRR17520069.3826001  
SRR17520069.3826003  
SRR17520069.3826005  
SRR17520069.3826007  
SRR17520069.3826009  
SRR17520069.3826011  
SRR17520069.3826013  
SRR17520069.3826017  
SRR17520069.3826019  
SRR17520069.3826023  
SRR17520069.3826025  
SRR17520069.3826027  
SRR17520069.3826031  
SRR17520069.3826033  
SRR17520069.3826035  
SRR17520069.3826037

SRR17520069. 3826039  
SRR17520069. 3826041  
SRR17520069. 3826043  
SRR17520069. 3826047  
SRR17520069. 3826049  
SRR17520069. 3826051  
SRR17520069. 3826053  
SRR17520069. 3826055  
SRR17520069. 3826057  
SRR17520069. 3826059  
SRR17520069. 3826061  
SRR17520069. 3826063  
SRR17520069. 3826065  
SRR17520069. 3826067  
SRR17520069. 3826069  
SRR17520069. 3826071  
SRR17520069. 3826073  
SRR17520069. 3826075  
SRR17520069. 3826077  
SRR17520069. 3826079  
SRR17520069. 3826081  
SRR17520069. 3826085  
SRR17520069. 3826087  
SRR17520069. 3826089  
SRR17520069. 3826091  
SRR17520069. 3826093  
SRR17520069. 3826095  
SRR17520069. 3826097  
SRR17520069. 3826099  
SRR17520069. 3826101  
SRR17520069. 3826103  
SRR17520069. 3826105  
SRR17520069. 3826107  
SRR17520069. 3826111  
SRR17520069. 3826113  
SRR17520069. 3826115  
SRR17520069. 3826117  
SRR17520069. 3826119  
SRR17520069. 3828077  
SRR17520069. 3828079  
SRR17520069. 3828081  
SRR17520069. 3828083  
SRR17520069. 3828085  
SRR17520069. 3828087  
SRR17520069. 3828089  
SRR17520069. 3828091  
SRR17520069. 3828093

SRR17520069.3828095  
SRR17520069.3828097  
SRR17520069.3828099  
SRR17520069.3828101  
SRR17520069.3828103  
SRR17520069.3828105  
SRR17520069.3828107  
SRR17520069.3828109  
SRR17520069.3828111  
SRR17520069.3828113  
SRR17520069.3828115  
SRR17520069.3830412  
SRR17520069.3830414  
SRR17520069.3830656  
SRR17520069.3830658  
SRR17520069.3830660  
SRR17520069.3830662  
SRR17520069.3830664  
SRR17520069.3830666  
SRR17520069.3830668  
SRR17520069.3830670  
SRR17520069.3830672  
SRR17520069.3830674  
SRR17520069.3830676  
SRR17520069.3830678  
SRR17520069.3830680  
SRR17520069.3830682  
SRR17520069.3830684  
SRR17520069.3836609  
SRR17520069.3836611  
SRR17520069.3836613  
SRR17520069.3836615  
SRR17520069.3836617  
SRR17520069.3836619  
SRR17520069.3836621  
SRR17520069.3836623  
SRR17520069.3836625  
SRR17520069.3836627  
SRR17520069.3836629  
SRR17520069.3836631  
SRR17520069.3836633  
SRR17520069.3836635  
SRR17520069.3839137  
SRR17520069.3839139  
SRR17520069.3839141  
SRR17520069.3839143  
SRR17520069.3839145

SRR17520069. 3839147  
SRR17520069. 3839149  
SRR17520069. 3839151  
SRR17520069. 3839153  
SRR17520069. 3839155  
SRR17520069. 3839159  
SRR17520069. 3839161  
SRR17520069. 3839163  
SRR17520069. 3839165  
SRR17520069. 3839167  
SRR17520069. 3839169  
SRR17520069. 3839171  
SRR17520069. 3839173  
SRR17520069. 3839175  
SRR17520069. 3839179  
SRR17520069. 3839181  
SRR17520069. 3839183  
SRR17520069. 3839185  
SRR17520069. 3839187  
SRR17520069. 3839189  
SRR17520069. 3839191  
SRR17520069. 3839193  
SRR17520069. 3839195  
SRR17520069. 3839197  
SRR17520069. 3843012  
SRR17520069. 3843014  
SRR17520069. 3843016  
SRR17520069. 3843018  
SRR17520069. 3843020  
SRR17520069. 3843022  
SRR17520069. 3843024  
SRR17520069. 3843026  
SRR17520069. 3843028  
SRR17520069. 3843030  
SRR17520069. 3843032  
SRR17520069. 3843034  
SRR17520069. 3843036  
SRR17520069. 3843038  
SRR17520069. 3843040  
SRR17520069. 3843042  
SRR17520069. 3843044  
SRR17520069. 3843046  
SRR17520069. 3843048  
SRR17520069. 3843050  
SRR17520069. 3843052  
SRR17520069. 3843054  
SRR17520069. 3843056



SRR17520069. 3843058  
SRR17520069. 3843060  
SRR17520069. 3844488  
SRR17520069. 3844490  
SRR17520069. 3849555  
SRR17520069. 3849557  
SRR17520069. 3849559  
SRR17520069. 3849561  
SRR17520069. 3849563  
SRR17520069. 3849565  
SRR17520069. 3849569  
SRR17520069. 3849571  
SRR17520069. 3849573  
SRR17520069. 3849575  
SRR17520069. 3849577  
SRR17520069. 3849579  
SRR17520069. 3849581  
SRR17520069. 3849583  
SRR17520069. 3849585  
SRR17520069. 3849587  
SRR17520069. 3849589  
SRR17520069. 3849591  
SRR17520069. 3849593  
SRR17520069. 3849595  
SRR17520069. 3849597  
SRR17520069. 3849599  
SRR17520069. 3849601  
SRR17520069. 3849603  
SRR17520069. 3849605  
SRR17520069. 3849607  
SRR17520069. 3849609  
SRR17520069. 3849611  
SRR17520069. 3849615  
SRR17520069. 3861279  
SRR17520069. 3861281  
SRR17520069. 3861283  
SRR17520069. 3861285  
SRR17520069. 3861287  
SRR17520069. 3861289  
SRR17520069. 3861291  
SRR17520069. 3861293  
SRR17520069. 3861295  
SRR17520069. 3861297  
SRR17520069. 3861299  
SRR17520069. 3861301  
SRR17520069. 3861303  
SRR17520069. 3861305

SRR17520069. 3861307  
SRR17520069. 3861309  
SRR17520069. 3861311  
SRR17520069. 3861313  
SRR17520069. 3861315  
SRR17520069. 3861317  
SRR17520069. 3861319  
SRR17520069. 3861321  
SRR17520069. 3861323  
SRR17520069. 3862574  
SRR17520069. 3862576  
SRR17520069. 3862578  
SRR17520069. 3862580  
SRR17520069. 3862582  
SRR17520069. 3862584  
SRR17520069. 3862586  
SRR17520069. 3862588  
SRR17520069. 3863450  
SRR17520069. 3863452  
SRR17520069. 3863454  
SRR17520069. 3863456  
SRR17520069. 3863458  
SRR17520069. 3863460  
SRR17520069. 3863462  
SRR17520069. 3863464  
SRR17520069. 3863468  
SRR17520069. 3863470  
SRR17520069. 3863474  
SRR17520069. 3863478  
SRR17520069. 3863480  
SRR17520069. 3863482  
SRR17520069. 3863484  
SRR17520069. 3863486  
SRR17520069. 3863488  
SRR17520069. 3863490  
SRR17520069. 3863492  
SRR17520069. 3863494  
SRR17520069. 3863496  
SRR17520069. 3863498  
SRR17520069. 3863500  
SRR17520069. 3863502  
SRR17520069. 3863504  
SRR17520069. 3863506  
SRR17520069. 3863508  
SRR17520069. 3863510  
SRR17520069. 3863512  
SRR17520069. 3863514

SRR17520069. 3863516  
SRR17520069. 3863518  
SRR17520069. 3863520  
SRR17520069. 3863522  
SRR17520069. 3864818  
SRR17520069. 3864820  
SRR17520069. 3864822  
SRR17520069. 3864824  
SRR17520069. 3864826  
SRR17520069. 3864828  
SRR17520069. 3864830  
SRR17520069. 3864832  
SRR17520069. 3864834  
SRR17520069. 3865267  
SRR17520069. 3865269  
SRR17520069. 3865271  
SRR17520069. 3865273  
SRR17520069. 3865275  
SRR17520069. 3865277  
SRR17520069. 3865279  
SRR17520069. 3865281  
SRR17520069. 3873820  
SRR17520069. 3873822  
SRR17520069. 3877130  
SRR17520069. 3877132  
SRR17520069. 3877134  
SRR17520069. 3877136  
SRR17520069. 3877138  
SRR17520069. 3877140  
SRR17520069. 3877142  
SRR17520069. 3877144  
SRR17520069. 3877146  
SRR17520069. 3877148  
SRR17520069. 3877150  
SRR17520069. 3877152  
SRR17520069. 3881549  
SRR17520069. 3881551  
SRR17520069. 3881553  
SRR17520069. 3881555  
SRR17520069. 3881557  
SRR17520069. 3884387  
SRR17520069. 3884389  
SRR17520069. 3884391  
SRR17520069. 3884393  
SRR17520069. 3884395  
SRR17520069. 3884397  
SRR17520069. 3884399

SRR17520069. 3884401  
SRR17520069. 3884403  
SRR17520069. 3884405  
SRR17520069. 3884407  
SRR17520069. 3884409  
SRR17520069. 3887066  
SRR17520069. 3887068  
SRR17520069. 3891836  
SRR17520069. 3891838  
SRR17520069. 3891840  
SRR17520069. 3891842  
SRR17520069. 3891844  
SRR17520069. 3891846  
SRR17520069. 3891848  
SRR17520069. 3891850  
SRR17520069. 3891852  
SRR17520069. 3891854  
SRR17520069. 3891856  
SRR17520069. 3891858  
SRR17520069. 3891860  
SRR17520069. 3891864  
SRR17520069. 3891866  
SRR17520069. 3891868  
SRR17520069. 3891870  
SRR17520069. 3891872  
SRR17520069. 3891874  
SRR17520069. 3891876  
SRR17520069. 3891878  
SRR17520069. 3896497  
SRR17520069. 3902607  
SRR17520069. 3902609  
SRR17520069. 3902611  
SRR17520069. 3902613  
SRR17520069. 3902615  
SRR17520069. 3902617  
SRR17520069. 3902619  
SRR17520069. 3902621  
SRR17520069. 3902623  
SRR17520069. 3902625  
SRR17520069. 3902627  
SRR17520069. 3902629  
SRR17520069. 3902633  
SRR17520069. 3902635  
SRR17520069. 3902637  
SRR17520069. 3902639  
SRR17520069. 3902641  
SRR17520069. 3902645

SRR17520069.3902647  
SRR17520069.3902649  
SRR17520069.3902651  
SRR17520069.3902653  
SRR17520069.3902655  
SRR17520069.3902657  
SRR17520069.3902659  
SRR17520069.3902661  
SRR17520069.3903089  
SRR17520069.3903091  
SRR17520069.3903093  
SRR17520069.3903095  
SRR17520069.3903097  
SRR17520069.3903099  
SRR17520069.3903101  
SRR17520069.3903103  
SRR17520069.3903105  
SRR17520069.3903107  
SRR17520069.3903109  
SRR17520069.3903111  
SRR17520069.3903113  
SRR17520069.3903115  
SRR17520069.3903117  
SRR17520069.3903119  
SRR17520069.3903121  
SRR17520069.3904401  
SRR17520069.3904403  
SRR17520069.3904405  
SRR17520069.3907459  
SRR17520069.3907461  
SRR17520069.3907463  
SRR17520069.3907465  
SRR17520069.3908528  
SRR17520069.3908530  
SRR17520069.3908532  
SRR17520069.3908534  
SRR17520069.3908536  
SRR17520069.3908538  
SRR17520069.3908540  
SRR17520069.3908542  
SRR17520069.3908544  
SRR17520069.3908546  
SRR17520069.3908548  
SRR17520069.3908550  
SRR17520069.3908552  
SRR17520069.3908554  
SRR17520069.3908556

SRR17520069.3908558  
SRR17520069.3908560  
SRR17520069.3908562  
SRR17520069.3911380  
SRR17520069.3911382  
SRR17520069.3911384  
SRR17520069.3911386  
SRR17520069.3911388  
SRR17520069.3911390  
SRR17520069.3911392  
SRR17520069.3911394  
SRR17520069.3911398  
SRR17520069.3911400  
SRR17520069.3911402  
SRR17520069.3911404  
SRR17520069.3911406  
SRR17520069.3911408  
SRR17520069.3911410  
SRR17520069.3911412  
SRR17520069.3911414  
SRR17520069.3911416  
SRR17520069.3911418  
SRR17520069.3911420  
SRR17520069.3911422  
SRR17520069.3913873  
SRR17520069.3913875  
SRR17520069.3913877  
SRR17520069.3913879  
SRR17520069.3913881  
SRR17520069.3913883  
SRR17520069.3913885  
SRR17520069.3913889  
SRR17520069.3913891  
SRR17520069.3913893  
SRR17520069.3913895  
SRR17520069.3913897  
SRR17520069.3913899  
SRR17520069.3913901  
SRR17520069.3913903  
SRR17520069.3913905  
SRR17520069.3913907  
SRR17520069.3913909  
SRR17520069.3913911  
SRR17520069.3913913  
SRR17520069.3913917  
SRR17520069.3913919  
SRR17520069.3913921

SRR17520069. 3913923  
SRR17520069. 3913925  
SRR17520069. 3913927  
SRR17520069. 3913929  
SRR17520069. 3913931  
SRR17520069. 3913933  
SRR17520069. 3913935  
SRR17520069. 3913937  
SRR17520069. 3913939  
SRR17520069. 3913941  
SRR17520069. 3913943  
SRR17520069. 3913945  
SRR17520069. 3913947  
SRR17520069. 3914529  
SRR17520069. 3914531  
SRR17520069. 3914533  
SRR17520069. 3914535  
SRR17520069. 3914537  
SRR17520069. 3914539  
SRR17520069. 3914541  
SRR17520069. 3914543  
SRR17520069. 3914545  
SRR17520069. 3914547  
SRR17520069. 3914549  
SRR17520069. 3914551  
SRR17520069. 3914555  
SRR17520069. 3914557  
SRR17520069. 3918978  
SRR17520069. 3918980  
SRR17520069. 3918982  
SRR17520069. 3918984  
SRR17520069. 3918986  
SRR17520069. 3918988  
SRR17520069. 3918990  
SRR17520069. 3918992  
SRR17520069. 3918994  
SRR17520069. 3918996  
SRR17520069. 3918998  
SRR17520069. 3919000  
SRR17520069. 3919002  
SRR17520069. 3919004  
SRR17520069. 3919006  
SRR17520069. 3919008  
SRR17520069. 3919010  
SRR17520069. 3919012  
SRR17520069. 3919014  
SRR17520069. 3924717

SRR17520069. 3924719  
SRR17520069. 3924721  
SRR17520069. 3924725  
SRR17520069. 3924727  
SRR17520069. 3924729  
SRR17520069. 3924733  
SRR17520069. 3924735  
SRR17520069. 3924737  
SRR17520069. 3924739  
SRR17520069. 3924741  
SRR17520069. 3924743  
SRR17520069. 3924745  
SRR17520069. 3924747  
SRR17520069. 3924749  
SRR17520069. 3924751  
SRR17520069. 3924753  
SRR17520069. 3924755  
SRR17520069. 3924757  
SRR17520069. 3924759  
SRR17520069. 3924761  
SRR17520069. 3924763  
SRR17520069. 3924765  
SRR17520069. 3924767  
SRR17520069. 3924769  
SRR17520069. 3924771  
SRR17520069. 3924773  
SRR17520069. 3924775  
SRR17520069. 3924777  
SRR17520069. 3924779  
SRR17520069. 3924781  
SRR17520069. 3924783  
SRR17520069. 3924787  
SRR17520069. 3924789  
SRR17520069. 3924791  
SRR17520069. 3924793  
SRR17520069. 3924795  
SRR17520069. 3924797  
SRR17520069. 3924799  
SRR17520069. 3924801  
SRR17520069. 3924803  
SRR17520069. 3924805  
SRR17520069. 3924807  
SRR17520069. 3924809  
SRR17520069. 3924811  
SRR17520069. 3924813  
SRR17520069. 3924815  
SRR17520069. 3924817



SRR17520069.3924821  
SRR17520069.3924823  
SRR17520069.3930272  
SRR17520069.3930276  
SRR17520069.3930278  
SRR17520069.3930280  
SRR17520069.3930282  
SRR17520069.3930284  
SRR17520069.3930286  
SRR17520069.3930288  
SRR17520069.3930290  
SRR17520069.3930292  
SRR17520069.3930294  
SRR17520069.3930296  
SRR17520069.3930298  
SRR17520069.3930300  
SRR17520069.3930302  
SRR17520069.3930304  
SRR17520069.3930306  
SRR17520069.3930308  
SRR17520069.3930310  
SRR17520069.3930312  
SRR17520069.3930314  
SRR17520069.3930316  
SRR17520069.3930318  
SRR17520069.3930320  
SRR17520069.3930322  
SRR17520069.3930324  
SRR17520069.3930326  
SRR17520069.3930328  
SRR17520069.3930332  
SRR17520069.3942423  
SRR17520069.3942425  
SRR17520069.3942427  
SRR17520069.3942429  
SRR17520069.3942431  
SRR17520069.3946732  
SRR17520069.3946734  
SRR17520069.3946738  
SRR17520069.3946740  
SRR17520069.3949835  
SRR17520069.3949837  
SRR17520069.3949839  
SRR17520069.3949841  
SRR17520069.3949843  
SRR17520069.3949845  
SRR17520069.3949847

SRR17520069. 3949849  
SRR17520069. 3949851  
SRR17520069. 3953032  
SRR17520069. 3953034  
SRR17520069. 3953036  
SRR17520069. 3953038  
SRR17520069. 3953040  
SRR17520069. 3953042  
SRR17520069. 3953044  
SRR17520069. 3953046  
SRR17520069. 3953048  
SRR17520069. 3953050  
SRR17520069. 3953052  
SRR17520069. 3953054  
SRR17520069. 3953056  
SRR17520069. 3953058  
SRR17520069. 3953060  
SRR17520069. 3953062  
SRR17520069. 3954773  
SRR17520069. 3954775  
SRR17520069. 3954777  
SRR17520069. 3954779  
SRR17520069. 3954781  
SRR17520069. 3954783  
SRR17520069. 3954785  
SRR17520069. 3954789  
SRR17520069. 3954793  
SRR17520069. 3954797  
SRR17520069. 3954799  
SRR17520069. 3954801  
SRR17520069. 3954803  
SRR17520069. 3954805  
SRR17520069. 3954809  
SRR17520069. 3954811  
SRR17520069. 3954813  
SRR17520069. 3954817  
SRR17520069. 3954819  
SRR17520069. 3954821  
SRR17520069. 3954823  
SRR17520069. 3954825  
SRR17520069. 3954827  
SRR17520069. 3954831  
SRR17520069. 3954833  
SRR17520069. 3954835  
SRR17520069. 3954837  
SRR17520069. 3954841  
SRR17520069. 3954843

SRR17520069. 3954845  
SRR17520069. 3954847  
SRR17520069. 3954851  
SRR17520069. 3954853  
SRR17520069. 3954857  
SRR17520069. 3960569  
SRR17520069. 3960571  
SRR17520069. 3960573  
SRR17520069. 3960575  
SRR17520069. 3960579  
SRR17520069. 3960581  
SRR17520069. 3960583  
SRR17520069. 3960585  
SRR17520069. 3960587  
SRR17520069. 3960589  
SRR17520069. 3960591  
SRR17520069. 3960593  
SRR17520069. 3960595  
SRR17520069. 3960597  
SRR17520069. 3960599  
SRR17520069. 3960601  
SRR17520069. 3960603  
SRR17520069. 3960605  
SRR17520069. 3960607  
SRR17520069. 3960609  
SRR17520069. 3960611  
SRR17520069. 3960615  
SRR17520069. 3960617  
SRR17520069. 3960621  
SRR17520069. 3960623  
SRR17520069. 3960625  
SRR17520069. 3960627  
SRR17520069. 3960629  
SRR17520069. 3962078  
SRR17520069. 3962080  
SRR17520069. 3962082  
SRR17520069. 3962084  
SRR17520069. 3962086  
SRR17520069. 3962088  
SRR17520069. 3962090  
SRR17520069. 3962092  
SRR17520069. 3962094  
SRR17520069. 3962096  
SRR17520069. 3962098  
SRR17520069. 3962100  
SRR17520069. 3962102  
SRR17520069. 3962104

SRR17520069. 3962106  
SRR17520069. 3962108  
SRR17520069. 3962110  
SRR17520069. 3962112  
SRR17520069. 3962114  
SRR17520069. 3962118  
SRR17520069. 3962120  
SRR17520069. 3962122  
SRR17520069. 3962124  
SRR17520069. 3962126  
SRR17520069. 3962128  
SRR17520069. 3962130  
SRR17520069. 3962132  
SRR17520069. 3962134  
SRR17520069. 3962136  
SRR17520069. 3962138  
SRR17520069. 3962140  
SRR17520069. 3962142  
SRR17520069. 3962144  
SRR17520069. 3962146  
SRR17520069. 3962148  
SRR17520069. 3962150  
SRR17520069. 3962152  
SRR17520069. 3962154  
SRR17520069. 3962156  
SRR17520069. 3962158  
SRR17520069. 3962160  
SRR17520069. 3962162  
SRR17520069. 3962164  
SRR17520069. 3962166  
SRR17520069. 3962168  
SRR17520069. 3962170  
SRR17520069. 3962172  
SRR17520069. 3962178  
SRR17520069. 3962180  
SRR17520069. 3966526  
SRR17520069. 3966528  
SRR17520069. 3966530  
SRR17520069. 3966532  
SRR17520069. 3966534  
SRR17520069. 3966536  
SRR17520069. 3966538  
SRR17520069. 3968288  
SRR17520069. 3968290  
SRR17520069. 3968292  
SRR17520069. 3968294  
SRR17520069. 3968296

SRR17520069. 3968298  
SRR17520069. 3968300  
SRR17520069. 3968302  
SRR17520069. 3968304  
SRR17520069. 3968306  
SRR17520069. 3968308  
SRR17520069. 3968311  
SRR17520069. 3968313  
SRR17520069. 3971241  
SRR17520069. 3973166  
SRR17520069. 3973168  
SRR17520069. 3973170  
SRR17520069. 3973172  
SRR17520069. 3973174  
SRR17520069. 3973176  
SRR17520069. 3973178  
SRR17520069. 3973180  
SRR17520069. 3973182  
SRR17520069. 3973186  
SRR17520069. 3973188  
SRR17520069. 3973190  
SRR17520069. 3973192  
SRR17520069. 3973194  
SRR17520069. 3973196  
SRR17520069. 3973198  
SRR17520069. 3973200  
SRR17520069. 3973202  
SRR17520069. 3973204  
SRR17520069. 3973206  
SRR17520069. 3973210  
SRR17520069. 3973212  
SRR17520069. 3973214  
SRR17520069. 3973216  
SRR17520069. 3975041  
SRR17520069. 3975043  
SRR17520069. 3975045  
SRR17520069. 3981273  
SRR17520069. 3981275  
SRR17520069. 3981277  
SRR17520069. 3981279  
SRR17520069. 3981281  
SRR17520069. 3981283  
SRR17520069. 3984358  
SRR17520069. 3984360  
SRR17520069. 3984362  
SRR17520069. 3984364  
SRR17520069. 3984366

SRR17520069.3984368  
SRR17520069.3984370  
SRR17520069.3987303  
SRR17520069.3987307  
SRR17520069.3992999  
SRR17520069.3993001  
SRR17520069.3993007  
SRR17520069.3993009  
SRR17520069.3993011  
SRR17520069.3993013  
SRR17520069.3993015  
SRR17520069.3993017  
SRR17520069.3996178  
SRR17520069.3996180  
SRR17520069.3996182  
SRR17520069.3999781  
SRR17520069.3999785  
SRR17520069.3999787  
SRR17520069.4000565  
SRR17520069.4004011  
SRR17520069.4004013  
SRR17520069.4004015  
SRR17520069.4004017  
SRR17520069.4004019  
SRR17520069.4004021  
SRR17520069.4004023  
SRR17520069.4004027  
SRR17520069.4004029  
SRR17520069.4004031  
SRR17520069.4004033  
SRR17520069.4004035  
SRR17520069.4004039  
SRR17520069.4004341  
SRR17520069.4004343  
SRR17520069.4004345  
SRR17520069.4019663  
SRR17520069.4019665  
SRR17520069.4019667  
SRR17520069.4019669  
SRR17520069.4019671  
SRR17520069.4021064  
SRR17520069.4021066  
SRR17520069.4021068  
SRR17520069.4021070  
SRR17520069.4021072  
SRR17520069.4021074  
SRR17520069.4021076

SRR17520069.4021078  
SRR17520069.4021080  
SRR17520069.4021082  
SRR17520069.4021084  
SRR17520069.4021086  
SRR17520069.4021088  
SRR17520069.4021090  
SRR17520069.4021092  
SRR17520069.4021094  
SRR17520069.4021096  
SRR17520069.4021098  
SRR17520069.4021100  
SRR17520069.4021102  
SRR17520069.4021104  
SRR17520069.4021106  
SRR17520069.4021108  
SRR17520069.4021110  
SRR17520069.4021112  
SRR17520069.4021114  
SRR17520069.4021116  
SRR17520069.4021118  
SRR17520069.4021120  
SRR17520069.4021122  
SRR17520069.4021124  
SRR17520069.4021126  
SRR17520069.4021128  
SRR17520069.4021130  
SRR17520069.4021132  
SRR17520069.4021134  
SRR17520069.4021136  
SRR17520069.4021138  
SRR17520069.4027789  
SRR17520069.4027791  
SRR17520069.4028669  
SRR17520069.4032398  
SRR17520069.4032400  
SRR17520069.4032402  
SRR17520069.4039259  
SRR17520069.4039261  
SRR17520069.4039263  
SRR17520069.4039265  
SRR17520069.4039267  
SRR17520069.4039269  
SRR17520069.4039271  
SRR17520069.4039273  
SRR17520069.4039275  
SRR17520069.4039277

SRR17520069.4039279  
SRR17520069.4039281  
SRR17520069.4039283  
SRR17520069.4039285  
SRR17520069.4039287  
SRR17520069.4039289  
SRR17520069.4039291  
SRR17520069.4039293  
SRR17520069.4039295  
SRR17520069.4039297  
SRR17520069.4039299  
SRR17520069.4039301  
SRR17520069.4039303  
SRR17520069.4039305  
SRR17520069.4039307  
SRR17520069.4039309  
SRR17520069.4039311  
SRR17520069.4039313  
SRR17520069.4039315  
SRR17520069.4039317  
SRR17520069.4039319  
SRR17520069.4039321  
SRR17520069.4039323  
SRR17520069.4039325  
SRR17520069.4039327  
SRR17520069.4039329  
SRR17520069.4039331  
SRR17520069.4039333  
SRR17520069.4039335  
SRR17520069.4039337  
SRR17520069.4039339  
SRR17520069.4039341  
SRR17520069.4039343  
SRR17520069.4039345  
SRR17520069.4039347  
SRR17520069.4039349  
SRR17520069.4039351  
SRR17520069.4039353  
SRR17520069.4039355  
SRR17520069.4043584  
SRR17520069.4049573  
SRR17520069.4049575  
SRR17520069.4049577  
SRR17520069.4049579  
SRR17520069.4049581  
SRR17520069.4049583  
SRR17520069.4049585



SRR17520069.4049587  
SRR17520069.4049589  
SRR17520069.4049591  
SRR17520069.4049593  
SRR17520069.4049595  
SRR17520069.4049597  
SRR17520069.4049599  
SRR17520069.4049601  
SRR17520069.4049603  
SRR17520069.4049607  
SRR17520069.4049609  
SRR17520069.4049611  
SRR17520069.4049613  
SRR17520069.4049615  
SRR17520069.4049617  
SRR17520069.4049619  
SRR17520069.4049621  
SRR17520069.4049623  
SRR17520069.4049625  
SRR17520069.4049627  
SRR17520069.4049629  
SRR17520069.4049631  
SRR17520069.4049633  
SRR17520069.4049635  
SRR17520069.4049637  
SRR17520069.4049641  
SRR17520069.4049647  
SRR17520069.4049649  
SRR17520069.4049651  
SRR17520069.4049653  
SRR17520069.4049655  
SRR17520069.4049657  
SRR17520069.4049659  
SRR17520069.4049661  
SRR17520069.4049663  
SRR17520069.4049665  
SRR17520069.4049667  
SRR17520069.4049669  
SRR17520069.4049671  
SRR17520069.4049673  
SRR17520069.4049675  
SRR17520069.4049782  
SRR17520069.4049784  
SRR17520069.4049786  
SRR17520069.4049788  
SRR17520069.4049790  
SRR17520069.4049792

SRR17520069.4049794  
SRR17520069.4049796  
SRR17520069.4049798  
SRR17520069.4049800  
SRR17520069.4049802  
SRR17520069.4049804  
SRR17520069.4049806  
SRR17520069.4049808  
SRR17520069.4049810  
SRR17520069.4049812  
SRR17520069.4049814  
SRR17520069.4049816  
SRR17520069.4049818  
SRR17520069.4049820  
SRR17520069.4049822  
SRR17520069.4049824  
SRR17520069.4049826  
SRR17520069.4049828  
SRR17520069.4049830  
SRR17520069.4049832  
SRR17520069.4049834  
SRR17520069.4049836  
SRR17520069.4049838  
SRR17520069.4049840  
SRR17520069.4049842  
SRR17520069.4049844  
SRR17520069.4049846  
SRR17520069.4049848  
SRR17520069.4049850  
SRR17520069.4049852  
SRR17520069.4049854  
SRR17520069.4049856  
SRR17520069.4049858  
SRR17520069.4049860  
SRR17520069.4049862  
SRR17520069.4049864  
SRR17520069.4049866  
SRR17520069.4049870  
SRR17520069.4049872  
SRR17520069.4049874  
SRR17520069.4049876  
SRR17520069.4049878  
SRR17520069.4049880  
SRR17520069.4049882  
SRR17520069.4049884  
SRR17520069.4049886  
SRR17520069.4049888

SRR17520069.4049890  
SRR17520069.4049892  
SRR17520069.4049894  
SRR17520069.4049896  
SRR17520069.4049898  
SRR17520069.4049900  
SRR17520069.4049902  
SRR17520069.4049904  
SRR17520069.4049906  
SRR17520069.4049908  
SRR17520069.4049910  
SRR17520069.4049912  
SRR17520069.4049914  
SRR17520069.4051105  
SRR17520069.4051107  
SRR17520069.4051109  
SRR17520069.4051111  
SRR17520069.4051113  
SRR17520069.4051115  
SRR17520069.4051117  
SRR17520069.4051119  
SRR17520069.4051121  
SRR17520069.4051123  
SRR17520069.4051125  
SRR17520069.4051127  
SRR17520069.4051129  
SRR17520069.4051131  
SRR17520069.4051133  
SRR17520069.4051135  
SRR17520069.4053267  
SRR17520069.4053269  
SRR17520069.4053271  
SRR17520069.4053273  
SRR17520069.4053275  
SRR17520069.4053277  
SRR17520069.4053281  
SRR17520069.4053287  
SRR17520069.4053289  
SRR17520069.4053293  
SRR17520069.4053295  
SRR17520069.4053297  
SRR17520069.4053299  
SRR17520069.4053521  
SRR17520069.4053523  
SRR17520069.4053525  
SRR17520069.4053527  
SRR17520069.4053529

SRR17520069.4055529  
SRR17520069.4055531  
SRR17520069.4055533  
SRR17520069.4055535  
SRR17520069.4055537  
SRR17520069.4055539  
SRR17520069.4055541  
SRR17520069.4055543  
SRR17520069.4055545  
SRR17520069.4055547  
SRR17520069.4055549  
SRR17520069.4055551  
SRR17520069.4063073  
SRR17520069.4063075  
SRR17520069.4063077  
SRR17520069.4063079  
SRR17520069.4063081  
SRR17520069.4063085  
SRR17520069.4065723  
SRR17520069.4065725  
SRR17520069.4065727  
SRR17520069.4065729  
SRR17520069.4065731  
SRR17520069.4065733  
SRR17520069.4065735  
SRR17520069.4065737  
SRR17520069.4065739  
SRR17520069.4065741  
SRR17520069.4065743  
SRR17520069.4069852  
SRR17520069.4069854  
SRR17520069.4069856  
SRR17520069.4069884  
SRR17520069.4069886  
SRR17520069.4069888  
SRR17520069.4069890  
SRR17520069.4091960  
SRR17520069.4091962  
SRR17520069.4091964  
SRR17520069.4091966  
SRR17520069.4091968  
SRR17520069.4091970  
SRR17520069.4091972  
SRR17520069.4091974  
SRR17520069.4091976  
SRR17520069.4091978  
SRR17520069.4091980

SRR17520069.4091982  
SRR17520069.4091984  
SRR17520069.4091986  
SRR17520069.4091988  
SRR17520069.4091992  
SRR17520069.4091994  
SRR17520069.4091996  
SRR17520069.4091998  
SRR17520069.4092000  
SRR17520069.4092002  
SRR17520069.4092004  
SRR17520069.4092006  
SRR17520069.4092008  
SRR17520069.4092010  
SRR17520069.4092012  
SRR17520069.4092014  
SRR17520069.4092016  
SRR17520069.4092018  
SRR17520069.4092020  
SRR17520069.4092022  
SRR17520069.4092024  
SRR17520069.4092026  
SRR17520069.4092028  
SRR17520069.4092030  
SRR17520069.4092032  
SRR17520069.4092034  
SRR17520069.4092036  
SRR17520069.4092038  
SRR17520069.4092040  
SRR17520069.4092042  
SRR17520069.4092044  
SRR17520069.4092046  
SRR17520069.4092048  
SRR17520069.4092054  
SRR17520069.4092056  
SRR17520069.4092058  
SRR17520069.4092060  
SRR17520069.4092064  
SRR17520069.4092066  
SRR17520069.4092068  
SRR17520069.4092070  
SRR17520069.4092072  
SRR17520069.4092074  
SRR17520069.4096183  
SRR17520069.4096185  
SRR17520069.4096187  
SRR17520069.4096189

SRR17520069.4096191  
SRR17520069.4096193  
SRR17520069.4096195  
SRR17520069.4096197  
SRR17520069.4096199  
SRR17520069.4096201  
SRR17520069.4096203  
SRR17520069.4096205  
SRR17520069.4096207  
SRR17520069.4096209  
SRR17520069.4096211  
SRR17520069.4096213  
SRR17520069.4096215  
SRR17520069.4096217  
SRR17520069.4096219  
SRR17520069.4096221  
SRR17520069.4096223  
SRR17520069.4096225  
SRR17520069.4096227  
SRR17520069.4096229  
SRR17520069.4096231  
SRR17520069.4098126  
SRR17520069.4098128  
SRR17520069.4098130  
SRR17520069.4098132  
SRR17520069.4098134  
SRR17520069.4098136  
SRR17520069.4098138  
SRR17520069.4098140  
SRR17520069.4098142  
SRR17520069.4098144  
SRR17520069.4098148  
SRR17520069.4098150  
SRR17520069.4098152  
SRR17520069.4098154  
SRR17520069.4098156  
SRR17520069.4098662  
SRR17520069.4098664  
SRR17520069.4098666  
SRR17520069.4098668  
SRR17520069.4098670  
SRR17520069.4098672  
SRR17520069.4098674  
SRR17520069.4098676  
SRR17520069.4098678  
SRR17520069.4098680  
SRR17520069.4098682

SRR17520069.4103217  
SRR17520069.4103219  
SRR17520069.4103221  
SRR17520069.4103223  
SRR17520069.4103225  
SRR17520069.4103227  
SRR17520069.4103229  
SRR17520069.4103231  
SRR17520069.4103233  
SRR17520069.4103235  
SRR17520069.4103239  
SRR17520069.4103241  
SRR17520069.4103243  
SRR17520069.4103245  
SRR17520069.4103247  
SRR17520069.4103249  
SRR17520069.4103251  
SRR17520069.4103253  
SRR17520069.4103255  
SRR17520069.4103257  
SRR17520069.4103259  
SRR17520069.4103261  
SRR17520069.4103263  
SRR17520069.4103265  
SRR17520069.4103267  
SRR17520069.4103269  
SRR17520069.4103271  
SRR17520069.4103273  
SRR17520069.4103275  
SRR17520069.4103277  
SRR17520069.4103281  
SRR17520069.4103285  
SRR17520069.4103287  
SRR17520069.4103289  
SRR17520069.4103291  
SRR17520069.4103293  
SRR17520069.4103297  
SRR17520069.4103299  
SRR17520069.4103301  
SRR17520069.4103303  
SRR17520069.4103305  
SRR17520069.4103307  
SRR17520069.4103309  
SRR17520069.4103311  
SRR17520069.4103313  
SRR17520069.4103315  
SRR17520069.4103317

SRR17520069.4103319  
SRR17520069.4103323  
SRR17520069.4103325  
SRR17520069.4103327  
SRR17520069.4103329  
SRR17520069.4103331  
SRR17520069.4103333  
SRR17520069.4103335  
SRR17520069.4103337  
SRR17520069.4105950  
SRR17520069.4105952  
SRR17520069.4105954  
SRR17520069.4105956  
SRR17520069.4105958  
SRR17520069.4105960  
SRR17520069.4105962  
SRR17520069.4105964  
SRR17520069.4105966  
SRR17520069.4105968  
SRR17520069.4105970  
SRR17520069.4105972  
SRR17520069.4105974  
SRR17520069.4105976  
SRR17520069.4105978  
SRR17520069.4105980  
SRR17520069.4105982  
SRR17520069.4105984  
SRR17520069.4105986  
SRR17520069.4105988  
SRR17520069.4105990  
SRR17520069.4105992  
SRR17520069.4105994  
SRR17520069.4105996  
SRR17520069.4105998  
SRR17520069.4106000  
SRR17520069.4106002  
SRR17520069.4106004  
SRR17520069.4106006  
SRR17520069.4106008  
SRR17520069.4106010  
SRR17520069.4106012  
SRR17520069.4106014  
SRR17520069.4106016  
SRR17520069.4106018  
SRR17520069.4106020  
SRR17520069.4106022  
SRR17520069.4106024



SRR17520069.4106026  
SRR17520069.4106028  
SRR17520069.4106030  
SRR17520069.4106032  
SRR17520069.4107597  
SRR17520069.4108320  
SRR17520069.4108322  
SRR17520069.4108324  
SRR17520069.4108326  
SRR17520069.4108328  
SRR17520069.4108330  
SRR17520069.4108334  
SRR17520069.4108336  
SRR17520069.4111691  
SRR17520069.4111693  
SRR17520069.4111695  
SRR17520069.4111697  
SRR17520069.4111699  
SRR17520069.4111703  
SRR17520069.4111705  
SRR17520069.4111707  
SRR17520069.4111709  
SRR17520069.4111711  
SRR17520069.4111713  
SRR17520069.4111717  
SRR17520069.4111719  
SRR17520069.4111721  
SRR17520069.4111731  
SRR17520069.4111733  
SRR17520069.4111737  
SRR17520069.4111745  
SRR17520069.4111751  
SRR17520069.4111753  
SRR17520069.4111755  
SRR17520069.4112488  
SRR17520069.4112490  
SRR17520069.4112492  
SRR17520069.4113185  
SRR17520069.4113187  
SRR17520069.4113189  
SRR17520069.4114810  
SRR17520069.4114812  
SRR17520069.4114814  
SRR17520069.4114816  
SRR17520069.4114818  
SRR17520069.4114828  
SRR17520069.4120019

SRR17520069.4120021  
SRR17520069.4120026  
SRR17520069.4120028  
SRR17520069.4120030  
SRR17520069.4120032  
SRR17520069.4128534  
SRR17520069.4128536  
SRR17520069.4128538  
SRR17520069.4128540  
SRR17520069.4128542  
SRR17520069.4128544  
SRR17520069.4128546  
SRR17520069.4128548  
SRR17520069.4128550  
SRR17520069.4128552  
SRR17520069.4128554  
SRR17520069.4128556  
SRR17520069.4128558  
SRR17520069.4128560  
SRR17520069.4128562  
SRR17520069.4128566  
SRR17520069.4128568  
SRR17520069.4128570  
SRR17520069.4129885  
SRR17520069.4138500  
SRR17520069.4138502  
SRR17520069.4138504  
SRR17520069.4138506  
SRR17520069.4138508  
SRR17520069.4138510  
SRR17520069.4138512  
SRR17520069.4138514  
SRR17520069.4144727  
SRR17520069.4144729  
SRR17520069.4144731  
SRR17520069.4144733  
SRR17520069.4144735  
SRR17520069.4151387  
SRR17520069.4151389  
SRR17520069.4151391  
SRR17520069.4151393  
SRR17520069.4151395  
SRR17520069.4151397  
SRR17520069.4151399  
SRR17520069.4151401  
SRR17520069.4151403  
SRR17520069.4155075

SRR17520069.4155077  
SRR17520069.4155079  
SRR17520069.4155081  
SRR17520069.4155085  
SRR17520069.4155087  
SRR17520069.4155089  
SRR17520069.4155091  
SRR17520069.4155093  
SRR17520069.4155097  
SRR17520069.4155099  
SRR17520069.4155101  
SRR17520069.4155103  
SRR17520069.4155105  
SRR17520069.4155107  
SRR17520069.4155109  
SRR17520069.4155111  
SRR17520069.4155115  
SRR17520069.4155119  
SRR17520069.4155121  
SRR17520069.4157356  
SRR17520069.4157358  
SRR17520069.4157360  
SRR17520069.4157362  
SRR17520069.4157364  
SRR17520069.4157366  
SRR17520069.4157368  
SRR17520069.4157370  
SRR17520069.4157372  
SRR17520069.4157374  
SRR17520069.4157376  
SRR17520069.4158207  
SRR17520069.4158209  
SRR17520069.4158211  
SRR17520069.4158213  
SRR17520069.4158217  
SRR17520069.4158219  
SRR17520069.4158223  
SRR17520069.4158225  
SRR17520069.4158227  
SRR17520069.4158229  
SRR17520069.4158231  
SRR17520069.4158233  
SRR17520069.4158235  
SRR17520069.4158237  
SRR17520069.4158239  
SRR17520069.4158241  
SRR17520069.4158243

SRR17520069.4158245  
SRR17520069.4158247  
SRR17520069.4158249  
SRR17520069.4158251  
SRR17520069.4158253  
SRR17520069.4158255  
SRR17520069.4158257  
SRR17520069.4158259  
SRR17520069.4158261  
SRR17520069.4158263  
SRR17520069.4158265  
SRR17520069.4158267  
SRR17520069.4158269  
SRR17520069.4158271  
SRR17520069.4158273  
SRR17520069.4158275  
SRR17520069.4158277  
SRR17520069.4158279  
SRR17520069.4158281  
SRR17520069.4158283  
SRR17520069.4158285  
SRR17520069.4158287  
SRR17520069.4158289  
SRR17520069.4158291  
SRR17520069.4158293  
SRR17520069.4158295  
SRR17520069.4158297  
SRR17520069.4158299  
SRR17520069.4158301  
SRR17520069.4158303  
SRR17520069.4158305  
SRR17520069.4158307  
SRR17520069.4158309  
SRR17520069.4158311  
SRR17520069.4158313  
SRR17520069.4158315  
SRR17520069.4158317  
SRR17520069.4158319  
SRR17520069.4160320  
SRR17520069.4160322  
SRR17520069.4160324  
SRR17520069.4160326  
SRR17520069.4161828  
SRR17520069.4162532  
SRR17520069.4162536  
SRR17520069.4164823  
SRR17520069.4164825

SRR17520069. 4164827  
SRR17520069. 4164829  
SRR17520069. 4164831  
SRR17520069. 4164833  
SRR17520069. 4164835  
SRR17520069. 4164837  
SRR17520069. 4164839  
SRR17520069. 4164841  
SRR17520069. 4164843  
SRR17520069. 4164845  
SRR17520069. 4164847  
SRR17520069. 4164849  
SRR17520069. 4164851  
SRR17520069. 4164853  
SRR17520069. 4164855  
SRR17520069. 4164857  
SRR17520069. 4164859  
SRR17520069. 4164861  
SRR17520069. 4164863  
SRR17520069. 4164865  
SRR17520069. 4164867  
SRR17520069. 4164869  
SRR17520069. 4164871  
SRR17520069. 4164873  
SRR17520069. 4164875  
SRR17520069. 4164877  
SRR17520069. 4164879  
SRR17520069. 4164881  
SRR17520069. 4164883  
SRR17520069. 4164885  
SRR17520069. 4164887  
SRR17520069. 4164889  
SRR17520069. 4164891  
SRR17520069. 4164893  
SRR17520069. 4164895  
SRR17520069. 4164897  
SRR17520069. 4164899  
SRR17520069. 4170347  
SRR17520069. 4170349  
SRR17520069. 4170351  
SRR17520069. 4170353  
SRR17520069. 4170355  
SRR17520069. 4170359  
SRR17520069. 4170361  
SRR17520069. 4170363  
SRR17520069. 4170365  
SRR17520069. 4170367

SRR17520069.4170369  
SRR17520069.4170371  
SRR17520069.4170373  
SRR17520069.4170375  
SRR17520069.4170377  
SRR17520069.4170379  
SRR17520069.4170381  
SRR17520069.4170383  
SRR17520069.4170385  
SRR17520069.4170387  
SRR17520069.4170389  
SRR17520069.4170391  
SRR17520069.4170393  
SRR17520069.4170395  
SRR17520069.4170397  
SRR17520069.4170399  
SRR17520069.4170401  
SRR17520069.4170403  
SRR17520069.4170405  
SRR17520069.4170407  
SRR17520069.4173063  
SRR17520069.4173067  
SRR17520069.4173069  
SRR17520069.4173071  
SRR17520069.4173073  
SRR17520069.4173075  
SRR17520069.4173077  
SRR17520069.4173079  
SRR17520069.4173081  
SRR17520069.4173083  
SRR17520069.4173087  
SRR17520069.4173089  
SRR17520069.4173091  
SRR17520069.4173093  
SRR17520069.4173095  
SRR17520069.4173097  
SRR17520069.4173099  
SRR17520069.4173101  
SRR17520069.4173103  
SRR17520069.4173105  
SRR17520069.4173107  
SRR17520069.4173109  
SRR17520069.4173111  
SRR17520069.4173113  
SRR17520069.4173115  
SRR17520069.4173117  
SRR17520069.4178805

SRR17520069.4178807  
SRR17520069.4178811  
SRR17520069.4178813  
SRR17520069.4180891  
SRR17520069.4183815  
SRR17520069.4183817  
SRR17520069.4183819  
SRR17520069.4183821  
SRR17520069.4183823  
SRR17520069.4183825  
SRR17520069.4183827  
SRR17520069.4189749  
SRR17520069.4189751  
SRR17520069.4189753  
SRR17520069.4189755  
SRR17520069.4189981  
SRR17520069.4189983  
SRR17520069.4189987  
SRR17520069.4189991  
SRR17520069.4189993  
SRR17520069.4189995  
SRR17520069.4189997  
SRR17520069.4189999  
SRR17520069.4190001  
SRR17520069.4190003  
SRR17520069.4190005  
SRR17520069.4190007  
SRR17520069.4190298  
SRR17520069.4190300  
SRR17520069.4190302  
SRR17520069.4190304  
SRR17520069.4190306  
SRR17520069.4190308  
SRR17520069.4190310  
SRR17520069.4190312  
SRR17520069.4190314  
SRR17520069.4190316  
SRR17520069.4190318  
SRR17520069.4190320  
SRR17520069.4190322  
SRR17520069.4190326  
SRR17520069.4190328  
SRR17520069.4190330  
SRR17520069.4190332  
SRR17520069.4190334  
SRR17520069.4190336  
SRR17520069.4190338

SRR17520069.4190340  
SRR17520069.4190342  
SRR17520069.4190344  
SRR17520069.4190346  
SRR17520069.4190348  
SRR17520069.4190350  
SRR17520069.4190352  
SRR17520069.4190354  
SRR17520069.4190356  
SRR17520069.4190358  
SRR17520069.4190360  
SRR17520069.4190362  
SRR17520069.4190364  
SRR17520069.4190366  
SRR17520069.4190368  
SRR17520069.4190370  
SRR17520069.4190372  
SRR17520069.4190374  
SRR17520069.4190376  
SRR17520069.4190378  
SRR17520069.4190380  
SRR17520069.4190382  
SRR17520069.4190384  
SRR17520069.4190386  
SRR17520069.4190388  
SRR17520069.4190390  
SRR17520069.4190392  
SRR17520069.4190394  
SRR17520069.4190396  
SRR17520069.4191666  
SRR17520069.4191668  
SRR17520069.4191670  
SRR17520069.4191672  
SRR17520069.4191674  
SRR17520069.4191676  
SRR17520069.4191678  
SRR17520069.4191680  
SRR17520069.4191682  
SRR17520069.4191684  
SRR17520069.4191686  
SRR17520069.4191688  
SRR17520069.4191690  
SRR17520069.4191692  
SRR17520069.4191694  
SRR17520069.4191696  
SRR17520069.4191698  
SRR17520069.4191700



SRR17520069.4191702  
SRR17520069.4191704  
SRR17520069.4191706  
SRR17520069.4191708  
SRR17520069.4191710  
SRR17520069.4191712  
SRR17520069.4191714  
SRR17520069.4191716  
SRR17520069.4191718  
SRR17520069.4204578  
SRR17520069.4204580  
SRR17520069.4205997  
SRR17520069.4206001  
SRR17520069.4206003  
SRR17520069.4206005  
SRR17520069.4206007  
SRR17520069.4206009  
SRR17520069.4206011  
SRR17520069.4206013  
SRR17520069.4206015  
SRR17520069.4206017  
SRR17520069.4206019  
SRR17520069.4214548  
SRR17520069.4214550  
SRR17520069.4214552  
SRR17520069.4214554  
SRR17520069.4214556  
SRR17520069.4214558  
SRR17520069.4214560  
SRR17520069.4214562  
SRR17520069.4214564  
SRR17520069.4214566  
SRR17520069.4214568  
SRR17520069.4214570  
SRR17520069.4214572  
SRR17520069.4214574  
SRR17520069.4214576  
SRR17520069.4214578  
SRR17520069.4214580  
SRR17520069.4214584  
SRR17520069.4214586  
SRR17520069.4215625  
SRR17520069.4215627  
SRR17520069.4215629  
SRR17520069.4215631  
SRR17520069.4215633  
SRR17520069.4215637

SRR17520069.4215639  
SRR17520069.4215641  
SRR17520069.4215643  
SRR17520069.4215647  
SRR17520069.4217485  
SRR17520069.4217487  
SRR17520069.4217489  
SRR17520069.4217491  
SRR17520069.4217495  
SRR17520069.4217497  
SRR17520069.4217501  
SRR17520069.4217503  
SRR17520069.4217505  
SRR17520069.4217507  
SRR17520069.4217511  
SRR17520069.4217513  
SRR17520069.4217515  
SRR17520069.4217517  
SRR17520069.4217521  
SRR17520069.4217523  
SRR17520069.4217525  
SRR17520069.4217527  
SRR17520069.4217529  
SRR17520069.4217531  
SRR17520069.4217533  
SRR17520069.4217535  
SRR17520069.4217537  
SRR17520069.4217539  
SRR17520069.4217541  
SRR17520069.4217543  
SRR17520069.4217545  
SRR17520069.4217549  
SRR17520069.4217551  
SRR17520069.4217553  
SRR17520069.4217555  
SRR17520069.4217557  
SRR17520069.4217559  
SRR17520069.4217561  
SRR17520069.4217563  
SRR17520069.4217565  
SRR17520069.4217567  
SRR17520069.4217569  
SRR17520069.4220605  
SRR17520069.4221314  
SRR17520069.4221316  
SRR17520069.4221318  
SRR17520069.4223170

SRR17520069.4223172  
SRR17520069.4223174  
SRR17520069.4223176  
SRR17520069.4223178  
SRR17520069.4223180  
SRR17520069.4223182  
SRR17520069.4223184  
SRR17520069.4223186  
SRR17520069.4223188  
SRR17520069.4223190  
SRR17520069.4223192  
SRR17520069.4223194  
SRR17520069.4223196  
SRR17520069.4223198  
SRR17520069.4223200  
SRR17520069.4223202  
SRR17520069.4223204  
SRR17520069.4223206  
SRR17520069.4223208  
SRR17520069.4223210  
SRR17520069.4223212  
SRR17520069.4223214  
SRR17520069.4223216  
SRR17520069.4223218  
SRR17520069.4223220  
SRR17520069.4223222  
SRR17520069.4223224  
SRR17520069.4223228  
SRR17520069.4223230  
SRR17520069.4223232  
SRR17520069.4223234  
SRR17520069.4223236  
SRR17520069.4223238  
SRR17520069.4223240  
SRR17520069.4223242  
SRR17520069.4223244  
SRR17520069.4223246  
SRR17520069.4223248  
SRR17520069.4225251  
SRR17520069.4231939  
SRR17520069.4231941  
SRR17520069.4231943  
SRR17520069.4231945  
SRR17520069.4231947  
SRR17520069.4231949  
SRR17520069.4231951  
SRR17520069.4231953

SRR17520069.4231955  
SRR17520069.4231957  
SRR17520069.4231959  
SRR17520069.4231961  
SRR17520069.4231963  
SRR17520069.4231965  
SRR17520069.4231967  
SRR17520069.4231969  
SRR17520069.4231971  
SRR17520069.4231973  
SRR17520069.4231975  
SRR17520069.4231977  
SRR17520069.4231981  
SRR17520069.4231983  
SRR17520069.4231985  
SRR17520069.4231987  
SRR17520069.4231989  
SRR17520069.4231991  
SRR17520069.4231993  
SRR17520069.4231995  
SRR17520069.4231997  
SRR17520069.4231999  
SRR17520069.4232001  
SRR17520069.4232005  
SRR17520069.4232007  
SRR17520069.4232009  
SRR17520069.4232011  
SRR17520069.4232013  
SRR17520069.4232015  
SRR17520069.4232017  
SRR17520069.4232019  
SRR17520069.4232021  
SRR17520069.4232023  
SRR17520069.4232025  
SRR17520069.4232027  
SRR17520069.4232029  
SRR17520069.4232031  
SRR17520069.4232033  
SRR17520069.4232035  
SRR17520069.4232037  
SRR17520069.4232041  
SRR17520069.4232043  
SRR17520069.4232045  
SRR17520069.4232047  
SRR17520069.4232049  
SRR17520069.4232051  
SRR17520069.4232055

SRR17520069.4232057  
SRR17520069.4232059  
SRR17520069.4232061  
SRR17520069.4232063  
SRR17520069.4232065  
SRR17520069.4232067  
SRR17520069.4232069  
SRR17520069.4232071  
SRR17520069.4232075  
SRR17520069.4232077  
SRR17520069.4232079  
SRR17520069.4232081  
SRR17520069.4232083  
SRR17520069.4232085  
SRR17520069.4232087  
SRR17520069.4232089  
SRR17520069.4232091  
SRR17520069.4232093  
SRR17520069.4232095  
SRR17520069.4232097  
SRR17520069.4232099  
SRR17520069.4233937  
SRR17520069.4233939  
SRR17520069.4233941  
SRR17520069.4233943  
SRR17520069.4233945  
SRR17520069.4234689  
SRR17520069.4234691  
SRR17520069.4234693  
SRR17520069.4234695  
SRR17520069.4234697  
SRR17520069.4234699  
SRR17520069.4234701  
SRR17520069.4234703  
SRR17520069.4234705  
SRR17520069.4234707  
SRR17520069.4234709  
SRR17520069.4234713  
SRR17520069.4234715  
SRR17520069.4234753  
SRR17520069.4234755  
SRR17520069.4234757  
SRR17520069.4234759  
SRR17520069.4234761  
SRR17520069.4234763  
SRR17520069.4234765  
SRR17520069.4234767

SRR17520069.4234769  
SRR17520069.4234771  
SRR17520069.4234773  
SRR17520069.4234775  
SRR17520069.4234777  
SRR17520069.4234779  
SRR17520069.4234781  
SRR17520069.4234783  
SRR17520069.4234785  
SRR17520069.4234787  
SRR17520069.4234789  
SRR17520069.4234791  
SRR17520069.4234793  
SRR17520069.4234795  
SRR17520069.4234797  
SRR17520069.4234967  
SRR17520069.4234969  
SRR17520069.4234971  
SRR17520069.4234973  
SRR17520069.4234975  
SRR17520069.4234977  
SRR17520069.4234979  
SRR17520069.4234981  
SRR17520069.4234983  
SRR17520069.4234985  
SRR17520069.4234987  
SRR17520069.4234989  
SRR17520069.4234991  
SRR17520069.4234993  
SRR17520069.4234995  
SRR17520069.4234997  
SRR17520069.4234999  
SRR17520069.4235418  
SRR17520069.4235420  
SRR17520069.4235422  
SRR17520069.4235424  
SRR17520069.4235426  
SRR17520069.4235428  
SRR17520069.4235430  
SRR17520069.4235432  
SRR17520069.4235434  
SRR17520069.4235436  
SRR17520069.4235438  
SRR17520069.4235440  
SRR17520069.4235442  
SRR17520069.4235444  
SRR17520069.4235446

SRR17520069.4240554  
SRR17520069.4240556  
SRR17520069.4240558  
SRR17520069.4240560  
SRR17520069.4240562  
SRR17520069.4240564  
SRR17520069.4240566  
SRR17520069.4240568  
SRR17520069.4240570  
SRR17520069.4240572  
SRR17520069.4240574  
SRR17520069.4240576  
SRR17520069.4240578  
SRR17520069.4240580  
SRR17520069.4240582  
SRR17520069.4240765  
SRR17520069.4240767  
SRR17520069.4240769  
SRR17520069.4240771  
SRR17520069.4240773  
SRR17520069.4240775  
SRR17520069.4240777  
SRR17520069.4240779  
SRR17520069.4240781  
SRR17520069.4240783  
SRR17520069.4240785  
SRR17520069.4240787  
SRR17520069.4240789  
SRR17520069.4240791  
SRR17520069.4240793  
SRR17520069.4240795  
SRR17520069.4240797  
SRR17520069.4240799  
SRR17520069.4240801  
SRR17520069.4240803  
SRR17520069.4240805  
SRR17520069.4240807  
SRR17520069.4240809  
SRR17520069.4240811  
SRR17520069.4240813  
SRR17520069.4240815  
SRR17520069.4240817  
SRR17520069.4240819  
SRR17520069.4240821  
SRR17520069.4240823  
SRR17520069.4240825  
SRR17520069.4240827

SRR17520069.4240829  
SRR17520069.4240831  
SRR17520069.4240833  
SRR17520069.4240835  
SRR17520069.4240837  
SRR17520069.4240839  
SRR17520069.4240841  
SRR17520069.4240843  
SRR17520069.4240849  
SRR17520069.4240851  
SRR17520069.4240853  
SRR17520069.4240855  
SRR17520069.4240857  
SRR17520069.4240859  
SRR17520069.4240861  
SRR17520069.4240863  
SRR17520069.4240865  
SRR17520069.4240867  
SRR17520069.4240869  
SRR17520069.4242379  
SRR17520069.4242383  
SRR17520069.4242700  
SRR17520069.4242702  
SRR17520069.4242704  
SRR17520069.4247739  
SRR17520069.4247741  
SRR17520069.4247743  
SRR17520069.4247745  
SRR17520069.4247747  
SRR17520069.4247749  
SRR17520069.4247751  
SRR17520069.4247753  
SRR17520069.4247755  
SRR17520069.4247757  
SRR17520069.4247759  
SRR17520069.4247763  
SRR17520069.4247765  
SRR17520069.4247767  
SRR17520069.4247769  
SRR17520069.4247771  
SRR17520069.4247773  
SRR17520069.4247775  
SRR17520069.4247777  
SRR17520069.4247779  
SRR17520069.4247781  
SRR17520069.4247783  
SRR17520069.4247785



SRR17520069.4248573  
SRR17520069.4248575  
SRR17520069.4248581  
SRR17520069.4248583  
SRR17520069.4248585  
SRR17520069.4248587  
SRR17520069.4248597  
SRR17520069.4248599  
SRR17520069.4248601  
SRR17520069.4248603  
SRR17520069.4248605  
SRR17520069.4248607  
SRR17520069.4248609  
SRR17520069.4256824  
SRR17520069.4256826  
SRR17520069.4256828  
SRR17520069.4256830  
SRR17520069.4256832  
SRR17520069.4256834  
SRR17520069.4256836  
SRR17520069.4256838  
SRR17520069.4256840  
SRR17520069.4256842  
SRR17520069.4256844  
SRR17520069.4256846  
SRR17520069.4256848  
SRR17520069.4259354  
SRR17520069.4259356  
SRR17520069.4259358  
SRR17520069.4259360  
SRR17520069.4259362  
SRR17520069.4259364  
SRR17520069.4259366  
SRR17520069.4259368  
SRR17520069.4259370  
SRR17520069.4259372  
SRR17520069.4259374  
SRR17520069.4259376  
SRR17520069.4259378  
SRR17520069.4259380  
SRR17520069.4259382  
SRR17520069.4259384  
SRR17520069.4259386  
SRR17520069.4259388  
SRR17520069.4259390  
SRR17520069.4259392  
SRR17520069.4259394

SRR17520069.4259396  
SRR17520069.4259398  
SRR17520069.4259400  
SRR17520069.4259402  
SRR17520069.4259404  
SRR17520069.4259406  
SRR17520069.4259408  
SRR17520069.4259410  
SRR17520069.4259412  
SRR17520069.4259414  
SRR17520069.4259416  
SRR17520069.4259418  
SRR17520069.4259420  
SRR17520069.4259422  
SRR17520069.4259424  
SRR17520069.4259426  
SRR17520069.4259428  
SRR17520069.4259430  
SRR17520069.4259432  
SRR17520069.4259434  
SRR17520069.4259436  
SRR17520069.4259438  
SRR17520069.4259440  
SRR17520069.4259442  
SRR17520069.4259444  
SRR17520069.4259446  
SRR17520069.4259448  
SRR17520069.4259450  
SRR17520069.4259452  
SRR17520069.4259454  
SRR17520069.4259456  
SRR17520069.4259458  
SRR17520069.4259462  
SRR17520069.4259464  
SRR17520069.4259466  
SRR17520069.4259468  
SRR17520069.4259470  
SRR17520069.4259472  
SRR17520069.4259474  
SRR17520069.4259476  
SRR17520069.4259478  
SRR17520069.4259480  
SRR17520069.4259482  
SRR17520069.4259484  
SRR17520069.4259486  
SRR17520069.4259488  
SRR17520069.4259490

SRR17520069.4259494  
SRR17520069.4259496  
SRR17520069.4259498  
SRR17520069.4259500  
SRR17520069.4259502  
SRR17520069.4262998  
SRR17520069.4264350  
SRR17520069.4264352  
SRR17520069.4264354  
SRR17520069.4264356  
SRR17520069.4264358  
SRR17520069.4264360  
SRR17520069.4264362  
SRR17520069.4264364  
SRR17520069.4264366  
SRR17520069.4264368  
SRR17520069.4264370  
SRR17520069.4264372  
SRR17520069.4264374  
SRR17520069.4264376  
SRR17520069.4264378  
SRR17520069.4264382  
SRR17520069.4264384  
SRR17520069.4264732  
SRR17520069.4264734  
SRR17520069.4264736  
SRR17520069.4264738  
SRR17520069.4264740  
SRR17520069.4264742  
SRR17520069.4264744  
SRR17520069.4264748  
SRR17520069.4264750  
SRR17520069.4264752  
SRR17520069.4272758  
SRR17520069.4272760  
SRR17520069.4272762  
SRR17520069.4272764  
SRR17520069.4272768  
SRR17520069.4272772  
SRR17520069.4273066  
SRR17520069.4274650  
SRR17520069.4277968  
SRR17520069.4277970  
SRR17520069.4277972  
SRR17520069.4289972  
SRR17520069.4289974  
SRR17520069.4289976

SRR17520069.4289978  
SRR17520069.4289980  
SRR17520069.4289982  
SRR17520069.4289984  
SRR17520069.4289986  
SRR17520069.4289988  
SRR17520069.4289990  
SRR17520069.4289992  
SRR17520069.4289994  
SRR17520069.4289996  
SRR17520069.4289998  
SRR17520069.4290000  
SRR17520069.4290002  
SRR17520069.4290004  
SRR17520069.4290006  
SRR17520069.4290008  
SRR17520069.4290010  
SRR17520069.4290012  
SRR17520069.4290014  
SRR17520069.4290018  
SRR17520069.4290020  
SRR17520069.4290022  
SRR17520069.4290024  
SRR17520069.4290026  
SRR17520069.4290028  
SRR17520069.4290032  
SRR17520069.4292475  
SRR17520069.4292477  
SRR17520069.4292479  
SRR17520069.4292483  
SRR17520069.4306277  
SRR17520069.4306279  
SRR17520069.4306281  
SRR17520069.4306283  
SRR17520069.4306285  
SRR17520069.4306287  
SRR17520069.4306289  
SRR17520069.4306291  
SRR17520069.4306293  
SRR17520069.4306295  
SRR17520069.4306297  
SRR17520069.4306299  
SRR17520069.4306301  
SRR17520069.4306303  
SRR17520069.4306305  
SRR17520069.4306307  
SRR17520069.4306309

SRR17520069.4306311  
SRR17520069.4306313  
SRR17520069.4306315  
SRR17520069.4306317  
SRR17520069.4306319  
SRR17520069.4306321  
SRR17520069.4306323  
SRR17520069.4306325  
SRR17520069.4306327  
SRR17520069.4306329  
SRR17520069.4306331  
SRR17520069.4306333  
SRR17520069.4313851  
SRR17520069.4313853  
SRR17520069.4313855  
SRR17520069.4313857  
SRR17520069.4313859  
SRR17520069.4313861  
SRR17520069.4314209  
SRR17520069.4314247  
SRR17520069.4314313  
SRR17520069.4318139  
SRR17520069.4318141  
SRR17520069.4318143  
SRR17520069.4319783  
SRR17520069.4319785  
SRR17520069.4319787  
SRR17520069.4319789  
SRR17520069.4319791  
SRR17520069.4320021  
SRR17520069.4320023  
SRR17520069.4320025  
SRR17520069.4320027  
SRR17520069.4320029  
SRR17520069.4320031  
SRR17520069.4320033  
SRR17520069.4320035  
SRR17520069.4320037  
SRR17520069.4320039  
SRR17520069.4320041  
SRR17520069.4320043  
SRR17520069.4320045  
SRR17520069.4320049  
SRR17520069.4320051  
SRR17520069.4320053  
SRR17520069.4320055  
SRR17520069.4320057

SRR17520069.4320059  
SRR17520069.4320061  
SRR17520069.4320063  
SRR17520069.4323371  
SRR17520069.4324352  
SRR17520069.4324354  
SRR17520069.4324356  
SRR17520069.4324358  
SRR17520069.4324360  
SRR17520069.4324362  
SRR17520069.4324364  
SRR17520069.4324366  
SRR17520069.4324368  
SRR17520069.4329441  
SRR17520069.4329443  
SRR17520069.4329449  
SRR17520069.4329451  
SRR17520069.4329453  
SRR17520069.4329455  
SRR17520069.4329457  
SRR17520069.4329459  
SRR17520069.4329461  
SRR17520069.4329466  
SRR17520069.4329470  
SRR17520069.4329472  
SRR17520069.4329474  
SRR17520069.4329476  
SRR17520069.4329478  
SRR17520069.4329480  
SRR17520069.4329482  
SRR17520069.4329484  
SRR17520069.4329486  
SRR17520069.4329488  
SRR17520069.4329490  
SRR17520069.4329492  
SRR17520069.4329494  
SRR17520069.4329496  
SRR17520069.4329498  
SRR17520069.4329500  
SRR17520069.4329502  
SRR17520069.4329504  
SRR17520069.4329508  
SRR17520069.4329510  
SRR17520069.4329512  
SRR17520069.4329514  
SRR17520069.4329516  
SRR17520069.4329518

SRR17520069.4329520  
SRR17520069.4329522  
SRR17520069.4329524  
SRR17520069.4329526  
SRR17520069.4329528  
SRR17520069.4329530  
SRR17520069.4329532  
SRR17520069.4329534  
SRR17520069.4329536  
SRR17520069.4329538  
SRR17520069.4329540  
SRR17520069.4329542  
SRR17520069.4329544  
SRR17520069.4329546  
SRR17520069.4329548  
SRR17520069.4329550  
SRR17520069.4329554  
SRR17520069.4329556  
SRR17520069.4329558  
SRR17520069.4329560  
SRR17520069.4329562  
SRR17520069.4329564  
SRR17520069.4329566  
SRR17520069.4329568  
SRR17520069.4329570  
SRR17520069.4329572  
SRR17520069.4329574  
SRR17520069.4329578  
SRR17520069.4329580  
SRR17520069.4329582  
SRR17520069.4329584  
SRR17520069.4329586  
SRR17520069.4329588  
SRR17520069.4329590  
SRR17520069.4329592  
SRR17520069.4329594  
SRR17520069.4329596  
SRR17520069.4329598  
SRR17520069.4329600  
SRR17520069.4329602  
SRR17520069.4329604  
SRR17520069.4333504  
SRR17520069.4333506  
SRR17520069.4333508  
SRR17520069.4333510  
SRR17520069.4333512  
SRR17520069.4333514

SRR17520069.4333516  
SRR17520069.4333518  
SRR17520069.4333520  
SRR17520069.4333522  
SRR17520069.4333524  
SRR17520069.4333526  
SRR17520069.4333528  
SRR17520069.4333530  
SRR17520069.4333532  
SRR17520069.4333534  
SRR17520069.4333536  
SRR17520069.4333538  
SRR17520069.4333540  
SRR17520069.4333542  
SRR17520069.4333544  
SRR17520069.4333546  
SRR17520069.4333548  
SRR17520069.4333550  
SRR17520069.4333552  
SRR17520069.4333554  
SRR17520069.4333556  
SRR17520069.4333558  
SRR17520069.4333969  
SRR17520069.4333971  
SRR17520069.4333973  
SRR17520069.4333975  
SRR17520069.4333977  
SRR17520069.4333979  
SRR17520069.4333981  
SRR17520069.4333983  
SRR17520069.4333985  
SRR17520069.4333987  
SRR17520069.4333989  
SRR17520069.4333991  
SRR17520069.4333993  
SRR17520069.4333995  
SRR17520069.4333997  
SRR17520069.4333999  
SRR17520069.4334001  
SRR17520069.4334003  
SRR17520069.4334005  
SRR17520069.4334007  
SRR17520069.4334009  
SRR17520069.4334011  
SRR17520069.4334013  
SRR17520069.4334015  
SRR17520069.4334017



SRR17520069.4334019  
SRR17520069.4334021  
SRR17520069.4334023  
SRR17520069.4340050  
SRR17520069.4340052  
SRR17520069.4340054  
SRR17520069.4341288  
SRR17520069.4341290  
SRR17520069.4341292  
SRR17520069.4342272  
SRR17520069.4342274  
SRR17520069.4342276  
SRR17520069.4342278  
SRR17520069.4342280  
SRR17520069.4342282  
SRR17520069.4342284  
SRR17520069.4342286  
SRR17520069.4342288  
SRR17520069.4342290  
SRR17520069.4342292  
SRR17520069.4342294  
SRR17520069.4342296  
SRR17520069.4342298  
SRR17520069.4342300  
SRR17520069.4342302  
SRR17520069.4342304  
SRR17520069.4342306  
SRR17520069.4342308  
SRR17520069.4342310  
SRR17520069.4342312  
SRR17520069.4342314  
SRR17520069.4342316  
SRR17520069.4342318  
SRR17520069.4342320  
SRR17520069.4342322  
SRR17520069.4342324  
SRR17520069.4342326  
SRR17520069.4342328  
SRR17520069.4342330  
SRR17520069.4342332  
SRR17520069.4342334  
SRR17520069.4342336  
SRR17520069.4342338  
SRR17520069.4342340  
SRR17520069.4342342  
SRR17520069.4342344  
SRR17520069.4342346

SRR17520069.4342348  
SRR17520069.4342350  
SRR17520069.4342352  
SRR17520069.4342354  
SRR17520069.4342356  
SRR17520069.4342358  
SRR17520069.4342360  
SRR17520069.4355747  
SRR17520069.4355749  
SRR17520069.4355751  
SRR17520069.4355753  
SRR17520069.4355755  
SRR17520069.4355757  
SRR17520069.4355759  
SRR17520069.4355761  
SRR17520069.4355763  
SRR17520069.4355765  
SRR17520069.4355767  
SRR17520069.4355769  
SRR17520069.4355771  
SRR17520069.4355773  
SRR17520069.4355775  
SRR17520069.4355777  
SRR17520069.4355779  
SRR17520069.4355781  
SRR17520069.4355783  
SRR17520069.4355785  
SRR17520069.4355787  
SRR17520069.4355789  
SRR17520069.4355791  
SRR17520069.4355793  
SRR17520069.4355795  
SRR17520069.4355797  
SRR17520069.4355799  
SRR17520069.4355801  
SRR17520069.4355803  
SRR17520069.4355805  
SRR17520069.4355807  
SRR17520069.4355809  
SRR17520069.4355811  
SRR17520069.4355813  
SRR17520069.4355815  
SRR17520069.4355817  
SRR17520069.4355819  
SRR17520069.4355821  
SRR17520069.4355823  
SRR17520069.4355825

SRR17520069.4355827  
SRR17520069.4355829  
SRR17520069.4355831  
SRR17520069.4355833  
SRR17520069.4355835  
SRR17520069.4355837  
SRR17520069.4355839  
SRR17520069.4355841  
SRR17520069.4355843  
SRR17520069.4355845  
SRR17520069.4355847  
SRR17520069.4355849  
SRR17520069.4355851  
SRR17520069.4355853  
SRR17520069.4355855  
SRR17520069.4355857  
SRR17520069.4355859  
SRR17520069.4355861  
SRR17520069.4355863  
SRR17520069.4355865  
SRR17520069.4355867  
SRR17520069.4355871  
SRR17520069.4355873  
SRR17520069.4355875  
SRR17520069.4355877  
SRR17520069.4355879  
SRR17520069.4355881  
SRR17520069.4356681  
SRR17520069.4356683  
SRR17520069.4356871  
SRR17520069.4356873  
SRR17520069.4356875  
SRR17520069.4356877  
SRR17520069.4356881  
SRR17520069.4356883  
SRR17520069.4356885  
SRR17520069.4356887  
SRR17520069.4356889  
SRR17520069.4356891  
SRR17520069.4356893  
SRR17520069.4357441  
SRR17520069.4357443  
SRR17520069.4357445  
SRR17520069.4357447  
SRR17520069.4357449  
SRR17520069.4357451  
SRR17520069.4357453

SRR17520069.4357455  
SRR17520069.4357457  
SRR17520069.4357459  
SRR17520069.4357465  
SRR17520069.4357467  
SRR17520069.4357469  
SRR17520069.4357471  
SRR17520069.4357473  
SRR17520069.4357475  
SRR17520069.4365564  
SRR17520069.4365566  
SRR17520069.4365568  
SRR17520069.4365570  
SRR17520069.4365572  
SRR17520069.4365574  
SRR17520069.4365576  
SRR17520069.4365578  
SRR17520069.4365580  
SRR17520069.4365582  
SRR17520069.4365584  
SRR17520069.4365586  
SRR17520069.4365588  
SRR17520069.4365590  
SRR17520069.4365592  
SRR17520069.4365594  
SRR17520069.4365596  
SRR17520069.4365600  
SRR17520069.4365602  
SRR17520069.4365604  
SRR17520069.4367637  
SRR17520069.4367641  
SRR17520069.4367643  
SRR17520069.4367645  
SRR17520069.4367647  
SRR17520069.4367649  
SRR17520069.4373888  
SRR17520069.4373890  
SRR17520069.4373892  
SRR17520069.4373894  
SRR17520069.4373896  
SRR17520069.4373898  
SRR17520069.4373900  
SRR17520069.4373902  
SRR17520069.4373904  
SRR17520069.4373906  
SRR17520069.4373908  
SRR17520069.4373910

SRR17520069.4383234  
SRR17520069.4383236  
SRR17520069.4383238  
SRR17520069.4383240  
SRR17520069.4385295  
SRR17520069.4385297  
SRR17520069.4385299  
SRR17520069.4385301  
SRR17520069.4385303  
SRR17520069.4385305  
SRR17520069.4385307  
SRR17520069.4385309  
SRR17520069.4385311  
SRR17520069.4385313  
SRR17520069.4385315  
SRR17520069.4385319  
SRR17520069.4385321  
SRR17520069.4385323  
SRR17520069.4385325  
SRR17520069.4385327  
SRR17520069.4414651  
SRR17520069.4414653  
SRR17520069.4414655  
SRR17520069.4416750  
SRR17520069.4416752  
SRR17520069.4416754  
SRR17520069.4416756  
SRR17520069.4416758  
SRR17520069.4416760  
SRR17520069.4416910  
SRR17520069.4416912  
SRR17520069.4416914  
SRR17520069.4416916  
SRR17520069.4416918  
SRR17520069.4416920  
SRR17520069.4416922  
SRR17520069.4416924  
SRR17520069.4416926  
SRR17520069.4416928  
SRR17520069.4416930  
SRR17520069.4416932  
SRR17520069.4416934  
SRR17520069.4416936  
SRR17520069.4416938  
SRR17520069.4416940  
SRR17520069.4416942  
SRR17520069.4416944

SRR17520069.4416946  
SRR17520069.4416948  
SRR17520069.4416950  
SRR17520069.4416952  
SRR17520069.4416954  
SRR17520069.4416958  
SRR17520069.4416960  
SRR17520069.4416962  
SRR17520069.4417078  
SRR17520069.4417080  
SRR17520069.4417082  
SRR17520069.4417084  
SRR17520069.4417086  
SRR17520069.4417088  
SRR17520069.4417090  
SRR17520069.4417140  
SRR17520069.4429373  
SRR17520069.4429375  
SRR17520069.4429377  
SRR17520069.4429379  
SRR17520069.4429381  
SRR17520069.4429383  
SRR17520069.4429385  
SRR17520069.4429387  
SRR17520069.4429389  
SRR17520069.4429391  
SRR17520069.4429393  
SRR17520069.4429395  
SRR17520069.4429397  
SRR17520069.4429399  
SRR17520069.4435812  
SRR17520069.4435814  
SRR17520069.4435816  
SRR17520069.4435818  
SRR17520069.4435820  
SRR17520069.4435822  
SRR17520069.4435824  
SRR17520069.4435827  
SRR17520069.4435829  
SRR17520069.4435831  
SRR17520069.4435833  
SRR17520069.4435835  
SRR17520069.4435837  
SRR17520069.4438187  
SRR17520069.4438189  
SRR17520069.4438191  
SRR17520069.4439768

SRR17520069.4439770  
SRR17520069.4439772  
SRR17520069.4439774  
SRR17520069.4439776  
SRR17520069.4439778  
SRR17520069.4439780  
SRR17520069.4439782  
SRR17520069.4439784  
SRR17520069.4439786  
SRR17520069.4441082  
SRR17520069.4441084  
SRR17520069.4441086  
SRR17520069.4441088  
SRR17520069.4441092  
SRR17520069.4441094  
SRR17520069.4442478  
SRR17520069.4442505  
SRR17520069.4442507  
SRR17520069.4442509  
SRR17520069.4442538  
SRR17520069.4443944  
SRR17520069.4443946  
SRR17520069.4443948  
SRR17520069.4443950  
SRR17520069.4456273  
SRR17520069.4456484  
SRR17520069.4456486  
SRR17520069.4456488  
SRR17520069.4456490  
SRR17520069.4456492  
SRR17520069.4456494  
SRR17520069.4456496  
SRR17520069.4456498  
SRR17520069.4456500  
SRR17520069.4456502  
SRR17520069.4456504  
SRR17520069.4456506  
SRR17520069.4462776  
SRR17520069.4462778  
SRR17520069.4462780  
SRR17520069.4462782  
SRR17520069.4462784  
SRR17520069.4462786  
SRR17520069.4462788  
SRR17520069.4462790  
SRR17520069.4462792  
SRR17520069.4471430

SRR17520069.4471432  
SRR17520069.4471434  
SRR17520069.4471436  
SRR17520069.4471438  
SRR17520069.4471441  
SRR17520069.4474413  
SRR17520069.4474415  
SRR17520069.4474417  
SRR17520069.4474419  
SRR17520069.4474421  
SRR17520069.4474423  
SRR17520069.4474425  
SRR17520069.4474427  
SRR17520069.4474429  
SRR17520069.4474431  
SRR17520069.4474433  
SRR17520069.4474435  
SRR17520069.4474437  
SRR17520069.4474439  
SRR17520069.4474441  
SRR17520069.4474443  
SRR17520069.4474445  
SRR17520069.4474449  
SRR17520069.4474451  
SRR17520069.4475504  
SRR17520069.4475506  
SRR17520069.4475508  
SRR17520069.4475510  
SRR17520069.4475512  
SRR17520069.4475514  
SRR17520069.4475516  
SRR17520069.4475518  
SRR17520069.4475520  
SRR17520069.4475522  
SRR17520069.4475524  
SRR17520069.4475526  
SRR17520069.4475528  
SRR17520069.4475530  
SRR17520069.4475532  
SRR17520069.4475534  
SRR17520069.4475536  
SRR17520069.4475538  
SRR17520069.4475540  
SRR17520069.4475542  
SRR17520069.4475544  
SRR17520069.4475546  
SRR17520069.4475552



SRR17520069.4475554  
SRR17520069.4475556  
SRR17520069.4475558  
SRR17520069.4475560  
SRR17520069.4475562  
SRR17520069.4475564  
SRR17520069.4475566  
SRR17520069.4475568  
SRR17520069.4475570  
SRR17520069.4475572  
SRR17520069.4475574  
SRR17520069.4475576  
SRR17520069.4475578  
SRR17520069.4475580  
SRR17520069.4475582  
SRR17520069.4475584  
SRR17520069.4475586  
SRR17520069.4475588  
SRR17520069.4475590  
SRR17520069.4475592  
SRR17520069.4475594  
SRR17520069.4475596  
SRR17520069.4475598  
SRR17520069.4475600  
SRR17520069.4478682  
SRR17520069.4478684  
SRR17520069.4478686  
SRR17520069.4478688  
SRR17520069.4478690  
SRR17520069.4478692  
SRR17520069.4478694  
SRR17520069.4478696  
SRR17520069.4478698  
SRR17520069.4478700  
SRR17520069.4478702  
SRR17520069.4478704  
SRR17520069.4478706  
SRR17520069.4478708  
SRR17520069.4478710  
SRR17520069.4478712  
SRR17520069.4478714  
SRR17520069.4478716  
SRR17520069.4478718  
SRR17520069.4478720  
SRR17520069.4478722  
SRR17520069.4478724  
SRR17520069.4478726

SRR17520069.4478728  
SRR17520069.4478730  
SRR17520069.4478732  
SRR17520069.4478734  
SRR17520069.4478736  
SRR17520069.4478738  
SRR17520069.4478740  
SRR17520069.4478742  
SRR17520069.4478744  
SRR17520069.4478746  
SRR17520069.4478748  
SRR17520069.4480725  
SRR17520069.4480727  
SRR17520069.4480729  
SRR17520069.4480731  
SRR17520069.4480733  
SRR17520069.4480735  
SRR17520069.4480737  
SRR17520069.4480739  
SRR17520069.4480741  
SRR17520069.4480743  
SRR17520069.4480745  
SRR17520069.4480747  
SRR17520069.4480749  
SRR17520069.4480753  
SRR17520069.4480755  
SRR17520069.4480757  
SRR17520069.4480759  
SRR17520069.4480761  
SRR17520069.4480763  
SRR17520069.4480765  
SRR17520069.4480767  
SRR17520069.4480769  
SRR17520069.4480771  
SRR17520069.4480773  
SRR17520069.4480775  
SRR17520069.4480777  
SRR17520069.4480779  
SRR17520069.4480781  
SRR17520069.4480783  
SRR17520069.4480785  
SRR17520069.4480787  
SRR17520069.4480791  
SRR17520069.4480793  
SRR17520069.4480795  
SRR17520069.4480797  
SRR17520069.4480799

SRR17520069.4480801  
SRR17520069.4480803  
SRR17520069.4480805  
SRR17520069.4480807  
SRR17520069.4480809  
SRR17520069.4480811  
SRR17520069.4481215  
SRR17520069.4481217  
SRR17520069.4481219  
SRR17520069.4481221  
SRR17520069.4481223  
SRR17520069.4481225  
SRR17520069.4481227  
SRR17520069.4481229  
SRR17520069.4481231  
SRR17520069.4481233  
SRR17520069.4481235  
SRR17520069.4481237  
SRR17520069.4481239  
SRR17520069.4481241  
SRR17520069.4481243  
SRR17520069.4481245  
SRR17520069.4481247  
SRR17520069.4481249  
SRR17520069.4481251  
SRR17520069.4481253  
SRR17520069.4481255  
SRR17520069.4481257  
SRR17520069.4481259  
SRR17520069.4481261  
SRR17520069.4481263  
SRR17520069.4481267  
SRR17520069.4481269  
SRR17520069.4481271  
SRR17520069.4481273  
SRR17520069.4481275  
SRR17520069.4481277  
SRR17520069.4481279  
SRR17520069.4481281  
SRR17520069.4481283  
SRR17520069.4481285  
SRR17520069.4481287  
SRR17520069.4481289  
SRR17520069.4481291  
SRR17520069.4481293  
SRR17520069.4481295  
SRR17520069.4481299

SRR17520069.4481301  
SRR17520069.4481303  
SRR17520069.4481305  
SRR17520069.4481307  
SRR17520069.4481309  
SRR17520069.4481311  
SRR17520069.4481313  
SRR17520069.4481315  
SRR17520069.4481317  
SRR17520069.4481321  
SRR17520069.4481323  
SRR17520069.4481325  
SRR17520069.4481327  
SRR17520069.4481329  
SRR17520069.4481331  
SRR17520069.4481333  
SRR17520069.4487445  
SRR17520069.4487447  
SRR17520069.4487449  
SRR17520069.4488848  
SRR17520069.4488850  
SRR17520069.4488852  
SRR17520069.4488854  
SRR17520069.4488856  
SRR17520069.4488858  
SRR17520069.4488860  
SRR17520069.4488862  
SRR17520069.4488864  
SRR17520069.4488866  
SRR17520069.4488868  
SRR17520069.4488870  
SRR17520069.4488872  
SRR17520069.4488874  
SRR17520069.4488876  
SRR17520069.4488878  
SRR17520069.4488880  
SRR17520069.4488882  
SRR17520069.4488884  
SRR17520069.4488886  
SRR17520069.4488888  
SRR17520069.4488890  
SRR17520069.4488892  
SRR17520069.4488894  
SRR17520069.4488896  
SRR17520069.4488898  
SRR17520069.4488902  
SRR17520069.4488904

SRR17520069.4488906  
SRR17520069.4488908  
SRR17520069.4488910  
SRR17520069.4488912  
SRR17520069.4488914  
SRR17520069.4489005  
SRR17520069.4492990  
SRR17520069.4492992  
SRR17520069.4492994  
SRR17520069.4492996  
SRR17520069.4492998  
SRR17520069.4493000  
SRR17520069.4493002  
SRR17520069.4493004  
SRR17520069.4493006  
SRR17520069.4493008  
SRR17520069.4493010  
SRR17520069.4493012  
SRR17520069.4493014  
SRR17520069.4493016  
SRR17520069.4493018  
SRR17520069.4493020  
SRR17520069.4493022  
SRR17520069.4493024  
SRR17520069.4493026  
SRR17520069.4493028  
SRR17520069.4493030  
SRR17520069.4493032  
SRR17520069.4493034  
SRR17520069.4493036  
SRR17520069.4493038  
SRR17520069.4493040  
SRR17520069.4493042  
SRR17520069.4493044  
SRR17520069.4493046  
SRR17520069.4493048  
SRR17520069.4493050  
SRR17520069.4493052  
SRR17520069.4493056  
SRR17520069.4493058  
SRR17520069.4493060  
SRR17520069.4493062  
SRR17520069.4493064  
SRR17520069.4493066  
SRR17520069.4493068  
SRR17520069.4503601  
SRR17520069.4503603

SRR17520069.4503605  
SRR17520069.4503609  
SRR17520069.4503611  
SRR17520069.4503613  
SRR17520069.4503615  
SRR17520069.4503617  
SRR17520069.4503619  
SRR17520069.4503621  
SRR17520069.4503623  
SRR17520069.4503625  
SRR17520069.4503627  
SRR17520069.4503629  
SRR17520069.4503631  
SRR17520069.4503633  
SRR17520069.4503635  
SRR17520069.4503637  
SRR17520069.4503639  
SRR17520069.4503641  
SRR17520069.4503645  
SRR17520069.4503647  
SRR17520069.4503649  
SRR17520069.4503651  
SRR17520069.4503653  
SRR17520069.4503655  
SRR17520069.4503657  
SRR17520069.4503659  
SRR17520069.4503663  
SRR17520069.4503665  
SRR17520069.4503667  
SRR17520069.4503669  
SRR17520069.4503671  
SRR17520069.4503673  
SRR17520069.4503675  
SRR17520069.4505296  
SRR17520069.4506249  
SRR17520069.4506251  
SRR17520069.4506253  
SRR17520069.4506255  
SRR17520069.4506257  
SRR17520069.4506259  
SRR17520069.4506261  
SRR17520069.4506263  
SRR17520069.4506682  
SRR17520069.4506684  
SRR17520069.4506686  
SRR17520069.4506688  
SRR17520069.4519140

SRR17520069.4519142  
SRR17520069.4519144  
SRR17520069.4519146  
SRR17520069.4519148  
SRR17520069.4520524  
SRR17520069.4520526  
SRR17520069.4520528  
SRR17520069.4520530  
SRR17520069.4520532  
SRR17520069.4520534  
SRR17520069.4520536  
SRR17520069.4520538  
SRR17520069.4520540  
SRR17520069.4520544  
SRR17520069.4520546  
SRR17520069.4520548  
SRR17520069.4520550  
SRR17520069.4520552  
SRR17520069.4520554  
SRR17520069.4520556  
SRR17520069.4520560  
SRR17520069.4520562  
SRR17520069.4520564  
SRR17520069.4520566  
SRR17520069.4520568  
SRR17520069.4520570  
SRR17520069.4521321  
SRR17520069.4521323  
SRR17520069.4521325  
SRR17520069.4521327  
SRR17520069.4522958  
SRR17520069.4522960  
SRR17520069.4522962  
SRR17520069.4522972  
SRR17520069.4522974  
SRR17520069.4525736  
SRR17520069.4525738  
SRR17520069.4525740  
SRR17520069.4525742  
SRR17520069.4525744  
SRR17520069.4525748  
SRR17520069.4525750  
SRR17520069.4525754  
SRR17520069.4525756  
SRR17520069.4525758  
SRR17520069.4525762  
SRR17520069.4525764

SRR17520069.4525766  
SRR17520069.4525768  
SRR17520069.4525770  
SRR17520069.4525772  
SRR17520069.4525776  
SRR17520069.4525778  
SRR17520069.4525780  
SRR17520069.4525782  
SRR17520069.4525784  
SRR17520069.4526875  
SRR17520069.4526877  
SRR17520069.4526881  
SRR17520069.4526885  
SRR17520069.4526887  
SRR17520069.4526889  
SRR17520069.4526891  
SRR17520069.4526893  
SRR17520069.4526897  
SRR17520069.4526899  
SRR17520069.4526903  
SRR17520069.4526905  
SRR17520069.4526907  
SRR17520069.4526911  
SRR17520069.4527498  
SRR17520069.4527500  
SRR17520069.4527504  
SRR17520069.4528455  
SRR17520069.4528457  
SRR17520069.4528459  
SRR17520069.4528461  
SRR17520069.4528463  
SRR17520069.4528465  
SRR17520069.4528467  
SRR17520069.4528469  
SRR17520069.4528471  
SRR17520069.4528473  
SRR17520069.4528475  
SRR17520069.4528477  
SRR17520069.4528479  
SRR17520069.4528481  
SRR17520069.4528483  
SRR17520069.4528485  
SRR17520069.4528487  
SRR17520069.4528489  
SRR17520069.4528493  
SRR17520069.4528497  
SRR17520069.4528499



SRR17520069.4528501  
SRR17520069.4528503  
SRR17520069.4528505  
SRR17520069.4528507  
SRR17520069.4528664  
SRR17520069.4528666  
SRR17520069.4528668  
SRR17520069.4528670  
SRR17520069.4528672  
SRR17520069.4528674  
SRR17520069.4528676  
SRR17520069.4528678  
SRR17520069.4528680  
SRR17520069.4528682  
SRR17520069.4528684  
SRR17520069.4528686  
SRR17520069.4528688  
SRR17520069.4528690  
SRR17520069.4528692  
SRR17520069.4528694  
SRR17520069.4528696  
SRR17520069.4528698  
SRR17520069.4528700  
SRR17520069.4528702  
SRR17520069.4528704  
SRR17520069.4528706  
SRR17520069.4529997  
SRR17520069.4529999  
SRR17520069.4530001  
SRR17520069.4530003  
SRR17520069.4530011  
SRR17520069.4530013  
SRR17520069.4530015  
SRR17520069.4530017  
SRR17520069.4530019  
SRR17520069.4530021  
SRR17520069.4530023  
SRR17520069.4530025  
SRR17520069.4530027  
SRR17520069.4530029  
SRR17520069.4530031  
SRR17520069.4530033  
SRR17520069.4530035  
SRR17520069.4530037  
SRR17520069.4530039  
SRR17520069.4530041  
SRR17520069.4530043

SRR17520069.4530045  
SRR17520069.4530047  
SRR17520069.4530049  
SRR17520069.4530051  
SRR17520069.4530053  
SRR17520069.4530055  
SRR17520069.4530057  
SRR17520069.4530059  
SRR17520069.4530061  
SRR17520069.4530063  
SRR17520069.4530065  
SRR17520069.4530067  
SRR17520069.4530069  
SRR17520069.4530071  
SRR17520069.4530073  
SRR17520069.4530075  
SRR17520069.4530077  
SRR17520069.4530079  
SRR17520069.4530081  
SRR17520069.4530083  
SRR17520069.4530085  
SRR17520069.4530087  
SRR17520069.4530089  
SRR17520069.4530091  
SRR17520069.4530093  
SRR17520069.4530095  
SRR17520069.4530097  
SRR17520069.4530099  
SRR17520069.4530101  
SRR17520069.4530103  
SRR17520069.4530105  
SRR17520069.4530107  
SRR17520069.4530109  
SRR17520069.4530111  
SRR17520069.4530113  
SRR17520069.4530115  
SRR17520069.4530117  
SRR17520069.4530119  
SRR17520069.4530121  
SRR17520069.4530123  
SRR17520069.4530125  
SRR17520069.4530127  
SRR17520069.4530129  
SRR17520069.4530131  
SRR17520069.4530133  
SRR17520069.4530135  
SRR17520069.4530137

SRR17520069.4530139  
SRR17520069.4530141  
SRR17520069.4530143  
SRR17520069.4530145  
SRR17520069.4530147  
SRR17520069.4530149  
SRR17520069.4530151  
SRR17520069.4530153  
SRR17520069.4530155  
SRR17520069.4530157  
SRR17520069.4530159  
SRR17520069.4530161  
SRR17520069.4530163  
SRR17520069.4530167  
SRR17520069.4530169  
SRR17520069.4530171  
SRR17520069.4530173  
SRR17520069.4530175  
SRR17520069.4530177  
SRR17520069.4530179  
SRR17520069.4530181  
SRR17520069.4530183  
SRR17520069.4530185  
SRR17520069.4530187  
SRR17520069.4530189  
SRR17520069.4530191  
SRR17520069.4530193  
SRR17520069.4530195  
SRR17520069.4530197  
SRR17520069.4530199  
SRR17520069.4530201  
SRR17520069.4530203  
SRR17520069.4530205  
SRR17520069.4530207  
SRR17520069.4530209  
SRR17520069.4530211  
SRR17520069.4530213  
SRR17520069.4530215  
SRR17520069.4530217  
SRR17520069.4530219  
SRR17520069.4530221  
SRR17520069.4530223  
SRR17520069.4530225  
SRR17520069.4530227  
SRR17520069.4530229  
SRR17520069.4530231  
SRR17520069.4530233

SRR17520069.4530235  
SRR17520069.4530237  
SRR17520069.4530241  
SRR17520069.4530243  
SRR17520069.4530245  
SRR17520069.4530247  
SRR17520069.4530249  
SRR17520069.4530251  
SRR17520069.4530253  
SRR17520069.4531068  
SRR17520069.4531070  
SRR17520069.4531074  
SRR17520069.4531076  
SRR17520069.4531080  
SRR17520069.4531082  
SRR17520069.4531084  
SRR17520069.4531086  
SRR17520069.4544237  
SRR17520069.4544239  
SRR17520069.4544241  
SRR17520069.4544243  
SRR17520069.4544245  
SRR17520069.4544247  
SRR17520069.4544249  
SRR17520069.4544251  
SRR17520069.4544253  
SRR17520069.4544255  
SRR17520069.4544257  
SRR17520069.4544259  
SRR17520069.4544261  
SRR17520069.4544265  
SRR17520069.4544267  
SRR17520069.4544269  
SRR17520069.4544271  
SRR17520069.4544273  
SRR17520069.4544275  
SRR17520069.4544277  
SRR17520069.4544279  
SRR17520069.4544283  
SRR17520069.4544285  
SRR17520069.4544287  
SRR17520069.4544289  
SRR17520069.4544291  
SRR17520069.4544293  
SRR17520069.4544295  
SRR17520069.4545203  
SRR17520069.4545205

SRR17520069.4545207  
SRR17520069.4545209  
SRR17520069.4545211  
SRR17520069.4545213  
SRR17520069.4545215  
SRR17520069.4545217  
SRR17520069.4545219  
SRR17520069.4545221  
SRR17520069.4545223  
SRR17520069.4545225  
SRR17520069.4545227  
SRR17520069.4545229  
SRR17520069.4545231  
SRR17520069.4545233  
SRR17520069.4545235  
SRR17520069.4545237  
SRR17520069.4545239  
SRR17520069.4545241  
SRR17520069.4545243  
SRR17520069.4545245  
SRR17520069.4545247  
SRR17520069.4545249  
SRR17520069.4545251  
SRR17520069.4545253  
SRR17520069.4545257  
SRR17520069.4545259  
SRR17520069.4545263  
SRR17520069.4545265  
SRR17520069.4545267  
SRR17520069.4545271  
SRR17520069.4545275  
SRR17520069.4545277  
SRR17520069.4545279  
SRR17520069.4545281  
SRR17520069.4545283  
SRR17520069.4545285  
SRR17520069.4545287  
SRR17520069.4545289  
SRR17520069.4545291  
SRR17520069.4545293  
SRR17520069.4545295  
SRR17520069.4545297  
SRR17520069.4545299  
SRR17520069.4545301  
SRR17520069.4549478  
SRR17520069.4549480  
SRR17520069.4549482

SRR17520069.4549484  
SRR17520069.4549486  
SRR17520069.4549488  
SRR17520069.4549490  
SRR17520069.4549492  
SRR17520069.4549494  
SRR17520069.4549496  
SRR17520069.4549498  
SRR17520069.4549500  
SRR17520069.4549502  
SRR17520069.4549504  
SRR17520069.4549506  
SRR17520069.4549508  
SRR17520069.4549512  
SRR17520069.4549514  
SRR17520069.4549518  
SRR17520069.4549520  
SRR17520069.4549522  
SRR17520069.4549524  
SRR17520069.4549526  
SRR17520069.4549528  
SRR17520069.4549530  
SRR17520069.4549532  
SRR17520069.4549534  
SRR17520069.4549538  
SRR17520069.4549540  
SRR17520069.4549544  
SRR17520069.4549546  
SRR17520069.4549548  
SRR17520069.4549550  
SRR17520069.4549552  
SRR17520069.4551129  
SRR17520069.4551131  
SRR17520069.4551133  
SRR17520069.4551135  
SRR17520069.4551137  
SRR17520069.4551139  
SRR17520069.4551141  
SRR17520069.4551143  
SRR17520069.4551145  
SRR17520069.4551147  
SRR17520069.4551149  
SRR17520069.4551151  
SRR17520069.4551153  
SRR17520069.4551155  
SRR17520069.4551157  
SRR17520069.4551159

SRR17520069.4551161  
SRR17520069.4551163  
SRR17520069.4551165  
SRR17520069.4551169  
SRR17520069.4551171  
SRR17520069.4551173  
SRR17520069.4551175  
SRR17520069.4551177  
SRR17520069.4551179  
SRR17520069.4551181  
SRR17520069.4551183  
SRR17520069.4551185  
SRR17520069.4551187  
SRR17520069.4551189  
SRR17520069.4551191  
SRR17520069.4551193  
SRR17520069.4551195  
SRR17520069.4551197  
SRR17520069.4551199  
SRR17520069.4551201  
SRR17520069.4551203  
SRR17520069.4551205  
SRR17520069.4551207  
SRR17520069.4551209  
SRR17520069.4551211  
SRR17520069.4551213  
SRR17520069.4551215  
SRR17520069.4551217  
SRR17520069.4551219  
SRR17520069.4551221  
SRR17520069.4551223  
SRR17520069.4551225  
SRR17520069.4551227  
SRR17520069.4551229  
SRR17520069.4551231  
SRR17520069.4551233  
SRR17520069.4551235  
SRR17520069.4551237  
SRR17520069.4551239  
SRR17520069.4551241  
SRR17520069.4551243  
SRR17520069.4551245  
SRR17520069.4551249  
SRR17520069.4551251  
SRR17520069.4551253  
SRR17520069.4551255  
SRR17520069.4551257

SRR17520069.4551259  
SRR17520069.4551261  
SRR17520069.4551263  
SRR17520069.4551265  
SRR17520069.4551267  
SRR17520069.4551932  
SRR17520069.4551934  
SRR17520069.4551936  
SRR17520069.4551938  
SRR17520069.4551940  
SRR17520069.4551942  
SRR17520069.4551944  
SRR17520069.4551946  
SRR17520069.4551948  
SRR17520069.4554412  
SRR17520069.4554414  
SRR17520069.4554416  
SRR17520069.4554418  
SRR17520069.4554420  
SRR17520069.4554422  
SRR17520069.4554424  
SRR17520069.4554426  
SRR17520069.4554428  
SRR17520069.4554432  
SRR17520069.4561520  
SRR17520069.4561522  
SRR17520069.4561524  
SRR17520069.4561526  
SRR17520069.4561530  
SRR17520069.4561532  
SRR17520069.4561534  
SRR17520069.4561536  
SRR17520069.4561538  
SRR17520069.4561540  
SRR17520069.4561542  
SRR17520069.4561544  
SRR17520069.4561546  
SRR17520069.4561548  
SRR17520069.4561550  
SRR17520069.4561552  
SRR17520069.4561554  
SRR17520069.4561556  
SRR17520069.4561558  
SRR17520069.4561560  
SRR17520069.4561562  
SRR17520069.4561564  
SRR17520069.4561566



SRR17520069.4561568  
SRR17520069.4561570  
SRR17520069.4561572  
SRR17520069.4561574  
SRR17520069.4561576  
SRR17520069.4561578  
SRR17520069.4562456  
SRR17520069.4562566  
SRR17520069.4562570  
SRR17520069.4562572  
SRR17520069.4562574  
SRR17520069.4562576  
SRR17520069.4562578  
SRR17520069.4562784  
SRR17520069.4562786  
SRR17520069.4562788  
SRR17520069.4562790  
SRR17520069.4562792  
SRR17520069.4562794  
SRR17520069.4562796  
SRR17520069.4562798  
SRR17520069.4562800  
SRR17520069.4562804  
SRR17520069.4562806  
SRR17520069.4562808  
SRR17520069.4562812  
SRR17520069.4562816  
SRR17520069.4562818  
SRR17520069.4562820  
SRR17520069.4562822  
SRR17520069.4562824  
SRR17520069.4562826  
SRR17520069.4562828  
SRR17520069.4562830  
SRR17520069.4562832  
SRR17520069.4562834  
SRR17520069.4562836  
SRR17520069.4562838  
SRR17520069.4562840  
SRR17520069.4562842  
SRR17520069.4562844  
SRR17520069.4562846  
SRR17520069.4562848  
SRR17520069.4562850  
SRR17520069.4562852  
SRR17520069.4562854  
SRR17520069.4563041

SRR17520069.4563043  
SRR17520069.4563045  
SRR17520069.4563047  
SRR17520069.4563049  
SRR17520069.4563051  
SRR17520069.4563053  
SRR17520069.4565142  
SRR17520069.4565144  
SRR17520069.4565146  
SRR17520069.4565148  
SRR17520069.4565150  
SRR17520069.4565152  
SRR17520069.4565154  
SRR17520069.4565156  
SRR17520069.4565160  
SRR17520069.4565162  
SRR17520069.4565164  
SRR17520069.4565166  
SRR17520069.4565168  
SRR17520069.4565170  
SRR17520069.4565172  
SRR17520069.4565174  
SRR17520069.4565176  
SRR17520069.4565178  
SRR17520069.4565180  
SRR17520069.4565182  
SRR17520069.4565184  
SRR17520069.4565186  
SRR17520069.4565188  
SRR17520069.4565190  
SRR17520069.4565192  
SRR17520069.4565194  
SRR17520069.4565196  
SRR17520069.4565198  
SRR17520069.4565200  
SRR17520069.4565202  
SRR17520069.4565204  
SRR17520069.4565206  
SRR17520069.4565208  
SRR17520069.4565650  
SRR17520069.4565652  
SRR17520069.4565654  
SRR17520069.4565656  
SRR17520069.4565658  
SRR17520069.4565660  
SRR17520069.4567280  
SRR17520069.4567282

SRR17520069.4567284  
SRR17520069.4567286  
SRR17520069.4567288  
SRR17520069.4567290  
SRR17520069.4567292  
SRR17520069.4567294  
SRR17520069.4567296  
SRR17520069.4567298  
SRR17520069.4567300  
SRR17520069.4567302  
SRR17520069.4567304  
SRR17520069.4569012  
SRR17520069.4569014  
SRR17520069.4569016  
SRR17520069.4569018  
SRR17520069.4569020  
SRR17520069.4569022  
SRR17520069.4569024  
SRR17520069.4569026  
SRR17520069.4569028  
SRR17520069.4569030  
SRR17520069.4579195  
SRR17520069.4579197  
SRR17520069.4579199  
SRR17520069.4579201  
SRR17520069.4579203  
SRR17520069.4579205  
SRR17520069.4581739  
SRR17520069.4592966  
SRR17520069.4592968  
SRR17520069.4592970  
SRR17520069.4592972  
SRR17520069.4592974  
SRR17520069.4592976  
SRR17520069.4592978  
SRR17520069.4592980  
SRR17520069.4592984  
SRR17520069.4592986  
SRR17520069.4592988  
SRR17520069.4592990  
SRR17520069.4604088  
SRR17520069.4604090  
SRR17520069.4604094  
SRR17520069.4604096  
SRR17520069.4604098  
SRR17520069.4604100  
SRR17520069.4604102

SRR17520069.4607646  
SRR17520069.4607648  
SRR17520069.4607650  
SRR17520069.4616595  
SRR17520069.4616597  
SRR17520069.4617119  
SRR17520069.4617121  
SRR17520069.4617123  
SRR17520069.4617125  
SRR17520069.4617127  
SRR17520069.4617129  
SRR17520069.4617131  
SRR17520069.4617133  
SRR17520069.4617135  
SRR17520069.4617137  
SRR17520069.4617139  
SRR17520069.4617143  
SRR17520069.4617145  
SRR17520069.4622791  
SRR17520069.4622793  
SRR17520069.4622795  
SRR17520069.4622797  
SRR17520069.4622799  
SRR17520069.4622801  
SRR17520069.4622803  
SRR17520069.4622805  
SRR17520069.4622807  
SRR17520069.4622809  
SRR17520069.4622811  
SRR17520069.4622813  
SRR17520069.4622815  
SRR17520069.4622817  
SRR17520069.4622819  
SRR17520069.4622821  
SRR17520069.4622823  
SRR17520069.4622825  
SRR17520069.4622827  
SRR17520069.4622829  
SRR17520069.4622831  
SRR17520069.4622833  
SRR17520069.4622835  
SRR17520069.4622837  
SRR17520069.4622839  
SRR17520069.4622841  
SRR17520069.4622843  
SRR17520069.4622845  
SRR17520069.4622847

SRR17520069.4622849  
SRR17520069.4626134  
SRR17520069.4626136  
SRR17520069.4626138  
SRR17520069.4626140  
SRR17520069.4626142  
SRR17520069.4626144  
SRR17520069.4626146  
SRR17520069.4626148  
SRR17520069.4626150  
SRR17520069.4626152  
SRR17520069.4626154  
SRR17520069.4626156  
SRR17520069.4626158  
SRR17520069.4626160  
SRR17520069.4626162  
SRR17520069.4626164  
SRR17520069.4626166  
SRR17520069.4626168  
SRR17520069.4626170  
SRR17520069.4626172  
SRR17520069.4626174  
SRR17520069.4626176  
SRR17520069.4626178  
SRR17520069.4626180  
SRR17520069.4626182  
SRR17520069.4626184  
SRR17520069.4626186  
SRR17520069.4629221  
SRR17520069.4629223  
SRR17520069.4629225  
SRR17520069.4629227  
SRR17520069.4629229  
SRR17520069.4629231  
SRR17520069.4629233  
SRR17520069.4639506  
SRR17520069.4639508  
SRR17520069.4639510  
SRR17520069.4639512  
SRR17520069.4639514  
SRR17520069.4639516  
SRR17520069.4639520  
SRR17520069.4639522  
SRR17520069.4639524  
SRR17520069.4639526  
SRR17520069.4639528  
SRR17520069.4639530

SRR17520069.4639532  
SRR17520069.4639534  
SRR17520069.4639536  
SRR17520069.4639540  
SRR17520069.4639542  
SRR17520069.4639544  
SRR17520069.4639546  
SRR17520069.4639548  
SRR17520069.4639550  
SRR17520069.4639552  
SRR17520069.4639554  
SRR17520069.4639558  
SRR17520069.4639562  
SRR17520069.4639564  
SRR17520069.4639566  
SRR17520069.4639568  
SRR17520069.4639570  
SRR17520069.4639572  
SRR17520069.4639574  
SRR17520069.4639576  
SRR17520069.4639578  
SRR17520069.4639580  
SRR17520069.4639582  
SRR17520069.4639584  
SRR17520069.4639586  
SRR17520069.4639588  
SRR17520069.4639590  
SRR17520069.4639592  
SRR17520069.4639594  
SRR17520069.4639596  
SRR17520069.4639600  
SRR17520069.4639602  
SRR17520069.4639604  
SRR17520069.4639606  
SRR17520069.4639608  
SRR17520069.4639610  
SRR17520069.4639612  
SRR17520069.4639614  
SRR17520069.4639616  
SRR17520069.4639618  
SRR17520069.4639620  
SRR17520069.4639622  
SRR17520069.4639624  
SRR17520069.4639626  
SRR17520069.4639628  
SRR17520069.4639630  
SRR17520069.4639632

SRR17520069.4639634  
SRR17520069.4639636  
SRR17520069.4639638  
SRR17520069.4639640  
SRR17520069.4639642  
SRR17520069.4639646  
SRR17520069.4639648  
SRR17520069.4639650  
SRR17520069.4639652  
SRR17520069.4639654  
SRR17520069.4639656  
SRR17520069.4639658  
SRR17520069.4639668  
SRR17520069.4639670  
SRR17520069.4639672  
SRR17520069.4639676  
SRR17520069.4639678  
SRR17520069.4639680  
SRR17520069.4639682  
SRR17520069.4639684  
SRR17520069.4639686  
SRR17520069.4639688  
SRR17520069.4640026  
SRR17520069.4640028  
SRR17520069.4640030  
SRR17520069.4641686  
SRR17520069.4641688  
SRR17520069.4641690  
SRR17520069.4641692  
SRR17520069.4641694  
SRR17520069.4642510  
SRR17520069.4642512  
SRR17520069.4642514  
SRR17520069.4642516  
SRR17520069.4642518  
SRR17520069.4642520  
SRR17520069.4642522  
SRR17520069.4642524  
SRR17520069.4642526  
SRR17520069.4642528  
SRR17520069.4642530  
SRR17520069.4642532  
SRR17520069.4642534  
SRR17520069.4642536  
SRR17520069.4642538  
SRR17520069.4642540  
SRR17520069.4642542

SRR17520069.4642544  
SRR17520069.4642548  
SRR17520069.4642550  
SRR17520069.4642552  
SRR17520069.4642554  
SRR17520069.4642556  
SRR17520069.4642558  
SRR17520069.4642560  
SRR17520069.4642562  
SRR17520069.4642564  
SRR17520069.4642566  
SRR17520069.4642568  
SRR17520069.4642570  
SRR17520069.4642572  
SRR17520069.4642576  
SRR17520069.4642578  
SRR17520069.4642580  
SRR17520069.4642582  
SRR17520069.4642584  
SRR17520069.4642586  
SRR17520069.4642588  
SRR17520069.4642590  
SRR17520069.4642592  
SRR17520069.4642594  
SRR17520069.4642596  
SRR17520069.4642598  
SRR17520069.4642602  
SRR17520069.4642604  
SRR17520069.4642606  
SRR17520069.4642608  
SRR17520069.4642610  
SRR17520069.4642612  
SRR17520069.4642614  
SRR17520069.4645904  
SRR17520069.4655933  
SRR17520069.4655935  
SRR17520069.4655937  
SRR17520069.4655939  
SRR17520069.4655941  
SRR17520069.4655943  
SRR17520069.4655945  
SRR17520069.4655947  
SRR17520069.4655949  
SRR17520069.4655951  
SRR17520069.4655953  
SRR17520069.4655955  
SRR17520069.4655957



SRR17520069.4655959  
SRR17520069.4655961  
SRR17520069.4655963  
SRR17520069.4655965  
SRR17520069.4655967  
SRR17520069.4655969  
SRR17520069.4655971  
SRR17520069.4655973  
SRR17520069.4655975  
SRR17520069.4655977  
SRR17520069.4655979  
SRR17520069.4655981  
SRR17520069.4655983  
SRR17520069.4656916  
SRR17520069.4656918  
SRR17520069.4656920  
SRR17520069.4656922  
SRR17520069.4656924  
SRR17520069.4656926  
SRR17520069.4656928  
SRR17520069.4656930  
SRR17520069.4656932  
SRR17520069.4674855  
SRR17520069.4674857  
SRR17520069.4674859  
SRR17520069.4674861  
SRR17520069.4674863  
SRR17520069.4674865  
SRR17520069.4674867  
SRR17520069.4674869  
SRR17520069.4674871  
SRR17520069.4674873  
SRR17520069.4674875  
SRR17520069.4674877  
SRR17520069.4674879  
SRR17520069.4674881  
SRR17520069.4674883  
SRR17520069.4674885  
SRR17520069.4674889  
SRR17520069.4674893  
SRR17520069.4674895  
SRR17520069.4674897  
SRR17520069.4674901  
SRR17520069.4674905  
SRR17520069.4674907  
SRR17520069.4674909  
SRR17520069.4674911

SRR17520069.4674913  
SRR17520069.4674915  
SRR17520069.4674917  
SRR17520069.4677558  
SRR17520069.4677560  
SRR17520069.4677562  
SRR17520069.4677564  
SRR17520069.4677566  
SRR17520069.4677568  
SRR17520069.4677570  
SRR17520069.4677572  
SRR17520069.4677574  
SRR17520069.4677576  
SRR17520069.4677578  
SRR17520069.4677580  
SRR17520069.4677582  
SRR17520069.4677584  
SRR17520069.4677586  
SRR17520069.4677588  
SRR17520069.4677590  
SRR17520069.4677592  
SRR17520069.4677594  
SRR17520069.4677596  
SRR17520069.4677598  
SRR17520069.4677600  
SRR17520069.4677602  
SRR17520069.4677604  
SRR17520069.4677606  
SRR17520069.4677608  
SRR17520069.4677610  
SRR17520069.4677612  
SRR17520069.4677614  
SRR17520069.4677616  
SRR17520069.4677618  
SRR17520069.4677620  
SRR17520069.4677622  
SRR17520069.4677624  
SRR17520069.4677626  
SRR17520069.4677628  
SRR17520069.4677630  
SRR17520069.4677632  
SRR17520069.4677634  
SRR17520069.4677636  
SRR17520069.4677638  
SRR17520069.4679264  
SRR17520069.4679266  
SRR17520069.4679268

SRR17520069.4679270  
SRR17520069.4679272  
SRR17520069.4679274  
SRR17520069.4679276  
SRR17520069.4679278  
SRR17520069.4679280  
SRR17520069.4679282  
SRR17520069.4679284  
SRR17520069.4679286  
SRR17520069.4679288  
SRR17520069.4679290  
SRR17520069.4679292  
SRR17520069.4679294  
SRR17520069.4679296  
SRR17520069.4679298  
SRR17520069.4679300  
SRR17520069.4679304  
SRR17520069.4679306  
SRR17520069.4679308  
SRR17520069.4679310  
SRR17520069.4679312  
SRR17520069.4679314  
SRR17520069.4679316  
SRR17520069.4684473  
SRR17520069.4684475  
SRR17520069.4684477  
SRR17520069.4684479  
SRR17520069.4684481  
SRR17520069.4684483  
SRR17520069.4684485  
SRR17520069.4684489  
SRR17520069.4684491  
SRR17520069.4684493  
SRR17520069.4684495  
SRR17520069.4684497  
SRR17520069.4684499  
SRR17520069.4684501  
SRR17520069.4685139  
SRR17520069.4685141  
SRR17520069.4685143  
SRR17520069.4685145  
SRR17520069.4685949  
SRR17520069.4685951  
SRR17520069.4685953  
SRR17520069.4685955  
SRR17520069.4685957  
SRR17520069.4685959

SRR17520069.4687169  
SRR17520069.4687171  
SRR17520069.4687173  
SRR17520069.4687175  
SRR17520069.4687177  
SRR17520069.4687179  
SRR17520069.4687181  
SRR17520069.4687183  
SRR17520069.4687185  
SRR17520069.4687187  
SRR17520069.4687189  
SRR17520069.4687191  
SRR17520069.4687193  
SRR17520069.4687195  
SRR17520069.4687197  
SRR17520069.4689790  
SRR17520069.4689792  
SRR17520069.4689794  
SRR17520069.4689796  
SRR17520069.4689798  
SRR17520069.4689800  
SRR17520069.4689802  
SRR17520069.4689804  
SRR17520069.4689806  
SRR17520069.4689808  
SRR17520069.4689810  
SRR17520069.4689812  
SRR17520069.4689814  
SRR17520069.4689816  
SRR17520069.4689818  
SRR17520069.4689820  
SRR17520069.4689822  
SRR17520069.4689824  
SRR17520069.4689828  
SRR17520069.4689830  
SRR17520069.4689832  
SRR17520069.4689834  
SRR17520069.4689836  
SRR17520069.4689838  
SRR17520069.4691671  
SRR17520069.4691673  
SRR17520069.4691675  
SRR17520069.4691677  
SRR17520069.4691679  
SRR17520069.4691681  
SRR17520069.4691683  
SRR17520069.4691685

SRR17520069.4699832  
SRR17520069.4699834  
SRR17520069.4699836  
SRR17520069.4699838  
SRR17520069.4699840  
SRR17520069.4699842  
SRR17520069.4699844  
SRR17520069.4699846  
SRR17520069.4699848  
SRR17520069.4699850  
SRR17520069.4699852  
SRR17520069.4699854  
SRR17520069.4699856  
SRR17520069.4699858  
SRR17520069.4699860  
SRR17520069.4699862  
SRR17520069.4699864  
SRR17520069.4699866  
SRR17520069.4699868  
SRR17520069.4699870  
SRR17520069.4699872  
SRR17520069.4699874  
SRR17520069.4699876  
SRR17520069.4699878  
SRR17520069.4699880  
SRR17520069.4699882  
SRR17520069.4699884  
SRR17520069.4699886  
SRR17520069.4699888  
SRR17520069.4699890  
SRR17520069.4699892  
SRR17520069.4699894  
SRR17520069.4699896  
SRR17520069.4699898  
SRR17520069.4699900  
SRR17520069.4699902  
SRR17520069.4699904  
SRR17520069.4699906  
SRR17520069.4699908  
SRR17520069.4699910  
SRR17520069.4699912  
SRR17520069.4699914  
SRR17520069.4699916  
SRR17520069.4699918  
SRR17520069.4699920  
SRR17520069.4699922  
SRR17520069.4703292

SRR17520069.4703294  
SRR17520069.4703296  
SRR17520069.4703298  
SRR17520069.4703300  
SRR17520069.4703302  
SRR17520069.4703304  
SRR17520069.4703306  
SRR17520069.4703308  
SRR17520069.4703310  
SRR17520069.4703312  
SRR17520069.4703314  
SRR17520069.4703316  
SRR17520069.4703318  
SRR17520069.4703322  
SRR17520069.4703324  
SRR17520069.4703326  
SRR17520069.4703328  
SRR17520069.4703330  
SRR17520069.4703332  
SRR17520069.4705767  
SRR17520069.4705769  
SRR17520069.4705771  
SRR17520069.4705773  
SRR17520069.4705775  
SRR17520069.4705777  
SRR17520069.4705779  
SRR17520069.4705781  
SRR17520069.4705783  
SRR17520069.4705785  
SRR17520069.4705787  
SRR17520069.4705789  
SRR17520069.4705791  
SRR17520069.4705793  
SRR17520069.4705795  
SRR17520069.4705797  
SRR17520069.4705799  
SRR17520069.4705801  
SRR17520069.4705803  
SRR17520069.4705805  
SRR17520069.4705807  
SRR17520069.4705809  
SRR17520069.4705811  
SRR17520069.4705813  
SRR17520069.4705815  
SRR17520069.4705817  
SRR17520069.4705819  
SRR17520069.4705821

SRR17520069.4705823  
SRR17520069.4705825  
SRR17520069.4705827  
SRR17520069.4705829  
SRR17520069.4705835  
SRR17520069.4705839  
SRR17520069.4705843  
SRR17520069.4708682  
SRR17520069.4708684  
SRR17520069.4708686  
SRR17520069.4708688  
SRR17520069.4708690  
SRR17520069.4708692  
SRR17520069.4710328  
SRR17520069.4710330  
SRR17520069.4710332  
SRR17520069.4710334  
SRR17520069.4710336  
SRR17520069.4710338  
SRR17520069.4710340  
SRR17520069.4711521  
SRR17520069.4711523  
SRR17520069.4711525  
SRR17520069.4711527  
SRR17520069.4711529  
SRR17520069.4712584  
SRR17520069.4712586  
SRR17520069.4712590  
SRR17520069.4712592  
SRR17520069.4712594  
SRR17520069.4712596  
SRR17520069.4712598  
SRR17520069.4712600  
SRR17520069.4712602  
SRR17520069.4712604  
SRR17520069.4712606  
SRR17520069.4712608  
SRR17520069.4712612  
SRR17520069.4712614  
SRR17520069.4719389  
SRR17520069.4719391  
SRR17520069.4719393  
SRR17520069.4719395  
SRR17520069.4719397  
SRR17520069.4719399  
SRR17520069.4719401  
SRR17520069.4719403

SRR17520069.4719405  
SRR17520069.4719407  
SRR17520069.4719604  
SRR17520069.4719606  
SRR17520069.4719608  
SRR17520069.4719612  
SRR17520069.4719614  
SRR17520069.4719616  
SRR17520069.4719624  
SRR17520069.4719628  
SRR17520069.4719630  
SRR17520069.4719634  
SRR17520069.4719636  
SRR17520069.4719644  
SRR17520069.4719646  
SRR17520069.4719648  
SRR17520069.4719652  
SRR17520069.4719654  
SRR17520069.4719656  
SRR17520069.4719658  
SRR17520069.4719660  
SRR17520069.4719664  
SRR17520069.4719666  
SRR17520069.4730895  
SRR17520069.4730897  
SRR17520069.4730899  
SRR17520069.4730901  
SRR17520069.4730903  
SRR17520069.4730905  
SRR17520069.4730907  
SRR17520069.4730909  
SRR17520069.4730911  
SRR17520069.4730913  
SRR17520069.4735529  
SRR17520069.4738442  
SRR17520069.4738444  
SRR17520069.4738446  
SRR17520069.4738448  
SRR17520069.4738450  
SRR17520069.4738452  
SRR17520069.4738454  
SRR17520069.4738456  
SRR17520069.4738458  
SRR17520069.4738460  
SRR17520069.4738464  
SRR17520069.4738466  
SRR17520069.4738468



SRR17520069.4738470  
SRR17520069.4738472  
SRR17520069.4738474  
SRR17520069.4741426  
SRR17520069.4741428  
SRR17520069.4741430  
SRR17520069.4741432  
SRR17520069.4741434  
SRR17520069.4741436  
SRR17520069.4741438  
SRR17520069.4741440  
SRR17520069.4741442  
SRR17520069.4741444  
SRR17520069.4741446  
SRR17520069.4741448  
SRR17520069.4741450  
SRR17520069.4741452  
SRR17520069.4741454  
SRR17520069.4741456  
SRR17520069.4741458  
SRR17520069.4741464  
SRR17520069.4741466  
SRR17520069.4741468  
SRR17520069.4741472  
SRR17520069.4741474  
SRR17520069.4741476  
SRR17520069.4741478  
SRR17520069.4741480  
SRR17520069.4741482  
SRR17520069.4741484  
SRR17520069.4741486  
SRR17520069.4741488  
SRR17520069.4741490  
SRR17520069.4741492  
SRR17520069.4741494  
SRR17520069.4741498  
SRR17520069.4745743  
SRR17520069.4747943  
SRR17520069.4747945  
SRR17520069.4747947  
SRR17520069.4747949  
SRR17520069.4747951  
SRR17520069.4747953  
SRR17520069.4749460  
SRR17520069.4749462  
SRR17520069.4749464  
SRR17520069.4749466

SRR17520069.4749468  
SRR17520069.4749470  
SRR17520069.4749472  
SRR17520069.4749474  
SRR17520069.4749476  
SRR17520069.4749478  
SRR17520069.4749480  
SRR17520069.4749482  
SRR17520069.4749489  
SRR17520069.4749491  
SRR17520069.4749493  
SRR17520069.4749495  
SRR17520069.4756754  
SRR17520069.4763366  
SRR17520069.4763368  
SRR17520069.4763370  
SRR17520069.4763831  
SRR17520069.4763833  
SRR17520069.4763835  
SRR17520069.4763837  
SRR17520069.4763839  
SRR17520069.4763841  
SRR17520069.4764510  
SRR17520069.4766795  
SRR17520069.4768318  
SRR17520069.4768320  
SRR17520069.4768322  
SRR17520069.4768324  
SRR17520069.4768326  
SRR17520069.4770515  
SRR17520069.4770517  
SRR17520069.4770519  
SRR17520069.4770521  
SRR17520069.4770523  
SRR17520069.4770525  
SRR17520069.4770529  
SRR17520069.4770531  
SRR17520069.4770533  
SRR17520069.4771119  
SRR17520069.4771121  
SRR17520069.4771123  
SRR17520069.4771125  
SRR17520069.4771127  
SRR17520069.4771129  
SRR17520069.4771133  
SRR17520069.4771135  
SRR17520069.4771467

SRR17520069.4771469  
SRR17520069.4771471  
SRR17520069.4771473  
SRR17520069.4771475  
SRR17520069.4771477  
SRR17520069.4771479  
SRR17520069.4771481  
SRR17520069.4771483  
SRR17520069.4771485  
SRR17520069.4771487  
SRR17520069.4771489  
SRR17520069.4771491  
SRR17520069.4771493  
SRR17520069.4771495  
SRR17520069.4771497  
SRR17520069.4771499  
SRR17520069.4771501  
SRR17520069.4771503  
SRR17520069.4771505  
SRR17520069.4771509  
SRR17520069.4771511  
SRR17520069.4771513  
SRR17520069.4771515  
SRR17520069.4771517  
SRR17520069.4771519  
SRR17520069.4771521  
SRR17520069.4785449  
SRR17520069.4785451  
SRR17520069.4785453  
SRR17520069.4785455  
SRR17520069.4785457  
SRR17520069.4785459  
SRR17520069.4785461  
SRR17520069.4785463  
SRR17520069.4785467  
SRR17520069.4785469  
SRR17520069.4785471  
SRR17520069.4785473  
SRR17520069.4785475  
SRR17520069.4785477  
SRR17520069.4785479  
SRR17520069.4785481  
SRR17520069.4785483  
SRR17520069.4785485  
SRR17520069.4785487  
SRR17520069.4785489  
SRR17520069.4785491

SRR17520069.4785493  
SRR17520069.4785495  
SRR17520069.4785497  
SRR17520069.4785499  
SRR17520069.4785501  
SRR17520069.4785503  
SRR17520069.4785505  
SRR17520069.4785507  
SRR17520069.4785509  
SRR17520069.4785511  
SRR17520069.4785513  
SRR17520069.4785515  
SRR17520069.4785517  
SRR17520069.4785519  
SRR17520069.4785521  
SRR17520069.4785523  
SRR17520069.4785525  
SRR17520069.4785527  
SRR17520069.4785529  
SRR17520069.4785531  
SRR17520069.4785535  
SRR17520069.4785537  
SRR17520069.4785539  
SRR17520069.4785541  
SRR17520069.4785543  
SRR17520069.4785545  
SRR17520069.4785547  
SRR17520069.4785549  
SRR17520069.4785551  
SRR17520069.4785553  
SRR17520069.4785555  
SRR17520069.4785557  
SRR17520069.4785559  
SRR17520069.4785561  
SRR17520069.4785563  
SRR17520069.4785565  
SRR17520069.4785567  
SRR17520069.4785569  
SRR17520069.4785571  
SRR17520069.4785573  
SRR17520069.4785575  
SRR17520069.4785577  
SRR17520069.4785579  
SRR17520069.4791377  
SRR17520069.4791379  
SRR17520069.4792217  
SRR17520069.4793280

SRR17520069.4793282  
SRR17520069.4793284  
SRR17520069.4793286  
SRR17520069.4793288  
SRR17520069.4793290  
SRR17520069.4798392  
SRR17520069.4798394  
SRR17520069.4798396  
SRR17520069.4798398  
SRR17520069.4798400  
SRR17520069.4798402  
SRR17520069.4798404  
SRR17520069.4798408  
SRR17520069.4798410  
SRR17520069.4798412  
SRR17520069.4798414  
SRR17520069.4798418  
SRR17520069.4798420  
SRR17520069.4798422  
SRR17520069.4798424  
SRR17520069.4798426  
SRR17520069.4798430  
SRR17520069.4798432  
SRR17520069.4798434  
SRR17520069.4798436  
SRR17520069.4798438  
SRR17520069.4798440  
SRR17520069.4798442  
SRR17520069.4798444  
SRR17520069.4798446  
SRR17520069.4798448  
SRR17520069.4798450  
SRR17520069.4798452  
SRR17520069.4798454  
SRR17520069.4798456  
SRR17520069.4798458  
SRR17520069.4798460  
SRR17520069.4798462  
SRR17520069.4798464  
SRR17520069.4803867  
SRR17520069.4803869  
SRR17520069.4803871  
SRR17520069.4803873  
SRR17520069.4803875  
SRR17520069.4803877  
SRR17520069.4803879  
SRR17520069.4803881

SRR17520069.4803883  
SRR17520069.4803885  
SRR17520069.4803887  
SRR17520069.4803889  
SRR17520069.4803891  
SRR17520069.4803893  
SRR17520069.4803895  
SRR17520069.4803897  
SRR17520069.4803899  
SRR17520069.4803901  
SRR17520069.4803903  
SRR17520069.4803905  
SRR17520069.4803907  
SRR17520069.4803909  
SRR17520069.4820718  
SRR17520069.4820720  
SRR17520069.4820722  
SRR17520069.4820726  
SRR17520069.4820728  
SRR17520069.4820730  
SRR17520069.4820732  
SRR17520069.4820734  
SRR17520069.4820736  
SRR17520069.4820738  
SRR17520069.4820740  
SRR17520069.4820742  
SRR17520069.4820744  
SRR17520069.4820746  
SRR17520069.4820748  
SRR17520069.4820750  
SRR17520069.4820752  
SRR17520069.4820754  
SRR17520069.4820756  
SRR17520069.4820758  
SRR17520069.4820760  
SRR17520069.4820762  
SRR17520069.4820764  
SRR17520069.4820766  
SRR17520069.4820768  
SRR17520069.4820770  
SRR17520069.4820772  
SRR17520069.4826968  
SRR17520069.4826970  
SRR17520069.4826972  
SRR17520069.4826974  
SRR17520069.4826976  
SRR17520069.4826978

SRR17520069.4826980  
SRR17520069.4826982  
SRR17520069.4826984  
SRR17520069.4826988  
SRR17520069.4826990  
SRR17520069.4826992  
SRR17520069.4826994  
SRR17520069.4826996  
SRR17520069.4826998  
SRR17520069.4827000  
SRR17520069.4827006  
SRR17520069.4827008  
SRR17520069.4827010  
SRR17520069.4827012  
SRR17520069.4827014  
SRR17520069.4827016  
SRR17520069.4827018  
SRR17520069.4827020  
SRR17520069.4827022  
SRR17520069.4829149  
SRR17520069.4829151  
SRR17520069.4829153  
SRR17520069.4829155  
SRR17520069.4829157  
SRR17520069.4829159  
SRR17520069.4829161  
SRR17520069.4829163  
SRR17520069.4829165  
SRR17520069.4829167  
SRR17520069.4829169  
SRR17520069.4829171  
SRR17520069.4829175  
SRR17520069.4829177  
SRR17520069.4829179  
SRR17520069.4829181  
SRR17520069.4829183  
SRR17520069.4829185  
SRR17520069.4829187  
SRR17520069.4829189  
SRR17520069.4829191  
SRR17520069.4832395  
SRR17520069.4837740  
SRR17520069.4837742  
SRR17520069.4837744  
SRR17520069.4837746  
SRR17520069.4837748  
SRR17520069.4837750

SRR17520069.4837752  
SRR17520069.4837754  
SRR17520069.4837756  
SRR17520069.4837758  
SRR17520069.4837760  
SRR17520069.4837762  
SRR17520069.4837764  
SRR17520069.4837766  
SRR17520069.4837768  
SRR17520069.4837770  
SRR17520069.4837772  
SRR17520069.4837774  
SRR17520069.4837776  
SRR17520069.4837778  
SRR17520069.4837780  
SRR17520069.4837782  
SRR17520069.4837784  
SRR17520069.4837786  
SRR17520069.4837788  
SRR17520069.4837790  
SRR17520069.4837792  
SRR17520069.4837794  
SRR17520069.4837796  
SRR17520069.4837798  
SRR17520069.4837800  
SRR17520069.4837802  
SRR17520069.4837804  
SRR17520069.4837806  
SRR17520069.4837808  
SRR17520069.4837810  
SRR17520069.4837812  
SRR17520069.4837814  
SRR17520069.4837816  
SRR17520069.4837818  
SRR17520069.4837820  
SRR17520069.4837822  
SRR17520069.4837824  
SRR17520069.4837826  
SRR17520069.4838837  
SRR17520069.4838839  
SRR17520069.4838843  
SRR17520069.4838845  
SRR17520069.4838847  
SRR17520069.4838849  
SRR17520069.4838851  
SRR17520069.4838853  
SRR17520069.4838855



SRR17520069.4838857  
SRR17520069.4838863  
SRR17520069.4838865  
SRR17520069.4838867  
SRR17520069.4838869  
SRR17520069.4838871  
SRR17520069.4838873  
SRR17520069.4838875  
SRR17520069.4838877  
SRR17520069.4838879  
SRR17520069.4838881  
SRR17520069.4838883  
SRR17520069.4838885  
SRR17520069.4838887  
SRR17520069.4838889  
SRR17520069.4838891  
SRR17520069.4838893  
SRR17520069.4838897  
SRR17520069.4838899  
SRR17520069.4838901  
SRR17520069.4838903  
SRR17520069.4838905  
SRR17520069.4838907  
SRR17520069.4838909  
SRR17520069.4838911  
SRR17520069.4838913  
SRR17520069.4838917  
SRR17520069.4838919  
SRR17520069.4838921  
SRR17520069.4838923  
SRR17520069.4838925  
SRR17520069.4838927  
SRR17520069.4841941  
SRR17520069.4841943  
SRR17520069.4841945  
SRR17520069.4841947  
SRR17520069.4841949  
SRR17520069.4841951  
SRR17520069.4841953  
SRR17520069.4841955  
SRR17520069.4841957  
SRR17520069.4841959  
SRR17520069.4842532  
SRR17520069.4842534  
SRR17520069.4842536  
SRR17520069.4842538  
SRR17520069.4842540

SRR17520069.4842542  
SRR17520069.4842544  
SRR17520069.4842546  
SRR17520069.4842548  
SRR17520069.4842550  
SRR17520069.4842552  
SRR17520069.4842556  
SRR17520069.4842558  
SRR17520069.4842560  
SRR17520069.4842562  
SRR17520069.4842564  
SRR17520069.4842566  
SRR17520069.4842570  
SRR17520069.4842572  
SRR17520069.4842574  
SRR17520069.4842576  
SRR17520069.4842578  
SRR17520069.4842580  
SRR17520069.4842582  
SRR17520069.4842584  
SRR17520069.4842586  
SRR17520069.4842588  
SRR17520069.4842590  
SRR17520069.4842594  
SRR17520069.4842596  
SRR17520069.4842598  
SRR17520069.4842600  
SRR17520069.4842602  
SRR17520069.4842604  
SRR17520069.4842606  
SRR17520069.4842608  
SRR17520069.4842610  
SRR17520069.4842612  
SRR17520069.4842614  
SRR17520069.4842616  
SRR17520069.4842618  
SRR17520069.4842620  
SRR17520069.4842622  
SRR17520069.4842624  
SRR17520069.4842626  
SRR17520069.4842628  
SRR17520069.4842632  
SRR17520069.4842634  
SRR17520069.4842636  
SRR17520069.4842638  
SRR17520069.4842640  
SRR17520069.4842642

SRR17520069.4842644  
SRR17520069.4842646  
SRR17520069.4842648  
SRR17520069.4842650  
SRR17520069.4842652  
SRR17520069.4842654  
SRR17520069.4842656  
SRR17520069.4842658  
SRR17520069.4842660  
SRR17520069.4842662  
SRR17520069.4842664  
SRR17520069.4842666  
SRR17520069.4842670  
SRR17520069.4842672  
SRR17520069.4842674  
SRR17520069.4842676  
SRR17520069.4842678  
SRR17520069.4842680  
SRR17520069.4842682  
SRR17520069.4842684  
SRR17520069.4842686  
SRR17520069.4842688  
SRR17520069.4842690  
SRR17520069.4842692  
SRR17520069.4842694  
SRR17520069.4842696  
SRR17520069.4842698  
SRR17520069.4842700  
SRR17520069.4842702  
SRR17520069.4842704  
SRR17520069.4842706  
SRR17520069.4842708  
SRR17520069.4842710  
SRR17520069.4842712  
SRR17520069.4842714  
SRR17520069.4842716  
SRR17520069.4842718  
SRR17520069.4842720  
SRR17520069.4842722  
SRR17520069.4842724  
SRR17520069.4842726  
SRR17520069.4842728  
SRR17520069.4842730  
SRR17520069.4842732  
SRR17520069.4842734  
SRR17520069.4843906  
SRR17520069.4846473

SRR17520069.4846475  
SRR17520069.4846477  
SRR17520069.4846479  
SRR17520069.4846481  
SRR17520069.4846483  
SRR17520069.4846485  
SRR17520069.4846487  
SRR17520069.4846489  
SRR17520069.4846491  
SRR17520069.4846493  
SRR17520069.4846495  
SRR17520069.4846497  
SRR17520069.4846499  
SRR17520069.4846501  
SRR17520069.4846503  
SRR17520069.4846505  
SRR17520069.4846507  
SRR17520069.4846509  
SRR17520069.4846888  
SRR17520069.4846890  
SRR17520069.4846892  
SRR17520069.4846894  
SRR17520069.4846896  
SRR17520069.4846898  
SRR17520069.4846900  
SRR17520069.4846902  
SRR17520069.4846904  
SRR17520069.4846906  
SRR17520069.4846908  
SRR17520069.4846910  
SRR17520069.4846912  
SRR17520069.4846914  
SRR17520069.4846916  
SRR17520069.4846918  
SRR17520069.4846920  
SRR17520069.4848345  
SRR17520069.4848347  
SRR17520069.4848349  
SRR17520069.4848351  
SRR17520069.4848353  
SRR17520069.4848355  
SRR17520069.4848357  
SRR17520069.4848359  
SRR17520069.4848361  
SRR17520069.4848363  
SRR17520069.4848365  
SRR17520069.4848367

SRR17520069.4848369  
SRR17520069.4848371  
SRR17520069.4848373  
SRR17520069.4848375  
SRR17520069.4848377  
SRR17520069.4848379  
SRR17520069.4848381  
SRR17520069.4849318  
SRR17520069.4849320  
SRR17520069.4849322  
SRR17520069.4849324  
SRR17520069.4849326  
SRR17520069.4849328  
SRR17520069.4849330  
SRR17520069.4849332  
SRR17520069.4849336  
SRR17520069.4849338  
SRR17520069.4849340  
SRR17520069.4849342  
SRR17520069.4849346  
SRR17520069.4849348  
SRR17520069.4849350  
SRR17520069.4853887  
SRR17520069.4853889  
SRR17520069.4853891  
SRR17520069.4853893  
SRR17520069.4853895  
SRR17520069.4853897  
SRR17520069.4853899  
SRR17520069.4853901  
SRR17520069.4853903  
SRR17520069.4853905  
SRR17520069.4853907  
SRR17520069.4853909  
SRR17520069.4853911  
SRR17520069.4853913  
SRR17520069.4853915  
SRR17520069.4853917  
SRR17520069.4853919  
SRR17520069.4853921  
SRR17520069.4853923  
SRR17520069.4853925  
SRR17520069.4853927  
SRR17520069.4866759  
SRR17520069.4866761  
SRR17520069.4866763  
SRR17520069.4866765

SRR17520069.4866767  
SRR17520069.4866769  
SRR17520069.4866771  
SRR17520069.4866773  
SRR17520069.4866775  
SRR17520069.4866777  
SRR17520069.4866779  
SRR17520069.4866781  
SRR17520069.4866783  
SRR17520069.4866787  
SRR17520069.4866789  
SRR17520069.4866791  
SRR17520069.4866793  
SRR17520069.4866795  
SRR17520069.4866797  
SRR17520069.4866799  
SRR17520069.4866801  
SRR17520069.4866805  
SRR17520069.4866807  
SRR17520069.4866809  
SRR17520069.4866811  
SRR17520069.4866813  
SRR17520069.4866815  
SRR17520069.4866817  
SRR17520069.4866819  
SRR17520069.4866821  
SRR17520069.4866823  
SRR17520069.4866825  
SRR17520069.4866827  
SRR17520069.4866829  
SRR17520069.4866831  
SRR17520069.4866833  
SRR17520069.4866835  
SRR17520069.4866837  
SRR17520069.4866839  
SRR17520069.4866841  
SRR17520069.4866843  
SRR17520069.4866845  
SRR17520069.4866847  
SRR17520069.4866849  
SRR17520069.4866851  
SRR17520069.4876694  
SRR17520069.4876696  
SRR17520069.4876698  
SRR17520069.4876700  
SRR17520069.4876702  
SRR17520069.4876704

SRR17520069.4876706  
SRR17520069.4876708  
SRR17520069.4876712  
SRR17520069.4876714  
SRR17520069.4876716  
SRR17520069.4876718  
SRR17520069.4876720  
SRR17520069.4876722  
SRR17520069.4876724  
SRR17520069.4876728  
SRR17520069.4876730  
SRR17520069.4876732  
SRR17520069.4876734  
SRR17520069.4876736  
SRR17520069.4876738  
SRR17520069.4876740  
SRR17520069.4876742  
SRR17520069.4876744  
SRR17520069.4876746  
SRR17520069.4876748  
SRR17520069.4876750  
SRR17520069.4876752  
SRR17520069.4876754  
SRR17520069.4876756  
SRR17520069.4876760  
SRR17520069.4876762  
SRR17520069.4876766  
SRR17520069.4876768  
SRR17520069.4876770  
SRR17520069.4876772  
SRR17520069.4876776  
SRR17520069.4876817  
SRR17520069.4876819  
SRR17520069.4879436  
SRR17520069.4879438  
SRR17520069.4879440  
SRR17520069.4879442  
SRR17520069.4879444  
SRR17520069.4879446  
SRR17520069.4879448  
SRR17520069.4879450  
SRR17520069.4879452  
SRR17520069.4879454  
SRR17520069.4879456  
SRR17520069.4879458  
SRR17520069.4879460  
SRR17520069.4879462

SRR17520069.4879464  
SRR17520069.4879466  
SRR17520069.4879468  
SRR17520069.4879470  
SRR17520069.4879472  
SRR17520069.4879474  
SRR17520069.4879476  
SRR17520069.4879478  
SRR17520069.4879703  
SRR17520069.4879705  
SRR17520069.4879707  
SRR17520069.4879709  
SRR17520069.4879711  
SRR17520069.4879713  
SRR17520069.4879715  
SRR17520069.4879717  
SRR17520069.4879719  
SRR17520069.4879721  
SRR17520069.4879723  
SRR17520069.4879725  
SRR17520069.4879727  
SRR17520069.4879729  
SRR17520069.4879731  
SRR17520069.4879733  
SRR17520069.4879735  
SRR17520069.4879737  
SRR17520069.4879739  
SRR17520069.4879741  
SRR17520069.4879743  
SRR17520069.4879745  
SRR17520069.4879747  
SRR17520069.4879749  
SRR17520069.4879751  
SRR17520069.4879753  
SRR17520069.4879755  
SRR17520069.4879757  
SRR17520069.4879759  
SRR17520069.4879761  
SRR17520069.4879763  
SRR17520069.4879765  
SRR17520069.4879767  
SRR17520069.4879769  
SRR17520069.4879771  
SRR17520069.4879775  
SRR17520069.4879783  
SRR17520069.4879785  
SRR17520069.4879787



SRR17520069.4879789  
SRR17520069.4879791  
SRR17520069.4879793  
SRR17520069.4879795  
SRR17520069.4879797  
SRR17520069.4886077  
SRR17520069.4886079  
SRR17520069.4886083  
SRR17520069.4886085  
SRR17520069.4886087  
SRR17520069.4886089  
SRR17520069.4886093  
SRR17520069.4886095  
SRR17520069.4886097  
SRR17520069.4886099  
SRR17520069.4886101  
SRR17520069.4886103  
SRR17520069.4903275  
SRR17520069.4903277  
SRR17520069.4903279  
SRR17520069.4903281  
SRR17520069.4903283  
SRR17520069.4903285  
SRR17520069.4903287  
SRR17520069.4904566  
SRR17520069.4904568  
SRR17520069.4904570  
SRR17520069.4904572  
SRR17520069.4904574  
SRR17520069.4904576  
SRR17520069.4904578  
SRR17520069.4904580  
SRR17520069.4904582  
SRR17520069.4904584  
SRR17520069.4904586  
SRR17520069.4904588  
SRR17520069.4904590  
SRR17520069.4904592  
SRR17520069.4904594  
SRR17520069.4904596  
SRR17520069.4904598  
SRR17520069.4904600  
SRR17520069.4904602  
SRR17520069.4904604  
SRR17520069.4904606  
SRR17520069.4904608  
SRR17520069.4904610

SRR17520069.4904612  
SRR17520069.4904614  
SRR17520069.4904616  
SRR17520069.4904618  
SRR17520069.4904620  
SRR17520069.4904622  
SRR17520069.4904624  
SRR17520069.4904626  
SRR17520069.4904628  
SRR17520069.4904630  
SRR17520069.4904632  
SRR17520069.4904634  
SRR17520069.4904636  
SRR17520069.4904638  
SRR17520069.4904640  
SRR17520069.4904642  
SRR17520069.4904644  
SRR17520069.4904646  
SRR17520069.4904648  
SRR17520069.4904650  
SRR17520069.4904652  
SRR17520069.4904656  
SRR17520069.4904658  
SRR17520069.4904660  
SRR17520069.4904662  
SRR17520069.4904664  
SRR17520069.4904666  
SRR17520069.4904668  
SRR17520069.4904670  
SRR17520069.4904672  
SRR17520069.4904674  
SRR17520069.4904676  
SRR17520069.4904678  
SRR17520069.4904680  
SRR17520069.4904682  
SRR17520069.4904684  
SRR17520069.4904686  
SRR17520069.4904688  
SRR17520069.4904690  
SRR17520069.4904692  
SRR17520069.4904694  
SRR17520069.4904696  
SRR17520069.4904698  
SRR17520069.4904700  
SRR17520069.4904702  
SRR17520069.4904704  
SRR17520069.4904706

SRR17520069.4904708  
SRR17520069.4904710  
SRR17520069.4904712  
SRR17520069.4904714  
SRR17520069.4904716  
SRR17520069.4904718  
SRR17520069.4904720  
SRR17520069.4904722  
SRR17520069.4904724  
SRR17520069.4904726  
SRR17520069.4904728  
SRR17520069.4904730  
SRR17520069.4904732  
SRR17520069.4904734  
SRR17520069.4904736  
SRR17520069.4904738  
SRR17520069.4904740  
SRR17520069.4904742  
SRR17520069.4904744  
SRR17520069.4905677  
SRR17520069.4905679  
SRR17520069.4905681  
SRR17520069.4905683  
SRR17520069.4905685  
SRR17520069.4905687  
SRR17520069.4921603  
SRR17520069.4921605  
SRR17520069.4921607  
SRR17520069.4921609  
SRR17520069.4921611  
SRR17520069.4921613  
SRR17520069.4921615  
SRR17520069.4921617  
SRR17520069.4921619  
SRR17520069.4921621  
SRR17520069.4921623  
SRR17520069.4921625  
SRR17520069.4921627  
SRR17520069.4921629  
SRR17520069.4924382  
SRR17520069.4924384  
SRR17520069.4926851  
SRR17520069.4926854  
SRR17520069.4926856  
SRR17520069.4931233  
SRR17520069.4931235  
SRR17520069.4931237

SRR17520069.4931243  
SRR17520069.4931245  
SRR17520069.4931247  
SRR17520069.4931249  
SRR17520069.4931251  
SRR17520069.4931253  
SRR17520069.4931255  
SRR17520069.4931257  
SRR17520069.4931259  
SRR17520069.4931261  
SRR17520069.4931263  
SRR17520069.4931265  
SRR17520069.4931269  
SRR17520069.4931271  
SRR17520069.4931275  
SRR17520069.4931277  
SRR17520069.4931279  
SRR17520069.4931281  
SRR17520069.4931283  
SRR17520069.4931285  
SRR17520069.4931287  
SRR17520069.4931291  
SRR17520069.4931293  
SRR17520069.4931295  
SRR17520069.4931297  
SRR17520069.4931299  
SRR17520069.4931301  
SRR17520069.4931303  
SRR17520069.4935122  
SRR17520069.4935124  
SRR17520069.4935126  
SRR17520069.4935128  
SRR17520069.4935130  
SRR17520069.4935132  
SRR17520069.4935134  
SRR17520069.4935136  
SRR17520069.4935138  
SRR17520069.4935142  
SRR17520069.4935144  
SRR17520069.4935146  
SRR17520069.4935150  
SRR17520069.4935152  
SRR17520069.4935154  
SRR17520069.4935156  
SRR17520069.4935158  
SRR17520069.4935160  
SRR17520069.4935162

SRR17520069.4935164  
SRR17520069.4935166  
SRR17520069.4935168  
SRR17520069.4935170  
SRR17520069.4935172  
SRR17520069.4935174  
SRR17520069.4935176  
SRR17520069.4935178  
SRR17520069.4935180  
SRR17520069.4935182  
SRR17520069.4935184  
SRR17520069.4935186  
SRR17520069.4935188  
SRR17520069.4935190  
SRR17520069.4935192  
SRR17520069.4935194  
SRR17520069.4935196  
SRR17520069.4935198  
SRR17520069.4935200  
SRR17520069.4935202  
SRR17520069.4935204  
SRR17520069.4935206  
SRR17520069.4935208  
SRR17520069.4935210  
SRR17520069.4935212  
SRR17520069.4935214  
SRR17520069.4935216  
SRR17520069.4935218  
SRR17520069.4935220  
SRR17520069.4935222  
SRR17520069.4943330  
SRR17520069.4943332  
SRR17520069.4943334  
SRR17520069.4943336  
SRR17520069.4943338  
SRR17520069.4943340  
SRR17520069.4943342  
SRR17520069.4943344  
SRR17520069.4943346  
SRR17520069.4943348  
SRR17520069.4943350  
SRR17520069.4943352  
SRR17520069.4943354  
SRR17520069.4943356  
SRR17520069.4943358  
SRR17520069.4943360  
SRR17520069.4943362

SRR17520069.4943364  
SRR17520069.4943366  
SRR17520069.4943368  
SRR17520069.4943370  
SRR17520069.4943372  
SRR17520069.4943374  
SRR17520069.4943376  
SRR17520069.4943380  
SRR17520069.4943382  
SRR17520069.4943384  
SRR17520069.4943386  
SRR17520069.4943388  
SRR17520069.4943390  
SRR17520069.4943392  
SRR17520069.4949970  
SRR17520069.4949972  
SRR17520069.4949974  
SRR17520069.4949980  
SRR17520069.4952340  
SRR17520069.4952342  
SRR17520069.4952344  
SRR17520069.4952346  
SRR17520069.4952348  
SRR17520069.4952350  
SRR17520069.4952352  
SRR17520069.4952354  
SRR17520069.4952356  
SRR17520069.4952358  
SRR17520069.4952360  
SRR17520069.4952362  
SRR17520069.4957859  
SRR17520069.4957861  
SRR17520069.4957863  
SRR17520069.4957865  
SRR17520069.4957867  
SRR17520069.4957869  
SRR17520069.4957871  
SRR17520069.4957873  
SRR17520069.4957875  
SRR17520069.4957877  
SRR17520069.4957879  
SRR17520069.4962923  
SRR17520069.4962925  
SRR17520069.4962927  
SRR17520069.4962929  
SRR17520069.4962931  
SRR17520069.4962933

SRR17520069.4962935  
SRR17520069.4963422  
SRR17520069.4967557  
SRR17520069.4967559  
SRR17520069.4971373  
SRR17520069.4971375  
SRR17520069.4971377  
SRR17520069.4971379  
SRR17520069.4971381  
SRR17520069.4971383  
SRR17520069.4971385  
SRR17520069.4971387  
SRR17520069.4971389  
SRR17520069.4971391  
SRR17520069.4971393  
SRR17520069.4971395  
SRR17520069.4971397  
SRR17520069.4971399  
SRR17520069.4971401  
SRR17520069.4971403  
SRR17520069.4971405  
SRR17520069.4971407  
SRR17520069.4971409  
SRR17520069.4971413  
SRR17520069.4971415  
SRR17520069.4971417  
SRR17520069.4971419  
SRR17520069.4971423  
SRR17520069.4971425  
SRR17520069.4971427  
SRR17520069.4984288  
SRR17520069.4986397  
SRR17520069.4986399  
SRR17520069.4986401  
SRR17520069.4988390  
SRR17520069.4988392  
SRR17520069.4988394  
SRR17520069.4988398  
SRR17520069.4988400  
SRR17520069.4988402  
SRR17520069.4988404  
SRR17520069.4988406  
SRR17520069.4988408  
SRR17520069.4988410  
SRR17520069.4988412  
SRR17520069.4988414  
SRR17520069.4988416

SRR17520069.4988418  
SRR17520069.4988420  
SRR17520069.4988422  
SRR17520069.4988424  
SRR17520069.4988426  
SRR17520069.4988428  
SRR17520069.4988430  
SRR17520069.4988432  
SRR17520069.4988434  
SRR17520069.4988436  
SRR17520069.4988438  
SRR17520069.4988440  
SRR17520069.4988442  
SRR17520069.4988444  
SRR17520069.4988446  
SRR17520069.4988450  
SRR17520069.4988452  
SRR17520069.4988454  
SRR17520069.4988456  
SRR17520069.4988458  
SRR17520069.4988460  
SRR17520069.4988462  
SRR17520069.4988464  
SRR17520069.4988466  
SRR17520069.4988468  
SRR17520069.4988470  
SRR17520069.4988472  
SRR17520069.4988474  
SRR17520069.4988476  
SRR17520069.4988478  
SRR17520069.4988480  
SRR17520069.4988482  
SRR17520069.4988486  
SRR17520069.4988488  
SRR17520069.4988490  
SRR17520069.4988492  
SRR17520069.4988494  
SRR17520069.4988496  
SRR17520069.4988498  
SRR17520069.4988500  
SRR17520069.4988502  
SRR17520069.4988504  
SRR17520069.4988506  
SRR17520069.4993980  
SRR17520069.4993982  
SRR17520069.4993984  
SRR17520069.4993986



SRR17520069.4993988  
SRR17520069.4993990  
SRR17520069.4993992  
SRR17520069.4993994  
SRR17520069.4993996  
SRR17520069.4993998  
SRR17520069.4994000  
SRR17520069.4994002  
SRR17520069.4994004  
SRR17520069.4994006  
SRR17520069.4994008  
SRR17520069.4994010  
SRR17520069.4994012  
SRR17520069.4994014  
SRR17520069.4994016  
SRR17520069.5000449  
SRR17520069.5004401  
SRR17520069.5004403  
SRR17520069.5004405  
SRR17520069.5004407  
SRR17520069.5004409  
SRR17520069.5004411  
SRR17520069.5004413  
SRR17520069.5004415  
SRR17520069.5004417  
SRR17520069.5011923  
SRR17520069.5011925  
SRR17520069.5011927  
SRR17520069.5011929  
SRR17520069.5011931  
SRR17520069.5011933  
SRR17520069.5011935  
SRR17520069.5011937  
SRR17520069.5011939  
SRR17520069.5011941  
SRR17520069.5011943  
SRR17520069.5011945  
SRR17520069.5011947  
SRR17520069.5011949  
SRR17520069.5011951  
SRR17520069.5011953  
SRR17520069.5011955  
SRR17520069.5011957  
SRR17520069.5011959  
SRR17520069.5011961  
SRR17520069.5011963  
SRR17520069.5011965

SRR17520069.5011967  
SRR17520069.5011969  
SRR17520069.5011971  
SRR17520069.5011973  
SRR17520069.5011975  
SRR17520069.5011977  
SRR17520069.5011979  
SRR17520069.5014727  
SRR17520069.5014729  
SRR17520069.5014731  
SRR17520069.5014733  
SRR17520069.5014735  
SRR17520069.5014737  
SRR17520069.5014739  
SRR17520069.5014741  
SRR17520069.5014743  
SRR17520069.5014745  
SRR17520069.5014747  
SRR17520069.5014749  
SRR17520069.5014751  
SRR17520069.5014753  
SRR17520069.5014755  
SRR17520069.5014757  
SRR17520069.5014759  
SRR17520069.5014761  
SRR17520069.5014763  
SRR17520069.5014853  
SRR17520069.5014855  
SRR17520069.5014857  
SRR17520069.5014859  
SRR17520069.5014861  
SRR17520069.5016470  
SRR17520069.5016472  
SRR17520069.5016474  
SRR17520069.5016476  
SRR17520069.5016478  
SRR17520069.5016480  
SRR17520069.5016482  
SRR17520069.5016484  
SRR17520069.5016486  
SRR17520069.5016488  
SRR17520069.5016490  
SRR17520069.5016492  
SRR17520069.5016494  
SRR17520069.5016496  
SRR17520069.5016498  
SRR17520069.5016500

SRR17520069.5016502  
SRR17520069.5016504  
SRR17520069.5016506  
SRR17520069.5016508  
SRR17520069.5016510  
SRR17520069.5016514  
SRR17520069.5016516  
SRR17520069.5016518  
SRR17520069.5016520  
SRR17520069.5016522  
SRR17520069.5016524  
SRR17520069.5016526  
SRR17520069.5016528  
SRR17520069.5016530  
SRR17520069.5016532  
SRR17520069.5016534  
SRR17520069.5016536  
SRR17520069.5016538  
SRR17520069.5016540  
SRR17520069.5016542  
SRR17520069.5016544  
SRR17520069.5016546  
SRR17520069.5016548  
SRR17520069.5016550  
SRR17520069.5016552  
SRR17520069.5016554  
SRR17520069.5016556  
SRR17520069.5016558  
SRR17520069.5016560  
SRR17520069.5016562  
SRR17520069.5016564  
SRR17520069.5016566  
SRR17520069.5016568  
SRR17520069.5016570  
SRR17520069.5016572  
SRR17520069.5016574  
SRR17520069.5016576  
SRR17520069.5020486  
SRR17520069.5020488  
SRR17520069.5020490  
SRR17520069.5020492  
SRR17520069.5020494  
SRR17520069.5020496  
SRR17520069.5020498  
SRR17520069.5020500  
SRR17520069.5020502  
SRR17520069.5020504

SRR17520069.5026891  
SRR17520069.5026893  
SRR17520069.5026895  
SRR17520069.5031756  
SRR17520069.5031758  
SRR17520069.5031760  
SRR17520069.5031762  
SRR17520069.5031764  
SRR17520069.5031766  
SRR17520069.5032187  
SRR17520069.5045073  
SRR17520069.5045075  
SRR17520069.5045079  
SRR17520069.5045081  
SRR17520069.5045083  
SRR17520069.5045085  
SRR17520069.5045087  
SRR17520069.5045089  
SRR17520069.5045091  
SRR17520069.5045093  
SRR17520069.5045095  
SRR17520069.5045097  
SRR17520069.5045099  
SRR17520069.5045101  
SRR17520069.5045103  
SRR17520069.5045105  
SRR17520069.5045107  
SRR17520069.5045109  
SRR17520069.5045113  
SRR17520069.5045115  
SRR17520069.5045117  
SRR17520069.5045119  
SRR17520069.5045121  
SRR17520069.5045123  
SRR17520069.5045127  
SRR17520069.5049700  
SRR17520069.5051039  
SRR17520069.5052438  
SRR17520069.5052442  
SRR17520069.5052444  
SRR17520069.5052446  
SRR17520069.5052448  
SRR17520069.5052450  
SRR17520069.5052452  
SRR17520069.5052454  
SRR17520069.5052456  
SRR17520069.5052458

SRR17520069.5052460  
SRR17520069.5052462  
SRR17520069.5052464  
SRR17520069.5052466  
SRR17520069.5052468  
SRR17520069.5052470  
SRR17520069.5052472  
SRR17520069.5071511  
SRR17520069.5071513  
SRR17520069.5071515  
SRR17520069.5071517  
SRR17520069.5071519  
SRR17520069.5072877  
SRR17520069.5074988  
SRR17520069.5074990  
SRR17520069.5074992  
SRR17520069.5074994  
SRR17520069.5074996  
SRR17520069.5074998  
SRR17520069.5075000  
SRR17520069.5075002  
SRR17520069.5075004  
SRR17520069.5075006  
SRR17520069.5075008  
SRR17520069.5075010  
SRR17520069.5075012  
SRR17520069.5075014  
SRR17520069.5075016  
SRR17520069.5075018  
SRR17520069.5075020  
SRR17520069.5075022  
SRR17520069.5075024  
SRR17520069.5075026  
SRR17520069.5075028  
SRR17520069.5075030  
SRR17520069.5075032  
SRR17520069.5075034  
SRR17520069.5075036  
SRR17520069.5075038  
SRR17520069.5075040  
SRR17520069.5075042  
SRR17520069.5075044  
SRR17520069.5075046  
SRR17520069.5075048  
SRR17520069.5075050  
SRR17520069.5075052  
SRR17520069.5075056

SRR17520069.5075058  
SRR17520069.5075060  
SRR17520069.5075062  
SRR17520069.5075064  
SRR17520069.5075066  
SRR17520069.5075068  
SRR17520069.5075070  
SRR17520069.5075072  
SRR17520069.5075074  
SRR17520069.5075076  
SRR17520069.5075078  
SRR17520069.5075080  
SRR17520069.5075082  
SRR17520069.5075084  
SRR17520069.5075086  
SRR17520069.5075088  
SRR17520069.5075090  
SRR17520069.5075092  
SRR17520069.5075094  
SRR17520069.5075096  
SRR17520069.5080425  
SRR17520069.5080427  
SRR17520069.5080429  
SRR17520069.5080431  
SRR17520069.5080433  
SRR17520069.5080435  
SRR17520069.5080437  
SRR17520069.5080439  
SRR17520069.5080441  
SRR17520069.5083323  
SRR17520069.5083331  
SRR17520069.5083333  
SRR17520069.5083335  
SRR17520069.5083459  
SRR17520069.5083463  
SRR17520069.5083465  
SRR17520069.5083467  
SRR17520069.5083469  
SRR17520069.5083471  
SRR17520069.5083473  
SRR17520069.5083475  
SRR17520069.5083477  
SRR17520069.5083479  
SRR17520069.5083481  
SRR17520069.5083483  
SRR17520069.5083485  
SRR17520069.5083487

SRR17520069. 5083489  
SRR17520069. 5083491  
SRR17520069. 5083493  
SRR17520069. 5083495  
SRR17520069. 5083497  
SRR17520069. 5085423  
SRR17520069. 5085425  
SRR17520069. 5085427  
SRR17520069. 5085429  
SRR17520069. 5085431  
SRR17520069. 5085433  
SRR17520069. 5085435  
SRR17520069. 5085439  
SRR17520069. 5085441  
SRR17520069. 5085443  
SRR17520069. 5085445  
SRR17520069. 5085447  
SRR17520069. 5085451  
SRR17520069. 5085453  
SRR17520069. 5085455  
SRR17520069. 5085457  
SRR17520069. 5085459  
SRR17520069. 5085461  
SRR17520069. 5085463  
SRR17520069. 5085465  
SRR17520069. 5085467  
SRR17520069. 5085469  
SRR17520069. 5085471  
SRR17520069. 5085473  
SRR17520069. 5085475  
SRR17520069. 5085477  
SRR17520069. 5085479  
SRR17520069. 5085481  
SRR17520069. 5085483  
SRR17520069. 5085485  
SRR17520069. 5085487  
SRR17520069. 5085489  
SRR17520069. 5085491  
SRR17520069. 5085493  
SRR17520069. 5087910  
SRR17520069. 5094853  
SRR17520069. 5094855  
SRR17520069. 5094857  
SRR17520069. 5094859  
SRR17520069. 5094861  
SRR17520069. 5094863  
SRR17520069. 5094865

SRR17520069.5094867  
SRR17520069.5094869  
SRR17520069.5094871  
SRR17520069.5094873  
SRR17520069.5094875  
SRR17520069.5094877  
SRR17520069.5094879  
SRR17520069.5094881  
SRR17520069.5094883  
SRR17520069.5094885  
SRR17520069.5094887  
SRR17520069.5094889  
SRR17520069.5094891  
SRR17520069.5094893  
SRR17520069.5094895  
SRR17520069.5094897  
SRR17520069.5094899  
SRR17520069.5094901  
SRR17520069.5094903  
SRR17520069.5094905  
SRR17520069.5094907  
SRR17520069.5094909  
SRR17520069.5094911  
SRR17520069.5094913  
SRR17520069.5094915  
SRR17520069.5094917  
SRR17520069.5094919  
SRR17520069.5094921  
SRR17520069.5094923  
SRR17520069.5094925  
SRR17520069.5094927  
SRR17520069.5094929  
SRR17520069.5094931  
SRR17520069.5094933  
SRR17520069.5094935  
SRR17520069.5094937  
SRR17520069.5094939  
SRR17520069.5094941  
SRR17520069.5094943  
SRR17520069.5094945  
SRR17520069.5094947  
SRR17520069.5095381  
SRR17520069.5095383  
SRR17520069.5095385  
SRR17520069.5095389  
SRR17520069.5095391  
SRR17520069.5098114



SRR17520069.5098116  
SRR17520069.5098118  
SRR17520069.5098120  
SRR17520069.5098122  
SRR17520069.5098124  
SRR17520069.5098128  
SRR17520069.5098130  
SRR17520069.5098132  
SRR17520069.5098134  
SRR17520069.5100603  
SRR17520069.5100605  
SRR17520069.5100607  
SRR17520069.5100609  
SRR17520069.5100611  
SRR17520069.5100613  
SRR17520069.5100615  
SRR17520069.5100617  
SRR17520069.5100621  
SRR17520069.5100625  
SRR17520069.5100627  
SRR17520069.5100629  
SRR17520069.5100631  
SRR17520069.5100633  
SRR17520069.5100635  
SRR17520069.5100637  
SRR17520069.5100641  
SRR17520069.5100643  
SRR17520069.5100647  
SRR17520069.5100649  
SRR17520069.5100651  
SRR17520069.5100653  
SRR17520069.5100655  
SRR17520069.5100657  
SRR17520069.5100659  
SRR17520069.5100663  
SRR17520069.5100667  
SRR17520069.5100671  
SRR17520069.5100673  
SRR17520069.5100675  
SRR17520069.5100681  
SRR17520069.5100683  
SRR17520069.5100685  
SRR17520069.5100687  
SRR17520069.5100689  
SRR17520069.5100691  
SRR17520069.5100693  
SRR17520069.5100695

SRR17520069.5100697  
SRR17520069.5100699  
SRR17520069.5100701  
SRR17520069.5100703  
SRR17520069.5100705  
SRR17520069.5101472  
SRR17520069.5101474  
SRR17520069.5101476  
SRR17520069.5101478  
SRR17520069.5101480  
SRR17520069.5101482  
SRR17520069.5101486  
SRR17520069.5101491  
SRR17520069.5101493  
SRR17520069.5101495  
SRR17520069.5101497  
SRR17520069.5101499  
SRR17520069.5101501  
SRR17520069.5101503  
SRR17520069.5101505  
SRR17520069.5101507  
SRR17520069.5101509  
SRR17520069.5104970  
SRR17520069.5104972  
SRR17520069.5104974  
SRR17520069.5104976  
SRR17520069.5104978  
SRR17520069.5104980  
SRR17520069.5104982  
SRR17520069.5104984  
SRR17520069.5104986  
SRR17520069.5104990  
SRR17520069.5104992  
SRR17520069.5104994  
SRR17520069.5104996  
SRR17520069.5104998  
SRR17520069.5105000  
SRR17520069.5105002  
SRR17520069.5112813  
SRR17520069.5112815  
SRR17520069.5112817  
SRR17520069.5112819  
SRR17520069.5112821  
SRR17520069.5112823  
SRR17520069.5112825  
SRR17520069.5112827  
SRR17520069.5112829

SRR17520069.5112831  
SRR17520069.5112833  
SRR17520069.5112835  
SRR17520069.5112837  
SRR17520069.5112839  
SRR17520069.5112841  
SRR17520069.5112843  
SRR17520069.5112845  
SRR17520069.5112847  
SRR17520069.5112849  
SRR17520069.5112851  
SRR17520069.5112853  
SRR17520069.5112855  
SRR17520069.5112857  
SRR17520069.5112863  
SRR17520069.5112865  
SRR17520069.5112867  
SRR17520069.5112869  
SRR17520069.5112871  
SRR17520069.5112873  
SRR17520069.5112875  
SRR17520069.5112879  
SRR17520069.5112881  
SRR17520069.5112883  
SRR17520069.5112885  
SRR17520069.5112887  
SRR17520069.5112889  
SRR17520069.5112891  
SRR17520069.5112893  
SRR17520069.5112895  
SRR17520069.5112897  
SRR17520069.5112899  
SRR17520069.5112901  
SRR17520069.5112903  
SRR17520069.5112905  
SRR17520069.5112907  
SRR17520069.5112909  
SRR17520069.5112911  
SRR17520069.5112913  
SRR17520069.5112915  
SRR17520069.5112917  
SRR17520069.5112919  
SRR17520069.5112921  
SRR17520069.5112925  
SRR17520069.5112931  
SRR17520069.5112933  
SRR17520069.5112935

SRR17520069.5112937  
SRR17520069.5112939  
SRR17520069.5112941  
SRR17520069.5112943  
SRR17520069.5112945  
SRR17520069.5112947  
SRR17520069.5112951  
SRR17520069.5112953  
SRR17520069.5112955  
SRR17520069.5112957  
SRR17520069.5112959  
SRR17520069.5112961  
SRR17520069.5112963  
SRR17520069.5112965  
SRR17520069.5112967  
SRR17520069.5112969  
SRR17520069.5112973  
SRR17520069.5112975  
SRR17520069.5112977  
SRR17520069.5112981  
SRR17520069.5114238  
SRR17520069.5114240  
SRR17520069.5114242  
SRR17520069.5114244  
SRR17520069.5114246  
SRR17520069.5114248  
SRR17520069.5114250  
SRR17520069.5114252  
SRR17520069.5114254  
SRR17520069.5114256  
SRR17520069.5114258  
SRR17520069.5114260  
SRR17520069.5114262  
SRR17520069.5114264  
SRR17520069.5114266  
SRR17520069.5114271  
SRR17520069.5114273  
SRR17520069.5114275  
SRR17520069.5115168  
SRR17520069.5115170  
SRR17520069.5115172  
SRR17520069.5115174  
SRR17520069.5115176  
SRR17520069.5116357  
SRR17520069.5116359  
SRR17520069.5116361  
SRR17520069.5116365

SRR17520069.5116367  
SRR17520069.5116369  
SRR17520069.5116371  
SRR17520069.5116373  
SRR17520069.5116375  
SRR17520069.5116377  
SRR17520069.5116379  
SRR17520069.5116381  
SRR17520069.5116383  
SRR17520069.5116385  
SRR17520069.5118612  
SRR17520069.5118614  
SRR17520069.5118616  
SRR17520069.5118618  
SRR17520069.5118622  
SRR17520069.5118624  
SRR17520069.5118626  
SRR17520069.5118628  
SRR17520069.5118630  
SRR17520069.5118632  
SRR17520069.5118634  
SRR17520069.5118636  
SRR17520069.5118640  
SRR17520069.5118642  
SRR17520069.5118644  
SRR17520069.5118646  
SRR17520069.5118648  
SRR17520069.5118650  
SRR17520069.5118652  
SRR17520069.5118654  
SRR17520069.5118656  
SRR17520069.5118658  
SRR17520069.5118660  
SRR17520069.5118662  
SRR17520069.5118664  
SRR17520069.5118666  
SRR17520069.5118672  
SRR17520069.5118674  
SRR17520069.5118676  
SRR17520069.5118680  
SRR17520069.5118682  
SRR17520069.5118684  
SRR17520069.5118686  
SRR17520069.5119096  
SRR17520069.5119098  
SRR17520069.5119100  
SRR17520069.5119102

SRR17520069.5119104  
SRR17520069.5119106  
SRR17520069.5119108  
SRR17520069.5119110  
SRR17520069.5119112  
SRR17520069.5125827  
SRR17520069.5125831  
SRR17520069.5125833  
SRR17520069.5126132  
SRR17520069.5126693  
SRR17520069.5126695  
SRR17520069.5126697  
SRR17520069.5126699  
SRR17520069.5126701  
SRR17520069.5126703  
SRR17520069.5126705  
SRR17520069.5126707  
SRR17520069.5126709  
SRR17520069.5126711  
SRR17520069.5126713  
SRR17520069.5131379  
SRR17520069.5131407  
SRR17520069.5132286  
SRR17520069.5132288  
SRR17520069.5132290  
SRR17520069.5132292  
SRR17520069.5132294  
SRR17520069.5132296  
SRR17520069.5132298  
SRR17520069.5132300  
SRR17520069.5132302  
SRR17520069.5132304  
SRR17520069.5132306  
SRR17520069.5132308  
SRR17520069.5132310  
SRR17520069.5132312  
SRR17520069.5132314  
SRR17520069.5132316  
SRR17520069.5132320  
SRR17520069.5132322  
SRR17520069.5132324  
SRR17520069.5132326  
SRR17520069.5132328  
SRR17520069.5132330  
SRR17520069.5132332  
SRR17520069.5132334  
SRR17520069.5132336

SRR17520069. 5132338  
SRR17520069. 5132340  
SRR17520069. 5133737  
SRR17520069. 5133741  
SRR17520069. 5133743  
SRR17520069. 5133745  
SRR17520069. 5133747  
SRR17520069. 5154497  
SRR17520069. 5154499  
SRR17520069. 5154501  
SRR17520069. 5154503  
SRR17520069. 5154505  
SRR17520069. 5154507  
SRR17520069. 5154509  
SRR17520069. 5154511  
SRR17520069. 5154513  
SRR17520069. 5154515  
SRR17520069. 5154517  
SRR17520069. 5154521  
SRR17520069. 5154523  
SRR17520069. 5154525  
SRR17520069. 5154527  
SRR17520069. 5154529  
SRR17520069. 5154533  
SRR17520069. 5154535  
SRR17520069. 5154537  
SRR17520069. 5154539  
SRR17520069. 5154541  
SRR17520069. 5154543  
SRR17520069. 5154545  
SRR17520069. 5154547  
SRR17520069. 5154549  
SRR17520069. 5156730  
SRR17520069. 5156732  
SRR17520069. 5156734  
SRR17520069. 5156736  
SRR17520069. 5156738  
SRR17520069. 5156740  
SRR17520069. 5156742  
SRR17520069. 5156744  
SRR17520069. 5156746  
SRR17520069. 5156748  
SRR17520069. 5156750  
SRR17520069. 5156752  
SRR17520069. 5156754  
SRR17520069. 5156756  
SRR17520069. 5156758

SRR17520069. 5156760  
SRR17520069. 5156762  
SRR17520069. 5156764  
SRR17520069. 5156766  
SRR17520069. 5156768  
SRR17520069. 5156770  
SRR17520069. 5156772  
SRR17520069. 5156774  
SRR17520069. 5156776  
SRR17520069. 5156778  
SRR17520069. 5156780  
SRR17520069. 5156782  
SRR17520069. 5156786  
SRR17520069. 5156788  
SRR17520069. 5156790  
SRR17520069. 5156792  
SRR17520069. 5156794  
SRR17520069. 5156796  
SRR17520069. 5156798  
SRR17520069. 5156800  
SRR17520069. 5156802  
SRR17520069. 5156804  
SRR17520069. 5156806  
SRR17520069. 5156808  
SRR17520069. 5156810  
SRR17520069. 5156812  
SRR17520069. 5156814  
SRR17520069. 5156816  
SRR17520069. 5156818  
SRR17520069. 5156820  
SRR17520069. 5156822  
SRR17520069. 5156824  
SRR17520069. 5156826  
SRR17520069. 5156828  
SRR17520069. 5156830  
SRR17520069. 5160795  
SRR17520069. 5160797  
SRR17520069. 5160799  
SRR17520069. 5160801  
SRR17520069. 5160803  
SRR17520069. 5160805  
SRR17520069. 5160807  
SRR17520069. 5160809  
SRR17520069. 5160811  
SRR17520069. 5160813  
SRR17520069. 5160815  
SRR17520069. 5160817



SRR17520069.5160819  
SRR17520069.5160821  
SRR17520069.5160823  
SRR17520069.5160825  
SRR17520069.5160827  
SRR17520069.5160829  
SRR17520069.5160831  
SRR17520069.5160833  
SRR17520069.5160835  
SRR17520069.5160837  
SRR17520069.5160839  
SRR17520069.5160841  
SRR17520069.5160843  
SRR17520069.5160845  
SRR17520069.5160847  
SRR17520069.5160849  
SRR17520069.5160851  
SRR17520069.5160853  
SRR17520069.5160855  
SRR17520069.5160857  
SRR17520069.5173103  
SRR17520069.5173105  
SRR17520069.5173107  
SRR17520069.5173109  
SRR17520069.5173111  
SRR17520069.5173113  
SRR17520069.5173115  
SRR17520069.5173117  
SRR17520069.5173119  
SRR17520069.5175677  
SRR17520069.5175679  
SRR17520069.5175681  
SRR17520069.5175683  
SRR17520069.5175685  
SRR17520069.5175687  
SRR17520069.5175689  
SRR17520069.5175691  
SRR17520069.5175693  
SRR17520069.5175695  
SRR17520069.5175697  
SRR17520069.5175699  
SRR17520069.5175701  
SRR17520069.5175703  
SRR17520069.5175705  
SRR17520069.5175707  
SRR17520069.5175709  
SRR17520069.5175711

SRR17520069. 5175713  
SRR17520069. 5175715  
SRR17520069. 5175717  
SRR17520069. 5175719  
SRR17520069. 5175721  
SRR17520069. 5175723  
SRR17520069. 5175725  
SRR17520069. 5175727  
SRR17520069. 5175729  
SRR17520069. 5175731  
SRR17520069. 5175733  
SRR17520069. 5175735  
SRR17520069. 5175737  
SRR17520069. 5175739  
SRR17520069. 5175741  
SRR17520069. 5175743  
SRR17520069. 5175745  
SRR17520069. 5175747  
SRR17520069. 5175749  
SRR17520069. 5175751  
SRR17520069. 5175753  
SRR17520069. 5175755  
SRR17520069. 5175757  
SRR17520069. 5175759  
SRR17520069. 5175761  
SRR17520069. 5175763  
SRR17520069. 5175765  
SRR17520069. 5175767  
SRR17520069. 5175769  
SRR17520069. 5175771  
SRR17520069. 5175773  
SRR17520069. 5175775  
SRR17520069. 5175777  
SRR17520069. 5175779  
SRR17520069. 5175781  
SRR17520069. 5175783  
SRR17520069. 5175785  
SRR17520069. 5175787  
SRR17520069. 5175789  
SRR17520069. 5175791  
SRR17520069. 5175793  
SRR17520069. 5175795  
SRR17520069. 5175797  
SRR17520069. 5175801  
SRR17520069. 5175803  
SRR17520069. 5175805  
SRR17520069. 5175807

SRR17520069. 5175811  
SRR17520069. 5175813  
SRR17520069. 5175815  
SRR17520069. 5176455  
SRR17520069. 5176457  
SRR17520069. 5177581  
SRR17520069. 5177583  
SRR17520069. 5177585  
SRR17520069. 5177587  
SRR17520069. 5177589  
SRR17520069. 5177591  
SRR17520069. 5177593  
SRR17520069. 5177595  
SRR17520069. 5177597  
SRR17520069. 5177599  
SRR17520069. 5177601  
SRR17520069. 5177603  
SRR17520069. 5177605  
SRR17520069. 5177607  
SRR17520069. 5177609  
SRR17520069. 5177611  
SRR17520069. 5177613  
SRR17520069. 5177615  
SRR17520069. 5177617  
SRR17520069. 5177621  
SRR17520069. 5177623  
SRR17520069. 5177625  
SRR17520069. 5177627  
SRR17520069. 5177629  
SRR17520069. 5177631  
SRR17520069. 5177633  
SRR17520069. 5177635  
SRR17520069. 5177637  
SRR17520069. 5177639  
SRR17520069. 5177641  
SRR17520069. 5177643  
SRR17520069. 5177645  
SRR17520069. 5177647  
SRR17520069. 5177649  
SRR17520069. 5184224  
SRR17520069. 5184231  
SRR17520069. 5184233  
SRR17520069. 5184235  
SRR17520069. 5184237  
SRR17520069. 5184239  
SRR17520069. 5184241  
SRR17520069. 5184243

SRR17520069. 5184245  
SRR17520069. 5184247  
SRR17520069. 5184249  
SRR17520069. 5184251  
SRR17520069. 5184253  
SRR17520069. 5184255  
SRR17520069. 5184257  
SRR17520069. 5184259  
SRR17520069. 5184261  
SRR17520069. 5184263  
SRR17520069. 5184265  
SRR17520069. 5184267  
SRR17520069. 5184269  
SRR17520069. 5184271  
SRR17520069. 5184273  
SRR17520069. 5184275  
SRR17520069. 5184277  
SRR17520069. 5184279  
SRR17520069. 5184281  
SRR17520069. 5184283  
SRR17520069. 5184285  
SRR17520069. 5184287  
SRR17520069. 5184289  
SRR17520069. 5184291  
SRR17520069. 5184293  
SRR17520069. 5184295  
SRR17520069. 5184299  
SRR17520069. 5184301  
SRR17520069. 5184303  
SRR17520069. 5184305  
SRR17520069. 5184307  
SRR17520069. 5184309  
SRR17520069. 5184311  
SRR17520069. 5184313  
SRR17520069. 5184315  
SRR17520069. 5184317  
SRR17520069. 5184319  
SRR17520069. 5184321  
SRR17520069. 5184323  
SRR17520069. 5184325  
SRR17520069. 5184327  
SRR17520069. 5184329  
SRR17520069. 5184331  
SRR17520069. 5184333  
SRR17520069. 5194688  
SRR17520069. 5194690  
SRR17520069. 5194692

SRR17520069. 5194694  
SRR17520069. 5194698  
SRR17520069. 5194700  
SRR17520069. 5194702  
SRR17520069. 5194704  
SRR17520069. 5194706  
SRR17520069. 5194708  
SRR17520069. 5199390  
SRR17520069. 5199392  
SRR17520069. 5199394  
SRR17520069. 5199396  
SRR17520069. 5199398  
SRR17520069. 5199400  
SRR17520069. 5199402  
SRR17520069. 5199404  
SRR17520069. 5199406  
SRR17520069. 5199408  
SRR17520069. 5199410  
SRR17520069. 5199412  
SRR17520069. 5199414  
SRR17520069. 5199416  
SRR17520069. 5199418  
SRR17520069. 5199420  
SRR17520069. 5199422  
SRR17520069. 5199424  
SRR17520069. 5199426  
SRR17520069. 5199428  
SRR17520069. 5199430  
SRR17520069. 5199432  
SRR17520069. 5199434  
SRR17520069. 5199436  
SRR17520069. 5199438  
SRR17520069. 5199440  
SRR17520069. 5199442  
SRR17520069. 5199444  
SRR17520069. 5199446  
SRR17520069. 5199450  
SRR17520069. 5204912  
SRR17520069. 5204914  
SRR17520069. 5204916  
SRR17520069. 5204918  
SRR17520069. 5204920  
SRR17520069. 5204922  
SRR17520069. 5204924  
SRR17520069. 5204926  
SRR17520069. 5204928  
SRR17520069. 5204930

SRR17520069.5204932  
SRR17520069.5204934  
SRR17520069.5204936  
SRR17520069.5204938  
SRR17520069.5204940  
SRR17520069.5204942  
SRR17520069.5204944  
SRR17520069.5204946  
SRR17520069.5204948  
SRR17520069.5204950  
SRR17520069.5204952  
SRR17520069.5204954  
SRR17520069.5204956  
SRR17520069.5204958  
SRR17520069.5204960  
SRR17520069.5204962  
SRR17520069.5204964  
SRR17520069.5204966  
SRR17520069.5204968  
SRR17520069.5204970  
SRR17520069.5204972  
SRR17520069.5204974  
SRR17520069.5204976  
SRR17520069.5204978  
SRR17520069.5204980  
SRR17520069.5204984  
SRR17520069.5204986  
SRR17520069.5207345  
SRR17520069.5207347  
SRR17520069.5207349  
SRR17520069.5207351  
SRR17520069.5207353  
SRR17520069.5207355  
SRR17520069.5207359  
SRR17520069.5207361  
SRR17520069.5207363  
SRR17520069.5207365  
SRR17520069.5207367  
SRR17520069.5207369  
SRR17520069.5207371  
SRR17520069.5207373  
SRR17520069.5207375  
SRR17520069.5207377  
SRR17520069.5207379  
SRR17520069.5207381  
SRR17520069.5207383  
SRR17520069.5207385

SRR17520069. 5207387  
SRR17520069. 5207389  
SRR17520069. 5207391  
SRR17520069. 5207393  
SRR17520069. 5207395  
SRR17520069. 5207397  
SRR17520069. 5207399  
SRR17520069. 5207401  
SRR17520069. 5207403  
SRR17520069. 5207405  
SRR17520069. 5207407  
SRR17520069. 5207409  
SRR17520069. 5207411  
SRR17520069. 5207413  
SRR17520069. 5219525  
SRR17520069. 5219527  
SRR17520069. 5219529  
SRR17520069. 5219531  
SRR17520069. 5219533  
SRR17520069. 5219535  
SRR17520069. 5219537  
SRR17520069. 5219539  
SRR17520069. 5219541  
SRR17520069. 5219543  
SRR17520069. 5219545  
SRR17520069. 5219547  
SRR17520069. 5219549  
SRR17520069. 5219551  
SRR17520069. 5219553  
SRR17520069. 5219555  
SRR17520069. 5219557  
SRR17520069. 5219559  
SRR17520069. 5219561  
SRR17520069. 5219563  
SRR17520069. 5219565  
SRR17520069. 5219567  
SRR17520069. 5219569  
SRR17520069. 5219571  
SRR17520069. 5219573  
SRR17520069. 5219575  
SRR17520069. 5219577  
SRR17520069. 5219579  
SRR17520069. 5219581  
SRR17520069. 5219583  
SRR17520069. 5219585  
SRR17520069. 5219587  
SRR17520069. 5219589

SRR17520069. 5219591  
SRR17520069. 5219593  
SRR17520069. 5219595  
SRR17520069. 5219597  
SRR17520069. 5219599  
SRR17520069. 5219601  
SRR17520069. 5219603  
SRR17520069. 5219605  
SRR17520069. 5219607  
SRR17520069. 5219609  
SRR17520069. 5219611  
SRR17520069. 5219613  
SRR17520069. 5219615  
SRR17520069. 5219617  
SRR17520069. 5219619  
SRR17520069. 5219621  
SRR17520069. 5219623  
SRR17520069. 5219625  
SRR17520069. 5219627  
SRR17520069. 5219631  
SRR17520069. 5219633  
SRR17520069. 5219635  
SRR17520069. 5219637  
SRR17520069. 5219639  
SRR17520069. 5219641  
SRR17520069. 5219643  
SRR17520069. 5219645  
SRR17520069. 5219647  
SRR17520069. 5219651  
SRR17520069. 5219653  
SRR17520069. 5219655  
SRR17520069. 5219657  
SRR17520069. 5219659  
SRR17520069. 5219661  
SRR17520069. 5219663  
SRR17520069. 5219665  
SRR17520069. 5219667  
SRR17520069. 5219669  
SRR17520069. 5219671  
SRR17520069. 5219673  
SRR17520069. 5219675  
SRR17520069. 5219677  
SRR17520069. 5219679  
SRR17520069. 5219681  
SRR17520069. 5219683  
SRR17520069. 5219687  
SRR17520069. 5219691



SRR17520069. 5219693  
SRR17520069. 5219898  
SRR17520069. 5219900  
SRR17520069. 5219902  
SRR17520069. 5219904  
SRR17520069. 5219906  
SRR17520069. 5219908  
SRR17520069. 5219910  
SRR17520069. 5219912  
SRR17520069. 5219914  
SRR17520069. 5219922  
SRR17520069. 5219924  
SRR17520069. 5219926  
SRR17520069. 5219928  
SRR17520069. 5219930  
SRR17520069. 5219932  
SRR17520069. 5219934  
SRR17520069. 5219936  
SRR17520069. 5219938  
SRR17520069. 5219940  
SRR17520069. 5219942  
SRR17520069. 5219944  
SRR17520069. 5219946  
SRR17520069. 5219948  
SRR17520069. 5219950  
SRR17520069. 5219952  
SRR17520069. 5219954  
SRR17520069. 5219956  
SRR17520069. 5219958  
SRR17520069. 5219960  
SRR17520069. 5219962  
SRR17520069. 5219964  
SRR17520069. 5219966  
SRR17520069. 5223098  
SRR17520069. 5223100  
SRR17520069. 5223102  
SRR17520069. 5223104  
SRR17520069. 5223106  
SRR17520069. 5223108  
SRR17520069. 5223110  
SRR17520069. 5223112  
SRR17520069. 5223114  
SRR17520069. 5223116  
SRR17520069. 5223118  
SRR17520069. 5223122  
SRR17520069. 5223124  
SRR17520069. 5223126

SRR17520069. 5223128  
SRR17520069. 5223130  
SRR17520069. 5223132  
SRR17520069. 5223134  
SRR17520069. 5223136  
SRR17520069. 5223138  
SRR17520069. 5223140  
SRR17520069. 5223277  
SRR17520069. 5223281  
SRR17520069. 5223283  
SRR17520069. 5223285  
SRR17520069. 5223287  
SRR17520069. 5223289  
SRR17520069. 5223295  
SRR17520069. 5223297  
SRR17520069. 5223299  
SRR17520069. 5223301  
SRR17520069. 5223303  
SRR17520069. 5223309  
SRR17520069. 5223311  
SRR17520069. 5223313  
SRR17520069. 5223315  
SRR17520069. 5223317  
SRR17520069. 5223319  
SRR17520069. 5223321  
SRR17520069. 5223323  
SRR17520069. 5225578  
SRR17520069. 5225580  
SRR17520069. 5225582  
SRR17520069. 5225586  
SRR17520069. 5225588  
SRR17520069. 5225590  
SRR17520069. 5225592  
SRR17520069. 5225594  
SRR17520069. 5225596  
SRR17520069. 5225598  
SRR17520069. 5233288  
SRR17520069. 5233290  
SRR17520069. 5233292  
SRR17520069. 5233294  
SRR17520069. 5233296  
SRR17520069. 5233298  
SRR17520069. 5233300  
SRR17520069. 5233302  
SRR17520069. 5233304  
SRR17520069. 5233306  
SRR17520069. 5233308

SRR17520069. 5233310  
SRR17520069. 5233312  
SRR17520069. 5233314  
SRR17520069. 5233316  
SRR17520069. 5233318  
SRR17520069. 5233915  
SRR17520069. 5233917  
SRR17520069. 5233919  
SRR17520069. 5233921  
SRR17520069. 5233923  
SRR17520069. 5233925  
SRR17520069. 5233927  
SRR17520069. 5233929  
SRR17520069. 5233931  
SRR17520069. 5233933  
SRR17520069. 5233935  
SRR17520069. 5233937  
SRR17520069. 5233939  
SRR17520069. 5233941  
SRR17520069. 5233943  
SRR17520069. 5233945  
SRR17520069. 5233947  
SRR17520069. 5233949  
SRR17520069. 5233951  
SRR17520069. 5233953  
SRR17520069. 5233955  
SRR17520069. 5233957  
SRR17520069. 5233959  
SRR17520069. 5233961  
SRR17520069. 5233963  
SRR17520069. 5233965  
SRR17520069. 5233967  
SRR17520069. 5233971  
SRR17520069. 5238819  
SRR17520069. 5238821  
SRR17520069. 5238823  
SRR17520069. 5238825  
SRR17520069. 5238827  
SRR17520069. 5238829  
SRR17520069. 5238831  
SRR17520069. 5240546  
SRR17520069. 5240548  
SRR17520069. 5240550  
SRR17520069. 5240552  
SRR17520069. 5240554  
SRR17520069. 5240556  
SRR17520069. 5240558

SRR17520069.5240560  
SRR17520069.5240562  
SRR17520069.5240564  
SRR17520069.5240566  
SRR17520069.5240568  
SRR17520069.5240570  
SRR17520069.5240572  
SRR17520069.5240574  
SRR17520069.5240576  
SRR17520069.5240578  
SRR17520069.5240580  
SRR17520069.5240582  
SRR17520069.5240584  
SRR17520069.5240586  
SRR17520069.5240588  
SRR17520069.5240590  
SRR17520069.5240592  
SRR17520069.5240594  
SRR17520069.5242351  
SRR17520069.5242353  
SRR17520069.5242355  
SRR17520069.5243409  
SRR17520069.5243411  
SRR17520069.5243413  
SRR17520069.5243415  
SRR17520069.5243417  
SRR17520069.5243419  
SRR17520069.5243421  
SRR17520069.5243425  
SRR17520069.5243427  
SRR17520069.5243433  
SRR17520069.5243439  
SRR17520069.5243441  
SRR17520069.5243443  
SRR17520069.5243447  
SRR17520069.5243449  
SRR17520069.5243455  
SRR17520069.5243459  
SRR17520069.5243461  
SRR17520069.5243463  
SRR17520069.5243465  
SRR17520069.5243467  
SRR17520069.5243469  
SRR17520069.5243473  
SRR17520069.5243475  
SRR17520069.5243477  
SRR17520069.5243479

SRR17520069. 5243481  
SRR17520069. 5243483  
SRR17520069. 5243485  
SRR17520069. 5243487  
SRR17520069. 5243489  
SRR17520069. 5243491  
SRR17520069. 5243493  
SRR17520069. 5243495  
SRR17520069. 5243497  
SRR17520069. 5243499  
SRR17520069. 5243503  
SRR17520069. 5243505  
SRR17520069. 5243507  
SRR17520069. 5243511  
SRR17520069. 5243513  
SRR17520069. 5243515  
SRR17520069. 5243517  
SRR17520069. 5243519  
SRR17520069. 5243521  
SRR17520069. 5243523  
SRR17520069. 5243525  
SRR17520069. 5243527  
SRR17520069. 5243529  
SRR17520069. 5243531  
SRR17520069. 5243533  
SRR17520069. 5243535  
SRR17520069. 5243537  
SRR17520069. 5243539  
SRR17520069. 5248802  
SRR17520069. 5248804  
SRR17520069. 5249671  
SRR17520069. 5249673  
SRR17520069. 5249677  
SRR17520069. 5249679  
SRR17520069. 5249681  
SRR17520069. 5249683  
SRR17520069. 5249685  
SRR17520069. 5249687  
SRR17520069. 5249689  
SRR17520069. 5249691  
SRR17520069. 5249693  
SRR17520069. 5249695  
SRR17520069. 5249697  
SRR17520069. 5249701  
SRR17520069. 5249703  
SRR17520069. 5249705  
SRR17520069. 5249707

SRR17520069. 5249709  
SRR17520069. 5249711  
SRR17520069. 5249713  
SRR17520069. 5249715  
SRR17520069. 5249717  
SRR17520069. 5249719  
SRR17520069. 5249721  
SRR17520069. 5249723  
SRR17520069. 5249725  
SRR17520069. 5249727  
SRR17520069. 5249729  
SRR17520069. 5249731  
SRR17520069. 5249733  
SRR17520069. 5249735  
SRR17520069. 5249737  
SRR17520069. 5249739  
SRR17520069. 5249741  
SRR17520069. 5249743  
SRR17520069. 5249745  
SRR17520069. 5249747  
SRR17520069. 5249749  
SRR17520069. 5249751  
SRR17520069. 5249753  
SRR17520069. 5249755  
SRR17520069. 5249757  
SRR17520069. 5249759  
SRR17520069. 5249761  
SRR17520069. 5249763  
SRR17520069. 5249765  
SRR17520069. 5249767  
SRR17520069. 5249769  
SRR17520069. 5249771  
SRR17520069. 5249773  
SRR17520069. 5249775  
SRR17520069. 5249777  
SRR17520069. 5249779  
SRR17520069. 5249781  
SRR17520069. 5249783  
SRR17520069. 5249785  
SRR17520069. 5249787  
SRR17520069. 5249789  
SRR17520069. 5249791  
SRR17520069. 5249795  
SRR17520069. 5249797  
SRR17520069. 5249799  
SRR17520069. 5255627  
SRR17520069. 5255629

SRR17520069. 5255631  
SRR17520069. 5255633  
SRR17520069. 5255635  
SRR17520069. 5255637  
SRR17520069. 5255639  
SRR17520069. 5255641  
SRR17520069. 5255643  
SRR17520069. 5255645  
SRR17520069. 5255647  
SRR17520069. 5255649  
SRR17520069. 5255651  
SRR17520069. 5255653  
SRR17520069. 5255655  
SRR17520069. 5255657  
SRR17520069. 5255659  
SRR17520069. 5255661  
SRR17520069. 5255663  
SRR17520069. 5270986  
SRR17520069. 5270988  
SRR17520069. 5270990  
SRR17520069. 5270992  
SRR17520069. 5270994  
SRR17520069. 5270996  
SRR17520069. 5270998  
SRR17520069. 5271000  
SRR17520069. 5271002  
SRR17520069. 5271004  
SRR17520069. 5271006  
SRR17520069. 5271008  
SRR17520069. 5271010  
SRR17520069. 5271012  
SRR17520069. 5271014  
SRR17520069. 5271016  
SRR17520069. 5271018  
SRR17520069. 5271020  
SRR17520069. 5271022  
SRR17520069. 5271024  
SRR17520069. 5271026  
SRR17520069. 5271028  
SRR17520069. 5271030  
SRR17520069. 5271032  
SRR17520069. 5271034  
SRR17520069. 5271036  
SRR17520069. 5271038  
SRR17520069. 5271040  
SRR17520069. 5271042  
SRR17520069. 5271044

SRR17520069. 5271046  
SRR17520069. 5271048  
SRR17520069. 5271052  
SRR17520069. 5271054  
SRR17520069. 5271056  
SRR17520069. 5271058  
SRR17520069. 5271060  
SRR17520069. 5271062  
SRR17520069. 5276311  
SRR17520069. 5276313  
SRR17520069. 5276321  
SRR17520069. 5276323  
SRR17520069. 5276327  
SRR17520069. 5276331  
SRR17520069. 5276333  
SRR17520069. 5276337  
SRR17520069. 5276343  
SRR17520069. 5276347  
SRR17520069. 5276349  
SRR17520069. 5276355  
SRR17520069. 5276357  
SRR17520069. 5276359  
SRR17520069. 5276365  
SRR17520069. 5276371  
SRR17520069. 5276373  
SRR17520069. 5281085  
SRR17520069. 5281087  
SRR17520069. 5281089  
SRR17520069. 5281091  
SRR17520069. 5281093  
SRR17520069. 5286176  
SRR17520069. 5286178  
SRR17520069. 5286180  
SRR17520069. 5286182  
SRR17520069. 5286184  
SRR17520069. 5286186  
SRR17520069. 5286188  
SRR17520069. 5286190  
SRR17520069. 5286192  
SRR17520069. 5286194  
SRR17520069. 5286196  
SRR17520069. 5286198  
SRR17520069. 5286200  
SRR17520069. 5297901  
SRR17520069. 5303079  
SRR17520069. 5303081  
SRR17520069. 5303083



SRR17520069. 5304725  
SRR17520069. 5304727  
SRR17520069. 5304731  
SRR17520069. 5304733  
SRR17520069. 5304735  
SRR17520069. 5304737  
SRR17520069. 5304739  
SRR17520069. 5304741  
SRR17520069. 5304743  
SRR17520069. 5304745  
SRR17520069. 5304747  
SRR17520069. 5313089  
SRR17520069. 5313091  
SRR17520069. 5313093  
SRR17520069. 5313466  
SRR17520069. 5316915  
SRR17520069. 5316917  
SRR17520069. 5316919  
SRR17520069. 5316921  
SRR17520069. 5316923  
SRR17520069. 5316925  
SRR17520069. 5316927  
SRR17520069. 5316929  
SRR17520069. 5316931  
SRR17520069. 5316933  
SRR17520069. 5316935  
SRR17520069. 5316937  
SRR17520069. 5316939  
SRR17520069. 5316943  
SRR17520069. 5316947  
SRR17520069. 5316949  
SRR17520069. 5316951  
SRR17520069. 5316953  
SRR17520069. 5316955  
SRR17520069. 5321503  
SRR17520069. 5321505  
SRR17520069. 5321507  
SRR17520069. 5321509  
SRR17520069. 5321511  
SRR17520069. 5321513  
SRR17520069. 5321515  
SRR17520069. 5321517  
SRR17520069. 5321519  
SRR17520069. 5321521  
SRR17520069. 5321525  
SRR17520069. 5321527  
SRR17520069. 5321529

SRR17520069. 5321531  
SRR17520069. 5321533  
SRR17520069. 5321535  
SRR17520069. 5321539  
SRR17520069. 5321543  
SRR17520069. 5321545  
SRR17520069. 5321547  
SRR17520069. 5321549  
SRR17520069. 5321551  
SRR17520069. 5321553  
SRR17520069. 5323002  
SRR17520069. 5323004  
SRR17520069. 5323006  
SRR17520069. 5323008  
SRR17520069. 5323010  
SRR17520069. 5323012  
SRR17520069. 5323014  
SRR17520069. 5323016  
SRR17520069. 5323018  
SRR17520069. 5323020  
SRR17520069. 5323024  
SRR17520069. 5323026  
SRR17520069. 5323028  
SRR17520069. 5323030  
SRR17520069. 5323032  
SRR17520069. 5323034  
SRR17520069. 5323036  
SRR17520069. 5323038  
SRR17520069. 5323040  
SRR17520069. 5323042  
SRR17520069. 5323044  
SRR17520069. 5323046  
SRR17520069. 5323048  
SRR17520069. 5323050  
SRR17520069. 5323052  
SRR17520069. 5323056  
SRR17520069. 5323058  
SRR17520069. 5323060  
SRR17520069. 5323062  
SRR17520069. 5323064  
SRR17520069. 5323066  
SRR17520069. 5323068  
SRR17520069. 5323070  
SRR17520069. 5323072  
SRR17520069. 5323074  
SRR17520069. 5323076  
SRR17520069. 5323080

SRR17520069. 5323082  
SRR17520069. 5324143  
SRR17520069. 5324145  
SRR17520069. 5324147  
SRR17520069. 5324149  
SRR17520069. 5324151  
SRR17520069. 5324153  
SRR17520069. 5324229  
SRR17520069. 5324231  
SRR17520069. 5324233  
SRR17520069. 5324235  
SRR17520069. 5324237  
SRR17520069. 5324239  
SRR17520069. 5324241  
SRR17520069. 5324243  
SRR17520069. 5324245  
SRR17520069. 5324247  
SRR17520069. 5324249  
SRR17520069. 5324253  
SRR17520069. 5324255  
SRR17520069. 5324259  
SRR17520069. 5324261  
SRR17520069. 5324263  
SRR17520069. 5324267  
SRR17520069. 5324269  
SRR17520069. 5324271  
SRR17520069. 5324273  
SRR17520069. 5324275  
SRR17520069. 5324277  
SRR17520069. 5324279  
SRR17520069. 5324281  
SRR17520069. 5324283  
SRR17520069. 5324285  
SRR17520069. 5324287  
SRR17520069. 5324289  
SRR17520069. 5324291  
SRR17520069. 5324293  
SRR17520069. 5324295  
SRR17520069. 5324297  
SRR17520069. 5324299  
SRR17520069. 5324301  
SRR17520069. 5324303  
SRR17520069. 5324305  
SRR17520069. 5324307  
SRR17520069. 5331038  
SRR17520069. 5331040  
SRR17520069. 5331042

SRR17520069. 5331044  
SRR17520069. 5331046  
SRR17520069. 5331048  
SRR17520069. 5331050  
SRR17520069. 5331052  
SRR17520069. 5331054  
SRR17520069. 5331056  
SRR17520069. 5331058  
SRR17520069. 5331060  
SRR17520069. 5331062  
SRR17520069. 5331064  
SRR17520069. 5331066  
SRR17520069. 5331068  
SRR17520069. 5331070  
SRR17520069. 5331072  
SRR17520069. 5331208  
SRR17520069. 5331210  
SRR17520069. 5331212  
SRR17520069. 5331214  
SRR17520069. 5331216  
SRR17520069. 5331218  
SRR17520069. 5331220  
SRR17520069. 5331222  
SRR17520069. 5331224  
SRR17520069. 5331226  
SRR17520069. 5331228  
SRR17520069. 5331230  
SRR17520069. 5331232  
SRR17520069. 5331234  
SRR17520069. 5331236  
SRR17520069. 5331238  
SRR17520069. 5331240  
SRR17520069. 5331242  
SRR17520069. 5331244  
SRR17520069. 5331246  
SRR17520069. 5331248  
SRR17520069. 5331250  
SRR17520069. 5331252  
SRR17520069. 5331254  
SRR17520069. 5331256  
SRR17520069. 5331258  
SRR17520069. 5331260  
SRR17520069. 5331262  
SRR17520069. 5331264  
SRR17520069. 5331266  
SRR17520069. 5331268  
SRR17520069. 5331270

SRR17520069. 5331272  
SRR17520069. 5331274  
SRR17520069. 5331276  
SRR17520069. 5331278  
SRR17520069. 5331280  
SRR17520069. 5331282  
SRR17520069. 5331284  
SRR17520069. 5331286  
SRR17520069. 5331288  
SRR17520069. 5331290  
SRR17520069. 5331292  
SRR17520069. 5331294  
SRR17520069. 5331296  
SRR17520069. 5331298  
SRR17520069. 5331302  
SRR17520069. 5331304  
SRR17520069. 5331306  
SRR17520069. 5331308  
SRR17520069. 5331310  
SRR17520069. 5331312  
SRR17520069. 5331314  
SRR17520069. 5331316  
SRR17520069. 5331318  
SRR17520069. 5331320  
SRR17520069. 5340383  
SRR17520069. 5344325  
SRR17520069. 5349151  
SRR17520069. 5351230  
SRR17520069. 5351234  
SRR17520069. 5351236  
SRR17520069. 5351238  
SRR17520069. 5351240  
SRR17520069. 5351242  
SRR17520069. 5351244  
SRR17520069. 5351246  
SRR17520069. 5351248  
SRR17520069. 5351250  
SRR17520069. 5351252  
SRR17520069. 5351335  
SRR17520069. 5351337  
SRR17520069. 5351339  
SRR17520069. 5351341  
SRR17520069. 5351343  
SRR17520069. 5351345  
SRR17520069. 5351347  
SRR17520069. 5351349  
SRR17520069. 5351351

SRR17520069. 5351353  
SRR17520069. 5351355  
SRR17520069. 5351357  
SRR17520069. 5351359  
SRR17520069. 5351361  
SRR17520069. 5351363  
SRR17520069. 5351365  
SRR17520069. 5351367  
SRR17520069. 5351369  
SRR17520069. 5351371  
SRR17520069. 5351373  
SRR17520069. 5351375  
SRR17520069. 5351379  
SRR17520069. 5351381  
SRR17520069. 5351383  
SRR17520069. 5351385  
SRR17520069. 5351387  
SRR17520069. 5351389  
SRR17520069. 5351391  
SRR17520069. 5351393  
SRR17520069. 5351397  
SRR17520069. 5351399  
SRR17520069. 5351401  
SRR17520069. 5351403  
SRR17520069. 5351405  
SRR17520069. 5351407  
SRR17520069. 5351409  
SRR17520069. 5351411  
SRR17520069. 5351413  
SRR17520069. 5351417  
SRR17520069. 5351419  
SRR17520069. 5351421  
SRR17520069. 5351423  
SRR17520069. 5351425  
SRR17520069. 5351427  
SRR17520069. 5351429  
SRR17520069. 5351431  
SRR17520069. 5351433  
SRR17520069. 5351435  
SRR17520069. 5351437  
SRR17520069. 5351439  
SRR17520069. 5351441  
SRR17520069. 5351443  
SRR17520069. 5351445  
SRR17520069. 5351447  
SRR17520069. 5351449  
SRR17520069. 5351451

SRR17520069. 5351453  
SRR17520069. 5351455  
SRR17520069. 5351457  
SRR17520069. 5351459  
SRR17520069. 5351517  
SRR17520069. 5351519  
SRR17520069. 5351521  
SRR17520069. 5351523  
SRR17520069. 5351525  
SRR17520069. 5351527  
SRR17520069. 5351529  
SRR17520069. 5351531  
SRR17520069. 5351533  
SRR17520069. 5351535  
SRR17520069. 5351537  
SRR17520069. 5351539  
SRR17520069. 5351541  
SRR17520069. 5351543  
SRR17520069. 5351545  
SRR17520069. 5351547  
SRR17520069. 5351551  
SRR17520069. 5351553  
SRR17520069. 5351557  
SRR17520069. 5351559  
SRR17520069. 5351561  
SRR17520069. 5351563  
SRR17520069. 5351565  
SRR17520069. 5351567  
SRR17520069. 5351569  
SRR17520069. 5351571  
SRR17520069. 5351573  
SRR17520069. 5351577  
SRR17520069. 5351579  
SRR17520069. 5351581  
SRR17520069. 5351583  
SRR17520069. 5351585  
SRR17520069. 5351587  
SRR17520069. 5351589  
SRR17520069. 5351591  
SRR17520069. 5351593  
SRR17520069. 5351595  
SRR17520069. 5351597  
SRR17520069. 5351599  
SRR17520069. 5351601  
SRR17520069. 5351603  
SRR17520069. 5351605  
SRR17520069. 5351607

SRR17520069.5351609  
SRR17520069.5351611  
SRR17520069.5351613  
SRR17520069.5351615  
SRR17520069.5351617  
SRR17520069.5351619  
SRR17520069.5351621  
SRR17520069.5353160  
SRR17520069.5353162  
SRR17520069.5353164  
SRR17520069.5353166  
SRR17520069.5353168  
SRR17520069.5353170  
SRR17520069.5353172  
SRR17520069.5353174  
SRR17520069.5353176  
SRR17520069.5353178  
SRR17520069.5353180  
SRR17520069.5353182  
SRR17520069.5353184  
SRR17520069.5353186  
SRR17520069.5353188  
SRR17520069.5353190  
SRR17520069.5353192  
SRR17520069.5353194  
SRR17520069.5353196  
SRR17520069.5353198  
SRR17520069.5353200  
SRR17520069.5353202  
SRR17520069.5353204  
SRR17520069.5353206  
SRR17520069.5353208  
SRR17520069.5356256  
SRR17520069.5356258  
SRR17520069.5356260  
SRR17520069.5356262  
SRR17520069.5356264  
SRR17520069.5356266  
SRR17520069.5356268  
SRR17520069.5356270  
SRR17520069.5356272  
SRR17520069.5356274  
SRR17520069.5356276  
SRR17520069.5356278  
SRR17520069.5356280  
SRR17520069.5356282  
SRR17520069.5356284



SRR17520069. 5356298  
SRR17520069. 5356956  
SRR17520069. 5356958  
SRR17520069. 5356960  
SRR17520069. 5356962  
SRR17520069. 5356964  
SRR17520069. 5356966  
SRR17520069. 5356968  
SRR17520069. 5356970  
SRR17520069. 5356974  
SRR17520069. 5356976  
SRR17520069. 5356978  
SRR17520069. 5356980  
SRR17520069. 5356984  
SRR17520069. 5356986  
SRR17520069. 5356988  
SRR17520069. 5356990  
SRR17520069. 5356992  
SRR17520069. 5356994  
SRR17520069. 5356996  
SRR17520069. 5356998  
SRR17520069. 5357000  
SRR17520069. 5357002  
SRR17520069. 5357004  
SRR17520069. 5357006  
SRR17520069. 5357008  
SRR17520069. 5357010  
SRR17520069. 5357012  
SRR17520069. 5357014  
SRR17520069. 5358395  
SRR17520069. 5358397  
SRR17520069. 5358399  
SRR17520069. 5358401  
SRR17520069. 5358403  
SRR17520069. 5358405  
SRR17520069. 5358407  
SRR17520069. 5358409  
SRR17520069. 5358411  
SRR17520069. 5358413  
SRR17520069. 5358415  
SRR17520069. 5358417  
SRR17520069. 5358419  
SRR17520069. 5358421  
SRR17520069. 5358423  
SRR17520069. 5358425  
SRR17520069. 5358427  
SRR17520069. 5358429

SRR17520069. 5358431  
SRR17520069. 5358433  
SRR17520069. 5358435  
SRR17520069. 5358437  
SRR17520069. 5358439  
SRR17520069. 5358441  
SRR17520069. 5358443  
SRR17520069. 5358445  
SRR17520069. 5358447  
SRR17520069. 5358449  
SRR17520069. 5358451  
SRR17520069. 5358453  
SRR17520069. 5358455  
SRR17520069. 5358457  
SRR17520069. 5358459  
SRR17520069. 5358461  
SRR17520069. 5358463  
SRR17520069. 5358465  
SRR17520069. 5358467  
SRR17520069. 5358469  
SRR17520069. 5358471  
SRR17520069. 5358473  
SRR17520069. 5358475  
SRR17520069. 5358477  
SRR17520069. 5358479  
SRR17520069. 5358481  
SRR17520069. 5358483  
SRR17520069. 5358485  
SRR17520069. 5358487  
SRR17520069. 5358489  
SRR17520069. 5358491  
SRR17520069. 5358495  
SRR17520069. 5358497  
SRR17520069. 5358499  
SRR17520069. 5358501  
SRR17520069. 5358503  
SRR17520069. 5358505  
SRR17520069. 5358507  
SRR17520069. 5358509  
SRR17520069. 5358511  
SRR17520069. 5358513  
SRR17520069. 5364006  
SRR17520069. 5366299  
SRR17520069. 5366301  
SRR17520069. 5366305  
SRR17520069. 5366309  
SRR17520069. 5366311

SRR17520069. 5366313  
SRR17520069. 5366315  
SRR17520069. 5366317  
SRR17520069. 5366319  
SRR17520069. 5366321  
SRR17520069. 5366323  
SRR17520069. 5366325  
SRR17520069. 5366327  
SRR17520069. 5366329  
SRR17520069. 5366331  
SRR17520069. 5379281  
SRR17520069. 5379283  
SRR17520069. 5379287  
SRR17520069. 5379298  
SRR17520069. 5379300  
SRR17520069. 5379302  
SRR17520069. 5379304  
SRR17520069. 5379306  
SRR17520069. 5379310  
SRR17520069. 5379312  
SRR17520069. 5379314  
SRR17520069. 5379316  
SRR17520069. 5379318  
SRR17520069. 5379551  
SRR17520069. 5379553  
SRR17520069. 5379555  
SRR17520069. 5379557  
SRR17520069. 5379559  
SRR17520069. 5379561  
SRR17520069. 5379563  
SRR17520069. 5379565  
SRR17520069. 5379567  
SRR17520069. 5379569  
SRR17520069. 5379571  
SRR17520069. 5379573  
SRR17520069. 5379575  
SRR17520069. 5379577  
SRR17520069. 5379579  
SRR17520069. 5379581  
SRR17520069. 5379583  
SRR17520069. 5379585  
SRR17520069. 5379587  
SRR17520069. 5379589  
SRR17520069. 5379591  
SRR17520069. 5379593  
SRR17520069. 5385289  
SRR17520069. 5389872

SRR17520069. 5397462  
SRR17520069. 5398540  
SRR17520069. 5398542  
SRR17520069. 5398544  
SRR17520069. 5398546  
SRR17520069. 5398548  
SRR17520069. 5398550  
SRR17520069. 5398552  
SRR17520069. 5398554  
SRR17520069. 5398556  
SRR17520069. 5398558  
SRR17520069. 5398560  
SRR17520069. 5398562  
SRR17520069. 5398566  
SRR17520069. 5398568  
SRR17520069. 5398570  
SRR17520069. 5398574  
SRR17520069. 5398576  
SRR17520069. 5398578  
SRR17520069. 5398580  
SRR17520069. 5398582  
SRR17520069. 5398584  
SRR17520069. 5398586  
SRR17520069. 5402872  
SRR17520069. 5402874  
SRR17520069. 5402876  
SRR17520069. 5402878  
SRR17520069. 5402880  
SRR17520069. 5402882  
SRR17520069. 5402884  
SRR17520069. 5402886  
SRR17520069. 5402888  
SRR17520069. 5402890  
SRR17520069. 5402892  
SRR17520069. 5402894  
SRR17520069. 5402896  
SRR17520069. 5402898  
SRR17520069. 5402900  
SRR17520069. 5402902  
SRR17520069. 5402904  
SRR17520069. 5402906  
SRR17520069. 5402908  
SRR17520069. 5402910  
SRR17520069. 5402912  
SRR17520069. 5402914  
SRR17520069. 5402916  
SRR17520069. 5402920

SRR17520069. 5402922  
SRR17520069. 5402924  
SRR17520069. 5402928  
SRR17520069. 5402930  
SRR17520069. 5402932  
SRR17520069. 5402934  
SRR17520069. 5402936  
SRR17520069. 5402938  
SRR17520069. 5402940  
SRR17520069. 5402942  
SRR17520069. 5402944  
SRR17520069. 5402946  
SRR17520069. 5402948  
SRR17520069. 5402950  
SRR17520069. 5402952  
SRR17520069. 5414004  
SRR17520069. 5414006  
SRR17520069. 5414008  
SRR17520069. 5414950  
SRR17520069. 5414952  
SRR17520069. 5424102  
SRR17520069. 5424114  
SRR17520069. 5424116  
SRR17520069. 5424118  
SRR17520069. 5424122  
SRR17520069. 5424124  
SRR17520069. 5424126  
SRR17520069. 5424128  
SRR17520069. 5424130  
SRR17520069. 5424132  
SRR17520069. 5424134  
SRR17520069. 5424136  
SRR17520069. 5424138  
SRR17520069. 5424140  
SRR17520069. 5424142  
SRR17520069. 5424144  
SRR17520069. 5424146  
SRR17520069. 5424148  
SRR17520069. 5424150  
SRR17520069. 5424152  
SRR17520069. 5424154  
SRR17520069. 5424156  
SRR17520069. 5424158  
SRR17520069. 5424160  
SRR17520069. 5424162  
SRR17520069. 5424164  
SRR17520069. 5424166

SRR17520069.5424168  
SRR17520069.5424170  
SRR17520069.5424174  
SRR17520069.5424188  
SRR17520069.5424190  
SRR17520069.5424192  
SRR17520069.5424194  
SRR17520069.5424196  
SRR17520069.5424198  
SRR17520069.5424200  
SRR17520069.5424202  
SRR17520069.5424204  
SRR17520069.5424206  
SRR17520069.5424208  
SRR17520069.5424210  
SRR17520069.5424212  
SRR17520069.5424214  
SRR17520069.5424216  
SRR17520069.5424218  
SRR17520069.5424220  
SRR17520069.5424222  
SRR17520069.5424224  
SRR17520069.5424226  
SRR17520069.5424228  
SRR17520069.5424230  
SRR17520069.5424232  
SRR17520069.5424234  
SRR17520069.5424236  
SRR17520069.5424238  
SRR17520069.5424240  
SRR17520069.5424242  
SRR17520069.5424244  
SRR17520069.5424246  
SRR17520069.5424248  
SRR17520069.5424250  
SRR17520069.5424252  
SRR17520069.5424254  
SRR17520069.5424256  
SRR17520069.5424258  
SRR17520069.5424260  
SRR17520069.5424262  
SRR17520069.5424264  
SRR17520069.5424266  
SRR17520069.5424268  
SRR17520069.5424270  
SRR17520069.5424272  
SRR17520069.5424274

SRR17520069.5424276  
SRR17520069.5424278  
SRR17520069.5424280  
SRR17520069.5424282  
SRR17520069.5424284  
SRR17520069.5424286  
SRR17520069.5424290  
SRR17520069.5424292  
SRR17520069.5424294  
SRR17520069.5424296  
SRR17520069.5424298  
SRR17520069.5424300  
SRR17520069.5424302  
SRR17520069.5424304  
SRR17520069.5424306  
SRR17520069.5424308  
SRR17520069.5424310  
SRR17520069.5424312  
SRR17520069.5424314  
SRR17520069.5424316  
SRR17520069.5424318  
SRR17520069.5424320  
SRR17520069.5424322  
SRR17520069.5424324  
SRR17520069.5424326  
SRR17520069.5424328  
SRR17520069.5424330  
SRR17520069.5424332  
SRR17520069.5424334  
SRR17520069.5424336  
SRR17520069.5424338  
SRR17520069.5424340  
SRR17520069.5424342  
SRR17520069.5424344  
SRR17520069.5424346  
SRR17520069.5424348  
SRR17520069.5424350  
SRR17520069.5424352  
SRR17520069.5424354  
SRR17520069.5424356  
SRR17520069.5433629  
SRR17520069.5433631  
SRR17520069.5433633  
SRR17520069.5433635  
SRR17520069.5433637  
SRR17520069.5438813  
SRR17520069.5438815

SRR17520069.5438817  
SRR17520069.5438819  
SRR17520069.5438821  
SRR17520069.5438823  
SRR17520069.5438825  
SRR17520069.5438829  
SRR17520069.5438831  
SRR17520069.5438833  
SRR17520069.5438835  
SRR17520069.5438837  
SRR17520069.5438839  
SRR17520069.5442534  
SRR17520069.5442685  
SRR17520069.5442687  
SRR17520069.5442691  
SRR17520069.5442693  
SRR17520069.5442695  
SRR17520069.5442697  
SRR17520069.5442699  
SRR17520069.5442701  
SRR17520069.5442703  
SRR17520069.5442705  
SRR17520069.5442707  
SRR17520069.5442709  
SRR17520069.5442711  
SRR17520069.5442713  
SRR17520069.5442715  
SRR17520069.5442717  
SRR17520069.5442719  
SRR17520069.5442721  
SRR17520069.5442723  
SRR17520069.5442725  
SRR17520069.5442727  
SRR17520069.5442729  
SRR17520069.5442731  
SRR17520069.5442733  
SRR17520069.5446835  
SRR17520069.5446837  
SRR17520069.5457684  
SRR17520069.5460189  
SRR17520069.5460191  
SRR17520069.5460193  
SRR17520069.5460195  
SRR17520069.5460197  
SRR17520069.5460199  
SRR17520069.5460203  
SRR17520069.5460205



SRR17520069. 5460207  
SRR17520069. 5460209  
SRR17520069. 5460211  
SRR17520069. 5460213  
SRR17520069. 5460215  
SRR17520069. 5460217  
SRR17520069. 5460219  
SRR17520069. 5460221  
SRR17520069. 5460223  
SRR17520069. 5460225  
SRR17520069. 5460227  
SRR17520069. 5460229  
SRR17520069. 5460231  
SRR17520069. 5460233  
SRR17520069. 5460235  
SRR17520069. 5460237  
SRR17520069. 5460239  
SRR17520069. 5460241  
SRR17520069. 5460243  
SRR17520069. 5460245  
SRR17520069. 5460247  
SRR17520069. 5460249  
SRR17520069. 5460251  
SRR17520069. 5460253  
SRR17520069. 5460255  
SRR17520069. 5460257  
SRR17520069. 5460259  
SRR17520069. 5460261  
SRR17520069. 5460263  
SRR17520069. 5460265  
SRR17520069. 5460267  
SRR17520069. 5460269  
SRR17520069. 5460271  
SRR17520069. 5460273  
SRR17520069. 5460275  
SRR17520069. 5460277  
SRR17520069. 5460279  
SRR17520069. 5460281  
SRR17520069. 5460283  
SRR17520069. 5460285  
SRR17520069. 5460287  
SRR17520069. 5460289  
SRR17520069. 5460291  
SRR17520069. 5460293  
SRR17520069. 5460295  
SRR17520069. 5460297  
SRR17520069. 5460299

SRR17520069. 5460301  
SRR17520069. 5460303  
SRR17520069. 5460305  
SRR17520069. 5460307  
SRR17520069. 5460309  
SRR17520069. 5460311  
SRR17520069. 5460313  
SRR17520069. 5460315  
SRR17520069. 5460317  
SRR17520069. 5460319  
SRR17520069. 5460321  
SRR17520069. 5460323  
SRR17520069. 5460325  
SRR17520069. 5466019  
SRR17520069. 5466021  
SRR17520069. 5466023  
SRR17520069. 5466025  
SRR17520069. 5466027  
SRR17520069. 5466029  
SRR17520069. 5466031  
SRR17520069. 5466033  
SRR17520069. 5466035  
SRR17520069. 5466037  
SRR17520069. 5466039  
SRR17520069. 5466041  
SRR17520069. 5466043  
SRR17520069. 5466045  
SRR17520069. 5466047  
SRR17520069. 5466049  
SRR17520069. 5466051  
SRR17520069. 5469885  
SRR17520069. 5469887  
SRR17520069. 5469889  
SRR17520069. 5469891  
SRR17520069. 5469893  
SRR17520069. 5469897  
SRR17520069. 5469899  
SRR17520069. 5469901  
SRR17520069. 5469903  
SRR17520069. 5469905  
SRR17520069. 5469909  
SRR17520069. 5469911  
SRR17520069. 5469913  
SRR17520069. 5469915  
SRR17520069. 5469917  
SRR17520069. 5469919  
SRR17520069. 5469921

SRR17520069.5469923  
SRR17520069.5469925  
SRR17520069.5469927  
SRR17520069.5469929  
SRR17520069.5469931  
SRR17520069.5469933  
SRR17520069.5469935  
SRR17520069.5469937  
SRR17520069.5469939  
SRR17520069.5469941  
SRR17520069.5469943  
SRR17520069.5469945  
SRR17520069.5469947  
SRR17520069.5469949  
SRR17520069.5469951  
SRR17520069.5469953  
SRR17520069.5469955  
SRR17520069.5469957  
SRR17520069.5469959  
SRR17520069.5469961  
SRR17520069.5469963  
SRR17520069.5469965  
SRR17520069.5469967  
SRR17520069.5469969  
SRR17520069.5469973  
SRR17520069.5469975  
SRR17520069.5469977  
SRR17520069.5469979  
SRR17520069.5469981  
SRR17520069.5469983  
SRR17520069.5489475  
SRR17520069.5489477  
SRR17520069.5489479  
SRR17520069.5489481  
SRR17520069.5489483  
SRR17520069.5489485  
SRR17520069.5489487  
SRR17520069.5489489  
SRR17520069.5489491  
SRR17520069.5489493  
SRR17520069.5489495  
SRR17520069.5489497  
SRR17520069.5489499  
SRR17520069.5489501  
SRR17520069.5489503  
SRR17520069.5489505  
SRR17520069.5489507

SRR17520069. 5489509  
SRR17520069. 5489511  
SRR17520069. 5489513  
SRR17520069. 5489515  
SRR17520069. 5489517  
SRR17520069. 5489519  
SRR17520069. 5490820  
SRR17520069. 5490824  
SRR17520069. 5490830  
SRR17520069. 5490832  
SRR17520069. 5490838  
SRR17520069. 5490846  
SRR17520069. 5490848  
SRR17520069. 5490850  
SRR17520069. 5490852  
SRR17520069. 5490854  
SRR17520069. 5490856  
SRR17520069. 5490858  
SRR17520069. 5490860  
SRR17520069. 5490862  
SRR17520069. 5490864  
SRR17520069. 5490866  
SRR17520069. 5490870  
SRR17520069. 5490872  
SRR17520069. 5490874  
SRR17520069. 5490876  
SRR17520069. 5490878  
SRR17520069. 5490880  
SRR17520069. 5490882  
SRR17520069. 5490886  
SRR17520069. 5490888  
SRR17520069. 5490890  
SRR17520069. 5496364  
SRR17520069. 5496378  
SRR17520069. 5496382  
SRR17520069. 5496384  
SRR17520069. 5496386  
SRR17520069. 5496388  
SRR17520069. 5496390  
SRR17520069. 5496392  
SRR17520069. 5496394  
SRR17520069. 5496396  
SRR17520069. 5496398  
SRR17520069. 5496400  
SRR17520069. 5496402  
SRR17520069. 5496404  
SRR17520069. 5496406

SRR17520069. 5496408  
SRR17520069. 5496410  
SRR17520069. 5496412  
SRR17520069. 5496414  
SRR17520069. 5496416  
SRR17520069. 5496418  
SRR17520069. 5496420  
SRR17520069. 5496422  
SRR17520069. 5496424  
SRR17520069. 5496426  
SRR17520069. 5496428  
SRR17520069. 5496430  
SRR17520069. 5496432  
SRR17520069. 5496434  
SRR17520069. 5496436  
SRR17520069. 5496438  
SRR17520069. 5496440  
SRR17520069. 5496442  
SRR17520069. 5496444  
SRR17520069. 5496446  
SRR17520069. 5496448  
SRR17520069. 5496452  
SRR17520069. 5496454  
SRR17520069. 5496456  
SRR17520069. 5496458  
SRR17520069. 5496460  
SRR17520069. 5496462  
SRR17520069. 5496464  
SRR17520069. 5496466  
SRR17520069. 5496468  
SRR17520069. 5496470  
SRR17520069. 5496472  
SRR17520069. 5496474  
SRR17520069. 5496476  
SRR17520069. 5496478  
SRR17520069. 5496480  
SRR17520069. 5496482  
SRR17520069. 5496486  
SRR17520069. 5496488  
SRR17520069. 5496490  
SRR17520069. 5496492  
SRR17520069. 5496494  
SRR17520069. 5496496  
SRR17520069. 5496498  
SRR17520069. 5504264  
SRR17520069. 5504266  
SRR17520069. 5504268

SRR17520069.5504272  
SRR17520069.5504274  
SRR17520069.5504276  
SRR17520069.5504278  
SRR17520069.5504280  
SRR17520069.5504282  
SRR17520069.5504284  
SRR17520069.5504286  
SRR17520069.5504288  
SRR17520069.5504290  
SRR17520069.5504292  
SRR17520069.5504294  
SRR17520069.5504300  
SRR17520069.5504302  
SRR17520069.5504306  
SRR17520069.5506193  
SRR17520069.5506195  
SRR17520069.5506197  
SRR17520069.5506199  
SRR17520069.5506201  
SRR17520069.5509864  
SRR17520069.5509866  
SRR17520069.5509868  
SRR17520069.5509870  
SRR17520069.5509872  
SRR17520069.5509874  
SRR17520069.5509876  
SRR17520069.5509878  
SRR17520069.5509880  
SRR17520069.5509882  
SRR17520069.5509884  
SRR17520069.5509886  
SRR17520069.5509888  
SRR17520069.5509890  
SRR17520069.5509892  
SRR17520069.5509894  
SRR17520069.5509896  
SRR17520069.5509898  
SRR17520069.5509900  
SRR17520069.5509902  
SRR17520069.5509904  
SRR17520069.5509906  
SRR17520069.5509908  
SRR17520069.5509910  
SRR17520069.5509912  
SRR17520069.5509914  
SRR17520069.5509916

SRR17520069.5509918  
SRR17520069.5509920  
SRR17520069.5509922  
SRR17520069.5509924  
SRR17520069.5509926  
SRR17520069.5509928  
SRR17520069.5509930  
SRR17520069.5509932  
SRR17520069.5509934  
SRR17520069.5509936  
SRR17520069.5509938  
SRR17520069.5509940  
SRR17520069.5509942  
SRR17520069.5509944  
SRR17520069.5509946  
SRR17520069.5509948  
SRR17520069.5509950  
SRR17520069.5509952  
SRR17520069.5509954  
SRR17520069.5509956  
SRR17520069.5509958  
SRR17520069.5509960  
SRR17520069.5509962  
SRR17520069.5509964  
SRR17520069.5517487  
SRR17520069.5517489  
SRR17520069.5517491  
SRR17520069.5517493  
SRR17520069.5517495  
SRR17520069.5517497  
SRR17520069.5521410  
SRR17520069.5521414  
SRR17520069.5521416  
SRR17520069.5521418  
SRR17520069.5521420  
SRR17520069.5521422  
SRR17520069.5521424  
SRR17520069.5521970  
SRR17520069.5521972  
SRR17520069.5521974  
SRR17520069.5521976  
SRR17520069.5521978  
SRR17520069.5521980  
SRR17520069.5521982  
SRR17520069.5521984  
SRR17520069.5521986  
SRR17520069.5521990

SRR17520069. 5521992  
SRR17520069. 5521994  
SRR17520069. 5521996  
SRR17520069. 5524343  
SRR17520069. 5524345  
SRR17520069. 5524347  
SRR17520069. 5524349  
SRR17520069. 5524351  
SRR17520069. 5524353  
SRR17520069. 5524355  
SRR17520069. 5524357  
SRR17520069. 5524359  
SRR17520069. 5524361  
SRR17520069. 5524534  
SRR17520069. 5524536  
SRR17520069. 5524538  
SRR17520069. 5524540  
SRR17520069. 5524542  
SRR17520069. 5524544  
SRR17520069. 5524546  
SRR17520069. 5524548  
SRR17520069. 5528433  
SRR17520069. 5530153  
SRR17520069. 5530155  
SRR17520069. 5530157  
SRR17520069. 5530159  
SRR17520069. 5530161  
SRR17520069. 5530163  
SRR17520069. 5530165  
SRR17520069. 5530169  
SRR17520069. 5530171  
SRR17520069. 5530173  
SRR17520069. 5530175  
SRR17520069. 5530177  
SRR17520069. 5530179  
SRR17520069. 5530181  
SRR17520069. 5530183  
SRR17520069. 5530185  
SRR17520069. 5530187  
SRR17520069. 5530189  
SRR17520069. 5530191  
SRR17520069. 5530193  
SRR17520069. 5530195  
SRR17520069. 5530201  
SRR17520069. 5530203  
SRR17520069. 5530207  
SRR17520069. 5530209



SRR17520069.5530211  
SRR17520069.5530213  
SRR17520069.5530215  
SRR17520069.5530217  
SRR17520069.5530219  
SRR17520069.5530221  
SRR17520069.5530223  
SRR17520069.5530225  
SRR17520069.5530227  
SRR17520069.5530229  
SRR17520069.5531813  
SRR17520069.5531815  
SRR17520069.5531817  
SRR17520069.5531819  
SRR17520069.5531821  
SRR17520069.5531823  
SRR17520069.5531825  
SRR17520069.5531827  
SRR17520069.5531829  
SRR17520069.5531831  
SRR17520069.5531833  
SRR17520069.5531835  
SRR17520069.5531837  
SRR17520069.5531839  
SRR17520069.5531841  
SRR17520069.5531843  
SRR17520069.5531845  
SRR17520069.5531847  
SRR17520069.5531849  
SRR17520069.5531851  
SRR17520069.5531853  
SRR17520069.5531855  
SRR17520069.5531857  
SRR17520069.5532214  
SRR17520069.5532216  
SRR17520069.5532218  
SRR17520069.5532382  
SRR17520069.5539547  
SRR17520069.5544039  
SRR17520069.5548606  
SRR17520069.5548608  
SRR17520069.5548610  
SRR17520069.5548612  
SRR17520069.5548614  
SRR17520069.5548616  
SRR17520069.5548618  
SRR17520069.5548620

SRR17520069. 5548622  
SRR17520069. 5548624  
SRR17520069. 5548626  
SRR17520069. 5548628  
SRR17520069. 5548632  
SRR17520069. 5548634  
SRR17520069. 5551211  
SRR17520069. 5552103  
SRR17520069. 5554104  
SRR17520069. 5561777  
SRR17520069. 5561779  
SRR17520069. 5561781  
SRR17520069. 5561783  
SRR17520069. 5561785  
SRR17520069. 5561787  
SRR17520069. 5561791  
SRR17520069. 5561793  
SRR17520069. 5561795  
SRR17520069. 5561797  
SRR17520069. 5561799  
SRR17520069. 5561801  
SRR17520069. 5561803  
SRR17520069. 5561805  
SRR17520069. 5561807  
SRR17520069. 5561809  
SRR17520069. 5561811  
SRR17520069. 5561813  
SRR17520069. 5561815  
SRR17520069. 5562813  
SRR17520069. 5562815  
SRR17520069. 5562823  
SRR17520069. 5562825  
SRR17520069. 5563195  
SRR17520069. 5563197  
SRR17520069. 5563199  
SRR17520069. 5563201  
SRR17520069. 5563203  
SRR17520069. 5563205  
SRR17520069. 5563207  
SRR17520069. 5563209  
SRR17520069. 5563211  
SRR17520069. 5565573  
SRR17520069. 5565575  
SRR17520069. 5565577  
SRR17520069. 5565579  
SRR17520069. 5565581  
SRR17520069. 5565583

SRR17520069.5565585  
SRR17520069.5565587  
SRR17520069.5565589  
SRR17520069.5565591  
SRR17520069.5565593  
SRR17520069.5565595  
SRR17520069.5570401  
SRR17520069.5570403  
SRR17520069.5570405  
SRR17520069.5570407  
SRR17520069.5570409  
SRR17520069.5573014  
SRR17520069.5573016  
SRR17520069.5573018  
SRR17520069.5573020  
SRR17520069.5573022  
SRR17520069.5573024  
SRR17520069.5573026  
SRR17520069.5573030  
SRR17520069.5573032  
SRR17520069.5573034  
SRR17520069.5573036  
SRR17520069.5573038  
SRR17520069.5573040  
SRR17520069.5573042  
SRR17520069.5573044  
SRR17520069.5573046  
SRR17520069.5573048  
SRR17520069.5573050  
SRR17520069.5573052  
SRR17520069.5573056  
SRR17520069.5573058  
SRR17520069.5573060  
SRR17520069.5573062  
SRR17520069.5573064  
SRR17520069.5573066  
SRR17520069.5573068  
SRR17520069.5573070  
SRR17520069.5573072  
SRR17520069.5573074  
SRR17520069.5573076  
SRR17520069.5573078  
SRR17520069.5573080  
SRR17520069.5573082  
SRR17520069.5573086  
SRR17520069.5573088  
SRR17520069.5573090

SRR17520069.5573092  
SRR17520069.5573094  
SRR17520069.5573096  
SRR17520069.5573098  
SRR17520069.5573100  
SRR17520069.5573102  
SRR17520069.5573104  
SRR17520069.5573106  
SRR17520069.5573108  
SRR17520069.5573110  
SRR17520069.5573112  
SRR17520069.5573114  
SRR17520069.5573116  
SRR17520069.5573118  
SRR17520069.5573120  
SRR17520069.5573122  
SRR17520069.5573124  
SRR17520069.5573126  
SRR17520069.5573128  
SRR17520069.5573130  
SRR17520069.5573132  
SRR17520069.5573134  
SRR17520069.5573136  
SRR17520069.5573138  
SRR17520069.5573140  
SRR17520069.5573142  
SRR17520069.5573144  
SRR17520069.5573148  
SRR17520069.5573150  
SRR17520069.5573152  
SRR17520069.5573154  
SRR17520069.5573156  
SRR17520069.5573158  
SRR17520069.5573160  
SRR17520069.5573162  
SRR17520069.5573164  
SRR17520069.5573166  
SRR17520069.5573168  
SRR17520069.5573172  
SRR17520069.5573174  
SRR17520069.5573176  
SRR17520069.5573178  
SRR17520069.5573180  
SRR17520069.5573182  
SRR17520069.5573184  
SRR17520069.5573188  
SRR17520069.5573192

SRR17520069.5573194  
SRR17520069.5573196  
SRR17520069.5573200  
SRR17520069.5573202  
SRR17520069.5573204  
SRR17520069.5573206  
SRR17520069.5573208  
SRR17520069.5573210  
SRR17520069.5573212  
SRR17520069.5573214  
SRR17520069.5573216  
SRR17520069.5573220  
SRR17520069.5573222  
SRR17520069.5573228  
SRR17520069.5573230  
SRR17520069.5573232  
SRR17520069.5573234  
SRR17520069.5573236  
SRR17520069.5573238  
SRR17520069.5573240  
SRR17520069.5573242  
SRR17520069.5573244  
SRR17520069.5573246  
SRR17520069.5573248  
SRR17520069.5573250  
SRR17520069.5573252  
SRR17520069.5573254  
SRR17520069.5573256  
SRR17520069.5573260  
SRR17520069.5573879  
SRR17520069.5573881  
SRR17520069.5573883  
SRR17520069.5573885  
SRR17520069.5573887  
SRR17520069.5573889  
SRR17520069.5573891  
SRR17520069.5573893  
SRR17520069.5573895  
SRR17520069.5573897  
SRR17520069.5573899  
SRR17520069.5573901  
SRR17520069.5573903  
SRR17520069.5573905  
SRR17520069.5573907  
SRR17520069.5573909  
SRR17520069.5573911  
SRR17520069.5573913

SRR17520069.5573915  
SRR17520069.5573917  
SRR17520069.5573919  
SRR17520069.5573921  
SRR17520069.5573923  
SRR17520069.5573925  
SRR17520069.5573927  
SRR17520069.5573929  
SRR17520069.5573931  
SRR17520069.5573933  
SRR17520069.5573935  
SRR17520069.5573937  
SRR17520069.5573939  
SRR17520069.5573941  
SRR17520069.5573943  
SRR17520069.5573945  
SRR17520069.5573947  
SRR17520069.5573949  
SRR17520069.5573951  
SRR17520069.5573953  
SRR17520069.5573955  
SRR17520069.5573957  
SRR17520069.5573959  
SRR17520069.5573961  
SRR17520069.5573963  
SRR17520069.5573965  
SRR17520069.5573967  
SRR17520069.5573969  
SRR17520069.5573971  
SRR17520069.5573973  
SRR17520069.5573975  
SRR17520069.5573977  
SRR17520069.5573979  
SRR17520069.5573981  
SRR17520069.5573983  
SRR17520069.5573985  
SRR17520069.5573987  
SRR17520069.5573989  
SRR17520069.5573991  
SRR17520069.5573993  
SRR17520069.5573995  
SRR17520069.5573997  
SRR17520069.5573999  
SRR17520069.5574001  
SRR17520069.5574003  
SRR17520069.5576252  
SRR17520069.5576254

SRR17520069. 5576256  
SRR17520069. 5576258  
SRR17520069. 5576260  
SRR17520069. 5576262  
SRR17520069. 5576264  
SRR17520069. 5576266  
SRR17520069. 5576268  
SRR17520069. 5576270  
SRR17520069. 5576272  
SRR17520069. 5576274  
SRR17520069. 5576276  
SRR17520069. 5576278  
SRR17520069. 5576280  
SRR17520069. 5576282  
SRR17520069. 5576284  
SRR17520069. 5576286  
SRR17520069. 5587193  
SRR17520069. 5587195  
SRR17520069. 5587197  
SRR17520069. 5587199  
SRR17520069. 5587201  
SRR17520069. 5587204  
SRR17520069. 5587206  
SRR17520069. 5587208  
SRR17520069. 5587210  
SRR17520069. 5587212  
SRR17520069. 5587214  
SRR17520069. 5587216  
SRR17520069. 5587218  
SRR17520069. 5587222  
SRR17520069. 5587224  
SRR17520069. 5587226  
SRR17520069. 5587228  
SRR17520069. 5587230  
SRR17520069. 5587232  
SRR17520069. 5587234  
SRR17520069. 5587236  
SRR17520069. 5587238  
SRR17520069. 5587240  
SRR17520069. 5587242  
SRR17520069. 5587244  
SRR17520069. 5587246  
SRR17520069. 5587248  
SRR17520069. 5587250  
SRR17520069. 5587252  
SRR17520069. 5587254  
SRR17520069. 5587256

SRR17520069.5587258  
SRR17520069.5587260  
SRR17520069.5587262  
SRR17520069.5587264  
SRR17520069.5590510  
SRR17520069.5590512  
SRR17520069.5590514  
SRR17520069.5590516  
SRR17520069.5590518  
SRR17520069.5609232  
SRR17520069.5609234  
SRR17520069.5609240  
SRR17520069.5609242  
SRR17520069.5615712  
SRR17520069.5615714  
SRR17520069.5615716  
SRR17520069.5615718  
SRR17520069.5615720  
SRR17520069.5615722  
SRR17520069.5615724  
SRR17520069.5615726  
SRR17520069.5615728  
SRR17520069.5615730  
SRR17520069.5615732  
SRR17520069.5615734  
SRR17520069.5615736  
SRR17520069.5615738  
SRR17520069.5615740  
SRR17520069.5615742  
SRR17520069.5615744  
SRR17520069.5615746  
SRR17520069.5615748  
SRR17520069.5615750  
SRR17520069.5615752  
SRR17520069.5615754  
SRR17520069.5615756  
SRR17520069.5615758  
SRR17520069.5615760  
SRR17520069.5615762  
SRR17520069.5615766  
SRR17520069.5615768  
SRR17520069.5615770  
SRR17520069.5615772  
SRR17520069.5615774  
SRR17520069.5615776  
SRR17520069.5615778  
SRR17520069.5615780



SRR17520069.5615782  
SRR17520069.5615786  
SRR17520069.5615788  
SRR17520069.5615790  
SRR17520069.5615792  
SRR17520069.5615794  
SRR17520069.5615796  
SRR17520069.5615798  
SRR17520069.5615800  
SRR17520069.5615802  
SRR17520069.5615804  
SRR17520069.5615806  
SRR17520069.5615808  
SRR17520069.5615810  
SRR17520069.5615812  
SRR17520069.5615814  
SRR17520069.5615816  
SRR17520069.5615818  
SRR17520069.5615820  
SRR17520069.5615822  
SRR17520069.5615824  
SRR17520069.5615826  
SRR17520069.5615828  
SRR17520069.5616598  
SRR17520069.5616600  
SRR17520069.5616605  
SRR17520069.5616607  
SRR17520069.5616609  
SRR17520069.5616611  
SRR17520069.5616613  
SRR17520069.5616615  
SRR17520069.5616617  
SRR17520069.5618258  
SRR17520069.5618260  
SRR17520069.5618262  
SRR17520069.5618264  
SRR17520069.5618266  
SRR17520069.5618268  
SRR17520069.5618270  
SRR17520069.5618272  
SRR17520069.5618274  
SRR17520069.5618276  
SRR17520069.5625191  
SRR17520069.5625193  
SRR17520069.5625195  
SRR17520069.5625197  
SRR17520069.5625199

SRR17520069.5625201  
SRR17520069.5625203  
SRR17520069.5625205  
SRR17520069.5625207  
SRR17520069.5625209  
SRR17520069.5625211  
SRR17520069.5631650  
SRR17520069.5631652  
SRR17520069.5631654  
SRR17520069.5631656  
SRR17520069.5631658  
SRR17520069.5631660  
SRR17520069.5631662  
SRR17520069.5631664  
SRR17520069.5631666  
SRR17520069.5631668  
SRR17520069.5631670  
SRR17520069.5631672  
SRR17520069.5631674  
SRR17520069.5631676  
SRR17520069.5631678  
SRR17520069.5631680  
SRR17520069.5631682  
SRR17520069.5631684  
SRR17520069.5631686  
SRR17520069.5631688  
SRR17520069.5631690  
SRR17520069.5631692  
SRR17520069.5631694  
SRR17520069.5631696  
SRR17520069.5631698  
SRR17520069.5631700  
SRR17520069.5631702  
SRR17520069.5631704  
SRR17520069.5631706  
SRR17520069.5631708  
SRR17520069.5631710  
SRR17520069.5631712  
SRR17520069.5631714  
SRR17520069.5631716  
SRR17520069.5631718  
SRR17520069.5631720  
SRR17520069.5631722  
SRR17520069.5631724  
SRR17520069.5631726  
SRR17520069.5631728  
SRR17520069.5631730

SRR17520069. 5631732  
SRR17520069. 5631734  
SRR17520069. 5631736  
SRR17520069. 5631738  
SRR17520069. 5631740  
SRR17520069. 5631742  
SRR17520069. 5631744  
SRR17520069. 5631746  
SRR17520069. 5631748  
SRR17520069. 5631750  
SRR17520069. 5631752  
SRR17520069. 5631754  
SRR17520069. 5631756  
SRR17520069. 5631758  
SRR17520069. 5631760  
SRR17520069. 5631762  
SRR17520069. 5631764  
SRR17520069. 5631766  
SRR17520069. 5631768  
SRR17520069. 5631770  
SRR17520069. 5631772  
SRR17520069. 5631774  
SRR17520069. 5631776  
SRR17520069. 5631778  
SRR17520069. 5631780  
SRR17520069. 5631782  
SRR17520069. 5631784  
SRR17520069. 5631786  
SRR17520069. 5631788  
SRR17520069. 5631790  
SRR17520069. 5631792  
SRR17520069. 5631794  
SRR17520069. 5631796  
SRR17520069. 5631798  
SRR17520069. 5631800  
SRR17520069. 5631802  
SRR17520069. 5631804  
SRR17520069. 5631806  
SRR17520069. 5631808  
SRR17520069. 5631810  
SRR17520069. 5631812  
SRR17520069. 5631814  
SRR17520069. 5631816  
SRR17520069. 5631818  
SRR17520069. 5631820  
SRR17520069. 5631822  
SRR17520069. 5631824

SRR17520069. 5631826  
SRR17520069. 5631828  
SRR17520069. 5631830  
SRR17520069. 5631832  
SRR17520069. 5631834  
SRR17520069. 5631836  
SRR17520069. 5637237  
SRR17520069. 5637239  
SRR17520069. 5637241  
SRR17520069. 5637243  
SRR17520069. 5637245  
SRR17520069. 5637247  
SRR17520069. 5637249  
SRR17520069. 5637251  
SRR17520069. 5637253  
SRR17520069. 5637255  
SRR17520069. 5637257  
SRR17520069. 5637259  
SRR17520069. 5637261  
SRR17520069. 5637263  
SRR17520069. 5637265  
SRR17520069. 5637269  
SRR17520069. 5637271  
SRR17520069. 5637273  
SRR17520069. 5637275  
SRR17520069. 5637277  
SRR17520069. 5637279  
SRR17520069. 5637281  
SRR17520069. 5637285  
SRR17520069. 5637287  
SRR17520069. 5637289  
SRR17520069. 5637291  
SRR17520069. 5637293  
SRR17520069. 5637295  
SRR17520069. 5637297  
SRR17520069. 5637299  
SRR17520069. 5637301  
SRR17520069. 5637303  
SRR17520069. 5637305  
SRR17520069. 5637307  
SRR17520069. 5637309  
SRR17520069. 5637311  
SRR17520069. 5637313  
SRR17520069. 5637315  
SRR17520069. 5639413  
SRR17520069. 5639415  
SRR17520069. 5639417

SRR17520069.5639419  
SRR17520069.5639421  
SRR17520069.5639423  
SRR17520069.5639425  
SRR17520069.5639429  
SRR17520069.5639431  
SRR17520069.5639433  
SRR17520069.5639439  
SRR17520069.5641456  
SRR17520069.5641458  
SRR17520069.5643511  
SRR17520069.5643513  
SRR17520069.5643515  
SRR17520069.5643517  
SRR17520069.5643519  
SRR17520069.5643521  
SRR17520069.5643523  
SRR17520069.5643525  
SRR17520069.5643527  
SRR17520069.5643529  
SRR17520069.5643531  
SRR17520069.5643533  
SRR17520069.5643535  
SRR17520069.5643537  
SRR17520069.5643539  
SRR17520069.5643541  
SRR17520069.5643551  
SRR17520069.5643553  
SRR17520069.5643555  
SRR17520069.5643557  
SRR17520069.5643567  
SRR17520069.5643569  
SRR17520069.5644727  
SRR17520069.5644729  
SRR17520069.5644731  
SRR17520069.5644733  
SRR17520069.5644735  
SRR17520069.5644737  
SRR17520069.5644739  
SRR17520069.5644741  
SRR17520069.5644743  
SRR17520069.5644745  
SRR17520069.5644747  
SRR17520069.5647340  
SRR17520069.5647342  
SRR17520069.5647344  
SRR17520069.5647346

SRR17520069.5647348  
SRR17520069.5647350  
SRR17520069.5647352  
SRR17520069.5647354  
SRR17520069.5647356  
SRR17520069.5647358  
SRR17520069.5647360  
SRR17520069.5647362  
SRR17520069.5647364  
SRR17520069.5647879  
SRR17520069.5647881  
SRR17520069.5647883  
SRR17520069.5647885  
SRR17520069.5647887  
SRR17520069.5647889  
SRR17520069.5652702  
SRR17520069.5652706  
SRR17520069.5652708  
SRR17520069.5652710  
SRR17520069.5652714  
SRR17520069.5652716  
SRR17520069.5652718  
SRR17520069.5652722  
SRR17520069.5652724  
SRR17520069.5652726  
SRR17520069.5652728  
SRR17520069.5652730  
SRR17520069.5663437  
SRR17520069.5663439  
SRR17520069.5663441  
SRR17520069.5663443  
SRR17520069.5663445  
SRR17520069.5676451  
SRR17520069.5676453  
SRR17520069.5676455  
SRR17520069.5676457  
SRR17520069.5676459  
SRR17520069.5676461  
SRR17520069.5676463  
SRR17520069.5676465  
SRR17520069.5676467  
SRR17520069.5678548  
SRR17520069.5678550  
SRR17520069.5678552  
SRR17520069.5678554  
SRR17520069.5678556  
SRR17520069.5678558

SRR17520069. 5678560  
SRR17520069. 5678562  
SRR17520069. 5678564  
SRR17520069. 5678566  
SRR17520069. 5678568  
SRR17520069. 5678570  
SRR17520069. 5678572  
SRR17520069. 5678574  
SRR17520069. 5678576  
SRR17520069. 5678580  
SRR17520069. 5678582  
SRR17520069. 5678584  
SRR17520069. 5678586  
SRR17520069. 5678588  
SRR17520069. 5678590  
SRR17520069. 5678592  
SRR17520069. 5678594  
SRR17520069. 5678596  
SRR17520069. 5678598  
SRR17520069. 5678600  
SRR17520069. 5678602  
SRR17520069. 5678604  
SRR17520069. 5678606  
SRR17520069. 5678608  
SRR17520069. 5678610  
SRR17520069. 5678612  
SRR17520069. 5679010  
SRR17520069. 5679012  
SRR17520069. 5693918  
SRR17520069. 5693920  
SRR17520069. 5695414  
SRR17520069. 5695416  
SRR17520069. 5695418  
SRR17520069. 5695420  
SRR17520069. 5695422  
SRR17520069. 5695424  
SRR17520069. 5695426  
SRR17520069. 5695428  
SRR17520069. 5695430  
SRR17520069. 5695434  
SRR17520069. 5695436  
SRR17520069. 5695522  
SRR17520069. 5695524  
SRR17520069. 5695526  
SRR17520069. 5695528  
SRR17520069. 5695530  
SRR17520069. 5695532

SRR17520069.5701798  
SRR17520069.5701800  
SRR17520069.5701804  
SRR17520069.5701806  
SRR17520069.5701808  
SRR17520069.5701812  
SRR17520069.5701814  
SRR17520069.5701816  
SRR17520069.5701818  
SRR17520069.5701820  
SRR17520069.5701822  
SRR17520069.5701824  
SRR17520069.5703702  
SRR17520069.5703704  
SRR17520069.5703706  
SRR17520069.5703708  
SRR17520069.5703710  
SRR17520069.5703712  
SRR17520069.5703714  
SRR17520069.5703716  
SRR17520069.5703718  
SRR17520069.5704274  
SRR17520069.5704276  
SRR17520069.5704278  
SRR17520069.5704280  
SRR17520069.5704282  
SRR17520069.5704284  
SRR17520069.5704286  
SRR17520069.5704288  
SRR17520069.5704320  
SRR17520069.5704322  
SRR17520069.5704324  
SRR17520069.5704326  
SRR17520069.5704328  
SRR17520069.5704330  
SRR17520069.5704332  
SRR17520069.5704334  
SRR17520069.5704336  
SRR17520069.5704338  
SRR17520069.5704342  
SRR17520069.5704344  
SRR17520069.5704346  
SRR17520069.5704348  
SRR17520069.5704350  
SRR17520069.5704352  
SRR17520069.5704354  
SRR17520069.5704356



SRR17520069.5704362  
SRR17520069.5704364  
SRR17520069.5704366  
SRR17520069.5704368  
SRR17520069.5704370  
SRR17520069.5704372  
SRR17520069.5704374  
SRR17520069.5704376  
SRR17520069.5704378  
SRR17520069.5704813  
SRR17520069.5704815  
SRR17520069.5704817  
SRR17520069.5704819  
SRR17520069.5704821  
SRR17520069.5704823  
SRR17520069.5704825  
SRR17520069.5704827  
SRR17520069.5704831  
SRR17520069.5704833  
SRR17520069.5704835  
SRR17520069.5704837  
SRR17520069.5704839  
SRR17520069.5704841  
SRR17520069.5704843  
SRR17520069.5704845  
SRR17520069.5711165  
SRR17520069.5711167  
SRR17520069.5714214  
SRR17520069.5714216  
SRR17520069.5714218  
SRR17520069.5714220  
SRR17520069.5715939  
SRR17520069.5715941  
SRR17520069.5715943  
SRR17520069.5715945  
SRR17520069.5715947  
SRR17520069.5715949  
SRR17520069.5715951  
SRR17520069.5715953  
SRR17520069.5715955  
SRR17520069.5715957  
SRR17520069.5715959  
SRR17520069.5715961  
SRR17520069.5715963  
SRR17520069.5715965  
SRR17520069.5715969  
SRR17520069.5715971

SRR17520069.5715973  
SRR17520069.5715975  
SRR17520069.5715977  
SRR17520069.5715981  
SRR17520069.5715989  
SRR17520069.5715991  
SRR17520069.5715997  
SRR17520069.5716001  
SRR17520069.5721928  
SRR17520069.5721930  
SRR17520069.5721932  
SRR17520069.5721934  
SRR17520069.5721936  
SRR17520069.5721938  
SRR17520069.5721940  
SRR17520069.5721942  
SRR17520069.5732876  
SRR17520069.5734191  
SRR17520069.5734193  
SRR17520069.5734195  
SRR17520069.5734197  
SRR17520069.5734199  
SRR17520069.5734201  
SRR17520069.5734203  
SRR17520069.5734205  
SRR17520069.5734207  
SRR17520069.5734209  
SRR17520069.5734211  
SRR17520069.5734213  
SRR17520069.5734215  
SRR17520069.5734217  
SRR17520069.5734219  
SRR17520069.5734221  
SRR17520069.5734225  
SRR17520069.5734227  
SRR17520069.5734229  
SRR17520069.5734231  
SRR17520069.5734233  
SRR17520069.5734235  
SRR17520069.5734237  
SRR17520069.5734239  
SRR17520069.5734241  
SRR17520069.5734243  
SRR17520069.5734245  
SRR17520069.5734247  
SRR17520069.5734249  
SRR17520069.5734251

SRR17520069.5734253  
SRR17520069.5741100  
SRR17520069.5741102  
SRR17520069.5741104  
SRR17520069.5741106  
SRR17520069.5741108  
SRR17520069.5741110  
SRR17520069.5741112  
SRR17520069.5741116  
SRR17520069.5741118  
SRR17520069.5741120  
SRR17520069.5741122  
SRR17520069.5741124  
SRR17520069.5741126  
SRR17520069.5741128  
SRR17520069.5741130  
SRR17520069.5741132  
SRR17520069.5741134  
SRR17520069.5741136  
SRR17520069.5741138  
SRR17520069.5741140  
SRR17520069.5742186  
SRR17520069.5742188  
SRR17520069.5742190  
SRR17520069.5742192  
SRR17520069.5744100  
SRR17520069.5744102  
SRR17520069.5744104  
SRR17520069.5744106  
SRR17520069.5744108  
SRR17520069.5744110  
SRR17520069.5744112  
SRR17520069.5744114  
SRR17520069.5744116  
SRR17520069.5744898  
SRR17520069.5744900  
SRR17520069.5744902  
SRR17520069.5744904  
SRR17520069.5744906  
SRR17520069.5744908  
SRR17520069.5744910  
SRR17520069.5744912  
SRR17520069.5744914  
SRR17520069.5744916  
SRR17520069.5744918  
SRR17520069.5744920  
SRR17520069.5744922

SRR17520069.5744926  
SRR17520069.5744928  
SRR17520069.5744930  
SRR17520069.5744932  
SRR17520069.5744934  
SRR17520069.5748778  
SRR17520069.5750686  
SRR17520069.5750688  
SRR17520069.5750692  
SRR17520069.5753747  
SRR17520069.5753749  
SRR17520069.5753751  
SRR17520069.5753753  
SRR17520069.5753755  
SRR17520069.5753757  
SRR17520069.5753759  
SRR17520069.5753761  
SRR17520069.5753763  
SRR17520069.5753765  
SRR17520069.5753767  
SRR17520069.5753771  
SRR17520069.5753773  
SRR17520069.5753775  
SRR17520069.5753777  
SRR17520069.5753779  
SRR17520069.5753781  
SRR17520069.5753783  
SRR17520069.5753785  
SRR17520069.5753787  
SRR17520069.5753789  
SRR17520069.5753791  
SRR17520069.5753793  
SRR17520069.5753795  
SRR17520069.5753797  
SRR17520069.5753799  
SRR17520069.5753801  
SRR17520069.5753803  
SRR17520069.5753805  
SRR17520069.5753807  
SRR17520069.5753809  
SRR17520069.5760592  
SRR17520069.5760594  
SRR17520069.5760683  
SRR17520069.5760685  
SRR17520069.5760687  
SRR17520069.5760689  
SRR17520069.5760691

SRR17520069. 5762142  
SRR17520069. 5762144  
SRR17520069. 5762146  
SRR17520069. 5762148  
SRR17520069. 5762150  
SRR17520069. 5762152  
SRR17520069. 5762154  
SRR17520069. 5762156  
SRR17520069. 5762158  
SRR17520069. 5762160  
SRR17520069. 5762162  
SRR17520069. 5762164  
SRR17520069. 5762166  
SRR17520069. 5762168  
SRR17520069. 5762170  
SRR17520069. 5762176  
SRR17520069. 5762178  
SRR17520069. 5762180  
SRR17520069. 5762182  
SRR17520069. 5762184  
SRR17520069. 5762190  
SRR17520069. 5762192  
SRR17520069. 5762194  
SRR17520069. 5762196  
SRR17520069. 5762198  
SRR17520069. 5762200  
SRR17520069. 5762202  
SRR17520069. 5762204  
SRR17520069. 5762206  
SRR17520069. 5762208  
SRR17520069. 5762210  
SRR17520069. 5762212  
SRR17520069. 5762214  
SRR17520069. 5762216  
SRR17520069. 5762218  
SRR17520069. 5762220  
SRR17520069. 5762222  
SRR17520069. 5762224  
SRR17520069. 5762226  
SRR17520069. 5762228  
SRR17520069. 5762230  
SRR17520069. 5762232  
SRR17520069. 5762236  
SRR17520069. 5762238  
SRR17520069. 5762240  
SRR17520069. 5762242  
SRR17520069. 5762244

SRR17520069.5762246  
SRR17520069.5774771  
SRR17520069.5780187  
SRR17520069.5780189  
SRR17520069.5780191  
SRR17520069.5780193  
SRR17520069.5780195  
SRR17520069.5780197  
SRR17520069.5780199  
SRR17520069.5780201  
SRR17520069.5780203  
SRR17520069.5780205  
SRR17520069.5780207  
SRR17520069.5780209  
SRR17520069.5780211  
SRR17520069.5783925  
SRR17520069.5783927  
SRR17520069.5783929  
SRR17520069.5783931  
SRR17520069.5783933  
SRR17520069.5783935  
SRR17520069.5783937  
SRR17520069.5783939  
SRR17520069.5783941  
SRR17520069.5783943  
SRR17520069.5783945  
SRR17520069.5783947  
SRR17520069.5783949  
SRR17520069.5783951  
SRR17520069.5783953  
SRR17520069.5783955  
SRR17520069.5783957  
SRR17520069.5783961  
SRR17520069.5783963  
SRR17520069.5783965  
SRR17520069.5783967  
SRR17520069.5783969  
SRR17520069.5783973  
SRR17520069.5783975  
SRR17520069.5783977  
SRR17520069.5783981  
SRR17520069.5783983  
SRR17520069.5783985  
SRR17520069.5783987  
SRR17520069.5783989  
SRR17520069.5783991  
SRR17520069.5783995

SRR17520069.5783997  
SRR17520069.5783999  
SRR17520069.5784001  
SRR17520069.5784003  
SRR17520069.5784005  
SRR17520069.5784007  
SRR17520069.5784009  
SRR17520069.5784011  
SRR17520069.5784013  
SRR17520069.5784015  
SRR17520069.5784017  
SRR17520069.5784019  
SRR17520069.5784021  
SRR17520069.5784023  
SRR17520069.5784025  
SRR17520069.5784027  
SRR17520069.5784029  
SRR17520069.5784031  
SRR17520069.5784033  
SRR17520069.5784035  
SRR17520069.5784037  
SRR17520069.5784039  
SRR17520069.5784041  
SRR17520069.5784043  
SRR17520069.5784047  
SRR17520069.5784051  
SRR17520069.5784053  
SRR17520069.5784055  
SRR17520069.5784057  
SRR17520069.5784059  
SRR17520069.5784061  
SRR17520069.5784063  
SRR17520069.5784065  
SRR17520069.5784067  
SRR17520069.5784069  
SRR17520069.5784071  
SRR17520069.5784077  
SRR17520069.5784079  
SRR17520069.5784081  
SRR17520069.5784083  
SRR17520069.5784358  
SRR17520069.5784360  
SRR17520069.5784362  
SRR17520069.5784364  
SRR17520069.5784366  
SRR17520069.5784368  
SRR17520069.5784370

SRR17520069. 5784372  
SRR17520069. 5784374  
SRR17520069. 5784376  
SRR17520069. 5784378  
SRR17520069. 5784380  
SRR17520069. 5784382  
SRR17520069. 5784384  
SRR17520069. 5784386  
SRR17520069. 5784388  
SRR17520069. 5784390  
SRR17520069. 5784392  
SRR17520069. 5784394  
SRR17520069. 5785803  
SRR17520069. 5785805  
SRR17520069. 5785807  
SRR17520069. 5785809  
SRR17520069. 5785811  
SRR17520069. 5785813  
SRR17520069. 5785815  
SRR17520069. 5785817  
SRR17520069. 5785819  
SRR17520069. 5785821  
SRR17520069. 5785823  
SRR17520069. 5785825  
SRR17520069. 5785827  
SRR17520069. 5785831  
SRR17520069. 5785833  
SRR17520069. 5786209  
SRR17520069. 5786211  
SRR17520069. 5786213  
SRR17520069. 5786215  
SRR17520069. 5786217  
SRR17520069. 5786219  
SRR17520069. 5786221  
SRR17520069. 5786223  
SRR17520069. 5797451  
SRR17520069. 5800203  
SRR17520069. 5800205  
SRR17520069. 5800207  
SRR17520069. 5800209  
SRR17520069. 5800211  
SRR17520069. 5800213  
SRR17520069. 5800215  
SRR17520069. 5800217  
SRR17520069. 5800279  
SRR17520069. 5800281  
SRR17520069. 5800608



SRR17520069.5800610  
SRR17520069.5800612  
SRR17520069.5800614  
SRR17520069.5800616  
SRR17520069.5800618  
SRR17520069.5800620  
SRR17520069.5800622  
SRR17520069.5800624  
SRR17520069.5800626  
SRR17520069.5800628  
SRR17520069.5800630  
SRR17520069.5800632  
SRR17520069.5800634  
SRR17520069.5800636  
SRR17520069.5800638  
SRR17520069.5800640  
SRR17520069.5800642  
SRR17520069.5800644  
SRR17520069.5800646  
SRR17520069.5800648  
SRR17520069.5800650  
SRR17520069.5800652  
SRR17520069.5800654  
SRR17520069.5800656  
SRR17520069.5800658  
SRR17520069.5800660  
SRR17520069.5800662  
SRR17520069.5800664  
SRR17520069.5800666  
SRR17520069.5800668  
SRR17520069.5800670  
SRR17520069.5800672  
SRR17520069.5800674  
SRR17520069.5800676  
SRR17520069.5807938  
SRR17520069.5807940  
SRR17520069.5807942  
SRR17520069.5807944  
SRR17520069.5807946  
SRR17520069.5807948  
SRR17520069.5807950  
SRR17520069.5807952  
SRR17520069.5807954  
SRR17520069.5807956  
SRR17520069.5807958  
SRR17520069.5807960  
SRR17520069.5807962

SRR17520069.5807964  
SRR17520069.5807966  
SRR17520069.5807968  
SRR17520069.5807970  
SRR17520069.5807972  
SRR17520069.5807974  
SRR17520069.5807976  
SRR17520069.5810031  
SRR17520069.5811779  
SRR17520069.5811781  
SRR17520069.5811783  
SRR17520069.5811785  
SRR17520069.5811787  
SRR17520069.5811789  
SRR17520069.5811791  
SRR17520069.5811793  
SRR17520069.5811795  
SRR17520069.5811797  
SRR17520069.5811799  
SRR17520069.5811801  
SRR17520069.5811803  
SRR17520069.5811805  
SRR17520069.5811807  
SRR17520069.5811809  
SRR17520069.5811811  
SRR17520069.5811813  
SRR17520069.5811817  
SRR17520069.5811819  
SRR17520069.5811821  
SRR17520069.5811825  
SRR17520069.5818948  
SRR17520069.5818950  
SRR17520069.5818954  
SRR17520069.5818956  
SRR17520069.5818958  
SRR17520069.5818960  
SRR17520069.5818962  
SRR17520069.5818966  
SRR17520069.5818968  
SRR17520069.5818972  
SRR17520069.5818974  
SRR17520069.5818976  
SRR17520069.5818980  
SRR17520069.5818982  
SRR17520069.5818984  
SRR17520069.5818986  
SRR17520069.5818988

SRR17520069.5818990  
SRR17520069.5818992  
SRR17520069.5818994  
SRR17520069.5818996  
SRR17520069.5818998  
SRR17520069.5819000  
SRR17520069.5819002  
SRR17520069.5819004  
SRR17520069.5819006  
SRR17520069.5819008  
SRR17520069.5819010  
SRR17520069.5819014  
SRR17520069.5819016  
SRR17520069.5819018  
SRR17520069.5819020  
SRR17520069.5819022  
SRR17520069.5819024  
SRR17520069.5819026  
SRR17520069.5819028  
SRR17520069.5819032  
SRR17520069.5819034  
SRR17520069.5819036  
SRR17520069.5819038  
SRR17520069.5819040  
SRR17520069.5819042  
SRR17520069.5819044  
SRR17520069.5819046  
SRR17520069.5819048  
SRR17520069.5819050  
SRR17520069.5819052  
SRR17520069.5819054  
SRR17520069.5819056  
SRR17520069.5819058  
SRR17520069.5819060  
SRR17520069.5819062  
SRR17520069.5819064  
SRR17520069.5819066  
SRR17520069.5822089  
SRR17520069.5822091  
SRR17520069.5822093  
SRR17520069.5822095  
SRR17520069.5822097  
SRR17520069.5822103  
SRR17520069.5822105  
SRR17520069.5822109  
SRR17520069.5822111  
SRR17520069.5822113

SRR17520069.5822115  
SRR17520069.5822117  
SRR17520069.5822119  
SRR17520069.5822121  
SRR17520069.5825312  
SRR17520069.5827433  
SRR17520069.5832391  
SRR17520069.5832393  
SRR17520069.5832395  
SRR17520069.5832397  
SRR17520069.5832399  
SRR17520069.5832401  
SRR17520069.5832403  
SRR17520069.5832405  
SRR17520069.5832407  
SRR17520069.5832409  
SRR17520069.5834148  
SRR17520069.5834152  
SRR17520069.5834156  
SRR17520069.5834158  
SRR17520069.5834160  
SRR17520069.5834164  
SRR17520069.5834166  
SRR17520069.5834168  
SRR17520069.5834170  
SRR17520069.5834172  
SRR17520069.5838242  
SRR17520069.5838244  
SRR17520069.5838246  
SRR17520069.5838248  
SRR17520069.5838250  
SRR17520069.5838918  
SRR17520069.5838920  
SRR17520069.5838922  
SRR17520069.5838926  
SRR17520069.5838930  
SRR17520069.5838932  
SRR17520069.5838934  
SRR17520069.5838936  
SRR17520069.5838938  
SRR17520069.5838940  
SRR17520069.5838942  
SRR17520069.5838944  
SRR17520069.5838946  
SRR17520069.5839945  
SRR17520069.5839947  
SRR17520069.5839949

SRR17520069.5839951  
SRR17520069.5839953  
SRR17520069.5839955  
SRR17520069.5839957  
SRR17520069.5839959  
SRR17520069.5839961  
SRR17520069.5839963  
SRR17520069.5843621  
SRR17520069.5843623  
SRR17520069.5843625  
SRR17520069.5843627  
SRR17520069.5843629  
SRR17520069.5843631  
SRR17520069.5843633  
SRR17520069.5843635  
SRR17520069.5843637  
SRR17520069.5843639  
SRR17520069.5843641  
SRR17520069.5843643  
SRR17520069.5843645  
SRR17520069.5843647  
SRR17520069.5843649  
SRR17520069.5843651  
SRR17520069.5843653  
SRR17520069.5843655  
SRR17520069.5843657  
SRR17520069.5843659  
SRR17520069.5843663  
SRR17520069.5843665  
SRR17520069.5843667  
SRR17520069.5843669  
SRR17520069.5843673  
SRR17520069.5843675  
SRR17520069.5843677  
SRR17520069.5843679  
SRR17520069.5843681  
SRR17520069.5843683  
SRR17520069.5846889  
SRR17520069.5846891  
SRR17520069.5846893  
SRR17520069.5846895  
SRR17520069.5846897  
SRR17520069.5846899  
SRR17520069.5846901  
SRR17520069.5846903  
SRR17520069.5846905  
SRR17520069.5846907

SRR17520069.5846909  
SRR17520069.5846911  
SRR17520069.5846913  
SRR17520069.5846915  
SRR17520069.5847273  
SRR17520069.5847275  
SRR17520069.5847277  
SRR17520069.5848484  
SRR17520069.5848486  
SRR17520069.5848488  
SRR17520069.5848490  
SRR17520069.5848492  
SRR17520069.5848494  
SRR17520069.5848496  
SRR17520069.5848498  
SRR17520069.5848500  
SRR17520069.5848502  
SRR17520069.5848504  
SRR17520069.5848506  
SRR17520069.5848508  
SRR17520069.5848510  
SRR17520069.5848512  
SRR17520069.5848514  
SRR17520069.5848516  
SRR17520069.5848518  
SRR17520069.5848520  
SRR17520069.5848522  
SRR17520069.5848524  
SRR17520069.5848526  
SRR17520069.5848530  
SRR17520069.5848532  
SRR17520069.5848534  
SRR17520069.5848536  
SRR17520069.5848538  
SRR17520069.5848540  
SRR17520069.5848542  
SRR17520069.5848544  
SRR17520069.5848546  
SRR17520069.5848548  
SRR17520069.5848550  
SRR17520069.5848552  
SRR17520069.5848554  
SRR17520069.5848556  
SRR17520069.5848558  
SRR17520069.5848560  
SRR17520069.5848562  
SRR17520069.5848564

SRR17520069.5848566  
SRR17520069.5848568  
SRR17520069.5848570  
SRR17520069.5848572  
SRR17520069.5848574  
SRR17520069.5848576  
SRR17520069.5848578  
SRR17520069.5848580  
SRR17520069.5848582  
SRR17520069.5848584  
SRR17520069.5848586  
SRR17520069.5848588  
SRR17520069.5848590  
SRR17520069.5848592  
SRR17520069.5848594  
SRR17520069.5848596  
SRR17520069.5848598  
SRR17520069.5848600  
SRR17520069.5848602  
SRR17520069.5848606  
SRR17520069.5848947  
SRR17520069.5848949  
SRR17520069.5848951  
SRR17520069.5848953  
SRR17520069.5848955  
SRR17520069.5848957  
SRR17520069.5848959  
SRR17520069.5848961  
SRR17520069.5848965  
SRR17520069.5848967  
SRR17520069.5848969  
SRR17520069.5848973  
SRR17520069.5848977  
SRR17520069.5848979  
SRR17520069.5848981  
SRR17520069.5848987  
SRR17520069.5849692  
SRR17520069.5849694  
SRR17520069.5849696  
SRR17520069.5849698  
SRR17520069.5849700  
SRR17520069.5849702  
SRR17520069.5849704  
SRR17520069.5849706  
SRR17520069.5849708  
SRR17520069.5849710  
SRR17520069.5849712

SRR17520069.5849714  
SRR17520069.5849716  
SRR17520069.5849718  
SRR17520069.5849720  
SRR17520069.5849722  
SRR17520069.5849724  
SRR17520069.5849728  
SRR17520069.5849730  
SRR17520069.5849732  
SRR17520069.5849734  
SRR17520069.5849736  
SRR17520069.5849738  
SRR17520069.5849740  
SRR17520069.5849742  
SRR17520069.5849744  
SRR17520069.5849746  
SRR17520069.5849748  
SRR17520069.5849750  
SRR17520069.5849752  
SRR17520069.5849754  
SRR17520069.5849756  
SRR17520069.5849758  
SRR17520069.5849760  
SRR17520069.5849762  
SRR17520069.5849764  
SRR17520069.5849766  
SRR17520069.5849768  
SRR17520069.5849770  
SRR17520069.5849772  
SRR17520069.5849774  
SRR17520069.5849776  
SRR17520069.5849778  
SRR17520069.5849780  
SRR17520069.5849782  
SRR17520069.5849784  
SRR17520069.5849786  
SRR17520069.5849788  
SRR17520069.5849790  
SRR17520069.5849792  
SRR17520069.5849796  
SRR17520069.5849798  
SRR17520069.5849800  
SRR17520069.5849802  
SRR17520069.5849804  
SRR17520069.5849806  
SRR17520069.5849808  
SRR17520069.5849810



SRR17520069.5849812  
SRR17520069.5849819  
SRR17520069.5849821  
SRR17520069.5849823  
SRR17520069.5849825  
SRR17520069.5849827  
SRR17520069.5862425  
SRR17520069.5862427  
SRR17520069.5862429  
SRR17520069.5862431  
SRR17520069.5862433  
SRR17520069.5862435  
SRR17520069.5862437  
SRR17520069.5864101  
SRR17520069.5864103  
SRR17520069.5869859  
SRR17520069.5869861  
SRR17520069.5869863  
SRR17520069.5869865  
SRR17520069.5869867  
SRR17520069.5869869  
SRR17520069.5869871  
SRR17520069.5869873  
SRR17520069.5869875  
SRR17520069.5869877  
SRR17520069.5869879  
SRR17520069.5869881  
SRR17520069.5869883  
SRR17520069.5869885  
SRR17520069.5869887  
SRR17520069.5869889  
SRR17520069.5869891  
SRR17520069.5869893  
SRR17520069.5869895  
SRR17520069.5869897  
SRR17520069.5869899  
SRR17520069.5869901  
SRR17520069.5869905  
SRR17520069.5869909  
SRR17520069.5869911  
SRR17520069.5869913  
SRR17520069.5869915  
SRR17520069.5869917  
SRR17520069.5869927  
SRR17520069.5869929  
SRR17520069.5871311  
SRR17520069.5871313

SRR17520069.5871329  
SRR17520069.5871371  
SRR17520069.5871416  
SRR17520069.5873871  
SRR17520069.5876802  
SRR17520069.5876804  
SRR17520069.5876808  
SRR17520069.5876810  
SRR17520069.5885259  
SRR17520069.5888592  
SRR17520069.5888594  
SRR17520069.5888596  
SRR17520069.5888598  
SRR17520069.5888600  
SRR17520069.5888602  
SRR17520069.5888604  
SRR17520069.5888606  
SRR17520069.5888608  
SRR17520069.5888610  
SRR17520069.5888612  
SRR17520069.5888614  
SRR17520069.5888616  
SRR17520069.5888618  
SRR17520069.5888620  
SRR17520069.5888622  
SRR17520069.5888624  
SRR17520069.5888626  
SRR17520069.5888628  
SRR17520069.5888630  
SRR17520069.5888632  
SRR17520069.5888634  
SRR17520069.5888636  
SRR17520069.5888638  
SRR17520069.5888640  
SRR17520069.5888642  
SRR17520069.5888644  
SRR17520069.5888646  
SRR17520069.5888648  
SRR17520069.5888650  
SRR17520069.5888652  
SRR17520069.5888654  
SRR17520069.5888656  
SRR17520069.5888658  
SRR17520069.5888660  
SRR17520069.5888662  
SRR17520069.5888664  
SRR17520069.5888666

SRR17520069.5888668  
SRR17520069.5888670  
SRR17520069.5888672  
SRR17520069.5888674  
SRR17520069.5888676  
SRR17520069.5889115  
SRR17520069.5889121  
SRR17520069.5889125  
SRR17520069.5889127  
SRR17520069.5889129  
SRR17520069.5889131  
SRR17520069.5889133  
SRR17520069.5889135  
SRR17520069.5889137  
SRR17520069.5889139  
SRR17520069.5889141  
SRR17520069.5889143  
SRR17520069.5889145  
SRR17520069.5889147  
SRR17520069.5889149  
SRR17520069.5889151  
SRR17520069.5889153  
SRR17520069.5889155  
SRR17520069.5889157  
SRR17520069.5889606  
SRR17520069.5889608  
SRR17520069.5889610  
SRR17520069.5889612  
SRR17520069.5889614  
SRR17520069.5889616  
SRR17520069.5889618  
SRR17520069.5889620  
SRR17520069.5889622  
SRR17520069.5889624  
SRR17520069.5889626  
SRR17520069.5889628  
SRR17520069.5889630  
SRR17520069.5889632  
SRR17520069.5889634  
SRR17520069.5889636  
SRR17520069.5889638  
SRR17520069.5889644  
SRR17520069.5889648  
SRR17520069.5889650  
SRR17520069.5889654  
SRR17520069.5889829  
SRR17520069.5889831

SRR17520069.5889833  
SRR17520069.5889835  
SRR17520069.5889837  
SRR17520069.5889839  
SRR17520069.5889841  
SRR17520069.5889843  
SRR17520069.5889845  
SRR17520069.5889847  
SRR17520069.5889849  
SRR17520069.5889851  
SRR17520069.5889853  
SRR17520069.5889855  
SRR17520069.5889857  
SRR17520069.5889859  
SRR17520069.5889861  
SRR17520069.5889863  
SRR17520069.5889865  
SRR17520069.5889867  
SRR17520069.5889869  
SRR17520069.5889873  
SRR17520069.5889875  
SRR17520069.5889877  
SRR17520069.5889879  
SRR17520069.5889881  
SRR17520069.5889883  
SRR17520069.5889887  
SRR17520069.5889889  
SRR17520069.5889891  
SRR17520069.5889893  
SRR17520069.5889895  
SRR17520069.5889897  
SRR17520069.5889899  
SRR17520069.5889901  
SRR17520069.5889903  
SRR17520069.5889905  
SRR17520069.5889907  
SRR17520069.5889909  
SRR17520069.5889911  
SRR17520069.5889913  
SRR17520069.5889917  
SRR17520069.5889921  
SRR17520069.5889923  
SRR17520069.5891749  
SRR17520069.5891751  
SRR17520069.5891753  
SRR17520069.5891755  
SRR17520069.5891757

SRR17520069. 5891759  
SRR17520069. 5891761  
SRR17520069. 5891763  
SRR17520069. 5891765  
SRR17520069. 5891769  
SRR17520069. 5891771  
SRR17520069. 5891773  
SRR17520069. 5891775  
SRR17520069. 5891780  
SRR17520069. 5891782  
SRR17520069. 5891784  
SRR17520069. 5891786  
SRR17520069. 5891788  
SRR17520069. 5891790  
SRR17520069. 5891792  
SRR17520069. 5891794  
SRR17520069. 5891796  
SRR17520069. 5891798  
SRR17520069. 5891800  
SRR17520069. 5891802  
SRR17520069. 5891804  
SRR17520069. 5892330  
SRR17520069. 5892332  
SRR17520069. 5892334  
SRR17520069. 5892336  
SRR17520069. 5892338  
SRR17520069. 5892340  
SRR17520069. 5892342  
SRR17520069. 5892344  
SRR17520069. 5892350  
SRR17520069. 5892352  
SRR17520069. 5892354  
SRR17520069. 5892358  
SRR17520069. 5892360  
SRR17520069. 5892362  
SRR17520069. 5894141  
SRR17520069. 5894145  
SRR17520069. 5894149  
SRR17520069. 5894151  
SRR17520069. 5894153  
SRR17520069. 5894155  
SRR17520069. 5894157  
SRR17520069. 5894159  
SRR17520069. 5894161  
SRR17520069. 5894163  
SRR17520069. 5894165  
SRR17520069. 5894167

SRR17520069.5894169  
SRR17520069.5894171  
SRR17520069.5894175  
SRR17520069.5894177  
SRR17520069.5894181  
SRR17520069.5894185  
SRR17520069.5894187  
SRR17520069.5894189  
SRR17520069.5894191  
SRR17520069.5894915  
SRR17520069.5894917  
SRR17520069.5894919  
SRR17520069.5894921  
SRR17520069.5894923  
SRR17520069.5894925  
SRR17520069.5894927  
SRR17520069.5894929  
SRR17520069.5894933  
SRR17520069.5894935  
SRR17520069.5894937  
SRR17520069.5894939  
SRR17520069.5894941  
SRR17520069.5894943  
SRR17520069.5894945  
SRR17520069.5894947  
SRR17520069.5894949  
SRR17520069.5894951  
SRR17520069.5894953  
SRR17520069.5894955  
SRR17520069.5894957  
SRR17520069.5894959  
SRR17520069.5894961  
SRR17520069.5894963  
SRR17520069.5894965  
SRR17520069.5894967  
SRR17520069.5894969  
SRR17520069.5894971  
SRR17520069.5894973  
SRR17520069.5894975  
SRR17520069.5894979  
SRR17520069.5894981  
SRR17520069.5894983  
SRR17520069.5894985  
SRR17520069.5894987  
SRR17520069.5894989  
SRR17520069.5898472  
SRR17520069.5898474

SRR17520069.5900740  
SRR17520069.5901804  
SRR17520069.5901806  
SRR17520069.5901808  
SRR17520069.5901810  
SRR17520069.5901812  
SRR17520069.5901814  
SRR17520069.5901816  
SRR17520069.5901818  
SRR17520069.5901820  
SRR17520069.5901822  
SRR17520069.5901824  
SRR17520069.5901826  
SRR17520069.5901828  
SRR17520069.5901830  
SRR17520069.5901832  
SRR17520069.5901834  
SRR17520069.5901836  
SRR17520069.5901838  
SRR17520069.5901840  
SRR17520069.5901842  
SRR17520069.5901844  
SRR17520069.5901846  
SRR17520069.5901848  
SRR17520069.5901850  
SRR17520069.5901852  
SRR17520069.5901854  
SRR17520069.5901856  
SRR17520069.5901858  
SRR17520069.5901860  
SRR17520069.5901862  
SRR17520069.5901864  
SRR17520069.5901866  
SRR17520069.5901868  
SRR17520069.5901870  
SRR17520069.5901872  
SRR17520069.5901874  
SRR17520069.5901876  
SRR17520069.5901878  
SRR17520069.5901880  
SRR17520069.5901882  
SRR17520069.5901884  
SRR17520069.5901886  
SRR17520069.5901888  
SRR17520069.5901890  
SRR17520069.5901892  
SRR17520069.5901894

SRR17520069.5901896  
SRR17520069.5911914  
SRR17520069.5917751  
SRR17520069.5917753  
SRR17520069.5917755  
SRR17520069.5917757  
SRR17520069.5917759  
SRR17520069.5917761  
SRR17520069.5917763  
SRR17520069.5917765  
SRR17520069.5917767  
SRR17520069.5917769  
SRR17520069.5917771  
SRR17520069.5917773  
SRR17520069.5917775  
SRR17520069.5917777  
SRR17520069.5917779  
SRR17520069.5917781  
SRR17520069.5917783  
SRR17520069.5917785  
SRR17520069.5917787  
SRR17520069.5922948  
SRR17520069.5922950  
SRR17520069.5922952  
SRR17520069.5922954  
SRR17520069.5922956  
SRR17520069.5922958  
SRR17520069.5922960  
SRR17520069.5922962  
SRR17520069.5922964  
SRR17520069.5922966  
SRR17520069.5922968  
SRR17520069.5922970  
SRR17520069.5922972  
SRR17520069.5922974  
SRR17520069.5922976  
SRR17520069.5922978  
SRR17520069.5922980  
SRR17520069.5922982  
SRR17520069.5922986  
SRR17520069.5922988  
SRR17520069.5922990  
SRR17520069.5938636  
SRR17520069.5938638  
SRR17520069.5938640  
SRR17520069.5938642  
SRR17520069.5938646



SRR17520069. 5938648  
SRR17520069. 5938650  
SRR17520069. 5938652  
SRR17520069. 5938654  
SRR17520069. 5938656  
SRR17520069. 5938658  
SRR17520069. 5938660  
SRR17520069. 5938662  
SRR17520069. 5938664  
SRR17520069. 5938666  
SRR17520069. 5938668  
SRR17520069. 5938670  
SRR17520069. 5938672  
SRR17520069. 5938674  
SRR17520069. 5938676  
SRR17520069. 5938678  
SRR17520069. 5938680  
SRR17520069. 5938682  
SRR17520069. 5938684  
SRR17520069. 5938686  
SRR17520069. 5938688  
SRR17520069. 5938690  
SRR17520069. 5938692  
SRR17520069. 5938694  
SRR17520069. 5938696  
SRR17520069. 5938698  
SRR17520069. 5938700  
SRR17520069. 5938702  
SRR17520069. 5938704  
SRR17520069. 5938706  
SRR17520069. 5938708  
SRR17520069. 5938710  
SRR17520069. 5938712  
SRR17520069. 5938714  
SRR17520069. 5947175  
SRR17520069. 5947177  
SRR17520069. 5947179  
SRR17520069. 5947181  
SRR17520069. 5947183  
SRR17520069. 5947185  
SRR17520069. 5947187  
SRR17520069. 5947189  
SRR17520069. 5947191  
SRR17520069. 5947193  
SRR17520069. 5947195  
SRR17520069. 5947199  
SRR17520069. 5947201

SRR17520069. 5947203  
SRR17520069. 5947205  
SRR17520069. 5947207  
SRR17520069. 5952812  
SRR17520069. 5952814  
SRR17520069. 5952816  
SRR17520069. 5952818  
SRR17520069. 5952820  
SRR17520069. 5952822  
SRR17520069. 5952824  
SRR17520069. 5952826  
SRR17520069. 5952828  
SRR17520069. 5952830  
SRR17520069. 5952832  
SRR17520069. 5952834  
SRR17520069. 5952836  
SRR17520069. 5952838  
SRR17520069. 5952840  
SRR17520069. 5952842  
SRR17520069. 5952844  
SRR17520069. 5952846  
SRR17520069. 5952848  
SRR17520069. 5952850  
SRR17520069. 5952852  
SRR17520069. 5952854  
SRR17520069. 5952856  
SRR17520069. 5952858  
SRR17520069. 5952860  
SRR17520069. 5952862  
SRR17520069. 5952864  
SRR17520069. 5952866  
SRR17520069. 5952868  
SRR17520069. 5952870  
SRR17520069. 5952872  
SRR17520069. 5952874  
SRR17520069. 5952876  
SRR17520069. 5952878  
SRR17520069. 5952880  
SRR17520069. 5952882  
SRR17520069. 5952884  
SRR17520069. 5952886  
SRR17520069. 5952888  
SRR17520069. 5952890  
SRR17520069. 5952892  
SRR17520069. 5952894  
SRR17520069. 5952896  
SRR17520069. 5952898

SRR17520069.5952900  
SRR17520069.5952902  
SRR17520069.5952904  
SRR17520069.5952906  
SRR17520069.5952908  
SRR17520069.5952910  
SRR17520069.5952912  
SRR17520069.5952914  
SRR17520069.5952916  
SRR17520069.5952918  
SRR17520069.5954405  
SRR17520069.5956281  
SRR17520069.5956283  
SRR17520069.5956285  
SRR17520069.5956287  
SRR17520069.5956289  
SRR17520069.5956291  
SRR17520069.5956293  
SRR17520069.5956295  
SRR17520069.5956297  
SRR17520069.5956299  
SRR17520069.5956301  
SRR17520069.5956303  
SRR17520069.5956305  
SRR17520069.5956307  
SRR17520069.5956309  
SRR17520069.5956311  
SRR17520069.5956313  
SRR17520069.5956315  
SRR17520069.5956317  
SRR17520069.5956319  
SRR17520069.5956321  
SRR17520069.5956323  
SRR17520069.5956325  
SRR17520069.5960218  
SRR17520069.5960220  
SRR17520069.5960222  
SRR17520069.5960224  
SRR17520069.5960226  
SRR17520069.5960228  
SRR17520069.5960230  
SRR17520069.5960232  
SRR17520069.5960234  
SRR17520069.5960236  
SRR17520069.5960238  
SRR17520069.5960240  
SRR17520069.5960242

SRR17520069. 5960244  
SRR17520069. 5960246  
SRR17520069. 5960248  
SRR17520069. 5960250  
SRR17520069. 5960252  
SRR17520069. 5960254  
SRR17520069. 5960256  
SRR17520069. 5960258  
SRR17520069. 5960260  
SRR17520069. 5960262  
SRR17520069. 5960264  
SRR17520069. 5960266  
SRR17520069. 5960268  
SRR17520069. 5960270  
SRR17520069. 5960272  
SRR17520069. 5960274  
SRR17520069. 5960276  
SRR17520069. 5960278  
SRR17520069. 5960280  
SRR17520069. 5960282  
SRR17520069. 5960284  
SRR17520069. 5960286  
SRR17520069. 5971827  
SRR17520069. 5971829  
SRR17520069. 5971831  
SRR17520069. 5971833  
SRR17520069. 5971835  
SRR17520069. 5971837  
SRR17520069. 5971841  
SRR17520069. 5971843  
SRR17520069. 5971845  
SRR17520069. 5971847  
SRR17520069. 5982848  
SRR17520069. 5982850  
SRR17520069. 5982852  
SRR17520069. 5982854  
SRR17520069. 5982856  
SRR17520069. 5982858  
SRR17520069. 5982860  
SRR17520069. 5982862  
SRR17520069. 5982864  
SRR17520069. 5982866  
SRR17520069. 5982868  
SRR17520069. 5982872  
SRR17520069. 5982874  
SRR17520069. 5982876  
SRR17520069. 5982878

SRR17520069. 5982880  
SRR17520069. 5982882  
SRR17520069. 5982884  
SRR17520069. 5982886  
SRR17520069. 5982888  
SRR17520069. 5982890  
SRR17520069. 5982892  
SRR17520069. 5982894  
SRR17520069. 5982896  
SRR17520069. 5982898  
SRR17520069. 5982900  
SRR17520069. 5982902  
SRR17520069. 5982904  
SRR17520069. 5982906  
SRR17520069. 5982908  
SRR17520069. 5982910  
SRR17520069. 5982912  
SRR17520069. 5982914  
SRR17520069. 5982916  
SRR17520069. 5982918  
SRR17520069. 5982920  
SRR17520069. 5982922  
SRR17520069. 5982926  
SRR17520069. 5983582  
SRR17520069. 5983584  
SRR17520069. 5983586  
SRR17520069. 5983588  
SRR17520069. 5983590  
SRR17520069. 5983592  
SRR17520069. 5983594  
SRR17520069. 5983596  
SRR17520069. 5983598  
SRR17520069. 5983600  
SRR17520069. 5983602  
SRR17520069. 5983604  
SRR17520069. 5983606  
SRR17520069. 5983608  
SRR17520069. 5983610  
SRR17520069. 5983612  
SRR17520069. 5983614  
SRR17520069. 5983616  
SRR17520069. 5983618  
SRR17520069. 5983620  
SRR17520069. 5983622  
SRR17520069. 5983624  
SRR17520069. 5983628  
SRR17520069. 5983630

SRR17520069. 5983632  
SRR17520069. 5983634  
SRR17520069. 5983636  
SRR17520069. 5983638  
SRR17520069. 5983640  
SRR17520069. 5983642  
SRR17520069. 5983644  
SRR17520069. 5984445  
SRR17520069. 5984447  
SRR17520069. 5984449  
SRR17520069. 5984451  
SRR17520069. 5984455  
SRR17520069. 5984457  
SRR17520069. 5984459  
SRR17520069. 5984461  
SRR17520069. 5984463  
SRR17520069. 5984465  
SRR17520069. 5984467  
SRR17520069. 5984469  
SRR17520069. 5984471  
SRR17520069. 5984473  
SRR17520069. 5984475  
SRR17520069. 5984477  
SRR17520069. 5984479  
SRR17520069. 5984481  
SRR17520069. 5984483  
SRR17520069. 5984485  
SRR17520069. 5984487  
SRR17520069. 5984489  
SRR17520069. 5984491  
SRR17520069. 5984493  
SRR17520069. 5984495  
SRR17520069. 5984497  
SRR17520069. 5984499  
SRR17520069. 5984501  
SRR17520069. 5984503  
SRR17520069. 5984505  
SRR17520069. 5984507  
SRR17520069. 5984509  
SRR17520069. 5984511  
SRR17520069. 5984513  
SRR17520069. 5984515  
SRR17520069. 5984517  
SRR17520069. 5985360  
SRR17520069. 5985362  
SRR17520069. 5985364  
SRR17520069. 5985366

SRR17520069.5985368  
SRR17520069.5985370  
SRR17520069.5985372  
SRR17520069.5985374  
SRR17520069.5985376  
SRR17520069.5985378  
SRR17520069.5987749  
SRR17520069.5987751  
SRR17520069.5987753  
SRR17520069.5987755  
SRR17520069.5987757  
SRR17520069.5987759  
SRR17520069.5987761  
SRR17520069.5987763  
SRR17520069.5987767  
SRR17520069.5987769  
SRR17520069.5987771  
SRR17520069.5987773  
SRR17520069.5987777  
SRR17520069.5987781  
SRR17520069.5987783  
SRR17520069.5987785  
SRR17520069.5987787  
SRR17520069.5987789  
SRR17520069.5987791  
SRR17520069.5987793  
SRR17520069.5987795  
SRR17520069.5987797  
SRR17520069.5987799  
SRR17520069.5987801  
SRR17520069.5987803  
SRR17520069.5987805  
SRR17520069.5987807  
SRR17520069.5987809  
SRR17520069.5987811  
SRR17520069.5987813  
SRR17520069.5987815  
SRR17520069.5987817  
SRR17520069.5987821  
SRR17520069.5987823  
SRR17520069.5987825  
SRR17520069.5987827  
SRR17520069.5987829  
SRR17520069.5987833  
SRR17520069.5987835  
SRR17520069.5987837  
SRR17520069.5987839

SRR17520069.5987841  
SRR17520069.5987843  
SRR17520069.5987845  
SRR17520069.5987847  
SRR17520069.5987849  
SRR17520069.5988721  
SRR17520069.5988724  
SRR17520069.5988726  
SRR17520069.5988728  
SRR17520069.5988730  
SRR17520069.5988732  
SRR17520069.5988734  
SRR17520069.5988736  
SRR17520069.5988738  
SRR17520069.5988740  
SRR17520069.5988742  
SRR17520069.5988744  
SRR17520069.5988746  
SRR17520069.5989208  
SRR17520069.5989210  
SRR17520069.5990066  
SRR17520069.5997663  
SRR17520069.5997665  
SRR17520069.5997667  
SRR17520069.5997669  
SRR17520069.5997671  
SRR17520069.5997673  
SRR17520069.5997675  
SRR17520069.5997677  
SRR17520069.5997679  
SRR17520069.5997681  
SRR17520069.5997683  
SRR17520069.5997685  
SRR17520069.5997687  
SRR17520069.5997689  
SRR17520069.5997691  
SRR17520069.5997693  
SRR17520069.5997695  
SRR17520069.5997697  
SRR17520069.5997699  
SRR17520069.5997701  
SRR17520069.5997703  
SRR17520069.5997705  
SRR17520069.5997707  
SRR17520069.5997826  
SRR17520069.5997828  
SRR17520069.5997830



SRR17520069.5997832  
SRR17520069.5997834  
SRR17520069.5997836  
SRR17520069.5997838  
SRR17520069.5997840  
SRR17520069.6005077  
SRR17520069.6005079  
SRR17520069.6005081  
SRR17520069.6005083  
SRR17520069.6005085  
SRR17520069.6005087  
SRR17520069.6005089  
SRR17520069.6005091  
SRR17520069.6005093  
SRR17520069.6011301  
SRR17520069.6011303  
SRR17520069.6011305  
SRR17520069.6011307  
SRR17520069.6011309  
SRR17520069.6011311  
SRR17520069.6011313  
SRR17520069.6011315  
SRR17520069.6011317  
SRR17520069.6011319  
SRR17520069.6015056  
SRR17520069.6015058  
SRR17520069.6015060  
SRR17520069.6015062  
SRR17520069.6015064  
SRR17520069.6015066  
SRR17520069.6015068  
SRR17520069.6015070  
SRR17520069.6015072  
SRR17520069.6015074  
SRR17520069.6015076  
SRR17520069.6015078  
SRR17520069.6015080  
SRR17520069.6015082  
SRR17520069.6015084  
SRR17520069.6015086  
SRR17520069.6015088  
SRR17520069.6015090  
SRR17520069.6016877  
SRR17520069.6019804  
SRR17520069.6021276  
SRR17520069.6021278  
SRR17520069.6021280

SRR17520069.6027231  
SRR17520069.6027233  
SRR17520069.6027235  
SRR17520069.6027237  
SRR17520069.6027241  
SRR17520069.6027243  
SRR17520069.6027245  
SRR17520069.6027247  
SRR17520069.6027249  
SRR17520069.6027251  
SRR17520069.6027253  
SRR17520069.6027255  
SRR17520069.6027257  
SRR17520069.6027259  
SRR17520069.6027261  
SRR17520069.6027263  
SRR17520069.6027265  
SRR17520069.6027267  
SRR17520069.6027269  
SRR17520069.6027271  
SRR17520069.6027273  
SRR17520069.6027275  
SRR17520069.6027277  
SRR17520069.6027279  
SRR17520069.6027281  
SRR17520069.6027283  
SRR17520069.6027285  
SRR17520069.6027287  
SRR17520069.6027289  
SRR17520069.6027291  
SRR17520069.6028449  
SRR17520069.6028451  
SRR17520069.6028453  
SRR17520069.6028455  
SRR17520069.6028457  
SRR17520069.6028459  
SRR17520069.6028461  
SRR17520069.6028463  
SRR17520069.6030377  
SRR17520069.6030379  
SRR17520069.6030381  
SRR17520069.6030383  
SRR17520069.6030385  
SRR17520069.6030387  
SRR17520069.6030389  
SRR17520069.6030391  
SRR17520069.6030393

SRR17520069. 6031858  
SRR17520069. 6031860  
SRR17520069. 6031862  
SRR17520069. 6031864  
SRR17520069. 6031866  
SRR17520069. 6031870  
SRR17520069. 6031872  
SRR17520069. 6031885  
SRR17520069. 6031887  
SRR17520069. 6031889  
SRR17520069. 6031891  
SRR17520069. 6031893  
SRR17520069. 6031895  
SRR17520069. 6031897  
SRR17520069. 6031899  
SRR17520069. 6031903  
SRR17520069. 6031905  
SRR17520069. 6031907  
SRR17520069. 6031913  
SRR17520069. 6031915  
SRR17520069. 6031917  
SRR17520069. 6031919  
SRR17520069. 6031921  
SRR17520069. 6031923  
SRR17520069. 6031925  
SRR17520069. 6031927  
SRR17520069. 6031929  
SRR17520069. 6031931  
SRR17520069. 6031933  
SRR17520069. 6031935  
SRR17520069. 6031937  
SRR17520069. 6031939  
SRR17520069. 6031941  
SRR17520069. 6031943  
SRR17520069. 6031945  
SRR17520069. 6031947  
SRR17520069. 6031949  
SRR17520069. 6031951  
SRR17520069. 6031953  
SRR17520069. 6031955  
SRR17520069. 6031957  
SRR17520069. 6031959  
SRR17520069. 6034065  
SRR17520069. 6034067  
SRR17520069. 6034069  
SRR17520069. 6034071  
SRR17520069. 6034073

SRR17520069. 6034075  
SRR17520069. 6034077  
SRR17520069. 6034079  
SRR17520069. 6034081  
SRR17520069. 6034083  
SRR17520069. 6034085  
SRR17520069. 6034087  
SRR17520069. 6034091  
SRR17520069. 6034093  
SRR17520069. 6034095  
SRR17520069. 6040996  
SRR17520069. 6041367  
SRR17520069. 6041369  
SRR17520069. 6041371  
SRR17520069. 6041373  
SRR17520069. 6041375  
SRR17520069. 6041377  
SRR17520069. 6041379  
SRR17520069. 6041381  
SRR17520069. 6041383  
SRR17520069. 6041385  
SRR17520069. 6041387  
SRR17520069. 6041389  
SRR17520069. 6041518  
SRR17520069. 6041520  
SRR17520069. 6041522  
SRR17520069. 6041526  
SRR17520069. 6041528  
SRR17520069. 6041534  
SRR17520069. 6041536  
SRR17520069. 6041538  
SRR17520069. 6041540  
SRR17520069. 6041542  
SRR17520069. 6041544  
SRR17520069. 6041546  
SRR17520069. 6041548  
SRR17520069. 6041550  
SRR17520069. 6041552  
SRR17520069. 6041554  
SRR17520069. 6041556  
SRR17520069. 6041558  
SRR17520069. 6041560  
SRR17520069. 6041562  
SRR17520069. 6041564  
SRR17520069. 6041566  
SRR17520069. 6041568  
SRR17520069. 6041570

SRR17520069.6041572  
SRR17520069.6041574  
SRR17520069.6041576  
SRR17520069.6045764  
SRR17520069.6045766  
SRR17520069.6045768  
SRR17520069.6045770  
SRR17520069.6045772  
SRR17520069.6045774  
SRR17520069.6045776  
SRR17520069.6045778  
SRR17520069.6048775  
SRR17520069.6048777  
SRR17520069.6048779  
SRR17520069.6048781  
SRR17520069.6048783  
SRR17520069.6048785  
SRR17520069.6048787  
SRR17520069.6048789  
SRR17520069.6048791  
SRR17520069.6048793  
SRR17520069.6048795  
SRR17520069.6048797  
SRR17520069.6048799  
SRR17520069.6048801  
SRR17520069.6048803  
SRR17520069.6048805  
SRR17520069.6048807  
SRR17520069.6048809  
SRR17520069.6048811  
SRR17520069.6048813  
SRR17520069.6048815  
SRR17520069.6048817  
SRR17520069.6048821  
SRR17520069.6048823  
SRR17520069.6048825  
SRR17520069.6048827  
SRR17520069.6048829  
SRR17520069.6048831  
SRR17520069.6048833  
SRR17520069.6048835  
SRR17520069.6049134  
SRR17520069.6049136  
SRR17520069.6049138  
SRR17520069.6049140  
SRR17520069.6049142  
SRR17520069.6049144

SRR17520069.6049146  
SRR17520069.6049148  
SRR17520069.6049150  
SRR17520069.6049152  
SRR17520069.6049156  
SRR17520069.6049158  
SRR17520069.6049160  
SRR17520069.6049162  
SRR17520069.6051367  
SRR17520069.6051369  
SRR17520069.6051371  
SRR17520069.6051373  
SRR17520069.6051375  
SRR17520069.6051377  
SRR17520069.6051379  
SRR17520069.6054828  
SRR17520069.6056895  
SRR17520069.6056899  
SRR17520069.6056903  
SRR17520069.6056905  
SRR17520069.6056907  
SRR17520069.6056909  
SRR17520069.6056911  
SRR17520069.6056983  
SRR17520069.6058471  
SRR17520069.6058473  
SRR17520069.6058475  
SRR17520069.6058479  
SRR17520069.6058481  
SRR17520069.6058483  
SRR17520069.6058485  
SRR17520069.6058487  
SRR17520069.6058489  
SRR17520069.6058491  
SRR17520069.6058493  
SRR17520069.6058495  
SRR17520069.6058497  
SRR17520069.6058499  
SRR17520069.6058501  
SRR17520069.6058503  
SRR17520069.6058505  
SRR17520069.6058507  
SRR17520069.6058509  
SRR17520069.6061303  
SRR17520069.6072420  
SRR17520069.6072422  
SRR17520069.6072424

SRR17520069. 6072426  
SRR17520069. 6072428  
SRR17520069. 6072430  
SRR17520069. 6072432  
SRR17520069. 6072436  
SRR17520069. 6072438  
SRR17520069. 6072440  
SRR17520069. 6072442  
SRR17520069. 6072446  
SRR17520069. 6072448  
SRR17520069. 6072450  
SRR17520069. 6072452  
SRR17520069. 6072454  
SRR17520069. 6072456  
SRR17520069. 6072458  
SRR17520069. 6072460  
SRR17520069. 6072464  
SRR17520069. 6072466  
SRR17520069. 6072468  
SRR17520069. 6072470  
SRR17520069. 6072474  
SRR17520069. 6072478  
SRR17520069. 6072480  
SRR17520069. 6072482  
SRR17520069. 6072484  
SRR17520069. 6072486  
SRR17520069. 6072488  
SRR17520069. 6072490  
SRR17520069. 6072492  
SRR17520069. 6072494  
SRR17520069. 6072496  
SRR17520069. 6072498  
SRR17520069. 6072500  
SRR17520069. 6072506  
SRR17520069. 6072508  
SRR17520069. 6072510  
SRR17520069. 6072512  
SRR17520069. 6072514  
SRR17520069. 6072518  
SRR17520069. 6072520  
SRR17520069. 6072522  
SRR17520069. 6072524  
SRR17520069. 6072526  
SRR17520069. 6072528  
SRR17520069. 6074407  
SRR17520069. 6074409  
SRR17520069. 6074411

SRR17520069.6074413  
SRR17520069.6074415  
SRR17520069.6074417  
SRR17520069.6074421  
SRR17520069.6074423  
SRR17520069.6074425  
SRR17520069.6074590  
SRR17520069.6080164  
SRR17520069.6080166  
SRR17520069.6080168  
SRR17520069.6080170  
SRR17520069.6085059  
SRR17520069.6085061  
SRR17520069.6085063  
SRR17520069.6085067  
SRR17520069.6085069  
SRR17520069.6085071  
SRR17520069.6085073  
SRR17520069.6085075  
SRR17520069.6085077  
SRR17520069.6085079  
SRR17520069.6085081  
SRR17520069.6085083  
SRR17520069.6093546  
SRR17520069.6093548  
SRR17520069.6093550  
SRR17520069.6093552  
SRR17520069.6093554  
SRR17520069.6093556  
SRR17520069.6093558  
SRR17520069.6093560  
SRR17520069.6093562  
SRR17520069.6093564  
SRR17520069.6093566  
SRR17520069.6093568  
SRR17520069.6093570  
SRR17520069.6093572  
SRR17520069.6093574  
SRR17520069.6093576  
SRR17520069.6093578  
SRR17520069.6093580  
SRR17520069.6093582  
SRR17520069.6093584  
SRR17520069.6093586  
SRR17520069.6093588  
SRR17520069.6093590  
SRR17520069.6093592



SRR17520069.6093596  
SRR17520069.6093598  
SRR17520069.6093602  
SRR17520069.6093604  
SRR17520069.6093606  
SRR17520069.6096913  
SRR17520069.6096915  
SRR17520069.6096917  
SRR17520069.6096919  
SRR17520069.6096921  
SRR17520069.6096923  
SRR17520069.6096925  
SRR17520069.6096927  
SRR17520069.6096929  
SRR17520069.6096931  
SRR17520069.6096933  
SRR17520069.6096935  
SRR17520069.6096937  
SRR17520069.6097158  
SRR17520069.6097162  
SRR17520069.6097170  
SRR17520069.6097174  
SRR17520069.6097178  
SRR17520069.6097180  
SRR17520069.6097182  
SRR17520069.6097184  
SRR17520069.6097186  
SRR17520069.6097188  
SRR17520069.6097190  
SRR17520069.6097192  
SRR17520069.6097194  
SRR17520069.6097196  
SRR17520069.6097198  
SRR17520069.6097857  
SRR17520069.6097859  
SRR17520069.6097861  
SRR17520069.6097863  
SRR17520069.6097865  
SRR17520069.6097867  
SRR17520069.6097869  
SRR17520069.6097871  
SRR17520069.6097873  
SRR17520069.6097875  
SRR17520069.6099964  
SRR17520069.6099966  
SRR17520069.6099968  
SRR17520069.6099970

SRR17520069.6099972  
SRR17520069.6099974  
SRR17520069.6099976  
SRR17520069.6099978  
SRR17520069.6099980  
SRR17520069.6099982  
SRR17520069.6099984  
SRR17520069.6099986  
SRR17520069.6099988  
SRR17520069.6099990  
SRR17520069.6099992  
SRR17520069.6099994  
SRR17520069.6099996  
SRR17520069.6099998  
SRR17520069.6100000  
SRR17520069.6100002  
SRR17520069.6100004  
SRR17520069.6100006  
SRR17520069.6100008  
SRR17520069.6100010  
SRR17520069.6100012  
SRR17520069.6100014  
SRR17520069.6100016  
SRR17520069.6100018  
SRR17520069.6100020  
SRR17520069.6100022  
SRR17520069.6100024  
SRR17520069.6100026  
SRR17520069.6100028  
SRR17520069.6100030  
SRR17520069.6100032  
SRR17520069.6100034  
SRR17520069.6100036  
SRR17520069.6100038  
SRR17520069.6100040  
SRR17520069.6100042  
SRR17520069.6100044  
SRR17520069.6100046  
SRR17520069.6100048  
SRR17520069.6100050  
SRR17520069.6100052  
SRR17520069.6100054  
SRR17520069.6100056  
SRR17520069.6100058  
SRR17520069.6100060  
SRR17520069.6100062  
SRR17520069.6100064

SRR17520069.6100066  
SRR17520069.6100068  
SRR17520069.6100070  
SRR17520069.6100546  
SRR17520069.6104389  
SRR17520069.6104391  
SRR17520069.6104393  
SRR17520069.6104395  
SRR17520069.6104397  
SRR17520069.6104399  
SRR17520069.6104401  
SRR17520069.6104403  
SRR17520069.6106358  
SRR17520069.6106360  
SRR17520069.6106362  
SRR17520069.6106364  
SRR17520069.6106366  
SRR17520069.6106368  
SRR17520069.6106370  
SRR17520069.6106372  
SRR17520069.6106374  
SRR17520069.6106376  
SRR17520069.6106378  
SRR17520069.6106380  
SRR17520069.6106382  
SRR17520069.6106384  
SRR17520069.6106386  
SRR17520069.6106388  
SRR17520069.6106390  
SRR17520069.6106392  
SRR17520069.6106394  
SRR17520069.6106396  
SRR17520069.6106398  
SRR17520069.6106400  
SRR17520069.6106402  
SRR17520069.6106404  
SRR17520069.6106406  
SRR17520069.6106408  
SRR17520069.6106410  
SRR17520069.6106412  
SRR17520069.6106414  
SRR17520069.6106416  
SRR17520069.6106418  
SRR17520069.6106420  
SRR17520069.6106422  
SRR17520069.6106424  
SRR17520069.6106426

SRR17520069.6106428  
SRR17520069.6106430  
SRR17520069.6106432  
SRR17520069.6106434  
SRR17520069.6106436  
SRR17520069.6106438  
SRR17520069.6106440  
SRR17520069.6106442  
SRR17520069.6106444  
SRR17520069.6106446  
SRR17520069.6106448  
SRR17520069.6106450  
SRR17520069.6106452  
SRR17520069.6106454  
SRR17520069.6106456  
SRR17520069.6106458  
SRR17520069.6106460  
SRR17520069.6106462  
SRR17520069.6106464  
SRR17520069.6106466  
SRR17520069.6106468  
SRR17520069.6106470  
SRR17520069.6106472  
SRR17520069.6106474  
SRR17520069.6106476  
SRR17520069.6106478  
SRR17520069.6106480  
SRR17520069.6106482  
SRR17520069.6106484  
SRR17520069.6106486  
SRR17520069.6106488  
SRR17520069.6106490  
SRR17520069.6106492  
SRR17520069.6106494  
SRR17520069.6106496  
SRR17520069.6106498  
SRR17520069.6106500  
SRR17520069.6106502  
SRR17520069.6106504  
SRR17520069.6106506  
SRR17520069.6106508  
SRR17520069.6106510  
SRR17520069.6106512  
SRR17520069.6106514  
SRR17520069.6106516  
SRR17520069.6106518  
SRR17520069.6106520

SRR17520069.6106522  
SRR17520069.6106524  
SRR17520069.6106526  
SRR17520069.6106528  
SRR17520069.6106530  
SRR17520069.6106532  
SRR17520069.6106534  
SRR17520069.6106536  
SRR17520069.6108739  
SRR17520069.6108743  
SRR17520069.6108747  
SRR17520069.6108749  
SRR17520069.6108751  
SRR17520069.6108755  
SRR17520069.6108759  
SRR17520069.6108761  
SRR17520069.6108763  
SRR17520069.6111303  
SRR17520069.6111305  
SRR17520069.6111307  
SRR17520069.6111309  
SRR17520069.6111311  
SRR17520069.6111313  
SRR17520069.6113948  
SRR17520069.6113950  
SRR17520069.6117524  
SRR17520069.6117526  
SRR17520069.6117528  
SRR17520069.6117532  
SRR17520069.6117534  
SRR17520069.6117536  
SRR17520069.6117538  
SRR17520069.6117540  
SRR17520069.6117542  
SRR17520069.6117544  
SRR17520069.6117546  
SRR17520069.6117548  
SRR17520069.6117550  
SRR17520069.6117552  
SRR17520069.6117554  
SRR17520069.6117556  
SRR17520069.6117558  
SRR17520069.6117560  
SRR17520069.6117562  
SRR17520069.6117564  
SRR17520069.6117566  
SRR17520069.6117568

SRR17520069.6117572  
SRR17520069.6117574  
SRR17520069.6117576  
SRR17520069.6117578  
SRR17520069.6117580  
SRR17520069.6117805  
SRR17520069.6117807  
SRR17520069.6117809  
SRR17520069.6117811  
SRR17520069.6117813  
SRR17520069.6117815  
SRR17520069.6117817  
SRR17520069.6117819  
SRR17520069.6117821  
SRR17520069.6117823  
SRR17520069.6117825  
SRR17520069.6118787  
SRR17520069.6118789  
SRR17520069.6124140  
SRR17520069.6124142  
SRR17520069.6124144  
SRR17520069.6124146  
SRR17520069.6124148  
SRR17520069.6124150  
SRR17520069.6124152  
SRR17520069.6124154  
SRR17520069.6124156  
SRR17520069.6124158  
SRR17520069.6124160  
SRR17520069.6124162  
SRR17520069.6124164  
SRR17520069.6124166  
SRR17520069.6124168  
SRR17520069.6124170  
SRR17520069.6124172  
SRR17520069.6124174  
SRR17520069.6124176  
SRR17520069.6124178  
SRR17520069.6124180  
SRR17520069.6124182  
SRR17520069.6124184  
SRR17520069.6124186  
SRR17520069.6124188  
SRR17520069.6124190  
SRR17520069.6124192  
SRR17520069.6124194  
SRR17520069.6124196

SRR17520069.6124198  
SRR17520069.6124200  
SRR17520069.6124202  
SRR17520069.6124204  
SRR17520069.6124206  
SRR17520069.6124208  
SRR17520069.6124212  
SRR17520069.6124214  
SRR17520069.6124220  
SRR17520069.6124222  
SRR17520069.6124224  
SRR17520069.6124226  
SRR17520069.6124230  
SRR17520069.6124232  
SRR17520069.6124234  
SRR17520069.6127095  
SRR17520069.6127097  
SRR17520069.6127099  
SRR17520069.6127101  
SRR17520069.6127103  
SRR17520069.6127105  
SRR17520069.6127107  
SRR17520069.6127109  
SRR17520069.6127111  
SRR17520069.6127113  
SRR17520069.6127115  
SRR17520069.6127118  
SRR17520069.6127120  
SRR17520069.6127122  
SRR17520069.6127124  
SRR17520069.6127126  
SRR17520069.6127128  
SRR17520069.6127130  
SRR17520069.6127416  
SRR17520069.6127418  
SRR17520069.6127420  
SRR17520069.6135010  
SRR17520069.6135012  
SRR17520069.6135014  
SRR17520069.6135016  
SRR17520069.6135018  
SRR17520069.6135020  
SRR17520069.6135022  
SRR17520069.6135024  
SRR17520069.6135026  
SRR17520069.6135028  
SRR17520069.6135030

SRR17520069.6135032  
SRR17520069.6135034  
SRR17520069.6135036  
SRR17520069.6135038  
SRR17520069.6135040  
SRR17520069.6135042  
SRR17520069.6138139  
SRR17520069.6138141  
SRR17520069.6138143  
SRR17520069.6138145  
SRR17520069.6138147  
SRR17520069.6138149  
SRR17520069.6138151  
SRR17520069.6138153  
SRR17520069.6138155  
SRR17520069.6138157  
SRR17520069.6138951  
SRR17520069.6138953  
SRR17520069.6138955  
SRR17520069.6138957  
SRR17520069.6138959  
SRR17520069.6138961  
SRR17520069.6144125  
SRR17520069.6144127  
SRR17520069.6144129  
SRR17520069.6144131  
SRR17520069.6146890  
SRR17520069.6146892  
SRR17520069.6146894  
SRR17520069.6146896  
SRR17520069.6146898  
SRR17520069.6146902  
SRR17520069.6146904  
SRR17520069.6146906  
SRR17520069.6146908  
SRR17520069.6146910  
SRR17520069.6146912  
SRR17520069.6147686  
SRR17520069.6147688  
SRR17520069.6147690  
SRR17520069.6147692  
SRR17520069.6147694  
SRR17520069.6147696  
SRR17520069.6147698  
SRR17520069.6147700  
SRR17520069.6147702  
SRR17520069.6147704



SRR17520069.6147706  
SRR17520069.6147708  
SRR17520069.6147710  
SRR17520069.6147712  
SRR17520069.6147714  
SRR17520069.6147718  
SRR17520069.6147720  
SRR17520069.6147722  
SRR17520069.6147724  
SRR17520069.6147726  
SRR17520069.6147728  
SRR17520069.6147730  
SRR17520069.6147732  
SRR17520069.6147734  
SRR17520069.6147736  
SRR17520069.6147740  
SRR17520069.6147742  
SRR17520069.6147744  
SRR17520069.6148567  
SRR17520069.6148569  
SRR17520069.6149731  
SRR17520069.6149733  
SRR17520069.6149735  
SRR17520069.6149737  
SRR17520069.6149739  
SRR17520069.6155946  
SRR17520069.6155948  
SRR17520069.6155950  
SRR17520069.6155952  
SRR17520069.6155954  
SRR17520069.6155956  
SRR17520069.6155958  
SRR17520069.6155960  
SRR17520069.6155962  
SRR17520069.6155964  
SRR17520069.6155966  
SRR17520069.6155968  
SRR17520069.6155970  
SRR17520069.6155972  
SRR17520069.6155974  
SRR17520069.6155976  
SRR17520069.6155978  
SRR17520069.6155980  
SRR17520069.6155982  
SRR17520069.6155988  
SRR17520069.6155990  
SRR17520069.6155992

SRR17520069.6155994  
SRR17520069.6155996  
SRR17520069.6155998  
SRR17520069.6156000  
SRR17520069.6156002  
SRR17520069.6156004  
SRR17520069.6156006  
SRR17520069.6156008  
SRR17520069.6156010  
SRR17520069.6156012  
SRR17520069.6156014  
SRR17520069.6156016  
SRR17520069.6162827  
SRR17520069.6162829  
SRR17520069.6162831  
SRR17520069.6162833  
SRR17520069.6162835  
SRR17520069.6162837  
SRR17520069.6162843  
SRR17520069.6162847  
SRR17520069.6164152  
SRR17520069.6164154  
SRR17520069.6164156  
SRR17520069.6164158  
SRR17520069.6164160  
SRR17520069.6164162  
SRR17520069.6164164  
SRR17520069.6164166  
SRR17520069.6164168  
SRR17520069.6164170  
SRR17520069.6164172  
SRR17520069.6164174  
SRR17520069.6170593  
SRR17520069.6170595  
SRR17520069.6170597  
SRR17520069.6170599  
SRR17520069.6170601  
SRR17520069.6170603  
SRR17520069.6170605  
SRR17520069.6170607  
SRR17520069.6170609  
SRR17520069.6170611  
SRR17520069.6170613  
SRR17520069.6170615  
SRR17520069.6170617  
SRR17520069.6170619  
SRR17520069.6170621

SRR17520069. 6170623  
SRR17520069. 6170625  
SRR17520069. 6170627  
SRR17520069. 6170629  
SRR17520069. 6170631  
SRR17520069. 6170633  
SRR17520069. 6170635  
SRR17520069. 6170637  
SRR17520069. 6170639  
SRR17520069. 6170641  
SRR17520069. 6170643  
SRR17520069. 6170647  
SRR17520069. 6170649  
SRR17520069. 6170651  
SRR17520069. 6171243  
SRR17520069. 6171245  
SRR17520069. 6171247  
SRR17520069. 6171249  
SRR17520069. 6171251  
SRR17520069. 6171253  
SRR17520069. 6171255  
SRR17520069. 6171257  
SRR17520069. 6171259  
SRR17520069. 6171261  
SRR17520069. 6171263  
SRR17520069. 6171265  
SRR17520069. 6171267  
SRR17520069. 6171269  
SRR17520069. 6171271  
SRR17520069. 6171273  
SRR17520069. 6171275  
SRR17520069. 6171277  
SRR17520069. 6171279  
SRR17520069. 6171281  
SRR17520069. 6171283  
SRR17520069. 6171285  
SRR17520069. 6171287  
SRR17520069. 6171289  
SRR17520069. 6171291  
SRR17520069. 6171293  
SRR17520069. 6171295  
SRR17520069. 6171297  
SRR17520069. 6171299  
SRR17520069. 6171301  
SRR17520069. 6171303  
SRR17520069. 6171305  
SRR17520069. 6171307

SRR17520069.6171309  
SRR17520069.6171311  
SRR17520069.6171313  
SRR17520069.6171315  
SRR17520069.6171317  
SRR17520069.6171319  
SRR17520069.6171321  
SRR17520069.6171323  
SRR17520069.6171325  
SRR17520069.6171327  
SRR17520069.6171329  
SRR17520069.6171331  
SRR17520069.6171333  
SRR17520069.6171335  
SRR17520069.6171339  
SRR17520069.6171341  
SRR17520069.6171343  
SRR17520069.6171345  
SRR17520069.6173808  
SRR17520069.6173810  
SRR17520069.6173812  
SRR17520069.6173814  
SRR17520069.6173816  
SRR17520069.6173818  
SRR17520069.6173820  
SRR17520069.6173822  
SRR17520069.6173824  
SRR17520069.6173826  
SRR17520069.6173828  
SRR17520069.6173830  
SRR17520069.6173832  
SRR17520069.6173834  
SRR17520069.6173836  
SRR17520069.6182521  
SRR17520069.6185094  
SRR17520069.6185096  
SRR17520069.6185098  
SRR17520069.6185100  
SRR17520069.6185104  
SRR17520069.6185106  
SRR17520069.6185108  
SRR17520069.6185110  
SRR17520069.6188031  
SRR17520069.6188033  
SRR17520069.6188035  
SRR17520069.6188037  
SRR17520069.6188039

SRR17520069.6188041  
SRR17520069.6188043  
SRR17520069.6188047  
SRR17520069.6188049  
SRR17520069.6188051  
SRR17520069.6188053  
SRR17520069.6188055  
SRR17520069.6188057  
SRR17520069.6188059  
SRR17520069.6188061  
SRR17520069.6188063  
SRR17520069.6188065  
SRR17520069.6188067  
SRR17520069.6188069  
SRR17520069.6188385  
SRR17520069.6188387  
SRR17520069.6188389  
SRR17520069.6188391  
SRR17520069.6188393  
SRR17520069.6188395  
SRR17520069.6188397  
SRR17520069.6188399  
SRR17520069.6188401  
SRR17520069.6188403  
SRR17520069.6188405  
SRR17520069.6188407  
SRR17520069.6188409  
SRR17520069.6188411  
SRR17520069.6188413  
SRR17520069.6188415  
SRR17520069.6188417  
SRR17520069.6188419  
SRR17520069.6188421  
SRR17520069.6188423  
SRR17520069.6188425  
SRR17520069.6188427  
SRR17520069.6188429  
SRR17520069.6188431  
SRR17520069.6188433  
SRR17520069.6188435  
SRR17520069.6188437  
SRR17520069.6188439  
SRR17520069.6188441  
SRR17520069.6188443  
SRR17520069.6188445  
SRR17520069.6188447  
SRR17520069.6188449

SRR17520069.6188451  
SRR17520069.6188453  
SRR17520069.6188455  
SRR17520069.6188457  
SRR17520069.6188459  
SRR17520069.6189058  
SRR17520069.6189060  
SRR17520069.6190214  
SRR17520069.6190216  
SRR17520069.6190218  
SRR17520069.6190220  
SRR17520069.6190222  
SRR17520069.6190224  
SRR17520069.6190226  
SRR17520069.6190230  
SRR17520069.6191609  
SRR17520069.6191611  
SRR17520069.6191613  
SRR17520069.6191615  
SRR17520069.6191617  
SRR17520069.6191619  
SRR17520069.6191623  
SRR17520069.6191625  
SRR17520069.6191627  
SRR17520069.6191629  
SRR17520069.6191633  
SRR17520069.6191635  
SRR17520069.6194923  
SRR17520069.6194925  
SRR17520069.6194927  
SRR17520069.6194929  
SRR17520069.6194931  
SRR17520069.6194933  
SRR17520069.6194935  
SRR17520069.6194937  
SRR17520069.6194939  
SRR17520069.6194941  
SRR17520069.6194943  
SRR17520069.6198353  
SRR17520069.6198355  
SRR17520069.6198357  
SRR17520069.6198359  
SRR17520069.6198361  
SRR17520069.6198363  
SRR17520069.6198365  
SRR17520069.6198367  
SRR17520069.6198369

SRR17520069.6198371  
SRR17520069.6198373  
SRR17520069.6198375  
SRR17520069.6198377  
SRR17520069.6198381  
SRR17520069.6198383  
SRR17520069.6198385  
SRR17520069.6198387  
SRR17520069.6198389  
SRR17520069.6198393  
SRR17520069.6198395  
SRR17520069.6198397  
SRR17520069.6198399  
SRR17520069.6198401  
SRR17520069.6198403  
SRR17520069.6198405  
SRR17520069.6198407  
SRR17520069.6198409  
SRR17520069.6198411  
SRR17520069.6198413  
SRR17520069.6198415  
SRR17520069.6198417  
SRR17520069.6198419  
SRR17520069.6198421  
SRR17520069.6198423  
SRR17520069.6198425  
SRR17520069.6198427  
SRR17520069.6198429  
SRR17520069.6198431  
SRR17520069.6198433  
SRR17520069.6198435  
SRR17520069.6198437  
SRR17520069.6198439  
SRR17520069.6198441  
SRR17520069.6198443  
SRR17520069.6198445  
SRR17520069.6198447  
SRR17520069.6198449  
SRR17520069.6198453  
SRR17520069.6198455  
SRR17520069.6198457  
SRR17520069.6198459  
SRR17520069.6198461  
SRR17520069.6198463  
SRR17520069.6198465  
SRR17520069.6198469  
SRR17520069.6198471

SRR17520069.6198473  
SRR17520069.6198475  
SRR17520069.6198477  
SRR17520069.6198479  
SRR17520069.6198481  
SRR17520069.6198483  
SRR17520069.6198485  
SRR17520069.6198487  
SRR17520069.6198489  
SRR17520069.6198491  
SRR17520069.6198493  
SRR17520069.6198495  
SRR17520069.6200288  
SRR17520069.6200290  
SRR17520069.6200292  
SRR17520069.6200294  
SRR17520069.6200296  
SRR17520069.6200298  
SRR17520069.6200300  
SRR17520069.6200302  
SRR17520069.6200304  
SRR17520069.6200306  
SRR17520069.6200308  
SRR17520069.6200310  
SRR17520069.6200312  
SRR17520069.6200314  
SRR17520069.6200316  
SRR17520069.6200320  
SRR17520069.6200322  
SRR17520069.6200324  
SRR17520069.6200328  
SRR17520069.6200330  
SRR17520069.6200332  
SRR17520069.6200334  
SRR17520069.6200336  
SRR17520069.6200338  
SRR17520069.6200340  
SRR17520069.6200342  
SRR17520069.6200344  
SRR17520069.6200346  
SRR17520069.6200348  
SRR17520069.6200350  
SRR17520069.6200352  
SRR17520069.6200354  
SRR17520069.6200356  
SRR17520069.6200358  
SRR17520069.6200360



SRR17520069. 6200362  
SRR17520069. 6200364  
SRR17520069. 6200366  
SRR17520069. 6200368  
SRR17520069. 6200370  
SRR17520069. 6200372  
SRR17520069. 6200374  
SRR17520069. 6200376  
SRR17520069. 6200378  
SRR17520069. 6200380  
SRR17520069. 6200382  
SRR17520069. 6200384  
SRR17520069. 6200388  
SRR17520069. 6200390  
SRR17520069. 6200392  
SRR17520069. 6200394  
SRR17520069. 6200396  
SRR17520069. 6200398  
SRR17520069. 6200400  
SRR17520069. 6200402  
SRR17520069. 6200404  
SRR17520069. 6200406  
SRR17520069. 6200408  
SRR17520069. 6200410  
SRR17520069. 6200412  
SRR17520069. 6200414  
SRR17520069. 6200416  
SRR17520069. 6200418  
SRR17520069. 6200420  
SRR17520069. 6200422  
SRR17520069. 6200424  
SRR17520069. 6200426  
SRR17520069. 6200428  
SRR17520069. 6200430  
SRR17520069. 6200432  
SRR17520069. 6200434  
SRR17520069. 6200436  
SRR17520069. 6200438  
SRR17520069. 6200440  
SRR17520069. 6200442  
SRR17520069. 6200444  
SRR17520069. 6200446  
SRR17520069. 6200448  
SRR17520069. 6200450  
SRR17520069. 6200452  
SRR17520069. 6200456  
SRR17520069. 6200460

SRR17520069.6200462  
SRR17520069.6200464  
SRR17520069.6203224  
SRR17520069.6203226  
SRR17520069.6203228  
SRR17520069.6203230  
SRR17520069.6203232  
SRR17520069.6203234  
SRR17520069.6203236  
SRR17520069.6203240  
SRR17520069.6203242  
SRR17520069.6203244  
SRR17520069.6203246  
SRR17520069.6203248  
SRR17520069.6203250  
SRR17520069.6203252  
SRR17520069.6203254  
SRR17520069.6203256  
SRR17520069.6203258  
SRR17520069.6203260  
SRR17520069.6203262  
SRR17520069.6203264  
SRR17520069.6203266  
SRR17520069.6203268  
SRR17520069.6208867  
SRR17520069.6208869  
SRR17520069.6208871  
SRR17520069.6208873  
SRR17520069.6208875  
SRR17520069.6208877  
SRR17520069.6208879  
SRR17520069.6208881  
SRR17520069.6208883  
SRR17520069.6208885  
SRR17520069.6208887  
SRR17520069.6208889  
SRR17520069.6208891  
SRR17520069.6208893  
SRR17520069.6208895  
SRR17520069.6208897  
SRR17520069.6208899  
SRR17520069.6208901  
SRR17520069.6208903  
SRR17520069.6208905  
SRR17520069.6208907  
SRR17520069.6208909  
SRR17520069.6208911

SRR17520069.6208913  
SRR17520069.6208915  
SRR17520069.6208917  
SRR17520069.6209465  
SRR17520069.6209467  
SRR17520069.6210956  
SRR17520069.6210958  
SRR17520069.6210960  
SRR17520069.6210962  
SRR17520069.6210964  
SRR17520069.6210966  
SRR17520069.6210968  
SRR17520069.6210970  
SRR17520069.6210972  
SRR17520069.6210974  
SRR17520069.6210976  
SRR17520069.6210978  
SRR17520069.6210980  
SRR17520069.6210982  
SRR17520069.6210984  
SRR17520069.6210986  
SRR17520069.6210988  
SRR17520069.6210990  
SRR17520069.6210992  
SRR17520069.6210994  
SRR17520069.6210996  
SRR17520069.6210998  
SRR17520069.6211000  
SRR17520069.6211002  
SRR17520069.6219185  
SRR17520069.6219187  
SRR17520069.6220643  
SRR17520069.6220645  
SRR17520069.6220647  
SRR17520069.6222461  
SRR17520069.6222463  
SRR17520069.6222465  
SRR17520069.6222467  
SRR17520069.6222469  
SRR17520069.6222471  
SRR17520069.6222473  
SRR17520069.6222475  
SRR17520069.6222477  
SRR17520069.6222479  
SRR17520069.6222481  
SRR17520069.6222483  
SRR17520069.6222485

SRR17520069.6222487  
SRR17520069.6222489  
SRR17520069.6222491  
SRR17520069.6222493  
SRR17520069.6222495  
SRR17520069.6222497  
SRR17520069.6222499  
SRR17520069.6222501  
SRR17520069.6222503  
SRR17520069.6222505  
SRR17520069.6222507  
SRR17520069.6222509  
SRR17520069.6222511  
SRR17520069.6222513  
SRR17520069.6222515  
SRR17520069.6222517  
SRR17520069.6222519  
SRR17520069.6222521  
SRR17520069.6222523  
SRR17520069.6222525  
SRR17520069.6222527  
SRR17520069.6222529  
SRR17520069.6222531  
SRR17520069.6222533  
SRR17520069.6222537  
SRR17520069.6222539  
SRR17520069.6222541  
SRR17520069.6222543  
SRR17520069.6222545  
SRR17520069.6222547  
SRR17520069.6222549  
SRR17520069.6222551  
SRR17520069.6222553  
SRR17520069.6222555  
SRR17520069.6222557  
SRR17520069.6222559  
SRR17520069.6222561  
SRR17520069.6222563  
SRR17520069.6222565  
SRR17520069.6222567  
SRR17520069.6222569  
SRR17520069.6222571  
SRR17520069.6222573  
SRR17520069.6222575  
SRR17520069.6222577  
SRR17520069.6222579  
SRR17520069.6222581

SRR17520069.6222583  
SRR17520069.6222585  
SRR17520069.6222587  
SRR17520069.6222589  
SRR17520069.6222591  
SRR17520069.6222593  
SRR17520069.6222595  
SRR17520069.6222597  
SRR17520069.6222599  
SRR17520069.6222601  
SRR17520069.6222603  
SRR17520069.6222605  
SRR17520069.6222607  
SRR17520069.6222609  
SRR17520069.6222611  
SRR17520069.6222613  
SRR17520069.6222615  
SRR17520069.6222617  
SRR17520069.6225471  
SRR17520069.6225473  
SRR17520069.6225750  
SRR17520069.6225752  
SRR17520069.6225754  
SRR17520069.6225756  
SRR17520069.6225758  
SRR17520069.6225760  
SRR17520069.6225762  
SRR17520069.6225764  
SRR17520069.6225766  
SRR17520069.6225768  
SRR17520069.6225770  
SRR17520069.6225772  
SRR17520069.6225774  
SRR17520069.6225776  
SRR17520069.6225778  
SRR17520069.6225780  
SRR17520069.6225782  
SRR17520069.6225784  
SRR17520069.6225786  
SRR17520069.6225788  
SRR17520069.6225790  
SRR17520069.6225792  
SRR17520069.6225794  
SRR17520069.6225796  
SRR17520069.6225798  
SRR17520069.6225800  
SRR17520069.6225802

SRR17520069. 6225804  
SRR17520069. 6225806  
SRR17520069. 6226996  
SRR17520069. 6226998  
SRR17520069. 6228487  
SRR17520069. 6228489  
SRR17520069. 6228493  
SRR17520069. 6228495  
SRR17520069. 6228497  
SRR17520069. 6228499  
SRR17520069. 6228501  
SRR17520069. 6228503  
SRR17520069. 6228505  
SRR17520069. 6228507  
SRR17520069. 6228509  
SRR17520069. 6228511  
SRR17520069. 6228513  
SRR17520069. 6228947  
SRR17520069. 6228949  
SRR17520069. 6228951  
SRR17520069. 6228953  
SRR17520069. 6228955  
SRR17520069. 6228957  
SRR17520069. 6228959  
SRR17520069. 6228961  
SRR17520069. 6228963  
SRR17520069. 6228965  
SRR17520069. 6228967  
SRR17520069. 6228969  
SRR17520069. 6228971  
SRR17520069. 6228973  
SRR17520069. 6228975  
SRR17520069. 6228977  
SRR17520069. 6228979  
SRR17520069. 6228981  
SRR17520069. 6228983  
SRR17520069. 6228985  
SRR17520069. 6228987  
SRR17520069. 6228989  
SRR17520069. 6228991  
SRR17520069. 6228993  
SRR17520069. 6228995  
SRR17520069. 6228997  
SRR17520069. 6228999  
SRR17520069. 6229001  
SRR17520069. 6229003  
SRR17520069. 6232480

SRR17520069. 6232482  
SRR17520069. 6232484  
SRR17520069. 6232488  
SRR17520069. 6232490  
SRR17520069. 6232492  
SRR17520069. 6232494  
SRR17520069. 6232496  
SRR17520069. 6232498  
SRR17520069. 6232500  
SRR17520069. 6232502  
SRR17520069. 6232504  
SRR17520069. 6232506  
SRR17520069. 6232510  
SRR17520069. 6232512  
SRR17520069. 6232514  
SRR17520069. 6232518  
SRR17520069. 6232520  
SRR17520069. 6232522  
SRR17520069. 6232524  
SRR17520069. 6232526  
SRR17520069. 6232530  
SRR17520069. 6232532  
SRR17520069. 6232536  
SRR17520069. 6232540  
SRR17520069. 6232542  
SRR17520069. 6232544  
SRR17520069. 6232546  
SRR17520069. 6237031  
SRR17520069. 6237033  
SRR17520069. 6237035  
SRR17520069. 6237037  
SRR17520069. 6237039  
SRR17520069. 6237041  
SRR17520069. 6237043  
SRR17520069. 6237047  
SRR17520069. 6237049  
SRR17520069. 6237051  
SRR17520069. 6237053  
SRR17520069. 6237055  
SRR17520069. 6237059  
SRR17520069. 6237061  
SRR17520069. 6237063  
SRR17520069. 6237065  
SRR17520069. 6237067  
SRR17520069. 6237071  
SRR17520069. 6237073  
SRR17520069. 6237075

SRR17520069. 6237077  
SRR17520069. 6237079  
SRR17520069. 6237081  
SRR17520069. 6237083  
SRR17520069. 6237085  
SRR17520069. 6237087  
SRR17520069. 6237089  
SRR17520069. 6237091  
SRR17520069. 6237093  
SRR17520069. 6237095  
SRR17520069. 6246960  
SRR17520069. 6248934  
SRR17520069. 6248936  
SRR17520069. 6248938  
SRR17520069. 6248940  
SRR17520069. 6248942  
SRR17520069. 6248944  
SRR17520069. 6248946  
SRR17520069. 6248948  
SRR17520069. 6248950  
SRR17520069. 6248952  
SRR17520069. 6248954  
SRR17520069. 6248956  
SRR17520069. 6248958  
SRR17520069. 6248960  
SRR17520069. 6248962  
SRR17520069. 6248966  
SRR17520069. 6248968  
SRR17520069. 6248970  
SRR17520069. 6252363  
SRR17520069. 6252365  
SRR17520069. 6252367  
SRR17520069. 6252369  
SRR17520069. 6252371  
SRR17520069. 6252373  
SRR17520069. 6252375  
SRR17520069. 6252377  
SRR17520069. 6252379  
SRR17520069. 6252381  
SRR17520069. 6252383  
SRR17520069. 6252385  
SRR17520069. 6252387  
SRR17520069. 6252389  
SRR17520069. 6252391  
SRR17520069. 6252393  
SRR17520069. 6252395  
SRR17520069. 6252397



SRR17520069.6252399  
SRR17520069.6252401  
SRR17520069.6252403  
SRR17520069.6252405  
SRR17520069.6252407  
SRR17520069.6252409  
SRR17520069.6252411  
SRR17520069.6252413  
SRR17520069.6252415  
SRR17520069.6252417  
SRR17520069.6252421  
SRR17520069.6252423  
SRR17520069.6252425  
SRR17520069.6252427  
SRR17520069.6252429  
SRR17520069.6252431  
SRR17520069.6252433  
SRR17520069.6252439  
SRR17520069.6252441  
SRR17520069.6252443  
SRR17520069.6252445  
SRR17520069.6252447  
SRR17520069.6252449  
SRR17520069.6252451  
SRR17520069.6252453  
SRR17520069.6252455  
SRR17520069.6252457  
SRR17520069.6252459  
SRR17520069.6252461  
SRR17520069.6252463  
SRR17520069.6252465  
SRR17520069.6262467  
SRR17520069.6262469  
SRR17520069.6262471  
SRR17520069.6262473  
SRR17520069.6262477  
SRR17520069.6271869  
SRR17520069.6271871  
SRR17520069.6271873  
SRR17520069.6271875  
SRR17520069.6271877  
SRR17520069.6271879  
SRR17520069.6271882  
SRR17520069.6271884  
SRR17520069.6271886  
SRR17520069.6271888  
SRR17520069.6271890

SRR17520069. 6271892  
SRR17520069. 6271898  
SRR17520069. 6271900  
SRR17520069. 6271902  
SRR17520069. 6278852  
SRR17520069. 6278854  
SRR17520069. 6278856  
SRR17520069. 6283355  
SRR17520069. 6283357  
SRR17520069. 6283359  
SRR17520069. 6283361  
SRR17520069. 6283363  
SRR17520069. 6283365  
SRR17520069. 6283367  
SRR17520069. 6283369  
SRR17520069. 6283371  
SRR17520069. 6283373  
SRR17520069. 6283375  
SRR17520069. 6283377  
SRR17520069. 6283379  
SRR17520069. 6283381  
SRR17520069. 6283385  
SRR17520069. 6283387  
SRR17520069. 6283389  
SRR17520069. 6283391  
SRR17520069. 6283393  
SRR17520069. 6283395  
SRR17520069. 6283397  
SRR17520069. 6283399  
SRR17520069. 6283401  
SRR17520069. 6283403  
SRR17520069. 6283405  
SRR17520069. 6283407  
SRR17520069. 6283409  
SRR17520069. 6283411  
SRR17520069. 6283413  
SRR17520069. 6283415  
SRR17520069. 6283417  
SRR17520069. 6283419  
SRR17520069. 6283421  
SRR17520069. 6283423  
SRR17520069. 6286890  
SRR17520069. 6286892  
SRR17520069. 6286894  
SRR17520069. 6286896  
SRR17520069. 6286900  
SRR17520069. 6286904

SRR17520069.6286906  
SRR17520069.6286908  
SRR17520069.6286910  
SRR17520069.6288633  
SRR17520069.6289448  
SRR17520069.6289450  
SRR17520069.6289452  
SRR17520069.6289454  
SRR17520069.6289456  
SRR17520069.6289458  
SRR17520069.6289460  
SRR17520069.6289462  
SRR17520069.6289464  
SRR17520069.6289466  
SRR17520069.6289470  
SRR17520069.6289472  
SRR17520069.6289474  
SRR17520069.6289476  
SRR17520069.6289478  
SRR17520069.6289480  
SRR17520069.6289482  
SRR17520069.6289484  
SRR17520069.6289486  
SRR17520069.6289488  
SRR17520069.6289490  
SRR17520069.6289492  
SRR17520069.6289494  
SRR17520069.6289496  
SRR17520069.6289498  
SRR17520069.6289500  
SRR17520069.6289502  
SRR17520069.6289504  
SRR17520069.6289506  
SRR17520069.6289508  
SRR17520069.6289510  
SRR17520069.6289512  
SRR17520069.6291723  
SRR17520069.6291725  
SRR17520069.6291727  
SRR17520069.6291729  
SRR17520069.6291731  
SRR17520069.6291733  
SRR17520069.6291735  
SRR17520069.6291737  
SRR17520069.6291739  
SRR17520069.6291741  
SRR17520069.6291743

SRR17520069. 6291745  
SRR17520069. 6291747  
SRR17520069. 6291749  
SRR17520069. 6291751  
SRR17520069. 6291753  
SRR17520069. 6291755  
SRR17520069. 6291757  
SRR17520069. 6291759  
SRR17520069. 6291763  
SRR17520069. 6291765  
SRR17520069. 6291769  
SRR17520069. 6291771  
SRR17520069. 6291775  
SRR17520069. 6291777  
SRR17520069. 6296568  
SRR17520069. 6296570  
SRR17520069. 6296574  
SRR17520069. 6296576  
SRR17520069. 6296578  
SRR17520069. 6296580  
SRR17520069. 6296584  
SRR17520069. 6296586  
SRR17520069. 6296588  
SRR17520069. 6296590  
SRR17520069. 6296592  
SRR17520069. 6296594  
SRR17520069. 6296598  
SRR17520069. 6296600  
SRR17520069. 6298940  
SRR17520069. 6298942  
SRR17520069. 6298944  
SRR17520069. 6298946  
SRR17520069. 6298948  
SRR17520069. 6298950  
SRR17520069. 6298952  
SRR17520069. 6298954  
SRR17520069. 6298956  
SRR17520069. 6298958  
SRR17520069. 6298960  
SRR17520069. 6298962  
SRR17520069. 6298964  
SRR17520069. 6298966  
SRR17520069. 6298968  
SRR17520069. 6298970  
SRR17520069. 6302990  
SRR17520069. 6302992  
SRR17520069. 6302994

SRR17520069. 6302996  
SRR17520069. 6302998  
SRR17520069. 6303000  
SRR17520069. 6303002  
SRR17520069. 6303004  
SRR17520069. 6303006  
SRR17520069. 6303008  
SRR17520069. 6303010  
SRR17520069. 6303012  
SRR17520069. 6303014  
SRR17520069. 6303016  
SRR17520069. 6316688  
SRR17520069. 6316690  
SRR17520069. 6323519  
SRR17520069. 6323521  
SRR17520069. 6323523  
SRR17520069. 6323525  
SRR17520069. 6323527  
SRR17520069. 6323529  
SRR17520069. 6323531  
SRR17520069. 6323533  
SRR17520069. 6323535  
SRR17520069. 6323537  
SRR17520069. 6323539  
SRR17520069. 6323541  
SRR17520069. 6323543  
SRR17520069. 6323545  
SRR17520069. 6323547  
SRR17520069. 6323549  
SRR17520069. 6323551  
SRR17520069. 6323553  
SRR17520069. 6323555  
SRR17520069. 6323557  
SRR17520069. 6323559  
SRR17520069. 6323561  
SRR17520069. 6323563  
SRR17520069. 6323565  
SRR17520069. 6323567  
SRR17520069. 6323569  
SRR17520069. 6323571  
SRR17520069. 6323573  
SRR17520069. 6323575  
SRR17520069. 6323581  
SRR17520069. 6323583  
SRR17520069. 6323585  
SRR17520069. 6323587  
SRR17520069. 6323589

SRR17520069. 6323591  
SRR17520069. 6323593  
SRR17520069. 6323595  
SRR17520069. 6323597  
SRR17520069. 6323599  
SRR17520069. 6323601  
SRR17520069. 6323603  
SRR17520069. 6323605  
SRR17520069. 6323607  
SRR17520069. 6323609  
SRR17520069. 6323611  
SRR17520069. 6323613  
SRR17520069. 6323615  
SRR17520069. 6323617  
SRR17520069. 6323619  
SRR17520069. 6339567  
SRR17520069. 6339569  
SRR17520069. 6339571  
SRR17520069. 6341484  
SRR17520069. 6341486  
SRR17520069. 6341488  
SRR17520069. 6341490  
SRR17520069. 6341492  
SRR17520069. 6341494  
SRR17520069. 6341498  
SRR17520069. 6341500  
SRR17520069. 6341502  
SRR17520069. 6341504  
SRR17520069. 6341506  
SRR17520069. 6341508  
SRR17520069. 6341510  
SRR17520069. 6341512  
SRR17520069. 6341514  
SRR17520069. 6341516  
SRR17520069. 6341520  
SRR17520069. 6341522  
SRR17520069. 6341524  
SRR17520069. 6341526  
SRR17520069. 6341528  
SRR17520069. 6341530  
SRR17520069. 6341532  
SRR17520069. 6341534  
SRR17520069. 6341536  
SRR17520069. 6341538  
SRR17520069. 6341540  
SRR17520069. 6341542  
SRR17520069. 6341544

SRR17520069. 6341546  
SRR17520069. 6341548  
SRR17520069. 6341550  
SRR17520069. 6341552  
SRR17520069. 6341554  
SRR17520069. 6341556  
SRR17520069. 6341558  
SRR17520069. 6341560  
SRR17520069. 6342824  
SRR17520069. 6342826  
SRR17520069. 6342828  
SRR17520069. 6342830  
SRR17520069. 6342832  
SRR17520069. 6343664  
SRR17520069. 6343666  
SRR17520069. 6343668  
SRR17520069. 6343670  
SRR17520069. 6343672  
SRR17520069. 6343674  
SRR17520069. 6343676  
SRR17520069. 6343678  
SRR17520069. 6343680  
SRR17520069. 6343682  
SRR17520069. 6343684  
SRR17520069. 6343686  
SRR17520069. 6343688  
SRR17520069. 6343690  
SRR17520069. 6343692  
SRR17520069. 6343694  
SRR17520069. 6343696  
SRR17520069. 6343698  
SRR17520069. 6343700  
SRR17520069. 6343702  
SRR17520069. 6343704  
SRR17520069. 6343706  
SRR17520069. 6343708  
SRR17520069. 6343710  
SRR17520069. 6343712  
SRR17520069. 6343714  
SRR17520069. 6343716  
SRR17520069. 6343718  
SRR17520069. 6343722  
SRR17520069. 6343724  
SRR17520069. 6343726  
SRR17520069. 6349864  
SRR17520069. 6350189  
SRR17520069. 6350191

SRR17520069.6350193  
SRR17520069.6350195  
SRR17520069.6350197  
SRR17520069.6350199  
SRR17520069.6350201  
SRR17520069.6350205  
SRR17520069.6350207  
SRR17520069.6350209  
SRR17520069.6350211  
SRR17520069.6350213  
SRR17520069.6350215  
SRR17520069.6350217  
SRR17520069.6350219  
SRR17520069.6350221  
SRR17520069.6353904  
SRR17520069.6353906  
SRR17520069.6353908  
SRR17520069.6353910  
SRR17520069.6353912  
SRR17520069.6353914  
SRR17520069.6353918  
SRR17520069.6353924  
SRR17520069.6353926  
SRR17520069.6353928  
SRR17520069.6353930  
SRR17520069.6353932  
SRR17520069.6353934  
SRR17520069.6353936  
SRR17520069.6353938  
SRR17520069.6353942  
SRR17520069.6353944  
SRR17520069.6353946  
SRR17520069.6353948  
SRR17520069.6354693  
SRR17520069.6354695  
SRR17520069.6354697  
SRR17520069.6354699  
SRR17520069.6354701  
SRR17520069.6354703  
SRR17520069.6354705  
SRR17520069.6354707  
SRR17520069.6354709  
SRR17520069.6354711  
SRR17520069.6354713  
SRR17520069.6359089  
SRR17520069.6359091  
SRR17520069.6359095



SRR17520069.6359097  
SRR17520069.6359099  
SRR17520069.6359101  
SRR17520069.6359103  
SRR17520069.6359105  
SRR17520069.6359107  
SRR17520069.6359109  
SRR17520069.6359111  
SRR17520069.6359113  
SRR17520069.6359115  
SRR17520069.6359117  
SRR17520069.6359119  
SRR17520069.6359121  
SRR17520069.6359123  
SRR17520069.6359125  
SRR17520069.6359127  
SRR17520069.6359129  
SRR17520069.6359131  
SRR17520069.6359133  
SRR17520069.6359135  
SRR17520069.6359137  
SRR17520069.6359141  
SRR17520069.6359143  
SRR17520069.6359145  
SRR17520069.6359147  
SRR17520069.6359149  
SRR17520069.6359151  
SRR17520069.6359153  
SRR17520069.6359155  
SRR17520069.6359157  
SRR17520069.6359159  
SRR17520069.6359161  
SRR17520069.6359163  
SRR17520069.6359165  
SRR17520069.6359167  
SRR17520069.6360062  
SRR17520069.6360064  
SRR17520069.6360066  
SRR17520069.6360070  
SRR17520069.6360072  
SRR17520069.6360074  
SRR17520069.6360076  
SRR17520069.6360078  
SRR17520069.6368216  
SRR17520069.6368218  
SRR17520069.6368220  
SRR17520069.6368222

SRR17520069. 6368224  
SRR17520069. 6368226  
SRR17520069. 6368228  
SRR17520069. 6368230  
SRR17520069. 6368232  
SRR17520069. 6368234  
SRR17520069. 6368236  
SRR17520069. 6368238  
SRR17520069. 6368240  
SRR17520069. 6368244  
SRR17520069. 6368246  
SRR17520069. 6368248  
SRR17520069. 6368250  
SRR17520069. 6368252  
SRR17520069. 6368254  
SRR17520069. 6368256  
SRR17520069. 6368258  
SRR17520069. 6368260  
SRR17520069. 6368262  
SRR17520069. 6368264  
SRR17520069. 6368266  
SRR17520069. 6368270  
SRR17520069. 6368272  
SRR17520069. 6368274  
SRR17520069. 6368276  
SRR17520069. 6368278  
SRR17520069. 6368280  
SRR17520069. 6368282  
SRR17520069. 6368284  
SRR17520069. 6368286  
SRR17520069. 6368288  
SRR17520069. 6368294  
SRR17520069. 6368296  
SRR17520069. 6368302  
SRR17520069. 6375001  
SRR17520069. 6378038  
SRR17520069. 6378040  
SRR17520069. 6378042  
SRR17520069. 6378044  
SRR17520069. 6378046  
SRR17520069. 6378048  
SRR17520069. 6378050  
SRR17520069. 6378052  
SRR17520069. 6378054  
SRR17520069. 6378056  
SRR17520069. 6378058  
SRR17520069. 6378060

SRR17520069. 6378062  
SRR17520069. 6378064  
SRR17520069. 6378066  
SRR17520069. 6378068  
SRR17520069. 6378070  
SRR17520069. 6378072  
SRR17520069. 6378074  
SRR17520069. 6378076  
SRR17520069. 6378078  
SRR17520069. 6379755  
SRR17520069. 6379757  
SRR17520069. 6379759  
SRR17520069. 6379761  
SRR17520069. 6379763  
SRR17520069. 6379765  
SRR17520069. 6379767  
SRR17520069. 6379769  
SRR17520069. 6379771  
SRR17520069. 6379773  
SRR17520069. 6379775  
SRR17520069. 6379777  
SRR17520069. 6379779  
SRR17520069. 6379781  
SRR17520069. 6379783  
SRR17520069. 6379785  
SRR17520069. 6379787  
SRR17520069. 6379789  
SRR17520069. 6379791  
SRR17520069. 6379793  
SRR17520069. 6379795  
SRR17520069. 6379797  
SRR17520069. 6379799  
SRR17520069. 6379801  
SRR17520069. 6382158  
SRR17520069. 6382160  
SRR17520069. 6382162  
SRR17520069. 6382164  
SRR17520069. 6382166  
SRR17520069. 6382168  
SRR17520069. 6382170  
SRR17520069. 6382172  
SRR17520069. 6382174  
SRR17520069. 6382176  
SRR17520069. 6382180  
SRR17520069. 6382182  
SRR17520069. 6382184  
SRR17520069. 6382186

SRR17520069. 6382188  
SRR17520069. 6382192  
SRR17520069. 6382194  
SRR17520069. 6382196  
SRR17520069. 6382198  
SRR17520069. 6382200  
SRR17520069. 6382202  
SRR17520069. 6382204  
SRR17520069. 6382206  
SRR17520069. 6382208  
SRR17520069. 6382210  
SRR17520069. 6382212  
SRR17520069. 6382214  
SRR17520069. 6382216  
SRR17520069. 6382218  
SRR17520069. 6382220  
SRR17520069. 6382222  
SRR17520069. 6382224  
SRR17520069. 6382226  
SRR17520069. 6382228  
SRR17520069. 6382230  
SRR17520069. 6382232  
SRR17520069. 6382234  
SRR17520069. 6382236  
SRR17520069. 6382238  
SRR17520069. 6383710  
SRR17520069. 6383712  
SRR17520069. 6383714  
SRR17520069. 6383716  
SRR17520069. 6383718  
SRR17520069. 6383720  
SRR17520069. 6383722  
SRR17520069. 6383724  
SRR17520069. 6383726  
SRR17520069. 6387516  
SRR17520069. 6387518  
SRR17520069. 6387739  
SRR17520069. 6387741  
SRR17520069. 6387743  
SRR17520069. 6388294  
SRR17520069. 6389061  
SRR17520069. 6389063  
SRR17520069. 6389065  
SRR17520069. 6389067  
SRR17520069. 6389069  
SRR17520069. 6389071  
SRR17520069. 6389073

SRR17520069.6389075  
SRR17520069.6389077  
SRR17520069.6389079  
SRR17520069.6392324  
SRR17520069.6392326  
SRR17520069.6392328  
SRR17520069.6392330  
SRR17520069.6392332  
SRR17520069.6392334  
SRR17520069.6392336  
SRR17520069.6392338  
SRR17520069.6399262  
SRR17520069.6399264  
SRR17520069.6399266  
SRR17520069.6399917  
SRR17520069.6399919  
SRR17520069.6399921  
SRR17520069.6399923  
SRR17520069.6399925  
SRR17520069.6399927  
SRR17520069.6401957  
SRR17520069.6401959  
SRR17520069.6401961  
SRR17520069.6401963  
SRR17520069.6401965  
SRR17520069.6401967  
SRR17520069.6401969  
SRR17520069.6401971  
SRR17520069.6401975  
SRR17520069.6401977  
SRR17520069.6401981  
SRR17520069.6401983  
SRR17520069.6401985  
SRR17520069.6401987  
SRR17520069.6401989  
SRR17520069.6401991  
SRR17520069.6401993  
SRR17520069.6407889  
SRR17520069.6407891  
SRR17520069.6408108  
SRR17520069.6408110  
SRR17520069.6408112  
SRR17520069.6408114  
SRR17520069.6408493  
SRR17520069.6408495  
SRR17520069.6408497  
SRR17520069.6408499

SRR17520069.6408501  
SRR17520069.6408503  
SRR17520069.6408505  
SRR17520069.6408507  
SRR17520069.6408509  
SRR17520069.6408511  
SRR17520069.6408513  
SRR17520069.6408515  
SRR17520069.6408517  
SRR17520069.6408519  
SRR17520069.6408521  
SRR17520069.6408523  
SRR17520069.6408525  
SRR17520069.6408527  
SRR17520069.6408529  
SRR17520069.6408747  
SRR17520069.6414954  
SRR17520069.6419702  
SRR17520069.6419704  
SRR17520069.6421042  
SRR17520069.6421170  
SRR17520069.6421172  
SRR17520069.6421174  
SRR17520069.6421176  
SRR17520069.6421178  
SRR17520069.6421180  
SRR17520069.6421182  
SRR17520069.6421184  
SRR17520069.6421190  
SRR17520069.6421192  
SRR17520069.6421194  
SRR17520069.6421196  
SRR17520069.6421204  
SRR17520069.6421206  
SRR17520069.6428910  
SRR17520069.6428912  
SRR17520069.6428914  
SRR17520069.6428916  
SRR17520069.6428918  
SRR17520069.6429287  
SRR17520069.6429289  
SRR17520069.6438086  
SRR17520069.6438088  
SRR17520069.6438090  
SRR17520069.6438092  
SRR17520069.6438094  
SRR17520069.6443862

SRR17520069. 6443864  
SRR17520069. 6443866  
SRR17520069. 6446022  
SRR17520069. 6457928  
SRR17520069. 6463926  
SRR17520069. 6463928  
SRR17520069. 6463930  
SRR17520069. 6463934  
SRR17520069. 6463936  
SRR17520069. 6463938  
SRR17520069. 6463940  
SRR17520069. 6463942  
SRR17520069. 6463944  
SRR17520069. 6466423  
SRR17520069. 6466425  
SRR17520069. 6466427  
SRR17520069. 6466429  
SRR17520069. 6466431  
SRR17520069. 6466433  
SRR17520069. 6466435  
SRR17520069. 6466437  
SRR17520069. 6466439  
SRR17520069. 6466441  
SRR17520069. 6466443  
SRR17520069. 6466445  
SRR17520069. 6466447  
SRR17520069. 6466449  
SRR17520069. 6466451  
SRR17520069. 6466453  
SRR17520069. 6466455  
SRR17520069. 6466457  
SRR17520069. 6466459  
SRR17520069. 6466461  
SRR17520069. 6466463  
SRR17520069. 6466465  
SRR17520069. 6466467  
SRR17520069. 6466469  
SRR17520069. 6466471  
SRR17520069. 6466473  
SRR17520069. 6466475  
SRR17520069. 6466477  
SRR17520069. 6466479  
SRR17520069. 6466481  
SRR17520069. 6466483  
SRR17520069. 6466485  
SRR17520069. 6466487  
SRR17520069. 6466491

SRR17520069. 6466493  
SRR17520069. 6466495  
SRR17520069. 6466497  
SRR17520069. 6466499  
SRR17520069. 6466501  
SRR17520069. 6466503  
SRR17520069. 6466505  
SRR17520069. 6466507  
SRR17520069. 6466509  
SRR17520069. 6466511  
SRR17520069. 6466513  
SRR17520069. 6466515  
SRR17520069. 6466517  
SRR17520069. 6466519  
SRR17520069. 6466521  
SRR17520069. 6466523  
SRR17520069. 6466525  
SRR17520069. 6466527  
SRR17520069. 6466529  
SRR17520069. 6466531  
SRR17520069. 6466533  
SRR17520069. 6466535  
SRR17520069. 6466537  
SRR17520069. 6466539  
SRR17520069. 6466541  
SRR17520069. 6466543  
SRR17520069. 6466545  
SRR17520069. 6466547  
SRR17520069. 6466549  
SRR17520069. 6466551  
SRR17520069. 6466553  
SRR17520069. 6466555  
SRR17520069. 6466557  
SRR17520069. 6466559  
SRR17520069. 6466561  
SRR17520069. 6466563  
SRR17520069. 6466565  
SRR17520069. 6472814  
SRR17520069. 6472816  
SRR17520069. 6472818  
SRR17520069. 6472820  
SRR17520069. 6472824  
SRR17520069. 6472826  
SRR17520069. 6472828  
SRR17520069. 6472830  
SRR17520069. 6472834  
SRR17520069. 6472836



SRR17520069. 6472838  
SRR17520069. 6472840  
SRR17520069. 6472842  
SRR17520069. 6472844  
SRR17520069. 6472846  
SRR17520069. 6472848  
SRR17520069. 6472850  
SRR17520069. 6472852  
SRR17520069. 6472856  
SRR17520069. 6472858  
SRR17520069. 6472860  
SRR17520069. 6472862  
SRR17520069. 6472864  
SRR17520069. 6472866  
SRR17520069. 6472868  
SRR17520069. 6472870  
SRR17520069. 6472872  
SRR17520069. 6472876  
SRR17520069. 6472878  
SRR17520069. 6472880  
SRR17520069. 6472882  
SRR17520069. 6472884  
SRR17520069. 6479569  
SRR17520069. 6479571  
SRR17520069. 6479573  
SRR17520069. 6479575  
SRR17520069. 6480942  
SRR17520069. 6480944  
SRR17520069. 6480946  
SRR17520069. 6480950  
SRR17520069. 6480952  
SRR17520069. 6480954  
SRR17520069. 6480956  
SRR17520069. 6480958  
SRR17520069. 6482642  
SRR17520069. 6482644  
SRR17520069. 6482646  
SRR17520069. 6482648  
SRR17520069. 6482650  
SRR17520069. 6482652  
SRR17520069. 6482654  
SRR17520069. 6482656  
SRR17520069. 6482658  
SRR17520069. 6482660  
SRR17520069. 6482662  
SRR17520069. 6482664  
SRR17520069. 6482666

SRR17520069. 6482670  
SRR17520069. 6482672  
SRR17520069. 6482674  
SRR17520069. 6482676  
SRR17520069. 6482678  
SRR17520069. 6482682  
SRR17520069. 6482684  
SRR17520069. 6482686  
SRR17520069. 6482688  
SRR17520069. 6482690  
SRR17520069. 6482692  
SRR17520069. 6482694  
SRR17520069. 6482696  
SRR17520069. 6482698  
SRR17520069. 6482700  
SRR17520069. 6482702  
SRR17520069. 6482704  
SRR17520069. 6482706  
SRR17520069. 6482708  
SRR17520069. 6482710  
SRR17520069. 6482712  
SRR17520069. 6482714  
SRR17520069. 6482716  
SRR17520069. 6482718  
SRR17520069. 6482720  
SRR17520069. 6482722  
SRR17520069. 6482724  
SRR17520069. 6482726  
SRR17520069. 6482728  
SRR17520069. 6482730  
SRR17520069. 6482732  
SRR17520069. 6482734  
SRR17520069. 6482736  
SRR17520069. 6482738  
SRR17520069. 6482740  
SRR17520069. 6482742  
SRR17520069. 6482744  
SRR17520069. 6482746  
SRR17520069. 6482748  
SRR17520069. 6482750  
SRR17520069. 6482754  
SRR17520069. 6482756  
SRR17520069. 6482758  
SRR17520069. 6482760  
SRR17520069. 6482762  
SRR17520069. 6482764  
SRR17520069. 6482766

SRR17520069. 6482768  
SRR17520069. 6482770  
SRR17520069. 6482772  
SRR17520069. 6485737  
SRR17520069. 6485739  
SRR17520069. 6485741  
SRR17520069. 6485743  
SRR17520069. 6485745  
SRR17520069. 6485747  
SRR17520069. 6485749  
SRR17520069. 6485751  
SRR17520069. 6485753  
SRR17520069. 6485755  
SRR17520069. 6485757  
SRR17520069. 6485759  
SRR17520069. 6485761  
SRR17520069. 6485763  
SRR17520069. 6485765  
SRR17520069. 6485767  
SRR17520069. 6485769  
SRR17520069. 6485771  
SRR17520069. 6485775  
SRR17520069. 6485777  
SRR17520069. 6485779  
SRR17520069. 6485781  
SRR17520069. 6485783  
SRR17520069. 6485785  
SRR17520069. 6485787  
SRR17520069. 6485789  
SRR17520069. 6485791  
SRR17520069. 6485793  
SRR17520069. 6485795  
SRR17520069. 6485797  
SRR17520069. 6485799  
SRR17520069. 6485801  
SRR17520069. 6485803  
SRR17520069. 6485805  
SRR17520069. 6485807  
SRR17520069. 6485809  
SRR17520069. 6485811  
SRR17520069. 6485813  
SRR17520069. 6499576  
SRR17520069. 6499578  
SRR17520069. 6499580  
SRR17520069. 6499582  
SRR17520069. 6499584  
SRR17520069. 6499588

SRR17520069.6499653  
SRR17520069.6505287  
SRR17520069.6505289  
SRR17520069.6505293  
SRR17520069.6505601  
SRR17520069.6508840  
SRR17520069.6508842  
SRR17520069.6510819  
SRR17520069.6510821  
SRR17520069.6510823  
SRR17520069.6510825  
SRR17520069.6510827  
SRR17520069.6510829  
SRR17520069.6511911  
SRR17520069.6517397  
SRR17520069.6517399  
SRR17520069.6517401  
SRR17520069.6517403  
SRR17520069.6517405  
SRR17520069.6517407  
SRR17520069.6517409  
SRR17520069.6517411  
SRR17520069.6517413  
SRR17520069.6517415  
SRR17520069.6517417  
SRR17520069.6517419  
SRR17520069.6517421  
SRR17520069.6517423  
SRR17520069.6518369  
SRR17520069.6527529  
SRR17520069.6527531  
SRR17520069.6527533  
SRR17520069.6527535  
SRR17520069.6527537  
SRR17520069.6527539  
SRR17520069.6527541  
SRR17520069.6527543  
SRR17520069.6538600  
SRR17520069.6538602  
SRR17520069.6538604  
SRR17520069.6538606  
SRR17520069.6538608  
SRR17520069.6538610  
SRR17520069.6538614  
SRR17520069.6538618  
SRR17520069.6538624  
SRR17520069.6538626

SRR17520069. 6538628  
SRR17520069. 6538630  
SRR17520069. 6538632  
SRR17520069. 6538634  
SRR17520069. 6538636  
SRR17520069. 6538642  
SRR17520069. 6538644  
SRR17520069. 6538646  
SRR17520069. 6538648  
SRR17520069. 6538650  
SRR17520069. 6540332  
SRR17520069. 6540334  
SRR17520069. 6540336  
SRR17520069. 6540338  
SRR17520069. 6540340  
SRR17520069. 6540342  
SRR17520069. 6540346  
SRR17520069. 6540348  
SRR17520069. 6540350  
SRR17520069. 6540352  
SRR17520069. 6540354  
SRR17520069. 6540356  
SRR17520069. 6545514  
SRR17520069. 6545516  
SRR17520069. 6545518  
SRR17520069. 6551425  
SRR17520069. 6554166  
SRR17520069. 6557154  
SRR17520069. 6557156  
SRR17520069. 6557158  
SRR17520069. 6557160  
SRR17520069. 6557162  
SRR17520069. 6557164  
SRR17520069. 6557166  
SRR17520069. 6557168  
SRR17520069. 6557170  
SRR17520069. 6557172  
SRR17520069. 6557174  
SRR17520069. 6557176  
SRR17520069. 6557178  
SRR17520069. 6557180  
SRR17520069. 6557182  
SRR17520069. 6557184  
SRR17520069. 6557186  
SRR17520069. 6557188  
SRR17520069. 6557190  
SRR17520069. 6557192

SRR17520069.6557194  
SRR17520069.6557196  
SRR17520069.6557198  
SRR17520069.6557200  
SRR17520069.6557202  
SRR17520069.6557204  
SRR17520069.6557206  
SRR17520069.6557208  
SRR17520069.6557210  
SRR17520069.6557212  
SRR17520069.6557214  
SRR17520069.6557216  
SRR17520069.6557218  
SRR17520069.6557220  
SRR17520069.6557222  
SRR17520069.6557224  
SRR17520069.6557226  
SRR17520069.6557228  
SRR17520069.6557230  
SRR17520069.6557232  
SRR17520069.6557234  
SRR17520069.6557236  
SRR17520069.6557238  
SRR17520069.6557240  
SRR17520069.6557242  
SRR17520069.6557244  
SRR17520069.6557246  
SRR17520069.6557248  
SRR17520069.6557250  
SRR17520069.6557252  
SRR17520069.6557254  
SRR17520069.6557256  
SRR17520069.6557258  
SRR17520069.6557260  
SRR17520069.6557262  
SRR17520069.6557264  
SRR17520069.6557266  
SRR17520069.6557268  
SRR17520069.6557270  
SRR17520069.6557272  
SRR17520069.6557274  
SRR17520069.6557276  
SRR17520069.6558940  
SRR17520069.6558942  
SRR17520069.6558944  
SRR17520069.6561793  
SRR17520069.6561795

SRR17520069.6561797  
SRR17520069.6561799  
SRR17520069.6561801  
SRR17520069.6564882  
SRR17520069.6564884  
SRR17520069.6564886  
SRR17520069.6564888  
SRR17520069.6564890  
SRR17520069.6564892  
SRR17520069.6564894  
SRR17520069.6564896  
SRR17520069.6564898  
SRR17520069.6564900  
SRR17520069.6564902  
SRR17520069.6564904  
SRR17520069.6564906  
SRR17520069.6565298  
SRR17520069.6565300  
SRR17520069.6565302  
SRR17520069.6565304  
SRR17520069.6565306  
SRR17520069.6565308  
SRR17520069.6565310  
SRR17520069.6565312  
SRR17520069.6565314  
SRR17520069.6565316  
SRR17520069.6565318  
SRR17520069.6565320  
SRR17520069.6565322  
SRR17520069.6565324  
SRR17520069.6565326  
SRR17520069.6565328  
SRR17520069.6565330  
SRR17520069.6565332  
SRR17520069.6565334  
SRR17520069.6565336  
SRR17520069.6565338  
SRR17520069.6565340  
SRR17520069.6565342  
SRR17520069.6565346  
SRR17520069.6565348  
SRR17520069.6565350  
SRR17520069.6565352  
SRR17520069.6565354  
SRR17520069.6565356  
SRR17520069.6565358  
SRR17520069.6565360

SRR17520069. 6565362  
SRR17520069. 6565364  
SRR17520069. 6565366  
SRR17520069. 6565368  
SRR17520069. 6565372  
SRR17520069. 6565376  
SRR17520069. 6565378  
SRR17520069. 6565380  
SRR17520069. 6565382  
SRR17520069. 6565384  
SRR17520069. 6565386  
SRR17520069. 6565388  
SRR17520069. 6565390  
SRR17520069. 6565392  
SRR17520069. 6565394  
SRR17520069. 6565396  
SRR17520069. 6565398  
SRR17520069. 6565400  
SRR17520069. 6565402  
SRR17520069. 6565404  
SRR17520069. 6565406  
SRR17520069. 6565408  
SRR17520069. 6565410  
SRR17520069. 6565412  
SRR17520069. 6565414  
SRR17520069. 6565416  
SRR17520069. 6565418  
SRR17520069. 6565420  
SRR17520069. 6565422  
SRR17520069. 6565424  
SRR17520069. 6565426  
SRR17520069. 6565428  
SRR17520069. 6565430  
SRR17520069. 6573949  
SRR17520069. 6573951  
SRR17520069. 6573953  
SRR17520069. 6573955  
SRR17520069. 6573957  
SRR17520069. 6573959  
SRR17520069. 6573961  
SRR17520069. 6573963  
SRR17520069. 6573965  
SRR17520069. 6573967  
SRR17520069. 6573969  
SRR17520069. 6573971  
SRR17520069. 6573973  
SRR17520069. 6573975



SRR17520069. 6573977  
SRR17520069. 6573979  
SRR17520069. 6573981  
SRR17520069. 6573983  
SRR17520069. 6573985  
SRR17520069. 6573987  
SRR17520069. 6573989  
SRR17520069. 6573991  
SRR17520069. 6573993  
SRR17520069. 6573995  
SRR17520069. 6573997  
SRR17520069. 6573999  
SRR17520069. 6574001  
SRR17520069. 6574003  
SRR17520069. 6574005  
SRR17520069. 6574007  
SRR17520069. 6574009  
SRR17520069. 6574011  
SRR17520069. 6574015  
SRR17520069. 6574017  
SRR17520069. 6574019  
SRR17520069. 6574021  
SRR17520069. 6574025  
SRR17520069. 6574027  
SRR17520069. 6574029  
SRR17520069. 6574031  
SRR17520069. 6574033  
SRR17520069. 6574035  
SRR17520069. 6574037  
SRR17520069. 6574039  
SRR17520069. 6574041  
SRR17520069. 6574043  
SRR17520069. 6574045  
SRR17520069. 6574047  
SRR17520069. 6574049  
SRR17520069. 6574051  
SRR17520069. 6574053  
SRR17520069. 6574055  
SRR17520069. 6574057  
SRR17520069. 6574059  
SRR17520069. 6574061  
SRR17520069. 6574063  
SRR17520069. 6574065  
SRR17520069. 6574067  
SRR17520069. 6574069  
SRR17520069. 6574071  
SRR17520069. 6574073

SRR17520069. 6574075  
SRR17520069. 6574077  
SRR17520069. 6574079  
SRR17520069. 6574081  
SRR17520069. 6574083  
SRR17520069. 6574085  
SRR17520069. 6574087  
SRR17520069. 6574089  
SRR17520069. 6574091  
SRR17520069. 6574093  
SRR17520069. 6574095  
SRR17520069. 6574097  
SRR17520069. 6574099  
SRR17520069. 6574101  
SRR17520069. 6574103  
SRR17520069. 6574105  
SRR17520069. 6574107  
SRR17520069. 6574111  
SRR17520069. 6574113  
SRR17520069. 6574115  
SRR17520069. 6574117  
SRR17520069. 6574119  
SRR17520069. 6577901  
SRR17520069. 6577903  
SRR17520069. 6577905  
SRR17520069. 6577907  
SRR17520069. 6577909  
SRR17520069. 6577911  
SRR17520069. 6577913  
SRR17520069. 6577915  
SRR17520069. 6577917  
SRR17520069. 6577919  
SRR17520069. 6577921  
SRR17520069. 6578640  
SRR17520069. 6578642  
SRR17520069. 6578644  
SRR17520069. 6578646  
SRR17520069. 6578648  
SRR17520069. 6578650  
SRR17520069. 6578652  
SRR17520069. 6578654  
SRR17520069. 6578656  
SRR17520069. 6578658  
SRR17520069. 6578660  
SRR17520069. 6578662  
SRR17520069. 6578664  
SRR17520069. 6578666

SRR17520069. 6578668  
SRR17520069. 6578670  
SRR17520069. 6578672  
SRR17520069. 6578674  
SRR17520069. 6578676  
SRR17520069. 6578678  
SRR17520069. 6578687  
SRR17520069. 6578689  
SRR17520069. 6578691  
SRR17520069. 6578693  
SRR17520069. 6578695  
SRR17520069. 6578697  
SRR17520069. 6578699  
SRR17520069. 6578701  
SRR17520069. 6578703  
SRR17520069. 6578705  
SRR17520069. 6578709  
SRR17520069. 6578711  
SRR17520069. 6578713  
SRR17520069. 6578715  
SRR17520069. 6578719  
SRR17520069. 6578721  
SRR17520069. 6578723  
SRR17520069. 6578725  
SRR17520069. 6578727  
SRR17520069. 6578729  
SRR17520069. 6578731  
SRR17520069. 6578733  
SRR17520069. 6578735  
SRR17520069. 6578737  
SRR17520069. 6578739  
SRR17520069. 6578741  
SRR17520069. 6578743  
SRR17520069. 6578745  
SRR17520069. 6578747  
SRR17520069. 6578749  
SRR17520069. 6578751  
SRR17520069. 6578753  
SRR17520069. 6578755  
SRR17520069. 6578757  
SRR17520069. 6578759  
SRR17520069. 6578761  
SRR17520069. 6578763  
SRR17520069. 6578767  
SRR17520069. 6578769  
SRR17520069. 6578771  
SRR17520069. 6578773

SRR17520069.6578775  
SRR17520069.6578777  
SRR17520069.6578779  
SRR17520069.6578781  
SRR17520069.6578783  
SRR17520069.6578785  
SRR17520069.6578787  
SRR17520069.6578791  
SRR17520069.6578793  
SRR17520069.6578797  
SRR17520069.6578799  
SRR17520069.6578801  
SRR17520069.6578803  
SRR17520069.6579268  
SRR17520069.6579270  
SRR17520069.6579272  
SRR17520069.6579274  
SRR17520069.6579276  
SRR17520069.6579278  
SRR17520069.6588604  
SRR17520069.6588606  
SRR17520069.6589312  
SRR17520069.6589314  
SRR17520069.6589316  
SRR17520069.6589318  
SRR17520069.6589320  
SRR17520069.6589324  
SRR17520069.6589326  
SRR17520069.6589328  
SRR17520069.6589330  
SRR17520069.6589332  
SRR17520069.6589334  
SRR17520069.6597156  
SRR17520069.6597158  
SRR17520069.6598058  
SRR17520069.6598060  
SRR17520069.6598062  
SRR17520069.6598064  
SRR17520069.6598066  
SRR17520069.6598068  
SRR17520069.6598070  
SRR17520069.6598072  
SRR17520069.6598074  
SRR17520069.6598076  
SRR17520069.6598078  
SRR17520069.6598080  
SRR17520069.6598082

SRR17520069.6598084  
SRR17520069.6598088  
SRR17520069.6598090  
SRR17520069.6598092  
SRR17520069.6598094  
SRR17520069.6598100  
SRR17520069.6598102  
SRR17520069.6599742  
SRR17520069.6599744  
SRR17520069.6599746  
SRR17520069.6599748  
SRR17520069.6599750  
SRR17520069.6613089  
SRR17520069.6613091  
SRR17520069.6613093  
SRR17520069.6613095  
SRR17520069.6613097  
SRR17520069.6613099  
SRR17520069.6615101  
SRR17520069.6615103  
SRR17520069.6615105  
SRR17520069.6615107  
SRR17520069.6615109  
SRR17520069.6615111  
SRR17520069.6615113  
SRR17520069.6615115  
SRR17520069.6615117  
SRR17520069.6615119  
SRR17520069.6615121  
SRR17520069.6615123  
SRR17520069.6615125  
SRR17520069.6615129  
SRR17520069.6615131  
SRR17520069.6615133  
SRR17520069.6622700  
SRR17520069.6632162  
SRR17520069.6632164  
SRR17520069.6632166  
SRR17520069.6632168  
SRR17520069.6632170  
SRR17520069.6632172  
SRR17520069.6632174  
SRR17520069.6632176  
SRR17520069.6632178  
SRR17520069.6632180  
SRR17520069.6632182  
SRR17520069.6632184

SRR17520069.6632186  
SRR17520069.6632188  
SRR17520069.6632190  
SRR17520069.6632316  
SRR17520069.6632318  
SRR17520069.6632320  
SRR17520069.6632326  
SRR17520069.6632328  
SRR17520069.6632330  
SRR17520069.6632332  
SRR17520069.6632334  
SRR17520069.6632336  
SRR17520069.6632338  
SRR17520069.6632340  
SRR17520069.6632342  
SRR17520069.6632344  
SRR17520069.6632346  
SRR17520069.6632348  
SRR17520069.6632350  
SRR17520069.6632352  
SRR17520069.6632354  
SRR17520069.6632356  
SRR17520069.6632358  
SRR17520069.6632362  
SRR17520069.6632364  
SRR17520069.6632366  
SRR17520069.6632368  
SRR17520069.6632370  
SRR17520069.6632372  
SRR17520069.6632374  
SRR17520069.6632376  
SRR17520069.6632378  
SRR17520069.6632380  
SRR17520069.6632382  
SRR17520069.6632384  
SRR17520069.6632386  
SRR17520069.6632388  
SRR17520069.6632390  
SRR17520069.6632392  
SRR17520069.6632394  
SRR17520069.6632396  
SRR17520069.6632398  
SRR17520069.6632400  
SRR17520069.6634450  
SRR17520069.6634452  
SRR17520069.6634454  
SRR17520069.6634456

SRR17520069. 6634458  
SRR17520069. 6634460  
SRR17520069. 6634462  
SRR17520069. 6634464  
SRR17520069. 6634466  
SRR17520069. 6634468  
SRR17520069. 6634470  
SRR17520069. 6634472  
SRR17520069. 6634474  
SRR17520069. 6634476  
SRR17520069. 6634478  
SRR17520069. 6634480  
SRR17520069. 6634482  
SRR17520069. 6634484  
SRR17520069. 6636041  
SRR17520069. 6636043  
SRR17520069. 6636045  
SRR17520069. 6636047  
SRR17520069. 6636049  
SRR17520069. 6636051  
SRR17520069. 6636053  
SRR17520069. 6636055  
SRR17520069. 6636057  
SRR17520069. 6636059  
SRR17520069. 6636061  
SRR17520069. 6636063  
SRR17520069. 6636065  
SRR17520069. 6636067  
SRR17520069. 6636069  
SRR17520069. 6636071  
SRR17520069. 6636073  
SRR17520069. 6636075  
SRR17520069. 6636077  
SRR17520069. 6636079  
SRR17520069. 6636081  
SRR17520069. 6636083  
SRR17520069. 6636085  
SRR17520069. 6636087  
SRR17520069. 6636089  
SRR17520069. 6636095  
SRR17520069. 6636097  
SRR17520069. 6636099  
SRR17520069. 6636101  
SRR17520069. 6636103  
SRR17520069. 6636105  
SRR17520069. 6636107  
SRR17520069. 6636109

SRR17520069. 6636111  
SRR17520069. 6636113  
SRR17520069. 6636115  
SRR17520069. 6636117  
SRR17520069. 6636119  
SRR17520069. 6636121  
SRR17520069. 6636123  
SRR17520069. 6636125  
SRR17520069. 6636127  
SRR17520069. 6636129  
SRR17520069. 6636131  
SRR17520069. 6636133  
SRR17520069. 6636135  
SRR17520069. 6636137  
SRR17520069. 6636139  
SRR17520069. 6636141  
SRR17520069. 6636143  
SRR17520069. 6638328  
SRR17520069. 6638330  
SRR17520069. 6638332  
SRR17520069. 6640582  
SRR17520069. 6640584  
SRR17520069. 6640586  
SRR17520069. 6640588  
SRR17520069. 6640590  
SRR17520069. 6640592  
SRR17520069. 6640594  
SRR17520069. 6640596  
SRR17520069. 6640598  
SRR17520069. 6640600  
SRR17520069. 6640602  
SRR17520069. 6640604  
SRR17520069. 6640606  
SRR17520069. 6640608  
SRR17520069. 6640610  
SRR17520069. 6640612  
SRR17520069. 6640614  
SRR17520069. 6640616  
SRR17520069. 6640618  
SRR17520069. 6640620  
SRR17520069. 6640622  
SRR17520069. 6640624  
SRR17520069. 6640626  
SRR17520069. 6640628  
SRR17520069. 6640630  
SRR17520069. 6640632  
SRR17520069. 6640634



SRR17520069.6640636  
SRR17520069.6640638  
SRR17520069.6643611  
SRR17520069.6643613  
SRR17520069.6643615  
SRR17520069.6643617  
SRR17520069.6643619  
SRR17520069.6643621  
SRR17520069.6643623  
SRR17520069.6643625  
SRR17520069.6643627  
SRR17520069.6643629  
SRR17520069.6643631  
SRR17520069.6643633  
SRR17520069.6643635  
SRR17520069.6643637  
SRR17520069.6643639  
SRR17520069.6643641  
SRR17520069.6643643  
SRR17520069.6643645  
SRR17520069.6643647  
SRR17520069.6643649  
SRR17520069.6643651  
SRR17520069.6643653  
SRR17520069.6643655  
SRR17520069.6643657  
SRR17520069.6643661  
SRR17520069.6643663  
SRR17520069.6643665  
SRR17520069.6643667  
SRR17520069.6643669  
SRR17520069.6643671  
SRR17520069.6643673  
SRR17520069.6643675  
SRR17520069.6643677  
SRR17520069.6644946  
SRR17520069.6644948  
SRR17520069.6644952  
SRR17520069.6644954  
SRR17520069.6644956  
SRR17520069.6644958  
SRR17520069.6644960  
SRR17520069.6644962  
SRR17520069.6644964  
SRR17520069.6644966  
SRR17520069.6644970  
SRR17520069.6644972

SRR17520069.6644974  
SRR17520069.6644976  
SRR17520069.6644978  
SRR17520069.6644980  
SRR17520069.6644982  
SRR17520069.6644986  
SRR17520069.6644988  
SRR17520069.6644990  
SRR17520069.6644992  
SRR17520069.6646806  
SRR17520069.6646810  
SRR17520069.6646812  
SRR17520069.6648818  
SRR17520069.6648820  
SRR17520069.6648822  
SRR17520069.6648824  
SRR17520069.6648826  
SRR17520069.6648828  
SRR17520069.6648830  
SRR17520069.6648832  
SRR17520069.6648834  
SRR17520069.6648836  
SRR17520069.6648838  
SRR17520069.6648840  
SRR17520069.6648842  
SRR17520069.6648844  
SRR17520069.6648846  
SRR17520069.6648848  
SRR17520069.6648850  
SRR17520069.6648852  
SRR17520069.6648854  
SRR17520069.6648856  
SRR17520069.6648858  
SRR17520069.6648860  
SRR17520069.6648862  
SRR17520069.6648864  
SRR17520069.6648866  
SRR17520069.6648868  
SRR17520069.6648870  
SRR17520069.6648872  
SRR17520069.6648874  
SRR17520069.6648876  
SRR17520069.6648878  
SRR17520069.6648880  
SRR17520069.6648882  
SRR17520069.6648884  
SRR17520069.6648886

SRR17520069.6648888  
SRR17520069.6648890  
SRR17520069.6648892  
SRR17520069.6648894  
SRR17520069.6648896  
SRR17520069.6657668  
SRR17520069.6657670  
SRR17520069.6657672  
SRR17520069.6657674  
SRR17520069.6657676  
SRR17520069.6657678  
SRR17520069.6657682  
SRR17520069.6657684  
SRR17520069.6657686  
SRR17520069.6657688  
SRR17520069.6657690  
SRR17520069.6657692  
SRR17520069.6657694  
SRR17520069.6657696  
SRR17520069.6657698  
SRR17520069.6657700  
SRR17520069.6657702  
SRR17520069.6657704  
SRR17520069.6657706  
SRR17520069.6657708  
SRR17520069.6657710  
SRR17520069.6657712  
SRR17520069.6657714  
SRR17520069.6657716  
SRR17520069.6657718  
SRR17520069.6657720  
SRR17520069.6657722  
SRR17520069.6657724  
SRR17520069.6657726  
SRR17520069.6657728  
SRR17520069.6657730  
SRR17520069.6657732  
SRR17520069.6657736  
SRR17520069.6657740  
SRR17520069.6657742  
SRR17520069.6657744  
SRR17520069.6657748  
SRR17520069.6657750  
SRR17520069.6657754  
SRR17520069.6657756  
SRR17520069.6657758  
SRR17520069.6657760

SRR17520069.6657762  
SRR17520069.6657764  
SRR17520069.6657766  
SRR17520069.6657770  
SRR17520069.6660073  
SRR17520069.6660075  
SRR17520069.6660077  
SRR17520069.6660079  
SRR17520069.6660081  
SRR17520069.6660083  
SRR17520069.6660966  
SRR17520069.6665942  
SRR17520069.6665944  
SRR17520069.6665948  
SRR17520069.6665950  
SRR17520069.6665952  
SRR17520069.6665954  
SRR17520069.6665956  
SRR17520069.6665958  
SRR17520069.6665960  
SRR17520069.6665962  
SRR17520069.6665964  
SRR17520069.6665966  
SRR17520069.6665968  
SRR17520069.6665970  
SRR17520069.6665972  
SRR17520069.6665974  
SRR17520069.6665976  
SRR17520069.6665978  
SRR17520069.6665980  
SRR17520069.6665982  
SRR17520069.6665984  
SRR17520069.6665986  
SRR17520069.6665988  
SRR17520069.6665990  
SRR17520069.6665992  
SRR17520069.6665994  
SRR17520069.6665996  
SRR17520069.6665998  
SRR17520069.6666000  
SRR17520069.6666002  
SRR17520069.6666004  
SRR17520069.6666006  
SRR17520069.6666008  
SRR17520069.6666010  
SRR17520069.6666012  
SRR17520069.6666014

SRR17520069.6666016  
SRR17520069.6666018  
SRR17520069.6666026  
SRR17520069.6666028  
SRR17520069.6666034  
SRR17520069.6666038  
SRR17520069.6666040  
SRR17520069.6666042  
SRR17520069.6666044  
SRR17520069.6666050  
SRR17520069.6666052  
SRR17520069.6666054  
SRR17520069.6666066  
SRR17520069.6666068  
SRR17520069.6666072  
SRR17520069.6666074  
SRR17520069.6666078  
SRR17520069.6666080  
SRR17520069.6666082  
SRR17520069.6666084  
SRR17520069.6666087  
SRR17520069.6672889  
SRR17520069.6672893  
SRR17520069.6672895  
SRR17520069.6672897  
SRR17520069.6672899  
SRR17520069.6672901  
SRR17520069.6672903  
SRR17520069.6672907  
SRR17520069.6672909  
SRR17520069.6672911  
SRR17520069.6672913  
SRR17520069.6672915  
SRR17520069.6672917  
SRR17520069.6672921  
SRR17520069.6672923  
SRR17520069.6677502  
SRR17520069.6677504  
SRR17520069.6677506  
SRR17520069.6677508  
SRR17520069.6678569  
SRR17520069.6679341  
SRR17520069.6679343  
SRR17520069.6679345  
SRR17520069.6685420  
SRR17520069.6685422  
SRR17520069.6685424

SRR17520069. 6685426  
SRR17520069. 6685829  
SRR17520069. 6685831  
SRR17520069. 6685833  
SRR17520069. 6685835  
SRR17520069. 6685837  
SRR17520069. 6685839  
SRR17520069. 6685841  
SRR17520069. 6685843  
SRR17520069. 6685845  
SRR17520069. 6685847  
SRR17520069. 6685849  
SRR17520069. 6685851  
SRR17520069. 6685853  
SRR17520069. 6685855  
SRR17520069. 6685857  
SRR17520069. 6685859  
SRR17520069. 6685861  
SRR17520069. 6685863  
SRR17520069. 6685865  
SRR17520069. 6685869  
SRR17520069. 6685871  
SRR17520069. 6685873  
SRR17520069. 6685875  
SRR17520069. 6685877  
SRR17520069. 6686535  
SRR17520069. 6686537  
SRR17520069. 6689756  
SRR17520069. 6689758  
SRR17520069. 6689760  
SRR17520069. 6689762  
SRR17520069. 6689764  
SRR17520069. 6691490  
SRR17520069. 6691494  
SRR17520069. 6691496  
SRR17520069. 6691498  
SRR17520069. 6691500  
SRR17520069. 6691502  
SRR17520069. 6691504  
SRR17520069. 6691506  
SRR17520069. 6691512  
SRR17520069. 6700650  
SRR17520069. 6700652  
SRR17520069. 6700654  
SRR17520069. 6700656  
SRR17520069. 6700658  
SRR17520069. 6701431

SRR17520069.6701433  
SRR17520069.6701435  
SRR17520069.6701437  
SRR17520069.6701439  
SRR17520069.6701441  
SRR17520069.6701443  
SRR17520069.6701445  
SRR17520069.6701447  
SRR17520069.6701449  
SRR17520069.6701451  
SRR17520069.6701455  
SRR17520069.6701457  
SRR17520069.6701459  
SRR17520069.6701461  
SRR17520069.6701463  
SRR17520069.6701465  
SRR17520069.6701469  
SRR17520069.6701471  
SRR17520069.6701475  
SRR17520069.6701477  
SRR17520069.6701479  
SRR17520069.6701481  
SRR17520069.6701483  
SRR17520069.6701485  
SRR17520069.6701487  
SRR17520069.6701489  
SRR17520069.6701491  
SRR17520069.6701493  
SRR17520069.6701495  
SRR17520069.6701497  
SRR17520069.6701499  
SRR17520069.6701501  
SRR17520069.6701503  
SRR17520069.6701505  
SRR17520069.6710153  
SRR17520069.6710155  
SRR17520069.6710159  
SRR17520069.6711899  
SRR17520069.6711901  
SRR17520069.6711903  
SRR17520069.6711905  
SRR17520069.6712703  
SRR17520069.6712705  
SRR17520069.6712707  
SRR17520069.6712709  
SRR17520069.6712713  
SRR17520069.6712715

SRR17520069.6712717  
SRR17520069.6712719  
SRR17520069.6712721  
SRR17520069.6712723  
SRR17520069.6712725  
SRR17520069.6721591  
SRR17520069.6721593  
SRR17520069.6721595  
SRR17520069.6721597  
SRR17520069.6721599  
SRR17520069.6721601  
SRR17520069.6721603  
SRR17520069.6721605  
SRR17520069.6721607  
SRR17520069.6721609  
SRR17520069.6730184  
SRR17520069.6730186  
SRR17520069.6730188  
SRR17520069.6730190  
SRR17520069.6730192  
SRR17520069.6730194  
SRR17520069.6730196  
SRR17520069.6744511  
SRR17520069.6744513  
SRR17520069.6744515  
SRR17520069.6744519  
SRR17520069.6744521  
SRR17520069.6744523  
SRR17520069.6744525  
SRR17520069.6744527  
SRR17520069.6744529  
SRR17520069.6744531  
SRR17520069.6744533  
SRR17520069.6744535  
SRR17520069.6744537  
SRR17520069.6744539  
SRR17520069.6744541  
SRR17520069.6744543  
SRR17520069.6744545  
SRR17520069.6744547  
SRR17520069.6744549  
SRR17520069.6744551  
SRR17520069.6744553  
SRR17520069.6744555  
SRR17520069.6744557  
SRR17520069.6744559  
SRR17520069.6744561



SRR17520069. 6744563  
SRR17520069. 6744565  
SRR17520069. 6744567  
SRR17520069. 6744569  
SRR17520069. 6744571  
SRR17520069. 6744573  
SRR17520069. 6744575  
SRR17520069. 6744577  
SRR17520069. 6744579  
SRR17520069. 6744581  
SRR17520069. 6744583  
SRR17520069. 6744585  
SRR17520069. 6752371  
SRR17520069. 6752373  
SRR17520069. 6752375  
SRR17520069. 6752377  
SRR17520069. 6752379  
SRR17520069. 6762429  
SRR17520069. 6762431  
SRR17520069. 6768525  
SRR17520069. 6768527  
SRR17520069. 6768529  
SRR17520069. 6768531  
SRR17520069. 6768533  
SRR17520069. 6768535  
SRR17520069. 6768537  
SRR17520069. 6768539  
SRR17520069. 6768541  
SRR17520069. 6768543  
SRR17520069. 6768545  
SRR17520069. 6768547  
SRR17520069. 6768549  
SRR17520069. 6768553  
SRR17520069. 6768555  
SRR17520069. 6768557  
SRR17520069. 6768561  
SRR17520069. 6768563  
SRR17520069. 6768565  
SRR17520069. 6768567  
SRR17520069. 6768569  
SRR17520069. 6768571  
SRR17520069. 6768573  
SRR17520069. 6768575  
SRR17520069. 6768577  
SRR17520069. 6768579  
SRR17520069. 6768581  
SRR17520069. 6768583

SRR17520069. 6768585  
SRR17520069. 6768587  
SRR17520069. 6768589  
SRR17520069. 6768591  
SRR17520069. 6768593  
SRR17520069. 6768595  
SRR17520069. 6768597  
SRR17520069. 6768599  
SRR17520069. 6768601  
SRR17520069. 6768603  
SRR17520069. 6768605  
SRR17520069. 6768607  
SRR17520069. 6768609  
SRR17520069. 6768611  
SRR17520069. 6768613  
SRR17520069. 6768615  
SRR17520069. 6768619  
SRR17520069. 6768621  
SRR17520069. 6768623  
SRR17520069. 6768625  
SRR17520069. 6768627  
SRR17520069. 6768629  
SRR17520069. 6768631  
SRR17520069. 6768639  
SRR17520069. 6768641  
SRR17520069. 6768643  
SRR17520069. 6768645  
SRR17520069. 6768647  
SRR17520069. 6768649  
SRR17520069. 6768651  
SRR17520069. 6768653  
SRR17520069. 6768655  
SRR17520069. 6768657  
SRR17520069. 6768659  
SRR17520069. 6768661  
SRR17520069. 6768663  
SRR17520069. 6768665  
SRR17520069. 6768667  
SRR17520069. 6768669  
SRR17520069. 6768671  
SRR17520069. 6768673  
SRR17520069. 6768675  
SRR17520069. 6768677  
SRR17520069. 6768679  
SRR17520069. 6768681  
SRR17520069. 6768683  
SRR17520069. 6768685

SRR17520069. 6768687  
SRR17520069. 6768689  
SRR17520069. 6768691  
SRR17520069. 6768693  
SRR17520069. 6768695  
SRR17520069. 6768697  
SRR17520069. 6768699  
SRR17520069. 6768701  
SRR17520069. 6768703  
SRR17520069. 6768705  
SRR17520069. 6768707  
SRR17520069. 6768709  
SRR17520069. 6768711  
SRR17520069. 6768713  
SRR17520069. 6768715  
SRR17520069. 6768719  
SRR17520069. 6768721  
SRR17520069. 6768723  
SRR17520069. 6768725  
SRR17520069. 6768727  
SRR17520069. 6768729  
SRR17520069. 6768731  
SRR17520069. 6768733  
SRR17520069. 6768735  
SRR17520069. 6768737  
SRR17520069. 6768739  
SRR17520069. 6768741  
SRR17520069. 6768743  
SRR17520069. 6768745  
SRR17520069. 6768747  
SRR17520069. 6768749  
SRR17520069. 6768751  
SRR17520069. 6768753  
SRR17520069. 6768755  
SRR17520069. 6768757  
SRR17520069. 6768759  
SRR17520069. 6768761  
SRR17520069. 6768763  
SRR17520069. 6768765  
SRR17520069. 6768767  
SRR17520069. 6768769  
SRR17520069. 6768771  
SRR17520069. 6768775  
SRR17520069. 6768777  
SRR17520069. 6768779  
SRR17520069. 6771672  
SRR17520069. 6780205

SRR17520069.6780207  
SRR17520069.6780209  
SRR17520069.6780211  
SRR17520069.6780213  
SRR17520069.6780321  
SRR17520069.6780323  
SRR17520069.6780325  
SRR17520069.6780327  
SRR17520069.6780329  
SRR17520069.6780331  
SRR17520069.6780333  
SRR17520069.6780335  
SRR17520069.6780337  
SRR17520069.6780339  
SRR17520069.6780341  
SRR17520069.6780343  
SRR17520069.6780345  
SRR17520069.6780347  
SRR17520069.6780349  
SRR17520069.6780351  
SRR17520069.6780353  
SRR17520069.6780355  
SRR17520069.6780357  
SRR17520069.6780359  
SRR17520069.6780361  
SRR17520069.6780363  
SRR17520069.6780365  
SRR17520069.6780367  
SRR17520069.6780369  
SRR17520069.6780371  
SRR17520069.6780373  
SRR17520069.6780375  
SRR17520069.6780377  
SRR17520069.6780379  
SRR17520069.6780381  
SRR17520069.6780383  
SRR17520069.6780385  
SRR17520069.6780387  
SRR17520069.6780389  
SRR17520069.6780391  
SRR17520069.6780393  
SRR17520069.6780395  
SRR17520069.6780397  
SRR17520069.6780399  
SRR17520069.6783037  
SRR17520069.6783039  
SRR17520069.6783041

SRR17520069.6784326  
SRR17520069.6784330  
SRR17520069.6784332  
SRR17520069.6784334  
SRR17520069.6784336  
SRR17520069.6784338  
SRR17520069.6784340  
SRR17520069.6784342  
SRR17520069.6784344  
SRR17520069.6784346  
SRR17520069.6785052  
SRR17520069.6785054  
SRR17520069.6785056  
SRR17520069.6785058  
SRR17520069.6787707  
SRR17520069.6787709  
SRR17520069.6787711  
SRR17520069.6787713  
SRR17520069.6787715  
SRR17520069.6787721  
SRR17520069.6787723  
SRR17520069.6787725  
SRR17520069.6787727  
SRR17520069.6787729  
SRR17520069.6787731  
SRR17520069.6787733  
SRR17520069.6787735  
SRR17520069.6787737  
SRR17520069.6787739  
SRR17520069.6787741  
SRR17520069.6787743  
SRR17520069.6787745  
SRR17520069.6787747  
SRR17520069.6792166  
SRR17520069.6792168  
SRR17520069.6792170  
SRR17520069.6792876  
SRR17520069.6792878  
SRR17520069.6792880  
SRR17520069.6792882  
SRR17520069.6792884  
SRR17520069.6792886  
SRR17520069.6792888  
SRR17520069.6792890  
SRR17520069.6795695  
SRR17520069.6795697  
SRR17520069.6795699

SRR17520069.6795701  
SRR17520069.6795705  
SRR17520069.6795707  
SRR17520069.6795709  
SRR17520069.6795711  
SRR17520069.6795715  
SRR17520069.6795717  
SRR17520069.6795719  
SRR17520069.6795721  
SRR17520069.6795723  
SRR17520069.6795725  
SRR17520069.6795727  
SRR17520069.6795729  
SRR17520069.6795731  
SRR17520069.6795733  
SRR17520069.6795735  
SRR17520069.6795737  
SRR17520069.6795739  
SRR17520069.6795741  
SRR17520069.6795743  
SRR17520069.6795745  
SRR17520069.6795747  
SRR17520069.6795749  
SRR17520069.6795751  
SRR17520069.6795753  
SRR17520069.6795755  
SRR17520069.6795757  
SRR17520069.6795759  
SRR17520069.6795761  
SRR17520069.6795763  
SRR17520069.6795765  
SRR17520069.6801173  
SRR17520069.6801175  
SRR17520069.6801177  
SRR17520069.6801179  
SRR17520069.6801181  
SRR17520069.6801183  
SRR17520069.6801185  
SRR17520069.6801187  
SRR17520069.6801189  
SRR17520069.6801191  
SRR17520069.6801193  
SRR17520069.6801195  
SRR17520069.6801197  
SRR17520069.6801199  
SRR17520069.6801201  
SRR17520069.6801203

SRR17520069.6801205  
SRR17520069.6801207  
SRR17520069.6801209  
SRR17520069.6801211  
SRR17520069.6801213  
SRR17520069.6801215  
SRR17520069.6801217  
SRR17520069.6801219  
SRR17520069.6801221  
SRR17520069.6801223  
SRR17520069.6801225  
SRR17520069.6801227  
SRR17520069.6801229  
SRR17520069.6801231  
SRR17520069.6801233  
SRR17520069.6801235  
SRR17520069.6801237  
SRR17520069.6801239  
SRR17520069.6801241  
SRR17520069.6801243  
SRR17520069.6801245  
SRR17520069.6801247  
SRR17520069.6801249  
SRR17520069.6801251  
SRR17520069.6801253  
SRR17520069.6801255  
SRR17520069.6801257  
SRR17520069.6801259  
SRR17520069.6801261  
SRR17520069.6801263  
SRR17520069.6810398  
SRR17520069.6810412  
SRR17520069.6810668  
SRR17520069.6810670  
SRR17520069.6810672  
SRR17520069.6810674  
SRR17520069.6810676  
SRR17520069.6810678  
SRR17520069.6810680  
SRR17520069.6810682  
SRR17520069.6810684  
SRR17520069.6810686  
SRR17520069.6810688  
SRR17520069.6810690  
SRR17520069.6810692  
SRR17520069.6810694  
SRR17520069.6810696

SRR17520069.6810698  
SRR17520069.6810700  
SRR17520069.6810702  
SRR17520069.6810704  
SRR17520069.6810706  
SRR17520069.6810708  
SRR17520069.6810710  
SRR17520069.6810712  
SRR17520069.6810714  
SRR17520069.6810716  
SRR17520069.6810718  
SRR17520069.6810720  
SRR17520069.6810722  
SRR17520069.6810724  
SRR17520069.6810728  
SRR17520069.6810730  
SRR17520069.6810732  
SRR17520069.6810736  
SRR17520069.6810740  
SRR17520069.6810744  
SRR17520069.6810746  
SRR17520069.6810748  
SRR17520069.6810750  
SRR17520069.6810752  
SRR17520069.6810754  
SRR17520069.6812319  
SRR17520069.6812321  
SRR17520069.6812323  
SRR17520069.6812325  
SRR17520069.6812327  
SRR17520069.6812329  
SRR17520069.6812331  
SRR17520069.6812333  
SRR17520069.6812335  
SRR17520069.6812337  
SRR17520069.6812339  
SRR17520069.6812341  
SRR17520069.6812343  
SRR17520069.6812345  
SRR17520069.6812347  
SRR17520069.6812349  
SRR17520069.6812351  
SRR17520069.6812355  
SRR17520069.6812357  
SRR17520069.6812359  
SRR17520069.6812361  
SRR17520069.6812365



SRR17520069.6812367  
SRR17520069.6812369  
SRR17520069.6812371  
SRR17520069.6812375  
SRR17520069.6812377  
SRR17520069.6812379  
SRR17520069.6812381  
SRR17520069.6812383  
SRR17520069.6812385  
SRR17520069.6812387  
SRR17520069.6812389  
SRR17520069.6812391  
SRR17520069.6812393  
SRR17520069.6812395  
SRR17520069.6812397  
SRR17520069.6812399  
SRR17520069.6812401  
SRR17520069.6812403  
SRR17520069.6812405  
SRR17520069.6812407  
SRR17520069.6812409  
SRR17520069.6812413  
SRR17520069.6812415  
SRR17520069.6812417  
SRR17520069.6812419  
SRR17520069.6812421  
SRR17520069.6812423  
SRR17520069.6812425  
SRR17520069.6812427  
SRR17520069.6812429  
SRR17520069.6812431  
SRR17520069.6812433  
SRR17520069.6812435  
SRR17520069.6812437  
SRR17520069.6812439  
SRR17520069.6812441  
SRR17520069.6812443  
SRR17520069.6812445  
SRR17520069.6812447  
SRR17520069.6812449  
SRR17520069.6812451  
SRR17520069.6812453  
SRR17520069.6812455  
SRR17520069.6812457  
SRR17520069.6820169  
SRR17520069.6820171  
SRR17520069.6820598

SRR17520069. 6820600  
SRR17520069. 6820602  
SRR17520069. 6820604  
SRR17520069. 6820606  
SRR17520069. 6821138  
SRR17520069. 6821140  
SRR17520069. 6821144  
SRR17520069. 6821146  
SRR17520069. 6821148  
SRR17520069. 6821150  
SRR17520069. 6821152  
SRR17520069. 6821154  
SRR17520069. 6821156  
SRR17520069. 6821158  
SRR17520069. 6821160  
SRR17520069. 6821162  
SRR17520069. 6821164  
SRR17520069. 6821170  
SRR17520069. 6821172  
SRR17520069. 6821174  
SRR17520069. 6821176  
SRR17520069. 6821178  
SRR17520069. 6821180  
SRR17520069. 6821182  
SRR17520069. 6821184  
SRR17520069. 6821186  
SRR17520069. 6821188  
SRR17520069. 6821190  
SRR17520069. 6821192  
SRR17520069. 6821194  
SRR17520069. 6821196  
SRR17520069. 6821198  
SRR17520069. 6821200  
SRR17520069. 6821202  
SRR17520069. 6821204  
SRR17520069. 6821206  
SRR17520069. 6821208  
SRR17520069. 6821210  
SRR17520069. 6821212  
SRR17520069. 6821214  
SRR17520069. 6821216  
SRR17520069. 6821218  
SRR17520069. 6821220  
SRR17520069. 6821222  
SRR17520069. 6821348  
SRR17520069. 6821350  
SRR17520069. 6821352

SRR17520069.6821354  
SRR17520069.6821356  
SRR17520069.6821358  
SRR17520069.6821360  
SRR17520069.6821735  
SRR17520069.6824868  
SRR17520069.6824872  
SRR17520069.6824874  
SRR17520069.6824876  
SRR17520069.6824878  
SRR17520069.6824880  
SRR17520069.6824882  
SRR17520069.6824884  
SRR17520069.6824886  
SRR17520069.6824888  
SRR17520069.6824890  
SRR17520069.6824892  
SRR17520069.6824894  
SRR17520069.6824896  
SRR17520069.6824898  
SRR17520069.6824900  
SRR17520069.6824902  
SRR17520069.6824904  
SRR17520069.6824906  
SRR17520069.6824908  
SRR17520069.6838798  
SRR17520069.6844560  
SRR17520069.6844562  
SRR17520069.6844564  
SRR17520069.6844566  
SRR17520069.6844568  
SRR17520069.6844570  
SRR17520069.6844572  
SRR17520069.6844574  
SRR17520069.6844576  
SRR17520069.6844578  
SRR17520069.6844580  
SRR17520069.6844582  
SRR17520069.6844584  
SRR17520069.6844586  
SRR17520069.6844588  
SRR17520069.6844590  
SRR17520069.6844592  
SRR17520069.6844594  
SRR17520069.6844596  
SRR17520069.6844598  
SRR17520069.6844600

SRR17520069.6844602  
SRR17520069.6844604  
SRR17520069.6844606  
SRR17520069.6854664  
SRR17520069.6857961  
SRR17520069.6857963  
SRR17520069.6857965  
SRR17520069.6857967  
SRR17520069.6857969  
SRR17520069.6857978  
SRR17520069.6857980  
SRR17520069.6857982  
SRR17520069.6857984  
SRR17520069.6857988  
SRR17520069.6857990  
SRR17520069.6857994  
SRR17520069.6857996  
SRR17520069.6857998  
SRR17520069.6858000  
SRR17520069.6858002  
SRR17520069.6858004  
SRR17520069.6858006  
SRR17520069.6858008  
SRR17520069.6858010  
SRR17520069.6858012  
SRR17520069.6858014  
SRR17520069.6858016  
SRR17520069.6858018  
SRR17520069.6858020  
SRR17520069.6858024  
SRR17520069.6858026  
SRR17520069.6858028  
SRR17520069.6858030  
SRR17520069.6858032  
SRR17520069.6858036  
SRR17520069.6858038  
SRR17520069.6858040  
SRR17520069.6858042  
SRR17520069.6858044  
SRR17520069.6858046  
SRR17520069.6858048  
SRR17520069.6858050  
SRR17520069.6858052  
SRR17520069.6858054  
SRR17520069.6858056  
SRR17520069.6858058  
SRR17520069.6858060

SRR17520069.6858062  
SRR17520069.6858064  
SRR17520069.6858066  
SRR17520069.6858068  
SRR17520069.6858070  
SRR17520069.6858072  
SRR17520069.6858074  
SRR17520069.6858076  
SRR17520069.6858078  
SRR17520069.6858080  
SRR17520069.6858082  
SRR17520069.6858084  
SRR17520069.6858086  
SRR17520069.6858088  
SRR17520069.6858090  
SRR17520069.6858092  
SRR17520069.6858094  
SRR17520069.6858096  
SRR17520069.6858098  
SRR17520069.6858100  
SRR17520069.6858102  
SRR17520069.6858104  
SRR17520069.6858110  
SRR17520069.6858112  
SRR17520069.6858114  
SRR17520069.6858118  
SRR17520069.6858120  
SRR17520069.6858122  
SRR17520069.6858124  
SRR17520069.6862875  
SRR17520069.6862877  
SRR17520069.6862879  
SRR17520069.6862881  
SRR17520069.6862883  
SRR17520069.6862885  
SRR17520069.6862887  
SRR17520069.6862889  
SRR17520069.6862891  
SRR17520069.6862893  
SRR17520069.6862895  
SRR17520069.6862897  
SRR17520069.6862899  
SRR17520069.6862901  
SRR17520069.6862905  
SRR17520069.6862907  
SRR17520069.6862909  
SRR17520069.6862911

SRR17520069. 6862913  
SRR17520069. 6862915  
SRR17520069. 6862917  
SRR17520069. 6862919  
SRR17520069. 6862921  
SRR17520069. 6862923  
SRR17520069. 6862925  
SRR17520069. 6862927  
SRR17520069. 6862929  
SRR17520069. 6862931  
SRR17520069. 6862933  
SRR17520069. 6862935  
SRR17520069. 6862937  
SRR17520069. 6862939  
SRR17520069. 6862941  
SRR17520069. 6862943  
SRR17520069. 6862945  
SRR17520069. 6862947  
SRR17520069. 6862951  
SRR17520069. 6862953  
SRR17520069. 6862955  
SRR17520069. 6867035  
SRR17520069. 6867037  
SRR17520069. 6867039  
SRR17520069. 6867041  
SRR17520069. 6867043  
SRR17520069. 6867045  
SRR17520069. 6867047  
SRR17520069. 6867049  
SRR17520069. 6867051  
SRR17520069. 6867053  
SRR17520069. 6867055  
SRR17520069. 6867057  
SRR17520069. 6867059  
SRR17520069. 6867061  
SRR17520069. 6867063  
SRR17520069. 6867065  
SRR17520069. 6867067  
SRR17520069. 6867069  
SRR17520069. 6867071  
SRR17520069. 6867073  
SRR17520069. 6867075  
SRR17520069. 6867077  
SRR17520069. 6867079  
SRR17520069. 6880146  
SRR17520069. 6880148  
SRR17520069. 6880150

SRR17520069.6880152  
SRR17520069.6880154  
SRR17520069.6903063  
SRR17520069.6903065  
SRR17520069.6903073  
SRR17520069.6903075  
SRR17520069.6903077  
SRR17520069.6903081  
SRR17520069.6903595  
SRR17520069.6903597  
SRR17520069.6903599  
SRR17520069.6903601  
SRR17520069.6903603  
SRR17520069.6903605  
SRR17520069.6903607  
SRR17520069.6903609  
SRR17520069.6903611  
SRR17520069.6903613  
SRR17520069.6903615  
SRR17520069.6903617  
SRR17520069.6903619  
SRR17520069.6903621  
SRR17520069.6903623  
SRR17520069.6903625  
SRR17520069.6903627  
SRR17520069.6905197  
SRR17520069.6905199  
SRR17520069.6905201  
SRR17520069.6905203  
SRR17520069.6905205  
SRR17520069.6905207  
SRR17520069.6905209  
SRR17520069.6905211  
SRR17520069.6905213  
SRR17520069.6905215  
SRR17520069.6905217  
SRR17520069.6905219  
SRR17520069.6905221  
SRR17520069.6905223  
SRR17520069.6905225  
SRR17520069.6905227  
SRR17520069.6905229  
SRR17520069.6905231  
SRR17520069.6907159  
SRR17520069.6907161  
SRR17520069.6907163  
SRR17520069.6907165

SRR17520069.6907167  
SRR17520069.6907169  
SRR17520069.6907171  
SRR17520069.6907173  
SRR17520069.6907175  
SRR17520069.6907177  
SRR17520069.6907179  
SRR17520069.6907181  
SRR17520069.6907183  
SRR17520069.6907185  
SRR17520069.6907187  
SRR17520069.6907189  
SRR17520069.6907191  
SRR17520069.6907193  
SRR17520069.6907195  
SRR17520069.6907197  
SRR17520069.6907199  
SRR17520069.6907201  
SRR17520069.6911689  
SRR17520069.6911691  
SRR17520069.6911693  
SRR17520069.6911697  
SRR17520069.6911699  
SRR17520069.6911701  
SRR17520069.6911703  
SRR17520069.6911705  
SRR17520069.6911707  
SRR17520069.6911709  
SRR17520069.6911711  
SRR17520069.6911713  
SRR17520069.6911715  
SRR17520069.6911717  
SRR17520069.6911719  
SRR17520069.6911721  
SRR17520069.6911723  
SRR17520069.6911725  
SRR17520069.6911727  
SRR17520069.6911729  
SRR17520069.6911731  
SRR17520069.6911733  
SRR17520069.6911735  
SRR17520069.6911737  
SRR17520069.6911739  
SRR17520069.6911741  
SRR17520069.6911743  
SRR17520069.6911747  
SRR17520069.6911749



SRR17520069.6911751  
SRR17520069.6911753  
SRR17520069.6911755  
SRR17520069.6911757  
SRR17520069.6911759  
SRR17520069.6911761  
SRR17520069.6918664  
SRR17520069.6921165  
SRR17520069.6921187  
SRR17520069.6927887  
SRR17520069.6927889  
SRR17520069.6927891  
SRR17520069.6927893  
SRR17520069.6927895  
SRR17520069.6927897  
SRR17520069.6927899  
SRR17520069.6927901  
SRR17520069.6927903  
SRR17520069.6927905  
SRR17520069.6927907  
SRR17520069.6931693  
SRR17520069.6931695  
SRR17520069.6931697  
SRR17520069.6931699  
SRR17520069.6931701  
SRR17520069.6931703  
SRR17520069.6931705  
SRR17520069.6931707  
SRR17520069.6931709  
SRR17520069.6931711  
SRR17520069.6931713  
SRR17520069.6931715  
SRR17520069.6931717  
SRR17520069.6931719  
SRR17520069.6931721  
SRR17520069.6931723  
SRR17520069.6931725  
SRR17520069.6931727  
SRR17520069.6931729  
SRR17520069.6931731  
SRR17520069.6931733  
SRR17520069.6931735  
SRR17520069.6931737  
SRR17520069.6931739  
SRR17520069.6933569  
SRR17520069.6933571  
SRR17520069.6933573

SRR17520069.6933575  
SRR17520069.6933577  
SRR17520069.6933579  
SRR17520069.6933581  
SRR17520069.6933585  
SRR17520069.6933587  
SRR17520069.6933589  
SRR17520069.6933591  
SRR17520069.6933593  
SRR17520069.6935423  
SRR17520069.6935425  
SRR17520069.6935427  
SRR17520069.6936106  
SRR17520069.6936108  
SRR17520069.6936110  
SRR17520069.6936112  
SRR17520069.6936114  
SRR17520069.6936116  
SRR17520069.6936118  
SRR17520069.6936120  
SRR17520069.6936122  
SRR17520069.6936126  
SRR17520069.6936128  
SRR17520069.6936130  
SRR17520069.6936132  
SRR17520069.6936134  
SRR17520069.6936136  
SRR17520069.6936138  
SRR17520069.6936140  
SRR17520069.6936142  
SRR17520069.6936144  
SRR17520069.6936146  
SRR17520069.6936148  
SRR17520069.6936150  
SRR17520069.6936152  
SRR17520069.6936154  
SRR17520069.6936156  
SRR17520069.6936158  
SRR17520069.6936160  
SRR17520069.6936162  
SRR17520069.6936164  
SRR17520069.6936166  
SRR17520069.6936168  
SRR17520069.6936170  
SRR17520069.6936172  
SRR17520069.6936174  
SRR17520069.6936176

SRR17520069. 6936178  
SRR17520069. 6936180  
SRR17520069. 6936182  
SRR17520069. 6936184  
SRR17520069. 6936186  
SRR17520069. 6936188  
SRR17520069. 6936190  
SRR17520069. 6936588  
SRR17520069. 6936590  
SRR17520069. 6936592  
SRR17520069. 6936594  
SRR17520069. 6936596  
SRR17520069. 6936598  
SRR17520069. 6936600  
SRR17520069. 6936602  
SRR17520069. 6936604  
SRR17520069. 6936607  
SRR17520069. 6936609  
SRR17520069. 6936611  
SRR17520069. 6936613  
SRR17520069. 6936615  
SRR17520069. 6936617  
SRR17520069. 6936619  
SRR17520069. 6936621  
SRR17520069. 6936623  
SRR17520069. 6936625  
SRR17520069. 6936627  
SRR17520069. 6936629  
SRR17520069. 6936631  
SRR17520069. 6936633  
SRR17520069. 6936635  
SRR17520069. 6936637  
SRR17520069. 6936639  
SRR17520069. 6936641  
SRR17520069. 6936643  
SRR17520069. 6936645  
SRR17520069. 6936647  
SRR17520069. 6936653  
SRR17520069. 6943936  
SRR17520069. 6943938  
SRR17520069. 6943940  
SRR17520069. 6943942  
SRR17520069. 6943944  
SRR17520069. 6943946  
SRR17520069. 6943948  
SRR17520069. 6943950  
SRR17520069. 6943952

SRR17520069.6943954  
SRR17520069.6943956  
SRR17520069.6943958  
SRR17520069.6943960  
SRR17520069.6943962  
SRR17520069.6943964  
SRR17520069.6943968  
SRR17520069.6943970  
SRR17520069.6943972  
SRR17520069.6943974  
SRR17520069.6943976  
SRR17520069.6943978  
SRR17520069.6943980  
SRR17520069.6943982  
SRR17520069.6943984  
SRR17520069.6943988  
SRR17520069.6943990  
SRR17520069.6943992  
SRR17520069.6943994  
SRR17520069.6943996  
SRR17520069.6943998  
SRR17520069.6944000  
SRR17520069.6944002  
SRR17520069.6944004  
SRR17520069.6944006  
SRR17520069.6944008  
SRR17520069.6944010  
SRR17520069.6944012  
SRR17520069.6944014  
SRR17520069.6944016  
SRR17520069.6944018  
SRR17520069.6944020  
SRR17520069.6944026  
SRR17520069.6944028  
SRR17520069.6944030  
SRR17520069.6944713  
SRR17520069.6944715  
SRR17520069.6944717  
SRR17520069.6947614  
SRR17520069.6947616  
SRR17520069.6947618  
SRR17520069.6947620  
SRR17520069.6947622  
SRR17520069.6947624  
SRR17520069.6947626  
SRR17520069.6947628  
SRR17520069.6947630

SRR17520069.6947632  
SRR17520069.6947634  
SRR17520069.6947636  
SRR17520069.6947638  
SRR17520069.6947640  
SRR17520069.6947642  
SRR17520069.6947644  
SRR17520069.6947646  
SRR17520069.6947648  
SRR17520069.6947650  
SRR17520069.6947652  
SRR17520069.6947654  
SRR17520069.6947656  
SRR17520069.6947658  
SRR17520069.6947660  
SRR17520069.6947662  
SRR17520069.6947664  
SRR17520069.6947666  
SRR17520069.6947668  
SRR17520069.6947670  
SRR17520069.6947672  
SRR17520069.6947674  
SRR17520069.6947676  
SRR17520069.6947678  
SRR17520069.6947684  
SRR17520069.6947690  
SRR17520069.6947694  
SRR17520069.6953146  
SRR17520069.6953148  
SRR17520069.6953150  
SRR17520069.6953152  
SRR17520069.6953154  
SRR17520069.6953164  
SRR17520069.6953168  
SRR17520069.6953170  
SRR17520069.6953172  
SRR17520069.6953176  
SRR17520069.6953178  
SRR17520069.6953180  
SRR17520069.6953184  
SRR17520069.6953186  
SRR17520069.6953188  
SRR17520069.6964097  
SRR17520069.6964099  
SRR17520069.6964101  
SRR17520069.6964352  
SRR17520069.6964354

SRR17520069.6965150  
SRR17520069.6965152  
SRR17520069.6965154  
SRR17520069.6965156  
SRR17520069.6965158  
SRR17520069.6965160  
SRR17520069.6965164  
SRR17520069.6965166  
SRR17520069.6965170  
SRR17520069.6965172  
SRR17520069.6965174  
SRR17520069.6965176  
SRR17520069.6965178  
SRR17520069.6965180  
SRR17520069.6965182  
SRR17520069.6965184  
SRR17520069.6965186  
SRR17520069.6965188  
SRR17520069.6965190  
SRR17520069.6965192  
SRR17520069.6965194  
SRR17520069.6965196  
SRR17520069.6965198  
SRR17520069.6965200  
SRR17520069.6965202  
SRR17520069.6965204  
SRR17520069.6965206  
SRR17520069.6965208  
SRR17520069.6967625  
SRR17520069.6967627  
SRR17520069.6967629  
SRR17520069.6967631  
SRR17520069.6967633  
SRR17520069.6967635  
SRR17520069.6980806  
SRR17520069.6980808  
SRR17520069.6980810  
SRR17520069.6980812  
SRR17520069.6980814  
SRR17520069.6981773  
SRR17520069.6981917  
SRR17520069.6984249  
SRR17520069.6984257  
SRR17520069.6984259  
SRR17520069.6984261  
SRR17520069.6984267  
SRR17520069.6984271

SRR17520069.6984277  
SRR17520069.6984291  
SRR17520069.6984297  
SRR17520069.6984775  
SRR17520069.6984783  
SRR17520069.6984789  
SRR17520069.6984791  
SRR17520069.6990773  
SRR17520069.6990775  
SRR17520069.6990777  
SRR17520069.6990779  
SRR17520069.6990781  
SRR17520069.6990787  
SRR17520069.6990789  
SRR17520069.6990791  
SRR17520069.6990793  
SRR17520069.6990795  
SRR17520069.6990797  
SRR17520069.6990799  
SRR17520069.6990801  
SRR17520069.6990803  
SRR17520069.6990805  
SRR17520069.6990807  
SRR17520069.6990809  
SRR17520069.6990811  
SRR17520069.6990813  
SRR17520069.6990815  
SRR17520069.6990819  
SRR17520069.6990821  
SRR17520069.6990823  
SRR17520069.6990825  
SRR17520069.6990827  
SRR17520069.6990829  
SRR17520069.6990831  
SRR17520069.6990833  
SRR17520069.6990835  
SRR17520069.6990837  
SRR17520069.6990839  
SRR17520069.6990841  
SRR17520069.6990843  
SRR17520069.6990845  
SRR17520069.6990847  
SRR17520069.6990849  
SRR17520069.6990851  
SRR17520069.6990853  
SRR17520069.6990855  
SRR17520069.6990857

SRR17520069.6990859  
SRR17520069.6990861  
SRR17520069.6990863  
SRR17520069.6990865  
SRR17520069.6990867  
SRR17520069.6990869  
SRR17520069.6990871  
SRR17520069.6990873  
SRR17520069.6990875  
SRR17520069.6990877  
SRR17520069.6990881  
SRR17520069.6990883  
SRR17520069.6990887  
SRR17520069.6990889  
SRR17520069.6991884  
SRR17520069.6991886  
SRR17520069.6991888  
SRR17520069.6991890  
SRR17520069.6991892  
SRR17520069.6991894  
SRR17520069.6991896  
SRR17520069.6991898  
SRR17520069.6991900  
SRR17520069.6991902  
SRR17520069.6991904  
SRR17520069.6991906  
SRR17520069.6991908  
SRR17520069.6991910  
SRR17520069.6991912  
SRR17520069.6991914  
SRR17520069.6992701  
SRR17520069.6992703  
SRR17520069.6992705  
SRR17520069.6992707  
SRR17520069.6995110  
SRR17520069.6995112  
SRR17520069.6995966  
SRR17520069.6995968  
SRR17520069.6995970  
SRR17520069.6995972  
SRR17520069.6995974  
SRR17520069.6995976  
SRR17520069.6995978  
SRR17520069.6995980  
SRR17520069.6995982  
SRR17520069.6995984  
SRR17520069.6995986



SRR17520069.6995988  
SRR17520069.6995990  
SRR17520069.6995992  
SRR17520069.6995994  
SRR17520069.6995996  
SRR17520069.6995998  
SRR17520069.6996000  
SRR17520069.6996002  
SRR17520069.6996004  
SRR17520069.6996006  
SRR17520069.6996008  
SRR17520069.6996010  
SRR17520069.6996014  
SRR17520069.7000490  
SRR17520069.7000492  
SRR17520069.7000494  
SRR17520069.7000496  
SRR17520069.7000498  
SRR17520069.7000500  
SRR17520069.7009865  
SRR17520069.7012709  
SRR17520069.7013860  
SRR17520069.7013862  
SRR17520069.7013864  
SRR17520069.7013866  
SRR17520069.7013868  
SRR17520069.7013870  
SRR17520069.7013872  
SRR17520069.7013874  
SRR17520069.7013876  
SRR17520069.7013878  
SRR17520069.7013880  
SRR17520069.7013882  
SRR17520069.7013884  
SRR17520069.7013886  
SRR17520069.7013890  
SRR17520069.7013892  
SRR17520069.7016069  
SRR17520069.7016071  
SRR17520069.7016073  
SRR17520069.7016075  
SRR17520069.7016077  
SRR17520069.7016079  
SRR17520069.7016083  
SRR17520069.7016085  
SRR17520069.7016784  
SRR17520069.7016786

SRR17520069.7020949  
SRR17520069.7020951  
SRR17520069.7020953  
SRR17520069.7020955  
SRR17520069.7020957  
SRR17520069.7020959  
SRR17520069.7020961  
SRR17520069.7020963  
SRR17520069.7020965  
SRR17520069.7020967  
SRR17520069.7020969  
SRR17520069.7020971  
SRR17520069.7020973  
SRR17520069.7020975  
SRR17520069.7020977  
SRR17520069.7020979  
SRR17520069.7020981  
SRR17520069.7020983  
SRR17520069.7020985  
SRR17520069.7020987  
SRR17520069.7020989  
SRR17520069.7020991  
SRR17520069.7020993  
SRR17520069.7020995  
SRR17520069.7020997  
SRR17520069.7020999  
SRR17520069.7021001  
SRR17520069.7021003  
SRR17520069.7021005  
SRR17520069.7021007  
SRR17520069.7021009  
SRR17520069.7021011  
SRR17520069.7021013  
SRR17520069.7021015  
SRR17520069.7021017  
SRR17520069.7021021  
SRR17520069.7021023  
SRR17520069.7021025  
SRR17520069.7021441  
SRR17520069.7021443  
SRR17520069.7021445  
SRR17520069.7021447  
SRR17520069.7021449  
SRR17520069.7021451  
SRR17520069.7021453  
SRR17520069.7021455  
SRR17520069.7021457

SRR17520069. 7021459  
SRR17520069. 7021461  
SRR17520069. 7021463  
SRR17520069. 7021465  
SRR17520069. 7021469  
SRR17520069. 7021471  
SRR17520069. 7021475  
SRR17520069. 7021477  
SRR17520069. 7021479  
SRR17520069. 7021481  
SRR17520069. 7021483  
SRR17520069. 7021485  
SRR17520069. 7021487  
SRR17520069. 7021489  
SRR17520069. 7021491  
SRR17520069. 7033395  
SRR17520069. 7033397  
SRR17520069. 7033399  
SRR17520069. 7033401  
SRR17520069. 7033403  
SRR17520069. 7033405  
SRR17520069. 7033407  
SRR17520069. 7033409  
SRR17520069. 7033411  
SRR17520069. 7033413  
SRR17520069. 7033415  
SRR17520069. 7033417  
SRR17520069. 7033419  
SRR17520069. 7033421  
SRR17520069. 7040886  
SRR17520069. 7040890  
SRR17520069. 7042214  
SRR17520069. 7042216  
SRR17520069. 7042218  
SRR17520069. 7042220  
SRR17520069. 7042222  
SRR17520069. 7050687  
SRR17520069. 7050689  
SRR17520069. 7052884  
SRR17520069. 7052886  
SRR17520069. 7052888  
SRR17520069. 7052892  
SRR17520069. 7052894  
SRR17520069. 7052896  
SRR17520069. 7052898  
SRR17520069. 7052900  
SRR17520069. 7052902

SRR17520069.7052904  
SRR17520069.7052906  
SRR17520069.7052908  
SRR17520069.7052910  
SRR17520069.7052912  
SRR17520069.7052914  
SRR17520069.7052916  
SRR17520069.7052918  
SRR17520069.7052922  
SRR17520069.7052924  
SRR17520069.7052926  
SRR17520069.7052928  
SRR17520069.7052938  
SRR17520069.7062496  
SRR17520069.7062498  
SRR17520069.7062500  
SRR17520069.7062502  
SRR17520069.7062504  
SRR17520069.7062506  
SRR17520069.7062508  
SRR17520069.7062510  
SRR17520069.7062512  
SRR17520069.7062514  
SRR17520069.7062516  
SRR17520069.7062518  
SRR17520069.7062522  
SRR17520069.7062524  
SRR17520069.7062526  
SRR17520069.7062528  
SRR17520069.7062530  
SRR17520069.7062532  
SRR17520069.7062534  
SRR17520069.7062536  
SRR17520069.7062538  
SRR17520069.7062540  
SRR17520069.7062542  
SRR17520069.7062544  
SRR17520069.7062546  
SRR17520069.7062548  
SRR17520069.7062550  
SRR17520069.7062552  
SRR17520069.7062554  
SRR17520069.7062556  
SRR17520069.7062558  
SRR17520069.7062560  
SRR17520069.7062562  
SRR17520069.7062564

SRR17520069.7062566  
SRR17520069.7062568  
SRR17520069.7062570  
SRR17520069.7062572  
SRR17520069.7062574  
SRR17520069.7062576  
SRR17520069.7062578  
SRR17520069.7062580  
SRR17520069.7062582  
SRR17520069.7062584  
SRR17520069.7062586  
SRR17520069.7062588  
SRR17520069.7062590  
SRR17520069.7062592  
SRR17520069.7062594  
SRR17520069.7062596  
SRR17520069.7062598  
SRR17520069.7062600  
SRR17520069.7062602  
SRR17520069.7063737  
SRR17520069.7063739  
SRR17520069.7063741  
SRR17520069.7063743  
SRR17520069.7063749  
SRR17520069.7063751  
SRR17520069.7063753  
SRR17520069.7063755  
SRR17520069.7063757  
SRR17520069.7063761  
SRR17520069.7063763  
SRR17520069.7063765  
SRR17520069.7063767  
SRR17520069.7063769  
SRR17520069.7063771  
SRR17520069.7063773  
SRR17520069.7063775  
SRR17520069.7063777  
SRR17520069.7063779  
SRR17520069.7063781  
SRR17520069.7063783  
SRR17520069.7063785  
SRR17520069.7063787  
SRR17520069.7063789  
SRR17520069.7063791  
SRR17520069.7063793  
SRR17520069.7063795  
SRR17520069.7063797

SRR17520069. 7064117  
SRR17520069. 7064119  
SRR17520069. 7064121  
SRR17520069. 7064123  
SRR17520069. 7064125  
SRR17520069. 7064127  
SRR17520069. 7064129  
SRR17520069. 7064131  
SRR17520069. 7064133  
SRR17520069. 7064135  
SRR17520069. 7064137  
SRR17520069. 7064139  
SRR17520069. 7064141  
SRR17520069. 7064143  
SRR17520069. 7064145  
SRR17520069. 7064147  
SRR17520069. 7064149  
SRR17520069. 7064151  
SRR17520069. 7064153  
SRR17520069. 7064155  
SRR17520069. 7064157  
SRR17520069. 7064159  
SRR17520069. 7064161  
SRR17520069. 7064163  
SRR17520069. 7064165  
SRR17520069. 7064167  
SRR17520069. 7064169  
SRR17520069. 7064171  
SRR17520069. 7064173  
SRR17520069. 7064175  
SRR17520069. 7064177  
SRR17520069. 7064179  
SRR17520069. 7064181  
SRR17520069. 7073383  
SRR17520069. 7073385  
SRR17520069. 7074364  
SRR17520069. 7074366  
SRR17520069. 7074368  
SRR17520069. 7074370  
SRR17520069. 7074372  
SRR17520069. 7080583  
SRR17520069. 7080585  
SRR17520069. 7080587  
SRR17520069. 7080589  
SRR17520069. 7080591  
SRR17520069. 7080593  
SRR17520069. 7080595

SRR17520069.7080597  
SRR17520069.7084501  
SRR17520069.7084503  
SRR17520069.7101940  
SRR17520069.7101942  
SRR17520069.7101944  
SRR17520069.7101946  
SRR17520069.7101948  
SRR17520069.7101950  
SRR17520069.7101952  
SRR17520069.7101954  
SRR17520069.7101956  
SRR17520069.7102347  
SRR17520069.7102349  
SRR17520069.7102351  
SRR17520069.7102353  
SRR17520069.7102355  
SRR17520069.7102357  
SRR17520069.7102359  
SRR17520069.7102361  
SRR17520069.7102363  
SRR17520069.7102365  
SRR17520069.7102367  
SRR17520069.7102369  
SRR17520069.7102371  
SRR17520069.7102373  
SRR17520069.7102375  
SRR17520069.7103568  
SRR17520069.7103570  
SRR17520069.7103572  
SRR17520069.7120360  
SRR17520069.7120362  
SRR17520069.7120364  
SRR17520069.7120366  
SRR17520069.7120368  
SRR17520069.7120370  
SRR17520069.7120372  
SRR17520069.7120374  
SRR17520069.7120376  
SRR17520069.7120378  
SRR17520069.7134871  
SRR17520069.7134876  
SRR17520069.7146873  
SRR17520069.7146875  
SRR17520069.7146877  
SRR17520069.7146879  
SRR17520069.7146881

SRR17520069.7146883  
SRR17520069.7146885  
SRR17520069.7146887  
SRR17520069.7146889  
SRR17520069.7149144  
SRR17520069.7149146  
SRR17520069.7149150  
SRR17520069.7149158  
SRR17520069.7149160  
SRR17520069.7149162  
SRR17520069.7149164  
SRR17520069.7149166  
SRR17520069.7149168  
SRR17520069.7149170  
SRR17520069.7149172  
SRR17520069.7149174  
SRR17520069.7149176  
SRR17520069.7149178  
SRR17520069.7149180  
SRR17520069.7149182  
SRR17520069.7149184  
SRR17520069.7149186  
SRR17520069.7149188  
SRR17520069.7149190  
SRR17520069.7149192  
SRR17520069.7149194  
SRR17520069.7155330  
SRR17520069.7155332  
SRR17520069.7155334  
SRR17520069.7165722  
SRR17520069.7165724  
SRR17520069.7165726  
SRR17520069.7165728  
SRR17520069.7165730  
SRR17520069.7165732  
SRR17520069.7165734  
SRR17520069.7165736  
SRR17520069.7165738  
SRR17520069.7165740  
SRR17520069.7165742  
SRR17520069.7165744  
SRR17520069.7165746  
SRR17520069.7165748  
SRR17520069.7165750  
SRR17520069.7165752  
SRR17520069.7165754  
SRR17520069.7165756



SRR17520069.7165758  
SRR17520069.7165760  
SRR17520069.7165762  
SRR17520069.7165764  
SRR17520069.7165766  
SRR17520069.7165768  
SRR17520069.7165770  
SRR17520069.7165772  
SRR17520069.7165774  
SRR17520069.7165776  
SRR17520069.7168384  
SRR17520069.7168386  
SRR17520069.7168388  
SRR17520069.7168390  
SRR17520069.7168392  
SRR17520069.7168394  
SRR17520069.7168396  
SRR17520069.7173585  
SRR17520069.7173587  
SRR17520069.7173589  
SRR17520069.7173591  
SRR17520069.7173593  
SRR17520069.7173595  
SRR17520069.7173597  
SRR17520069.7173599  
SRR17520069.7173601  
SRR17520069.7173603  
SRR17520069.7173605  
SRR17520069.7173609  
SRR17520069.7173611  
SRR17520069.7178851  
SRR17520069.7178853  
SRR17520069.7178855  
SRR17520069.7178857  
SRR17520069.7178859  
SRR17520069.7178861  
SRR17520069.7178863  
SRR17520069.7178865  
SRR17520069.7178867  
SRR17520069.7178869  
SRR17520069.7178871  
SRR17520069.7178873  
SRR17520069.7178875  
SRR17520069.7178877  
SRR17520069.7178879  
SRR17520069.7178881  
SRR17520069.7178883

SRR17520069. 7178885  
SRR17520069. 7178887  
SRR17520069. 7178889  
SRR17520069. 7178891  
SRR17520069. 7178893  
SRR17520069. 7178895  
SRR17520069. 7178897  
SRR17520069. 7178899  
SRR17520069. 7178901  
SRR17520069. 7178903  
SRR17520069. 7178905  
SRR17520069. 7178907  
SRR17520069. 7178909  
SRR17520069. 7178911  
SRR17520069. 7178913  
SRR17520069. 7178917  
SRR17520069. 7178919  
SRR17520069. 7178921  
SRR17520069. 7178923  
SRR17520069. 7178925  
SRR17520069. 7180781  
SRR17520069. 7180783  
SRR17520069. 7180785  
SRR17520069. 7180787  
SRR17520069. 7180789  
SRR17520069. 7180791  
SRR17520069. 7180793  
SRR17520069. 7180797  
SRR17520069. 7180799  
SRR17520069. 7180801  
SRR17520069. 7192071  
SRR17520069. 7192073  
SRR17520069. 7192075  
SRR17520069. 7192077  
SRR17520069. 7192079  
SRR17520069. 7192081  
SRR17520069. 7192083  
SRR17520069. 7192085  
SRR17520069. 7192087  
SRR17520069. 7192089  
SRR17520069. 7192093  
SRR17520069. 7192097  
SRR17520069. 7192099  
SRR17520069. 7192101  
SRR17520069. 7192103  
SRR17520069. 7192105  
SRR17520069. 7192107

SRR17520069. 7192109  
SRR17520069. 7192111  
SRR17520069. 7192113  
SRR17520069. 7192115  
SRR17520069. 7192117  
SRR17520069. 7192119  
SRR17520069. 7192121  
SRR17520069. 7192123  
SRR17520069. 7192125  
SRR17520069. 7197558  
SRR17520069. 7197560  
SRR17520069. 7197562  
SRR17520069. 7197564  
SRR17520069. 7197566  
SRR17520069. 7197568  
SRR17520069. 7197570  
SRR17520069. 7202363  
SRR17520069. 7202365  
SRR17520069. 7202367  
SRR17520069. 7202369  
SRR17520069. 7202371  
SRR17520069. 7202373  
SRR17520069. 7202375  
SRR17520069. 7202377  
SRR17520069. 7202379  
SRR17520069. 7202381  
SRR17520069. 7202383  
SRR17520069. 7202385  
SRR17520069. 7202387  
SRR17520069. 7202389  
SRR17520069. 7202391  
SRR17520069. 7202393  
SRR17520069. 7202395  
SRR17520069. 7202397  
SRR17520069. 7202399  
SRR17520069. 7202401  
SRR17520069. 7202403  
SRR17520069. 7202405  
SRR17520069. 7202407  
SRR17520069. 7205302  
SRR17520069. 7205304  
SRR17520069. 7205306  
SRR17520069. 7205308  
SRR17520069. 7205310  
SRR17520069. 7205312  
SRR17520069. 7205314  
SRR17520069. 7205316

SRR17520069.7205318  
SRR17520069.7205320  
SRR17520069.7205322  
SRR17520069.7205324  
SRR17520069.7205326  
SRR17520069.7205328  
SRR17520069.7205330  
SRR17520069.7205332  
SRR17520069.7205334  
SRR17520069.7205336  
SRR17520069.7205338  
SRR17520069.7205340  
SRR17520069.7206916  
SRR17520069.7211633  
SRR17520069.7211635  
SRR17520069.7211637  
SRR17520069.7211639  
SRR17520069.7211643  
SRR17520069.7211645  
SRR17520069.7211647  
SRR17520069.7211649  
SRR17520069.7211651  
SRR17520069.7211653  
SRR17520069.7211655  
SRR17520069.7211657  
SRR17520069.7211659  
SRR17520069.7211661  
SRR17520069.7211663  
SRR17520069.7211665  
SRR17520069.7211667  
SRR17520069.7211669  
SRR17520069.7211671  
SRR17520069.7211673  
SRR17520069.7211675  
SRR17520069.7211677  
SRR17520069.7215791  
SRR17520069.7215793  
SRR17520069.7215795  
SRR17520069.7216882  
SRR17520069.7216884  
SRR17520069.7216886  
SRR17520069.7216888  
SRR17520069.7216890  
SRR17520069.7216892  
SRR17520069.7216894  
SRR17520069.7220384  
SRR17520069.7220386

SRR17520069. 7220388  
SRR17520069. 7220390  
SRR17520069. 7220392  
SRR17520069. 7220394  
SRR17520069. 7220396  
SRR17520069. 7220398  
SRR17520069. 7220400  
SRR17520069. 7220402  
SRR17520069. 7220404  
SRR17520069. 7220406  
SRR17520069. 7220408  
SRR17520069. 7220410  
SRR17520069. 7220414  
SRR17520069. 7220416  
SRR17520069. 7220418  
SRR17520069. 7220420  
SRR17520069. 7220422  
SRR17520069. 7220424  
SRR17520069. 7220426  
SRR17520069. 7220428  
SRR17520069. 7220430  
SRR17520069. 7220432  
SRR17520069. 7220434  
SRR17520069. 7220436  
SRR17520069. 7220438  
SRR17520069. 7220440  
SRR17520069. 7220442  
SRR17520069. 7220444  
SRR17520069. 7220446  
SRR17520069. 7220448  
SRR17520069. 7220450  
SRR17520069. 7220452  
SRR17520069. 7220454  
SRR17520069. 7220458  
SRR17520069. 7220460  
SRR17520069. 7220462  
SRR17520069. 7220464  
SRR17520069. 7220466  
SRR17520069. 7220714  
SRR17520069. 7220716  
SRR17520069. 7220718  
SRR17520069. 7220720  
SRR17520069. 7220722  
SRR17520069. 7220724  
SRR17520069. 7220726  
SRR17520069. 7221186  
SRR17520069. 7221188

SRR17520069. 7221190  
SRR17520069. 7221192  
SRR17520069. 7221194  
SRR17520069. 7221196  
SRR17520069. 7221198  
SRR17520069. 7221200  
SRR17520069. 7221202  
SRR17520069. 7221204  
SRR17520069. 7221206  
SRR17520069. 7221208  
SRR17520069. 7221210  
SRR17520069. 7221212  
SRR17520069. 7221214  
SRR17520069. 7221216  
SRR17520069. 7221218  
SRR17520069. 7221220  
SRR17520069. 7224655  
SRR17520069. 7226391  
SRR17520069. 7228988  
SRR17520069. 7228992  
SRR17520069. 7228994  
SRR17520069. 7228998  
SRR17520069. 7229000  
SRR17520069. 7229002  
SRR17520069. 7229004  
SRR17520069. 7229006  
SRR17520069. 7229008  
SRR17520069. 7229010  
SRR17520069. 7229012  
SRR17520069. 7231851  
SRR17520069. 7231853  
SRR17520069. 7231857  
SRR17520069. 7231859  
SRR17520069. 7231861  
SRR17520069. 7231865  
SRR17520069. 7231867  
SRR17520069. 7231869  
SRR17520069. 7231871  
SRR17520069. 7231875  
SRR17520069. 7231877  
SRR17520069. 7231879  
SRR17520069. 7231881  
SRR17520069. 7231885  
SRR17520069. 7231887  
SRR17520069. 7231889  
SRR17520069. 7231891  
SRR17520069. 7231893

SRR17520069. 7231895  
SRR17520069. 7231897  
SRR17520069. 7231899  
SRR17520069. 7231901  
SRR17520069. 7231903  
SRR17520069. 7231905  
SRR17520069. 7231907  
SRR17520069. 7231909  
SRR17520069. 7231911  
SRR17520069. 7231913  
SRR17520069. 7231915  
SRR17520069. 7231917  
SRR17520069. 7231919  
SRR17520069. 7231921  
SRR17520069. 7231923  
SRR17520069. 7231925  
SRR17520069. 7231927  
SRR17520069. 7231929  
SRR17520069. 7231931  
SRR17520069. 7231933  
SRR17520069. 7231935  
SRR17520069. 7231939  
SRR17520069. 7231941  
SRR17520069. 7231943  
SRR17520069. 7231945  
SRR17520069. 7231947  
SRR17520069. 7231949  
SRR17520069. 7231951  
SRR17520069. 7231953  
SRR17520069. 7231955  
SRR17520069. 7231957  
SRR17520069. 7231959  
SRR17520069. 7231961  
SRR17520069. 7231965  
SRR17520069. 7231967  
SRR17520069. 7231969  
SRR17520069. 7231971  
SRR17520069. 7231973  
SRR17520069. 7231975  
SRR17520069. 7231977  
SRR17520069. 7231979  
SRR17520069. 7231981  
SRR17520069. 7231983  
SRR17520069. 7231985  
SRR17520069. 7231987  
SRR17520069. 7231989  
SRR17520069. 7231991

SRR17520069. 7231995  
SRR17520069. 7231997  
SRR17520069. 7231999  
SRR17520069. 7232001  
SRR17520069. 7232003  
SRR17520069. 7232005  
SRR17520069. 7232007  
SRR17520069. 7232009  
SRR17520069. 7232011  
SRR17520069. 7232013  
SRR17520069. 7232015  
SRR17520069. 7232017  
SRR17520069. 7232019  
SRR17520069. 7232021  
SRR17520069. 7232023  
SRR17520069. 7232025  
SRR17520069. 7232027  
SRR17520069. 7232029  
SRR17520069. 7232031  
SRR17520069. 7232033  
SRR17520069. 7232035  
SRR17520069. 7232037  
SRR17520069. 7232039  
SRR17520069. 7232041  
SRR17520069. 7232043  
SRR17520069. 7232045  
SRR17520069. 7232047  
SRR17520069. 7232049  
SRR17520069. 7232051  
SRR17520069. 7232053  
SRR17520069. 7232055  
SRR17520069. 7232057  
SRR17520069. 7232059  
SRR17520069. 7232061  
SRR17520069. 7232063  
SRR17520069. 7232065  
SRR17520069. 7236067  
SRR17520069. 7236069  
SRR17520069. 7236071  
SRR17520069. 7236073  
SRR17520069. 7236075  
SRR17520069. 7236077  
SRR17520069. 7236079  
SRR17520069. 7236081  
SRR17520069. 7236083  
SRR17520069. 7236085  
SRR17520069. 7236087



SRR17520069. 7236089  
SRR17520069. 7236091  
SRR17520069. 7236093  
SRR17520069. 7236097  
SRR17520069. 7236099  
SRR17520069. 7236101  
SRR17520069. 7236103  
SRR17520069. 7236105  
SRR17520069. 7236109  
SRR17520069. 7236111  
SRR17520069. 7236113  
SRR17520069. 7236115  
SRR17520069. 7236117  
SRR17520069. 7236119  
SRR17520069. 7236123  
SRR17520069. 7237134  
SRR17520069. 7237136  
SRR17520069. 7237138  
SRR17520069. 7237142  
SRR17520069. 7237144  
SRR17520069. 7237146  
SRR17520069. 7237148  
SRR17520069. 7237150  
SRR17520069. 7237152  
SRR17520069. 7239676  
SRR17520069. 7251142  
SRR17520069. 7251144  
SRR17520069. 7251146  
SRR17520069. 7251148  
SRR17520069. 7251468  
SRR17520069. 7251470  
SRR17520069. 7251472  
SRR17520069. 7251474  
SRR17520069. 7251476  
SRR17520069. 7251478  
SRR17520069. 7251480  
SRR17520069. 7251482  
SRR17520069. 7251484  
SRR17520069. 7251486  
SRR17520069. 7251488  
SRR17520069. 7251490  
SRR17520069. 7251492  
SRR17520069. 7251494  
SRR17520069. 7251496  
SRR17520069. 7253735  
SRR17520069. 7253737  
SRR17520069. 7253739

SRR17520069. 7253741  
SRR17520069. 7253743  
SRR17520069. 7253745  
SRR17520069. 7253747  
SRR17520069. 7253749  
SRR17520069. 7253751  
SRR17520069. 7253753  
SRR17520069. 7253755  
SRR17520069. 7253757  
SRR17520069. 7253759  
SRR17520069. 7253761  
SRR17520069. 7253763  
SRR17520069. 7253765  
SRR17520069. 7253767  
SRR17520069. 7253769  
SRR17520069. 7253771  
SRR17520069. 7253773  
SRR17520069. 7253775  
SRR17520069. 7253777  
SRR17520069. 7253779  
SRR17520069. 7253781  
SRR17520069. 7253783  
SRR17520069. 7253785  
SRR17520069. 7253787  
SRR17520069. 7253789  
SRR17520069. 7253791  
SRR17520069. 7253793  
SRR17520069. 7253795  
SRR17520069. 7253797  
SRR17520069. 7253799  
SRR17520069. 7253801  
SRR17520069. 7253803  
SRR17520069. 7253805  
SRR17520069. 7253807  
SRR17520069. 7253809  
SRR17520069. 7253811  
SRR17520069. 7253815  
SRR17520069. 7253817  
SRR17520069. 7253819  
SRR17520069. 7253821  
SRR17520069. 7253823  
SRR17520069. 7254120  
SRR17520069. 7254122  
SRR17520069. 7254124  
SRR17520069. 7254126  
SRR17520069. 7254128  
SRR17520069. 7258257

SRR17520069. 7258261  
SRR17520069. 7258263  
SRR17520069. 7258265  
SRR17520069. 7258267  
SRR17520069. 7258269  
SRR17520069. 7258271  
SRR17520069. 7258273  
SRR17520069. 7258275  
SRR17520069. 7258277  
SRR17520069. 7258279  
SRR17520069. 7258281  
SRR17520069. 7258283  
SRR17520069. 7258285  
SRR17520069. 7258287  
SRR17520069. 7258289  
SRR17520069. 7258291  
SRR17520069. 7258293  
SRR17520069. 7258299  
SRR17520069. 7258301  
SRR17520069. 7258305  
SRR17520069. 7258307  
SRR17520069. 7258309  
SRR17520069. 7258311  
SRR17520069. 7258313  
SRR17520069. 7258315  
SRR17520069. 7258317  
SRR17520069. 7258319  
SRR17520069. 7258321  
SRR17520069. 7258323  
SRR17520069. 7258325  
SRR17520069. 7258327  
SRR17520069. 7258329  
SRR17520069. 7258331  
SRR17520069. 7258333  
SRR17520069. 7258337  
SRR17520069. 7258339  
SRR17520069. 7258341  
SRR17520069. 7258343  
SRR17520069. 7261949  
SRR17520069. 7267094  
SRR17520069. 7267096  
SRR17520069. 7267098  
SRR17520069. 7267100  
SRR17520069. 7267102  
SRR17520069. 7270461  
SRR17520069. 7270463  
SRR17520069. 7270465

SRR17520069. 7270469  
SRR17520069. 7270471  
SRR17520069. 7270473  
SRR17520069. 7270475  
SRR17520069. 7270477  
SRR17520069. 7270479  
SRR17520069. 7270481  
SRR17520069. 7274566  
SRR17520069. 7274568  
SRR17520069. 7274570  
SRR17520069. 7274572  
SRR17520069. 7274574  
SRR17520069. 7274576  
SRR17520069. 7274578  
SRR17520069. 7274580  
SRR17520069. 7274582  
SRR17520069. 7274584  
SRR17520069. 7274586  
SRR17520069. 7274588  
SRR17520069. 7274590  
SRR17520069. 7274592  
SRR17520069. 7274594  
SRR17520069. 7274596  
SRR17520069. 7274598  
SRR17520069. 7274600  
SRR17520069. 7274602  
SRR17520069. 7274604  
SRR17520069. 7274606  
SRR17520069. 7274608  
SRR17520069. 7274610  
SRR17520069. 7274612  
SRR17520069. 7281840  
SRR17520069. 7284357  
SRR17520069. 7284359  
SRR17520069. 7284361  
SRR17520069. 7284363  
SRR17520069. 7284365  
SRR17520069. 7284367  
SRR17520069. 7284369  
SRR17520069. 7284371  
SRR17520069. 7284373  
SRR17520069. 7284375  
SRR17520069. 7284377  
SRR17520069. 7284379  
SRR17520069. 7284381  
SRR17520069. 7284383  
SRR17520069. 7284385

SRR17520069. 7284387  
SRR17520069. 7284389  
SRR17520069. 7284393  
SRR17520069. 7284395  
SRR17520069. 7284397  
SRR17520069. 7284399  
SRR17520069. 7284401  
SRR17520069. 7284403  
SRR17520069. 7284405  
SRR17520069. 7284407  
SRR17520069. 7284409  
SRR17520069. 7284411  
SRR17520069. 7284413  
SRR17520069. 7284415  
SRR17520069. 7284417  
SRR17520069. 7284419  
SRR17520069. 7284421  
SRR17520069. 7284423  
SRR17520069. 7284425  
SRR17520069. 7284427  
SRR17520069. 7284429  
SRR17520069. 7284431  
SRR17520069. 7284433  
SRR17520069. 7284435  
SRR17520069. 7284437  
SRR17520069. 7284439  
SRR17520069. 7284441  
SRR17520069. 7284443  
SRR17520069. 7284445  
SRR17520069. 7284447  
SRR17520069. 7284451  
SRR17520069. 7285558  
SRR17520069. 7285560  
SRR17520069. 7285562  
SRR17520069. 7285564  
SRR17520069. 7285566  
SRR17520069. 7285568  
SRR17520069. 7285572  
SRR17520069. 7285576  
SRR17520069. 7285578  
SRR17520069. 7285580  
SRR17520069. 7285584  
SRR17520069. 7285586  
SRR17520069. 7285588  
SRR17520069. 7285590  
SRR17520069. 7285592  
SRR17520069. 7285594

SRR17520069. 7285596  
SRR17520069. 7285598  
SRR17520069. 7285600  
SRR17520069. 7285602  
SRR17520069. 7285604  
SRR17520069. 7285805  
SRR17520069. 7285807  
SRR17520069. 7285809  
SRR17520069. 7285811  
SRR17520069. 7285813  
SRR17520069. 7285815  
SRR17520069. 7285817  
SRR17520069. 7285819  
SRR17520069. 7299626  
SRR17520069. 7299628  
SRR17520069. 7299630  
SRR17520069. 7299632  
SRR17520069. 7299634  
SRR17520069. 7299636  
SRR17520069. 7299638  
SRR17520069. 7299640  
SRR17520069. 7299642  
SRR17520069. 7299644  
SRR17520069. 7299646  
SRR17520069. 7299648  
SRR17520069. 7299650  
SRR17520069. 7299652  
SRR17520069. 7299654  
SRR17520069. 7299656  
SRR17520069. 7299658  
SRR17520069. 7299660  
SRR17520069. 7299662  
SRR17520069. 7299664  
SRR17520069. 7299666  
SRR17520069. 7299668  
SRR17520069. 7299670  
SRR17520069. 7299672  
SRR17520069. 7299674  
SRR17520069. 7299676  
SRR17520069. 7299678  
SRR17520069. 7299680  
SRR17520069. 7299682  
SRR17520069. 7299684  
SRR17520069. 7299686  
SRR17520069. 7299688  
SRR17520069. 7299690  
SRR17520069. 7299692

SRR17520069.7299694  
SRR17520069.7299696  
SRR17520069.7299698  
SRR17520069.7299700  
SRR17520069.7299702  
SRR17520069.7299704  
SRR17520069.7299706  
SRR17520069.7300559  
SRR17520069.7300561  
SRR17520069.7307309  
SRR17520069.7307313  
SRR17520069.7307333  
SRR17520069.7308713  
SRR17520069.7311051  
SRR17520069.7311053  
SRR17520069.7311055  
SRR17520069.7311057  
SRR17520069.7311059  
SRR17520069.7311061  
SRR17520069.7311065  
SRR17520069.7311067  
SRR17520069.7311069  
SRR17520069.7311071  
SRR17520069.7311073  
SRR17520069.7311075  
SRR17520069.7311077  
SRR17520069.7311079  
SRR17520069.7311081  
SRR17520069.7311083  
SRR17520069.7311085  
SRR17520069.7311087  
SRR17520069.7318819  
SRR17520069.7318821  
SRR17520069.7318823  
SRR17520069.7318825  
SRR17520069.7318827  
SRR17520069.7318829  
SRR17520069.7318831  
SRR17520069.7318833  
SRR17520069.7318837  
SRR17520069.7318839  
SRR17520069.7318841  
SRR17520069.7318843  
SRR17520069.7318845  
SRR17520069.7318847  
SRR17520069.7318849  
SRR17520069.7318851

SRR17520069. 7318853  
SRR17520069. 7318855  
SRR17520069. 7318857  
SRR17520069. 7318859  
SRR17520069. 7318861  
SRR17520069. 7318863  
SRR17520069. 7318865  
SRR17520069. 7318867  
SRR17520069. 7318870  
SRR17520069. 7318872  
SRR17520069. 7318874  
SRR17520069. 7318876  
SRR17520069. 7318878  
SRR17520069. 7318880  
SRR17520069. 7318884  
SRR17520069. 7318886  
SRR17520069. 7318888  
SRR17520069. 7318890  
SRR17520069. 7318892  
SRR17520069. 7318894  
SRR17520069. 7318896  
SRR17520069. 7318898  
SRR17520069. 7318900  
SRR17520069. 7318902  
SRR17520069. 7318904  
SRR17520069. 7318906  
SRR17520069. 7318908  
SRR17520069. 7318910  
SRR17520069. 7325654  
SRR17520069. 7325656  
SRR17520069. 7325658  
SRR17520069. 7325660  
SRR17520069. 7325662  
SRR17520069. 7325664  
SRR17520069. 7325666  
SRR17520069. 7325668  
SRR17520069. 7325670  
SRR17520069. 7325672  
SRR17520069. 7325674  
SRR17520069. 7325676  
SRR17520069. 7325678  
SRR17520069. 7325680  
SRR17520069. 7325682  
SRR17520069. 7325684  
SRR17520069. 7325686  
SRR17520069. 7325688  
SRR17520069. 7325690



SRR17520069. 7325692  
SRR17520069. 7325694  
SRR17520069. 7325696  
SRR17520069. 7325698  
SRR17520069. 7325700  
SRR17520069. 7325702  
SRR17520069. 7325704  
SRR17520069. 7325706  
SRR17520069. 7325708  
SRR17520069. 7325710  
SRR17520069. 7325712  
SRR17520069. 7325714  
SRR17520069. 7325716  
SRR17520069. 7325718  
SRR17520069. 7325720  
SRR17520069. 7325722  
SRR17520069. 7325724  
SRR17520069. 7325726  
SRR17520069. 7325728  
SRR17520069. 7325730  
SRR17520069. 7325732  
SRR17520069. 7325734  
SRR17520069. 7325736  
SRR17520069. 7325738  
SRR17520069. 7325740  
SRR17520069. 7325742  
SRR17520069. 7325744  
SRR17520069. 7325746  
SRR17520069. 7325748  
SRR17520069. 7325750  
SRR17520069. 7325752  
SRR17520069. 7325754  
SRR17520069. 7325756  
SRR17520069. 7325758  
SRR17520069. 7325760  
SRR17520069. 7325762  
SRR17520069. 7325764  
SRR17520069. 7325766  
SRR17520069. 7325768  
SRR17520069. 7325770  
SRR17520069. 7325772  
SRR17520069. 7325774  
SRR17520069. 7325776  
SRR17520069. 7325778  
SRR17520069. 7325780  
SRR17520069. 7325782  
SRR17520069. 7325784

SRR17520069. 7325786  
SRR17520069. 7327693  
SRR17520069. 7327695  
SRR17520069. 7327697  
SRR17520069. 7327699  
SRR17520069. 7327701  
SRR17520069. 7327703  
SRR17520069. 7327705  
SRR17520069. 7327707  
SRR17520069. 7327709  
SRR17520069. 7327711  
SRR17520069. 7327713  
SRR17520069. 7327715  
SRR17520069. 7327717  
SRR17520069. 7327719  
SRR17520069. 7327721  
SRR17520069. 7327723  
SRR17520069. 7327725  
SRR17520069. 7327727  
SRR17520069. 7327729  
SRR17520069. 7327731  
SRR17520069. 7327733  
SRR17520069. 7327735  
SRR17520069. 7327739  
SRR17520069. 7327743  
SRR17520069. 7327745  
SRR17520069. 7327747  
SRR17520069. 7327749  
SRR17520069. 7327751  
SRR17520069. 7327753  
SRR17520069. 7327755  
SRR17520069. 7327757  
SRR17520069. 7327759  
SRR17520069. 7327761  
SRR17520069. 7327763  
SRR17520069. 7327765  
SRR17520069. 7327769  
SRR17520069. 7327771  
SRR17520069. 7327792  
SRR17520069. 7327796  
SRR17520069. 7327798  
SRR17520069. 7327800  
SRR17520069. 7327802  
SRR17520069. 7327804  
SRR17520069. 7327806  
SRR17520069. 7327808  
SRR17520069. 7327810

SRR17520069. 7327812  
SRR17520069. 7327814  
SRR17520069. 7327816  
SRR17520069. 7327818  
SRR17520069. 7327820  
SRR17520069. 7327822  
SRR17520069. 7327824  
SRR17520069. 7327826  
SRR17520069. 7327828  
SRR17520069. 7327830  
SRR17520069. 7327832  
SRR17520069. 7327834  
SRR17520069. 7327836  
SRR17520069. 7327838  
SRR17520069. 7327840  
SRR17520069. 7327842  
SRR17520069. 7327844  
SRR17520069. 7327846  
SRR17520069. 7327848  
SRR17520069. 7327850  
SRR17520069. 7327852  
SRR17520069. 7327854  
SRR17520069. 7327856  
SRR17520069. 7327858  
SRR17520069. 7327860  
SRR17520069. 7327862  
SRR17520069. 7327864  
SRR17520069. 7327866  
SRR17520069. 7327868  
SRR17520069. 7327870  
SRR17520069. 7327872  
SRR17520069. 7327874  
SRR17520069. 7328953  
SRR17520069. 7328955  
SRR17520069. 7329838  
SRR17520069. 7329840  
SRR17520069. 7329842  
SRR17520069. 7329844  
SRR17520069. 7329846  
SRR17520069. 7329848  
SRR17520069. 7329850  
SRR17520069. 7329852  
SRR17520069. 7329854  
SRR17520069. 7329856  
SRR17520069. 7329858  
SRR17520069. 7329860  
SRR17520069. 7330440

SRR17520069. 7330442  
SRR17520069. 7330444  
SRR17520069. 7330446  
SRR17520069. 7344683  
SRR17520069. 7344685  
SRR17520069. 7344687  
SRR17520069. 7344689  
SRR17520069. 7344691  
SRR17520069. 7344693  
SRR17520069. 7344695  
SRR17520069. 7344697  
SRR17520069. 7344699  
SRR17520069. 7344701  
SRR17520069. 7344703  
SRR17520069. 7344705  
SRR17520069. 7344707  
SRR17520069. 7344709  
SRR17520069. 7344711  
SRR17520069. 7344713  
SRR17520069. 7344715  
SRR17520069. 7344717  
SRR17520069. 7344719  
SRR17520069. 7344721  
SRR17520069. 7344723  
SRR17520069. 7344725  
SRR17520069. 7344727  
SRR17520069. 7344729  
SRR17520069. 7344731  
SRR17520069. 7344733  
SRR17520069. 7344735  
SRR17520069. 7344737  
SRR17520069. 7344739  
SRR17520069. 7344741  
SRR17520069. 7344743  
SRR17520069. 7344745  
SRR17520069. 7344747  
SRR17520069. 7344749  
SRR17520069. 7344751  
SRR17520069. 7344753  
SRR17520069. 7344755  
SRR17520069. 7344757  
SRR17520069. 7344759  
SRR17520069. 7344761  
SRR17520069. 7345310  
SRR17520069. 7345312  
SRR17520069. 7345314  
SRR17520069. 7345316

SRR17520069. 7345318  
SRR17520069. 7345320  
SRR17520069. 7345322  
SRR17520069. 7345324  
SRR17520069. 7345326  
SRR17520069. 7345328  
SRR17520069. 7345330  
SRR17520069. 7345332  
SRR17520069. 7345334  
SRR17520069. 7345336  
SRR17520069. 7345338  
SRR17520069. 7345340  
SRR17520069. 7345358  
SRR17520069. 7345360  
SRR17520069. 7345362  
SRR17520069. 7345364  
SRR17520069. 7345366  
SRR17520069. 7345368  
SRR17520069. 7345370  
SRR17520069. 7345372  
SRR17520069. 7345374  
SRR17520069. 7345376  
SRR17520069. 7345378  
SRR17520069. 7345380  
SRR17520069. 7345382  
SRR17520069. 7345384  
SRR17520069. 7345386  
SRR17520069. 7345388  
SRR17520069. 7345392  
SRR17520069. 7345394  
SRR17520069. 7345396  
SRR17520069. 7345398  
SRR17520069. 7345400  
SRR17520069. 7345402  
SRR17520069. 7345404  
SRR17520069. 7345406  
SRR17520069. 7345408  
SRR17520069. 7345410  
SRR17520069. 7345412  
SRR17520069. 7345414  
SRR17520069. 7345416  
SRR17520069. 7345418  
SRR17520069. 7345420  
SRR17520069. 7345422  
SRR17520069. 7345424  
SRR17520069. 7345426  
SRR17520069. 7345428

SRR17520069. 7345430  
SRR17520069. 7345432  
SRR17520069. 7345434  
SRR17520069. 7345436  
SRR17520069. 7345438  
SRR17520069. 7345440  
SRR17520069. 7345442  
SRR17520069. 7345444  
SRR17520069. 7345446  
SRR17520069. 7345448  
SRR17520069. 7345452  
SRR17520069. 7345454  
SRR17520069. 7345456  
SRR17520069. 7345458  
SRR17520069. 7345460  
SRR17520069. 7345462  
SRR17520069. 7345464  
SRR17520069. 7345468  
SRR17520069. 7346873  
SRR17520069. 7346875  
SRR17520069. 7346877  
SRR17520069. 7346879  
SRR17520069. 7346881  
SRR17520069. 7346883  
SRR17520069. 7351683  
SRR17520069. 7351685  
SRR17520069. 7351687  
SRR17520069. 7351689  
SRR17520069. 7351691  
SRR17520069. 7351693  
SRR17520069. 7351695  
SRR17520069. 7351697  
SRR17520069. 7351699  
SRR17520069. 7351701  
SRR17520069. 7351703  
SRR17520069. 7351705  
SRR17520069. 7351707  
SRR17520069. 7351709  
SRR17520069. 7351711  
SRR17520069. 7351713  
SRR17520069. 7351715  
SRR17520069. 7351717  
SRR17520069. 7351719  
SRR17520069. 7351721  
SRR17520069. 7351723  
SRR17520069. 7351725  
SRR17520069. 7351727

SRR17520069. 7351729  
SRR17520069. 7351731  
SRR17520069. 7351735  
SRR17520069. 7351737  
SRR17520069. 7351739  
SRR17520069. 7351741  
SRR17520069. 7351743  
SRR17520069. 7351745  
SRR17520069. 7351747  
SRR17520069. 7351749  
SRR17520069. 7351751  
SRR17520069. 7351753  
SRR17520069. 7357000  
SRR17520069. 7357002  
SRR17520069. 7357004  
SRR17520069. 7357006  
SRR17520069. 7357008  
SRR17520069. 7357010  
SRR17520069. 7357012  
SRR17520069. 7357014  
SRR17520069. 7357016  
SRR17520069. 7357018  
SRR17520069. 7357020  
SRR17520069. 7357022  
SRR17520069. 7357024  
SRR17520069. 7357026  
SRR17520069. 7357028  
SRR17520069. 7357030  
SRR17520069. 7357032  
SRR17520069. 7357034  
SRR17520069. 7357038  
SRR17520069. 7357040  
SRR17520069. 7357042  
SRR17520069. 7357044  
SRR17520069. 7357046  
SRR17520069. 7357048  
SRR17520069. 7357050  
SRR17520069. 7362521  
SRR17520069. 7362523  
SRR17520069. 7362525  
SRR17520069. 7370270  
SRR17520069. 7370272  
SRR17520069. 7370274  
SRR17520069. 7370278  
SRR17520069. 7370280  
SRR17520069. 7370282  
SRR17520069. 7370284

SRR17520069. 7370286  
SRR17520069. 7370288  
SRR17520069. 7370290  
SRR17520069. 7370292  
SRR17520069. 7370294  
SRR17520069. 7370296  
SRR17520069. 7370298  
SRR17520069. 7370989  
SRR17520069. 7370993  
SRR17520069. 7370995  
SRR17520069. 7370997  
SRR17520069. 7370999  
SRR17520069. 7371001  
SRR17520069. 7371003  
SRR17520069. 7371005  
SRR17520069. 7371007  
SRR17520069. 7371009  
SRR17520069. 7371011  
SRR17520069. 7371013  
SRR17520069. 7371015  
SRR17520069. 7371017  
SRR17520069. 7371019  
SRR17520069. 7371021  
SRR17520069. 7371023  
SRR17520069. 7371025  
SRR17520069. 7371027  
SRR17520069. 7371029  
SRR17520069. 7371031  
SRR17520069. 7371033  
SRR17520069. 7371035  
SRR17520069. 7371037  
SRR17520069. 7371039  
SRR17520069. 7371041  
SRR17520069. 7371043  
SRR17520069. 7371045  
SRR17520069. 7371047  
SRR17520069. 7371049  
SRR17520069. 7371051  
SRR17520069. 7372151  
SRR17520069. 7372153  
SRR17520069. 7372155  
SRR17520069. 7376217  
SRR17520069. 7376219  
SRR17520069. 7376221  
SRR17520069. 7376223  
SRR17520069. 7376225  
SRR17520069. 7376227



SRR17520069. 7376229  
SRR17520069. 7376231  
SRR17520069. 7376233  
SRR17520069. 7376235  
SRR17520069. 7376237  
SRR17520069. 7376239  
SRR17520069. 7376241  
SRR17520069. 7376243  
SRR17520069. 7376245  
SRR17520069. 7376247  
SRR17520069. 7376249  
SRR17520069. 7376251  
SRR17520069. 7376253  
SRR17520069. 7376255  
SRR17520069. 7376261  
SRR17520069. 7389642  
SRR17520069. 7389644  
SRR17520069. 7389646  
SRR17520069. 7389648  
SRR17520069. 7389650  
SRR17520069. 7389652  
SRR17520069. 7389654  
SRR17520069. 7389656  
SRR17520069. 7389658  
SRR17520069. 7389660  
SRR17520069. 7389662  
SRR17520069. 7389664  
SRR17520069. 7389666  
SRR17520069. 7389668  
SRR17520069. 7389670  
SRR17520069. 7389672  
SRR17520069. 7389674  
SRR17520069. 7389676  
SRR17520069. 7389680  
SRR17520069. 7392713  
SRR17520069. 7392715  
SRR17520069. 7392717  
SRR17520069. 7392719  
SRR17520069. 7392721  
SRR17520069. 7392723  
SRR17520069. 7392725  
SRR17520069. 7392727  
SRR17520069. 7394920  
SRR17520069. 7394922  
SRR17520069. 7394924  
SRR17520069. 7394926  
SRR17520069. 7394928

SRR17520069. 7394930  
SRR17520069. 7394932  
SRR17520069. 7394934  
SRR17520069. 7394936  
SRR17520069. 7394938  
SRR17520069. 7394940  
SRR17520069. 7394942  
SRR17520069. 7394944  
SRR17520069. 7394946  
SRR17520069. 7394948  
SRR17520069. 7394950  
SRR17520069. 7394952  
SRR17520069. 7394954  
SRR17520069. 7394956  
SRR17520069. 7394958  
SRR17520069. 7394960  
SRR17520069. 7394962  
SRR17520069. 7394964  
SRR17520069. 7394966  
SRR17520069. 7394968  
SRR17520069. 7394970  
SRR17520069. 7394972  
SRR17520069. 7394974  
SRR17520069. 7394976  
SRR17520069. 7394978  
SRR17520069. 7394980  
SRR17520069. 7394982  
SRR17520069. 7394984  
SRR17520069. 7394986  
SRR17520069. 7394988  
SRR17520069. 7394990  
SRR17520069. 7394992  
SRR17520069. 7394994  
SRR17520069. 7394996  
SRR17520069. 7394998  
SRR17520069. 7395000  
SRR17520069. 7395002  
SRR17520069. 7395004  
SRR17520069. 7395008  
SRR17520069. 7395010  
SRR17520069. 7395012  
SRR17520069. 7395014  
SRR17520069. 7395016  
SRR17520069. 7395018  
SRR17520069. 7395020  
SRR17520069. 7395022  
SRR17520069. 7395024

SRR17520069. 7395026  
SRR17520069. 7395028  
SRR17520069. 7395443  
SRR17520069. 7395445  
SRR17520069. 7395447  
SRR17520069. 7395449  
SRR17520069. 7395451  
SRR17520069. 7395453  
SRR17520069. 7398479  
SRR17520069. 7398481  
SRR17520069. 7398483  
SRR17520069. 7398485  
SRR17520069. 7398487  
SRR17520069. 7398491  
SRR17520069. 7398493  
SRR17520069. 7398495  
SRR17520069. 7398499  
SRR17520069. 7398501  
SRR17520069. 7398505  
SRR17520069. 7398509  
SRR17520069. 7398511  
SRR17520069. 7398513  
SRR17520069. 7398515  
SRR17520069. 7398517  
SRR17520069. 7398519  
SRR17520069. 7398521  
SRR17520069. 7400359  
SRR17520069. 7400361  
SRR17520069. 7400363  
SRR17520069. 7400365  
SRR17520069. 7400367  
SRR17520069. 7400369  
SRR17520069. 7400371  
SRR17520069. 7400373  
SRR17520069. 7400375  
SRR17520069. 7401752  
SRR17520069. 7401754  
SRR17520069. 7401756  
SRR17520069. 7401758  
SRR17520069. 7401762  
SRR17520069. 7401764  
SRR17520069. 7401766  
SRR17520069. 7401768  
SRR17520069. 7401770  
SRR17520069. 7401772  
SRR17520069. 7401776  
SRR17520069. 7401778

SRR17520069. 7401780  
SRR17520069. 7401782  
SRR17520069. 7401784  
SRR17520069. 7401786  
SRR17520069. 7401788  
SRR17520069. 7401792  
SRR17520069. 7401794  
SRR17520069. 7401796  
SRR17520069. 7401798  
SRR17520069. 7401800  
SRR17520069. 7401802  
SRR17520069. 7401804  
SRR17520069. 7401806  
SRR17520069. 7401808  
SRR17520069. 7401814  
SRR17520069. 7401818  
SRR17520069. 7401821  
SRR17520069. 7401823  
SRR17520069. 7401825  
SRR17520069. 7401827  
SRR17520069. 7401831  
SRR17520069. 7401833  
SRR17520069. 7401835  
SRR17520069. 7401837  
SRR17520069. 7401839  
SRR17520069. 7401841  
SRR17520069. 7401843  
SRR17520069. 7401845  
SRR17520069. 7401847  
SRR17520069. 7401849  
SRR17520069. 7401851  
SRR17520069. 7401855  
SRR17520069. 7401857  
SRR17520069. 7401861  
SRR17520069. 7401863  
SRR17520069. 7401865  
SRR17520069. 7401867  
SRR17520069. 7401869  
SRR17520069. 7401871  
SRR17520069. 7401873  
SRR17520069. 7401875  
SRR17520069. 7401877  
SRR17520069. 7401879  
SRR17520069. 7401883  
SRR17520069. 7401885  
SRR17520069. 7401887  
SRR17520069. 7401889

SRR17520069.7401891  
SRR17520069.7401893  
SRR17520069.7401895  
SRR17520069.7401897  
SRR17520069.7401899  
SRR17520069.7401901  
SRR17520069.7401903  
SRR17520069.7401905  
SRR17520069.7401907  
SRR17520069.7401909  
SRR17520069.7401911  
SRR17520069.7401913  
SRR17520069.7409924  
SRR17520069.7409926  
SRR17520069.7420550  
SRR17520069.7420552  
SRR17520069.7420554  
SRR17520069.7420556  
SRR17520069.7420558  
SRR17520069.7420560  
SRR17520069.7420562  
SRR17520069.7420564  
SRR17520069.7420566  
SRR17520069.7420568  
SRR17520069.7420570  
SRR17520069.7420572  
SRR17520069.7420574  
SRR17520069.7420576  
SRR17520069.7420578  
SRR17520069.7420580  
SRR17520069.7420582  
SRR17520069.7420584  
SRR17520069.7420586  
SRR17520069.7420588  
SRR17520069.7420590  
SRR17520069.7420592  
SRR17520069.7420594  
SRR17520069.7420596  
SRR17520069.7420598  
SRR17520069.7420600  
SRR17520069.7420602  
SRR17520069.7420604  
SRR17520069.7420606  
SRR17520069.7420608  
SRR17520069.7420610  
SRR17520069.7420612  
SRR17520069.7424573

SRR17520069. 7424575  
SRR17520069. 7430132  
SRR17520069. 7430134  
SRR17520069. 7430136  
SRR17520069. 7430138  
SRR17520069. 7430140  
SRR17520069. 7430142  
SRR17520069. 7430144  
SRR17520069. 7430146  
SRR17520069. 7430148  
SRR17520069. 7430150  
SRR17520069. 7430152  
SRR17520069. 7430154  
SRR17520069. 7430156  
SRR17520069. 7430158  
SRR17520069. 7430160  
SRR17520069. 7430162  
SRR17520069. 7430164  
SRR17520069. 7430166  
SRR17520069. 7430168  
SRR17520069. 7430170  
SRR17520069. 7430172  
SRR17520069. 7430174  
SRR17520069. 7430176  
SRR17520069. 7430178  
SRR17520069. 7430180  
SRR17520069. 7430182  
SRR17520069. 7430184  
SRR17520069. 7430186  
SRR17520069. 7430188  
SRR17520069. 7430190  
SRR17520069. 7430192  
SRR17520069. 7430194  
SRR17520069. 7430196  
SRR17520069. 7430198  
SRR17520069. 7430200  
SRR17520069. 7430202  
SRR17520069. 7432605  
SRR17520069. 7432607  
SRR17520069. 7432609  
SRR17520069. 7432611  
SRR17520069. 7432613  
SRR17520069. 7432615  
SRR17520069. 7432617  
SRR17520069. 7432619  
SRR17520069. 7432621  
SRR17520069. 7432623

SRR17520069. 7432625  
SRR17520069. 7432627  
SRR17520069. 7432629  
SRR17520069. 7432631  
SRR17520069. 7432633  
SRR17520069. 7432635  
SRR17520069. 7432637  
SRR17520069. 7432639  
SRR17520069. 7432641  
SRR17520069. 7432643  
SRR17520069. 7432645  
SRR17520069. 7432647  
SRR17520069. 7432649  
SRR17520069. 7432651  
SRR17520069. 7432653  
SRR17520069. 7432655  
SRR17520069. 7432657  
SRR17520069. 7432659  
SRR17520069. 7432661  
SRR17520069. 7432663  
SRR17520069. 7432665  
SRR17520069. 7432667  
SRR17520069. 7432669  
SRR17520069. 7432671  
SRR17520069. 7432673  
SRR17520069. 7432675  
SRR17520069. 7432677  
SRR17520069. 7432679  
SRR17520069. 7432681  
SRR17520069. 7432685  
SRR17520069. 7432687  
SRR17520069. 7432689  
SRR17520069. 7432691  
SRR17520069. 7432693  
SRR17520069. 7432695  
SRR17520069. 7432697  
SRR17520069. 7432699  
SRR17520069. 7432701  
SRR17520069. 7432703  
SRR17520069. 7432705  
SRR17520069. 7432707  
SRR17520069. 7432709  
SRR17520069. 7432711  
SRR17520069. 7432713  
SRR17520069. 7432715  
SRR17520069. 7432717  
SRR17520069. 7432719

SRR17520069.7443658  
SRR17520069.7450978  
SRR17520069.7450980  
SRR17520069.7450982  
SRR17520069.7450984  
SRR17520069.7450986  
SRR17520069.7450988  
SRR17520069.7450990  
SRR17520069.7450992  
SRR17520069.7450994  
SRR17520069.7450998  
SRR17520069.7451000  
SRR17520069.7451002  
SRR17520069.7451004  
SRR17520069.7451006  
SRR17520069.7451008  
SRR17520069.7451010  
SRR17520069.7451014  
SRR17520069.7451016  
SRR17520069.7451018  
SRR17520069.7451020  
SRR17520069.7451022  
SRR17520069.7451024  
SRR17520069.7452141  
SRR17520069.7452143  
SRR17520069.7452145  
SRR17520069.7452147  
SRR17520069.7452149  
SRR17520069.7452151  
SRR17520069.7452153  
SRR17520069.7452155  
SRR17520069.7452157  
SRR17520069.7452159  
SRR17520069.7452161  
SRR17520069.7455643  
SRR17520069.7455645  
SRR17520069.7455647  
SRR17520069.7455649  
SRR17520069.7455651  
SRR17520069.7455653  
SRR17520069.7456576  
SRR17520069.7456578  
SRR17520069.7456580  
SRR17520069.7456582  
SRR17520069.7456584  
SRR17520069.7456586  
SRR17520069.7456588



SRR17520069.7456590  
SRR17520069.7456592  
SRR17520069.7456594  
SRR17520069.7456596  
SRR17520069.7456598  
SRR17520069.7456600  
SRR17520069.7456602  
SRR17520069.7456604  
SRR17520069.7456606  
SRR17520069.7456608  
SRR17520069.7456610  
SRR17520069.7456612  
SRR17520069.7456614  
SRR17520069.7456616  
SRR17520069.7456618  
SRR17520069.7456620  
SRR17520069.7456624  
SRR17520069.7456626  
SRR17520069.7456628  
SRR17520069.7456630  
SRR17520069.7456632  
SRR17520069.7456634  
SRR17520069.7456636  
SRR17520069.7456638  
SRR17520069.7456640  
SRR17520069.7456642  
SRR17520069.7456644  
SRR17520069.7456646  
SRR17520069.7457645  
SRR17520069.7457647  
SRR17520069.7457649  
SRR17520069.7457651  
SRR17520069.7457653  
SRR17520069.7457655  
SRR17520069.7457657  
SRR17520069.7457659  
SRR17520069.7457661  
SRR17520069.7457663  
SRR17520069.7457665  
SRR17520069.7457667  
SRR17520069.7457669  
SRR17520069.7457671  
SRR17520069.7457673  
SRR17520069.7457675  
SRR17520069.7457677  
SRR17520069.7457679  
SRR17520069.7457681

SRR17520069.7457683  
SRR17520069.7457685  
SRR17520069.7457687  
SRR17520069.7457689  
SRR17520069.7457693  
SRR17520069.7457695  
SRR17520069.7457697  
SRR17520069.7457699  
SRR17520069.7457701  
SRR17520069.7457703  
SRR17520069.7457705  
SRR17520069.7457707  
SRR17520069.7457709  
SRR17520069.7457711  
SRR17520069.7457713  
SRR17520069.7457715  
SRR17520069.7457717  
SRR17520069.7457719  
SRR17520069.7457721  
SRR17520069.7457723  
SRR17520069.7457725  
SRR17520069.7457727  
SRR17520069.7457729  
SRR17520069.7457731  
SRR17520069.7457733  
SRR17520069.7458620  
SRR17520069.7458622  
SRR17520069.7458624  
SRR17520069.7458626  
SRR17520069.7458628  
SRR17520069.7458630  
SRR17520069.7458632  
SRR17520069.7458634  
SRR17520069.7458636  
SRR17520069.7458638  
SRR17520069.7458640  
SRR17520069.7458642  
SRR17520069.7458644  
SRR17520069.7458646  
SRR17520069.7458648  
SRR17520069.7458650  
SRR17520069.7458652  
SRR17520069.7458654  
SRR17520069.7458656  
SRR17520069.7463533  
SRR17520069.7463535  
SRR17520069.7463537

SRR17520069.7463539  
SRR17520069.7463541  
SRR17520069.7463543  
SRR17520069.7463545  
SRR17520069.7463547  
SRR17520069.7463549  
SRR17520069.7463551  
SRR17520069.7463553  
SRR17520069.7463555  
SRR17520069.7463557  
SRR17520069.7463559  
SRR17520069.7463561  
SRR17520069.7463563  
SRR17520069.7463565  
SRR17520069.7463567  
SRR17520069.7463569  
SRR17520069.7463571  
SRR17520069.7463573  
SRR17520069.7463575  
SRR17520069.7463577  
SRR17520069.7463579  
SRR17520069.7463581  
SRR17520069.7463583  
SRR17520069.7463585  
SRR17520069.7463587  
SRR17520069.7463589  
SRR17520069.7463591  
SRR17520069.7463838  
SRR17520069.7470019  
SRR17520069.7470021  
SRR17520069.7470023  
SRR17520069.7470025  
SRR17520069.7470027  
SRR17520069.7470029  
SRR17520069.7470031  
SRR17520069.7470033  
SRR17520069.7470035  
SRR17520069.7470037  
SRR17520069.7470039  
SRR17520069.7470041  
SRR17520069.7470043  
SRR17520069.7470045  
SRR17520069.7470047  
SRR17520069.7470049  
SRR17520069.7470051  
SRR17520069.7470053  
SRR17520069.7470055

SRR17520069.7470057  
SRR17520069.7470485  
SRR17520069.7470487  
SRR17520069.7470489  
SRR17520069.7470491  
SRR17520069.7470493  
SRR17520069.7470495  
SRR17520069.7470497  
SRR17520069.7470499  
SRR17520069.7470501  
SRR17520069.7470503  
SRR17520069.7470505  
SRR17520069.7470507  
SRR17520069.7470509  
SRR17520069.7470511  
SRR17520069.7470513  
SRR17520069.7471814  
SRR17520069.7471816  
SRR17520069.7471818  
SRR17520069.7472357  
SRR17520069.7472359  
SRR17520069.7472363  
SRR17520069.7472365  
SRR17520069.7472367  
SRR17520069.7472369  
SRR17520069.7472371  
SRR17520069.7472373  
SRR17520069.7472375  
SRR17520069.7472377  
SRR17520069.7472471  
SRR17520069.7472473  
SRR17520069.7472475  
SRR17520069.7472477  
SRR17520069.7475310  
SRR17520069.7475312  
SRR17520069.7475314  
SRR17520069.7476390  
SRR17520069.7476392  
SRR17520069.7476396  
SRR17520069.7476479  
SRR17520069.7476481  
SRR17520069.7476483  
SRR17520069.7476485  
SRR17520069.7476487  
SRR17520069.7476489  
SRR17520069.7476491  
SRR17520069.7476493

SRR17520069. 7476495  
SRR17520069. 7476499  
SRR17520069. 7476501  
SRR17520069. 7476503  
SRR17520069. 7476505  
SRR17520069. 7476507  
SRR17520069. 7476509  
SRR17520069. 7476511  
SRR17520069. 7476513  
SRR17520069. 7476515  
SRR17520069. 7476517  
SRR17520069. 7476519  
SRR17520069. 7476521  
SRR17520069. 7476523  
SRR17520069. 7476525  
SRR17520069. 7476527  
SRR17520069. 7476529  
SRR17520069. 7476531  
SRR17520069. 7476533  
SRR17520069. 7476535  
SRR17520069. 7476537  
SRR17520069. 7476539  
SRR17520069. 7476541  
SRR17520069. 7478596  
SRR17520069. 7478598  
SRR17520069. 7478600  
SRR17520069. 7478602  
SRR17520069. 7478604  
SRR17520069. 7478606  
SRR17520069. 7478608  
SRR17520069. 7478612  
SRR17520069. 7478614  
SRR17520069. 7478616  
SRR17520069. 7478618  
SRR17520069. 7478620  
SRR17520069. 7478622  
SRR17520069. 7478624  
SRR17520069. 7478626  
SRR17520069. 7479492  
SRR17520069. 7479494  
SRR17520069. 7479496  
SRR17520069. 7479498  
SRR17520069. 7479500  
SRR17520069. 7479502  
SRR17520069. 7479504  
SRR17520069. 7479506  
SRR17520069. 7479508

SRR17520069.7479510  
SRR17520069.7479512  
SRR17520069.7479514  
SRR17520069.7479516  
SRR17520069.7479518  
SRR17520069.7479520  
SRR17520069.7479522  
SRR17520069.7479524  
SRR17520069.7479657  
SRR17520069.7479659  
SRR17520069.7479661  
SRR17520069.7479663  
SRR17520069.7479665  
SRR17520069.7479667  
SRR17520069.7479669  
SRR17520069.7479671  
SRR17520069.7479673  
SRR17520069.7479675  
SRR17520069.7479677  
SRR17520069.7479679  
SRR17520069.7479681  
SRR17520069.7479683  
SRR17520069.7479685  
SRR17520069.7479687  
SRR17520069.7479689  
SRR17520069.7479691  
SRR17520069.7479693  
SRR17520069.7479695  
SRR17520069.7479697  
SRR17520069.7479699  
SRR17520069.7479701  
SRR17520069.7479703  
SRR17520069.7479705  
SRR17520069.7479707  
SRR17520069.7479709  
SRR17520069.7479711  
SRR17520069.7479713  
SRR17520069.7479715  
SRR17520069.7479717  
SRR17520069.7479719  
SRR17520069.7479721  
SRR17520069.7479723  
SRR17520069.7479725  
SRR17520069.7479727  
SRR17520069.7479729  
SRR17520069.7479731  
SRR17520069.7479733

SRR17520069.7479735  
SRR17520069.7479737  
SRR17520069.7483026  
SRR17520069.7483028  
SRR17520069.7483030  
SRR17520069.7483032  
SRR17520069.7483036  
SRR17520069.7483040  
SRR17520069.7483042  
SRR17520069.7483044  
SRR17520069.7483046  
SRR17520069.7483048  
SRR17520069.7483052  
SRR17520069.7483054  
SRR17520069.7483056  
SRR17520069.7488994  
SRR17520069.7488996  
SRR17520069.7488998  
SRR17520069.7490492  
SRR17520069.7490494  
SRR17520069.7490496  
SRR17520069.7490498  
SRR17520069.7490500  
SRR17520069.7490502  
SRR17520069.7490506  
SRR17520069.7490508  
SRR17520069.7490510  
SRR17520069.7490512  
SRR17520069.7490514  
SRR17520069.7490516  
SRR17520069.7490518  
SRR17520069.7490520  
SRR17520069.7490522  
SRR17520069.7490524  
SRR17520069.7490526  
SRR17520069.7490528  
SRR17520069.7490530  
SRR17520069.7490532  
SRR17520069.7490534  
SRR17520069.7490536  
SRR17520069.7490538  
SRR17520069.7490540  
SRR17520069.7490542  
SRR17520069.7490544  
SRR17520069.7490546  
SRR17520069.7490548  
SRR17520069.7490550

SRR17520069. 7490552  
SRR17520069. 7490554  
SRR17520069. 7490556  
SRR17520069. 7490558  
SRR17520069. 7490560  
SRR17520069. 7490562  
SRR17520069. 7490564  
SRR17520069. 7490566  
SRR17520069. 7490568  
SRR17520069. 7490570  
SRR17520069. 7490572  
SRR17520069. 7490574  
SRR17520069. 7490576  
SRR17520069. 7490578  
SRR17520069. 7490580  
SRR17520069. 7490582  
SRR17520069. 7490584  
SRR17520069. 7490586  
SRR17520069. 7490588  
SRR17520069. 7490590  
SRR17520069. 7490592  
SRR17520069. 7490594  
SRR17520069. 7490596  
SRR17520069. 7490598  
SRR17520069. 7490600  
SRR17520069. 7490602  
SRR17520069. 7490604  
SRR17520069. 7490606  
SRR17520069. 7490608  
SRR17520069. 7490610  
SRR17520069. 7490612  
SRR17520069. 7490614  
SRR17520069. 7490616  
SRR17520069. 7490618  
SRR17520069. 7490620  
SRR17520069. 7490622  
SRR17520069. 7490624  
SRR17520069. 7490626  
SRR17520069. 7490628  
SRR17520069. 7490630  
SRR17520069. 7490632  
SRR17520069. 7490634  
SRR17520069. 7490636  
SRR17520069. 7490638  
SRR17520069. 7490640  
SRR17520069. 7490642  
SRR17520069. 7490644



SRR17520069.7490646  
SRR17520069.7490648  
SRR17520069.7490650  
SRR17520069.7490652  
SRR17520069.7490654  
SRR17520069.7490656  
SRR17520069.7490660  
SRR17520069.7490662  
SRR17520069.7490664  
SRR17520069.7491923  
SRR17520069.7491925  
SRR17520069.7491927  
SRR17520069.7491929  
SRR17520069.7491931  
SRR17520069.7491933  
SRR17520069.7491935  
SRR17520069.7491937  
SRR17520069.7491939  
SRR17520069.7491941  
SRR17520069.7491943  
SRR17520069.7491945  
SRR17520069.7491947  
SRR17520069.7491949  
SRR17520069.7491951  
SRR17520069.7491955  
SRR17520069.7491957  
SRR17520069.7491959  
SRR17520069.7491961  
SRR17520069.7491963  
SRR17520069.7491965  
SRR17520069.7491967  
SRR17520069.7491969  
SRR17520069.7491971  
SRR17520069.7491973  
SRR17520069.7497822  
SRR17520069.7497824  
SRR17520069.7497826  
SRR17520069.7500972  
SRR17520069.7516543  
SRR17520069.7516545  
SRR17520069.7516547  
SRR17520069.7516549  
SRR17520069.7516551  
SRR17520069.7516553  
SRR17520069.7516555  
SRR17520069.7516557  
SRR17520069.7516559

SRR17520069.7516561  
SRR17520069.7516563  
SRR17520069.7520796  
SRR17520069.7520798  
SRR17520069.7520800  
SRR17520069.7520802  
SRR17520069.7520804  
SRR17520069.7520806  
SRR17520069.7520808  
SRR17520069.7520810  
SRR17520069.7520812  
SRR17520069.7520814  
SRR17520069.7520816  
SRR17520069.7524825  
SRR17520069.7524827  
SRR17520069.7524829  
SRR17520069.7524831  
SRR17520069.7524833  
SRR17520069.7524837  
SRR17520069.7524839  
SRR17520069.7524841  
SRR17520069.7524843  
SRR17520069.7524845  
SRR17520069.7524847  
SRR17520069.7524849  
SRR17520069.7524851  
SRR17520069.7524853  
SRR17520069.7524855  
SRR17520069.7524857  
SRR17520069.7524861  
SRR17520069.7524863  
SRR17520069.7524865  
SRR17520069.7524867  
SRR17520069.7524869  
SRR17520069.7524871  
SRR17520069.7524873  
SRR17520069.7524875  
SRR17520069.7524877  
SRR17520069.7524879  
SRR17520069.7524881  
SRR17520069.7524883  
SRR17520069.7524885  
SRR17520069.7524887  
SRR17520069.7529717  
SRR17520069.7529719  
SRR17520069.7529721  
SRR17520069.7529723

SRR17520069. 7529725  
SRR17520069. 7529727  
SRR17520069. 7529729  
SRR17520069. 7529731  
SRR17520069. 7529733  
SRR17520069. 7529735  
SRR17520069. 7529737  
SRR17520069. 7529739  
SRR17520069. 7529741  
SRR17520069. 7529743  
SRR17520069. 7529745  
SRR17520069. 7529747  
SRR17520069. 7529749  
SRR17520069. 7529751  
SRR17520069. 7529753  
SRR17520069. 7529755  
SRR17520069. 7529757  
SRR17520069. 7529759  
SRR17520069. 7529761  
SRR17520069. 7529763  
SRR17520069. 7529765  
SRR17520069. 7529767  
SRR17520069. 7529769  
SRR17520069. 7529771  
SRR17520069. 7529773  
SRR17520069. 7529775  
SRR17520069. 7529777  
SRR17520069. 7529781  
SRR17520069. 7529783  
SRR17520069. 7529785  
SRR17520069. 7529787  
SRR17520069. 7529789  
SRR17520069. 7529791  
SRR17520069. 7529793  
SRR17520069. 7529795  
SRR17520069. 7529797  
SRR17520069. 7529799  
SRR17520069. 7529803  
SRR17520069. 7529805  
SRR17520069. 7529807  
SRR17520069. 7529809  
SRR17520069. 7529811  
SRR17520069. 7529813  
SRR17520069. 7529815  
SRR17520069. 7529817  
SRR17520069. 7529819  
SRR17520069. 7535334

SRR17520069.7535336  
SRR17520069.7535338  
SRR17520069.7535340  
SRR17520069.7535342  
SRR17520069.7535344  
SRR17520069.7535346  
SRR17520069.7535348  
SRR17520069.7535350  
SRR17520069.7535352  
SRR17520069.7535354  
SRR17520069.7535356  
SRR17520069.7535358  
SRR17520069.7535360  
SRR17520069.7535362  
SRR17520069.7535364  
SRR17520069.7535366  
SRR17520069.7535368  
SRR17520069.7535370  
SRR17520069.7535372  
SRR17520069.7535374  
SRR17520069.7535376  
SRR17520069.7544994  
SRR17520069.7544996  
SRR17520069.7544998  
SRR17520069.7545000  
SRR17520069.7545002  
SRR17520069.7545004  
SRR17520069.7545008  
SRR17520069.7545010  
SRR17520069.7545012  
SRR17520069.7545014  
SRR17520069.7545016  
SRR17520069.7545018  
SRR17520069.7545020  
SRR17520069.7545022  
SRR17520069.7545024  
SRR17520069.7545026  
SRR17520069.7545028  
SRR17520069.7545030  
SRR17520069.7545032  
SRR17520069.7545034  
SRR17520069.7545036  
SRR17520069.7545038  
SRR17520069.7545040  
SRR17520069.7545042  
SRR17520069.7545044  
SRR17520069.7545046

SRR17520069.7545048  
SRR17520069.7545050  
SRR17520069.7545054  
SRR17520069.7545056  
SRR17520069.7545058  
SRR17520069.7545060  
SRR17520069.7545062  
SRR17520069.7545064  
SRR17520069.7545066  
SRR17520069.7545068  
SRR17520069.7545070  
SRR17520069.7545072  
SRR17520069.7545360  
SRR17520069.7545362  
SRR17520069.7545364  
SRR17520069.7545366  
SRR17520069.7545368  
SRR17520069.7545370  
SRR17520069.7545372  
SRR17520069.7545374  
SRR17520069.7545376  
SRR17520069.7545378  
SRR17520069.7545380  
SRR17520069.7545382  
SRR17520069.7545384  
SRR17520069.7545386  
SRR17520069.7545388  
SRR17520069.7545390  
SRR17520069.7545392  
SRR17520069.7545394  
SRR17520069.7545396  
SRR17520069.7545398  
SRR17520069.7545400  
SRR17520069.7545404  
SRR17520069.7545406  
SRR17520069.7545408  
SRR17520069.7545410  
SRR17520069.7545412  
SRR17520069.7545414  
SRR17520069.7545416  
SRR17520069.7545418  
SRR17520069.7545420  
SRR17520069.7545424  
SRR17520069.7545426  
SRR17520069.7545428  
SRR17520069.7545430  
SRR17520069.7545432

SRR17520069. 7545436  
SRR17520069. 7545440  
SRR17520069. 7545442  
SRR17520069. 7545444  
SRR17520069. 7545446  
SRR17520069. 7545448  
SRR17520069. 7545450  
SRR17520069. 7545452  
SRR17520069. 7545454  
SRR17520069. 7545456  
SRR17520069. 7545458  
SRR17520069. 7545460  
SRR17520069. 7545462  
SRR17520069. 7545464  
SRR17520069. 7545466  
SRR17520069. 7545468  
SRR17520069. 7545470  
SRR17520069. 7545472  
SRR17520069. 7545474  
SRR17520069. 7545476  
SRR17520069. 7545478  
SRR17520069. 7545480  
SRR17520069. 7545482  
SRR17520069. 7545484  
SRR17520069. 7545486  
SRR17520069. 7545488  
SRR17520069. 7545490  
SRR17520069. 7545492  
SRR17520069. 7545494  
SRR17520069. 7545496  
SRR17520069. 7545498  
SRR17520069. 7545500  
SRR17520069. 7545502  
SRR17520069. 7545504  
SRR17520069. 7545506  
SRR17520069. 7545508  
SRR17520069. 7545510  
SRR17520069. 7545514  
SRR17520069. 7545516  
SRR17520069. 7545518  
SRR17520069. 7545520  
SRR17520069. 7549748  
SRR17520069. 7549750  
SRR17520069. 7551465  
SRR17520069. 7551467  
SRR17520069. 7551469  
SRR17520069. 7551471

SRR17520069.7551473  
SRR17520069.7551475  
SRR17520069.7551477  
SRR17520069.7551479  
SRR17520069.7551481  
SRR17520069.7551483  
SRR17520069.7551485  
SRR17520069.7557123  
SRR17520069.7557125  
SRR17520069.7557127  
SRR17520069.7557129  
SRR17520069.7557131  
SRR17520069.7557133  
SRR17520069.7557135  
SRR17520069.7557137  
SRR17520069.7557139  
SRR17520069.7557141  
SRR17520069.7557143  
SRR17520069.7557145  
SRR17520069.7557149  
SRR17520069.7557151  
SRR17520069.7557242  
SRR17520069.7557244  
SRR17520069.7557246  
SRR17520069.7557248  
SRR17520069.7557250  
SRR17520069.7557252  
SRR17520069.7557254  
SRR17520069.7557256  
SRR17520069.7557258  
SRR17520069.7557260  
SRR17520069.7557262  
SRR17520069.7557266  
SRR17520069.7557268  
SRR17520069.7557270  
SRR17520069.7557272  
SRR17520069.7557274  
SRR17520069.7557276  
SRR17520069.7557278  
SRR17520069.7557280  
SRR17520069.7557282  
SRR17520069.7557284  
SRR17520069.7557286  
SRR17520069.7557288  
SRR17520069.7557290  
SRR17520069.7557292  
SRR17520069.7557294

SRR17520069.7557296  
SRR17520069.7557298  
SRR17520069.7557300  
SRR17520069.7557302  
SRR17520069.7557304  
SRR17520069.7557306  
SRR17520069.7557308  
SRR17520069.7557310  
SRR17520069.7557312  
SRR17520069.7557314  
SRR17520069.7557316  
SRR17520069.7557318  
SRR17520069.7557320  
SRR17520069.7557322  
SRR17520069.7559524  
SRR17520069.7559526  
SRR17520069.7562663  
SRR17520069.7562665  
SRR17520069.7562667  
SRR17520069.7562669  
SRR17520069.7562671  
SRR17520069.7562673  
SRR17520069.7564622  
SRR17520069.7564624  
SRR17520069.7564626  
SRR17520069.7564628  
SRR17520069.7564630  
SRR17520069.7564632  
SRR17520069.7564634  
SRR17520069.7564636  
SRR17520069.7564638  
SRR17520069.7564642  
SRR17520069.7564644  
SRR17520069.7564646  
SRR17520069.7564648  
SRR17520069.7564650  
SRR17520069.7564652  
SRR17520069.7564654  
SRR17520069.7564656  
SRR17520069.7564658  
SRR17520069.7564660  
SRR17520069.7564662  
SRR17520069.7564664  
SRR17520069.7564666  
SRR17520069.7564668  
SRR17520069.7564670  
SRR17520069.7564672



SRR17520069. 7564674  
SRR17520069. 7564676  
SRR17520069. 7564678  
SRR17520069. 7564680  
SRR17520069. 7564682  
SRR17520069. 7564684  
SRR17520069. 7564686  
SRR17520069. 7564688  
SRR17520069. 7564690  
SRR17520069. 7564692  
SRR17520069. 7564694  
SRR17520069. 7564696  
SRR17520069. 7564698  
SRR17520069. 7564700  
SRR17520069. 7564702  
SRR17520069. 7564704  
SRR17520069. 7564706  
SRR17520069. 7564708  
SRR17520069. 7566130  
SRR17520069. 7566132  
SRR17520069. 7569772  
SRR17520069. 7579421  
SRR17520069. 7579423  
SRR17520069. 7579425  
SRR17520069. 7579427  
SRR17520069. 7579429  
SRR17520069. 7579431  
SRR17520069. 7579433  
SRR17520069. 7579435  
SRR17520069. 7579437  
SRR17520069. 7579439  
SRR17520069. 7579441  
SRR17520069. 7579443  
SRR17520069. 7579445  
SRR17520069. 7579447  
SRR17520069. 7579449  
SRR17520069. 7579451  
SRR17520069. 7579453  
SRR17520069. 7579455  
SRR17520069. 7579457  
SRR17520069. 7579459  
SRR17520069. 7579461  
SRR17520069. 7579463  
SRR17520069. 7579465  
SRR17520069. 7579467  
SRR17520069. 7579471  
SRR17520069. 7579473

SRR17520069.7579475  
SRR17520069.7579477  
SRR17520069.7579479  
SRR17520069.7579481  
SRR17520069.7579483  
SRR17520069.7579485  
SRR17520069.7579487  
SRR17520069.7579489  
SRR17520069.7579491  
SRR17520069.7579493  
SRR17520069.7579495  
SRR17520069.7579497  
SRR17520069.7579499  
SRR17520069.7579501  
SRR17520069.7579503  
SRR17520069.7579505  
SRR17520069.7579507  
SRR17520069.7579509  
SRR17520069.7579511  
SRR17520069.7579513  
SRR17520069.7579515  
SRR17520069.7579517  
SRR17520069.7579519  
SRR17520069.7579521  
SRR17520069.7579523  
SRR17520069.7579525  
SRR17520069.7579527  
SRR17520069.7579529  
SRR17520069.7579531  
SRR17520069.7579533  
SRR17520069.7579535  
SRR17520069.7579537  
SRR17520069.7579539  
SRR17520069.7579541  
SRR17520069.7579543  
SRR17520069.7579545  
SRR17520069.7579547  
SRR17520069.7579549  
SRR17520069.7579551  
SRR17520069.7579553  
SRR17520069.7579555  
SRR17520069.7579557  
SRR17520069.7579559  
SRR17520069.7579561  
SRR17520069.7579563  
SRR17520069.7579565  
SRR17520069.7579567

SRR17520069. 7579798  
SRR17520069. 7589598  
SRR17520069. 7589600  
SRR17520069. 7589602  
SRR17520069. 7589604  
SRR17520069. 7589606  
SRR17520069. 7589608  
SRR17520069. 7589610  
SRR17520069. 7589612  
SRR17520069. 7589614  
SRR17520069. 7589616  
SRR17520069. 7589618  
SRR17520069. 7589620  
SRR17520069. 7589622  
SRR17520069. 7589624  
SRR17520069. 7589626  
SRR17520069. 7589628  
SRR17520069. 7589630  
SRR17520069. 7589632  
SRR17520069. 7589634  
SRR17520069. 7589636  
SRR17520069. 7589638  
SRR17520069. 7589640  
SRR17520069. 7592332  
SRR17520069. 7592334  
SRR17520069. 7592336  
SRR17520069. 7592338  
SRR17520069. 7592340  
SRR17520069. 7592342  
SRR17520069. 7597159  
SRR17520069. 7597161  
SRR17520069. 7597163  
SRR17520069. 7597165  
SRR17520069. 7599226  
SRR17520069. 7599228  
SRR17520069. 7599230  
SRR17520069. 7600586  
SRR17520069. 7600588  
SRR17520069. 7600590  
SRR17520069. 7600592  
SRR17520069. 7600594  
SRR17520069. 7600596  
SRR17520069. 7600598  
SRR17520069. 7600600  
SRR17520069. 7600602  
SRR17520069. 7600604  
SRR17520069. 7600606

SRR17520069.7600608  
SRR17520069.7600610  
SRR17520069.7600612  
SRR17520069.7600614  
SRR17520069.7600616  
SRR17520069.7600618  
SRR17520069.7600620  
SRR17520069.7600622  
SRR17520069.7600624  
SRR17520069.7600626  
SRR17520069.7600628  
SRR17520069.7600630  
SRR17520069.7600632  
SRR17520069.7600634  
SRR17520069.7600636  
SRR17520069.7600638  
SRR17520069.7600640  
SRR17520069.7600642  
SRR17520069.7600644  
SRR17520069.7600646  
SRR17520069.7600648  
SRR17520069.7600650  
SRR17520069.7600652  
SRR17520069.7600654  
SRR17520069.7600656  
SRR17520069.7600658  
SRR17520069.7600660  
SRR17520069.7600662  
SRR17520069.7600664  
SRR17520069.7600666  
SRR17520069.7600668  
SRR17520069.7600670  
SRR17520069.7600672  
SRR17520069.7600674  
SRR17520069.7600676  
SRR17520069.7600678  
SRR17520069.7600680  
SRR17520069.7600682  
SRR17520069.7600684  
SRR17520069.7600686  
SRR17520069.7600688  
SRR17520069.7600690  
SRR17520069.7600692  
SRR17520069.7600694  
SRR17520069.7600696  
SRR17520069.7600698  
SRR17520069.7600700

SRR17520069.7600702  
SRR17520069.7600704  
SRR17520069.7600706  
SRR17520069.7604371  
SRR17520069.7605646  
SRR17520069.7605648  
SRR17520069.7605650  
SRR17520069.7605652  
SRR17520069.7605654  
SRR17520069.7605656  
SRR17520069.7605658  
SRR17520069.7605660  
SRR17520069.7605662  
SRR17520069.7605664  
SRR17520069.7605666  
SRR17520069.7605668  
SRR17520069.7605672  
SRR17520069.7605674  
SRR17520069.7612991  
SRR17520069.7612993  
SRR17520069.7612995  
SRR17520069.7612997  
SRR17520069.7612999  
SRR17520069.7613001  
SRR17520069.7613003  
SRR17520069.7613005  
SRR17520069.7613007  
SRR17520069.7613009  
SRR17520069.7613011  
SRR17520069.7613013  
SRR17520069.7613015  
SRR17520069.7613017  
SRR17520069.7613019  
SRR17520069.7613021  
SRR17520069.7613023  
SRR17520069.7613025  
SRR17520069.7613027  
SRR17520069.7613029  
SRR17520069.7613031  
SRR17520069.7613033  
SRR17520069.7613035  
SRR17520069.7613037  
SRR17520069.7613039  
SRR17520069.7613043  
SRR17520069.7613045  
SRR17520069.7613047  
SRR17520069.7613049

SRR17520069.7613051  
SRR17520069.7613053  
SRR17520069.7613055  
SRR17520069.7613057  
SRR17520069.7613059  
SRR17520069.7613061  
SRR17520069.7613063  
SRR17520069.7613065  
SRR17520069.7613067  
SRR17520069.7613069  
SRR17520069.7613071  
SRR17520069.7613073  
SRR17520069.7613075  
SRR17520069.7613077  
SRR17520069.7613079  
SRR17520069.7613081  
SRR17520069.7613083  
SRR17520069.7613085  
SRR17520069.7613087  
SRR17520069.7613089  
SRR17520069.7613091  
SRR17520069.7613095  
SRR17520069.7613097  
SRR17520069.7613099  
SRR17520069.7613104  
SRR17520069.7613106  
SRR17520069.7613108  
SRR17520069.7613110  
SRR17520069.7613112  
SRR17520069.7613114  
SRR17520069.7613116  
SRR17520069.7613118  
SRR17520069.7613120  
SRR17520069.7613122  
SRR17520069.7613124  
SRR17520069.7613126  
SRR17520069.7613128  
SRR17520069.7613130  
SRR17520069.7613132  
SRR17520069.7613134  
SRR17520069.7614398  
SRR17520069.7614400  
SRR17520069.7614402  
SRR17520069.7614404  
SRR17520069.7614406  
SRR17520069.7614408  
SRR17520069.7614410

SRR17520069. 7614412  
SRR17520069. 7615606  
SRR17520069. 7615608  
SRR17520069. 7615610  
SRR17520069. 7615612  
SRR17520069. 7615614  
SRR17520069. 7615616  
SRR17520069. 7615618  
SRR17520069. 7615620  
SRR17520069. 7615622  
SRR17520069. 7615624  
SRR17520069. 7615626  
SRR17520069. 7615628  
SRR17520069. 7619473  
SRR17520069. 7619476  
SRR17520069. 7619478  
SRR17520069. 7619480  
SRR17520069. 7619482  
SRR17520069. 7619484  
SRR17520069. 7619486  
SRR17520069. 7619488  
SRR17520069. 7619490  
SRR17520069. 7619492  
SRR17520069. 7619494  
SRR17520069. 7619496  
SRR17520069. 7619498  
SRR17520069. 7619500  
SRR17520069. 7619502  
SRR17520069. 7619504  
SRR17520069. 7619506  
SRR17520069. 7619508  
SRR17520069. 7619510  
SRR17520069. 7619512  
SRR17520069. 7619514  
SRR17520069. 7619516  
SRR17520069. 7619518  
SRR17520069. 7619520  
SRR17520069. 7619522  
SRR17520069. 7630991  
SRR17520069. 7630993  
SRR17520069. 7630995  
SRR17520069. 7630997  
SRR17520069. 7630999  
SRR17520069. 7631169  
SRR17520069. 7631171  
SRR17520069. 7631173  
SRR17520069. 7631175

SRR17520069.7631177  
SRR17520069.7631179  
SRR17520069.7631181  
SRR17520069.7631183  
SRR17520069.7631185  
SRR17520069.7631187  
SRR17520069.7631189  
SRR17520069.7631191  
SRR17520069.7631193  
SRR17520069.7631195  
SRR17520069.7631197  
SRR17520069.7631199  
SRR17520069.7631201  
SRR17520069.7631203  
SRR17520069.7631205  
SRR17520069.7631207  
SRR17520069.7631209  
SRR17520069.7631213  
SRR17520069.7631217  
SRR17520069.7631219  
SRR17520069.7631221  
SRR17520069.7631223  
SRR17520069.7631225  
SRR17520069.7631227  
SRR17520069.7631229  
SRR17520069.7631231  
SRR17520069.7631233  
SRR17520069.7631235  
SRR17520069.7631237  
SRR17520069.7631239  
SRR17520069.7631241  
SRR17520069.7631243  
SRR17520069.7637039  
SRR17520069.7637041  
SRR17520069.7637043  
SRR17520069.7637045  
SRR17520069.7637047  
SRR17520069.7637049  
SRR17520069.7637051  
SRR17520069.7637053  
SRR17520069.7637055  
SRR17520069.7637057  
SRR17520069.7637059  
SRR17520069.7637061  
SRR17520069.7637063  
SRR17520069.7637065  
SRR17520069.7637067



SRR17520069. 7637069  
SRR17520069. 7637071  
SRR17520069. 7637073  
SRR17520069. 7637075  
SRR17520069. 7637077  
SRR17520069. 7637079  
SRR17520069. 7637081  
SRR17520069. 7637083  
SRR17520069. 7637085  
SRR17520069. 7637087  
SRR17520069. 7637089  
SRR17520069. 7637091  
SRR17520069. 7637093  
SRR17520069. 7637095  
SRR17520069. 7637097  
SRR17520069. 7637099  
SRR17520069. 7637101  
SRR17520069. 7637103  
SRR17520069. 7637107  
SRR17520069. 7637109  
SRR17520069. 7637111  
SRR17520069. 7637113  
SRR17520069. 7637115  
SRR17520069. 7637117  
SRR17520069. 7637119  
SRR17520069. 7637123  
SRR17520069. 7637125  
SRR17520069. 7642562  
SRR17520069. 7642564  
SRR17520069. 7642566  
SRR17520069. 7642568  
SRR17520069. 7642570  
SRR17520069. 7642572  
SRR17520069. 7642574  
SRR17520069. 7642576  
SRR17520069. 7642578  
SRR17520069. 7642580  
SRR17520069. 7642582  
SRR17520069. 7642584  
SRR17520069. 7642586  
SRR17520069. 7642588  
SRR17520069. 7642592  
SRR17520069. 7642594  
SRR17520069. 7642596  
SRR17520069. 7642598  
SRR17520069. 7642600  
SRR17520069. 7642602

SRR17520069. 7642606  
SRR17520069. 7655648  
SRR17520069. 7655650  
SRR17520069. 7655652  
SRR17520069. 7655654  
SRR17520069. 7655656  
SRR17520069. 7655658  
SRR17520069. 7655660  
SRR17520069. 7655662  
SRR17520069. 7655664  
SRR17520069. 7655666  
SRR17520069. 7655668  
SRR17520069. 7655670  
SRR17520069. 7655672  
SRR17520069. 7655674  
SRR17520069. 7658519  
SRR17520069. 7658521  
SRR17520069. 7658523  
SRR17520069. 7658525  
SRR17520069. 7658527  
SRR17520069. 7658529  
SRR17520069. 7658531  
SRR17520069. 7658533  
SRR17520069. 7658535  
SRR17520069. 7658537  
SRR17520069. 7658539  
SRR17520069. 7658541  
SRR17520069. 7658543  
SRR17520069. 7658545  
SRR17520069. 7658547  
SRR17520069. 7658549  
SRR17520069. 7658551  
SRR17520069. 7658553  
SRR17520069. 7658555  
SRR17520069. 7658557  
SRR17520069. 7658559  
SRR17520069. 7658561  
SRR17520069. 7658563  
SRR17520069. 7658565  
SRR17520069. 7658567  
SRR17520069. 7658569  
SRR17520069. 7658571  
SRR17520069. 7658573  
SRR17520069. 7658575  
SRR17520069. 7658577  
SRR17520069. 7658579  
SRR17520069. 7658581

SRR17520069.7658583  
SRR17520069.7658585  
SRR17520069.7658587  
SRR17520069.7658589  
SRR17520069.7658591  
SRR17520069.7658593  
SRR17520069.7658595  
SRR17520069.7658597  
SRR17520069.7658599  
SRR17520069.7658601  
SRR17520069.7658605  
SRR17520069.7658607  
SRR17520069.7658609  
SRR17520069.7658611  
SRR17520069.7658613  
SRR17520069.7658615  
SRR17520069.7658617  
SRR17520069.7658619  
SRR17520069.7658621  
SRR17520069.7658623  
SRR17520069.7662585  
SRR17520069.7662587  
SRR17520069.7662589  
SRR17520069.7662591  
SRR17520069.7662593  
SRR17520069.7662595  
SRR17520069.7662597  
SRR17520069.7662599  
SRR17520069.7662601  
SRR17520069.7662603  
SRR17520069.7662605  
SRR17520069.7662607  
SRR17520069.7662611  
SRR17520069.7662615  
SRR17520069.7667020  
SRR17520069.7667022  
SRR17520069.7667024  
SRR17520069.7667026  
SRR17520069.7667028  
SRR17520069.7667030  
SRR17520069.7667032  
SRR17520069.7667034  
SRR17520069.7667036  
SRR17520069.7667038  
SRR17520069.7667040  
SRR17520069.7668015  
SRR17520069.7668017

SRR17520069. 7668021  
SRR17520069. 7668023  
SRR17520069. 7668025  
SRR17520069. 7668027  
SRR17520069. 7671916  
SRR17520069. 7671918  
SRR17520069. 7671920  
SRR17520069. 7671922  
SRR17520069. 7671924  
SRR17520069. 7671926  
SRR17520069. 7671928  
SRR17520069. 7671930  
SRR17520069. 7671932  
SRR17520069. 7671934  
SRR17520069. 7671936  
SRR17520069. 7671938  
SRR17520069. 7671940  
SRR17520069. 7671942  
SRR17520069. 7671944  
SRR17520069. 7671946  
SRR17520069. 7671948  
SRR17520069. 7671950  
SRR17520069. 7671952  
SRR17520069. 7672157  
SRR17520069. 7672159  
SRR17520069. 7672161  
SRR17520069. 7672163  
SRR17520069. 7672165  
SRR17520069. 7672167  
SRR17520069. 7672169  
SRR17520069. 7672171  
SRR17520069. 7672173  
SRR17520069. 7672175  
SRR17520069. 7672177  
SRR17520069. 7672179  
SRR17520069. 7672185  
SRR17520069. 7672187  
SRR17520069. 7672189  
SRR17520069. 7672191  
SRR17520069. 7672193  
SRR17520069. 7672195  
SRR17520069. 7672197  
SRR17520069. 7672199  
SRR17520069. 7672201  
SRR17520069. 7672203  
SRR17520069. 7672205  
SRR17520069. 7672207

SRR17520069.7672209  
SRR17520069.7672211  
SRR17520069.7672213  
SRR17520069.7672215  
SRR17520069.7672217  
SRR17520069.7672219  
SRR17520069.7672221  
SRR17520069.7672223  
SRR17520069.7672225  
SRR17520069.7672227  
SRR17520069.7672229  
SRR17520069.7672231  
SRR17520069.7672233  
SRR17520069.7672235  
SRR17520069.7672237  
SRR17520069.7672239  
SRR17520069.7672241  
SRR17520069.7672243  
SRR17520069.7672245  
SRR17520069.7672247  
SRR17520069.7672249  
SRR17520069.7672251  
SRR17520069.7672253  
SRR17520069.7672255  
SRR17520069.7672257  
SRR17520069.7672259  
SRR17520069.7672261  
SRR17520069.7672263  
SRR17520069.7674764  
SRR17520069.7674766  
SRR17520069.7674768  
SRR17520069.7674770  
SRR17520069.7679104  
SRR17520069.7679106  
SRR17520069.7679108  
SRR17520069.7679110  
SRR17520069.7679112  
SRR17520069.7679114  
SRR17520069.7679116  
SRR17520069.7679118  
SRR17520069.7679120  
SRR17520069.7679122  
SRR17520069.7679124  
SRR17520069.7679126  
SRR17520069.7679128  
SRR17520069.7679130  
SRR17520069.7679132

SRR17520069.7679134  
SRR17520069.7679136  
SRR17520069.7679138  
SRR17520069.7679140  
SRR17520069.7679142  
SRR17520069.7679439  
SRR17520069.7679441  
SRR17520069.7679443  
SRR17520069.7679445  
SRR17520069.7679447  
SRR17520069.7679449  
SRR17520069.7679451  
SRR17520069.7679453  
SRR17520069.7679457  
SRR17520069.7679459  
SRR17520069.7679461  
SRR17520069.7679463  
SRR17520069.7679465  
SRR17520069.7679467  
SRR17520069.7679469  
SRR17520069.7679471  
SRR17520069.7679473  
SRR17520069.7679475  
SRR17520069.7679477  
SRR17520069.7679479  
SRR17520069.7679481  
SRR17520069.7679483  
SRR17520069.7679485  
SRR17520069.7679487  
SRR17520069.7679489  
SRR17520069.7679491  
SRR17520069.7679493  
SRR17520069.7679495  
SRR17520069.7679497  
SRR17520069.7679499  
SRR17520069.7679501  
SRR17520069.7679503  
SRR17520069.7679505  
SRR17520069.7679507  
SRR17520069.7679509  
SRR17520069.7679511  
SRR17520069.7679513  
SRR17520069.7679515  
SRR17520069.7679517  
SRR17520069.7679519  
SRR17520069.7679521  
SRR17520069.7679523

SRR17520069.7679525  
SRR17520069.7679527  
SRR17520069.7679925  
SRR17520069.7689274  
SRR17520069.7689290  
SRR17520069.7689294  
SRR17520069.7689320  
SRR17520069.7689350  
SRR17520069.7689358  
SRR17520069.7689720  
SRR17520069.7689722  
SRR17520069.7689724  
SRR17520069.7694502  
SRR17520069.7694504  
SRR17520069.7694508  
SRR17520069.7694510  
SRR17520069.7694512  
SRR17520069.7694514  
SRR17520069.7694516  
SRR17520069.7694518  
SRR17520069.7694520  
SRR17520069.7701372  
SRR17520069.7701374  
SRR17520069.7701376  
SRR17520069.7701378  
SRR17520069.7701380  
SRR17520069.7701382  
SRR17520069.7701384  
SRR17520069.7703297  
SRR17520069.7703299  
SRR17520069.7703301  
SRR17520069.7703303  
SRR17520069.7703305  
SRR17520069.7703309  
SRR17520069.7703311  
SRR17520069.7703313  
SRR17520069.7703315  
SRR17520069.7703317  
SRR17520069.7703319  
SRR17520069.7703321  
SRR17520069.7703323  
SRR17520069.7703325  
SRR17520069.7703327  
SRR17520069.7703329  
SRR17520069.7703333  
SRR17520069.7703335  
SRR17520069.7703337

SRR17520069.7703339  
SRR17520069.7703343  
SRR17520069.7703345  
SRR17520069.7703347  
SRR17520069.7703349  
SRR17520069.7703351  
SRR17520069.7703357  
SRR17520069.7703359  
SRR17520069.7703361  
SRR17520069.7703365  
SRR17520069.7703367  
SRR17520069.7703369  
SRR17520069.7703371  
SRR17520069.7703373  
SRR17520069.7703375  
SRR17520069.7704677  
SRR17520069.7704679  
SRR17520069.7704681  
SRR17520069.7704683  
SRR17520069.7704685  
SRR17520069.7704687  
SRR17520069.7704689  
SRR17520069.7704691  
SRR17520069.7704693  
SRR17520069.7704695  
SRR17520069.7704697  
SRR17520069.7704699  
SRR17520069.7704701  
SRR17520069.7706068  
SRR17520069.7706070  
SRR17520069.7706072  
SRR17520069.7706074  
SRR17520069.7706076  
SRR17520069.7706078  
SRR17520069.7707600  
SRR17520069.7707602  
SRR17520069.7707606  
SRR17520069.7707610  
SRR17520069.7707612  
SRR17520069.7707614  
SRR17520069.7707616  
SRR17520069.7707965  
SRR17520069.7707967  
SRR17520069.7707969  
SRR17520069.7707971  
SRR17520069.7707973  
SRR17520069.7707975



SRR17520069.7707977  
SRR17520069.7707979  
SRR17520069.7707981  
SRR17520069.7707983  
SRR17520069.7707985  
SRR17520069.7707987  
SRR17520069.7707989  
SRR17520069.7707991  
SRR17520069.7707993  
SRR17520069.7707995  
SRR17520069.7707997  
SRR17520069.7707999  
SRR17520069.7708001  
SRR17520069.7708003  
SRR17520069.7708005  
SRR17520069.7708007  
SRR17520069.7708009  
SRR17520069.7708011  
SRR17520069.7708013  
SRR17520069.7708015  
SRR17520069.7708017  
SRR17520069.7708019  
SRR17520069.7708021  
SRR17520069.7708023  
SRR17520069.7708025  
SRR17520069.7708027  
SRR17520069.7708029  
SRR17520069.7708031  
SRR17520069.7708033  
SRR17520069.7708035  
SRR17520069.7708039  
SRR17520069.7708041  
SRR17520069.7708043  
SRR17520069.7708045  
SRR17520069.7708047  
SRR17520069.7714320  
SRR17520069.7714322  
SRR17520069.7714324  
SRR17520069.7714326  
SRR17520069.7714328  
SRR17520069.7714330  
SRR17520069.7714332  
SRR17520069.7714334  
SRR17520069.7714336  
SRR17520069.7714338  
SRR17520069.7714340  
SRR17520069.7714342

SRR17520069.7714344  
SRR17520069.7714346  
SRR17520069.7714348  
SRR17520069.7714350  
SRR17520069.7714352  
SRR17520069.7714354  
SRR17520069.7714984  
SRR17520069.7715230  
SRR17520069.7715232  
SRR17520069.7715234  
SRR17520069.7715236  
SRR17520069.7715240  
SRR17520069.7715242  
SRR17520069.7715244  
SRR17520069.7715246  
SRR17520069.7715248  
SRR17520069.7733859  
SRR17520069.7738670  
SRR17520069.7738672  
SRR17520069.7738674  
SRR17520069.7738676  
SRR17520069.7738722  
SRR17520069.7743111  
SRR17520069.7743113  
SRR17520069.7743115  
SRR17520069.7743117  
SRR17520069.7743119  
SRR17520069.7743121  
SRR17520069.7743123  
SRR17520069.7743125  
SRR17520069.7743127  
SRR17520069.7743129  
SRR17520069.7743131  
SRR17520069.7743133  
SRR17520069.7743135  
SRR17520069.7743137  
SRR17520069.7743139  
SRR17520069.7744048  
SRR17520069.7750453  
SRR17520069.7750455  
SRR17520069.7750457  
SRR17520069.7750459  
SRR17520069.7750461  
SRR17520069.7750463  
SRR17520069.7750465  
SRR17520069.7750467  
SRR17520069.7750469

SRR17520069.7750471  
SRR17520069.7750473  
SRR17520069.7750475  
SRR17520069.7750477  
SRR17520069.7754767  
SRR17520069.7754771  
SRR17520069.7754773  
SRR17520069.7754775  
SRR17520069.7754777  
SRR17520069.7754779  
SRR17520069.7754781  
SRR17520069.7754783  
SRR17520069.7754785  
SRR17520069.7754787  
SRR17520069.7754789  
SRR17520069.7754791  
SRR17520069.7754793  
SRR17520069.7754795  
SRR17520069.7754797  
SRR17520069.7754799  
SRR17520069.7754801  
SRR17520069.7754805  
SRR17520069.7754807  
SRR17520069.7754809  
SRR17520069.7754811  
SRR17520069.7754813  
SRR17520069.7754815  
SRR17520069.7754817  
SRR17520069.7754819  
SRR17520069.7754821  
SRR17520069.7754823  
SRR17520069.7754825  
SRR17520069.7754827  
SRR17520069.7754831  
SRR17520069.7754833  
SRR17520069.7754835  
SRR17520069.7754837  
SRR17520069.7754839  
SRR17520069.7754841  
SRR17520069.7754843  
SRR17520069.7754845  
SRR17520069.7754847  
SRR17520069.7754849  
SRR17520069.7754851  
SRR17520069.7754853  
SRR17520069.7754855  
SRR17520069.7754859

SRR17520069.7754861  
SRR17520069.7754863  
SRR17520069.7754865  
SRR17520069.7754867  
SRR17520069.7754869  
SRR17520069.7754871  
SRR17520069.7754873  
SRR17520069.7754875  
SRR17520069.7754877  
SRR17520069.7754879  
SRR17520069.7754881  
SRR17520069.7754883  
SRR17520069.7754885  
SRR17520069.7754887  
SRR17520069.7754889  
SRR17520069.7754891  
SRR17520069.7755025  
SRR17520069.7755027  
SRR17520069.7755029  
SRR17520069.7755031  
SRR17520069.7755035  
SRR17520069.7755037  
SRR17520069.7755041  
SRR17520069.7755045  
SRR17520069.7755047  
SRR17520069.7755049  
SRR17520069.7755053  
SRR17520069.7755055  
SRR17520069.7755057  
SRR17520069.7756470  
SRR17520069.7756472  
SRR17520069.7756474  
SRR17520069.7756476  
SRR17520069.7756478  
SRR17520069.7756480  
SRR17520069.7756482  
SRR17520069.7756484  
SRR17520069.7764938  
SRR17520069.7764942  
SRR17520069.7764944  
SRR17520069.7764946  
SRR17520069.7764948  
SRR17520069.7764950  
SRR17520069.7764954  
SRR17520069.7766826  
SRR17520069.7766828  
SRR17520069.7766830

SRR17520069. 7766832  
SRR17520069. 7786998  
SRR17520069. 7787000  
SRR17520069. 7787002  
SRR17520069. 7787008  
SRR17520069. 7787010  
SRR17520069. 7787012  
SRR17520069. 7787014  
SRR17520069. 7787016  
SRR17520069. 7787018  
SRR17520069. 7787020  
SRR17520069. 7787022  
SRR17520069. 7787024  
SRR17520069. 7787026  
SRR17520069. 7787028  
SRR17520069. 7787030  
SRR17520069. 7787032  
SRR17520069. 7787034  
SRR17520069. 7787036  
SRR17520069. 7787038  
SRR17520069. 7787040  
SRR17520069. 7787042  
SRR17520069. 7787044  
SRR17520069. 7787046  
SRR17520069. 7789480  
SRR17520069. 7789482  
SRR17520069. 7789484  
SRR17520069. 7789486  
SRR17520069. 7792608  
SRR17520069. 7792610  
SRR17520069. 7792614  
SRR17520069. 7792616  
SRR17520069. 7792618  
SRR17520069. 7792620  
SRR17520069. 7792622  
SRR17520069. 7792624  
SRR17520069. 7792698  
SRR17520069. 7792700  
SRR17520069. 7792702  
SRR17520069. 7792706  
SRR17520069. 7792708  
SRR17520069. 7792710  
SRR17520069. 7792712  
SRR17520069. 7792714  
SRR17520069. 7792716  
SRR17520069. 7792718  
SRR17520069. 7792720

SRR17520069.7792722  
SRR17520069.7792724  
SRR17520069.7799327  
SRR17520069.7799329  
SRR17520069.7799331  
SRR17520069.7799333  
SRR17520069.7799335  
SRR17520069.7799337  
SRR17520069.7799339  
SRR17520069.7799341  
SRR17520069.7799343  
SRR17520069.7799345  
SRR17520069.7799349  
SRR17520069.7799351  
SRR17520069.7799353  
SRR17520069.7799355  
SRR17520069.7799357  
SRR17520069.7799359  
SRR17520069.7799361  
SRR17520069.7799363  
SRR17520069.7799365  
SRR17520069.7799367  
SRR17520069.7799369  
SRR17520069.7799371  
SRR17520069.7799373  
SRR17520069.7799377  
SRR17520069.7799379  
SRR17520069.7799381  
SRR17520069.7799383  
SRR17520069.7799385  
SRR17520069.7799389  
SRR17520069.7799391  
SRR17520069.7799393  
SRR17520069.7799395  
SRR17520069.7799397  
SRR17520069.7799399  
SRR17520069.7799401  
SRR17520069.7799403  
SRR17520069.7799405  
SRR17520069.7799407  
SRR17520069.7799409  
SRR17520069.7799413  
SRR17520069.7799415  
SRR17520069.7799417  
SRR17520069.7799419  
SRR17520069.7799421  
SRR17520069.7799739

SRR17520069.7799741  
SRR17520069.7799745  
SRR17520069.7799747  
SRR17520069.7799749  
SRR17520069.7799751  
SRR17520069.7799753  
SRR17520069.7799755  
SRR17520069.7799757  
SRR17520069.7799759  
SRR17520069.7799761  
SRR17520069.7799763  
SRR17520069.7799765  
SRR17520069.7799771  
SRR17520069.7799773  
SRR17520069.7799775  
SRR17520069.7799777  
SRR17520069.7799779  
SRR17520069.7799781  
SRR17520069.7799783  
SRR17520069.7799785  
SRR17520069.7799787  
SRR17520069.7799789  
SRR17520069.7799791  
SRR17520069.7799793  
SRR17520069.7799795  
SRR17520069.7799797  
SRR17520069.7799799  
SRR17520069.7799801  
SRR17520069.7799803  
SRR17520069.7799805  
SRR17520069.7799807  
SRR17520069.7799811  
SRR17520069.7799813  
SRR17520069.7799815  
SRR17520069.7799817  
SRR17520069.7799819  
SRR17520069.7799821  
SRR17520069.7799823  
SRR17520069.7799825  
SRR17520069.7799827  
SRR17520069.7799829  
SRR17520069.7799831  
SRR17520069.7799833  
SRR17520069.7799835  
SRR17520069.7799837  
SRR17520069.7799841  
SRR17520069.7799845

SRR17520069. 7799847  
SRR17520069. 7799849  
SRR17520069. 7799851  
SRR17520069. 7799853  
SRR17520069. 7799855  
SRR17520069. 7799857  
SRR17520069. 7799859  
SRR17520069. 7799861  
SRR17520069. 7799865  
SRR17520069. 7802913  
SRR17520069. 7802915  
SRR17520069. 7802917  
SRR17520069. 7802919  
SRR17520069. 7802921  
SRR17520069. 7802923  
SRR17520069. 7802925  
SRR17520069. 7806338  
SRR17520069. 7806340  
SRR17520069. 7806342  
SRR17520069. 7806344  
SRR17520069. 7806346  
SRR17520069. 7806348  
SRR17520069. 7806350  
SRR17520069. 7806352  
SRR17520069. 7806354  
SRR17520069. 7806356  
SRR17520069. 7806360  
SRR17520069. 7806362  
SRR17520069. 7806364  
SRR17520069. 7806366  
SRR17520069. 7806368  
SRR17520069. 7806370  
SRR17520069. 7806372  
SRR17520069. 7806374  
SRR17520069. 7806376  
SRR17520069. 7806378  
SRR17520069. 7806380  
SRR17520069. 7806382  
SRR17520069. 7806384  
SRR17520069. 7806386  
SRR17520069. 7806388  
SRR17520069. 7806390  
SRR17520069. 7806392  
SRR17520069. 7806394  
SRR17520069. 7806396  
SRR17520069. 7806398  
SRR17520069. 7806400



SRR17520069. 7806402  
SRR17520069. 7806404  
SRR17520069. 7806406  
SRR17520069. 7806408  
SRR17520069. 7806410  
SRR17520069. 7806412  
SRR17520069. 7806414  
SRR17520069. 7806416  
SRR17520069. 7806418  
SRR17520069. 7807161  
SRR17520069. 7807163  
SRR17520069. 7807165  
SRR17520069. 7807167  
SRR17520069. 7807169  
SRR17520069. 7807171  
SRR17520069. 7807173  
SRR17520069. 7807175  
SRR17520069. 7807177  
SRR17520069. 7807179  
SRR17520069. 7807181  
SRR17520069. 7807183  
SRR17520069. 7807185  
SRR17520069. 7807187  
SRR17520069. 7807189  
SRR17520069. 7807191  
SRR17520069. 7807193  
SRR17520069. 7807195  
SRR17520069. 7807197  
SRR17520069. 7807199  
SRR17520069. 7807201  
SRR17520069. 7807205  
SRR17520069. 7807207  
SRR17520069. 7807209  
SRR17520069. 7807211  
SRR17520069. 7807213  
SRR17520069. 7807215  
SRR17520069. 7807217  
SRR17520069. 7807219  
SRR17520069. 7807221  
SRR17520069. 7807223  
SRR17520069. 7811435  
SRR17520069. 7813599  
SRR17520069. 7813601  
SRR17520069. 7813603  
SRR17520069. 7813605  
SRR17520069. 7813607  
SRR17520069. 7813609

SRR17520069.7813611  
SRR17520069.7813613  
SRR17520069.7813615  
SRR17520069.7813617  
SRR17520069.7813619  
SRR17520069.7813621  
SRR17520069.7813623  
SRR17520069.7813625  
SRR17520069.7813627  
SRR17520069.7813629  
SRR17520069.7813631  
SRR17520069.7813633  
SRR17520069.7813635  
SRR17520069.7813637  
SRR17520069.7813639  
SRR17520069.7813641  
SRR17520069.7813643  
SRR17520069.7813645  
SRR17520069.7813647  
SRR17520069.7813649  
SRR17520069.7813651  
SRR17520069.7813653  
SRR17520069.7813655  
SRR17520069.7813657  
SRR17520069.7813659  
SRR17520069.7813661  
SRR17520069.7813663  
SRR17520069.7813667  
SRR17520069.7813669  
SRR17520069.7813671  
SRR17520069.7813673  
SRR17520069.7813675  
SRR17520069.7813677  
SRR17520069.7813681  
SRR17520069.7813683  
SRR17520069.7813685  
SRR17520069.7813687  
SRR17520069.7813689  
SRR17520069.7813691  
SRR17520069.7813693  
SRR17520069.7813695  
SRR17520069.7813697  
SRR17520069.7813699  
SRR17520069.7813701  
SRR17520069.7813703  
SRR17520069.7813705  
SRR17520069.7814320

SRR17520069.7814322  
SRR17520069.7814324  
SRR17520069.7816165  
SRR17520069.7816167  
SRR17520069.7826754  
SRR17520069.7826756  
SRR17520069.7826758  
SRR17520069.7826760  
SRR17520069.7826762  
SRR17520069.7826764  
SRR17520069.7826766  
SRR17520069.7826768  
SRR17520069.7826770  
SRR17520069.7826772  
SRR17520069.7826774  
SRR17520069.7826776  
SRR17520069.7826778  
SRR17520069.7826780  
SRR17520069.7826782  
SRR17520069.7826784  
SRR17520069.7826786  
SRR17520069.7826788  
SRR17520069.7826790  
SRR17520069.7826792  
SRR17520069.7826794  
SRR17520069.7826796  
SRR17520069.7826798  
SRR17520069.7826800  
SRR17520069.7826802  
SRR17520069.7826804  
SRR17520069.7826806  
SRR17520069.7826808  
SRR17520069.7826810  
SRR17520069.7826812  
SRR17520069.7826814  
SRR17520069.7826816  
SRR17520069.7835358  
SRR17520069.7835360  
SRR17520069.7835362  
SRR17520069.7835364  
SRR17520069.7835366  
SRR17520069.7835368  
SRR17520069.7835370  
SRR17520069.7835372  
SRR17520069.7835374  
SRR17520069.7835709  
SRR17520069.7835711

SRR17520069.7835713  
SRR17520069.7835715  
SRR17520069.7835717  
SRR17520069.7835719  
SRR17520069.7835721  
SRR17520069.7835723  
SRR17520069.7835725  
SRR17520069.7835727  
SRR17520069.7835729  
SRR17520069.7835731  
SRR17520069.7835733  
SRR17520069.7835735  
SRR17520069.7835737  
SRR17520069.7835739  
SRR17520069.7835741  
SRR17520069.7835743  
SRR17520069.7835747  
SRR17520069.7835749  
SRR17520069.7835751  
SRR17520069.7835753  
SRR17520069.7835755  
SRR17520069.7835757  
SRR17520069.7835759  
SRR17520069.7835761  
SRR17520069.7835763  
SRR17520069.7835767  
SRR17520069.7835769  
SRR17520069.7835771  
SRR17520069.7835773  
SRR17520069.7835775  
SRR17520069.7835779  
SRR17520069.7836146  
SRR17520069.7836148  
SRR17520069.7836150  
SRR17520069.7836154  
SRR17520069.7836156  
SRR17520069.7836158  
SRR17520069.7836162  
SRR17520069.7836164  
SRR17520069.7844622  
SRR17520069.7844624  
SRR17520069.7844626  
SRR17520069.7844628  
SRR17520069.7844630  
SRR17520069.7844632  
SRR17520069.7844634  
SRR17520069.7847257

SRR17520069.7847259  
SRR17520069.7847261  
SRR17520069.7847263  
SRR17520069.7847265  
SRR17520069.7847267  
SRR17520069.7847271  
SRR17520069.7847273  
SRR17520069.7848285  
SRR17520069.7848287  
SRR17520069.7848289  
SRR17520069.7848291  
SRR17520069.7848293  
SRR17520069.7848295  
SRR17520069.7848297  
SRR17520069.7848299  
SRR17520069.7848301  
SRR17520069.7848303  
SRR17520069.7848305  
SRR17520069.7848307  
SRR17520069.7848309  
SRR17520069.7848311  
SRR17520069.7848313  
SRR17520069.7848831  
SRR17520069.7848833  
SRR17520069.7848835  
SRR17520069.7848837  
SRR17520069.7848839  
SRR17520069.7848841  
SRR17520069.7848843  
SRR17520069.7848845  
SRR17520069.7848847  
SRR17520069.7848851  
SRR17520069.7848853  
SRR17520069.7848855  
SRR17520069.7848857  
SRR17520069.7848861  
SRR17520069.7848863  
SRR17520069.7848867  
SRR17520069.7848869  
SRR17520069.7848871  
SRR17520069.7848875  
SRR17520069.7848877  
SRR17520069.7848948  
SRR17520069.7848950  
SRR17520069.7848952  
SRR17520069.7848954  
SRR17520069.7848956

SRR17520069.7848958  
SRR17520069.7848960  
SRR17520069.7848962  
SRR17520069.7848964  
SRR17520069.7848966  
SRR17520069.7848968  
SRR17520069.7848970  
SRR17520069.7848972  
SRR17520069.7848974  
SRR17520069.7848976  
SRR17520069.7848978  
SRR17520069.7848980  
SRR17520069.7848982  
SRR17520069.7857297  
SRR17520069.7857299  
SRR17520069.7857301  
SRR17520069.7857303  
SRR17520069.7857306  
SRR17520069.7857308  
SRR17520069.7857310  
SRR17520069.7857312  
SRR17520069.7857314  
SRR17520069.7857316  
SRR17520069.7857318  
SRR17520069.7857320  
SRR17520069.7857322  
SRR17520069.7857324  
SRR17520069.7857326  
SRR17520069.7857328  
SRR17520069.7857330  
SRR17520069.7857332  
SRR17520069.7857334  
SRR17520069.7857336  
SRR17520069.7857338  
SRR17520069.7857340  
SRR17520069.7857342  
SRR17520069.7857346  
SRR17520069.7857348  
SRR17520069.7857350  
SRR17520069.7857352  
SRR17520069.7857354  
SRR17520069.7857356  
SRR17520069.7857358  
SRR17520069.7857360  
SRR17520069.7857362  
SRR17520069.7857364  
SRR17520069.7857366

SRR17520069.7857368  
SRR17520069.7857370  
SRR17520069.7857372  
SRR17520069.7857374  
SRR17520069.7857376  
SRR17520069.7857378  
SRR17520069.7857380  
SRR17520069.7857382  
SRR17520069.7857384  
SRR17520069.7857386  
SRR17520069.7857388  
SRR17520069.7857390  
SRR17520069.7857392  
SRR17520069.7857394  
SRR17520069.7857396  
SRR17520069.7857398  
SRR17520069.7857400  
SRR17520069.7857402  
SRR17520069.7857404  
SRR17520069.7857406  
SRR17520069.7857408  
SRR17520069.7857410  
SRR17520069.7857412  
SRR17520069.7857414  
SRR17520069.7857416  
SRR17520069.7857418  
SRR17520069.7857420  
SRR17520069.7857422  
SRR17520069.7857426  
SRR17520069.7857428  
SRR17520069.7857430  
SRR17520069.7857432  
SRR17520069.7857434  
SRR17520069.7857436  
SRR17520069.7857438  
SRR17520069.7857440  
SRR17520069.7857442  
SRR17520069.7857444  
SRR17520069.7857446  
SRR17520069.7857448  
SRR17520069.7857450  
SRR17520069.7857454  
SRR17520069.7857456  
SRR17520069.7857458  
SRR17520069.7857460  
SRR17520069.7857462  
SRR17520069.7857466

SRR17520069.7865675  
SRR17520069.7865677  
SRR17520069.7865679  
SRR17520069.7865681  
SRR17520069.7865683  
SRR17520069.7870140  
SRR17520069.7870146  
SRR17520069.7870148  
SRR17520069.7870150  
SRR17520069.7870154  
SRR17520069.7870156  
SRR17520069.7870162  
SRR17520069.7871860  
SRR17520069.7871862  
SRR17520069.7871864  
SRR17520069.7871866  
SRR17520069.7871868  
SRR17520069.7871870  
SRR17520069.7871872  
SRR17520069.7871874  
SRR17520069.7871876  
SRR17520069.7871878  
SRR17520069.7871880  
SRR17520069.7871882  
SRR17520069.7871884  
SRR17520069.7871886  
SRR17520069.7871888  
SRR17520069.7871890  
SRR17520069.7871892  
SRR17520069.7871894  
SRR17520069.7871896  
SRR17520069.7871898  
SRR17520069.7871900  
SRR17520069.7871902  
SRR17520069.7871904  
SRR17520069.7871906  
SRR17520069.7871908  
SRR17520069.7871910  
SRR17520069.7871912  
SRR17520069.7871914  
SRR17520069.7871918  
SRR17520069.7871920  
SRR17520069.7871922  
SRR17520069.7871924  
SRR17520069.7871926  
SRR17520069.7871928  
SRR17520069.7871930



SRR17520069. 7876462  
SRR17520069. 7876464  
SRR17520069. 7889177  
SRR17520069. 7889183  
SRR17520069. 7889186  
SRR17520069. 7889188  
SRR17520069. 7889190  
SRR17520069. 7889192  
SRR17520069. 7889194  
SRR17520069. 7889196  
SRR17520069. 7889198  
SRR17520069. 7889200  
SRR17520069. 7889202  
SRR17520069. 7889204  
SRR17520069. 7889206  
SRR17520069. 7889208  
SRR17520069. 7889210  
SRR17520069. 7889212  
SRR17520069. 7889214  
SRR17520069. 7889216  
SRR17520069. 7889218  
SRR17520069. 7889220  
SRR17520069. 7889222  
SRR17520069. 7889224  
SRR17520069. 7889226  
SRR17520069. 7889228  
SRR17520069. 7889230  
SRR17520069. 7889232  
SRR17520069. 7889234  
SRR17520069. 7889236  
SRR17520069. 7889238  
SRR17520069. 7889240  
SRR17520069. 7889242  
SRR17520069. 7889244  
SRR17520069. 7889246  
SRR17520069. 7889248  
SRR17520069. 7889250  
SRR17520069. 7889252  
SRR17520069. 7889254  
SRR17520069. 7889256  
SRR17520069. 7889258  
SRR17520069. 7889260  
SRR17520069. 7889262  
SRR17520069. 7889266  
SRR17520069. 7889268  
SRR17520069. 7889270  
SRR17520069. 7889272

SRR17520069.7889274  
SRR17520069.7889276  
SRR17520069.7889278  
SRR17520069.7889280  
SRR17520069.7891292  
SRR17520069.7891294  
SRR17520069.7891296  
SRR17520069.7891302  
SRR17520069.7891304  
SRR17520069.7891308  
SRR17520069.7891310  
SRR17520069.7891312  
SRR17520069.7891314  
SRR17520069.7891318  
SRR17520069.7891320  
SRR17520069.7891322  
SRR17520069.7891324  
SRR17520069.7891328  
SRR17520069.7891330  
SRR17520069.7891332  
SRR17520069.7891334  
SRR17520069.7891336  
SRR17520069.7891342  
SRR17520069.7891344  
SRR17520069.7891346  
SRR17520069.7891348  
SRR17520069.7891350  
SRR17520069.7891352  
SRR17520069.7892866  
SRR17520069.7892870  
SRR17520069.7892872  
SRR17520069.7892874  
SRR17520069.7892876  
SRR17520069.7894662  
SRR17520069.7894664  
SRR17520069.7894666  
SRR17520069.7894668  
SRR17520069.7894670  
SRR17520069.7894672  
SRR17520069.7894674  
SRR17520069.7894676  
SRR17520069.7894678  
SRR17520069.7894680  
SRR17520069.7894682  
SRR17520069.7894684  
SRR17520069.7894686  
SRR17520069.7894688

SRR17520069. 7894690  
SRR17520069. 7894692  
SRR17520069. 7895688  
SRR17520069. 7895690  
SRR17520069. 7895692  
SRR17520069. 7895694  
SRR17520069. 7895696  
SRR17520069. 7895698  
SRR17520069. 7895700  
SRR17520069. 7895702  
SRR17520069. 7895704  
SRR17520069. 7895706  
SRR17520069. 7895708  
SRR17520069. 7895710  
SRR17520069. 7895712  
SRR17520069. 7895714  
SRR17520069. 7895716  
SRR17520069. 7895718  
SRR17520069. 7895720  
SRR17520069. 7895722  
SRR17520069. 7895724  
SRR17520069. 7895728  
SRR17520069. 7895730  
SRR17520069. 7895732  
SRR17520069. 7895734  
SRR17520069. 7895736  
SRR17520069. 7895738  
SRR17520069. 7895740  
SRR17520069. 7895742  
SRR17520069. 7895744  
SRR17520069. 7895746  
SRR17520069. 7895748  
SRR17520069. 7895750  
SRR17520069. 7897229  
SRR17520069. 7898336  
SRR17520069. 7898338  
SRR17520069. 7898340  
SRR17520069. 7898342  
SRR17520069. 7898344  
SRR17520069. 7898346  
SRR17520069. 7898348  
SRR17520069. 7898350  
SRR17520069. 7898352  
SRR17520069. 7898354  
SRR17520069. 7900669  
SRR17520069. 7900671  
SRR17520069. 7900673

SRR17520069.7900675  
SRR17520069.7900677  
SRR17520069.7900679  
SRR17520069.7900681  
SRR17520069.7900683  
SRR17520069.7900685  
SRR17520069.7900687  
SRR17520069.7900689  
SRR17520069.7900691  
SRR17520069.7900693  
SRR17520069.7900695  
SRR17520069.7900697  
SRR17520069.7900699  
SRR17520069.7900701  
SRR17520069.7903007  
SRR17520069.7903009  
SRR17520069.7903015  
SRR17520069.7903019  
SRR17520069.7903021  
SRR17520069.7903023  
SRR17520069.7903025  
SRR17520069.7903027  
SRR17520069.7903029  
SRR17520069.7903031  
SRR17520069.7903033  
SRR17520069.7903035  
SRR17520069.7903037  
SRR17520069.7903039  
SRR17520069.7903041  
SRR17520069.7903043  
SRR17520069.7903045  
SRR17520069.7903047  
SRR17520069.7903049  
SRR17520069.7903051  
SRR17520069.7903053  
SRR17520069.7903055  
SRR17520069.7903057  
SRR17520069.7903059  
SRR17520069.7903061  
SRR17520069.7903063  
SRR17520069.7903065  
SRR17520069.7903067  
SRR17520069.7903069  
SRR17520069.7903071  
SRR17520069.7903073  
SRR17520069.7903075  
SRR17520069.7903077

SRR17520069.7903079  
SRR17520069.7903081  
SRR17520069.7903083  
SRR17520069.7903085  
SRR17520069.7903087  
SRR17520069.7905291  
SRR17520069.7905295  
SRR17520069.7906126  
SRR17520069.7906130  
SRR17520069.7906132  
SRR17520069.7906134  
SRR17520069.7906136  
SRR17520069.7906138  
SRR17520069.7906140  
SRR17520069.7906142  
SRR17520069.7906144  
SRR17520069.7906146  
SRR17520069.7906148  
SRR17520069.7906152  
SRR17520069.7906154  
SRR17520069.7906156  
SRR17520069.7906158  
SRR17520069.7906160  
SRR17520069.7906162  
SRR17520069.7906164  
SRR17520069.7906166  
SRR17520069.7906168  
SRR17520069.7907784  
SRR17520069.7907786  
SRR17520069.7907788  
SRR17520069.7907790  
SRR17520069.7907792  
SRR17520069.7907794  
SRR17520069.7907796  
SRR17520069.7907800  
SRR17520069.7907802  
SRR17520069.7907804  
SRR17520069.7907806  
SRR17520069.7907808  
SRR17520069.7907810  
SRR17520069.7907814  
SRR17520069.7907818  
SRR17520069.7907820  
SRR17520069.7907822  
SRR17520069.7907824  
SRR17520069.7907828  
SRR17520069.7907830

SRR17520069.7907832  
SRR17520069.7907834  
SRR17520069.7907836  
SRR17520069.7907838  
SRR17520069.7907840  
SRR17520069.7907842  
SRR17520069.7907844  
SRR17520069.7907846  
SRR17520069.7907848  
SRR17520069.7907850  
SRR17520069.7907854  
SRR17520069.7907856  
SRR17520069.7908378  
SRR17520069.7908380  
SRR17520069.7908382  
SRR17520069.7922005  
SRR17520069.7922007  
SRR17520069.7922009  
SRR17520069.7922011  
SRR17520069.7922015  
SRR17520069.7922017  
SRR17520069.7922019  
SRR17520069.7922021  
SRR17520069.7922023  
SRR17520069.7922025  
SRR17520069.7922027  
SRR17520069.7922029  
SRR17520069.7922031  
SRR17520069.7922033  
SRR17520069.7929149  
SRR17520069.7929151  
SRR17520069.7929153  
SRR17520069.7929155  
SRR17520069.7929159  
SRR17520069.7929161  
SRR17520069.7929163  
SRR17520069.7929165  
SRR17520069.7929167  
SRR17520069.7929169  
SRR17520069.7929171  
SRR17520069.7929173  
SRR17520069.7929175  
SRR17520069.7929177  
SRR17520069.7929179  
SRR17520069.7929181  
SRR17520069.7929183  
SRR17520069.7936571

SRR17520069.7936573  
SRR17520069.7936575  
SRR17520069.7936577  
SRR17520069.7936579  
SRR17520069.7942723  
SRR17520069.7942725  
SRR17520069.7942727  
SRR17520069.7942729  
SRR17520069.7942731  
SRR17520069.7942733  
SRR17520069.7942735  
SRR17520069.7950253  
SRR17520069.7950255  
SRR17520069.7950259  
SRR17520069.7950261  
SRR17520069.7950263  
SRR17520069.7950265  
SRR17520069.7950267  
SRR17520069.7950269  
SRR17520069.7950271  
SRR17520069.7950273  
SRR17520069.7950275  
SRR17520069.7950277  
SRR17520069.7950279  
SRR17520069.7950281  
SRR17520069.7950283  
SRR17520069.7950285  
SRR17520069.7950289  
SRR17520069.7950291  
SRR17520069.7950293  
SRR17520069.7950295  
SRR17520069.7950297  
SRR17520069.7950299  
SRR17520069.7950301  
SRR17520069.7950303  
SRR17520069.7952339  
SRR17520069.7952343  
SRR17520069.7952345  
SRR17520069.7952347  
SRR17520069.7964046  
SRR17520069.7964048  
SRR17520069.7964050  
SRR17520069.7964052  
SRR17520069.7964054  
SRR17520069.7964056  
SRR17520069.7964058  
SRR17520069.7964060

SRR17520069.7964062  
SRR17520069.7964064  
SRR17520069.7964066  
SRR17520069.7964068  
SRR17520069.7964070  
SRR17520069.7964072  
SRR17520069.7964074  
SRR17520069.7964076  
SRR17520069.7964078  
SRR17520069.7964080  
SRR17520069.7964082  
SRR17520069.7964084  
SRR17520069.7964086  
SRR17520069.7964088  
SRR17520069.7964090  
SRR17520069.7964092  
SRR17520069.7964094  
SRR17520069.7964096  
SRR17520069.7964098  
SRR17520069.7964100  
SRR17520069.7964102  
SRR17520069.7964104  
SRR17520069.7964106  
SRR17520069.7964108  
SRR17520069.7964110  
SRR17520069.7964112  
SRR17520069.7964114  
SRR17520069.7964116  
SRR17520069.7964118  
SRR17520069.7964120  
SRR17520069.7964122  
SRR17520069.7964124  
SRR17520069.7964126  
SRR17520069.7964128  
SRR17520069.7964130  
SRR17520069.7964132  
SRR17520069.7964134  
SRR17520069.7964136  
SRR17520069.7964138  
SRR17520069.7964140  
SRR17520069.7964142  
SRR17520069.7964144  
SRR17520069.7964147  
SRR17520069.7964149  
SRR17520069.7964151  
SRR17520069.7964158  
SRR17520069.7964160



SRR17520069.7964162  
SRR17520069.7964164  
SRR17520069.7964166  
SRR17520069.7964168  
SRR17520069.7964172  
SRR17520069.7964174  
SRR17520069.7964176  
SRR17520069.7964178  
SRR17520069.7964180  
SRR17520069.7964182  
SRR17520069.7964184  
SRR17520069.7964188  
SRR17520069.7964190  
SRR17520069.7964192  
SRR17520069.7964194  
SRR17520069.7964196  
SRR17520069.7964200  
SRR17520069.7964202  
SRR17520069.7964204  
SRR17520069.7964208  
SRR17520069.7964210  
SRR17520069.7964212  
SRR17520069.7964214  
SRR17520069.7964216  
SRR17520069.7964218  
SRR17520069.7964220  
SRR17520069.7964222  
SRR17520069.7964224  
SRR17520069.7964226  
SRR17520069.7964228  
SRR17520069.7964230  
SRR17520069.7964232  
SRR17520069.7964234  
SRR17520069.7964236  
SRR17520069.7964238  
SRR17520069.7964240  
SRR17520069.7964242  
SRR17520069.7964244  
SRR17520069.7964246  
SRR17520069.7964250  
SRR17520069.7964252  
SRR17520069.7964254  
SRR17520069.7964256  
SRR17520069.7964258  
SRR17520069.7964262  
SRR17520069.7964264  
SRR17520069.7964266

SRR17520069.7964268  
SRR17520069.7964270  
SRR17520069.7964278  
SRR17520069.7964282  
SRR17520069.7964284  
SRR17520069.7964737  
SRR17520069.7964739  
SRR17520069.7964741  
SRR17520069.7964743  
SRR17520069.7964745  
SRR17520069.7964747  
SRR17520069.7964749  
SRR17520069.7964751  
SRR17520069.7964753  
SRR17520069.7964755  
SRR17520069.7966448  
SRR17520069.7966450  
SRR17520069.7966452  
SRR17520069.7966454  
SRR17520069.7966456  
SRR17520069.7966460  
SRR17520069.7966462  
SRR17520069.7966464  
SRR17520069.7966466  
SRR17520069.7966470  
SRR17520069.7966472  
SRR17520069.7966474  
SRR17520069.7966476  
SRR17520069.7976152  
SRR17520069.7976154  
SRR17520069.7976156  
SRR17520069.7976158  
SRR17520069.7976160  
SRR17520069.7976164  
SRR17520069.7976166  
SRR17520069.7976168  
SRR17520069.7976170  
SRR17520069.7976172  
SRR17520069.7976174  
SRR17520069.7976176  
SRR17520069.7976178  
SRR17520069.7976180  
SRR17520069.7976182  
SRR17520069.7976184  
SRR17520069.7976186  
SRR17520069.7976188  
SRR17520069.7976190

SRR17520069.7976192  
SRR17520069.7976194  
SRR17520069.7976196  
SRR17520069.7976198  
SRR17520069.7976200  
SRR17520069.7978211  
SRR17520069.7978213  
SRR17520069.7978215  
SRR17520069.7978217  
SRR17520069.7978219  
SRR17520069.7978221  
SRR17520069.7978223  
SRR17520069.7978225  
SRR17520069.7978227  
SRR17520069.7978229  
SRR17520069.7978231  
SRR17520069.7978235  
SRR17520069.7978237  
SRR17520069.7978239  
SRR17520069.7978241  
SRR17520069.7978243  
SRR17520069.7978245  
SRR17520069.7978247  
SRR17520069.7978249  
SRR17520069.7978251  
SRR17520069.7978253  
SRR17520069.7978257  
SRR17520069.7978259  
SRR17520069.7978995  
SRR17520069.7978999  
SRR17520069.7979001  
SRR17520069.7979003  
SRR17520069.7979005  
SRR17520069.7980155  
SRR17520069.7980159  
SRR17520069.7980163  
SRR17520069.7983384  
SRR17520069.7983386  
SRR17520069.7983390  
SRR17520069.7983392  
SRR17520069.7983394  
SRR17520069.7983396  
SRR17520069.7984319  
SRR17520069.7984321  
SRR17520069.7984323  
SRR17520069.7984325  
SRR17520069.7984329

SRR17520069. 7984331  
SRR17520069. 7984333  
SRR17520069. 7984335  
SRR17520069. 7984337  
SRR17520069. 7984339  
SRR17520069. 7984341  
SRR17520069. 7984343  
SRR17520069. 7984345  
SRR17520069. 7984347  
SRR17520069. 7984349  
SRR17520069. 7984351  
SRR17520069. 7984353  
SRR17520069. 7984355  
SRR17520069. 7984357  
SRR17520069. 7984359  
SRR17520069. 7984361  
SRR17520069. 7984363  
SRR17520069. 7984365  
SRR17520069. 7984367  
SRR17520069. 7984369  
SRR17520069. 7984371  
SRR17520069. 7984373  
SRR17520069. 7984375  
SRR17520069. 7984377  
SRR17520069. 7984379  
SRR17520069. 7984381  
SRR17520069. 7984383  
SRR17520069. 7984385  
SRR17520069. 7984387  
SRR17520069. 7984389  
SRR17520069. 7984391  
SRR17520069. 7984393  
SRR17520069. 7984395  
SRR17520069. 7984397  
SRR17520069. 7984399  
SRR17520069. 7984401  
SRR17520069. 7986304  
SRR17520069. 7986306  
SRR17520069. 7986308  
SRR17520069. 7986310  
SRR17520069. 7986312  
SRR17520069. 7986316  
SRR17520069. 7986318  
SRR17520069. 7986320  
SRR17520069. 7986322  
SRR17520069. 7986324  
SRR17520069. 7986326

SRR17520069. 7986328  
SRR17520069. 7986330  
SRR17520069. 7986332  
SRR17520069. 7986334  
SRR17520069. 7986336  
SRR17520069. 7986338  
SRR17520069. 7986340  
SRR17520069. 7986342  
SRR17520069. 7986344  
SRR17520069. 7986346  
SRR17520069. 7986348  
SRR17520069. 7986350  
SRR17520069. 7986352  
SRR17520069. 7986354  
SRR17520069. 7986356  
SRR17520069. 7986358  
SRR17520069. 7986360  
SRR17520069. 7986362  
SRR17520069. 7986364  
SRR17520069. 7990653  
SRR17520069. 7990655  
SRR17520069. 7990657  
SRR17520069. 7990659  
SRR17520069. 7990661  
SRR17520069. 7990663  
SRR17520069. 7990665  
SRR17520069. 7995488  
SRR17520069. 7995490  
SRR17520069. 7995492  
SRR17520069. 7995494  
SRR17520069. 7995496  
SRR17520069. 7995498  
SRR17520069. 7995500  
SRR17520069. 7995502  
SRR17520069. 7995504  
SRR17520069. 7995506  
SRR17520069. 7995508  
SRR17520069. 7995510  
SRR17520069. 7995512  
SRR17520069. 7995514  
SRR17520069. 7995516  
SRR17520069. 7995518  
SRR17520069. 7995520  
SRR17520069. 7995522  
SRR17520069. 7995524  
SRR17520069. 7995526  
SRR17520069. 7995528

SRR17520069.7995530  
SRR17520069.7995532  
SRR17520069.7995534  
SRR17520069.7995536  
SRR17520069.7998572  
SRR17520069.7998574  
SRR17520069.7998576  
SRR17520069.7998580  
SRR17520069.7998582  
SRR17520069.7998584  
SRR17520069.7998586  
SRR17520069.7998588  
SRR17520069.7998590  
SRR17520069.7998592  
SRR17520069.7998594  
SRR17520069.7998596  
SRR17520069.8002622  
SRR17520069.8002624  
SRR17520069.8002626  
SRR17520069.8002628  
SRR17520069.8002630  
SRR17520069.8002632  
SRR17520069.8002634  
SRR17520069.8002636  
SRR17520069.8002638  
SRR17520069.8002640  
SRR17520069.8002642  
SRR17520069.8002644  
SRR17520069.8002646  
SRR17520069.8002648  
SRR17520069.8002650  
SRR17520069.8002652  
SRR17520069.8002656  
SRR17520069.8002658  
SRR17520069.8007329  
SRR17520069.8007331  
SRR17520069.8007333  
SRR17520069.8007335  
SRR17520069.8007337  
SRR17520069.8007339  
SRR17520069.8007341  
SRR17520069.8007343  
SRR17520069.8007345  
SRR17520069.8007347  
SRR17520069.8007349  
SRR17520069.8007351  
SRR17520069.8007353

SRR17520069.8007355  
SRR17520069.8007357  
SRR17520069.8007359  
SRR17520069.8007363  
SRR17520069.8007365  
SRR17520069.8007367  
SRR17520069.8007369  
SRR17520069.8007371  
SRR17520069.8007373  
SRR17520069.8014651  
SRR17520069.8014653  
SRR17520069.8014655  
SRR17520069.8014657  
SRR17520069.8014659  
SRR17520069.8014661  
SRR17520069.8014663  
SRR17520069.8014665  
SRR17520069.8014667  
SRR17520069.8014671  
SRR17520069.8014673  
SRR17520069.8014675  
SRR17520069.8014679  
SRR17520069.8014681  
SRR17520069.8014683  
SRR17520069.8014685  
SRR17520069.8014687  
SRR17520069.8014689  
SRR17520069.8014691  
SRR17520069.8014693  
SRR17520069.8014695  
SRR17520069.8014697  
SRR17520069.8014699  
SRR17520069.8014701  
SRR17520069.8014703  
SRR17520069.8014705  
SRR17520069.8014707  
SRR17520069.8014709  
SRR17520069.8014711  
SRR17520069.8014713  
SRR17520069.8014715  
SRR17520069.8014717  
SRR17520069.8014719  
SRR17520069.8014721  
SRR17520069.8014723  
SRR17520069.8014725  
SRR17520069.8014729  
SRR17520069.8014731

SRR17520069.8014733  
SRR17520069.8014735  
SRR17520069.8014737  
SRR17520069.8014739  
SRR17520069.8014741  
SRR17520069.8014743  
SRR17520069.8014745  
SRR17520069.8014747  
SRR17520069.8014749  
SRR17520069.8014753  
SRR17520069.8014755  
SRR17520069.8014757  
SRR17520069.8014759  
SRR17520069.8014761  
SRR17520069.8014763  
SRR17520069.8014765  
SRR17520069.8014767  
SRR17520069.8014769  
SRR17520069.8014771  
SRR17520069.8014773  
SRR17520069.8014775  
SRR17520069.8014777  
SRR17520069.8014779  
SRR17520069.8014781  
SRR17520069.8014783  
SRR17520069.8014785  
SRR17520069.8014787  
SRR17520069.8014789  
SRR17520069.8014791  
SRR17520069.8014793  
SRR17520069.8014795  
SRR17520069.8015582  
SRR17520069.8015584  
SRR17520069.8015586  
SRR17520069.8015588  
SRR17520069.8015590  
SRR17520069.8015592  
SRR17520069.8015596  
SRR17520069.8015598  
SRR17520069.8018768  
SRR17520069.8020522  
SRR17520069.8023014  
SRR17520069.8023016  
SRR17520069.8023018  
SRR17520069.8023020  
SRR17520069.8023022  
SRR17520069.8023024



SRR17520069.8023026  
SRR17520069.8026589  
SRR17520069.8026595  
SRR17520069.8026597  
SRR17520069.8026603  
SRR17520069.8026605  
SRR17520069.8026613  
SRR17520069.8026615  
SRR17520069.8026621  
SRR17520069.8047280  
SRR17520069.8047282  
SRR17520069.8047284  
SRR17520069.8047286  
SRR17520069.8047288  
SRR17520069.8047290  
SRR17520069.8047292  
SRR17520069.8048605  
SRR17520069.8048607  
SRR17520069.8048609  
SRR17520069.8048611  
SRR17520069.8048617  
SRR17520069.8056838  
SRR17520069.8056840  
SRR17520069.8056842  
SRR17520069.8056844  
SRR17520069.8056846  
SRR17520069.8056848  
SRR17520069.8056850  
SRR17520069.8062989  
SRR17520069.8062991  
SRR17520069.8062993  
SRR17520069.8062995  
SRR17520069.8062997  
SRR17520069.8062999  
SRR17520069.8063001  
SRR17520069.8063003  
SRR17520069.8063005  
SRR17520069.8063007  
SRR17520069.8063009  
SRR17520069.8063011  
SRR17520069.8063013  
SRR17520069.8063015  
SRR17520069.8063017  
SRR17520069.8063019  
SRR17520069.8063021  
SRR17520069.8063023  
SRR17520069.8063025

SRR17520069.8063027  
SRR17520069.8063029  
SRR17520069.8063031  
SRR17520069.8063033  
SRR17520069.8063035  
SRR17520069.8063037  
SRR17520069.8063039  
SRR17520069.8063041  
SRR17520069.8063043  
SRR17520069.8063045  
SRR17520069.8063047  
SRR17520069.8063049  
SRR17520069.8063051  
SRR17520069.8063053  
SRR17520069.8063055  
SRR17520069.8063057  
SRR17520069.8063059  
SRR17520069.8063063  
SRR17520069.8063065  
SRR17520069.8063069  
SRR17520069.8063071  
SRR17520069.8063073  
SRR17520069.8063075  
SRR17520069.8063077  
SRR17520069.8063079  
SRR17520069.8063081  
SRR17520069.8063083  
SRR17520069.8063085  
SRR17520069.8063087  
SRR17520069.8063089  
SRR17520069.8063091  
SRR17520069.8063093  
SRR17520069.8063095  
SRR17520069.8063097  
SRR17520069.8063099  
SRR17520069.8063101  
SRR17520069.8063105  
SRR17520069.8067361  
SRR17520069.8067363  
SRR17520069.8067365  
SRR17520069.8067369  
SRR17520069.8067371  
SRR17520069.8067373  
SRR17520069.8067375  
SRR17520069.8067377  
SRR17520069.8067383  
SRR17520069.8067385

SRR17520069.8067387  
SRR17520069.8067389  
SRR17520069.8067391  
SRR17520069.8067395  
SRR17520069.8067399  
SRR17520069.8067403  
SRR17520069.8067405  
SRR17520069.8067407  
SRR17520069.8067409  
SRR17520069.8074437  
SRR17520069.8074453  
SRR17520069.8077554  
SRR17520069.8077653  
SRR17520069.8077655  
SRR17520069.8077657  
SRR17520069.8077659  
SRR17520069.8077661  
SRR17520069.8077663  
SRR17520069.8077665  
SRR17520069.8077667  
SRR17520069.8077669  
SRR17520069.8077671  
SRR17520069.8077673  
SRR17520069.8077675  
SRR17520069.8077677  
SRR17520069.8077679  
SRR17520069.8077681  
SRR17520069.8077683  
SRR17520069.8077685  
SRR17520069.8077687  
SRR17520069.8077689  
SRR17520069.8077691  
SRR17520069.8084587  
SRR17520069.8084589  
SRR17520069.8084591  
SRR17520069.8084593  
SRR17520069.8084595  
SRR17520069.8084597  
SRR17520069.8084599  
SRR17520069.8084601  
SRR17520069.8084603  
SRR17520069.8084605  
SRR17520069.8084607  
SRR17520069.8084609  
SRR17520069.8084611  
SRR17520069.8084613  
SRR17520069.8084615

SRR17520069.8084617  
SRR17520069.8084619  
SRR17520069.8084621  
SRR17520069.8084623  
SRR17520069.8084625  
SRR17520069.8084627  
SRR17520069.8084629  
SRR17520069.8084631  
SRR17520069.8084633  
SRR17520069.8084635  
SRR17520069.8084637  
SRR17520069.8084639  
SRR17520069.8084818  
SRR17520069.8084820  
SRR17520069.8084822  
SRR17520069.8084824  
SRR17520069.8084826  
SRR17520069.8084828  
SRR17520069.8084830  
SRR17520069.8084832  
SRR17520069.8085881  
SRR17520069.8085883  
SRR17520069.8085885  
SRR17520069.8085887  
SRR17520069.8085889  
SRR17520069.8085891  
SRR17520069.8086042  
SRR17520069.8087920  
SRR17520069.8087922  
SRR17520069.8087924  
SRR17520069.8087926  
SRR17520069.8087928  
SRR17520069.8087930  
SRR17520069.8087932  
SRR17520069.8087934  
SRR17520069.8087936  
SRR17520069.8087938  
SRR17520069.8087940  
SRR17520069.8087946  
SRR17520069.8087948  
SRR17520069.8087950  
SRR17520069.8088029  
SRR17520069.8088031  
SRR17520069.8088033  
SRR17520069.8088035  
SRR17520069.8088037  
SRR17520069.8088039

SRR17520069.8088041  
SRR17520069.8088043  
SRR17520069.8088045  
SRR17520069.8093572  
SRR17520069.8093574  
SRR17520069.8093576  
SRR17520069.8093578  
SRR17520069.8093580  
SRR17520069.8093582  
SRR17520069.8093584  
SRR17520069.8093586  
SRR17520069.8093588  
SRR17520069.8093590  
SRR17520069.8093592  
SRR17520069.8093594  
SRR17520069.8093596  
SRR17520069.8093598  
SRR17520069.8093600  
SRR17520069.8093602  
SRR17520069.8105574  
SRR17520069.8107929  
SRR17520069.8107931  
SRR17520069.8107933  
SRR17520069.8107935  
SRR17520069.8107937  
SRR17520069.8107939  
SRR17520069.8107941  
SRR17520069.8107943  
SRR17520069.8107945  
SRR17520069.8107947  
SRR17520069.8107949  
SRR17520069.8107951  
SRR17520069.8107953  
SRR17520069.8107955  
SRR17520069.8107957  
SRR17520069.8107959  
SRR17520069.8107961  
SRR17520069.8107963  
SRR17520069.8107965  
SRR17520069.8107967  
SRR17520069.8107969  
SRR17520069.8107971  
SRR17520069.8107973  
SRR17520069.8112418  
SRR17520069.8112420  
SRR17520069.8112422  
SRR17520069.8112424

SRR17520069.8112426  
SRR17520069.8112428  
SRR17520069.8112430  
SRR17520069.8112432  
SRR17520069.8112434  
SRR17520069.8112436  
SRR17520069.8124720  
SRR17520069.8124722  
SRR17520069.8124724  
SRR17520069.8124726  
SRR17520069.8124728  
SRR17520069.8124730  
SRR17520069.8124732  
SRR17520069.8124734  
SRR17520069.8124736  
SRR17520069.8124738  
SRR17520069.8126488  
SRR17520069.8126490  
SRR17520069.8126492  
SRR17520069.8126496  
SRR17520069.8126498  
SRR17520069.8136671  
SRR17520069.8136673  
SRR17520069.8136675  
SRR17520069.8136677  
SRR17520069.8136679  
SRR17520069.8136681  
SRR17520069.8136683  
SRR17520069.8136685  
SRR17520069.8136687  
SRR17520069.8136689  
SRR17520069.8136691  
SRR17520069.8136693  
SRR17520069.8136695  
SRR17520069.8136697  
SRR17520069.8136699  
SRR17520069.8136701  
SRR17520069.8136703  
SRR17520069.8136705  
SRR17520069.8136707  
SRR17520069.8136709  
SRR17520069.8136711  
SRR17520069.8136713  
SRR17520069.8136715  
SRR17520069.8136717  
SRR17520069.8136719  
SRR17520069.8136721

SRR17520069.8136723  
SRR17520069.8136725  
SRR17520069.8136727  
SRR17520069.8136729  
SRR17520069.8136731  
SRR17520069.8136733  
SRR17520069.8136735  
SRR17520069.8136737  
SRR17520069.8136739  
SRR17520069.8136741  
SRR17520069.8136743  
SRR17520069.8136745  
SRR17520069.8136747  
SRR17520069.8136749  
SRR17520069.8136751  
SRR17520069.8136753  
SRR17520069.8136755  
SRR17520069.8136757  
SRR17520069.8136759  
SRR17520069.8136761  
SRR17520069.8136763  
SRR17520069.8136765  
SRR17520069.8136767  
SRR17520069.8136769  
SRR17520069.8136771  
SRR17520069.8136773  
SRR17520069.8136775  
SRR17520069.8136777  
SRR17520069.8136779  
SRR17520069.8136783  
SRR17520069.8136785  
SRR17520069.8136787  
SRR17520069.8136789  
SRR17520069.8136791  
SRR17520069.8136793  
SRR17520069.8136795  
SRR17520069.8136797  
SRR17520069.8136799  
SRR17520069.8136801  
SRR17520069.8136803  
SRR17520069.8136805  
SRR17520069.8136807  
SRR17520069.8136809  
SRR17520069.8136811  
SRR17520069.8136813  
SRR17520069.8136815  
SRR17520069.8136817

SRR17520069.8136819  
SRR17520069.8136821  
SRR17520069.8136823  
SRR17520069.8136825  
SRR17520069.8136827  
SRR17520069.8136829  
SRR17520069.8143225  
SRR17520069.8145704  
SRR17520069.8145706  
SRR17520069.8145710  
SRR17520069.8145712  
SRR17520069.8145714  
SRR17520069.8145716  
SRR17520069.8145718  
SRR17520069.8147608  
SRR17520069.8147610  
SRR17520069.8147612  
SRR17520069.8147614  
SRR17520069.8147616  
SRR17520069.8147618  
SRR17520069.8147620  
SRR17520069.8147622  
SRR17520069.8147626  
SRR17520069.8147628  
SRR17520069.8147630  
SRR17520069.8147632  
SRR17520069.8147634  
SRR17520069.8147636  
SRR17520069.8147638  
SRR17520069.8147640  
SRR17520069.8147642  
SRR17520069.8147644  
SRR17520069.8147646  
SRR17520069.8147648  
SRR17520069.8147650  
SRR17520069.8147652  
SRR17520069.8147654  
SRR17520069.8147656  
SRR17520069.8148267  
SRR17520069.8148269  
SRR17520069.8148271  
SRR17520069.8148273  
SRR17520069.8148275  
SRR17520069.8148277  
SRR17520069.8148279  
SRR17520069.8148281  
SRR17520069.8148283



SRR17520069.8148623  
SRR17520069.8148633  
SRR17520069.8151325  
SRR17520069.8151327  
SRR17520069.8151329  
SRR17520069.8151331  
SRR17520069.8151333  
SRR17520069.8151335  
SRR17520069.8151337  
SRR17520069.8151339  
SRR17520069.8151341  
SRR17520069.8151343  
SRR17520069.8151345  
SRR17520069.8151347  
SRR17520069.8151349  
SRR17520069.8158658  
SRR17520069.8158660  
SRR17520069.8158662  
SRR17520069.8161998  
SRR17520069.8162000  
SRR17520069.8162328  
SRR17520069.8162330  
SRR17520069.8162332  
SRR17520069.8174188  
SRR17520069.8174464  
SRR17520069.8174466  
SRR17520069.8174468  
SRR17520069.8174470  
SRR17520069.8174472  
SRR17520069.8174474  
SRR17520069.8174476  
SRR17520069.8174478  
SRR17520069.8174480  
SRR17520069.8174482  
SRR17520069.8174484  
SRR17520069.8174486  
SRR17520069.8174488  
SRR17520069.8174490  
SRR17520069.8174492  
SRR17520069.8174496  
SRR17520069.8174500  
SRR17520069.8174502  
SRR17520069.8174504  
SRR17520069.8174506  
SRR17520069.8174508  
SRR17520069.8174510  
SRR17520069.8174512

SRR17520069.8174514  
SRR17520069.8174516  
SRR17520069.8174518  
SRR17520069.8174520  
SRR17520069.8174522  
SRR17520069.8174524  
SRR17520069.8174526  
SRR17520069.8174528  
SRR17520069.8174530  
SRR17520069.8174532  
SRR17520069.8174534  
SRR17520069.8174536  
SRR17520069.8174538  
SRR17520069.8174540  
SRR17520069.8179815  
SRR17520069.8184354  
SRR17520069.8184356  
SRR17520069.8184358  
SRR17520069.8184360  
SRR17520069.8184362  
SRR17520069.8184364  
SRR17520069.8184366  
SRR17520069.8184368  
SRR17520069.8184370  
SRR17520069.8184372  
SRR17520069.8184374  
SRR17520069.8184376  
SRR17520069.8184380  
SRR17520069.8184382  
SRR17520069.8184384  
SRR17520069.8184386  
SRR17520069.8184388  
SRR17520069.8184390  
SRR17520069.8184392  
SRR17520069.8184394  
SRR17520069.8184396  
SRR17520069.8184398  
SRR17520069.8184400  
SRR17520069.8184402  
SRR17520069.8184404  
SRR17520069.8184406  
SRR17520069.8184408  
SRR17520069.8184410  
SRR17520069.8184412  
SRR17520069.8184414  
SRR17520069.8184416  
SRR17520069.8184418

SRR17520069.8184420  
SRR17520069.8184422  
SRR17520069.8184424  
SRR17520069.8184426  
SRR17520069.8184428  
SRR17520069.8184430  
SRR17520069.8184432  
SRR17520069.8184434  
SRR17520069.8184436  
SRR17520069.8184438  
SRR17520069.8184440  
SRR17520069.8184909  
SRR17520069.8184911  
SRR17520069.8184913  
SRR17520069.8184915  
SRR17520069.8184917  
SRR17520069.8184919  
SRR17520069.8184921  
SRR17520069.8184923  
SRR17520069.8184925  
SRR17520069.8184927  
SRR17520069.8184929  
SRR17520069.8184931  
SRR17520069.8190731  
SRR17520069.8190733  
SRR17520069.8190735  
SRR17520069.8190737  
SRR17520069.8195089  
SRR17520069.8196868  
SRR17520069.8196872  
SRR17520069.8196874  
SRR17520069.8196876  
SRR17520069.8196878  
SRR17520069.8196880  
SRR17520069.8196882  
SRR17520069.8196884  
SRR17520069.8196886  
SRR17520069.8196888  
SRR17520069.8196890  
SRR17520069.8196892  
SRR17520069.8196894  
SRR17520069.8196896  
SRR17520069.8196898  
SRR17520069.8196900  
SRR17520069.8196902  
SRR17520069.8196904  
SRR17520069.8196906

SRR17520069.8196908  
SRR17520069.8196910  
SRR17520069.8196912  
SRR17520069.8196914  
SRR17520069.8196916  
SRR17520069.8196918  
SRR17520069.8196920  
SRR17520069.8196922  
SRR17520069.8200413  
SRR17520069.8200415  
SRR17520069.8200417  
SRR17520069.8200419  
SRR17520069.8200421  
SRR17520069.8204835  
SRR17520069.8204837  
SRR17520069.8204839  
SRR17520069.8204841  
SRR17520069.8204843  
SRR17520069.8204845  
SRR17520069.8204847  
SRR17520069.8204849  
SRR17520069.8204851  
SRR17520069.8204853  
SRR17520069.8206666  
SRR17520069.8206672  
SRR17520069.8206674  
SRR17520069.8206676  
SRR17520069.8206678  
SRR17520069.8206680  
SRR17520069.8206682  
SRR17520069.8206684  
SRR17520069.8206686  
SRR17520069.8206688  
SRR17520069.8206690  
SRR17520069.8206692  
SRR17520069.8206694  
SRR17520069.8206696  
SRR17520069.8206698  
SRR17520069.8206700  
SRR17520069.8206702  
SRR17520069.8206704  
SRR17520069.8206706  
SRR17520069.8206708  
SRR17520069.8209420  
SRR17520069.8209422  
SRR17520069.8209424  
SRR17520069.8209426

SRR17520069.8209428  
SRR17520069.8209430  
SRR17520069.8209432  
SRR17520069.8209434  
SRR17520069.8209436  
SRR17520069.8209438  
SRR17520069.8209440  
SRR17520069.8209442  
SRR17520069.8209444  
SRR17520069.8209446  
SRR17520069.8209448  
SRR17520069.8209452  
SRR17520069.8209454  
SRR17520069.8209456  
SRR17520069.8209458  
SRR17520069.8209460  
SRR17520069.8209462  
SRR17520069.8209464  
SRR17520069.8209466  
SRR17520069.8209468  
SRR17520069.8209470  
SRR17520069.8209472  
SRR17520069.8215778  
SRR17520069.8215780  
SRR17520069.8215782  
SRR17520069.8215784  
SRR17520069.8215786  
SRR17520069.8215788  
SRR17520069.8215790  
SRR17520069.8215792  
SRR17520069.8215794  
SRR17520069.8215796  
SRR17520069.8215798  
SRR17520069.8215800  
SRR17520069.8215802  
SRR17520069.8215804  
SRR17520069.8215806  
SRR17520069.8215808  
SRR17520069.8215810  
SRR17520069.8215812  
SRR17520069.8215814  
SRR17520069.8215816  
SRR17520069.8215818  
SRR17520069.8215820  
SRR17520069.8215822  
SRR17520069.8215824  
SRR17520069.8215826

SRR17520069.8215828  
SRR17520069.8215830  
SRR17520069.8215832  
SRR17520069.8215834  
SRR17520069.8215836  
SRR17520069.8215838  
SRR17520069.8215840  
SRR17520069.8215842  
SRR17520069.8215844  
SRR17520069.8215846  
SRR17520069.8215850  
SRR17520069.8215852  
SRR17520069.8215854  
SRR17520069.8215856  
SRR17520069.8215858  
SRR17520069.8215860  
SRR17520069.8215862  
SRR17520069.8215864  
SRR17520069.8215866  
SRR17520069.8216746  
SRR17520069.8216748  
SRR17520069.8216750  
SRR17520069.8216752  
SRR17520069.8216754  
SRR17520069.8216756  
SRR17520069.8216758  
SRR17520069.8216760  
SRR17520069.8216762  
SRR17520069.8216764  
SRR17520069.8216766  
SRR17520069.8216768  
SRR17520069.8216770  
SRR17520069.8216772  
SRR17520069.8216774  
SRR17520069.8216776  
SRR17520069.8216778  
SRR17520069.8216780  
SRR17520069.8222515  
SRR17520069.8222517  
SRR17520069.8222519  
SRR17520069.8222521  
SRR17520069.8222523  
SRR17520069.8222529  
SRR17520069.8222531  
SRR17520069.8222533  
SRR17520069.8222535  
SRR17520069.8222537

SRR17520069.8222539  
SRR17520069.8222541  
SRR17520069.8222543  
SRR17520069.8222545  
SRR17520069.8222547  
SRR17520069.8222549  
SRR17520069.8222551  
SRR17520069.8222553  
SRR17520069.8222555  
SRR17520069.8222557  
SRR17520069.8222559  
SRR17520069.8222561  
SRR17520069.8222565  
SRR17520069.8222567  
SRR17520069.8222569  
SRR17520069.8222571  
SRR17520069.8224243  
SRR17520069.8227327  
SRR17520069.8227329  
SRR17520069.8227331  
SRR17520069.8227333  
SRR17520069.8227335  
SRR17520069.8227337  
SRR17520069.8227339  
SRR17520069.8227341  
SRR17520069.8227343  
SRR17520069.8227345  
SRR17520069.8227347  
SRR17520069.8227349  
SRR17520069.8227351  
SRR17520069.8227353  
SRR17520069.8227355  
SRR17520069.8227357  
SRR17520069.8227359  
SRR17520069.8227361  
SRR17520069.8227418  
SRR17520069.8227420  
SRR17520069.8227422  
SRR17520069.8232965  
SRR17520069.8232967  
SRR17520069.8232969  
SRR17520069.8232971  
SRR17520069.8232973  
SRR17520069.8232977  
SRR17520069.8232979  
SRR17520069.8232981  
SRR17520069.8232983

SRR17520069.8232985  
SRR17520069.8232987  
SRR17520069.8232989  
SRR17520069.8232991  
SRR17520069.8232993  
SRR17520069.8232995  
SRR17520069.8232997  
SRR17520069.8232999  
SRR17520069.8233001  
SRR17520069.8233003  
SRR17520069.8233005  
SRR17520069.8233007  
SRR17520069.8233009  
SRR17520069.8233011  
SRR17520069.8234643  
SRR17520069.8234645  
SRR17520069.8234647  
SRR17520069.8234651  
SRR17520069.8234653  
SRR17520069.8234655  
SRR17520069.8234657  
SRR17520069.8234659  
SRR17520069.8234661  
SRR17520069.8234663  
SRR17520069.8234665  
SRR17520069.8234667  
SRR17520069.8234669  
SRR17520069.8234671  
SRR17520069.8234673  
SRR17520069.8234675  
SRR17520069.8234677  
SRR17520069.8234679  
SRR17520069.8234681  
SRR17520069.8234683  
SRR17520069.8234685  
SRR17520069.8234687  
SRR17520069.8234689  
SRR17520069.8236108  
SRR17520069.8236110  
SRR17520069.8236112  
SRR17520069.8236114  
SRR17520069.8236116  
SRR17520069.8236118  
SRR17520069.8236120  
SRR17520069.8236122  
SRR17520069.8236124  
SRR17520069.8236126



SRR17520069.8236128  
SRR17520069.8236130  
SRR17520069.8236132  
SRR17520069.8236134  
SRR17520069.8236136  
SRR17520069.8236138  
SRR17520069.8236140  
SRR17520069.8236142  
SRR17520069.8236144  
SRR17520069.8236146  
SRR17520069.8236148  
SRR17520069.8236150  
SRR17520069.8236152  
SRR17520069.8236154  
SRR17520069.8236156  
SRR17520069.8236158  
SRR17520069.8236164  
SRR17520069.8236166  
SRR17520069.8236168  
SRR17520069.8236170  
SRR17520069.8236172  
SRR17520069.8236174  
SRR17520069.8236176  
SRR17520069.8236178  
SRR17520069.8236180  
SRR17520069.8243366  
SRR17520069.8243368  
SRR17520069.8243370  
SRR17520069.8243372  
SRR17520069.8243374  
SRR17520069.8243376  
SRR17520069.8243378  
SRR17520069.8243382  
SRR17520069.8243384  
SRR17520069.8243386  
SRR17520069.8243388  
SRR17520069.8243390  
SRR17520069.8243392  
SRR17520069.8243394  
SRR17520069.8243396  
SRR17520069.8243398  
SRR17520069.8243400  
SRR17520069.8243402  
SRR17520069.8243404  
SRR17520069.8243408  
SRR17520069.8243410  
SRR17520069.8243412

SRR17520069.8243414  
SRR17520069.8243416  
SRR17520069.8243418  
SRR17520069.8243422  
SRR17520069.8243424  
SRR17520069.8243426  
SRR17520069.8243428  
SRR17520069.8243430  
SRR17520069.8243432  
SRR17520069.8243434  
SRR17520069.8243436  
SRR17520069.8243438  
SRR17520069.8243440  
SRR17520069.8243442  
SRR17520069.8243444  
SRR17520069.8243446  
SRR17520069.8243448  
SRR17520069.8243450  
SRR17520069.8243452  
SRR17520069.8243456  
SRR17520069.8243458  
SRR17520069.8243462  
SRR17520069.8243464  
SRR17520069.8243466  
SRR17520069.8243468  
SRR17520069.8243470  
SRR17520069.8243472  
SRR17520069.8243474  
SRR17520069.8243476  
SRR17520069.8243478  
SRR17520069.8243480  
SRR17520069.8243484  
SRR17520069.8243486  
SRR17520069.8243488  
SRR17520069.8243490  
SRR17520069.8243492  
SRR17520069.8243494  
SRR17520069.8243498  
SRR17520069.8243500  
SRR17520069.8243502  
SRR17520069.8243504  
SRR17520069.8243506  
SRR17520069.8243508  
SRR17520069.8243510  
SRR17520069.8243512  
SRR17520069.8243514  
SRR17520069.8243516

SRR17520069.8243518  
SRR17520069.8243520  
SRR17520069.8243522  
SRR17520069.8243524  
SRR17520069.8243526  
SRR17520069.8243528  
SRR17520069.8243530  
SRR17520069.8243532  
SRR17520069.8243534  
SRR17520069.8243536  
SRR17520069.8243538  
SRR17520069.8243540  
SRR17520069.8243542  
SRR17520069.8243544  
SRR17520069.8243546  
SRR17520069.8243548  
SRR17520069.8243550  
SRR17520069.8243552  
SRR17520069.8243554  
SRR17520069.8244327  
SRR17520069.8244329  
SRR17520069.8244333  
SRR17520069.8244335  
SRR17520069.8244337  
SRR17520069.8244339  
SRR17520069.8244341  
SRR17520069.8244343  
SRR17520069.8244345  
SRR17520069.8244347  
SRR17520069.8244349  
SRR17520069.8245531  
SRR17520069.8253289  
SRR17520069.8253291  
SRR17520069.8253293  
SRR17520069.8253295  
SRR17520069.8253297  
SRR17520069.8253299  
SRR17520069.8253301  
SRR17520069.8253303  
SRR17520069.8253305  
SRR17520069.8253307  
SRR17520069.8253309  
SRR17520069.8253311  
SRR17520069.8253313  
SRR17520069.8253315  
SRR17520069.8253317  
SRR17520069.8253319

SRR17520069.8253321  
SRR17520069.8253323  
SRR17520069.8253329  
SRR17520069.8253331  
SRR17520069.8253333  
SRR17520069.8253335  
SRR17520069.8253337  
SRR17520069.8253339  
SRR17520069.8253341  
SRR17520069.8253343  
SRR17520069.8253345  
SRR17520069.8253347  
SRR17520069.8253349  
SRR17520069.8253351  
SRR17520069.8253353  
SRR17520069.8253355  
SRR17520069.8253357  
SRR17520069.8253359  
SRR17520069.8253361  
SRR17520069.8253363  
SRR17520069.8253365  
SRR17520069.8253367  
SRR17520069.8253369  
SRR17520069.8253371  
SRR17520069.8253373  
SRR17520069.8253375  
SRR17520069.8253377  
SRR17520069.8253379  
SRR17520069.8255005  
SRR17520069.8255019  
SRR17520069.8255065  
SRR17520069.8255073  
SRR17520069.8255081  
SRR17520069.8255089  
SRR17520069.8258191  
SRR17520069.8258193  
SRR17520069.8258195  
SRR17520069.8258197  
SRR17520069.8258199  
SRR17520069.8258201  
SRR17520069.8258203  
SRR17520069.8258207  
SRR17520069.8258209  
SRR17520069.8258211  
SRR17520069.8258213  
SRR17520069.8258215  
SRR17520069.8258217

SRR17520069.8258219  
SRR17520069.8258221  
SRR17520069.8258223  
SRR17520069.8258227  
SRR17520069.8258229  
SRR17520069.8258231  
SRR17520069.8258233  
SRR17520069.8258235  
SRR17520069.8258237  
SRR17520069.8258239  
SRR17520069.8258241  
SRR17520069.8258243  
SRR17520069.8258247  
SRR17520069.8258249  
SRR17520069.8258251  
SRR17520069.8258253  
SRR17520069.8258255  
SRR17520069.8258257  
SRR17520069.8258259  
SRR17520069.8258261  
SRR17520069.8258263  
SRR17520069.8258265  
SRR17520069.8258267  
SRR17520069.8258269  
SRR17520069.8258271  
SRR17520069.8258273  
SRR17520069.8258275  
SRR17520069.8258277  
SRR17520069.8258279  
SRR17520069.8258281  
SRR17520069.8258285  
SRR17520069.8258287  
SRR17520069.8258289  
SRR17520069.8258291  
SRR17520069.8258293  
SRR17520069.8258295  
SRR17520069.8258297  
SRR17520069.8258299  
SRR17520069.8260343  
SRR17520069.8260345  
SRR17520069.8260347  
SRR17520069.8260349  
SRR17520069.8260351  
SRR17520069.8260353  
SRR17520069.8260355  
SRR17520069.8267509  
SRR17520069.8267511

SRR17520069.8269080  
SRR17520069.8269082  
SRR17520069.8269084  
SRR17520069.8269086  
SRR17520069.8269088  
SRR17520069.8269090  
SRR17520069.8269092  
SRR17520069.8269094  
SRR17520069.8269096  
SRR17520069.8269098  
SRR17520069.8269100  
SRR17520069.8275909  
SRR17520069.8275911  
SRR17520069.8275913  
SRR17520069.8288266  
SRR17520069.8288268  
SRR17520069.8288270  
SRR17520069.8288272  
SRR17520069.8288274  
SRR17520069.8288280  
SRR17520069.8288282  
SRR17520069.8288284  
SRR17520069.8288286  
SRR17520069.8288288  
SRR17520069.8289674  
SRR17520069.8289676  
SRR17520069.8289678  
SRR17520069.8289680  
SRR17520069.8289682  
SRR17520069.8289684  
SRR17520069.8289686  
SRR17520069.8290277  
SRR17520069.8290279  
SRR17520069.8291651  
SRR17520069.8291653  
SRR17520069.8291655  
SRR17520069.8291657  
SRR17520069.8291659  
SRR17520069.8299377  
SRR17520069.8299379  
SRR17520069.8299381  
SRR17520069.8299383  
SRR17520069.8299385  
SRR17520069.8299387  
SRR17520069.8299389  
SRR17520069.8299391  
SRR17520069.8299393

SRR17520069.8299395  
SRR17520069.8299397  
SRR17520069.8299399  
SRR17520069.8299401  
SRR17520069.8299403  
SRR17520069.8299405  
SRR17520069.8299407  
SRR17520069.8299409  
SRR17520069.8299411  
SRR17520069.8299413  
SRR17520069.8299415  
SRR17520069.8299417  
SRR17520069.8299419  
SRR17520069.8299421  
SRR17520069.8299423  
SRR17520069.8299425  
SRR17520069.8299427  
SRR17520069.8299429  
SRR17520069.8299431  
SRR17520069.8299433  
SRR17520069.8299435  
SRR17520069.8299437  
SRR17520069.8299439  
SRR17520069.8299441  
SRR17520069.8299443  
SRR17520069.8299445  
SRR17520069.8299447  
SRR17520069.8299451  
SRR17520069.8299453  
SRR17520069.8299455  
SRR17520069.8299457  
SRR17520069.8299459  
SRR17520069.8299461  
SRR17520069.8299463  
SRR17520069.8299465  
SRR17520069.8299467  
SRR17520069.8299469  
SRR17520069.8299473  
SRR17520069.8299475  
SRR17520069.8299477  
SRR17520069.8299479  
SRR17520069.8299481  
SRR17520069.8299483  
SRR17520069.8299485  
SRR17520069.8299487  
SRR17520069.8299489  
SRR17520069.8299491

SRR17520069.8299493  
SRR17520069.8299495  
SRR17520069.8299497  
SRR17520069.8299501  
SRR17520069.8302024  
SRR17520069.8302026  
SRR17520069.8302029  
SRR17520069.8302033  
SRR17520069.8302035  
SRR17520069.8302037  
SRR17520069.8302039  
SRR17520069.8302041  
SRR17520069.8302043  
SRR17520069.8302045  
SRR17520069.8302047  
SRR17520069.8302049  
SRR17520069.8302051  
SRR17520069.8302053  
SRR17520069.8302055  
SRR17520069.8302057  
SRR17520069.8302059  
SRR17520069.8302061  
SRR17520069.8302063  
SRR17520069.8302065  
SRR17520069.8302067  
SRR17520069.8302069  
SRR17520069.8302071  
SRR17520069.8302073  
SRR17520069.8302077  
SRR17520069.8302079  
SRR17520069.8306495  
SRR17520069.8308089  
SRR17520069.8308091  
SRR17520069.8308093  
SRR17520069.8308095  
SRR17520069.8308097  
SRR17520069.8308099  
SRR17520069.8315769  
SRR17520069.8315775  
SRR17520069.8315777  
SRR17520069.8315779  
SRR17520069.8315783  
SRR17520069.8315785  
SRR17520069.8315787  
SRR17520069.8315789  
SRR17520069.8315791  
SRR17520069.8315793



SRR17520069.8315795  
SRR17520069.8315801  
SRR17520069.8315803  
SRR17520069.8315805  
SRR17520069.8315813  
SRR17520069.8315815  
SRR17520069.8315817  
SRR17520069.8315819  
SRR17520069.8315821  
SRR17520069.8315823  
SRR17520069.8315825  
SRR17520069.8315827  
SRR17520069.8315831  
SRR17520069.8315833  
SRR17520069.8315835  
SRR17520069.8315837  
SRR17520069.8315839  
SRR17520069.8315851  
SRR17520069.8315853  
SRR17520069.8315857  
SRR17520069.8315863  
SRR17520069.8317623  
SRR17520069.8327819  
SRR17520069.8327821  
SRR17520069.8327825  
SRR17520069.8327827  
SRR17520069.8327829  
SRR17520069.8327831  
SRR17520069.8327833  
SRR17520069.8327835  
SRR17520069.8327837  
SRR17520069.8327839  
SRR17520069.8327841  
SRR17520069.8327843  
SRR17520069.8327845  
SRR17520069.8327847  
SRR17520069.8327849  
SRR17520069.8327851  
SRR17520069.8327853  
SRR17520069.8327855  
SRR17520069.8327857  
SRR17520069.8327859  
SRR17520069.8327861  
SRR17520069.8327863  
SRR17520069.8327865  
SRR17520069.8327867  
SRR17520069.8327869

SRR17520069.8327871  
SRR17520069.8327873  
SRR17520069.8327875  
SRR17520069.8327877  
SRR17520069.8327879  
SRR17520069.8327881  
SRR17520069.8327883  
SRR17520069.8327885  
SRR17520069.8327887  
SRR17520069.8327889  
SRR17520069.8327891  
SRR17520069.8327893  
SRR17520069.8327895  
SRR17520069.8327897  
SRR17520069.8327899  
SRR17520069.8327901  
SRR17520069.8327903  
SRR17520069.8327905  
SRR17520069.8327907  
SRR17520069.8327909  
SRR17520069.8327911  
SRR17520069.8327913  
SRR17520069.8327915  
SRR17520069.8327917  
SRR17520069.8327919  
SRR17520069.8327921  
SRR17520069.8327923  
SRR17520069.8327925  
SRR17520069.8327927  
SRR17520069.8327929  
SRR17520069.8327931  
SRR17520069.8327933  
SRR17520069.8327935  
SRR17520069.8327937  
SRR17520069.8327939  
SRR17520069.8327941  
SRR17520069.8327943  
SRR17520069.8327945  
SRR17520069.8327947  
SRR17520069.8327949  
SRR17520069.8327951  
SRR17520069.8327953  
SRR17520069.8327955  
SRR17520069.8327957  
SRR17520069.8327961  
SRR17520069.8327963  
SRR17520069.8327965

SRR17520069.8327967  
SRR17520069.8327969  
SRR17520069.8329259  
SRR17520069.8329261  
SRR17520069.8329263  
SRR17520069.8329265  
SRR17520069.8329269  
SRR17520069.8329271  
SRR17520069.8329273  
SRR17520069.8329275  
SRR17520069.8329277  
SRR17520069.8329279  
SRR17520069.8329281  
SRR17520069.8329283  
SRR17520069.8329285  
SRR17520069.8329287  
SRR17520069.8329289  
SRR17520069.8329291  
SRR17520069.8329293  
SRR17520069.8329295  
SRR17520069.8329297  
SRR17520069.8329299  
SRR17520069.8329301  
SRR17520069.8329303  
SRR17520069.8329305  
SRR17520069.8329307  
SRR17520069.8329309  
SRR17520069.8329311  
SRR17520069.8329313  
SRR17520069.8329315  
SRR17520069.8329317  
SRR17520069.8329319  
SRR17520069.8329321  
SRR17520069.8329323  
SRR17520069.8329325  
SRR17520069.8329327  
SRR17520069.8329329  
SRR17520069.8329331  
SRR17520069.8329333  
SRR17520069.8329335  
SRR17520069.8329337  
SRR17520069.8329339  
SRR17520069.8329341  
SRR17520069.8329343  
SRR17520069.8329345  
SRR17520069.8329347  
SRR17520069.8329349

SRR17520069.8329351  
SRR17520069.8329353  
SRR17520069.8329355  
SRR17520069.8329357  
SRR17520069.8329359  
SRR17520069.8329361  
SRR17520069.8329363  
SRR17520069.8329365  
SRR17520069.8329367  
SRR17520069.8329605  
SRR17520069.8329607  
SRR17520069.8329609  
SRR17520069.8329611  
SRR17520069.8329613  
SRR17520069.8329615  
SRR17520069.8329617  
SRR17520069.8329619  
SRR17520069.8332393  
SRR17520069.8333860  
SRR17520069.8333862  
SRR17520069.8333864  
SRR17520069.8333866  
SRR17520069.8333868  
SRR17520069.8333870  
SRR17520069.8333872  
SRR17520069.8333874  
SRR17520069.8333876  
SRR17520069.8333878  
SRR17520069.8333880  
SRR17520069.8333882  
SRR17520069.8333884  
SRR17520069.8333886  
SRR17520069.8333888  
SRR17520069.8335264  
SRR17520069.8335266  
SRR17520069.8335268  
SRR17520069.8335712  
SRR17520069.8335714  
SRR17520069.8335716  
SRR17520069.8335718  
SRR17520069.8335720  
SRR17520069.8335722  
SRR17520069.8338201  
SRR17520069.8338203  
SRR17520069.8338205  
SRR17520069.8338207  
SRR17520069.8338209

SRR17520069.8344738  
SRR17520069.8344740  
SRR17520069.8346258  
SRR17520069.8347116  
SRR17520069.8347118  
SRR17520069.8348166  
SRR17520069.8348168  
SRR17520069.8348170  
SRR17520069.8348172  
SRR17520069.8348174  
SRR17520069.8348176  
SRR17520069.8348178  
SRR17520069.8348180  
SRR17520069.8348182  
SRR17520069.8348184  
SRR17520069.8348186  
SRR17520069.8348188  
SRR17520069.8348190  
SRR17520069.8348192  
SRR17520069.8348194  
SRR17520069.8348196  
SRR17520069.8348198  
SRR17520069.8348200  
SRR17520069.8348202  
SRR17520069.8348204  
SRR17520069.8348206  
SRR17520069.8348208  
SRR17520069.8348210  
SRR17520069.8348212  
SRR17520069.8348214  
SRR17520069.8348216  
SRR17520069.8348218  
SRR17520069.8348220  
SRR17520069.8348222  
SRR17520069.8348224  
SRR17520069.8348226  
SRR17520069.8348228  
SRR17520069.8348230  
SRR17520069.8348232  
SRR17520069.8348234  
SRR17520069.8348236  
SRR17520069.8348238  
SRR17520069.8354525  
SRR17520069.8354527  
SRR17520069.8354529  
SRR17520069.8354531  
SRR17520069.8354533

SRR17520069.8354535  
SRR17520069.8354537  
SRR17520069.8354539  
SRR17520069.8354541  
SRR17520069.8354543  
SRR17520069.8354545  
SRR17520069.8354547  
SRR17520069.8354549  
SRR17520069.8354551  
SRR17520069.8354553  
SRR17520069.8354557  
SRR17520069.8354559  
SRR17520069.8354561  
SRR17520069.8360325  
SRR17520069.8360327  
SRR17520069.8360329  
SRR17520069.8360331  
SRR17520069.8360333  
SRR17520069.8360335  
SRR17520069.8360337  
SRR17520069.8360339  
SRR17520069.8360341  
SRR17520069.8360343  
SRR17520069.8360345  
SRR17520069.8360347  
SRR17520069.8360349  
SRR17520069.8360351  
SRR17520069.8360353  
SRR17520069.8360355  
SRR17520069.8360357  
SRR17520069.8360359  
SRR17520069.8360361  
SRR17520069.8360363  
SRR17520069.8360365  
SRR17520069.8360367  
SRR17520069.8360369  
SRR17520069.8360371  
SRR17520069.8360373  
SRR17520069.8360375  
SRR17520069.8360377  
SRR17520069.8360379  
SRR17520069.8360381  
SRR17520069.8360383  
SRR17520069.8360385  
SRR17520069.8360387  
SRR17520069.8360389  
SRR17520069.8360391

SRR17520069. 8360393  
SRR17520069. 8360395  
SRR17520069. 8360397  
SRR17520069. 8360399  
SRR17520069. 8360401  
SRR17520069. 8360403  
SRR17520069. 8360405  
SRR17520069. 8360407  
SRR17520069. 8360411  
SRR17520069. 8360413  
SRR17520069. 8360415  
SRR17520069. 8360417  
SRR17520069. 8360419  
SRR17520069. 8360421  
SRR17520069. 8360423  
SRR17520069. 8360425  
SRR17520069. 8360427  
SRR17520069. 8360429  
SRR17520069. 8360431  
SRR17520069. 8360433  
SRR17520069. 8360435  
SRR17520069. 8360437  
SRR17520069. 8360439  
SRR17520069. 8360441  
SRR17520069. 8360443  
SRR17520069. 8360445  
SRR17520069. 8360447  
SRR17520069. 8360449  
SRR17520069. 8360451  
SRR17520069. 8360453  
SRR17520069. 8360455  
SRR17520069. 8360459  
SRR17520069. 8360461  
SRR17520069. 8360463  
SRR17520069. 8362234  
SRR17520069. 8363957  
SRR17520069. 8363959  
SRR17520069. 8363961  
SRR17520069. 8363963  
SRR17520069. 8364036  
SRR17520069. 8364038  
SRR17520069. 8364040  
SRR17520069. 8364042  
SRR17520069. 8364044  
SRR17520069. 8364046  
SRR17520069. 8364048  
SRR17520069. 8364050

SRR17520069.8364052  
SRR17520069.8364054  
SRR17520069.8365035  
SRR17520069.8365039  
SRR17520069.8365041  
SRR17520069.8365043  
SRR17520069.8365045  
SRR17520069.8365047  
SRR17520069.8365049  
SRR17520069.8365051  
SRR17520069.8365053  
SRR17520069.8365055  
SRR17520069.8365057  
SRR17520069.8365059  
SRR17520069.8365061  
SRR17520069.8365063  
SRR17520069.8365065  
SRR17520069.8365067  
SRR17520069.8365069  
SRR17520069.8365071  
SRR17520069.8365073  
SRR17520069.8365075  
SRR17520069.8365077  
SRR17520069.8365079  
SRR17520069.8365081  
SRR17520069.8365084  
SRR17520069.8365086  
SRR17520069.8365088  
SRR17520069.8365090  
SRR17520069.8365092  
SRR17520069.8365094  
SRR17520069.8365096  
SRR17520069.8365100  
SRR17520069.8365102  
SRR17520069.8365104  
SRR17520069.8365106  
SRR17520069.8365108  
SRR17520069.8365110  
SRR17520069.8365112  
SRR17520069.8365114  
SRR17520069.8365116  
SRR17520069.8365118  
SRR17520069.8365120  
SRR17520069.8365124  
SRR17520069.8365126  
SRR17520069.8365128  
SRR17520069.8365130



SRR17520069.8365132  
SRR17520069.8365134  
SRR17520069.8365136  
SRR17520069.8365138  
SRR17520069.8368816  
SRR17520069.8368818  
SRR17520069.8368820  
SRR17520069.8368822  
SRR17520069.8368824  
SRR17520069.8368826  
SRR17520069.8368828  
SRR17520069.8368830  
SRR17520069.8368832  
SRR17520069.8368834  
SRR17520069.8368836  
SRR17520069.8368838  
SRR17520069.8368840  
SRR17520069.8368842  
SRR17520069.8368844  
SRR17520069.8368846  
SRR17520069.8368848  
SRR17520069.8368850  
SRR17520069.8368852  
SRR17520069.8368854  
SRR17520069.8368856  
SRR17520069.8368858  
SRR17520069.8368860  
SRR17520069.8368862  
SRR17520069.8368864  
SRR17520069.8368866  
SRR17520069.8374696  
SRR17520069.8374698  
SRR17520069.8378551  
SRR17520069.8378553  
SRR17520069.8378909  
SRR17520069.8378911  
SRR17520069.8378913  
SRR17520069.8379823  
SRR17520069.8379825  
SRR17520069.8379827  
SRR17520069.8379829  
SRR17520069.8379831  
SRR17520069.8379833  
SRR17520069.8379835  
SRR17520069.8379837  
SRR17520069.8379839  
SRR17520069.8379841

SRR17520069.8379843  
SRR17520069.8379845  
SRR17520069.8379847  
SRR17520069.8379849  
SRR17520069.8379851  
SRR17520069.8379853  
SRR17520069.8379855  
SRR17520069.8379857  
SRR17520069.8379859  
SRR17520069.8379861  
SRR17520069.8379863  
SRR17520069.8379865  
SRR17520069.8379867  
SRR17520069.8379869  
SRR17520069.8379871  
SRR17520069.8379873  
SRR17520069.8379875  
SRR17520069.8379877  
SRR17520069.8379879  
SRR17520069.8379881  
SRR17520069.8379883  
SRR17520069.8379885  
SRR17520069.8379887  
SRR17520069.8379889  
SRR17520069.8379891  
SRR17520069.8379893  
SRR17520069.8379895  
SRR17520069.8379897  
SRR17520069.8379899  
SRR17520069.8379901  
SRR17520069.8379903  
SRR17520069.8379905  
SRR17520069.8379907  
SRR17520069.8379909  
SRR17520069.8379911  
SRR17520069.8379913  
SRR17520069.8379915  
SRR17520069.8379917  
SRR17520069.8379919  
SRR17520069.8379921  
SRR17520069.8379923  
SRR17520069.8384124  
SRR17520069.8384126  
SRR17520069.8384128  
SRR17520069.8384130  
SRR17520069.8384132  
SRR17520069.8384134

SRR17520069.8384136  
SRR17520069.8384138  
SRR17520069.8384585  
SRR17520069.8384587  
SRR17520069.8384589  
SRR17520069.8384591  
SRR17520069.8384593  
SRR17520069.8384597  
SRR17520069.8384599  
SRR17520069.8384601  
SRR17520069.8384603  
SRR17520069.8384605  
SRR17520069.8388094  
SRR17520069.8388096  
SRR17520069.8388100  
SRR17520069.8388102  
SRR17520069.8389974  
SRR17520069.8389976  
SRR17520069.8389978  
SRR17520069.8389980  
SRR17520069.8389982  
SRR17520069.8389984  
SRR17520069.8389986  
SRR17520069.8389988  
SRR17520069.8389990  
SRR17520069.8389992  
SRR17520069.8389994  
SRR17520069.8389996  
SRR17520069.8389998  
SRR17520069.8390000  
SRR17520069.8390002  
SRR17520069.8390004  
SRR17520069.8390557  
SRR17520069.8390559  
SRR17520069.8390561  
SRR17520069.8394386  
SRR17520069.8394388  
SRR17520069.8394390  
SRR17520069.8394392  
SRR17520069.8394394  
SRR17520069.8394396  
SRR17520069.8394398  
SRR17520069.8394400  
SRR17520069.8394402  
SRR17520069.8394404  
SRR17520069.8394406  
SRR17520069.8394408

SRR17520069.8404809  
SRR17520069.8404811  
SRR17520069.8404813  
SRR17520069.8404815  
SRR17520069.8404817  
SRR17520069.8404819  
SRR17520069.8404821  
SRR17520069.8404823  
SRR17520069.8404825  
SRR17520069.8404827  
SRR17520069.8404829  
SRR17520069.8404831  
SRR17520069.8404833  
SRR17520069.8404835  
SRR17520069.8404837  
SRR17520069.8404839  
SRR17520069.8404841  
SRR17520069.8404843  
SRR17520069.8404845  
SRR17520069.8404847  
SRR17520069.8404849  
SRR17520069.8404851  
SRR17520069.8404855  
SRR17520069.8404857  
SRR17520069.8404861  
SRR17520069.8404863  
SRR17520069.8404865  
SRR17520069.8404867  
SRR17520069.8404869  
SRR17520069.8404871  
SRR17520069.8404873  
SRR17520069.8404875  
SRR17520069.8404877  
SRR17520069.8404881  
SRR17520069.8404883  
SRR17520069.8404885  
SRR17520069.8404891  
SRR17520069.8405108  
SRR17520069.8406530  
SRR17520069.8406532  
SRR17520069.8406534  
SRR17520069.8406536  
SRR17520069.8406538  
SRR17520069.8406540  
SRR17520069.8406542  
SRR17520069.8406544  
SRR17520069.8406546

SRR17520069.8406548  
SRR17520069.8406550  
SRR17520069.8406554  
SRR17520069.8406556  
SRR17520069.8406558  
SRR17520069.8406560  
SRR17520069.8406562  
SRR17520069.8406564  
SRR17520069.8406566  
SRR17520069.8406568  
SRR17520069.8406570  
SRR17520069.8410389  
SRR17520069.8410391  
SRR17520069.8410393  
SRR17520069.8410395  
SRR17520069.8410397  
SRR17520069.8410399  
SRR17520069.8410401  
SRR17520069.8410403  
SRR17520069.8410405  
SRR17520069.8410407  
SRR17520069.8410409  
SRR17520069.8410411  
SRR17520069.8410413  
SRR17520069.8410415  
SRR17520069.8410417  
SRR17520069.8410419  
SRR17520069.8410421  
SRR17520069.8410423  
SRR17520069.8410425  
SRR17520069.8410427  
SRR17520069.8410429  
SRR17520069.8410431  
SRR17520069.8410433  
SRR17520069.8410435  
SRR17520069.8410437  
SRR17520069.8410439  
SRR17520069.8410441  
SRR17520069.8410443  
SRR17520069.8410445  
SRR17520069.8410447  
SRR17520069.8410449  
SRR17520069.8410451  
SRR17520069.8410453  
SRR17520069.8410455  
SRR17520069.8410457  
SRR17520069.8410459

SRR17520069.8410461  
SRR17520069.8410463  
SRR17520069.8410465  
SRR17520069.8410467  
SRR17520069.8410469  
SRR17520069.8410471  
SRR17520069.8410473  
SRR17520069.8423467  
SRR17520069.8423469  
SRR17520069.8423471  
SRR17520069.8423473  
SRR17520069.8423475  
SRR17520069.8423477  
SRR17520069.8432821  
SRR17520069.8432823  
SRR17520069.8432825  
SRR17520069.8432827  
SRR17520069.8432829  
SRR17520069.8432831  
SRR17520069.8432835  
SRR17520069.8432837  
SRR17520069.8432839  
SRR17520069.8432841  
SRR17520069.8432843  
SRR17520069.8432845  
SRR17520069.8432847  
SRR17520069.8432849  
SRR17520069.8432851  
SRR17520069.8432853  
SRR17520069.8432855  
SRR17520069.8432857  
SRR17520069.8432859  
SRR17520069.8432863  
SRR17520069.8432865  
SRR17520069.8432867  
SRR17520069.8432869  
SRR17520069.8432871  
SRR17520069.8432873  
SRR17520069.8439786  
SRR17520069.8439788  
SRR17520069.8439790  
SRR17520069.8439792  
SRR17520069.8441897  
SRR17520069.8442510  
SRR17520069.8442512  
SRR17520069.8442514  
SRR17520069.8442516

SRR17520069.8442518  
SRR17520069.8442520  
SRR17520069.8442522  
SRR17520069.8442524  
SRR17520069.8442526  
SRR17520069.8443899  
SRR17520069.8443901  
SRR17520069.8443903  
SRR17520069.8443905  
SRR17520069.8443907  
SRR17520069.8443909  
SRR17520069.8443911  
SRR17520069.8443913  
SRR17520069.8443915  
SRR17520069.8443919  
SRR17520069.8443921  
SRR17520069.8443923  
SRR17520069.8443925  
SRR17520069.8443927  
SRR17520069.8443929  
SRR17520069.8443931  
SRR17520069.8443933  
SRR17520069.8443935  
SRR17520069.8443937  
SRR17520069.8443939  
SRR17520069.8443941  
SRR17520069.8443943  
SRR17520069.8443945  
SRR17520069.8443947  
SRR17520069.8443949  
SRR17520069.8443951  
SRR17520069.8443953  
SRR17520069.8443955  
SRR17520069.8443957  
SRR17520069.8443959  
SRR17520069.8447246  
SRR17520069.8447248  
SRR17520069.8447250  
SRR17520069.8447252  
SRR17520069.8447254  
SRR17520069.8447256  
SRR17520069.8447258  
SRR17520069.8447260  
SRR17520069.8449505  
SRR17520069.8449507  
SRR17520069.8449509  
SRR17520069.8449511

SRR17520069.8449513  
SRR17520069.8449515  
SRR17520069.8449517  
SRR17520069.8449519  
SRR17520069.8449523  
SRR17520069.8452857  
SRR17520069.8452859  
SRR17520069.8452861  
SRR17520069.8452863  
SRR17520069.8452865  
SRR17520069.8452867  
SRR17520069.8452869  
SRR17520069.8452871  
SRR17520069.8452873  
SRR17520069.8452875  
SRR17520069.8452877  
SRR17520069.8452879  
SRR17520069.8452881  
SRR17520069.8452883  
SRR17520069.8452885  
SRR17520069.8452887  
SRR17520069.8452889  
SRR17520069.8452891  
SRR17520069.8452893  
SRR17520069.8452895  
SRR17520069.8452897  
SRR17520069.8452899  
SRR17520069.8452901  
SRR17520069.8452903  
SRR17520069.8452905  
SRR17520069.8452907  
SRR17520069.8452909  
SRR17520069.8452911  
SRR17520069.8452913  
SRR17520069.8452915  
SRR17520069.8452917  
SRR17520069.8452919  
SRR17520069.8452921  
SRR17520069.8452923  
SRR17520069.8452925  
SRR17520069.8452927  
SRR17520069.8452929  
SRR17520069.8452931  
SRR17520069.8452933  
SRR17520069.8452935  
SRR17520069.8452937  
SRR17520069.8452939



SRR17520069.8452941  
SRR17520069.8452943  
SRR17520069.8452945  
SRR17520069.8453210  
SRR17520069.8453212  
SRR17520069.8453214  
SRR17520069.8453216  
SRR17520069.8453218  
SRR17520069.8453220  
SRR17520069.8453222  
SRR17520069.8453224  
SRR17520069.8453226  
SRR17520069.8453228  
SRR17520069.8453230  
SRR17520069.8453232  
SRR17520069.8453234  
SRR17520069.8453236  
SRR17520069.8453238  
SRR17520069.8453240  
SRR17520069.8453242  
SRR17520069.8453244  
SRR17520069.8453246  
SRR17520069.8453248  
SRR17520069.8453250  
SRR17520069.8453252  
SRR17520069.8453254  
SRR17520069.8453256  
SRR17520069.8453258  
SRR17520069.8453262  
SRR17520069.8453264  
SRR17520069.8453266  
SRR17520069.8453268  
SRR17520069.8453270  
SRR17520069.8453272  
SRR17520069.8453274  
SRR17520069.8453276  
SRR17520069.8454101  
SRR17520069.8454103  
SRR17520069.8454105  
SRR17520069.8454107  
SRR17520069.8454109  
SRR17520069.8454111  
SRR17520069.8454113  
SRR17520069.8454115  
SRR17520069.8454117  
SRR17520069.8454119  
SRR17520069.8454123

SRR17520069.8462231  
SRR17520069.8462233  
SRR17520069.8462235  
SRR17520069.8462237  
SRR17520069.8462239  
SRR17520069.8462241  
SRR17520069.8462243  
SRR17520069.8462245  
SRR17520069.8462247  
SRR17520069.8462249  
SRR17520069.8462251  
SRR17520069.8462253  
SRR17520069.8462255  
SRR17520069.8462257  
SRR17520069.8462259  
SRR17520069.8462261  
SRR17520069.8462263  
SRR17520069.8462265  
SRR17520069.8462267  
SRR17520069.8462269  
SRR17520069.8462271  
SRR17520069.8462273  
SRR17520069.8462275  
SRR17520069.8462277  
SRR17520069.8463730  
SRR17520069.8463734  
SRR17520069.8463736  
SRR17520069.8463738  
SRR17520069.8463740  
SRR17520069.8463742  
SRR17520069.8463744  
SRR17520069.8463746  
SRR17520069.8463748  
SRR17520069.8463750  
SRR17520069.8463752  
SRR17520069.8463754  
SRR17520069.8463756  
SRR17520069.8463758  
SRR17520069.8463760  
SRR17520069.8464071  
SRR17520069.8464073  
SRR17520069.8464075  
SRR17520069.8464077  
SRR17520069.8464079  
SRR17520069.8464081  
SRR17520069.8464083  
SRR17520069.8464085

SRR17520069.8464087  
SRR17520069.8464089  
SRR17520069.8464091  
SRR17520069.8464093  
SRR17520069.8464095  
SRR17520069.8464097  
SRR17520069.8464099  
SRR17520069.8464101  
SRR17520069.8464103  
SRR17520069.8464105  
SRR17520069.8464107  
SRR17520069.8464109  
SRR17520069.8464111  
SRR17520069.8464113  
SRR17520069.8464115  
SRR17520069.8464117  
SRR17520069.8464119  
SRR17520069.8464121  
SRR17520069.8464123  
SRR17520069.8464125  
SRR17520069.8464127  
SRR17520069.8464129  
SRR17520069.8464131  
SRR17520069.8464133  
SRR17520069.8464135  
SRR17520069.8464137  
SRR17520069.8464139  
SRR17520069.8464141  
SRR17520069.8464143  
SRR17520069.8464145  
SRR17520069.8464147  
SRR17520069.8464149  
SRR17520069.8464151  
SRR17520069.8464153  
SRR17520069.8464155  
SRR17520069.8464157  
SRR17520069.8464159  
SRR17520069.8464161  
SRR17520069.8464163  
SRR17520069.8464165  
SRR17520069.8464167  
SRR17520069.8464169  
SRR17520069.8464171  
SRR17520069.8464173  
SRR17520069.8464175  
SRR17520069.8464177  
SRR17520069.8464179

SRR17520069.8464181  
SRR17520069.8464183  
SRR17520069.8464185  
SRR17520069.8464187  
SRR17520069.8464189  
SRR17520069.8464191  
SRR17520069.8467194  
SRR17520069.8467198  
SRR17520069.8467200  
SRR17520069.8467202  
SRR17520069.8467204  
SRR17520069.8467206  
SRR17520069.8467208  
SRR17520069.8467210  
SRR17520069.8467212  
SRR17520069.8467214  
SRR17520069.8467216  
SRR17520069.8467218  
SRR17520069.8467220  
SRR17520069.8467222  
SRR17520069.8467226  
SRR17520069.8468366  
SRR17520069.8468368  
SRR17520069.8468370  
SRR17520069.8468372  
SRR17520069.8468374  
SRR17520069.8468376  
SRR17520069.8468378  
SRR17520069.8468380  
SRR17520069.8468382  
SRR17520069.8468384  
SRR17520069.8468386  
SRR17520069.8468388  
SRR17520069.8468390  
SRR17520069.8468392  
SRR17520069.8468394  
SRR17520069.8468396  
SRR17520069.8468398  
SRR17520069.8468400  
SRR17520069.8468402  
SRR17520069.8468404  
SRR17520069.8468406  
SRR17520069.8472629  
SRR17520069.8472631  
SRR17520069.8472633  
SRR17520069.8472635  
SRR17520069.8472639

SRR17520069.8472647  
SRR17520069.8472649  
SRR17520069.8472651  
SRR17520069.8472653  
SRR17520069.8472655  
SRR17520069.8472657  
SRR17520069.8472659  
SRR17520069.8472661  
SRR17520069.8472663  
SRR17520069.8472665  
SRR17520069.8472667  
SRR17520069.8472669  
SRR17520069.8472671  
SRR17520069.8472673  
SRR17520069.8473164  
SRR17520069.8473166  
SRR17520069.8473168  
SRR17520069.8473170  
SRR17520069.8473172  
SRR17520069.8473174  
SRR17520069.8473176  
SRR17520069.8473178  
SRR17520069.8481308  
SRR17520069.8481310  
SRR17520069.8481312  
SRR17520069.8481314  
SRR17520069.8481316  
SRR17520069.8481318  
SRR17520069.8481320  
SRR17520069.8481322  
SRR17520069.8481324  
SRR17520069.8481328  
SRR17520069.8481330  
SRR17520069.8481332  
SRR17520069.8481334  
SRR17520069.8481336  
SRR17520069.8481338  
SRR17520069.8483918  
SRR17520069.8483920  
SRR17520069.8483922  
SRR17520069.8483924  
SRR17520069.8483926  
SRR17520069.8483928  
SRR17520069.8483930  
SRR17520069.8483932  
SRR17520069.8483934  
SRR17520069.8483936

SRR17520069.8483938  
SRR17520069.8483940  
SRR17520069.8483942  
SRR17520069.8483944  
SRR17520069.8483946  
SRR17520069.8483950  
SRR17520069.8483952  
SRR17520069.8483954  
SRR17520069.8483956  
SRR17520069.8483958  
SRR17520069.8483960  
SRR17520069.8484900  
SRR17520069.8484902  
SRR17520069.8486109  
SRR17520069.8486111  
SRR17520069.8486113  
SRR17520069.8486115  
SRR17520069.8486117  
SRR17520069.8486119  
SRR17520069.8486121  
SRR17520069.8486123  
SRR17520069.8486125  
SRR17520069.8486127  
SRR17520069.8486129  
SRR17520069.8486131  
SRR17520069.8486133  
SRR17520069.8486135  
SRR17520069.8486137  
SRR17520069.8486139  
SRR17520069.8486141  
SRR17520069.8486143  
SRR17520069.8486145  
SRR17520069.8486147  
SRR17520069.8486151  
SRR17520069.8486153  
SRR17520069.8486155  
SRR17520069.8486157  
SRR17520069.8486159  
SRR17520069.8486161  
SRR17520069.8486163  
SRR17520069.8486165  
SRR17520069.8486167  
SRR17520069.8486169  
SRR17520069.8486171  
SRR17520069.8486173  
SRR17520069.8486175  
SRR17520069.8486177

SRR17520069.8486179  
SRR17520069.8486181  
SRR17520069.8489449  
SRR17520069.8489451  
SRR17520069.8489453  
SRR17520069.8489455  
SRR17520069.8489457  
SRR17520069.8489459  
SRR17520069.8489461  
SRR17520069.8489463  
SRR17520069.8489465  
SRR17520069.8489467  
SRR17520069.8489469  
SRR17520069.8489471  
SRR17520069.8496333  
SRR17520069.8496335  
SRR17520069.8497752  
SRR17520069.8497754  
SRR17520069.8497756  
SRR17520069.8497758  
SRR17520069.8497760  
SRR17520069.8497762  
SRR17520069.8497764  
SRR17520069.8497766  
SRR17520069.8497768  
SRR17520069.8497770  
SRR17520069.8497772  
SRR17520069.8497774  
SRR17520069.8497776  
SRR17520069.8497778  
SRR17520069.8497780  
SRR17520069.8497782  
SRR17520069.8497784  
SRR17520069.8497786  
SRR17520069.8497788  
SRR17520069.8497790  
SRR17520069.8497792  
SRR17520069.8497794  
SRR17520069.8497796  
SRR17520069.8499539  
SRR17520069.8499541  
SRR17520069.8499543  
SRR17520069.8499545  
SRR17520069.8499547  
SRR17520069.8499551  
SRR17520069.8511745  
SRR17520069.8511747

SRR17520069.8511749  
SRR17520069.8511751  
SRR17520069.8511753  
SRR17520069.8511755  
SRR17520069.8511757  
SRR17520069.8514043  
SRR17520069.8514045  
SRR17520069.8514047  
SRR17520069.8514049  
SRR17520069.8515244  
SRR17520069.8515246  
SRR17520069.8515248  
SRR17520069.8515250  
SRR17520069.8515252  
SRR17520069.8515254  
SRR17520069.8515256  
SRR17520069.8515258  
SRR17520069.8515260  
SRR17520069.8515262  
SRR17520069.8515264  
SRR17520069.8515266  
SRR17520069.8515268  
SRR17520069.8515270  
SRR17520069.8515272  
SRR17520069.8515274  
SRR17520069.8515276  
SRR17520069.8515278  
SRR17520069.8515280  
SRR17520069.8515282  
SRR17520069.8515284  
SRR17520069.8515286  
SRR17520069.8515288  
SRR17520069.8515290  
SRR17520069.8515292  
SRR17520069.8515294  
SRR17520069.8515296  
SRR17520069.8515298  
SRR17520069.8515300  
SRR17520069.8515302  
SRR17520069.8515304  
SRR17520069.8515306  
SRR17520069.8515308  
SRR17520069.8515314  
SRR17520069.8515316  
SRR17520069.8515318  
SRR17520069.8515320  
SRR17520069.8515322



SRR17520069.8515324  
SRR17520069.8515326  
SRR17520069.8515328  
SRR17520069.8515330  
SRR17520069.8515334  
SRR17520069.8517837  
SRR17520069.8517839  
SRR17520069.8517841  
SRR17520069.8517843  
SRR17520069.8517845  
SRR17520069.8522652  
SRR17520069.8522654  
SRR17520069.8522656  
SRR17520069.8522660  
SRR17520069.8522662  
SRR17520069.8522664  
SRR17520069.8522666  
SRR17520069.8522668  
SRR17520069.8522670  
SRR17520069.8522672  
SRR17520069.8522674  
SRR17520069.8522676  
SRR17520069.8522678  
SRR17520069.8522680  
SRR17520069.8522682  
SRR17520069.8522684  
SRR17520069.8522686  
SRR17520069.8522688  
SRR17520069.8522690  
SRR17520069.8522692  
SRR17520069.8522694  
SRR17520069.8522696  
SRR17520069.8522698  
SRR17520069.8522700  
SRR17520069.8522702  
SRR17520069.8522704  
SRR17520069.8522706  
SRR17520069.8522708  
SRR17520069.8522710  
SRR17520069.8524192  
SRR17520069.8524238  
SRR17520069.8525828  
SRR17520069.8527149  
SRR17520069.8527151  
SRR17520069.8527153  
SRR17520069.8527155  
SRR17520069.8527157

SRR17520069.8527159  
SRR17520069.8527161  
SRR17520069.8527163  
SRR17520069.8527165  
SRR17520069.8527167  
SRR17520069.8531192  
SRR17520069.8531194  
SRR17520069.8531196  
SRR17520069.8531198  
SRR17520069.8531200  
SRR17520069.8531202  
SRR17520069.8531204  
SRR17520069.8531206  
SRR17520069.8531208  
SRR17520069.8531210  
SRR17520069.8531212  
SRR17520069.8531214  
SRR17520069.8531216  
SRR17520069.8531218  
SRR17520069.8531220  
SRR17520069.8531222  
SRR17520069.8531224  
SRR17520069.8531226  
SRR17520069.8531228  
SRR17520069.8531230  
SRR17520069.8531232  
SRR17520069.8531234  
SRR17520069.8531236  
SRR17520069.8531238  
SRR17520069.8531240  
SRR17520069.8531242  
SRR17520069.8531244  
SRR17520069.8531246  
SRR17520069.8531248  
SRR17520069.8531250  
SRR17520069.8531252  
SRR17520069.8531254  
SRR17520069.8531256  
SRR17520069.8536540  
SRR17520069.8544739  
SRR17520069.8544741  
SRR17520069.8544743  
SRR17520069.8544745  
SRR17520069.8544747  
SRR17520069.8544749  
SRR17520069.8544751  
SRR17520069.8544753

SRR17520069.8544755  
SRR17520069.8544759  
SRR17520069.8544761  
SRR17520069.8544763  
SRR17520069.8544765  
SRR17520069.8544769  
SRR17520069.8551176  
SRR17520069.8551178  
SRR17520069.8551180  
SRR17520069.8551182  
SRR17520069.8551186  
SRR17520069.8551188  
SRR17520069.8551190  
SRR17520069.8551192  
SRR17520069.8551194  
SRR17520069.8551196  
SRR17520069.8551198  
SRR17520069.8551200  
SRR17520069.8551202  
SRR17520069.8551204  
SRR17520069.8551206  
SRR17520069.8551208  
SRR17520069.8551210  
SRR17520069.8551212  
SRR17520069.8551214  
SRR17520069.8551216  
SRR17520069.8551220  
SRR17520069.8551222  
SRR17520069.8551224  
SRR17520069.8551226  
SRR17520069.8551228  
SRR17520069.8551230  
SRR17520069.8551232  
SRR17520069.8551234  
SRR17520069.8551236  
SRR17520069.8551238  
SRR17520069.8551240  
SRR17520069.8551242  
SRR17520069.8551244  
SRR17520069.8551246  
SRR17520069.8551248  
SRR17520069.8551250  
SRR17520069.8551252  
SRR17520069.8551254  
SRR17520069.8551256  
SRR17520069.8551258  
SRR17520069.8551260

SRR17520069.8551262  
SRR17520069.8551515  
SRR17520069.8551517  
SRR17520069.8551521  
SRR17520069.8551525  
SRR17520069.8552647  
SRR17520069.8552649  
SRR17520069.8552651  
SRR17520069.8552653  
SRR17520069.8552655  
SRR17520069.8552657  
SRR17520069.8552659  
SRR17520069.8552661  
SRR17520069.8552663  
SRR17520069.8552665  
SRR17520069.8552669  
SRR17520069.8552671  
SRR17520069.8552673  
SRR17520069.8552675  
SRR17520069.8554329  
SRR17520069.8554331  
SRR17520069.8554337  
SRR17520069.8554339  
SRR17520069.8554341  
SRR17520069.8554343  
SRR17520069.8554347  
SRR17520069.8554395  
SRR17520069.8554397  
SRR17520069.8554399  
SRR17520069.8554401  
SRR17520069.8554403  
SRR17520069.8554405  
SRR17520069.8554407  
SRR17520069.8554409  
SRR17520069.8554411  
SRR17520069.8564215  
SRR17520069.8564217  
SRR17520069.8564219  
SRR17520069.8564221  
SRR17520069.8564223  
SRR17520069.8564225  
SRR17520069.8564227  
SRR17520069.8564229  
SRR17520069.8564231  
SRR17520069.8564233  
SRR17520069.8564235  
SRR17520069.8564237

SRR17520069.8564239  
SRR17520069.8564241  
SRR17520069.8564297  
SRR17520069.8564299  
SRR17520069.8564301  
SRR17520069.8564303  
SRR17520069.8564305  
SRR17520069.8564307  
SRR17520069.8564309  
SRR17520069.8564311  
SRR17520069.8564313  
SRR17520069.8564315  
SRR17520069.8564317  
SRR17520069.8564319  
SRR17520069.8564321  
SRR17520069.8564323  
SRR17520069.8564325  
SRR17520069.8564327  
SRR17520069.8564329  
SRR17520069.8564331  
SRR17520069.8564333  
SRR17520069.8564335  
SRR17520069.8564337  
SRR17520069.8564339  
SRR17520069.8564341  
SRR17520069.8564343  
SRR17520069.8564345  
SRR17520069.8564347  
SRR17520069.8564349  
SRR17520069.8564351  
SRR17520069.8564355  
SRR17520069.8564357  
SRR17520069.8564359  
SRR17520069.8564361  
SRR17520069.8564363  
SRR17520069.8564367  
SRR17520069.8564369  
SRR17520069.8564371  
SRR17520069.8564373  
SRR17520069.8564375  
SRR17520069.8564377  
SRR17520069.8564379  
SRR17520069.8564381  
SRR17520069.8564383  
SRR17520069.8564385  
SRR17520069.8564387  
SRR17520069.8564389

SRR17520069.8565970  
SRR17520069.8565972  
SRR17520069.8565974  
SRR17520069.8577172  
SRR17520069.8577174  
SRR17520069.8577176  
SRR17520069.8577178  
SRR17520069.8577180  
SRR17520069.8577182  
SRR17520069.8577184  
SRR17520069.8577186  
SRR17520069.8577188  
SRR17520069.8577190  
SRR17520069.8578345  
SRR17520069.8578347  
SRR17520069.8581232  
SRR17520069.8585894  
SRR17520069.8585896  
SRR17520069.8591767  
SRR17520069.8591769  
SRR17520069.8591771  
SRR17520069.8591775  
SRR17520069.8591777  
SRR17520069.8591779  
SRR17520069.8595825  
SRR17520069.8595827  
SRR17520069.8595829  
SRR17520069.8595831  
SRR17520069.8595833  
SRR17520069.8595835  
SRR17520069.8595837  
SRR17520069.8595839  
SRR17520069.8595841  
SRR17520069.8595843  
SRR17520069.8595845  
SRR17520069.8595847  
SRR17520069.8595849  
SRR17520069.8595851  
SRR17520069.8595855  
SRR17520069.8595857  
SRR17520069.8595859  
SRR17520069.8595861  
SRR17520069.8595863  
SRR17520069.8595865  
SRR17520069.8595867  
SRR17520069.8595869  
SRR17520069.8595871

SRR17520069.8599906  
SRR17520069.8599908  
SRR17520069.8599910  
SRR17520069.8599912  
SRR17520069.8599914  
SRR17520069.8599916  
SRR17520069.8599918  
SRR17520069.8599920  
SRR17520069.8599922  
SRR17520069.8599924  
SRR17520069.8599926  
SRR17520069.8599930  
SRR17520069.8599932  
SRR17520069.8599934  
SRR17520069.8602281  
SRR17520069.8602285  
SRR17520069.8602287  
SRR17520069.8602293  
SRR17520069.8602295  
SRR17520069.8603813  
SRR17520069.8603815  
SRR17520069.8603817  
SRR17520069.8603819  
SRR17520069.8603821  
SRR17520069.8603823  
SRR17520069.8603825  
SRR17520069.8603827  
SRR17520069.8603829  
SRR17520069.8603831  
SRR17520069.8603835  
SRR17520069.8603837  
SRR17520069.8603839  
SRR17520069.8603841  
SRR17520069.8603843  
SRR17520069.8603845  
SRR17520069.8607382  
SRR17520069.8607384  
SRR17520069.8607386  
SRR17520069.8607388  
SRR17520069.8607390  
SRR17520069.8607392  
SRR17520069.8607394  
SRR17520069.8607396  
SRR17520069.8607398  
SRR17520069.8607400  
SRR17520069.8607402  
SRR17520069.8607404

SRR17520069.8607406  
SRR17520069.8607408  
SRR17520069.8608503  
SRR17520069.8608507  
SRR17520069.8608509  
SRR17520069.8608511  
SRR17520069.8608513  
SRR17520069.8608515  
SRR17520069.8608519  
SRR17520069.8611065  
SRR17520069.8611069  
SRR17520069.8611071  
SRR17520069.8613823  
SRR17520069.8613825  
SRR17520069.8613827  
SRR17520069.8613829  
SRR17520069.8613831  
SRR17520069.8613833  
SRR17520069.8613835  
SRR17520069.8613837  
SRR17520069.8613839  
SRR17520069.8613841  
SRR17520069.8613843  
SRR17520069.8613845  
SRR17520069.8613847  
SRR17520069.8613849  
SRR17520069.8613851  
SRR17520069.8613853  
SRR17520069.8613855  
SRR17520069.8613857  
SRR17520069.8613861  
SRR17520069.8613863  
SRR17520069.8613865  
SRR17520069.8613867  
SRR17520069.8613869  
SRR17520069.8613871  
SRR17520069.8613873  
SRR17520069.8613875  
SRR17520069.8613877  
SRR17520069.8613879  
SRR17520069.8613881  
SRR17520069.8613883  
SRR17520069.8613885  
SRR17520069.8613887  
SRR17520069.8613889  
SRR17520069.8613891  
SRR17520069.8613893



SRR17520069.8613895  
SRR17520069.8613897  
SRR17520069.8613899  
SRR17520069.8613901  
SRR17520069.8613903  
SRR17520069.8613905  
SRR17520069.8613907  
SRR17520069.8613909  
SRR17520069.8613911  
SRR17520069.8613913  
SRR17520069.8613915  
SRR17520069.8613917  
SRR17520069.8613919  
SRR17520069.8613921  
SRR17520069.8613923  
SRR17520069.8613925  
SRR17520069.8613927  
SRR17520069.8617210  
SRR17520069.8617212  
SRR17520069.8617214  
SRR17520069.8617216  
SRR17520069.8617218  
SRR17520069.8617220  
SRR17520069.8617222  
SRR17520069.8617224  
SRR17520069.8617226  
SRR17520069.8617228  
SRR17520069.8617230  
SRR17520069.8617232  
SRR17520069.8617234  
SRR17520069.8617236  
SRR17520069.8617238  
SRR17520069.8617240  
SRR17520069.8617242  
SRR17520069.8617244  
SRR17520069.8617246  
SRR17520069.8617248  
SRR17520069.8617250  
SRR17520069.8617252  
SRR17520069.8617254  
SRR17520069.8617256  
SRR17520069.8617258  
SRR17520069.8617260  
SRR17520069.8617262  
SRR17520069.8617264  
SRR17520069.8617266  
SRR17520069.8617268

SRR17520069.8617270  
SRR17520069.8617272  
SRR17520069.8617274  
SRR17520069.8617276  
SRR17520069.8617278  
SRR17520069.8617280  
SRR17520069.8617282  
SRR17520069.8617284  
SRR17520069.8617286  
SRR17520069.8617288  
SRR17520069.8617290  
SRR17520069.8617292  
SRR17520069.8617294  
SRR17520069.8618193  
SRR17520069.8618195  
SRR17520069.8618197  
SRR17520069.8618199  
SRR17520069.8618201  
SRR17520069.8618203  
SRR17520069.8618205  
SRR17520069.8618207  
SRR17520069.8618209  
SRR17520069.8618211  
SRR17520069.8618213  
SRR17520069.8618215  
SRR17520069.8618217  
SRR17520069.8618219  
SRR17520069.8618221  
SRR17520069.8618223  
SRR17520069.8618225  
SRR17520069.8618229  
SRR17520069.8618231  
SRR17520069.8618233  
SRR17520069.8618235  
SRR17520069.8618237  
SRR17520069.8618239  
SRR17520069.8618241  
SRR17520069.8618243  
SRR17520069.8618245  
SRR17520069.8618247  
SRR17520069.8618251  
SRR17520069.8618253  
SRR17520069.8618255  
SRR17520069.8618257  
SRR17520069.8618259  
SRR17520069.8618261  
SRR17520069.8618263

SRR17520069.8618265  
SRR17520069.8626287  
SRR17520069.8626289  
SRR17520069.8626291  
SRR17520069.8626293  
SRR17520069.8626295  
SRR17520069.8626297  
SRR17520069.8626299  
SRR17520069.8626301  
SRR17520069.8626303  
SRR17520069.8626305  
SRR17520069.8626307  
SRR17520069.8626309  
SRR17520069.8626311  
SRR17520069.8626313  
SRR17520069.8626315  
SRR17520069.8626317  
SRR17520069.8626319  
SRR17520069.8630176  
SRR17520069.8630178  
SRR17520069.8630180  
SRR17520069.8630182  
SRR17520069.8630184  
SRR17520069.8630186  
SRR17520069.8630188  
SRR17520069.8630190  
SRR17520069.8630192  
SRR17520069.8630194  
SRR17520069.8630196  
SRR17520069.8630200  
SRR17520069.8630202  
SRR17520069.8630204  
SRR17520069.8630206  
SRR17520069.8630208  
SRR17520069.8630210  
SRR17520069.8630212  
SRR17520069.8630214  
SRR17520069.8630216  
SRR17520069.8630218  
SRR17520069.8630220  
SRR17520069.8630222  
SRR17520069.8630224  
SRR17520069.8630226  
SRR17520069.8630228  
SRR17520069.8630230  
SRR17520069.8630232  
SRR17520069.8630234

SRR17520069.8630236  
SRR17520069.8630238  
SRR17520069.8630240  
SRR17520069.8630242  
SRR17520069.8630244  
SRR17520069.8630246  
SRR17520069.8630248  
SRR17520069.8630250  
SRR17520069.8630252  
SRR17520069.8630254  
SRR17520069.8630256  
SRR17520069.8630258  
SRR17520069.8630260  
SRR17520069.8630262  
SRR17520069.8630264  
SRR17520069.8630268  
SRR17520069.8639787  
SRR17520069.8639789  
SRR17520069.8639791  
SRR17520069.8639793  
SRR17520069.8639795  
SRR17520069.8639797  
SRR17520069.8639799  
SRR17520069.8639801  
SRR17520069.8640737  
SRR17520069.8640739  
SRR17520069.8640741  
SRR17520069.8640743  
SRR17520069.8640745  
SRR17520069.8640747  
SRR17520069.8640749  
SRR17520069.8640751  
SRR17520069.8640753  
SRR17520069.8640755  
SRR17520069.8640757  
SRR17520069.8640759  
SRR17520069.8640761  
SRR17520069.8640763  
SRR17520069.8640765  
SRR17520069.8640767  
SRR17520069.8640769  
SRR17520069.8642366  
SRR17520069.8642368  
SRR17520069.8645628  
SRR17520069.8645630  
SRR17520069.8645632  
SRR17520069.8645634

SRR17520069.8645636  
SRR17520069.8645638  
SRR17520069.8645640  
SRR17520069.8645642  
SRR17520069.8645644  
SRR17520069.8645646  
SRR17520069.8645648  
SRR17520069.8645650  
SRR17520069.8645652  
SRR17520069.8645654  
SRR17520069.8645656  
SRR17520069.8645658  
SRR17520069.8645660  
SRR17520069.8645662  
SRR17520069.8645664  
SRR17520069.8645666  
SRR17520069.8645668  
SRR17520069.8645670  
SRR17520069.8645672  
SRR17520069.8645674  
SRR17520069.8645676  
SRR17520069.8645678  
SRR17520069.8645680  
SRR17520069.8645682  
SRR17520069.8645684  
SRR17520069.8645686  
SRR17520069.8645688  
SRR17520069.8645690  
SRR17520069.8650804  
SRR17520069.8650806  
SRR17520069.8650808  
SRR17520069.8650810  
SRR17520069.8650812  
SRR17520069.8650814  
SRR17520069.8650816  
SRR17520069.8650818  
SRR17520069.8650820  
SRR17520069.8650822  
SRR17520069.8657345  
SRR17520069.8657347  
SRR17520069.8657349  
SRR17520069.8657351  
SRR17520069.8657353  
SRR17520069.8657355  
SRR17520069.8657357  
SRR17520069.8657359  
SRR17520069.8657361

SRR17520069.8657363  
SRR17520069.8657365  
SRR17520069.8657367  
SRR17520069.8657369  
SRR17520069.8657371  
SRR17520069.8657597  
SRR17520069.8657599  
SRR17520069.8657601  
SRR17520069.8657603  
SRR17520069.8657605  
SRR17520069.8657607  
SRR17520069.8657609  
SRR17520069.8657611  
SRR17520069.8657613  
SRR17520069.8657615  
SRR17520069.8657617  
SRR17520069.8657619  
SRR17520069.8657621  
SRR17520069.8657623  
SRR17520069.8657625  
SRR17520069.8657627  
SRR17520069.8657631  
SRR17520069.8657633  
SRR17520069.8657635  
SRR17520069.8657637  
SRR17520069.8657639  
SRR17520069.8657641  
SRR17520069.8657643  
SRR17520069.8657645  
SRR17520069.8657647  
SRR17520069.8657649  
SRR17520069.8657651  
SRR17520069.8657653  
SRR17520069.8657655  
SRR17520069.8657657  
SRR17520069.8657659  
SRR17520069.8657661  
SRR17520069.8657663  
SRR17520069.8657665  
SRR17520069.8657667  
SRR17520069.8657669  
SRR17520069.8657671  
SRR17520069.8657673  
SRR17520069.8657675  
SRR17520069.8657677  
SRR17520069.8657679  
SRR17520069.8657681

SRR17520069.8657683  
SRR17520069.8657685  
SRR17520069.8657687  
SRR17520069.8657689  
SRR17520069.8657818  
SRR17520069.8657820  
SRR17520069.8657822  
SRR17520069.8657824  
SRR17520069.8657826  
SRR17520069.8657828  
SRR17520069.8657830  
SRR17520069.8657832  
SRR17520069.8657834  
SRR17520069.8657836  
SRR17520069.8657838  
SRR17520069.8657840  
SRR17520069.8657842  
SRR17520069.8657844  
SRR17520069.8657846  
SRR17520069.8662398  
SRR17520069.8662400  
SRR17520069.8662406  
SRR17520069.8662408  
SRR17520069.8662410  
SRR17520069.8662412  
SRR17520069.8662414  
SRR17520069.8662416  
SRR17520069.8662418  
SRR17520069.8662420  
SRR17520069.8662422  
SRR17520069.8662426  
SRR17520069.8662428  
SRR17520069.8662430  
SRR17520069.8662432  
SRR17520069.8662434  
SRR17520069.8662436  
SRR17520069.8662438  
SRR17520069.8662440  
SRR17520069.8662442  
SRR17520069.8662444  
SRR17520069.8662446  
SRR17520069.8662448  
SRR17520069.8662452  
SRR17520069.8662456  
SRR17520069.8662458  
SRR17520069.8662460  
SRR17520069.8662462

SRR17520069.8662464  
SRR17520069.8662466  
SRR17520069.8662468  
SRR17520069.8662470  
SRR17520069.8662472  
SRR17520069.8662474  
SRR17520069.8662476  
SRR17520069.8672838  
SRR17520069.8675769  
SRR17520069.8675771  
SRR17520069.8675773  
SRR17520069.8675775  
SRR17520069.8675779  
SRR17520069.8675781  
SRR17520069.8675783  
SRR17520069.8675785  
SRR17520069.8675787  
SRR17520069.8675789  
SRR17520069.8675791  
SRR17520069.8675793  
SRR17520069.8675795  
SRR17520069.8675797  
SRR17520069.8675799  
SRR17520069.8675801  
SRR17520069.8675803  
SRR17520069.8676548  
SRR17520069.8676550  
SRR17520069.8676552  
SRR17520069.8676554  
SRR17520069.8676556  
SRR17520069.8676558  
SRR17520069.8676560  
SRR17520069.8676562  
SRR17520069.8676564  
SRR17520069.8676566  
SRR17520069.8676568  
SRR17520069.8676570  
SRR17520069.8676572  
SRR17520069.8676574  
SRR17520069.8676576  
SRR17520069.8676578  
SRR17520069.8676580  
SRR17520069.8676582  
SRR17520069.8676586  
SRR17520069.8676588  
SRR17520069.8676590  
SRR17520069.8676592



SRR17520069. 8678568  
SRR17520069. 8678570  
SRR17520069. 8678572  
SRR17520069. 8678574  
SRR17520069. 8678576  
SRR17520069. 8678578  
SRR17520069. 8678580  
SRR17520069. 8678582  
SRR17520069. 8678584  
SRR17520069. 8678586  
SRR17520069. 8678588  
SRR17520069. 8678590  
SRR17520069. 8678592  
SRR17520069. 8678594  
SRR17520069. 8678596  
SRR17520069. 8678598  
SRR17520069. 8680318  
SRR17520069. 8680320  
SRR17520069. 8680322  
SRR17520069. 8680324  
SRR17520069. 8680326  
SRR17520069. 8680328  
SRR17520069. 8680330  
SRR17520069. 8680332  
SRR17520069. 8680334  
SRR17520069. 8680338  
SRR17520069. 8680340  
SRR17520069. 8680342  
SRR17520069. 8680344  
SRR17520069. 8680346  
SRR17520069. 8680348  
SRR17520069. 8680350  
SRR17520069. 8680352  
SRR17520069. 8680354  
SRR17520069. 8680356  
SRR17520069. 8680358  
SRR17520069. 8680360  
SRR17520069. 8680362  
SRR17520069. 8680364  
SRR17520069. 8680366  
SRR17520069. 8680368  
SRR17520069. 8680370  
SRR17520069. 8680372  
SRR17520069. 8680374  
SRR17520069. 8680376  
SRR17520069. 8680378  
SRR17520069. 8680380

SRR17520069.8680382  
SRR17520069.8680384  
SRR17520069.8680386  
SRR17520069.8680388  
SRR17520069.8680390  
SRR17520069.8680392  
SRR17520069.8680394  
SRR17520069.8680396  
SRR17520069.8680398  
SRR17520069.8680400  
SRR17520069.8680402  
SRR17520069.8680404  
SRR17520069.8680406  
SRR17520069.8680411  
SRR17520069.8680413  
SRR17520069.8680415  
SRR17520069.8680417  
SRR17520069.8680421  
SRR17520069.8680423  
SRR17520069.8680425  
SRR17520069.8680427  
SRR17520069.8680429  
SRR17520069.8680431  
SRR17520069.8680433  
SRR17520069.8680435  
SRR17520069.8680437  
SRR17520069.8680439  
SRR17520069.8680441  
SRR17520069.8680443  
SRR17520069.8680445  
SRR17520069.8680447  
SRR17520069.8680449  
SRR17520069.8680451  
SRR17520069.8680453  
SRR17520069.8680455  
SRR17520069.8680457  
SRR17520069.8680459  
SRR17520069.8680461  
SRR17520069.8680463  
SRR17520069.8680465  
SRR17520069.8684134  
SRR17520069.8684136  
SRR17520069.8684138  
SRR17520069.8684140  
SRR17520069.8684142  
SRR17520069.8684144  
SRR17520069.8684146

SRR17520069.8684148  
SRR17520069.8684150  
SRR17520069.8684152  
SRR17520069.8684154  
SRR17520069.8684158  
SRR17520069.8684160  
SRR17520069.8684162  
SRR17520069.8684164  
SRR17520069.8684166  
SRR17520069.8684168  
SRR17520069.8684170  
SRR17520069.8684172  
SRR17520069.8684174  
SRR17520069.8684176  
SRR17520069.8684178  
SRR17520069.8684180  
SRR17520069.8684182  
SRR17520069.8684184  
SRR17520069.8684186  
SRR17520069.8684188  
SRR17520069.8684190  
SRR17520069.8684192  
SRR17520069.8684194  
SRR17520069.8684196  
SRR17520069.8684198  
SRR17520069.8684200  
SRR17520069.8684202  
SRR17520069.8684204  
SRR17520069.8684206  
SRR17520069.8684208  
SRR17520069.8684210  
SRR17520069.8684212  
SRR17520069.8686518  
SRR17520069.8686520  
SRR17520069.8689718  
SRR17520069.8689720  
SRR17520069.8689722  
SRR17520069.8689724  
SRR17520069.8689726  
SRR17520069.8689728  
SRR17520069.8692575  
SRR17520069.8692577  
SRR17520069.8693107  
SRR17520069.8698672  
SRR17520069.8698676  
SRR17520069.8698694  
SRR17520069.8700345

SRR17520069.8700347  
SRR17520069.8700349  
SRR17520069.8700351  
SRR17520069.8700353  
SRR17520069.8700357  
SRR17520069.8700359  
SRR17520069.8700361  
SRR17520069.8700363  
SRR17520069.8700365  
SRR17520069.8700367  
SRR17520069.8700369  
SRR17520069.8700371  
SRR17520069.8700375  
SRR17520069.8700377  
SRR17520069.8700379  
SRR17520069.8700381  
SRR17520069.8700383  
SRR17520069.8700385  
SRR17520069.8700387  
SRR17520069.8700389  
SRR17520069.8700393  
SRR17520069.8700395  
SRR17520069.8700397  
SRR17520069.8700399  
SRR17520069.8700401  
SRR17520069.8700403  
SRR17520069.8700405  
SRR17520069.8700407  
SRR17520069.8700413  
SRR17520069.8700417  
SRR17520069.8700419  
SRR17520069.8700423  
SRR17520069.8700425  
SRR17520069.8700561  
SRR17520069.8700563  
SRR17520069.8700565  
SRR17520069.8700567  
SRR17520069.8700569  
SRR17520069.8700571  
SRR17520069.8700573  
SRR17520069.8700575  
SRR17520069.8700577  
SRR17520069.8700579  
SRR17520069.8700583  
SRR17520069.8700585  
SRR17520069.8700587  
SRR17520069.8700591

SRR17520069.8700597  
SRR17520069.8700599  
SRR17520069.8700601  
SRR17520069.8700603  
SRR17520069.8700607  
SRR17520069.8700609  
SRR17520069.8700611  
SRR17520069.8700613  
SRR17520069.8700615  
SRR17520069.8700617  
SRR17520069.8700619  
SRR17520069.8700621  
SRR17520069.8700623  
SRR17520069.8700625  
SRR17520069.8700627  
SRR17520069.8700629  
SRR17520069.8700631  
SRR17520069.8700633  
SRR17520069.8700635  
SRR17520069.8700637  
SRR17520069.8700639  
SRR17520069.8700641  
SRR17520069.8700643  
SRR17520069.8700645  
SRR17520069.8705176  
SRR17520069.8705182  
SRR17520069.8707111  
SRR17520069.8707113  
SRR17520069.8707115  
SRR17520069.8707117  
SRR17520069.8707119  
SRR17520069.8707121  
SRR17520069.8707123  
SRR17520069.8707125  
SRR17520069.8707127  
SRR17520069.8707129  
SRR17520069.8707131  
SRR17520069.8707135  
SRR17520069.8707137  
SRR17520069.8707139  
SRR17520069.8707141  
SRR17520069.8707143  
SRR17520069.8707145  
SRR17520069.8707147  
SRR17520069.8707149  
SRR17520069.8707151  
SRR17520069.8707153

SRR17520069.8707155  
SRR17520069.8707157  
SRR17520069.8718013  
SRR17520069.8718015  
SRR17520069.8718017  
SRR17520069.8718019  
SRR17520069.8718021  
SRR17520069.8718023  
SRR17520069.8718025  
SRR17520069.8718027  
SRR17520069.8718029  
SRR17520069.8718031  
SRR17520069.8718033  
SRR17520069.8718035  
SRR17520069.8718037  
SRR17520069.8718039  
SRR17520069.8718041  
SRR17520069.8718043  
SRR17520069.8718045  
SRR17520069.8718047  
SRR17520069.8718049  
SRR17520069.8718051  
SRR17520069.8718055  
SRR17520069.8718057  
SRR17520069.8718059  
SRR17520069.8718061  
SRR17520069.8718063  
SRR17520069.8718065  
SRR17520069.8718067  
SRR17520069.8720352  
SRR17520069.8720354  
SRR17520069.8720356  
SRR17520069.8720358  
SRR17520069.8720360  
SRR17520069.8720362  
SRR17520069.8720364  
SRR17520069.8720366  
SRR17520069.8720368  
SRR17520069.8720370  
SRR17520069.8720372  
SRR17520069.8720374  
SRR17520069.8720376  
SRR17520069.8720378  
SRR17520069.8720380  
SRR17520069.8720382  
SRR17520069.8720384  
SRR17520069.8720386

SRR17520069.8720388  
SRR17520069.8720394  
SRR17520069.8720396  
SRR17520069.8720398  
SRR17520069.8720400  
SRR17520069.8720404  
SRR17520069.8724751  
SRR17520069.8724753  
SRR17520069.8724755  
SRR17520069.8724757  
SRR17520069.8724759  
SRR17520069.8724763  
SRR17520069.8724765  
SRR17520069.8724767  
SRR17520069.8724769  
SRR17520069.8724771  
SRR17520069.8724773  
SRR17520069.8724775  
SRR17520069.8724777  
SRR17520069.8724779  
SRR17520069.8724781  
SRR17520069.8724783  
SRR17520069.8724785  
SRR17520069.8724787  
SRR17520069.8724789  
SRR17520069.8724791  
SRR17520069.8724793  
SRR17520069.8724795  
SRR17520069.8724797  
SRR17520069.8724799  
SRR17520069.8724801  
SRR17520069.8724803  
SRR17520069.8724805  
SRR17520069.8724807  
SRR17520069.8724809  
SRR17520069.8724811  
SRR17520069.8724813  
SRR17520069.8724815  
SRR17520069.8724819  
SRR17520069.8724821  
SRR17520069.8724823  
SRR17520069.8724825  
SRR17520069.8724829  
SRR17520069.8724831  
SRR17520069.8726178  
SRR17520069.8726180  
SRR17520069.8726182

SRR17520069.8726184  
SRR17520069.8726186  
SRR17520069.8726188  
SRR17520069.8726190  
SRR17520069.8726192  
SRR17520069.8726194  
SRR17520069.8726196  
SRR17520069.8726198  
SRR17520069.8726630  
SRR17520069.8726632  
SRR17520069.8726634  
SRR17520069.8726636  
SRR17520069.8726638  
SRR17520069.8726640  
SRR17520069.8726642  
SRR17520069.8726644  
SRR17520069.8726646  
SRR17520069.8726648  
SRR17520069.8726650  
SRR17520069.8730331  
SRR17520069.8730333  
SRR17520069.8730335  
SRR17520069.8730337  
SRR17520069.8730339  
SRR17520069.8730341  
SRR17520069.8730343  
SRR17520069.8730345  
SRR17520069.8730347  
SRR17520069.8730349  
SRR17520069.8730351  
SRR17520069.8730353  
SRR17520069.8730355  
SRR17520069.8730357  
SRR17520069.8730359  
SRR17520069.8730361  
SRR17520069.8730363  
SRR17520069.8730365  
SRR17520069.8730367  
SRR17520069.8730369  
SRR17520069.8730371  
SRR17520069.8730373  
SRR17520069.8730375  
SRR17520069.8730377  
SRR17520069.8730379  
SRR17520069.8730381  
SRR17520069.8730383  
SRR17520069.8730385



SRR17520069.8730387  
SRR17520069.8730389  
SRR17520069.8730391  
SRR17520069.8730393  
SRR17520069.8730395  
SRR17520069.8730397  
SRR17520069.8730399  
SRR17520069.8730401  
SRR17520069.8730403  
SRR17520069.8730405  
SRR17520069.8730407  
SRR17520069.8730409  
SRR17520069.8730411  
SRR17520069.8730413  
SRR17520069.8730415  
SRR17520069.8730417  
SRR17520069.8730419  
SRR17520069.8730423  
SRR17520069.8730425  
SRR17520069.8730427  
SRR17520069.8730429  
SRR17520069.8730431  
SRR17520069.8730433  
SRR17520069.8730435  
SRR17520069.8731395  
SRR17520069.8731397  
SRR17520069.8731399  
SRR17520069.8731401  
SRR17520069.8731403  
SRR17520069.8731405  
SRR17520069.8731407  
SRR17520069.8731409  
SRR17520069.8731411  
SRR17520069.8731413  
SRR17520069.8731415  
SRR17520069.8731417  
SRR17520069.8731419  
SRR17520069.8731421  
SRR17520069.8731423  
SRR17520069.8731425  
SRR17520069.8731427  
SRR17520069.8731429  
SRR17520069.8731431  
SRR17520069.8731433  
SRR17520069.8731435  
SRR17520069.8731437  
SRR17520069.8731439

SRR17520069.8731441  
SRR17520069.8731443  
SRR17520069.8731445  
SRR17520069.8731447  
SRR17520069.8731449  
SRR17520069.8731451  
SRR17520069.8731453  
SRR17520069.8731455  
SRR17520069.8731457  
SRR17520069.8731459  
SRR17520069.8731461  
SRR17520069.8731463  
SRR17520069.8731465  
SRR17520069.8731467  
SRR17520069.8731469  
SRR17520069.8731471  
SRR17520069.8731473  
SRR17520069.8731475  
SRR17520069.8731479  
SRR17520069.8731481  
SRR17520069.8731483  
SRR17520069.8735524  
SRR17520069.8735526  
SRR17520069.8735528  
SRR17520069.8735530  
SRR17520069.8735532  
SRR17520069.8735534  
SRR17520069.8735536  
SRR17520069.8735541  
SRR17520069.8735543  
SRR17520069.8738801  
SRR17520069.8738803  
SRR17520069.8738805  
SRR17520069.8738807  
SRR17520069.8738809  
SRR17520069.8738811  
SRR17520069.8738813  
SRR17520069.8738817  
SRR17520069.8738819  
SRR17520069.8738821  
SRR17520069.8738823  
SRR17520069.8738825  
SRR17520069.8738827  
SRR17520069.8738829  
SRR17520069.8738831  
SRR17520069.8738833  
SRR17520069.8738835

SRR17520069.8738837  
SRR17520069.8738839  
SRR17520069.8738841  
SRR17520069.8738843  
SRR17520069.8738845  
SRR17520069.8738847  
SRR17520069.8738849  
SRR17520069.8738851  
SRR17520069.8738853  
SRR17520069.8738855  
SRR17520069.8738857  
SRR17520069.8738859  
SRR17520069.8738861  
SRR17520069.8738863  
SRR17520069.8738865  
SRR17520069.8738869  
SRR17520069.8738871  
SRR17520069.8738873  
SRR17520069.8738875  
SRR17520069.8738877  
SRR17520069.8738879  
SRR17520069.8738881  
SRR17520069.8738883  
SRR17520069.8738885  
SRR17520069.8738887  
SRR17520069.8738889  
SRR17520069.8738891  
SRR17520069.8738893  
SRR17520069.8738895  
SRR17520069.8738897  
SRR17520069.8738899  
SRR17520069.8738901  
SRR17520069.8738907  
SRR17520069.8746207  
SRR17520069.8746209  
SRR17520069.8746211  
SRR17520069.8746213  
SRR17520069.8746215  
SRR17520069.8746217  
SRR17520069.8746219  
SRR17520069.8746221  
SRR17520069.8746223  
SRR17520069.8746225  
SRR17520069.8751698  
SRR17520069.8751700  
SRR17520069.8751702  
SRR17520069.8751704

SRR17520069.8751708  
SRR17520069.8751712  
SRR17520069.8751714  
SRR17520069.8751716  
SRR17520069.8751718  
SRR17520069.8751720  
SRR17520069.8751722  
SRR17520069.8751724  
SRR17520069.8751726  
SRR17520069.8751730  
SRR17520069.8751732  
SRR17520069.8751734  
SRR17520069.8751736  
SRR17520069.8751738  
SRR17520069.8751740  
SRR17520069.8751742  
SRR17520069.8753525  
SRR17520069.8753527  
SRR17520069.8753529  
SRR17520069.8753531  
SRR17520069.8753533  
SRR17520069.8753535  
SRR17520069.8753537  
SRR17520069.8753539  
SRR17520069.8758672  
SRR17520069.8758674  
SRR17520069.8758678  
SRR17520069.8758680  
SRR17520069.8758682  
SRR17520069.8758686  
SRR17520069.8758688  
SRR17520069.8758690  
SRR17520069.8758692  
SRR17520069.8758696  
SRR17520069.8758700  
SRR17520069.8758704  
SRR17520069.8769177  
SRR17520069.8769179  
SRR17520069.8769181  
SRR17520069.8772124  
SRR17520069.8772480  
SRR17520069.8772482  
SRR17520069.8772484  
SRR17520069.8772486  
SRR17520069.8772488  
SRR17520069.8772490  
SRR17520069.8772492

SRR17520069.8772494  
SRR17520069.8772496  
SRR17520069.8773267  
SRR17520069.8773269  
SRR17520069.8773273  
SRR17520069.8773275  
SRR17520069.8773277  
SRR17520069.8773281  
SRR17520069.8773283  
SRR17520069.8774581  
SRR17520069.8791141  
SRR17520069.8791143  
SRR17520069.8791145  
SRR17520069.8791147  
SRR17520069.8791149  
SRR17520069.8791151  
SRR17520069.8791153  
SRR17520069.8791155  
SRR17520069.8791157  
SRR17520069.8791159  
SRR17520069.8791161  
SRR17520069.8791163  
SRR17520069.8791165  
SRR17520069.8791167  
SRR17520069.8791169  
SRR17520069.8791171  
SRR17520069.8791173  
SRR17520069.8791175  
SRR17520069.8791177  
SRR17520069.8791179  
SRR17520069.8791181  
SRR17520069.8791183  
SRR17520069.8791185  
SRR17520069.8791187  
SRR17520069.8791189  
SRR17520069.8791191  
SRR17520069.8791193  
SRR17520069.8791195  
SRR17520069.8791197  
SRR17520069.8791199  
SRR17520069.8791201  
SRR17520069.8791203  
SRR17520069.8791205  
SRR17520069.8791207  
SRR17520069.8791209  
SRR17520069.8791211  
SRR17520069.8791213

SRR17520069.8791215  
SRR17520069.8791217  
SRR17520069.8791219  
SRR17520069.8791221  
SRR17520069.8791223  
SRR17520069.8791225  
SRR17520069.8791227  
SRR17520069.8791229  
SRR17520069.8791231  
SRR17520069.8791233  
SRR17520069.8791235  
SRR17520069.8791237  
SRR17520069.8791239  
SRR17520069.8791241  
SRR17520069.8793042  
SRR17520069.8793044  
SRR17520069.8793046  
SRR17520069.8793048  
SRR17520069.8793050  
SRR17520069.8793054  
SRR17520069.8793056  
SRR17520069.8797790  
SRR17520069.8797792  
SRR17520069.8797794  
SRR17520069.8797796  
SRR17520069.8797798  
SRR17520069.8797800  
SRR17520069.8797802  
SRR17520069.8797804  
SRR17520069.8797806  
SRR17520069.8797808  
SRR17520069.8797810  
SRR17520069.8797812  
SRR17520069.8797814  
SRR17520069.8797816  
SRR17520069.8797818  
SRR17520069.8797820  
SRR17520069.8797822  
SRR17520069.8797824  
SRR17520069.8797826  
SRR17520069.8797828  
SRR17520069.8797830  
SRR17520069.8797832  
SRR17520069.8797834  
SRR17520069.8797836  
SRR17520069.8797838  
SRR17520069.8797840

SRR17520069.8797842  
SRR17520069.8797844  
SRR17520069.8797846  
SRR17520069.8797848  
SRR17520069.8797850  
SRR17520069.8797852  
SRR17520069.8797854  
SRR17520069.8797856  
SRR17520069.8797858  
SRR17520069.8797860  
SRR17520069.8797862  
SRR17520069.8797864  
SRR17520069.8797866  
SRR17520069.8797868  
SRR17520069.8797870  
SRR17520069.8797872  
SRR17520069.8797874  
SRR17520069.8797876  
SRR17520069.8797878  
SRR17520069.8797880  
SRR17520069.8797882  
SRR17520069.8797884  
SRR17520069.8797886  
SRR17520069.8798193  
SRR17520069.8798195  
SRR17520069.8798197  
SRR17520069.8798199  
SRR17520069.8798201  
SRR17520069.8798203  
SRR17520069.8798205  
SRR17520069.8798207  
SRR17520069.8798209  
SRR17520069.8798211  
SRR17520069.8800715  
SRR17520069.8815384  
SRR17520069.8815386  
SRR17520069.8815388  
SRR17520069.8817317  
SRR17520069.8821804  
SRR17520069.8821806  
SRR17520069.8821808  
SRR17520069.8840028  
SRR17520069.8840032  
SRR17520069.8840034  
SRR17520069.8840036  
SRR17520069.8840038  
SRR17520069.8840040

SRR17520069.8840042  
SRR17520069.8840044  
SRR17520069.8840046  
SRR17520069.8843153  
SRR17520069.8843155  
SRR17520069.8843157  
SRR17520069.8843159  
SRR17520069.8843161  
SRR17520069.8843163  
SRR17520069.8843165  
SRR17520069.8843167  
SRR17520069.8843169  
SRR17520069.8843171  
SRR17520069.8843173  
SRR17520069.8843175  
SRR17520069.8843179  
SRR17520069.8843183  
SRR17520069.8843185  
SRR17520069.8843187  
SRR17520069.8843191  
SRR17520069.8843193  
SRR17520069.8843195  
SRR17520069.8843197  
SRR17520069.8843327  
SRR17520069.8843329  
SRR17520069.8843331  
SRR17520069.8843333  
SRR17520069.8843335  
SRR17520069.8843337  
SRR17520069.8843339  
SRR17520069.8843341  
SRR17520069.8843343  
SRR17520069.8843345  
SRR17520069.8843347  
SRR17520069.8843349  
SRR17520069.8843351  
SRR17520069.8843353  
SRR17520069.8843355  
SRR17520069.8843357  
SRR17520069.8848330  
SRR17520069.8848332  
SRR17520069.8848334  
SRR17520069.8848336  
SRR17520069.8848338  
SRR17520069.8848340  
SRR17520069.8848342  
SRR17520069.8848344



SRR17520069.8848346  
SRR17520069.8848348  
SRR17520069.8848350  
SRR17520069.8848352  
SRR17520069.8848354  
SRR17520069.8848356  
SRR17520069.8848358  
SRR17520069.8848360  
SRR17520069.8848362  
SRR17520069.8848364  
SRR17520069.8848366  
SRR17520069.8848368  
SRR17520069.8848370  
SRR17520069.8848372  
SRR17520069.8848374  
SRR17520069.8849976  
SRR17520069.8859413  
SRR17520069.8859415  
SRR17520069.8859417  
SRR17520069.8859419  
SRR17520069.8859421  
SRR17520069.8859423  
SRR17520069.8859425  
SRR17520069.8859427  
SRR17520069.8859429  
SRR17520069.8859431  
SRR17520069.8859433  
SRR17520069.8859435  
SRR17520069.8859437  
SRR17520069.8859439  
SRR17520069.8859441  
SRR17520069.8859443  
SRR17520069.8859445  
SRR17520069.8859447  
SRR17520069.8859449  
SRR17520069.8859451  
SRR17520069.8859453  
SRR17520069.8859455  
SRR17520069.8859457  
SRR17520069.8859459  
SRR17520069.8859461  
SRR17520069.8861462  
SRR17520069.8861464  
SRR17520069.8861466  
SRR17520069.8861468  
SRR17520069.8861470  
SRR17520069.8861472

SRR17520069.8861474  
SRR17520069.8861476  
SRR17520069.8861478  
SRR17520069.8861480  
SRR17520069.8861482  
SRR17520069.8861484  
SRR17520069.8861486  
SRR17520069.8861488  
SRR17520069.8861490  
SRR17520069.8861492  
SRR17520069.8861494  
SRR17520069.8861496  
SRR17520069.8861498  
SRR17520069.8861500  
SRR17520069.8861502  
SRR17520069.8861504  
SRR17520069.8861506  
SRR17520069.8861508  
SRR17520069.8861512  
SRR17520069.8861514  
SRR17520069.8861516  
SRR17520069.8861518  
SRR17520069.8861520  
SRR17520069.8861524  
SRR17520069.8861526  
SRR17520069.8861528  
SRR17520069.8861530  
SRR17520069.8861532  
SRR17520069.8861534  
SRR17520069.8861536  
SRR17520069.8874286  
SRR17520069.8874288  
SRR17520069.8874290  
SRR17520069.8874644  
SRR17520069.8874646  
SRR17520069.8874650  
SRR17520069.8874652  
SRR17520069.8874654  
SRR17520069.8874656  
SRR17520069.8874658  
SRR17520069.8874660  
SRR17520069.8874662  
SRR17520069.8874664  
SRR17520069.8874666  
SRR17520069.8874668  
SRR17520069.8876020  
SRR17520069.8876022

SRR17520069.8876024  
SRR17520069.8876026  
SRR17520069.8876028  
SRR17520069.8876030  
SRR17520069.8876034  
SRR17520069.8876036  
SRR17520069.8876038  
SRR17520069.8876040  
SRR17520069.8876042  
SRR17520069.8876044  
SRR17520069.8876046  
SRR17520069.8876048  
SRR17520069.8876050  
SRR17520069.8876052  
SRR17520069.8876054  
SRR17520069.8876056  
SRR17520069.8876058  
SRR17520069.8876060  
SRR17520069.8876062  
SRR17520069.8876064  
SRR17520069.8876066  
SRR17520069.8876068  
SRR17520069.8876070  
SRR17520069.8876072  
SRR17520069.8876074  
SRR17520069.8876076  
SRR17520069.8876078  
SRR17520069.8876080  
SRR17520069.8876082  
SRR17520069.8876084  
SRR17520069.8876086  
SRR17520069.8876088  
SRR17520069.8876092  
SRR17520069.8876094  
SRR17520069.8876096  
SRR17520069.8876098  
SRR17520069.8876100  
SRR17520069.8876102  
SRR17520069.8876104  
SRR17520069.8876106  
SRR17520069.8876108  
SRR17520069.8879393  
SRR17520069.8888168  
SRR17520069.8888170  
SRR17520069.8888172  
SRR17520069.8888174  
SRR17520069.8888176

SRR17520069.8897422  
SRR17520069.8897424  
SRR17520069.8897426  
SRR17520069.8897428  
SRR17520069.8897430  
SRR17520069.8897432  
SRR17520069.8897434  
SRR17520069.8897436  
SRR17520069.8897438  
SRR17520069.8902972  
SRR17520069.8909389  
SRR17520069.8909391  
SRR17520069.8909393  
SRR17520069.8909395  
SRR17520069.8909397  
SRR17520069.8909399  
SRR17520069.8909401  
SRR17520069.8909403  
SRR17520069.8909405  
SRR17520069.8909407  
SRR17520069.8909409  
SRR17520069.8909411  
SRR17520069.8909413  
SRR17520069.8909415  
SRR17520069.8909419  
SRR17520069.8909421  
SRR17520069.8909423  
SRR17520069.8909425  
SRR17520069.8909427  
SRR17520069.8909429  
SRR17520069.8909431  
SRR17520069.8909433  
SRR17520069.8909435  
SRR17520069.8909437  
SRR17520069.8909439  
SRR17520069.8909441  
SRR17520069.8909443  
SRR17520069.8909447  
SRR17520069.8909449  
SRR17520069.8909451  
SRR17520069.8909453  
SRR17520069.8909459  
SRR17520069.8909461  
SRR17520069.8909463  
SRR17520069.8909465  
SRR17520069.8909467  
SRR17520069.8909469

SRR17520069.8909471  
SRR17520069.8909473  
SRR17520069.8909475  
SRR17520069.8910562  
SRR17520069.8910564  
SRR17520069.8910566  
SRR17520069.8910568  
SRR17520069.8910570  
SRR17520069.8910574  
SRR17520069.8910578  
SRR17520069.8910582  
SRR17520069.8910584  
SRR17520069.8910586  
SRR17520069.8910588  
SRR17520069.8910590  
SRR17520069.8910592  
SRR17520069.8910594  
SRR17520069.8910596  
SRR17520069.8910598  
SRR17520069.8910600  
SRR17520069.8910602  
SRR17520069.8910604  
SRR17520069.8910606  
SRR17520069.8910608  
SRR17520069.8910610  
SRR17520069.8910612  
SRR17520069.8910614  
SRR17520069.8910616  
SRR17520069.8910618  
SRR17520069.8910620  
SRR17520069.8910624  
SRR17520069.8910626  
SRR17520069.8910628  
SRR17520069.8910630  
SRR17520069.8910632  
SRR17520069.8910634  
SRR17520069.8912113  
SRR17520069.8912119  
SRR17520069.8912121  
SRR17520069.8912123  
SRR17520069.8912125  
SRR17520069.8912129  
SRR17520069.8912131  
SRR17520069.8912133  
SRR17520069.8912351  
SRR17520069.8922574  
SRR17520069.8922576

SRR17520069.8922578  
SRR17520069.8922580  
SRR17520069.8922582  
SRR17520069.8922584  
SRR17520069.8922586  
SRR17520069.8922588  
SRR17520069.8922590  
SRR17520069.8922592  
SRR17520069.8922594  
SRR17520069.8922596  
SRR17520069.8922598  
SRR17520069.8922600  
SRR17520069.8922602  
SRR17520069.8922604  
SRR17520069.8922606  
SRR17520069.8922608  
SRR17520069.8927820  
SRR17520069.8927822  
SRR17520069.8927824  
SRR17520069.8927826  
SRR17520069.8927828  
SRR17520069.8927830  
SRR17520069.8933338  
SRR17520069.8933340  
SRR17520069.8933342  
SRR17520069.8933344  
SRR17520069.8933346  
SRR17520069.8933348  
SRR17520069.8933350  
SRR17520069.8933352  
SRR17520069.8933354  
SRR17520069.8933356  
SRR17520069.8933358  
SRR17520069.8933360  
SRR17520069.8933362  
SRR17520069.8933364  
SRR17520069.8933366  
SRR17520069.8933368  
SRR17520069.8933370  
SRR17520069.8933372  
SRR17520069.8933374  
SRR17520069.8933376  
SRR17520069.8933378  
SRR17520069.8933380  
SRR17520069.8933382  
SRR17520069.8933384  
SRR17520069.8933386

SRR17520069.8933388  
SRR17520069.8933390  
SRR17520069.8933392  
SRR17520069.8933394  
SRR17520069.8933396  
SRR17520069.8933398  
SRR17520069.8933400  
SRR17520069.8933402  
SRR17520069.8933404  
SRR17520069.8933406  
SRR17520069.8933408  
SRR17520069.8933410  
SRR17520069.8933412  
SRR17520069.8933414  
SRR17520069.8933416  
SRR17520069.8933418  
SRR17520069.8933424  
SRR17520069.8933426  
SRR17520069.8933528  
SRR17520069.8933530  
SRR17520069.8933532  
SRR17520069.8933534  
SRR17520069.8933536  
SRR17520069.8933538  
SRR17520069.8939442  
SRR17520069.8939444  
SRR17520069.8939446  
SRR17520069.8939448  
SRR17520069.8939450  
SRR17520069.8939452  
SRR17520069.8939454  
SRR17520069.8939456  
SRR17520069.8939460  
SRR17520069.8939462  
SRR17520069.8939958  
SRR17520069.8940479  
SRR17520069.8940481  
SRR17520069.8940483  
SRR17520069.8940485  
SRR17520069.8940487  
SRR17520069.8945339  
SRR17520069.8945341  
SRR17520069.8945343  
SRR17520069.8945347  
SRR17520069.8945349  
SRR17520069.8945351  
SRR17520069.8945353

SRR17520069.8945355  
SRR17520069.8945357  
SRR17520069.8945359  
SRR17520069.8945361  
SRR17520069.8945363  
SRR17520069.8946672  
SRR17520069.8946674  
SRR17520069.8946678  
SRR17520069.8946680  
SRR17520069.8946682  
SRR17520069.8946690  
SRR17520069.8946692  
SRR17520069.8946694  
SRR17520069.8946696  
SRR17520069.8946698  
SRR17520069.8946700  
SRR17520069.8946702  
SRR17520069.8946704  
SRR17520069.8946708  
SRR17520069.8946712  
SRR17520069.8948444  
SRR17520069.8948446  
SRR17520069.8948448  
SRR17520069.8948450  
SRR17520069.8950479  
SRR17520069.8950483  
SRR17520069.8950487  
SRR17520069.8950491  
SRR17520069.8950493  
SRR17520069.8959039  
SRR17520069.8964844  
SRR17520069.8964846  
SRR17520069.8964848  
SRR17520069.8964850  
SRR17520069.8964852  
SRR17520069.8964854  
SRR17520069.8964856  
SRR17520069.8964858  
SRR17520069.8964860  
SRR17520069.8964862  
SRR17520069.8964864  
SRR17520069.8967591  
SRR17520069.8967593  
SRR17520069.8967595  
SRR17520069.8967597  
SRR17520069.8967599  
SRR17520069.8967601



SRR17520069.8967603  
SRR17520069.8967605  
SRR17520069.8967607  
SRR17520069.8967882  
SRR17520069.8967884  
SRR17520069.8967886  
SRR17520069.8967888  
SRR17520069.8967890  
SRR17520069.8967892  
SRR17520069.8967894  
SRR17520069.8967896  
SRR17520069.8967898  
SRR17520069.8967900  
SRR17520069.8967902  
SRR17520069.8967904  
SRR17520069.8967906  
SRR17520069.8967908  
SRR17520069.8967910  
SRR17520069.8967912  
SRR17520069.8967914  
SRR17520069.8967916  
SRR17520069.8967918  
SRR17520069.8967920  
SRR17520069.8967922  
SRR17520069.8967924  
SRR17520069.8967926  
SRR17520069.8967928  
SRR17520069.8967930  
SRR17520069.8967932  
SRR17520069.8967934  
SRR17520069.8967936  
SRR17520069.8967938  
SRR17520069.8967940  
SRR17520069.8967942  
SRR17520069.8967944  
SRR17520069.8967946  
SRR17520069.8967948  
SRR17520069.8967950  
SRR17520069.8967952  
SRR17520069.8967954  
SRR17520069.8967956  
SRR17520069.8967958  
SRR17520069.8967963  
SRR17520069.8967965  
SRR17520069.8967967  
SRR17520069.8967969  
SRR17520069.8967971

SRR17520069.8967973  
SRR17520069.8967975  
SRR17520069.8967977  
SRR17520069.8967979  
SRR17520069.8967981  
SRR17520069.8967983  
SRR17520069.8967985  
SRR17520069.8967987  
SRR17520069.8967989  
SRR17520069.8967991  
SRR17520069.8967993  
SRR17520069.8967995  
SRR17520069.8967997  
SRR17520069.8967999  
SRR17520069.8968001  
SRR17520069.8968003  
SRR17520069.8968005  
SRR17520069.8971219  
SRR17520069.8971221  
SRR17520069.8971229  
SRR17520069.8971233  
SRR17520069.8971235  
SRR17520069.8971241  
SRR17520069.8971243  
SRR17520069.8974381  
SRR17520069.8974387  
SRR17520069.8974389  
SRR17520069.8974393  
SRR17520069.8974395  
SRR17520069.8974450  
SRR17520069.8974452  
SRR17520069.8974454  
SRR17520069.8974456  
SRR17520069.8974458  
SRR17520069.8974460  
SRR17520069.8974462  
SRR17520069.8974464  
SRR17520069.8974466  
SRR17520069.8974468  
SRR17520069.8974470  
SRR17520069.8974472  
SRR17520069.8974474  
SRR17520069.8974476  
SRR17520069.8974478  
SRR17520069.8974480  
SRR17520069.8974482  
SRR17520069.8974484

SRR17520069.8974486  
SRR17520069.8974488  
SRR17520069.8982726  
SRR17520069.8982730  
SRR17520069.8982732  
SRR17520069.8982734  
SRR17520069.8982736  
SRR17520069.8982738  
SRR17520069.8982740  
SRR17520069.8982742  
SRR17520069.8982744  
SRR17520069.8982746  
SRR17520069.8982748  
SRR17520069.8982750  
SRR17520069.8982752  
SRR17520069.8982754  
SRR17520069.8982756  
SRR17520069.8982758  
SRR17520069.8991601  
SRR17520069.8996852  
SRR17520069.8996854  
SRR17520069.8996856  
SRR17520069.8996858  
SRR17520069.8996860  
SRR17520069.8996862  
SRR17520069.8996864  
SRR17520069.8996866  
SRR17520069.8996868  
SRR17520069.8996870  
SRR17520069.8996872  
SRR17520069.8996874  
SRR17520069.8996876  
SRR17520069.9006124  
SRR17520069.9006126  
SRR17520069.9006128  
SRR17520069.9006130  
SRR17520069.9006132  
SRR17520069.9006134  
SRR17520069.9006136  
SRR17520069.9006138  
SRR17520069.9006140  
SRR17520069.9006142  
SRR17520069.9006144  
SRR17520069.9006146  
SRR17520069.9006148  
SRR17520069.9006150  
SRR17520069.9006152

SRR17520069.9006154  
SRR17520069.9006156  
SRR17520069.9006158  
SRR17520069.9006160  
SRR17520069.9006164  
SRR17520069.9006166  
SRR17520069.9006168  
SRR17520069.9006170  
SRR17520069.9006172  
SRR17520069.9006176  
SRR17520069.9006178  
SRR17520069.9006180  
SRR17520069.9006182  
SRR17520069.9006184  
SRR17520069.9006186  
SRR17520069.9006188  
SRR17520069.9006190  
SRR17520069.9006192  
SRR17520069.9006194  
SRR17520069.9006196  
SRR17520069.9006198  
SRR17520069.9006200  
SRR17520069.9006202  
SRR17520069.9006204  
SRR17520069.9006206  
SRR17520069.9006208  
SRR17520069.9006210  
SRR17520069.9006214  
SRR17520069.9006216  
SRR17520069.9006218  
SRR17520069.9006220  
SRR17520069.9006222  
SRR17520069.9006224  
SRR17520069.9006226  
SRR17520069.9006228  
SRR17520069.9006230  
SRR17520069.9006232  
SRR17520069.9006234  
SRR17520069.9006236  
SRR17520069.9006240  
SRR17520069.9006242  
SRR17520069.9006244  
SRR17520069.9006246  
SRR17520069.9006248  
SRR17520069.9006250  
SRR17520069.9006252  
SRR17520069.9006254

SRR17520069. 9006256  
SRR17520069. 9006258  
SRR17520069. 9006260  
SRR17520069. 9006262  
SRR17520069. 9006264  
SRR17520069. 9006268  
SRR17520069. 9006270  
SRR17520069. 9006272  
SRR17520069. 9006274  
SRR17520069. 9006276  
SRR17520069. 9006278  
SRR17520069. 9006280  
SRR17520069. 9006282  
SRR17520069. 9006284  
SRR17520069. 9006286  
SRR17520069. 9006288  
SRR17520069. 9006290  
SRR17520069. 9006292  
SRR17520069. 9006296  
SRR17520069. 9007077  
SRR17520069. 9007079  
SRR17520069. 9007081  
SRR17520069. 9007083  
SRR17520069. 9007085  
SRR17520069. 9007087  
SRR17520069. 9008566  
SRR17520069. 9008568  
SRR17520069. 9008570  
SRR17520069. 9008572  
SRR17520069. 9008574  
SRR17520069. 9008576  
SRR17520069. 9008578  
SRR17520069. 9008580  
SRR17520069. 9008582  
SRR17520069. 9008584  
SRR17520069. 9008586  
SRR17520069. 9008588  
SRR17520069. 9008590  
SRR17520069. 9008594  
SRR17520069. 9008596  
SRR17520069. 9008598  
SRR17520069. 9008600  
SRR17520069. 9008602  
SRR17520069. 9008604  
SRR17520069. 9008606  
SRR17520069. 9008608  
SRR17520069. 9008610

SRR17520069.9008612  
SRR17520069.9008614  
SRR17520069.9008616  
SRR17520069.9008618  
SRR17520069.9008620  
SRR17520069.9008622  
SRR17520069.9008624  
SRR17520069.9008626  
SRR17520069.9008628  
SRR17520069.9008630  
SRR17520069.9008632  
SRR17520069.9008634  
SRR17520069.9008636  
SRR17520069.9008638  
SRR17520069.9008640  
SRR17520069.9008642  
SRR17520069.9008644  
SRR17520069.9008646  
SRR17520069.9008648  
SRR17520069.9008650  
SRR17520069.9008652  
SRR17520069.9008654  
SRR17520069.9008656  
SRR17520069.9008660  
SRR17520069.9008662  
SRR17520069.9008664  
SRR17520069.9008668  
SRR17520069.9008670  
SRR17520069.9008672  
SRR17520069.9011390  
SRR17520069.9011392  
SRR17520069.9011396  
SRR17520069.9011854  
SRR17520069.9011925  
SRR17520069.9011927  
SRR17520069.9011929  
SRR17520069.9011931  
SRR17520069.9011933  
SRR17520069.9011935  
SRR17520069.9011937  
SRR17520069.9011939  
SRR17520069.9011941  
SRR17520069.9011943  
SRR17520069.9011945  
SRR17520069.9011949  
SRR17520069.9011951  
SRR17520069.9011953

SRR17520069.9011955  
SRR17520069.9011957  
SRR17520069.9011961  
SRR17520069.9011963  
SRR17520069.9011965  
SRR17520069.9011967  
SRR17520069.9011969  
SRR17520069.9011971  
SRR17520069.9011973  
SRR17520069.9011975  
SRR17520069.9011977  
SRR17520069.9011979  
SRR17520069.9011983  
SRR17520069.9011985  
SRR17520069.9011987  
SRR17520069.9011989  
SRR17520069.9011991  
SRR17520069.9011993  
SRR17520069.9011995  
SRR17520069.9011997  
SRR17520069.9011999  
SRR17520069.9012001  
SRR17520069.9012003  
SRR17520069.9012005  
SRR17520069.9012007  
SRR17520069.9012009  
SRR17520069.9012015  
SRR17520069.9012017  
SRR17520069.9024618  
SRR17520069.9024620  
SRR17520069.9024622  
SRR17520069.9024624  
SRR17520069.9024626  
SRR17520069.9024628  
SRR17520069.9024630  
SRR17520069.9024632  
SRR17520069.9024634  
SRR17520069.9024636  
SRR17520069.9024638  
SRR17520069.9024640  
SRR17520069.9024642  
SRR17520069.9024644  
SRR17520069.9024646  
SRR17520069.9024648  
SRR17520069.9024650  
SRR17520069.9024652  
SRR17520069.9024654

SRR17520069. 9024656  
SRR17520069. 9024658  
SRR17520069. 9024660  
SRR17520069. 9024662  
SRR17520069. 9024664  
SRR17520069. 9024666  
SRR17520069. 9024668  
SRR17520069. 9024670  
SRR17520069. 9024672  
SRR17520069. 9024674  
SRR17520069. 9024676  
SRR17520069. 9024678  
SRR17520069. 9024680  
SRR17520069. 9024682  
SRR17520069. 9024684  
SRR17520069. 9024686  
SRR17520069. 9024688  
SRR17520069. 9024690  
SRR17520069. 9024692  
SRR17520069. 9024694  
SRR17520069. 9024696  
SRR17520069. 9024698  
SRR17520069. 9024700  
SRR17520069. 9024702  
SRR17520069. 9024704  
SRR17520069. 9024706  
SRR17520069. 9024708  
SRR17520069. 9024712  
SRR17520069. 9024714  
SRR17520069. 9024716  
SRR17520069. 9024718  
SRR17520069. 9024720  
SRR17520069. 9024722  
SRR17520069. 9024724  
SRR17520069. 9024726  
SRR17520069. 9024728  
SRR17520069. 9024730  
SRR17520069. 9024732  
SRR17520069. 9024734  
SRR17520069. 9024736  
SRR17520069. 9024738  
SRR17520069. 9024740  
SRR17520069. 9024742  
SRR17520069. 9024744  
SRR17520069. 9024746  
SRR17520069. 9024748  
SRR17520069. 9024750



SRR17520069. 9024752  
SRR17520069. 9024754  
SRR17520069. 9024756  
SRR17520069. 9024758  
SRR17520069. 9024760  
SRR17520069. 9024762  
SRR17520069. 9024764  
SRR17520069. 9024766  
SRR17520069. 9024768  
SRR17520069. 9024770  
SRR17520069. 9024772  
SRR17520069. 9024774  
SRR17520069. 9024776  
SRR17520069. 9026715  
SRR17520069. 9026717  
SRR17520069. 9026719  
SRR17520069. 9026721  
SRR17520069. 9026723  
SRR17520069. 9026725  
SRR17520069. 9026727  
SRR17520069. 9026729  
SRR17520069. 9026731  
SRR17520069. 9026733  
SRR17520069. 9026735  
SRR17520069. 9026737  
SRR17520069. 9026739  
SRR17520069. 9026741  
SRR17520069. 9026743  
SRR17520069. 9026745  
SRR17520069. 9026747  
SRR17520069. 9026749  
SRR17520069. 9026751  
SRR17520069. 9026753  
SRR17520069. 9026755  
SRR17520069. 9026757  
SRR17520069. 9026759  
SRR17520069. 9026761  
SRR17520069. 9026763  
SRR17520069. 9026765  
SRR17520069. 9026767  
SRR17520069. 9026769  
SRR17520069. 9026771  
SRR17520069. 9026773  
SRR17520069. 9026775  
SRR17520069. 9026777  
SRR17520069. 9026779  
SRR17520069. 9026781

SRR17520069. 9026783  
SRR17520069. 9026785  
SRR17520069. 9026787  
SRR17520069. 9026789  
SRR17520069. 9026791  
SRR17520069. 9026793  
SRR17520069. 9026797  
SRR17520069. 9026799  
SRR17520069. 9026801  
SRR17520069. 9026803  
SRR17520069. 9026805  
SRR17520069. 9026807  
SRR17520069. 9026809  
SRR17520069. 9026813  
SRR17520069. 9026815  
SRR17520069. 9026817  
SRR17520069. 9026820  
SRR17520069. 9026822  
SRR17520069. 9026824  
SRR17520069. 9026826  
SRR17520069. 9026828  
SRR17520069. 9026830  
SRR17520069. 9026832  
SRR17520069. 9026834  
SRR17520069. 9026836  
SRR17520069. 9026838  
SRR17520069. 9026840  
SRR17520069. 9026842  
SRR17520069. 9026844  
SRR17520069. 9026846  
SRR17520069. 9026848  
SRR17520069. 9026850  
SRR17520069. 9026852  
SRR17520069. 9026854  
SRR17520069. 9026856  
SRR17520069. 9026858  
SRR17520069. 9027895  
SRR17520069. 9027897  
SRR17520069. 9027899  
SRR17520069. 9027901  
SRR17520069. 9027903  
SRR17520069. 9027905  
SRR17520069. 9027907  
SRR17520069. 9027909  
SRR17520069. 9027911  
SRR17520069. 9027913  
SRR17520069. 9027915

SRR17520069.9027917  
SRR17520069.9027919  
SRR17520069.9027921  
SRR17520069.9027923  
SRR17520069.9027925  
SRR17520069.9027927  
SRR17520069.9027929  
SRR17520069.9027931  
SRR17520069.9027933  
SRR17520069.9027935  
SRR17520069.9027937  
SRR17520069.9027939  
SRR17520069.9027941  
SRR17520069.9031276  
SRR17520069.9031278  
SRR17520069.9031280  
SRR17520069.9031282  
SRR17520069.9039546  
SRR17520069.9039548  
SRR17520069.9039550  
SRR17520069.9039552  
SRR17520069.9039554  
SRR17520069.9039556  
SRR17520069.9039558  
SRR17520069.9039560  
SRR17520069.9039562  
SRR17520069.9039564  
SRR17520069.9039566  
SRR17520069.9039568  
SRR17520069.9039570  
SRR17520069.9039572  
SRR17520069.9039574  
SRR17520069.9040697  
SRR17520069.9040699  
SRR17520069.9040701  
SRR17520069.9040703  
SRR17520069.9040897  
SRR17520069.9040899  
SRR17520069.9040901  
SRR17520069.9040903  
SRR17520069.9040905  
SRR17520069.9040907  
SRR17520069.9040909  
SRR17520069.9044135  
SRR17520069.9047117  
SRR17520069.9047119  
SRR17520069.9047121

SRR17520069.9047123  
SRR17520069.9052492  
SRR17520069.9052494  
SRR17520069.9052498  
SRR17520069.9052502  
SRR17520069.9052504  
SRR17520069.9052506  
SRR17520069.9052512  
SRR17520069.9052514  
SRR17520069.9052516  
SRR17520069.9052518  
SRR17520069.9052520  
SRR17520069.9052522  
SRR17520069.9052524  
SRR17520069.9052526  
SRR17520069.9053650  
SRR17520069.9053652  
SRR17520069.9053654  
SRR17520069.9053656  
SRR17520069.9053658  
SRR17520069.9053660  
SRR17520069.9053662  
SRR17520069.9053664  
SRR17520069.9053666  
SRR17520069.9053668  
SRR17520069.9053670  
SRR17520069.9053672  
SRR17520069.9053674  
SRR17520069.9053676  
SRR17520069.9053678  
SRR17520069.9053680  
SRR17520069.9053682  
SRR17520069.9053684  
SRR17520069.9053686  
SRR17520069.9053688  
SRR17520069.9061521  
SRR17520069.9061523  
SRR17520069.9061525  
SRR17520069.9061527  
SRR17520069.9061529  
SRR17520069.9061531  
SRR17520069.9061533  
SRR17520069.9061535  
SRR17520069.9061537  
SRR17520069.9061539  
SRR17520069.9061541  
SRR17520069.9061543

SRR17520069. 9061545  
SRR17520069. 9061547  
SRR17520069. 9061551  
SRR17520069. 9061553  
SRR17520069. 9061555  
SRR17520069. 9061557  
SRR17520069. 9061559  
SRR17520069. 9061561  
SRR17520069. 9061563  
SRR17520069. 9061565  
SRR17520069. 9061567  
SRR17520069. 9061571  
SRR17520069. 9061573  
SRR17520069. 9061575  
SRR17520069. 9061577  
SRR17520069. 9061579  
SRR17520069. 9061581  
SRR17520069. 9061583  
SRR17520069. 9061585  
SRR17520069. 9061587  
SRR17520069. 9061589  
SRR17520069. 9061591  
SRR17520069. 9061595  
SRR17520069. 9061597  
SRR17520069. 9061599  
SRR17520069. 9061601  
SRR17520069. 9061603  
SRR17520069. 9061605  
SRR17520069. 9061607  
SRR17520069. 9061609  
SRR17520069. 9061611  
SRR17520069. 9061613  
SRR17520069. 9061615  
SRR17520069. 9061617  
SRR17520069. 9061619  
SRR17520069. 9061621  
SRR17520069. 9061623  
SRR17520069. 9061625  
SRR17520069. 9061627  
SRR17520069. 9061629  
SRR17520069. 9061631  
SRR17520069. 9061633  
SRR17520069. 9061635  
SRR17520069. 9061637  
SRR17520069. 9061639  
SRR17520069. 9061641  
SRR17520069. 9068181

SRR17520069. 9068183  
SRR17520069. 9068185  
SRR17520069. 9068187  
SRR17520069. 9068191  
SRR17520069. 9068193  
SRR17520069. 9068195  
SRR17520069. 9068197  
SRR17520069. 9068199  
SRR17520069. 9068201  
SRR17520069. 9068203  
SRR17520069. 9068205  
SRR17520069. 9068207  
SRR17520069. 9068209  
SRR17520069. 9068211  
SRR17520069. 9072204  
SRR17520069. 9072206  
SRR17520069. 9072208  
SRR17520069. 9072210  
SRR17520069. 9072212  
SRR17520069. 9072214  
SRR17520069. 9072218  
SRR17520069. 9072220  
SRR17520069. 9077262  
SRR17520069. 9077811  
SRR17520069. 9077813  
SRR17520069. 9077815  
SRR17520069. 9077817  
SRR17520069. 9077819  
SRR17520069. 9077821  
SRR17520069. 9077823  
SRR17520069. 9077825  
SRR17520069. 9077827  
SRR17520069. 9077829  
SRR17520069. 9081288  
SRR17520069. 9081290  
SRR17520069. 9081292  
SRR17520069. 9081294  
SRR17520069. 9081296  
SRR17520069. 9081298  
SRR17520069. 9081300  
SRR17520069. 9081302  
SRR17520069. 9081304  
SRR17520069. 9081306  
SRR17520069. 9081308  
SRR17520069. 9081310  
SRR17520069. 9081312  
SRR17520069. 9081314

SRR17520069.9081316  
SRR17520069.9081318  
SRR17520069.9081320  
SRR17520069.9081322  
SRR17520069.9081324  
SRR17520069.9081326  
SRR17520069.9081328  
SRR17520069.9081330  
SRR17520069.9081332  
SRR17520069.9081334  
SRR17520069.9081336  
SRR17520069.9081338  
SRR17520069.9081340  
SRR17520069.9081342  
SRR17520069.9081344  
SRR17520069.9081346  
SRR17520069.9081348  
SRR17520069.9081350  
SRR17520069.9081352  
SRR17520069.9081354  
SRR17520069.9081356  
SRR17520069.9081358  
SRR17520069.9081360  
SRR17520069.9081362  
SRR17520069.9081364  
SRR17520069.9081366  
SRR17520069.9081368  
SRR17520069.9081370  
SRR17520069.9081372  
SRR17520069.9081374  
SRR17520069.9081376  
SRR17520069.9081378  
SRR17520069.9081380  
SRR17520069.9081382  
SRR17520069.9081384  
SRR17520069.9081386  
SRR17520069.9081388  
SRR17520069.9081390  
SRR17520069.9081392  
SRR17520069.9081396  
SRR17520069.9081398  
SRR17520069.9081400  
SRR17520069.9081405  
SRR17520069.9081407  
SRR17520069.9081411  
SRR17520069.9081413  
SRR17520069.9081415

SRR17520069.9081417  
SRR17520069.9081419  
SRR17520069.9081421  
SRR17520069.9081423  
SRR17520069.9081425  
SRR17520069.9084262  
SRR17520069.9084266  
SRR17520069.9084268  
SRR17520069.9084270  
SRR17520069.9084272  
SRR17520069.9084278  
SRR17520069.9084280  
SRR17520069.9084282  
SRR17520069.9084286  
SRR17520069.9084288  
SRR17520069.9084290  
SRR17520069.9084292  
SRR17520069.9084294  
SRR17520069.9084296  
SRR17520069.9084298  
SRR17520069.9084300  
SRR17520069.9084302  
SRR17520069.9084304  
SRR17520069.9084306  
SRR17520069.9084308  
SRR17520069.9084310  
SRR17520069.9084312  
SRR17520069.9088062  
SRR17520069.9088064  
SRR17520069.9088066  
SRR17520069.9088068  
SRR17520069.9088070  
SRR17520069.9089020  
SRR17520069.9089022  
SRR17520069.9089024  
SRR17520069.9089026  
SRR17520069.9089028  
SRR17520069.9089030  
SRR17520069.9089032  
SRR17520069.9090809  
SRR17520069.9090811  
SRR17520069.9090813  
SRR17520069.9090815  
SRR17520069.9090817  
SRR17520069.9090819  
SRR17520069.9090821  
SRR17520069.9090823



SRR17520069.9090825  
SRR17520069.9090827  
SRR17520069.9090829  
SRR17520069.9090831  
SRR17520069.9090833  
SRR17520069.9090835  
SRR17520069.9090837  
SRR17520069.9090839  
SRR17520069.9090841  
SRR17520069.9090843  
SRR17520069.9090845  
SRR17520069.9090847  
SRR17520069.9090849  
SRR17520069.9090853  
SRR17520069.9090994  
SRR17520069.9090996  
SRR17520069.9090998  
SRR17520069.9091000  
SRR17520069.9091002  
SRR17520069.9091006  
SRR17520069.9091011  
SRR17520069.9091015  
SRR17520069.9091017  
SRR17520069.9091019  
SRR17520069.9094619  
SRR17520069.9094621  
SRR17520069.9094623  
SRR17520069.9094625  
SRR17520069.9094627  
SRR17520069.9094629  
SRR17520069.9100812  
SRR17520069.9100814  
SRR17520069.9100816  
SRR17520069.9100818  
SRR17520069.9100820  
SRR17520069.9104903  
SRR17520069.9108936  
SRR17520069.9108938  
SRR17520069.9108944  
SRR17520069.9108946  
SRR17520069.9108948  
SRR17520069.9108950  
SRR17520069.9108952  
SRR17520069.9108954  
SRR17520069.9108956  
SRR17520069.9108958  
SRR17520069.9108960

SRR17520069.9108962  
SRR17520069.9108964  
SRR17520069.9108966  
SRR17520069.9108968  
SRR17520069.9108970  
SRR17520069.9108972  
SRR17520069.9108974  
SRR17520069.9108976  
SRR17520069.9114646  
SRR17520069.9114648  
SRR17520069.9114650  
SRR17520069.9114652  
SRR17520069.9114656  
SRR17520069.9114660  
SRR17520069.9114664  
SRR17520069.9115434  
SRR17520069.9120202  
SRR17520069.9120206  
SRR17520069.9120208  
SRR17520069.9120210  
SRR17520069.9120212  
SRR17520069.9120214  
SRR17520069.9120216  
SRR17520069.9120218  
SRR17520069.9120222  
SRR17520069.9120224  
SRR17520069.9120226  
SRR17520069.9120228  
SRR17520069.9120230  
SRR17520069.9120232  
SRR17520069.9120234  
SRR17520069.9120236  
SRR17520069.9120238  
SRR17520069.9120240  
SRR17520069.9120242  
SRR17520069.9120244  
SRR17520069.9120246  
SRR17520069.9120248  
SRR17520069.9120250  
SRR17520069.9120252  
SRR17520069.9120254  
SRR17520069.9120260  
SRR17520069.9120262  
SRR17520069.9120264  
SRR17520069.9120266  
SRR17520069.9120270  
SRR17520069.9123877

SRR17520069.9123879  
SRR17520069.9123881  
SRR17520069.9123883  
SRR17520069.9123885  
SRR17520069.9123887  
SRR17520069.9123889  
SRR17520069.9123891  
SRR17520069.9123893  
SRR17520069.9123895  
SRR17520069.9123897  
SRR17520069.9123899  
SRR17520069.9123903  
SRR17520069.9123905  
SRR17520069.9123909  
SRR17520069.9123911  
SRR17520069.9123913  
SRR17520069.9123915  
SRR17520069.9123917  
SRR17520069.9123919  
SRR17520069.9123921  
SRR17520069.9123923  
SRR17520069.9125186  
SRR17520069.9125188  
SRR17520069.9126821  
SRR17520069.9126823  
SRR17520069.9126825  
SRR17520069.9126827  
SRR17520069.9126829  
SRR17520069.9126831  
SRR17520069.9126833  
SRR17520069.9126835  
SRR17520069.9126837  
SRR17520069.9126839  
SRR17520069.9126841  
SRR17520069.9126843  
SRR17520069.9126845  
SRR17520069.9126847  
SRR17520069.9126849  
SRR17520069.9126851  
SRR17520069.9126853  
SRR17520069.9126855  
SRR17520069.9126857  
SRR17520069.9126859  
SRR17520069.9126861  
SRR17520069.9126863  
SRR17520069.9126865  
SRR17520069.9126867

SRR17520069.9126869  
SRR17520069.9126871  
SRR17520069.9131308  
SRR17520069.9131310  
SRR17520069.9131312  
SRR17520069.9131314  
SRR17520069.9131318  
SRR17520069.9134558  
SRR17520069.9134560  
SRR17520069.9134562  
SRR17520069.9134564  
SRR17520069.9134566  
SRR17520069.9134568  
SRR17520069.9134570  
SRR17520069.9134572  
SRR17520069.9134574  
SRR17520069.9134576  
SRR17520069.9134578  
SRR17520069.9140591  
SRR17520069.9140593  
SRR17520069.9140595  
SRR17520069.9140597  
SRR17520069.9140599  
SRR17520069.9140601  
SRR17520069.9140603  
SRR17520069.9140607  
SRR17520069.9140609  
SRR17520069.9140611  
SRR17520069.9140613  
SRR17520069.9140615  
SRR17520069.9140617  
SRR17520069.9140619  
SRR17520069.9140621  
SRR17520069.9140623  
SRR17520069.9140625  
SRR17520069.9140627  
SRR17520069.9140631  
SRR17520069.9140633  
SRR17520069.9140635  
SRR17520069.9140637  
SRR17520069.9140639  
SRR17520069.9140641  
SRR17520069.9140643  
SRR17520069.9140645  
SRR17520069.9140647  
SRR17520069.9140649  
SRR17520069.9140651

SRR17520069.9140653  
SRR17520069.9140655  
SRR17520069.9140657  
SRR17520069.9140659  
SRR17520069.9140661  
SRR17520069.9140663  
SRR17520069.9140665  
SRR17520069.9140667  
SRR17520069.9145150  
SRR17520069.9148475  
SRR17520069.9148477  
SRR17520069.9148479  
SRR17520069.9148481  
SRR17520069.9148483  
SRR17520069.9148485  
SRR17520069.9148487  
SRR17520069.9148489  
SRR17520069.9148491  
SRR17520069.9148493  
SRR17520069.9148495  
SRR17520069.9148497  
SRR17520069.9148499  
SRR17520069.9148501  
SRR17520069.9148503  
SRR17520069.9148505  
SRR17520069.9148507  
SRR17520069.9148509  
SRR17520069.9148511  
SRR17520069.9148513  
SRR17520069.9148515  
SRR17520069.9148517  
SRR17520069.9148519  
SRR17520069.9148521  
SRR17520069.9148523  
SRR17520069.9148525  
SRR17520069.9148527  
SRR17520069.9148529  
SRR17520069.9148531  
SRR17520069.9148533  
SRR17520069.9148535  
SRR17520069.9149433  
SRR17520069.9149435  
SRR17520069.9149437  
SRR17520069.9149439  
SRR17520069.9149441  
SRR17520069.9149443  
SRR17520069.9149445

SRR17520069.9149447  
SRR17520069.9149449  
SRR17520069.9149451  
SRR17520069.9149453  
SRR17520069.9149455  
SRR17520069.9149457  
SRR17520069.9149459  
SRR17520069.9149461  
SRR17520069.9149465  
SRR17520069.9149467  
SRR17520069.9149469  
SRR17520069.9149471  
SRR17520069.9149473  
SRR17520069.9149475  
SRR17520069.9149477  
SRR17520069.9149479  
SRR17520069.9157152  
SRR17520069.9157154  
SRR17520069.9157156  
SRR17520069.9157158  
SRR17520069.9157160  
SRR17520069.9157162  
SRR17520069.9157164  
SRR17520069.9157166  
SRR17520069.9157168  
SRR17520069.9157170  
SRR17520069.9157175  
SRR17520069.9157177  
SRR17520069.9157179  
SRR17520069.9157181  
SRR17520069.9157183  
SRR17520069.9157185  
SRR17520069.9157187  
SRR17520069.9157189  
SRR17520069.9157191  
SRR17520069.9157193  
SRR17520069.9157195  
SRR17520069.9157197  
SRR17520069.9157199  
SRR17520069.9157201  
SRR17520069.9157203  
SRR17520069.9157205  
SRR17520069.9157207  
SRR17520069.9157209  
SRR17520069.9157211  
SRR17520069.9157213  
SRR17520069.9157215

SRR17520069.9157217  
SRR17520069.9157219  
SRR17520069.9157221  
SRR17520069.9157225  
SRR17520069.9157227  
SRR17520069.9157229  
SRR17520069.9157231  
SRR17520069.9157233  
SRR17520069.9157237  
SRR17520069.9157239  
SRR17520069.9157241  
SRR17520069.9157243  
SRR17520069.9157245  
SRR17520069.9157247  
SRR17520069.9157249  
SRR17520069.9157251  
SRR17520069.9160960  
SRR17520069.9160962  
SRR17520069.9160964  
SRR17520069.9160966  
SRR17520069.9160968  
SRR17520069.9160970  
SRR17520069.9160972  
SRR17520069.9160974  
SRR17520069.9160976  
SRR17520069.9160978  
SRR17520069.9160980  
SRR17520069.9160982  
SRR17520069.9160984  
SRR17520069.9160986  
SRR17520069.9160988  
SRR17520069.9160990  
SRR17520069.9160992  
SRR17520069.9160994  
SRR17520069.9160996  
SRR17520069.9160998  
SRR17520069.9161000  
SRR17520069.9161002  
SRR17520069.9161004  
SRR17520069.9161006  
SRR17520069.9161008  
SRR17520069.9161012  
SRR17520069.9161014  
SRR17520069.9161016  
SRR17520069.9161018  
SRR17520069.9161020  
SRR17520069.9161022

SRR17520069.9161024  
SRR17520069.9161026  
SRR17520069.9161028  
SRR17520069.9161030  
SRR17520069.9161032  
SRR17520069.9161034  
SRR17520069.9161036  
SRR17520069.9161818  
SRR17520069.9161820  
SRR17520069.9162344  
SRR17520069.9162346  
SRR17520069.9162348  
SRR17520069.9162350  
SRR17520069.9162352  
SRR17520069.9162354  
SRR17520069.9162356  
SRR17520069.9162358  
SRR17520069.9162360  
SRR17520069.9162362  
SRR17520069.9162364  
SRR17520069.9162366  
SRR17520069.9162368  
SRR17520069.9162370  
SRR17520069.9162372  
SRR17520069.9166976  
SRR17520069.9166978  
SRR17520069.9166980  
SRR17520069.9166982  
SRR17520069.9166984  
SRR17520069.9166986  
SRR17520069.9166988  
SRR17520069.9166990  
SRR17520069.9166992  
SRR17520069.9166994  
SRR17520069.9166996  
SRR17520069.9167000  
SRR17520069.9167002  
SRR17520069.9167006  
SRR17520069.9167008  
SRR17520069.9170563  
SRR17520069.9170567  
SRR17520069.9170569  
SRR17520069.9170571  
SRR17520069.9170575  
SRR17520069.9170577  
SRR17520069.9170579  
SRR17520069.9170581



SRR17520069.9170583  
SRR17520069.9170585  
SRR17520069.9170587  
SRR17520069.9170589  
SRR17520069.9170591  
SRR17520069.9170593  
SRR17520069.9170595  
SRR17520069.9173164  
SRR17520069.9173166  
SRR17520069.9173168  
SRR17520069.9173170  
SRR17520069.9173172  
SRR17520069.9174205  
SRR17520069.9174207  
SRR17520069.9174209  
SRR17520069.9174211  
SRR17520069.9174213  
SRR17520069.9174215  
SRR17520069.9174217  
SRR17520069.9174219  
SRR17520069.9174221  
SRR17520069.9174223  
SRR17520069.9174225  
SRR17520069.9174227  
SRR17520069.9174229  
SRR17520069.9174231  
SRR17520069.9174233  
SRR17520069.9174235  
SRR17520069.9174237  
SRR17520069.9174239  
SRR17520069.9174241  
SRR17520069.9174245  
SRR17520069.9174247  
SRR17520069.9174249  
SRR17520069.9174251  
SRR17520069.9174253  
SRR17520069.9174255  
SRR17520069.9174257  
SRR17520069.9174259  
SRR17520069.9174261  
SRR17520069.9174263  
SRR17520069.9174265  
SRR17520069.9174267  
SRR17520069.9174269  
SRR17520069.9174271  
SRR17520069.9174273  
SRR17520069.9174275

SRR17520069.9174277  
SRR17520069.9176873  
SRR17520069.9176875  
SRR17520069.9176877  
SRR17520069.9176879  
SRR17520069.9176881  
SRR17520069.9176883  
SRR17520069.9176885  
SRR17520069.9176887  
SRR17520069.9176889  
SRR17520069.9176891  
SRR17520069.9176893  
SRR17520069.9176895  
SRR17520069.9176897  
SRR17520069.9176899  
SRR17520069.9176901  
SRR17520069.9176903  
SRR17520069.9184352  
SRR17520069.9185251  
SRR17520069.9188161  
SRR17520069.9188165  
SRR17520069.9188167  
SRR17520069.9188169  
SRR17520069.9188171  
SRR17520069.9188173  
SRR17520069.9188175  
SRR17520069.9188177  
SRR17520069.9188179  
SRR17520069.9188181  
SRR17520069.9188183  
SRR17520069.9188185  
SRR17520069.9188187  
SRR17520069.9188189  
SRR17520069.9188191  
SRR17520069.9188193  
SRR17520069.9188195  
SRR17520069.9188197  
SRR17520069.9188199  
SRR17520069.9188201  
SRR17520069.9188203  
SRR17520069.9188205  
SRR17520069.9188207  
SRR17520069.9188209  
SRR17520069.9188211  
SRR17520069.9188213  
SRR17520069.9188217  
SRR17520069.9188219

SRR17520069.9188221  
SRR17520069.9188223  
SRR17520069.9188225  
SRR17520069.9188227  
SRR17520069.9188229  
SRR17520069.9188231  
SRR17520069.9188233  
SRR17520069.9188235  
SRR17520069.9188237  
SRR17520069.9188239  
SRR17520069.9188241  
SRR17520069.9188243  
SRR17520069.9188310  
SRR17520069.9188312  
SRR17520069.9188314  
SRR17520069.9188316  
SRR17520069.9188318  
SRR17520069.9188320  
SRR17520069.9188322  
SRR17520069.9188834  
SRR17520069.9188836  
SRR17520069.9189152  
SRR17520069.9190775  
SRR17520069.9190777  
SRR17520069.9190779  
SRR17520069.9190781  
SRR17520069.9190783  
SRR17520069.9190787  
SRR17520069.9198271  
SRR17520069.9198273  
SRR17520069.9198275  
SRR17520069.9198277  
SRR17520069.9198281  
SRR17520069.9198283  
SRR17520069.9198285  
SRR17520069.9198287  
SRR17520069.9198289  
SRR17520069.9198291  
SRR17520069.9198293  
SRR17520069.9198295  
SRR17520069.9198297  
SRR17520069.9198299  
SRR17520069.9198301  
SRR17520069.9198303  
SRR17520069.9198305  
SRR17520069.9198307  
SRR17520069.9198309

SRR17520069.9198311  
SRR17520069.9198313  
SRR17520069.9198315  
SRR17520069.9198317  
SRR17520069.9198319  
SRR17520069.9198321  
SRR17520069.9198323  
SRR17520069.9198325  
SRR17520069.9198327  
SRR17520069.9198329  
SRR17520069.9198333  
SRR17520069.9198335  
SRR17520069.9198337  
SRR17520069.9198339  
SRR17520069.9200710  
SRR17520069.9200712  
SRR17520069.9200714  
SRR17520069.9200716  
SRR17520069.9200718  
SRR17520069.9200720  
SRR17520069.9202186  
SRR17520069.9202188  
SRR17520069.9202190  
SRR17520069.9202192  
SRR17520069.9202194  
SRR17520069.9202196  
SRR17520069.9202198  
SRR17520069.9202200  
SRR17520069.9202202  
SRR17520069.9202204  
SRR17520069.9202206  
SRR17520069.9202208  
SRR17520069.9202210  
SRR17520069.9202216  
SRR17520069.9202702  
SRR17520069.9202704  
SRR17520069.9202706  
SRR17520069.9202708  
SRR17520069.9202710  
SRR17520069.9202712  
SRR17520069.9202714  
SRR17520069.9202716  
SRR17520069.9202718  
SRR17520069.9202720  
SRR17520069.9202722  
SRR17520069.9202724  
SRR17520069.9202726

SRR17520069. 9202728  
SRR17520069. 9202730  
SRR17520069. 9202732  
SRR17520069. 9202734  
SRR17520069. 9202736  
SRR17520069. 9202738  
SRR17520069. 9202740  
SRR17520069. 9202742  
SRR17520069. 9202744  
SRR17520069. 9202746  
SRR17520069. 9202748  
SRR17520069. 9202752  
SRR17520069. 9202754  
SRR17520069. 9202756  
SRR17520069. 9202758  
SRR17520069. 9202760  
SRR17520069. 9202762  
SRR17520069. 9202764  
SRR17520069. 9202766  
SRR17520069. 9202768  
SRR17520069. 9202770  
SRR17520069. 9202772  
SRR17520069. 9202774  
SRR17520069. 9202776  
SRR17520069. 9202778  
SRR17520069. 9202780  
SRR17520069. 9202782  
SRR17520069. 9202784  
SRR17520069. 9202786  
SRR17520069. 9202788  
SRR17520069. 9202790  
SRR17520069. 9202792  
SRR17520069. 9202794  
SRR17520069. 9202796  
SRR17520069. 9202798  
SRR17520069. 9202800  
SRR17520069. 9202802  
SRR17520069. 9205566  
SRR17520069. 9205568  
SRR17520069. 9205570  
SRR17520069. 9205572  
SRR17520069. 9205574  
SRR17520069. 9205578  
SRR17520069. 9205580  
SRR17520069. 9205582  
SRR17520069. 9205584  
SRR17520069. 9205586

SRR17520069.9205588  
SRR17520069.9205590  
SRR17520069.9205592  
SRR17520069.9205594  
SRR17520069.9205596  
SRR17520069.9205600  
SRR17520069.9205602  
SRR17520069.9205604  
SRR17520069.9205606  
SRR17520069.9210558  
SRR17520069.9210560  
SRR17520069.9210562  
SRR17520069.9210564  
SRR17520069.9210566  
SRR17520069.9210568  
SRR17520069.9210570  
SRR17520069.9210572  
SRR17520069.9210574  
SRR17520069.9210576  
SRR17520069.9210578  
SRR17520069.9210580  
SRR17520069.9210582  
SRR17520069.9210586  
SRR17520069.9210588  
SRR17520069.9210590  
SRR17520069.9210592  
SRR17520069.9210594  
SRR17520069.9210596  
SRR17520069.9210598  
SRR17520069.9210600  
SRR17520069.9210602  
SRR17520069.9210604  
SRR17520069.9210606  
SRR17520069.9210608  
SRR17520069.9210610  
SRR17520069.9210612  
SRR17520069.9210614  
SRR17520069.9210616  
SRR17520069.9210618  
SRR17520069.9210620  
SRR17520069.9210622  
SRR17520069.9210624  
SRR17520069.9210626  
SRR17520069.9210628  
SRR17520069.9210630  
SRR17520069.9210632  
SRR17520069.9210634

SRR17520069. 9210636  
SRR17520069. 9213106  
SRR17520069. 9213108  
SRR17520069. 9213110  
SRR17520069. 9213112  
SRR17520069. 9213114  
SRR17520069. 9213116  
SRR17520069. 9213118  
SRR17520069. 9213120  
SRR17520069. 9213122  
SRR17520069. 9213124  
SRR17520069. 9213126  
SRR17520069. 9213128  
SRR17520069. 9213130  
SRR17520069. 9213132  
SRR17520069. 9215365  
SRR17520069. 9215367  
SRR17520069. 9215369  
SRR17520069. 9215371  
SRR17520069. 9215373  
SRR17520069. 9215375  
SRR17520069. 9215377  
SRR17520069. 9215379  
SRR17520069. 9215381  
SRR17520069. 9215383  
SRR17520069. 9219028  
SRR17520069. 9219030  
SRR17520069. 9222366  
SRR17520069. 9222368  
SRR17520069. 9222370  
SRR17520069. 9222372  
SRR17520069. 9222374  
SRR17520069. 9222376  
SRR17520069. 9222378  
SRR17520069. 9222380  
SRR17520069. 9222382  
SRR17520069. 9222384  
SRR17520069. 9222386  
SRR17520069. 9222388  
SRR17520069. 9222390  
SRR17520069. 9222392  
SRR17520069. 9222394  
SRR17520069. 9222396  
SRR17520069. 9222398  
SRR17520069. 9222400  
SRR17520069. 9222402  
SRR17520069. 9223059

SRR17520069. 9223063  
SRR17520069. 9223065  
SRR17520069. 9223067  
SRR17520069. 9229569  
SRR17520069. 9229571  
SRR17520069. 9229573  
SRR17520069. 9229575  
SRR17520069. 9229577  
SRR17520069. 9229579  
SRR17520069. 9229581  
SRR17520069. 9229583  
SRR17520069. 9229585  
SRR17520069. 9229587  
SRR17520069. 9229589  
SRR17520069. 9229591  
SRR17520069. 9229593  
SRR17520069. 9237828  
SRR17520069. 9237830  
SRR17520069. 9237832  
SRR17520069. 9237834  
SRR17520069. 9238096  
SRR17520069. 9238100  
SRR17520069. 9238102  
SRR17520069. 9238104  
SRR17520069. 9238106  
SRR17520069. 9238110  
SRR17520069. 9238112  
SRR17520069. 9238114  
SRR17520069. 9238116  
SRR17520069. 9238118  
SRR17520069. 9238120  
SRR17520069. 9238122  
SRR17520069. 9238124  
SRR17520069. 9238126  
SRR17520069. 9238128  
SRR17520069. 9238130  
SRR17520069. 9238132  
SRR17520069. 9238134  
SRR17520069. 9238136  
SRR17520069. 9244916  
SRR17520069. 9244918  
SRR17520069. 9244920  
SRR17520069. 9244922  
SRR17520069. 9244924  
SRR17520069. 9245477  
SRR17520069. 9245479  
SRR17520069. 9245481



SRR17520069. 9245483  
SRR17520069. 9245485  
SRR17520069. 9245489  
SRR17520069. 9245491  
SRR17520069. 9245493  
SRR17520069. 9245495  
SRR17520069. 9245497  
SRR17520069. 9245499  
SRR17520069. 9245501  
SRR17520069. 9245503  
SRR17520069. 9248561  
SRR17520069. 9248563  
SRR17520069. 9248565  
SRR17520069. 9248567  
SRR17520069. 9248569  
SRR17520069. 9248571  
SRR17520069. 9248573  
SRR17520069. 9248575  
SRR17520069. 9248577  
SRR17520069. 9248579  
SRR17520069. 9248581  
SRR17520069. 9248583  
SRR17520069. 9248585  
SRR17520069. 9248587  
SRR17520069. 9248589  
SRR17520069. 9248591  
SRR17520069. 9248593  
SRR17520069. 9248595  
SRR17520069. 9248597  
SRR17520069. 9248599  
SRR17520069. 9248601  
SRR17520069. 9248603  
SRR17520069. 9248605  
SRR17520069. 9248607  
SRR17520069. 9248609  
SRR17520069. 9248611  
SRR17520069. 9248613  
SRR17520069. 9248615  
SRR17520069. 9248617  
SRR17520069. 9248619  
SRR17520069. 9248621  
SRR17520069. 9248628  
SRR17520069. 9248630  
SRR17520069. 9248632  
SRR17520069. 9248634  
SRR17520069. 9248636  
SRR17520069. 9248638

SRR17520069. 9248640  
SRR17520069. 9248642  
SRR17520069. 9248648  
SRR17520069. 9248650  
SRR17520069. 9248652  
SRR17520069. 9248658  
SRR17520069. 9248660  
SRR17520069. 9248662  
SRR17520069. 9248664  
SRR17520069. 9248668  
SRR17520069. 9248670  
SRR17520069. 9248672  
SRR17520069. 9248676  
SRR17520069. 9248678  
SRR17520069. 9248680  
SRR17520069. 9251413  
SRR17520069. 9251415  
SRR17520069. 9251417  
SRR17520069. 9251419  
SRR17520069. 9251421  
SRR17520069. 9251423  
SRR17520069. 9251425  
SRR17520069. 9251429  
SRR17520069. 9251433  
SRR17520069. 9251435  
SRR17520069. 9251437  
SRR17520069. 9251439  
SRR17520069. 9251441  
SRR17520069. 9251443  
SRR17520069. 9251445  
SRR17520069. 9251447  
SRR17520069. 9251449  
SRR17520069. 9251451  
SRR17520069. 9251453  
SRR17520069. 9251455  
SRR17520069. 9251457  
SRR17520069. 9251459  
SRR17520069. 9251461  
SRR17520069. 9251463  
SRR17520069. 9251465  
SRR17520069. 9251467  
SRR17520069. 9251469  
SRR17520069. 9251471  
SRR17520069. 9251473  
SRR17520069. 9251475  
SRR17520069. 9251477  
SRR17520069. 9251479

SRR17520069. 9251481  
SRR17520069. 9251483  
SRR17520069. 9251485  
SRR17520069. 9251487  
SRR17520069. 9251489  
SRR17520069. 9251491  
SRR17520069. 9251493  
SRR17520069. 9251495  
SRR17520069. 9251497  
SRR17520069. 9251499  
SRR17520069. 9251501  
SRR17520069. 9251503  
SRR17520069. 9251505  
SRR17520069. 9251507  
SRR17520069. 9251509  
SRR17520069. 9251511  
SRR17520069. 9251513  
SRR17520069. 9251515  
SRR17520069. 9251517  
SRR17520069. 9251519  
SRR17520069. 9251521  
SRR17520069. 9251523  
SRR17520069. 9251525  
SRR17520069. 9251527  
SRR17520069. 9251529  
SRR17520069. 9251531  
SRR17520069. 9251533  
SRR17520069. 9251535  
SRR17520069. 9251537  
SRR17520069. 9251541  
SRR17520069. 9251543  
SRR17520069. 9251545  
SRR17520069. 9251547  
SRR17520069. 9251549  
SRR17520069. 9251551  
SRR17520069. 9251553  
SRR17520069. 9251555  
SRR17520069. 9251557  
SRR17520069. 9251559  
SRR17520069. 9252395  
SRR17520069. 9252397  
SRR17520069. 9252399  
SRR17520069. 9252401  
SRR17520069. 9252403  
SRR17520069. 9252405  
SRR17520069. 9252407  
SRR17520069. 9252409

SRR17520069. 9252413  
SRR17520069. 9252415  
SRR17520069. 9252417  
SRR17520069. 9252419  
SRR17520069. 9252421  
SRR17520069. 9252423  
SRR17520069. 9252425  
SRR17520069. 9252427  
SRR17520069. 9252429  
SRR17520069. 9252431  
SRR17520069. 9252433  
SRR17520069. 9252435  
SRR17520069. 9252437  
SRR17520069. 9252439  
SRR17520069. 9254756  
SRR17520069. 9254758  
SRR17520069. 9254760  
SRR17520069. 9254762  
SRR17520069. 9254764  
SRR17520069. 9254766  
SRR17520069. 9254768  
SRR17520069. 9254770  
SRR17520069. 9254772  
SRR17520069. 9254774  
SRR17520069. 9254776  
SRR17520069. 9254778  
SRR17520069. 9254780  
SRR17520069. 9254782  
SRR17520069. 9254784  
SRR17520069. 9254786  
SRR17520069. 9256865  
SRR17520069. 9256867  
SRR17520069. 9268846  
SRR17520069. 9268848  
SRR17520069. 9268850  
SRR17520069. 9268852  
SRR17520069. 9268854  
SRR17520069. 9268858  
SRR17520069. 9268860  
SRR17520069. 9268862  
SRR17520069. 9268864  
SRR17520069. 9268866  
SRR17520069. 9273436  
SRR17520069. 9273438  
SRR17520069. 9273440  
SRR17520069. 9273442  
SRR17520069. 9273444

SRR17520069. 9273446  
SRR17520069. 9273448  
SRR17520069. 9273450  
SRR17520069. 9273452  
SRR17520069. 9273454  
SRR17520069. 9273456  
SRR17520069. 9274096  
SRR17520069. 9274098  
SRR17520069. 9274100  
SRR17520069. 9274102  
SRR17520069. 9274104  
SRR17520069. 9274106  
SRR17520069. 9274108  
SRR17520069. 9274112  
SRR17520069. 9274114  
SRR17520069. 9274116  
SRR17520069. 9274118  
SRR17520069. 9274120  
SRR17520069. 9274122  
SRR17520069. 9274124  
SRR17520069. 9274126  
SRR17520069. 9274128  
SRR17520069. 9274130  
SRR17520069. 9274240  
SRR17520069. 9274242  
SRR17520069. 9274244  
SRR17520069. 9274246  
SRR17520069. 9274248  
SRR17520069. 9274250  
SRR17520069. 9274252  
SRR17520069. 9274254  
SRR17520069. 9274256  
SRR17520069. 9274258  
SRR17520069. 9274260  
SRR17520069. 9274262  
SRR17520069. 9274264  
SRR17520069. 9274532  
SRR17520069. 9274534  
SRR17520069. 9274536  
SRR17520069. 9274538  
SRR17520069. 9274540  
SRR17520069. 9274542  
SRR17520069. 9274544  
SRR17520069. 9274546  
SRR17520069. 9274548  
SRR17520069. 9275525  
SRR17520069. 9275527

SRR17520069. 9275529  
SRR17520069. 9275531  
SRR17520069. 9275533  
SRR17520069. 9275535  
SRR17520069. 9275537  
SRR17520069. 9275539  
SRR17520069. 9275541  
SRR17520069. 9275543  
SRR17520069. 9275545  
SRR17520069. 9275547  
SRR17520069. 9275549  
SRR17520069. 9275551  
SRR17520069. 9275553  
SRR17520069. 9275555  
SRR17520069. 9275557  
SRR17520069. 9275559  
SRR17520069. 9275561  
SRR17520069. 9275563  
SRR17520069. 9275565  
SRR17520069. 9275567  
SRR17520069. 9275569  
SRR17520069. 9275573  
SRR17520069. 9275575  
SRR17520069. 9275577  
SRR17520069. 9275579  
SRR17520069. 9275581  
SRR17520069. 9275583  
SRR17520069. 9275585  
SRR17520069. 9275587  
SRR17520069. 9278818  
SRR17520069. 9278820  
SRR17520069. 9278822  
SRR17520069. 9278824  
SRR17520069. 9278826  
SRR17520069. 9278828  
SRR17520069. 9278830  
SRR17520069. 9278832  
SRR17520069. 9278834  
SRR17520069. 9279361  
SRR17520069. 9279365  
SRR17520069. 9279367  
SRR17520069. 9279369  
SRR17520069. 9279373  
SRR17520069. 9279375  
SRR17520069. 9279377  
SRR17520069. 9279379  
SRR17520069. 9279381

SRR17520069. 9279383  
SRR17520069. 9279385  
SRR17520069. 9279387  
SRR17520069. 9279480  
SRR17520069. 9279482  
SRR17520069. 9279484  
SRR17520069. 9279486  
SRR17520069. 9279488  
SRR17520069. 9279490  
SRR17520069. 9279494  
SRR17520069. 9279496  
SRR17520069. 9279498  
SRR17520069. 9279500  
SRR17520069. 9279502  
SRR17520069. 9279504  
SRR17520069. 9279506  
SRR17520069. 9279508  
SRR17520069. 9279510  
SRR17520069. 9279512  
SRR17520069. 9279514  
SRR17520069. 9279516  
SRR17520069. 9279959  
SRR17520069. 9282436  
SRR17520069. 9282438  
SRR17520069. 9282440  
SRR17520069. 9282442  
SRR17520069. 9282444  
SRR17520069. 9282446  
SRR17520069. 9282448  
SRR17520069. 9282450  
SRR17520069. 9284810  
SRR17520069. 9284812  
SRR17520069. 9284814  
SRR17520069. 9284816  
SRR17520069. 9284818  
SRR17520069. 9284820  
SRR17520069. 9284822  
SRR17520069. 9284824  
SRR17520069. 9284826  
SRR17520069. 9284828  
SRR17520069. 9284830  
SRR17520069. 9284832  
SRR17520069. 9284834  
SRR17520069. 9284836  
SRR17520069. 9284838  
SRR17520069. 9284840  
SRR17520069. 9284842

SRR17520069. 9284844  
SRR17520069. 9284846  
SRR17520069. 9284848  
SRR17520069. 9284850  
SRR17520069. 9284852  
SRR17520069. 9284854  
SRR17520069. 9284856  
SRR17520069. 9284858  
SRR17520069. 9284860  
SRR17520069. 9284862  
SRR17520069. 9284866  
SRR17520069. 9284870  
SRR17520069. 9284872  
SRR17520069. 9284874  
SRR17520069. 9284876  
SRR17520069. 9284878  
SRR17520069. 9284880  
SRR17520069. 9284882  
SRR17520069. 9284884  
SRR17520069. 9284886  
SRR17520069. 9284888  
SRR17520069. 9284890  
SRR17520069. 9284892  
SRR17520069. 9284894  
SRR17520069. 9284896  
SRR17520069. 9284898  
SRR17520069. 9284900  
SRR17520069. 9284902  
SRR17520069. 9284904  
SRR17520069. 9284906  
SRR17520069. 9284908  
SRR17520069. 9284910  
SRR17520069. 9284912  
SRR17520069. 9284914  
SRR17520069. 9288317  
SRR17520069. 9288319  
SRR17520069. 9288321  
SRR17520069. 9288323  
SRR17520069. 9288325  
SRR17520069. 9288327  
SRR17520069. 9288329  
SRR17520069. 9288331  
SRR17520069. 9288333  
SRR17520069. 9288335  
SRR17520069. 9288337  
SRR17520069. 9288339  
SRR17520069. 9288343



SRR17520069. 9288345  
SRR17520069. 9288347  
SRR17520069. 9288349  
SRR17520069. 9288351  
SRR17520069. 9288353  
SRR17520069. 9288355  
SRR17520069. 9288357  
SRR17520069. 9288359  
SRR17520069. 9288361  
SRR17520069. 9288363  
SRR17520069. 9288365  
SRR17520069. 9288367  
SRR17520069. 9288369  
SRR17520069. 9288371  
SRR17520069. 9288373  
SRR17520069. 9288375  
SRR17520069. 9288377  
SRR17520069. 9288379  
SRR17520069. 9288383  
SRR17520069. 9288385  
SRR17520069. 9288387  
SRR17520069. 9289308  
SRR17520069. 9289310  
SRR17520069. 9289312  
SRR17520069. 9289708  
SRR17520069. 9289710  
SRR17520069. 9289712  
SRR17520069. 9289714  
SRR17520069. 9289716  
SRR17520069. 9289720  
SRR17520069. 9289722  
SRR17520069. 9289724  
SRR17520069. 9289726  
SRR17520069. 9297615  
SRR17520069. 9297662  
SRR17520069. 9297664  
SRR17520069. 9297666  
SRR17520069. 9297668  
SRR17520069. 9297672  
SRR17520069. 9297674  
SRR17520069. 9297676  
SRR17520069. 9302690  
SRR17520069. 9302692  
SRR17520069. 9302694  
SRR17520069. 9302696  
SRR17520069. 9302698  
SRR17520069. 9302700

SRR17520069. 9302702  
SRR17520069. 9302704  
SRR17520069. 9302706  
SRR17520069. 9302708  
SRR17520069. 9302710  
SRR17520069. 9302712  
SRR17520069. 9302714  
SRR17520069. 9305417  
SRR17520069. 9305419  
SRR17520069. 9305421  
SRR17520069. 9305427  
SRR17520069. 9305429  
SRR17520069. 9305431  
SRR17520069. 9305433  
SRR17520069. 9305435  
SRR17520069. 9305437  
SRR17520069. 9305439  
SRR17520069. 9305441  
SRR17520069. 9305445  
SRR17520069. 9305447  
SRR17520069. 9305449  
SRR17520069. 9305451  
SRR17520069. 9305453  
SRR17520069. 9310131  
SRR17520069. 9310133  
SRR17520069. 9310279  
SRR17520069. 9310281  
SRR17520069. 9310283  
SRR17520069. 9310285  
SRR17520069. 9312223  
SRR17520069. 9312225  
SRR17520069. 9312227  
SRR17520069. 9312229  
SRR17520069. 9312231  
SRR17520069. 9312233  
SRR17520069. 9312235  
SRR17520069. 9312237  
SRR17520069. 9312239  
SRR17520069. 9312241  
SRR17520069. 9312243  
SRR17520069. 9312247  
SRR17520069. 9312249  
SRR17520069. 9312251  
SRR17520069. 9312253  
SRR17520069. 9312255  
SRR17520069. 9312257  
SRR17520069. 9312259

SRR17520069. 9312261  
SRR17520069. 9312263  
SRR17520069. 9312265  
SRR17520069. 9312267  
SRR17520069. 9312269  
SRR17520069. 9312271  
SRR17520069. 9312273  
SRR17520069. 9312275  
SRR17520069. 9314087  
SRR17520069. 9314089  
SRR17520069. 9314091  
SRR17520069. 9314093  
SRR17520069. 9314097  
SRR17520069. 9314099  
SRR17520069. 9314101  
SRR17520069. 9314103  
SRR17520069. 9314105  
SRR17520069. 9314107  
SRR17520069. 9314109  
SRR17520069. 9314111  
SRR17520069. 9314113  
SRR17520069. 9314115  
SRR17520069. 9314117  
SRR17520069. 9314119  
SRR17520069. 9314121  
SRR17520069. 9314123  
SRR17520069. 9314125  
SRR17520069. 9314127  
SRR17520069. 9314129  
SRR17520069. 9314131  
SRR17520069. 9314133  
SRR17520069. 9314137  
SRR17520069. 9314139  
SRR17520069. 9314141  
SRR17520069. 9314143  
SRR17520069. 9314145  
SRR17520069. 9314147  
SRR17520069. 9314149  
SRR17520069. 9314151  
SRR17520069. 9314153  
SRR17520069. 9314155  
SRR17520069. 9316349  
SRR17520069. 9316351  
SRR17520069. 9316353  
SRR17520069. 9316355  
SRR17520069. 9316357  
SRR17520069. 9316359

SRR17520069. 9316361  
SRR17520069. 9316363  
SRR17520069. 9316365  
SRR17520069. 9316367  
SRR17520069. 9316369  
SRR17520069. 9316371  
SRR17520069. 9328330  
SRR17520069. 9328332  
SRR17520069. 9328334  
SRR17520069. 9328336  
SRR17520069. 9328338  
SRR17520069. 9328340  
SRR17520069. 9328342  
SRR17520069. 9328344  
SRR17520069. 9328348  
SRR17520069. 9328350  
SRR17520069. 9328353  
SRR17520069. 9328355  
SRR17520069. 9328357  
SRR17520069. 9328359  
SRR17520069. 9328361  
SRR17520069. 9328363  
SRR17520069. 9328365  
SRR17520069. 9328367  
SRR17520069. 9328369  
SRR17520069. 9328371  
SRR17520069. 9328373  
SRR17520069. 9328375  
SRR17520069. 9328377  
SRR17520069. 9328379  
SRR17520069. 9328381  
SRR17520069. 9328383  
SRR17520069. 9328385  
SRR17520069. 9328387  
SRR17520069. 9328389  
SRR17520069. 9328393  
SRR17520069. 9328395  
SRR17520069. 9328397  
SRR17520069. 9328399  
SRR17520069. 9334418  
SRR17520069. 9334422  
SRR17520069. 9334424  
SRR17520069. 9334426  
SRR17520069. 9340560  
SRR17520069. 9340562  
SRR17520069. 9340564  
SRR17520069. 9340566

SRR17520069. 9340568  
SRR17520069. 9340570  
SRR17520069. 9340572  
SRR17520069. 9340574  
SRR17520069. 9340576  
SRR17520069. 9340578  
SRR17520069. 9340580  
SRR17520069. 9340582  
SRR17520069. 9340584  
SRR17520069. 9340586  
SRR17520069. 9340588  
SRR17520069. 9340590  
SRR17520069. 9340592  
SRR17520069. 9340594  
SRR17520069. 9340596  
SRR17520069. 9340598  
SRR17520069. 9340600  
SRR17520069. 9340602  
SRR17520069. 9340604  
SRR17520069. 9340606  
SRR17520069. 9340608  
SRR17520069. 9340610  
SRR17520069. 9340612  
SRR17520069. 9340614  
SRR17520069. 9340616  
SRR17520069. 9340618  
SRR17520069. 9340620  
SRR17520069. 9340622  
SRR17520069. 9340624  
SRR17520069. 9340626  
SRR17520069. 9340628  
SRR17520069. 9340630  
SRR17520069. 9340632  
SRR17520069. 9340634  
SRR17520069. 9340636  
SRR17520069. 9340638  
SRR17520069. 9340640  
SRR17520069. 9340642  
SRR17520069. 9340644  
SRR17520069. 9340646  
SRR17520069. 9342990  
SRR17520069. 9354493  
SRR17520069. 9354495  
SRR17520069. 9354499  
SRR17520069. 9354501  
SRR17520069. 9354503  
SRR17520069. 9354505

SRR17520069. 9354507  
SRR17520069. 9354509  
SRR17520069. 9354511  
SRR17520069. 9354513  
SRR17520069. 9354515  
SRR17520069. 9357932  
SRR17520069. 9367525  
SRR17520069. 9367527  
SRR17520069. 9367529  
SRR17520069. 9367531  
SRR17520069. 9367533  
SRR17520069. 9367535  
SRR17520069. 9367537  
SRR17520069. 9367539  
SRR17520069. 9367541  
SRR17520069. 9367543  
SRR17520069. 9367545  
SRR17520069. 9367547  
SRR17520069. 9367549  
SRR17520069. 9367551  
SRR17520069. 9367553  
SRR17520069. 9367555  
SRR17520069. 9367557  
SRR17520069. 9367559  
SRR17520069. 9367561  
SRR17520069. 9367563  
SRR17520069. 9367565  
SRR17520069. 9367567  
SRR17520069. 9367569  
SRR17520069. 9367571  
SRR17520069. 9367574  
SRR17520069. 9367576  
SRR17520069. 9367578  
SRR17520069. 9367580  
SRR17520069. 9367582  
SRR17520069. 9367584  
SRR17520069. 9367586  
SRR17520069. 9367588  
SRR17520069. 9367590  
SRR17520069. 9367592  
SRR17520069. 9367594  
SRR17520069. 9367596  
SRR17520069. 9367598  
SRR17520069. 9367600  
SRR17520069. 9367602  
SRR17520069. 9367604  
SRR17520069. 9367606

SRR17520069. 9367608  
SRR17520069. 9367610  
SRR17520069. 9367612  
SRR17520069. 9367614  
SRR17520069. 9367616  
SRR17520069. 9367618  
SRR17520069. 9367620  
SRR17520069. 9367622  
SRR17520069. 9367624  
SRR17520069. 9367626  
SRR17520069. 9369626  
SRR17520069. 9369628  
SRR17520069. 9369635  
SRR17520069. 9370455  
SRR17520069. 9370457  
SRR17520069. 9377509  
SRR17520069. 9377511  
SRR17520069. 9377513  
SRR17520069. 9377515  
SRR17520069. 9377517  
SRR17520069. 9377519  
SRR17520069. 9377521  
SRR17520069. 9377523  
SRR17520069. 9377525  
SRR17520069. 9377527  
SRR17520069. 9377529  
SRR17520069. 9377531  
SRR17520069. 9377533  
SRR17520069. 9377535  
SRR17520069. 9377537  
SRR17520069. 9377539  
SRR17520069. 9377541  
SRR17520069. 9377543  
SRR17520069. 9377545  
SRR17520069. 9377547  
SRR17520069. 9377549  
SRR17520069. 9380222  
SRR17520069. 9380224  
SRR17520069. 9380226  
SRR17520069. 9380228  
SRR17520069. 9380974  
SRR17520069. 9380976  
SRR17520069. 9380978  
SRR17520069. 9380980  
SRR17520069. 9380984  
SRR17520069. 9382638  
SRR17520069. 9382640

SRR17520069. 9382642  
SRR17520069. 9382644  
SRR17520069. 9382646  
SRR17520069. 9382648  
SRR17520069. 9388560  
SRR17520069. 9388562  
SRR17520069. 9388564  
SRR17520069. 9388566  
SRR17520069. 9388568  
SRR17520069. 9388570  
SRR17520069. 9388572  
SRR17520069. 9388574  
SRR17520069. 9388576  
SRR17520069. 9388578  
SRR17520069. 9390943  
SRR17520069. 9390945  
SRR17520069. 9390947  
SRR17520069. 9390949  
SRR17520069. 9390951  
SRR17520069. 9390953  
SRR17520069. 9390955  
SRR17520069. 9390957  
SRR17520069. 9390959  
SRR17520069. 9390961  
SRR17520069. 9390963  
SRR17520069. 9390965  
SRR17520069. 9390967  
SRR17520069. 9390969  
SRR17520069. 9390971  
SRR17520069. 9390973  
SRR17520069. 9390975  
SRR17520069. 9390977  
SRR17520069. 9403821  
SRR17520069. 9403823  
SRR17520069. 9403827  
SRR17520069. 9403829  
SRR17520069. 9403831  
SRR17520069. 9403833  
SRR17520069. 9403835  
SRR17520069. 9403837  
SRR17520069. 9403839  
SRR17520069. 9403841  
SRR17520069. 9403843  
SRR17520069. 9403845  
SRR17520069. 9403847  
SRR17520069. 9403849  
SRR17520069. 9403851



SRR17520069.9403853  
SRR17520069.9403855  
SRR17520069.9403857  
SRR17520069.9404873  
SRR17520069.9409349  
SRR17520069.9409351  
SRR17520069.9409763  
SRR17520069.9428801  
SRR17520069.9428803  
SRR17520069.9428808  
SRR17520069.9428810  
SRR17520069.9428812  
SRR17520069.9428814  
SRR17520069.9428818  
SRR17520069.9428820  
SRR17520069.9428822  
SRR17520069.9428824  
SRR17520069.9428826  
SRR17520069.9445029  
SRR17520069.9445031  
SRR17520069.9445033  
SRR17520069.9445035  
SRR17520069.9445037  
SRR17520069.9445039  
SRR17520069.9445041  
SRR17520069.9445043  
SRR17520069.9445045  
SRR17520069.9445047  
SRR17520069.9445049  
SRR17520069.9445053  
SRR17520069.9445055  
SRR17520069.9445057  
SRR17520069.9445059  
SRR17520069.9451321  
SRR17520069.9451323  
SRR17520069.9451325  
SRR17520069.9451327  
SRR17520069.9451329  
SRR17520069.9451331  
SRR17520069.9451333  
SRR17520069.9451335  
SRR17520069.9451337  
SRR17520069.9451339  
SRR17520069.9451341  
SRR17520069.9451343  
SRR17520069.9451345  
SRR17520069.9451347

SRR17520069.9451349  
SRR17520069.9451351  
SRR17520069.9451353  
SRR17520069.9451357  
SRR17520069.9451359  
SRR17520069.9451361  
SRR17520069.9451363  
SRR17520069.9451365  
SRR17520069.9451367  
SRR17520069.9451369  
SRR17520069.9451371  
SRR17520069.9451373  
SRR17520069.9451375  
SRR17520069.9451377  
SRR17520069.9451379  
SRR17520069.9451381  
SRR17520069.9451383  
SRR17520069.9451385  
SRR17520069.9453022  
SRR17520069.9453024  
SRR17520069.9466506  
SRR17520069.9466508  
SRR17520069.9466510  
SRR17520069.9466512  
SRR17520069.9466514  
SRR17520069.9466516  
SRR17520069.9466518  
SRR17520069.9466520  
SRR17520069.9466522  
SRR17520069.9466524  
SRR17520069.9466526  
SRR17520069.9466528  
SRR17520069.9466530  
SRR17520069.9466532  
SRR17520069.9466534  
SRR17520069.9466536  
SRR17520069.9466538  
SRR17520069.9466542  
SRR17520069.9466544  
SRR17520069.9466546  
SRR17520069.9466548  
SRR17520069.9466550  
SRR17520069.9466552  
SRR17520069.9466554  
SRR17520069.9466556  
SRR17520069.9466558  
SRR17520069.9466560

SRR17520069. 9466562  
SRR17520069. 9466564  
SRR17520069. 9466566  
SRR17520069. 9466568  
SRR17520069. 9466570  
SRR17520069. 9466572  
SRR17520069. 9466574  
SRR17520069. 9466576  
SRR17520069. 9466578  
SRR17520069. 9466580  
SRR17520069. 9466584  
SRR17520069. 9466586  
SRR17520069. 9466588  
SRR17520069. 9466590  
SRR17520069. 9466592  
SRR17520069. 9466594  
SRR17520069. 9466596  
SRR17520069. 9466598  
SRR17520069. 9466600  
SRR17520069. 9466602  
SRR17520069. 9466604  
SRR17520069. 9466606  
SRR17520069. 9466608  
SRR17520069. 9466610  
SRR17520069. 9466612  
SRR17520069. 9466614  
SRR17520069. 9466616  
SRR17520069. 9466618  
SRR17520069. 9466620  
SRR17520069. 9471269  
SRR17520069. 9471273  
SRR17520069. 9471275  
SRR17520069. 9471277  
SRR17520069. 9471279  
SRR17520069. 9471281  
SRR17520069. 9471283  
SRR17520069. 9471285  
SRR17520069. 9471289  
SRR17520069. 9471291  
SRR17520069. 9471293  
SRR17520069. 9471295  
SRR17520069. 9471297  
SRR17520069. 9471299  
SRR17520069. 9471301  
SRR17520069. 9471303  
SRR17520069. 9471305  
SRR17520069. 9471307

SRR17520069.9471309  
SRR17520069.9471311  
SRR17520069.9471313  
SRR17520069.9471315  
SRR17520069.9471317  
SRR17520069.9471319  
SRR17520069.9471321  
SRR17520069.9471323  
SRR17520069.9471325  
SRR17520069.9471327  
SRR17520069.9471329  
SRR17520069.9471331  
SRR17520069.9471333  
SRR17520069.9471335  
SRR17520069.9471337  
SRR17520069.9471339  
SRR17520069.9471341  
SRR17520069.9471343  
SRR17520069.9471345  
SRR17520069.9471347  
SRR17520069.9471349  
SRR17520069.9471351  
SRR17520069.9471353  
SRR17520069.9471355  
SRR17520069.9471357  
SRR17520069.9471359  
SRR17520069.9471361  
SRR17520069.9471363  
SRR17520069.9471365  
SRR17520069.9471369  
SRR17520069.9471371  
SRR17520069.9471373  
SRR17520069.9471375  
SRR17520069.9471377  
SRR17520069.9471379  
SRR17520069.9471381  
SRR17520069.9471383  
SRR17520069.9471385  
SRR17520069.9471387  
SRR17520069.9471391  
SRR17520069.9471393  
SRR17520069.9471395  
SRR17520069.9471397  
SRR17520069.9471399  
SRR17520069.9471401  
SRR17520069.9471403  
SRR17520069.9471405

SRR17520069.9471407  
SRR17520069.9471409  
SRR17520069.9471411  
SRR17520069.9471413  
SRR17520069.9471415  
SRR17520069.9471417  
SRR17520069.9471419  
SRR17520069.9471421  
SRR17520069.9471423  
SRR17520069.9471425  
SRR17520069.9471427  
SRR17520069.9471429  
SRR17520069.9471431  
SRR17520069.9471433  
SRR17520069.9471435  
SRR17520069.9471437  
SRR17520069.9471439  
SRR17520069.9471441  
SRR17520069.9472183  
SRR17520069.9472185  
SRR17520069.9472187  
SRR17520069.9472189  
SRR17520069.9472191  
SRR17520069.9472193  
SRR17520069.9472195  
SRR17520069.9472197  
SRR17520069.9472199  
SRR17520069.9472201  
SRR17520069.9472203  
SRR17520069.9472205  
SRR17520069.9472207  
SRR17520069.9472211  
SRR17520069.9472215  
SRR17520069.9472217  
SRR17520069.9472219  
SRR17520069.9472221  
SRR17520069.9472223  
SRR17520069.9472225  
SRR17520069.9479133  
SRR17520069.9479135  
SRR17520069.9479137  
SRR17520069.9479139  
SRR17520069.9479141  
SRR17520069.9479143  
SRR17520069.9479145  
SRR17520069.9479147  
SRR17520069.9479149

SRR17520069.9479151  
SRR17520069.9479153  
SRR17520069.9479155  
SRR17520069.9479157  
SRR17520069.9479159  
SRR17520069.9479161  
SRR17520069.9479163  
SRR17520069.9479165  
SRR17520069.9479167  
SRR17520069.9479169  
SRR17520069.9479171  
SRR17520069.9479173  
SRR17520069.9479175  
SRR17520069.9479179  
SRR17520069.9479181  
SRR17520069.9479183  
SRR17520069.9479185  
SRR17520069.9479187  
SRR17520069.9479189  
SRR17520069.9479191  
SRR17520069.9479193  
SRR17520069.9479197  
SRR17520069.9479199  
SRR17520069.9479201  
SRR17520069.9479203  
SRR17520069.9479207  
SRR17520069.9479209  
SRR17520069.9479211  
SRR17520069.9479213  
SRR17520069.9479215  
SRR17520069.9479217  
SRR17520069.9479219  
SRR17520069.9479221  
SRR17520069.9479882  
SRR17520069.9479884  
SRR17520069.9479886  
SRR17520069.9487159  
SRR17520069.9487161  
SRR17520069.9487165  
SRR17520069.9487167  
SRR17520069.9487169  
SRR17520069.9487171  
SRR17520069.9487173  
SRR17520069.9491403  
SRR17520069.9491405  
SRR17520069.9491407  
SRR17520069.9491409

SRR17520069.9491413  
SRR17520069.9491417  
SRR17520069.9491419  
SRR17520069.9491421  
SRR17520069.9491489  
SRR17520069.9491491  
SRR17520069.9491493  
SRR17520069.9491495  
SRR17520069.9491497  
SRR17520069.9491499  
SRR17520069.9491503  
SRR17520069.9491505  
SRR17520069.9491507  
SRR17520069.9491509  
SRR17520069.9491511  
SRR17520069.9491513  
SRR17520069.9491515  
SRR17520069.9491517  
SRR17520069.9491519  
SRR17520069.9491521  
SRR17520069.9491523  
SRR17520069.9491525  
SRR17520069.9491527  
SRR17520069.9491529  
SRR17520069.9491531  
SRR17520069.9491533  
SRR17520069.9491535  
SRR17520069.9491537  
SRR17520069.9491541  
SRR17520069.9491543  
SRR17520069.9491545  
SRR17520069.9491547  
SRR17520069.9491549  
SRR17520069.9491551  
SRR17520069.9491553  
SRR17520069.9491555  
SRR17520069.9491557  
SRR17520069.9491559  
SRR17520069.9491561  
SRR17520069.9491563  
SRR17520069.9492311  
SRR17520069.9492313  
SRR17520069.9492315  
SRR17520069.9492317  
SRR17520069.9492319  
SRR17520069.9492321  
SRR17520069.9492323

SRR17520069.9492327  
SRR17520069.9492329  
SRR17520069.9492331  
SRR17520069.9492333  
SRR17520069.9492335  
SRR17520069.9492337  
SRR17520069.9492339  
SRR17520069.9492341  
SRR17520069.9492343  
SRR17520069.9492345  
SRR17520069.9492347  
SRR17520069.9492349  
SRR17520069.9492351  
SRR17520069.9492353  
SRR17520069.9492355  
SRR17520069.9492357  
SRR17520069.9492359  
SRR17520069.9492361  
SRR17520069.9492363  
SRR17520069.9492365  
SRR17520069.9492367  
SRR17520069.9492623  
SRR17520069.9492625  
SRR17520069.9492627  
SRR17520069.9492629  
SRR17520069.9492631  
SRR17520069.9492633  
SRR17520069.9492635  
SRR17520069.9492637  
SRR17520069.9492641  
SRR17520069.9497166  
SRR17520069.9497168  
SRR17520069.9497170  
SRR17520069.9497172  
SRR17520069.9497174  
SRR17520069.9497176  
SRR17520069.9497178  
SRR17520069.9497180  
SRR17520069.9498779  
SRR17520069.9498781  
SRR17520069.9498783  
SRR17520069.9498785  
SRR17520069.9498787  
SRR17520069.9498789  
SRR17520069.9498793  
SRR17520069.9498795  
SRR17520069.9498797



SRR17520069. 9498799  
SRR17520069. 9498801  
SRR17520069. 9498803  
SRR17520069. 9498807  
SRR17520069. 9498809  
SRR17520069. 9498811  
SRR17520069. 9498813  
SRR17520069. 9498815  
SRR17520069. 9498817  
SRR17520069. 9498819  
SRR17520069. 9498821  
SRR17520069. 9498823  
SRR17520069. 9498825  
SRR17520069. 9498827  
SRR17520069. 9498829  
SRR17520069. 9498831  
SRR17520069. 9498833  
SRR17520069. 9498835  
SRR17520069. 9498839  
SRR17520069. 9498841  
SRR17520069. 9498843  
SRR17520069. 9498845  
SRR17520069. 9498847  
SRR17520069. 9498851  
SRR17520069. 9498853  
SRR17520069. 9498855  
SRR17520069. 9498857  
SRR17520069. 9498859  
SRR17520069. 9498863  
SRR17520069. 9498865  
SRR17520069. 9498867  
SRR17520069. 9498869  
SRR17520069. 9498871  
SRR17520069. 9498873  
SRR17520069. 9498875  
SRR17520069. 9498879  
SRR17520069. 9500776  
SRR17520069. 9500778  
SRR17520069. 9500780  
SRR17520069. 9500782  
SRR17520069. 9500784  
SRR17520069. 9500786  
SRR17520069. 9500788  
SRR17520069. 9500792  
SRR17520069. 9500794  
SRR17520069. 9500796  
SRR17520069. 9500798

SRR17520069.9500800  
SRR17520069.9500802  
SRR17520069.9500804  
SRR17520069.9500806  
SRR17520069.9500808  
SRR17520069.9500810  
SRR17520069.9500814  
SRR17520069.9500816  
SRR17520069.9500818  
SRR17520069.9501588  
SRR17520069.9501590  
SRR17520069.9501592  
SRR17520069.9501594  
SRR17520069.9501596  
SRR17520069.9501598  
SRR17520069.9501600  
SRR17520069.9501604  
SRR17520069.9501606  
SRR17520069.9501608  
SRR17520069.9501610  
SRR17520069.9501612  
SRR17520069.9501614  
SRR17520069.9501616  
SRR17520069.9501618  
SRR17520069.9501620  
SRR17520069.9501622  
SRR17520069.9501624  
SRR17520069.9501626  
SRR17520069.9501628  
SRR17520069.9501630  
SRR17520069.9501632  
SRR17520069.9501634  
SRR17520069.9505324  
SRR17520069.9507527  
SRR17520069.9507531  
SRR17520069.9507533  
SRR17520069.9507535  
SRR17520069.9507537  
SRR17520069.9510327  
SRR17520069.9510333  
SRR17520069.9519340  
SRR17520069.9519342  
SRR17520069.9519344  
SRR17520069.9519346  
SRR17520069.9519348  
SRR17520069.9522502  
SRR17520069.9522504

SRR17520069.9522506  
SRR17520069.9522508  
SRR17520069.9522510  
SRR17520069.9522512  
SRR17520069.9522514  
SRR17520069.9522516  
SRR17520069.9522518  
SRR17520069.9522520  
SRR17520069.9522522  
SRR17520069.9522524  
SRR17520069.9522526  
SRR17520069.9522528  
SRR17520069.9522530  
SRR17520069.9522532  
SRR17520069.9522534  
SRR17520069.9522536  
SRR17520069.9522538  
SRR17520069.9522540  
SRR17520069.9522542  
SRR17520069.9522544  
SRR17520069.9522546  
SRR17520069.9522548  
SRR17520069.9522550  
SRR17520069.9522552  
SRR17520069.9522554  
SRR17520069.9522556  
SRR17520069.9522558  
SRR17520069.9522560  
SRR17520069.9522562  
SRR17520069.9522564  
SRR17520069.9522566  
SRR17520069.9522568  
SRR17520069.9522570  
SRR17520069.9522572  
SRR17520069.9522574  
SRR17520069.9522576  
SRR17520069.9522578  
SRR17520069.9522580  
SRR17520069.9522582  
SRR17520069.9522584  
SRR17520069.9522586  
SRR17520069.9522588  
SRR17520069.9522590  
SRR17520069.9522592  
SRR17520069.9522594  
SRR17520069.9522596  
SRR17520069.9522598

SRR17520069.9522600  
SRR17520069.9522602  
SRR17520069.9522604  
SRR17520069.9522606  
SRR17520069.9522608  
SRR17520069.9522610  
SRR17520069.9522612  
SRR17520069.9522614  
SRR17520069.9522616  
SRR17520069.9522618  
SRR17520069.9522620  
SRR17520069.9522622  
SRR17520069.9522624  
SRR17520069.9522626  
SRR17520069.9522628  
SRR17520069.9522630  
SRR17520069.9522632  
SRR17520069.9522634  
SRR17520069.9522636  
SRR17520069.9522638  
SRR17520069.9522640  
SRR17520069.9522642  
SRR17520069.9522644  
SRR17520069.9525353  
SRR17520069.9525355  
SRR17520069.9525357  
SRR17520069.9525359  
SRR17520069.9525361  
SRR17520069.9525363  
SRR17520069.9525365  
SRR17520069.9525367  
SRR17520069.9525615  
SRR17520069.9525617  
SRR17520069.9525619  
SRR17520069.9525621  
SRR17520069.9525623  
SRR17520069.9525625  
SRR17520069.9525627  
SRR17520069.9525629  
SRR17520069.9525631  
SRR17520069.9525633  
SRR17520069.9525635  
SRR17520069.9525637  
SRR17520069.9525639  
SRR17520069.9525641  
SRR17520069.9525643  
SRR17520069.9525645

SRR17520069.9525647  
SRR17520069.9525649  
SRR17520069.9525651  
SRR17520069.9525653  
SRR17520069.9525655  
SRR17520069.9525657  
SRR17520069.9525661  
SRR17520069.9525663  
SRR17520069.9525665  
SRR17520069.9525667  
SRR17520069.9525669  
SRR17520069.9531137  
SRR17520069.9531139  
SRR17520069.9531141  
SRR17520069.9531143  
SRR17520069.9531145  
SRR17520069.9531147  
SRR17520069.9531149  
SRR17520069.9531151  
SRR17520069.9531845  
SRR17520069.9531849  
SRR17520069.9531851  
SRR17520069.9531855  
SRR17520069.9531857  
SRR17520069.9531859  
SRR17520069.9531861  
SRR17520069.9531863  
SRR17520069.9531865  
SRR17520069.9537283  
SRR17520069.9538566  
SRR17520069.9538568  
SRR17520069.9538572  
SRR17520069.9539750  
SRR17520069.9539752  
SRR17520069.9539754  
SRR17520069.9539756  
SRR17520069.9539758  
SRR17520069.9539760  
SRR17520069.9539762  
SRR17520069.9539764  
SRR17520069.9539766  
SRR17520069.9539768  
SRR17520069.9539770  
SRR17520069.9539772  
SRR17520069.9539774  
SRR17520069.9539776  
SRR17520069.9539778

SRR17520069.9539780  
SRR17520069.9539782  
SRR17520069.9539784  
SRR17520069.9539786  
SRR17520069.9539788  
SRR17520069.9539790  
SRR17520069.9539792  
SRR17520069.9539794  
SRR17520069.9539796  
SRR17520069.9539798  
SRR17520069.9539800  
SRR17520069.9539802  
SRR17520069.9539804  
SRR17520069.9539806  
SRR17520069.9539808  
SRR17520069.9539810  
SRR17520069.9539812  
SRR17520069.9539814  
SRR17520069.9539816  
SRR17520069.9539818  
SRR17520069.9539820  
SRR17520069.9539822  
SRR17520069.9539824  
SRR17520069.9539826  
SRR17520069.9539828  
SRR17520069.9539830  
SRR17520069.9539832  
SRR17520069.9539834  
SRR17520069.9539836  
SRR17520069.9539838  
SRR17520069.9539840  
SRR17520069.9539842  
SRR17520069.9539844  
SRR17520069.9539846  
SRR17520069.9539848  
SRR17520069.9539850  
SRR17520069.9539852  
SRR17520069.9540612  
SRR17520069.9540614  
SRR17520069.9540616  
SRR17520069.9540618  
SRR17520069.9541761  
SRR17520069.9541763  
SRR17520069.9541765  
SRR17520069.9541767  
SRR17520069.9541769  
SRR17520069.9541773

SRR17520069.9541775  
SRR17520069.9541777  
SRR17520069.9541779  
SRR17520069.9541781  
SRR17520069.9541785  
SRR17520069.9541787  
SRR17520069.9541789  
SRR17520069.9541791  
SRR17520069.9541793  
SRR17520069.9541795  
SRR17520069.9541797  
SRR17520069.9541799  
SRR17520069.9541801  
SRR17520069.9541803  
SRR17520069.9541805  
SRR17520069.9541807  
SRR17520069.9541809  
SRR17520069.9541811  
SRR17520069.9541813  
SRR17520069.9541815  
SRR17520069.9541817  
SRR17520069.9541819  
SRR17520069.9541821  
SRR17520069.9541823  
SRR17520069.9541825  
SRR17520069.9541827  
SRR17520069.9541829  
SRR17520069.9541831  
SRR17520069.9541833  
SRR17520069.9541835  
SRR17520069.9541837  
SRR17520069.9541839  
SRR17520069.9541841  
SRR17520069.9541843  
SRR17520069.9541845  
SRR17520069.9541847  
SRR17520069.9541849  
SRR17520069.9541851  
SRR17520069.9541853  
SRR17520069.9541855  
SRR17520069.9541857  
SRR17520069.9541859  
SRR17520069.9541863  
SRR17520069.9541865  
SRR17520069.9541867  
SRR17520069.9541869  
SRR17520069.9541871

SRR17520069.9541873  
SRR17520069.9541875  
SRR17520069.9541877  
SRR17520069.9541879  
SRR17520069.9541881  
SRR17520069.9541883  
SRR17520069.9541885  
SRR17520069.9541887  
SRR17520069.9541889  
SRR17520069.9541891  
SRR17520069.9541893  
SRR17520069.9541895  
SRR17520069.9541897  
SRR17520069.9541899  
SRR17520069.9541901  
SRR17520069.9541903  
SRR17520069.9541905  
SRR17520069.9541909  
SRR17520069.9541911  
SRR17520069.9544659  
SRR17520069.9544661  
SRR17520069.9544663  
SRR17520069.9544665  
SRR17520069.9544667  
SRR17520069.9544669  
SRR17520069.9544671  
SRR17520069.9544673  
SRR17520069.9544675  
SRR17520069.9544677  
SRR17520069.9544679  
SRR17520069.9544681  
SRR17520069.9544683  
SRR17520069.9544685  
SRR17520069.9544687  
SRR17520069.9544689  
SRR17520069.9544691  
SRR17520069.9544693  
SRR17520069.9544695  
SRR17520069.9544697  
SRR17520069.9544699  
SRR17520069.9544701  
SRR17520069.9560679  
SRR17520069.9560681  
SRR17520069.9560683  
SRR17520069.9560685  
SRR17520069.9560687  
SRR17520069.9560689



SRR17520069.9560691  
SRR17520069.9560693  
SRR17520069.9560695  
SRR17520069.9560697  
SRR17520069.9560699  
SRR17520069.9560701  
SRR17520069.9560703  
SRR17520069.9560705  
SRR17520069.9560707  
SRR17520069.9560709  
SRR17520069.9560711  
SRR17520069.9560717  
SRR17520069.9560719  
SRR17520069.9560721  
SRR17520069.9560723  
SRR17520069.9560725  
SRR17520069.9560727  
SRR17520069.9560729  
SRR17520069.9560731  
SRR17520069.9560733  
SRR17520069.9560735  
SRR17520069.9560737  
SRR17520069.9560739  
SRR17520069.9560741  
SRR17520069.9560743  
SRR17520069.9560745  
SRR17520069.9560747  
SRR17520069.9563495  
SRR17520069.9563497  
SRR17520069.9566064  
SRR17520069.9568336  
SRR17520069.9568338  
SRR17520069.9568340  
SRR17520069.9568342  
SRR17520069.9568346  
SRR17520069.9568348  
SRR17520069.9568352  
SRR17520069.9568354  
SRR17520069.9568358  
SRR17520069.9568360  
SRR17520069.9568362  
SRR17520069.9571578  
SRR17520069.9571580  
SRR17520069.9571582  
SRR17520069.9571584  
SRR17520069.9571586  
SRR17520069.9571588

SRR17520069.9571590  
SRR17520069.9571592  
SRR17520069.9571594  
SRR17520069.9571596  
SRR17520069.9571598  
SRR17520069.9571600  
SRR17520069.9571602  
SRR17520069.9571604  
SRR17520069.9571606  
SRR17520069.9571608  
SRR17520069.9571610  
SRR17520069.9571614  
SRR17520069.9571616  
SRR17520069.9571618  
SRR17520069.9571620  
SRR17520069.9571622  
SRR17520069.9571624  
SRR17520069.9571626  
SRR17520069.9571628  
SRR17520069.9571630  
SRR17520069.9571632  
SRR17520069.9571634  
SRR17520069.9571636  
SRR17520069.9571638  
SRR17520069.9571640  
SRR17520069.9571642  
SRR17520069.9571644  
SRR17520069.9571646  
SRR17520069.9571648  
SRR17520069.9571650  
SRR17520069.9571652  
SRR17520069.9571654  
SRR17520069.9571656  
SRR17520069.9571658  
SRR17520069.9571660  
SRR17520069.9571662  
SRR17520069.9571664  
SRR17520069.9571666  
SRR17520069.9571670  
SRR17520069.9571672  
SRR17520069.9571674  
SRR17520069.9571676  
SRR17520069.9571678  
SRR17520069.9571680  
SRR17520069.9571682  
SRR17520069.9571686  
SRR17520069.9571688

SRR17520069.9571690  
SRR17520069.9571692  
SRR17520069.9571694  
SRR17520069.9571696  
SRR17520069.9571698  
SRR17520069.9571700  
SRR17520069.9571702  
SRR17520069.9571704  
SRR17520069.9571706  
SRR17520069.9571708  
SRR17520069.9571710  
SRR17520069.9571712  
SRR17520069.9571714  
SRR17520069.9571716  
SRR17520069.9571718  
SRR17520069.9571720  
SRR17520069.9571722  
SRR17520069.9571724  
SRR17520069.9571726  
SRR17520069.9583106  
SRR17520069.9583108  
SRR17520069.9583110  
SRR17520069.9583112  
SRR17520069.9583114  
SRR17520069.9583116  
SRR17520069.9583118  
SRR17520069.9583120  
SRR17520069.9583122  
SRR17520069.9583124  
SRR17520069.9583126  
SRR17520069.9583128  
SRR17520069.9583130  
SRR17520069.9583132  
SRR17520069.9583136  
SRR17520069.9583138  
SRR17520069.9583140  
SRR17520069.9583142  
SRR17520069.9583144  
SRR17520069.9583146  
SRR17520069.9583148  
SRR17520069.9583150  
SRR17520069.9583152  
SRR17520069.9583154  
SRR17520069.9583156  
SRR17520069.9583160  
SRR17520069.9583164  
SRR17520069.9583166

SRR17520069.9583168  
SRR17520069.9587300  
SRR17520069.9590262  
SRR17520069.9590266  
SRR17520069.9590268  
SRR17520069.9590270  
SRR17520069.9590272  
SRR17520069.9590276  
SRR17520069.9590278  
SRR17520069.9590280  
SRR17520069.9590282  
SRR17520069.9590284  
SRR17520069.9590286  
SRR17520069.9590288  
SRR17520069.9590290  
SRR17520069.9590292  
SRR17520069.9592422  
SRR17520069.9592424  
SRR17520069.9592428  
SRR17520069.9592430  
SRR17520069.9592432  
SRR17520069.9592434  
SRR17520069.9592436  
SRR17520069.9592438  
SRR17520069.9592440  
SRR17520069.9592442  
SRR17520069.9592444  
SRR17520069.9592448  
SRR17520069.9593306  
SRR17520069.9593308  
SRR17520069.9593310  
SRR17520069.9593312  
SRR17520069.9593314  
SRR17520069.9593316  
SRR17520069.9593318  
SRR17520069.9593322  
SRR17520069.9593324  
SRR17520069.9593326  
SRR17520069.9593328  
SRR17520069.9594143  
SRR17520069.9594145  
SRR17520069.9594149  
SRR17520069.9594151  
SRR17520069.9594155  
SRR17520069.9594157  
SRR17520069.9594159  
SRR17520069.9594161

SRR17520069.9594163  
SRR17520069.9598461  
SRR17520069.9598463  
SRR17520069.9598465  
SRR17520069.9598467  
SRR17520069.9598469  
SRR17520069.9598471  
SRR17520069.9598473  
SRR17520069.9598475  
SRR17520069.9598477  
SRR17520069.9601229  
SRR17520069.9601231  
SRR17520069.9601233  
SRR17520069.9601235  
SRR17520069.9601237  
SRR17520069.9601239  
SRR17520069.9601241  
SRR17520069.9601243  
SRR17520069.9601245  
SRR17520069.9601247  
SRR17520069.9601249  
SRR17520069.9601251  
SRR17520069.9601253  
SRR17520069.9601257  
SRR17520069.9601259  
SRR17520069.9601261  
SRR17520069.9601265  
SRR17520069.9601267  
SRR17520069.9601269  
SRR17520069.9601271  
SRR17520069.9601273  
SRR17520069.9601275  
SRR17520069.9601277  
SRR17520069.9601279  
SRR17520069.9601283  
SRR17520069.9601285  
SRR17520069.9601287  
SRR17520069.9601289  
SRR17520069.9601293  
SRR17520069.9603975  
SRR17520069.9603979  
SRR17520069.9606590  
SRR17520069.9606592  
SRR17520069.9606594  
SRR17520069.9606596  
SRR17520069.9606598  
SRR17520069.9606600

SRR17520069.9606602  
SRR17520069.9606604  
SRR17520069.9606606  
SRR17520069.9606608  
SRR17520069.9606612  
SRR17520069.9606614  
SRR17520069.9606616  
SRR17520069.9606618  
SRR17520069.9606620  
SRR17520069.9606622  
SRR17520069.9606624  
SRR17520069.9606626  
SRR17520069.9606628  
SRR17520069.9606630  
SRR17520069.9606632  
SRR17520069.9606634  
SRR17520069.9606636  
SRR17520069.9606638  
SRR17520069.9606640  
SRR17520069.9606642  
SRR17520069.9606644  
SRR17520069.9606648  
SRR17520069.9606652  
SRR17520069.9606654  
SRR17520069.9606656  
SRR17520069.9606658  
SRR17520069.9606660  
SRR17520069.9606662  
SRR17520069.9606664  
SRR17520069.9606668  
SRR17520069.9606670  
SRR17520069.9606672  
SRR17520069.9606674  
SRR17520069.9606676  
SRR17520069.9606680  
SRR17520069.9606682  
SRR17520069.9606684  
SRR17520069.9606686  
SRR17520069.9606688  
SRR17520069.9606690  
SRR17520069.9606692  
SRR17520069.9606694  
SRR17520069.9606696  
SRR17520069.9606700  
SRR17520069.9606702  
SRR17520069.9606704  
SRR17520069.9606706

SRR17520069.9606708  
SRR17520069.9606710  
SRR17520069.9606712  
SRR17520069.9606716  
SRR17520069.9606718  
SRR17520069.9606720  
SRR17520069.9606722  
SRR17520069.9606724  
SRR17520069.9606726  
SRR17520069.9606728  
SRR17520069.9606730  
SRR17520069.9606732  
SRR17520069.9606734  
SRR17520069.9606736  
SRR17520069.9606740  
SRR17520069.9606744  
SRR17520069.9606746  
SRR17520069.9608591  
SRR17520069.9608593  
SRR17520069.9608595  
SRR17520069.9609061  
SRR17520069.9609063  
SRR17520069.9609067  
SRR17520069.9609069  
SRR17520069.9609071  
SRR17520069.9609073  
SRR17520069.9609075  
SRR17520069.9609077  
SRR17520069.9609079  
SRR17520069.9609081  
SRR17520069.9609083  
SRR17520069.9609085  
SRR17520069.9609087  
SRR17520069.9613085  
SRR17520069.9613087  
SRR17520069.9613089  
SRR17520069.9613091  
SRR17520069.9613093  
SRR17520069.9613095  
SRR17520069.9613097  
SRR17520069.9623032  
SRR17520069.9623034  
SRR17520069.9623036  
SRR17520069.9623038  
SRR17520069.9623040  
SRR17520069.9623042  
SRR17520069.9623044

SRR17520069.9623046  
SRR17520069.9623048  
SRR17520069.9623050  
SRR17520069.9623052  
SRR17520069.9623054  
SRR17520069.9623056  
SRR17520069.9623058  
SRR17520069.9623060  
SRR17520069.9623062  
SRR17520069.9623064  
SRR17520069.9623066  
SRR17520069.9623070  
SRR17520069.9623072  
SRR17520069.9623074  
SRR17520069.9623076  
SRR17520069.9623078  
SRR17520069.9623080  
SRR17520069.9623082  
SRR17520069.9623084  
SRR17520069.9623086  
SRR17520069.9623088  
SRR17520069.9623093  
SRR17520069.9634141  
SRR17520069.9634145  
SRR17520069.9634147  
SRR17520069.9634149  
SRR17520069.9634153  
SRR17520069.9634155  
SRR17520069.9637835  
SRR17520069.9637837  
SRR17520069.9637839  
SRR17520069.9637841  
SRR17520069.9637843  
SRR17520069.9641627  
SRR17520069.9641629  
SRR17520069.9641631  
SRR17520069.9641633  
SRR17520069.9642177  
SRR17520069.9642179  
SRR17520069.9642181  
SRR17520069.9642183  
SRR17520069.9642185  
SRR17520069.9642189  
SRR17520069.9642191  
SRR17520069.9642193  
SRR17520069.9642195  
SRR17520069.9642197



SRR17520069.9642199  
SRR17520069.9642201  
SRR17520069.9642209  
SRR17520069.9642211  
SRR17520069.9642217  
SRR17520069.9642219  
SRR17520069.9645758  
SRR17520069.9645760  
SRR17520069.9645762  
SRR17520069.9645764  
SRR17520069.9645995  
SRR17520069.9645997  
SRR17520069.9645999  
SRR17520069.9646001  
SRR17520069.9646003  
SRR17520069.9646005  
SRR17520069.9646007  
SRR17520069.9648593  
SRR17520069.9648595  
SRR17520069.9648597  
SRR17520069.9648599  
SRR17520069.9648601  
SRR17520069.9648603  
SRR17520069.9648605  
SRR17520069.9648607  
SRR17520069.9648609  
SRR17520069.9648611  
SRR17520069.9648613  
SRR17520069.9648615  
SRR17520069.9648617  
SRR17520069.9648619  
SRR17520069.9648621  
SRR17520069.9648623  
SRR17520069.9648625  
SRR17520069.9648627  
SRR17520069.9648629  
SRR17520069.9648631  
SRR17520069.9650847  
SRR17520069.9650849  
SRR17520069.9650851  
SRR17520069.9650853  
SRR17520069.9650855  
SRR17520069.9650857  
SRR17520069.9650859  
SRR17520069.9650861  
SRR17520069.9650863  
SRR17520069.9650865

SRR17520069.9650867  
SRR17520069.9650869  
SRR17520069.9650871  
SRR17520069.9650873  
SRR17520069.9651739  
SRR17520069.9656169  
SRR17520069.9656171  
SRR17520069.9656173  
SRR17520069.9656175  
SRR17520069.9656177  
SRR17520069.9656179  
SRR17520069.9656181  
SRR17520069.9656183  
SRR17520069.9656185  
SRR17520069.9656187  
SRR17520069.9656189  
SRR17520069.9656191  
SRR17520069.9656193  
SRR17520069.9656195  
SRR17520069.9656197  
SRR17520069.9656199  
SRR17520069.9656201  
SRR17520069.9657900  
SRR17520069.9657904  
SRR17520069.9657906  
SRR17520069.9657908  
SRR17520069.9657912  
SRR17520069.9657914  
SRR17520069.9657918  
SRR17520069.9659560  
SRR17520069.9659562  
SRR17520069.9659564  
SRR17520069.9659566  
SRR17520069.9659568  
SRR17520069.9659639  
SRR17520069.9659641  
SRR17520069.9659643  
SRR17520069.9659645  
SRR17520069.9659647  
SRR17520069.9659649  
SRR17520069.9659651  
SRR17520069.9663040  
SRR17520069.9663042  
SRR17520069.9663044  
SRR17520069.9663046  
SRR17520069.9663048  
SRR17520069.9663050

SRR17520069.9663052  
SRR17520069.9663054  
SRR17520069.9663056  
SRR17520069.9663058  
SRR17520069.9663060  
SRR17520069.9663062  
SRR17520069.9663064  
SRR17520069.9663066  
SRR17520069.9663068  
SRR17520069.9663070  
SRR17520069.9663072  
SRR17520069.9663074  
SRR17520069.9663076  
SRR17520069.9663078  
SRR17520069.9663080  
SRR17520069.9663082  
SRR17520069.9663084  
SRR17520069.9663086  
SRR17520069.9663088  
SRR17520069.9663090  
SRR17520069.9663092  
SRR17520069.9663094  
SRR17520069.9663096  
SRR17520069.9663098  
SRR17520069.9663100  
SRR17520069.9663102  
SRR17520069.9663104  
SRR17520069.9663106  
SRR17520069.9663108  
SRR17520069.9666668  
SRR17520069.9666670  
SRR17520069.9666672  
SRR17520069.9666674  
SRR17520069.9677002  
SRR17520069.9677004  
SRR17520069.9677006  
SRR17520069.9677010  
SRR17520069.9677012  
SRR17520069.9677014  
SRR17520069.9677016  
SRR17520069.9680834  
SRR17520069.9680836  
SRR17520069.9680838  
SRR17520069.9680840  
SRR17520069.9682804  
SRR17520069.9682806  
SRR17520069.9682808

SRR17520069.9682810  
SRR17520069.9687812  
SRR17520069.9687814  
SRR17520069.9687816  
SRR17520069.9687818  
SRR17520069.9687820  
SRR17520069.9687822  
SRR17520069.9687824  
SRR17520069.9687826  
SRR17520069.9687828  
SRR17520069.9687830  
SRR17520069.9687834  
SRR17520069.9687836  
SRR17520069.9687838  
SRR17520069.9687844  
SRR17520069.9688557  
SRR17520069.9688559  
SRR17520069.9688561  
SRR17520069.9688563  
SRR17520069.9688565  
SRR17520069.9688567  
SRR17520069.9688569  
SRR17520069.9688571  
SRR17520069.9688575  
SRR17520069.9688577  
SRR17520069.9688581  
SRR17520069.9688583  
SRR17520069.9688585  
SRR17520069.9688587  
SRR17520069.9689268  
SRR17520069.9689270  
SRR17520069.9689272  
SRR17520069.9689274  
SRR17520069.9689276  
SRR17520069.9689278  
SRR17520069.9689280  
SRR17520069.9689282  
SRR17520069.9689284  
SRR17520069.9689286  
SRR17520069.9689288  
SRR17520069.9689290  
SRR17520069.9689292  
SRR17520069.9689294  
SRR17520069.9689296  
SRR17520069.9689298  
SRR17520069.9689300  
SRR17520069.9689302

SRR17520069.9689304  
SRR17520069.9699118  
SRR17520069.9699120  
SRR17520069.9699122  
SRR17520069.9699124  
SRR17520069.9699126  
SRR17520069.9699128  
SRR17520069.9699130  
SRR17520069.9699132  
SRR17520069.9699134  
SRR17520069.9699136  
SRR17520069.9699140  
SRR17520069.9699142  
SRR17520069.9699144  
SRR17520069.9699146  
SRR17520069.9699148  
SRR17520069.9699150  
SRR17520069.9699152  
SRR17520069.9700062  
SRR17520069.9700064  
SRR17520069.9700066  
SRR17520069.9700068  
SRR17520069.9700070  
SRR17520069.9700072  
SRR17520069.9700074  
SRR17520069.9700076  
SRR17520069.9700078  
SRR17520069.9700080  
SRR17520069.9700082  
SRR17520069.9700084  
SRR17520069.9706613  
SRR17520069.9706615  
SRR17520069.9706617  
SRR17520069.9706619  
SRR17520069.9706621  
SRR17520069.9706623  
SRR17520069.9706625  
SRR17520069.9706627  
SRR17520069.9706629  
SRR17520069.9706631  
SRR17520069.9706633  
SRR17520069.9706635  
SRR17520069.9706637  
SRR17520069.9706639  
SRR17520069.9706641  
SRR17520069.9706643  
SRR17520069.9706645

SRR17520069.9706949  
SRR17520069.9706951  
SRR17520069.9710108  
SRR17520069.9710110  
SRR17520069.9712188  
SRR17520069.9712190  
SRR17520069.9712192  
SRR17520069.9712194  
SRR17520069.9712196  
SRR17520069.9712198  
SRR17520069.9712200  
SRR17520069.9712202  
SRR17520069.9712204  
SRR17520069.9712206  
SRR17520069.9712208  
SRR17520069.9712210  
SRR17520069.9712212  
SRR17520069.9713263  
SRR17520069.9713265  
SRR17520069.9713269  
SRR17520069.9713271  
SRR17520069.9713273  
SRR17520069.9713275  
SRR17520069.9713277  
SRR17520069.9713279  
SRR17520069.9713281  
SRR17520069.9713283  
SRR17520069.9713285  
SRR17520069.9713287  
SRR17520069.9713289  
SRR17520069.9713291  
SRR17520069.9713293  
SRR17520069.9713295  
SRR17520069.9713297  
SRR17520069.9713299  
SRR17520069.9713301  
SRR17520069.9713303  
SRR17520069.9713305  
SRR17520069.9713307  
SRR17520069.9713309  
SRR17520069.9713311  
SRR17520069.9713313  
SRR17520069.9713315  
SRR17520069.9713317  
SRR17520069.9713319  
SRR17520069.9713321  
SRR17520069.9713323

SRR17520069.9713325  
SRR17520069.9713327  
SRR17520069.9713329  
SRR17520069.9713331  
SRR17520069.9713333  
SRR17520069.9713335  
SRR17520069.9713337  
SRR17520069.9713339  
SRR17520069.9713341  
SRR17520069.9713343  
SRR17520069.9713345  
SRR17520069.9713347  
SRR17520069.9713349  
SRR17520069.9713351  
SRR17520069.9715782  
SRR17520069.9715784  
SRR17520069.9715786  
SRR17520069.9716567  
SRR17520069.9716569  
SRR17520069.9716571  
SRR17520069.9720270  
SRR17520069.9720272  
SRR17520069.9720274  
SRR17520069.9720276  
SRR17520069.9720278  
SRR17520069.9720280  
SRR17520069.9720282  
SRR17520069.9720284  
SRR17520069.9722995  
SRR17520069.9722997  
SRR17520069.9722999  
SRR17520069.9723001  
SRR17520069.9723005  
SRR17520069.9723007  
SRR17520069.9723009  
SRR17520069.9723011  
SRR17520069.9723013  
SRR17520069.9723015  
SRR17520069.9723017  
SRR17520069.9723019  
SRR17520069.9723021  
SRR17520069.9723023  
SRR17520069.9723025  
SRR17520069.9723027  
SRR17520069.9723029  
SRR17520069.9723031  
SRR17520069.9723033

SRR17520069.9723035  
SRR17520069.9723037  
SRR17520069.9723039  
SRR17520069.9723041  
SRR17520069.9723043  
SRR17520069.9723045  
SRR17520069.9723047  
SRR17520069.9723049  
SRR17520069.9723051  
SRR17520069.9723053  
SRR17520069.9723055  
SRR17520069.9723057  
SRR17520069.9723059  
SRR17520069.9723061  
SRR17520069.9723063  
SRR17520069.9723065  
SRR17520069.9723067  
SRR17520069.9723069  
SRR17520069.9723071  
SRR17520069.9723073  
SRR17520069.9723075  
SRR17520069.9723077  
SRR17520069.9731002  
SRR17520069.9731004  
SRR17520069.9731006  
SRR17520069.9731008  
SRR17520069.9731010  
SRR17520069.9731012  
SRR17520069.9731250  
SRR17520069.9731252  
SRR17520069.9731254  
SRR17520069.9731256  
SRR17520069.9731258  
SRR17520069.9731260  
SRR17520069.9731262  
SRR17520069.9731264  
SRR17520069.9731266  
SRR17520069.9731268  
SRR17520069.9731270  
SRR17520069.9731272  
SRR17520069.9731274  
SRR17520069.9731276  
SRR17520069.9731278  
SRR17520069.9735220  
SRR17520069.9735650  
SRR17520069.9735652  
SRR17520069.9735654



SRR17520069.9735656  
SRR17520069.9735658  
SRR17520069.9735660  
SRR17520069.9735662  
SRR17520069.9735664  
SRR17520069.9735978  
SRR17520069.9735980  
SRR17520069.9735982  
SRR17520069.9735984  
SRR17520069.9735986  
SRR17520069.9735988  
SRR17520069.9735990  
SRR17520069.9735992  
SRR17520069.9735994  
SRR17520069.9735996  
SRR17520069.9735998  
SRR17520069.9736000  
SRR17520069.9736002  
SRR17520069.9736004  
SRR17520069.9736006  
SRR17520069.9736008  
SRR17520069.9736010  
SRR17520069.9736012  
SRR17520069.9736014  
SRR17520069.9736016  
SRR17520069.9736018  
SRR17520069.9736020  
SRR17520069.9736725  
SRR17520069.9736727  
SRR17520069.9736729  
SRR17520069.9736731  
SRR17520069.9738503  
SRR17520069.9738505  
SRR17520069.9738507  
SRR17520069.9738509  
SRR17520069.9738511  
SRR17520069.9738513  
SRR17520069.9738517  
SRR17520069.9738519  
SRR17520069.9742293  
SRR17520069.9742295  
SRR17520069.9742297  
SRR17520069.9742299  
SRR17520069.9742303  
SRR17520069.9742305  
SRR17520069.9742307  
SRR17520069.9742309

SRR17520069.9742311  
SRR17520069.9742313  
SRR17520069.9742315  
SRR17520069.9742317  
SRR17520069.9742319  
SRR17520069.9742321  
SRR17520069.9742323  
SRR17520069.9742325  
SRR17520069.9742327  
SRR17520069.9742329  
SRR17520069.9742331  
SRR17520069.9742333  
SRR17520069.9742335  
SRR17520069.9742337  
SRR17520069.9742339  
SRR17520069.9742341  
SRR17520069.9742343  
SRR17520069.9742345  
SRR17520069.9742347  
SRR17520069.9742349  
SRR17520069.9742351  
SRR17520069.9742353  
SRR17520069.9742355  
SRR17520069.9742359  
SRR17520069.9742361  
SRR17520069.9742365  
SRR17520069.9742367  
SRR17520069.9742369  
SRR17520069.9742373  
SRR17520069.9742375  
SRR17520069.9742377  
SRR17520069.9742379  
SRR17520069.9742381  
SRR17520069.9742383  
SRR17520069.9742385  
SRR17520069.9742387  
SRR17520069.9742389  
SRR17520069.9742391  
SRR17520069.9742393  
SRR17520069.9742395  
SRR17520069.9742397  
SRR17520069.9742399  
SRR17520069.9742401  
SRR17520069.9742403  
SRR17520069.9742407  
SRR17520069.9742409  
SRR17520069.9742411

SRR17520069.9742413  
SRR17520069.9742415  
SRR17520069.9742421  
SRR17520069.9742423  
SRR17520069.9742425  
SRR17520069.9742427  
SRR17520069.9742431  
SRR17520069.9742433  
SRR17520069.9742437  
SRR17520069.9742439  
SRR17520069.9742441  
SRR17520069.9742443  
SRR17520069.9742445  
SRR17520069.9742447  
SRR17520069.9742449  
SRR17520069.9742451  
SRR17520069.9742453  
SRR17520069.9742455  
SRR17520069.9742457  
SRR17520069.9742459  
SRR17520069.9742461  
SRR17520069.9742463  
SRR17520069.9742465  
SRR17520069.9742467  
SRR17520069.9742469  
SRR17520069.9742471  
SRR17520069.9742473  
SRR17520069.9742475  
SRR17520069.9742477  
SRR17520069.9742479  
SRR17520069.9742481  
SRR17520069.9742483  
SRR17520069.9742485  
SRR17520069.9742487  
SRR17520069.9742489  
SRR17520069.9742491  
SRR17520069.9742493  
SRR17520069.9742912  
SRR17520069.9742914  
SRR17520069.9742916  
SRR17520069.9742918  
SRR17520069.9742920  
SRR17520069.9742924  
SRR17520069.9745548  
SRR17520069.9745550  
SRR17520069.9745552  
SRR17520069.9753243

SRR17520069.9753245  
SRR17520069.9754307  
SRR17520069.9754309  
SRR17520069.9754311  
SRR17520069.9754313  
SRR17520069.9754315  
SRR17520069.9754317  
SRR17520069.9754319  
SRR17520069.9754323  
SRR17520069.9755613  
SRR17520069.9755615  
SRR17520069.9755617  
SRR17520069.9755619  
SRR17520069.9755621  
SRR17520069.9755623  
SRR17520069.9755625  
SRR17520069.9755627  
SRR17520069.9755631  
SRR17520069.9755633  
SRR17520069.9755635  
SRR17520069.9755637  
SRR17520069.9755639  
SRR17520069.9755641  
SRR17520069.9755643  
SRR17520069.9755645  
SRR17520069.9755647  
SRR17520069.9755649  
SRR17520069.9755651  
SRR17520069.9755653  
SRR17520069.9755655  
SRR17520069.9755657  
SRR17520069.9759573  
SRR17520069.9759575  
SRR17520069.9759577  
SRR17520069.9759579  
SRR17520069.9759581  
SRR17520069.9759583  
SRR17520069.9759585  
SRR17520069.9759587  
SRR17520069.9759589  
SRR17520069.9759591  
SRR17520069.9759593  
SRR17520069.9759595  
SRR17520069.9760738  
SRR17520069.9760740  
SRR17520069.9760742  
SRR17520069.9760744

SRR17520069. 9760746  
SRR17520069. 9760748  
SRR17520069. 9760752  
SRR17520069. 9760754  
SRR17520069. 9760758  
SRR17520069. 9760760  
SRR17520069. 9760762  
SRR17520069. 9760766  
SRR17520069. 9760768  
SRR17520069. 9760774  
SRR17520069. 9760778  
SRR17520069. 9760780  
SRR17520069. 9760782  
SRR17520069. 9760784  
SRR17520069. 9760786  
SRR17520069. 9764814  
SRR17520069. 9764816  
SRR17520069. 9764818  
SRR17520069. 9764820  
SRR17520069. 9764822  
SRR17520069. 9764824  
SRR17520069. 9764826  
SRR17520069. 9764828  
SRR17520069. 9764830  
SRR17520069. 9764832  
SRR17520069. 9764834  
SRR17520069. 9764836  
SRR17520069. 9764838  
SRR17520069. 9764840  
SRR17520069. 9764842  
SRR17520069. 9764844  
SRR17520069. 9764846  
SRR17520069. 9764848  
SRR17520069. 9764850  
SRR17520069. 9764852  
SRR17520069. 9764854  
SRR17520069. 9764856  
SRR17520069. 9764858  
SRR17520069. 9764860  
SRR17520069. 9764862  
SRR17520069. 9764864  
SRR17520069. 9764866  
SRR17520069. 9764868  
SRR17520069. 9764870  
SRR17520069. 9764872  
SRR17520069. 9764874  
SRR17520069. 9764876

SRR17520069.9764878  
SRR17520069.9764880  
SRR17520069.9764882  
SRR17520069.9764884  
SRR17520069.9764886  
SRR17520069.9764888  
SRR17520069.9764890  
SRR17520069.9764892  
SRR17520069.9764894  
SRR17520069.9764896  
SRR17520069.9764898  
SRR17520069.9764900  
SRR17520069.9764902  
SRR17520069.9764904  
SRR17520069.9764906  
SRR17520069.9764908  
SRR17520069.9764910  
SRR17520069.9764912  
SRR17520069.9764914  
SRR17520069.9766556  
SRR17520069.9766558  
SRR17520069.9766560  
SRR17520069.9766564  
SRR17520069.9766566  
SRR17520069.9766568  
SRR17520069.9766570  
SRR17520069.9766572  
SRR17520069.9766574  
SRR17520069.9766576  
SRR17520069.9766580  
SRR17520069.9766586  
SRR17520069.9766590  
SRR17520069.9766594  
SRR17520069.9772640  
SRR17520069.9772642  
SRR17520069.9772644  
SRR17520069.9772646  
SRR17520069.9772648  
SRR17520069.9772650  
SRR17520069.9772652  
SRR17520069.9772656  
SRR17520069.9772658  
SRR17520069.9772660  
SRR17520069.9772662  
SRR17520069.9772664  
SRR17520069.9772666  
SRR17520069.9772668

SRR17520069.9772670  
SRR17520069.9772672  
SRR17520069.9772674  
SRR17520069.9772676  
SRR17520069.9772678  
SRR17520069.9772680  
SRR17520069.9772682  
SRR17520069.9772684  
SRR17520069.9772686  
SRR17520069.9772688  
SRR17520069.9772690  
SRR17520069.9772692  
SRR17520069.9772694  
SRR17520069.9772696  
SRR17520069.9772698  
SRR17520069.9772700  
SRR17520069.9772702  
SRR17520069.9772704  
SRR17520069.9772706  
SRR17520069.9772708  
SRR17520069.9772712  
SRR17520069.9772714  
SRR17520069.9772716  
SRR17520069.9772718  
SRR17520069.9772720  
SRR17520069.9772724  
SRR17520069.9772726  
SRR17520069.9772728  
SRR17520069.9772730  
SRR17520069.9772734  
SRR17520069.9772736  
SRR17520069.9772871  
SRR17520069.9772875  
SRR17520069.9772897  
SRR17520069.9772911  
SRR17520069.9778466  
SRR17520069.9778470  
SRR17520069.9778472  
SRR17520069.9778474  
SRR17520069.9778476  
SRR17520069.9778478  
SRR17520069.9778480  
SRR17520069.9778482  
SRR17520069.9778484  
SRR17520069.9778486  
SRR17520069.9778488  
SRR17520069.9778490

SRR17520069.9778492  
SRR17520069.9778494  
SRR17520069.9778496  
SRR17520069.9778498  
SRR17520069.9778500  
SRR17520069.9778502  
SRR17520069.9778504  
SRR17520069.9779156  
SRR17520069.9779387  
SRR17520069.9779389  
SRR17520069.9779391  
SRR17520069.9779393  
SRR17520069.9779395  
SRR17520069.9779397  
SRR17520069.9781856  
SRR17520069.9781858  
SRR17520069.9781860  
SRR17520069.9781862  
SRR17520069.9781864  
SRR17520069.9781866  
SRR17520069.9781868  
SRR17520069.9781870  
SRR17520069.9781872  
SRR17520069.9781874  
SRR17520069.9781876  
SRR17520069.9781878  
SRR17520069.9781880  
SRR17520069.9781882  
SRR17520069.9781884  
SRR17520069.9781886  
SRR17520069.9781890  
SRR17520069.9781892  
SRR17520069.9781894  
SRR17520069.9781896  
SRR17520069.9781898  
SRR17520069.9781900  
SRR17520069.9781902  
SRR17520069.9781906  
SRR17520069.9783825  
SRR17520069.9783827  
SRR17520069.9783829  
SRR17520069.9783831  
SRR17520069.9783833  
SRR17520069.9783835  
SRR17520069.9783837  
SRR17520069.9783839  
SRR17520069.9783843



SRR17520069.9783845  
SRR17520069.9783847  
SRR17520069.9783849  
SRR17520069.9783851  
SRR17520069.9783853  
SRR17520069.9783855  
SRR17520069.9783857  
SRR17520069.9783859  
SRR17520069.9783861  
SRR17520069.9783863  
SRR17520069.9783865  
SRR17520069.9783867  
SRR17520069.9783869  
SRR17520069.9783871  
SRR17520069.9783873  
SRR17520069.9783875  
SRR17520069.9783877  
SRR17520069.9783879  
SRR17520069.9783881  
SRR17520069.9783887  
SRR17520069.9783889  
SRR17520069.9783891  
SRR17520069.9783893  
SRR17520069.9783895  
SRR17520069.9783897  
SRR17520069.9783899  
SRR17520069.9783901  
SRR17520069.9783903  
SRR17520069.9783905  
SRR17520069.9783907  
SRR17520069.9783909  
SRR17520069.9783911  
SRR17520069.9783913  
SRR17520069.9783917  
SRR17520069.9783919  
SRR17520069.9783921  
SRR17520069.9783923  
SRR17520069.9783925  
SRR17520069.9783927  
SRR17520069.9783929  
SRR17520069.9783931  
SRR17520069.9783933  
SRR17520069.9783935  
SRR17520069.9783937  
SRR17520069.9783939  
SRR17520069.9783941  
SRR17520069.9783943

SRR17520069.9783947  
SRR17520069.9783949  
SRR17520069.9783951  
SRR17520069.9783953  
SRR17520069.9783955  
SRR17520069.9783957  
SRR17520069.9783959  
SRR17520069.9783961  
SRR17520069.9783963  
SRR17520069.9783965  
SRR17520069.9783967  
SRR17520069.9783969  
SRR17520069.9783971  
SRR17520069.9783973  
SRR17520069.9783975  
SRR17520069.9783977  
SRR17520069.9783979  
SRR17520069.9783981  
SRR17520069.9783983  
SRR17520069.9783985  
SRR17520069.9784209  
SRR17520069.9789807  
SRR17520069.9789809  
SRR17520069.9789811  
SRR17520069.9789813  
SRR17520069.9789815  
SRR17520069.9789817  
SRR17520069.9789819  
SRR17520069.9789821  
SRR17520069.9789823  
SRR17520069.9789825  
SRR17520069.9789831  
SRR17520069.9789833  
SRR17520069.9789835  
SRR17520069.9793118  
SRR17520069.9793120  
SRR17520069.9793122  
SRR17520069.9793124  
SRR17520069.9793126  
SRR17520069.9793128  
SRR17520069.9793130  
SRR17520069.9802236  
SRR17520069.9802238  
SRR17520069.9802240  
SRR17520069.9802242  
SRR17520069.9802244  
SRR17520069.9802246

SRR17520069.9802248  
SRR17520069.9802250  
SRR17520069.9802252  
SRR17520069.9802254  
SRR17520069.9802256  
SRR17520069.9802258  
SRR17520069.9802260  
SRR17520069.9802262  
SRR17520069.9802264  
SRR17520069.9802266  
SRR17520069.9802268  
SRR17520069.9802270  
SRR17520069.9802272  
SRR17520069.9802274  
SRR17520069.9802276  
SRR17520069.9802278  
SRR17520069.9802280  
SRR17520069.9802282  
SRR17520069.9802284  
SRR17520069.9802286  
SRR17520069.9802288  
SRR17520069.9802290  
SRR17520069.9802292  
SRR17520069.9802294  
SRR17520069.9802296  
SRR17520069.9802298  
SRR17520069.9802300  
SRR17520069.9802302  
SRR17520069.9802304  
SRR17520069.9802306  
SRR17520069.9802308  
SRR17520069.9802310  
SRR17520069.9802312  
SRR17520069.9802314  
SRR17520069.9802316  
SRR17520069.9802318  
SRR17520069.9802320  
SRR17520069.9802322  
SRR17520069.9802324  
SRR17520069.9802326  
SRR17520069.9802328  
SRR17520069.9802330  
SRR17520069.9802332  
SRR17520069.9802334  
SRR17520069.9802336  
SRR17520069.9802338  
SRR17520069.9802340

SRR17520069.9802342  
SRR17520069.9802344  
SRR17520069.9802346  
SRR17520069.9802348  
SRR17520069.9802350  
SRR17520069.9802352  
SRR17520069.9802354  
SRR17520069.9802356  
SRR17520069.9802358  
SRR17520069.9802360  
SRR17520069.9802362  
SRR17520069.9802364  
SRR17520069.9802366  
SRR17520069.9802368  
SRR17520069.9809369  
SRR17520069.9809371  
SRR17520069.9809373  
SRR17520069.9809375  
SRR17520069.9809377  
SRR17520069.9809379  
SRR17520069.9809381  
SRR17520069.9809383  
SRR17520069.9809385  
SRR17520069.9809387  
SRR17520069.9809389  
SRR17520069.9809391  
SRR17520069.9809395  
SRR17520069.9809397  
SRR17520069.9809399  
SRR17520069.9809401  
SRR17520069.9809403  
SRR17520069.9809405  
SRR17520069.9830916  
SRR17520069.9830918  
SRR17520069.9830920  
SRR17520069.9830922  
SRR17520069.9830924  
SRR17520069.9830926  
SRR17520069.9830928  
SRR17520069.9830930  
SRR17520069.9830932  
SRR17520069.9831431  
SRR17520069.9842260  
SRR17520069.9842262  
SRR17520069.9842264  
SRR17520069.9842266  
SRR17520069.9842268

SRR17520069.9842270  
SRR17520069.9842272  
SRR17520069.9842274  
SRR17520069.9842276  
SRR17520069.9842278  
SRR17520069.9842280  
SRR17520069.9842282  
SRR17520069.9842284  
SRR17520069.9842286  
SRR17520069.9853859  
SRR17520069.9853861  
SRR17520069.9853863  
SRR17520069.9853865  
SRR17520069.9853867  
SRR17520069.9853869  
SRR17520069.9853871  
SRR17520069.9853873  
SRR17520069.9853875  
SRR17520069.9854888  
SRR17520069.9854892  
SRR17520069.9854896  
SRR17520069.9854900  
SRR17520069.9854906  
SRR17520069.9857943  
SRR17520069.9857945  
SRR17520069.9857983  
SRR17520069.9857985  
SRR17520069.9857987  
SRR17520069.9857989  
SRR17520069.9857991  
SRR17520069.9857993  
SRR17520069.9857995  
SRR17520069.9857997  
SRR17520069.9857999  
SRR17520069.9858001  
SRR17520069.9858003  
SRR17520069.9858005  
SRR17520069.9858007  
SRR17520069.9858009  
SRR17520069.9858011  
SRR17520069.9859938  
SRR17520069.9859940  
SRR17520069.9859944  
SRR17520069.9859946  
SRR17520069.9859948  
SRR17520069.9859950  
SRR17520069.9859952

SRR17520069.9859954  
SRR17520069.9859956  
SRR17520069.9859958  
SRR17520069.9859960  
SRR17520069.9859962  
SRR17520069.9859964  
SRR17520069.9859966  
SRR17520069.9859968  
SRR17520069.9859970  
SRR17520069.9859972  
SRR17520069.9859974  
SRR17520069.9859976  
SRR17520069.9859978  
SRR17520069.9859980  
SRR17520069.9859982  
SRR17520069.9859984  
SRR17520069.9870739  
SRR17520069.9870741  
SRR17520069.9870743  
SRR17520069.9870745  
SRR17520069.9872882  
SRR17520069.9872884  
SRR17520069.9872886  
SRR17520069.9872891  
SRR17520069.9872893  
SRR17520069.9872895  
SRR17520069.9872897  
SRR17520069.9872899  
SRR17520069.9874385  
SRR17520069.9874387  
SRR17520069.9874389  
SRR17520069.9874391  
SRR17520069.9874393  
SRR17520069.9874395  
SRR17520069.9874671  
SRR17520069.9874673  
SRR17520069.9874675  
SRR17520069.9874679  
SRR17520069.9874681  
SRR17520069.9874683  
SRR17520069.9874685  
SRR17520069.9874687  
SRR17520069.9874689  
SRR17520069.9885549  
SRR17520069.9885553  
SRR17520069.9885555  
SRR17520069.9885557

SRR17520069.9888884  
SRR17520069.9888886  
SRR17520069.9888888  
SRR17520069.9888890  
SRR17520069.9888892  
SRR17520069.9888894  
SRR17520069.9888896  
SRR17520069.9888898  
SRR17520069.9888900  
SRR17520069.9888902  
SRR17520069.9888904  
SRR17520069.9888906  
SRR17520069.9888908  
SRR17520069.9888910  
SRR17520069.9888912  
SRR17520069.9888914  
SRR17520069.9888916  
SRR17520069.9888918  
SRR17520069.9888920  
SRR17520069.9889580  
SRR17520069.9889582  
SRR17520069.9889584  
SRR17520069.9889586  
SRR17520069.9889588  
SRR17520069.9889590  
SRR17520069.9889592  
SRR17520069.9889594  
SRR17520069.9889596  
SRR17520069.9889598  
SRR17520069.9889600  
SRR17520069.9889602  
SRR17520069.9889604  
SRR17520069.9892521  
SRR17520069.9892523  
SRR17520069.9892525  
SRR17520069.9892527  
SRR17520069.9892529  
SRR17520069.9892948  
SRR17520069.9892950  
SRR17520069.9892952  
SRR17520069.9892954  
SRR17520069.9892956  
SRR17520069.9892958  
SRR17520069.9892960  
SRR17520069.9892962  
SRR17520069.9892964  
SRR17520069.9892966

SRR17520069.9892968  
SRR17520069.9892972  
SRR17520069.9892974  
SRR17520069.9892976  
SRR17520069.9892978  
SRR17520069.9892980  
SRR17520069.9892982  
SRR17520069.9892984  
SRR17520069.9892986  
SRR17520069.9892988  
SRR17520069.9892990  
SRR17520069.9892992  
SRR17520069.9892994  
SRR17520069.9892996  
SRR17520069.9892998  
SRR17520069.9893000  
SRR17520069.9893002  
SRR17520069.9893004  
SRR17520069.9893006  
SRR17520069.9893008  
SRR17520069.9893010  
SRR17520069.9893014  
SRR17520069.9893016  
SRR17520069.9893018  
SRR17520069.9893020  
SRR17520069.9893022  
SRR17520069.9893024  
SRR17520069.9893026  
SRR17520069.9893028  
SRR17520069.9893030  
SRR17520069.9893032  
SRR17520069.9893034  
SRR17520069.9893036  
SRR17520069.9893040  
SRR17520069.9893042  
SRR17520069.9893044  
SRR17520069.9893046  
SRR17520069.9893048  
SRR17520069.9893050  
SRR17520069.9899495  
SRR17520069.9899497  
SRR17520069.9899499  
SRR17520069.9899501  
SRR17520069.9899503  
SRR17520069.9900930  
SRR17520069.9903764  
SRR17520069.9903766



SRR17520069.9903768  
SRR17520069.9903770  
SRR17520069.9903772  
SRR17520069.9903774  
SRR17520069.9903776  
SRR17520069.9903778  
SRR17520069.9903780  
SRR17520069.9903782  
SRR17520069.9903784  
SRR17520069.9903786  
SRR17520069.9903788  
SRR17520069.9903790  
SRR17520069.9903794  
SRR17520069.9903796  
SRR17520069.9903798  
SRR17520069.9903800  
SRR17520069.9903802  
SRR17520069.9903804  
SRR17520069.9903806  
SRR17520069.9903808  
SRR17520069.9903810  
SRR17520069.9903812  
SRR17520069.9903814  
SRR17520069.9903818  
SRR17520069.9903820  
SRR17520069.9903822  
SRR17520069.9903824  
SRR17520069.9903826  
SRR17520069.9903828  
SRR17520069.9905447  
SRR17520069.9905449  
SRR17520069.9905451  
SRR17520069.9905455  
SRR17520069.9905457  
SRR17520069.9905459  
SRR17520069.9905461  
SRR17520069.9905463  
SRR17520069.9905465  
SRR17520069.9905467  
SRR17520069.9905469  
SRR17520069.9905471  
SRR17520069.9905473  
SRR17520069.9905475  
SRR17520069.9905477  
SRR17520069.9905479  
SRR17520069.9905481  
SRR17520069.9905483

SRR17520069.9905487  
SRR17520069.9905491  
SRR17520069.9905493  
SRR17520069.9905495  
SRR17520069.9905497  
SRR17520069.9905499  
SRR17520069.9905501  
SRR17520069.9905503  
SRR17520069.9905505  
SRR17520069.9905507  
SRR17520069.9905511  
SRR17520069.9905515  
SRR17520069.9905517  
SRR17520069.9905519  
SRR17520069.9905521  
SRR17520069.9905523  
SRR17520069.9905525  
SRR17520069.9905527  
SRR17520069.9905529  
SRR17520069.9905531  
SRR17520069.9905533  
SRR17520069.9905535  
SRR17520069.9905537  
SRR17520069.9905539  
SRR17520069.9905541  
SRR17520069.9905543  
SRR17520069.9905545  
SRR17520069.9905547  
SRR17520069.9905549  
SRR17520069.9905551  
SRR17520069.9905553  
SRR17520069.9905555  
SRR17520069.9905557  
SRR17520069.9905559  
SRR17520069.9905561  
SRR17520069.9905565  
SRR17520069.9905567  
SRR17520069.9905569  
SRR17520069.9905571  
SRR17520069.9905573  
SRR17520069.9905575  
SRR17520069.9905577  
SRR17520069.9905579  
SRR17520069.9905581  
SRR17520069.9905583  
SRR17520069.9905585  
SRR17520069.9905587

SRR17520069.9905589  
SRR17520069.9905593  
SRR17520069.9905597  
SRR17520069.9905599  
SRR17520069.9905601  
SRR17520069.9905603  
SRR17520069.9905605  
SRR17520069.9905607  
SRR17520069.9905609  
SRR17520069.9908548  
SRR17520069.9908550  
SRR17520069.9908552  
SRR17520069.9908554  
SRR17520069.9908558  
SRR17520069.9908560  
SRR17520069.9908562  
SRR17520069.9908564  
SRR17520069.9908566  
SRR17520069.9908568  
SRR17520069.9908570  
SRR17520069.9910908  
SRR17520069.9910912  
SRR17520069.9910914  
SRR17520069.9910916  
SRR17520069.9910918  
SRR17520069.9910920  
SRR17520069.9910922  
SRR17520069.9910924  
SRR17520069.9910926  
SRR17520069.9910928  
SRR17520069.9910930  
SRR17520069.9910932  
SRR17520069.9910934  
SRR17520069.9910936  
SRR17520069.9910938  
SRR17520069.9910940  
SRR17520069.9911161  
SRR17520069.9911163  
SRR17520069.9911166  
SRR17520069.9911168  
SRR17520069.9911170  
SRR17520069.9911172  
SRR17520069.9911174  
SRR17520069.9911176  
SRR17520069.9911178  
SRR17520069.9911180  
SRR17520069.9911182

SRR17520069.9911184  
SRR17520069.9911186  
SRR17520069.9911188  
SRR17520069.9911190  
SRR17520069.9914493  
SRR17520069.9914495  
SRR17520069.9914497  
SRR17520069.9914499  
SRR17520069.9914501  
SRR17520069.9914503  
SRR17520069.9917976  
SRR17520069.9917978  
SRR17520069.9917980  
SRR17520069.9919202  
SRR17520069.9919204  
SRR17520069.9919206  
SRR17520069.9919208  
SRR17520069.9919210  
SRR17520069.9919212  
SRR17520069.9922363  
SRR17520069.9922365  
SRR17520069.9922367  
SRR17520069.9922369  
SRR17520069.9922371  
SRR17520069.9922610  
SRR17520069.9922612  
SRR17520069.9922614  
SRR17520069.9922616  
SRR17520069.9922618  
SRR17520069.9922620  
SRR17520069.9922622  
SRR17520069.9922624  
SRR17520069.9922626  
SRR17520069.9922628  
SRR17520069.9922630  
SRR17520069.9922632  
SRR17520069.9922634  
SRR17520069.9922636  
SRR17520069.9922638  
SRR17520069.9922640  
SRR17520069.9922642  
SRR17520069.9922644  
SRR17520069.9922646  
SRR17520069.9922648  
SRR17520069.9922650  
SRR17520069.9922652  
SRR17520069.9922654

SRR17520069.9922656  
SRR17520069.9922658  
SRR17520069.9922660  
SRR17520069.9922662  
SRR17520069.9922664  
SRR17520069.9922666  
SRR17520069.9922668  
SRR17520069.9922670  
SRR17520069.9922672  
SRR17520069.9922674  
SRR17520069.9922676  
SRR17520069.9923602  
SRR17520069.9923604  
SRR17520069.9923606  
SRR17520069.9923608  
SRR17520069.9923610  
SRR17520069.9923612  
SRR17520069.9923614  
SRR17520069.9923616  
SRR17520069.9923618  
SRR17520069.9923620  
SRR17520069.9923622  
SRR17520069.9923624  
SRR17520069.9923626  
SRR17520069.9923628  
SRR17520069.9924940  
SRR17520069.9924944  
SRR17520069.9924946  
SRR17520069.9924948  
SRR17520069.9924950  
SRR17520069.9924952  
SRR17520069.9924954  
SRR17520069.9924956  
SRR17520069.9924958  
SRR17520069.9924960  
SRR17520069.9924962  
SRR17520069.9924964  
SRR17520069.9924966  
SRR17520069.9924968  
SRR17520069.9924970  
SRR17520069.9924972  
SRR17520069.9924974  
SRR17520069.9924976  
SRR17520069.9924978  
SRR17520069.9924980  
SRR17520069.9924982  
SRR17520069.9924984

SRR17520069.9924986  
SRR17520069.9924988  
SRR17520069.9924990  
SRR17520069.9924992  
SRR17520069.9924996  
SRR17520069.9924998  
SRR17520069.9925000  
SRR17520069.9925002  
SRR17520069.9925004  
SRR17520069.9925008  
SRR17520069.9925010  
SRR17520069.9925012  
SRR17520069.9930199  
SRR17520069.9930201  
SRR17520069.9934537  
SRR17520069.9934539  
SRR17520069.9934541  
SRR17520069.9934543  
SRR17520069.9934545  
SRR17520069.9934547  
SRR17520069.9934549  
SRR17520069.9934551  
SRR17520069.9934553  
SRR17520069.9934557  
SRR17520069.9938561  
SRR17520069.9938770  
SRR17520069.9938772  
SRR17520069.9938774  
SRR17520069.9946896  
SRR17520069.9946900  
SRR17520069.9946904  
SRR17520069.9946906  
SRR17520069.9946910  
SRR17520069.9946912  
SRR17520069.9946914  
SRR17520069.9946916  
SRR17520069.9946918  
SRR17520069.9946920  
SRR17520069.9946922  
SRR17520069.9946924  
SRR17520069.9946928  
SRR17520069.9953914  
SRR17520069.9953916  
SRR17520069.9953918  
SRR17520069.9953920  
SRR17520069.9953922  
SRR17520069.9953924

SRR17520069.9953926  
SRR17520069.9953928  
SRR17520069.9953930  
SRR17520069.9953932  
SRR17520069.9953934  
SRR17520069.9953936  
SRR17520069.9953938  
SRR17520069.9953940  
SRR17520069.9953942  
SRR17520069.9953944  
SRR17520069.9958234  
SRR17520069.9958236  
SRR17520069.9958238  
SRR17520069.9958240  
SRR17520069.9958242  
SRR17520069.9958244  
SRR17520069.9958246  
SRR17520069.9958248  
SRR17520069.9958250  
SRR17520069.9958252  
SRR17520069.9958254  
SRR17520069.9958256  
SRR17520069.9958258  
SRR17520069.9958260  
SRR17520069.9958262  
SRR17520069.9958264  
SRR17520069.9958266  
SRR17520069.9958268  
SRR17520069.9958270  
SRR17520069.9958272  
SRR17520069.9958274  
SRR17520069.9958276  
SRR17520069.9958278  
SRR17520069.9958280  
SRR17520069.9958282  
SRR17520069.9959260  
SRR17520069.9959262  
SRR17520069.9959264  
SRR17520069.9959266  
SRR17520069.9959268  
SRR17520069.9959270  
SRR17520069.9959272  
SRR17520069.9959274  
SRR17520069.9959276  
SRR17520069.9971584  
SRR17520069.9971586  
SRR17520069.9971588

SRR17520069. 9971590  
SRR17520069. 9971592  
SRR17520069. 9971594  
SRR17520069. 9971596  
SRR17520069. 9971598  
SRR17520069. 9971600  
SRR17520069. 9971602  
SRR17520069. 9971604  
SRR17520069. 9971606  
SRR17520069. 9971608  
SRR17520069. 9971610  
SRR17520069. 9971751  
SRR17520069. 9971753  
SRR17520069. 9971755  
SRR17520069. 9971757  
SRR17520069. 9971759  
SRR17520069. 9971763  
SRR17520069. 9971765  
SRR17520069. 9971767  
SRR17520069. 9971769  
SRR17520069. 9971771  
SRR17520069. 9971773  
SRR17520069. 9971775  
SRR17520069. 9971777  
SRR17520069. 9971779  
SRR17520069. 9971781  
SRR17520069. 9971783  
SRR17520069. 9971785  
SRR17520069. 9971787  
SRR17520069. 9971789  
SRR17520069. 9971791  
SRR17520069. 9971793  
SRR17520069. 9971795  
SRR17520069. 9980579  
SRR17520069. 9980581  
SRR17520069. 9980583  
SRR17520069. 9980585  
SRR17520069. 9980587  
SRR17520069. 9980589  
SRR17520069. 9980591  
SRR17520069. 9980597  
SRR17520069. 9980599  
SRR17520069. 9980601  
SRR17520069. 9980603  
SRR17520069. 9980605  
SRR17520069. 9980607  
SRR17520069. 9980609



SRR17520069.9980918  
SRR17520069.9980922  
SRR17520069.9980924  
SRR17520069.9980926  
SRR17520069.9980928  
SRR17520069.9980930  
SRR17520069.9980932  
SRR17520069.9980934  
SRR17520069.9980936  
SRR17520069.9980938  
SRR17520069.9980940  
SRR17520069.9980942  
SRR17520069.9980944  
SRR17520069.9980946  
SRR17520069.9980948  
SRR17520069.9980950  
SRR17520069.9982503  
SRR17520069.9982505  
SRR17520069.9982507  
SRR17520069.9982509  
SRR17520069.9982511  
SRR17520069.9982513  
SRR17520069.9982515  
SRR17520069.9982517  
SRR17520069.9982519  
SRR17520069.9982521  
SRR17520069.9982523  
SRR17520069.9982525  
SRR17520069.9982527  
SRR17520069.9982529  
SRR17520069.9982531  
SRR17520069.9982533  
SRR17520069.9982535  
SRR17520069.9982537  
SRR17520069.9982539  
SRR17520069.9982541  
SRR17520069.9982543  
SRR17520069.9982545  
SRR17520069.9982547  
SRR17520069.9982549  
SRR17520069.9982551  
SRR17520069.9982553  
SRR17520069.9982555  
SRR17520069.9982557  
SRR17520069.9982559  
SRR17520069.9982561  
SRR17520069.9982565

SRR17520069.9983978  
SRR17520069.9983980  
SRR17520069.9983984  
SRR17520069.9983988  
SRR17520069.9983990  
SRR17520069.9983992  
SRR17520069.9989511  
SRR17520069.9989513  
SRR17520069.9989515  
SRR17520069.9989517  
SRR17520069.9990381  
SRR17520069.9991307  
SRR17520069.9991309  
SRR17520069.9991311  
SRR17520069.9991313  
SRR17520069.9991315  
SRR17520069.9991317  
SRR17520069.9991323  
SRR17520069.9991325  
SRR17520069.9991327  
SRR17520069.9992006  
SRR17520069.9992008  
SRR17520069.9992010  
SRR17520069.9993813  
SRR17520069.9993815  
SRR17520069.9996797  
SRR17520069.10000909  
SRR17520069.10000911  
SRR17520069.10000913  
SRR17520069.10000915  
SRR17520069.10000919  
SRR17520069.10000921  
SRR17520069.10000923  
SRR17520069.10000925  
SRR17520069.10000927  
SRR17520069.10000929  
SRR17520069.10000931  
SRR17520069.10000935  
SRR17520069.10000939  
SRR17520069.10001807  
SRR17520069.10001809  
SRR17520069.10001811  
SRR17520069.10001813  
SRR17520069.10001815  
SRR17520069.10001817  
SRR17520069.10001819  
SRR17520069.10001821

SRR17520069.10001823  
SRR17520069.10001825  
SRR17520069.10001827  
SRR17520069.10001829  
SRR17520069.10001831  
SRR17520069.10001833  
SRR17520069.10001835  
SRR17520069.10001837  
SRR17520069.10001839  
SRR17520069.10001841  
SRR17520069.10001843  
SRR17520069.10001845  
SRR17520069.10001847  
SRR17520069.10001849  
SRR17520069.10001851  
SRR17520069.10001853  
SRR17520069.10001855  
SRR17520069.10001857  
SRR17520069.10001859  
SRR17520069.10001861  
SRR17520069.10001863  
SRR17520069.10001865  
SRR17520069.10001867  
SRR17520069.10001869  
SRR17520069.10001871  
SRR17520069.10007728  
SRR17520069.10007732  
SRR17520069.10007734  
SRR17520069.10007736  
SRR17520069.10007738  
SRR17520069.10007742  
SRR17520069.10007744  
SRR17520069.10007746  
SRR17520069.10007748  
SRR17520069.10007750  
SRR17520069.10007752  
SRR17520069.10007754  
SRR17520069.10007756  
SRR17520069.10007758  
SRR17520069.10007760  
SRR17520069.10007762  
SRR17520069.10007764  
SRR17520069.10007766  
SRR17520069.10007768  
SRR17520069.10007772  
SRR17520069.10007774  
SRR17520069.10007776

SRR17520069.10007778  
SRR17520069.10007780  
SRR17520069.10007782  
SRR17520069.10007784  
SRR17520069.10007786  
SRR17520069.10008701  
SRR17520069.10008703  
SRR17520069.10008705  
SRR17520069.10008707  
SRR17520069.10008709  
SRR17520069.10008711  
SRR17520069.10008713  
SRR17520069.10008715  
SRR17520069.10008717  
SRR17520069.10008719  
SRR17520069.10008721  
SRR17520069.10009017  
SRR17520069.10011097  
SRR17520069.10011099  
SRR17520069.10011101  
SRR17520069.10011103  
SRR17520069.10011105  
SRR17520069.10011107  
SRR17520069.10011109  
SRR17520069.10011111  
SRR17520069.10011113  
SRR17520069.10011115  
SRR17520069.10011117  
SRR17520069.10011119  
SRR17520069.10017385  
SRR17520069.10017387  
SRR17520069.10017389  
SRR17520069.10017391  
SRR17520069.10017393  
SRR17520069.10017395  
SRR17520069.10017397  
SRR17520069.10017399  
SRR17520069.10017401  
SRR17520069.10017403  
SRR17520069.10017405  
SRR17520069.10017407  
SRR17520069.10017409  
SRR17520069.10017411  
SRR17520069.10017413  
SRR17520069.10017415  
SRR17520069.10017419  
SRR17520069.10017421

SRR17520069.10017423  
SRR17520069.10017425  
SRR17520069.10017427  
SRR17520069.10017429  
SRR17520069.10017433  
SRR17520069.10017435  
SRR17520069.10017437  
SRR17520069.10017439  
SRR17520069.10017441  
SRR17520069.10017443  
SRR17520069.10017445  
SRR17520069.10017447  
SRR17520069.10017451  
SRR17520069.10017453  
SRR17520069.10017455  
SRR17520069.10017457  
SRR17520069.10017459  
SRR17520069.10017461  
SRR17520069.10017463  
SRR17520069.10019080  
SRR17520069.10020862  
SRR17520069.10020864  
SRR17520069.10029979  
SRR17520069.10029981  
SRR17520069.10030178  
SRR17520069.10033013  
SRR17520069.10033015  
SRR17520069.10035227  
SRR17520069.10035229  
SRR17520069.10035231  
SRR17520069.10035233  
SRR17520069.10035235  
SRR17520069.10035237  
SRR17520069.10035239  
SRR17520069.10037513  
SRR17520069.10037517  
SRR17520069.10037521  
SRR17520069.10037523  
SRR17520069.10037525  
SRR17520069.10037527  
SRR17520069.10037529  
SRR17520069.10037531  
SRR17520069.10037533  
SRR17520069.10037535  
SRR17520069.10037537  
SRR17520069.10037539  
SRR17520069.10037541

SRR17520069.10037543  
SRR17520069.10037545  
SRR17520069.10037547  
SRR17520069.10037549  
SRR17520069.10037551  
SRR17520069.10037553  
SRR17520069.10037555  
SRR17520069.10037557  
SRR17520069.10037559  
SRR17520069.10037561  
SRR17520069.10039964  
SRR17520069.10039966  
SRR17520069.10039968  
SRR17520069.10039970  
SRR17520069.10039972  
SRR17520069.10039976  
SRR17520069.10039978  
SRR17520069.10039980  
SRR17520069.10039982  
SRR17520069.10039984  
SRR17520069.10039986  
SRR17520069.10039988  
SRR17520069.10039990  
SRR17520069.10039992  
SRR17520069.10039994  
SRR17520069.10039996  
SRR17520069.10039998  
SRR17520069.10040000  
SRR17520069.10040004  
SRR17520069.10040006  
SRR17520069.10040008  
SRR17520069.10040010  
SRR17520069.10040012  
SRR17520069.10040014  
SRR17520069.10040016  
SRR17520069.10040018  
SRR17520069.10040020  
SRR17520069.10040022  
SRR17520069.10040024  
SRR17520069.10040026  
SRR17520069.10040891  
SRR17520069.10040893  
SRR17520069.10040895  
SRR17520069.10040897  
SRR17520069.10040899  
SRR17520069.10040901  
SRR17520069.10040903

SRR17520069.10040905  
SRR17520069.10040907  
SRR17520069.10040909  
SRR17520069.10040911  
SRR17520069.10040913  
SRR17520069.10041303  
SRR17520069.10041305  
SRR17520069.10041307  
SRR17520069.10041309  
SRR17520069.10041315  
SRR17520069.10041317  
SRR17520069.10041319  
SRR17520069.10041321  
SRR17520069.10041325  
SRR17520069.10041327  
SRR17520069.10041329  
SRR17520069.10041331  
SRR17520069.10041333  
SRR17520069.10041335  
SRR17520069.10041337  
SRR17520069.10042808  
SRR17520069.10049241  
SRR17520069.10049243  
SRR17520069.10050991  
SRR17520069.10051001  
SRR17520069.10051003  
SRR17520069.10051005  
SRR17520069.10051007  
SRR17520069.10051273  
SRR17520069.10053110  
SRR17520069.10053112  
SRR17520069.10053114  
SRR17520069.10053116  
SRR17520069.10053120  
SRR17520069.10053122  
SRR17520069.10053124  
SRR17520069.10053126  
SRR17520069.10053128  
SRR17520069.10053130  
SRR17520069.10053132  
SRR17520069.10053134  
SRR17520069.10053136  
SRR17520069.10053138  
SRR17520069.10053140  
SRR17520069.10053142  
SRR17520069.10053144  
SRR17520069.10053146

SRR17520069.10053148  
SRR17520069.10053492  
SRR17520069.10053494  
SRR17520069.10053496  
SRR17520069.10053498  
SRR17520069.10053500  
SRR17520069.10053502  
SRR17520069.10053504  
SRR17520069.10053506  
SRR17520069.10057208  
SRR17520069.10057210  
SRR17520069.10057212  
SRR17520069.10057214  
SRR17520069.10057216  
SRR17520069.10057218  
SRR17520069.10057220  
SRR17520069.10057222  
SRR17520069.10057224  
SRR17520069.10057226  
SRR17520069.10057228  
SRR17520069.10057230  
SRR17520069.10057232  
SRR17520069.10057234  
SRR17520069.10057236  
SRR17520069.10057238  
SRR17520069.10057240  
SRR17520069.10057242  
SRR17520069.10057246  
SRR17520069.10057248  
SRR17520069.10057250  
SRR17520069.10057252  
SRR17520069.10057254  
SRR17520069.10057256  
SRR17520069.10057258  
SRR17520069.10057260  
SRR17520069.10057262  
SRR17520069.10057264  
SRR17520069.10057266  
SRR17520069.10057268  
SRR17520069.10057270  
SRR17520069.10057272  
SRR17520069.10065736  
SRR17520069.10065738  
SRR17520069.10065740  
SRR17520069.10065742  
SRR17520069.10065744  
SRR17520069.10065746



SRR17520069. 10065748  
SRR17520069. 10067459  
SRR17520069. 10067461  
SRR17520069. 10067463  
SRR17520069. 10067465  
SRR17520069. 10067467  
SRR17520069. 10067579  
SRR17520069. 10067583  
SRR17520069. 10068765  
SRR17520069. 10068767  
SRR17520069. 10068769  
SRR17520069. 10068771  
SRR17520069. 10068773  
SRR17520069. 10068775  
SRR17520069. 10068777  
SRR17520069. 10068779  
SRR17520069. 10068781  
SRR17520069. 10068783  
SRR17520069. 10068785  
SRR17520069. 10071770  
SRR17520069. 10081673  
SRR17520069. 10081675  
SRR17520069. 10081677  
SRR17520069. 10081679  
SRR17520069. 10081681  
SRR17520069. 10081683  
SRR17520069. 10081685  
SRR17520069. 10081687  
SRR17520069. 10081689  
SRR17520069. 10081691  
SRR17520069. 10081693  
SRR17520069. 10081695  
SRR17520069. 10081697  
SRR17520069. 10081826  
SRR17520069. 10081828  
SRR17520069. 10081830  
SRR17520069. 10081832  
SRR17520069. 10081834  
SRR17520069. 10081836  
SRR17520069. 10081838  
SRR17520069. 10081840  
SRR17520069. 10081842  
SRR17520069. 10081844  
SRR17520069. 10081846  
SRR17520069. 10081848  
SRR17520069. 10081850  
SRR17520069. 10081852

SRR17520069.10081854  
SRR17520069.10081856  
SRR17520069.10081858  
SRR17520069.10081860  
SRR17520069.10081862  
SRR17520069.10081864  
SRR17520069.10081866  
SRR17520069.10081868  
SRR17520069.10085488  
SRR17520069.10085490  
SRR17520069.10085492  
SRR17520069.10085494  
SRR17520069.10085498  
SRR17520069.10085500  
SRR17520069.10085502  
SRR17520069.10085504  
SRR17520069.10085506  
SRR17520069.10085508  
SRR17520069.10085510  
SRR17520069.10085512  
SRR17520069.10085514  
SRR17520069.10085516  
SRR17520069.10091208  
SRR17520069.10091210  
SRR17520069.10091212  
SRR17520069.10091214  
SRR17520069.10091216  
SRR17520069.10091218  
SRR17520069.10091220  
SRR17520069.10091222  
SRR17520069.10091224  
SRR17520069.10091226  
SRR17520069.10091228  
SRR17520069.10091230  
SRR17520069.10091232  
SRR17520069.10091234  
SRR17520069.10091236  
SRR17520069.10091238  
SRR17520069.10091240  
SRR17520069.10095066  
SRR17520069.10095068  
SRR17520069.10095070  
SRR17520069.10095072  
SRR17520069.10095074  
SRR17520069.10095076  
SRR17520069.10095078  
SRR17520069.10095080

SRR17520069.10095082  
SRR17520069.10095084  
SRR17520069.10095086  
SRR17520069.10095088  
SRR17520069.10095090  
SRR17520069.10095092  
SRR17520069.10095094  
SRR17520069.10095096  
SRR17520069.10095098  
SRR17520069.10095100  
SRR17520069.10095102  
SRR17520069.10095104  
SRR17520069.10095106  
SRR17520069.10095108  
SRR17520069.10097348  
SRR17520069.10102741  
SRR17520069.10102743  
SRR17520069.10102745  
SRR17520069.10102747  
SRR17520069.10102749  
SRR17520069.10102751  
SRR17520069.10102755  
SRR17520069.10102759  
SRR17520069.10102761  
SRR17520069.10102763  
SRR17520069.10102765  
SRR17520069.10102767  
SRR17520069.10102769  
SRR17520069.10102771  
SRR17520069.10102773  
SRR17520069.10102775  
SRR17520069.10102777  
SRR17520069.10102779  
SRR17520069.10102781  
SRR17520069.10102783  
SRR17520069.10102785  
SRR17520069.10102787  
SRR17520069.10102789  
SRR17520069.10102791  
SRR17520069.10102795  
SRR17520069.10102797  
SRR17520069.10102799  
SRR17520069.10102801  
SRR17520069.10102803  
SRR17520069.10102805  
SRR17520069.10102807  
SRR17520069.10102811

SRR17520069.10102817  
SRR17520069.10102821  
SRR17520069.10102823  
SRR17520069.10102825  
SRR17520069.10102827  
SRR17520069.10102829  
SRR17520069.10102831  
SRR17520069.10102833  
SRR17520069.10104928  
SRR17520069.10104930  
SRR17520069.10104932  
SRR17520069.10104934  
SRR17520069.10104936  
SRR17520069.10111495  
SRR17520069.10111497  
SRR17520069.10111499  
SRR17520069.10111501  
SRR17520069.10111503  
SRR17520069.10111505  
SRR17520069.10111507  
SRR17520069.10111509  
SRR17520069.10111511  
SRR17520069.10111513  
SRR17520069.10111515  
SRR17520069.10111517  
SRR17520069.10111519  
SRR17520069.10111521  
SRR17520069.10112116  
SRR17520069.10113879  
SRR17520069.10113881  
SRR17520069.10113883  
SRR17520069.10113885  
SRR17520069.10113887  
SRR17520069.10113889  
SRR17520069.10113891  
SRR17520069.10113893  
SRR17520069.10113895  
SRR17520069.10113897  
SRR17520069.10113899  
SRR17520069.10113901  
SRR17520069.10113903  
SRR17520069.10113905  
SRR17520069.10113907  
SRR17520069.10113909  
SRR17520069.10113911  
SRR17520069.10113913  
SRR17520069.10113915

SRR17520069.10113917  
SRR17520069.10113919  
SRR17520069.10113921  
SRR17520069.10113925  
SRR17520069.10113927  
SRR17520069.10113929  
SRR17520069.10113931  
SRR17520069.10113933  
SRR17520069.10113935  
SRR17520069.10113937  
SRR17520069.10113939  
SRR17520069.10113941  
SRR17520069.10113943  
SRR17520069.10113945  
SRR17520069.10113947  
SRR17520069.10113949  
SRR17520069.10113951  
SRR17520069.10113953  
SRR17520069.10113955  
SRR17520069.10113957  
SRR17520069.10113959  
SRR17520069.10113961  
SRR17520069.10113963  
SRR17520069.10113965  
SRR17520069.10113967  
SRR17520069.10113969  
SRR17520069.10113971  
SRR17520069.10113973  
SRR17520069.10113975  
SRR17520069.10113977  
SRR17520069.10113979  
SRR17520069.10113981  
SRR17520069.10113983  
SRR17520069.10113985  
SRR17520069.10113987  
SRR17520069.10113989  
SRR17520069.10113991  
SRR17520069.10113993  
SRR17520069.10113995  
SRR17520069.10113997  
SRR17520069.10113999  
SRR17520069.10114001  
SRR17520069.10114003  
SRR17520069.10114005  
SRR17520069.10114007  
SRR17520069.10114009  
SRR17520069.10114011

SRR17520069.10114013  
SRR17520069.10114015  
SRR17520069.10114017  
SRR17520069.10114019  
SRR17520069.10114021  
SRR17520069.10114023  
SRR17520069.10114025  
SRR17520069.10114027  
SRR17520069.10114029  
SRR17520069.10114031  
SRR17520069.10114033  
SRR17520069.10114035  
SRR17520069.10116993  
SRR17520069.10116995  
SRR17520069.10116997  
SRR17520069.10117079  
SRR17520069.10117081  
SRR17520069.10117083  
SRR17520069.10120689  
SRR17520069.10120691  
SRR17520069.10124077  
SRR17520069.10124079  
SRR17520069.10124081  
SRR17520069.10124083  
SRR17520069.10124085  
SRR17520069.10124087  
SRR17520069.10124089  
SRR17520069.10124091  
SRR17520069.10124093  
SRR17520069.10124095  
SRR17520069.10124097  
SRR17520069.10124099  
SRR17520069.10124101  
SRR17520069.10124103  
SRR17520069.10124105  
SRR17520069.10124107  
SRR17520069.10124109  
SRR17520069.10124111  
SRR17520069.10124113  
SRR17520069.10124115  
SRR17520069.10124117  
SRR17520069.10124119  
SRR17520069.10124121  
SRR17520069.10124123  
SRR17520069.10124125  
SRR17520069.10124127  
SRR17520069.10124129

SRR17520069.10124131  
SRR17520069.10124133  
SRR17520069.10124135  
SRR17520069.10124137  
SRR17520069.10124139  
SRR17520069.10124141  
SRR17520069.10124143  
SRR17520069.10124145  
SRR17520069.10124147  
SRR17520069.10124149  
SRR17520069.10124151  
SRR17520069.10124153  
SRR17520069.10124155  
SRR17520069.10124157  
SRR17520069.10124159  
SRR17520069.10124161  
SRR17520069.10124163  
SRR17520069.10124165  
SRR17520069.10124167  
SRR17520069.10124169  
SRR17520069.10124171  
SRR17520069.10124173  
SRR17520069.10124175  
SRR17520069.10124177  
SRR17520069.10124179  
SRR17520069.10124181  
SRR17520069.10124183  
SRR17520069.10124185  
SRR17520069.10124187  
SRR17520069.10124189  
SRR17520069.10124191  
SRR17520069.10124193  
SRR17520069.10124195  
SRR17520069.10124197  
SRR17520069.10124199  
SRR17520069.10124201  
SRR17520069.10124203  
SRR17520069.10124205  
SRR17520069.10128156  
SRR17520069.10128158  
SRR17520069.10128160  
SRR17520069.10128162  
SRR17520069.10128164  
SRR17520069.10128166  
SRR17520069.10128168  
SRR17520069.10128170  
SRR17520069.10128172

SRR17520069.10128174  
SRR17520069.10128176  
SRR17520069.10128178  
SRR17520069.10128180  
SRR17520069.10128182  
SRR17520069.10128184  
SRR17520069.10128186  
SRR17520069.10128188  
SRR17520069.10128190  
SRR17520069.10128192  
SRR17520069.10128194  
SRR17520069.10128196  
SRR17520069.10128198  
SRR17520069.10128200  
SRR17520069.10128202  
SRR17520069.10128204  
SRR17520069.10128490  
SRR17520069.10128492  
SRR17520069.10128498  
SRR17520069.10128500  
SRR17520069.10128502  
SRR17520069.10128506  
SRR17520069.10128510  
SRR17520069.10128512  
SRR17520069.10128514  
SRR17520069.10128516  
SRR17520069.10128518  
SRR17520069.10128961  
SRR17520069.10128967  
SRR17520069.10128969  
SRR17520069.10128973  
SRR17520069.10128977  
SRR17520069.10128979  
SRR17520069.10128981  
SRR17520069.10128987  
SRR17520069.10128991  
SRR17520069.10128993  
SRR17520069.10128995  
SRR17520069.10141683  
SRR17520069.10141685  
SRR17520069.10142793  
SRR17520069.10142795  
SRR17520069.10142797  
SRR17520069.10142799  
SRR17520069.10142801  
SRR17520069.10142803  
SRR17520069.10142805



SRR17520069.10142807  
SRR17520069.10142809  
SRR17520069.10142813  
SRR17520069.10142815  
SRR17520069.10142817  
SRR17520069.10142819  
SRR17520069.10142821  
SRR17520069.10142823  
SRR17520069.10142825  
SRR17520069.10142827  
SRR17520069.10142829  
SRR17520069.10142831  
SRR17520069.10142833  
SRR17520069.10142835  
SRR17520069.10142837  
SRR17520069.10142839  
SRR17520069.10142841  
SRR17520069.10142843  
SRR17520069.10142845  
SRR17520069.10142847  
SRR17520069.10142849  
SRR17520069.10142851  
SRR17520069.10142855  
SRR17520069.10142857  
SRR17520069.10142859  
SRR17520069.10142863  
SRR17520069.10142865  
SRR17520069.10142867  
SRR17520069.10142869  
SRR17520069.10142871  
SRR17520069.10142873  
SRR17520069.10142875  
SRR17520069.10142877  
SRR17520069.10142879  
SRR17520069.10142881  
SRR17520069.10142883  
SRR17520069.10142885  
SRR17520069.10142887  
SRR17520069.10142889  
SRR17520069.10142891  
SRR17520069.10142893  
SRR17520069.10142895  
SRR17520069.10142897  
SRR17520069.10142899  
SRR17520069.10148111  
SRR17520069.10151697  
SRR17520069.10154852

SRR17520069.10154861  
SRR17520069.10154863  
SRR17520069.10154867  
SRR17520069.10154874  
SRR17520069.10154876  
SRR17520069.10154878  
SRR17520069.10154884  
SRR17520069.10154886  
SRR17520069.10154892  
SRR17520069.10154894  
SRR17520069.10154896  
SRR17520069.10154898  
SRR17520069.10154900  
SRR17520069.10154902  
SRR17520069.10154904  
SRR17520069.10154906  
SRR17520069.10154908  
SRR17520069.10154910  
SRR17520069.10154912  
SRR17520069.10154914  
SRR17520069.10154916  
SRR17520069.10154918  
SRR17520069.10154920  
SRR17520069.10154922  
SRR17520069.10154924  
SRR17520069.10154926  
SRR17520069.10154928  
SRR17520069.10154930  
SRR17520069.10154932  
SRR17520069.10154934  
SRR17520069.10154936  
SRR17520069.10154938  
SRR17520069.10154940  
SRR17520069.10154942  
SRR17520069.10154944  
SRR17520069.10154946  
SRR17520069.10154948  
SRR17520069.10154950  
SRR17520069.10154952  
SRR17520069.10154954  
SRR17520069.10154958  
SRR17520069.10154960  
SRR17520069.10154962  
SRR17520069.10154964  
SRR17520069.10154966  
SRR17520069.10154970  
SRR17520069.10154972

SRR17520069.10154974  
SRR17520069.10154976  
SRR17520069.10154978  
SRR17520069.10154980  
SRR17520069.10154982  
SRR17520069.10154984  
SRR17520069.10154986  
SRR17520069.10155028  
SRR17520069.10155030  
SRR17520069.10155032  
SRR17520069.10155034  
SRR17520069.10155036  
SRR17520069.10155038  
SRR17520069.10155040  
SRR17520069.10155042  
SRR17520069.10155044  
SRR17520069.10156021  
SRR17520069.10156025  
SRR17520069.10156027  
SRR17520069.10156029  
SRR17520069.10156031  
SRR17520069.10156033  
SRR17520069.10156035  
SRR17520069.10156037  
SRR17520069.10160466  
SRR17520069.10160468  
SRR17520069.10160470  
SRR17520069.10160472  
SRR17520069.10160474  
SRR17520069.10160476  
SRR17520069.10160478  
SRR17520069.10160480  
SRR17520069.10160482  
SRR17520069.10160484  
SRR17520069.10160486  
SRR17520069.10160488  
SRR17520069.10160490  
SRR17520069.10160492  
SRR17520069.10160494  
SRR17520069.10160496  
SRR17520069.10160498  
SRR17520069.10160500  
SRR17520069.10160502  
SRR17520069.10160504  
SRR17520069.10160506  
SRR17520069.10160508  
SRR17520069.10160510

SRR17520069.10160512  
SRR17520069.10160514  
SRR17520069.10160516  
SRR17520069.10160518  
SRR17520069.10160520  
SRR17520069.10160522  
SRR17520069.10160524  
SRR17520069.10160526  
SRR17520069.10160528  
SRR17520069.10160530  
SRR17520069.10160532  
SRR17520069.10160534  
SRR17520069.10160536  
SRR17520069.10160538  
SRR17520069.10160540  
SRR17520069.10160542  
SRR17520069.10160544  
SRR17520069.10160546  
SRR17520069.10160548  
SRR17520069.10160550  
SRR17520069.10160552  
SRR17520069.10160554  
SRR17520069.10160556  
SRR17520069.10160558  
SRR17520069.10160560  
SRR17520069.10160562  
SRR17520069.10160564  
SRR17520069.10160566  
SRR17520069.10160568  
SRR17520069.10160570  
SRR17520069.10160572  
SRR17520069.10160574  
SRR17520069.10160576  
SRR17520069.10160578  
SRR17520069.10160580  
SRR17520069.10160582  
SRR17520069.10160584  
SRR17520069.10160586  
SRR17520069.10160588  
SRR17520069.10160590  
SRR17520069.10160592  
SRR17520069.10160594  
SRR17520069.10160596  
SRR17520069.10160598  
SRR17520069.10160600  
SRR17520069.10160604  
SRR17520069.10160606

SRR17520069.10160608  
SRR17520069.10160610  
SRR17520069.10160612  
SRR17520069.10160614  
SRR17520069.10160616  
SRR17520069.10160618  
SRR17520069.10160620  
SRR17520069.10160624  
SRR17520069.10160626  
SRR17520069.10161472  
SRR17520069.10161474  
SRR17520069.10161668  
SRR17520069.10166392  
SRR17520069.10166394  
SRR17520069.10166396  
SRR17520069.10166398  
SRR17520069.10178766  
SRR17520069.10178770  
SRR17520069.10182005  
SRR17520069.10182465  
SRR17520069.10189176  
SRR17520069.10189178  
SRR17520069.10189180  
SRR17520069.10189182  
SRR17520069.10189184  
SRR17520069.10189186  
SRR17520069.10189188  
SRR17520069.10189190  
SRR17520069.10189192  
SRR17520069.10189194  
SRR17520069.10189196  
SRR17520069.10189198  
SRR17520069.10189200  
SRR17520069.10189202  
SRR17520069.10189204  
SRR17520069.10189206  
SRR17520069.10189208  
SRR17520069.10199031  
SRR17520069.10199035  
SRR17520069.10199037  
SRR17520069.10199039  
SRR17520069.10199041  
SRR17520069.10199045  
SRR17520069.10199047  
SRR17520069.10199998  
SRR17520069.10200000  
SRR17520069.10200002

SRR17520069.10200004  
SRR17520069.10200006  
SRR17520069.10200008  
SRR17520069.10200010  
SRR17520069.10200012  
SRR17520069.10200014  
SRR17520069.10200098  
SRR17520069.10200100  
SRR17520069.10200110  
SRR17520069.10200112  
SRR17520069.10200114  
SRR17520069.10200118  
SRR17520069.10203378  
SRR17520069.10203380  
SRR17520069.10203382  
SRR17520069.10203386  
SRR17520069.10203388  
SRR17520069.10203390  
SRR17520069.10203392  
SRR17520069.10203396  
SRR17520069.10203398  
SRR17520069.10203402  
SRR17520069.10203404  
SRR17520069.10203406  
SRR17520069.10203408  
SRR17520069.10203410  
SRR17520069.10203412  
SRR17520069.10203414  
SRR17520069.10203416  
SRR17520069.10203418  
SRR17520069.10203420  
SRR17520069.10203422  
SRR17520069.10203424  
SRR17520069.10203426  
SRR17520069.10203428  
SRR17520069.10203430  
SRR17520069.10203432  
SRR17520069.10203436  
SRR17520069.10203438  
SRR17520069.10203440  
SRR17520069.10203442  
SRR17520069.10203444  
SRR17520069.10203446  
SRR17520069.10203450  
SRR17520069.10203452  
SRR17520069.10203454  
SRR17520069.10203456

SRR17520069. 10203458  
SRR17520069. 10203460  
SRR17520069. 10203462  
SRR17520069. 10203464  
SRR17520069. 10203466  
SRR17520069. 10203468  
SRR17520069. 10203470  
SRR17520069. 10203472  
SRR17520069. 10203476  
SRR17520069. 10203478  
SRR17520069. 10203480  
SRR17520069. 10203482  
SRR17520069. 10203484  
SRR17520069. 10203486  
SRR17520069. 10203488  
SRR17520069. 10203490  
SRR17520069. 10203492  
SRR17520069. 10203494  
SRR17520069. 10203496  
SRR17520069. 10203498  
SRR17520069. 10203500  
SRR17520069. 10203502  
SRR17520069. 10203504  
SRR17520069. 10203506  
SRR17520069. 10203508  
SRR17520069. 10203510  
SRR17520069. 10203514  
SRR17520069. 10203516  
SRR17520069. 10203518  
SRR17520069. 10203520  
SRR17520069. 10203522  
SRR17520069. 10203524  
SRR17520069. 10203526  
SRR17520069. 10203528  
SRR17520069. 10203530  
SRR17520069. 10203532  
SRR17520069. 10203534  
SRR17520069. 10203536  
SRR17520069. 10203538  
SRR17520069. 10203540  
SRR17520069. 10203544  
SRR17520069. 10203546  
SRR17520069. 10203548  
SRR17520069. 10203550  
SRR17520069. 10203552  
SRR17520069. 10203554  
SRR17520069. 10203556

SRR17520069.10203558  
SRR17520069.10203560  
SRR17520069.10203562  
SRR17520069.10203564  
SRR17520069.10203566  
SRR17520069.10208484  
SRR17520069.10208486  
SRR17520069.10208488  
SRR17520069.10208490  
SRR17520069.10208492  
SRR17520069.10208494  
SRR17520069.10208496  
SRR17520069.10208498  
SRR17520069.10208500  
SRR17520069.10208502  
SRR17520069.10208504  
SRR17520069.10208506  
SRR17520069.10208508  
SRR17520069.10208510  
SRR17520069.10208512  
SRR17520069.10208514  
SRR17520069.10208516  
SRR17520069.10208518  
SRR17520069.10208520  
SRR17520069.10208522  
SRR17520069.10208524  
SRR17520069.10208526  
SRR17520069.10208528  
SRR17520069.10208530  
SRR17520069.10208532  
SRR17520069.10208534  
SRR17520069.10208536  
SRR17520069.10208538  
SRR17520069.10208718  
SRR17520069.10208720  
SRR17520069.10208722  
SRR17520069.10208724  
SRR17520069.10208726  
SRR17520069.10208728  
SRR17520069.10208730  
SRR17520069.10208732  
SRR17520069.10208734  
SRR17520069.10208736  
SRR17520069.10208738  
SRR17520069.10208740  
SRR17520069.10208746  
SRR17520069.10208748



SRR17520069.10208750  
SRR17520069.10208752  
SRR17520069.10208754  
SRR17520069.10208756  
SRR17520069.10208758  
SRR17520069.10208760  
SRR17520069.10208762  
SRR17520069.10208764  
SRR17520069.10208766  
SRR17520069.10208768  
SRR17520069.10208770  
SRR17520069.10209738  
SRR17520069.10209740  
SRR17520069.10209742  
SRR17520069.10220455  
SRR17520069.10220457  
SRR17520069.10220459  
SRR17520069.10220461  
SRR17520069.10220463  
SRR17520069.10220465  
SRR17520069.10220467  
SRR17520069.10220913  
SRR17520069.10220915  
SRR17520069.10220917  
SRR17520069.10220921  
SRR17520069.10220923  
SRR17520069.10220925  
SRR17520069.10220927  
SRR17520069.10220929  
SRR17520069.10220931  
SRR17520069.10231961  
SRR17520069.10235669  
SRR17520069.10235671  
SRR17520069.10235673  
SRR17520069.10235675  
SRR17520069.10235677  
SRR17520069.10235679  
SRR17520069.10235681  
SRR17520069.10235683  
SRR17520069.10235685  
SRR17520069.10235687  
SRR17520069.10235689  
SRR17520069.10235691  
SRR17520069.10235693  
SRR17520069.10235695  
SRR17520069.10235697  
SRR17520069.10235699

SRR17520069.10235701  
SRR17520069.10241498  
SRR17520069.10241500  
SRR17520069.10241502  
SRR17520069.10241504  
SRR17520069.10245372  
SRR17520069.10245374  
SRR17520069.10245376  
SRR17520069.10245378  
SRR17520069.10245380  
SRR17520069.10245382  
SRR17520069.10245384  
SRR17520069.10245386  
SRR17520069.10245388  
SRR17520069.10245390  
SRR17520069.10245392  
SRR17520069.10245394  
SRR17520069.10245396  
SRR17520069.10245398  
SRR17520069.10245400  
SRR17520069.10245402  
SRR17520069.10245404  
SRR17520069.10245406  
SRR17520069.10245408  
SRR17520069.10245410  
SRR17520069.10245412  
SRR17520069.10245414  
SRR17520069.10248393  
SRR17520069.10248395  
SRR17520069.10248397  
SRR17520069.10248399  
SRR17520069.10248401  
SRR17520069.10248403  
SRR17520069.10248405  
SRR17520069.10248407  
SRR17520069.10248409  
SRR17520069.10248411  
SRR17520069.10248413  
SRR17520069.10248415  
SRR17520069.10248417  
SRR17520069.10248419  
SRR17520069.10248421  
SRR17520069.10248425  
SRR17520069.10248427  
SRR17520069.10248429  
SRR17520069.10248431  
SRR17520069.10248433

SRR17520069.10248435  
SRR17520069.10248437  
SRR17520069.10248439  
SRR17520069.10248441  
SRR17520069.10248443  
SRR17520069.10248445  
SRR17520069.10248447  
SRR17520069.10248449  
SRR17520069.10248451  
SRR17520069.10248453  
SRR17520069.10248455  
SRR17520069.10248457  
SRR17520069.10248461  
SRR17520069.10248463  
SRR17520069.10248465  
SRR17520069.10248467  
SRR17520069.10248469  
SRR17520069.10248471  
SRR17520069.10248473  
SRR17520069.10256902  
SRR17520069.10256904  
SRR17520069.10256908  
SRR17520069.10256910  
SRR17520069.10256912  
SRR17520069.10257809  
SRR17520069.10257811  
SRR17520069.10257813  
SRR17520069.10257815  
SRR17520069.10257817  
SRR17520069.10257819  
SRR17520069.10257821  
SRR17520069.10257823  
SRR17520069.10257829  
SRR17520069.10257831  
SRR17520069.10257835  
SRR17520069.10257837  
SRR17520069.10257839  
SRR17520069.10257841  
SRR17520069.10257843  
SRR17520069.10266163  
SRR17520069.10266165  
SRR17520069.10266167  
SRR17520069.10266169  
SRR17520069.10266171  
SRR17520069.10266173  
SRR17520069.10266175  
SRR17520069.10266177

SRR17520069.10266179  
SRR17520069.10266181  
SRR17520069.10266183  
SRR17520069.10266185  
SRR17520069.10266187  
SRR17520069.10266189  
SRR17520069.10266191  
SRR17520069.10266193  
SRR17520069.10266195  
SRR17520069.10266197  
SRR17520069.10266201  
SRR17520069.10266203  
SRR17520069.10266205  
SRR17520069.10266207  
SRR17520069.10266209  
SRR17520069.10266211  
SRR17520069.10266213  
SRR17520069.10266215  
SRR17520069.10266217  
SRR17520069.10266219  
SRR17520069.10266221  
SRR17520069.10266223  
SRR17520069.10266225  
SRR17520069.10266227  
SRR17520069.10266229  
SRR17520069.10266231  
SRR17520069.10266233  
SRR17520069.10266235  
SRR17520069.10266237  
SRR17520069.10266239  
SRR17520069.10266241  
SRR17520069.10266243  
SRR17520069.10266245  
SRR17520069.10266247  
SRR17520069.10266249  
SRR17520069.10266251  
SRR17520069.10266255  
SRR17520069.10266257  
SRR17520069.10267045  
SRR17520069.10269268  
SRR17520069.10271785  
SRR17520069.10271819  
SRR17520069.10271821  
SRR17520069.10271823  
SRR17520069.10271825  
SRR17520069.10271827  
SRR17520069.10271829

SRR17520069.10271831  
SRR17520069.10271833  
SRR17520069.10271835  
SRR17520069.10275681  
SRR17520069.10275683  
SRR17520069.10275685  
SRR17520069.10275687  
SRR17520069.10275689  
SRR17520069.10275691  
SRR17520069.10275693  
SRR17520069.10275695  
SRR17520069.10275697  
SRR17520069.10275699  
SRR17520069.10275701  
SRR17520069.10275703  
SRR17520069.10275705  
SRR17520069.10275709  
SRR17520069.10275713  
SRR17520069.10275715  
SRR17520069.10275717  
SRR17520069.10275719  
SRR17520069.10275721  
SRR17520069.10275725  
SRR17520069.10275729  
SRR17520069.10275733  
SRR17520069.10275741  
SRR17520069.10290393  
SRR17520069.10290395  
SRR17520069.10290397  
SRR17520069.10290399  
SRR17520069.10290404  
SRR17520069.10290406  
SRR17520069.10290408  
SRR17520069.10290410  
SRR17520069.10290412  
SRR17520069.10290414  
SRR17520069.10290416  
SRR17520069.10290418  
SRR17520069.10290420  
SRR17520069.10290422  
SRR17520069.10290426  
SRR17520069.10290428  
SRR17520069.10290430  
SRR17520069.10290432  
SRR17520069.10290434  
SRR17520069.10290436  
SRR17520069.10290438

SRR17520069. 10290440  
SRR17520069. 10290442  
SRR17520069. 10290444  
SRR17520069. 10290446  
SRR17520069. 10290448  
SRR17520069. 10290450  
SRR17520069. 10290452  
SRR17520069. 10290454  
SRR17520069. 10290456  
SRR17520069. 10290458  
SRR17520069. 10290460  
SRR17520069. 10290464  
SRR17520069. 10290466  
SRR17520069. 10290468  
SRR17520069. 10290470  
SRR17520069. 10290472  
SRR17520069. 10290474  
SRR17520069. 10290476  
SRR17520069. 10290478  
SRR17520069. 10290480  
SRR17520069. 10290482  
SRR17520069. 10290484  
SRR17520069. 10290486  
SRR17520069. 10290488  
SRR17520069. 10290490  
SRR17520069. 10290492  
SRR17520069. 10290494  
SRR17520069. 10290496  
SRR17520069. 10290498  
SRR17520069. 10290500  
SRR17520069. 10290502  
SRR17520069. 10290504  
SRR17520069. 10290506  
SRR17520069. 10290508  
SRR17520069. 10290510  
SRR17520069. 10290512  
SRR17520069. 10290514  
SRR17520069. 10290516  
SRR17520069. 10290518  
SRR17520069. 10290520  
SRR17520069. 10290522  
SRR17520069. 10290524  
SRR17520069. 10290526  
SRR17520069. 10290530  
SRR17520069. 10290532  
SRR17520069. 10290534  
SRR17520069. 10290536

SRR17520069. 10290538  
SRR17520069. 10290540  
SRR17520069. 10290542  
SRR17520069. 10290544  
SRR17520069. 10290546  
SRR17520069. 10290548  
SRR17520069. 10290550  
SRR17520069. 10290552  
SRR17520069. 10290554  
SRR17520069. 10290556  
SRR17520069. 10290558  
SRR17520069. 10290560  
SRR17520069. 10290562  
SRR17520069. 10290564  
SRR17520069. 10290566  
SRR17520069. 10290568  
SRR17520069. 10290570  
SRR17520069. 10290572  
SRR17520069. 10290574  
SRR17520069. 10290576  
SRR17520069. 10290884  
SRR17520069. 10290886  
SRR17520069. 10290888  
SRR17520069. 10290890  
SRR17520069. 10290892  
SRR17520069. 10290894  
SRR17520069. 10290896  
SRR17520069. 10290898  
SRR17520069. 10290900  
SRR17520069. 10290902  
SRR17520069. 10290904  
SRR17520069. 10290906  
SRR17520069. 10290908  
SRR17520069. 10293141  
SRR17520069. 10293143  
SRR17520069. 10293145  
SRR17520069. 10294128  
SRR17520069. 10294130  
SRR17520069. 10294132  
SRR17520069. 10294134  
SRR17520069. 10294136  
SRR17520069. 10294138  
SRR17520069. 10294140  
SRR17520069. 10294142  
SRR17520069. 10294144  
SRR17520069. 10294146  
SRR17520069. 10294148

SRR17520069. 10294150  
SRR17520069. 10294152  
SRR17520069. 10299824  
SRR17520069. 10299826  
SRR17520069. 10299828  
SRR17520069. 10299830  
SRR17520069. 10299832  
SRR17520069. 10299834  
SRR17520069. 10299836  
SRR17520069. 10299838  
SRR17520069. 10299840  
SRR17520069. 10299842  
SRR17520069. 10299844  
SRR17520069. 10299846  
SRR17520069. 10299848  
SRR17520069. 10299850  
SRR17520069. 10299852  
SRR17520069. 10299854  
SRR17520069. 10299856  
SRR17520069. 10299858  
SRR17520069. 10299875  
SRR17520069. 10299877  
SRR17520069. 10299879  
SRR17520069. 10299881  
SRR17520069. 10299883  
SRR17520069. 10299885  
SRR17520069. 10299887  
SRR17520069. 10299889  
SRR17520069. 10299891  
SRR17520069. 10299893  
SRR17520069. 10299895  
SRR17520069. 10299897  
SRR17520069. 10299899  
SRR17520069. 10299901  
SRR17520069. 10299903  
SRR17520069. 10304194  
SRR17520069. 10304196  
SRR17520069. 10304198  
SRR17520069. 10304200  
SRR17520069. 10304202  
SRR17520069. 10304204  
SRR17520069. 10304210  
SRR17520069. 10304212  
SRR17520069. 10304214  
SRR17520069. 10305264  
SRR17520069. 10305266  
SRR17520069. 10305268



SRR17520069.10305270  
SRR17520069.10305272  
SRR17520069.10305274  
SRR17520069.10305276  
SRR17520069.10305278  
SRR17520069.10305280  
SRR17520069.10305282  
SRR17520069.10305284  
SRR17520069.10305969  
SRR17520069.10305971  
SRR17520069.10305973  
SRR17520069.10305975  
SRR17520069.10305979  
SRR17520069.10305981  
SRR17520069.10305983  
SRR17520069.10305987  
SRR17520069.10305989  
SRR17520069.10305991  
SRR17520069.10305993  
SRR17520069.10305995  
SRR17520069.10305997  
SRR17520069.10305999  
SRR17520069.10314408  
SRR17520069.10314410  
SRR17520069.10314412  
SRR17520069.10314416  
SRR17520069.10314420  
SRR17520069.10314422  
SRR17520069.10314424  
SRR17520069.10314426  
SRR17520069.10315355  
SRR17520069.10315357  
SRR17520069.10315359  
SRR17520069.10315363  
SRR17520069.10315365  
SRR17520069.10315367  
SRR17520069.10315369  
SRR17520069.10315371  
SRR17520069.10315373  
SRR17520069.10316728  
SRR17520069.10316730  
SRR17520069.10316732  
SRR17520069.10316734  
SRR17520069.10316736  
SRR17520069.10316738  
SRR17520069.10316740  
SRR17520069.10316742

SRR17520069. 10316744  
SRR17520069. 10316746  
SRR17520069. 10316748  
SRR17520069. 10316750  
SRR17520069. 10316754  
SRR17520069. 10316756  
SRR17520069. 10316758  
SRR17520069. 10316760  
SRR17520069. 10316762  
SRR17520069. 10316764  
SRR17520069. 10316766  
SRR17520069. 10316768  
SRR17520069. 10316770  
SRR17520069. 10316772  
SRR17520069. 10316774  
SRR17520069. 10316776  
SRR17520069. 10316778  
SRR17520069. 10316780  
SRR17520069. 10317653  
SRR17520069. 10317655  
SRR17520069. 10317657  
SRR17520069. 10317659  
SRR17520069. 10317661  
SRR17520069. 10317663  
SRR17520069. 10317667  
SRR17520069. 10317669  
SRR17520069. 10317671  
SRR17520069. 10317673  
SRR17520069. 10317675  
SRR17520069. 10317677  
SRR17520069. 10317679  
SRR17520069. 10317681  
SRR17520069. 10317683  
SRR17520069. 10317685  
SRR17520069. 10317689  
SRR17520069. 10317691  
SRR17520069. 10317693  
SRR17520069. 10327151  
SRR17520069. 10327153  
SRR17520069. 10327155  
SRR17520069. 10327157  
SRR17520069. 10327159  
SRR17520069. 10327161  
SRR17520069. 10327163  
SRR17520069. 10327165  
SRR17520069. 10327169  
SRR17520069. 10327171

SRR17520069.10327173  
SRR17520069.10327175  
SRR17520069.10327177  
SRR17520069.10327179  
SRR17520069.10327181  
SRR17520069.10327183  
SRR17520069.10334263  
SRR17520069.10334265  
SRR17520069.10334267  
SRR17520069.10334269  
SRR17520069.10334271  
SRR17520069.10334273  
SRR17520069.10334275  
SRR17520069.10334277  
SRR17520069.10334279  
SRR17520069.10336191  
SRR17520069.10336261  
SRR17520069.10336272  
SRR17520069.10337331  
SRR17520069.10337333  
SRR17520069.10337335  
SRR17520069.10337337  
SRR17520069.10337339  
SRR17520069.10337341  
SRR17520069.10337343  
SRR17520069.10337345  
SRR17520069.10337347  
SRR17520069.10337349  
SRR17520069.10337351  
SRR17520069.10337353  
SRR17520069.10337355  
SRR17520069.10337359  
SRR17520069.10337361  
SRR17520069.10337363  
SRR17520069.10337365  
SRR17520069.10337367  
SRR17520069.10337369  
SRR17520069.10337371  
SRR17520069.10337373  
SRR17520069.10337375  
SRR17520069.10337377  
SRR17520069.10337379  
SRR17520069.10337381  
SRR17520069.10337383  
SRR17520069.10337385  
SRR17520069.10337387  
SRR17520069.10337389

SRR17520069. 10337391  
SRR17520069. 10337395  
SRR17520069. 10337397  
SRR17520069. 10337399  
SRR17520069. 10337401  
SRR17520069. 10337403  
SRR17520069. 10337405  
SRR17520069. 10337407  
SRR17520069. 10337409  
SRR17520069. 10337413  
SRR17520069. 10337415  
SRR17520069. 10337417  
SRR17520069. 10337419  
SRR17520069. 10337421  
SRR17520069. 10339160  
SRR17520069. 10339162  
SRR17520069. 10340103  
SRR17520069. 10341247  
SRR17520069. 10341249  
SRR17520069. 10341251  
SRR17520069. 10341253  
SRR17520069. 10341255  
SRR17520069. 10341257  
SRR17520069. 10341259  
SRR17520069. 10341261  
SRR17520069. 10341263  
SRR17520069. 10341265  
SRR17520069. 10341267  
SRR17520069. 10341269  
SRR17520069. 10344940  
SRR17520069. 10344942  
SRR17520069. 10344944  
SRR17520069. 10344946  
SRR17520069. 10344948  
SRR17520069. 10344950  
SRR17520069. 10344952  
SRR17520069. 10344954  
SRR17520069. 10344956  
SRR17520069. 10344958  
SRR17520069. 10344960  
SRR17520069. 10344962  
SRR17520069. 10348493  
SRR17520069. 10348495  
SRR17520069. 10348497  
SRR17520069. 10348499  
SRR17520069. 10348501  
SRR17520069. 10348503

SRR17520069.10348505  
SRR17520069.10348507  
SRR17520069.10348509  
SRR17520069.10348511  
SRR17520069.10348513  
SRR17520069.10348515  
SRR17520069.10348519  
SRR17520069.10348521  
SRR17520069.10348523  
SRR17520069.10348525  
SRR17520069.10348527  
SRR17520069.10348531  
SRR17520069.10348533  
SRR17520069.10348535  
SRR17520069.10348537  
SRR17520069.10348558  
SRR17520069.10348560  
SRR17520069.10348562  
SRR17520069.10348564  
SRR17520069.10348566  
SRR17520069.10348568  
SRR17520069.10348570  
SRR17520069.10348572  
SRR17520069.10348574  
SRR17520069.10348576  
SRR17520069.10348580  
SRR17520069.10348582  
SRR17520069.10348584  
SRR17520069.10348586  
SRR17520069.10348588  
SRR17520069.10348590  
SRR17520069.10348592  
SRR17520069.10348594  
SRR17520069.10348596  
SRR17520069.10348598  
SRR17520069.10348600  
SRR17520069.10348602  
SRR17520069.10348604  
SRR17520069.10348606  
SRR17520069.10348608  
SRR17520069.10348719  
SRR17520069.10348721  
SRR17520069.10348723  
SRR17520069.10348725  
SRR17520069.10349717  
SRR17520069.10349719  
SRR17520069.10349721

SRR17520069.10349723  
SRR17520069.10349725  
SRR17520069.10349727  
SRR17520069.10349729  
SRR17520069.10349731  
SRR17520069.10349733  
SRR17520069.10349735  
SRR17520069.10349737  
SRR17520069.10349739  
SRR17520069.10349743  
SRR17520069.10349745  
SRR17520069.10350560  
SRR17520069.10350562  
SRR17520069.10350564  
SRR17520069.10350566  
SRR17520069.10350568  
SRR17520069.10350570  
SRR17520069.10350572  
SRR17520069.10350574  
SRR17520069.10353224  
SRR17520069.10353226  
SRR17520069.10353228  
SRR17520069.10353230  
SRR17520069.10353232  
SRR17520069.10353234  
SRR17520069.10353238  
SRR17520069.10353240  
SRR17520069.10353242  
SRR17520069.10353246  
SRR17520069.10353248  
SRR17520069.10353250  
SRR17520069.10353252  
SRR17520069.10353254  
SRR17520069.10353256  
SRR17520069.10353258  
SRR17520069.10353260  
SRR17520069.10353776  
SRR17520069.10353778  
SRR17520069.10353780  
SRR17520069.10353782  
SRR17520069.10353784  
SRR17520069.10353786  
SRR17520069.10353788  
SRR17520069.10353790  
SRR17520069.10353792  
SRR17520069.10353794  
SRR17520069.10353796

SRR17520069. 10353798  
SRR17520069. 10353800  
SRR17520069. 10353802  
SRR17520069. 10353804  
SRR17520069. 10353806  
SRR17520069. 10353808  
SRR17520069. 10353810  
SRR17520069. 10353812  
SRR17520069. 10353814  
SRR17520069. 10353816  
SRR17520069. 10353818  
SRR17520069. 10353820  
SRR17520069. 10353822  
SRR17520069. 10353824  
SRR17520069. 10353826  
SRR17520069. 10353828  
SRR17520069. 10353830  
SRR17520069. 10353832  
SRR17520069. 10353834  
SRR17520069. 10353836  
SRR17520069. 10363159  
SRR17520069. 10363161  
SRR17520069. 10363163  
SRR17520069. 10363165  
SRR17520069. 10363169  
SRR17520069. 10363171  
SRR17520069. 10363173  
SRR17520069. 10363175  
SRR17520069. 10363177  
SRR17520069. 10363179  
SRR17520069. 10363181  
SRR17520069. 10363183  
SRR17520069. 10363185  
SRR17520069. 10363187  
SRR17520069. 10363189  
SRR17520069. 10363191  
SRR17520069. 10363195  
SRR17520069. 10363197  
SRR17520069. 10363678  
SRR17520069. 10363680  
SRR17520069. 10365065  
SRR17520069. 10365067  
SRR17520069. 10365069  
SRR17520069. 10365071  
SRR17520069. 10365073  
SRR17520069. 10365075  
SRR17520069. 10365077

SRR17520069. 10365081  
SRR17520069. 10365083  
SRR17520069. 10365085  
SRR17520069. 10365087  
SRR17520069. 10365089  
SRR17520069. 10365091  
SRR17520069. 10365093  
SRR17520069. 10365095  
SRR17520069. 10365097  
SRR17520069. 10365099  
SRR17520069. 10365101  
SRR17520069. 10365103  
SRR17520069. 10365105  
SRR17520069. 10365107  
SRR17520069. 10365109  
SRR17520069. 10365111  
SRR17520069. 10365113  
SRR17520069. 10365115  
SRR17520069. 10365117  
SRR17520069. 10365119  
SRR17520069. 10365121  
SRR17520069. 10365123  
SRR17520069. 10365125  
SRR17520069. 10365127  
SRR17520069. 10365129  
SRR17520069. 10366698  
SRR17520069. 10366700  
SRR17520069. 10373876  
SRR17520069. 10373878  
SRR17520069. 10374869  
SRR17520069. 10376119  
SRR17520069. 10376121  
SRR17520069. 10376123  
SRR17520069. 10376125  
SRR17520069. 10376127  
SRR17520069. 10376129  
SRR17520069. 10376131  
SRR17520069. 10376133  
SRR17520069. 10376135  
SRR17520069. 10376137  
SRR17520069. 10376139  
SRR17520069. 10376141  
SRR17520069. 10376143  
SRR17520069. 10376145  
SRR17520069. 10376147  
SRR17520069. 10376149  
SRR17520069. 10376151



SRR17520069. 10376359  
SRR17520069. 10376361  
SRR17520069. 10376363  
SRR17520069. 10376365  
SRR17520069. 10376367  
SRR17520069. 10376369  
SRR17520069. 10376371  
SRR17520069. 10376373  
SRR17520069. 10376375  
SRR17520069. 10376377  
SRR17520069. 10376379  
SRR17520069. 10376381  
SRR17520069. 10376383  
SRR17520069. 10376385  
SRR17520069. 10376387  
SRR17520069. 10376389  
SRR17520069. 10376391  
SRR17520069. 10376393  
SRR17520069. 10376395  
SRR17520069. 10376397  
SRR17520069. 10376399  
SRR17520069. 10376401  
SRR17520069. 10376403  
SRR17520069. 10376405  
SRR17520069. 10376407  
SRR17520069. 10376409  
SRR17520069. 10376411  
SRR17520069. 10376413  
SRR17520069. 10376415  
SRR17520069. 10376417  
SRR17520069. 10376419  
SRR17520069. 10376421  
SRR17520069. 10376423  
SRR17520069. 10376425  
SRR17520069. 10376429  
SRR17520069. 10376431  
SRR17520069. 10378562  
SRR17520069. 10378564  
SRR17520069. 10378566  
SRR17520069. 10378568  
SRR17520069. 10378570  
SRR17520069. 10378572  
SRR17520069. 10378574  
SRR17520069. 10378576  
SRR17520069. 10378578  
SRR17520069. 10378580  
SRR17520069. 10378582

SRR17520069. 10378584  
SRR17520069. 10378586  
SRR17520069. 10378590  
SRR17520069. 10378592  
SRR17520069. 10378594  
SRR17520069. 10378596  
SRR17520069. 10378598  
SRR17520069. 10378600  
SRR17520069. 10378604  
SRR17520069. 10378606  
SRR17520069. 10378608  
SRR17520069. 10378610  
SRR17520069. 10378612  
SRR17520069. 10378614  
SRR17520069. 10378616  
SRR17520069. 10378618  
SRR17520069. 10378620  
SRR17520069. 10378622  
SRR17520069. 10378624  
SRR17520069. 10378626  
SRR17520069. 10378628  
SRR17520069. 10382080  
SRR17520069. 10382082  
SRR17520069. 10382084  
SRR17520069. 10382088  
SRR17520069. 10382090  
SRR17520069. 10382092  
SRR17520069. 10382094  
SRR17520069. 10382096  
SRR17520069. 10382098  
SRR17520069. 10382100  
SRR17520069. 10382102  
SRR17520069. 10382104  
SRR17520069. 10382106  
SRR17520069. 10382108  
SRR17520069. 10382110  
SRR17520069. 10382112  
SRR17520069. 10382114  
SRR17520069. 10382116  
SRR17520069. 10382118  
SRR17520069. 10382120  
SRR17520069. 10382122  
SRR17520069. 10382124  
SRR17520069. 10382126  
SRR17520069. 10382128  
SRR17520069. 10382130  
SRR17520069. 10382132

SRR17520069. 10382134  
SRR17520069. 10382136  
SRR17520069. 10382138  
SRR17520069. 10382140  
SRR17520069. 10382142  
SRR17520069. 10382144  
SRR17520069. 10382146  
SRR17520069. 10382148  
SRR17520069. 10382150  
SRR17520069. 10382152  
SRR17520069. 10382154  
SRR17520069. 10382156  
SRR17520069. 10382158  
SRR17520069. 10382160  
SRR17520069. 10382162  
SRR17520069. 10382164  
SRR17520069. 10382166  
SRR17520069. 10382168  
SRR17520069. 10382170  
SRR17520069. 10382172  
SRR17520069. 10382174  
SRR17520069. 10382176  
SRR17520069. 10382178  
SRR17520069. 10382180  
SRR17520069. 10382182  
SRR17520069. 10382184  
SRR17520069. 10382186  
SRR17520069. 10382188  
SRR17520069. 10382190  
SRR17520069. 10382192  
SRR17520069. 10382194  
SRR17520069. 10382196  
SRR17520069. 10382198  
SRR17520069. 10382200  
SRR17520069. 10382202  
SRR17520069. 10382204  
SRR17520069. 10382206  
SRR17520069. 10382208  
SRR17520069. 10382210  
SRR17520069. 10382214  
SRR17520069. 10382216  
SRR17520069. 10382218  
SRR17520069. 10382220  
SRR17520069. 10382224  
SRR17520069. 10382226  
SRR17520069. 10382228  
SRR17520069. 10382230

SRR17520069. 10382232  
SRR17520069. 10382234  
SRR17520069. 10382236  
SRR17520069. 10382238  
SRR17520069. 10382240  
SRR17520069. 10382242  
SRR17520069. 10382244  
SRR17520069. 10386902  
SRR17520069. 10386904  
SRR17520069. 10386906  
SRR17520069. 10386908  
SRR17520069. 10386910  
SRR17520069. 10386912  
SRR17520069. 10386914  
SRR17520069. 10386916  
SRR17520069. 10386918  
SRR17520069. 10386920  
SRR17520069. 10386922  
SRR17520069. 10386924  
SRR17520069. 10386926  
SRR17520069. 10388140  
SRR17520069. 10388142  
SRR17520069. 10388144  
SRR17520069. 10388146  
SRR17520069. 10388148  
SRR17520069. 10388150  
SRR17520069. 10388152  
SRR17520069. 10388154  
SRR17520069. 10388156  
SRR17520069. 10388158  
SRR17520069. 10388160  
SRR17520069. 10389932  
SRR17520069. 10389934  
SRR17520069. 10389936  
SRR17520069. 10389938  
SRR17520069. 10389940  
SRR17520069. 10389942  
SRR17520069. 10389944  
SRR17520069. 10389946  
SRR17520069. 10389950  
SRR17520069. 10389952  
SRR17520069. 10389954  
SRR17520069. 10389956  
SRR17520069. 10389958  
SRR17520069. 10389960  
SRR17520069. 10389962  
SRR17520069. 10389964

SRR17520069. 10389966  
SRR17520069. 10389968  
SRR17520069. 10389970  
SRR17520069. 10389972  
SRR17520069. 10389974  
SRR17520069. 10389976  
SRR17520069. 10389979  
SRR17520069. 10389981  
SRR17520069. 10389983  
SRR17520069. 10389985  
SRR17520069. 10389987  
SRR17520069. 10389991  
SRR17520069. 10389993  
SRR17520069. 10389995  
SRR17520069. 10389997  
SRR17520069. 10389999  
SRR17520069. 10390001  
SRR17520069. 10390003  
SRR17520069. 10390005  
SRR17520069. 10390007  
SRR17520069. 10390009  
SRR17520069. 10390011  
SRR17520069. 10393241  
SRR17520069. 10393243  
SRR17520069. 10393245  
SRR17520069. 10393247  
SRR17520069. 10393249  
SRR17520069. 10393255  
SRR17520069. 10394206  
SRR17520069. 10404585  
SRR17520069. 10404587  
SRR17520069. 10404589  
SRR17520069. 10404591  
SRR17520069. 10404593  
SRR17520069. 10404595  
SRR17520069. 10404597  
SRR17520069. 10404599  
SRR17520069. 10404601  
SRR17520069. 10404603  
SRR17520069. 10404605  
SRR17520069. 10404607  
SRR17520069. 10404609  
SRR17520069. 10404611  
SRR17520069. 10404613  
SRR17520069. 10404615  
SRR17520069. 10404617  
SRR17520069. 10404619

SRR17520069. 10404621  
SRR17520069. 10404623  
SRR17520069. 10404625  
SRR17520069. 10404627  
SRR17520069. 10404629  
SRR17520069. 10404631  
SRR17520069. 10404633  
SRR17520069. 10404635  
SRR17520069. 10404637  
SRR17520069. 10404639  
SRR17520069. 10404641  
SRR17520069. 10404643  
SRR17520069. 10404645  
SRR17520069. 10404647  
SRR17520069. 10404649  
SRR17520069. 10404651  
SRR17520069. 10404653  
SRR17520069. 10404655  
SRR17520069. 10404657  
SRR17520069. 10404659  
SRR17520069. 10404661  
SRR17520069. 10404663  
SRR17520069. 10404665  
SRR17520069. 10404667  
SRR17520069. 10404669  
SRR17520069. 10404671  
SRR17520069. 10404673  
SRR17520069. 10404675  
SRR17520069. 10404677  
SRR17520069. 10404679  
SRR17520069. 10404681  
SRR17520069. 10404683  
SRR17520069. 10404685  
SRR17520069. 10404687  
SRR17520069. 10404689  
SRR17520069. 10404691  
SRR17520069. 10404693  
SRR17520069. 10404695  
SRR17520069. 10404697  
SRR17520069. 10404699  
SRR17520069. 10404701  
SRR17520069. 10404703  
SRR17520069. 10404705  
SRR17520069. 10404707  
SRR17520069. 10404709  
SRR17520069. 10404711  
SRR17520069. 10404713

SRR17520069.10404715  
SRR17520069.10404717  
SRR17520069.10404719  
SRR17520069.10404723  
SRR17520069.10407104  
SRR17520069.10409268  
SRR17520069.10412160  
SRR17520069.10412162  
SRR17520069.10412164  
SRR17520069.10412166  
SRR17520069.10412168  
SRR17520069.10412170  
SRR17520069.10412172  
SRR17520069.10412174  
SRR17520069.10412176  
SRR17520069.10412178  
SRR17520069.10412180  
SRR17520069.10412182  
SRR17520069.10412184  
SRR17520069.10412186  
SRR17520069.10412188  
SRR17520069.10412190  
SRR17520069.10412192  
SRR17520069.10412194  
SRR17520069.10412196  
SRR17520069.10412198  
SRR17520069.10412200  
SRR17520069.10412202  
SRR17520069.10412204  
SRR17520069.10412206  
SRR17520069.10412208  
SRR17520069.10412210  
SRR17520069.10412212  
SRR17520069.10412214  
SRR17520069.10412216  
SRR17520069.10412218  
SRR17520069.10412220  
SRR17520069.10412222  
SRR17520069.10412224  
SRR17520069.10412226  
SRR17520069.10412228  
SRR17520069.10412230  
SRR17520069.10412232  
SRR17520069.10412236  
SRR17520069.10412238  
SRR17520069.10412240  
SRR17520069.10412242

SRR17520069. 10412244  
SRR17520069. 10412246  
SRR17520069. 10412248  
SRR17520069. 10412250  
SRR17520069. 10412252  
SRR17520069. 10412254  
SRR17520069. 10412258  
SRR17520069. 10412260  
SRR17520069. 10422266  
SRR17520069. 10422268  
SRR17520069. 10422270  
SRR17520069. 10422272  
SRR17520069. 10422274  
SRR17520069. 10422276  
SRR17520069. 10422278  
SRR17520069. 10422284  
SRR17520069. 10422286  
SRR17520069. 10422288  
SRR17520069. 10425874  
SRR17520069. 10425876  
SRR17520069. 10425878  
SRR17520069. 10425880  
SRR17520069. 10425882  
SRR17520069. 10425884  
SRR17520069. 10425886  
SRR17520069. 10425888  
SRR17520069. 10425890  
SRR17520069. 10425892  
SRR17520069. 10425894  
SRR17520069. 10425896  
SRR17520069. 10426009  
SRR17520069. 10426011  
SRR17520069. 10426013  
SRR17520069. 10426015  
SRR17520069. 10426017  
SRR17520069. 10426019  
SRR17520069. 10429213  
SRR17520069. 10429215  
SRR17520069. 10429217  
SRR17520069. 10429219  
SRR17520069. 10429221  
SRR17520069. 10431164  
SRR17520069. 10431166  
SRR17520069. 10431168  
SRR17520069. 10431170  
SRR17520069. 10431172  
SRR17520069. 10431174



SRR17520069.10431176  
SRR17520069.10431178  
SRR17520069.10431182  
SRR17520069.10431184  
SRR17520069.10431190  
SRR17520069.10431192  
SRR17520069.10431194  
SRR17520069.10431198  
SRR17520069.10431202  
SRR17520069.10431204  
SRR17520069.10431206  
SRR17520069.10431208  
SRR17520069.10431210  
SRR17520069.10431212  
SRR17520069.10431216  
SRR17520069.10431224  
SRR17520069.10431226  
SRR17520069.10431228  
SRR17520069.10431230  
SRR17520069.10431232  
SRR17520069.10432317  
SRR17520069.10432319  
SRR17520069.10432321  
SRR17520069.10432323  
SRR17520069.10432325  
SRR17520069.10432327  
SRR17520069.10432329  
SRR17520069.10432331  
SRR17520069.10432333  
SRR17520069.10432335  
SRR17520069.10432337  
SRR17520069.10432339  
SRR17520069.10432341  
SRR17520069.10432343  
SRR17520069.10432345  
SRR17520069.10432347  
SRR17520069.10432349  
SRR17520069.10432351  
SRR17520069.10432353  
SRR17520069.10432355  
SRR17520069.10432359  
SRR17520069.10432361  
SRR17520069.10432365  
SRR17520069.10432367  
SRR17520069.10432369  
SRR17520069.10432371  
SRR17520069.10432375

SRR17520069.10432377  
SRR17520069.10432379  
SRR17520069.10432383  
SRR17520069.10432387  
SRR17520069.10432389  
SRR17520069.10432391  
SRR17520069.10432393  
SRR17520069.10432395  
SRR17520069.10432397  
SRR17520069.10432738  
SRR17520069.10437358  
SRR17520069.10448650  
SRR17520069.10448652  
SRR17520069.10448654  
SRR17520069.10448656  
SRR17520069.10448658  
SRR17520069.10448660  
SRR17520069.10448662  
SRR17520069.10448664  
SRR17520069.10448666  
SRR17520069.10448668  
SRR17520069.10448670  
SRR17520069.10448672  
SRR17520069.10448674  
SRR17520069.10448676  
SRR17520069.10448678  
SRR17520069.10448680  
SRR17520069.10448682  
SRR17520069.10449016  
SRR17520069.10449078  
SRR17520069.10455188  
SRR17520069.10455190  
SRR17520069.10455192  
SRR17520069.10456354  
SRR17520069.10456356  
SRR17520069.10456358  
SRR17520069.10456360  
SRR17520069.10456362  
SRR17520069.10456364  
SRR17520069.10456366  
SRR17520069.10456368  
SRR17520069.10456370  
SRR17520069.10456372  
SRR17520069.10456374  
SRR17520069.10456376  
SRR17520069.10456378  
SRR17520069.10456380

SRR17520069. 10456382  
SRR17520069. 10456384  
SRR17520069. 10456386  
SRR17520069. 10456388  
SRR17520069. 10456390  
SRR17520069. 10456392  
SRR17520069. 10456394  
SRR17520069. 10456396  
SRR17520069. 10456398  
SRR17520069. 10456400  
SRR17520069. 10456404  
SRR17520069. 10456406  
SRR17520069. 10456408  
SRR17520069. 10456410  
SRR17520069. 10456412  
SRR17520069. 10456414  
SRR17520069. 10456416  
SRR17520069. 10456418  
SRR17520069. 10456420  
SRR17520069. 10456422  
SRR17520069. 10456424  
SRR17520069. 10456426  
SRR17520069. 10456428  
SRR17520069. 10456430  
SRR17520069. 10456432  
SRR17520069. 10456434  
SRR17520069. 10456436  
SRR17520069. 10456438  
SRR17520069. 10456440  
SRR17520069. 10456442  
SRR17520069. 10456444  
SRR17520069. 10456446  
SRR17520069. 10457527  
SRR17520069. 10457529  
SRR17520069. 10457531  
SRR17520069. 10457533  
SRR17520069. 10457535  
SRR17520069. 10457537  
SRR17520069. 10457539  
SRR17520069. 10457541  
SRR17520069. 10457543  
SRR17520069. 10457545  
SRR17520069. 10457547  
SRR17520069. 10457549  
SRR17520069. 10457551  
SRR17520069. 10457553  
SRR17520069. 10457555

SRR17520069. 10457557  
SRR17520069. 10457559  
SRR17520069. 10457561  
SRR17520069. 10457563  
SRR17520069. 10457565  
SRR17520069. 10457567  
SRR17520069. 10457569  
SRR17520069. 10457571  
SRR17520069. 10457573  
SRR17520069. 10457575  
SRR17520069. 10457577  
SRR17520069. 10457579  
SRR17520069. 10457581  
SRR17520069. 10457583  
SRR17520069. 10457585  
SRR17520069. 10457587  
SRR17520069. 10457589  
SRR17520069. 10457591  
SRR17520069. 10457593  
SRR17520069. 10457595  
SRR17520069. 10457599  
SRR17520069. 10457601  
SRR17520069. 10457603  
SRR17520069. 10457605  
SRR17520069. 10457607  
SRR17520069. 10457609  
SRR17520069. 10457611  
SRR17520069. 10457613  
SRR17520069. 10457615  
SRR17520069. 10457617  
SRR17520069. 10457619  
SRR17520069. 10457621  
SRR17520069. 10457623  
SRR17520069. 10457625  
SRR17520069. 10457627  
SRR17520069. 10457629  
SRR17520069. 10457631  
SRR17520069. 10457633  
SRR17520069. 10457635  
SRR17520069. 10457637  
SRR17520069. 10457639  
SRR17520069. 10457641  
SRR17520069. 10457643  
SRR17520069. 10457645  
SRR17520069. 10457647  
SRR17520069. 10457649  
SRR17520069. 10457651

SRR17520069. 10457653  
SRR17520069. 10457655  
SRR17520069. 10459476  
SRR17520069. 10462787  
SRR17520069. 10462789  
SRR17520069. 10462793  
SRR17520069. 10462795  
SRR17520069. 10464941  
SRR17520069. 10464943  
SRR17520069. 10464945  
SRR17520069. 10464947  
SRR17520069. 10465975  
SRR17520069. 10465977  
SRR17520069. 10465979  
SRR17520069. 10465981  
SRR17520069. 10465983  
SRR17520069. 10465985  
SRR17520069. 10465987  
SRR17520069. 10465989  
SRR17520069. 10465991  
SRR17520069. 10465993  
SRR17520069. 10465995  
SRR17520069. 10465997  
SRR17520069. 10465999  
SRR17520069. 10466001  
SRR17520069. 10466003  
SRR17520069. 10470597  
SRR17520069. 10473660  
SRR17520069. 10476818  
SRR17520069. 10476820  
SRR17520069. 10476822  
SRR17520069. 10476824  
SRR17520069. 10476826  
SRR17520069. 10476828  
SRR17520069. 10476830  
SRR17520069. 10476832  
SRR17520069. 10476834  
SRR17520069. 10476836  
SRR17520069. 10476838  
SRR17520069. 10476840  
SRR17520069. 10476842  
SRR17520069. 10476844  
SRR17520069. 10476846  
SRR17520069. 10476848  
SRR17520069. 10476850  
SRR17520069. 10476852  
SRR17520069. 10476856

SRR17520069. 10476858  
SRR17520069. 10476862  
SRR17520069. 10476864  
SRR17520069. 10476866  
SRR17520069. 10476868  
SRR17520069. 10476870  
SRR17520069. 10476872  
SRR17520069. 10476874  
SRR17520069. 10476876  
SRR17520069. 10476878  
SRR17520069. 10476880  
SRR17520069. 10476882  
SRR17520069. 10476884  
SRR17520069. 10476886  
SRR17520069. 10476888  
SRR17520069. 10476890  
SRR17520069. 10476892  
SRR17520069. 10476894  
SRR17520069. 10476896  
SRR17520069. 10476898  
SRR17520069. 10476900  
SRR17520069. 10476928  
SRR17520069. 10476930  
SRR17520069. 10476932  
SRR17520069. 10476934  
SRR17520069. 10476936  
SRR17520069. 10476938  
SRR17520069. 10476940  
SRR17520069. 10476942  
SRR17520069. 10476944  
SRR17520069. 10476946  
SRR17520069. 10490806  
SRR17520069. 10490808  
SRR17520069. 10490810  
SRR17520069. 10490812  
SRR17520069. 10490814  
SRR17520069. 10490816  
SRR17520069. 10490818  
SRR17520069. 10490820  
SRR17520069. 10490822  
SRR17520069. 10490824  
SRR17520069. 10490826  
SRR17520069. 10490828  
SRR17520069. 10490830  
SRR17520069. 10490832  
SRR17520069. 10490834  
SRR17520069. 10490836

SRR17520069. 10490838  
SRR17520069. 10490840  
SRR17520069. 10490842  
SRR17520069. 10490844  
SRR17520069. 10491625  
SRR17520069. 10491627  
SRR17520069. 10491629  
SRR17520069. 10491631  
SRR17520069. 10491633  
SRR17520069. 10491635  
SRR17520069. 10491637  
SRR17520069. 10491639  
SRR17520069. 10491641  
SRR17520069. 10491643  
SRR17520069. 10491645  
SRR17520069. 10491647  
SRR17520069. 10491649  
SRR17520069. 10491651  
SRR17520069. 10491657  
SRR17520069. 10491659  
SRR17520069. 10491661  
SRR17520069. 10491663  
SRR17520069. 10491665  
SRR17520069. 10491667  
SRR17520069. 10491669  
SRR17520069. 10491671  
SRR17520069. 10491673  
SRR17520069. 10491675  
SRR17520069. 10491677  
SRR17520069. 10491679  
SRR17520069. 10491683  
SRR17520069. 10491685  
SRR17520069. 10491687  
SRR17520069. 10491691  
SRR17520069. 10491693  
SRR17520069. 10491695  
SRR17520069. 10491697  
SRR17520069. 10491699  
SRR17520069. 10491701  
SRR17520069. 10491703  
SRR17520069. 10491705  
SRR17520069. 10491707  
SRR17520069. 10491709  
SRR17520069. 10498997  
SRR17520069. 10498999  
SRR17520069. 10499001  
SRR17520069. 10499003

SRR17520069.10499005  
SRR17520069.10499007  
SRR17520069.10499009  
SRR17520069.10499011  
SRR17520069.10499013  
SRR17520069.10499015  
SRR17520069.10499019  
SRR17520069.10499021  
SRR17520069.10499023  
SRR17520069.10505733  
SRR17520069.10505735  
SRR17520069.10505739  
SRR17520069.10505741  
SRR17520069.10505743  
SRR17520069.10505745  
SRR17520069.10505747  
SRR17520069.10505749  
SRR17520069.10505751  
SRR17520069.10513294  
SRR17520069.10513298  
SRR17520069.10513300  
SRR17520069.10513302  
SRR17520069.10513304  
SRR17520069.10513306  
SRR17520069.10515480  
SRR17520069.10515482  
SRR17520069.10515484  
SRR17520069.10515486  
SRR17520069.10515488  
SRR17520069.10515490  
SRR17520069.10515492  
SRR17520069.10515494  
SRR17520069.10515496  
SRR17520069.10515498  
SRR17520069.10518599  
SRR17520069.10518601  
SRR17520069.10518605  
SRR17520069.10518607  
SRR17520069.10518611  
SRR17520069.10518613  
SRR17520069.10518615  
SRR17520069.10518617  
SRR17520069.10518619  
SRR17520069.10518621  
SRR17520069.10518623  
SRR17520069.10518625  
SRR17520069.10518627



SRR17520069.10518629  
SRR17520069.10518631  
SRR17520069.10520563  
SRR17520069.10520565  
SRR17520069.10520569  
SRR17520069.10527927  
SRR17520069.10527929  
SRR17520069.10527931  
SRR17520069.10527933  
SRR17520069.10527935  
SRR17520069.10527937  
SRR17520069.10527939  
SRR17520069.10527941  
SRR17520069.10527943  
SRR17520069.10527945  
SRR17520069.10527947  
SRR17520069.10527949  
SRR17520069.10527951  
SRR17520069.10527953  
SRR17520069.10527955  
SRR17520069.10527957  
SRR17520069.10527959  
SRR17520069.10527961  
SRR17520069.10527963  
SRR17520069.10527965  
SRR17520069.10527967  
SRR17520069.10527969  
SRR17520069.10527971  
SRR17520069.10527973  
SRR17520069.10530136  
SRR17520069.10530138  
SRR17520069.10530140  
SRR17520069.10530142  
SRR17520069.10530144  
SRR17520069.10530146  
SRR17520069.10530148  
SRR17520069.10530150  
SRR17520069.10530152  
SRR17520069.10530154  
SRR17520069.10530156  
SRR17520069.10530158  
SRR17520069.10530160  
SRR17520069.10530162  
SRR17520069.10530164  
SRR17520069.10530166  
SRR17520069.10530168  
SRR17520069.10530170

SRR17520069.10530172  
SRR17520069.10530174  
SRR17520069.10530176  
SRR17520069.10530178  
SRR17520069.10530180  
SRR17520069.10530182  
SRR17520069.10530184  
SRR17520069.10530186  
SRR17520069.10530188  
SRR17520069.10530190  
SRR17520069.10530192  
SRR17520069.10530194  
SRR17520069.10530196  
SRR17520069.10530198  
SRR17520069.10530200  
SRR17520069.10530202  
SRR17520069.10530204  
SRR17520069.10530206  
SRR17520069.10530208  
SRR17520069.10530210  
SRR17520069.10530212  
SRR17520069.10530214  
SRR17520069.10530216  
SRR17520069.10530218  
SRR17520069.10530220  
SRR17520069.10530222  
SRR17520069.10530224  
SRR17520069.10530226  
SRR17520069.10530228  
SRR17520069.10530230  
SRR17520069.10530232  
SRR17520069.10530234  
SRR17520069.10530236  
SRR17520069.10530238  
SRR17520069.10530240  
SRR17520069.10530242  
SRR17520069.10530244  
SRR17520069.10530246  
SRR17520069.10530248  
SRR17520069.10530250  
SRR17520069.10530252  
SRR17520069.10530254  
SRR17520069.10530256  
SRR17520069.10530258  
SRR17520069.10530260  
SRR17520069.10530262  
SRR17520069.10530264

SRR17520069.10530266  
SRR17520069.10530268  
SRR17520069.10530270  
SRR17520069.10530272  
SRR17520069.10530274  
SRR17520069.10530276  
SRR17520069.10530278  
SRR17520069.10530280  
SRR17520069.10536720  
SRR17520069.10536722  
SRR17520069.10536724  
SRR17520069.10536726  
SRR17520069.10536728  
SRR17520069.10536730  
SRR17520069.10536732  
SRR17520069.10536734  
SRR17520069.10536736  
SRR17520069.10536738  
SRR17520069.10536740  
SRR17520069.10549810  
SRR17520069.10549812  
SRR17520069.10549814  
SRR17520069.10549816  
SRR17520069.10549818  
SRR17520069.10549820  
SRR17520069.10549822  
SRR17520069.10549824  
SRR17520069.10549826  
SRR17520069.10549828  
SRR17520069.10549830  
SRR17520069.10549832  
SRR17520069.10549834  
SRR17520069.10549836  
SRR17520069.10549838  
SRR17520069.10549840  
SRR17520069.10549842  
SRR17520069.10549844  
SRR17520069.10549899  
SRR17520069.10551052  
SRR17520069.10551056  
SRR17520069.10551058  
SRR17520069.10551060  
SRR17520069.10551062  
SRR17520069.10551064  
SRR17520069.10551066  
SRR17520069.10551068  
SRR17520069.10551070

SRR17520069.10551072  
SRR17520069.10551074  
SRR17520069.10551076  
SRR17520069.10551078  
SRR17520069.10551080  
SRR17520069.10551082  
SRR17520069.10551086  
SRR17520069.10551088  
SRR17520069.10551090  
SRR17520069.10551092  
SRR17520069.10551094  
SRR17520069.10551096  
SRR17520069.10551098  
SRR17520069.10551100  
SRR17520069.10551102  
SRR17520069.10556659  
SRR17520069.10556661  
SRR17520069.10556663  
SRR17520069.10556665  
SRR17520069.10558387  
SRR17520069.10558389  
SRR17520069.10558391  
SRR17520069.10558393  
SRR17520069.10558395  
SRR17520069.10558397  
SRR17520069.10558399  
SRR17520069.10558401  
SRR17520069.10558403  
SRR17520069.10558405  
SRR17520069.10558407  
SRR17520069.10558409  
SRR17520069.10558411  
SRR17520069.10558413  
SRR17520069.10558415  
SRR17520069.10558417  
SRR17520069.10558419  
SRR17520069.10558421  
SRR17520069.10558423  
SRR17520069.10558425  
SRR17520069.10558429  
SRR17520069.10559920  
SRR17520069.10559922  
SRR17520069.10559924  
SRR17520069.10559926  
SRR17520069.10559928  
SRR17520069.10559932  
SRR17520069.10559934

SRR17520069.10559936  
SRR17520069.10559938  
SRR17520069.10559942  
SRR17520069.10559944  
SRR17520069.10559946  
SRR17520069.10559948  
SRR17520069.10559950  
SRR17520069.10559952  
SRR17520069.10559954  
SRR17520069.10559956  
SRR17520069.10559958  
SRR17520069.10559960  
SRR17520069.10559962  
SRR17520069.10559966  
SRR17520069.10559970  
SRR17520069.10559972  
SRR17520069.10559974  
SRR17520069.10559976  
SRR17520069.10559978  
SRR17520069.10559980  
SRR17520069.10559982  
SRR17520069.10559984  
SRR17520069.10559986  
SRR17520069.10559988  
SRR17520069.10559990  
SRR17520069.10559994  
SRR17520069.10559998  
SRR17520069.10560000  
SRR17520069.10560002  
SRR17520069.10560004  
SRR17520069.10560006  
SRR17520069.10560010  
SRR17520069.10560012  
SRR17520069.10560014  
SRR17520069.10560016  
SRR17520069.10560018  
SRR17520069.10560022  
SRR17520069.10560024  
SRR17520069.10560026  
SRR17520069.10560028  
SRR17520069.10560034  
SRR17520069.10560036  
SRR17520069.10560038  
SRR17520069.10560048  
SRR17520069.10560050  
SRR17520069.10560054  
SRR17520069.10560060

SRR17520069.10560062  
SRR17520069.10562403  
SRR17520069.10568318  
SRR17520069.10568320  
SRR17520069.10570497  
SRR17520069.10570499  
SRR17520069.10570501  
SRR17520069.10570503  
SRR17520069.10570505  
SRR17520069.10570507  
SRR17520069.10570509  
SRR17520069.10570511  
SRR17520069.10580012  
SRR17520069.10580014  
SRR17520069.10580016  
SRR17520069.10580018  
SRR17520069.10580020  
SRR17520069.10580984  
SRR17520069.10580986  
SRR17520069.10580988  
SRR17520069.10580990  
SRR17520069.10580992  
SRR17520069.10580994  
SRR17520069.10580996  
SRR17520069.10580998  
SRR17520069.10581000  
SRR17520069.10581002  
SRR17520069.10581004  
SRR17520069.10581006  
SRR17520069.10581008  
SRR17520069.10581010  
SRR17520069.10581012  
SRR17520069.10581014  
SRR17520069.10581016  
SRR17520069.10581020  
SRR17520069.10581022  
SRR17520069.10581024  
SRR17520069.10581028  
SRR17520069.10581030  
SRR17520069.10581032  
SRR17520069.10581034  
SRR17520069.10581036  
SRR17520069.10581038  
SRR17520069.10581040  
SRR17520069.10581042  
SRR17520069.10588623  
SRR17520069.10588625

SRR17520069.10588627  
SRR17520069.10588629  
SRR17520069.10588631  
SRR17520069.10588633  
SRR17520069.10588635  
SRR17520069.10588637  
SRR17520069.10588639  
SRR17520069.10588641  
SRR17520069.10588643  
SRR17520069.10588645  
SRR17520069.10588647  
SRR17520069.10588649  
SRR17520069.10588651  
SRR17520069.10588653  
SRR17520069.10588655  
SRR17520069.10588657  
SRR17520069.10588659  
SRR17520069.10588661  
SRR17520069.10588663  
SRR17520069.10588665  
SRR17520069.10588667  
SRR17520069.10588669  
SRR17520069.10588671  
SRR17520069.10588673  
SRR17520069.10588675  
SRR17520069.10588677  
SRR17520069.10588679  
SRR17520069.10588681  
SRR17520069.10588683  
SRR17520069.10588685  
SRR17520069.10588687  
SRR17520069.10588689  
SRR17520069.10588691  
SRR17520069.10588693  
SRR17520069.10588695  
SRR17520069.10588697  
SRR17520069.10588699  
SRR17520069.10588701  
SRR17520069.10588703  
SRR17520069.10588705  
SRR17520069.10588707  
SRR17520069.10588709  
SRR17520069.10588711  
SRR17520069.10588713  
SRR17520069.10588715  
SRR17520069.10588717  
SRR17520069.10588719

SRR17520069.10588721  
SRR17520069.10588723  
SRR17520069.10588725  
SRR17520069.10588727  
SRR17520069.10588729  
SRR17520069.10588731  
SRR17520069.10588733  
SRR17520069.10588735  
SRR17520069.10588737  
SRR17520069.10588739  
SRR17520069.10588741  
SRR17520069.10588743  
SRR17520069.10588745  
SRR17520069.10588747  
SRR17520069.10588751  
SRR17520069.10588753  
SRR17520069.10588755  
SRR17520069.10588757  
SRR17520069.10588759  
SRR17520069.10588761  
SRR17520069.10588763  
SRR17520069.10588765  
SRR17520069.10588767  
SRR17520069.10588769  
SRR17520069.10588771  
SRR17520069.10588773  
SRR17520069.10588775  
SRR17520069.10588777  
SRR17520069.10588779  
SRR17520069.10588781  
SRR17520069.10588783  
SRR17520069.10588785  
SRR17520069.10588787  
SRR17520069.10588789  
SRR17520069.10588791  
SRR17520069.10588795  
SRR17520069.10588797  
SRR17520069.10588799  
SRR17520069.10588801  
SRR17520069.10588803  
SRR17520069.10588805  
SRR17520069.10588807  
SRR17520069.10588809  
SRR17520069.10588811  
SRR17520069.10588813  
SRR17520069.10588815  
SRR17520069.10588817



SRR17520069.10588819  
SRR17520069.10588821  
SRR17520069.10588823  
SRR17520069.10588825  
SRR17520069.10588827  
SRR17520069.10588829  
SRR17520069.10588831  
SRR17520069.10588833  
SRR17520069.10588835  
SRR17520069.10588837  
SRR17520069.10588839  
SRR17520069.10588841  
SRR17520069.10588843  
SRR17520069.10588845  
SRR17520069.10593950  
SRR17520069.10593954  
SRR17520069.10593960  
SRR17520069.10593962  
SRR17520069.10593964  
SRR17520069.10593966  
SRR17520069.10593968  
SRR17520069.10593970  
SRR17520069.10593972  
SRR17520069.10593980  
SRR17520069.10593982  
SRR17520069.10593986  
SRR17520069.10593998  
SRR17520069.10594000  
SRR17520069.10594008  
SRR17520069.10594014  
SRR17520069.10594022  
SRR17520069.10594024  
SRR17520069.10594026  
SRR17520069.10594028  
SRR17520069.10594030  
SRR17520069.10594040  
SRR17520069.10596575  
SRR17520069.10597037  
SRR17520069.10597039  
SRR17520069.10597043  
SRR17520069.10597045  
SRR17520069.10597047  
SRR17520069.10597049  
SRR17520069.10597051  
SRR17520069.10597053  
SRR17520069.10598319  
SRR17520069.10599929

SRR17520069.10599931  
SRR17520069.10599933  
SRR17520069.10599935  
SRR17520069.10599937  
SRR17520069.10599939  
SRR17520069.10599941  
SRR17520069.10599943  
SRR17520069.10599945  
SRR17520069.10599947  
SRR17520069.10599949  
SRR17520069.10599951  
SRR17520069.10599953  
SRR17520069.10599955  
SRR17520069.10599957  
SRR17520069.10599959  
SRR17520069.10599963  
SRR17520069.10599965  
SRR17520069.10599967  
SRR17520069.10599969  
SRR17520069.10599971  
SRR17520069.10599973  
SRR17520069.10599975  
SRR17520069.10599977  
SRR17520069.10599979  
SRR17520069.10599981  
SRR17520069.10599983  
SRR17520069.10599985  
SRR17520069.10599987  
SRR17520069.10599989  
SRR17520069.10599991  
SRR17520069.10599993  
SRR17520069.10599995  
SRR17520069.10599997  
SRR17520069.10599999  
SRR17520069.10600001  
SRR17520069.10600003  
SRR17520069.10600005  
SRR17520069.10600007  
SRR17520069.10600009  
SRR17520069.10600011  
SRR17520069.10600013  
SRR17520069.10600015  
SRR17520069.10600017  
SRR17520069.10600019  
SRR17520069.10600021  
SRR17520069.10600023  
SRR17520069.10600025

SRR17520069.10601085  
SRR17520069.10602229  
SRR17520069.10602231  
SRR17520069.10602233  
SRR17520069.10602235  
SRR17520069.10602237  
SRR17520069.10602239  
SRR17520069.10602241  
SRR17520069.10602243  
SRR17520069.10602245  
SRR17520069.10603508  
SRR17520069.10603510  
SRR17520069.10603512  
SRR17520069.10603514  
SRR17520069.10603516  
SRR17520069.10603518  
SRR17520069.10603520  
SRR17520069.10603522  
SRR17520069.10603524  
SRR17520069.10603526  
SRR17520069.10603528  
SRR17520069.10603530  
SRR17520069.10603532  
SRR17520069.10603534  
SRR17520069.10603536  
SRR17520069.10604674  
SRR17520069.10604676  
SRR17520069.10604678  
SRR17520069.10604680  
SRR17520069.10604933  
SRR17520069.10604935  
SRR17520069.10604937  
SRR17520069.10604939  
SRR17520069.10604941  
SRR17520069.10604943  
SRR17520069.10604945  
SRR17520069.10604949  
SRR17520069.10604951  
SRR17520069.10609183  
SRR17520069.10609185  
SRR17520069.10609187  
SRR17520069.10609189  
SRR17520069.10609191  
SRR17520069.10609193  
SRR17520069.10609195  
SRR17520069.10609197  
SRR17520069.10609199

SRR17520069.10609201  
SRR17520069.10609203  
SRR17520069.10609205  
SRR17520069.10609207  
SRR17520069.10609209  
SRR17520069.10609211  
SRR17520069.10609213  
SRR17520069.10609215  
SRR17520069.10609217  
SRR17520069.10609219  
SRR17520069.10609221  
SRR17520069.10609223  
SRR17520069.10609225  
SRR17520069.10609227  
SRR17520069.10609229  
SRR17520069.10609231  
SRR17520069.10611933  
SRR17520069.10611935  
SRR17520069.10611937  
SRR17520069.10611939  
SRR17520069.10611941  
SRR17520069.10611943  
SRR17520069.10611945  
SRR17520069.10611947  
SRR17520069.10611949  
SRR17520069.10611951  
SRR17520069.10611953  
SRR17520069.10614381  
SRR17520069.10614383  
SRR17520069.10616822  
SRR17520069.10618928  
SRR17520069.10618930  
SRR17520069.10618932  
SRR17520069.10618934  
SRR17520069.10618936  
SRR17520069.10618938  
SRR17520069.10618940  
SRR17520069.10618942  
SRR17520069.10618944  
SRR17520069.10618946  
SRR17520069.10618948  
SRR17520069.10618950  
SRR17520069.10618952  
SRR17520069.10618954  
SRR17520069.10618956  
SRR17520069.10618958  
SRR17520069.10618960

SRR17520069.10618962  
SRR17520069.10618964  
SRR17520069.10618966  
SRR17520069.10618968  
SRR17520069.10621166  
SRR17520069.10621168  
SRR17520069.10621170  
SRR17520069.10621172  
SRR17520069.10629482  
SRR17520069.10629484  
SRR17520069.10629486  
SRR17520069.10635096  
SRR17520069.10635098  
SRR17520069.10635100  
SRR17520069.10635102  
SRR17520069.10635104  
SRR17520069.10635106  
SRR17520069.10635108  
SRR17520069.10635110  
SRR17520069.10635112  
SRR17520069.10635114  
SRR17520069.10635116  
SRR17520069.10635118  
SRR17520069.10635120  
SRR17520069.10635122  
SRR17520069.10635124  
SRR17520069.10635219  
SRR17520069.10635221  
SRR17520069.10635223  
SRR17520069.10635225  
SRR17520069.10635227  
SRR17520069.10635229  
SRR17520069.10635231  
SRR17520069.10635233  
SRR17520069.10635235  
SRR17520069.10635237  
SRR17520069.10635239  
SRR17520069.10635241  
SRR17520069.10635243  
SRR17520069.10635245  
SRR17520069.10635247  
SRR17520069.10635249  
SRR17520069.10635253  
SRR17520069.10635255  
SRR17520069.10635257  
SRR17520069.10635259  
SRR17520069.10635261

SRR17520069.10635263  
SRR17520069.10635265  
SRR17520069.10635267  
SRR17520069.10635269  
SRR17520069.10635271  
SRR17520069.10635273  
SRR17520069.10636855  
SRR17520069.10636857  
SRR17520069.10636859  
SRR17520069.10636861  
SRR17520069.10636863  
SRR17520069.10636867  
SRR17520069.10636869  
SRR17520069.10637700  
SRR17520069.10637702  
SRR17520069.10637704  
SRR17520069.10637706  
SRR17520069.10637708  
SRR17520069.10637710  
SRR17520069.10637712  
SRR17520069.10637714  
SRR17520069.10637716  
SRR17520069.10637718  
SRR17520069.10637720  
SRR17520069.10637722  
SRR17520069.10637724  
SRR17520069.10637726  
SRR17520069.10637728  
SRR17520069.10637730  
SRR17520069.10637732  
SRR17520069.10637734  
SRR17520069.10637736  
SRR17520069.10637738  
SRR17520069.10637740  
SRR17520069.10637742  
SRR17520069.10637744  
SRR17520069.10637746  
SRR17520069.10637748  
SRR17520069.10637750  
SRR17520069.10637752  
SRR17520069.10637754  
SRR17520069.10637756  
SRR17520069.10638856  
SRR17520069.10638858  
SRR17520069.10643208  
SRR17520069.10643214  
SRR17520069.10649051

SRR17520069.10649055  
SRR17520069.10649059  
SRR17520069.10649063  
SRR17520069.10649065  
SRR17520069.10649067  
SRR17520069.10649069  
SRR17520069.10649071  
SRR17520069.10649075  
SRR17520069.10649077  
SRR17520069.10649079  
SRR17520069.10649081  
SRR17520069.10649083  
SRR17520069.10649085  
SRR17520069.10649087  
SRR17520069.10654667  
SRR17520069.10654669  
SRR17520069.10656227  
SRR17520069.10656229  
SRR17520069.10656231  
SRR17520069.10656233  
SRR17520069.10656235  
SRR17520069.10656237  
SRR17520069.10656239  
SRR17520069.10656241  
SRR17520069.10656243  
SRR17520069.10658790  
SRR17520069.10658792  
SRR17520069.10658794  
SRR17520069.10658796  
SRR17520069.10658798  
SRR17520069.10658800  
SRR17520069.10658802  
SRR17520069.10658804  
SRR17520069.10658806  
SRR17520069.10658808  
SRR17520069.10658810  
SRR17520069.10658812  
SRR17520069.10658814  
SRR17520069.10658816  
SRR17520069.10658818  
SRR17520069.10658820  
SRR17520069.10658822  
SRR17520069.10658824  
SRR17520069.10658826  
SRR17520069.10658828  
SRR17520069.10658830  
SRR17520069.10658832

SRR17520069.10658836  
SRR17520069.10658838  
SRR17520069.10658840  
SRR17520069.10658842  
SRR17520069.10658844  
SRR17520069.10658846  
SRR17520069.10658848  
SRR17520069.10658850  
SRR17520069.10658852  
SRR17520069.10658854  
SRR17520069.10658856  
SRR17520069.10658858  
SRR17520069.10658860  
SRR17520069.10658862  
SRR17520069.10658864  
SRR17520069.10658866  
SRR17520069.10658868  
SRR17520069.10658870  
SRR17520069.10658874  
SRR17520069.10658876  
SRR17520069.10658878  
SRR17520069.10658880  
SRR17520069.10658882  
SRR17520069.10658884  
SRR17520069.10662537  
SRR17520069.10662539  
SRR17520069.10662541  
SRR17520069.10662543  
SRR17520069.10662545  
SRR17520069.10662547  
SRR17520069.10662549  
SRR17520069.10662551  
SRR17520069.10662553  
SRR17520069.10662555  
SRR17520069.10662557  
SRR17520069.10662559  
SRR17520069.10662561  
SRR17520069.10662563  
SRR17520069.10662565  
SRR17520069.10662569  
SRR17520069.10662571  
SRR17520069.10662573  
SRR17520069.10662575  
SRR17520069.10662577  
SRR17520069.10662579  
SRR17520069.10662581  
SRR17520069.10662583



SRR17520069.10662585  
SRR17520069.10662587  
SRR17520069.10662589  
SRR17520069.10662591  
SRR17520069.10662593  
SRR17520069.10662595  
SRR17520069.10662597  
SRR17520069.10662601  
SRR17520069.10662603  
SRR17520069.10662605  
SRR17520069.10662607  
SRR17520069.10662609  
SRR17520069.10662611  
SRR17520069.10662613  
SRR17520069.10662615  
SRR17520069.10662617  
SRR17520069.10662619  
SRR17520069.10662621  
SRR17520069.10662623  
SRR17520069.10662625  
SRR17520069.10662627  
SRR17520069.10662629  
SRR17520069.10662631  
SRR17520069.10662633  
SRR17520069.10662635  
SRR17520069.10663154  
SRR17520069.10663156  
SRR17520069.10663158  
SRR17520069.10663160  
SRR17520069.10663162  
SRR17520069.10663164  
SRR17520069.10663166  
SRR17520069.10663168  
SRR17520069.10663170  
SRR17520069.10663172  
SRR17520069.10663174  
SRR17520069.10663176  
SRR17520069.10663178  
SRR17520069.10663180  
SRR17520069.10663182  
SRR17520069.10663184  
SRR17520069.10663186  
SRR17520069.10663188  
SRR17520069.10663190  
SRR17520069.10663192  
SRR17520069.10663194  
SRR17520069.10663196

SRR17520069.10663198  
SRR17520069.10663200  
SRR17520069.10663202  
SRR17520069.10663204  
SRR17520069.10663206  
SRR17520069.10663208  
SRR17520069.10663210  
SRR17520069.10663212  
SRR17520069.10663909  
SRR17520069.10663911  
SRR17520069.10663913  
SRR17520069.10663915  
SRR17520069.10663917  
SRR17520069.10663919  
SRR17520069.10663921  
SRR17520069.10663923  
SRR17520069.10663925  
SRR17520069.10663927  
SRR17520069.10663929  
SRR17520069.10663931  
SRR17520069.10663933  
SRR17520069.10663935  
SRR17520069.10663937  
SRR17520069.10663939  
SRR17520069.10663941  
SRR17520069.10663943  
SRR17520069.10663945  
SRR17520069.10663947  
SRR17520069.10666481  
SRR17520069.10666483  
SRR17520069.10673348  
SRR17520069.10673350  
SRR17520069.10673352  
SRR17520069.10673354  
SRR17520069.10673356  
SRR17520069.10673358  
SRR17520069.10673360  
SRR17520069.10673362  
SRR17520069.10673364  
SRR17520069.10673366  
SRR17520069.10673368  
SRR17520069.10673370  
SRR17520069.10673372  
SRR17520069.10673374  
SRR17520069.10673376  
SRR17520069.10673378  
SRR17520069.10673382

SRR17520069. 10673384  
SRR17520069. 10673386  
SRR17520069. 10678483  
SRR17520069. 10681988  
SRR17520069. 10683578  
SRR17520069. 10683582  
SRR17520069. 10683584  
SRR17520069. 10683586  
SRR17520069. 10683588  
SRR17520069. 10683590  
SRR17520069. 10683592  
SRR17520069. 10683594  
SRR17520069. 10683596  
SRR17520069. 10683598  
SRR17520069. 10683600  
SRR17520069. 10683602  
SRR17520069. 10683604  
SRR17520069. 10683606  
SRR17520069. 10683608  
SRR17520069. 10683610  
SRR17520069. 10683612  
SRR17520069. 10683614  
SRR17520069. 10683616  
SRR17520069. 10683618  
SRR17520069. 10683620  
SRR17520069. 10683622  
SRR17520069. 10683624  
SRR17520069. 10683626  
SRR17520069. 10683628  
SRR17520069. 10683630  
SRR17520069. 10683632  
SRR17520069. 10683634  
SRR17520069. 10683636  
SRR17520069. 10683640  
SRR17520069. 10683644  
SRR17520069. 10683646  
SRR17520069. 10683648  
SRR17520069. 10683650  
SRR17520069. 10683652  
SRR17520069. 10683654  
SRR17520069. 10683656  
SRR17520069. 10683658  
SRR17520069. 10683660  
SRR17520069. 10683662  
SRR17520069. 10683664  
SRR17520069. 10683666  
SRR17520069. 10683668

SRR17520069.10683670  
SRR17520069.10683672  
SRR17520069.10683674  
SRR17520069.10683676  
SRR17520069.10683680  
SRR17520069.10683682  
SRR17520069.10683684  
SRR17520069.10683686  
SRR17520069.10683688  
SRR17520069.10683690  
SRR17520069.10683692  
SRR17520069.10683694  
SRR17520069.10683696  
SRR17520069.10690047  
SRR17520069.10690049  
SRR17520069.10690875  
SRR17520069.10690877  
SRR17520069.10690879  
SRR17520069.10690881  
SRR17520069.10690883  
SRR17520069.10694227  
SRR17520069.10698276  
SRR17520069.10698278  
SRR17520069.10698280  
SRR17520069.10698282  
SRR17520069.10698284  
SRR17520069.10698286  
SRR17520069.10699128  
SRR17520069.10699130  
SRR17520069.10699135  
SRR17520069.10699137  
SRR17520069.10699139  
SRR17520069.10699141  
SRR17520069.10699143  
SRR17520069.10699145  
SRR17520069.10699147  
SRR17520069.10699149  
SRR17520069.10699151  
SRR17520069.10699153  
SRR17520069.10699155  
SRR17520069.10699157  
SRR17520069.10699159  
SRR17520069.10699161  
SRR17520069.10699163  
SRR17520069.10699165  
SRR17520069.10699167  
SRR17520069.10699169

SRR17520069.10699171  
SRR17520069.10699173  
SRR17520069.10699175  
SRR17520069.10699177  
SRR17520069.10699179  
SRR17520069.10699181  
SRR17520069.10699183  
SRR17520069.10699185  
SRR17520069.10699187  
SRR17520069.10699189  
SRR17520069.10699191  
SRR17520069.10699193  
SRR17520069.10699195  
SRR17520069.10699197  
SRR17520069.10707492  
SRR17520069.10707494  
SRR17520069.10707496  
SRR17520069.10707498  
SRR17520069.10707500  
SRR17520069.10707502  
SRR17520069.10707504  
SRR17520069.10707506  
SRR17520069.10707508  
SRR17520069.10707510  
SRR17520069.10707512  
SRR17520069.10707514  
SRR17520069.10707516  
SRR17520069.10707518  
SRR17520069.10707520  
SRR17520069.10707522  
SRR17520069.10709323  
SRR17520069.10709325  
SRR17520069.10709327  
SRR17520069.10709329  
SRR17520069.10709331  
SRR17520069.10709333  
SRR17520069.10709335  
SRR17520069.10709337  
SRR17520069.10709339  
SRR17520069.10709341  
SRR17520069.10709343  
SRR17520069.10709345  
SRR17520069.10709347  
SRR17520069.10709349  
SRR17520069.10712581  
SRR17520069.10712583  
SRR17520069.10712585

SRR17520069.10712587  
SRR17520069.10712589  
SRR17520069.10712591  
SRR17520069.10717006  
SRR17520069.10717008  
SRR17520069.10717010  
SRR17520069.10717012  
SRR17520069.10717403  
SRR17520069.10717405  
SRR17520069.10717407  
SRR17520069.10717409  
SRR17520069.10717411  
SRR17520069.10717413  
SRR17520069.10721184  
SRR17520069.10721186  
SRR17520069.10721188  
SRR17520069.10721190  
SRR17520069.10721192  
SRR17520069.10721194  
SRR17520069.10721196  
SRR17520069.10721198  
SRR17520069.10721200  
SRR17520069.10721202  
SRR17520069.10721204  
SRR17520069.10721206  
SRR17520069.10721208  
SRR17520069.10721210  
SRR17520069.10721212  
SRR17520069.10721214  
SRR17520069.10721216  
SRR17520069.10721218  
SRR17520069.10721220  
SRR17520069.10721222  
SRR17520069.10721224  
SRR17520069.10721226  
SRR17520069.10721228  
SRR17520069.10721230  
SRR17520069.10721232  
SRR17520069.10721236  
SRR17520069.10721238  
SRR17520069.10721240  
SRR17520069.10721242  
SRR17520069.10721244  
SRR17520069.10721246  
SRR17520069.10721248  
SRR17520069.10721250  
SRR17520069.10721252

SRR17520069.10721254  
SRR17520069.10721256  
SRR17520069.10721258  
SRR17520069.10721260  
SRR17520069.10721262  
SRR17520069.10721264  
SRR17520069.10721266  
SRR17520069.10721268  
SRR17520069.10721270  
SRR17520069.10721272  
SRR17520069.10721274  
SRR17520069.10721276  
SRR17520069.10721278  
SRR17520069.10721280  
SRR17520069.10721282  
SRR17520069.10721284  
SRR17520069.10721286  
SRR17520069.10721288  
SRR17520069.10721290  
SRR17520069.10724198  
SRR17520069.10724200  
SRR17520069.10724202  
SRR17520069.10724204  
SRR17520069.10724206  
SRR17520069.10724208  
SRR17520069.10724210  
SRR17520069.10724212  
SRR17520069.10724214  
SRR17520069.10724216  
SRR17520069.10724218  
SRR17520069.10727906  
SRR17520069.10727908  
SRR17520069.10727910  
SRR17520069.10727912  
SRR17520069.10727914  
SRR17520069.10727916  
SRR17520069.10727918  
SRR17520069.10727920  
SRR17520069.10727922  
SRR17520069.10727924  
SRR17520069.10727926  
SRR17520069.10727928  
SRR17520069.10727930  
SRR17520069.10727932  
SRR17520069.10727934  
SRR17520069.10736986  
SRR17520069.10736988

SRR17520069.10736990  
SRR17520069.10736992  
SRR17520069.10736994  
SRR17520069.10736996  
SRR17520069.10736998  
SRR17520069.10737000  
SRR17520069.10737002  
SRR17520069.10737004  
SRR17520069.10737006  
SRR17520069.10737008  
SRR17520069.10737010  
SRR17520069.10737012  
SRR17520069.10739902  
SRR17520069.10739904  
SRR17520069.10739906  
SRR17520069.10739910  
SRR17520069.10739912  
SRR17520069.10739914  
SRR17520069.10739916  
SRR17520069.10739918  
SRR17520069.10739920  
SRR17520069.10744072  
SRR17520069.10744074  
SRR17520069.10744076  
SRR17520069.10744078  
SRR17520069.10744080  
SRR17520069.10744082  
SRR17520069.10744084  
SRR17520069.10744086  
SRR17520069.10744088  
SRR17520069.10744090  
SRR17520069.10744092  
SRR17520069.10744094  
SRR17520069.10744096  
SRR17520069.10744098  
SRR17520069.10744100  
SRR17520069.10744102  
SRR17520069.10744104  
SRR17520069.10744106  
SRR17520069.10744108  
SRR17520069.10744110  
SRR17520069.10744112  
SRR17520069.10744114  
SRR17520069.10744116  
SRR17520069.10744118  
SRR17520069.10744120  
SRR17520069.10745127



SRR17520069.10745129  
SRR17520069.10745131  
SRR17520069.10745133  
SRR17520069.10745135  
SRR17520069.10745137  
SRR17520069.10745141  
SRR17520069.10745143  
SRR17520069.10745145  
SRR17520069.10745147  
SRR17520069.10745149  
SRR17520069.10745151  
SRR17520069.10745153  
SRR17520069.10745155  
SRR17520069.10745157  
SRR17520069.10745159  
SRR17520069.10745161  
SRR17520069.10745163  
SRR17520069.10745165  
SRR17520069.10745167  
SRR17520069.10745169  
SRR17520069.10745171  
SRR17520069.10745173  
SRR17520069.10745175  
SRR17520069.10745177  
SRR17520069.10745179  
SRR17520069.10745181  
SRR17520069.10745183  
SRR17520069.10745185  
SRR17520069.10745187  
SRR17520069.10745189  
SRR17520069.10747921  
SRR17520069.10747923  
SRR17520069.10747925  
SRR17520069.10747927  
SRR17520069.10747929  
SRR17520069.10747931  
SRR17520069.10747933  
SRR17520069.10747935  
SRR17520069.10747937  
SRR17520069.10747939  
SRR17520069.10747941  
SRR17520069.10747943  
SRR17520069.10747945  
SRR17520069.10747947  
SRR17520069.10747949  
SRR17520069.10747951  
SRR17520069.10747953

SRR17520069.10747955  
SRR17520069.10747957  
SRR17520069.10747959  
SRR17520069.10747961  
SRR17520069.10747963  
SRR17520069.10747965  
SRR17520069.10747967  
SRR17520069.10749898  
SRR17520069.10749900  
SRR17520069.10749902  
SRR17520069.10749904  
SRR17520069.10749906  
SRR17520069.10749908  
SRR17520069.10749910  
SRR17520069.10749912  
SRR17520069.10749914  
SRR17520069.10749916  
SRR17520069.10749918  
SRR17520069.10749920  
SRR17520069.10749922  
SRR17520069.10752462  
SRR17520069.10752464  
SRR17520069.10752466  
SRR17520069.10752468  
SRR17520069.10752822  
SRR17520069.10752824  
SRR17520069.10752826  
SRR17520069.10752828  
SRR17520069.10752830  
SRR17520069.10752832  
SRR17520069.10752834  
SRR17520069.10752836  
SRR17520069.10754091  
SRR17520069.10757891  
SRR17520069.10757893  
SRR17520069.10757895  
SRR17520069.10757897  
SRR17520069.10757899  
SRR17520069.10757901  
SRR17520069.10757903  
SRR17520069.10757905  
SRR17520069.10757907  
SRR17520069.10757909  
SRR17520069.10757911  
SRR17520069.10757913  
SRR17520069.10757915  
SRR17520069.10757917

SRR17520069.10757919  
SRR17520069.10757921  
SRR17520069.10757923  
SRR17520069.10757925  
SRR17520069.10757927  
SRR17520069.10757929  
SRR17520069.10757931  
SRR17520069.10757933  
SRR17520069.10757935  
SRR17520069.10757937  
SRR17520069.10760261  
SRR17520069.10760263  
SRR17520069.10760265  
SRR17520069.10760267  
SRR17520069.10761761  
SRR17520069.10761763  
SRR17520069.10761765  
SRR17520069.10761767  
SRR17520069.10761769  
SRR17520069.10761771  
SRR17520069.10761773  
SRR17520069.10761775  
SRR17520069.10761779  
SRR17520069.10761781  
SRR17520069.10761783  
SRR17520069.10761785  
SRR17520069.10761787  
SRR17520069.10761789  
SRR17520069.10761791  
SRR17520069.10761793  
SRR17520069.10761797  
SRR17520069.10761799  
SRR17520069.10761801  
SRR17520069.10761803  
SRR17520069.10764574  
SRR17520069.10764578  
SRR17520069.10764580  
SRR17520069.10764582  
SRR17520069.10764584  
SRR17520069.10765453  
SRR17520069.10765455  
SRR17520069.10765457  
SRR17520069.10765459  
SRR17520069.10765461  
SRR17520069.10765463  
SRR17520069.10765465  
SRR17520069.10765467

SRR17520069. 10765469  
SRR17520069. 10765471  
SRR17520069. 10765473  
SRR17520069. 10765475  
SRR17520069. 10765477  
SRR17520069. 10765479  
SRR17520069. 10765481  
SRR17520069. 10765483  
SRR17520069. 10765485  
SRR17520069. 10765487  
SRR17520069. 10765489  
SRR17520069. 10765491  
SRR17520069. 10765493  
SRR17520069. 10765495  
SRR17520069. 10765497  
SRR17520069. 10765499  
SRR17520069. 10765501  
SRR17520069. 10765503  
SRR17520069. 10765505  
SRR17520069. 10765507  
SRR17520069. 10765509  
SRR17520069. 10765511  
SRR17520069. 10765513  
SRR17520069. 10765515  
SRR17520069. 10765519  
SRR17520069. 10765521  
SRR17520069. 10765523  
SRR17520069. 10765525  
SRR17520069. 10765527  
SRR17520069. 10765529  
SRR17520069. 10765531  
SRR17520069. 10765533  
SRR17520069. 10765535  
SRR17520069. 10765537  
SRR17520069. 10768642  
SRR17520069. 10768644  
SRR17520069. 10768646  
SRR17520069. 10768648  
SRR17520069. 10768650  
SRR17520069. 10768652  
SRR17520069. 10768654  
SRR17520069. 10768656  
SRR17520069. 10768658  
SRR17520069. 10768660  
SRR17520069. 10768662  
SRR17520069. 10768664  
SRR17520069. 10768666

SRR17520069. 10768668  
SRR17520069. 10768670  
SRR17520069. 10768672  
SRR17520069. 10768674  
SRR17520069. 10769616  
SRR17520069. 10769618  
SRR17520069. 10769620  
SRR17520069. 10769622  
SRR17520069. 10769624  
SRR17520069. 10769626  
SRR17520069. 10769628  
SRR17520069. 10769630  
SRR17520069. 10769632  
SRR17520069. 10769636  
SRR17520069. 10769638  
SRR17520069. 10771271  
SRR17520069. 10771273  
SRR17520069. 10771275  
SRR17520069. 10771277  
SRR17520069. 10771279  
SRR17520069. 10771281  
SRR17520069. 10771283  
SRR17520069. 10771285  
SRR17520069. 10771287  
SRR17520069. 10771289  
SRR17520069. 10771291  
SRR17520069. 10771293  
SRR17520069. 10771295  
SRR17520069. 10771297  
SRR17520069. 10771299  
SRR17520069. 10771301  
SRR17520069. 10771303  
SRR17520069. 10771305  
SRR17520069. 10771307  
SRR17520069. 10771309  
SRR17520069. 10771311  
SRR17520069. 10771313  
SRR17520069. 10771315  
SRR17520069. 10771317  
SRR17520069. 10771319  
SRR17520069. 10771321  
SRR17520069. 10771323  
SRR17520069. 10772579  
SRR17520069. 10774690  
SRR17520069. 10774692  
SRR17520069. 10774694  
SRR17520069. 10774696

SRR17520069.10774698  
SRR17520069.10774700  
SRR17520069.10774702  
SRR17520069.10774704  
SRR17520069.10774706  
SRR17520069.10774708  
SRR17520069.10774710  
SRR17520069.10774712  
SRR17520069.10774714  
SRR17520069.10774716  
SRR17520069.10774718  
SRR17520069.10774720  
SRR17520069.10774722  
SRR17520069.10774724  
SRR17520069.10774726  
SRR17520069.10774728  
SRR17520069.10774730  
SRR17520069.10774732  
SRR17520069.10774736  
SRR17520069.10774738  
SRR17520069.10774740  
SRR17520069.10774742  
SRR17520069.10774744  
SRR17520069.10774746  
SRR17520069.10774748  
SRR17520069.10774750  
SRR17520069.10777332  
SRR17520069.10779011  
SRR17520069.10779013  
SRR17520069.10779015  
SRR17520069.10779017  
SRR17520069.10779019  
SRR17520069.10779021  
SRR17520069.10779023  
SRR17520069.10779025  
SRR17520069.10779027  
SRR17520069.10779029  
SRR17520069.10779031  
SRR17520069.10779033  
SRR17520069.10779035  
SRR17520069.10779037  
SRR17520069.10779039  
SRR17520069.10779041  
SRR17520069.10779043  
SRR17520069.10779045  
SRR17520069.10779047  
SRR17520069.10779049

SRR17520069.10779051  
SRR17520069.10779053  
SRR17520069.10779055  
SRR17520069.10779057  
SRR17520069.10779059  
SRR17520069.10779061  
SRR17520069.10779063  
SRR17520069.10779065  
SRR17520069.10779067  
SRR17520069.10779069  
SRR17520069.10779071  
SRR17520069.10779073  
SRR17520069.10779075  
SRR17520069.10779077  
SRR17520069.10781224  
SRR17520069.10781226  
SRR17520069.10781228  
SRR17520069.10781230  
SRR17520069.10781232  
SRR17520069.10791217  
SRR17520069.10791219  
SRR17520069.10791221  
SRR17520069.10791223  
SRR17520069.10791225  
SRR17520069.10791227  
SRR17520069.10791229  
SRR17520069.10791231  
SRR17520069.10791233  
SRR17520069.10791235  
SRR17520069.10791237  
SRR17520069.10791239  
SRR17520069.10791241  
SRR17520069.10791243  
SRR17520069.10791245  
SRR17520069.10791247  
SRR17520069.10791249  
SRR17520069.10791251  
SRR17520069.10791253  
SRR17520069.10791255  
SRR17520069.10791257  
SRR17520069.10791259  
SRR17520069.10793729  
SRR17520069.10793731  
SRR17520069.10793733  
SRR17520069.10793735  
SRR17520069.10793737  
SRR17520069.10793739

SRR17520069.10793741  
SRR17520069.10793743  
SRR17520069.10793745  
SRR17520069.10793747  
SRR17520069.10793749  
SRR17520069.10800020  
SRR17520069.10800022  
SRR17520069.10800024  
SRR17520069.10800026  
SRR17520069.10800028  
SRR17520069.10800030  
SRR17520069.10800032  
SRR17520069.10800034  
SRR17520069.10800036  
SRR17520069.10809774  
SRR17520069.10809776  
SRR17520069.10809778  
SRR17520069.10809780  
SRR17520069.10809782  
SRR17520069.10809784  
SRR17520069.10809786  
SRR17520069.10809788  
SRR17520069.10809790  
SRR17520069.10809792  
SRR17520069.10809796  
SRR17520069.10809798  
SRR17520069.10809800  
SRR17520069.10809802  
SRR17520069.10809804  
SRR17520069.10809806  
SRR17520069.10812766  
SRR17520069.10812768  
SRR17520069.10812770  
SRR17520069.10812772  
SRR17520069.10812774  
SRR17520069.10812778  
SRR17520069.10812780  
SRR17520069.10812782  
SRR17520069.10812784  
SRR17520069.10812786  
SRR17520069.10812788  
SRR17520069.10812790  
SRR17520069.10812792  
SRR17520069.10812796  
SRR17520069.10812798  
SRR17520069.10812802  
SRR17520069.10812804



SRR17520069.10813513  
SRR17520069.10813545  
SRR17520069.10813549  
SRR17520069.10813551  
SRR17520069.10813553  
SRR17520069.10813555  
SRR17520069.10813557  
SRR17520069.10813559  
SRR17520069.10813561  
SRR17520069.10813563  
SRR17520069.10813565  
SRR17520069.10813567  
SRR17520069.10813569  
SRR17520069.10813571  
SRR17520069.10813573  
SRR17520069.10813575  
SRR17520069.10813577  
SRR17520069.10813579  
SRR17520069.10813581  
SRR17520069.10813583  
SRR17520069.10813585  
SRR17520069.10813587  
SRR17520069.10813589  
SRR17520069.10813591  
SRR17520069.10813593  
SRR17520069.10813595  
SRR17520069.10813599  
SRR17520069.10813601  
SRR17520069.10813603  
SRR17520069.10813605  
SRR17520069.10813607  
SRR17520069.10813609  
SRR17520069.10813611  
SRR17520069.10813615  
SRR17520069.10813617  
SRR17520069.10813619  
SRR17520069.10813621  
SRR17520069.10813623  
SRR17520069.10813625  
SRR17520069.10813627  
SRR17520069.10813629  
SRR17520069.10813631  
SRR17520069.10813633  
SRR17520069.10813635  
SRR17520069.10813637  
SRR17520069.10813639  
SRR17520069.10819060

SRR17520069.10819062  
SRR17520069.10824108  
SRR17520069.10824110  
SRR17520069.10824114  
SRR17520069.10824116  
SRR17520069.10824118  
SRR17520069.10824427  
SRR17520069.10824429  
SRR17520069.10824431  
SRR17520069.10824433  
SRR17520069.10824435  
SRR17520069.10824437  
SRR17520069.10824439  
SRR17520069.10824441  
SRR17520069.10824443  
SRR17520069.10824445  
SRR17520069.10824447  
SRR17520069.10824449  
SRR17520069.10824451  
SRR17520069.10824453  
SRR17520069.10824455  
SRR17520069.10824457  
SRR17520069.10824459  
SRR17520069.10824461  
SRR17520069.10824463  
SRR17520069.10824465  
SRR17520069.10824467  
SRR17520069.10824471  
SRR17520069.10831523  
SRR17520069.10831527  
SRR17520069.10837365  
SRR17520069.10837367  
SRR17520069.10837369  
SRR17520069.10841575  
SRR17520069.10841577  
SRR17520069.10841579  
SRR17520069.10841581  
SRR17520069.10841583  
SRR17520069.10841585  
SRR17520069.10841587  
SRR17520069.10841589  
SRR17520069.10841591  
SRR17520069.10841593  
SRR17520069.10841595  
SRR17520069.10841602  
SRR17520069.10841606  
SRR17520069.10841608

SRR17520069.10841610  
SRR17520069.10841612  
SRR17520069.10841614  
SRR17520069.10841616  
SRR17520069.10841618  
SRR17520069.10841620  
SRR17520069.10841622  
SRR17520069.10841624  
SRR17520069.10841626  
SRR17520069.10848952  
SRR17520069.10848954  
SRR17520069.10852274  
SRR17520069.10852278  
SRR17520069.10852280  
SRR17520069.10852282  
SRR17520069.10852284  
SRR17520069.10852286  
SRR17520069.10852288  
SRR17520069.10852290  
SRR17520069.10852292  
SRR17520069.10852294  
SRR17520069.10852296  
SRR17520069.10852298  
SRR17520069.10852302  
SRR17520069.10852308  
SRR17520069.10852310  
SRR17520069.10852312  
SRR17520069.10852314  
SRR17520069.10852974  
SRR17520069.10852976  
SRR17520069.10852978  
SRR17520069.10852980  
SRR17520069.10852982  
SRR17520069.10852986  
SRR17520069.10852988  
SRR17520069.10852990  
SRR17520069.10852992  
SRR17520069.10852994  
SRR17520069.10852996  
SRR17520069.10852998  
SRR17520069.10853014  
SRR17520069.10853016  
SRR17520069.10853018  
SRR17520069.10853020  
SRR17520069.10853022  
SRR17520069.10853024  
SRR17520069.10853028

SRR17520069.10853030  
SRR17520069.10853034  
SRR17520069.10853036  
SRR17520069.10853038  
SRR17520069.10853040  
SRR17520069.10853042  
SRR17520069.10853044  
SRR17520069.10853046  
SRR17520069.10853048  
SRR17520069.10853050  
SRR17520069.10853052  
SRR17520069.10853056  
SRR17520069.10853058  
SRR17520069.10853060  
SRR17520069.10853062  
SRR17520069.10853064  
SRR17520069.10853066  
SRR17520069.10858989  
SRR17520069.10858991  
SRR17520069.10858995  
SRR17520069.10858997  
SRR17520069.10858999  
SRR17520069.10859001  
SRR17520069.10859003  
SRR17520069.10859005  
SRR17520069.10859007  
SRR17520069.10859009  
SRR17520069.10859011  
SRR17520069.10859013  
SRR17520069.10859015  
SRR17520069.10859017  
SRR17520069.10859019  
SRR17520069.10859021  
SRR17520069.10859023  
SRR17520069.10859025  
SRR17520069.10859027  
SRR17520069.10859029  
SRR17520069.10859031  
SRR17520069.10859033  
SRR17520069.10859035  
SRR17520069.10859037  
SRR17520069.10859039  
SRR17520069.10859041  
SRR17520069.10859043  
SRR17520069.10859045  
SRR17520069.10859047  
SRR17520069.10859049

SRR17520069.10859051  
SRR17520069.10859053  
SRR17520069.10859055  
SRR17520069.10859057  
SRR17520069.10859059  
SRR17520069.10859061  
SRR17520069.10859063  
SRR17520069.10859067  
SRR17520069.10859069  
SRR17520069.10859071  
SRR17520069.10859073  
SRR17520069.10859075  
SRR17520069.10859077  
SRR17520069.10859079  
SRR17520069.10859081  
SRR17520069.10860001  
SRR17520069.10860021  
SRR17520069.10860029  
SRR17520069.10861851  
SRR17520069.10861855  
SRR17520069.10861857  
SRR17520069.10861859  
SRR17520069.10861861  
SRR17520069.10861863  
SRR17520069.10861865  
SRR17520069.10861869  
SRR17520069.10861871  
SRR17520069.10861873  
SRR17520069.10861875  
SRR17520069.10869497  
SRR17520069.10870326  
SRR17520069.10870328  
SRR17520069.10870330  
SRR17520069.10870332  
SRR17520069.10870334  
SRR17520069.10870336  
SRR17520069.10870338  
SRR17520069.10870340  
SRR17520069.10870342  
SRR17520069.10870344  
SRR17520069.10870346  
SRR17520069.10870348  
SRR17520069.10870350  
SRR17520069.10870352  
SRR17520069.10870354  
SRR17520069.10875405  
SRR17520069.10877027

SRR17520069.10877029  
SRR17520069.10877031  
SRR17520069.10877033  
SRR17520069.10877035  
SRR17520069.10877037  
SRR17520069.10877039  
SRR17520069.10877043  
SRR17520069.10877045  
SRR17520069.10877049  
SRR17520069.10877051  
SRR17520069.10877053  
SRR17520069.10877055  
SRR17520069.10877057  
SRR17520069.10877059  
SRR17520069.10877061  
SRR17520069.10877063  
SRR17520069.10877065  
SRR17520069.10878073  
SRR17520069.10878075  
SRR17520069.10878077  
SRR17520069.10878079  
SRR17520069.10878081  
SRR17520069.10878083  
SRR17520069.10878085  
SRR17520069.10878087  
SRR17520069.10878089  
SRR17520069.10878091  
SRR17520069.10878093  
SRR17520069.10878095  
SRR17520069.10878097  
SRR17520069.10878099  
SRR17520069.10878101  
SRR17520069.10878103  
SRR17520069.10878105  
SRR17520069.10884855  
SRR17520069.10884857  
SRR17520069.10884859  
SRR17520069.10884861  
SRR17520069.10884863  
SRR17520069.10884865  
SRR17520069.10884867  
SRR17520069.10884869  
SRR17520069.10884871  
SRR17520069.10884873  
SRR17520069.10884875  
SRR17520069.10884877  
SRR17520069.10884879

SRR17520069.10884881  
SRR17520069.10884883  
SRR17520069.10884885  
SRR17520069.10884887  
SRR17520069.10884889  
SRR17520069.10884891  
SRR17520069.10884893  
SRR17520069.10884895  
SRR17520069.10884897  
SRR17520069.10884899  
SRR17520069.10884901  
SRR17520069.10884903  
SRR17520069.10884907  
SRR17520069.10884909  
SRR17520069.10884911  
SRR17520069.10885940  
SRR17520069.10885942  
SRR17520069.10885946  
SRR17520069.10885948  
SRR17520069.10885950  
SRR17520069.10885952  
SRR17520069.10885954  
SRR17520069.10885956  
SRR17520069.10885958  
SRR17520069.10885960  
SRR17520069.10885962  
SRR17520069.10885964  
SRR17520069.10885966  
SRR17520069.10885968  
SRR17520069.10885970  
SRR17520069.10885972  
SRR17520069.10885974  
SRR17520069.10885976  
SRR17520069.10885978  
SRR17520069.10885980  
SRR17520069.10885982  
SRR17520069.10885984  
SRR17520069.10885986  
SRR17520069.10885988  
SRR17520069.10885990  
SRR17520069.10885992  
SRR17520069.10885994  
SRR17520069.10885998  
SRR17520069.10886000  
SRR17520069.10886004  
SRR17520069.10886006  
SRR17520069.10886008

SRR17520069.10886010  
SRR17520069.10886012  
SRR17520069.10886016  
SRR17520069.10886018  
SRR17520069.10886020  
SRR17520069.10886022  
SRR17520069.10897161  
SRR17520069.10897163  
SRR17520069.10897165  
SRR17520069.10897167  
SRR17520069.10897169  
SRR17520069.10897171  
SRR17520069.10897173  
SRR17520069.10897175  
SRR17520069.10897177  
SRR17520069.10897179  
SRR17520069.10897181  
SRR17520069.10897183  
SRR17520069.10897185  
SRR17520069.10897187  
SRR17520069.10898098  
SRR17520069.10898100  
SRR17520069.10898102  
SRR17520069.10898104  
SRR17520069.10898106  
SRR17520069.10898108  
SRR17520069.10898110  
SRR17520069.10898112  
SRR17520069.10898114  
SRR17520069.10898116  
SRR17520069.10898118  
SRR17520069.10898120  
SRR17520069.10898122  
SRR17520069.10898124  
SRR17520069.10898126  
SRR17520069.10898128  
SRR17520069.10898130  
SRR17520069.10898132  
SRR17520069.10898134  
SRR17520069.10898136  
SRR17520069.10898138  
SRR17520069.10898140  
SRR17520069.10898142  
SRR17520069.10898144  
SRR17520069.10898146  
SRR17520069.10898148  
SRR17520069.10898150



SRR17520069.10898152  
SRR17520069.10898154  
SRR17520069.10900043  
SRR17520069.10900045  
SRR17520069.10900049  
SRR17520069.10900051  
SRR17520069.10900053  
SRR17520069.10900055  
SRR17520069.10900057  
SRR17520069.10900059  
SRR17520069.10900061  
SRR17520069.10900063  
SRR17520069.10900065  
SRR17520069.10900067  
SRR17520069.10900071  
SRR17520069.10900073  
SRR17520069.10900075  
SRR17520069.10900077  
SRR17520069.10900079  
SRR17520069.10900081  
SRR17520069.10900083  
SRR17520069.10900085  
SRR17520069.10900087  
SRR17520069.10900089  
SRR17520069.10900091  
SRR17520069.10900095  
SRR17520069.10900097  
SRR17520069.10900099  
SRR17520069.10900101  
SRR17520069.10900103  
SRR17520069.10900105  
SRR17520069.10900107  
SRR17520069.10900109  
SRR17520069.10900111  
SRR17520069.10900115  
SRR17520069.10900117  
SRR17520069.10900119  
SRR17520069.10900121  
SRR17520069.10900123  
SRR17520069.10900125  
SRR17520069.10900127  
SRR17520069.10900129  
SRR17520069.10900716  
SRR17520069.10900718  
SRR17520069.10900720  
SRR17520069.10900722  
SRR17520069.10900726

SRR17520069.10900728  
SRR17520069.10900730  
SRR17520069.10900732  
SRR17520069.10900734  
SRR17520069.10900736  
SRR17520069.10900738  
SRR17520069.10900740  
SRR17520069.10901678  
SRR17520069.10901680  
SRR17520069.10901682  
SRR17520069.10901684  
SRR17520069.10901686  
SRR17520069.10901688  
SRR17520069.10901690  
SRR17520069.10901692  
SRR17520069.10901694  
SRR17520069.10901696  
SRR17520069.10901698  
SRR17520069.10901700  
SRR17520069.10901702  
SRR17520069.10901704  
SRR17520069.10903825  
SRR17520069.10903827  
SRR17520069.10903829  
SRR17520069.10903831  
SRR17520069.10903833  
SRR17520069.10903835  
SRR17520069.10903837  
SRR17520069.10903839  
SRR17520069.10903841  
SRR17520069.10903843  
SRR17520069.10903845  
SRR17520069.10903847  
SRR17520069.10903849  
SRR17520069.10903851  
SRR17520069.10903853  
SRR17520069.10903855  
SRR17520069.10903857  
SRR17520069.10903859  
SRR17520069.10909301  
SRR17520069.10909303  
SRR17520069.10909305  
SRR17520069.10909307  
SRR17520069.10909309  
SRR17520069.10909311  
SRR17520069.10909313  
SRR17520069.10909315

SRR17520069.10909317  
SRR17520069.10909319  
SRR17520069.10909321  
SRR17520069.10909323  
SRR17520069.10909325  
SRR17520069.10909329  
SRR17520069.10909331  
SRR17520069.10909333  
SRR17520069.10909337  
SRR17520069.10909339  
SRR17520069.10909341  
SRR17520069.10909343  
SRR17520069.10909345  
SRR17520069.10909347  
SRR17520069.10909349  
SRR17520069.10909351  
SRR17520069.10909353  
SRR17520069.10909355  
SRR17520069.10909357  
SRR17520069.10909359  
SRR17520069.10909361  
SRR17520069.10909363  
SRR17520069.10909365  
SRR17520069.10909367  
SRR17520069.10909369  
SRR17520069.10909371  
SRR17520069.10909373  
SRR17520069.10909375  
SRR17520069.10909377  
SRR17520069.10909379  
SRR17520069.10909381  
SRR17520069.10909383  
SRR17520069.10909387  
SRR17520069.10909389  
SRR17520069.10909391  
SRR17520069.10909393  
SRR17520069.10909395  
SRR17520069.10909397  
SRR17520069.10909399  
SRR17520069.10909403  
SRR17520069.10909407  
SRR17520069.10909409  
SRR17520069.10909411  
SRR17520069.10909413  
SRR17520069.10909415  
SRR17520069.10909419  
SRR17520069.10909421

SRR17520069.10909423  
SRR17520069.10909425  
SRR17520069.10909427  
SRR17520069.10917167  
SRR17520069.10917169  
SRR17520069.10917171  
SRR17520069.10917173  
SRR17520069.10917175  
SRR17520069.10917177  
SRR17520069.10917179  
SRR17520069.10917181  
SRR17520069.10917183  
SRR17520069.10917185  
SRR17520069.10917187  
SRR17520069.10917189  
SRR17520069.10917191  
SRR17520069.10917193  
SRR17520069.10917195  
SRR17520069.10917197  
SRR17520069.10917199  
SRR17520069.10917201  
SRR17520069.10917203  
SRR17520069.10917205  
SRR17520069.10917207  
SRR17520069.10917209  
SRR17520069.10917211  
SRR17520069.10917213  
SRR17520069.10917215  
SRR17520069.10917217  
SRR17520069.10917219  
SRR17520069.10917221  
SRR17520069.10917223  
SRR17520069.10917225  
SRR17520069.10917227  
SRR17520069.10917229  
SRR17520069.10917231  
SRR17520069.10917233  
SRR17520069.10917235  
SRR17520069.10917240  
SRR17520069.10917242  
SRR17520069.10917244  
SRR17520069.10917252  
SRR17520069.10917254  
SRR17520069.10917256  
SRR17520069.10917258  
SRR17520069.10917260  
SRR17520069.10917262

SRR17520069.10917264  
SRR17520069.10917266  
SRR17520069.10917268  
SRR17520069.10917270  
SRR17520069.10921328  
SRR17520069.10921407  
SRR17520069.10921409  
SRR17520069.10921411  
SRR17520069.10921413  
SRR17520069.10921415  
SRR17520069.10921417  
SRR17520069.10921419  
SRR17520069.10921423  
SRR17520069.10921427  
SRR17520069.10921429  
SRR17520069.10921431  
SRR17520069.10921433  
SRR17520069.10921435  
SRR17520069.10921439  
SRR17520069.10921441  
SRR17520069.10921443  
SRR17520069.10921445  
SRR17520069.10921447  
SRR17520069.10921449  
SRR17520069.10921453  
SRR17520069.10921455  
SRR17520069.10921457  
SRR17520069.10921463  
SRR17520069.10921465  
SRR17520069.10932061  
SRR17520069.10932063  
SRR17520069.10932065  
SRR17520069.10932067  
SRR17520069.10932069  
SRR17520069.10932071  
SRR17520069.10932073  
SRR17520069.10932075  
SRR17520069.10932077  
SRR17520069.10932079  
SRR17520069.10933623  
SRR17520069.10933625  
SRR17520069.10933629  
SRR17520069.10933631  
SRR17520069.10933633  
SRR17520069.10933635  
SRR17520069.10933637  
SRR17520069.10933639

SRR17520069.10933641  
SRR17520069.10933643  
SRR17520069.10933645  
SRR17520069.10933647  
SRR17520069.10933649  
SRR17520069.10933651  
SRR17520069.10933653  
SRR17520069.10933655  
SRR17520069.10933657  
SRR17520069.10933659  
SRR17520069.10933661  
SRR17520069.10933663  
SRR17520069.10933665  
SRR17520069.10933667  
SRR17520069.10933669  
SRR17520069.10933671  
SRR17520069.10933673  
SRR17520069.10933675  
SRR17520069.10933677  
SRR17520069.10933679  
SRR17520069.10933681  
SRR17520069.10933683  
SRR17520069.10935436  
SRR17520069.10935438  
SRR17520069.10935440  
SRR17520069.10935442  
SRR17520069.10935446  
SRR17520069.10935448  
SRR17520069.10935450  
SRR17520069.10935452  
SRR17520069.10935454  
SRR17520069.10935456  
SRR17520069.10938558  
SRR17520069.10938560  
SRR17520069.10938562  
SRR17520069.10938564  
SRR17520069.10938566  
SRR17520069.10938568  
SRR17520069.10938572  
SRR17520069.10938574  
SRR17520069.10938576  
SRR17520069.10938578  
SRR17520069.10938580  
SRR17520069.10938582  
SRR17520069.10938584  
SRR17520069.10938586  
SRR17520069.10938590

SRR17520069.10938592  
SRR17520069.10938594  
SRR17520069.10939535  
SRR17520069.10939537  
SRR17520069.10939539  
SRR17520069.10939541  
SRR17520069.10939545  
SRR17520069.10939547  
SRR17520069.10939549  
SRR17520069.10939551  
SRR17520069.10939553  
SRR17520069.10956675  
SRR17520069.10956679  
SRR17520069.10956681  
SRR17520069.10956683  
SRR17520069.10956685  
SRR17520069.10956687  
SRR17520069.10956689  
SRR17520069.10956691  
SRR17520069.10956693  
SRR17520069.10956695  
SRR17520069.10956697  
SRR17520069.10956699  
SRR17520069.10956701  
SRR17520069.10956703  
SRR17520069.10956705  
SRR17520069.10956707  
SRR17520069.10956709  
SRR17520069.10956711  
SRR17520069.10956713  
SRR17520069.10956715  
SRR17520069.10956717  
SRR17520069.10960136  
SRR17520069.10960138  
SRR17520069.10960140  
SRR17520069.10960142  
SRR17520069.10960144  
SRR17520069.10960146  
SRR17520069.10960148  
SRR17520069.10960150  
SRR17520069.10960152  
SRR17520069.10960154  
SRR17520069.10960156  
SRR17520069.10960160  
SRR17520069.10960162  
SRR17520069.10960164  
SRR17520069.10960166

SRR17520069.10960168  
SRR17520069.10960170  
SRR17520069.10960172  
SRR17520069.10960174  
SRR17520069.10960176  
SRR17520069.10960178  
SRR17520069.10960180  
SRR17520069.10960182  
SRR17520069.10960184  
SRR17520069.10960186  
SRR17520069.10960188  
SRR17520069.10960190  
SRR17520069.10960192  
SRR17520069.10960194  
SRR17520069.10960196  
SRR17520069.10960198  
SRR17520069.10960200  
SRR17520069.10960202  
SRR17520069.10960204  
SRR17520069.10960206  
SRR17520069.10960208  
SRR17520069.10960210  
SRR17520069.10960212  
SRR17520069.10960214  
SRR17520069.10960216  
SRR17520069.10960218  
SRR17520069.10960220  
SRR17520069.10960222  
SRR17520069.10960224  
SRR17520069.10960226  
SRR17520069.10960228  
SRR17520069.10960230  
SRR17520069.10960232  
SRR17520069.10960234  
SRR17520069.10960236  
SRR17520069.10960238  
SRR17520069.10964839  
SRR17520069.10964841  
SRR17520069.10964843  
SRR17520069.10964845  
SRR17520069.10964847  
SRR17520069.10964849  
SRR17520069.10964851  
SRR17520069.10964853  
SRR17520069.10964855  
SRR17520069.10966428  
SRR17520069.10966430



SRR17520069.10966432  
SRR17520069.10966434  
SRR17520069.10966436  
SRR17520069.10966438  
SRR17520069.10966440  
SRR17520069.10966442  
SRR17520069.10966446  
SRR17520069.10966448  
SRR17520069.10966450  
SRR17520069.10966452  
SRR17520069.10966454  
SRR17520069.10966456  
SRR17520069.10966458  
SRR17520069.10966460  
SRR17520069.10966462  
SRR17520069.10966464  
SRR17520069.10966466  
SRR17520069.10966468  
SRR17520069.10966470  
SRR17520069.10966472  
SRR17520069.10966474  
SRR17520069.10966476  
SRR17520069.10966478  
SRR17520069.10966480  
SRR17520069.10966482  
SRR17520069.10966484  
SRR17520069.10966486  
SRR17520069.10966488  
SRR17520069.10966490  
SRR17520069.10966492  
SRR17520069.10966494  
SRR17520069.10966496  
SRR17520069.10966498  
SRR17520069.10966500  
SRR17520069.10966502  
SRR17520069.10966504  
SRR17520069.10966506  
SRR17520069.10966508  
SRR17520069.10966510  
SRR17520069.10966512  
SRR17520069.10966779  
SRR17520069.10967382  
SRR17520069.10967384  
SRR17520069.10967386  
SRR17520069.10967388  
SRR17520069.10967390  
SRR17520069.10967392

SRR17520069.10967394  
SRR17520069.10967396  
SRR17520069.10967398  
SRR17520069.10967400  
SRR17520069.10967402  
SRR17520069.10967404  
SRR17520069.10967406  
SRR17520069.10967408  
SRR17520069.10967410  
SRR17520069.10967412  
SRR17520069.10968400  
SRR17520069.10968402  
SRR17520069.10968404  
SRR17520069.10968406  
SRR17520069.10968408  
SRR17520069.10968410  
SRR17520069.10968412  
SRR17520069.10968414  
SRR17520069.10968416  
SRR17520069.10968418  
SRR17520069.10968420  
SRR17520069.10968422  
SRR17520069.10968424  
SRR17520069.10968426  
SRR17520069.10968428  
SRR17520069.10968430  
SRR17520069.10968432  
SRR17520069.10968434  
SRR17520069.10968436  
SRR17520069.10971160  
SRR17520069.10971162  
SRR17520069.10971164  
SRR17520069.10971166  
SRR17520069.10971168  
SRR17520069.10971170  
SRR17520069.10971174  
SRR17520069.10971176  
SRR17520069.10971178  
SRR17520069.10972911  
SRR17520069.10975803  
SRR17520069.10975805  
SRR17520069.10976777  
SRR17520069.10976779  
SRR17520069.10976781  
SRR17520069.10976783  
SRR17520069.10976785  
SRR17520069.10976787

SRR17520069.10976789  
SRR17520069.10980401  
SRR17520069.10980403  
SRR17520069.10980405  
SRR17520069.10980407  
SRR17520069.10980409  
SRR17520069.10980411  
SRR17520069.10980413  
SRR17520069.10980415  
SRR17520069.10980417  
SRR17520069.10980419  
SRR17520069.10980421  
SRR17520069.10980423  
SRR17520069.10980425  
SRR17520069.10980427  
SRR17520069.10980429  
SRR17520069.10980431  
SRR17520069.10980433  
SRR17520069.10980435  
SRR17520069.10980437  
SRR17520069.10980439  
SRR17520069.10980445  
SRR17520069.10980447  
SRR17520069.10984243  
SRR17520069.10984245  
SRR17520069.10984247  
SRR17520069.10984249  
SRR17520069.10984251  
SRR17520069.10984253  
SRR17520069.10984255  
SRR17520069.10984257  
SRR17520069.10984259  
SRR17520069.10984261  
SRR17520069.10984263  
SRR17520069.10984265  
SRR17520069.10984267  
SRR17520069.10986003  
SRR17520069.10986005  
SRR17520069.10986007  
SRR17520069.10986009  
SRR17520069.10986011  
SRR17520069.10986015  
SRR17520069.10986017  
SRR17520069.10986019  
SRR17520069.10986021  
SRR17520069.10988101  
SRR17520069.10988103

SRR17520069.10988105  
SRR17520069.10988111  
SRR17520069.10988113  
SRR17520069.10988115  
SRR17520069.10988117  
SRR17520069.10988119  
SRR17520069.10988121  
SRR17520069.10988123  
SRR17520069.10988125  
SRR17520069.10988127  
SRR17520069.10988129  
SRR17520069.10988131  
SRR17520069.10988133  
SRR17520069.10988135  
SRR17520069.10988137  
SRR17520069.10988139  
SRR17520069.10988141  
SRR17520069.10988143  
SRR17520069.10988145  
SRR17520069.10988147  
SRR17520069.10988149  
SRR17520069.10988151  
SRR17520069.10988153  
SRR17520069.10988155  
SRR17520069.10988157  
SRR17520069.10992106  
SRR17520069.10992108  
SRR17520069.10992110  
SRR17520069.10992112  
SRR17520069.11007872  
SRR17520069.11007874  
SRR17520069.11007876  
SRR17520069.11007878  
SRR17520069.11007880  
SRR17520069.11007882  
SRR17520069.11007884  
SRR17520069.11007886  
SRR17520069.11007888  
SRR17520069.11007890  
SRR17520069.11007892  
SRR17520069.11007894  
SRR17520069.11007896  
SRR17520069.11007898  
SRR17520069.11007900  
SRR17520069.11007902  
SRR17520069.11007904  
SRR17520069.11007906

SRR17520069.11007908  
SRR17520069.11007910  
SRR17520069.11007914  
SRR17520069.11007916  
SRR17520069.11007918  
SRR17520069.11007920  
SRR17520069.11007924  
SRR17520069.11007926  
SRR17520069.11007928  
SRR17520069.11007932  
SRR17520069.11007934  
SRR17520069.11007936  
SRR17520069.11007938  
SRR17520069.11007940  
SRR17520069.11007942  
SRR17520069.11007944  
SRR17520069.11007946  
SRR17520069.11009211  
SRR17520069.11009213  
SRR17520069.11009215  
SRR17520069.11009217  
SRR17520069.11009219  
SRR17520069.11009221  
SRR17520069.11009223  
SRR17520069.11009227  
SRR17520069.11009229  
SRR17520069.11009231  
SRR17520069.11009233  
SRR17520069.11009235  
SRR17520069.11009237  
SRR17520069.11009239  
SRR17520069.11009241  
SRR17520069.11009243  
SRR17520069.11009245  
SRR17520069.11009247  
SRR17520069.11011708  
SRR17520069.11011712  
SRR17520069.11011714  
SRR17520069.11011716  
SRR17520069.11011718  
SRR17520069.11011720  
SRR17520069.11011722  
SRR17520069.11011724  
SRR17520069.11011726  
SRR17520069.11011728  
SRR17520069.11011730  
SRR17520069.11011732

SRR17520069.11011734  
SRR17520069.11011736  
SRR17520069.11011738  
SRR17520069.11011740  
SRR17520069.11011742  
SRR17520069.11011744  
SRR17520069.11011746  
SRR17520069.11011748  
SRR17520069.11011750  
SRR17520069.11011752  
SRR17520069.11011754  
SRR17520069.11011756  
SRR17520069.11014981  
SRR17520069.11014983  
SRR17520069.11014985  
SRR17520069.11014987  
SRR17520069.11014989  
SRR17520069.11014991  
SRR17520069.11014993  
SRR17520069.11014997  
SRR17520069.11014999  
SRR17520069.11015001  
SRR17520069.11015003  
SRR17520069.11015005  
SRR17520069.11015007  
SRR17520069.11015009  
SRR17520069.11015011  
SRR17520069.11015013  
SRR17520069.11015015  
SRR17520069.11015017  
SRR17520069.11015021  
SRR17520069.11015023  
SRR17520069.11015025  
SRR17520069.11015027  
SRR17520069.11015029  
SRR17520069.11015031  
SRR17520069.11015033  
SRR17520069.11015035  
SRR17520069.11015037  
SRR17520069.11015039  
SRR17520069.11015041  
SRR17520069.11015043  
SRR17520069.11015045  
SRR17520069.11015047  
SRR17520069.11015049  
SRR17520069.11015051  
SRR17520069.11015053

SRR17520069.11015055  
SRR17520069.11015057  
SRR17520069.11017825  
SRR17520069.11017827  
SRR17520069.11017829  
SRR17520069.11017831  
SRR17520069.11017833  
SRR17520069.11017835  
SRR17520069.11017837  
SRR17520069.11017839  
SRR17520069.11017843  
SRR17520069.11017845  
SRR17520069.11017853  
SRR17520069.11017855  
SRR17520069.11017857  
SRR17520069.11018045  
SRR17520069.11018047  
SRR17520069.11018049  
SRR17520069.11018051  
SRR17520069.11018053  
SRR17520069.11018055  
SRR17520069.11018057  
SRR17520069.11018059  
SRR17520069.11018061  
SRR17520069.11018063  
SRR17520069.11018065  
SRR17520069.11018067  
SRR17520069.11018069  
SRR17520069.11018071  
SRR17520069.11018073  
SRR17520069.11018075  
SRR17520069.11018077  
SRR17520069.11018079  
SRR17520069.11018081  
SRR17520069.11018083  
SRR17520069.11018085  
SRR17520069.11018087  
SRR17520069.11018089  
SRR17520069.11018091  
SRR17520069.11018093  
SRR17520069.11018095  
SRR17520069.11018097  
SRR17520069.11018099  
SRR17520069.11018101  
SRR17520069.11018103  
SRR17520069.11018105  
SRR17520069.11018107

SRR17520069.11018109  
SRR17520069.11018111  
SRR17520069.11018113  
SRR17520069.11018115  
SRR17520069.11018117  
SRR17520069.11018119  
SRR17520069.11018121  
SRR17520069.11018123  
SRR17520069.11018125  
SRR17520069.11018127  
SRR17520069.11018129  
SRR17520069.11018131  
SRR17520069.11018133  
SRR17520069.11018135  
SRR17520069.11018137  
SRR17520069.11018139  
SRR17520069.11018141  
SRR17520069.11018143  
SRR17520069.11018145  
SRR17520069.11019379  
SRR17520069.11019381  
SRR17520069.11024816  
SRR17520069.11024818  
SRR17520069.11024820  
SRR17520069.11024822  
SRR17520069.11024824  
SRR17520069.11024826  
SRR17520069.11024828  
SRR17520069.11024830  
SRR17520069.11024832  
SRR17520069.11024834  
SRR17520069.11024836  
SRR17520069.11024838  
SRR17520069.11024840  
SRR17520069.11024842  
SRR17520069.11036136  
SRR17520069.11036138  
SRR17520069.11036140  
SRR17520069.11036144  
SRR17520069.11036148  
SRR17520069.11036152  
SRR17520069.11036154  
SRR17520069.11036156  
SRR17520069.11036158  
SRR17520069.11036160  
SRR17520069.11036162  
SRR17520069.11036164



SRR17520069.11036168  
SRR17520069.11036170  
SRR17520069.11036172  
SRR17520069.11036174  
SRR17520069.11036176  
SRR17520069.11036178  
SRR17520069.11036180  
SRR17520069.11036182  
SRR17520069.11036184  
SRR17520069.11036186  
SRR17520069.11036188  
SRR17520069.11036190  
SRR17520069.11036192  
SRR17520069.11036194  
SRR17520069.11036196  
SRR17520069.11036198  
SRR17520069.11036200  
SRR17520069.11046014  
SRR17520069.11046016  
SRR17520069.11054928  
SRR17520069.11054930  
SRR17520069.11054932  
SRR17520069.11054934  
SRR17520069.11054936  
SRR17520069.11054938  
SRR17520069.11054940  
SRR17520069.11054942  
SRR17520069.11054944  
SRR17520069.11054946  
SRR17520069.11054948  
SRR17520069.11054950  
SRR17520069.11054952  
SRR17520069.11055081  
SRR17520069.11055083  
SRR17520069.11055085  
SRR17520069.11058200  
SRR17520069.11062795  
SRR17520069.11076046  
SRR17520069.11076048  
SRR17520069.11076050  
SRR17520069.11076052  
SRR17520069.11076054  
SRR17520069.11076056  
SRR17520069.11076058  
SRR17520069.11076060  
SRR17520069.11076062  
SRR17520069.11076064

SRR17520069.11077660  
SRR17520069.11077662  
SRR17520069.11077664  
SRR17520069.11077666  
SRR17520069.11077668  
SRR17520069.11077670  
SRR17520069.11077672  
SRR17520069.11077674  
SRR17520069.11077676  
SRR17520069.11077678  
SRR17520069.11077680  
SRR17520069.11077682  
SRR17520069.11077684  
SRR17520069.11077686  
SRR17520069.11077688  
SRR17520069.11077690  
SRR17520069.11077692  
SRR17520069.11077694  
SRR17520069.11077696  
SRR17520069.11077698  
SRR17520069.11077700  
SRR17520069.11077702  
SRR17520069.11077704  
SRR17520069.11077706  
SRR17520069.11077708  
SRR17520069.11080686  
SRR17520069.11080688  
SRR17520069.11082020  
SRR17520069.11082022  
SRR17520069.11082024  
SRR17520069.11082026  
SRR17520069.11082028  
SRR17520069.11082030  
SRR17520069.11082032  
SRR17520069.11082034  
SRR17520069.11082036  
SRR17520069.11082038  
SRR17520069.11082040  
SRR17520069.11082042  
SRR17520069.11082044  
SRR17520069.11082046  
SRR17520069.11082048  
SRR17520069.11082050  
SRR17520069.11082054  
SRR17520069.11082056  
SRR17520069.11082058  
SRR17520069.11082060

SRR17520069.11082062  
SRR17520069.11086120  
SRR17520069.11086122  
SRR17520069.11086124  
SRR17520069.11086126  
SRR17520069.11086128  
SRR17520069.11086130  
SRR17520069.11086132  
SRR17520069.11086134  
SRR17520069.11086136  
SRR17520069.11086411  
SRR17520069.11086415  
SRR17520069.11086417  
SRR17520069.11086419  
SRR17520069.11087144  
SRR17520069.11087146  
SRR17520069.11087148  
SRR17520069.11087150  
SRR17520069.11087152  
SRR17520069.11087154  
SRR17520069.11087156  
SRR17520069.11087160  
SRR17520069.11087162  
SRR17520069.11087164  
SRR17520069.11087166  
SRR17520069.11087168  
SRR17520069.11087170  
SRR17520069.11087172  
SRR17520069.11087174  
SRR17520069.11087176  
SRR17520069.11087178  
SRR17520069.11087180  
SRR17520069.11087182  
SRR17520069.11087184  
SRR17520069.11087186  
SRR17520069.11087188  
SRR17520069.11087190  
SRR17520069.11087192  
SRR17520069.11087194  
SRR17520069.11090801  
SRR17520069.11090803  
SRR17520069.11090805  
SRR17520069.11090807  
SRR17520069.11090809  
SRR17520069.11091927  
SRR17520069.11091931  
SRR17520069.11091933

SRR17520069.11091935  
SRR17520069.11091937  
SRR17520069.11091939  
SRR17520069.11091941  
SRR17520069.11091945  
SRR17520069.11091949  
SRR17520069.11091951  
SRR17520069.11091953  
SRR17520069.11091955  
SRR17520069.11092449  
SRR17520069.11092451  
SRR17520069.11092453  
SRR17520069.11092457  
SRR17520069.11096495  
SRR17520069.11096497  
SRR17520069.11096499  
SRR17520069.11096501  
SRR17520069.11096503  
SRR17520069.11096505  
SRR17520069.11096507  
SRR17520069.11096509  
SRR17520069.11096511  
SRR17520069.11096513  
SRR17520069.11096515  
SRR17520069.11096517  
SRR17520069.11096519  
SRR17520069.11096521  
SRR17520069.11096523  
SRR17520069.11096525  
SRR17520069.11096527  
SRR17520069.11096531  
SRR17520069.11096533  
SRR17520069.11103990  
SRR17520069.11103992  
SRR17520069.11103994  
SRR17520069.11103996  
SRR17520069.11103998  
SRR17520069.11104000  
SRR17520069.11104002  
SRR17520069.11104004  
SRR17520069.11104006  
SRR17520069.11104008  
SRR17520069.11104010  
SRR17520069.11104012  
SRR17520069.11104014  
SRR17520069.11104018  
SRR17520069.11104020

SRR17520069.11104022  
SRR17520069.11104024  
SRR17520069.11104026  
SRR17520069.11104028  
SRR17520069.11104030  
SRR17520069.11104032  
SRR17520069.11104034  
SRR17520069.11104036  
SRR17520069.11104038  
SRR17520069.11104040  
SRR17520069.11104042  
SRR17520069.11104044  
SRR17520069.11104046  
SRR17520069.11104048  
SRR17520069.11104050  
SRR17520069.11104052  
SRR17520069.11104054  
SRR17520069.11104056  
SRR17520069.11104058  
SRR17520069.11104060  
SRR17520069.11104062  
SRR17520069.11105370  
SRR17520069.11112166  
SRR17520069.11112168  
SRR17520069.11112170  
SRR17520069.11112172  
SRR17520069.11112174  
SRR17520069.11112176  
SRR17520069.11112178  
SRR17520069.11112180  
SRR17520069.11112182  
SRR17520069.11112184  
SRR17520069.11112186  
SRR17520069.11112188  
SRR17520069.11112190  
SRR17520069.11112192  
SRR17520069.11112194  
SRR17520069.11112196  
SRR17520069.11112198  
SRR17520069.11112200  
SRR17520069.11112202  
SRR17520069.11112204  
SRR17520069.11112206  
SRR17520069.11112208  
SRR17520069.11112210  
SRR17520069.11112212  
SRR17520069.11112214

SRR17520069.11112216  
SRR17520069.11112218  
SRR17520069.11112220  
SRR17520069.11112222  
SRR17520069.11112224  
SRR17520069.11112226  
SRR17520069.11112228  
SRR17520069.11112230  
SRR17520069.11112232  
SRR17520069.11112234  
SRR17520069.11112236  
SRR17520069.11112240  
SRR17520069.11112242  
SRR17520069.11112244  
SRR17520069.11112246  
SRR17520069.11112248  
SRR17520069.11112250  
SRR17520069.11112252  
SRR17520069.11112254  
SRR17520069.11112256  
SRR17520069.11112258  
SRR17520069.11112260  
SRR17520069.11112262  
SRR17520069.11112264  
SRR17520069.11112266  
SRR17520069.11112270  
SRR17520069.11112272  
SRR17520069.11112274  
SRR17520069.11112276  
SRR17520069.11112278  
SRR17520069.11112280  
SRR17520069.11112282  
SRR17520069.11112284  
SRR17520069.11112286  
SRR17520069.11112288  
SRR17520069.11112290  
SRR17520069.11112292  
SRR17520069.11112294  
SRR17520069.11112296  
SRR17520069.11112298  
SRR17520069.11112300  
SRR17520069.11112302  
SRR17520069.11112304  
SRR17520069.11112306  
SRR17520069.11112308  
SRR17520069.11112310  
SRR17520069.11112312

SRR17520069.11112314  
SRR17520069.11112316  
SRR17520069.11112318  
SRR17520069.11112320  
SRR17520069.11112322  
SRR17520069.11112324  
SRR17520069.11112326  
SRR17520069.11112328  
SRR17520069.11112330  
SRR17520069.11112332  
SRR17520069.11112334  
SRR17520069.11112336  
SRR17520069.11112338  
SRR17520069.11112340  
SRR17520069.11112342  
SRR17520069.11112344  
SRR17520069.11112346  
SRR17520069.11112350  
SRR17520069.11112352  
SRR17520069.11112354  
SRR17520069.11112356  
SRR17520069.11112358  
SRR17520069.11112360  
SRR17520069.11114759  
SRR17520069.11114761  
SRR17520069.11114763  
SRR17520069.11114765  
SRR17520069.11114767  
SRR17520069.11114769  
SRR17520069.11116261  
SRR17520069.11116263  
SRR17520069.11116265  
SRR17520069.11116267  
SRR17520069.11116269  
SRR17520069.11118323  
SRR17520069.11118327  
SRR17520069.11118329  
SRR17520069.11118331  
SRR17520069.11118333  
SRR17520069.11118335  
SRR17520069.11118337  
SRR17520069.11118339  
SRR17520069.11118341  
SRR17520069.11118343  
SRR17520069.11118345  
SRR17520069.11118347  
SRR17520069.11118349

SRR17520069.11118351  
SRR17520069.11118353  
SRR17520069.11118355  
SRR17520069.11118357  
SRR17520069.11118359  
SRR17520069.11118361  
SRR17520069.11118375  
SRR17520069.11118957  
SRR17520069.11118959  
SRR17520069.11118961  
SRR17520069.11118963  
SRR17520069.11118965  
SRR17520069.11118967  
SRR17520069.11118969  
SRR17520069.11118971  
SRR17520069.11118973  
SRR17520069.11118977  
SRR17520069.11118979  
SRR17520069.11118981  
SRR17520069.11118983  
SRR17520069.11118985  
SRR17520069.11118987  
SRR17520069.11118989  
SRR17520069.11118991  
SRR17520069.11118993  
SRR17520069.11118995  
SRR17520069.11118997  
SRR17520069.11118999  
SRR17520069.11119001  
SRR17520069.11119003  
SRR17520069.11119005  
SRR17520069.11119007  
SRR17520069.11119009  
SRR17520069.11119011  
SRR17520069.11119013  
SRR17520069.11119015  
SRR17520069.11119017  
SRR17520069.11119019  
SRR17520069.11119021  
SRR17520069.11119023  
SRR17520069.11119025  
SRR17520069.11119027  
SRR17520069.11119029  
SRR17520069.11119031  
SRR17520069.11119033  
SRR17520069.11119035  
SRR17520069.11119037



SRR17520069.11119039  
SRR17520069.11119041  
SRR17520069.11119043  
SRR17520069.11119045  
SRR17520069.11119047  
SRR17520069.11119049  
SRR17520069.11119051  
SRR17520069.11119053  
SRR17520069.11119055  
SRR17520069.11119057  
SRR17520069.11119059  
SRR17520069.11119061  
SRR17520069.11119063  
SRR17520069.11119065  
SRR17520069.11119067  
SRR17520069.11119069  
SRR17520069.11119071  
SRR17520069.11119075  
SRR17520069.11119077  
SRR17520069.11119079  
SRR17520069.11119081  
SRR17520069.11119083  
SRR17520069.11119085  
SRR17520069.11119087  
SRR17520069.11119089  
SRR17520069.11119091  
SRR17520069.11119093  
SRR17520069.11119095  
SRR17520069.11119097  
SRR17520069.11122270  
SRR17520069.11122272  
SRR17520069.11122274  
SRR17520069.11122276  
SRR17520069.11122280  
SRR17520069.11122284  
SRR17520069.11122286  
SRR17520069.11122288  
SRR17520069.11122290  
SRR17520069.11122292  
SRR17520069.11122294  
SRR17520069.11122296  
SRR17520069.11122298  
SRR17520069.11122300  
SRR17520069.11122302  
SRR17520069.11122304  
SRR17520069.11122306  
SRR17520069.11122308

SRR17520069.11122310  
SRR17520069.11122312  
SRR17520069.11122314  
SRR17520069.11122316  
SRR17520069.11122318  
SRR17520069.11122320  
SRR17520069.11122322  
SRR17520069.11122324  
SRR17520069.11122326  
SRR17520069.11122328  
SRR17520069.11122330  
SRR17520069.11122332  
SRR17520069.11122334  
SRR17520069.11122336  
SRR17520069.11122338  
SRR17520069.11122340  
SRR17520069.11122342  
SRR17520069.11122344  
SRR17520069.11123862  
SRR17520069.11123864  
SRR17520069.11123866  
SRR17520069.11123868  
SRR17520069.11123870  
SRR17520069.11123872  
SRR17520069.11123874  
SRR17520069.11123876  
SRR17520069.11123878  
SRR17520069.11123880  
SRR17520069.11123882  
SRR17520069.11123884  
SRR17520069.11123886  
SRR17520069.11123888  
SRR17520069.11123890  
SRR17520069.11123892  
SRR17520069.11123894  
SRR17520069.11123896  
SRR17520069.11123900  
SRR17520069.11123902  
SRR17520069.11123904  
SRR17520069.11123906  
SRR17520069.11123908  
SRR17520069.11123910  
SRR17520069.11123912  
SRR17520069.11123914  
SRR17520069.11123916  
SRR17520069.11123918  
SRR17520069.11123920

SRR17520069.11123922  
SRR17520069.11123924  
SRR17520069.11123926  
SRR17520069.11123930  
SRR17520069.11124637  
SRR17520069.11124639  
SRR17520069.11124641  
SRR17520069.11124643  
SRR17520069.11124645  
SRR17520069.11124647  
SRR17520069.11124649  
SRR17520069.11124651  
SRR17520069.11124653  
SRR17520069.11124655  
SRR17520069.11133998  
SRR17520069.11134000  
SRR17520069.11134002  
SRR17520069.11134004  
SRR17520069.11135931  
SRR17520069.11135933  
SRR17520069.11135935  
SRR17520069.11135937  
SRR17520069.11135939  
SRR17520069.11135941  
SRR17520069.11135943  
SRR17520069.11135945  
SRR17520069.11135947  
SRR17520069.11135949  
SRR17520069.11135951  
SRR17520069.11135953  
SRR17520069.11135955  
SRR17520069.11135957  
SRR17520069.11135959  
SRR17520069.11135961  
SRR17520069.11135963  
SRR17520069.11135967  
SRR17520069.11135969  
SRR17520069.11135971  
SRR17520069.11135973  
SRR17520069.11135977  
SRR17520069.11135979  
SRR17520069.11135981  
SRR17520069.11135983  
SRR17520069.11135985  
SRR17520069.11135987  
SRR17520069.11135989  
SRR17520069.11135991

SRR17520069.11135993  
SRR17520069.11135995  
SRR17520069.11135997  
SRR17520069.11135999  
SRR17520069.11136001  
SRR17520069.11136003  
SRR17520069.11136005  
SRR17520069.11136007  
SRR17520069.11136009  
SRR17520069.11136011  
SRR17520069.11136013  
SRR17520069.11136015  
SRR17520069.11136017  
SRR17520069.11136019  
SRR17520069.11136021  
SRR17520069.11136023  
SRR17520069.11136025  
SRR17520069.11136027  
SRR17520069.11136029  
SRR17520069.11136031  
SRR17520069.11136033  
SRR17520069.11136035  
SRR17520069.11136037  
SRR17520069.11136039  
SRR17520069.11136041  
SRR17520069.11136043  
SRR17520069.11136045  
SRR17520069.11136047  
SRR17520069.11136049  
SRR17520069.11136051  
SRR17520069.11136053  
SRR17520069.11136055  
SRR17520069.11136057  
SRR17520069.11136059  
SRR17520069.11136061  
SRR17520069.11136063  
SRR17520069.11136065  
SRR17520069.11136067  
SRR17520069.11136069  
SRR17520069.11136071  
SRR17520069.11136073  
SRR17520069.11136075  
SRR17520069.11136077  
SRR17520069.11136079  
SRR17520069.11136081  
SRR17520069.11136083  
SRR17520069.11136087

SRR17520069.11136089  
SRR17520069.11136091  
SRR17520069.11136093  
SRR17520069.11136095  
SRR17520069.11136097  
SRR17520069.11136099  
SRR17520069.11136101  
SRR17520069.11136103  
SRR17520069.11136105  
SRR17520069.11136107  
SRR17520069.11136109  
SRR17520069.11136111  
SRR17520069.11136113  
SRR17520069.11136115  
SRR17520069.11137360  
SRR17520069.11137362  
SRR17520069.11137364  
SRR17520069.11137366  
SRR17520069.11137370  
SRR17520069.11137372  
SRR17520069.11137374  
SRR17520069.11137376  
SRR17520069.11137378  
SRR17520069.11137380  
SRR17520069.11137382  
SRR17520069.11137384  
SRR17520069.11137386  
SRR17520069.11137388  
SRR17520069.11137390  
SRR17520069.11137392  
SRR17520069.11139353  
SRR17520069.11139355  
SRR17520069.11139357  
SRR17520069.11139359  
SRR17520069.11139361  
SRR17520069.11139365  
SRR17520069.11139367  
SRR17520069.11139369  
SRR17520069.11139371  
SRR17520069.11139375  
SRR17520069.11139377  
SRR17520069.11139379  
SRR17520069.11139383  
SRR17520069.11139385  
SRR17520069.11139387  
SRR17520069.11139389  
SRR17520069.11139391

SRR17520069. 11139393  
SRR17520069. 11139395  
SRR17520069. 11139397  
SRR17520069. 11139399  
SRR17520069. 11139401  
SRR17520069. 11139403  
SRR17520069. 11139405  
SRR17520069. 11139407  
SRR17520069. 11139409  
SRR17520069. 11139411  
SRR17520069. 11139413  
SRR17520069. 11139415  
SRR17520069. 11139417  
SRR17520069. 11139419  
SRR17520069. 11139421  
SRR17520069. 11139423  
SRR17520069. 11139425  
SRR17520069. 11139427  
SRR17520069. 11139429  
SRR17520069. 11139431  
SRR17520069. 11139433  
SRR17520069. 11139435  
SRR17520069. 11139439  
SRR17520069. 11139441  
SRR17520069. 11139443  
SRR17520069. 11139445  
SRR17520069. 11139447  
SRR17520069. 11139449  
SRR17520069. 11139451  
SRR17520069. 11139453  
SRR17520069. 11139455  
SRR17520069. 11139457  
SRR17520069. 11139459  
SRR17520069. 11139461  
SRR17520069. 11139463  
SRR17520069. 11139465  
SRR17520069. 11139467  
SRR17520069. 11139469  
SRR17520069. 11139471  
SRR17520069. 11139473  
SRR17520069. 11139475  
SRR17520069. 11139477  
SRR17520069. 11144429  
SRR17520069. 11144431  
SRR17520069. 11144433  
SRR17520069. 11144435  
SRR17520069. 11144437

SRR17520069.11144439  
SRR17520069.11144441  
SRR17520069.11144443  
SRR17520069.11144445  
SRR17520069.11144447  
SRR17520069.11144449  
SRR17520069.11144451  
SRR17520069.11144453  
SRR17520069.11144455  
SRR17520069.11144457  
SRR17520069.11144459  
SRR17520069.11144461  
SRR17520069.11144463  
SRR17520069.11144465  
SRR17520069.11144467  
SRR17520069.11144469  
SRR17520069.11144471  
SRR17520069.11144473  
SRR17520069.11144475  
SRR17520069.11144477  
SRR17520069.11144479  
SRR17520069.11144481  
SRR17520069.11144483  
SRR17520069.11144485  
SRR17520069.11144487  
SRR17520069.11144489  
SRR17520069.11144493  
SRR17520069.11144495  
SRR17520069.11144497  
SRR17520069.11144499  
SRR17520069.11144501  
SRR17520069.11144503  
SRR17520069.11144505  
SRR17520069.11151755  
SRR17520069.11151757  
SRR17520069.11151759  
SRR17520069.11151761  
SRR17520069.11151763  
SRR17520069.11151767  
SRR17520069.11151769  
SRR17520069.11151771  
SRR17520069.11151773  
SRR17520069.11151775  
SRR17520069.11151777  
SRR17520069.11151779  
SRR17520069.11151781  
SRR17520069.11151783

SRR17520069.11153981  
SRR17520069.11153983  
SRR17520069.11153985  
SRR17520069.11153987  
SRR17520069.11153989  
SRR17520069.11153991  
SRR17520069.11153995  
SRR17520069.11153997  
SRR17520069.11153999  
SRR17520069.11154001  
SRR17520069.11154005  
SRR17520069.11154007  
SRR17520069.11154009  
SRR17520069.11154011  
SRR17520069.11154013  
SRR17520069.11154015  
SRR17520069.11154017  
SRR17520069.11154019  
SRR17520069.11154021  
SRR17520069.11154023  
SRR17520069.11154025  
SRR17520069.11154027  
SRR17520069.11161178  
SRR17520069.11162788  
SRR17520069.11166225  
SRR17520069.11166227  
SRR17520069.11166229  
SRR17520069.11166231  
SRR17520069.11166233  
SRR17520069.11166235  
SRR17520069.11166237  
SRR17520069.11166239  
SRR17520069.11166241  
SRR17520069.11166243  
SRR17520069.11166245  
SRR17520069.11166247  
SRR17520069.11166249  
SRR17520069.11166251  
SRR17520069.11166253  
SRR17520069.11166255  
SRR17520069.11166257  
SRR17520069.11166259  
SRR17520069.11166261  
SRR17520069.11166263  
SRR17520069.11166265  
SRR17520069.11166267  
SRR17520069.11166269



SRR17520069.11166271  
SRR17520069.11166273  
SRR17520069.11174016  
SRR17520069.11174018  
SRR17520069.11174020  
SRR17520069.11174022  
SRR17520069.11174024  
SRR17520069.11174028  
SRR17520069.11174030  
SRR17520069.11174032  
SRR17520069.11174034  
SRR17520069.11174036  
SRR17520069.11174038  
SRR17520069.11174040  
SRR17520069.11174042  
SRR17520069.11174044  
SRR17520069.11174046  
SRR17520069.11174048  
SRR17520069.11174050  
SRR17520069.11174052  
SRR17520069.11175845  
SRR17520069.11176786  
SRR17520069.11176788  
SRR17520069.11176790  
SRR17520069.11176792  
SRR17520069.11176794  
SRR17520069.11176796  
SRR17520069.11176798  
SRR17520069.11176800  
SRR17520069.11176802  
SRR17520069.11176804  
SRR17520069.11176806  
SRR17520069.11176808  
SRR17520069.11176810  
SRR17520069.11176812  
SRR17520069.11176814  
SRR17520069.11176816  
SRR17520069.11176818  
SRR17520069.11179325  
SRR17520069.11185568  
SRR17520069.11185570  
SRR17520069.11187281  
SRR17520069.11187283  
SRR17520069.11187285  
SRR17520069.11187287  
SRR17520069.11187289  
SRR17520069.11187291

SRR17520069.11187293  
SRR17520069.11187295  
SRR17520069.11187297  
SRR17520069.11187299  
SRR17520069.11187301  
SRR17520069.11187303  
SRR17520069.11187305  
SRR17520069.11187307  
SRR17520069.11187309  
SRR17520069.11187311  
SRR17520069.11187313  
SRR17520069.11187315  
SRR17520069.11187317  
SRR17520069.11187319  
SRR17520069.11187321  
SRR17520069.11187323  
SRR17520069.11187325  
SRR17520069.11187329  
SRR17520069.11187331  
SRR17520069.11187333  
SRR17520069.11187335  
SRR17520069.11187337  
SRR17520069.11187339  
SRR17520069.11187341  
SRR17520069.11187343  
SRR17520069.11187345  
SRR17520069.11187347  
SRR17520069.11187351  
SRR17520069.11187353  
SRR17520069.11187355  
SRR17520069.11187357  
SRR17520069.11187359  
SRR17520069.11187361  
SRR17520069.11187363  
SRR17520069.11187365  
SRR17520069.11187367  
SRR17520069.11187369  
SRR17520069.11187993  
SRR17520069.11187995  
SRR17520069.11188001  
SRR17520069.11188003  
SRR17520069.11188005  
SRR17520069.11188007  
SRR17520069.11188009  
SRR17520069.11188011  
SRR17520069.11188013  
SRR17520069.11188015

SRR17520069.11188017  
SRR17520069.11188019  
SRR17520069.11188021  
SRR17520069.11188023  
SRR17520069.11188025  
SRR17520069.11188027  
SRR17520069.11188029  
SRR17520069.11188031  
SRR17520069.11188033  
SRR17520069.11188035  
SRR17520069.11188037  
SRR17520069.11188039  
SRR17520069.11188041  
SRR17520069.11188045  
SRR17520069.11188047  
SRR17520069.11188049  
SRR17520069.11188051  
SRR17520069.11194410  
SRR17520069.11194412  
SRR17520069.11194414  
SRR17520069.11194416  
SRR17520069.11194418  
SRR17520069.11194420  
SRR17520069.11194424  
SRR17520069.11194426  
SRR17520069.11194428  
SRR17520069.11194430  
SRR17520069.11194432  
SRR17520069.11194436  
SRR17520069.11194438  
SRR17520069.11194440  
SRR17520069.11194442  
SRR17520069.11194444  
SRR17520069.11197903  
SRR17520069.11197905  
SRR17520069.11197907  
SRR17520069.11197909  
SRR17520069.11197911  
SRR17520069.11197913  
SRR17520069.11197915  
SRR17520069.11197917  
SRR17520069.11197919  
SRR17520069.11197921  
SRR17520069.11197923  
SRR17520069.11197925  
SRR17520069.11197927  
SRR17520069.11197929

SRR17520069.11197931  
SRR17520069.11197933  
SRR17520069.11197935  
SRR17520069.11197937  
SRR17520069.11197939  
SRR17520069.11197941  
SRR17520069.11197943  
SRR17520069.11197945  
SRR17520069.11197947  
SRR17520069.11197949  
SRR17520069.11197951  
SRR17520069.11197953  
SRR17520069.11197955  
SRR17520069.11197957  
SRR17520069.11197959  
SRR17520069.11197961  
SRR17520069.11197963  
SRR17520069.11197965  
SRR17520069.11206051  
SRR17520069.11206053  
SRR17520069.11206055  
SRR17520069.11206057  
SRR17520069.11206059  
SRR17520069.11206061  
SRR17520069.11206063  
SRR17520069.11206065  
SRR17520069.11206067  
SRR17520069.11206069  
SRR17520069.11206071  
SRR17520069.11206073  
SRR17520069.11206075  
SRR17520069.11206077  
SRR17520069.11206079  
SRR17520069.11206081  
SRR17520069.11206083  
SRR17520069.11206085  
SRR17520069.11206087  
SRR17520069.11207614  
SRR17520069.11207616  
SRR17520069.11207618  
SRR17520069.11207620  
SRR17520069.11207622  
SRR17520069.11207624  
SRR17520069.11207626  
SRR17520069.11207628  
SRR17520069.11207630  
SRR17520069.11207634

SRR17520069.11207636  
SRR17520069.11207638  
SRR17520069.11207640  
SRR17520069.11207642  
SRR17520069.11207644  
SRR17520069.11207646  
SRR17520069.11207648  
SRR17520069.11207650  
SRR17520069.11207652  
SRR17520069.11208066  
SRR17520069.11208068  
SRR17520069.11208070  
SRR17520069.11208076  
SRR17520069.11208078  
SRR17520069.11208080  
SRR17520069.11208082  
SRR17520069.11208084  
SRR17520069.11208086  
SRR17520069.11208088  
SRR17520069.11208090  
SRR17520069.11208092  
SRR17520069.11208094  
SRR17520069.11208096  
SRR17520069.11208098  
SRR17520069.11208100  
SRR17520069.11208102  
SRR17520069.11208104  
SRR17520069.11208106  
SRR17520069.11208108  
SRR17520069.11208110  
SRR17520069.11208112  
SRR17520069.11208114  
SRR17520069.11208118  
SRR17520069.11208120  
SRR17520069.11208122  
SRR17520069.11208124  
SRR17520069.11208126  
SRR17520069.11208128  
SRR17520069.11208130  
SRR17520069.11208132  
SRR17520069.11208134  
SRR17520069.11208136  
SRR17520069.11208138  
SRR17520069.11208140  
SRR17520069.11208142  
SRR17520069.11208144  
SRR17520069.11208146

SRR17520069.11208148  
SRR17520069.11208150  
SRR17520069.11208152  
SRR17520069.11208154  
SRR17520069.11208156  
SRR17520069.11208160  
SRR17520069.11208162  
SRR17520069.11208164  
SRR17520069.11208166  
SRR17520069.11208168  
SRR17520069.11208170  
SRR17520069.11208172  
SRR17520069.11208174  
SRR17520069.11208176  
SRR17520069.11208178  
SRR17520069.11208180  
SRR17520069.11208182  
SRR17520069.11208184  
SRR17520069.11208186  
SRR17520069.11208188  
SRR17520069.11208192  
SRR17520069.11208194  
SRR17520069.11208196  
SRR17520069.11208198  
SRR17520069.11208265  
SRR17520069.11208267  
SRR17520069.11208269  
SRR17520069.11208271  
SRR17520069.11208273  
SRR17520069.11208275  
SRR17520069.11208277  
SRR17520069.11208279  
SRR17520069.11208281  
SRR17520069.11208283  
SRR17520069.11208285  
SRR17520069.11208287  
SRR17520069.11208289  
SRR17520069.11208291  
SRR17520069.11208293  
SRR17520069.11208295  
SRR17520069.11208297  
SRR17520069.11212830  
SRR17520069.11216300  
SRR17520069.11216302  
SRR17520069.11216306  
SRR17520069.11216308  
SRR17520069.11216310

SRR17520069.11216312  
SRR17520069.11216314  
SRR17520069.11216316  
SRR17520069.11216318  
SRR17520069.11216320  
SRR17520069.11216322  
SRR17520069.11216326  
SRR17520069.11216328  
SRR17520069.11216330  
SRR17520069.11216332  
SRR17520069.11216334  
SRR17520069.11216336  
SRR17520069.11219448  
SRR17520069.11219450  
SRR17520069.11219452  
SRR17520069.11219454  
SRR17520069.11219456  
SRR17520069.11219458  
SRR17520069.11219460  
SRR17520069.11219462  
SRR17520069.11219464  
SRR17520069.11219466  
SRR17520069.11219468  
SRR17520069.11219470  
SRR17520069.11219472  
SRR17520069.11219474  
SRR17520069.11219476  
SRR17520069.11219478  
SRR17520069.11219480  
SRR17520069.11219482  
SRR17520069.11219484  
SRR17520069.11229183  
SRR17520069.11232085  
SRR17520069.11232087  
SRR17520069.11232089  
SRR17520069.11232091  
SRR17520069.11232093  
SRR17520069.11232095  
SRR17520069.11232097  
SRR17520069.11232101  
SRR17520069.11232103  
SRR17520069.11232105  
SRR17520069.11232107  
SRR17520069.11232109  
SRR17520069.11241782  
SRR17520069.11241784  
SRR17520069.11241786

SRR17520069.11241788  
SRR17520069.11241790  
SRR17520069.11241792  
SRR17520069.11241794  
SRR17520069.11241796  
SRR17520069.11241798  
SRR17520069.11241800  
SRR17520069.11241802  
SRR17520069.11241804  
SRR17520069.11241806  
SRR17520069.11241808  
SRR17520069.11241810  
SRR17520069.11241814  
SRR17520069.11241816  
SRR17520069.11241818  
SRR17520069.11241820  
SRR17520069.11241822  
SRR17520069.11242628  
SRR17520069.11242630  
SRR17520069.11242632  
SRR17520069.11242634  
SRR17520069.11242636  
SRR17520069.11242638  
SRR17520069.11242642  
SRR17520069.11242644  
SRR17520069.11242646  
SRR17520069.11242648  
SRR17520069.11242652  
SRR17520069.11242654  
SRR17520069.11242656  
SRR17520069.11242658  
SRR17520069.11242660  
SRR17520069.11242662  
SRR17520069.11242664  
SRR17520069.11242666  
SRR17520069.11242668  
SRR17520069.11242790  
SRR17520069.11242792  
SRR17520069.11242794  
SRR17520069.11243594  
SRR17520069.11243596  
SRR17520069.11243598  
SRR17520069.11243600  
SRR17520069.11243602  
SRR17520069.11243604  
SRR17520069.11243606  
SRR17520069.11243608



SRR17520069.11243610  
SRR17520069.11243612  
SRR17520069.11243614  
SRR17520069.11243616  
SRR17520069.11243618  
SRR17520069.11243620  
SRR17520069.11243622  
SRR17520069.11243624  
SRR17520069.11243626  
SRR17520069.11243666  
SRR17520069.11243668  
SRR17520069.11249006  
SRR17520069.11249010  
SRR17520069.11249012  
SRR17520069.11249014  
SRR17520069.11249016  
SRR17520069.11249018  
SRR17520069.11249020  
SRR17520069.11249022  
SRR17520069.11249024  
SRR17520069.11249026  
SRR17520069.11249028  
SRR17520069.11249030  
SRR17520069.11249032  
SRR17520069.11249034  
SRR17520069.11249036  
SRR17520069.11249038  
SRR17520069.11249040  
SRR17520069.11249042  
SRR17520069.11249044  
SRR17520069.11249046  
SRR17520069.11249048  
SRR17520069.11249050  
SRR17520069.11249052  
SRR17520069.11249054  
SRR17520069.11249056  
SRR17520069.11249060  
SRR17520069.11249062  
SRR17520069.11249064  
SRR17520069.11249066  
SRR17520069.11249068  
SRR17520069.11249070  
SRR17520069.11249074  
SRR17520069.11249078  
SRR17520069.11249080  
SRR17520069.11249082  
SRR17520069.11249084

SRR17520069.11249086  
SRR17520069.11249088  
SRR17520069.11249090  
SRR17520069.11249092  
SRR17520069.11250921  
SRR17520069.11250923  
SRR17520069.11250927  
SRR17520069.11250929  
SRR17520069.11250931  
SRR17520069.11250933  
SRR17520069.11250937  
SRR17520069.11250939  
SRR17520069.11250941  
SRR17520069.11250943  
SRR17520069.11250945  
SRR17520069.11250947  
SRR17520069.11256634  
SRR17520069.11256636  
SRR17520069.11256640  
SRR17520069.11256642  
SRR17520069.11256644  
SRR17520069.11256646  
SRR17520069.11256648  
SRR17520069.11256650  
SRR17520069.11256652  
SRR17520069.11265750  
SRR17520069.11265752  
SRR17520069.11265754  
SRR17520069.11265756  
SRR17520069.11265758  
SRR17520069.11265760  
SRR17520069.11265762  
SRR17520069.11265764  
SRR17520069.11265766  
SRR17520069.11265770  
SRR17520069.11265772  
SRR17520069.11265774  
SRR17520069.11265776  
SRR17520069.11268335  
SRR17520069.11268337  
SRR17520069.11268339  
SRR17520069.11268341  
SRR17520069.11268343  
SRR17520069.11268345  
SRR17520069.11268347  
SRR17520069.11268349  
SRR17520069.11268351

SRR17520069.11268353  
SRR17520069.11268355  
SRR17520069.11268357  
SRR17520069.11268359  
SRR17520069.11268361  
SRR17520069.11268365  
SRR17520069.11268367  
SRR17520069.11268369  
SRR17520069.11268371  
SRR17520069.11268373  
SRR17520069.11268375  
SRR17520069.11268377  
SRR17520069.11268379  
SRR17520069.11268381  
SRR17520069.11271771  
SRR17520069.11271773  
SRR17520069.11271775  
SRR17520069.11271777  
SRR17520069.11271779  
SRR17520069.11271781  
SRR17520069.11271783  
SRR17520069.11271785  
SRR17520069.11271787  
SRR17520069.11271789  
SRR17520069.11271791  
SRR17520069.11271793  
SRR17520069.11271795  
SRR17520069.11271797  
SRR17520069.11271801  
SRR17520069.11271803  
SRR17520069.11271805  
SRR17520069.11271807  
SRR17520069.11271809  
SRR17520069.11271811  
SRR17520069.11271813  
SRR17520069.11271815  
SRR17520069.11272599  
SRR17520069.11272601  
SRR17520069.11272603  
SRR17520069.11272605  
SRR17520069.11272607  
SRR17520069.11272609  
SRR17520069.11272611  
SRR17520069.11272615  
SRR17520069.11272617  
SRR17520069.11272619  
SRR17520069.11272621

SRR17520069. 11272623  
SRR17520069. 11272625  
SRR17520069. 11272627  
SRR17520069. 11272629  
SRR17520069. 11272631  
SRR17520069. 11272633  
SRR17520069. 11272635  
SRR17520069. 11272637  
SRR17520069. 11272639  
SRR17520069. 11272641  
SRR17520069. 11272643  
SRR17520069. 11272645  
SRR17520069. 11272647  
SRR17520069. 11272649  
SRR17520069. 11272653  
SRR17520069. 11272657  
SRR17520069. 11276114  
SRR17520069. 11276116  
SRR17520069. 11276118  
SRR17520069. 11276120  
SRR17520069. 11276122  
SRR17520069. 11276124  
SRR17520069. 11276126  
SRR17520069. 11276128  
SRR17520069. 11276130  
SRR17520069. 11276132  
SRR17520069. 11276134  
SRR17520069. 11276136  
SRR17520069. 11276138  
SRR17520069. 11276140  
SRR17520069. 11276142  
SRR17520069. 11276144  
SRR17520069. 11276146  
SRR17520069. 11276148  
SRR17520069. 11276150  
SRR17520069. 11276152  
SRR17520069. 11276154  
SRR17520069. 11276156  
SRR17520069. 11276158  
SRR17520069. 11276160  
SRR17520069. 11276162  
SRR17520069. 11276164  
SRR17520069. 11276166  
SRR17520069. 11276168  
SRR17520069. 11276172  
SRR17520069. 11276382  
SRR17520069. 11276384

SRR17520069. 11276386  
SRR17520069. 11276388  
SRR17520069. 11276390  
SRR17520069. 11276392  
SRR17520069. 11276394  
SRR17520069. 11276396  
SRR17520069. 11276398  
SRR17520069. 11276400  
SRR17520069. 11276402  
SRR17520069. 11276404  
SRR17520069. 11276406  
SRR17520069. 11276408  
SRR17520069. 11276410  
SRR17520069. 11276412  
SRR17520069. 11276414  
SRR17520069. 11276416  
SRR17520069. 11276418  
SRR17520069. 11276420  
SRR17520069. 11276422  
SRR17520069. 11276424  
SRR17520069. 11276426  
SRR17520069. 11276428  
SRR17520069. 11276430  
SRR17520069. 11278418  
SRR17520069. 11278966  
SRR17520069. 11278968  
SRR17520069. 11278970  
SRR17520069. 11278972  
SRR17520069. 11278974  
SRR17520069. 11278976  
SRR17520069. 11278978  
SRR17520069. 11278980  
SRR17520069. 11278982  
SRR17520069. 11278984  
SRR17520069. 11278986  
SRR17520069. 11278988  
SRR17520069. 11278992  
SRR17520069. 11278994  
SRR17520069. 11281282  
SRR17520069. 11281284  
SRR17520069. 11281286  
SRR17520069. 11281290  
SRR17520069. 11281292  
SRR17520069. 11281294  
SRR17520069. 11281296  
SRR17520069. 11281298  
SRR17520069. 11281302

SRR17520069.11281304  
SRR17520069.11281306  
SRR17520069.11281308  
SRR17520069.11281310  
SRR17520069.11281312  
SRR17520069.11281314  
SRR17520069.11281316  
SRR17520069.11281318  
SRR17520069.11281320  
SRR17520069.11283002  
SRR17520069.11283004  
SRR17520069.11283006  
SRR17520069.11283008  
SRR17520069.11283010  
SRR17520069.11283012  
SRR17520069.11289333  
SRR17520069.11289335  
SRR17520069.11289337  
SRR17520069.11289339  
SRR17520069.11289341  
SRR17520069.11289343  
SRR17520069.11289345  
SRR17520069.11289347  
SRR17520069.11289351  
SRR17520069.11289353  
SRR17520069.11289355  
SRR17520069.11289357  
SRR17520069.11289359  
SRR17520069.11289361  
SRR17520069.11289363  
SRR17520069.11289365  
SRR17520069.11289367  
SRR17520069.11289369  
SRR17520069.11289371  
SRR17520069.11289373  
SRR17520069.11289375  
SRR17520069.11289377  
SRR17520069.11289379  
SRR17520069.11289381  
SRR17520069.11289383  
SRR17520069.11289385  
SRR17520069.11289387  
SRR17520069.11289389  
SRR17520069.11289391  
SRR17520069.11289393  
SRR17520069.11289395  
SRR17520069.11289397

SRR17520069.11289399  
SRR17520069.11289401  
SRR17520069.11289403  
SRR17520069.11289405  
SRR17520069.11289407  
SRR17520069.11289409  
SRR17520069.11289411  
SRR17520069.11289413  
SRR17520069.11289415  
SRR17520069.11289417  
SRR17520069.11289419  
SRR17520069.11289421  
SRR17520069.11289423  
SRR17520069.11289425  
SRR17520069.11289427  
SRR17520069.11289429  
SRR17520069.11289431  
SRR17520069.11289433  
SRR17520069.11291035  
SRR17520069.11291037  
SRR17520069.11291039  
SRR17520069.11291041  
SRR17520069.11291045  
SRR17520069.11291047  
SRR17520069.11291049  
SRR17520069.11291051  
SRR17520069.11291053  
SRR17520069.11291055  
SRR17520069.11291057  
SRR17520069.11291059  
SRR17520069.11291061  
SRR17520069.11291063  
SRR17520069.11291065  
SRR17520069.11291067  
SRR17520069.11291069  
SRR17520069.11291071  
SRR17520069.11291073  
SRR17520069.11291075  
SRR17520069.11291077  
SRR17520069.11291079  
SRR17520069.11291081  
SRR17520069.11291083  
SRR17520069.11291085  
SRR17520069.11291087  
SRR17520069.11291089  
SRR17520069.11291091  
SRR17520069.11291093

SRR17520069.11291095  
SRR17520069.11291097  
SRR17520069.11291099  
SRR17520069.11291101  
SRR17520069.11291103  
SRR17520069.11291105  
SRR17520069.11291107  
SRR17520069.11291109  
SRR17520069.11291111  
SRR17520069.11291113  
SRR17520069.11292086  
SRR17520069.11292088  
SRR17520069.11292090  
SRR17520069.11292092  
SRR17520069.11292094  
SRR17520069.11296688  
SRR17520069.11296690  
SRR17520069.11296692  
SRR17520069.11296694  
SRR17520069.11297573  
SRR17520069.11297575  
SRR17520069.11297577  
SRR17520069.11297579  
SRR17520069.11297581  
SRR17520069.11297585  
SRR17520069.11297587  
SRR17520069.11297589  
SRR17520069.11297591  
SRR17520069.11297593  
SRR17520069.11297595  
SRR17520069.11297597  
SRR17520069.11297599  
SRR17520069.11297601  
SRR17520069.11297603  
SRR17520069.11299696  
SRR17520069.11299698  
SRR17520069.11299700  
SRR17520069.11299702  
SRR17520069.11299704  
SRR17520069.11299706  
SRR17520069.11299708  
SRR17520069.11299710  
SRR17520069.11299712  
SRR17520069.11299714  
SRR17520069.11299716  
SRR17520069.11299718  
SRR17520069.11299720



SRR17520069.11299722  
SRR17520069.11299724  
SRR17520069.11299726  
SRR17520069.11299728  
SRR17520069.11299730  
SRR17520069.11299732  
SRR17520069.11299734  
SRR17520069.11299736  
SRR17520069.11299738  
SRR17520069.11299740  
SRR17520069.11299742  
SRR17520069.11299744  
SRR17520069.11299746  
SRR17520069.11299748  
SRR17520069.11299750  
SRR17520069.11299754  
SRR17520069.11299756  
SRR17520069.11299758  
SRR17520069.11299760  
SRR17520069.11299762  
SRR17520069.11299764  
SRR17520069.11300374  
SRR17520069.11300376  
SRR17520069.11300378  
SRR17520069.11300382  
SRR17520069.11300384  
SRR17520069.11300386  
SRR17520069.11300388  
SRR17520069.11300390  
SRR17520069.11300392  
SRR17520069.11300394  
SRR17520069.11300396  
SRR17520069.11300398  
SRR17520069.11300402  
SRR17520069.11300404  
SRR17520069.11300410  
SRR17520069.11300412  
SRR17520069.11300414  
SRR17520069.11300416  
SRR17520069.11300418  
SRR17520069.11300420  
SRR17520069.11300422  
SRR17520069.11300424  
SRR17520069.11300426  
SRR17520069.11300430  
SRR17520069.11300432  
SRR17520069.11300434

SRR17520069. 11300436  
SRR17520069. 11300438  
SRR17520069. 11300442  
SRR17520069. 11300447  
SRR17520069. 11300449  
SRR17520069. 11300451  
SRR17520069. 11300453  
SRR17520069. 11300455  
SRR17520069. 11300457  
SRR17520069. 11300459  
SRR17520069. 11300461  
SRR17520069. 11300463  
SRR17520069. 11300465  
SRR17520069. 11300467  
SRR17520069. 11300469  
SRR17520069. 11300471  
SRR17520069. 11300473  
SRR17520069. 11300475  
SRR17520069. 11300477  
SRR17520069. 11300479  
SRR17520069. 11300481  
SRR17520069. 11300483  
SRR17520069. 11300485  
SRR17520069. 11300487  
SRR17520069. 11300489  
SRR17520069. 11303036  
SRR17520069. 11303038  
SRR17520069. 11303040  
SRR17520069. 11303042  
SRR17520069. 11303044  
SRR17520069. 11303046  
SRR17520069. 11303048  
SRR17520069. 11303050  
SRR17520069. 11303052  
SRR17520069. 11303054  
SRR17520069. 11303056  
SRR17520069. 11303058  
SRR17520069. 11303060  
SRR17520069. 11303062  
SRR17520069. 11303064  
SRR17520069. 11303066  
SRR17520069. 11303583  
SRR17520069. 11310919  
SRR17520069. 11310921  
SRR17520069. 11310923  
SRR17520069. 11310925  
SRR17520069. 11310927

SRR17520069.11310929  
SRR17520069.11310931  
SRR17520069.11310933  
SRR17520069.11310935  
SRR17520069.11310937  
SRR17520069.11310939  
SRR17520069.11310941  
SRR17520069.11310943  
SRR17520069.11310945  
SRR17520069.11310947  
SRR17520069.11310949  
SRR17520069.11310951  
SRR17520069.11310953  
SRR17520069.11310955  
SRR17520069.11310957  
SRR17520069.11310959  
SRR17520069.11310961  
SRR17520069.11310963  
SRR17520069.11310965  
SRR17520069.11310967  
SRR17520069.11323460  
SRR17520069.11323462  
SRR17520069.11323464  
SRR17520069.11323466  
SRR17520069.11323468  
SRR17520069.11323470  
SRR17520069.11323472  
SRR17520069.11323474  
SRR17520069.11323476  
SRR17520069.11323478  
SRR17520069.11323480  
SRR17520069.11323482  
SRR17520069.11323484  
SRR17520069.11323486  
SRR17520069.11323488  
SRR17520069.11323490  
SRR17520069.11323492  
SRR17520069.11323494  
SRR17520069.11323496  
SRR17520069.11323498  
SRR17520069.11323502  
SRR17520069.11323504  
SRR17520069.11323506  
SRR17520069.11323508  
SRR17520069.11323510  
SRR17520069.11323512  
SRR17520069.11323754

SRR17520069. 11323756  
SRR17520069. 11323758  
SRR17520069. 11323760  
SRR17520069. 11327966  
SRR17520069. 11327968  
SRR17520069. 11327970  
SRR17520069. 11327972  
SRR17520069. 11327974  
SRR17520069. 11327976  
SRR17520069. 11327978  
SRR17520069. 11327980  
SRR17520069. 11327982  
SRR17520069. 11327984  
SRR17520069. 11327986  
SRR17520069. 11327988  
SRR17520069. 11327990  
SRR17520069. 11327992  
SRR17520069. 11327994  
SRR17520069. 11327996  
SRR17520069. 11327998  
SRR17520069. 11328000  
SRR17520069. 11328002  
SRR17520069. 11331334  
SRR17520069. 11331336  
SRR17520069. 11331338  
SRR17520069. 11331342  
SRR17520069. 11331344  
SRR17520069. 11331346  
SRR17520069. 11331348  
SRR17520069. 11331350  
SRR17520069. 11331354  
SRR17520069. 11331356  
SRR17520069. 11331358  
SRR17520069. 11331360  
SRR17520069. 11331362  
SRR17520069. 11331364  
SRR17520069. 11331366  
SRR17520069. 11331368  
SRR17520069. 11331370  
SRR17520069. 11331372  
SRR17520069. 11331374  
SRR17520069. 11331376  
SRR17520069. 11331378  
SRR17520069. 11331382  
SRR17520069. 11331384  
SRR17520069. 11331386  
SRR17520069. 11331388

SRR17520069. 11331390  
SRR17520069. 11331392  
SRR17520069. 11331394  
SRR17520069. 11331396  
SRR17520069. 11331398  
SRR17520069. 11331400  
SRR17520069. 11331402  
SRR17520069. 11331406  
SRR17520069. 11331408  
SRR17520069. 11331410  
SRR17520069. 11331412  
SRR17520069. 11331414  
SRR17520069. 11331416  
SRR17520069. 11331418  
SRR17520069. 11331420  
SRR17520069. 11331422  
SRR17520069. 11331424  
SRR17520069. 11334072  
SRR17520069. 11336708  
SRR17520069. 11336710  
SRR17520069. 11336712  
SRR17520069. 11338657  
SRR17520069. 11338659  
SRR17520069. 11338667  
SRR17520069. 11338671  
SRR17520069. 11338679  
SRR17520069. 11341549  
SRR17520069. 11341551  
SRR17520069. 11341553  
SRR17520069. 11341557  
SRR17520069. 11341559  
SRR17520069. 11341561  
SRR17520069. 11341563  
SRR17520069. 11341565  
SRR17520069. 11341567  
SRR17520069. 11341569  
SRR17520069. 11341571  
SRR17520069. 11341573  
SRR17520069. 11341575  
SRR17520069. 11341577  
SRR17520069. 11341579  
SRR17520069. 11341581  
SRR17520069. 11341583  
SRR17520069. 11341585  
SRR17520069. 11341587  
SRR17520069. 11341589  
SRR17520069. 11341593

SRR17520069. 11341595  
SRR17520069. 11341597  
SRR17520069. 11341599  
SRR17520069. 11341601  
SRR17520069. 11341603  
SRR17520069. 11341607  
SRR17520069. 11341609  
SRR17520069. 11341611  
SRR17520069. 11341613  
SRR17520069. 11341615  
SRR17520069. 11341617  
SRR17520069. 11341619  
SRR17520069. 11341621  
SRR17520069. 11341623  
SRR17520069. 11341625  
SRR17520069. 11341627  
SRR17520069. 11341629  
SRR17520069. 11341631  
SRR17520069. 11342873  
SRR17520069. 11342875  
SRR17520069. 11342877  
SRR17520069. 11342879  
SRR17520069. 11342881  
SRR17520069. 11342883  
SRR17520069. 11342885  
SRR17520069. 11342887  
SRR17520069. 11342889  
SRR17520069. 11342891  
SRR17520069. 11342893  
SRR17520069. 11344609  
SRR17520069. 11344611  
SRR17520069. 11344613  
SRR17520069. 11344615  
SRR17520069. 11344617  
SRR17520069. 11344619  
SRR17520069. 11344621  
SRR17520069. 11344623  
SRR17520069. 11344625  
SRR17520069. 11344627  
SRR17520069. 11344629  
SRR17520069. 11344631  
SRR17520069. 11344635  
SRR17520069. 11344637  
SRR17520069. 11344639  
SRR17520069. 11344641  
SRR17520069. 11344643  
SRR17520069. 11344645

SRR17520069. 11344647  
SRR17520069. 11344649  
SRR17520069. 11344651  
SRR17520069. 11344653  
SRR17520069. 11344655  
SRR17520069. 11344657  
SRR17520069. 11344659  
SRR17520069. 11344661  
SRR17520069. 11344663  
SRR17520069. 11344665  
SRR17520069. 11344667  
SRR17520069. 11344669  
SRR17520069. 11344671  
SRR17520069. 11344673  
SRR17520069. 11344677  
SRR17520069. 11344679  
SRR17520069. 11344681  
SRR17520069. 11344683  
SRR17520069. 11344685  
SRR17520069. 11344687  
SRR17520069. 11344689  
SRR17520069. 11344691  
SRR17520069. 11344693  
SRR17520069. 11344695  
SRR17520069. 11344697  
SRR17520069. 11344699  
SRR17520069. 11344701  
SRR17520069. 11344705  
SRR17520069. 11344707  
SRR17520069. 11344709  
SRR17520069. 11344711  
SRR17520069. 11344713  
SRR17520069. 11344715  
SRR17520069. 11344717  
SRR17520069. 11344719  
SRR17520069. 11344721  
SRR17520069. 11344723  
SRR17520069. 11344725  
SRR17520069. 11344727  
SRR17520069. 11344729  
SRR17520069. 11344731  
SRR17520069. 11344733  
SRR17520069. 11344735  
SRR17520069. 11344737  
SRR17520069. 11344739  
SRR17520069. 11344741  
SRR17520069. 11344743

SRR17520069. 11344745  
SRR17520069. 11344747  
SRR17520069. 11344749  
SRR17520069. 11344751  
SRR17520069. 11344753  
SRR17520069. 11344755  
SRR17520069. 11344757  
SRR17520069. 11344759  
SRR17520069. 11344761  
SRR17520069. 11344763  
SRR17520069. 11344765  
SRR17520069. 11344767  
SRR17520069. 11344769  
SRR17520069. 11344771  
SRR17520069. 11344773  
SRR17520069. 11344775  
SRR17520069. 11344777  
SRR17520069. 11344779  
SRR17520069. 11344781  
SRR17520069. 11344783  
SRR17520069. 11344785  
SRR17520069. 11344787  
SRR17520069. 11344789  
SRR17520069. 11344791  
SRR17520069. 11344793  
SRR17520069. 11344795  
SRR17520069. 11344799  
SRR17520069. 11344801  
SRR17520069. 11344803  
SRR17520069. 11344807  
SRR17520069. 11344809  
SRR17520069. 11344811  
SRR17520069. 11344813  
SRR17520069. 11344815  
SRR17520069. 11344817  
SRR17520069. 11344819  
SRR17520069. 11344821  
SRR17520069. 11344823  
SRR17520069. 11344825  
SRR17520069. 11344827  
SRR17520069. 11344829  
SRR17520069. 11344831  
SRR17520069. 11344833  
SRR17520069. 11344835  
SRR17520069. 11344837  
SRR17520069. 11344839  
SRR17520069. 11344841



SRR17520069. 11344843  
SRR17520069. 11344845  
SRR17520069. 11344847  
SRR17520069. 11344849  
SRR17520069. 11344853  
SRR17520069. 11344855  
SRR17520069. 11349340  
SRR17520069. 11349342  
SRR17520069. 11349344  
SRR17520069. 11349346  
SRR17520069. 11349348  
SRR17520069. 11349350  
SRR17520069. 11349352  
SRR17520069. 11349354  
SRR17520069. 11349356  
SRR17520069. 11349358  
SRR17520069. 11349360  
SRR17520069. 11349362  
SRR17520069. 11349364  
SRR17520069. 11349366  
SRR17520069. 11349368  
SRR17520069. 11349370  
SRR17520069. 11349372  
SRR17520069. 11349374  
SRR17520069. 11349376  
SRR17520069. 11349378  
SRR17520069. 11349380  
SRR17520069. 11349382  
SRR17520069. 11349384  
SRR17520069. 11349386  
SRR17520069. 11349388  
SRR17520069. 11349390  
SRR17520069. 11349392  
SRR17520069. 11349394  
SRR17520069. 11349396  
SRR17520069. 11349398  
SRR17520069. 11349400  
SRR17520069. 11349402  
SRR17520069. 11349404  
SRR17520069. 11349406  
SRR17520069. 11349408  
SRR17520069. 11349410  
SRR17520069. 11349412  
SRR17520069. 11349414  
SRR17520069. 11349416  
SRR17520069. 11349418  
SRR17520069. 11349420

SRR17520069. 11349422  
SRR17520069. 11349424  
SRR17520069. 11349426  
SRR17520069. 11349428  
SRR17520069. 11349430  
SRR17520069. 11349432  
SRR17520069. 11349434  
SRR17520069. 11349436  
SRR17520069. 11349438  
SRR17520069. 11349440  
SRR17520069. 11349442  
SRR17520069. 11349444  
SRR17520069. 11349446  
SRR17520069. 11349448  
SRR17520069. 11349450  
SRR17520069. 11349454  
SRR17520069. 11349456  
SRR17520069. 11349458  
SRR17520069. 11349460  
SRR17520069. 11349462  
SRR17520069. 11349464  
SRR17520069. 11349466  
SRR17520069. 11349468  
SRR17520069. 11349470  
SRR17520069. 11349472  
SRR17520069. 11349474  
SRR17520069. 11349476  
SRR17520069. 11356202  
SRR17520069. 11356204  
SRR17520069. 11356206  
SRR17520069. 11356208  
SRR17520069. 11356210  
SRR17520069. 11356212  
SRR17520069. 11356214  
SRR17520069. 11356216  
SRR17520069. 11356218  
SRR17520069. 11356220  
SRR17520069. 11356222  
SRR17520069. 11356224  
SRR17520069. 11356226  
SRR17520069. 11356228  
SRR17520069. 11356230  
SRR17520069. 11356232  
SRR17520069. 11356234  
SRR17520069. 11356236  
SRR17520069. 11356238  
SRR17520069. 11356240

SRR17520069. 11356242  
SRR17520069. 11356244  
SRR17520069. 11356246  
SRR17520069. 11356248  
SRR17520069. 11356250  
SRR17520069. 11356252  
SRR17520069. 11356254  
SRR17520069. 11356256  
SRR17520069. 11356258  
SRR17520069. 11356260  
SRR17520069. 11356262  
SRR17520069. 11356264  
SRR17520069. 11356266  
SRR17520069. 11356268  
SRR17520069. 11356270  
SRR17520069. 11356272  
SRR17520069. 11356274  
SRR17520069. 11356276  
SRR17520069. 11356334  
SRR17520069. 11356336  
SRR17520069. 11356340  
SRR17520069. 11356342  
SRR17520069. 11356344  
SRR17520069. 11358269  
SRR17520069. 11358271  
SRR17520069. 11358273  
SRR17520069. 11358275  
SRR17520069. 11358279  
SRR17520069. 11358281  
SRR17520069. 11358283  
SRR17520069. 11358285  
SRR17520069. 11358287  
SRR17520069. 11358289  
SRR17520069. 11358291  
SRR17520069. 11358293  
SRR17520069. 11358295  
SRR17520069. 11358297  
SRR17520069. 11358299  
SRR17520069. 11358301  
SRR17520069. 11358303  
SRR17520069. 11358305  
SRR17520069. 11358307  
SRR17520069. 11358309  
SRR17520069. 11358313  
SRR17520069. 11358315  
SRR17520069. 11358317  
SRR17520069. 11358319

SRR17520069. 11358323  
SRR17520069. 11358325  
SRR17520069. 11358327  
SRR17520069. 11358329  
SRR17520069. 11358333  
SRR17520069. 11358335  
SRR17520069. 11358337  
SRR17520069. 11358339  
SRR17520069. 11358341  
SRR17520069. 11358343  
SRR17520069. 11358345  
SRR17520069. 11358347  
SRR17520069. 11358349  
SRR17520069. 11358351  
SRR17520069. 11358353  
SRR17520069. 11358357  
SRR17520069. 11358359  
SRR17520069. 11358363  
SRR17520069. 11358365  
SRR17520069. 11377412  
SRR17520069. 11377414  
SRR17520069. 11377416  
SRR17520069. 11377418  
SRR17520069. 11377420  
SRR17520069. 11377422  
SRR17520069. 11377424  
SRR17520069. 11377426  
SRR17520069. 11377428  
SRR17520069. 11377430  
SRR17520069. 11377432  
SRR17520069. 11378227  
SRR17520069. 11379072  
SRR17520069. 11379074  
SRR17520069. 11379076  
SRR17520069. 11379078  
SRR17520069. 11379082  
SRR17520069. 11379084  
SRR17520069. 11379086  
SRR17520069. 11379088  
SRR17520069. 11379090  
SRR17520069. 11379092  
SRR17520069. 11379094  
SRR17520069. 11379096  
SRR17520069. 11379098  
SRR17520069. 11379100  
SRR17520069. 11379102  
SRR17520069. 11379104

SRR17520069. 11379108  
SRR17520069. 11379110  
SRR17520069. 11379112  
SRR17520069. 11379114  
SRR17520069. 11379116  
SRR17520069. 11379118  
SRR17520069. 11379120  
SRR17520069. 11379122  
SRR17520069. 11379124  
SRR17520069. 11379126  
SRR17520069. 11379128  
SRR17520069. 11379130  
SRR17520069. 11383416  
SRR17520069. 11383418  
SRR17520069. 11383420  
SRR17520069. 11383422  
SRR17520069. 11383424  
SRR17520069. 11383426  
SRR17520069. 11383428  
SRR17520069. 11383430  
SRR17520069. 11383432  
SRR17520069. 11383434  
SRR17520069. 11383436  
SRR17520069. 11383438  
SRR17520069. 11383440  
SRR17520069. 11383442  
SRR17520069. 11383444  
SRR17520069. 11383446  
SRR17520069. 11383448  
SRR17520069. 11383450  
SRR17520069. 11383452  
SRR17520069. 11383454  
SRR17520069. 11383456  
SRR17520069. 11383458  
SRR17520069. 11383460  
SRR17520069. 11383462  
SRR17520069. 11383464  
SRR17520069. 11392869  
SRR17520069. 11392871  
SRR17520069. 11392873  
SRR17520069. 11392875  
SRR17520069. 11392877  
SRR17520069. 11392879  
SRR17520069. 11392881  
SRR17520069. 11392883  
SRR17520069. 11392885  
SRR17520069. 11392887

SRR17520069. 11392889  
SRR17520069. 11392891  
SRR17520069. 11392893  
SRR17520069. 11392895  
SRR17520069. 11392897  
SRR17520069. 11392899  
SRR17520069. 11392901  
SRR17520069. 11392905  
SRR17520069. 11392907  
SRR17520069. 11392909  
SRR17520069. 11392911  
SRR17520069. 11392915  
SRR17520069. 11392917  
SRR17520069. 11392919  
SRR17520069. 11397410  
SRR17520069. 11397412  
SRR17520069. 11404561  
SRR17520069. 11404563  
SRR17520069. 11404565  
SRR17520069. 11404567  
SRR17520069. 11404569  
SRR17520069. 11406362  
SRR17520069. 11406366  
SRR17520069. 11406368  
SRR17520069. 11406370  
SRR17520069. 11406372  
SRR17520069. 11406374  
SRR17520069. 11406376  
SRR17520069. 11406378  
SRR17520069. 11406380  
SRR17520069. 11406382  
SRR17520069. 11406384  
SRR17520069. 11406386  
SRR17520069. 11406388  
SRR17520069. 11406390  
SRR17520069. 11406392  
SRR17520069. 11406394  
SRR17520069. 11406396  
SRR17520069. 11406414  
SRR17520069. 11406416  
SRR17520069. 11406418  
SRR17520069. 11406420  
SRR17520069. 11406422  
SRR17520069. 11406424  
SRR17520069. 11406426  
SRR17520069. 11406428  
SRR17520069. 11406430

SRR17520069.11406432  
SRR17520069.11406434  
SRR17520069.11406436  
SRR17520069.11406438  
SRR17520069.11406440  
SRR17520069.11406442  
SRR17520069.11406444  
SRR17520069.11406446  
SRR17520069.11406448  
SRR17520069.11406450  
SRR17520069.11406452  
SRR17520069.11406454  
SRR17520069.11406456  
SRR17520069.11406458  
SRR17520069.11406460  
SRR17520069.11406462  
SRR17520069.11406464  
SRR17520069.11406466  
SRR17520069.11406468  
SRR17520069.11406470  
SRR17520069.11406472  
SRR17520069.11406474  
SRR17520069.11406476  
SRR17520069.11406478  
SRR17520069.11406480  
SRR17520069.11406482  
SRR17520069.11406484  
SRR17520069.11406486  
SRR17520069.11406488  
SRR17520069.11406490  
SRR17520069.11406492  
SRR17520069.11406494  
SRR17520069.11406496  
SRR17520069.11406498  
SRR17520069.11406500  
SRR17520069.11406502  
SRR17520069.11406504  
SRR17520069.11406506  
SRR17520069.11406508  
SRR17520069.11406510  
SRR17520069.11406512  
SRR17520069.11406514  
SRR17520069.11406516  
SRR17520069.11406518  
SRR17520069.11406520  
SRR17520069.11406522  
SRR17520069.11406524

SRR17520069.11406526  
SRR17520069.11406528  
SRR17520069.11406530  
SRR17520069.11406532  
SRR17520069.11406534  
SRR17520069.11406536  
SRR17520069.11406538  
SRR17520069.11406540  
SRR17520069.11406542  
SRR17520069.11406544  
SRR17520069.11406546  
SRR17520069.11406548  
SRR17520069.11408540  
SRR17520069.11408542  
SRR17520069.11408544  
SRR17520069.11408546  
SRR17520069.11408548  
SRR17520069.11408550  
SRR17520069.11408552  
SRR17520069.11408554  
SRR17520069.11408556  
SRR17520069.11408558  
SRR17520069.11408560  
SRR17520069.11408562  
SRR17520069.11408564  
SRR17520069.11408566  
SRR17520069.11408568  
SRR17520069.11408570  
SRR17520069.11408572  
SRR17520069.11408574  
SRR17520069.11408576  
SRR17520069.11408578  
SRR17520069.11414744  
SRR17520069.11414746  
SRR17520069.11414748  
SRR17520069.11414754  
SRR17520069.11414756  
SRR17520069.11414760  
SRR17520069.11414764  
SRR17520069.11415098  
SRR17520069.11415100  
SRR17520069.11415102  
SRR17520069.11415104  
SRR17520069.11415106  
SRR17520069.11415108  
SRR17520069.11415110  
SRR17520069.11415112



SRR17520069.11415114  
SRR17520069.11415116  
SRR17520069.11415118  
SRR17520069.11415120  
SRR17520069.11415122  
SRR17520069.11415124  
SRR17520069.11415126  
SRR17520069.11415128  
SRR17520069.11415130  
SRR17520069.11415132  
SRR17520069.11415134  
SRR17520069.11415136  
SRR17520069.11415138  
SRR17520069.11415140  
SRR17520069.11415142  
SRR17520069.11415144  
SRR17520069.11415146  
SRR17520069.11415148  
SRR17520069.11415150  
SRR17520069.11415152  
SRR17520069.11415154  
SRR17520069.11415156  
SRR17520069.11415158  
SRR17520069.11415160  
SRR17520069.11415162  
SRR17520069.11415164  
SRR17520069.11415166  
SRR17520069.11415168  
SRR17520069.11415170  
SRR17520069.11415172  
SRR17520069.11415176  
SRR17520069.11415178  
SRR17520069.11415180  
SRR17520069.11415182  
SRR17520069.11421725  
SRR17520069.11421727  
SRR17520069.11421729  
SRR17520069.11421731  
SRR17520069.11421735  
SRR17520069.11423462  
SRR17520069.11423679  
SRR17520069.11423681  
SRR17520069.11423683  
SRR17520069.11423685  
SRR17520069.11423687  
SRR17520069.11423689  
SRR17520069.11423691

SRR17520069.11423693  
SRR17520069.11423695  
SRR17520069.11423697  
SRR17520069.11423699  
SRR17520069.11423701  
SRR17520069.11423703  
SRR17520069.11423705  
SRR17520069.11423707  
SRR17520069.11423709  
SRR17520069.11423711  
SRR17520069.11423713  
SRR17520069.11423715  
SRR17520069.11423717  
SRR17520069.11423719  
SRR17520069.11423721  
SRR17520069.11423723  
SRR17520069.11423725  
SRR17520069.11425548  
SRR17520069.11425550  
SRR17520069.11425552  
SRR17520069.11425554  
SRR17520069.11425634  
SRR17520069.11425636  
SRR17520069.11425638  
SRR17520069.11425640  
SRR17520069.11425704  
SRR17520069.11425706  
SRR17520069.11425708  
SRR17520069.11425712  
SRR17520069.11425714  
SRR17520069.11425716  
SRR17520069.11430115  
SRR17520069.11430117  
SRR17520069.11430119  
SRR17520069.11430121  
SRR17520069.11433269  
SRR17520069.11433271  
SRR17520069.11433273  
SRR17520069.11433275  
SRR17520069.11433277  
SRR17520069.11433279  
SRR17520069.11433283  
SRR17520069.11433285  
SRR17520069.11433287  
SRR17520069.11433289  
SRR17520069.11433291  
SRR17520069.11433293

SRR17520069.11433297  
SRR17520069.11434275  
SRR17520069.11434277  
SRR17520069.11434283  
SRR17520069.11434285  
SRR17520069.11434287  
SRR17520069.11434289  
SRR17520069.11434291  
SRR17520069.11434293  
SRR17520069.11434295  
SRR17520069.11434297  
SRR17520069.11434299  
SRR17520069.11434301  
SRR17520069.11434303  
SRR17520069.11434305  
SRR17520069.11434307  
SRR17520069.11434309  
SRR17520069.11434311  
SRR17520069.11434313  
SRR17520069.11434315  
SRR17520069.11434317  
SRR17520069.11434319  
SRR17520069.11434321  
SRR17520069.11434323  
SRR17520069.11434325  
SRR17520069.11434327  
SRR17520069.11434329  
SRR17520069.11434331  
SRR17520069.11434333  
SRR17520069.11434335  
SRR17520069.11434337  
SRR17520069.11434339  
SRR17520069.11434341  
SRR17520069.11434343  
SRR17520069.11434345  
SRR17520069.11440003  
SRR17520069.11440005  
SRR17520069.11440007  
SRR17520069.11440009  
SRR17520069.11440011  
SRR17520069.11440013  
SRR17520069.11440015  
SRR17520069.11440017  
SRR17520069.11440019  
SRR17520069.11440021  
SRR17520069.11444746  
SRR17520069.11444748

SRR17520069.11444750  
SRR17520069.11444752  
SRR17520069.11444754  
SRR17520069.11444756  
SRR17520069.11444758  
SRR17520069.11444760  
SRR17520069.11444762  
SRR17520069.11444764  
SRR17520069.11444766  
SRR17520069.11444768  
SRR17520069.11444770  
SRR17520069.11444772  
SRR17520069.11444774  
SRR17520069.11444776  
SRR17520069.11444778  
SRR17520069.11444780  
SRR17520069.11444782  
SRR17520069.11444784  
SRR17520069.11444786  
SRR17520069.11444788  
SRR17520069.11444790  
SRR17520069.11444792  
SRR17520069.11444794  
SRR17520069.11444796  
SRR17520069.11444798  
SRR17520069.11444800  
SRR17520069.11444802  
SRR17520069.11444804  
SRR17520069.11444806  
SRR17520069.11444808  
SRR17520069.11444810  
SRR17520069.11444812  
SRR17520069.11444814  
SRR17520069.11444816  
SRR17520069.11444818  
SRR17520069.11444820  
SRR17520069.11444822  
SRR17520069.11444824  
SRR17520069.11444826  
SRR17520069.11444828  
SRR17520069.11444830  
SRR17520069.11444832  
SRR17520069.11444834  
SRR17520069.11444836  
SRR17520069.11444838  
SRR17520069.11444840  
SRR17520069.11444842

SRR17520069.11444844  
SRR17520069.11450545  
SRR17520069.11450548  
SRR17520069.11451965  
SRR17520069.11451967  
SRR17520069.11451969  
SRR17520069.11451971  
SRR17520069.11451973  
SRR17520069.11451975  
SRR17520069.11451977  
SRR17520069.11451979  
SRR17520069.11451981  
SRR17520069.11451983  
SRR17520069.11451985  
SRR17520069.11451987  
SRR17520069.11451989  
SRR17520069.11451991  
SRR17520069.11451995  
SRR17520069.11451997  
SRR17520069.11451999  
SRR17520069.11452081  
SRR17520069.11452083  
SRR17520069.11452085  
SRR17520069.11452087  
SRR17520069.11452089  
SRR17520069.11452091  
SRR17520069.11452093  
SRR17520069.11452095  
SRR17520069.11452097  
SRR17520069.11452099  
SRR17520069.11452101  
SRR17520069.11452103  
SRR17520069.11452105  
SRR17520069.11452107  
SRR17520069.11452109  
SRR17520069.11452111  
SRR17520069.11452113  
SRR17520069.11452115  
SRR17520069.11452117  
SRR17520069.11452119  
SRR17520069.11452121  
SRR17520069.11457678  
SRR17520069.11460259  
SRR17520069.11460261  
SRR17520069.11460263  
SRR17520069.11460265  
SRR17520069.11460267

SRR17520069.11460269  
SRR17520069.11460271  
SRR17520069.11460273  
SRR17520069.11460275  
SRR17520069.11462761  
SRR17520069.11462763  
SRR17520069.11462765  
SRR17520069.11462767  
SRR17520069.11462769  
SRR17520069.11462771  
SRR17520069.11462773  
SRR17520069.11462775  
SRR17520069.11462777  
SRR17520069.11462779  
SRR17520069.11465856  
SRR17520069.11468691  
SRR17520069.11468693  
SRR17520069.11468697  
SRR17520069.11468699  
SRR17520069.11468701  
SRR17520069.11468703  
SRR17520069.11468705  
SRR17520069.11468707  
SRR17520069.11468709  
SRR17520069.11468711  
SRR17520069.11468713  
SRR17520069.11468715  
SRR17520069.11468717  
SRR17520069.11468719  
SRR17520069.11468721  
SRR17520069.11468723  
SRR17520069.11468725  
SRR17520069.11468727  
SRR17520069.11468729  
SRR17520069.11468731  
SRR17520069.11468733  
SRR17520069.11469213  
SRR17520069.11469215  
SRR17520069.11469217  
SRR17520069.11469219  
SRR17520069.11469221  
SRR17520069.11469223  
SRR17520069.11469225  
SRR17520069.11469227  
SRR17520069.11469229  
SRR17520069.11469231  
SRR17520069.11469233

SRR17520069.11469235  
SRR17520069.11469237  
SRR17520069.11469239  
SRR17520069.11477044  
SRR17520069.11477046  
SRR17520069.11477048  
SRR17520069.11477052  
SRR17520069.11477054  
SRR17520069.11477056  
SRR17520069.11477058  
SRR17520069.11477880  
SRR17520069.11477882  
SRR17520069.11477886  
SRR17520069.11477888  
SRR17520069.11477890  
SRR17520069.11477892  
SRR17520069.11477894  
SRR17520069.11477896  
SRR17520069.11477898  
SRR17520069.11477900  
SRR17520069.11478000  
SRR17520069.11478002  
SRR17520069.11478004  
SRR17520069.11478006  
SRR17520069.11478008  
SRR17520069.11478010  
SRR17520069.11478012  
SRR17520069.11478014  
SRR17520069.11478016  
SRR17520069.11478022  
SRR17520069.11478024  
SRR17520069.11478026  
SRR17520069.11478028  
SRR17520069.11478030  
SRR17520069.11478235  
SRR17520069.11478237  
SRR17520069.11478239  
SRR17520069.11478241  
SRR17520069.11478243  
SRR17520069.11478245  
SRR17520069.11478247  
SRR17520069.11478249  
SRR17520069.11478251  
SRR17520069.11478253  
SRR17520069.11478255  
SRR17520069.11478257  
SRR17520069.11478259

SRR17520069.11478261  
SRR17520069.11478263  
SRR17520069.11478265  
SRR17520069.11478267  
SRR17520069.11478271  
SRR17520069.11478273  
SRR17520069.11478275  
SRR17520069.11478277  
SRR17520069.11478279  
SRR17520069.11478281  
SRR17520069.11478283  
SRR17520069.11478285  
SRR17520069.11478289  
SRR17520069.11478291  
SRR17520069.11478293  
SRR17520069.11478297  
SRR17520069.11478299  
SRR17520069.11494206  
SRR17520069.11494208  
SRR17520069.11494212  
SRR17520069.11494214  
SRR17520069.11494216  
SRR17520069.11494218  
SRR17520069.11494220  
SRR17520069.11494222  
SRR17520069.11494224  
SRR17520069.11494226  
SRR17520069.11494228  
SRR17520069.11494230  
SRR17520069.11494232  
SRR17520069.11494234  
SRR17520069.11494236  
SRR17520069.11494238  
SRR17520069.11494240  
SRR17520069.11494242  
SRR17520069.11502047  
SRR17520069.11502049  
SRR17520069.11502051  
SRR17520069.11502053  
SRR17520069.11502055  
SRR17520069.11502057  
SRR17520069.11502059  
SRR17520069.11502061  
SRR17520069.11502063  
SRR17520069.11502065  
SRR17520069.11502067  
SRR17520069.11502069



SRR17520069.11502071  
SRR17520069.11502073  
SRR17520069.11502075  
SRR17520069.11502077  
SRR17520069.11502079  
SRR17520069.11502081  
SRR17520069.11502083  
SRR17520069.11502087  
SRR17520069.11502089  
SRR17520069.11502091  
SRR17520069.11502093  
SRR17520069.11502095  
SRR17520069.11502097  
SRR17520069.11502099  
SRR17520069.11502101  
SRR17520069.11502103  
SRR17520069.11502105  
SRR17520069.11502107  
SRR17520069.11502109  
SRR17520069.11502111  
SRR17520069.11502113  
SRR17520069.11502115  
SRR17520069.11502117  
SRR17520069.11502119  
SRR17520069.11502121  
SRR17520069.11502123  
SRR17520069.11502125  
SRR17520069.11502127  
SRR17520069.11502129  
SRR17520069.11502131  
SRR17520069.11502133  
SRR17520069.11502135  
SRR17520069.11502137  
SRR17520069.11502139  
SRR17520069.11502141  
SRR17520069.11502143  
SRR17520069.11502145  
SRR17520069.11502147  
SRR17520069.11502149  
SRR17520069.11502151  
SRR17520069.11502153  
SRR17520069.11502155  
SRR17520069.11502157  
SRR17520069.11502159  
SRR17520069.11502161  
SRR17520069.11502163  
SRR17520069.11502165

SRR17520069.11502167  
SRR17520069.11502171  
SRR17520069.11502173  
SRR17520069.11502175  
SRR17520069.11502177  
SRR17520069.11502179  
SRR17520069.11502181  
SRR17520069.11502183  
SRR17520069.11502185  
SRR17520069.11502187  
SRR17520069.11502189  
SRR17520069.11502191  
SRR17520069.11502193  
SRR17520069.11502195  
SRR17520069.11502197  
SRR17520069.11502199  
SRR17520069.11502201  
SRR17520069.11502203  
SRR17520069.11502205  
SRR17520069.11502207  
SRR17520069.11502209  
SRR17520069.11502211  
SRR17520069.11502213  
SRR17520069.11502215  
SRR17520069.11502217  
SRR17520069.11509196  
SRR17520069.11509198  
SRR17520069.11509200  
SRR17520069.11509202  
SRR17520069.11509204  
SRR17520069.11509206  
SRR17520069.11509208  
SRR17520069.11509210  
SRR17520069.11509212  
SRR17520069.11509214  
SRR17520069.11509216  
SRR17520069.11509218  
SRR17520069.11509220  
SRR17520069.11509222  
SRR17520069.11509226  
SRR17520069.11509228  
SRR17520069.11509230  
SRR17520069.11509232  
SRR17520069.11509234  
SRR17520069.11509236  
SRR17520069.11509238  
SRR17520069.11509240

SRR17520069.11509242  
SRR17520069.11509244  
SRR17520069.11509246  
SRR17520069.11509248  
SRR17520069.11509250  
SRR17520069.11509252  
SRR17520069.11509254  
SRR17520069.11509256  
SRR17520069.11509260  
SRR17520069.11509262  
SRR17520069.11509264  
SRR17520069.11509266  
SRR17520069.11509270  
SRR17520069.11509272  
SRR17520069.11509274  
SRR17520069.11509278  
SRR17520069.11509280  
SRR17520069.11509282  
SRR17520069.11509284  
SRR17520069.11509286  
SRR17520069.11509288  
SRR17520069.11509290  
SRR17520069.11509292  
SRR17520069.11509294  
SRR17520069.11509296  
SRR17520069.11509298  
SRR17520069.11509300  
SRR17520069.11509302  
SRR17520069.11509304  
SRR17520069.11509306  
SRR17520069.11509308  
SRR17520069.11509310  
SRR17520069.11509312  
SRR17520069.11509314  
SRR17520069.11509316  
SRR17520069.11509318  
SRR17520069.11509320  
SRR17520069.11509322  
SRR17520069.11509324  
SRR17520069.11509328  
SRR17520069.11509330  
SRR17520069.11509332  
SRR17520069.11509334  
SRR17520069.11509336  
SRR17520069.11509338  
SRR17520069.11509340  
SRR17520069.11509342

SRR17520069.11509344  
SRR17520069.11509346  
SRR17520069.11509348  
SRR17520069.11509350  
SRR17520069.11509352  
SRR17520069.11509354  
SRR17520069.11509356  
SRR17520069.11509362  
SRR17520069.11510282  
SRR17520069.11510284  
SRR17520069.11510288  
SRR17520069.11510292  
SRR17520069.11510294  
SRR17520069.11510296  
SRR17520069.11510298  
SRR17520069.11510300  
SRR17520069.11510302  
SRR17520069.11510304  
SRR17520069.11510306  
SRR17520069.11510308  
SRR17520069.11510310  
SRR17520069.11510312  
SRR17520069.11510314  
SRR17520069.11510316  
SRR17520069.11510318  
SRR17520069.11510322  
SRR17520069.11513197  
SRR17520069.11513199  
SRR17520069.11513201  
SRR17520069.11513203  
SRR17520069.11513205  
SRR17520069.11513207  
SRR17520069.11513209  
SRR17520069.11513211  
SRR17520069.11513213  
SRR17520069.11513215  
SRR17520069.11513217  
SRR17520069.11513219  
SRR17520069.11513221  
SRR17520069.11513223  
SRR17520069.11513225  
SRR17520069.11513227  
SRR17520069.11513229  
SRR17520069.11513231  
SRR17520069.11513233  
SRR17520069.11513235  
SRR17520069.11513237

SRR17520069.11513239  
SRR17520069.11513241  
SRR17520069.11513243  
SRR17520069.11513245  
SRR17520069.11513247  
SRR17520069.11513249  
SRR17520069.11513251  
SRR17520069.11513253  
SRR17520069.11513255  
SRR17520069.11513257  
SRR17520069.11513259  
SRR17520069.11513261  
SRR17520069.11513263  
SRR17520069.11513265  
SRR17520069.11513267  
SRR17520069.11513269  
SRR17520069.11513271  
SRR17520069.11513273  
SRR17520069.11513275  
SRR17520069.11530745  
SRR17520069.11530747  
SRR17520069.11530749  
SRR17520069.11530751  
SRR17520069.11530753  
SRR17520069.11530755  
SRR17520069.11530757  
SRR17520069.11530759  
SRR17520069.11530761  
SRR17520069.11530763  
SRR17520069.11534506  
SRR17520069.11534508  
SRR17520069.11534510  
SRR17520069.11534512  
SRR17520069.11534516  
SRR17520069.11534518  
SRR17520069.11535178  
SRR17520069.11535180  
SRR17520069.11535182  
SRR17520069.11535184  
SRR17520069.11535186  
SRR17520069.11535188  
SRR17520069.11535190  
SRR17520069.11535192  
SRR17520069.11535194  
SRR17520069.11535196  
SRR17520069.11535198  
SRR17520069.11535200

SRR17520069.11535202  
SRR17520069.11535204  
SRR17520069.11535206  
SRR17520069.11537038  
SRR17520069.11537040  
SRR17520069.11537042  
SRR17520069.11537044  
SRR17520069.11537046  
SRR17520069.11537048  
SRR17520069.11537050  
SRR17520069.11537052  
SRR17520069.11537054  
SRR17520069.11537056  
SRR17520069.11537058  
SRR17520069.11537060  
SRR17520069.11537062  
SRR17520069.11537064  
SRR17520069.11537066  
SRR17520069.11537068  
SRR17520069.11537070  
SRR17520069.11537072  
SRR17520069.11537074  
SRR17520069.11537076  
SRR17520069.11537078  
SRR17520069.11537080  
SRR17520069.11537082  
SRR17520069.11537084  
SRR17520069.11537086  
SRR17520069.11537088  
SRR17520069.11537090  
SRR17520069.11537092  
SRR17520069.11537096  
SRR17520069.11537098  
SRR17520069.11537100  
SRR17520069.11537102  
SRR17520069.11537104  
SRR17520069.11537106  
SRR17520069.11537108  
SRR17520069.11537110  
SRR17520069.11542090  
SRR17520069.11542092  
SRR17520069.11542094  
SRR17520069.11542096  
SRR17520069.11542098  
SRR17520069.11542100  
SRR17520069.11543337  
SRR17520069.11543339

SRR17520069.11543341  
SRR17520069.11543343  
SRR17520069.11543345  
SRR17520069.11548348  
SRR17520069.11548350  
SRR17520069.11560356  
SRR17520069.11560358  
SRR17520069.11560360  
SRR17520069.11560362  
SRR17520069.11560364  
SRR17520069.11569360  
SRR17520069.11569362  
SRR17520069.11569364  
SRR17520069.11569366  
SRR17520069.11569368  
SRR17520069.11569370  
SRR17520069.11569372  
SRR17520069.11569374  
SRR17520069.11569376  
SRR17520069.11569378  
SRR17520069.11569380  
SRR17520069.11569382  
SRR17520069.11569384  
SRR17520069.11569386  
SRR17520069.11569388  
SRR17520069.11569390  
SRR17520069.11569392  
SRR17520069.11569394  
SRR17520069.11569396  
SRR17520069.11569398  
SRR17520069.11569400  
SRR17520069.11569402  
SRR17520069.11569406  
SRR17520069.11569410  
SRR17520069.11569412  
SRR17520069.11569414  
SRR17520069.11569416  
SRR17520069.11569418  
SRR17520069.11569422  
SRR17520069.11569424  
SRR17520069.11569426  
SRR17520069.11569428  
SRR17520069.11569430  
SRR17520069.11569432  
SRR17520069.11569434  
SRR17520069.11569436  
SRR17520069.11569438

SRR17520069.11569440  
SRR17520069.11569442  
SRR17520069.11569444  
SRR17520069.11569446  
SRR17520069.11569448  
SRR17520069.11569450  
SRR17520069.11569452  
SRR17520069.11569454  
SRR17520069.11569456  
SRR17520069.11569458  
SRR17520069.11569460  
SRR17520069.11569462  
SRR17520069.11569464  
SRR17520069.11569466  
SRR17520069.11569468  
SRR17520069.11569470  
SRR17520069.11569472  
SRR17520069.11569474  
SRR17520069.11569476  
SRR17520069.11569478  
SRR17520069.11569480  
SRR17520069.11569482  
SRR17520069.11569484  
SRR17520069.11569486  
SRR17520069.11569488  
SRR17520069.11569490  
SRR17520069.11569492  
SRR17520069.11569494  
SRR17520069.11569496  
SRR17520069.11569498  
SRR17520069.11569500  
SRR17520069.11569502  
SRR17520069.11569504  
SRR17520069.11569506  
SRR17520069.11573147  
SRR17520069.11574006  
SRR17520069.11574008  
SRR17520069.11587696  
SRR17520069.11587698  
SRR17520069.11588752  
SRR17520069.11588754  
SRR17520069.11588756  
SRR17520069.11588758  
SRR17520069.11603520  
SRR17520069.11603522  
SRR17520069.11603524  
SRR17520069.11603526



SRR17520069.11603528  
SRR17520069.11603530  
SRR17520069.11603532  
SRR17520069.11603534  
SRR17520069.11603536  
SRR17520069.11603538  
SRR17520069.11603540  
SRR17520069.11603542  
SRR17520069.11603544  
SRR17520069.11603546  
SRR17520069.11603548  
SRR17520069.11603550  
SRR17520069.11603552  
SRR17520069.11603554  
SRR17520069.11603556  
SRR17520069.11603558  
SRR17520069.11603560  
SRR17520069.11603562  
SRR17520069.11603564  
SRR17520069.11603568  
SRR17520069.11603570  
SRR17520069.11603572  
SRR17520069.11603574  
SRR17520069.11603576  
SRR17520069.11603578  
SRR17520069.11603580  
SRR17520069.11603582  
SRR17520069.11603584  
SRR17520069.11603586  
SRR17520069.11603588  
SRR17520069.11603590  
SRR17520069.11603592  
SRR17520069.11603594  
SRR17520069.11603596  
SRR17520069.11603598  
SRR17520069.11603600  
SRR17520069.11603602  
SRR17520069.11603604  
SRR17520069.11603606  
SRR17520069.11603608  
SRR17520069.11603610  
SRR17520069.11603612  
SRR17520069.11603614  
SRR17520069.11603616  
SRR17520069.11603618  
SRR17520069.11604236  
SRR17520069.11604238

SRR17520069.11604240  
SRR17520069.11604242  
SRR17520069.11604244  
SRR17520069.11604246  
SRR17520069.11604248  
SRR17520069.11604250  
SRR17520069.11604252  
SRR17520069.11604254  
SRR17520069.11604256  
SRR17520069.11604258  
SRR17520069.11604260  
SRR17520069.11604262  
SRR17520069.11604264  
SRR17520069.11604266  
SRR17520069.11604268  
SRR17520069.11604270  
SRR17520069.11604272  
SRR17520069.11604274  
SRR17520069.11604276  
SRR17520069.11604278  
SRR17520069.11604280  
SRR17520069.11604282  
SRR17520069.11604284  
SRR17520069.11608152  
SRR17520069.11608156  
SRR17520069.11608158  
SRR17520069.11608160  
SRR17520069.11608162  
SRR17520069.11608164  
SRR17520069.11615842  
SRR17520069.11615844  
SRR17520069.11615846  
SRR17520069.11615848  
SRR17520069.11615850  
SRR17520069.11620909  
SRR17520069.11620911  
SRR17520069.11620913  
SRR17520069.11620915  
SRR17520069.11620917  
SRR17520069.11620919  
SRR17520069.11620921  
SRR17520069.11620923  
SRR17520069.11624687  
SRR17520069.11624689  
SRR17520069.11624691  
SRR17520069.11624693  
SRR17520069.11624695

SRR17520069.11624697  
SRR17520069.11624699  
SRR17520069.11624701  
SRR17520069.11624703  
SRR17520069.11624705  
SRR17520069.11624707  
SRR17520069.11624709  
SRR17520069.11624711  
SRR17520069.11624713  
SRR17520069.11624715  
SRR17520069.11624717  
SRR17520069.11624719  
SRR17520069.11624723  
SRR17520069.11624725  
SRR17520069.11624727  
SRR17520069.11624729  
SRR17520069.11624731  
SRR17520069.11624733  
SRR17520069.11624735  
SRR17520069.11624737  
SRR17520069.11638833  
SRR17520069.11638835  
SRR17520069.11638837  
SRR17520069.11638839  
SRR17520069.11638841  
SRR17520069.11638843  
SRR17520069.11638845  
SRR17520069.11638847  
SRR17520069.11638849  
SRR17520069.11638851  
SRR17520069.11638853  
SRR17520069.11638855  
SRR17520069.11638857  
SRR17520069.11638859  
SRR17520069.11638861  
SRR17520069.11638863  
SRR17520069.11638865  
SRR17520069.11638867  
SRR17520069.11638869  
SRR17520069.11638871  
SRR17520069.11638873  
SRR17520069.11638875  
SRR17520069.11638877  
SRR17520069.11638879  
SRR17520069.11638881  
SRR17520069.11638883  
SRR17520069.11638885

SRR17520069.11638887  
SRR17520069.11638889  
SRR17520069.11638891  
SRR17520069.11638893  
SRR17520069.11638895  
SRR17520069.11638897  
SRR17520069.11638899  
SRR17520069.11638901  
SRR17520069.11638903  
SRR17520069.11638905  
SRR17520069.11638907  
SRR17520069.11638909  
SRR17520069.11638911  
SRR17520069.11638913  
SRR17520069.11638915  
SRR17520069.11638917  
SRR17520069.11638919  
SRR17520069.11638921  
SRR17520069.11638923  
SRR17520069.11638925  
SRR17520069.11638927  
SRR17520069.11638929  
SRR17520069.11638931  
SRR17520069.11638933  
SRR17520069.11638935  
SRR17520069.11638939  
SRR17520069.11638941  
SRR17520069.11638943  
SRR17520069.11638945  
SRR17520069.11638947  
SRR17520069.11638949  
SRR17520069.11638951  
SRR17520069.11638955  
SRR17520069.11638957  
SRR17520069.11638959  
SRR17520069.11638961  
SRR17520069.11638963  
SRR17520069.11638965  
SRR17520069.11638967  
SRR17520069.11638969  
SRR17520069.11638971  
SRR17520069.11638973  
SRR17520069.11638975  
SRR17520069.11638977  
SRR17520069.11638981  
SRR17520069.11638983  
SRR17520069.11650690

SRR17520069.11650694  
SRR17520069.11650696  
SRR17520069.11650698  
SRR17520069.11650700  
SRR17520069.11650702  
SRR17520069.11650704  
SRR17520069.11650706  
SRR17520069.11650710  
SRR17520069.11650714  
SRR17520069.11650716  
SRR17520069.11650718  
SRR17520069.11650720  
SRR17520069.11650722  
SRR17520069.11650724  
SRR17520069.11650726  
SRR17520069.11650728  
SRR17520069.11650730  
SRR17520069.11650732  
SRR17520069.11650989  
SRR17520069.11650991  
SRR17520069.11661219  
SRR17520069.11661221  
SRR17520069.11661223  
SRR17520069.11661225  
SRR17520069.11661227  
SRR17520069.11661229  
SRR17520069.11661231  
SRR17520069.11661233  
SRR17520069.11661237  
SRR17520069.11661241  
SRR17520069.11661243  
SRR17520069.11661245  
SRR17520069.11661247  
SRR17520069.11661249  
SRR17520069.11661251  
SRR17520069.11661253  
SRR17520069.11661255  
SRR17520069.11661257  
SRR17520069.11661259  
SRR17520069.11661261  
SRR17520069.11661263  
SRR17520069.11661265  
SRR17520069.11661267  
SRR17520069.11661273  
SRR17520069.11661275  
SRR17520069.11661277  
SRR17520069.11661279

SRR17520069.11661283  
SRR17520069.11661285  
SRR17520069.11661287  
SRR17520069.11661289  
SRR17520069.11661291  
SRR17520069.11661293  
SRR17520069.11661295  
SRR17520069.11661297  
SRR17520069.11661299  
SRR17520069.11661301  
SRR17520069.11661303  
SRR17520069.11661305  
SRR17520069.11661307  
SRR17520069.11661309  
SRR17520069.11661311  
SRR17520069.11661313  
SRR17520069.11661315  
SRR17520069.11661317  
SRR17520069.11661321  
SRR17520069.11661323  
SRR17520069.11661325  
SRR17520069.11661327  
SRR17520069.11661329  
SRR17520069.11664226  
SRR17520069.11670316  
SRR17520069.11670318  
SRR17520069.11670320  
SRR17520069.11670322  
SRR17520069.11670324  
SRR17520069.11670326  
SRR17520069.11670328  
SRR17520069.11670330  
SRR17520069.11670332  
SRR17520069.11670334  
SRR17520069.11670336  
SRR17520069.11670338  
SRR17520069.11670340  
SRR17520069.11670342  
SRR17520069.11670346  
SRR17520069.11670348  
SRR17520069.11670350  
SRR17520069.11670352  
SRR17520069.11670354  
SRR17520069.11670356  
SRR17520069.11670358  
SRR17520069.11670360  
SRR17520069.11670362

SRR17520069.11670364  
SRR17520069.11670366  
SRR17520069.11670368  
SRR17520069.11670370  
SRR17520069.11670372  
SRR17520069.11670374  
SRR17520069.11670376  
SRR17520069.11679409  
SRR17520069.11679411  
SRR17520069.11679413  
SRR17520069.11679415  
SRR17520069.11679417  
SRR17520069.11679419  
SRR17520069.11679421  
SRR17520069.11679423  
SRR17520069.11679425  
SRR17520069.11679427  
SRR17520069.11679429  
SRR17520069.11679431  
SRR17520069.11679433  
SRR17520069.11679435  
SRR17520069.11679437  
SRR17520069.11680452  
SRR17520069.11680454  
SRR17520069.11680456  
SRR17520069.11680458  
SRR17520069.11680460  
SRR17520069.11680462  
SRR17520069.11680464  
SRR17520069.11680466  
SRR17520069.11680761  
SRR17520069.11680767  
SRR17520069.11680769  
SRR17520069.11680773  
SRR17520069.11680775  
SRR17520069.11680777  
SRR17520069.11680779  
SRR17520069.11680781  
SRR17520069.11680783  
SRR17520069.11680785  
SRR17520069.11680787  
SRR17520069.11680789  
SRR17520069.11680793  
SRR17520069.11680795  
SRR17520069.11680797  
SRR17520069.11680799  
SRR17520069.11680801

SRR17520069.11680803  
SRR17520069.11680805  
SRR17520069.11680807  
SRR17520069.11680809  
SRR17520069.11680811  
SRR17520069.11680813  
SRR17520069.11680815  
SRR17520069.11680817  
SRR17520069.11680819  
SRR17520069.11680821  
SRR17520069.11680823  
SRR17520069.11680825  
SRR17520069.11680827  
SRR17520069.11684450  
SRR17520069.11684452  
SRR17520069.11684454  
SRR17520069.11684456  
SRR17520069.11692132  
SRR17520069.11692136  
SRR17520069.11692138  
SRR17520069.11692140  
SRR17520069.11698816  
SRR17520069.11698819  
SRR17520069.11698821  
SRR17520069.11698823  
SRR17520069.11698825  
SRR17520069.11698827  
SRR17520069.11698829  
SRR17520069.11698831  
SRR17520069.11701261  
SRR17520069.11701265  
SRR17520069.11701267  
SRR17520069.11707937  
SRR17520069.11707939  
SRR17520069.11707941  
SRR17520069.11707943  
SRR17520069.11707945  
SRR17520069.11707947  
SRR17520069.11707949  
SRR17520069.11707951  
SRR17520069.11707953  
SRR17520069.11707957  
SRR17520069.11707959  
SRR17520069.11707961  
SRR17520069.11707963  
SRR17520069.11707965  
SRR17520069.11707967



SRR17520069.11707969  
SRR17520069.11707971  
SRR17520069.11707973  
SRR17520069.11707975  
SRR17520069.11707977  
SRR17520069.11707979  
SRR17520069.11707981  
SRR17520069.11707983  
SRR17520069.11707985  
SRR17520069.11707987  
SRR17520069.11707989  
SRR17520069.11707991  
SRR17520069.11707993  
SRR17520069.11707995  
SRR17520069.11707997  
SRR17520069.11707999  
SRR17520069.11708001  
SRR17520069.11708003  
SRR17520069.11708005  
SRR17520069.11708007  
SRR17520069.11708009  
SRR17520069.11708011  
SRR17520069.11708013  
SRR17520069.11708017  
SRR17520069.11708019  
SRR17520069.11708021  
SRR17520069.11708023  
SRR17520069.11708025  
SRR17520069.11708027  
SRR17520069.11708029  
SRR17520069.11708031  
SRR17520069.11708033  
SRR17520069.11708035  
SRR17520069.11708037  
SRR17520069.11708039  
SRR17520069.11708041  
SRR17520069.11714603  
SRR17520069.11714607  
SRR17520069.11714611  
SRR17520069.11714619  
SRR17520069.11714623  
SRR17520069.11714629  
SRR17520069.11714631  
SRR17520069.11714637  
SRR17520069.11714639  
SRR17520069.11716762  
SRR17520069.11716764

SRR17520069.11716766  
SRR17520069.11716768  
SRR17520069.11716865  
SRR17520069.11716867  
SRR17520069.11716869  
SRR17520069.11717068  
SRR17520069.11717070  
SRR17520069.11717072  
SRR17520069.11717160  
SRR17520069.11717707  
SRR17520069.11735048  
SRR17520069.11735052  
SRR17520069.11735054  
SRR17520069.11735056  
SRR17520069.11736198  
SRR17520069.11736200  
SRR17520069.11736204  
SRR17520069.11736206  
SRR17520069.11736208  
SRR17520069.11736210  
SRR17520069.11736218  
SRR17520069.11736220  
SRR17520069.11736222  
SRR17520069.11736224  
SRR17520069.11736226  
SRR17520069.11736228  
SRR17520069.11736230  
SRR17520069.11736234  
SRR17520069.11736236  
SRR17520069.11736238  
SRR17520069.11736240  
SRR17520069.11736242  
SRR17520069.11736244  
SRR17520069.11736246  
SRR17520069.11736248  
SRR17520069.11736250  
SRR17520069.11736252  
SRR17520069.11736254  
SRR17520069.11736256  
SRR17520069.11736258  
SRR17520069.11736260  
SRR17520069.11736262  
SRR17520069.11736264  
SRR17520069.11736266  
SRR17520069.11736268  
SRR17520069.11736270  
SRR17520069.11736272

SRR17520069.11736274  
SRR17520069.11736276  
SRR17520069.11736278  
SRR17520069.11736280  
SRR17520069.11736282  
SRR17520069.11736284  
SRR17520069.11736286  
SRR17520069.11736288  
SRR17520069.11736290  
SRR17520069.11736292  
SRR17520069.11736294  
SRR17520069.11736296  
SRR17520069.11736298  
SRR17520069.11736300  
SRR17520069.11736302  
SRR17520069.11736304  
SRR17520069.11736306  
SRR17520069.11736308  
SRR17520069.11736310  
SRR17520069.11736314  
SRR17520069.11736316  
SRR17520069.11736318  
SRR17520069.11736320  
SRR17520069.11736322  
SRR17520069.11736326  
SRR17520069.11736328  
SRR17520069.11736330  
SRR17520069.11736332  
SRR17520069.11736334  
SRR17520069.11736336  
SRR17520069.11736338  
SRR17520069.11736340  
SRR17520069.11736342  
SRR17520069.11736344  
SRR17520069.11736346  
SRR17520069.11736348  
SRR17520069.11736350  
SRR17520069.11736352  
SRR17520069.11736354  
SRR17520069.11736356  
SRR17520069.11736358  
SRR17520069.11736360  
SRR17520069.11736362  
SRR17520069.11736364  
SRR17520069.11736366  
SRR17520069.11736368  
SRR17520069.11736370

SRR17520069.11736372  
SRR17520069.11736374  
SRR17520069.11736376  
SRR17520069.11736378  
SRR17520069.11736380  
SRR17520069.11736382  
SRR17520069.11736384  
SRR17520069.11736386  
SRR17520069.11736388  
SRR17520069.11736390  
SRR17520069.11736392  
SRR17520069.11736394  
SRR17520069.11736396  
SRR17520069.11736398  
SRR17520069.11742004  
SRR17520069.11742006  
SRR17520069.11742010  
SRR17520069.11742012  
SRR17520069.11742014  
SRR17520069.11742016  
SRR17520069.11742018  
SRR17520069.11742020  
SRR17520069.11742022  
SRR17520069.11742024  
SRR17520069.11742026  
SRR17520069.11742028  
SRR17520069.11748313  
SRR17520069.11748315  
SRR17520069.11748317  
SRR17520069.11748319  
SRR17520069.11748321  
SRR17520069.11748323  
SRR17520069.11748325  
SRR17520069.11748329  
SRR17520069.11748331  
SRR17520069.11748333  
SRR17520069.11748335  
SRR17520069.11748337  
SRR17520069.11748339  
SRR17520069.11748341  
SRR17520069.11748343  
SRR17520069.11748345  
SRR17520069.11748347  
SRR17520069.11748349  
SRR17520069.11748351  
SRR17520069.11748353  
SRR17520069.11748355

SRR17520069.11748357  
SRR17520069.11748359  
SRR17520069.11748361  
SRR17520069.11748363  
SRR17520069.11748365  
SRR17520069.11748367  
SRR17520069.11748369  
SRR17520069.11748371  
SRR17520069.11748373  
SRR17520069.11748375  
SRR17520069.11748377  
SRR17520069.11748379  
SRR17520069.11748381  
SRR17520069.11748383  
SRR17520069.11748385  
SRR17520069.11748387  
SRR17520069.11751625  
SRR17520069.11751627  
SRR17520069.11751629  
SRR17520069.11751631  
SRR17520069.11751633  
SRR17520069.11751635  
SRR17520069.11751637  
SRR17520069.11751639  
SRR17520069.11751641  
SRR17520069.11751643  
SRR17520069.11755468  
SRR17520069.11764781  
SRR17520069.11764783  
SRR17520069.11775343  
SRR17520069.11775345  
SRR17520069.11775347  
SRR17520069.11775349  
SRR17520069.11775351  
SRR17520069.11775353  
SRR17520069.11775355  
SRR17520069.11775357  
SRR17520069.11775359  
SRR17520069.11775361  
SRR17520069.11775363  
SRR17520069.11775365  
SRR17520069.11775367  
SRR17520069.11775369  
SRR17520069.11775371  
SRR17520069.11775375  
SRR17520069.11775377  
SRR17520069.11775379

SRR17520069.11780121  
SRR17520069.11780123  
SRR17520069.11780125  
SRR17520069.11789941  
SRR17520069.11789943  
SRR17520069.11789945  
SRR17520069.11789947  
SRR17520069.11789951  
SRR17520069.11789953  
SRR17520069.11789955  
SRR17520069.11789957  
SRR17520069.11789959  
SRR17520069.11789961  
SRR17520069.11789963  
SRR17520069.11789965  
SRR17520069.11789967  
SRR17520069.11789969  
SRR17520069.11789974  
SRR17520069.11789976  
SRR17520069.11789978  
SRR17520069.11789980  
SRR17520069.11789982  
SRR17520069.11789986  
SRR17520069.11789988  
SRR17520069.11789990  
SRR17520069.11789992  
SRR17520069.11789994  
SRR17520069.11789996  
SRR17520069.11789998  
SRR17520069.11790000  
SRR17520069.11790002  
SRR17520069.11790004  
SRR17520069.11790006  
SRR17520069.11790008  
SRR17520069.11790010  
SRR17520069.11790012  
SRR17520069.11790014  
SRR17520069.11790016  
SRR17520069.11790018  
SRR17520069.11790020  
SRR17520069.11790022  
SRR17520069.11790024  
SRR17520069.11790026  
SRR17520069.11790030  
SRR17520069.11790032  
SRR17520069.11790034  
SRR17520069.11790036

SRR17520069.11790038  
SRR17520069.11790042  
SRR17520069.11790044  
SRR17520069.11790046  
SRR17520069.11790048  
SRR17520069.11790050  
SRR17520069.11790052  
SRR17520069.11790054  
SRR17520069.11790056  
SRR17520069.11790058  
SRR17520069.11790060  
SRR17520069.11790062  
SRR17520069.11790064  
SRR17520069.11790066  
SRR17520069.11790068  
SRR17520069.11790070  
SRR17520069.11790072  
SRR17520069.11790214  
SRR17520069.11790216  
SRR17520069.11790218  
SRR17520069.11790220  
SRR17520069.11790222  
SRR17520069.11790224  
SRR17520069.11790226  
SRR17520069.11790228  
SRR17520069.11790230  
SRR17520069.11790232  
SRR17520069.11790234  
SRR17520069.11790236  
SRR17520069.11790238  
SRR17520069.11790240  
SRR17520069.11790242  
SRR17520069.11790244  
SRR17520069.11790246  
SRR17520069.11790248  
SRR17520069.11790250  
SRR17520069.11792371  
SRR17520069.11792373  
SRR17520069.11792375  
SRR17520069.11792379  
SRR17520069.11808670  
SRR17520069.11808672  
SRR17520069.11808674  
SRR17520069.11812309  
SRR17520069.11812313  
SRR17520069.11812315  
SRR17520069.11812317

SRR17520069.11812319  
SRR17520069.11812321  
SRR17520069.11812323  
SRR17520069.11812764  
SRR17520069.11812766  
SRR17520069.11823638  
SRR17520069.11823640  
SRR17520069.11823642  
SRR17520069.11823644  
SRR17520069.11823646  
SRR17520069.11823648  
SRR17520069.11823650  
SRR17520069.11823652  
SRR17520069.11823654  
SRR17520069.11823656  
SRR17520069.11823658  
SRR17520069.11823660  
SRR17520069.11823662  
SRR17520069.11823664  
SRR17520069.11823666  
SRR17520069.11823668  
SRR17520069.11823670  
SRR17520069.11823672  
SRR17520069.11823674  
SRR17520069.11823676  
SRR17520069.11823678  
SRR17520069.11823680  
SRR17520069.11823682  
SRR17520069.11823686  
SRR17520069.11823688  
SRR17520069.11823690  
SRR17520069.11823692  
SRR17520069.11823694  
SRR17520069.11823696  
SRR17520069.11823698  
SRR17520069.11823700  
SRR17520069.11823702  
SRR17520069.11823704  
SRR17520069.11823706  
SRR17520069.11823708  
SRR17520069.11823710  
SRR17520069.11823712  
SRR17520069.11823714  
SRR17520069.11823716  
SRR17520069.11823718  
SRR17520069.11823720  
SRR17520069.11823722



SRR17520069.11823724  
SRR17520069.11823728  
SRR17520069.11823730  
SRR17520069.11823732  
SRR17520069.11823734  
SRR17520069.11823736  
SRR17520069.11823738  
SRR17520069.11823740  
SRR17520069.11823742  
SRR17520069.11824683  
SRR17520069.11824685  
SRR17520069.11832520  
SRR17520069.11832522  
SRR17520069.11832524  
SRR17520069.11832528  
SRR17520069.11832530  
SRR17520069.11832532  
SRR17520069.11832534  
SRR17520069.11832536  
SRR17520069.11832538  
SRR17520069.11832540  
SRR17520069.11832542  
SRR17520069.11833779  
SRR17520069.11833781  
SRR17520069.11833783  
SRR17520069.11833785  
SRR17520069.11833787  
SRR17520069.11833789  
SRR17520069.11833793  
SRR17520069.11833795  
SRR17520069.11833797  
SRR17520069.11833799  
SRR17520069.11833801  
SRR17520069.11844674  
SRR17520069.11844676  
SRR17520069.11844678  
SRR17520069.11844680  
SRR17520069.11844684  
SRR17520069.11844686  
SRR17520069.11844688  
SRR17520069.11844690  
SRR17520069.11844692  
SRR17520069.11844694  
SRR17520069.11844696  
SRR17520069.11844698  
SRR17520069.11844700  
SRR17520069.11844702

SRR17520069.11844704  
SRR17520069.11844706  
SRR17520069.11844708  
SRR17520069.11844710  
SRR17520069.11844712  
SRR17520069.11844714  
SRR17520069.11844716  
SRR17520069.11844718  
SRR17520069.11844720  
SRR17520069.11844722  
SRR17520069.11844724  
SRR17520069.11844726  
SRR17520069.11844728  
SRR17520069.11844730  
SRR17520069.11844732  
SRR17520069.11844734  
SRR17520069.11844736  
SRR17520069.11844738  
SRR17520069.11844740  
SRR17520069.11844742  
SRR17520069.11844744  
SRR17520069.11844746  
SRR17520069.11844748  
SRR17520069.11844750  
SRR17520069.11844752  
SRR17520069.11844754  
SRR17520069.11844756  
SRR17520069.11844758  
SRR17520069.11844760  
SRR17520069.11844762  
SRR17520069.11844764  
SRR17520069.11845993  
SRR17520069.11845995  
SRR17520069.11845997  
SRR17520069.11845999  
SRR17520069.11846001  
SRR17520069.11846003  
SRR17520069.11846005  
SRR17520069.11846007  
SRR17520069.11846009  
SRR17520069.11846011  
SRR17520069.11846013  
SRR17520069.11846015  
SRR17520069.11846017  
SRR17520069.11846019  
SRR17520069.11846021  
SRR17520069.11850120

SRR17520069.11850122  
SRR17520069.11850124  
SRR17520069.11850126  
SRR17520069.11850128  
SRR17520069.11850130  
SRR17520069.11850132  
SRR17520069.11861395  
SRR17520069.11861397  
SRR17520069.11861399  
SRR17520069.11861403  
SRR17520069.11861405  
SRR17520069.11861407  
SRR17520069.11863501  
SRR17520069.11863503  
SRR17520069.11863505  
SRR17520069.11863507  
SRR17520069.11863509  
SRR17520069.11863511  
SRR17520069.11863513  
SRR17520069.11864889  
SRR17520069.11864891  
SRR17520069.11864895  
SRR17520069.11864897  
SRR17520069.11864899  
SRR17520069.11864901  
SRR17520069.11864933  
SRR17520069.11864935  
SRR17520069.11864937  
SRR17520069.11864939  
SRR17520069.11864941  
SRR17520069.11864943  
SRR17520069.11864945  
SRR17520069.11864947  
SRR17520069.11864949  
SRR17520069.11864951  
SRR17520069.11864953  
SRR17520069.11864955  
SRR17520069.11864957  
SRR17520069.11864959  
SRR17520069.11864961  
SRR17520069.11864963  
SRR17520069.11864965  
SRR17520069.11864967  
SRR17520069.11864969  
SRR17520069.11864971  
SRR17520069.11864973  
SRR17520069.11864975

SRR17520069.11864977  
SRR17520069.11864979  
SRR17520069.11864981  
SRR17520069.11864983  
SRR17520069.11864985  
SRR17520069.11864987  
SRR17520069.11864989  
SRR17520069.11864991  
SRR17520069.11864993  
SRR17520069.11864995  
SRR17520069.11864997  
SRR17520069.11864999  
SRR17520069.11866982  
SRR17520069.11872090  
SRR17520069.11872092  
SRR17520069.11872094  
SRR17520069.11872096  
SRR17520069.11872098  
SRR17520069.11872100  
SRR17520069.11875469  
SRR17520069.11875471  
SRR17520069.11875473  
SRR17520069.11875475  
SRR17520069.11875477  
SRR17520069.11875479  
SRR17520069.11875481  
SRR17520069.11875483  
SRR17520069.11875485  
SRR17520069.11881385  
SRR17520069.11882416  
SRR17520069.11882418  
SRR17520069.11882420  
SRR17520069.11882422  
SRR17520069.11882424  
SRR17520069.11882426  
SRR17520069.11882428  
SRR17520069.11882430  
SRR17520069.11882432  
SRR17520069.11882434  
SRR17520069.11882436  
SRR17520069.11882438  
SRR17520069.11882440  
SRR17520069.11882442  
SRR17520069.11882444  
SRR17520069.11882446  
SRR17520069.11882448  
SRR17520069.11882450

SRR17520069.11882452  
SRR17520069.11882454  
SRR17520069.11882456  
SRR17520069.11882458  
SRR17520069.11882460  
SRR17520069.11882462  
SRR17520069.11882464  
SRR17520069.11882466  
SRR17520069.11882470  
SRR17520069.11882472  
SRR17520069.11882474  
SRR17520069.11882476  
SRR17520069.11882478  
SRR17520069.11882480  
SRR17520069.11882484  
SRR17520069.11882486  
SRR17520069.11883703  
SRR17520069.11883709  
SRR17520069.11885932  
SRR17520069.11885934  
SRR17520069.11885936  
SRR17520069.11885938  
SRR17520069.11885940  
SRR17520069.11885942  
SRR17520069.11885944  
SRR17520069.11885946  
SRR17520069.11885948  
SRR17520069.11885950  
SRR17520069.11885952  
SRR17520069.11885954  
SRR17520069.11885956  
SRR17520069.11885958  
SRR17520069.11885960  
SRR17520069.11885962  
SRR17520069.11885964  
SRR17520069.11885966  
SRR17520069.11885968  
SRR17520069.11885970  
SRR17520069.11885972  
SRR17520069.11885974  
SRR17520069.11885976  
SRR17520069.11885978  
SRR17520069.11885980  
SRR17520069.11885982  
SRR17520069.11885984  
SRR17520069.11885986  
SRR17520069.11885988

SRR17520069.11885990  
SRR17520069.11885992  
SRR17520069.11885994  
SRR17520069.11885996  
SRR17520069.11885998  
SRR17520069.11886000  
SRR17520069.11886002  
SRR17520069.11886004  
SRR17520069.11886006  
SRR17520069.11886008  
SRR17520069.11886010  
SRR17520069.11886012  
SRR17520069.11886014  
SRR17520069.11886016  
SRR17520069.11886018  
SRR17520069.11886020  
SRR17520069.11886022  
SRR17520069.11886024  
SRR17520069.11886026  
SRR17520069.11886028  
SRR17520069.11886030  
SRR17520069.11886032  
SRR17520069.11886034  
SRR17520069.11886036  
SRR17520069.11886038  
SRR17520069.11886040  
SRR17520069.11886042  
SRR17520069.11886044  
SRR17520069.11886046  
SRR17520069.11886048  
SRR17520069.11886050  
SRR17520069.11886052  
SRR17520069.11891087  
SRR17520069.11891089  
SRR17520069.11891091  
SRR17520069.11891095  
SRR17520069.11891097  
SRR17520069.11891101  
SRR17520069.11891103  
SRR17520069.11892821  
SRR17520069.11902377  
SRR17520069.11906957  
SRR17520069.11906961  
SRR17520069.11906963  
SRR17520069.11906965  
SRR17520069.11906967  
SRR17520069.11906971

SRR17520069.11906973  
SRR17520069.11906975  
SRR17520069.11906977  
SRR17520069.11906979  
SRR17520069.11906981  
SRR17520069.11906983  
SRR17520069.11906985  
SRR17520069.11906987  
SRR17520069.11906989  
SRR17520069.11906991  
SRR17520069.11906993  
SRR17520069.11906995  
SRR17520069.11906997  
SRR17520069.11906999  
SRR17520069.11907001  
SRR17520069.11907003  
SRR17520069.11907005  
SRR17520069.11907007  
SRR17520069.11907009  
SRR17520069.11907011  
SRR17520069.11907013  
SRR17520069.11907015  
SRR17520069.11907017  
SRR17520069.11907019  
SRR17520069.11907021  
SRR17520069.11907023  
SRR17520069.11907025  
SRR17520069.11907027  
SRR17520069.11907029  
SRR17520069.11907031  
SRR17520069.11907033  
SRR17520069.11907035  
SRR17520069.11907037  
SRR17520069.11907041  
SRR17520069.11907043  
SRR17520069.11907045  
SRR17520069.11907047  
SRR17520069.11907049  
SRR17520069.11907051  
SRR17520069.11907053  
SRR17520069.11907055  
SRR17520069.11907057  
SRR17520069.11907059  
SRR17520069.11907061  
SRR17520069.11907063  
SRR17520069.11907065  
SRR17520069.11907067

SRR17520069.11907069  
SRR17520069.11907071  
SRR17520069.11907073  
SRR17520069.11907075  
SRR17520069.11907077  
SRR17520069.11907079  
SRR17520069.11907081  
SRR17520069.11907083  
SRR17520069.11914005  
SRR17520069.11920136  
SRR17520069.11920140  
SRR17520069.11920144  
SRR17520069.11920146  
SRR17520069.11920148  
SRR17520069.11920160  
SRR17520069.11920162  
SRR17520069.11924569  
SRR17520069.11924571  
SRR17520069.11924573  
SRR17520069.11924575  
SRR17520069.11924577  
SRR17520069.11924579  
SRR17520069.11924583  
SRR17520069.11924587  
SRR17520069.11924589  
SRR17520069.11924591  
SRR17520069.11924593  
SRR17520069.11924595  
SRR17520069.11924597  
SRR17520069.11924599  
SRR17520069.11924601  
SRR17520069.11924603  
SRR17520069.11924605  
SRR17520069.11924607  
SRR17520069.11924609  
SRR17520069.11924611  
SRR17520069.11924613  
SRR17520069.11924615  
SRR17520069.11924617  
SRR17520069.11924619  
SRR17520069.11924621  
SRR17520069.11924623  
SRR17520069.11924625  
SRR17520069.11924627  
SRR17520069.11924629  
SRR17520069.11924631  
SRR17520069.11924633



SRR17520069. 11924635  
SRR17520069. 11924637  
SRR17520069. 11924639  
SRR17520069. 11924641  
SRR17520069. 11924643  
SRR17520069. 11924645  
SRR17520069. 11924647  
SRR17520069. 11924649  
SRR17520069. 11924651  
SRR17520069. 11924653  
SRR17520069. 11924655  
SRR17520069. 11924657  
SRR17520069. 11924659  
SRR17520069. 11924661  
SRR17520069. 11924663  
SRR17520069. 11924665  
SRR17520069. 11924667  
SRR17520069. 11924669  
SRR17520069. 11924671  
SRR17520069. 11924673  
SRR17520069. 11924675  
SRR17520069. 11924677  
SRR17520069. 11924679  
SRR17520069. 11924681  
SRR17520069. 11924683  
SRR17520069. 11924685  
SRR17520069. 11924687  
SRR17520069. 11924689  
SRR17520069. 11924691  
SRR17520069. 11924693  
SRR17520069. 11927460  
SRR17520069. 11927462  
SRR17520069. 11927464  
SRR17520069. 11927466  
SRR17520069. 11930458  
SRR17520069. 11932384  
SRR17520069. 11932386  
SRR17520069. 11932388  
SRR17520069. 11932390  
SRR17520069. 11932392  
SRR17520069. 11932394  
SRR17520069. 11932396  
SRR17520069. 11932398  
SRR17520069. 11932401  
SRR17520069. 11933401  
SRR17520069. 11933403  
SRR17520069. 11933405

SRR17520069.11933407  
SRR17520069.11933409  
SRR17520069.11933411  
SRR17520069.11933413  
SRR17520069.11933415  
SRR17520069.11933417  
SRR17520069.11933419  
SRR17520069.11933421  
SRR17520069.11933423  
SRR17520069.11933425  
SRR17520069.11933427  
SRR17520069.11933429  
SRR17520069.11933431  
SRR17520069.11933433  
SRR17520069.11933435  
SRR17520069.11933437  
SRR17520069.11933439  
SRR17520069.11933441  
SRR17520069.11933443  
SRR17520069.11933445  
SRR17520069.11933447  
SRR17520069.11933449  
SRR17520069.11933451  
SRR17520069.11933453  
SRR17520069.11933455  
SRR17520069.11933457  
SRR17520069.11938709  
SRR17520069.11938711  
SRR17520069.11938713  
SRR17520069.11938717  
SRR17520069.11938719  
SRR17520069.11939729  
SRR17520069.11945218  
SRR17520069.11945220  
SRR17520069.11945226  
SRR17520069.11945228  
SRR17520069.11945230  
SRR17520069.11945234  
SRR17520069.11945238  
SRR17520069.11945240  
SRR17520069.11945244  
SRR17520069.11945246  
SRR17520069.11945248  
SRR17520069.11945250  
SRR17520069.11945252  
SRR17520069.11945256  
SRR17520069.11945264

SRR17520069.11946379  
SRR17520069.11946381  
SRR17520069.11946383  
SRR17520069.11946385  
SRR17520069.11946387  
SRR17520069.11946389  
SRR17520069.11948226  
SRR17520069.11948228  
SRR17520069.11948230  
SRR17520069.11948232  
SRR17520069.11948234  
SRR17520069.11948236  
SRR17520069.11948238  
SRR17520069.11948242  
SRR17520069.11948244  
SRR17520069.11948246  
SRR17520069.11948248  
SRR17520069.11948250  
SRR17520069.11948252  
SRR17520069.11948254  
SRR17520069.11948256  
SRR17520069.11948258  
SRR17520069.11948260  
SRR17520069.11948262  
SRR17520069.11948264  
SRR17520069.11948266  
SRR17520069.11948268  
SRR17520069.11980982  
SRR17520069.11980984  
SRR17520069.11980986  
SRR17520069.11980988  
SRR17520069.11980990  
SRR17520069.11980992  
SRR17520069.11980994  
SRR17520069.11980996  
SRR17520069.11980998  
SRR17520069.11981000  
SRR17520069.11981002  
SRR17520069.11981004  
SRR17520069.11981006  
SRR17520069.11981008  
SRR17520069.11981010  
SRR17520069.11981012  
SRR17520069.11981014  
SRR17520069.11981016  
SRR17520069.11981018  
SRR17520069.11981020

SRR17520069.11981022  
SRR17520069.11981024  
SRR17520069.11981026  
SRR17520069.11981028  
SRR17520069.11981030  
SRR17520069.11981032  
SRR17520069.11981034  
SRR17520069.11981036  
SRR17520069.11981038  
SRR17520069.11981040  
SRR17520069.11981042  
SRR17520069.11981044  
SRR17520069.11981046  
SRR17520069.11981048  
SRR17520069.11981050  
SRR17520069.11981052  
SRR17520069.11981054  
SRR17520069.11981058  
SRR17520069.11981060  
SRR17520069.11981062  
SRR17520069.11981064  
SRR17520069.11981066  
SRR17520069.11981068  
SRR17520069.11981070  
SRR17520069.11981072  
SRR17520069.11981074  
SRR17520069.11981076  
SRR17520069.11981078  
SRR17520069.11981080  
SRR17520069.11981082  
SRR17520069.11981084  
SRR17520069.11981086  
SRR17520069.11981088  
SRR17520069.11981805  
SRR17520069.11982589  
SRR17520069.11982591  
SRR17520069.11982593  
SRR17520069.11982595  
SRR17520069.11982597  
SRR17520069.11982599  
SRR17520069.11982601  
SRR17520069.11982603  
SRR17520069.11982605  
SRR17520069.11982607  
SRR17520069.11983611  
SRR17520069.11983613  
SRR17520069.11983615

SRR17520069.11983617  
SRR17520069.11983619  
SRR17520069.11983621  
SRR17520069.11983623  
SRR17520069.11983625  
SRR17520069.11983627  
SRR17520069.11983629  
SRR17520069.11983631  
SRR17520069.11983633  
SRR17520069.11983635  
SRR17520069.11983638  
SRR17520069.11988541  
SRR17520069.11989076  
SRR17520069.11989078  
SRR17520069.11989080  
SRR17520069.11989082  
SRR17520069.11989084  
SRR17520069.11989086  
SRR17520069.11989088  
SRR17520069.11989090  
SRR17520069.11989092  
SRR17520069.11989094  
SRR17520069.11989096  
SRR17520069.11989098  
SRR17520069.11989100  
SRR17520069.11989102  
SRR17520069.11989104  
SRR17520069.11989106  
SRR17520069.11989108  
SRR17520069.11989110  
SRR17520069.11989112  
SRR17520069.11989114  
SRR17520069.11989118  
SRR17520069.11989120  
SRR17520069.11989122  
SRR17520069.11989124  
SRR17520069.11989126  
SRR17520069.11989128  
SRR17520069.11989130  
SRR17520069.11989132  
SRR17520069.11989388  
SRR17520069.11989390  
SRR17520069.11989392  
SRR17520069.11993196  
SRR17520069.11993198  
SRR17520069.11993200  
SRR17520069.11993202

SRR17520069.11993204  
SRR17520069.11993206  
SRR17520069.11993208  
SRR17520069.11993210  
SRR17520069.11993212  
SRR17520069.11993214  
SRR17520069.11993216  
SRR17520069.11993218  
SRR17520069.11993220  
SRR17520069.11993222  
SRR17520069.11993224  
SRR17520069.11993226  
SRR17520069.11993228  
SRR17520069.11993230  
SRR17520069.11993232  
SRR17520069.11993234  
SRR17520069.11993236  
SRR17520069.11993238  
SRR17520069.11993240  
SRR17520069.11993244  
SRR17520069.11993246  
SRR17520069.11993248  
SRR17520069.11993250  
SRR17520069.11993252  
SRR17520069.11993254  
SRR17520069.11993256  
SRR17520069.11993258  
SRR17520069.11993260  
SRR17520069.11993262  
SRR17520069.11993264  
SRR17520069.11993266  
SRR17520069.11993268  
SRR17520069.11993270  
SRR17520069.11993272  
SRR17520069.11993274  
SRR17520069.11993276  
SRR17520069.11999061  
SRR17520069.11999063  
SRR17520069.11999065  
SRR17520069.11999067  
SRR17520069.11999069  
SRR17520069.11999071  
SRR17520069.11999073  
SRR17520069.11999075  
SRR17520069.11999077  
SRR17520069.11999079  
SRR17520069.12008625

SRR17520069.12008627  
SRR17520069.12008631  
SRR17520069.12008633  
SRR17520069.12008635  
SRR17520069.12008637  
SRR17520069.12008639  
SRR17520069.12008643  
SRR17520069.12008986  
SRR17520069.12008988  
SRR17520069.12008990  
SRR17520069.12008992  
SRR17520069.12008994  
SRR17520069.12008996  
SRR17520069.12008998  
SRR17520069.12010909  
SRR17520069.12010911  
SRR17520069.12010913  
SRR17520069.12010915  
SRR17520069.12010917  
SRR17520069.12010919  
SRR17520069.12010921  
SRR17520069.12010923  
SRR17520069.12010925  
SRR17520069.12010927  
SRR17520069.12010929  
SRR17520069.12010931  
SRR17520069.12014910  
SRR17520069.12014912  
SRR17520069.12014916  
SRR17520069.12014918  
SRR17520069.12014920  
SRR17520069.12014922  
SRR17520069.12014924  
SRR17520069.12014926  
SRR17520069.12014928  
SRR17520069.12014930  
SRR17520069.12014932  
SRR17520069.12014934  
SRR17520069.12014936  
SRR17520069.12014938  
SRR17520069.12014940  
SRR17520069.12014942  
SRR17520069.12014944  
SRR17520069.12014946  
SRR17520069.12014948  
SRR17520069.12014950  
SRR17520069.12014952

SRR17520069.12014954  
SRR17520069.12014956  
SRR17520069.12014958  
SRR17520069.12014960  
SRR17520069.12014962  
SRR17520069.12014964  
SRR17520069.12014966  
SRR17520069.12014968  
SRR17520069.12014970  
SRR17520069.12014972  
SRR17520069.12014974  
SRR17520069.12014976  
SRR17520069.12014978  
SRR17520069.12014980  
SRR17520069.12014982  
SRR17520069.12014986  
SRR17520069.12014990  
SRR17520069.12027281  
SRR17520069.12027283  
SRR17520069.12029147  
SRR17520069.12029149  
SRR17520069.12029151  
SRR17520069.12029155  
SRR17520069.12029157  
SRR17520069.12029159  
SRR17520069.12029161  
SRR17520069.12029163  
SRR17520069.12029165  
SRR17520069.12029167  
SRR17520069.12029171  
SRR17520069.12029173  
SRR17520069.12029175  
SRR17520069.12029177  
SRR17520069.12029179  
SRR17520069.12029181  
SRR17520069.12029183  
SRR17520069.12029185  
SRR17520069.12029187  
SRR17520069.12029189  
SRR17520069.12029191  
SRR17520069.12029193  
SRR17520069.12029195  
SRR17520069.12029197  
SRR17520069.12029201  
SRR17520069.12029203  
SRR17520069.12029205  
SRR17520069.12029207



SRR17520069. 12029209  
SRR17520069. 12029211  
SRR17520069. 12029213  
SRR17520069. 12029215  
SRR17520069. 12029219  
SRR17520069. 12029221  
SRR17520069. 12029223  
SRR17520069. 12029225  
SRR17520069. 12029227  
SRR17520069. 12029231  
SRR17520069. 12029233  
SRR17520069. 12029235  
SRR17520069. 12029237  
SRR17520069. 12029239  
SRR17520069. 12029241  
SRR17520069. 12029243  
SRR17520069. 12029245  
SRR17520069. 12029247  
SRR17520069. 12029249  
SRR17520069. 12029251  
SRR17520069. 12029253  
SRR17520069. 12029257  
SRR17520069. 12029259  
SRR17520069. 12029263  
SRR17520069. 12029265  
SRR17520069. 12029267  
SRR17520069. 12029269  
SRR17520069. 12029271  
SRR17520069. 12029273  
SRR17520069. 12029275  
SRR17520069. 12029277  
SRR17520069. 12029279  
SRR17520069. 12029281  
SRR17520069. 12029283  
SRR17520069. 12029285  
SRR17520069. 12029289  
SRR17520069. 12029291  
SRR17520069. 12029293  
SRR17520069. 12029295  
SRR17520069. 12029297  
SRR17520069. 12029299  
SRR17520069. 12029301  
SRR17520069. 12029303  
SRR17520069. 12029305  
SRR17520069. 12029307  
SRR17520069. 12029311  
SRR17520069. 12029313

SRR17520069. 12038753  
SRR17520069. 12038755  
SRR17520069. 12038757  
SRR17520069. 12038759  
SRR17520069. 12038761  
SRR17520069. 12038763  
SRR17520069. 12038765  
SRR17520069. 12038767  
SRR17520069. 12039431  
SRR17520069. 12040655  
SRR17520069. 12040657  
SRR17520069. 12040659  
SRR17520069. 12040661  
SRR17520069. 12040663  
SRR17520069. 12040667  
SRR17520069. 12040669  
SRR17520069. 12040671  
SRR17520069. 12040673  
SRR17520069. 12040675  
SRR17520069. 12040677  
SRR17520069. 12040679  
SRR17520069. 12041187  
SRR17520069. 12041189  
SRR17520069. 12041193  
SRR17520069. 12041195  
SRR17520069. 12041197  
SRR17520069. 12041199  
SRR17520069. 12041201  
SRR17520069. 12041203  
SRR17520069. 12041205  
SRR17520069. 12041207  
SRR17520069. 12041209  
SRR17520069. 12041211  
SRR17520069. 12041213  
SRR17520069. 12041219  
SRR17520069. 12042477  
SRR17520069. 12042479  
SRR17520069. 12042481  
SRR17520069. 12042483  
SRR17520069. 12042487  
SRR17520069. 12042489  
SRR17520069. 12042491  
SRR17520069. 12042493  
SRR17520069. 12042495  
SRR17520069. 12042497  
SRR17520069. 12042499  
SRR17520069. 12042501

SRR17520069.12042503  
SRR17520069.12042505  
SRR17520069.12042509  
SRR17520069.12042511  
SRR17520069.12042513  
SRR17520069.12042515  
SRR17520069.12042517  
SRR17520069.12042519  
SRR17520069.12042523  
SRR17520069.12042525  
SRR17520069.12042527  
SRR17520069.12042529  
SRR17520069.12042531  
SRR17520069.12042533  
SRR17520069.12042535  
SRR17520069.12042537  
SRR17520069.12042539  
SRR17520069.12042541  
SRR17520069.12042543  
SRR17520069.12042545  
SRR17520069.12042547  
SRR17520069.12042551  
SRR17520069.12042553  
SRR17520069.12042555  
SRR17520069.12042557  
SRR17520069.12042559  
SRR17520069.12042561  
SRR17520069.12042563  
SRR17520069.12042565  
SRR17520069.12042567  
SRR17520069.12042569  
SRR17520069.12042571  
SRR17520069.12042573  
SRR17520069.12042575  
SRR17520069.12042577  
SRR17520069.12043661  
SRR17520069.12043663  
SRR17520069.12043665  
SRR17520069.12043669  
SRR17520069.12043671  
SRR17520069.12043673  
SRR17520069.12043675  
SRR17520069.12043677  
SRR17520069.12048801  
SRR17520069.12048803  
SRR17520069.12048805  
SRR17520069.12048807

SRR17520069.12048809  
SRR17520069.12048811  
SRR17520069.12048813  
SRR17520069.12048815  
SRR17520069.12048817  
SRR17520069.12048819  
SRR17520069.12048821  
SRR17520069.12048823  
SRR17520069.12051765  
SRR17520069.12051767  
SRR17520069.12051769  
SRR17520069.12051773  
SRR17520069.12051779  
SRR17520069.12051781  
SRR17520069.12051791  
SRR17520069.12051793  
SRR17520069.12051797  
SRR17520069.12051799  
SRR17520069.12051801  
SRR17520069.12051803  
SRR17520069.12051807  
SRR17520069.12051809  
SRR17520069.12051811  
SRR17520069.12051815  
SRR17520069.12051817  
SRR17520069.12051819  
SRR17520069.12051821  
SRR17520069.12051825  
SRR17520069.12051827  
SRR17520069.12051831  
SRR17520069.12051833  
SRR17520069.12051837  
SRR17520069.12051841  
SRR17520069.12051843  
SRR17520069.12051845  
SRR17520069.12051847  
SRR17520069.12051851  
SRR17520069.12051855  
SRR17520069.12051861  
SRR17520069.12056186  
SRR17520069.12056192  
SRR17520069.12056194  
SRR17520069.12056198  
SRR17520069.12056202  
SRR17520069.12056204  
SRR17520069.12056206  
SRR17520069.12056208

SRR17520069. 12056210  
SRR17520069. 12057691  
SRR17520069. 12057693  
SRR17520069. 12057695  
SRR17520069. 12057697  
SRR17520069. 12057699  
SRR17520069. 12057701  
SRR17520069. 12057703  
SRR17520069. 12057705  
SRR17520069. 12057707  
SRR17520069. 12057709  
SRR17520069. 12057711  
SRR17520069. 12057713  
SRR17520069. 12057715  
SRR17520069. 12057717  
SRR17520069. 12057719  
SRR17520069. 12057721  
SRR17520069. 12057723  
SRR17520069. 12057725  
SRR17520069. 12057727  
SRR17520069. 12057729  
SRR17520069. 12057731  
SRR17520069. 12057733  
SRR17520069. 12057735  
SRR17520069. 12057737  
SRR17520069. 12057739  
SRR17520069. 12057741  
SRR17520069. 12057743  
SRR17520069. 12057745  
SRR17520069. 12057747  
SRR17520069. 12057749  
SRR17520069. 12057751  
SRR17520069. 12057753  
SRR17520069. 12057755  
SRR17520069. 12057757  
SRR17520069. 12057759  
SRR17520069. 12057763  
SRR17520069. 12057765  
SRR17520069. 12057767  
SRR17520069. 12057769  
SRR17520069. 12057771  
SRR17520069. 12065143  
SRR17520069. 12068050  
SRR17520069. 12068054  
SRR17520069. 12068056  
SRR17520069. 12068058  
SRR17520069. 12068060

SRR17520069.12068062  
SRR17520069.12068064  
SRR17520069.12068066  
SRR17520069.12068068  
SRR17520069.12068070  
SRR17520069.12068072  
SRR17520069.12068074  
SRR17520069.12068076  
SRR17520069.12068078  
SRR17520069.12068080  
SRR17520069.12068082  
SRR17520069.12068084  
SRR17520069.12071553  
SRR17520069.12071555  
SRR17520069.12071557  
SRR17520069.12071559  
SRR17520069.12071561  
SRR17520069.12071563  
SRR17520069.12072828  
SRR17520069.12072830  
SRR17520069.12072832  
SRR17520069.12072834  
SRR17520069.12072836  
SRR17520069.12079226  
SRR17520069.12079228  
SRR17520069.12079230  
SRR17520069.12079234  
SRR17520069.12079236  
SRR17520069.12079238  
SRR17520069.12079240  
SRR17520069.12083650  
SRR17520069.12083652  
SRR17520069.12083654  
SRR17520069.12083656  
SRR17520069.12083658  
SRR17520069.12083660  
SRR17520069.12083662  
SRR17520069.12083664  
SRR17520069.12083666  
SRR17520069.12083668  
SRR17520069.12083670  
SRR17520069.12083672  
SRR17520069.12083674  
SRR17520069.12083676  
SRR17520069.12083678  
SRR17520069.12083680  
SRR17520069.12083682

SRR17520069.12083684  
SRR17520069.12083686  
SRR17520069.12083688  
SRR17520069.12083690  
SRR17520069.12083692  
SRR17520069.12083694  
SRR17520069.12083696  
SRR17520069.12083698  
SRR17520069.12083700  
SRR17520069.12083702  
SRR17520069.12083704  
SRR17520069.12083706  
SRR17520069.12083708  
SRR17520069.12083710  
SRR17520069.12083712  
SRR17520069.12083714  
SRR17520069.12083716  
SRR17520069.12083718  
SRR17520069.12083720  
SRR17520069.12083722  
SRR17520069.12083724  
SRR17520069.12084083  
SRR17520069.12084085  
SRR17520069.12089029  
SRR17520069.12089031  
SRR17520069.12089033  
SRR17520069.12089035  
SRR17520069.12089037  
SRR17520069.12089039  
SRR17520069.12089041  
SRR17520069.12096992  
SRR17520069.12096994  
SRR17520069.12096998  
SRR17520069.12097002  
SRR17520069.12097004  
SRR17520069.12098550  
SRR17520069.12098554  
SRR17520069.12098558  
SRR17520069.12098562  
SRR17520069.12098564  
SRR17520069.12098566  
SRR17520069.12098568  
SRR17520069.12102346  
SRR17520069.12103334  
SRR17520069.12107738  
SRR17520069.12107740  
SRR17520069.12107742

SRR17520069.12107744  
SRR17520069.12107746  
SRR17520069.12110431  
SRR17520069.12110433  
SRR17520069.12110435  
SRR17520069.12110437  
SRR17520069.12110439  
SRR17520069.12110441  
SRR17520069.12110443  
SRR17520069.12110445  
SRR17520069.12110447  
SRR17520069.12110449  
SRR17520069.12110451  
SRR17520069.12110453  
SRR17520069.12110455  
SRR17520069.12110457  
SRR17520069.12110459  
SRR17520069.12110461  
SRR17520069.12110463  
SRR17520069.12110465  
SRR17520069.12110467  
SRR17520069.12110469  
SRR17520069.12110471  
SRR17520069.12110473  
SRR17520069.12110475  
SRR17520069.12116683  
SRR17520069.12116685  
SRR17520069.12116687  
SRR17520069.12116689  
SRR17520069.12116691  
SRR17520069.12116693  
SRR17520069.12116695  
SRR17520069.12116697  
SRR17520069.12127755  
SRR17520069.12127757  
SRR17520069.12127759  
SRR17520069.12127761  
SRR17520069.12127763  
SRR17520069.12127765  
SRR17520069.12127767  
SRR17520069.12127769  
SRR17520069.12127771  
SRR17520069.12127773  
SRR17520069.12127775  
SRR17520069.12127777  
SRR17520069.12127779  
SRR17520069.12127781



SRR17520069. 12127783  
SRR17520069. 12127785  
SRR17520069. 12127787  
SRR17520069. 12129042  
SRR17520069. 12129044  
SRR17520069. 12129046  
SRR17520069. 12129048  
SRR17520069. 12129050  
SRR17520069. 12129052  
SRR17520069. 12129054  
SRR17520069. 12129056  
SRR17520069. 12129058  
SRR17520069. 12129060  
SRR17520069. 12129062  
SRR17520069. 12129064  
SRR17520069. 12129066  
SRR17520069. 12129068  
SRR17520069. 12129070  
SRR17520069. 12129072  
SRR17520069. 12129074  
SRR17520069. 12129076  
SRR17520069. 12129080  
SRR17520069. 12129082  
SRR17520069. 12129084  
SRR17520069. 12129088  
SRR17520069. 12129090  
SRR17520069. 12129092  
SRR17520069. 12129094  
SRR17520069. 12129096  
SRR17520069. 12129098  
SRR17520069. 12129100  
SRR17520069. 12129102  
SRR17520069. 12129104  
SRR17520069. 12129106  
SRR17520069. 12129108  
SRR17520069. 12129110  
SRR17520069. 12129112  
SRR17520069. 12129114  
SRR17520069. 12129116  
SRR17520069. 12129118  
SRR17520069. 12129122  
SRR17520069. 12129124  
SRR17520069. 12129126  
SRR17520069. 12129128  
SRR17520069. 12129130  
SRR17520069. 12129132  
SRR17520069. 12129134

SRR17520069. 12129136  
SRR17520069. 12129138  
SRR17520069. 12129140  
SRR17520069. 12129142  
SRR17520069. 12129144  
SRR17520069. 12129146  
SRR17520069. 12129148  
SRR17520069. 12129150  
SRR17520069. 12129152  
SRR17520069. 12129154  
SRR17520069. 12129156  
SRR17520069. 12129158  
SRR17520069. 12129160  
SRR17520069. 12129162  
SRR17520069. 12129164  
SRR17520069. 12129166  
SRR17520069. 12129168  
SRR17520069. 12129170  
SRR17520069. 12129172  
SRR17520069. 12129174  
SRR17520069. 12137552  
SRR17520069. 12137556  
SRR17520069. 12137558  
SRR17520069. 12137560  
SRR17520069. 12137562  
SRR17520069. 12137564  
SRR17520069. 12137566  
SRR17520069. 12137568  
SRR17520069. 12137570  
SRR17520069. 12137572  
SRR17520069. 12137574  
SRR17520069. 12137576  
SRR17520069. 12137578  
SRR17520069. 12137580  
SRR17520069. 12137582  
SRR17520069. 12137584  
SRR17520069. 12137586  
SRR17520069. 12137588  
SRR17520069. 12137590  
SRR17520069. 12137594  
SRR17520069. 12137596  
SRR17520069. 12137598  
SRR17520069. 12137600  
SRR17520069. 12137602  
SRR17520069. 12137604  
SRR17520069. 12137606  
SRR17520069. 12137610

SRR17520069. 12137614  
SRR17520069. 12137616  
SRR17520069. 12137618  
SRR17520069. 12137620  
SRR17520069. 12137622  
SRR17520069. 12137624  
SRR17520069. 12137626  
SRR17520069. 12137628  
SRR17520069. 12137630  
SRR17520069. 12137632  
SRR17520069. 12137634  
SRR17520069. 12137636  
SRR17520069. 12137638  
SRR17520069. 12137640  
SRR17520069. 12137642  
SRR17520069. 12137644  
SRR17520069. 12137646  
SRR17520069. 12137648  
SRR17520069. 12137650  
SRR17520069. 12137652  
SRR17520069. 12137654  
SRR17520069. 12137656  
SRR17520069. 12137660  
SRR17520069. 12137662  
SRR17520069. 12137664  
SRR17520069. 12137666  
SRR17520069. 12137668  
SRR17520069. 12137670  
SRR17520069. 12137672  
SRR17520069. 12137674  
SRR17520069. 12142949  
SRR17520069. 12142951  
SRR17520069. 12142953  
SRR17520069. 12142955  
SRR17520069. 12142957  
SRR17520069. 12142959  
SRR17520069. 12142961  
SRR17520069. 12142963  
SRR17520069. 12143731  
SRR17520069. 12143733  
SRR17520069. 12143735  
SRR17520069. 12143737  
SRR17520069. 12143739  
SRR17520069. 12143743  
SRR17520069. 12143745  
SRR17520069. 12143747  
SRR17520069. 12143749

SRR17520069.12143751  
SRR17520069.12143753  
SRR17520069.12143755  
SRR17520069.12143757  
SRR17520069.12143759  
SRR17520069.12143761  
SRR17520069.12143763  
SRR17520069.12143767  
SRR17520069.12143769  
SRR17520069.12143771  
SRR17520069.12143773  
SRR17520069.12143775  
SRR17520069.12143777  
SRR17520069.12144617  
SRR17520069.12144619  
SRR17520069.12144625  
SRR17520069.12144629  
SRR17520069.12144631  
SRR17520069.12144633  
SRR17520069.12144639  
SRR17520069.12144643  
SRR17520069.12144645  
SRR17520069.12144647  
SRR17520069.12152115  
SRR17520069.12152117  
SRR17520069.12152712  
SRR17520069.12152714  
SRR17520069.12152716  
SRR17520069.12152718  
SRR17520069.12152720  
SRR17520069.12152722  
SRR17520069.12152724  
SRR17520069.12152726  
SRR17520069.12152728  
SRR17520069.12152730  
SRR17520069.12152732  
SRR17520069.12152734  
SRR17520069.12152736  
SRR17520069.12152738  
SRR17520069.12152740  
SRR17520069.12152742  
SRR17520069.12152744  
SRR17520069.12152746  
SRR17520069.12152748  
SRR17520069.12152750  
SRR17520069.12152752  
SRR17520069.12152754

SRR17520069. 12152756  
SRR17520069. 12152758  
SRR17520069. 12152760  
SRR17520069. 12152764  
SRR17520069. 12152766  
SRR17520069. 12152768  
SRR17520069. 12152770  
SRR17520069. 12152772  
SRR17520069. 12152774  
SRR17520069. 12152776  
SRR17520069. 12152778  
SRR17520069. 12152780  
SRR17520069. 12152782  
SRR17520069. 12152784  
SRR17520069. 12152786  
SRR17520069. 12152788  
SRR17520069. 12154912  
SRR17520069. 12154914  
SRR17520069. 12155295  
SRR17520069. 12155297  
SRR17520069. 12155299  
SRR17520069. 12155301  
SRR17520069. 12155303  
SRR17520069. 12155307  
SRR17520069. 12155309  
SRR17520069. 12155311  
SRR17520069. 12155313  
SRR17520069. 12155315  
SRR17520069. 12155317  
SRR17520069. 12155319  
SRR17520069. 12155323  
SRR17520069. 12155327  
SRR17520069. 12155329  
SRR17520069. 12155331  
SRR17520069. 12155333  
SRR17520069. 12155335  
SRR17520069. 12155337  
SRR17520069. 12155339  
SRR17520069. 12155341  
SRR17520069. 12155343  
SRR17520069. 12155345  
SRR17520069. 12155347  
SRR17520069. 12155349  
SRR17520069. 12155351  
SRR17520069. 12155353  
SRR17520069. 12155355  
SRR17520069. 12155357

SRR17520069. 12155359  
SRR17520069. 12155365  
SRR17520069. 12155367  
SRR17520069. 12155369  
SRR17520069. 12155371  
SRR17520069. 12155373  
SRR17520069. 12155375  
SRR17520069. 12155377  
SRR17520069. 12155379  
SRR17520069. 12155381  
SRR17520069. 12155383  
SRR17520069. 12155385  
SRR17520069. 12155387  
SRR17520069. 12155389  
SRR17520069. 12155391  
SRR17520069. 12155395  
SRR17520069. 12155397  
SRR17520069. 12155399  
SRR17520069. 12155401  
SRR17520069. 12155403  
SRR17520069. 12155405  
SRR17520069. 12155407  
SRR17520069. 12155409  
SRR17520069. 12155411  
SRR17520069. 12155413  
SRR17520069. 12155415  
SRR17520069. 12155417  
SRR17520069. 12155419  
SRR17520069. 12155423  
SRR17520069. 12155425  
SRR17520069. 12157124  
SRR17520069. 12157126  
SRR17520069. 12157128  
SRR17520069. 12157130  
SRR17520069. 12157132  
SRR17520069. 12157134  
SRR17520069. 12157136  
SRR17520069. 12157138  
SRR17520069. 12157140  
SRR17520069. 12157142  
SRR17520069. 12164058  
SRR17520069. 12164060  
SRR17520069. 12164062  
SRR17520069. 12164064  
SRR17520069. 12164066  
SRR17520069. 12164068  
SRR17520069. 12164070

SRR17520069. 12164072  
SRR17520069. 12164074  
SRR17520069. 12164076  
SRR17520069. 12164078  
SRR17520069. 12164080  
SRR17520069. 12164082  
SRR17520069. 12164084  
SRR17520069. 12164086  
SRR17520069. 12164088  
SRR17520069. 12164090  
SRR17520069. 12164092  
SRR17520069. 12173574  
SRR17520069. 12173576  
SRR17520069. 12173578  
SRR17520069. 12173582  
SRR17520069. 12173586  
SRR17520069. 12173588  
SRR17520069. 12173590  
SRR17520069. 12173592  
SRR17520069. 12173594  
SRR17520069. 12173596  
SRR17520069. 12173598  
SRR17520069. 12173600  
SRR17520069. 12173602  
SRR17520069. 12173604  
SRR17520069. 12173606  
SRR17520069. 12173608  
SRR17520069. 12173610  
SRR17520069. 12173612  
SRR17520069. 12173614  
SRR17520069. 12173616  
SRR17520069. 12173618  
SRR17520069. 12173620  
SRR17520069. 12173622  
SRR17520069. 12173624  
SRR17520069. 12173626  
SRR17520069. 12173628  
SRR17520069. 12173630  
SRR17520069. 12173632  
SRR17520069. 12173634  
SRR17520069. 12173638  
SRR17520069. 12173640  
SRR17520069. 12173642  
SRR17520069. 12173644  
SRR17520069. 12173646  
SRR17520069. 12173648  
SRR17520069. 12173650

SRR17520069. 12173652  
SRR17520069. 12173654  
SRR17520069. 12173656  
SRR17520069. 12173658  
SRR17520069. 12173660  
SRR17520069. 12173662  
SRR17520069. 12173664  
SRR17520069. 12173666  
SRR17520069. 12173668  
SRR17520069. 12185066  
SRR17520069. 12185068  
SRR17520069. 12185070  
SRR17520069. 12185072  
SRR17520069. 12185074  
SRR17520069. 12185076  
SRR17520069. 12185080  
SRR17520069. 12185082  
SRR17520069. 12185084  
SRR17520069. 12185086  
SRR17520069. 12185088  
SRR17520069. 12185090  
SRR17520069. 12185092  
SRR17520069. 12185094  
SRR17520069. 12185096  
SRR17520069. 12185098  
SRR17520069. 12185100  
SRR17520069. 12185102  
SRR17520069. 12185313  
SRR17520069. 12187188  
SRR17520069. 12187190  
SRR17520069. 12187192  
SRR17520069. 12187194  
SRR17520069. 12187196  
SRR17520069. 12188068  
SRR17520069. 12188070  
SRR17520069. 12188072  
SRR17520069. 12188074  
SRR17520069. 12188076  
SRR17520069. 12188078  
SRR17520069. 12188082  
SRR17520069. 12188086  
SRR17520069. 12188088  
SRR17520069. 12188090  
SRR17520069. 12188092  
SRR17520069. 12188094  
SRR17520069. 12188096  
SRR17520069. 12188098



SRR17520069.12188100  
SRR17520069.12188102  
SRR17520069.12188104  
SRR17520069.12188110  
SRR17520069.12188114  
SRR17520069.12190923  
SRR17520069.12190925  
SRR17520069.12190927  
SRR17520069.12190929  
SRR17520069.12190931  
SRR17520069.12190933  
SRR17520069.12190935  
SRR17520069.12190937  
SRR17520069.12190941  
SRR17520069.12191166  
SRR17520069.12191168  
SRR17520069.12195623  
SRR17520069.12195652  
SRR17520069.12195654  
SRR17520069.12195656  
SRR17520069.12195660  
SRR17520069.12195662  
SRR17520069.12195664  
SRR17520069.12195666  
SRR17520069.12195668  
SRR17520069.12199845  
SRR17520069.12199847  
SRR17520069.12199851  
SRR17520069.12201188  
SRR17520069.12201190  
SRR17520069.12201192  
SRR17520069.12201194  
SRR17520069.12201196  
SRR17520069.12201198  
SRR17520069.12201200  
SRR17520069.12201204  
SRR17520069.12201208  
SRR17520069.12201212  
SRR17520069.12201214  
SRR17520069.12201216  
SRR17520069.12201218  
SRR17520069.12201224  
SRR17520069.12201228  
SRR17520069.12201234  
SRR17520069.12201238  
SRR17520069.12201244  
SRR17520069.12201250

SRR17520069. 12201252  
SRR17520069. 12201254  
SRR17520069. 12201256  
SRR17520069. 12201260  
SRR17520069. 12201262  
SRR17520069. 12201270  
SRR17520069. 12201272  
SRR17520069. 12201276  
SRR17520069. 12201278  
SRR17520069. 12201280  
SRR17520069. 12201290  
SRR17520069. 12201292  
SRR17520069. 12201294  
SRR17520069. 12201296  
SRR17520069. 12201298  
SRR17520069. 12201678  
SRR17520069. 12201680  
SRR17520069. 12201682  
SRR17520069. 12201684  
SRR17520069. 12201686  
SRR17520069. 12201688  
SRR17520069. 12201690  
SRR17520069. 12201692  
SRR17520069. 12201694  
SRR17520069. 12201696  
SRR17520069. 12201698  
SRR17520069. 12201700  
SRR17520069. 12201702  
SRR17520069. 12201704  
SRR17520069. 12201706  
SRR17520069. 12201708  
SRR17520069. 12201710  
SRR17520069. 12201712  
SRR17520069. 12201714  
SRR17520069. 12201716  
SRR17520069. 12201718  
SRR17520069. 12201720  
SRR17520069. 12201722  
SRR17520069. 12201724  
SRR17520069. 12201726  
SRR17520069. 12201728  
SRR17520069. 12201730  
SRR17520069. 12201732  
SRR17520069. 12201734  
SRR17520069. 12201736  
SRR17520069. 12201738  
SRR17520069. 12201740

SRR17520069.12201742  
SRR17520069.12201744  
SRR17520069.12201746  
SRR17520069.12201748  
SRR17520069.12201750  
SRR17520069.12201752  
SRR17520069.12201754  
SRR17520069.12201758  
SRR17520069.12201760  
SRR17520069.12201762  
SRR17520069.12201764  
SRR17520069.12201768  
SRR17520069.12201770  
SRR17520069.12201772  
SRR17520069.12201774  
SRR17520069.12201776  
SRR17520069.12201778  
SRR17520069.12201780  
SRR17520069.12201782  
SRR17520069.12201784  
SRR17520069.12201786  
SRR17520069.12201788  
SRR17520069.12201790  
SRR17520069.12201792  
SRR17520069.12201794  
SRR17520069.12201796  
SRR17520069.12201798  
SRR17520069.12201800  
SRR17520069.12201802  
SRR17520069.12201804  
SRR17520069.12201806  
SRR17520069.12201808  
SRR17520069.12201810  
SRR17520069.12201812  
SRR17520069.12201814  
SRR17520069.12201816  
SRR17520069.12201818  
SRR17520069.12201820  
SRR17520069.12201822  
SRR17520069.12201826  
SRR17520069.12201828  
SRR17520069.12201832  
SRR17520069.12201842  
SRR17520069.12204032  
SRR17520069.12204034  
SRR17520069.12204036  
SRR17520069.12204038

SRR17520069.12204040  
SRR17520069.12204042  
SRR17520069.12204044  
SRR17520069.12204046  
SRR17520069.12204048  
SRR17520069.12204050  
SRR17520069.12204052  
SRR17520069.12204054  
SRR17520069.12204056  
SRR17520069.12204058  
SRR17520069.12204060  
SRR17520069.12204062  
SRR17520069.12204064  
SRR17520069.12210808  
SRR17520069.12220277  
SRR17520069.12220279  
SRR17520069.12223850  
SRR17520069.12223852  
SRR17520069.12223854  
SRR17520069.12223856  
SRR17520069.12223858  
SRR17520069.12223860  
SRR17520069.12223862  
SRR17520069.12223864  
SRR17520069.12223866  
SRR17520069.12223868  
SRR17520069.12223870  
SRR17520069.12225347  
SRR17520069.12225349  
SRR17520069.12225351  
SRR17520069.12225353  
SRR17520069.12225355  
SRR17520069.12225357  
SRR17520069.12225359  
SRR17520069.12225361  
SRR17520069.12225365  
SRR17520069.12225367  
SRR17520069.12225369  
SRR17520069.12225371  
SRR17520069.12225377  
SRR17520069.12225379  
SRR17520069.12225381  
SRR17520069.12225383  
SRR17520069.12225385  
SRR17520069.12225387  
SRR17520069.12225389  
SRR17520069.12225391

SRR17520069.12225393  
SRR17520069.12225395  
SRR17520069.12225397  
SRR17520069.12225399  
SRR17520069.12225401  
SRR17520069.12225403  
SRR17520069.12225405  
SRR17520069.12225407  
SRR17520069.12225409  
SRR17520069.12225411  
SRR17520069.12225413  
SRR17520069.12225415  
SRR17520069.12225417  
SRR17520069.12225419  
SRR17520069.12225421  
SRR17520069.12225423  
SRR17520069.12225425  
SRR17520069.12225427  
SRR17520069.12225429  
SRR17520069.12225431  
SRR17520069.12225433  
SRR17520069.12225435  
SRR17520069.12225437  
SRR17520069.12225439  
SRR17520069.12225441  
SRR17520069.12225443  
SRR17520069.12225445  
SRR17520069.12225447  
SRR17520069.12225449  
SRR17520069.12225451  
SRR17520069.12225453  
SRR17520069.12225455  
SRR17520069.12233819  
SRR17520069.12233821  
SRR17520069.12233823  
SRR17520069.12233825  
SRR17520069.12233827  
SRR17520069.12233829  
SRR17520069.12233831  
SRR17520069.12233833  
SRR17520069.12233835  
SRR17520069.12233837  
SRR17520069.12233839  
SRR17520069.12233841  
SRR17520069.12233843  
SRR17520069.12233845  
SRR17520069.12233847

SRR17520069. 12233849  
SRR17520069. 12233851  
SRR17520069. 12233853  
SRR17520069. 12233855  
SRR17520069. 12233857  
SRR17520069. 12233859  
SRR17520069. 12233861  
SRR17520069. 12233863  
SRR17520069. 12233865  
SRR17520069. 12233867  
SRR17520069. 12233869  
SRR17520069. 12233871  
SRR17520069. 12233873  
SRR17520069. 12233875  
SRR17520069. 12233877  
SRR17520069. 12233879  
SRR17520069. 12233881  
SRR17520069. 12233883  
SRR17520069. 12233885  
SRR17520069. 12233887  
SRR17520069. 12233889  
SRR17520069. 12233891  
SRR17520069. 12233893  
SRR17520069. 12233895  
SRR17520069. 12233897  
SRR17520069. 12233899  
SRR17520069. 12233901  
SRR17520069. 12233903  
SRR17520069. 12233905  
SRR17520069. 12233907  
SRR17520069. 12233909  
SRR17520069. 12233911  
SRR17520069. 12233913  
SRR17520069. 12233915  
SRR17520069. 12233917  
SRR17520069. 12233919  
SRR17520069. 12233921  
SRR17520069. 12233923  
SRR17520069. 12233925  
SRR17520069. 12233927  
SRR17520069. 12233929  
SRR17520069. 12233931  
SRR17520069. 12233933  
SRR17520069. 12237650  
SRR17520069. 12237652  
SRR17520069. 12237654  
SRR17520069. 12237656

SRR17520069. 12237658  
SRR17520069. 12237660  
SRR17520069. 12237662  
SRR17520069. 12237664  
SRR17520069. 12237666  
SRR17520069. 12237668  
SRR17520069. 12237670  
SRR17520069. 12237672  
SRR17520069. 12237674  
SRR17520069. 12237676  
SRR17520069. 12237678  
SRR17520069. 12237680  
SRR17520069. 12237682  
SRR17520069. 12237684  
SRR17520069. 12237686  
SRR17520069. 12237688  
SRR17520069. 12237690  
SRR17520069. 12237692  
SRR17520069. 12237694  
SRR17520069. 12237696  
SRR17520069. 12237698  
SRR17520069. 12237700  
SRR17520069. 12237702  
SRR17520069. 12237704  
SRR17520069. 12237706  
SRR17520069. 12237708  
SRR17520069. 12237710  
SRR17520069. 12237712  
SRR17520069. 12237714  
SRR17520069. 12237716  
SRR17520069. 12237718  
SRR17520069. 12237720  
SRR17520069. 12237722  
SRR17520069. 12237724  
SRR17520069. 12237726  
SRR17520069. 12237728  
SRR17520069. 12237730  
SRR17520069. 12237732  
SRR17520069. 12237734  
SRR17520069. 12237736  
SRR17520069. 12237738  
SRR17520069. 12237740  
SRR17520069. 12237742  
SRR17520069. 12237744  
SRR17520069. 12237746  
SRR17520069. 12237748  
SRR17520069. 12237750

SRR17520069. 12237752  
SRR17520069. 12237754  
SRR17520069. 12237756  
SRR17520069. 12237758  
SRR17520069. 12237762  
SRR17520069. 12237764  
SRR17520069. 12237766  
SRR17520069. 12237768  
SRR17520069. 12237770  
SRR17520069. 12237772  
SRR17520069. 12240843  
SRR17520069. 12240845  
SRR17520069. 12240847  
SRR17520069. 12245692  
SRR17520069. 12245694  
SRR17520069. 12245696  
SRR17520069. 12245698  
SRR17520069. 12245700  
SRR17520069. 12245702  
SRR17520069. 12245704  
SRR17520069. 12245706  
SRR17520069. 12245708  
SRR17520069. 12245710  
SRR17520069. 12245712  
SRR17520069. 12245714  
SRR17520069. 12245716  
SRR17520069. 12245718  
SRR17520069. 12245720  
SRR17520069. 12245722  
SRR17520069. 12245724  
SRR17520069. 12245726  
SRR17520069. 12245728  
SRR17520069. 12245730  
SRR17520069. 12245732  
SRR17520069. 12245734  
SRR17520069. 12247754  
SRR17520069. 12247756  
SRR17520069. 12247758  
SRR17520069. 12247760  
SRR17520069. 12247762  
SRR17520069. 12247764  
SRR17520069. 12247766  
SRR17520069. 12247768  
SRR17520069. 12247770  
SRR17520069. 12247772  
SRR17520069. 12247774  
SRR17520069. 12247776



SRR17520069.12247778  
SRR17520069.12247780  
SRR17520069.12247782  
SRR17520069.12247784  
SRR17520069.12247786  
SRR17520069.12248981  
SRR17520069.12248983  
SRR17520069.12248985  
SRR17520069.12248987  
SRR17520069.12248989  
SRR17520069.12248991  
SRR17520069.12248993  
SRR17520069.12248995  
SRR17520069.12248997  
SRR17520069.12248999  
SRR17520069.12249001  
SRR17520069.12249003  
SRR17520069.12249057  
SRR17520069.12249059  
SRR17520069.12249061  
SRR17520069.12249063  
SRR17520069.12249065  
SRR17520069.12249067  
SRR17520069.12249069  
SRR17520069.12249071  
SRR17520069.12249073  
SRR17520069.12249075  
SRR17520069.12249077  
SRR17520069.12249079  
SRR17520069.12249081  
SRR17520069.12249083  
SRR17520069.12249085  
SRR17520069.12249087  
SRR17520069.12249089  
SRR17520069.12249091  
SRR17520069.12249093  
SRR17520069.12249095  
SRR17520069.12249099  
SRR17520069.12249101  
SRR17520069.12249103  
SRR17520069.12249105  
SRR17520069.12249107  
SRR17520069.12249109  
SRR17520069.12249111  
SRR17520069.12249113  
SRR17520069.12249115  
SRR17520069.12249117

SRR17520069. 12249119  
SRR17520069. 12249121  
SRR17520069. 12249123  
SRR17520069. 12249125  
SRR17520069. 12249127  
SRR17520069. 12249129  
SRR17520069. 12249131  
SRR17520069. 12249133  
SRR17520069. 12249135  
SRR17520069. 12249137  
SRR17520069. 12249139  
SRR17520069. 12249141  
SRR17520069. 12249143  
SRR17520069. 12249145  
SRR17520069. 12249147  
SRR17520069. 12249149  
SRR17520069. 12249151  
SRR17520069. 12249153  
SRR17520069. 12249155  
SRR17520069. 12249157  
SRR17520069. 12249159  
SRR17520069. 12249161  
SRR17520069. 12249163  
SRR17520069. 12249165  
SRR17520069. 12249167  
SRR17520069. 12249169  
SRR17520069. 12249171  
SRR17520069. 12249173  
SRR17520069. 12249175  
SRR17520069. 12252763  
SRR17520069. 12252765  
SRR17520069. 12252767  
SRR17520069. 12252769  
SRR17520069. 12252773  
SRR17520069. 12252775  
SRR17520069. 12252777  
SRR17520069. 12252779  
SRR17520069. 12252781  
SRR17520069. 12252783  
SRR17520069. 12252785  
SRR17520069. 12252787  
SRR17520069. 12252791  
SRR17520069. 12252793  
SRR17520069. 12252795  
SRR17520069. 12252797  
SRR17520069. 12252799  
SRR17520069. 12252801

SRR17520069.12252803  
SRR17520069.12252807  
SRR17520069.12252809  
SRR17520069.12252811  
SRR17520069.12252813  
SRR17520069.12252815  
SRR17520069.12252817  
SRR17520069.12253691  
SRR17520069.12253693  
SRR17520069.12253695  
SRR17520069.12253697  
SRR17520069.12253699  
SRR17520069.12253701  
SRR17520069.12253703  
SRR17520069.12253705  
SRR17520069.12253707  
SRR17520069.12253709  
SRR17520069.12253711  
SRR17520069.12253713  
SRR17520069.12253715  
SRR17520069.12253717  
SRR17520069.12262295  
SRR17520069.12262297  
SRR17520069.12262299  
SRR17520069.12262301  
SRR17520069.12262303  
SRR17520069.12262305  
SRR17520069.12262307  
SRR17520069.12262309  
SRR17520069.12262311  
SRR17520069.12262313  
SRR17520069.12262315  
SRR17520069.12262317  
SRR17520069.12262319  
SRR17520069.12262323  
SRR17520069.12262325  
SRR17520069.12262327  
SRR17520069.12262329  
SRR17520069.12262331  
SRR17520069.12262333  
SRR17520069.12262335  
SRR17520069.12262337  
SRR17520069.12262339  
SRR17520069.12262341  
SRR17520069.12262343  
SRR17520069.12262345  
SRR17520069.12262347

SRR17520069.12262349  
SRR17520069.12262351  
SRR17520069.12265504  
SRR17520069.12265508  
SRR17520069.12265510  
SRR17520069.12265512  
SRR17520069.12265514  
SRR17520069.12265516  
SRR17520069.12265518  
SRR17520069.12265520  
SRR17520069.12265522  
SRR17520069.12265524  
SRR17520069.12265528  
SRR17520069.12265530  
SRR17520069.12265532  
SRR17520069.12265534  
SRR17520069.12265956  
SRR17520069.12265958  
SRR17520069.12265960  
SRR17520069.12265962  
SRR17520069.12265964  
SRR17520069.12265966  
SRR17520069.12265968  
SRR17520069.12265970  
SRR17520069.12265972  
SRR17520069.12265974  
SRR17520069.12265976  
SRR17520069.12265978  
SRR17520069.12265980  
SRR17520069.12265982  
SRR17520069.12265984  
SRR17520069.12265986  
SRR17520069.12265988  
SRR17520069.12265990  
SRR17520069.12265992  
SRR17520069.12265994  
SRR17520069.12265996  
SRR17520069.12265998  
SRR17520069.12266000  
SRR17520069.12266002  
SRR17520069.12269745  
SRR17520069.12269751  
SRR17520069.12269757  
SRR17520069.12269761  
SRR17520069.12269763  
SRR17520069.12269767  
SRR17520069.12269771

SRR17520069. 12269773  
SRR17520069. 12269775  
SRR17520069. 12269777  
SRR17520069. 12269779  
SRR17520069. 12269781  
SRR17520069. 12269783  
SRR17520069. 12269785  
SRR17520069. 12269787  
SRR17520069. 12269789  
SRR17520069. 12269791  
SRR17520069. 12269793  
SRR17520069. 12269795  
SRR17520069. 12269797  
SRR17520069. 12269799  
SRR17520069. 12269801  
SRR17520069. 12269803  
SRR17520069. 12269805  
SRR17520069. 12269807  
SRR17520069. 12269809  
SRR17520069. 12269811  
SRR17520069. 12269813  
SRR17520069. 12269815  
SRR17520069. 12269817  
SRR17520069. 12269819  
SRR17520069. 12269821  
SRR17520069. 12269823  
SRR17520069. 12269825  
SRR17520069. 12269827  
SRR17520069. 12269831  
SRR17520069. 12269833  
SRR17520069. 12269835  
SRR17520069. 12269837  
SRR17520069. 12280015  
SRR17520069. 12280047  
SRR17520069. 12280049  
SRR17520069. 12280051  
SRR17520069. 12280057  
SRR17520069. 12280059  
SRR17520069. 12280061  
SRR17520069. 12280063  
SRR17520069. 12280065  
SRR17520069. 12280067  
SRR17520069. 12280069  
SRR17520069. 12280071  
SRR17520069. 12280073  
SRR17520069. 12280075  
SRR17520069. 12280077

SRR17520069.12280079  
SRR17520069.12280081  
SRR17520069.12280083  
SRR17520069.12280085  
SRR17520069.12280087  
SRR17520069.12280924  
SRR17520069.12280926  
SRR17520069.12280928  
SRR17520069.12280930  
SRR17520069.12280932  
SRR17520069.12280934  
SRR17520069.12280936  
SRR17520069.12280938  
SRR17520069.12280940  
SRR17520069.12280942  
SRR17520069.12280944  
SRR17520069.12280946  
SRR17520069.12280948  
SRR17520069.12280950  
SRR17520069.12280952  
SRR17520069.12280954  
SRR17520069.12280956  
SRR17520069.12280958  
SRR17520069.12280960  
SRR17520069.12280962  
SRR17520069.12280964  
SRR17520069.12280966  
SRR17520069.12280968  
SRR17520069.12280970  
SRR17520069.12280972  
SRR17520069.12280974  
SRR17520069.12280976  
SRR17520069.12280978  
SRR17520069.12280980  
SRR17520069.12280982  
SRR17520069.12280984  
SRR17520069.12280986  
SRR17520069.12280988  
SRR17520069.12280990  
SRR17520069.12280992  
SRR17520069.12280994  
SRR17520069.12280996  
SRR17520069.12280998  
SRR17520069.12281000  
SRR17520069.12281002  
SRR17520069.12281004  
SRR17520069.12281006

SRR17520069.12281008  
SRR17520069.12281010  
SRR17520069.12281012  
SRR17520069.12282134  
SRR17520069.12282136  
SRR17520069.12282140  
SRR17520069.12282142  
SRR17520069.12282144  
SRR17520069.12282148  
SRR17520069.12285463  
SRR17520069.12285465  
SRR17520069.12285467  
SRR17520069.12285469  
SRR17520069.12285471  
SRR17520069.12285473  
SRR17520069.12285475  
SRR17520069.12285477  
SRR17520069.12285479  
SRR17520069.12286332  
SRR17520069.12286334  
SRR17520069.12286336  
SRR17520069.12286338  
SRR17520069.12286340  
SRR17520069.12286342  
SRR17520069.12286344  
SRR17520069.12289432  
SRR17520069.12289434  
SRR17520069.12289436  
SRR17520069.12289438  
SRR17520069.12289440  
SRR17520069.12289442  
SRR17520069.12289444  
SRR17520069.12289446  
SRR17520069.12289448  
SRR17520069.12289452  
SRR17520069.12289454  
SRR17520069.12289456  
SRR17520069.12289458  
SRR17520069.12289460  
SRR17520069.12289462  
SRR17520069.12289464  
SRR17520069.12289466  
SRR17520069.12289468  
SRR17520069.12289470  
SRR17520069.12289472  
SRR17520069.12289476  
SRR17520069.12289478

SRR17520069.12289480  
SRR17520069.12289482  
SRR17520069.12289484  
SRR17520069.12289486  
SRR17520069.12289488  
SRR17520069.12289490  
SRR17520069.12289492  
SRR17520069.12289494  
SRR17520069.12289496  
SRR17520069.12289498  
SRR17520069.12289500  
SRR17520069.12289502  
SRR17520069.12289504  
SRR17520069.12289506  
SRR17520069.12289508  
SRR17520069.12289510  
SRR17520069.12289512  
SRR17520069.12289514  
SRR17520069.12289516  
SRR17520069.12289518  
SRR17520069.12289520  
SRR17520069.12289522  
SRR17520069.12289524  
SRR17520069.12289528  
SRR17520069.12289530  
SRR17520069.12289532  
SRR17520069.12289534  
SRR17520069.12289538  
SRR17520069.12289540  
SRR17520069.12289542  
SRR17520069.12289544  
SRR17520069.12289546  
SRR17520069.12289548  
SRR17520069.12289550  
SRR17520069.12289554  
SRR17520069.12289556  
SRR17520069.12289558  
SRR17520069.12289560  
SRR17520069.12289564  
SRR17520069.12289566  
SRR17520069.12289568  
SRR17520069.12289570  
SRR17520069.12289572  
SRR17520069.12289574  
SRR17520069.12289576  
SRR17520069.12289578  
SRR17520069.12289580



SRR17520069.12289582  
SRR17520069.12289584  
SRR17520069.12289586  
SRR17520069.12289588  
SRR17520069.12289590  
SRR17520069.12289592  
SRR17520069.12289594  
SRR17520069.12289596  
SRR17520069.12289600  
SRR17520069.12289602  
SRR17520069.12289604  
SRR17520069.12289606  
SRR17520069.12289608  
SRR17520069.12289610  
SRR17520069.12289612  
SRR17520069.12289614  
SRR17520069.12289616  
SRR17520069.12289618  
SRR17520069.12289620  
SRR17520069.12289622  
SRR17520069.12289624  
SRR17520069.12289626  
SRR17520069.12289628  
SRR17520069.12289630  
SRR17520069.12294662  
SRR17520069.12294664  
SRR17520069.12294666  
SRR17520069.12294668  
SRR17520069.12294670  
SRR17520069.12294672  
SRR17520069.12294674  
SRR17520069.12294676  
SRR17520069.12294678  
SRR17520069.12294680  
SRR17520069.12294682  
SRR17520069.12294684  
SRR17520069.12294686  
SRR17520069.12294688  
SRR17520069.12294690  
SRR17520069.12294692  
SRR17520069.12294694  
SRR17520069.12294696  
SRR17520069.12294698  
SRR17520069.12294700  
SRR17520069.12294702  
SRR17520069.12294704  
SRR17520069.12294706

SRR17520069. 12294708  
SRR17520069. 12294710  
SRR17520069. 12294712  
SRR17520069. 12294714  
SRR17520069. 12294716  
SRR17520069. 12294718  
SRR17520069. 12294720  
SRR17520069. 12294722  
SRR17520069. 12294724  
SRR17520069. 12294726  
SRR17520069. 12294728  
SRR17520069. 12294730  
SRR17520069. 12294732  
SRR17520069. 12294734  
SRR17520069. 12297114  
SRR17520069. 12297116  
SRR17520069. 12297118  
SRR17520069. 12297120  
SRR17520069. 12297122  
SRR17520069. 12297124  
SRR17520069. 12297126  
SRR17520069. 12297128  
SRR17520069. 12297130  
SRR17520069. 12297132  
SRR17520069. 12297134  
SRR17520069. 12297136  
SRR17520069. 12297138  
SRR17520069. 12297140  
SRR17520069. 12297142  
SRR17520069. 12297144  
SRR17520069. 12297146  
SRR17520069. 12297148  
SRR17520069. 12297150  
SRR17520069. 12297152  
SRR17520069. 12297154  
SRR17520069. 12297156  
SRR17520069. 12297158  
SRR17520069. 12297160  
SRR17520069. 12297164  
SRR17520069. 12297166  
SRR17520069. 12297168  
SRR17520069. 12300328  
SRR17520069. 12300330  
SRR17520069. 12300332  
SRR17520069. 12303433  
SRR17520069. 12303437  
SRR17520069. 12303439

SRR17520069. 12303441  
SRR17520069. 12303443  
SRR17520069. 12303445  
SRR17520069. 12303447  
SRR17520069. 12303449  
SRR17520069. 12303451  
SRR17520069. 12303453  
SRR17520069. 12303455  
SRR17520069. 12303457  
SRR17520069. 12303459  
SRR17520069. 12303461  
SRR17520069. 12303463  
SRR17520069. 12303465  
SRR17520069. 12303467  
SRR17520069. 12303469  
SRR17520069. 12310906  
SRR17520069. 12310908  
SRR17520069. 12310910  
SRR17520069. 12310912  
SRR17520069. 12310914  
SRR17520069. 12310916  
SRR17520069. 12310918  
SRR17520069. 12310920  
SRR17520069. 12312351  
SRR17520069. 12312353  
SRR17520069. 12312355  
SRR17520069. 12312357  
SRR17520069. 12312359  
SRR17520069. 12312361  
SRR17520069. 12312363  
SRR17520069. 12312365  
SRR17520069. 12312367  
SRR17520069. 12312369  
SRR17520069. 12312371  
SRR17520069. 12312373  
SRR17520069. 12312375  
SRR17520069. 12312377  
SRR17520069. 12312379  
SRR17520069. 12312381  
SRR17520069. 12312383  
SRR17520069. 12316273  
SRR17520069. 12316275  
SRR17520069. 12316277  
SRR17520069. 12316279  
SRR17520069. 12316281  
SRR17520069. 12316283  
SRR17520069. 12316285

SRR17520069. 12316287  
SRR17520069. 12316289  
SRR17520069. 12316291  
SRR17520069. 12316293  
SRR17520069. 12316295  
SRR17520069. 12316297  
SRR17520069. 12316299  
SRR17520069. 12316301  
SRR17520069. 12316303  
SRR17520069. 12316305  
SRR17520069. 12316307  
SRR17520069. 12316309  
SRR17520069. 12316311  
SRR17520069. 12316313  
SRR17520069. 12316315  
SRR17520069. 12316317  
SRR17520069. 12316319  
SRR17520069. 12316321  
SRR17520069. 12316323  
SRR17520069. 12316325  
SRR17520069. 12316327  
SRR17520069. 12316329  
SRR17520069. 12316331  
SRR17520069. 12316333  
SRR17520069. 12316335  
SRR17520069. 12316337  
SRR17520069. 12316339  
SRR17520069. 12316341  
SRR17520069. 12316343  
SRR17520069. 12316345  
SRR17520069. 12316347  
SRR17520069. 12316349  
SRR17520069. 12316351  
SRR17520069. 12316353  
SRR17520069. 12316355  
SRR17520069. 12316357  
SRR17520069. 12316359  
SRR17520069. 12316361  
SRR17520069. 12316365  
SRR17520069. 12316367  
SRR17520069. 12316369  
SRR17520069. 12316371  
SRR17520069. 12316373  
SRR17520069. 12316375  
SRR17520069. 12316377  
SRR17520069. 12316379  
SRR17520069. 12316381

SRR17520069. 12316383  
SRR17520069. 12316387  
SRR17520069. 12316389  
SRR17520069. 12316393  
SRR17520069. 12316395  
SRR17520069. 12316399  
SRR17520069. 12316401  
SRR17520069. 12316403  
SRR17520069. 12316405  
SRR17520069. 12316407  
SRR17520069. 12316409  
SRR17520069. 12316411  
SRR17520069. 12316413  
SRR17520069. 12316415  
SRR17520069. 12316419  
SRR17520069. 12317756  
SRR17520069. 12317758  
SRR17520069. 12317760  
SRR17520069. 12317762  
SRR17520069. 12317764  
SRR17520069. 12317766  
SRR17520069. 12317768  
SRR17520069. 12317770  
SRR17520069. 12317772  
SRR17520069. 12317774  
SRR17520069. 12317776  
SRR17520069. 12317778  
SRR17520069. 12317780  
SRR17520069. 12317782  
SRR17520069. 12322477  
SRR17520069. 12322479  
SRR17520069. 12322481  
SRR17520069. 12322483  
SRR17520069. 12322485  
SRR17520069. 12322487  
SRR17520069. 12322489  
SRR17520069. 12322491  
SRR17520069. 12322493  
SRR17520069. 12322495  
SRR17520069. 12322497  
SRR17520069. 12322499  
SRR17520069. 12322501  
SRR17520069. 12322503  
SRR17520069. 12322505  
SRR17520069. 12322507  
SRR17520069. 12322509  
SRR17520069. 12322511

SRR17520069.12322513  
SRR17520069.12322515  
SRR17520069.12322517  
SRR17520069.12322519  
SRR17520069.12322521  
SRR17520069.12322523  
SRR17520069.12322525  
SRR17520069.12322527  
SRR17520069.12322529  
SRR17520069.12322531  
SRR17520069.12322533  
SRR17520069.12322535  
SRR17520069.12322537  
SRR17520069.12322539  
SRR17520069.12322541  
SRR17520069.12322543  
SRR17520069.12322545  
SRR17520069.12322547  
SRR17520069.12322549  
SRR17520069.12322551  
SRR17520069.12322553  
SRR17520069.12322555  
SRR17520069.12322557  
SRR17520069.12322559  
SRR17520069.12322561  
SRR17520069.12322563  
SRR17520069.12322565  
SRR17520069.12322567  
SRR17520069.12322569  
SRR17520069.12322571  
SRR17520069.12322573  
SRR17520069.12322575  
SRR17520069.12322577  
SRR17520069.12322579  
SRR17520069.12322581  
SRR17520069.12322583  
SRR17520069.12322585  
SRR17520069.12322587  
SRR17520069.12322589  
SRR17520069.12322591  
SRR17520069.12322593  
SRR17520069.12322595  
SRR17520069.12322597  
SRR17520069.12322599  
SRR17520069.12322601  
SRR17520069.12322603  
SRR17520069.12322605

SRR17520069.12322607  
SRR17520069.12322609  
SRR17520069.12322611  
SRR17520069.12322613  
SRR17520069.12322615  
SRR17520069.12322617  
SRR17520069.12323160  
SRR17520069.12323162  
SRR17520069.12323164  
SRR17520069.12323166  
SRR17520069.12323168  
SRR17520069.12323170  
SRR17520069.12323172  
SRR17520069.12323174  
SRR17520069.12323176  
SRR17520069.12323178  
SRR17520069.12323180  
SRR17520069.12323182  
SRR17520069.12323184  
SRR17520069.12323188  
SRR17520069.12323190  
SRR17520069.12323192  
SRR17520069.12323194  
SRR17520069.12323196  
SRR17520069.12323198  
SRR17520069.12323200  
SRR17520069.12323202  
SRR17520069.12323204  
SRR17520069.12323206  
SRR17520069.12323208  
SRR17520069.12323210  
SRR17520069.12323212  
SRR17520069.12323214  
SRR17520069.12323216  
SRR17520069.12323220  
SRR17520069.12323222  
SRR17520069.12323224  
SRR17520069.12323226  
SRR17520069.12323228  
SRR17520069.12323230  
SRR17520069.12323232  
SRR17520069.12323234  
SRR17520069.12323236  
SRR17520069.12323238  
SRR17520069.12323240  
SRR17520069.12323242  
SRR17520069.12323246

SRR17520069. 12323248  
SRR17520069. 12323250  
SRR17520069. 12323252  
SRR17520069. 12323254  
SRR17520069. 12323256  
SRR17520069. 12323258  
SRR17520069. 12323260  
SRR17520069. 12323262  
SRR17520069. 12323264  
SRR17520069. 12323266  
SRR17520069. 12323268  
SRR17520069. 12323270  
SRR17520069. 12323272  
SRR17520069. 12323274  
SRR17520069. 12323278  
SRR17520069. 12323280  
SRR17520069. 12323282  
SRR17520069. 12323284  
SRR17520069. 12323286  
SRR17520069. 12323288  
SRR17520069. 12323290  
SRR17520069. 12323292  
SRR17520069. 12323294  
SRR17520069. 12323296  
SRR17520069. 12323298  
SRR17520069. 12323300  
SRR17520069. 12328902  
SRR17520069. 12328904  
SRR17520069. 12328906  
SRR17520069. 12328908  
SRR17520069. 12328910  
SRR17520069. 12328912  
SRR17520069. 12328914  
SRR17520069. 12328916  
SRR17520069. 12328918  
SRR17520069. 12328920  
SRR17520069. 12328922  
SRR17520069. 12328924  
SRR17520069. 12328926  
SRR17520069. 12328928  
SRR17520069. 12328930  
SRR17520069. 12328932  
SRR17520069. 12328934  
SRR17520069. 12328936  
SRR17520069. 12328938  
SRR17520069. 12328940  
SRR17520069. 12335478



SRR17520069. 12335480  
SRR17520069. 12335486  
SRR17520069. 12335488  
SRR17520069. 12335494  
SRR17520069. 12335496  
SRR17520069. 12336583  
SRR17520069. 12336587  
SRR17520069. 12336589  
SRR17520069. 12339958  
SRR17520069. 12339960  
SRR17520069. 12339962  
SRR17520069. 12348076  
SRR17520069. 12348078  
SRR17520069. 12348080  
SRR17520069. 12348082  
SRR17520069. 12348084  
SRR17520069. 12348086  
SRR17520069. 12348096  
SRR17520069. 12348098  
SRR17520069. 12348100  
SRR17520069. 12348102  
SRR17520069. 12348104  
SRR17520069. 12348106  
SRR17520069. 12348108  
SRR17520069. 12356915  
SRR17520069. 12356917  
SRR17520069. 12356919  
SRR17520069. 12356921  
SRR17520069. 12356923  
SRR17520069. 12356925  
SRR17520069. 12356927  
SRR17520069. 12356929  
SRR17520069. 12356931  
SRR17520069. 12356933  
SRR17520069. 12356935  
SRR17520069. 12356937  
SRR17520069. 12356939  
SRR17520069. 12356941  
SRR17520069. 12356943  
SRR17520069. 12356945  
SRR17520069. 12356947  
SRR17520069. 12356949  
SRR17520069. 12356951  
SRR17520069. 12356953  
SRR17520069. 12356955  
SRR17520069. 12356957  
SRR17520069. 12356959

SRR17520069. 12356963  
SRR17520069. 12356965  
SRR17520069. 12356967  
SRR17520069. 12356969  
SRR17520069. 12356971  
SRR17520069. 12356973  
SRR17520069. 12356975  
SRR17520069. 12356981  
SRR17520069. 12356983  
SRR17520069. 12356985  
SRR17520069. 12356987  
SRR17520069. 12356989  
SRR17520069. 12356993  
SRR17520069. 12356995  
SRR17520069. 12356997  
SRR17520069. 12356999  
SRR17520069. 12357001  
SRR17520069. 12358316  
SRR17520069. 12358318  
SRR17520069. 12358320  
SRR17520069. 12358322  
SRR17520069. 12358337  
SRR17520069. 12358339  
SRR17520069. 12358341  
SRR17520069. 12358343  
SRR17520069. 12358345  
SRR17520069. 12358347  
SRR17520069. 12358349  
SRR17520069. 12358351  
SRR17520069. 12358353  
SRR17520069. 12358355  
SRR17520069. 12358357  
SRR17520069. 12358359  
SRR17520069. 12358361  
SRR17520069. 12358363  
SRR17520069. 12358365  
SRR17520069. 12358367  
SRR17520069. 12358369  
SRR17520069. 12358371  
SRR17520069. 12358373  
SRR17520069. 12358375  
SRR17520069. 12358377  
SRR17520069. 12358379  
SRR17520069. 12358381  
SRR17520069. 12358383  
SRR17520069. 12358385  
SRR17520069. 12358387

SRR17520069. 12362114  
SRR17520069. 12362118  
SRR17520069. 12362120  
SRR17520069. 12362122  
SRR17520069. 12362124  
SRR17520069. 12362126  
SRR17520069. 12362128  
SRR17520069. 12362130  
SRR17520069. 12362132  
SRR17520069. 12362134  
SRR17520069. 12362136  
SRR17520069. 12362138  
SRR17520069. 12362140  
SRR17520069. 12362142  
SRR17520069. 12362144  
SRR17520069. 12362146  
SRR17520069. 12365995  
SRR17520069. 12365997  
SRR17520069. 12365999  
SRR17520069. 12366001  
SRR17520069. 12366003  
SRR17520069. 12366005  
SRR17520069. 12366007  
SRR17520069. 12366009  
SRR17520069. 12366011  
SRR17520069. 12366013  
SRR17520069. 12366015  
SRR17520069. 12366017  
SRR17520069. 12366019  
SRR17520069. 12366021  
SRR17520069. 12366023  
SRR17520069. 12366027  
SRR17520069. 12366031  
SRR17520069. 12366033  
SRR17520069. 12366035  
SRR17520069. 12366037  
SRR17520069. 12366358  
SRR17520069. 12366360  
SRR17520069. 12366362  
SRR17520069. 12366364  
SRR17520069. 12366366  
SRR17520069. 12366368  
SRR17520069. 12366370  
SRR17520069. 12366372  
SRR17520069. 12366374  
SRR17520069. 12366376  
SRR17520069. 12366378

SRR17520069. 12366380  
SRR17520069. 12366392  
SRR17520069. 12367893  
SRR17520069. 12367895  
SRR17520069. 12367897  
SRR17520069. 12367899  
SRR17520069. 12367901  
SRR17520069. 12367903  
SRR17520069. 12367905  
SRR17520069. 12367909  
SRR17520069. 12367913  
SRR17520069. 12367915  
SRR17520069. 12367917  
SRR17520069. 12367919  
SRR17520069. 12367921  
SRR17520069. 12367923  
SRR17520069. 12367925  
SRR17520069. 12369670  
SRR17520069. 12369672  
SRR17520069. 12369674  
SRR17520069. 12369676  
SRR17520069. 12369678  
SRR17520069. 12369680  
SRR17520069. 12369682  
SRR17520069. 12369684  
SRR17520069. 12369686  
SRR17520069. 12369688  
SRR17520069. 12369690  
SRR17520069. 12369692  
SRR17520069. 12369694  
SRR17520069. 12369696  
SRR17520069. 12369698  
SRR17520069. 12369700  
SRR17520069. 12369702  
SRR17520069. 12369704  
SRR17520069. 12369706  
SRR17520069. 12369708  
SRR17520069. 12369710  
SRR17520069. 12369712  
SRR17520069. 12369714  
SRR17520069. 12369716  
SRR17520069. 12369718  
SRR17520069. 12369720  
SRR17520069. 12369722  
SRR17520069. 12369724  
SRR17520069. 12369726  
SRR17520069. 12369728

SRR17520069. 12369730  
SRR17520069. 12369732  
SRR17520069. 12369734  
SRR17520069. 12369736  
SRR17520069. 12369738  
SRR17520069. 12369740  
SRR17520069. 12369742  
SRR17520069. 12369744  
SRR17520069. 12374098  
SRR17520069. 12380910  
SRR17520069. 12380912  
SRR17520069. 12380916  
SRR17520069. 12380918  
SRR17520069. 12380920  
SRR17520069. 12380922  
SRR17520069. 12380924  
SRR17520069. 12380926  
SRR17520069. 12380928  
SRR17520069. 12380930  
SRR17520069. 12380932  
SRR17520069. 12380934  
SRR17520069. 12380936  
SRR17520069. 12380938  
SRR17520069. 12380940  
SRR17520069. 12380942  
SRR17520069. 12380944  
SRR17520069. 12380946  
SRR17520069. 12380948  
SRR17520069. 12380950  
SRR17520069. 12380952  
SRR17520069. 12380954  
SRR17520069. 12380956  
SRR17520069. 12380958  
SRR17520069. 12380960  
SRR17520069. 12380962  
SRR17520069. 12380964  
SRR17520069. 12380968  
SRR17520069. 12390565  
SRR17520069. 12390567  
SRR17520069. 12393273  
SRR17520069. 12393275  
SRR17520069. 12393279  
SRR17520069. 12393281  
SRR17520069. 12393283  
SRR17520069. 12393285  
SRR17520069. 12393287  
SRR17520069. 12393289

SRR17520069. 12393291  
SRR17520069. 12393293  
SRR17520069. 12393295  
SRR17520069. 12393297  
SRR17520069. 12393299  
SRR17520069. 12393301  
SRR17520069. 12393303  
SRR17520069. 12393305  
SRR17520069. 12393307  
SRR17520069. 12393309  
SRR17520069. 12393311  
SRR17520069. 12393313  
SRR17520069. 12395226  
SRR17520069. 12395228  
SRR17520069. 12395230  
SRR17520069. 12395232  
SRR17520069. 12395234  
SRR17520069. 12395236  
SRR17520069. 12395238  
SRR17520069. 12395240  
SRR17520069. 12395242  
SRR17520069. 12395244  
SRR17520069. 12395246  
SRR17520069. 12395248  
SRR17520069. 12395250  
SRR17520069. 12395252  
SRR17520069. 12395254  
SRR17520069. 12395256  
SRR17520069. 12395258  
SRR17520069. 12395260  
SRR17520069. 12395262  
SRR17520069. 12395264  
SRR17520069. 12395266  
SRR17520069. 12395268  
SRR17520069. 12395270  
SRR17520069. 12395272  
SRR17520069. 12395274  
SRR17520069. 12395276  
SRR17520069. 12395278  
SRR17520069. 12395280  
SRR17520069. 12395282  
SRR17520069. 12395284  
SRR17520069. 12395286  
SRR17520069. 12395288  
SRR17520069. 12395290  
SRR17520069. 12395292  
SRR17520069. 12395294

SRR17520069. 12395296  
SRR17520069. 12395298  
SRR17520069. 12395300  
SRR17520069. 12395302  
SRR17520069. 12395304  
SRR17520069. 12395306  
SRR17520069. 12395308  
SRR17520069. 12395310  
SRR17520069. 12395312  
SRR17520069. 12395314  
SRR17520069. 12395316  
SRR17520069. 12395318  
SRR17520069. 12395320  
SRR17520069. 12395322  
SRR17520069. 12395324  
SRR17520069. 12395326  
SRR17520069. 12395328  
SRR17520069. 12395330  
SRR17520069. 12395334  
SRR17520069. 12395336  
SRR17520069. 12395338  
SRR17520069. 12395340  
SRR17520069. 12395342  
SRR17520069. 12404887  
SRR17520069. 12404889  
SRR17520069. 12404891  
SRR17520069. 12404893  
SRR17520069. 12404895  
SRR17520069. 12404897  
SRR17520069. 12404899  
SRR17520069. 12404901  
SRR17520069. 12404903  
SRR17520069. 12404905  
SRR17520069. 12404907  
SRR17520069. 12404909  
SRR17520069. 12404911  
SRR17520069. 12404913  
SRR17520069. 12404915  
SRR17520069. 12404917  
SRR17520069. 12404919  
SRR17520069. 12404921  
SRR17520069. 12404923  
SRR17520069. 12404925  
SRR17520069. 12404927  
SRR17520069. 12404929  
SRR17520069. 12404931  
SRR17520069. 12404933

SRR17520069. 12404935  
SRR17520069. 12404937  
SRR17520069. 12404939  
SRR17520069. 12404941  
SRR17520069. 12404943  
SRR17520069. 12404945  
SRR17520069. 12404947  
SRR17520069. 12404949  
SRR17520069. 12404951  
SRR17520069. 12404953  
SRR17520069. 12404955  
SRR17520069. 12404957  
SRR17520069. 12404959  
SRR17520069. 12405425  
SRR17520069. 12405427  
SRR17520069. 12405429  
SRR17520069. 12405431  
SRR17520069. 12405433  
SRR17520069. 12405435  
SRR17520069. 12405441  
SRR17520069. 12405443  
SRR17520069. 12405445  
SRR17520069. 12405447  
SRR17520069. 12405449  
SRR17520069. 12405451  
SRR17520069. 12405453  
SRR17520069. 12405455  
SRR17520069. 12405457  
SRR17520069. 12405459  
SRR17520069. 12405461  
SRR17520069. 12405463  
SRR17520069. 12405465  
SRR17520069. 12405467  
SRR17520069. 12414324  
SRR17520069. 12414330  
SRR17520069. 12420464  
SRR17520069. 12420466  
SRR17520069. 12420468  
SRR17520069. 12420470  
SRR17520069. 12420472  
SRR17520069. 12420474  
SRR17520069. 12420476  
SRR17520069. 12420478  
SRR17520069. 12420480  
SRR17520069. 12420482  
SRR17520069. 12420484  
SRR17520069. 12420486



SRR17520069. 12420488  
SRR17520069. 12420490  
SRR17520069. 12420492  
SRR17520069. 12420494  
SRR17520069. 12420496  
SRR17520069. 12420498  
SRR17520069. 12420500  
SRR17520069. 12420502  
SRR17520069. 12420504  
SRR17520069. 12420506  
SRR17520069. 12424368  
SRR17520069. 12424370  
SRR17520069. 12424372  
SRR17520069. 12424376  
SRR17520069. 12424378  
SRR17520069. 12424380  
SRR17520069. 12424382  
SRR17520069. 12425034  
SRR17520069. 12425036  
SRR17520069. 12425038  
SRR17520069. 12425040  
SRR17520069. 12425042  
SRR17520069. 12425044  
SRR17520069. 12425046  
SRR17520069. 12425048  
SRR17520069. 12426379  
SRR17520069. 12426381  
SRR17520069. 12426383  
SRR17520069. 12426385  
SRR17520069. 12426387  
SRR17520069. 12426389  
SRR17520069. 12426391  
SRR17520069. 12426393  
SRR17520069. 12426395  
SRR17520069. 12426397  
SRR17520069. 12426399  
SRR17520069. 12426401  
SRR17520069. 12426403  
SRR17520069. 12426405  
SRR17520069. 12426407  
SRR17520069. 12426409  
SRR17520069. 12426411  
SRR17520069. 12426413  
SRR17520069. 12426415  
SRR17520069. 12426417  
SRR17520069. 12426419  
SRR17520069. 12426421

SRR17520069. 12426423  
SRR17520069. 12426425  
SRR17520069. 12426427  
SRR17520069. 12426429  
SRR17520069. 12426431  
SRR17520069. 12426433  
SRR17520069. 12426435  
SRR17520069. 12426437  
SRR17520069. 12426439  
SRR17520069. 12426441  
SRR17520069. 12426443  
SRR17520069. 12426445  
SRR17520069. 12426447  
SRR17520069. 12426449  
SRR17520069. 12426451  
SRR17520069. 12426453  
SRR17520069. 12426455  
SRR17520069. 12426457  
SRR17520069. 12426459  
SRR17520069. 12426461  
SRR17520069. 12426463  
SRR17520069. 12426465  
SRR17520069. 12426467  
SRR17520069. 12426469  
SRR17520069. 12426471  
SRR17520069. 12426473  
SRR17520069. 12426475  
SRR17520069. 12426477  
SRR17520069. 12426479  
SRR17520069. 12426481  
SRR17520069. 12429103  
SRR17520069. 12429105  
SRR17520069. 12429107  
SRR17520069. 12429109  
SRR17520069. 12429111  
SRR17520069. 12429113  
SRR17520069. 12429115  
SRR17520069. 12429117  
SRR17520069. 12429119  
SRR17520069. 12429121  
SRR17520069. 12429123  
SRR17520069. 12429125  
SRR17520069. 12429127  
SRR17520069. 12429129  
SRR17520069. 12430270  
SRR17520069. 12430272  
SRR17520069. 12430274

SRR17520069. 12434424  
SRR17520069. 12434426  
SRR17520069. 12434428  
SRR17520069. 12434785  
SRR17520069. 12434787  
SRR17520069. 12434789  
SRR17520069. 12434791  
SRR17520069. 12434793  
SRR17520069. 12434795  
SRR17520069. 12434799  
SRR17520069. 12436582  
SRR17520069. 12448487  
SRR17520069. 12448489  
SRR17520069. 12448491  
SRR17520069. 12448493  
SRR17520069. 12448497  
SRR17520069. 12448499  
SRR17520069. 12448511  
SRR17520069. 12448515  
SRR17520069. 12448517  
SRR17520069. 12449837  
SRR17520069. 12449845  
SRR17520069. 12449847  
SRR17520069. 12453984  
SRR17520069. 12453986  
SRR17520069. 12453988  
SRR17520069. 12453990  
SRR17520069. 12453996  
SRR17520069. 12453998  
SRR17520069. 12454000  
SRR17520069. 12454002  
SRR17520069. 12454004  
SRR17520069. 12454006  
SRR17520069. 12454008  
SRR17520069. 12454010  
SRR17520069. 12454012  
SRR17520069. 12454014  
SRR17520069. 12454016  
SRR17520069. 12454018  
SRR17520069. 12454020  
SRR17520069. 12454022  
SRR17520069. 12454024  
SRR17520069. 12454026  
SRR17520069. 12454028  
SRR17520069. 12454030  
SRR17520069. 12456250  
SRR17520069. 12456252

SRR17520069. 12456254  
SRR17520069. 12456256  
SRR17520069. 12456258  
SRR17520069. 12456260  
SRR17520069. 12456262  
SRR17520069. 12456264  
SRR17520069. 12456266  
SRR17520069. 12456268  
SRR17520069. 12456270  
SRR17520069. 12456272  
SRR17520069. 12456274  
SRR17520069. 12456276  
SRR17520069. 12456278  
SRR17520069. 12456280  
SRR17520069. 12456282  
SRR17520069. 12456284  
SRR17520069. 12456286  
SRR17520069. 12456288  
SRR17520069. 12456290  
SRR17520069. 12456292  
SRR17520069. 12456294  
SRR17520069. 12456296  
SRR17520069. 12456298  
SRR17520069. 12456300  
SRR17520069. 12456302  
SRR17520069. 12456304  
SRR17520069. 12456306  
SRR17520069. 12456308  
SRR17520069. 12456310  
SRR17520069. 12456312  
SRR17520069. 12462934  
SRR17520069. 12462936  
SRR17520069. 12464853  
SRR17520069. 12464855  
SRR17520069. 12464857  
SRR17520069. 12464859  
SRR17520069. 12464861  
SRR17520069. 12464863  
SRR17520069. 12464865  
SRR17520069. 12464867  
SRR17520069. 12464869  
SRR17520069. 12464871  
SRR17520069. 12464873  
SRR17520069. 12474956  
SRR17520069. 12474958  
SRR17520069. 12474960  
SRR17520069. 12474962

SRR17520069. 12474964  
SRR17520069. 12474968  
SRR17520069. 12474970  
SRR17520069. 12474972  
SRR17520069. 12474974  
SRR17520069. 12474976  
SRR17520069. 12474978  
SRR17520069. 12474980  
SRR17520069. 12474982  
SRR17520069. 12474984  
SRR17520069. 12474986  
SRR17520069. 12474988  
SRR17520069. 12474990  
SRR17520069. 12474992  
SRR17520069. 12474994  
SRR17520069. 12474996  
SRR17520069. 12474998  
SRR17520069. 12475000  
SRR17520069. 12475002  
SRR17520069. 12475004  
SRR17520069. 12475006  
SRR17520069. 12475008  
SRR17520069. 12475010  
SRR17520069. 12479223  
SRR17520069. 12479225  
SRR17520069. 12479227  
SRR17520069. 12479231  
SRR17520069. 12479239  
SRR17520069. 12479241  
SRR17520069. 12479243  
SRR17520069. 12479245  
SRR17520069. 12479247  
SRR17520069. 12479249  
SRR17520069. 12479251  
SRR17520069. 12479253  
SRR17520069. 12479255  
SRR17520069. 12479257  
SRR17520069. 12479259  
SRR17520069. 12479261  
SRR17520069. 12479263  
SRR17520069. 12479265  
SRR17520069. 12479267  
SRR17520069. 12479269  
SRR17520069. 12479271  
SRR17520069. 12479273  
SRR17520069. 12479275  
SRR17520069. 12479277

SRR17520069. 12479279  
SRR17520069. 12479281  
SRR17520069. 12479283  
SRR17520069. 12479285  
SRR17520069. 12479287  
SRR17520069. 12479289  
SRR17520069. 12479291  
SRR17520069. 12479293  
SRR17520069. 12479295  
SRR17520069. 12479297  
SRR17520069. 12479299  
SRR17520069. 12479301  
SRR17520069. 12480487  
SRR17520069. 12483342  
SRR17520069. 12483344  
SRR17520069. 12484349  
SRR17520069. 12484351  
SRR17520069. 12484353  
SRR17520069. 12484355  
SRR17520069. 12484357  
SRR17520069. 12484359  
SRR17520069. 12484361  
SRR17520069. 12484363  
SRR17520069. 12484365  
SRR17520069. 12484367  
SRR17520069. 12484369  
SRR17520069. 12484371  
SRR17520069. 12484373  
SRR17520069. 12484375  
SRR17520069. 12484377  
SRR17520069. 12490008  
SRR17520069. 12505583  
SRR17520069. 12505585  
SRR17520069. 12505587  
SRR17520069. 12505589  
SRR17520069. 12506510  
SRR17520069. 12506512  
SRR17520069. 12506514  
SRR17520069. 12506516  
SRR17520069. 12506518  
SRR17520069. 12519114  
SRR17520069. 12519116  
SRR17520069. 12519118  
SRR17520069. 12519120  
SRR17520069. 12519122  
SRR17520069. 12519124  
SRR17520069. 12519126

SRR17520069. 12519128  
SRR17520069. 12519130  
SRR17520069. 12519132  
SRR17520069. 12519134  
SRR17520069. 12519136  
SRR17520069. 12519138  
SRR17520069. 12519140  
SRR17520069. 12519142  
SRR17520069. 12519144  
SRR17520069. 12519146  
SRR17520069. 12519148  
SRR17520069. 12519150  
SRR17520069. 12519152  
SRR17520069. 12519154  
SRR17520069. 12519156  
SRR17520069. 12519158  
SRR17520069. 12519160  
SRR17520069. 12519162  
SRR17520069. 12519164  
SRR17520069. 12519166  
SRR17520069. 12519168  
SRR17520069. 12519170  
SRR17520069. 12519172  
SRR17520069. 12519174  
SRR17520069. 12519176  
SRR17520069. 12519178  
SRR17520069. 12519180  
SRR17520069. 12519182  
SRR17520069. 12519184  
SRR17520069. 12519186  
SRR17520069. 12519188  
SRR17520069. 12519190  
SRR17520069. 12519192  
SRR17520069. 12519194  
SRR17520069. 12519196  
SRR17520069. 12519198  
SRR17520069. 12519200  
SRR17520069. 12519202  
SRR17520069. 12519204  
SRR17520069. 12519206  
SRR17520069. 12519208  
SRR17520069. 12519210  
SRR17520069. 12519212  
SRR17520069. 12519214  
SRR17520069. 12519216  
SRR17520069. 12519218  
SRR17520069. 12519220

SRR17520069. 12519222  
SRR17520069. 12519224  
SRR17520069. 12519226  
SRR17520069. 12519228  
SRR17520069. 12519230  
SRR17520069. 12519232  
SRR17520069. 12519234  
SRR17520069. 12519236  
SRR17520069. 12519238  
SRR17520069. 12519240  
SRR17520069. 12519244  
SRR17520069. 12519246  
SRR17520069. 12519248  
SRR17520069. 12519250  
SRR17520069. 12519252  
SRR17520069. 12519254  
SRR17520069. 12519256  
SRR17520069. 12519262  
SRR17520069. 12519264  
SRR17520069. 12519266  
SRR17520069. 12519268  
SRR17520069. 12519270  
SRR17520069. 12519272  
SRR17520069. 12519274  
SRR17520069. 12519278  
SRR17520069. 12519280  
SRR17520069. 12519282  
SRR17520069. 12519284  
SRR17520069. 12519286  
SRR17520069. 12519288  
SRR17520069. 12519290  
SRR17520069. 12519292  
SRR17520069. 12519294  
SRR17520069. 12519296  
SRR17520069. 12519298  
SRR17520069. 12519302  
SRR17520069. 12519304  
SRR17520069. 12519308  
SRR17520069. 12519310  
SRR17520069. 12519312  
SRR17520069. 12519314  
SRR17520069. 12519318  
SRR17520069. 12519320  
SRR17520069. 12519322  
SRR17520069. 12519324  
SRR17520069. 12519326  
SRR17520069. 12519328



SRR17520069. 12519330  
SRR17520069. 12519332  
SRR17520069. 12519334  
SRR17520069. 12519336  
SRR17520069. 12519338  
SRR17520069. 12519340  
SRR17520069. 12519342  
SRR17520069. 12519344  
SRR17520069. 12519346  
SRR17520069. 12519348  
SRR17520069. 12519350  
SRR17520069. 12519352  
SRR17520069. 12519354  
SRR17520069. 12519356  
SRR17520069. 12519358  
SRR17520069. 12519360  
SRR17520069. 12519362  
SRR17520069. 12519364  
SRR17520069. 12519366  
SRR17520069. 12519368  
SRR17520069. 12519370  
SRR17520069. 12519372  
SRR17520069. 12519374  
SRR17520069. 12519376  
SRR17520069. 12519378  
SRR17520069. 12519380  
SRR17520069. 12519382  
SRR17520069. 12519386  
SRR17520069. 12519388  
SRR17520069. 12520027  
SRR17520069. 12520029  
SRR17520069. 12520031  
SRR17520069. 12520033  
SRR17520069. 12520035  
SRR17520069. 12520037  
SRR17520069. 12520039  
SRR17520069. 12520041  
SRR17520069. 12520043  
SRR17520069. 12520045  
SRR17520069. 12520047  
SRR17520069. 12520049  
SRR17520069. 12520051  
SRR17520069. 12520053  
SRR17520069. 12520055  
SRR17520069. 12520057  
SRR17520069. 12520059  
SRR17520069. 12520061

SRR17520069.12520063  
SRR17520069.12520065  
SRR17520069.12520067  
SRR17520069.12520069  
SRR17520069.12520071  
SRR17520069.12520073  
SRR17520069.12520075  
SRR17520069.12520077  
SRR17520069.12520079  
SRR17520069.12520081  
SRR17520069.12520083  
SRR17520069.12520085  
SRR17520069.12520089  
SRR17520069.12520091  
SRR17520069.12520093  
SRR17520069.12520095  
SRR17520069.12529770  
SRR17520069.12529772  
SRR17520069.12529774  
SRR17520069.12529776  
SRR17520069.12529778  
SRR17520069.12529780  
SRR17520069.12529782  
SRR17520069.12529784  
SRR17520069.12529786  
SRR17520069.12529788  
SRR17520069.12529790  
SRR17520069.12529792  
SRR17520069.12529798  
SRR17520069.12529949  
SRR17520069.12529951  
SRR17520069.12529953  
SRR17520069.12529955  
SRR17520069.12529957  
SRR17520069.12529959  
SRR17520069.12529961  
SRR17520069.12529963  
SRR17520069.12535675  
SRR17520069.12535679  
SRR17520069.12535681  
SRR17520069.12535683  
SRR17520069.12535685  
SRR17520069.12535687  
SRR17520069.12535689  
SRR17520069.12535691  
SRR17520069.12535695  
SRR17520069.12535697

SRR17520069.12535699  
SRR17520069.12535701  
SRR17520069.12535703  
SRR17520069.12535705  
SRR17520069.12535707  
SRR17520069.12535711  
SRR17520069.12535713  
SRR17520069.12535715  
SRR17520069.12535717  
SRR17520069.12535719  
SRR17520069.12535721  
SRR17520069.12535723  
SRR17520069.12535725  
SRR17520069.12535727  
SRR17520069.12535729  
SRR17520069.12535731  
SRR17520069.12535733  
SRR17520069.12535735  
SRR17520069.12535737  
SRR17520069.12535739  
SRR17520069.12535743  
SRR17520069.12536241  
SRR17520069.12536243  
SRR17520069.12536245  
SRR17520069.12536247  
SRR17520069.12536249  
SRR17520069.12536251  
SRR17520069.12536253  
SRR17520069.12536255  
SRR17520069.12536257  
SRR17520069.12536259  
SRR17520069.12536261  
SRR17520069.12536263  
SRR17520069.12536265  
SRR17520069.12536267  
SRR17520069.12536269  
SRR17520069.12536271  
SRR17520069.12536273  
SRR17520069.12536275  
SRR17520069.12536277  
SRR17520069.12536279  
SRR17520069.12536281  
SRR17520069.12536283  
SRR17520069.12536285  
SRR17520069.12536287  
SRR17520069.12536289  
SRR17520069.12536291

SRR17520069. 12536293  
SRR17520069. 12536295  
SRR17520069. 12536297  
SRR17520069. 12536299  
SRR17520069. 12536301  
SRR17520069. 12536303  
SRR17520069. 12536305  
SRR17520069. 12536307  
SRR17520069. 12536309  
SRR17520069. 12536311  
SRR17520069. 12536313  
SRR17520069. 12536315  
SRR17520069. 12536317  
SRR17520069. 12536319  
SRR17520069. 12536321  
SRR17520069. 12536323  
SRR17520069. 12536325  
SRR17520069. 12536327  
SRR17520069. 12536329  
SRR17520069. 12536333  
SRR17520069. 12536335  
SRR17520069. 12536337  
SRR17520069. 12536339  
SRR17520069. 12536341  
SRR17520069. 12536343  
SRR17520069. 12536345  
SRR17520069. 12536347  
SRR17520069. 12536349  
SRR17520069. 12536351  
SRR17520069. 12536353  
SRR17520069. 12536355  
SRR17520069. 12536357  
SRR17520069. 12536359  
SRR17520069. 12536361  
SRR17520069. 12536363  
SRR17520069. 12536365  
SRR17520069. 12536367  
SRR17520069. 12536369  
SRR17520069. 12536371  
SRR17520069. 12536373  
SRR17520069. 12536375  
SRR17520069. 12536377  
SRR17520069. 12536379  
SRR17520069. 12536381  
SRR17520069. 12536383  
SRR17520069. 12536385  
SRR17520069. 12536387

SRR17520069. 12536389  
SRR17520069. 12536391  
SRR17520069. 12536393  
SRR17520069. 12536395  
SRR17520069. 12536397  
SRR17520069. 12536399  
SRR17520069. 12536401  
SRR17520069. 12536403  
SRR17520069. 12536405  
SRR17520069. 12536814  
SRR17520069. 12536816  
SRR17520069. 12536818  
SRR17520069. 12539751  
SRR17520069. 12539753  
SRR17520069. 12539755  
SRR17520069. 12539757  
SRR17520069. 12539759  
SRR17520069. 12539763  
SRR17520069. 12539765  
SRR17520069. 12539767  
SRR17520069. 12539769  
SRR17520069. 12539771  
SRR17520069. 12539774  
SRR17520069. 12539776  
SRR17520069. 12539778  
SRR17520069. 12539780  
SRR17520069. 12539782  
SRR17520069. 12539784  
SRR17520069. 12539786  
SRR17520069. 12539788  
SRR17520069. 12539790  
SRR17520069. 12548501  
SRR17520069. 12548503  
SRR17520069. 12548507  
SRR17520069. 12551236  
SRR17520069. 12551238  
SRR17520069. 12551240  
SRR17520069. 12551242  
SRR17520069. 12551244  
SRR17520069. 12551246  
SRR17520069. 12551248  
SRR17520069. 12551250  
SRR17520069. 12551252  
SRR17520069. 12551254  
SRR17520069. 12551256  
SRR17520069. 12551258  
SRR17520069. 12551260

SRR17520069. 12551262  
SRR17520069. 12551264  
SRR17520069. 12551266  
SRR17520069. 12551268  
SRR17520069. 12551270  
SRR17520069. 12551272  
SRR17520069. 12551274  
SRR17520069. 12551276  
SRR17520069. 12551278  
SRR17520069. 12552489  
SRR17520069. 12552491  
SRR17520069. 12552493  
SRR17520069. 12552495  
SRR17520069. 12552497  
SRR17520069. 12552499  
SRR17520069. 12552501  
SRR17520069. 12552503  
SRR17520069. 12552505  
SRR17520069. 12552507  
SRR17520069. 12552509  
SRR17520069. 12552511  
SRR17520069. 12552513  
SRR17520069. 12552515  
SRR17520069. 12552517  
SRR17520069. 12552519  
SRR17520069. 12552521  
SRR17520069. 12552523  
SRR17520069. 12552525  
SRR17520069. 12552527  
SRR17520069. 12552529  
SRR17520069. 12552531  
SRR17520069. 12552533  
SRR17520069. 12552535  
SRR17520069. 12552537  
SRR17520069. 12552539  
SRR17520069. 12552541  
SRR17520069. 12552543  
SRR17520069. 12552545  
SRR17520069. 12552547  
SRR17520069. 12552549  
SRR17520069. 12552551  
SRR17520069. 12552553  
SRR17520069. 12552555  
SRR17520069. 12552557  
SRR17520069. 12552559  
SRR17520069. 12552561  
SRR17520069. 12552563

SRR17520069. 12552565  
SRR17520069. 12552567  
SRR17520069. 12552569  
SRR17520069. 12552573  
SRR17520069. 12552575  
SRR17520069. 12552577  
SRR17520069. 12552579  
SRR17520069. 12552581  
SRR17520069. 12552583  
SRR17520069. 12552585  
SRR17520069. 12552587  
SRR17520069. 12552589  
SRR17520069. 12552591  
SRR17520069. 12552593  
SRR17520069. 12552595  
SRR17520069. 12552597  
SRR17520069. 12552679  
SRR17520069. 12552681  
SRR17520069. 12552683  
SRR17520069. 12552685  
SRR17520069. 12552687  
SRR17520069. 12552691  
SRR17520069. 12552693  
SRR17520069. 12552695  
SRR17520069. 12552697  
SRR17520069. 12552786  
SRR17520069. 12552788  
SRR17520069. 12552790  
SRR17520069. 12552792  
SRR17520069. 12552794  
SRR17520069. 12552796  
SRR17520069. 12552798  
SRR17520069. 12552800  
SRR17520069. 12552802  
SRR17520069. 12552804  
SRR17520069. 12552806  
SRR17520069. 12552808  
SRR17520069. 12552810  
SRR17520069. 12552812  
SRR17520069. 12552814  
SRR17520069. 12552816  
SRR17520069. 12552818  
SRR17520069. 12552822  
SRR17520069. 12552824  
SRR17520069. 12552826  
SRR17520069. 12552828  
SRR17520069. 12552830

SRR17520069. 12552832  
SRR17520069. 12552834  
SRR17520069. 12552836  
SRR17520069. 12552838  
SRR17520069. 12552840  
SRR17520069. 12552842  
SRR17520069. 12554405  
SRR17520069. 12554412  
SRR17520069. 12554414  
SRR17520069. 12554416  
SRR17520069. 12554418  
SRR17520069. 12554420  
SRR17520069. 12554422  
SRR17520069. 12554424  
SRR17520069. 12554426  
SRR17520069. 12554428  
SRR17520069. 12554430  
SRR17520069. 12554432  
SRR17520069. 12554436  
SRR17520069. 12554438  
SRR17520069. 12554440  
SRR17520069. 12554442  
SRR17520069. 12554444  
SRR17520069. 12554446  
SRR17520069. 12554448  
SRR17520069. 12554450  
SRR17520069. 12554452  
SRR17520069. 12554454  
SRR17520069. 12554456  
SRR17520069. 12554458  
SRR17520069. 12554460  
SRR17520069. 12554462  
SRR17520069. 12554464  
SRR17520069. 12554468  
SRR17520069. 12554470  
SRR17520069. 12558926  
SRR17520069. 12558930  
SRR17520069. 12558932  
SRR17520069. 12558934  
SRR17520069. 12558936  
SRR17520069. 12558942  
SRR17520069. 12558944  
SRR17520069. 12559296  
SRR17520069. 12559298  
SRR17520069. 12562730  
SRR17520069. 12562732  
SRR17520069. 12562734



SRR17520069. 12562736  
SRR17520069. 12562738  
SRR17520069. 12562740  
SRR17520069. 12562742  
SRR17520069. 12562744  
SRR17520069. 12562746  
SRR17520069. 12565365  
SRR17520069. 12565367  
SRR17520069. 12565371  
SRR17520069. 12565373  
SRR17520069. 12565375  
SRR17520069. 12565377  
SRR17520069. 12565379  
SRR17520069. 12565381  
SRR17520069. 12565383  
SRR17520069. 12565385  
SRR17520069. 12565893  
SRR17520069. 12565895  
SRR17520069. 12565897  
SRR17520069. 12565899  
SRR17520069. 12565901  
SRR17520069. 12565903  
SRR17520069. 12565905  
SRR17520069. 12565907  
SRR17520069. 12565912  
SRR17520069. 12565914  
SRR17520069. 12565916  
SRR17520069. 12565918  
SRR17520069. 12565920  
SRR17520069. 12565922  
SRR17520069. 12565926  
SRR17520069. 12565928  
SRR17520069. 12565932  
SRR17520069. 12565934  
SRR17520069. 12565936  
SRR17520069. 12565938  
SRR17520069. 12565940  
SRR17520069. 12565942  
SRR17520069. 12565944  
SRR17520069. 12565946  
SRR17520069. 12565948  
SRR17520069. 12565950  
SRR17520069. 12565952  
SRR17520069. 12565954  
SRR17520069. 12565956  
SRR17520069. 12565958  
SRR17520069. 12565960

SRR17520069. 12565962  
SRR17520069. 12565964  
SRR17520069. 12565966  
SRR17520069. 12577463  
SRR17520069. 12577465  
SRR17520069. 12577467  
SRR17520069. 12577469  
SRR17520069. 12577471  
SRR17520069. 12577473  
SRR17520069. 12577475  
SRR17520069. 12577477  
SRR17520069. 12577479  
SRR17520069. 12577481  
SRR17520069. 12577483  
SRR17520069. 12577485  
SRR17520069. 12577487  
SRR17520069. 12577489  
SRR17520069. 12577491  
SRR17520069. 12577493  
SRR17520069. 12577495  
SRR17520069. 12577497  
SRR17520069. 12577499  
SRR17520069. 12577501  
SRR17520069. 12577503  
SRR17520069. 12577505  
SRR17520069. 12577507  
SRR17520069. 12577509  
SRR17520069. 12577511  
SRR17520069. 12577513  
SRR17520069. 12577515  
SRR17520069. 12577517  
SRR17520069. 12577519  
SRR17520069. 12578176  
SRR17520069. 12578178  
SRR17520069. 12578180  
SRR17520069. 12578182  
SRR17520069. 12578184  
SRR17520069. 12578186  
SRR17520069. 12578190  
SRR17520069. 12578192  
SRR17520069. 12578194  
SRR17520069. 12578196  
SRR17520069. 12578198  
SRR17520069. 12578200  
SRR17520069. 12578202  
SRR17520069. 12578204  
SRR17520069. 12578206

SRR17520069. 12578208  
SRR17520069. 12578210  
SRR17520069. 12578212  
SRR17520069. 12580744  
SRR17520069. 12580746  
SRR17520069. 12580752  
SRR17520069. 12580754  
SRR17520069. 12580756  
SRR17520069. 12580758  
SRR17520069. 12584145  
SRR17520069. 12584147  
SRR17520069. 12584149  
SRR17520069. 12584151  
SRR17520069. 12584153  
SRR17520069. 12584155  
SRR17520069. 12584159  
SRR17520069. 12584163  
SRR17520069. 12584165  
SRR17520069. 12584571  
SRR17520069. 12584573  
SRR17520069. 12584575  
SRR17520069. 12584577  
SRR17520069. 12584579  
SRR17520069. 12584583  
SRR17520069. 12584585  
SRR17520069. 12584587  
SRR17520069. 12584589  
SRR17520069. 12584591  
SRR17520069. 12584593  
SRR17520069. 12584597  
SRR17520069. 12584599  
SRR17520069. 12584601  
SRR17520069. 12584603  
SRR17520069. 12584605  
SRR17520069. 12584607  
SRR17520069. 12584609  
SRR17520069. 12584611  
SRR17520069. 12584613  
SRR17520069. 12584615  
SRR17520069. 12584617  
SRR17520069. 12584619  
SRR17520069. 12584621  
SRR17520069. 12584623  
SRR17520069. 12584625  
SRR17520069. 12588704  
SRR17520069. 12588706  
SRR17520069. 12588708

SRR17520069.12588710  
SRR17520069.12588712  
SRR17520069.12588714  
SRR17520069.12588716  
SRR17520069.12588720  
SRR17520069.12589426  
SRR17520069.12589428  
SRR17520069.12589430  
SRR17520069.12589432  
SRR17520069.12589434  
SRR17520069.12589436  
SRR17520069.12589440  
SRR17520069.12589442  
SRR17520069.12589444  
SRR17520069.12589446  
SRR17520069.12589448  
SRR17520069.12589450  
SRR17520069.12589452  
SRR17520069.12589454  
SRR17520069.12589456  
SRR17520069.12589458  
SRR17520069.12589460  
SRR17520069.12589462  
SRR17520069.12589464  
SRR17520069.12589466  
SRR17520069.12589468  
SRR17520069.12589470  
SRR17520069.12589472  
SRR17520069.12589474  
SRR17520069.12589476  
SRR17520069.12589478  
SRR17520069.12589480  
SRR17520069.12589482  
SRR17520069.12589484  
SRR17520069.12589486  
SRR17520069.12589488  
SRR17520069.12589490  
SRR17520069.12589492  
SRR17520069.12589494  
SRR17520069.12589496  
SRR17520069.12589498  
SRR17520069.12589500  
SRR17520069.12589502  
SRR17520069.12589506  
SRR17520069.12589508  
SRR17520069.12589510  
SRR17520069.12589512

SRR17520069.12589514  
SRR17520069.12589516  
SRR17520069.12589518  
SRR17520069.12589520  
SRR17520069.12589522  
SRR17520069.12589524  
SRR17520069.12589526  
SRR17520069.12589528  
SRR17520069.12589530  
SRR17520069.12589532  
SRR17520069.12589534  
SRR17520069.12589536  
SRR17520069.12589538  
SRR17520069.12589540  
SRR17520069.12589542  
SRR17520069.12589544  
SRR17520069.12589546  
SRR17520069.12590594  
SRR17520069.12590596  
SRR17520069.12590598  
SRR17520069.12590600  
SRR17520069.12590602  
SRR17520069.12590604  
SRR17520069.12590606  
SRR17520069.12590608  
SRR17520069.12590610  
SRR17520069.12590612  
SRR17520069.12590614  
SRR17520069.12590616  
SRR17520069.12590618  
SRR17520069.12590620  
SRR17520069.12590622  
SRR17520069.12590624  
SRR17520069.12590626  
SRR17520069.12590628  
SRR17520069.12590630  
SRR17520069.12590632  
SRR17520069.12590634  
SRR17520069.12590636  
SRR17520069.12590638  
SRR17520069.12590640  
SRR17520069.12590642  
SRR17520069.12590644  
SRR17520069.12590646  
SRR17520069.12590648  
SRR17520069.12590650  
SRR17520069.12590652

SRR17520069. 12590654  
SRR17520069. 12590658  
SRR17520069. 12602734  
SRR17520069. 12602738  
SRR17520069. 12602740  
SRR17520069. 12602742  
SRR17520069. 12602744  
SRR17520069. 12602746  
SRR17520069. 12602748  
SRR17520069. 12602750  
SRR17520069. 12602752  
SRR17520069. 12602754  
SRR17520069. 12604742  
SRR17520069. 12604746  
SRR17520069. 12604748  
SRR17520069. 12604750  
SRR17520069. 12604752  
SRR17520069. 12613922  
SRR17520069. 12613924  
SRR17520069. 12613926  
SRR17520069. 12614061  
SRR17520069. 12619729  
SRR17520069. 12619731  
SRR17520069. 12619735  
SRR17520069. 12621087  
SRR17520069. 12621089  
SRR17520069. 12621091  
SRR17520069. 12621093  
SRR17520069. 12621095  
SRR17520069. 12621097  
SRR17520069. 12621101  
SRR17520069. 12621103  
SRR17520069. 12621105  
SRR17520069. 12621107  
SRR17520069. 12621109  
SRR17520069. 12621111  
SRR17520069. 12621113  
SRR17520069. 12621115  
SRR17520069. 12621117  
SRR17520069. 12621119  
SRR17520069. 12621121  
SRR17520069. 12621123  
SRR17520069. 12621125  
SRR17520069. 12621127  
SRR17520069. 12621129  
SRR17520069. 12621131  
SRR17520069. 12621133

SRR17520069.12621135  
SRR17520069.12621137  
SRR17520069.12621139  
SRR17520069.12621143  
SRR17520069.12621145  
SRR17520069.12621147  
SRR17520069.12621149  
SRR17520069.12621151  
SRR17520069.12621153  
SRR17520069.12621155  
SRR17520069.12621157  
SRR17520069.12621159  
SRR17520069.12621161  
SRR17520069.12621163  
SRR17520069.12621165  
SRR17520069.12621588  
SRR17520069.12621590  
SRR17520069.12621592  
SRR17520069.12621594  
SRR17520069.12621596  
SRR17520069.12621598  
SRR17520069.12621600  
SRR17520069.12621602  
SRR17520069.12621604  
SRR17520069.12621606  
SRR17520069.12621608  
SRR17520069.12630264  
SRR17520069.12630266  
SRR17520069.12630268  
SRR17520069.12630270  
SRR17520069.12630272  
SRR17520069.12630274  
SRR17520069.12630276  
SRR17520069.12630278  
SRR17520069.12630282  
SRR17520069.12630284  
SRR17520069.12630286  
SRR17520069.12638980  
SRR17520069.12638982  
SRR17520069.12638984  
SRR17520069.12638986  
SRR17520069.12638988  
SRR17520069.12638990  
SRR17520069.12638992  
SRR17520069.12638994  
SRR17520069.12638996  
SRR17520069.12638998

SRR17520069. 12639002  
SRR17520069. 12639004  
SRR17520069. 12639006  
SRR17520069. 12639008  
SRR17520069. 12639010  
SRR17520069. 12639012  
SRR17520069. 12639014  
SRR17520069. 12639016  
SRR17520069. 12639018  
SRR17520069. 12639020  
SRR17520069. 12639022  
SRR17520069. 12639024  
SRR17520069. 12639026  
SRR17520069. 12639758  
SRR17520069. 12639760  
SRR17520069. 12639762  
SRR17520069. 12639764  
SRR17520069. 12639766  
SRR17520069. 12639768  
SRR17520069. 12639770  
SRR17520069. 12639772  
SRR17520069. 12639774  
SRR17520069. 12639776  
SRR17520069. 12639778  
SRR17520069. 12639780  
SRR17520069. 12639782  
SRR17520069. 12639784  
SRR17520069. 12639786  
SRR17520069. 12639788  
SRR17520069. 12639790  
SRR17520069. 12639792  
SRR17520069. 12639794  
SRR17520069. 12639796  
SRR17520069. 12639798  
SRR17520069. 12639800  
SRR17520069. 12639802  
SRR17520069. 12639804  
SRR17520069. 12639806  
SRR17520069. 12639808  
SRR17520069. 12639810  
SRR17520069. 12639812  
SRR17520069. 12639814  
SRR17520069. 12639816  
SRR17520069. 12639818  
SRR17520069. 12639820  
SRR17520069. 12639822  
SRR17520069. 12639824



SRR17520069. 12639826  
SRR17520069. 12639828  
SRR17520069. 12639830  
SRR17520069. 12644679  
SRR17520069. 12644683  
SRR17520069. 12644687  
SRR17520069. 12644689  
SRR17520069. 12644691  
SRR17520069. 12644693  
SRR17520069. 12644695  
SRR17520069. 12644697  
SRR17520069. 12644699  
SRR17520069. 12644701  
SRR17520069. 12644703  
SRR17520069. 12644705  
SRR17520069. 12644707  
SRR17520069. 12644709  
SRR17520069. 12644711  
SRR17520069. 12644713  
SRR17520069. 12644715  
SRR17520069. 12644717  
SRR17520069. 12644719  
SRR17520069. 12644721  
SRR17520069. 12644723  
SRR17520069. 12644725  
SRR17520069. 12644727  
SRR17520069. 12644729  
SRR17520069. 12644731  
SRR17520069. 12644733  
SRR17520069. 12644735  
SRR17520069. 12644737  
SRR17520069. 12644739  
SRR17520069. 12644741  
SRR17520069. 12644743  
SRR17520069. 12644745  
SRR17520069. 12644747  
SRR17520069. 12644749  
SRR17520069. 12644751  
SRR17520069. 12644753  
SRR17520069. 12644755  
SRR17520069. 12644757  
SRR17520069. 12644761  
SRR17520069. 12644763  
SRR17520069. 12644765  
SRR17520069. 12644767  
SRR17520069. 12644769  
SRR17520069. 12644771

SRR17520069. 12644773  
SRR17520069. 12644775  
SRR17520069. 12644777  
SRR17520069. 12644779  
SRR17520069. 12644781  
SRR17520069. 12644783  
SRR17520069. 12644787  
SRR17520069. 12644789  
SRR17520069. 12644791  
SRR17520069. 12644793  
SRR17520069. 12644795  
SRR17520069. 12644797  
SRR17520069. 12644799  
SRR17520069. 12644801  
SRR17520069. 12644803  
SRR17520069. 12644805  
SRR17520069. 12644809  
SRR17520069. 12644811  
SRR17520069. 12644813  
SRR17520069. 12644815  
SRR17520069. 12644817  
SRR17520069. 12644819  
SRR17520069. 12644821  
SRR17520069. 12644823  
SRR17520069. 12644825  
SRR17520069. 12644827  
SRR17520069. 12644829  
SRR17520069. 12644831  
SRR17520069. 12644833  
SRR17520069. 12644835  
SRR17520069. 12644837  
SRR17520069. 12644839  
SRR17520069. 12644841  
SRR17520069. 12644843  
SRR17520069. 12644845  
SRR17520069. 12644847  
SRR17520069. 12644849  
SRR17520069. 12644851  
SRR17520069. 12644853  
SRR17520069. 12644857  
SRR17520069. 12644859  
SRR17520069. 12647852  
SRR17520069. 12647864  
SRR17520069. 12647866  
SRR17520069. 12647868  
SRR17520069. 12647870  
SRR17520069. 12647872

SRR17520069.12647874  
SRR17520069.12647876  
SRR17520069.12655044  
SRR17520069.12655046  
SRR17520069.12655048  
SRR17520069.12655050  
SRR17520069.12655052  
SRR17520069.12655054  
SRR17520069.12655056  
SRR17520069.12655062  
SRR17520069.12655064  
SRR17520069.12655066  
SRR17520069.12655068  
SRR17520069.12655070  
SRR17520069.12655072  
SRR17520069.12655074  
SRR17520069.12655076  
SRR17520069.12655078  
SRR17520069.12655080  
SRR17520069.12655082  
SRR17520069.12655084  
SRR17520069.12655088  
SRR17520069.12655090  
SRR17520069.12655092  
SRR17520069.12655094  
SRR17520069.12655096  
SRR17520069.12655100  
SRR17520069.12655102  
SRR17520069.12657588  
SRR17520069.12665795  
SRR17520069.12665797  
SRR17520069.12665799  
SRR17520069.12665801  
SRR17520069.12665803  
SRR17520069.12665805  
SRR17520069.12665807  
SRR17520069.12665809  
SRR17520069.12665811  
SRR17520069.12665813  
SRR17520069.12665815  
SRR17520069.12667027  
SRR17520069.12667029  
SRR17520069.12667031  
SRR17520069.12667033  
SRR17520069.12667035  
SRR17520069.12667037  
SRR17520069.12667039

SRR17520069. 12667041  
SRR17520069. 12667043  
SRR17520069. 12667045  
SRR17520069. 12667047  
SRR17520069. 12667049  
SRR17520069. 12667051  
SRR17520069. 12667053  
SRR17520069. 12667055  
SRR17520069. 12667057  
SRR17520069. 12667059  
SRR17520069. 12667061  
SRR17520069. 12667063  
SRR17520069. 12667065  
SRR17520069. 12667067  
SRR17520069. 12667069  
SRR17520069. 12667071  
SRR17520069. 12669259  
SRR17520069. 12674854  
SRR17520069. 12674856  
SRR17520069. 12674858  
SRR17520069. 12674860  
SRR17520069. 12678288  
SRR17520069. 12678290  
SRR17520069. 12680835  
SRR17520069. 12682049  
SRR17520069. 12682051  
SRR17520069. 12683724  
SRR17520069. 12683726  
SRR17520069. 12683728  
SRR17520069. 12683730  
SRR17520069. 12683732  
SRR17520069. 12683734  
SRR17520069. 12683736  
SRR17520069. 12683738  
SRR17520069. 12683740  
SRR17520069. 12683742  
SRR17520069. 12683744  
SRR17520069. 12683746  
SRR17520069. 12683748  
SRR17520069. 12683750  
SRR17520069. 12683752  
SRR17520069. 12683754  
SRR17520069. 12683756  
SRR17520069. 12683758  
SRR17520069. 12683760  
SRR17520069. 12683762  
SRR17520069. 12683764

SRR17520069. 12683766  
SRR17520069. 12683768  
SRR17520069. 12683770  
SRR17520069. 12683772  
SRR17520069. 12683774  
SRR17520069. 12683776  
SRR17520069. 12683778  
SRR17520069. 12683780  
SRR17520069. 12683782  
SRR17520069. 12683784  
SRR17520069. 12683786  
SRR17520069. 12685423  
SRR17520069. 12685425  
SRR17520069. 12685427  
SRR17520069. 12685429  
SRR17520069. 12685431  
SRR17520069. 12685433  
SRR17520069. 12685435  
SRR17520069. 12685437  
SRR17520069. 12685439  
SRR17520069. 12685441  
SRR17520069. 12685445  
SRR17520069. 12685447  
SRR17520069. 12685449  
SRR17520069. 12685451  
SRR17520069. 12685453  
SRR17520069. 12685455  
SRR17520069. 12685457  
SRR17520069. 12685459  
SRR17520069. 12688407  
SRR17520069. 12688409  
SRR17520069. 12688411  
SRR17520069. 12688415  
SRR17520069. 12688417  
SRR17520069. 12688419  
SRR17520069. 12688421  
SRR17520069. 12688423  
SRR17520069. 12688425  
SRR17520069. 12688427  
SRR17520069. 12688429  
SRR17520069. 12692673  
SRR17520069. 12692675  
SRR17520069. 12692677  
SRR17520069. 12692679  
SRR17520069. 12692681  
SRR17520069. 12692683  
SRR17520069. 12692687

SRR17520069. 12694997  
SRR17520069. 12696522  
SRR17520069. 12696524  
SRR17520069. 12696526  
SRR17520069. 12696528  
SRR17520069. 12696530  
SRR17520069. 12696532  
SRR17520069. 12696534  
SRR17520069. 12696536  
SRR17520069. 12696538  
SRR17520069. 12696540  
SRR17520069. 12697440  
SRR17520069. 12697442  
SRR17520069. 12697444  
SRR17520069. 12697446  
SRR17520069. 12697448  
SRR17520069. 12697450  
SRR17520069. 12697452  
SRR17520069. 12697454  
SRR17520069. 12697456  
SRR17520069. 12697458  
SRR17520069. 12697460  
SRR17520069. 12698796  
SRR17520069. 12698798  
SRR17520069. 12698800  
SRR17520069. 12698802  
SRR17520069. 12698804  
SRR17520069. 12698806  
SRR17520069. 12698808  
SRR17520069. 12698810  
SRR17520069. 12698812  
SRR17520069. 12698814  
SRR17520069. 12698816  
SRR17520069. 12698818  
SRR17520069. 12698820  
SRR17520069. 12698822  
SRR17520069. 12698824  
SRR17520069. 12698826  
SRR17520069. 12698828  
SRR17520069. 12698830  
SRR17520069. 12703146  
SRR17520069. 12703148  
SRR17520069. 12703150  
SRR17520069. 12703152  
SRR17520069. 12703154  
SRR17520069. 12703156  
SRR17520069. 12703158

SRR17520069. 12703160  
SRR17520069. 12703162  
SRR17520069. 12703164  
SRR17520069. 12703166  
SRR17520069. 12703168  
SRR17520069. 12703170  
SRR17520069. 12703172  
SRR17520069. 12703174  
SRR17520069. 12703176  
SRR17520069. 12703178  
SRR17520069. 12703180  
SRR17520069. 12703182  
SRR17520069. 12703184  
SRR17520069. 12703186  
SRR17520069. 12703188  
SRR17520069. 12703190  
SRR17520069. 12703192  
SRR17520069. 12703194  
SRR17520069. 12703196  
SRR17520069. 12703198  
SRR17520069. 12703200  
SRR17520069. 12703202  
SRR17520069. 12703204  
SRR17520069. 12703206  
SRR17520069. 12703208  
SRR17520069. 12703210  
SRR17520069. 12712745  
SRR17520069. 12716624  
SRR17520069. 12716626  
SRR17520069. 12716628  
SRR17520069. 12716630  
SRR17520069. 12716632  
SRR17520069. 12716634  
SRR17520069. 12716636  
SRR17520069. 12716638  
SRR17520069. 12716640  
SRR17520069. 12716642  
SRR17520069. 12716644  
SRR17520069. 12716646  
SRR17520069. 12716648  
SRR17520069. 12716650  
SRR17520069. 12716654  
SRR17520069. 12716656  
SRR17520069. 12716658  
SRR17520069. 12720347  
SRR17520069. 12720349  
SRR17520069. 12720351

SRR17520069. 12720353  
SRR17520069. 12720355  
SRR17520069. 12720357  
SRR17520069. 12720359  
SRR17520069. 12720361  
SRR17520069. 12720363  
SRR17520069. 12720365  
SRR17520069. 12720367  
SRR17520069. 12720369  
SRR17520069. 12720371  
SRR17520069. 12720373  
SRR17520069. 12720375  
SRR17520069. 12720377  
SRR17520069. 12720379  
SRR17520069. 12720381  
SRR17520069. 12720383  
SRR17520069. 12720385  
SRR17520069. 12720387  
SRR17520069. 12720389  
SRR17520069. 12720391  
SRR17520069. 12720393  
SRR17520069. 12720395  
SRR17520069. 12720397  
SRR17520069. 12720399  
SRR17520069. 12720401  
SRR17520069. 12720403  
SRR17520069. 12720405  
SRR17520069. 12720409  
SRR17520069. 12720411  
SRR17520069. 12720413  
SRR17520069. 12720415  
SRR17520069. 12720417  
SRR17520069. 12720419  
SRR17520069. 12720421  
SRR17520069. 12720423  
SRR17520069. 12721560  
SRR17520069. 12721562  
SRR17520069. 12721564  
SRR17520069. 12722396  
SRR17520069. 12722398  
SRR17520069. 12722400  
SRR17520069. 12722402  
SRR17520069. 12722404  
SRR17520069. 12722406  
SRR17520069. 12722408  
SRR17520069. 12722410  
SRR17520069. 12722412



SRR17520069. 12722414  
SRR17520069. 12722416  
SRR17520069. 12722418  
SRR17520069. 12722420  
SRR17520069. 12722422  
SRR17520069. 12722424  
SRR17520069. 12722426  
SRR17520069. 12726757  
SRR17520069. 12726759  
SRR17520069. 12726761  
SRR17520069. 12729912  
SRR17520069. 12729914  
SRR17520069. 12729916  
SRR17520069. 12729918  
SRR17520069. 12729920  
SRR17520069. 12729924  
SRR17520069. 12729926  
SRR17520069. 12729928  
SRR17520069. 12729930  
SRR17520069. 12729932  
SRR17520069. 12729934  
SRR17520069. 12729936  
SRR17520069. 12729938  
SRR17520069. 12729940  
SRR17520069. 12729942  
SRR17520069. 12729944  
SRR17520069. 12729946  
SRR17520069. 12729948  
SRR17520069. 12729950  
SRR17520069. 12729952  
SRR17520069. 12729954  
SRR17520069. 12731562  
SRR17520069. 12731564  
SRR17520069. 12731566  
SRR17520069. 12731568  
SRR17520069. 12731570  
SRR17520069. 12731572  
SRR17520069. 12731574  
SRR17520069. 12731576  
SRR17520069. 12731578  
SRR17520069. 12731580  
SRR17520069. 12731582  
SRR17520069. 12731584  
SRR17520069. 12731586  
SRR17520069. 12731588  
SRR17520069. 12731590  
SRR17520069. 12731592

SRR17520069. 12731594  
SRR17520069. 12731596  
SRR17520069. 12731598  
SRR17520069. 12731600  
SRR17520069. 12731610  
SRR17520069. 12735480  
SRR17520069. 12735482  
SRR17520069. 12735484  
SRR17520069. 12735486  
SRR17520069. 12735488  
SRR17520069. 12735490  
SRR17520069. 12735492  
SRR17520069. 12735494  
SRR17520069. 12735496  
SRR17520069. 12735498  
SRR17520069. 12735500  
SRR17520069. 12735502  
SRR17520069. 12735504  
SRR17520069. 12735506  
SRR17520069. 12735508  
SRR17520069. 12735512  
SRR17520069. 12735514  
SRR17520069. 12735516  
SRR17520069. 12735518  
SRR17520069. 12735520  
SRR17520069. 12735522  
SRR17520069. 12735524  
SRR17520069. 12735526  
SRR17520069. 12735528  
SRR17520069. 12735530  
SRR17520069. 12735532  
SRR17520069. 12735534  
SRR17520069. 12735536  
SRR17520069. 12735538  
SRR17520069. 12735540  
SRR17520069. 12735542  
SRR17520069. 12735544  
SRR17520069. 12735546  
SRR17520069. 12735548  
SRR17520069. 12735550  
SRR17520069. 12735552  
SRR17520069. 12735554  
SRR17520069. 12735556  
SRR17520069. 12735558  
SRR17520069. 12735560  
SRR17520069. 12735566  
SRR17520069. 12735568

SRR17520069. 12735770  
SRR17520069. 12736854  
SRR17520069. 12736856  
SRR17520069. 12736858  
SRR17520069. 12736860  
SRR17520069. 12736862  
SRR17520069. 12736864  
SRR17520069. 12736866  
SRR17520069. 12736868  
SRR17520069. 12736870  
SRR17520069. 12736874  
SRR17520069. 12736876  
SRR17520069. 12736878  
SRR17520069. 12736880  
SRR17520069. 12736882  
SRR17520069. 12736886  
SRR17520069. 12736888  
SRR17520069. 12736890  
SRR17520069. 12736892  
SRR17520069. 12736894  
SRR17520069. 12736896  
SRR17520069. 12736898  
SRR17520069. 12736900  
SRR17520069. 12736902  
SRR17520069. 12736904  
SRR17520069. 12736906  
SRR17520069. 12736912  
SRR17520069. 12736914  
SRR17520069. 12736916  
SRR17520069. 12736918  
SRR17520069. 12736920  
SRR17520069. 12736924  
SRR17520069. 12736926  
SRR17520069. 12736928  
SRR17520069. 12736933  
SRR17520069. 12736935  
SRR17520069. 12737436  
SRR17520069. 12737438  
SRR17520069. 12737440  
SRR17520069. 12737442  
SRR17520069. 12737444  
SRR17520069. 12737446  
SRR17520069. 12737448  
SRR17520069. 12740588  
SRR17520069. 12740590  
SRR17520069. 12740592  
SRR17520069. 12740594

SRR17520069. 12740598  
SRR17520069. 12744489  
SRR17520069. 12744491  
SRR17520069. 12744493  
SRR17520069. 12747400  
SRR17520069. 12747402  
SRR17520069. 12747404  
SRR17520069. 12747406  
SRR17520069. 12747408  
SRR17520069. 12747410  
SRR17520069. 12747412  
SRR17520069. 12747414  
SRR17520069. 12747416  
SRR17520069. 12747418  
SRR17520069. 12747420  
SRR17520069. 12747422  
SRR17520069. 12756966  
SRR17520069. 12757063  
SRR17520069. 12757067  
SRR17520069. 12757069  
SRR17520069. 12757071  
SRR17520069. 12757073  
SRR17520069. 12757075  
SRR17520069. 12757077  
SRR17520069. 12757079  
SRR17520069. 12757081  
SRR17520069. 12757083  
SRR17520069. 12757085  
SRR17520069. 12757087  
SRR17520069. 12757089  
SRR17520069. 12757091  
SRR17520069. 12757093  
SRR17520069. 12757095  
SRR17520069. 12757097  
SRR17520069. 12757099  
SRR17520069. 12757101  
SRR17520069. 12757103  
SRR17520069. 12757105  
SRR17520069. 12757107  
SRR17520069. 12757109  
SRR17520069. 12758407  
SRR17520069. 12759109  
SRR17520069. 12759111  
SRR17520069. 12759113  
SRR17520069. 12759117  
SRR17520069. 12759119  
SRR17520069. 12759121

SRR17520069. 12759123  
SRR17520069. 12759125  
SRR17520069. 12759131  
SRR17520069. 12760006  
SRR17520069. 12760008  
SRR17520069. 12760010  
SRR17520069. 12760012  
SRR17520069. 12760014  
SRR17520069. 12760016  
SRR17520069. 12760018  
SRR17520069. 12760020  
SRR17520069. 12760022  
SRR17520069. 12760024  
SRR17520069. 12760026  
SRR17520069. 12760898  
SRR17520069. 12760900  
SRR17520069. 12760902  
SRR17520069. 12760904  
SRR17520069. 12760906  
SRR17520069. 12762817  
SRR17520069. 12762819  
SRR17520069. 12762821  
SRR17520069. 12762823  
SRR17520069. 12762825  
SRR17520069. 12762827  
SRR17520069. 12762829  
SRR17520069. 12762831  
SRR17520069. 12762833  
SRR17520069. 12762835  
SRR17520069. 12762841  
SRR17520069. 12762843  
SRR17520069. 12762845  
SRR17520069. 12767097  
SRR17520069. 12767103  
SRR17520069. 12768352  
SRR17520069. 12768354  
SRR17520069. 12768356  
SRR17520069. 12768358  
SRR17520069. 12768360  
SRR17520069. 12768362  
SRR17520069. 12768364  
SRR17520069. 12768366  
SRR17520069. 12768368  
SRR17520069. 12768370  
SRR17520069. 12768372  
SRR17520069. 12768374  
SRR17520069. 12768376

SRR17520069. 12768378  
SRR17520069. 12768380  
SRR17520069. 12768382  
SRR17520069. 12768384  
SRR17520069. 12768386  
SRR17520069. 12768390  
SRR17520069. 12768392  
SRR17520069. 12768394  
SRR17520069. 12768396  
SRR17520069. 12768398  
SRR17520069. 12768400  
SRR17520069. 12768402  
SRR17520069. 12768404  
SRR17520069. 12768406  
SRR17520069. 12768408  
SRR17520069. 12768410  
SRR17520069. 12768412  
SRR17520069. 12768414  
SRR17520069. 12768416  
SRR17520069. 12768418  
SRR17520069. 12768420  
SRR17520069. 12768422  
SRR17520069. 12768424  
SRR17520069. 12768426  
SRR17520069. 12768428  
SRR17520069. 12768430  
SRR17520069. 12768434  
SRR17520069. 12768436  
SRR17520069. 12768438  
SRR17520069. 12768440  
SRR17520069. 12768442  
SRR17520069. 12768444  
SRR17520069. 12768446  
SRR17520069. 12768448  
SRR17520069. 12768450  
SRR17520069. 12768452  
SRR17520069. 12768456  
SRR17520069. 12768458  
SRR17520069. 12768460  
SRR17520069. 12768462  
SRR17520069. 12768464  
SRR17520069. 12768466  
SRR17520069. 12768468  
SRR17520069. 12768470  
SRR17520069. 12768472  
SRR17520069. 12768474  
SRR17520069. 12768476

SRR17520069. 12768478  
SRR17520069. 12768480  
SRR17520069. 12768482  
SRR17520069. 12768484  
SRR17520069. 12768486  
SRR17520069. 12768488  
SRR17520069. 12768490  
SRR17520069. 12768492  
SRR17520069. 12768494  
SRR17520069. 12768496  
SRR17520069. 12768498  
SRR17520069. 12768500  
SRR17520069. 12768502  
SRR17520069. 12768504  
SRR17520069. 12768506  
SRR17520069. 12768508  
SRR17520069. 12768510  
SRR17520069. 12768512  
SRR17520069. 12768514  
SRR17520069. 12768516  
SRR17520069. 12770479  
SRR17520069. 12770481  
SRR17520069. 12770483  
SRR17520069. 12770485  
SRR17520069. 12770487  
SRR17520069. 12770489  
SRR17520069. 12770491  
SRR17520069. 12778267  
SRR17520069. 12778269  
SRR17520069. 12778271  
SRR17520069. 12784245  
SRR17520069. 12784247  
SRR17520069. 12784249  
SRR17520069. 12784251  
SRR17520069. 12784253  
SRR17520069. 12784255  
SRR17520069. 12784257  
SRR17520069. 12784259  
SRR17520069. 12784261  
SRR17520069. 12784263  
SRR17520069. 12784265  
SRR17520069. 12784267  
SRR17520069. 12784269  
SRR17520069. 12784271  
SRR17520069. 12784273  
SRR17520069. 12784275  
SRR17520069. 12784277

SRR17520069. 12784279  
SRR17520069. 12784281  
SRR17520069. 12784283  
SRR17520069. 12784285  
SRR17520069. 12784287  
SRR17520069. 12784289  
SRR17520069. 12784291  
SRR17520069. 12784293  
SRR17520069. 12784295  
SRR17520069. 12784297  
SRR17520069. 12784299  
SRR17520069. 12784301  
SRR17520069. 12784303  
SRR17520069. 12784305  
SRR17520069. 12784307  
SRR17520069. 12784309  
SRR17520069. 12784311  
SRR17520069. 12784313  
SRR17520069. 12784315  
SRR17520069. 12784317  
SRR17520069. 12784319  
SRR17520069. 12784321  
SRR17520069. 12784323  
SRR17520069. 12784325  
SRR17520069. 12784327  
SRR17520069. 12784329  
SRR17520069. 12784331  
SRR17520069. 12784333  
SRR17520069. 12784335  
SRR17520069. 12784337  
SRR17520069. 12784339  
SRR17520069. 12785041  
SRR17520069. 12785043  
SRR17520069. 12785047  
SRR17520069. 12785049  
SRR17520069. 12785053  
SRR17520069. 12785359  
SRR17520069. 12785361  
SRR17520069. 12785363  
SRR17520069. 12785365  
SRR17520069. 12785367  
SRR17520069. 12785369  
SRR17520069. 12785371  
SRR17520069. 12785373  
SRR17520069. 12785375  
SRR17520069. 12785377  
SRR17520069. 12785379



SRR17520069. 12785381  
SRR17520069. 12785383  
SRR17520069. 12785385  
SRR17520069. 12785387  
SRR17520069. 12785389  
SRR17520069. 12785393  
SRR17520069. 12785395  
SRR17520069. 12785397  
SRR17520069. 12785399  
SRR17520069. 12785401  
SRR17520069. 12785403  
SRR17520069. 12785405  
SRR17520069. 12785407  
SRR17520069. 12785409  
SRR17520069. 12785411  
SRR17520069. 12785413  
SRR17520069. 12785415  
SRR17520069. 12785417  
SRR17520069. 12785419  
SRR17520069. 12785421  
SRR17520069. 12785423  
SRR17520069. 12785425  
SRR17520069. 12785427  
SRR17520069. 12785429  
SRR17520069. 12787684  
SRR17520069. 12787688  
SRR17520069. 12787692  
SRR17520069. 12787697  
SRR17520069. 12787699  
SRR17520069. 12787701  
SRR17520069. 12787703  
SRR17520069. 12787705  
SRR17520069. 12787707  
SRR17520069. 12787709  
SRR17520069. 12787711  
SRR17520069. 12787713  
SRR17520069. 12787715  
SRR17520069. 12787717  
SRR17520069. 12787719  
SRR17520069. 12787721  
SRR17520069. 12787879  
SRR17520069. 12787881  
SRR17520069. 12787883  
SRR17520069. 12787885  
SRR17520069. 12787887  
SRR17520069. 12787889  
SRR17520069. 12787891

SRR17520069. 12787893  
SRR17520069. 12787895  
SRR17520069. 12787897  
SRR17520069. 12787899  
SRR17520069. 12787901  
SRR17520069. 12787903  
SRR17520069. 12787905  
SRR17520069. 12787907  
SRR17520069. 12787911  
SRR17520069. 12787913  
SRR17520069. 12787915  
SRR17520069. 12787917  
SRR17520069. 12787919  
SRR17520069. 12787921  
SRR17520069. 12787929  
SRR17520069. 12787931  
SRR17520069. 12787933  
SRR17520069. 12787935  
SRR17520069. 12787937  
SRR17520069. 12787939  
SRR17520069. 12787941  
SRR17520069. 12797186  
SRR17520069. 12797188  
SRR17520069. 12797190  
SRR17520069. 12797192  
SRR17520069. 12797194  
SRR17520069. 12797196  
SRR17520069. 12797198  
SRR17520069. 12797200  
SRR17520069. 12797202  
SRR17520069. 12802871  
SRR17520069. 12802898  
SRR17520069. 12807853  
SRR17520069. 12814970  
SRR17520069. 12820026  
SRR17520069. 12822312  
SRR17520069. 12822314  
SRR17520069. 12822318  
SRR17520069. 12822320  
SRR17520069. 12822322  
SRR17520069. 12822324  
SRR17520069. 12822326  
SRR17520069. 12822328  
SRR17520069. 12822330  
SRR17520069. 12822332  
SRR17520069. 12822334  
SRR17520069. 12822336

SRR17520069.12822338  
SRR17520069.12825553  
SRR17520069.12825555  
SRR17520069.12825557  
SRR17520069.12825559  
SRR17520069.12825561  
SRR17520069.12825563  
SRR17520069.12825565  
SRR17520069.12825567  
SRR17520069.12825569  
SRR17520069.12825571  
SRR17520069.12825573  
SRR17520069.12825575  
SRR17520069.12825577  
SRR17520069.12825579  
SRR17520069.12825581  
SRR17520069.12825583  
SRR17520069.12829806  
SRR17520069.12829808  
SRR17520069.12829810  
SRR17520069.12836004  
SRR17520069.12836006  
SRR17520069.12836008  
SRR17520069.12836010  
SRR17520069.12836012  
SRR17520069.12836014  
SRR17520069.12836016  
SRR17520069.12836018  
SRR17520069.12836020  
SRR17520069.12836022  
SRR17520069.12836024  
SRR17520069.12837106  
SRR17520069.12837108  
SRR17520069.12837110  
SRR17520069.12837112  
SRR17520069.12837114  
SRR17520069.12837116  
SRR17520069.12837118  
SRR17520069.12837120  
SRR17520069.12837122  
SRR17520069.12837124  
SRR17520069.12837126  
SRR17520069.12837128  
SRR17520069.12837130  
SRR17520069.12837132  
SRR17520069.12837134  
SRR17520069.12837136

SRR17520069. 12837138  
SRR17520069. 12837140  
SRR17520069. 12837142  
SRR17520069. 12837144  
SRR17520069. 12837146  
SRR17520069. 12837148  
SRR17520069. 12837150  
SRR17520069. 12837152  
SRR17520069. 12837154  
SRR17520069. 12837156  
SRR17520069. 12837158  
SRR17520069. 12837160  
SRR17520069. 12837162  
SRR17520069. 12837164  
SRR17520069. 12837166  
SRR17520069. 12837168  
SRR17520069. 12837170  
SRR17520069. 12837174  
SRR17520069. 12837176  
SRR17520069. 12837178  
SRR17520069. 12837180  
SRR17520069. 12837182  
SRR17520069. 12837184  
SRR17520069. 12837186  
SRR17520069. 12837188  
SRR17520069. 12837190  
SRR17520069. 12837192  
SRR17520069. 12837194  
SRR17520069. 12837196  
SRR17520069. 12837198  
SRR17520069. 12837200  
SRR17520069. 12837202  
SRR17520069. 12837204  
SRR17520069. 12837206  
SRR17520069. 12837208  
SRR17520069. 12837210  
SRR17520069. 12837212  
SRR17520069. 12837214  
SRR17520069. 12837216  
SRR17520069. 12837218  
SRR17520069. 12837220  
SRR17520069. 12837222  
SRR17520069. 12837224  
SRR17520069. 12837226  
SRR17520069. 12837228  
SRR17520069. 12837230  
SRR17520069. 12837232

SRR17520069.12837234  
SRR17520069.12837236  
SRR17520069.12837238  
SRR17520069.12837240  
SRR17520069.12837242  
SRR17520069.12837244  
SRR17520069.12837246  
SRR17520069.12837248  
SRR17520069.12837250  
SRR17520069.12837252  
SRR17520069.12837254  
SRR17520069.12837256  
SRR17520069.12837258  
SRR17520069.12837260  
SRR17520069.12837262  
SRR17520069.12837264  
SRR17520069.12837266  
SRR17520069.12837268  
SRR17520069.12837270  
SRR17520069.12837272  
SRR17520069.12837274  
SRR17520069.12837276  
SRR17520069.12837278  
SRR17520069.12837280  
SRR17520069.12837282  
SRR17520069.12837284  
SRR17520069.12837286  
SRR17520069.12837288  
SRR17520069.12837290  
SRR17520069.12837292  
SRR17520069.12837294  
SRR17520069.12837296  
SRR17520069.12837298  
SRR17520069.12837300  
SRR17520069.12837302  
SRR17520069.12837304  
SRR17520069.12837306  
SRR17520069.12837308  
SRR17520069.12837310  
SRR17520069.12837312  
SRR17520069.12837314  
SRR17520069.12837316  
SRR17520069.12837318  
SRR17520069.12841025  
SRR17520069.12841027  
SRR17520069.12841029  
SRR17520069.12841031

SRR17520069.12841033  
SRR17520069.12841035  
SRR17520069.12841037  
SRR17520069.12841039  
SRR17520069.12841041  
SRR17520069.12841043  
SRR17520069.12841045  
SRR17520069.12841047  
SRR17520069.12841049  
SRR17520069.12841051  
SRR17520069.12841053  
SRR17520069.12841055  
SRR17520069.12841057  
SRR17520069.12841059  
SRR17520069.12841061  
SRR17520069.12841063  
SRR17520069.12841065  
SRR17520069.12841067  
SRR17520069.12841069  
SRR17520069.12841071  
SRR17520069.12841073  
SRR17520069.12841075  
SRR17520069.12841077  
SRR17520069.12841079  
SRR17520069.12841081  
SRR17520069.12841083  
SRR17520069.12841085  
SRR17520069.12841087  
SRR17520069.12841089  
SRR17520069.12841091  
SRR17520069.12841093  
SRR17520069.12841095  
SRR17520069.12841097  
SRR17520069.12841099  
SRR17520069.12841101  
SRR17520069.12841103  
SRR17520069.12841105  
SRR17520069.12841107  
SRR17520069.12841109  
SRR17520069.12841111  
SRR17520069.12841113  
SRR17520069.12841115  
SRR17520069.12841117  
SRR17520069.12841119  
SRR17520069.12841121  
SRR17520069.12841123  
SRR17520069.12841125

SRR17520069.12841127  
SRR17520069.12841129  
SRR17520069.12841131  
SRR17520069.12841133  
SRR17520069.12841135  
SRR17520069.12841137  
SRR17520069.12841139  
SRR17520069.12841141  
SRR17520069.12841143  
SRR17520069.12841145  
SRR17520069.12841147  
SRR17520069.12850006  
SRR17520069.12850008  
SRR17520069.12850010  
SRR17520069.12850012  
SRR17520069.12852843  
SRR17520069.12852845  
SRR17520069.12852847  
SRR17520069.12852849  
SRR17520069.12852851  
SRR17520069.12852853  
SRR17520069.12852855  
SRR17520069.12852857  
SRR17520069.12854020  
SRR17520069.12854022  
SRR17520069.12854024  
SRR17520069.12854026  
SRR17520069.12854028  
SRR17520069.12854286  
SRR17520069.12854288  
SRR17520069.12854937  
SRR17520069.12854939  
SRR17520069.12854941  
SRR17520069.12854945  
SRR17520069.12854947  
SRR17520069.12854949  
SRR17520069.12854951  
SRR17520069.12854953  
SRR17520069.12860897  
SRR17520069.12860899  
SRR17520069.12860901  
SRR17520069.12860903  
SRR17520069.12860905  
SRR17520069.12860907  
SRR17520069.12860913  
SRR17520069.12860917  
SRR17520069.12871671

SRR17520069.12871673  
SRR17520069.12871677  
SRR17520069.12871679  
SRR17520069.12871681  
SRR17520069.12871683  
SRR17520069.12871685  
SRR17520069.12871687  
SRR17520069.12871689  
SRR17520069.12871691  
SRR17520069.12871693  
SRR17520069.12880128  
SRR17520069.12880130  
SRR17520069.12880132  
SRR17520069.12880134  
SRR17520069.12880136  
SRR17520069.12880138  
SRR17520069.12880140  
SRR17520069.12880142  
SRR17520069.12880144  
SRR17520069.12880146  
SRR17520069.12880148  
SRR17520069.12880150  
SRR17520069.12880152  
SRR17520069.12880154  
SRR17520069.12880156  
SRR17520069.12880158  
SRR17520069.12880160  
SRR17520069.12885771  
SRR17520069.12885773  
SRR17520069.12885775  
SRR17520069.12885777  
SRR17520069.12885781  
SRR17520069.12885783  
SRR17520069.12885785  
SRR17520069.12885787  
SRR17520069.12885793  
SRR17520069.12885795  
SRR17520069.12885797  
SRR17520069.12885799  
SRR17520069.12885801  
SRR17520069.12885805  
SRR17520069.12885807  
SRR17520069.12885809  
SRR17520069.12885813  
SRR17520069.12885815  
SRR17520069.12885817  
SRR17520069.12885821



SRR17520069.12885823  
SRR17520069.12885825  
SRR17520069.12885827  
SRR17520069.12885829  
SRR17520069.12885831  
SRR17520069.12888733  
SRR17520069.12890449  
SRR17520069.12890451  
SRR17520069.12890453  
SRR17520069.12892589  
SRR17520069.12896346  
SRR17520069.12896348  
SRR17520069.12896350  
SRR17520069.12896352  
SRR17520069.12896354  
SRR17520069.12896356  
SRR17520069.12896358  
SRR17520069.12896360  
SRR17520069.12896362  
SRR17520069.12896364  
SRR17520069.12896366  
SRR17520069.12896368  
SRR17520069.12896370  
SRR17520069.12896372  
SRR17520069.12896374  
SRR17520069.12896376  
SRR17520069.12896378  
SRR17520069.12896380  
SRR17520069.12896382  
SRR17520069.12896384  
SRR17520069.12896386  
SRR17520069.12896388  
SRR17520069.12896390  
SRR17520069.12896392  
SRR17520069.12896394  
SRR17520069.12896396  
SRR17520069.12896398  
SRR17520069.12896400  
SRR17520069.12896402  
SRR17520069.12896404  
SRR17520069.12896406  
SRR17520069.12896408  
SRR17520069.12896410  
SRR17520069.12896412  
SRR17520069.12896414  
SRR17520069.12896416  
SRR17520069.12896418

SRR17520069.12896420  
SRR17520069.12896422  
SRR17520069.12896424  
SRR17520069.12896426  
SRR17520069.12896428  
SRR17520069.12896430  
SRR17520069.12896432  
SRR17520069.12896434  
SRR17520069.12896436  
SRR17520069.12897112  
SRR17520069.12897114  
SRR17520069.12897116  
SRR17520069.12897118  
SRR17520069.12897120  
SRR17520069.12897122  
SRR17520069.12897124  
SRR17520069.12897126  
SRR17520069.12897128  
SRR17520069.12897130  
SRR17520069.12897132  
SRR17520069.12897134  
SRR17520069.12897136  
SRR17520069.12897138  
SRR17520069.12897140  
SRR17520069.12897144  
SRR17520069.12897146  
SRR17520069.12897148  
SRR17520069.12897150  
SRR17520069.12897152  
SRR17520069.12897154  
SRR17520069.12899080  
SRR17520069.12899082  
SRR17520069.12899084  
SRR17520069.12899086  
SRR17520069.12899088  
SRR17520069.12899090  
SRR17520069.12899092  
SRR17520069.12899094  
SRR17520069.12899096  
SRR17520069.12899098  
SRR17520069.12905125  
SRR17520069.12905127  
SRR17520069.12905129  
SRR17520069.12905131  
SRR17520069.12905133  
SRR17520069.12905135  
SRR17520069.12905256

SRR17520069. 12905258  
SRR17520069. 12905260  
SRR17520069. 12905262  
SRR17520069. 12905264  
SRR17520069. 12905266  
SRR17520069. 12905268  
SRR17520069. 12905270  
SRR17520069. 12905272  
SRR17520069. 12905274  
SRR17520069. 12905276  
SRR17520069. 12905278  
SRR17520069. 12905280  
SRR17520069. 12905282  
SRR17520069. 12905284  
SRR17520069. 12905286  
SRR17520069. 12905288  
SRR17520069. 12905290  
SRR17520069. 12905292  
SRR17520069. 12905294  
SRR17520069. 12905296  
SRR17520069. 12905298  
SRR17520069. 12905300  
SRR17520069. 12905302  
SRR17520069. 12905304  
SRR17520069. 12905306  
SRR17520069. 12905308  
SRR17520069. 12905310  
SRR17520069. 12905312  
SRR17520069. 12906918  
SRR17520069. 12906920  
SRR17520069. 12906922  
SRR17520069. 12906924  
SRR17520069. 12906926  
SRR17520069. 12906928  
SRR17520069. 12906930  
SRR17520069. 12906932  
SRR17520069. 12906934  
SRR17520069. 12906936  
SRR17520069. 12906938  
SRR17520069. 12910360  
SRR17520069. 12910362  
SRR17520069. 12910364  
SRR17520069. 12911087  
SRR17520069. 12911089  
SRR17520069. 12911091  
SRR17520069. 12911093  
SRR17520069. 12911095

SRR17520069. 12911097  
SRR17520069. 12911099  
SRR17520069. 12911101  
SRR17520069. 12911103  
SRR17520069. 12911105  
SRR17520069. 12912935  
SRR17520069. 12912937  
SRR17520069. 12912939  
SRR17520069. 12912941  
SRR17520069. 12912943  
SRR17520069. 12912945  
SRR17520069. 12912947  
SRR17520069. 12912949  
SRR17520069. 12912951  
SRR17520069. 12912955  
SRR17520069. 12912957  
SRR17520069. 12912959  
SRR17520069. 12912961  
SRR17520069. 12918047  
SRR17520069. 12918049  
SRR17520069. 12918051  
SRR17520069. 12918053  
SRR17520069. 12918055  
SRR17520069. 12918057  
SRR17520069. 12918059  
SRR17520069. 12918061  
SRR17520069. 12919661  
SRR17520069. 12919663  
SRR17520069. 12919665  
SRR17520069. 12919667  
SRR17520069. 12919669  
SRR17520069. 12919671  
SRR17520069. 12919673  
SRR17520069. 12919675  
SRR17520069. 12919677  
SRR17520069. 12919679  
SRR17520069. 12919681  
SRR17520069. 12919683  
SRR17520069. 12919685  
SRR17520069. 12919687  
SRR17520069. 12919689  
SRR17520069. 12919691  
SRR17520069. 12919693  
SRR17520069. 12920390  
SRR17520069. 12920392  
SRR17520069. 12921373  
SRR17520069. 12921375

SRR17520069. 12921377  
SRR17520069. 12921379  
SRR17520069. 12921381  
SRR17520069. 12921383  
SRR17520069. 12921385  
SRR17520069. 12921387  
SRR17520069. 12921389  
SRR17520069. 12921391  
SRR17520069. 12921393  
SRR17520069. 12921395  
SRR17520069. 12921397  
SRR17520069. 12921399  
SRR17520069. 12921403  
SRR17520069. 12921405  
SRR17520069. 12921407  
SRR17520069. 12921409  
SRR17520069. 12921411  
SRR17520069. 12921413  
SRR17520069. 12921831  
SRR17520069. 12921835  
SRR17520069. 12921837  
SRR17520069. 12921841  
SRR17520069. 12921843  
SRR17520069. 12921847  
SRR17520069. 12921851  
SRR17520069. 12921855  
SRR17520069. 12921857  
SRR17520069. 12921859  
SRR17520069. 12923524  
SRR17520069. 12927538  
SRR17520069. 12927542  
SRR17520069. 12927544  
SRR17520069. 12927546  
SRR17520069. 12927548  
SRR17520069. 12927550  
SRR17520069. 12927552  
SRR17520069. 12927554  
SRR17520069. 12927556  
SRR17520069. 12927558  
SRR17520069. 12927560  
SRR17520069. 12927562  
SRR17520069. 12927817  
SRR17520069. 12927819  
SRR17520069. 12927821  
SRR17520069. 12927823  
SRR17520069. 12927825  
SRR17520069. 12932294

SRR17520069.12932298  
SRR17520069.12932300  
SRR17520069.12932302  
SRR17520069.12932304  
SRR17520069.12932308  
SRR17520069.12932310  
SRR17520069.12932314  
SRR17520069.12932316  
SRR17520069.12932320  
SRR17520069.12932322  
SRR17520069.12932324  
SRR17520069.12932326  
SRR17520069.12932328  
SRR17520069.12932330  
SRR17520069.12932332  
SRR17520069.12932334  
SRR17520069.12932336  
SRR17520069.12932338  
SRR17520069.12932340  
SRR17520069.12932342  
SRR17520069.12932344  
SRR17520069.12932346  
SRR17520069.12932348  
SRR17520069.12932350  
SRR17520069.12941812  
SRR17520069.12941814  
SRR17520069.12941816  
SRR17520069.12941818  
SRR17520069.12941820  
SRR17520069.12941822  
SRR17520069.12941824  
SRR17520069.12941828  
SRR17520069.12941830  
SRR17520069.12941832  
SRR17520069.12941834  
SRR17520069.12941836  
SRR17520069.12941838  
SRR17520069.12941840  
SRR17520069.12941842  
SRR17520069.12941844  
SRR17520069.12941846  
SRR17520069.12941848  
SRR17520069.12944089  
SRR17520069.12944091  
SRR17520069.12944093  
SRR17520069.12944095  
SRR17520069.12944097

SRR17520069.12944099  
SRR17520069.12944101  
SRR17520069.12944103  
SRR17520069.12944105  
SRR17520069.12944107  
SRR17520069.12944109  
SRR17520069.12944111  
SRR17520069.12944113  
SRR17520069.12944115  
SRR17520069.12944117  
SRR17520069.12944119  
SRR17520069.12944121  
SRR17520069.12944123  
SRR17520069.12944127  
SRR17520069.12944129  
SRR17520069.12944131  
SRR17520069.12944133  
SRR17520069.12944135  
SRR17520069.12944137  
SRR17520069.12944139  
SRR17520069.12944141  
SRR17520069.12944143  
SRR17520069.12944145  
SRR17520069.12944147  
SRR17520069.12944149  
SRR17520069.12944151  
SRR17520069.12944153  
SRR17520069.12944155  
SRR17520069.12944157  
SRR17520069.12944159  
SRR17520069.12944161  
SRR17520069.12944163  
SRR17520069.12944165  
SRR17520069.12944167  
SRR17520069.12944169  
SRR17520069.12944171  
SRR17520069.12944173  
SRR17520069.12944175  
SRR17520069.12944177  
SRR17520069.12944179  
SRR17520069.12944181  
SRR17520069.12944183  
SRR17520069.12944185  
SRR17520069.12944187  
SRR17520069.12944189  
SRR17520069.12944191  
SRR17520069.12944193

SRR17520069. 12944195  
SRR17520069. 12944197  
SRR17520069. 12944199  
SRR17520069. 12944201  
SRR17520069. 12944203  
SRR17520069. 12944205  
SRR17520069. 12948222  
SRR17520069. 12948224  
SRR17520069. 12948226  
SRR17520069. 12948228  
SRR17520069. 12948230  
SRR17520069. 12948232  
SRR17520069. 12948234  
SRR17520069. 12948236  
SRR17520069. 12948238  
SRR17520069. 12948240  
SRR17520069. 12948242  
SRR17520069. 12948244  
SRR17520069. 12948246  
SRR17520069. 12948248  
SRR17520069. 12948250  
SRR17520069. 12948252  
SRR17520069. 12948254  
SRR17520069. 12948256  
SRR17520069. 12948258  
SRR17520069. 12948260  
SRR17520069. 12948262  
SRR17520069. 12948264  
SRR17520069. 12948266  
SRR17520069. 12948268  
SRR17520069. 12948270  
SRR17520069. 12948272  
SRR17520069. 12948274  
SRR17520069. 12948276  
SRR17520069. 12948278  
SRR17520069. 12948280  
SRR17520069. 12948282  
SRR17520069. 12952552  
SRR17520069. 12952554  
SRR17520069. 12952556  
SRR17520069. 12952558  
SRR17520069. 12953235  
SRR17520069. 12953237  
SRR17520069. 12953239  
SRR17520069. 12953241  
SRR17520069. 12953243  
SRR17520069. 12953245



SRR17520069. 12953247  
SRR17520069. 12953249  
SRR17520069. 12953251  
SRR17520069. 12953253  
SRR17520069. 12953255  
SRR17520069. 12953257  
SRR17520069. 12953259  
SRR17520069. 12953261  
SRR17520069. 12953265  
SRR17520069. 12953267  
SRR17520069. 12953269  
SRR17520069. 12953271  
SRR17520069. 12953273  
SRR17520069. 12953275  
SRR17520069. 12953277  
SRR17520069. 12953279  
SRR17520069. 12953281  
SRR17520069. 12953283  
SRR17520069. 12953285  
SRR17520069. 12953287  
SRR17520069. 12953289  
SRR17520069. 12953291  
SRR17520069. 12953293  
SRR17520069. 12953295  
SRR17520069. 12953297  
SRR17520069. 12953299  
SRR17520069. 12953301  
SRR17520069. 12953303  
SRR17520069. 12953305  
SRR17520069. 12953307  
SRR17520069. 12953309  
SRR17520069. 12957782  
SRR17520069. 12957784  
SRR17520069. 12957786  
SRR17520069. 12957788  
SRR17520069. 12957790  
SRR17520069. 12957792  
SRR17520069. 12957794  
SRR17520069. 12957798  
SRR17520069. 12957800  
SRR17520069. 12957802  
SRR17520069. 12957804  
SRR17520069. 12957806  
SRR17520069. 12957808  
SRR17520069. 12957810  
SRR17520069. 12957812  
SRR17520069. 12957814

SRR17520069. 12957816  
SRR17520069. 12957818  
SRR17520069. 12957820  
SRR17520069. 12957822  
SRR17520069. 12957824  
SRR17520069. 12957826  
SRR17520069. 12957828  
SRR17520069. 12957830  
SRR17520069. 12957832  
SRR17520069. 12957834  
SRR17520069. 12957836  
SRR17520069. 12957838  
SRR17520069. 12957842  
SRR17520069. 12957844  
SRR17520069. 12957846  
SRR17520069. 12957848  
SRR17520069. 12957850  
SRR17520069. 12959273  
SRR17520069. 12959275  
SRR17520069. 12959277  
SRR17520069. 12959279  
SRR17520069. 12959281  
SRR17520069. 12959283  
SRR17520069. 12959285  
SRR17520069. 12959287  
SRR17520069. 12959289  
SRR17520069. 12959291  
SRR17520069. 12959293  
SRR17520069. 12959295  
SRR17520069. 12959297  
SRR17520069. 12959299  
SRR17520069. 12959301  
SRR17520069. 12959303  
SRR17520069. 12959305  
SRR17520069. 12959309  
SRR17520069. 12959311  
SRR17520069. 12959315  
SRR17520069. 12959317  
SRR17520069. 12959319  
SRR17520069. 12959321  
SRR17520069. 12959323  
SRR17520069. 12959325  
SRR17520069. 12959327  
SRR17520069. 12959329  
SRR17520069. 12959331  
SRR17520069. 12959333  
SRR17520069. 12959335

SRR17520069.12959337  
SRR17520069.12959339  
SRR17520069.12959341  
SRR17520069.12959343  
SRR17520069.12959345  
SRR17520069.12959349  
SRR17520069.12959351  
SRR17520069.12959353  
SRR17520069.12959355  
SRR17520069.12959357  
SRR17520069.12959359  
SRR17520069.12959361  
SRR17520069.12959363  
SRR17520069.12959365  
SRR17520069.12959367  
SRR17520069.12959371  
SRR17520069.12959373  
SRR17520069.12959375  
SRR17520069.12959377  
SRR17520069.12959379  
SRR17520069.12959381  
SRR17520069.12959383  
SRR17520069.12959385  
SRR17520069.12959387  
SRR17520069.12959389  
SRR17520069.12959391  
SRR17520069.12959393  
SRR17520069.12959395  
SRR17520069.12959397  
SRR17520069.12959791  
SRR17520069.12959793  
SRR17520069.12959795  
SRR17520069.12959797  
SRR17520069.12959799  
SRR17520069.12959805  
SRR17520069.12959807  
SRR17520069.12959811  
SRR17520069.12959813  
SRR17520069.12959815  
SRR17520069.12959817  
SRR17520069.12959819  
SRR17520069.12959821  
SRR17520069.12963303  
SRR17520069.12963305  
SRR17520069.12963307  
SRR17520069.12963309  
SRR17520069.12963311

SRR17520069. 12963313  
SRR17520069. 12963317  
SRR17520069. 12963319  
SRR17520069. 12964182  
SRR17520069. 12964184  
SRR17520069. 12964186  
SRR17520069. 12964188  
SRR17520069. 12964190  
SRR17520069. 12964192  
SRR17520069. 12964194  
SRR17520069. 12964196  
SRR17520069. 12964198  
SRR17520069. 12964200  
SRR17520069. 12964202  
SRR17520069. 12964204  
SRR17520069. 12964206  
SRR17520069. 12964208  
SRR17520069. 12964210  
SRR17520069. 12964212  
SRR17520069. 12964214  
SRR17520069. 12964216  
SRR17520069. 12964218  
SRR17520069. 12964220  
SRR17520069. 12964222  
SRR17520069. 12964224  
SRR17520069. 12964226  
SRR17520069. 12964228  
SRR17520069. 12964232  
SRR17520069. 12964234  
SRR17520069. 12964236  
SRR17520069. 12965412  
SRR17520069. 12965416  
SRR17520069. 12965418  
SRR17520069. 12965420  
SRR17520069. 12965422  
SRR17520069. 12965424  
SRR17520069. 12965426  
SRR17520069. 12969492  
SRR17520069. 12969494  
SRR17520069. 12969496  
SRR17520069. 12969498  
SRR17520069. 12969500  
SRR17520069. 12969502  
SRR17520069. 12969504  
SRR17520069. 12969506  
SRR17520069. 12969508  
SRR17520069. 12969510

SRR17520069.12969512  
SRR17520069.12969514  
SRR17520069.12969516  
SRR17520069.12969518  
SRR17520069.12978677  
SRR17520069.12978681  
SRR17520069.12978683  
SRR17520069.12978685  
SRR17520069.12978687  
SRR17520069.12978689  
SRR17520069.12978691  
SRR17520069.12978693  
SRR17520069.12978695  
SRR17520069.12978697  
SRR17520069.12985224  
SRR17520069.12985226  
SRR17520069.12985228  
SRR17520069.12985230  
SRR17520069.12985232  
SRR17520069.12985234  
SRR17520069.12985236  
SRR17520069.12985238  
SRR17520069.12985240  
SRR17520069.12985242  
SRR17520069.12985244  
SRR17520069.12985246  
SRR17520069.12985248  
SRR17520069.12985252  
SRR17520069.12985254  
SRR17520069.12985256  
SRR17520069.12985258  
SRR17520069.12985260  
SRR17520069.12985262  
SRR17520069.12985264  
SRR17520069.12985266  
SRR17520069.12985268  
SRR17520069.12985270  
SRR17520069.12985272  
SRR17520069.12985274  
SRR17520069.12985276  
SRR17520069.12985278  
SRR17520069.12985280  
SRR17520069.12985282  
SRR17520069.12985284  
SRR17520069.12985288  
SRR17520069.12985292  
SRR17520069.12985294

SRR17520069. 12985296  
SRR17520069. 12985298  
SRR17520069. 12985300  
SRR17520069. 12985304  
SRR17520069. 12985306  
SRR17520069. 12985308  
SRR17520069. 12985310  
SRR17520069. 12985312  
SRR17520069. 12985314  
SRR17520069. 12985316  
SRR17520069. 12985318  
SRR17520069. 12985320  
SRR17520069. 12985322  
SRR17520069. 12985324  
SRR17520069. 12985326  
SRR17520069. 12985328  
SRR17520069. 12985332  
SRR17520069. 12985334  
SRR17520069. 12985336  
SRR17520069. 12985338  
SRR17520069. 12987715  
SRR17520069. 12987719  
SRR17520069. 12987721  
SRR17520069. 12987723  
SRR17520069. 12987725  
SRR17520069. 12987727  
SRR17520069. 12987729  
SRR17520069. 12987731  
SRR17520069. 12987733  
SRR17520069. 12987735  
SRR17520069. 12987737  
SRR17520069. 12987739  
SRR17520069. 12987741  
SRR17520069. 12987743  
SRR17520069. 12987745  
SRR17520069. 12987747  
SRR17520069. 12987749  
SRR17520069. 12987753  
SRR17520069. 12987755  
SRR17520069. 12987757  
SRR17520069. 12995199  
SRR17520069. 12995201  
SRR17520069. 12995203  
SRR17520069. 12995205  
SRR17520069. 12995207  
SRR17520069. 12995209  
SRR17520069. 12995211

SRR17520069.12995213  
SRR17520069.13004246  
SRR17520069.13004248  
SRR17520069.13004250  
SRR17520069.13004252  
SRR17520069.13015679  
SRR17520069.13015681  
SRR17520069.13015683  
SRR17520069.13026439  
SRR17520069.13026441  
SRR17520069.13026443  
SRR17520069.13026445  
SRR17520069.13038429  
SRR17520069.13038431  
SRR17520069.13038433  
SRR17520069.13038435  
SRR17520069.13038437  
SRR17520069.13038439  
SRR17520069.13038441  
SRR17520069.13043680  
SRR17520069.13043682  
SRR17520069.13056283  
SRR17520069.13056285  
SRR17520069.13056287  
SRR17520069.13056289  
SRR17520069.13056293  
SRR17520069.13056295  
SRR17520069.13056297  
SRR17520069.13056299  
SRR17520069.13056301  
SRR17520069.13056303  
SRR17520069.13056305  
SRR17520069.13056307  
SRR17520069.13056309  
SRR17520069.13056311  
SRR17520069.13056313  
SRR17520069.13056315  
SRR17520069.13056317  
SRR17520069.13056319  
SRR17520069.13056321  
SRR17520069.13056323  
SRR17520069.13056325  
SRR17520069.13056327  
SRR17520069.13056329  
SRR17520069.13056331  
SRR17520069.13056333  
SRR17520069.13056335

SRR17520069. 13056337  
SRR17520069. 13056339  
SRR17520069. 13056341  
SRR17520069. 13056343  
SRR17520069. 13056345  
SRR17520069. 13056347  
SRR17520069. 13056349  
SRR17520069. 13056351  
SRR17520069. 13056353  
SRR17520069. 13056355  
SRR17520069. 13056357  
SRR17520069. 13056359  
SRR17520069. 13056361  
SRR17520069. 13056363  
SRR17520069. 13056365  
SRR17520069. 13056367  
SRR17520069. 13056369  
SRR17520069. 13056371  
SRR17520069. 13056373  
SRR17520069. 13056375  
SRR17520069. 13056377  
SRR17520069. 13056379  
SRR17520069. 13056383  
SRR17520069. 13056385  
SRR17520069. 13056387  
SRR17520069. 13056389  
SRR17520069. 13056391  
SRR17520069. 13056393  
SRR17520069. 13056395  
SRR17520069. 13056397  
SRR17520069. 13056401  
SRR17520069. 13056403  
SRR17520069. 13056405  
SRR17520069. 13056407  
SRR17520069. 13056409  
SRR17520069. 13056411  
SRR17520069. 13058134  
SRR17520069. 13058136  
SRR17520069. 13058138  
SRR17520069. 13058140  
SRR17520069. 13058142  
SRR17520069. 13058144  
SRR17520069. 13058146  
SRR17520069. 13058148  
SRR17520069. 13058150  
SRR17520069. 13058152  
SRR17520069. 13058154



SRR17520069. 13058156  
SRR17520069. 13058158  
SRR17520069. 13058160  
SRR17520069. 13058162  
SRR17520069. 13058164  
SRR17520069. 13058166  
SRR17520069. 13058168  
SRR17520069. 13058170  
SRR17520069. 13058172  
SRR17520069. 13058174  
SRR17520069. 13058176  
SRR17520069. 13058178  
SRR17520069. 13058182  
SRR17520069. 13058184  
SRR17520069. 13058186  
SRR17520069. 13058188  
SRR17520069. 13058190  
SRR17520069. 13058192  
SRR17520069. 13060877  
SRR17520069. 13060879  
SRR17520069. 13060881  
SRR17520069. 13060883  
SRR17520069. 13060885  
SRR17520069. 13060887  
SRR17520069. 13060889  
SRR17520069. 13060891  
SRR17520069. 13060893  
SRR17520069. 13060895  
SRR17520069. 13060897  
SRR17520069. 13060899  
SRR17520069. 13060903  
SRR17520069. 13060905  
SRR17520069. 13060907  
SRR17520069. 13060909  
SRR17520069. 13060913  
SRR17520069. 13060915  
SRR17520069. 13060917  
SRR17520069. 13060919  
SRR17520069. 13060921  
SRR17520069. 13060923  
SRR17520069. 13060925  
SRR17520069. 13060927  
SRR17520069. 13060929  
SRR17520069. 13060933  
SRR17520069. 13060935  
SRR17520069. 13060937  
SRR17520069. 13060939

SRR17520069. 13060941  
SRR17520069. 13060943  
SRR17520069. 13060945  
SRR17520069. 13060947  
SRR17520069. 13060949  
SRR17520069. 13060951  
SRR17520069. 13060953  
SRR17520069. 13060955  
SRR17520069. 13064298  
SRR17520069. 13064300  
SRR17520069. 13064302  
SRR17520069. 13064304  
SRR17520069. 13064306  
SRR17520069. 13064308  
SRR17520069. 13064310  
SRR17520069. 13064312  
SRR17520069. 13064314  
SRR17520069. 13064316  
SRR17520069. 13064318  
SRR17520069. 13064320  
SRR17520069. 13064322  
SRR17520069. 13064324  
SRR17520069. 13064326  
SRR17520069. 13064328  
SRR17520069. 13064330  
SRR17520069. 13064332  
SRR17520069. 13064334  
SRR17520069. 13064336  
SRR17520069. 13064338  
SRR17520069. 13064340  
SRR17520069. 13064342  
SRR17520069. 13064344  
SRR17520069. 13064346  
SRR17520069. 13064348  
SRR17520069. 13064350  
SRR17520069. 13064352  
SRR17520069. 13064354  
SRR17520069. 13064356  
SRR17520069. 13064358  
SRR17520069. 13064360  
SRR17520069. 13064362  
SRR17520069. 13064364  
SRR17520069. 13064366  
SRR17520069. 13064368  
SRR17520069. 13064370  
SRR17520069. 13064372  
SRR17520069. 13064374

SRR17520069. 13064376  
SRR17520069. 13064378  
SRR17520069. 13064380  
SRR17520069. 13064382  
SRR17520069. 13064384  
SRR17520069. 13064386  
SRR17520069. 13064388  
SRR17520069. 13064390  
SRR17520069. 13070682  
SRR17520069. 13070686  
SRR17520069. 13070688  
SRR17520069. 13070690  
SRR17520069. 13070692  
SRR17520069. 13070694  
SRR17520069. 13070696  
SRR17520069. 13070698  
SRR17520069. 13070700  
SRR17520069. 13070702  
SRR17520069. 13070704  
SRR17520069. 13070706  
SRR17520069. 13070708  
SRR17520069. 13070710  
SRR17520069. 13070712  
SRR17520069. 13070714  
SRR17520069. 13070716  
SRR17520069. 13070718  
SRR17520069. 13070720  
SRR17520069. 13070722  
SRR17520069. 13070724  
SRR17520069. 13073710  
SRR17520069. 13073712  
SRR17520069. 13073714  
SRR17520069. 13073716  
SRR17520069. 13073718  
SRR17520069. 13073720  
SRR17520069. 13073722  
SRR17520069. 13073724  
SRR17520069. 13073726  
SRR17520069. 13073728  
SRR17520069. 13073730  
SRR17520069. 13073732  
SRR17520069. 13073734  
SRR17520069. 13073736  
SRR17520069. 13073738  
SRR17520069. 13073740  
SRR17520069. 13073742  
SRR17520069. 13073744

SRR17520069. 13073746  
SRR17520069. 13073748  
SRR17520069. 13073750  
SRR17520069. 13073752  
SRR17520069. 13073756  
SRR17520069. 13073758  
SRR17520069. 13073760  
SRR17520069. 13075408  
SRR17520069. 13075410  
SRR17520069. 13092552  
SRR17520069. 13092554  
SRR17520069. 13092556  
SRR17520069. 13092558  
SRR17520069. 13092560  
SRR17520069. 13092562  
SRR17520069. 13092564  
SRR17520069. 13092566  
SRR17520069. 13092568  
SRR17520069. 13092570  
SRR17520069. 13092572  
SRR17520069. 13092574  
SRR17520069. 13092578  
SRR17520069. 13092580  
SRR17520069. 13092582  
SRR17520069. 13092584  
SRR17520069. 13092586  
SRR17520069. 13092588  
SRR17520069. 13092590  
SRR17520069. 13092592  
SRR17520069. 13092594  
SRR17520069. 13092596  
SRR17520069. 13092598  
SRR17520069. 13092600  
SRR17520069. 13092602  
SRR17520069. 13092604  
SRR17520069. 13092606  
SRR17520069. 13092608  
SRR17520069. 13092610  
SRR17520069. 13092612  
SRR17520069. 13092614  
SRR17520069. 13092616  
SRR17520069. 13092618  
SRR17520069. 13092620  
SRR17520069. 13092624  
SRR17520069. 13092628  
SRR17520069. 13092630  
SRR17520069. 13092632

SRR17520069. 13092634  
SRR17520069. 13092636  
SRR17520069. 13092638  
SRR17520069. 13092640  
SRR17520069. 13092642  
SRR17520069. 13092644  
SRR17520069. 13092686  
SRR17520069. 13092688  
SRR17520069. 13092690  
SRR17520069. 13092692  
SRR17520069. 13092694  
SRR17520069. 13092696  
SRR17520069. 13092698  
SRR17520069. 13092700  
SRR17520069. 13092702  
SRR17520069. 13092704  
SRR17520069. 13092706  
SRR17520069. 13092708  
SRR17520069. 13092710  
SRR17520069. 13092714  
SRR17520069. 13092716  
SRR17520069. 13092718  
SRR17520069. 13092720  
SRR17520069. 13092722  
SRR17520069. 13092724  
SRR17520069. 13092726  
SRR17520069. 13092728  
SRR17520069. 13092730  
SRR17520069. 13092732  
SRR17520069. 13098014  
SRR17520069. 13098016  
SRR17520069. 13098018  
SRR17520069. 13098020  
SRR17520069. 13098022  
SRR17520069. 13098024  
SRR17520069. 13098026  
SRR17520069. 13099767  
SRR17520069. 13099769  
SRR17520069. 13099771  
SRR17520069. 13099773  
SRR17520069. 13099775  
SRR17520069. 13099777  
SRR17520069. 13099779  
SRR17520069. 13099785  
SRR17520069. 13099787  
SRR17520069. 13099789  
SRR17520069. 13099791

SRR17520069.13103300  
SRR17520069.13103302  
SRR17520069.13103304  
SRR17520069.13103306  
SRR17520069.13103308  
SRR17520069.13103310  
SRR17520069.13103312  
SRR17520069.13103314  
SRR17520069.13103316  
SRR17520069.13103318  
SRR17520069.13103320  
SRR17520069.13103322  
SRR17520069.13103324  
SRR17520069.13107036  
SRR17520069.13107038  
SRR17520069.13107040  
SRR17520069.13107042  
SRR17520069.13107044  
SRR17520069.13107046  
SRR17520069.13107048  
SRR17520069.13107050  
SRR17520069.13107054  
SRR17520069.13107056  
SRR17520069.13107058  
SRR17520069.13107060  
SRR17520069.13107062  
SRR17520069.13107064  
SRR17520069.13107066  
SRR17520069.13107068  
SRR17520069.13107070  
SRR17520069.13107072  
SRR17520069.13107074  
SRR17520069.13107078  
SRR17520069.13107080  
SRR17520069.13107082  
SRR17520069.13107084  
SRR17520069.13107086  
SRR17520069.13107088  
SRR17520069.13107090  
SRR17520069.13107092  
SRR17520069.13107094  
SRR17520069.13107096  
SRR17520069.13107098  
SRR17520069.13107100  
SRR17520069.13107102  
SRR17520069.13107104  
SRR17520069.13107106

SRR17520069.13107108  
SRR17520069.13107112  
SRR17520069.13107114  
SRR17520069.13107116  
SRR17520069.13107118  
SRR17520069.13107120  
SRR17520069.13107122  
SRR17520069.13107124  
SRR17520069.13107126  
SRR17520069.13107128  
SRR17520069.13107130  
SRR17520069.13107132  
SRR17520069.13107134  
SRR17520069.13107136  
SRR17520069.13116890  
SRR17520069.13116894  
SRR17520069.13116898  
SRR17520069.13116900  
SRR17520069.13116902  
SRR17520069.13116904  
SRR17520069.13126062  
SRR17520069.13126064  
SRR17520069.13126066  
SRR17520069.13126068  
SRR17520069.13126070  
SRR17520069.13126072  
SRR17520069.13126074  
SRR17520069.13126076  
SRR17520069.13126078  
SRR17520069.13126080  
SRR17520069.13126082  
SRR17520069.13126084  
SRR17520069.13128656  
SRR17520069.13133135  
SRR17520069.13133137  
SRR17520069.13133139  
SRR17520069.13133141  
SRR17520069.13133145  
SRR17520069.13133147  
SRR17520069.13133149  
SRR17520069.13133151  
SRR17520069.13133153  
SRR17520069.13133155  
SRR17520069.13133157  
SRR17520069.13133159  
SRR17520069.13133161  
SRR17520069.13133163

SRR17520069. 13133165  
SRR17520069. 13133167  
SRR17520069. 13133169  
SRR17520069. 13133171  
SRR17520069. 13133173  
SRR17520069. 13133175  
SRR17520069. 13133179  
SRR17520069. 13133181  
SRR17520069. 13133183  
SRR17520069. 13133185  
SRR17520069. 13133187  
SRR17520069. 13133191  
SRR17520069. 13133193  
SRR17520069. 13133195  
SRR17520069. 13133197  
SRR17520069. 13133199  
SRR17520069. 13133201  
SRR17520069. 13133203  
SRR17520069. 13133205  
SRR17520069. 13133207  
SRR17520069. 13133209  
SRR17520069. 13133213  
SRR17520069. 13133215  
SRR17520069. 13133217  
SRR17520069. 13133221  
SRR17520069. 13133223  
SRR17520069. 13133225  
SRR17520069. 13133227  
SRR17520069. 13133229  
SRR17520069. 13133231  
SRR17520069. 13141143  
SRR17520069. 13141145  
SRR17520069. 13141147  
SRR17520069. 13141149  
SRR17520069. 13141151  
SRR17520069. 13141153  
SRR17520069. 13141155  
SRR17520069. 13141157  
SRR17520069. 13141168  
SRR17520069. 13141170  
SRR17520069. 13141172  
SRR17520069. 13141174  
SRR17520069. 13141176  
SRR17520069. 13141178  
SRR17520069. 13141182  
SRR17520069. 13141184  
SRR17520069. 13141186



SRR17520069.13141188  
SRR17520069.13141192  
SRR17520069.13141194  
SRR17520069.13141196  
SRR17520069.13141198  
SRR17520069.13141200  
SRR17520069.13141202  
SRR17520069.13141204  
SRR17520069.13141206  
SRR17520069.13141243  
SRR17520069.13141245  
SRR17520069.13141247  
SRR17520069.13141249  
SRR17520069.13141251  
SRR17520069.13141253  
SRR17520069.13141255  
SRR17520069.13141257  
SRR17520069.13141259  
SRR17520069.13141261  
SRR17520069.13141263  
SRR17520069.13141265  
SRR17520069.13141267  
SRR17520069.13141269  
SRR17520069.13141271  
SRR17520069.13141273  
SRR17520069.13143345  
SRR17520069.13143347  
SRR17520069.13143349  
SRR17520069.13143351  
SRR17520069.13143353  
SRR17520069.13143355  
SRR17520069.13143357  
SRR17520069.13143359  
SRR17520069.13143361  
SRR17520069.13143363  
SRR17520069.13143365  
SRR17520069.13143367  
SRR17520069.13143369  
SRR17520069.13143371  
SRR17520069.13143373  
SRR17520069.13143375  
SRR17520069.13143377  
SRR17520069.13143379  
SRR17520069.13143381  
SRR17520069.13143383  
SRR17520069.13143385  
SRR17520069.13143387

SRR17520069. 13143389  
SRR17520069. 13143391  
SRR17520069. 13143393  
SRR17520069. 13143395  
SRR17520069. 13143397  
SRR17520069. 13143399  
SRR17520069. 13143401  
SRR17520069. 13144794  
SRR17520069. 13144796  
SRR17520069. 13144798  
SRR17520069. 13144800  
SRR17520069. 13144802  
SRR17520069. 13144804  
SRR17520069. 13144806  
SRR17520069. 13154256  
SRR17520069. 13154258  
SRR17520069. 13154260  
SRR17520069. 13154262  
SRR17520069. 13154264  
SRR17520069. 13154266  
SRR17520069. 13154268  
SRR17520069. 13154270  
SRR17520069. 13154272  
SRR17520069. 13154274  
SRR17520069. 13154276  
SRR17520069. 13154278  
SRR17520069. 13154280  
SRR17520069. 13154282  
SRR17520069. 13154284  
SRR17520069. 13154286  
SRR17520069. 13154288  
SRR17520069. 13154290  
SRR17520069. 13154292  
SRR17520069. 13154294  
SRR17520069. 13154296  
SRR17520069. 13154298  
SRR17520069. 13154300  
SRR17520069. 13154302  
SRR17520069. 13154304  
SRR17520069. 13154306  
SRR17520069. 13154308  
SRR17520069. 13154310  
SRR17520069. 13154312  
SRR17520069. 13154314  
SRR17520069. 13154316  
SRR17520069. 13154318  
SRR17520069. 13154320

SRR17520069. 13154322  
SRR17520069. 13154324  
SRR17520069. 13154326  
SRR17520069. 13154328  
SRR17520069. 13154330  
SRR17520069. 13154332  
SRR17520069. 13154334  
SRR17520069. 13154336  
SRR17520069. 13154338  
SRR17520069. 13154340  
SRR17520069. 13154342  
SRR17520069. 13154344  
SRR17520069. 13154346  
SRR17520069. 13154348  
SRR17520069. 13154350  
SRR17520069. 13154352  
SRR17520069. 13154354  
SRR17520069. 13154356  
SRR17520069. 13154358  
SRR17520069. 13154360  
SRR17520069. 13154362  
SRR17520069. 13154364  
SRR17520069. 13154366  
SRR17520069. 13154370  
SRR17520069. 13154374  
SRR17520069. 13154376  
SRR17520069. 13154378  
SRR17520069. 13154380  
SRR17520069. 13154382  
SRR17520069. 13154384  
SRR17520069. 13154386  
SRR17520069. 13154388  
SRR17520069. 13154390  
SRR17520069. 13158902  
SRR17520069. 13158904  
SRR17520069. 13158906  
SRR17520069. 13161265  
SRR17520069. 13161267  
SRR17520069. 13161269  
SRR17520069. 13161271  
SRR17520069. 13161273  
SRR17520069. 13161275  
SRR17520069. 13161277  
SRR17520069. 13161279  
SRR17520069. 13161283  
SRR17520069. 13161285  
SRR17520069. 13161287

SRR17520069.13161289  
SRR17520069.13161319  
SRR17520069.13161321  
SRR17520069.13161323  
SRR17520069.13161325  
SRR17520069.13161327  
SRR17520069.13161329  
SRR17520069.13161331  
SRR17520069.13161333  
SRR17520069.13161335  
SRR17520069.13161337  
SRR17520069.13161339  
SRR17520069.13161341  
SRR17520069.13161343  
SRR17520069.13161345  
SRR17520069.13161351  
SRR17520069.13161353  
SRR17520069.13161355  
SRR17520069.13161357  
SRR17520069.13161359  
SRR17520069.13161361  
SRR17520069.13161363  
SRR17520069.13167407  
SRR17520069.13169527  
SRR17520069.13170517  
SRR17520069.13170519  
SRR17520069.13170521  
SRR17520069.13175328  
SRR17520069.13175330  
SRR17520069.13175332  
SRR17520069.13175334  
SRR17520069.13175336  
SRR17520069.13175338  
SRR17520069.13189741  
SRR17520069.13190000  
SRR17520069.13202796  
SRR17520069.13202798  
SRR17520069.13202800  
SRR17520069.13207433  
SRR17520069.13207435  
SRR17520069.13207437  
SRR17520069.13214368  
SRR17520069.13214370  
SRR17520069.13214372  
SRR17520069.13214374  
SRR17520069.13214376  
SRR17520069.13233922

SRR17520069. 13233924  
SRR17520069. 13233926  
SRR17520069. 13233928  
SRR17520069. 13233930  
SRR17520069. 13233932  
SRR17520069. 13233934  
SRR17520069. 13233940  
SRR17520069. 13233942  
SRR17520069. 13233944  
SRR17520069. 13233946  
SRR17520069. 13233948  
SRR17520069. 13233950  
SRR17520069. 13233952  
SRR17520069. 13233954  
SRR17520069. 13233956  
SRR17520069. 13233960  
SRR17520069. 13233962  
SRR17520069. 13233964  
SRR17520069. 13233966  
SRR17520069. 13233968  
SRR17520069. 13233970  
SRR17520069. 13233972  
SRR17520069. 13233974  
SRR17520069. 13233976  
SRR17520069. 13233978  
SRR17520069. 13233980  
SRR17520069. 13233982  
SRR17520069. 13233984  
SRR17520069. 13233986  
SRR17520069. 13233988  
SRR17520069. 13233990  
SRR17520069. 13233992  
SRR17520069. 13233994  
SRR17520069. 13233996  
SRR17520069. 13233998  
SRR17520069. 13236603  
SRR17520069. 13236605  
SRR17520069. 13236607  
SRR17520069. 13236609  
SRR17520069. 13236611  
SRR17520069. 13236613  
SRR17520069. 13236615  
SRR17520069. 13236617  
SRR17520069. 13236619  
SRR17520069. 13236621  
SRR17520069. 13236623  
SRR17520069. 13236625

SRR17520069. 13236627  
SRR17520069. 13236629  
SRR17520069. 13239880  
SRR17520069. 13239882  
SRR17520069. 13241686  
SRR17520069. 13241688  
SRR17520069. 13241690  
SRR17520069. 13241692  
SRR17520069. 13241694  
SRR17520069. 13241696  
SRR17520069. 13241698  
SRR17520069. 13241700  
SRR17520069. 13241702  
SRR17520069. 13241706  
SRR17520069. 13241708  
SRR17520069. 13241710  
SRR17520069. 13241712  
SRR17520069. 13241714  
SRR17520069. 13241716  
SRR17520069. 13241718  
SRR17520069. 13242200  
SRR17520069. 13242202  
SRR17520069. 13242206  
SRR17520069. 13242208  
SRR17520069. 13242210  
SRR17520069. 13242212  
SRR17520069. 13244641  
SRR17520069. 13245928  
SRR17520069. 13245930  
SRR17520069. 13245932  
SRR17520069. 13245934  
SRR17520069. 13245936  
SRR17520069. 13245938  
SRR17520069. 13245940  
SRR17520069. 13245942  
SRR17520069. 13245946  
SRR17520069. 13245948  
SRR17520069. 13245950  
SRR17520069. 13245952  
SRR17520069. 13245954  
SRR17520069. 13245960  
SRR17520069. 13245962  
SRR17520069. 13245964  
SRR17520069. 13247025  
SRR17520069. 13247027  
SRR17520069. 13247029  
SRR17520069. 13247031

SRR17520069. 13247033  
SRR17520069. 13247035  
SRR17520069. 13247037  
SRR17520069. 13247039  
SRR17520069. 13247041  
SRR17520069. 13247043  
SRR17520069. 13247045  
SRR17520069. 13247047  
SRR17520069. 13247049  
SRR17520069. 13247051  
SRR17520069. 13247053  
SRR17520069. 13247055  
SRR17520069. 13247057  
SRR17520069. 13247061  
SRR17520069. 13247065  
SRR17520069. 13247067  
SRR17520069. 13247069  
SRR17520069. 13247071  
SRR17520069. 13247073  
SRR17520069. 13247075  
SRR17520069. 13247077  
SRR17520069. 13247083  
SRR17520069. 13247085  
SRR17520069. 13247087  
SRR17520069. 13261795  
SRR17520069. 13261797  
SRR17520069. 13261799  
SRR17520069. 13261801  
SRR17520069. 13261803  
SRR17520069. 13261805  
SRR17520069. 13261807  
SRR17520069. 13261809  
SRR17520069. 13261811  
SRR17520069. 13261813  
SRR17520069. 13261815  
SRR17520069. 13261817  
SRR17520069. 13261819  
SRR17520069. 13261821  
SRR17520069. 13261823  
SRR17520069. 13261825  
SRR17520069. 13261829  
SRR17520069. 13261831  
SRR17520069. 13261833  
SRR17520069. 13261835  
SRR17520069. 13261837  
SRR17520069. 13261841  
SRR17520069. 13261843

SRR17520069. 13261845  
SRR17520069. 13261847  
SRR17520069. 13261849  
SRR17520069. 13261851  
SRR17520069. 13261853  
SRR17520069. 13261855  
SRR17520069. 13261857  
SRR17520069. 13261859  
SRR17520069. 13261861  
SRR17520069. 13261863  
SRR17520069. 13262044  
SRR17520069. 13262046  
SRR17520069. 13273035  
SRR17520069. 13273037  
SRR17520069. 13273039  
SRR17520069. 13273041  
SRR17520069. 13273043  
SRR17520069. 13273045  
SRR17520069. 13273047  
SRR17520069. 13273049  
SRR17520069. 13273051  
SRR17520069. 13273053  
SRR17520069. 13273055  
SRR17520069. 13273057  
SRR17520069. 13273059  
SRR17520069. 13273061  
SRR17520069. 13273063  
SRR17520069. 13273065  
SRR17520069. 13273067  
SRR17520069. 13273069  
SRR17520069. 13273071  
SRR17520069. 13273073  
SRR17520069. 13273075  
SRR17520069. 13273077  
SRR17520069. 13273079  
SRR17520069. 13273081  
SRR17520069. 13273083  
SRR17520069. 13273085  
SRR17520069. 13273087  
SRR17520069. 13273089  
SRR17520069. 13273091  
SRR17520069. 13273093  
SRR17520069. 13273095  
SRR17520069. 13273099  
SRR17520069. 13273101  
SRR17520069. 13273103  
SRR17520069. 13273105



SRR17520069.13273107  
SRR17520069.13273109  
SRR17520069.13273111  
SRR17520069.13273113  
SRR17520069.13273115  
SRR17520069.13277010  
SRR17520069.13277012  
SRR17520069.13277014  
SRR17520069.13277016  
SRR17520069.13277018  
SRR17520069.13277020  
SRR17520069.13277022  
SRR17520069.13277024  
SRR17520069.13277026  
SRR17520069.13277028  
SRR17520069.13277030  
SRR17520069.13277034  
SRR17520069.13277036  
SRR17520069.13277038  
SRR17520069.13277040  
SRR17520069.13277042  
SRR17520069.13277044  
SRR17520069.13277048  
SRR17520069.13277050  
SRR17520069.13277052  
SRR17520069.13277054  
SRR17520069.13277056  
SRR17520069.13277058  
SRR17520069.13278611  
SRR17520069.13278613  
SRR17520069.13278615  
SRR17520069.13278617  
SRR17520069.13278619  
SRR17520069.13278621  
SRR17520069.13278623  
SRR17520069.13278625  
SRR17520069.13278627  
SRR17520069.13278629  
SRR17520069.13278631  
SRR17520069.13278633  
SRR17520069.13278635  
SRR17520069.13278637  
SRR17520069.13278639  
SRR17520069.13279974  
SRR17520069.13280234  
SRR17520069.13280236  
SRR17520069.13280238

SRR17520069. 13280240  
SRR17520069. 13280242  
SRR17520069. 13280244  
SRR17520069. 13282107  
SRR17520069. 13282109  
SRR17520069. 13282113  
SRR17520069. 13282115  
SRR17520069. 13282117  
SRR17520069. 13282119  
SRR17520069. 13282121  
SRR17520069. 13282123  
SRR17520069. 13282125  
SRR17520069. 13282127  
SRR17520069. 13282129  
SRR17520069. 13282461  
SRR17520069. 13282463  
SRR17520069. 13282465  
SRR17520069. 13282467  
SRR17520069. 13286188  
SRR17520069. 13286190  
SRR17520069. 13286192  
SRR17520069. 13286194  
SRR17520069. 13286196  
SRR17520069. 13286198  
SRR17520069. 13286200  
SRR17520069. 13286202  
SRR17520069. 13286204  
SRR17520069. 13286206  
SRR17520069. 13286208  
SRR17520069. 13286210  
SRR17520069. 13286212  
SRR17520069. 13286214  
SRR17520069. 13286216  
SRR17520069. 13286218  
SRR17520069. 13286220  
SRR17520069. 13286222  
SRR17520069. 13286224  
SRR17520069. 13286226  
SRR17520069. 13286228  
SRR17520069. 13286230  
SRR17520069. 13286232  
SRR17520069. 13286234  
SRR17520069. 13286236  
SRR17520069. 13286238  
SRR17520069. 13286240  
SRR17520069. 13286244  
SRR17520069. 13286246

SRR17520069. 13286248  
SRR17520069. 13286250  
SRR17520069. 13286252  
SRR17520069. 13286254  
SRR17520069. 13286256  
SRR17520069. 13286258  
SRR17520069. 13286260  
SRR17520069. 13286262  
SRR17520069. 13286264  
SRR17520069. 13286266  
SRR17520069. 13286268  
SRR17520069. 13286270  
SRR17520069. 13286272  
SRR17520069. 13286274  
SRR17520069. 13286276  
SRR17520069. 13286278  
SRR17520069. 13286280  
SRR17520069. 13286282  
SRR17520069. 13286284  
SRR17520069. 13286286  
SRR17520069. 13290963  
SRR17520069. 13290965  
SRR17520069. 13290967  
SRR17520069. 13290969  
SRR17520069. 13290971  
SRR17520069. 13290973  
SRR17520069. 13290975  
SRR17520069. 13290977  
SRR17520069. 13294964  
SRR17520069. 13294966  
SRR17520069. 13294968  
SRR17520069. 13294972  
SRR17520069. 13294974  
SRR17520069. 13294976  
SRR17520069. 13294978  
SRR17520069. 13294980  
SRR17520069. 13294982  
SRR17520069. 13294984  
SRR17520069. 13294988  
SRR17520069. 13294990  
SRR17520069. 13294992  
SRR17520069. 13294994  
SRR17520069. 13295502  
SRR17520069. 13295504  
SRR17520069. 13295506  
SRR17520069. 13295804  
SRR17520069. 13295884

SRR17520069. 13296005  
SRR17520069. 13296007  
SRR17520069. 13296009  
SRR17520069. 13297323  
SRR17520069. 13297325  
SRR17520069. 13297327  
SRR17520069. 13297329  
SRR17520069. 13297331  
SRR17520069. 13297335  
SRR17520069. 13297337  
SRR17520069. 13297339  
SRR17520069. 13297341  
SRR17520069. 13297343  
SRR17520069. 13297345  
SRR17520069. 13297347  
SRR17520069. 13297349  
SRR17520069. 13297351  
SRR17520069. 13297355  
SRR17520069. 13297357  
SRR17520069. 13297359  
SRR17520069. 13297363  
SRR17520069. 13297365  
SRR17520069. 13297367  
SRR17520069. 13297369  
SRR17520069. 13297371  
SRR17520069. 13297373  
SRR17520069. 13297375  
SRR17520069. 13297377  
SRR17520069. 13297379  
SRR17520069. 13297381  
SRR17520069. 13297383  
SRR17520069. 13297385  
SRR17520069. 13297387  
SRR17520069. 13297389  
SRR17520069. 13297393  
SRR17520069. 13297395  
SRR17520069. 13297397  
SRR17520069. 13297399  
SRR17520069. 13297886  
SRR17520069. 13297888  
SRR17520069. 13297890  
SRR17520069. 13297892  
SRR17520069. 13297894  
SRR17520069. 13304225  
SRR17520069. 13304227  
SRR17520069. 13304229  
SRR17520069. 13304231

SRR17520069. 13304233  
SRR17520069. 13304235  
SRR17520069. 13304237  
SRR17520069. 13304239  
SRR17520069. 13304241  
SRR17520069. 13304243  
SRR17520069. 13304245  
SRR17520069. 13304247  
SRR17520069. 13304249  
SRR17520069. 13304251  
SRR17520069. 13304253  
SRR17520069. 13304255  
SRR17520069. 13304257  
SRR17520069. 13304259  
SRR17520069. 13304261  
SRR17520069. 13304263  
SRR17520069. 13304265  
SRR17520069. 13304267  
SRR17520069. 13304269  
SRR17520069. 13304271  
SRR17520069. 13304273  
SRR17520069. 13304275  
SRR17520069. 13304277  
SRR17520069. 13304279  
SRR17520069. 13304281  
SRR17520069. 13304283  
SRR17520069. 13304285  
SRR17520069. 13304287  
SRR17520069. 13304289  
SRR17520069. 13304291  
SRR17520069. 13304293  
SRR17520069. 13304295  
SRR17520069. 13304297  
SRR17520069. 13304299  
SRR17520069. 13304301  
SRR17520069. 13304303  
SRR17520069. 13304305  
SRR17520069. 13304307  
SRR17520069. 13304309  
SRR17520069. 13304311  
SRR17520069. 13304313  
SRR17520069. 13304315  
SRR17520069. 13304317  
SRR17520069. 13304319  
SRR17520069. 13304321  
SRR17520069. 13304323  
SRR17520069. 13306040

SRR17520069.13311322  
SRR17520069.13311324  
SRR17520069.13311326  
SRR17520069.13311328  
SRR17520069.13311330  
SRR17520069.13311332  
SRR17520069.13311334  
SRR17520069.13311336  
SRR17520069.13311338  
SRR17520069.13311340  
SRR17520069.13311342  
SRR17520069.13311344  
SRR17520069.13311346  
SRR17520069.13311348  
SRR17520069.13311350  
SRR17520069.13311352  
SRR17520069.13311354  
SRR17520069.13311356  
SRR17520069.13311358  
SRR17520069.13311360  
SRR17520069.13311362  
SRR17520069.13311364  
SRR17520069.13311366  
SRR17520069.13311368  
SRR17520069.13311370  
SRR17520069.13311372  
SRR17520069.13311374  
SRR17520069.13311376  
SRR17520069.13311378  
SRR17520069.13311380  
SRR17520069.13311382  
SRR17520069.13311384  
SRR17520069.13311386  
SRR17520069.13311388  
SRR17520069.13311390  
SRR17520069.13311392  
SRR17520069.13311394  
SRR17520069.13311396  
SRR17520069.13311398  
SRR17520069.13311400  
SRR17520069.13311402  
SRR17520069.13311404  
SRR17520069.13311406  
SRR17520069.13311408  
SRR17520069.13311414  
SRR17520069.13311416  
SRR17520069.13311418

SRR17520069.13311420  
SRR17520069.13311424  
SRR17520069.13311428  
SRR17520069.13311430  
SRR17520069.13311432  
SRR17520069.13311434  
SRR17520069.13311436  
SRR17520069.13311438  
SRR17520069.13311440  
SRR17520069.13311442  
SRR17520069.13311444  
SRR17520069.13311446  
SRR17520069.13311448  
SRR17520069.13316956  
SRR17520069.13316958  
SRR17520069.13316960  
SRR17520069.13316962  
SRR17520069.13316964  
SRR17520069.13316966  
SRR17520069.13316968  
SRR17520069.13316970  
SRR17520069.13316972  
SRR17520069.13316974  
SRR17520069.13316976  
SRR17520069.13316978  
SRR17520069.13316980  
SRR17520069.13316982  
SRR17520069.13316984  
SRR17520069.13316986  
SRR17520069.13316988  
SRR17520069.13316990  
SRR17520069.13316992  
SRR17520069.13316994  
SRR17520069.13316996  
SRR17520069.13316998  
SRR17520069.13317000  
SRR17520069.13317002  
SRR17520069.13317004  
SRR17520069.13317006  
SRR17520069.13317008  
SRR17520069.13317010  
SRR17520069.13317012  
SRR17520069.13317014  
SRR17520069.13317016  
SRR17520069.13317018  
SRR17520069.13317020  
SRR17520069.13317024

SRR17520069. 13317026  
SRR17520069. 13317028  
SRR17520069. 13317030  
SRR17520069. 13317032  
SRR17520069. 13317034  
SRR17520069. 13317036  
SRR17520069. 13317038  
SRR17520069. 13317040  
SRR17520069. 13317042  
SRR17520069. 13317044  
SRR17520069. 13317046  
SRR17520069. 13317048  
SRR17520069. 13317050  
SRR17520069. 13317052  
SRR17520069. 13317054  
SRR17520069. 13317056  
SRR17520069. 13317058  
SRR17520069. 13317060  
SRR17520069. 13317062  
SRR17520069. 13317064  
SRR17520069. 13317066  
SRR17520069. 13317068  
SRR17520069. 13317070  
SRR17520069. 13318256  
SRR17520069. 13318258  
SRR17520069. 13321652  
SRR17520069. 13321654  
SRR17520069. 13321656  
SRR17520069. 13321658  
SRR17520069. 13321660  
SRR17520069. 13321662  
SRR17520069. 13321664  
SRR17520069. 13321666  
SRR17520069. 13321668  
SRR17520069. 13321670  
SRR17520069. 13321672  
SRR17520069. 13321674  
SRR17520069. 13329377  
SRR17520069. 13329379  
SRR17520069. 13329381  
SRR17520069. 13329383  
SRR17520069. 13329385  
SRR17520069. 13329387  
SRR17520069. 13329389  
SRR17520069. 13329391  
SRR17520069. 13329393  
SRR17520069. 13329395



SRR17520069. 13329397  
SRR17520069. 13329399  
SRR17520069. 13329401  
SRR17520069. 13329403  
SRR17520069. 13329405  
SRR17520069. 13329407  
SRR17520069. 13329409  
SRR17520069. 13329411  
SRR17520069. 13329413  
SRR17520069. 13329415  
SRR17520069. 13329417  
SRR17520069. 13329419  
SRR17520069. 13329421  
SRR17520069. 13329423  
SRR17520069. 13329425  
SRR17520069. 13329427  
SRR17520069. 13329429  
SRR17520069. 13329431  
SRR17520069. 13329433  
SRR17520069. 13329435  
SRR17520069. 13341621  
SRR17520069. 13341623  
SRR17520069. 13341625  
SRR17520069. 13341627  
SRR17520069. 13341629  
SRR17520069. 13341631  
SRR17520069. 13341633  
SRR17520069. 13341635  
SRR17520069. 13341637  
SRR17520069. 13341639  
SRR17520069. 13341641  
SRR17520069. 13341643  
SRR17520069. 13341645  
SRR17520069. 13341647  
SRR17520069. 13341649  
SRR17520069. 13341651  
SRR17520069. 13345250  
SRR17520069. 13345252  
SRR17520069. 13345254  
SRR17520069. 13345256  
SRR17520069. 13345396  
SRR17520069. 13345398  
SRR17520069. 13345400  
SRR17520069. 13345402  
SRR17520069. 13345404  
SRR17520069. 13345406  
SRR17520069. 13345408

SRR17520069. 13345410  
SRR17520069. 13345412  
SRR17520069. 13345414  
SRR17520069. 13345416  
SRR17520069. 13345418  
SRR17520069. 13345420  
SRR17520069. 13345422  
SRR17520069. 13345424  
SRR17520069. 13345426  
SRR17520069. 13345428  
SRR17520069. 13345432  
SRR17520069. 13345434  
SRR17520069. 13345436  
SRR17520069. 13345438  
SRR17520069. 13345440  
SRR17520069. 13345442  
SRR17520069. 13345444  
SRR17520069. 13345446  
SRR17520069. 13345448  
SRR17520069. 13345450  
SRR17520069. 13345452  
SRR17520069. 13345454  
SRR17520069. 13345458  
SRR17520069. 13345460  
SRR17520069. 13345462  
SRR17520069. 13345464  
SRR17520069. 13345466  
SRR17520069. 13345468  
SRR17520069. 13345470  
SRR17520069. 13345472  
SRR17520069. 13345474  
SRR17520069. 13345476  
SRR17520069. 13345478  
SRR17520069. 13345480  
SRR17520069. 13345482  
SRR17520069. 13345484  
SRR17520069. 13345486  
SRR17520069. 13345488  
SRR17520069. 13345490  
SRR17520069. 13345492  
SRR17520069. 13345494  
SRR17520069. 13345496  
SRR17520069. 13345498  
SRR17520069. 13345500  
SRR17520069. 13345502  
SRR17520069. 13345504  
SRR17520069. 13345506

SRR17520069.13345508  
SRR17520069.13345510  
SRR17520069.13345512  
SRR17520069.13345516  
SRR17520069.13345518  
SRR17520069.13345520  
SRR17520069.13345522  
SRR17520069.13345524  
SRR17520069.13345526  
SRR17520069.13345528  
SRR17520069.13345530  
SRR17520069.13348620  
SRR17520069.13348622  
SRR17520069.13348624  
SRR17520069.13348626  
SRR17520069.13354147  
SRR17520069.13354385  
SRR17520069.13354387  
SRR17520069.13354389  
SRR17520069.13354391  
SRR17520069.13354393  
SRR17520069.13354395  
SRR17520069.13354397  
SRR17520069.13354399  
SRR17520069.13354401  
SRR17520069.13354403  
SRR17520069.13354405  
SRR17520069.13354407  
SRR17520069.13354409  
SRR17520069.13354411  
SRR17520069.13354413  
SRR17520069.13354417  
SRR17520069.13354419  
SRR17520069.13354421  
SRR17520069.13354423  
SRR17520069.13354425  
SRR17520069.13354429  
SRR17520069.13355988  
SRR17520069.13355990  
SRR17520069.13367604  
SRR17520069.13376182  
SRR17520069.13376184  
SRR17520069.13395029  
SRR17520069.13396462  
SRR17520069.13396464  
SRR17520069.13396466  
SRR17520069.13396468

SRR17520069. 13396470  
SRR17520069. 13396472  
SRR17520069. 13396474  
SRR17520069. 13396476  
SRR17520069. 13396478  
SRR17520069. 13396480  
SRR17520069. 13396482  
SRR17520069. 13396484  
SRR17520069. 13396486  
SRR17520069. 13396490  
SRR17520069. 13396492  
SRR17520069. 13396494  
SRR17520069. 13396496  
SRR17520069. 13396498  
SRR17520069. 13396500  
SRR17520069. 13396502  
SRR17520069. 13396504  
SRR17520069. 13396506  
SRR17520069. 13396508  
SRR17520069. 13396510  
SRR17520069. 13396512  
SRR17520069. 13396514  
SRR17520069. 13396516  
SRR17520069. 13396518  
SRR17520069. 13396520  
SRR17520069. 13396522  
SRR17520069. 13396524  
SRR17520069. 13396526  
SRR17520069. 13396528  
SRR17520069. 13396530  
SRR17520069. 13396532  
SRR17520069. 13396534  
SRR17520069. 13396536  
SRR17520069. 13396538  
SRR17520069. 13396540  
SRR17520069. 13396542  
SRR17520069. 13396544  
SRR17520069. 13396546  
SRR17520069. 13396548  
SRR17520069. 13396550  
SRR17520069. 13396552  
SRR17520069. 13396554  
SRR17520069. 13396556  
SRR17520069. 13397723  
SRR17520069. 13397725  
SRR17520069. 13397727  
SRR17520069. 13397729

SRR17520069. 13397731  
SRR17520069. 13397733  
SRR17520069. 13397735  
SRR17520069. 13397737  
SRR17520069. 13397739  
SRR17520069. 13397741  
SRR17520069. 13400924  
SRR17520069. 13400926  
SRR17520069. 13400928  
SRR17520069. 13400930  
SRR17520069. 13400934  
SRR17520069. 13400936  
SRR17520069. 13400938  
SRR17520069. 13400940  
SRR17520069. 13400942  
SRR17520069. 13400944  
SRR17520069. 13400948  
SRR17520069. 13400950  
SRR17520069. 13400952  
SRR17520069. 13400956  
SRR17520069. 13400960  
SRR17520069. 13400962  
SRR17520069. 13400966  
SRR17520069. 13400968  
SRR17520069. 13400972  
SRR17520069. 13400974  
SRR17520069. 13400976  
SRR17520069. 13400980  
SRR17520069. 13400984  
SRR17520069. 13400986  
SRR17520069. 13400988  
SRR17520069. 13400990  
SRR17520069. 13400992  
SRR17520069. 13400994  
SRR17520069. 13400996  
SRR17520069. 13400998  
SRR17520069. 13401000  
SRR17520069. 13401475  
SRR17520069. 13401477  
SRR17520069. 13406124  
SRR17520069. 13406126  
SRR17520069. 13406128  
SRR17520069. 13406130  
SRR17520069. 13406132  
SRR17520069. 13406134  
SRR17520069. 13406136  
SRR17520069. 13406138

SRR17520069. 13406140  
SRR17520069. 13406142  
SRR17520069. 13406146  
SRR17520069. 13406148  
SRR17520069. 13406150  
SRR17520069. 13406154  
SRR17520069. 13406156  
SRR17520069. 13406158  
SRR17520069. 13406160  
SRR17520069. 13406162  
SRR17520069. 13406164  
SRR17520069. 13406166  
SRR17520069. 13406168  
SRR17520069. 13406170  
SRR17520069. 13406172  
SRR17520069. 13406174  
SRR17520069. 13406176  
SRR17520069. 13406178  
SRR17520069. 13406180  
SRR17520069. 13406182  
SRR17520069. 13406184  
SRR17520069. 13406186  
SRR17520069. 13406188  
SRR17520069. 13406190  
SRR17520069. 13406192  
SRR17520069. 13406194  
SRR17520069. 13406196  
SRR17520069. 13409651  
SRR17520069. 13409653  
SRR17520069. 13409655  
SRR17520069. 13409657  
SRR17520069. 13409659  
SRR17520069. 13409661  
SRR17520069. 13409665  
SRR17520069. 13409667  
SRR17520069. 13409669  
SRR17520069. 13409671  
SRR17520069. 13409673  
SRR17520069. 13409675  
SRR17520069. 13409677  
SRR17520069. 13409679  
SRR17520069. 13409681  
SRR17520069. 13409683  
SRR17520069. 13409685  
SRR17520069. 13409687  
SRR17520069. 13409689  
SRR17520069. 13409691

SRR17520069. 13409693  
SRR17520069. 13409695  
SRR17520069. 13409697  
SRR17520069. 13409699  
SRR17520069. 13409701  
SRR17520069. 13409703  
SRR17520069. 13409705  
SRR17520069. 13409707  
SRR17520069. 13409709  
SRR17520069. 13409711  
SRR17520069. 13409713  
SRR17520069. 13409715  
SRR17520069. 13409717  
SRR17520069. 13409719  
SRR17520069. 13409721  
SRR17520069. 13409723  
SRR17520069. 13409725  
SRR17520069. 13409727  
SRR17520069. 13409729  
SRR17520069. 13409731  
SRR17520069. 13411959  
SRR17520069. 13411961  
SRR17520069. 13411965  
SRR17520069. 13411969  
SRR17520069. 13411971  
SRR17520069. 13411973  
SRR17520069. 13411975  
SRR17520069. 13411977  
SRR17520069. 13411979  
SRR17520069. 13411981  
SRR17520069. 13411983  
SRR17520069. 13411985  
SRR17520069. 13411987  
SRR17520069. 13411988  
SRR17520069. 13411993  
SRR17520069. 13411995  
SRR17520069. 13411997  
SRR17520069. 13411999  
SRR17520069. 13412001  
SRR17520069. 13412005  
SRR17520069. 13412007  
SRR17520069. 13412011  
SRR17520069. 13412013  
SRR17520069. 13412015  
SRR17520069. 13412017  
SRR17520069. 13412019  
SRR17520069. 13412021

SRR17520069. 13412023  
SRR17520069. 13412025  
SRR17520069. 13412027  
SRR17520069. 13412029  
SRR17520069. 13412031  
SRR17520069. 13412035  
SRR17520069. 13412037  
SRR17520069. 13412039  
SRR17520069. 13412041  
SRR17520069. 13412043  
SRR17520069. 13412045  
SRR17520069. 13412047  
SRR17520069. 13412049  
SRR17520069. 13412051  
SRR17520069. 13412053  
SRR17520069. 13412055  
SRR17520069. 13412057  
SRR17520069. 13412059  
SRR17520069. 13412061  
SRR17520069. 13412063  
SRR17520069. 13412065  
SRR17520069. 13412067  
SRR17520069. 13412075  
SRR17520069. 13412077  
SRR17520069. 13412079  
SRR17520069. 13412081  
SRR17520069. 13412083  
SRR17520069. 13412085  
SRR17520069. 13412087  
SRR17520069. 13412089  
SRR17520069. 13412091  
SRR17520069. 13412093  
SRR17520069. 13412095  
SRR17520069. 13412097  
SRR17520069. 13412099  
SRR17520069. 13412101  
SRR17520069. 13412103  
SRR17520069. 13412105  
SRR17520069. 13412107  
SRR17520069. 13415298  
SRR17520069. 13415302  
SRR17520069. 13415304  
SRR17520069. 13415306  
SRR17520069. 13415308  
SRR17520069. 13415310  
SRR17520069. 13415314  
SRR17520069. 13415316



SRR17520069. 13415318  
SRR17520069. 13415322  
SRR17520069. 13415324  
SRR17520069. 13415326  
SRR17520069. 13415330  
SRR17520069. 13415332  
SRR17520069. 13415334  
SRR17520069. 13415336  
SRR17520069. 13415340  
SRR17520069. 13415342  
SRR17520069. 13415344  
SRR17520069. 13415346  
SRR17520069. 13415350  
SRR17520069. 13415352  
SRR17520069. 13415354  
SRR17520069. 13415356  
SRR17520069. 13415358  
SRR17520069. 13415360  
SRR17520069. 13415362  
SRR17520069. 13415364  
SRR17520069. 13415368  
SRR17520069. 13415370  
SRR17520069. 13415861  
SRR17520069. 13415863  
SRR17520069. 13415865  
SRR17520069. 13415867  
SRR17520069. 13415869  
SRR17520069. 13428553  
SRR17520069. 13428555  
SRR17520069. 13428557  
SRR17520069. 13428559  
SRR17520069. 13428561  
SRR17520069. 13428563  
SRR17520069. 13428565  
SRR17520069. 13429704  
SRR17520069. 13429706  
SRR17520069. 13429713  
SRR17520069. 13429715  
SRR17520069. 13429717  
SRR17520069. 13429719  
SRR17520069. 13429721  
SRR17520069. 13429723  
SRR17520069. 13429725  
SRR17520069. 13430959  
SRR17520069. 13430961  
SRR17520069. 13430963  
SRR17520069. 13430965

SRR17520069. 13430967  
SRR17520069. 13430969  
SRR17520069. 13430971  
SRR17520069. 13430973  
SRR17520069. 13430975  
SRR17520069. 13430977  
SRR17520069. 13430979  
SRR17520069. 13430983  
SRR17520069. 13430989  
SRR17520069. 13430991  
SRR17520069. 13430997  
SRR17520069. 13431911  
SRR17520069. 13436722  
SRR17520069. 13436724  
SRR17520069. 13436726  
SRR17520069. 13436728  
SRR17520069. 13436730  
SRR17520069. 13436732  
SRR17520069. 13445276  
SRR17520069. 13445278  
SRR17520069. 13445280  
SRR17520069. 13445282  
SRR17520069. 13445284  
SRR17520069. 13445286  
SRR17520069. 13445288  
SRR17520069. 13445290  
SRR17520069. 13445292  
SRR17520069. 13445294  
SRR17520069. 13445296  
SRR17520069. 13445298  
SRR17520069. 13445300  
SRR17520069. 13445302  
SRR17520069. 13445304  
SRR17520069. 13445306  
SRR17520069. 13445308  
SRR17520069. 13445310  
SRR17520069. 13445312  
SRR17520069. 13445314  
SRR17520069. 13445316  
SRR17520069. 13445318  
SRR17520069. 13445320  
SRR17520069. 13445322  
SRR17520069. 13445324  
SRR17520069. 13445326  
SRR17520069. 13445328  
SRR17520069. 13445330  
SRR17520069. 13445332

SRR17520069. 13445334  
SRR17520069. 13445336  
SRR17520069. 13445338  
SRR17520069. 13445340  
SRR17520069. 13445342  
SRR17520069. 13445344  
SRR17520069. 13445346  
SRR17520069. 13448825  
SRR17520069. 13448827  
SRR17520069. 13448829  
SRR17520069. 13448831  
SRR17520069. 13448833  
SRR17520069. 13448835  
SRR17520069. 13448837  
SRR17520069. 13448839  
SRR17520069. 13448841  
SRR17520069. 13448843  
SRR17520069. 13448845  
SRR17520069. 13448847  
SRR17520069. 13448849  
SRR17520069. 13448851  
SRR17520069. 13448853  
SRR17520069. 13448855  
SRR17520069. 13448857  
SRR17520069. 13448859  
SRR17520069. 13448861  
SRR17520069. 13448863  
SRR17520069. 13448865  
SRR17520069. 13459754  
SRR17520069. 13459756  
SRR17520069. 13459758  
SRR17520069. 13459760  
SRR17520069. 13459762  
SRR17520069. 13459764  
SRR17520069. 13459766  
SRR17520069. 13459768  
SRR17520069. 13459770  
SRR17520069. 13459772  
SRR17520069. 13459774  
SRR17520069. 13459776  
SRR17520069. 13459778  
SRR17520069. 13459782  
SRR17520069. 13459784  
SRR17520069. 13459786  
SRR17520069. 13459788  
SRR17520069. 13459790  
SRR17520069. 13459792

SRR17520069. 13459794  
SRR17520069. 13459796  
SRR17520069. 13459798  
SRR17520069. 13459800  
SRR17520069. 13459802  
SRR17520069. 13459804  
SRR17520069. 13459806  
SRR17520069. 13459808  
SRR17520069. 13459810  
SRR17520069. 13463359  
SRR17520069. 13463361  
SRR17520069. 13463365  
SRR17520069. 13463367  
SRR17520069. 13463369  
SRR17520069. 13463371  
SRR17520069. 13463373  
SRR17520069. 13463375  
SRR17520069. 13463377  
SRR17520069. 13463379  
SRR17520069. 13463381  
SRR17520069. 13463383  
SRR17520069. 13463385  
SRR17520069. 13463387  
SRR17520069. 13463389  
SRR17520069. 13463391  
SRR17520069. 13463393  
SRR17520069. 13463395  
SRR17520069. 13463397  
SRR17520069. 13463399  
SRR17520069. 13463401  
SRR17520069. 13463403  
SRR17520069. 13463405  
SRR17520069. 13463407  
SRR17520069. 13463409  
SRR17520069. 13463411  
SRR17520069. 13463413  
SRR17520069. 13463415  
SRR17520069. 13463417  
SRR17520069. 13463419  
SRR17520069. 13463421  
SRR17520069. 13463423  
SRR17520069. 13463425  
SRR17520069. 13463427  
SRR17520069. 13463429  
SRR17520069. 13463431  
SRR17520069. 13463433  
SRR17520069. 13463435

SRR17520069. 13463437  
SRR17520069. 13463439  
SRR17520069. 13463441  
SRR17520069. 13463443  
SRR17520069. 13463445  
SRR17520069. 13463521  
SRR17520069. 13463523  
SRR17520069. 13463525  
SRR17520069. 13463527  
SRR17520069. 13463529  
SRR17520069. 13463531  
SRR17520069. 13463533  
SRR17520069. 13463535  
SRR17520069. 13463539  
SRR17520069. 13463541  
SRR17520069. 13463543  
SRR17520069. 13463545  
SRR17520069. 13463547  
SRR17520069. 13463549  
SRR17520069. 13463551  
SRR17520069. 13463553  
SRR17520069. 13463555  
SRR17520069. 13463557  
SRR17520069. 13463559  
SRR17520069. 13463561  
SRR17520069. 13463563  
SRR17520069. 13463565  
SRR17520069. 13463571  
SRR17520069. 13463573  
SRR17520069. 13463575  
SRR17520069. 13463577  
SRR17520069. 13463579  
SRR17520069. 13463581  
SRR17520069. 13463583  
SRR17520069. 13463585  
SRR17520069. 13463587  
SRR17520069. 13463589  
SRR17520069. 13463591  
SRR17520069. 13463593  
SRR17520069. 13463595  
SRR17520069. 13463597  
SRR17520069. 13463599  
SRR17520069. 13463601  
SRR17520069. 13463603  
SRR17520069. 13463605  
SRR17520069. 13463607  
SRR17520069. 13463609

SRR17520069. 13463611  
SRR17520069. 13463613  
SRR17520069. 13463615  
SRR17520069. 13463617  
SRR17520069. 13463621  
SRR17520069. 13463623  
SRR17520069. 13463625  
SRR17520069. 13463627  
SRR17520069. 13463629  
SRR17520069. 13463631  
SRR17520069. 13463633  
SRR17520069. 13463635  
SRR17520069. 13463637  
SRR17520069. 13463639  
SRR17520069. 13463641  
SRR17520069. 13463643  
SRR17520069. 13463645  
SRR17520069. 13469544  
SRR17520069. 13469546  
SRR17520069. 13469548  
SRR17520069. 13469550  
SRR17520069. 13469552  
SRR17520069. 13469554  
SRR17520069. 13469556  
SRR17520069. 13469558  
SRR17520069. 13469560  
SRR17520069. 13470178  
SRR17520069. 13470276  
SRR17520069. 13470278  
SRR17520069. 13470280  
SRR17520069. 13470282  
SRR17520069. 13470284  
SRR17520069. 13470286  
SRR17520069. 13470288  
SRR17520069. 13470290  
SRR17520069. 13470292  
SRR17520069. 13470294  
SRR17520069. 13470296  
SRR17520069. 13470298  
SRR17520069. 13470300  
SRR17520069. 13470302  
SRR17520069. 13470304  
SRR17520069. 13470306  
SRR17520069. 13470308  
SRR17520069. 13470310  
SRR17520069. 13470312  
SRR17520069. 13470314

SRR17520069. 13470316  
SRR17520069. 13470318  
SRR17520069. 13470320  
SRR17520069. 13470322  
SRR17520069. 13470324  
SRR17520069. 13470326  
SRR17520069. 13470328  
SRR17520069. 13470330  
SRR17520069. 13470332  
SRR17520069. 13470334  
SRR17520069. 13470338  
SRR17520069. 13473200  
SRR17520069. 13473202  
SRR17520069. 13473204  
SRR17520069. 13473206  
SRR17520069. 13473208  
SRR17520069. 13477074  
SRR17520069. 13477076  
SRR17520069. 13477078  
SRR17520069. 13477080  
SRR17520069. 13477082  
SRR17520069. 13477084  
SRR17520069. 13477086  
SRR17520069. 13477088  
SRR17520069. 13477090  
SRR17520069. 13477092  
SRR17520069. 13477094  
SRR17520069. 13477096  
SRR17520069. 13477098  
SRR17520069. 13477102  
SRR17520069. 13477104  
SRR17520069. 13477106  
SRR17520069. 13477108  
SRR17520069. 13477110  
SRR17520069. 13477112  
SRR17520069. 13477114  
SRR17520069. 13477116  
SRR17520069. 13477120  
SRR17520069. 13477122  
SRR17520069. 13477124  
SRR17520069. 13477126  
SRR17520069. 13477128  
SRR17520069. 13477130  
SRR17520069. 13477134  
SRR17520069. 13477136  
SRR17520069. 13477138  
SRR17520069. 13477140

SRR17520069. 13477142  
SRR17520069. 13477144  
SRR17520069. 13477146  
SRR17520069. 13477148  
SRR17520069. 13477150  
SRR17520069. 13477152  
SRR17520069. 13477154  
SRR17520069. 13477156  
SRR17520069. 13477158  
SRR17520069. 13478231  
SRR17520069. 13478233  
SRR17520069. 13478235  
SRR17520069. 13478237  
SRR17520069. 13478239  
SRR17520069. 13478243  
SRR17520069. 13478245  
SRR17520069. 13478247  
SRR17520069. 13478249  
SRR17520069. 13478251  
SRR17520069. 13478253  
SRR17520069. 13478255  
SRR17520069. 13478257  
SRR17520069. 13478259  
SRR17520069. 13478261  
SRR17520069. 13478263  
SRR17520069. 13478265  
SRR17520069. 13478267  
SRR17520069. 13478269  
SRR17520069. 13478271  
SRR17520069. 13478273  
SRR17520069. 13478276  
SRR17520069. 13478278  
SRR17520069. 13478280  
SRR17520069. 13478282  
SRR17520069. 13478284  
SRR17520069. 13478286  
SRR17520069. 13478288  
SRR17520069. 13478290  
SRR17520069. 13478292  
SRR17520069. 13478294  
SRR17520069. 13478296  
SRR17520069. 13478298  
SRR17520069. 13478300  
SRR17520069. 13478302  
SRR17520069. 13478304  
SRR17520069. 13478306  
SRR17520069. 13478308



SRR17520069. 13478310  
SRR17520069. 13478312  
SRR17520069. 13478314  
SRR17520069. 13478316  
SRR17520069. 13478318  
SRR17520069. 13482357  
SRR17520069. 13484692  
SRR17520069. 13484694  
SRR17520069. 13484696  
SRR17520069. 13484698  
SRR17520069. 13484706  
SRR17520069. 13484708  
SRR17520069. 13484710  
SRR17520069. 13484714  
SRR17520069. 13484716  
SRR17520069. 13484718  
SRR17520069. 13484720  
SRR17520069. 13484722  
SRR17520069. 13484724  
SRR17520069. 13484726  
SRR17520069. 13484728  
SRR17520069. 13484730  
SRR17520069. 13484732  
SRR17520069. 13484734  
SRR17520069. 13484736  
SRR17520069. 13484738  
SRR17520069. 13484740  
SRR17520069. 13484742  
SRR17520069. 13484744  
SRR17520069. 13484746  
SRR17520069. 13484748  
SRR17520069. 13484750  
SRR17520069. 13484752  
SRR17520069. 13484754  
SRR17520069. 13484758  
SRR17520069. 13484760  
SRR17520069. 13484762  
SRR17520069. 13484764  
SRR17520069. 13484766  
SRR17520069. 13484768  
SRR17520069. 13484774  
SRR17520069. 13484776  
SRR17520069. 13484778  
SRR17520069. 13484780  
SRR17520069. 13484782  
SRR17520069. 13484786  
SRR17520069. 13484788

SRR17520069. 13490851  
SRR17520069. 13490853  
SRR17520069. 13490855  
SRR17520069. 13490857  
SRR17520069. 13490859  
SRR17520069. 13490861  
SRR17520069. 13490863  
SRR17520069. 13490865  
SRR17520069. 13490867  
SRR17520069. 13490869  
SRR17520069. 13490871  
SRR17520069. 13490873  
SRR17520069. 13490877  
SRR17520069. 13490879  
SRR17520069. 13490881  
SRR17520069. 13490883  
SRR17520069. 13490885  
SRR17520069. 13490887  
SRR17520069. 13490889  
SRR17520069. 13490891  
SRR17520069. 13490893  
SRR17520069. 13490895  
SRR17520069. 13490897  
SRR17520069. 13490899  
SRR17520069. 13494569  
SRR17520069. 13498794  
SRR17520069. 13498796  
SRR17520069. 13498798  
SRR17520069. 13498800  
SRR17520069. 13498802  
SRR17520069. 13498804  
SRR17520069. 13498806  
SRR17520069. 13498808  
SRR17520069. 13498810  
SRR17520069. 13498812  
SRR17520069. 13498814  
SRR17520069. 13498816  
SRR17520069. 13498820  
SRR17520069. 13498822  
SRR17520069. 13498824  
SRR17520069. 13498826  
SRR17520069. 13498830  
SRR17520069. 13498832  
SRR17520069. 13498834  
SRR17520069. 13498836  
SRR17520069. 13498838  
SRR17520069. 13498840

SRR17520069. 13498842  
SRR17520069. 13498844  
SRR17520069. 13498846  
SRR17520069. 13498848  
SRR17520069. 13498850  
SRR17520069. 13498852  
SRR17520069. 13498854  
SRR17520069. 13498856  
SRR17520069. 13498858  
SRR17520069. 13498860  
SRR17520069. 13498862  
SRR17520069. 13498864  
SRR17520069. 13498868  
SRR17520069. 13498870  
SRR17520069. 13498872  
SRR17520069. 13498874  
SRR17520069. 13498876  
SRR17520069. 13498878  
SRR17520069. 13498880  
SRR17520069. 13498882  
SRR17520069. 13498884  
SRR17520069. 13498886  
SRR17520069. 13498888  
SRR17520069. 13498890  
SRR17520069. 13498892  
SRR17520069. 13498896  
SRR17520069. 13498898  
SRR17520069. 13498900  
SRR17520069. 13498902  
SRR17520069. 13498904  
SRR17520069. 13501605  
SRR17520069. 13501607  
SRR17520069. 13501609  
SRR17520069. 13501611  
SRR17520069. 13501613  
SRR17520069. 13501712  
SRR17520069. 13501714  
SRR17520069. 13501716  
SRR17520069. 13501718  
SRR17520069. 13501720  
SRR17520069. 13504455  
SRR17520069. 13504457  
SRR17520069. 13504459  
SRR17520069. 13504461  
SRR17520069. 13504463  
SRR17520069. 13504465  
SRR17520069. 13504467

SRR17520069. 13504469  
SRR17520069. 13504471  
SRR17520069. 13504473  
SRR17520069. 13504475  
SRR17520069. 13507380  
SRR17520069. 13507605  
SRR17520069. 13507607  
SRR17520069. 13507609  
SRR17520069. 13507611  
SRR17520069. 13507613  
SRR17520069. 13507615  
SRR17520069. 13511366  
SRR17520069. 13511368  
SRR17520069. 13511370  
SRR17520069. 13511372  
SRR17520069. 13511374  
SRR17520069. 13511376  
SRR17520069. 13511378  
SRR17520069. 13511380  
SRR17520069. 13511382  
SRR17520069. 13511384  
SRR17520069. 13511386  
SRR17520069. 13527557  
SRR17520069. 13527563  
SRR17520069. 13527567  
SRR17520069. 13527569  
SRR17520069. 13529617  
SRR17520069. 13529619  
SRR17520069. 13529623  
SRR17520069. 13529627  
SRR17520069. 13529629  
SRR17520069. 13529631  
SRR17520069. 13529637  
SRR17520069. 13529639  
SRR17520069. 13529641  
SRR17520069. 13529643  
SRR17520069. 13529645  
SRR17520069. 13529647  
SRR17520069. 13529649  
SRR17520069. 13529651  
SRR17520069. 13529653  
SRR17520069. 13529655  
SRR17520069. 13529657  
SRR17520069. 13529659  
SRR17520069. 13529661  
SRR17520069. 13529663  
SRR17520069. 13529665

SRR17520069. 13529667  
SRR17520069. 13529669  
SRR17520069. 13529671  
SRR17520069. 13529673  
SRR17520069. 13529675  
SRR17520069. 13539812  
SRR17520069. 13539814  
SRR17520069. 13539816  
SRR17520069. 13539818  
SRR17520069. 13539820  
SRR17520069. 13539822  
SRR17520069. 13539824  
SRR17520069. 13539826  
SRR17520069. 13542193  
SRR17520069. 13542971  
SRR17520069. 13542973  
SRR17520069. 13542975  
SRR17520069. 13542977  
SRR17520069. 13542979  
SRR17520069. 13542981  
SRR17520069. 13542983  
SRR17520069. 13542985  
SRR17520069. 13542987  
SRR17520069. 13542989  
SRR17520069. 13542991  
SRR17520069. 13542993  
SRR17520069. 13542995  
SRR17520069. 13542997  
SRR17520069. 13542999  
SRR17520069. 13543001  
SRR17520069. 13543003  
SRR17520069. 13543005  
SRR17520069. 13545840  
SRR17520069. 13545842  
SRR17520069. 13545844  
SRR17520069. 13550752  
SRR17520069. 13564226  
SRR17520069. 13564228  
SRR17520069. 13565685  
SRR17520069. 13565687  
SRR17520069. 13565689  
SRR17520069. 13565691  
SRR17520069. 13565693  
SRR17520069. 13565695  
SRR17520069. 13565697  
SRR17520069. 13565699  
SRR17520069. 13565701

SRR17520069. 13565703  
SRR17520069. 13565705  
SRR17520069. 13565707  
SRR17520069. 13565713  
SRR17520069. 13565715  
SRR17520069. 13565717  
SRR17520069. 13565719  
SRR17520069. 13565721  
SRR17520069. 13565723  
SRR17520069. 13565725  
SRR17520069. 13565727  
SRR17520069. 13565729  
SRR17520069. 13565731  
SRR17520069. 13565733  
SRR17520069. 13565735  
SRR17520069. 13565737  
SRR17520069. 13565739  
SRR17520069. 13565741  
SRR17520069. 13565743  
SRR17520069. 13565745  
SRR17520069. 13565747  
SRR17520069. 13565749  
SRR17520069. 13565751  
SRR17520069. 13565753  
SRR17520069. 13565755  
SRR17520069. 13565757  
SRR17520069. 13565761  
SRR17520069. 13570221  
SRR17520069. 13570223  
SRR17520069. 13570225  
SRR17520069. 13570227  
SRR17520069. 13570229  
SRR17520069. 13570233  
SRR17520069. 13570235  
SRR17520069. 13570237  
SRR17520069. 13570241  
SRR17520069. 13570243  
SRR17520069. 13570247  
SRR17520069. 13573281  
SRR17520069. 13573283  
SRR17520069. 13573285  
SRR17520069. 13573287  
SRR17520069. 13573289  
SRR17520069. 13573291  
SRR17520069. 13573293  
SRR17520069. 13573295  
SRR17520069. 13573299

SRR17520069. 13573301  
SRR17520069. 13573303  
SRR17520069. 13573305  
SRR17520069. 13573307  
SRR17520069. 13573309  
SRR17520069. 13573311  
SRR17520069. 13573313  
SRR17520069. 13582672  
SRR17520069. 13582674  
SRR17520069. 13582678  
SRR17520069. 13582680  
SRR17520069. 13582682  
SRR17520069. 13582684  
SRR17520069. 13582686  
SRR17520069. 13582688  
SRR17520069. 13582690  
SRR17520069. 13582692  
SRR17520069. 13582694  
SRR17520069. 13582696  
SRR17520069. 13582700  
SRR17520069. 13582702  
SRR17520069. 13582704  
SRR17520069. 13582706  
SRR17520069. 13582708  
SRR17520069. 13582710  
SRR17520069. 13582712  
SRR17520069. 13582714  
SRR17520069. 13582716  
SRR17520069. 13582718  
SRR17520069. 13582720  
SRR17520069. 13582722  
SRR17520069. 13585618  
SRR17520069. 13585620  
SRR17520069. 13585622  
SRR17520069. 13585624  
SRR17520069. 13585626  
SRR17520069. 13585628  
SRR17520069. 13592129  
SRR17520069. 13592131  
SRR17520069. 13592133  
SRR17520069. 13592135  
SRR17520069. 13592137  
SRR17520069. 13592139  
SRR17520069. 13592141  
SRR17520069. 13592143  
SRR17520069. 13592145  
SRR17520069. 13592151

SRR17520069. 13592155  
SRR17520069. 13596659  
SRR17520069. 13596661  
SRR17520069. 13597083  
SRR17520069. 13597085  
SRR17520069. 13597087  
SRR17520069. 13597089  
SRR17520069. 13597091  
SRR17520069. 13597095  
SRR17520069. 13597097  
SRR17520069. 13597307  
SRR17520069. 13597309  
SRR17520069. 13597311  
SRR17520069. 13597313  
SRR17520069. 13597315  
SRR17520069. 13597317  
SRR17520069. 13597319  
SRR17520069. 13597321  
SRR17520069. 13597323  
SRR17520069. 13597325  
SRR17520069. 13597327  
SRR17520069. 13597329  
SRR17520069. 13597331  
SRR17520069. 13597333  
SRR17520069. 13597337  
SRR17520069. 13597339  
SRR17520069. 13597343  
SRR17520069. 13597345  
SRR17520069. 13597347  
SRR17520069. 13597349  
SRR17520069. 13597351  
SRR17520069. 13597355  
SRR17520069. 13597357  
SRR17520069. 13605109  
SRR17520069. 13605111  
SRR17520069. 13605113  
SRR17520069. 13605115  
SRR17520069. 13605117  
SRR17520069. 13605119  
SRR17520069. 13605121  
SRR17520069. 13605123  
SRR17520069. 13605125  
SRR17520069. 13605127  
SRR17520069. 13605129  
SRR17520069. 13605131  
SRR17520069. 13605135  
SRR17520069. 13605137



SRR17520069. 13605139  
SRR17520069. 13605141  
SRR17520069. 13605143  
SRR17520069. 13605145  
SRR17520069. 13605147  
SRR17520069. 13605149  
SRR17520069. 13605151  
SRR17520069. 13605153  
SRR17520069. 13605155  
SRR17520069. 13605157  
SRR17520069. 13605159  
SRR17520069. 13605161  
SRR17520069. 13605163  
SRR17520069. 13605165  
SRR17520069. 13605167  
SRR17520069. 13605169  
SRR17520069. 13605171  
SRR17520069. 13605173  
SRR17520069. 13605177  
SRR17520069. 13606776  
SRR17520069. 13606778  
SRR17520069. 13606780  
SRR17520069. 13606782  
SRR17520069. 13606784  
SRR17520069. 13606786  
SRR17520069. 13606788  
SRR17520069. 13606790  
SRR17520069. 13606792  
SRR17520069. 13606794  
SRR17520069. 13606796  
SRR17520069. 13606798  
SRR17520069. 13606800  
SRR17520069. 13606802  
SRR17520069. 13606804  
SRR17520069. 13606806  
SRR17520069. 13606808  
SRR17520069. 13608194  
SRR17520069. 13608655  
SRR17520069. 13608657  
SRR17520069. 13608659  
SRR17520069. 13608661  
SRR17520069. 13608663  
SRR17520069. 13608665  
SRR17520069. 13608667  
SRR17520069. 13608951  
SRR17520069. 13608955  
SRR17520069. 13610506

SRR17520069. 13610508  
SRR17520069. 13616855  
SRR17520069. 13625277  
SRR17520069. 13625279  
SRR17520069. 13625281  
SRR17520069. 13625283  
SRR17520069. 13625285  
SRR17520069. 13625287  
SRR17520069. 13625289  
SRR17520069. 13625291  
SRR17520069. 13625293  
SRR17520069. 13625295  
SRR17520069. 13625297  
SRR17520069. 13627811  
SRR17520069. 13627813  
SRR17520069. 13633601  
SRR17520069. 13633603  
SRR17520069. 13637150  
SRR17520069. 13637152  
SRR17520069. 13638487  
SRR17520069. 13638489  
SRR17520069. 13638491  
SRR17520069. 13638493  
SRR17520069. 13638495  
SRR17520069. 13638497  
SRR17520069. 13638499  
SRR17520069. 13638501  
SRR17520069. 13638503  
SRR17520069. 13638505  
SRR17520069. 13638507  
SRR17520069. 13638509  
SRR17520069. 13638511  
SRR17520069. 13638513  
SRR17520069. 13638515  
SRR17520069. 13638517  
SRR17520069. 13638519  
SRR17520069. 13638521  
SRR17520069. 13638523  
SRR17520069. 13638525  
SRR17520069. 13638527  
SRR17520069. 13638529  
SRR17520069. 13638531  
SRR17520069. 13638533  
SRR17520069. 13638535  
SRR17520069. 13638537  
SRR17520069. 13638539  
SRR17520069. 13644156

SRR17520069. 13644158  
SRR17520069. 13644160  
SRR17520069. 13644162  
SRR17520069. 13644164  
SRR17520069. 13644166  
SRR17520069. 13644168  
SRR17520069. 13644170  
SRR17520069. 13644172  
SRR17520069. 13644174  
SRR17520069. 13644176  
SRR17520069. 13644178  
SRR17520069. 13644180  
SRR17520069. 13644182  
SRR17520069. 13644184  
SRR17520069. 13644186  
SRR17520069. 13644188  
SRR17520069. 13644190  
SRR17520069. 13644192  
SRR17520069. 13644194  
SRR17520069. 13644196  
SRR17520069. 13644198  
SRR17520069. 13644200  
SRR17520069. 13644202  
SRR17520069. 13644204  
SRR17520069. 13644206  
SRR17520069. 13644208  
SRR17520069. 13649731  
SRR17520069. 13649733  
SRR17520069. 13649735  
SRR17520069. 13649737  
SRR17520069. 13649739  
SRR17520069. 13649743  
SRR17520069. 13649745  
SRR17520069. 13649747  
SRR17520069. 13649749  
SRR17520069. 13649751  
SRR17520069. 13654264  
SRR17520069. 13654266  
SRR17520069. 13654268  
SRR17520069. 13654270  
SRR17520069. 13654272  
SRR17520069. 13654274  
SRR17520069. 13655861  
SRR17520069. 13655863  
SRR17520069. 13655865  
SRR17520069. 13655867  
SRR17520069. 13655869

SRR17520069. 13655871  
SRR17520069. 13655873  
SRR17520069. 13656592  
SRR17520069. 13658950  
SRR17520069. 13658954  
SRR17520069. 13658956  
SRR17520069. 13658958  
SRR17520069. 13658960  
SRR17520069. 13658962  
SRR17520069. 13658964  
SRR17520069. 13658966  
SRR17520069. 13658968  
SRR17520069. 13658972  
SRR17520069. 13658974  
SRR17520069. 13667499  
SRR17520069. 13667501  
SRR17520069. 13667503  
SRR17520069. 13667507  
SRR17520069. 13667509  
SRR17520069. 13667511  
SRR17520069. 13667513  
SRR17520069. 13667515  
SRR17520069. 13667517  
SRR17520069. 13667519  
SRR17520069. 13667521  
SRR17520069. 13667523  
SRR17520069. 13667525  
SRR17520069. 13667527  
SRR17520069. 13668365  
SRR17520069. 13668367  
SRR17520069. 13668369  
SRR17520069. 13668371  
SRR17520069. 13668373  
SRR17520069. 13668375  
SRR17520069. 13668377  
SRR17520069. 13668379  
SRR17520069. 13668381  
SRR17520069. 13668383  
SRR17520069. 13668861  
SRR17520069. 13668863  
SRR17520069. 13668865  
SRR17520069. 13668867  
SRR17520069. 13668869  
SRR17520069. 13668871  
SRR17520069. 13668877  
SRR17520069. 13676074  
SRR17520069. 13676076

SRR17520069. 13676078  
SRR17520069. 13676080  
SRR17520069. 13676082  
SRR17520069. 13676084  
SRR17520069. 13676086  
SRR17520069. 13676088  
SRR17520069. 13676090  
SRR17520069. 13676092  
SRR17520069. 13676094  
SRR17520069. 13676096  
SRR17520069. 13676098  
SRR17520069. 13676100  
SRR17520069. 13676102  
SRR17520069. 13676104  
SRR17520069. 13676106  
SRR17520069. 13676108  
SRR17520069. 13676110  
SRR17520069. 13676112  
SRR17520069. 13676114  
SRR17520069. 13676116  
SRR17520069. 13676118  
SRR17520069. 13676120  
SRR17520069. 13676122  
SRR17520069. 13676124  
SRR17520069. 13676126  
SRR17520069. 13676128  
SRR17520069. 13676130  
SRR17520069. 13676132  
SRR17520069. 13676134  
SRR17520069. 13676136  
SRR17520069. 13676138  
SRR17520069. 13676140  
SRR17520069. 13676142  
SRR17520069. 13676144  
SRR17520069. 13676146  
SRR17520069. 13676150  
SRR17520069. 13676152  
SRR17520069. 13676154  
SRR17520069. 13676156  
SRR17520069. 13676158  
SRR17520069. 13676292  
SRR17520069. 13676294  
SRR17520069. 13676296  
SRR17520069. 13676300  
SRR17520069. 13676302  
SRR17520069. 13676304  
SRR17520069. 13676306

SRR17520069. 13676308  
SRR17520069. 13676310  
SRR17520069. 13676312  
SRR17520069. 13676314  
SRR17520069. 13676316  
SRR17520069. 13676318  
SRR17520069. 13676320  
SRR17520069. 13676322  
SRR17520069. 13676324  
SRR17520069. 13676326  
SRR17520069. 13676328  
SRR17520069. 13676330  
SRR17520069. 13676332  
SRR17520069. 13676334  
SRR17520069. 13676336  
SRR17520069. 13676338  
SRR17520069. 13676340  
SRR17520069. 13676342  
SRR17520069. 13676344  
SRR17520069. 13676346  
SRR17520069. 13676348  
SRR17520069. 13676350  
SRR17520069. 13676352  
SRR17520069. 13676354  
SRR17520069. 13676356  
SRR17520069. 13676358  
SRR17520069. 13676360  
SRR17520069. 13676362  
SRR17520069. 13676364  
SRR17520069. 13676366  
SRR17520069. 13676368  
SRR17520069. 13677747  
SRR17520069. 13677749  
SRR17520069. 13677751  
SRR17520069. 13677753  
SRR17520069. 13677755  
SRR17520069. 13677757  
SRR17520069. 13677759  
SRR17520069. 13677761  
SRR17520069. 13678970  
SRR17520069. 13678972  
SRR17520069. 13678976  
SRR17520069. 13678980  
SRR17520069. 13679080  
SRR17520069. 13683130  
SRR17520069. 13683132  
SRR17520069. 13683138

SRR17520069. 13683140  
SRR17520069. 13683144  
SRR17520069. 13683148  
SRR17520069. 13688055  
SRR17520069. 13688057  
SRR17520069. 13688059  
SRR17520069. 13688061  
SRR17520069. 13688063  
SRR17520069. 13688065  
SRR17520069. 13688067  
SRR17520069. 13688069  
SRR17520069. 13688071  
SRR17520069. 13688073  
SRR17520069. 13688075  
SRR17520069. 13688077  
SRR17520069. 13688079  
SRR17520069. 13688081  
SRR17520069. 13688083  
SRR17520069. 13688085  
SRR17520069. 13688087  
SRR17520069. 13688089  
SRR17520069. 13688091  
SRR17520069. 13688093  
SRR17520069. 13688097  
SRR17520069. 13688099  
SRR17520069. 13688101  
SRR17520069. 13688103  
SRR17520069. 13689129  
SRR17520069. 13689131  
SRR17520069. 13689133  
SRR17520069. 13689135  
SRR17520069. 13689137  
SRR17520069. 13689139  
SRR17520069. 13689141  
SRR17520069. 13689143  
SRR17520069. 13689145  
SRR17520069. 13689147  
SRR17520069. 13689149  
SRR17520069. 13689151  
SRR17520069. 13689153  
SRR17520069. 13689155  
SRR17520069. 13689157  
SRR17520069. 13689159  
SRR17520069. 13689161  
SRR17520069. 13689163  
SRR17520069. 13689165  
SRR17520069. 13689167

SRR17520069. 13689169  
SRR17520069. 13689171  
SRR17520069. 13689173  
SRR17520069. 13689175  
SRR17520069. 13689177  
SRR17520069. 13689179  
SRR17520069. 13689181  
SRR17520069. 13689183  
SRR17520069. 13689185  
SRR17520069. 13689187  
SRR17520069. 13689189  
SRR17520069. 13689191  
SRR17520069. 13689193  
SRR17520069. 13689195  
SRR17520069. 13689197  
SRR17520069. 13689199  
SRR17520069. 13689201  
SRR17520069. 13691451  
SRR17520069. 13691453  
SRR17520069. 13691455  
SRR17520069. 13691837  
SRR17520069. 13691839  
SRR17520069. 13691841  
SRR17520069. 13691843  
SRR17520069. 13691847  
SRR17520069. 13691849  
SRR17520069. 13691851  
SRR17520069. 13691855  
SRR17520069. 13691857  
SRR17520069. 13691859  
SRR17520069. 13691861  
SRR17520069. 13691863  
SRR17520069. 13691867  
SRR17520069. 13691869  
SRR17520069. 13691871  
SRR17520069. 13691873  
SRR17520069. 13691877  
SRR17520069. 13691879  
SRR17520069. 13691883  
SRR17520069. 13691885  
SRR17520069. 13691887  
SRR17520069. 13691889  
SRR17520069. 13691891  
SRR17520069. 13691893  
SRR17520069. 13691895  
SRR17520069. 13691897  
SRR17520069. 13691901



SRR17520069. 13691903  
SRR17520069. 13691905  
SRR17520069. 13691907  
SRR17520069. 13691909  
SRR17520069. 13691911  
SRR17520069. 13691913  
SRR17520069. 13691915  
SRR17520069. 13691917  
SRR17520069. 13691919  
SRR17520069. 13691921  
SRR17520069. 13691925  
SRR17520069. 13691929  
SRR17520069. 13691931  
SRR17520069. 13691933  
SRR17520069. 13691935  
SRR17520069. 13694248  
SRR17520069. 13694250  
SRR17520069. 13694252  
SRR17520069. 13695683  
SRR17520069. 13695685  
SRR17520069. 13695687  
SRR17520069. 13698185  
SRR17520069. 13701649  
SRR17520069. 13701651  
SRR17520069. 13701653  
SRR17520069. 13701655  
SRR17520069. 13701657  
SRR17520069. 13701659  
SRR17520069. 13701661  
SRR17520069. 13701663  
SRR17520069. 13701665  
SRR17520069. 13701667  
SRR17520069. 13701669  
SRR17520069. 13701671  
SRR17520069. 13701673  
SRR17520069. 13701675  
SRR17520069. 13701677  
SRR17520069. 13701679  
SRR17520069. 13701681  
SRR17520069. 13701683  
SRR17520069. 13701685  
SRR17520069. 13701687  
SRR17520069. 13701689  
SRR17520069. 13701691  
SRR17520069. 13701693  
SRR17520069. 13701695  
SRR17520069. 13701697

SRR17520069. 13701699  
SRR17520069. 13701701  
SRR17520069. 13701703  
SRR17520069. 13701705  
SRR17520069. 13701707  
SRR17520069. 13701709  
SRR17520069. 13701711  
SRR17520069. 13701713  
SRR17520069. 13701715  
SRR17520069. 13701717  
SRR17520069. 13701719  
SRR17520069. 13701721  
SRR17520069. 13701723  
SRR17520069. 13701725  
SRR17520069. 13701727  
SRR17520069. 13701729  
SRR17520069. 13701731  
SRR17520069. 13701733  
SRR17520069. 13701735  
SRR17520069. 13701737  
SRR17520069. 13701739  
SRR17520069. 13701741  
SRR17520069. 13701743  
SRR17520069. 13701745  
SRR17520069. 13713848  
SRR17520069. 13713850  
SRR17520069. 13715633  
SRR17520069. 13715635  
SRR17520069. 13715637  
SRR17520069. 13715639  
SRR17520069. 13715641  
SRR17520069. 13715643  
SRR17520069. 13715645  
SRR17520069. 13715647  
SRR17520069. 13715649  
SRR17520069. 13715651  
SRR17520069. 13715653  
SRR17520069. 13715655  
SRR17520069. 13715657  
SRR17520069. 13715659  
SRR17520069. 13715661  
SRR17520069. 13715663  
SRR17520069. 13715665  
SRR17520069. 13715667  
SRR17520069. 13715669  
SRR17520069. 13715671  
SRR17520069. 13715673

SRR17520069. 13715675  
SRR17520069. 13715677  
SRR17520069. 13715679  
SRR17520069. 13718767  
SRR17520069. 13718769  
SRR17520069. 13718771  
SRR17520069. 13718773  
SRR17520069. 13718775  
SRR17520069. 13718777  
SRR17520069. 13718779  
SRR17520069. 13718781  
SRR17520069. 13718783  
SRR17520069. 13718785  
SRR17520069. 13722144  
SRR17520069. 13722146  
SRR17520069. 13722148  
SRR17520069. 13722150  
SRR17520069. 13722152  
SRR17520069. 13722154  
SRR17520069. 13722158  
SRR17520069. 13722160  
SRR17520069. 13722162  
SRR17520069. 13722164  
SRR17520069. 13722166  
SRR17520069. 13722168  
SRR17520069. 13722170  
SRR17520069. 13722172  
SRR17520069. 13722174  
SRR17520069. 13722176  
SRR17520069. 13722178  
SRR17520069. 13722180  
SRR17520069. 13722182  
SRR17520069. 13722184  
SRR17520069. 13724718  
SRR17520069. 13724721  
SRR17520069. 13724723  
SRR17520069. 13724725  
SRR17520069. 13724727  
SRR17520069. 13724729  
SRR17520069. 13724731  
SRR17520069. 13724733  
SRR17520069. 13724735  
SRR17520069. 13724737  
SRR17520069. 13724739  
SRR17520069. 13724741  
SRR17520069. 13724745  
SRR17520069. 13724747

SRR17520069. 13727684  
SRR17520069. 13727686  
SRR17520069. 13727688  
SRR17520069. 13727690  
SRR17520069. 13727692  
SRR17520069. 13727694  
SRR17520069. 13727696  
SRR17520069. 13727698  
SRR17520069. 13727700  
SRR17520069. 13727702  
SRR17520069. 13727704  
SRR17520069. 13727706  
SRR17520069. 13730248  
SRR17520069. 13730250  
SRR17520069. 13730252  
SRR17520069. 13730254  
SRR17520069. 13742382  
SRR17520069. 13742384  
SRR17520069. 13742386  
SRR17520069. 13742388  
SRR17520069. 13742390  
SRR17520069. 13742392  
SRR17520069. 13742394  
SRR17520069. 13742396  
SRR17520069. 13742398  
SRR17520069. 13742400  
SRR17520069. 13742402  
SRR17520069. 13742404  
SRR17520069. 13742406  
SRR17520069. 13742408  
SRR17520069. 13742410  
SRR17520069. 13742412  
SRR17520069. 13742414  
SRR17520069. 13742416  
SRR17520069. 13750204  
SRR17520069. 13750206  
SRR17520069. 13750208  
SRR17520069. 13750210  
SRR17520069. 13750212  
SRR17520069. 13750214  
SRR17520069. 13750216  
SRR17520069. 13750218  
SRR17520069. 13750220  
SRR17520069. 13750222  
SRR17520069. 13750224  
SRR17520069. 13750226  
SRR17520069. 13750228

SRR17520069. 13750230  
SRR17520069. 13750232  
SRR17520069. 13750234  
SRR17520069. 13750236  
SRR17520069. 13750238  
SRR17520069. 13750240  
SRR17520069. 13750242  
SRR17520069. 13751677  
SRR17520069. 13751679  
SRR17520069. 13751681  
SRR17520069. 13751683  
SRR17520069. 13751685  
SRR17520069. 13751687  
SRR17520069. 13757355  
SRR17520069. 13757357  
SRR17520069. 13759938  
SRR17520069. 13759940  
SRR17520069. 13759942  
SRR17520069. 13759944  
SRR17520069. 13759946  
SRR17520069. 13759948  
SRR17520069. 13759950  
SRR17520069. 13759952  
SRR17520069. 13759954  
SRR17520069. 13759956  
SRR17520069. 13759958  
SRR17520069. 13759960  
SRR17520069. 13759962  
SRR17520069. 13759964  
SRR17520069. 13759966  
SRR17520069. 13759968  
SRR17520069. 13759970  
SRR17520069. 13759972  
SRR17520069. 13759974  
SRR17520069. 13759976  
SRR17520069. 13759978  
SRR17520069. 13759980  
SRR17520069. 13759982  
SRR17520069. 13759984  
SRR17520069. 13759986  
SRR17520069. 13759988  
SRR17520069. 13759990  
SRR17520069. 13759992  
SRR17520069. 13759994  
SRR17520069. 13759996  
SRR17520069. 13759998  
SRR17520069. 13760000

SRR17520069. 13760002  
SRR17520069. 13760004  
SRR17520069. 13760008  
SRR17520069. 13760010  
SRR17520069. 13760012  
SRR17520069. 13760014  
SRR17520069. 13760016  
SRR17520069. 13760018  
SRR17520069. 13760020  
SRR17520069. 13760022  
SRR17520069. 13760024  
SRR17520069. 13760026  
SRR17520069. 13760028  
SRR17520069. 13760030  
SRR17520069. 13760034  
SRR17520069. 13760036  
SRR17520069. 13760038  
SRR17520069. 13760040  
SRR17520069. 13760042  
SRR17520069. 13760044  
SRR17520069. 13760046  
SRR17520069. 13760048  
SRR17520069. 13760050  
SRR17520069. 13760052  
SRR17520069. 13760054  
SRR17520069. 13760056  
SRR17520069. 13760060  
SRR17520069. 13760062  
SRR17520069. 13760064  
SRR17520069. 13760066  
SRR17520069. 13760068  
SRR17520069. 13760070  
SRR17520069. 13760072  
SRR17520069. 13760074  
SRR17520069. 13760076  
SRR17520069. 13760078  
SRR17520069. 13761413  
SRR17520069. 13761415  
SRR17520069. 13761417  
SRR17520069. 13761419  
SRR17520069. 13761421  
SRR17520069. 13761423  
SRR17520069. 13761425  
SRR17520069. 13761427  
SRR17520069. 13761429  
SRR17520069. 13761431  
SRR17520069. 13761433

SRR17520069. 13761435  
SRR17520069. 13761437  
SRR17520069. 13761439  
SRR17520069. 13761441  
SRR17520069. 13761443  
SRR17520069. 13761445  
SRR17520069. 13761447  
SRR17520069. 13761449  
SRR17520069. 13761451  
SRR17520069. 13761453  
SRR17520069. 13761455  
SRR17520069. 13761457  
SRR17520069. 13761459  
SRR17520069. 13761461  
SRR17520069. 13761463  
SRR17520069. 13761465  
SRR17520069. 13761467  
SRR17520069. 13761469  
SRR17520069. 13761471  
SRR17520069. 13761473  
SRR17520069. 13761475  
SRR17520069. 13761477  
SRR17520069. 13761479  
SRR17520069. 13761481  
SRR17520069. 13761483  
SRR17520069. 13761485  
SRR17520069. 13761487  
SRR17520069. 13761489  
SRR17520069. 13761493  
SRR17520069. 13761495  
SRR17520069. 13761497  
SRR17520069. 13761499  
SRR17520069. 13761501  
SRR17520069. 13761503  
SRR17520069. 13761505  
SRR17520069. 13761507  
SRR17520069. 13761509  
SRR17520069. 13761511  
SRR17520069. 13761513  
SRR17520069. 13761515  
SRR17520069. 13761517  
SRR17520069. 13761519  
SRR17520069. 13761521  
SRR17520069. 13761523  
SRR17520069. 13761525  
SRR17520069. 13761527  
SRR17520069. 13761529

SRR17520069. 13761531  
SRR17520069. 13761533  
SRR17520069. 13761535  
SRR17520069. 13761537  
SRR17520069. 13761539  
SRR17520069. 13761541  
SRR17520069. 13763941  
SRR17520069. 13763943  
SRR17520069. 13763945  
SRR17520069. 13763947  
SRR17520069. 13763949  
SRR17520069. 13763951  
SRR17520069. 13763953  
SRR17520069. 13763955  
SRR17520069. 13763957  
SRR17520069. 13763959  
SRR17520069. 13763961  
SRR17520069. 13763963  
SRR17520069. 13763965  
SRR17520069. 13763967  
SRR17520069. 13763969  
SRR17520069. 13763971  
SRR17520069. 13763973  
SRR17520069. 13763975  
SRR17520069. 13763977  
SRR17520069. 13764111  
SRR17520069. 13764113  
SRR17520069. 13766762  
SRR17520069. 13766764  
SRR17520069. 13766766  
SRR17520069. 13766768  
SRR17520069. 13766770  
SRR17520069. 13766772  
SRR17520069. 13766774  
SRR17520069. 13773852  
SRR17520069. 13773854  
SRR17520069. 13773856  
SRR17520069. 13773858  
SRR17520069. 13773860  
SRR17520069. 13773862  
SRR17520069. 13773864  
SRR17520069. 13775502  
SRR17520069. 13775504  
SRR17520069. 13775508  
SRR17520069. 13775510  
SRR17520069. 13775512  
SRR17520069. 13775514



SRR17520069. 13775518  
SRR17520069. 13775520  
SRR17520069. 13775522  
SRR17520069. 13775524  
SRR17520069. 13775526  
SRR17520069. 13775528  
SRR17520069. 13775530  
SRR17520069. 13775532  
SRR17520069. 13775534  
SRR17520069. 13775536  
SRR17520069. 13775538  
SRR17520069. 13775540  
SRR17520069. 13776221  
SRR17520069. 13776223  
SRR17520069. 13776225  
SRR17520069. 13776227  
SRR17520069. 13776231  
SRR17520069. 13776233  
SRR17520069. 13776235  
SRR17520069. 13776237  
SRR17520069. 13776239  
SRR17520069. 13776241  
SRR17520069. 13776243  
SRR17520069. 13776245  
SRR17520069. 13776247  
SRR17520069. 13776249  
SRR17520069. 13776251  
SRR17520069. 13776253  
SRR17520069. 13776255  
SRR17520069. 13776257  
SRR17520069. 13776259  
SRR17520069. 13776261  
SRR17520069. 13776263  
SRR17520069. 13776267  
SRR17520069. 13776269  
SRR17520069. 13776271  
SRR17520069. 13776273  
SRR17520069. 13776275  
SRR17520069. 13776277  
SRR17520069. 13776279  
SRR17520069. 13776281  
SRR17520069. 13776283  
SRR17520069. 13776285  
SRR17520069. 13776287  
SRR17520069. 13776526  
SRR17520069. 13776528  
SRR17520069. 13776530

SRR17520069. 13776532  
SRR17520069. 13776534  
SRR17520069. 13776536  
SRR17520069. 13776538  
SRR17520069. 13776542  
SRR17520069. 13776544  
SRR17520069. 13776546  
SRR17520069. 13776548  
SRR17520069. 13776550  
SRR17520069. 13776552  
SRR17520069. 13776554  
SRR17520069. 13776556  
SRR17520069. 13776558  
SRR17520069. 13776560  
SRR17520069. 13776562  
SRR17520069. 13776564  
SRR17520069. 13776566  
SRR17520069. 13776568  
SRR17520069. 13776570  
SRR17520069. 13776572  
SRR17520069. 13779061  
SRR17520069. 13779063  
SRR17520069. 13779065  
SRR17520069. 13779067  
SRR17520069. 13779069  
SRR17520069. 13779071  
SRR17520069. 13781553  
SRR17520069. 13781555  
SRR17520069. 13781557  
SRR17520069. 13781561  
SRR17520069. 13781563  
SRR17520069. 13781565  
SRR17520069. 13781567  
SRR17520069. 13781569  
SRR17520069. 13781571  
SRR17520069. 13781573  
SRR17520069. 13781575  
SRR17520069. 13781577  
SRR17520069. 13781579  
SRR17520069. 13781581  
SRR17520069. 13781583  
SRR17520069. 13781585  
SRR17520069. 13781587  
SRR17520069. 13781589  
SRR17520069. 13781591  
SRR17520069. 13781593  
SRR17520069. 13781595

SRR17520069. 13781597  
SRR17520069. 13781599  
SRR17520069. 13781601  
SRR17520069. 13781603  
SRR17520069. 13781605  
SRR17520069. 13781607  
SRR17520069. 13781609  
SRR17520069. 13781611  
SRR17520069. 13781613  
SRR17520069. 13781615  
SRR17520069. 13781617  
SRR17520069. 13781619  
SRR17520069. 13781621  
SRR17520069. 13781623  
SRR17520069. 13781625  
SRR17520069. 13781627  
SRR17520069. 13781629  
SRR17520069. 13781631  
SRR17520069. 13781633  
SRR17520069. 13781635  
SRR17520069. 13788409  
SRR17520069. 13791323  
SRR17520069. 13791325  
SRR17520069. 13791327  
SRR17520069. 13793496  
SRR17520069. 13793498  
SRR17520069. 13793500  
SRR17520069. 13793502  
SRR17520069. 13793504  
SRR17520069. 13793506  
SRR17520069. 13793508  
SRR17520069. 13793510  
SRR17520069. 13793512  
SRR17520069. 13793514  
SRR17520069. 13793516  
SRR17520069. 13793518  
SRR17520069. 13793520  
SRR17520069. 13793522  
SRR17520069. 13793524  
SRR17520069. 13793526  
SRR17520069. 13793528  
SRR17520069. 13793530  
SRR17520069. 13793532  
SRR17520069. 13793534  
SRR17520069. 13793536  
SRR17520069. 13795264  
SRR17520069. 13795266

SRR17520069. 13795268  
SRR17520069. 13795270  
SRR17520069. 13795272  
SRR17520069. 13795274  
SRR17520069. 13795276  
SRR17520069. 13795278  
SRR17520069. 13796488  
SRR17520069. 13796490  
SRR17520069. 13796492  
SRR17520069. 13796494  
SRR17520069. 13796496  
SRR17520069. 13798291  
SRR17520069. 13798293  
SRR17520069. 13798295  
SRR17520069. 13798297  
SRR17520069. 13798299  
SRR17520069. 13799816  
SRR17520069. 13799818  
SRR17520069. 13799820  
SRR17520069. 13799822  
SRR17520069. 13799824  
SRR17520069. 13799826  
SRR17520069. 13799828  
SRR17520069. 13799830  
SRR17520069. 13799832  
SRR17520069. 13799834  
SRR17520069. 13799836  
SRR17520069. 13799838  
SRR17520069. 13799840  
SRR17520069. 13799842  
SRR17520069. 13799844  
SRR17520069. 13799846  
SRR17520069. 13799848  
SRR17520069. 13799850  
SRR17520069. 13799852  
SRR17520069. 13799854  
SRR17520069. 13799856  
SRR17520069. 13799858  
SRR17520069. 13799860  
SRR17520069. 13799862  
SRR17520069. 13801152  
SRR17520069. 13801154  
SRR17520069. 13801156  
SRR17520069. 13801158  
SRR17520069. 13801160  
SRR17520069. 13801162  
SRR17520069. 13801164

SRR17520069. 13801166  
SRR17520069. 13801168  
SRR17520069. 13801170  
SRR17520069. 13801172  
SRR17520069. 13801174  
SRR17520069. 13801176  
SRR17520069. 13801178  
SRR17520069. 13801180  
SRR17520069. 13801182  
SRR17520069. 13801184  
SRR17520069. 13801186  
SRR17520069. 13801188  
SRR17520069. 13801190  
SRR17520069. 13801192  
SRR17520069. 13801194  
SRR17520069. 13801200  
SRR17520069. 13801202  
SRR17520069. 13801204  
SRR17520069. 13801206  
SRR17520069. 13801208  
SRR17520069. 13801210  
SRR17520069. 13801212  
SRR17520069. 13801214  
SRR17520069. 13801216  
SRR17520069. 13801218  
SRR17520069. 13801220  
SRR17520069. 13801222  
SRR17520069. 13801224  
SRR17520069. 13801226  
SRR17520069. 13801228  
SRR17520069. 13801344  
SRR17520069. 13801346  
SRR17520069. 13801348  
SRR17520069. 13801350  
SRR17520069. 13801352  
SRR17520069. 13801354  
SRR17520069. 13801356  
SRR17520069. 13801358  
SRR17520069. 13801360  
SRR17520069. 13801362  
SRR17520069. 13801364  
SRR17520069. 13801366  
SRR17520069. 13801368  
SRR17520069. 13801370  
SRR17520069. 13801372  
SRR17520069. 13801374  
SRR17520069. 13801376

SRR17520069. 13801378  
SRR17520069. 13801380  
SRR17520069. 13801384  
SRR17520069. 13801386  
SRR17520069. 13801388  
SRR17520069. 13801390  
SRR17520069. 13801392  
SRR17520069. 13801394  
SRR17520069. 13801396  
SRR17520069. 13801398  
SRR17520069. 13801400  
SRR17520069. 13801970  
SRR17520069. 13802043  
SRR17520069. 13802048  
SRR17520069. 13809110  
SRR17520069. 13809112  
SRR17520069. 13809114  
SRR17520069. 13809116  
SRR17520069. 13809118  
SRR17520069. 13809120  
SRR17520069. 13809122  
SRR17520069. 13809124  
SRR17520069. 13809126  
SRR17520069. 13810256  
SRR17520069. 13810258  
SRR17520069. 13810260  
SRR17520069. 13810262  
SRR17520069. 13810264  
SRR17520069. 13810266  
SRR17520069. 13810268  
SRR17520069. 13810270  
SRR17520069. 13810272  
SRR17520069. 13810274  
SRR17520069. 13810276  
SRR17520069. 13816063  
SRR17520069. 13816065  
SRR17520069. 13816067  
SRR17520069. 13816069  
SRR17520069. 13816071  
SRR17520069. 13816073  
SRR17520069. 13816075  
SRR17520069. 13816077  
SRR17520069. 13816081  
SRR17520069. 13816083  
SRR17520069. 13816087  
SRR17520069. 13816089  
SRR17520069. 13816091

SRR17520069. 13816093  
SRR17520069. 13816095  
SRR17520069. 13816097  
SRR17520069. 13816099  
SRR17520069. 13816101  
SRR17520069. 13816103  
SRR17520069. 13816105  
SRR17520069. 13816107  
SRR17520069. 13821446  
SRR17520069. 13822870  
SRR17520069. 13822872  
SRR17520069. 13822874  
SRR17520069. 13822876  
SRR17520069. 13822878  
SRR17520069. 13822880  
SRR17520069. 13822882  
SRR17520069. 13822884  
SRR17520069. 13822886  
SRR17520069. 13822888  
SRR17520069. 13822890  
SRR17520069. 13822892  
SRR17520069. 13822894  
SRR17520069. 13822896  
SRR17520069. 13822898  
SRR17520069. 13822900  
SRR17520069. 13822902  
SRR17520069. 13822904  
SRR17520069. 13822906  
SRR17520069. 13822908  
SRR17520069. 13822910  
SRR17520069. 13822912  
SRR17520069. 13822914  
SRR17520069. 13822916  
SRR17520069. 13822918  
SRR17520069. 13822920  
SRR17520069. 13822924  
SRR17520069. 13822926  
SRR17520069. 13822928  
SRR17520069. 13822930  
SRR17520069. 13822932  
SRR17520069. 13822934  
SRR17520069. 13822936  
SRR17520069. 13822938  
SRR17520069. 13822940  
SRR17520069. 13822942  
SRR17520069. 13822944  
SRR17520069. 13822946

SRR17520069. 13822948  
SRR17520069. 13822950  
SRR17520069. 13822952  
SRR17520069. 13822954  
SRR17520069. 13822956  
SRR17520069. 13822958  
SRR17520069. 13822960  
SRR17520069. 13822962  
SRR17520069. 13822964  
SRR17520069. 13822966  
SRR17520069. 13822968  
SRR17520069. 13822970  
SRR17520069. 13822972  
SRR17520069. 13822974  
SRR17520069. 13822976  
SRR17520069. 13822978  
SRR17520069. 13822980  
SRR17520069. 13822982  
SRR17520069. 13822984  
SRR17520069. 13822986  
SRR17520069. 13822988  
SRR17520069. 13822990  
SRR17520069. 13822992  
SRR17520069. 13829349  
SRR17520069. 13829351  
SRR17520069. 13835606  
SRR17520069. 13841726  
SRR17520069. 13841728  
SRR17520069. 13841730  
SRR17520069. 13841732  
SRR17520069. 13841734  
SRR17520069. 13841736  
SRR17520069. 13841738  
SRR17520069. 13841742  
SRR17520069. 13841746  
SRR17520069. 13841748  
SRR17520069. 13841750  
SRR17520069. 13841752  
SRR17520069. 13841754  
SRR17520069. 13841756  
SRR17520069. 13841758  
SRR17520069. 13841760  
SRR17520069. 13848860  
SRR17520069. 13848862  
SRR17520069. 13848864  
SRR17520069. 13848866  
SRR17520069. 13848868



SRR17520069. 13848870  
SRR17520069. 13848872  
SRR17520069. 13848874  
SRR17520069. 13848876  
SRR17520069. 13848878  
SRR17520069. 13848880  
SRR17520069. 13848882  
SRR17520069. 13848884  
SRR17520069. 13848886  
SRR17520069. 13848888  
SRR17520069. 13848890  
SRR17520069. 13848892  
SRR17520069. 13857103  
SRR17520069. 13857105  
SRR17520069. 13861939  
SRR17520069. 13861941  
SRR17520069. 13861943  
SRR17520069. 13861945  
SRR17520069. 13861949  
SRR17520069. 13861951  
SRR17520069. 13861953  
SRR17520069. 13861955  
SRR17520069. 13861959  
SRR17520069. 13861961  
SRR17520069. 13861963  
SRR17520069. 13861965  
SRR17520069. 13861967  
SRR17520069. 13861969  
SRR17520069. 13861973  
SRR17520069. 13861977  
SRR17520069. 13865728  
SRR17520069. 13865730  
SRR17520069. 13865732  
SRR17520069. 13865734  
SRR17520069. 13865736  
SRR17520069. 13865738  
SRR17520069. 13865740  
SRR17520069. 13865746  
SRR17520069. 13866496  
SRR17520069. 13866498  
SRR17520069. 13866500  
SRR17520069. 13869920  
SRR17520069. 13869922  
SRR17520069. 13869924  
SRR17520069. 13869926  
SRR17520069. 13869928  
SRR17520069. 13869930

SRR17520069. 13869932  
SRR17520069. 13869934  
SRR17520069. 13879014  
SRR17520069. 13879016  
SRR17520069. 13879018  
SRR17520069. 13879020  
SRR17520069. 13879022  
SRR17520069. 13879024  
SRR17520069. 13879026  
SRR17520069. 13879028  
SRR17520069. 13879030  
SRR17520069. 13879032  
SRR17520069. 13879034  
SRR17520069. 13879036  
SRR17520069. 13879038  
SRR17520069. 13879040  
SRR17520069. 13879042  
SRR17520069. 13879044  
SRR17520069. 13879046  
SRR17520069. 13879048  
SRR17520069. 13879050  
SRR17520069. 13879052  
SRR17520069. 13879054  
SRR17520069. 13879056  
SRR17520069. 13879792  
SRR17520069. 13879794  
SRR17520069. 13879796  
SRR17520069. 13879798  
SRR17520069. 13879800  
SRR17520069. 13879802  
SRR17520069. 13879804  
SRR17520069. 13879806  
SRR17520069. 13879808  
SRR17520069. 13879810  
SRR17520069. 13879812  
SRR17520069. 13879814  
SRR17520069. 13887333  
SRR17520069. 13887335  
SRR17520069. 13887337  
SRR17520069. 13887339  
SRR17520069. 13887341  
SRR17520069. 13887343  
SRR17520069. 13887345  
SRR17520069. 13887347  
SRR17520069. 13887349  
SRR17520069. 13887351  
SRR17520069. 13887355

SRR17520069. 13887357  
SRR17520069. 13887359  
SRR17520069. 13887361  
SRR17520069. 13895938  
SRR17520069. 13898705  
SRR17520069. 13898707  
SRR17520069. 13898709  
SRR17520069. 13898711  
SRR17520069. 13898713  
SRR17520069. 13898715  
SRR17520069. 13898717  
SRR17520069. 13898719  
SRR17520069. 13898721  
SRR17520069. 13898723  
SRR17520069. 13898725  
SRR17520069. 13898727  
SRR17520069. 13898729  
SRR17520069. 13898731  
SRR17520069. 13898733  
SRR17520069. 13898735  
SRR17520069. 13898737  
SRR17520069. 13898739  
SRR17520069. 13898741  
SRR17520069. 13898743  
SRR17520069. 13898745  
SRR17520069. 13898747  
SRR17520069. 13898749  
SRR17520069. 13898751  
SRR17520069. 13898753  
SRR17520069. 13898757  
SRR17520069. 13898759  
SRR17520069. 13898761  
SRR17520069. 13898763  
SRR17520069. 13898765  
SRR17520069. 13898767  
SRR17520069. 13898769  
SRR17520069. 13898771  
SRR17520069. 13898775  
SRR17520069. 13898777  
SRR17520069. 13898779  
SRR17520069. 13898781  
SRR17520069. 13898783  
SRR17520069. 13898785  
SRR17520069. 13898787  
SRR17520069. 13898789  
SRR17520069. 13898793  
SRR17520069. 13898795

SRR17520069. 13898797  
SRR17520069. 13898799  
SRR17520069. 13898801  
SRR17520069. 13898803  
SRR17520069. 13898805  
SRR17520069. 13898807  
SRR17520069. 13898809  
SRR17520069. 13898811  
SRR17520069. 13898813  
SRR17520069. 13898815  
SRR17520069. 13898817  
SRR17520069. 13898819  
SRR17520069. 13899248  
SRR17520069. 13899250  
SRR17520069. 13899252  
SRR17520069. 13899254  
SRR17520069. 13899256  
SRR17520069. 13899258  
SRR17520069. 13899260  
SRR17520069. 13899262  
SRR17520069. 13899264  
SRR17520069. 13899266  
SRR17520069. 13899268  
SRR17520069. 13899270  
SRR17520069. 13899337  
SRR17520069. 13899339  
SRR17520069. 13910753  
SRR17520069. 13910755  
SRR17520069. 13910757  
SRR17520069. 13910759  
SRR17520069. 13910761  
SRR17520069. 13910763  
SRR17520069. 13910765  
SRR17520069. 13910767  
SRR17520069. 13910769  
SRR17520069. 13910771  
SRR17520069. 13910773  
SRR17520069. 13910775  
SRR17520069. 13910777  
SRR17520069. 13910779  
SRR17520069. 13910781  
SRR17520069. 13910783  
SRR17520069. 13910785  
SRR17520069. 13910787  
SRR17520069. 13910789  
SRR17520069. 13910791  
SRR17520069. 13910793

SRR17520069. 13910795  
SRR17520069. 13910797  
SRR17520069. 13910799  
SRR17520069. 13910801  
SRR17520069. 13910803  
SRR17520069. 13910805  
SRR17520069. 13910807  
SRR17520069. 13910809  
SRR17520069. 13910811  
SRR17520069. 13910813  
SRR17520069. 13910815  
SRR17520069. 13910817  
SRR17520069. 13910819  
SRR17520069. 13910821  
SRR17520069. 13910823  
SRR17520069. 13910825  
SRR17520069. 13910827  
SRR17520069. 13910829  
SRR17520069. 13910831  
SRR17520069. 13910833  
SRR17520069. 13910835  
SRR17520069. 13910837  
SRR17520069. 13910839  
SRR17520069. 13910841  
SRR17520069. 13910843  
SRR17520069. 13910845  
SRR17520069. 13910847  
SRR17520069. 13910849  
SRR17520069. 13910851  
SRR17520069. 13910853  
SRR17520069. 13910855  
SRR17520069. 13910857  
SRR17520069. 13910859  
SRR17520069. 13917645  
SRR17520069. 13917649  
SRR17520069. 13936061  
SRR17520069. 13937816  
SRR17520069. 13937818  
SRR17520069. 13937820  
SRR17520069. 13937822  
SRR17520069. 13937824  
SRR17520069. 13937826  
SRR17520069. 13937828  
SRR17520069. 13937830  
SRR17520069. 13937832  
SRR17520069. 13937834  
SRR17520069. 13937836

SRR17520069. 13937838  
SRR17520069. 13937840  
SRR17520069. 13937842  
SRR17520069. 13937846  
SRR17520069. 13937848  
SRR17520069. 13937852  
SRR17520069. 13937854  
SRR17520069. 13937856  
SRR17520069. 13937858  
SRR17520069. 13937860  
SRR17520069. 13937862  
SRR17520069. 13937864  
SRR17520069. 13937866  
SRR17520069. 13937868  
SRR17520069. 13937870  
SRR17520069. 13937872  
SRR17520069. 13940616  
SRR17520069. 13940618  
SRR17520069. 13940620  
SRR17520069. 13958536  
SRR17520069. 13958538  
SRR17520069. 13958540  
SRR17520069. 13971029  
SRR17520069. 13971031  
SRR17520069. 13971033  
SRR17520069. 13971035  
SRR17520069. 13971037  
SRR17520069. 13971039  
SRR17520069. 13971041  
SRR17520069. 13971043  
SRR17520069. 13971045  
SRR17520069. 13971047  
SRR17520069. 13971049  
SRR17520069. 13971051  
SRR17520069. 13971053  
SRR17520069. 13971055  
SRR17520069. 13971057  
SRR17520069. 13971059  
SRR17520069. 13971061  
SRR17520069. 13971063  
SRR17520069. 13971065  
SRR17520069. 13971067  
SRR17520069. 13971069  
SRR17520069. 13971071  
SRR17520069. 13971073  
SRR17520069. 13971075  
SRR17520069. 13971077

SRR17520069. 13971081  
SRR17520069. 13971083  
SRR17520069. 13971085  
SRR17520069. 13971087  
SRR17520069. 13971089  
SRR17520069. 13971091  
SRR17520069. 13971093  
SRR17520069. 13971095  
SRR17520069. 13971097  
SRR17520069. 13971099  
SRR17520069. 13978359  
SRR17520069. 13978361  
SRR17520069. 13978363  
SRR17520069. 13978367  
SRR17520069. 13978369  
SRR17520069. 13978371  
SRR17520069. 13978373  
SRR17520069. 13978375  
SRR17520069. 13978377  
SRR17520069. 13978379  
SRR17520069. 13978381  
SRR17520069. 13978383  
SRR17520069. 13978385  
SRR17520069. 13978387  
SRR17520069. 13978389  
SRR17520069. 13978391  
SRR17520069. 13978393  
SRR17520069. 13978395  
SRR17520069. 13978397  
SRR17520069. 13987359  
SRR17520069. 13987361  
SRR17520069. 13987363  
SRR17520069. 13987365  
SRR17520069. 13987367  
SRR17520069. 13987369  
SRR17520069. 13987371  
SRR17520069. 13987373  
SRR17520069. 13987375  
SRR17520069. 13987377  
SRR17520069. 13987379  
SRR17520069. 13987381  
SRR17520069. 13987383  
SRR17520069. 13987559  
SRR17520069. 13987561  
SRR17520069. 13993088  
SRR17520069. 13993090  
SRR17520069. 13993092

SRR17520069. 13993094  
SRR17520069. 13993096  
SRR17520069. 13993098  
SRR17520069. 13993100  
SRR17520069. 13993102  
SRR17520069. 13993106  
SRR17520069. 13993108  
SRR17520069. 13993110  
SRR17520069. 13993112  
SRR17520069. 13993114  
SRR17520069. 13993116  
SRR17520069. 13993120  
SRR17520069. 13993122  
SRR17520069. 13993124  
SRR17520069. 13993126  
SRR17520069. 13993128  
SRR17520069. 13993130  
SRR17520069. 13993132  
SRR17520069. 13993134  
SRR17520069. 13993136  
SRR17520069. 13993138  
SRR17520069. 13993140  
SRR17520069. 13993142  
SRR17520069. 13993144  
SRR17520069. 13993146  
SRR17520069. 13993148  
SRR17520069. 13993150  
SRR17520069. 13993152  
SRR17520069. 13993154  
SRR17520069. 13993158  
SRR17520069. 13993160  
SRR17520069. 13993162  
SRR17520069. 13993164  
SRR17520069. 13993166  
SRR17520069. 13993168  
SRR17520069. 13993172  
SRR17520069. 13993174  
SRR17520069. 13993176  
SRR17520069. 13993178  
SRR17520069. 13993180  
SRR17520069. 13993182  
SRR17520069. 13993184  
SRR17520069. 13993186  
SRR17520069. 13993188  
SRR17520069. 13993190  
SRR17520069. 13993192  
SRR17520069. 13993194



SRR17520069. 13993196  
SRR17520069. 13993198  
SRR17520069. 13993200  
SRR17520069. 13993202  
SRR17520069. 13993204  
SRR17520069. 13993206  
SRR17520069. 13993211  
SRR17520069. 13993213  
SRR17520069. 13993215  
SRR17520069. 13993217  
SRR17520069. 13993221  
SRR17520069. 13993223  
SRR17520069. 13993225  
SRR17520069. 13993227  
SRR17520069. 13993229  
SRR17520069. 13993231  
SRR17520069. 13993233  
SRR17520069. 13993235  
SRR17520069. 13993237  
SRR17520069. 13993239  
SRR17520069. 13993241  
SRR17520069. 13993243  
SRR17520069. 13993245  
SRR17520069. 13993247  
SRR17520069. 13993249  
SRR17520069. 13993251  
SRR17520069. 13993253  
SRR17520069. 13993255  
SRR17520069. 13993257  
SRR17520069. 13993259  
SRR17520069. 13993261  
SRR17520069. 13993263  
SRR17520069. 13993265  
SRR17520069. 13993267  
SRR17520069. 13993269  
SRR17520069. 13993271  
SRR17520069. 13993273  
SRR17520069. 13993277  
SRR17520069. 13993279  
SRR17520069. 13993283  
SRR17520069. 13993285  
SRR17520069. 13993287  
SRR17520069. 13993289  
SRR17520069. 13993293  
SRR17520069. 13993295  
SRR17520069. 13993297  
SRR17520069. 13993299

SRR17520069. 13993301  
SRR17520069. 13993303  
SRR17520069. 13993307  
SRR17520069. 13993309  
SRR17520069. 13993311  
SRR17520069. 13993313  
SRR17520069. 13993315  
SRR17520069. 13993317  
SRR17520069. 13993321  
SRR17520069. 13993323  
SRR17520069. 13993325  
SRR17520069. 13993327  
SRR17520069. 13994535  
SRR17520069. 13994541  
SRR17520069. 13995914  
SRR17520069. 13995916  
SRR17520069. 13995918  
SRR17520069. 13995920  
SRR17520069. 13995922  
SRR17520069. 14002155  
SRR17520069. 14002157  
SRR17520069. 14002159  
SRR17520069. 14002161  
SRR17520069. 14002163  
SRR17520069. 14002165  
SRR17520069. 14002167  
SRR17520069. 14002169  
SRR17520069. 14002171  
SRR17520069. 14002173  
SRR17520069. 14002177  
SRR17520069. 14002179  
SRR17520069. 14002181  
SRR17520069. 14002183  
SRR17520069. 14002185  
SRR17520069. 14002187  
SRR17520069. 14002189  
SRR17520069. 14002191  
SRR17520069. 14002195  
SRR17520069. 14002197  
SRR17520069. 14002199  
SRR17520069. 14002201  
SRR17520069. 14002203  
SRR17520069. 14002205  
SRR17520069. 14002207  
SRR17520069. 14002209  
SRR17520069. 14002211  
SRR17520069. 14002213

SRR17520069.14002215  
SRR17520069.14002217  
SRR17520069.14002219  
SRR17520069.14002221  
SRR17520069.14002223  
SRR17520069.14002225  
SRR17520069.14002227  
SRR17520069.14009026  
SRR17520069.14009028  
SRR17520069.14009030  
SRR17520069.14009032  
SRR17520069.14009034  
SRR17520069.14009036  
SRR17520069.14009038  
SRR17520069.14009040  
SRR17520069.14009042  
SRR17520069.14009044  
SRR17520069.14009046  
SRR17520069.14009048  
SRR17520069.14009050  
SRR17520069.14009052  
SRR17520069.14009054  
SRR17520069.14009056  
SRR17520069.14009058  
SRR17520069.14009060  
SRR17520069.14009062  
SRR17520069.14009064  
SRR17520069.14009066  
SRR17520069.14009068  
SRR17520069.14009070  
SRR17520069.14009072  
SRR17520069.14009074  
SRR17520069.14009078  
SRR17520069.14009080  
SRR17520069.14009082  
SRR17520069.14009084  
SRR17520069.14009086  
SRR17520069.14009088  
SRR17520069.14009090  
SRR17520069.14009092  
SRR17520069.14009094  
SRR17520069.14009096  
SRR17520069.14009098  
SRR17520069.14009100  
SRR17520069.14009102  
SRR17520069.14009104  
SRR17520069.14009106

SRR17520069.14009108  
SRR17520069.14009110  
SRR17520069.14009114  
SRR17520069.14009116  
SRR17520069.14009118  
SRR17520069.14009120  
SRR17520069.14009122  
SRR17520069.14009124  
SRR17520069.14009126  
SRR17520069.14009128  
SRR17520069.14009130  
SRR17520069.14009132  
SRR17520069.14009134  
SRR17520069.14009136  
SRR17520069.14009138  
SRR17520069.14009140  
SRR17520069.14009142  
SRR17520069.14009144  
SRR17520069.14009146  
SRR17520069.14009148  
SRR17520069.14009150  
SRR17520069.14009152  
SRR17520069.14009154  
SRR17520069.14009156  
SRR17520069.14009158  
SRR17520069.14009160  
SRR17520069.14012508  
SRR17520069.14012510  
SRR17520069.14012512  
SRR17520069.14012514  
SRR17520069.14012516  
SRR17520069.14012518  
SRR17520069.14012520  
SRR17520069.14012522  
SRR17520069.14012526  
SRR17520069.14012528  
SRR17520069.14012530  
SRR17520069.14012532  
SRR17520069.14012534  
SRR17520069.14012536  
SRR17520069.14012538  
SRR17520069.14012540  
SRR17520069.14012542  
SRR17520069.14012544  
SRR17520069.14012546  
SRR17520069.14012548  
SRR17520069.14012552

SRR17520069.14012554  
SRR17520069.14012556  
SRR17520069.14012558  
SRR17520069.14012560  
SRR17520069.14012562  
SRR17520069.14012564  
SRR17520069.14012566  
SRR17520069.14012568  
SRR17520069.14012570  
SRR17520069.14012572  
SRR17520069.14012574  
SRR17520069.14012576  
SRR17520069.14012578  
SRR17520069.14012580  
SRR17520069.14012582  
SRR17520069.14012584  
SRR17520069.14012586  
SRR17520069.14013065  
SRR17520069.14013067  
SRR17520069.14013069  
SRR17520069.14013071  
SRR17520069.14013075  
SRR17520069.14013077  
SRR17520069.14013079  
SRR17520069.14013081  
SRR17520069.14013083  
SRR17520069.14013085  
SRR17520069.14013087  
SRR17520069.14013089  
SRR17520069.14013091  
SRR17520069.14013093  
SRR17520069.14013095  
SRR17520069.14013097  
SRR17520069.14013099  
SRR17520069.14013101  
SRR17520069.14013103  
SRR17520069.14013105  
SRR17520069.14013107  
SRR17520069.14013109  
SRR17520069.14013111  
SRR17520069.14013113  
SRR17520069.14013115  
SRR17520069.14013117  
SRR17520069.14013119  
SRR17520069.14013121  
SRR17520069.14013123  
SRR17520069.14013125

SRR17520069.14013127  
SRR17520069.14013129  
SRR17520069.14013131  
SRR17520069.14016186  
SRR17520069.14016188  
SRR17520069.14016190  
SRR17520069.14016192  
SRR17520069.14018651  
SRR17520069.14018653  
SRR17520069.14018655  
SRR17520069.14018659  
SRR17520069.14018661  
SRR17520069.14018663  
SRR17520069.14018665  
SRR17520069.14018667  
SRR17520069.14020327  
SRR17520069.14020329  
SRR17520069.14020331  
SRR17520069.14020333  
SRR17520069.14020335  
SRR17520069.14020337  
SRR17520069.14020339  
SRR17520069.14020341  
SRR17520069.14020343  
SRR17520069.14020345  
SRR17520069.14020347  
SRR17520069.14020349  
SRR17520069.14020351  
SRR17520069.14020353  
SRR17520069.14020357  
SRR17520069.14020359  
SRR17520069.14021116  
SRR17520069.14021118  
SRR17520069.14021120  
SRR17520069.14021122  
SRR17520069.14021124  
SRR17520069.14021126  
SRR17520069.14021128  
SRR17520069.14021130  
SRR17520069.14021132  
SRR17520069.14021134  
SRR17520069.14027974  
SRR17520069.14027976  
SRR17520069.14027978  
SRR17520069.14027980  
SRR17520069.14034181  
SRR17520069.14034185

SRR17520069.14034201  
SRR17520069.14034334  
SRR17520069.14039853  
SRR17520069.14039855  
SRR17520069.14039857  
SRR17520069.14039859  
SRR17520069.14040062  
SRR17520069.14040064  
SRR17520069.14040068  
SRR17520069.14040070  
SRR17520069.14040072  
SRR17520069.14040074  
SRR17520069.14040076  
SRR17520069.14040078  
SRR17520069.14040080  
SRR17520069.14040082  
SRR17520069.14040084  
SRR17520069.14040086  
SRR17520069.14040088  
SRR17520069.14040090  
SRR17520069.14040092  
SRR17520069.14040094  
SRR17520069.14040096  
SRR17520069.14040098  
SRR17520069.14040100  
SRR17520069.14040102  
SRR17520069.14040104  
SRR17520069.14040106  
SRR17520069.14047298  
SRR17520069.14047300  
SRR17520069.14047302  
SRR17520069.14047304  
SRR17520069.14047306  
SRR17520069.14047308  
SRR17520069.14047310  
SRR17520069.14047312  
SRR17520069.14047314  
SRR17520069.14047316  
SRR17520069.14047318  
SRR17520069.14047320  
SRR17520069.14047322  
SRR17520069.14047324  
SRR17520069.14047326  
SRR17520069.14047328  
SRR17520069.14047330  
SRR17520069.14047332  
SRR17520069.14047334

SRR17520069.14048252  
SRR17520069.14048254  
SRR17520069.14048256  
SRR17520069.14048258  
SRR17520069.14048260  
SRR17520069.14048262  
SRR17520069.14048264  
SRR17520069.14048266  
SRR17520069.14048270  
SRR17520069.14050216  
SRR17520069.14051507  
SRR17520069.14051509  
SRR17520069.14051511  
SRR17520069.14051513  
SRR17520069.14051515  
SRR17520069.14051517  
SRR17520069.14051521  
SRR17520069.14051525  
SRR17520069.14051527  
SRR17520069.14051529  
SRR17520069.14051533  
SRR17520069.14051535  
SRR17520069.14051537  
SRR17520069.14052417  
SRR17520069.14052419  
SRR17520069.14052421  
SRR17520069.14052423  
SRR17520069.14052425  
SRR17520069.14052427  
SRR17520069.14052429  
SRR17520069.14052431  
SRR17520069.14052433  
SRR17520069.14052435  
SRR17520069.14052437  
SRR17520069.14052439  
SRR17520069.14052441  
SRR17520069.14052443  
SRR17520069.14052445  
SRR17520069.14052447  
SRR17520069.14052449  
SRR17520069.14052451  
SRR17520069.14052453  
SRR17520069.14052455  
SRR17520069.14052457  
SRR17520069.14052459  
SRR17520069.14052461  
SRR17520069.14052463



SRR17520069.14052465  
SRR17520069.14052467  
SRR17520069.14052471  
SRR17520069.14052473  
SRR17520069.14052475  
SRR17520069.14052477  
SRR17520069.14052479  
SRR17520069.14052481  
SRR17520069.14052483  
SRR17520069.14052485  
SRR17520069.14052487  
SRR17520069.14052489  
SRR17520069.14052491  
SRR17520069.14052493  
SRR17520069.14052495  
SRR17520069.14052497  
SRR17520069.14052499  
SRR17520069.14052501  
SRR17520069.14052503  
SRR17520069.14052505  
SRR17520069.14057959  
SRR17520069.14057961  
SRR17520069.14057963  
SRR17520069.14058401  
SRR17520069.14058403  
SRR17520069.14064693  
SRR17520069.14068334  
SRR17520069.14070603  
SRR17520069.14070605  
SRR17520069.14070609  
SRR17520069.14070611  
SRR17520069.14070613  
SRR17520069.14070615  
SRR17520069.14070617  
SRR17520069.14070619  
SRR17520069.14070621  
SRR17520069.14070623  
SRR17520069.14070625  
SRR17520069.14070627  
SRR17520069.14070629  
SRR17520069.14070631  
SRR17520069.14070633  
SRR17520069.14070635  
SRR17520069.14070637  
SRR17520069.14070639  
SRR17520069.14070641  
SRR17520069.14070643

SRR17520069.14070645  
SRR17520069.14070647  
SRR17520069.14070649  
SRR17520069.14070651  
SRR17520069.14070653  
SRR17520069.14070655  
SRR17520069.14070657  
SRR17520069.14070659  
SRR17520069.14070661  
SRR17520069.14070665  
SRR17520069.14070667  
SRR17520069.14070669  
SRR17520069.14070671  
SRR17520069.14070673  
SRR17520069.14070675  
SRR17520069.14070677  
SRR17520069.14070679  
SRR17520069.14070681  
SRR17520069.14070685  
SRR17520069.14070687  
SRR17520069.14070691  
SRR17520069.14070693  
SRR17520069.14070695  
SRR17520069.14070697  
SRR17520069.14070699  
SRR17520069.14079162  
SRR17520069.14079164  
SRR17520069.14079166  
SRR17520069.14079168  
SRR17520069.14079170  
SRR17520069.14079172  
SRR17520069.14079174  
SRR17520069.14079509  
SRR17520069.14079511  
SRR17520069.14079513  
SRR17520069.14079515  
SRR17520069.14079517  
SRR17520069.14079519  
SRR17520069.14079521  
SRR17520069.14079523  
SRR17520069.14079525  
SRR17520069.14088952  
SRR17520069.14088954  
SRR17520069.14088956  
SRR17520069.14088958  
SRR17520069.14088960  
SRR17520069.14088962

SRR17520069.14088964  
SRR17520069.14088966  
SRR17520069.14088968  
SRR17520069.14088970  
SRR17520069.14088972  
SRR17520069.14088974  
SRR17520069.14088976  
SRR17520069.14088978  
SRR17520069.14088980  
SRR17520069.14088982  
SRR17520069.14088984  
SRR17520069.14088986  
SRR17520069.14088988  
SRR17520069.14088990  
SRR17520069.14088992  
SRR17520069.14088994  
SRR17520069.14088996  
SRR17520069.14088998  
SRR17520069.14089000  
SRR17520069.14089002  
SRR17520069.14089004  
SRR17520069.14089006  
SRR17520069.14089008  
SRR17520069.14089010  
SRR17520069.14089012  
SRR17520069.14089014  
SRR17520069.14089016  
SRR17520069.14089020  
SRR17520069.14089022  
SRR17520069.14089024  
SRR17520069.14089026  
SRR17520069.14089028  
SRR17520069.14092161  
SRR17520069.14092163  
SRR17520069.14092165  
SRR17520069.14093459  
SRR17520069.14096408  
SRR17520069.14100155  
SRR17520069.14100157  
SRR17520069.14100159  
SRR17520069.14100161  
SRR17520069.14100163  
SRR17520069.14100165  
SRR17520069.14100167  
SRR17520069.14100169  
SRR17520069.14100171  
SRR17520069.14100173

SRR17520069.14100175  
SRR17520069.14108091  
SRR17520069.14108093  
SRR17520069.14108095  
SRR17520069.14108097  
SRR17520069.14108099  
SRR17520069.14108101  
SRR17520069.14108103  
SRR17520069.14108105  
SRR17520069.14108107  
SRR17520069.14108109  
SRR17520069.14108111  
SRR17520069.14108113  
SRR17520069.14108115  
SRR17520069.14108117  
SRR17520069.14108119  
SRR17520069.14109835  
SRR17520069.14109837  
SRR17520069.14109839  
SRR17520069.14109841  
SRR17520069.14109846  
SRR17520069.14109848  
SRR17520069.14109850  
SRR17520069.14109852  
SRR17520069.14109854  
SRR17520069.14109856  
SRR17520069.14109860  
SRR17520069.14111762  
SRR17520069.14115329  
SRR17520069.14115331  
SRR17520069.14115333  
SRR17520069.14115335  
SRR17520069.14115343  
SRR17520069.14115345  
SRR17520069.14115347  
SRR17520069.14115349  
SRR17520069.14115351  
SRR17520069.14115353  
SRR17520069.14115355  
SRR17520069.14115357  
SRR17520069.14115361  
SRR17520069.14115363  
SRR17520069.14115365  
SRR17520069.14115367  
SRR17520069.14115369  
SRR17520069.14115371  
SRR17520069.14115373

SRR17520069.14115375  
SRR17520069.14115377  
SRR17520069.14115379  
SRR17520069.14115381  
SRR17520069.14115383  
SRR17520069.14115385  
SRR17520069.14115387  
SRR17520069.14115389  
SRR17520069.14115391  
SRR17520069.14115393  
SRR17520069.14115395  
SRR17520069.14115397  
SRR17520069.14115399  
SRR17520069.14115401  
SRR17520069.14115403  
SRR17520069.14115405  
SRR17520069.14115407  
SRR17520069.14115409  
SRR17520069.14115411  
SRR17520069.14115413  
SRR17520069.14115415  
SRR17520069.14115417  
SRR17520069.14115421  
SRR17520069.14115423  
SRR17520069.14115425  
SRR17520069.14115427  
SRR17520069.14115429  
SRR17520069.14119678  
SRR17520069.14119680  
SRR17520069.14119682  
SRR17520069.14119684  
SRR17520069.14119686  
SRR17520069.14119688  
SRR17520069.14119690  
SRR17520069.14119692  
SRR17520069.14119694  
SRR17520069.14119696  
SRR17520069.14119698  
SRR17520069.14119700  
SRR17520069.14119702  
SRR17520069.14119704  
SRR17520069.14119706  
SRR17520069.14119708  
SRR17520069.14119710  
SRR17520069.14119712  
SRR17520069.14119714  
SRR17520069.14119716

SRR17520069.14119718  
SRR17520069.14119720  
SRR17520069.14119722  
SRR17520069.14119724  
SRR17520069.14119726  
SRR17520069.14119728  
SRR17520069.14119730  
SRR17520069.14119732  
SRR17520069.14123310  
SRR17520069.14123312  
SRR17520069.14123314  
SRR17520069.14123316  
SRR17520069.14123318  
SRR17520069.14123320  
SRR17520069.14123322  
SRR17520069.14123324  
SRR17520069.14123326  
SRR17520069.14123328  
SRR17520069.14123330  
SRR17520069.14123332  
SRR17520069.14123334  
SRR17520069.14123336  
SRR17520069.14123340  
SRR17520069.14123342  
SRR17520069.14123344  
SRR17520069.14123346  
SRR17520069.14123348  
SRR17520069.14123350  
SRR17520069.14123352  
SRR17520069.14123354  
SRR17520069.14123358  
SRR17520069.14123360  
SRR17520069.14123362  
SRR17520069.14132049  
SRR17520069.14132051  
SRR17520069.14132053  
SRR17520069.14132055  
SRR17520069.14132057  
SRR17520069.14132059  
SRR17520069.14132061  
SRR17520069.14132063  
SRR17520069.14132067  
SRR17520069.14132069  
SRR17520069.14132071  
SRR17520069.14132073  
SRR17520069.14132075  
SRR17520069.14132077

SRR17520069. 14132079  
SRR17520069. 14132081  
SRR17520069. 14132083  
SRR17520069. 14132085  
SRR17520069. 14132087  
SRR17520069. 14132089  
SRR17520069. 14132091  
SRR17520069. 14132093  
SRR17520069. 14132095  
SRR17520069. 14132097  
SRR17520069. 14132099  
SRR17520069. 14132101  
SRR17520069. 14132103  
SRR17520069. 14132105  
SRR17520069. 14132107  
SRR17520069. 14132109  
SRR17520069. 14132111  
SRR17520069. 14132113  
SRR17520069. 14132115  
SRR17520069. 14132117  
SRR17520069. 14132119  
SRR17520069. 14132121  
SRR17520069. 14132123  
SRR17520069. 14132125  
SRR17520069. 14132127  
SRR17520069. 14132129  
SRR17520069. 14132131  
SRR17520069. 14132133  
SRR17520069. 14132135  
SRR17520069. 14132137  
SRR17520069. 14132139  
SRR17520069. 14132141  
SRR17520069. 14132143  
SRR17520069. 14132145  
SRR17520069. 14132147  
SRR17520069. 14132149  
SRR17520069. 14132151  
SRR17520069. 14132153  
SRR17520069. 14132155  
SRR17520069. 14132157  
SRR17520069. 14132159  
SRR17520069. 14132161  
SRR17520069. 14132163  
SRR17520069. 14132165  
SRR17520069. 14132167  
SRR17520069. 14132169  
SRR17520069. 14132171

SRR17520069.14132173  
SRR17520069.14132175  
SRR17520069.14132177  
SRR17520069.14132179  
SRR17520069.14132181  
SRR17520069.14132183  
SRR17520069.14132185  
SRR17520069.14132187  
SRR17520069.14132189  
SRR17520069.14136863  
SRR17520069.14145662  
SRR17520069.14145664  
SRR17520069.14145666  
SRR17520069.14145668  
SRR17520069.14145670  
SRR17520069.14145672  
SRR17520069.14145674  
SRR17520069.14145676  
SRR17520069.14145678  
SRR17520069.14145680  
SRR17520069.14145682  
SRR17520069.14145684  
SRR17520069.14145686  
SRR17520069.14145688  
SRR17520069.14145690  
SRR17520069.14145692  
SRR17520069.14145694  
SRR17520069.14145696  
SRR17520069.14145698  
SRR17520069.14145700  
SRR17520069.14145702  
SRR17520069.14145704  
SRR17520069.14145706  
SRR17520069.14145708  
SRR17520069.14145710  
SRR17520069.14145712  
SRR17520069.14145714  
SRR17520069.14145716  
SRR17520069.14145718  
SRR17520069.14145720  
SRR17520069.14145722  
SRR17520069.14145724  
SRR17520069.14145726  
SRR17520069.14145728  
SRR17520069.14145730  
SRR17520069.14145734  
SRR17520069.14145736



SRR17520069. 14145738  
SRR17520069. 14145740  
SRR17520069. 14145742  
SRR17520069. 14145744  
SRR17520069. 14145746  
SRR17520069. 14145748  
SRR17520069. 14145750  
SRR17520069. 14145752  
SRR17520069. 14145754  
SRR17520069. 14145756  
SRR17520069. 14145758  
SRR17520069. 14145760  
SRR17520069. 14145762  
SRR17520069. 14145764  
SRR17520069. 14145766  
SRR17520069. 14145768  
SRR17520069. 14149097  
SRR17520069. 14149099  
SRR17520069. 14149101  
SRR17520069. 14149103  
SRR17520069. 14149105  
SRR17520069. 14149107  
SRR17520069. 14149109  
SRR17520069. 14149111  
SRR17520069. 14149113  
SRR17520069. 14149115  
SRR17520069. 14157172  
SRR17520069. 14157174  
SRR17520069. 14157176  
SRR17520069. 14159705  
SRR17520069. 14159707  
SRR17520069. 14159709  
SRR17520069. 14159711  
SRR17520069. 14159715  
SRR17520069. 14159717  
SRR17520069. 14159719  
SRR17520069. 14159721  
SRR17520069. 14159723  
SRR17520069. 14159725  
SRR17520069. 14159727  
SRR17520069. 14159729  
SRR17520069. 14159731  
SRR17520069. 14159733  
SRR17520069. 14160402  
SRR17520069. 14160404  
SRR17520069. 14160406  
SRR17520069. 14171222

SRR17520069. 14171224  
SRR17520069. 14171226  
SRR17520069. 14171228  
SRR17520069. 14171230  
SRR17520069. 14171232  
SRR17520069. 14171234  
SRR17520069. 14171236  
SRR17520069. 14171238  
SRR17520069. 14171242  
SRR17520069. 14171244  
SRR17520069. 14171246  
SRR17520069. 14171248  
SRR17520069. 14171252  
SRR17520069. 14171254  
SRR17520069. 14171256  
SRR17520069. 14174093  
SRR17520069. 14174095  
SRR17520069. 14174097  
SRR17520069. 14174103  
SRR17520069. 14174105  
SRR17520069. 14174107  
SRR17520069. 14174109  
SRR17520069. 14174111  
SRR17520069. 14174113  
SRR17520069. 14174117  
SRR17520069. 14174119  
SRR17520069. 14174121  
SRR17520069. 14174123  
SRR17520069. 14174125  
SRR17520069. 14174127  
SRR17520069. 14174129  
SRR17520069. 14174131  
SRR17520069. 14174133  
SRR17520069. 14174135  
SRR17520069. 14174137  
SRR17520069. 14174139  
SRR17520069. 14174141  
SRR17520069. 14174143  
SRR17520069. 14176287  
SRR17520069. 14176289  
SRR17520069. 14176291  
SRR17520069. 14176293  
SRR17520069. 14176295  
SRR17520069. 14176297  
SRR17520069. 14176299  
SRR17520069. 14176301  
SRR17520069. 14176303

SRR17520069.14176305  
SRR17520069.14176307  
SRR17520069.14176311  
SRR17520069.14176313  
SRR17520069.14176315  
SRR17520069.14176317  
SRR17520069.14176319  
SRR17520069.14176321  
SRR17520069.14176323  
SRR17520069.14176325  
SRR17520069.14176327  
SRR17520069.14176329  
SRR17520069.14176331  
SRR17520069.14176333  
SRR17520069.14176335  
SRR17520069.14176337  
SRR17520069.14176343  
SRR17520069.14176345  
SRR17520069.14176347  
SRR17520069.14176349  
SRR17520069.14176353  
SRR17520069.14176355  
SRR17520069.14176357  
SRR17520069.14176359  
SRR17520069.14176363  
SRR17520069.14176365  
SRR17520069.14176367  
SRR17520069.14176369  
SRR17520069.14176371  
SRR17520069.14178389  
SRR17520069.14178391  
SRR17520069.14178393  
SRR17520069.14178395  
SRR17520069.14178397  
SRR17520069.14178399  
SRR17520069.14178401  
SRR17520069.14178403  
SRR17520069.14178405  
SRR17520069.14178407  
SRR17520069.14178409  
SRR17520069.14178411  
SRR17520069.14178413  
SRR17520069.14178417  
SRR17520069.14178419  
SRR17520069.14178421  
SRR17520069.14178423  
SRR17520069.14178425

SRR17520069. 14178427  
SRR17520069. 14178429  
SRR17520069. 14178431  
SRR17520069. 14178433  
SRR17520069. 14178435  
SRR17520069. 14178437  
SRR17520069. 14178441  
SRR17520069. 14178445  
SRR17520069. 14178447  
SRR17520069. 14178449  
SRR17520069. 14178451  
SRR17520069. 14178453  
SRR17520069. 14183878  
SRR17520069. 14183880  
SRR17520069. 14183882  
SRR17520069. 14183884  
SRR17520069. 14183886  
SRR17520069. 14183888  
SRR17520069. 14183890  
SRR17520069. 14183892  
SRR17520069. 14183894  
SRR17520069. 14183896  
SRR17520069. 14183898  
SRR17520069. 14183900  
SRR17520069. 14183902  
SRR17520069. 14183904  
SRR17520069. 14183906  
SRR17520069. 14183908  
SRR17520069. 14183910  
SRR17520069. 14183912  
SRR17520069. 14183914  
SRR17520069. 14183916  
SRR17520069. 14183918  
SRR17520069. 14183920  
SRR17520069. 14183922  
SRR17520069. 14183924  
SRR17520069. 14183926  
SRR17520069. 14183928  
SRR17520069. 14183930  
SRR17520069. 14183932  
SRR17520069. 14183934  
SRR17520069. 14183936  
SRR17520069. 14183938  
SRR17520069. 14183940  
SRR17520069. 14183942  
SRR17520069. 14183944  
SRR17520069. 14183946

SRR17520069. 14183948  
SRR17520069. 14183950  
SRR17520069. 14183952  
SRR17520069. 14183954  
SRR17520069. 14183956  
SRR17520069. 14183958  
SRR17520069. 14183960  
SRR17520069. 14183962  
SRR17520069. 14183964  
SRR17520069. 14183966  
SRR17520069. 14183968  
SRR17520069. 14183970  
SRR17520069. 14183972  
SRR17520069. 14187211  
SRR17520069. 14187213  
SRR17520069. 14187215  
SRR17520069. 14187217  
SRR17520069. 14187219  
SRR17520069. 14187221  
SRR17520069. 14187223  
SRR17520069. 14187225  
SRR17520069. 14187227  
SRR17520069. 14187229  
SRR17520069. 14187231  
SRR17520069. 14187233  
SRR17520069. 14187235  
SRR17520069. 14187237  
SRR17520069. 14187239  
SRR17520069. 14187241  
SRR17520069. 14187243  
SRR17520069. 14187245  
SRR17520069. 14196121  
SRR17520069. 14196123  
SRR17520069. 14196125  
SRR17520069. 14196127  
SRR17520069. 14227406  
SRR17520069. 14227408  
SRR17520069. 14227410  
SRR17520069. 14227416  
SRR17520069. 14227418  
SRR17520069. 14227420  
SRR17520069. 14227422  
SRR17520069. 14227424  
SRR17520069. 14227436  
SRR17520069. 14232575  
SRR17520069. 14232577  
SRR17520069. 14232579

SRR17520069.14232581  
SRR17520069.14233224  
SRR17520069.14234950  
SRR17520069.14234985  
SRR17520069.14236811  
SRR17520069.14236813  
SRR17520069.14236815  
SRR17520069.14236817  
SRR17520069.14236819  
SRR17520069.14236821  
SRR17520069.14236823  
SRR17520069.14236825  
SRR17520069.14236827  
SRR17520069.14236829  
SRR17520069.14236831  
SRR17520069.14236833  
SRR17520069.14243615  
SRR17520069.14243617  
SRR17520069.14243619  
SRR17520069.14243621  
SRR17520069.14243623  
SRR17520069.14243625  
SRR17520069.14243627  
SRR17520069.14243629  
SRR17520069.14243631  
SRR17520069.14243633  
SRR17520069.14251536  
SRR17520069.14251538  
SRR17520069.14251540  
SRR17520069.14251542  
SRR17520069.14251544  
SRR17520069.14251546  
SRR17520069.14251548  
SRR17520069.14251550  
SRR17520069.14251554  
SRR17520069.14251556  
SRR17520069.14251558  
SRR17520069.14251560  
SRR17520069.14251562  
SRR17520069.14251564  
SRR17520069.14251566  
SRR17520069.14251568  
SRR17520069.14251570  
SRR17520069.14251572  
SRR17520069.14251574  
SRR17520069.14251576  
SRR17520069.14251578

SRR17520069.14251580  
SRR17520069.14251582  
SRR17520069.14251584  
SRR17520069.14251586  
SRR17520069.14251588  
SRR17520069.14251590  
SRR17520069.14251592  
SRR17520069.14251594  
SRR17520069.14251596  
SRR17520069.14251600  
SRR17520069.14251602  
SRR17520069.14251604  
SRR17520069.14251606  
SRR17520069.14251608  
SRR17520069.14251610  
SRR17520069.14251612  
SRR17520069.14251614  
SRR17520069.14251616  
SRR17520069.14251618  
SRR17520069.14251620  
SRR17520069.14251622  
SRR17520069.14251624  
SRR17520069.14251626  
SRR17520069.14251628  
SRR17520069.14251630  
SRR17520069.14251632  
SRR17520069.14251634  
SRR17520069.14251636  
SRR17520069.14266916  
SRR17520069.14266918  
SRR17520069.14266920  
SRR17520069.14266922  
SRR17520069.14266924  
SRR17520069.14266926  
SRR17520069.14267155  
SRR17520069.14267157  
SRR17520069.14267159  
SRR17520069.14268541  
SRR17520069.14268543  
SRR17520069.14268545  
SRR17520069.14268547  
SRR17520069.14268549  
SRR17520069.14268862  
SRR17520069.14268866  
SRR17520069.14268868  
SRR17520069.14268870  
SRR17520069.14268872

SRR17520069.14268874  
SRR17520069.14277982  
SRR17520069.14279526  
SRR17520069.14279528  
SRR17520069.14279530  
SRR17520069.14279532  
SRR17520069.14279534  
SRR17520069.14279536  
SRR17520069.14279538  
SRR17520069.14279540  
SRR17520069.14279542  
SRR17520069.14279544  
SRR17520069.14279546  
SRR17520069.14279548  
SRR17520069.14279550  
SRR17520069.14279552  
SRR17520069.14279554  
SRR17520069.14279556  
SRR17520069.14279558  
SRR17520069.14279560  
SRR17520069.14279562  
SRR17520069.14279564  
SRR17520069.14279566  
SRR17520069.14279568  
SRR17520069.14279570  
SRR17520069.14279572  
SRR17520069.14279574  
SRR17520069.14279576  
SRR17520069.14279578  
SRR17520069.14279580  
SRR17520069.14279582  
SRR17520069.14279584  
SRR17520069.14279586  
SRR17520069.14279588  
SRR17520069.14279590  
SRR17520069.14279592  
SRR17520069.14279594  
SRR17520069.14279596  
SRR17520069.14279598  
SRR17520069.14284512  
SRR17520069.14284514  
SRR17520069.14284516  
SRR17520069.14284518  
SRR17520069.14284520  
SRR17520069.14284522  
SRR17520069.14284524  
SRR17520069.14284526



SRR17520069. 14284528  
SRR17520069. 14284532  
SRR17520069. 14284534  
SRR17520069. 14284536  
SRR17520069. 14284538  
SRR17520069. 14284540  
SRR17520069. 14284542  
SRR17520069. 14284544  
SRR17520069. 14284546  
SRR17520069. 14284548  
SRR17520069. 14284550  
SRR17520069. 14284552  
SRR17520069. 14284554  
SRR17520069. 14284556  
SRR17520069. 14284558  
SRR17520069. 14284560  
SRR17520069. 14284562  
SRR17520069. 14284564  
SRR17520069. 14284566  
SRR17520069. 14284568  
SRR17520069. 14284570  
SRR17520069. 14284572  
SRR17520069. 14284574  
SRR17520069. 14290843  
SRR17520069. 14290845  
SRR17520069. 14290847  
SRR17520069. 14290851  
SRR17520069. 14290853  
SRR17520069. 14290855  
SRR17520069. 14290857  
SRR17520069. 14290859  
SRR17520069. 14290861  
SRR17520069. 14290863  
SRR17520069. 14296574  
SRR17520069. 14296576  
SRR17520069. 14296578  
SRR17520069. 14296580  
SRR17520069. 14296582  
SRR17520069. 14296584  
SRR17520069. 14296586  
SRR17520069. 14296588  
SRR17520069. 14296590  
SRR17520069. 14296592  
SRR17520069. 14296594  
SRR17520069. 14296596  
SRR17520069. 14296598  
SRR17520069. 14296600

SRR17520069. 14296602  
SRR17520069. 14296604  
SRR17520069. 14296606  
SRR17520069. 14296608  
SRR17520069. 14296610  
SRR17520069. 14298026  
SRR17520069. 14298028  
SRR17520069. 14298030  
SRR17520069. 14298032  
SRR17520069. 14298034  
SRR17520069. 14298036  
SRR17520069. 14299209  
SRR17520069. 14299211  
SRR17520069. 14299213  
SRR17520069. 14299215  
SRR17520069. 14299217  
SRR17520069. 14299219  
SRR17520069. 14299221  
SRR17520069. 14299225  
SRR17520069. 14299227  
SRR17520069. 14299229  
SRR17520069. 14299231  
SRR17520069. 14299233  
SRR17520069. 14307864  
SRR17520069. 14307866  
SRR17520069. 14307868  
SRR17520069. 14307870  
SRR17520069. 14307872  
SRR17520069. 14307874  
SRR17520069. 14307876  
SRR17520069. 14307878  
SRR17520069. 14307880  
SRR17520069. 14307882  
SRR17520069. 14307884  
SRR17520069. 14307886  
SRR17520069. 14307888  
SRR17520069. 14307890  
SRR17520069. 14307892  
SRR17520069. 14307894  
SRR17520069. 14307896  
SRR17520069. 14309798  
SRR17520069. 14309800  
SRR17520069. 14309802  
SRR17520069. 14309804  
SRR17520069. 14309806  
SRR17520069. 14309808  
SRR17520069. 14309810

SRR17520069. 14309812  
SRR17520069. 14309814  
SRR17520069. 14309816  
SRR17520069. 14309818  
SRR17520069. 14309820  
SRR17520069. 14309822  
SRR17520069. 14309824  
SRR17520069. 14313665  
SRR17520069. 14313667  
SRR17520069. 14313669  
SRR17520069. 14313671  
SRR17520069. 14313673  
SRR17520069. 14313675  
SRR17520069. 14313677  
SRR17520069. 14313679  
SRR17520069. 14313681  
SRR17520069. 14313683  
SRR17520069. 14313685  
SRR17520069. 14313687  
SRR17520069. 14313689  
SRR17520069. 14313691  
SRR17520069. 14313693  
SRR17520069. 14313695  
SRR17520069. 14313697  
SRR17520069. 14313699  
SRR17520069. 14313701  
SRR17520069. 14313703  
SRR17520069. 14313705  
SRR17520069. 14313707  
SRR17520069. 14313709  
SRR17520069. 14313711  
SRR17520069. 14313713  
SRR17520069. 14313715  
SRR17520069. 14313717  
SRR17520069. 14313719  
SRR17520069. 14313721  
SRR17520069. 14313723  
SRR17520069. 14313725  
SRR17520069. 14313727  
SRR17520069. 14313729  
SRR17520069. 14319076  
SRR17520069. 14319078  
SRR17520069. 14319080  
SRR17520069. 14319082  
SRR17520069. 14319084  
SRR17520069. 14326701  
SRR17520069. 14326703

SRR17520069. 14326705  
SRR17520069. 14326707  
SRR17520069. 14326709  
SRR17520069. 14326711  
SRR17520069. 14326713  
SRR17520069. 14326715  
SRR17520069. 14326717  
SRR17520069. 14326719  
SRR17520069. 14326721  
SRR17520069. 14326723  
SRR17520069. 14326725  
SRR17520069. 14326727  
SRR17520069. 14326729  
SRR17520069. 14326731  
SRR17520069. 14326733  
SRR17520069. 14326735  
SRR17520069. 14326737  
SRR17520069. 14326739  
SRR17520069. 14326741  
SRR17520069. 14326825  
SRR17520069. 14326827  
SRR17520069. 14326829  
SRR17520069. 14326831  
SRR17520069. 14326833  
SRR17520069. 14326835  
SRR17520069. 14326837  
SRR17520069. 14326839  
SRR17520069. 14326841  
SRR17520069. 14326843  
SRR17520069. 14326845  
SRR17520069. 14326847  
SRR17520069. 14326849  
SRR17520069. 14326851  
SRR17520069. 14326853  
SRR17520069. 14326855  
SRR17520069. 14326857  
SRR17520069. 14326859  
SRR17520069. 14326861  
SRR17520069. 14326863  
SRR17520069. 14326865  
SRR17520069. 14326867  
SRR17520069. 14326869  
SRR17520069. 14326873  
SRR17520069. 14326875  
SRR17520069. 14326879  
SRR17520069. 14326881  
SRR17520069. 14326883

SRR17520069.14326887  
SRR17520069.14326889  
SRR17520069.14326891  
SRR17520069.14326893  
SRR17520069.14327777  
SRR17520069.14327779  
SRR17520069.14327781  
SRR17520069.14327783  
SRR17520069.14327785  
SRR17520069.14331495  
SRR17520069.14331497  
SRR17520069.14331499  
SRR17520069.14331501  
SRR17520069.14331503  
SRR17520069.14331505  
SRR17520069.14331507  
SRR17520069.14331509  
SRR17520069.14331511  
SRR17520069.14331513  
SRR17520069.14339350  
SRR17520069.14339352  
SRR17520069.14339354  
SRR17520069.14339358  
SRR17520069.14340121  
SRR17520069.14340123  
SRR17520069.14340125  
SRR17520069.14340127  
SRR17520069.14340129  
SRR17520069.14340131  
SRR17520069.14340133  
SRR17520069.14340135  
SRR17520069.14340137  
SRR17520069.14340139  
SRR17520069.14340141  
SRR17520069.14340143  
SRR17520069.14340145  
SRR17520069.14340147  
SRR17520069.14340149  
SRR17520069.14340151  
SRR17520069.14340153  
SRR17520069.14340155  
SRR17520069.14340157  
SRR17520069.14340159  
SRR17520069.14340161  
SRR17520069.14340163  
SRR17520069.14340165  
SRR17520069.14340167

SRR17520069.14340169  
SRR17520069.14344175  
SRR17520069.14344177  
SRR17520069.14344181  
SRR17520069.14344183  
SRR17520069.14344185  
SRR17520069.14344187  
SRR17520069.14344189  
SRR17520069.14344191  
SRR17520069.14344193  
SRR17520069.14344195  
SRR17520069.14344197  
SRR17520069.14344199  
SRR17520069.14344201  
SRR17520069.14344203  
SRR17520069.14344205  
SRR17520069.14344207  
SRR17520069.14344209  
SRR17520069.14344211  
SRR17520069.14344213  
SRR17520069.14344215  
SRR17520069.14344217  
SRR17520069.14344219  
SRR17520069.14344221  
SRR17520069.14344223  
SRR17520069.14344225  
SRR17520069.14344227  
SRR17520069.14344229  
SRR17520069.14344231  
SRR17520069.14344233  
SRR17520069.14344235  
SRR17520069.14344237  
SRR17520069.14344239  
SRR17520069.14344241  
SRR17520069.14344243  
SRR17520069.14344245  
SRR17520069.14344247  
SRR17520069.14344249  
SRR17520069.14344251  
SRR17520069.14344253  
SRR17520069.14344255  
SRR17520069.14357318  
SRR17520069.14357320  
SRR17520069.14357322  
SRR17520069.14357324  
SRR17520069.14357326  
SRR17520069.14357328

SRR17520069.14357330  
SRR17520069.14357332  
SRR17520069.14359346  
SRR17520069.14359348  
SRR17520069.14359350  
SRR17520069.14359352  
SRR17520069.14359354  
SRR17520069.14359356  
SRR17520069.14359358  
SRR17520069.14359360  
SRR17520069.14359362  
SRR17520069.14359364  
SRR17520069.14359366  
SRR17520069.14359368  
SRR17520069.14359370  
SRR17520069.14359372  
SRR17520069.14359374  
SRR17520069.14359376  
SRR17520069.14359378  
SRR17520069.14359380  
SRR17520069.14359382  
SRR17520069.14359384  
SRR17520069.14359386  
SRR17520069.14359388  
SRR17520069.14359390  
SRR17520069.14359392  
SRR17520069.14359394  
SRR17520069.14359396  
SRR17520069.14359398  
SRR17520069.14359400  
SRR17520069.14359402  
SRR17520069.14359404  
SRR17520069.14359406  
SRR17520069.14359408  
SRR17520069.14359410  
SRR17520069.14359412  
SRR17520069.14359414  
SRR17520069.14359416  
SRR17520069.14359418  
SRR17520069.14359420  
SRR17520069.14359422  
SRR17520069.14359424  
SRR17520069.14359426  
SRR17520069.14359428  
SRR17520069.14359430  
SRR17520069.14359432  
SRR17520069.14359434

SRR17520069. 14359436  
SRR17520069. 14359438  
SRR17520069. 14359440  
SRR17520069. 14359442  
SRR17520069. 14359744  
SRR17520069. 14359768  
SRR17520069. 14361471  
SRR17520069. 14361473  
SRR17520069. 14361475  
SRR17520069. 14361477  
SRR17520069. 14361479  
SRR17520069. 14361481  
SRR17520069. 14361483  
SRR17520069. 14361485  
SRR17520069. 14361490  
SRR17520069. 14361492  
SRR17520069. 14361494  
SRR17520069. 14361496  
SRR17520069. 14361498  
SRR17520069. 14361500  
SRR17520069. 14361502  
SRR17520069. 14361504  
SRR17520069. 14361506  
SRR17520069. 14361508  
SRR17520069. 14361510  
SRR17520069. 14361512  
SRR17520069. 14361516  
SRR17520069. 14361520  
SRR17520069. 14361522  
SRR17520069. 14361524  
SRR17520069. 14361526  
SRR17520069. 14361528  
SRR17520069. 14361530  
SRR17520069. 14363223  
SRR17520069. 14363225  
SRR17520069. 14363231  
SRR17520069. 14363233  
SRR17520069. 14363235  
SRR17520069. 14363237  
SRR17520069. 14363239  
SRR17520069. 14363241  
SRR17520069. 14363243  
SRR17520069. 14363245  
SRR17520069. 14363247  
SRR17520069. 14363249  
SRR17520069. 14363251  
SRR17520069. 14370575



SRR17520069.14370577  
SRR17520069.14370579  
SRR17520069.14370581  
SRR17520069.14370583  
SRR17520069.14370585  
SRR17520069.14370587  
SRR17520069.14370589  
SRR17520069.14370591  
SRR17520069.14370593  
SRR17520069.14373319  
SRR17520069.14373321  
SRR17520069.14373323  
SRR17520069.14376459  
SRR17520069.14376461  
SRR17520069.14376463  
SRR17520069.14376465  
SRR17520069.14376467  
SRR17520069.14377485  
SRR17520069.14380658  
SRR17520069.14380660  
SRR17520069.14380662  
SRR17520069.14380664  
SRR17520069.14380666  
SRR17520069.14380668  
SRR17520069.14380670  
SRR17520069.14380672  
SRR17520069.14380674  
SRR17520069.14380676  
SRR17520069.14380678  
SRR17520069.14380680  
SRR17520069.14380682  
SRR17520069.14380684  
SRR17520069.14380686  
SRR17520069.14380690  
SRR17520069.14380692  
SRR17520069.14380694  
SRR17520069.14380696  
SRR17520069.14380698  
SRR17520069.14380702  
SRR17520069.14380704  
SRR17520069.14380706  
SRR17520069.14380708  
SRR17520069.14380710  
SRR17520069.14380712  
SRR17520069.14380714  
SRR17520069.14380716  
SRR17520069.14380720

SRR17520069.14380722  
SRR17520069.14380724  
SRR17520069.14380726  
SRR17520069.14380728  
SRR17520069.14380730  
SRR17520069.14380732  
SRR17520069.14380734  
SRR17520069.14380736  
SRR17520069.14380738  
SRR17520069.14380740  
SRR17520069.14380742  
SRR17520069.14380744  
SRR17520069.14380746  
SRR17520069.14380748  
SRR17520069.14380750  
SRR17520069.14380752  
SRR17520069.14380754  
SRR17520069.14380756  
SRR17520069.14384425  
SRR17520069.14384427  
SRR17520069.14384429  
SRR17520069.14384431  
SRR17520069.14384433  
SRR17520069.14384435  
SRR17520069.14392700  
SRR17520069.14392702  
SRR17520069.14392704  
SRR17520069.14392706  
SRR17520069.14392708  
SRR17520069.14392710  
SRR17520069.14392712  
SRR17520069.14392714  
SRR17520069.14392716  
SRR17520069.14392718  
SRR17520069.14392720  
SRR17520069.14392722  
SRR17520069.14392724  
SRR17520069.14392726  
SRR17520069.14392728  
SRR17520069.14392730  
SRR17520069.14397128  
SRR17520069.14397306  
SRR17520069.14397308  
SRR17520069.14397312  
SRR17520069.14397956  
SRR17520069.14397958  
SRR17520069.14397960

SRR17520069. 14397962  
SRR17520069. 14397964  
SRR17520069. 14397966  
SRR17520069. 14397970  
SRR17520069. 14397972  
SRR17520069. 14397974  
SRR17520069. 14397976  
SRR17520069. 14397978  
SRR17520069. 14397980  
SRR17520069. 14397982  
SRR17520069. 14398640  
SRR17520069. 14398642  
SRR17520069. 14398644  
SRR17520069. 14398646  
SRR17520069. 14398648  
SRR17520069. 14398650  
SRR17520069. 14398652  
SRR17520069. 14398654  
SRR17520069. 14399909  
SRR17520069. 14399911  
SRR17520069. 14404331  
SRR17520069. 14404333  
SRR17520069. 14404335  
SRR17520069. 14404337  
SRR17520069. 14404341  
SRR17520069. 14404343  
SRR17520069. 14406353  
SRR17520069. 14406355  
SRR17520069. 14407928  
SRR17520069. 14407930  
SRR17520069. 14407932  
SRR17520069. 14407934  
SRR17520069. 14407936  
SRR17520069. 14407938  
SRR17520069. 14407940  
SRR17520069. 14407942  
SRR17520069. 14407944  
SRR17520069. 14407946  
SRR17520069. 14407948  
SRR17520069. 14407950  
SRR17520069. 14407952  
SRR17520069. 14407954  
SRR17520069. 14407956  
SRR17520069. 14407958  
SRR17520069. 14407960  
SRR17520069. 14407962  
SRR17520069. 14407964

SRR17520069.14407966  
SRR17520069.14407968  
SRR17520069.14407970  
SRR17520069.14407972  
SRR17520069.14407974  
SRR17520069.14407976  
SRR17520069.14407978  
SRR17520069.14407980  
SRR17520069.14407982  
SRR17520069.14407984  
SRR17520069.14407986  
SRR17520069.14407988  
SRR17520069.14410837  
SRR17520069.14410839  
SRR17520069.14410841  
SRR17520069.14410843  
SRR17520069.14410845  
SRR17520069.14410847  
SRR17520069.14410849  
SRR17520069.14410851  
SRR17520069.14410853  
SRR17520069.14410855  
SRR17520069.14410857  
SRR17520069.14410859  
SRR17520069.14410861  
SRR17520069.14410863  
SRR17520069.14410865  
SRR17520069.14410867  
SRR17520069.14410869  
SRR17520069.14410871  
SRR17520069.14411192  
SRR17520069.14411194  
SRR17520069.14411196  
SRR17520069.14411198  
SRR17520069.14411200  
SRR17520069.14411202  
SRR17520069.14411204  
SRR17520069.14411206  
SRR17520069.14411208  
SRR17520069.14411210  
SRR17520069.14411212  
SRR17520069.14411214  
SRR17520069.14411216  
SRR17520069.14411218  
SRR17520069.14411220  
SRR17520069.14411222  
SRR17520069.14426618

SRR17520069.14426622  
SRR17520069.14426624  
SRR17520069.14426626  
SRR17520069.14426630  
SRR17520069.14430042  
SRR17520069.14430044  
SRR17520069.14430046  
SRR17520069.14430048  
SRR17520069.14430050  
SRR17520069.14430052  
SRR17520069.14430054  
SRR17520069.14430056  
SRR17520069.14430058  
SRR17520069.14430060  
SRR17520069.14441533  
SRR17520069.14441535  
SRR17520069.14441537  
SRR17520069.14441539  
SRR17520069.14441541  
SRR17520069.14446318  
SRR17520069.14446322  
SRR17520069.14446324  
SRR17520069.14446326  
SRR17520069.14446328  
SRR17520069.14446330  
SRR17520069.14446332  
SRR17520069.14446336  
SRR17520069.14446338  
SRR17520069.14446340  
SRR17520069.14446342  
SRR17520069.14446344  
SRR17520069.14446346  
SRR17520069.14446348  
SRR17520069.14446350  
SRR17520069.14446352  
SRR17520069.14446354  
SRR17520069.14446356  
SRR17520069.14446358  
SRR17520069.14446360  
SRR17520069.14446364  
SRR17520069.14446366  
SRR17520069.14446368  
SRR17520069.14446370  
SRR17520069.14446372  
SRR17520069.14446374  
SRR17520069.14446376  
SRR17520069.14446378

SRR17520069.14446380  
SRR17520069.14446382  
SRR17520069.14446384  
SRR17520069.14446386  
SRR17520069.14446390  
SRR17520069.14446392  
SRR17520069.14446394  
SRR17520069.14446396  
SRR17520069.14446398  
SRR17520069.14446400  
SRR17520069.14446402  
SRR17520069.14446404  
SRR17520069.14446406  
SRR17520069.14446408  
SRR17520069.14446410  
SRR17520069.14446412  
SRR17520069.14446414  
SRR17520069.14446416  
SRR17520069.14446418  
SRR17520069.14446420  
SRR17520069.14446422  
SRR17520069.14446424  
SRR17520069.14446426  
SRR17520069.14446428  
SRR17520069.14446430  
SRR17520069.14446432  
SRR17520069.14446434  
SRR17520069.14446436  
SRR17520069.14446438  
SRR17520069.14446440  
SRR17520069.14446442  
SRR17520069.14446444  
SRR17520069.14446446  
SRR17520069.14446448  
SRR17520069.14446450  
SRR17520069.14446455  
SRR17520069.14446457  
SRR17520069.14446459  
SRR17520069.14446461  
SRR17520069.14446463  
SRR17520069.14446465  
SRR17520069.14446467  
SRR17520069.14446469  
SRR17520069.14446471  
SRR17520069.14446473  
SRR17520069.14446475  
SRR17520069.14446477

SRR17520069.14446479  
SRR17520069.14446481  
SRR17520069.14446483  
SRR17520069.14446485  
SRR17520069.14455633  
SRR17520069.14456498  
SRR17520069.14456500  
SRR17520069.14456502  
SRR17520069.14456504  
SRR17520069.14456506  
SRR17520069.14456508  
SRR17520069.14456510  
SRR17520069.14456512  
SRR17520069.14456514  
SRR17520069.14456516  
SRR17520069.14456518  
SRR17520069.14456520  
SRR17520069.14456522  
SRR17520069.14460275  
SRR17520069.14468510  
SRR17520069.14468512  
SRR17520069.14479649  
SRR17520069.14479651  
SRR17520069.14479653  
SRR17520069.14479655  
SRR17520069.14479657  
SRR17520069.14479659  
SRR17520069.14482299  
SRR17520069.14482301  
SRR17520069.14482303  
SRR17520069.14482305  
SRR17520069.14482307  
SRR17520069.14482309  
SRR17520069.14482311  
SRR17520069.14484892  
SRR17520069.14484894  
SRR17520069.14484896  
SRR17520069.14484898  
SRR17520069.14484900  
SRR17520069.14484902  
SRR17520069.14484904  
SRR17520069.14484906  
SRR17520069.14484908  
SRR17520069.14484910  
SRR17520069.14484914  
SRR17520069.14484916  
SRR17520069.14484918

SRR17520069.14484920  
SRR17520069.14484922  
SRR17520069.14484924  
SRR17520069.14484926  
SRR17520069.14484928  
SRR17520069.14484930  
SRR17520069.14484932  
SRR17520069.14484934  
SRR17520069.14484936  
SRR17520069.14484938  
SRR17520069.14484940  
SRR17520069.14484942  
SRR17520069.14484946  
SRR17520069.14484948  
SRR17520069.14484950  
SRR17520069.14484952  
SRR17520069.14484954  
SRR17520069.14484956  
SRR17520069.14484958  
SRR17520069.14484960  
SRR17520069.14484962  
SRR17520069.14484964  
SRR17520069.14484966  
SRR17520069.14484968  
SRR17520069.14484970  
SRR17520069.14484972  
SRR17520069.14484974  
SRR17520069.14484976  
SRR17520069.14484978  
SRR17520069.14484980  
SRR17520069.14484982  
SRR17520069.14484984  
SRR17520069.14484988  
SRR17520069.14484990  
SRR17520069.14484992  
SRR17520069.14484994  
SRR17520069.14484996  
SRR17520069.14484998  
SRR17520069.14485000  
SRR17520069.14485002  
SRR17520069.14485004  
SRR17520069.14485006  
SRR17520069.14485008  
SRR17520069.14485010  
SRR17520069.14485012  
SRR17520069.14485014  
SRR17520069.14485016



SRR17520069.14485018  
SRR17520069.14485020  
SRR17520069.14485022  
SRR17520069.14485024  
SRR17520069.14485026  
SRR17520069.14485028  
SRR17520069.14485030  
SRR17520069.14485032  
SRR17520069.14485034  
SRR17520069.14485036  
SRR17520069.14485038  
SRR17520069.14485040  
SRR17520069.14485042  
SRR17520069.14485046  
SRR17520069.14485050  
SRR17520069.14485052  
SRR17520069.14485054  
SRR17520069.14485056  
SRR17520069.14485058  
SRR17520069.14485060  
SRR17520069.14485062  
SRR17520069.14485064  
SRR17520069.14485066  
SRR17520069.14485068  
SRR17520069.14485070  
SRR17520069.14486088  
SRR17520069.14486090  
SRR17520069.14486094  
SRR17520069.14486098  
SRR17520069.14497205  
SRR17520069.14497207  
SRR17520069.14497209  
SRR17520069.14497211  
SRR17520069.14498420  
SRR17520069.14498422  
SRR17520069.14498424  
SRR17520069.14498426  
SRR17520069.14498428  
SRR17520069.14498430  
SRR17520069.14498432  
SRR17520069.14498434  
SRR17520069.14498436  
SRR17520069.14498438  
SRR17520069.14498440  
SRR17520069.14498442  
SRR17520069.14498444  
SRR17520069.14498446

SRR17520069.14498448  
SRR17520069.14498450  
SRR17520069.14498452  
SRR17520069.14498454  
SRR17520069.14498458  
SRR17520069.14498462  
SRR17520069.14498464  
SRR17520069.14498466  
SRR17520069.14498470  
SRR17520069.14498472  
SRR17520069.14498474  
SRR17520069.14498476  
SRR17520069.14498478  
SRR17520069.14498480  
SRR17520069.14498482  
SRR17520069.14498484  
SRR17520069.14498486  
SRR17520069.14498488  
SRR17520069.14498490  
SRR17520069.14498492  
SRR17520069.14498498  
SRR17520069.14498500  
SRR17520069.14498502  
SRR17520069.14498504  
SRR17520069.14498506  
SRR17520069.14498508  
SRR17520069.14498510  
SRR17520069.14498512  
SRR17520069.14501603  
SRR17520069.14501607  
SRR17520069.14501613  
SRR17520069.14501615  
SRR17520069.14501617  
SRR17520069.14501619  
SRR17520069.14501621  
SRR17520069.14502970  
SRR17520069.14502972  
SRR17520069.14502974  
SRR17520069.14502978  
SRR17520069.14502980  
SRR17520069.14502982  
SRR17520069.14502984  
SRR17520069.14502986  
SRR17520069.14502988  
SRR17520069.14502990  
SRR17520069.14502992  
SRR17520069.14502994

SRR17520069.14502996  
SRR17520069.14502998  
SRR17520069.14503000  
SRR17520069.14503002  
SRR17520069.14503004  
SRR17520069.14503006  
SRR17520069.14503008  
SRR17520069.14503010  
SRR17520069.14503012  
SRR17520069.14503014  
SRR17520069.14503016  
SRR17520069.14503020  
SRR17520069.14503022  
SRR17520069.14503024  
SRR17520069.14503026  
SRR17520069.14503028  
SRR17520069.14503030  
SRR17520069.14503034  
SRR17520069.14503036  
SRR17520069.14503038  
SRR17520069.14503040  
SRR17520069.14503042  
SRR17520069.14503044  
SRR17520069.14504705  
SRR17520069.14504707  
SRR17520069.14504709  
SRR17520069.14504711  
SRR17520069.14504713  
SRR17520069.14504715  
SRR17520069.14504717  
SRR17520069.14504719  
SRR17520069.14504721  
SRR17520069.14504723  
SRR17520069.14504725  
SRR17520069.14504727  
SRR17520069.14504729  
SRR17520069.14504731  
SRR17520069.14504733  
SRR17520069.14504735  
SRR17520069.14504737  
SRR17520069.14504739  
SRR17520069.14504788  
SRR17520069.14504790  
SRR17520069.14508675  
SRR17520069.14508679  
SRR17520069.14508681  
SRR17520069.14508683

SRR17520069. 14508685  
SRR17520069. 14508687  
SRR17520069. 14508689  
SRR17520069. 14508691  
SRR17520069. 14508693  
SRR17520069. 14508695  
SRR17520069. 14508697  
SRR17520069. 14508699  
SRR17520069. 14508701  
SRR17520069. 14508703  
SRR17520069. 14508705  
SRR17520069. 14508707  
SRR17520069. 14508709  
SRR17520069. 14508711  
SRR17520069. 14508713  
SRR17520069. 14508715  
SRR17520069. 14508717  
SRR17520069. 14508719  
SRR17520069. 14508721  
SRR17520069. 14508723  
SRR17520069. 14514594  
SRR17520069. 14514598  
SRR17520069. 14514602  
SRR17520069. 14514604  
SRR17520069. 14514606  
SRR17520069. 14514608  
SRR17520069. 14514610  
SRR17520069. 14514612  
SRR17520069. 14514614  
SRR17520069. 14514616  
SRR17520069. 14514620  
SRR17520069. 14514622  
SRR17520069. 14514624  
SRR17520069. 14514626  
SRR17520069. 14514767  
SRR17520069. 14514769  
SRR17520069. 14514895  
SRR17520069. 14514897  
SRR17520069. 14514899  
SRR17520069. 14514901  
SRR17520069. 14514903  
SRR17520069. 14514905  
SRR17520069. 14514907  
SRR17520069. 14514909  
SRR17520069. 14514911  
SRR17520069. 14514913  
SRR17520069. 14514915

SRR17520069.14514917  
SRR17520069.14514919  
SRR17520069.14514921  
SRR17520069.14514923  
SRR17520069.14514925  
SRR17520069.14514929  
SRR17520069.14514931  
SRR17520069.14514933  
SRR17520069.14514935  
SRR17520069.14514937  
SRR17520069.14514939  
SRR17520069.14514941  
SRR17520069.14515887  
SRR17520069.14515889  
SRR17520069.14515891  
SRR17520069.14515893  
SRR17520069.14515895  
SRR17520069.14515897  
SRR17520069.14515899  
SRR17520069.14515901  
SRR17520069.14515903  
SRR17520069.14515905  
SRR17520069.14515907  
SRR17520069.14515909  
SRR17520069.14515911  
SRR17520069.14515913  
SRR17520069.14515915  
SRR17520069.14515917  
SRR17520069.14515919  
SRR17520069.14515921  
SRR17520069.14515923  
SRR17520069.14515925  
SRR17520069.14515927  
SRR17520069.14515929  
SRR17520069.14515931  
SRR17520069.14515933  
SRR17520069.14515935  
SRR17520069.14515937  
SRR17520069.14515939  
SRR17520069.14515941  
SRR17520069.14515943  
SRR17520069.14515945  
SRR17520069.14515947  
SRR17520069.14515949  
SRR17520069.14515951  
SRR17520069.14515953  
SRR17520069.14515955

SRR17520069.14521899  
SRR17520069.14521901  
SRR17520069.14521905  
SRR17520069.14521907  
SRR17520069.14521909  
SRR17520069.14521911  
SRR17520069.14521913  
SRR17520069.14521915  
SRR17520069.14521917  
SRR17520069.14528618  
SRR17520069.14528622  
SRR17520069.14528624  
SRR17520069.14528626  
SRR17520069.14528628  
SRR17520069.14528630  
SRR17520069.14528632  
SRR17520069.14528634  
SRR17520069.14528636  
SRR17520069.14528638  
SRR17520069.14539776  
SRR17520069.14539778  
SRR17520069.14539780  
SRR17520069.14539782  
SRR17520069.14539784  
SRR17520069.14539786  
SRR17520069.14539788  
SRR17520069.14539790  
SRR17520069.14539792  
SRR17520069.14539794  
SRR17520069.14539796  
SRR17520069.14539798  
SRR17520069.14539800  
SRR17520069.14539802  
SRR17520069.14539804  
SRR17520069.14539806  
SRR17520069.14539808  
SRR17520069.14539810  
SRR17520069.14539812  
SRR17520069.14539814  
SRR17520069.14539816  
SRR17520069.14539818  
SRR17520069.14539820  
SRR17520069.14539822  
SRR17520069.14539824  
SRR17520069.14539826  
SRR17520069.14539828  
SRR17520069.14539830

SRR17520069.14539832  
SRR17520069.14539834  
SRR17520069.14539836  
SRR17520069.14539838  
SRR17520069.14539840  
SRR17520069.14539842  
SRR17520069.14539844  
SRR17520069.14539846  
SRR17520069.14539848  
SRR17520069.14539850  
SRR17520069.14539852  
SRR17520069.14539854  
SRR17520069.14539856  
SRR17520069.14539858  
SRR17520069.14539860  
SRR17520069.14539862  
SRR17520069.14539864  
SRR17520069.14539866  
SRR17520069.14539868  
SRR17520069.14539870  
SRR17520069.14539872  
SRR17520069.14539874  
SRR17520069.14539876  
SRR17520069.14539878  
SRR17520069.14539880  
SRR17520069.14539882  
SRR17520069.14539884  
SRR17520069.14539886  
SRR17520069.14539888  
SRR17520069.14539892  
SRR17520069.14539894  
SRR17520069.14539896  
SRR17520069.14539898  
SRR17520069.14539900  
SRR17520069.14539902  
SRR17520069.14539904  
SRR17520069.14539906  
SRR17520069.14539908  
SRR17520069.14539910  
SRR17520069.14539912  
SRR17520069.14539914  
SRR17520069.14539916  
SRR17520069.14539918  
SRR17520069.14539920  
SRR17520069.14539922  
SRR17520069.14539924  
SRR17520069.14539926

SRR17520069.14539928  
SRR17520069.14539930  
SRR17520069.14539932  
SRR17520069.14539934  
SRR17520069.14539936  
SRR17520069.14539938  
SRR17520069.14539940  
SRR17520069.14540235  
SRR17520069.14543992  
SRR17520069.14543994  
SRR17520069.14543996  
SRR17520069.14543998  
SRR17520069.14544000  
SRR17520069.14544002  
SRR17520069.14544004  
SRR17520069.14544006  
SRR17520069.14544008  
SRR17520069.14544010  
SRR17520069.14544012  
SRR17520069.14544014  
SRR17520069.14544016  
SRR17520069.14544018  
SRR17520069.14544020  
SRR17520069.14544022  
SRR17520069.14544024  
SRR17520069.14544026  
SRR17520069.14544028  
SRR17520069.14544030  
SRR17520069.14544032  
SRR17520069.14544034  
SRR17520069.14544036  
SRR17520069.14544038  
SRR17520069.14544040  
SRR17520069.14544042  
SRR17520069.14544044  
SRR17520069.14544046  
SRR17520069.14544048  
SRR17520069.14544050  
SRR17520069.14544052  
SRR17520069.14547396  
SRR17520069.14554910  
SRR17520069.14554912  
SRR17520069.14554914  
SRR17520069.14554916  
SRR17520069.14554918  
SRR17520069.14554922  
SRR17520069.14554924



SRR17520069.14554926  
SRR17520069.14554928  
SRR17520069.14554930  
SRR17520069.14554932  
SRR17520069.14554934  
SRR17520069.14560650  
SRR17520069.14560652  
SRR17520069.14560654  
SRR17520069.14560656  
SRR17520069.14560658  
SRR17520069.14560660  
SRR17520069.14560664  
SRR17520069.14560666  
SRR17520069.14560668  
SRR17520069.14560670  
SRR17520069.14560672  
SRR17520069.14560674  
SRR17520069.14560676  
SRR17520069.14560678  
SRR17520069.14560680  
SRR17520069.14560682  
SRR17520069.14563249  
SRR17520069.14563251  
SRR17520069.14563255  
SRR17520069.14563257  
SRR17520069.14563259  
SRR17520069.14563261  
SRR17520069.14564563  
SRR17520069.14567228  
SRR17520069.14567230  
SRR17520069.14567232  
SRR17520069.14567234  
SRR17520069.14567236  
SRR17520069.14567238  
SRR17520069.14567240  
SRR17520069.14567242  
SRR17520069.14567244  
SRR17520069.14567246  
SRR17520069.14567248  
SRR17520069.14567250  
SRR17520069.14567252  
SRR17520069.14567254  
SRR17520069.14567256  
SRR17520069.14567258  
SRR17520069.14567260  
SRR17520069.14567262  
SRR17520069.14567264

SRR17520069. 14567266  
SRR17520069. 14567268  
SRR17520069. 14567270  
SRR17520069. 14567272  
SRR17520069. 14567274  
SRR17520069. 14567276  
SRR17520069. 14567280  
SRR17520069. 14567282  
SRR17520069. 14567284  
SRR17520069. 14567286  
SRR17520069. 14567288  
SRR17520069. 14567290  
SRR17520069. 14567292  
SRR17520069. 14567294  
SRR17520069. 14567296  
SRR17520069. 14567298  
SRR17520069. 14567300  
SRR17520069. 14567302  
SRR17520069. 14567304  
SRR17520069. 14567306  
SRR17520069. 14567308  
SRR17520069. 14567310  
SRR17520069. 14567312  
SRR17520069. 14567314  
SRR17520069. 14567316  
SRR17520069. 14567318  
SRR17520069. 14567320  
SRR17520069. 14567322  
SRR17520069. 14567324  
SRR17520069. 14567326  
SRR17520069. 14567328  
SRR17520069. 14567330  
SRR17520069. 14567332  
SRR17520069. 14567334  
SRR17520069. 14567336  
SRR17520069. 14567338  
SRR17520069. 14567340  
SRR17520069. 14567342  
SRR17520069. 14567344  
SRR17520069. 14567346  
SRR17520069. 14567348  
SRR17520069. 14567350  
SRR17520069. 14567352  
SRR17520069. 14567354  
SRR17520069. 14567356  
SRR17520069. 14568543  
SRR17520069. 14568545

SRR17520069.14568547  
SRR17520069.14568549  
SRR17520069.14568551  
SRR17520069.14568553  
SRR17520069.14568557  
SRR17520069.14568559  
SRR17520069.14568561  
SRR17520069.14568563  
SRR17520069.14568565  
SRR17520069.14568567  
SRR17520069.14568569  
SRR17520069.14568571  
SRR17520069.14568573  
SRR17520069.14568575  
SRR17520069.14568577  
SRR17520069.14568579  
SRR17520069.14568581  
SRR17520069.14568583  
SRR17520069.14568585  
SRR17520069.14568587  
SRR17520069.14568589  
SRR17520069.14568591  
SRR17520069.14568593  
SRR17520069.14568595  
SRR17520069.14569947  
SRR17520069.14569949  
SRR17520069.14569951  
SRR17520069.14569953  
SRR17520069.14569955  
SRR17520069.14569957  
SRR17520069.14569959  
SRR17520069.14569961  
SRR17520069.14569963  
SRR17520069.14569965  
SRR17520069.14569967  
SRR17520069.14569969  
SRR17520069.14569971  
SRR17520069.14569973  
SRR17520069.14569975  
SRR17520069.14569977  
SRR17520069.14569981  
SRR17520069.14569983  
SRR17520069.14569985  
SRR17520069.14569987  
SRR17520069.14569989  
SRR17520069.14569991  
SRR17520069.14569993

SRR17520069.14571759  
SRR17520069.14571761  
SRR17520069.14572429  
SRR17520069.14572431  
SRR17520069.14573372  
SRR17520069.14573374  
SRR17520069.14573376  
SRR17520069.14573378  
SRR17520069.14573380  
SRR17520069.14573382  
SRR17520069.14573384  
SRR17520069.14573386  
SRR17520069.14573388  
SRR17520069.14573390  
SRR17520069.14573392  
SRR17520069.14573394  
SRR17520069.14573396  
SRR17520069.14573398  
SRR17520069.14575353  
SRR17520069.14575355  
SRR17520069.14575357  
SRR17520069.14580262  
SRR17520069.14580264  
SRR17520069.14580266  
SRR17520069.14580268  
SRR17520069.14580270  
SRR17520069.14580272  
SRR17520069.14580274  
SRR17520069.14580276  
SRR17520069.14580278  
SRR17520069.14580280  
SRR17520069.14580282  
SRR17520069.14580284  
SRR17520069.14580286  
SRR17520069.14580288  
SRR17520069.14580290  
SRR17520069.14580292  
SRR17520069.14580294  
SRR17520069.14580296  
SRR17520069.14580298  
SRR17520069.14588448  
SRR17520069.14588450  
SRR17520069.14588457  
SRR17520069.14588459  
SRR17520069.14588461  
SRR17520069.14588463  
SRR17520069.14588465

SRR17520069.14588467  
SRR17520069.14588469  
SRR17520069.14588471  
SRR17520069.14588473  
SRR17520069.14588475  
SRR17520069.14588477  
SRR17520069.14588479  
SRR17520069.14588481  
SRR17520069.14588483  
SRR17520069.14588485  
SRR17520069.14588487  
SRR17520069.14588489  
SRR17520069.14588491  
SRR17520069.14589858  
SRR17520069.14589860  
SRR17520069.14589862  
SRR17520069.14589864  
SRR17520069.14589866  
SRR17520069.14589868  
SRR17520069.14589870  
SRR17520069.14592102  
SRR17520069.14592104  
SRR17520069.14592106  
SRR17520069.14592108  
SRR17520069.14592110  
SRR17520069.14592112  
SRR17520069.14592114  
SRR17520069.14592116  
SRR17520069.14592118  
SRR17520069.14592120  
SRR17520069.14592122  
SRR17520069.14592124  
SRR17520069.14592126  
SRR17520069.14592128  
SRR17520069.14592130  
SRR17520069.14592132  
SRR17520069.14592134  
SRR17520069.14592136  
SRR17520069.14592138  
SRR17520069.14592140  
SRR17520069.14592142  
SRR17520069.14592144  
SRR17520069.14592146  
SRR17520069.14592148  
SRR17520069.14592150  
SRR17520069.14592152  
SRR17520069.14592154

SRR17520069.14592156  
SRR17520069.14592158  
SRR17520069.14592160  
SRR17520069.14592162  
SRR17520069.14592164  
SRR17520069.14592166  
SRR17520069.14594269  
SRR17520069.14594271  
SRR17520069.14594273  
SRR17520069.14594275  
SRR17520069.14599814  
SRR17520069.14599816  
SRR17520069.14599818  
SRR17520069.14599820  
SRR17520069.14599824  
SRR17520069.14599826  
SRR17520069.14599828  
SRR17520069.14599830  
SRR17520069.14599832  
SRR17520069.14599834  
SRR17520069.14599836  
SRR17520069.14599838  
SRR17520069.14599840  
SRR17520069.14599842  
SRR17520069.14599844  
SRR17520069.14599846  
SRR17520069.14599848  
SRR17520069.14599850  
SRR17520069.14599852  
SRR17520069.14599854  
SRR17520069.14599856  
SRR17520069.14599858  
SRR17520069.14599860  
SRR17520069.14599862  
SRR17520069.14599864  
SRR17520069.14599866  
SRR17520069.14599868  
SRR17520069.14599870  
SRR17520069.14599872  
SRR17520069.14599874  
SRR17520069.14599876  
SRR17520069.14599878  
SRR17520069.14599880  
SRR17520069.14599882  
SRR17520069.14599884  
SRR17520069.14599886  
SRR17520069.14599888

SRR17520069.14599890  
SRR17520069.14599892  
SRR17520069.14599894  
SRR17520069.14599896  
SRR17520069.14599898  
SRR17520069.14599902  
SRR17520069.14599904  
SRR17520069.14599906  
SRR17520069.14599908  
SRR17520069.14599912  
SRR17520069.14599914  
SRR17520069.14599916  
SRR17520069.14599918  
SRR17520069.14599920  
SRR17520069.14599924  
SRR17520069.14599926  
SRR17520069.14599928  
SRR17520069.14599930  
SRR17520069.14599932  
SRR17520069.14599934  
SRR17520069.14599936  
SRR17520069.14599938  
SRR17520069.14599940  
SRR17520069.14599942  
SRR17520069.14599944  
SRR17520069.14599946  
SRR17520069.14599948  
SRR17520069.14599950  
SRR17520069.14599952  
SRR17520069.14599954  
SRR17520069.14599956  
SRR17520069.14599958  
SRR17520069.14599960  
SRR17520069.14599962  
SRR17520069.14599964  
SRR17520069.14605643  
SRR17520069.14610748  
SRR17520069.14610750  
SRR17520069.14610752  
SRR17520069.14610754  
SRR17520069.14610756  
SRR17520069.14610758  
SRR17520069.14610760  
SRR17520069.14610762  
SRR17520069.14610764  
SRR17520069.14610766  
SRR17520069.14610768

SRR17520069. 14610770  
SRR17520069. 14612639  
SRR17520069. 14612641  
SRR17520069. 14612643  
SRR17520069. 14612645  
SRR17520069. 14612647  
SRR17520069. 14612649  
SRR17520069. 14612651  
SRR17520069. 14612653  
SRR17520069. 14612655  
SRR17520069. 14612657  
SRR17520069. 14612661  
SRR17520069. 14612663  
SRR17520069. 14612665  
SRR17520069. 14612667  
SRR17520069. 14612669  
SRR17520069. 14612671  
SRR17520069. 14612673  
SRR17520069. 14612675  
SRR17520069. 14612677  
SRR17520069. 14612679  
SRR17520069. 14612681  
SRR17520069. 14612683  
SRR17520069. 14612687  
SRR17520069. 14612689  
SRR17520069. 14612691  
SRR17520069. 14612693  
SRR17520069. 14612695  
SRR17520069. 14612697  
SRR17520069. 14612699  
SRR17520069. 14612703  
SRR17520069. 14612705  
SRR17520069. 14612707  
SRR17520069. 14612709  
SRR17520069. 14612711  
SRR17520069. 14612713  
SRR17520069. 14612715  
SRR17520069. 14612717  
SRR17520069. 14612719  
SRR17520069. 14612721  
SRR17520069. 14612723  
SRR17520069. 14612725  
SRR17520069. 14612727  
SRR17520069. 14612729  
SRR17520069. 14612731  
SRR17520069. 14612735  
SRR17520069. 14612737



SRR17520069. 14612741  
SRR17520069. 14612743  
SRR17520069. 14612745  
SRR17520069. 14612747  
SRR17520069. 14612749  
SRR17520069. 14612751  
SRR17520069. 14612753  
SRR17520069. 14612755  
SRR17520069. 14612757  
SRR17520069. 14612761  
SRR17520069. 14612763  
SRR17520069. 14612765  
SRR17520069. 14612767  
SRR17520069. 14612769  
SRR17520069. 14612771  
SRR17520069. 14612773  
SRR17520069. 14612775  
SRR17520069. 14612777  
SRR17520069. 14612779  
SRR17520069. 14612783  
SRR17520069. 14612785  
SRR17520069. 14612787  
SRR17520069. 14612789  
SRR17520069. 14612791  
SRR17520069. 14612793  
SRR17520069. 14612795  
SRR17520069. 14612797  
SRR17520069. 14612799  
SRR17520069. 14612801  
SRR17520069. 14612803  
SRR17520069. 14612805  
SRR17520069. 14612807  
SRR17520069. 14612809  
SRR17520069. 14612811  
SRR17520069. 14612813  
SRR17520069. 14612817  
SRR17520069. 14612819  
SRR17520069. 14612821  
SRR17520069. 14612823  
SRR17520069. 14612825  
SRR17520069. 14612827  
SRR17520069. 14612829  
SRR17520069. 14612831  
SRR17520069. 14612833  
SRR17520069. 14612835  
SRR17520069. 14612837  
SRR17520069. 14612839

SRR17520069.14612841  
SRR17520069.14612843  
SRR17520069.14612845  
SRR17520069.14614437  
SRR17520069.14616207  
SRR17520069.14616209  
SRR17520069.14616211  
SRR17520069.14616213  
SRR17520069.14616215  
SRR17520069.14616217  
SRR17520069.14616219  
SRR17520069.14616221  
SRR17520069.14616223  
SRR17520069.14616225  
SRR17520069.14616227  
SRR17520069.14616229  
SRR17520069.14616231  
SRR17520069.14616233  
SRR17520069.14616235  
SRR17520069.14616237  
SRR17520069.14616239  
SRR17520069.14616241  
SRR17520069.14616243  
SRR17520069.14616245  
SRR17520069.14616247  
SRR17520069.14616249  
SRR17520069.14616251  
SRR17520069.14616253  
SRR17520069.14616257  
SRR17520069.14616259  
SRR17520069.14616261  
SRR17520069.14616263  
SRR17520069.14616265  
SRR17520069.14616267  
SRR17520069.14622901  
SRR17520069.14622905  
SRR17520069.14622907  
SRR17520069.14622909  
SRR17520069.14622911  
SRR17520069.14622913  
SRR17520069.14622915  
SRR17520069.14622917  
SRR17520069.14622919  
SRR17520069.14622921  
SRR17520069.14622923  
SRR17520069.14622927  
SRR17520069.14622931

SRR17520069.14622933  
SRR17520069.14622935  
SRR17520069.14623719  
SRR17520069.14623721  
SRR17520069.14623723  
SRR17520069.14623725  
SRR17520069.14623727  
SRR17520069.14623729  
SRR17520069.14623731  
SRR17520069.14623733  
SRR17520069.14623735  
SRR17520069.14623737  
SRR17520069.14623739  
SRR17520069.14626106  
SRR17520069.14626108  
SRR17520069.14629708  
SRR17520069.14629710  
SRR17520069.14629714  
SRR17520069.14629718  
SRR17520069.14629720  
SRR17520069.14629722  
SRR17520069.14629724  
SRR17520069.14629726  
SRR17520069.14629728  
SRR17520069.14629730  
SRR17520069.14629732  
SRR17520069.14629734  
SRR17520069.14629738  
SRR17520069.14629740  
SRR17520069.14629742  
SRR17520069.14629744  
SRR17520069.14629748  
SRR17520069.14629752  
SRR17520069.14630058  
SRR17520069.14630060  
SRR17520069.14630062  
SRR17520069.14630064  
SRR17520069.14630066  
SRR17520069.14630068  
SRR17520069.14631049  
SRR17520069.14631051  
SRR17520069.14631053  
SRR17520069.14631055  
SRR17520069.14631057  
SRR17520069.14631059  
SRR17520069.14631065  
SRR17520069.14631067

SRR17520069.14631069  
SRR17520069.14631071  
SRR17520069.14631073  
SRR17520069.14631075  
SRR17520069.14631077  
SRR17520069.14631079  
SRR17520069.14631081  
SRR17520069.14631083  
SRR17520069.14631085  
SRR17520069.14631087  
SRR17520069.14631089  
SRR17520069.14631091  
SRR17520069.14631093  
SRR17520069.14631095  
SRR17520069.14631097  
SRR17520069.14631099  
SRR17520069.14631101  
SRR17520069.14631103  
SRR17520069.14631105  
SRR17520069.14631107  
SRR17520069.14631109  
SRR17520069.14631111  
SRR17520069.14631113  
SRR17520069.14631115  
SRR17520069.14631117  
SRR17520069.14631119  
SRR17520069.14631123  
SRR17520069.14631125  
SRR17520069.14631131  
SRR17520069.14631143  
SRR17520069.14631146  
SRR17520069.14636251  
SRR17520069.14641302  
SRR17520069.14641304  
SRR17520069.14641306  
SRR17520069.14641308  
SRR17520069.14641310  
SRR17520069.14641312  
SRR17520069.14641314  
SRR17520069.14641316  
SRR17520069.14641318  
SRR17520069.14641320  
SRR17520069.14641322  
SRR17520069.14641324  
SRR17520069.14641326  
SRR17520069.14641328  
SRR17520069.14641330

SRR17520069. 14641332  
SRR17520069. 14641336  
SRR17520069. 14641338  
SRR17520069. 14641340  
SRR17520069. 14641342  
SRR17520069. 14641344  
SRR17520069. 14641346  
SRR17520069. 14641348  
SRR17520069. 14641350  
SRR17520069. 14641352  
SRR17520069. 14641354  
SRR17520069. 14641356  
SRR17520069. 14641358  
SRR17520069. 14641360  
SRR17520069. 14641362  
SRR17520069. 14641364  
SRR17520069. 14641366  
SRR17520069. 14641368  
SRR17520069. 14641370  
SRR17520069. 14641372  
SRR17520069. 14641374  
SRR17520069. 14641378  
SRR17520069. 14641380  
SRR17520069. 14641382  
SRR17520069. 14641384  
SRR17520069. 14641386  
SRR17520069. 14641388  
SRR17520069. 14641390  
SRR17520069. 14641392  
SRR17520069. 14641396  
SRR17520069. 14641398  
SRR17520069. 14641400  
SRR17520069. 14641402  
SRR17520069. 14641404  
SRR17520069. 14641406  
SRR17520069. 14641408  
SRR17520069. 14641410  
SRR17520069. 14641412  
SRR17520069. 14641414  
SRR17520069. 14641416  
SRR17520069. 14641418  
SRR17520069. 14641420  
SRR17520069. 14641422  
SRR17520069. 14641424  
SRR17520069. 14641426  
SRR17520069. 14641428  
SRR17520069. 14641430

SRR17520069.14641432  
SRR17520069.14641434  
SRR17520069.14641436  
SRR17520069.14641438  
SRR17520069.14641440  
SRR17520069.14641442  
SRR17520069.14641444  
SRR17520069.14641446  
SRR17520069.14641448  
SRR17520069.14641450  
SRR17520069.14641452  
SRR17520069.14641454  
SRR17520069.14641456  
SRR17520069.14641458  
SRR17520069.14641460  
SRR17520069.14641462  
SRR17520069.14641464  
SRR17520069.14641466  
SRR17520069.14641468  
SRR17520069.14641470  
SRR17520069.14641472  
SRR17520069.14641474  
SRR17520069.14641476  
SRR17520069.14641478  
SRR17520069.14641480  
SRR17520069.14644694  
SRR17520069.14644696  
SRR17520069.14644698  
SRR17520069.14644700  
SRR17520069.14644702  
SRR17520069.14644704  
SRR17520069.14644706  
SRR17520069.14644708  
SRR17520069.14644710  
SRR17520069.14644714  
SRR17520069.14644716  
SRR17520069.14644718  
SRR17520069.14644720  
SRR17520069.14644722  
SRR17520069.14647093  
SRR17520069.14647097  
SRR17520069.14647099  
SRR17520069.14647101  
SRR17520069.14653698  
SRR17520069.14653700  
SRR17520069.14653702  
SRR17520069.14653704

SRR17520069.14653706  
SRR17520069.14653708  
SRR17520069.14653710  
SRR17520069.14653714  
SRR17520069.14653716  
SRR17520069.14653718  
SRR17520069.14653720  
SRR17520069.14653722  
SRR17520069.14653724  
SRR17520069.14653726  
SRR17520069.14653728  
SRR17520069.14653730  
SRR17520069.14653732  
SRR17520069.14653734  
SRR17520069.14653736  
SRR17520069.14653738  
SRR17520069.14653740  
SRR17520069.14653742  
SRR17520069.14653744  
SRR17520069.14653746  
SRR17520069.14653748  
SRR17520069.14653750  
SRR17520069.14653752  
SRR17520069.14653754  
SRR17520069.14663827  
SRR17520069.14663829  
SRR17520069.14663831  
SRR17520069.14663833  
SRR17520069.14663835  
SRR17520069.14663837  
SRR17520069.14663839  
SRR17520069.14663841  
SRR17520069.14663843  
SRR17520069.14663845  
SRR17520069.14663847  
SRR17520069.14663849  
SRR17520069.14663851  
SRR17520069.14663853  
SRR17520069.14663855  
SRR17520069.14663857  
SRR17520069.14663859  
SRR17520069.14663861  
SRR17520069.14663863  
SRR17520069.14663865  
SRR17520069.14663867  
SRR17520069.14663869  
SRR17520069.14663871

SRR17520069.14663875  
SRR17520069.14663877  
SRR17520069.14663914  
SRR17520069.14663945  
SRR17520069.14663949  
SRR17520069.14663951  
SRR17520069.14665385  
SRR17520069.14665387  
SRR17520069.14665389  
SRR17520069.14665391  
SRR17520069.14665393  
SRR17520069.14665395  
SRR17520069.14665397  
SRR17520069.14665399  
SRR17520069.14665401  
SRR17520069.14665403  
SRR17520069.14665405  
SRR17520069.14665407  
SRR17520069.14665409  
SRR17520069.14665411  
SRR17520069.14665413  
SRR17520069.14665415  
SRR17520069.14665417  
SRR17520069.14665419  
SRR17520069.14665421  
SRR17520069.14665423  
SRR17520069.14665425  
SRR17520069.14665427  
SRR17520069.14665429  
SRR17520069.14665431  
SRR17520069.14665433  
SRR17520069.14669421  
SRR17520069.14669423  
SRR17520069.14669425  
SRR17520069.14669427  
SRR17520069.14669429  
SRR17520069.14669431  
SRR17520069.14669433  
SRR17520069.14669435  
SRR17520069.14669437  
SRR17520069.14669439  
SRR17520069.14669441  
SRR17520069.14669443  
SRR17520069.14669449  
SRR17520069.14669451  
SRR17520069.14669453  
SRR17520069.14669455



SRR17520069.14669459  
SRR17520069.14669461  
SRR17520069.14669463  
SRR17520069.14669465  
SRR17520069.14669467  
SRR17520069.14669469  
SRR17520069.14669471  
SRR17520069.14669473  
SRR17520069.14669475  
SRR17520069.14669477  
SRR17520069.14669479  
SRR17520069.14669481  
SRR17520069.14669483  
SRR17520069.14669487  
SRR17520069.14669863  
SRR17520069.14669865  
SRR17520069.14669867  
SRR17520069.14669869  
SRR17520069.14669871  
SRR17520069.14669873  
SRR17520069.14669875  
SRR17520069.14669877  
SRR17520069.14669879  
SRR17520069.14669881  
SRR17520069.14669883  
SRR17520069.14669885  
SRR17520069.14669887  
SRR17520069.14669889  
SRR17520069.14669891  
SRR17520069.14677010  
SRR17520069.14677012  
SRR17520069.14677014  
SRR17520069.14677016  
SRR17520069.14677018  
SRR17520069.14677020  
SRR17520069.14677022  
SRR17520069.14677024  
SRR17520069.14677026  
SRR17520069.14677028  
SRR17520069.14677030  
SRR17520069.14677032  
SRR17520069.14677034  
SRR17520069.14677036  
SRR17520069.14677038  
SRR17520069.14677040  
SRR17520069.14677042  
SRR17520069.14677044

SRR17520069. 14677046  
SRR17520069. 14677048  
SRR17520069. 14677050  
SRR17520069. 14680301  
SRR17520069. 14683906  
SRR17520069. 14683908  
SRR17520069. 14683910  
SRR17520069. 14683912  
SRR17520069. 14683914  
SRR17520069. 14683916  
SRR17520069. 14685467  
SRR17520069. 14685469  
SRR17520069. 14685471  
SRR17520069. 14685473  
SRR17520069. 14685475  
SRR17520069. 14685477  
SRR17520069. 14685479  
SRR17520069. 14685481  
SRR17520069. 14685483  
SRR17520069. 14685485  
SRR17520069. 14685487  
SRR17520069. 14685489  
SRR17520069. 14685491  
SRR17520069. 14685493  
SRR17520069. 14685495  
SRR17520069. 14685497  
SRR17520069. 14685499  
SRR17520069. 14685501  
SRR17520069. 14685503  
SRR17520069. 14685505  
SRR17520069. 14685507  
SRR17520069. 14685509  
SRR17520069. 14685511  
SRR17520069. 14685513  
SRR17520069. 14685515  
SRR17520069. 14685517  
SRR17520069. 14685519  
SRR17520069. 14685521  
SRR17520069. 14685523  
SRR17520069. 14685525  
SRR17520069. 14685527  
SRR17520069. 14685529  
SRR17520069. 14685531  
SRR17520069. 14685533  
SRR17520069. 14685535  
SRR17520069. 14685537  
SRR17520069. 14685539

SRR17520069.14685541  
SRR17520069.14685543  
SRR17520069.14685545  
SRR17520069.14685547  
SRR17520069.14685549  
SRR17520069.14685551  
SRR17520069.14685553  
SRR17520069.14685555  
SRR17520069.14685557  
SRR17520069.14685559  
SRR17520069.14685561  
SRR17520069.14685563  
SRR17520069.14686174  
SRR17520069.14686176  
SRR17520069.14686178  
SRR17520069.14686180  
SRR17520069.14686182  
SRR17520069.14686184  
SRR17520069.14686186  
SRR17520069.14686188  
SRR17520069.14686190  
SRR17520069.14686192  
SRR17520069.14686194  
SRR17520069.14686196  
SRR17520069.14686198  
SRR17520069.14686200  
SRR17520069.14686202  
SRR17520069.14686204  
SRR17520069.14686206  
SRR17520069.14686208  
SRR17520069.14686210  
SRR17520069.14686212  
SRR17520069.14686214  
SRR17520069.14686216  
SRR17520069.14686218  
SRR17520069.14686220  
SRR17520069.14686222  
SRR17520069.14686224  
SRR17520069.14686226  
SRR17520069.14686228  
SRR17520069.14686230  
SRR17520069.14686232  
SRR17520069.14686234  
SRR17520069.14686236  
SRR17520069.14686238  
SRR17520069.14686240  
SRR17520069.14686242

SRR17520069.14686244  
SRR17520069.14686246  
SRR17520069.14686248  
SRR17520069.14686252  
SRR17520069.14686254  
SRR17520069.14686256  
SRR17520069.14686258  
SRR17520069.14686260  
SRR17520069.14686262  
SRR17520069.14686264  
SRR17520069.14686266  
SRR17520069.14686268  
SRR17520069.14686270  
SRR17520069.14686272  
SRR17520069.14686274  
SRR17520069.14686276  
SRR17520069.14686280  
SRR17520069.14686282  
SRR17520069.14686284  
SRR17520069.14686286  
SRR17520069.14686288  
SRR17520069.14686290  
SRR17520069.14686292  
SRR17520069.14686294  
SRR17520069.14686296  
SRR17520069.14686298  
SRR17520069.14686300  
SRR17520069.14686302  
SRR17520069.14686304  
SRR17520069.14687041  
SRR17520069.14687043  
SRR17520069.14687045  
SRR17520069.14687047  
SRR17520069.14687051  
SRR17520069.14687053  
SRR17520069.14687055  
SRR17520069.14687057  
SRR17520069.14687059  
SRR17520069.14687061  
SRR17520069.14687067  
SRR17520069.14687071  
SRR17520069.14687073  
SRR17520069.14687075  
SRR17520069.14687077  
SRR17520069.14687081  
SRR17520069.14687083  
SRR17520069.14687087

SRR17520069.14687089  
SRR17520069.14687091  
SRR17520069.14687093  
SRR17520069.14690784  
SRR17520069.14690786  
SRR17520069.14690788  
SRR17520069.14690790  
SRR17520069.14690792  
SRR17520069.14690794  
SRR17520069.14690796  
SRR17520069.14690798  
SRR17520069.14690800  
SRR17520069.14690802  
SRR17520069.14690804  
SRR17520069.14690806  
SRR17520069.14690808  
SRR17520069.14690810  
SRR17520069.14690812  
SRR17520069.14690814  
SRR17520069.14690816  
SRR17520069.14690820  
SRR17520069.14690822  
SRR17520069.14690824  
SRR17520069.14690826  
SRR17520069.14690828  
SRR17520069.14690830  
SRR17520069.14690832  
SRR17520069.14690834  
SRR17520069.14690836  
SRR17520069.14690838  
SRR17520069.14690840  
SRR17520069.14690842  
SRR17520069.14690844  
SRR17520069.14690846  
SRR17520069.14690848  
SRR17520069.14690850  
SRR17520069.14690852  
SRR17520069.14690854  
SRR17520069.14690856  
SRR17520069.14690858  
SRR17520069.14690860  
SRR17520069.14690862  
SRR17520069.14690864  
SRR17520069.14690866  
SRR17520069.14690868  
SRR17520069.14690872  
SRR17520069.14690876

SRR17520069.14690878  
SRR17520069.14690880  
SRR17520069.14690882  
SRR17520069.14690884  
SRR17520069.14690888  
SRR17520069.14690890  
SRR17520069.14690892  
SRR17520069.14690894  
SRR17520069.14690896  
SRR17520069.14690898  
SRR17520069.14690900  
SRR17520069.14690902  
SRR17520069.14690904  
SRR17520069.14690906  
SRR17520069.14690908  
SRR17520069.14690910  
SRR17520069.14690912  
SRR17520069.14690914  
SRR17520069.14690916  
SRR17520069.14690918  
SRR17520069.14690920  
SRR17520069.14690922  
SRR17520069.14690924  
SRR17520069.14690926  
SRR17520069.14690928  
SRR17520069.14690930  
SRR17520069.14690932  
SRR17520069.14690934  
SRR17520069.14690936  
SRR17520069.14690938  
SRR17520069.14690940  
SRR17520069.14690942  
SRR17520069.14690944  
SRR17520069.14690946  
SRR17520069.14690948  
SRR17520069.14690950  
SRR17520069.14690952  
SRR17520069.14690954  
SRR17520069.14690956  
SRR17520069.14693820  
SRR17520069.14695380  
SRR17520069.14697077  
SRR17520069.14697079  
SRR17520069.14705690  
SRR17520069.14705694  
SRR17520069.14705696  
SRR17520069.14705702

SRR17520069.14705706  
SRR17520069.14705708  
SRR17520069.14705710  
SRR17520069.14705712  
SRR17520069.14705714  
SRR17520069.14705716  
SRR17520069.14705718  
SRR17520069.14705720  
SRR17520069.14705722  
SRR17520069.14705724  
SRR17520069.14705726  
SRR17520069.14705728  
SRR17520069.14705730  
SRR17520069.14705732  
SRR17520069.14705734  
SRR17520069.14705736  
SRR17520069.14707731  
SRR17520069.14707733  
SRR17520069.14707735  
SRR17520069.14707737  
SRR17520069.14707739  
SRR17520069.14707741  
SRR17520069.14707743  
SRR17520069.14707745  
SRR17520069.14707749  
SRR17520069.14707751  
SRR17520069.14707753  
SRR17520069.14707755  
SRR17520069.14707757  
SRR17520069.14707759  
SRR17520069.14707761  
SRR17520069.14707763  
SRR17520069.14707765  
SRR17520069.14707767  
SRR17520069.14707769  
SRR17520069.14710676  
SRR17520069.14710678  
SRR17520069.14710680  
SRR17520069.14710682  
SRR17520069.14711615  
SRR17520069.14711617  
SRR17520069.14711619  
SRR17520069.14731679  
SRR17520069.14731681  
SRR17520069.14731683  
SRR17520069.14731685  
SRR17520069.14731687

SRR17520069.14731689  
SRR17520069.14734128  
SRR17520069.14734130  
SRR17520069.14734132  
SRR17520069.14734134  
SRR17520069.14734136  
SRR17520069.14734138  
SRR17520069.14734140  
SRR17520069.14734142  
SRR17520069.14734144  
SRR17520069.14734146  
SRR17520069.14734148  
SRR17520069.14734150  
SRR17520069.14734152  
SRR17520069.14734154  
SRR17520069.14734156  
SRR17520069.14734158  
SRR17520069.14734160  
SRR17520069.14734164  
SRR17520069.14734166  
SRR17520069.14734168  
SRR17520069.14734170  
SRR17520069.14734172  
SRR17520069.14734174  
SRR17520069.14734176  
SRR17520069.14734178  
SRR17520069.14734180  
SRR17520069.14734182  
SRR17520069.14734184  
SRR17520069.14734186  
SRR17520069.14734188  
SRR17520069.14734190  
SRR17520069.14734192  
SRR17520069.14734194  
SRR17520069.14734196  
SRR17520069.14734198  
SRR17520069.14734200  
SRR17520069.14734202  
SRR17520069.14734204  
SRR17520069.14734206  
SRR17520069.14734208  
SRR17520069.14734210  
SRR17520069.14734212  
SRR17520069.14734214  
SRR17520069.14734216  
SRR17520069.14734218  
SRR17520069.14734966



SRR17520069.14734968  
SRR17520069.14742504  
SRR17520069.14746753  
SRR17520069.14746755  
SRR17520069.14746757  
SRR17520069.14746759  
SRR17520069.14746761  
SRR17520069.14746763  
SRR17520069.14746765  
SRR17520069.14746767  
SRR17520069.14746769  
SRR17520069.14746771  
SRR17520069.14746773  
SRR17520069.14746775  
SRR17520069.14746777  
SRR17520069.14746779  
SRR17520069.14746781  
SRR17520069.14746783  
SRR17520069.14746785  
SRR17520069.14746787  
SRR17520069.14746789  
SRR17520069.14746791  
SRR17520069.14746793  
SRR17520069.14746795  
SRR17520069.14752803  
SRR17520069.14752805  
SRR17520069.14752807  
SRR17520069.14755674  
SRR17520069.14755676  
SRR17520069.14755678  
SRR17520069.14755680  
SRR17520069.14755684  
SRR17520069.14755686  
SRR17520069.14755688  
SRR17520069.14755690  
SRR17520069.14755692  
SRR17520069.14758924  
SRR17520069.14758926  
SRR17520069.14758928  
SRR17520069.14758930  
SRR17520069.14758932  
SRR17520069.14758934  
SRR17520069.14758936  
SRR17520069.14758938  
SRR17520069.14758940  
SRR17520069.14758942  
SRR17520069.14758944

SRR17520069. 14758948  
SRR17520069. 14758950  
SRR17520069. 14758952  
SRR17520069. 14758954  
SRR17520069. 14758958  
SRR17520069. 14758960  
SRR17520069. 14758962  
SRR17520069. 14758964  
SRR17520069. 14758966  
SRR17520069. 14758968  
SRR17520069. 14758970  
SRR17520069. 14758972  
SRR17520069. 14758974  
SRR17520069. 14758976  
SRR17520069. 14758978  
SRR17520069. 14758980  
SRR17520069. 14758982  
SRR17520069. 14758984  
SRR17520069. 14758986  
SRR17520069. 14758988  
SRR17520069. 14758990  
SRR17520069. 14758992  
SRR17520069. 14758994  
SRR17520069. 14758996  
SRR17520069. 14758998  
SRR17520069. 14759000  
SRR17520069. 14759002  
SRR17520069. 14759004  
SRR17520069. 14759006  
SRR17520069. 14759008  
SRR17520069. 14759010  
SRR17520069. 14759012  
SRR17520069. 14759014  
SRR17520069. 14759016  
SRR17520069. 14759018  
SRR17520069. 14759020  
SRR17520069. 14759432  
SRR17520069. 14759434  
SRR17520069. 14759436  
SRR17520069. 14759438  
SRR17520069. 14767058  
SRR17520069. 14767060  
SRR17520069. 14767062  
SRR17520069. 14767064  
SRR17520069. 14767066  
SRR17520069. 14767068  
SRR17520069. 14767070

SRR17520069. 14767072  
SRR17520069. 14767074  
SRR17520069. 14767076  
SRR17520069. 14767078  
SRR17520069. 14767080  
SRR17520069. 14767082  
SRR17520069. 14767084  
SRR17520069. 14767086  
SRR17520069. 14767088  
SRR17520069. 14767090  
SRR17520069. 14767092  
SRR17520069. 14767094  
SRR17520069. 14767096  
SRR17520069. 14767098  
SRR17520069. 14767100  
SRR17520069. 14767102  
SRR17520069. 14767104  
SRR17520069. 14767106  
SRR17520069. 14767108  
SRR17520069. 14767110  
SRR17520069. 14767112  
SRR17520069. 14767114  
SRR17520069. 14767116  
SRR17520069. 14767118  
SRR17520069. 14767120  
SRR17520069. 14767122  
SRR17520069. 14767124  
SRR17520069. 14767126  
SRR17520069. 14767128  
SRR17520069. 14767130  
SRR17520069. 14767132  
SRR17520069. 14767134  
SRR17520069. 14767136  
SRR17520069. 14767138  
SRR17520069. 14767140  
SRR17520069. 14767142  
SRR17520069. 14767144  
SRR17520069. 14767146  
SRR17520069. 14767148  
SRR17520069. 14767150  
SRR17520069. 14767152  
SRR17520069. 14767154  
SRR17520069. 14767156  
SRR17520069. 14767158  
SRR17520069. 14767160  
SRR17520069. 14767162  
SRR17520069. 14767164

SRR17520069. 14767166  
SRR17520069. 14767168  
SRR17520069. 14767172  
SRR17520069. 14767174  
SRR17520069. 14767176  
SRR17520069. 14767178  
SRR17520069. 14767180  
SRR17520069. 14767182  
SRR17520069. 14767184  
SRR17520069. 14767186  
SRR17520069. 14767188  
SRR17520069. 14767190  
SRR17520069. 14767192  
SRR17520069. 14767194  
SRR17520069. 14767196  
SRR17520069. 14767198  
SRR17520069. 14767200  
SRR17520069. 14767202  
SRR17520069. 14767204  
SRR17520069. 14767206  
SRR17520069. 14767208  
SRR17520069. 14767210  
SRR17520069. 14767212  
SRR17520069. 14767214  
SRR17520069. 14767216  
SRR17520069. 14767218  
SRR17520069. 14767220  
SRR17520069. 14767222  
SRR17520069. 14767304  
SRR17520069. 14767306  
SRR17520069. 14767308  
SRR17520069. 14767310  
SRR17520069. 14767312  
SRR17520069. 14767314  
SRR17520069. 14767316  
SRR17520069. 14767318  
SRR17520069. 14767320  
SRR17520069. 14767322  
SRR17520069. 14767324  
SRR17520069. 14767326  
SRR17520069. 14767328  
SRR17520069. 14767330  
SRR17520069. 14773713  
SRR17520069. 14780684  
SRR17520069. 14780686  
SRR17520069. 14780688  
SRR17520069. 14780692

SRR17520069.14780694  
SRR17520069.14780696  
SRR17520069.14782148  
SRR17520069.14782150  
SRR17520069.14782152  
SRR17520069.14782154  
SRR17520069.14782164  
SRR17520069.14782176  
SRR17520069.14782178  
SRR17520069.14783923  
SRR17520069.14792675  
SRR17520069.14792677  
SRR17520069.14792679  
SRR17520069.14792681  
SRR17520069.14792683  
SRR17520069.14792685  
SRR17520069.14792687  
SRR17520069.14792689  
SRR17520069.14792693  
SRR17520069.14792695  
SRR17520069.14792697  
SRR17520069.14792699  
SRR17520069.14792701  
SRR17520069.14792703  
SRR17520069.14792705  
SRR17520069.14792707  
SRR17520069.14793999  
SRR17520069.14794001  
SRR17520069.14794003  
SRR17520069.14794005  
SRR17520069.14794007  
SRR17520069.14794009  
SRR17520069.14794011  
SRR17520069.14794013  
SRR17520069.14794015  
SRR17520069.14794017  
SRR17520069.14794019  
SRR17520069.14794021  
SRR17520069.14794023  
SRR17520069.14794025  
SRR17520069.14796679  
SRR17520069.14798083  
SRR17520069.14798085  
SRR17520069.14798087  
SRR17520069.14798089  
SRR17520069.14798091  
SRR17520069.14798093

SRR17520069.14798095  
SRR17520069.14798097  
SRR17520069.14798099  
SRR17520069.14798101  
SRR17520069.14798103  
SRR17520069.14798105  
SRR17520069.14805164  
SRR17520069.14805166  
SRR17520069.14805168  
SRR17520069.14805170  
SRR17520069.14805172  
SRR17520069.14805176  
SRR17520069.14805178  
SRR17520069.14805180  
SRR17520069.14805182  
SRR17520069.14805184  
SRR17520069.14805186  
SRR17520069.14805188  
SRR17520069.14814626  
SRR17520069.14814628  
SRR17520069.14814630  
SRR17520069.14814632  
SRR17520069.14814634  
SRR17520069.14814636  
SRR17520069.14814638  
SRR17520069.14814640  
SRR17520069.14814642  
SRR17520069.14814644  
SRR17520069.14814646  
SRR17520069.14814648  
SRR17520069.14815363  
SRR17520069.14817212  
SRR17520069.14817214  
SRR17520069.14817216  
SRR17520069.14817218  
SRR17520069.14817220  
SRR17520069.14817222  
SRR17520069.14817224  
SRR17520069.14817226  
SRR17520069.14817228  
SRR17520069.14817230  
SRR17520069.14817232  
SRR17520069.14817234  
SRR17520069.14817236  
SRR17520069.14817238  
SRR17520069.14817240  
SRR17520069.14817242

SRR17520069.14817244  
SRR17520069.14817246  
SRR17520069.14817248  
SRR17520069.14817250  
SRR17520069.14817252  
SRR17520069.14822246  
SRR17520069.14822248  
SRR17520069.14822250  
SRR17520069.14822252  
SRR17520069.14822254  
SRR17520069.14822256  
SRR17520069.14822258  
SRR17520069.14822260  
SRR17520069.14822262  
SRR17520069.14822264  
SRR17520069.14822266  
SRR17520069.14822268  
SRR17520069.14822270  
SRR17520069.14822272  
SRR17520069.14822274  
SRR17520069.14822276  
SRR17520069.14824788  
SRR17520069.14824790  
SRR17520069.14824792  
SRR17520069.14824794  
SRR17520069.14824796  
SRR17520069.14824798  
SRR17520069.14824800  
SRR17520069.14824802  
SRR17520069.14824804  
SRR17520069.14824806  
SRR17520069.14824808  
SRR17520069.14824810  
SRR17520069.14824812  
SRR17520069.14824814  
SRR17520069.14824816  
SRR17520069.14824818  
SRR17520069.14824820  
SRR17520069.14824822  
SRR17520069.14824824  
SRR17520069.14824826  
SRR17520069.14831871  
SRR17520069.14831873  
SRR17520069.14834373  
SRR17520069.14834375  
SRR17520069.14834379  
SRR17520069.14834381

SRR17520069.14834383  
SRR17520069.14834385  
SRR17520069.14834387  
SRR17520069.14834389  
SRR17520069.14834391  
SRR17520069.14834393  
SRR17520069.14834395  
SRR17520069.14834397  
SRR17520069.14834399  
SRR17520069.14834401  
SRR17520069.14834403  
SRR17520069.14834405  
SRR17520069.14834407  
SRR17520069.14834409  
SRR17520069.14834411  
SRR17520069.14834413  
SRR17520069.14834415  
SRR17520069.14834417  
SRR17520069.14834419  
SRR17520069.14834421  
SRR17520069.14834423  
SRR17520069.14834425  
SRR17520069.14836680  
SRR17520069.14836682  
SRR17520069.14836684  
SRR17520069.14836686  
SRR17520069.14836688  
SRR17520069.14836690  
SRR17520069.14836692  
SRR17520069.14836694  
SRR17520069.14845698  
SRR17520069.14848215  
SRR17520069.14848217  
SRR17520069.14848219  
SRR17520069.14848221  
SRR17520069.14848223  
SRR17520069.14848225  
SRR17520069.14848227  
SRR17520069.14848229  
SRR17520069.14848231  
SRR17520069.14848233  
SRR17520069.14848235  
SRR17520069.14848237  
SRR17520069.14848239  
SRR17520069.14848241  
SRR17520069.14848243  
SRR17520069.14848245



SRR17520069.14848247  
SRR17520069.14848249  
SRR17520069.14848251  
SRR17520069.14848253  
SRR17520069.14848255  
SRR17520069.14848257  
SRR17520069.14848259  
SRR17520069.14848261  
SRR17520069.14848263  
SRR17520069.14848265  
SRR17520069.14848267  
SRR17520069.14848269  
SRR17520069.14848271  
SRR17520069.14848273  
SRR17520069.14848275  
SRR17520069.14848277  
SRR17520069.14848279  
SRR17520069.14848281  
SRR17520069.14848283  
SRR17520069.14848285  
SRR17520069.14848287  
SRR17520069.14848289  
SRR17520069.14848291  
SRR17520069.14848293  
SRR17520069.14848295  
SRR17520069.14848297  
SRR17520069.14848299  
SRR17520069.14848301  
SRR17520069.14848303  
SRR17520069.14848305  
SRR17520069.14848307  
SRR17520069.14848309  
SRR17520069.14848311  
SRR17520069.14848313  
SRR17520069.14848315  
SRR17520069.14848317  
SRR17520069.14848319  
SRR17520069.14848321  
SRR17520069.14848323  
SRR17520069.14848325  
SRR17520069.14848327  
SRR17520069.14848329  
SRR17520069.14848331  
SRR17520069.14848333  
SRR17520069.14848335  
SRR17520069.14848337  
SRR17520069.14848339

SRR17520069.14848341  
SRR17520069.14848343  
SRR17520069.14848345  
SRR17520069.14848347  
SRR17520069.14848349  
SRR17520069.14848351  
SRR17520069.14848353  
SRR17520069.14848355  
SRR17520069.14848357  
SRR17520069.14848359  
SRR17520069.14848361  
SRR17520069.14848363  
SRR17520069.14848365  
SRR17520069.14848367  
SRR17520069.14848369  
SRR17520069.14848371  
SRR17520069.14848373  
SRR17520069.14848375  
SRR17520069.14848377  
SRR17520069.14848379  
SRR17520069.14848381  
SRR17520069.14848383  
SRR17520069.14849615  
SRR17520069.14849617  
SRR17520069.14849619  
SRR17520069.14849621  
SRR17520069.14849623  
SRR17520069.14849625  
SRR17520069.14849627  
SRR17520069.14850478  
SRR17520069.14850480  
SRR17520069.14850482  
SRR17520069.14850484  
SRR17520069.14850486  
SRR17520069.14850488  
SRR17520069.14850490  
SRR17520069.14850492  
SRR17520069.14850496  
SRR17520069.14850498  
SRR17520069.14850500  
SRR17520069.14850502  
SRR17520069.14850504  
SRR17520069.14850506  
SRR17520069.14850508  
SRR17520069.14854798  
SRR17520069.14854800  
SRR17520069.14854802

SRR17520069.14856049  
SRR17520069.14856051  
SRR17520069.14856053  
SRR17520069.14856055  
SRR17520069.14856057  
SRR17520069.14856059  
SRR17520069.14856061  
SRR17520069.14856063  
SRR17520069.14856065  
SRR17520069.14856067  
SRR17520069.14856077  
SRR17520069.14856079  
SRR17520069.14856081  
SRR17520069.14856083  
SRR17520069.14856085  
SRR17520069.14856087  
SRR17520069.14856089  
SRR17520069.14856091  
SRR17520069.14856093  
SRR17520069.14856095  
SRR17520069.14856097  
SRR17520069.14856099  
SRR17520069.14856101  
SRR17520069.14856103  
SRR17520069.14856105  
SRR17520069.14856107  
SRR17520069.14874188  
SRR17520069.14880144  
SRR17520069.14880146  
SRR17520069.14880148  
SRR17520069.14881892  
SRR17520069.14881894  
SRR17520069.14881898  
SRR17520069.14881900  
SRR17520069.14881902  
SRR17520069.14882744  
SRR17520069.14882746  
SRR17520069.14882748  
SRR17520069.14882750  
SRR17520069.14882752  
SRR17520069.14882754  
SRR17520069.14882756  
SRR17520069.14882758  
SRR17520069.14882760  
SRR17520069.14884139  
SRR17520069.14884141  
SRR17520069.14884145

SRR17520069.14884147  
SRR17520069.14884149  
SRR17520069.14884151  
SRR17520069.14884153  
SRR17520069.14884155  
SRR17520069.14884157  
SRR17520069.14884159  
SRR17520069.14884161  
SRR17520069.14884163  
SRR17520069.14884165  
SRR17520069.14884167  
SRR17520069.14884169  
SRR17520069.14884171  
SRR17520069.14884173  
SRR17520069.14884175  
SRR17520069.14884177  
SRR17520069.14884179  
SRR17520069.14884181  
SRR17520069.14884183  
SRR17520069.14884185  
SRR17520069.14884187  
SRR17520069.14884189  
SRR17520069.14884191  
SRR17520069.14884193  
SRR17520069.14884195  
SRR17520069.14884197  
SRR17520069.14884199  
SRR17520069.14884201  
SRR17520069.14884203  
SRR17520069.14884205  
SRR17520069.14884207  
SRR17520069.14884209  
SRR17520069.14884211  
SRR17520069.14884213  
SRR17520069.14884215  
SRR17520069.14884217  
SRR17520069.14884219  
SRR17520069.14884221  
SRR17520069.14892551  
SRR17520069.14892553  
SRR17520069.14892555  
SRR17520069.14892557  
SRR17520069.14892559  
SRR17520069.14892561  
SRR17520069.14892563  
SRR17520069.14892565  
SRR17520069.14892567

SRR17520069.14892569  
SRR17520069.14892573  
SRR17520069.14892575  
SRR17520069.14892577  
SRR17520069.14892579  
SRR17520069.14892581  
SRR17520069.14892583  
SRR17520069.14892585  
SRR17520069.14892587  
SRR17520069.14892589  
SRR17520069.14892591  
SRR17520069.14892593  
SRR17520069.14892595  
SRR17520069.14892599  
SRR17520069.14892601  
SRR17520069.14892603  
SRR17520069.14892605  
SRR17520069.14892607  
SRR17520069.14892609  
SRR17520069.14892611  
SRR17520069.14892613  
SRR17520069.14892615  
SRR17520069.14892619  
SRR17520069.14892621  
SRR17520069.14892623  
SRR17520069.14892625  
SRR17520069.14892627  
SRR17520069.14892629  
SRR17520069.14892631  
SRR17520069.14892633  
SRR17520069.14892635  
SRR17520069.14892637  
SRR17520069.14892639  
SRR17520069.14892641  
SRR17520069.14892643  
SRR17520069.14892645  
SRR17520069.14892647  
SRR17520069.14892649  
SRR17520069.14892651  
SRR17520069.14892653  
SRR17520069.14892655  
SRR17520069.14892657  
SRR17520069.14892659  
SRR17520069.14895790  
SRR17520069.14895792  
SRR17520069.14895794  
SRR17520069.14895796

SRR17520069. 14895798  
SRR17520069. 14895800  
SRR17520069. 14895802  
SRR17520069. 14895804  
SRR17520069. 14895806  
SRR17520069. 14895808  
SRR17520069. 14895812  
SRR17520069. 14895814  
SRR17520069. 14895816  
SRR17520069. 14895820  
SRR17520069. 14895822  
SRR17520069. 14895824  
SRR17520069. 14895826  
SRR17520069. 14895828  
SRR17520069. 14895830  
SRR17520069. 14895832  
SRR17520069. 14895834  
SRR17520069. 14895836  
SRR17520069. 14895838  
SRR17520069. 14895840  
SRR17520069. 14895842  
SRR17520069. 14895844  
SRR17520069. 14895846  
SRR17520069. 14895848  
SRR17520069. 14895850  
SRR17520069. 14895852  
SRR17520069. 14895854  
SRR17520069. 14895856  
SRR17520069. 14897082  
SRR17520069. 14897084  
SRR17520069. 14897086  
SRR17520069. 14897088  
SRR17520069. 14897090  
SRR17520069. 14897092  
SRR17520069. 14897096  
SRR17520069. 14897100  
SRR17520069. 14897102  
SRR17520069. 14897104  
SRR17520069. 14897106  
SRR17520069. 14897108  
SRR17520069. 14897110  
SRR17520069. 14897124  
SRR17520069. 14897126  
SRR17520069. 14898577  
SRR17520069. 14899830  
SRR17520069. 14899832  
SRR17520069. 14900688

SRR17520069.14914772  
SRR17520069.14914774  
SRR17520069.14914776  
SRR17520069.14914778  
SRR17520069.14914780  
SRR17520069.14914782  
SRR17520069.14914784  
SRR17520069.14914786  
SRR17520069.14914788  
SRR17520069.14914790  
SRR17520069.14914792  
SRR17520069.14914794  
SRR17520069.14914796  
SRR17520069.14914798  
SRR17520069.14914800  
SRR17520069.14914802  
SRR17520069.14914804  
SRR17520069.14914806  
SRR17520069.14914808  
SRR17520069.14917509  
SRR17520069.14917511  
SRR17520069.14918161  
SRR17520069.14918163  
SRR17520069.14918165  
SRR17520069.14918167  
SRR17520069.14918169  
SRR17520069.14918171  
SRR17520069.14918173  
SRR17520069.14918239  
SRR17520069.14918241  
SRR17520069.14918243  
SRR17520069.14918245  
SRR17520069.14918247  
SRR17520069.14918249  
SRR17520069.14918251  
SRR17520069.14918253  
SRR17520069.14920367  
SRR17520069.14920369  
SRR17520069.14920371  
SRR17520069.14920373  
SRR17520069.14920379  
SRR17520069.14920381  
SRR17520069.14920383  
SRR17520069.14920385  
SRR17520069.14920387  
SRR17520069.14920389  
SRR17520069.14920391

SRR17520069.14920393  
SRR17520069.14927071  
SRR17520069.14927073  
SRR17520069.14927075  
SRR17520069.14927079  
SRR17520069.14927081  
SRR17520069.14927083  
SRR17520069.14927085  
SRR17520069.14927087  
SRR17520069.14927089  
SRR17520069.14927091  
SRR17520069.14927093  
SRR17520069.14927095  
SRR17520069.14927097  
SRR17520069.14927099  
SRR17520069.14927101  
SRR17520069.14927103  
SRR17520069.14927105  
SRR17520069.14927107  
SRR17520069.14927109  
SRR17520069.14927111  
SRR17520069.14927113  
SRR17520069.14927115  
SRR17520069.14927117  
SRR17520069.14927119  
SRR17520069.14927121  
SRR17520069.14927123  
SRR17520069.14927125  
SRR17520069.14927127  
SRR17520069.14927129  
SRR17520069.14927131  
SRR17520069.14928030  
SRR17520069.14928317  
SRR17520069.14928319  
SRR17520069.14928321  
SRR17520069.14936064  
SRR17520069.14936066  
SRR17520069.14936068  
SRR17520069.14936070  
SRR17520069.14936072  
SRR17520069.14936074  
SRR17520069.14936076  
SRR17520069.14936078  
SRR17520069.14936080  
SRR17520069.14937795  
SRR17520069.14937797  
SRR17520069.14937799



SRR17520069.14937801  
SRR17520069.14937803  
SRR17520069.14937805  
SRR17520069.14937807  
SRR17520069.14937809  
SRR17520069.14937811  
SRR17520069.14937813  
SRR17520069.14937815  
SRR17520069.14937817  
SRR17520069.14937819  
SRR17520069.14937821  
SRR17520069.14937823  
SRR17520069.14937825  
SRR17520069.14937827  
SRR17520069.14937829  
SRR17520069.14937831  
SRR17520069.14937833  
SRR17520069.14937835  
SRR17520069.14937837  
SRR17520069.14937839  
SRR17520069.14949022  
SRR17520069.14949024  
SRR17520069.14957274  
SRR17520069.14958066  
SRR17520069.14958068  
SRR17520069.14958070  
SRR17520069.14958072  
SRR17520069.14958074  
SRR17520069.14958076  
SRR17520069.14958078  
SRR17520069.14958080  
SRR17520069.14958502  
SRR17520069.14958504  
SRR17520069.14958506  
SRR17520069.14958508  
SRR17520069.14958510  
SRR17520069.14958512  
SRR17520069.14958514  
SRR17520069.14958516  
SRR17520069.14958518  
SRR17520069.14958520  
SRR17520069.14958522  
SRR17520069.14958524  
SRR17520069.14958526  
SRR17520069.14958528  
SRR17520069.14958530  
SRR17520069.14958534

SRR17520069. 14958538  
SRR17520069. 14958540  
SRR17520069. 14958542  
SRR17520069. 14958544  
SRR17520069. 14958548  
SRR17520069. 14958552  
SRR17520069. 14958554  
SRR17520069. 14958556  
SRR17520069. 14958558  
SRR17520069. 14958560  
SRR17520069. 14958562  
SRR17520069. 14958566  
SRR17520069. 14958568  
SRR17520069. 14958570  
SRR17520069. 14958572  
SRR17520069. 14958574  
SRR17520069. 14958576  
SRR17520069. 14965468  
SRR17520069. 14965470  
SRR17520069. 14965472  
SRR17520069. 14973159  
SRR17520069. 14973161  
SRR17520069. 14973163  
SRR17520069. 14973165  
SRR17520069. 14973167  
SRR17520069. 14973169  
SRR17520069. 14973171  
SRR17520069. 14973173  
SRR17520069. 14973175  
SRR17520069. 14973177  
SRR17520069. 14973179  
SRR17520069. 14973181  
SRR17520069. 14973183  
SRR17520069. 14973185  
SRR17520069. 14973187  
SRR17520069. 14973189  
SRR17520069. 14973191  
SRR17520069. 14973195  
SRR17520069. 14973199  
SRR17520069. 14973201  
SRR17520069. 14973203  
SRR17520069. 14973205  
SRR17520069. 14973207  
SRR17520069. 14973209  
SRR17520069. 14973211  
SRR17520069. 14973213  
SRR17520069. 14973215

SRR17520069. 14973217  
SRR17520069. 14973219  
SRR17520069. 14973221  
SRR17520069. 14973223  
SRR17520069. 14973225  
SRR17520069. 14973227  
SRR17520069. 14973229  
SRR17520069. 14973231  
SRR17520069. 14973233  
SRR17520069. 14973235  
SRR17520069. 14973237  
SRR17520069. 14973239  
SRR17520069. 14973241  
SRR17520069. 14973245  
SRR17520069. 14973247  
SRR17520069. 14973249  
SRR17520069. 14973251  
SRR17520069. 14973253  
SRR17520069. 14973255  
SRR17520069. 14973257  
SRR17520069. 14973259  
SRR17520069. 14973261  
SRR17520069. 14973263  
SRR17520069. 14973265  
SRR17520069. 14973267  
SRR17520069. 14973269  
SRR17520069. 14973271  
SRR17520069. 14973273  
SRR17520069. 14973275  
SRR17520069. 14973277  
SRR17520069. 14973279  
SRR17520069. 14973281  
SRR17520069. 14973283  
SRR17520069. 14975052  
SRR17520069. 14975054  
SRR17520069. 14975056  
SRR17520069. 14975058  
SRR17520069. 14975060  
SRR17520069. 14975062  
SRR17520069. 14975970  
SRR17520069. 14975972  
SRR17520069. 14975974  
SRR17520069. 14975978  
SRR17520069. 14975980  
SRR17520069. 14975982  
SRR17520069. 14975984  
SRR17520069. 14975986

SRR17520069. 14975988  
SRR17520069. 14975990  
SRR17520069. 14975992  
SRR17520069. 14975994  
SRR17520069. 14988963  
SRR17520069. 14988965  
SRR17520069. 14988967  
SRR17520069. 14988969  
SRR17520069. 14988971  
SRR17520069. 14988973  
SRR17520069. 14988975  
SRR17520069. 14988977  
SRR17520069. 14988979  
SRR17520069. 14988981  
SRR17520069. 14988983  
SRR17520069. 14988985  
SRR17520069. 14988987  
SRR17520069. 14988989  
SRR17520069. 14988991  
SRR17520069. 14988993  
SRR17520069. 14989535  
SRR17520069. 14991175  
SRR17520069. 14991177  
SRR17520069. 14991179  
SRR17520069. 14991181  
SRR17520069. 14991183  
SRR17520069. 14994938  
SRR17520069. 14994940  
SRR17520069. 14994942  
SRR17520069. 14994944  
SRR17520069. 14994946  
SRR17520069. 14994948  
SRR17520069. 14994950  
SRR17520069. 14994952  
SRR17520069. 14994954  
SRR17520069. 14994956  
SRR17520069. 14994958  
SRR17520069. 14994960  
SRR17520069. 14994962  
SRR17520069. 14994964  
SRR17520069. 14999330  
SRR17520069. 14999332  
SRR17520069. 14999334  
SRR17520069. 14999336  
SRR17520069. 14999338  
SRR17520069. 14999340  
SRR17520069. 15007696

SRR17520069. 15007698  
SRR17520069. 15007700  
SRR17520069. 15007702  
SRR17520069. 15016771  
SRR17520069. 15016775  
SRR17520069. 15016777  
SRR17520069. 15016779  
SRR17520069. 15016781  
SRR17520069. 15016783  
SRR17520069. 15016785  
SRR17520069. 15016787  
SRR17520069. 15016791  
SRR17520069. 15016793  
SRR17520069. 15016795  
SRR17520069. 15016799  
SRR17520069. 15016801  
SRR17520069. 15016803  
SRR17520069. 15016805  
SRR17520069. 15016809  
SRR17520069. 15016811  
SRR17520069. 15040746  
SRR17520069. 15043862  
SRR17520069. 15043864  
SRR17520069. 15043866  
SRR17520069. 15043868  
SRR17520069. 15043870  
SRR17520069. 15043872  
SRR17520069. 15043874  
SRR17520069. 15045558  
SRR17520069. 15045560  
SRR17520069. 15045562  
SRR17520069. 15045564  
SRR17520069. 15045566  
SRR17520069. 15045568  
SRR17520069. 15045570  
SRR17520069. 15045572  
SRR17520069. 15045574  
SRR17520069. 15045576  
SRR17520069. 15045580  
SRR17520069. 15045582  
SRR17520069. 15045584  
SRR17520069. 15045586  
SRR17520069. 15045588  
SRR17520069. 15045590  
SRR17520069. 15045596  
SRR17520069. 15045598  
SRR17520069. 15045600

SRR17520069. 15045602  
SRR17520069. 15045604  
SRR17520069. 15045606  
SRR17520069. 15045608  
SRR17520069. 15045610  
SRR17520069. 15045612  
SRR17520069. 15045614  
SRR17520069. 15045975  
SRR17520069. 15045977  
SRR17520069. 15045979  
SRR17520069. 15045981  
SRR17520069. 15045983  
SRR17520069. 15045985  
SRR17520069. 15045987  
SRR17520069. 15045989  
SRR17520069. 15045991  
SRR17520069. 15045993  
SRR17520069. 15045995  
SRR17520069. 15045997  
SRR17520069. 15045999  
SRR17520069. 15046001  
SRR17520069. 15046003  
SRR17520069. 15056526  
SRR17520069. 15057943  
SRR17520069. 15057947  
SRR17520069. 15057949  
SRR17520069. 15057951  
SRR17520069. 15057953  
SRR17520069. 15062992  
SRR17520069. 15062994  
SRR17520069. 15062996  
SRR17520069. 15062998  
SRR17520069. 15063000  
SRR17520069. 15063002  
SRR17520069. 15063004  
SRR17520069. 15063006  
SRR17520069. 15063008  
SRR17520069. 15063010  
SRR17520069. 15063012  
SRR17520069. 15063014  
SRR17520069. 15063016  
SRR17520069. 15063018  
SRR17520069. 15063020  
SRR17520069. 15063022  
SRR17520069. 15063024  
SRR17520069. 15063026  
SRR17520069. 15063028

SRR17520069. 15063032  
SRR17520069. 15063034  
SRR17520069. 15063036  
SRR17520069. 15063038  
SRR17520069. 15063040  
SRR17520069. 15063042  
SRR17520069. 15063044  
SRR17520069. 15063046  
SRR17520069. 15063048  
SRR17520069. 15063050  
SRR17520069. 15063052  
SRR17520069. 15063054  
SRR17520069. 15063056  
SRR17520069. 15063058  
SRR17520069. 15063060  
SRR17520069. 15063062  
SRR17520069. 15063064  
SRR17520069. 15063066  
SRR17520069. 15063068  
SRR17520069. 15063070  
SRR17520069. 15063072  
SRR17520069. 15063074  
SRR17520069. 15063076  
SRR17520069. 15063078  
SRR17520069. 15063080  
SRR17520069. 15063082  
SRR17520069. 15063553  
SRR17520069. 15065495  
SRR17520069. 15065497  
SRR17520069. 15065499  
SRR17520069. 15068883  
SRR17520069. 15068885  
SRR17520069. 15068887  
SRR17520069. 15068889  
SRR17520069. 15068891  
SRR17520069. 15068893  
SRR17520069. 15068895  
SRR17520069. 15068897  
SRR17520069. 15068899  
SRR17520069. 15074032  
SRR17520069. 15074034  
SRR17520069. 15074036  
SRR17520069. 15074039  
SRR17520069. 15074041  
SRR17520069. 15074043  
SRR17520069. 15074045  
SRR17520069. 15074047

SRR17520069. 15074049  
SRR17520069. 15074051  
SRR17520069. 15074053  
SRR17520069. 15074055  
SRR17520069. 15074057  
SRR17520069. 15074059  
SRR17520069. 15074061  
SRR17520069. 15074063  
SRR17520069. 15074065  
SRR17520069. 15074067  
SRR17520069. 15074069  
SRR17520069. 15074071  
SRR17520069. 15074073  
SRR17520069. 15074075  
SRR17520069. 15074077  
SRR17520069. 15074079  
SRR17520069. 15074081  
SRR17520069. 15074083  
SRR17520069. 15074085  
SRR17520069. 15074087  
SRR17520069. 15074089  
SRR17520069. 15074091  
SRR17520069. 15074093  
SRR17520069. 15074097  
SRR17520069. 15074099  
SRR17520069. 15074101  
SRR17520069. 15074103  
SRR17520069. 15074105  
SRR17520069. 15074107  
SRR17520069. 15074109  
SRR17520069. 15074111  
SRR17520069. 15074113  
SRR17520069. 15074115  
SRR17520069. 15076369  
SRR17520069. 15076375  
SRR17520069. 15076377  
SRR17520069. 15076381  
SRR17520069. 15076383  
SRR17520069. 15076385  
SRR17520069. 15076387  
SRR17520069. 15076389  
SRR17520069. 15076393  
SRR17520069. 15076395  
SRR17520069. 15076397  
SRR17520069. 15076401  
SRR17520069. 15076403  
SRR17520069. 15076405



SRR17520069. 15076407  
SRR17520069. 15076409  
SRR17520069. 15076411  
SRR17520069. 15076413  
SRR17520069. 15076415  
SRR17520069. 15076417  
SRR17520069. 15076419  
SRR17520069. 15076421  
SRR17520069. 15076423  
SRR17520069. 15076425  
SRR17520069. 15076427  
SRR17520069. 15076429  
SRR17520069. 15076431  
SRR17520069. 15076433  
SRR17520069. 15076993  
SRR17520069. 15076995  
SRR17520069. 15076997  
SRR17520069. 15076999  
SRR17520069. 15079256  
SRR17520069. 15079258  
SRR17520069. 15079260  
SRR17520069. 15079262  
SRR17520069. 15079264  
SRR17520069. 15079266  
SRR17520069. 15079268  
SRR17520069. 15079270  
SRR17520069. 15079272  
SRR17520069. 15079274  
SRR17520069. 15079276  
SRR17520069. 15079278  
SRR17520069. 15079280  
SRR17520069. 15079282  
SRR17520069. 15079284  
SRR17520069. 15079286  
SRR17520069. 15079288  
SRR17520069. 15079290  
SRR17520069. 15079292  
SRR17520069. 15079294  
SRR17520069. 15079296  
SRR17520069. 15079298  
SRR17520069. 15079300  
SRR17520069. 15079302  
SRR17520069. 15079304  
SRR17520069. 15079306  
SRR17520069. 15079308  
SRR17520069. 15079310  
SRR17520069. 15079312

SRR17520069.15079314  
SRR17520069.15079318  
SRR17520069.15079320  
SRR17520069.15079322  
SRR17520069.15079324  
SRR17520069.15079326  
SRR17520069.15079328  
SRR17520069.15079330  
SRR17520069.15079332  
SRR17520069.15079334  
SRR17520069.15079336  
SRR17520069.15079338  
SRR17520069.15079340  
SRR17520069.15079344  
SRR17520069.15079346  
SRR17520069.15079348  
SRR17520069.15079350  
SRR17520069.15079352  
SRR17520069.15079354  
SRR17520069.15079356  
SRR17520069.15079358  
SRR17520069.15079360  
SRR17520069.15079362  
SRR17520069.15079364  
SRR17520069.15079366  
SRR17520069.15079368  
SRR17520069.15079370  
SRR17520069.15079372  
SRR17520069.15079374  
SRR17520069.15079376  
SRR17520069.15079378  
SRR17520069.15079380  
SRR17520069.15079382  
SRR17520069.15079384  
SRR17520069.15079386  
SRR17520069.15079388  
SRR17520069.15079390  
SRR17520069.15079392  
SRR17520069.15079394  
SRR17520069.15079396  
SRR17520069.15079398  
SRR17520069.15079400  
SRR17520069.15080614  
SRR17520069.15080616  
SRR17520069.15080618  
SRR17520069.15080620  
SRR17520069.15080622

SRR17520069. 15080624  
SRR17520069. 15080626  
SRR17520069. 15080630  
SRR17520069. 15080632  
SRR17520069. 15080634  
SRR17520069. 15084515  
SRR17520069. 15084517  
SRR17520069. 15084519  
SRR17520069. 15084521  
SRR17520069. 15084523  
SRR17520069. 15085441  
SRR17520069. 15085443  
SRR17520069. 15085445  
SRR17520069. 15085808  
SRR17520069. 15085810  
SRR17520069. 15085812  
SRR17520069. 15085814  
SRR17520069. 15085816  
SRR17520069. 15085818  
SRR17520069. 15085820  
SRR17520069. 15085822  
SRR17520069. 15085824  
SRR17520069. 15085826  
SRR17520069. 15085828  
SRR17520069. 15085830  
SRR17520069. 15085832  
SRR17520069. 15085834  
SRR17520069. 15085838  
SRR17520069. 15085840  
SRR17520069. 15085842  
SRR17520069. 15088457  
SRR17520069. 15091254  
SRR17520069. 15091256  
SRR17520069. 15091258  
SRR17520069. 15091260  
SRR17520069. 15091262  
SRR17520069. 15091264  
SRR17520069. 15091266  
SRR17520069. 15091268  
SRR17520069. 15091270  
SRR17520069. 15091274  
SRR17520069. 15091276  
SRR17520069. 15091278  
SRR17520069. 15091280  
SRR17520069. 15091282  
SRR17520069. 15091284  
SRR17520069. 15091286

SRR17520069. 15091288  
SRR17520069. 15091290  
SRR17520069. 15091292  
SRR17520069. 15091294  
SRR17520069. 15091296  
SRR17520069. 15091298  
SRR17520069. 15091300  
SRR17520069. 15091302  
SRR17520069. 15091304  
SRR17520069. 15091306  
SRR17520069. 15097053  
SRR17520069. 15097055  
SRR17520069. 15097059  
SRR17520069. 15097063  
SRR17520069. 15097065  
SRR17520069. 15097474  
SRR17520069. 15097476  
SRR17520069. 15097478  
SRR17520069. 15097480  
SRR17520069. 15097482  
SRR17520069. 15097484  
SRR17520069. 15097486  
SRR17520069. 15097488  
SRR17520069. 15097490  
SRR17520069. 15097492  
SRR17520069. 15097494  
SRR17520069. 15097496  
SRR17520069. 15097498  
SRR17520069. 15097502  
SRR17520069. 15097504  
SRR17520069. 15097506  
SRR17520069. 15097508  
SRR17520069. 15097510  
SRR17520069. 15097512  
SRR17520069. 15097516  
SRR17520069. 15097518  
SRR17520069. 15097520  
SRR17520069. 15097522  
SRR17520069. 15097524  
SRR17520069. 15097526  
SRR17520069. 15097528  
SRR17520069. 15097530  
SRR17520069. 15097532  
SRR17520069. 15097534  
SRR17520069. 15097536  
SRR17520069. 15097540  
SRR17520069. 15109951

SRR17520069. 15109953  
SRR17520069. 15109955  
SRR17520069. 15109957  
SRR17520069. 15115158  
SRR17520069. 15115160  
SRR17520069. 15115162  
SRR17520069. 15115164  
SRR17520069. 15117870  
SRR17520069. 15117872  
SRR17520069. 15117874  
SRR17520069. 15117876  
SRR17520069. 15117878  
SRR17520069. 15117880  
SRR17520069. 15117882  
SRR17520069. 15117884  
SRR17520069. 15117886  
SRR17520069. 15117888  
SRR17520069. 15117890  
SRR17520069. 15117892  
SRR17520069. 15117894  
SRR17520069. 15117896  
SRR17520069. 15117898  
SRR17520069. 15117900  
SRR17520069. 15117902  
SRR17520069. 15117904  
SRR17520069. 15117908  
SRR17520069. 15117910  
SRR17520069. 15117912  
SRR17520069. 15117914  
SRR17520069. 15117916  
SRR17520069. 15117918  
SRR17520069. 15117920  
SRR17520069. 15117922  
SRR17520069. 15117924  
SRR17520069. 15117926  
SRR17520069. 15117928  
SRR17520069. 15117930  
SRR17520069. 15117932  
SRR17520069. 15117936  
SRR17520069. 15117938  
SRR17520069. 15117940  
SRR17520069. 15117942  
SRR17520069. 15117944  
SRR17520069. 15117946  
SRR17520069. 15117948  
SRR17520069. 15117950  
SRR17520069. 15117954

SRR17520069. 15117956  
SRR17520069. 15117958  
SRR17520069. 15117960  
SRR17520069. 15117962  
SRR17520069. 15117966  
SRR17520069. 15117968  
SRR17520069. 15117970  
SRR17520069. 15117972  
SRR17520069. 15117974  
SRR17520069. 15117976  
SRR17520069. 15117978  
SRR17520069. 15117980  
SRR17520069. 15117982  
SRR17520069. 15118241  
SRR17520069. 15118243  
SRR17520069. 15118245  
SRR17520069. 15118247  
SRR17520069. 15118249  
SRR17520069. 15118251  
SRR17520069. 15118253  
SRR17520069. 15120517  
SRR17520069. 15120519  
SRR17520069. 15120521  
SRR17520069. 15120523  
SRR17520069. 15120525  
SRR17520069. 15120527  
SRR17520069. 15120529  
SRR17520069. 15120531  
SRR17520069. 15120533  
SRR17520069. 15120535  
SRR17520069. 15120537  
SRR17520069. 15120539  
SRR17520069. 15120541  
SRR17520069. 15122166  
SRR17520069. 15122170  
SRR17520069. 15122172  
SRR17520069. 15122174  
SRR17520069. 15122176  
SRR17520069. 15122178  
SRR17520069. 15122180  
SRR17520069. 15122182  
SRR17520069. 15122184  
SRR17520069. 15122186  
SRR17520069. 15122188  
SRR17520069. 15122190  
SRR17520069. 15122192  
SRR17520069. 15122194

SRR17520069. 15122196  
SRR17520069. 15122198  
SRR17520069. 15122200  
SRR17520069. 15122202  
SRR17520069. 15122204  
SRR17520069. 15122206  
SRR17520069. 15122208  
SRR17520069. 15122210  
SRR17520069. 15122212  
SRR17520069. 15122214  
SRR17520069. 15122216  
SRR17520069. 15122218  
SRR17520069. 15122222  
SRR17520069. 15122224  
SRR17520069. 15122226  
SRR17520069. 15122228  
SRR17520069. 15122230  
SRR17520069. 15122232  
SRR17520069. 15122310  
SRR17520069. 15122312  
SRR17520069. 15122314  
SRR17520069. 15122316  
SRR17520069. 15122318  
SRR17520069. 15122320  
SRR17520069. 15122322  
SRR17520069. 15122324  
SRR17520069. 15122326  
SRR17520069. 15122328  
SRR17520069. 15122330  
SRR17520069. 15122332  
SRR17520069. 15122334  
SRR17520069. 15122336  
SRR17520069. 15122338  
SRR17520069. 15122340  
SRR17520069. 15122342  
SRR17520069. 15122344  
SRR17520069. 15122346  
SRR17520069. 15122348  
SRR17520069. 15122350  
SRR17520069. 15122352  
SRR17520069. 15122354  
SRR17520069. 15122358  
SRR17520069. 15122360  
SRR17520069. 15122362  
SRR17520069. 15122364  
SRR17520069. 15122366  
SRR17520069. 15122368

SRR17520069. 15122370  
SRR17520069. 15122372  
SRR17520069. 15122374  
SRR17520069. 15122376  
SRR17520069. 15122378  
SRR17520069. 15122380  
SRR17520069. 15122382  
SRR17520069. 15122384  
SRR17520069. 15127476  
SRR17520069. 15127478  
SRR17520069. 15127480  
SRR17520069. 15127482  
SRR17520069. 15127484  
SRR17520069. 15127486  
SRR17520069. 15127488  
SRR17520069. 15127490  
SRR17520069. 15127492  
SRR17520069. 15127494  
SRR17520069. 15127496  
SRR17520069. 15127498  
SRR17520069. 15127500  
SRR17520069. 15127504  
SRR17520069. 15127506  
SRR17520069. 15127508  
SRR17520069. 15127510  
SRR17520069. 15127512  
SRR17520069. 15127514  
SRR17520069. 15127516  
SRR17520069. 15127518  
SRR17520069. 15127520  
SRR17520069. 15127522  
SRR17520069. 15127524  
SRR17520069. 15127526  
SRR17520069. 15127528  
SRR17520069. 15127530  
SRR17520069. 15127532  
SRR17520069. 15127534  
SRR17520069. 15127536  
SRR17520069. 15127576  
SRR17520069. 15127578  
SRR17520069. 15127580  
SRR17520069. 15127582  
SRR17520069. 15127584  
SRR17520069. 15127586  
SRR17520069. 15127588  
SRR17520069. 15127590  
SRR17520069. 15127592



SRR17520069. 15127594  
SRR17520069. 15127596  
SRR17520069. 15127598  
SRR17520069. 15127600  
SRR17520069. 15127602  
SRR17520069. 15127604  
SRR17520069. 15127606  
SRR17520069. 15127608  
SRR17520069. 15127610  
SRR17520069. 15127612  
SRR17520069. 15127614  
SRR17520069. 15127616  
SRR17520069. 15127618  
SRR17520069. 15127620  
SRR17520069. 15127622  
SRR17520069. 15127624  
SRR17520069. 15127626  
SRR17520069. 15127628  
SRR17520069. 15127630  
SRR17520069. 15127632  
SRR17520069. 15127634  
SRR17520069. 15127636  
SRR17520069. 15127766  
SRR17520069. 15127768  
SRR17520069. 15127770  
SRR17520069. 15127772  
SRR17520069. 15127774  
SRR17520069. 15127776  
SRR17520069. 15127778  
SRR17520069. 15127780  
SRR17520069. 15127782  
SRR17520069. 15127784  
SRR17520069. 15127786  
SRR17520069. 15127788  
SRR17520069. 15127790  
SRR17520069. 15127792  
SRR17520069. 15127794  
SRR17520069. 15128178  
SRR17520069. 15128180  
SRR17520069. 15128182  
SRR17520069. 15128184  
SRR17520069. 15128186  
SRR17520069. 15128188  
SRR17520069. 15128190  
SRR17520069. 15128192  
SRR17520069. 15128194  
SRR17520069. 15128196

SRR17520069. 15128198  
SRR17520069. 15128200  
SRR17520069. 15128202  
SRR17520069. 15128204  
SRR17520069. 15128206  
SRR17520069. 15128208  
SRR17520069. 15128210  
SRR17520069. 15128212  
SRR17520069. 15128214  
SRR17520069. 15128216  
SRR17520069. 15128220  
SRR17520069. 15128222  
SRR17520069. 15128226  
SRR17520069. 15128228  
SRR17520069. 15128230  
SRR17520069. 15128232  
SRR17520069. 15128234  
SRR17520069. 15128236  
SRR17520069. 15128238  
SRR17520069. 15128240  
SRR17520069. 15128242  
SRR17520069. 15128244  
SRR17520069. 15128246  
SRR17520069. 15128248  
SRR17520069. 15128250  
SRR17520069. 15128252  
SRR17520069. 15128254  
SRR17520069. 15128258  
SRR17520069. 15128260  
SRR17520069. 15128262  
SRR17520069. 15128264  
SRR17520069. 15128266  
SRR17520069. 15128268  
SRR17520069. 15128270  
SRR17520069. 15128272  
SRR17520069. 15132379  
SRR17520069. 15132381  
SRR17520069. 15132383  
SRR17520069. 15132385  
SRR17520069. 15134092  
SRR17520069. 15134094  
SRR17520069. 15134096  
SRR17520069. 15134098  
SRR17520069. 15134100  
SRR17520069. 15141037  
SRR17520069. 15141041  
SRR17520069. 15141045

SRR17520069. 15141047  
SRR17520069. 15141049  
SRR17520069. 15141051  
SRR17520069. 15141053  
SRR17520069. 15141055  
SRR17520069. 15141059  
SRR17520069. 15141063  
SRR17520069. 15141067  
SRR17520069. 15141069  
SRR17520069. 15141071  
SRR17520069. 15142542  
SRR17520069. 15142544  
SRR17520069. 15142546  
SRR17520069. 15142548  
SRR17520069. 15142550  
SRR17520069. 15142552  
SRR17520069. 15142554  
SRR17520069. 15142556  
SRR17520069. 15142558  
SRR17520069. 15142560  
SRR17520069. 15142562  
SRR17520069. 15147981  
SRR17520069. 15147983  
SRR17520069. 15147985  
SRR17520069. 15147987  
SRR17520069. 15147989  
SRR17520069. 15147991  
SRR17520069. 15147993  
SRR17520069. 15148478  
SRR17520069. 15150269  
SRR17520069. 15150271  
SRR17520069. 15150273  
SRR17520069. 15150275  
SRR17520069. 15150277  
SRR17520069. 15150279  
SRR17520069. 15150281  
SRR17520069. 15150283  
SRR17520069. 15150285  
SRR17520069. 15150287  
SRR17520069. 15150289  
SRR17520069. 15150291  
SRR17520069. 15150293  
SRR17520069. 15150295  
SRR17520069. 15150297  
SRR17520069. 15150299  
SRR17520069. 15150301  
SRR17520069. 15150303

SRR17520069. 15160294  
SRR17520069. 15160296  
SRR17520069. 15160298  
SRR17520069. 15160300  
SRR17520069. 15160302  
SRR17520069. 15160304  
SRR17520069. 15160306  
SRR17520069. 15160308  
SRR17520069. 15160314  
SRR17520069. 15160915  
SRR17520069. 15160917  
SRR17520069. 15160919  
SRR17520069. 15160921  
SRR17520069. 15160923  
SRR17520069. 15160925  
SRR17520069. 15160927  
SRR17520069. 15160929  
SRR17520069. 15160933  
SRR17520069. 15160935  
SRR17520069. 15160937  
SRR17520069. 15160939  
SRR17520069. 15167730  
SRR17520069. 15167732  
SRR17520069. 15167734  
SRR17520069. 15167736  
SRR17520069. 15167738  
SRR17520069. 15167740  
SRR17520069. 15167742  
SRR17520069. 15167744  
SRR17520069. 15167746  
SRR17520069. 15167748  
SRR17520069. 15167750  
SRR17520069. 15174127  
SRR17520069. 15174129  
SRR17520069. 15174131  
SRR17520069. 15174133  
SRR17520069. 15182308  
SRR17520069. 15182310  
SRR17520069. 15182312  
SRR17520069. 15182314  
SRR17520069. 15182316  
SRR17520069. 15182318  
SRR17520069. 15182320  
SRR17520069. 15182324  
SRR17520069. 15182326  
SRR17520069. 15182328  
SRR17520069. 15182330

SRR17520069. 15182332  
SRR17520069. 15182756  
SRR17520069. 15193644  
SRR17520069. 15193646  
SRR17520069. 15193648  
SRR17520069. 15193650  
SRR17520069. 15193652  
SRR17520069. 15193654  
SRR17520069. 15193656  
SRR17520069. 15193658  
SRR17520069. 15193660  
SRR17520069. 15193662  
SRR17520069. 15193664  
SRR17520069. 15194049  
SRR17520069. 15194051  
SRR17520069. 15194053  
SRR17520069. 15194057  
SRR17520069. 15194059  
SRR17520069. 15194061  
SRR17520069. 15194063  
SRR17520069. 15194065  
SRR17520069. 15194067  
SRR17520069. 15194069  
SRR17520069. 15194071  
SRR17520069. 15194073  
SRR17520069. 15194075  
SRR17520069. 15194077  
SRR17520069. 15194079  
SRR17520069. 15194081  
SRR17520069. 15194083  
SRR17520069. 15194085  
SRR17520069. 15194087  
SRR17520069. 15194089  
SRR17520069. 15194091  
SRR17520069. 15194093  
SRR17520069. 15194095  
SRR17520069. 15194097  
SRR17520069. 15208152  
SRR17520069. 15208154  
SRR17520069. 15211493  
SRR17520069. 15211495  
SRR17520069. 15211497  
SRR17520069. 15211499  
SRR17520069. 15211501  
SRR17520069. 15215473  
SRR17520069. 15215475  
SRR17520069. 15215477

SRR17520069. 15215479  
SRR17520069. 15215481  
SRR17520069. 15215483  
SRR17520069. 15215485  
SRR17520069. 15215487  
SRR17520069. 15215489  
SRR17520069. 15215491  
SRR17520069. 15215493  
SRR17520069. 15215495  
SRR17520069. 15215497  
SRR17520069. 15215499  
SRR17520069. 15215501  
SRR17520069. 15215503  
SRR17520069. 15215505  
SRR17520069. 15215507  
SRR17520069. 15215509  
SRR17520069. 15215511  
SRR17520069. 15215513  
SRR17520069. 15215515  
SRR17520069. 15215517  
SRR17520069. 15215519  
SRR17520069. 15215521  
SRR17520069. 15215523  
SRR17520069. 15215525  
SRR17520069. 15215527  
SRR17520069. 15215529  
SRR17520069. 15215531  
SRR17520069. 15215533  
SRR17520069. 15215535  
SRR17520069. 15215537  
SRR17520069. 15215539  
SRR17520069. 15215541  
SRR17520069. 15215543  
SRR17520069. 15215545  
SRR17520069. 15215547  
SRR17520069. 15215549  
SRR17520069. 15215551  
SRR17520069. 15215553  
SRR17520069. 15215555  
SRR17520069. 15215557  
SRR17520069. 15215559  
SRR17520069. 15233124  
SRR17520069. 15233126  
SRR17520069. 15233128  
SRR17520069. 15233130  
SRR17520069. 15233137  
SRR17520069. 15233139

SRR17520069. 15233141  
SRR17520069. 15233143  
SRR17520069. 15233145  
SRR17520069. 15233147  
SRR17520069. 15233149  
SRR17520069. 15233151  
SRR17520069. 15233153  
SRR17520069. 15233155  
SRR17520069. 15233157  
SRR17520069. 15233159  
SRR17520069. 15233161  
SRR17520069. 15233163  
SRR17520069. 15233165  
SRR17520069. 15233167  
SRR17520069. 15233169  
SRR17520069. 15233171  
SRR17520069. 15233173  
SRR17520069. 15233175  
SRR17520069. 15233179  
SRR17520069. 15233181  
SRR17520069. 15233183  
SRR17520069. 15233185  
SRR17520069. 15233187  
SRR17520069. 15233189  
SRR17520069. 15233191  
SRR17520069. 15233193  
SRR17520069. 15233195  
SRR17520069. 15233197  
SRR17520069. 15233199  
SRR17520069. 15233201  
SRR17520069. 15234994  
SRR17520069. 15234996  
SRR17520069. 15234998  
SRR17520069. 15235000  
SRR17520069. 15235002  
SRR17520069. 15235004  
SRR17520069. 15235006  
SRR17520069. 15236172  
SRR17520069. 15236174  
SRR17520069. 15236176  
SRR17520069. 15236178  
SRR17520069. 15236180  
SRR17520069. 15236182  
SRR17520069. 15236184  
SRR17520069. 15236186  
SRR17520069. 15236188  
SRR17520069. 15236190

SRR17520069. 15236192  
SRR17520069. 15236194  
SRR17520069. 15236196  
SRR17520069. 15236198  
SRR17520069. 15236202  
SRR17520069. 15236206  
SRR17520069. 15236208  
SRR17520069. 15236210  
SRR17520069. 15236212  
SRR17520069. 15236216  
SRR17520069. 15236218  
SRR17520069. 15236220  
SRR17520069. 15236222  
SRR17520069. 15236224  
SRR17520069. 15236226  
SRR17520069. 15236228  
SRR17520069. 15236232  
SRR17520069. 15236234  
SRR17520069. 15236236  
SRR17520069. 15236272  
SRR17520069. 15236274  
SRR17520069. 15237147  
SRR17520069. 15237614  
SRR17520069. 15238326  
SRR17520069. 15238328  
SRR17520069. 15238330  
SRR17520069. 15238332  
SRR17520069. 15238334  
SRR17520069. 15238336  
SRR17520069. 15238338  
SRR17520069. 15238340  
SRR17520069. 15238342  
SRR17520069. 15238344  
SRR17520069. 15238346  
SRR17520069. 15238348  
SRR17520069. 15238350  
SRR17520069. 15238352  
SRR17520069. 15238354  
SRR17520069. 15238356  
SRR17520069. 15238358  
SRR17520069. 15238360  
SRR17520069. 15238362  
SRR17520069. 15238364  
SRR17520069. 15238366  
SRR17520069. 15238368  
SRR17520069. 15239733  
SRR17520069. 15239735



SRR17520069. 15241308  
SRR17520069. 15241310  
SRR17520069. 15241312  
SRR17520069. 15241314  
SRR17520069. 15241316  
SRR17520069. 15241318  
SRR17520069. 15244173  
SRR17520069. 15244175  
SRR17520069. 15244177  
SRR17520069. 15244179  
SRR17520069. 15244181  
SRR17520069. 15244183  
SRR17520069. 15244185  
SRR17520069. 15244187  
SRR17520069. 15255453  
SRR17520069. 15255455  
SRR17520069. 15255457  
SRR17520069. 15255459  
SRR17520069. 15255461  
SRR17520069. 15260537  
SRR17520069. 15260539  
SRR17520069. 15260541  
SRR17520069. 15260543  
SRR17520069. 15260545  
SRR17520069. 15260547  
SRR17520069. 15260549  
SRR17520069. 15260551  
SRR17520069. 15260553  
SRR17520069. 15260555  
SRR17520069. 15260557  
SRR17520069. 15260559  
SRR17520069. 15261418  
SRR17520069. 15261420  
SRR17520069. 15261422  
SRR17520069. 15261424  
SRR17520069. 15261426  
SRR17520069. 15264117  
SRR17520069. 15264119  
SRR17520069. 15264121  
SRR17520069. 15264123  
SRR17520069. 15264125  
SRR17520069. 15264127  
SRR17520069. 15264129  
SRR17520069. 15264131  
SRR17520069. 15264133  
SRR17520069. 15264135  
SRR17520069. 15264137

SRR17520069. 15264139  
SRR17520069. 15264141  
SRR17520069. 15264143  
SRR17520069. 15264145  
SRR17520069. 15264147  
SRR17520069. 15264149  
SRR17520069. 15264151  
SRR17520069. 15264153  
SRR17520069. 15264155  
SRR17520069. 15264157  
SRR17520069. 15264159  
SRR17520069. 15264161  
SRR17520069. 15271349  
SRR17520069. 15271351  
SRR17520069. 15271353  
SRR17520069. 15271355  
SRR17520069. 15271357  
SRR17520069. 15271359  
SRR17520069. 15271361  
SRR17520069. 15271363  
SRR17520069. 15271365  
SRR17520069. 15271367  
SRR17520069. 15271369  
SRR17520069. 15271371  
SRR17520069. 15271373  
SRR17520069. 15271375  
SRR17520069. 15271377  
SRR17520069. 15271379  
SRR17520069. 15271381  
SRR17520069. 15271383  
SRR17520069. 15271385  
SRR17520069. 15271387  
SRR17520069. 15271389  
SRR17520069. 15271391  
SRR17520069. 15271393  
SRR17520069. 15271395  
SRR17520069. 15271397  
SRR17520069. 15271399  
SRR17520069. 15271401  
SRR17520069. 15271403  
SRR17520069. 15271405  
SRR17520069. 15272040  
SRR17520069. 15272042  
SRR17520069. 15272044  
SRR17520069. 15272046  
SRR17520069. 15272048  
SRR17520069. 15272050

SRR17520069. 15272052  
SRR17520069. 15272054  
SRR17520069. 15272056  
SRR17520069. 15273567  
SRR17520069. 15273569  
SRR17520069. 15274546  
SRR17520069. 15274548  
SRR17520069. 15278294  
SRR17520069. 15278296  
SRR17520069. 15278298  
SRR17520069. 15278300  
SRR17520069. 15278302  
SRR17520069. 15278304  
SRR17520069. 15278306  
SRR17520069. 15278308  
SRR17520069. 15278310  
SRR17520069. 15278312  
SRR17520069. 15278314  
SRR17520069. 15278318  
SRR17520069. 15278320  
SRR17520069. 15278322  
SRR17520069. 15278324  
SRR17520069. 15278326  
SRR17520069. 15278328  
SRR17520069. 15278330  
SRR17520069. 15278332  
SRR17520069. 15278334  
SRR17520069. 15278336  
SRR17520069. 15278338  
SRR17520069. 15278340  
SRR17520069. 15278342  
SRR17520069. 15278344  
SRR17520069. 15278346  
SRR17520069. 15278348  
SRR17520069. 15278350  
SRR17520069. 15278352  
SRR17520069. 15278354  
SRR17520069. 15278356  
SRR17520069. 15278358  
SRR17520069. 15278360  
SRR17520069. 15278362  
SRR17520069. 15278364  
SRR17520069. 15278366  
SRR17520069. 15278368  
SRR17520069. 15278370  
SRR17520069. 15278372  
SRR17520069. 15279855

SRR17520069. 15279857  
SRR17520069. 15279859  
SRR17520069. 15279861  
SRR17520069. 15279863  
SRR17520069. 15279865  
SRR17520069. 15279867  
SRR17520069. 15279869  
SRR17520069. 15279871  
SRR17520069. 15279873  
SRR17520069. 15279875  
SRR17520069. 15279877  
SRR17520069. 15279879  
SRR17520069. 15279881  
SRR17520069. 15279883  
SRR17520069. 15284467  
SRR17520069. 15284469  
SRR17520069. 15284471  
SRR17520069. 15284473  
SRR17520069. 15284475  
SRR17520069. 15284477  
SRR17520069. 15285695  
SRR17520069. 15285697  
SRR17520069. 15293873  
SRR17520069. 15293875  
SRR17520069. 15293877  
SRR17520069. 15296442  
SRR17520069. 15296444  
SRR17520069. 15296446  
SRR17520069. 15296448  
SRR17520069. 15296450  
SRR17520069. 15296452  
SRR17520069. 15296454  
SRR17520069. 15296456  
SRR17520069. 15296458  
SRR17520069. 15296460  
SRR17520069. 15296462  
SRR17520069. 15296464  
SRR17520069. 15296466  
SRR17520069. 15296468  
SRR17520069. 15296472  
SRR17520069. 15296474  
SRR17520069. 15296476  
SRR17520069. 15296478  
SRR17520069. 15296480  
SRR17520069. 15296482  
SRR17520069. 15296484  
SRR17520069. 15296486

SRR17520069. 15296488  
SRR17520069. 15296492  
SRR17520069. 15296494  
SRR17520069. 15296496  
SRR17520069. 15296498  
SRR17520069. 15296500  
SRR17520069. 15296502  
SRR17520069. 15296504  
SRR17520069. 15296506  
SRR17520069. 15296508  
SRR17520069. 15296510  
SRR17520069. 15296512  
SRR17520069. 15296516  
SRR17520069. 15296518  
SRR17520069. 15296520  
SRR17520069. 15296522  
SRR17520069. 15296524  
SRR17520069. 15296529  
SRR17520069. 15296531  
SRR17520069. 15296533  
SRR17520069. 15296535  
SRR17520069. 15296537  
SRR17520069. 15296539  
SRR17520069. 15296541  
SRR17520069. 15296543  
SRR17520069. 15296545  
SRR17520069. 15296547  
SRR17520069. 15296549  
SRR17520069. 15296551  
SRR17520069. 15296553  
SRR17520069. 15296555  
SRR17520069. 15296557  
SRR17520069. 15296559  
SRR17520069. 15296561  
SRR17520069. 15296563  
SRR17520069. 15296565  
SRR17520069. 15296567  
SRR17520069. 15296569  
SRR17520069. 15296571  
SRR17520069. 15296573  
SRR17520069. 15296575  
SRR17520069. 15296577  
SRR17520069. 15296579  
SRR17520069. 15297230  
SRR17520069. 15297232  
SRR17520069. 15297235  
SRR17520069. 15297239

SRR17520069. 15297241  
SRR17520069. 15297243  
SRR17520069. 15297245  
SRR17520069. 15297247  
SRR17520069. 15297249  
SRR17520069. 15297251  
SRR17520069. 15297253  
SRR17520069. 15298787  
SRR17520069. 15298789  
SRR17520069. 15298791  
SRR17520069. 15298793  
SRR17520069. 15302659  
SRR17520069. 15302665  
SRR17520069. 15302669  
SRR17520069. 15302671  
SRR17520069. 15302673  
SRR17520069. 15302675  
SRR17520069. 15302677  
SRR17520069. 15302679  
SRR17520069. 15302681  
SRR17520069. 15302683  
SRR17520069. 15302685  
SRR17520069. 15302687  
SRR17520069. 15302705  
SRR17520069. 15302707  
SRR17520069. 15302709  
SRR17520069. 15302711  
SRR17520069. 15302713  
SRR17520069. 15302715  
SRR17520069. 15302717  
SRR17520069. 15302719  
SRR17520069. 15302721  
SRR17520069. 15302723  
SRR17520069. 15302725  
SRR17520069. 15302727  
SRR17520069. 15302729  
SRR17520069. 15302731  
SRR17520069. 15303296  
SRR17520069. 15303298  
SRR17520069. 15303300  
SRR17520069. 15303302  
SRR17520069. 15303304  
SRR17520069. 15303306  
SRR17520069. 15303308  
SRR17520069. 15303310  
SRR17520069. 15303312  
SRR17520069. 15303314

SRR17520069. 15303316  
SRR17520069. 15303658  
SRR17520069. 15303660  
SRR17520069. 15303662  
SRR17520069. 15303664  
SRR17520069. 15303666  
SRR17520069. 15303668  
SRR17520069. 15303670  
SRR17520069. 15303672  
SRR17520069. 15303674  
SRR17520069. 15303676  
SRR17520069. 15303678  
SRR17520069. 15303680  
SRR17520069. 15303682  
SRR17520069. 15303684  
SRR17520069. 15303686  
SRR17520069. 15303688  
SRR17520069. 15303690  
SRR17520069. 15303692  
SRR17520069. 15303694  
SRR17520069. 15303696  
SRR17520069. 15303698  
SRR17520069. 15303700  
SRR17520069. 15303702  
SRR17520069. 15303704  
SRR17520069. 15303706  
SRR17520069. 15303708  
SRR17520069. 15309179  
SRR17520069. 15309181  
SRR17520069. 15309183  
SRR17520069. 15309185  
SRR17520069. 15309187  
SRR17520069. 15309189  
SRR17520069. 15309191  
SRR17520069. 15309193  
SRR17520069. 15309195  
SRR17520069. 15309197  
SRR17520069. 15309199  
SRR17520069. 15309201  
SRR17520069. 15309203  
SRR17520069. 15309205  
SRR17520069. 15309207  
SRR17520069. 15309209  
SRR17520069. 15309211  
SRR17520069. 15309213  
SRR17520069. 15309215  
SRR17520069. 15309219

SRR17520069. 15309221  
SRR17520069. 15309223  
SRR17520069. 15309225  
SRR17520069. 15309227  
SRR17520069. 15309229  
SRR17520069. 15309231  
SRR17520069. 15309233  
SRR17520069. 15309235  
SRR17520069. 15309237  
SRR17520069. 15309239  
SRR17520069. 15309241  
SRR17520069. 15309243  
SRR17520069. 15309245  
SRR17520069. 15309247  
SRR17520069. 15309249  
SRR17520069. 15315505  
SRR17520069. 15315507  
SRR17520069. 15315509  
SRR17520069. 15315511  
SRR17520069. 15315513  
SRR17520069. 15315515  
SRR17520069. 15315517  
SRR17520069. 15315519  
SRR17520069. 15315521  
SRR17520069. 15315523  
SRR17520069. 15315525  
SRR17520069. 15315527  
SRR17520069. 15315529  
SRR17520069. 15315531  
SRR17520069. 15315533  
SRR17520069. 15323131  
SRR17520069. 15323133  
SRR17520069. 15323137  
SRR17520069. 15323139  
SRR17520069. 15323141  
SRR17520069. 15323143  
SRR17520069. 15323145  
SRR17520069. 15323147  
SRR17520069. 15323149  
SRR17520069. 15325692  
SRR17520069. 15325694  
SRR17520069. 15325696  
SRR17520069. 15325698  
SRR17520069. 15325700  
SRR17520069. 15325702  
SRR17520069. 15325704  
SRR17520069. 15325706



SRR17520069. 15325708  
SRR17520069. 15325710  
SRR17520069. 15325712  
SRR17520069. 15325714  
SRR17520069. 15325716  
SRR17520069. 15325718  
SRR17520069. 15325720  
SRR17520069. 15325722  
SRR17520069. 15325724  
SRR17520069. 15325726  
SRR17520069. 15325728  
SRR17520069. 15325730  
SRR17520069. 15325732  
SRR17520069. 15325734  
SRR17520069. 15325736  
SRR17520069. 15325738  
SRR17520069. 15325740  
SRR17520069. 15325742  
SRR17520069. 15325744  
SRR17520069. 15325746  
SRR17520069. 15325748  
SRR17520069. 15326133  
SRR17520069. 15326135  
SRR17520069. 15326137  
SRR17520069. 15326139  
SRR17520069. 15326141  
SRR17520069. 15326143  
SRR17520069. 15326145  
SRR17520069. 15326147  
SRR17520069. 15326149  
SRR17520069. 15326151  
SRR17520069. 15326153  
SRR17520069. 15326155  
SRR17520069. 15326157  
SRR17520069. 15326159  
SRR17520069. 15326161  
SRR17520069. 15326163  
SRR17520069. 15326165  
SRR17520069. 15326167  
SRR17520069. 15326169  
SRR17520069. 15326171  
SRR17520069. 15326173  
SRR17520069. 15326177  
SRR17520069. 15326179  
SRR17520069. 15326288  
SRR17520069. 15326292  
SRR17520069. 15326294

SRR17520069. 15326298  
SRR17520069. 15326300  
SRR17520069. 15326302  
SRR17520069. 15326304  
SRR17520069. 15326306  
SRR17520069. 15327007  
SRR17520069. 15327009  
SRR17520069. 15327011  
SRR17520069. 15327487  
SRR17520069. 15332947  
SRR17520069. 15332949  
SRR17520069. 15332951  
SRR17520069. 15332953  
SRR17520069. 15332955  
SRR17520069. 15332957  
SRR17520069. 15332961  
SRR17520069. 15332963  
SRR17520069. 15332965  
SRR17520069. 15332967  
SRR17520069. 15332969  
SRR17520069. 15332971  
SRR17520069. 15332973  
SRR17520069. 15332975  
SRR17520069. 15332977  
SRR17520069. 15332979  
SRR17520069. 15332981  
SRR17520069. 15335396  
SRR17520069. 15335398  
SRR17520069. 15335400  
SRR17520069. 15340046  
SRR17520069. 15340048  
SRR17520069. 15340050  
SRR17520069. 15340056  
SRR17520069. 15340058  
SRR17520069. 15340060  
SRR17520069. 15340062  
SRR17520069. 15340064  
SRR17520069. 15340066  
SRR17520069. 15340068  
SRR17520069. 15340070  
SRR17520069. 15340074  
SRR17520069. 15340076  
SRR17520069. 15340078  
SRR17520069. 15340080  
SRR17520069. 15340082  
SRR17520069. 15340084  
SRR17520069. 15340086

SRR17520069. 15340088  
SRR17520069. 15340090  
SRR17520069. 15340092  
SRR17520069. 15340094  
SRR17520069. 15340096  
SRR17520069. 15340098  
SRR17520069. 15340100  
SRR17520069. 15340102  
SRR17520069. 15340104  
SRR17520069. 15342425  
SRR17520069. 15342427  
SRR17520069. 15342429  
SRR17520069. 15342431  
SRR17520069. 15342433  
SRR17520069. 15342435  
SRR17520069. 15342439  
SRR17520069. 15342441  
SRR17520069. 15342443  
SRR17520069. 15342447  
SRR17520069. 15342449  
SRR17520069. 15342451  
SRR17520069. 15342457  
SRR17520069. 15345779  
SRR17520069. 15345781  
SRR17520069. 15345783  
SRR17520069. 15345785  
SRR17520069. 15345789  
SRR17520069. 15345791  
SRR17520069. 15345793  
SRR17520069. 15345795  
SRR17520069. 15345799  
SRR17520069. 15345805  
SRR17520069. 15345807  
SRR17520069. 15345809  
SRR17520069. 15345811  
SRR17520069. 15345813  
SRR17520069. 15345815  
SRR17520069. 15347185  
SRR17520069. 15347187  
SRR17520069. 15347191  
SRR17520069. 15347193  
SRR17520069. 15347197  
SRR17520069. 15347199  
SRR17520069. 15347201  
SRR17520069. 15347203  
SRR17520069. 15347205  
SRR17520069. 15347207

SRR17520069. 15347209  
SRR17520069. 15347211  
SRR17520069. 15347213  
SRR17520069. 15347215  
SRR17520069. 15352382  
SRR17520069. 15352384  
SRR17520069. 15352386  
SRR17520069. 15352388  
SRR17520069. 15352390  
SRR17520069. 15352392  
SRR17520069. 15352394  
SRR17520069. 15352396  
SRR17520069. 15352398  
SRR17520069. 15352402  
SRR17520069. 15352404  
SRR17520069. 15352406  
SRR17520069. 15352408  
SRR17520069. 15352410  
SRR17520069. 15352412  
SRR17520069. 15352414  
SRR17520069. 15352416  
SRR17520069. 15352418  
SRR17520069. 15352420  
SRR17520069. 15352422  
SRR17520069. 15352424  
SRR17520069. 15359179  
SRR17520069. 15359181  
SRR17520069. 15359183  
SRR17520069. 15359185  
SRR17520069. 15359187  
SRR17520069. 15359189  
SRR17520069. 15359191  
SRR17520069. 15359193  
SRR17520069. 15359195  
SRR17520069. 15359197  
SRR17520069. 15359199  
SRR17520069. 15359201  
SRR17520069. 15362085  
SRR17520069. 15362087  
SRR17520069. 15362089  
SRR17520069. 15362091  
SRR17520069. 15362093  
SRR17520069. 15362095  
SRR17520069. 15362097  
SRR17520069. 15362099  
SRR17520069. 15362101  
SRR17520069. 15362103

SRR17520069. 15362105  
SRR17520069. 15362107  
SRR17520069. 15362508  
SRR17520069. 15362510  
SRR17520069. 15362512  
SRR17520069. 15372125  
SRR17520069. 15372127  
SRR17520069. 15372129  
SRR17520069. 15372131  
SRR17520069. 15372133  
SRR17520069. 15372135  
SRR17520069. 15372137  
SRR17520069. 15372139  
SRR17520069. 15372141  
SRR17520069. 15372143  
SRR17520069. 15372145  
SRR17520069. 15372147  
SRR17520069. 15372149  
SRR17520069. 15372151  
SRR17520069. 15372153  
SRR17520069. 15372155  
SRR17520069. 15372656  
SRR17520069. 15372658  
SRR17520069. 15372660  
SRR17520069. 15372662  
SRR17520069. 15372664  
SRR17520069. 15372666  
SRR17520069. 15372668  
SRR17520069. 15372670  
SRR17520069. 15372672  
SRR17520069. 15372674  
SRR17520069. 15372676  
SRR17520069. 15372678  
SRR17520069. 15372680  
SRR17520069. 15372682  
SRR17520069. 15372684  
SRR17520069. 15372686  
SRR17520069. 15372688  
SRR17520069. 15372690  
SRR17520069. 15372692  
SRR17520069. 15372694  
SRR17520069. 15372696  
SRR17520069. 15372698  
SRR17520069. 15372700  
SRR17520069. 15372702  
SRR17520069. 15372704  
SRR17520069. 15372706

SRR17520069. 15372708  
SRR17520069. 15372710  
SRR17520069. 15372712  
SRR17520069. 15372714  
SRR17520069. 15372716  
SRR17520069. 15372718  
SRR17520069. 15372720  
SRR17520069. 15372722  
SRR17520069. 15372724  
SRR17520069. 15372726  
SRR17520069. 15372728  
SRR17520069. 15372730  
SRR17520069. 15372732  
SRR17520069. 15376916  
SRR17520069. 15376918  
SRR17520069. 15376920  
SRR17520069. 15376922  
SRR17520069. 15376924  
SRR17520069. 15376926  
SRR17520069. 15376928  
SRR17520069. 15376930  
SRR17520069. 15376932  
SRR17520069. 15376934  
SRR17520069. 15376936  
SRR17520069. 15376938  
SRR17520069. 15376940  
SRR17520069. 15376942  
SRR17520069. 15376944  
SRR17520069. 15376946  
SRR17520069. 15376948  
SRR17520069. 15376950  
SRR17520069. 15376952  
SRR17520069. 15376954  
SRR17520069. 15376956  
SRR17520069. 15380405  
SRR17520069. 15380407  
SRR17520069. 15380409  
SRR17520069. 15380411  
SRR17520069. 15380413  
SRR17520069. 15380415  
SRR17520069. 15380417  
SRR17520069. 15380419  
SRR17520069. 15380421  
SRR17520069. 15380423  
SRR17520069. 15380425  
SRR17520069. 15380429  
SRR17520069. 15380431

SRR17520069. 15380433  
SRR17520069. 15380435  
SRR17520069. 15380437  
SRR17520069. 15380441  
SRR17520069. 15380443  
SRR17520069. 15380445  
SRR17520069. 15380447  
SRR17520069. 15380449  
SRR17520069. 15380451  
SRR17520069. 15380453  
SRR17520069. 15380455  
SRR17520069. 15380457  
SRR17520069. 15380461  
SRR17520069. 15380463  
SRR17520069. 15380465  
SRR17520069. 15380467  
SRR17520069. 15380469  
SRR17520069. 15380471  
SRR17520069. 15380473  
SRR17520069. 15380475  
SRR17520069. 15380477  
SRR17520069. 15380479  
SRR17520069. 15380481  
SRR17520069. 15380483  
SRR17520069. 15380485  
SRR17520069. 15380487  
SRR17520069. 15380489  
SRR17520069. 15380491  
SRR17520069. 15380495  
SRR17520069. 15380497  
SRR17520069. 15380499  
SRR17520069. 15380503  
SRR17520069. 15381754  
SRR17520069. 15381756  
SRR17520069. 15385930  
SRR17520069. 15385932  
SRR17520069. 15385934  
SRR17520069. 15385936  
SRR17520069. 15385938  
SRR17520069. 15385940  
SRR17520069. 15385942  
SRR17520069. 15385944  
SRR17520069. 15385946  
SRR17520069. 15385948  
SRR17520069. 15385950  
SRR17520069. 15385952  
SRR17520069. 15385954

SRR17520069. 15385956  
SRR17520069. 15385958  
SRR17520069. 15385960  
SRR17520069. 15385962  
SRR17520069. 15385966  
SRR17520069. 15385968  
SRR17520069. 15385970  
SRR17520069. 15385972  
SRR17520069. 15385974  
SRR17520069. 15385976  
SRR17520069. 15385978  
SRR17520069. 15385980  
SRR17520069. 15385982  
SRR17520069. 15385984  
SRR17520069. 15385986  
SRR17520069. 15385988  
SRR17520069. 15385990  
SRR17520069. 15385992  
SRR17520069. 15385994  
SRR17520069. 15385996  
SRR17520069. 15385998  
SRR17520069. 15386000  
SRR17520069. 15386002  
SRR17520069. 15386006  
SRR17520069. 15386008  
SRR17520069. 15389671  
SRR17520069. 15389673  
SRR17520069. 15389675  
SRR17520069. 15393118  
SRR17520069. 15393120  
SRR17520069. 15393122  
SRR17520069. 15393124  
SRR17520069. 15393126  
SRR17520069. 15397170  
SRR17520069. 15397172  
SRR17520069. 15397174  
SRR17520069. 15397176  
SRR17520069. 15397180  
SRR17520069. 15397182  
SRR17520069. 15397184  
SRR17520069. 15397186  
SRR17520069. 15397188  
SRR17520069. 15397190  
SRR17520069. 15397192  
SRR17520069. 15397194  
SRR17520069. 15397196  
SRR17520069. 15397198



SRR17520069. 15397200  
SRR17520069. 15397202  
SRR17520069. 15397204  
SRR17520069. 15397206  
SRR17520069. 15399021  
SRR17520069. 15399023  
SRR17520069. 15413203  
SRR17520069. 15413205  
SRR17520069. 15414713  
SRR17520069. 15414715  
SRR17520069. 15414717  
SRR17520069. 15415249  
SRR17520069. 15415251  
SRR17520069. 15415253  
SRR17520069. 15415255  
SRR17520069. 15417983  
SRR17520069. 15417985  
SRR17520069. 15417987  
SRR17520069. 15417989  
SRR17520069. 15417991  
SRR17520069. 15417993  
SRR17520069. 15417995  
SRR17520069. 15417997  
SRR17520069. 15417999  
SRR17520069. 15418001  
SRR17520069. 15418003  
SRR17520069. 15418005  
SRR17520069. 15418009  
SRR17520069. 15418011  
SRR17520069. 15418015  
SRR17520069. 15418017  
SRR17520069. 15418019  
SRR17520069. 15418021  
SRR17520069. 15418025  
SRR17520069. 15418027  
SRR17520069. 15424529  
SRR17520069. 15424531  
SRR17520069. 15424533  
SRR17520069. 15424535  
SRR17520069. 15424537  
SRR17520069. 15424539  
SRR17520069. 15424541  
SRR17520069. 15424543  
SRR17520069. 15424545  
SRR17520069. 15424547  
SRR17520069. 15424549  
SRR17520069. 15424551

SRR17520069. 15424553  
SRR17520069. 15424557  
SRR17520069. 15424559  
SRR17520069. 15424561  
SRR17520069. 15424563  
SRR17520069. 15424565  
SRR17520069. 15424567  
SRR17520069. 15424569  
SRR17520069. 15424571  
SRR17520069. 15424573  
SRR17520069. 15424575  
SRR17520069. 15424577  
SRR17520069. 15424579  
SRR17520069. 15424581  
SRR17520069. 15425798  
SRR17520069. 15425800  
SRR17520069. 15425802  
SRR17520069. 15435981  
SRR17520069. 15435983  
SRR17520069. 15435985  
SRR17520069. 15435987  
SRR17520069. 15441641  
SRR17520069. 15441684  
SRR17520069. 15451765  
SRR17520069. 15451767  
SRR17520069. 15451769  
SRR17520069. 15451771  
SRR17520069. 15451773  
SRR17520069. 15451775  
SRR17520069. 15451777  
SRR17520069. 15451779  
SRR17520069. 15451781  
SRR17520069. 15451783  
SRR17520069. 15451787  
SRR17520069. 15451789  
SRR17520069. 15451791  
SRR17520069. 15451793  
SRR17520069. 15458581  
SRR17520069. 15458583  
SRR17520069. 15458585  
SRR17520069. 15458587  
SRR17520069. 15458589  
SRR17520069. 15458591  
SRR17520069. 15458593  
SRR17520069. 15458595  
SRR17520069. 15458597  
SRR17520069. 15464368

SRR17520069. 15464370  
SRR17520069. 15464372  
SRR17520069. 15464374  
SRR17520069. 15464376  
SRR17520069. 15464378  
SRR17520069. 15464380  
SRR17520069. 15464382  
SRR17520069. 15464384  
SRR17520069. 15464386  
SRR17520069. 15464388  
SRR17520069. 15464390  
SRR17520069. 15464392  
SRR17520069. 15464394  
SRR17520069. 15464396  
SRR17520069. 15464398  
SRR17520069. 15464400  
SRR17520069. 15464402  
SRR17520069. 15464404  
SRR17520069. 15464406  
SRR17520069. 15464408  
SRR17520069. 15464410  
SRR17520069. 15464412  
SRR17520069. 15464414  
SRR17520069. 15464416  
SRR17520069. 15464420  
SRR17520069. 15464422  
SRR17520069. 15464424  
SRR17520069. 15464426  
SRR17520069. 15464428  
SRR17520069. 15464430  
SRR17520069. 15464432  
SRR17520069. 15464434  
SRR17520069. 15464436  
SRR17520069. 15464438  
SRR17520069. 15464440  
SRR17520069. 15464444  
SRR17520069. 15464446  
SRR17520069. 15464448  
SRR17520069. 15464450  
SRR17520069. 15464452  
SRR17520069. 15468840  
SRR17520069. 15468842  
SRR17520069. 15468844  
SRR17520069. 15468846  
SRR17520069. 15468848  
SRR17520069. 15468850  
SRR17520069. 15468852

SRR17520069. 15468854  
SRR17520069. 15468856  
SRR17520069. 15468858  
SRR17520069. 15468860  
SRR17520069. 15468862  
SRR17520069. 15468864  
SRR17520069. 15468866  
SRR17520069. 15468868  
SRR17520069. 15468870  
SRR17520069. 15468872  
SRR17520069. 15468874  
SRR17520069. 15468876  
SRR17520069. 15468878  
SRR17520069. 15468880  
SRR17520069. 15468882  
SRR17520069. 15468884  
SRR17520069. 15468886  
SRR17520069. 15468888  
SRR17520069. 15468890  
SRR17520069. 15468892  
SRR17520069. 15468894  
SRR17520069. 15468896  
SRR17520069. 15468898  
SRR17520069. 15468900  
SRR17520069. 15468902  
SRR17520069. 15470077  
SRR17520069. 15470079  
SRR17520069. 15472351  
SRR17520069. 15472355  
SRR17520069. 15472357  
SRR17520069. 15472359  
SRR17520069. 15472361  
SRR17520069. 15472363  
SRR17520069. 15472365  
SRR17520069. 15472367  
SRR17520069. 15472369  
SRR17520069. 15472371  
SRR17520069. 15472373  
SRR17520069. 15472375  
SRR17520069. 15472377  
SRR17520069. 15477700  
SRR17520069. 15477702  
SRR17520069. 15477706  
SRR17520069. 15477708  
SRR17520069. 15477710  
SRR17520069. 15477712  
SRR17520069. 15477714

SRR17520069. 15477718  
SRR17520069. 15477720  
SRR17520069. 15477722  
SRR17520069. 15477724  
SRR17520069. 15477726  
SRR17520069. 15477730  
SRR17520069. 15477732  
SRR17520069. 15481323  
SRR17520069. 15481325  
SRR17520069. 15481327  
SRR17520069. 15481329  
SRR17520069. 15481331  
SRR17520069. 15481333  
SRR17520069. 15481335  
SRR17520069. 15481337  
SRR17520069. 15481339  
SRR17520069. 15481341  
SRR17520069. 15481343  
SRR17520069. 15481345  
SRR17520069. 15481347  
SRR17520069. 15481349  
SRR17520069. 15481351  
SRR17520069. 15481353  
SRR17520069. 15481355  
SRR17520069. 15481357  
SRR17520069. 15481361  
SRR17520069. 15481363  
SRR17520069. 15481365  
SRR17520069. 15481367  
SRR17520069. 15481369  
SRR17520069. 15481371  
SRR17520069. 15481373  
SRR17520069. 15481375  
SRR17520069. 15481377  
SRR17520069. 15481379  
SRR17520069. 15481381  
SRR17520069. 15481383  
SRR17520069. 15496596  
SRR17520069. 15496598  
SRR17520069. 15496600  
SRR17520069. 15496602  
SRR17520069. 15496604  
SRR17520069. 15496606  
SRR17520069. 15496608  
SRR17520069. 15496614  
SRR17520069. 15498252  
SRR17520069. 15498254

SRR17520069. 15498258  
SRR17520069. 15498260  
SRR17520069. 15498262  
SRR17520069. 15498264  
SRR17520069. 15498266  
SRR17520069. 15498268  
SRR17520069. 15498270  
SRR17520069. 15498272  
SRR17520069. 15498274  
SRR17520069. 15498276  
SRR17520069. 15498278  
SRR17520069. 15498280  
SRR17520069. 15498282  
SRR17520069. 15498284  
SRR17520069. 15498286  
SRR17520069. 15498288  
SRR17520069. 15498290  
SRR17520069. 15498292  
SRR17520069. 15498294  
SRR17520069. 15498296  
SRR17520069. 15498298  
SRR17520069. 15498300  
SRR17520069. 15498302  
SRR17520069. 15498304  
SRR17520069. 15498306  
SRR17520069. 15498308  
SRR17520069. 15498310  
SRR17520069. 15500354  
SRR17520069. 15500356  
SRR17520069. 15500358  
SRR17520069. 15500360  
SRR17520069. 15500362  
SRR17520069. 15500364  
SRR17520069. 15500366  
SRR17520069. 15500368  
SRR17520069. 15500370  
SRR17520069. 15500372  
SRR17520069. 15500374  
SRR17520069. 15500376  
SRR17520069. 15500380  
SRR17520069. 15500382  
SRR17520069. 15500384  
SRR17520069. 15500386  
SRR17520069. 15500388  
SRR17520069. 15500390  
SRR17520069. 15500392  
SRR17520069. 15500394

SRR17520069.15500396  
SRR17520069.15500398  
SRR17520069.15500400  
SRR17520069.15500402  
SRR17520069.15500404  
SRR17520069.15500406  
SRR17520069.15500408  
SRR17520069.15500410  
SRR17520069.15500412  
SRR17520069.15500414  
SRR17520069.15500416  
SRR17520069.15500418  
SRR17520069.15500420  
SRR17520069.15500422  
SRR17520069.15500424  
SRR17520069.15500426  
SRR17520069.15500428  
SRR17520069.15500430  
SRR17520069.15500432  
SRR17520069.15500434  
SRR17520069.15500436  
SRR17520069.15500438  
SRR17520069.15500440  
SRR17520069.15500442  
SRR17520069.15500444  
SRR17520069.15500446  
SRR17520069.15500448  
SRR17520069.15501751  
SRR17520069.15501753  
SRR17520069.15509350  
SRR17520069.15509352  
SRR17520069.15509354  
SRR17520069.15509356  
SRR17520069.15514261  
SRR17520069.15514263  
SRR17520069.15514265  
SRR17520069.15514267  
SRR17520069.15514269  
SRR17520069.15514271  
SRR17520069.15514273  
SRR17520069.15514275  
SRR17520069.15514277  
SRR17520069.15514279  
SRR17520069.15514281  
SRR17520069.15514283  
SRR17520069.15514285  
SRR17520069.15514287

SRR17520069. 15514291  
SRR17520069. 15514293  
SRR17520069. 15514295  
SRR17520069. 15514299  
SRR17520069. 15514301  
SRR17520069. 15514303  
SRR17520069. 15519287  
SRR17520069. 15519289  
SRR17520069. 15519291  
SRR17520069. 15519293  
SRR17520069. 15519295  
SRR17520069. 15519297  
SRR17520069. 15519299  
SRR17520069. 15519301  
SRR17520069. 15519303  
SRR17520069. 15519305  
SRR17520069. 15519307  
SRR17520069. 15519309  
SRR17520069. 15519311  
SRR17520069. 15519313  
SRR17520069. 15519315  
SRR17520069. 15519317  
SRR17520069. 15519319  
SRR17520069. 15519321  
SRR17520069. 15519323  
SRR17520069. 15524211  
SRR17520069. 15524213  
SRR17520069. 15524219  
SRR17520069. 15524221  
SRR17520069. 15524223  
SRR17520069. 15524227  
SRR17520069. 15524229  
SRR17520069. 15524231  
SRR17520069. 15524233  
SRR17520069. 15524235  
SRR17520069. 15524237  
SRR17520069. 15524239  
SRR17520069. 15525487  
SRR17520069. 15525489  
SRR17520069. 15530613  
SRR17520069. 15530615  
SRR17520069. 15530617  
SRR17520069. 15530619  
SRR17520069. 15530621  
SRR17520069. 15530623  
SRR17520069. 15530625  
SRR17520069. 15530629



SRR17520069. 15530631  
SRR17520069. 15530633  
SRR17520069. 15530635  
SRR17520069. 15530637  
SRR17520069. 15530639  
SRR17520069. 15530641  
SRR17520069. 15530643  
SRR17520069. 15530645  
SRR17520069. 15530647  
SRR17520069. 15530649  
SRR17520069. 15530651  
SRR17520069. 15530653  
SRR17520069. 15530655  
SRR17520069. 15530657  
SRR17520069. 15530659  
SRR17520069. 15530661  
SRR17520069. 15530663  
SRR17520069. 15530665  
SRR17520069. 15530667  
SRR17520069. 15535441  
SRR17520069. 15535443  
SRR17520069. 15535445  
SRR17520069. 15535447  
SRR17520069. 15535449  
SRR17520069. 15535451  
SRR17520069. 15535453  
SRR17520069. 15535455  
SRR17520069. 15544313  
SRR17520069. 15546045  
SRR17520069. 15546047  
SRR17520069. 15546049  
SRR17520069. 15546053  
SRR17520069. 15546055  
SRR17520069. 15546057  
SRR17520069. 15546059  
SRR17520069. 15546061  
SRR17520069. 15546063  
SRR17520069. 15546065  
SRR17520069. 15546067  
SRR17520069. 15546069  
SRR17520069. 15546071  
SRR17520069. 15546073  
SRR17520069. 15546075  
SRR17520069. 15546077  
SRR17520069. 15546079  
SRR17520069. 15546085  
SRR17520069. 15546087

SRR17520069. 15546089  
SRR17520069. 15546093  
SRR17520069. 15546095  
SRR17520069. 15546097  
SRR17520069. 15549534  
SRR17520069. 15549536  
SRR17520069. 15549538  
SRR17520069. 15549542  
SRR17520069. 15552587  
SRR17520069. 15552591  
SRR17520069. 15552593  
SRR17520069. 15552595  
SRR17520069. 15552597  
SRR17520069. 15552599  
SRR17520069. 15552601  
SRR17520069. 15552603  
SRR17520069. 15552605  
SRR17520069. 15552607  
SRR17520069. 15552609  
SRR17520069. 15552611  
SRR17520069. 15552613  
SRR17520069. 15552617  
SRR17520069. 15552619  
SRR17520069. 15552621  
SRR17520069. 15552623  
SRR17520069. 15552625  
SRR17520069. 15553434  
SRR17520069. 15553436  
SRR17520069. 15553438  
SRR17520069. 15553440  
SRR17520069. 15553442  
SRR17520069. 15553444  
SRR17520069. 15553446  
SRR17520069. 15553448  
SRR17520069. 15553450  
SRR17520069. 15553452  
SRR17520069. 15553454  
SRR17520069. 15553458  
SRR17520069. 15553460  
SRR17520069. 15553462  
SRR17520069. 15553464  
SRR17520069. 15553466  
SRR17520069. 15553470  
SRR17520069. 15553474  
SRR17520069. 15553476  
SRR17520069. 15553478  
SRR17520069. 15553480

SRR17520069. 15553482  
SRR17520069. 15553484  
SRR17520069. 15553486  
SRR17520069. 15553488  
SRR17520069. 15553492  
SRR17520069. 15553494  
SRR17520069. 15553496  
SRR17520069. 15553498  
SRR17520069. 15553500  
SRR17520069. 15553502  
SRR17520069. 15563219  
SRR17520069. 15563221  
SRR17520069. 15563223  
SRR17520069. 15563225  
SRR17520069. 15564254  
SRR17520069. 15564256  
SRR17520069. 15564258  
SRR17520069. 15564260  
SRR17520069. 15564262  
SRR17520069. 15564264  
SRR17520069. 15564266  
SRR17520069. 15564268  
SRR17520069. 15564270  
SRR17520069. 15564272  
SRR17520069. 15564274  
SRR17520069. 15564276  
SRR17520069. 15564278  
SRR17520069. 15564280  
SRR17520069. 15564282  
SRR17520069. 15564284  
SRR17520069. 15567413  
SRR17520069. 15567415  
SRR17520069. 15567417  
SRR17520069. 15567419  
SRR17520069. 15567421  
SRR17520069. 15567425  
SRR17520069. 15567427  
SRR17520069. 15567429  
SRR17520069. 15567431  
SRR17520069. 15567433  
SRR17520069. 15567435  
SRR17520069. 15569091  
SRR17520069. 15574839  
SRR17520069. 15574843  
SRR17520069. 15574845  
SRR17520069. 15574847  
SRR17520069. 15574849

SRR17520069. 15574851  
SRR17520069. 15574853  
SRR17520069. 15574855  
SRR17520069. 15574859  
SRR17520069. 15574861  
SRR17520069. 15574863  
SRR17520069. 15574865  
SRR17520069. 15574867  
SRR17520069. 15574869  
SRR17520069. 15574871  
SRR17520069. 15574873  
SRR17520069. 15574875  
SRR17520069. 15574877  
SRR17520069. 15574879  
SRR17520069. 15574881  
SRR17520069. 15574883  
SRR17520069. 15574889  
SRR17520069. 15574891  
SRR17520069. 15574893  
SRR17520069. 15574895  
SRR17520069. 15574897  
SRR17520069. 15574899  
SRR17520069. 15574901  
SRR17520069. 15574903  
SRR17520069. 15574905  
SRR17520069. 15574909  
SRR17520069. 15574911  
SRR17520069. 15574913  
SRR17520069. 15576315  
SRR17520069. 15577417  
SRR17520069. 15577419  
SRR17520069. 15577421  
SRR17520069. 15577423  
SRR17520069. 15577425  
SRR17520069. 15577427  
SRR17520069. 15577429  
SRR17520069. 15577431  
SRR17520069. 15577435  
SRR17520069. 15577439  
SRR17520069. 15577441  
SRR17520069. 15577443  
SRR17520069. 15577445  
SRR17520069. 15577447  
SRR17520069. 15577449  
SRR17520069. 15577451  
SRR17520069. 15577453  
SRR17520069. 15577455

SRR17520069. 15577457  
SRR17520069. 15577459  
SRR17520069. 15577461  
SRR17520069. 15577463  
SRR17520069. 15577465  
SRR17520069. 15577467  
SRR17520069. 15577469  
SRR17520069. 15577471  
SRR17520069. 15577473  
SRR17520069. 15577475  
SRR17520069. 15577477  
SRR17520069. 15577479  
SRR17520069. 15577481  
SRR17520069. 15577483  
SRR17520069. 15577572  
SRR17520069. 15577625  
SRR17520069. 15577627  
SRR17520069. 15577629  
SRR17520069. 15577631  
SRR17520069. 15577633  
SRR17520069. 15577635  
SRR17520069. 15577637  
SRR17520069. 15577639  
SRR17520069. 15577643  
SRR17520069. 15577645  
SRR17520069. 15577647  
SRR17520069. 15577649  
SRR17520069. 15577651  
SRR17520069. 15577653  
SRR17520069. 15577655  
SRR17520069. 15577657  
SRR17520069. 15577659  
SRR17520069. 15577661  
SRR17520069. 15577665  
SRR17520069. 15577667  
SRR17520069. 15577669  
SRR17520069. 15577671  
SRR17520069. 15577675  
SRR17520069. 15577677  
SRR17520069. 15577679  
SRR17520069. 15577681  
SRR17520069. 15577683  
SRR17520069. 15577685  
SRR17520069. 15577687  
SRR17520069. 15577689  
SRR17520069. 15577691  
SRR17520069. 15577693

SRR17520069. 15577695  
SRR17520069. 15577697  
SRR17520069. 15577699  
SRR17520069. 15577701  
SRR17520069. 15577703  
SRR17520069. 15577707  
SRR17520069. 15577709  
SRR17520069. 15577711  
SRR17520069. 15577713  
SRR17520069. 15577715  
SRR17520069. 15577717  
SRR17520069. 15577719  
SRR17520069. 15577721  
SRR17520069. 15577723  
SRR17520069. 15577725  
SRR17520069. 15577727  
SRR17520069. 15577729  
SRR17520069. 15577731  
SRR17520069. 15577733  
SRR17520069. 15577735  
SRR17520069. 15577737  
SRR17520069. 15577739  
SRR17520069. 15577741  
SRR17520069. 15577743  
SRR17520069. 15577745  
SRR17520069. 15577747  
SRR17520069. 15577749  
SRR17520069. 15577751  
SRR17520069. 15577753  
SRR17520069. 15577755  
SRR17520069. 15577757  
SRR17520069. 15577759  
SRR17520069. 15577761  
SRR17520069. 15577763  
SRR17520069. 15577765  
SRR17520069. 15577767  
SRR17520069. 15577769  
SRR17520069. 15577771  
SRR17520069. 15578310  
SRR17520069. 15578312  
SRR17520069. 15578314  
SRR17520069. 15578316  
SRR17520069. 15578318  
SRR17520069. 15578320  
SRR17520069. 15578322  
SRR17520069. 15578324  
SRR17520069. 15578384

SRR17520069. 15578386  
SRR17520069. 15578388  
SRR17520069. 15578390  
SRR17520069. 15578392  
SRR17520069. 15578394  
SRR17520069. 15578398  
SRR17520069. 15578400  
SRR17520069. 15578402  
SRR17520069. 15578404  
SRR17520069. 15578406  
SRR17520069. 15578408  
SRR17520069. 15578410  
SRR17520069. 15578412  
SRR17520069. 15578414  
SRR17520069. 15578416  
SRR17520069. 15578422  
SRR17520069. 15578424  
SRR17520069. 15578426  
SRR17520069. 15578428  
SRR17520069. 15578430  
SRR17520069. 15578432  
SRR17520069. 15578434  
SRR17520069. 15578685  
SRR17520069. 15581328  
SRR17520069. 15581330  
SRR17520069. 15581332  
SRR17520069. 15581334  
SRR17520069. 15581336  
SRR17520069. 15581338  
SRR17520069. 15581340  
SRR17520069. 15581342  
SRR17520069. 15581344  
SRR17520069. 15581346  
SRR17520069. 15581348  
SRR17520069. 15581350  
SRR17520069. 15581352  
SRR17520069. 15581354  
SRR17520069. 15581356  
SRR17520069. 15581358  
SRR17520069. 15581360  
SRR17520069. 15581362  
SRR17520069. 15581364  
SRR17520069. 15581366  
SRR17520069. 15581368  
SRR17520069. 15581370  
SRR17520069. 15581372  
SRR17520069. 15581374

SRR17520069. 15581376  
SRR17520069. 15581378  
SRR17520069. 15581380  
SRR17520069. 15581382  
SRR17520069. 15581384  
SRR17520069. 15581386  
SRR17520069. 15581388  
SRR17520069. 15581392  
SRR17520069. 15581394  
SRR17520069. 15581396  
SRR17520069. 15581398  
SRR17520069. 15581400  
SRR17520069. 15581402  
SRR17520069. 15581404  
SRR17520069. 15581406  
SRR17520069. 15584985  
SRR17520069. 15584987  
SRR17520069. 15584991  
SRR17520069. 15584993  
SRR17520069. 15584995  
SRR17520069. 15584997  
SRR17520069. 15584999  
SRR17520069. 15585001  
SRR17520069. 15585003  
SRR17520069. 15585005  
SRR17520069. 15585007  
SRR17520069. 15585009  
SRR17520069. 15585011  
SRR17520069. 15585013  
SRR17520069. 15585015  
SRR17520069. 15585017  
SRR17520069. 15590174  
SRR17520069. 15590176  
SRR17520069. 15590178  
SRR17520069. 15590180  
SRR17520069. 15590182  
SRR17520069. 15590186  
SRR17520069. 15590188  
SRR17520069. 15590190  
SRR17520069. 15590192  
SRR17520069. 15590194  
SRR17520069. 15590196  
SRR17520069. 15590198  
SRR17520069. 15590200  
SRR17520069. 15590202  
SRR17520069. 15590204  
SRR17520069. 15590206



SRR17520069.15590208  
SRR17520069.15590210  
SRR17520069.15590212  
SRR17520069.15590214  
SRR17520069.15590216  
SRR17520069.15590218  
SRR17520069.15590220  
SRR17520069.15590222  
SRR17520069.15590224  
SRR17520069.15590226  
SRR17520069.15590228  
SRR17520069.15590230  
SRR17520069.15590232  
SRR17520069.15590234  
SRR17520069.15590236  
SRR17520069.15590238  
SRR17520069.15590240  
SRR17520069.15590242  
SRR17520069.15590244  
SRR17520069.15590246  
SRR17520069.15590248  
SRR17520069.15590250  
SRR17520069.15590252  
SRR17520069.15590254  
SRR17520069.15590256  
SRR17520069.15590258  
SRR17520069.15590260  
SRR17520069.15590262  
SRR17520069.15590264  
SRR17520069.15590266  
SRR17520069.15590268  
SRR17520069.15590270  
SRR17520069.15590272  
SRR17520069.15590274  
SRR17520069.15590276  
SRR17520069.15590278  
SRR17520069.15590280  
SRR17520069.15590282  
SRR17520069.15590284  
SRR17520069.15590286  
SRR17520069.15590288  
SRR17520069.15590290  
SRR17520069.15590292  
SRR17520069.15590294  
SRR17520069.15590296  
SRR17520069.15590298  
SRR17520069.15590300

SRR17520069.15600570  
SRR17520069.15600572  
SRR17520069.15600574  
SRR17520069.15600576  
SRR17520069.15600578  
SRR17520069.15600582  
SRR17520069.15600584  
SRR17520069.15600586  
SRR17520069.15600588  
SRR17520069.15600590  
SRR17520069.15600592  
SRR17520069.15600594  
SRR17520069.15600596  
SRR17520069.15602628  
SRR17520069.15602630  
SRR17520069.15606653  
SRR17520069.15606655  
SRR17520069.15606657  
SRR17520069.15606659  
SRR17520069.15606661  
SRR17520069.15606663  
SRR17520069.15606665  
SRR17520069.15606667  
SRR17520069.15606669  
SRR17520069.15606671  
SRR17520069.15606673  
SRR17520069.15606675  
SRR17520069.15606677  
SRR17520069.15606679  
SRR17520069.15606681  
SRR17520069.15606683  
SRR17520069.15606685  
SRR17520069.15606687  
SRR17520069.15606689  
SRR17520069.15607444  
SRR17520069.15607446  
SRR17520069.15607448  
SRR17520069.15607450  
SRR17520069.15607452  
SRR17520069.15607454  
SRR17520069.15607456  
SRR17520069.15613060  
SRR17520069.15613062  
SRR17520069.15613064  
SRR17520069.15613066  
SRR17520069.15613068  
SRR17520069.15613070

SRR17520069. 15613072  
SRR17520069. 15613074  
SRR17520069. 15613076  
SRR17520069. 15613078  
SRR17520069. 15613080  
SRR17520069. 15613082  
SRR17520069. 15613084  
SRR17520069. 15613086  
SRR17520069. 15613088  
SRR17520069. 15613090  
SRR17520069. 15613092  
SRR17520069. 15613094  
SRR17520069. 15613096  
SRR17520069. 15613705  
SRR17520069. 15613707  
SRR17520069. 15613717  
SRR17520069. 15615233  
SRR17520069. 15615235  
SRR17520069. 15615237  
SRR17520069. 15615239  
SRR17520069. 15615241  
SRR17520069. 15616575  
SRR17520069. 15616577  
SRR17520069. 15616579  
SRR17520069. 15616581  
SRR17520069. 15616585  
SRR17520069. 15616587  
SRR17520069. 15616589  
SRR17520069. 15616591  
SRR17520069. 15617620  
SRR17520069. 15617622  
SRR17520069. 15617624  
SRR17520069. 15617626  
SRR17520069. 15617628  
SRR17520069. 15617630  
SRR17520069. 15617632  
SRR17520069. 15617634  
SRR17520069. 15617636  
SRR17520069. 15617638  
SRR17520069. 15617640  
SRR17520069. 15617642  
SRR17520069. 15617644  
SRR17520069. 15618319  
SRR17520069. 15618323  
SRR17520069. 15618325  
SRR17520069. 15618327  
SRR17520069. 15618329

SRR17520069. 15618331  
SRR17520069. 15618333  
SRR17520069. 15618335  
SRR17520069. 15618337  
SRR17520069. 15618339  
SRR17520069. 15618341  
SRR17520069. 15618343  
SRR17520069. 15618345  
SRR17520069. 15618347  
SRR17520069. 15618349  
SRR17520069. 15618351  
SRR17520069. 15618353  
SRR17520069. 15618355  
SRR17520069. 15618359  
SRR17520069. 15618361  
SRR17520069. 15618363  
SRR17520069. 15618365  
SRR17520069. 15618367  
SRR17520069. 15618369  
SRR17520069. 15618371  
SRR17520069. 15618373  
SRR17520069. 15618375  
SRR17520069. 15618377  
SRR17520069. 15618379  
SRR17520069. 15619104  
SRR17520069. 15619106  
SRR17520069. 15619108  
SRR17520069. 15619110  
SRR17520069. 15619112  
SRR17520069. 15619114  
SRR17520069. 15619116  
SRR17520069. 15619118  
SRR17520069. 15619120  
SRR17520069. 15619122  
SRR17520069. 15619124  
SRR17520069. 15619126  
SRR17520069. 15619128  
SRR17520069. 15619130  
SRR17520069. 15619132  
SRR17520069. 15619134  
SRR17520069. 15619136  
SRR17520069. 15619138  
SRR17520069. 15619140  
SRR17520069. 15619142  
SRR17520069. 15619144  
SRR17520069. 15619146  
SRR17520069. 15619148

SRR17520069. 15619150  
SRR17520069. 15619152  
SRR17520069. 15619154  
SRR17520069. 15619156  
SRR17520069. 15619158  
SRR17520069. 15619160  
SRR17520069. 15619164  
SRR17520069. 15619166  
SRR17520069. 15619168  
SRR17520069. 15619170  
SRR17520069. 15619172  
SRR17520069. 15619174  
SRR17520069. 15619176  
SRR17520069. 15619178  
SRR17520069. 15619180  
SRR17520069. 15619182  
SRR17520069. 15619184  
SRR17520069. 15619186  
SRR17520069. 15619188  
SRR17520069. 15619190  
SRR17520069. 15619192  
SRR17520069. 15619194  
SRR17520069. 15619196  
SRR17520069. 15619198  
SRR17520069. 15619202  
SRR17520069. 15619204  
SRR17520069. 15619206  
SRR17520069. 15619208  
SRR17520069. 15619210  
SRR17520069. 15619212  
SRR17520069. 15619214  
SRR17520069. 15620178  
SRR17520069. 15620180  
SRR17520069. 15620182  
SRR17520069. 15620184  
SRR17520069. 15620186  
SRR17520069. 15620188  
SRR17520069. 15620190  
SRR17520069. 15620192  
SRR17520069. 15621603  
SRR17520069. 15621605  
SRR17520069. 15621607  
SRR17520069. 15621609  
SRR17520069. 15621611  
SRR17520069. 15621613  
SRR17520069. 15621615  
SRR17520069. 15621617

SRR17520069. 15621619  
SRR17520069. 15621621  
SRR17520069. 15621623  
SRR17520069. 15621625  
SRR17520069. 15621627  
SRR17520069. 15622887  
SRR17520069. 15622889  
SRR17520069. 15624321  
SRR17520069. 15624323  
SRR17520069. 15632438  
SRR17520069. 15632440  
SRR17520069. 15632442  
SRR17520069. 15632444  
SRR17520069. 15632446  
SRR17520069. 15634447  
SRR17520069. 15634451  
SRR17520069. 15634455  
SRR17520069. 15634457  
SRR17520069. 15634461  
SRR17520069. 15634463  
SRR17520069. 15634465  
SRR17520069. 15634467  
SRR17520069. 15634469  
SRR17520069. 15634473  
SRR17520069. 15634475  
SRR17520069. 15634477  
SRR17520069. 15634479  
SRR17520069. 15634481  
SRR17520069. 15634483  
SRR17520069. 15634485  
SRR17520069. 15634487  
SRR17520069. 15634489  
SRR17520069. 15634491  
SRR17520069. 15634495  
SRR17520069. 15634497  
SRR17520069. 15634499  
SRR17520069. 15634501  
SRR17520069. 15634505  
SRR17520069. 15634507  
SRR17520069. 15638353  
SRR17520069. 15640127  
SRR17520069. 15640129  
SRR17520069. 15640131  
SRR17520069. 15640133  
SRR17520069. 15640135  
SRR17520069. 15640137  
SRR17520069. 15640139

SRR17520069. 15640141  
SRR17520069. 15640143  
SRR17520069. 15640145  
SRR17520069. 15640149  
SRR17520069. 15640151  
SRR17520069. 15640153  
SRR17520069. 15640155  
SRR17520069. 15640157  
SRR17520069. 15640159  
SRR17520069. 15640161  
SRR17520069. 15640163  
SRR17520069. 15640165  
SRR17520069. 15640167  
SRR17520069. 15640169  
SRR17520069. 15640171  
SRR17520069. 15640173  
SRR17520069. 15640175  
SRR17520069. 15640177  
SRR17520069. 15640179  
SRR17520069. 15641037  
SRR17520069. 15641039  
SRR17520069. 15641041  
SRR17520069. 15641043  
SRR17520069. 15641047  
SRR17520069. 15641049  
SRR17520069. 15641051  
SRR17520069. 15641055  
SRR17520069. 15641057  
SRR17520069. 15641059  
SRR17520069. 15641061  
SRR17520069. 15641065  
SRR17520069. 15641067  
SRR17520069. 15641069  
SRR17520069. 15641071  
SRR17520069. 15641073  
SRR17520069. 15641075  
SRR17520069. 15641077  
SRR17520069. 15641079  
SRR17520069. 15641081  
SRR17520069. 15641083  
SRR17520069. 15641085  
SRR17520069. 15641087  
SRR17520069. 15641091  
SRR17520069. 15641093  
SRR17520069. 15641095  
SRR17520069. 15643355  
SRR17520069. 15644962

SRR17520069. 15644964  
SRR17520069. 15644966  
SRR17520069. 15644968  
SRR17520069. 15644970  
SRR17520069. 15644972  
SRR17520069. 15644974  
SRR17520069. 15644978  
SRR17520069. 15645465  
SRR17520069. 15645467  
SRR17520069. 15645469  
SRR17520069. 15645691  
SRR17520069. 15645693  
SRR17520069. 15645695  
SRR17520069. 15645697  
SRR17520069. 15645699  
SRR17520069. 15645701  
SRR17520069. 15645703  
SRR17520069. 15645705  
SRR17520069. 15645707  
SRR17520069. 15645709  
SRR17520069. 15645711  
SRR17520069. 15645715  
SRR17520069. 15645717  
SRR17520069. 15645719  
SRR17520069. 15645721  
SRR17520069. 15645723  
SRR17520069. 15645725  
SRR17520069. 15645727  
SRR17520069. 15658306  
SRR17520069. 15659177  
SRR17520069. 15659179  
SRR17520069. 15659181  
SRR17520069. 15659183  
SRR17520069. 15659185  
SRR17520069. 15659187  
SRR17520069. 15659189  
SRR17520069. 15659191  
SRR17520069. 15659193  
SRR17520069. 15659195  
SRR17520069. 15659197  
SRR17520069. 15659199  
SRR17520069. 15659201  
SRR17520069. 15659203  
SRR17520069. 15659205  
SRR17520069. 15659207  
SRR17520069. 15659209  
SRR17520069. 15659211



SRR17520069. 15662084  
SRR17520069. 15662086  
SRR17520069. 15662088  
SRR17520069. 15662090  
SRR17520069. 15662094  
SRR17520069. 15662096  
SRR17520069. 15662098  
SRR17520069. 15662100  
SRR17520069. 15662102  
SRR17520069. 15662104  
SRR17520069. 15662106  
SRR17520069. 15662108  
SRR17520069. 15662110  
SRR17520069. 15662112  
SRR17520069. 15662114  
SRR17520069. 15662116  
SRR17520069. 15662118  
SRR17520069. 15662120  
SRR17520069. 15662122  
SRR17520069. 15662124  
SRR17520069. 15662126  
SRR17520069. 15662128  
SRR17520069. 15662130  
SRR17520069. 15662132  
SRR17520069. 15662134  
SRR17520069. 15662136  
SRR17520069. 15662138  
SRR17520069. 15662140  
SRR17520069. 15662142  
SRR17520069. 15662144  
SRR17520069. 15662146  
SRR17520069. 15662148  
SRR17520069. 15662150  
SRR17520069. 15662152  
SRR17520069. 15662154  
SRR17520069. 15663888  
SRR17520069. 15663890  
SRR17520069. 15665096  
SRR17520069. 15665098  
SRR17520069. 15665100  
SRR17520069. 15665102  
SRR17520069. 15665106  
SRR17520069. 15665108  
SRR17520069. 15665110  
SRR17520069. 15665112  
SRR17520069. 15665114  
SRR17520069. 15665116

SRR17520069. 15665118  
SRR17520069. 15665120  
SRR17520069. 15665588  
SRR17520069. 15665590  
SRR17520069. 15665592  
SRR17520069. 15665594  
SRR17520069. 15665596  
SRR17520069. 15665598  
SRR17520069. 15665600  
SRR17520069. 15665602  
SRR17520069. 15668165  
SRR17520069. 15668167  
SRR17520069. 15668169  
SRR17520069. 15668173  
SRR17520069. 15668175  
SRR17520069. 15668177  
SRR17520069. 15668179  
SRR17520069. 15668181  
SRR17520069. 15668183  
SRR17520069. 15668185  
SRR17520069. 15668187  
SRR17520069. 15668189  
SRR17520069. 15668191  
SRR17520069. 15668193  
SRR17520069. 15668195  
SRR17520069. 15668197  
SRR17520069. 15668199  
SRR17520069. 15668201  
SRR17520069. 15668203  
SRR17520069. 15668205  
SRR17520069. 15668207  
SRR17520069. 15668209  
SRR17520069. 15668211  
SRR17520069. 15668213  
SRR17520069. 15668215  
SRR17520069. 15668217  
SRR17520069. 15668219  
SRR17520069. 15668221  
SRR17520069. 15671011  
SRR17520069. 15671013  
SRR17520069. 15671015  
SRR17520069. 15671017  
SRR17520069. 15671019  
SRR17520069. 15671021  
SRR17520069. 15671023  
SRR17520069. 15671025  
SRR17520069. 15671027

SRR17520069. 15671029  
SRR17520069. 15671031  
SRR17520069. 15671033  
SRR17520069. 15671035  
SRR17520069. 15671037  
SRR17520069. 15671039  
SRR17520069. 15671041  
SRR17520069. 15671043  
SRR17520069. 15671045  
SRR17520069. 15671047  
SRR17520069. 15671049  
SRR17520069. 15671053  
SRR17520069. 15671055  
SRR17520069. 15671059  
SRR17520069. 15671063  
SRR17520069. 15671065  
SRR17520069. 15671067  
SRR17520069. 15671069  
SRR17520069. 15671071  
SRR17520069. 15671073  
SRR17520069. 15671075  
SRR17520069. 15671077  
SRR17520069. 15671079  
SRR17520069. 15671081  
SRR17520069. 15671083  
SRR17520069. 15671085  
SRR17520069. 15671087  
SRR17520069. 15671089  
SRR17520069. 15671093  
SRR17520069. 15671095  
SRR17520069. 15671097  
SRR17520069. 15671099  
SRR17520069. 15671101  
SRR17520069. 15671103  
SRR17520069. 15671105  
SRR17520069. 15671107  
SRR17520069. 15671111  
SRR17520069. 15671113  
SRR17520069. 15671115  
SRR17520069. 15671117  
SRR17520069. 15671119  
SRR17520069. 15674091  
SRR17520069. 15674093  
SRR17520069. 15674095  
SRR17520069. 15674097  
SRR17520069. 15674099  
SRR17520069. 15674101

SRR17520069. 15674103  
SRR17520069. 15674105  
SRR17520069. 15674107  
SRR17520069. 15676480  
SRR17520069. 15676482  
SRR17520069. 15676484  
SRR17520069. 15676486  
SRR17520069. 15676488  
SRR17520069. 15676490  
SRR17520069. 15676492  
SRR17520069. 15679406  
SRR17520069. 15679408  
SRR17520069. 15679410  
SRR17520069. 15679412  
SRR17520069. 15679414  
SRR17520069. 15679416  
SRR17520069. 15679418  
SRR17520069. 15679420  
SRR17520069. 15679422  
SRR17520069. 15682725  
SRR17520069. 15682727  
SRR17520069. 15682729  
SRR17520069. 15682733  
SRR17520069. 15682735  
SRR17520069. 15682737  
SRR17520069. 15682739  
SRR17520069. 15682741  
SRR17520069. 15682743  
SRR17520069. 15682745  
SRR17520069. 15682747  
SRR17520069. 15682749  
SRR17520069. 15682751  
SRR17520069. 15682757  
SRR17520069. 15682759  
SRR17520069. 15682761  
SRR17520069. 15682763  
SRR17520069. 15682765  
SRR17520069. 15682769  
SRR17520069. 15682773  
SRR17520069. 15682775  
SRR17520069. 15682777  
SRR17520069. 15682779  
SRR17520069. 15682781  
SRR17520069. 15682783  
SRR17520069. 15682785  
SRR17520069. 15682787  
SRR17520069. 15682789

SRR17520069. 15682791  
SRR17520069. 15682793  
SRR17520069. 15682795  
SRR17520069. 15682797  
SRR17520069. 15682799  
SRR17520069. 15682801  
SRR17520069. 15682803  
SRR17520069. 15682805  
SRR17520069. 15682807  
SRR17520069. 15682809  
SRR17520069. 15682811  
SRR17520069. 15682813  
SRR17520069. 15682815  
SRR17520069. 15682817  
SRR17520069. 15682819  
SRR17520069. 15682821  
SRR17520069. 15682823  
SRR17520069. 15682825  
SRR17520069. 15682827  
SRR17520069. 15682829  
SRR17520069. 15682831  
SRR17520069. 15682833  
SRR17520069. 15682835  
SRR17520069. 15682837  
SRR17520069. 15682839  
SRR17520069. 15682845  
SRR17520069. 15682847  
SRR17520069. 15682849  
SRR17520069. 15682851  
SRR17520069. 15682853  
SRR17520069. 15682855  
SRR17520069. 15682857  
SRR17520069. 15682859  
SRR17520069. 15682861  
SRR17520069. 15682863  
SRR17520069. 15682865  
SRR17520069. 15682867  
SRR17520069. 15682869  
SRR17520069. 15682871  
SRR17520069. 15682873  
SRR17520069. 15682875  
SRR17520069. 15682877  
SRR17520069. 15682879  
SRR17520069. 15682881  
SRR17520069. 15682883  
SRR17520069. 15682885  
SRR17520069. 15682887

SRR17520069. 15682889  
SRR17520069. 15683046  
SRR17520069. 15683048  
SRR17520069. 15683050  
SRR17520069. 15683052  
SRR17520069. 15683054  
SRR17520069. 15683056  
SRR17520069. 15683058  
SRR17520069. 15683060  
SRR17520069. 15683062  
SRR17520069. 15683064  
SRR17520069. 15683066  
SRR17520069. 15683068  
SRR17520069. 15683072  
SRR17520069. 15683074  
SRR17520069. 15683076  
SRR17520069. 15683078  
SRR17520069. 15683080  
SRR17520069. 15683082  
SRR17520069. 15683084  
SRR17520069. 15683086  
SRR17520069. 15683088  
SRR17520069. 15683090  
SRR17520069. 15683092  
SRR17520069. 15683094  
SRR17520069. 15683096  
SRR17520069. 15683098  
SRR17520069. 15683100  
SRR17520069. 15684934  
SRR17520069. 15684936  
SRR17520069. 15684938  
SRR17520069. 15684940  
SRR17520069. 15684942  
SRR17520069. 15684944  
SRR17520069. 15684946  
SRR17520069. 15684948  
SRR17520069. 15684950  
SRR17520069. 15684952  
SRR17520069. 15684956  
SRR17520069. 15684958  
SRR17520069. 15684960  
SRR17520069. 15684962  
SRR17520069. 15684964  
SRR17520069. 15684966  
SRR17520069. 15684968  
SRR17520069. 15684970  
SRR17520069. 15684972

SRR17520069. 15684974  
SRR17520069. 15684976  
SRR17520069. 15684978  
SRR17520069. 15685351  
SRR17520069. 15685520  
SRR17520069. 15685522  
SRR17520069. 15685524  
SRR17520069. 15685526  
SRR17520069. 15685528  
SRR17520069. 15685530  
SRR17520069. 15685532  
SRR17520069. 15685534  
SRR17520069. 15685536  
SRR17520069. 15685538  
SRR17520069. 15685540  
SRR17520069. 15685542  
SRR17520069. 15685544  
SRR17520069. 15685546  
SRR17520069. 15685548  
SRR17520069. 15685550  
SRR17520069. 15685552  
SRR17520069. 15685554  
SRR17520069. 15685556  
SRR17520069. 15685558  
SRR17520069. 15685560  
SRR17520069. 15685562  
SRR17520069. 15685564  
SRR17520069. 15685566  
SRR17520069. 15685568  
SRR17520069. 15685570  
SRR17520069. 15685572  
SRR17520069. 15685576  
SRR17520069. 15685578  
SRR17520069. 15685580  
SRR17520069. 15685582  
SRR17520069. 15685584  
SRR17520069. 15685586  
SRR17520069. 15685588  
SRR17520069. 15685590  
SRR17520069. 15685592  
SRR17520069. 15685594  
SRR17520069. 15685596  
SRR17520069. 15685598  
SRR17520069. 15685600  
SRR17520069. 15685602  
SRR17520069. 15687329  
SRR17520069. 15687333

SRR17520069. 15690242  
SRR17520069. 15690244  
SRR17520069. 15690246  
SRR17520069. 15690248  
SRR17520069. 15690250  
SRR17520069. 15690252  
SRR17520069. 15690254  
SRR17520069. 15690256  
SRR17520069. 15690258  
SRR17520069. 15691674  
SRR17520069. 15691676  
SRR17520069. 15691678  
SRR17520069. 15691680  
SRR17520069. 15691682  
SRR17520069. 15691684  
SRR17520069. 15691686  
SRR17520069. 15691688  
SRR17520069. 15691690  
SRR17520069. 15691692  
SRR17520069. 15691694  
SRR17520069. 15691696  
SRR17520069. 15691698  
SRR17520069. 15691702  
SRR17520069. 15691704  
SRR17520069. 15691706  
SRR17520069. 15691708  
SRR17520069. 15691710  
SRR17520069. 15691712  
SRR17520069. 15691714  
SRR17520069. 15691716  
SRR17520069. 15691718  
SRR17520069. 15691720  
SRR17520069. 15691724  
SRR17520069. 15697237  
SRR17520069. 15697239  
SRR17520069. 15697241  
SRR17520069. 15697243  
SRR17520069. 15697245  
SRR17520069. 15697247  
SRR17520069. 15701437  
SRR17520069. 15702058  
SRR17520069. 15702060  
SRR17520069. 15702062  
SRR17520069. 15704520  
SRR17520069. 15704522  
SRR17520069. 15704524  
SRR17520069. 15704527



SRR17520069. 15704529  
SRR17520069. 15704533  
SRR17520069. 15704535  
SRR17520069. 15704537  
SRR17520069. 15704539  
SRR17520069. 15704541  
SRR17520069. 15704543  
SRR17520069. 15704545  
SRR17520069. 15704547  
SRR17520069. 15704549  
SRR17520069. 15704551  
SRR17520069. 15704553  
SRR17520069. 15704555  
SRR17520069. 15704557  
SRR17520069. 15704563  
SRR17520069. 15704565  
SRR17520069. 15704567  
SRR17520069. 15704569  
SRR17520069. 15706388  
SRR17520069. 15706390  
SRR17520069. 15706392  
SRR17520069. 15706394  
SRR17520069. 15706396  
SRR17520069. 15706400  
SRR17520069. 15706402  
SRR17520069. 15706404  
SRR17520069. 15706406  
SRR17520069. 15706408  
SRR17520069. 15706410  
SRR17520069. 15706412  
SRR17520069. 15706414  
SRR17520069. 15706418  
SRR17520069. 15706420  
SRR17520069. 15706422  
SRR17520069. 15706424  
SRR17520069. 15706428  
SRR17520069. 15706430  
SRR17520069. 15706432  
SRR17520069. 15706434  
SRR17520069. 15706436  
SRR17520069. 15706438  
SRR17520069. 15706440  
SRR17520069. 15706442  
SRR17520069. 15706444  
SRR17520069. 15706446  
SRR17520069. 15706448  
SRR17520069. 15706450

SRR17520069. 15706452  
SRR17520069. 15706454  
SRR17520069. 15706458  
SRR17520069. 15706460  
SRR17520069. 15706462  
SRR17520069. 15706464  
SRR17520069. 15706466  
SRR17520069. 15706468  
SRR17520069. 15706472  
SRR17520069. 15706474  
SRR17520069. 15706476  
SRR17520069. 15706478  
SRR17520069. 15706480  
SRR17520069. 15706482  
SRR17520069. 15706484  
SRR17520069. 15706486  
SRR17520069. 15706488  
SRR17520069. 15706490  
SRR17520069. 15707773  
SRR17520069. 15707775  
SRR17520069. 15707777  
SRR17520069. 15707779  
SRR17520069. 15707781  
SRR17520069. 15707785  
SRR17520069. 15707787  
SRR17520069. 15707789  
SRR17520069. 15707793  
SRR17520069. 15707795  
SRR17520069. 15707797  
SRR17520069. 15707799  
SRR17520069. 15707801  
SRR17520069. 15707803  
SRR17520069. 15707805  
SRR17520069. 15707807  
SRR17520069. 15707809  
SRR17520069. 15707811  
SRR17520069. 15707813  
SRR17520069. 15707815  
SRR17520069. 15707817  
SRR17520069. 15707819  
SRR17520069. 15707821  
SRR17520069. 15707823  
SRR17520069. 15707825  
SRR17520069. 15707827  
SRR17520069. 15707829  
SRR17520069. 15707831  
SRR17520069. 15712716

SRR17520069. 15713493  
SRR17520069. 15713495  
SRR17520069. 15713497  
SRR17520069. 15713499  
SRR17520069. 15713501  
SRR17520069. 15713503  
SRR17520069. 15713505  
SRR17520069. 15713507  
SRR17520069. 15713509  
SRR17520069. 15713511  
SRR17520069. 15713513  
SRR17520069. 15713515  
SRR17520069. 15713517  
SRR17520069. 15714836  
SRR17520069. 15714838  
SRR17520069. 15714840  
SRR17520069. 15714842  
SRR17520069. 15714844  
SRR17520069. 15714846  
SRR17520069. 15714850  
SRR17520069. 15714852  
SRR17520069. 15714854  
SRR17520069. 15714856  
SRR17520069. 15714858  
SRR17520069. 15714860  
SRR17520069. 15714862  
SRR17520069. 15714864  
SRR17520069. 15714866  
SRR17520069. 15714868  
SRR17520069. 15714870  
SRR17520069. 15714874  
SRR17520069. 15714876  
SRR17520069. 15714878  
SRR17520069. 15714880  
SRR17520069. 15714882  
SRR17520069. 15714886  
SRR17520069. 15714888  
SRR17520069. 15714890  
SRR17520069. 15714892  
SRR17520069. 15714925  
SRR17520069. 15714927  
SRR17520069. 15714929  
SRR17520069. 15714931  
SRR17520069. 15714933  
SRR17520069. 15714935  
SRR17520069. 15714937  
SRR17520069. 15714939

SRR17520069. 15714941  
SRR17520069. 15714943  
SRR17520069. 15714945  
SRR17520069. 15714947  
SRR17520069. 15714949  
SRR17520069. 15714951  
SRR17520069. 15714953  
SRR17520069. 15717985  
SRR17520069. 15717987  
SRR17520069. 15717989  
SRR17520069. 15717991  
SRR17520069. 15717993  
SRR17520069. 15717995  
SRR17520069. 15717997  
SRR17520069. 15717999  
SRR17520069. 15718001  
SRR17520069. 15718003  
SRR17520069. 15718005  
SRR17520069. 15718007  
SRR17520069. 15718009  
SRR17520069. 15718011  
SRR17520069. 15718013  
SRR17520069. 15718015  
SRR17520069. 15718017  
SRR17520069. 15718019  
SRR17520069. 15718021  
SRR17520069. 15718023  
SRR17520069. 15718025  
SRR17520069. 15722052  
SRR17520069. 15722054  
SRR17520069. 15722056  
SRR17520069. 15722058  
SRR17520069. 15722060  
SRR17520069. 15722062  
SRR17520069. 15722064  
SRR17520069. 15722066  
SRR17520069. 15722068  
SRR17520069. 15722070  
SRR17520069. 15722072  
SRR17520069. 15722074  
SRR17520069. 15722076  
SRR17520069. 15725768  
SRR17520069. 15725770  
SRR17520069. 15725772  
SRR17520069. 15725774  
SRR17520069. 15725776  
SRR17520069. 15725778

SRR17520069. 15725780  
SRR17520069. 15725782  
SRR17520069. 15725784  
SRR17520069. 15725786  
SRR17520069. 15725788  
SRR17520069. 15725790  
SRR17520069. 15725792  
SRR17520069. 15725794  
SRR17520069. 15725796  
SRR17520069. 15725798  
SRR17520069. 15725800  
SRR17520069. 15727851  
SRR17520069. 15727853  
SRR17520069. 15727855  
SRR17520069. 15727857  
SRR17520069. 15727859  
SRR17520069. 15727861  
SRR17520069. 15727863  
SRR17520069. 15727865  
SRR17520069. 15727867  
SRR17520069. 15727869  
SRR17520069. 15727871  
SRR17520069. 15727873  
SRR17520069. 15730012  
SRR17520069. 15730016  
SRR17520069. 15730018  
SRR17520069. 15730020  
SRR17520069. 15730022  
SRR17520069. 15730026  
SRR17520069. 15730030  
SRR17520069. 15730034  
SRR17520069. 15730036  
SRR17520069. 15730038  
SRR17520069. 15730040  
SRR17520069. 15730042  
SRR17520069. 15730044  
SRR17520069. 15730046  
SRR17520069. 15730048  
SRR17520069. 15730050  
SRR17520069. 15730052  
SRR17520069. 15730054  
SRR17520069. 15730056  
SRR17520069. 15730058  
SRR17520069. 15730060  
SRR17520069. 15730062  
SRR17520069. 15730064  
SRR17520069. 15730066

SRR17520069. 15730068  
SRR17520069. 15730070  
SRR17520069. 15730072  
SRR17520069. 15730074  
SRR17520069. 15730076  
SRR17520069. 15730078  
SRR17520069. 15730080  
SRR17520069. 15733767  
SRR17520069. 15733769  
SRR17520069. 15733771  
SRR17520069. 15733773  
SRR17520069. 15740137  
SRR17520069. 15740139  
SRR17520069. 15740141  
SRR17520069. 15740143  
SRR17520069. 15740145  
SRR17520069. 15740147  
SRR17520069. 15740149  
SRR17520069. 15740151  
SRR17520069. 15740153  
SRR17520069. 15740155  
SRR17520069. 15740157  
SRR17520069. 15740159  
SRR17520069. 15740161  
SRR17520069. 15740163  
SRR17520069. 15740165  
SRR17520069. 15740167  
SRR17520069. 15740169  
SRR17520069. 15740171  
SRR17520069. 15740173  
SRR17520069. 15743897  
SRR17520069. 15743899  
SRR17520069. 15743901  
SRR17520069. 15743903  
SRR17520069. 15748071  
SRR17520069. 15748077  
SRR17520069. 15749141  
SRR17520069. 15749143  
SRR17520069. 15749145  
SRR17520069. 15749147  
SRR17520069. 15749149  
SRR17520069. 15749151  
SRR17520069. 15749153  
SRR17520069. 15749155  
SRR17520069. 15749159  
SRR17520069. 15749161  
SRR17520069. 15749163

SRR17520069. 15749165  
SRR17520069. 15749167  
SRR17520069. 15749169  
SRR17520069. 15749171  
SRR17520069. 15749173  
SRR17520069. 15749175  
SRR17520069. 15749177  
SRR17520069. 15749179  
SRR17520069. 15749181  
SRR17520069. 15749183  
SRR17520069. 15752674  
SRR17520069. 15752676  
SRR17520069. 15752678  
SRR17520069. 15752680  
SRR17520069. 15752684  
SRR17520069. 15752686  
SRR17520069. 15752688  
SRR17520069. 15752690  
SRR17520069. 15752692  
SRR17520069. 15752694  
SRR17520069. 15752696  
SRR17520069. 15752698  
SRR17520069. 15752700  
SRR17520069. 15752702  
SRR17520069. 15752704  
SRR17520069. 15752706  
SRR17520069. 15752708  
SRR17520069. 15752710  
SRR17520069. 15752712  
SRR17520069. 15752714  
SRR17520069. 15752716  
SRR17520069. 15752718  
SRR17520069. 15752720  
SRR17520069. 15752722  
SRR17520069. 15752724  
SRR17520069. 15752726  
SRR17520069. 15752728  
SRR17520069. 15752730  
SRR17520069. 15754224  
SRR17520069. 15754226  
SRR17520069. 15754228  
SRR17520069. 15754230  
SRR17520069. 15754232  
SRR17520069. 15754234  
SRR17520069. 15757730  
SRR17520069. 15757732  
SRR17520069. 15757734

SRR17520069. 15757736  
SRR17520069. 15757738  
SRR17520069. 15757740  
SRR17520069. 15757742  
SRR17520069. 15757744  
SRR17520069. 15757746  
SRR17520069. 15757748  
SRR17520069. 15757750  
SRR17520069. 15757752  
SRR17520069. 15757754  
SRR17520069. 15757756  
SRR17520069. 15757758  
SRR17520069. 15757762  
SRR17520069. 15764473  
SRR17520069. 15764475  
SRR17520069. 15764477  
SRR17520069. 15764479  
SRR17520069. 15764481  
SRR17520069. 15764483  
SRR17520069. 15764485  
SRR17520069. 15764487  
SRR17520069. 15764489  
SRR17520069. 15764491  
SRR17520069. 15764493  
SRR17520069. 15764495  
SRR17520069. 15764497  
SRR17520069. 15764499  
SRR17520069. 15764503  
SRR17520069. 15764505  
SRR17520069. 15764507  
SRR17520069. 15764509  
SRR17520069. 15764511  
SRR17520069. 15764513  
SRR17520069. 15764515  
SRR17520069. 15764517  
SRR17520069. 15764519  
SRR17520069. 15764521  
SRR17520069. 15764523  
SRR17520069. 15764525  
SRR17520069. 15764527  
SRR17520069. 15764529  
SRR17520069. 15764531  
SRR17520069. 15764533  
SRR17520069. 15764535  
SRR17520069. 15764537  
SRR17520069. 15764539  
SRR17520069. 15764541



SRR17520069. 15764543  
SRR17520069. 15764545  
SRR17520069. 15764547  
SRR17520069. 15765168  
SRR17520069. 15765170  
SRR17520069. 15765172  
SRR17520069. 15765174  
SRR17520069. 15765176  
SRR17520069. 15765178  
SRR17520069. 15765180  
SRR17520069. 15765182  
SRR17520069. 15765184  
SRR17520069. 15765186  
SRR17520069. 15765188  
SRR17520069. 15765190  
SRR17520069. 15765192  
SRR17520069. 15765194  
SRR17520069. 15765196  
SRR17520069. 15767775  
SRR17520069. 15768236  
SRR17520069. 15768238  
SRR17520069. 15768240  
SRR17520069. 15768242  
SRR17520069. 15768244  
SRR17520069. 15768246  
SRR17520069. 15768248  
SRR17520069. 15768250  
SRR17520069. 15768252  
SRR17520069. 15768254  
SRR17520069. 15768256  
SRR17520069. 15768258  
SRR17520069. 15768260  
SRR17520069. 15777719  
SRR17520069. 15777721  
SRR17520069. 15777723  
SRR17520069. 15777725  
SRR17520069. 15777727  
SRR17520069. 15779114  
SRR17520069. 15779116  
SRR17520069. 15779118  
SRR17520069. 15779120  
SRR17520069. 15779122  
SRR17520069. 15779124  
SRR17520069. 15779126  
SRR17520069. 15779128  
SRR17520069. 15779130  
SRR17520069. 15779132

SRR17520069. 15779134  
SRR17520069. 15779136  
SRR17520069. 15779138  
SRR17520069. 15782097  
SRR17520069. 15782099  
SRR17520069. 15791301  
SRR17520069. 15791475  
SRR17520069. 15791477  
SRR17520069. 15791479  
SRR17520069. 15791481  
SRR17520069. 15791483  
SRR17520069. 15791485  
SRR17520069. 15791487  
SRR17520069. 15791489  
SRR17520069. 15791491  
SRR17520069. 15791493  
SRR17520069. 15791495  
SRR17520069. 15792391  
SRR17520069. 15792393  
SRR17520069. 15792395  
SRR17520069. 15792397  
SRR17520069. 15792399  
SRR17520069. 15792401  
SRR17520069. 15795722  
SRR17520069. 15795724  
SRR17520069. 15795726  
SRR17520069. 15800924  
SRR17520069. 15808748  
SRR17520069. 15808750  
SRR17520069. 15808754  
SRR17520069. 15808756  
SRR17520069. 15808758  
SRR17520069. 15808760  
SRR17520069. 15808762  
SRR17520069. 15808764  
SRR17520069. 15808766  
SRR17520069. 15808768  
SRR17520069. 15808770  
SRR17520069. 15808772  
SRR17520069. 15808774  
SRR17520069. 15808776  
SRR17520069. 15808778  
SRR17520069. 15808780  
SRR17520069. 15808782  
SRR17520069. 15808784  
SRR17520069. 15808786  
SRR17520069. 15808788

SRR17520069. 15808790  
SRR17520069. 15808792  
SRR17520069. 15808794  
SRR17520069. 15808796  
SRR17520069. 15808798  
SRR17520069. 15808800  
SRR17520069. 15808802  
SRR17520069. 15808804  
SRR17520069. 15808806  
SRR17520069. 15808808  
SRR17520069. 15808810  
SRR17520069. 15808812  
SRR17520069. 15808814  
SRR17520069. 15809410  
SRR17520069. 15809412  
SRR17520069. 15809414  
SRR17520069. 15809416  
SRR17520069. 15809418  
SRR17520069. 15809420  
SRR17520069. 15809422  
SRR17520069. 15809424  
SRR17520069. 15809426  
SRR17520069. 15818676  
SRR17520069. 15818678  
SRR17520069. 15818680  
SRR17520069. 15818682  
SRR17520069. 15818684  
SRR17520069. 15818686  
SRR17520069. 15818688  
SRR17520069. 15818690  
SRR17520069. 15818694  
SRR17520069. 15818696  
SRR17520069. 15821227  
SRR17520069. 15821229  
SRR17520069. 15821231  
SRR17520069. 15821233  
SRR17520069. 15824016  
SRR17520069. 15824018  
SRR17520069. 15824020  
SRR17520069. 15824022  
SRR17520069. 15824024  
SRR17520069. 15824026  
SRR17520069. 15824028  
SRR17520069. 15824030  
SRR17520069. 15824032  
SRR17520069. 15824034  
SRR17520069. 15824036

SRR17520069. 15824038  
SRR17520069. 15824040  
SRR17520069. 15824042  
SRR17520069. 15824044  
SRR17520069. 15824046  
SRR17520069. 15824048  
SRR17520069. 15824050  
SRR17520069. 15824052  
SRR17520069. 15824056  
SRR17520069. 15824058  
SRR17520069. 15824060  
SRR17520069. 15824062  
SRR17520069. 15824064  
SRR17520069. 15824066  
SRR17520069. 15824068  
SRR17520069. 15824070  
SRR17520069. 15824072  
SRR17520069. 15824074  
SRR17520069. 15824076  
SRR17520069. 15824078  
SRR17520069. 15824080  
SRR17520069. 15824082  
SRR17520069. 15824084  
SRR17520069. 15824086  
SRR17520069. 15824088  
SRR17520069. 15824090  
SRR17520069. 15824092  
SRR17520069. 15824094  
SRR17520069. 15824096  
SRR17520069. 15824098  
SRR17520069. 15824100  
SRR17520069. 15824102  
SRR17520069. 15824104  
SRR17520069. 15824106  
SRR17520069. 15824108  
SRR17520069. 15824110  
SRR17520069. 15824112  
SRR17520069. 15824114  
SRR17520069. 15824116  
SRR17520069. 15824118  
SRR17520069. 15824120  
SRR17520069. 15824122  
SRR17520069. 15824124  
SRR17520069. 15824126  
SRR17520069. 15824128  
SRR17520069. 15824130  
SRR17520069. 15824132

SRR17520069. 15824134  
SRR17520069. 15824136  
SRR17520069. 15824138  
SRR17520069. 15824140  
SRR17520069. 15824142  
SRR17520069. 15824144  
SRR17520069. 15833434  
SRR17520069. 15833880  
SRR17520069. 15833882  
SRR17520069. 15833884  
SRR17520069. 15833886  
SRR17520069. 15833888  
SRR17520069. 15833890  
SRR17520069. 15833892  
SRR17520069. 15833894  
SRR17520069. 15833896  
SRR17520069. 15833898  
SRR17520069. 15833900  
SRR17520069. 15833902  
SRR17520069. 15833904  
SRR17520069. 15833906  
SRR17520069. 15833908  
SRR17520069. 15833910  
SRR17520069. 15833912  
SRR17520069. 15833914  
SRR17520069. 15833916  
SRR17520069. 15833918  
SRR17520069. 15833920  
SRR17520069. 15833922  
SRR17520069. 15833924  
SRR17520069. 15833926  
SRR17520069. 15835450  
SRR17520069. 15835452  
SRR17520069. 15835454  
SRR17520069. 15837622  
SRR17520069. 15837624  
SRR17520069. 15837626  
SRR17520069. 15837628  
SRR17520069. 15837630  
SRR17520069. 15837632  
SRR17520069. 15837634  
SRR17520069. 15837636  
SRR17520069. 15837638  
SRR17520069. 15840293  
SRR17520069. 15840295  
SRR17520069. 15840297  
SRR17520069. 15840299

SRR17520069. 15840301  
SRR17520069. 15840303  
SRR17520069. 15840305  
SRR17520069. 15840307  
SRR17520069. 15844239  
SRR17520069. 15844241  
SRR17520069. 15844243  
SRR17520069. 15845664  
SRR17520069. 15845666  
SRR17520069. 15845668  
SRR17520069. 15845670  
SRR17520069. 15845672  
SRR17520069. 15845674  
SRR17520069. 15845676  
SRR17520069. 15845678  
SRR17520069. 15845680  
SRR17520069. 15845682  
SRR17520069. 15845684  
SRR17520069. 15845686  
SRR17520069. 15845688  
SRR17520069. 15845690  
SRR17520069. 15845694  
SRR17520069. 15845696  
SRR17520069. 15845698  
SRR17520069. 15845700  
SRR17520069. 15845702  
SRR17520069. 15845704  
SRR17520069. 15846350  
SRR17520069. 15846356  
SRR17520069. 15847547  
SRR17520069. 15847549  
SRR17520069. 15847553  
SRR17520069. 15847555  
SRR17520069. 15847557  
SRR17520069. 15847559  
SRR17520069. 15847561  
SRR17520069. 15847563  
SRR17520069. 15847565  
SRR17520069. 15847567  
SRR17520069. 15847569  
SRR17520069. 15853793  
SRR17520069. 15853795  
SRR17520069. 15853797  
SRR17520069. 15853947  
SRR17520069. 15853952  
SRR17520069. 15853954  
SRR17520069. 15853956

SRR17520069. 15853960  
SRR17520069. 15853962  
SRR17520069. 15853964  
SRR17520069. 15853966  
SRR17520069. 15853968  
SRR17520069. 15853970  
SRR17520069. 15853972  
SRR17520069. 15853974  
SRR17520069. 15853976  
SRR17520069. 15853978  
SRR17520069. 15853980  
SRR17520069. 15853984  
SRR17520069. 15853986  
SRR17520069. 15853988  
SRR17520069. 15853990  
SRR17520069. 15853992  
SRR17520069. 15853994  
SRR17520069. 15853996  
SRR17520069. 15853998  
SRR17520069. 15854000  
SRR17520069. 15854002  
SRR17520069. 15854004  
SRR17520069. 15854008  
SRR17520069. 15854010  
SRR17520069. 15854012  
SRR17520069. 15856372  
SRR17520069. 15856374  
SRR17520069. 15856376  
SRR17520069. 15856378  
SRR17520069. 15856380  
SRR17520069. 15856382  
SRR17520069. 15856384  
SRR17520069. 15856386  
SRR17520069. 15856388  
SRR17520069. 15856390  
SRR17520069. 15856392  
SRR17520069. 15856394  
SRR17520069. 15856396  
SRR17520069. 15856398  
SRR17520069. 15856400  
SRR17520069. 15856402  
SRR17520069. 15856404  
SRR17520069. 15856406  
SRR17520069. 15856408  
SRR17520069. 15856410  
SRR17520069. 15856412  
SRR17520069. 15856414

SRR17520069. 15856416  
SRR17520069. 15856418  
SRR17520069. 15856420  
SRR17520069. 15856424  
SRR17520069. 15856426  
SRR17520069. 15856428  
SRR17520069. 15856430  
SRR17520069. 15856432  
SRR17520069. 15856434  
SRR17520069. 15856436  
SRR17520069. 15856438  
SRR17520069. 15856440  
SRR17520069. 15856442  
SRR17520069. 15856444  
SRR17520069. 15856446  
SRR17520069. 15856448  
SRR17520069. 15856450  
SRR17520069. 15856452  
SRR17520069. 15856454  
SRR17520069. 15856456  
SRR17520069. 15856458  
SRR17520069. 15856462  
SRR17520069. 15856464  
SRR17520069. 15856466  
SRR17520069. 15856468  
SRR17520069. 15859642  
SRR17520069. 15859985  
SRR17520069. 15859989  
SRR17520069. 15859991  
SRR17520069. 15859993  
SRR17520069. 15859995  
SRR17520069. 15859997  
SRR17520069. 15859999  
SRR17520069. 15860001  
SRR17520069. 15860003  
SRR17520069. 15860007  
SRR17520069. 15863208  
SRR17520069. 15863210  
SRR17520069. 15863212  
SRR17520069. 15863214  
SRR17520069. 15863216  
SRR17520069. 15863218  
SRR17520069. 15863220  
SRR17520069. 15863222  
SRR17520069. 15863224  
SRR17520069. 15863226  
SRR17520069. 15863228



SRR17520069. 15863230  
SRR17520069. 15863232  
SRR17520069. 15863234  
SRR17520069. 15863236  
SRR17520069. 15863238  
SRR17520069. 15863240  
SRR17520069. 15863242  
SRR17520069. 15863244  
SRR17520069. 15863246  
SRR17520069. 15863248  
SRR17520069. 15863250  
SRR17520069. 15863252  
SRR17520069. 15863254  
SRR17520069. 15863256  
SRR17520069. 15863258  
SRR17520069. 15863260  
SRR17520069. 15866835  
SRR17520069. 15866839  
SRR17520069. 15866841  
SRR17520069. 15866843  
SRR17520069. 15866847  
SRR17520069. 15866849  
SRR17520069. 15866851  
SRR17520069. 15866853  
SRR17520069. 15866855  
SRR17520069. 15866857  
SRR17520069. 15866859  
SRR17520069. 15866861  
SRR17520069. 15866863  
SRR17520069. 15866865  
SRR17520069. 15866867  
SRR17520069. 15866869  
SRR17520069. 15866871  
SRR17520069. 15866873  
SRR17520069. 15866875  
SRR17520069. 15866877  
SRR17520069. 15866879  
SRR17520069. 15866881  
SRR17520069. 15866883  
SRR17520069. 15866887  
SRR17520069. 15866891  
SRR17520069. 15866893  
SRR17520069. 15872217  
SRR17520069. 15872219  
SRR17520069. 15872221  
SRR17520069. 15872223  
SRR17520069. 15872225

SRR17520069. 15872227  
SRR17520069. 15872229  
SRR17520069. 15872231  
SRR17520069. 15872233  
SRR17520069. 15872235  
SRR17520069. 15872237  
SRR17520069. 15872239  
SRR17520069. 15872241  
SRR17520069. 15872243  
SRR17520069. 15872245  
SRR17520069. 15872247  
SRR17520069. 15872249  
SRR17520069. 15872251  
SRR17520069. 15872253  
SRR17520069. 15872255  
SRR17520069. 15872257  
SRR17520069. 15872259  
SRR17520069. 15872261  
SRR17520069. 15872263  
SRR17520069. 15872265  
SRR17520069. 15872267  
SRR17520069. 15872269  
SRR17520069. 15872271  
SRR17520069. 15873754  
SRR17520069. 15873756  
SRR17520069. 15873758  
SRR17520069. 15873760  
SRR17520069. 15873762  
SRR17520069. 15873766  
SRR17520069. 15873768  
SRR17520069. 15876524  
SRR17520069. 15876526  
SRR17520069. 15876528  
SRR17520069. 15876530  
SRR17520069. 15876532  
SRR17520069. 15876534  
SRR17520069. 15876536  
SRR17520069. 15876538  
SRR17520069. 15876540  
SRR17520069. 15876542  
SRR17520069. 15876544  
SRR17520069. 15876546  
SRR17520069. 15876548  
SRR17520069. 15876550  
SRR17520069. 15876552  
SRR17520069. 15876554  
SRR17520069. 15876556

SRR17520069. 15876558  
SRR17520069. 15876560  
SRR17520069. 15876562  
SRR17520069. 15876564  
SRR17520069. 15876566  
SRR17520069. 15876568  
SRR17520069. 15876570  
SRR17520069. 15876572  
SRR17520069. 15876574  
SRR17520069. 15876576  
SRR17520069. 15876578  
SRR17520069. 15876580  
SRR17520069. 15876582  
SRR17520069. 15876584  
SRR17520069. 15876586  
SRR17520069. 15876588  
SRR17520069. 15876590  
SRR17520069. 15876592  
SRR17520069. 15876594  
SRR17520069. 15876596  
SRR17520069. 15876598  
SRR17520069. 15876600  
SRR17520069. 15876602  
SRR17520069. 15876604  
SRR17520069. 15876606  
SRR17520069. 15876608  
SRR17520069. 15876610  
SRR17520069. 15876612  
SRR17520069. 15876614  
SRR17520069. 15879096  
SRR17520069. 15879098  
SRR17520069. 15879102  
SRR17520069. 15879104  
SRR17520069. 15879106  
SRR17520069. 15879108  
SRR17520069. 15879110  
SRR17520069. 15879112  
SRR17520069. 15879116  
SRR17520069. 15879118  
SRR17520069. 15879120  
SRR17520069. 15879122  
SRR17520069. 15879124  
SRR17520069. 15879126  
SRR17520069. 15879128  
SRR17520069. 15879130  
SRR17520069. 15879132  
SRR17520069. 15879134

SRR17520069. 15879136  
SRR17520069. 15879138  
SRR17520069. 15879140  
SRR17520069. 15879142  
SRR17520069. 15879144  
SRR17520069. 15879146  
SRR17520069. 15879148  
SRR17520069. 15879150  
SRR17520069. 15879152  
SRR17520069. 15879154  
SRR17520069. 15879156  
SRR17520069. 15879158  
SRR17520069. 15879160  
SRR17520069. 15879162  
SRR17520069. 15879164  
SRR17520069. 15879166  
SRR17520069. 15879168  
SRR17520069. 15879170  
SRR17520069. 15879172  
SRR17520069. 15879176  
SRR17520069. 15879180  
SRR17520069. 15879182  
SRR17520069. 15879184  
SRR17520069. 15879186  
SRR17520069. 15879188  
SRR17520069. 15879190  
SRR17520069. 15879192  
SRR17520069. 15879194  
SRR17520069. 15879196  
SRR17520069. 15879198  
SRR17520069. 15879200  
SRR17520069. 15880105  
SRR17520069. 15880107  
SRR17520069. 15880109  
SRR17520069. 15880111  
SRR17520069. 15880113  
SRR17520069. 15880115  
SRR17520069. 15880117  
SRR17520069. 15880119  
SRR17520069. 15880121  
SRR17520069. 15880123  
SRR17520069. 15880125  
SRR17520069. 15880127  
SRR17520069. 15880129  
SRR17520069. 15880131  
SRR17520069. 15880133  
SRR17520069. 15880135

SRR17520069. 15880137  
SRR17520069. 15880139  
SRR17520069. 15880141  
SRR17520069. 15880143  
SRR17520069. 15880145  
SRR17520069. 15880147  
SRR17520069. 15880149  
SRR17520069. 15880151  
SRR17520069. 15880153  
SRR17520069. 15880155  
SRR17520069. 15880157  
SRR17520069. 15880159  
SRR17520069. 15880161  
SRR17520069. 15880163  
SRR17520069. 15880165  
SRR17520069. 15880167  
SRR17520069. 15880171  
SRR17520069. 15880173  
SRR17520069. 15880175  
SRR17520069. 15880177  
SRR17520069. 15880179  
SRR17520069. 15880181  
SRR17520069. 15880183  
SRR17520069. 15880185  
SRR17520069. 15880187  
SRR17520069. 15880189  
SRR17520069. 15884097  
SRR17520069. 15884099  
SRR17520069. 15884101  
SRR17520069. 15884103  
SRR17520069. 15884105  
SRR17520069. 15884107  
SRR17520069. 15884109  
SRR17520069. 15884111  
SRR17520069. 15884113  
SRR17520069. 15884115  
SRR17520069. 15884117  
SRR17520069. 15884119  
SRR17520069. 15884123  
SRR17520069. 15884125  
SRR17520069. 15884127  
SRR17520069. 15885778  
SRR17520069. 15885780  
SRR17520069. 15885782  
SRR17520069. 15885784  
SRR17520069. 15885786  
SRR17520069. 15885788

SRR17520069. 15885790  
SRR17520069. 15885792  
SRR17520069. 15885794  
SRR17520069. 15885796  
SRR17520069. 15885798  
SRR17520069. 15885800  
SRR17520069. 15885802  
SRR17520069. 15885804  
SRR17520069. 15885806  
SRR17520069. 15885808  
SRR17520069. 15885810  
SRR17520069. 15885812  
SRR17520069. 15885814  
SRR17520069. 15885816  
SRR17520069. 15885818  
SRR17520069. 15885820  
SRR17520069. 15885822  
SRR17520069. 15890387  
SRR17520069. 15890389  
SRR17520069. 15890391  
SRR17520069. 15890393  
SRR17520069. 15894354  
SRR17520069. 15894356  
SRR17520069. 15894358  
SRR17520069. 15894626  
SRR17520069. 15894630  
SRR17520069. 15894632  
SRR17520069. 15894634  
SRR17520069. 15894636  
SRR17520069. 15894640  
SRR17520069. 15894642  
SRR17520069. 15894644  
SRR17520069. 15894646  
SRR17520069. 15894648  
SRR17520069. 15894650  
SRR17520069. 15894652  
SRR17520069. 15894654  
SRR17520069. 15894798  
SRR17520069. 15894800  
SRR17520069. 15899588  
SRR17520069. 15899590  
SRR17520069. 15899592  
SRR17520069. 15899594  
SRR17520069. 15899596  
SRR17520069. 15899598  
SRR17520069. 15899600  
SRR17520069. 15899602

SRR17520069. 15899604  
SRR17520069. 15899606  
SRR17520069. 15899608  
SRR17520069. 15899610  
SRR17520069. 15899612  
SRR17520069. 15899614  
SRR17520069. 15899616  
SRR17520069. 15899618  
SRR17520069. 15899620  
SRR17520069. 15902962  
SRR17520069. 15902964  
SRR17520069. 15902966  
SRR17520069. 15902968  
SRR17520069. 15902970  
SRR17520069. 15902972  
SRR17520069. 15902974  
SRR17520069. 15902976  
SRR17520069. 15902978  
SRR17520069. 15902980  
SRR17520069. 15902982  
SRR17520069. 15902984  
SRR17520069. 15902986  
SRR17520069. 15902990  
SRR17520069. 15902992  
SRR17520069. 15904121  
SRR17520069. 15904123  
SRR17520069. 15905751  
SRR17520069. 15905753  
SRR17520069. 15905755  
SRR17520069. 15905757  
SRR17520069. 15905759  
SRR17520069. 15905761  
SRR17520069. 15905763  
SRR17520069. 15905765  
SRR17520069. 15905767  
SRR17520069. 15905769  
SRR17520069. 15908515  
SRR17520069. 15908517  
SRR17520069. 15908519  
SRR17520069. 15908521  
SRR17520069. 15908523  
SRR17520069. 15908527  
SRR17520069. 15914860  
SRR17520069. 15914862  
SRR17520069. 15914864  
SRR17520069. 15914866  
SRR17520069. 15914868

SRR17520069. 15914870  
SRR17520069. 15914872  
SRR17520069. 15914876  
SRR17520069. 15914878  
SRR17520069. 15914880  
SRR17520069. 15914882  
SRR17520069. 15914884  
SRR17520069. 15914886  
SRR17520069. 15914888  
SRR17520069. 15914890  
SRR17520069. 15914892  
SRR17520069. 15914894  
SRR17520069. 15914896  
SRR17520069. 15914898  
SRR17520069. 15914900  
SRR17520069. 15914902  
SRR17520069. 15914904  
SRR17520069. 15914906  
SRR17520069. 15914910  
SRR17520069. 15914912  
SRR17520069. 15914914  
SRR17520069. 15914916  
SRR17520069. 15914920  
SRR17520069. 15914922  
SRR17520069. 15914924  
SRR17520069. 15914928  
SRR17520069. 15914930  
SRR17520069. 15914932  
SRR17520069. 15915543  
SRR17520069. 15915545  
SRR17520069. 15918838  
SRR17520069. 15918840  
SRR17520069. 15918842  
SRR17520069. 15918844  
SRR17520069. 15918846  
SRR17520069. 15918848  
SRR17520069. 15918850  
SRR17520069. 15918852  
SRR17520069. 15918854  
SRR17520069. 15918856  
SRR17520069. 15918858  
SRR17520069. 15918860  
SRR17520069. 15918862  
SRR17520069. 15918864  
SRR17520069. 15918866  
SRR17520069. 15918868  
SRR17520069. 15918870



SRR17520069. 15918872  
SRR17520069. 15918874  
SRR17520069. 15918876  
SRR17520069. 15918878  
SRR17520069. 15918880  
SRR17520069. 15918882  
SRR17520069. 15918884  
SRR17520069. 15918886  
SRR17520069. 15918888  
SRR17520069. 15918890  
SRR17520069. 15918892  
SRR17520069. 15918894  
SRR17520069. 15918896  
SRR17520069. 15918898  
SRR17520069. 15918902  
SRR17520069. 15918904  
SRR17520069. 15920760  
SRR17520069. 15920762  
SRR17520069. 15920764  
SRR17520069. 15920766  
SRR17520069. 15920768  
SRR17520069. 15920770  
SRR17520069. 15920772  
SRR17520069. 15920774  
SRR17520069. 15920776  
SRR17520069. 15920778  
SRR17520069. 15920780  
SRR17520069. 15920782  
SRR17520069. 15920784  
SRR17520069. 15920788  
SRR17520069. 15920790  
SRR17520069. 15920792  
SRR17520069. 15920794  
SRR17520069. 15920796  
SRR17520069. 15920798  
SRR17520069. 15920800  
SRR17520069. 15920802  
SRR17520069. 15920804  
SRR17520069. 15920806  
SRR17520069. 15920808  
SRR17520069. 15920810  
SRR17520069. 15920812  
SRR17520069. 15920814  
SRR17520069. 15920816  
SRR17520069. 15920818  
SRR17520069. 15920820  
SRR17520069. 15920822

SRR17520069. 15920824  
SRR17520069. 15920826  
SRR17520069. 15920828  
SRR17520069. 15920830  
SRR17520069. 15920832  
SRR17520069. 15920888  
SRR17520069. 15920890  
SRR17520069. 15920892  
SRR17520069. 15920894  
SRR17520069. 15920896  
SRR17520069. 15920898  
SRR17520069. 15920900  
SRR17520069. 15920902  
SRR17520069. 15920904  
SRR17520069. 15920906  
SRR17520069. 15920908  
SRR17520069. 15920910  
SRR17520069. 15920912  
SRR17520069. 15920914  
SRR17520069. 15920916  
SRR17520069. 15920918  
SRR17520069. 15920920  
SRR17520069. 15920922  
SRR17520069. 15920924  
SRR17520069. 15920928  
SRR17520069. 15920932  
SRR17520069. 15920934  
SRR17520069. 15920936  
SRR17520069. 15932656  
SRR17520069. 15932658  
SRR17520069. 15932660  
SRR17520069. 15932664  
SRR17520069. 15932668  
SRR17520069. 15932670  
SRR17520069. 15932672  
SRR17520069. 15932674  
SRR17520069. 15932676  
SRR17520069. 15932678  
SRR17520069. 15932680  
SRR17520069. 15932682  
SRR17520069. 15933360  
SRR17520069. 15933362  
SRR17520069. 15933364  
SRR17520069. 15933370  
SRR17520069. 15933372  
SRR17520069. 15933374  
SRR17520069. 15933378

SRR17520069. 15933380  
SRR17520069. 15933382  
SRR17520069. 15933384  
SRR17520069. 15933388  
SRR17520069. 15938347  
SRR17520069. 15938349  
SRR17520069. 15938351  
SRR17520069. 15938353  
SRR17520069. 15938355  
SRR17520069. 15938357  
SRR17520069. 15938359  
SRR17520069. 15938361  
SRR17520069. 15938363  
SRR17520069. 15938365  
SRR17520069. 15938367  
SRR17520069. 15938369  
SRR17520069. 15938371  
SRR17520069. 15938373  
SRR17520069. 15938375  
SRR17520069. 15938377  
SRR17520069. 15938379  
SRR17520069. 15938381  
SRR17520069. 15938383  
SRR17520069. 15938385  
SRR17520069. 15938387  
SRR17520069. 15938389  
SRR17520069. 15938391  
SRR17520069. 15938393  
SRR17520069. 15938395  
SRR17520069. 15938397  
SRR17520069. 15938399  
SRR17520069. 15938401  
SRR17520069. 15938403  
SRR17520069. 15938407  
SRR17520069. 15938409  
SRR17520069. 15938411  
SRR17520069. 15938413  
SRR17520069. 15938415  
SRR17520069. 15938417  
SRR17520069. 15938419  
SRR17520069. 15938421  
SRR17520069. 15938423  
SRR17520069. 15938425  
SRR17520069. 15938427  
SRR17520069. 15938429  
SRR17520069. 15938431  
SRR17520069. 15938433

SRR17520069. 15938435  
SRR17520069. 15948867  
SRR17520069. 15948869  
SRR17520069. 15948871  
SRR17520069. 15948873  
SRR17520069. 15948875  
SRR17520069. 15948877  
SRR17520069. 15948879  
SRR17520069. 15948881  
SRR17520069. 15948883  
SRR17520069. 15948885  
SRR17520069. 15948887  
SRR17520069. 15948889  
SRR17520069. 15948891  
SRR17520069. 15948893  
SRR17520069. 15948895  
SRR17520069. 15948897  
SRR17520069. 15948899  
SRR17520069. 15948901  
SRR17520069. 15948903  
SRR17520069. 15949797  
SRR17520069. 15949801  
SRR17520069. 15949803  
SRR17520069. 15949805  
SRR17520069. 15949807  
SRR17520069. 15949809  
SRR17520069. 15949811  
SRR17520069. 15949813  
SRR17520069. 15949815  
SRR17520069. 15949817  
SRR17520069. 15949819  
SRR17520069. 15949821  
SRR17520069. 15949825  
SRR17520069. 15949827  
SRR17520069. 15949829  
SRR17520069. 15949831  
SRR17520069. 15949833  
SRR17520069. 15949835  
SRR17520069. 15949837  
SRR17520069. 15949839  
SRR17520069. 15949841  
SRR17520069. 15949843  
SRR17520069. 15949845  
SRR17520069. 15949847  
SRR17520069. 15949851  
SRR17520069. 15949853  
SRR17520069. 15949855

SRR17520069. 15949857  
SRR17520069. 15949859  
SRR17520069. 15949863  
SRR17520069. 15949865  
SRR17520069. 15949867  
SRR17520069. 15949869  
SRR17520069. 15949871  
SRR17520069. 15949873  
SRR17520069. 15949875  
SRR17520069. 15949877  
SRR17520069. 15949879  
SRR17520069. 15949881  
SRR17520069. 15949885  
SRR17520069. 15949887  
SRR17520069. 15949889  
SRR17520069. 15949891  
SRR17520069. 15949893  
SRR17520069. 15949895  
SRR17520069. 15949897  
SRR17520069. 15949899  
SRR17520069. 15949901  
SRR17520069. 15949903  
SRR17520069. 15949905  
SRR17520069. 15949907  
SRR17520069. 15949909  
SRR17520069. 15949911  
SRR17520069. 15949913  
SRR17520069. 15949915  
SRR17520069. 15949917  
SRR17520069. 15949919  
SRR17520069. 15949923  
SRR17520069. 15955633  
SRR17520069. 15955635  
SRR17520069. 15955641  
SRR17520069. 15955643  
SRR17520069. 15955645  
SRR17520069. 15956972  
SRR17520069. 15956974  
SRR17520069. 15956976  
SRR17520069. 15956978  
SRR17520069. 15956982  
SRR17520069. 15956984  
SRR17520069. 15956988  
SRR17520069. 15956992  
SRR17520069. 15956994  
SRR17520069. 15956996  
SRR17520069. 15956998

SRR17520069. 15969841  
SRR17520069. 15969859  
SRR17520069. 15969861  
SRR17520069. 15969865  
SRR17520069. 15969869  
SRR17520069. 15969879  
SRR17520069. 15969881  
SRR17520069. 15969883  
SRR17520069. 15969887  
SRR17520069. 15969889  
SRR17520069. 15969893  
SRR17520069. 15969895  
SRR17520069. 15969897  
SRR17520069. 15969901  
SRR17520069. 15969909  
SRR17520069. 15969915  
SRR17520069. 15969917  
SRR17520069. 15969921  
SRR17520069. 15969927  
SRR17520069. 15970220  
SRR17520069. 15970222  
SRR17520069. 15970224  
SRR17520069. 15970226  
SRR17520069. 15970228  
SRR17520069. 15970230  
SRR17520069. 15970232  
SRR17520069. 15970234  
SRR17520069. 15970236  
SRR17520069. 15970238  
SRR17520069. 15970240  
SRR17520069. 15970242  
SRR17520069. 15970244  
SRR17520069. 15970248  
SRR17520069. 15970250  
SRR17520069. 15970252  
SRR17520069. 15970254  
SRR17520069. 15970256  
SRR17520069. 15970258  
SRR17520069. 15970260  
SRR17520069. 15970262  
SRR17520069. 15970264  
SRR17520069. 15970266  
SRR17520069. 15975342  
SRR17520069. 15975344  
SRR17520069. 15975346  
SRR17520069. 15975348  
SRR17520069. 15975350

SRR17520069. 15975352  
SRR17520069. 15975354  
SRR17520069. 15975356  
SRR17520069. 15975358  
SRR17520069. 15975360  
SRR17520069. 15975362  
SRR17520069. 15975364  
SRR17520069. 15975366  
SRR17520069. 15975368  
SRR17520069. 15975370  
SRR17520069. 15976477  
SRR17520069. 15983074  
SRR17520069. 15983076  
SRR17520069. 15983078  
SRR17520069. 15983080  
SRR17520069. 15983086  
SRR17520069. 15983088  
SRR17520069. 15983090  
SRR17520069. 15983092  
SRR17520069. 15983094  
SRR17520069. 15983096  
SRR17520069. 15983100  
SRR17520069. 15983102  
SRR17520069. 15983106  
SRR17520069. 15983108  
SRR17520069. 15983110  
SRR17520069. 15983112  
SRR17520069. 15983114  
SRR17520069. 15983116  
SRR17520069. 15983118  
SRR17520069. 15983120  
SRR17520069. 15983122  
SRR17520069. 15983124  
SRR17520069. 15983126  
SRR17520069. 15983128  
SRR17520069. 15983130  
SRR17520069. 15983132  
SRR17520069. 15983134  
SRR17520069. 15983136  
SRR17520069. 15983138  
SRR17520069. 15983140  
SRR17520069. 15983142  
SRR17520069. 15983144  
SRR17520069. 15983146  
SRR17520069. 15983150  
SRR17520069. 15983152  
SRR17520069. 15983154

SRR17520069. 15983156  
SRR17520069. 15983158  
SRR17520069. 15983160  
SRR17520069. 15983162  
SRR17520069. 15983164  
SRR17520069. 15983166  
SRR17520069. 15983168  
SRR17520069. 15983170  
SRR17520069. 15983172  
SRR17520069. 15983174  
SRR17520069. 15983176  
SRR17520069. 15983178  
SRR17520069. 15983182  
SRR17520069. 15983184  
SRR17520069. 15983188  
SRR17520069. 15983190  
SRR17520069. 15983192  
SRR17520069. 15983194  
SRR17520069. 15983196  
SRR17520069. 15983198  
SRR17520069. 15983200  
SRR17520069. 15983202  
SRR17520069. 15987343  
SRR17520069. 15987345  
SRR17520069. 15987347  
SRR17520069. 15987349  
SRR17520069. 15987351  
SRR17520069. 15987353  
SRR17520069. 15987355  
SRR17520069. 15987357  
SRR17520069. 15987359  
SRR17520069. 15987361  
SRR17520069. 15990611  
SRR17520069. 15990613  
SRR17520069. 15990615  
SRR17520069. 15990617  
SRR17520069. 15990619  
SRR17520069. 15990621  
SRR17520069. 15990625  
SRR17520069. 15990627  
SRR17520069. 15990629  
SRR17520069. 15990631  
SRR17520069. 15990633  
SRR17520069. 15990635  
SRR17520069. 15990637  
SRR17520069. 15990639  
SRR17520069. 15990641



SRR17520069. 15990643  
SRR17520069. 15990645  
SRR17520069. 15990647  
SRR17520069. 15990649  
SRR17520069. 15990651  
SRR17520069. 15991153  
SRR17520069. 15991155  
SRR17520069. 15991157  
SRR17520069. 15991159  
SRR17520069. 15991161  
SRR17520069. 15991163  
SRR17520069. 15991165  
SRR17520069. 15991167  
SRR17520069. 15991169  
SRR17520069. 15991171  
SRR17520069. 15991175  
SRR17520069. 15991177  
SRR17520069. 15991179  
SRR17520069. 15991181  
SRR17520069. 15991183  
SRR17520069. 15997608  
SRR17520069. 16001514  
SRR17520069. 16001518  
SRR17520069. 16001520  
SRR17520069. 16001522  
SRR17520069. 16001524  
SRR17520069. 16001526  
SRR17520069. 16001528  
SRR17520069. 16001530  
SRR17520069. 16001532  
SRR17520069. 16001534  
SRR17520069. 16001536  
SRR17520069. 16001538  
SRR17520069. 16001540  
SRR17520069. 16001542  
SRR17520069. 16001544  
SRR17520069. 16001546  
SRR17520069. 16001548  
SRR17520069. 16001550  
SRR17520069. 16001552  
SRR17520069. 16001554  
SRR17520069. 16001556  
SRR17520069. 16001558  
SRR17520069. 16001560  
SRR17520069. 16001562  
SRR17520069. 16001564  
SRR17520069. 16001566

SRR17520069. 16001568  
SRR17520069. 16001570  
SRR17520069. 16001572  
SRR17520069. 16001576  
SRR17520069. 16001578  
SRR17520069. 16001580  
SRR17520069. 16001582  
SRR17520069. 16001584  
SRR17520069. 16001586  
SRR17520069. 16001588  
SRR17520069. 16001590  
SRR17520069. 16001592  
SRR17520069. 16001596  
SRR17520069. 16001602  
SRR17520069. 16002674  
SRR17520069. 16002676  
SRR17520069. 16002678  
SRR17520069. 16002680  
SRR17520069. 16002682  
SRR17520069. 16002684  
SRR17520069. 16002686  
SRR17520069. 16002688  
SRR17520069. 16002690  
SRR17520069. 16002692  
SRR17520069. 16002694  
SRR17520069. 16002696  
SRR17520069. 16002698  
SRR17520069. 16002700  
SRR17520069. 16002702  
SRR17520069. 16002704  
SRR17520069. 16002706  
SRR17520069. 16002708  
SRR17520069. 16002710  
SRR17520069. 16002716  
SRR17520069. 16002718  
SRR17520069. 16002720  
SRR17520069. 16002722  
SRR17520069. 16002724  
SRR17520069. 16002726  
SRR17520069. 16002728  
SRR17520069. 16002730  
SRR17520069. 16002734  
SRR17520069. 16002736  
SRR17520069. 16002738  
SRR17520069. 16002740  
SRR17520069. 16002742  
SRR17520069. 16002744

SRR17520069. 16002746  
SRR17520069. 16002748  
SRR17520069. 16002750  
SRR17520069. 16002752  
SRR17520069. 16002754  
SRR17520069. 16002756  
SRR17520069. 16002758  
SRR17520069. 16002760  
SRR17520069. 16002762  
SRR17520069. 16002764  
SRR17520069. 16002768  
SRR17520069. 16002770  
SRR17520069. 16002772  
SRR17520069. 16002774  
SRR17520069. 16002776  
SRR17520069. 16002778  
SRR17520069. 16002780  
SRR17520069. 16002782  
SRR17520069. 16002784  
SRR17520069. 16002786  
SRR17520069. 16002788  
SRR17520069. 16002790  
SRR17520069. 16002792  
SRR17520069. 16002794  
SRR17520069. 16002796  
SRR17520069. 16003874  
SRR17520069. 16003876  
SRR17520069. 16003878  
SRR17520069. 16003880  
SRR17520069. 16003882  
SRR17520069. 16003884  
SRR17520069. 16003886  
SRR17520069. 16003888  
SRR17520069. 16003892  
SRR17520069. 16003894  
SRR17520069. 16003896  
SRR17520069. 16003898  
SRR17520069. 16003900  
SRR17520069. 16003902  
SRR17520069. 16003904  
SRR17520069. 16003906  
SRR17520069. 16003908  
SRR17520069. 16003910  
SRR17520069. 16003912  
SRR17520069. 16003914  
SRR17520069. 16003916  
SRR17520069. 16003918

SRR17520069.16003920  
SRR17520069.16003922  
SRR17520069.16003924  
SRR17520069.16003926  
SRR17520069.16003928  
SRR17520069.16003930  
SRR17520069.16003932  
SRR17520069.16003934  
SRR17520069.16009963  
SRR17520069.16009965  
SRR17520069.16009967  
SRR17520069.16009969  
SRR17520069.16009971  
SRR17520069.16009973  
SRR17520069.16009975  
SRR17520069.16009977  
SRR17520069.16011137  
SRR17520069.16011139  
SRR17520069.16011141  
SRR17520069.16011143  
SRR17520069.16011145  
SRR17520069.16011147  
SRR17520069.16011149  
SRR17520069.16011151  
SRR17520069.16011153  
SRR17520069.16011155  
SRR17520069.16011157  
SRR17520069.16011159  
SRR17520069.16011161  
SRR17520069.16011163  
SRR17520069.16011165  
SRR17520069.16011167  
SRR17520069.16011169  
SRR17520069.16011171  
SRR17520069.16011175  
SRR17520069.16011177  
SRR17520069.16011179  
SRR17520069.16011181  
SRR17520069.16011183  
SRR17520069.16011185  
SRR17520069.16011187  
SRR17520069.16011189  
SRR17520069.16011191  
SRR17520069.16011193  
SRR17520069.16011195  
SRR17520069.16011197  
SRR17520069.16011199

SRR17520069.16011201  
SRR17520069.16011203  
SRR17520069.16011205  
SRR17520069.16011207  
SRR17520069.16011209  
SRR17520069.16011211  
SRR17520069.16011213  
SRR17520069.16011215  
SRR17520069.16011217  
SRR17520069.16011219  
SRR17520069.16011221  
SRR17520069.16011223  
SRR17520069.16011225  
SRR17520069.16011227  
SRR17520069.16011229  
SRR17520069.16011231  
SRR17520069.16011233  
SRR17520069.16011235  
SRR17520069.16011237  
SRR17520069.16011239  
SRR17520069.16011241  
SRR17520069.16011243  
SRR17520069.16011245  
SRR17520069.16011247  
SRR17520069.16011249  
SRR17520069.16011251  
SRR17520069.16011253  
SRR17520069.16011255  
SRR17520069.16011257  
SRR17520069.16011259  
SRR17520069.16011261  
SRR17520069.16011263  
SRR17520069.16011265  
SRR17520069.16011267  
SRR17520069.16011269  
SRR17520069.16011271  
SRR17520069.16012506  
SRR17520069.16012508  
SRR17520069.16012510  
SRR17520069.16012512  
SRR17520069.16012514  
SRR17520069.16012524  
SRR17520069.16012526  
SRR17520069.16012528  
SRR17520069.16012530  
SRR17520069.16012534  
SRR17520069.16012536

SRR17520069. 16012540  
SRR17520069. 16012542  
SRR17520069. 16012544  
SRR17520069. 16012546  
SRR17520069. 16012550  
SRR17520069. 16012552  
SRR17520069. 16012554  
SRR17520069. 16012556  
SRR17520069. 16012558  
SRR17520069. 16012562  
SRR17520069. 16012564  
SRR17520069. 16012570  
SRR17520069. 16012572  
SRR17520069. 16012574  
SRR17520069. 16015861  
SRR17520069. 16015863  
SRR17520069. 16015865  
SRR17520069. 16015867  
SRR17520069. 16015869  
SRR17520069. 16015871  
SRR17520069. 16015873  
SRR17520069. 16015875  
SRR17520069. 16015877  
SRR17520069. 16015879  
SRR17520069. 16015881  
SRR17520069. 16015883  
SRR17520069. 16015885  
SRR17520069. 16015887  
SRR17520069. 16015889  
SRR17520069. 16015891  
SRR17520069. 16021792  
SRR17520069. 16021794  
SRR17520069. 16021796  
SRR17520069. 16021798  
SRR17520069. 16021800  
SRR17520069. 16021802  
SRR17520069. 16021804  
SRR17520069. 16021806  
SRR17520069. 16021808  
SRR17520069. 16021810  
SRR17520069. 16021812  
SRR17520069. 16021814  
SRR17520069. 16021816  
SRR17520069. 16021818  
SRR17520069. 16021820  
SRR17520069. 16021822  
SRR17520069. 16021824

SRR17520069. 16021826  
SRR17520069. 16021828  
SRR17520069. 16021830  
SRR17520069. 16021832  
SRR17520069. 16021834  
SRR17520069. 16021836  
SRR17520069. 16024450  
SRR17520069. 16024452  
SRR17520069. 16024454  
SRR17520069. 16024456  
SRR17520069. 16024458  
SRR17520069. 16024460  
SRR17520069. 16024462  
SRR17520069. 16024464  
SRR17520069. 16024466  
SRR17520069. 16024468  
SRR17520069. 16024470  
SRR17520069. 16024472  
SRR17520069. 16026292  
SRR17520069. 16026294  
SRR17520069. 16026296  
SRR17520069. 16026298  
SRR17520069. 16026300  
SRR17520069. 16026302  
SRR17520069. 16034191  
SRR17520069. 16034193  
SRR17520069. 16034195  
SRR17520069. 16034199  
SRR17520069. 16034201  
SRR17520069. 16034203  
SRR17520069. 16034205  
SRR17520069. 16034207  
SRR17520069. 16034211  
SRR17520069. 16034213  
SRR17520069. 16034215  
SRR17520069. 16034217  
SRR17520069. 16034219  
SRR17520069. 16034221  
SRR17520069. 16034223  
SRR17520069. 16034225  
SRR17520069. 16034227  
SRR17520069. 16034229  
SRR17520069. 16034233  
SRR17520069. 16034235  
SRR17520069. 16034237  
SRR17520069. 16034239  
SRR17520069. 16034241

SRR17520069. 16034243  
SRR17520069. 16034245  
SRR17520069. 16034247  
SRR17520069. 16034249  
SRR17520069. 16034251  
SRR17520069. 16034253  
SRR17520069. 16034255  
SRR17520069. 16034257  
SRR17520069. 16034259  
SRR17520069. 16034261  
SRR17520069. 16034263  
SRR17520069. 16034265  
SRR17520069. 16034267  
SRR17520069. 16034269  
SRR17520069. 16034271  
SRR17520069. 16034273  
SRR17520069. 16034275  
SRR17520069. 16034277  
SRR17520069. 16034279  
SRR17520069. 16034281  
SRR17520069. 16034283  
SRR17520069. 16034285  
SRR17520069. 16034287  
SRR17520069. 16034291  
SRR17520069. 16034293  
SRR17520069. 16034295  
SRR17520069. 16034297  
SRR17520069. 16034345  
SRR17520069. 16034347  
SRR17520069. 16034349  
SRR17520069. 16034351  
SRR17520069. 16034353  
SRR17520069. 16034355  
SRR17520069. 16034357  
SRR17520069. 16034359  
SRR17520069. 16034361  
SRR17520069. 16034363  
SRR17520069. 16034365  
SRR17520069. 16034367  
SRR17520069. 16034369  
SRR17520069. 16034371  
SRR17520069. 16034373  
SRR17520069. 16034375  
SRR17520069. 16034377  
SRR17520069. 16034379  
SRR17520069. 16034381  
SRR17520069. 16034383



SRR17520069. 16034385  
SRR17520069. 16034387  
SRR17520069. 16034389  
SRR17520069. 16034391  
SRR17520069. 16034393  
SRR17520069. 16034683  
SRR17520069. 16034685  
SRR17520069. 16039094  
SRR17520069. 16039096  
SRR17520069. 16039098  
SRR17520069. 16039100  
SRR17520069. 16039102  
SRR17520069. 16039104  
SRR17520069. 16039106  
SRR17520069. 16039108  
SRR17520069. 16039110  
SRR17520069. 16039114  
SRR17520069. 16039116  
SRR17520069. 16039118  
SRR17520069. 16039120  
SRR17520069. 16039122  
SRR17520069. 16039126  
SRR17520069. 16039128  
SRR17520069. 16039130  
SRR17520069. 16039132  
SRR17520069. 16041885  
SRR17520069. 16041889  
SRR17520069. 16041891  
SRR17520069. 16042509  
SRR17520069. 16042511  
SRR17520069. 16042513  
SRR17520069. 16042515  
SRR17520069. 16042517  
SRR17520069. 16042519  
SRR17520069. 16042521  
SRR17520069. 16042525  
SRR17520069. 16042527  
SRR17520069. 16042529  
SRR17520069. 16042531  
SRR17520069. 16042533  
SRR17520069. 16045246  
SRR17520069. 16045248  
SRR17520069. 16045250  
SRR17520069. 16045252  
SRR17520069. 16045937  
SRR17520069. 16045939  
SRR17520069. 16045941

SRR17520069. 16045943  
SRR17520069. 16045945  
SRR17520069. 16045947  
SRR17520069. 16045949  
SRR17520069. 16045951  
SRR17520069. 16045953  
SRR17520069. 16045955  
SRR17520069. 16045957  
SRR17520069. 16045959  
SRR17520069. 16045961  
SRR17520069. 16045963  
SRR17520069. 16045965  
SRR17520069. 16045967  
SRR17520069. 16045969  
SRR17520069. 16045971  
SRR17520069. 16045973  
SRR17520069. 16045975  
SRR17520069. 16045977  
SRR17520069. 16045979  
SRR17520069. 16045981  
SRR17520069. 16045983  
SRR17520069. 16045985  
SRR17520069. 16045987  
SRR17520069. 16045989  
SRR17520069. 16045991  
SRR17520069. 16045993  
SRR17520069. 16045995  
SRR17520069. 16045997  
SRR17520069. 16045999  
SRR17520069. 16046001  
SRR17520069. 16046003  
SRR17520069. 16046005  
SRR17520069. 16046007  
SRR17520069. 16046009  
SRR17520069. 16046011  
SRR17520069. 16046013  
SRR17520069. 16046015  
SRR17520069. 16046017  
SRR17520069. 16046019  
SRR17520069. 16046021  
SRR17520069. 16046025  
SRR17520069. 16046027  
SRR17520069. 16046029  
SRR17520069. 16046031  
SRR17520069. 16046607  
SRR17520069. 16046609  
SRR17520069. 16046611

SRR17520069. 16046613  
SRR17520069. 16046615  
SRR17520069. 16046617  
SRR17520069. 16046619  
SRR17520069. 16046621  
SRR17520069. 16046623  
SRR17520069. 16047368  
SRR17520069. 16047370  
SRR17520069. 16048791  
SRR17520069. 16048814  
SRR17520069. 16049795  
SRR17520069. 16049797  
SRR17520069. 16049799  
SRR17520069. 16049801  
SRR17520069. 16049803  
SRR17520069. 16049805  
SRR17520069. 16049807  
SRR17520069. 16049809  
SRR17520069. 16049811  
SRR17520069. 16049813  
SRR17520069. 16060261  
SRR17520069. 16060263  
SRR17520069. 16060265  
SRR17520069. 16060267  
SRR17520069. 16060269  
SRR17520069. 16060271  
SRR17520069. 16060275  
SRR17520069. 16060279  
SRR17520069. 16060285  
SRR17520069. 16060287  
SRR17520069. 16063511  
SRR17520069. 16063513  
SRR17520069. 16063517  
SRR17520069. 16063519  
SRR17520069. 16063521  
SRR17520069. 16063523  
SRR17520069. 16063525  
SRR17520069. 16063527  
SRR17520069. 16063529  
SRR17520069. 16063531  
SRR17520069. 16063533  
SRR17520069. 16063535  
SRR17520069. 16063537  
SRR17520069. 16063539  
SRR17520069. 16063541  
SRR17520069. 16063543  
SRR17520069. 16063545

SRR17520069. 16063547  
SRR17520069. 16063549  
SRR17520069. 16063551  
SRR17520069. 16063555  
SRR17520069. 16063557  
SRR17520069. 16063559  
SRR17520069. 16063561  
SRR17520069. 16063563  
SRR17520069. 16064444  
SRR17520069. 16064446  
SRR17520069. 16064448  
SRR17520069. 16064450  
SRR17520069. 16064452  
SRR17520069. 16064454  
SRR17520069. 16064456  
SRR17520069. 16064458  
SRR17520069. 16064460  
SRR17520069. 16064462  
SRR17520069. 16064464  
SRR17520069. 16064466  
SRR17520069. 16067189  
SRR17520069. 16067191  
SRR17520069. 16077902  
SRR17520069. 16077904  
SRR17520069. 16077906  
SRR17520069. 16077908  
SRR17520069. 16077910  
SRR17520069. 16077912  
SRR17520069. 16077914  
SRR17520069. 16077916  
SRR17520069. 16077920  
SRR17520069. 16077922  
SRR17520069. 16077924  
SRR17520069. 16077926  
SRR17520069. 16077930  
SRR17520069. 16077932  
SRR17520069. 16077934  
SRR17520069. 16077936  
SRR17520069. 16077938  
SRR17520069. 16077942  
SRR17520069. 16077944  
SRR17520069. 16077946  
SRR17520069. 16077948  
SRR17520069. 16077950  
SRR17520069. 16077952  
SRR17520069. 16077954  
SRR17520069. 16077956

SRR17520069. 16077958  
SRR17520069. 16077960  
SRR17520069. 16082649  
SRR17520069. 16082651  
SRR17520069. 16082653  
SRR17520069. 16082655  
SRR17520069. 16082657  
SRR17520069. 16082659  
SRR17520069. 16082661  
SRR17520069. 16082663  
SRR17520069. 16082665  
SRR17520069. 16082667  
SRR17520069. 16082669  
SRR17520069. 16082671  
SRR17520069. 16082673  
SRR17520069. 16082675  
SRR17520069. 16082677  
SRR17520069. 16082679  
SRR17520069. 16082681  
SRR17520069. 16082683  
SRR17520069. 16082687  
SRR17520069. 16082689  
SRR17520069. 16082691  
SRR17520069. 16082693  
SRR17520069. 16082695  
SRR17520069. 16082697  
SRR17520069. 16082699  
SRR17520069. 16082701  
SRR17520069. 16082703  
SRR17520069. 16082705  
SRR17520069. 16087072  
SRR17520069. 16087074  
SRR17520069. 16087076  
SRR17520069. 16087078  
SRR17520069. 16091478  
SRR17520069. 16091480  
SRR17520069. 16091482  
SRR17520069. 16091484  
SRR17520069. 16091486  
SRR17520069. 16091488  
SRR17520069. 16091490  
SRR17520069. 16091492  
SRR17520069. 16091494  
SRR17520069. 16091496  
SRR17520069. 16091498  
SRR17520069. 16091500  
SRR17520069. 16091502

SRR17520069.16091504  
SRR17520069.16091506  
SRR17520069.16091508  
SRR17520069.16091510  
SRR17520069.16091512  
SRR17520069.16091514  
SRR17520069.16091516  
SRR17520069.16091518  
SRR17520069.16091520  
SRR17520069.16091522  
SRR17520069.16091524  
SRR17520069.16091526  
SRR17520069.16091528  
SRR17520069.16091530  
SRR17520069.16091532  
SRR17520069.16091534  
SRR17520069.16091536  
SRR17520069.16091538  
SRR17520069.16091540  
SRR17520069.16091542  
SRR17520069.16091544  
SRR17520069.16091546  
SRR17520069.16091548  
SRR17520069.16091550  
SRR17520069.16091552  
SRR17520069.16091554  
SRR17520069.16091556  
SRR17520069.16091558  
SRR17520069.16091560  
SRR17520069.16091562  
SRR17520069.16091564  
SRR17520069.16091566  
SRR17520069.16091568  
SRR17520069.16091570  
SRR17520069.16093379  
SRR17520069.16093381  
SRR17520069.16093383  
SRR17520069.16093385  
SRR17520069.16093387  
SRR17520069.16093389  
SRR17520069.16093391  
SRR17520069.16094464  
SRR17520069.16094466  
SRR17520069.16094468  
SRR17520069.16094470  
SRR17520069.16094472  
SRR17520069.16094474

SRR17520069. 16094476  
SRR17520069. 16094478  
SRR17520069. 16094480  
SRR17520069. 16094482  
SRR17520069. 16094484  
SRR17520069. 16094486  
SRR17520069. 16094488  
SRR17520069. 16094490  
SRR17520069. 16094492  
SRR17520069. 16094494  
SRR17520069. 16094496  
SRR17520069. 16094498  
SRR17520069. 16094500  
SRR17520069. 16094502  
SRR17520069. 16094504  
SRR17520069. 16094506  
SRR17520069. 16094508  
SRR17520069. 16094510  
SRR17520069. 16094512  
SRR17520069. 16094514  
SRR17520069. 16094516  
SRR17520069. 16094518  
SRR17520069. 16094520  
SRR17520069. 16094522  
SRR17520069. 16094524  
SRR17520069. 16094526  
SRR17520069. 16094528  
SRR17520069. 16094530  
SRR17520069. 16096004  
SRR17520069. 16096006  
SRR17520069. 16096008  
SRR17520069. 16096010  
SRR17520069. 16096012  
SRR17520069. 16096014  
SRR17520069. 16096016  
SRR17520069. 16096018  
SRR17520069. 16096020  
SRR17520069. 16096022  
SRR17520069. 16096024  
SRR17520069. 16096026  
SRR17520069. 16096028  
SRR17520069. 16096030  
SRR17520069. 16096034  
SRR17520069. 16096036  
SRR17520069. 16096038  
SRR17520069. 16096040  
SRR17520069. 16096042

SRR17520069. 16096044  
SRR17520069. 16096046  
SRR17520069. 16096048  
SRR17520069. 16096050  
SRR17520069. 16096052  
SRR17520069. 16096054  
SRR17520069. 16096056  
SRR17520069. 16096058  
SRR17520069. 16096060  
SRR17520069. 16096062  
SRR17520069. 16096064  
SRR17520069. 16096066  
SRR17520069. 16096068  
SRR17520069. 16096070  
SRR17520069. 16096072  
SRR17520069. 16096076  
SRR17520069. 16096078  
SRR17520069. 16096080  
SRR17520069. 16096082  
SRR17520069. 16096084  
SRR17520069. 16096086  
SRR17520069. 16096088  
SRR17520069. 16096090  
SRR17520069. 16096092  
SRR17520069. 16096094  
SRR17520069. 16096096  
SRR17520069. 16096098  
SRR17520069. 16096100  
SRR17520069. 16096102  
SRR17520069. 16096104  
SRR17520069. 16096106  
SRR17520069. 16096108  
SRR17520069. 16096110  
SRR17520069. 16104457  
SRR17520069. 16104459  
SRR17520069. 16104461  
SRR17520069. 16104463  
SRR17520069. 16104465  
SRR17520069. 16105421  
SRR17520069. 16105423  
SRR17520069. 16105425  
SRR17520069. 16105427  
SRR17520069. 16105429  
SRR17520069. 16105431  
SRR17520069. 16105433  
SRR17520069. 16105435  
SRR17520069. 16105437



SRR17520069. 16105439  
SRR17520069. 16105441  
SRR17520069. 16105443  
SRR17520069. 16105445  
SRR17520069. 16105447  
SRR17520069. 16105449  
SRR17520069. 16105451  
SRR17520069. 16105453  
SRR17520069. 16106812  
SRR17520069. 16106814  
SRR17520069. 16106816  
SRR17520069. 16106818  
SRR17520069. 16106820  
SRR17520069. 16106822  
SRR17520069. 16106824  
SRR17520069. 16106826  
SRR17520069. 16106828  
SRR17520069. 16106830  
SRR17520069. 16106832  
SRR17520069. 16106834  
SRR17520069. 16106836  
SRR17520069. 16106838  
SRR17520069. 16106840  
SRR17520069. 16106842  
SRR17520069. 16106846  
SRR17520069. 16106848  
SRR17520069. 16106850  
SRR17520069. 16106852  
SRR17520069. 16106854  
SRR17520069. 16106856  
SRR17520069. 16106858  
SRR17520069. 16106860  
SRR17520069. 16112430  
SRR17520069. 16112432  
SRR17520069. 16115971  
SRR17520069. 16115973  
SRR17520069. 16115975  
SRR17520069. 16115977  
SRR17520069. 16115979  
SRR17520069. 16115981  
SRR17520069. 16115983  
SRR17520069. 16115985  
SRR17520069. 16115987  
SRR17520069. 16115989  
SRR17520069. 16115991  
SRR17520069. 16115993  
SRR17520069. 16115995

SRR17520069. 16115997  
SRR17520069. 16115999  
SRR17520069. 16116001  
SRR17520069. 16116003  
SRR17520069. 16116946  
SRR17520069. 16116948  
SRR17520069. 16116950  
SRR17520069. 16116952  
SRR17520069. 16116954  
SRR17520069. 16116956  
SRR17520069. 16116958  
SRR17520069. 16116960  
SRR17520069. 16116962  
SRR17520069. 16116964  
SRR17520069. 16116966  
SRR17520069. 16116968  
SRR17520069. 16116970  
SRR17520069. 16116972  
SRR17520069. 16116974  
SRR17520069. 16116976  
SRR17520069. 16116978  
SRR17520069. 16116980  
SRR17520069. 16116982  
SRR17520069. 16116984  
SRR17520069. 16116986  
SRR17520069. 16116988  
SRR17520069. 16116990  
SRR17520069. 16116992  
SRR17520069. 16116994  
SRR17520069. 16116996  
SRR17520069. 16116998  
SRR17520069. 16117000  
SRR17520069. 16117002  
SRR17520069. 16117004  
SRR17520069. 16117006  
SRR17520069. 16117008  
SRR17520069. 16117010  
SRR17520069. 16117012  
SRR17520069. 16117014  
SRR17520069. 16117016  
SRR17520069. 16117018  
SRR17520069. 16117020  
SRR17520069. 16117022  
SRR17520069. 16117024  
SRR17520069. 16117026  
SRR17520069. 16117028  
SRR17520069. 16120417

SRR17520069.16120419  
SRR17520069.16120421  
SRR17520069.16120423  
SRR17520069.16120425  
SRR17520069.16120427  
SRR17520069.16120429  
SRR17520069.16120431  
SRR17520069.16120433  
SRR17520069.16120435  
SRR17520069.16120437  
SRR17520069.16120439  
SRR17520069.16120441  
SRR17520069.16120443  
SRR17520069.16120445  
SRR17520069.16120447  
SRR17520069.16120449  
SRR17520069.16120453  
SRR17520069.16120455  
SRR17520069.16120457  
SRR17520069.16120459  
SRR17520069.16120461  
SRR17520069.16120463  
SRR17520069.16120465  
SRR17520069.16120467  
SRR17520069.16120469  
SRR17520069.16120471  
SRR17520069.16120473  
SRR17520069.16120475  
SRR17520069.16120477  
SRR17520069.16120479  
SRR17520069.16120481  
SRR17520069.16120483  
SRR17520069.16120485  
SRR17520069.16120489  
SRR17520069.16120491  
SRR17520069.16120495  
SRR17520069.16120497  
SRR17520069.16120499  
SRR17520069.16120501  
SRR17520069.16120503  
SRR17520069.16120505  
SRR17520069.16120507  
SRR17520069.16120509  
SRR17520069.16120515  
SRR17520069.16120517  
SRR17520069.16120519  
SRR17520069.16120521

SRR17520069. 16120523  
SRR17520069. 16120525  
SRR17520069. 16120527  
SRR17520069. 16120529  
SRR17520069. 16120531  
SRR17520069. 16120535  
SRR17520069. 16125156  
SRR17520069. 16125158  
SRR17520069. 16125160  
SRR17520069. 16125162  
SRR17520069. 16125164  
SRR17520069. 16125166  
SRR17520069. 16125168  
SRR17520069. 16125170  
SRR17520069. 16125172  
SRR17520069. 16125174  
SRR17520069. 16125176  
SRR17520069. 16125178  
SRR17520069. 16125180  
SRR17520069. 16125182  
SRR17520069. 16125184  
SRR17520069. 16125186  
SRR17520069. 16125188  
SRR17520069. 16125190  
SRR17520069. 16125192  
SRR17520069. 16125194  
SRR17520069. 16125196  
SRR17520069. 16125198  
SRR17520069. 16125200  
SRR17520069. 16125202  
SRR17520069. 16125204  
SRR17520069. 16125206  
SRR17520069. 16125208  
SRR17520069. 16125210  
SRR17520069. 16125212  
SRR17520069. 16125214  
SRR17520069. 16125216  
SRR17520069. 16125218  
SRR17520069. 16125220  
SRR17520069. 16128550  
SRR17520069. 16128552  
SRR17520069. 16128554  
SRR17520069. 16128556  
SRR17520069. 16130017  
SRR17520069. 16130022  
SRR17520069. 16141153  
SRR17520069. 16141282

SRR17520069. 16141284  
SRR17520069. 16141286  
SRR17520069. 16141288  
SRR17520069. 16141290  
SRR17520069. 16141292  
SRR17520069. 16141294  
SRR17520069. 16141296  
SRR17520069. 16141298  
SRR17520069. 16141300  
SRR17520069. 16141302  
SRR17520069. 16141304  
SRR17520069. 16141306  
SRR17520069. 16145163  
SRR17520069. 16147757  
SRR17520069. 16147759  
SRR17520069. 16147761  
SRR17520069. 16147765  
SRR17520069. 16157707  
SRR17520069. 16157709  
SRR17520069. 16157711  
SRR17520069. 16157713  
SRR17520069. 16157715  
SRR17520069. 16157717  
SRR17520069. 16157719  
SRR17520069. 16157723  
SRR17520069. 16157725  
SRR17520069. 16157727  
SRR17520069. 16157729  
SRR17520069. 16157731  
SRR17520069. 16157735  
SRR17520069. 16157737  
SRR17520069. 16157739  
SRR17520069. 16157741  
SRR17520069. 16157743  
SRR17520069. 16157745  
SRR17520069. 16157747  
SRR17520069. 16157749  
SRR17520069. 16157751  
SRR17520069. 16157753  
SRR17520069. 16157755  
SRR17520069. 16157757  
SRR17520069. 16157759  
SRR17520069. 16157761  
SRR17520069. 16157763  
SRR17520069. 16157765  
SRR17520069. 16157767  
SRR17520069. 16157769

SRR17520069. 16157771  
SRR17520069. 16158191  
SRR17520069. 16158193  
SRR17520069. 16158195  
SRR17520069. 16158197  
SRR17520069. 16158199  
SRR17520069. 16158201  
SRR17520069. 16158203  
SRR17520069. 16158205  
SRR17520069. 16158207  
SRR17520069. 16158209  
SRR17520069. 16158211  
SRR17520069. 16158213  
SRR17520069. 16158215  
SRR17520069. 16158217  
SRR17520069. 16158219  
SRR17520069. 16158221  
SRR17520069. 16158223  
SRR17520069. 16158225  
SRR17520069. 16158227  
SRR17520069. 16158229  
SRR17520069. 16158231  
SRR17520069. 16158233  
SRR17520069. 16158235  
SRR17520069. 16158237  
SRR17520069. 16158239  
SRR17520069. 16158241  
SRR17520069. 16163172  
SRR17520069. 16163174  
SRR17520069. 16163176  
SRR17520069. 16163178  
SRR17520069. 16163180  
SRR17520069. 16163182  
SRR17520069. 16163184  
SRR17520069. 16163186  
SRR17520069. 16163188  
SRR17520069. 16163190  
SRR17520069. 16163192  
SRR17520069. 16163194  
SRR17520069. 16163196  
SRR17520069. 16163198  
SRR17520069. 16163200  
SRR17520069. 16163202  
SRR17520069. 16169137  
SRR17520069. 16169139  
SRR17520069. 16169141  
SRR17520069. 16169143

SRR17520069. 16169145  
SRR17520069. 16169147  
SRR17520069. 16169149  
SRR17520069. 16169155  
SRR17520069. 16169157  
SRR17520069. 16169159  
SRR17520069. 16169161  
SRR17520069. 16169163  
SRR17520069. 16169165  
SRR17520069. 16169167  
SRR17520069. 16169169  
SRR17520069. 16169171  
SRR17520069. 16169173  
SRR17520069. 16169175  
SRR17520069. 16169177  
SRR17520069. 16169179  
SRR17520069. 16181165  
SRR17520069. 16181167  
SRR17520069. 16181169  
SRR17520069. 16181171  
SRR17520069. 16181173  
SRR17520069. 16181175  
SRR17520069. 16181177  
SRR17520069. 16181179  
SRR17520069. 16181181  
SRR17520069. 16186187  
SRR17520069. 16186189  
SRR17520069. 16186191  
SRR17520069. 16186193  
SRR17520069. 16186195  
SRR17520069. 16186197  
SRR17520069. 16186199  
SRR17520069. 16186201  
SRR17520069. 16186203  
SRR17520069. 16186205  
SRR17520069. 16186207  
SRR17520069. 16186209  
SRR17520069. 16186211  
SRR17520069. 16186213  
SRR17520069. 16186215  
SRR17520069. 16186217  
SRR17520069. 16186219  
SRR17520069. 16186221  
SRR17520069. 16186223  
SRR17520069. 16186225  
SRR17520069. 16186227  
SRR17520069. 16186229

SRR17520069. 16186231  
SRR17520069. 16186233  
SRR17520069. 16186235  
SRR17520069. 16186237  
SRR17520069. 16186239  
SRR17520069. 16186241  
SRR17520069. 16186243  
SRR17520069. 16186245  
SRR17520069. 16186247  
SRR17520069. 16188056  
SRR17520069. 16188058  
SRR17520069. 16188060  
SRR17520069. 16188062  
SRR17520069. 16188064  
SRR17520069. 16188066  
SRR17520069. 16188068  
SRR17520069. 16188072  
SRR17520069. 16188074  
SRR17520069. 16188076  
SRR17520069. 16188078  
SRR17520069. 16188080  
SRR17520069. 16188082  
SRR17520069. 16188084  
SRR17520069. 16188086  
SRR17520069. 16188088  
SRR17520069. 16188090  
SRR17520069. 16188092  
SRR17520069. 16188094  
SRR17520069. 16188096  
SRR17520069. 16188098  
SRR17520069. 16188100  
SRR17520069. 16188102  
SRR17520069. 16188104  
SRR17520069. 16188106  
SRR17520069. 16188108  
SRR17520069. 16188110  
SRR17520069. 16188112  
SRR17520069. 16188114  
SRR17520069. 16188116  
SRR17520069. 16188118  
SRR17520069. 16188120  
SRR17520069. 16188122  
SRR17520069. 16188124  
SRR17520069. 16188126  
SRR17520069. 16188128  
SRR17520069. 16211790  
SRR17520069. 16211792



SRR17520069. 16211794  
SRR17520069. 16211796  
SRR17520069. 16217633  
SRR17520069. 16217635  
SRR17520069. 16217637  
SRR17520069. 16217639  
SRR17520069. 16217641  
SRR17520069. 16217643  
SRR17520069. 16217645  
SRR17520069. 16217647  
SRR17520069. 16217651  
SRR17520069. 16217653  
SRR17520069. 16217655  
SRR17520069. 16217657  
SRR17520069. 16217659  
SRR17520069. 16217661  
SRR17520069. 16217663  
SRR17520069. 16217665  
SRR17520069. 16217667  
SRR17520069. 16217669  
SRR17520069. 16217671  
SRR17520069. 16217675  
SRR17520069. 16217677  
SRR17520069. 16217679  
SRR17520069. 16217681  
SRR17520069. 16217683  
SRR17520069. 16217685  
SRR17520069. 16217687  
SRR17520069. 16217689  
SRR17520069. 16217691  
SRR17520069. 16217693  
SRR17520069. 16217700  
SRR17520069. 16217702  
SRR17520069. 16217704  
SRR17520069. 16217706  
SRR17520069. 16217708  
SRR17520069. 16217710  
SRR17520069. 16217712  
SRR17520069. 16217714  
SRR17520069. 16217716  
SRR17520069. 16217718  
SRR17520069. 16217720  
SRR17520069. 16217722  
SRR17520069. 16217724  
SRR17520069. 16217726  
SRR17520069. 16217728  
SRR17520069. 16217733

SRR17520069. 16217735  
SRR17520069. 16217887  
SRR17520069. 16217889  
SRR17520069. 16217893  
SRR17520069. 16217895  
SRR17520069. 16225715  
SRR17520069. 16225717  
SRR17520069. 16225721  
SRR17520069. 16225723  
SRR17520069. 16225725  
SRR17520069. 16225727  
SRR17520069. 16225729  
SRR17520069. 16225731  
SRR17520069. 16225733  
SRR17520069. 16225735  
SRR17520069. 16225739  
SRR17520069. 16225741  
SRR17520069. 16225743  
SRR17520069. 16225745  
SRR17520069. 16225747  
SRR17520069. 16238074  
SRR17520069. 16238078  
SRR17520069. 16238080  
SRR17520069. 16238082  
SRR17520069. 16238084  
SRR17520069. 16238086  
SRR17520069. 16238088  
SRR17520069. 16238090  
SRR17520069. 16238092  
SRR17520069. 16239416  
SRR17520069. 16239434  
SRR17520069. 16239466  
SRR17520069. 16239476  
SRR17520069. 16239500  
SRR17520069. 16239512  
SRR17520069. 16240690  
SRR17520069. 16240692  
SRR17520069. 16240694  
SRR17520069. 16240696  
SRR17520069. 16240698  
SRR17520069. 16240700  
SRR17520069. 16240702  
SRR17520069. 16240704  
SRR17520069. 16240706  
SRR17520069. 16240708  
SRR17520069. 16240710  
SRR17520069. 16240712

SRR17520069. 16240714  
SRR17520069. 16240716  
SRR17520069. 16240718  
SRR17520069. 16240720  
SRR17520069. 16240722  
SRR17520069. 16240724  
SRR17520069. 16240726  
SRR17520069. 16240728  
SRR17520069. 16240730  
SRR17520069. 16240732  
SRR17520069. 16240734  
SRR17520069. 16240736  
SRR17520069. 16240738  
SRR17520069. 16240740  
SRR17520069. 16240742  
SRR17520069. 16240744  
SRR17520069. 16240746  
SRR17520069. 16240748  
SRR17520069. 16240750  
SRR17520069. 16240752  
SRR17520069. 16240754  
SRR17520069. 16240756  
SRR17520069. 16240758  
SRR17520069. 16240760  
SRR17520069. 16240762  
SRR17520069. 16242752  
SRR17520069. 16242754  
SRR17520069. 16242756  
SRR17520069. 16242758  
SRR17520069. 16242760  
SRR17520069. 16242762  
SRR17520069. 16242764  
SRR17520069. 16242766  
SRR17520069. 16242768  
SRR17520069. 16242770  
SRR17520069. 16242772  
SRR17520069. 16242774  
SRR17520069. 16242776  
SRR17520069. 16242778  
SRR17520069. 16242780  
SRR17520069. 16242782  
SRR17520069. 16242784  
SRR17520069. 16242786  
SRR17520069. 16242850  
SRR17520069. 16242854  
SRR17520069. 16245835  
SRR17520069. 16245839

SRR17520069. 16245841  
SRR17520069. 16245843  
SRR17520069. 16245845  
SRR17520069. 16245847  
SRR17520069. 16247079  
SRR17520069. 16247081  
SRR17520069. 16247083  
SRR17520069. 16247085  
SRR17520069. 16247087  
SRR17520069. 16247089  
SRR17520069. 16247093  
SRR17520069. 16247095  
SRR17520069. 16247097  
SRR17520069. 16247099  
SRR17520069. 16247101  
SRR17520069. 16247103  
SRR17520069. 16247105  
SRR17520069. 16247107  
SRR17520069. 16247109  
SRR17520069. 16248336  
SRR17520069. 16248338  
SRR17520069. 16248340  
SRR17520069. 16248342  
SRR17520069. 16248344  
SRR17520069. 16248346  
SRR17520069. 16248348  
SRR17520069. 16248350  
SRR17520069. 16248352  
SRR17520069. 16248354  
SRR17520069. 16248356  
SRR17520069. 16248358  
SRR17520069. 16248360  
SRR17520069. 16248362  
SRR17520069. 16248364  
SRR17520069. 16248366  
SRR17520069. 16248368  
SRR17520069. 16248370  
SRR17520069. 16248372  
SRR17520069. 16248374  
SRR17520069. 16248376  
SRR17520069. 16248378  
SRR17520069. 16248380  
SRR17520069. 16248382  
SRR17520069. 16248384  
SRR17520069. 16248386  
SRR17520069. 16248388  
SRR17520069. 16248390

SRR17520069. 16248392  
SRR17520069. 16248396  
SRR17520069. 16248398  
SRR17520069. 16248400  
SRR17520069. 16248402  
SRR17520069. 16248404  
SRR17520069. 16249268  
SRR17520069. 16249270  
SRR17520069. 16249272  
SRR17520069. 16249274  
SRR17520069. 16249276  
SRR17520069. 16249278  
SRR17520069. 16249280  
SRR17520069. 16249282  
SRR17520069. 16249284  
SRR17520069. 16249286  
SRR17520069. 16249288  
SRR17520069. 16249290  
SRR17520069. 16249292  
SRR17520069. 16249294  
SRR17520069. 16249296  
SRR17520069. 16249300  
SRR17520069. 16249302  
SRR17520069. 16249304  
SRR17520069. 16249306  
SRR17520069. 16249308  
SRR17520069. 16249310  
SRR17520069. 16249312  
SRR17520069. 16249318  
SRR17520069. 16249320  
SRR17520069. 16249322  
SRR17520069. 16249324  
SRR17520069. 16249326  
SRR17520069. 16249328  
SRR17520069. 16249330  
SRR17520069. 16249332  
SRR17520069. 16249334  
SRR17520069. 16249336  
SRR17520069. 16249338  
SRR17520069. 16249340  
SRR17520069. 16249342  
SRR17520069. 16249344  
SRR17520069. 16249346  
SRR17520069. 16249840  
SRR17520069. 16249842  
SRR17520069. 16249846  
SRR17520069. 16249848

SRR17520069. 16249850  
SRR17520069. 16249852  
SRR17520069. 16249854  
SRR17520069. 16249856  
SRR17520069. 16249858  
SRR17520069. 16259806  
SRR17520069. 16259808  
SRR17520069. 16259810  
SRR17520069. 16261817  
SRR17520069. 16261819  
SRR17520069. 16261821  
SRR17520069. 16261832  
SRR17520069. 16261836  
SRR17520069. 16261840  
SRR17520069. 16268451  
SRR17520069. 16268453  
SRR17520069. 16268461  
SRR17520069. 16268463  
SRR17520069. 16273398  
SRR17520069. 16273400  
SRR17520069. 16273421  
SRR17520069. 16273423  
SRR17520069. 16273427  
SRR17520069. 16273429  
SRR17520069. 16273431  
SRR17520069. 16273433  
SRR17520069. 16273435  
SRR17520069. 16273437  
SRR17520069. 16273439  
SRR17520069. 16273441  
SRR17520069. 16273443  
SRR17520069. 16273445  
SRR17520069. 16273447  
SRR17520069. 16273449  
SRR17520069. 16273451  
SRR17520069. 16273453  
SRR17520069. 16273455  
SRR17520069. 16273457  
SRR17520069. 16273459  
SRR17520069. 16273461  
SRR17520069. 16273463  
SRR17520069. 16273465  
SRR17520069. 16273467  
SRR17520069. 16273469  
SRR17520069. 16273471  
SRR17520069. 16273473  
SRR17520069. 16273475

SRR17520069. 16273477  
SRR17520069. 16273479  
SRR17520069. 16273481  
SRR17520069. 16273483  
SRR17520069. 16273485  
SRR17520069. 16273487  
SRR17520069. 16273489  
SRR17520069. 16273491  
SRR17520069. 16273493  
SRR17520069. 16273495  
SRR17520069. 16273497  
SRR17520069. 16273499  
SRR17520069. 16273501  
SRR17520069. 16273503  
SRR17520069. 16273505  
SRR17520069. 16273507  
SRR17520069. 16273509  
SRR17520069. 16273511  
SRR17520069. 16273513  
SRR17520069. 16273515  
SRR17520069. 16273517  
SRR17520069. 16273519  
SRR17520069. 16273521  
SRR17520069. 16273523  
SRR17520069. 16273525  
SRR17520069. 16273590  
SRR17520069. 16286001  
SRR17520069. 16286003  
SRR17520069. 16286005  
SRR17520069. 16286007  
SRR17520069. 16286009  
SRR17520069. 16298575  
SRR17520069. 16298577  
SRR17520069. 16298579  
SRR17520069. 16303072  
SRR17520069. 16303074  
SRR17520069. 16303076  
SRR17520069. 16303078  
SRR17520069. 16303080  
SRR17520069. 16303082  
SRR17520069. 16303084  
SRR17520069. 16303086  
SRR17520069. 16303088  
SRR17520069. 16303090  
SRR17520069. 16303092  
SRR17520069. 16303094  
SRR17520069. 16303096

SRR17520069. 16303098  
SRR17520069. 16303102  
SRR17520069. 16303104  
SRR17520069. 16303106  
SRR17520069. 16303108  
SRR17520069. 16303110  
SRR17520069. 16303112  
SRR17520069. 16303114  
SRR17520069. 16303116  
SRR17520069. 16303118  
SRR17520069. 16303120  
SRR17520069. 16303122  
SRR17520069. 16303124  
SRR17520069. 16303126  
SRR17520069. 16304246  
SRR17520069. 16304248  
SRR17520069. 16304250  
SRR17520069. 16304252  
SRR17520069. 16304254  
SRR17520069. 16304256  
SRR17520069. 16304260  
SRR17520069. 16304262  
SRR17520069. 16304264  
SRR17520069. 16304266  
SRR17520069. 16304268  
SRR17520069. 16304270  
SRR17520069. 16304272  
SRR17520069. 16304274  
SRR17520069. 16304276  
SRR17520069. 16304278  
SRR17520069. 16304280  
SRR17520069. 16304282  
SRR17520069. 16304284  
SRR17520069. 16304286  
SRR17520069. 16305543  
SRR17520069. 16305545  
SRR17520069. 16305547  
SRR17520069. 16305549  
SRR17520069. 16305553  
SRR17520069. 16305555  
SRR17520069. 16305559  
SRR17520069. 16305561  
SRR17520069. 16305563  
SRR17520069. 16305565  
SRR17520069. 16305569  
SRR17520069. 16305571  
SRR17520069. 16305573



SRR17520069. 16305575  
SRR17520069. 16305577  
SRR17520069. 16305579  
SRR17520069. 16305581  
SRR17520069. 16305583  
SRR17520069. 16305585  
SRR17520069. 16305587  
SRR17520069. 16305589  
SRR17520069. 16305591  
SRR17520069. 16305593  
SRR17520069. 16305595  
SRR17520069. 16311809  
SRR17520069. 16311811  
SRR17520069. 16311813  
SRR17520069. 16311815  
SRR17520069. 16312754  
SRR17520069. 16312756  
SRR17520069. 16312758  
SRR17520069. 16312762  
SRR17520069. 16312764  
SRR17520069. 16313209  
SRR17520069. 16313211  
SRR17520069. 16313213  
SRR17520069. 16313218  
SRR17520069. 16313220  
SRR17520069. 16313222  
SRR17520069. 16313224  
SRR17520069. 16313226  
SRR17520069. 16313228  
SRR17520069. 16313230  
SRR17520069. 16313232  
SRR17520069. 16313234  
SRR17520069. 16313236  
SRR17520069. 16313238  
SRR17520069. 16313240  
SRR17520069. 16313242  
SRR17520069. 16313246  
SRR17520069. 16313248  
SRR17520069. 16313250  
SRR17520069. 16313252  
SRR17520069. 16313254  
SRR17520069. 16313256  
SRR17520069. 16313258  
SRR17520069. 16313260  
SRR17520069. 16313262  
SRR17520069. 16313264  
SRR17520069. 16313266

SRR17520069. 16313268  
SRR17520069. 16313270  
SRR17520069. 16313272  
SRR17520069. 16313274  
SRR17520069. 16313276  
SRR17520069. 16313278  
SRR17520069. 16313280  
SRR17520069. 16313282  
SRR17520069. 16313284  
SRR17520069. 16313286  
SRR17520069. 16313288  
SRR17520069. 16313290  
SRR17520069. 16313292  
SRR17520069. 16313296  
SRR17520069. 16313298  
SRR17520069. 16313300  
SRR17520069. 16313302  
SRR17520069. 16313304  
SRR17520069. 16313306  
SRR17520069. 16320116  
SRR17520069. 16320118  
SRR17520069. 16320120  
SRR17520069. 16320122  
SRR17520069. 16320124  
SRR17520069. 16320126  
SRR17520069. 16320230  
SRR17520069. 16320232  
SRR17520069. 16320240  
SRR17520069. 16320242  
SRR17520069. 16320246  
SRR17520069. 16320248  
SRR17520069. 16320250  
SRR17520069. 16320252  
SRR17520069. 16320254  
SRR17520069. 16320256  
SRR17520069. 16320258  
SRR17520069. 16320260  
SRR17520069. 16320262  
SRR17520069. 16320264  
SRR17520069. 16320266  
SRR17520069. 16320268  
SRR17520069. 16320270  
SRR17520069. 16320272  
SRR17520069. 16320280  
SRR17520069. 16320282  
SRR17520069. 16320284  
SRR17520069. 16320286

SRR17520069. 16320288  
SRR17520069. 16320292  
SRR17520069. 16320294  
SRR17520069. 16320296  
SRR17520069. 16320298  
SRR17520069. 16320300  
SRR17520069. 16320302  
SRR17520069. 16320304  
SRR17520069. 16320306  
SRR17520069. 16320308  
SRR17520069. 16320310  
SRR17520069. 16320312  
SRR17520069. 16320314  
SRR17520069. 16320316  
SRR17520069. 16320318  
SRR17520069. 16322113  
SRR17520069. 16322115  
SRR17520069. 16322117  
SRR17520069. 16324013  
SRR17520069. 16324015  
SRR17520069. 16324017  
SRR17520069. 16324019  
SRR17520069. 16324021  
SRR17520069. 16324023  
SRR17520069. 16324025  
SRR17520069. 16324027  
SRR17520069. 16324029  
SRR17520069. 16324038  
SRR17520069. 16324042  
SRR17520069. 16324044  
SRR17520069. 16324046  
SRR17520069. 16324048  
SRR17520069. 16324050  
SRR17520069. 16327499  
SRR17520069. 16327501  
SRR17520069. 16327503  
SRR17520069. 16327505  
SRR17520069. 16327511  
SRR17520069. 16327513  
SRR17520069. 16327515  
SRR17520069. 16327517  
SRR17520069. 16327519  
SRR17520069. 16328944  
SRR17520069. 16328946  
SRR17520069. 16328952  
SRR17520069. 16328954  
SRR17520069. 16328956

SRR17520069. 16328960  
SRR17520069. 16328962  
SRR17520069. 16331468  
SRR17520069. 16331470  
SRR17520069. 16331472  
SRR17520069. 16331476  
SRR17520069. 16331478  
SRR17520069. 16331480  
SRR17520069. 16331482  
SRR17520069. 16331484  
SRR17520069. 16331486  
SRR17520069. 16331488  
SRR17520069. 16347025  
SRR17520069. 16347027  
SRR17520069. 16347029  
SRR17520069. 16347031  
SRR17520069. 16347033  
SRR17520069. 16347035  
SRR17520069. 16349211  
SRR17520069. 16349213  
SRR17520069. 16349215  
SRR17520069. 16349991  
SRR17520069. 16349993  
SRR17520069. 16349997  
SRR17520069. 16349999  
SRR17520069. 16350001  
SRR17520069. 16350003  
SRR17520069. 16350005  
SRR17520069. 16350007  
SRR17520069. 16350009  
SRR17520069. 16350011  
SRR17520069. 16350013  
SRR17520069. 16350015  
SRR17520069. 16350017  
SRR17520069. 16350019  
SRR17520069. 16350021  
SRR17520069. 16350023  
SRR17520069. 16350025  
SRR17520069. 16350027  
SRR17520069. 16352160  
SRR17520069. 16352162  
SRR17520069. 16352166  
SRR17520069. 16352168  
SRR17520069. 16352170  
SRR17520069. 16352172  
SRR17520069. 16352174  
SRR17520069. 16352176

SRR17520069. 16352178  
SRR17520069. 16352182  
SRR17520069. 16352184  
SRR17520069. 16352186  
SRR17520069. 16352188  
SRR17520069. 16352190  
SRR17520069. 16352192  
SRR17520069. 16352194  
SRR17520069. 16352198  
SRR17520069. 16352200  
SRR17520069. 16352202  
SRR17520069. 16352204  
SRR17520069. 16352206  
SRR17520069. 16352208  
SRR17520069. 16352210  
SRR17520069. 16352212  
SRR17520069. 16352214  
SRR17520069. 16352216  
SRR17520069. 16352218  
SRR17520069. 16352220  
SRR17520069. 16352222  
SRR17520069. 16352224  
SRR17520069. 16352226  
SRR17520069. 16352228  
SRR17520069. 16352230  
SRR17520069. 16352232  
SRR17520069. 16352234  
SRR17520069. 16352236  
SRR17520069. 16352238  
SRR17520069. 16352240  
SRR17520069. 16352242  
SRR17520069. 16352244  
SRR17520069. 16352246  
SRR17520069. 16352248  
SRR17520069. 16352250  
SRR17520069. 16352252  
SRR17520069. 16352254  
SRR17520069. 16352256  
SRR17520069. 16352258  
SRR17520069. 16352260  
SRR17520069. 16352262  
SRR17520069. 16352264  
SRR17520069. 16352266  
SRR17520069. 16352268  
SRR17520069. 16352270  
SRR17520069. 16352272  
SRR17520069. 16352274

SRR17520069. 16352276  
SRR17520069. 16352278  
SRR17520069. 16352280  
SRR17520069. 16352282  
SRR17520069. 16352284  
SRR17520069. 16352286  
SRR17520069. 16352288  
SRR17520069. 16352290  
SRR17520069. 16352292  
SRR17520069. 16352294  
SRR17520069. 16352296  
SRR17520069. 16352298  
SRR17520069. 16352300  
SRR17520069. 16352302  
SRR17520069. 16352304  
SRR17520069. 16352306  
SRR17520069. 16352308  
SRR17520069. 16352310  
SRR17520069. 16352314  
SRR17520069. 16352316  
SRR17520069. 16352318  
SRR17520069. 16352320  
SRR17520069. 16352322  
SRR17520069. 16352324  
SRR17520069. 16352326  
SRR17520069. 16352328  
SRR17520069. 16352330  
SRR17520069. 16352332  
SRR17520069. 16352334  
SRR17520069. 16352336  
SRR17520069. 16352338  
SRR17520069. 16356733  
SRR17520069. 16356735  
SRR17520069. 16356749  
SRR17520069. 16361169  
SRR17520069. 16362936  
SRR17520069. 16362938  
SRR17520069. 16362940  
SRR17520069. 16362942  
SRR17520069. 16362944  
SRR17520069. 16362946  
SRR17520069. 16362948  
SRR17520069. 16362952  
SRR17520069. 16362954  
SRR17520069. 16362956  
SRR17520069. 16366590  
SRR17520069. 16366592

SRR17520069. 16366594  
SRR17520069. 16366596  
SRR17520069. 16366598  
SRR17520069. 16366600  
SRR17520069. 16366602  
SRR17520069. 16366604  
SRR17520069. 16366606  
SRR17520069. 16366608  
SRR17520069. 16366610  
SRR17520069. 16366612  
SRR17520069. 16366614  
SRR17520069. 16372746  
SRR17520069. 16372748  
SRR17520069. 16372750  
SRR17520069. 16372752  
SRR17520069. 16372754  
SRR17520069. 16372756  
SRR17520069. 16372758  
SRR17520069. 16372760  
SRR17520069. 16382148  
SRR17520069. 16382774  
SRR17520069. 16382776  
SRR17520069. 16382778  
SRR17520069. 16382780  
SRR17520069. 16382782  
SRR17520069. 16382784  
SRR17520069. 16382786  
SRR17520069. 16382788  
SRR17520069. 16382790  
SRR17520069. 16382792  
SRR17520069. 16382794  
SRR17520069. 16382796  
SRR17520069. 16382798  
SRR17520069. 16382800  
SRR17520069. 16382802  
SRR17520069. 16382804  
SRR17520069. 16382806  
SRR17520069. 16382808  
SRR17520069. 16382812  
SRR17520069. 16382814  
SRR17520069. 16382816  
SRR17520069. 16382818  
SRR17520069. 16382820  
SRR17520069. 16382822  
SRR17520069. 16382824  
SRR17520069. 16382826  
SRR17520069. 16382828

SRR17520069. 16382830  
SRR17520069. 16382834  
SRR17520069. 16382836  
SRR17520069. 16382838  
SRR17520069. 16383922  
SRR17520069. 16383924  
SRR17520069. 16383926  
SRR17520069. 16383928  
SRR17520069. 16383930  
SRR17520069. 16383932  
SRR17520069. 16383934  
SRR17520069. 16383936  
SRR17520069. 16383938  
SRR17520069. 16383940  
SRR17520069. 16383942  
SRR17520069. 16383944  
SRR17520069. 16383946  
SRR17520069. 16383948  
SRR17520069. 16383950  
SRR17520069. 16383952  
SRR17520069. 16383954  
SRR17520069. 16394448  
SRR17520069. 16394450  
SRR17520069. 16394454  
SRR17520069. 16394456  
SRR17520069. 16394458  
SRR17520069. 16394460  
SRR17520069. 16394462  
SRR17520069. 16394464  
SRR17520069. 16394466  
SRR17520069. 16394468  
SRR17520069. 16394470  
SRR17520069. 16396065  
SRR17520069. 16396067  
SRR17520069. 16396069  
SRR17520069. 16398667  
SRR17520069. 16398669  
SRR17520069. 16398671  
SRR17520069. 16398673  
SRR17520069. 16398675  
SRR17520069. 16398677  
SRR17520069. 16398679  
SRR17520069. 16398681  
SRR17520069. 16398683  
SRR17520069. 16400223  
SRR17520069. 16400227  
SRR17520069. 16400229



SRR17520069. 16400231  
SRR17520069. 16400233  
SRR17520069. 16400237  
SRR17520069. 16403594  
SRR17520069. 16403596  
SRR17520069. 16403598  
SRR17520069. 16403600  
SRR17520069. 16403602  
SRR17520069. 16403604  
SRR17520069. 16403606  
SRR17520069. 16403608  
SRR17520069. 16405758  
SRR17520069. 16407350  
SRR17520069. 16407352  
SRR17520069. 16407354  
SRR17520069. 16407356  
SRR17520069. 16407358  
SRR17520069. 16407360  
SRR17520069. 16407362  
SRR17520069. 16407364  
SRR17520069. 16407366  
SRR17520069. 16407368  
SRR17520069. 16413942  
SRR17520069. 16413944  
SRR17520069. 16413946  
SRR17520069. 16413948  
SRR17520069. 16413950  
SRR17520069. 16413952  
SRR17520069. 16413954  
SRR17520069. 16413956  
SRR17520069. 16413958  
SRR17520069. 16413960  
SRR17520069. 16413962  
SRR17520069. 16413964  
SRR17520069. 16413966  
SRR17520069. 16413968  
SRR17520069. 16413970  
SRR17520069. 16413972  
SRR17520069. 16413974  
SRR17520069. 16413976  
SRR17520069. 16413978  
SRR17520069. 16413980  
SRR17520069. 16413982  
SRR17520069. 16413984  
SRR17520069. 16413986  
SRR17520069. 16413988  
SRR17520069. 16413990

SRR17520069. 16413992  
SRR17520069. 16413994  
SRR17520069. 16413996  
SRR17520069. 16413998  
SRR17520069. 16414000  
SRR17520069. 16414002  
SRR17520069. 16414004  
SRR17520069. 16414006  
SRR17520069. 16414008  
SRR17520069. 16414010  
SRR17520069. 16414012  
SRR17520069. 16414014  
SRR17520069. 16414016  
SRR17520069. 16414018  
SRR17520069. 16414020  
SRR17520069. 16414022  
SRR17520069. 16414024  
SRR17520069. 16414026  
SRR17520069. 16414028  
SRR17520069. 16414030  
SRR17520069. 16414032  
SRR17520069. 16414034  
SRR17520069. 16414036  
SRR17520069. 16414038  
SRR17520069. 16414040  
SRR17520069. 16414042  
SRR17520069. 16414044  
SRR17520069. 16414046  
SRR17520069. 16414048  
SRR17520069. 16414050  
SRR17520069. 16414052  
SRR17520069. 16414054  
SRR17520069. 16414056  
SRR17520069. 16414058  
SRR17520069. 16414060  
SRR17520069. 16414062  
SRR17520069. 16414064  
SRR17520069. 16414066  
SRR17520069. 16414068  
SRR17520069. 16414070  
SRR17520069. 16414072  
SRR17520069. 16414074  
SRR17520069. 16414076  
SRR17520069. 16414078  
SRR17520069. 16414080  
SRR17520069. 16414082  
SRR17520069. 16414084

SRR17520069. 16414086  
SRR17520069. 16414088  
SRR17520069. 16414090  
SRR17520069. 16414092  
SRR17520069. 16414094  
SRR17520069. 16414096  
SRR17520069. 16414098  
SRR17520069. 16414100  
SRR17520069. 16414102  
SRR17520069. 16414104  
SRR17520069. 16414106  
SRR17520069. 16414108  
SRR17520069. 16414110  
SRR17520069. 16414112  
SRR17520069. 16414114  
SRR17520069. 16414116  
SRR17520069. 16414118  
SRR17520069. 16414120  
SRR17520069. 16414122  
SRR17520069. 16414124  
SRR17520069. 16414126  
SRR17520069. 16414128  
SRR17520069. 16414130  
SRR17520069. 16414132  
SRR17520069. 16414134  
SRR17520069. 16414136  
SRR17520069. 16418123  
SRR17520069. 16418170  
SRR17520069. 16418172  
SRR17520069. 16418174  
SRR17520069. 16418176  
SRR17520069. 16418178  
SRR17520069. 16418180  
SRR17520069. 16418182  
SRR17520069. 16418184  
SRR17520069. 16418186  
SRR17520069. 16418188  
SRR17520069. 16418190  
SRR17520069. 16422659  
SRR17520069. 16422661  
SRR17520069. 16427345  
SRR17520069. 16440019  
SRR17520069. 16441356  
SRR17520069. 16441358  
SRR17520069. 16441360  
SRR17520069. 16441362  
SRR17520069. 16441364

SRR17520069. 16441366  
SRR17520069. 16441368  
SRR17520069. 16441370  
SRR17520069. 16441372  
SRR17520069. 16441374  
SRR17520069. 16441376  
SRR17520069. 16441378  
SRR17520069. 16441380  
SRR17520069. 16441382  
SRR17520069. 16441384  
SRR17520069. 16441386  
SRR17520069. 16441388  
SRR17520069. 16441390  
SRR17520069. 16441392  
SRR17520069. 16441394  
SRR17520069. 16441396  
SRR17520069. 16441398  
SRR17520069. 16441400  
SRR17520069. 16441402  
SRR17520069. 16441404  
SRR17520069. 16441406  
SRR17520069. 16441408  
SRR17520069. 16441410  
SRR17520069. 16441412  
SRR17520069. 16441414  
SRR17520069. 16441416  
SRR17520069. 16441418  
SRR17520069. 16441420  
SRR17520069. 16441422  
SRR17520069. 16443074  
SRR17520069. 16443076  
SRR17520069. 16443078  
SRR17520069. 16443080  
SRR17520069. 16443082  
SRR17520069. 16443084  
SRR17520069. 16443086  
SRR17520069. 16443088  
SRR17520069. 16443090  
SRR17520069. 16443092  
SRR17520069. 16443094  
SRR17520069. 16443096  
SRR17520069. 16443098  
SRR17520069. 16443100  
SRR17520069. 16443102  
SRR17520069. 16443104  
SRR17520069. 16443106  
SRR17520069. 16443108

SRR17520069.16443110  
SRR17520069.16443112  
SRR17520069.16447977  
SRR17520069.16447979  
SRR17520069.16450325  
SRR17520069.16450327  
SRR17520069.16450329  
SRR17520069.16450331  
SRR17520069.16450333  
SRR17520069.16450335  
SRR17520069.16450337  
SRR17520069.16450339  
SRR17520069.16450341  
SRR17520069.16450343  
SRR17520069.16450345  
SRR17520069.16450347  
SRR17520069.16450349  
SRR17520069.16450351  
SRR17520069.16450353  
SRR17520069.16450355  
SRR17520069.16450357  
SRR17520069.16450359  
SRR17520069.16450361  
SRR17520069.16450363  
SRR17520069.16450365  
SRR17520069.16450367  
SRR17520069.16450369  
SRR17520069.16450371  
SRR17520069.16450373  
SRR17520069.16450375  
SRR17520069.16450377  
SRR17520069.16450379  
SRR17520069.16450381  
SRR17520069.16450383  
SRR17520069.16450385  
SRR17520069.16450387  
SRR17520069.16450389  
SRR17520069.16450391  
SRR17520069.16453470  
SRR17520069.16453472  
SRR17520069.16453474  
SRR17520069.16453476  
SRR17520069.16453478  
SRR17520069.16457967  
SRR17520069.16457969  
SRR17520069.16457971  
SRR17520069.16457973

SRR17520069. 16457975  
SRR17520069. 16457977  
SRR17520069. 16457979  
SRR17520069. 16457981  
SRR17520069. 16457983  
SRR17520069. 16457985  
SRR17520069. 16457987  
SRR17520069. 16457989  
SRR17520069. 16457991  
SRR17520069. 16457993  
SRR17520069. 16457995  
SRR17520069. 16457997  
SRR17520069. 16457999  
SRR17520069. 16458001  
SRR17520069. 16458003  
SRR17520069. 16458005  
SRR17520069. 16458007  
SRR17520069. 16458009  
SRR17520069. 16458011  
SRR17520069. 16458013  
SRR17520069. 16458015  
SRR17520069. 16458017  
SRR17520069. 16458019  
SRR17520069. 16458021  
SRR17520069. 16458023  
SRR17520069. 16458025  
SRR17520069. 16458027  
SRR17520069. 16458029  
SRR17520069. 16458031  
SRR17520069. 16458033  
SRR17520069. 16458035  
SRR17520069. 16458037  
SRR17520069. 16458039  
SRR17520069. 16458041  
SRR17520069. 16458043  
SRR17520069. 16458045  
SRR17520069. 16458047  
SRR17520069. 16458049  
SRR17520069. 16458051  
SRR17520069. 16458053  
SRR17520069. 16458055  
SRR17520069. 16458057  
SRR17520069. 16458549  
SRR17520069. 16458551  
SRR17520069. 16458553  
SRR17520069. 16458555  
SRR17520069. 16458557

SRR17520069. 16458559  
SRR17520069. 16458561  
SRR17520069. 16458563  
SRR17520069. 16460493  
SRR17520069. 16460495  
SRR17520069. 16460497  
SRR17520069. 16460499  
SRR17520069. 16460501  
SRR17520069. 16460503  
SRR17520069. 16460505  
SRR17520069. 16460507  
SRR17520069. 16460509  
SRR17520069. 16460511  
SRR17520069. 16460513  
SRR17520069. 16460515  
SRR17520069. 16460517  
SRR17520069. 16460519  
SRR17520069. 16460521  
SRR17520069. 16460523  
SRR17520069. 16460527  
SRR17520069. 16460529  
SRR17520069. 16460531  
SRR17520069. 16460533  
SRR17520069. 16460535  
SRR17520069. 16460537  
SRR17520069. 16460539  
SRR17520069. 16460541  
SRR17520069. 16460543  
SRR17520069. 16460547  
SRR17520069. 16460549  
SRR17520069. 16463126  
SRR17520069. 16463128  
SRR17520069. 16463130  
SRR17520069. 16463132  
SRR17520069. 16463134  
SRR17520069. 16463136  
SRR17520069. 16463138  
SRR17520069. 16463140  
SRR17520069. 16463142  
SRR17520069. 16463144  
SRR17520069. 16463146  
SRR17520069. 16463148  
SRR17520069. 16463150  
SRR17520069. 16463152  
SRR17520069. 16463154  
SRR17520069. 16463158  
SRR17520069. 16463162

SRR17520069. 16463164  
SRR17520069. 16463166  
SRR17520069. 16463168  
SRR17520069. 16463170  
SRR17520069. 16463172  
SRR17520069. 16463174  
SRR17520069. 16463176  
SRR17520069. 16463178  
SRR17520069. 16463180  
SRR17520069. 16463182  
SRR17520069. 16469516  
SRR17520069. 16469518  
SRR17520069. 16469520  
SRR17520069. 16469522  
SRR17520069. 16469524  
SRR17520069. 16469526  
SRR17520069. 16469528  
SRR17520069. 16469530  
SRR17520069. 16469532  
SRR17520069. 16469534  
SRR17520069. 16469536  
SRR17520069. 16469538  
SRR17520069. 16469540  
SRR17520069. 16469542  
SRR17520069. 16469544  
SRR17520069. 16469546  
SRR17520069. 16469548  
SRR17520069. 16469550  
SRR17520069. 16469552  
SRR17520069. 16469554  
SRR17520069. 16469556  
SRR17520069. 16469558  
SRR17520069. 16469560  
SRR17520069. 16469562  
SRR17520069. 16469564  
SRR17520069. 16469566  
SRR17520069. 16469568  
SRR17520069. 16478231  
SRR17520069. 16478233  
SRR17520069. 16478235  
SRR17520069. 16478237  
SRR17520069. 16478239  
SRR17520069. 16478241  
SRR17520069. 16478243  
SRR17520069. 16478245  
SRR17520069. 16478247  
SRR17520069. 16486477



SRR17520069. 16486479  
SRR17520069. 16486481  
SRR17520069. 16486483  
SRR17520069. 16486485  
SRR17520069. 16486487  
SRR17520069. 16486489  
SRR17520069. 16486491  
SRR17520069. 16486493  
SRR17520069. 16486495  
SRR17520069. 16486497  
SRR17520069. 16486499  
SRR17520069. 16486501  
SRR17520069. 16486503  
SRR17520069. 16486505  
SRR17520069. 16486507  
SRR17520069. 16486509  
SRR17520069. 16486511  
SRR17520069. 16486513  
SRR17520069. 16486515  
SRR17520069. 16486517  
SRR17520069. 16486519  
SRR17520069. 16486521  
SRR17520069. 16486523  
SRR17520069. 16486525  
SRR17520069. 16486527  
SRR17520069. 16486529  
SRR17520069. 16486531  
SRR17520069. 16486533  
SRR17520069. 16486535  
SRR17520069. 16486537  
SRR17520069. 16486539  
SRR17520069. 16486541  
SRR17520069. 16486543  
SRR17520069. 16487156  
SRR17520069. 16493048  
SRR17520069. 16493050  
SRR17520069. 16493052  
SRR17520069. 16493054  
SRR17520069. 16493056  
SRR17520069. 16493058  
SRR17520069. 16493062  
SRR17520069. 16493064  
SRR17520069. 16493066  
SRR17520069. 16493068  
SRR17520069. 16493070  
SRR17520069. 16493072  
SRR17520069. 16493074

SRR17520069. 16493076  
SRR17520069. 16493078  
SRR17520069. 16493080  
SRR17520069. 16493082  
SRR17520069. 16493084  
SRR17520069. 16493086  
SRR17520069. 16493088  
SRR17520069. 16493090  
SRR17520069. 16493092  
SRR17520069. 16493094  
SRR17520069. 16493096  
SRR17520069. 16493098  
SRR17520069. 16493100  
SRR17520069. 16493102  
SRR17520069. 16493104  
SRR17520069. 16493106  
SRR17520069. 16493108  
SRR17520069. 16493110  
SRR17520069. 16493112  
SRR17520069. 16493114  
SRR17520069. 16493116  
SRR17520069. 16493118  
SRR17520069. 16493120  
SRR17520069. 16493122  
SRR17520069. 16493124  
SRR17520069. 16493126  
SRR17520069. 16493128  
SRR17520069. 16493130  
SRR17520069. 16493132  
SRR17520069. 16493134  
SRR17520069. 16493136  
SRR17520069. 16493138  
SRR17520069. 16493140  
SRR17520069. 16493144  
SRR17520069. 16493146  
SRR17520069. 16493148  
SRR17520069. 16493150  
SRR17520069. 16493152  
SRR17520069. 16493154  
SRR17520069. 16493156  
SRR17520069. 16493158  
SRR17520069. 16493160  
SRR17520069. 16493162  
SRR17520069. 16493164  
SRR17520069. 16493166  
SRR17520069. 16493168  
SRR17520069. 16493170

SRR17520069. 16497761  
SRR17520069. 16497763  
SRR17520069. 16497765  
SRR17520069. 16497767  
SRR17520069. 16497769  
SRR17520069. 16497771  
SRR17520069. 16497773  
SRR17520069. 16497775  
SRR17520069. 16497777  
SRR17520069. 16497779  
SRR17520069. 16497781  
SRR17520069. 16497783  
SRR17520069. 16497785  
SRR17520069. 16497787  
SRR17520069. 16497789  
SRR17520069. 16497791  
SRR17520069. 16497793  
SRR17520069. 16498221  
SRR17520069. 16498223  
SRR17520069. 16498225  
SRR17520069. 16498227  
SRR17520069. 16498229  
SRR17520069. 16498233  
SRR17520069. 16498235  
SRR17520069. 16498237  
SRR17520069. 16498241  
SRR17520069. 16498243  
SRR17520069. 16498245  
SRR17520069. 16498247  
SRR17520069. 16498249  
SRR17520069. 16498251  
SRR17520069. 16498253  
SRR17520069. 16498255  
SRR17520069. 16498257  
SRR17520069. 16498261  
SRR17520069. 16498263  
SRR17520069. 16498265  
SRR17520069. 16498267  
SRR17520069. 16498269  
SRR17520069. 16498271  
SRR17520069. 16498273  
SRR17520069. 16498277  
SRR17520069. 16498279  
SRR17520069. 16498694  
SRR17520069. 16498696  
SRR17520069. 16498698  
SRR17520069. 16498700

SRR17520069. 16498702  
SRR17520069. 16498704  
SRR17520069. 16498887  
SRR17520069. 16498889  
SRR17520069. 16498891  
SRR17520069. 16498893  
SRR17520069. 16498895  
SRR17520069. 16498897  
SRR17520069. 16498899  
SRR17520069. 16498901  
SRR17520069. 16498903  
SRR17520069. 16498905  
SRR17520069. 16498907  
SRR17520069. 16498909  
SRR17520069. 16498911  
SRR17520069. 16498913  
SRR17520069. 16498915  
SRR17520069. 16498917  
SRR17520069. 16499115  
SRR17520069. 16499117  
SRR17520069. 16499119  
SRR17520069. 16499121  
SRR17520069. 16499123  
SRR17520069. 16499125  
SRR17520069. 16501792  
SRR17520069. 16509912  
SRR17520069. 16509914  
SRR17520069. 16509916  
SRR17520069. 16509918  
SRR17520069. 16509920  
SRR17520069. 16509922  
SRR17520069. 16509926  
SRR17520069. 16515108  
SRR17520069. 16515110  
SRR17520069. 16515461  
SRR17520069. 16515463  
SRR17520069. 16515465  
SRR17520069. 16515467  
SRR17520069. 16515469  
SRR17520069. 16515471  
SRR17520069. 16515473  
SRR17520069. 16515475  
SRR17520069. 16515477  
SRR17520069. 16515481  
SRR17520069. 16515483  
SRR17520069. 16515485  
SRR17520069. 16515487

SRR17520069. 16515489  
SRR17520069. 16515491  
SRR17520069. 16515493  
SRR17520069. 16515495  
SRR17520069. 16515497  
SRR17520069. 16515499  
SRR17520069. 16515501  
SRR17520069. 16515503  
SRR17520069. 16515505  
SRR17520069. 16515507  
SRR17520069. 16515513  
SRR17520069. 16515515  
SRR17520069. 16515517  
SRR17520069. 16515519  
SRR17520069. 16515521  
SRR17520069. 16515523  
SRR17520069. 16515525  
SRR17520069. 16515527  
SRR17520069. 16515529  
SRR17520069. 16515531  
SRR17520069. 16515533  
SRR17520069. 16515535  
SRR17520069. 16515537  
SRR17520069. 16515539  
SRR17520069. 16515541  
SRR17520069. 16515543  
SRR17520069. 16515545  
SRR17520069. 16515547  
SRR17520069. 16515549  
SRR17520069. 16515551  
SRR17520069. 16515553  
SRR17520069. 16515555  
SRR17520069. 16515557  
SRR17520069. 16515559  
SRR17520069. 16515561  
SRR17520069. 16515563  
SRR17520069. 16515565  
SRR17520069. 16515567  
SRR17520069. 16515569  
SRR17520069. 16521399  
SRR17520069. 16521401  
SRR17520069. 16521403  
SRR17520069. 16521405  
SRR17520069. 16521409  
SRR17520069. 16521411  
SRR17520069. 16521413  
SRR17520069. 16521415

SRR17520069. 16521417  
SRR17520069. 16521419  
SRR17520069. 16521421  
SRR17520069. 16521423  
SRR17520069. 16521425  
SRR17520069. 16521427  
SRR17520069. 16521429  
SRR17520069. 16521431  
SRR17520069. 16521433  
SRR17520069. 16521435  
SRR17520069. 16521437  
SRR17520069. 16521439  
SRR17520069. 16521441  
SRR17520069. 16521443  
SRR17520069. 16521445  
SRR17520069. 16521447  
SRR17520069. 16521449  
SRR17520069. 16521451  
SRR17520069. 16521453  
SRR17520069. 16521455  
SRR17520069. 16521457  
SRR17520069. 16521461  
SRR17520069. 16521463  
SRR17520069. 16521465  
SRR17520069. 16521467  
SRR17520069. 16521469  
SRR17520069. 16521471  
SRR17520069. 16521473  
SRR17520069. 16521475  
SRR17520069. 16521477  
SRR17520069. 16522323  
SRR17520069. 16522325  
SRR17520069. 16522327  
SRR17520069. 16522329  
SRR17520069. 16522331  
SRR17520069. 16522333  
SRR17520069. 16522335  
SRR17520069. 16522337  
SRR17520069. 16522339  
SRR17520069. 16522341  
SRR17520069. 16522343  
SRR17520069. 16522347  
SRR17520069. 16522349  
SRR17520069. 16522351  
SRR17520069. 16522353  
SRR17520069. 16522355  
SRR17520069. 16522357

SRR17520069. 16522359  
SRR17520069. 16522361  
SRR17520069. 16522363  
SRR17520069. 16522365  
SRR17520069. 16522367  
SRR17520069. 16522369  
SRR17520069. 16522371  
SRR17520069. 16522373  
SRR17520069. 16522375  
SRR17520069. 16522379  
SRR17520069. 16522381  
SRR17520069. 16522383  
SRR17520069. 16522385  
SRR17520069. 16522387  
SRR17520069. 16522389  
SRR17520069. 16522391  
SRR17520069. 16522393  
SRR17520069. 16522395  
SRR17520069. 16522397  
SRR17520069. 16522399  
SRR17520069. 16522401  
SRR17520069. 16522403  
SRR17520069. 16522405  
SRR17520069. 16522407  
SRR17520069. 16522409  
SRR17520069. 16522411  
SRR17520069. 16522413  
SRR17520069. 16522415  
SRR17520069. 16534490  
SRR17520069. 16538560  
SRR17520069. 16538562  
SRR17520069. 16538566  
SRR17520069. 16538568  
SRR17520069. 16538570  
SRR17520069. 16538572  
SRR17520069. 16538574  
SRR17520069. 16538576  
SRR17520069. 16538578  
SRR17520069. 16538580  
SRR17520069. 16538582  
SRR17520069. 16540788  
SRR17520069. 16540790  
SRR17520069. 16540792  
SRR17520069. 16540794  
SRR17520069. 16540796  
SRR17520069. 16540798  
SRR17520069. 16540800

SRR17520069. 16540802  
SRR17520069. 16540804  
SRR17520069. 16540806  
SRR17520069. 16540808  
SRR17520069. 16540810  
SRR17520069. 16547779  
SRR17520069. 16547781  
SRR17520069. 16547783  
SRR17520069. 16547785  
SRR17520069. 16547787  
SRR17520069. 16547789  
SRR17520069. 16547791  
SRR17520069. 16547793  
SRR17520069. 16547795  
SRR17520069. 16547797  
SRR17520069. 16547799  
SRR17520069. 16547801  
SRR17520069. 16547803  
SRR17520069. 16547805  
SRR17520069. 16547807  
SRR17520069. 16547809  
SRR17520069. 16547811  
SRR17520069. 16547813  
SRR17520069. 16547815  
SRR17520069. 16547817  
SRR17520069. 16547819  
SRR17520069. 16547821  
SRR17520069. 16547823  
SRR17520069. 16547825  
SRR17520069. 16547827  
SRR17520069. 16547829  
SRR17520069. 16547831  
SRR17520069. 16547833  
SRR17520069. 16559378  
SRR17520069. 16559380  
SRR17520069. 16559382  
SRR17520069. 16559384  
SRR17520069. 16559386  
SRR17520069. 16559388  
SRR17520069. 16559390  
SRR17520069. 16559392  
SRR17520069. 16559394  
SRR17520069. 16559396  
SRR17520069. 16559398  
SRR17520069. 16559400  
SRR17520069. 16559402  
SRR17520069. 16559404



SRR17520069.16559406  
SRR17520069.16559408  
SRR17520069.16559410  
SRR17520069.16559412  
SRR17520069.16559414  
SRR17520069.16559416  
SRR17520069.16559418  
SRR17520069.16559420  
SRR17520069.16559422  
SRR17520069.16559424  
SRR17520069.16559426  
SRR17520069.16559428  
SRR17520069.16559430  
SRR17520069.16559432  
SRR17520069.16559434  
SRR17520069.16559436  
SRR17520069.16559438  
SRR17520069.16559440  
SRR17520069.16559442  
SRR17520069.16559444  
SRR17520069.16559446  
SRR17520069.16559448  
SRR17520069.16559450  
SRR17520069.16559452  
SRR17520069.16559454  
SRR17520069.16559456  
SRR17520069.16562744  
SRR17520069.16562746  
SRR17520069.16562748  
SRR17520069.16562750  
SRR17520069.16562752  
SRR17520069.16562754  
SRR17520069.16562756  
SRR17520069.16562758  
SRR17520069.16562760  
SRR17520069.16562762  
SRR17520069.16562764  
SRR17520069.16562770  
SRR17520069.16573031  
SRR17520069.16573033  
SRR17520069.16573035  
SRR17520069.16573037  
SRR17520069.16573039  
SRR17520069.16573041  
SRR17520069.16573043  
SRR17520069.16573045  
SRR17520069.16573047

SRR17520069. 16573049  
SRR17520069. 16575849  
SRR17520069. 16575851  
SRR17520069. 16575853  
SRR17520069. 16575855  
SRR17520069. 16575857  
SRR17520069. 16575859  
SRR17520069. 16575861  
SRR17520069. 16575863  
SRR17520069. 16575865  
SRR17520069. 16575867  
SRR17520069. 16575869  
SRR17520069. 16575871  
SRR17520069. 16575873  
SRR17520069. 16575875  
SRR17520069. 16575877  
SRR17520069. 16575879  
SRR17520069. 16575883  
SRR17520069. 16575885  
SRR17520069. 16575887  
SRR17520069. 16575889  
SRR17520069. 16575891  
SRR17520069. 16575893  
SRR17520069. 16575895  
SRR17520069. 16575897  
SRR17520069. 16575899  
SRR17520069. 16575901  
SRR17520069. 16575903  
SRR17520069. 16575905  
SRR17520069. 16575907  
SRR17520069. 16575909  
SRR17520069. 16575911  
SRR17520069. 16575913  
SRR17520069. 16575915  
SRR17520069. 16575917  
SRR17520069. 16575919  
SRR17520069. 16575921  
SRR17520069. 16575923  
SRR17520069. 16575925  
SRR17520069. 16575927  
SRR17520069. 16575929  
SRR17520069. 16575931  
SRR17520069. 16575933  
SRR17520069. 16575935  
SRR17520069. 16575937  
SRR17520069. 16575939  
SRR17520069. 16575941

SRR17520069. 16575943  
SRR17520069. 16575945  
SRR17520069. 16575947  
SRR17520069. 16575959  
SRR17520069. 16575961  
SRR17520069. 16575963  
SRR17520069. 16575965  
SRR17520069. 16575967  
SRR17520069. 16575969  
SRR17520069. 16575971  
SRR17520069. 16575973  
SRR17520069. 16575975  
SRR17520069. 16575977  
SRR17520069. 16575979  
SRR17520069. 16585016  
SRR17520069. 16585018  
SRR17520069. 16585020  
SRR17520069. 16585022  
SRR17520069. 16585024  
SRR17520069. 16585026  
SRR17520069. 16585028  
SRR17520069. 16585030  
SRR17520069. 16585032  
SRR17520069. 16585034  
SRR17520069. 16585036  
SRR17520069. 16585038  
SRR17520069. 16585040  
SRR17520069. 16585042  
SRR17520069. 16585044  
SRR17520069. 16585046  
SRR17520069. 16585048  
SRR17520069. 16585050  
SRR17520069. 16585052  
SRR17520069. 16585274  
SRR17520069. 16589136  
SRR17520069. 16589189  
SRR17520069. 16589191  
SRR17520069. 16589193  
SRR17520069. 16589195  
SRR17520069. 16589197  
SRR17520069. 16590934  
SRR17520069. 16590936  
SRR17520069. 16590938  
SRR17520069. 16590940  
SRR17520069. 16590942  
SRR17520069. 16591198  
SRR17520069. 16591200

SRR17520069.16591202  
SRR17520069.16591204  
SRR17520069.16591206  
SRR17520069.16591208  
SRR17520069.16591210  
SRR17520069.16591218  
SRR17520069.16598333  
SRR17520069.16598335  
SRR17520069.16598337  
SRR17520069.16598339  
SRR17520069.16598341  
SRR17520069.16598343  
SRR17520069.16598345  
SRR17520069.16598347  
SRR17520069.16598349  
SRR17520069.16598351  
SRR17520069.16598353  
SRR17520069.16598355  
SRR17520069.16598357  
SRR17520069.16598359  
SRR17520069.16598361  
SRR17520069.16598363  
SRR17520069.16598365  
SRR17520069.16598367  
SRR17520069.16599826  
SRR17520069.16599828  
SRR17520069.16599830  
SRR17520069.16599832  
SRR17520069.16599834  
SRR17520069.16599836  
SRR17520069.16599838  
SRR17520069.16599840  
SRR17520069.16599842  
SRR17520069.16599846  
SRR17520069.16599848  
SRR17520069.16599850  
SRR17520069.16599852  
SRR17520069.16599854  
SRR17520069.16599856  
SRR17520069.16599858  
SRR17520069.16599860  
SRR17520069.16599862  
SRR17520069.16599864  
SRR17520069.16605685  
SRR17520069.16605687  
SRR17520069.16605689  
SRR17520069.16605691

SRR17520069.16605693  
SRR17520069.16605695  
SRR17520069.16605697  
SRR17520069.16609658  
SRR17520069.16609660  
SRR17520069.16609662  
SRR17520069.16609664  
SRR17520069.16612781  
SRR17520069.16612783  
SRR17520069.16612849  
SRR17520069.16620233  
SRR17520069.16620237  
SRR17520069.16620239  
SRR17520069.16620245  
SRR17520069.16625806  
SRR17520069.16625808  
SRR17520069.16625810  
SRR17520069.16625812  
SRR17520069.16625814  
SRR17520069.16625816  
SRR17520069.16625818  
SRR17520069.16625820  
SRR17520069.16630386  
SRR17520069.16630388  
SRR17520069.16630390  
SRR17520069.16630392  
SRR17520069.16630394  
SRR17520069.16630396  
SRR17520069.16630398  
SRR17520069.16630400  
SRR17520069.16636553  
SRR17520069.16636555  
SRR17520069.16636557  
SRR17520069.16636559  
SRR17520069.16636561  
SRR17520069.16641121  
SRR17520069.16641123  
SRR17520069.16641125  
SRR17520069.16643638  
SRR17520069.16643640  
SRR17520069.16644281  
SRR17520069.16644283  
SRR17520069.16644285  
SRR17520069.16644287  
SRR17520069.16644289  
SRR17520069.16644291  
SRR17520069.16644293

SRR17520069. 16644295  
SRR17520069. 16644297  
SRR17520069. 16644299  
SRR17520069. 16644301  
SRR17520069. 16644303  
SRR17520069. 16644305  
SRR17520069. 16644307  
SRR17520069. 16644309  
SRR17520069. 16644311  
SRR17520069. 16644313  
SRR17520069. 16644315  
SRR17520069. 16644317  
SRR17520069. 16644319  
SRR17520069. 16644321  
SRR17520069. 16644323  
SRR17520069. 16644325  
SRR17520069. 16644327  
SRR17520069. 16644329  
SRR17520069. 16644331  
SRR17520069. 16644333  
SRR17520069. 16644335  
SRR17520069. 16644337  
SRR17520069. 16644341  
SRR17520069. 16644343  
SRR17520069. 16644345  
SRR17520069. 16644347  
SRR17520069. 16644349  
SRR17520069. 16644351  
SRR17520069. 16644353  
SRR17520069. 16644355  
SRR17520069. 16644357  
SRR17520069. 16644359  
SRR17520069. 16644361  
SRR17520069. 16644363  
SRR17520069. 16644365  
SRR17520069. 16644705  
SRR17520069. 16644707  
SRR17520069. 16646561  
SRR17520069. 16646563  
SRR17520069. 16646565  
SRR17520069. 16646567  
SRR17520069. 16646569  
SRR17520069. 16646571  
SRR17520069. 16646573  
SRR17520069. 16646575  
SRR17520069. 16646577  
SRR17520069. 16646579

SRR17520069. 16646583  
SRR17520069. 16646585  
SRR17520069. 16646587  
SRR17520069. 16658171  
SRR17520069. 16663567  
SRR17520069. 16663569  
SRR17520069. 16663571  
SRR17520069. 16684275  
SRR17520069. 16684277  
SRR17520069. 16684279  
SRR17520069. 16684281  
SRR17520069. 16684283  
SRR17520069. 16684285  
SRR17520069. 16684287  
SRR17520069. 16684289  
SRR17520069. 16684291  
SRR17520069. 16684293  
SRR17520069. 16684295  
SRR17520069. 16684297  
SRR17520069. 16684299  
SRR17520069. 16684301  
SRR17520069. 16684303  
SRR17520069. 16684305  
SRR17520069. 16684309  
SRR17520069. 16690377  
SRR17520069. 16690379  
SRR17520069. 16690381  
SRR17520069. 16690383  
SRR17520069. 16690385  
SRR17520069. 16690387  
SRR17520069. 16690389  
SRR17520069. 16690393  
SRR17520069. 16690395  
SRR17520069. 16690397  
SRR17520069. 16690399  
SRR17520069. 16690401  
SRR17520069. 16690403  
SRR17520069. 16690407  
SRR17520069. 16690409  
SRR17520069. 16690411  
SRR17520069. 16690413  
SRR17520069. 16690415  
SRR17520069. 16690417  
SRR17520069. 16690419  
SRR17520069. 16690421  
SRR17520069. 16690423  
SRR17520069. 16690885

SRR17520069.16690887  
SRR17520069.16690889  
SRR17520069.16690893  
SRR17520069.16690895  
SRR17520069.16690897  
SRR17520069.16692439  
SRR17520069.16692441  
SRR17520069.16692443  
SRR17520069.16692445  
SRR17520069.16692447  
SRR17520069.16692449  
SRR17520069.16692451  
SRR17520069.16692455  
SRR17520069.16692457  
SRR17520069.16692461  
SRR17520069.16697801  
SRR17520069.16697803  
SRR17520069.16697805  
SRR17520069.16702322  
SRR17520069.16702324  
SRR17520069.16702326  
SRR17520069.16702328  
SRR17520069.16702330  
SRR17520069.16702332  
SRR17520069.16702334  
SRR17520069.16702336  
SRR17520069.16702338  
SRR17520069.16702340  
SRR17520069.16702342  
SRR17520069.16702344  
SRR17520069.16702346  
SRR17520069.16702348  
SRR17520069.16702350  
SRR17520069.16702352  
SRR17520069.16702354  
SRR17520069.16702356  
SRR17520069.16702358  
SRR17520069.16702360  
SRR17520069.16702362  
SRR17520069.16702364  
SRR17520069.16702368  
SRR17520069.16702370  
SRR17520069.16702372  
SRR17520069.16702374  
SRR17520069.16702376  
SRR17520069.16702378  
SRR17520069.16702380



SRR17520069. 16706335  
SRR17520069. 16706337  
SRR17520069. 16706341  
SRR17520069. 16706343  
SRR17520069. 16707122  
SRR17520069. 16707126  
SRR17520069. 16707128  
SRR17520069. 16707130  
SRR17520069. 16707132  
SRR17520069. 16707134  
SRR17520069. 16707136  
SRR17520069. 16707138  
SRR17520069. 16707140  
SRR17520069. 16707142  
SRR17520069. 16707144  
SRR17520069. 16707146  
SRR17520069. 16707148  
SRR17520069. 16707150  
SRR17520069. 16707152  
SRR17520069. 16707154  
SRR17520069. 16707156  
SRR17520069. 16707158  
SRR17520069. 16707160  
SRR17520069. 16707162  
SRR17520069. 16707164  
SRR17520069. 16707166  
SRR17520069. 16707168  
SRR17520069. 16707170  
SRR17520069. 16707172  
SRR17520069. 16707174  
SRR17520069. 16707176  
SRR17520069. 16707178  
SRR17520069. 16707180  
SRR17520069. 16707182  
SRR17520069. 16707184  
SRR17520069. 16707186  
SRR17520069. 16707188  
SRR17520069. 16707190  
SRR17520069. 16707192  
SRR17520069. 16707194  
SRR17520069. 16707196  
SRR17520069. 16707198  
SRR17520069. 16707200  
SRR17520069. 16707202  
SRR17520069. 16707204  
SRR17520069. 16707206  
SRR17520069. 16707208

SRR17520069. 16707210  
SRR17520069. 16707212  
SRR17520069. 16707214  
SRR17520069. 16707216  
SRR17520069. 16707218  
SRR17520069. 16707220  
SRR17520069. 16707222  
SRR17520069. 16707224  
SRR17520069. 16707626  
SRR17520069. 16707628  
SRR17520069. 16707630  
SRR17520069. 16707632  
SRR17520069. 16707634  
SRR17520069. 16707636  
SRR17520069. 16707638  
SRR17520069. 16707640  
SRR17520069. 16707642  
SRR17520069. 16707644  
SRR17520069. 16707646  
SRR17520069. 16707650  
SRR17520069. 16707652  
SRR17520069. 16707654  
SRR17520069. 16707656  
SRR17520069. 16707658  
SRR17520069. 16707660  
SRR17520069. 16707662  
SRR17520069. 16707664  
SRR17520069. 16707666  
SRR17520069. 16707668  
SRR17520069. 16707670  
SRR17520069. 16707672  
SRR17520069. 16707674  
SRR17520069. 16713575  
SRR17520069. 16713577  
SRR17520069. 16713579  
SRR17520069. 16713581  
SRR17520069. 16713583  
SRR17520069. 16713585  
SRR17520069. 16713587  
SRR17520069. 16713589  
SRR17520069. 16713591  
SRR17520069. 16713593  
SRR17520069. 16713595  
SRR17520069. 16713597  
SRR17520069. 16713599  
SRR17520069. 16713601  
SRR17520069. 16713603

SRR17520069. 16713605  
SRR17520069. 16713607  
SRR17520069. 16713609  
SRR17520069. 16713611  
SRR17520069. 16713613  
SRR17520069. 16713615  
SRR17520069. 16713617  
SRR17520069. 16713619  
SRR17520069. 16713621  
SRR17520069. 16713623  
SRR17520069. 16713625  
SRR17520069. 16713627  
SRR17520069. 16713629  
SRR17520069. 16713631  
SRR17520069. 16713633  
SRR17520069. 16713635  
SRR17520069. 16713637  
SRR17520069. 16713639  
SRR17520069. 16713641  
SRR17520069. 16713643  
SRR17520069. 16713645  
SRR17520069. 16713647  
SRR17520069. 16713649  
SRR17520069. 16713651  
SRR17520069. 16713653  
SRR17520069. 16713655  
SRR17520069. 16713657  
SRR17520069. 16713659  
SRR17520069. 16713661  
SRR17520069. 16713663  
SRR17520069. 16713665  
SRR17520069. 16713667  
SRR17520069. 16713669  
SRR17520069. 16713671  
SRR17520069. 16713673  
SRR17520069. 16713675  
SRR17520069. 16713677  
SRR17520069. 16713679  
SRR17520069. 16713681  
SRR17520069. 16713683  
SRR17520069. 16713685  
SRR17520069. 16713687  
SRR17520069. 16713689  
SRR17520069. 16713691  
SRR17520069. 16713693  
SRR17520069. 16713695  
SRR17520069. 16713697

SRR17520069. 16713699  
SRR17520069. 16713701  
SRR17520069. 16713703  
SRR17520069. 16713705  
SRR17520069. 16713707  
SRR17520069. 16713709  
SRR17520069. 16713711  
SRR17520069. 16713713  
SRR17520069. 16713715  
SRR17520069. 16713717  
SRR17520069. 16713719  
SRR17520069. 16713721  
SRR17520069. 16713723  
SRR17520069. 16713725  
SRR17520069. 16713727  
SRR17520069. 16713729  
SRR17520069. 16714713  
SRR17520069. 16714715  
SRR17520069. 16714717  
SRR17520069. 16714719  
SRR17520069. 16714721  
SRR17520069. 16714723  
SRR17520069. 16714725  
SRR17520069. 16714727  
SRR17520069. 16714729  
SRR17520069. 16714731  
SRR17520069. 16714733  
SRR17520069. 16714735  
SRR17520069. 16714737  
SRR17520069. 16714739  
SRR17520069. 16714741  
SRR17520069. 16714743  
SRR17520069. 16714745  
SRR17520069. 16714747  
SRR17520069. 16714749  
SRR17520069. 16714751  
SRR17520069. 16714753  
SRR17520069. 16714755  
SRR17520069. 16714757  
SRR17520069. 16714759  
SRR17520069. 16714761  
SRR17520069. 16714763  
SRR17520069. 16714765  
SRR17520069. 16714767  
SRR17520069. 16714769  
SRR17520069. 16714771  
SRR17520069. 16714773

SRR17520069. 16714775  
SRR17520069. 16714777  
SRR17520069. 16714779  
SRR17520069. 16714781  
SRR17520069. 16714783  
SRR17520069. 16714785  
SRR17520069. 16714787  
SRR17520069. 16714789  
SRR17520069. 16714791  
SRR17520069. 16714793  
SRR17520069. 16714795  
SRR17520069. 16714797  
SRR17520069. 16714799  
SRR17520069. 16714801  
SRR17520069. 16714803  
SRR17520069. 16714805  
SRR17520069. 16714807  
SRR17520069. 16714809  
SRR17520069. 16714811  
SRR17520069. 16714813  
SRR17520069. 16714815  
SRR17520069. 16714817  
SRR17520069. 16714819  
SRR17520069. 16714823  
SRR17520069. 16714825  
SRR17520069. 16714827  
SRR17520069. 16714829  
SRR17520069. 16714831  
SRR17520069. 16714835  
SRR17520069. 16714837  
SRR17520069. 16714839  
SRR17520069. 16714841  
SRR17520069. 16714843  
SRR17520069. 16714845  
SRR17520069. 16714847  
SRR17520069. 16714849  
SRR17520069. 16714851  
SRR17520069. 16714853  
SRR17520069. 16714855  
SRR17520069. 16714857  
SRR17520069. 16714859  
SRR17520069. 16714861  
SRR17520069. 16714863  
SRR17520069. 16714865  
SRR17520069. 16714867  
SRR17520069. 16714869  
SRR17520069. 16714871

SRR17520069. 16714873  
SRR17520069. 16714875  
SRR17520069. 16714877  
SRR17520069. 16714879  
SRR17520069. 16714881  
SRR17520069. 16714883  
SRR17520069. 16714885  
SRR17520069. 16714889  
SRR17520069. 16714891  
SRR17520069. 16714893  
SRR17520069. 16714895  
SRR17520069. 16714897  
SRR17520069. 16714899  
SRR17520069. 16714901  
SRR17520069. 16714903  
SRR17520069. 16714905  
SRR17520069. 16714907  
SRR17520069. 16714909  
SRR17520069. 16714911  
SRR17520069. 16714913  
SRR17520069. 16714915  
SRR17520069. 16714917  
SRR17520069. 16714919  
SRR17520069. 16714921  
SRR17520069. 16714923  
SRR17520069. 16714925  
SRR17520069. 16714927  
SRR17520069. 16714929  
SRR17520069. 16714931  
SRR17520069. 16714933  
SRR17520069. 16714935  
SRR17520069. 16714937  
SRR17520069. 16714939  
SRR17520069. 16714941  
SRR17520069. 16714943  
SRR17520069. 16714945  
SRR17520069. 16720440  
SRR17520069. 16720442  
SRR17520069. 16720444  
SRR17520069. 16720448  
SRR17520069. 16720450  
SRR17520069. 16720452  
SRR17520069. 16720454  
SRR17520069. 16720456  
SRR17520069. 16720458  
SRR17520069. 16720460  
SRR17520069. 16721478

SRR17520069. 16721480  
SRR17520069. 16721482  
SRR17520069. 16721484  
SRR17520069. 16721486  
SRR17520069. 16721488  
SRR17520069. 16721490  
SRR17520069. 16721492  
SRR17520069. 16721494  
SRR17520069. 16721496  
SRR17520069. 16721498  
SRR17520069. 16721500  
SRR17520069. 16721502  
SRR17520069. 16721504  
SRR17520069. 16721506  
SRR17520069. 16721508  
SRR17520069. 16721510  
SRR17520069. 16721512  
SRR17520069. 16721514  
SRR17520069. 16721516  
SRR17520069. 16721518  
SRR17520069. 16721520  
SRR17520069. 16721522  
SRR17520069. 16721524  
SRR17520069. 16721526  
SRR17520069. 16721528  
SRR17520069. 16721530  
SRR17520069. 16721532  
SRR17520069. 16722074  
SRR17520069. 16722076  
SRR17520069. 16722078  
SRR17520069. 16722080  
SRR17520069. 16722082  
SRR17520069. 16722084  
SRR17520069. 16722086  
SRR17520069. 16722088  
SRR17520069. 16722090  
SRR17520069. 16722092  
SRR17520069. 16722094  
SRR17520069. 16722096  
SRR17520069. 16722098  
SRR17520069. 16722100  
SRR17520069. 16722102  
SRR17520069. 16722108  
SRR17520069. 16722110  
SRR17520069. 16722112  
SRR17520069. 16722114  
SRR17520069. 16722116

SRR17520069. 16722118  
SRR17520069. 16722120  
SRR17520069. 16722122  
SRR17520069. 16722124  
SRR17520069. 16722126  
SRR17520069. 16722130  
SRR17520069. 16722132  
SRR17520069. 16722134  
SRR17520069. 16722136  
SRR17520069. 16722138  
SRR17520069. 16722140  
SRR17520069. 16722142  
SRR17520069. 16722144  
SRR17520069. 16722146  
SRR17520069. 16722148  
SRR17520069. 16722150  
SRR17520069. 16722152  
SRR17520069. 16722154  
SRR17520069. 16722156  
SRR17520069. 16722158  
SRR17520069. 16722160  
SRR17520069. 16722162  
SRR17520069. 16722164  
SRR17520069. 16722166  
SRR17520069. 16722168  
SRR17520069. 16722170  
SRR17520069. 16722172  
SRR17520069. 16722174  
SRR17520069. 16722176  
SRR17520069. 16722178  
SRR17520069. 16722180  
SRR17520069. 16722182  
SRR17520069. 16722184  
SRR17520069. 16722186  
SRR17520069. 16722188  
SRR17520069. 16722190  
SRR17520069. 16722192  
SRR17520069. 16722194  
SRR17520069. 16722196  
SRR17520069. 16729327  
SRR17520069. 16729329  
SRR17520069. 16729333  
SRR17520069. 16729335  
SRR17520069. 16729337  
SRR17520069. 16729339  
SRR17520069. 16729341  
SRR17520069. 16729345



SRR17520069. 16729347  
SRR17520069. 16729349  
SRR17520069. 16729351  
SRR17520069. 16729353  
SRR17520069. 16729355  
SRR17520069. 16729357  
SRR17520069. 16729359  
SRR17520069. 16729363  
SRR17520069. 16729365  
SRR17520069. 16729371  
SRR17520069. 16729373  
SRR17520069. 16729375  
SRR17520069. 16729377  
SRR17520069. 16729379  
SRR17520069. 16729381  
SRR17520069. 16729383  
SRR17520069. 16729385  
SRR17520069. 16729387  
SRR17520069. 16729391  
SRR17520069. 16729393  
SRR17520069. 16729395  
SRR17520069. 16729397  
SRR17520069. 16729399  
SRR17520069. 16729403  
SRR17520069. 16729405  
SRR17520069. 16729407  
SRR17520069. 16729409  
SRR17520069. 16729411  
SRR17520069. 16729413  
SRR17520069. 16729415  
SRR17520069. 16729417  
SRR17520069. 16729419  
SRR17520069. 16729421  
SRR17520069. 16729423  
SRR17520069. 16729425  
SRR17520069. 16729427  
SRR17520069. 16729429  
SRR17520069. 16729431  
SRR17520069. 16729433  
SRR17520069. 16729435  
SRR17520069. 16729437  
SRR17520069. 16729439  
SRR17520069. 16729441  
SRR17520069. 16729443  
SRR17520069. 16729445  
SRR17520069. 16729449  
SRR17520069. 16729451

SRR17520069. 16729453  
SRR17520069. 16729455  
SRR17520069. 16729457  
SRR17520069. 16729459  
SRR17520069. 16729461  
SRR17520069. 16729463  
SRR17520069. 16737731  
SRR17520069. 16737733  
SRR17520069. 16737735  
SRR17520069. 16737737  
SRR17520069. 16737739  
SRR17520069. 16737741  
SRR17520069. 16737743  
SRR17520069. 16737745  
SRR17520069. 16737747  
SRR17520069. 16737749  
SRR17520069. 16737751  
SRR17520069. 16737753  
SRR17520069. 16737755  
SRR17520069. 16737757  
SRR17520069. 16737759  
SRR17520069. 16737761  
SRR17520069. 16737763  
SRR17520069. 16737767  
SRR17520069. 16737769  
SRR17520069. 16737771  
SRR17520069. 16737773  
SRR17520069. 16737775  
SRR17520069. 16737777  
SRR17520069. 16737779  
SRR17520069. 16737781  
SRR17520069. 16737783  
SRR17520069. 16737785  
SRR17520069. 16737787  
SRR17520069. 16737789  
SRR17520069. 16737791  
SRR17520069. 16737793  
SRR17520069. 16737797  
SRR17520069. 16737799  
SRR17520069. 16737801  
SRR17520069. 16737803  
SRR17520069. 16737805  
SRR17520069. 16737807  
SRR17520069. 16737809  
SRR17520069. 16737811  
SRR17520069. 16737813  
SRR17520069. 16737815

SRR17520069. 16742965  
SRR17520069. 16742967  
SRR17520069. 16742969  
SRR17520069. 16742971  
SRR17520069. 16742973  
SRR17520069. 16742975  
SRR17520069. 16742977  
SRR17520069. 16742979  
SRR17520069. 16742981  
SRR17520069. 16742983  
SRR17520069. 16742985  
SRR17520069. 16742987  
SRR17520069. 16742989  
SRR17520069. 16742991  
SRR17520069. 16742993  
SRR17520069. 16742995  
SRR17520069. 16742997  
SRR17520069. 16743001  
SRR17520069. 16743003  
SRR17520069. 16748655  
SRR17520069. 16748657  
SRR17520069. 16748659  
SRR17520069. 16748661  
SRR17520069. 16748663  
SRR17520069. 16748665  
SRR17520069. 16748669  
SRR17520069. 16748671  
SRR17520069. 16748673  
SRR17520069. 16748675  
SRR17520069. 16748677  
SRR17520069. 16748679  
SRR17520069. 16748681  
SRR17520069. 16748683  
SRR17520069. 16748685  
SRR17520069. 16748687  
SRR17520069. 16748689  
SRR17520069. 16748691  
SRR17520069. 16748693  
SRR17520069. 16748695  
SRR17520069. 16748697  
SRR17520069. 16748699  
SRR17520069. 16748701  
SRR17520069. 16748703  
SRR17520069. 16748705  
SRR17520069. 16748707  
SRR17520069. 16748709  
SRR17520069. 16748711

SRR17520069. 16748713  
SRR17520069. 16748715  
SRR17520069. 16748717  
SRR17520069. 16748719  
SRR17520069. 16748721  
SRR17520069. 16748723  
SRR17520069. 16748725  
SRR17520069. 16748727  
SRR17520069. 16748729  
SRR17520069. 16748731  
SRR17520069. 16751296  
SRR17520069. 16751298  
SRR17520069. 16751300  
SRR17520069. 16751302  
SRR17520069. 16751304  
SRR17520069. 16751306  
SRR17520069. 16751308  
SRR17520069. 16751310  
SRR17520069. 16751312  
SRR17520069. 16751314  
SRR17520069. 16751316  
SRR17520069. 16751318  
SRR17520069. 16751320  
SRR17520069. 16751322  
SRR17520069. 16751324  
SRR17520069. 16751326  
SRR17520069. 16751328  
SRR17520069. 16751330  
SRR17520069. 16751332  
SRR17520069. 16751334  
SRR17520069. 16751336  
SRR17520069. 16751338  
SRR17520069. 16751340  
SRR17520069. 16751342  
SRR17520069. 16751344  
SRR17520069. 16751346  
SRR17520069. 16751348  
SRR17520069. 16751350  
SRR17520069. 16751352  
SRR17520069. 16751354  
SRR17520069. 16751356  
SRR17520069. 16751358  
SRR17520069. 16751360  
SRR17520069. 16751364  
SRR17520069. 16751366  
SRR17520069. 16751368  
SRR17520069. 16751372

SRR17520069. 16752856  
SRR17520069. 16753820  
SRR17520069. 16753824  
SRR17520069. 16753826  
SRR17520069. 16753830  
SRR17520069. 16753832  
SRR17520069. 16753834  
SRR17520069. 16753836  
SRR17520069. 16753838  
SRR17520069. 16753840  
SRR17520069. 16753842  
SRR17520069. 16753844  
SRR17520069. 16753846  
SRR17520069. 16753848  
SRR17520069. 16753850  
SRR17520069. 16753852  
SRR17520069. 16753854  
SRR17520069. 16753856  
SRR17520069. 16753858  
SRR17520069. 16753860  
SRR17520069. 16753862  
SRR17520069. 16753864  
SRR17520069. 16753866  
SRR17520069. 16753868  
SRR17520069. 16753870  
SRR17520069. 16753872  
SRR17520069. 16753874  
SRR17520069. 16753876  
SRR17520069. 16753878  
SRR17520069. 16753880  
SRR17520069. 16753884  
SRR17520069. 16754224  
SRR17520069. 16754226  
SRR17520069. 16754228  
SRR17520069. 16754232  
SRR17520069. 16754234  
SRR17520069. 16754240  
SRR17520069. 16754248  
SRR17520069. 16754250  
SRR17520069. 16758036  
SRR17520069. 16758042  
SRR17520069. 16758046  
SRR17520069. 16758048  
SRR17520069. 16758050  
SRR17520069. 16758052  
SRR17520069. 16758054  
SRR17520069. 16758056

SRR17520069. 16758058  
SRR17520069. 16758060  
SRR17520069. 16758062  
SRR17520069. 16758064  
SRR17520069. 16758066  
SRR17520069. 16758068  
SRR17520069. 16758072  
SRR17520069. 16758074  
SRR17520069. 16758076  
SRR17520069. 16758078  
SRR17520069. 16758080  
SRR17520069. 16758082  
SRR17520069. 16758084  
SRR17520069. 16758086  
SRR17520069. 16758088  
SRR17520069. 16758090  
SRR17520069. 16758092  
SRR17520069. 16758094  
SRR17520069. 16758096  
SRR17520069. 16758098  
SRR17520069. 16758100  
SRR17520069. 16758102  
SRR17520069. 16758104  
SRR17520069. 16758106  
SRR17520069. 16758108  
SRR17520069. 16758110  
SRR17520069. 16758112  
SRR17520069. 16758114  
SRR17520069. 16758120  
SRR17520069. 16758122  
SRR17520069. 16758124  
SRR17520069. 16758126  
SRR17520069. 16758128  
SRR17520069. 16758130  
SRR17520069. 16758132  
SRR17520069. 16758134  
SRR17520069. 16758138  
SRR17520069. 16758140  
SRR17520069. 16769499  
SRR17520069. 16769501  
SRR17520069. 16769503  
SRR17520069. 16769505  
SRR17520069. 16769507  
SRR17520069. 16769509  
SRR17520069. 16769511  
SRR17520069. 16769513  
SRR17520069. 16770318

SRR17520069. 16770322  
SRR17520069. 16770324  
SRR17520069. 16770326  
SRR17520069. 16770328  
SRR17520069. 16770330  
SRR17520069. 16770332  
SRR17520069. 16770336  
SRR17520069. 16773193  
SRR17520069. 16773195  
SRR17520069. 16777679  
SRR17520069. 16777681  
SRR17520069. 16777683  
SRR17520069. 16777685  
SRR17520069. 16777687  
SRR17520069. 16777689  
SRR17520069. 16777691  
SRR17520069. 16777693  
SRR17520069. 16777695  
SRR17520069. 16777697  
SRR17520069. 16777699  
SRR17520069. 16777701  
SRR17520069. 16777705  
SRR17520069. 16777707  
SRR17520069. 16777709  
SRR17520069. 16777711  
SRR17520069. 16777713  
SRR17520069. 16777715  
SRR17520069. 16777717  
SRR17520069. 16777719  
SRR17520069. 16777723  
SRR17520069. 16777727  
SRR17520069. 16777729  
SRR17520069. 16777731  
SRR17520069. 16777733  
SRR17520069. 16777735  
SRR17520069. 16777737  
SRR17520069. 16785578  
SRR17520069. 16785580  
SRR17520069. 16785582  
SRR17520069. 16785584  
SRR17520069. 16785586  
SRR17520069. 16785588  
SRR17520069. 16785590  
SRR17520069. 16785592  
SRR17520069. 16785594  
SRR17520069. 16785596  
SRR17520069. 16787053

SRR17520069. 16791276  
SRR17520069. 16791278  
SRR17520069. 16791280  
SRR17520069. 16796127  
SRR17520069. 16798436  
SRR17520069. 16798438  
SRR17520069. 16798440  
SRR17520069. 16798442  
SRR17520069. 16798444  
SRR17520069. 16798446  
SRR17520069. 16798448  
SRR17520069. 16798450  
SRR17520069. 16798452  
SRR17520069. 16798454  
SRR17520069. 16798456  
SRR17520069. 16798458  
SRR17520069. 16798460  
SRR17520069. 16798462  
SRR17520069. 16798464  
SRR17520069. 16798468  
SRR17520069. 16798470  
SRR17520069. 16798472  
SRR17520069. 16798474  
SRR17520069. 16798476  
SRR17520069. 16798478  
SRR17520069. 16798480  
SRR17520069. 16798482  
SRR17520069. 16798484  
SRR17520069. 16798486  
SRR17520069. 16805342  
SRR17520069. 16805344  
SRR17520069. 16805346  
SRR17520069. 16805348  
SRR17520069. 16805350  
SRR17520069. 16805352  
SRR17520069. 16805354  
SRR17520069. 16805356  
SRR17520069. 16805358  
SRR17520069. 16805360  
SRR17520069. 16817757  
SRR17520069. 16817857  
SRR17520069. 16817859  
SRR17520069. 16817861  
SRR17520069. 16817863  
SRR17520069. 16817865  
SRR17520069. 16817867  
SRR17520069. 16817869



SRR17520069. 16817871  
SRR17520069. 16817873  
SRR17520069. 16817875  
SRR17520069. 16817877  
SRR17520069. 16817879  
SRR17520069. 16817881  
SRR17520069. 16817883  
SRR17520069. 16817885  
SRR17520069. 16817887  
SRR17520069. 16817889  
SRR17520069. 16817891  
SRR17520069. 16817893  
SRR17520069. 16817895  
SRR17520069. 16817897  
SRR17520069. 16817901  
SRR17520069. 16817903  
SRR17520069. 16817905  
SRR17520069. 16817907  
SRR17520069. 16817909  
SRR17520069. 16817911  
SRR17520069. 16817913  
SRR17520069. 16817915  
SRR17520069. 16817917  
SRR17520069. 16817919  
SRR17520069. 16817921  
SRR17520069. 16817923  
SRR17520069. 16823403  
SRR17520069. 16823405  
SRR17520069. 16823409  
SRR17520069. 16823411  
SRR17520069. 16823413  
SRR17520069. 16823419  
SRR17520069. 16823421  
SRR17520069. 16830294  
SRR17520069. 16830296  
SRR17520069. 16830298  
SRR17520069. 16830300  
SRR17520069. 16830302  
SRR17520069. 16830304  
SRR17520069. 16830306  
SRR17520069. 16830308  
SRR17520069. 16830310  
SRR17520069. 16830312  
SRR17520069. 16830314  
SRR17520069. 16830316  
SRR17520069. 16830318  
SRR17520069. 16830320

SRR17520069.16830322  
SRR17520069.16830326  
SRR17520069.16830328  
SRR17520069.16830330  
SRR17520069.16830332  
SRR17520069.16830334  
SRR17520069.16830336  
SRR17520069.16830338  
SRR17520069.16830342  
SRR17520069.16830344  
SRR17520069.16830346  
SRR17520069.16830348  
SRR17520069.16830350  
SRR17520069.16830352  
SRR17520069.16830354  
SRR17520069.16830358  
SRR17520069.16830360  
SRR17520069.16830362  
SRR17520069.16830364  
SRR17520069.16830366  
SRR17520069.16830368  
SRR17520069.16830370  
SRR17520069.16830372  
SRR17520069.16830374  
SRR17520069.16830378  
SRR17520069.16830380  
SRR17520069.16830382  
SRR17520069.16830384  
SRR17520069.16830386  
SRR17520069.16830388  
SRR17520069.16830390  
SRR17520069.16830392  
SRR17520069.16830394  
SRR17520069.16830396  
SRR17520069.16839837  
SRR17520069.16839839  
SRR17520069.16839841  
SRR17520069.16839843  
SRR17520069.16839845  
SRR17520069.16839847  
SRR17520069.16839849  
SRR17520069.16839851  
SRR17520069.16839853  
SRR17520069.16839855  
SRR17520069.16839859  
SRR17520069.16839861  
SRR17520069.16839863

SRR17520069. 16839865  
SRR17520069. 16839867  
SRR17520069. 16839869  
SRR17520069. 16839871  
SRR17520069. 16839873  
SRR17520069. 16839875  
SRR17520069. 16839877  
SRR17520069. 16839879  
SRR17520069. 16839881  
SRR17520069. 16839885  
SRR17520069. 16839887  
SRR17520069. 16839889  
SRR17520069. 16839891  
SRR17520069. 16839893  
SRR17520069. 16839895  
SRR17520069. 16839897  
SRR17520069. 16839899  
SRR17520069. 16839901  
SRR17520069. 16839903  
SRR17520069. 16839905  
SRR17520069. 16839907  
SRR17520069. 16839909  
SRR17520069. 16839911  
SRR17520069. 16839913  
SRR17520069. 16839915  
SRR17520069. 16839917  
SRR17520069. 16839919  
SRR17520069. 16839921  
SRR17520069. 16839923  
SRR17520069. 16839925  
SRR17520069. 16839927  
SRR17520069. 16845056  
SRR17520069. 16848660  
SRR17520069. 16848662  
SRR17520069. 16848664  
SRR17520069. 16848666  
SRR17520069. 16848668  
SRR17520069. 16848670  
SRR17520069. 16848672  
SRR17520069. 16848674  
SRR17520069. 16848676  
SRR17520069. 16848678  
SRR17520069. 16848680  
SRR17520069. 16848682  
SRR17520069. 16848684  
SRR17520069. 16848686  
SRR17520069. 16850952

SRR17520069.16850954  
SRR17520069.16850956  
SRR17520069.16850958  
SRR17520069.16850960  
SRR17520069.16850962  
SRR17520069.16850964  
SRR17520069.16850966  
SRR17520069.16850968  
SRR17520069.16850970  
SRR17520069.16850972  
SRR17520069.16850976  
SRR17520069.16852270  
SRR17520069.16852272  
SRR17520069.16852274  
SRR17520069.16852276  
SRR17520069.16852278  
SRR17520069.16852280  
SRR17520069.16852282  
SRR17520069.16852284  
SRR17520069.16852286  
SRR17520069.16852288  
SRR17520069.16852290  
SRR17520069.16852292  
SRR17520069.16852294  
SRR17520069.16852296  
SRR17520069.16852298  
SRR17520069.16852300  
SRR17520069.16852302  
SRR17520069.16852304  
SRR17520069.16852306  
SRR17520069.16852308  
SRR17520069.16852310  
SRR17520069.16852675  
SRR17520069.16852677  
SRR17520069.16852679  
SRR17520069.16852681  
SRR17520069.16852683  
SRR17520069.16852685  
SRR17520069.16852687  
SRR17520069.16852689  
SRR17520069.16852691  
SRR17520069.16852693  
SRR17520069.16852695  
SRR17520069.16852699  
SRR17520069.16852701  
SRR17520069.16852703  
SRR17520069.16852705

SRR17520069. 16852707  
SRR17520069. 16852709  
SRR17520069. 16852711  
SRR17520069. 16867537  
SRR17520069. 16867603  
SRR17520069. 16867605  
SRR17520069. 16867607  
SRR17520069. 16867609  
SRR17520069. 16867611  
SRR17520069. 16867613  
SRR17520069. 16867615  
SRR17520069. 16867617  
SRR17520069. 16867619  
SRR17520069. 16867621  
SRR17520069. 16867623  
SRR17520069. 16867625  
SRR17520069. 16867627  
SRR17520069. 16867629  
SRR17520069. 16867631  
SRR17520069. 16867633  
SRR17520069. 16867635  
SRR17520069. 16867637  
SRR17520069. 16867639  
SRR17520069. 16867641  
SRR17520069. 16867643  
SRR17520069. 16867645  
SRR17520069. 16867647  
SRR17520069. 16867649  
SRR17520069. 16867651  
SRR17520069. 16867653  
SRR17520069. 16867655  
SRR17520069. 16867657  
SRR17520069. 16867659  
SRR17520069. 16867661  
SRR17520069. 16867663  
SRR17520069. 16867751  
SRR17520069. 16867753  
SRR17520069. 16867755  
SRR17520069. 16867761  
SRR17520069. 16867763  
SRR17520069. 16867765  
SRR17520069. 16867767  
SRR17520069. 16867769  
SRR17520069. 16867771  
SRR17520069. 16867773  
SRR17520069. 16867775  
SRR17520069. 16867777

SRR17520069. 16867779  
SRR17520069. 16867781  
SRR17520069. 16867783  
SRR17520069. 16867785  
SRR17520069. 16867787  
SRR17520069. 16867789  
SRR17520069. 16867791  
SRR17520069. 16867793  
SRR17520069. 16867795  
SRR17520069. 16867799  
SRR17520069. 16867801  
SRR17520069. 16867803  
SRR17520069. 16867805  
SRR17520069. 16867807  
SRR17520069. 16867809  
SRR17520069. 16867811  
SRR17520069. 16867813  
SRR17520069. 16867815  
SRR17520069. 16867817  
SRR17520069. 16867819  
SRR17520069. 16867821  
SRR17520069. 16867823  
SRR17520069. 16867825  
SRR17520069. 16867827  
SRR17520069. 16867829  
SRR17520069. 16867831  
SRR17520069. 16867833  
SRR17520069. 16867835  
SRR17520069. 16867837  
SRR17520069. 16867839  
SRR17520069. 16867841  
SRR17520069. 16867843  
SRR17520069. 16867845  
SRR17520069. 16867847  
SRR17520069. 16867849  
SRR17520069. 16867851  
SRR17520069. 16867853  
SRR17520069. 16868068  
SRR17520069. 16871098  
SRR17520069. 16871100  
SRR17520069. 16871102  
SRR17520069. 16871104  
SRR17520069. 16871106  
SRR17520069. 16871108  
SRR17520069. 16871110  
SRR17520069. 16871112  
SRR17520069. 16871114

SRR17520069. 16871116  
SRR17520069. 16871120  
SRR17520069. 16871122  
SRR17520069. 16871124  
SRR17520069. 16871126  
SRR17520069. 16871128  
SRR17520069. 16871130  
SRR17520069. 16871132  
SRR17520069. 16871134  
SRR17520069. 16871136  
SRR17520069. 16871138  
SRR17520069. 16871140  
SRR17520069. 16871142  
SRR17520069. 16871144  
SRR17520069. 16871146  
SRR17520069. 16871148  
SRR17520069. 16871150  
SRR17520069. 16871152  
SRR17520069. 16871154  
SRR17520069. 16871156  
SRR17520069. 16871158  
SRR17520069. 16871160  
SRR17520069. 16871162  
SRR17520069. 16871164  
SRR17520069. 16871166  
SRR17520069. 16871168  
SRR17520069. 16871170  
SRR17520069. 16877349  
SRR17520069. 16877351  
SRR17520069. 16877353  
SRR17520069. 16877355  
SRR17520069. 16878390  
SRR17520069. 16878392  
SRR17520069. 16878394  
SRR17520069. 16879306  
SRR17520069. 16879308  
SRR17520069. 16879310  
SRR17520069. 16879312  
SRR17520069. 16879314  
SRR17520069. 16879316  
SRR17520069. 16879318  
SRR17520069. 16879320  
SRR17520069. 16879322  
SRR17520069. 16879324  
SRR17520069. 16879326  
SRR17520069. 16879328  
SRR17520069. 16879330

SRR17520069. 16879332  
SRR17520069. 16879334  
SRR17520069. 16879336  
SRR17520069. 16879338  
SRR17520069. 16879340  
SRR17520069. 16879342  
SRR17520069. 16879344  
SRR17520069. 16879346  
SRR17520069. 16879348  
SRR17520069. 16879350  
SRR17520069. 16880072  
SRR17520069. 16880074  
SRR17520069. 16880078  
SRR17520069. 16882682  
SRR17520069. 16882684  
SRR17520069. 16882686  
SRR17520069. 16882688  
SRR17520069. 16882690  
SRR17520069. 16882692  
SRR17520069. 16886552  
SRR17520069. 16886554  
SRR17520069. 16886556  
SRR17520069. 16886558  
SRR17520069. 16886560  
SRR17520069. 16886562  
SRR17520069. 16886564  
SRR17520069. 16886566  
SRR17520069. 16886568  
SRR17520069. 16886570  
SRR17520069. 16886572  
SRR17520069. 16886574  
SRR17520069. 16886576  
SRR17520069. 16886578  
SRR17520069. 16886580  
SRR17520069. 16886582  
SRR17520069. 16886584  
SRR17520069. 16886586  
SRR17520069. 16886588  
SRR17520069. 16886590  
SRR17520069. 16889753  
SRR17520069. 16889755  
SRR17520069. 16889757  
SRR17520069. 16889759  
SRR17520069. 16889761  
SRR17520069. 16889763  
SRR17520069. 16889765  
SRR17520069. 16889767



SRR17520069.16889771  
SRR17520069.16889773  
SRR17520069.16889777  
SRR17520069.16889779  
SRR17520069.16889781  
SRR17520069.16889783  
SRR17520069.16889785  
SRR17520069.16889787  
SRR17520069.16889789  
SRR17520069.16889791  
SRR17520069.16890444  
SRR17520069.16893221  
SRR17520069.16893223  
SRR17520069.16893225  
SRR17520069.16893227  
SRR17520069.16893229  
SRR17520069.16893231  
SRR17520069.16893233  
SRR17520069.16893235  
SRR17520069.16893237  
SRR17520069.16893239  
SRR17520069.16893241  
SRR17520069.16893243  
SRR17520069.16893245  
SRR17520069.16894888  
SRR17520069.16894890  
SRR17520069.16894892  
SRR17520069.16894894  
SRR17520069.16894896  
SRR17520069.16894898  
SRR17520069.16894900  
SRR17520069.16896935  
SRR17520069.16896937  
SRR17520069.16896941  
SRR17520069.16896943  
SRR17520069.16896945  
SRR17520069.16896947  
SRR17520069.16896949  
SRR17520069.16896951  
SRR17520069.16896953  
SRR17520069.16896955  
SRR17520069.16896957  
SRR17520069.16896959  
SRR17520069.16896961  
SRR17520069.16896963  
SRR17520069.16896965  
SRR17520069.16896967

SRR17520069. 16896969  
SRR17520069. 16896971  
SRR17520069. 16896973  
SRR17520069. 16896975  
SRR17520069. 16896977  
SRR17520069. 16897225  
SRR17520069. 16897227  
SRR17520069. 16897229  
SRR17520069. 16897231  
SRR17520069. 16897233  
SRR17520069. 16897235  
SRR17520069. 16897237  
SRR17520069. 16897239  
SRR17520069. 16897241  
SRR17520069. 16897243  
SRR17520069. 16897245  
SRR17520069. 16897247  
SRR17520069. 16897249  
SRR17520069. 16897251  
SRR17520069. 16897253  
SRR17520069. 16897255  
SRR17520069. 16897257  
SRR17520069. 16897259  
SRR17520069. 16897261  
SRR17520069. 16897263  
SRR17520069. 16897265  
SRR17520069. 16897267  
SRR17520069. 16897269  
SRR17520069. 16897271  
SRR17520069. 16897273  
SRR17520069. 16897275  
SRR17520069. 16897277  
SRR17520069. 16897279  
SRR17520069. 16897281  
SRR17520069. 16897283  
SRR17520069. 16897285  
SRR17520069. 16897287  
SRR17520069. 16897289  
SRR17520069. 16897291  
SRR17520069. 16897293  
SRR17520069. 16897295  
SRR17520069. 16897297  
SRR17520069. 16897299  
SRR17520069. 16897301  
SRR17520069. 16897303  
SRR17520069. 16897305  
SRR17520069. 16897307

SRR17520069. 16897309  
SRR17520069. 16897311  
SRR17520069. 16897313  
SRR17520069. 16897315  
SRR17520069. 16897317  
SRR17520069. 16897319  
SRR17520069. 16897321  
SRR17520069. 16897323  
SRR17520069. 16897325  
SRR17520069. 16897327  
SRR17520069. 16897329  
SRR17520069. 16897331  
SRR17520069. 16897333  
SRR17520069. 16897335  
SRR17520069. 16897337  
SRR17520069. 16897339  
SRR17520069. 16897341  
SRR17520069. 16897343  
SRR17520069. 16897345  
SRR17520069. 16897349  
SRR17520069. 16897351  
SRR17520069. 16897353  
SRR17520069. 16897355  
SRR17520069. 16897357  
SRR17520069. 16897359  
SRR17520069. 16897361  
SRR17520069. 16897363  
SRR17520069. 16897365  
SRR17520069. 16897367  
SRR17520069. 16897369  
SRR17520069. 16897371  
SRR17520069. 16897373  
SRR17520069. 16897375  
SRR17520069. 16897377  
SRR17520069. 16897379  
SRR17520069. 16897381  
SRR17520069. 16897383  
SRR17520069. 16897385  
SRR17520069. 16897387  
SRR17520069. 16897389  
SRR17520069. 16897391  
SRR17520069. 16897395  
SRR17520069. 16897397  
SRR17520069. 16897399  
SRR17520069. 16897401  
SRR17520069. 16897403  
SRR17520069. 16897405

SRR17520069. 16897407  
SRR17520069. 16897409  
SRR17520069. 16897411  
SRR17520069. 16897413  
SRR17520069. 16897415  
SRR17520069. 16897417  
SRR17520069. 16897419  
SRR17520069. 16897421  
SRR17520069. 16897423  
SRR17520069. 16897425  
SRR17520069. 16897427  
SRR17520069. 16897429  
SRR17520069. 16897431  
SRR17520069. 16897435  
SRR17520069. 16897437  
SRR17520069. 16897439  
SRR17520069. 16897443  
SRR17520069. 16897445  
SRR17520069. 16897447  
SRR17520069. 16897449  
SRR17520069. 16897451  
SRR17520069. 16897453  
SRR17520069. 16897455  
SRR17520069. 16897457  
SRR17520069. 16897459  
SRR17520069. 16897463  
SRR17520069. 16897465  
SRR17520069. 16897467  
SRR17520069. 16897469  
SRR17520069. 16897471  
SRR17520069. 16897473  
SRR17520069. 16897475  
SRR17520069. 16897477  
SRR17520069. 16897479  
SRR17520069. 16897481  
SRR17520069. 16897483  
SRR17520069. 16897485  
SRR17520069. 16897487  
SRR17520069. 16897489  
SRR17520069. 16898166  
SRR17520069. 16898168  
SRR17520069. 16898170  
SRR17520069. 16899743  
SRR17520069. 16899745  
SRR17520069. 16899747  
SRR17520069. 16901598  
SRR17520069. 16901600

SRR17520069. 16901602  
SRR17520069. 16901604  
SRR17520069. 16901606  
SRR17520069. 16901608  
SRR17520069. 16901610  
SRR17520069. 16901612  
SRR17520069. 16901614  
SRR17520069. 16901616  
SRR17520069. 16901618  
SRR17520069. 16901620  
SRR17520069. 16903348  
SRR17520069. 16903350  
SRR17520069. 16903352  
SRR17520069. 16903354  
SRR17520069. 16903358  
SRR17520069. 16903360  
SRR17520069. 16903362  
SRR17520069. 16903366  
SRR17520069. 16906478  
SRR17520069. 16906480  
SRR17520069. 16906482  
SRR17520069. 16906484  
SRR17520069. 16906486  
SRR17520069. 16906488  
SRR17520069. 16906492  
SRR17520069. 16906494  
SRR17520069. 16913304  
SRR17520069. 16913306  
SRR17520069. 16913308  
SRR17520069. 16913310  
SRR17520069. 16913312  
SRR17520069. 16913314  
SRR17520069. 16913316  
SRR17520069. 16913320  
SRR17520069. 16913322  
SRR17520069. 16913324  
SRR17520069. 16913326  
SRR17520069. 16914595  
SRR17520069. 16920380  
SRR17520069. 16920382  
SRR17520069. 16920384  
SRR17520069. 16920386  
SRR17520069. 16920388  
SRR17520069. 16920390  
SRR17520069. 16920392  
SRR17520069. 16920394  
SRR17520069. 16920396

SRR17520069. 16920398  
SRR17520069. 16920400  
SRR17520069. 16920402  
SRR17520069. 16920404  
SRR17520069. 16920406  
SRR17520069. 16920408  
SRR17520069. 16920410  
SRR17520069. 16920412  
SRR17520069. 16920414  
SRR17520069. 16920416  
SRR17520069. 16920418  
SRR17520069. 16920420  
SRR17520069. 16920422  
SRR17520069. 16920424  
SRR17520069. 16920426  
SRR17520069. 16920428  
SRR17520069. 16920430  
SRR17520069. 16920432  
SRR17520069. 16920434  
SRR17520069. 16920436  
SRR17520069. 16920438  
SRR17520069. 16920440  
SRR17520069. 16920442  
SRR17520069. 16920444  
SRR17520069. 16920446  
SRR17520069. 16920448  
SRR17520069. 16920450  
SRR17520069. 16920452  
SRR17520069. 16920454  
SRR17520069. 16920456  
SRR17520069. 16920458  
SRR17520069. 16920460  
SRR17520069. 16925831  
SRR17520069. 16925833  
SRR17520069. 16925839  
SRR17520069. 16925841  
SRR17520069. 16925843  
SRR17520069. 16925845  
SRR17520069. 16925847  
SRR17520069. 16925849  
SRR17520069. 16925858  
SRR17520069. 16925860  
SRR17520069. 16925862  
SRR17520069. 16925864  
SRR17520069. 16925866  
SRR17520069. 16925868  
SRR17520069. 16925870

SRR17520069. 16925872  
SRR17520069. 16925874  
SRR17520069. 16925876  
SRR17520069. 16925878  
SRR17520069. 16925880  
SRR17520069. 16925882  
SRR17520069. 16925884  
SRR17520069. 16925886  
SRR17520069. 16925890  
SRR17520069. 16925892  
SRR17520069. 16927385  
SRR17520069. 16927387  
SRR17520069. 16927389  
SRR17520069. 16927391  
SRR17520069. 16927393  
SRR17520069. 16927395  
SRR17520069. 16927397  
SRR17520069. 16927399  
SRR17520069. 16927401  
SRR17520069. 16927403  
SRR17520069. 16927405  
SRR17520069. 16927407  
SRR17520069. 16927409  
SRR17520069. 16927411  
SRR17520069. 16927413  
SRR17520069. 16927415  
SRR17520069. 16927417  
SRR17520069. 16927419  
SRR17520069. 16927421  
SRR17520069. 16927423  
SRR17520069. 16927425  
SRR17520069. 16927427  
SRR17520069. 16932710  
SRR17520069. 16932712  
SRR17520069. 16932714  
SRR17520069. 16932716  
SRR17520069. 16932718  
SRR17520069. 16932720  
SRR17520069. 16932722  
SRR17520069. 16932724  
SRR17520069. 16932726  
SRR17520069. 16932728  
SRR17520069. 16932730  
SRR17520069. 16940127  
SRR17520069. 16940129  
SRR17520069. 16940133  
SRR17520069. 16940135

SRR17520069. 16940137  
SRR17520069. 16940141  
SRR17520069. 16940143  
SRR17520069. 16944393  
SRR17520069. 16944395  
SRR17520069. 16944397  
SRR17520069. 16944399  
SRR17520069. 16944401  
SRR17520069. 16944403  
SRR17520069. 16944405  
SRR17520069. 16944407  
SRR17520069. 16944409  
SRR17520069. 16944411  
SRR17520069. 16944413  
SRR17520069. 16944415  
SRR17520069. 16944417  
SRR17520069. 16944419  
SRR17520069. 16944421  
SRR17520069. 16944423  
SRR17520069. 16944425  
SRR17520069. 16944427  
SRR17520069. 16944429  
SRR17520069. 16944431  
SRR17520069. 16944433  
SRR17520069. 16944437  
SRR17520069. 16944439  
SRR17520069. 16944441  
SRR17520069. 16944443  
SRR17520069. 16944445  
SRR17520069. 16944447  
SRR17520069. 16944449  
SRR17520069. 16944451  
SRR17520069. 16944453  
SRR17520069. 16944455  
SRR17520069. 16944457  
SRR17520069. 16944459  
SRR17520069. 16944461  
SRR17520069. 16944463  
SRR17520069. 16944465  
SRR17520069. 16945459  
SRR17520069. 16945461  
SRR17520069. 16945463  
SRR17520069. 16945465  
SRR17520069. 16945467  
SRR17520069. 16945469  
SRR17520069. 16945471  
SRR17520069. 16945473



SRR17520069. 16945475  
SRR17520069. 16945477  
SRR17520069. 16945479  
SRR17520069. 16945481  
SRR17520069. 16945483  
SRR17520069. 16945485  
SRR17520069. 16945487  
SRR17520069. 16945489  
SRR17520069. 16945491  
SRR17520069. 16945493  
SRR17520069. 16945495  
SRR17520069. 16945497  
SRR17520069. 16945499  
SRR17520069. 16945501  
SRR17520069. 16945503  
SRR17520069. 16945505  
SRR17520069. 16945507  
SRR17520069. 16945509  
SRR17520069. 16945511  
SRR17520069. 16945513  
SRR17520069. 16945515  
SRR17520069. 16947210  
SRR17520069. 16947212  
SRR17520069. 16947214  
SRR17520069. 16947216  
SRR17520069. 16947218  
SRR17520069. 16947220  
SRR17520069. 16947222  
SRR17520069. 16947224  
SRR17520069. 16948884  
SRR17520069. 16948886  
SRR17520069. 16948888  
SRR17520069. 16948892  
SRR17520069. 16948894  
SRR17520069. 16948898  
SRR17520069. 16960297  
SRR17520069. 16960299  
SRR17520069. 16960301  
SRR17520069. 16960303  
SRR17520069. 16960305  
SRR17520069. 16960307  
SRR17520069. 16960309  
SRR17520069. 16960311  
SRR17520069. 16960313  
SRR17520069. 16960315  
SRR17520069. 16960317  
SRR17520069. 16960321

SRR17520069. 16960323  
SRR17520069. 16960325  
SRR17520069. 16960327  
SRR17520069. 16960329  
SRR17520069. 16960331  
SRR17520069. 16960333  
SRR17520069. 16960335  
SRR17520069. 16960337  
SRR17520069. 16960339  
SRR17520069. 16960341  
SRR17520069. 16960513  
SRR17520069. 16960515  
SRR17520069. 16960517  
SRR17520069. 16960519  
SRR17520069. 16960521  
SRR17520069. 16960523  
SRR17520069. 16960527  
SRR17520069. 16960529  
SRR17520069. 16960531  
SRR17520069. 16962971  
SRR17520069. 16962973  
SRR17520069. 16962977  
SRR17520069. 16962979  
SRR17520069. 16962983  
SRR17520069. 16962985  
SRR17520069. 16962987  
SRR17520069. 16962989  
SRR17520069. 16962991  
SRR17520069. 16962993  
SRR17520069. 16963845  
SRR17520069. 16967509  
SRR17520069. 16967511  
SRR17520069. 16967513  
SRR17520069. 16967515  
SRR17520069. 16967517  
SRR17520069. 16967519  
SRR17520069. 16967521  
SRR17520069. 16967523  
SRR17520069. 16967525  
SRR17520069. 16967527  
SRR17520069. 16967529  
SRR17520069. 16967531  
SRR17520069. 16967533  
SRR17520069. 16967535  
SRR17520069. 16967537  
SRR17520069. 16967539  
SRR17520069. 16967541

SRR17520069. 16967543  
SRR17520069. 16967545  
SRR17520069. 16967547  
SRR17520069. 16967549  
SRR17520069. 16967551  
SRR17520069. 16967553  
SRR17520069. 16967555  
SRR17520069. 16967557  
SRR17520069. 16967559  
SRR17520069. 16967561  
SRR17520069. 16967563  
SRR17520069. 16967565  
SRR17520069. 16967569  
SRR17520069. 16967571  
SRR17520069. 16968642  
SRR17520069. 16968884  
SRR17520069. 16968886  
SRR17520069. 16968888  
SRR17520069. 16968890  
SRR17520069. 16968892  
SRR17520069. 16968894  
SRR17520069. 16968896  
SRR17520069. 16968898  
SRR17520069. 16968900  
SRR17520069. 16968902  
SRR17520069. 16968904  
SRR17520069. 16968906  
SRR17520069. 16968908  
SRR17520069. 16968910  
SRR17520069. 16968912  
SRR17520069. 16968914  
SRR17520069. 16978597  
SRR17520069. 16978599  
SRR17520069. 16978601  
SRR17520069. 16978603  
SRR17520069. 16978605  
SRR17520069. 16981709  
SRR17520069. 16981711  
SRR17520069. 16981713  
SRR17520069. 16981717  
SRR17520069. 16981719  
SRR17520069. 16981721  
SRR17520069. 16981725  
SRR17520069. 16981727  
SRR17520069. 16981729  
SRR17520069. 16981731  
SRR17520069. 16981733

SRR17520069. 16981737  
SRR17520069. 16981739  
SRR17520069. 16981741  
SRR17520069. 16981743  
SRR17520069. 16981745  
SRR17520069. 16988778  
SRR17520069. 16988780  
SRR17520069. 16991340  
SRR17520069. 16991342  
SRR17520069. 16991344  
SRR17520069. 16991346  
SRR17520069. 16991348  
SRR17520069. 16991350  
SRR17520069. 16991352  
SRR17520069. 16991354  
SRR17520069. 16991356  
SRR17520069. 16991358  
SRR17520069. 16991360  
SRR17520069. 16991362  
SRR17520069. 16991364  
SRR17520069. 16991366  
SRR17520069. 16991368  
SRR17520069. 16991370  
SRR17520069. 16991372  
SRR17520069. 16991374  
SRR17520069. 16991376  
SRR17520069. 16991378  
SRR17520069. 16991380  
SRR17520069. 16991382  
SRR17520069. 16991384  
SRR17520069. 16991386  
SRR17520069. 16991388  
SRR17520069. 16991390  
SRR17520069. 16991392  
SRR17520069. 16991394  
SRR17520069. 16991396  
SRR17520069. 16991398  
SRR17520069. 16991400  
SRR17520069. 16991402  
SRR17520069. 16991404  
SRR17520069. 16991406  
SRR17520069. 16991613  
SRR17520069. 16991615  
SRR17520069. 16991621  
SRR17520069. 16991623  
SRR17520069. 16991627  
SRR17520069. 16991629

SRR17520069. 16991631  
SRR17520069. 16993271  
SRR17520069. 16993273  
SRR17520069. 16993275  
SRR17520069. 16993279  
SRR17520069. 16993281  
SRR17520069. 16993283  
SRR17520069. 16993285  
SRR17520069. 16993287  
SRR17520069. 16993289  
SRR17520069. 16993291  
SRR17520069. 16993293  
SRR17520069. 16993295  
SRR17520069. 16993297  
SRR17520069. 16993299  
SRR17520069. 16993301  
SRR17520069. 16993379  
SRR17520069. 16993381  
SRR17520069. 16993383  
SRR17520069. 16993385  
SRR17520069. 16993387  
SRR17520069. 16993389  
SRR17520069. 16993393  
SRR17520069. 16993395  
SRR17520069. 16993397  
SRR17520069. 16993399  
SRR17520069. 16993401  
SRR17520069. 16993403  
SRR17520069. 16993405  
SRR17520069. 16993407  
SRR17520069. 16993409  
SRR17520069. 16993411  
SRR17520069. 16993413  
SRR17520069. 16993415  
SRR17520069. 16993417  
SRR17520069. 16993419  
SRR17520069. 16994184  
SRR17520069. 16994186  
SRR17520069. 16994188  
SRR17520069. 16994190  
SRR17520069. 16994192  
SRR17520069. 16994194  
SRR17520069. 16994196  
SRR17520069. 16994198  
SRR17520069. 16994200  
SRR17520069. 16994202  
SRR17520069. 16994204

SRR17520069.16994206  
SRR17520069.16994208  
SRR17520069.16994210  
SRR17520069.16994212  
SRR17520069.16994214  
SRR17520069.16994216  
SRR17520069.16994218  
SRR17520069.16994224  
SRR17520069.16994226  
SRR17520069.16994228  
SRR17520069.16994230  
SRR17520069.16994232  
SRR17520069.16994234  
SRR17520069.16994236  
SRR17520069.16994238  
SRR17520069.16994240  
SRR17520069.16994242  
SRR17520069.16994807  
SRR17520069.16994809  
SRR17520069.16994813  
SRR17520069.16994815  
SRR17520069.16994817  
SRR17520069.16994819  
SRR17520069.16994821  
SRR17520069.16994823  
SRR17520069.16994825  
SRR17520069.16995167  
SRR17520069.16995169  
SRR17520069.16997011  
SRR17520069.16997013  
SRR17520069.16997015  
SRR17520069.16997017  
SRR17520069.16997023  
SRR17520069.16997027  
SRR17520069.16997029  
SRR17520069.16997031  
SRR17520069.16997037  
SRR17520069.16997049  
SRR17520069.16997051  
SRR17520069.16997053  
SRR17520069.16997055  
SRR17520069.16997059  
SRR17520069.16997061  
SRR17520069.16997065  
SRR17520069.16997067  
SRR17520069.16997073  
SRR17520069.16997075

SRR17520069. 16997079  
SRR17520069. 16997081  
SRR17520069. 16997085  
SRR17520069. 16997087  
SRR17520069. 16997089  
SRR17520069. 16997091  
SRR17520069. 16997095  
SRR17520069. 16997097  
SRR17520069. 16997099  
SRR17520069. 16997101  
SRR17520069. 16997105  
SRR17520069. 16997107  
SRR17520069. 16997109  
SRR17520069. 16997111  
SRR17520069. 16997113  
SRR17520069. 16997115  
SRR17520069. 16997117  
SRR17520069. 16997119  
SRR17520069. 17002023  
SRR17520069. 17002025  
SRR17520069. 17002029  
SRR17520069. 17002031  
SRR17520069. 17002033  
SRR17520069. 17002037  
SRR17520069. 17002039  
SRR17520069. 17002041  
SRR17520069. 17002043  
SRR17520069. 17002049  
SRR17520069. 17002051  
SRR17520069. 17002053  
SRR17520069. 17002055  
SRR17520069. 17002059  
SRR17520069. 17002065  
SRR17520069. 17002067  
SRR17520069. 17002069  
SRR17520069. 17002073  
SRR17520069. 17002077  
SRR17520069. 17002079  
SRR17520069. 17002081  
SRR17520069. 17002083  
SRR17520069. 17002087  
SRR17520069. 17002089  
SRR17520069. 17002091  
SRR17520069. 17002093  
SRR17520069. 17002095  
SRR17520069. 17002097  
SRR17520069. 17002099

SRR17520069.17002101  
SRR17520069.17002105  
SRR17520069.17002109  
SRR17520069.17002111  
SRR17520069.17002113  
SRR17520069.17002915  
SRR17520069.17002917  
SRR17520069.17002919  
SRR17520069.17002921  
SRR17520069.17002923  
SRR17520069.17002925  
SRR17520069.17002927  
SRR17520069.17002929  
SRR17520069.17002931  
SRR17520069.17004325  
SRR17520069.17004327  
SRR17520069.17004329  
SRR17520069.17004333  
SRR17520069.17006661  
SRR17520069.17006663  
SRR17520069.17006665  
SRR17520069.17006667  
SRR17520069.17006669  
SRR17520069.17006671  
SRR17520069.17006673  
SRR17520069.17006677  
SRR17520069.17006679  
SRR17520069.17006681  
SRR17520069.17006683  
SRR17520069.17006685  
SRR17520069.17006687  
SRR17520069.17006689  
SRR17520069.17006691  
SRR17520069.17006693  
SRR17520069.17006695  
SRR17520069.17006697  
SRR17520069.17006699  
SRR17520069.17006701  
SRR17520069.17006703  
SRR17520069.17006705  
SRR17520069.17006707  
SRR17520069.17017744  
SRR17520069.17017746  
SRR17520069.17017748  
SRR17520069.17017750  
SRR17520069.17021920  
SRR17520069.17021922



SRR17520069.17025299  
SRR17520069.17025301  
SRR17520069.17025303  
SRR17520069.17025305  
SRR17520069.17025307  
SRR17520069.17025309  
SRR17520069.17025314  
SRR17520069.17025318  
SRR17520069.17025320  
SRR17520069.17025322  
SRR17520069.17025326  
SRR17520069.17025328  
SRR17520069.17025330  
SRR17520069.17025332  
SRR17520069.17025334  
SRR17520069.17025338  
SRR17520069.17025340  
SRR17520069.17025342  
SRR17520069.17025344  
SRR17520069.17025346  
SRR17520069.17025350  
SRR17520069.17025352  
SRR17520069.17025356  
SRR17520069.17025358  
SRR17520069.17025360  
SRR17520069.17025362  
SRR17520069.17025364  
SRR17520069.17025366  
SRR17520069.17025370  
SRR17520069.17025372  
SRR17520069.17025374  
SRR17520069.17025376  
SRR17520069.17025378  
SRR17520069.17025382  
SRR17520069.17025384  
SRR17520069.17025386  
SRR17520069.17025392  
SRR17520069.17025394  
SRR17520069.17025398  
SRR17520069.17025400  
SRR17520069.17025404  
SRR17520069.17025406  
SRR17520069.17025408  
SRR17520069.17025410  
SRR17520069.17025414  
SRR17520069.17025416  
SRR17520069.17025418

SRR17520069.17025422  
SRR17520069.17025424  
SRR17520069.17025426  
SRR17520069.17025428  
SRR17520069.17025430  
SRR17520069.17025432  
SRR17520069.17025434  
SRR17520069.17025436  
SRR17520069.17025440  
SRR17520069.17025442  
SRR17520069.17025446  
SRR17520069.17025450  
SRR17520069.17025452  
SRR17520069.17025456  
SRR17520069.17025458  
SRR17520069.17028154  
SRR17520069.17028156  
SRR17520069.17028158  
SRR17520069.17028160  
SRR17520069.17028162  
SRR17520069.17028164  
SRR17520069.17028166  
SRR17520069.17028168  
SRR17520069.17028170  
SRR17520069.17028172  
SRR17520069.17028174  
SRR17520069.17028178  
SRR17520069.17028180  
SRR17520069.17028182  
SRR17520069.17028184  
SRR17520069.17028186  
SRR17520069.17028188  
SRR17520069.17028190  
SRR17520069.17028192  
SRR17520069.17028194  
SRR17520069.17028196  
SRR17520069.17028200  
SRR17520069.17028202  
SRR17520069.17028204  
SRR17520069.17028206  
SRR17520069.17028208  
SRR17520069.17028210  
SRR17520069.17028212  
SRR17520069.17028214  
SRR17520069.17028216  
SRR17520069.17028218  
SRR17520069.17028220

SRR17520069.17028222  
SRR17520069.17028224  
SRR17520069.17028226  
SRR17520069.17029637  
SRR17520069.17029639  
SRR17520069.17029641  
SRR17520069.17029643  
SRR17520069.17029645  
SRR17520069.17029647  
SRR17520069.17038189  
SRR17520069.17038193  
SRR17520069.17038195  
SRR17520069.17038197  
SRR17520069.17038201  
SRR17520069.17038203  
SRR17520069.17038205  
SRR17520069.17038207  
SRR17520069.17038209  
SRR17520069.17038211  
SRR17520069.17038213  
SRR17520069.17038215  
SRR17520069.17038217  
SRR17520069.17038219  
SRR17520069.17038221  
SRR17520069.17038223  
SRR17520069.17038225  
SRR17520069.17038227  
SRR17520069.17038229  
SRR17520069.17038231  
SRR17520069.17038233  
SRR17520069.17038390  
SRR17520069.17038392  
SRR17520069.17038394  
SRR17520069.17038396  
SRR17520069.17038398  
SRR17520069.17038400  
SRR17520069.17038404  
SRR17520069.17040841  
SRR17520069.17040843  
SRR17520069.17040845  
SRR17520069.17040847  
SRR17520069.17040849  
SRR17520069.17040851  
SRR17520069.17040853  
SRR17520069.17040855  
SRR17520069.17040857  
SRR17520069.17040859

SRR17520069.17040861  
SRR17520069.17040863  
SRR17520069.17040865  
SRR17520069.17041723  
SRR17520069.17041725  
SRR17520069.17041727  
SRR17520069.17041729  
SRR17520069.17042179  
SRR17520069.17042181  
SRR17520069.17042183  
SRR17520069.17044307  
SRR17520069.17044309  
SRR17520069.17044313  
SRR17520069.17044315  
SRR17520069.17047525  
SRR17520069.17047527  
SRR17520069.17047529  
SRR17520069.17047531  
SRR17520069.17047533  
SRR17520069.17047535  
SRR17520069.17047537  
SRR17520069.17047539  
SRR17520069.17047541  
SRR17520069.17047543  
SRR17520069.17047547  
SRR17520069.17047549  
SRR17520069.17047553  
SRR17520069.17047555  
SRR17520069.17047557  
SRR17520069.17047559  
SRR17520069.17047561  
SRR17520069.17047563  
SRR17520069.17047565  
SRR17520069.17047567  
SRR17520069.17047569  
SRR17520069.17047571  
SRR17520069.17047573  
SRR17520069.17047575  
SRR17520069.17050229  
SRR17520069.17050231  
SRR17520069.17050233  
SRR17520069.17050235  
SRR17520069.17050237  
SRR17520069.17050239  
SRR17520069.17050241  
SRR17520069.17051870  
SRR17520069.17051872

SRR17520069.17051874  
SRR17520069.17051876  
SRR17520069.17051878  
SRR17520069.17051880  
SRR17520069.17051882  
SRR17520069.17051884  
SRR17520069.17051886  
SRR17520069.17051888  
SRR17520069.17051890  
SRR17520069.17051892  
SRR17520069.17051894  
SRR17520069.17051896  
SRR17520069.17051898  
SRR17520069.17051900  
SRR17520069.17051902  
SRR17520069.17051904  
SRR17520069.17051906  
SRR17520069.17051910  
SRR17520069.17051912  
SRR17520069.17054096  
SRR17520069.17054098  
SRR17520069.17054100  
SRR17520069.17054102  
SRR17520069.17054104  
SRR17520069.17054106  
SRR17520069.17054108  
SRR17520069.17054110  
SRR17520069.17054112  
SRR17520069.17054114  
SRR17520069.17054116  
SRR17520069.17054118  
SRR17520069.17054120  
SRR17520069.17054122  
SRR17520069.17054124  
SRR17520069.17054126  
SRR17520069.17063856  
SRR17520069.17063858  
SRR17520069.17063860  
SRR17520069.17063862  
SRR17520069.17063864  
SRR17520069.17065877  
SRR17520069.17065879  
SRR17520069.17065881  
SRR17520069.17065883  
SRR17520069.17065885  
SRR17520069.17065887  
SRR17520069.17065889

SRR17520069.17065891  
SRR17520069.17065893  
SRR17520069.17065895  
SRR17520069.17065897  
SRR17520069.17065899  
SRR17520069.17065903  
SRR17520069.17065905  
SRR17520069.17065907  
SRR17520069.17065909  
SRR17520069.17065911  
SRR17520069.17065913  
SRR17520069.17065915  
SRR17520069.17065917  
SRR17520069.17065919  
SRR17520069.17065921  
SRR17520069.17065923  
SRR17520069.17065925  
SRR17520069.17065927  
SRR17520069.17065929  
SRR17520069.17065931  
SRR17520069.17065933  
SRR17520069.17065935  
SRR17520069.17065937  
SRR17520069.17065939  
SRR17520069.17065941  
SRR17520069.17065943  
SRR17520069.17065945  
SRR17520069.17065947  
SRR17520069.17065951  
SRR17520069.17065953  
SRR17520069.17065955  
SRR17520069.17065957  
SRR17520069.17065959  
SRR17520069.17065961  
SRR17520069.17065963  
SRR17520069.17065965  
SRR17520069.17070972  
SRR17520069.17070974  
SRR17520069.17070976  
SRR17520069.17070978  
SRR17520069.17070980  
SRR17520069.17070984  
SRR17520069.17070986  
SRR17520069.17070988  
SRR17520069.17070990  
SRR17520069.17070992  
SRR17520069.17070994

SRR17520069.17070996  
SRR17520069.17070998  
SRR17520069.17075011  
SRR17520069.17077137  
SRR17520069.17077139  
SRR17520069.17078459  
SRR17520069.17078461  
SRR17520069.17078463  
SRR17520069.17078465  
SRR17520069.17078467  
SRR17520069.17078469  
SRR17520069.17078471  
SRR17520069.17078473  
SRR17520069.17078475  
SRR17520069.17078477  
SRR17520069.17078479  
SRR17520069.17078481  
SRR17520069.17078483  
SRR17520069.17078485  
SRR17520069.17078487  
SRR17520069.17078489  
SRR17520069.17078491  
SRR17520069.17078493  
SRR17520069.17078495  
SRR17520069.17078497  
SRR17520069.17078499  
SRR17520069.17078501  
SRR17520069.17078503  
SRR17520069.17078505  
SRR17520069.17087547  
SRR17520069.17087549  
SRR17520069.17087551  
SRR17520069.17087553  
SRR17520069.17087555  
SRR17520069.17087557  
SRR17520069.17099023  
SRR17520069.17099025  
SRR17520069.17099027  
SRR17520069.17099029  
SRR17520069.17099031  
SRR17520069.17099033  
SRR17520069.17099035  
SRR17520069.17099037  
SRR17520069.17099039  
SRR17520069.17099043  
SRR17520069.17099045  
SRR17520069.17099047

SRR17520069.17099049  
SRR17520069.17099051  
SRR17520069.17099053  
SRR17520069.17099055  
SRR17520069.17104029  
SRR17520069.17113456  
SRR17520069.17113458  
SRR17520069.17113460  
SRR17520069.17113462  
SRR17520069.17113464  
SRR17520069.17113466  
SRR17520069.17113468  
SRR17520069.17113472  
SRR17520069.17113474  
SRR17520069.17113476  
SRR17520069.17113478  
SRR17520069.17113480  
SRR17520069.17115200  
SRR17520069.17115202  
SRR17520069.17115204  
SRR17520069.17115206  
SRR17520069.17115208  
SRR17520069.17117738  
SRR17520069.17117740  
SRR17520069.17119916  
SRR17520069.17119918  
SRR17520069.17119920  
SRR17520069.17119922  
SRR17520069.17119924  
SRR17520069.17119926  
SRR17520069.17119928  
SRR17520069.17119930  
SRR17520069.17119932  
SRR17520069.17119934  
SRR17520069.17119936  
SRR17520069.17119938  
SRR17520069.17119940  
SRR17520069.17119942  
SRR17520069.17119944  
SRR17520069.17119946  
SRR17520069.17119948  
SRR17520069.17119950  
SRR17520069.17119952  
SRR17520069.17119954  
SRR17520069.17119956  
SRR17520069.17119958  
SRR17520069.17119960



SRR17520069. 17131552  
SRR17520069. 17131570  
SRR17520069. 17137981  
SRR17520069. 17137983  
SRR17520069. 17137985  
SRR17520069. 17137987  
SRR17520069. 17137989  
SRR17520069. 17137991  
SRR17520069. 17137993  
SRR17520069. 17137995  
SRR17520069. 17137997  
SRR17520069. 17137999  
SRR17520069. 17138001  
SRR17520069. 17138003  
SRR17520069. 17138005  
SRR17520069. 17138007  
SRR17520069. 17138009  
SRR17520069. 17138011  
SRR17520069. 17138013  
SRR17520069. 17138015  
SRR17520069. 17138017  
SRR17520069. 17138021  
SRR17520069. 17138023  
SRR17520069. 17138025  
SRR17520069. 17138027  
SRR17520069. 17138029  
SRR17520069. 17138031  
SRR17520069. 17138033  
SRR17520069. 17138035  
SRR17520069. 17138037  
SRR17520069. 17138039  
SRR17520069. 17138041  
SRR17520069. 17138043  
SRR17520069. 17138045  
SRR17520069. 17138047  
SRR17520069. 17138049  
SRR17520069. 17138051  
SRR17520069. 17138055  
SRR17520069. 17138057  
SRR17520069. 17138059  
SRR17520069. 17138061  
SRR17520069. 17138611  
SRR17520069. 17138613  
SRR17520069. 17138615  
SRR17520069. 17138617  
SRR17520069. 17138619  
SRR17520069. 17142035

SRR17520069. 17142037  
SRR17520069. 17142039  
SRR17520069. 17142041  
SRR17520069. 17142043  
SRR17520069. 17142045  
SRR17520069. 17142047  
SRR17520069. 17142049  
SRR17520069. 17142051  
SRR17520069. 17142053  
SRR17520069. 17142055  
SRR17520069. 17142057  
SRR17520069. 17142059  
SRR17520069. 17142061  
SRR17520069. 17142063  
SRR17520069. 17142065  
SRR17520069. 17142067  
SRR17520069. 17142069  
SRR17520069. 17142071  
SRR17520069. 17142073  
SRR17520069. 17142075  
SRR17520069. 17142460  
SRR17520069. 17142826  
SRR17520069. 17163295  
SRR17520069. 17163299  
SRR17520069. 17163301  
SRR17520069. 17164775  
SRR17520069. 17164777  
SRR17520069. 17164779  
SRR17520069. 17164781  
SRR17520069. 17164783  
SRR17520069. 17164785  
SRR17520069. 17164787  
SRR17520069. 17164789  
SRR17520069. 17164791  
SRR17520069. 17166079  
SRR17520069. 17166081  
SRR17520069. 17166083  
SRR17520069. 17166085  
SRR17520069. 17166087  
SRR17520069. 17166089  
SRR17520069. 17166091  
SRR17520069. 17166093  
SRR17520069. 17166095  
SRR17520069. 17166097  
SRR17520069. 17166099  
SRR17520069. 17166101  
SRR17520069. 17166105

SRR17520069.17168344  
SRR17520069.17168346  
SRR17520069.17168348  
SRR17520069.17168350  
SRR17520069.17168352  
SRR17520069.17168354  
SRR17520069.17168356  
SRR17520069.17168358  
SRR17520069.17168360  
SRR17520069.17168362  
SRR17520069.17168364  
SRR17520069.17168368  
SRR17520069.17168370  
SRR17520069.17168372  
SRR17520069.17173200  
SRR17520069.17173202  
SRR17520069.17173204  
SRR17520069.17173206  
SRR17520069.17173208  
SRR17520069.17173210  
SRR17520069.17173212  
SRR17520069.17173214  
SRR17520069.17173216  
SRR17520069.17175646  
SRR17520069.17175648  
SRR17520069.17175652  
SRR17520069.17175654  
SRR17520069.17175656  
SRR17520069.17175658  
SRR17520069.17175660  
SRR17520069.17175662  
SRR17520069.17175664  
SRR17520069.17175666  
SRR17520069.17175668  
SRR17520069.17175670  
SRR17520069.17175672  
SRR17520069.17175674  
SRR17520069.17175676  
SRR17520069.17175680  
SRR17520069.17175682  
SRR17520069.17175684  
SRR17520069.17175686  
SRR17520069.17175690  
SRR17520069.17175692  
SRR17520069.17175694  
SRR17520069.17175696  
SRR17520069.17175698

SRR17520069. 17175700  
SRR17520069. 17175702  
SRR17520069. 17175704  
SRR17520069. 17175706  
SRR17520069. 17181842  
SRR17520069. 17181844  
SRR17520069. 17181846  
SRR17520069. 17181848  
SRR17520069. 17181850  
SRR17520069. 17181852  
SRR17520069. 17181854  
SRR17520069. 17181856  
SRR17520069. 17181858  
SRR17520069. 17181860  
SRR17520069. 17181862  
SRR17520069. 17181864  
SRR17520069. 17181866  
SRR17520069. 17181868  
SRR17520069. 17181870  
SRR17520069. 17181872  
SRR17520069. 17181874  
SRR17520069. 17181876  
SRR17520069. 17181878  
SRR17520069. 17181880  
SRR17520069. 17181882  
SRR17520069. 17181886  
SRR17520069. 17181888  
SRR17520069. 17181890  
SRR17520069. 17181892  
SRR17520069. 17181894  
SRR17520069. 17181896  
SRR17520069. 17181898  
SRR17520069. 17183325  
SRR17520069. 17183327  
SRR17520069. 17183329  
SRR17520069. 17183331  
SRR17520069. 17183333  
SRR17520069. 17183335  
SRR17520069. 17183337  
SRR17520069. 17183339  
SRR17520069. 17183341  
SRR17520069. 17183934  
SRR17520069. 17183936  
SRR17520069. 17183938  
SRR17520069. 17183940  
SRR17520069. 17187329  
SRR17520069. 17187331

SRR17520069. 17187333  
SRR17520069. 17187335  
SRR17520069. 17194445  
SRR17520069. 17194447  
SRR17520069. 17194449  
SRR17520069. 17194453  
SRR17520069. 17194455  
SRR17520069. 17194457  
SRR17520069. 17194459  
SRR17520069. 17194461  
SRR17520069. 17194463  
SRR17520069. 17195300  
SRR17520069. 17195302  
SRR17520069. 17195304  
SRR17520069. 17195306  
SRR17520069. 17195308  
SRR17520069. 17195310  
SRR17520069. 17195312  
SRR17520069. 17195314  
SRR17520069. 17195316  
SRR17520069. 17196170  
SRR17520069. 17202683  
SRR17520069. 17202685  
SRR17520069. 17202687  
SRR17520069. 17202689  
SRR17520069. 17202691  
SRR17520069. 17202693  
SRR17520069. 17202695  
SRR17520069. 17202697  
SRR17520069. 17202699  
SRR17520069. 17202701  
SRR17520069. 17202703  
SRR17520069. 17202705  
SRR17520069. 17202707  
SRR17520069. 17202709  
SRR17520069. 17203922  
SRR17520069. 17203924  
SRR17520069. 17203926  
SRR17520069. 17203928  
SRR17520069. 17203930  
SRR17520069. 17203932  
SRR17520069. 17203940  
SRR17520069. 17203942  
SRR17520069. 17203944  
SRR17520069. 17203946  
SRR17520069. 17203948  
SRR17520069. 17204122

SRR17520069. 17204124  
SRR17520069. 17204126  
SRR17520069. 17204128  
SRR17520069. 17204130  
SRR17520069. 17204132  
SRR17520069. 17204134  
SRR17520069. 17204136  
SRR17520069. 17204138  
SRR17520069. 17204140  
SRR17520069. 17204142  
SRR17520069. 17204144  
SRR17520069. 17204146  
SRR17520069. 17207668  
SRR17520069. 17207670  
SRR17520069. 17207672  
SRR17520069. 17207674  
SRR17520069. 17207676  
SRR17520069. 17207678  
SRR17520069. 17207680  
SRR17520069. 17207682  
SRR17520069. 17207684  
SRR17520069. 17207686  
SRR17520069. 17207688  
SRR17520069. 17207690  
SRR17520069. 17207692  
SRR17520069. 17207694  
SRR17520069. 17207696  
SRR17520069. 17207698  
SRR17520069. 17207700  
SRR17520069. 17207702  
SRR17520069. 17207704  
SRR17520069. 17207706  
SRR17520069. 17207708  
SRR17520069. 17207710  
SRR17520069. 17207712  
SRR17520069. 17207714  
SRR17520069. 17207716  
SRR17520069. 17207718  
SRR17520069. 17207720  
SRR17520069. 17207722  
SRR17520069. 17207724  
SRR17520069. 17207726  
SRR17520069. 17207728  
SRR17520069. 17207730  
SRR17520069. 17207732  
SRR17520069. 17207734  
SRR17520069. 17207736

SRR17520069. 17207738  
SRR17520069. 17207740  
SRR17520069. 17207742  
SRR17520069. 17207744  
SRR17520069. 17207748  
SRR17520069. 17207752  
SRR17520069. 17207754  
SRR17520069. 17207756  
SRR17520069. 17207758  
SRR17520069. 17212950  
SRR17520069. 17212952  
SRR17520069. 17212954  
SRR17520069. 17212958  
SRR17520069. 17212960  
SRR17520069. 17212962  
SRR17520069. 17212964  
SRR17520069. 17212966  
SRR17520069. 17212968  
SRR17520069. 17212970  
SRR17520069. 17212972  
SRR17520069. 17212974  
SRR17520069. 17214846  
SRR17520069. 17214848  
SRR17520069. 17214850  
SRR17520069. 17215656  
SRR17520069. 17215658  
SRR17520069. 17215660  
SRR17520069. 17215662  
SRR17520069. 17215666  
SRR17520069. 17215668  
SRR17520069. 17223133  
SRR17520069. 17223135  
SRR17520069. 17229095  
SRR17520069. 17229097  
SRR17520069. 17229099  
SRR17520069. 17229101  
SRR17520069. 17229103  
SRR17520069. 17229105  
SRR17520069. 17229107  
SRR17520069. 17229109  
SRR17520069. 17229111  
SRR17520069. 17229113  
SRR17520069. 17230894  
SRR17520069. 17230896  
SRR17520069. 17230898  
SRR17520069. 17230900  
SRR17520069. 17230902

SRR17520069.17230904  
SRR17520069.17230906  
SRR17520069.17230908  
SRR17520069.17230910  
SRR17520069.17230912  
SRR17520069.17230914  
SRR17520069.17230916  
SRR17520069.17230918  
SRR17520069.17230920  
SRR17520069.17230922  
SRR17520069.17230924  
SRR17520069.17230926  
SRR17520069.17230928  
SRR17520069.17235651  
SRR17520069.17235653  
SRR17520069.17235655  
SRR17520069.17235657  
SRR17520069.17235659  
SRR17520069.17235661  
SRR17520069.17235663  
SRR17520069.17235665  
SRR17520069.17235667  
SRR17520069.17235669  
SRR17520069.17235671  
SRR17520069.17235675  
SRR17520069.17235677  
SRR17520069.17235679  
SRR17520069.17237359  
SRR17520069.17237361  
SRR17520069.17237363  
SRR17520069.17237365  
SRR17520069.17237367  
SRR17520069.17237369  
SRR17520069.17237371  
SRR17520069.17237379  
SRR17520069.17237389  
SRR17520069.17237391  
SRR17520069.17237393  
SRR17520069.17237395  
SRR17520069.17237397  
SRR17520069.17237403  
SRR17520069.17237405  
SRR17520069.17251707  
SRR17520069.17251709  
SRR17520069.17251711  
SRR17520069.17251713  
SRR17520069.17251715



SRR17520069.17251717  
SRR17520069.17251719  
SRR17520069.17251721  
SRR17520069.17251723  
SRR17520069.17251727  
SRR17520069.17251729  
SRR17520069.17251731  
SRR17520069.17251733  
SRR17520069.17251735  
SRR17520069.17251737  
SRR17520069.17251741  
SRR17520069.17251743  
SRR17520069.17251745  
SRR17520069.17251747  
SRR17520069.17251749  
SRR17520069.17251751  
SRR17520069.17251753  
SRR17520069.17251755  
SRR17520069.17251757  
SRR17520069.17251759  
SRR17520069.17251761  
SRR17520069.17254381  
SRR17520069.17254385  
SRR17520069.17254387  
SRR17520069.17254389  
SRR17520069.17254391  
SRR17520069.17254393  
SRR17520069.17254395  
SRR17520069.17254397  
SRR17520069.17254399  
SRR17520069.17256268  
SRR17520069.17256270  
SRR17520069.17256274  
SRR17520069.17256280  
SRR17520069.17256282  
SRR17520069.17256284  
SRR17520069.17256286  
SRR17520069.17256290  
SRR17520069.17256292  
SRR17520069.17256294  
SRR17520069.17256296  
SRR17520069.17256298  
SRR17520069.17256300  
SRR17520069.17256302  
SRR17520069.17256304  
SRR17520069.17274980  
SRR17520069.17274982

SRR17520069. 17274984  
SRR17520069. 17274986  
SRR17520069. 17274988  
SRR17520069. 17274990  
SRR17520069. 17274992  
SRR17520069. 17274994  
SRR17520069. 17274996  
SRR17520069. 17274998  
SRR17520069. 17275333  
SRR17520069. 17278064  
SRR17520069. 17278066  
SRR17520069. 17278070  
SRR17520069. 17278072  
SRR17520069. 17278076  
SRR17520069. 17278078  
SRR17520069. 17278080  
SRR17520069. 17278082  
SRR17520069. 17278084  
SRR17520069. 17278086  
SRR17520069. 17278088  
SRR17520069. 17278090  
SRR17520069. 17278092  
SRR17520069. 17278094  
SRR17520069. 17278096  
SRR17520069. 17278098  
SRR17520069. 17278100  
SRR17520069. 17278102  
SRR17520069. 17278104  
SRR17520069. 17278106  
SRR17520069. 17278108  
SRR17520069. 17278110  
SRR17520069. 17278112  
SRR17520069. 17278114  
SRR17520069. 17278116  
SRR17520069. 17278118  
SRR17520069. 17278120  
SRR17520069. 17278122  
SRR17520069. 17278124  
SRR17520069. 17278126  
SRR17520069. 17278130  
SRR17520069. 17278132  
SRR17520069. 17278134  
SRR17520069. 17278136  
SRR17520069. 17278138  
SRR17520069. 17278140  
SRR17520069. 17278142  
SRR17520069. 17278144

SRR17520069. 17278146  
SRR17520069. 17278148  
SRR17520069. 17278150  
SRR17520069. 17278154  
SRR17520069. 17278156  
SRR17520069. 17284763  
SRR17520069. 17285148  
SRR17520069. 17285150  
SRR17520069. 17285152  
SRR17520069. 17285154  
SRR17520069. 17285156  
SRR17520069. 17285158  
SRR17520069. 17285160  
SRR17520069. 17285162  
SRR17520069. 17285164  
SRR17520069. 17285166  
SRR17520069. 17285168  
SRR17520069. 17285170  
SRR17520069. 17285172  
SRR17520069. 17285174  
SRR17520069. 17285176  
SRR17520069. 17285178  
SRR17520069. 17285180  
SRR17520069. 17285182  
SRR17520069. 17285186  
SRR17520069. 17285188  
SRR17520069. 17285190  
SRR17520069. 17285192  
SRR17520069. 17285194  
SRR17520069. 17285196  
SRR17520069. 17285198  
SRR17520069. 17285202  
SRR17520069. 17285204  
SRR17520069. 17285206  
SRR17520069. 17285208  
SRR17520069. 17285210  
SRR17520069. 17285212  
SRR17520069. 17285214  
SRR17520069. 17285216  
SRR17520069. 17285218  
SRR17520069. 17285220  
SRR17520069. 17285222  
SRR17520069. 17285224  
SRR17520069. 17285226  
SRR17520069. 17285228  
SRR17520069. 17285230  
SRR17520069. 17285232

SRR17520069. 17285234  
SRR17520069. 17285236  
SRR17520069. 17285238  
SRR17520069. 17285240  
SRR17520069. 17285242  
SRR17520069. 17285244  
SRR17520069. 17285246  
SRR17520069. 17285248  
SRR17520069. 17285250  
SRR17520069. 17285252  
SRR17520069. 17285254  
SRR17520069. 17285256  
SRR17520069. 17285258  
SRR17520069. 17285260  
SRR17520069. 17285262  
SRR17520069. 17285264  
SRR17520069. 17285266  
SRR17520069. 17285268  
SRR17520069. 17285270  
SRR17520069. 17285272  
SRR17520069. 17285274  
SRR17520069. 17285276  
SRR17520069. 17285278  
SRR17520069. 17285280  
SRR17520069. 17285282  
SRR17520069. 17285284  
SRR17520069. 17285286  
SRR17520069. 17285288  
SRR17520069. 17285290  
SRR17520069. 17287950  
SRR17520069. 17287952  
SRR17520069. 17287954  
SRR17520069. 17287956  
SRR17520069. 17287958  
SRR17520069. 17287960  
SRR17520069. 17287962  
SRR17520069. 17287964  
SRR17520069. 17287966  
SRR17520069. 17287968  
SRR17520069. 17287972  
SRR17520069. 17287974  
SRR17520069. 17287976  
SRR17520069. 17287978  
SRR17520069. 17287980  
SRR17520069. 17287982  
SRR17520069. 17287984  
SRR17520069. 17287986

SRR17520069. 17287988  
SRR17520069. 17287990  
SRR17520069. 17287992  
SRR17520069. 17287994  
SRR17520069. 17287996  
SRR17520069. 17288000  
SRR17520069. 17288002  
SRR17520069. 17288004  
SRR17520069. 17288006  
SRR17520069. 17288008  
SRR17520069. 17288012  
SRR17520069. 17288014  
SRR17520069. 17288016  
SRR17520069. 17288020  
SRR17520069. 17288022  
SRR17520069. 17288024  
SRR17520069. 17288026  
SRR17520069. 17288030  
SRR17520069. 17288032  
SRR17520069. 17288034  
SRR17520069. 17288036  
SRR17520069. 17288038  
SRR17520069. 17288040  
SRR17520069. 17288042  
SRR17520069. 17288044  
SRR17520069. 17288046  
SRR17520069. 17288048  
SRR17520069. 17288050  
SRR17520069. 17288052  
SRR17520069. 17288054  
SRR17520069. 17288056  
SRR17520069. 17288058  
SRR17520069. 17288062  
SRR17520069. 17288064  
SRR17520069. 17288066  
SRR17520069. 17288068  
SRR17520069. 17288070  
SRR17520069. 17288074  
SRR17520069. 17288076  
SRR17520069. 17288078  
SRR17520069. 17288080  
SRR17520069. 17288082  
SRR17520069. 17288084  
SRR17520069. 17288086  
SRR17520069. 17288088  
SRR17520069. 17288090  
SRR17520069. 17288092

SRR17520069.17288094  
SRR17520069.17288096  
SRR17520069.17288098  
SRR17520069.17288100  
SRR17520069.17288102  
SRR17520069.17288104  
SRR17520069.17288106  
SRR17520069.17288108  
SRR17520069.17288110  
SRR17520069.17288112  
SRR17520069.17288114  
SRR17520069.17288116  
SRR17520069.17288118  
SRR17520069.17288120  
SRR17520069.17288122  
SRR17520069.17288124  
SRR17520069.17288126  
SRR17520069.17288130  
SRR17520069.17288132  
SRR17520069.17288134  
SRR17520069.17288136  
SRR17520069.17290795  
SRR17520069.17290797  
SRR17520069.17290799  
SRR17520069.17290801  
SRR17520069.17290803  
SRR17520069.17290805  
SRR17520069.17290807  
SRR17520069.17290809  
SRR17520069.17290811  
SRR17520069.17290813  
SRR17520069.17290815  
SRR17520069.17290820  
SRR17520069.17290822  
SRR17520069.17290824  
SRR17520069.17290826  
SRR17520069.17290828  
SRR17520069.17290830  
SRR17520069.17290832  
SRR17520069.17290834  
SRR17520069.17290836  
SRR17520069.17290838  
SRR17520069.17290840  
SRR17520069.17290842  
SRR17520069.17290844  
SRR17520069.17290846  
SRR17520069.17292768

SRR17520069. 17292770  
SRR17520069. 17292774  
SRR17520069. 17292776  
SRR17520069. 17292778  
SRR17520069. 17294435  
SRR17520069. 17294439  
SRR17520069. 17294441  
SRR17520069. 17294443  
SRR17520069. 17294445  
SRR17520069. 17294447  
SRR17520069. 17294531  
SRR17520069. 17294533  
SRR17520069. 17294535  
SRR17520069. 17294537  
SRR17520069. 17294539  
SRR17520069. 17294541  
SRR17520069. 17294543  
SRR17520069. 17294545  
SRR17520069. 17294547  
SRR17520069. 17294549  
SRR17520069. 17294551  
SRR17520069. 17294555  
SRR17520069. 17294557  
SRR17520069. 17294559  
SRR17520069. 17294561  
SRR17520069. 17294563  
SRR17520069. 17294565  
SRR17520069. 17294567  
SRR17520069. 17294569  
SRR17520069. 17295599  
SRR17520069. 17295601  
SRR17520069. 17295603  
SRR17520069. 17295607  
SRR17520069. 17295609  
SRR17520069. 17295611  
SRR17520069. 17303173  
SRR17520069. 17304047  
SRR17520069. 17304049  
SRR17520069. 17304051  
SRR17520069. 17304053  
SRR17520069. 17304055  
SRR17520069. 17304057  
SRR17520069. 17304059  
SRR17520069. 17304063  
SRR17520069. 17304065  
SRR17520069. 17304067  
SRR17520069. 17304069

SRR17520069. 17304071  
SRR17520069. 17304073  
SRR17520069. 17304075  
SRR17520069. 17304077  
SRR17520069. 17304079  
SRR17520069. 17304081  
SRR17520069. 17304085  
SRR17520069. 17304087  
SRR17520069. 17304089  
SRR17520069. 17304091  
SRR17520069. 17304093  
SRR17520069. 17304095  
SRR17520069. 17304097  
SRR17520069. 17304099  
SRR17520069. 17304101  
SRR17520069. 17304103  
SRR17520069. 17306412  
SRR17520069. 17306414  
SRR17520069. 17306416  
SRR17520069. 17306420  
SRR17520069. 17306422  
SRR17520069. 17306426  
SRR17520069. 17306428  
SRR17520069. 17306430  
SRR17520069. 17306432  
SRR17520069. 17306436  
SRR17520069. 17306438  
SRR17520069. 17306442  
SRR17520069. 17306444  
SRR17520069. 17306446  
SRR17520069. 17306448  
SRR17520069. 17306450  
SRR17520069. 17306452  
SRR17520069. 17306454  
SRR17520069. 17306568  
SRR17520069. 17306570  
SRR17520069. 17306572  
SRR17520069. 17306574  
SRR17520069. 17306578  
SRR17520069. 17306580  
SRR17520069. 17306582  
SRR17520069. 17306584  
SRR17520069. 17306586  
SRR17520069. 17306588  
SRR17520069. 17306590  
SRR17520069. 17306592  
SRR17520069. 17306594



SRR17520069. 17306596  
SRR17520069. 17306598  
SRR17520069. 17307939  
SRR17520069. 17307941  
SRR17520069. 17307943  
SRR17520069. 17307945  
SRR17520069. 17307947  
SRR17520069. 17307949  
SRR17520069. 17307951  
SRR17520069. 17307953  
SRR17520069. 17307955  
SRR17520069. 17307957  
SRR17520069. 17307959  
SRR17520069. 17307961  
SRR17520069. 17307963  
SRR17520069. 17307965  
SRR17520069. 17307967  
SRR17520069. 17307969  
SRR17520069. 17307971  
SRR17520069. 17307973  
SRR17520069. 17307975  
SRR17520069. 17307977  
SRR17520069. 17307979  
SRR17520069. 17307981  
SRR17520069. 17307983  
SRR17520069. 17307985  
SRR17520069. 17307987  
SRR17520069. 17307989  
SRR17520069. 17307991  
SRR17520069. 17307993  
SRR17520069. 17307995  
SRR17520069. 17307997  
SRR17520069. 17307999  
SRR17520069. 17308001  
SRR17520069. 17308003  
SRR17520069. 17308005  
SRR17520069. 17308555  
SRR17520069. 17308557  
SRR17520069. 17308559  
SRR17520069. 17308561  
SRR17520069. 17308565  
SRR17520069. 17308569  
SRR17520069. 17308571  
SRR17520069. 17308573  
SRR17520069. 17308575  
SRR17520069. 17308577  
SRR17520069. 17308579

SRR17520069. 17308581  
SRR17520069. 17308583  
SRR17520069. 17308585  
SRR17520069. 17308587  
SRR17520069. 17308589  
SRR17520069. 17308591  
SRR17520069. 17308593  
SRR17520069. 17308595  
SRR17520069. 17308597  
SRR17520069. 17308599  
SRR17520069. 17308601  
SRR17520069. 17322246  
SRR17520069. 17322248  
SRR17520069. 17322250  
SRR17520069. 17322252  
SRR17520069. 17322254  
SRR17520069. 17322256  
SRR17520069. 17322258  
SRR17520069. 17322260  
SRR17520069. 17322262  
SRR17520069. 17322264  
SRR17520069. 17322266  
SRR17520069. 17322268  
SRR17520069. 17322270  
SRR17520069. 17322272  
SRR17520069. 17322274  
SRR17520069. 17322276  
SRR17520069. 17322278  
SRR17520069. 17322280  
SRR17520069. 17322282  
SRR17520069. 17322284  
SRR17520069. 17322286  
SRR17520069. 17322288  
SRR17520069. 17322290  
SRR17520069. 17322292  
SRR17520069. 17322294  
SRR17520069. 17322296  
SRR17520069. 17322298  
SRR17520069. 17322300  
SRR17520069. 17322302  
SRR17520069. 17322304  
SRR17520069. 17322306  
SRR17520069. 17322308  
SRR17520069. 17322310  
SRR17520069. 17322312  
SRR17520069. 17322314  
SRR17520069. 17322316

SRR17520069. 17322318  
SRR17520069. 17322320  
SRR17520069. 17322322  
SRR17520069. 17322324  
SRR17520069. 17322326  
SRR17520069. 17324340  
SRR17520069. 17324342  
SRR17520069. 17324344  
SRR17520069. 17324346  
SRR17520069. 17324348  
SRR17520069. 17324350  
SRR17520069. 17324354  
SRR17520069. 17324356  
SRR17520069. 17324358  
SRR17520069. 17324360  
SRR17520069. 17324362  
SRR17520069. 17324364  
SRR17520069. 17324366  
SRR17520069. 17324368  
SRR17520069. 17324370  
SRR17520069. 17324372  
SRR17520069. 17324374  
SRR17520069. 17324376  
SRR17520069. 17324378  
SRR17520069. 17324380  
SRR17520069. 17332674  
SRR17520069. 17332676  
SRR17520069. 17332678  
SRR17520069. 17332680  
SRR17520069. 17332682  
SRR17520069. 17332684  
SRR17520069. 17332688  
SRR17520069. 17332692  
SRR17520069. 17332696  
SRR17520069. 17332698  
SRR17520069. 17332700  
SRR17520069. 17332702  
SRR17520069. 17333856  
SRR17520069. 17333858  
SRR17520069. 17333860  
SRR17520069. 17333862  
SRR17520069. 17333864  
SRR17520069. 17333909  
SRR17520069. 17333911  
SRR17520069. 17333914  
SRR17520069. 17336469  
SRR17520069. 17336471

SRR17520069. 17336473  
SRR17520069. 17336475  
SRR17520069. 17336479  
SRR17520069. 17336481  
SRR17520069. 17336483  
SRR17520069. 17336485  
SRR17520069. 17336487  
SRR17520069. 17336489  
SRR17520069. 17336491  
SRR17520069. 17336495  
SRR17520069. 17336497  
SRR17520069. 17336499  
SRR17520069. 17336501  
SRR17520069. 17336503  
SRR17520069. 17336505  
SRR17520069. 17336507  
SRR17520069. 17336509  
SRR17520069. 17336511  
SRR17520069. 17336513  
SRR17520069. 17336515  
SRR17520069. 17338642  
SRR17520069. 17338644  
SRR17520069. 17338646  
SRR17520069. 17338652  
SRR17520069. 17338654  
SRR17520069. 17338656  
SRR17520069. 17338658  
SRR17520069. 17338660  
SRR17520069. 17338662  
SRR17520069. 17338666  
SRR17520069. 17338668  
SRR17520069. 17338670  
SRR17520069. 17338672  
SRR17520069. 17338674  
SRR17520069. 17338676  
SRR17520069. 17338678  
SRR17520069. 17338680  
SRR17520069. 17338682  
SRR17520069. 17339075  
SRR17520069. 17339077  
SRR17520069. 17339079  
SRR17520069. 17339081  
SRR17520069. 17339083  
SRR17520069. 17339085  
SRR17520069. 17339087  
SRR17520069. 17339089  
SRR17520069. 17339091

SRR17520069. 17339095  
SRR17520069. 17339097  
SRR17520069. 17339099  
SRR17520069. 17343819  
SRR17520069. 17344962  
SRR17520069. 17344964  
SRR17520069. 17344966  
SRR17520069. 17344968  
SRR17520069. 17345571  
SRR17520069. 17345573  
SRR17520069. 17345575  
SRR17520069. 17345577  
SRR17520069. 17345579  
SRR17520069. 17345583  
SRR17520069. 17345585  
SRR17520069. 17345587  
SRR17520069. 17345589  
SRR17520069. 17345591  
SRR17520069. 17345593  
SRR17520069. 17357057  
SRR17520069. 17357059  
SRR17520069. 17357061  
SRR17520069. 17357549  
SRR17520069. 17357551  
SRR17520069. 17357553  
SRR17520069. 17357555  
SRR17520069. 17357557  
SRR17520069. 17357559  
SRR17520069. 17357561  
SRR17520069. 17357563  
SRR17520069. 17357565  
SRR17520069. 17357567  
SRR17520069. 17357569  
SRR17520069. 17357571  
SRR17520069. 17357573  
SRR17520069. 17357575  
SRR17520069. 17357577  
SRR17520069. 17357579  
SRR17520069. 17357581  
SRR17520069. 17357583  
SRR17520069. 17357588  
SRR17520069. 17357590  
SRR17520069. 17357592  
SRR17520069. 17357594  
SRR17520069. 17357596  
SRR17520069. 17357598  
SRR17520069. 17357600

SRR17520069. 17357602  
SRR17520069. 17357604  
SRR17520069. 17357606  
SRR17520069. 17357608  
SRR17520069. 17357610  
SRR17520069. 17357612  
SRR17520069. 17357614  
SRR17520069. 17357616  
SRR17520069. 17357618  
SRR17520069. 17357620  
SRR17520069. 17357622  
SRR17520069. 17357624  
SRR17520069. 17357626  
SRR17520069. 17357628  
SRR17520069. 17357630  
SRR17520069. 17357632  
SRR17520069. 17357634  
SRR17520069. 17357636  
SRR17520069. 17357638  
SRR17520069. 17357640  
SRR17520069. 17357642  
SRR17520069. 17357644  
SRR17520069. 17357646  
SRR17520069. 17357648  
SRR17520069. 17357650  
SRR17520069. 17357652  
SRR17520069. 17357654  
SRR17520069. 17357656  
SRR17520069. 17357658  
SRR17520069. 17357660  
SRR17520069. 17357662  
SRR17520069. 17357664  
SRR17520069. 17357666  
SRR17520069. 17357668  
SRR17520069. 17357670  
SRR17520069. 17357672  
SRR17520069. 17357674  
SRR17520069. 17357678  
SRR17520069. 17357680  
SRR17520069. 17357682  
SRR17520069. 17357684  
SRR17520069. 17357686  
SRR17520069. 17357688  
SRR17520069. 17357690  
SRR17520069. 17357692  
SRR17520069. 17357694  
SRR17520069. 17357696

SRR17520069. 17357698  
SRR17520069. 17357700  
SRR17520069. 17357702  
SRR17520069. 17357706  
SRR17520069. 17357708  
SRR17520069. 17357710  
SRR17520069. 17357712  
SRR17520069. 17357714  
SRR17520069. 17357716  
SRR17520069. 17357718  
SRR17520069. 17357720  
SRR17520069. 17357722  
SRR17520069. 17357724  
SRR17520069. 17357726  
SRR17520069. 17357728  
SRR17520069. 17357730  
SRR17520069. 17357732  
SRR17520069. 17359065  
SRR17520069. 17359067  
SRR17520069. 17359069  
SRR17520069. 17359071  
SRR17520069. 17359073  
SRR17520069. 17359075  
SRR17520069. 17359077  
SRR17520069. 17359079  
SRR17520069. 17362872  
SRR17520069. 17362876  
SRR17520069. 17362880  
SRR17520069. 17362882  
SRR17520069. 17362884  
SRR17520069. 17362886  
SRR17520069. 17362888  
SRR17520069. 17362890  
SRR17520069. 17362892  
SRR17520069. 17362894  
SRR17520069. 17368715  
SRR17520069. 17368717  
SRR17520069. 17368719  
SRR17520069. 17368721  
SRR17520069. 17368723  
SRR17520069. 17368725  
SRR17520069. 17368727  
SRR17520069. 17368729  
SRR17520069. 17368731  
SRR17520069. 17372409  
SRR17520069. 17372411  
SRR17520069. 17372415

SRR17520069. 17372417  
SRR17520069. 17372419  
SRR17520069. 17372421  
SRR17520069. 17372423  
SRR17520069. 17372425  
SRR17520069. 17372427  
SRR17520069. 17372429  
SRR17520069. 17372431  
SRR17520069. 17372433  
SRR17520069. 17372435  
SRR17520069. 17372437  
SRR17520069. 17372439  
SRR17520069. 17372441  
SRR17520069. 17372443  
SRR17520069. 17372445  
SRR17520069. 17372447  
SRR17520069. 17372449  
SRR17520069. 17372453  
SRR17520069. 17372455  
SRR17520069. 17372686  
SRR17520069. 17372688  
SRR17520069. 17372690  
SRR17520069. 17372692  
SRR17520069. 17372694  
SRR17520069. 17372696  
SRR17520069. 17372698  
SRR17520069. 17372700  
SRR17520069. 17372702  
SRR17520069. 17372704  
SRR17520069. 17372706  
SRR17520069. 17372708  
SRR17520069. 17372710  
SRR17520069. 17374360  
SRR17520069. 17374362  
SRR17520069. 17374364  
SRR17520069. 17374366  
SRR17520069. 17377595  
SRR17520069. 17377599  
SRR17520069. 17381652  
SRR17520069. 17381656  
SRR17520069. 17381658  
SRR17520069. 17381660  
SRR17520069. 17381662  
SRR17520069. 17381664  
SRR17520069. 17381666  
SRR17520069. 17381668  
SRR17520069. 17381670



SRR17520069. 17381674  
SRR17520069. 17381676  
SRR17520069. 17381678  
SRR17520069. 17381680  
SRR17520069. 17381682  
SRR17520069. 17381685  
SRR17520069. 17381687  
SRR17520069. 17381689  
SRR17520069. 17381691  
SRR17520069. 17381693  
SRR17520069. 17381695  
SRR17520069. 17381697  
SRR17520069. 17381699  
SRR17520069. 17381701  
SRR17520069. 17381703  
SRR17520069. 17381705  
SRR17520069. 17381707  
SRR17520069. 17381709  
SRR17520069. 17381711  
SRR17520069. 17381713  
SRR17520069. 17381715  
SRR17520069. 17381717  
SRR17520069. 17381719  
SRR17520069. 17381721  
SRR17520069. 17381723  
SRR17520069. 17381725  
SRR17520069. 17381727  
SRR17520069. 17381729  
SRR17520069. 17381731  
SRR17520069. 17381733  
SRR17520069. 17381735  
SRR17520069. 17381737  
SRR17520069. 17381739  
SRR17520069. 17381741  
SRR17520069. 17381743  
SRR17520069. 17381745  
SRR17520069. 17381747  
SRR17520069. 17381749  
SRR17520069. 17381751  
SRR17520069. 17381753  
SRR17520069. 17381755  
SRR17520069. 17381759  
SRR17520069. 17381761  
SRR17520069. 17381763  
SRR17520069. 17381765  
SRR17520069. 17383541  
SRR17520069. 17383543

SRR17520069. 17383545  
SRR17520069. 17383547  
SRR17520069. 17383549  
SRR17520069. 17383551  
SRR17520069. 17383553  
SRR17520069. 17383555  
SRR17520069. 17383557  
SRR17520069. 17383559  
SRR17520069. 17383561  
SRR17520069. 17383563  
SRR17520069. 17383565  
SRR17520069. 17383567  
SRR17520069. 17383569  
SRR17520069. 17383571  
SRR17520069. 17383573  
SRR17520069. 17383575  
SRR17520069. 17383577  
SRR17520069. 17383579  
SRR17520069. 17383581  
SRR17520069. 17386068  
SRR17520069. 17386579  
SRR17520069. 17386581  
SRR17520069. 17386583  
SRR17520069. 17386585  
SRR17520069. 17386587  
SRR17520069. 17386589  
SRR17520069. 17386591  
SRR17520069. 17386593  
SRR17520069. 17386595  
SRR17520069. 17386597  
SRR17520069. 17386599  
SRR17520069. 17386601  
SRR17520069. 17386603  
SRR17520069. 17386605  
SRR17520069. 17386607  
SRR17520069. 17386609  
SRR17520069. 17386611  
SRR17520069. 17386613  
SRR17520069. 17386615  
SRR17520069. 17386617  
SRR17520069. 17386619  
SRR17520069. 17386621  
SRR17520069. 17386623  
SRR17520069. 17386625  
SRR17520069. 17386627  
SRR17520069. 17386629  
SRR17520069. 17386631

SRR17520069. 17387697  
SRR17520069. 17387699  
SRR17520069. 17387701  
SRR17520069. 17387703  
SRR17520069. 17387705  
SRR17520069. 17387707  
SRR17520069. 17387711  
SRR17520069. 17387713  
SRR17520069. 17387715  
SRR17520069. 17387717  
SRR17520069. 17387719  
SRR17520069. 17387721  
SRR17520069. 17387723  
SRR17520069. 17387725  
SRR17520069. 17387727  
SRR17520069. 17387729  
SRR17520069. 17387731  
SRR17520069. 17387733  
SRR17520069. 17387735  
SRR17520069. 17387737  
SRR17520069. 17387739  
SRR17520069. 17387741  
SRR17520069. 17388673  
SRR17520069. 17398197  
SRR17520069. 17399327  
SRR17520069. 17399329  
SRR17520069. 17399333  
SRR17520069. 17399335  
SRR17520069. 17399337  
SRR17520069. 17399339  
SRR17520069. 17399341  
SRR17520069. 17399343  
SRR17520069. 17399345  
SRR17520069. 17399347  
SRR17520069. 17399349  
SRR17520069. 17399351  
SRR17520069. 17399353  
SRR17520069. 17399355  
SRR17520069. 17399357  
SRR17520069. 17399359  
SRR17520069. 17399361  
SRR17520069. 17399363  
SRR17520069. 17399365  
SRR17520069. 17399367  
SRR17520069. 17400211  
SRR17520069. 17400213  
SRR17520069. 17400215

SRR17520069.17400219  
SRR17520069.17400221  
SRR17520069.17403707  
SRR17520069.17403709  
SRR17520069.17403711  
SRR17520069.17403713  
SRR17520069.17403715  
SRR17520069.17403717  
SRR17520069.17403719  
SRR17520069.17403721  
SRR17520069.17403723  
SRR17520069.17403725  
SRR17520069.17403727  
SRR17520069.17403729  
SRR17520069.17403731  
SRR17520069.17403733  
SRR17520069.17403735  
SRR17520069.17403737  
SRR17520069.17403739  
SRR17520069.17403746  
SRR17520069.17403748  
SRR17520069.17403750  
SRR17520069.17403754  
SRR17520069.17403756  
SRR17520069.17403758  
SRR17520069.17403760  
SRR17520069.17403762  
SRR17520069.17403764  
SRR17520069.17403766  
SRR17520069.17403770  
SRR17520069.17403772  
SRR17520069.17403776  
SRR17520069.17403778  
SRR17520069.17403780  
SRR17520069.17403782  
SRR17520069.17403786  
SRR17520069.17403788  
SRR17520069.17403790  
SRR17520069.17403792  
SRR17520069.17403794  
SRR17520069.17403796  
SRR17520069.17407546  
SRR17520069.17407550  
SRR17520069.17407552  
SRR17520069.17407554  
SRR17520069.17407556  
SRR17520069.17407558

SRR17520069. 17407560  
SRR17520069. 17407562  
SRR17520069. 17407564  
SRR17520069. 17407566  
SRR17520069. 17407568  
SRR17520069. 17407570  
SRR17520069. 17407572  
SRR17520069. 17407574  
SRR17520069. 17407576  
SRR17520069. 17407578  
SRR17520069. 17407580  
SRR17520069. 17407582  
SRR17520069. 17407584  
SRR17520069. 17407586  
SRR17520069. 17407588  
SRR17520069. 17407590  
SRR17520069. 17407592  
SRR17520069. 17407594  
SRR17520069. 17407596  
SRR17520069. 17407598  
SRR17520069. 17407602  
SRR17520069. 17407604  
SRR17520069. 17407606  
SRR17520069. 17407608  
SRR17520069. 17407612  
SRR17520069. 17407614  
SRR17520069. 17407616  
SRR17520069. 17407618  
SRR17520069. 17407620  
SRR17520069. 17407622  
SRR17520069. 17407624  
SRR17520069. 17407626  
SRR17520069. 17407628  
SRR17520069. 17407632  
SRR17520069. 17407634  
SRR17520069. 17407636  
SRR17520069. 17407638  
SRR17520069. 17407640  
SRR17520069. 17407642  
SRR17520069. 17407644  
SRR17520069. 17407646  
SRR17520069. 17407650  
SRR17520069. 17407652  
SRR17520069. 17407654  
SRR17520069. 17407656  
SRR17520069. 17407660  
SRR17520069. 17407662

SRR17520069. 17407664  
SRR17520069. 17407666  
SRR17520069. 17407670  
SRR17520069. 17407672  
SRR17520069. 17407674  
SRR17520069. 17407676  
SRR17520069. 17407678  
SRR17520069. 17407680  
SRR17520069. 17407682  
SRR17520069. 17407684  
SRR17520069. 17407686  
SRR17520069. 17407688  
SRR17520069. 17407690  
SRR17520069. 17407692  
SRR17520069. 17407694  
SRR17520069. 17407696  
SRR17520069. 17407698  
SRR17520069. 17407700  
SRR17520069. 17407702  
SRR17520069. 17407704  
SRR17520069. 17407706  
SRR17520069. 17407710  
SRR17520069. 17407712  
SRR17520069. 17407714  
SRR17520069. 17407716  
SRR17520069. 17407718  
SRR17520069. 17407720  
SRR17520069. 17407722  
SRR17520069. 17407724  
SRR17520069. 17411671  
SRR17520069. 17411673  
SRR17520069. 17411675  
SRR17520069. 17411677  
SRR17520069. 17411679  
SRR17520069. 17411681  
SRR17520069. 17411683  
SRR17520069. 17411685  
SRR17520069. 17411687  
SRR17520069. 17411689  
SRR17520069. 17411691  
SRR17520069. 17411693  
SRR17520069. 17411695  
SRR17520069. 17418358  
SRR17520069. 17418360  
SRR17520069. 17418362  
SRR17520069. 17418364  
SRR17520069. 17418366

SRR17520069. 17418368  
SRR17520069. 17418370  
SRR17520069. 17418372  
SRR17520069. 17418374  
SRR17520069. 17418376  
SRR17520069. 17418378  
SRR17520069. 17418380  
SRR17520069. 17418382  
SRR17520069. 17418384  
SRR17520069. 17418386  
SRR17520069. 17418388  
SRR17520069. 17418390  
SRR17520069. 17418392  
SRR17520069. 17418394  
SRR17520069. 17418396  
SRR17520069. 17418398  
SRR17520069. 17418400  
SRR17520069. 17418402  
SRR17520069. 17418404  
SRR17520069. 17418406  
SRR17520069. 17418408  
SRR17520069. 17418410  
SRR17520069. 17418412  
SRR17520069. 17418414  
SRR17520069. 17418416  
SRR17520069. 17418418  
SRR17520069. 17418420  
SRR17520069. 17418422  
SRR17520069. 17418424  
SRR17520069. 17418426  
SRR17520069. 17418428  
SRR17520069. 17418430  
SRR17520069. 17418432  
SRR17520069. 17418434  
SRR17520069. 17418436  
SRR17520069. 17418438  
SRR17520069. 17418440  
SRR17520069. 17418442  
SRR17520069. 17418444  
SRR17520069. 17418446  
SRR17520069. 17418448  
SRR17520069. 17418450  
SRR17520069. 17418452  
SRR17520069. 17418454  
SRR17520069. 17418456  
SRR17520069. 17418458  
SRR17520069. 17418460

SRR17520069. 17418462  
SRR17520069. 17418464  
SRR17520069. 17418466  
SRR17520069. 17418468  
SRR17520069. 17418470  
SRR17520069. 17418472  
SRR17520069. 17418474  
SRR17520069. 17418476  
SRR17520069. 17418478  
SRR17520069. 17418480  
SRR17520069. 17418482  
SRR17520069. 17418484  
SRR17520069. 17418486  
SRR17520069. 17418488  
SRR17520069. 17418490  
SRR17520069. 17418492  
SRR17520069. 17418494  
SRR17520069. 17418496  
SRR17520069. 17418498  
SRR17520069. 17418500  
SRR17520069. 17418502  
SRR17520069. 17418504  
SRR17520069. 17418506  
SRR17520069. 17418508  
SRR17520069. 17418510  
SRR17520069. 17418512  
SRR17520069. 17418514  
SRR17520069. 17418516  
SRR17520069. 17418518  
SRR17520069. 17418520  
SRR17520069. 17418522  
SRR17520069. 17418524  
SRR17520069. 17418526  
SRR17520069. 17418528  
SRR17520069. 17418530  
SRR17520069. 17418532  
SRR17520069. 17418534  
SRR17520069. 17418536  
SRR17520069. 17418538  
SRR17520069. 17418540  
SRR17520069. 17418542  
SRR17520069. 17418544  
SRR17520069. 17418546  
SRR17520069. 17418548  
SRR17520069. 17418550  
SRR17520069. 17418552  
SRR17520069. 17418554



SRR17520069. 17418556  
SRR17520069. 17418558  
SRR17520069. 17418560  
SRR17520069. 17418562  
SRR17520069. 17418564  
SRR17520069. 17418566  
SRR17520069. 17418568  
SRR17520069. 17418570  
SRR17520069. 17418572  
SRR17520069. 17418574  
SRR17520069. 17418576  
SRR17520069. 17418578  
SRR17520069. 17430340  
SRR17520069. 17430342  
SRR17520069. 17430344  
SRR17520069. 17430346  
SRR17520069. 17430348  
SRR17520069. 17430350  
SRR17520069. 17430352  
SRR17520069. 17430354  
SRR17520069. 17430356  
SRR17520069. 17430358  
SRR17520069. 17430360  
SRR17520069. 17430362  
SRR17520069. 17430364  
SRR17520069. 17430366  
SRR17520069. 17430368  
SRR17520069. 17430370  
SRR17520069. 17430372  
SRR17520069. 17430374  
SRR17520069. 17430376  
SRR17520069. 17430378  
SRR17520069. 17430380  
SRR17520069. 17430382  
SRR17520069. 17430384  
SRR17520069. 17430386  
SRR17520069. 17430388  
SRR17520069. 17430390  
SRR17520069. 17430392  
SRR17520069. 17430394  
SRR17520069. 17432516  
SRR17520069. 17432518  
SRR17520069. 17432522  
SRR17520069. 17432524  
SRR17520069. 17432526  
SRR17520069. 17432528  
SRR17520069. 17432530

SRR17520069. 17432532  
SRR17520069. 17432534  
SRR17520069. 17432536  
SRR17520069. 17432538  
SRR17520069. 17432542  
SRR17520069. 17432544  
SRR17520069. 17432546  
SRR17520069. 17432548  
SRR17520069. 17432550  
SRR17520069. 17432552  
SRR17520069. 17432554  
SRR17520069. 17432556  
SRR17520069. 17432558  
SRR17520069. 17432560  
SRR17520069. 17432562  
SRR17520069. 17432564  
SRR17520069. 17432566  
SRR17520069. 17432568  
SRR17520069. 17432570  
SRR17520069. 17432572  
SRR17520069. 17432574  
SRR17520069. 17432578  
SRR17520069. 17432580  
SRR17520069. 17432582  
SRR17520069. 17432584  
SRR17520069. 17432586  
SRR17520069. 17432588  
SRR17520069. 17432590  
SRR17520069. 17432592  
SRR17520069. 17432594  
SRR17520069. 17432596  
SRR17520069. 17432598  
SRR17520069. 17432600  
SRR17520069. 17432602  
SRR17520069. 17432604  
SRR17520069. 17432606  
SRR17520069. 17432608  
SRR17520069. 17432610  
SRR17520069. 17432612  
SRR17520069. 17432614  
SRR17520069. 17432618  
SRR17520069. 17432620  
SRR17520069. 17432624  
SRR17520069. 17432626  
SRR17520069. 17432628  
SRR17520069. 17432630  
SRR17520069. 17434692

SRR17520069. 17434694  
SRR17520069. 17434696  
SRR17520069. 17434698  
SRR17520069. 17434700  
SRR17520069. 17434702  
SRR17520069. 17434704  
SRR17520069. 17434706  
SRR17520069. 17434708  
SRR17520069. 17434710  
SRR17520069. 17434712  
SRR17520069. 17435436  
SRR17520069. 17435438  
SRR17520069. 17435440  
SRR17520069. 17435442  
SRR17520069. 17435444  
SRR17520069. 17435448  
SRR17520069. 17435450  
SRR17520069. 17436686  
SRR17520069. 17446667  
SRR17520069. 17446669  
SRR17520069. 17446671  
SRR17520069. 17446673  
SRR17520069. 17446675  
SRR17520069. 17446677  
SRR17520069. 17446679  
SRR17520069. 17446681  
SRR17520069. 17446683  
SRR17520069. 17446685  
SRR17520069. 17446687  
SRR17520069. 17446689  
SRR17520069. 17446691  
SRR17520069. 17446693  
SRR17520069. 17446695  
SRR17520069. 17446697  
SRR17520069. 17446699  
SRR17520069. 17446701  
SRR17520069. 17448742  
SRR17520069. 17462825  
SRR17520069. 17462827  
SRR17520069. 17464599  
SRR17520069. 17464601  
SRR17520069. 17472110  
SRR17520069. 17472112  
SRR17520069. 17472114  
SRR17520069. 17472116  
SRR17520069. 17472118  
SRR17520069. 17472120

SRR17520069.17472122  
SRR17520069.17472124  
SRR17520069.17472126  
SRR17520069.17472128  
SRR17520069.17472130  
SRR17520069.17472132  
SRR17520069.17472134  
SRR17520069.17472136  
SRR17520069.17472138  
SRR17520069.17473177  
SRR17520069.17473181  
SRR17520069.17473185  
SRR17520069.17473187  
SRR17520069.17473189  
SRR17520069.17473191  
SRR17520069.17473193  
SRR17520069.17478260  
SRR17520069.17478262  
SRR17520069.17478264  
SRR17520069.17478266  
SRR17520069.17478268  
SRR17520069.17478270  
SRR17520069.17478272  
SRR17520069.17478274  
SRR17520069.17486983  
SRR17520069.17486985  
SRR17520069.17486987  
SRR17520069.17486989  
SRR17520069.17486991  
SRR17520069.17486995  
SRR17520069.17486997  
SRR17520069.17486999  
SRR17520069.17487001  
SRR17520069.17487003  
SRR17520069.17487005  
SRR17520069.17487007  
SRR17520069.17487011  
SRR17520069.17487013  
SRR17520069.17487015  
SRR17520069.17487017  
SRR17520069.17487019  
SRR17520069.17487021  
SRR17520069.17487023  
SRR17520069.17487025  
SRR17520069.17487027  
SRR17520069.17487029  
SRR17520069.17487031

SRR17520069.17487035  
SRR17520069.17487037  
SRR17520069.17494968  
SRR17520069.17494970  
SRR17520069.17496232  
SRR17520069.17496234  
SRR17520069.17496236  
SRR17520069.17496238  
SRR17520069.17496240  
SRR17520069.17496242  
SRR17520069.17496244  
SRR17520069.17496246  
SRR17520069.17496248  
SRR17520069.17510004  
SRR17520069.17510006  
SRR17520069.17510008  
SRR17520069.17510010  
SRR17520069.17510012  
SRR17520069.17510014  
SRR17520069.17510016  
SRR17520069.17510018  
SRR17520069.17510020  
SRR17520069.17510022  
SRR17520069.17510024  
SRR17520069.17510026  
SRR17520069.17510028  
SRR17520069.17510030  
SRR17520069.17510032  
SRR17520069.17511611  
SRR17520069.17511613  
SRR17520069.17511615  
SRR17520069.17511617  
SRR17520069.17511619  
SRR17520069.17511621  
SRR17520069.17511623  
SRR17520069.17511625  
SRR17520069.17511627  
SRR17520069.17511629  
SRR17520069.17511632  
SRR17520069.17511634  
SRR17520069.17511636  
SRR17520069.17511638  
SRR17520069.17511640  
SRR17520069.17511642  
SRR17520069.17511644  
SRR17520069.17511646  
SRR17520069.17511648

SRR17520069.17511650  
SRR17520069.17511652  
SRR17520069.17511654  
SRR17520069.17511656  
SRR17520069.17511658  
SRR17520069.17511660  
SRR17520069.17511662  
SRR17520069.17511664  
SRR17520069.17511666  
SRR17520069.17511668  
SRR17520069.17511670  
SRR17520069.17511673  
SRR17520069.17511675  
SRR17520069.17511677  
SRR17520069.17511679  
SRR17520069.17511681  
SRR17520069.17511683  
SRR17520069.17511685  
SRR17520069.17511687  
SRR17520069.17511689  
SRR17520069.17511691  
SRR17520069.17511693  
SRR17520069.17511697  
SRR17520069.17511699  
SRR17520069.17511701  
SRR17520069.17511703  
SRR17520069.17511705  
SRR17520069.17511707  
SRR17520069.17511709  
SRR17520069.17511711  
SRR17520069.17511713  
SRR17520069.17511715  
SRR17520069.17511717  
SRR17520069.17511719  
SRR17520069.17511721  
SRR17520069.17511723  
SRR17520069.17511725  
SRR17520069.17511727  
SRR17520069.17511729  
SRR17520069.17511731  
SRR17520069.17511733  
SRR17520069.17511735  
SRR17520069.17511737  
SRR17520069.17511739  
SRR17520069.17511743  
SRR17520069.17511745  
SRR17520069.17511747

SRR17520069.17511749  
SRR17520069.17511751  
SRR17520069.17511753  
SRR17520069.17511755  
SRR17520069.17511757  
SRR17520069.17511759  
SRR17520069.17511761  
SRR17520069.17511763  
SRR17520069.17511765  
SRR17520069.17511767  
SRR17520069.17511769  
SRR17520069.17515017  
SRR17520069.17515019  
SRR17520069.17515021  
SRR17520069.17515023  
SRR17520069.17515025  
SRR17520069.17515027  
SRR17520069.17515029  
SRR17520069.17515031  
SRR17520069.17515033  
SRR17520069.17515035  
SRR17520069.17515037  
SRR17520069.17515039  
SRR17520069.17515041  
SRR17520069.17515043  
SRR17520069.17515045  
SRR17520069.17515047  
SRR17520069.17515049  
SRR17520069.17515051  
SRR17520069.17515053  
SRR17520069.17515055  
SRR17520069.17515057  
SRR17520069.17515059  
SRR17520069.17515061  
SRR17520069.17515063  
SRR17520069.17515065  
SRR17520069.17515067  
SRR17520069.17515069  
SRR17520069.17515071  
SRR17520069.17515073  
SRR17520069.17515075  
SRR17520069.17515077  
SRR17520069.17515079  
SRR17520069.17515081  
SRR17520069.17515083  
SRR17520069.17515085  
SRR17520069.17515087

SRR17520069.17515089  
SRR17520069.17515091  
SRR17520069.17515093  
SRR17520069.17515095  
SRR17520069.17515097  
SRR17520069.17515099  
SRR17520069.17515101  
SRR17520069.17519978  
SRR17520069.17519988  
SRR17520069.17519992  
SRR17520069.17519994  
SRR17520069.17519996  
SRR17520069.17520000  
SRR17520069.17520002  
SRR17520069.17520143  
SRR17520069.17520145  
SRR17520069.17520147  
SRR17520069.17520149  
SRR17520069.17520151  
SRR17520069.17520155  
SRR17520069.17520157  
SRR17520069.17520159  
SRR17520069.17520161  
SRR17520069.17520163  
SRR17520069.17520165  
SRR17520069.17520167  
SRR17520069.17520169  
SRR17520069.17520171  
SRR17520069.17520173  
SRR17520069.17520175  
SRR17520069.17520177  
SRR17520069.17520179  
SRR17520069.17520181  
SRR17520069.17520183  
SRR17520069.17520185  
SRR17520069.17520187  
SRR17520069.17520189  
SRR17520069.17520191  
SRR17520069.17520193  
SRR17520069.17520195  
SRR17520069.17520197  
SRR17520069.17520199  
SRR17520069.17520201  
SRR17520069.17520203  
SRR17520069.17520205  
SRR17520069.17520207  
SRR17520069.17520209



SRR17520069.17520211  
SRR17520069.17521635  
SRR17520069.17521637  
SRR17520069.17521639  
SRR17520069.17521641  
SRR17520069.17521643  
SRR17520069.17521645  
SRR17520069.17521647  
SRR17520069.17521649  
SRR17520069.17521651  
SRR17520069.17521653  
SRR17520069.17521655  
SRR17520069.17521657  
SRR17520069.17521659  
SRR17520069.17521661  
SRR17520069.17521663  
SRR17520069.17521665  
SRR17520069.17522843  
SRR17520069.17522845  
SRR17520069.17522847  
SRR17520069.17522849  
SRR17520069.17522851  
SRR17520069.17522853  
SRR17520069.17522855  
SRR17520069.17522857  
SRR17520069.17522859  
SRR17520069.17522861  
SRR17520069.17522863  
SRR17520069.17522865  
SRR17520069.17522867  
SRR17520069.17522869  
SRR17520069.17522871  
SRR17520069.17522873  
SRR17520069.17522875  
SRR17520069.17522877  
SRR17520069.17522879  
SRR17520069.17522881  
SRR17520069.17522883  
SRR17520069.17523116  
SRR17520069.17524495  
SRR17520069.17524497  
SRR17520069.17526101  
SRR17520069.17526103  
SRR17520069.17526105  
SRR17520069.17526107  
SRR17520069.17526109  
SRR17520069.17526111

SRR17520069.17526113  
SRR17520069.17526115  
SRR17520069.17526119  
SRR17520069.17526121  
SRR17520069.17526123  
SRR17520069.17526125  
SRR17520069.17526127  
SRR17520069.17531203  
SRR17520069.17531205  
SRR17520069.17531207  
SRR17520069.17531211  
SRR17520069.17531213  
SRR17520069.17531215  
SRR17520069.17531217  
SRR17520069.17531219  
SRR17520069.17531221  
SRR17520069.17531223  
SRR17520069.17531225  
SRR17520069.17531227  
SRR17520069.17531231  
SRR17520069.17531233  
SRR17520069.17531235  
SRR17520069.17531237  
SRR17520069.17531239  
SRR17520069.17531241  
SRR17520069.17532141  
SRR17520069.17532809  
SRR17520069.17532811  
SRR17520069.17532813  
SRR17520069.17532815  
SRR17520069.17532817  
SRR17520069.17532819  
SRR17520069.17532821  
SRR17520069.17532823  
SRR17520069.17532825  
SRR17520069.17532827  
SRR17520069.17532829  
SRR17520069.17532831  
SRR17520069.17532833  
SRR17520069.17532835  
SRR17520069.17532837  
SRR17520069.17532839  
SRR17520069.17532841  
SRR17520069.17532843  
SRR17520069.17532845  
SRR17520069.17532847  
SRR17520069.17532849

SRR17520069. 17532851  
SRR17520069. 17532853  
SRR17520069. 17532855  
SRR17520069. 17532857  
SRR17520069. 17532859  
SRR17520069. 17532861  
SRR17520069. 17532863  
SRR17520069. 17532865  
SRR17520069. 17532869  
SRR17520069. 17532871  
SRR17520069. 17532873  
SRR17520069. 17532875  
SRR17520069. 17532877  
SRR17520069. 17532879  
SRR17520069. 17532881  
SRR17520069. 17532883  
SRR17520069. 17532885  
SRR17520069. 17532887  
SRR17520069. 17532889  
SRR17520069. 17532891  
SRR17520069. 17532893  
SRR17520069. 17532895  
SRR17520069. 17532897  
SRR17520069. 17532899  
SRR17520069. 17532901  
SRR17520069. 17532903  
SRR17520069. 17532905  
SRR17520069. 17532907  
SRR17520069. 17532909  
SRR17520069. 17532911  
SRR17520069. 17532913  
SRR17520069. 17532915  
SRR17520069. 17532917  
SRR17520069. 17532919  
SRR17520069. 17532921  
SRR17520069. 17532923  
SRR17520069. 17532925  
SRR17520069. 17532927  
SRR17520069. 17532929  
SRR17520069. 17532931  
SRR17520069. 17532935  
SRR17520069. 17532937  
SRR17520069. 17534613  
SRR17520069. 17534615  
SRR17520069. 17534617  
SRR17520069. 17534619  
SRR17520069. 17534621

SRR17520069. 17535578  
SRR17520069. 17535580  
SRR17520069. 17535582  
SRR17520069. 17535584  
SRR17520069. 17535586  
SRR17520069. 17535588  
SRR17520069. 17535590  
SRR17520069. 17535592  
SRR17520069. 17535594  
SRR17520069. 17535596  
SRR17520069. 17538583  
SRR17520069. 17538585  
SRR17520069. 17538587  
SRR17520069. 17538589  
SRR17520069. 17538591  
SRR17520069. 17538593  
SRR17520069. 17540028  
SRR17520069. 17540030  
SRR17520069. 17540032  
SRR17520069. 17540034  
SRR17520069. 17540036  
SRR17520069. 17540038  
SRR17520069. 17540861  
SRR17520069. 17546345  
SRR17520069. 17546347  
SRR17520069. 17546349  
SRR17520069. 17546351  
SRR17520069. 17546353  
SRR17520069. 17546355  
SRR17520069. 17546357  
SRR17520069. 17546359  
SRR17520069. 17546361  
SRR17520069. 17546363  
SRR17520069. 17546365  
SRR17520069. 17546367  
SRR17520069. 17546369  
SRR17520069. 17546371  
SRR17520069. 17546373  
SRR17520069. 17546375  
SRR17520069. 17556473  
SRR17520069. 17556475  
SRR17520069. 17556477  
SRR17520069. 17556479  
SRR17520069. 17556481  
SRR17520069. 17556483  
SRR17520069. 17556485  
SRR17520069. 17556489

SRR17520069. 17556491  
SRR17520069. 17556493  
SRR17520069. 17556495  
SRR17520069. 17556497  
SRR17520069. 17556499  
SRR17520069. 17556501  
SRR17520069. 17556503  
SRR17520069. 17556505  
SRR17520069. 17556507  
SRR17520069. 17556509  
SRR17520069. 17556511  
SRR17520069. 17556513  
SRR17520069. 17556515  
SRR17520069. 17556517  
SRR17520069. 17556519  
SRR17520069. 17556521  
SRR17520069. 17556523  
SRR17520069. 17556525  
SRR17520069. 17556527  
SRR17520069. 17556529  
SRR17520069. 17556531  
SRR17520069. 17556533  
SRR17520069. 17556535  
SRR17520069. 17561072  
SRR17520069. 17561076  
SRR17520069. 17561078  
SRR17520069. 17561080  
SRR17520069. 17561082  
SRR17520069. 17561084  
SRR17520069. 17566686  
SRR17520069. 17566688  
SRR17520069. 17566690  
SRR17520069. 17566692  
SRR17520069. 17566694  
SRR17520069. 17566696  
SRR17520069. 17566698  
SRR17520069. 17566700  
SRR17520069. 17566702  
SRR17520069. 17566704  
SRR17520069. 17566706  
SRR17520069. 17566708  
SRR17520069. 17566710  
SRR17520069. 17566712  
SRR17520069. 17566714  
SRR17520069. 17566716  
SRR17520069. 17566718  
SRR17520069. 17566720

SRR17520069. 17566722  
SRR17520069. 17566724  
SRR17520069. 17566726  
SRR17520069. 17566728  
SRR17520069. 17566730  
SRR17520069. 17566732  
SRR17520069. 17566734  
SRR17520069. 17566736  
SRR17520069. 17566738  
SRR17520069. 17566740  
SRR17520069. 17566742  
SRR17520069. 17566746  
SRR17520069. 17566748  
SRR17520069. 17566750  
SRR17520069. 17566752  
SRR17520069. 17566754  
SRR17520069. 17566756  
SRR17520069. 17566758  
SRR17520069. 17566760  
SRR17520069. 17566762  
SRR17520069. 17566764  
SRR17520069. 17566766  
SRR17520069. 17573997  
SRR17520069. 17573999  
SRR17520069. 17574001  
SRR17520069. 17574003  
SRR17520069. 17574005  
SRR17520069. 17574007  
SRR17520069. 17574009  
SRR17520069. 17574011  
SRR17520069. 17574013  
SRR17520069. 17574015  
SRR17520069. 17574017  
SRR17520069. 17574019  
SRR17520069. 17574021  
SRR17520069. 17574023  
SRR17520069. 17574025  
SRR17520069. 17574027  
SRR17520069. 17574029  
SRR17520069. 17574033  
SRR17520069. 17574035  
SRR17520069. 17574037  
SRR17520069. 17574039  
SRR17520069. 17574041  
SRR17520069. 17574043  
SRR17520069. 17574045  
SRR17520069. 17574047

SRR17520069. 17574049  
SRR17520069. 17574051  
SRR17520069. 17574053  
SRR17520069. 17574055  
SRR17520069. 17574057  
SRR17520069. 17574059  
SRR17520069. 17574061  
SRR17520069. 17574063  
SRR17520069. 17574065  
SRR17520069. 17574067  
SRR17520069. 17574069  
SRR17520069. 17574074  
SRR17520069. 17574076  
SRR17520069. 17574078  
SRR17520069. 17574080  
SRR17520069. 17574082  
SRR17520069. 17574084  
SRR17520069. 17574086  
SRR17520069. 17574088  
SRR17520069. 17574090  
SRR17520069. 17574092  
SRR17520069. 17574094  
SRR17520069. 17574096  
SRR17520069. 17576481  
SRR17520069. 17576483  
SRR17520069. 17576485  
SRR17520069. 17576487  
SRR17520069. 17576489  
SRR17520069. 17576491  
SRR17520069. 17576493  
SRR17520069. 17576495  
SRR17520069. 17576497  
SRR17520069. 17576499  
SRR17520069. 17576501  
SRR17520069. 17577190  
SRR17520069. 17577192  
SRR17520069. 17577194  
SRR17520069. 17577198  
SRR17520069. 17577202  
SRR17520069. 17577204  
SRR17520069. 17577206  
SRR17520069. 17577210  
SRR17520069. 17577212  
SRR17520069. 17577214  
SRR17520069. 17577216  
SRR17520069. 17577218  
SRR17520069. 17577220

SRR17520069. 17577222  
SRR17520069. 17577224  
SRR17520069. 17577226  
SRR17520069. 17577228  
SRR17520069. 17577230  
SRR17520069. 17577232  
SRR17520069. 17577234  
SRR17520069. 17577236  
SRR17520069. 17577238  
SRR17520069. 17577240  
SRR17520069. 17577242  
SRR17520069. 17577244  
SRR17520069. 17577246  
SRR17520069. 17577248  
SRR17520069. 17577252  
SRR17520069. 17579054  
SRR17520069. 17579056  
SRR17520069. 17579058  
SRR17520069. 17579060  
SRR17520069. 17579062  
SRR17520069. 17579064  
SRR17520069. 17581363  
SRR17520069. 17581367  
SRR17520069. 17581375  
SRR17520069. 17581377  
SRR17520069. 17581379  
SRR17520069. 17581381  
SRR17520069. 17581383  
SRR17520069. 17581385  
SRR17520069. 17582438  
SRR17520069. 17582440  
SRR17520069. 17582442  
SRR17520069. 17582444  
SRR17520069. 17582446  
SRR17520069. 17582448  
SRR17520069. 17582450  
SRR17520069. 17582452  
SRR17520069. 17582454  
SRR17520069. 17582456  
SRR17520069. 17582458  
SRR17520069. 17582460  
SRR17520069. 17582462  
SRR17520069. 17582464  
SRR17520069. 17582466  
SRR17520069. 17582470  
SRR17520069. 17582472  
SRR17520069. 17582476



SRR17520069. 17582480  
SRR17520069. 17582482  
SRR17520069. 17582484  
SRR17520069. 17582486  
SRR17520069. 17582488  
SRR17520069. 17582490  
SRR17520069. 17582492  
SRR17520069. 17582494  
SRR17520069. 17582496  
SRR17520069. 17582498  
SRR17520069. 17582500  
SRR17520069. 17582502  
SRR17520069. 17582504  
SRR17520069. 17582506  
SRR17520069. 17582508  
SRR17520069. 17582510  
SRR17520069. 17582512  
SRR17520069. 17582514  
SRR17520069. 17582516  
SRR17520069. 17582518  
SRR17520069. 17582520  
SRR17520069. 17582522  
SRR17520069. 17582526  
SRR17520069. 17582528  
SRR17520069. 17582530  
SRR17520069. 17582532  
SRR17520069. 17582534  
SRR17520069. 17582536  
SRR17520069. 17582538  
SRR17520069. 17582540  
SRR17520069. 17584623  
SRR17520069. 17584625  
SRR17520069. 17584627  
SRR17520069. 17584630  
SRR17520069. 17584632  
SRR17520069. 17584634  
SRR17520069. 17584636  
SRR17520069. 17584638  
SRR17520069. 17584640  
SRR17520069. 17584642  
SRR17520069. 17584644  
SRR17520069. 17584646  
SRR17520069. 17584648  
SRR17520069. 17584650  
SRR17520069. 17584652  
SRR17520069. 17584654  
SRR17520069. 17584656

SRR17520069. 17584658  
SRR17520069. 17584660  
SRR17520069. 17584664  
SRR17520069. 17584666  
SRR17520069. 17584668  
SRR17520069. 17584670  
SRR17520069. 17586291  
SRR17520069. 17586293  
SRR17520069. 17586295  
SRR17520069. 17586297  
SRR17520069. 17586299  
SRR17520069. 17586301  
SRR17520069. 17586303  
SRR17520069. 17586305  
SRR17520069. 17586307  
SRR17520069. 17586309  
SRR17520069. 17586311  
SRR17520069. 17586313  
SRR17520069. 17586315  
SRR17520069. 17586317  
SRR17520069. 17586319  
SRR17520069. 17586321  
SRR17520069. 17586323  
SRR17520069. 17586325  
SRR17520069. 17586327  
SRR17520069. 17586329  
SRR17520069. 17586331  
SRR17520069. 17586333  
SRR17520069. 17586335  
SRR17520069. 17586337  
SRR17520069. 17588436  
SRR17520069. 17588438  
SRR17520069. 17588440  
SRR17520069. 17588442  
SRR17520069. 17588444  
SRR17520069. 17588446  
SRR17520069. 17589236  
SRR17520069. 17589971  
SRR17520069. 17589973  
SRR17520069. 17589975  
SRR17520069. 17589977  
SRR17520069. 17589979  
SRR17520069. 17589981  
SRR17520069. 17589983  
SRR17520069. 17589985  
SRR17520069. 17593296  
SRR17520069. 17593300

SRR17520069. 17595691  
SRR17520069. 17595693  
SRR17520069. 17595695  
SRR17520069. 17595697  
SRR17520069. 17595699  
SRR17520069. 17595701  
SRR17520069. 17595703  
SRR17520069. 17595705  
SRR17520069. 17595709  
SRR17520069. 17595711  
SRR17520069. 17595715  
SRR17520069. 17595717  
SRR17520069. 17595719  
SRR17520069. 17595721  
SRR17520069. 17595723  
SRR17520069. 17595725  
SRR17520069. 17595727  
SRR17520069. 17595729  
SRR17520069. 17595731  
SRR17520069. 17595735  
SRR17520069. 17595737  
SRR17520069. 17595739  
SRR17520069. 17595741  
SRR17520069. 17595743  
SRR17520069. 17595745  
SRR17520069. 17595747  
SRR17520069. 17595749  
SRR17520069. 17595751  
SRR17520069. 17602655  
SRR17520069. 17602657  
SRR17520069. 17603643  
SRR17520069. 17603645  
SRR17520069. 17603647  
SRR17520069. 17603649  
SRR17520069. 17603651  
SRR17520069. 17603653  
SRR17520069. 17603655  
SRR17520069. 17603657  
SRR17520069. 17603659  
SRR17520069. 17603661  
SRR17520069. 17603663  
SRR17520069. 17603665  
SRR17520069. 17603667  
SRR17520069. 17603669  
SRR17520069. 17603671  
SRR17520069. 17603673  
SRR17520069. 17603675

SRR17520069.17603677  
SRR17520069.17603679  
SRR17520069.17603681  
SRR17520069.17603683  
SRR17520069.17609934  
SRR17520069.17609936  
SRR17520069.17609941  
SRR17520069.17609943  
SRR17520069.17609945  
SRR17520069.17609947  
SRR17520069.17609949  
SRR17520069.17609951  
SRR17520069.17609953  
SRR17520069.17609955  
SRR17520069.17609957  
SRR17520069.17609959  
SRR17520069.17624225  
SRR17520069.17628454  
SRR17520069.17628456  
SRR17520069.17628458  
SRR17520069.17628460  
SRR17520069.17628462  
SRR17520069.17628464  
SRR17520069.17628466  
SRR17520069.17628468  
SRR17520069.17628470  
SRR17520069.17628472  
SRR17520069.17628474  
SRR17520069.17628476  
SRR17520069.17628478  
SRR17520069.17628480  
SRR17520069.17628482  
SRR17520069.17628484  
SRR17520069.17628486  
SRR17520069.17628488  
SRR17520069.17628490  
SRR17520069.17628492  
SRR17520069.17628494  
SRR17520069.17628496  
SRR17520069.17628498  
SRR17520069.17628500  
SRR17520069.17628502  
SRR17520069.17628504  
SRR17520069.17628506  
SRR17520069.17628508  
SRR17520069.17628510  
SRR17520069.17628512

SRR17520069. 17628514  
SRR17520069. 17628516  
SRR17520069. 17628520  
SRR17520069. 17628522  
SRR17520069. 17628524  
SRR17520069. 17628526  
SRR17520069. 17628528  
SRR17520069. 17628530  
SRR17520069. 17628532  
SRR17520069. 17628538  
SRR17520069. 17628540  
SRR17520069. 17628542  
SRR17520069. 17628544  
SRR17520069. 17628546  
SRR17520069. 17628548  
SRR17520069. 17628550  
SRR17520069. 17628552  
SRR17520069. 17628554  
SRR17520069. 17628556  
SRR17520069. 17628562  
SRR17520069. 17628564  
SRR17520069. 17628566  
SRR17520069. 17628568  
SRR17520069. 17628570  
SRR17520069. 17628572  
SRR17520069. 17628574  
SRR17520069. 17628576  
SRR17520069. 17628578  
SRR17520069. 17628580  
SRR17520069. 17628582  
SRR17520069. 17634059  
SRR17520069. 17634061  
SRR17520069. 17634063  
SRR17520069. 17634065  
SRR17520069. 17634067  
SRR17520069. 17634069  
SRR17520069. 17634071  
SRR17520069. 17634073  
SRR17520069. 17634075  
SRR17520069. 17634077  
SRR17520069. 17637517  
SRR17520069. 17637519  
SRR17520069. 17637521  
SRR17520069. 17637523  
SRR17520069. 17637525  
SRR17520069. 17637527  
SRR17520069. 17637529

SRR17520069. 17637531  
SRR17520069. 17637533  
SRR17520069. 17637535  
SRR17520069. 17637539  
SRR17520069. 17637541  
SRR17520069. 17637543  
SRR17520069. 17637545  
SRR17520069. 17637547  
SRR17520069. 17637549  
SRR17520069. 17637551  
SRR17520069. 17637553  
SRR17520069. 17640005  
SRR17520069. 17643769  
SRR17520069. 17643771  
SRR17520069. 17643773  
SRR17520069. 17643775  
SRR17520069. 17643777  
SRR17520069. 17643779  
SRR17520069. 17643781  
SRR17520069. 17643783  
SRR17520069. 17643785  
SRR17520069. 17647855  
SRR17520069. 17647857  
SRR17520069. 17647861  
SRR17520069. 17647863  
SRR17520069. 17647865  
SRR17520069. 17647867  
SRR17520069. 17647871  
SRR17520069. 17647873  
SRR17520069. 17647875  
SRR17520069. 17647877  
SRR17520069. 17647879  
SRR17520069. 17647881  
SRR17520069. 17647883  
SRR17520069. 17647885  
SRR17520069. 17647887  
SRR17520069. 17647889  
SRR17520069. 17647891  
SRR17520069. 17647893  
SRR17520069. 17651380  
SRR17520069. 17657713  
SRR17520069. 17657715  
SRR17520069. 17657717  
SRR17520069. 17661467  
SRR17520069. 17662821  
SRR17520069. 17666643  
SRR17520069. 17666645

SRR17520069. 17666647  
SRR17520069. 17666649  
SRR17520069. 17666651  
SRR17520069. 17666653  
SRR17520069. 17666655  
SRR17520069. 17666657  
SRR17520069. 17666659  
SRR17520069. 17666663  
SRR17520069. 17666665  
SRR17520069. 17666667  
SRR17520069. 17666669  
SRR17520069. 17666671  
SRR17520069. 17667508  
SRR17520069. 17667510  
SRR17520069. 17667512  
SRR17520069. 17667581  
SRR17520069. 17667583  
SRR17520069. 17667585  
SRR17520069. 17667587  
SRR17520069. 17667589  
SRR17520069. 17667591  
SRR17520069. 17667593  
SRR17520069. 17667595  
SRR17520069. 17667597  
SRR17520069. 17667599  
SRR17520069. 17667601  
SRR17520069. 17667603  
SRR17520069. 17667605  
SRR17520069. 17667607  
SRR17520069. 17667609  
SRR17520069. 17667611  
SRR17520069. 17667613  
SRR17520069. 17667615  
SRR17520069. 17668161  
SRR17520069. 17668165  
SRR17520069. 17668167  
SRR17520069. 17674893  
SRR17520069. 17674895  
SRR17520069. 17674897  
SRR17520069. 17674899  
SRR17520069. 17674901  
SRR17520069. 17674903  
SRR17520069. 17674905  
SRR17520069. 17674907  
SRR17520069. 17680372  
SRR17520069. 17680374  
SRR17520069. 17680376

SRR17520069. 17680378  
SRR17520069. 17680380  
SRR17520069. 17682676  
SRR17520069. 17682678  
SRR17520069. 17682680  
SRR17520069. 17682682  
SRR17520069. 17682684  
SRR17520069. 17682686  
SRR17520069. 17682688  
SRR17520069. 17682690  
SRR17520069. 17682692  
SRR17520069. 17682694  
SRR17520069. 17682696  
SRR17520069. 17682698  
SRR17520069. 17682700  
SRR17520069. 17682702  
SRR17520069. 17682704  
SRR17520069. 17682706  
SRR17520069. 17682708  
SRR17520069. 17682710  
SRR17520069. 17682712  
SRR17520069. 17682714  
SRR17520069. 17682716  
SRR17520069. 17682718  
SRR17520069. 17682720  
SRR17520069. 17682722  
SRR17520069. 17682724  
SRR17520069. 17682726  
SRR17520069. 17684162  
SRR17520069. 17684164  
SRR17520069. 17684166  
SRR17520069. 17684168  
SRR17520069. 17684170  
SRR17520069. 17684172  
SRR17520069. 17684174  
SRR17520069. 17684176  
SRR17520069. 17684178  
SRR17520069. 17684180  
SRR17520069. 17684182  
SRR17520069. 17684184  
SRR17520069. 17684186  
SRR17520069. 17684188  
SRR17520069. 17684190  
SRR17520069. 17689232  
SRR17520069. 17689234  
SRR17520069. 17689236  
SRR17520069. 17689238



SRR17520069. 17689240  
SRR17520069. 17689242  
SRR17520069. 17689244  
SRR17520069. 17689246  
SRR17520069. 17689248  
SRR17520069. 17689250  
SRR17520069. 17689252  
SRR17520069. 17689254  
SRR17520069. 17689256  
SRR17520069. 17689258  
SRR17520069. 17689260  
SRR17520069. 17696393  
SRR17520069. 17703999  
SRR17520069. 17704001  
SRR17520069. 17704003  
SRR17520069. 17704005  
SRR17520069. 17704007  
SRR17520069. 17704009  
SRR17520069. 17704011  
SRR17520069. 17704013  
SRR17520069. 17704015  
SRR17520069. 17704017  
SRR17520069. 17704019  
SRR17520069. 17704021  
SRR17520069. 17704023  
SRR17520069. 17704025  
SRR17520069. 17704027  
SRR17520069. 17704029  
SRR17520069. 17704031  
SRR17520069. 17704033  
SRR17520069. 17704035  
SRR17520069. 17704037  
SRR17520069. 17704039  
SRR17520069. 17704041  
SRR17520069. 17704043  
SRR17520069. 17704045  
SRR17520069. 17704047  
SRR17520069. 17704049  
SRR17520069. 17704051  
SRR17520069. 17704053  
SRR17520069. 17704055  
SRR17520069. 17704057  
SRR17520069. 17704059  
SRR17520069. 17704061  
SRR17520069. 17704063  
SRR17520069. 17704065  
SRR17520069. 17704067

SRR17520069.17704069  
SRR17520069.17710980  
SRR17520069.17710982  
SRR17520069.17710984  
SRR17520069.17710986  
SRR17520069.17710988  
SRR17520069.17710990  
SRR17520069.17710992  
SRR17520069.17711088  
SRR17520069.17711090  
SRR17520069.17711092  
SRR17520069.17711094  
SRR17520069.17711096  
SRR17520069.17711098  
SRR17520069.17711100  
SRR17520069.17711102  
SRR17520069.17711106  
SRR17520069.17711108  
SRR17520069.17711842  
SRR17520069.17711846  
SRR17520069.17711848  
SRR17520069.17711850  
SRR17520069.17711852  
SRR17520069.17711854  
SRR17520069.17711856  
SRR17520069.17711858  
SRR17520069.17711860  
SRR17520069.17711862  
SRR17520069.17711864  
SRR17520069.17715236  
SRR17520069.17715240  
SRR17520069.17715242  
SRR17520069.17715244  
SRR17520069.17715246  
SRR17520069.17715248  
SRR17520069.17715250  
SRR17520069.17715252  
SRR17520069.17715254  
SRR17520069.17715256  
SRR17520069.17715258  
SRR17520069.17715260  
SRR17520069.17715262  
SRR17520069.17715264  
SRR17520069.17715266  
SRR17520069.17715268  
SRR17520069.17715270  
SRR17520069.17715272

SRR17520069.17715274  
SRR17520069.17715276  
SRR17520069.17715278  
SRR17520069.17715280  
SRR17520069.17715282  
SRR17520069.17715284  
SRR17520069.17715286  
SRR17520069.17715288  
SRR17520069.17715290  
SRR17520069.17715292  
SRR17520069.17715294  
SRR17520069.17715296  
SRR17520069.17715298  
SRR17520069.17715300  
SRR17520069.17715302  
SRR17520069.17715304  
SRR17520069.17715306  
SRR17520069.17715308  
SRR17520069.17715310  
SRR17520069.17715312  
SRR17520069.17716332  
SRR17520069.17716334  
SRR17520069.17716336  
SRR17520069.17716338  
SRR17520069.17716340  
SRR17520069.17716342  
SRR17520069.17716344  
SRR17520069.17716346  
SRR17520069.17716348  
SRR17520069.17716350  
SRR17520069.17716352  
SRR17520069.17716354  
SRR17520069.17716356  
SRR17520069.17716358  
SRR17520069.17716360  
SRR17520069.17716362  
SRR17520069.17716364  
SRR17520069.17716366  
SRR17520069.17716368  
SRR17520069.17716370  
SRR17520069.17716372  
SRR17520069.17716374  
SRR17520069.17716376  
SRR17520069.17716378  
SRR17520069.17716380  
SRR17520069.17716382  
SRR17520069.17716384

SRR17520069. 17716386  
SRR17520069. 17716388  
SRR17520069. 17716390  
SRR17520069. 17716392  
SRR17520069. 17716396  
SRR17520069. 17716398  
SRR17520069. 17716400  
SRR17520069. 17716402  
SRR17520069. 17716404  
SRR17520069. 17716406  
SRR17520069. 17716408  
SRR17520069. 17716410  
SRR17520069. 17716412  
SRR17520069. 17716414  
SRR17520069. 17716416  
SRR17520069. 17716418  
SRR17520069. 17716420  
SRR17520069. 17716422  
SRR17520069. 17716424  
SRR17520069. 17716426  
SRR17520069. 17716428  
SRR17520069. 17716430  
SRR17520069. 17716432  
SRR17520069. 17717256  
SRR17520069. 17717258  
SRR17520069. 17717260  
SRR17520069. 17717262  
SRR17520069. 17717264  
SRR17520069. 17717266  
SRR17520069. 17717268  
SRR17520069. 17717270  
SRR17520069. 17717272  
SRR17520069. 17717274  
SRR17520069. 17717276  
SRR17520069. 17717280  
SRR17520069. 17717282  
SRR17520069. 17717284  
SRR17520069. 17717286  
SRR17520069. 17717288  
SRR17520069. 17717292  
SRR17520069. 17717294  
SRR17520069. 17717296  
SRR17520069. 17717298  
SRR17520069. 17717300  
SRR17520069. 17717302  
SRR17520069. 17717304  
SRR17520069. 17717306

SRR17520069.17717308  
SRR17520069.17717310  
SRR17520069.17717312  
SRR17520069.17717319  
SRR17520069.17717321  
SRR17520069.17717323  
SRR17520069.17717325  
SRR17520069.17717329  
SRR17520069.17717331  
SRR17520069.17717333  
SRR17520069.17717335  
SRR17520069.17717337  
SRR17520069.17717341  
SRR17520069.17717343  
SRR17520069.17717345  
SRR17520069.17717349  
SRR17520069.17717351  
SRR17520069.17717353  
SRR17520069.17717355  
SRR17520069.17717357  
SRR17520069.17717359  
SRR17520069.17717361  
SRR17520069.17717363  
SRR17520069.17717365  
SRR17520069.17717367  
SRR17520069.17717371  
SRR17520069.17717373  
SRR17520069.17717375  
SRR17520069.17717377  
SRR17520069.17717379  
SRR17520069.17717381  
SRR17520069.17717383  
SRR17520069.17717385  
SRR17520069.17717387  
SRR17520069.17717389  
SRR17520069.17717391  
SRR17520069.17717393  
SRR17520069.17717395  
SRR17520069.17717397  
SRR17520069.17717399  
SRR17520069.17717401  
SRR17520069.17717403  
SRR17520069.17717405  
SRR17520069.17717407  
SRR17520069.17717411  
SRR17520069.17717413  
SRR17520069.17717417

SRR17520069.17717419  
SRR17520069.17717421  
SRR17520069.17717990  
SRR17520069.17719955  
SRR17520069.17719957  
SRR17520069.17719959  
SRR17520069.17747585  
SRR17520069.17747587  
SRR17520069.17747589  
SRR17520069.17747591  
SRR17520069.17747593  
SRR17520069.17747595  
SRR17520069.17747597  
SRR17520069.17747599  
SRR17520069.17747601  
SRR17520069.17747603  
SRR17520069.17747605  
SRR17520069.17749627  
SRR17520069.17749629  
SRR17520069.17749631  
SRR17520069.17749633  
SRR17520069.17749635  
SRR17520069.17749637  
SRR17520069.17749639  
SRR17520069.17749641  
SRR17520069.17749643  
SRR17520069.17749645  
SRR17520069.17749647  
SRR17520069.17749649  
SRR17520069.17749651  
SRR17520069.17749653  
SRR17520069.17749655  
SRR17520069.17749657  
SRR17520069.17749659  
SRR17520069.17749661  
SRR17520069.17750530  
SRR17520069.17752288  
SRR17520069.17752423  
SRR17520069.17760741  
SRR17520069.17760743  
SRR17520069.17760745  
SRR17520069.17760747  
SRR17520069.17760749  
SRR17520069.17760751  
SRR17520069.17760753  
SRR17520069.17760755  
SRR17520069.17760757

SRR17520069. 17760759  
SRR17520069. 17760761  
SRR17520069. 17760763  
SRR17520069. 17760765  
SRR17520069. 17760767  
SRR17520069. 17760769  
SRR17520069. 17760771  
SRR17520069. 17760773  
SRR17520069. 17760775  
SRR17520069. 17760777  
SRR17520069. 17760779  
SRR17520069. 17760781  
SRR17520069. 17760783  
SRR17520069. 17760785  
SRR17520069. 17760787  
SRR17520069. 17760789  
SRR17520069. 17760791  
SRR17520069. 17760793  
SRR17520069. 17760795  
SRR17520069. 17760797  
SRR17520069. 17760799  
SRR17520069. 17760803  
SRR17520069. 17760805  
SRR17520069. 17760807  
SRR17520069. 17760809  
SRR17520069. 17763013  
SRR17520069. 17763015  
SRR17520069. 17763021  
SRR17520069. 17763023  
SRR17520069. 17763025  
SRR17520069. 17763027  
SRR17520069. 17763029  
SRR17520069. 17763031  
SRR17520069. 17763033  
SRR17520069. 17763035  
SRR17520069. 17766383  
SRR17520069. 17768176  
SRR17520069. 17768182  
SRR17520069. 17769993  
SRR17520069. 17769995  
SRR17520069. 17769997  
SRR17520069. 17769999  
SRR17520069. 17770001  
SRR17520069. 17770003  
SRR17520069. 17770005  
SRR17520069. 17774214  
SRR17520069. 17774216

SRR17520069. 17784467  
SRR17520069. 17784469  
SRR17520069. 17784471  
SRR17520069. 17784475  
SRR17520069. 17784477  
SRR17520069. 17784479  
SRR17520069. 17784481  
SRR17520069. 17784483  
SRR17520069. 17784485  
SRR17520069. 17784487  
SRR17520069. 17784489  
SRR17520069. 17784491  
SRR17520069. 17784493  
SRR17520069. 17784495  
SRR17520069. 17784497  
SRR17520069. 17784499  
SRR17520069. 17784501  
SRR17520069. 17784503  
SRR17520069. 17784505  
SRR17520069. 17784507  
SRR17520069. 17784509  
SRR17520069. 17784511  
SRR17520069. 17784513  
SRR17520069. 17784515  
SRR17520069. 17784517  
SRR17520069. 17784519  
SRR17520069. 17784521  
SRR17520069. 17784523  
SRR17520069. 17784525  
SRR17520069. 17784527  
SRR17520069. 17784529  
SRR17520069. 17784531  
SRR17520069. 17784533  
SRR17520069. 17784535  
SRR17520069. 17784537  
SRR17520069. 17784539  
SRR17520069. 17784541  
SRR17520069. 17784543  
SRR17520069. 17784545  
SRR17520069. 17784547  
SRR17520069. 17784549  
SRR17520069. 17784551  
SRR17520069. 17784553  
SRR17520069. 17784555  
SRR17520069. 17784557  
SRR17520069. 17784559  
SRR17520069. 17784561



SRR17520069. 17784563  
SRR17520069. 17784565  
SRR17520069. 17784567  
SRR17520069. 17784569  
SRR17520069. 17784573  
SRR17520069. 17784575  
SRR17520069. 17784577  
SRR17520069. 17784579  
SRR17520069. 17784581  
SRR17520069. 17791013  
SRR17520069. 17791015  
SRR17520069. 17791017  
SRR17520069. 17791019  
SRR17520069. 17791021  
SRR17520069. 17791023  
SRR17520069. 17791027  
SRR17520069. 17791029  
SRR17520069. 17791031  
SRR17520069. 17791033  
SRR17520069. 17791035  
SRR17520069. 17791037  
SRR17520069. 17791039  
SRR17520069. 17791041  
SRR17520069. 17791043  
SRR17520069. 17791045  
SRR17520069. 17791047  
SRR17520069. 17791049  
SRR17520069. 17791051  
SRR17520069. 17791053  
SRR17520069. 17791055  
SRR17520069. 17791057  
SRR17520069. 17791059  
SRR17520069. 17791061  
SRR17520069. 17791063  
SRR17520069. 17791065  
SRR17520069. 17791067  
SRR17520069. 17791069  
SRR17520069. 17791071  
SRR17520069. 17791073  
SRR17520069. 17791075  
SRR17520069. 17791077  
SRR17520069. 17791079  
SRR17520069. 17791081  
SRR17520069. 17791083  
SRR17520069. 17791087  
SRR17520069. 17791089  
SRR17520069. 17791091

SRR17520069.17791093  
SRR17520069.17791095  
SRR17520069.17791097  
SRR17520069.17791653  
SRR17520069.17791655  
SRR17520069.17791657  
SRR17520069.17791659  
SRR17520069.17791661  
SRR17520069.17791663  
SRR17520069.17791665  
SRR17520069.17791667  
SRR17520069.17791669  
SRR17520069.17791671  
SRR17520069.17791673  
SRR17520069.17791675  
SRR17520069.17791677  
SRR17520069.17791679  
SRR17520069.17791681  
SRR17520069.17791683  
SRR17520069.17791685  
SRR17520069.17791687  
SRR17520069.17791689  
SRR17520069.17791691  
SRR17520069.17791693  
SRR17520069.17791695  
SRR17520069.17791697  
SRR17520069.17791699  
SRR17520069.17791701  
SRR17520069.17791703  
SRR17520069.17791705  
SRR17520069.17791709  
SRR17520069.17791711  
SRR17520069.17791713  
SRR17520069.17791715  
SRR17520069.17791717  
SRR17520069.17791719  
SRR17520069.17791721  
SRR17520069.17791836  
SRR17520069.17794183  
SRR17520069.17794185  
SRR17520069.17794187  
SRR17520069.17794191  
SRR17520069.17794193  
SRR17520069.17794195  
SRR17520069.17794197  
SRR17520069.17794199  
SRR17520069.17794203

SRR17520069.17809127  
SRR17520069.17809129  
SRR17520069.17809131  
SRR17520069.17809133  
SRR17520069.17809135  
SRR17520069.17809137  
SRR17520069.17809139  
SRR17520069.17809141  
SRR17520069.17809143  
SRR17520069.17809147  
SRR17520069.17809149  
SRR17520069.17809151  
SRR17520069.17809153  
SRR17520069.17809155  
SRR17520069.17809161  
SRR17520069.17809165  
SRR17520069.17809167  
SRR17520069.17809169  
SRR17520069.17809171  
SRR17520069.17820165  
SRR17520069.17820167  
SRR17520069.17820169  
SRR17520069.17820171  
SRR17520069.17820173  
SRR17520069.17820175  
SRR17520069.17820177  
SRR17520069.17820179  
SRR17520069.17820181  
SRR17520069.17831451  
SRR17520069.17831453  
SRR17520069.17841218  
SRR17520069.17841220  
SRR17520069.17841222  
SRR17520069.17841224  
SRR17520069.17841226  
SRR17520069.17841228  
SRR17520069.17841230  
SRR17520069.17841232  
SRR17520069.17841234  
SRR17520069.17841236  
SRR17520069.17841238  
SRR17520069.17841240  
SRR17520069.17841242  
SRR17520069.17841246  
SRR17520069.17841248  
SRR17520069.17841250  
SRR17520069.17841252

SRR17520069. 17841254  
SRR17520069. 17841256  
SRR17520069. 17841258  
SRR17520069. 17841260  
SRR17520069. 17841262  
SRR17520069. 17841264  
SRR17520069. 17841266  
SRR17520069. 17841268  
SRR17520069. 17841270  
SRR17520069. 17841272  
SRR17520069. 17841274  
SRR17520069. 17841276  
SRR17520069. 17841278  
SRR17520069. 17841280  
SRR17520069. 17841282  
SRR17520069. 17841284  
SRR17520069. 17841286  
SRR17520069. 17841288  
SRR17520069. 17841290  
SRR17520069. 17841292  
SRR17520069. 17841294  
SRR17520069. 17841296  
SRR17520069. 17841298  
SRR17520069. 17841300  
SRR17520069. 17841302  
SRR17520069. 17846725  
SRR17520069. 17846727  
SRR17520069. 17846729  
SRR17520069. 17846731  
SRR17520069. 17846733  
SRR17520069. 17846735  
SRR17520069. 17846737  
SRR17520069. 17846739  
SRR17520069. 17846741  
SRR17520069. 17846743  
SRR17520069. 17850960  
SRR17520069. 17852438  
SRR17520069. 17852440  
SRR17520069. 17852442  
SRR17520069. 17852444  
SRR17520069. 17852446  
SRR17520069. 17852448  
SRR17520069. 17852450  
SRR17520069. 17852452  
SRR17520069. 17852454  
SRR17520069. 17852458  
SRR17520069. 17852460

SRR17520069.17852464  
SRR17520069.17852466  
SRR17520069.17852468  
SRR17520069.17852470  
SRR17520069.17852472  
SRR17520069.17852474  
SRR17520069.17855114  
SRR17520069.17855116  
SRR17520069.17855118  
SRR17520069.17855120  
SRR17520069.17855122  
SRR17520069.17855124  
SRR17520069.17855126  
SRR17520069.17855128  
SRR17520069.17855130  
SRR17520069.17855134  
SRR17520069.17855136  
SRR17520069.17855138  
SRR17520069.17855140  
SRR17520069.17855142  
SRR17520069.17855144  
SRR17520069.17855146  
SRR17520069.17855148  
SRR17520069.17855150  
SRR17520069.17855152  
SRR17520069.17855154  
SRR17520069.17855156  
SRR17520069.17855158  
SRR17520069.17855160  
SRR17520069.17855164  
SRR17520069.17855166  
SRR17520069.17855168  
SRR17520069.17855170  
SRR17520069.17855172  
SRR17520069.17855174  
SRR17520069.17855176  
SRR17520069.17855178  
SRR17520069.17856764  
SRR17520069.17858446  
SRR17520069.17858448  
SRR17520069.17858450  
SRR17520069.17858452  
SRR17520069.17858454  
SRR17520069.17858456  
SRR17520069.17858458  
SRR17520069.17858460  
SRR17520069.17858462

SRR17520069. 17858464  
SRR17520069. 17858466  
SRR17520069. 17858468  
SRR17520069. 17858470  
SRR17520069. 17858472  
SRR17520069. 17873888  
SRR17520069. 17873890  
SRR17520069. 17873892  
SRR17520069. 17873894  
SRR17520069. 17873896  
SRR17520069. 17873898  
SRR17520069. 17874452  
SRR17520069. 17874454  
SRR17520069. 17874456  
SRR17520069. 17874458  
SRR17520069. 17874460  
SRR17520069. 17874462  
SRR17520069. 17874464  
SRR17520069. 17874466  
SRR17520069. 17874468  
SRR17520069. 17874470  
SRR17520069. 17874472  
SRR17520069. 17874474  
SRR17520069. 17874476  
SRR17520069. 17874478  
SRR17520069. 17878941  
SRR17520069. 17878943  
SRR17520069. 17878945  
SRR17520069. 17878947  
SRR17520069. 17879774  
SRR17520069. 17879776  
SRR17520069. 17879778  
SRR17520069. 17880441  
SRR17520069. 17880443  
SRR17520069. 17880445  
SRR17520069. 17880447  
SRR17520069. 17880449  
SRR17520069. 17880451  
SRR17520069. 17880453  
SRR17520069. 17880455  
SRR17520069. 17880457  
SRR17520069. 17880459  
SRR17520069. 17880461  
SRR17520069. 17880463  
SRR17520069. 17880465  
SRR17520069. 17880467  
SRR17520069. 17880469

SRR17520069.17880471  
SRR17520069.17880473  
SRR17520069.17880475  
SRR17520069.17880477  
SRR17520069.17880479  
SRR17520069.17880481  
SRR17520069.17880483  
SRR17520069.17880485  
SRR17520069.17880487  
SRR17520069.17880489  
SRR17520069.17880491  
SRR17520069.17880493  
SRR17520069.17880497  
SRR17520069.17880499  
SRR17520069.17880501  
SRR17520069.17880503  
SRR17520069.17880505  
SRR17520069.17880507  
SRR17520069.17880509  
SRR17520069.17880511  
SRR17520069.17880513  
SRR17520069.17880515  
SRR17520069.17880517  
SRR17520069.17880519  
SRR17520069.17883357  
SRR17520069.17883359  
SRR17520069.17883911  
SRR17520069.17883913  
SRR17520069.17883915  
SRR17520069.17883917  
SRR17520069.17883919  
SRR17520069.17883921  
SRR17520069.17883923  
SRR17520069.17883925  
SRR17520069.17883927  
SRR17520069.17883929  
SRR17520069.17883931  
SRR17520069.17883933  
SRR17520069.17883935  
SRR17520069.17883937  
SRR17520069.17883939  
SRR17520069.17883941  
SRR17520069.17883943  
SRR17520069.17883945  
SRR17520069.17883947  
SRR17520069.17889790  
SRR17520069.17890714

SRR17520069.17890716  
SRR17520069.17890718  
SRR17520069.17890720  
SRR17520069.17890722  
SRR17520069.17890724  
SRR17520069.17890726  
SRR17520069.17890728  
SRR17520069.17890730  
SRR17520069.17890734  
SRR17520069.17890736  
SRR17520069.17890738  
SRR17520069.17890740  
SRR17520069.17890742  
SRR17520069.17890744  
SRR17520069.17890746  
SRR17520069.17891039  
SRR17520069.17891041  
SRR17520069.17891045  
SRR17520069.17891047  
SRR17520069.17891049  
SRR17520069.17891051  
SRR17520069.17891053  
SRR17520069.17891055  
SRR17520069.17891057  
SRR17520069.17891059  
SRR17520069.17891061  
SRR17520069.17891063  
SRR17520069.17891067  
SRR17520069.17891069  
SRR17520069.17891071  
SRR17520069.17896861  
SRR17520069.17896863  
SRR17520069.17896865  
SRR17520069.17896867  
SRR17520069.17896869  
SRR17520069.17901650  
SRR17520069.17901652  
SRR17520069.17901654  
SRR17520069.17901656  
SRR17520069.17901660  
SRR17520069.17901662  
SRR17520069.17901664  
SRR17520069.17901666  
SRR17520069.17901668  
SRR17520069.17903026  
SRR17520069.17903028  
SRR17520069.17903030



SRR17520069.17903032  
SRR17520069.17906451  
SRR17520069.17906455  
SRR17520069.17906457  
SRR17520069.17906459  
SRR17520069.17906461  
SRR17520069.17906463  
SRR17520069.17906465  
SRR17520069.17906467  
SRR17520069.17909886  
SRR17520069.17913683  
SRR17520069.17913685  
SRR17520069.17913687  
SRR17520069.17913689  
SRR17520069.17913693  
SRR17520069.17913695  
SRR17520069.17913697  
SRR17520069.17913699  
SRR17520069.17913701  
SRR17520069.17913703  
SRR17520069.17913705  
SRR17520069.17913707  
SRR17520069.17913709  
SRR17520069.17913711  
SRR17520069.17913713  
SRR17520069.17913715  
SRR17520069.17913717  
SRR17520069.17913719  
SRR17520069.17913721  
SRR17520069.17913779  
SRR17520069.17914117  
SRR17520069.17914119  
SRR17520069.17914121  
SRR17520069.17914123  
SRR17520069.17914125  
SRR17520069.17914127  
SRR17520069.17914129  
SRR17520069.17914131  
SRR17520069.17914133  
SRR17520069.17914135  
SRR17520069.17914137  
SRR17520069.17914141  
SRR17520069.17914143  
SRR17520069.17921507  
SRR17520069.17921509  
SRR17520069.17921511  
SRR17520069.17921513

SRR17520069.17921515  
SRR17520069.17921517  
SRR17520069.17921519  
SRR17520069.17921521  
SRR17520069.17921523  
SRR17520069.17921525  
SRR17520069.17921527  
SRR17520069.17928640  
SRR17520069.17928642  
SRR17520069.17928644  
SRR17520069.17928646  
SRR17520069.17928648  
SRR17520069.17928650  
SRR17520069.17928652  
SRR17520069.17928654  
SRR17520069.17928656  
SRR17520069.17928658  
SRR17520069.17928660  
SRR17520069.17928662  
SRR17520069.17932898  
SRR17520069.17932900  
SRR17520069.17932902  
SRR17520069.17932904  
SRR17520069.17932906  
SRR17520069.17934912  
SRR17520069.17934914  
SRR17520069.17934916  
SRR17520069.17934918  
SRR17520069.17934920  
SRR17520069.17934922  
SRR17520069.17934924  
SRR17520069.17934928  
SRR17520069.17934930  
SRR17520069.17934932  
SRR17520069.17934936  
SRR17520069.17934938  
SRR17520069.17934940  
SRR17520069.17934942  
SRR17520069.17934944  
SRR17520069.17934946  
SRR17520069.17934948  
SRR17520069.17935136  
SRR17520069.17935138  
SRR17520069.17935140  
SRR17520069.17935142  
SRR17520069.17935146  
SRR17520069.17935148

SRR17520069.17935150  
SRR17520069.17935152  
SRR17520069.17935154  
SRR17520069.17935156  
SRR17520069.17935158  
SRR17520069.17935160  
SRR17520069.17935162  
SRR17520069.17935164  
SRR17520069.17935166  
SRR17520069.17935170  
SRR17520069.17935172  
SRR17520069.17935174  
SRR17520069.17935176  
SRR17520069.17935178  
SRR17520069.17935180  
SRR17520069.17935182  
SRR17520069.17935184  
SRR17520069.17939990  
SRR17520069.17939992  
SRR17520069.17939994  
SRR17520069.17939996  
SRR17520069.17940000  
SRR17520069.17940002  
SRR17520069.17940004  
SRR17520069.17940006  
SRR17520069.17940008  
SRR17520069.17940010  
SRR17520069.17940012  
SRR17520069.17940014  
SRR17520069.17940018  
SRR17520069.17940020  
SRR17520069.17940022  
SRR17520069.17940024  
SRR17520069.17940026  
SRR17520069.17940028  
SRR17520069.17940030  
SRR17520069.17940032  
SRR17520069.17940034  
SRR17520069.17940038  
SRR17520069.17940042  
SRR17520069.17940044  
SRR17520069.17940046  
SRR17520069.17940048  
SRR17520069.17940050  
SRR17520069.17940052  
SRR17520069.17941334  
SRR17520069.17941336

SRR17520069.17941338  
SRR17520069.17941342  
SRR17520069.17942942  
SRR17520069.17942944  
SRR17520069.17942946  
SRR17520069.17942948  
SRR17520069.17942950  
SRR17520069.17942952  
SRR17520069.17942954  
SRR17520069.17942956  
SRR17520069.17942958  
SRR17520069.17942960  
SRR17520069.17942962  
SRR17520069.17942964  
SRR17520069.17942966  
SRR17520069.17942968  
SRR17520069.17942970  
SRR17520069.17942972  
SRR17520069.17942974  
SRR17520069.17942976  
SRR17520069.17942978  
SRR17520069.17942980  
SRR17520069.17942982  
SRR17520069.17942984  
SRR17520069.17942986  
SRR17520069.17942988  
SRR17520069.17942990  
SRR17520069.17942994  
SRR17520069.17942996  
SRR17520069.17942998  
SRR17520069.17943000  
SRR17520069.17943002  
SRR17520069.17943004  
SRR17520069.17943006  
SRR17520069.17943008  
SRR17520069.17943010  
SRR17520069.17943012  
SRR17520069.17943014  
SRR17520069.17943016  
SRR17520069.17943018  
SRR17520069.17944050  
SRR17520069.17944052  
SRR17520069.17944054  
SRR17520069.17944056  
SRR17520069.17944058  
SRR17520069.17944060  
SRR17520069.17944062

SRR17520069.17944064  
SRR17520069.17944066  
SRR17520069.17944068  
SRR17520069.17944070  
SRR17520069.17944072  
SRR17520069.17944074  
SRR17520069.17944078  
SRR17520069.17944080  
SRR17520069.17944082  
SRR17520069.17944084  
SRR17520069.17944086  
SRR17520069.17944088  
SRR17520069.17944092  
SRR17520069.17944094  
SRR17520069.17944096  
SRR17520069.17944098  
SRR17520069.17944100  
SRR17520069.17944102  
SRR17520069.17944104  
SRR17520069.17944106  
SRR17520069.17944110  
SRR17520069.17944112  
SRR17520069.17944114  
SRR17520069.17944116  
SRR17520069.17944118  
SRR17520069.17944120  
SRR17520069.17944122  
SRR17520069.17944124  
SRR17520069.17944126  
SRR17520069.17944128  
SRR17520069.17944130  
SRR17520069.17944132  
SRR17520069.17944134  
SRR17520069.17944136  
SRR17520069.17944138  
SRR17520069.17948610  
SRR17520069.17948612  
SRR17520069.17948614  
SRR17520069.17948616  
SRR17520069.17948618  
SRR17520069.17949037  
SRR17520069.17949039  
SRR17520069.17949041  
SRR17520069.17949043  
SRR17520069.17949045  
SRR17520069.17949047  
SRR17520069.17949049

SRR17520069.17949051  
SRR17520069.17949053  
SRR17520069.17949055  
SRR17520069.17949057  
SRR17520069.17949059  
SRR17520069.17949061  
SRR17520069.17949063  
SRR17520069.17949066  
SRR17520069.17949068  
SRR17520069.17949070  
SRR17520069.17949072  
SRR17520069.17949074  
SRR17520069.17949076  
SRR17520069.17949078  
SRR17520069.17949080  
SRR17520069.17949082  
SRR17520069.17949084  
SRR17520069.17949086  
SRR17520069.17949088  
SRR17520069.17949090  
SRR17520069.17949092  
SRR17520069.17949094  
SRR17520069.17949096  
SRR17520069.17949098  
SRR17520069.17949106  
SRR17520069.17952309  
SRR17520069.17952311  
SRR17520069.17952313  
SRR17520069.17952315  
SRR17520069.17952317  
SRR17520069.17952319  
SRR17520069.17952321  
SRR17520069.17952323  
SRR17520069.17952325  
SRR17520069.17952327  
SRR17520069.17952329  
SRR17520069.17952333  
SRR17520069.17952335  
SRR17520069.17955577  
SRR17520069.17955579  
SRR17520069.17955581  
SRR17520069.17955583  
SRR17520069.17955585  
SRR17520069.17955587  
SRR17520069.17955589  
SRR17520069.17955591  
SRR17520069.17955593

SRR17520069.17955675  
SRR17520069.17955677  
SRR17520069.17955679  
SRR17520069.17957608  
SRR17520069.17957610  
SRR17520069.17957612  
SRR17520069.17957614  
SRR17520069.17957616  
SRR17520069.17957618  
SRR17520069.17957620  
SRR17520069.17957622  
SRR17520069.17965790  
SRR17520069.17965792  
SRR17520069.17966132  
SRR17520069.17966145  
SRR17520069.17966796  
SRR17520069.17979044  
SRR17520069.17979046  
SRR17520069.17979048  
SRR17520069.17979050  
SRR17520069.17979052  
SRR17520069.17979054  
SRR17520069.17983539  
SRR17520069.17983541  
SRR17520069.17983543  
SRR17520069.17983545  
SRR17520069.17983547  
SRR17520069.17989755  
SRR17520069.17989757  
SRR17520069.17989759  
SRR17520069.17989761  
SRR17520069.17989763  
SRR17520069.17989765  
SRR17520069.17989767  
SRR17520069.17989769  
SRR17520069.17989771  
SRR17520069.17989773  
SRR17520069.17989775  
SRR17520069.17989777  
SRR17520069.17989779  
SRR17520069.17989781  
SRR17520069.17989783  
SRR17520069.17989785  
SRR17520069.17989787  
SRR17520069.17989789  
SRR17520069.17989791  
SRR17520069.17989793

SRR17520069.17989795  
SRR17520069.17989797  
SRR17520069.17989799  
SRR17520069.17989801  
SRR17520069.17989803  
SRR17520069.17989805  
SRR17520069.17989807  
SRR17520069.17989809  
SRR17520069.17989813  
SRR17520069.17989815  
SRR17520069.17989817  
SRR17520069.17989819  
SRR17520069.17989821  
SRR17520069.17989823  
SRR17520069.17989825  
SRR17520069.17989827  
SRR17520069.17989829  
SRR17520069.17989831  
SRR17520069.17989833  
SRR17520069.17989835  
SRR17520069.17989837  
SRR17520069.17989841  
SRR17520069.17989843  
SRR17520069.17989970  
SRR17520069.17989972  
SRR17520069.17989974  
SRR17520069.17993365  
SRR17520069.17993367  
SRR17520069.17993369  
SRR17520069.17993371  
SRR17520069.17993373  
SRR17520069.17993375  
SRR17520069.17993377  
SRR17520069.17993379  
SRR17520069.17993381  
SRR17520069.17993383  
SRR17520069.17993385  
SRR17520069.17993387  
SRR17520069.17993389  
SRR17520069.17993391  
SRR17520069.17993393  
SRR17520069.17993395  
SRR17520069.17993397  
SRR17520069.17993624  
SRR17520069.17993628  
SRR17520069.17993636  
SRR17520069.17993638



SRR17520069. 17993640  
SRR17520069. 17993646  
SRR17520069. 17993650  
SRR17520069. 18004751  
SRR17520069. 18004753  
SRR17520069. 18004755  
SRR17520069. 18004757  
SRR17520069. 18004761  
SRR17520069. 18004763  
SRR17520069. 18004765  
SRR17520069. 18004767  
SRR17520069. 18004769  
SRR17520069. 18004771  
SRR17520069. 18004773  
SRR17520069. 18004775  
SRR17520069. 18004777  
SRR17520069. 18004779  
SRR17520069. 18004781  
SRR17520069. 18004783  
SRR17520069. 18004785  
SRR17520069. 18004787  
SRR17520069. 18004789  
SRR17520069. 18004791  
SRR17520069. 18004793  
SRR17520069. 18004795  
SRR17520069. 18004797  
SRR17520069. 18004799  
SRR17520069. 18004803  
SRR17520069. 18004805  
SRR17520069. 18004807  
SRR17520069. 18004809  
SRR17520069. 18004811  
SRR17520069. 18004813  
SRR17520069. 18004815  
SRR17520069. 18004817  
SRR17520069. 18004819  
SRR17520069. 18004821  
SRR17520069. 18004823  
SRR17520069. 18004825  
SRR17520069. 18004827  
SRR17520069. 18004829  
SRR17520069. 18004831  
SRR17520069. 18004835  
SRR17520069. 18004837  
SRR17520069. 18004839  
SRR17520069. 18004841  
SRR17520069. 18004843

SRR17520069.18004845  
SRR17520069.18004847  
SRR17520069.18004849  
SRR17520069.18004851  
SRR17520069.18004853  
SRR17520069.18004855  
SRR17520069.18004857  
SRR17520069.18004859  
SRR17520069.18004861  
SRR17520069.18004863  
SRR17520069.18004865  
SRR17520069.18004867  
SRR17520069.18004869  
SRR17520069.18004871  
SRR17520069.18004873  
SRR17520069.18010429  
SRR17520069.18010431  
SRR17520069.18010433  
SRR17520069.18010435  
SRR17520069.18010437  
SRR17520069.18010439  
SRR17520069.18010441  
SRR17520069.18010443  
SRR17520069.18010445  
SRR17520069.18010447  
SRR17520069.18010449  
SRR17520069.18010453  
SRR17520069.18010455  
SRR17520069.18010457  
SRR17520069.18010459  
SRR17520069.18010461  
SRR17520069.18010463  
SRR17520069.18010465  
SRR17520069.18010467  
SRR17520069.18010469  
SRR17520069.18010471  
SRR17520069.18010473  
SRR17520069.18010475  
SRR17520069.18010477  
SRR17520069.18010479  
SRR17520069.18010481  
SRR17520069.18010483  
SRR17520069.18010485  
SRR17520069.18010487  
SRR17520069.18010489  
SRR17520069.18010491  
SRR17520069.18010493

SRR17520069.18010495  
SRR17520069.18010497  
SRR17520069.18022261  
SRR17520069.18022263  
SRR17520069.18022265  
SRR17520069.18022267  
SRR17520069.18022269  
SRR17520069.18022271  
SRR17520069.18022273  
SRR17520069.18022275  
SRR17520069.18022277  
SRR17520069.18022279  
SRR17520069.18022281  
SRR17520069.18022283  
SRR17520069.18022285  
SRR17520069.18022287  
SRR17520069.18025287  
SRR17520069.18025289  
SRR17520069.18025291  
SRR17520069.18025295  
SRR17520069.18025297  
SRR17520069.18025299  
SRR17520069.18025301  
SRR17520069.18025303  
SRR17520069.18025305  
SRR17520069.18025307  
SRR17520069.18025309  
SRR17520069.18025311  
SRR17520069.18025313  
SRR17520069.18025315  
SRR17520069.18025317  
SRR17520069.18025319  
SRR17520069.18025321  
SRR17520069.18025323  
SRR17520069.18025325  
SRR17520069.18025327  
SRR17520069.18025329  
SRR17520069.18025331  
SRR17520069.18025335  
SRR17520069.18025403  
SRR17520069.18025407  
SRR17520069.18025409  
SRR17520069.18025411  
SRR17520069.18025413  
SRR17520069.18025415  
SRR17520069.18025417  
SRR17520069.18025419

SRR17520069.18025421  
SRR17520069.18025423  
SRR17520069.18025425  
SRR17520069.18025427  
SRR17520069.18025429  
SRR17520069.18025431  
SRR17520069.18025433  
SRR17520069.18025435  
SRR17520069.18025437  
SRR17520069.18025439  
SRR17520069.18025441  
SRR17520069.18025443  
SRR17520069.18025445  
SRR17520069.18025447  
SRR17520069.18025449  
SRR17520069.18025451  
SRR17520069.18028172  
SRR17520069.18028174  
SRR17520069.18028176  
SRR17520069.18028178  
SRR17520069.18028180  
SRR17520069.18028182  
SRR17520069.18028184  
SRR17520069.18028186  
SRR17520069.18028188  
SRR17520069.18028192  
SRR17520069.18028194  
SRR17520069.18028196  
SRR17520069.18028198  
SRR17520069.18028200  
SRR17520069.18028202  
SRR17520069.18028204  
SRR17520069.18028206  
SRR17520069.18028208  
SRR17520069.18028210  
SRR17520069.18028212  
SRR17520069.18028214  
SRR17520069.18028216  
SRR17520069.18028218  
SRR17520069.18028220  
SRR17520069.18029601  
SRR17520069.18029603  
SRR17520069.18029605  
SRR17520069.18029607  
SRR17520069.18029609  
SRR17520069.18029611  
SRR17520069.18029613

SRR17520069.18029615  
SRR17520069.18029619  
SRR17520069.18029621  
SRR17520069.18029623  
SRR17520069.18033611  
SRR17520069.18033613  
SRR17520069.18033615  
SRR17520069.18033617  
SRR17520069.18033619  
SRR17520069.18033621  
SRR17520069.18033623  
SRR17520069.18033625  
SRR17520069.18033627  
SRR17520069.18033629  
SRR17520069.18033631  
SRR17520069.18033633  
SRR17520069.18033635  
SRR17520069.18033637  
SRR17520069.18033639  
SRR17520069.18033641  
SRR17520069.18033643  
SRR17520069.18033647  
SRR17520069.18033649  
SRR17520069.18033651  
SRR17520069.18033653  
SRR17520069.18033655  
SRR17520069.18033659  
SRR17520069.18033661  
SRR17520069.18034554  
SRR17520069.18034556  
SRR17520069.18034558  
SRR17520069.18034560  
SRR17520069.18034562  
SRR17520069.18034564  
SRR17520069.18034566  
SRR17520069.18034568  
SRR17520069.18034570  
SRR17520069.18034572  
SRR17520069.18034574  
SRR17520069.18034576  
SRR17520069.18034578  
SRR17520069.18034580  
SRR17520069.18034582  
SRR17520069.18034584  
SRR17520069.18034586  
SRR17520069.18034588  
SRR17520069.18034590

SRR17520069. 18034592  
SRR17520069. 18034594  
SRR17520069. 18034596  
SRR17520069. 18034598  
SRR17520069. 18034600  
SRR17520069. 18034602  
SRR17520069. 18034604  
SRR17520069. 18034606  
SRR17520069. 18034608  
SRR17520069. 18034610  
SRR17520069. 18034612  
SRR17520069. 18034614  
SRR17520069. 18034616  
SRR17520069. 18034618  
SRR17520069. 18034620  
SRR17520069. 18034622  
SRR17520069. 18034624  
SRR17520069. 18034626  
SRR17520069. 18034628  
SRR17520069. 18034630  
SRR17520069. 18034632  
SRR17520069. 18034634  
SRR17520069. 18034638  
SRR17520069. 18034640  
SRR17520069. 18034642  
SRR17520069. 18034644  
SRR17520069. 18034646  
SRR17520069. 18034648  
SRR17520069. 18034650  
SRR17520069. 18034652  
SRR17520069. 18034654  
SRR17520069. 18034656  
SRR17520069. 18034660  
SRR17520069. 18034664  
SRR17520069. 18035805  
SRR17520069. 18035807  
SRR17520069. 18035811  
SRR17520069. 18035815  
SRR17520069. 18035819  
SRR17520069. 18035821  
SRR17520069. 18035839  
SRR17520069. 18036394  
SRR17520069. 18036396  
SRR17520069. 18036398  
SRR17520069. 18036400  
SRR17520069. 18036402  
SRR17520069. 18036404

SRR17520069. 18036406  
SRR17520069. 18036408  
SRR17520069. 18036410  
SRR17520069. 18036412  
SRR17520069. 18036414  
SRR17520069. 18036416  
SRR17520069. 18036418  
SRR17520069. 18036420  
SRR17520069. 18036422  
SRR17520069. 18036424  
SRR17520069. 18036426  
SRR17520069. 18036428  
SRR17520069. 18036430  
SRR17520069. 18036432  
SRR17520069. 18036434  
SRR17520069. 18036436  
SRR17520069. 18036438  
SRR17520069. 18036440  
SRR17520069. 18036442  
SRR17520069. 18036444  
SRR17520069. 18036446  
SRR17520069. 18036448  
SRR17520069. 18036450  
SRR17520069. 18036452  
SRR17520069. 18036454  
SRR17520069. 18036456  
SRR17520069. 18036458  
SRR17520069. 18036460  
SRR17520069. 18036462  
SRR17520069. 18036464  
SRR17520069. 18036466  
SRR17520069. 18036468  
SRR17520069. 18036470  
SRR17520069. 18036472  
SRR17520069. 18036474  
SRR17520069. 18036476  
SRR17520069. 18045770  
SRR17520069. 18058204  
SRR17520069. 18058206  
SRR17520069. 18058208  
SRR17520069. 18058210  
SRR17520069. 18058214  
SRR17520069. 18058220  
SRR17520069. 18058224  
SRR17520069. 18058226  
SRR17520069. 18058228  
SRR17520069. 18058230

SRR17520069. 18061811  
SRR17520069. 18061813  
SRR17520069. 18061815  
SRR17520069. 18063118  
SRR17520069. 18063120  
SRR17520069. 18063122  
SRR17520069. 18063124  
SRR17520069. 18063126  
SRR17520069. 18064113  
SRR17520069. 18064115  
SRR17520069. 18064117  
SRR17520069. 18064119  
SRR17520069. 18064121  
SRR17520069. 18064123  
SRR17520069. 18064125  
SRR17520069. 18064129  
SRR17520069. 18064131  
SRR17520069. 18064133  
SRR17520069. 18064135  
SRR17520069. 18064137  
SRR17520069. 18064139  
SRR17520069. 18064141  
SRR17520069. 18064143  
SRR17520069. 18064145  
SRR17520069. 18064147  
SRR17520069. 18064149  
SRR17520069. 18064151  
SRR17520069. 18064153  
SRR17520069. 18064155  
SRR17520069. 18064157  
SRR17520069. 18064159  
SRR17520069. 18064161  
SRR17520069. 18064163  
SRR17520069. 18064165  
SRR17520069. 18064167  
SRR17520069. 18064169  
SRR17520069. 18064171  
SRR17520069. 18064173  
SRR17520069. 18064175  
SRR17520069. 18064179  
SRR17520069. 18064181  
SRR17520069. 18064183  
SRR17520069. 18064185  
SRR17520069. 18064187  
SRR17520069. 18064189  
SRR17520069. 18064191  
SRR17520069. 18064193



SRR17520069.18064195  
SRR17520069.18083050  
SRR17520069.18083052  
SRR17520069.18083054  
SRR17520069.18083056  
SRR17520069.18083058  
SRR17520069.18083060  
SRR17520069.18083062  
SRR17520069.18083064  
SRR17520069.18083066  
SRR17520069.18083068  
SRR17520069.18083070  
SRR17520069.18083072  
SRR17520069.18083074  
SRR17520069.18083076  
SRR17520069.18083078  
SRR17520069.18083080  
SRR17520069.18083084  
SRR17520069.18083086  
SRR17520069.18095430  
SRR17520069.18095432  
SRR17520069.18095743  
SRR17520069.18095745  
SRR17520069.18095747  
SRR17520069.18095749  
SRR17520069.18095751  
SRR17520069.18095753  
SRR17520069.18095755  
SRR17520069.18095757  
SRR17520069.18095761  
SRR17520069.18095763  
SRR17520069.18095765  
SRR17520069.18095767  
SRR17520069.18095769  
SRR17520069.18095771  
SRR17520069.18099518  
SRR17520069.18106882  
SRR17520069.18106884  
SRR17520069.18106886  
SRR17520069.18106888  
SRR17520069.18106890  
SRR17520069.18106892  
SRR17520069.18106894  
SRR17520069.18106896  
SRR17520069.18106898  
SRR17520069.18106900  
SRR17520069.18106902

SRR17520069. 18106904  
SRR17520069. 18106906  
SRR17520069. 18106908  
SRR17520069. 18106910  
SRR17520069. 18106912  
SRR17520069. 18106914  
SRR17520069. 18106916  
SRR17520069. 18116331  
SRR17520069. 18116333  
SRR17520069. 18116335  
SRR17520069. 18116337  
SRR17520069. 18116339  
SRR17520069. 18116341  
SRR17520069. 18116343  
SRR17520069. 18116345  
SRR17520069. 18116347  
SRR17520069. 18116349  
SRR17520069. 18116351  
SRR17520069. 18116353  
SRR17520069. 18116355  
SRR17520069. 18116357  
SRR17520069. 18116359  
SRR17520069. 18116361  
SRR17520069. 18116363  
SRR17520069. 18120215  
SRR17520069. 18121466  
SRR17520069. 18122552  
SRR17520069. 18122554  
SRR17520069. 18122847  
SRR17520069. 18122849  
SRR17520069. 18125067  
SRR17520069. 18125069  
SRR17520069. 18126287  
SRR17520069. 18126289  
SRR17520069. 18126291  
SRR17520069. 18126293  
SRR17520069. 18126295  
SRR17520069. 18126297  
SRR17520069. 18126299  
SRR17520069. 18126301  
SRR17520069. 18126303  
SRR17520069. 18126305  
SRR17520069. 18126307  
SRR17520069. 18126309  
SRR17520069. 18126311  
SRR17520069. 18126313  
SRR17520069. 18126315

SRR17520069. 18126317  
SRR17520069. 18126319  
SRR17520069. 18126321  
SRR17520069. 18126323  
SRR17520069. 18126325  
SRR17520069. 18126329  
SRR17520069. 18126331  
SRR17520069. 18126333  
SRR17520069. 18126335  
SRR17520069. 18126337  
SRR17520069. 18126339  
SRR17520069. 18126341  
SRR17520069. 18133013  
SRR17520069. 18133015  
SRR17520069. 18133017  
SRR17520069. 18133019  
SRR17520069. 18133021  
SRR17520069. 18133023  
SRR17520069. 18133025  
SRR17520069. 18133027  
SRR17520069. 18133029  
SRR17520069. 18133031  
SRR17520069. 18133033  
SRR17520069. 18133035  
SRR17520069. 18133037  
SRR17520069. 18133039  
SRR17520069. 18133041  
SRR17520069. 18133043  
SRR17520069. 18133045  
SRR17520069. 18133047  
SRR17520069. 18133049  
SRR17520069. 18133051  
SRR17520069. 18133053  
SRR17520069. 18133055  
SRR17520069. 18133057  
SRR17520069. 18133059  
SRR17520069. 18133061  
SRR17520069. 18133063  
SRR17520069. 18133065  
SRR17520069. 18133067  
SRR17520069. 18133069  
SRR17520069. 18133071  
SRR17520069. 18133073  
SRR17520069. 18133075  
SRR17520069. 18133077  
SRR17520069. 18133079  
SRR17520069. 18133081

SRR17520069. 18133083  
SRR17520069. 18133323  
SRR17520069. 18133325  
SRR17520069. 18133327  
SRR17520069. 18133329  
SRR17520069. 18133331  
SRR17520069. 18133335  
SRR17520069. 18133337  
SRR17520069. 18133339  
SRR17520069. 18133341  
SRR17520069. 18133343  
SRR17520069. 18133345  
SRR17520069. 18133347  
SRR17520069. 18133349  
SRR17520069. 18152747  
SRR17520069. 18152749  
SRR17520069. 18152751  
SRR17520069. 18152753  
SRR17520069. 18152755  
SRR17520069. 18152757  
SRR17520069. 18152759  
SRR17520069. 18152765  
SRR17520069. 18152767  
SRR17520069. 18152771  
SRR17520069. 18152773  
SRR17520069. 18152775  
SRR17520069. 18152778  
SRR17520069. 18152780  
SRR17520069. 18166283  
SRR17520069. 18166285  
SRR17520069. 18166287  
SRR17520069. 18166289  
SRR17520069. 18166291  
SRR17520069. 18166293  
SRR17520069. 18166295  
SRR17520069. 18166297  
SRR17520069. 18166299  
SRR17520069. 18166301  
SRR17520069. 18166305  
SRR17520069. 18166307  
SRR17520069. 18166309  
SRR17520069. 18166311  
SRR17520069. 18166315  
SRR17520069. 18166317  
SRR17520069. 18166319  
SRR17520069. 18166321  
SRR17520069. 18166323

SRR17520069. 18166325  
SRR17520069. 18166327  
SRR17520069. 18166329  
SRR17520069. 18166331  
SRR17520069. 18166333  
SRR17520069. 18166335  
SRR17520069. 18166337  
SRR17520069. 18166339  
SRR17520069. 18166341  
SRR17520069. 18166343  
SRR17520069. 18166345  
SRR17520069. 18166347  
SRR17520069. 18166349  
SRR17520069. 18175670  
SRR17520069. 18175672  
SRR17520069. 18175674  
SRR17520069. 18175676  
SRR17520069. 18175678  
SRR17520069. 18180235  
SRR17520069. 18180237  
SRR17520069. 18180239  
SRR17520069. 18180241  
SRR17520069. 18180243  
SRR17520069. 18180245  
SRR17520069. 18180247  
SRR17520069. 18180249  
SRR17520069. 18180251  
SRR17520069. 18180253  
SRR17520069. 18180255  
SRR17520069. 18180257  
SRR17520069. 18180259  
SRR17520069. 18180261  
SRR17520069. 18180263  
SRR17520069. 18180265  
SRR17520069. 18180267  
SRR17520069. 18180269  
SRR17520069. 18180271  
SRR17520069. 18180273  
SRR17520069. 18180275  
SRR17520069. 18180277  
SRR17520069. 18180279  
SRR17520069. 18180281  
SRR17520069. 18180283  
SRR17520069. 18180285  
SRR17520069. 18180287  
SRR17520069. 18180289  
SRR17520069. 18187323

SRR17520069.18187325  
SRR17520069.18187327  
SRR17520069.18187329  
SRR17520069.18187333  
SRR17520069.18187335  
SRR17520069.18187337  
SRR17520069.18191654  
SRR17520069.18191656  
SRR17520069.18191658  
SRR17520069.18191660  
SRR17520069.18191662  
SRR17520069.18191664  
SRR17520069.18191666  
SRR17520069.18191668  
SRR17520069.18191670  
SRR17520069.18191676  
SRR17520069.18191682  
SRR17520069.18191684  
SRR17520069.18191686  
SRR17520069.18191696  
SRR17520069.18192166  
SRR17520069.18192168  
SRR17520069.18192170  
SRR17520069.18192172  
SRR17520069.18192174  
SRR17520069.18192176  
SRR17520069.18192180  
SRR17520069.18192182  
SRR17520069.18192184  
SRR17520069.18192188  
SRR17520069.18192190  
SRR17520069.18192192  
SRR17520069.18197583  
SRR17520069.18197585  
SRR17520069.18197587  
SRR17520069.18197589  
SRR17520069.18197591  
SRR17520069.18197595  
SRR17520069.18197597  
SRR17520069.18197599  
SRR17520069.18197601  
SRR17520069.18197603  
SRR17520069.18197605  
SRR17520069.18197607  
SRR17520069.18197609  
SRR17520069.18197613  
SRR17520069.18197615

SRR17520069. 18197617  
SRR17520069. 18197619  
SRR17520069. 18197621  
SRR17520069. 18197623  
SRR17520069. 18197625  
SRR17520069. 18197627  
SRR17520069. 18197629  
SRR17520069. 18197631  
SRR17520069. 18197633  
SRR17520069. 18197635  
SRR17520069. 18197637  
SRR17520069. 18197639  
SRR17520069. 18197641  
SRR17520069. 18197643  
SRR17520069. 18197645  
SRR17520069. 18197647  
SRR17520069. 18197649  
SRR17520069. 18197651  
SRR17520069. 18197653  
SRR17520069. 18197655  
SRR17520069. 18197657  
SRR17520069. 18197659  
SRR17520069. 18197661  
SRR17520069. 18197665  
SRR17520069. 18197667  
SRR17520069. 18199243  
SRR17520069. 18199245  
SRR17520069. 18199247  
SRR17520069. 18199249  
SRR17520069. 18199251  
SRR17520069. 18199253  
SRR17520069. 18199255  
SRR17520069. 18199257  
SRR17520069. 18199259  
SRR17520069. 18199261  
SRR17520069. 18199263  
SRR17520069. 18199265  
SRR17520069. 18199267  
SRR17520069. 18199269  
SRR17520069. 18199271  
SRR17520069. 18199273  
SRR17520069. 18199275  
SRR17520069. 18199277  
SRR17520069. 18199279  
SRR17520069. 18199281  
SRR17520069. 18199283  
SRR17520069. 18199285

SRR17520069. 18199287  
SRR17520069. 18199291  
SRR17520069. 18199293  
SRR17520069. 18199295  
SRR17520069. 18199297  
SRR17520069. 18199299  
SRR17520069. 18199301  
SRR17520069. 18199303  
SRR17520069. 18199305  
SRR17520069. 18199307  
SRR17520069. 18199311  
SRR17520069. 18199313  
SRR17520069. 18199315  
SRR17520069. 18199317  
SRR17520069. 18199319  
SRR17520069. 18201967  
SRR17520069. 18202448  
SRR17520069. 18202450  
SRR17520069. 18202452  
SRR17520069. 18202454  
SRR17520069. 18202458  
SRR17520069. 18202460  
SRR17520069. 18202462  
SRR17520069. 18202464  
SRR17520069. 18202466  
SRR17520069. 18202468  
SRR17520069. 18202470  
SRR17520069. 18202472  
SRR17520069. 18202474  
SRR17520069. 18202476  
SRR17520069. 18202478  
SRR17520069. 18202480  
SRR17520069. 18203170  
SRR17520069. 18203172  
SRR17520069. 18203174  
SRR17520069. 18203176  
SRR17520069. 18203178  
SRR17520069. 18203180  
SRR17520069. 18203184  
SRR17520069. 18203186  
SRR17520069. 18203188  
SRR17520069. 18203190  
SRR17520069. 18207980  
SRR17520069. 18207982  
SRR17520069. 18207984  
SRR17520069. 18207986  
SRR17520069. 18207988



SRR17520069.18207990  
SRR17520069.18207992  
SRR17520069.18207994  
SRR17520069.18207996  
SRR17520069.18207998  
SRR17520069.18208000  
SRR17520069.18208002  
SRR17520069.18208004  
SRR17520069.18208006  
SRR17520069.18208008  
SRR17520069.18208010  
SRR17520069.18208012  
SRR17520069.18208014  
SRR17520069.18208306  
SRR17520069.18208308  
SRR17520069.18208310  
SRR17520069.18208312  
SRR17520069.18208314  
SRR17520069.18208316  
SRR17520069.18208318  
SRR17520069.18208320  
SRR17520069.18208322  
SRR17520069.18208326  
SRR17520069.18208328  
SRR17520069.18208330  
SRR17520069.18208332  
SRR17520069.18208334  
SRR17520069.18208336  
SRR17520069.18208338  
SRR17520069.18224343  
SRR17520069.18224345  
SRR17520069.18232260  
SRR17520069.18232332  
SRR17520069.18232334  
SRR17520069.18232336  
SRR17520069.18232338  
SRR17520069.18232340  
SRR17520069.18232342  
SRR17520069.18232344  
SRR17520069.18232346  
SRR17520069.18232348  
SRR17520069.18232350  
SRR17520069.18232352  
SRR17520069.18232354  
SRR17520069.18232356  
SRR17520069.18232358  
SRR17520069.18232360

SRR17520069. 18232362  
SRR17520069. 18232364  
SRR17520069. 18232366  
SRR17520069. 18232368  
SRR17520069. 18232370  
SRR17520069. 18232372  
SRR17520069. 18232374  
SRR17520069. 18232376  
SRR17520069. 18232378  
SRR17520069. 18232380  
SRR17520069. 18232382  
SRR17520069. 18232384  
SRR17520069. 18232386  
SRR17520069. 18232388  
SRR17520069. 18232390  
SRR17520069. 18232392  
SRR17520069. 18232394  
SRR17520069. 18232396  
SRR17520069. 18232398  
SRR17520069. 18232400  
SRR17520069. 18232402  
SRR17520069. 18232404  
SRR17520069. 18232406  
SRR17520069. 18232408  
SRR17520069. 18232410  
SRR17520069. 18232412  
SRR17520069. 18232414  
SRR17520069. 18232416  
SRR17520069. 18232418  
SRR17520069. 18232420  
SRR17520069. 18232426  
SRR17520069. 18232428  
SRR17520069. 18232430  
SRR17520069. 18232432  
SRR17520069. 18232434  
SRR17520069. 18232436  
SRR17520069. 18232438  
SRR17520069. 18232440  
SRR17520069. 18232442  
SRR17520069. 18232444  
SRR17520069. 18232446  
SRR17520069. 18232448  
SRR17520069. 18232450  
SRR17520069. 18232454  
SRR17520069. 18232456  
SRR17520069. 18232458  
SRR17520069. 18232460

SRR17520069. 18232462  
SRR17520069. 18232464  
SRR17520069. 18232466  
SRR17520069. 18232468  
SRR17520069. 18232470  
SRR17520069. 18232472  
SRR17520069. 18232474  
SRR17520069. 18232639  
SRR17520069. 18232641  
SRR17520069. 18232643  
SRR17520069. 18232645  
SRR17520069. 18236780  
SRR17520069. 18236782  
SRR17520069. 18236784  
SRR17520069. 18236786  
SRR17520069. 18236788  
SRR17520069. 18236790  
SRR17520069. 18236792  
SRR17520069. 18236794  
SRR17520069. 18236796  
SRR17520069. 18236798  
SRR17520069. 18236800  
SRR17520069. 18236802  
SRR17520069. 18236804  
SRR17520069. 18236806  
SRR17520069. 18236808  
SRR17520069. 18236810  
SRR17520069. 18236812  
SRR17520069. 18236814  
SRR17520069. 18236816  
SRR17520069. 18236818  
SRR17520069. 18236820  
SRR17520069. 18236822  
SRR17520069. 18236824  
SRR17520069. 18236826  
SRR17520069. 18236828  
SRR17520069. 18236830  
SRR17520069. 18236832  
SRR17520069. 18236834  
SRR17520069. 18236836  
SRR17520069. 18236838  
SRR17520069. 18236840  
SRR17520069. 18238236  
SRR17520069. 18238238  
SRR17520069. 18238240  
SRR17520069. 18238242  
SRR17520069. 18238244

SRR17520069. 18238246  
SRR17520069. 18238248  
SRR17520069. 18238250  
SRR17520069. 18238252  
SRR17520069. 18238254  
SRR17520069. 18238256  
SRR17520069. 18238258  
SRR17520069. 18238260  
SRR17520069. 18238262  
SRR17520069. 18238266  
SRR17520069. 18238268  
SRR17520069. 18238270  
SRR17520069. 18238272  
SRR17520069. 18238274  
SRR17520069. 18238276  
SRR17520069. 18238278  
SRR17520069. 18238280  
SRR17520069. 18238282  
SRR17520069. 18238284  
SRR17520069. 18238286  
SRR17520069. 18238288  
SRR17520069. 18238290  
SRR17520069. 18238292  
SRR17520069. 18238294  
SRR17520069. 18238296  
SRR17520069. 18246367  
SRR17520069. 18246369  
SRR17520069. 18246371  
SRR17520069. 18246373  
SRR17520069. 18246375  
SRR17520069. 18246377  
SRR17520069. 18246379  
SRR17520069. 18246381  
SRR17520069. 18246383  
SRR17520069. 18246385  
SRR17520069. 18246387  
SRR17520069. 18246389  
SRR17520069. 18246391  
SRR17520069. 18246393  
SRR17520069. 18246395  
SRR17520069. 18246397  
SRR17520069. 18246399  
SRR17520069. 18246401  
SRR17520069. 18246403  
SRR17520069. 18246405  
SRR17520069. 18247336  
SRR17520069. 18247338

SRR17520069. 18247340  
SRR17520069. 18247342  
SRR17520069. 18247344  
SRR17520069. 18247346  
SRR17520069. 18247348  
SRR17520069. 18247350  
SRR17520069. 18247352  
SRR17520069. 18247354  
SRR17520069. 18247356  
SRR17520069. 18247358  
SRR17520069. 18247360  
SRR17520069. 18247362  
SRR17520069. 18247364  
SRR17520069. 18247366  
SRR17520069. 18247368  
SRR17520069. 18247370  
SRR17520069. 18247372  
SRR17520069. 18247374  
SRR17520069. 18247376  
SRR17520069. 18247379  
SRR17520069. 18247381  
SRR17520069. 18247383  
SRR17520069. 18247385  
SRR17520069. 18250794  
SRR17520069. 18250796  
SRR17520069. 18250798  
SRR17520069. 18250800  
SRR17520069. 18250802  
SRR17520069. 18250804  
SRR17520069. 18250806  
SRR17520069. 18250808  
SRR17520069. 18250810  
SRR17520069. 18250812  
SRR17520069. 18250814  
SRR17520069. 18250816  
SRR17520069. 18250818  
SRR17520069. 18250820  
SRR17520069. 18250822  
SRR17520069. 18250824  
SRR17520069. 18250826  
SRR17520069. 18250828  
SRR17520069. 18250830  
SRR17520069. 18250832  
SRR17520069. 18250834  
SRR17520069. 18250836  
SRR17520069. 18250838  
SRR17520069. 18250840

SRR17520069. 18250842  
SRR17520069. 18250844  
SRR17520069. 18250846  
SRR17520069. 18250848  
SRR17520069. 18250850  
SRR17520069. 18250852  
SRR17520069. 18250854  
SRR17520069. 18250856  
SRR17520069. 18250858  
SRR17520069. 18250860  
SRR17520069. 18250862  
SRR17520069. 18250864  
SRR17520069. 18250868  
SRR17520069. 18250870  
SRR17520069. 18250872  
SRR17520069. 18250874  
SRR17520069. 18250876  
SRR17520069. 18250878  
SRR17520069. 18250880  
SRR17520069. 18250884  
SRR17520069. 18250886  
SRR17520069. 18250888  
SRR17520069. 18250890  
SRR17520069. 18250892  
SRR17520069. 18250894  
SRR17520069. 18250896  
SRR17520069. 18250900  
SRR17520069. 18250902  
SRR17520069. 18250904  
SRR17520069. 18250908  
SRR17520069. 18250910  
SRR17520069. 18250914  
SRR17520069. 18250916  
SRR17520069. 18250918  
SRR17520069. 18250920  
SRR17520069. 18250922  
SRR17520069. 18250924  
SRR17520069. 18250926  
SRR17520069. 18250928  
SRR17520069. 18250930  
SRR17520069. 18250932  
SRR17520069. 18250934  
SRR17520069. 18250936  
SRR17520069. 18250938  
SRR17520069. 18250940  
SRR17520069. 18250942  
SRR17520069. 18250944

SRR17520069. 18250946  
SRR17520069. 18250948  
SRR17520069. 18250950  
SRR17520069. 18250952  
SRR17520069. 18250954  
SRR17520069. 18250956  
SRR17520069. 18250958  
SRR17520069. 18250960  
SRR17520069. 18250962  
SRR17520069. 18250964  
SRR17520069. 18250966  
SRR17520069. 18250968  
SRR17520069. 18250972  
SRR17520069. 18250974  
SRR17520069. 18250976  
SRR17520069. 18250978  
SRR17520069. 18250980  
SRR17520069. 18250982  
SRR17520069. 18250984  
SRR17520069. 18253349  
SRR17520069. 18253351  
SRR17520069. 18263942  
SRR17520069. 18272646  
SRR17520069. 18272648  
SRR17520069. 18272650  
SRR17520069. 18273107  
SRR17520069. 18273109  
SRR17520069. 18273111  
SRR17520069. 18273113  
SRR17520069. 18273115  
SRR17520069. 18273117  
SRR17520069. 18273121  
SRR17520069. 18273123  
SRR17520069. 18273125  
SRR17520069. 18273127  
SRR17520069. 18273129  
SRR17520069. 18273131  
SRR17520069. 18273133  
SRR17520069. 18273135  
SRR17520069. 18273137  
SRR17520069. 18273139  
SRR17520069. 18273141  
SRR17520069. 18273143  
SRR17520069. 18273145  
SRR17520069. 18273147  
SRR17520069. 18273149  
SRR17520069. 18273151

SRR17520069. 18273153  
SRR17520069. 18273155  
SRR17520069. 18273157  
SRR17520069. 18273159  
SRR17520069. 18273161  
SRR17520069. 18273163  
SRR17520069. 18273165  
SRR17520069. 18273167  
SRR17520069. 18273169  
SRR17520069. 18273171  
SRR17520069. 18273173  
SRR17520069. 18273175  
SRR17520069. 18273177  
SRR17520069. 18273179  
SRR17520069. 18273181  
SRR17520069. 18273183  
SRR17520069. 18273185  
SRR17520069. 18273187  
SRR17520069. 18273189  
SRR17520069. 18273191  
SRR17520069. 18273193  
SRR17520069. 18273195  
SRR17520069. 18273197  
SRR17520069. 18273199  
SRR17520069. 18273201  
SRR17520069. 18273203  
SRR17520069. 18273205  
SRR17520069. 18273207  
SRR17520069. 18273209  
SRR17520069. 18273211  
SRR17520069. 18273213  
SRR17520069. 18273215  
SRR17520069. 18273217  
SRR17520069. 18273219  
SRR17520069. 18273221  
SRR17520069. 18273223  
SRR17520069. 18273225  
SRR17520069. 18273227  
SRR17520069. 18273229  
SRR17520069. 18276162  
SRR17520069. 18276164  
SRR17520069. 18276166  
SRR17520069. 18276168  
SRR17520069. 18276170  
SRR17520069. 18276172  
SRR17520069. 18276174  
SRR17520069. 18276176



SRR17520069. 18276178  
SRR17520069. 18276180  
SRR17520069. 18276182  
SRR17520069. 18276184  
SRR17520069. 18276188  
SRR17520069. 18276190  
SRR17520069. 18276192  
SRR17520069. 18276194  
SRR17520069. 18276196  
SRR17520069. 18276198  
SRR17520069. 18276200  
SRR17520069. 18276202  
SRR17520069. 18276204  
SRR17520069. 18276206  
SRR17520069. 18276210  
SRR17520069. 18276212  
SRR17520069. 18276214  
SRR17520069. 18276216  
SRR17520069. 18276218  
SRR17520069. 18277672  
SRR17520069. 18280439  
SRR17520069. 18280441  
SRR17520069. 18280443  
SRR17520069. 18280445  
SRR17520069. 18280447  
SRR17520069. 18280451  
SRR17520069. 18280453  
SRR17520069. 18280455  
SRR17520069. 18281255  
SRR17520069. 18281257  
SRR17520069. 18281261  
SRR17520069. 18284108  
SRR17520069. 18284110  
SRR17520069. 18284112  
SRR17520069. 18284114  
SRR17520069. 18284116  
SRR17520069. 18284118  
SRR17520069. 18284120  
SRR17520069. 18284122  
SRR17520069. 18284124  
SRR17520069. 18284126  
SRR17520069. 18284128  
SRR17520069. 18284130  
SRR17520069. 18284132  
SRR17520069. 18284134  
SRR17520069. 18284136  
SRR17520069. 18284138

SRR17520069. 18284140  
SRR17520069. 18284142  
SRR17520069. 18284144  
SRR17520069. 18284146  
SRR17520069. 18284148  
SRR17520069. 18284150  
SRR17520069. 18284152  
SRR17520069. 18284154  
SRR17520069. 18284158  
SRR17520069. 18284160  
SRR17520069. 18284162  
SRR17520069. 18284166  
SRR17520069. 18284168  
SRR17520069. 18284172  
SRR17520069. 18284174  
SRR17520069. 18289427  
SRR17520069. 18289429  
SRR17520069. 18289431  
SRR17520069. 18289435  
SRR17520069. 18289437  
SRR17520069. 18289439  
SRR17520069. 18289441  
SRR17520069. 18289443  
SRR17520069. 18289445  
SRR17520069. 18290788  
SRR17520069. 18290790  
SRR17520069. 18290792  
SRR17520069. 18290794  
SRR17520069. 18290796  
SRR17520069. 18290806  
SRR17520069. 18293902  
SRR17520069. 18294451  
SRR17520069. 18301449  
SRR17520069. 18301453  
SRR17520069. 18301455  
SRR17520069. 18301457  
SRR17520069. 18301459  
SRR17520069. 18301461  
SRR17520069. 18301463  
SRR17520069. 18301465  
SRR17520069. 18301467  
SRR17520069. 18301469  
SRR17520069. 18301471  
SRR17520069. 18301475  
SRR17520069. 18301477  
SRR17520069. 18301479  
SRR17520069. 18301483

SRR17520069. 18301485  
SRR17520069. 18301487  
SRR17520069. 18301489  
SRR17520069. 18301491  
SRR17520069. 18301493  
SRR17520069. 18301495  
SRR17520069. 18301497  
SRR17520069. 18301499  
SRR17520069. 18301501  
SRR17520069. 18301503  
SRR17520069. 18301505  
SRR17520069. 18301507  
SRR17520069. 18301511  
SRR17520069. 18301513  
SRR17520069. 18301515  
SRR17520069. 18301517  
SRR17520069. 18301519  
SRR17520069. 18301521  
SRR17520069. 18301523  
SRR17520069. 18301527  
SRR17520069. 18301531  
SRR17520069. 18301533  
SRR17520069. 18301535  
SRR17520069. 18301537  
SRR17520069. 18301539  
SRR17520069. 18301541  
SRR17520069. 18301543  
SRR17520069. 18301545  
SRR17520069. 18301547  
SRR17520069. 18301549  
SRR17520069. 18301551  
SRR17520069. 18301553  
SRR17520069. 18301555  
SRR17520069. 18301557  
SRR17520069. 18301559  
SRR17520069. 18301563  
SRR17520069. 18301565  
SRR17520069. 18303729  
SRR17520069. 18303731  
SRR17520069. 18304613  
SRR17520069. 18304615  
SRR17520069. 18304617  
SRR17520069. 18304619  
SRR17520069. 18304621  
SRR17520069. 18304623  
SRR17520069. 18304625  
SRR17520069. 18312844

SRR17520069. 18312846  
SRR17520069. 18312848  
SRR17520069. 18312852  
SRR17520069. 18312854  
SRR17520069. 18317975  
SRR17520069. 18317981  
SRR17520069. 18317983  
SRR17520069. 18320470  
SRR17520069. 18320472  
SRR17520069. 18320474  
SRR17520069. 18320476  
SRR17520069. 18320478  
SRR17520069. 18320480  
SRR17520069. 18320482  
SRR17520069. 18320484  
SRR17520069. 18320486  
SRR17520069. 18320488  
SRR17520069. 18320490  
SRR17520069. 18320492  
SRR17520069. 18320494  
SRR17520069. 18321540  
SRR17520069. 18323996  
SRR17520069. 18323998  
SRR17520069. 18324000  
SRR17520069. 18324002  
SRR17520069. 18324004  
SRR17520069. 18324006  
SRR17520069. 18324008  
SRR17520069. 18324010  
SRR17520069. 18324012  
SRR17520069. 18324014  
SRR17520069. 18324016  
SRR17520069. 18324018  
SRR17520069. 18324020  
SRR17520069. 18324022  
SRR17520069. 18324024  
SRR17520069. 18324026  
SRR17520069. 18327287  
SRR17520069. 18327289  
SRR17520069. 18332854  
SRR17520069. 18332856  
SRR17520069. 18332858  
SRR17520069. 18332860  
SRR17520069. 18332862  
SRR17520069. 18332864  
SRR17520069. 18332866  
SRR17520069. 18332868

SRR17520069. 18332870  
SRR17520069. 18332872  
SRR17520069. 18332874  
SRR17520069. 18332876  
SRR17520069. 18332878  
SRR17520069. 18332880  
SRR17520069. 18332882  
SRR17520069. 18332884  
SRR17520069. 18332886  
SRR17520069. 18332888  
SRR17520069. 18332890  
SRR17520069. 18332892  
SRR17520069. 18332894  
SRR17520069. 18333489  
SRR17520069. 18333996  
SRR17520069. 18334000  
SRR17520069. 18334002  
SRR17520069. 18334004  
SRR17520069. 18334006  
SRR17520069. 18334008  
SRR17520069. 18334010  
SRR17520069. 18334014  
SRR17520069. 18334016  
SRR17520069. 18334019  
SRR17520069. 18334021  
SRR17520069. 18334023  
SRR17520069. 18334025  
SRR17520069. 18334027  
SRR17520069. 18334029  
SRR17520069. 18334031  
SRR17520069. 18334033  
SRR17520069. 18334035  
SRR17520069. 18334037  
SRR17520069. 18334039  
SRR17520069. 18334041  
SRR17520069. 18334043  
SRR17520069. 18334045  
SRR17520069. 18334947  
SRR17520069. 18334949  
SRR17520069. 18334951  
SRR17520069. 18334953  
SRR17520069. 18334955  
SRR17520069. 18337554  
SRR17520069. 18337556  
SRR17520069. 18337558  
SRR17520069. 18338458  
SRR17520069. 18338462

SRR17520069. 18338464  
SRR17520069. 18338466  
SRR17520069. 18338468  
SRR17520069. 18343806  
SRR17520069. 18348722  
SRR17520069. 18348724  
SRR17520069. 18348726  
SRR17520069. 18348728  
SRR17520069. 18348730  
SRR17520069. 18348732  
SRR17520069. 18348734  
SRR17520069. 18348736  
SRR17520069. 18348738  
SRR17520069. 18348740  
SRR17520069. 18348742  
SRR17520069. 18348744  
SRR17520069. 18348746  
SRR17520069. 18348748  
SRR17520069. 18348750  
SRR17520069. 18348754  
SRR17520069. 18353767  
SRR17520069. 18353769  
SRR17520069. 18353771  
SRR17520069. 18353773  
SRR17520069. 18353775  
SRR17520069. 18356238  
SRR17520069. 18356240  
SRR17520069. 18356242  
SRR17520069. 18356244  
SRR17520069. 18356246  
SRR17520069. 18356248  
SRR17520069. 18356250  
SRR17520069. 18356252  
SRR17520069. 18356254  
SRR17520069. 18356256  
SRR17520069. 18356260  
SRR17520069. 18356262  
SRR17520069. 18356264  
SRR17520069. 18356268  
SRR17520069. 18356270  
SRR17520069. 18356272  
SRR17520069. 18356284  
SRR17520069. 18356294  
SRR17520069. 18356296  
SRR17520069. 18357220  
SRR17520069. 18357222  
SRR17520069. 18357224

SRR17520069. 18357226  
SRR17520069. 18357228  
SRR17520069. 18357230  
SRR17520069. 18357232  
SRR17520069. 18357234  
SRR17520069. 18357236  
SRR17520069. 18357238  
SRR17520069. 18357240  
SRR17520069. 18357242  
SRR17520069. 18357244  
SRR17520069. 18357246  
SRR17520069. 18357248  
SRR17520069. 18357250  
SRR17520069. 18357252  
SRR17520069. 18357254  
SRR17520069. 18357256  
SRR17520069. 18357258  
SRR17520069. 18357260  
SRR17520069. 18357262  
SRR17520069. 18357264  
SRR17520069. 18357266  
SRR17520069. 18357268  
SRR17520069. 18357270  
SRR17520069. 18357272  
SRR17520069. 18362558  
SRR17520069. 18368366  
SRR17520069. 18368368  
SRR17520069. 18368370  
SRR17520069. 18368372  
SRR17520069. 18368374  
SRR17520069. 18368376  
SRR17520069. 18368378  
SRR17520069. 18368380  
SRR17520069. 18368382  
SRR17520069. 18368384  
SRR17520069. 18368386  
SRR17520069. 18368388  
SRR17520069. 18368390  
SRR17520069. 18368392  
SRR17520069. 18368394  
SRR17520069. 18368396  
SRR17520069. 18368398  
SRR17520069. 18368400  
SRR17520069. 18368402  
SRR17520069. 18368404  
SRR17520069. 18368406  
SRR17520069. 18368408

SRR17520069. 18368410  
SRR17520069. 18369238  
SRR17520069. 18373733  
SRR17520069. 18376038  
SRR17520069. 18376040  
SRR17520069. 18376042  
SRR17520069. 18378936  
SRR17520069. 18378938  
SRR17520069. 18378940  
SRR17520069. 18378942  
SRR17520069. 18378944  
SRR17520069. 18378946  
SRR17520069. 18378948  
SRR17520069. 18378950  
SRR17520069. 18378952  
SRR17520069. 18378954  
SRR17520069. 18378956  
SRR17520069. 18378958  
SRR17520069. 18378962  
SRR17520069. 18378964  
SRR17520069. 18378966  
SRR17520069. 18378968  
SRR17520069. 18378970  
SRR17520069. 18378972  
SRR17520069. 18378974  
SRR17520069. 18378976  
SRR17520069. 18378978  
SRR17520069. 18378980  
SRR17520069. 18378982  
SRR17520069. 18378984  
SRR17520069. 18378986  
SRR17520069. 18378988  
SRR17520069. 18378992  
SRR17520069. 18378994  
SRR17520069. 18378996  
SRR17520069. 18378998  
SRR17520069. 18379000  
SRR17520069. 18379002  
SRR17520069. 18379004  
SRR17520069. 18379006  
SRR17520069. 18379008  
SRR17520069. 18379010  
SRR17520069. 18379012  
SRR17520069. 18379014  
SRR17520069. 18379016  
SRR17520069. 18379018  
SRR17520069. 18379020



SRR17520069. 18379022  
SRR17520069. 18379024  
SRR17520069. 18379026  
SRR17520069. 18379028  
SRR17520069. 18379030  
SRR17520069. 18379032  
SRR17520069. 18379034  
SRR17520069. 18379036  
SRR17520069. 18379038  
SRR17520069. 18379040  
SRR17520069. 18379042  
SRR17520069. 18379044  
SRR17520069. 18379046  
SRR17520069. 18379048  
SRR17520069. 18379050  
SRR17520069. 18379052  
SRR17520069. 18383506  
SRR17520069. 18383508  
SRR17520069. 18383510  
SRR17520069. 18383512  
SRR17520069. 18383514  
SRR17520069. 18383516  
SRR17520069. 18383518  
SRR17520069. 18383520  
SRR17520069. 18383522  
SRR17520069. 18383524  
SRR17520069. 18383526  
SRR17520069. 18383528  
SRR17520069. 18383530  
SRR17520069. 18383532  
SRR17520069. 18383534  
SRR17520069. 18383536  
SRR17520069. 18383538  
SRR17520069. 18383540  
SRR17520069. 18383544  
SRR17520069. 18383546  
SRR17520069. 18383548  
SRR17520069. 18383550  
SRR17520069. 18383552  
SRR17520069. 18391307  
SRR17520069. 18391309  
SRR17520069. 18391311  
SRR17520069. 18391313  
SRR17520069. 18391315  
SRR17520069. 18391317  
SRR17520069. 18391319  
SRR17520069. 18391321

SRR17520069. 18391325  
SRR17520069. 18391327  
SRR17520069. 18391329  
SRR17520069. 18391331  
SRR17520069. 18391333  
SRR17520069. 18391335  
SRR17520069. 18391337  
SRR17520069. 18391339  
SRR17520069. 18391341  
SRR17520069. 18391343  
SRR17520069. 18391345  
SRR17520069. 18391347  
SRR17520069. 18391349  
SRR17520069. 18391351  
SRR17520069. 18391353  
SRR17520069. 18391355  
SRR17520069. 18391357  
SRR17520069. 18391359  
SRR17520069. 18391361  
SRR17520069. 18391363  
SRR17520069. 18391365  
SRR17520069. 18391367  
SRR17520069. 18391369  
SRR17520069. 18391371  
SRR17520069. 18391373  
SRR17520069. 18391375  
SRR17520069. 18391377  
SRR17520069. 18391379  
SRR17520069. 18391381  
SRR17520069. 18391383  
SRR17520069. 18391386  
SRR17520069. 18391388  
SRR17520069. 18391390  
SRR17520069. 18391392  
SRR17520069. 18391394  
SRR17520069. 18391396  
SRR17520069. 18391400  
SRR17520069. 18391402  
SRR17520069. 18391404  
SRR17520069. 18391406  
SRR17520069. 18391408  
SRR17520069. 18391410  
SRR17520069. 18391412  
SRR17520069. 18391416  
SRR17520069. 18391418  
SRR17520069. 18391420  
SRR17520069. 18391422

SRR17520069. 18391424  
SRR17520069. 18391426  
SRR17520069. 18391428  
SRR17520069. 18391430  
SRR17520069. 18391432  
SRR17520069. 18391434  
SRR17520069. 18391436  
SRR17520069. 18391438  
SRR17520069. 18391440  
SRR17520069. 18391442  
SRR17520069. 18391444  
SRR17520069. 18391446  
SRR17520069. 18391448  
SRR17520069. 18391450  
SRR17520069. 18391452  
SRR17520069. 18391454  
SRR17520069. 18391456  
SRR17520069. 18391458  
SRR17520069. 18391462  
SRR17520069. 18391464  
SRR17520069. 18391466  
SRR17520069. 18391468  
SRR17520069. 18391470  
SRR17520069. 18391474  
SRR17520069. 18391480  
SRR17520069. 18391482  
SRR17520069. 18391484  
SRR17520069. 18393059  
SRR17520069. 18393061  
SRR17520069. 18393063  
SRR17520069. 18393065  
SRR17520069. 18393067  
SRR17520069. 18393069  
SRR17520069. 18393071  
SRR17520069. 18393073  
SRR17520069. 18393075  
SRR17520069. 18393077  
SRR17520069. 18393079  
SRR17520069. 18393081  
SRR17520069. 18393083  
SRR17520069. 18393085  
SRR17520069. 18393087  
SRR17520069. 18393089  
SRR17520069. 18393091  
SRR17520069. 18393093  
SRR17520069. 18393095  
SRR17520069. 18393097

SRR17520069. 18393099  
SRR17520069. 18393103  
SRR17520069. 18393105  
SRR17520069. 18393107  
SRR17520069. 18393109  
SRR17520069. 18393111  
SRR17520069. 18393113  
SRR17520069. 18393115  
SRR17520069. 18393117  
SRR17520069. 18393119  
SRR17520069. 18393121  
SRR17520069. 18393123  
SRR17520069. 18393125  
SRR17520069. 18393127  
SRR17520069. 18393129  
SRR17520069. 18393131  
SRR17520069. 18393133  
SRR17520069. 18393135  
SRR17520069. 18393137  
SRR17520069. 18393139  
SRR17520069. 18393141  
SRR17520069. 18396430  
SRR17520069. 18396432  
SRR17520069. 18396434  
SRR17520069. 18396436  
SRR17520069. 18396438  
SRR17520069. 18407549  
SRR17520069. 18407551  
SRR17520069. 18407553  
SRR17520069. 18407555  
SRR17520069. 18407557  
SRR17520069. 18407559  
SRR17520069. 18407561  
SRR17520069. 18407563  
SRR17520069. 18407567  
SRR17520069. 18407569  
SRR17520069. 18407571  
SRR17520069. 18407573  
SRR17520069. 18407575  
SRR17520069. 18407577  
SRR17520069. 18407579  
SRR17520069. 18407581  
SRR17520069. 18407583  
SRR17520069. 18407585  
SRR17520069. 18407587  
SRR17520069. 18407589  
SRR17520069. 18407591

SRR17520069. 18407593  
SRR17520069. 18407595  
SRR17520069. 18407597  
SRR17520069. 18407599  
SRR17520069. 18407601  
SRR17520069. 18407603  
SRR17520069. 18407605  
SRR17520069. 18407607  
SRR17520069. 18407609  
SRR17520069. 18407611  
SRR17520069. 18407613  
SRR17520069. 18407615  
SRR17520069. 18407617  
SRR17520069. 18407619  
SRR17520069. 18407621  
SRR17520069. 18407623  
SRR17520069. 18407625  
SRR17520069. 18407629  
SRR17520069. 18407631  
SRR17520069. 18407633  
SRR17520069. 18407635  
SRR17520069. 18407637  
SRR17520069. 18407639  
SRR17520069. 18407641  
SRR17520069. 18407643  
SRR17520069. 18407645  
SRR17520069. 18407647  
SRR17520069. 18407649  
SRR17520069. 18407651  
SRR17520069. 18407653  
SRR17520069. 18407655  
SRR17520069. 18407657  
SRR17520069. 18407659  
SRR17520069. 18407661  
SRR17520069. 18407663  
SRR17520069. 18407665  
SRR17520069. 18407667  
SRR17520069. 18407669  
SRR17520069. 18407671  
SRR17520069. 18407673  
SRR17520069. 18410575  
SRR17520069. 18410577  
SRR17520069. 18410579  
SRR17520069. 18410581  
SRR17520069. 18410583  
SRR17520069. 18417105  
SRR17520069. 18417107

SRR17520069. 18431178  
SRR17520069. 18431180  
SRR17520069. 18431182  
SRR17520069. 18431184  
SRR17520069. 18431186  
SRR17520069. 18431188  
SRR17520069. 18431190  
SRR17520069. 18431192  
SRR17520069. 18431194  
SRR17520069. 18431196  
SRR17520069. 18431198  
SRR17520069. 18431202  
SRR17520069. 18432391  
SRR17520069. 18432393  
SRR17520069. 18438987  
SRR17520069. 18438989  
SRR17520069. 18438993  
SRR17520069. 18443322  
SRR17520069. 18443324  
SRR17520069. 18443326  
SRR17520069. 18443328  
SRR17520069. 18443330  
SRR17520069. 18443332  
SRR17520069. 18443334  
SRR17520069. 18443336  
SRR17520069. 18443338  
SRR17520069. 18443340  
SRR17520069. 18443344  
SRR17520069. 18443346  
SRR17520069. 18443348  
SRR17520069. 18443350  
SRR17520069. 18443352  
SRR17520069. 18443354  
SRR17520069. 18443356  
SRR17520069. 18443358  
SRR17520069. 18443360  
SRR17520069. 18443362  
SRR17520069. 18443364  
SRR17520069. 18443366  
SRR17520069. 18443368  
SRR17520069. 18443370  
SRR17520069. 18443374  
SRR17520069. 18443376  
SRR17520069. 18443378  
SRR17520069. 18443380  
SRR17520069. 18443382  
SRR17520069. 18443384

SRR17520069. 18443386  
SRR17520069. 18443388  
SRR17520069. 18443390  
SRR17520069. 18443392  
SRR17520069. 18443394  
SRR17520069. 18443396  
SRR17520069. 18443398  
SRR17520069. 18443400  
SRR17520069. 18443402  
SRR17520069. 18443404  
SRR17520069. 18443408  
SRR17520069. 18443410  
SRR17520069. 18443412  
SRR17520069. 18443414  
SRR17520069. 18443416  
SRR17520069. 18443418  
SRR17520069. 18443420  
SRR17520069. 18443422  
SRR17520069. 18443426  
SRR17520069. 18443428  
SRR17520069. 18443430  
SRR17520069. 18444247  
SRR17520069. 18444251  
SRR17520069. 18444253  
SRR17520069. 18444255  
SRR17520069. 18444257  
SRR17520069. 18444259  
SRR17520069. 18444261  
SRR17520069. 18444263  
SRR17520069. 18444265  
SRR17520069. 18444267  
SRR17520069. 18444269  
SRR17520069. 18444271  
SRR17520069. 18444273  
SRR17520069. 18444275  
SRR17520069. 18444277  
SRR17520069. 18444279  
SRR17520069. 18444281  
SRR17520069. 18444283  
SRR17520069. 18444285  
SRR17520069. 18444287  
SRR17520069. 18447231  
SRR17520069. 18447233  
SRR17520069. 18447235  
SRR17520069. 18447237  
SRR17520069. 18447239  
SRR17520069. 18447243

SRR17520069. 18447245  
SRR17520069. 18447654  
SRR17520069. 18447656  
SRR17520069. 18447658  
SRR17520069. 18447660  
SRR17520069. 18447662  
SRR17520069. 18447664  
SRR17520069. 18447666  
SRR17520069. 18447668  
SRR17520069. 18447670  
SRR17520069. 18447672  
SRR17520069. 18447674  
SRR17520069. 18447676  
SRR17520069. 18447678  
SRR17520069. 18447680  
SRR17520069. 18447682  
SRR17520069. 18447684  
SRR17520069. 18447686  
SRR17520069. 18447688  
SRR17520069. 18447690  
SRR17520069. 18447692  
SRR17520069. 18447694  
SRR17520069. 18447696  
SRR17520069. 18447698  
SRR17520069. 18447700  
SRR17520069. 18447702  
SRR17520069. 18456562  
SRR17520069. 18456564  
SRR17520069. 18456566  
SRR17520069. 18456568  
SRR17520069. 18456570  
SRR17520069. 18456572  
SRR17520069. 18456574  
SRR17520069. 18456576  
SRR17520069. 18456578  
SRR17520069. 18462578  
SRR17520069. 18462580  
SRR17520069. 18464336  
SRR17520069. 18464338  
SRR17520069. 18464340  
SRR17520069. 18464342  
SRR17520069. 18464344  
SRR17520069. 18464346  
SRR17520069. 18464348  
SRR17520069. 18464350  
SRR17520069. 18464352  
SRR17520069. 18464354



SRR17520069. 18464356  
SRR17520069. 18464358  
SRR17520069. 18464360  
SRR17520069. 18464362  
SRR17520069. 18464364  
SRR17520069. 18464366  
SRR17520069. 18464368  
SRR17520069. 18464370  
SRR17520069. 18464372  
SRR17520069. 18464374  
SRR17520069. 18464376  
SRR17520069. 18464378  
SRR17520069. 18464380  
SRR17520069. 18464382  
SRR17520069. 18464384  
SRR17520069. 18464386  
SRR17520069. 18464388  
SRR17520069. 18464390  
SRR17520069. 18464392  
SRR17520069. 18464394  
SRR17520069. 18464396  
SRR17520069. 18464398  
SRR17520069. 18464400  
SRR17520069. 18464402  
SRR17520069. 18464404  
SRR17520069. 18466307  
SRR17520069. 18466311  
SRR17520069. 18469596  
SRR17520069. 18469604  
SRR17520069. 18469606  
SRR17520069. 18469631  
SRR17520069. 18471079  
SRR17520069. 18471081  
SRR17520069. 18471083  
SRR17520069. 18471085  
SRR17520069. 18471087  
SRR17520069. 18471089  
SRR17520069. 18471091  
SRR17520069. 18471093  
SRR17520069. 18471095  
SRR17520069. 18471097  
SRR17520069. 18471099  
SRR17520069. 18471101  
SRR17520069. 18471103  
SRR17520069. 18471105  
SRR17520069. 18471107  
SRR17520069. 18471109

SRR17520069. 18471111  
SRR17520069. 18490389  
SRR17520069. 18490391  
SRR17520069. 18490395  
SRR17520069. 18490397  
SRR17520069. 18490399  
SRR17520069. 18490401  
SRR17520069. 18490403  
SRR17520069. 18490407  
SRR17520069. 18490409  
SRR17520069. 18490411  
SRR17520069. 18490413  
SRR17520069. 18490417  
SRR17520069. 18490419  
SRR17520069. 18490421  
SRR17520069. 18490427  
SRR17520069. 18492620  
SRR17520069. 18492622  
SRR17520069. 18492624  
SRR17520069. 18492628  
SRR17520069. 18492630  
SRR17520069. 18492632  
SRR17520069. 18492634  
SRR17520069. 18492636  
SRR17520069. 18496602  
SRR17520069. 18496604  
SRR17520069. 18502963  
SRR17520069. 18502965  
SRR17520069. 18502967  
SRR17520069. 18502969  
SRR17520069. 18502971  
SRR17520069. 18506506  
SRR17520069. 18506508  
SRR17520069. 18506510  
SRR17520069. 18506512  
SRR17520069. 18506514  
SRR17520069. 18506518  
SRR17520069. 18506520  
SRR17520069. 18506522  
SRR17520069. 18506524  
SRR17520069. 18506526  
SRR17520069. 18506528  
SRR17520069. 18506530  
SRR17520069. 18506532  
SRR17520069. 18506534  
SRR17520069. 18506536  
SRR17520069. 18506538

SRR17520069. 18506540  
SRR17520069. 18506542  
SRR17520069. 18506544  
SRR17520069. 18506546  
SRR17520069. 18506548  
SRR17520069. 18506550  
SRR17520069. 18512317  
SRR17520069. 18512319  
SRR17520069. 18513837  
SRR17520069. 18513839  
SRR17520069. 18517530  
SRR17520069. 18517532  
SRR17520069. 18517534  
SRR17520069. 18517536  
SRR17520069. 18517538  
SRR17520069. 18517540  
SRR17520069. 18517542  
SRR17520069. 18517544  
SRR17520069. 18517546  
SRR17520069. 18517548  
SRR17520069. 18517550  
SRR17520069. 18517552  
SRR17520069. 18517554  
SRR17520069. 18517556  
SRR17520069. 18517558  
SRR17520069. 18517560  
SRR17520069. 18517562  
SRR17520069. 18517564  
SRR17520069. 18517566  
SRR17520069. 18517568  
SRR17520069. 18517570  
SRR17520069. 18517572  
SRR17520069. 18519636  
SRR17520069. 18519638  
SRR17520069. 18519640  
SRR17520069. 18519642  
SRR17520069. 18519644  
SRR17520069. 18519646  
SRR17520069. 18519648  
SRR17520069. 18519650  
SRR17520069. 18519652  
SRR17520069. 18519654  
SRR17520069. 18519656  
SRR17520069. 18519658  
SRR17520069. 18519660  
SRR17520069. 18519662  
SRR17520069. 18519664

SRR17520069. 18519666  
SRR17520069. 18519668  
SRR17520069. 18519670  
SRR17520069. 18519674  
SRR17520069. 18519676  
SRR17520069. 18519678  
SRR17520069. 18519680  
SRR17520069. 18519682  
SRR17520069. 18519684  
SRR17520069. 18519686  
SRR17520069. 18519688  
SRR17520069. 18519945  
SRR17520069. 18519947  
SRR17520069. 18519949  
SRR17520069. 18519951  
SRR17520069. 18519953  
SRR17520069. 18519955  
SRR17520069. 18519957  
SRR17520069. 18519959  
SRR17520069. 18519961  
SRR17520069. 18519963  
SRR17520069. 18519965  
SRR17520069. 18519969  
SRR17520069. 18519971  
SRR17520069. 18519975  
SRR17520069. 18519977  
SRR17520069. 18519981  
SRR17520069. 18519986  
SRR17520069. 18519988  
SRR17520069. 18519994  
SRR17520069. 18519996  
SRR17520069. 18520120  
SRR17520069. 18520122  
SRR17520069. 18520124  
SRR17520069. 18520126  
SRR17520069. 18520128  
SRR17520069. 18520130  
SRR17520069. 18522932  
SRR17520069. 18522934  
SRR17520069. 18522936  
SRR17520069. 18522938  
SRR17520069. 18522940  
SRR17520069. 18522942  
SRR17520069. 18522944  
SRR17520069. 18522946  
SRR17520069. 18522948  
SRR17520069. 18522950

SRR17520069. 18522952  
SRR17520069. 18522954  
SRR17520069. 18522956  
SRR17520069. 18522958  
SRR17520069. 18522960  
SRR17520069. 18522962  
SRR17520069. 18522964  
SRR17520069. 18522966  
SRR17520069. 18522968  
SRR17520069. 18522970  
SRR17520069. 18522972  
SRR17520069. 18522974  
SRR17520069. 18522976  
SRR17520069. 18522978  
SRR17520069. 18522980  
SRR17520069. 18522982  
SRR17520069. 18522984  
SRR17520069. 18522986  
SRR17520069. 18522988  
SRR17520069. 18522990  
SRR17520069. 18522992  
SRR17520069. 18522994  
SRR17520069. 18522996  
SRR17520069. 18522998  
SRR17520069. 18523235  
SRR17520069. 18523237  
SRR17520069. 18523239  
SRR17520069. 18523241  
SRR17520069. 18523249  
SRR17520069. 18523251  
SRR17520069. 18523253  
SRR17520069. 18523259  
SRR17520069. 18523261  
SRR17520069. 18523263  
SRR17520069. 18523267  
SRR17520069. 18524894  
SRR17520069. 18524896  
SRR17520069. 18524898  
SRR17520069. 18524900  
SRR17520069. 18524902  
SRR17520069. 18524904  
SRR17520069. 18524906  
SRR17520069. 18524908  
SRR17520069. 18524910  
SRR17520069. 18524912  
SRR17520069. 18524914  
SRR17520069. 18524916

SRR17520069. 18524918  
SRR17520069. 18524920  
SRR17520069. 18524924  
SRR17520069. 18524926  
SRR17520069. 18524928  
SRR17520069. 18524930  
SRR17520069. 18524932  
SRR17520069. 18524934  
SRR17520069. 18524936  
SRR17520069. 18524938  
SRR17520069. 18524940  
SRR17520069. 18524942  
SRR17520069. 18524944  
SRR17520069. 18524946  
SRR17520069. 18524948  
SRR17520069. 18524950  
SRR17520069. 18524952  
SRR17520069. 18524954  
SRR17520069. 18524956  
SRR17520069. 18524958  
SRR17520069. 18524960  
SRR17520069. 18524962  
SRR17520069. 18524964  
SRR17520069. 18524966  
SRR17520069. 18524968  
SRR17520069. 18524970  
SRR17520069. 18524972  
SRR17520069. 18524974  
SRR17520069. 18524976  
SRR17520069. 18524978  
SRR17520069. 18524980  
SRR17520069. 18524982  
SRR17520069. 18524984  
SRR17520069. 18524986  
SRR17520069. 18524988  
SRR17520069. 18524990  
SRR17520069. 18524992  
SRR17520069. 18524994  
SRR17520069. 18524996  
SRR17520069. 18524998  
SRR17520069. 18525000  
SRR17520069. 18525002  
SRR17520069. 18525004  
SRR17520069. 18525006  
SRR17520069. 18525008  
SRR17520069. 18525010  
SRR17520069. 18525012

SRR17520069. 18525014  
SRR17520069. 18525016  
SRR17520069. 18525018  
SRR17520069. 18525020  
SRR17520069. 18525022  
SRR17520069. 18525024  
SRR17520069. 18525026  
SRR17520069. 18525028  
SRR17520069. 18525030  
SRR17520069. 18525032  
SRR17520069. 18527103  
SRR17520069. 18527105  
SRR17520069. 18527107  
SRR17520069. 18527109  
SRR17520069. 18527111  
SRR17520069. 18527113  
SRR17520069. 18527115  
SRR17520069. 18527117  
SRR17520069. 18527119  
SRR17520069. 18527121  
SRR17520069. 18527123  
SRR17520069. 18527125  
SRR17520069. 18527127  
SRR17520069. 18527129  
SRR17520069. 18527133  
SRR17520069. 18527135  
SRR17520069. 18527137  
SRR17520069. 18527139  
SRR17520069. 18527141  
SRR17520069. 18527143  
SRR17520069. 18527145  
SRR17520069. 18527147  
SRR17520069. 18527149  
SRR17520069. 18527151  
SRR17520069. 18527153  
SRR17520069. 18527155  
SRR17520069. 18527157  
SRR17520069. 18527159  
SRR17520069. 18527161  
SRR17520069. 18527163  
SRR17520069. 18527165  
SRR17520069. 18527167  
SRR17520069. 18527169  
SRR17520069. 18527171  
SRR17520069. 18527173  
SRR17520069. 18527175  
SRR17520069. 18527177

SRR17520069. 18527179  
SRR17520069. 18527181  
SRR17520069. 18527183  
SRR17520069. 18527185  
SRR17520069. 18527187  
SRR17520069. 18527189  
SRR17520069. 18527191  
SRR17520069. 18527193  
SRR17520069. 18527197  
SRR17520069. 18527199  
SRR17520069. 18527201  
SRR17520069. 18527203  
SRR17520069. 18527205  
SRR17520069. 18527207  
SRR17520069. 18527211  
SRR17520069. 18527213  
SRR17520069. 18527215  
SRR17520069. 18527217  
SRR17520069. 18527219  
SRR17520069. 18527221  
SRR17520069. 18532479  
SRR17520069. 18534221  
SRR17520069. 18540611  
SRR17520069. 18552933  
SRR17520069. 18552935  
SRR17520069. 18552937  
SRR17520069. 18560153  
SRR17520069. 18560155  
SRR17520069. 18560157  
SRR17520069. 18560159  
SRR17520069. 18560161  
SRR17520069. 18560163  
SRR17520069. 18560165  
SRR17520069. 18560167  
SRR17520069. 18560169  
SRR17520069. 18560171  
SRR17520069. 18560173  
SRR17520069. 18560175  
SRR17520069. 18560177  
SRR17520069. 18560179  
SRR17520069. 18560181  
SRR17520069. 18560183  
SRR17520069. 18569529  
SRR17520069. 18569531  
SRR17520069. 18569533  
SRR17520069. 18569797  
SRR17520069. 18569799



SRR17520069. 18569801  
SRR17520069. 18569803  
SRR17520069. 18569805  
SRR17520069. 18569807  
SRR17520069. 18569809  
SRR17520069. 18571342  
SRR17520069. 18576556  
SRR17520069. 18576560  
SRR17520069. 18576564  
SRR17520069. 18576568  
SRR17520069. 18576570  
SRR17520069. 18576572  
SRR17520069. 18576574  
SRR17520069. 18576576  
SRR17520069. 18576578  
SRR17520069. 18576580  
SRR17520069. 18576582  
SRR17520069. 18577650  
SRR17520069. 18577652  
SRR17520069. 18577654  
SRR17520069. 18577656  
SRR17520069. 18577658  
SRR17520069. 18577660  
SRR17520069. 18577662  
SRR17520069. 18577664  
SRR17520069. 18577666  
SRR17520069. 18577668  
SRR17520069. 18577670  
SRR17520069. 18577672  
SRR17520069. 18577674  
SRR17520069. 18577676  
SRR17520069. 18577678  
SRR17520069. 18577680  
SRR17520069. 18577682  
SRR17520069. 18577969  
SRR17520069. 18577971  
SRR17520069. 18577973  
SRR17520069. 18577975  
SRR17520069. 18577977  
SRR17520069. 18581386  
SRR17520069. 18581388  
SRR17520069. 18581390  
SRR17520069. 18581392  
SRR17520069. 18581394  
SRR17520069. 18581396  
SRR17520069. 18581398  
SRR17520069. 18581400

SRR17520069. 18581402  
SRR17520069. 18581404  
SRR17520069. 18581406  
SRR17520069. 18581408  
SRR17520069. 18581410  
SRR17520069. 18581412  
SRR17520069. 18581414  
SRR17520069. 18581416  
SRR17520069. 18581418  
SRR17520069. 18581420  
SRR17520069. 18581422  
SRR17520069. 18581424  
SRR17520069. 18581426  
SRR17520069. 18581428  
SRR17520069. 18581432  
SRR17520069. 18581571  
SRR17520069. 18581573  
SRR17520069. 18581581  
SRR17520069. 18581583  
SRR17520069. 18581589  
SRR17520069. 18582236  
SRR17520069. 18582242  
SRR17520069. 18582246  
SRR17520069. 18587804  
SRR17520069. 18587806  
SRR17520069. 18587808  
SRR17520069. 18587810  
SRR17520069. 18592530  
SRR17520069. 18592532  
SRR17520069. 18592534  
SRR17520069. 18592536  
SRR17520069. 18592538  
SRR17520069. 18592540  
SRR17520069. 18592542  
SRR17520069. 18592544  
SRR17520069. 18592546  
SRR17520069. 18592548  
SRR17520069. 18592550  
SRR17520069. 18592552  
SRR17520069. 18592554  
SRR17520069. 18592556  
SRR17520069. 18592558  
SRR17520069. 18592560  
SRR17520069. 18592562  
SRR17520069. 18592564  
SRR17520069. 18592566  
SRR17520069. 18592568

SRR17520069. 18592570  
SRR17520069. 18592572  
SRR17520069. 18592574  
SRR17520069. 18595945  
SRR17520069. 18595947  
SRR17520069. 18595949  
SRR17520069. 18595951  
SRR17520069. 18595953  
SRR17520069. 18595955  
SRR17520069. 18595957  
SRR17520069. 18595959  
SRR17520069. 18595961  
SRR17520069. 18595963  
SRR17520069. 18595965  
SRR17520069. 18595969  
SRR17520069. 18595973  
SRR17520069. 18595975  
SRR17520069. 18595977  
SRR17520069. 18595979  
SRR17520069. 18595981  
SRR17520069. 18595985  
SRR17520069. 18595987  
SRR17520069. 18595989  
SRR17520069. 18595991  
SRR17520069. 18595993  
SRR17520069. 18608545  
SRR17520069. 18608547  
SRR17520069. 18614272  
SRR17520069. 18614274  
SRR17520069. 18614276  
SRR17520069. 18614278  
SRR17520069. 18614280  
SRR17520069. 18616594  
SRR17520069. 18623299  
SRR17520069. 18623303  
SRR17520069. 18623305  
SRR17520069. 18623307  
SRR17520069. 18623309  
SRR17520069. 18623313  
SRR17520069. 18623883  
SRR17520069. 18623885  
SRR17520069. 18623887  
SRR17520069. 18623889  
SRR17520069. 18623891  
SRR17520069. 18623893  
SRR17520069. 18623895  
SRR17520069. 18623897

SRR17520069. 18623899  
SRR17520069. 18624942  
SRR17520069. 18624944  
SRR17520069. 18626592  
SRR17520069. 18626594  
SRR17520069. 18626596  
SRR17520069. 18626598  
SRR17520069. 18626600  
SRR17520069. 18626602  
SRR17520069. 18626604  
SRR17520069. 18626606  
SRR17520069. 18626608  
SRR17520069. 18626612  
SRR17520069. 18626614  
SRR17520069. 18626616  
SRR17520069. 18626618  
SRR17520069. 18626620  
SRR17520069. 18626622  
SRR17520069. 18626624  
SRR17520069. 18626626  
SRR17520069. 18626628  
SRR17520069. 18626630  
SRR17520069. 18626632  
SRR17520069. 18626634  
SRR17520069. 18626636  
SRR17520069. 18629084  
SRR17520069. 18629088  
SRR17520069. 18629090  
SRR17520069. 18636638  
SRR17520069. 18636640  
SRR17520069. 18636642  
SRR17520069. 18636644  
SRR17520069. 18636646  
SRR17520069. 18636648  
SRR17520069. 18636650  
SRR17520069. 18636652  
SRR17520069. 18636654  
SRR17520069. 18636656  
SRR17520069. 18636658  
SRR17520069. 18636662  
SRR17520069. 18636664  
SRR17520069. 18636666  
SRR17520069. 18636668  
SRR17520069. 18636670  
SRR17520069. 18636672  
SRR17520069. 18636674  
SRR17520069. 18636676

SRR17520069. 18636678  
SRR17520069. 18636680  
SRR17520069. 18636682  
SRR17520069. 18636684  
SRR17520069. 18636686  
SRR17520069. 18636688  
SRR17520069. 18636690  
SRR17520069. 18636692  
SRR17520069. 18636694  
SRR17520069. 18638671  
SRR17520069. 18638673  
SRR17520069. 18638675  
SRR17520069. 18638677  
SRR17520069. 18638679  
SRR17520069. 18638681  
SRR17520069. 18638683  
SRR17520069. 18638685  
SRR17520069. 18638687  
SRR17520069. 18638689  
SRR17520069. 18640338  
SRR17520069. 18640340  
SRR17520069. 18640342  
SRR17520069. 18640344  
SRR17520069. 18640346  
SRR17520069. 18640348  
SRR17520069. 18640350  
SRR17520069. 18640352  
SRR17520069. 18640354  
SRR17520069. 18640356  
SRR17520069. 18640358  
SRR17520069. 18640624  
SRR17520069. 18640626  
SRR17520069. 18640628  
SRR17520069. 18640630  
SRR17520069. 18640632  
SRR17520069. 18640634  
SRR17520069. 18640636  
SRR17520069. 18644113  
SRR17520069. 18644115  
SRR17520069. 18644117  
SRR17520069. 18644119  
SRR17520069. 18646295  
SRR17520069. 18651748  
SRR17520069. 18651750  
SRR17520069. 18651752  
SRR17520069. 18651754  
SRR17520069. 18651756

SRR17520069. 18651758  
SRR17520069. 18651760  
SRR17520069. 18651762  
SRR17520069. 18651764  
SRR17520069. 18651766  
SRR17520069. 18651768  
SRR17520069. 18651770  
SRR17520069. 18651774  
SRR17520069. 18651776  
SRR17520069. 18651780  
SRR17520069. 18651782  
SRR17520069. 18651784  
SRR17520069. 18651786  
SRR17520069. 18651788  
SRR17520069. 18651790  
SRR17520069. 18651792  
SRR17520069. 18652373  
SRR17520069. 18665280  
SRR17520069. 18665282  
SRR17520069. 18665284  
SRR17520069. 18665286  
SRR17520069. 18665288  
SRR17520069. 18665290  
SRR17520069. 18665292  
SRR17520069. 18665294  
SRR17520069. 18665298  
SRR17520069. 18665300  
SRR17520069. 18670646  
SRR17520069. 18670648  
SRR17520069. 18670650  
SRR17520069. 18670652  
SRR17520069. 18670654  
SRR17520069. 18670656  
SRR17520069. 18670658  
SRR17520069. 18670660  
SRR17520069. 18670662  
SRR17520069. 18670664  
SRR17520069. 18670666  
SRR17520069. 18670668  
SRR17520069. 18670670  
SRR17520069. 18670672  
SRR17520069. 18670674  
SRR17520069. 18670676  
SRR17520069. 18670678  
SRR17520069. 18670680  
SRR17520069. 18670682  
SRR17520069. 18670684

SRR17520069. 18670686  
SRR17520069. 18670688  
SRR17520069. 18670690  
SRR17520069. 18670692  
SRR17520069. 18670694  
SRR17520069. 18670696  
SRR17520069. 18670698  
SRR17520069. 18670700  
SRR17520069. 18670702  
SRR17520069. 18670704  
SRR17520069. 18670706  
SRR17520069. 18673496  
SRR17520069. 18673498  
SRR17520069. 18673500  
SRR17520069. 18673502  
SRR17520069. 18673506  
SRR17520069. 18673508  
SRR17520069. 18673510  
SRR17520069. 18673512  
SRR17520069. 18673514  
SRR17520069. 18673516  
SRR17520069. 18673518  
SRR17520069. 18673520  
SRR17520069. 18673522  
SRR17520069. 18673526  
SRR17520069. 18673528  
SRR17520069. 18673530  
SRR17520069. 18673532  
SRR17520069. 18673534  
SRR17520069. 18673536  
SRR17520069. 18673538  
SRR17520069. 18673540  
SRR17520069. 18673542  
SRR17520069. 18673544  
SRR17520069. 18673546  
SRR17520069. 18673548  
SRR17520069. 18673550  
SRR17520069. 18673552  
SRR17520069. 18673554  
SRR17520069. 18684888  
SRR17520069. 18684890  
SRR17520069. 18684892  
SRR17520069. 18684894  
SRR17520069. 18684896  
SRR17520069. 18689228  
SRR17520069. 18689230  
SRR17520069. 18689232

SRR17520069. 18689234  
SRR17520069. 18689238  
SRR17520069. 18689240  
SRR17520069. 18689242  
SRR17520069. 18689244  
SRR17520069. 18689320  
SRR17520069. 18689322  
SRR17520069. 18689324  
SRR17520069. 18689326  
SRR17520069. 18689328  
SRR17520069. 18689330  
SRR17520069. 18689332  
SRR17520069. 18689334  
SRR17520069. 18689336  
SRR17520069. 18689338  
SRR17520069. 18689340  
SRR17520069. 18689342  
SRR17520069. 18689344  
SRR17520069. 18689346  
SRR17520069. 18689348  
SRR17520069. 18689350  
SRR17520069. 18689352  
SRR17520069. 18689354  
SRR17520069. 18689356  
SRR17520069. 18689358  
SRR17520069. 18689362  
SRR17520069. 18689364  
SRR17520069. 18689366  
SRR17520069. 18689368  
SRR17520069. 18690321  
SRR17520069. 18690323  
SRR17520069. 18690325  
SRR17520069. 18691546  
SRR17520069. 18691548  
SRR17520069. 18691550  
SRR17520069. 18691552  
SRR17520069. 18691554  
SRR17520069. 18691556  
SRR17520069. 18691558  
SRR17520069. 18691560  
SRR17520069. 18693971  
SRR17520069. 18693973  
SRR17520069. 18693975  
SRR17520069. 18693977  
SRR17520069. 18693979  
SRR17520069. 18697165  
SRR17520069. 18697167



SRR17520069. 18697169  
SRR17520069. 18697171  
SRR17520069. 18697173  
SRR17520069. 18701958  
SRR17520069. 18703539  
SRR17520069. 18703541  
SRR17520069. 18703543  
SRR17520069. 18703545  
SRR17520069. 18703547  
SRR17520069. 18703549  
SRR17520069. 18703553  
SRR17520069. 18703555  
SRR17520069. 18703559  
SRR17520069. 18703561  
SRR17520069. 18703563  
SRR17520069. 18703565  
SRR17520069. 18704130  
SRR17520069. 18704132  
SRR17520069. 18704134  
SRR17520069. 18704136  
SRR17520069. 18704140  
SRR17520069. 18704142  
SRR17520069. 18704144  
SRR17520069. 18704148  
SRR17520069. 18704150  
SRR17520069. 18704152  
SRR17520069. 18704154  
SRR17520069. 18704156  
SRR17520069. 18704158  
SRR17520069. 18704160  
SRR17520069. 18704162  
SRR17520069. 18704164  
SRR17520069. 18704166  
SRR17520069. 18704168  
SRR17520069. 18706871  
SRR17520069. 18709212  
SRR17520069. 18709214  
SRR17520069. 18710327  
SRR17520069. 18710329  
SRR17520069. 18710331  
SRR17520069. 18710333  
SRR17520069. 18710335  
SRR17520069. 18710337  
SRR17520069. 18710339  
SRR17520069. 18710341  
SRR17520069. 18710343  
SRR17520069. 18710345

SRR17520069. 18710347  
SRR17520069. 18710349  
SRR17520069. 18710351  
SRR17520069. 18710353  
SRR17520069. 18710355  
SRR17520069. 18710357  
SRR17520069. 18710359  
SRR17520069. 18710361  
SRR17520069. 18710363  
SRR17520069. 18710365  
SRR17520069. 18710367  
SRR17520069. 18710369  
SRR17520069. 18710371  
SRR17520069. 18710373  
SRR17520069. 18710375  
SRR17520069. 18710377  
SRR17520069. 18710379  
SRR17520069. 18710381  
SRR17520069. 18710383  
SRR17520069. 18710385  
SRR17520069. 18710387  
SRR17520069. 18710389  
SRR17520069. 18710391  
SRR17520069. 18710393  
SRR17520069. 18710395  
SRR17520069. 18710397  
SRR17520069. 18710399  
SRR17520069. 18710401  
SRR17520069. 18710403  
SRR17520069. 18710405  
SRR17520069. 18710407  
SRR17520069. 18710409  
SRR17520069. 18711638  
SRR17520069. 18711640  
SRR17520069. 18711642  
SRR17520069. 18711644  
SRR17520069. 18711646  
SRR17520069. 18711648  
SRR17520069. 18711650  
SRR17520069. 18711652  
SRR17520069. 18711654  
SRR17520069. 18711656  
SRR17520069. 18711658  
SRR17520069. 18711660  
SRR17520069. 18711662  
SRR17520069. 18711664  
SRR17520069. 18711666

SRR17520069. 18711668  
SRR17520069. 18711670  
SRR17520069. 18711672  
SRR17520069. 18711674  
SRR17520069. 18711676  
SRR17520069. 18711678  
SRR17520069. 18711680  
SRR17520069. 18711682  
SRR17520069. 18711684  
SRR17520069. 18711686  
SRR17520069. 18711688  
SRR17520069. 18711690  
SRR17520069. 18713670  
SRR17520069. 18717371  
SRR17520069. 18717373  
SRR17520069. 18717375  
SRR17520069. 18718233  
SRR17520069. 18718235  
SRR17520069. 18718237  
SRR17520069. 18718239  
SRR17520069. 18718243  
SRR17520069. 18720425  
SRR17520069. 18720427  
SRR17520069. 18720429  
SRR17520069. 18720431  
SRR17520069. 18720433  
SRR17520069. 18720435  
SRR17520069. 18720437  
SRR17520069. 18720439  
SRR17520069. 18720441  
SRR17520069. 18720443  
SRR17520069. 18720445  
SRR17520069. 18720447  
SRR17520069. 18720449  
SRR17520069. 18720451  
SRR17520069. 18720453  
SRR17520069. 18720455  
SRR17520069. 18720457  
SRR17520069. 18720459  
SRR17520069. 18720461  
SRR17520069. 18720463  
SRR17520069. 18720465  
SRR17520069. 18720467  
SRR17520069. 18720469  
SRR17520069. 18720471  
SRR17520069. 18720473  
SRR17520069. 18720475

SRR17520069. 18720477  
SRR17520069. 18720479  
SRR17520069. 18720481  
SRR17520069. 18720483  
SRR17520069. 18720485  
SRR17520069. 18720487  
SRR17520069. 18720489  
SRR17520069. 18720491  
SRR17520069. 18720493  
SRR17520069. 18720495  
SRR17520069. 18720497  
SRR17520069. 18720499  
SRR17520069. 18720501  
SRR17520069. 18720503  
SRR17520069. 18720505  
SRR17520069. 18720507  
SRR17520069. 18720509  
SRR17520069. 18720511  
SRR17520069. 18720513  
SRR17520069. 18720517  
SRR17520069. 18720519  
SRR17520069. 18720523  
SRR17520069. 18720525  
SRR17520069. 18720527  
SRR17520069. 18720529  
SRR17520069. 18720931  
SRR17520069. 18720933  
SRR17520069. 18720935  
SRR17520069. 18720937  
SRR17520069. 18720939  
SRR17520069. 18720941  
SRR17520069. 18720943  
SRR17520069. 18720945  
SRR17520069. 18720947  
SRR17520069. 18720949  
SRR17520069. 18720951  
SRR17520069. 18720953  
SRR17520069. 18720955  
SRR17520069. 18720957  
SRR17520069. 18720959  
SRR17520069. 18720961  
SRR17520069. 18720963  
SRR17520069. 18720965  
SRR17520069. 18720967  
SRR17520069. 18720969  
SRR17520069. 18720971  
SRR17520069. 18720973

SRR17520069. 18720975  
SRR17520069. 18720977  
SRR17520069. 18720979  
SRR17520069. 18720981  
SRR17520069. 18720983  
SRR17520069. 18720985  
SRR17520069. 18720987  
SRR17520069. 18720989  
SRR17520069. 18720991  
SRR17520069. 18720993  
SRR17520069. 18720995  
SRR17520069. 18720997  
SRR17520069. 18720999  
SRR17520069. 18721001  
SRR17520069. 18721003  
SRR17520069. 18721005  
SRR17520069. 18721007  
SRR17520069. 18721009  
SRR17520069. 18721011  
SRR17520069. 18721013  
SRR17520069. 18721015  
SRR17520069. 18721017  
SRR17520069. 18721298  
SRR17520069. 18721300  
SRR17520069. 18721302  
SRR17520069. 18721304  
SRR17520069. 18721306  
SRR17520069. 18721308  
SRR17520069. 18721310  
SRR17520069. 18721312  
SRR17520069. 18721314  
SRR17520069. 18721316  
SRR17520069. 18721318  
SRR17520069. 18727881  
SRR17520069. 18727885  
SRR17520069. 18727887  
SRR17520069. 18727889  
SRR17520069. 18727891  
SRR17520069. 18727893  
SRR17520069. 18727895  
SRR17520069. 18727897  
SRR17520069. 18733503  
SRR17520069. 18733505  
SRR17520069. 18733507  
SRR17520069. 18733509  
SRR17520069. 18733511  
SRR17520069. 18733513

SRR17520069. 18733515  
SRR17520069. 18733517  
SRR17520069. 18733519  
SRR17520069. 18733521  
SRR17520069. 18733523  
SRR17520069. 18733525  
SRR17520069. 18733527  
SRR17520069. 18733529  
SRR17520069. 18733531  
SRR17520069. 18733533  
SRR17520069. 18733535  
SRR17520069. 18733537  
SRR17520069. 18733539  
SRR17520069. 18733541  
SRR17520069. 18733543  
SRR17520069. 18733545  
SRR17520069. 18733547  
SRR17520069. 18733549  
SRR17520069. 18733551  
SRR17520069. 18733553  
SRR17520069. 18733555  
SRR17520069. 18733557  
SRR17520069. 18733559  
SRR17520069. 18733561  
SRR17520069. 18733563  
SRR17520069. 18733565  
SRR17520069. 18733567  
SRR17520069. 18733569  
SRR17520069. 18733571  
SRR17520069. 18733573  
SRR17520069. 18733575  
SRR17520069. 18733577  
SRR17520069. 18733579  
SRR17520069. 18733581  
SRR17520069. 18733583  
SRR17520069. 18733585  
SRR17520069. 18733587  
SRR17520069. 18733589  
SRR17520069. 18733591  
SRR17520069. 18733593  
SRR17520069. 18733595  
SRR17520069. 18733597  
SRR17520069. 18733599  
SRR17520069. 18733601  
SRR17520069. 18733603  
SRR17520069. 18733605  
SRR17520069. 18733607

SRR17520069. 18733609  
SRR17520069. 18733611  
SRR17520069. 18733613  
SRR17520069. 18733615  
SRR17520069. 18733617  
SRR17520069. 18733619  
SRR17520069. 18733621  
SRR17520069. 18733623  
SRR17520069. 18733625  
SRR17520069. 18733627  
SRR17520069. 18733629  
SRR17520069. 18733631  
SRR17520069. 18733633  
SRR17520069. 18733635  
SRR17520069. 18733637  
SRR17520069. 18733639  
SRR17520069. 18733641  
SRR17520069. 18733643  
SRR17520069. 18733645  
SRR17520069. 18733647  
SRR17520069. 18733649  
SRR17520069. 18733651  
SRR17520069. 18733653  
SRR17520069. 18733655  
SRR17520069. 18733657  
SRR17520069. 18733659  
SRR17520069. 18733661  
SRR17520069. 18733663  
SRR17520069. 18733665  
SRR17520069. 18733667  
SRR17520069. 18733669  
SRR17520069. 18733886  
SRR17520069. 18733888  
SRR17520069. 18733890  
SRR17520069. 18733892  
SRR17520069. 18733894  
SRR17520069. 18733896  
SRR17520069. 18733898  
SRR17520069. 18733900  
SRR17520069. 18733902  
SRR17520069. 18733904  
SRR17520069. 18733906  
SRR17520069. 18733908  
SRR17520069. 18738639  
SRR17520069. 18738964  
SRR17520069. 18738966  
SRR17520069. 18738968

SRR17520069. 18738972  
SRR17520069. 18743206  
SRR17520069. 18743208  
SRR17520069. 18743210  
SRR17520069. 18743212  
SRR17520069. 18743214  
SRR17520069. 18743216  
SRR17520069. 18743218  
SRR17520069. 18743220  
SRR17520069. 18743222  
SRR17520069. 18743224  
SRR17520069. 18743226  
SRR17520069. 18743228  
SRR17520069. 18743230  
SRR17520069. 18743232  
SRR17520069. 18743234  
SRR17520069. 18743236  
SRR17520069. 18743238  
SRR17520069. 18743240  
SRR17520069. 18743242  
SRR17520069. 18743244  
SRR17520069. 18743246  
SRR17520069. 18744603  
SRR17520069. 18744605  
SRR17520069. 18744607  
SRR17520069. 18744980  
SRR17520069. 18746686  
SRR17520069. 18747022  
SRR17520069. 18747024  
SRR17520069. 18748118  
SRR17520069. 18748120  
SRR17520069. 18748122  
SRR17520069. 18748124  
SRR17520069. 18748126  
SRR17520069. 18749853  
SRR17520069. 18749855  
SRR17520069. 18749857  
SRR17520069. 18749859  
SRR17520069. 18749861  
SRR17520069. 18756373  
SRR17520069. 18756375  
SRR17520069. 18756377  
SRR17520069. 18756379  
SRR17520069. 18756381  
SRR17520069. 18756383  
SRR17520069. 18756385  
SRR17520069. 18758862



SRR17520069. 18758864  
SRR17520069. 18758866  
SRR17520069. 18758868  
SRR17520069. 18758870  
SRR17520069. 18758872  
SRR17520069. 18758874  
SRR17520069. 18758876  
SRR17520069. 18758878  
SRR17520069. 18758880  
SRR17520069. 18758882  
SRR17520069. 18758884  
SRR17520069. 18758893  
SRR17520069. 18758895  
SRR17520069. 18758901  
SRR17520069. 18758905  
SRR17520069. 18758907  
SRR17520069. 18758909  
SRR17520069. 18758911  
SRR17520069. 18758913  
SRR17520069. 18758915  
SRR17520069. 18758917  
SRR17520069. 18758919  
SRR17520069. 18758921  
SRR17520069. 18758923  
SRR17520069. 18758925  
SRR17520069. 18758927  
SRR17520069. 18758929  
SRR17520069. 18758931  
SRR17520069. 18763803  
SRR17520069. 18763805  
SRR17520069. 18763807  
SRR17520069. 18763809  
SRR17520069. 18764101  
SRR17520069. 18764103  
SRR17520069. 18764105  
SRR17520069. 18764107  
SRR17520069. 18764109  
SRR17520069. 18764111  
SRR17520069. 18764113  
SRR17520069. 18764115  
SRR17520069. 18764117  
SRR17520069. 18764119  
SRR17520069. 18764121  
SRR17520069. 18764123  
SRR17520069. 18764125  
SRR17520069. 18764127  
SRR17520069. 18764129

SRR17520069. 18764131  
SRR17520069. 18765136  
SRR17520069. 18765138  
SRR17520069. 18765140  
SRR17520069. 18765142  
SRR17520069. 18765144  
SRR17520069. 18765146  
SRR17520069. 18765148  
SRR17520069. 18765150  
SRR17520069. 18765152  
SRR17520069. 18765154  
SRR17520069. 18765156  
SRR17520069. 18765158  
SRR17520069. 18765160  
SRR17520069. 18765162  
SRR17520069. 18765164  
SRR17520069. 18765166  
SRR17520069. 18765168  
SRR17520069. 18765170  
SRR17520069. 18765172  
SRR17520069. 18765174  
SRR17520069. 18765176  
SRR17520069. 18765178  
SRR17520069. 18765180  
SRR17520069. 18765182  
SRR17520069. 18765184  
SRR17520069. 18765186  
SRR17520069. 18765188  
SRR17520069. 18765190  
SRR17520069. 18765192  
SRR17520069. 18765194  
SRR17520069. 18765196  
SRR17520069. 18765198  
SRR17520069. 18765200  
SRR17520069. 18765202  
SRR17520069. 18765204  
SRR17520069. 18765206  
SRR17520069. 18765208  
SRR17520069. 18765210  
SRR17520069. 18765212  
SRR17520069. 18765214  
SRR17520069. 18765216  
SRR17520069. 18765218  
SRR17520069. 18765220  
SRR17520069. 18765222  
SRR17520069. 18765224  
SRR17520069. 18765226

SRR17520069. 18765228  
SRR17520069. 18765230  
SRR17520069. 18765232  
SRR17520069. 18765234  
SRR17520069. 18765236  
SRR17520069. 18765238  
SRR17520069. 18765240  
SRR17520069. 18765242  
SRR17520069. 18765244  
SRR17520069. 18765246  
SRR17520069. 18765248  
SRR17520069. 18765250  
SRR17520069. 18765252  
SRR17520069. 18765254  
SRR17520069. 18765256  
SRR17520069. 18765258  
SRR17520069. 18765260  
SRR17520069. 18765262  
SRR17520069. 18765264  
SRR17520069. 18769386  
SRR17520069. 18769388  
SRR17520069. 18769390  
SRR17520069. 18769392  
SRR17520069. 18769394  
SRR17520069. 18769396  
SRR17520069. 18769398  
SRR17520069. 18769400  
SRR17520069. 18769402  
SRR17520069. 18769404  
SRR17520069. 18769406  
SRR17520069. 18769408  
SRR17520069. 18769410  
SRR17520069. 18769412  
SRR17520069. 18769414  
SRR17520069. 18769416  
SRR17520069. 18769418  
SRR17520069. 18769420  
SRR17520069. 18769422  
SRR17520069. 18769424  
SRR17520069. 18769426  
SRR17520069. 18769428  
SRR17520069. 18769430  
SRR17520069. 18769432  
SRR17520069. 18769434  
SRR17520069. 18769436  
SRR17520069. 18769438  
SRR17520069. 18769440

SRR17520069. 18769442  
SRR17520069. 18769444  
SRR17520069. 18769446  
SRR17520069. 18769448  
SRR17520069. 18769450  
SRR17520069. 18769452  
SRR17520069. 18769454  
SRR17520069. 18769456  
SRR17520069. 18769458  
SRR17520069. 18769460  
SRR17520069. 18769462  
SRR17520069. 18769464  
SRR17520069. 18769466  
SRR17520069. 18769468  
SRR17520069. 18769470  
SRR17520069. 18769472  
SRR17520069. 18769474  
SRR17520069. 18769476  
SRR17520069. 18769478  
SRR17520069. 18773937  
SRR17520069. 18773939  
SRR17520069. 18773941  
SRR17520069. 18773943  
SRR17520069. 18773945  
SRR17520069. 18773947  
SRR17520069. 18773949  
SRR17520069. 18773951  
SRR17520069. 18773953  
SRR17520069. 18773955  
SRR17520069. 18773957  
SRR17520069. 18773959  
SRR17520069. 18773961  
SRR17520069. 18773963  
SRR17520069. 18776622  
SRR17520069. 18776624  
SRR17520069. 18776626  
SRR17520069. 18776628  
SRR17520069. 18776630  
SRR17520069. 18776972  
SRR17520069. 18776974  
SRR17520069. 18776976  
SRR17520069. 18776978  
SRR17520069. 18776980  
SRR17520069. 18776982  
SRR17520069. 18776984  
SRR17520069. 18776986  
SRR17520069. 18776988

SRR17520069. 18776990  
SRR17520069. 18776992  
SRR17520069. 18776994  
SRR17520069. 18776996  
SRR17520069. 18776998  
SRR17520069. 18777000  
SRR17520069. 18777002  
SRR17520069. 18777004  
SRR17520069. 18777006  
SRR17520069. 18777008  
SRR17520069. 18777010  
SRR17520069. 18777012  
SRR17520069. 18777014  
SRR17520069. 18777016  
SRR17520069. 18777018  
SRR17520069. 18778076  
SRR17520069. 18778078  
SRR17520069. 18778080  
SRR17520069. 18778082  
SRR17520069. 18778084  
SRR17520069. 18778086  
SRR17520069. 18778088  
SRR17520069. 18778090  
SRR17520069. 18778092  
SRR17520069. 18778094  
SRR17520069. 18778096  
SRR17520069. 18778098  
SRR17520069. 18778100  
SRR17520069. 18778102  
SRR17520069. 18778104  
SRR17520069. 18778106  
SRR17520069. 18778108  
SRR17520069. 18778110  
SRR17520069. 18778112  
SRR17520069. 18778114  
SRR17520069. 18778116  
SRR17520069. 18778118  
SRR17520069. 18778120  
SRR17520069. 18778122  
SRR17520069. 18778124  
SRR17520069. 18778126  
SRR17520069. 18778128  
SRR17520069. 18778130  
SRR17520069. 18778132  
SRR17520069. 18778134  
SRR17520069. 18778136  
SRR17520069. 18778138

SRR17520069. 18778140  
SRR17520069. 18778142  
SRR17520069. 18781832  
SRR17520069. 18781834  
SRR17520069. 18781836  
SRR17520069. 18781838  
SRR17520069. 18781840  
SRR17520069. 18781842  
SRR17520069. 18781844  
SRR17520069. 18781846  
SRR17520069. 18781848  
SRR17520069. 18781850  
SRR17520069. 18781852  
SRR17520069. 18781854  
SRR17520069. 18781856  
SRR17520069. 18781858  
SRR17520069. 18781860  
SRR17520069. 18781947  
SRR17520069. 18786058  
SRR17520069. 18786060  
SRR17520069. 18786062  
SRR17520069. 18786064  
SRR17520069. 18786066  
SRR17520069. 18786068  
SRR17520069. 18786070  
SRR17520069. 18786072  
SRR17520069. 18786074  
SRR17520069. 18786076  
SRR17520069. 18786078  
SRR17520069. 18786080  
SRR17520069. 18786082  
SRR17520069. 18786084  
SRR17520069. 18787664  
SRR17520069. 18787666  
SRR17520069. 18787668  
SRR17520069. 18790730  
SRR17520069. 18790732  
SRR17520069. 18790734  
SRR17520069. 18790736  
SRR17520069. 18790738  
SRR17520069. 18790740  
SRR17520069. 18790742  
SRR17520069. 18790744  
SRR17520069. 18790746  
SRR17520069. 18790748  
SRR17520069. 18790750  
SRR17520069. 18790752

SRR17520069. 18790756  
SRR17520069. 18790758  
SRR17520069. 18790760  
SRR17520069. 18790762  
SRR17520069. 18790764  
SRR17520069. 18790766  
SRR17520069. 18790768  
SRR17520069. 18790770  
SRR17520069. 18795727  
SRR17520069. 18795729  
SRR17520069. 18799778  
SRR17520069. 18799784  
SRR17520069. 18799786  
SRR17520069. 18804105  
SRR17520069. 18804107  
SRR17520069. 18804109  
SRR17520069. 18804111  
SRR17520069. 18804113  
SRR17520069. 18804115  
SRR17520069. 18804117  
SRR17520069. 18804119  
SRR17520069. 18804121  
SRR17520069. 18804123  
SRR17520069. 18804125  
SRR17520069. 18804127  
SRR17520069. 18804129  
SRR17520069. 18804131  
SRR17520069. 18804133  
SRR17520069. 18804135  
SRR17520069. 18804137  
SRR17520069. 18804141  
SRR17520069. 18804143  
SRR17520069. 18804145  
SRR17520069. 18804147  
SRR17520069. 18804149  
SRR17520069. 18804151  
SRR17520069. 18804153  
SRR17520069. 18804155  
SRR17520069. 18804157  
SRR17520069. 18804159  
SRR17520069. 18807221  
SRR17520069. 18807223  
SRR17520069. 18807225  
SRR17520069. 18807227  
SRR17520069. 18807229  
SRR17520069. 18807231  
SRR17520069. 18807235

SRR17520069.18807237  
SRR17520069.18807239  
SRR17520069.18807241  
SRR17520069.18807243  
SRR17520069.18807245  
SRR17520069.18807247  
SRR17520069.18807249  
SRR17520069.18807251  
SRR17520069.18807253  
SRR17520069.18807255  
SRR17520069.18807257  
SRR17520069.18807259  
SRR17520069.18807261  
SRR17520069.18810708  
SRR17520069.18810710  
SRR17520069.18810712  
SRR17520069.18810714  
SRR17520069.18810716  
SRR17520069.18810720  
SRR17520069.18810722  
SRR17520069.18810724  
SRR17520069.18810726  
SRR17520069.18810728  
SRR17520069.18810730  
SRR17520069.18810734  
SRR17520069.18810738  
SRR17520069.18810740  
SRR17520069.18810742  
SRR17520069.18810746  
SRR17520069.18810750  
SRR17520069.18810752  
SRR17520069.18810754  
SRR17520069.18810756  
SRR17520069.18810758  
SRR17520069.18810760  
SRR17520069.18810762  
SRR17520069.18810764  
SRR17520069.18810766  
SRR17520069.18810770  
SRR17520069.18810772  
SRR17520069.18810776  
SRR17520069.18810778  
SRR17520069.18810780  
SRR17520069.18810786  
SRR17520069.18810788  
SRR17520069.18810794  
SRR17520069.18810796



SRR17520069. 18810798  
SRR17520069. 18810806  
SRR17520069. 18810808  
SRR17520069. 18810814  
SRR17520069. 18810816  
SRR17520069. 18810818  
SRR17520069. 18810820  
SRR17520069. 18810824  
SRR17520069. 18810826  
SRR17520069. 18810828  
SRR17520069. 18813017  
SRR17520069. 18813019  
SRR17520069. 18813021  
SRR17520069. 18813023  
SRR17520069. 18813025  
SRR17520069. 18813027  
SRR17520069. 18813029  
SRR17520069. 18813031  
SRR17520069. 18813033  
SRR17520069. 18817474  
SRR17520069. 18817476  
SRR17520069. 18817718  
SRR17520069. 18817720  
SRR17520069. 18817722  
SRR17520069. 18817726  
SRR17520069. 18817728  
SRR17520069. 18817730  
SRR17520069. 18817734  
SRR17520069. 18817736  
SRR17520069. 18817738  
SRR17520069. 18817740  
SRR17520069. 18817742  
SRR17520069. 18817744  
SRR17520069. 18817746  
SRR17520069. 18817748  
SRR17520069. 18817750  
SRR17520069. 18817752  
SRR17520069. 18817754  
SRR17520069. 18817758  
SRR17520069. 18817760  
SRR17520069. 18818205  
SRR17520069. 18818207  
SRR17520069. 18818209  
SRR17520069. 18818211  
SRR17520069. 18818213  
SRR17520069. 18818215  
SRR17520069. 18818217

SRR17520069.18818219  
SRR17520069.18818221  
SRR17520069.18818223  
SRR17520069.18818225  
SRR17520069.18818227  
SRR17520069.18823350  
SRR17520069.18823352  
SRR17520069.18823354  
SRR17520069.18823356  
SRR17520069.18823358  
SRR17520069.18823360  
SRR17520069.18823362  
SRR17520069.18823364  
SRR17520069.18823368  
SRR17520069.18823370  
SRR17520069.18823372  
SRR17520069.18823374  
SRR17520069.18823376  
SRR17520069.18823378  
SRR17520069.18823380  
SRR17520069.18823382  
SRR17520069.18823384  
SRR17520069.18823386  
SRR17520069.18823388  
SRR17520069.18823390  
SRR17520069.18823392  
SRR17520069.18823394  
SRR17520069.18823396  
SRR17520069.18823398  
SRR17520069.18823400  
SRR17520069.18823402  
SRR17520069.18823404  
SRR17520069.18823406  
SRR17520069.18823408  
SRR17520069.18823410  
SRR17520069.18823412  
SRR17520069.18823414  
SRR17520069.18823418  
SRR17520069.18823420  
SRR17520069.18823422  
SRR17520069.18823424  
SRR17520069.18823426  
SRR17520069.18823428  
SRR17520069.18823430  
SRR17520069.18823949  
SRR17520069.18823951  
SRR17520069.18823953

SRR17520069. 18823955  
SRR17520069. 18823957  
SRR17520069. 18823959  
SRR17520069. 18823961  
SRR17520069. 18823963  
SRR17520069. 18823965  
SRR17520069. 18823967  
SRR17520069. 18823971  
SRR17520069. 18823973  
SRR17520069. 18823975  
SRR17520069. 18823977  
SRR17520069. 18823979  
SRR17520069. 18823981  
SRR17520069. 18823983  
SRR17520069. 18823985  
SRR17520069. 18823987  
SRR17520069. 18823989  
SRR17520069. 18823991  
SRR17520069. 18823993  
SRR17520069. 18823995  
SRR17520069. 18823997  
SRR17520069. 18823999  
SRR17520069. 18824001  
SRR17520069. 18824003  
SRR17520069. 18824007  
SRR17520069. 18824009  
SRR17520069. 18824011  
SRR17520069. 18824013  
SRR17520069. 18824015  
SRR17520069. 18824017  
SRR17520069. 18824019  
SRR17520069. 18824021  
SRR17520069. 18824023  
SRR17520069. 18824025  
SRR17520069. 18824027  
SRR17520069. 18824029  
SRR17520069. 18824031  
SRR17520069. 18824033  
SRR17520069. 18824035  
SRR17520069. 18824037  
SRR17520069. 18824039  
SRR17520069. 18824041  
SRR17520069. 18824043  
SRR17520069. 18824045  
SRR17520069. 18824047  
SRR17520069. 18824049  
SRR17520069. 18824051

SRR17520069.18824053  
SRR17520069.18824055  
SRR17520069.18824059  
SRR17520069.18824061  
SRR17520069.18824063  
SRR17520069.18824065  
SRR17520069.18824067  
SRR17520069.18824071  
SRR17520069.18824073  
SRR17520069.18824075  
SRR17520069.18824077  
SRR17520069.18824079  
SRR17520069.18824081  
SRR17520069.18824083  
SRR17520069.18824085  
SRR17520069.18824087  
SRR17520069.18824089  
SRR17520069.18824095  
SRR17520069.18824097  
SRR17520069.18824099  
SRR17520069.18824101  
SRR17520069.18824103  
SRR17520069.18824105  
SRR17520069.18824935  
SRR17520069.18824937  
SRR17520069.18824939  
SRR17520069.18824941  
SRR17520069.18831267  
SRR17520069.18831269  
SRR17520069.18831271  
SRR17520069.18831273  
SRR17520069.18831558  
SRR17520069.18831560  
SRR17520069.18831562  
SRR17520069.18831564  
SRR17520069.18831566  
SRR17520069.18835329  
SRR17520069.18835331  
SRR17520069.18835333  
SRR17520069.18835335  
SRR17520069.18835337  
SRR17520069.18835339  
SRR17520069.18835341  
SRR17520069.18835343  
SRR17520069.18835345  
SRR17520069.18835349  
SRR17520069.18835351

SRR17520069.18835353  
SRR17520069.18835355  
SRR17520069.18835357  
SRR17520069.18835359  
SRR17520069.18835363  
SRR17520069.18835365  
SRR17520069.18835367  
SRR17520069.18835369  
SRR17520069.18835371  
SRR17520069.18835373  
SRR17520069.18836501  
SRR17520069.18836503  
SRR17520069.18836505  
SRR17520069.18836507  
SRR17520069.18836509  
SRR17520069.18836511  
SRR17520069.18836513  
SRR17520069.18836515  
SRR17520069.18836517  
SRR17520069.18836519  
SRR17520069.18836521  
SRR17520069.18836523  
SRR17520069.18836525  
SRR17520069.18836527  
SRR17520069.18836529  
SRR17520069.18836531  
SRR17520069.18836533  
SRR17520069.18836535  
SRR17520069.18836537  
SRR17520069.18836539  
SRR17520069.18836541  
SRR17520069.18836543  
SRR17520069.18836545  
SRR17520069.18836547  
SRR17520069.18836549  
SRR17520069.18836551  
SRR17520069.18836553  
SRR17520069.18836555  
SRR17520069.18836557  
SRR17520069.18836559  
SRR17520069.18836561  
SRR17520069.18836563  
SRR17520069.18836565  
SRR17520069.18836567  
SRR17520069.18837318  
SRR17520069.18837320  
SRR17520069.18837322

SRR17520069.18837324  
SRR17520069.18837326  
SRR17520069.18837328  
SRR17520069.18837330  
SRR17520069.18837332  
SRR17520069.18839100  
SRR17520069.18839102  
SRR17520069.18839104  
SRR17520069.18839106  
SRR17520069.18839108  
SRR17520069.18839110  
SRR17520069.18839112  
SRR17520069.18839114  
SRR17520069.18839116  
SRR17520069.18839118  
SRR17520069.18839120  
SRR17520069.18839122  
SRR17520069.18839124  
SRR17520069.18839126  
SRR17520069.18839128  
SRR17520069.18839132  
SRR17520069.18839134  
SRR17520069.18839136  
SRR17520069.18839138  
SRR17520069.18839140  
SRR17520069.18839142  
SRR17520069.18839144  
SRR17520069.18839146  
SRR17520069.18839148  
SRR17520069.18839150  
SRR17520069.18839152  
SRR17520069.18839154  
SRR17520069.18839158  
SRR17520069.18839162  
SRR17520069.18839164  
SRR17520069.18839166  
SRR17520069.18839170  
SRR17520069.18839172  
SRR17520069.18839174  
SRR17520069.18839176  
SRR17520069.18839178  
SRR17520069.18839180  
SRR17520069.18839182  
SRR17520069.18839184  
SRR17520069.18839186  
SRR17520069.18839188  
SRR17520069.18839190

SRR17520069.18839192  
SRR17520069.18839194  
SRR17520069.18839196  
SRR17520069.18839198  
SRR17520069.18839200  
SRR17520069.18839202  
SRR17520069.18839204  
SRR17520069.18839206  
SRR17520069.18839208  
SRR17520069.18839210  
SRR17520069.18839212  
SRR17520069.18839214  
SRR17520069.18839216  
SRR17520069.18839218  
SRR17520069.18839220  
SRR17520069.18839226  
SRR17520069.18839228  
SRR17520069.18845071  
SRR17520069.18845073  
SRR17520069.18845075  
SRR17520069.18845077  
SRR17520069.18845079  
SRR17520069.18845081  
SRR17520069.18845083  
SRR17520069.18845085  
SRR17520069.18845087  
SRR17520069.18845089  
SRR17520069.18845091  
SRR17520069.18845093  
SRR17520069.18845095  
SRR17520069.18845097  
SRR17520069.18845099  
SRR17520069.18845101  
SRR17520069.18845103  
SRR17520069.18845105  
SRR17520069.18845107  
SRR17520069.18845109  
SRR17520069.18845113  
SRR17520069.18845115  
SRR17520069.18845117  
SRR17520069.18845119  
SRR17520069.18845121  
SRR17520069.18845123  
SRR17520069.18845125  
SRR17520069.18845127  
SRR17520069.18845129  
SRR17520069.18845131

SRR17520069.18845133  
SRR17520069.18845135  
SRR17520069.18845137  
SRR17520069.18845139  
SRR17520069.18845141  
SRR17520069.18845143  
SRR17520069.18845145  
SRR17520069.18845147  
SRR17520069.18845149  
SRR17520069.18845151  
SRR17520069.18845153  
SRR17520069.18845155  
SRR17520069.18848479  
SRR17520069.18848481  
SRR17520069.18848483  
SRR17520069.18854056  
SRR17520069.18854058  
SRR17520069.18854060  
SRR17520069.18854062  
SRR17520069.18854064  
SRR17520069.18854066  
SRR17520069.18854068  
SRR17520069.18861675  
SRR17520069.18861677  
SRR17520069.18861679  
SRR17520069.18861681  
SRR17520069.18861683  
SRR17520069.18861685  
SRR17520069.18861687  
SRR17520069.18861689  
SRR17520069.18861691  
SRR17520069.18861693  
SRR17520069.18861695  
SRR17520069.18861697  
SRR17520069.18861699  
SRR17520069.18861701  
SRR17520069.18861703  
SRR17520069.18861705  
SRR17520069.18861707  
SRR17520069.18861709  
SRR17520069.18861711  
SRR17520069.18861713  
SRR17520069.18892038  
SRR17520069.18892040  
SRR17520069.18892042  
SRR17520069.18892044  
SRR17520069.18892046



SRR17520069. 18892048  
SRR17520069. 18892050  
SRR17520069. 18892052  
SRR17520069. 18892054  
SRR17520069. 18894648  
SRR17520069. 18898137  
SRR17520069. 18906444  
SRR17520069. 18906446  
SRR17520069. 18906448  
SRR17520069. 18906450  
SRR17520069. 18906452  
SRR17520069. 18906454  
SRR17520069. 18906456  
SRR17520069. 18906458  
SRR17520069. 18906460  
SRR17520069. 18906462  
SRR17520069. 18906464  
SRR17520069. 18906466  
SRR17520069. 18906468  
SRR17520069. 18906472  
SRR17520069. 18906476  
SRR17520069. 18906478  
SRR17520069. 18906480  
SRR17520069. 18906484  
SRR17520069. 18906486  
SRR17520069. 18906488  
SRR17520069. 18906490  
SRR17520069. 18906492  
SRR17520069. 18906494  
SRR17520069. 18906496  
SRR17520069. 18906498  
SRR17520069. 18906500  
SRR17520069. 18906502  
SRR17520069. 18906504  
SRR17520069. 18906506  
SRR17520069. 18906508  
SRR17520069. 18906510  
SRR17520069. 18906512  
SRR17520069. 18906514  
SRR17520069. 18906516  
SRR17520069. 18906520  
SRR17520069. 18906522  
SRR17520069. 18906524  
SRR17520069. 18912663  
SRR17520069. 18912665  
SRR17520069. 18912667  
SRR17520069. 18912669

SRR17520069. 18912671  
SRR17520069. 18912673  
SRR17520069. 18912675  
SRR17520069. 18912677  
SRR17520069. 18912679  
SRR17520069. 18912681  
SRR17520069. 18912683  
SRR17520069. 18914947  
SRR17520069. 18915100  
SRR17520069. 18915106  
SRR17520069. 18915110  
SRR17520069. 18915112  
SRR17520069. 18915118  
SRR17520069. 18915120  
SRR17520069. 18917386  
SRR17520069. 18917388  
SRR17520069. 18917390  
SRR17520069. 18917392  
SRR17520069. 18917394  
SRR17520069. 18917396  
SRR17520069. 18917398  
SRR17520069. 18917400  
SRR17520069. 18917402  
SRR17520069. 18917404  
SRR17520069. 18917406  
SRR17520069. 18917410  
SRR17520069. 18917412  
SRR17520069. 18917414  
SRR17520069. 18917416  
SRR17520069. 18917420  
SRR17520069. 18917424  
SRR17520069. 18919229  
SRR17520069. 18919231  
SRR17520069. 18919233  
SRR17520069. 18919235  
SRR17520069. 18919237  
SRR17520069. 18919239  
SRR17520069. 18919241  
SRR17520069. 18919243  
SRR17520069. 18919245  
SRR17520069. 18919247  
SRR17520069. 18919249  
SRR17520069. 18919251  
SRR17520069. 18919253  
SRR17520069. 18919255  
SRR17520069. 18919257  
SRR17520069. 18919259

SRR17520069. 18919261  
SRR17520069. 18919263  
SRR17520069. 18919265  
SRR17520069. 18919267  
SRR17520069. 18919269  
SRR17520069. 18919271  
SRR17520069. 18919273  
SRR17520069. 18919275  
SRR17520069. 18919277  
SRR17520069. 18919279  
SRR17520069. 18919281  
SRR17520069. 18919283  
SRR17520069. 18919285  
SRR17520069. 18919287  
SRR17520069. 18919289  
SRR17520069. 18919291  
SRR17520069. 18919293  
SRR17520069. 18919295  
SRR17520069. 18919297  
SRR17520069. 18919299  
SRR17520069. 18919301  
SRR17520069. 18919303  
SRR17520069. 18919305  
SRR17520069. 18919307  
SRR17520069. 18919309  
SRR17520069. 18919311  
SRR17520069. 18919313  
SRR17520069. 18919315  
SRR17520069. 18919317  
SRR17520069. 18919319  
SRR17520069. 18919321  
SRR17520069. 18919323  
SRR17520069. 18919325  
SRR17520069. 18919327  
SRR17520069. 18919329  
SRR17520069. 18919331  
SRR17520069. 18919333  
SRR17520069. 18919335  
SRR17520069. 18919337  
SRR17520069. 18919339  
SRR17520069. 18919341  
SRR17520069. 18919343  
SRR17520069. 18919345  
SRR17520069. 18919347  
SRR17520069. 18919349  
SRR17520069. 18919351  
SRR17520069. 18919353

SRR17520069. 18919355  
SRR17520069. 18919359  
SRR17520069. 18919361  
SRR17520069. 18919363  
SRR17520069. 18919365  
SRR17520069. 18919367  
SRR17520069. 18919369  
SRR17520069. 18919371  
SRR17520069. 18919373  
SRR17520069. 18919375  
SRR17520069. 18919377  
SRR17520069. 18919379  
SRR17520069. 18919381  
SRR17520069. 18919383  
SRR17520069. 18919385  
SRR17520069. 18919387  
SRR17520069. 18919389  
SRR17520069. 18919391  
SRR17520069. 18919393  
SRR17520069. 18935044  
SRR17520069. 18935046  
SRR17520069. 18935048  
SRR17520069. 18935050  
SRR17520069. 18935052  
SRR17520069. 18935056  
SRR17520069. 18935058  
SRR17520069. 18935060  
SRR17520069. 18935062  
SRR17520069. 18935064  
SRR17520069. 18935066  
SRR17520069. 18935068  
SRR17520069. 18935070  
SRR17520069. 18935074  
SRR17520069. 18935076  
SRR17520069. 18935078  
SRR17520069. 18935080  
SRR17520069. 18935082  
SRR17520069. 18935084  
SRR17520069. 18935086  
SRR17520069. 18935088  
SRR17520069. 18935092  
SRR17520069. 18935098  
SRR17520069. 18935100  
SRR17520069. 18935102  
SRR17520069. 18935104  
SRR17520069. 18935108  
SRR17520069. 18935110

SRR17520069. 18935112  
SRR17520069. 18940371  
SRR17520069. 18940373  
SRR17520069. 18945074  
SRR17520069. 18945076  
SRR17520069. 18945078  
SRR17520069. 18945080  
SRR17520069. 18945084  
SRR17520069. 18945086  
SRR17520069. 18945088  
SRR17520069. 18945090  
SRR17520069. 18945092  
SRR17520069. 18945094  
SRR17520069. 18945100  
SRR17520069. 18945102  
SRR17520069. 18945104  
SRR17520069. 18945106  
SRR17520069. 18945108  
SRR17520069. 18945110  
SRR17520069. 18945112  
SRR17520069. 18945114  
SRR17520069. 18945116  
SRR17520069. 18945118  
SRR17520069. 18945120  
SRR17520069. 18945122  
SRR17520069. 18945124  
SRR17520069. 18945126  
SRR17520069. 18945128  
SRR17520069. 18945130  
SRR17520069. 18948000  
SRR17520069. 18948002  
SRR17520069. 18948004  
SRR17520069. 18948006  
SRR17520069. 18948008  
SRR17520069. 18948010  
SRR17520069. 18948012  
SRR17520069. 18948014  
SRR17520069. 18948016  
SRR17520069. 18948018  
SRR17520069. 18948020  
SRR17520069. 18948022  
SRR17520069. 18948024  
SRR17520069. 18948026  
SRR17520069. 18948028  
SRR17520069. 18948030  
SRR17520069. 18948032  
SRR17520069. 18948034

SRR17520069. 18948038  
SRR17520069. 18948040  
SRR17520069. 18948042  
SRR17520069. 18948044  
SRR17520069. 18948046  
SRR17520069. 18948048  
SRR17520069. 18948050  
SRR17520069. 18948052  
SRR17520069. 18948054  
SRR17520069. 18948056  
SRR17520069. 18948058  
SRR17520069. 18948060  
SRR17520069. 18948062  
SRR17520069. 18948064  
SRR17520069. 18948066  
SRR17520069. 18948068  
SRR17520069. 18948070  
SRR17520069. 18948072  
SRR17520069. 18948074  
SRR17520069. 18948076  
SRR17520069. 18948078  
SRR17520069. 18948519  
SRR17520069. 18948521  
SRR17520069. 18948523  
SRR17520069. 18948525  
SRR17520069. 18948529  
SRR17520069. 18948531  
SRR17520069. 18948535  
SRR17520069. 18948537  
SRR17520069. 18948539  
SRR17520069. 18948541  
SRR17520069. 18948543  
SRR17520069. 18948545  
SRR17520069. 18948547  
SRR17520069. 18948549  
SRR17520069. 18948551  
SRR17520069. 18948553  
SRR17520069. 18948555  
SRR17520069. 18948557  
SRR17520069. 18948559  
SRR17520069. 18948561  
SRR17520069. 18948567  
SRR17520069. 18948569  
SRR17520069. 18948575  
SRR17520069. 18948577  
SRR17520069. 18949139  
SRR17520069. 18949141

SRR17520069. 18949143  
SRR17520069. 18949145  
SRR17520069. 18949147  
SRR17520069. 18949149  
SRR17520069. 18949151  
SRR17520069. 18949153  
SRR17520069. 18949155  
SRR17520069. 18949157  
SRR17520069. 18949161  
SRR17520069. 18949163  
SRR17520069. 18949165  
SRR17520069. 18949169  
SRR17520069. 18949171  
SRR17520069. 18949173  
SRR17520069. 18949175  
SRR17520069. 18949177  
SRR17520069. 18949179  
SRR17520069. 18949181  
SRR17520069. 18959728  
SRR17520069. 18959730  
SRR17520069. 18959732  
SRR17520069. 18959734  
SRR17520069. 18959736  
SRR17520069. 18961655  
SRR17520069. 18961657  
SRR17520069. 18961659  
SRR17520069. 18961661  
SRR17520069. 18961663  
SRR17520069. 18961665  
SRR17520069. 18961667  
SRR17520069. 18961669  
SRR17520069. 18961671  
SRR17520069. 18961673  
SRR17520069. 18961675  
SRR17520069. 18961677  
SRR17520069. 18961679  
SRR17520069. 18961683  
SRR17520069. 18961685  
SRR17520069. 18961687  
SRR17520069. 18961689  
SRR17520069. 18961691  
SRR17520069. 18961693  
SRR17520069. 18961695  
SRR17520069. 18961697  
SRR17520069. 18961699  
SRR17520069. 18961701  
SRR17520069. 18961703

SRR17520069. 18961707  
SRR17520069. 18961709  
SRR17520069. 18961711  
SRR17520069. 18961713  
SRR17520069. 18961715  
SRR17520069. 18961717  
SRR17520069. 18961719  
SRR17520069. 18961721  
SRR17520069. 18961723  
SRR17520069. 18961725  
SRR17520069. 18961727  
SRR17520069. 18961729  
SRR17520069. 18961731  
SRR17520069. 18961733  
SRR17520069. 18961737  
SRR17520069. 18961739  
SRR17520069. 18961741  
SRR17520069. 18961743  
SRR17520069. 18961745  
SRR17520069. 18961747  
SRR17520069. 18961749  
SRR17520069. 18961751  
SRR17520069. 18961753  
SRR17520069. 18961755  
SRR17520069. 18962176  
SRR17520069. 18962178  
SRR17520069. 18962180  
SRR17520069. 18962182  
SRR17520069. 18962184  
SRR17520069. 18962186  
SRR17520069. 18962188  
SRR17520069. 18962190  
SRR17520069. 18962192  
SRR17520069. 18962194  
SRR17520069. 18962196  
SRR17520069. 18962267  
SRR17520069. 18962269  
SRR17520069. 18962273  
SRR17520069. 18962275  
SRR17520069. 18962277  
SRR17520069. 18962279  
SRR17520069. 18962281  
SRR17520069. 18962285  
SRR17520069. 18962287  
SRR17520069. 18962289  
SRR17520069. 18962291  
SRR17520069. 18962293



SRR17520069. 18962295  
SRR17520069. 18962297  
SRR17520069. 18962299  
SRR17520069. 18962301  
SRR17520069. 18962303  
SRR17520069. 18962305  
SRR17520069. 18962307  
SRR17520069. 18962309  
SRR17520069. 18962311  
SRR17520069. 18962313  
SRR17520069. 18962315  
SRR17520069. 18962321  
SRR17520069. 18962323  
SRR17520069. 18962331  
SRR17520069. 18962333  
SRR17520069. 18962335  
SRR17520069. 18962337  
SRR17520069. 18962339  
SRR17520069. 18962341  
SRR17520069. 18962343  
SRR17520069. 18962345  
SRR17520069. 18962347  
SRR17520069. 18962349  
SRR17520069. 18962351  
SRR17520069. 18962353  
SRR17520069. 18962355  
SRR17520069. 18962357  
SRR17520069. 18962359  
SRR17520069. 18962361  
SRR17520069. 18962363  
SRR17520069. 18962365  
SRR17520069. 18962367  
SRR17520069. 18962371  
SRR17520069. 18962599  
SRR17520069. 18962601  
SRR17520069. 18963256  
SRR17520069. 18963258  
SRR17520069. 18963260  
SRR17520069. 18963262  
SRR17520069. 18963264  
SRR17520069. 18963266  
SRR17520069. 18963268  
SRR17520069. 18963270  
SRR17520069. 18963272  
SRR17520069. 18963274  
SRR17520069. 18963276  
SRR17520069. 18963278

SRR17520069. 18963280  
SRR17520069. 18963282  
SRR17520069. 18963286  
SRR17520069. 18963288  
SRR17520069. 18963290  
SRR17520069. 18963292  
SRR17520069. 18963294  
SRR17520069. 18963296  
SRR17520069. 18963298  
SRR17520069. 18963300  
SRR17520069. 18963302  
SRR17520069. 18963304  
SRR17520069. 18963306  
SRR17520069. 18963308  
SRR17520069. 18963310  
SRR17520069. 18963312  
SRR17520069. 18963314  
SRR17520069. 18963316  
SRR17520069. 18963318  
SRR17520069. 18963320  
SRR17520069. 18963322  
SRR17520069. 18963324  
SRR17520069. 18963326  
SRR17520069. 18963328  
SRR17520069. 18963330  
SRR17520069. 18963332  
SRR17520069. 18969916  
SRR17520069. 18969918  
SRR17520069. 18969920  
SRR17520069. 18969922  
SRR17520069. 18969924  
SRR17520069. 18972667  
SRR17520069. 18977981  
SRR17520069. 18977985  
SRR17520069. 18977987  
SRR17520069. 18977989  
SRR17520069. 18977991  
SRR17520069. 18977993  
SRR17520069. 18977995  
SRR17520069. 18977997  
SRR17520069. 18977999  
SRR17520069. 18978001  
SRR17520069. 18978003  
SRR17520069. 18978005  
SRR17520069. 18978007  
SRR17520069. 18978009  
SRR17520069. 18978011

SRR17520069. 18978013  
SRR17520069. 18978015  
SRR17520069. 18985973  
SRR17520069. 18985975  
SRR17520069. 18985977  
SRR17520069. 18985979  
SRR17520069. 18985981  
SRR17520069. 18985983  
SRR17520069. 18985985  
SRR17520069. 18985987  
SRR17520069. 18985989  
SRR17520069. 18985991  
SRR17520069. 18985993  
SRR17520069. 18985995  
SRR17520069. 18985997  
SRR17520069. 18985999  
SRR17520069. 18986001  
SRR17520069. 18987222  
SRR17520069. 18987224  
SRR17520069. 18987226  
SRR17520069. 18987228  
SRR17520069. 18987230  
SRR17520069. 18987232  
SRR17520069. 18987234  
SRR17520069. 18987236  
SRR17520069. 18987238  
SRR17520069. 18987240  
SRR17520069. 18987242  
SRR17520069. 18987244  
SRR17520069. 18987246  
SRR17520069. 18987248  
SRR17520069. 18987250  
SRR17520069. 18987252  
SRR17520069. 18987254  
SRR17520069. 18987256  
SRR17520069. 18987258  
SRR17520069. 18987260  
SRR17520069. 18987262  
SRR17520069. 18987264  
SRR17520069. 18987266  
SRR17520069. 18987268  
SRR17520069. 18987270  
SRR17520069. 18987272  
SRR17520069. 18987274  
SRR17520069. 18987276  
SRR17520069. 18987911  
SRR17520069. 18987913

SRR17520069. 18987915  
SRR17520069. 18987917  
SRR17520069. 18987919  
SRR17520069. 18987921  
SRR17520069. 18987923  
SRR17520069. 18987925  
SRR17520069. 18987927  
SRR17520069. 18987929  
SRR17520069. 18987931  
SRR17520069. 18987933  
SRR17520069. 18987935  
SRR17520069. 18987937  
SRR17520069. 18987939  
SRR17520069. 18987941  
SRR17520069. 18987943  
SRR17520069. 18987945  
SRR17520069. 18987947  
SRR17520069. 18987949  
SRR17520069. 18987951  
SRR17520069. 18987953  
SRR17520069. 18987955  
SRR17520069. 18987957  
SRR17520069. 18987959  
SRR17520069. 18987961  
SRR17520069. 18987963  
SRR17520069. 18987965  
SRR17520069. 18987967  
SRR17520069. 18987969  
SRR17520069. 18987971  
SRR17520069. 18987973  
SRR17520069. 18987975  
SRR17520069. 18987977  
SRR17520069. 18987979  
SRR17520069. 18987981  
SRR17520069. 18987983  
SRR17520069. 18987987  
SRR17520069. 18987989  
SRR17520069. 18987991  
SRR17520069. 18987993  
SRR17520069. 18987995  
SRR17520069. 18987997  
SRR17520069. 18987999  
SRR17520069. 18988001  
SRR17520069. 18988003  
SRR17520069. 18988005  
SRR17520069. 18988007  
SRR17520069. 18988009

SRR17520069.18988011  
SRR17520069.18988013  
SRR17520069.18988015  
SRR17520069.18988017  
SRR17520069.18990650  
SRR17520069.18990652  
SRR17520069.18990654  
SRR17520069.18990656  
SRR17520069.18990658  
SRR17520069.18990660  
SRR17520069.18990662  
SRR17520069.18990664  
SRR17520069.18990666  
SRR17520069.18990668  
SRR17520069.18990670  
SRR17520069.18990672  
SRR17520069.18990674  
SRR17520069.18990676  
SRR17520069.18990678  
SRR17520069.18990680  
SRR17520069.18998571  
SRR17520069.18998573  
SRR17520069.18998575  
SRR17520069.18998579  
SRR17520069.18998581  
SRR17520069.18998583  
SRR17520069.18998585  
SRR17520069.18998587  
SRR17520069.18998589  
SRR17520069.18998591  
SRR17520069.18998593  
SRR17520069.18998595  
SRR17520069.18998597  
SRR17520069.18998599  
SRR17520069.18998601  
SRR17520069.18998603  
SRR17520069.18998605  
SRR17520069.18998607  
SRR17520069.18999823  
SRR17520069.18999825  
SRR17520069.18999827  
SRR17520069.18999829  
SRR17520069.18999831  
SRR17520069.18999833  
SRR17520069.18999835  
SRR17520069.18999837  
SRR17520069.18999839

SRR17520069.18999841  
SRR17520069.18999843  
SRR17520069.18999845  
SRR17520069.18999847  
SRR17520069.18999849  
SRR17520069.18999851  
SRR17520069.18999853  
SRR17520069.18999855  
SRR17520069.18999857  
SRR17520069.18999859  
SRR17520069.18999861  
SRR17520069.18999865  
SRR17520069.18999867  
SRR17520069.18999869  
SRR17520069.18999871  
SRR17520069.18999873  
SRR17520069.18999875  
SRR17520069.18999877  
SRR17520069.18999881  
SRR17520069.19001247  
SRR17520069.19001249  
SRR17520069.19001251  
SRR17520069.19005687  
SRR17520069.19005689  
SRR17520069.19005691  
SRR17520069.19005693  
SRR17520069.19005695  
SRR17520069.19005697  
SRR17520069.19005699  
SRR17520069.19005701  
SRR17520069.19005705  
SRR17520069.19005707  
SRR17520069.19005709  
SRR17520069.19005711  
SRR17520069.19005713  
SRR17520069.19005715  
SRR17520069.19005717  
SRR17520069.19005719  
SRR17520069.19005721  
SRR17520069.19005725  
SRR17520069.19006846  
SRR17520069.19006848  
SRR17520069.19006852  
SRR17520069.19006854  
SRR17520069.19006860  
SRR17520069.19006862  
SRR17520069.19006864

SRR17520069.19010373  
SRR17520069.19010375  
SRR17520069.19010377  
SRR17520069.19010379  
SRR17520069.19010381  
SRR17520069.19010383  
SRR17520069.19010385  
SRR17520069.19010387  
SRR17520069.19010389  
SRR17520069.19010391  
SRR17520069.19010393  
SRR17520069.19010395  
SRR17520069.19010397  
SRR17520069.19010399  
SRR17520069.19010401  
SRR17520069.19010403  
SRR17520069.19010405  
SRR17520069.19010407  
SRR17520069.19015900  
SRR17520069.19015902  
SRR17520069.19015904  
SRR17520069.19015910  
SRR17520069.19015912  
SRR17520069.19015914  
SRR17520069.19015916  
SRR17520069.19015918  
SRR17520069.19015920  
SRR17520069.19015924  
SRR17520069.19015926  
SRR17520069.19015928  
SRR17520069.19015930  
SRR17520069.19015932  
SRR17520069.19015934  
SRR17520069.19015936  
SRR17520069.19015938  
SRR17520069.19015940  
SRR17520069.19015942  
SRR17520069.19015944  
SRR17520069.19015946  
SRR17520069.19015948  
SRR17520069.19015950  
SRR17520069.19015952  
SRR17520069.19015954  
SRR17520069.19015956  
SRR17520069.19021167  
SRR17520069.19021185  
SRR17520069.19027790

SRR17520069.19031368  
SRR17520069.19031370  
SRR17520069.19031372  
SRR17520069.19031374  
SRR17520069.19031376  
SRR17520069.19032040  
SRR17520069.19032042  
SRR17520069.19032044  
SRR17520069.19032046  
SRR17520069.19032048  
SRR17520069.19039156  
SRR17520069.19039158  
SRR17520069.19039160  
SRR17520069.19039162  
SRR17520069.19039164  
SRR17520069.19039166  
SRR17520069.19039168  
SRR17520069.19039170  
SRR17520069.19039172  
SRR17520069.19039174  
SRR17520069.19043869  
SRR17520069.19043871  
SRR17520069.19043875  
SRR17520069.19043879  
SRR17520069.19043883  
SRR17520069.19043896  
SRR17520069.19043898  
SRR17520069.19043900  
SRR17520069.19048840  
SRR17520069.19048842  
SRR17520069.19048844  
SRR17520069.19048846  
SRR17520069.19048848  
SRR17520069.19048850  
SRR17520069.19048852  
SRR17520069.19048856  
SRR17520069.19048858  
SRR17520069.19048860  
SRR17520069.19048862  
SRR17520069.19048864  
SRR17520069.19048866  
SRR17520069.19048868  
SRR17520069.19048870  
SRR17520069.19049943  
SRR17520069.19049945  
SRR17520069.19049947  
SRR17520069.19049949



SRR17520069.19049951  
SRR17520069.19049953  
SRR17520069.19053759  
SRR17520069.19053761  
SRR17520069.19053763  
SRR17520069.19053765  
SRR17520069.19053769  
SRR17520069.19053771  
SRR17520069.19053773  
SRR17520069.19053775  
SRR17520069.19053777  
SRR17520069.19058639  
SRR17520069.19058641  
SRR17520069.19058643  
SRR17520069.19058645  
SRR17520069.19058647  
SRR17520069.19058649  
SRR17520069.19058651  
SRR17520069.19058653  
SRR17520069.19058655  
SRR17520069.19061627  
SRR17520069.19061629  
SRR17520069.19061631  
SRR17520069.19065982  
SRR17520069.19065984  
SRR17520069.19065986  
SRR17520069.19065988  
SRR17520069.19065990  
SRR17520069.19065992  
SRR17520069.19065994  
SRR17520069.19065996  
SRR17520069.19065998  
SRR17520069.19066000  
SRR17520069.19066004  
SRR17520069.19066006  
SRR17520069.19066008  
SRR17520069.19066010  
SRR17520069.19066012  
SRR17520069.19066014  
SRR17520069.19066016  
SRR17520069.19066018  
SRR17520069.19066020  
SRR17520069.19066022  
SRR17520069.19066024  
SRR17520069.19066026  
SRR17520069.19066028  
SRR17520069.19066030

SRR17520069.19066032  
SRR17520069.19066034  
SRR17520069.19066036  
SRR17520069.19066038  
SRR17520069.19066040  
SRR17520069.19066188  
SRR17520069.19066208  
SRR17520069.19066250  
SRR17520069.19066258  
SRR17520069.19066277  
SRR17520069.19066283  
SRR17520069.19066289  
SRR17520069.19066317  
SRR17520069.19066327  
SRR17520069.19068216  
SRR17520069.19068218  
SRR17520069.19076129  
SRR17520069.19076131  
SRR17520069.19076133  
SRR17520069.19076135  
SRR17520069.19076137  
SRR17520069.19076139  
SRR17520069.19076141  
SRR17520069.19076143  
SRR17520069.19076147  
SRR17520069.19076149  
SRR17520069.19076151  
SRR17520069.19076153  
SRR17520069.19076155  
SRR17520069.19076159  
SRR17520069.19076161  
SRR17520069.19076163  
SRR17520069.19076165  
SRR17520069.19076167  
SRR17520069.19076574  
SRR17520069.19076576  
SRR17520069.19076578  
SRR17520069.19076580  
SRR17520069.19076582  
SRR17520069.19076584  
SRR17520069.19076586  
SRR17520069.19076588  
SRR17520069.19076590  
SRR17520069.19076592  
SRR17520069.19076594  
SRR17520069.19076596  
SRR17520069.19076598

SRR17520069.19076600  
SRR17520069.19076602  
SRR17520069.19076604  
SRR17520069.19076606  
SRR17520069.19076608  
SRR17520069.19076620  
SRR17520069.19076622  
SRR17520069.19080881  
SRR17520069.19080883  
SRR17520069.19080885  
SRR17520069.19080887  
SRR17520069.19080889  
SRR17520069.19080891  
SRR17520069.19080893  
SRR17520069.19080895  
SRR17520069.19080897  
SRR17520069.19080899  
SRR17520069.19080901  
SRR17520069.19080903  
SRR17520069.19080905  
SRR17520069.19080907  
SRR17520069.19080909  
SRR17520069.19080911  
SRR17520069.19080913  
SRR17520069.19080915  
SRR17520069.19080917  
SRR17520069.19080919  
SRR17520069.19080921  
SRR17520069.19080923  
SRR17520069.19080925  
SRR17520069.19080929  
SRR17520069.19080933  
SRR17520069.19080935  
SRR17520069.19081854  
SRR17520069.19081856  
SRR17520069.19081858  
SRR17520069.19081860  
SRR17520069.19081864  
SRR17520069.19081866  
SRR17520069.19081870  
SRR17520069.19081872  
SRR17520069.19081874  
SRR17520069.19081876  
SRR17520069.19081878  
SRR17520069.19081880  
SRR17520069.19081882  
SRR17520069.19081886

SRR17520069.19081888  
SRR17520069.19081890  
SRR17520069.19081892  
SRR17520069.19081894  
SRR17520069.19081896  
SRR17520069.19081898  
SRR17520069.19081900  
SRR17520069.19081902  
SRR17520069.19081904  
SRR17520069.19081906  
SRR17520069.19081908  
SRR17520069.19081914  
SRR17520069.19081916  
SRR17520069.19081918  
SRR17520069.19081924  
SRR17520069.19081926  
SRR17520069.19081928  
SRR17520069.19081932  
SRR17520069.19081934  
SRR17520069.19081936  
SRR17520069.19081940  
SRR17520069.19081942  
SRR17520069.19081944  
SRR17520069.19081946  
SRR17520069.19092524  
SRR17520069.19092526  
SRR17520069.19092528  
SRR17520069.19092530  
SRR17520069.19092532  
SRR17520069.19092534  
SRR17520069.19092536  
SRR17520069.19092538  
SRR17520069.19092540  
SRR17520069.19092542  
SRR17520069.19092544  
SRR17520069.19092546  
SRR17520069.19092548  
SRR17520069.19092550  
SRR17520069.19092552  
SRR17520069.19092554  
SRR17520069.19092556  
SRR17520069.19092558  
SRR17520069.19092560  
SRR17520069.19092562  
SRR17520069.19092564  
SRR17520069.19092566  
SRR17520069.19092568

SRR17520069.19092570  
SRR17520069.19092572  
SRR17520069.19092574  
SRR17520069.19092576  
SRR17520069.19092578  
SRR17520069.19092580  
SRR17520069.19092582  
SRR17520069.19092584  
SRR17520069.19092586  
SRR17520069.19092588  
SRR17520069.19092590  
SRR17520069.19092592  
SRR17520069.19092594  
SRR17520069.19092596  
SRR17520069.19092598  
SRR17520069.19092600  
SRR17520069.19092602  
SRR17520069.19092604  
SRR17520069.19092606  
SRR17520069.19092608  
SRR17520069.19092610  
SRR17520069.19092612  
SRR17520069.19092614  
SRR17520069.19092616  
SRR17520069.19092618  
SRR17520069.19092620  
SRR17520069.19092622  
SRR17520069.19092626  
SRR17520069.19092628  
SRR17520069.19092630  
SRR17520069.19092632  
SRR17520069.19092634  
SRR17520069.19092636  
SRR17520069.19092638  
SRR17520069.19092640  
SRR17520069.19092642  
SRR17520069.19092644  
SRR17520069.19098520  
SRR17520069.19098522  
SRR17520069.19098524  
SRR17520069.19098526  
SRR17520069.19099196  
SRR17520069.19099198  
SRR17520069.19099200  
SRR17520069.19099202  
SRR17520069.19099204  
SRR17520069.19099206

SRR17520069.19099208  
SRR17520069.19099210  
SRR17520069.19099212  
SRR17520069.19099214  
SRR17520069.19099216  
SRR17520069.19099218  
SRR17520069.19099220  
SRR17520069.19099785  
SRR17520069.19099787  
SRR17520069.19099789  
SRR17520069.19099791  
SRR17520069.19099793  
SRR17520069.19099795  
SRR17520069.19099801  
SRR17520069.19099803  
SRR17520069.19099805  
SRR17520069.19099807  
SRR17520069.19099809  
SRR17520069.19099811  
SRR17520069.19099813  
SRR17520069.19099815  
SRR17520069.19099817  
SRR17520069.19099819  
SRR17520069.19103079  
SRR17520069.19103083  
SRR17520069.19103085  
SRR17520069.19103087  
SRR17520069.19103089  
SRR17520069.19103091  
SRR17520069.19103093  
SRR17520069.19103095  
SRR17520069.19103097  
SRR17520069.19103101  
SRR17520069.19103103  
SRR17520069.19103105  
SRR17520069.19103107  
SRR17520069.19103637  
SRR17520069.19103639  
SRR17520069.19103641  
SRR17520069.19103643  
SRR17520069.19103645  
SRR17520069.19103647  
SRR17520069.19103649  
SRR17520069.19103651  
SRR17520069.19103653  
SRR17520069.19103655  
SRR17520069.19103657

SRR17520069.19103659  
SRR17520069.19103661  
SRR17520069.19103663  
SRR17520069.19103665  
SRR17520069.19103667  
SRR17520069.19103669  
SRR17520069.19103671  
SRR17520069.19103673  
SRR17520069.19103675  
SRR17520069.19103677  
SRR17520069.19103679  
SRR17520069.19103681  
SRR17520069.19103683  
SRR17520069.19103685  
SRR17520069.19103687  
SRR17520069.19103689  
SRR17520069.19103691  
SRR17520069.19103693  
SRR17520069.19103695  
SRR17520069.19103697  
SRR17520069.19103699  
SRR17520069.19103701  
SRR17520069.19103703  
SRR17520069.19103705  
SRR17520069.19103721  
SRR17520069.19103723  
SRR17520069.19103725  
SRR17520069.19103727  
SRR17520069.19103729  
SRR17520069.19103731  
SRR17520069.19103733  
SRR17520069.19103735  
SRR17520069.19103739  
SRR17520069.19103741  
SRR17520069.19103743  
SRR17520069.19103745  
SRR17520069.19103747  
SRR17520069.19103749  
SRR17520069.19103751  
SRR17520069.19103753  
SRR17520069.19103755  
SRR17520069.19103757  
SRR17520069.19103759  
SRR17520069.19103761  
SRR17520069.19103763  
SRR17520069.19103767  
SRR17520069.19103769

SRR17520069.19103771  
SRR17520069.19103773  
SRR17520069.19104588  
SRR17520069.19104590  
SRR17520069.19104592  
SRR17520069.19104594  
SRR17520069.19104596  
SRR17520069.19104598  
SRR17520069.19104600  
SRR17520069.19104602  
SRR17520069.19104604  
SRR17520069.19104606  
SRR17520069.19104608  
SRR17520069.19104610  
SRR17520069.19104612  
SRR17520069.19104614  
SRR17520069.19104616  
SRR17520069.19104618  
SRR17520069.19104620  
SRR17520069.19104622  
SRR17520069.19104624  
SRR17520069.19104626  
SRR17520069.19104628  
SRR17520069.19104630  
SRR17520069.19110184  
SRR17520069.19110186  
SRR17520069.19110188  
SRR17520069.19110190  
SRR17520069.19110192  
SRR17520069.19110194  
SRR17520069.19110198  
SRR17520069.19110200  
SRR17520069.19110202  
SRR17520069.19110204  
SRR17520069.19110206  
SRR17520069.19110210  
SRR17520069.19110212  
SRR17520069.19110214  
SRR17520069.19110216  
SRR17520069.19110218  
SRR17520069.19110220  
SRR17520069.19110222  
SRR17520069.19110224  
SRR17520069.19110226  
SRR17520069.19110228  
SRR17520069.19110230  
SRR17520069.19110232



SRR17520069.19110234  
SRR17520069.19113252  
SRR17520069.19113254  
SRR17520069.19113256  
SRR17520069.19113258  
SRR17520069.19113260  
SRR17520069.19113262  
SRR17520069.19113264  
SRR17520069.19113266  
SRR17520069.19113268  
SRR17520069.19113270  
SRR17520069.19113272  
SRR17520069.19113274  
SRR17520069.19113276  
SRR17520069.19113278  
SRR17520069.19113280  
SRR17520069.19113282  
SRR17520069.19113284  
SRR17520069.19113286  
SRR17520069.19113288  
SRR17520069.19113290  
SRR17520069.19113292  
SRR17520069.19121840  
SRR17520069.19121842  
SRR17520069.19121844  
SRR17520069.19121846  
SRR17520069.19124423  
SRR17520069.19124425  
SRR17520069.19124427  
SRR17520069.19124429  
SRR17520069.19124431  
SRR17520069.19124433  
SRR17520069.19124539  
SRR17520069.19124541  
SRR17520069.19124543  
SRR17520069.19138020  
SRR17520069.19138022  
SRR17520069.19138024  
SRR17520069.19138026  
SRR17520069.19138028  
SRR17520069.19138364  
SRR17520069.19138366  
SRR17520069.19138368  
SRR17520069.19138370  
SRR17520069.19138372  
SRR17520069.19138374  
SRR17520069.19138376

SRR17520069.19138378  
SRR17520069.19138380  
SRR17520069.19140159  
SRR17520069.19140161  
SRR17520069.19140163  
SRR17520069.19140165  
SRR17520069.19140167  
SRR17520069.19140169  
SRR17520069.19140171  
SRR17520069.19140173  
SRR17520069.19140175  
SRR17520069.19140177  
SRR17520069.19140179  
SRR17520069.19140181  
SRR17520069.19140183  
SRR17520069.19140185  
SRR17520069.19140187  
SRR17520069.19140189  
SRR17520069.19140193  
SRR17520069.19140195  
SRR17520069.19140197  
SRR17520069.19140199  
SRR17520069.19140201  
SRR17520069.19140203  
SRR17520069.19140205  
SRR17520069.19140207  
SRR17520069.19140209  
SRR17520069.19140211  
SRR17520069.19140213  
SRR17520069.19140215  
SRR17520069.19140217  
SRR17520069.19140219  
SRR17520069.19140221  
SRR17520069.19145093  
SRR17520069.19145095  
SRR17520069.19145097  
SRR17520069.19145099  
SRR17520069.19145101  
SRR17520069.19145806  
SRR17520069.19145808  
SRR17520069.19145810  
SRR17520069.19145812  
SRR17520069.19145814  
SRR17520069.19145816  
SRR17520069.19145818  
SRR17520069.19145820  
SRR17520069.19145822

SRR17520069.19145824  
SRR17520069.19145826  
SRR17520069.19145828  
SRR17520069.19145830  
SRR17520069.19145832  
SRR17520069.19145834  
SRR17520069.19145836  
SRR17520069.19145838  
SRR17520069.19145840  
SRR17520069.19145842  
SRR17520069.19145844  
SRR17520069.19145846  
SRR17520069.19145848  
SRR17520069.19145850  
SRR17520069.19145854  
SRR17520069.19145856  
SRR17520069.19145858  
SRR17520069.19145860  
SRR17520069.19145862  
SRR17520069.19145864  
SRR17520069.19145866  
SRR17520069.19145868  
SRR17520069.19145872  
SRR17520069.19152075  
SRR17520069.19152077  
SRR17520069.19152079  
SRR17520069.19152081  
SRR17520069.19152083  
SRR17520069.19152085  
SRR17520069.19152087  
SRR17520069.19152089  
SRR17520069.19152091  
SRR17520069.19152093  
SRR17520069.19152095  
SRR17520069.19152097  
SRR17520069.19152099  
SRR17520069.19152101  
SRR17520069.19152105  
SRR17520069.19152107  
SRR17520069.19152109  
SRR17520069.19152111  
SRR17520069.19152113  
SRR17520069.19152115  
SRR17520069.19152117  
SRR17520069.19152119  
SRR17520069.19152121  
SRR17520069.19152123

SRR17520069. 19153993  
SRR17520069. 19153995  
SRR17520069. 19153997  
SRR17520069. 19153999  
SRR17520069. 19154001  
SRR17520069. 19154003  
SRR17520069. 19154005  
SRR17520069. 19154007  
SRR17520069. 19154009  
SRR17520069. 19154011  
SRR17520069. 19154013  
SRR17520069. 19154015  
SRR17520069. 19154017  
SRR17520069. 19154019  
SRR17520069. 19154025  
SRR17520069. 19154027  
SRR17520069. 19154029  
SRR17520069. 19154031  
SRR17520069. 19154033  
SRR17520069. 19154035  
SRR17520069. 19154037  
SRR17520069. 19154039  
SRR17520069. 19154041  
SRR17520069. 19154043  
SRR17520069. 19154045  
SRR17520069. 19154047  
SRR17520069. 19161371  
SRR17520069. 19161373  
SRR17520069. 19161375  
SRR17520069. 19161377  
SRR17520069. 19161379  
SRR17520069. 19161381  
SRR17520069. 19161383  
SRR17520069. 19161385  
SRR17520069. 19161387  
SRR17520069. 19161389  
SRR17520069. 19161391  
SRR17520069. 19161393  
SRR17520069. 19161395  
SRR17520069. 19161397  
SRR17520069. 19161399  
SRR17520069. 19161401  
SRR17520069. 19161403  
SRR17520069. 19161405  
SRR17520069. 19161407  
SRR17520069. 19161409  
SRR17520069. 19161413

SRR17520069. 19161415  
SRR17520069. 19161417  
SRR17520069. 19161419  
SRR17520069. 19161421  
SRR17520069. 19161423  
SRR17520069. 19161425  
SRR17520069. 19161427  
SRR17520069. 19161429  
SRR17520069. 19161431  
SRR17520069. 19161433  
SRR17520069. 19161435  
SRR17520069. 19161437  
SRR17520069. 19161439  
SRR17520069. 19161441  
SRR17520069. 19161443  
SRR17520069. 19161445  
SRR17520069. 19161447  
SRR17520069. 19161449  
SRR17520069. 19161451  
SRR17520069. 19161453  
SRR17520069. 19163206  
SRR17520069. 19163208  
SRR17520069. 19166189  
SRR17520069. 19166191  
SRR17520069. 19166193  
SRR17520069. 19166195  
SRR17520069. 19166197  
SRR17520069. 19166199  
SRR17520069. 19166201  
SRR17520069. 19166203  
SRR17520069. 19166211  
SRR17520069. 19166213  
SRR17520069. 19166215  
SRR17520069. 19166221  
SRR17520069. 19166223  
SRR17520069. 19166225  
SRR17520069. 19175891  
SRR17520069. 19175893  
SRR17520069. 19175895  
SRR17520069. 19175897  
SRR17520069. 19175899  
SRR17520069. 19175901  
SRR17520069. 19178851  
SRR17520069. 19182993  
SRR17520069. 19182997  
SRR17520069. 19182999  
SRR17520069. 19183001

SRR17520069.19183003  
SRR17520069.19183005  
SRR17520069.19183007  
SRR17520069.19183009  
SRR17520069.19183011  
SRR17520069.19183013  
SRR17520069.19183016  
SRR17520069.19183018  
SRR17520069.19183020  
SRR17520069.19184830  
SRR17520069.19184832  
SRR17520069.19184834  
SRR17520069.19184836  
SRR17520069.19184838  
SRR17520069.19184840  
SRR17520069.19184842  
SRR17520069.19184844  
SRR17520069.19184846  
SRR17520069.19184848  
SRR17520069.19184850  
SRR17520069.19184852  
SRR17520069.19184856  
SRR17520069.19184858  
SRR17520069.19184860  
SRR17520069.19184862  
SRR17520069.19184864  
SRR17520069.19184866  
SRR17520069.19184868  
SRR17520069.19184870  
SRR17520069.19184872  
SRR17520069.19184876  
SRR17520069.19184878  
SRR17520069.19184880  
SRR17520069.19184882  
SRR17520069.19184884  
SRR17520069.19184886  
SRR17520069.19184888  
SRR17520069.19184890  
SRR17520069.19184892  
SRR17520069.19184894  
SRR17520069.19184896  
SRR17520069.19184898  
SRR17520069.19184900  
SRR17520069.19184902  
SRR17520069.19184904  
SRR17520069.19184906  
SRR17520069.19184908

SRR17520069.19184910  
SRR17520069.19184912  
SRR17520069.19184914  
SRR17520069.19184916  
SRR17520069.19184918  
SRR17520069.19184920  
SRR17520069.19184922  
SRR17520069.19184924  
SRR17520069.19184926  
SRR17520069.19184928  
SRR17520069.19184930  
SRR17520069.19184932  
SRR17520069.19184934  
SRR17520069.19184936  
SRR17520069.19184938  
SRR17520069.19184940  
SRR17520069.19184942  
SRR17520069.19184944  
SRR17520069.19184948  
SRR17520069.19184950  
SRR17520069.19184952  
SRR17520069.19184954  
SRR17520069.19184956  
SRR17520069.19184958  
SRR17520069.19184960  
SRR17520069.19184962  
SRR17520069.19184964  
SRR17520069.19184966  
SRR17520069.19184968  
SRR17520069.19184970  
SRR17520069.19184972  
SRR17520069.19184974  
SRR17520069.19184976  
SRR17520069.19184978  
SRR17520069.19184980  
SRR17520069.19184982  
SRR17520069.19184984  
SRR17520069.19184986  
SRR17520069.19184988  
SRR17520069.19184990  
SRR17520069.19184992  
SRR17520069.19184994  
SRR17520069.19184996  
SRR17520069.19184998  
SRR17520069.19185000  
SRR17520069.19185002  
SRR17520069.19185004

SRR17520069.19185006  
SRR17520069.19185008  
SRR17520069.19185010  
SRR17520069.19185012  
SRR17520069.19185014  
SRR17520069.19185016  
SRR17520069.19185018  
SRR17520069.19185020  
SRR17520069.19185022  
SRR17520069.19185024  
SRR17520069.19185026  
SRR17520069.19185028  
SRR17520069.19185030  
SRR17520069.19185032  
SRR17520069.19185034  
SRR17520069.19185036  
SRR17520069.19185038  
SRR17520069.19185040  
SRR17520069.19185042  
SRR17520069.19185044  
SRR17520069.19185046  
SRR17520069.19185048  
SRR17520069.19185050  
SRR17520069.19185052  
SRR17520069.19185054  
SRR17520069.19185056  
SRR17520069.19185058  
SRR17520069.19185060  
SRR17520069.19185062  
SRR17520069.19185064  
SRR17520069.19185066  
SRR17520069.19187347  
SRR17520069.19187349  
SRR17520069.19187351  
SRR17520069.19187353  
SRR17520069.19187355  
SRR17520069.19187357  
SRR17520069.19187359  
SRR17520069.19187361  
SRR17520069.19198941  
SRR17520069.19200041  
SRR17520069.19201562  
SRR17520069.19201564  
SRR17520069.19201566  
SRR17520069.19201568  
SRR17520069.19201570  
SRR17520069.19201572



SRR17520069. 19201576  
SRR17520069. 19201578  
SRR17520069. 19201580  
SRR17520069. 19201582  
SRR17520069. 19201584  
SRR17520069. 19201586  
SRR17520069. 19201588  
SRR17520069. 19201590  
SRR17520069. 19201592  
SRR17520069. 19201594  
SRR17520069. 19201596  
SRR17520069. 19201598  
SRR17520069. 19201600  
SRR17520069. 19201602  
SRR17520069. 19201604  
SRR17520069. 19201606  
SRR17520069. 19201608  
SRR17520069. 19201610  
SRR17520069. 19201612  
SRR17520069. 19201614  
SRR17520069. 19201616  
SRR17520069. 19201618  
SRR17520069. 19201620  
SRR17520069. 19201622  
SRR17520069. 19201624  
SRR17520069. 19201626  
SRR17520069. 19201628  
SRR17520069. 19201632  
SRR17520069. 19201634  
SRR17520069. 19201636  
SRR17520069. 19201638  
SRR17520069. 19201640  
SRR17520069. 19201642  
SRR17520069. 19201644  
SRR17520069. 19201646  
SRR17520069. 19201648  
SRR17520069. 19201650  
SRR17520069. 19201652  
SRR17520069. 19201654  
SRR17520069. 19201656  
SRR17520069. 19201660  
SRR17520069. 19201662  
SRR17520069. 19201664  
SRR17520069. 19201666  
SRR17520069. 19201668  
SRR17520069. 19201670  
SRR17520069. 19201672

SRR17520069. 19201674  
SRR17520069. 19201676  
SRR17520069. 19201678  
SRR17520069. 19201680  
SRR17520069. 19201682  
SRR17520069. 19201684  
SRR17520069. 19201686  
SRR17520069. 19201688  
SRR17520069. 19201690  
SRR17520069. 19201692  
SRR17520069. 19201694  
SRR17520069. 19201696  
SRR17520069. 19201698  
SRR17520069. 19201700  
SRR17520069. 19201702  
SRR17520069. 19201704  
SRR17520069. 19201706  
SRR17520069. 19201708  
SRR17520069. 19201712  
SRR17520069. 19201714  
SRR17520069. 19201716  
SRR17520069. 19201718  
SRR17520069. 19201720  
SRR17520069. 19201722  
SRR17520069. 19201724  
SRR17520069. 19201726  
SRR17520069. 19201728  
SRR17520069. 19201730  
SRR17520069. 19201732  
SRR17520069. 19201734  
SRR17520069. 19201736  
SRR17520069. 19201738  
SRR17520069. 19201740  
SRR17520069. 19201742  
SRR17520069. 19201744  
SRR17520069. 19201746  
SRR17520069. 19201748  
SRR17520069. 19201750  
SRR17520069. 19201752  
SRR17520069. 19201754  
SRR17520069. 19201756  
SRR17520069. 19201758  
SRR17520069. 19201760  
SRR17520069. 19201762  
SRR17520069. 19205955  
SRR17520069. 19205957  
SRR17520069. 19205959

SRR17520069. 19205961  
SRR17520069. 19205963  
SRR17520069. 19205965  
SRR17520069. 19205967  
SRR17520069. 19205969  
SRR17520069. 19205971  
SRR17520069. 19205973  
SRR17520069. 19205975  
SRR17520069. 19205977  
SRR17520069. 19205979  
SRR17520069. 19205981  
SRR17520069. 19205985  
SRR17520069. 19205987  
SRR17520069. 19205989  
SRR17520069. 19205993  
SRR17520069. 19205995  
SRR17520069. 19205997  
SRR17520069. 19205999  
SRR17520069. 19206001  
SRR17520069. 19206003  
SRR17520069. 19206005  
SRR17520069. 19206007  
SRR17520069. 19206011  
SRR17520069. 19206013  
SRR17520069. 19206015  
SRR17520069. 19206017  
SRR17520069. 19206019  
SRR17520069. 19206021  
SRR17520069. 19206023  
SRR17520069. 19206025  
SRR17520069. 19206027  
SRR17520069. 19206029  
SRR17520069. 19206031  
SRR17520069. 19206033  
SRR17520069. 19206035  
SRR17520069. 19206037  
SRR17520069. 19206039  
SRR17520069. 19206041  
SRR17520069. 19206043  
SRR17520069. 19206045  
SRR17520069. 19206047  
SRR17520069. 19206049  
SRR17520069. 19206053  
SRR17520069. 19206055  
SRR17520069. 19206057  
SRR17520069. 19206059  
SRR17520069. 19206061

SRR17520069.19206063  
SRR17520069.19206065  
SRR17520069.19208464  
SRR17520069.19208466  
SRR17520069.19208468  
SRR17520069.19208470  
SRR17520069.19221107  
SRR17520069.19221109  
SRR17520069.19221113  
SRR17520069.19221117  
SRR17520069.19221119  
SRR17520069.19221121  
SRR17520069.19221125  
SRR17520069.19221127  
SRR17520069.19221129  
SRR17520069.19221131  
SRR17520069.19221133  
SRR17520069.19221135  
SRR17520069.19226629  
SRR17520069.19226631  
SRR17520069.19232852  
SRR17520069.19232854  
SRR17520069.19232856  
SRR17520069.19232858  
SRR17520069.19232860  
SRR17520069.19232862  
SRR17520069.19232864  
SRR17520069.19232866  
SRR17520069.19232868  
SRR17520069.19232870  
SRR17520069.19232872  
SRR17520069.19232874  
SRR17520069.19244518  
SRR17520069.19244520  
SRR17520069.19244522  
SRR17520069.19244524  
SRR17520069.19244526  
SRR17520069.19244528  
SRR17520069.19244530  
SRR17520069.19246953  
SRR17520069.19246955  
SRR17520069.19246957  
SRR17520069.19246961  
SRR17520069.19246963  
SRR17520069.19246965  
SRR17520069.19246967  
SRR17520069.19246969

SRR17520069. 19246971  
SRR17520069. 19246973  
SRR17520069. 19246975  
SRR17520069. 19246977  
SRR17520069. 19246979  
SRR17520069. 19246981  
SRR17520069. 19246983  
SRR17520069. 19246985  
SRR17520069. 19246987  
SRR17520069. 19246989  
SRR17520069. 19246991  
SRR17520069. 19246993  
SRR17520069. 19246995  
SRR17520069. 19246997  
SRR17520069. 19246999  
SRR17520069. 19247001  
SRR17520069. 19247003  
SRR17520069. 19247005  
SRR17520069. 19247007  
SRR17520069. 19247009  
SRR17520069. 19247011  
SRR17520069. 19247013  
SRR17520069. 19247017  
SRR17520069. 19247019  
SRR17520069. 19247021  
SRR17520069. 19247023  
SRR17520069. 19247025  
SRR17520069. 19247027  
SRR17520069. 19247029  
SRR17520069. 19247031  
SRR17520069. 19247033  
SRR17520069. 19247035  
SRR17520069. 19247037  
SRR17520069. 19247039  
SRR17520069. 19247041  
SRR17520069. 19247043  
SRR17520069. 19247045  
SRR17520069. 19247047  
SRR17520069. 19247049  
SRR17520069. 19247082  
SRR17520069. 19247084  
SRR17520069. 19247086  
SRR17520069. 19247088  
SRR17520069. 19247090  
SRR17520069. 19247092  
SRR17520069. 19247094  
SRR17520069. 19247096

SRR17520069. 19247098  
SRR17520069. 19249173  
SRR17520069. 19249175  
SRR17520069. 19249177  
SRR17520069. 19252733  
SRR17520069. 19252735  
SRR17520069. 19252737  
SRR17520069. 19252739  
SRR17520069. 19252741  
SRR17520069. 19252743  
SRR17520069. 19252745  
SRR17520069. 19252747  
SRR17520069. 19252749  
SRR17520069. 19252751  
SRR17520069. 19252753  
SRR17520069. 19252755  
SRR17520069. 19252757  
SRR17520069. 19252759  
SRR17520069. 19252763  
SRR17520069. 19252765  
SRR17520069. 19252767  
SRR17520069. 19252769  
SRR17520069. 19252771  
SRR17520069. 19252773  
SRR17520069. 19252775  
SRR17520069. 19252779  
SRR17520069. 19252781  
SRR17520069. 19255414  
SRR17520069. 19255424  
SRR17520069. 19255428  
SRR17520069. 19255430  
SRR17520069. 19255432  
SRR17520069. 19255434  
SRR17520069. 19257065  
SRR17520069. 19257067  
SRR17520069. 19257069  
SRR17520069. 19257071  
SRR17520069. 19257073  
SRR17520069. 19257075  
SRR17520069. 19257077  
SRR17520069. 19257079  
SRR17520069. 19257081  
SRR17520069. 19257083  
SRR17520069. 19257085  
SRR17520069. 19257087  
SRR17520069. 19259319  
SRR17520069. 19259321

SRR17520069. 19259325  
SRR17520069. 19259327  
SRR17520069. 19259329  
SRR17520069. 19259331  
SRR17520069. 19259333  
SRR17520069. 19259335  
SRR17520069. 19259339  
SRR17520069. 19259341  
SRR17520069. 19259343  
SRR17520069. 19259345  
SRR17520069. 19263324  
SRR17520069. 19263326  
SRR17520069. 19263328  
SRR17520069. 19263900  
SRR17520069. 19263902  
SRR17520069. 19263904  
SRR17520069. 19263906  
SRR17520069. 19263908  
SRR17520069. 19263910  
SRR17520069. 19263912  
SRR17520069. 19263914  
SRR17520069. 19263916  
SRR17520069. 19263918  
SRR17520069. 19263920  
SRR17520069. 19263922  
SRR17520069. 19263924  
SRR17520069. 19263926  
SRR17520069. 19263928  
SRR17520069. 19263930  
SRR17520069. 19263932  
SRR17520069. 19264441  
SRR17520069. 19264443  
SRR17520069. 19264445  
SRR17520069. 19264447  
SRR17520069. 19264449  
SRR17520069. 19264451  
SRR17520069. 19264453  
SRR17520069. 19264455  
SRR17520069. 19264457  
SRR17520069. 19264459  
SRR17520069. 19264461  
SRR17520069. 19264463  
SRR17520069. 19264465  
SRR17520069. 19264467  
SRR17520069. 19264469  
SRR17520069. 19264473  
SRR17520069. 19264475

SRR17520069. 19264477  
SRR17520069. 19264479  
SRR17520069. 19264481  
SRR17520069. 19271685  
SRR17520069. 19271687  
SRR17520069. 19271689  
SRR17520069. 19271691  
SRR17520069. 19271693  
SRR17520069. 19271695  
SRR17520069. 19271697  
SRR17520069. 19271699  
SRR17520069. 19271701  
SRR17520069. 19271703  
SRR17520069. 19271705  
SRR17520069. 19271707  
SRR17520069. 19271709  
SRR17520069. 19271711  
SRR17520069. 19271713  
SRR17520069. 19271715  
SRR17520069. 19271717  
SRR17520069. 19271719  
SRR17520069. 19271721  
SRR17520069. 19271723  
SRR17520069. 19271725  
SRR17520069. 19271727  
SRR17520069. 19271729  
SRR17520069. 19274162  
SRR17520069. 19274166  
SRR17520069. 19274168  
SRR17520069. 19274170  
SRR17520069. 19274172  
SRR17520069. 19274174  
SRR17520069. 19274176  
SRR17520069. 19274178  
SRR17520069. 19274180  
SRR17520069. 19274182  
SRR17520069. 19274184  
SRR17520069. 19274186  
SRR17520069. 19274188  
SRR17520069. 19274824  
SRR17520069. 19274826  
SRR17520069. 19274830  
SRR17520069. 19274832  
SRR17520069. 19274836  
SRR17520069. 19274838  
SRR17520069. 19274840  
SRR17520069. 19274842



SRR17520069. 19274844  
SRR17520069. 19274846  
SRR17520069. 19274848  
SRR17520069. 19274850  
SRR17520069. 19274852  
SRR17520069. 19274854  
SRR17520069. 19274856  
SRR17520069. 19274858  
SRR17520069. 19274860  
SRR17520069. 19274862  
SRR17520069. 19274864  
SRR17520069. 19274866  
SRR17520069. 19274870  
SRR17520069. 19274874  
SRR17520069. 19274876  
SRR17520069. 19274878  
SRR17520069. 19274880  
SRR17520069. 19274882  
SRR17520069. 19274884  
SRR17520069. 19274886  
SRR17520069. 19274888  
SRR17520069. 19274890  
SRR17520069. 19274892  
SRR17520069. 19274894  
SRR17520069. 19274896  
SRR17520069. 19274898  
SRR17520069. 19274900  
SRR17520069. 19274902  
SRR17520069. 19274904  
SRR17520069. 19274906  
SRR17520069. 19274908  
SRR17520069. 19274910  
SRR17520069. 19274912  
SRR17520069. 19279418  
SRR17520069. 19279420  
SRR17520069. 19279422  
SRR17520069. 19279424  
SRR17520069. 19279428  
SRR17520069. 19279430  
SRR17520069. 19279432  
SRR17520069. 19279434  
SRR17520069. 19279436  
SRR17520069. 19279438  
SRR17520069. 19279440  
SRR17520069. 19279442  
SRR17520069. 19279444  
SRR17520069. 19279446

SRR17520069. 19279448  
SRR17520069. 19279450  
SRR17520069. 19279452  
SRR17520069. 19279456  
SRR17520069. 19279458  
SRR17520069. 19279460  
SRR17520069. 19279462  
SRR17520069. 19279466  
SRR17520069. 19279468  
SRR17520069. 19279470  
SRR17520069. 19279472  
SRR17520069. 19279476  
SRR17520069. 19279478  
SRR17520069. 19279480  
SRR17520069. 19279482  
SRR17520069. 19279484  
SRR17520069. 19279486  
SRR17520069. 19279488  
SRR17520069. 19279492  
SRR17520069. 19279494  
SRR17520069. 19279496  
SRR17520069. 19279498  
SRR17520069. 19279500  
SRR17520069. 19279502  
SRR17520069. 19279504  
SRR17520069. 19279506  
SRR17520069. 19279508  
SRR17520069. 19279510  
SRR17520069. 19279512  
SRR17520069. 19279514  
SRR17520069. 19279516  
SRR17520069. 19279518  
SRR17520069. 19279520  
SRR17520069. 19279522  
SRR17520069. 19279524  
SRR17520069. 19279526  
SRR17520069. 19279528  
SRR17520069. 19279530  
SRR17520069. 19279881  
SRR17520069. 19279883  
SRR17520069. 19279887  
SRR17520069. 19279889  
SRR17520069. 19279891  
SRR17520069. 19280513  
SRR17520069. 19280515  
SRR17520069. 19280519  
SRR17520069. 19280521

SRR17520069.19280523  
SRR17520069.19280525  
SRR17520069.19280527  
SRR17520069.19280529  
SRR17520069.19280531  
SRR17520069.19280533  
SRR17520069.19280535  
SRR17520069.19280537  
SRR17520069.19299214  
SRR17520069.19299216  
SRR17520069.19299218  
SRR17520069.19299220  
SRR17520069.19299222  
SRR17520069.19299224  
SRR17520069.19299226  
SRR17520069.19299228  
SRR17520069.19305619  
SRR17520069.19305621  
SRR17520069.19305623  
SRR17520069.19305625  
SRR17520069.19305627  
SRR17520069.19306986  
SRR17520069.19306988  
SRR17520069.19324066  
SRR17520069.19324068  
SRR17520069.19324070  
SRR17520069.19324072  
SRR17520069.19324074  
SRR17520069.19324078  
SRR17520069.19324080  
SRR17520069.19324082  
SRR17520069.19324084  
SRR17520069.19324086  
SRR17520069.19324088  
SRR17520069.19324090  
SRR17520069.19324092  
SRR17520069.19324094  
SRR17520069.19324096  
SRR17520069.19324098  
SRR17520069.19324100  
SRR17520069.19324102  
SRR17520069.19324104  
SRR17520069.19324106  
SRR17520069.19324110  
SRR17520069.19324112  
SRR17520069.19324114  
SRR17520069.19324116

SRR17520069. 19324118  
SRR17520069. 19324120  
SRR17520069. 19324124  
SRR17520069. 19324126  
SRR17520069. 19324128  
SRR17520069. 19324130  
SRR17520069. 19324132  
SRR17520069. 19324134  
SRR17520069. 19324136  
SRR17520069. 19324138  
SRR17520069. 19324140  
SRR17520069. 19324142  
SRR17520069. 19324144  
SRR17520069. 19324146  
SRR17520069. 19324148  
SRR17520069. 19324150  
SRR17520069. 19324152  
SRR17520069. 19324154  
SRR17520069. 19324156  
SRR17520069. 19324158  
SRR17520069. 19324160  
SRR17520069. 19324162  
SRR17520069. 19324164  
SRR17520069. 19324166  
SRR17520069. 19324168  
SRR17520069. 19324172  
SRR17520069. 19324174  
SRR17520069. 19324176  
SRR17520069. 19324178  
SRR17520069. 19324180  
SRR17520069. 19324182  
SRR17520069. 19324186  
SRR17520069. 19324188  
SRR17520069. 19324190  
SRR17520069. 19324192  
SRR17520069. 19324194  
SRR17520069. 19324196  
SRR17520069. 19324208  
SRR17520069. 19324226  
SRR17520069. 19324228  
SRR17520069. 19324230  
SRR17520069. 19324232  
SRR17520069. 19329331  
SRR17520069. 19329333  
SRR17520069. 19329335  
SRR17520069. 19329337  
SRR17520069. 19329339

SRR17520069. 19329341  
SRR17520069. 19329343  
SRR17520069. 19329345  
SRR17520069. 19329347  
SRR17520069. 19329349  
SRR17520069. 19329351  
SRR17520069. 19329353  
SRR17520069. 19329355  
SRR17520069. 19329357  
SRR17520069. 19329359  
SRR17520069. 19329361  
SRR17520069. 19329363  
SRR17520069. 19329365  
SRR17520069. 19329367  
SRR17520069. 19329369  
SRR17520069. 19329371  
SRR17520069. 19329373  
SRR17520069. 19329375  
SRR17520069. 19329377  
SRR17520069. 19329379  
SRR17520069. 19329381  
SRR17520069. 19329383  
SRR17520069. 19329385  
SRR17520069. 19329387  
SRR17520069. 19329389  
SRR17520069. 19329391  
SRR17520069. 19329393  
SRR17520069. 19329395  
SRR17520069. 19329397  
SRR17520069. 19329399  
SRR17520069. 19329401  
SRR17520069. 19329405  
SRR17520069. 19329407  
SRR17520069. 19329409  
SRR17520069. 19329411  
SRR17520069. 19329413  
SRR17520069. 19329415  
SRR17520069. 19329417  
SRR17520069. 19329419  
SRR17520069. 19329421  
SRR17520069. 19329423  
SRR17520069. 19329425  
SRR17520069. 19329427  
SRR17520069. 19329429  
SRR17520069. 19329431  
SRR17520069. 19329433  
SRR17520069. 19329435

SRR17520069. 19329437  
SRR17520069. 19329439  
SRR17520069. 19329441  
SRR17520069. 19329443  
SRR17520069. 19329445  
SRR17520069. 19329447  
SRR17520069. 19329449  
SRR17520069. 19329451  
SRR17520069. 19329453  
SRR17520069. 19329455  
SRR17520069. 19329457  
SRR17520069. 19330369  
SRR17520069. 19330371  
SRR17520069. 19330373  
SRR17520069. 19330375  
SRR17520069. 19334643  
SRR17520069. 19334645  
SRR17520069. 19334649  
SRR17520069. 19337299  
SRR17520069. 19337301  
SRR17520069. 19337303  
SRR17520069. 19337305  
SRR17520069. 19337307  
SRR17520069. 19337309  
SRR17520069. 19337311  
SRR17520069. 19337313  
SRR17520069. 19337315  
SRR17520069. 19337317  
SRR17520069. 19337319  
SRR17520069. 19337321  
SRR17520069. 19337323  
SRR17520069. 19337325  
SRR17520069. 19337327  
SRR17520069. 19337329  
SRR17520069. 19337331  
SRR17520069. 19337333  
SRR17520069. 19337335  
SRR17520069. 19337337  
SRR17520069. 19337339  
SRR17520069. 19337341  
SRR17520069. 19337343  
SRR17520069. 19337345  
SRR17520069. 19337347  
SRR17520069. 19337349  
SRR17520069. 19337351  
SRR17520069. 19337353  
SRR17520069. 19337355

SRR17520069. 19337357  
SRR17520069. 19337359  
SRR17520069. 19337361  
SRR17520069. 19337363  
SRR17520069. 19337365  
SRR17520069. 19337367  
SRR17520069. 19337369  
SRR17520069. 19337371  
SRR17520069. 19337373  
SRR17520069. 19337375  
SRR17520069. 19337377  
SRR17520069. 19337379  
SRR17520069. 19337381  
SRR17520069. 19337383  
SRR17520069. 19337385  
SRR17520069. 19337387  
SRR17520069. 19337391  
SRR17520069. 19337395  
SRR17520069. 19337397  
SRR17520069. 19337399  
SRR17520069. 19337401  
SRR17520069. 19337403  
SRR17520069. 19337405  
SRR17520069. 19337407  
SRR17520069. 19337409  
SRR17520069. 19337411  
SRR17520069. 19337415  
SRR17520069. 19337417  
SRR17520069. 19337419  
SRR17520069. 19337421  
SRR17520069. 19337427  
SRR17520069. 19337429  
SRR17520069. 19337431  
SRR17520069. 19337433  
SRR17520069. 19337435  
SRR17520069. 19337437  
SRR17520069. 19337439  
SRR17520069. 19337441  
SRR17520069. 19337443  
SRR17520069. 19337445  
SRR17520069. 19337447  
SRR17520069. 19337449  
SRR17520069. 19337451  
SRR17520069. 19337453  
SRR17520069. 19337455  
SRR17520069. 19337457  
SRR17520069. 19337459

SRR17520069. 19337461  
SRR17520069. 19337463  
SRR17520069. 19337465  
SRR17520069. 19337467  
SRR17520069. 19337469  
SRR17520069. 19337471  
SRR17520069. 19339061  
SRR17520069. 19339063  
SRR17520069. 19339065  
SRR17520069. 19339067  
SRR17520069. 19339069  
SRR17520069. 19339071  
SRR17520069. 19339073  
SRR17520069. 19339075  
SRR17520069. 19339077  
SRR17520069. 19339079  
SRR17520069. 19339081  
SRR17520069. 19339083  
SRR17520069. 19339085  
SRR17520069. 19339087  
SRR17520069. 19339089  
SRR17520069. 19339091  
SRR17520069. 19339093  
SRR17520069. 19339095  
SRR17520069. 19339097  
SRR17520069. 19339099  
SRR17520069. 19339101  
SRR17520069. 19339103  
SRR17520069. 19339105  
SRR17520069. 19339107  
SRR17520069. 19339109  
SRR17520069. 19339111  
SRR17520069. 19339113  
SRR17520069. 19339115  
SRR17520069. 19339117  
SRR17520069. 19339119  
SRR17520069. 19339121  
SRR17520069. 19341303  
SRR17520069. 19341305  
SRR17520069. 19341307  
SRR17520069. 19341309  
SRR17520069. 19341311  
SRR17520069. 19341315  
SRR17520069. 19341317  
SRR17520069. 19341321  
SRR17520069. 19341323  
SRR17520069. 19341325



SRR17520069. 19341329  
SRR17520069. 19341333  
SRR17520069. 19341335  
SRR17520069. 19341337  
SRR17520069. 19341339  
SRR17520069. 19342471  
SRR17520069. 19342473  
SRR17520069. 19342475  
SRR17520069. 19348757  
SRR17520069. 19357234  
SRR17520069. 19357236  
SRR17520069. 19357238  
SRR17520069. 19357240  
SRR17520069. 19357242  
SRR17520069. 19357244  
SRR17520069. 19357246  
SRR17520069. 19357248  
SRR17520069. 19357250  
SRR17520069. 19357252  
SRR17520069. 19357254  
SRR17520069. 19357256  
SRR17520069. 19357258  
SRR17520069. 19357260  
SRR17520069. 19357262  
SRR17520069. 19357264  
SRR17520069. 19357266  
SRR17520069. 19357268  
SRR17520069. 19357270  
SRR17520069. 19357272  
SRR17520069. 19357274  
SRR17520069. 19357276  
SRR17520069. 19357278  
SRR17520069. 19357280  
SRR17520069. 19357282  
SRR17520069. 19357284  
SRR17520069. 19357286  
SRR17520069. 19357288  
SRR17520069. 19357290  
SRR17520069. 19357292  
SRR17520069. 19357294  
SRR17520069. 19357296  
SRR17520069. 19357298  
SRR17520069. 19357300  
SRR17520069. 19357302  
SRR17520069. 19359527  
SRR17520069. 19359533  
SRR17520069. 19359535

SRR17520069. 19359537  
SRR17520069. 19359539  
SRR17520069. 19359541  
SRR17520069. 19360999  
SRR17520069. 19361001  
SRR17520069. 19361003  
SRR17520069. 19361005  
SRR17520069. 19361009  
SRR17520069. 19361011  
SRR17520069. 19361013  
SRR17520069. 19361015  
SRR17520069. 19361017  
SRR17520069. 19361019  
SRR17520069. 19361021  
SRR17520069. 19361023  
SRR17520069. 19361454  
SRR17520069. 19361456  
SRR17520069. 19361458  
SRR17520069. 19361460  
SRR17520069. 19361462  
SRR17520069. 19361464  
SRR17520069. 19361466  
SRR17520069. 19361468  
SRR17520069. 19361470  
SRR17520069. 19361472  
SRR17520069. 19361474  
SRR17520069. 19361476  
SRR17520069. 19361480  
SRR17520069. 19361482  
SRR17520069. 19361484  
SRR17520069. 19361486  
SRR17520069. 19361488  
SRR17520069. 19361490  
SRR17520069. 19361492  
SRR17520069. 19361494  
SRR17520069. 19361496  
SRR17520069. 19361498  
SRR17520069. 19361500  
SRR17520069. 19362816  
SRR17520069. 19362818  
SRR17520069. 19362820  
SRR17520069. 19362822  
SRR17520069. 19362824  
SRR17520069. 19362826  
SRR17520069. 19362828  
SRR17520069. 19362830  
SRR17520069. 19362832

SRR17520069. 19362834  
SRR17520069. 19362836  
SRR17520069. 19362838  
SRR17520069. 19362840  
SRR17520069. 19362842  
SRR17520069. 19364630  
SRR17520069. 19364632  
SRR17520069. 19364634  
SRR17520069. 19364636  
SRR17520069. 19368267  
SRR17520069. 19368269  
SRR17520069. 19368271  
SRR17520069. 19368275  
SRR17520069. 19368277  
SRR17520069. 19368279  
SRR17520069. 19368281  
SRR17520069. 19368283  
SRR17520069. 19368285  
SRR17520069. 19368287  
SRR17520069. 19368289  
SRR17520069. 19368291  
SRR17520069. 19368293  
SRR17520069. 19368295  
SRR17520069. 19368297  
SRR17520069. 19368299  
SRR17520069. 19368301  
SRR17520069. 19368303  
SRR17520069. 19368305  
SRR17520069. 19368307  
SRR17520069. 19368309  
SRR17520069. 19368311  
SRR17520069. 19368313  
SRR17520069. 19368315  
SRR17520069. 19368317  
SRR17520069. 19368319  
SRR17520069. 19368323  
SRR17520069. 19368325  
SRR17520069. 19368327  
SRR17520069. 19368329  
SRR17520069. 19368331  
SRR17520069. 19368333  
SRR17520069. 19368335  
SRR17520069. 19368337  
SRR17520069. 19368339  
SRR17520069. 19368341  
SRR17520069. 19368343  
SRR17520069. 19368345

SRR17520069. 19368347  
SRR17520069. 19368818  
SRR17520069. 19368820  
SRR17520069. 19368822  
SRR17520069. 19368824  
SRR17520069. 19368826  
SRR17520069. 19368828  
SRR17520069. 19368830  
SRR17520069. 19368832  
SRR17520069. 19368834  
SRR17520069. 19368836  
SRR17520069. 19368838  
SRR17520069. 19368840  
SRR17520069. 19368842  
SRR17520069. 19368844  
SRR17520069. 19368846  
SRR17520069. 19368848  
SRR17520069. 19368850  
SRR17520069. 19368852  
SRR17520069. 19368854  
SRR17520069. 19368856  
SRR17520069. 19368858  
SRR17520069. 19368860  
SRR17520069. 19368862  
SRR17520069. 19368864  
SRR17520069. 19368866  
SRR17520069. 19368868  
SRR17520069. 19368872  
SRR17520069. 19368874  
SRR17520069. 19368876  
SRR17520069. 19368878  
SRR17520069. 19368880  
SRR17520069. 19368882  
SRR17520069. 19368884  
SRR17520069. 19368886  
SRR17520069. 19368888  
SRR17520069. 19368890  
SRR17520069. 19383144  
SRR17520069. 19383146  
SRR17520069. 19383148  
SRR17520069. 19383150  
SRR17520069. 19383152  
SRR17520069. 19383154  
SRR17520069. 19383156  
SRR17520069. 19383158  
SRR17520069. 19383160  
SRR17520069. 19383162

SRR17520069. 19383164  
SRR17520069. 19383166  
SRR17520069. 19383168  
SRR17520069. 19383170  
SRR17520069. 19383172  
SRR17520069. 19383176  
SRR17520069. 19383178  
SRR17520069. 19383180  
SRR17520069. 19383182  
SRR17520069. 19383184  
SRR17520069. 19383186  
SRR17520069. 19383188  
SRR17520069. 19383192  
SRR17520069. 19383194  
SRR17520069. 19383196  
SRR17520069. 19383198  
SRR17520069. 19383200  
SRR17520069. 19383202  
SRR17520069. 19383204  
SRR17520069. 19383206  
SRR17520069. 19383208  
SRR17520069. 19383212  
SRR17520069. 19383214  
SRR17520069. 19383218  
SRR17520069. 19383220  
SRR17520069. 19383222  
SRR17520069. 19383555  
SRR17520069. 19383557  
SRR17520069. 19383559  
SRR17520069. 19386198  
SRR17520069. 19389755  
SRR17520069. 19389757  
SRR17520069. 19389759  
SRR17520069. 19389761  
SRR17520069. 19389765  
SRR17520069. 19394515  
SRR17520069. 19394517  
SRR17520069. 19394519  
SRR17520069. 19394521  
SRR17520069. 19394523  
SRR17520069. 19394525  
SRR17520069. 19394527  
SRR17520069. 19394529  
SRR17520069. 19394531  
SRR17520069. 19394533  
SRR17520069. 19394535  
SRR17520069. 19394537

SRR17520069. 19394539  
SRR17520069. 19394543  
SRR17520069. 19394545  
SRR17520069. 19394547  
SRR17520069. 19394549  
SRR17520069. 19394551  
SRR17520069. 19394553  
SRR17520069. 19394555  
SRR17520069. 19394557  
SRR17520069. 19394559  
SRR17520069. 19394561  
SRR17520069. 19394563  
SRR17520069. 19394565  
SRR17520069. 19394567  
SRR17520069. 19394569  
SRR17520069. 19394571  
SRR17520069. 19394573  
SRR17520069. 19394575  
SRR17520069. 19394577  
SRR17520069. 19394579  
SRR17520069. 19394581  
SRR17520069. 19394583  
SRR17520069. 19394585  
SRR17520069. 19394587  
SRR17520069. 19394589  
SRR17520069. 19394591  
SRR17520069. 19394593  
SRR17520069. 19394595  
SRR17520069. 19394597  
SRR17520069. 19402584  
SRR17520069. 19402586  
SRR17520069. 19402588  
SRR17520069. 19402590  
SRR17520069. 19402592  
SRR17520069. 19402594  
SRR17520069. 19402596  
SRR17520069. 19402598  
SRR17520069. 19402600  
SRR17520069. 19402602  
SRR17520069. 19402604  
SRR17520069. 19402606  
SRR17520069. 19402608  
SRR17520069. 19402610  
SRR17520069. 19402612  
SRR17520069. 19402614  
SRR17520069. 19402616  
SRR17520069. 19402618

SRR17520069. 19402620  
SRR17520069. 19402622  
SRR17520069. 19402624  
SRR17520069. 19402626  
SRR17520069. 19402634  
SRR17520069. 19402636  
SRR17520069. 19402638  
SRR17520069. 19402640  
SRR17520069. 19402642  
SRR17520069. 19402644  
SRR17520069. 19402646  
SRR17520069. 19402648  
SRR17520069. 19402650  
SRR17520069. 19402652  
SRR17520069. 19402654  
SRR17520069. 19402656  
SRR17520069. 19402660  
SRR17520069. 19402662  
SRR17520069. 19402664  
SRR17520069. 19402666  
SRR17520069. 19402668  
SRR17520069. 19402670  
SRR17520069. 19402672  
SRR17520069. 19402674  
SRR17520069. 19402676  
SRR17520069. 19402678  
SRR17520069. 19402680  
SRR17520069. 19402682  
SRR17520069. 19402684  
SRR17520069. 19402686  
SRR17520069. 19402688  
SRR17520069. 19402690  
SRR17520069. 19402692  
SRR17520069. 19402694  
SRR17520069. 19402696  
SRR17520069. 19402698  
SRR17520069. 19402700  
SRR17520069. 19402702  
SRR17520069. 19402704  
SRR17520069. 19402706  
SRR17520069. 19402708  
SRR17520069. 19402710  
SRR17520069. 19402712  
SRR17520069. 19402714  
SRR17520069. 19402716  
SRR17520069. 19402718  
SRR17520069. 19421091

SRR17520069.19421093  
SRR17520069.19424645  
SRR17520069.19424647  
SRR17520069.19424649  
SRR17520069.19424651  
SRR17520069.19424653  
SRR17520069.19424655  
SRR17520069.19424657  
SRR17520069.19424659  
SRR17520069.19424661  
SRR17520069.19424663  
SRR17520069.19424665  
SRR17520069.19424667  
SRR17520069.19424669  
SRR17520069.19424671  
SRR17520069.19424673  
SRR17520069.19429310  
SRR17520069.19429312  
SRR17520069.19429314  
SRR17520069.19429316  
SRR17520069.19435602  
SRR17520069.19435604  
SRR17520069.19435606  
SRR17520069.19435608  
SRR17520069.19435610  
SRR17520069.19435612  
SRR17520069.19435614  
SRR17520069.19435616  
SRR17520069.19435618  
SRR17520069.19435620  
SRR17520069.19435622  
SRR17520069.19435630  
SRR17520069.19435632  
SRR17520069.19435634  
SRR17520069.19435636  
SRR17520069.19435640  
SRR17520069.19435642  
SRR17520069.19435644  
SRR17520069.19443137  
SRR17520069.19443139  
SRR17520069.19443141  
SRR17520069.19443143  
SRR17520069.19443145  
SRR17520069.19443147  
SRR17520069.19443149  
SRR17520069.19443151  
SRR17520069.19443153



SRR17520069.19443155  
SRR17520069.19443157  
SRR17520069.19443159  
SRR17520069.19443161  
SRR17520069.19443163  
SRR17520069.19443165  
SRR17520069.19443167  
SRR17520069.19443169  
SRR17520069.19443171  
SRR17520069.19443173  
SRR17520069.19443175  
SRR17520069.19443177  
SRR17520069.19443179  
SRR17520069.19443181  
SRR17520069.19443183  
SRR17520069.19443185  
SRR17520069.19443187  
SRR17520069.19443189  
SRR17520069.19443191  
SRR17520069.19443193  
SRR17520069.19443195  
SRR17520069.19443197  
SRR17520069.19443199  
SRR17520069.19443201  
SRR17520069.19443203  
SRR17520069.19443205  
SRR17520069.19443207  
SRR17520069.19443209  
SRR17520069.19443213  
SRR17520069.19443215  
SRR17520069.19443217  
SRR17520069.19443219  
SRR17520069.19443221  
SRR17520069.19443223  
SRR17520069.19443225  
SRR17520069.19443227  
SRR17520069.19443229  
SRR17520069.19443231  
SRR17520069.19443233  
SRR17520069.19443235  
SRR17520069.19443237  
SRR17520069.19443239  
SRR17520069.19443241  
SRR17520069.19443243  
SRR17520069.19443245  
SRR17520069.19443247  
SRR17520069.19443249

SRR17520069.19443251  
SRR17520069.19443253  
SRR17520069.19443255  
SRR17520069.19443257  
SRR17520069.19443259  
SRR17520069.19443261  
SRR17520069.19443263  
SRR17520069.19443265  
SRR17520069.19443267  
SRR17520069.19443269  
SRR17520069.19443271  
SRR17520069.19443273  
SRR17520069.19458955  
SRR17520069.19458957  
SRR17520069.19458959  
SRR17520069.19458961  
SRR17520069.19458963  
SRR17520069.19458965  
SRR17520069.19458967  
SRR17520069.19458969  
SRR17520069.19458971  
SRR17520069.19458973  
SRR17520069.19458975  
SRR17520069.19458977  
SRR17520069.19458979  
SRR17520069.19458981  
SRR17520069.19458983  
SRR17520069.19458985  
SRR17520069.19460317  
SRR17520069.19460319  
SRR17520069.19460321  
SRR17520069.19460323  
SRR17520069.19462685  
SRR17520069.19462687  
SRR17520069.19462689  
SRR17520069.19462691  
SRR17520069.19462693  
SRR17520069.19462695  
SRR17520069.19462697  
SRR17520069.19462699  
SRR17520069.19462701  
SRR17520069.19462703  
SRR17520069.19462705  
SRR17520069.19462707  
SRR17520069.19462709  
SRR17520069.19462711  
SRR17520069.19462713

SRR17520069. 19462715  
SRR17520069. 19462717  
SRR17520069. 19462721  
SRR17520069. 19462723  
SRR17520069. 19462725  
SRR17520069. 19462727  
SRR17520069. 19462729  
SRR17520069. 19462731  
SRR17520069. 19462733  
SRR17520069. 19462735  
SRR17520069. 19462737  
SRR17520069. 19462739  
SRR17520069. 19462741  
SRR17520069. 19462743  
SRR17520069. 19462751  
SRR17520069. 19471507  
SRR17520069. 19471509  
SRR17520069. 19471511  
SRR17520069. 19471513  
SRR17520069. 19471515  
SRR17520069. 19473799  
SRR17520069. 19473801  
SRR17520069. 19473803  
SRR17520069. 19473805  
SRR17520069. 19484262  
SRR17520069. 19484264  
SRR17520069. 19484266  
SRR17520069. 19484268  
SRR17520069. 19484270  
SRR17520069. 19484272  
SRR17520069. 19484274  
SRR17520069. 19484276  
SRR17520069. 19484278  
SRR17520069. 19484280  
SRR17520069. 19484282  
SRR17520069. 19484284  
SRR17520069. 19484286  
SRR17520069. 19484288  
SRR17520069. 19485546  
SRR17520069. 19485548  
SRR17520069. 19485550  
SRR17520069. 19485552  
SRR17520069. 19485554  
SRR17520069. 19485556  
SRR17520069. 19485558  
SRR17520069. 19485560  
SRR17520069. 19485562

SRR17520069. 19485564  
SRR17520069. 19486127  
SRR17520069. 19499408  
SRR17520069. 19499410  
SRR17520069. 19499412  
SRR17520069. 19499414  
SRR17520069. 19499416  
SRR17520069. 19499418  
SRR17520069. 19499858  
SRR17520069. 19500560  
SRR17520069. 19500562  
SRR17520069. 19500564  
SRR17520069. 19500566  
SRR17520069. 19500568  
SRR17520069. 19500570  
SRR17520069. 19500572  
SRR17520069. 19500574  
SRR17520069. 19500576  
SRR17520069. 19500578  
SRR17520069. 19500580  
SRR17520069. 19500582  
SRR17520069. 19500584  
SRR17520069. 19500586  
SRR17520069. 19517106  
SRR17520069. 19517775  
SRR17520069. 19528897  
SRR17520069. 19528899  
SRR17520069. 19528901  
SRR17520069. 19528903  
SRR17520069. 19528905  
SRR17520069. 19528907  
SRR17520069. 19528909  
SRR17520069. 19528911  
SRR17520069. 19528913  
SRR17520069. 19528915  
SRR17520069. 19528917  
SRR17520069. 19528919  
SRR17520069. 19537122  
SRR17520069. 19537124  
SRR17520069. 19537126  
SRR17520069. 19537128  
SRR17520069. 19537130  
SRR17520069. 19537134  
SRR17520069. 19537136  
SRR17520069. 19537138  
SRR17520069. 19537140  
SRR17520069. 19537144

SRR17520069. 19537152  
SRR17520069. 19537156  
SRR17520069. 19537160  
SRR17520069. 19543593  
SRR17520069. 19543595  
SRR17520069. 19543597  
SRR17520069. 19543599  
SRR17520069. 19543601  
SRR17520069. 19543603  
SRR17520069. 19545019  
SRR17520069. 19545021  
SRR17520069. 19545023  
SRR17520069. 19545025  
SRR17520069. 19545027  
SRR17520069. 19545029  
SRR17520069. 19545031  
SRR17520069. 19545033  
SRR17520069. 19545035  
SRR17520069. 19545037  
SRR17520069. 19545039  
SRR17520069. 19545041  
SRR17520069. 19545043  
SRR17520069. 19545045  
SRR17520069. 19545047  
SRR17520069. 19545049  
SRR17520069. 19548648  
SRR17520069. 19548650  
SRR17520069. 19548652  
SRR17520069. 19548654  
SRR17520069. 19548656  
SRR17520069. 19548658  
SRR17520069. 19548660  
SRR17520069. 19548662  
SRR17520069. 19548664  
SRR17520069. 19548666  
SRR17520069. 19548668  
SRR17520069. 19548670  
SRR17520069. 19548966  
SRR17520069. 19548968  
SRR17520069. 19548974  
SRR17520069. 19548976  
SRR17520069. 19553256  
SRR17520069. 19553260  
SRR17520069. 19553262  
SRR17520069. 19553264  
SRR17520069. 19553266  
SRR17520069. 19553268

SRR17520069. 19553270  
SRR17520069. 19553272  
SRR17520069. 19556076  
SRR17520069. 19556078  
SRR17520069. 19556080  
SRR17520069. 19556082  
SRR17520069. 19556084  
SRR17520069. 19556086  
SRR17520069. 19556088  
SRR17520069. 19556090  
SRR17520069. 19556092  
SRR17520069. 19556094  
SRR17520069. 19556096  
SRR17520069. 19556098  
SRR17520069. 19557622  
SRR17520069. 19557624  
SRR17520069. 19557626  
SRR17520069. 19557628  
SRR17520069. 19557630  
SRR17520069. 19557632  
SRR17520069. 19557634  
SRR17520069. 19557636  
SRR17520069. 19557638  
SRR17520069. 19557640  
SRR17520069. 19557642  
SRR17520069. 19557646  
SRR17520069. 19557648  
SRR17520069. 19557650  
SRR17520069. 19557652  
SRR17520069. 19557654  
SRR17520069. 19557656  
SRR17520069. 19557658  
SRR17520069. 19557660  
SRR17520069. 19557662  
SRR17520069. 19557664  
SRR17520069. 19557666  
SRR17520069. 19557668  
SRR17520069. 19557670  
SRR17520069. 19557672  
SRR17520069. 19557674  
SRR17520069. 19557678  
SRR17520069. 1026  
SRR17520069. 1034  
SRR17520069. 2811  
SRR17520069. 2835  
SRR17520069. 2841  
SRR17520069. 2861

SRR17520069. 7639  
SRR17520069. 7657  
SRR17520069. 7677  
SRR17520069. 7679  
SRR17520069. 7685  
SRR17520069. 9784  
SRR17520069. 13806  
SRR17520069. 23570  
SRR17520069. 23803  
SRR17520069. 23817  
SRR17520069. 23845  
SRR17520069. 23853  
SRR17520069. 29601  
SRR17520069. 29603  
SRR17520069. 29605  
SRR17520069. 29607  
SRR17520069. 30013  
SRR17520069. 30031  
SRR17520069. 36682  
SRR17520069. 53631  
SRR17520069. 53675  
SRR17520069. 53715  
SRR17520069. 53735  
SRR17520069. 53747  
SRR17520069. 53781  
SRR17520069. 53795  
SRR17520069. 53811  
SRR17520069. 53815  
SRR17520069. 53817  
SRR17520069. 56894  
SRR17520069. 65387  
SRR17520069. 79058  
SRR17520069. 108454  
SRR17520069. 114735  
SRR17520069. 120846  
SRR17520069. 123355  
SRR17520069. 131687  
SRR17520069. 145013  
SRR17520069. 148124  
SRR17520069. 148126  
SRR17520069. 148142  
SRR17520069. 148154  
SRR17520069. 148166  
SRR17520069. 148174  
SRR17520069. 148176  
SRR17520069. 151531  
SRR17520069. 151567

SRR17520069. 151571  
SRR17520069. 151583  
SRR17520069. 151589  
SRR17520069. 154631  
SRR17520069. 154685  
SRR17520069. 155712  
SRR17520069. 155720  
SRR17520069. 155764  
SRR17520069. 155772  
SRR17520069. 155782  
SRR17520069. 155806  
SRR17520069. 155808  
SRR17520069. 155815  
SRR17520069. 162874  
SRR17520069. 165381  
SRR17520069. 176812  
SRR17520069. 176852  
SRR17520069. 176866  
SRR17520069. 176876  
SRR17520069. 179471  
SRR17520069. 179475  
SRR17520069. 179497  
SRR17520069. 179501  
SRR17520069. 180909  
SRR17520069. 180911  
SRR17520069. 186021  
SRR17520069. 192495  
SRR17520069. 192499  
SRR17520069. 192501  
SRR17520069. 192503  
SRR17520069. 192505  
SRR17520069. 192507  
SRR17520069. 192509  
SRR17520069. 192511  
SRR17520069. 192513  
SRR17520069. 192515  
SRR17520069. 192517  
SRR17520069. 192519  
SRR17520069. 192521  
SRR17520069. 192523  
SRR17520069. 192525  
SRR17520069. 192527  
SRR17520069. 192529  
SRR17520069. 192531  
SRR17520069. 192533  
SRR17520069. 192535  
SRR17520069. 192537



SRR17520069.192539  
SRR17520069.193994  
SRR17520069.194006  
SRR17520069.194008  
SRR17520069.194038  
SRR17520069.204629  
SRR17520069.207501  
SRR17520069.214406  
SRR17520069.225203  
SRR17520069.227275  
SRR17520069.234833  
SRR17520069.234839  
SRR17520069.234851  
SRR17520069.234877  
SRR17520069.234891  
SRR17520069.234893  
SRR17520069.234905  
SRR17520069.234909  
SRR17520069.245532  
SRR17520069.245590  
SRR17520069.245592  
SRR17520069.245626  
SRR17520069.263614  
SRR17520069.265516  
SRR17520069.265532  
SRR17520069.266052  
SRR17520069.266190  
SRR17520069.266202  
SRR17520069.279416  
SRR17520069.298533  
SRR17520069.298547  
SRR17520069.301023  
SRR17520069.305948  
SRR17520069.311483  
SRR17520069.311571  
SRR17520069.311619  
SRR17520069.312857  
SRR17520069.317266  
SRR17520069.317484  
SRR17520069.317486  
SRR17520069.317488  
SRR17520069.317490  
SRR17520069.317491  
SRR17520069.317493  
SRR17520069.317495  
SRR17520069.317497  
SRR17520069.317499

SRR17520069.317501  
SRR17520069.317503  
SRR17520069.317507  
SRR17520069.317509  
SRR17520069.317511  
SRR17520069.317513  
SRR17520069.317515  
SRR17520069.317517  
SRR17520069.317519  
SRR17520069.317521  
SRR17520069.317523  
SRR17520069.317525  
SRR17520069.317527  
SRR17520069.317529  
SRR17520069.317531  
SRR17520069.317533  
SRR17520069.319716  
SRR17520069.319717  
SRR17520069.319719  
SRR17520069.319721  
SRR17520069.319723  
SRR17520069.319725  
SRR17520069.319727  
SRR17520069.319729  
SRR17520069.319731  
SRR17520069.319733  
SRR17520069.321121  
SRR17520069.325789  
SRR17520069.325807  
SRR17520069.329204  
SRR17520069.332879  
SRR17520069.341051  
SRR17520069.343406  
SRR17520069.348571  
SRR17520069.354058  
SRR17520069.360024  
SRR17520069.360034  
SRR17520069.360038  
SRR17520069.363295  
SRR17520069.366205  
SRR17520069.366243  
SRR17520069.366293  
SRR17520069.366690  
SRR17520069.366860  
SRR17520069.366926  
SRR17520069.367002  
SRR17520069.367016

SRR17520069. 368215  
SRR17520069. 368297  
SRR17520069. 368323  
SRR17520069. 368331  
SRR17520069. 368337  
SRR17520069. 371554  
SRR17520069. 372404  
SRR17520069. 372406  
SRR17520069. 373230  
SRR17520069. 373250  
SRR17520069. 381848  
SRR17520069. 383646  
SRR17520069. 383656  
SRR17520069. 383670  
SRR17520069. 383696  
SRR17520069. 390297  
SRR17520069. 390414  
SRR17520069. 390422  
SRR17520069. 390446  
SRR17520069. 395198  
SRR17520069. 396357  
SRR17520069. 415807  
SRR17520069. 420361  
SRR17520069. 429193  
SRR17520069. 433562  
SRR17520069. 434644  
SRR17520069. 435046  
SRR17520069. 446104  
SRR17520069. 446106  
SRR17520069. 446108  
SRR17520069. 446110  
SRR17520069. 446112  
SRR17520069. 446114  
SRR17520069. 446116  
SRR17520069. 446118  
SRR17520069. 446120  
SRR17520069. 446122  
SRR17520069. 446124  
SRR17520069. 446126  
SRR17520069. 446128  
SRR17520069. 446130  
SRR17520069. 446132  
SRR17520069. 446134  
SRR17520069. 472619  
SRR17520069. 475106  
SRR17520069. 475112  
SRR17520069. 475124

SRR17520069. 491417  
SRR17520069. 500897  
SRR17520069. 504402  
SRR17520069. 521935  
SRR17520069. 538209  
SRR17520069. 538213  
SRR17520069. 540248  
SRR17520069. 544133  
SRR17520069. 544151  
SRR17520069. 544175  
SRR17520069. 544943  
SRR17520069. 545722  
SRR17520069. 552337  
SRR17520069. 556358  
SRR17520069. 561096  
SRR17520069. 572375  
SRR17520069. 572423  
SRR17520069. 572427  
SRR17520069. 573570  
SRR17520069. 576272  
SRR17520069. 578649  
SRR17520069. 584291  
SRR17520069. 585077  
SRR17520069. 585376  
SRR17520069. 589026  
SRR17520069. 592059  
SRR17520069. 594762  
SRR17520069. 594788  
SRR17520069. 594800  
SRR17520069. 594804  
SRR17520069. 594808  
SRR17520069. 607524  
SRR17520069. 607528  
SRR17520069. 610165  
SRR17520069. 622325  
SRR17520069. 630622  
SRR17520069. 630626  
SRR17520069. 630632  
SRR17520069. 630640  
SRR17520069. 630662  
SRR17520069. 630686  
SRR17520069. 630694  
SRR17520069. 630696  
SRR17520069. 630706  
SRR17520069. 634855  
SRR17520069. 635740  
SRR17520069. 635788

SRR17520069. 649608  
SRR17520069. 663310  
SRR17520069. 664590  
SRR17520069. 664604  
SRR17520069. 666788  
SRR17520069. 671726  
SRR17520069. 679659  
SRR17520069. 680884  
SRR17520069. 686059  
SRR17520069. 688738  
SRR17520069. 688743  
SRR17520069. 688748  
SRR17520069. 695246  
SRR17520069. 695276  
SRR17520069. 695316  
SRR17520069. 695326  
SRR17520069. 696141  
SRR17520069. 696151  
SRR17520069. 696165  
SRR17520069. 700247  
SRR17520069. 702292  
SRR17520069. 702941  
SRR17520069. 715838  
SRR17520069. 715846  
SRR17520069. 715852  
SRR17520069. 731635  
SRR17520069. 731637  
SRR17520069. 731639  
SRR17520069. 731641  
SRR17520069. 731643  
SRR17520069. 731645  
SRR17520069. 731647  
SRR17520069. 731649  
SRR17520069. 731651  
SRR17520069. 731653  
SRR17520069. 731655  
SRR17520069. 731657  
SRR17520069. 731659  
SRR17520069. 731661  
SRR17520069. 731663  
SRR17520069. 731665  
SRR17520069. 731667  
SRR17520069. 731669  
SRR17520069. 731671  
SRR17520069. 731673  
SRR17520069. 731675  
SRR17520069. 731677

SRR17520069. 731679  
SRR17520069. 731681  
SRR17520069. 731683  
SRR17520069. 731685  
SRR17520069. 731687  
SRR17520069. 732279  
SRR17520069. 732285  
SRR17520069. 732291  
SRR17520069. 732313  
SRR17520069. 732319  
SRR17520069. 732321  
SRR17520069. 733445  
SRR17520069. 737563  
SRR17520069. 739315  
SRR17520069. 739365  
SRR17520069. 751541  
SRR17520069. 751547  
SRR17520069. 751585  
SRR17520069. 751613  
SRR17520069. 752013  
SRR17520069. 753457  
SRR17520069. 755227  
SRR17520069. 755278  
SRR17520069. 755279  
SRR17520069. 755303  
SRR17520069. 764143  
SRR17520069. 764153  
SRR17520069. 764163  
SRR17520069. 764173  
SRR17520069. 764907  
SRR17520069. 764909  
SRR17520069. 769578  
SRR17520069. 769580  
SRR17520069. 772291  
SRR17520069. 772293  
SRR17520069. 772297  
SRR17520069. 772299  
SRR17520069. 772301  
SRR17520069. 772305  
SRR17520069. 772307  
SRR17520069. 772309  
SRR17520069. 772313  
SRR17520069. 772317  
SRR17520069. 772321  
SRR17520069. 772325  
SRR17520069. 772327  
SRR17520069. 772331

SRR17520069. 772333  
SRR17520069. 772335  
SRR17520069. 772337  
SRR17520069. 772339  
SRR17520069. 772341  
SRR17520069. 772345  
SRR17520069. 772347  
SRR17520069. 772349  
SRR17520069. 772351  
SRR17520069. 772357  
SRR17520069. 772359  
SRR17520069. 772361  
SRR17520069. 772363  
SRR17520069. 772365  
SRR17520069. 772367  
SRR17520069. 772369  
SRR17520069. 772371  
SRR17520069. 772373  
SRR17520069. 772375  
SRR17520069. 772377  
SRR17520069. 772381  
SRR17520069. 772383  
SRR17520069. 772385  
SRR17520069. 772387  
SRR17520069. 772389  
SRR17520069. 772391  
SRR17520069. 772393  
SRR17520069. 772395  
SRR17520069. 772397  
SRR17520069. 772399  
SRR17520069. 772401  
SRR17520069. 772403  
SRR17520069. 772405  
SRR17520069. 772409  
SRR17520069. 772413  
SRR17520069. 772415  
SRR17520069. 773996  
SRR17520069. 774004  
SRR17520069. 774030  
SRR17520069. 780393  
SRR17520069. 785441  
SRR17520069. 791392  
SRR17520069. 792178  
SRR17520069. 798830  
SRR17520069. 813059  
SRR17520069. 813861  
SRR17520069. 813877

SRR17520069.815332  
SRR17520069.816176  
SRR17520069.818301  
SRR17520069.821110  
SRR17520069.847128  
SRR17520069.847174  
SRR17520069.849595  
SRR17520069.855367  
SRR17520069.863489  
SRR17520069.865701  
SRR17520069.868442  
SRR17520069.868454  
SRR17520069.868710  
SRR17520069.868720  
SRR17520069.868740  
SRR17520069.869608  
SRR17520069.876983  
SRR17520069.877448  
SRR17520069.882278  
SRR17520069.882513  
SRR17520069.882527  
SRR17520069.882589  
SRR17520069.882607  
SRR17520069.882615  
SRR17520069.885819  
SRR17520069.885821  
SRR17520069.885825  
SRR17520069.885829  
SRR17520069.885849  
SRR17520069.885851  
SRR17520069.885871  
SRR17520069.896943  
SRR17520069.901947  
SRR17520069.901949  
SRR17520069.901951  
SRR17520069.901953  
SRR17520069.901955  
SRR17520069.901957  
SRR17520069.901959  
SRR17520069.901961  
SRR17520069.901963  
SRR17520069.901965  
SRR17520069.901967  
SRR17520069.901969  
SRR17520069.901971  
SRR17520069.901973  
SRR17520069.901975



SRR17520069.901977  
SRR17520069.901979  
SRR17520069.901981  
SRR17520069.901983  
SRR17520069.901985  
SRR17520069.901987  
SRR17520069.901989  
SRR17520069.901991  
SRR17520069.901993  
SRR17520069.901995  
SRR17520069.901997  
SRR17520069.901999  
SRR17520069.902001  
SRR17520069.902003  
SRR17520069.902005  
SRR17520069.902007  
SRR17520069.902009  
SRR17520069.902011  
SRR17520069.902013  
SRR17520069.902015  
SRR17520069.902017  
SRR17520069.902019  
SRR17520069.902021  
SRR17520069.902023  
SRR17520069.902025  
SRR17520069.902027  
SRR17520069.902029  
SRR17520069.902031  
SRR17520069.902033  
SRR17520069.902035  
SRR17520069.902037  
SRR17520069.902039  
SRR17520069.902041  
SRR17520069.902043  
SRR17520069.902045  
SRR17520069.902047  
SRR17520069.902049  
SRR17520069.902051  
SRR17520069.902053  
SRR17520069.902055  
SRR17520069.902057  
SRR17520069.902059  
SRR17520069.902061  
SRR17520069.902065  
SRR17520069.902067  
SRR17520069.902069  
SRR17520069.902071

SRR17520069.902073  
SRR17520069.902075  
SRR17520069.902077  
SRR17520069.902079  
SRR17520069.906444  
SRR17520069.906446  
SRR17520069.906448  
SRR17520069.906450  
SRR17520069.906452  
SRR17520069.913347  
SRR17520069.913351  
SRR17520069.921997  
SRR17520069.921999  
SRR17520069.922001  
SRR17520069.929987  
SRR17520069.930772  
SRR17520069.930776  
SRR17520069.930786  
SRR17520069.931757  
SRR17520069.937416  
SRR17520069.937644  
SRR17520069.957733  
SRR17520069.957741  
SRR17520069.958193  
SRR17520069.963855  
SRR17520069.971886  
SRR17520069.985449  
SRR17520069.988104  
SRR17520069.988122  
SRR17520069.988124  
SRR17520069.1000225  
SRR17520069.1017667  
SRR17520069.1022780  
SRR17520069.1022786  
SRR17520069.1032927  
SRR17520069.1033155  
SRR17520069.1038238  
SRR17520069.1039081  
SRR17520069.1039135  
SRR17520069.1039157  
SRR17520069.1039169  
SRR17520069.1040329  
SRR17520069.1041353  
SRR17520069.1043038  
SRR17520069.1043068  
SRR17520069.1043076  
SRR17520069.1043116

SRR17520069.1051456  
SRR17520069.1056826  
SRR17520069.1065412  
SRR17520069.1071923  
SRR17520069.1071945  
SRR17520069.1071947  
SRR17520069.1078078  
SRR17520069.1078090  
SRR17520069.1078126  
SRR17520069.1093377  
SRR17520069.1104026  
SRR17520069.1104618  
SRR17520069.1104632  
SRR17520069.1109448  
SRR17520069.1109452  
SRR17520069.1109460  
SRR17520069.1110978  
SRR17520069.1110980  
SRR17520069.1111042  
SRR17520069.1112022  
SRR17520069.1112026  
SRR17520069.1112034  
SRR17520069.1112036  
SRR17520069.1112042  
SRR17520069.1115600  
SRR17520069.1116195  
SRR17520069.1124707  
SRR17520069.1136714  
SRR17520069.1136764  
SRR17520069.1154406  
SRR17520069.1155975  
SRR17520069.1170092  
SRR17520069.1173489  
SRR17520069.1178335  
SRR17520069.1178337  
SRR17520069.1178339  
SRR17520069.1178341  
SRR17520069.1178343  
SRR17520069.1178345  
SRR17520069.1178347  
SRR17520069.1182971  
SRR17520069.1187469  
SRR17520069.1188072  
SRR17520069.1188629  
SRR17520069.1205149  
SRR17520069.1209636  
SRR17520069.1214754

SRR17520069.1216337  
SRR17520069.1216345  
SRR17520069.1225956  
SRR17520069.1237660  
SRR17520069.1238647  
SRR17520069.1249506  
SRR17520069.1249510  
SRR17520069.1249514  
SRR17520069.1249528  
SRR17520069.1249554  
SRR17520069.1249562  
SRR17520069.1249564  
SRR17520069.1249566  
SRR17520069.1249570  
SRR17520069.1249574  
SRR17520069.1249584  
SRR17520069.1249592  
SRR17520069.1249596  
SRR17520069.1256922  
SRR17520069.1258181  
SRR17520069.1258753  
SRR17520069.1259958  
SRR17520069.1259960  
SRR17520069.1259962  
SRR17520069.1259964  
SRR17520069.1259966  
SRR17520069.1259968  
SRR17520069.1259970  
SRR17520069.1259972  
SRR17520069.1267956  
SRR17520069.1267968  
SRR17520069.1282100  
SRR17520069.1287107  
SRR17520069.1287109  
SRR17520069.1287595  
SRR17520069.1288060  
SRR17520069.1292896  
SRR17520069.1295157  
SRR17520069.1295397  
SRR17520069.1295405  
SRR17520069.1298476  
SRR17520069.1298478  
SRR17520069.1299578  
SRR17520069.1319113  
SRR17520069.1322944  
SRR17520069.1334562  
SRR17520069.1334576

SRR17520069. 1351656  
SRR17520069. 1351662  
SRR17520069. 1352022  
SRR17520069. 1352036  
SRR17520069. 1357468  
SRR17520069. 1358124  
SRR17520069. 1358132  
SRR17520069. 1362506  
SRR17520069. 1362516  
SRR17520069. 1364218  
SRR17520069. 1364294  
SRR17520069. 1364302  
SRR17520069. 1364306  
SRR17520069. 1364314  
SRR17520069. 1367235  
SRR17520069. 1368183  
SRR17520069. 1368187  
SRR17520069. 1368197  
SRR17520069. 1368201  
SRR17520069. 1368213  
SRR17520069. 1388990  
SRR17520069. 1390011  
SRR17520069. 1390021  
SRR17520069. 1390027  
SRR17520069. 1390037  
SRR17520069. 1392520  
SRR17520069. 1394964  
SRR17520069. 1400490  
SRR17520069. 1406389  
SRR17520069. 1409712  
SRR17520069. 1418513  
SRR17520069. 1419549  
SRR17520069. 1420817  
SRR17520069. 1433203  
SRR17520069. 1433213  
SRR17520069. 1435183  
SRR17520069. 1435186  
SRR17520069. 1436072  
SRR17520069. 1436074  
SRR17520069. 1436086  
SRR17520069. 1436098  
SRR17520069. 1436112  
SRR17520069. 1436160  
SRR17520069. 1442188  
SRR17520069. 1444606  
SRR17520069. 1444610  
SRR17520069. 1445865

SRR17520069. 1452524  
SRR17520069. 1458496  
SRR17520069. 1468536  
SRR17520069. 1470935  
SRR17520069. 1478675  
SRR17520069. 1478679  
SRR17520069. 1478693  
SRR17520069. 1478705  
SRR17520069. 1478711  
SRR17520069. 1478721  
SRR17520069. 1478777  
SRR17520069. 1478827  
SRR17520069. 1478839  
SRR17520069. 1496193  
SRR17520069. 1496251  
SRR17520069. 1496253  
SRR17520069. 1496281  
SRR17520069. 1496317  
SRR17520069. 1496369  
SRR17520069. 1496375  
SRR17520069. 1496383  
SRR17520069. 1497628  
SRR17520069. 1503304  
SRR17520069. 1505164  
SRR17520069. 1505870  
SRR17520069. 1505904  
SRR17520069. 1505958  
SRR17520069. 1505980  
SRR17520069. 1506018  
SRR17520069. 1506901  
SRR17520069. 1511062  
SRR17520069. 1517147  
SRR17520069. 1517175  
SRR17520069. 1535770  
SRR17520069. 1536990  
SRR17520069. 1552455  
SRR17520069. 1556177  
SRR17520069. 1564376  
SRR17520069. 1566131  
SRR17520069. 1566147  
SRR17520069. 1572761  
SRR17520069. 1572767  
SRR17520069. 1572811  
SRR17520069. 1575682  
SRR17520069. 1575684  
SRR17520069. 1575686  
SRR17520069. 1575688

SRR17520069. 1575690  
SRR17520069. 1575692  
SRR17520069. 1575694  
SRR17520069. 1575696  
SRR17520069. 1575698  
SRR17520069. 1575700  
SRR17520069. 1575702  
SRR17520069. 1575706  
SRR17520069. 1575710  
SRR17520069. 1575712  
SRR17520069. 1575714  
SRR17520069. 1575716  
SRR17520069. 1575718  
SRR17520069. 1575720  
SRR17520069. 1575722  
SRR17520069. 1575724  
SRR17520069. 1575726  
SRR17520069. 1575728  
SRR17520069. 1575730  
SRR17520069. 1575732  
SRR17520069. 1575734  
SRR17520069. 1575736  
SRR17520069. 1575740  
SRR17520069. 1575742  
SRR17520069. 1575746  
SRR17520069. 1575748  
SRR17520069. 1575752  
SRR17520069. 1575754  
SRR17520069. 1575756  
SRR17520069. 1575758  
SRR17520069. 1575760  
SRR17520069. 1575762  
SRR17520069. 1575766  
SRR17520069. 1575770  
SRR17520069. 1578057  
SRR17520069. 1578073  
SRR17520069. 1578081  
SRR17520069. 1578105  
SRR17520069. 1596663  
SRR17520069. 1608056  
SRR17520069. 1608100  
SRR17520069. 1608104  
SRR17520069. 1608108  
SRR17520069. 1608134  
SRR17520069. 1608140  
SRR17520069. 1608170  
SRR17520069. 1637052

SRR17520069. 1642991  
SRR17520069. 1656127  
SRR17520069. 1656137  
SRR17520069. 1656139  
SRR17520069. 1656143  
SRR17520069. 1656155  
SRR17520069. 1658564  
SRR17520069. 1658566  
SRR17520069. 1658568  
SRR17520069. 1658572  
SRR17520069. 1658574  
SRR17520069. 1658576  
SRR17520069. 1658578  
SRR17520069. 1658580  
SRR17520069. 1658582  
SRR17520069. 1658584  
SRR17520069. 1658586  
SRR17520069. 1658588  
SRR17520069. 1658590  
SRR17520069. 1658592  
SRR17520069. 1658594  
SRR17520069. 1658598  
SRR17520069. 1658600  
SRR17520069. 1658602  
SRR17520069. 1658604  
SRR17520069. 1658606  
SRR17520069. 1658608  
SRR17520069. 1658610  
SRR17520069. 1658612  
SRR17520069. 1658614  
SRR17520069. 1658616  
SRR17520069. 1658618  
SRR17520069. 1658620  
SRR17520069. 1658622  
SRR17520069. 1658624  
SRR17520069. 1658626  
SRR17520069. 1658628  
SRR17520069. 1658632  
SRR17520069. 1658634  
SRR17520069. 1658636  
SRR17520069. 1658638  
SRR17520069. 1658640  
SRR17520069. 1658644  
SRR17520069. 1658646  
SRR17520069. 1658650  
SRR17520069. 1658652  
SRR17520069. 1659463



SRR17520069. 1663909  
SRR17520069. 1664811  
SRR17520069. 1664829  
SRR17520069. 1667928  
SRR17520069. 1667972  
SRR17520069. 1667998  
SRR17520069. 1672188  
SRR17520069. 1672939  
SRR17520069. 1678500  
SRR17520069. 1678512  
SRR17520069. 1678516  
SRR17520069. 1678995  
SRR17520069. 1680822  
SRR17520069. 1680824  
SRR17520069. 1680834  
SRR17520069. 1686223  
SRR17520069. 1704795  
SRR17520069. 1704825  
SRR17520069. 1718502  
SRR17520069. 1750490  
SRR17520069. 1751717  
SRR17520069. 1759633  
SRR17520069. 1759637  
SRR17520069. 1759641  
SRR17520069. 1759647  
SRR17520069. 1759667  
SRR17520069. 1767519  
SRR17520069. 1767521  
SRR17520069. 1767523  
SRR17520069. 1767525  
SRR17520069. 1767527  
SRR17520069. 1767529  
SRR17520069. 1767531  
SRR17520069. 1767533  
SRR17520069. 1767535  
SRR17520069. 1767537  
SRR17520069. 1767539  
SRR17520069. 1767541  
SRR17520069. 1767543  
SRR17520069. 1767545  
SRR17520069. 1767547  
SRR17520069. 1767549  
SRR17520069. 1767551  
SRR17520069. 1767553  
SRR17520069. 1767555  
SRR17520069. 1767557  
SRR17520069. 1767559

SRR17520069. 1767561  
SRR17520069. 1767563  
SRR17520069. 1767565  
SRR17520069. 1767567  
SRR17520069. 1767569  
SRR17520069. 1767571  
SRR17520069. 1767573  
SRR17520069. 1767575  
SRR17520069. 1767577  
SRR17520069. 1767579  
SRR17520069. 1767581  
SRR17520069. 1767583  
SRR17520069. 1767585  
SRR17520069. 1767587  
SRR17520069. 1767589  
SRR17520069. 1767591  
SRR17520069. 1767593  
SRR17520069. 1767595  
SRR17520069. 1767597  
SRR17520069. 1767599  
SRR17520069. 1767601  
SRR17520069. 1767603  
SRR17520069. 1767605  
SRR17520069. 1767607  
SRR17520069. 1769748  
SRR17520069. 1786034  
SRR17520069. 1786036  
SRR17520069. 1786038  
SRR17520069. 1786040  
SRR17520069. 1786042  
SRR17520069. 1786044  
SRR17520069. 1786046  
SRR17520069. 1786048  
SRR17520069. 1786050  
SRR17520069. 1786052  
SRR17520069. 1786054  
SRR17520069. 1786056  
SRR17520069. 1786058  
SRR17520069. 1786060  
SRR17520069. 1791512  
SRR17520069. 1796517  
SRR17520069. 1796601  
SRR17520069. 1799159  
SRR17520069. 1799211  
SRR17520069. 1799229  
SRR17520069. 1799239  
SRR17520069. 1799279

SRR17520069.1799327  
SRR17520069.1804857  
SRR17520069.1805321  
SRR17520069.1809678  
SRR17520069.1810014  
SRR17520069.1810016  
SRR17520069.1810024  
SRR17520069.1810182  
SRR17520069.1818442  
SRR17520069.1831517  
SRR17520069.1831545  
SRR17520069.1831589  
SRR17520069.1831668  
SRR17520069.1831682  
SRR17520069.1831720  
SRR17520069.1833322  
SRR17520069.1833336  
SRR17520069.1833344  
SRR17520069.1833352  
SRR17520069.1833388  
SRR17520069.1833460  
SRR17520069.1833466  
SRR17520069.1841478  
SRR17520069.1841982  
SRR17520069.1849583  
SRR17520069.1860741  
SRR17520069.1870885  
SRR17520069.1870887  
SRR17520069.1870929  
SRR17520069.1870937  
SRR17520069.1885094  
SRR17520069.1887377  
SRR17520069.1887433  
SRR17520069.1891004  
SRR17520069.1891012  
SRR17520069.1891016  
SRR17520069.1891074  
SRR17520069.1892107  
SRR17520069.1893200  
SRR17520069.1893941  
SRR17520069.1893943  
SRR17520069.1893945  
SRR17520069.1893947  
SRR17520069.1893949  
SRR17520069.1893951  
SRR17520069.1903353  
SRR17520069.1903357

SRR17520069.1903359  
SRR17520069.1903363  
SRR17520069.1917960  
SRR17520069.1917962  
SRR17520069.1917976  
SRR17520069.1917980  
SRR17520069.1917982  
SRR17520069.1918012  
SRR17520069.1918016  
SRR17520069.1921245  
SRR17520069.1921817  
SRR17520069.1923430  
SRR17520069.1923682  
SRR17520069.1926774  
SRR17520069.1926828  
SRR17520069.1938391  
SRR17520069.1942010  
SRR17520069.1942022  
SRR17520069.1948644  
SRR17520069.1949479  
SRR17520069.1951291  
SRR17520069.1951583  
SRR17520069.1957131  
SRR17520069.1957382  
SRR17520069.1957384  
SRR17520069.1957386  
SRR17520069.1957388  
SRR17520069.1957390  
SRR17520069.1957392  
SRR17520069.1957394  
SRR17520069.1957396  
SRR17520069.1957398  
SRR17520069.1957400  
SRR17520069.1957402  
SRR17520069.1957404  
SRR17520069.1957406  
SRR17520069.1957408  
SRR17520069.1957410  
SRR17520069.1957412  
SRR17520069.1957414  
SRR17520069.1957416  
SRR17520069.1971713  
SRR17520069.1977176  
SRR17520069.1978382  
SRR17520069.1978635  
SRR17520069.1990736  
SRR17520069.1990740

SRR17520069. 1990742  
SRR17520069. 1990744  
SRR17520069. 1990746  
SRR17520069. 1990748  
SRR17520069. 1990750  
SRR17520069. 1990752  
SRR17520069. 1990754  
SRR17520069. 1990756  
SRR17520069. 1990758  
SRR17520069. 1990760  
SRR17520069. 1990762  
SRR17520069. 1990764  
SRR17520069. 1990766  
SRR17520069. 1990768  
SRR17520069. 1995129  
SRR17520069. 1998143  
SRR17520069. 1998163  
SRR17520069. 1998195  
SRR17520069. 1998219  
SRR17520069. 2006834  
SRR17520069. 2006836  
SRR17520069. 2006838  
SRR17520069. 2014516  
SRR17520069. 2014556  
SRR17520069. 2015898  
SRR17520069. 2015930  
SRR17520069. 2016756  
SRR17520069. 2017506  
SRR17520069. 2017959  
SRR17520069. 2017971  
SRR17520069. 2023944  
SRR17520069. 2024221  
SRR17520069. 2031049  
SRR17520069. 2035360  
SRR17520069. 2035392  
SRR17520069. 2035416  
SRR17520069. 2038358  
SRR17520069. 2043817  
SRR17520069. 2044966  
SRR17520069. 2045567  
SRR17520069. 2047453  
SRR17520069. 2047460  
SRR17520069. 2047462  
SRR17520069. 2047468  
SRR17520069. 2047470  
SRR17520069. 2047476  
SRR17520069. 2066655

SRR17520069.2066683  
SRR17520069.2073946  
SRR17520069.2073962  
SRR17520069.2073980  
SRR17520069.2076628  
SRR17520069.2079952  
SRR17520069.2101510  
SRR17520069.2101534  
SRR17520069.2101562  
SRR17520069.2101578  
SRR17520069.2106586  
SRR17520069.2106614  
SRR17520069.2107404  
SRR17520069.2107414  
SRR17520069.2107420  
SRR17520069.2110840  
SRR17520069.2113419  
SRR17520069.2113719  
SRR17520069.2125172  
SRR17520069.2125182  
SRR17520069.2125184  
SRR17520069.2125789  
SRR17520069.2134824  
SRR17520069.2137013  
SRR17520069.2141494  
SRR17520069.2141504  
SRR17520069.2142898  
SRR17520069.2145036  
SRR17520069.2145041  
SRR17520069.2160472  
SRR17520069.2170039  
SRR17520069.2170049  
SRR17520069.2175316  
SRR17520069.2188651  
SRR17520069.2188667  
SRR17520069.2188679  
SRR17520069.2188713  
SRR17520069.2188715  
SRR17520069.2188717  
SRR17520069.2190730  
SRR17520069.2202762  
SRR17520069.2209523  
SRR17520069.2209801  
SRR17520069.2223815  
SRR17520069.2228852  
SRR17520069.2230238  
SRR17520069.2230240

SRR17520069.2230248  
SRR17520069.2230250  
SRR17520069.2230268  
SRR17520069.2230280  
SRR17520069.2230298  
SRR17520069.2230302  
SRR17520069.2230344  
SRR17520069.2244874  
SRR17520069.2244875  
SRR17520069.2247028  
SRR17520069.2248851  
SRR17520069.2248853  
SRR17520069.2248873  
SRR17520069.2250004  
SRR17520069.2250006  
SRR17520069.2250008  
SRR17520069.2250010  
SRR17520069.2250012  
SRR17520069.2250014  
SRR17520069.2250016  
SRR17520069.2250018  
SRR17520069.2250020  
SRR17520069.2250022  
SRR17520069.2250024  
SRR17520069.2250026  
SRR17520069.2250028  
SRR17520069.2250030  
SRR17520069.2250034  
SRR17520069.2250036  
SRR17520069.2250038  
SRR17520069.2250040  
SRR17520069.2250042  
SRR17520069.2250044  
SRR17520069.2250046  
SRR17520069.2250048  
SRR17520069.2250050  
SRR17520069.2250052  
SRR17520069.2252030  
SRR17520069.2255346  
SRR17520069.2255360  
SRR17520069.2262161  
SRR17520069.2281022  
SRR17520069.2282012  
SRR17520069.2282016  
SRR17520069.2286359  
SRR17520069.2305252  
SRR17520069.2310070

SRR17520069. 2314860  
SRR17520069. 2314862  
SRR17520069. 2314864  
SRR17520069. 2314866  
SRR17520069. 2314868  
SRR17520069. 2314870  
SRR17520069. 2314872  
SRR17520069. 2314874  
SRR17520069. 2314876  
SRR17520069. 2314878  
SRR17520069. 2314880  
SRR17520069. 2314882  
SRR17520069. 2314884  
SRR17520069. 2314886  
SRR17520069. 2314888  
SRR17520069. 2314890  
SRR17520069. 2314892  
SRR17520069. 2314894  
SRR17520069. 2314896  
SRR17520069. 2314898  
SRR17520069. 2314900  
SRR17520069. 2314902  
SRR17520069. 2314904  
SRR17520069. 2314906  
SRR17520069. 2314908  
SRR17520069. 2314910  
SRR17520069. 2314912  
SRR17520069. 2314914  
SRR17520069. 2314916  
SRR17520069. 2314918  
SRR17520069. 2314920  
SRR17520069. 2314922  
SRR17520069. 2314924  
SRR17520069. 2314926  
SRR17520069. 2314928  
SRR17520069. 2323260  
SRR17520069. 2328029  
SRR17520069. 2336078  
SRR17520069. 2340346  
SRR17520069. 2340378  
SRR17520069. 2345418  
SRR17520069. 2357980  
SRR17520069. 2363262  
SRR17520069. 2363518  
SRR17520069. 2364208  
SRR17520069. 2364210  
SRR17520069. 2381318



SRR17520069.2381324  
SRR17520069.2385628  
SRR17520069.2385656  
SRR17520069.2388601  
SRR17520069.2395039  
SRR17520069.2395085  
SRR17520069.2395087  
SRR17520069.2398372  
SRR17520069.2398382  
SRR17520069.2398398  
SRR17520069.2398422  
SRR17520069.2398430  
SRR17520069.2398447  
SRR17520069.2403675  
SRR17520069.2403677  
SRR17520069.2403679  
SRR17520069.2403681  
SRR17520069.2403683  
SRR17520069.2403685  
SRR17520069.2403687  
SRR17520069.2408369  
SRR17520069.2432694  
SRR17520069.2435223  
SRR17520069.2435229  
SRR17520069.2443703  
SRR17520069.2454525  
SRR17520069.2454561  
SRR17520069.2454577  
SRR17520069.2454581  
SRR17520069.2462544  
SRR17520069.2462546  
SRR17520069.2478026  
SRR17520069.2485111  
SRR17520069.2489157  
SRR17520069.2489237  
SRR17520069.2495062  
SRR17520069.2495074  
SRR17520069.2495078  
SRR17520069.2497871  
SRR17520069.2501452  
SRR17520069.2505962  
SRR17520069.2505970  
SRR17520069.2505980  
SRR17520069.2505992  
SRR17520069.2506024  
SRR17520069.2506058  
SRR17520069.2506060

SRR17520069. 2514525  
SRR17520069. 2514543  
SRR17520069. 2514565  
SRR17520069. 2526070  
SRR17520069. 2532766  
SRR17520069. 2538749  
SRR17520069. 2543535  
SRR17520069. 2545384  
SRR17520069. 2550474  
SRR17520069. 2550508  
SRR17520069. 2550580  
SRR17520069. 2556253  
SRR17520069. 2556265  
SRR17520069. 2564231  
SRR17520069. 2564233  
SRR17520069. 2573137  
SRR17520069. 2573139  
SRR17520069. 2573141  
SRR17520069. 2573143  
SRR17520069. 2573147  
SRR17520069. 2573149  
SRR17520069. 2573153  
SRR17520069. 2573155  
SRR17520069. 2573157  
SRR17520069. 2573159  
SRR17520069. 2573161  
SRR17520069. 2573163  
SRR17520069. 2573165  
SRR17520069. 2573167  
SRR17520069. 2573169  
SRR17520069. 2573173  
SRR17520069. 2573176  
SRR17520069. 2573178  
SRR17520069. 2573180  
SRR17520069. 2573182  
SRR17520069. 2573184  
SRR17520069. 2573186  
SRR17520069. 2573188  
SRR17520069. 2573190  
SRR17520069. 2573192  
SRR17520069. 2573194  
SRR17520069. 2573198  
SRR17520069. 2573200  
SRR17520069. 2573202  
SRR17520069. 2573204  
SRR17520069. 2573206  
SRR17520069. 2573210

SRR17520069. 2573212  
SRR17520069. 2573214  
SRR17520069. 2597376  
SRR17520069. 2597412  
SRR17520069. 2604827  
SRR17520069. 2608543  
SRR17520069. 2609904  
SRR17520069. 2611814  
SRR17520069. 2614045  
SRR17520069. 2614099  
SRR17520069. 2614127  
SRR17520069. 2614286  
SRR17520069. 2626876  
SRR17520069. 2626884  
SRR17520069. 2630242  
SRR17520069. 2636931  
SRR17520069. 2638961  
SRR17520069. 2638981  
SRR17520069. 2642691  
SRR17520069. 2642705  
SRR17520069. 2642707  
SRR17520069. 2642709  
SRR17520069. 2651265  
SRR17520069. 2654337  
SRR17520069. 2654375  
SRR17520069. 2687070  
SRR17520069. 2687112  
SRR17520069. 2687114  
SRR17520069. 2687269  
SRR17520069. 2687271  
SRR17520069. 2690764  
SRR17520069. 2693772  
SRR17520069. 2695718  
SRR17520069. 2695730  
SRR17520069. 2699495  
SRR17520069. 2702963  
SRR17520069. 2705276  
SRR17520069. 2709439  
SRR17520069. 2710415  
SRR17520069. 2733852  
SRR17520069. 2742453  
SRR17520069. 2742475  
SRR17520069. 2743892  
SRR17520069. 2748842  
SRR17520069. 2754322  
SRR17520069. 2763547  
SRR17520069. 2777383

SRR17520069.2777391  
SRR17520069.2777399  
SRR17520069.2798777  
SRR17520069.2798779  
SRR17520069.2798781  
SRR17520069.2798783  
SRR17520069.2798785  
SRR17520069.2798787  
SRR17520069.2798789  
SRR17520069.2798791  
SRR17520069.2798793  
SRR17520069.2798795  
SRR17520069.2798797  
SRR17520069.2804900  
SRR17520069.2804942  
SRR17520069.2814134  
SRR17520069.2845382  
SRR17520069.2845424  
SRR17520069.2858054  
SRR17520069.2862434  
SRR17520069.2862868  
SRR17520069.2862875  
SRR17520069.2862887  
SRR17520069.2871347  
SRR17520069.2871361  
SRR17520069.2873152  
SRR17520069.2873156  
SRR17520069.2873162  
SRR17520069.2873184  
SRR17520069.2873190  
SRR17520069.2873208  
SRR17520069.2875027  
SRR17520069.2877840  
SRR17520069.2877860  
SRR17520069.2878698  
SRR17520069.2886763  
SRR17520069.2889376  
SRR17520069.2891812  
SRR17520069.2891842  
SRR17520069.2892494  
SRR17520069.2892496  
SRR17520069.2894206  
SRR17520069.2895600  
SRR17520069.2904833  
SRR17520069.2908933  
SRR17520069.2908967  
SRR17520069.2908975

SRR17520069.2908981  
SRR17520069.2915192  
SRR17520069.2915202  
SRR17520069.2915206  
SRR17520069.2915220  
SRR17520069.2915226  
SRR17520069.2915228  
SRR17520069.2915244  
SRR17520069.2915250  
SRR17520069.2916771  
SRR17520069.2916775  
SRR17520069.2916809  
SRR17520069.2916813  
SRR17520069.2916821  
SRR17520069.2916837  
SRR17520069.2916843  
SRR17520069.2917993  
SRR17520069.2927337  
SRR17520069.2932284  
SRR17520069.2932316  
SRR17520069.2935190  
SRR17520069.2938063  
SRR17520069.2938605  
SRR17520069.2947975  
SRR17520069.2948586  
SRR17520069.2948588  
SRR17520069.2953564  
SRR17520069.2957111  
SRR17520069.2957135  
SRR17520069.2957141  
SRR17520069.2964949  
SRR17520069.2965831  
SRR17520069.2967913  
SRR17520069.2981334  
SRR17520069.2985835  
SRR17520069.2985845  
SRR17520069.2999866  
SRR17520069.2999868  
SRR17520069.2999894  
SRR17520069.2999906  
SRR17520069.3006787  
SRR17520069.3006815  
SRR17520069.3007316  
SRR17520069.3011990  
SRR17520069.3012615  
SRR17520069.3020132  
SRR17520069.3032787

SRR17520069. 3044014  
SRR17520069. 3044056  
SRR17520069. 3046818  
SRR17520069. 3048493  
SRR17520069. 3068902  
SRR17520069. 3069495  
SRR17520069. 3070205  
SRR17520069. 3070207  
SRR17520069. 3070213  
SRR17520069. 3082423  
SRR17520069. 3082425  
SRR17520069. 3097181  
SRR17520069. 3098367  
SRR17520069. 3112332  
SRR17520069. 3112338  
SRR17520069. 3112378  
SRR17520069. 3112408  
SRR17520069. 3112410  
SRR17520069. 3115053  
SRR17520069. 3137599  
SRR17520069. 3152926  
SRR17520069. 3167280  
SRR17520069. 3169883  
SRR17520069. 3172833  
SRR17520069. 3172927  
SRR17520069. 3172939  
SRR17520069. 3172975  
SRR17520069. 3173011  
SRR17520069. 3181764  
SRR17520069. 3187596  
SRR17520069. 3195447  
SRR17520069. 3195449  
SRR17520069. 3195457  
SRR17520069. 3195459  
SRR17520069. 3195487  
SRR17520069. 3199826  
SRR17520069. 3202750  
SRR17520069. 3219798  
SRR17520069. 3220401  
SRR17520069. 3221666  
SRR17520069. 3222675  
SRR17520069. 3222698  
SRR17520069. 3222700  
SRR17520069. 3225534  
SRR17520069. 3225564  
SRR17520069. 3225574  
SRR17520069. 3231612

SRR17520069. 3239630  
SRR17520069. 3245855  
SRR17520069. 3245863  
SRR17520069. 3245881  
SRR17520069. 3245987  
SRR17520069. 3246053  
SRR17520069. 3252778  
SRR17520069. 3252788  
SRR17520069. 3256060  
SRR17520069. 3258075  
SRR17520069. 3264949  
SRR17520069. 3271386  
SRR17520069. 3274004  
SRR17520069. 3274591  
SRR17520069. 3274828  
SRR17520069. 3274866  
SRR17520069. 3279219  
SRR17520069. 3279239  
SRR17520069. 3279241  
SRR17520069. 3309995  
SRR17520069. 3310035  
SRR17520069. 3318916  
SRR17520069. 3318918  
SRR17520069. 3327931  
SRR17520069. 3327947  
SRR17520069. 3327951  
SRR17520069. 3327969  
SRR17520069. 3327971  
SRR17520069. 3327973  
SRR17520069. 3327991  
SRR17520069. 3327995  
SRR17520069. 3327997  
SRR17520069. 3328744  
SRR17520069. 3328762  
SRR17520069. 3332710  
SRR17520069. 3335380  
SRR17520069. 3337655  
SRR17520069. 3339540  
SRR17520069. 3339546  
SRR17520069. 3339548  
SRR17520069. 3339638  
SRR17520069. 3339654  
SRR17520069. 3339656  
SRR17520069. 3339678  
SRR17520069. 3342620  
SRR17520069. 3345273  
SRR17520069. 3345315

SRR17520069. 3345361  
SRR17520069. 3345369  
SRR17520069. 3346073  
SRR17520069. 3346347  
SRR17520069. 3346355  
SRR17520069. 3352801  
SRR17520069. 3362111  
SRR17520069. 3367839  
SRR17520069. 3375942  
SRR17520069. 3375965  
SRR17520069. 3375988  
SRR17520069. 3376062  
SRR17520069. 3376067  
SRR17520069. 3376071  
SRR17520069. 3376091  
SRR17520069. 3376134  
SRR17520069. 3381327  
SRR17520069. 3386647  
SRR17520069. 3386663  
SRR17520069. 3391584  
SRR17520069. 3399140  
SRR17520069. 3399585  
SRR17520069. 3399589  
SRR17520069. 3407530  
SRR17520069. 3422267  
SRR17520069. 3425601  
SRR17520069. 3430861  
SRR17520069. 3430899  
SRR17520069. 3430903  
SRR17520069. 3446121  
SRR17520069. 3462330  
SRR17520069. 3467111  
SRR17520069. 3467113  
SRR17520069. 3467161  
SRR17520069. 3467179  
SRR17520069. 3476403  
SRR17520069. 3476429  
SRR17520069. 3485947  
SRR17520069. 3489905  
SRR17520069. 3491546  
SRR17520069. 3492518  
SRR17520069. 3510573  
SRR17520069. 3510577  
SRR17520069. 3511645  
SRR17520069. 3511657  
SRR17520069. 3511681  
SRR17520069. 3511685



SRR17520069. 3511689  
SRR17520069. 3513982  
SRR17520069. 3513988  
SRR17520069. 3514008  
SRR17520069. 3514044  
SRR17520069. 3514048  
SRR17520069. 3514060  
SRR17520069. 3521618  
SRR17520069. 3527742  
SRR17520069. 3527744  
SRR17520069. 3527750  
SRR17520069. 3527758  
SRR17520069. 3527760  
SRR17520069. 3527764  
SRR17520069. 3527778  
SRR17520069. 3527780  
SRR17520069. 3527784  
SRR17520069. 3527789  
SRR17520069. 3527794  
SRR17520069. 3527798  
SRR17520069. 3527802  
SRR17520069. 3527806  
SRR17520069. 3527808  
SRR17520069. 3527810  
SRR17520069. 3527814  
SRR17520069. 3527818  
SRR17520069. 3527842  
SRR17520069. 3527846  
SRR17520069. 3527848  
SRR17520069. 3527852  
SRR17520069. 3527858  
SRR17520069. 3527860  
SRR17520069. 3530378  
SRR17520069. 3532371  
SRR17520069. 3532373  
SRR17520069. 3542990  
SRR17520069. 3543054  
SRR17520069. 3544113  
SRR17520069. 3544115  
SRR17520069. 3544160  
SRR17520069. 3544629  
SRR17520069. 3544665  
SRR17520069. 3545263  
SRR17520069. 3545267  
SRR17520069. 3545335  
SRR17520069. 3552376  
SRR17520069. 3555576

SRR17520069. 3555594  
SRR17520069. 3555622  
SRR17520069. 3555658  
SRR17520069. 3563735  
SRR17520069. 3563749  
SRR17520069. 3564893  
SRR17520069. 3564906  
SRR17520069. 3564918  
SRR17520069. 3564922  
SRR17520069. 3568928  
SRR17520069. 3573777  
SRR17520069. 3578291  
SRR17520069. 3578339  
SRR17520069. 3584060  
SRR17520069. 3594516  
SRR17520069. 3602311  
SRR17520069. 3608227  
SRR17520069. 3608309  
SRR17520069. 3627992  
SRR17520069. 3627994  
SRR17520069. 3628000  
SRR17520069. 3628020  
SRR17520069. 3628028  
SRR17520069. 3630116  
SRR17520069. 3633905  
SRR17520069. 3636286  
SRR17520069. 3645365  
SRR17520069. 3645387  
SRR17520069. 3645399  
SRR17520069. 3645401  
SRR17520069. 3645405  
SRR17520069. 3645419  
SRR17520069. 3645425  
SRR17520069. 3645431  
SRR17520069. 3645433  
SRR17520069. 3645435  
SRR17520069. 3645443  
SRR17520069. 3645447  
SRR17520069. 3653657  
SRR17520069. 3657355  
SRR17520069. 3657453  
SRR17520069. 3657462  
SRR17520069. 3662722  
SRR17520069. 3662798  
SRR17520069. 3662842  
SRR17520069. 3662858  
SRR17520069. 3665811

SRR17520069. 3668470  
SRR17520069. 3670947  
SRR17520069. 3670949  
SRR17520069. 3674695  
SRR17520069. 3675017  
SRR17520069. 3679723  
SRR17520069. 3680772  
SRR17520069. 3680788  
SRR17520069. 3680790  
SRR17520069. 3695899  
SRR17520069. 3695954  
SRR17520069. 3710472  
SRR17520069. 3712066  
SRR17520069. 3715766  
SRR17520069. 3722057  
SRR17520069. 3726368  
SRR17520069. 3732845  
SRR17520069. 3732881  
SRR17520069. 3732903  
SRR17520069. 3732909  
SRR17520069. 3732917  
SRR17520069. 3732925  
SRR17520069. 3732941  
SRR17520069. 3732943  
SRR17520069. 3737365  
SRR17520069. 3738204  
SRR17520069. 3744986  
SRR17520069. 3745731  
SRR17520069. 3762375  
SRR17520069. 3770156  
SRR17520069. 3770178  
SRR17520069. 3770594  
SRR17520069. 3770982  
SRR17520069. 3772231  
SRR17520069. 3772430  
SRR17520069. 3772466  
SRR17520069. 3776928  
SRR17520069. 3790665  
SRR17520069. 3793882  
SRR17520069. 3802131  
SRR17520069. 3803822  
SRR17520069. 3809404  
SRR17520069. 3809430  
SRR17520069. 3809436  
SRR17520069. 3816265  
SRR17520069. 3816271  
SRR17520069. 3825982

SRR17520069. 3826010  
SRR17520069. 3826026  
SRR17520069. 3826062  
SRR17520069. 3826076  
SRR17520069. 3826086  
SRR17520069. 3826098  
SRR17520069. 3826106  
SRR17520069. 3829838  
SRR17520069. 3829840  
SRR17520069. 3829842  
SRR17520069. 3830411  
SRR17520069. 3839134  
SRR17520069. 3843011  
SRR17520069. 3844489  
SRR17520069. 3862573  
SRR17520069. 3865266  
SRR17520069. 3881546  
SRR17520069. 3888604  
SRR17520069. 3891853  
SRR17520069. 3902606  
SRR17520069. 3907458  
SRR17520069. 3908533  
SRR17520069. 3911379  
SRR17520069. 3911393  
SRR17520069. 3918983  
SRR17520069. 3924716  
SRR17520069. 3924812  
SRR17520069. 3930271  
SRR17520069. 3930301  
SRR17520069. 3946729  
SRR17520069. 3953031  
SRR17520069. 3954139  
SRR17520069. 3954772  
SRR17520069. 3954778  
SRR17520069. 3954786  
SRR17520069. 3954792  
SRR17520069. 3954808  
SRR17520069. 3954830  
SRR17520069. 3954846  
SRR17520069. 3954848  
SRR17520069. 3960578  
SRR17520069. 3960586  
SRR17520069. 3960610  
SRR17520069. 3960616  
SRR17520069. 3966525  
SRR17520069. 3968285  
SRR17520069. 3975040

SRR17520069.3976462  
SRR17520069.3981272  
SRR17520069.3984357  
SRR17520069.3996177  
SRR17520069.3999782  
SRR17520069.4004014  
SRR17520069.4004340  
SRR17520069.4027788  
SRR17520069.4039258  
SRR17520069.4039318  
SRR17520069.4043583  
SRR17520069.4049596  
SRR17520069.4049781  
SRR17520069.4049869  
SRR17520069.4049885  
SRR17520069.4049893  
SRR17520069.4049903  
SRR17520069.4051116  
SRR17520069.4051132  
SRR17520069.4053266  
SRR17520069.4053284  
SRR17520069.4053286  
SRR17520069.4063080  
SRR17520069.4065722  
SRR17520069.4093483  
SRR17520069.4093488  
SRR17520069.4096228  
SRR17520069.4098125  
SRR17520069.4098153  
SRR17520069.4098661  
SRR17520069.4105949  
SRR17520069.4105957  
SRR17520069.4106011  
SRR17520069.4108329  
SRR17520069.4111690  
SRR17520069.4111696  
SRR17520069.4111702  
SRR17520069.4111710  
SRR17520069.4111722  
SRR17520069.4111724  
SRR17520069.4111726  
SRR17520069.4111728  
SRR17520069.4111746  
SRR17520069.4111754  
SRR17520069.4112487  
SRR17520069.4114823  
SRR17520069.4114825

SRR17520069.4114829  
SRR17520069.4127416  
SRR17520069.4128545  
SRR17520069.4138499  
SRR17520069.4151386  
SRR17520069.4154366  
SRR17520069.4154687  
SRR17520069.4154689  
SRR17520069.4154691  
SRR17520069.4154693  
SRR17520069.4154695  
SRR17520069.4154697  
SRR17520069.4154699  
SRR17520069.4155074  
SRR17520069.4155086  
SRR17520069.4157355  
SRR17520069.4158266  
SRR17520069.4161697  
SRR17520069.4161699  
SRR17520069.4161701  
SRR17520069.4161703  
SRR17520069.4161705  
SRR17520069.4161707  
SRR17520069.4161709  
SRR17520069.4161711  
SRR17520069.4161713  
SRR17520069.4161715  
SRR17520069.4161717  
SRR17520069.4161719  
SRR17520069.4161721  
SRR17520069.4161723  
SRR17520069.4161725  
SRR17520069.4161727  
SRR17520069.4161729  
SRR17520069.4161731  
SRR17520069.4161733  
SRR17520069.4161735  
SRR17520069.4161737  
SRR17520069.4161739  
SRR17520069.4161741  
SRR17520069.4161743  
SRR17520069.4161745  
SRR17520069.4161747  
SRR17520069.4161749  
SRR17520069.4161751  
SRR17520069.4161753  
SRR17520069.4161755

SRR17520069.4161757  
SRR17520069.4161759  
SRR17520069.4161761  
SRR17520069.4161763  
SRR17520069.4161765  
SRR17520069.4161767  
SRR17520069.4161769  
SRR17520069.4161771  
SRR17520069.4161773  
SRR17520069.4161775  
SRR17520069.4161777  
SRR17520069.4161779  
SRR17520069.4161781  
SRR17520069.4161783  
SRR17520069.4161785  
SRR17520069.4161787  
SRR17520069.4161789  
SRR17520069.4161791  
SRR17520069.4161793  
SRR17520069.4161795  
SRR17520069.4161799  
SRR17520069.4161801  
SRR17520069.4161803  
SRR17520069.4161805  
SRR17520069.4161807  
SRR17520069.4161809  
SRR17520069.4161811  
SRR17520069.4161813  
SRR17520069.4161815  
SRR17520069.4161817  
SRR17520069.4161819  
SRR17520069.4161821  
SRR17520069.4161825  
SRR17520069.4161827  
SRR17520069.4162531  
SRR17520069.4164822  
SRR17520069.4181108  
SRR17520069.4181110  
SRR17520069.4181112  
SRR17520069.4181114  
SRR17520069.4181116  
SRR17520069.4181118  
SRR17520069.4181120  
SRR17520069.4181122  
SRR17520069.4181124  
SRR17520069.4181126  
SRR17520069.4189984

SRR17520069.4189990  
SRR17520069.4190335  
SRR17520069.4191665  
SRR17520069.4196740  
SRR17520069.4196742  
SRR17520069.4196744  
SRR17520069.4196746  
SRR17520069.4196748  
SRR17520069.4196750  
SRR17520069.4196752  
SRR17520069.4204577  
SRR17520069.4214547  
SRR17520069.4214553  
SRR17520069.4214555  
SRR17520069.4214559  
SRR17520069.4214561  
SRR17520069.4214581  
SRR17520069.4217514  
SRR17520069.4217570  
SRR17520069.4220604  
SRR17520069.4221313  
SRR17520069.4223169  
SRR17520069.4223227  
SRR17520069.4235417  
SRR17520069.4240790  
SRR17520069.4240798  
SRR17520069.4240826  
SRR17520069.4240828  
SRR17520069.4240838  
SRR17520069.4240848  
SRR17520069.4240860  
SRR17520069.4242382  
SRR17520069.4256823  
SRR17520069.4259353  
SRR17520069.4259467  
SRR17520069.4264349  
SRR17520069.4264359  
SRR17520069.4264369  
SRR17520069.4264385  
SRR17520069.4264391  
SRR17520069.4274672  
SRR17520069.4292478  
SRR17520069.4292482  
SRR17520069.4306278  
SRR17520069.4306284  
SRR17520069.4306292  
SRR17520069.4306296



SRR17520069.4311727  
SRR17520069.4313850  
SRR17520069.4313856  
SRR17520069.4314186  
SRR17520069.4314188  
SRR17520069.4314190  
SRR17520069.4314192  
SRR17520069.4314194  
SRR17520069.4314196  
SRR17520069.4314198  
SRR17520069.4314200  
SRR17520069.4314202  
SRR17520069.4314204  
SRR17520069.4314206  
SRR17520069.4314208  
SRR17520069.4314210  
SRR17520069.4314212  
SRR17520069.4314214  
SRR17520069.4314216  
SRR17520069.4314218  
SRR17520069.4314220  
SRR17520069.4314222  
SRR17520069.4314224  
SRR17520069.4314226  
SRR17520069.4314228  
SRR17520069.4314230  
SRR17520069.4314232  
SRR17520069.4314234  
SRR17520069.4314236  
SRR17520069.4314238  
SRR17520069.4314240  
SRR17520069.4314242  
SRR17520069.4314244  
SRR17520069.4314246  
SRR17520069.4314248  
SRR17520069.4314250  
SRR17520069.4314252  
SRR17520069.4314254  
SRR17520069.4314256  
SRR17520069.4314260  
SRR17520069.4314262  
SRR17520069.4314264  
SRR17520069.4314266  
SRR17520069.4314268  
SRR17520069.4314270  
SRR17520069.4314272  
SRR17520069.4314274

SRR17520069.4314276  
SRR17520069.4314278  
SRR17520069.4314280  
SRR17520069.4314282  
SRR17520069.4314284  
SRR17520069.4314286  
SRR17520069.4314288  
SRR17520069.4314290  
SRR17520069.4314292  
SRR17520069.4314294  
SRR17520069.4314296  
SRR17520069.4314300  
SRR17520069.4314302  
SRR17520069.4314304  
SRR17520069.4314306  
SRR17520069.4314308  
SRR17520069.4314312  
SRR17520069.4314314  
SRR17520069.4314316  
SRR17520069.4314318  
SRR17520069.4314320  
SRR17520069.4314322  
SRR17520069.4314324  
SRR17520069.4314326  
SRR17520069.4314328  
SRR17520069.4318138  
SRR17520069.4320024  
SRR17520069.4320036  
SRR17520069.4324351  
SRR17520069.4326849  
SRR17520069.4329469  
SRR17520069.4329567  
SRR17520069.4333503  
SRR17520069.4333968  
SRR17520069.4342271  
SRR17520069.4342404  
SRR17520069.4355746  
SRR17520069.4355880  
SRR17520069.4356680  
SRR17520069.4356866  
SRR17520069.4356874  
SRR17520069.4356884  
SRR17520069.4357440  
SRR17520069.4357444  
SRR17520069.4357448  
SRR17520069.4367636  
SRR17520069.4385298

SRR17520069.4414650  
SRR17520069.4416909  
SRR17520069.4417077  
SRR17520069.4417079  
SRR17520069.4435821  
SRR17520069.4441080  
SRR17520069.4442477  
SRR17520069.4454812  
SRR17520069.4462775  
SRR17520069.4463438  
SRR17520069.4471433  
SRR17520069.4471435  
SRR17520069.4478683  
SRR17520069.4478717  
SRR17520069.4480724  
SRR17520069.4480802  
SRR17520069.4481228  
SRR17520069.4481264  
SRR17520069.4482019  
SRR17520069.4486051  
SRR17520069.4488847  
SRR17520069.4488893  
SRR17520069.4488913  
SRR17520069.4503600  
SRR17520069.4503618  
SRR17520069.4503630  
SRR17520069.4506248  
SRR17520069.4511603  
SRR17520069.4511609  
SRR17520069.4511611  
SRR17520069.4511613  
SRR17520069.4515294  
SRR17520069.4520533  
SRR17520069.4520535  
SRR17520069.4520551  
SRR17520069.4520553  
SRR17520069.4521320  
SRR17520069.4522957  
SRR17520069.4522969  
SRR17520069.4525757  
SRR17520069.4525767  
SRR17520069.4525783  
SRR17520069.4526878  
SRR17520069.4526886  
SRR17520069.4526888  
SRR17520069.4526906  
SRR17520069.4527503

SRR17520069.4528476  
SRR17520069.4528490  
SRR17520069.4528494  
SRR17520069.4528498  
SRR17520069.4528502  
SRR17520069.4528663  
SRR17520069.4531067  
SRR17520069.4544240  
SRR17520069.4544290  
SRR17520069.4545246  
SRR17520069.4545256  
SRR17520069.4551158  
SRR17520069.4551931  
SRR17520069.4551951  
SRR17520069.4554411  
SRR17520069.4561519  
SRR17520069.4561559  
SRR17520069.4562565  
SRR17520069.4562575  
SRR17520069.4562783  
SRR17520069.4562813  
SRR17520069.4562817  
SRR17520069.4562837  
SRR17520069.4562841  
SRR17520069.4562849  
SRR17520069.4562851  
SRR17520069.4562855  
SRR17520069.4563040  
SRR17520069.4565151  
SRR17520069.4565659  
SRR17520069.4579208  
SRR17520069.4584110  
SRR17520069.4592965  
SRR17520069.4592983  
SRR17520069.4622790  
SRR17520069.4626133  
SRR17520069.4639515  
SRR17520069.4639559  
SRR17520069.4639561  
SRR17520069.4639609  
SRR17520069.4639625  
SRR17520069.4639667  
SRR17520069.4639683  
SRR17520069.4641691  
SRR17520069.4642509  
SRR17520069.4642513  
SRR17520069.4642525

SRR17520069.4642527  
SRR17520069.4642539  
SRR17520069.4642571  
SRR17520069.4642575  
SRR17520069.4642611  
SRR17520069.4655725  
SRR17520069.4664045  
SRR17520069.4664047  
SRR17520069.4664049  
SRR17520069.4664051  
SRR17520069.4665801  
SRR17520069.4674854  
SRR17520069.4674903  
SRR17520069.4677557  
SRR17520069.4684498  
SRR17520069.4691670  
SRR17520069.4699839  
SRR17520069.4699849  
SRR17520069.4699857  
SRR17520069.4703291  
SRR17520069.4708681  
SRR17520069.4710327  
SRR17520069.4711520  
SRR17520069.4712593  
SRR17520069.4712597  
SRR17520069.4712599  
SRR17520069.4712607  
SRR17520069.4719398  
SRR17520069.4719611  
SRR17520069.4719615  
SRR17520069.4719617  
SRR17520069.4719621  
SRR17520069.4719625  
SRR17520069.4719627  
SRR17520069.4719663  
SRR17520069.4729175  
SRR17520069.4735528  
SRR17520069.4738439  
SRR17520069.4738441  
SRR17520069.4738447  
SRR17520069.4741425  
SRR17520069.4741471  
SRR17520069.4741491  
SRR17520069.4749486  
SRR17520069.4763830  
SRR17520069.4766794  
SRR17520069.4770514

SRR17520069.4771126  
SRR17520069.4771128  
SRR17520069.4771132  
SRR17520069.4771134  
SRR17520069.4771488  
SRR17520069.4771494  
SRR17520069.4771496  
SRR17520069.4771498  
SRR17520069.4771504  
SRR17520069.4785472  
SRR17520069.4785502  
SRR17520069.4785540  
SRR17520069.4785546  
SRR17520069.4785562  
SRR17520069.4785578  
SRR17520069.4791374  
SRR17520069.4791376  
SRR17520069.4803866  
SRR17520069.4803886  
SRR17520069.4820717  
SRR17520069.4820721  
SRR17520069.4820723  
SRR17520069.4820731  
SRR17520069.4820749  
SRR17520069.4829178  
SRR17520069.4829180  
SRR17520069.4832394  
SRR17520069.4837133  
SRR17520069.4837135  
SRR17520069.4837137  
SRR17520069.4837139  
SRR17520069.4837141  
SRR17520069.4837143  
SRR17520069.4837145  
SRR17520069.4837147  
SRR17520069.4837149  
SRR17520069.4837151  
SRR17520069.4837153  
SRR17520069.4837155  
SRR17520069.4837157  
SRR17520069.4837159  
SRR17520069.4837161  
SRR17520069.4837163  
SRR17520069.4837165  
SRR17520069.4837167  
SRR17520069.4837169  
SRR17520069.4837171

SRR17520069.4837173  
SRR17520069.4837175  
SRR17520069.4837177  
SRR17520069.4837179  
SRR17520069.4837181  
SRR17520069.4837183  
SRR17520069.4837185  
SRR17520069.4837187  
SRR17520069.4837189  
SRR17520069.4837191  
SRR17520069.4837193  
SRR17520069.4837195  
SRR17520069.4837197  
SRR17520069.4837199  
SRR17520069.4837201  
SRR17520069.4837203  
SRR17520069.4837205  
SRR17520069.4837207  
SRR17520069.4837209  
SRR17520069.4837211  
SRR17520069.4837213  
SRR17520069.4837215  
SRR17520069.4837217  
SRR17520069.4837219  
SRR17520069.4837221  
SRR17520069.4837223  
SRR17520069.4837225  
SRR17520069.4838860  
SRR17520069.4839741  
SRR17520069.4839743  
SRR17520069.4839745  
SRR17520069.4839747  
SRR17520069.4839749  
SRR17520069.4839751  
SRR17520069.4839753  
SRR17520069.4839755  
SRR17520069.4842531  
SRR17520069.4842685  
SRR17520069.4846511  
SRR17520069.4849345  
SRR17520069.4852722  
SRR17520069.4853886  
SRR17520069.4853888  
SRR17520069.4853916  
SRR17520069.4855603  
SRR17520069.4866758  
SRR17520069.4876719

SRR17520069.4876721  
SRR17520069.4876733  
SRR17520069.4879435  
SRR17520069.4879704  
SRR17520069.4879708  
SRR17520069.4879768  
SRR17520069.4879792  
SRR17520069.4886078  
SRR17520069.4905676  
SRR17520069.4921602  
SRR17520069.4921616  
SRR17520069.4921622  
SRR17520069.4924381  
SRR17520069.4926850  
SRR17520069.4931230  
SRR17520069.4931266  
SRR17520069.4935131  
SRR17520069.4935157  
SRR17520069.4935215  
SRR17520069.4949969  
SRR17520069.4952337  
SRR17520069.4964598  
SRR17520069.4964599  
SRR17520069.4964659  
SRR17520069.4967556  
SRR17520069.4971400  
SRR17520069.4985834  
SRR17520069.4986398  
SRR17520069.4988367  
SRR17520069.4988385  
SRR17520069.4988389  
SRR17520069.4988403  
SRR17520069.4988423  
SRR17520069.4988447  
SRR17520069.4988455  
SRR17520069.4988495  
SRR17520069.4988499  
SRR17520069.4993979  
SRR17520069.5004408  
SRR17520069.5011922  
SRR17520069.5014726  
SRR17520069.5014748  
SRR17520069.5014852  
SRR17520069.5016471  
SRR17520069.5016553  
SRR17520069.5016557  
SRR17520069.5016559



SRR17520069. 5020485  
SRR17520069. 5020499  
SRR17520069. 5031755  
SRR17520069. 5032184  
SRR17520069. 5032186  
SRR17520069. 5032192  
SRR17520069. 5045082  
SRR17520069. 5045094  
SRR17520069. 5052437  
SRR17520069. 5052451  
SRR17520069. 5072836  
SRR17520069. 5072882  
SRR17520069. 5075035  
SRR17520069. 5075083  
SRR17520069. 5080424  
SRR17520069. 5080426  
SRR17520069. 5083322  
SRR17520069. 5083328  
SRR17520069. 5083330  
SRR17520069. 5083334  
SRR17520069. 5083458  
SRR17520069. 5085418  
SRR17520069. 5085422  
SRR17520069. 5094217  
SRR17520069. 5094219  
SRR17520069. 5094852  
SRR17520069. 5095380  
SRR17520069. 5095435  
SRR17520069. 5095437  
SRR17520069. 5095439  
SRR17520069. 5095441  
SRR17520069. 5095443  
SRR17520069. 5095445  
SRR17520069. 5095447  
SRR17520069. 5095449  
SRR17520069. 5095451  
SRR17520069. 5095453  
SRR17520069. 5095455  
SRR17520069. 5095457  
SRR17520069. 5095459  
SRR17520069. 5095461  
SRR17520069. 5095463  
SRR17520069. 5095465  
SRR17520069. 5095467  
SRR17520069. 5095469  
SRR17520069. 5095471  
SRR17520069. 5095473

SRR17520069.5095475  
SRR17520069.5095477  
SRR17520069.5095479  
SRR17520069.5098121  
SRR17520069.5100620  
SRR17520069.5100638  
SRR17520069.5100640  
SRR17520069.5100650  
SRR17520069.5100702  
SRR17520069.5100704  
SRR17520069.5104969  
SRR17520069.5112866  
SRR17520069.5112890  
SRR17520069.5112892  
SRR17520069.5112914  
SRR17520069.5112944  
SRR17520069.5116356  
SRR17520069.5118611  
SRR17520069.5118621  
SRR17520069.5118653  
SRR17520069.5118677  
SRR17520069.5118681  
SRR17520069.5118685  
SRR17520069.5126128  
SRR17520069.5126131  
SRR17520069.5126137  
SRR17520069.5131758  
SRR17520069.5132295  
SRR17520069.5132299  
SRR17520069.5132313  
SRR17520069.5132319  
SRR17520069.5132321  
SRR17520069.5132335  
SRR17520069.5132339  
SRR17520069.5133736  
SRR17520069.5173102  
SRR17520069.5175676  
SRR17520069.5175678  
SRR17520069.5176454  
SRR17520069.5177580  
SRR17520069.5184223  
SRR17520069.5199389  
SRR17520069.5219524  
SRR17520069.5219536  
SRR17520069.5219558  
SRR17520069.5219588  
SRR17520069.5219656

SRR17520069. 5219670  
SRR17520069. 5219674  
SRR17520069. 5219915  
SRR17520069. 5223276  
SRR17520069. 5223284  
SRR17520069. 5233914  
SRR17520069. 5236192  
SRR17520069. 5238820  
SRR17520069. 5240563  
SRR17520069. 5240565  
SRR17520069. 5240575  
SRR17520069. 5240589  
SRR17520069. 5243468  
SRR17520069. 5243496  
SRR17520069. 5243504  
SRR17520069. 5249670  
SRR17520069. 5249776  
SRR17520069. 5270995  
SRR17520069. 5271019  
SRR17520069. 5271041  
SRR17520069. 5271055  
SRR17520069. 5271059  
SRR17520069. 5276364  
SRR17520069. 5281084  
SRR17520069. 5286173  
SRR17520069. 5297900  
SRR17520069. 5303078  
SRR17520069. 5313088  
SRR17520069. 5313450  
SRR17520069. 5316918  
SRR17520069. 5316920  
SRR17520069. 5316926  
SRR17520069. 5321502  
SRR17520069. 5321538  
SRR17520069. 5321544  
SRR17520069. 5321552  
SRR17520069. 5323041  
SRR17520069. 5323055  
SRR17520069. 5331037  
SRR17520069. 5331207  
SRR17520069. 5331299  
SRR17520069. 5351229  
SRR17520069. 5353159  
SRR17520069. 5353205  
SRR17520069. 5356955  
SRR17520069. 5356991  
SRR17520069. 5358394

SRR17520069. 5363150  
SRR17520069. 5366298  
SRR17520069. 5373423  
SRR17520069. 5379280  
SRR17520069. 5379291  
SRR17520069. 5379550  
SRR17520069. 5379554  
SRR17520069. 5398539  
SRR17520069. 5398571  
SRR17520069. 5402871  
SRR17520069. 5402929  
SRR17520069. 5422028  
SRR17520069. 5424187  
SRR17520069. 5431443  
SRR17520069. 5433628  
SRR17520069. 5439444  
SRR17520069. 5442684  
SRR17520069. 5442714  
SRR17520069. 5442722  
SRR17520069. 5442726  
SRR17520069. 5446834  
SRR17520069. 5460114  
SRR17520069. 5460150  
SRR17520069. 5460198  
SRR17520069. 5460202  
SRR17520069. 5466036  
SRR17520069. 5469910  
SRR17520069. 5469922  
SRR17520069. 5469942  
SRR17520069. 5469952  
SRR17520069. 5469972  
SRR17520069. 5489474  
SRR17520069. 5490825  
SRR17520069. 5490827  
SRR17520069. 5490841  
SRR17520069. 5490845  
SRR17520069. 5490883  
SRR17520069. 5490887  
SRR17520069. 5490889  
SRR17520069. 5496379  
SRR17520069. 5496425  
SRR17520069. 5496485  
SRR17520069. 5496495  
SRR17520069. 5504263  
SRR17520069. 5506194  
SRR17520069. 5509863  
SRR17520069. 5509901

SRR17520069. 5517486  
SRR17520069. 5521183  
SRR17520069. 5521409  
SRR17520069. 5521967  
SRR17520069. 5521969  
SRR17520069. 5524533  
SRR17520069. 5528432  
SRR17520069. 5530176  
SRR17520069. 5530186  
SRR17520069. 5530196  
SRR17520069. 5530204  
SRR17520069. 5530206  
SRR17520069. 5530210  
SRR17520069. 5531834  
SRR17520069. 5531850  
SRR17520069. 5532213  
SRR17520069. 5532381  
SRR17520069. 5539546  
SRR17520069. 5548611  
SRR17520069. 5550541  
SRR17520069. 5552102  
SRR17520069. 5554103  
SRR17520069. 5555014  
SRR17520069. 5562810  
SRR17520069. 5570400  
SRR17520069. 5573013  
SRR17520069. 5573113  
SRR17520069. 5573143  
SRR17520069. 5573223  
SRR17520069. 5576277  
SRR17520069. 5576285  
SRR17520069. 5576287  
SRR17520069. 5587211  
SRR17520069. 5587215  
SRR17520069. 5587217  
SRR17520069. 5587245  
SRR17520069. 5590507  
SRR17520069. 5601789  
SRR17520069. 5601791  
SRR17520069. 5601793  
SRR17520069. 5601795  
SRR17520069. 5601797  
SRR17520069. 5601799  
SRR17520069. 5601801  
SRR17520069. 5601803  
SRR17520069. 5601805  
SRR17520069. 5601807

SRR17520069.5601809  
SRR17520069.5601811  
SRR17520069.5601813  
SRR17520069.5601815  
SRR17520069.5601817  
SRR17520069.5601819  
SRR17520069.5601821  
SRR17520069.5601823  
SRR17520069.5601825  
SRR17520069.5601827  
SRR17520069.5601829  
SRR17520069.5601831  
SRR17520069.5601833  
SRR17520069.5601835  
SRR17520069.5601837  
SRR17520069.5601839  
SRR17520069.5601841  
SRR17520069.5601843  
SRR17520069.5601845  
SRR17520069.5601847  
SRR17520069.5601849  
SRR17520069.5601851  
SRR17520069.5601853  
SRR17520069.5601855  
SRR17520069.5601857  
SRR17520069.5601859  
SRR17520069.5601861  
SRR17520069.5601863  
SRR17520069.5601865  
SRR17520069.5601867  
SRR17520069.5601869  
SRR17520069.5601871  
SRR17520069.5601873  
SRR17520069.5601875  
SRR17520069.5601877  
SRR17520069.5601879  
SRR17520069.5601881  
SRR17520069.5601883  
SRR17520069.5601885  
SRR17520069.5601887  
SRR17520069.5601889  
SRR17520069.5601891  
SRR17520069.5601893  
SRR17520069.5601895  
SRR17520069.5601897  
SRR17520069.5601899  
SRR17520069.5601901

SRR17520069.5601903  
SRR17520069.5601905  
SRR17520069.5601907  
SRR17520069.5601909  
SRR17520069.5601911  
SRR17520069.5601913  
SRR17520069.5601915  
SRR17520069.5601917  
SRR17520069.5601919  
SRR17520069.5601921  
SRR17520069.5601923  
SRR17520069.5601925  
SRR17520069.5601927  
SRR17520069.5601929  
SRR17520069.5601931  
SRR17520069.5601933  
SRR17520069.5601935  
SRR17520069.5601937  
SRR17520069.5601939  
SRR17520069.5601941  
SRR17520069.5601943  
SRR17520069.5601945  
SRR17520069.5601947  
SRR17520069.5601949  
SRR17520069.5601951  
SRR17520069.5601953  
SRR17520069.5601955  
SRR17520069.5601957  
SRR17520069.5601959  
SRR17520069.5601961  
SRR17520069.5601963  
SRR17520069.5601965  
SRR17520069.5601967  
SRR17520069.5601969  
SRR17520069.5601973  
SRR17520069.5609229  
SRR17520069.5612350  
SRR17520069.5612352  
SRR17520069.5612354  
SRR17520069.5612356  
SRR17520069.5612360  
SRR17520069.5612362  
SRR17520069.5612364  
SRR17520069.5612366  
SRR17520069.5612368  
SRR17520069.5612370  
SRR17520069.5612372

SRR17520069. 5612374  
SRR17520069. 5612376  
SRR17520069. 5612378  
SRR17520069. 5612380  
SRR17520069. 5612382  
SRR17520069. 5612384  
SRR17520069. 5612386  
SRR17520069. 5612388  
SRR17520069. 5612390  
SRR17520069. 5612392  
SRR17520069. 5612396  
SRR17520069. 5612398  
SRR17520069. 5612400  
SRR17520069. 5612402  
SRR17520069. 5612404  
SRR17520069. 5612406  
SRR17520069. 5615711  
SRR17520069. 5615733  
SRR17520069. 5615745  
SRR17520069. 5615749  
SRR17520069. 5615769  
SRR17520069. 5615783  
SRR17520069. 5615821  
SRR17520069. 5615829  
SRR17520069. 5616597  
SRR17520069. 5625171  
SRR17520069. 5625175  
SRR17520069. 5625179  
SRR17520069. 5625183  
SRR17520069. 5625186  
SRR17520069. 5631715  
SRR17520069. 5637234  
SRR17520069. 5637244  
SRR17520069. 5637260  
SRR17520069. 5637264  
SRR17520069. 5637276  
SRR17520069. 5637292  
SRR17520069. 5637296  
SRR17520069. 5637300  
SRR17520069. 5639400  
SRR17520069. 5639426  
SRR17520069. 5641455  
SRR17520069. 5643544  
SRR17520069. 5647882  
SRR17520069. 5652701  
SRR17520069. 5652703  
SRR17520069. 5652709



SRR17520069. 5652711  
SRR17520069. 5663440  
SRR17520069. 5663444  
SRR17520069. 5664309  
SRR17520069. 5666530  
SRR17520069. 5666532  
SRR17520069. 5666534  
SRR17520069. 5666536  
SRR17520069. 5666538  
SRR17520069. 5666540  
SRR17520069. 5666542  
SRR17520069. 5666544  
SRR17520069. 5666546  
SRR17520069. 5666548  
SRR17520069. 5666550  
SRR17520069. 5666552  
SRR17520069. 5666554  
SRR17520069. 5666556  
SRR17520069. 5666558  
SRR17520069. 5666560  
SRR17520069. 5666562  
SRR17520069. 5666564  
SRR17520069. 5666566  
SRR17520069. 5666568  
SRR17520069. 5666570  
SRR17520069. 5666572  
SRR17520069. 5666574  
SRR17520069. 5666576  
SRR17520069. 5666578  
SRR17520069. 5666580  
SRR17520069. 5666582  
SRR17520069. 5666584  
SRR17520069. 5666586  
SRR17520069. 5666588  
SRR17520069. 5676452  
SRR17520069. 5678553  
SRR17520069. 5679009  
SRR17520069. 5695413  
SRR17520069. 5695521  
SRR17520069. 5701799  
SRR17520069. 5701813  
SRR17520069. 5703703  
SRR17520069. 5704319  
SRR17520069. 5704812  
SRR17520069. 5714213  
SRR17520069. 5715970  
SRR17520069. 5715988

SRR17520069.5716002  
SRR17520069.5717707  
SRR17520069.5721927  
SRR17520069.5732875  
SRR17520069.5734200  
SRR17520069.5741099  
SRR17520069.5744897  
SRR17520069.5750691  
SRR17520069.5762193  
SRR17520069.5762235  
SRR17520069.5763146  
SRR17520069.5774770  
SRR17520069.5780186  
SRR17520069.5783928  
SRR17520069.5783954  
SRR17520069.5783960  
SRR17520069.5783964  
SRR17520069.5784042  
SRR17520069.5784062  
SRR17520069.5784066  
SRR17520069.5800651  
SRR17520069.5810030  
SRR17520069.5811778  
SRR17520069.5811802  
SRR17520069.5811824  
SRR17520069.5818965  
SRR17520069.5818967  
SRR17520069.5818969  
SRR17520069.5818971  
SRR17520069.5818973  
SRR17520069.5818981  
SRR17520069.5818989  
SRR17520069.5818993  
SRR17520069.5818995  
SRR17520069.5819023  
SRR17520069.5819039  
SRR17520069.5819063  
SRR17520069.5822096  
SRR17520069.5825311  
SRR17520069.5827432  
SRR17520069.5832388  
SRR17520069.5834159  
SRR17520069.5834161  
SRR17520069.5834169  
SRR17520069.5834171  
SRR17520069.5838241  
SRR17520069.5838917

SRR17520069.5843622  
SRR17520069.5843624  
SRR17520069.5846904  
SRR17520069.5846910  
SRR17520069.5848946  
SRR17520069.5848986  
SRR17520069.5849705  
SRR17520069.5864098  
SRR17520069.5864100  
SRR17520069.5871297  
SRR17520069.5871327  
SRR17520069.5873211  
SRR17520069.5873213  
SRR17520069.5873215  
SRR17520069.5876801  
SRR17520069.5876803  
SRR17520069.5881703  
SRR17520069.5885262  
SRR17520069.5885264  
SRR17520069.5885266  
SRR17520069.5885268  
SRR17520069.5889120  
SRR17520069.5889605  
SRR17520069.5889619  
SRR17520069.5889625  
SRR17520069.5889655  
SRR17520069.5889846  
SRR17520069.5889882  
SRR17520069.5889896  
SRR17520069.5889902  
SRR17520069.5891779  
SRR17520069.5891781  
SRR17520069.5892361  
SRR17520069.5894148  
SRR17520069.5894168  
SRR17520069.5894180  
SRR17520069.5894190  
SRR17520069.5894196  
SRR17520069.5898473  
SRR17520069.5917748  
SRR17520069.5917752  
SRR17520069.5917762  
SRR17520069.5922965  
SRR17520069.5922975  
SRR17520069.5922981  
SRR17520069.5922985  
SRR17520069.5938673

SRR17520069. 5938689  
SRR17520069. 5938699  
SRR17520069. 5938709  
SRR17520069. 5938713  
SRR17520069. 5947174  
SRR17520069. 5952811  
SRR17520069. 5954404  
SRR17520069. 5971846  
SRR17520069. 5975717  
SRR17520069. 5983061  
SRR17520069. 5988723  
SRR17520069. 5997670  
SRR17520069. 6005076  
SRR17520069. 6011300  
SRR17520069. 6016874  
SRR17520069. 6019803  
SRR17520069. 6021275  
SRR17520069. 6030382  
SRR17520069. 6031890  
SRR17520069. 6031950  
SRR17520069. 6040995  
SRR17520069. 6041519  
SRR17520069. 6041521  
SRR17520069. 6041525  
SRR17520069. 6041529  
SRR17520069. 6041555  
SRR17520069. 6041567  
SRR17520069. 6048802  
SRR17520069. 6049133  
SRR17520069. 6054511  
SRR17520069. 6054513  
SRR17520069. 6054515  
SRR17520069. 6054517  
SRR17520069. 6054519  
SRR17520069. 6054521  
SRR17520069. 6054523  
SRR17520069. 6054525  
SRR17520069. 6054527  
SRR17520069. 6054529  
SRR17520069. 6056910  
SRR17520069. 6058474  
SRR17520069. 6058478  
SRR17520069. 6058480  
SRR17520069. 6058488  
SRR17520069. 6058502  
SRR17520069. 6058510  
SRR17520069. 6061302

SRR17520069.6072419  
SRR17520069.6072425  
SRR17520069.6072461  
SRR17520069.6072471  
SRR17520069.6072473  
SRR17520069.6072481  
SRR17520069.6072487  
SRR17520069.6072493  
SRR17520069.6072517  
SRR17520069.6072519  
SRR17520069.6072527  
SRR17520069.6074418  
SRR17520069.6080163  
SRR17520069.6085070  
SRR17520069.6085072  
SRR17520069.6093323  
SRR17520069.6093595  
SRR17520069.6096912  
SRR17520069.6097856  
SRR17520069.6099963  
SRR17520069.6100545  
SRR17520069.6104388  
SRR17520069.6106357  
SRR17520069.6108738  
SRR17520069.6108742  
SRR17520069.6108754  
SRR17520069.6108758  
SRR17520069.6108762  
SRR17520069.6111302  
SRR17520069.6111306  
SRR17520069.6112605  
SRR17520069.6117523  
SRR17520069.6117567  
SRR17520069.6117569  
SRR17520069.6118786  
SRR17520069.6124139  
SRR17520069.6124145  
SRR17520069.6124183  
SRR17520069.6124195  
SRR17520069.6124197  
SRR17520069.6127415  
SRR17520069.6135009  
SRR17520069.6138138  
SRR17520069.6144130  
SRR17520069.6146903  
SRR17520069.6147685  
SRR17520069.6149734

SRR17520069.6155169  
SRR17520069.6155171  
SRR17520069.6155173  
SRR17520069.6155175  
SRR17520069.6155177  
SRR17520069.6155179  
SRR17520069.6155181  
SRR17520069.6155183  
SRR17520069.6155185  
SRR17520069.6155187  
SRR17520069.6155189  
SRR17520069.6155191  
SRR17520069.6155193  
SRR17520069.6155195  
SRR17520069.6155985  
SRR17520069.6162834  
SRR17520069.6162840  
SRR17520069.6162846  
SRR17520069.6164159  
SRR17520069.6165756  
SRR17520069.6169722  
SRR17520069.6169747  
SRR17520069.6171242  
SRR17520069.6172602  
SRR17520069.6172604  
SRR17520069.6172606  
SRR17520069.6172608  
SRR17520069.6172610  
SRR17520069.6172612  
SRR17520069.6172614  
SRR17520069.6172616  
SRR17520069.6173807  
SRR17520069.6185093  
SRR17520069.6185103  
SRR17520069.6185111  
SRR17520069.6188030  
SRR17520069.6190213  
SRR17520069.6190231  
SRR17520069.6191608  
SRR17520069.6194922  
SRR17520069.6194930  
SRR17520069.6198352  
SRR17520069.6198360  
SRR17520069.6198376  
SRR17520069.6198408  
SRR17520069.6198418  
SRR17520069.6198420

SRR17520069. 6198474  
SRR17520069. 6200395  
SRR17520069. 6200457  
SRR17520069. 6210955  
SRR17520069. 6225470  
SRR17520069. 6232485  
SRR17520069. 6232497  
SRR17520069. 6232541  
SRR17520069. 6237030  
SRR17520069. 6237032  
SRR17520069. 6237044  
SRR17520069. 6237046  
SRR17520069. 6237050  
SRR17520069. 6237094  
SRR17520069. 6246951  
SRR17520069. 6248933  
SRR17520069. 6250868  
SRR17520069. 6250870  
SRR17520069. 6250872  
SRR17520069. 6252362  
SRR17520069. 6252418  
SRR17520069. 6252452  
SRR17520069. 6271256  
SRR17520069. 6271883  
SRR17520069. 6271887  
SRR17520069. 6271901  
SRR17520069. 6283368  
SRR17520069. 6283370  
SRR17520069. 6283378  
SRR17520069. 6283386  
SRR17520069. 6283408  
SRR17520069. 6283418  
SRR17520069. 6296573  
SRR17520069. 6296589  
SRR17520069. 6300351  
SRR17520069. 6302989  
SRR17520069. 6302997  
SRR17520069. 6323518  
SRR17520069. 6339568  
SRR17520069. 6341489  
SRR17520069. 6342827  
SRR17520069. 6343685  
SRR17520069. 6343723  
SRR17520069. 6350192  
SRR17520069. 6350194  
SRR17520069. 6350218  
SRR17520069. 6353905

SRR17520069. 6353911  
SRR17520069. 6353913  
SRR17520069. 6353919  
SRR17520069. 6353921  
SRR17520069. 6353935  
SRR17520069. 6353939  
SRR17520069. 6353945  
SRR17520069. 6353949  
SRR17520069. 6354694  
SRR17520069. 6354696  
SRR17520069. 6354704  
SRR17520069. 6359094  
SRR17520069. 6359112  
SRR17520069. 6359144  
SRR17520069. 6359152  
SRR17520069. 6365756  
SRR17520069. 6368223  
SRR17520069. 6368225  
SRR17520069. 6368279  
SRR17520069. 6368303  
SRR17520069. 6378037  
SRR17520069. 6378073  
SRR17520069. 6379754  
SRR17520069. 6382157  
SRR17520069. 6387515  
SRR17520069. 6387738  
SRR17520069. 6389058  
SRR17520069. 6389064  
SRR17520069. 6389066  
SRR17520069. 6392323  
SRR17520069. 6399261  
SRR17520069. 6401980  
SRR17520069. 6408107  
SRR17520069. 6414960  
SRR17520069. 6421041  
SRR17520069. 6421169  
SRR17520069. 6425560  
SRR17520069. 6438085  
SRR17520069. 6463925  
SRR17520069. 6472813  
SRR17520069. 6472819  
SRR17520069. 6479576  
SRR17520069. 6480941  
SRR17520069. 6485776  
SRR17520069. 6485798  
SRR17520069. 6499587  
SRR17520069. 6499640



SRR17520069.6499642  
SRR17520069.6499644  
SRR17520069.6499646  
SRR17520069.6499648  
SRR17520069.6499650  
SRR17520069.6510818  
SRR17520069.6511910  
SRR17520069.6511914  
SRR17520069.6540331  
SRR17520069.6557151  
SRR17520069.6574018  
SRR17520069.6574048  
SRR17520069.6574064  
SRR17520069.6574116  
SRR17520069.6578649  
SRR17520069.6578665  
SRR17520069.6578688  
SRR17520069.6578720  
SRR17520069.6578734  
SRR17520069.6578744  
SRR17520069.6578754  
SRR17520069.6578765  
SRR17520069.6578772  
SRR17520069.6578786  
SRR17520069.6578788  
SRR17520069.6578798  
SRR17520069.6588603  
SRR17520069.6589311  
SRR17520069.6599741  
SRR17520069.6613088  
SRR17520069.6615124  
SRR17520069.6632161  
SRR17520069.6632165  
SRR17520069.6632315  
SRR17520069.6632343  
SRR17520069.6632365  
SRR17520069.6632395  
SRR17520069.6636040  
SRR17520069.6644945  
SRR17520069.6644951  
SRR17520069.6657667  
SRR17520069.6660072  
SRR17520069.6660965  
SRR17520069.6666027  
SRR17520069.6666035  
SRR17520069.6666037  
SRR17520069.6666088

SRR17520069.6672898  
SRR17520069.6677501  
SRR17520069.6679340  
SRR17520069.6679344  
SRR17520069.6685419  
SRR17520069.6685828  
SRR17520069.6685848  
SRR17520069.6686534  
SRR17520069.6689755  
SRR17520069.6700649  
SRR17520069.6701436  
SRR17520069.6701488  
SRR17520069.6701496  
SRR17520069.6711898  
SRR17520069.6711900  
SRR17520069.6712712  
SRR17520069.6712724  
SRR17520069.6715077  
SRR17520069.6715081  
SRR17520069.6715083  
SRR17520069.6715085  
SRR17520069.6715087  
SRR17520069.6715089  
SRR17520069.6715091  
SRR17520069.6725941  
SRR17520069.6730183  
SRR17520069.6730189  
SRR17520069.6744520  
SRR17520069.6744526  
SRR17520069.6758281  
SRR17520069.6758283  
SRR17520069.6758285  
SRR17520069.6758287  
SRR17520069.6758289  
SRR17520069.6758291  
SRR17520069.6758293  
SRR17520069.6758295  
SRR17520069.6758297  
SRR17520069.6758299  
SRR17520069.6758301  
SRR17520069.6758303  
SRR17520069.6758305  
SRR17520069.6758307  
SRR17520069.6758309  
SRR17520069.6758311  
SRR17520069.6758313  
SRR17520069.6758315

SRR17520069.6758317  
SRR17520069.6758319  
SRR17520069.6758321  
SRR17520069.6758323  
SRR17520069.6758325  
SRR17520069.6758327  
SRR17520069.6758329  
SRR17520069.6758331  
SRR17520069.6758333  
SRR17520069.6758335  
SRR17520069.6758337  
SRR17520069.6758339  
SRR17520069.6758341  
SRR17520069.6758343  
SRR17520069.6758345  
SRR17520069.6758347  
SRR17520069.6762426  
SRR17520069.6768740  
SRR17520069.6771671  
SRR17520069.6780206  
SRR17520069.6780210  
SRR17520069.6780320  
SRR17520069.6783034  
SRR17520069.6787706  
SRR17520069.6792875  
SRR17520069.6803425  
SRR17520069.6807506  
SRR17520069.6807508  
SRR17520069.6807510  
SRR17520069.6807512  
SRR17520069.6807514  
SRR17520069.6807516  
SRR17520069.6807518  
SRR17520069.6807520  
SRR17520069.6807522  
SRR17520069.6807524  
SRR17520069.6807526  
SRR17520069.6807528  
SRR17520069.6807530  
SRR17520069.6807532  
SRR17520069.6807534  
SRR17520069.6807536  
SRR17520069.6810353  
SRR17520069.6810355  
SRR17520069.6810357  
SRR17520069.6810359  
SRR17520069.6810361

SRR17520069.6810363  
SRR17520069.6810365  
SRR17520069.6810367  
SRR17520069.6810369  
SRR17520069.6810371  
SRR17520069.6810373  
SRR17520069.6810375  
SRR17520069.6810377  
SRR17520069.6810379  
SRR17520069.6810381  
SRR17520069.6810383  
SRR17520069.6810385  
SRR17520069.6810387  
SRR17520069.6810389  
SRR17520069.6810391  
SRR17520069.6810393  
SRR17520069.6810737  
SRR17520069.6820168  
SRR17520069.6820174  
SRR17520069.6820176  
SRR17520069.6820178  
SRR17520069.6820180  
SRR17520069.6820182  
SRR17520069.6820184  
SRR17520069.6820186  
SRR17520069.6820188  
SRR17520069.6820190  
SRR17520069.6820192  
SRR17520069.6820194  
SRR17520069.6820196  
SRR17520069.6820198  
SRR17520069.6820200  
SRR17520069.6820202  
SRR17520069.6820204  
SRR17520069.6820206  
SRR17520069.6820208  
SRR17520069.6820210  
SRR17520069.6820212  
SRR17520069.6820214  
SRR17520069.6820216  
SRR17520069.6820218  
SRR17520069.6820220  
SRR17520069.6820222  
SRR17520069.6820224  
SRR17520069.6820226  
SRR17520069.6820228  
SRR17520069.6820230

SRR17520069.6820232  
SRR17520069.6820234  
SRR17520069.6820236  
SRR17520069.6821137  
SRR17520069.6821147  
SRR17520069.6821163  
SRR17520069.6821734  
SRR17520069.6835660  
SRR17520069.6835663  
SRR17520069.6844559  
SRR17520069.6857968  
SRR17520069.6858019  
SRR17520069.6858035  
SRR17520069.6862874  
SRR17520069.6880145  
SRR17520069.6903070  
SRR17520069.6903612  
SRR17520069.6903618  
SRR17520069.6903620  
SRR17520069.6903624  
SRR17520069.6907158  
SRR17520069.6911688  
SRR17520069.6918661  
SRR17520069.6921174  
SRR17520069.6931692  
SRR17520069.6933568  
SRR17520069.6936105  
SRR17520069.6936161  
SRR17520069.6936608  
SRR17520069.6936626  
SRR17520069.6936642  
SRR17520069.6936660  
SRR17520069.6943935  
SRR17520069.6944720  
SRR17520069.6947611  
SRR17520069.6947695  
SRR17520069.6949979  
SRR17520069.6950112  
SRR17520069.6953159  
SRR17520069.6953161  
SRR17520069.6953169  
SRR17520069.6953173  
SRR17520069.6953183  
SRR17520069.6953991  
SRR17520069.6964096  
SRR17520069.6965147  
SRR17520069.6965157

SRR17520069.6965159  
SRR17520069.6965201  
SRR17520069.6984244  
SRR17520069.6984266  
SRR17520069.6984278  
SRR17520069.6984298  
SRR17520069.6990772  
SRR17520069.6995113  
SRR17520069.7016076  
SRR17520069.7020948  
SRR17520069.7021440  
SRR17520069.7021442  
SRR17520069.7030902  
SRR17520069.7052883  
SRR17520069.7052913  
SRR17520069.7052923  
SRR17520069.7062495  
SRR17520069.7062509  
SRR17520069.7063736  
SRR17520069.7074363  
SRR17520069.7080582  
SRR17520069.7101939  
SRR17520069.7103567  
SRR17520069.7113847  
SRR17520069.7120359  
SRR17520069.7127304  
SRR17520069.7136346  
SRR17520069.7146872  
SRR17520069.7149157  
SRR17520069.7155329  
SRR17520069.7192080  
SRR17520069.7192088  
SRR17520069.7192092  
SRR17520069.7192100  
SRR17520069.7192106  
SRR17520069.7197561  
SRR17520069.7197569  
SRR17520069.7211632  
SRR17520069.7216891  
SRR17520069.7220383  
SRR17520069.7220713  
SRR17520069.7228991  
SRR17520069.7229003  
SRR17520069.7229011  
SRR17520069.7231856  
SRR17520069.7231892  
SRR17520069.7231906

SRR17520069. 7231910  
SRR17520069. 7231978  
SRR17520069. 7231980  
SRR17520069. 7232008  
SRR17520069. 7236066  
SRR17520069. 7236076  
SRR17520069. 7236088  
SRR17520069. 7236126  
SRR17520069. 7239675  
SRR17520069. 7258256  
SRR17520069. 7258314  
SRR17520069. 7258324  
SRR17520069. 7258328  
SRR17520069. 7258334  
SRR17520069. 7258340  
SRR17520069. 7270460  
SRR17520069. 7281839  
SRR17520069. 7284444  
SRR17520069. 7285557  
SRR17520069. 7285587  
SRR17520069. 7300558  
SRR17520069. 7311050  
SRR17520069. 7318822  
SRR17520069. 7318826  
SRR17520069. 7318866  
SRR17520069. 7325653  
SRR17520069. 7327692  
SRR17520069. 7327708  
SRR17520069. 7327795  
SRR17520069. 7327797  
SRR17520069. 7327803  
SRR17520069. 7327827  
SRR17520069. 7327851  
SRR17520069. 7329837  
SRR17520069. 7329839  
SRR17520069. 7330439  
SRR17520069. 7345309  
SRR17520069. 7345354  
SRR17520069. 7351682  
SRR17520069. 7356688  
SRR17520069. 7356689  
SRR17520069. 7356999  
SRR17520069. 7370269  
SRR17520069. 7370285  
SRR17520069. 7372150  
SRR17520069. 7372154  
SRR17520069. 7389641

SRR17520069. 7392712  
SRR17520069. 7394923  
SRR17520069. 7394937  
SRR17520069. 7394965  
SRR17520069. 7394971  
SRR17520069. 7394999  
SRR17520069. 7395440  
SRR17520069. 7398478  
SRR17520069. 7398484  
SRR17520069. 7400358  
SRR17520069. 7400360  
SRR17520069. 7401751  
SRR17520069. 7401759  
SRR17520069. 7401763  
SRR17520069. 7401795  
SRR17520069. 7401799  
SRR17520069. 7401801  
SRR17520069. 7401862  
SRR17520069. 7401886  
SRR17520069. 7401890  
SRR17520069. 7409923  
SRR17520069. 7420549  
SRR17520069. 7432608  
SRR17520069. 7432652  
SRR17520069. 7432712  
SRR17520069. 7435014  
SRR17520069. 7450975  
SRR17520069. 7450987  
SRR17520069. 7451005  
SRR17520069. 7455644  
SRR17520069. 7458619  
SRR17520069. 7463548  
SRR17520069. 7463837  
SRR17520069. 7463839  
SRR17520069. 7470484  
SRR17520069. 7472470  
SRR17520069. 7472472  
SRR17520069. 7476380  
SRR17520069. 7476389  
SRR17520069. 7476397  
SRR17520069. 7476478  
SRR17520069. 7478595  
SRR17520069. 7478603  
SRR17520069. 7479489  
SRR17520069. 7484313  
SRR17520069. 7497827  
SRR17520069. 7516542



SRR17520069.7520795  
SRR17520069.7520797  
SRR17520069.7535347  
SRR17520069.7544993  
SRR17520069.7545359  
SRR17520069.7549747  
SRR17520069.7551464  
SRR17520069.7552694  
SRR17520069.7557241  
SRR17520069.7562662  
SRR17520069.7564665  
SRR17520069.7579522  
SRR17520069.7589607  
SRR17520069.7598019  
SRR17520069.7604370  
SRR17520069.7614403  
SRR17520069.7615605  
SRR17520069.7615609  
SRR17520069.7619475  
SRR17520069.7630990  
SRR17520069.7631000  
SRR17520069.7631238  
SRR17520069.7637038  
SRR17520069.7637046  
SRR17520069.7637068  
SRR17520069.7642561  
SRR17520069.7643712  
SRR17520069.7644210  
SRR17520069.7658530  
SRR17520069.7658554  
SRR17520069.7658558  
SRR17520069.7658614  
SRR17520069.7662594  
SRR17520069.7662620  
SRR17520069.7667023  
SRR17520069.7667025  
SRR17520069.7667043  
SRR17520069.7667045  
SRR17520069.7668014  
SRR17520069.7679470  
SRR17520069.7679480  
SRR17520069.7689267  
SRR17520069.7689283  
SRR17520069.7689301  
SRR17520069.7689310  
SRR17520069.7689325  
SRR17520069.7689364

SRR17520069.7689723  
SRR17520069.7703298  
SRR17520069.7703306  
SRR17520069.7703360  
SRR17520069.7704676  
SRR17520069.7704680  
SRR17520069.7704688  
SRR17520069.7714981  
SRR17520069.7715229  
SRR17520069.7721244  
SRR17520069.7743110  
SRR17520069.7743972  
SRR17520069.7743974  
SRR17520069.7743976  
SRR17520069.7743978  
SRR17520069.7743980  
SRR17520069.7743982  
SRR17520069.7743984  
SRR17520069.7743986  
SRR17520069.7743988  
SRR17520069.7743990  
SRR17520069.7743992  
SRR17520069.7743994  
SRR17520069.7743996  
SRR17520069.7743998  
SRR17520069.7744000  
SRR17520069.7744002  
SRR17520069.7744004  
SRR17520069.7744006  
SRR17520069.7744008  
SRR17520069.7744010  
SRR17520069.7744012  
SRR17520069.7744014  
SRR17520069.7744016  
SRR17520069.7744018  
SRR17520069.7754806  
SRR17520069.7754834  
SRR17520069.7754840  
SRR17520069.7754844  
SRR17520069.7755024  
SRR17520069.7755028  
SRR17520069.7755036  
SRR17520069.7755040  
SRR17520069.7755046  
SRR17520069.7755048  
SRR17520069.7755050  
SRR17520069.7755052

SRR17520069.7756469  
SRR17520069.7756475  
SRR17520069.7764947  
SRR17520069.7766827  
SRR17520069.7766831  
SRR17520069.7778480  
SRR17520069.7785785  
SRR17520069.7786997  
SRR17520069.7787009  
SRR17520069.7789479  
SRR17520069.7792607  
SRR17520069.7792621  
SRR17520069.7792721  
SRR17520069.7799368  
SRR17520069.7799376  
SRR17520069.7799748  
SRR17520069.7799756  
SRR17520069.7799758  
SRR17520069.7799764  
SRR17520069.7799810  
SRR17520069.7799832  
SRR17520069.7799836  
SRR17520069.7816164  
SRR17520069.7817788  
SRR17520069.7817790  
SRR17520069.7817792  
SRR17520069.7817794  
SRR17520069.7817796  
SRR17520069.7817798  
SRR17520069.7817800  
SRR17520069.7817802  
SRR17520069.7817804  
SRR17520069.7817806  
SRR17520069.7817810  
SRR17520069.7817812  
SRR17520069.7817814  
SRR17520069.7817816  
SRR17520069.7817818  
SRR17520069.7817820  
SRR17520069.7817822  
SRR17520069.7817824  
SRR17520069.7817826  
SRR17520069.7817828  
SRR17520069.7817830  
SRR17520069.7817832  
SRR17520069.7817834  
SRR17520069.7817836

SRR17520069.7817838  
SRR17520069.7817840  
SRR17520069.7817842  
SRR17520069.7826753  
SRR17520069.7826761  
SRR17520069.7826777  
SRR17520069.7826801  
SRR17520069.7835359  
SRR17520069.7835367  
SRR17520069.7835718  
SRR17520069.7835770  
SRR17520069.7835776  
SRR17520069.7847256  
SRR17520069.7847266  
SRR17520069.7848830  
SRR17520069.7848840  
SRR17520069.7848852  
SRR17520069.7848854  
SRR17520069.7848866  
SRR17520069.7857309  
SRR17520069.7867639  
SRR17520069.7870153  
SRR17520069.7870161  
SRR17520069.7871859  
SRR17520069.7890868  
SRR17520069.7891313  
SRR17520069.7891317  
SRR17520069.7891341  
SRR17520069.7891351  
SRR17520069.7894661  
SRR17520069.7895749  
SRR17520069.7900690  
SRR17520069.7903036  
SRR17520069.7903044  
SRR17520069.7903060  
SRR17520069.7903078  
SRR17520069.7903080  
SRR17520069.7905290  
SRR17520069.7906125  
SRR17520069.7907783  
SRR17520069.7907795  
SRR17520069.7907801  
SRR17520069.7907811  
SRR17520069.7907823  
SRR17520069.7907851  
SRR17520069.7936570  
SRR17520069.7936572

SRR17520069.7942722  
SRR17520069.7952338  
SRR17520069.7960937  
SRR17520069.7960946  
SRR17520069.7964045  
SRR17520069.7964059  
SRR17520069.7964069  
SRR17520069.7964075  
SRR17520069.7964089  
SRR17520069.7964091  
SRR17520069.7964127  
SRR17520069.7964131  
SRR17520069.7964146  
SRR17520069.7964159  
SRR17520069.7964163  
SRR17520069.7964173  
SRR17520069.7964205  
SRR17520069.7964215  
SRR17520069.7964219  
SRR17520069.7964247  
SRR17520069.7964249  
SRR17520069.7964267  
SRR17520069.7964271  
SRR17520069.7966447  
SRR17520069.7966451  
SRR17520069.7966463  
SRR17520069.7966473  
SRR17520069.7976151  
SRR17520069.7977527  
SRR17520069.7977530  
SRR17520069.7977532  
SRR17520069.7977534  
SRR17520069.7978210  
SRR17520069.7978228  
SRR17520069.7983383  
SRR17520069.7986307  
SRR17520069.7986323  
SRR17520069.7986329  
SRR17520069.7986343  
SRR17520069.7986353  
SRR17520069.7990664  
SRR17520069.7998579  
SRR17520069.7998581  
SRR17520069.7998593  
SRR17520069.7998595  
SRR17520069.8004060  
SRR17520069.8007330

SRR17520069.8007338  
SRR17520069.8007342  
SRR17520069.8007354  
SRR17520069.8007356  
SRR17520069.8007362  
SRR17520069.8007366  
SRR17520069.8007374  
SRR17520069.8014650  
SRR17520069.8015581  
SRR17520069.8026588  
SRR17520069.8026598  
SRR17520069.8033467  
SRR17520069.8048604  
SRR17520069.8056837  
SRR17520069.8062988  
SRR17520069.8067362  
SRR17520069.8067364  
SRR17520069.8067368  
SRR17520069.8067370  
SRR17520069.8067378  
SRR17520069.8067382  
SRR17520069.8067388  
SRR17520069.8074436  
SRR17520069.8074457  
SRR17520069.8085880  
SRR17520069.8087919  
SRR17520069.8087927  
SRR17520069.8088028  
SRR17520069.8105573  
SRR17520069.8107934  
SRR17520069.8107952  
SRR17520069.8126493  
SRR17520069.8136010  
SRR17520069.8140398  
SRR17520069.8140400  
SRR17520069.8140402  
SRR17520069.8140404  
SRR17520069.8140406  
SRR17520069.8147621  
SRR17520069.8157999  
SRR17520069.8161997  
SRR17520069.8162331  
SRR17520069.8174463  
SRR17520069.8174542  
SRR17520069.8184353  
SRR17520069.8184908  
SRR17520069.8184910

SRR17520069.8184912  
SRR17520069.8184922  
SRR17520069.8184926  
SRR17520069.8193574  
SRR17520069.8193576  
SRR17520069.8193578  
SRR17520069.8196867  
SRR17520069.8202276  
SRR17520069.8206663  
SRR17520069.8206677  
SRR17520069.8206699  
SRR17520069.8206707  
SRR17520069.8209419  
SRR17520069.8222528  
SRR17520069.8227326  
SRR17520069.8227417  
SRR17520069.8232964  
SRR17520069.8232978  
SRR17520069.8232988  
SRR17520069.8232994  
SRR17520069.8233000  
SRR17520069.8236107  
SRR17520069.8243507  
SRR17520069.8244326  
SRR17520069.8244344  
SRR17520069.8253294  
SRR17520069.8255027  
SRR17520069.8258198  
SRR17520069.8258206  
SRR17520069.8258228  
SRR17520069.8267506  
SRR17520069.8275914  
SRR17520069.8290278  
SRR17520069.8299440  
SRR17520069.8299450  
SRR17520069.8299472  
SRR17520069.8299486  
SRR17520069.8299488  
SRR17520069.8302023  
SRR17520069.8315774  
SRR17520069.8327818  
SRR17520069.8329258  
SRR17520069.8329266  
SRR17520069.8329602  
SRR17520069.8329604  
SRR17520069.8329616  
SRR17520069.8331593

SRR17520069.8335261  
SRR17520069.8335339  
SRR17520069.8338200  
SRR17520069.8344737  
SRR17520069.8346257  
SRR17520069.8354556  
SRR17520069.8360133  
SRR17520069.8362233  
SRR17520069.8363964  
SRR17520069.8365083  
SRR17520069.8365087  
SRR17520069.8365109  
SRR17520069.8365115  
SRR17520069.8368819  
SRR17520069.8375288  
SRR17520069.8375290  
SRR17520069.8375292  
SRR17520069.8375294  
SRR17520069.8375296  
SRR17520069.8375298  
SRR17520069.8378908  
SRR17520069.8378910  
SRR17520069.8390556  
SRR17520069.8402771  
SRR17520069.8402773  
SRR17520069.8402775  
SRR17520069.8402777  
SRR17520069.8410388  
SRR17520069.8432820  
SRR17520069.8432836  
SRR17520069.8439783  
SRR17520069.8443898  
SRR17520069.8443924  
SRR17520069.8448011  
SRR17520069.8449504  
SRR17520069.8454100  
SRR17520069.8462230  
SRR17520069.8463727  
SRR17520069.8468365  
SRR17520069.8468389  
SRR17520069.8472638  
SRR17520069.8472644  
SRR17520069.8472654  
SRR17520069.8472656  
SRR17520069.8479479  
SRR17520069.8483919  
SRR17520069.8483953



SRR17520069.8486108  
SRR17520069.8486138  
SRR17520069.8486146  
SRR17520069.8486622  
SRR17520069.8497751  
SRR17520069.8500958  
SRR17520069.8514042  
SRR17520069.8515243  
SRR17520069.8515325  
SRR17520069.8517836  
SRR17520069.8517842  
SRR17520069.8522657  
SRR17520069.8522659  
SRR17520069.8522683  
SRR17520069.8522697  
SRR17520069.8527148  
SRR17520069.8551179  
SRR17520069.8554334  
SRR17520069.8554394  
SRR17520069.8564214  
SRR17520069.8564320  
SRR17520069.8564340  
SRR17520069.8581231  
SRR17520069.8585893  
SRR17520069.8595824  
SRR17520069.8599905  
SRR17520069.8603832  
SRR17520069.8607393  
SRR17520069.8608504  
SRR17520069.8608510  
SRR17520069.8608516  
SRR17520069.8617215  
SRR17520069.8617227  
SRR17520069.8617245  
SRR17520069.8617257  
SRR17520069.8617273  
SRR17520069.8622243  
SRR17520069.8626286  
SRR17520069.8645653  
SRR17520069.8648480  
SRR17520069.8648484  
SRR17520069.8648486  
SRR17520069.8648488  
SRR17520069.8648490  
SRR17520069.8648494  
SRR17520069.8648496  
SRR17520069.8648498

SRR17520069.8648502  
SRR17520069.8648504  
SRR17520069.8648506  
SRR17520069.8648508  
SRR17520069.8648512  
SRR17520069.8648514  
SRR17520069.8648516  
SRR17520069.8648520  
SRR17520069.8648522  
SRR17520069.8648524  
SRR17520069.8648526  
SRR17520069.8648528  
SRR17520069.8648530  
SRR17520069.8648534  
SRR17520069.8648536  
SRR17520069.8648538  
SRR17520069.8648540  
SRR17520069.8648542  
SRR17520069.8648544  
SRR17520069.8648546  
SRR17520069.8648548  
SRR17520069.8648550  
SRR17520069.8648554  
SRR17520069.8648556  
SRR17520069.8648558  
SRR17520069.8648562  
SRR17520069.8648564  
SRR17520069.8648566  
SRR17520069.8648570  
SRR17520069.8648574  
SRR17520069.8648576  
SRR17520069.8648578  
SRR17520069.8648580  
SRR17520069.8648582  
SRR17520069.8650803  
SRR17520069.8657596  
SRR17520069.8662399  
SRR17520069.8662415  
SRR17520069.8662425  
SRR17520069.8662441  
SRR17520069.8662471  
SRR17520069.8665586  
SRR17520069.8672837  
SRR17520069.8675768  
SRR17520069.8675802  
SRR17520069.8676547  
SRR17520069.8676555

SRR17520069.8676593  
SRR17520069.8676595  
SRR17520069.8676597  
SRR17520069.8680339  
SRR17520069.8680389  
SRR17520069.8680393  
SRR17520069.8680407  
SRR17520069.8680440  
SRR17520069.8680552  
SRR17520069.8686517  
SRR17520069.8689161  
SRR17520069.8692574  
SRR17520069.8698648  
SRR17520069.8698654  
SRR17520069.8700378  
SRR17520069.8700380  
SRR17520069.8700384  
SRR17520069.8700400  
SRR17520069.8700418  
SRR17520069.8716171  
SRR17520069.8718010  
SRR17520069.8718020  
SRR17520069.8718058  
SRR17520069.8720351  
SRR17520069.8720385  
SRR17520069.8723274  
SRR17520069.8723276  
SRR17520069.8723278  
SRR17520069.8723282  
SRR17520069.8723284  
SRR17520069.8723286  
SRR17520069.8723288  
SRR17520069.8723290  
SRR17520069.8723292  
SRR17520069.8723294  
SRR17520069.8723296  
SRR17520069.8723298  
SRR17520069.8723300  
SRR17520069.8723302  
SRR17520069.8723306  
SRR17520069.8723308  
SRR17520069.8723310  
SRR17520069.8723312  
SRR17520069.8723314  
SRR17520069.8723318  
SRR17520069.8723320  
SRR17520069.8723322

SRR17520069.8723324  
SRR17520069.8723326  
SRR17520069.8723328  
SRR17520069.8723332  
SRR17520069.8723336  
SRR17520069.8723338  
SRR17520069.8723340  
SRR17520069.8723342  
SRR17520069.8723344  
SRR17520069.8723346  
SRR17520069.8723348  
SRR17520069.8723350  
SRR17520069.8723352  
SRR17520069.8723354  
SRR17520069.8723358  
SRR17520069.8723360  
SRR17520069.8723362  
SRR17520069.8723368  
SRR17520069.8723370  
SRR17520069.8723372  
SRR17520069.8723374  
SRR17520069.8723376  
SRR17520069.8723378  
SRR17520069.8723380  
SRR17520069.8723382  
SRR17520069.8723384  
SRR17520069.8723386  
SRR17520069.8723388  
SRR17520069.8723390  
SRR17520069.8723392  
SRR17520069.8723396  
SRR17520069.8723398  
SRR17520069.8723400  
SRR17520069.8723402  
SRR17520069.8723404  
SRR17520069.8723406  
SRR17520069.8723408  
SRR17520069.8723410  
SRR17520069.8723414  
SRR17520069.8723416  
SRR17520069.8724750  
SRR17520069.8724752  
SRR17520069.8724756  
SRR17520069.8724764  
SRR17520069.8724768  
SRR17520069.8724780  
SRR17520069.8724798

SRR17520069.8724818  
SRR17520069.8724820  
SRR17520069.8726635  
SRR17520069.8731394  
SRR17520069.8731404  
SRR17520069.8731420  
SRR17520069.8731450  
SRR17520069.8731456  
SRR17520069.8731470  
SRR17520069.8731478  
SRR17520069.8738840  
SRR17520069.8751697  
SRR17520069.8751701  
SRR17520069.8751703  
SRR17520069.8751731  
SRR17520069.8751735  
SRR17520069.8751737  
SRR17520069.8753524  
SRR17520069.8758668  
SRR17520069.8758669  
SRR17520069.8758681  
SRR17520069.8758703  
SRR17520069.8772117  
SRR17520069.8772125  
SRR17520069.8772479  
SRR17520069.8774580  
SRR17520069.8774588  
SRR17520069.8791214  
SRR17520069.8798192  
SRR17520069.8800714  
SRR17520069.8840027  
SRR17520069.8840047  
SRR17520069.8843150  
SRR17520069.8843164  
SRR17520069.8843172  
SRR17520069.8843176  
SRR17520069.8853019  
SRR17520069.8853021  
SRR17520069.8853023  
SRR17520069.8853025  
SRR17520069.8853027  
SRR17520069.8853029  
SRR17520069.8853031  
SRR17520069.8853033  
SRR17520069.8853035  
SRR17520069.8853037  
SRR17520069.8853039

SRR17520069.8853041  
SRR17520069.8853043  
SRR17520069.8853045  
SRR17520069.8853047  
SRR17520069.8853049  
SRR17520069.8853051  
SRR17520069.8853053  
SRR17520069.8853055  
SRR17520069.8853057  
SRR17520069.8853059  
SRR17520069.8853061  
SRR17520069.8853063  
SRR17520069.8853065  
SRR17520069.8853067  
SRR17520069.8853069  
SRR17520069.8853071  
SRR17520069.8853073  
SRR17520069.8853075  
SRR17520069.8853077  
SRR17520069.8853079  
SRR17520069.8853081  
SRR17520069.8853083  
SRR17520069.8853085  
SRR17520069.8853087  
SRR17520069.8853089  
SRR17520069.8853091  
SRR17520069.8853093  
SRR17520069.8853095  
SRR17520069.8853097  
SRR17520069.8853099  
SRR17520069.8858663  
SRR17520069.8859412  
SRR17520069.8861456  
SRR17520069.8861479  
SRR17520069.8861509  
SRR17520069.8861545  
SRR17520069.8874285  
SRR17520069.8876019  
SRR17520069.8876023  
SRR17520069.8876025  
SRR17520069.8876049  
SRR17520069.8888173  
SRR17520069.8897421  
SRR17520069.8902971  
SRR17520069.8909388  
SRR17520069.8909428  
SRR17520069.8909446

SRR17520069.8912112  
SRR17520069.8912130  
SRR17520069.8912350  
SRR17520069.8933349  
SRR17520069.8933361  
SRR17520069.8933369  
SRR17520069.8933377  
SRR17520069.8933415  
SRR17520069.8933527  
SRR17520069.8933541  
SRR17520069.8939455  
SRR17520069.8945336  
SRR17520069.8946671  
SRR17520069.8946673  
SRR17520069.8946691  
SRR17520069.8946693  
SRR17520069.8948443  
SRR17520069.8950480  
SRR17520069.8950486  
SRR17520069.8950488  
SRR17520069.8950494  
SRR17520069.8959036  
SRR17520069.8967590  
SRR17520069.8967596  
SRR17520069.8967604  
SRR17520069.8967990  
SRR17520069.8971218  
SRR17520069.8974378  
SRR17520069.8982725  
SRR17520069.8991600  
SRR17520069.8996851  
SRR17520069.9006183  
SRR17520069.9006213  
SRR17520069.9008565  
SRR17520069.9011389  
SRR17520069.9011853  
SRR17520069.9011928  
SRR17520069.9011932  
SRR17520069.9011958  
SRR17520069.9011974  
SRR17520069.9014152  
SRR17520069.9016604  
SRR17520069.9026583  
SRR17520069.9027904  
SRR17520069.9031277  
SRR17520069.9039545  
SRR17520069.9040896

SRR17520069.9040904  
SRR17520069.9044134  
SRR17520069.9045677  
SRR17520069.9047116  
SRR17520069.9052491  
SRR17520069.9052513  
SRR17520069.9052525  
SRR17520069.9053649  
SRR17520069.9068198  
SRR17520069.9072201  
SRR17520069.9072255  
SRR17520069.9077810  
SRR17520069.9081412  
SRR17520069.9081424  
SRR17520069.9083272  
SRR17520069.9083274  
SRR17520069.9083276  
SRR17520069.9083278  
SRR17520069.9083280  
SRR17520069.9083282  
SRR17520069.9083284  
SRR17520069.9083286  
SRR17520069.9083288  
SRR17520069.9083290  
SRR17520069.9083292  
SRR17520069.9083294  
SRR17520069.9083296  
SRR17520069.9083298  
SRR17520069.9083302  
SRR17520069.9083304  
SRR17520069.9083306  
SRR17520069.9083308  
SRR17520069.9083310  
SRR17520069.9083312  
SRR17520069.9083314  
SRR17520069.9083316  
SRR17520069.9083318  
SRR17520069.9083320  
SRR17520069.9083322  
SRR17520069.9083324  
SRR17520069.9083326  
SRR17520069.9083328  
SRR17520069.9083330  
SRR17520069.9083332  
SRR17520069.9083334  
SRR17520069.9083336  
SRR17520069.9083338



SRR17520069.9083340  
SRR17520069.9083342  
SRR17520069.9083344  
SRR17520069.9083346  
SRR17520069.9083348  
SRR17520069.9083350  
SRR17520069.9083352  
SRR17520069.9083354  
SRR17520069.9083356  
SRR17520069.9083358  
SRR17520069.9083360  
SRR17520069.9083362  
SRR17520069.9083364  
SRR17520069.9083366  
SRR17520069.9083368  
SRR17520069.9083631  
SRR17520069.9084283  
SRR17520069.9088061  
SRR17520069.9088063  
SRR17520069.9090832  
SRR17520069.9090850  
SRR17520069.9090993  
SRR17520069.9090995  
SRR17520069.9091010  
SRR17520069.9091014  
SRR17520069.9091018  
SRR17520069.9091020  
SRR17520069.9120215  
SRR17520069.9123900  
SRR17520069.9126820  
SRR17520069.9131307  
SRR17520069.9131309  
SRR17520069.9140590  
SRR17520069.9145149  
SRR17520069.9148476  
SRR17520069.9157167  
SRR17520069.9157169  
SRR17520069.9157184  
SRR17520069.9157200  
SRR17520069.9160993  
SRR17520069.9161815  
SRR17520069.9165921  
SRR17520069.9165922  
SRR17520069.9166975  
SRR17520069.9166979  
SRR17520069.9166991  
SRR17520069.9167001

SRR17520069.9170572  
SRR17520069.9170580  
SRR17520069.9170590  
SRR17520069.9173171  
SRR17520069.9185250  
SRR17520069.9187440  
SRR17520069.9188160  
SRR17520069.9188176  
SRR17520069.9188178  
SRR17520069.9188208  
SRR17520069.9188220  
SRR17520069.9188234  
SRR17520069.9188309  
SRR17520069.9188833  
SRR17520069.9190786  
SRR17520069.9198296  
SRR17520069.9198302  
SRR17520069.9198336  
SRR17520069.9202393  
SRR17520069.9202395  
SRR17520069.9202397  
SRR17520069.9202399  
SRR17520069.9202401  
SRR17520069.9202403  
SRR17520069.9202407  
SRR17520069.9202409  
SRR17520069.9202701  
SRR17520069.9205581  
SRR17520069.9205587  
SRR17520069.9205595  
SRR17520069.9205597  
SRR17520069.9222367  
SRR17520069.9222373  
SRR17520069.9222381  
SRR17520069.9223056  
SRR17520069.9223066  
SRR17520069.9228528  
SRR17520069.9229588  
SRR17520069.9238125  
SRR17520069.9244915  
SRR17520069.9251540  
SRR17520069.9254765  
SRR17520069.9256864  
SRR17520069.9268845  
SRR17520069.9274243  
SRR17520069.9274257  
SRR17520069.9275546

SRR17520069.9279362  
SRR17520069.9279372  
SRR17520069.9279479  
SRR17520069.9284891  
SRR17520069.9284893  
SRR17520069.9289305  
SRR17520069.9289311  
SRR17520069.9297673  
SRR17520069.9302689  
SRR17520069.9305416  
SRR17520069.9310278  
SRR17520069.9312222  
SRR17520069.9312234  
SRR17520069.9312254  
SRR17520069.9314094  
SRR17520069.9316348  
SRR17520069.9328329  
SRR17520069.9328337  
SRR17520069.9328356  
SRR17520069.9328372  
SRR17520069.9328380  
SRR17520069.9334417  
SRR17520069.9340589  
SRR17520069.9354492  
SRR17520069.9367524  
SRR17520069.9367540  
SRR17520069.9369649  
SRR17520069.9371760  
SRR17520069.9371762  
SRR17520069.9371764  
SRR17520069.9371766  
SRR17520069.9377508  
SRR17520069.9380221  
SRR17520069.9380229  
SRR17520069.9380973  
SRR17520069.9382637  
SRR17520069.9388559  
SRR17520069.9390942  
SRR17520069.9403820  
SRR17520069.9403828  
SRR17520069.9403830  
SRR17520069.9403832  
SRR17520069.9403842  
SRR17520069.9428800  
SRR17520069.9451384  
SRR17520069.9466515  
SRR17520069.9470879

SRR17520069.9471278  
SRR17520069.9479881  
SRR17520069.9481550  
SRR17520069.9481552  
SRR17520069.9481554  
SRR17520069.9481556  
SRR17520069.9481558  
SRR17520069.9487166  
SRR17520069.9491420  
SRR17520069.9491488  
SRR17520069.9491496  
SRR17520069.9491500  
SRR17520069.9492318  
SRR17520069.9492622  
SRR17520069.9492628  
SRR17520069.9492638  
SRR17520069.9494025  
SRR17520069.9495664  
SRR17520069.9498872  
SRR17520069.9500775  
SRR17520069.9500777  
SRR17520069.9500801  
SRR17520069.9500817  
SRR17520069.9510332  
SRR17520069.9517370  
SRR17520069.9525352  
SRR17520069.9531136  
SRR17520069.9531138  
SRR17520069.9538567  
SRR17520069.9538571  
SRR17520069.9539749  
SRR17520069.9539799  
SRR17520069.9544658  
SRR17520069.9544664  
SRR17520069.9559258  
SRR17520069.9560676  
SRR17520069.9560712  
SRR17520069.9560718  
SRR17520069.9560734  
SRR17520069.9560740  
SRR17520069.9568333  
SRR17520069.9568339  
SRR17520069.9583109  
SRR17520069.9583143  
SRR17520069.9583165  
SRR17520069.9583169  
SRR17520069.9587299

SRR17520069.9587305  
SRR17520069.9590261  
SRR17520069.9590269  
SRR17520069.9590271  
SRR17520069.9590277  
SRR17520069.9590281  
SRR17520069.9590285  
SRR17520069.9592421  
SRR17520069.9592423  
SRR17520069.9592431  
SRR17520069.9592435  
SRR17520069.9593305  
SRR17520069.9594154  
SRR17520069.9594160  
SRR17520069.9598460  
SRR17520069.9601252  
SRR17520069.9601254  
SRR17520069.9601256  
SRR17520069.9601276  
SRR17520069.9601280  
SRR17520069.9601288  
SRR17520069.9601292  
SRR17520069.9606605  
SRR17520069.9606633  
SRR17520069.9606649  
SRR17520069.9606665  
SRR17520069.9606679  
SRR17520069.9606709  
SRR17520069.9606735  
SRR17520069.9610304  
SRR17520069.9637834  
SRR17520069.9641626  
SRR17520069.9641628  
SRR17520069.9642206  
SRR17520069.9645757  
SRR17520069.9648592  
SRR17520069.9651737  
SRR17520069.9651738  
SRR17520069.9656168  
SRR17520069.9659559  
SRR17520069.9666667  
SRR17520069.9677001  
SRR17520069.9677015  
SRR17520069.9680833  
SRR17520069.9682803  
SRR17520069.9687811  
SRR17520069.9688556

SRR17520069.9688558  
SRR17520069.9688576  
SRR17520069.9688578  
SRR17520069.9688588  
SRR17520069.9689267  
SRR17520069.9690799  
SRR17520069.9694151  
SRR17520069.9700061  
SRR17520069.9706612  
SRR17520069.9706626  
SRR17520069.9706948  
SRR17520069.9710111  
SRR17520069.9716566  
SRR17520069.9722994  
SRR17520069.9723022  
SRR17520069.9735977  
SRR17520069.9742292  
SRR17520069.9742328  
SRR17520069.9742422  
SRR17520069.9754322  
SRR17520069.9759572  
SRR17520069.9759582  
SRR17520069.9760775  
SRR17520069.9766577  
SRR17520069.9766589  
SRR17520069.9766595  
SRR17520069.9772673  
SRR17520069.9772675  
SRR17520069.9772695  
SRR17520069.9772864  
SRR17520069.9772866  
SRR17520069.9772868  
SRR17520069.9772870  
SRR17520069.9772874  
SRR17520069.9772876  
SRR17520069.9772878  
SRR17520069.9772880  
SRR17520069.9772882  
SRR17520069.9772884  
SRR17520069.9772886  
SRR17520069.9772888  
SRR17520069.9772890  
SRR17520069.9772894  
SRR17520069.9772896  
SRR17520069.9772898  
SRR17520069.9772902  
SRR17520069.9772904

SRR17520069.9772906  
SRR17520069.9772910  
SRR17520069.9776799  
SRR17520069.9778479  
SRR17520069.9778497  
SRR17520069.9779384  
SRR17520069.9779386  
SRR17520069.9781855  
SRR17520069.9781903  
SRR17520069.9781905  
SRR17520069.9783842  
SRR17520069.9783884  
SRR17520069.9783892  
SRR17520069.9783954  
SRR17520069.9783978  
SRR17520069.9784208  
SRR17520069.9784210  
SRR17520069.9789808  
SRR17520069.9789816  
SRR17520069.9789832  
SRR17520069.9793117  
SRR17520069.9802239  
SRR17520069.9802303  
SRR17520069.9809368  
SRR17520069.9842259  
SRR17520069.9852052  
SRR17520069.9853860  
SRR17520069.9853872  
SRR17520069.9857942  
SRR17520069.9857998  
SRR17520069.9870738  
SRR17520069.9872892  
SRR17520069.9872902  
SRR17520069.9874390  
SRR17520069.9882118  
SRR17520069.9885550  
SRR17520069.9885552  
SRR17520069.9889579  
SRR17520069.9892520  
SRR17520069.9903763  
SRR17520069.9903775  
SRR17520069.9903785  
SRR17520069.9903809  
SRR17520069.9903823  
SRR17520069.9903827  
SRR17520069.9905448  
SRR17520069.9905474

SRR17520069.9905504  
SRR17520069.9905508  
SRR17520069.9905522  
SRR17520069.9905552  
SRR17520069.9905562  
SRR17520069.9905586  
SRR17520069.9905608  
SRR17520069.9910911  
SRR17520069.9911158  
SRR17520069.9911160  
SRR17520069.9911171  
SRR17520069.9911175  
SRR17520069.9919199  
SRR17520069.9922609  
SRR17520069.9924947  
SRR17520069.9924969  
SRR17520069.9925011  
SRR17520069.9930198  
SRR17520069.9938560  
SRR17520069.9946893  
SRR17520069.9946903  
SRR17520069.9956199  
SRR17520069.9956309  
SRR17520069.9959259  
SRR17520069.9980943  
SRR17520069.9983977  
SRR17520069.9989510  
SRR17520069.9992005  
SRR17520069.9993812  
SRR17520069.10007727  
SRR17520069.10007737  
SRR17520069.10007757  
SRR17520069.10007785  
SRR17520069.10011096  
SRR17520069.10011112  
SRR17520069.10011114  
SRR17520069.10017390  
SRR17520069.10017410  
SRR17520069.10017414  
SRR17520069.10017460  
SRR17520069.10017981  
SRR17520069.10019079  
SRR17520069.10020861  
SRR17520069.10035226  
SRR17520069.10037558  
SRR17520069.10037560  
SRR17520069.10037562



SRR17520069.10039961  
SRR17520069.10039975  
SRR17520069.10039997  
SRR17520069.10041330  
SRR17520069.10049240  
SRR17520069.10050990  
SRR17520069.10053135  
SRR17520069.10053491  
SRR17520069.10057217  
SRR17520069.10057247  
SRR17520069.10057251  
SRR17520069.10067458  
SRR17520069.10068368  
SRR17520069.10091213  
SRR17520069.10095065  
SRR17520069.10095067  
SRR17520069.10097347  
SRR17520069.10102740  
SRR17520069.10102780  
SRR17520069.10102818  
SRR17520069.10102826  
SRR17520069.10104927  
SRR17520069.10104931  
SRR17520069.10112115  
SRR17520069.10112119  
SRR17520069.10113878  
SRR17520069.10116992  
SRR17520069.10120432  
SRR17520069.10120445  
SRR17520069.10120686  
SRR17520069.10124076  
SRR17520069.10126606  
SRR17520069.10128489  
SRR17520069.10128519  
SRR17520069.10128962  
SRR17520069.10128964  
SRR17520069.10142792  
SRR17520069.10146118  
SRR17520069.10146135  
SRR17520069.10147598  
SRR17520069.10147600  
SRR17520069.10147604  
SRR17520069.10147606  
SRR17520069.10147608  
SRR17520069.10147612  
SRR17520069.10147614  
SRR17520069.10147618

SRR17520069.10147620  
SRR17520069.10147624  
SRR17520069.10147626  
SRR17520069.10147628  
SRR17520069.10147630  
SRR17520069.10147632  
SRR17520069.10147634  
SRR17520069.10147636  
SRR17520069.10154845  
SRR17520069.10154870  
SRR17520069.10154873  
SRR17520069.10154879  
SRR17520069.10154881  
SRR17520069.10154895  
SRR17520069.10154899  
SRR17520069.10160465  
SRR17520069.10166397  
SRR17520069.10189175  
SRR17520069.10189205  
SRR17520069.10189207  
SRR17520069.10200097  
SRR17520069.10200107  
SRR17520069.10200109  
SRR17520069.10200113  
SRR17520069.10200115  
SRR17520069.10203377  
SRR17520069.10203395  
SRR17520069.10203437  
SRR17520069.10203475  
SRR17520069.10203513  
SRR17520069.10203517  
SRR17520069.10203535  
SRR17520069.10203549  
SRR17520069.10203553  
SRR17520069.10203557  
SRR17520069.10203563  
SRR17520069.10208483  
SRR17520069.10208765  
SRR17520069.10235668  
SRR17520069.10245377  
SRR17520069.10248392  
SRR17520069.10257812  
SRR17520069.10264358  
SRR17520069.10267043  
SRR17520069.10267044  
SRR17520069.10275680  
SRR17520069.10275712

SRR17520069.10275724  
SRR17520069.10275726  
SRR17520069.10290401  
SRR17520069.10290411  
SRR17520069.10290433  
SRR17520069.10290437  
SRR17520069.10290475  
SRR17520069.10290543  
SRR17520069.10290547  
SRR17520069.10290883  
SRR17520069.10293140  
SRR17520069.10299823  
SRR17520069.10304199  
SRR17520069.10304207  
SRR17520069.10304215  
SRR17520069.10305980  
SRR17520069.10332449  
SRR17520069.10336222  
SRR17520069.10340102  
SRR17520069.10341160  
SRR17520069.10348492  
SRR17520069.10348522  
SRR17520069.10348573  
SRR17520069.10348591  
SRR17520069.10348607  
SRR17520069.10353225  
SRR17520069.10353233  
SRR17520069.10363158  
SRR17520069.10366697  
SRR17520069.10373875  
SRR17520069.10376118  
SRR17520069.10382145  
SRR17520069.10382177  
SRR17520069.10382231  
SRR17520069.10389931  
SRR17520069.10389951  
SRR17520069.10389973  
SRR17520069.10389978  
SRR17520069.10394677  
SRR17520069.10404584  
SRR17520069.10422279  
SRR17520069.10422280  
SRR17520069.10431175  
SRR17520069.10432737  
SRR17520069.10437357  
SRR17520069.10448649  
SRR17520069.10455187

SRR17520069.10456353  
SRR17520069.10457542  
SRR17520069.10457554  
SRR17520069.10457606  
SRR17520069.10462784  
SRR17520069.10472453  
SRR17520069.10476853  
SRR17520069.10476869  
SRR17520069.10487883  
SRR17520069.10487967  
SRR17520069.10487971  
SRR17520069.10491634  
SRR17520069.10491656  
SRR17520069.10491698  
SRR17520069.10491708  
SRR17520069.10505732  
SRR17520069.10513305  
SRR17520069.10515485  
SRR17520069.10515495  
SRR17520069.10518620  
SRR17520069.10527968  
SRR17520069.10530135  
SRR17520069.10530153  
SRR17520069.10536719  
SRR17520069.10536727  
SRR17520069.10536733  
SRR17520069.10549809  
SRR17520069.10549898  
SRR17520069.10551051  
SRR17520069.10551061  
SRR17520069.10551075  
SRR17520069.10551079  
SRR17520069.10551085  
SRR17520069.10551087  
SRR17520069.10551089  
SRR17520069.10551101  
SRR17520069.10556658  
SRR17520069.10559919  
SRR17520069.10559925  
SRR17520069.10559931  
SRR17520069.10559955  
SRR17520069.10559975  
SRR17520069.10559977  
SRR17520069.10559987  
SRR17520069.10559989  
SRR17520069.10560003  
SRR17520069.10560009

SRR17520069.10560035  
SRR17520069.10560037  
SRR17520069.10560043  
SRR17520069.10560045  
SRR17520069.10562402  
SRR17520069.10568319  
SRR17520069.10570496  
SRR17520069.10580011  
SRR17520069.10580983  
SRR17520069.10588622  
SRR17520069.10588756  
SRR17520069.10588796  
SRR17520069.10594011  
SRR17520069.10597044  
SRR17520069.10598318  
SRR17520069.10599928  
SRR17520069.10602409  
SRR17520069.10602440  
SRR17520069.10602447  
SRR17520069.10603507  
SRR17520069.10604673  
SRR17520069.10604932  
SRR17520069.10609182  
SRR17520069.10609210  
SRR17520069.10611031  
SRR17520069.10614380  
SRR17520069.10617478  
SRR17520069.10618927  
SRR17520069.10635218  
SRR17520069.10638855  
SRR17520069.10657796  
SRR17520069.10657801  
SRR17520069.10662536  
SRR17520069.10662538  
SRR17520069.10662552  
SRR17520069.10662562  
SRR17520069.10662580  
SRR17520069.10662586  
SRR17520069.10662598  
SRR17520069.10662602  
SRR17520069.10663614  
SRR17520069.10673385  
SRR17520069.10678497  
SRR17520069.10681987  
SRR17520069.10683577  
SRR17520069.10690046  
SRR17520069.10694226

SRR17520069.10699984  
SRR17520069.10699986  
SRR17520069.10699988  
SRR17520069.10699992  
SRR17520069.10699994  
SRR17520069.10699996  
SRR17520069.10699998  
SRR17520069.10700000  
SRR17520069.10700002  
SRR17520069.10700004  
SRR17520069.10700006  
SRR17520069.10700008  
SRR17520069.10700010  
SRR17520069.10700012  
SRR17520069.10700014  
SRR17520069.10700016  
SRR17520069.10700018  
SRR17520069.10709322  
SRR17520069.10709348  
SRR17520069.10712580  
SRR17520069.10721183  
SRR17520069.10727909  
SRR17520069.10727923  
SRR17520069.10736985  
SRR17520069.10736991  
SRR17520069.10739901  
SRR17520069.10744097  
SRR17520069.10746431  
SRR17520069.10746433  
SRR17520069.10746435  
SRR17520069.10746437  
SRR17520069.10746439  
SRR17520069.10746441  
SRR17520069.10747920  
SRR17520069.10752465  
SRR17520069.10752823  
SRR17520069.10757890  
SRR17520069.10757898  
SRR17520069.10761794  
SRR17520069.10764571  
SRR17520069.10764581  
SRR17520069.10765452  
SRR17520069.10769615  
SRR17520069.10769619  
SRR17520069.10771270  
SRR17520069.10771298  
SRR17520069.10771304

SRR17520069.10771322  
SRR17520069.10774689  
SRR17520069.10774709  
SRR17520069.10774741  
SRR17520069.10779052  
SRR17520069.10793728  
SRR17520069.10794547  
SRR17520069.10794549  
SRR17520069.10794551  
SRR17520069.10794553  
SRR17520069.10794555  
SRR17520069.10794557  
SRR17520069.10794559  
SRR17520069.10794561  
SRR17520069.10794563  
SRR17520069.10794565  
SRR17520069.10794567  
SRR17520069.10794569  
SRR17520069.10794571  
SRR17520069.10794573  
SRR17520069.10794575  
SRR17520069.10794577  
SRR17520069.10794579  
SRR17520069.10794581  
SRR17520069.10794583  
SRR17520069.10794585  
SRR17520069.10794587  
SRR17520069.10794589  
SRR17520069.10794591  
SRR17520069.10794593  
SRR17520069.10812795  
SRR17520069.10812799  
SRR17520069.10813510  
SRR17520069.10813528  
SRR17520069.10813542  
SRR17520069.10813608  
SRR17520069.10813614  
SRR17520069.10824107  
SRR17520069.10837364  
SRR17520069.10852297  
SRR17520069.10853013  
SRR17520069.10858988  
SRR17520069.10859993  
SRR17520069.10859996  
SRR17520069.10870325  
SRR17520069.10870329  
SRR17520069.10877042

SRR17520069.10884900  
SRR17520069.10885985  
SRR17520069.10898111  
SRR17520069.10900042  
SRR17520069.10900126  
SRR17520069.10900358  
SRR17520069.10900715  
SRR17520069.10901689  
SRR17520069.10909350  
SRR17520069.10909360  
SRR17520069.10909370  
SRR17520069.10909388  
SRR17520069.10909416  
SRR17520069.10917247  
SRR17520069.10921426  
SRR17520069.10921432  
SRR17520069.10932060  
SRR17520069.10933622  
SRR17520069.10933646  
SRR17520069.10933670  
SRR17520069.10933672  
SRR17520069.10933676  
SRR17520069.10933684  
SRR17520069.10939534  
SRR17520069.10939548  
SRR17520069.10964838  
SRR17520069.10966489  
SRR17520069.10966778  
SRR17520069.10967407  
SRR17520069.10968399  
SRR17520069.10971159  
SRR17520069.10971800  
SRR17520069.10972294  
SRR17520069.10980426  
SRR17520069.10980438  
SRR17520069.10984256  
SRR17520069.10986002  
SRR17520069.10986020  
SRR17520069.10988110  
SRR17520069.11003519  
SRR17520069.11007933  
SRR17520069.11009210  
SRR17520069.11011743  
SRR17520069.11015022  
SRR17520069.11015032  
SRR17520069.11015034  
SRR17520069.11015048



SRR17520069.11015052  
SRR17520069.11015056  
SRR17520069.11017348  
SRR17520069.11030815  
SRR17520069.11030819  
SRR17520069.11030821  
SRR17520069.11030823  
SRR17520069.11030825  
SRR17520069.11030829  
SRR17520069.11030833  
SRR17520069.11030835  
SRR17520069.11030837  
SRR17520069.11036157  
SRR17520069.11046013  
SRR17520069.11046027  
SRR17520069.11046039  
SRR17520069.11046045  
SRR17520069.11054927  
SRR17520069.11055084  
SRR17520069.11069097  
SRR17520069.11077659  
SRR17520069.11080685  
SRR17520069.11086119  
SRR17520069.11086410  
SRR17520069.11087147  
SRR17520069.11087159  
SRR17520069.11096500  
SRR17520069.11103991  
SRR17520069.11104009  
SRR17520069.11112271  
SRR17520069.11112353  
SRR17520069.11117179  
SRR17520069.11118376  
SRR17520069.11123901  
SRR17520069.11124636  
SRR17520069.11124642  
SRR17520069.11124652  
SRR17520069.11137359  
SRR17520069.11139352  
SRR17520069.11139394  
SRR17520069.11139396  
SRR17520069.11139406  
SRR17520069.11139468  
SRR17520069.11144428  
SRR17520069.11153996  
SRR17520069.11154002  
SRR17520069.11154012

SRR17520069.11155511  
SRR17520069.11162787  
SRR17520069.11166224  
SRR17520069.11174023  
SRR17520069.11179324  
SRR17520069.11185567  
SRR17520069.11188038  
SRR17520069.11188040  
SRR17520069.11188042  
SRR17520069.11188052  
SRR17520069.11194409  
SRR17520069.11194439  
SRR17520069.11207637  
SRR17520069.11207643  
SRR17520069.11208083  
SRR17520069.11208109  
SRR17520069.11208111  
SRR17520069.11208115  
SRR17520069.11208127  
SRR17520069.11208129  
SRR17520069.11208131  
SRR17520069.11208145  
SRR17520069.11208151  
SRR17520069.11208161  
SRR17520069.11208175  
SRR17520069.11208185  
SRR17520069.11216301  
SRR17520069.11216317  
SRR17520069.11229182  
SRR17520069.11232100  
SRR17520069.11232104  
SRR17520069.11232106  
SRR17520069.11241781  
SRR17520069.11241821  
SRR17520069.11242641  
SRR17520069.11242645  
SRR17520069.11242659  
SRR17520069.11242667  
SRR17520069.11242789  
SRR17520069.11243613  
SRR17520069.11249003  
SRR17520069.11249005  
SRR17520069.11249015  
SRR17520069.11249019  
SRR17520069.11249065  
SRR17520069.11250920  
SRR17520069.11256633

SRR17520069.11268334  
SRR17520069.11268364  
SRR17520069.11271784  
SRR17520069.11271786  
SRR17520069.11271806  
SRR17520069.11272644  
SRR17520069.11276113  
SRR17520069.11276121  
SRR17520069.11276161  
SRR17520069.11276163  
SRR17520069.11276381  
SRR17520069.11276399  
SRR17520069.11278979  
SRR17520069.11278985  
SRR17520069.11278989  
SRR17520069.11281281  
SRR17520069.11283011  
SRR17520069.11289332  
SRR17520069.11289420  
SRR17520069.11296693  
SRR17520069.11299695  
SRR17520069.11331403  
SRR17520069.11331405  
SRR17520069.11331409  
SRR17520069.11331413  
SRR17520069.11334041  
SRR17520069.11334043  
SRR17520069.11334045  
SRR17520069.11334047  
SRR17520069.11334049  
SRR17520069.11334051  
SRR17520069.11334053  
SRR17520069.11334055  
SRR17520069.11334057  
SRR17520069.11334059  
SRR17520069.11334061  
SRR17520069.11334063  
SRR17520069.11334065  
SRR17520069.11334067  
SRR17520069.11334069  
SRR17520069.11334073  
SRR17520069.11334075  
SRR17520069.11334077  
SRR17520069.11334079  
SRR17520069.11334081  
SRR17520069.11334083  
SRR17520069.11334085

SRR17520069. 11334087  
SRR17520069. 11334089  
SRR17520069. 11334091  
SRR17520069. 11334093  
SRR17520069. 11334095  
SRR17520069. 11334097  
SRR17520069. 11334099  
SRR17520069. 11334101  
SRR17520069. 11336715  
SRR17520069. 11344608  
SRR17520069. 11344646  
SRR17520069. 11344674  
SRR17520069. 11344680  
SRR17520069. 11344688  
SRR17520069. 11344714  
SRR17520069. 11344734  
SRR17520069. 11344768  
SRR17520069. 11349689  
SRR17520069. 11356201  
SRR17520069. 11356339  
SRR17520069. 11358276  
SRR17520069. 11358278  
SRR17520069. 11358288  
SRR17520069. 11358320  
SRR17520069. 11358364  
SRR17520069. 11377411  
SRR17520069. 11377421  
SRR17520069. 11377427  
SRR17520069. 11392904  
SRR17520069. 11397407  
SRR17520069. 11404560  
SRR17520069. 11406361  
SRR17520069. 11406367  
SRR17520069. 11406379  
SRR17520069. 11406397  
SRR17520069. 11406413  
SRR17520069. 11406461  
SRR17520069. 11408539  
SRR17520069. 11414743  
SRR17520069. 11414753  
SRR17520069. 11415097  
SRR17520069. 11415127  
SRR17520069. 11421675  
SRR17520069. 11421677  
SRR17520069. 11421679  
SRR17520069. 11421681  
SRR17520069. 11421683

SRR17520069.11421687  
SRR17520069.11421689  
SRR17520069.11421691  
SRR17520069.11421693  
SRR17520069.11421695  
SRR17520069.11421697  
SRR17520069.11421699  
SRR17520069.11421701  
SRR17520069.11421703  
SRR17520069.11421705  
SRR17520069.11421707  
SRR17520069.11421709  
SRR17520069.11421711  
SRR17520069.11421713  
SRR17520069.11423461  
SRR17520069.11423678  
SRR17520069.11423708  
SRR17520069.11425711  
SRR17520069.11434272  
SRR17520069.11434274  
SRR17520069.11434276  
SRR17520069.11434284  
SRR17520069.11434286  
SRR17520069.11440002  
SRR17520069.11451964  
SRR17520069.11452080  
SRR17520069.11458273  
SRR17520069.11460258  
SRR17520069.11465855  
SRR17520069.11473790  
SRR17520069.11478027  
SRR17520069.11478256  
SRR17520069.11478286  
SRR17520069.11478298  
SRR17520069.11494205  
SRR17520069.11501416  
SRR17520069.11502056  
SRR17520069.11502104  
SRR17520069.11502110  
SRR17520069.11502120  
SRR17520069.11502144  
SRR17520069.11502154  
SRR17520069.11502156  
SRR17520069.11502198  
SRR17520069.11509199  
SRR17520069.11509217  
SRR17520069.11509279

SRR17520069.11509281  
SRR17520069.11510305  
SRR17520069.11513196  
SRR17520069.11530748  
SRR17520069.11534505  
SRR17520069.11537047  
SRR17520069.11537075  
SRR17520069.11542089  
SRR17520069.11560355  
SRR17520069.11560363  
SRR17520069.11569359  
SRR17520069.11569459  
SRR17520069.11575880  
SRR17520069.11603517  
SRR17520069.11608155  
SRR17520069.11608157  
SRR17520069.11615847  
SRR17520069.11624686  
SRR17520069.11627936  
SRR17520069.11627938  
SRR17520069.11627942  
SRR17520069.11627944  
SRR17520069.11627946  
SRR17520069.11627948  
SRR17520069.11627950  
SRR17520069.11627952  
SRR17520069.11627954  
SRR17520069.11627956  
SRR17520069.11627958  
SRR17520069.11627960  
SRR17520069.11627962  
SRR17520069.11627964  
SRR17520069.11627966  
SRR17520069.11627968  
SRR17520069.11627970  
SRR17520069.11627972  
SRR17520069.11627974  
SRR17520069.11627976  
SRR17520069.11627978  
SRR17520069.11627980  
SRR17520069.11627982  
SRR17520069.11627986  
SRR17520069.11627988  
SRR17520069.11627992  
SRR17520069.11627994  
SRR17520069.11627996  
SRR17520069.11638834

SRR17520069.11650988  
SRR17520069.11661218  
SRR17520069.11670319  
SRR17520069.11670345  
SRR17520069.11670357  
SRR17520069.11670377  
SRR17520069.11672038  
SRR17520069.11679408  
SRR17520069.11679410  
SRR17520069.11680455  
SRR17520069.11680459  
SRR17520069.11680762  
SRR17520069.11680764  
SRR17520069.11680800  
SRR17520069.11680820  
SRR17520069.11692135  
SRR17520069.11698815  
SRR17520069.11701260  
SRR17520069.11714606  
SRR17520069.11714614  
SRR17520069.11714620  
SRR17520069.11714626  
SRR17520069.11717069  
SRR17520069.11736207  
SRR17520069.11736233  
SRR17520069.11736281  
SRR17520069.11736303  
SRR17520069.11736347  
SRR17520069.11736363  
SRR17520069.11742003  
SRR17520069.11742013  
SRR17520069.11742017  
SRR17520069.11751624  
SRR17520069.11755467  
SRR17520069.11775342  
SRR17520069.11789970  
SRR17520069.11789999  
SRR17520069.11790009  
SRR17520069.11790017  
SRR17520069.11790051  
SRR17520069.11792370  
SRR17520069.11808669  
SRR17520069.11812763  
SRR17520069.11812995  
SRR17520069.11823641  
SRR17520069.11823649  
SRR17520069.11823735

SRR17520069.11832519  
SRR17520069.11833792  
SRR17520069.11833796  
SRR17520069.11845992  
SRR17520069.11850119  
SRR17520069.11861394  
SRR17520069.11863500  
SRR17520069.11863502  
SRR17520069.11864890  
SRR17520069.11864962  
SRR17520069.11864970  
SRR17520069.11881384  
SRR17520069.11883710  
SRR17520069.11885931  
SRR17520069.11891082  
SRR17520069.11892820  
SRR17520069.11895406  
SRR17520069.11895408  
SRR17520069.11895410  
SRR17520069.11895420  
SRR17520069.11920143  
SRR17520069.11920156  
SRR17520069.11920167  
SRR17520069.11924578  
SRR17520069.11924618  
SRR17520069.11927459  
SRR17520069.11932399  
SRR17520069.11933400  
SRR17520069.11939318  
SRR17520069.11939320  
SRR17520069.11939322  
SRR17520069.11939324  
SRR17520069.11939326  
SRR17520069.11939328  
SRR17520069.11939330  
SRR17520069.11939332  
SRR17520069.11939334  
SRR17520069.11945219  
SRR17520069.11945223  
SRR17520069.11945239  
SRR17520069.11945245  
SRR17520069.11945267  
SRR17520069.11946378  
SRR17520069.11948249  
SRR17520069.11980981  
SRR17520069.11981804  
SRR17520069.11982592



SRR17520069. 11982608  
SRR17520069. 11983610  
SRR17520069. 11983637  
SRR17520069. 11993195  
SRR17520069. 11993243  
SRR17520069. 11993247  
SRR17520069. 11993269  
SRR17520069. 12008624  
SRR17520069. 12010920  
SRR17520069. 12014935  
SRR17520069. 12014989  
SRR17520069. 12027280  
SRR17520069. 12029146  
SRR17520069. 12029154  
SRR17520069. 12029180  
SRR17520069. 12029230  
SRR17520069. 12029236  
SRR17520069. 12029290  
SRR17520069. 12029304  
SRR17520069. 12029308  
SRR17520069. 12040668  
SRR17520069. 12041186  
SRR17520069. 12041188  
SRR17520069. 12042476  
SRR17520069. 12051761  
SRR17520069. 12051826  
SRR17520069. 12056185  
SRR17520069. 12056201  
SRR17520069. 12057690  
SRR17520069. 12057702  
SRR17520069. 12065142  
SRR17520069. 12068053  
SRR17520069. 12079241  
SRR17520069. 12089028  
SRR17520069. 12096453  
SRR17520069. 12098563  
SRR17520069. 12102345  
SRR17520069. 12107741  
SRR17520069. 12127770  
SRR17520069. 12129039  
SRR17520069. 12129053  
SRR17520069. 12129055  
SRR17520069. 12129075  
SRR17520069. 12129119  
SRR17520069. 12129137  
SRR17520069. 12129149  
SRR17520069. 12129175

SRR17520069.12129177  
SRR17520069.12133675  
SRR17520069.12137551  
SRR17520069.12137579  
SRR17520069.12137581  
SRR17520069.12137595  
SRR17520069.12137671  
SRR17520069.12137673  
SRR17520069.12143762  
SRR17520069.12143772  
SRR17520069.12144614  
SRR17520069.12144638  
SRR17520069.12152711  
SRR17520069.12152727  
SRR17520069.12154913  
SRR17520069.12155210  
SRR17520069.12155241  
SRR17520069.12155326  
SRR17520069.12155356  
SRR17520069.12155380  
SRR17520069.12155388  
SRR17520069.12155394  
SRR17520069.12155412  
SRR17520069.12155424  
SRR17520069.12157123  
SRR17520069.12164075  
SRR17520069.12173573  
SRR17520069.12188091  
SRR17520069.12188093  
SRR17520069.12188101  
SRR17520069.12190922  
SRR17520069.12191165  
SRR17520069.12199844  
SRR17520069.12201187  
SRR17520069.12201193  
SRR17520069.12201195  
SRR17520069.12201205  
SRR17520069.12201213  
SRR17520069.12201217  
SRR17520069.12201219  
SRR17520069.12201227  
SRR17520069.12201229  
SRR17520069.12201243  
SRR17520069.12201247  
SRR17520069.12201249  
SRR17520069.12201253  
SRR17520069.12201259

SRR17520069. 12201263  
SRR17520069. 12201267  
SRR17520069. 12201271  
SRR17520069. 12201287  
SRR17520069. 12201291  
SRR17520069. 12201293  
SRR17520069. 12201299  
SRR17520069. 12204055  
SRR17520069. 12210807  
SRR17520069. 12220276  
SRR17520069. 12225346  
SRR17520069. 12225356  
SRR17520069. 12225384  
SRR17520069. 12225394  
SRR17520069. 12233852  
SRR17520069. 12249056  
SRR17520069. 12252762  
SRR17520069. 12252772  
SRR17520069. 12252788  
SRR17520069. 12252790  
SRR17520069. 12252798  
SRR17520069. 12252804  
SRR17520069. 12253690  
SRR17520069. 12253706  
SRR17520069. 12253710  
SRR17520069. 12260613  
SRR17520069. 12262328  
SRR17520069. 12265953  
SRR17520069. 12269758  
SRR17520069. 12269762  
SRR17520069. 12280935  
SRR17520069. 12282139  
SRR17520069. 12285462  
SRR17520069. 12286564  
SRR17520069. 12289433  
SRR17520069. 12289459  
SRR17520069. 12289467  
SRR17520069. 12289473  
SRR17520069. 12289501  
SRR17520069. 12289531  
SRR17520069. 12289583  
SRR17520069. 12289585  
SRR17520069. 12294661  
SRR17520069. 12297113  
SRR17520069. 12297335  
SRR17520069. 12297337  
SRR17520069. 12297339

SRR17520069. 12297341  
SRR17520069. 12297343  
SRR17520069. 12297345  
SRR17520069. 12297347  
SRR17520069. 12297349  
SRR17520069. 12297351  
SRR17520069. 12297353  
SRR17520069. 12297355  
SRR17520069. 12297357  
SRR17520069. 12297359  
SRR17520069. 12297361  
SRR17520069. 12297363  
SRR17520069. 12297365  
SRR17520069. 12297367  
SRR17520069. 12297369  
SRR17520069. 12297371  
SRR17520069. 12297373  
SRR17520069. 12297375  
SRR17520069. 12297377  
SRR17520069. 12297379  
SRR17520069. 12297381  
SRR17520069. 12297383  
SRR17520069. 12297385  
SRR17520069. 12297387  
SRR17520069. 12297389  
SRR17520069. 12297391  
SRR17520069. 12297393  
SRR17520069. 12297395  
SRR17520069. 12297397  
SRR17520069. 12297399  
SRR17520069. 12297401  
SRR17520069. 12297403  
SRR17520069. 12297405  
SRR17520069. 12297407  
SRR17520069. 12297409  
SRR17520069. 12297411  
SRR17520069. 12297413  
SRR17520069. 12297417  
SRR17520069. 12297419  
SRR17520069. 12297421  
SRR17520069. 12297423  
SRR17520069. 12297425  
SRR17520069. 12297427  
SRR17520069. 12297429  
SRR17520069. 12297431  
SRR17520069. 12297433  
SRR17520069. 12297435

SRR17520069. 12297437  
SRR17520069. 12297439  
SRR17520069. 12297441  
SRR17520069. 12297443  
SRR17520069. 12297445  
SRR17520069. 12297447  
SRR17520069. 12297449  
SRR17520069. 12297451  
SRR17520069. 12297453  
SRR17520069. 12297455  
SRR17520069. 12297457  
SRR17520069. 12297459  
SRR17520069. 12297461  
SRR17520069. 12297463  
SRR17520069. 12297465  
SRR17520069. 12297467  
SRR17520069. 12297469  
SRR17520069. 12297471  
SRR17520069. 12297473  
SRR17520069. 12297475  
SRR17520069. 12297477  
SRR17520069. 12297479  
SRR17520069. 12297483  
SRR17520069. 12297485  
SRR17520069. 12297487  
SRR17520069. 12297489  
SRR17520069. 12297491  
SRR17520069. 12297493  
SRR17520069. 12297495  
SRR17520069. 12297499  
SRR17520069. 12297501  
SRR17520069. 12297503  
SRR17520069. 12297505  
SRR17520069. 12297507  
SRR17520069. 12297509  
SRR17520069. 12297511  
SRR17520069. 12297513  
SRR17520069. 12297515  
SRR17520069. 12297517  
SRR17520069. 12297519  
SRR17520069. 12303442  
SRR17520069. 12303458  
SRR17520069. 12310905  
SRR17520069. 12312350  
SRR17520069. 12316286  
SRR17520069. 12316294  
SRR17520069. 12316312

SRR17520069. 12316320  
SRR17520069. 12316382  
SRR17520069. 12317777  
SRR17520069. 12323189  
SRR17520069. 12323191  
SRR17520069. 12323217  
SRR17520069. 12323241  
SRR17520069. 12323271  
SRR17520069. 12323289  
SRR17520069. 12328905  
SRR17520069. 12335477  
SRR17520069. 12336582  
SRR17520069. 12339957  
SRR17520069. 12358336  
SRR17520069. 12358344  
SRR17520069. 12362113  
SRR17520069. 12365994  
SRR17520069. 12366367  
SRR17520069. 12367892  
SRR17520069. 12374097  
SRR17520069. 12380909  
SRR17520069. 12380949  
SRR17520069. 12380963  
SRR17520069. 12393272  
SRR17520069. 12405426  
SRR17520069. 12405430  
SRR17520069. 12405434  
SRR17520069. 12410383  
SRR17520069. 12410925  
SRR17520069. 12414323  
SRR17520069. 12425033  
SRR17520069. 12429106  
SRR17520069. 12429126  
SRR17520069. 12430269  
SRR17520069. 12434790  
SRR17520069. 12434792  
SRR17520069. 12436581  
SRR17520069. 12454011  
SRR17520069. 12454015  
SRR17520069. 12471546  
SRR17520069. 12471548  
SRR17520069. 12474955  
SRR17520069. 12474967  
SRR17520069. 12479240  
SRR17520069. 12479250  
SRR17520069. 12479294  
SRR17520069. 12479298

SRR17520069.12483341  
SRR17520069.12484348  
SRR17520069.12505580  
SRR17520069.12506509  
SRR17520069.12519127  
SRR17520069.12519177  
SRR17520069.12519277  
SRR17520069.12519365  
SRR17520069.12519369  
SRR17520069.12519377  
SRR17520069.12528745  
SRR17520069.12529789  
SRR17520069.12529803  
SRR17520069.12531021  
SRR17520069.12531023  
SRR17520069.12531025  
SRR17520069.12531027  
SRR17520069.12531029  
SRR17520069.12531031  
SRR17520069.12531033  
SRR17520069.12531035  
SRR17520069.12531037  
SRR17520069.12531039  
SRR17520069.12531041  
SRR17520069.12531045  
SRR17520069.12531049  
SRR17520069.12535672  
SRR17520069.12535682  
SRR17520069.12535702  
SRR17520069.12535712  
SRR17520069.12535722  
SRR17520069.12536240  
SRR17520069.12539773  
SRR17520069.12552678  
SRR17520069.12554461  
SRR17520069.12554471  
SRR17520069.12558941  
SRR17520069.12565382  
SRR17520069.12565925  
SRR17520069.12565955  
SRR17520069.12577462  
SRR17520069.12578187  
SRR17520069.12580749  
SRR17520069.12580753  
SRR17520069.12580757  
SRR17520069.12584570  
SRR17520069.12584598

SRR17520069. 12584618  
SRR17520069. 12589425  
SRR17520069. 12590593  
SRR17520069. 12590649  
SRR17520069. 12604745  
SRR17520069. 12614060  
SRR17520069. 12621086  
SRR17520069. 12621595  
SRR17520069. 12630277  
SRR17520069. 12630281  
SRR17520069. 12639757  
SRR17520069. 12644740  
SRR17520069. 12644760  
SRR17520069. 12644778  
SRR17520069. 12644800  
SRR17520069. 12644826  
SRR17520069. 12647851  
SRR17520069. 12647869  
SRR17520069. 12650033  
SRR17520069. 12655047  
SRR17520069. 12655051  
SRR17520069. 12655055  
SRR17520069. 12674853  
SRR17520069. 12678287  
SRR17520069. 12680834  
SRR17520069. 12682048  
SRR17520069. 12683609  
SRR17520069. 12683723  
SRR17520069. 12683779  
SRR17520069. 12692676  
SRR17520069. 12696521  
SRR17520069. 12698795  
SRR17520069. 12703145  
SRR17520069. 12716659  
SRR17520069. 12720400  
SRR17520069. 12731605  
SRR17520069. 12731611  
SRR17520069. 12735513  
SRR17520069. 12735515  
SRR17520069. 12735521  
SRR17520069. 12735559  
SRR17520069. 12736877  
SRR17520069. 12736929  
SRR17520069. 12740599  
SRR17520069. 12744488  
SRR17520069. 12747397  
SRR17520069. 12747399



SRR17520069. 12747401  
SRR17520069. 12749699  
SRR17520069. 12757062  
SRR17520069. 12759108  
SRR17520069. 12760005  
SRR17520069. 12760897  
SRR17520069. 12762816  
SRR17520069. 12767092  
SRR17520069. 12785358  
SRR17520069. 12785386  
SRR17520069. 12785392  
SRR17520069. 12785422  
SRR17520069. 12787683  
SRR17520069. 12787716  
SRR17520069. 12820024  
SRR17520069. 12820028  
SRR17520069. 12822311  
SRR17520069. 12825552  
SRR17520069. 12825572  
SRR17520069. 12837241  
SRR17520069. 12839969  
SRR17520069. 12839971  
SRR17520069. 12839973  
SRR17520069. 12839975  
SRR17520069. 12839977  
SRR17520069. 12839979  
SRR17520069. 12839981  
SRR17520069. 12839983  
SRR17520069. 12839985  
SRR17520069. 12839987  
SRR17520069. 12839989  
SRR17520069. 12841042  
SRR17520069. 12850005  
SRR17520069. 12850013  
SRR17520069. 12852852  
SRR17520069. 12852858  
SRR17520069. 12853272  
SRR17520069. 12854942  
SRR17520069. 12854946  
SRR17520069. 12860896  
SRR17520069. 12871684  
SRR17520069. 12871686  
SRR17520069. 12880127  
SRR17520069. 12892586  
SRR17520069. 12897153  
SRR17520069. 12899079  
SRR17520069. 12899085

SRR17520069.12899097  
SRR17520069.12905303  
SRR17520069.12910359  
SRR17520069.12910365  
SRR17520069.12911082  
SRR17520069.12911090  
SRR17520069.12912934  
SRR17520069.12919660  
SRR17520069.12923523  
SRR17520069.12925412  
SRR17520069.12927816  
SRR17520069.12932305  
SRR17520069.12932323  
SRR17520069.12932337  
SRR17520069.12932343  
SRR17520069.12932347  
SRR17520069.12936651  
SRR17520069.12944180  
SRR17520069.12944202  
SRR17520069.12948247  
SRR17520069.12952551  
SRR17520069.12953276  
SRR17520069.12953292  
SRR17520069.12957789  
SRR17520069.12957827  
SRR17520069.12964181  
SRR17520069.12965205  
SRR17520069.12965411  
SRR17520069.12969489  
SRR17520069.12978686  
SRR17520069.12978690  
SRR17520069.12985227  
SRR17520069.12985237  
SRR17520069.12985239  
SRR17520069.12985265  
SRR17520069.12985285  
SRR17520069.12985309  
SRR17520069.12985317  
SRR17520069.13004245  
SRR17520069.13006514  
SRR17520069.13026438  
SRR17520069.13038428  
SRR17520069.13038430  
SRR17520069.13038432  
SRR17520069.13042792  
SRR17520069.13042794  
SRR17520069.13042796

SRR17520069. 13042798  
SRR17520069. 13042800  
SRR17520069. 13042802  
SRR17520069. 13042804  
SRR17520069. 13042806  
SRR17520069. 13042808  
SRR17520069. 13042810  
SRR17520069. 13042812  
SRR17520069. 13042814  
SRR17520069. 13042816  
SRR17520069. 13042818  
SRR17520069. 13042820  
SRR17520069. 13042822  
SRR17520069. 13042824  
SRR17520069. 13042826  
SRR17520069. 13042828  
SRR17520069. 13042830  
SRR17520069. 13042832  
SRR17520069. 13042834  
SRR17520069. 13042836  
SRR17520069. 13042838  
SRR17520069. 13042842  
SRR17520069. 13042844  
SRR17520069. 13042846  
SRR17520069. 13042848  
SRR17520069. 13042852  
SRR17520069. 13042854  
SRR17520069. 13042856  
SRR17520069. 13042858  
SRR17520069. 13042860  
SRR17520069. 13042862  
SRR17520069. 13042864  
SRR17520069. 13042866  
SRR17520069. 13056282  
SRR17520069. 13056314  
SRR17520069. 13058131  
SRR17520069. 13058153  
SRR17520069. 13069478  
SRR17520069. 13070707  
SRR17520069. 13073709  
SRR17520069. 13075407  
SRR17520069. 13092583  
SRR17520069. 13092685  
SRR17520069. 13092691  
SRR17520069. 13092695  
SRR17520069. 13092709  
SRR17520069. 13092715

SRR17520069. 13092717  
SRR17520069. 13093108  
SRR17520069. 13103299  
SRR17520069. 13133140  
SRR17520069. 13133152  
SRR17520069. 13133176  
SRR17520069. 13133220  
SRR17520069. 13141142  
SRR17520069. 13141191  
SRR17520069. 13143348  
SRR17520069. 13143362  
SRR17520069. 13143378  
SRR17520069. 13143390  
SRR17520069. 13143398  
SRR17520069. 13144793  
SRR17520069. 13161264  
SRR17520069. 13161282  
SRR17520069. 13161328  
SRR17520069. 13161336  
SRR17520069. 13161348  
SRR17520069. 13167406  
SRR17520069. 13175327  
SRR17520069. 13189740  
SRR17520069. 13207432  
SRR17520069. 13208442  
SRR17520069. 13214367  
SRR17520069. 13233987  
SRR17520069. 13242199  
SRR17520069. 13244637  
SRR17520069. 13245963  
SRR17520069. 13247060  
SRR17520069. 13248512  
SRR17520069. 13249205  
SRR17520069. 13261864  
SRR17520069. 13261866  
SRR17520069. 13262043  
SRR17520069. 13273034  
SRR17520069. 13274798  
SRR17520069. 13277029  
SRR17520069. 13294963  
SRR17520069. 13295870  
SRR17520069. 13296004  
SRR17520069. 13297330  
SRR17520069. 13297332  
SRR17520069. 13297336  
SRR17520069. 13297340  
SRR17520069. 13297370

SRR17520069. 13297893  
SRR17520069. 13304224  
SRR17520069. 13311423  
SRR17520069. 13311425  
SRR17520069. 13318255  
SRR17520069. 13321651  
SRR17520069. 13341620  
SRR17520069. 13345249  
SRR17520069. 13348619  
SRR17520069. 13354398  
SRR17520069. 13354402  
SRR17520069. 13376181  
SRR17520069. 13396461  
SRR17520069. 13401478  
SRR17520069. 13406123  
SRR17520069. 13406127  
SRR17520069. 13409650  
SRR17520069. 13411958  
SRR17520069. 13415860  
SRR17520069. 13415864  
SRR17520069. 13429707  
SRR17520069. 13429716  
SRR17520069. 13429718  
SRR17520069. 13436721  
SRR17520069. 13436731  
SRR17520069. 13438201  
SRR17520069. 13445275  
SRR17520069. 13445335  
SRR17520069. 13448824  
SRR17520069. 13459779  
SRR17520069. 13463536  
SRR17520069. 13463572  
SRR17520069. 13463576  
SRR17520069. 13463586  
SRR17520069. 13463588  
SRR17520069. 13463592  
SRR17520069. 13463636  
SRR17520069. 13469559  
SRR17520069. 13470275  
SRR17520069. 13477811  
SRR17520069. 13478246  
SRR17520069. 13478266  
SRR17520069. 13478275  
SRR17520069. 13484691  
SRR17520069. 13484729  
SRR17520069. 13484743  
SRR17520069. 13484757

SRR17520069. 13484761  
SRR17520069. 13484767  
SRR17520069. 13484783  
SRR17520069. 13486488  
SRR17520069. 13494568  
SRR17520069. 13498799  
SRR17520069. 13498809  
SRR17520069. 13498813  
SRR17520069. 13498819  
SRR17520069. 13498881  
SRR17520069. 13498891  
SRR17520069. 13501604  
SRR17520069. 13501711  
SRR17520069. 13507604  
SRR17520069. 13511365  
SRR17520069. 13511385  
SRR17520069. 13511387  
SRR17520069. 13527562  
SRR17520069. 13527566  
SRR17520069. 13527568  
SRR17520069. 13529614  
SRR17520069. 13529622  
SRR17520069. 13529664  
SRR17520069. 13529672  
SRR17520069. 13533720  
SRR17520069. 13539811  
SRR17520069. 13539815  
SRR17520069. 13539819  
SRR17520069. 13550751  
SRR17520069. 13554997  
SRR17520069. 13565684  
SRR17520069. 13565718  
SRR17520069. 13570220  
SRR17520069. 13573280  
SRR17520069. 13582671  
SRR17520069. 13592128  
SRR17520069. 13592150  
SRR17520069. 13596658  
SRR17520069. 13597306  
SRR17520069. 13597312  
SRR17520069. 13597352  
SRR17520069. 13604144  
SRR17520069. 13604146  
SRR17520069. 13604148  
SRR17520069. 13605108  
SRR17520069. 13606775  
SRR17520069. 13608189

SRR17520069. 13608654  
SRR17520069. 13616854  
SRR17520069. 13625276  
SRR17520069. 13627810  
SRR17520069. 13637149  
SRR17520069. 13638486  
SRR17520069. 13638488  
SRR17520069. 13644155  
SRR17520069. 13654901  
SRR17520069. 13667498  
SRR17520069. 13667512  
SRR17520069. 13667522  
SRR17520069. 13672619  
SRR17520069. 13672621  
SRR17520069. 13672623  
SRR17520069. 13672625  
SRR17520069. 13672627  
SRR17520069. 13676303  
SRR17520069. 13676319  
SRR17520069. 13676333  
SRR17520069. 13676345  
SRR17520069. 13677746  
SRR17520069. 13677750  
SRR17520069. 13678969  
SRR17520069. 13679079  
SRR17520069. 13688054  
SRR17520069. 13688058  
SRR17520069. 13688082  
SRR17520069. 13688086  
SRR17520069. 13688102  
SRR17520069. 13688104  
SRR17520069. 13689128  
SRR17520069. 13691448  
SRR17520069. 13691836  
SRR17520069. 13691856  
SRR17520069. 13691860  
SRR17520069. 13691866  
SRR17520069. 13691922  
SRR17520069. 13694247  
SRR17520069. 13698158  
SRR17520069. 13715385  
SRR17520069. 13715391  
SRR17520069. 13715393  
SRR17520069. 13715395  
SRR17520069. 13715397  
SRR17520069. 13715401  
SRR17520069. 13715403

SRR17520069. 13715405  
SRR17520069. 13715407  
SRR17520069. 13715409  
SRR17520069. 13715411  
SRR17520069. 13715413  
SRR17520069. 13715415  
SRR17520069. 13715417  
SRR17520069. 13715419  
SRR17520069. 13715421  
SRR17520069. 13715423  
SRR17520069. 13715425  
SRR17520069. 13715427  
SRR17520069. 13715429  
SRR17520069. 13715431  
SRR17520069. 13715435  
SRR17520069. 13715437  
SRR17520069. 13715439  
SRR17520069. 13715441  
SRR17520069. 13715443  
SRR17520069. 13715445  
SRR17520069. 13715660  
SRR17520069. 13715670  
SRR17520069. 13718766  
SRR17520069. 13721275  
SRR17520069. 13721279  
SRR17520069. 13724730  
SRR17520069. 13724736  
SRR17520069. 13742383  
SRR17520069. 13742395  
SRR17520069. 13742397  
SRR17520069. 13742399  
SRR17520069. 13757545  
SRR17520069. 13757613  
SRR17520069. 13759937  
SRR17520069. 13760015  
SRR17520069. 13760047  
SRR17520069. 13760057  
SRR17520069. 13763940  
SRR17520069. 13763954  
SRR17520069. 13763962  
SRR17520069. 13763966  
SRR17520069. 13766761  
SRR17520069. 13773851  
SRR17520069. 13775513  
SRR17520069. 13776555  
SRR17520069. 13779070  
SRR17520069. 13793509



SRR17520069. 13796487  
SRR17520069. 13799823  
SRR17520069. 13799859  
SRR17520069. 13801151  
SRR17520069. 13801171  
SRR17520069. 13801191  
SRR17520069. 13801199  
SRR17520069. 13801215  
SRR17520069. 13801221  
SRR17520069. 13801343  
SRR17520069. 13801369  
SRR17520069. 13807819  
SRR17520069. 13841725  
SRR17520069. 13857102  
SRR17520069. 13861936  
SRR17520069. 13861944  
SRR17520069. 13865729  
SRR17520069. 13865733  
SRR17520069. 13869919  
SRR17520069. 13879021  
SRR17520069. 13879791  
SRR17520069. 13880618  
SRR17520069. 13887332  
SRR17520069. 13895937  
SRR17520069. 13898736  
SRR17520069. 13898780  
SRR17520069. 13898782  
SRR17520069. 13899336  
SRR17520069. 13910814  
SRR17520069. 13936060  
SRR17520069. 13937845  
SRR17520069. 13937851  
SRR17520069. 13940615  
SRR17520069. 13946601  
SRR17520069. 13956340  
SRR17520069. 13956342  
SRR17520069. 13956344  
SRR17520069. 13956346  
SRR17520069. 13956348  
SRR17520069. 13956350  
SRR17520069. 13956352  
SRR17520069. 13987358  
SRR17520069. 13987370  
SRR17520069. 13987915  
SRR17520069. 13993097  
SRR17520069. 13993149  
SRR17520069. 13993151

SRR17520069. 13993153  
SRR17520069. 13993193  
SRR17520069. 13993222  
SRR17520069. 13993224  
SRR17520069. 13994534  
SRR17520069. 13994538  
SRR17520069. 13995913  
SRR17520069. 13997068  
SRR17520069. 13997213  
SRR17520069. 14002166  
SRR17520069. 14002216  
SRR17520069. 14009025  
SRR17520069. 14012507  
SRR17520069. 14012539  
SRR17520069. 14014322  
SRR17520069. 14016185  
SRR17520069. 14018650  
SRR17520069. 14020326  
SRR17520069. 14020356  
SRR17520069. 14020358  
SRR17520069. 14021115  
SRR17520069. 14034198  
SRR17520069. 14047297  
SRR17520069. 14047311  
SRR17520069. 14047335  
SRR17520069. 14048251  
SRR17520069. 14058400  
SRR17520069. 14068333  
SRR17520069. 14089027  
SRR17520069. 14092160  
SRR17520069. 14093321  
SRR17520069. 14093458  
SRR17520069. 14096407  
SRR17520069. 14100168  
SRR17520069. 14100728  
SRR17520069. 14100732  
SRR17520069. 14109834  
SRR17520069. 14109838  
SRR17520069. 14109845  
SRR17520069. 14109859  
SRR17520069. 14111761  
SRR17520069. 14115328  
SRR17520069. 14115348  
SRR17520069. 14115352  
SRR17520069. 14115394  
SRR17520069. 14119695  
SRR17520069. 14119697

SRR17520069.14119713  
SRR17520069.14123309  
SRR17520069.14123353  
SRR17520069.14132048  
SRR17520069.14132080  
SRR17520069.14132084  
SRR17520069.14132086  
SRR17520069.14132092  
SRR17520069.14132126  
SRR17520069.14132144  
SRR17520069.14132176  
SRR17520069.14136862  
SRR17520069.14157171  
SRR17520069.14171221  
SRR17520069.14171249  
SRR17520069.14174092  
SRR17520069.14174096  
SRR17520069.14174102  
SRR17520069.14174106  
SRR17520069.14174108  
SRR17520069.14174116  
SRR17520069.14174120  
SRR17520069.14176286  
SRR17520069.14176306  
SRR17520069.14176308  
SRR17520069.14178396  
SRR17520069.14178410  
SRR17520069.14178436  
SRR17520069.14183907  
SRR17520069.14183957  
SRR17520069.14183973  
SRR17520069.14196126  
SRR17520069.14227403  
SRR17520069.14227405  
SRR17520069.14227409  
SRR17520069.14227413  
SRR17520069.14227415  
SRR17520069.14227433  
SRR17520069.14227435  
SRR17520069.14232574  
SRR17520069.14233221  
SRR17520069.14243620  
SRR17520069.14251535  
SRR17520069.14251601  
SRR17520069.14251609  
SRR17520069.14251631  
SRR17520069.14268540

SRR17520069.14268861  
SRR17520069.14268875  
SRR17520069.14277981  
SRR17520069.14279525  
SRR17520069.14279547  
SRR17520069.14296573  
SRR17520069.14296577  
SRR17520069.14296607  
SRR17520069.14298025  
SRR17520069.14307863  
SRR17520069.14309797  
SRR17520069.14313664  
SRR17520069.14326464  
SRR17520069.14326826  
SRR17520069.14326874  
SRR17520069.14327312  
SRR17520069.14327776  
SRR17520069.14331494  
SRR17520069.14339344  
SRR17520069.14357321  
SRR17520069.14359345  
SRR17520069.14361493  
SRR17520069.14370578  
SRR17520069.14370594  
SRR17520069.14373318  
SRR17520069.14376462  
SRR17520069.14378129  
SRR17520069.14378131  
SRR17520069.14378133  
SRR17520069.14378135  
SRR17520069.14378137  
SRR17520069.14378139  
SRR17520069.14378141  
SRR17520069.14378143  
SRR17520069.14378145  
SRR17520069.14378147  
SRR17520069.14378149  
SRR17520069.14378151  
SRR17520069.14378153  
SRR17520069.14378157  
SRR17520069.14378159  
SRR17520069.14378161  
SRR17520069.14378163  
SRR17520069.14378165  
SRR17520069.14378167  
SRR17520069.14378169  
SRR17520069.14378171

SRR17520069.14378173  
SRR17520069.14378175  
SRR17520069.14378177  
SRR17520069.14378179  
SRR17520069.14378181  
SRR17520069.14378183  
SRR17520069.14378185  
SRR17520069.14378187  
SRR17520069.14378189  
SRR17520069.14378191  
SRR17520069.14378193  
SRR17520069.14378195  
SRR17520069.14378197  
SRR17520069.14378199  
SRR17520069.14378201  
SRR17520069.14378203  
SRR17520069.14378205  
SRR17520069.14378207  
SRR17520069.14378209  
SRR17520069.14378211  
SRR17520069.14378213  
SRR17520069.14378215  
SRR17520069.14378217  
SRR17520069.14378219  
SRR17520069.14378221  
SRR17520069.14378223  
SRR17520069.14378225  
SRR17520069.14378227  
SRR17520069.14378229  
SRR17520069.14378231  
SRR17520069.14378233  
SRR17520069.14378235  
SRR17520069.14378237  
SRR17520069.14378239  
SRR17520069.14380717  
SRR17520069.14384424  
SRR17520069.14397955  
SRR17520069.14404334  
SRR17520069.14410836  
SRR17520069.14411191  
SRR17520069.14411215  
SRR17520069.14441532  
SRR17520069.14446343  
SRR17520069.14446345  
SRR17520069.14446361  
SRR17520069.14446391  
SRR17520069.14446399

SRR17520069.14446421  
SRR17520069.14446476  
SRR17520069.14446480  
SRR17520069.14456497  
SRR17520069.14456501  
SRR17520069.14456521  
SRR17520069.14468503  
SRR17520069.14468507  
SRR17520069.14471238  
SRR17520069.14471240  
SRR17520069.14471242  
SRR17520069.14471244  
SRR17520069.14471246  
SRR17520069.14471248  
SRR17520069.14471250  
SRR17520069.14471252  
SRR17520069.14471254  
SRR17520069.14471256  
SRR17520069.14471258  
SRR17520069.14471260  
SRR17520069.14482314  
SRR17520069.14484891  
SRR17520069.14484905  
SRR17520069.14484981  
SRR17520069.14485039  
SRR17520069.14486091  
SRR17520069.14486097  
SRR17520069.14486101  
SRR17520069.14497206  
SRR17520069.14498419  
SRR17520069.14498441  
SRR17520069.14498445  
SRR17520069.14498491  
SRR17520069.14498507  
SRR17520069.14500584  
SRR17520069.14501602  
SRR17520069.14501610  
SRR17520069.14501620  
SRR17520069.14502969  
SRR17520069.14502987  
SRR17520069.14503015  
SRR17520069.14503035  
SRR17520069.14504714  
SRR17520069.14504726  
SRR17520069.14504736  
SRR17520069.14504787  
SRR17520069.14504789

SRR17520069. 14514593  
SRR17520069. 14515936  
SRR17520069. 14528621  
SRR17520069. 14548997  
SRR17520069. 14554935  
SRR17520069. 14563248  
SRR17520069. 14569946  
SRR17520069. 14572428  
SRR17520069. 14572432  
SRR17520069. 14573393  
SRR17520069. 14575352  
SRR17520069. 14580261  
SRR17520069. 14589857  
SRR17520069. 14592101  
SRR17520069. 14607577  
SRR17520069. 14607579  
SRR17520069. 14607581  
SRR17520069. 14607583  
SRR17520069. 14607585  
SRR17520069. 14607587  
SRR17520069. 14607591  
SRR17520069. 14607593  
SRR17520069. 14607595  
SRR17520069. 14607597  
SRR17520069. 14607599  
SRR17520069. 14607601  
SRR17520069. 14607603  
SRR17520069. 14607605  
SRR17520069. 14607607  
SRR17520069. 14607609  
SRR17520069. 14607611  
SRR17520069. 14607613  
SRR17520069. 14607615  
SRR17520069. 14607617  
SRR17520069. 14607619  
SRR17520069. 14607621  
SRR17520069. 14607623  
SRR17520069. 14607625  
SRR17520069. 14607627  
SRR17520069. 14607629  
SRR17520069. 14607631  
SRR17520069. 14607633  
SRR17520069. 14607635  
SRR17520069. 14607637  
SRR17520069. 14609697  
SRR17520069. 14612650  
SRR17520069. 14612666

SRR17520069.14612694  
SRR17520069.14612702  
SRR17520069.14612720  
SRR17520069.14612726  
SRR17520069.14612768  
SRR17520069.14612776  
SRR17520069.14612812  
SRR17520069.14616204  
SRR17520069.14616220  
SRR17520069.14616256  
SRR17520069.14629715  
SRR17520069.14629717  
SRR17520069.14629725  
SRR17520069.14630057  
SRR17520069.14630063  
SRR17520069.14630065  
SRR17520069.14630069  
SRR17520069.14631098  
SRR17520069.14631134  
SRR17520069.14631136  
SRR17520069.14631145  
SRR17520069.14641127  
SRR17520069.14641129  
SRR17520069.14641131  
SRR17520069.14641134  
SRR17520069.14641136  
SRR17520069.14641138  
SRR17520069.14641140  
SRR17520069.14644705  
SRR17520069.14644709  
SRR17520069.14644719  
SRR17520069.14647102  
SRR17520069.14653697  
SRR17520069.14653725  
SRR17520069.14653753  
SRR17520069.14663826  
SRR17520069.14665432  
SRR17520069.14669448  
SRR17520069.14669464  
SRR17520069.14669472  
SRR17520069.14669476  
SRR17520069.14669478  
SRR17520069.14677009  
SRR17520069.14680300  
SRR17520069.14687044  
SRR17520069.14687064  
SRR17520069.14690855



SRR17520069.14690919  
SRR17520069.14697076  
SRR17520069.14705705  
SRR17520069.14710140  
SRR17520069.14710164  
SRR17520069.14731690  
SRR17520069.14746752  
SRR17520069.14746770  
SRR17520069.14767303  
SRR17520069.14780683  
SRR17520069.14782147  
SRR17520069.14782159  
SRR17520069.14782175  
SRR17520069.14789863  
SRR17520069.14789865  
SRR17520069.14798082  
SRR17520069.14814625  
SRR17520069.14814645  
SRR17520069.14814649  
SRR17520069.14815362  
SRR17520069.14824801  
SRR17520069.14824825  
SRR17520069.14845695  
SRR17520069.14845699  
SRR17520069.14848328  
SRR17520069.14848364  
SRR17520069.14848372  
SRR17520069.14850477  
SRR17520069.14856050  
SRR17520069.14856052  
SRR17520069.14856074  
SRR17520069.14873357  
SRR17520069.14873359  
SRR17520069.14873363  
SRR17520069.14873365  
SRR17520069.14873367  
SRR17520069.14873371  
SRR17520069.14873374  
SRR17520069.14873376  
SRR17520069.14873378  
SRR17520069.14873380  
SRR17520069.14873382  
SRR17520069.14873384  
SRR17520069.14873386  
SRR17520069.14873388  
SRR17520069.14873390  
SRR17520069.14873392

SRR17520069.14873394  
SRR17520069.14873396  
SRR17520069.14873398  
SRR17520069.14873400  
SRR17520069.14873402  
SRR17520069.14873404  
SRR17520069.14873406  
SRR17520069.14873408  
SRR17520069.14873410  
SRR17520069.14873412  
SRR17520069.14873414  
SRR17520069.14873416  
SRR17520069.14873418  
SRR17520069.14881891  
SRR17520069.14882743  
SRR17520069.14884138  
SRR17520069.14888430  
SRR17520069.14888436  
SRR17520069.14892082  
SRR17520069.14892084  
SRR17520069.14892086  
SRR17520069.14892088  
SRR17520069.14892090  
SRR17520069.14892092  
SRR17520069.14892094  
SRR17520069.14892096  
SRR17520069.14892102  
SRR17520069.14892110  
SRR17520069.14892116  
SRR17520069.14892120  
SRR17520069.14892122  
SRR17520069.14892550  
SRR17520069.14892598  
SRR17520069.14892644  
SRR17520069.14897081  
SRR17520069.14897101  
SRR17520069.14898542  
SRR17520069.14898544  
SRR17520069.14898546  
SRR17520069.14898548  
SRR17520069.14898550  
SRR17520069.14898552  
SRR17520069.14898554  
SRR17520069.14898556  
SRR17520069.14898558  
SRR17520069.14898560  
SRR17520069.14898562

SRR17520069.14898564  
SRR17520069.14898566  
SRR17520069.14898568  
SRR17520069.14898570  
SRR17520069.14898572  
SRR17520069.14898574  
SRR17520069.14898576  
SRR17520069.14898578  
SRR17520069.14898580  
SRR17520069.14898582  
SRR17520069.14898584  
SRR17520069.14898586  
SRR17520069.14898588  
SRR17520069.14898590  
SRR17520069.14898592  
SRR17520069.14898594  
SRR17520069.14898596  
SRR17520069.14898598  
SRR17520069.14898600  
SRR17520069.14898602  
SRR17520069.14898604  
SRR17520069.14898606  
SRR17520069.14898608  
SRR17520069.14898610  
SRR17520069.14898612  
SRR17520069.14898614  
SRR17520069.14898616  
SRR17520069.14898618  
SRR17520069.14898620  
SRR17520069.14898622  
SRR17520069.14898624  
SRR17520069.14898626  
SRR17520069.14898628  
SRR17520069.14898630  
SRR17520069.14898632  
SRR17520069.14898634  
SRR17520069.14898636  
SRR17520069.14918160  
SRR17520069.14918238  
SRR17520069.14918250  
SRR17520069.14923388  
SRR17520069.14928029  
SRR17520069.14937794  
SRR17520069.14937800  
SRR17520069.14957273  
SRR17520069.14958065  
SRR17520069.14958075

SRR17520069.14958501  
SRR17520069.14958513  
SRR17520069.14958515  
SRR17520069.14958541  
SRR17520069.14958547  
SRR17520069.14958555  
SRR17520069.14958561  
SRR17520069.14958567  
SRR17520069.14975969  
SRR17520069.14975971  
SRR17520069.14975979  
SRR17520069.14975985  
SRR17520069.14994937  
SRR17520069.14994939  
SRR17520069.14994949  
SRR17520069.14994957  
SRR17520069.14994961  
SRR17520069.14999339  
SRR17520069.15007695  
SRR17520069.15016770  
SRR17520069.15016778  
SRR17520069.15016792  
SRR17520069.15043873  
SRR17520069.15045557  
SRR17520069.15045567  
SRR17520069.15045595  
SRR17520069.15045611  
SRR17520069.15057945  
SRR17520069.15063134  
SRR17520069.15064711  
SRR17520069.15065494  
SRR17520069.15068605  
SRR17520069.15068882  
SRR17520069.15070299  
SRR17520069.15074031  
SRR17520069.15076372  
SRR17520069.15080613  
SRR17520069.15085436  
SRR17520069.15088456  
SRR17520069.15091253  
SRR17520069.15097052  
SRR17520069.15097062  
SRR17520069.15115155  
SRR17520069.15117877  
SRR17520069.15117879  
SRR17520069.15117893  
SRR17520069.15117901

SRR17520069. 15117925  
SRR17520069. 15117959  
SRR17520069. 15120516  
SRR17520069. 15122150  
SRR17520069. 15122213  
SRR17520069. 15122369  
SRR17520069. 15127507  
SRR17520069. 15127765  
SRR17520069. 15128177  
SRR17520069. 15128183  
SRR17520069. 15128243  
SRR17520069. 15134097  
SRR17520069. 15141040  
SRR17520069. 15141048  
SRR17520069. 15142551  
SRR17520069. 15142553  
SRR17520069. 15142555  
SRR17520069. 15147980  
SRR17520069. 15148477  
SRR17520069. 15167747  
SRR17520069. 15173838  
SRR17520069. 15174126  
SRR17520069. 15182307  
SRR17520069. 15182311  
SRR17520069. 15182325  
SRR17520069. 15182724  
SRR17520069. 15211492  
SRR17520069. 15215542  
SRR17520069. 15236197  
SRR17520069. 15236201  
SRR17520069. 15236205  
SRR17520069. 15237613  
SRR17520069. 15244172  
SRR17520069. 15260536  
SRR17520069. 15260542  
SRR17520069. 15273566  
SRR17520069. 15278291  
SRR17520069. 15278293  
SRR17520069. 15278297  
SRR17520069. 15278323  
SRR17520069. 15278325  
SRR17520069. 15279854  
SRR17520069. 15285470  
SRR17520069. 15296441  
SRR17520069. 15296453  
SRR17520069. 15297229  
SRR17520069. 15297234

SRR17520069. 15298786  
SRR17520069. 15302678  
SRR17520069. 15302701  
SRR17520069. 15302704  
SRR17520069. 15303297  
SRR17520069. 15303661  
SRR17520069. 15305247  
SRR17520069. 15309242  
SRR17520069. 15309248  
SRR17520069. 15312391  
SRR17520069. 15315504  
SRR17520069. 15315530  
SRR17520069. 15323136  
SRR17520069. 15326291  
SRR17520069. 15326299  
SRR17520069. 15340073  
SRR17520069. 15340115  
SRR17520069. 15341886  
SRR17520069. 15341888  
SRR17520069. 15342454  
SRR17520069. 15342456  
SRR17520069. 15342458  
SRR17520069. 15345788  
SRR17520069. 15345802  
SRR17520069. 15347196  
SRR17520069. 15347204  
SRR17520069. 15352383  
SRR17520069. 15352413  
SRR17520069. 15362102  
SRR17520069. 15372655  
SRR17520069. 15380404  
SRR17520069. 15381753  
SRR17520069. 15385925  
SRR17520069. 15385937  
SRR17520069. 15413202  
SRR17520069. 15414712  
SRR17520069. 15415705  
SRR17520069. 15415707  
SRR17520069. 15415709  
SRR17520069. 15415711  
SRR17520069. 15415713  
SRR17520069. 15415715  
SRR17520069. 15415717  
SRR17520069. 15415719  
SRR17520069. 15415721  
SRR17520069. 15415723  
SRR17520069. 15415725

SRR17520069. 15415727  
SRR17520069. 15415729  
SRR17520069. 15415731  
SRR17520069. 15415733  
SRR17520069. 15415735  
SRR17520069. 15415737  
SRR17520069. 15415739  
SRR17520069. 15415741  
SRR17520069. 15415743  
SRR17520069. 15415745  
SRR17520069. 15415747  
SRR17520069. 15415749  
SRR17520069. 15415751  
SRR17520069. 15415753  
SRR17520069. 15415755  
SRR17520069. 15415757  
SRR17520069. 15415759  
SRR17520069. 15415761  
SRR17520069. 15415763  
SRR17520069. 15415765  
SRR17520069. 15415767  
SRR17520069. 15415769  
SRR17520069. 15417986  
SRR17520069. 15418002  
SRR17520069. 15418024  
SRR17520069. 15424528  
SRR17520069. 15425797  
SRR17520069. 15458580  
SRR17520069. 15464367  
SRR17520069. 15464441  
SRR17520069. 15464457  
SRR17520069. 15464459  
SRR17520069. 15468839  
SRR17520069. 15470076  
SRR17520069. 15472350  
SRR17520069. 15481340  
SRR17520069. 15481350  
SRR17520069. 15481352  
SRR17520069. 15481372  
SRR17520069. 15491612  
SRR17520069. 15491625  
SRR17520069. 15494749  
SRR17520069. 15494764  
SRR17520069. 15494770  
SRR17520069. 15494774  
SRR17520069. 15494776  
SRR17520069. 15494780

SRR17520069. 15494784  
SRR17520069. 15494786  
SRR17520069. 15496251  
SRR17520069. 15500353  
SRR17520069. 15500445  
SRR17520069. 15501750  
SRR17520069. 15511772  
SRR17520069. 15514270  
SRR17520069. 15530612  
SRR17520069. 15535440  
SRR17520069. 15546042  
SRR17520069. 15546080  
SRR17520069. 15549531  
SRR17520069. 15552586  
SRR17520069. 15552606  
SRR17520069. 15564253  
SRR17520069. 15567428  
SRR17520069. 15576314  
SRR17520069. 15577450  
SRR17520069. 15577478  
SRR17520069. 15578309  
SRR17520069. 15578321  
SRR17520069. 15578385  
SRR17520069. 15578395  
SRR17520069. 15578409  
SRR17520069. 15581327  
SRR17520069. 15581399  
SRR17520069. 15584984  
SRR17520069. 15584988  
SRR17520069. 15585000  
SRR17520069. 15590173  
SRR17520069. 15590291  
SRR17520069. 15596760  
SRR17520069. 15596762  
SRR17520069. 15596766  
SRR17520069. 15596768  
SRR17520069. 15596770  
SRR17520069. 15596776  
SRR17520069. 15596778  
SRR17520069. 15596780  
SRR17520069. 15596784  
SRR17520069. 15596786  
SRR17520069. 15596798  
SRR17520069. 15596802  
SRR17520069. 15596806  
SRR17520069. 15596808  
SRR17520069. 15596812



SRR17520069. 15600569  
SRR17520069. 15606652  
SRR17520069. 15607447  
SRR17520069. 15613714  
SRR17520069. 15615232  
SRR17520069. 15616574  
SRR17520069. 15616576  
SRR17520069. 15616578  
SRR17520069. 15616580  
SRR17520069. 15616582  
SRR17520069. 15616584  
SRR17520069. 15616586  
SRR17520069. 15616588  
SRR17520069. 15616590  
SRR17520069. 15616592  
SRR17520069. 15617619  
SRR17520069. 15618338  
SRR17520069. 15619157  
SRR17520069. 15619203  
SRR17520069. 15622886  
SRR17520069. 15626805  
SRR17520069. 15626810  
SRR17520069. 15641042  
SRR17520069. 15641054  
SRR17520069. 15641056  
SRR17520069. 15641058  
SRR17520069. 15641068  
SRR17520069. 15641080  
SRR17520069. 15645464  
SRR17520069. 15645722  
SRR17520069. 15658305  
SRR17520069. 15659176  
SRR17520069. 15659184  
SRR17520069. 15659202  
SRR17520069. 15662083  
SRR17520069. 15662087  
SRR17520069. 15662127  
SRR17520069. 15665587  
SRR17520069. 15668164  
SRR17520069. 15668174  
SRR17520069. 15668190  
SRR17520069. 15671010  
SRR17520069. 15671080  
SRR17520069. 15676479  
SRR17520069. 15679405  
SRR17520069. 15682718  
SRR17520069. 15682722

SRR17520069. 15682760  
SRR17520069. 15682836  
SRR17520069. 15683087  
SRR17520069. 15685519  
SRR17520069. 15685571  
SRR17520069. 15690249  
SRR17520069. 15697236  
SRR17520069. 15701436  
SRR17520069. 15702057  
SRR17520069. 15704519  
SRR17520069. 15704526  
SRR17520069. 15706421  
SRR17520069. 15706439  
SRR17520069. 15706465  
SRR17520069. 15707772  
SRR17520069. 15707784  
SRR17520069. 15712713  
SRR17520069. 15712838  
SRR17520069. 15713500  
SRR17520069. 15725767  
SRR17520069. 15725779  
SRR17520069. 15730011  
SRR17520069. 15730013  
SRR17520069. 15730025  
SRR17520069. 15730029  
SRR17520069. 15730039  
SRR17520069. 15730045  
SRR17520069. 15730047  
SRR17520069. 15749162  
SRR17520069. 15749178  
SRR17520069. 15754219  
SRR17520069. 15768245  
SRR17520069. 15777716  
SRR17520069. 15779115  
SRR17520069. 15779123  
SRR17520069. 15779139  
SRR17520069. 15782096  
SRR17520069. 15786116  
SRR17520069. 15791300  
SRR17520069. 15791474  
SRR17520069. 15792390  
SRR17520069. 15818675  
SRR17520069. 15821226  
SRR17520069. 15821232  
SRR17520069. 15833893  
SRR17520069. 15837623  
SRR17520069. 15844238

SRR17520069. 15844244  
SRR17520069. 15845663  
SRR17520069. 15853792  
SRR17520069. 15853944  
SRR17520069. 15853946  
SRR17520069. 15853948  
SRR17520069. 15853950  
SRR17520069. 15853977  
SRR17520069. 15856407  
SRR17520069. 15859641  
SRR17520069. 15859998  
SRR17520069. 15866846  
SRR17520069. 15866862  
SRR17520069. 15873753  
SRR17520069. 15876523  
SRR17520069. 15879097  
SRR17520069. 15879119  
SRR17520069. 15879123  
SRR17520069. 15880104  
SRR17520069. 15880106  
SRR17520069. 15884096  
SRR17520069. 15884108  
SRR17520069. 15884126  
SRR17520069. 15890386  
SRR17520069. 15894353  
SRR17520069. 15894621  
SRR17520069. 15895541  
SRR17520069. 15905760  
SRR17520069. 15908524  
SRR17520069. 15915542  
SRR17520069. 15920759  
SRR17520069. 15932655  
SRR17520069. 15933359  
SRR17520069. 15933365  
SRR17520069. 15933371  
SRR17520069. 15933377  
SRR17520069. 15938346  
SRR17520069. 15945064  
SRR17520069. 15949796  
SRR17520069. 15949798  
SRR17520069. 15949800  
SRR17520069. 15949806  
SRR17520069. 15949874  
SRR17520069. 15949892  
SRR17520069. 15955632  
SRR17520069. 15956977  
SRR17520069. 15956991

SRR17520069. 15969840  
SRR17520069. 15969880  
SRR17520069. 15970378  
SRR17520069. 15970380  
SRR17520069. 15970382  
SRR17520069. 15970384  
SRR17520069. 15970386  
SRR17520069. 15970388  
SRR17520069. 15970392  
SRR17520069. 15970394  
SRR17520069. 15970398  
SRR17520069. 15970400  
SRR17520069. 15970402  
SRR17520069. 15970404  
SRR17520069. 15970406  
SRR17520069. 15970408  
SRR17520069. 15970410  
SRR17520069. 15970412  
SRR17520069. 15970414  
SRR17520069. 15970416  
SRR17520069. 15970418  
SRR17520069. 15970420  
SRR17520069. 15970422  
SRR17520069. 15970424  
SRR17520069. 15981103  
SRR17520069. 15983073  
SRR17520069. 15983125  
SRR17520069. 15983171  
SRR17520069. 15991810  
SRR17520069. 15991863  
SRR17520069. 15991915  
SRR17520069. 16003935  
SRR17520069. 16009962  
SRR17520069. 16011136  
SRR17520069. 16012503  
SRR17520069. 16012505  
SRR17520069. 16012547  
SRR17520069. 16015784  
SRR17520069. 16015860  
SRR17520069. 16015882  
SRR17520069. 16016531  
SRR17520069. 16026291  
SRR17520069. 16034192  
SRR17520069. 16034242  
SRR17520069. 16034254  
SRR17520069. 16034280  
SRR17520069. 16034294

SRR17520069.16034686  
SRR17520069.16034972  
SRR17520069.16039091  
SRR17520069.16039093  
SRR17520069.16039117  
SRR17520069.16039133  
SRR17520069.16041884  
SRR17520069.16045241  
SRR17520069.16045962  
SRR17520069.16045970  
SRR17520069.16045974  
SRR17520069.16046004  
SRR17520069.16046016  
SRR17520069.16046024  
SRR17520069.16060260  
SRR17520069.16060262  
SRR17520069.16060276  
SRR17520069.16060282  
SRR17520069.16060288  
SRR17520069.16063526  
SRR17520069.16063530  
SRR17520069.16063542  
SRR17520069.16063562  
SRR17520069.16063564  
SRR17520069.16064447  
SRR17520069.16077911  
SRR17520069.16077947  
SRR17520069.16082672  
SRR17520069.16082678  
SRR17520069.16091491  
SRR17520069.16092245  
SRR17520069.16092247  
SRR17520069.16092249  
SRR17520069.16092251  
SRR17520069.16092253  
SRR17520069.16092255  
SRR17520069.16092257  
SRR17520069.16092261  
SRR17520069.16092265  
SRR17520069.16092267  
SRR17520069.16092269  
SRR17520069.16092271  
SRR17520069.16092273  
SRR17520069.16092275  
SRR17520069.16092277  
SRR17520069.16092279  
SRR17520069.16092281

SRR17520069.16092283  
SRR17520069.16092285  
SRR17520069.16092287  
SRR17520069.16092289  
SRR17520069.16092291  
SRR17520069.16092293  
SRR17520069.16092295  
SRR17520069.16092297  
SRR17520069.16092299  
SRR17520069.16092301  
SRR17520069.16092303  
SRR17520069.16092305  
SRR17520069.16092307  
SRR17520069.16092309  
SRR17520069.16092311  
SRR17520069.16092313  
SRR17520069.16092315  
SRR17520069.16092317  
SRR17520069.16092319  
SRR17520069.16092321  
SRR17520069.16092323  
SRR17520069.16092325  
SRR17520069.16092327  
SRR17520069.16092329  
SRR17520069.16092331  
SRR17520069.16092333  
SRR17520069.16092335  
SRR17520069.16092337  
SRR17520069.16092339  
SRR17520069.16092341  
SRR17520069.16092345  
SRR17520069.16092347  
SRR17520069.16092349  
SRR17520069.16092351  
SRR17520069.16092353  
SRR17520069.16096027  
SRR17520069.16096037  
SRR17520069.16096059  
SRR17520069.16096061  
SRR17520069.16096077  
SRR17520069.16096091  
SRR17520069.16096111  
SRR17520069.16104456  
SRR17520069.16105420  
SRR17520069.16106811  
SRR17520069.16115998  
SRR17520069.16116973

SRR17520069. 16117007  
SRR17520069. 16120422  
SRR17520069. 16120440  
SRR17520069. 16120448  
SRR17520069. 16120472  
SRR17520069. 16120478  
SRR17520069. 16120508  
SRR17520069. 16120516  
SRR17520069. 16120532  
SRR17520069. 16120538  
SRR17520069. 16130016  
SRR17520069. 16139468  
SRR17520069. 16139472  
SRR17520069. 16141281  
SRR17520069. 16141295  
SRR17520069. 16147760  
SRR17520069. 16147762  
SRR17520069. 16157768  
SRR17520069. 16217632  
SRR17520069. 16217699  
SRR17520069. 16217721  
SRR17520069. 16217730  
SRR17520069. 16217886  
SRR17520069. 16238073  
SRR17520069. 16239389  
SRR17520069. 16239391  
SRR17520069. 16245834  
SRR17520069. 16247088  
SRR17520069. 16247096  
SRR17520069. 16249845  
SRR17520069. 16259805  
SRR17520069. 16273480  
SRR17520069. 16282211  
SRR17520069. 16286004  
SRR17520069. 16303071  
SRR17520069. 16303113  
SRR17520069. 16303125  
SRR17520069. 16305548  
SRR17520069. 16305566  
SRR17520069. 16305568  
SRR17520069. 16305570  
SRR17520069. 16305578  
SRR17520069. 16305594  
SRR17520069. 16312753  
SRR17520069. 16313208  
SRR17520069. 16313241  
SRR17520069. 16315516

SRR17520069. 16320115  
SRR17520069. 16320229  
SRR17520069. 16320281  
SRR17520069. 16324031  
SRR17520069. 16331467  
SRR17520069. 16331471  
SRR17520069. 16331475  
SRR17520069. 16352211  
SRR17520069. 16372761  
SRR17520069. 16382773  
SRR17520069. 16382801  
SRR17520069. 16383921  
SRR17520069. 16396062  
SRR17520069. 16400222  
SRR17520069. 16403593  
SRR17520069. 16413999  
SRR17520069. 16418177  
SRR17520069. 16427344  
SRR17520069. 16441355  
SRR17520069. 16450306  
SRR17520069. 16450324  
SRR17520069. 16453469  
SRR17520069. 16458562  
SRR17520069. 16460496  
SRR17520069. 16460504  
SRR17520069. 16463125  
SRR17520069. 16478230  
SRR17520069. 16486524  
SRR17520069. 16487155  
SRR17520069. 16487157  
SRR17520069. 16498254  
SRR17520069. 16498256  
SRR17520069. 16498693  
SRR17520069. 16501124  
SRR17520069. 16515476  
SRR17520069. 16515496  
SRR17520069. 16515512  
SRR17520069. 16515564  
SRR17520069. 16516904  
SRR17520069. 16516906  
SRR17520069. 16516908  
SRR17520069. 16516910  
SRR17520069. 16516912  
SRR17520069. 16516914  
SRR17520069. 16516916  
SRR17520069. 16516918  
SRR17520069. 16516920



SRR17520069.16516922  
SRR17520069.16516924  
SRR17520069.16516926  
SRR17520069.16516928  
SRR17520069.16516930  
SRR17520069.16516932  
SRR17520069.16516934  
SRR17520069.16516936  
SRR17520069.16516938  
SRR17520069.16516940  
SRR17520069.16516942  
SRR17520069.16516944  
SRR17520069.16516946  
SRR17520069.16516948  
SRR17520069.16516950  
SRR17520069.16516952  
SRR17520069.16516954  
SRR17520069.16516956  
SRR17520069.16516958  
SRR17520069.16516960  
SRR17520069.16516962  
SRR17520069.16516964  
SRR17520069.16516966  
SRR17520069.16516968  
SRR17520069.16516970  
SRR17520069.16516972  
SRR17520069.16516974  
SRR17520069.16516976  
SRR17520069.16516978  
SRR17520069.16516982  
SRR17520069.16516984  
SRR17520069.16516986  
SRR17520069.16516988  
SRR17520069.16516990  
SRR17520069.16516992  
SRR17520069.16516994  
SRR17520069.16516996  
SRR17520069.16516998  
SRR17520069.16517000  
SRR17520069.16517002  
SRR17520069.16517004  
SRR17520069.16517006  
SRR17520069.16517008  
SRR17520069.16517010  
SRR17520069.16517012  
SRR17520069.16517014  
SRR17520069.16517016

SRR17520069. 16517018  
SRR17520069. 16517020  
SRR17520069. 16517022  
SRR17520069. 16517024  
SRR17520069. 16517026  
SRR17520069. 16517028  
SRR17520069. 16517030  
SRR17520069. 16517032  
SRR17520069. 16517034  
SRR17520069. 16517036  
SRR17520069. 16517038  
SRR17520069. 16517040  
SRR17520069. 16517042  
SRR17520069. 16517044  
SRR17520069. 16517046  
SRR17520069. 16517048  
SRR17520069. 16517050  
SRR17520069. 16517052  
SRR17520069. 16517054  
SRR17520069. 16517056  
SRR17520069. 16517058  
SRR17520069. 16517060  
SRR17520069. 16517062  
SRR17520069. 16517064  
SRR17520069. 16517066  
SRR17520069. 16517068  
SRR17520069. 16517070  
SRR17520069. 16517072  
SRR17520069. 16517074  
SRR17520069. 16517076  
SRR17520069. 16517078  
SRR17520069. 16517080  
SRR17520069. 16517082  
SRR17520069. 16517084  
SRR17520069. 16517086  
SRR17520069. 16517088  
SRR17520069. 16517090  
SRR17520069. 16517092  
SRR17520069. 16521398  
SRR17520069. 16522322  
SRR17520069. 16531386  
SRR17520069. 16538559  
SRR17520069. 16538561  
SRR17520069. 16538573  
SRR17520069. 16538579  
SRR17520069. 16540787  
SRR17520069. 16540793

SRR17520069. 16540799  
SRR17520069. 16541368  
SRR17520069. 16547778  
SRR17520069. 16559377  
SRR17520069. 16559385  
SRR17520069. 16559431  
SRR17520069. 16559451  
SRR17520069. 16562761  
SRR17520069. 16569707  
SRR17520069. 16569709  
SRR17520069. 16569711  
SRR17520069. 16569713  
SRR17520069. 16569715  
SRR17520069. 16569717  
SRR17520069. 16569719  
SRR17520069. 16569721  
SRR17520069. 16569723  
SRR17520069. 16569725  
SRR17520069. 16569729  
SRR17520069. 16569731  
SRR17520069. 16569733  
SRR17520069. 16569735  
SRR17520069. 16569737  
SRR17520069. 16569739  
SRR17520069. 16569741  
SRR17520069. 16569743  
SRR17520069. 16569745  
SRR17520069. 16569747  
SRR17520069. 16569749  
SRR17520069. 16569751  
SRR17520069. 16569753  
SRR17520069. 16569755  
SRR17520069. 16569757  
SRR17520069. 16569759  
SRR17520069. 16569761  
SRR17520069. 16569763  
SRR17520069. 16569765  
SRR17520069. 16569767  
SRR17520069. 16569769  
SRR17520069. 16569771  
SRR17520069. 16569773  
SRR17520069. 16569775  
SRR17520069. 16569777  
SRR17520069. 16569779  
SRR17520069. 16569781  
SRR17520069. 16569783  
SRR17520069. 16569785

SRR17520069.16569787  
SRR17520069.16569789  
SRR17520069.16569791  
SRR17520069.16575848  
SRR17520069.16575914  
SRR17520069.16575922  
SRR17520069.16575940  
SRR17520069.16585037  
SRR17520069.16588299  
SRR17520069.16589135  
SRR17520069.16590933  
SRR17520069.16591213  
SRR17520069.16596680  
SRR17520069.16597317  
SRR17520069.16597318  
SRR17520069.16599863  
SRR17520069.16609657  
SRR17520069.16610932  
SRR17520069.16612762  
SRR17520069.16612764  
SRR17520069.16612766  
SRR17520069.16612768  
SRR17520069.16612770  
SRR17520069.16612772  
SRR17520069.16612774  
SRR17520069.16612776  
SRR17520069.16612778  
SRR17520069.16612782  
SRR17520069.16612784  
SRR17520069.16612786  
SRR17520069.16612788  
SRR17520069.16612792  
SRR17520069.16612794  
SRR17520069.16612796  
SRR17520069.16612798  
SRR17520069.16612800  
SRR17520069.16612802  
SRR17520069.16612804  
SRR17520069.16612806  
SRR17520069.16612808  
SRR17520069.16612810  
SRR17520069.16612812  
SRR17520069.16612814  
SRR17520069.16612816  
SRR17520069.16612818  
SRR17520069.16612820  
SRR17520069.16612822

SRR17520069.16612824  
SRR17520069.16612826  
SRR17520069.16612828  
SRR17520069.16612830  
SRR17520069.16612832  
SRR17520069.16612834  
SRR17520069.16612836  
SRR17520069.16612838  
SRR17520069.16612840  
SRR17520069.16612844  
SRR17520069.16612846  
SRR17520069.16612848  
SRR17520069.16612850  
SRR17520069.16612852  
SRR17520069.16612854  
SRR17520069.16612856  
SRR17520069.16612858  
SRR17520069.16612860  
SRR17520069.16612862  
SRR17520069.16612864  
SRR17520069.16612866  
SRR17520069.16612870  
SRR17520069.16620232  
SRR17520069.16620246  
SRR17520069.16625805  
SRR17520069.16625813  
SRR17520069.16625819  
SRR17520069.16636550  
SRR17520069.16636558  
SRR17520069.16641120  
SRR17520069.16641122  
SRR17520069.16641124  
SRR17520069.16643637  
SRR17520069.16644344  
SRR17520069.16656318  
SRR17520069.16656326  
SRR17520069.16663566  
SRR17520069.16690376  
SRR17520069.16690404  
SRR17520069.16692438  
SRR17520069.16692460  
SRR17520069.16697631  
SRR17520069.16697695  
SRR17520069.16697800  
SRR17520069.16702321  
SRR17520069.16702323  
SRR17520069.16702333

SRR17520069. 16702337  
SRR17520069. 16706344  
SRR17520069. 16707635  
SRR17520069. 16714938  
SRR17520069. 16720457  
SRR17520069. 16720461  
SRR17520069. 16721477  
SRR17520069. 16722189  
SRR17520069. 16729334  
SRR17520069. 16729384  
SRR17520069. 16729388  
SRR17520069. 16729394  
SRR17520069. 16729430  
SRR17520069. 16729434  
SRR17520069. 16729444  
SRR17520069. 16730346  
SRR17520069. 16730348  
SRR17520069. 16730354  
SRR17520069. 16737790  
SRR17520069. 16742964  
SRR17520069. 16742972  
SRR17520069. 16742984  
SRR17520069. 16742986  
SRR17520069. 16742996  
SRR17520069. 16752855  
SRR17520069. 16754247  
SRR17520069. 16754249  
SRR17520069. 16758043  
SRR17520069. 16758073  
SRR17520069. 16758111  
SRR17520069. 16758133  
SRR17520069. 16759585  
SRR17520069. 16759587  
SRR17520069. 16759589  
SRR17520069. 16759591  
SRR17520069. 16759593  
SRR17520069. 16759595  
SRR17520069. 16759597  
SRR17520069. 16759599  
SRR17520069. 16759601  
SRR17520069. 16759603  
SRR17520069. 16759605  
SRR17520069. 16759607  
SRR17520069. 16769514  
SRR17520069. 16773192  
SRR17520069. 16777686  
SRR17520069. 16777690

SRR17520069.16777700  
SRR17520069.16777718  
SRR17520069.16777732  
SRR17520069.16777734  
SRR17520069.16777736  
SRR17520069.16785577  
SRR17520069.16790817  
SRR17520069.16791273  
SRR17520069.16798435  
SRR17520069.16798449  
SRR17520069.16823402  
SRR17520069.16828290  
SRR17520069.16830293  
SRR17520069.16830359  
SRR17520069.16830371  
SRR17520069.16839842  
SRR17520069.16839890  
SRR17520069.16839892  
SRR17520069.16839924  
SRR17520069.16850951  
SRR17520069.16852269  
SRR17520069.16852682  
SRR17520069.16867558  
SRR17520069.16867612  
SRR17520069.16867758  
SRR17520069.16871097  
SRR17520069.16880071  
SRR17520069.16882681  
SRR17520069.16889752  
SRR17520069.16893220  
SRR17520069.16896934  
SRR17520069.16898165  
SRR17520069.16903347  
SRR17520069.16913327  
SRR17520069.16914392  
SRR17520069.16920379  
SRR17520069.16925838  
SRR17520069.16925852  
SRR17520069.16932709  
SRR17520069.16940134  
SRR17520069.16940140  
SRR17520069.16940148  
SRR17520069.16944392  
SRR17520069.16947221  
SRR17520069.16955208  
SRR17520069.16960302  
SRR17520069.16960316

SRR17520069. 16960512  
SRR17520069. 16962970  
SRR17520069. 16988777  
SRR17520069. 16991614  
SRR17520069. 16993286  
SRR17520069. 16993388  
SRR17520069. 16994191  
SRR17520069. 16994229  
SRR17520069. 16995166  
SRR17520069. 16997042  
SRR17520069. 17002026  
SRR17520069. 17002050  
SRR17520069. 17002066  
SRR17520069. 17002076  
SRR17520069. 17002078  
SRR17520069. 17002092  
SRR17520069. 17002100  
SRR17520069. 17002102  
SRR17520069. 17002106  
SRR17520069. 17006660  
SRR17520069. 17017743  
SRR17520069. 17025407  
SRR17520069. 17025413  
SRR17520069. 17028153  
SRR17520069. 17028167  
SRR17520069. 17028185  
SRR17520069. 17029636  
SRR17520069. 17038190  
SRR17520069. 17038196  
SRR17520069. 17038389  
SRR17520069. 17038403  
SRR17520069. 17040210  
SRR17520069. 17041722  
SRR17520069. 17047524  
SRR17520069. 17047552  
SRR17520069. 17047560  
SRR17520069. 17047562  
SRR17520069. 17048315  
SRR17520069. 17048317  
SRR17520069. 17048319  
SRR17520069. 17048321  
SRR17520069. 17048323  
SRR17520069. 17048325  
SRR17520069. 17048327  
SRR17520069. 17048329  
SRR17520069. 17048331  
SRR17520069. 17048333



SRR17520069.17048335  
SRR17520069.17048337  
SRR17520069.17048339  
SRR17520069.17048341  
SRR17520069.17048343  
SRR17520069.17048345  
SRR17520069.17048347  
SRR17520069.17048349  
SRR17520069.17054095  
SRR17520069.17054111  
SRR17520069.17054127  
SRR17520069.17063855  
SRR17520069.17077136  
SRR17520069.17078458  
SRR17520069.17078500  
SRR17520069.17078502  
SRR17520069.17078506  
SRR17520069.17078510  
SRR17520069.17099024  
SRR17520069.17099038  
SRR17520069.17099040  
SRR17520069.17099044  
SRR17520069.17099046  
SRR17520069.17099048  
SRR17520069.17117737  
SRR17520069.17137994  
SRR17520069.17138028  
SRR17520069.17142825  
SRR17520069.17164778  
SRR17520069.17166072  
SRR17520069.17168343  
SRR17520069.17175659  
SRR17520069.17175667  
SRR17520069.17175669  
SRR17520069.17175673  
SRR17520069.17175705  
SRR17520069.17181841  
SRR17520069.17183933  
SRR17520069.17194460  
SRR17520069.17196169  
SRR17520069.17204121  
SRR17520069.17207664  
SRR17520069.17207739  
SRR17520069.17212949  
SRR17520069.17229094  
SRR17520069.17235672  
SRR17520069.17237358

SRR17520069.17241038  
SRR17520069.17251726  
SRR17520069.17251728  
SRR17520069.17254380  
SRR17520069.17256277  
SRR17520069.17256279  
SRR17520069.17284760  
SRR17520069.17285147  
SRR17520069.17285205  
SRR17520069.17287957  
SRR17520069.17287991  
SRR17520069.17287999  
SRR17520069.17288055  
SRR17520069.17288067  
SRR17520069.17288091  
SRR17520069.17288107  
SRR17520069.17290833  
SRR17520069.17292769  
SRR17520069.17294536  
SRR17520069.17294546  
SRR17520069.17295598  
SRR17520069.17295610  
SRR17520069.17303120  
SRR17520069.17303151  
SRR17520069.17304050  
SRR17520069.17304082  
SRR17520069.17306433  
SRR17520069.17306445  
SRR17520069.17306455  
SRR17520069.17306567  
SRR17520069.17307085  
SRR17520069.17308554  
SRR17520069.17308564  
SRR17520069.17308582  
SRR17520069.17322245  
SRR17520069.17322297  
SRR17520069.17332699  
SRR17520069.17336488  
SRR17520069.17338647  
SRR17520069.17338655  
SRR17520069.17338665  
SRR17520069.17338667  
SRR17520069.17338671  
SRR17520069.17338675  
SRR17520069.17338681  
SRR17520069.17343818  
SRR17520069.17350609

SRR17520069. 17359068  
SRR17520069. 17359078  
SRR17520069. 17362871  
SRR17520069. 17368714  
SRR17520069. 17368722  
SRR17520069. 17368728  
SRR17520069. 17372699  
SRR17520069. 17381675  
SRR17520069. 17381714  
SRR17520069. 17381718  
SRR17520069. 17381754  
SRR17520069. 17387696  
SRR17520069. 17388672  
SRR17520069. 17398196  
SRR17520069. 17403706  
SRR17520069. 17403773  
SRR17520069. 17407577  
SRR17520069. 17411670  
SRR17520069. 17418407  
SRR17520069. 17418519  
SRR17520069. 17432545  
SRR17520069. 17432555  
SRR17520069. 17432587  
SRR17520069. 17435435  
SRR17520069. 17435439  
SRR17520069. 17435447  
SRR17520069. 17435449  
SRR17520069. 17435453  
SRR17520069. 17436685  
SRR17520069. 17448741  
SRR17520069. 17452376  
SRR17520069. 17452378  
SRR17520069. 17452380  
SRR17520069. 17452382  
SRR17520069. 17472109  
SRR17520069. 17477115  
SRR17520069. 17477168  
SRR17520069. 17478259  
SRR17520069. 17486982  
SRR17520069. 17487036  
SRR17520069. 17490065  
SRR17520069. 17491444  
SRR17520069. 17494967  
SRR17520069. 17499838  
SRR17520069. 17510025  
SRR17520069. 17520162  
SRR17520069. 17520166

SRR17520069. 17521634  
SRR17520069. 17522842  
SRR17520069. 17526108  
SRR17520069. 17526116  
SRR17520069. 17530527  
SRR17520069. 17530529  
SRR17520069. 17530531  
SRR17520069. 17530533  
SRR17520069. 17530535  
SRR17520069. 17530537  
SRR17520069. 17530539  
SRR17520069. 17530541  
SRR17520069. 17530543  
SRR17520069. 17531202  
SRR17520069. 17531242  
SRR17520069. 17532142  
SRR17520069. 17532840  
SRR17520069. 17546344  
SRR17520069. 17546350  
SRR17520069. 17546358  
SRR17520069. 17546360  
SRR17520069. 17561071  
SRR17520069. 17561073  
SRR17520069. 17561349  
SRR17520069. 17566701  
SRR17520069. 17577201  
SRR17520069. 17577223  
SRR17520069. 17579053  
SRR17520069. 17579055  
SRR17520069. 17581362  
SRR17520069. 17582437  
SRR17520069. 17582449  
SRR17520069. 17586296  
SRR17520069. 17586302  
SRR17520069. 17586304  
SRR17520069. 17586312  
SRR17520069. 17586318  
SRR17520069. 17588435  
SRR17520069. 17589970  
SRR17520069. 17593293  
SRR17520069. 17595694  
SRR17520069. 17595736  
SRR17520069. 17595750  
SRR17520069. 17602656  
SRR17520069. 17603642  
SRR17520069. 17603682  
SRR17520069. 17609940

SRR17520069. 17624224  
SRR17520069. 17628453  
SRR17520069. 17628555  
SRR17520069. 17628569  
SRR17520069. 17634066  
SRR17520069. 17637532  
SRR17520069. 17640004  
SRR17520069. 17647854  
SRR17520069. 17659182  
SRR17520069. 17666642  
SRR17520069. 17667515  
SRR17520069. 17668166  
SRR17520069. 17676212  
SRR17520069. 17680371  
SRR17520069. 17687535  
SRR17520069. 17709394  
SRR17520069. 17710998  
SRR17520069. 17711087  
SRR17520069. 17711849  
SRR17520069. 17711857  
SRR17520069. 17711865  
SRR17520069. 17715235  
SRR17520069. 17715275  
SRR17520069. 17715289  
SRR17520069. 17716331  
SRR17520069. 17717259  
SRR17520069. 17717338  
SRR17520069. 17717414  
SRR17520069. 17717420  
SRR17520069. 17719952  
SRR17520069. 17719954  
SRR17520069. 17747584  
SRR17520069. 17749628  
SRR17520069. 17752285  
SRR17520069. 17763014  
SRR17520069. 17763030  
SRR17520069. 17766354  
SRR17520069. 17768191  
SRR17520069. 17769992  
SRR17520069. 17784558  
SRR17520069. 17788877  
SRR17520069. 17791040  
SRR17520069. 17791058  
SRR17520069. 17791070  
SRR17520069. 17794182  
SRR17520069. 17809125  
SRR17520069. 17809138

SRR17520069.17809146  
SRR17520069.17809154  
SRR17520069.17841217  
SRR17520069.17846736  
SRR17520069.17852473  
SRR17520069.17855113  
SRR17520069.17858445  
SRR17520069.17874451  
SRR17520069.17883912  
SRR17520069.17883942  
SRR17520069.17889789  
SRR17520069.17890725  
SRR17520069.17891038  
SRR17520069.17891044  
SRR17520069.17891046  
SRR17520069.17891048  
SRR17520069.17896860  
SRR17520069.17899493  
SRR17520069.17901665  
SRR17520069.17903025  
SRR17520069.17903029  
SRR17520069.17908188  
SRR17520069.17921512  
SRR17520069.17923445  
SRR17520069.17923447  
SRR17520069.17928639  
SRR17520069.17928649  
SRR17520069.17928661  
SRR17520069.17932895  
SRR17520069.17934939  
SRR17520069.17935181  
SRR17520069.17939999  
SRR17520069.17940011  
SRR17520069.17940013  
SRR17520069.17940027  
SRR17520069.17942941  
SRR17520069.17942979  
SRR17520069.17947929  
SRR17520069.17949036  
SRR17520069.17949065  
SRR17520069.17955574  
SRR17520069.17957120  
SRR17520069.17957124  
SRR17520069.17957130  
SRR17520069.17957132  
SRR17520069.17957607  
SRR17520069.17960380

SRR17520069. 17983546  
SRR17520069. 17989794  
SRR17520069. 17993617  
SRR17520069. 17993633  
SRR17520069. 17993645  
SRR17520069. 18001515  
SRR17520069. 18004802  
SRR17520069. 18010430  
SRR17520069. 18025290  
SRR17520069. 18025298  
SRR17520069. 18025334  
SRR17520069. 18025402  
SRR17520069. 18028832  
SRR17520069. 18029600  
SRR17520069. 18033610  
SRR17520069. 18033632  
SRR17520069. 18033642  
SRR17520069. 18033648  
SRR17520069. 18035808  
SRR17520069. 18035838  
SRR17520069. 18035846  
SRR17520069. 18035850  
SRR17520069. 18058203  
SRR17520069. 18058215  
SRR17520069. 18061810  
SRR17520069. 18063117  
SRR17520069. 18063121  
SRR17520069. 18083049  
SRR17520069. 18106881  
SRR17520069. 18106905  
SRR17520069. 18122846  
SRR17520069. 18126286  
SRR17520069. 18133330  
SRR17520069. 18133350  
SRR17520069. 18141669  
SRR17520069. 18152762  
SRR17520069. 18152764  
SRR17520069. 18175669  
SRR17520069. 18180276  
SRR17520069. 18180288  
SRR17520069. 18189796  
SRR17520069. 18191699  
SRR17520069. 18197610  
SRR17520069. 18197644  
SRR17520069. 18197664  
SRR17520069. 18199242  
SRR17520069. 18199306

SRR17520069. 18201964  
SRR17520069. 18202457  
SRR17520069. 18202467  
SRR17520069. 18202475  
SRR17520069. 18203169  
SRR17520069. 18203175  
SRR17520069. 18207979  
SRR17520069. 18208305  
SRR17520069. 18224342  
SRR17520069. 18224348  
SRR17520069. 18232638  
SRR17520069. 18235205  
SRR17520069. 18235299  
SRR17520069. 18236793  
SRR17520069. 18253348  
SRR17520069. 18263941  
SRR17520069. 18272645  
SRR17520069. 18273106  
SRR17520069. 18276161  
SRR17520069. 18276163  
SRR17520069. 18277671  
SRR17520069. 18281256  
SRR17520069. 18290787  
SRR17520069. 18290805  
SRR17520069. 18290819  
SRR17520069. 18294456  
SRR17520069. 18301448  
SRR17520069. 18304612  
SRR17520069. 18312849  
SRR17520069. 18320487  
SRR17520069. 18327286  
SRR17520069. 18333488  
SRR17520069. 18334005  
SRR17520069. 18334026  
SRR17520069. 18334952  
SRR17520069. 18337553  
SRR17520069. 18344521  
SRR17520069. 18356279  
SRR17520069. 18356283  
SRR17520069. 18356287  
SRR17520069. 18356295  
SRR17520069. 18358751  
SRR17520069. 18358753  
SRR17520069. 18358755  
SRR17520069. 18358757  
SRR17520069. 18358759  
SRR17520069. 18358761



SRR17520069. 18358763  
SRR17520069. 18358765  
SRR17520069. 18358767  
SRR17520069. 18358769  
SRR17520069. 18358771  
SRR17520069. 18358773  
SRR17520069. 18358775  
SRR17520069. 18358777  
SRR17520069. 18358779  
SRR17520069. 18358781  
SRR17520069. 18358783  
SRR17520069. 18358785  
SRR17520069. 18358787  
SRR17520069. 18358789  
SRR17520069. 18358791  
SRR17520069. 18358793  
SRR17520069. 18358795  
SRR17520069. 18358797  
SRR17520069. 18358799  
SRR17520069. 18358803  
SRR17520069. 18358805  
SRR17520069. 18358807  
SRR17520069. 18358809  
SRR17520069. 18358811  
SRR17520069. 18358813  
SRR17520069. 18358815  
SRR17520069. 18358817  
SRR17520069. 18358821  
SRR17520069. 18358823  
SRR17520069. 18358825  
SRR17520069. 18358827  
SRR17520069. 18358829  
SRR17520069. 18358831  
SRR17520069. 18358833  
SRR17520069. 18358835  
SRR17520069. 18358837  
SRR17520069. 18358839  
SRR17520069. 18358843  
SRR17520069. 18358845  
SRR17520069. 18358847  
SRR17520069. 18358849  
SRR17520069. 18362557  
SRR17520069. 18368365  
SRR17520069. 18368367  
SRR17520069. 18368381  
SRR17520069. 18373732  
SRR17520069. 18376037

SRR17520069. 18391384  
SRR17520069. 18391475  
SRR17520069. 18396429  
SRR17520069. 18396435  
SRR17520069. 18410584  
SRR17520069. 18431177  
SRR17520069. 18431195  
SRR17520069. 18431197  
SRR17520069. 18438986  
SRR17520069. 18443373  
SRR17520069. 18444270  
SRR17520069. 18447683  
SRR17520069. 18453684  
SRR17520069. 18456561  
SRR17520069. 18462577  
SRR17520069. 18466308  
SRR17520069. 18469593  
SRR17520069. 18469601  
SRR17520069. 18469607  
SRR17520069. 18469608  
SRR17520069. 18477972  
SRR17520069. 18490388  
SRR17520069. 18492619  
SRR17520069. 18496601  
SRR17520069. 18513840  
SRR17520069. 18519673  
SRR17520069. 18519968  
SRR17520069. 18519972  
SRR17520069. 18519976  
SRR17520069. 18519982  
SRR17520069. 18519985  
SRR17520069. 18520119  
SRR17520069. 18523234  
SRR17520069. 18523242  
SRR17520069. 18523254  
SRR17520069. 18523260  
SRR17520069. 18523264  
SRR17520069. 18527154  
SRR17520069. 18527156  
SRR17520069. 18527170  
SRR17520069. 18532478  
SRR17520069. 18534220  
SRR17520069. 18540610  
SRR17520069. 18552932  
SRR17520069. 18569528  
SRR17520069. 18569796  
SRR17520069. 18571341

SRR17520069. 18576555  
SRR17520069. 18576559  
SRR17520069. 18576563  
SRR17520069. 18577663  
SRR17520069. 18581385  
SRR17520069. 18581403  
SRR17520069. 18581570  
SRR17520069. 18581578  
SRR17520069. 18582233  
SRR17520069. 18582237  
SRR17520069. 18582243  
SRR17520069. 18587805  
SRR17520069. 18588409  
SRR17520069. 18595944  
SRR17520069. 18608544  
SRR17520069. 18616593  
SRR17520069. 18622753  
SRR17520069. 18623298  
SRR17520069. 18623302  
SRR17520069. 18624941  
SRR17520069. 18629085  
SRR17520069. 18635752  
SRR17520069. 18640343  
SRR17520069. 18644112  
SRR17520069. 18646296  
SRR17520069. 18651745  
SRR17520069. 18665281  
SRR17520069. 18670645  
SRR17520069. 18670671  
SRR17520069. 18673495  
SRR17520069. 18684887  
SRR17520069. 18697166  
SRR17520069. 18701957  
SRR17520069. 18703427  
SRR17520069. 18703550  
SRR17520069. 18703552  
SRR17520069. 18703554  
SRR17520069. 18703558  
SRR17520069. 18704143  
SRR17520069. 18704145  
SRR17520069. 18706870  
SRR17520069. 18713669  
SRR17520069. 18717171  
SRR17520069. 18717173  
SRR17520069. 18717175  
SRR17520069. 18717177  
SRR17520069. 18717368

SRR17520069. 18720522  
SRR17520069. 18722914  
SRR17520069. 18725221  
SRR17520069. 18727888  
SRR17520069. 18733636  
SRR17520069. 18738963  
SRR17520069. 18738969  
SRR17520069. 18743205  
SRR17520069. 18744602  
SRR17520069. 18744606  
SRR17520069. 18744953  
SRR17520069. 18748117  
SRR17520069. 18749852  
SRR17520069. 18756382  
SRR17520069. 18758861  
SRR17520069. 18758898  
SRR17520069. 18763802  
SRR17520069. 18763806  
SRR17520069. 18763810  
SRR17520069. 18765135  
SRR17520069. 18773936  
SRR17520069. 18776621  
SRR17520069. 18776629  
SRR17520069. 18776971  
SRR17520069. 18781946  
SRR17520069. 18790729  
SRR17520069. 18790769  
SRR17520069. 18804779  
SRR17520069. 18807220  
SRR17520069. 18810733  
SRR17520069. 18810825  
SRR17520069. 18817473  
SRR17520069. 18817731  
SRR17520069. 18818204  
SRR17520069. 18823355  
SRR17520069. 18823365  
SRR17520069. 18823413  
SRR17520069. 18824006  
SRR17520069. 18824074  
SRR17520069. 18824934  
SRR17520069. 18833808  
SRR17520069. 18835328  
SRR17520069. 18836500  
SRR17520069. 18837321  
SRR17520069. 18839099  
SRR17520069. 18839137  
SRR17520069. 18839201

SRR17520069.18845070  
SRR17520069.18848478  
SRR17520069.18850638  
SRR17520069.18850640  
SRR17520069.18850642  
SRR17520069.18850647  
SRR17520069.18850649  
SRR17520069.18850651  
SRR17520069.18850653  
SRR17520069.18850655  
SRR17520069.18850657  
SRR17520069.18850659  
SRR17520069.18854069  
SRR17520069.18861702  
SRR17520069.18882350  
SRR17520069.18892037  
SRR17520069.18892043  
SRR17520069.18906443  
SRR17520069.18906445  
SRR17520069.18906453  
SRR17520069.18906473  
SRR17520069.18906485  
SRR17520069.18906489  
SRR17520069.18914946  
SRR17520069.18915099  
SRR17520069.18915123  
SRR17520069.18917391  
SRR17520069.18917423  
SRR17520069.18919407  
SRR17520069.18935043  
SRR17520069.18935045  
SRR17520069.18935051  
SRR17520069.18935065  
SRR17520069.18935067  
SRR17520069.18935071  
SRR17520069.18935075  
SRR17520069.18935079  
SRR17520069.18935087  
SRR17520069.18935089  
SRR17520069.18935093  
SRR17520069.18935095  
SRR17520069.18935101  
SRR17520069.18935105  
SRR17520069.18945073  
SRR17520069.18945111  
SRR17520069.18947999  
SRR17520069.18949180

SRR17520069. 18957614  
SRR17520069. 18957618  
SRR17520069. 18957620  
SRR17520069. 18957622  
SRR17520069. 18957624  
SRR17520069. 18957626  
SRR17520069. 18957628  
SRR17520069. 18957630  
SRR17520069. 18957632  
SRR17520069. 18957634  
SRR17520069. 18957636  
SRR17520069. 18957638  
SRR17520069. 18957640  
SRR17520069. 18957644  
SRR17520069. 18957646  
SRR17520069. 18957648  
SRR17520069. 18957652  
SRR17520069. 18957654  
SRR17520069. 18957658  
SRR17520069. 18957662  
SRR17520069. 18957664  
SRR17520069. 18957666  
SRR17520069. 18957668  
SRR17520069. 18957670  
SRR17520069. 18957672  
SRR17520069. 18957674  
SRR17520069. 18957676  
SRR17520069. 18957678  
SRR17520069. 18957680  
SRR17520069. 18957682  
SRR17520069. 18957684  
SRR17520069. 18957686  
SRR17520069. 18957688  
SRR17520069. 18959727  
SRR17520069. 18962266  
SRR17520069. 18963255  
SRR17520069. 18969915  
SRR17520069. 18977996  
SRR17520069. 18978008  
SRR17520069. 18978010  
SRR17520069. 18985972  
SRR17520069. 18985976  
SRR17520069. 18987221  
SRR17520069. 18990649  
SRR17520069. 18990663  
SRR17520069. 18998582  
SRR17520069. 19001246

SRR17520069.19006845  
SRR17520069.19010374  
SRR17520069.19015903  
SRR17520069.19015911  
SRR17520069.19015913  
SRR17520069.19015915  
SRR17520069.19015919  
SRR17520069.19015931  
SRR17520069.19015939  
SRR17520069.19015947  
SRR17520069.19043868  
SRR17520069.19043876  
SRR17520069.19048839  
SRR17520069.19048871  
SRR17520069.19053758  
SRR17520069.19058638  
SRR17520069.19066033  
SRR17520069.19066039  
SRR17520069.19066262  
SRR17520069.19076140  
SRR17520069.19076160  
SRR17520069.19076166  
SRR17520069.19076168  
SRR17520069.19076573  
SRR17520069.19076581  
SRR17520069.19076591  
SRR17520069.19076593  
SRR17520069.19076597  
SRR17520069.19076613  
SRR17520069.19076615  
SRR17520069.19076619  
SRR17520069.19076621  
SRR17520069.19080880  
SRR17520069.19080936  
SRR17520069.19081853  
SRR17520069.19081869  
SRR17520069.19081873  
SRR17520069.19081877  
SRR17520069.19081895  
SRR17520069.19081917  
SRR17520069.19081929  
SRR17520069.19081933  
SRR17520069.19081941  
SRR17520069.19082942  
SRR17520069.19082960  
SRR17520069.19084014  
SRR17520069.19099195

SRR17520069.19099211  
SRR17520069.19099215  
SRR17520069.19103078  
SRR17520069.19104587  
SRR17520069.19104609  
SRR17520069.19113249  
SRR17520069.19114658  
SRR17520069.19117895  
SRR17520069.19121839  
SRR17520069.19131854  
SRR17520069.19138363  
SRR17520069.19140158  
SRR17520069.19140174  
SRR17520069.19152074  
SRR17520069.19152078  
SRR17520069.19152098  
SRR17520069.19152102  
SRR17520069.19152118  
SRR17520069.19153992  
SRR17520069.19153998  
SRR17520069.19163205  
SRR17520069.19166188  
SRR17520069.19166194  
SRR17520069.19166196  
SRR17520069.19166200  
SRR17520069.19166208  
SRR17520069.19166212  
SRR17520069.19166218  
SRR17520069.19166222  
SRR17520069.19175342  
SRR17520069.19182992  
SRR17520069.19183015  
SRR17520069.19184965  
SRR17520069.19201597  
SRR17520069.19201601  
SRR17520069.19201607  
SRR17520069.19201609  
SRR17520069.19201659  
SRR17520069.19201745  
SRR17520069.19205966  
SRR17520069.19205974  
SRR17520069.19206014  
SRR17520069.19206028  
SRR17520069.19206042  
SRR17520069.19206064  
SRR17520069.19221136  
SRR17520069.19246952



SRR17520069. 19246958  
SRR17520069. 19246978  
SRR17520069. 19246980  
SRR17520069. 19247010  
SRR17520069. 19247022  
SRR17520069. 19247024  
SRR17520069. 19250873  
SRR17520069. 19255425  
SRR17520069. 19257470  
SRR17520069. 19262751  
SRR17520069. 19263323  
SRR17520069. 19264440  
SRR17520069. 19271728  
SRR17520069. 19273452  
SRR17520069. 19274161  
SRR17520069. 19274163  
SRR17520069. 19274177  
SRR17520069. 19274185  
SRR17520069. 19274189  
SRR17520069. 19274191  
SRR17520069. 19274871  
SRR17520069. 19274887  
SRR17520069. 19278435  
SRR17520069. 19279417  
SRR17520069. 19279423  
SRR17520069. 19279441  
SRR17520069. 19279445  
SRR17520069. 19279455  
SRR17520069. 19279461  
SRR17520069. 19279880  
SRR17520069. 19299213  
SRR17520069. 19305618  
SRR17520069. 19324127  
SRR17520069. 19324207  
SRR17520069. 19324229  
SRR17520069. 19330368  
SRR17520069. 19337298  
SRR17520069. 19337342  
SRR17520069. 19337348  
SRR17520069. 19337360  
SRR17520069. 19337366  
SRR17520069. 19337370  
SRR17520069. 19337382  
SRR17520069. 19337390  
SRR17520069. 19337396  
SRR17520069. 19337400  
SRR17520069. 19337404

SRR17520069. 19337406  
SRR17520069. 19337420  
SRR17520069. 19337428  
SRR17520069. 19337446  
SRR17520069. 19337448  
SRR17520069. 19337450  
SRR17520069. 19337452  
SRR17520069. 19337454  
SRR17520069. 19337458  
SRR17520069. 19337464  
SRR17520069. 19341302  
SRR17520069. 19342470  
SRR17520069. 19357233  
SRR17520069. 19364629  
SRR17520069. 19368264  
SRR17520069. 19368266  
SRR17520069. 19368298  
SRR17520069. 19368326  
SRR17520069. 19368346  
SRR17520069. 19368817  
SRR17520069. 19368851  
SRR17520069. 19368887  
SRR17520069. 19378111  
SRR17520069. 19378113  
SRR17520069. 19378115  
SRR17520069. 19378117  
SRR17520069. 19378119  
SRR17520069. 19378121  
SRR17520069. 19378125  
SRR17520069. 19378127  
SRR17520069. 19378129  
SRR17520069. 19378131  
SRR17520069. 19378133  
SRR17520069. 19378135  
SRR17520069. 19378137  
SRR17520069. 19378139  
SRR17520069. 19378141  
SRR17520069. 19378143  
SRR17520069. 19378145  
SRR17520069. 19378147  
SRR17520069. 19378149  
SRR17520069. 19378151  
SRR17520069. 19378153  
SRR17520069. 19378155  
SRR17520069. 19378157  
SRR17520069. 19378159  
SRR17520069. 19378161

SRR17520069. 19378163  
SRR17520069. 19378165  
SRR17520069. 19378167  
SRR17520069. 19378169  
SRR17520069. 19378171  
SRR17520069. 19378173  
SRR17520069. 19378175  
SRR17520069. 19378177  
SRR17520069. 19378179  
SRR17520069. 19378181  
SRR17520069. 19378183  
SRR17520069. 19378185  
SRR17520069. 19378187  
SRR17520069. 19378189  
SRR17520069. 19378191  
SRR17520069. 19378193  
SRR17520069. 19378195  
SRR17520069. 19378197  
SRR17520069. 19378199  
SRR17520069. 19378201  
SRR17520069. 19378203  
SRR17520069. 19378205  
SRR17520069. 19378207  
SRR17520069. 19378209  
SRR17520069. 19383161  
SRR17520069. 19383197  
SRR17520069. 19386197  
SRR17520069. 19394514  
SRR17520069. 19402589  
SRR17520069. 19402591  
SRR17520069. 19402615  
SRR17520069. 19402635  
SRR17520069. 19402685  
SRR17520069. 19402687  
SRR17520069. 19402691  
SRR17520069. 19421090  
SRR17520069. 19424666  
SRR17520069. 19429309  
SRR17520069. 19435607  
SRR17520069. 19435625  
SRR17520069. 19435633  
SRR17520069. 19435643  
SRR17520069. 19443150  
SRR17520069. 19451433  
SRR17520069. 19451475  
SRR17520069. 19451482  
SRR17520069. 19455737

SRR17520069. 19462684  
SRR17520069. 19462686  
SRR17520069. 19462716  
SRR17520069. 19462742  
SRR17520069. 19462750  
SRR17520069. 19473798  
SRR17520069. 19479543  
SRR17520069. 19484261  
SRR17520069. 19485545  
SRR17520069. 19499407  
SRR17520069. 19528918  
SRR17520069. 19537129  
SRR17520069. 19545018  
SRR17520069. 19548647  
SRR17520069. 19548657  
SRR17520069. 19548669  
SRR17520069. 19553255  
SRR17520069. 19557621  
SRR17520069. 2838  
SRR17520069. 2868  
SRR17520069. 5314  
SRR17520069. 6183  
SRR17520069. 7612  
SRR17520069. 11688  
SRR17520069. 11692  
SRR17520069. 16586  
SRR17520069. 23541  
SRR17520069. 25588  
SRR17520069. 29376  
SRR17520069. 29378  
SRR17520069. 29380  
SRR17520069. 29382  
SRR17520069. 29384  
SRR17520069. 29386  
SRR17520069. 29388  
SRR17520069. 29390  
SRR17520069. 29392  
SRR17520069. 29394  
SRR17520069. 29396  
SRR17520069. 29398  
SRR17520069. 29400  
SRR17520069. 29402  
SRR17520069. 29404  
SRR17520069. 30008  
SRR17520069. 32031  
SRR17520069. 33386  
SRR17520069. 34483

SRR17520069.34510  
SRR17520069.34597  
SRR17520069.48273  
SRR17520069.48292  
SRR17520069.48383  
SRR17520069.48405  
SRR17520069.57812  
SRR17520069.59879  
SRR17520069.60629  
SRR17520069.62477  
SRR17520069.82579  
SRR17520069.82591  
SRR17520069.106218  
SRR17520069.123266  
SRR17520069.123339  
SRR17520069.124749  
SRR17520069.125359  
SRR17520069.125876  
SRR17520069.126941  
SRR17520069.131658  
SRR17520069.145588  
SRR17520069.155711  
SRR17520069.160702  
SRR17520069.160950  
SRR17520069.161006  
SRR17520069.162905  
SRR17520069.165364  
SRR17520069.165376  
SRR17520069.169184  
SRR17520069.169230  
SRR17520069.179504  
SRR17520069.186012  
SRR17520069.186034  
SRR17520069.187324  
SRR17520069.187898  
SRR17520069.187936  
SRR17520069.189173  
SRR17520069.195799  
SRR17520069.197772  
SRR17520069.198010  
SRR17520069.202078  
SRR17520069.215937  
SRR17520069.216912  
SRR17520069.218067  
SRR17520069.224649  
SRR17520069.234125  
SRR17520069.234830

SRR17520069. 239534  
SRR17520069. 243409  
SRR17520069. 245527  
SRR17520069. 245607  
SRR17520069. 245625  
SRR17520069. 253751  
SRR17520069. 257192  
SRR17520069. 261597  
SRR17520069. 262413  
SRR17520069. 262431  
SRR17520069. 262966  
SRR17520069. 265015  
SRR17520069. 274664  
SRR17520069. 278243  
SRR17520069. 293491  
SRR17520069. 293492  
SRR17520069. 293504  
SRR17520069. 299515  
SRR17520069. 300864  
SRR17520069. 338803  
SRR17520069. 338816  
SRR17520069. 338831  
SRR17520069. 341070  
SRR17520069. 341076  
SRR17520069. 341421  
SRR17520069. 360003  
SRR17520069. 363298  
SRR17520069. 366675  
SRR17520069. 366827  
SRR17520069. 366839  
SRR17520069. 366885  
SRR17520069. 367031  
SRR17520069. 383713  
SRR17520069. 390437  
SRR17520069. 392349  
SRR17520069. 397651  
SRR17520069. 397655  
SRR17520069. 403101  
SRR17520069. 416111  
SRR17520069. 416115  
SRR17520069. 420360  
SRR17520069. 420374  
SRR17520069. 428042  
SRR17520069. 428044  
SRR17520069. 428046  
SRR17520069. 428048  
SRR17520069. 428050

SRR17520069.428052  
SRR17520069.428054  
SRR17520069.428056  
SRR17520069.428058  
SRR17520069.428751  
SRR17520069.429256  
SRR17520069.432424  
SRR17520069.433541  
SRR17520069.442623  
SRR17520069.445447  
SRR17520069.450356  
SRR17520069.450678  
SRR17520069.450735  
SRR17520069.452111  
SRR17520069.453699  
SRR17520069.453771  
SRR17520069.453782  
SRR17520069.453796  
SRR17520069.472634  
SRR17520069.472656  
SRR17520069.472720  
SRR17520069.476804  
SRR17520069.478826  
SRR17520069.508119  
SRR17520069.514050  
SRR17520069.521178  
SRR17520069.521180  
SRR17520069.521193  
SRR17520069.521197  
SRR17520069.521198  
SRR17520069.521219  
SRR17520069.538226  
SRR17520069.541355  
SRR17520069.545727  
SRR17520069.545765  
SRR17520069.552320  
SRR17520069.552344  
SRR17520069.553842  
SRR17520069.556343  
SRR17520069.569768  
SRR17520069.569886  
SRR17520069.573112  
SRR17520069.573114  
SRR17520069.573820  
SRR17520069.578634  
SRR17520069.578839  
SRR17520069.592068

SRR17520069. 592879  
SRR17520069. 592971  
SRR17520069. 595015  
SRR17520069. 598196  
SRR17520069. 598303  
SRR17520069. 598330  
SRR17520069. 604789  
SRR17520069. 615343  
SRR17520069. 622211  
SRR17520069. 622234  
SRR17520069. 622237  
SRR17520069. 622239  
SRR17520069. 622255  
SRR17520069. 622290  
SRR17520069. 622298  
SRR17520069. 622318  
SRR17520069. 623167  
SRR17520069. 623169  
SRR17520069. 623171  
SRR17520069. 623173  
SRR17520069. 624524  
SRR17520069. 630639  
SRR17520069. 630719  
SRR17520069. 643912  
SRR17520069. 644561  
SRR17520069. 666041  
SRR17520069. 690279  
SRR17520069. 693241  
SRR17520069. 693315  
SRR17520069. 696128  
SRR17520069. 700230  
SRR17520069. 700232  
SRR17520069. 700234  
SRR17520069. 700236  
SRR17520069. 700238  
SRR17520069. 700240  
SRR17520069. 700242  
SRR17520069. 700244  
SRR17520069. 700246  
SRR17520069. 700248  
SRR17520069. 700250  
SRR17520069. 700252  
SRR17520069. 700256  
SRR17520069. 700258  
SRR17520069. 700260  
SRR17520069. 700262  
SRR17520069. 700264



SRR17520069.700266  
SRR17520069.700268  
SRR17520069.701315  
SRR17520069.703681  
SRR17520069.703689  
SRR17520069.715827  
SRR17520069.717911  
SRR17520069.717913  
SRR17520069.719552  
SRR17520069.719560  
SRR17520069.721060  
SRR17520069.725656  
SRR17520069.729517  
SRR17520069.731039  
SRR17520069.732262  
SRR17520069.732280  
SRR17520069.733053  
SRR17520069.733137  
SRR17520069.733458  
SRR17520069.745371  
SRR17520069.745376  
SRR17520069.745378  
SRR17520069.751586  
SRR17520069.751614  
SRR17520069.755302  
SRR17520069.763288  
SRR17520069.763290  
SRR17520069.763292  
SRR17520069.763294  
SRR17520069.763296  
SRR17520069.763298  
SRR17520069.763300  
SRR17520069.763302  
SRR17520069.763304  
SRR17520069.763306  
SRR17520069.763308  
SRR17520069.763310  
SRR17520069.763312  
SRR17520069.763314  
SRR17520069.763316  
SRR17520069.763318  
SRR17520069.763320  
SRR17520069.763322  
SRR17520069.763324  
SRR17520069.763326  
SRR17520069.763328  
SRR17520069.763330

SRR17520069. 763332  
SRR17520069. 763334  
SRR17520069. 763336  
SRR17520069. 763338  
SRR17520069. 763340  
SRR17520069. 763342  
SRR17520069. 763344  
SRR17520069. 763346  
SRR17520069. 763348  
SRR17520069. 763350  
SRR17520069. 769571  
SRR17520069. 771137  
SRR17520069. 773981  
SRR17520069. 774003  
SRR17520069. 774047  
SRR17520069. 785447  
SRR17520069. 789383  
SRR17520069. 791377  
SRR17520069. 791389  
SRR17520069. 793882  
SRR17520069. 803913  
SRR17520069. 803925  
SRR17520069. 805847  
SRR17520069. 838480  
SRR17520069. 838616  
SRR17520069. 847125  
SRR17520069. 865664  
SRR17520069. 868441  
SRR17520069. 868709  
SRR17520069. 871633  
SRR17520069. 873711  
SRR17520069. 873715  
SRR17520069. 873718  
SRR17520069. 883130  
SRR17520069. 883367  
SRR17520069. 883369  
SRR17520069. 883371  
SRR17520069. 885890  
SRR17520069. 893592  
SRR17520069. 893598  
SRR17520069. 893599  
SRR17520069. 895682  
SRR17520069. 900707  
SRR17520069. 909561  
SRR17520069. 909595  
SRR17520069. 911336  
SRR17520069. 911358

SRR17520069.911368  
SRR17520069.911373  
SRR17520069.911407  
SRR17520069.912188  
SRR17520069.912566  
SRR17520069.924441  
SRR17520069.924616  
SRR17520069.924618  
SRR17520069.926878  
SRR17520069.930349  
SRR17520069.930767  
SRR17520069.931752  
SRR17520069.931796  
SRR17520069.943293  
SRR17520069.948060  
SRR17520069.948066  
SRR17520069.949896  
SRR17520069.951317  
SRR17520069.957047  
SRR17520069.964020  
SRR17520069.971867  
SRR17520069.971889  
SRR17520069.998927  
SRR17520069.1000218  
SRR17520069.1010331  
SRR17520069.1013726  
SRR17520069.1022791  
SRR17520069.1032913  
SRR17520069.1032914  
SRR17520069.1032926  
SRR17520069.1032936  
SRR17520069.1038512  
SRR17520069.1038514  
SRR17520069.1040320  
SRR17520069.1043001  
SRR17520069.1044913  
SRR17520069.1048894  
SRR17520069.1069197  
SRR17520069.1069208  
SRR17520069.1084216  
SRR17520069.1084220  
SRR17520069.1084225  
SRR17520069.1084231  
SRR17520069.1084236  
SRR17520069.1084240  
SRR17520069.1084252  
SRR17520069.1084272

SRR17520069.1084281  
SRR17520069.1084284  
SRR17520069.1084289  
SRR17520069.1088951  
SRR17520069.1088954  
SRR17520069.1090580  
SRR17520069.1100029  
SRR17520069.1104619  
SRR17520069.1109459  
SRR17520069.1111023  
SRR17520069.1112035  
SRR17520069.1115960  
SRR17520069.1116148  
SRR17520069.1121236  
SRR17520069.1121244  
SRR17520069.1121356  
SRR17520069.1128341  
SRR17520069.1128682  
SRR17520069.1128754  
SRR17520069.1152654  
SRR17520069.1173544  
SRR17520069.1178892  
SRR17520069.1187420  
SRR17520069.1187464  
SRR17520069.1189912  
SRR17520069.1201708  
SRR17520069.1202066  
SRR17520069.1208148  
SRR17520069.1209633  
SRR17520069.1211813  
SRR17520069.1217345  
SRR17520069.1228928  
SRR17520069.1243685  
SRR17520069.1253747  
SRR17520069.1257630  
SRR17520069.1264745  
SRR17520069.1264746  
SRR17520069.1264749  
SRR17520069.1264764  
SRR17520069.1264781  
SRR17520069.1266055  
SRR17520069.1266107  
SRR17520069.1278936  
SRR17520069.1288017  
SRR17520069.1291971  
SRR17520069.1292871  
SRR17520069.1293829

SRR17520069. 1296434  
SRR17520069. 1299050  
SRR17520069. 1302832  
SRR17520069. 1316682  
SRR17520069. 1316791  
SRR17520069. 1316797  
SRR17520069. 1320278  
SRR17520069. 1329757  
SRR17520069. 1334236  
SRR17520069. 1335974  
SRR17520069. 1336038  
SRR17520069. 1341609  
SRR17520069. 1342001  
SRR17520069. 1342051  
SRR17520069. 1347405  
SRR17520069. 1352089  
SRR17520069. 1362505  
SRR17520069. 1364217  
SRR17520069. 1364237  
SRR17520069. 1364299  
SRR17520069. 1367222  
SRR17520069. 1368202  
SRR17520069. 1381083  
SRR17520069. 1382719  
SRR17520069. 1394564  
SRR17520069. 1396737  
SRR17520069. 1396757  
SRR17520069. 1396821  
SRR17520069. 1412758  
SRR17520069. 1418510  
SRR17520069. 1433200  
SRR17520069. 1435597  
SRR17520069. 1446735  
SRR17520069. 1453325  
SRR17520069. 1458487  
SRR17520069. 1462669  
SRR17520069. 1471322  
SRR17520069. 1471324  
SRR17520069. 1471326  
SRR17520069. 1471328  
SRR17520069. 1471330  
SRR17520069. 1471332  
SRR17520069. 1471334  
SRR17520069. 1471336  
SRR17520069. 1471338  
SRR17520069. 1471340  
SRR17520069. 1471342

SRR17520069.1471344  
SRR17520069.1471346  
SRR17520069.1471348  
SRR17520069.1478838  
SRR17520069.1486178  
SRR17520069.1496184  
SRR17520069.1496348  
SRR17520069.1496358  
SRR17520069.1498808  
SRR17520069.1505885  
SRR17520069.1505901  
SRR17520069.1505933  
SRR17520069.1508021  
SRR17520069.1516437  
SRR17520069.1516445  
SRR17520069.1516459  
SRR17520069.1518840  
SRR17520069.1535012  
SRR17520069.1535035  
SRR17520069.1540765  
SRR17520069.1552407  
SRR17520069.1552409  
SRR17520069.1552411  
SRR17520069.1552413  
SRR17520069.1552415  
SRR17520069.1552419  
SRR17520069.1552421  
SRR17520069.1552423  
SRR17520069.1552425  
SRR17520069.1552427  
SRR17520069.1552429  
SRR17520069.1552431  
SRR17520069.1552433  
SRR17520069.1552435  
SRR17520069.1552437  
SRR17520069.1552439  
SRR17520069.1552441  
SRR17520069.1552443  
SRR17520069.1552445  
SRR17520069.1552447  
SRR17520069.1552451  
SRR17520069.1552453  
SRR17520069.1554056  
SRR17520069.1554064  
SRR17520069.1554067  
SRR17520069.1554080  
SRR17520069.1554083

SRR17520069. 1554084  
SRR17520069. 1554103  
SRR17520069. 1554126  
SRR17520069. 1554142  
SRR17520069. 1556181  
SRR17520069. 1556196  
SRR17520069. 1575744  
SRR17520069. 1585300  
SRR17520069. 1585337  
SRR17520069. 1589939  
SRR17520069. 1592647  
SRR17520069. 1596618  
SRR17520069. 1608005  
SRR17520069. 1608033  
SRR17520069. 1608099  
SRR17520069. 1608129  
SRR17520069. 1608175  
SRR17520069. 1623652  
SRR17520069. 1635994  
SRR17520069. 1640565  
SRR17520069. 1640725  
SRR17520069. 1640727  
SRR17520069. 1640729  
SRR17520069. 1640965  
SRR17520069. 1650477  
SRR17520069. 1653559  
SRR17520069. 1653599  
SRR17520069. 1674641  
SRR17520069. 1680851  
SRR17520069. 1688772  
SRR17520069. 1700482  
SRR17520069. 1702399  
SRR17520069. 1704798  
SRR17520069. 1709417  
SRR17520069. 1724961  
SRR17520069. 1725018  
SRR17520069. 1726597  
SRR17520069. 1729438  
SRR17520069. 1734617  
SRR17520069. 1734619  
SRR17520069. 1734621  
SRR17520069. 1734623  
SRR17520069. 1734625  
SRR17520069. 1734627  
SRR17520069. 1734629  
SRR17520069. 1734631  
SRR17520069. 1734633

SRR17520069.1734635  
SRR17520069.1734637  
SRR17520069.1734639  
SRR17520069.1734641  
SRR17520069.1734645  
SRR17520069.1751461  
SRR17520069.1752950  
SRR17520069.1752952  
SRR17520069.1752954  
SRR17520069.1752956  
SRR17520069.1752958  
SRR17520069.1752962  
SRR17520069.1752966  
SRR17520069.1752968  
SRR17520069.1752970  
SRR17520069.1752972  
SRR17520069.1752974  
SRR17520069.1752976  
SRR17520069.1752980  
SRR17520069.1752982  
SRR17520069.1752986  
SRR17520069.1752988  
SRR17520069.1752990  
SRR17520069.1752992  
SRR17520069.1752994  
SRR17520069.1752996  
SRR17520069.1752998  
SRR17520069.1753000  
SRR17520069.1753002  
SRR17520069.1753004  
SRR17520069.1753006  
SRR17520069.1753008  
SRR17520069.1753010  
SRR17520069.1753012  
SRR17520069.1753014  
SRR17520069.1753016  
SRR17520069.1753018  
SRR17520069.1753020  
SRR17520069.1753022  
SRR17520069.1753024  
SRR17520069.1753026  
SRR17520069.1753028  
SRR17520069.1753030  
SRR17520069.1753032  
SRR17520069.1753034  
SRR17520069.1753036  
SRR17520069.1753038



SRR17520069. 1753040  
SRR17520069. 1753042  
SRR17520069. 1753044  
SRR17520069. 1753046  
SRR17520069. 1753048  
SRR17520069. 1753050  
SRR17520069. 1753052  
SRR17520069. 1753054  
SRR17520069. 1753056  
SRR17520069. 1753060  
SRR17520069. 1753062  
SRR17520069. 1753064  
SRR17520069. 1753066  
SRR17520069. 1753068  
SRR17520069. 1753070  
SRR17520069. 1753072  
SRR17520069. 1753074  
SRR17520069. 1753076  
SRR17520069. 1753078  
SRR17520069. 1753080  
SRR17520069. 1753082  
SRR17520069. 1753084  
SRR17520069. 1753086  
SRR17520069. 1753088  
SRR17520069. 1753090  
SRR17520069. 1753092  
SRR17520069. 1753094  
SRR17520069. 1753096  
SRR17520069. 1753098  
SRR17520069. 1753100  
SRR17520069. 1753102  
SRR17520069. 1753104  
SRR17520069. 1753106  
SRR17520069. 1753108  
SRR17520069. 1757737  
SRR17520069. 1763951  
SRR17520069. 1765362  
SRR17520069. 1765364  
SRR17520069. 1766099  
SRR17520069. 1768584  
SRR17520069. 1769631  
SRR17520069. 1769703  
SRR17520069. 1769711  
SRR17520069. 1770384  
SRR17520069. 1770400  
SRR17520069. 1771800  
SRR17520069. 1774374

SRR17520069.1788145  
SRR17520069.1805135  
SRR17520069.1807239  
SRR17520069.1807293  
SRR17520069.1833327  
SRR17520069.1833341  
SRR17520069.1833433  
SRR17520069.1841983  
SRR17520069.1847353  
SRR17520069.1848589  
SRR17520069.1854317  
SRR17520069.1857605  
SRR17520069.1860822  
SRR17520069.1866412  
SRR17520069.1866914  
SRR17520069.1878926  
SRR17520069.1881304  
SRR17520069.1887368  
SRR17520069.1895932  
SRR17520069.1895934  
SRR17520069.1895936  
SRR17520069.1895938  
SRR17520069.1895940  
SRR17520069.1895942  
SRR17520069.1895944  
SRR17520069.1895946  
SRR17520069.1895948  
SRR17520069.1895952  
SRR17520069.1895954  
SRR17520069.1895956  
SRR17520069.1896037  
SRR17520069.1899901  
SRR17520069.1901869  
SRR17520069.1905405  
SRR17520069.1910042  
SRR17520069.1917957  
SRR17520069.1921661  
SRR17520069.1921922  
SRR17520069.1921927  
SRR17520069.1921938  
SRR17520069.1923429  
SRR17520069.1926809  
SRR17520069.1968261  
SRR17520069.1969849  
SRR17520069.1971245  
SRR17520069.1971263  
SRR17520069.1971329

SRR17520069. 1976501  
SRR17520069. 1978652  
SRR17520069. 1978656  
SRR17520069. 1983068  
SRR17520069. 1983170  
SRR17520069. 1990805  
SRR17520069. 1993822  
SRR17520069. 1998236  
SRR17520069. 2014551  
SRR17520069. 2015931  
SRR17520069. 2016951  
SRR17520069. 2017958  
SRR17520069. 2023939  
SRR17520069. 2023951  
SRR17520069. 2034166  
SRR17520069. 2034218  
SRR17520069. 2034236  
SRR17520069. 2035781  
SRR17520069. 2039140  
SRR17520069. 2050663  
SRR17520069. 2052288  
SRR17520069. 2076537  
SRR17520069. 2079029  
SRR17520069. 2079955  
SRR17520069. 2097230  
SRR17520069. 2098219  
SRR17520069. 2101519  
SRR17520069. 2107401  
SRR17520069. 2114386  
SRR17520069. 2127070  
SRR17520069. 2128825  
SRR17520069. 2134997  
SRR17520069. 2137112  
SRR17520069. 2142899  
SRR17520069. 2142901  
SRR17520069. 2142905  
SRR17520069. 2143717  
SRR17520069. 2145064  
SRR17520069. 2147804  
SRR17520069. 2148921  
SRR17520069. 2158286  
SRR17520069. 2158298  
SRR17520069. 2170287  
SRR17520069. 2170300  
SRR17520069. 2175263  
SRR17520069. 2176620  
SRR17520069. 2181539

SRR17520069.2184609  
SRR17520069.2193797  
SRR17520069.2202479  
SRR17520069.2202545  
SRR17520069.2209920  
SRR17520069.2230279  
SRR17520069.2235061  
SRR17520069.2239843  
SRR17520069.2241562  
SRR17520069.2241568  
SRR17520069.2241583  
SRR17520069.2247033  
SRR17520069.2250002  
SRR17520069.2262160  
SRR17520069.2279354  
SRR17520069.2280983  
SRR17520069.2282011  
SRR17520069.2295969  
SRR17520069.2299371  
SRR17520069.2299375  
SRR17520069.2299377  
SRR17520069.2299379  
SRR17520069.2299381  
SRR17520069.2299383  
SRR17520069.2299385  
SRR17520069.2299387  
SRR17520069.2299389  
SRR17520069.2299391  
SRR17520069.2299393  
SRR17520069.2299395  
SRR17520069.2299397  
SRR17520069.2299399  
SRR17520069.2299401  
SRR17520069.2299403  
SRR17520069.2299405  
SRR17520069.2299407  
SRR17520069.2299409  
SRR17520069.2299411  
SRR17520069.2328042  
SRR17520069.2336087  
SRR17520069.2340343  
SRR17520069.2351082  
SRR17520069.2351086  
SRR17520069.2363325  
SRR17520069.2363485  
SRR17520069.2366204  
SRR17520069.2366206

SRR17520069.2366208  
SRR17520069.2366210  
SRR17520069.2366212  
SRR17520069.2366214  
SRR17520069.2366216  
SRR17520069.2366218  
SRR17520069.2366220  
SRR17520069.2370358  
SRR17520069.2373789  
SRR17520069.2373790  
SRR17520069.2373795  
SRR17520069.2377101  
SRR17520069.2385649  
SRR17520069.2388458  
SRR17520069.2388476  
SRR17520069.2388608  
SRR17520069.2389557  
SRR17520069.2395076  
SRR17520069.2395092  
SRR17520069.2402398  
SRR17520069.2402875  
SRR17520069.2402897  
SRR17520069.2417731  
SRR17520069.2424516  
SRR17520069.2432685  
SRR17520069.2435226  
SRR17520069.2435254  
SRR17520069.2438310  
SRR17520069.2446176  
SRR17520069.2446178  
SRR17520069.2448848  
SRR17520069.2458064  
SRR17520069.2458066  
SRR17520069.2458068  
SRR17520069.2458070  
SRR17520069.2458072  
SRR17520069.2458074  
SRR17520069.2458076  
SRR17520069.2458078  
SRR17520069.2458080  
SRR17520069.2458082  
SRR17520069.2458084  
SRR17520069.2458086  
SRR17520069.2458090  
SRR17520069.2458092  
SRR17520069.2458094  
SRR17520069.2458096

SRR17520069.2458098  
SRR17520069.2458100  
SRR17520069.2458102  
SRR17520069.2458106  
SRR17520069.2458108  
SRR17520069.2458110  
SRR17520069.2458112  
SRR17520069.2458114  
SRR17520069.2458116  
SRR17520069.2458118  
SRR17520069.2458120  
SRR17520069.2458122  
SRR17520069.2458124  
SRR17520069.2458126  
SRR17520069.2462064  
SRR17520069.2481636  
SRR17520069.2489999  
SRR17520069.2494984  
SRR17520069.2497987  
SRR17520069.2497992  
SRR17520069.2520964  
SRR17520069.2526003  
SRR17520069.2532823  
SRR17520069.2535190  
SRR17520069.2545274  
SRR17520069.2555254  
SRR17520069.2567028  
SRR17520069.2573145  
SRR17520069.2573196  
SRR17520069.2575948  
SRR17520069.2577377  
SRR17520069.2587177  
SRR17520069.2587180  
SRR17520069.2604778  
SRR17520069.2604800  
SRR17520069.2605345  
SRR17520069.2606352  
SRR17520069.2612564  
SRR17520069.2626863  
SRR17520069.2631803  
SRR17520069.2631821  
SRR17520069.2631863  
SRR17520069.2636992  
SRR17520069.2642409  
SRR17520069.2649971  
SRR17520069.2652456  
SRR17520069.2654312

SRR17520069. 2672071  
SRR17520069. 2672072  
SRR17520069. 2693757  
SRR17520069. 2702922  
SRR17520069. 2705231  
SRR17520069. 2705282  
SRR17520069. 2705286  
SRR17520069. 2705314  
SRR17520069. 2705321  
SRR17520069. 2715463  
SRR17520069. 2717368  
SRR17520069. 2717716  
SRR17520069. 2723510  
SRR17520069. 2733831  
SRR17520069. 2733841  
SRR17520069. 2737454  
SRR17520069. 2737668  
SRR17520069. 2737670  
SRR17520069. 2737672  
SRR17520069. 2737674  
SRR17520069. 2737676  
SRR17520069. 2737678  
SRR17520069. 2737680  
SRR17520069. 2737682  
SRR17520069. 2737684  
SRR17520069. 2737686  
SRR17520069. 2737688  
SRR17520069. 2737690  
SRR17520069. 2737692  
SRR17520069. 2737694  
SRR17520069. 2737696  
SRR17520069. 2737698  
SRR17520069. 2737700  
SRR17520069. 2753487  
SRR17520069. 2755226  
SRR17520069. 2758409  
SRR17520069. 2762965  
SRR17520069. 2769174  
SRR17520069. 2769176  
SRR17520069. 2773431  
SRR17520069. 2780696  
SRR17520069. 2781804  
SRR17520069. 2783799  
SRR17520069. 2790821  
SRR17520069. 2790823  
SRR17520069. 2820598  
SRR17520069. 2820620

SRR17520069.2820633  
SRR17520069.2820634  
SRR17520069.2823734  
SRR17520069.2829186  
SRR17520069.2829188  
SRR17520069.2829190  
SRR17520069.2829192  
SRR17520069.2829194  
SRR17520069.2829196  
SRR17520069.2829198  
SRR17520069.2829200  
SRR17520069.2829202  
SRR17520069.2829204  
SRR17520069.2829206  
SRR17520069.2829208  
SRR17520069.2830955  
SRR17520069.2836142  
SRR17520069.2841568  
SRR17520069.2841570  
SRR17520069.2841572  
SRR17520069.2841574  
SRR17520069.2841576  
SRR17520069.2841578  
SRR17520069.2841580  
SRR17520069.2841582  
SRR17520069.2841584  
SRR17520069.2841586  
SRR17520069.2841590  
SRR17520069.2841592  
SRR17520069.2841596  
SRR17520069.2841598  
SRR17520069.2841600  
SRR17520069.2841602  
SRR17520069.2850651  
SRR17520069.2850661  
SRR17520069.2855068  
SRR17520069.2855070  
SRR17520069.2861748  
SRR17520069.2866443  
SRR17520069.2870741  
SRR17520069.2870756  
SRR17520069.2870761  
SRR17520069.2870775  
SRR17520069.2870782  
SRR17520069.2870802  
SRR17520069.2870804  
SRR17520069.2873207



SRR17520069.2874707  
SRR17520069.2874708  
SRR17520069.2875000  
SRR17520069.2877891  
SRR17520069.2879763  
SRR17520069.2886770  
SRR17520069.2887061  
SRR17520069.2887063  
SRR17520069.2887065  
SRR17520069.2887067  
SRR17520069.2887069  
SRR17520069.2887071  
SRR17520069.2887073  
SRR17520069.2887075  
SRR17520069.2887077  
SRR17520069.2887079  
SRR17520069.2887081  
SRR17520069.2887083  
SRR17520069.2887085  
SRR17520069.2887087  
SRR17520069.2887089  
SRR17520069.2887091  
SRR17520069.2887093  
SRR17520069.2887095  
SRR17520069.2887097  
SRR17520069.2887099  
SRR17520069.2887101  
SRR17520069.2887103  
SRR17520069.2887105  
SRR17520069.2887107  
SRR17520069.2887109  
SRR17520069.2887111  
SRR17520069.2887113  
SRR17520069.2887115  
SRR17520069.2887117  
SRR17520069.2887119  
SRR17520069.2887121  
SRR17520069.2887123  
SRR17520069.2887125  
SRR17520069.2887127  
SRR17520069.2887129  
SRR17520069.2887131  
SRR17520069.2887133  
SRR17520069.2887135  
SRR17520069.2887137  
SRR17520069.2887139  
SRR17520069.2887141

SRR17520069.2887143  
SRR17520069.2887145  
SRR17520069.2887147  
SRR17520069.2887149  
SRR17520069.2887151  
SRR17520069.2887153  
SRR17520069.2887155  
SRR17520069.2887157  
SRR17520069.2887159  
SRR17520069.2887161  
SRR17520069.2887163  
SRR17520069.2887165  
SRR17520069.2887167  
SRR17520069.2887169  
SRR17520069.2887171  
SRR17520069.2887173  
SRR17520069.2887175  
SRR17520069.2895446  
SRR17520069.2898294  
SRR17520069.2898560  
SRR17520069.2907099  
SRR17520069.2907123  
SRR17520069.2907160  
SRR17520069.2907167  
SRR17520069.2908918  
SRR17520069.2915249  
SRR17520069.2923214  
SRR17520069.2923220  
SRR17520069.2923226  
SRR17520069.2923236  
SRR17520069.2925670  
SRR17520069.2927332  
SRR17520069.2932295  
SRR17520069.2935159  
SRR17520069.2936114  
SRR17520069.2938056  
SRR17520069.2939516  
SRR17520069.2939543  
SRR17520069.2943894  
SRR17520069.2948590  
SRR17520069.2955365  
SRR17520069.2957104  
SRR17520069.2965852  
SRR17520069.2967918  
SRR17520069.2981926  
SRR17520069.2981928  
SRR17520069.2981930

SRR17520069.2981932  
SRR17520069.2981934  
SRR17520069.2981936  
SRR17520069.2981938  
SRR17520069.2981940  
SRR17520069.2981942  
SRR17520069.2981944  
SRR17520069.2981946  
SRR17520069.2981948  
SRR17520069.2981950  
SRR17520069.2981952  
SRR17520069.2981954  
SRR17520069.2981956  
SRR17520069.2981958  
SRR17520069.2981960  
SRR17520069.2981962  
SRR17520069.2981964  
SRR17520069.2981966  
SRR17520069.2981968  
SRR17520069.2981970  
SRR17520069.2981972  
SRR17520069.2981974  
SRR17520069.2981976  
SRR17520069.2985834  
SRR17520069.2995382  
SRR17520069.2995384  
SRR17520069.2999863  
SRR17520069.3010034  
SRR17520069.3010065  
SRR17520069.3010155  
SRR17520069.3017822  
SRR17520069.3032778  
SRR17520069.3036621  
SRR17520069.3042219  
SRR17520069.3044013  
SRR17520069.3053462  
SRR17520069.3054451  
SRR17520069.3068889  
SRR17520069.3070214  
SRR17520069.3070258  
SRR17520069.3082617  
SRR17520069.3091521  
SRR17520069.3091643  
SRR17520069.3104307  
SRR17520069.3104320  
SRR17520069.3107886  
SRR17520069.3115050

SRR17520069. 3120444  
SRR17520069. 3131928  
SRR17520069. 3132232  
SRR17520069. 3140513  
SRR17520069. 3140515  
SRR17520069. 3140529  
SRR17520069. 3152041  
SRR17520069. 3152079  
SRR17520069. 3158725  
SRR17520069. 3159983  
SRR17520069. 3161357  
SRR17520069. 3172994  
SRR17520069. 3187499  
SRR17520069. 3187603  
SRR17520069. 3195422  
SRR17520069. 3199528  
SRR17520069. 3199803  
SRR17520069. 3204264  
SRR17520069. 3220084  
SRR17520069. 3220394  
SRR17520069. 3225525  
SRR17520069. 3228481  
SRR17520069. 3228482  
SRR17520069. 3235324  
SRR17520069. 3236276  
SRR17520069. 3236289  
SRR17520069. 3236290  
SRR17520069. 3236304  
SRR17520069. 3237098  
SRR17520069. 3239665  
SRR17520069. 3243603  
SRR17520069. 3246062  
SRR17520069. 3249817  
SRR17520069. 3258006  
SRR17520069. 3258048  
SRR17520069. 3273024  
SRR17520069. 3273885  
SRR17520069. 3275607  
SRR17520069. 3282381  
SRR17520069. 3310803  
SRR17520069. 3314011  
SRR17520069. 3318915  
SRR17520069. 3319922  
SRR17520069. 3324385  
SRR17520069. 3324968  
SRR17520069. 3327940  
SRR17520069. 3331710

SRR17520069. 3331712  
SRR17520069. 3331714  
SRR17520069. 3331716  
SRR17520069. 3331718  
SRR17520069. 3331720  
SRR17520069. 3331722  
SRR17520069. 3332732  
SRR17520069. 3332734  
SRR17520069. 3332736  
SRR17520069. 3332965  
SRR17520069. 3332990  
SRR17520069. 3337654  
SRR17520069. 3339631  
SRR17520069. 3341526  
SRR17520069. 3345320  
SRR17520069. 3345326  
SRR17520069. 3346072  
SRR17520069. 3348864  
SRR17520069. 3352828  
SRR17520069. 3362102  
SRR17520069. 3366362  
SRR17520069. 3369647  
SRR17520069. 3384420  
SRR17520069. 3384998  
SRR17520069. 3386646  
SRR17520069. 3409414  
SRR17520069. 3409447  
SRR17520069. 3409965  
SRR17520069. 3409999  
SRR17520069. 3414942  
SRR17520069. 3414947  
SRR17520069. 3414979  
SRR17520069. 3443257  
SRR17520069. 3443262  
SRR17520069. 3463651  
SRR17520069. 3465389  
SRR17520069. 3465459  
SRR17520069. 3465462  
SRR17520069. 3471371  
SRR17520069. 3471380  
SRR17520069. 3474123  
SRR17520069. 3474163  
SRR17520069. 3476113  
SRR17520069. 3476146  
SRR17520069. 3480288  
SRR17520069. 3482985  
SRR17520069. 3482987

SRR17520069. 3482989  
SRR17520069. 3482991  
SRR17520069. 3482993  
SRR17520069. 3482995  
SRR17520069. 3482997  
SRR17520069. 3482999  
SRR17520069. 3483001  
SRR17520069. 3483003  
SRR17520069. 3483005  
SRR17520069. 3483007  
SRR17520069. 3483009  
SRR17520069. 3483011  
SRR17520069. 3483013  
SRR17520069. 3483021  
SRR17520069. 3483023  
SRR17520069. 3485880  
SRR17520069. 3488499  
SRR17520069. 3501262  
SRR17520069. 3504697  
SRR17520069. 3504699  
SRR17520069. 3504701  
SRR17520069. 3504703  
SRR17520069. 3504705  
SRR17520069. 3504707  
SRR17520069. 3504709  
SRR17520069. 3504711  
SRR17520069. 3504713  
SRR17520069. 3510562  
SRR17520069. 3511630  
SRR17520069. 3512094  
SRR17520069. 3512136  
SRR17520069. 3513970  
SRR17520069. 3514019  
SRR17520069. 3514375  
SRR17520069. 3514377  
SRR17520069. 3514379  
SRR17520069. 3514381  
SRR17520069. 3514383  
SRR17520069. 3514387  
SRR17520069. 3514389  
SRR17520069. 3514391  
SRR17520069. 3514393  
SRR17520069. 3514395  
SRR17520069. 3530377  
SRR17520069. 3545306  
SRR17520069. 3545340  
SRR17520069. 3545350

SRR17520069. 3552365  
SRR17520069. 3553515  
SRR17520069. 3558470  
SRR17520069. 3563560  
SRR17520069. 3564897  
SRR17520069. 3573551  
SRR17520069. 3578282  
SRR17520069. 3578752  
SRR17520069. 3578811  
SRR17520069. 3584065  
SRR17520069. 3588625  
SRR17520069. 3615894  
SRR17520069. 3630077  
SRR17520069. 3636305  
SRR17520069. 3636800  
SRR17520069. 3644662  
SRR17520069. 3660028  
SRR17520069. 3660894  
SRR17520069. 3662841  
SRR17520069. 3662855  
SRR17520069. 3663179  
SRR17520069. 3663193  
SRR17520069. 3667952  
SRR17520069. 3668511  
SRR17520069. 3670951  
SRR17520069. 3670953  
SRR17520069. 3686565  
SRR17520069. 3686656  
SRR17520069. 3688350  
SRR17520069. 3702777  
SRR17520069. 3710415  
SRR17520069. 3716032  
SRR17520069. 3726282  
SRR17520069. 3730118  
SRR17520069. 3730208  
SRR17520069. 3732786  
SRR17520069. 3732798  
SRR17520069. 3748482  
SRR17520069. 3766734  
SRR17520069. 3766812  
SRR17520069. 3766846  
SRR17520069. 3770143  
SRR17520069. 3770596  
SRR17520069. 3776257  
SRR17520069. 3786587  
SRR17520069. 3795344  
SRR17520069. 3795345

SRR17520069. 3795355  
SRR17520069. 3795358  
SRR17520069. 3795364  
SRR17520069. 3802318  
SRR17520069. 3803681  
SRR17520069. 3809622  
SRR17520069. 3820080  
SRR17520069. 3826021  
SRR17520069. 3826029  
SRR17520069. 3826083  
SRR17520069. 3826109  
SRR17520069. 3828075  
SRR17520069. 3836607  
SRR17520069. 3838509  
SRR17520069. 3838593  
SRR17520069. 3849553  
SRR17520069. 3858108  
SRR17520069. 3858112  
SRR17520069. 3858164  
SRR17520069. 3858175  
SRR17520069. 3858182  
SRR17520069. 3861277  
SRR17520069. 3863448  
SRR17520069. 3863472  
SRR17520069. 3864816  
SRR17520069. 3887064  
SRR17520069. 3888299  
SRR17520069. 3888301  
SRR17520069. 3888303  
SRR17520069. 3888305  
SRR17520069. 3888307  
SRR17520069. 3888309  
SRR17520069. 3888311  
SRR17520069. 3888313  
SRR17520069. 3888315  
SRR17520069. 3888317  
SRR17520069. 3888319  
SRR17520069. 3888321  
SRR17520069. 3896495  
SRR17520069. 3903087  
SRR17520069. 3911396  
SRR17520069. 3911715  
SRR17520069. 3913871  
SRR17520069. 3924492  
SRR17520069. 3924497  
SRR17520069. 3924498  
SRR17520069. 3924785



SRR17520069. 3932307  
SRR17520069. 3932336  
SRR17520069. 3942421  
SRR17520069. 3946730  
SRR17520069. 3946736  
SRR17520069. 3949833  
SRR17520069. 3954815  
SRR17520069. 3954839  
SRR17520069. 3956972  
SRR17520069. 3956974  
SRR17520069. 3956976  
SRR17520069. 3956978  
SRR17520069. 3956980  
SRR17520069. 3956982  
SRR17520069. 3956984  
SRR17520069. 3956986  
SRR17520069. 3956988  
SRR17520069. 3956990  
SRR17520069. 3956992  
SRR17520069. 3956996  
SRR17520069. 3956998  
SRR17520069. 3957000  
SRR17520069. 3957002  
SRR17520069. 3957004  
SRR17520069. 3957006  
SRR17520069. 3957008  
SRR17520069. 3957010  
SRR17520069. 3957012  
SRR17520069. 3957014  
SRR17520069. 3957016  
SRR17520069. 3957018  
SRR17520069. 3957020  
SRR17520069. 3957022  
SRR17520069. 3957024  
SRR17520069. 3960613  
SRR17520069. 3962076  
SRR17520069. 3962116  
SRR17520069. 3962176  
SRR17520069. 3962182  
SRR17520069. 3967582  
SRR17520069. 3968286  
SRR17520069. 3973164  
SRR17520069. 3992997  
SRR17520069. 3999783  
SRR17520069. 4001602  
SRR17520069. 4004009  
SRR17520069. 4004037

SRR17520069.4018179  
SRR17520069.4018191  
SRR17520069.4021062  
SRR17520069.4032396  
SRR17520069.4033119  
SRR17520069.4042143  
SRR17520069.4042156  
SRR17520069.4049639  
SRR17520069.4051103  
SRR17520069.4053519  
SRR17520069.4055527  
SRR17520069.4063071  
SRR17520069.4069850  
SRR17520069.4071456  
SRR17520069.4072201  
SRR17520069.4072222  
SRR17520069.4072225  
SRR17520069.4076996  
SRR17520069.4077009  
SRR17520069.4091958  
SRR17520069.4092050  
SRR17520069.4092052  
SRR17520069.4103215  
SRR17520069.4103279  
SRR17520069.4107591  
SRR17520069.4107593  
SRR17520069.4107595  
SRR17520069.4107599  
SRR17520069.4107601  
SRR17520069.4107603  
SRR17520069.4107605  
SRR17520069.4107607  
SRR17520069.4107609  
SRR17520069.4107611  
SRR17520069.4107613  
SRR17520069.4107615  
SRR17520069.4107617  
SRR17520069.4107619  
SRR17520069.4107621  
SRR17520069.4107625  
SRR17520069.4107627  
SRR17520069.4107631  
SRR17520069.4107633  
SRR17520069.4107635  
SRR17520069.4107637  
SRR17520069.4107639  
SRR17520069.4107641

SRR17520069.4107643  
SRR17520069.4107645  
SRR17520069.4107647  
SRR17520069.4107649  
SRR17520069.4107651  
SRR17520069.4107653  
SRR17520069.4107655  
SRR17520069.4107657  
SRR17520069.4107661  
SRR17520069.4107663  
SRR17520069.4107665  
SRR17520069.4107667  
SRR17520069.4107669  
SRR17520069.4107671  
SRR17520069.4107673  
SRR17520069.4107675  
SRR17520069.4107677  
SRR17520069.4107679  
SRR17520069.4107683  
SRR17520069.4107685  
SRR17520069.4107687  
SRR17520069.4107689  
SRR17520069.4107691  
SRR17520069.4107693  
SRR17520069.4107695  
SRR17520069.4107697  
SRR17520069.4107699  
SRR17520069.4108318  
SRR17520069.4110523  
SRR17520069.4113183  
SRR17520069.4114808  
SRR17520069.4120024  
SRR17520069.4121598  
SRR17520069.4121602  
SRR17520069.4124617  
SRR17520069.4128532  
SRR17520069.4143076  
SRR17520069.4155117  
SRR17520069.4170343  
SRR17520069.4180884  
SRR17520069.4180897  
SRR17520069.4180899  
SRR17520069.4180908  
SRR17520069.4180919  
SRR17520069.4180923  
SRR17520069.4189747  
SRR17520069.4191720

SRR17520069.4205995  
SRR17520069.4206572  
SRR17520069.4217509  
SRR17520069.4225247  
SRR17520069.4231935  
SRR17520069.4231979  
SRR17520069.4233935  
SRR17520069.4234965  
SRR17520069.4240552  
SRR17520069.4242698  
SRR17520069.4245568  
SRR17520069.4248571  
SRR17520069.4248577  
SRR17520069.4248579  
SRR17520069.4260133  
SRR17520069.4260155  
SRR17520069.4262985  
SRR17520069.4264730  
SRR17520069.4269082  
SRR17520069.4269083  
SRR17520069.4269087  
SRR17520069.4272756  
SRR17520069.4274483  
SRR17520069.4274508  
SRR17520069.4274544  
SRR17520069.4274552  
SRR17520069.4274579  
SRR17520069.4274583  
SRR17520069.4274587  
SRR17520069.4274595  
SRR17520069.4274602  
SRR17520069.4274603  
SRR17520069.4274611  
SRR17520069.4274615  
SRR17520069.4274655  
SRR17520069.4274658  
SRR17520069.4274680  
SRR17520069.4277966  
SRR17520069.4289970  
SRR17520069.4306275  
SRR17520069.4316309  
SRR17520069.4323368  
SRR17520069.4323373  
SRR17520069.4329445  
SRR17520069.4329447  
SRR17520069.4329464  
SRR17520069.4329506

SRR17520069.4336312  
SRR17520069.4337231  
SRR17520069.4340048  
SRR17520069.4341286  
SRR17520069.4356387  
SRR17520069.4356404  
SRR17520069.4356410  
SRR17520069.4356419  
SRR17520069.4356896  
SRR17520069.4360790  
SRR17520069.4360792  
SRR17520069.4360794  
SRR17520069.4360796  
SRR17520069.4360798  
SRR17520069.4360800  
SRR17520069.4367639  
SRR17520069.4369665  
SRR17520069.4373829  
SRR17520069.4373837  
SRR17520069.4385293  
SRR17520069.4411084  
SRR17520069.4416453  
SRR17520069.4416473  
SRR17520069.4416748  
SRR17520069.4429371  
SRR17520069.4438185  
SRR17520069.4439766  
SRR17520069.4442526  
SRR17520069.4443942  
SRR17520069.4461256  
SRR17520069.4468520  
SRR17520069.4469290  
SRR17520069.4471428  
SRR17520069.4474411  
SRR17520069.4475502  
SRR17520069.4475550  
SRR17520069.4482418  
SRR17520069.4492974  
SRR17520069.4492976  
SRR17520069.4492978  
SRR17520069.4492980  
SRR17520069.4492982  
SRR17520069.4492984  
SRR17520069.4492986  
SRR17520069.4506680  
SRR17520069.4519340  
SRR17520069.4519342

SRR17520069.4519344  
SRR17520069.4519346  
SRR17520069.4519348  
SRR17520069.4519350  
SRR17520069.4519352  
SRR17520069.4519354  
SRR17520069.4519356  
SRR17520069.4519358  
SRR17520069.4519360  
SRR17520069.4519362  
SRR17520069.4519364  
SRR17520069.4519366  
SRR17520069.4519368  
SRR17520069.4519370  
SRR17520069.4519372  
SRR17520069.4519374  
SRR17520069.4519376  
SRR17520069.4519378  
SRR17520069.4519380  
SRR17520069.4519382  
SRR17520069.4519384  
SRR17520069.4519388  
SRR17520069.4519390  
SRR17520069.4519392  
SRR17520069.4519394  
SRR17520069.4519396  
SRR17520069.4519398  
SRR17520069.4519400  
SRR17520069.4519402  
SRR17520069.4519406  
SRR17520069.4519408  
SRR17520069.4519410  
SRR17520069.4519412  
SRR17520069.4519414  
SRR17520069.4519416  
SRR17520069.4519418  
SRR17520069.4519420  
SRR17520069.4519422  
SRR17520069.4519424  
SRR17520069.4519426  
SRR17520069.4519428  
SRR17520069.4519430  
SRR17520069.4525734  
SRR17520069.4525774  
SRR17520069.4526672  
SRR17520069.4526879  
SRR17520069.4528453

SRR17520069.4532003  
SRR17520069.4532005  
SRR17520069.4532007  
SRR17520069.4532009  
SRR17520069.4532011  
SRR17520069.4532013  
SRR17520069.4537172  
SRR17520069.4537174  
SRR17520069.4537176  
SRR17520069.4537178  
SRR17520069.4537180  
SRR17520069.4537182  
SRR17520069.4537184  
SRR17520069.4537186  
SRR17520069.4537188  
SRR17520069.4537190  
SRR17520069.4537192  
SRR17520069.4537194  
SRR17520069.4537196  
SRR17520069.4537198  
SRR17520069.4537200  
SRR17520069.4537202  
SRR17520069.4537204  
SRR17520069.4537206  
SRR17520069.4537208  
SRR17520069.4537210  
SRR17520069.4537212  
SRR17520069.4537214  
SRR17520069.4537216  
SRR17520069.4537218  
SRR17520069.4537220  
SRR17520069.4537222  
SRR17520069.4537224  
SRR17520069.4537226  
SRR17520069.4537228  
SRR17520069.4537230  
SRR17520069.4537232  
SRR17520069.4537234  
SRR17520069.4537236  
SRR17520069.4537238  
SRR17520069.4537240  
SRR17520069.4537242  
SRR17520069.4537244  
SRR17520069.4537246  
SRR17520069.4537248  
SRR17520069.4537250  
SRR17520069.4537252

SRR17520069.4537254  
SRR17520069.4537256  
SRR17520069.4537258  
SRR17520069.4537260  
SRR17520069.4537262  
SRR17520069.4537264  
SRR17520069.4537266  
SRR17520069.4537268  
SRR17520069.4537270  
SRR17520069.4537272  
SRR17520069.4537274  
SRR17520069.4537276  
SRR17520069.4537278  
SRR17520069.4537280  
SRR17520069.4537282  
SRR17520069.4537284  
SRR17520069.4537286  
SRR17520069.4537288  
SRR17520069.4537290  
SRR17520069.4537292  
SRR17520069.4537294  
SRR17520069.4537296  
SRR17520069.4537298  
SRR17520069.4537302  
SRR17520069.4537304  
SRR17520069.4537306  
SRR17520069.4537308  
SRR17520069.4537310  
SRR17520069.4537312  
SRR17520069.4537314  
SRR17520069.4537316  
SRR17520069.4537318  
SRR17520069.4537320  
SRR17520069.4537322  
SRR17520069.4537324  
SRR17520069.4537326  
SRR17520069.4537328  
SRR17520069.4537330  
SRR17520069.4537332  
SRR17520069.4537334  
SRR17520069.4537336  
SRR17520069.4537338  
SRR17520069.4537340  
SRR17520069.4537342  
SRR17520069.4537344  
SRR17520069.4537346  
SRR17520069.4537348



SRR17520069.4537350  
SRR17520069.4537352  
SRR17520069.4539756  
SRR17520069.4540627  
SRR17520069.4540634  
SRR17520069.4540635  
SRR17520069.4544235  
SRR17520069.4549476  
SRR17520069.4549516  
SRR17520069.4551127  
SRR17520069.4551269  
SRR17520069.4560688  
SRR17520069.4565158  
SRR17520069.4580172  
SRR17520069.4580866  
SRR17520069.4580868  
SRR17520069.4580870  
SRR17520069.4580872  
SRR17520069.4580874  
SRR17520069.4580876  
SRR17520069.4580878  
SRR17520069.4580880  
SRR17520069.4580882  
SRR17520069.4581737  
SRR17520069.4584897  
SRR17520069.4594989  
SRR17520069.4616186  
SRR17520069.4616593  
SRR17520069.4617117  
SRR17520069.4639518  
SRR17520069.4639662  
SRR17520069.4639664  
SRR17520069.4640024  
SRR17520069.4641684  
SRR17520069.4642600  
SRR17520069.4644889  
SRR17520069.4656914  
SRR17520069.4665799  
SRR17520069.4679262  
SRR17520069.4681345  
SRR17520069.4685137  
SRR17520069.4686713  
SRR17520069.4689788  
SRR17520069.4691611  
SRR17520069.4705765  
SRR17520069.4711495  
SRR17520069.4712610

SRR17520069. 4719638  
SRR17520069. 4719650  
SRR17520069. 4720279  
SRR17520069. 4720473  
SRR17520069. 4720937  
SRR17520069. 4727608  
SRR17520069. 4738440  
SRR17520069. 4741460  
SRR17520069. 4741462  
SRR17520069. 4747941  
SRR17520069. 4749458  
SRR17520069. 4756675  
SRR17520069. 4756683  
SRR17520069. 4756697  
SRR17520069. 4756759  
SRR17520069. 4764500  
SRR17520069. 4764501  
SRR17520069. 4765196  
SRR17520069. 4765211  
SRR17520069. 4765221  
SRR17520069. 4765236  
SRR17520069. 4765241  
SRR17520069. 4765245  
SRR17520069. 4768316  
SRR17520069. 4771113  
SRR17520069. 4771465  
SRR17520069. 4771507  
SRR17520069. 4780581  
SRR17520069. 4792144  
SRR17520069. 4793278  
SRR17520069. 4826966  
SRR17520069. 4827002  
SRR17520069. 4829147  
SRR17520069. 4838835  
SRR17520069. 4841939  
SRR17520069. 4842568  
SRR17520069. 4842630  
SRR17520069. 4846886  
SRR17520069. 4848343  
SRR17520069. 4864203  
SRR17520069. 4876758  
SRR17520069. 4886075  
SRR17520069. 4886091  
SRR17520069. 4896668  
SRR17520069. 4903273  
SRR17520069. 4904564  
SRR17520069. 4904654

SRR17520069.4926847  
SRR17520069.4930311  
SRR17520069.4930313  
SRR17520069.4930326  
SRR17520069.4930331  
SRR17520069.4949976  
SRR17520069.4949978  
SRR17520069.4957857  
SRR17520069.4962921  
SRR17520069.4963399  
SRR17520069.4966075  
SRR17520069.4966079  
SRR17520069.4971371  
SRR17520069.4987256  
SRR17520069.4987375  
SRR17520069.4987688  
SRR17520069.4988369  
SRR17520069.4988371  
SRR17520069.4988373  
SRR17520069.4988375  
SRR17520069.4988377  
SRR17520069.4988379  
SRR17520069.4988381  
SRR17520069.4988383  
SRR17520069.4988448  
SRR17520069.4996505  
SRR17520069.4999804  
SRR17520069.4999929  
SRR17520069.5006572  
SRR17520069.5006610  
SRR17520069.5006622  
SRR17520069.5020506  
SRR17520069.5026889  
SRR17520069.5032183  
SRR17520069.5032189  
SRR17520069.5033174  
SRR17520069.5039426  
SRR17520069.5039430  
SRR17520069.5039432  
SRR17520069.5039443  
SRR17520069.5039444  
SRR17520069.5039451  
SRR17520069.5039457  
SRR17520069.5039464  
SRR17520069.5039465  
SRR17520069.5042437  
SRR17520069.5042439

SRR17520069.5045071  
SRR17520069.5045077  
SRR17520069.5045111  
SRR17520069.5049698  
SRR17520069.5050083  
SRR17520069.5050120  
SRR17520069.5051041  
SRR17520069.5051044  
SRR17520069.5051046  
SRR17520069.5052440  
SRR17520069.5056948  
SRR17520069.5056952  
SRR17520069.5056954  
SRR17520069.5056956  
SRR17520069.5056958  
SRR17520069.5056960  
SRR17520069.5056962  
SRR17520069.5056964  
SRR17520069.5056966  
SRR17520069.5062049  
SRR17520069.5074986  
SRR17520069.5087736  
SRR17520069.5087767  
SRR17520069.5094213  
SRR17520069.5094215  
SRR17520069.5094221  
SRR17520069.5094223  
SRR17520069.5094225  
SRR17520069.5094227  
SRR17520069.5094229  
SRR17520069.5094231  
SRR17520069.5094233  
SRR17520069.5094235  
SRR17520069.5094237  
SRR17520069.5094239  
SRR17520069.5094241  
SRR17520069.5094251  
SRR17520069.5094257  
SRR17520069.5094261  
SRR17520069.5094263  
SRR17520069.5094265  
SRR17520069.5094267  
SRR17520069.5094269  
SRR17520069.5094271  
SRR17520069.5094273  
SRR17520069.5098112  
SRR17520069.5100601

SRR17520069.5101470  
SRR17520069.5101489  
SRR17520069.5112877  
SRR17520069.5112979  
SRR17520069.5114236  
SRR17520069.5118620  
SRR17520069.5119094  
SRR17520069.5125469  
SRR17520069.5125477  
SRR17520069.5125499  
SRR17520069.5125825  
SRR17520069.5125829  
SRR17520069.5127379  
SRR17520069.5131284  
SRR17520069.5131394  
SRR17520069.5133739  
SRR17520069.5154531  
SRR17520069.5156784  
SRR17520069.5160793  
SRR17520069.5170881  
SRR17520069.5176084  
SRR17520069.5200055  
SRR17520069.5200061  
SRR17520069.5200165  
SRR17520069.5206566  
SRR17520069.5207217  
SRR17520069.5207343  
SRR17520069.5213931  
SRR17520069.5219689  
SRR17520069.5219920  
SRR17520069.5223096  
SRR17520069.5223120  
SRR17520069.5223279  
SRR17520069.5225576  
SRR17520069.5233286  
SRR17520069.5240544  
SRR17520069.5243437  
SRR17520069.5243453  
SRR17520069.5243501  
SRR17520069.5249950  
SRR17520069.5249952  
SRR17520069.5255625  
SRR17520069.5261386  
SRR17520069.5261403  
SRR17520069.5261421  
SRR17520069.5261430  
SRR17520069.5261447

SRR17520069. 5261448  
SRR17520069. 5270984  
SRR17520069. 5271050  
SRR17520069. 5304729  
SRR17520069. 5305198  
SRR17520069. 5313422  
SRR17520069. 5313424  
SRR17520069. 5313426  
SRR17520069. 5313428  
SRR17520069. 5313430  
SRR17520069. 5313432  
SRR17520069. 5313434  
SRR17520069. 5313436  
SRR17520069. 5313438  
SRR17520069. 5313440  
SRR17520069. 5313444  
SRR17520069. 5313446  
SRR17520069. 5313448  
SRR17520069. 5313452  
SRR17520069. 5313454  
SRR17520069. 5313456  
SRR17520069. 5313458  
SRR17520069. 5313460  
SRR17520069. 5313462  
SRR17520069. 5313464  
SRR17520069. 5324141  
SRR17520069. 5324227  
SRR17520069. 5324251  
SRR17520069. 5324265  
SRR17520069. 5340381  
SRR17520069. 5344209  
SRR17520069. 5351395  
SRR17520069. 5353158  
SRR17520069. 5356290  
SRR17520069. 5356982  
SRR17520069. 5358493  
SRR17520069. 5369506  
SRR17520069. 5375050  
SRR17520069. 5375052  
SRR17520069. 5375054  
SRR17520069. 5375056  
SRR17520069. 5375058  
SRR17520069. 5375060  
SRR17520069. 5375062  
SRR17520069. 5375064  
SRR17520069. 5375066  
SRR17520069. 5375068

SRR17520069. 5375070  
SRR17520069. 5375072  
SRR17520069. 5375074  
SRR17520069. 5378972  
SRR17520069. 5378990  
SRR17520069. 5379296  
SRR17520069. 5379308  
SRR17520069. 5379320  
SRR17520069. 5385163  
SRR17520069. 5385165  
SRR17520069. 5385167  
SRR17520069. 5385169  
SRR17520069. 5385171  
SRR17520069. 5385173  
SRR17520069. 5385175  
SRR17520069. 5385177  
SRR17520069. 5385179  
SRR17520069. 5385181  
SRR17520069. 5385183  
SRR17520069. 5385185  
SRR17520069. 5385187  
SRR17520069. 5385189  
SRR17520069. 5385191  
SRR17520069. 5385193  
SRR17520069. 5385195  
SRR17520069. 5385197  
SRR17520069. 5385199  
SRR17520069. 5385201  
SRR17520069. 5385203  
SRR17520069. 5385205  
SRR17520069. 5385207  
SRR17520069. 5385209  
SRR17520069. 5385211  
SRR17520069. 5385213  
SRR17520069. 5385217  
SRR17520069. 5385221  
SRR17520069. 5385223  
SRR17520069. 5385225  
SRR17520069. 5385227  
SRR17520069. 5385229  
SRR17520069. 5385231  
SRR17520069. 5385233  
SRR17520069. 5385235  
SRR17520069. 5385237  
SRR17520069. 5385239  
SRR17520069. 5385241  
SRR17520069. 5385243

SRR17520069. 5385245  
SRR17520069. 5385247  
SRR17520069. 5385249  
SRR17520069. 5385251  
SRR17520069. 5385253  
SRR17520069. 5385255  
SRR17520069. 5385257  
SRR17520069. 5385259  
SRR17520069. 5385261  
SRR17520069. 5385263  
SRR17520069. 5385265  
SRR17520069. 5385267  
SRR17520069. 5385269  
SRR17520069. 5385271  
SRR17520069. 5385273  
SRR17520069. 5385275  
SRR17520069. 5385277  
SRR17520069. 5385279  
SRR17520069. 5385281  
SRR17520069. 5385283  
SRR17520069. 5385285  
SRR17520069. 5385287  
SRR17520069. 5385291  
SRR17520069. 5385293  
SRR17520069. 5385295  
SRR17520069. 5385297  
SRR17520069. 5385299  
SRR17520069. 5385301  
SRR17520069. 5385303  
SRR17520069. 5385305  
SRR17520069. 5385307  
SRR17520069. 5385309  
SRR17520069. 5385311  
SRR17520069. 5385313  
SRR17520069. 5385315  
SRR17520069. 5385317  
SRR17520069. 5385319  
SRR17520069. 5385321  
SRR17520069. 5385323  
SRR17520069. 5385325  
SRR17520069. 5385327  
SRR17520069. 5385329  
SRR17520069. 5385331  
SRR17520069. 5385333  
SRR17520069. 5385335  
SRR17520069. 5385337  
SRR17520069. 5385339



SRR17520069.5385341  
SRR17520069.5397418  
SRR17520069.5397504  
SRR17520069.5397561  
SRR17520069.5402918  
SRR17520069.5414002  
SRR17520069.5416790  
SRR17520069.5428565  
SRR17520069.5430412  
SRR17520069.5433627  
SRR17520069.5438827  
SRR17520069.5444368  
SRR17520069.5452793  
SRR17520069.5457677  
SRR17520069.5457681  
SRR17520069.5460201  
SRR17520069.5462842  
SRR17520069.5469883  
SRR17520069.5474053  
SRR17520069.5479003  
SRR17520069.5479009  
SRR17520069.5479027  
SRR17520069.5479029  
SRR17520069.5479031  
SRR17520069.5479051  
SRR17520069.5479067  
SRR17520069.5479073  
SRR17520069.5479087  
SRR17520069.5479093  
SRR17520069.5479105  
SRR17520069.5479109  
SRR17520069.5479115  
SRR17520069.5479121  
SRR17520069.5479131  
SRR17520069.5489864  
SRR17520069.5489866  
SRR17520069.5490822  
SRR17520069.5490834  
SRR17520069.5496372  
SRR17520069.5496374  
SRR17520069.5504296  
SRR17520069.5506191  
SRR17520069.5509862  
SRR17520069.5520679  
SRR17520069.5520683  
SRR17520069.5520699  
SRR17520069.5521968

SRR17520069.5524365  
SRR17520069.5529996  
SRR17520069.5530151  
SRR17520069.5530167  
SRR17520069.5530205  
SRR17520069.5531811  
SRR17520069.5534453  
SRR17520069.5538370  
SRR17520069.5538414  
SRR17520069.5544018  
SRR17520069.5548630  
SRR17520069.5551209  
SRR17520069.5553824  
SRR17520069.5553828  
SRR17520069.5553834  
SRR17520069.5553866  
SRR17520069.5563193  
SRR17520069.5573028  
SRR17520069.5573084  
SRR17520069.5573186  
SRR17520069.5573190  
SRR17520069.5573198  
SRR17520069.5576250  
SRR17520069.5587202  
SRR17520069.5599628  
SRR17520069.5609238  
SRR17520069.5615764  
SRR17520069.5616603  
SRR17520069.5618256  
SRR17520069.5625172  
SRR17520069.5631648  
SRR17520069.5637235  
SRR17520069.5639397  
SRR17520069.5639403  
SRR17520069.5639407  
SRR17520069.5639427  
SRR17520069.5639435  
SRR17520069.5652700  
SRR17520069.5659373  
SRR17520069.5663435  
SRR17520069.5678578  
SRR17520069.5678813  
SRR17520069.5679656  
SRR17520069.5686850  
SRR17520069.5691363  
SRR17520069.5693916  
SRR17520069.5715469

SRR17520069.5715474  
SRR17520069.5715499  
SRR17520069.5715985  
SRR17520069.5717701  
SRR17520069.5717703  
SRR17520069.5717711  
SRR17520069.5717715  
SRR17520069.5717717  
SRR17520069.5717719  
SRR17520069.5728982  
SRR17520069.5734189  
SRR17520069.5738257  
SRR17520069.5738273  
SRR17520069.5738397  
SRR17520069.5738401  
SRR17520069.5738403  
SRR17520069.5738405  
SRR17520069.5738407  
SRR17520069.5738409  
SRR17520069.5738411  
SRR17520069.5738413  
SRR17520069.5738415  
SRR17520069.5738417  
SRR17520069.5738419  
SRR17520069.5738421  
SRR17520069.5738423  
SRR17520069.5738425  
SRR17520069.5738427  
SRR17520069.5738429  
SRR17520069.5738431  
SRR17520069.5738433  
SRR17520069.5738435  
SRR17520069.5738437  
SRR17520069.5738439  
SRR17520069.5738441  
SRR17520069.5738443  
SRR17520069.5738445  
SRR17520069.5738447  
SRR17520069.5738451  
SRR17520069.5738453  
SRR17520069.5738455  
SRR17520069.5738457  
SRR17520069.5738459  
SRR17520069.5738461  
SRR17520069.5738463  
SRR17520069.5738465  
SRR17520069.5738467

SRR17520069. 5738469  
SRR17520069. 5738471  
SRR17520069. 5738473  
SRR17520069. 5738475  
SRR17520069. 5738477  
SRR17520069. 5738479  
SRR17520069. 5738481  
SRR17520069. 5738483  
SRR17520069. 5738485  
SRR17520069. 5738487  
SRR17520069. 5741114  
SRR17520069. 5742184  
SRR17520069. 5748687  
SRR17520069. 5760681  
SRR17520069. 5762140  
SRR17520069. 5762188  
SRR17520069. 5767328  
SRR17520069. 5767334  
SRR17520069. 5770036  
SRR17520069. 5784356  
SRR17520069. 5785801  
SRR17520069. 5795071  
SRR17520069. 5797449  
SRR17520069. 5798753  
SRR17520069. 5800201  
SRR17520069. 5800606  
SRR17520069. 5809855  
SRR17520069. 5818964  
SRR17520069. 5831486  
SRR17520069. 5831508  
SRR17520069. 5838245  
SRR17520069. 5845972  
SRR17520069. 5845974  
SRR17520069. 5845976  
SRR17520069. 5845978  
SRR17520069. 5845980  
SRR17520069. 5845982  
SRR17520069. 5845984  
SRR17520069. 5845986  
SRR17520069. 5845988  
SRR17520069. 5845990  
SRR17520069. 5845992  
SRR17520069. 5845994  
SRR17520069. 5846887  
SRR17520069. 5847271  
SRR17520069. 5848482  
SRR17520069. 5848971

SRR17520069.5849690  
SRR17520069.5849794  
SRR17520069.5849817  
SRR17520069.5859983  
SRR17520069.5859985  
SRR17520069.5862423  
SRR17520069.5869857  
SRR17520069.5871275  
SRR17520069.5871277  
SRR17520069.5871279  
SRR17520069.5871283  
SRR17520069.5871285  
SRR17520069.5871287  
SRR17520069.5871289  
SRR17520069.5871291  
SRR17520069.5871293  
SRR17520069.5871295  
SRR17520069.5871299  
SRR17520069.5871301  
SRR17520069.5871303  
SRR17520069.5871305  
SRR17520069.5871307  
SRR17520069.5871309  
SRR17520069.5871315  
SRR17520069.5871317  
SRR17520069.5871319  
SRR17520069.5871321  
SRR17520069.5871323  
SRR17520069.5871325  
SRR17520069.5871331  
SRR17520069.5871333  
SRR17520069.5871335  
SRR17520069.5871337  
SRR17520069.5871339  
SRR17520069.5871341  
SRR17520069.5871343  
SRR17520069.5871345  
SRR17520069.5871347  
SRR17520069.5871349  
SRR17520069.5871351  
SRR17520069.5871355  
SRR17520069.5871357  
SRR17520069.5871359  
SRR17520069.5871363  
SRR17520069.5871365  
SRR17520069.5871367  
SRR17520069.5871369

SRR17520069. 5871373  
SRR17520069. 5871375  
SRR17520069. 5871379  
SRR17520069. 5871381  
SRR17520069. 5871383  
SRR17520069. 5871385  
SRR17520069. 5871387  
SRR17520069. 5871394  
SRR17520069. 5871396  
SRR17520069. 5871398  
SRR17520069. 5871400  
SRR17520069. 5871402  
SRR17520069. 5871404  
SRR17520069. 5871406  
SRR17520069. 5871408  
SRR17520069. 5871410  
SRR17520069. 5871412  
SRR17520069. 5871414  
SRR17520069. 5871418  
SRR17520069. 5871420  
SRR17520069. 5871422  
SRR17520069. 5871424  
SRR17520069. 5871426  
SRR17520069. 5871428  
SRR17520069. 5871430  
SRR17520069. 5873210  
SRR17520069. 5873803  
SRR17520069. 5873805  
SRR17520069. 5873807  
SRR17520069. 5873809  
SRR17520069. 5873811  
SRR17520069. 5873813  
SRR17520069. 5873815  
SRR17520069. 5873817  
SRR17520069. 5873819  
SRR17520069. 5873821  
SRR17520069. 5873823  
SRR17520069. 5873825  
SRR17520069. 5873827  
SRR17520069. 5873829  
SRR17520069. 5873831  
SRR17520069. 5873833  
SRR17520069. 5873835  
SRR17520069. 5873837  
SRR17520069. 5873839  
SRR17520069. 5873841  
SRR17520069. 5873843

SRR17520069.5873845  
SRR17520069.5873847  
SRR17520069.5873849  
SRR17520069.5873851  
SRR17520069.5873853  
SRR17520069.5873855  
SRR17520069.5873857  
SRR17520069.5873859  
SRR17520069.5873861  
SRR17520069.5873863  
SRR17520069.5873865  
SRR17520069.5873867  
SRR17520069.5873869  
SRR17520069.5873873  
SRR17520069.5873875  
SRR17520069.5873877  
SRR17520069.5873879  
SRR17520069.5873881  
SRR17520069.5873883  
SRR17520069.5873885  
SRR17520069.5873887  
SRR17520069.5873889  
SRR17520069.5873891  
SRR17520069.5873893  
SRR17520069.5873895  
SRR17520069.5873897  
SRR17520069.5873899  
SRR17520069.5873901  
SRR17520069.5873903  
SRR17520069.5873905  
SRR17520069.5873909  
SRR17520069.5873911  
SRR17520069.5873913  
SRR17520069.5873915  
SRR17520069.5879982  
SRR17520069.5889640  
SRR17520069.5889646  
SRR17520069.5889652  
SRR17520069.5889656  
SRR17520069.5889827  
SRR17520069.5891806  
SRR17520069.5894139  
SRR17520069.5894183  
SRR17520069.5894195  
SRR17520069.5894913  
SRR17520069.5894931  
SRR17520069.5900738

SRR17520069. 5937155  
SRR17520069. 5938634  
SRR17520069. 5956279  
SRR17520069. 5985857  
SRR17520069. 5985927  
SRR17520069. 5987747  
SRR17520069. 5987831  
SRR17520069. 5989973  
SRR17520069. 5992599  
SRR17520069. 5992647  
SRR17520069. 5993308  
SRR17520069. 5993323  
SRR17520069. 5994432  
SRR17520069. 5994434  
SRR17520069. 5994436  
SRR17520069. 5994438  
SRR17520069. 5994440  
SRR17520069. 5994442  
SRR17520069. 5994444  
SRR17520069. 5994446  
SRR17520069. 5997661  
SRR17520069. 5997824  
SRR17520069. 6000438  
SRR17520069. 6004980  
SRR17520069. 6013074  
SRR17520069. 6015520  
SRR17520069. 6015532  
SRR17520069. 6015540  
SRR17520069. 6024141  
SRR17520069. 6024589  
SRR17520069. 6024592  
SRR17520069. 6030375  
SRR17520069. 6031856  
SRR17520069. 6032562  
SRR17520069. 6032564  
SRR17520069. 6034063  
SRR17520069. 6041365  
SRR17520069. 6045196  
SRR17520069. 6045762  
SRR17520069. 6048684  
SRR17520069. 6048773  
SRR17520069. 6051365  
SRR17520069. 6052443  
SRR17520069. 6056965  
SRR17520069. 6056967  
SRR17520069. 6056969  
SRR17520069. 6056971



SRR17520069.6056973  
SRR17520069.6056975  
SRR17520069.6056977  
SRR17520069.6056979  
SRR17520069.6056981  
SRR17520069.6056985  
SRR17520069.6056987  
SRR17520069.6056989  
SRR17520069.6056991  
SRR17520069.6056993  
SRR17520069.6056995  
SRR17520069.6056997  
SRR17520069.6056999  
SRR17520069.6057001  
SRR17520069.6057003  
SRR17520069.6057005  
SRR17520069.6057007  
SRR17520069.6057009  
SRR17520069.6057011  
SRR17520069.6057013  
SRR17520069.6057015  
SRR17520069.6057017  
SRR17520069.6057021  
SRR17520069.6057023  
SRR17520069.6057025  
SRR17520069.6057027  
SRR17520069.6057029  
SRR17520069.6057031  
SRR17520069.6057033  
SRR17520069.6057037  
SRR17520069.6057039  
SRR17520069.6057041  
SRR17520069.6057043  
SRR17520069.6057045  
SRR17520069.6057047  
SRR17520069.6057049  
SRR17520069.6057051  
SRR17520069.6057053  
SRR17520069.6057055  
SRR17520069.6057057  
SRR17520069.6057059  
SRR17520069.6057061  
SRR17520069.6057063  
SRR17520069.6057065  
SRR17520069.6057067  
SRR17520069.6057069  
SRR17520069.6057071

SRR17520069.6057073  
SRR17520069.6057077  
SRR17520069.6057079  
SRR17520069.6057081  
SRR17520069.6057083  
SRR17520069.6057085  
SRR17520069.6057087  
SRR17520069.6057089  
SRR17520069.6057091  
SRR17520069.6057093  
SRR17520069.6057095  
SRR17520069.6057097  
SRR17520069.6057099  
SRR17520069.6057101  
SRR17520069.6057103  
SRR17520069.6057105  
SRR17520069.6057107  
SRR17520069.6057109  
SRR17520069.6057111  
SRR17520069.6062310  
SRR17520069.6067345  
SRR17520069.6074405  
SRR17520069.6074510  
SRR17520069.6076777  
SRR17520069.6076779  
SRR17520069.6085055  
SRR17520069.6093600  
SRR17520069.6097176  
SRR17520069.6099962  
SRR17520069.6103157  
SRR17520069.6103159  
SRR17520069.6104387  
SRR17520069.6108757  
SRR17520069.6110699  
SRR17520069.6112582  
SRR17520069.6112585  
SRR17520069.6112595  
SRR17520069.6112596  
SRR17520069.6112607  
SRR17520069.6112624  
SRR17520069.6112638  
SRR17520069.6112653  
SRR17520069.6112681  
SRR17520069.6112685  
SRR17520069.6112693  
SRR17520069.6112706  
SRR17520069.6113952

SRR17520069.6117803  
SRR17520069.6136240  
SRR17520069.6142978  
SRR17520069.6146888  
SRR17520069.6155944  
SRR17520069.6155984  
SRR17520069.6164150  
SRR17520069.6170481  
SRR17520069.6170517  
SRR17520069.6170591  
SRR17520069.6171337  
SRR17520069.6174985  
SRR17520069.6191621  
SRR17520069.6191631  
SRR17520069.6195141  
SRR17520069.6200286  
SRR17520069.6208865  
SRR17520069.6215180  
SRR17520069.6215182  
SRR17520069.6215184  
SRR17520069.6215188  
SRR17520069.6215190  
SRR17520069.6215192  
SRR17520069.6215194  
SRR17520069.6224217  
SRR17520069.6224219  
SRR17520069.6224221  
SRR17520069.6224223  
SRR17520069.6224225  
SRR17520069.6225748  
SRR17520069.6227802  
SRR17520069.6228945  
SRR17520069.6232476  
SRR17520069.6232508  
SRR17520069.6232516  
SRR17520069.6232528  
SRR17520069.6232534  
SRR17520069.6233361  
SRR17520069.6246543  
SRR17520069.6246545  
SRR17520069.6246547  
SRR17520069.6246553  
SRR17520069.6246559  
SRR17520069.6246568  
SRR17520069.6252361  
SRR17520069.6262465  
SRR17520069.6262475

SRR17520069. 6264887  
SRR17520069. 6264889  
SRR17520069. 6264891  
SRR17520069. 6264893  
SRR17520069. 6264895  
SRR17520069. 6264899  
SRR17520069. 6264901  
SRR17520069. 6264903  
SRR17520069. 6273289  
SRR17520069. 6278850  
SRR17520069. 6280900  
SRR17520069. 6280905  
SRR17520069. 6280943  
SRR17520069. 6283383  
SRR17520069. 6286888  
SRR17520069. 6288631  
SRR17520069. 6291721  
SRR17520069. 6293722  
SRR17520069. 6294098  
SRR17520069. 6296566  
SRR17520069. 6296582  
SRR17520069. 6298938  
SRR17520069. 6310731  
SRR17520069. 6310734  
SRR17520069. 6310744  
SRR17520069. 6310750  
SRR17520069. 6310758  
SRR17520069. 6316686  
SRR17520069. 6338535  
SRR17520069. 6342823  
SRR17520069. 6353920  
SRR17520069. 6360060  
SRR17520069. 6368242  
SRR17520069. 6370296  
SRR17520069. 6370298  
SRR17520069. 6370300  
SRR17520069. 6370302  
SRR17520069. 6370304  
SRR17520069. 6370306  
SRR17520069. 6370308  
SRR17520069. 6370310  
SRR17520069. 6370312  
SRR17520069. 6370314  
SRR17520069. 6370316  
SRR17520069. 6370318  
SRR17520069. 6370320  
SRR17520069. 6370322

SRR17520069. 6370324  
SRR17520069. 6370326  
SRR17520069. 6370328  
SRR17520069. 6370330  
SRR17520069. 6370332  
SRR17520069. 6370334  
SRR17520069. 6370336  
SRR17520069. 6370338  
SRR17520069. 6370340  
SRR17520069. 6370342  
SRR17520069. 6370344  
SRR17520069. 6370346  
SRR17520069. 6370348  
SRR17520069. 6370350  
SRR17520069. 6370352  
SRR17520069. 6370354  
SRR17520069. 6370356  
SRR17520069. 6370358  
SRR17520069. 6370360  
SRR17520069. 6370362  
SRR17520069. 6370364  
SRR17520069. 6370366  
SRR17520069. 6370368  
SRR17520069. 6370370  
SRR17520069. 6370372  
SRR17520069. 6370374  
SRR17520069. 6370376  
SRR17520069. 6370378  
SRR17520069. 6370380  
SRR17520069. 6370382  
SRR17520069. 6370384  
SRR17520069. 6370386  
SRR17520069. 6370388  
SRR17520069. 6370390  
SRR17520069. 6374999  
SRR17520069. 6388288  
SRR17520069. 6388290  
SRR17520069. 6389057  
SRR17520069. 6399915  
SRR17520069. 6401955  
SRR17520069. 6407887  
SRR17520069. 6408018  
SRR17520069. 6409616  
SRR17520069. 6414959  
SRR17520069. 6414961  
SRR17520069. 6418270  
SRR17520069. 6419700

SRR17520069.6419825  
SRR17520069.6419846  
SRR17520069.6428908  
SRR17520069.6429285  
SRR17520069.6431480  
SRR17520069.6431518  
SRR17520069.6446020  
SRR17520069.6466421  
SRR17520069.6472822  
SRR17520069.6472854  
SRR17520069.6482640  
SRR17520069.6485735  
SRR17520069.6487147  
SRR17520069.6496393  
SRR17520069.6496394  
SRR17520069.6499574  
SRR17520069.6505291  
SRR17520069.6505621  
SRR17520069.6505641  
SRR17520069.6521581  
SRR17520069.6528704  
SRR17520069.6535189  
SRR17520069.6535224  
SRR17520069.6554074  
SRR17520069.6554135  
SRR17520069.6554140  
SRR17520069.6558938  
SRR17520069.6565296  
SRR17520069.6565370  
SRR17520069.6577899  
SRR17520069.6596587  
SRR17520069.6596600  
SRR17520069.6597154  
SRR17520069.6598056  
SRR17520069.6615099  
SRR17520069.6615127  
SRR17520069.6622698  
SRR17520069.6636091  
SRR17520069.6638326  
SRR17520069.6640580  
SRR17520069.6642562  
SRR17520069.6642622  
SRR17520069.6644984  
SRR17520069.6646804  
SRR17520069.6657665  
SRR17520069.6657734  
SRR17520069.6659487

SRR17520069.6660938  
SRR17520069.6663785  
SRR17520069.6665946  
SRR17520069.6666046  
SRR17520069.6668200  
SRR17520069.6672887  
SRR17520069.6672919  
SRR17520069.6678546  
SRR17520069.6678593  
SRR17520069.6679234  
SRR17520069.6679236  
SRR17520069.6679238  
SRR17520069.6679240  
SRR17520069.6679242  
SRR17520069.6679244  
SRR17520069.6679246  
SRR17520069.6685400  
SRR17520069.6686533  
SRR17520069.6689290  
SRR17520069.6689330  
SRR17520069.6691488  
SRR17520069.6691492  
SRR17520069.6701429  
SRR17520069.6701473  
SRR17520069.6710151  
SRR17520069.6712701  
SRR17520069.6719187  
SRR17520069.6744174  
SRR17520069.6744176  
SRR17520069.6744178  
SRR17520069.6744180  
SRR17520069.6744509  
SRR17520069.6752369  
SRR17520069.6766290  
SRR17520069.6768773  
SRR17520069.6781813  
SRR17520069.6781815  
SRR17520069.6781817  
SRR17520069.6781819  
SRR17520069.6781821  
SRR17520069.6781823  
SRR17520069.6781825  
SRR17520069.6781827  
SRR17520069.6781829  
SRR17520069.6781831  
SRR17520069.6781833  
SRR17520069.6781835

SRR17520069.6787705  
SRR17520069.6795693  
SRR17520069.6795713  
SRR17520069.6801171  
SRR17520069.6803424  
SRR17520069.6810400  
SRR17520069.6810402  
SRR17520069.6810406  
SRR17520069.6810408  
SRR17520069.6810414  
SRR17520069.6810418  
SRR17520069.6810666  
SRR17520069.6810726  
SRR17520069.6810734  
SRR17520069.6810738  
SRR17520069.6812373  
SRR17520069.6820596  
SRR17520069.6821168  
SRR17520069.6824866  
SRR17520069.6826072  
SRR17520069.6837596  
SRR17520069.6838796  
SRR17520069.6854662  
SRR17520069.6855660  
SRR17520069.6855674  
SRR17520069.6858108  
SRR17520069.6862949  
SRR17520069.6863154  
SRR17520069.6867033  
SRR17520069.6876270  
SRR17520069.6879369  
SRR17520069.6879393  
SRR17520069.6903593  
SRR17520069.6905195  
SRR17520069.6914011  
SRR17520069.6943986  
SRR17520069.6953144  
SRR17520069.6954826  
SRR17520069.6954858  
SRR17520069.6964350  
SRR17520069.6965142  
SRR17520069.6965162  
SRR17520069.6967623  
SRR17520069.6974705  
SRR17520069.6976586  
SRR17520069.6980804  
SRR17520069.6981926



SRR17520069.6982185  
SRR17520069.6984773  
SRR17520069.6991882  
SRR17520069.6992699  
SRR17520069.6995964  
SRR17520069.7000489  
SRR17520069.7009863  
SRR17520069.7013858  
SRR17520069.7016081  
SRR17520069.7016780  
SRR17520069.7016972  
SRR17520069.7017672  
SRR17520069.7019815  
SRR17520069.7021467  
SRR17520069.7021473  
SRR17520069.7033393  
SRR17520069.7033508  
SRR17520069.7042212  
SRR17520069.7050685  
SRR17520069.7062520  
SRR17520069.7063735  
SRR17520069.7082053  
SRR17520069.7084499  
SRR17520069.7089413  
SRR17520069.7101938  
SRR17520069.7102345  
SRR17520069.7107262  
SRR17520069.7113835  
SRR17520069.7113844  
SRR17520069.7134865  
SRR17520069.7134867  
SRR17520069.7134874  
SRR17520069.7134888  
SRR17520069.7145713  
SRR17520069.7149148  
SRR17520069.7149152  
SRR17520069.7161150  
SRR17520069.7165720  
SRR17520069.7168382  
SRR17520069.7169074  
SRR17520069.7169868  
SRR17520069.7173583  
SRR17520069.7173607  
SRR17520069.7178849  
SRR17520069.7180779  
SRR17520069.7185009  
SRR17520069.7191437

SRR17520069. 7192069  
SRR17520069. 7197043  
SRR17520069. 7197556  
SRR17520069. 7198579  
SRR17520069. 7198618  
SRR17520069. 7205300  
SRR17520069. 7216880  
SRR17520069. 7220412  
SRR17520069. 7220455  
SRR17520069. 7224701  
SRR17520069. 7224751  
SRR17520069. 7224761  
SRR17520069. 7226389  
SRR17520069. 7227995  
SRR17520069. 7228986  
SRR17520069. 7231842  
SRR17520069. 7231849  
SRR17520069. 7231863  
SRR17520069. 7236121  
SRR17520069. 7237132  
SRR17520069. 7237140  
SRR17520069. 7249771  
SRR17520069. 7251152  
SRR17520069. 7251357  
SRR17520069. 7251363  
SRR17520069. 7251369  
SRR17520069. 7251376  
SRR17520069. 7251377  
SRR17520069. 7251382  
SRR17520069. 7251438  
SRR17520069. 7251449  
SRR17520069. 7253733  
SRR17520069. 7254118  
SRR17520069. 7258335  
SRR17520069. 7261947  
SRR17520069. 7284449  
SRR17520069. 7296951  
SRR17520069. 7307279  
SRR17520069. 7307281  
SRR17520069. 7307283  
SRR17520069. 7307285  
SRR17520069. 7307287  
SRR17520069. 7307289  
SRR17520069. 7307291  
SRR17520069. 7307293  
SRR17520069. 7307295  
SRR17520069. 7307297

SRR17520069. 7307299  
SRR17520069. 7307301  
SRR17520069. 7307303  
SRR17520069. 7307305  
SRR17520069. 7307307  
SRR17520069. 7307311  
SRR17520069. 7307315  
SRR17520069. 7307317  
SRR17520069. 7307319  
SRR17520069. 7307321  
SRR17520069. 7307323  
SRR17520069. 7307325  
SRR17520069. 7307327  
SRR17520069. 7307329  
SRR17520069. 7307331  
SRR17520069. 7307335  
SRR17520069. 7307337  
SRR17520069. 7307339  
SRR17520069. 7307341  
SRR17520069. 7307343  
SRR17520069. 7307345  
SRR17520069. 7308711  
SRR17520069. 7311091  
SRR17520069. 7318882  
SRR17520069. 7327091  
SRR17520069. 7327140  
SRR17520069. 7327790  
SRR17520069. 7327794  
SRR17520069. 7328951  
SRR17520069. 7329033  
SRR17520069. 7344681  
SRR17520069. 7362519  
SRR17520069. 7370276  
SRR17520069. 7370987  
SRR17520069. 7387946  
SRR17520069. 7387965  
SRR17520069. 7388024  
SRR17520069. 7388043  
SRR17520069. 7388052  
SRR17520069. 7388054  
SRR17520069. 7388068  
SRR17520069. 7388081  
SRR17520069. 7388084  
SRR17520069. 7392536  
SRR17520069. 7398489  
SRR17520069. 7398497  
SRR17520069. 7398503

SRR17520069.7401829  
SRR17520069.7401853  
SRR17520069.7424571  
SRR17520069.7451012  
SRR17520069.7452139  
SRR17520069.7452387  
SRR17520069.7455641  
SRR17520069.7456574  
SRR17520069.7470017  
SRR17520069.7471812  
SRR17520069.7472355  
SRR17520069.7472481  
SRR17520069.7478233  
SRR17520069.7478235  
SRR17520069.7478237  
SRR17520069.7478239  
SRR17520069.7478241  
SRR17520069.7478243  
SRR17520069.7478245  
SRR17520069.7478247  
SRR17520069.7478249  
SRR17520069.7478251  
SRR17520069.7478253  
SRR17520069.7478255  
SRR17520069.7478257  
SRR17520069.7478259  
SRR17520069.7478261  
SRR17520069.7478610  
SRR17520069.7479655  
SRR17520069.7483034  
SRR17520069.7483038  
SRR17520069.7488856  
SRR17520069.7488871  
SRR17520069.7488992  
SRR17520069.7490504  
SRR17520069.7491634  
SRR17520069.7491921  
SRR17520069.7500970  
SRR17520069.7512681  
SRR17520069.7512682  
SRR17520069.7515186  
SRR17520069.7524823  
SRR17520069.7529801  
SRR17520069.7533313  
SRR17520069.7535332  
SRR17520069.7545052  
SRR17520069.7545402

SRR17520069. 7549746  
SRR17520069. 7556114  
SRR17520069. 7557147  
SRR17520069. 7559737  
SRR17520069. 7564620  
SRR17520069. 7566128  
SRR17520069. 7569770  
SRR17520069. 7579003  
SRR17520069. 7579005  
SRR17520069. 7579007  
SRR17520069. 7579009  
SRR17520069. 7579011  
SRR17520069. 7579013  
SRR17520069. 7579015  
SRR17520069. 7579017  
SRR17520069. 7579019  
SRR17520069. 7579021  
SRR17520069. 7579023  
SRR17520069. 7579025  
SRR17520069. 7579027  
SRR17520069. 7579029  
SRR17520069. 7579031  
SRR17520069. 7579033  
SRR17520069. 7579035  
SRR17520069. 7579037  
SRR17520069. 7579039  
SRR17520069. 7579041  
SRR17520069. 7579043  
SRR17520069. 7579045  
SRR17520069. 7579047  
SRR17520069. 7579049  
SRR17520069. 7579051  
SRR17520069. 7579053  
SRR17520069. 7579055  
SRR17520069. 7579057  
SRR17520069. 7579059  
SRR17520069. 7579061  
SRR17520069. 7579063  
SRR17520069. 7579065  
SRR17520069. 7579067  
SRR17520069. 7579069  
SRR17520069. 7579071  
SRR17520069. 7579073  
SRR17520069. 7579075  
SRR17520069. 7579077  
SRR17520069. 7579419  
SRR17520069. 7592330

SRR17520069. 7599224  
SRR17520069. 7603656  
SRR17520069. 7608774  
SRR17520069. 7612989  
SRR17520069. 7631211  
SRR17520069. 7642604  
SRR17520069. 7682053  
SRR17520069. 7688303  
SRR17520069. 7688312  
SRR17520069. 7688323  
SRR17520069. 7689316  
SRR17520069. 7690022  
SRR17520069. 7694500  
SRR17520069. 7696433  
SRR17520069. 7701370  
SRR17520069. 7703353  
SRR17520069. 7704675  
SRR17520069. 7705132  
SRR17520069. 7707963  
SRR17520069. 7721246  
SRR17520069. 7721678  
SRR17520069. 7738378  
SRR17520069. 7738668  
SRR17520069. 7738704  
SRR17520069. 7767483  
SRR17520069. 7778449  
SRR17520069. 7787006  
SRR17520069. 7790507  
SRR17520069. 7792696  
SRR17520069. 7796731  
SRR17520069. 7796732  
SRR17520069. 7796734  
SRR17520069. 7799375  
SRR17520069. 7802911  
SRR17520069. 7806336  
SRR17520069. 7807203  
SRR17520069. 7809557  
SRR17520069. 7811433  
SRR17520069. 7813597  
SRR17520069. 7813665  
SRR17520069. 7814318  
SRR17520069. 7821622  
SRR17520069. 7823975  
SRR17520069. 7827360  
SRR17520069. 7829100  
SRR17520069. 7829152  
SRR17520069. 7829183

SRR17520069. 7835356  
SRR17520069. 7835705  
SRR17520069. 7836144  
SRR17520069. 7838164  
SRR17520069. 7844620  
SRR17520069. 7848283  
SRR17520069. 7857295  
SRR17520069. 7859837  
SRR17520069. 7859838  
SRR17520069. 7876460  
SRR17520069. 7891340  
SRR17520069. 7892864  
SRR17520069. 7893155  
SRR17520069. 7897227  
SRR17520069. 7898576  
SRR17520069. 7898634  
SRR17520069. 7898646  
SRR17520069. 7898650  
SRR17520069. 7898658  
SRR17520069. 7898660  
SRR17520069. 7898730  
SRR17520069. 7900667  
SRR17520069. 7903013  
SRR17520069. 7906222  
SRR17520069. 7907798  
SRR17520069. 7908376  
SRR17520069. 7927235  
SRR17520069. 7927247  
SRR17520069. 7927249  
SRR17520069. 7927251  
SRR17520069. 7927254  
SRR17520069. 7927258  
SRR17520069. 7927262  
SRR17520069. 7927265  
SRR17520069. 7927269  
SRR17520069. 7929147  
SRR17520069. 7964156  
SRR17520069. 7964276  
SRR17520069. 7966468  
SRR17520069. 7978993  
SRR17520069. 7978997  
SRR17520069. 7984317  
SRR17520069. 7986302  
SRR17520069. 7986314  
SRR17520069. 7990651  
SRR17520069. 7990667  
SRR17520069. 8014727

SRR17520069.8026591  
SRR17520069.8026599  
SRR17520069.8026607  
SRR17520069.8026609  
SRR17520069.8026611  
SRR17520069.8026623  
SRR17520069.8026625  
SRR17520069.8026627  
SRR17520069.8026629  
SRR17520069.8034853  
SRR17520069.8034858  
SRR17520069.8034860  
SRR17520069.8034862  
SRR17520069.8034869  
SRR17520069.8047278  
SRR17520069.8074441  
SRR17520069.8074443  
SRR17520069.8074445  
SRR17520069.8074451  
SRR17520069.8074455  
SRR17520069.8077651  
SRR17520069.8080870  
SRR17520069.8084585  
SRR17520069.8084816  
SRR17520069.8086040  
SRR17520069.8086432  
SRR17520069.8086452  
SRR17520069.8086462  
SRR17520069.8086470  
SRR17520069.8093570  
SRR17520069.8106608  
SRR17520069.8107036  
SRR17520069.8107038  
SRR17520069.8107064  
SRR17520069.8112414  
SRR17520069.8112416  
SRR17520069.8126486  
SRR17520069.8133569  
SRR17520069.8136306  
SRR17520069.8136781  
SRR17520069.8147606  
SRR17520069.8151323  
SRR17520069.8158656  
SRR17520069.8160978  
SRR17520069.8163551  
SRR17520069.8163563  
SRR17520069.8179810



SRR17520069.8179813  
SRR17520069.8180212  
SRR17520069.8192355  
SRR17520069.8204412  
SRR17520069.8204833  
SRR17520069.8205600  
SRR17520069.8212969  
SRR17520069.8213079  
SRR17520069.8213082  
SRR17520069.8215776  
SRR17520069.8222513  
SRR17520069.8222525  
SRR17520069.8222563  
SRR17520069.8224241  
SRR17520069.8224980  
SRR17520069.8224982  
SRR17520069.8224984  
SRR17520069.8224986  
SRR17520069.8224988  
SRR17520069.8224990  
SRR17520069.8224992  
SRR17520069.8224994  
SRR17520069.8224996  
SRR17520069.8224998  
SRR17520069.8225000  
SRR17520069.8225002  
SRR17520069.8225004  
SRR17520069.8225008  
SRR17520069.8225010  
SRR17520069.8225012  
SRR17520069.8225014  
SRR17520069.8225016  
SRR17520069.8225018  
SRR17520069.8225020  
SRR17520069.8225022  
SRR17520069.8225024  
SRR17520069.8225026  
SRR17520069.8225028  
SRR17520069.8225034  
SRR17520069.8234641  
SRR17520069.8243364  
SRR17520069.8244331  
SRR17520069.8245475  
SRR17520069.8245486  
SRR17520069.8248738  
SRR17520069.8253287  
SRR17520069.8254997

SRR17520069.8254999  
SRR17520069.8255001  
SRR17520069.8255003  
SRR17520069.8255007  
SRR17520069.8255011  
SRR17520069.8255013  
SRR17520069.8255015  
SRR17520069.8255017  
SRR17520069.8255021  
SRR17520069.8255023  
SRR17520069.8255025  
SRR17520069.8255029  
SRR17520069.8255031  
SRR17520069.8255033  
SRR17520069.8255035  
SRR17520069.8255037  
SRR17520069.8255039  
SRR17520069.8255041  
SRR17520069.8255043  
SRR17520069.8255045  
SRR17520069.8255047  
SRR17520069.8255049  
SRR17520069.8255051  
SRR17520069.8255055  
SRR17520069.8255059  
SRR17520069.8255063  
SRR17520069.8255067  
SRR17520069.8255069  
SRR17520069.8255071  
SRR17520069.8255075  
SRR17520069.8255077  
SRR17520069.8255079  
SRR17520069.8255083  
SRR17520069.8255085  
SRR17520069.8255087  
SRR17520069.8255091  
SRR17520069.8255095  
SRR17520069.8255097  
SRR17520069.8255099  
SRR17520069.8255103  
SRR17520069.8255105  
SRR17520069.8255107  
SRR17520069.8255109  
SRR17520069.8255111  
SRR17520069.8255113  
SRR17520069.8255115  
SRR17520069.8255117

SRR17520069.8255119  
SRR17520069.8255121  
SRR17520069.8255123  
SRR17520069.8255125  
SRR17520069.8258189  
SRR17520069.8266408  
SRR17520069.8269078  
SRR17520069.8275478  
SRR17520069.8275907  
SRR17520069.8289672  
SRR17520069.8290275  
SRR17520069.8291647  
SRR17520069.8299375  
SRR17520069.8302027  
SRR17520069.8306465  
SRR17520069.8306466  
SRR17520069.8308087  
SRR17520069.8315773  
SRR17520069.8317621  
SRR17520069.8325949  
SRR17520069.8329267  
SRR17520069.8333856  
SRR17520069.8335710  
SRR17520069.8347114  
SRR17520069.8348164  
SRR17520069.8354523  
SRR17520069.8360323  
SRR17520069.8362986  
SRR17520069.8364034  
SRR17520069.8368814  
SRR17520069.8379821  
SRR17520069.8384595  
SRR17520069.8386861  
SRR17520069.8389972  
SRR17520069.8397707  
SRR17520069.8404807  
SRR17520069.8404853  
SRR17520069.8404859  
SRR17520069.8423465  
SRR17520069.8442508  
SRR17520069.8443360  
SRR17520069.8443362  
SRR17520069.8443364  
SRR17520069.8447244  
SRR17520069.8449521  
SRR17520069.8454121  
SRR17520069.8463728

SRR17520069.8463732  
SRR17520069.8467192  
SRR17520069.8472627  
SRR17520069.8473163  
SRR17520069.8481306  
SRR17520069.8486149  
SRR17520069.8515310  
SRR17520069.8519923  
SRR17520069.8519949  
SRR17520069.8522647  
SRR17520069.8524197  
SRR17520069.8524198  
SRR17520069.8524201  
SRR17520069.8524264  
SRR17520069.8524268  
SRR17520069.8524276  
SRR17520069.8526566  
SRR17520069.8526589  
SRR17520069.8526595  
SRR17520069.8526603  
SRR17520069.8526616  
SRR17520069.8526624  
SRR17520069.8526625  
SRR17520069.8526632  
SRR17520069.8526647  
SRR17520069.8526650  
SRR17520069.8526651  
SRR17520069.8526656  
SRR17520069.8526683  
SRR17520069.8526693  
SRR17520069.8526694  
SRR17520069.8531190  
SRR17520069.8536538  
SRR17520069.8544737  
SRR17520069.8551218  
SRR17520069.8551511  
SRR17520069.8552667  
SRR17520069.8556820  
SRR17520069.8556822  
SRR17520069.8556824  
SRR17520069.8565968  
SRR17520069.8569640  
SRR17520069.8575628  
SRR17520069.8575638  
SRR17520069.8591765  
SRR17520069.8593135  
SRR17520069.8593771

SRR17520069.8603811  
SRR17520069.8607424  
SRR17520069.8617208  
SRR17520069.8618191  
SRR17520069.8642364  
SRR17520069.8648500  
SRR17520069.8648510  
SRR17520069.8657343  
SRR17520069.8657629  
SRR17520069.8657816  
SRR17520069.8662396  
SRR17520069.8672327  
SRR17520069.8680409  
SRR17520069.8693101  
SRR17520069.8693125  
SRR17520069.8700559  
SRR17520069.8700595  
SRR17520069.8700605  
SRR17520069.8702688  
SRR17520069.8705164  
SRR17520069.8705166  
SRR17520069.8705168  
SRR17520069.8705170  
SRR17520069.8705172  
SRR17520069.8705174  
SRR17520069.8705178  
SRR17520069.8705180  
SRR17520069.8705184  
SRR17520069.8705186  
SRR17520069.8705188  
SRR17520069.8705190  
SRR17520069.8705192  
SRR17520069.8705194  
SRR17520069.8705196  
SRR17520069.8705198  
SRR17520069.8705200  
SRR17520069.8705202  
SRR17520069.8705204  
SRR17520069.8705206  
SRR17520069.8707109  
SRR17520069.8718011  
SRR17520069.8726626  
SRR17520069.8730421  
SRR17520069.8738903  
SRR17520069.8744757  
SRR17520069.8751706  
SRR17520069.8751728

SRR17520069.8758670  
SRR17520069.8767223  
SRR17520069.8769175  
SRR17520069.8773265  
SRR17520069.8788850  
SRR17520069.8793041  
SRR17520069.8797788  
SRR17520069.8815382  
SRR17520069.8817245  
SRR17520069.8821802  
SRR17520069.8832369  
SRR17520069.8832374  
SRR17520069.8832377  
SRR17520069.8836919  
SRR17520069.8843149  
SRR17520069.8848328  
SRR17520069.8849942  
SRR17520069.8857301  
SRR17520069.8861455  
SRR17520069.8861460  
SRR17520069.8863298  
SRR17520069.8879337  
SRR17520069.8879340  
SRR17520069.8879341  
SRR17520069.8879364  
SRR17520069.8879381  
SRR17520069.8879397  
SRR17520069.8879431  
SRR17520069.8879454  
SRR17520069.8879466  
SRR17520069.8879468  
SRR17520069.8879470  
SRR17520069.8888164  
SRR17520069.8910572  
SRR17520069.8912111  
SRR17520069.8922572  
SRR17520069.8939440  
SRR17520069.8944898  
SRR17520069.8950471  
SRR17520069.8950475  
SRR17520069.8971572  
SRR17520069.8974448  
SRR17520069.8987237  
SRR17520069.8987239  
SRR17520069.8987268  
SRR17520069.9006174  
SRR17520069.9011923

SRR17520069.9014150  
SRR17520069.9017114  
SRR17520069.9024616  
SRR17520069.9026713  
SRR17520069.9031274  
SRR17520069.9043819  
SRR17520069.9043926  
SRR17520069.9047115  
SRR17520069.9048407  
SRR17520069.9052490  
SRR17520069.9052496  
SRR17520069.9052500  
SRR17520069.9052508  
SRR17520069.9060568  
SRR17520069.9061549  
SRR17520069.9061569  
SRR17520069.9077260  
SRR17520069.9081403  
SRR17520069.9083597  
SRR17520069.9084260  
SRR17520069.9084274  
SRR17520069.9084284  
SRR17520069.9089018  
SRR17520069.9090807  
SRR17520069.9091009  
SRR17520069.9100810  
SRR17520069.9102607  
SRR17520069.9104895  
SRR17520069.9104899  
SRR17520069.9104901  
SRR17520069.9116000  
SRR17520069.9120200  
SRR17520069.9125184  
SRR17520069.9140629  
SRR17520069.9148473  
SRR17520069.9157173  
SRR17520069.9159658  
SRR17520069.9159695  
SRR17520069.9159701  
SRR17520069.9161010  
SRR17520069.9162342  
SRR17520069.9170573  
SRR17520069.9173162  
SRR17520069.9174203  
SRR17520069.9176871  
SRR17520069.9178572  
SRR17520069.9180288

SRR17520069.9182587  
SRR17520069.9184350  
SRR17520069.9187364  
SRR17520069.9187366  
SRR17520069.9187368  
SRR17520069.9187370  
SRR17520069.9187372  
SRR17520069.9187374  
SRR17520069.9187376  
SRR17520069.9187378  
SRR17520069.9187380  
SRR17520069.9187382  
SRR17520069.9187384  
SRR17520069.9187388  
SRR17520069.9187390  
SRR17520069.9187392  
SRR17520069.9187394  
SRR17520069.9187396  
SRR17520069.9187398  
SRR17520069.9187402  
SRR17520069.9187404  
SRR17520069.9187406  
SRR17520069.9187408  
SRR17520069.9187410  
SRR17520069.9187412  
SRR17520069.9187414  
SRR17520069.9187416  
SRR17520069.9187418  
SRR17520069.9187420  
SRR17520069.9187422  
SRR17520069.9187424  
SRR17520069.9187426  
SRR17520069.9187428  
SRR17520069.9187430  
SRR17520069.9187432  
SRR17520069.9187434  
SRR17520069.9187436  
SRR17520069.9187438  
SRR17520069.9187442  
SRR17520069.9187444  
SRR17520069.9187446  
SRR17520069.9187448  
SRR17520069.9187450  
SRR17520069.9187452  
SRR17520069.9187454  
SRR17520069.9187456  
SRR17520069.9187458



SRR17520069.9187460  
SRR17520069.9187462  
SRR17520069.9187464  
SRR17520069.9187466  
SRR17520069.9188163  
SRR17520069.9189150  
SRR17520069.9200723  
SRR17520069.9200725  
SRR17520069.9200727  
SRR17520069.9200729  
SRR17520069.9200731  
SRR17520069.9200733  
SRR17520069.9200735  
SRR17520069.9200737  
SRR17520069.9200739  
SRR17520069.9200741  
SRR17520069.9200743  
SRR17520069.9200745  
SRR17520069.9200747  
SRR17520069.9200749  
SRR17520069.9200751  
SRR17520069.9200753  
SRR17520069.9200755  
SRR17520069.9200757  
SRR17520069.9200759  
SRR17520069.9200761  
SRR17520069.9200763  
SRR17520069.9200765  
SRR17520069.9200767  
SRR17520069.9200769  
SRR17520069.9200771  
SRR17520069.9200773  
SRR17520069.9200775  
SRR17520069.9200777  
SRR17520069.9200779  
SRR17520069.9200781  
SRR17520069.9200783  
SRR17520069.9200785  
SRR17520069.9200787  
SRR17520069.9200789  
SRR17520069.9200791  
SRR17520069.9200793  
SRR17520069.9200795  
SRR17520069.9200797  
SRR17520069.9200799  
SRR17520069.9200801  
SRR17520069.9200803

SRR17520069. 9200805  
SRR17520069. 9200807  
SRR17520069. 9200809  
SRR17520069. 9200811  
SRR17520069. 9200813  
SRR17520069. 9200815  
SRR17520069. 9200817  
SRR17520069. 9200819  
SRR17520069. 9200821  
SRR17520069. 9200823  
SRR17520069. 9200825  
SRR17520069. 9200827  
SRR17520069. 9200829  
SRR17520069. 9200831  
SRR17520069. 9200833  
SRR17520069. 9200835  
SRR17520069. 9200837  
SRR17520069. 9200839  
SRR17520069. 9200841  
SRR17520069. 9200843  
SRR17520069. 9200845  
SRR17520069. 9200847  
SRR17520069. 9200849  
SRR17520069. 9200851  
SRR17520069. 9200853  
SRR17520069. 9200855  
SRR17520069. 9200857  
SRR17520069. 9200859  
SRR17520069. 9200861  
SRR17520069. 9200863  
SRR17520069. 9200865  
SRR17520069. 9200867  
SRR17520069. 9200869  
SRR17520069. 9200871  
SRR17520069. 9200873  
SRR17520069. 9200875  
SRR17520069. 9200877  
SRR17520069. 9200879  
SRR17520069. 9200881  
SRR17520069. 9200883  
SRR17520069. 9200885  
SRR17520069. 9200887  
SRR17520069. 9200889  
SRR17520069. 9200893  
SRR17520069. 9200895  
SRR17520069. 9200897  
SRR17520069. 9200899

SRR17520069.9200901  
SRR17520069.9200903  
SRR17520069.9200905  
SRR17520069.9200907  
SRR17520069.9200909  
SRR17520069.9200911  
SRR17520069.9200913  
SRR17520069.9200915  
SRR17520069.9200917  
SRR17520069.9200919  
SRR17520069.9200921  
SRR17520069.9202181  
SRR17520069.9202184  
SRR17520069.9202750  
SRR17520069.9205576  
SRR17520069.9205703  
SRR17520069.9219026  
SRR17520069.9229567  
SRR17520069.9235318  
SRR17520069.9237826  
SRR17520069.9238098  
SRR17520069.9243511  
SRR17520069.9243512  
SRR17520069.9243620  
SRR17520069.9245475  
SRR17520069.9245487  
SRR17520069.9248645  
SRR17520069.9251431  
SRR17520069.9251539  
SRR17520069.9251703  
SRR17520069.9254754  
SRR17520069.9273434  
SRR17520069.9274094  
SRR17520069.9275182  
SRR17520069.9275523  
SRR17520069.9278816  
SRR17520069.9279909  
SRR17520069.9282434  
SRR17520069.9297670  
SRR17520069.9298349  
SRR17520069.9298351  
SRR17520069.9298353  
SRR17520069.9298355  
SRR17520069.9298357  
SRR17520069.9298359  
SRR17520069.9298361  
SRR17520069.9298363

SRR17520069.9298365  
SRR17520069.9298367  
SRR17520069.9298369  
SRR17520069.9298371  
SRR17520069.9298373  
SRR17520069.9303352  
SRR17520069.9303981  
SRR17520069.9305443  
SRR17520069.9314085  
SRR17520069.9314157  
SRR17520069.9328391  
SRR17520069.9338640  
SRR17520069.9351583  
SRR17520069.9357936  
SRR17520069.9358688  
SRR17520069.9359047  
SRR17520069.9359920  
SRR17520069.9367572  
SRR17520069.9369624  
SRR17520069.9369631  
SRR17520069.9369633  
SRR17520069.9369637  
SRR17520069.9369639  
SRR17520069.9369641  
SRR17520069.9369643  
SRR17520069.9369645  
SRR17520069.9369647  
SRR17520069.9369651  
SRR17520069.9369994  
SRR17520069.9403819  
SRR17520069.9404860  
SRR17520069.9409347  
SRR17520069.9416998  
SRR17520069.9417000  
SRR17520069.9417002  
SRR17520069.9417004  
SRR17520069.9417006  
SRR17520069.9417008  
SRR17520069.9428394  
SRR17520069.9428397  
SRR17520069.9442277  
SRR17520069.9442279  
SRR17520069.9445027  
SRR17520069.9451319  
SRR17520069.9470833  
SRR17520069.9470835  
SRR17520069.9470837

SRR17520069.9470839  
SRR17520069.9470841  
SRR17520069.9470843  
SRR17520069.9470845  
SRR17520069.9470847  
SRR17520069.9470849  
SRR17520069.9470851  
SRR17520069.9470853  
SRR17520069.9470855  
SRR17520069.9470857  
SRR17520069.9470859  
SRR17520069.9470861  
SRR17520069.9470863  
SRR17520069.9470865  
SRR17520069.9470867  
SRR17520069.9470869  
SRR17520069.9470871  
SRR17520069.9470873  
SRR17520069.9470875  
SRR17520069.9470877  
SRR17520069.9470883  
SRR17520069.9470885  
SRR17520069.9471287  
SRR17520069.9472181  
SRR17520069.9479205  
SRR17520069.9487157  
SRR17520069.9489300  
SRR17520069.9489393  
SRR17520069.9489994  
SRR17520069.9490002  
SRR17520069.9491539  
SRR17520069.9492309  
SRR17520069.9498777  
SRR17520069.9498791  
SRR17520069.9498805  
SRR17520069.9505203  
SRR17520069.9505319  
SRR17520069.9517132  
SRR17520069.9519338  
SRR17520069.9522500  
SRR17520069.9525613  
SRR17520069.9531843  
SRR17520069.9532790  
SRR17520069.9537316  
SRR17520069.9537336  
SRR17520069.9538564  
SRR17520069.9540610

SRR17520069.9541759  
SRR17520069.9571668  
SRR17520069.9583104  
SRR17520069.9583170  
SRR17520069.9588890  
SRR17520069.9588895  
SRR17520069.9588896  
SRR17520069.9594141  
SRR17520069.9598584  
SRR17520069.9598593  
SRR17520069.9601227  
SRR17520069.9606610  
SRR17520069.9608589  
SRR17520069.9613083  
SRR17520069.9623030  
SRR17520069.9641128  
SRR17520069.9650845  
SRR17520069.9657902  
SRR17520069.9659637  
SRR17520069.9694814  
SRR17520069.9694848  
SRR17520069.9699116  
SRR17520069.9710106  
SRR17520069.9710112  
SRR17520069.9711997  
SRR17520069.9712186  
SRR17520069.9713261  
SRR17520069.9715780  
SRR17520069.9720266  
SRR17520069.9732361  
SRR17520069.9735218  
SRR17520069.9735646  
SRR17520069.9736723  
SRR17520069.9741207  
SRR17520069.9753048  
SRR17520069.9753241  
SRR17520069.9755611  
SRR17520069.9760764  
SRR17520069.9764812  
SRR17520069.9766588  
SRR17520069.9779154  
SRR17520069.9781904  
SRR17520069.9783823  
SRR17520069.9783841  
SRR17520069.9790304  
SRR17520069.9790306  
SRR17520069.9790308

SRR17520069.9790310  
SRR17520069.9792845  
SRR17520069.9802234  
SRR17520069.9802372  
SRR17520069.9813473  
SRR17520069.9813475  
SRR17520069.9813476  
SRR17520069.9813483  
SRR17520069.9843004  
SRR17520069.9849169  
SRR17520069.9853857  
SRR17520069.9859936  
SRR17520069.9859942  
SRR17520069.9872889  
SRR17520069.9873087  
SRR17520069.9874383  
SRR17520069.9874669  
SRR17520069.9892946  
SRR17520069.9893012  
SRR17520069.9893038  
SRR17520069.9899493  
SRR17520069.9901129  
SRR17520069.9901131  
SRR17520069.9901133  
SRR17520069.9901135  
SRR17520069.9901137  
SRR17520069.9901139  
SRR17520069.9901141  
SRR17520069.9901143  
SRR17520069.9901145  
SRR17520069.9901147  
SRR17520069.9901149  
SRR17520069.9901151  
SRR17520069.9901153  
SRR17520069.9901155  
SRR17520069.9901159  
SRR17520069.9901161  
SRR17520069.9901163  
SRR17520069.9901165  
SRR17520069.9901167  
SRR17520069.9901169  
SRR17520069.9901171  
SRR17520069.9901173  
SRR17520069.9901175  
SRR17520069.9901177  
SRR17520069.9901179  
SRR17520069.9901181

SRR17520069.9905591  
SRR17520069.9905595  
SRR17520069.9911164  
SRR17520069.9914491  
SRR17520069.9917974  
SRR17520069.9920438  
SRR17520069.9920439  
SRR17520069.9920440  
SRR17520069.9920441  
SRR17520069.9920442  
SRR17520069.9923600  
SRR17520069.9934535  
SRR17520069.9937599  
SRR17520069.9941272  
SRR17520069.9946898  
SRR17520069.9953443  
SRR17520069.9953912  
SRR17520069.9958232  
SRR17520069.9971749  
SRR17520069.9980577  
SRR17520069.9980595  
SRR17520069.9980916  
SRR17520069.9980920  
SRR17520069.9983749  
SRR17520069.9983753  
SRR17520069.9983763  
SRR17520069.9983767  
SRR17520069.9983781  
SRR17520069.9983786  
SRR17520069.9983788  
SRR17520069.9987145  
SRR17520069.9996803  
SRR17520069.9996812  
SRR17520069.9997060  
SRR17520069.10001805  
SRR17520069.10014141  
SRR17520069.10017383  
SRR17520069.10029975  
SRR17520069.10030173  
SRR17520069.10030305  
SRR17520069.10033011  
SRR17520069.10040889  
SRR17520069.10041313  
SRR17520069.10041323  
SRR17520069.10042389  
SRR17520069.10042806  
SRR17520069.10051246



SRR17520069.10051263  
SRR17520069.10051267  
SRR17520069.10053457  
SRR17520069.10061402  
SRR17520069.10062323  
SRR17520069.10063808  
SRR17520069.10063817  
SRR17520069.10065734  
SRR17520069.10067453  
SRR17520069.10068367  
SRR17520069.10068763  
SRR17520069.10076920  
SRR17520069.10076922  
SRR17520069.10076924  
SRR17520069.10076926  
SRR17520069.10076928  
SRR17520069.10076930  
SRR17520069.10076932  
SRR17520069.10076934  
SRR17520069.10076936  
SRR17520069.10076938  
SRR17520069.10076940  
SRR17520069.10076942  
SRR17520069.10076944  
SRR17520069.10076946  
SRR17520069.10076948  
SRR17520069.10076950  
SRR17520069.10076952  
SRR17520069.10076954  
SRR17520069.10076956  
SRR17520069.10076958  
SRR17520069.10076960  
SRR17520069.10076962  
SRR17520069.10076964  
SRR17520069.10076966  
SRR17520069.10076968  
SRR17520069.10076970  
SRR17520069.10076972  
SRR17520069.10076974  
SRR17520069.10076976  
SRR17520069.10076978  
SRR17520069.10076980  
SRR17520069.10076982  
SRR17520069.10076984  
SRR17520069.10076986  
SRR17520069.10076988  
SRR17520069.10076990

SRR17520069.10081824  
SRR17520069.10082615  
SRR17520069.10085496  
SRR17520069.10091206  
SRR17520069.10102753  
SRR17520069.10102757  
SRR17520069.10109634  
SRR17520069.10111493  
SRR17520069.10113923  
SRR17520069.10119388  
SRR17520069.10119390  
SRR17520069.10119392  
SRR17520069.10119396  
SRR17520069.10119398  
SRR17520069.10119400  
SRR17520069.10119402  
SRR17520069.10119404  
SRR17520069.10119406  
SRR17520069.10119408  
SRR17520069.10119410  
SRR17520069.10119412  
SRR17520069.10119414  
SRR17520069.10119416  
SRR17520069.10119418  
SRR17520069.10119422  
SRR17520069.10119426  
SRR17520069.10119430  
SRR17520069.10119434  
SRR17520069.10119436  
SRR17520069.10119438  
SRR17520069.10119440  
SRR17520069.10119442  
SRR17520069.10119444  
SRR17520069.10119446  
SRR17520069.10119448  
SRR17520069.10119450  
SRR17520069.10120687  
SRR17520069.10126588  
SRR17520069.10126590  
SRR17520069.10126592  
SRR17520069.10126594  
SRR17520069.10126596  
SRR17520069.10126598  
SRR17520069.10126600  
SRR17520069.10126602  
SRR17520069.10126604  
SRR17520069.10126608

SRR17520069.10126610  
SRR17520069.10126612  
SRR17520069.10126614  
SRR17520069.10126617  
SRR17520069.10126619  
SRR17520069.10126621  
SRR17520069.10126623  
SRR17520069.10126625  
SRR17520069.10128154  
SRR17520069.10140364  
SRR17520069.10140372  
SRR17520069.10140396  
SRR17520069.10141681  
SRR17520069.10142853  
SRR17520069.10146602  
SRR17520069.10146624  
SRR17520069.10148032  
SRR17520069.10148049  
SRR17520069.10148059  
SRR17520069.10148083  
SRR17520069.10148086  
SRR17520069.10154956  
SRR17520069.10156019  
SRR17520069.10161666  
SRR17520069.10165105  
SRR17520069.10166390  
SRR17520069.10166393  
SRR17520069.10171871  
SRR17520069.10178760  
SRR17520069.10182003  
SRR17520069.10182463  
SRR17520069.10185667  
SRR17520069.10191125  
SRR17520069.10199029  
SRR17520069.10199049  
SRR17520069.10203394  
SRR17520069.10203434  
SRR17520069.10203512  
SRR17520069.10208043  
SRR17520069.10209736  
SRR17520069.10216680  
SRR17520069.10216681  
SRR17520069.10220911  
SRR17520069.10228890  
SRR17520069.10228958  
SRR17520069.10235667  
SRR17520069.10241496

SRR17520069.10245370  
SRR17520069.10256900  
SRR17520069.10257845  
SRR17520069.10266159  
SRR17520069.10266161  
SRR17520069.10266253  
SRR17520069.10269218  
SRR17520069.10274120  
SRR17520069.10274179  
SRR17520069.10275707  
SRR17520069.10275711  
SRR17520069.10285748  
SRR17520069.10285776  
SRR17520069.10285808  
SRR17520069.10285812  
SRR17520069.10285844  
SRR17520069.10285846  
SRR17520069.10285848  
SRR17520069.10290391  
SRR17520069.10290402  
SRR17520069.10294126  
SRR17520069.10304192  
SRR17520069.10305262  
SRR17520069.10314406  
SRR17520069.10316752  
SRR17520069.10317651  
SRR17520069.10327167  
SRR17520069.10336189  
SRR17520069.10337393  
SRR17520069.10337411  
SRR17520069.10341245  
SRR17520069.10344938  
SRR17520069.10348278  
SRR17520069.10348717  
SRR17520069.10353663  
SRR17520069.10357809  
SRR17520069.10358706  
SRR17520069.10358707  
SRR17520069.10358717  
SRR17520069.10358727  
SRR17520069.10358756  
SRR17520069.10358798  
SRR17520069.10358824  
SRR17520069.10365063  
SRR17520069.10376357  
SRR17520069.10376969  
SRR17520069.10388138

SRR17520069. 10393239  
SRR17520069. 10394261  
SRR17520069. 10407076  
SRR17520069. 10420640  
SRR17520069. 10420678  
SRR17520069. 10420698  
SRR17520069. 10420706  
SRR17520069. 10425872  
SRR17520069. 10428256  
SRR17520069. 10428427  
SRR17520069. 10428436  
SRR17520069. 10431186  
SRR17520069. 10431222  
SRR17520069. 10446428  
SRR17520069. 10446430  
SRR17520069. 10448455  
SRR17520069. 10448471  
SRR17520069. 10448480  
SRR17520069. 10448483  
SRR17520069. 10448515  
SRR17520069. 10448517  
SRR17520069. 10448520  
SRR17520069. 10448521  
SRR17520069. 10448533  
SRR17520069. 10449079  
SRR17520069. 10453712  
SRR17520069. 10457525  
SRR17520069. 10462791  
SRR17520069. 10464939  
SRR17520069. 10465973  
SRR17520069. 10473658  
SRR17520069. 10476816  
SRR17520069. 10476926  
SRR17520069. 10490804  
SRR17520069. 10491681  
SRR17520069. 10498995  
SRR17520069. 10515474  
SRR17520069. 10518597  
SRR17520069. 10526923  
SRR17520069. 10533809  
SRR17520069. 10533817  
SRR17520069. 10533819  
SRR17520069. 10533823  
SRR17520069. 10533825  
SRR17520069. 10533831  
SRR17520069. 10558385  
SRR17520069. 10559992

SRR17520069.10560044  
SRR17520069.10569536  
SRR17520069.10581018  
SRR17520069.10586092  
SRR17520069.10586181  
SRR17520069.10588824  
SRR17520069.10596523  
SRR17520069.10596528  
SRR17520069.10596580  
SRR17520069.10596630  
SRR17520069.10597035  
SRR17520069.10601083  
SRR17520069.10602227  
SRR17520069.10605697  
SRR17520069.10605699  
SRR17520069.10605701  
SRR17520069.10605707  
SRR17520069.10605709  
SRR17520069.10605713  
SRR17520069.10605727  
SRR17520069.10605735  
SRR17520069.10605745  
SRR17520069.10605758  
SRR17520069.10605796  
SRR17520069.10605862  
SRR17520069.10605866  
SRR17520069.10609233  
SRR17520069.10609387  
SRR17520069.10609451  
SRR17520069.10609514  
SRR17520069.10618926  
SRR17520069.10621164  
SRR17520069.10629480  
SRR17520069.10636853  
SRR17520069.10639117  
SRR17520069.10643210  
SRR17520069.10643212  
SRR17520069.10645000  
SRR17520069.10645035  
SRR17520069.10649049  
SRR17520069.10656225  
SRR17520069.10663152  
SRR17520069.10663907  
SRR17520069.10666477  
SRR17520069.10673346  
SRR17520069.10683642  
SRR17520069.10686370

SRR17520069.10690871  
SRR17520069.10694223  
SRR17520069.10698274  
SRR17520069.10704881  
SRR17520069.10705356  
SRR17520069.10707490  
SRR17520069.10715403  
SRR17520069.10717004  
SRR17520069.10717014  
SRR17520069.10727904  
SRR17520069.10727936  
SRR17520069.10727950  
SRR17520069.10733960  
SRR17520069.10744070  
SRR17520069.10745125  
SRR17520069.10745139  
SRR17520069.10746071  
SRR17520069.10746429  
SRR17520069.10752460  
SRR17520069.10754083  
SRR17520069.10760259  
SRR17520069.10761777  
SRR17520069.10765517  
SRR17520069.10768265  
SRR17520069.10768279  
SRR17520069.10769614  
SRR17520069.10772577  
SRR17520069.10781222  
SRR17520069.10782441  
SRR17520069.10782478  
SRR17520069.10791215  
SRR17520069.10800018  
SRR17520069.10813543  
SRR17520069.10813547  
SRR17520069.10818238  
SRR17520069.10819058  
SRR17520069.10831521  
SRR17520069.10831525  
SRR17520069.10841573  
SRR17520069.10852972  
SRR17520069.10861849  
SRR17520069.10861867  
SRR17520069.10869495  
SRR17520069.10875403  
SRR17520069.10877047  
SRR17520069.10884853  
SRR17520069.10885938

SRR17520069.10898096  
SRR17520069.10903823  
SRR17520069.10909401  
SRR17520069.10933627  
SRR17520069.10938556  
SRR17520069.10956677  
SRR17520069.10975801  
SRR17520069.10980399  
SRR17520069.10980441  
SRR17520069.10984241  
SRR17520069.10992104  
SRR17520069.11007870  
SRR17520069.11012450  
SRR17520069.11012494  
SRR17520069.11012555  
SRR17520069.11017347  
SRR17520069.11017823  
SRR17520069.11017847  
SRR17520069.11018043  
SRR17520069.11022620  
SRR17520069.11024814  
SRR17520069.11030817  
SRR17520069.11036709  
SRR17520069.11055077  
SRR17520069.11058198  
SRR17520069.11062793  
SRR17520069.11070261  
SRR17520069.11070263  
SRR17520069.11076044  
SRR17520069.11078350  
SRR17520069.11078383  
SRR17520069.11082018  
SRR17520069.11082052  
SRR17520069.11087142  
SRR17520069.11090799  
SRR17520069.11104016  
SRR17520069.11105368  
SRR17520069.11112238  
SRR17520069.11112268  
SRR17520069.11114757  
SRR17520069.11116223  
SRR17520069.11116225  
SRR17520069.11116227  
SRR17520069.11116259  
SRR17520069.11118325  
SRR17520069.11118371  
SRR17520069.11118975



SRR17520069.11122268  
SRR17520069.11122282  
SRR17520069.11123860  
SRR17520069.11123932  
SRR17520069.11126161  
SRR17520069.11133996  
SRR17520069.11139351  
SRR17520069.11140085  
SRR17520069.11140166  
SRR17520069.11149049  
SRR17520069.11153977  
SRR17520069.11160587  
SRR17520069.11160617  
SRR17520069.11161177  
SRR17520069.11161275  
SRR17520069.11166223  
SRR17520069.11174026  
SRR17520069.11175843  
SRR17520069.11176784  
SRR17520069.11187941  
SRR17520069.11187991  
SRR17520069.11187999  
SRR17520069.11189422  
SRR17520069.11189827  
SRR17520069.11192608  
SRR17520069.11192615  
SRR17520069.11197901  
SRR17520069.11206049  
SRR17520069.11207612  
SRR17520069.11208116  
SRR17520069.11208263  
SRR17520069.11216298  
SRR17520069.11232083  
SRR17520069.11239951  
SRR17520069.11243664  
SRR17520069.11244254  
SRR17520069.11249072  
SRR17520069.11249076  
SRR17520069.11265748  
SRR17520069.11272655  
SRR17520069.11278964  
SRR17520069.11281300  
SRR17520069.11283000  
SRR17520069.11292084  
SRR17520069.11296686  
SRR17520069.11297571  
SRR17520069.11301930

SRR17520069.11301952  
SRR17520069.11301977  
SRR17520069.11301997  
SRR17520069.11302027  
SRR17520069.11303034  
SRR17520069.11323500  
SRR17520069.11323753  
SRR17520069.11327964  
SRR17520069.11330728  
SRR17520069.11331380  
SRR17520069.11336718  
SRR17520069.11336722  
SRR17520069.11338653  
SRR17520069.11338673  
SRR17520069.11338677  
SRR17520069.11342871  
SRR17520069.11344607  
SRR17520069.11344851  
SRR17520069.11353113  
SRR17520069.11356332  
SRR17520069.11358267  
SRR17520069.11358321  
SRR17520069.11361977  
SRR17520069.11378209  
SRR17520069.11378211  
SRR17520069.11378213  
SRR17520069.11378215  
SRR17520069.11378217  
SRR17520069.11378219  
SRR17520069.11378221  
SRR17520069.11378223  
SRR17520069.11378225  
SRR17520069.11378229  
SRR17520069.11378231  
SRR17520069.11378233  
SRR17520069.11378235  
SRR17520069.11378237  
SRR17520069.11378239  
SRR17520069.11378241  
SRR17520069.11378243  
SRR17520069.11378245  
SRR17520069.11378249  
SRR17520069.11378251  
SRR17520069.11378253  
SRR17520069.11378255  
SRR17520069.11378257  
SRR17520069.11378259

SRR17520069.11378261  
SRR17520069.11378263  
SRR17520069.11378265  
SRR17520069.11378267  
SRR17520069.11379070  
SRR17520069.11383414  
SRR17520069.11390829  
SRR17520069.11392903  
SRR17520069.11392913  
SRR17520069.11414750  
SRR17520069.11414758  
SRR17520069.11421733  
SRR17520069.11425632  
SRR17520069.11430113  
SRR17520069.11438272  
SRR17520069.11444043  
SRR17520069.11444045  
SRR17520069.11444047  
SRR17520069.11444049  
SRR17520069.11444051  
SRR17520069.11444053  
SRR17520069.11444055  
SRR17520069.11444057  
SRR17520069.11444059  
SRR17520069.11444061  
SRR17520069.11444063  
SRR17520069.11444065  
SRR17520069.11444067  
SRR17520069.11444069  
SRR17520069.11444071  
SRR17520069.11444073  
SRR17520069.11444075  
SRR17520069.11444077  
SRR17520069.11444079  
SRR17520069.11444081  
SRR17520069.11444083  
SRR17520069.11444085  
SRR17520069.11444087  
SRR17520069.11444089  
SRR17520069.11444093  
SRR17520069.11444095  
SRR17520069.11444099  
SRR17520069.11444101  
SRR17520069.11444103  
SRR17520069.11444105  
SRR17520069.11444997  
SRR17520069.11450541

SRR17520069.11451993  
SRR17520069.11462759  
SRR17520069.11468689  
SRR17520069.11469211  
SRR17520069.11477884  
SRR17520069.11478295  
SRR17520069.11481267  
SRR17520069.11501417  
SRR17520069.11502045  
SRR17520069.11502169  
SRR17520069.11509192  
SRR17520069.11509224  
SRR17520069.11509258  
SRR17520069.11509268  
SRR17520069.11510286  
SRR17520069.11511722  
SRR17520069.11511964  
SRR17520069.11511966  
SRR17520069.11511968  
SRR17520069.11511970  
SRR17520069.11511972  
SRR17520069.11511974  
SRR17520069.11511976  
SRR17520069.11511978  
SRR17520069.11511980  
SRR17520069.11511982  
SRR17520069.11521360  
SRR17520069.11526240  
SRR17520069.11526248  
SRR17520069.11526299  
SRR17520069.11530667  
SRR17520069.11530669  
SRR17520069.11530671  
SRR17520069.11530673  
SRR17520069.11530675  
SRR17520069.11530677  
SRR17520069.11530679  
SRR17520069.11530681  
SRR17520069.11530683  
SRR17520069.11530685  
SRR17520069.11530687  
SRR17520069.11530689  
SRR17520069.11531819  
SRR17520069.11535176  
SRR17520069.11535835  
SRR17520069.11537036  
SRR17520069.11540157

SRR17520069.11543336  
SRR17520069.11548346  
SRR17520069.11562934  
SRR17520069.11573145  
SRR17520069.11574004  
SRR17520069.11574132  
SRR17520069.11580640  
SRR17520069.11584608  
SRR17520069.11585928  
SRR17520069.11585931  
SRR17520069.11585941  
SRR17520069.11588750  
SRR17520069.11615852  
SRR17520069.11616694  
SRR17520069.11616920  
SRR17520069.11620907  
SRR17520069.11633531  
SRR17520069.11633550  
SRR17520069.11638537  
SRR17520069.11650708  
SRR17520069.11651000  
SRR17520069.11661239  
SRR17520069.11661319  
SRR17520069.11664224  
SRR17520069.11670344  
SRR17520069.11670669  
SRR17520069.11679407  
SRR17520069.11680759  
SRR17520069.11680771  
SRR17520069.11684448  
SRR17520069.11701269  
SRR17520069.11704047  
SRR17520069.11714609  
SRR17520069.11714613  
SRR17520069.11714633  
SRR17520069.11716760  
SRR17520069.11716863  
SRR17520069.11717066  
SRR17520069.11717158  
SRR17520069.11717561  
SRR17520069.11729417  
SRR17520069.11735046  
SRR17520069.11736196  
SRR17520069.11736202  
SRR17520069.11736324  
SRR17520069.11744231  
SRR17520069.11744238

SRR17520069.11744246  
SRR17520069.11744255  
SRR17520069.11744263  
SRR17520069.11748327  
SRR17520069.11766061  
SRR17520069.11766160  
SRR17520069.11777287  
SRR17520069.11789949  
SRR17520069.11812316  
SRR17520069.11813746  
SRR17520069.11823636  
SRR17520069.11843502  
SRR17520069.11843537  
SRR17520069.11843544  
SRR17520069.11843554  
SRR17520069.11843559  
SRR17520069.11843611  
SRR17520069.11844672  
SRR17520069.11844682  
SRR17520069.11850355  
SRR17520069.11853444  
SRR17520069.11861401  
SRR17520069.11864925  
SRR17520069.11864927  
SRR17520069.11864931  
SRR17520069.11866980  
SRR17520069.11872088  
SRR17520069.11875467  
SRR17520069.11883701  
SRR17520069.11891085  
SRR17520069.11892870  
SRR17520069.11894838  
SRR17520069.11898746  
SRR17520069.11902385  
SRR17520069.11905226  
SRR17520069.11905228  
SRR17520069.11905230  
SRR17520069.11905232  
SRR17520069.11905234  
SRR17520069.11905236  
SRR17520069.11905238  
SRR17520069.11905240  
SRR17520069.11905242  
SRR17520069.11905244  
SRR17520069.11905246  
SRR17520069.11905248  
SRR17520069.11905250

SRR17520069.11905252  
SRR17520069.11905254  
SRR17520069.11905256  
SRR17520069.11905258  
SRR17520069.11905260  
SRR17520069.11905262  
SRR17520069.11905264  
SRR17520069.11905266  
SRR17520069.11905268  
SRR17520069.11905270  
SRR17520069.11905274  
SRR17520069.11905276  
SRR17520069.11905278  
SRR17520069.11905280  
SRR17520069.11905282  
SRR17520069.11905284  
SRR17520069.11905286  
SRR17520069.11905288  
SRR17520069.11905290  
SRR17520069.11905292  
SRR17520069.11905294  
SRR17520069.11905296  
SRR17520069.11905298  
SRR17520069.11905300  
SRR17520069.11906955  
SRR17520069.11906969  
SRR17520069.11914855  
SRR17520069.11920152  
SRR17520069.11920164  
SRR17520069.11929430  
SRR17520069.11929460  
SRR17520069.11929464  
SRR17520069.11932012  
SRR17520069.11935944  
SRR17520069.11938707  
SRR17520069.11948224  
SRR17520069.11959093  
SRR17520069.11974876  
SRR17520069.11974890  
SRR17520069.11974918  
SRR17520069.11974919  
SRR17520069.11981056  
SRR17520069.11988539  
SRR17520069.11989116  
SRR17520069.11999055  
SRR17520069.12000493  
SRR17520069.12008984

SRR17520069.12014908  
SRR17520069.12019098  
SRR17520069.12029169  
SRR17520069.12029287  
SRR17520069.12038751  
SRR17520069.12041191  
SRR17520069.12050268  
SRR17520069.12050310  
SRR17520069.12071719  
SRR17520069.12072826  
SRR17520069.12083508  
SRR17520069.12083527  
SRR17520069.12089027  
SRR17520069.12091800  
SRR17520069.12091824  
SRR17520069.12091846  
SRR17520069.12107748  
SRR17520069.12110429  
SRR17520069.12110868  
SRR17520069.12110870  
SRR17520069.12116681  
SRR17520069.12123818  
SRR17520069.12127753  
SRR17520069.12129040  
SRR17520069.12137658  
SRR17520069.12143741  
SRR17520069.12152113  
SRR17520069.12152762  
SRR17520069.12155293  
SRR17520069.12155363  
SRR17520069.12173580  
SRR17520069.12174911  
SRR17520069.12187186  
SRR17520069.12188066  
SRR17520069.12195621  
SRR17520069.12195658  
SRR17520069.12200866  
SRR17520069.12201258  
SRR17520069.12201676  
SRR17520069.12201756  
SRR17520069.12204030  
SRR17520069.12225363  
SRR17520069.12237760  
SRR17520069.12240841  
SRR17520069.12248979  
SRR17520069.12265502  
SRR17520069.12269753



SRR17520069.12279995  
SRR17520069.12280004  
SRR17520069.12280045  
SRR17520069.12282132  
SRR17520069.12282138  
SRR17520069.12282146  
SRR17520069.12289450  
SRR17520069.12289598  
SRR17520069.12297481  
SRR17520069.12303431  
SRR17520069.12316271  
SRR17520069.12317754  
SRR17520069.12323158  
SRR17520069.12326439  
SRR17520069.12335482  
SRR17520069.12348092  
SRR17520069.12353758  
SRR17520069.12355349  
SRR17520069.12355363  
SRR17520069.12358314  
SRR17520069.12369668  
SRR17520069.12371422  
SRR17520069.12371424  
SRR17520069.12371426  
SRR17520069.12377845  
SRR17520069.12380914  
SRR17520069.12386348  
SRR17520069.12390563  
SRR17520069.12404885  
SRR17520069.12410929  
SRR17520069.12411013  
SRR17520069.12414326  
SRR17520069.12420462  
SRR17520069.12424366  
SRR17520069.12426377  
SRR17520069.12434783  
SRR17520069.12460183  
SRR17520069.12464851  
SRR17520069.12469809  
SRR17520069.12469936  
SRR17520069.12469946  
SRR17520069.12469966  
SRR17520069.12480485  
SRR17520069.12506520  
SRR17520069.12510797  
SRR17520069.12519242  
SRR17520069.12519384

SRR17520069.12520023  
SRR17520069.12520672  
SRR17520069.12520684  
SRR17520069.12520788  
SRR17520069.12523716  
SRR17520069.12523732  
SRR17520069.12529768  
SRR17520069.12529808  
SRR17520069.12529947  
SRR17520069.12530517  
SRR17520069.12535673  
SRR17520069.12536812  
SRR17520069.12539749  
SRR17520069.12539761  
SRR17520069.12551234  
SRR17520069.12552571  
SRR17520069.12554434  
SRR17520069.12554466  
SRR17520069.12558940  
SRR17520069.12559294  
SRR17520069.12565363  
SRR17520069.12565910  
SRR17520069.12577877  
SRR17520069.12578174  
SRR17520069.12580748  
SRR17520069.12580750  
SRR17520069.12584581  
SRR17520069.12604740  
SRR17520069.12611808  
SRR17520069.12611876  
SRR17520069.12615405  
SRR17520069.12617628  
SRR17520069.12621141  
SRR17520069.12621586  
SRR17520069.12630262  
SRR17520069.12638978  
SRR17520069.12639000  
SRR17520069.12644807  
SRR17520069.12646139  
SRR17520069.12648730  
SRR17520069.12648746  
SRR17520069.12655042  
SRR17520069.12669257  
SRR17520069.12694975  
SRR17520069.12694985  
SRR17520069.12694999  
SRR17520069.12699661

SRR17520069. 12704391  
SRR17520069. 12712729  
SRR17520069. 12716622  
SRR17520069. 12716652  
SRR17520069. 12720345  
SRR17520069. 12726755  
SRR17520069. 12729910  
SRR17520069. 12729922  
SRR17520069. 12731560  
SRR17520069. 12731608  
SRR17520069. 12735478  
SRR17520069. 12735756  
SRR17520069. 12737434  
SRR17520069. 12739247  
SRR17520069. 12740586  
SRR17520069. 12756948  
SRR17520069. 12759127  
SRR17520069. 12768454  
SRR17520069. 12785039  
SRR17520069. 12785045  
SRR17520069. 12787877  
SRR17520069. 12791312  
SRR17520069. 12802793  
SRR17520069. 12807851  
SRR17520069. 12822316  
SRR17520069. 12825751  
SRR17520069. 12829804  
SRR17520069. 12836002  
SRR17520069. 12850004  
SRR17520069. 12854018  
SRR17520069. 12871669  
SRR17520069. 12871695  
SRR17520069. 12881894  
SRR17520069. 12888768  
SRR17520069. 12890447  
SRR17520069. 12897110  
SRR17520069. 12902323  
SRR17520069. 12905121  
SRR17520069. 12905137  
SRR17520069. 12905254  
SRR17520069. 12911085  
SRR17520069. 12918045  
SRR17520069. 12920388  
SRR17520069. 12921820  
SRR17520069. 12921827  
SRR17520069. 12927536  
SRR17520069. 12927565

SRR17520069. 12928604  
SRR17520069. 12941038  
SRR17520069. 12941810  
SRR17520069. 12948220  
SRR17520069. 12952674  
SRR17520069. 12952676  
SRR17520069. 12952708  
SRR17520069. 12955728  
SRR17520069. 12957780  
SRR17520069. 12957796  
SRR17520069. 12959307  
SRR17520069. 12959347  
SRR17520069. 12959789  
SRR17520069. 12959801  
SRR17520069. 12959803  
SRR17520069. 12959950  
SRR17520069. 12959979  
SRR17520069. 12961274  
SRR17520069. 12964230  
SRR17520069. 12973142  
SRR17520069. 12973144  
SRR17520069. 12973148  
SRR17520069. 12973150  
SRR17520069. 12973152  
SRR17520069. 12973154  
SRR17520069. 12973156  
SRR17520069. 12973158  
SRR17520069. 12973160  
SRR17520069. 12973162  
SRR17520069. 12973164  
SRR17520069. 12973166  
SRR17520069. 12973168  
SRR17520069. 12973170  
SRR17520069. 12973172  
SRR17520069. 12973174  
SRR17520069. 12973176  
SRR17520069. 12973178  
SRR17520069. 12973180  
SRR17520069. 12973184  
SRR17520069. 12973186  
SRR17520069. 12973188  
SRR17520069. 12973190  
SRR17520069. 12973192  
SRR17520069. 12973194  
SRR17520069. 12973196  
SRR17520069. 12973198  
SRR17520069. 12973200

SRR17520069. 12973202  
SRR17520069. 12973204  
SRR17520069. 12973206  
SRR17520069. 12973208  
SRR17520069. 12973210  
SRR17520069. 12973212  
SRR17520069. 12973214  
SRR17520069. 12973216  
SRR17520069. 12973218  
SRR17520069. 12973220  
SRR17520069. 12973222  
SRR17520069. 12973224  
SRR17520069. 12973226  
SRR17520069. 12973228  
SRR17520069. 12973232  
SRR17520069. 12973234  
SRR17520069. 12973236  
SRR17520069. 12973238  
SRR17520069. 12974976  
SRR17520069. 12974977  
SRR17520069. 12974979  
SRR17520069. 12985222  
SRR17520069. 12985250  
SRR17520069. 12985286  
SRR17520069. 12987751  
SRR17520069. 12995197  
SRR17520069. 13006313  
SRR17520069. 13006513  
SRR17520069. 13028637  
SRR17520069. 13031043  
SRR17520069. 13031096  
SRR17520069. 13056790  
SRR17520069. 13060875  
SRR17520069. 13060931  
SRR17520069. 13065697  
SRR17520069. 13065755  
SRR17520069. 13070680  
SRR17520069. 13086775  
SRR17520069. 13086785  
SRR17520069. 13090272  
SRR17520069. 13092576  
SRR17520069. 13092622  
SRR17520069. 13092626  
SRR17520069. 13098012  
SRR17520069. 13099765  
SRR17520069. 13099783  
SRR17520069. 13107076

SRR17520069.13112157  
SRR17520069.13112247  
SRR17520069.13112274  
SRR17520069.13112284  
SRR17520069.13116892  
SRR17520069.13126060  
SRR17520069.13128644  
SRR17520069.13128646  
SRR17520069.13128654  
SRR17520069.13128670  
SRR17520069.13133211  
SRR17520069.13141240  
SRR17520069.13143343  
SRR17520069.13144472  
SRR17520069.13161317  
SRR17520069.13169525  
SRR17520069.13170515  
SRR17520069.13177681  
SRR17520069.13179624  
SRR17520069.13179685  
SRR17520069.13186041  
SRR17520069.13186043  
SRR17520069.13186045  
SRR17520069.13186047  
SRR17520069.13186049  
SRR17520069.13186051  
SRR17520069.13186053  
SRR17520069.13186055  
SRR17520069.13186057  
SRR17520069.13186059  
SRR17520069.13186061  
SRR17520069.13186063  
SRR17520069.13186065  
SRR17520069.13186067  
SRR17520069.13186069  
SRR17520069.13186071  
SRR17520069.13186073  
SRR17520069.13186075  
SRR17520069.13186077  
SRR17520069.13186079  
SRR17520069.13186081  
SRR17520069.13186083  
SRR17520069.13186085  
SRR17520069.13186087  
SRR17520069.13186089  
SRR17520069.13186091  
SRR17520069.13186093

SRR17520069. 13186095  
SRR17520069. 13186097  
SRR17520069. 13186099  
SRR17520069. 13186101  
SRR17520069. 13186103  
SRR17520069. 13186105  
SRR17520069. 13186107  
SRR17520069. 13189935  
SRR17520069. 13190216  
SRR17520069. 13202792  
SRR17520069. 13202794  
SRR17520069. 13208444  
SRR17520069. 13213557  
SRR17520069. 13213559  
SRR17520069. 13213615  
SRR17520069. 13233920  
SRR17520069. 13233958  
SRR17520069. 13239878  
SRR17520069. 13241684  
SRR17520069. 13245924  
SRR17520069. 13245944  
SRR17520069. 13247023  
SRR17520069. 13247059  
SRR17520069. 13247081  
SRR17520069. 13251718  
SRR17520069. 13261793  
SRR17520069. 13263608  
SRR17520069. 13263609  
SRR17520069. 13263612  
SRR17520069. 13271605  
SRR17520069. 13271669  
SRR17520069. 13271672  
SRR17520069. 13278609  
SRR17520069. 13278782  
SRR17520069. 13279972  
SRR17520069. 13282105  
SRR17520069. 13290961  
SRR17520069. 13294970  
SRR17520069. 13295500  
SRR17520069. 13295802  
SRR17520069. 13297321  
SRR17520069. 13297361  
SRR17520069. 13307221  
SRR17520069. 13311320  
SRR17520069. 13319544  
SRR17520069. 13326869  
SRR17520069. 13329375

SRR17520069. 13332221  
SRR17520069. 13336884  
SRR17520069. 13343532  
SRR17520069. 13343534  
SRR17520069. 13343536  
SRR17520069. 13345394  
SRR17520069. 13345514  
SRR17520069. 13354383  
SRR17520069. 13354741  
SRR17520069. 13354751  
SRR17520069. 13354826  
SRR17520069. 13390504  
SRR17520069. 13395027  
SRR17520069. 13401473  
SRR17520069. 13411989  
SRR17520069. 13411991  
SRR17520069. 13415296  
SRR17520069. 13444230  
SRR17520069. 13459780  
SRR17520069. 13460760  
SRR17520069. 13463537  
SRR17520069. 13463569  
SRR17520069. 13469542  
SRR17520069. 13470159  
SRR17520069. 13478229  
SRR17520069. 13478241  
SRR17520069. 13482355  
SRR17520069. 13484075  
SRR17520069. 13484081  
SRR17520069. 13484097  
SRR17520069. 13484119  
SRR17520069. 13484772  
SRR17520069. 13486676  
SRR17520069. 13498894  
SRR17520069. 13504453  
SRR17520069. 13507378  
SRR17520069. 13513572  
SRR17520069. 13527555  
SRR17520069. 13529060  
SRR17520069. 13529062  
SRR17520069. 13529066  
SRR17520069. 13529068  
SRR17520069. 13529070  
SRR17520069. 13529072  
SRR17520069. 13529074  
SRR17520069. 13529076  
SRR17520069. 13529078



SRR17520069. 13529080  
SRR17520069. 13529082  
SRR17520069. 13529084  
SRR17520069. 13529086  
SRR17520069. 13529088  
SRR17520069. 13529090  
SRR17520069. 13529094  
SRR17520069. 13529096  
SRR17520069. 13529098  
SRR17520069. 13529100  
SRR17520069. 13529102  
SRR17520069. 13529104  
SRR17520069. 13529106  
SRR17520069. 13529108  
SRR17520069. 13529112  
SRR17520069. 13529114  
SRR17520069. 13529116  
SRR17520069. 13529118  
SRR17520069. 13529120  
SRR17520069. 13529122  
SRR17520069. 13529124  
SRR17520069. 13529126  
SRR17520069. 13529128  
SRR17520069. 13529130  
SRR17520069. 13529132  
SRR17520069. 13529134  
SRR17520069. 13529136  
SRR17520069. 13529138  
SRR17520069. 13529140  
SRR17520069. 13529144  
SRR17520069. 13529146  
SRR17520069. 13529148  
SRR17520069. 13529152  
SRR17520069. 13529154  
SRR17520069. 13529156  
SRR17520069. 13529158  
SRR17520069. 13529160  
SRR17520069. 13529162  
SRR17520069. 13542153  
SRR17520069. 13542197  
SRR17520069. 13542206  
SRR17520069. 13542969  
SRR17520069. 13543712  
SRR17520069. 13543714  
SRR17520069. 13543716  
SRR17520069. 13543718  
SRR17520069. 13543722

SRR17520069. 13543724  
SRR17520069. 13543726  
SRR17520069. 13543728  
SRR17520069. 13545838  
SRR17520069. 13547130  
SRR17520069. 13547134  
SRR17520069. 13547136  
SRR17520069. 13547144  
SRR17520069. 13547178  
SRR17520069. 13550750  
SRR17520069. 13554746  
SRR17520069. 13554748  
SRR17520069. 13554750  
SRR17520069. 13554752  
SRR17520069. 13554754  
SRR17520069. 13554756  
SRR17520069. 13554758  
SRR17520069. 13554760  
SRR17520069. 13554762  
SRR17520069. 13554764  
SRR17520069. 13554766  
SRR17520069. 13554768  
SRR17520069. 13554770  
SRR17520069. 13554774  
SRR17520069. 13554776  
SRR17520069. 13554778  
SRR17520069. 13554780  
SRR17520069. 13554782  
SRR17520069. 13554784  
SRR17520069. 13554786  
SRR17520069. 13554788  
SRR17520069. 13554790  
SRR17520069. 13554792  
SRR17520069. 13554794  
SRR17520069. 13554796  
SRR17520069. 13554798  
SRR17520069. 13554800  
SRR17520069. 13554802  
SRR17520069. 13554804  
SRR17520069. 13554806  
SRR17520069. 13554808  
SRR17520069. 13554810  
SRR17520069. 13554812  
SRR17520069. 13554814  
SRR17520069. 13554816  
SRR17520069. 13554818  
SRR17520069. 13554820

SRR17520069. 13554822  
SRR17520069. 13554824  
SRR17520069. 13554826  
SRR17520069. 13554828  
SRR17520069. 13554830  
SRR17520069. 13554832  
SRR17520069. 13554834  
SRR17520069. 13554836  
SRR17520069. 13554838  
SRR17520069. 13554840  
SRR17520069. 13554842  
SRR17520069. 13554844  
SRR17520069. 13554846  
SRR17520069. 13554848  
SRR17520069. 13554850  
SRR17520069. 13554852  
SRR17520069. 13554854  
SRR17520069. 13554856  
SRR17520069. 13554858  
SRR17520069. 13554860  
SRR17520069. 13554862  
SRR17520069. 13554864  
SRR17520069. 13554866  
SRR17520069. 13554868  
SRR17520069. 13554870  
SRR17520069. 13554872  
SRR17520069. 13554874  
SRR17520069. 13554876  
SRR17520069. 13554878  
SRR17520069. 13554880  
SRR17520069. 13554882  
SRR17520069. 13554884  
SRR17520069. 13554886  
SRR17520069. 13554888  
SRR17520069. 13554890  
SRR17520069. 13554892  
SRR17520069. 13554894  
SRR17520069. 13554896  
SRR17520069. 13554898  
SRR17520069. 13554900  
SRR17520069. 13554902  
SRR17520069. 13554904  
SRR17520069. 13554906  
SRR17520069. 13554908  
SRR17520069. 13554910  
SRR17520069. 13554912  
SRR17520069. 13554914

SRR17520069. 13554916  
SRR17520069. 13554918  
SRR17520069. 13554920  
SRR17520069. 13554922  
SRR17520069. 13554924  
SRR17520069. 13554926  
SRR17520069. 13554928  
SRR17520069. 13554930  
SRR17520069. 13554932  
SRR17520069. 13554934  
SRR17520069. 13554936  
SRR17520069. 13554938  
SRR17520069. 13554940  
SRR17520069. 13562226  
SRR17520069. 13564222  
SRR17520069. 13565711  
SRR17520069. 13565759  
SRR17520069. 13581377  
SRR17520069. 13581408  
SRR17520069. 13581439  
SRR17520069. 13582676  
SRR17520069. 13584078  
SRR17520069. 13584080  
SRR17520069. 13584082  
SRR17520069. 13584085  
SRR17520069. 13584094  
SRR17520069. 13584096  
SRR17520069. 13584099  
SRR17520069. 13584102  
SRR17520069. 13584124  
SRR17520069. 13584142  
SRR17520069. 13584149  
SRR17520069. 13584153  
SRR17520069. 13584156  
SRR17520069. 13584161  
SRR17520069. 13584168  
SRR17520069. 13584170  
SRR17520069. 13585616  
SRR17520069. 13597081  
SRR17520069. 13604143  
SRR17520069. 13608192  
SRR17520069. 13608949  
SRR17520069. 13618903  
SRR17520069. 13618932  
SRR17520069. 13620972  
SRR17520069. 13625299  
SRR17520069. 13633599

SRR17520069. 13640320  
SRR17520069. 13649729  
SRR17520069. 13651355  
SRR17520069. 13655859  
SRR17520069. 13656590  
SRR17520069. 13658946  
SRR17520069. 13668859  
SRR17520069. 13676290  
SRR17520069. 13677745  
SRR17520069. 13685202  
SRR17520069. 13691447  
SRR17520069. 13693615  
SRR17520069. 13693617  
SRR17520069. 13693619  
SRR17520069. 13693621  
SRR17520069. 13693623  
SRR17520069. 13693625  
SRR17520069. 13693627  
SRR17520069. 13693629  
SRR17520069. 13693631  
SRR17520069. 13693633  
SRR17520069. 13693635  
SRR17520069. 13693637  
SRR17520069. 13695679  
SRR17520069. 13701647  
SRR17520069. 13713846  
SRR17520069. 13721478  
SRR17520069. 13721551  
SRR17520069. 13724719  
SRR17520069. 13727682  
SRR17520069. 13743035  
SRR17520069. 13750202  
SRR17520069. 13750389  
SRR17520069. 13756530  
SRR17520069. 13756544  
SRR17520069. 13756583  
SRR17520069. 13756584  
SRR17520069. 13756591  
SRR17520069. 13756600  
SRR17520069. 13756619  
SRR17520069. 13756636  
SRR17520069. 13756637  
SRR17520069. 13756660  
SRR17520069. 13756665  
SRR17520069. 13756666  
SRR17520069. 13756685  
SRR17520069. 13756707

SRR17520069. 13756708  
SRR17520069. 13756709  
SRR17520069. 13756715  
SRR17520069. 13757523  
SRR17520069. 13759936  
SRR17520069. 13760032  
SRR17520069. 13760058  
SRR17520069. 13760776  
SRR17520069. 13760811  
SRR17520069. 13760879  
SRR17520069. 13761411  
SRR17520069. 13764107  
SRR17520069. 13772290  
SRR17520069. 13772334  
SRR17520069. 13772345  
SRR17520069. 13775500  
SRR17520069. 13776265  
SRR17520069. 13776524  
SRR17520069. 13777126  
SRR17520069. 13777453  
SRR17520069. 13779059  
SRR17520069. 13781551  
SRR17520069. 13788388  
SRR17520069. 13798289  
SRR17520069. 13799814  
SRR17520069. 13801932  
SRR17520069. 13802016  
SRR17520069. 13802057  
SRR17520069. 13807860  
SRR17520069. 13810254  
SRR17520069. 13811637  
SRR17520069. 13816085  
SRR17520069. 13822922  
SRR17520069. 13829347  
SRR17520069. 13835602  
SRR17520069. 13838185  
SRR17520069. 13840875  
SRR17520069. 13840877  
SRR17520069. 13840879  
SRR17520069. 13840881  
SRR17520069. 13840883  
SRR17520069. 13840885  
SRR17520069. 13840887  
SRR17520069. 13840891  
SRR17520069. 13848858  
SRR17520069. 13861975  
SRR17520069. 13862483

SRR17520069. 13865726  
SRR17520069. 13869764  
SRR17520069. 13871231  
SRR17520069. 13874864  
SRR17520069. 13879012  
SRR17520069. 13899246  
SRR17520069. 13904720  
SRR17520069. 13910749  
SRR17520069. 13917529  
SRR17520069. 13917641  
SRR17520069. 13921315  
SRR17520069. 13921318  
SRR17520069. 13921329  
SRR17520069. 13921333  
SRR17520069. 13944820  
SRR17520069. 13946231  
SRR17520069. 13946233  
SRR17520069. 13946235  
SRR17520069. 13946237  
SRR17520069. 13946241  
SRR17520069. 13946243  
SRR17520069. 13946245  
SRR17520069. 13946247  
SRR17520069. 13946249  
SRR17520069. 13946251  
SRR17520069. 13946253  
SRR17520069. 13958534  
SRR17520069. 13971027  
SRR17520069. 13979660  
SRR17520069. 13979673  
SRR17520069. 13987557  
SRR17520069. 13993086  
SRR17520069. 13993219  
SRR17520069. 13993291  
SRR17520069. 14002153  
SRR17520069. 14002193  
SRR17520069. 14003617  
SRR17520069. 14009076  
SRR17520069. 14009112  
SRR17520069. 14018657  
SRR17520069. 14027972  
SRR17520069. 14034179  
SRR17520069. 14034187  
SRR17520069. 14034189  
SRR17520069. 14034193  
SRR17520069. 14034195  
SRR17520069. 14034199

SRR17520069.14034344  
SRR17520069.14034347  
SRR17520069.14039851  
SRR17520069.14041774  
SRR17520069.14041914  
SRR17520069.14050214  
SRR17520069.14058873  
SRR17520069.14058875  
SRR17520069.14058877  
SRR17520069.14058879  
SRR17520069.14058881  
SRR17520069.14058883  
SRR17520069.14058887  
SRR17520069.14058889  
SRR17520069.14064673  
SRR17520069.14079507  
SRR17520069.14089473  
SRR17520069.14092167  
SRR17520069.14109843  
SRR17520069.14115359  
SRR17520069.14132065  
SRR17520069.14150341  
SRR17520069.14150351  
SRR17520069.14156508  
SRR17520069.14159703  
SRR17520069.14160410  
SRR17520069.14171307  
SRR17520069.14171309  
SRR17520069.14171311  
SRR17520069.14171313  
SRR17520069.14171315  
SRR17520069.14171317  
SRR17520069.14171319  
SRR17520069.14171323  
SRR17520069.14171325  
SRR17520069.14171327  
SRR17520069.14171331  
SRR17520069.14171333  
SRR17520069.14171335  
SRR17520069.14176361  
SRR17520069.14178387  
SRR17520069.14178415  
SRR17520069.14187209  
SRR17520069.14196119  
SRR17520069.14201443  
SRR17520069.14201453  
SRR17520069.14201477



SRR17520069.14201513  
SRR17520069.14234910  
SRR17520069.14243613  
SRR17520069.14251598  
SRR17520069.14264071  
SRR17520069.14264073  
SRR17520069.14264075  
SRR17520069.14264077  
SRR17520069.14264079  
SRR17520069.14264081  
SRR17520069.14264083  
SRR17520069.14264575  
SRR17520069.14267153  
SRR17520069.14267927  
SRR17520069.14267948  
SRR17520069.14290841  
SRR17520069.14293219  
SRR17520069.14299207  
SRR17520069.14306127  
SRR17520069.14306131  
SRR17520069.14306147  
SRR17520069.14306184  
SRR17520069.14319072  
SRR17520069.14325167  
SRR17520069.14325170  
SRR17520069.14327309  
SRR17520069.14339341  
SRR17520069.14339346  
SRR17520069.14340119  
SRR17520069.14359716  
SRR17520069.14363221  
SRR17520069.14370573  
SRR17520069.14376457  
SRR17520069.14377483  
SRR17520069.14385525  
SRR17520069.14392698  
SRR17520069.14397126  
SRR17520069.14398638  
SRR17520069.14402373  
SRR17520069.14404002  
SRR17520069.14404004  
SRR17520069.14404006  
SRR17520069.14404008  
SRR17520069.14404010  
SRR17520069.14404012  
SRR17520069.14404014  
SRR17520069.14404016

SRR17520069.14404018  
SRR17520069.14404020  
SRR17520069.14404022  
SRR17520069.14404024  
SRR17520069.14404026  
SRR17520069.14404028  
SRR17520069.14404032  
SRR17520069.14404034  
SRR17520069.14404036  
SRR17520069.14404038  
SRR17520069.14404040  
SRR17520069.14404042  
SRR17520069.14404046  
SRR17520069.14404048  
SRR17520069.14404050  
SRR17520069.14404052  
SRR17520069.14404054  
SRR17520069.14404056  
SRR17520069.14404058  
SRR17520069.14404060  
SRR17520069.14404329  
SRR17520069.14440733  
SRR17520069.14446316  
SRR17520069.14446334  
SRR17520069.14449138  
SRR17520069.14449143  
SRR17520069.14451006  
SRR17520069.14451009  
SRR17520069.14460212  
SRR17520069.14479647  
SRR17520069.14481864  
SRR17520069.14481866  
SRR17520069.14481868  
SRR17520069.14481870  
SRR17520069.14481872  
SRR17520069.14481874  
SRR17520069.14481876  
SRR17520069.14481878  
SRR17520069.14481880  
SRR17520069.14481882  
SRR17520069.14481884  
SRR17520069.14481886  
SRR17520069.14481888  
SRR17520069.14481890  
SRR17520069.14481892  
SRR17520069.14481894  
SRR17520069.14481896

SRR17520069.14481898  
SRR17520069.14481900  
SRR17520069.14481902  
SRR17520069.14481904  
SRR17520069.14481906  
SRR17520069.14481908  
SRR17520069.14481910  
SRR17520069.14481912  
SRR17520069.14481914  
SRR17520069.14481916  
SRR17520069.14481918  
SRR17520069.14481920  
SRR17520069.14481922  
SRR17520069.14481924  
SRR17520069.14481926  
SRR17520069.14481928  
SRR17520069.14481930  
SRR17520069.14481932  
SRR17520069.14481934  
SRR17520069.14481936  
SRR17520069.14481940  
SRR17520069.14481942  
SRR17520069.14481944  
SRR17520069.14481946  
SRR17520069.14482297  
SRR17520069.14482313  
SRR17520069.14485048  
SRR17520069.14486086  
SRR17520069.14498460  
SRR17520069.14500586  
SRR17520069.14508673  
SRR17520069.14508677  
SRR17520069.14514765  
SRR17520069.14521897  
SRR17520069.14521903  
SRR17520069.14528616  
SRR17520069.14532761  
SRR17520069.14539774  
SRR17520069.14539890  
SRR17520069.14540139  
SRR17520069.14540141  
SRR17520069.14540152  
SRR17520069.14543990  
SRR17520069.14550019  
SRR17520069.14560648  
SRR17520069.14563253  
SRR17520069.14564561

SRR17520069.14567224  
SRR17520069.14567278  
SRR17520069.14571757  
SRR17520069.14573370  
SRR17520069.14575351  
SRR17520069.14588446  
SRR17520069.14588730  
SRR17520069.14599033  
SRR17520069.14599812  
SRR17520069.14605641  
SRR17520069.14616255  
SRR17520069.14623715  
SRR17520069.14626104  
SRR17520069.14629716  
SRR17520069.14629746  
SRR17520069.14629750  
SRR17520069.14631047  
SRR17520069.14641394  
SRR17520069.14653756  
SRR17520069.14663910  
SRR17520069.14665383  
SRR17520069.14669419  
SRR17520069.14683904  
SRR17520069.14686172  
SRR17520069.14686278  
SRR17520069.14690870  
SRR17520069.14705686  
SRR17520069.14705700  
SRR17520069.14707729  
SRR17520069.14710163  
SRR17520069.14711613  
SRR17520069.14731677  
SRR17520069.14734127  
SRR17520069.14755672  
SRR17520069.14758922  
SRR17520069.14758946  
SRR17520069.14759430  
SRR17520069.14764123  
SRR17520069.14764206  
SRR17520069.14764266  
SRR17520069.14764272  
SRR17520069.14764295  
SRR17520069.14767056  
SRR17520069.14792673  
SRR17520069.14796677  
SRR17520069.14819162  
SRR17520069.14824416

SRR17520069.14824786  
SRR17520069.14826618  
SRR17520069.14827934  
SRR17520069.14831869  
SRR17520069.14834371  
SRR17520069.14834427  
SRR17520069.14845691  
SRR17520069.14845696  
SRR17520069.14874169  
SRR17520069.14874180  
SRR17520069.14875458  
SRR17520069.14877913  
SRR17520069.14879724  
SRR17520069.14892617  
SRR17520069.14895788  
SRR17520069.14895810  
SRR17520069.14895818  
SRR17520069.14897120  
SRR17520069.14898473  
SRR17520069.14914770  
SRR17520069.14917507  
SRR17520069.14920363  
SRR17520069.14928315  
SRR17520069.14940922  
SRR17520069.14940930  
SRR17520069.14951870  
SRR17520069.14975050  
SRR17520069.14983258  
SRR17520069.14991171  
SRR17520069.14998411  
SRR17520069.15015201  
SRR17520069.15015203  
SRR17520069.15015205  
SRR17520069.15016773  
SRR17520069.15022661  
SRR17520069.15041895  
SRR17520069.15044464  
SRR17520069.15044507  
SRR17520069.15044566  
SRR17520069.15044571  
SRR17520069.15044577  
SRR17520069.15044650  
SRR17520069.15045592  
SRR17520069.15051714  
SRR17520069.15061678  
SRR17520069.15063549  
SRR17520069.15076399

SRR17520069. 15076989  
SRR17520069. 15076991  
SRR17520069. 15079342  
SRR17520069. 15084513  
SRR17520069. 15085806  
SRR17520069. 15112331  
SRR17520069. 15115154  
SRR17520069. 15117989  
SRR17520069. 15122164  
SRR17520069. 15122168  
SRR17520069. 15123269  
SRR17520069. 15123270  
SRR17520069. 15123272  
SRR17520069. 15123276  
SRR17520069. 15123277  
SRR17520069. 15123290  
SRR17520069. 15123311  
SRR17520069. 15127474  
SRR17520069. 15127538  
SRR17520069. 15128218  
SRR17520069. 15134376  
SRR17520069. 15141065  
SRR17520069. 15142540  
SRR17520069. 15145681  
SRR17520069. 15145684  
SRR17520069. 15145719  
SRR17520069. 15145741  
SRR17520069. 15145775  
SRR17520069. 15145780  
SRR17520069. 15145782  
SRR17520069. 15167728  
SRR17520069. 15179552  
SRR17520069. 15179554  
SRR17520069. 15182322  
SRR17520069. 15193642  
SRR17520069. 15194055  
SRR17520069. 15201743  
SRR17520069. 15215471  
SRR17520069. 15233133  
SRR17520069. 15236170  
SRR17520069. 15236270  
SRR17520069. 15237145  
SRR17520069. 15238324  
SRR17520069. 15240088  
SRR17520069. 15241306  
SRR17520069. 15246375  
SRR17520069. 15246377

SRR17520069. 15249781  
SRR17520069. 15251821  
SRR17520069. 15255451  
SRR17520069. 15270036  
SRR17520069. 15274542  
SRR17520069. 15274544  
SRR17520069. 15274550  
SRR17520069. 15284465  
SRR17520069. 15293539  
SRR17520069. 15296527  
SRR17520069. 15300324  
SRR17520069. 15302657  
SRR17520069. 15303294  
SRR17520069. 15303432  
SRR17520069. 15303447  
SRR17520069. 15303656  
SRR17520069. 15309177  
SRR17520069. 15325690  
SRR17520069. 15326131  
SRR17520069. 15327470  
SRR17520069. 15327547  
SRR17520069. 15327563  
SRR17520069. 15332959  
SRR17520069. 15335394  
SRR17520069. 15340238  
SRR17520069. 15340311  
SRR17520069. 15345773  
SRR17520069. 15345777  
SRR17520069. 15345787  
SRR17520069. 15349725  
SRR17520069. 15349767  
SRR17520069. 15349802  
SRR17520069. 15352378  
SRR17520069. 15355827  
SRR17520069. 15359177  
SRR17520069. 15372121  
SRR17520069. 15383540  
SRR17520069. 15383545  
SRR17520069. 15383556  
SRR17520069. 15385924  
SRR17520069. 15395507  
SRR17520069. 15397168  
SRR17520069. 15397178  
SRR17520069. 15400912  
SRR17520069. 15400949  
SRR17520069. 15402149  
SRR17520069. 15402159

SRR17520069. 15402183  
SRR17520069. 15402206  
SRR17520069. 15402209  
SRR17520069. 15402211  
SRR17520069. 15402239  
SRR17520069. 15402255  
SRR17520069. 15402268  
SRR17520069. 15404943  
SRR17520069. 15415414  
SRR17520069. 15415433  
SRR17520069. 15417981  
SRR17520069. 15431594  
SRR17520069. 15435979  
SRR17520069. 15436245  
SRR17520069. 15437040  
SRR17520069. 15441474  
SRR17520069. 15447883  
SRR17520069. 15447905  
SRR17520069. 15454363  
SRR17520069. 15454457  
SRR17520069. 15456851  
SRR17520069. 15481321  
SRR17520069. 15496594  
SRR17520069. 15496610  
SRR17520069. 15496612  
SRR17520069. 15514259  
SRR17520069. 15514289  
SRR17520069. 15514297  
SRR17520069. 15519285  
SRR17520069. 15524217  
SRR17520069. 15530627  
SRR17520069. 15534035  
SRR17520069. 15534047  
SRR17520069. 15544311  
SRR17520069. 15546043  
SRR17520069. 15546051  
SRR17520069. 15546081  
SRR17520069. 15553456  
SRR17520069. 15553472  
SRR17520069. 15563217  
SRR17520069. 15564415  
SRR17520069. 15564443  
SRR17520069. 15565538  
SRR17520069. 15569089  
SRR17520069. 15577570  
SRR17520069. 15578382  
SRR17520069. 15578683



SRR17520069. 15584989  
SRR17520069. 15607440  
SRR17520069. 15613056  
SRR17520069. 15616891  
SRR17520069. 15618317  
SRR17520069. 15618321  
SRR17520069. 15619102  
SRR17520069. 15624319  
SRR17520069. 15628352  
SRR17520069. 15634449  
SRR17520069. 15634459  
SRR17520069. 15634471  
SRR17520069. 15641033  
SRR17520069. 15643353  
SRR17520069. 15645417  
SRR17520069. 15652104  
SRR17520069. 15663886  
SRR17520069. 15665094  
SRR17520069. 15665586  
SRR17520069. 15668163  
SRR17520069. 15669310  
SRR17520069. 15669312  
SRR17520069. 15669314  
SRR17520069. 15669316  
SRR17520069. 15669318  
SRR17520069. 15669320  
SRR17520069. 15669322  
SRR17520069. 15669324  
SRR17520069. 15674089  
SRR17520069. 15682723  
SRR17520069. 15683044  
SRR17520069. 15684175  
SRR17520069. 15684178  
SRR17520069. 15685353  
SRR17520069. 15685355  
SRR17520069. 15685357  
SRR17520069. 15685359  
SRR17520069. 15685361  
SRR17520069. 15685363  
SRR17520069. 15685365  
SRR17520069. 15685367  
SRR17520069. 15685369  
SRR17520069. 15685371  
SRR17520069. 15687327  
SRR17520069. 15690240  
SRR17520069. 15706398  
SRR17520069. 15706426

SRR17520069. 15706470  
SRR17520069. 15707771  
SRR17520069. 15714834  
SRR17520069. 15714848  
SRR17520069. 15717983  
SRR17520069. 15722050  
SRR17520069. 15737137  
SRR17520069. 15740135  
SRR17520069. 15748069  
SRR17520069. 15749157  
SRR17520069. 15752672  
SRR17520069. 15761700  
SRR17520069. 15764471  
SRR17520069. 15764501  
SRR17520069. 15768234  
SRR17520069. 15772332  
SRR17520069. 15772372  
SRR17520069. 15779112  
SRR17520069. 15786112  
SRR17520069. 15786114  
SRR17520069. 15786118  
SRR17520069. 15786120  
SRR17520069. 15786122  
SRR17520069. 15786124  
SRR17520069. 15786126  
SRR17520069. 15786128  
SRR17520069. 15786130  
SRR17520069. 15786132  
SRR17520069. 15786134  
SRR17520069. 15786136  
SRR17520069. 15786138  
SRR17520069. 15786140  
SRR17520069. 15786142  
SRR17520069. 15786144  
SRR17520069. 15786146  
SRR17520069. 15786148  
SRR17520069. 15786150  
SRR17520069. 15786152  
SRR17520069. 15786154  
SRR17520069. 15786156  
SRR17520069. 15786158  
SRR17520069. 15786160  
SRR17520069. 15786162  
SRR17520069. 15786164  
SRR17520069. 15786166  
SRR17520069. 15795720  
SRR17520069. 15808746

SRR17520069. 15809408  
SRR17520069. 15833878  
SRR17520069. 15837620  
SRR17520069. 15838036  
SRR17520069. 15840289  
SRR17520069. 15847233  
SRR17520069. 15848315  
SRR17520069. 15848427  
SRR17520069. 15853787  
SRR17520069. 15854014  
SRR17520069. 15859983  
SRR17520069. 15863206  
SRR17520069. 15866889  
SRR17520069. 15873764  
SRR17520069. 15879094  
SRR17520069. 15879178  
SRR17520069. 15880750  
SRR17520069. 15892769  
SRR17520069. 15894352  
SRR17520069. 15894796  
SRR17520069. 15902960  
SRR17520069. 15904119  
SRR17520069. 15905749  
SRR17520069. 15908513  
SRR17520069. 15908525  
SRR17520069. 15914858  
SRR17520069. 15914874  
SRR17520069. 15918836  
SRR17520069. 15918900  
SRR17520069. 15920926  
SRR17520069. 15941824  
SRR17520069. 15945062  
SRR17520069. 15945068  
SRR17520069. 15945070  
SRR17520069. 15946458  
SRR17520069. 15955637  
SRR17520069. 15983180  
SRR17520069. 15983341  
SRR17520069. 15990609  
SRR17520069. 15997590  
SRR17520069. 15997596  
SRR17520069. 16001512  
SRR17520069. 16001516  
SRR17520069. 16002672  
SRR17520069. 16002732  
SRR17520069. 16011173  
SRR17520069. 16015785

SRR17520069. 16024448  
SRR17520069. 16026473  
SRR17520069. 16026485  
SRR17520069. 16026489  
SRR17520069. 16034189  
SRR17520069. 16034209  
SRR17520069. 16034231  
SRR17520069. 16034343  
SRR17520069. 16042505  
SRR17520069. 16046605  
SRR17520069. 16049793  
SRR17520069. 16054491  
SRR17520069. 16064442  
SRR17520069. 16066860  
SRR17520069. 16066865  
SRR17520069. 16066973  
SRR17520069. 16067187  
SRR17520069. 16075721  
SRR17520069. 16075762  
SRR17520069. 16077940  
SRR17520069. 16086466  
SRR17520069. 16087070  
SRR17520069. 16090045  
SRR17520069. 16093377  
SRR17520069. 16094460  
SRR17520069. 16112428  
SRR17520069. 16115969  
SRR17520069. 16120493  
SRR17520069. 16125154  
SRR17520069. 16128548  
SRR17520069. 16130019  
SRR17520069. 16130020  
SRR17520069. 16134706  
SRR17520069. 16145159  
SRR17520069. 16149998  
SRR17520069. 16151224  
SRR17520069. 16151226  
SRR17520069. 16151228  
SRR17520069. 16158189  
SRR17520069. 16169135  
SRR17520069. 16186185  
SRR17520069. 16188054  
SRR17520069. 16190060  
SRR17520069. 16190091  
SRR17520069. 16193460  
SRR17520069. 16197425  
SRR17520069. 16197442

SRR17520069. 16197454  
SRR17520069. 16200080  
SRR17520069. 16201727  
SRR17520069. 16201780  
SRR17520069. 16201783  
SRR17520069. 16201788  
SRR17520069. 16217649  
SRR17520069. 16219454  
SRR17520069. 16222646  
SRR17520069. 16222648  
SRR17520069. 16223985  
SRR17520069. 16223987  
SRR17520069. 16223991  
SRR17520069. 16223993  
SRR17520069. 16223995  
SRR17520069. 16225737  
SRR17520069. 16238584  
SRR17520069. 16238591  
SRR17520069. 16238598  
SRR17520069. 16238600  
SRR17520069. 16240111  
SRR17520069. 16243475  
SRR17520069. 16243625  
SRR17520069. 16247077  
SRR17520069. 16249298  
SRR17520069. 16256565  
SRR17520069. 16256567  
SRR17520069. 16256569  
SRR17520069. 16256573  
SRR17520069. 16256575  
SRR17520069. 16256577  
SRR17520069. 16256579  
SRR17520069. 16256581  
SRR17520069. 16256583  
SRR17520069. 16256585  
SRR17520069. 16256587  
SRR17520069. 16259802  
SRR17520069. 16261815  
SRR17520069. 16261830  
SRR17520069. 16261838  
SRR17520069. 16268447  
SRR17520069. 16268449  
SRR17520069. 16273419  
SRR17520069. 16273425  
SRR17520069. 16273574  
SRR17520069. 16282078  
SRR17520069. 16282091

SRR17520069. 16282125  
SRR17520069. 16282151  
SRR17520069. 16282156  
SRR17520069. 16282198  
SRR17520069. 16282199  
SRR17520069. 16282220  
SRR17520069. 16282221  
SRR17520069. 16285999  
SRR17520069. 16293702  
SRR17520069. 16303100  
SRR17520069. 16304244  
SRR17520069. 16305541  
SRR17520069. 16315844  
SRR17520069. 16320114  
SRR17520069. 16320244  
SRR17520069. 16322111  
SRR17520069. 16326961  
SRR17520069. 16326963  
SRR17520069. 16326967  
SRR17520069. 16326969  
SRR17520069. 16326971  
SRR17520069. 16326973  
SRR17520069. 16326977  
SRR17520069. 16326979  
SRR17520069. 16326983  
SRR17520069. 16326985  
SRR17520069. 16326987  
SRR17520069. 16326989  
SRR17520069. 16326991  
SRR17520069. 16326995  
SRR17520069. 16326997  
SRR17520069. 16326999  
SRR17520069. 16327001  
SRR17520069. 16327003  
SRR17520069. 16327005  
SRR17520069. 16327007  
SRR17520069. 16327009  
SRR17520069. 16327011  
SRR17520069. 16327013  
SRR17520069. 16327015  
SRR17520069. 16327017  
SRR17520069. 16327019  
SRR17520069. 16327021  
SRR17520069. 16327023  
SRR17520069. 16327025  
SRR17520069. 16327027  
SRR17520069. 16327029

SRR17520069. 16327031  
SRR17520069. 16327033  
SRR17520069. 16327035  
SRR17520069. 16327037  
SRR17520069. 16327039  
SRR17520069. 16327041  
SRR17520069. 16327043  
SRR17520069. 16327045  
SRR17520069. 16327047  
SRR17520069. 16327051  
SRR17520069. 16327053  
SRR17520069. 16327055  
SRR17520069. 16327057  
SRR17520069. 16327059  
SRR17520069. 16327061  
SRR17520069. 16327063  
SRR17520069. 16327065  
SRR17520069. 16327067  
SRR17520069. 16327069  
SRR17520069. 16327071  
SRR17520069. 16327073  
SRR17520069. 16327075  
SRR17520069. 16327077  
SRR17520069. 16327079  
SRR17520069. 16327081  
SRR17520069. 16327083  
SRR17520069. 16327085  
SRR17520069. 16327087  
SRR17520069. 16327089  
SRR17520069. 16327091  
SRR17520069. 16327093  
SRR17520069. 16327497  
SRR17520069. 16328942  
SRR17520069. 16331466  
SRR17520069. 16342743  
SRR17520069. 16349209  
SRR17520069. 16349995  
SRR17520069. 16352180  
SRR17520069. 16352196  
SRR17520069. 16356731  
SRR17520069. 16358454  
SRR17520069. 16361140  
SRR17520069. 16361246  
SRR17520069. 16361951  
SRR17520069. 16361953  
SRR17520069. 16361955  
SRR17520069. 16361959

SRR17520069. 16361961  
SRR17520069. 16361963  
SRR17520069. 16362934  
SRR17520069. 16362950  
SRR17520069. 16366588  
SRR17520069. 16372744  
SRR17520069. 16379775  
SRR17520069. 16382840  
SRR17520069. 16394446  
SRR17520069. 16398665  
SRR17520069. 16400225  
SRR17520069. 16404239  
SRR17520069. 16405754  
SRR17520069. 16407348  
SRR17520069. 16418166  
SRR17520069. 16422657  
SRR17520069. 16434071  
SRR17520069. 16440285  
SRR17520069. 16443072  
SRR17520069. 16447975  
SRR17520069. 16460491  
SRR17520069. 16460545  
SRR17520069. 16463124  
SRR17520069. 16463156  
SRR17520069. 16467111  
SRR17520069. 16474641  
SRR17520069. 16486475  
SRR17520069. 16491467  
SRR17520069. 16493046  
SRR17520069. 16493060  
SRR17520069. 16497759  
SRR17520069. 16499113  
SRR17520069. 16501756  
SRR17520069. 16509910  
SRR17520069. 16510143  
SRR17520069. 16510199  
SRR17520069. 16510203  
SRR17520069. 16510218  
SRR17520069. 16522345  
SRR17520069. 16527280  
SRR17520069. 16531390  
SRR17520069. 16562742  
SRR17520069. 16562768  
SRR17520069. 16567312  
SRR17520069. 16567314  
SRR17520069. 16567316  
SRR17520069. 16567318



SRR17520069. 16567320  
SRR17520069. 16567322  
SRR17520069. 16567324  
SRR17520069. 16567326  
SRR17520069. 16567328  
SRR17520069. 16567330  
SRR17520069. 16567332  
SRR17520069. 16567334  
SRR17520069. 16567336  
SRR17520069. 16573616  
SRR17520069. 16588272  
SRR17520069. 16589187  
SRR17520069. 16591196  
SRR17520069. 16598331  
SRR17520069. 16600964  
SRR17520069. 16600975  
SRR17520069. 16610430  
SRR17520069. 16612790  
SRR17520069. 16612842  
SRR17520069. 16620241  
SRR17520069. 16623462  
SRR17520069. 16630384  
SRR17520069. 16638096  
SRR17520069. 16643678  
SRR17520069. 16644279  
SRR17520069. 16646559  
SRR17520069. 16647281  
SRR17520069. 16647293  
SRR17520069. 16647304  
SRR17520069. 16647339  
SRR17520069. 16647445  
SRR17520069. 16648353  
SRR17520069. 16653034  
SRR17520069. 16655878  
SRR17520069. 16674498  
SRR17520069. 16684273  
SRR17520069. 16690391  
SRR17520069. 16690891  
SRR17520069. 16697595  
SRR17520069. 16697597  
SRR17520069. 16697599  
SRR17520069. 16697601  
SRR17520069. 16697603  
SRR17520069. 16697605  
SRR17520069. 16697607  
SRR17520069. 16697609  
SRR17520069. 16697611

SRR17520069.16697613  
SRR17520069.16697615  
SRR17520069.16697619  
SRR17520069.16697621  
SRR17520069.16697623  
SRR17520069.16697625  
SRR17520069.16697629  
SRR17520069.16697633  
SRR17520069.16697635  
SRR17520069.16697637  
SRR17520069.16697639  
SRR17520069.16697641  
SRR17520069.16697643  
SRR17520069.16697645  
SRR17520069.16697647  
SRR17520069.16697649  
SRR17520069.16697651  
SRR17520069.16697653  
SRR17520069.16697655  
SRR17520069.16697657  
SRR17520069.16697659  
SRR17520069.16697661  
SRR17520069.16697663  
SRR17520069.16697665  
SRR17520069.16697667  
SRR17520069.16697669  
SRR17520069.16697675  
SRR17520069.16697677  
SRR17520069.16697679  
SRR17520069.16697681  
SRR17520069.16697683  
SRR17520069.16697685  
SRR17520069.16697687  
SRR17520069.16697689  
SRR17520069.16697691  
SRR17520069.16697693  
SRR17520069.16697697  
SRR17520069.16697699  
SRR17520069.16697701  
SRR17520069.16697705  
SRR17520069.16697707  
SRR17520069.16697709  
SRR17520069.16697711  
SRR17520069.16697713  
SRR17520069.16697715  
SRR17520069.16697717  
SRR17520069.16697719

SRR17520069. 16697723  
SRR17520069. 16697725  
SRR17520069. 16697727  
SRR17520069. 16697731  
SRR17520069. 16697733  
SRR17520069. 16697735  
SRR17520069. 16697737  
SRR17520069. 16697739  
SRR17520069. 16707120  
SRR17520069. 16707676  
SRR17520069. 16720438  
SRR17520069. 16722104  
SRR17520069. 16729325  
SRR17520069. 16730332  
SRR17520069. 16730334  
SRR17520069. 16730336  
SRR17520069. 16730338  
SRR17520069. 16730340  
SRR17520069. 16730342  
SRR17520069. 16730344  
SRR17520069. 16730350  
SRR17520069. 16730352  
SRR17520069. 16737795  
SRR17520069. 16748653  
SRR17520069. 16751294  
SRR17520069. 16754222  
SRR17520069. 16754230  
SRR17520069. 16754236  
SRR17520069. 16758040  
SRR17520069. 16758553  
SRR17520069. 16777677  
SRR17520069. 16787051  
SRR17520069. 16795483  
SRR17520069. 16805340  
SRR17520069. 16808476  
SRR17520069. 16808478  
SRR17520069. 16815333  
SRR17520069. 16816993  
SRR17520069. 16817091  
SRR17520069. 16817755  
SRR17520069. 16817855  
SRR17520069. 16817899  
SRR17520069. 16822122  
SRR17520069. 16822124  
SRR17520069. 16822126  
SRR17520069. 16822128  
SRR17520069. 16822130

SRR17520069. 16822132  
SRR17520069. 16822134  
SRR17520069. 16822136  
SRR17520069. 16822138  
SRR17520069. 16822140  
SRR17520069. 16822142  
SRR17520069. 16822144  
SRR17520069. 16822146  
SRR17520069. 16822148  
SRR17520069. 16822150  
SRR17520069. 16822152  
SRR17520069. 16822154  
SRR17520069. 16822156  
SRR17520069. 16822158  
SRR17520069. 16822160  
SRR17520069. 16822162  
SRR17520069. 16822164  
SRR17520069. 16822166  
SRR17520069. 16822168  
SRR17520069. 16822170  
SRR17520069. 16822172  
SRR17520069. 16822174  
SRR17520069. 16822176  
SRR17520069. 16823640  
SRR17520069. 16830324  
SRR17520069. 16834010  
SRR17520069. 16834012  
SRR17520069. 16839857  
SRR17520069. 16845031  
SRR17520069. 16845040  
SRR17520069. 16867223  
SRR17520069. 16867250  
SRR17520069. 16867535  
SRR17520069. 16867797  
SRR17520069. 16871118  
SRR17520069. 16877347  
SRR17520069. 16878388  
SRR17520069. 16879304  
SRR17520069. 16883506  
SRR17520069. 16890442  
SRR17520069. 16894902  
SRR17520069. 16897347  
SRR17520069. 16897441  
SRR17520069. 16897461  
SRR17520069. 16901264  
SRR17520069. 16903356  
SRR17520069. 16906476

SRR17520069. 16913300  
SRR17520069. 16923420  
SRR17520069. 16923437  
SRR17520069. 16925853  
SRR17520069. 16935745  
SRR17520069. 16935805  
SRR17520069. 16935881  
SRR17520069. 16945457  
SRR17520069. 16948473  
SRR17520069. 16948882  
SRR17520069. 16960319  
SRR17520069. 16961214  
SRR17520069. 16962975  
SRR17520069. 16963802  
SRR17520069. 16963813  
SRR17520069. 16963832  
SRR17520069. 16963840  
SRR17520069. 16963855  
SRR17520069. 16963859  
SRR17520069. 16963864  
SRR17520069. 16963865  
SRR17520069. 16963867  
SRR17520069. 16963872  
SRR17520069. 16963879  
SRR17520069. 16967507  
SRR17520069. 16968640  
SRR17520069. 16975298  
SRR17520069. 16975351  
SRR17520069. 16978595  
SRR17520069. 16994182  
SRR17520069. 16994244  
SRR17520069. 16994805  
SRR17520069. 16997007  
SRR17520069. 17000791  
SRR17520069. 17000830  
SRR17520069. 17000838  
SRR17520069. 17002019  
SRR17520069. 17002913  
SRR17520069. 17004323  
SRR17520069. 17025312  
SRR17520069. 17025348  
SRR17520069. 17027347  
SRR17520069. 17027360  
SRR17520069. 17038187  
SRR17520069. 17042177  
SRR17520069. 17043988  
SRR17520069. 17047551

SRR17520069.17050227  
SRR17520069.17051908  
SRR17520069.17056925  
SRR17520069.17056931  
SRR17520069.17056932  
SRR17520069.17056936  
SRR17520069.17056939  
SRR17520069.17056944  
SRR17520069.17056968  
SRR17520069.17056988  
SRR17520069.17056992  
SRR17520069.17061848  
SRR17520069.17063086  
SRR17520069.17067976  
SRR17520069.17078507  
SRR17520069.17078509  
SRR17520069.17079787  
SRR17520069.17079789  
SRR17520069.17079791  
SRR17520069.17079795  
SRR17520069.17079797  
SRR17520069.17079799  
SRR17520069.17079801  
SRR17520069.17079803  
SRR17520069.17079805  
SRR17520069.17079807  
SRR17520069.17079809  
SRR17520069.17079811  
SRR17520069.17079813  
SRR17520069.17087543  
SRR17520069.17089907  
SRR17520069.17099021  
SRR17520069.17103965  
SRR17520069.17104011  
SRR17520069.17113454  
SRR17520069.17119914  
SRR17520069.17131488  
SRR17520069.17131584  
SRR17520069.17131585  
SRR17520069.17134579  
SRR17520069.17134607  
SRR17520069.17134619  
SRR17520069.17134629  
SRR17520069.17135028  
SRR17520069.17137979  
SRR17520069.17138609  
SRR17520069.17139229

SRR17520069. 17139231  
SRR17520069. 17139233  
SRR17520069. 17139235  
SRR17520069. 17139237  
SRR17520069. 17139239  
SRR17520069. 17139241  
SRR17520069. 17139243  
SRR17520069. 17139245  
SRR17520069. 17139247  
SRR17520069. 17139249  
SRR17520069. 17139251  
SRR17520069. 17139253  
SRR17520069. 17139255  
SRR17520069. 17139257  
SRR17520069. 17139259  
SRR17520069. 17139261  
SRR17520069. 17139263  
SRR17520069. 17139265  
SRR17520069. 17139278  
SRR17520069. 17139280  
SRR17520069. 17139282  
SRR17520069. 17139284  
SRR17520069. 17139286  
SRR17520069. 17139288  
SRR17520069. 17139290  
SRR17520069. 17139292  
SRR17520069. 17139294  
SRR17520069. 17139296  
SRR17520069. 17139298  
SRR17520069. 17139300  
SRR17520069. 17139302  
SRR17520069. 17139304  
SRR17520069. 17139306  
SRR17520069. 17139308  
SRR17520069. 17139310  
SRR17520069. 17139312  
SRR17520069. 17139314  
SRR17520069. 17139316  
SRR17520069. 17139318  
SRR17520069. 17139320  
SRR17520069. 17139324  
SRR17520069. 17139326  
SRR17520069. 17139328  
SRR17520069. 17139330  
SRR17520069. 17139332  
SRR17520069. 17139334  
SRR17520069. 17139336

SRR17520069. 17139338  
SRR17520069. 17139340  
SRR17520069. 17139342  
SRR17520069. 17139344  
SRR17520069. 17139346  
SRR17520069. 17139348  
SRR17520069. 17139350  
SRR17520069. 17139352  
SRR17520069. 17139354  
SRR17520069. 17139356  
SRR17520069. 17139358  
SRR17520069. 17139360  
SRR17520069. 17139362  
SRR17520069. 17139364  
SRR17520069. 17139366  
SRR17520069. 17139370  
SRR17520069. 17139372  
SRR17520069. 17139374  
SRR17520069. 17139378  
SRR17520069. 17139382  
SRR17520069. 17139384  
SRR17520069. 17139386  
SRR17520069. 17139388  
SRR17520069. 17139390  
SRR17520069. 17139392  
SRR17520069. 17139396  
SRR17520069. 17139398  
SRR17520069. 17139400  
SRR17520069. 17139402  
SRR17520069. 17139404  
SRR17520069. 17139406  
SRR17520069. 17139408  
SRR17520069. 17142033  
SRR17520069. 17142439  
SRR17520069. 17142456  
SRR17520069. 17159508  
SRR17520069. 17166075  
SRR17520069. 17168366  
SRR17520069. 17173196  
SRR17520069. 17175644  
SRR17520069. 17179010  
SRR17520069. 17196168  
SRR17520069. 17203920  
SRR17520069. 17203938  
SRR17520069. 17204358  
SRR17520069. 17212956  
SRR17520069. 17215654



SRR17520069. 17224901  
SRR17520069. 17224903  
SRR17520069. 17224905  
SRR17520069. 17224909  
SRR17520069. 17224913  
SRR17520069. 17224915  
SRR17520069. 17224917  
SRR17520069. 17224919  
SRR17520069. 17224921  
SRR17520069. 17224923  
SRR17520069. 17224925  
SRR17520069. 17224927  
SRR17520069. 17224929  
SRR17520069. 17224931  
SRR17520069. 17224933  
SRR17520069. 17224935  
SRR17520069. 17224937  
SRR17520069. 17224939  
SRR17520069. 17224941  
SRR17520069. 17224943  
SRR17520069. 17224945  
SRR17520069. 17224947  
SRR17520069. 17224949  
SRR17520069. 17224951  
SRR17520069. 17224953  
SRR17520069. 17230892  
SRR17520069. 17235906  
SRR17520069. 17251705  
SRR17520069. 17251725  
SRR17520069. 17251739  
SRR17520069. 17256266  
SRR17520069. 17256272  
SRR17520069. 17275323  
SRR17520069. 17278152  
SRR17520069. 17284761  
SRR17520069. 17285537  
SRR17520069. 17288018  
SRR17520069. 17288128  
SRR17520069. 17292766  
SRR17520069. 17292772  
SRR17520069. 17293939  
SRR17520069. 17294437  
SRR17520069. 17304045  
SRR17520069. 17306346  
SRR17520069. 17306410  
SRR17520069. 17306462  
SRR17520069. 17307937

SRR17520069. 17324338  
SRR17520069. 17332694  
SRR17520069. 17333854  
SRR17520069. 17333907  
SRR17520069. 17337136  
SRR17520069. 17337186  
SRR17520069. 17337188  
SRR17520069. 17338648  
SRR17520069. 17339093  
SRR17520069. 17345569  
SRR17520069. 17357055  
SRR17520069. 17357547  
SRR17520069. 17359063  
SRR17520069. 17368713  
SRR17520069. 17374358  
SRR17520069. 17381650  
SRR17520069. 17381654  
SRR17520069. 17383539  
SRR17520069. 17386047  
SRR17520069. 17386048  
SRR17520069. 17386049  
SRR17520069. 17386059  
SRR17520069. 17386070  
SRR17520069. 17386098  
SRR17520069. 17403742  
SRR17520069. 17407544  
SRR17520069. 17407548  
SRR17520069. 17407630  
SRR17520069. 17407658  
SRR17520069. 17410293  
SRR17520069. 17410877  
SRR17520069. 17411935  
SRR17520069. 17411937  
SRR17520069. 17411941  
SRR17520069. 17411943  
SRR17520069. 17411945  
SRR17520069. 17411947  
SRR17520069. 17411949  
SRR17520069. 17411953  
SRR17520069. 17411955  
SRR17520069. 17411957  
SRR17520069. 17411959  
SRR17520069. 17411961  
SRR17520069. 17411963  
SRR17520069. 17424181  
SRR17520069. 17427374  
SRR17520069. 17427379

SRR17520069. 17427399  
SRR17520069. 17427401  
SRR17520069. 17427403  
SRR17520069. 17427419  
SRR17520069. 17427431  
SRR17520069. 17427437  
SRR17520069. 17427452  
SRR17520069. 17427459  
SRR17520069. 17427466  
SRR17520069. 17427473  
SRR17520069. 17427485  
SRR17520069. 17427488  
SRR17520069. 17432514  
SRR17520069. 17434690  
SRR17520069. 17446665  
SRR17520069. 17456030  
SRR17520069. 17456049  
SRR17520069. 17462278  
SRR17520069. 17462823  
SRR17520069. 17473175  
SRR17520069. 17484067  
SRR17520069. 17486993  
SRR17520069. 17487033  
SRR17520069. 17492795  
SRR17520069. 17494972  
SRR17520069. 17496141  
SRR17520069. 17496230  
SRR17520069. 17510002  
SRR17520069. 17511609  
SRR17520069. 17515015  
SRR17520069. 17529962  
SRR17520069. 17531209  
SRR17520069. 17531229  
SRR17520069. 17534611  
SRR17520069. 17550864  
SRR17520069. 17551249  
SRR17520069. 17566684  
SRR17520069. 17574072  
SRR17520069. 17576479  
SRR17520069. 17576644  
SRR17520069. 17581361  
SRR17520069. 17582478  
SRR17520069. 17582524  
SRR17520069. 17583240  
SRR17520069. 17583263  
SRR17520069. 17584621  
SRR17520069. 17584628

SRR17520069. 17589234  
SRR17520069. 17589969  
SRR17520069. 17593355  
SRR17520069. 17595707  
SRR17520069. 17602653  
SRR17520069. 17604211  
SRR17520069. 17604213  
SRR17520069. 17604215  
SRR17520069. 17604217  
SRR17520069. 17604219  
SRR17520069. 17604221  
SRR17520069. 17604223  
SRR17520069. 17604225  
SRR17520069. 17609932  
SRR17520069. 17634057  
SRR17520069. 17637515  
SRR17520069. 17641310  
SRR17520069. 17643767  
SRR17520069. 17648438  
SRR17520069. 17657711  
SRR17520069. 17661465  
SRR17520069. 17668159  
SRR17520069. 17669019  
SRR17520069. 17674891  
SRR17520069. 17680368  
SRR17520069. 17682674  
SRR17520069. 17684158  
SRR17520069. 17689230  
SRR17520069. 17692096  
SRR17520069. 17696389  
SRR17520069. 17711104  
SRR17520069. 17712557  
SRR17520069. 17716394  
SRR17520069. 17717988  
SRR17520069. 17717992  
SRR17520069. 17719953  
SRR17520069. 17736205  
SRR17520069. 17749625  
SRR17520069. 17752421  
SRR17520069. 17760801  
SRR17520069. 17763019  
SRR17520069. 17763037  
SRR17520069. 17775332  
SRR17520069. 17790538  
SRR17520069. 17791651  
SRR17520069. 17803526  
SRR17520069. 17820163

SRR17520069. 17831449  
SRR17520069. 17852436  
SRR17520069. 17856755  
SRR17520069. 17865554  
SRR17520069. 17865556  
SRR17520069. 17865558  
SRR17520069. 17865560  
SRR17520069. 17865562  
SRR17520069. 17865564  
SRR17520069. 17865566  
SRR17520069. 17865568  
SRR17520069. 17873886  
SRR17520069. 17878939  
SRR17520069. 17879772  
SRR17520069. 17880439  
SRR17520069. 17883355  
SRR17520069. 17883909  
SRR17520069. 17891037  
SRR17520069. 17906449  
SRR17520069. 17909884  
SRR17520069. 17914115  
SRR17520069. 17914139  
SRR17520069. 17921499  
SRR17520069. 17921501  
SRR17520069. 17931632  
SRR17520069. 17931636  
SRR17520069. 17934926  
SRR17520069. 17935503  
SRR17520069. 17944048  
SRR17520069. 17944108  
SRR17520069. 17948608  
SRR17520069. 17949108  
SRR17520069. 17949112  
SRR17520069. 17952307  
SRR17520069. 17954380  
SRR17520069. 17955201  
SRR17520069. 17955673  
SRR17520069. 17965556  
SRR17520069. 17965788  
SRR17520069. 17965794  
SRR17520069. 17966104  
SRR17520069. 17966149  
SRR17520069. 17966151  
SRR17520069. 17966153  
SRR17520069. 17966155  
SRR17520069. 17966157  
SRR17520069. 17966159

SRR17520069.17966161  
SRR17520069.17966163  
SRR17520069.17966165  
SRR17520069.17966167  
SRR17520069.17966169  
SRR17520069.17966171  
SRR17520069.17966173  
SRR17520069.17966175  
SRR17520069.17966177  
SRR17520069.17966179  
SRR17520069.17966181  
SRR17520069.17966183  
SRR17520069.17966185  
SRR17520069.17966189  
SRR17520069.17966191  
SRR17520069.17966794  
SRR17520069.17972147  
SRR17520069.17979042  
SRR17520069.17983537  
SRR17520069.17989753  
SRR17520069.17989968  
SRR17520069.17993400  
SRR17520069.18001505  
SRR17520069.18001507  
SRR17520069.18001513  
SRR17520069.18001516  
SRR17520069.18001519  
SRR17520069.18001521  
SRR17520069.18004749  
SRR17520069.18008086  
SRR17520069.18010427  
SRR17520069.18013349  
SRR17520069.18013351  
SRR17520069.18013354  
SRR17520069.18022259  
SRR17520069.18025285  
SRR17520069.18025333  
SRR17520069.18028170  
SRR17520069.18029617  
SRR17520069.18035803  
SRR17520069.18035809  
SRR17520069.18036392  
SRR17520069.18045696  
SRR17520069.18057512  
SRR17520069.18061818  
SRR17520069.18064111  
SRR17520069.18064127

SRR17520069.18087122  
SRR17520069.18087180  
SRR17520069.18087207  
SRR17520069.18087256  
SRR17520069.18088060  
SRR17520069.18088103  
SRR17520069.18088106  
SRR17520069.18088177  
SRR17520069.18095428  
SRR17520069.18102712  
SRR17520069.18116519  
SRR17520069.18122550  
SRR17520069.18122988  
SRR17520069.18125071  
SRR17520069.18126327  
SRR17520069.18133011  
SRR17520069.18133321  
SRR17520069.18136534  
SRR17520069.18152761  
SRR17520069.18156284  
SRR17520069.18156325  
SRR17520069.18156329  
SRR17520069.18156331  
SRR17520069.18168955  
SRR17520069.18169086  
SRR17520069.18169095  
SRR17520069.18169110  
SRR17520069.18180233  
SRR17520069.18183395  
SRR17520069.18183495  
SRR17520069.18188393  
SRR17520069.18188395  
SRR17520069.18188397  
SRR17520069.18188399  
SRR17520069.18188401  
SRR17520069.18190137  
SRR17520069.18190139  
SRR17520069.18190141  
SRR17520069.18190145  
SRR17520069.18190147  
SRR17520069.18190149  
SRR17520069.18190151  
SRR17520069.18190153  
SRR17520069.18190155  
SRR17520069.18190157  
SRR17520069.18190159  
SRR17520069.18190161

SRR17520069. 18190163  
SRR17520069. 18191652  
SRR17520069. 18197579  
SRR17520069. 18197581  
SRR17520069. 18197611  
SRR17520069. 18201963  
SRR17520069. 18201965  
SRR17520069. 18211322  
SRR17520069. 18214472  
SRR17520069. 18219361  
SRR17520069. 18219371  
SRR17520069. 18232258  
SRR17520069. 18232424  
SRR17520069. 18236771  
SRR17520069. 18250792  
SRR17520069. 18273231  
SRR17520069. 18276208  
SRR17520069. 18277578  
SRR17520069. 18281253  
SRR17520069. 18283447  
SRR17520069. 18283448  
SRR17520069. 18283467  
SRR17520069. 18283478  
SRR17520069. 18283484  
SRR17520069. 18283505  
SRR17520069. 18284180  
SRR17520069. 18289425  
SRR17520069. 18293805  
SRR17520069. 18294007  
SRR17520069. 18294450  
SRR17520069. 18311306  
SRR17520069. 18311308  
SRR17520069. 18317962  
SRR17520069. 18317971  
SRR17520069. 18321477  
SRR17520069. 18321517  
SRR17520069. 18321524  
SRR17520069. 18321532  
SRR17520069. 18321538  
SRR17520069. 18321539  
SRR17520069. 18321543  
SRR17520069. 18328611  
SRR17520069. 18328632  
SRR17520069. 18328635  
SRR17520069. 18332852  
SRR17520069. 18334945  
SRR17520069. 18340152



SRR17520069. 18341629  
SRR17520069. 18341672  
SRR17520069. 18348720  
SRR17520069. 18356236  
SRR17520069. 18356290  
SRR17520069. 18357218  
SRR17520069. 18378934  
SRR17520069. 18383504  
SRR17520069. 18393057  
SRR17520069. 18399012  
SRR17520069. 18407627  
SRR17520069. 18417103  
SRR17520069. 18434319  
SRR17520069. 18438985  
SRR17520069. 18440778  
SRR17520069. 18443372  
SRR17520069. 18443406  
SRR17520069. 18447229  
SRR17520069. 18472661  
SRR17520069. 18502961  
SRR17520069. 18513835  
SRR17520069. 18517528  
SRR17520069. 18519634  
SRR17520069. 18519973  
SRR17520069. 18519984  
SRR17520069. 18523245  
SRR17520069. 18523247  
SRR17520069. 18527131  
SRR17520069. 18533382  
SRR17520069. 18533418  
SRR17520069. 18533422  
SRR17520069. 18533440  
SRR17520069. 18533477  
SRR17520069. 18533487  
SRR17520069. 18560151  
SRR17520069. 18587802  
SRR17520069. 18614270  
SRR17520069. 18617419  
SRR17520069. 18623301  
SRR17520069. 18624940  
SRR17520069. 18640622  
SRR17520069. 18665125  
SRR17520069. 18682854  
SRR17520069. 18689318  
SRR17520069. 18690319  
SRR17520069. 18691544  
SRR17520069. 18697163

SRR17520069. 18704128  
SRR17520069. 18704146  
SRR17520069. 18709210  
SRR17520069. 18712214  
SRR17520069. 18716209  
SRR17520069. 18717369  
SRR17520069. 18720929  
SRR17520069. 18721296  
SRR17520069. 18722616  
SRR17520069. 18722630  
SRR17520069. 18722646  
SRR17520069. 18725113  
SRR17520069. 18725163  
SRR17520069. 18725177  
SRR17520069. 18725215  
SRR17520069. 18725217  
SRR17520069. 18725219  
SRR17520069. 18732256  
SRR17520069. 18733501  
SRR17520069. 18738637  
SRR17520069. 18746595  
SRR17520069. 18747020  
SRR17520069. 18751450  
SRR17520069. 18756371  
SRR17520069. 18757557  
SRR17520069. 18758891  
SRR17520069. 18758899  
SRR17520069. 18764099  
SRR17520069. 18767382  
SRR17520069. 18767384  
SRR17520069. 18778074  
SRR17520069. 18778519  
SRR17520069. 18781830  
SRR17520069. 18786056  
SRR17520069. 18795725  
SRR17520069. 18804103  
SRR17520069. 18810706  
SRR17520069. 18810744  
SRR17520069. 18810782  
SRR17520069. 18810804  
SRR17520069. 18817716  
SRR17520069. 18823366  
SRR17520069. 18824091  
SRR17520069. 18824093  
SRR17520069. 18824943  
SRR17520069. 18831265  
SRR17520069. 18833807

SRR17520069.18835375  
SRR17520069.18839160  
SRR17520069.18842272  
SRR17520069.18845111  
SRR17520069.18848458  
SRR17520069.18848826  
SRR17520069.18848838  
SRR17520069.18854054  
SRR17520069.18855379  
SRR17520069.18861673  
SRR17520069.18868927  
SRR17520069.18868991  
SRR17520069.18894606  
SRR17520069.18894609  
SRR17520069.18894619  
SRR17520069.18894632  
SRR17520069.18894639  
SRR17520069.18894650  
SRR17520069.18894658  
SRR17520069.18894665  
SRR17520069.18894666  
SRR17520069.18894701  
SRR17520069.18894715  
SRR17520069.18894717  
SRR17520069.18894724  
SRR17520069.18894734  
SRR17520069.18894743  
SRR17520069.18894753  
SRR17520069.18915102  
SRR17520069.18915108  
SRR17520069.18915116  
SRR17520069.18915122  
SRR17520069.18915124  
SRR17520069.18917408  
SRR17520069.18919227  
SRR17520069.18920022  
SRR17520069.18924506  
SRR17520069.18924508  
SRR17520069.18924510  
SRR17520069.18924512  
SRR17520069.18924518  
SRR17520069.18924520  
SRR17520069.18924522  
SRR17520069.18924524  
SRR17520069.18924526  
SRR17520069.18924530  
SRR17520069.18924532

SRR17520069. 18924538  
SRR17520069. 18925777  
SRR17520069. 18929433  
SRR17520069. 18935072  
SRR17520069. 18935623  
SRR17520069. 18940367  
SRR17520069. 18949137  
SRR17520069. 18961653  
SRR17520069. 18962174  
SRR17520069. 18962319  
SRR17520069. 18962369  
SRR17520069. 18962597  
SRR17520069. 18976738  
SRR17520069. 18976748  
SRR17520069. 18987985  
SRR17520069. 18998577  
SRR17520069. 18999821  
SRR17520069. 19005685  
SRR17520069. 19012373  
SRR17520069. 19012374  
SRR17520069. 19012384  
SRR17520069. 19012392  
SRR17520069. 19012395  
SRR17520069. 19012401  
SRR17520069. 19015898  
SRR17520069. 19021153  
SRR17520069. 19021157  
SRR17520069. 19021161  
SRR17520069. 19021163  
SRR17520069. 19021165  
SRR17520069. 19021169  
SRR17520069. 19021171  
SRR17520069. 19021173  
SRR17520069. 19021175  
SRR17520069. 19021177  
SRR17520069. 19021179  
SRR17520069. 19021181  
SRR17520069. 19021183  
SRR17520069. 19021187  
SRR17520069. 19031366  
SRR17520069. 19043894  
SRR17520069. 19053767  
SRR17520069. 19060866  
SRR17520069. 19060881  
SRR17520069. 19060906  
SRR17520069. 19061625  
SRR17520069. 19064171

SRR17520069.19064173  
SRR17520069.19064175  
SRR17520069.19064177  
SRR17520069.19064179  
SRR17520069.19064181  
SRR17520069.19064183  
SRR17520069.19064185  
SRR17520069.19064187  
SRR17520069.19064189  
SRR17520069.19064191  
SRR17520069.19064193  
SRR17520069.19064195  
SRR17520069.19064197  
SRR17520069.19064199  
SRR17520069.19064201  
SRR17520069.19064203  
SRR17520069.19064205  
SRR17520069.19064207  
SRR17520069.19064209  
SRR17520069.19064211  
SRR17520069.19064213  
SRR17520069.19064215  
SRR17520069.19064217  
SRR17520069.19064219  
SRR17520069.19064221  
SRR17520069.19064223  
SRR17520069.19064225  
SRR17520069.19065980  
SRR17520069.19075381  
SRR17520069.19076610  
SRR17520069.19076616  
SRR17520069.19081862  
SRR17520069.19081884  
SRR17520069.19081910  
SRR17520069.19081912  
SRR17520069.19081930  
SRR17520069.19081948  
SRR17520069.19092522  
SRR17520069.19098518  
SRR17520069.19099783  
SRR17520069.19099799  
SRR17520069.19100240  
SRR17520069.19100241  
SRR17520069.19124421  
SRR17520069.19132863  
SRR17520069.19138018  
SRR17520069.19138382

SRR17520069.19140191  
SRR17520069.19145852  
SRR17520069.19152506  
SRR17520069.19184828  
SRR17520069.19187345  
SRR17520069.19195322  
SRR17520069.19195364  
SRR17520069.19203915  
SRR17520069.19203934  
SRR17520069.19203945  
SRR17520069.19205953  
SRR17520069.19208711  
SRR17520069.19221105  
SRR17520069.19226627  
SRR17520069.19240419  
SRR17520069.19244517  
SRR17520069.19252761  
SRR17520069.19252777  
SRR17520069.19257063  
SRR17520069.19259317  
SRR17520069.19271683  
SRR17520069.19274190  
SRR17520069.19274820  
SRR17520069.19280511  
SRR17520069.19298110  
SRR17520069.19300503  
SRR17520069.19308820  
SRR17520069.19312875  
SRR17520069.19312876  
SRR17520069.19317134  
SRR17520069.19324206  
SRR17520069.19324214  
SRR17520069.19329329  
SRR17520069.19334641  
SRR17520069.19339059  
SRR17520069.19341319  
SRR17520069.19359525  
SRR17520069.19360997  
SRR17520069.19372771  
SRR17520069.19383174  
SRR17520069.19397871  
SRR17520069.19400253  
SRR17520069.19402582  
SRR17520069.19402628  
SRR17520069.19402658  
SRR17520069.19412832  
SRR17520069.19424643

SRR17520069. 19435600  
SRR17520069. 19458953  
SRR17520069. 19460315  
SRR17520069. 19462745  
SRR17520069. 19471505  
SRR17520069. 19475540  
SRR17520069. 19486126  
SRR17520069. 19491585  
SRR17520069. 19499406  
SRR17520069. 19500558  
SRR17520069. 19503477  
SRR17520069. 19503517  
SRR17520069. 19506903  
SRR17520069. 19510736  
SRR17520069. 19517105  
SRR17520069. 19528895  
SRR17520069. 19537744  
SRR17520069. 19543591  
SRR17520069. 19545752  
SRR17520069. 19548964  
SRR17520069. 19557644  
SRR17520069. 19557902  
SRR17520069. 19560282  
SRR17520069. 2834  
SRR17520069. 5328  
SRR17520069. 7654  
SRR17520069. 7676  
SRR17520069. 7688  
SRR17520069. 9799  
SRR17520069. 11690  
SRR17520069. 11694  
SRR17520069. 13813  
SRR17520069. 23573  
SRR17520069. 23826  
SRR17520069. 23840  
SRR17520069. 23842  
SRR17520069. 23844  
SRR17520069. 23852  
SRR17520069. 29602  
SRR17520069. 29608  
SRR17520069. 36705  
SRR17520069. 53680  
SRR17520069. 53688  
SRR17520069. 53734  
SRR17520069. 53782  
SRR17520069. 60663  
SRR17520069. 62479

SRR17520069.62509  
SRR17520069.65029  
SRR17520069.65396  
SRR17520069.65404  
SRR17520069.65414  
SRR17520069.79087  
SRR17520069.103890  
SRR17520069.106230  
SRR17520069.120857  
SRR17520069.123357  
SRR17520069.145488  
SRR17520069.145602  
SRR17520069.145608  
SRR17520069.145612  
SRR17520069.148153  
SRR17520069.148173  
SRR17520069.148183  
SRR17520069.148195  
SRR17520069.151542  
SRR17520069.151592  
SRR17520069.154672  
SRR17520069.154710  
SRR17520069.154712  
SRR17520069.155749  
SRR17520069.155765  
SRR17520069.160722  
SRR17520069.160732  
SRR17520069.162885  
SRR17520069.162889  
SRR17520069.170568  
SRR17520069.176851  
SRR17520069.176863  
SRR17520069.179484  
SRR17520069.179516  
SRR17520069.180912  
SRR17520069.186041  
SRR17520069.187330  
SRR17520069.187942  
SRR17520069.192496  
SRR17520069.192498  
SRR17520069.192500  
SRR17520069.192502  
SRR17520069.192504  
SRR17520069.192508  
SRR17520069.192510  
SRR17520069.192512  
SRR17520069.192514



SRR17520069. 192516  
SRR17520069. 192518  
SRR17520069. 192520  
SRR17520069. 192522  
SRR17520069. 192524  
SRR17520069. 192526  
SRR17520069. 192528  
SRR17520069. 192530  
SRR17520069. 192532  
SRR17520069. 192534  
SRR17520069. 192536  
SRR17520069. 192538  
SRR17520069. 192540  
SRR17520069. 194005  
SRR17520069. 194051  
SRR17520069. 196784  
SRR17520069. 197776  
SRR17520069. 198036  
SRR17520069. 214464  
SRR17520069. 216914  
SRR17520069. 224690  
SRR17520069. 225172  
SRR17520069. 225194  
SRR17520069. 234832  
SRR17520069. 234844  
SRR17520069. 234868  
SRR17520069. 234878  
SRR17520069. 234880  
SRR17520069. 234888  
SRR17520069. 234890  
SRR17520069. 234902  
SRR17520069. 245623  
SRR17520069. 245643  
SRR17520069. 252247  
SRR17520069. 261605  
SRR17520069. 263633  
SRR17520069. 265531  
SRR17520069. 265537  
SRR17520069. 266221  
SRR17520069. 266227  
SRR17520069. 293526  
SRR17520069. 293538  
SRR17520069. 297445  
SRR17520069. 298536  
SRR17520069. 301026  
SRR17520069. 305955  
SRR17520069. 305961

SRR17520069.305963  
SRR17520069.311570  
SRR17520069.311572  
SRR17520069.311594  
SRR17520069.312982  
SRR17520069.317261  
SRR17520069.317265  
SRR17520069.317485  
SRR17520069.317487  
SRR17520069.317489  
SRR17520069.317492  
SRR17520069.317494  
SRR17520069.317498  
SRR17520069.317502  
SRR17520069.317504  
SRR17520069.317506  
SRR17520069.317508  
SRR17520069.317510  
SRR17520069.317512  
SRR17520069.317514  
SRR17520069.317516  
SRR17520069.317518  
SRR17520069.317520  
SRR17520069.317522  
SRR17520069.317524  
SRR17520069.317526  
SRR17520069.317528  
SRR17520069.317530  
SRR17520069.317532  
SRR17520069.317534  
SRR17520069.319718  
SRR17520069.319720  
SRR17520069.319722  
SRR17520069.319724  
SRR17520069.319726  
SRR17520069.319732  
SRR17520069.319734  
SRR17520069.321140  
SRR17520069.321158  
SRR17520069.328781  
SRR17520069.329205  
SRR17520069.347180  
SRR17520069.348586  
SRR17520069.348592  
SRR17520069.348993  
SRR17520069.360009  
SRR17520069.360023

SRR17520069. 360029  
SRR17520069. 363300  
SRR17520069. 366254  
SRR17520069. 366679  
SRR17520069. 366693  
SRR17520069. 366695  
SRR17520069. 366957  
SRR17520069. 367041  
SRR17520069. 368268  
SRR17520069. 368338  
SRR17520069. 372403  
SRR17520069. 372413  
SRR17520069. 372425  
SRR17520069. 373251  
SRR17520069. 390302  
SRR17520069. 390429  
SRR17520069. 392423  
SRR17520069. 395167  
SRR17520069. 395183  
SRR17520069. 395201  
SRR17520069. 428043  
SRR17520069. 428755  
SRR17520069. 429210  
SRR17520069. 429226  
SRR17520069. 432432  
SRR17520069. 433547  
SRR17520069. 433577  
SRR17520069. 433585  
SRR17520069. 446103  
SRR17520069. 446107  
SRR17520069. 446109  
SRR17520069. 446111  
SRR17520069. 446115  
SRR17520069. 446119  
SRR17520069. 446121  
SRR17520069. 446125  
SRR17520069. 446127  
SRR17520069. 446129  
SRR17520069. 446131  
SRR17520069. 446133  
SRR17520069. 446135  
SRR17520069. 452165  
SRR17520069. 471500  
SRR17520069. 471888  
SRR17520069. 472648  
SRR17520069. 472708  
SRR17520069. 475115

SRR17520069.475143  
SRR17520069.476810  
SRR17520069.491013  
SRR17520069.491053  
SRR17520069.491059  
SRR17520069.500900  
SRR17520069.504411  
SRR17520069.538220  
SRR17520069.540250  
SRR17520069.544154  
SRR17520069.544174  
SRR17520069.545237  
SRR17520069.552354  
SRR17520069.569780  
SRR17520069.572422  
SRR17520069.572424  
SRR17520069.572430  
SRR17520069.573118  
SRR17520069.589049  
SRR17520069.594773  
SRR17520069.594797  
SRR17520069.594801  
SRR17520069.610162  
SRR17520069.615379  
SRR17520069.624578  
SRR17520069.630635  
SRR17520069.630669  
SRR17520069.630687  
SRR17520069.630689  
SRR17520069.630695  
SRR17520069.630701  
SRR17520069.630705  
SRR17520069.630727  
SRR17520069.635801  
SRR17520069.640444  
SRR17520069.641511  
SRR17520069.641515  
SRR17520069.643931  
SRR17520069.644583  
SRR17520069.654216  
SRR17520069.655776  
SRR17520069.662434  
SRR17520069.663365  
SRR17520069.672450  
SRR17520069.688790  
SRR17520069.695289  
SRR17520069.695313

SRR17520069.695323  
SRR17520069.696130  
SRR17520069.696136  
SRR17520069.715855  
SRR17520069.731636  
SRR17520069.731638  
SRR17520069.731640  
SRR17520069.731642  
SRR17520069.731644  
SRR17520069.731646  
SRR17520069.731648  
SRR17520069.731650  
SRR17520069.731652  
SRR17520069.731654  
SRR17520069.731656  
SRR17520069.731658  
SRR17520069.731662  
SRR17520069.731664  
SRR17520069.731666  
SRR17520069.731668  
SRR17520069.731670  
SRR17520069.731672  
SRR17520069.731674  
SRR17520069.731676  
SRR17520069.731678  
SRR17520069.731684  
SRR17520069.731686  
SRR17520069.731688  
SRR17520069.732322  
SRR17520069.733484  
SRR17520069.733498  
SRR17520069.739320  
SRR17520069.739324  
SRR17520069.739430  
SRR17520069.751546  
SRR17520069.751610  
SRR17520069.751618  
SRR17520069.752034  
SRR17520069.752369  
SRR17520069.753460  
SRR17520069.764188  
SRR17520069.764908  
SRR17520069.764910  
SRR17520069.771139  
SRR17520069.771165  
SRR17520069.772290  
SRR17520069.772292

SRR17520069. 772294  
SRR17520069. 772296  
SRR17520069. 772298  
SRR17520069. 772300  
SRR17520069. 772302  
SRR17520069. 772304  
SRR17520069. 772306  
SRR17520069. 772308  
SRR17520069. 772312  
SRR17520069. 772314  
SRR17520069. 772316  
SRR17520069. 772318  
SRR17520069. 772320  
SRR17520069. 772322  
SRR17520069. 772324  
SRR17520069. 772326  
SRR17520069. 772328  
SRR17520069. 772330  
SRR17520069. 772332  
SRR17520069. 772334  
SRR17520069. 772338  
SRR17520069. 772340  
SRR17520069. 772342  
SRR17520069. 772348  
SRR17520069. 772350  
SRR17520069. 772352  
SRR17520069. 772354  
SRR17520069. 772356  
SRR17520069. 772358  
SRR17520069. 772360  
SRR17520069. 772362  
SRR17520069. 772364  
SRR17520069. 772366  
SRR17520069. 772368  
SRR17520069. 772370  
SRR17520069. 772372  
SRR17520069. 772374  
SRR17520069. 772376  
SRR17520069. 772378  
SRR17520069. 772380  
SRR17520069. 772382  
SRR17520069. 772384  
SRR17520069. 772386  
SRR17520069. 772388  
SRR17520069. 772390  
SRR17520069. 772392  
SRR17520069. 772394

SRR17520069.772396  
SRR17520069.772398  
SRR17520069.772400  
SRR17520069.772402  
SRR17520069.772404  
SRR17520069.772408  
SRR17520069.772412  
SRR17520069.772414  
SRR17520069.772416  
SRR17520069.772417  
SRR17520069.773995  
SRR17520069.774033  
SRR17520069.777916  
SRR17520069.785446  
SRR17520069.789385  
SRR17520069.791417  
SRR17520069.793894  
SRR17520069.793900  
SRR17520069.798132  
SRR17520069.798834  
SRR17520069.805901  
SRR17520069.813060  
SRR17520069.813866  
SRR17520069.813888  
SRR17520069.815333  
SRR17520069.818304  
SRR17520069.821141  
SRR17520069.839520  
SRR17520069.847191  
SRR17520069.855422  
SRR17520069.865676  
SRR17520069.865698  
SRR17520069.865716  
SRR17520069.865738  
SRR17520069.868445  
SRR17520069.868457  
SRR17520069.868711  
SRR17520069.868721  
SRR17520069.868723  
SRR17520069.868725  
SRR17520069.868727  
SRR17520069.868735  
SRR17520069.873713  
SRR17520069.873717  
SRR17520069.877042  
SRR17520069.877062  
SRR17520069.877461

SRR17520069.882544  
SRR17520069.882564  
SRR17520069.882616  
SRR17520069.885894  
SRR17520069.897001  
SRR17520069.901944  
SRR17520069.901946  
SRR17520069.901948  
SRR17520069.901950  
SRR17520069.901952  
SRR17520069.901954  
SRR17520069.901956  
SRR17520069.901958  
SRR17520069.901960  
SRR17520069.901962  
SRR17520069.901964  
SRR17520069.901966  
SRR17520069.901968  
SRR17520069.901970  
SRR17520069.901972  
SRR17520069.901974  
SRR17520069.901976  
SRR17520069.901978  
SRR17520069.901980  
SRR17520069.901982  
SRR17520069.901984  
SRR17520069.901986  
SRR17520069.901988  
SRR17520069.901990  
SRR17520069.901992  
SRR17520069.901994  
SRR17520069.901996  
SRR17520069.901998  
SRR17520069.902000  
SRR17520069.902002  
SRR17520069.902004  
SRR17520069.902006  
SRR17520069.902010  
SRR17520069.902012  
SRR17520069.902014  
SRR17520069.902016  
SRR17520069.902018  
SRR17520069.902020  
SRR17520069.902022  
SRR17520069.902024  
SRR17520069.902026  
SRR17520069.902028



SRR17520069.902030  
SRR17520069.902032  
SRR17520069.902034  
SRR17520069.902036  
SRR17520069.902038  
SRR17520069.902040  
SRR17520069.902042  
SRR17520069.902044  
SRR17520069.902046  
SRR17520069.902048  
SRR17520069.902052  
SRR17520069.902056  
SRR17520069.902058  
SRR17520069.902060  
SRR17520069.902062  
SRR17520069.902064  
SRR17520069.902066  
SRR17520069.902068  
SRR17520069.902070  
SRR17520069.902072  
SRR17520069.902074  
SRR17520069.902076  
SRR17520069.902078  
SRR17520069.902080  
SRR17520069.906445  
SRR17520069.906447  
SRR17520069.906449  
SRR17520069.906451  
SRR17520069.906453  
SRR17520069.912204  
SRR17520069.913350  
SRR17520069.913352  
SRR17520069.921998  
SRR17520069.922000  
SRR17520069.922002  
SRR17520069.929994  
SRR17520069.930449  
SRR17520069.937431  
SRR17520069.948080  
SRR17520069.951323  
SRR17520069.957740  
SRR17520069.961094  
SRR17520069.963949  
SRR17520069.971891  
SRR17520069.978163  
SRR17520069.981113  
SRR17520069.981123

SRR17520069.988113  
SRR17520069.988131  
SRR17520069.998925  
SRR17520069.998945  
SRR17520069.1001892  
SRR17520069.1004759  
SRR17520069.1022793  
SRR17520069.1038280  
SRR17520069.1038518  
SRR17520069.1038526  
SRR17520069.1039144  
SRR17520069.1039180  
SRR17520069.1039198  
SRR17520069.1039208  
SRR17520069.1043073  
SRR17520069.1043105  
SRR17520069.1051463  
SRR17520069.1056862  
SRR17520069.1071980  
SRR17520069.1078109  
SRR17520069.1081025  
SRR17520069.1090520  
SRR17520069.1093384  
SRR17520069.1093408  
SRR17520069.1104075  
SRR17520069.1110979  
SRR17520069.1112029  
SRR17520069.1116174  
SRR17520069.1116184  
SRR17520069.1124710  
SRR17520069.1125342  
SRR17520069.1141706  
SRR17520069.1156004  
SRR17520069.1156020  
SRR17520069.1170099  
SRR17520069.1172040  
SRR17520069.1173540  
SRR17520069.1178336  
SRR17520069.1178338  
SRR17520069.1178340  
SRR17520069.1178342  
SRR17520069.1178344  
SRR17520069.1178346  
SRR17520069.1178348  
SRR17520069.1183086  
SRR17520069.1185843  
SRR17520069.1187488

SRR17520069.1188632  
SRR17520069.1188642  
SRR17520069.1188644  
SRR17520069.1208158  
SRR17520069.1209635  
SRR17520069.1209637  
SRR17520069.1209645  
SRR17520069.1216344  
SRR17520069.1217349  
SRR17520069.1237673  
SRR17520069.1237679  
SRR17520069.1243716  
SRR17520069.1249537  
SRR17520069.1249543  
SRR17520069.1249549  
SRR17520069.1249553  
SRR17520069.1249577  
SRR17520069.1249579  
SRR17520069.1249583  
SRR17520069.1257634  
SRR17520069.1258788  
SRR17520069.1259957  
SRR17520069.1259959  
SRR17520069.1259961  
SRR17520069.1259963  
SRR17520069.1259965  
SRR17520069.1259967  
SRR17520069.1259969  
SRR17520069.1259973  
SRR17520069.1278819  
SRR17520069.1278857  
SRR17520069.1287385  
SRR17520069.1287660  
SRR17520069.1288061  
SRR17520069.1291999  
SRR17520069.1292007  
SRR17520069.1292895  
SRR17520069.1295189  
SRR17520069.1295404  
SRR17520069.1295414  
SRR17520069.1298487  
SRR17520069.1299599  
SRR17520069.1302850  
SRR17520069.1307459  
SRR17520069.1319286  
SRR17520069.1332801  
SRR17520069.1334567

SRR17520069. 1334577  
SRR17520069. 1340597  
SRR17520069. 1351659  
SRR17520069. 1351661  
SRR17520069. 1362509  
SRR17520069. 1362529  
SRR17520069. 1364229  
SRR17520069. 1364263  
SRR17520069. 1364321  
SRR17520069. 1368186  
SRR17520069. 1368212  
SRR17520069. 1368238  
SRR17520069. 1381095  
SRR17520069. 1388997  
SRR17520069. 1388999  
SRR17520069. 1389007  
SRR17520069. 1390012  
SRR17520069. 1390016  
SRR17520069. 1390034  
SRR17520069. 1390036  
SRR17520069. 1400493  
SRR17520069. 1406392  
SRR17520069. 1409723  
SRR17520069. 1418520  
SRR17520069. 1419556  
SRR17520069. 1433224  
SRR17520069. 1434985  
SRR17520069. 1436085  
SRR17520069. 1436097  
SRR17520069. 1442203  
SRR17520069. 1444623  
SRR17520069. 1445878  
SRR17520069. 1445890  
SRR17520069. 1446765  
SRR17520069. 1446865  
SRR17520069. 1468544  
SRR17520069. 1478642  
SRR17520069. 1478814  
SRR17520069. 1478906  
SRR17520069. 1478982  
SRR17520069. 1486188  
SRR17520069. 1496232  
SRR17520069. 1496262  
SRR17520069. 1496312  
SRR17520069. 1496364  
SRR17520069. 1496392  
SRR17520069. 1496404

SRR17520069. 1503305  
SRR17520069. 1503307  
SRR17520069. 1505167  
SRR17520069. 1505939  
SRR17520069. 1506003  
SRR17520069. 1506027  
SRR17520069. 1511063  
SRR17520069. 1516491  
SRR17520069. 1516517  
SRR17520069. 1518928  
SRR17520069. 1556180  
SRR17520069. 1564377  
SRR17520069. 1566144  
SRR17520069. 1566156  
SRR17520069. 1572810  
SRR17520069. 1572814  
SRR17520069. 1575683  
SRR17520069. 1575685  
SRR17520069. 1575689  
SRR17520069. 1575691  
SRR17520069. 1575695  
SRR17520069. 1575697  
SRR17520069. 1575699  
SRR17520069. 1575701  
SRR17520069. 1575707  
SRR17520069. 1575709  
SRR17520069. 1575711  
SRR17520069. 1575713  
SRR17520069. 1575715  
SRR17520069. 1575717  
SRR17520069. 1575719  
SRR17520069. 1575721  
SRR17520069. 1575723  
SRR17520069. 1575725  
SRR17520069. 1575727  
SRR17520069. 1575729  
SRR17520069. 1575735  
SRR17520069. 1575739  
SRR17520069. 1575741  
SRR17520069. 1575743  
SRR17520069. 1575745  
SRR17520069. 1575747  
SRR17520069. 1575749  
SRR17520069. 1575751  
SRR17520069. 1575753  
SRR17520069. 1575755  
SRR17520069. 1575757

SRR17520069. 1575759  
SRR17520069. 1575761  
SRR17520069. 1575763  
SRR17520069. 1575765  
SRR17520069. 1575767  
SRR17520069. 1578102  
SRR17520069. 1578290  
SRR17520069. 1592667  
SRR17520069. 1596636  
SRR17520069. 1596638  
SRR17520069. 1596644  
SRR17520069. 1596652  
SRR17520069. 1596658  
SRR17520069. 1596664  
SRR17520069. 1596666  
SRR17520069. 1608051  
SRR17520069. 1608061  
SRR17520069. 1608125  
SRR17520069. 1608153  
SRR17520069. 1608169  
SRR17520069. 1608173  
SRR17520069. 1608183  
SRR17520069. 1631706  
SRR17520069. 1637053  
SRR17520069. 1650527  
SRR17520069. 1656140  
SRR17520069. 1656176  
SRR17520069. 1658565  
SRR17520069. 1658567  
SRR17520069. 1658569  
SRR17520069. 1658571  
SRR17520069. 1658573  
SRR17520069. 1658575  
SRR17520069. 1658577  
SRR17520069. 1658579  
SRR17520069. 1658581  
SRR17520069. 1658583  
SRR17520069. 1658585  
SRR17520069. 1658587  
SRR17520069. 1658591  
SRR17520069. 1658593  
SRR17520069. 1658595  
SRR17520069. 1658597  
SRR17520069. 1658599  
SRR17520069. 1658601  
SRR17520069. 1658603  
SRR17520069. 1658605

SRR17520069. 1658607  
SRR17520069. 1658609  
SRR17520069. 1658611  
SRR17520069. 1658613  
SRR17520069. 1658615  
SRR17520069. 1658617  
SRR17520069. 1658619  
SRR17520069. 1658625  
SRR17520069. 1658629  
SRR17520069. 1658631  
SRR17520069. 1658633  
SRR17520069. 1658635  
SRR17520069. 1658637  
SRR17520069. 1658639  
SRR17520069. 1658641  
SRR17520069. 1658645  
SRR17520069. 1658647  
SRR17520069. 1658653  
SRR17520069. 1663299  
SRR17520069. 1663914  
SRR17520069. 1668017  
SRR17520069. 1672197  
SRR17520069. 1672958  
SRR17520069. 1680879  
SRR17520069. 1686222  
SRR17520069. 1686576  
SRR17520069. 1686578  
SRR17520069. 1690327  
SRR17520069. 1700498  
SRR17520069. 1704828  
SRR17520069. 1704834  
SRR17520069. 1709465  
SRR17520069. 1716238  
SRR17520069. 1740908  
SRR17520069. 1750489  
SRR17520069. 1751764  
SRR17520069. 1751776  
SRR17520069. 1759662  
SRR17520069. 1759670  
SRR17520069. 1767520  
SRR17520069. 1767522  
SRR17520069. 1767524  
SRR17520069. 1767526  
SRR17520069. 1767528  
SRR17520069. 1767530  
SRR17520069. 1767532  
SRR17520069. 1767534

SRR17520069. 1767536  
SRR17520069. 1767538  
SRR17520069. 1767540  
SRR17520069. 1767542  
SRR17520069. 1767544  
SRR17520069. 1767546  
SRR17520069. 1767548  
SRR17520069. 1767552  
SRR17520069. 1767554  
SRR17520069. 1767556  
SRR17520069. 1767558  
SRR17520069. 1767560  
SRR17520069. 1767562  
SRR17520069. 1767564  
SRR17520069. 1767566  
SRR17520069. 1767568  
SRR17520069. 1767570  
SRR17520069. 1767572  
SRR17520069. 1767574  
SRR17520069. 1767576  
SRR17520069. 1767578  
SRR17520069. 1767580  
SRR17520069. 1767584  
SRR17520069. 1767586  
SRR17520069. 1767590  
SRR17520069. 1767592  
SRR17520069. 1767594  
SRR17520069. 1767596  
SRR17520069. 1767598  
SRR17520069. 1767600  
SRR17520069. 1767602  
SRR17520069. 1767604  
SRR17520069. 1767606  
SRR17520069. 1768586  
SRR17520069. 1774371  
SRR17520069. 1786035  
SRR17520069. 1786037  
SRR17520069. 1786039  
SRR17520069. 1786041  
SRR17520069. 1786043  
SRR17520069. 1786045  
SRR17520069. 1786047  
SRR17520069. 1786049  
SRR17520069. 1786051  
SRR17520069. 1786053  
SRR17520069. 1786055  
SRR17520069. 1786057



SRR17520069. 1786059  
SRR17520069. 1796618  
SRR17520069. 1799258  
SRR17520069. 1799350  
SRR17520069. 1805326  
SRR17520069. 1810189  
SRR17520069. 1831685  
SRR17520069. 1833371  
SRR17520069. 1833389  
SRR17520069. 1833405  
SRR17520069. 1833421  
SRR17520069. 1833451  
SRR17520069. 1841485  
SRR17520069. 1841491  
SRR17520069. 1841493  
SRR17520069. 1841497  
SRR17520069. 1847363  
SRR17520069. 1847397  
SRR17520069. 1849590  
SRR17520069. 1854377  
SRR17520069. 1857595  
SRR17520069. 1870008  
SRR17520069. 1880005  
SRR17520069. 1881322  
SRR17520069. 1881448  
SRR17520069. 1887428  
SRR17520069. 1891015  
SRR17520069. 1891109  
SRR17520069. 1893942  
SRR17520069. 1893944  
SRR17520069. 1893946  
SRR17520069. 1893948  
SRR17520069. 1893950  
SRR17520069. 1893952  
SRR17520069. 1899913  
SRR17520069. 1905411  
SRR17520069. 1905421  
SRR17520069. 1917956  
SRR17520069. 1917971  
SRR17520069. 1918001  
SRR17520069. 1918019  
SRR17520069. 1921663  
SRR17520069. 1921667  
SRR17520069. 1921699  
SRR17520069. 1923447  
SRR17520069. 1926815  
SRR17520069. 1942017

SRR17520069. 1942023  
SRR17520069. 1948645  
SRR17520069. 1949480  
SRR17520069. 1949482  
SRR17520069. 1951294  
SRR17520069. 1951538  
SRR17520069. 1951630  
SRR17520069. 1957383  
SRR17520069. 1957385  
SRR17520069. 1957387  
SRR17520069. 1957389  
SRR17520069. 1957391  
SRR17520069. 1957393  
SRR17520069. 1957395  
SRR17520069. 1957397  
SRR17520069. 1957399  
SRR17520069. 1957401  
SRR17520069. 1957403  
SRR17520069. 1957405  
SRR17520069. 1957407  
SRR17520069. 1957409  
SRR17520069. 1957411  
SRR17520069. 1957413  
SRR17520069. 1957415  
SRR17520069. 1957417  
SRR17520069. 1968263  
SRR17520069. 1971716  
SRR17520069. 1977243  
SRR17520069. 1978395  
SRR17520069. 1978470  
SRR17520069. 1980911  
SRR17520069. 1980999  
SRR17520069. 1983172  
SRR17520069. 1983793  
SRR17520069. 1990737  
SRR17520069. 1990739  
SRR17520069. 1990741  
SRR17520069. 1990743  
SRR17520069. 1990745  
SRR17520069. 1990747  
SRR17520069. 1990749  
SRR17520069. 1990751  
SRR17520069. 1990753  
SRR17520069. 1990755  
SRR17520069. 1990757  
SRR17520069. 1990761  
SRR17520069. 1990763

SRR17520069.1990765  
SRR17520069.1990767  
SRR17520069.1995154  
SRR17520069.1998192  
SRR17520069.1998208  
SRR17520069.2004403  
SRR17520069.2004419  
SRR17520069.2006829  
SRR17520069.2016757  
SRR17520069.2016953  
SRR17520069.2016979  
SRR17520069.2017513  
SRR17520069.2023955  
SRR17520069.2031050  
SRR17520069.2034256  
SRR17520069.2034258  
SRR17520069.2035361  
SRR17520069.2035397  
SRR17520069.2035399  
SRR17520069.2047471  
SRR17520069.2047479  
SRR17520069.2052332  
SRR17520069.2060688  
SRR17520069.2073941  
SRR17520069.2073945  
SRR17520069.2073961  
SRR17520069.2079973  
SRR17520069.2080543  
SRR17520069.2101515  
SRR17520069.2101517  
SRR17520069.2101539  
SRR17520069.2101551  
SRR17520069.2107423  
SRR17520069.2113422  
SRR17520069.2113732  
SRR17520069.2125183  
SRR17520069.2127072  
SRR17520069.2127076  
SRR17520069.2137014  
SRR17520069.2141501  
SRR17520069.2141503  
SRR17520069.2170052  
SRR17520069.2175293  
SRR17520069.2175309  
SRR17520069.2175323  
SRR17520069.2175331  
SRR17520069.2188684

SRR17520069.2188686  
SRR17520069.2188690  
SRR17520069.2209533  
SRR17520069.2209898  
SRR17520069.2223818  
SRR17520069.2230261  
SRR17520069.2230269  
SRR17520069.2248854  
SRR17520069.2248858  
SRR17520069.2248862  
SRR17520069.2248864  
SRR17520069.2248878  
SRR17520069.2250003  
SRR17520069.2250005  
SRR17520069.2250007  
SRR17520069.2250009  
SRR17520069.2250011  
SRR17520069.2250013  
SRR17520069.2250015  
SRR17520069.2250017  
SRR17520069.2250019  
SRR17520069.2250021  
SRR17520069.2250023  
SRR17520069.2250025  
SRR17520069.2250027  
SRR17520069.2250029  
SRR17520069.2250031  
SRR17520069.2250033  
SRR17520069.2250035  
SRR17520069.2250037  
SRR17520069.2250039  
SRR17520069.2250041  
SRR17520069.2250043  
SRR17520069.2250045  
SRR17520069.2250047  
SRR17520069.2250049  
SRR17520069.2250051  
SRR17520069.2252045  
SRR17520069.2279529  
SRR17520069.2279537  
SRR17520069.2279541  
SRR17520069.2281015  
SRR17520069.2305257  
SRR17520069.2314533  
SRR17520069.2314861  
SRR17520069.2314863  
SRR17520069.2314865

SRR17520069. 2314867  
SRR17520069. 2314869  
SRR17520069. 2314871  
SRR17520069. 2314873  
SRR17520069. 2314875  
SRR17520069. 2314877  
SRR17520069. 2314879  
SRR17520069. 2314881  
SRR17520069. 2314883  
SRR17520069. 2314885  
SRR17520069. 2314887  
SRR17520069. 2314889  
SRR17520069. 2314891  
SRR17520069. 2314893  
SRR17520069. 2314895  
SRR17520069. 2314897  
SRR17520069. 2314899  
SRR17520069. 2314901  
SRR17520069. 2314903  
SRR17520069. 2314905  
SRR17520069. 2314907  
SRR17520069. 2314909  
SRR17520069. 2314911  
SRR17520069. 2314913  
SRR17520069. 2314915  
SRR17520069. 2314917  
SRR17520069. 2314919  
SRR17520069. 2314921  
SRR17520069. 2314923  
SRR17520069. 2314925  
SRR17520069. 2314927  
SRR17520069. 2314929  
SRR17520069. 2321488  
SRR17520069. 2323291  
SRR17520069. 2328072  
SRR17520069. 2340359  
SRR17520069. 2340377  
SRR17520069. 2340379  
SRR17520069. 2340413  
SRR17520069. 2340419  
SRR17520069. 2345417  
SRR17520069. 2345433  
SRR17520069. 2357989  
SRR17520069. 2363377  
SRR17520069. 2363497  
SRR17520069. 2363529  
SRR17520069. 2363535

SRR17520069.2363539  
SRR17520069.2381325  
SRR17520069.2385681  
SRR17520069.2388592  
SRR17520069.2388596  
SRR17520069.2388598  
SRR17520069.2388602  
SRR17520069.2389559  
SRR17520069.2391417  
SRR17520069.2394978  
SRR17520069.2394992  
SRR17520069.2395006  
SRR17520069.2395038  
SRR17520069.2395070  
SRR17520069.2395088  
SRR17520069.2395098  
SRR17520069.2402887  
SRR17520069.2403676  
SRR17520069.2403678  
SRR17520069.2403680  
SRR17520069.2403682  
SRR17520069.2403684  
SRR17520069.2403686  
SRR17520069.2431816  
SRR17520069.2431848  
SRR17520069.2435240  
SRR17520069.2438322  
SRR17520069.2440392  
SRR17520069.2454556  
SRR17520069.2478038  
SRR17520069.2485122  
SRR17520069.2489316  
SRR17520069.2495071  
SRR17520069.2497860  
SRR17520069.2497886  
SRR17520069.2497892  
SRR17520069.2505961  
SRR17520069.2505965  
SRR17520069.2505969  
SRR17520069.2505975  
SRR17520069.2505989  
SRR17520069.2505991  
SRR17520069.2506021  
SRR17520069.2506023  
SRR17520069.2506055  
SRR17520069.2506061  
SRR17520069.2514592

SRR17520069.2521008  
SRR17520069.2526077  
SRR17520069.2542130  
SRR17520069.2543538  
SRR17520069.2545296  
SRR17520069.2545300  
SRR17520069.2550531  
SRR17520069.2555292  
SRR17520069.2556264  
SRR17520069.2567084  
SRR17520069.2573138  
SRR17520069.2573140  
SRR17520069.2573142  
SRR17520069.2573144  
SRR17520069.2573146  
SRR17520069.2573150  
SRR17520069.2573156  
SRR17520069.2573158  
SRR17520069.2573164  
SRR17520069.2573166  
SRR17520069.2573168  
SRR17520069.2573172  
SRR17520069.2573175  
SRR17520069.2573177  
SRR17520069.2573181  
SRR17520069.2573185  
SRR17520069.2573187  
SRR17520069.2573189  
SRR17520069.2573193  
SRR17520069.2573195  
SRR17520069.2573197  
SRR17520069.2573199  
SRR17520069.2573209  
SRR17520069.2573211  
SRR17520069.2575950  
SRR17520069.2597413  
SRR17520069.2600656  
SRR17520069.2604790  
SRR17520069.2604824  
SRR17520069.2604826  
SRR17520069.2608544  
SRR17520069.2611791  
SRR17520069.2611803  
SRR17520069.2611807  
SRR17520069.2611815  
SRR17520069.2614050  
SRR17520069.2614096

SRR17520069. 2614100  
SRR17520069. 2614144  
SRR17520069. 2625496  
SRR17520069. 2625500  
SRR17520069. 2629026  
SRR17520069. 2630247  
SRR17520069. 2636948  
SRR17520069. 2638984  
SRR17520069. 2645427  
SRR17520069. 2645443  
SRR17520069. 2649983  
SRR17520069. 2651270  
SRR17520069. 2654360  
SRR17520069. 2687153  
SRR17520069. 2693277  
SRR17520069. 2702974  
SRR17520069. 2717378  
SRR17520069. 2717388  
SRR17520069. 2717738  
SRR17520069. 2758471  
SRR17520069. 2773405  
SRR17520069. 2798778  
SRR17520069. 2798780  
SRR17520069. 2798784  
SRR17520069. 2798786  
SRR17520069. 2798788  
SRR17520069. 2798790  
SRR17520069. 2798792  
SRR17520069. 2798794  
SRR17520069. 2798798  
SRR17520069. 2798799  
SRR17520069. 2804918  
SRR17520069. 2814137  
SRR17520069. 2814203  
SRR17520069. 2814207  
SRR17520069. 2836152  
SRR17520069. 2845445  
SRR17520069. 2845457  
SRR17520069. 2847041  
SRR17520069. 2858015  
SRR17520069. 2858025  
SRR17520069. 2858061  
SRR17520069. 2861820  
SRR17520069. 2862872  
SRR17520069. 2862880  
SRR17520069. 2871364  
SRR17520069. 2873147



SRR17520069. 2873209  
SRR17520069. 2889375  
SRR17520069. 2889381  
SRR17520069. 2891174  
SRR17520069. 2891821  
SRR17520069. 2891831  
SRR17520069. 2892503  
SRR17520069. 2895627  
SRR17520069. 2908924  
SRR17520069. 2908936  
SRR17520069. 2908952  
SRR17520069. 2908958  
SRR17520069. 2908986  
SRR17520069. 2909000  
SRR17520069. 2914036  
SRR17520069. 2915207  
SRR17520069. 2916784  
SRR17520069. 2916800  
SRR17520069. 2916848  
SRR17520069. 2927336  
SRR17520069. 2935169  
SRR17520069. 2938064  
SRR17520069. 2947982  
SRR17520069. 2948587  
SRR17520069. 2953557  
SRR17520069. 2957142  
SRR17520069. 2957148  
SRR17520069. 2957154  
SRR17520069. 2957156  
SRR17520069. 2964954  
SRR17520069. 2981335  
SRR17520069. 2985850  
SRR17520069. 2985852  
SRR17520069. 2986163  
SRR17520069. 2999869  
SRR17520069. 2999907  
SRR17520069. 3006808  
SRR17520069. 3006812  
SRR17520069. 3011203  
SRR17520069. 3011225  
SRR17520069. 3011257  
SRR17520069. 3011277  
SRR17520069. 3017881  
SRR17520069. 3032057  
SRR17520069. 3036623  
SRR17520069. 3044051  
SRR17520069. 3044059

SRR17520069. 3044075  
SRR17520069. 3055576  
SRR17520069. 3059868  
SRR17520069. 3068891  
SRR17520069. 3068903  
SRR17520069. 3070206  
SRR17520069. 3080099  
SRR17520069. 3097196  
SRR17520069. 3097200  
SRR17520069. 3112415  
SRR17520069. 3115052  
SRR17520069. 3115058  
SRR17520069. 3152927  
SRR17520069. 3156660  
SRR17520069. 3158747  
SRR17520069. 3158753  
SRR17520069. 3168719  
SRR17520069. 3173018  
SRR17520069. 3181795  
SRR17520069. 3183436  
SRR17520069. 3187519  
SRR17520069. 3187523  
SRR17520069. 3195424  
SRR17520069. 3195448  
SRR17520069. 3195466  
SRR17520069. 3195468  
SRR17520069. 3195500  
SRR17520069. 3202785  
SRR17520069. 3219813  
SRR17520069. 3221679  
SRR17520069. 3222699  
SRR17520069. 3222702  
SRR17520069. 3222703  
SRR17520069. 3222707  
SRR17520069. 3225539  
SRR17520069. 3225597  
SRR17520069. 3231621  
SRR17520069. 3243609  
SRR17520069. 3245890  
SRR17520069. 3245966  
SRR17520069. 3245974  
SRR17520069. 3246048  
SRR17520069. 3246080  
SRR17520069. 3258046  
SRR17520069. 3258094  
SRR17520069. 3275609  
SRR17520069. 3286675

SRR17520069. 3292193  
SRR17520069. 3310815  
SRR17520069. 3318921  
SRR17520069. 3318927  
SRR17520069. 3327948  
SRR17520069. 3327972  
SRR17520069. 3327990  
SRR17520069. 3327998  
SRR17520069. 3335369  
SRR17520069. 3335379  
SRR17520069. 3335387  
SRR17520069. 3335421  
SRR17520069. 3337658  
SRR17520069. 3339591  
SRR17520069. 3339665  
SRR17520069. 3339669  
SRR17520069. 3341558  
SRR17520069. 3342689  
SRR17520069. 3345308  
SRR17520069. 3345348  
SRR17520069. 3346082  
SRR17520069. 3346084  
SRR17520069. 3346086  
SRR17520069. 3346350  
SRR17520069. 3346352  
SRR17520069. 3346366  
SRR17520069. 3346370  
SRR17520069. 3352772  
SRR17520069. 3352875  
SRR17520069. 3366370  
SRR17520069. 3367844  
SRR17520069. 3375961  
SRR17520069. 3376001  
SRR17520069. 3376013  
SRR17520069. 3376019  
SRR17520069. 3376129  
SRR17520069. 3386656  
SRR17520069. 3386670  
SRR17520069. 3399159  
SRR17520069. 3422268  
SRR17520069. 3425602  
SRR17520069. 3430864  
SRR17520069. 3430878  
SRR17520069. 3430880  
SRR17520069. 3430886  
SRR17520069. 3430896  
SRR17520069. 3446124

SRR17520069. 3462381  
SRR17520069. 3463659  
SRR17520069. 3467164  
SRR17520069. 3467170  
SRR17520069. 3469652  
SRR17520069. 3474147  
SRR17520069. 3476458  
SRR17520069. 3480308  
SRR17520069. 3485904  
SRR17520069. 3485948  
SRR17520069. 3494720  
SRR17520069. 3501711  
SRR17520069. 3508295  
SRR17520069. 3511632  
SRR17520069. 3511640  
SRR17520069. 3511644  
SRR17520069. 3511656  
SRR17520069. 3511658  
SRR17520069. 3511664  
SRR17520069. 3511666  
SRR17520069. 3511678  
SRR17520069. 3511680  
SRR17520069. 3511684  
SRR17520069. 3511690  
SRR17520069. 3511692  
SRR17520069. 3511696  
SRR17520069. 3513983  
SRR17520069. 3513989  
SRR17520069. 3513991  
SRR17520069. 3514007  
SRR17520069. 3514025  
SRR17520069. 3514061  
SRR17520069. 3514073  
SRR17520069. 3514077  
SRR17520069. 3514079  
SRR17520069. 3522027  
SRR17520069. 3527761  
SRR17520069. 3527781  
SRR17520069. 3527785  
SRR17520069. 3527803  
SRR17520069. 3527821  
SRR17520069. 3527825  
SRR17520069. 3527837  
SRR17520069. 3532398  
SRR17520069. 3535970  
SRR17520069. 3535982  
SRR17520069. 3536006

SRR17520069. 3536024  
SRR17520069. 3536034  
SRR17520069. 3536046  
SRR17520069. 3536060  
SRR17520069. 3539925  
SRR17520069. 3540081  
SRR17520069. 3540084  
SRR17520069. 3544104  
SRR17520069. 3544140  
SRR17520069. 3544163  
SRR17520069. 3544636  
SRR17520069. 3544646  
SRR17520069. 3545354  
SRR17520069. 3552369  
SRR17520069. 3552387  
SRR17520069. 3555641  
SRR17520069. 3555671  
SRR17520069. 3563654  
SRR17520069. 3564896  
SRR17520069. 3564927  
SRR17520069. 3573781  
SRR17520069. 3578318  
SRR17520069. 3578330  
SRR17520069. 3578338  
SRR17520069. 3584357  
SRR17520069. 3584377  
SRR17520069. 3602318  
SRR17520069. 3608317  
SRR17520069. 3628001  
SRR17520069. 3628047  
SRR17520069. 3628055  
SRR17520069. 3632254  
SRR17520069. 3644698  
SRR17520069. 3645372  
SRR17520069. 3645426  
SRR17520069. 3645436  
SRR17520069. 3645448  
SRR17520069. 3653686  
SRR17520069. 3657370  
SRR17520069. 3657855  
SRR17520069. 3657861  
SRR17520069. 3657893  
SRR17520069. 3662723  
SRR17520069. 3662725  
SRR17520069. 3662803  
SRR17520069. 3662853  
SRR17520069. 3662897

SRR17520069. 3668527  
SRR17520069. 3668533  
SRR17520069. 3672735  
SRR17520069. 3672739  
SRR17520069. 3674712  
SRR17520069. 3675022  
SRR17520069. 3675026  
SRR17520069. 3679728  
SRR17520069. 3680799  
SRR17520069. 3680803  
SRR17520069. 3686591  
SRR17520069. 3695961  
SRR17520069. 3702759  
SRR17520069. 3710419  
SRR17520069. 3710469  
SRR17520069. 3710493  
SRR17520069. 3729248  
SRR17520069. 3732836  
SRR17520069. 3732848  
SRR17520069. 3732886  
SRR17520069. 3732946  
SRR17520069. 3745001  
SRR17520069. 3745746  
SRR17520069. 3751893  
SRR17520069. 3751919  
SRR17520069. 3766736  
SRR17520069. 3770179  
SRR17520069. 3776295  
SRR17520069. 3776971  
SRR17520069. 3795848  
SRR17520069. 3795850  
SRR17520069. 3795854  
SRR17520069. 3802362  
SRR17520069. 3803695  
SRR17520069. 3803741  
SRR17520069. 3809385  
SRR17520069. 3809409  
SRR17520069. 3809449  
SRR17520069. 3826045  
SRR17520069. 3829839  
SRR17520069. 3829841  
SRR17520069. 3830416  
SRR17520069. 3830686  
SRR17520069. 3849567  
SRR17520069. 3858194  
SRR17520069. 3863466  
SRR17520069. 3864836

SRR17520069. 3891880  
SRR17520069. 3896499  
SRR17520069. 3902631  
SRR17520069. 3902643  
SRR17520069. 3903123  
SRR17520069. 3908564  
SRR17520069. 3911424  
SRR17520069. 3913887  
SRR17520069. 3913949  
SRR17520069. 3924825  
SRR17520069. 3930274  
SRR17520069. 3954849  
SRR17520069. 3954855  
SRR17520069. 3960577  
SRR17520069. 3960631  
SRR17520069. 3973184  
SRR17520069. 3973208  
SRR17520069. 3984372  
SRR17520069. 3993003  
SRR17520069. 3993005  
SRR17520069. 3993019  
SRR17520069. 3996184  
SRR17520069. 4004347  
SRR17520069. 4019673  
SRR17520069. 4027793  
SRR17520069. 4039359  
SRR17520069. 4043586  
SRR17520069. 4046611  
SRR17520069. 4049643  
SRR17520069. 4049677  
SRR17520069. 4053279  
SRR17520069. 4053283  
SRR17520069. 4053285  
SRR17520069. 4053291  
SRR17520069. 4053301  
SRR17520069. 4069858  
SRR17520069. 4069892  
SRR17520069. 4091990  
SRR17520069. 4092062  
SRR17520069. 4093507  
SRR17520069. 4098146  
SRR17520069. 4098684  
SRR17520069. 4103321  
SRR17520069. 4106034  
SRR17520069. 4110525  
SRR17520069. 4111701  
SRR17520069. 4111735

SRR17520069.4111741  
SRR17520069.4111747  
SRR17520069.4112494  
SRR17520069.4114826  
SRR17520069.4120023  
SRR17520069.4127417  
SRR17520069.4128564  
SRR17520069.4129889  
SRR17520069.4144737  
SRR17520069.4151405  
SRR17520069.4154688  
SRR17520069.4154690  
SRR17520069.4154692  
SRR17520069.4154694  
SRR17520069.4154696  
SRR17520069.4154698  
SRR17520069.4155095  
SRR17520069.4157378  
SRR17520069.4158321  
SRR17520069.4160328  
SRR17520069.4161698  
SRR17520069.4161700  
SRR17520069.4161702  
SRR17520069.4161704  
SRR17520069.4161706  
SRR17520069.4161708  
SRR17520069.4161710  
SRR17520069.4161712  
SRR17520069.4161714  
SRR17520069.4161716  
SRR17520069.4161718  
SRR17520069.4161720  
SRR17520069.4161722  
SRR17520069.4161724  
SRR17520069.4161726  
SRR17520069.4161728  
SRR17520069.4161734  
SRR17520069.4161736  
SRR17520069.4161738  
SRR17520069.4161740  
SRR17520069.4161742  
SRR17520069.4161744  
SRR17520069.4161746  
SRR17520069.4161748  
SRR17520069.4161750  
SRR17520069.4161754  
SRR17520069.4161756



SRR17520069. 4161758  
SRR17520069. 4161760  
SRR17520069. 4161762  
SRR17520069. 4161764  
SRR17520069. 4161766  
SRR17520069. 4161768  
SRR17520069. 4161770  
SRR17520069. 4161772  
SRR17520069. 4161774  
SRR17520069. 4161776  
SRR17520069. 4161778  
SRR17520069. 4161780  
SRR17520069. 4161784  
SRR17520069. 4161786  
SRR17520069. 4161788  
SRR17520069. 4161790  
SRR17520069. 4161792  
SRR17520069. 4161794  
SRR17520069. 4161796  
SRR17520069. 4161798  
SRR17520069. 4161800  
SRR17520069. 4161802  
SRR17520069. 4161804  
SRR17520069. 4161806  
SRR17520069. 4161808  
SRR17520069. 4161810  
SRR17520069. 4161812  
SRR17520069. 4161814  
SRR17520069. 4161816  
SRR17520069. 4161818  
SRR17520069. 4161820  
SRR17520069. 4161822  
SRR17520069. 4161826  
SRR17520069. 4161830  
SRR17520069. 4178815  
SRR17520069. 4181109  
SRR17520069. 4181111  
SRR17520069. 4181113  
SRR17520069. 4181115  
SRR17520069. 4181117  
SRR17520069. 4181119  
SRR17520069. 4181121  
SRR17520069. 4181123  
SRR17520069. 4181125  
SRR17520069. 4181127  
SRR17520069. 4183829  
SRR17520069. 4189985

SRR17520069.4190324  
SRR17520069.4191722  
SRR17520069.4196741  
SRR17520069.4196743  
SRR17520069.4196745  
SRR17520069.4196749  
SRR17520069.4196751  
SRR17520069.4196753  
SRR17520069.4206574  
SRR17520069.4214582  
SRR17520069.4215645  
SRR17520069.4215649  
SRR17520069.4217483  
SRR17520069.4217493  
SRR17520069.4217519  
SRR17520069.4217571  
SRR17520069.4232053  
SRR17520069.4235448  
SRR17520069.4240584  
SRR17520069.4240847  
SRR17520069.4242385  
SRR17520069.4245570  
SRR17520069.4245572  
SRR17520069.4247761  
SRR17520069.4264380  
SRR17520069.4264386  
SRR17520069.4264390  
SRR17520069.4264746  
SRR17520069.4264754  
SRR17520069.4290016  
SRR17520069.4290034  
SRR17520069.4292481  
SRR17520069.4292485  
SRR17520069.4314187  
SRR17520069.4314189  
SRR17520069.4314191  
SRR17520069.4314193  
SRR17520069.4314195  
SRR17520069.4314197  
SRR17520069.4314199  
SRR17520069.4314201  
SRR17520069.4314203  
SRR17520069.4314205  
SRR17520069.4314207  
SRR17520069.4314211  
SRR17520069.4314213  
SRR17520069.4314215

SRR17520069.4314217  
SRR17520069.4314219  
SRR17520069.4314221  
SRR17520069.4314223  
SRR17520069.4314225  
SRR17520069.4314227  
SRR17520069.4314229  
SRR17520069.4314231  
SRR17520069.4314233  
SRR17520069.4314235  
SRR17520069.4314237  
SRR17520069.4314239  
SRR17520069.4314241  
SRR17520069.4314243  
SRR17520069.4314245  
SRR17520069.4314249  
SRR17520069.4314251  
SRR17520069.4314253  
SRR17520069.4314255  
SRR17520069.4314257  
SRR17520069.4314259  
SRR17520069.4314263  
SRR17520069.4314265  
SRR17520069.4314267  
SRR17520069.4314269  
SRR17520069.4314271  
SRR17520069.4314273  
SRR17520069.4314275  
SRR17520069.4314277  
SRR17520069.4314279  
SRR17520069.4314281  
SRR17520069.4314283  
SRR17520069.4314285  
SRR17520069.4314287  
SRR17520069.4314289  
SRR17520069.4314291  
SRR17520069.4314293  
SRR17520069.4314295  
SRR17520069.4314297  
SRR17520069.4314299  
SRR17520069.4314301  
SRR17520069.4314305  
SRR17520069.4314307  
SRR17520069.4314309  
SRR17520069.4314311  
SRR17520069.4314315  
SRR17520069.4314317

SRR17520069.4314319  
SRR17520069.4314321  
SRR17520069.4314325  
SRR17520069.4314327  
SRR17520069.4314329  
SRR17520069.4320047  
SRR17520069.4329463  
SRR17520069.4333560  
SRR17520069.4342362  
SRR17520069.4355869  
SRR17520069.4356685  
SRR17520069.4356869  
SRR17520069.4356879  
SRR17520069.4356895  
SRR17520069.4357461  
SRR17520069.4365608  
SRR17520069.4367651  
SRR17520069.4373912  
SRR17520069.4383242  
SRR17520069.4385317  
SRR17520069.4414657  
SRR17520069.4416964  
SRR17520069.4417063  
SRR17520069.4429401  
SRR17520069.4441090  
SRR17520069.4442511  
SRR17520069.4463439  
SRR17520069.4468522  
SRR17520069.4471440  
SRR17520069.4473426  
SRR17520069.4474453  
SRR17520069.4475049  
SRR17520069.4475548  
SRR17520069.4481265  
SRR17520069.4481319  
SRR17520069.4486053  
SRR17520069.4486082  
SRR17520069.4488900  
SRR17520069.4493054  
SRR17520069.4503643  
SRR17520069.4503661  
SRR17520069.4503677  
SRR17520069.4505298  
SRR17520069.4506265  
SRR17520069.4506690  
SRR17520069.4511604  
SRR17520069.4511606

SRR17520069.4511608  
SRR17520069.4511610  
SRR17520069.4511618  
SRR17520069.4520542  
SRR17520069.4520572  
SRR17520069.4521329  
SRR17520069.4522964  
SRR17520069.4522968  
SRR17520069.4522970  
SRR17520069.4525746  
SRR17520069.4525752  
SRR17520069.4525760  
SRR17520069.4525786  
SRR17520069.4526883  
SRR17520069.4526895  
SRR17520069.4526901  
SRR17520069.4526909  
SRR17520069.4526913  
SRR17520069.4527502  
SRR17520069.4527506  
SRR17520069.4528491  
SRR17520069.4528509  
SRR17520069.4530009  
SRR17520069.4531072  
SRR17520069.4544281  
SRR17520069.4545255  
SRR17520069.4545261  
SRR17520069.4545269  
SRR17520069.4545273  
SRR17520069.4549536  
SRR17520069.4549542  
SRR17520069.4551167  
SRR17520069.4551247  
SRR17520069.4551950  
SRR17520069.4554434  
SRR17520069.4561528  
SRR17520069.4562458  
SRR17520069.4562568  
SRR17520069.4562802  
SRR17520069.4562810  
SRR17520069.4562856  
SRR17520069.4565662  
SRR17520069.4579207  
SRR17520069.4579209  
SRR17520069.4584162  
SRR17520069.4592992  
SRR17520069.4617141

SRR17520069.4622851  
SRR17520069.4626190  
SRR17520069.4633158  
SRR17520069.4639538  
SRR17520069.4639556  
SRR17520069.4639560  
SRR17520069.4639598  
SRR17520069.4639644  
SRR17520069.4639660  
SRR17520069.4639666  
SRR17520069.4639674  
SRR17520069.4642574  
SRR17520069.4642616  
SRR17520069.4655724  
SRR17520069.4655732  
SRR17520069.4655739  
SRR17520069.4655741  
SRR17520069.4655985  
SRR17520069.4656934  
SRR17520069.4664046  
SRR17520069.4664048  
SRR17520069.4664050  
SRR17520069.4664052  
SRR17520069.4677640  
SRR17520069.4679318  
SRR17520069.4684487  
SRR17520069.4684503  
SRR17520069.4685147  
SRR17520069.4689842  
SRR17520069.4705833  
SRR17520069.4705847  
SRR17520069.4708694  
SRR17520069.4710342  
SRR17520069.4711531  
SRR17520069.4712588  
SRR17520069.4719409  
SRR17520069.4719610  
SRR17520069.4719622  
SRR17520069.4719626  
SRR17520069.4719632  
SRR17520069.4719640  
SRR17520069.4719668  
SRR17520069.4729176  
SRR17520069.4730915  
SRR17520069.4738462  
SRR17520069.4741470  
SRR17520069.4750720

SRR17520069.4763372  
SRR17520069.4770527  
SRR17520069.4771115  
SRR17520069.4771117  
SRR17520069.4771131  
SRR17520069.4771137  
SRR17520069.4771139  
SRR17520069.4785465  
SRR17520069.4785533  
SRR17520069.4785581  
SRR17520069.4791375  
SRR17520069.4793292  
SRR17520069.4798406  
SRR17520069.4798416  
SRR17520069.4798466  
SRR17520069.4820724  
SRR17520069.4827024  
SRR17520069.4829173  
SRR17520069.4829193  
SRR17520069.4837134  
SRR17520069.4837136  
SRR17520069.4837138  
SRR17520069.4837140  
SRR17520069.4837142  
SRR17520069.4837144  
SRR17520069.4837146  
SRR17520069.4837148  
SRR17520069.4837150  
SRR17520069.4837152  
SRR17520069.4837154  
SRR17520069.4837156  
SRR17520069.4837158  
SRR17520069.4837162  
SRR17520069.4837164  
SRR17520069.4837166  
SRR17520069.4837168  
SRR17520069.4837170  
SRR17520069.4837172  
SRR17520069.4837174  
SRR17520069.4837176  
SRR17520069.4837178  
SRR17520069.4837180  
SRR17520069.4837182  
SRR17520069.4837184  
SRR17520069.4837186  
SRR17520069.4837188  
SRR17520069.4837190

SRR17520069.4837192  
SRR17520069.4837194  
SRR17520069.4837196  
SRR17520069.4837198  
SRR17520069.4837200  
SRR17520069.4837202  
SRR17520069.4837204  
SRR17520069.4837206  
SRR17520069.4837208  
SRR17520069.4837210  
SRR17520069.4837212  
SRR17520069.4837214  
SRR17520069.4837216  
SRR17520069.4837218  
SRR17520069.4837220  
SRR17520069.4837222  
SRR17520069.4837224  
SRR17520069.4837226  
SRR17520069.4837828  
SRR17520069.4838859  
SRR17520069.4839746  
SRR17520069.4839750  
SRR17520069.4839752  
SRR17520069.4839754  
SRR17520069.4839756  
SRR17520069.4842736  
SRR17520069.4843942  
SRR17520069.4849334  
SRR17520069.4849352  
SRR17520069.4876710  
SRR17520069.4876726  
SRR17520069.4876764  
SRR17520069.4876774  
SRR17520069.4876778  
SRR17520069.4876780  
SRR17520069.4879773  
SRR17520069.4879777  
SRR17520069.4879779  
SRR17520069.4879781  
SRR17520069.4879799  
SRR17520069.4886081  
SRR17520069.4913979  
SRR17520069.4921631  
SRR17520069.4931239  
SRR17520069.4931241  
SRR17520069.4931267  
SRR17520069.4931316



SRR17520069.4935140  
SRR17520069.4935148  
SRR17520069.4964671  
SRR17520069.4964681  
SRR17520069.4967555  
SRR17520069.4971411  
SRR17520069.4971421  
SRR17520069.4985835  
SRR17520069.4986403  
SRR17520069.4987377  
SRR17520069.4988396  
SRR17520069.4988484  
SRR17520069.4994018  
SRR17520069.5020508  
SRR17520069.5026897  
SRR17520069.5032185  
SRR17520069.5045125  
SRR17520069.5071509  
SRR17520069.5072907  
SRR17520069.5075054  
SRR17520069.5075098  
SRR17520069.5083325  
SRR17520069.5083329  
SRR17520069.5085419  
SRR17520069.5094216  
SRR17520069.5095387  
SRR17520069.5095434  
SRR17520069.5095436  
SRR17520069.5095438  
SRR17520069.5095440  
SRR17520069.5095442  
SRR17520069.5095444  
SRR17520069.5095448  
SRR17520069.5095450  
SRR17520069.5095452  
SRR17520069.5095454  
SRR17520069.5095456  
SRR17520069.5095458  
SRR17520069.5095460  
SRR17520069.5095462  
SRR17520069.5095464  
SRR17520069.5095466  
SRR17520069.5095468  
SRR17520069.5095470  
SRR17520069.5095472  
SRR17520069.5095474  
SRR17520069.5095476

SRR17520069.5095478  
SRR17520069.5095480  
SRR17520069.5098126  
SRR17520069.5098136  
SRR17520069.5100619  
SRR17520069.5100623  
SRR17520069.5100639  
SRR17520069.5100645  
SRR17520069.5100661  
SRR17520069.5100665  
SRR17520069.5100677  
SRR17520069.5100679  
SRR17520069.5101484  
SRR17520069.5101488  
SRR17520069.5104988  
SRR17520069.5112859  
SRR17520069.5112861  
SRR17520069.5112927  
SRR17520069.5112929  
SRR17520069.5112949  
SRR17520069.5114268  
SRR17520069.5118638  
SRR17520069.5118668  
SRR17520069.5118670  
SRR17520069.5118678  
SRR17520069.5119114  
SRR17520069.5126138  
SRR17520069.5132342  
SRR17520069.5154519  
SRR17520069.5154551  
SRR17520069.5173121  
SRR17520069.5177651  
SRR17520069.5184297  
SRR17520069.5194696  
SRR17520069.5194710  
SRR17520069.5199452  
SRR17520069.5204982  
SRR17520069.5204988  
SRR17520069.5207357  
SRR17520069.5207415  
SRR17520069.5210023  
SRR17520069.5219629  
SRR17520069.5219649  
SRR17520069.5219685  
SRR17520069.5219695  
SRR17520069.5223142  
SRR17520069.5223291

SRR17520069. 5223307  
SRR17520069. 5225584  
SRR17520069. 5233320  
SRR17520069. 5233969  
SRR17520069. 5233973  
SRR17520069. 5236193  
SRR17520069. 5240596  
SRR17520069. 5243429  
SRR17520069. 5243431  
SRR17520069. 5243445  
SRR17520069. 5243451  
SRR17520069. 5243457  
SRR17520069. 5248076  
SRR17520069. 5249675  
SRR17520069. 5249699  
SRR17520069. 5249793  
SRR17520069. 5276369  
SRR17520069. 5286174  
SRR17520069. 5297903  
SRR17520069. 5297909  
SRR17520069. 5305200  
SRR17520069. 5313095  
SRR17520069. 5316941  
SRR17520069. 5316957  
SRR17520069. 5321537  
SRR17520069. 5323022  
SRR17520069. 5323054  
SRR17520069. 5323078  
SRR17520069. 5324257  
SRR17520069. 5324309  
SRR17520069. 5340385  
SRR17520069. 5349155  
SRR17520069. 5351232  
SRR17520069. 5351377  
SRR17520069. 5351415  
SRR17520069. 5353210  
SRR17520069. 5356972  
SRR17520069. 5358515  
SRR17520069. 5366303  
SRR17520069. 5366307  
SRR17520069. 5366333  
SRR17520069. 5373431  
SRR17520069. 5373445  
SRR17520069. 5373472  
SRR17520069. 5379285  
SRR17520069. 5379322  
SRR17520069. 5379595

SRR17520069. 5398572  
SRR17520069. 5422029  
SRR17520069. 5424104  
SRR17520069. 5424112  
SRR17520069. 5431444  
SRR17520069. 5442689  
SRR17520069. 5452795  
SRR17520069. 5460327  
SRR17520069. 5466053  
SRR17520069. 5469895  
SRR17520069. 5469907  
SRR17520069. 5469971  
SRR17520069. 5474055  
SRR17520069. 5490818  
SRR17520069. 5490826  
SRR17520069. 5490828  
SRR17520069. 5490836  
SRR17520069. 5490840  
SRR17520069. 5490842  
SRR17520069. 5490844  
SRR17520069. 5490868  
SRR17520069. 5490884  
SRR17520069. 5490892  
SRR17520069. 5496380  
SRR17520069. 5496484  
SRR17520069. 5504270  
SRR17520069. 5506203  
SRR17520069. 5517485  
SRR17520069. 5517499  
SRR17520069. 5517501  
SRR17520069. 5521998  
SRR17520069. 5530197  
SRR17520069. 5530199  
SRR17520069. 5539549  
SRR17520069. 5543265  
SRR17520069. 5554106  
SRR17520069. 5562811  
SRR17520069. 5562827  
SRR17520069. 5573054  
SRR17520069. 5573218  
SRR17520069. 5573224  
SRR17520069. 5573226  
SRR17520069. 5573258  
SRR17520069. 5573262  
SRR17520069. 5573264  
SRR17520069. 5576288  
SRR17520069. 5587220

SRR17520069. 5587266  
SRR17520069. 5601788  
SRR17520069. 5601790  
SRR17520069. 5601794  
SRR17520069. 5601798  
SRR17520069. 5601800  
SRR17520069. 5601802  
SRR17520069. 5601804  
SRR17520069. 5601806  
SRR17520069. 5601808  
SRR17520069. 5601810  
SRR17520069. 5601812  
SRR17520069. 5601814  
SRR17520069. 5601816  
SRR17520069. 5601820  
SRR17520069. 5601822  
SRR17520069. 5601824  
SRR17520069. 5601826  
SRR17520069. 5601828  
SRR17520069. 5601830  
SRR17520069. 5601832  
SRR17520069. 5601836  
SRR17520069. 5601838  
SRR17520069. 5601842  
SRR17520069. 5601844  
SRR17520069. 5601848  
SRR17520069. 5601850  
SRR17520069. 5601852  
SRR17520069. 5601854  
SRR17520069. 5601856  
SRR17520069. 5601858  
SRR17520069. 5601860  
SRR17520069. 5601862  
SRR17520069. 5601864  
SRR17520069. 5601866  
SRR17520069. 5601868  
SRR17520069. 5601870  
SRR17520069. 5601872  
SRR17520069. 5601874  
SRR17520069. 5601876  
SRR17520069. 5601878  
SRR17520069. 5601880  
SRR17520069. 5601882  
SRR17520069. 5601884  
SRR17520069. 5601886  
SRR17520069. 5601888  
SRR17520069. 5601890

SRR17520069.5601892  
SRR17520069.5601894  
SRR17520069.5601896  
SRR17520069.5601900  
SRR17520069.5601902  
SRR17520069.5601904  
SRR17520069.5601906  
SRR17520069.5601908  
SRR17520069.5601910  
SRR17520069.5601912  
SRR17520069.5601914  
SRR17520069.5601916  
SRR17520069.5601918  
SRR17520069.5601920  
SRR17520069.5601924  
SRR17520069.5601926  
SRR17520069.5601928  
SRR17520069.5601930  
SRR17520069.5601932  
SRR17520069.5601934  
SRR17520069.5601936  
SRR17520069.5601938  
SRR17520069.5601940  
SRR17520069.5601942  
SRR17520069.5601944  
SRR17520069.5601946  
SRR17520069.5601950  
SRR17520069.5601952  
SRR17520069.5601954  
SRR17520069.5601956  
SRR17520069.5601960  
SRR17520069.5601962  
SRR17520069.5601966  
SRR17520069.5601968  
SRR17520069.5601970  
SRR17520069.5601972  
SRR17520069.5612351  
SRR17520069.5612353  
SRR17520069.5612355  
SRR17520069.5612357  
SRR17520069.5612359  
SRR17520069.5612361  
SRR17520069.5612363  
SRR17520069.5612365  
SRR17520069.5612367  
SRR17520069.5612369  
SRR17520069.5612371

SRR17520069. 5612373  
SRR17520069. 5612375  
SRR17520069. 5612377  
SRR17520069. 5612379  
SRR17520069. 5612381  
SRR17520069. 5612383  
SRR17520069. 5612385  
SRR17520069. 5612387  
SRR17520069. 5612389  
SRR17520069. 5612391  
SRR17520069. 5612393  
SRR17520069. 5612395  
SRR17520069. 5612397  
SRR17520069. 5612399  
SRR17520069. 5612401  
SRR17520069. 5612403  
SRR17520069. 5612405  
SRR17520069. 5612407  
SRR17520069. 5615784  
SRR17520069. 5616602  
SRR17520069. 5616619  
SRR17520069. 5625174  
SRR17520069. 5631838  
SRR17520069. 5637267  
SRR17520069. 5643549  
SRR17520069. 5643571  
SRR17520069. 5644749  
SRR17520069. 5652704  
SRR17520069. 5652712  
SRR17520069. 5652720  
SRR17520069. 5666531  
SRR17520069. 5666533  
SRR17520069. 5666535  
SRR17520069. 5666537  
SRR17520069. 5666539  
SRR17520069. 5666541  
SRR17520069. 5666543  
SRR17520069. 5666545  
SRR17520069. 5666547  
SRR17520069. 5666549  
SRR17520069. 5666551  
SRR17520069. 5666553  
SRR17520069. 5666555  
SRR17520069. 5666557  
SRR17520069. 5666559  
SRR17520069. 5666561  
SRR17520069. 5666563

SRR17520069. 5666565  
SRR17520069. 5666567  
SRR17520069. 5666569  
SRR17520069. 5666571  
SRR17520069. 5666573  
SRR17520069. 5666577  
SRR17520069. 5666579  
SRR17520069. 5666581  
SRR17520069. 5666583  
SRR17520069. 5666585  
SRR17520069. 5666587  
SRR17520069. 5695432  
SRR17520069. 5695534  
SRR17520069. 5701826  
SRR17520069. 5703720  
SRR17520069. 5704849  
SRR17520069. 5711171  
SRR17520069. 5714222  
SRR17520069. 5715967  
SRR17520069. 5715979  
SRR17520069. 5715983  
SRR17520069. 5715993  
SRR17520069. 5715995  
SRR17520069. 5715999  
SRR17520069. 5721944  
SRR17520069. 5734223  
SRR17520069. 5741142  
SRR17520069. 5742194  
SRR17520069. 5744924  
SRR17520069. 5744936  
SRR17520069. 5750690  
SRR17520069. 5750694  
SRR17520069. 5753811  
SRR17520069. 5762174  
SRR17520069. 5762186  
SRR17520069. 5762234  
SRR17520069. 5780213  
SRR17520069. 5783959  
SRR17520069. 5783971  
SRR17520069. 5783979  
SRR17520069. 5784045  
SRR17520069. 5784049  
SRR17520069. 5784073  
SRR17520069. 5784075  
SRR17520069. 5786225  
SRR17520069. 5795073  
SRR17520069. 5804551



SRR17520069.5807978  
SRR17520069.5810033  
SRR17520069.5811815  
SRR17520069.5811823  
SRR17520069.5811827  
SRR17520069.5811829  
SRR17520069.5818952  
SRR17520069.5818970  
SRR17520069.5818978  
SRR17520069.5819012  
SRR17520069.5819030  
SRR17520069.5822099  
SRR17520069.5822125  
SRR17520069.5832411  
SRR17520069.5834150  
SRR17520069.5838924  
SRR17520069.5838928  
SRR17520069.5838948  
SRR17520069.5839943  
SRR17520069.5843671  
SRR17520069.5843685  
SRR17520069.5846917  
SRR17520069.5847279  
SRR17520069.5848608  
SRR17520069.5849726  
SRR17520069.5849814  
SRR17520069.5849829  
SRR17520069.5864099  
SRR17520069.5869903  
SRR17520069.5869907  
SRR17520069.5873212  
SRR17520069.5873214  
SRR17520069.5876806  
SRR17520069.5876812  
SRR17520069.5881704  
SRR17520069.5885261  
SRR17520069.5885265  
SRR17520069.5885267  
SRR17520069.5888678  
SRR17520069.5889113  
SRR17520069.5889123  
SRR17520069.5889885  
SRR17520069.5889915  
SRR17520069.5889919  
SRR17520069.5889925  
SRR17520069.5891777  
SRR17520069.5894179

SRR17520069. 5894201  
SRR17520069. 5900742  
SRR17520069. 5901898  
SRR17520069. 5922984  
SRR17520069. 5938716  
SRR17520069. 5947173  
SRR17520069. 5947197  
SRR17520069. 5947209  
SRR17520069. 5952920  
SRR17520069. 5971839  
SRR17520069. 5982870  
SRR17520069. 5983062  
SRR17520069. 5983646  
SRR17520069. 5988748  
SRR17520069. 5997709  
SRR17520069. 5997842  
SRR17520069. 6005095  
SRR17520069. 6021282  
SRR17520069. 6027239  
SRR17520069. 6030395  
SRR17520069. 6031868  
SRR17520069. 6031874  
SRR17520069. 6031901  
SRR17520069. 6041391  
SRR17520069. 6041393  
SRR17520069. 6041524  
SRR17520069. 6041530  
SRR17520069. 6048819  
SRR17520069. 6048837  
SRR17520069. 6049164  
SRR17520069. 6054512  
SRR17520069. 6054514  
SRR17520069. 6054516  
SRR17520069. 6054518  
SRR17520069. 6054520  
SRR17520069. 6054522  
SRR17520069. 6054524  
SRR17520069. 6054526  
SRR17520069. 6054528  
SRR17520069. 6054530  
SRR17520069. 6054830  
SRR17520069. 6056893  
SRR17520069. 6056897  
SRR17520069. 6056901  
SRR17520069. 6056913  
SRR17520069. 6058477  
SRR17520069. 6067347

SRR17520069.6072434  
SRR17520069.6072462  
SRR17520069.6072472  
SRR17520069.6072476  
SRR17520069.6072502  
SRR17520069.6072516  
SRR17520069.6072530  
SRR17520069.6074419  
SRR17520069.6080172  
SRR17520069.6085057  
SRR17520069.6093387  
SRR17520069.6108741  
SRR17520069.6108753  
SRR17520069.6108765  
SRR17520069.6117530  
SRR17520069.6117827  
SRR17520069.6124210  
SRR17520069.6124216  
SRR17520069.6124218  
SRR17520069.6124228  
SRR17520069.6138159  
SRR17520069.6146900  
SRR17520069.6155170  
SRR17520069.6155172  
SRR17520069.6155174  
SRR17520069.6155176  
SRR17520069.6155178  
SRR17520069.6155180  
SRR17520069.6155182  
SRR17520069.6155184  
SRR17520069.6155188  
SRR17520069.6155190  
SRR17520069.6155192  
SRR17520069.6155194  
SRR17520069.6155196  
SRR17520069.6162839  
SRR17520069.6169723  
SRR17520069.6169754  
SRR17520069.6170645  
SRR17520069.6170653  
SRR17520069.6172603  
SRR17520069.6172605  
SRR17520069.6172607  
SRR17520069.6172609  
SRR17520069.6172611  
SRR17520069.6172613  
SRR17520069.6172615

SRR17520069.6172617  
SRR17520069.6182523  
SRR17520069.6185112  
SRR17520069.6188461  
SRR17520069.6189062  
SRR17520069.6190228  
SRR17520069.6198379  
SRR17520069.6198391  
SRR17520069.6198451  
SRR17520069.6198467  
SRR17520069.6198497  
SRR17520069.6200318  
SRR17520069.6200386  
SRR17520069.6208919  
SRR17520069.6209469  
SRR17520069.6222619  
SRR17520069.6225808  
SRR17520069.6227000  
SRR17520069.6228515  
SRR17520069.6232478  
SRR17520069.6232486  
SRR17520069.6232538  
SRR17520069.6232548  
SRR17520069.6237069  
SRR17520069.6246969  
SRR17520069.6248964  
SRR17520069.6250869  
SRR17520069.6250871  
SRR17520069.6250873  
SRR17520069.6252419  
SRR17520069.6252435  
SRR17520069.6252437  
SRR17520069.6262479  
SRR17520069.6264892  
SRR17520069.6271257  
SRR17520069.6293749  
SRR17520069.6296572  
SRR17520069.6296596  
SRR17520069.6303018  
SRR17520069.6339565  
SRR17520069.6342834  
SRR17520069.6342836  
SRR17520069.6343720  
SRR17520069.6343728  
SRR17520069.6349866  
SRR17520069.6350203  
SRR17520069.6353916

SRR17520069. 6353922  
SRR17520069. 6353950  
SRR17520069. 6359139  
SRR17520069. 6359169  
SRR17520069. 6360068  
SRR17520069. 6365757  
SRR17520069. 6368290  
SRR17520069. 6368292  
SRR17520069. 6368298  
SRR17520069. 6368304  
SRR17520069. 6375003  
SRR17520069. 6378080  
SRR17520069. 6382178  
SRR17520069. 6382190  
SRR17520069. 6382240  
SRR17520069. 6383706  
SRR17520069. 6383728  
SRR17520069. 6387745  
SRR17520069. 6388292  
SRR17520069. 6388296  
SRR17520069. 6389081  
SRR17520069. 6408116  
SRR17520069. 6408531  
SRR17520069. 6408745  
SRR17520069. 6414963  
SRR17520069. 6421044  
SRR17520069. 6421202  
SRR17520069. 6443868  
SRR17520069. 6457926  
SRR17520069. 6463932  
SRR17520069. 6472832  
SRR17520069. 6479577  
SRR17520069. 6482668  
SRR17520069. 6485773  
SRR17520069. 6496395  
SRR17520069. 6499586  
SRR17520069. 6499641  
SRR17520069. 6499643  
SRR17520069. 6499645  
SRR17520069. 6499647  
SRR17520069. 6499649  
SRR17520069. 6499651  
SRR17520069. 6499655  
SRR17520069. 6511913  
SRR17520069. 6511915  
SRR17520069. 6511917  
SRR17520069. 6527545

SRR17520069. 6528706  
SRR17520069. 6538616  
SRR17520069. 6538622  
SRR17520069. 6538638  
SRR17520069. 6538640  
SRR17520069. 6540344  
SRR17520069. 6557152  
SRR17520069. 6558946  
SRR17520069. 6561787  
SRR17520069. 6561789  
SRR17520069. 6565432  
SRR17520069. 6574023  
SRR17520069. 6578717  
SRR17520069. 6578789  
SRR17520069. 6579280  
SRR17520069. 6588608  
SRR17520069. 6589336  
SRR17520069. 6598086  
SRR17520069. 6613101  
SRR17520069. 6622702  
SRR17520069. 6632322  
SRR17520069. 6632324  
SRR17520069. 6634486  
SRR17520069. 6640640  
SRR17520069. 6644950  
SRR17520069. 6646808  
SRR17520069. 6657738  
SRR17520069. 6659489  
SRR17520069. 6666045  
SRR17520069. 6666091  
SRR17520069. 6672905  
SRR17520069. 6679347  
SRR17520069. 6685428  
SRR17520069. 6685867  
SRR17520069. 6700660  
SRR17520069. 6701467  
SRR17520069. 6710157  
SRR17520069. 6710161  
SRR17520069. 6712711  
SRR17520069. 6715078  
SRR17520069. 6715080  
SRR17520069. 6715082  
SRR17520069. 6715084  
SRR17520069. 6715086  
SRR17520069. 6715088  
SRR17520069. 6715090  
SRR17520069. 6715092

SRR17520069.6725942  
SRR17520069.6744517  
SRR17520069.6744587  
SRR17520069.6752381  
SRR17520069.6758282  
SRR17520069.6758284  
SRR17520069.6758286  
SRR17520069.6758288  
SRR17520069.6758290  
SRR17520069.6758292  
SRR17520069.6758294  
SRR17520069.6758296  
SRR17520069.6758298  
SRR17520069.6758300  
SRR17520069.6758302  
SRR17520069.6758304  
SRR17520069.6758306  
SRR17520069.6758308  
SRR17520069.6758310  
SRR17520069.6758312  
SRR17520069.6758314  
SRR17520069.6758316  
SRR17520069.6758318  
SRR17520069.6758320  
SRR17520069.6758322  
SRR17520069.6758324  
SRR17520069.6758326  
SRR17520069.6758328  
SRR17520069.6758330  
SRR17520069.6758332  
SRR17520069.6758334  
SRR17520069.6758336  
SRR17520069.6758338  
SRR17520069.6758340  
SRR17520069.6758342  
SRR17520069.6758344  
SRR17520069.6758346  
SRR17520069.6768633  
SRR17520069.6771673  
SRR17520069.6783035  
SRR17520069.6784328  
SRR17520069.6785060  
SRR17520069.6787719  
SRR17520069.6792892  
SRR17520069.6792894  
SRR17520069.6795767  
SRR17520069.6801265

SRR17520069.6807507  
SRR17520069.6807509  
SRR17520069.6807511  
SRR17520069.6807513  
SRR17520069.6807515  
SRR17520069.6807517  
SRR17520069.6807519  
SRR17520069.6807521  
SRR17520069.6807523  
SRR17520069.6807525  
SRR17520069.6807527  
SRR17520069.6807529  
SRR17520069.6807531  
SRR17520069.6807533  
SRR17520069.6807535  
SRR17520069.6807537  
SRR17520069.6810352  
SRR17520069.6810354  
SRR17520069.6810356  
SRR17520069.6810358  
SRR17520069.6810360  
SRR17520069.6810362  
SRR17520069.6810364  
SRR17520069.6810366  
SRR17520069.6810368  
SRR17520069.6810370  
SRR17520069.6810372  
SRR17520069.6810374  
SRR17520069.6810376  
SRR17520069.6810378  
SRR17520069.6810380  
SRR17520069.6810382  
SRR17520069.6810384  
SRR17520069.6810386  
SRR17520069.6810388  
SRR17520069.6810392  
SRR17520069.6810394  
SRR17520069.6810756  
SRR17520069.6812411  
SRR17520069.6820175  
SRR17520069.6820177  
SRR17520069.6820179  
SRR17520069.6820181  
SRR17520069.6820183  
SRR17520069.6820185  
SRR17520069.6820187  
SRR17520069.6820189



SRR17520069.6820191  
SRR17520069.6820193  
SRR17520069.6820195  
SRR17520069.6820197  
SRR17520069.6820199  
SRR17520069.6820201  
SRR17520069.6820203  
SRR17520069.6820205  
SRR17520069.6820207  
SRR17520069.6820209  
SRR17520069.6820211  
SRR17520069.6820213  
SRR17520069.6820215  
SRR17520069.6820217  
SRR17520069.6820219  
SRR17520069.6820221  
SRR17520069.6820223  
SRR17520069.6820225  
SRR17520069.6820227  
SRR17520069.6820229  
SRR17520069.6820231  
SRR17520069.6820233  
SRR17520069.6820235  
SRR17520069.6821142  
SRR17520069.6821166  
SRR17520069.6821362  
SRR17520069.6824439  
SRR17520069.6824870  
SRR17520069.6835661  
SRR17520069.6835667  
SRR17520069.6844608  
SRR17520069.6857986  
SRR17520069.6857992  
SRR17520069.6858022  
SRR17520069.6858034  
SRR17520069.6903067  
SRR17520069.6903071  
SRR17520069.6903079  
SRR17520069.6903083  
SRR17520069.6918662  
SRR17520069.6921185  
SRR17520069.6921189  
SRR17520069.6925397  
SRR17520069.6936124  
SRR17520069.6936649  
SRR17520069.6936657  
SRR17520069.6936661

SRR17520069.6944022  
SRR17520069.6944719  
SRR17520069.6944721  
SRR17520069.6947682  
SRR17520069.6953160  
SRR17520069.6953162  
SRR17520069.6953166  
SRR17520069.6965144  
SRR17520069.6965146  
SRR17520069.6965148  
SRR17520069.6965168  
SRR17520069.6984247  
SRR17520069.6984285  
SRR17520069.6984781  
SRR17520069.6984793  
SRR17520069.6990879  
SRR17520069.6990885  
SRR17520069.6991916  
SRR17520069.6992709  
SRR17520069.6996012  
SRR17520069.6996016  
SRR17520069.7000502  
SRR17520069.7012711  
SRR17520069.7016087  
SRR17520069.7016782  
SRR17520069.7030903  
SRR17520069.7040888  
SRR17520069.7050691  
SRR17520069.7063759  
SRR17520069.7074374  
SRR17520069.7082057  
SRR17520069.7101964  
SRR17520069.7134334  
SRR17520069.7134336  
SRR17520069.7149142  
SRR17520069.7149154  
SRR17520069.7149196  
SRR17520069.7155336  
SRR17520069.7165778  
SRR17520069.7169093  
SRR17520069.7180795  
SRR17520069.7180803  
SRR17520069.7192095  
SRR17520069.7206918  
SRR17520069.7215789  
SRR17520069.7216896  
SRR17520069.7220456

SRR17520069. 7220468  
SRR17520069. 7221222  
SRR17520069. 7228990  
SRR17520069. 7228996  
SRR17520069. 7229014  
SRR17520069. 7231883  
SRR17520069. 7231963  
SRR17520069. 7251150  
SRR17520069. 7251154  
SRR17520069. 7254130  
SRR17520069. 7258259  
SRR17520069. 7258295  
SRR17520069. 7258297  
SRR17520069. 7261580  
SRR17520069. 7261586  
SRR17520069. 7261590  
SRR17520069. 7261602  
SRR17520069. 7261628  
SRR17520069. 7261634  
SRR17520069. 7261662  
SRR17520069. 7261686  
SRR17520069. 7261692  
SRR17520069. 7261951  
SRR17520069. 7270467  
SRR17520069. 7270483  
SRR17520069. 7281866  
SRR17520069. 7285574  
SRR17520069. 7285582  
SRR17520069. 7285606  
SRR17520069. 7308715  
SRR17520069. 7311089  
SRR17520069. 7311093  
SRR17520069. 7327741  
SRR17520069. 7327767  
SRR17520069. 7327773  
SRR17520069. 7328957  
SRR17520069. 7330448  
SRR17520069. 7344763  
SRR17520069. 7345342  
SRR17520069. 7351733  
SRR17520069. 7376259  
SRR17520069. 7389682  
SRR17520069. 7395006  
SRR17520069. 7398507  
SRR17520069. 7398523  
SRR17520069. 7401774  
SRR17520069. 7401790

SRR17520069.7401810  
SRR17520069.7401859  
SRR17520069.7401915  
SRR17520069.7420614  
SRR17520069.7432683  
SRR17520069.7435031  
SRR17520069.7450996  
SRR17520069.7456648  
SRR17520069.7457691  
SRR17520069.7457735  
SRR17520069.7470515  
SRR17520069.7472361  
SRR17520069.7472479  
SRR17520069.7472483  
SRR17520069.7475316  
SRR17520069.7476394  
SRR17520069.7476398  
SRR17520069.7476542  
SRR17520069.7479708  
SRR17520069.7479739  
SRR17520069.7483050  
SRR17520069.7484320  
SRR17520069.7497828  
SRR17520069.7512684  
SRR17520069.7529779  
SRR17520069.7545006  
SRR17520069.7545522  
SRR17520069.7549752  
SRR17520069.7556116  
SRR17520069.7557153  
SRR17520069.7557324  
SRR17520069.7559528  
SRR17520069.7564640  
SRR17520069.7579569  
SRR17520069.7589642  
SRR17520069.7597167  
SRR17520069.7598020  
SRR17520069.7604373  
SRR17520069.7614414  
SRR17520069.7637105  
SRR17520069.7637127  
SRR17520069.7644211  
SRR17520069.7655676  
SRR17520069.7658603  
SRR17520069.7658625  
SRR17520069.7662609  
SRR17520069.7662613

SRR17520069.7667018  
SRR17520069.7667042  
SRR17520069.7668019  
SRR17520069.7672183  
SRR17520069.7678237  
SRR17520069.7679529  
SRR17520069.7689284  
SRR17520069.7690024  
SRR17520069.7703341  
SRR17520069.7704703  
SRR17520069.7707604  
SRR17520069.7708049  
SRR17520069.7714356  
SRR17520069.7714982  
SRR17520069.7715238  
SRR17520069.7716411  
SRR17520069.7738380  
SRR17520069.7738678  
SRR17520069.7743973  
SRR17520069.7743975  
SRR17520069.7743977  
SRR17520069.7743979  
SRR17520069.7743981  
SRR17520069.7743983  
SRR17520069.7743985  
SRR17520069.7743987  
SRR17520069.7743989  
SRR17520069.7743993  
SRR17520069.7743995  
SRR17520069.7743997  
SRR17520069.7743999  
SRR17520069.7744001  
SRR17520069.7744003  
SRR17520069.7744005  
SRR17520069.7744007  
SRR17520069.7744009  
SRR17520069.7744011  
SRR17520069.7744013  
SRR17520069.7744015  
SRR17520069.7744017  
SRR17520069.7744019  
SRR17520069.7754769  
SRR17520069.7754803  
SRR17520069.7754829  
SRR17520069.7755043  
SRR17520069.7755051  
SRR17520069.7755059

SRR17520069.7756486  
SRR17520069.7756488  
SRR17520069.7764936  
SRR17520069.7764952  
SRR17520069.7766824  
SRR17520069.7789488  
SRR17520069.7792704  
SRR17520069.7799347  
SRR17520069.7799411  
SRR17520069.7799743  
SRR17520069.7799769  
SRR17520069.7799809  
SRR17520069.7799839  
SRR17520069.7799843  
SRR17520069.7799863  
SRR17520069.7799867  
SRR17520069.7802927  
SRR17520069.7816169  
SRR17520069.7817789  
SRR17520069.7817791  
SRR17520069.7817793  
SRR17520069.7817795  
SRR17520069.7817797  
SRR17520069.7817799  
SRR17520069.7817801  
SRR17520069.7817803  
SRR17520069.7817805  
SRR17520069.7817809  
SRR17520069.7817811  
SRR17520069.7817813  
SRR17520069.7817815  
SRR17520069.7817817  
SRR17520069.7817819  
SRR17520069.7817821  
SRR17520069.7817823  
SRR17520069.7817825  
SRR17520069.7817827  
SRR17520069.7817829  
SRR17520069.7817831  
SRR17520069.7817833  
SRR17520069.7817835  
SRR17520069.7817837  
SRR17520069.7817839  
SRR17520069.7817841  
SRR17520069.7817843  
SRR17520069.7835376  
SRR17520069.7835707

SRR17520069.7835745  
SRR17520069.7835765  
SRR17520069.7835777  
SRR17520069.7835781  
SRR17520069.7836152  
SRR17520069.7844636  
SRR17520069.7844638  
SRR17520069.7847269  
SRR17520069.7848849  
SRR17520069.7848859  
SRR17520069.7848865  
SRR17520069.7848873  
SRR17520069.7850449  
SRR17520069.7857344  
SRR17520069.7857464  
SRR17520069.7865685  
SRR17520069.7867640  
SRR17520069.7870152  
SRR17520069.7870158  
SRR17520069.7870160  
SRR17520069.7871916  
SRR17520069.7876466  
SRR17520069.7889181  
SRR17520069.7889185  
SRR17520069.7890869  
SRR17520069.7891298  
SRR17520069.7891306  
SRR17520069.7891316  
SRR17520069.7892878  
SRR17520069.7895726  
SRR17520069.7895752  
SRR17520069.7898356  
SRR17520069.7903011  
SRR17520069.7903017  
SRR17520069.7903089  
SRR17520069.7905297  
SRR17520069.7906150  
SRR17520069.7907812  
SRR17520069.7907852  
SRR17520069.7922013  
SRR17520069.7929157  
SRR17520069.7936581  
SRR17520069.7950287  
SRR17520069.7952337  
SRR17520069.7960945  
SRR17520069.7960951  
SRR17520069.7964153

SRR17520069.7964198  
SRR17520069.7964206  
SRR17520069.7964248  
SRR17520069.7964260  
SRR17520069.7964272  
SRR17520069.7964274  
SRR17520069.7964280  
SRR17520069.7964286  
SRR17520069.7964757  
SRR17520069.7966458  
SRR17520069.7966478  
SRR17520069.7976162  
SRR17520069.7977529  
SRR17520069.7977531  
SRR17520069.7977533  
SRR17520069.7977535  
SRR17520069.7978261  
SRR17520069.7979007  
SRR17520069.7980157  
SRR17520069.7980161  
SRR17520069.7980165  
SRR17520069.7983388  
SRR17520069.7983398  
SRR17520069.7998578  
SRR17520069.8002660  
SRR17520069.8004077  
SRR17520069.8007375  
SRR17520069.8014797  
SRR17520069.8015594  
SRR17520069.8018766  
SRR17520069.8030051  
SRR17520069.8033456  
SRR17520069.8047294  
SRR17520069.8048613  
SRR17520069.8048615  
SRR17520069.8056852  
SRR17520069.8067367  
SRR17520069.8067379  
SRR17520069.8067381  
SRR17520069.8067393  
SRR17520069.8067397  
SRR17520069.8067401  
SRR17520069.8084641  
SRR17520069.8084834  
SRR17520069.8085893  
SRR17520069.8086044  
SRR17520069.8087952



SRR17520069.8088047  
SRR17520069.8093604  
SRR17520069.8106628  
SRR17520069.8124740  
SRR17520069.8126494  
SRR17520069.8136011  
SRR17520069.8136831  
SRR17520069.8140399  
SRR17520069.8140401  
SRR17520069.8140403  
SRR17520069.8140405  
SRR17520069.8140407  
SRR17520069.8145708  
SRR17520069.8147624  
SRR17520069.8147658  
SRR17520069.8158003  
SRR17520069.8162326  
SRR17520069.8174498  
SRR17520069.8179812  
SRR17520069.8184442  
SRR17520069.8193573  
SRR17520069.8193575  
SRR17520069.8193577  
SRR17520069.8193579  
SRR17520069.8200423  
SRR17520069.8205602  
SRR17520069.8206664  
SRR17520069.8206668  
SRR17520069.8206670  
SRR17520069.8206710  
SRR17520069.8209450  
SRR17520069.8209474  
SRR17520069.8215848  
SRR17520069.8222527  
SRR17520069.8227363  
SRR17520069.8234691  
SRR17520069.8243380  
SRR17520069.8248740  
SRR17520069.8258205  
SRR17520069.8258225  
SRR17520069.8258245  
SRR17520069.8258283  
SRR17520069.8267513  
SRR17520069.8269102  
SRR17520069.8282338  
SRR17520069.8288290  
SRR17520069.8289688

SRR17520069.8299449  
SRR17520069.8299471  
SRR17520069.8299499  
SRR17520069.8299503  
SRR17520069.8317625  
SRR17520069.8329369  
SRR17520069.8329603  
SRR17520069.8331594  
SRR17520069.8332255  
SRR17520069.8335262  
SRR17520069.8335367  
SRR17520069.8335724  
SRR17520069.8338211  
SRR17520069.8348240  
SRR17520069.8360134  
SRR17520069.8360457  
SRR17520069.8362236  
SRR17520069.8365037  
SRR17520069.8365122  
SRR17520069.8374700  
SRR17520069.8375289  
SRR17520069.8375291  
SRR17520069.8375293  
SRR17520069.8375295  
SRR17520069.8375297  
SRR17520069.8375299  
SRR17520069.8384122  
SRR17520069.8384607  
SRR17520069.8388098  
SRR17520069.8390006  
SRR17520069.8402770  
SRR17520069.8402772  
SRR17520069.8402774  
SRR17520069.8402776  
SRR17520069.8406572  
SRR17520069.8439784  
SRR17520069.8439794  
SRR17520069.8441899  
SRR17520069.8442528  
SRR17520069.8443961  
SRR17520069.8462279  
SRR17520069.8464193  
SRR17520069.8467228  
SRR17520069.8468408  
SRR17520069.8472637  
SRR17520069.8472641  
SRR17520069.8472643

SRR17520069.8472645  
SRR17520069.8473180  
SRR17520069.8481326  
SRR17520069.8483948  
SRR17520069.8483962  
SRR17520069.8486628  
SRR17520069.8496337  
SRR17520069.8496339  
SRR17520069.8499553  
SRR17520069.8514051  
SRR17520069.8515312  
SRR17520069.8522658  
SRR17520069.8531258  
SRR17520069.8536542  
SRR17520069.8551184  
SRR17520069.8551513  
SRR17520069.8551519  
SRR17520069.8551523  
SRR17520069.8552677  
SRR17520069.8554345  
SRR17520069.8554349  
SRR17520069.8554413  
SRR17520069.8554415  
SRR17520069.8554417  
SRR17520069.8564365  
SRR17520069.8564391  
SRR17520069.8565977  
SRR17520069.8578349  
SRR17520069.8585898  
SRR17520069.8591773  
SRR17520069.8595853  
SRR17520069.8602283  
SRR17520069.8602289  
SRR17520069.8602291  
SRR17520069.8602297  
SRR17520069.8603833  
SRR17520069.8607410  
SRR17520069.8607414  
SRR17520069.8608501  
SRR17520069.8608505  
SRR17520069.8613859  
SRR17520069.8613929  
SRR17520069.8618227  
SRR17520069.8622262  
SRR17520069.8626321  
SRR17520069.8639803  
SRR17520069.8645692

SRR17520069.8648481  
SRR17520069.8648483  
SRR17520069.8648485  
SRR17520069.8648487  
SRR17520069.8648491  
SRR17520069.8648493  
SRR17520069.8648495  
SRR17520069.8648497  
SRR17520069.8648499  
SRR17520069.8648501  
SRR17520069.8648503  
SRR17520069.8648505  
SRR17520069.8648507  
SRR17520069.8648511  
SRR17520069.8648515  
SRR17520069.8648517  
SRR17520069.8648519  
SRR17520069.8648523  
SRR17520069.8648525  
SRR17520069.8648527  
SRR17520069.8648529  
SRR17520069.8648531  
SRR17520069.8648533  
SRR17520069.8648535  
SRR17520069.8648539  
SRR17520069.8648541  
SRR17520069.8648543  
SRR17520069.8648545  
SRR17520069.8648547  
SRR17520069.8648549  
SRR17520069.8648551  
SRR17520069.8648553  
SRR17520069.8648555  
SRR17520069.8648557  
SRR17520069.8648559  
SRR17520069.8648561  
SRR17520069.8648563  
SRR17520069.8648565  
SRR17520069.8648567  
SRR17520069.8648569  
SRR17520069.8648571  
SRR17520069.8648573  
SRR17520069.8648575  
SRR17520069.8648577  
SRR17520069.8648579  
SRR17520069.8648581  
SRR17520069.8657691

SRR17520069.8662404  
SRR17520069.8662424  
SRR17520069.8662450  
SRR17520069.8665587  
SRR17520069.8672840  
SRR17520069.8675777  
SRR17520069.8676584  
SRR17520069.8676594  
SRR17520069.8676596  
SRR17520069.8676598  
SRR17520069.8678600  
SRR17520069.8680336  
SRR17520069.8680408  
SRR17520069.8680419  
SRR17520069.8686522  
SRR17520069.8689196  
SRR17520069.8698684  
SRR17520069.8698709  
SRR17520069.8700355  
SRR17520069.8700391  
SRR17520069.8700411  
SRR17520069.8700581  
SRR17520069.8716209  
SRR17520069.8718053  
SRR17520069.8718069  
SRR17520069.8720390  
SRR17520069.8720392  
SRR17520069.8720402  
SRR17520069.8720406  
SRR17520069.8723275  
SRR17520069.8723277  
SRR17520069.8723279  
SRR17520069.8723283  
SRR17520069.8723285  
SRR17520069.8723287  
SRR17520069.8723291  
SRR17520069.8723297  
SRR17520069.8723299  
SRR17520069.8723301  
SRR17520069.8723317  
SRR17520069.8723319  
SRR17520069.8723323  
SRR17520069.8723325  
SRR17520069.8723327  
SRR17520069.8723335  
SRR17520069.8723337  
SRR17520069.8723341

SRR17520069.8723343  
SRR17520069.8723345  
SRR17520069.8723351  
SRR17520069.8723355  
SRR17520069.8723357  
SRR17520069.8723365  
SRR17520069.8723367  
SRR17520069.8723373  
SRR17520069.8723375  
SRR17520069.8723381  
SRR17520069.8723383  
SRR17520069.8723385  
SRR17520069.8723387  
SRR17520069.8723389  
SRR17520069.8723391  
SRR17520069.8723395  
SRR17520069.8723399  
SRR17520069.8723401  
SRR17520069.8723403  
SRR17520069.8723405  
SRR17520069.8723413  
SRR17520069.8723415  
SRR17520069.8724761  
SRR17520069.8724817  
SRR17520069.8724827  
SRR17520069.8726200  
SRR17520069.8726652  
SRR17520069.8730437  
SRR17520069.8731485  
SRR17520069.8751710  
SRR17520069.8758676  
SRR17520069.8758694  
SRR17520069.8758702  
SRR17520069.8773285  
SRR17520069.8774583  
SRR17520069.8774585  
SRR17520069.8774587  
SRR17520069.8774589  
SRR17520069.8797888  
SRR17520069.8800717  
SRR17520069.8815390  
SRR17520069.8821810  
SRR17520069.8836921  
SRR17520069.8840048  
SRR17520069.8843151  
SRR17520069.8843177  
SRR17520069.8843181

SRR17520069.8843189  
SRR17520069.8853020  
SRR17520069.8853022  
SRR17520069.8853024  
SRR17520069.8853026  
SRR17520069.8853028  
SRR17520069.8853030  
SRR17520069.8853032  
SRR17520069.8853034  
SRR17520069.8853036  
SRR17520069.8853038  
SRR17520069.8853040  
SRR17520069.8853042  
SRR17520069.8853044  
SRR17520069.8853046  
SRR17520069.8853048  
SRR17520069.8853050  
SRR17520069.8853052  
SRR17520069.8853054  
SRR17520069.8853056  
SRR17520069.8853058  
SRR17520069.8853062  
SRR17520069.8853064  
SRR17520069.8853066  
SRR17520069.8853068  
SRR17520069.8853070  
SRR17520069.8853072  
SRR17520069.8853074  
SRR17520069.8853076  
SRR17520069.8853078  
SRR17520069.8853080  
SRR17520069.8853082  
SRR17520069.8853084  
SRR17520069.8853086  
SRR17520069.8853088  
SRR17520069.8853090  
SRR17520069.8853092  
SRR17520069.8853094  
SRR17520069.8853098  
SRR17520069.8853100  
SRR17520069.8897440  
SRR17520069.8902974  
SRR17520069.8902976  
SRR17520069.8909417  
SRR17520069.8909445  
SRR17520069.8909455  
SRR17520069.8909457

SRR17520069.8910622  
SRR17520069.8912115  
SRR17520069.8912117  
SRR17520069.8912127  
SRR17520069.8912353  
SRR17520069.8933420  
SRR17520069.8946684  
SRR17520069.8946688  
SRR17520069.8950473  
SRR17520069.8959037  
SRR17520069.8964866  
SRR17520069.8967559  
SRR17520069.8971223  
SRR17520069.8971225  
SRR17520069.8971227  
SRR17520069.8971231  
SRR17520069.8971237  
SRR17520069.8971239  
SRR17520069.8974385  
SRR17520069.8974391  
SRR17520069.8974490  
SRR17520069.8975865  
SRR17520069.8982728  
SRR17520069.9006162  
SRR17520069.9006212  
SRR17520069.9006266  
SRR17520069.9007089  
SRR17520069.9008674  
SRR17520069.9011394  
SRR17520069.9011921  
SRR17520069.9011959  
SRR17520069.9011981  
SRR17520069.9012011  
SRR17520069.9012013  
SRR17520069.9016605  
SRR17520069.9024710  
SRR17520069.9026584  
SRR17520069.9026811  
SRR17520069.9026860  
SRR17520069.9031284  
SRR17520069.9040911  
SRR17520069.9045678  
SRR17520069.9052510  
SRR17520069.9068213  
SRR17520069.9072202  
SRR17520069.9077264  
SRR17520069.9081402



SRR17520069.9081426  
SRR17520069.9083273  
SRR17520069.9083275  
SRR17520069.9083277  
SRR17520069.9083279  
SRR17520069.9083281  
SRR17520069.9083283  
SRR17520069.9083285  
SRR17520069.9083287  
SRR17520069.9083289  
SRR17520069.9083291  
SRR17520069.9083293  
SRR17520069.9083295  
SRR17520069.9083299  
SRR17520069.9083301  
SRR17520069.9083303  
SRR17520069.9083305  
SRR17520069.9083307  
SRR17520069.9083309  
SRR17520069.9083311  
SRR17520069.9083313  
SRR17520069.9083315  
SRR17520069.9083317  
SRR17520069.9083319  
SRR17520069.9083321  
SRR17520069.9083323  
SRR17520069.9083325  
SRR17520069.9083327  
SRR17520069.9083329  
SRR17520069.9083331  
SRR17520069.9083333  
SRR17520069.9083335  
SRR17520069.9083337  
SRR17520069.9083339  
SRR17520069.9083341  
SRR17520069.9083343  
SRR17520069.9083345  
SRR17520069.9083347  
SRR17520069.9083349  
SRR17520069.9083351  
SRR17520069.9083353  
SRR17520069.9083355  
SRR17520069.9083357  
SRR17520069.9083359  
SRR17520069.9083361  
SRR17520069.9083363  
SRR17520069.9083365

SRR17520069.9083367  
SRR17520069.9083369  
SRR17520069.9084264  
SRR17520069.9088072  
SRR17520069.9088074  
SRR17520069.9091004  
SRR17520069.9091008  
SRR17520069.9091013  
SRR17520069.9091021  
SRR17520069.9104897  
SRR17520069.9108940  
SRR17520069.9108942  
SRR17520069.9114658  
SRR17520069.9114666  
SRR17520069.9115436  
SRR17520069.9120258  
SRR17520069.9120268  
SRR17520069.9123901  
SRR17520069.9123907  
SRR17520069.9134580  
SRR17520069.9140669  
SRR17520069.9145152  
SRR17520069.9148537  
SRR17520069.9149463  
SRR17520069.9161038  
SRR17520069.9161816  
SRR17520069.9162374  
SRR17520069.9165061  
SRR17520069.9165064  
SRR17520069.9165927  
SRR17520069.9170565  
SRR17520069.9170597  
SRR17520069.9173174  
SRR17520069.9173176  
SRR17520069.9173178  
SRR17520069.9184354  
SRR17520069.9188215  
SRR17520069.9188245  
SRR17520069.9190785  
SRR17520069.9198279  
SRR17520069.9198341  
SRR17520069.9200706  
SRR17520069.9200708  
SRR17520069.9200760  
SRR17520069.9202183  
SRR17520069.9202394  
SRR17520069.9202396

SRR17520069. 9202398  
SRR17520069. 9202400  
SRR17520069. 9202402  
SRR17520069. 9202404  
SRR17520069. 9202406  
SRR17520069. 9202408  
SRR17520069. 9202410  
SRR17520069. 9202804  
SRR17520069. 9205608  
SRR17520069. 9205610  
SRR17520069. 9213134  
SRR17520069. 9223057  
SRR17520069. 9223061  
SRR17520069. 9223069  
SRR17520069. 9237836  
SRR17520069. 9238108  
SRR17520069. 9245505  
SRR17520069. 9245507  
SRR17520069. 9248623  
SRR17520069. 9248666  
SRR17520069. 9251705  
SRR17520069. 9252411  
SRR17520069. 9252441  
SRR17520069. 9254788  
SRR17520069. 9268856  
SRR17520069. 9268868  
SRR17520069. 9274110  
SRR17520069. 9274550  
SRR17520069. 9275571  
SRR17520069. 9275589  
SRR17520069. 9279363  
SRR17520069. 9279371  
SRR17520069. 9279492  
SRR17520069. 9289306  
SRR17520069. 9289314  
SRR17520069. 9289718  
SRR17520069. 9298358  
SRR17520069. 9302716  
SRR17520069. 9303897  
SRR17520069. 9312245  
SRR17520069. 9316373  
SRR17520069. 9328346  
SRR17520069. 9328401  
SRR17520069. 9330458  
SRR17520069. 9334420  
SRR17520069. 9354517  
SRR17520069. 9371763

SRR17520069.9371765  
SRR17520069.9371767  
SRR17520069.9380230  
SRR17520069.9380982  
SRR17520069.9380986  
SRR17520069.9382650  
SRR17520069.9403825  
SRR17520069.9404452  
SRR17520069.9409353  
SRR17520069.9442875  
SRR17520069.9453026  
SRR17520069.9466540  
SRR17520069.9466582  
SRR17520069.9471271  
SRR17520069.9471443  
SRR17520069.9479195  
SRR17520069.9481549  
SRR17520069.9481553  
SRR17520069.9481555  
SRR17520069.9481557  
SRR17520069.9481559  
SRR17520069.9481561  
SRR17520069.9487163  
SRR17520069.9487175  
SRR17520069.9491411  
SRR17520069.9491415  
SRR17520069.9491501  
SRR17520069.9492369  
SRR17520069.9492639  
SRR17520069.9495665  
SRR17520069.9497182  
SRR17520069.9498861  
SRR17520069.9500276  
SRR17520069.9500790  
SRR17520069.9500820  
SRR17520069.9500822  
SRR17520069.9507525  
SRR17520069.9507529  
SRR17520069.9510329  
SRR17520069.9517371  
SRR17520069.9525369  
SRR17520069.9531867  
SRR17520069.9538570  
SRR17520069.9540620  
SRR17520069.9541861  
SRR17520069.9559259  
SRR17520069.9560677

SRR17520069.9560713  
SRR17520069.9560715  
SRR17520069.9568334  
SRR17520069.9568344  
SRR17520069.9568350  
SRR17520069.9568356  
SRR17520069.9568364  
SRR17520069.9571612  
SRR17520069.9571684  
SRR17520069.9583134  
SRR17520069.9583158  
SRR17520069.9583162  
SRR17520069.9583174  
SRR17520069.9583176  
SRR17520069.9583178  
SRR17520069.9590274  
SRR17520069.9592426  
SRR17520069.9592446  
SRR17520069.9592450  
SRR17520069.9594147  
SRR17520069.9594153  
SRR17520069.9601255  
SRR17520069.9601263  
SRR17520069.9601281  
SRR17520069.9601291  
SRR17520069.9602483  
SRR17520069.9606646  
SRR17520069.9606650  
SRR17520069.9606666  
SRR17520069.9606678  
SRR17520069.9606698  
SRR17520069.9606714  
SRR17520069.9606738  
SRR17520069.9606742  
SRR17520069.9608597  
SRR17520069.9610305  
SRR17520069.9613099  
SRR17520069.9634143  
SRR17520069.9634151  
SRR17520069.9642187  
SRR17520069.9648608  
SRR17520069.9648632  
SRR17520069.9651741  
SRR17520069.9657910  
SRR17520069.9677018  
SRR17520069.9680842  
SRR17520069.9682812

SRR17520069.9687832  
SRR17520069.9687840  
SRR17520069.9687842  
SRR17520069.9687846  
SRR17520069.9688573  
SRR17520069.9688589  
SRR17520069.9694152  
SRR17520069.9699154  
SRR17520069.9706953  
SRR17520069.9712216  
SRR17520069.9723003  
SRR17520069.9723079  
SRR17520069.9735648  
SRR17520069.9735666  
SRR17520069.9738501  
SRR17520069.9738515  
SRR17520069.9742301  
SRR17520069.9742405  
SRR17520069.9742419  
SRR17520069.9742435  
SRR17520069.9742495  
SRR17520069.9745556  
SRR17520069.9753247  
SRR17520069.9754321  
SRR17520069.9755659  
SRR17520069.9759597  
SRR17520069.9760734  
SRR17520069.9760750  
SRR17520069.9760756  
SRR17520069.9760770  
SRR17520069.9760772  
SRR17520069.9760776  
SRR17520069.9764916  
SRR17520069.9766562  
SRR17520069.9766578  
SRR17520069.9766582  
SRR17520069.9766584  
SRR17520069.9772654  
SRR17520069.9772710  
SRR17520069.9772722  
SRR17520069.9772732  
SRR17520069.9772738  
SRR17520069.9772865  
SRR17520069.9772869  
SRR17520069.9772873  
SRR17520069.9772877  
SRR17520069.9772879

SRR17520069.9772881  
SRR17520069.9772883  
SRR17520069.9772885  
SRR17520069.9772887  
SRR17520069.9772891  
SRR17520069.9772893  
SRR17520069.9772895  
SRR17520069.9772899  
SRR17520069.9772901  
SRR17520069.9772903  
SRR17520069.9772905  
SRR17520069.9772907  
SRR17520069.9772909  
SRR17520069.9776824  
SRR17520069.9778468  
SRR17520069.9778506  
SRR17520069.9779385  
SRR17520069.9781888  
SRR17520069.9783883  
SRR17520069.9783915  
SRR17520069.9783945  
SRR17520069.9789827  
SRR17520069.9789829  
SRR17520069.9789837  
SRR17520069.9802370  
SRR17520069.9809393  
SRR17520069.9842288  
SRR17520069.9853877  
SRR17520069.9854894  
SRR17520069.9854898  
SRR17520069.9854902  
SRR17520069.9857947  
SRR17520069.9859986  
SRR17520069.9872901  
SRR17520069.9872903  
SRR17520069.9874397  
SRR17520069.9874677  
SRR17520069.9882119  
SRR17520069.9885551  
SRR17520069.9885559  
SRR17520069.9889606  
SRR17520069.9902703  
SRR17520069.9903816  
SRR17520069.9905453  
SRR17520069.9905485  
SRR17520069.9905489  
SRR17520069.9905513

SRR17520069.9905563  
SRR17520069.9908556  
SRR17520069.9910910  
SRR17520069.9911192  
SRR17520069.9914505  
SRR17520069.9919200  
SRR17520069.9919214  
SRR17520069.9924942  
SRR17520069.9925006  
SRR17520069.9925014  
SRR17520069.9937601  
SRR17520069.9938776  
SRR17520069.9946894  
SRR17520069.9946926  
SRR17520069.9946932  
SRR17520069.9956248  
SRR17520069.9958284  
SRR17520069.9959278  
SRR17520069.9971612  
SRR17520069.9983982  
SRR17520069.9983986  
SRR17520069.9989519  
SRR17520069.9991321  
SRR17520069.9991329  
SRR17520069.9991331  
SRR17520069.9993817  
SRR17520069.10000907  
SRR17520069.10007730  
SRR17520069.10007740  
SRR17520069.10007770  
SRR17520069.10007787  
SRR17520069.10008723  
SRR17520069.10017417  
SRR17520069.10017431  
SRR17520069.10017983  
SRR17520069.10020866  
SRR17520069.10020868  
SRR17520069.10037515  
SRR17520069.10039974  
SRR17520069.10040002  
SRR17520069.10040028  
SRR17520069.10041311  
SRR17520069.10053118  
SRR17520069.10053150  
SRR17520069.10057244  
SRR17520069.10057274  
SRR17520069.10065750



SRR17520069.10067455  
SRR17520069.10067457  
SRR17520069.10067581  
SRR17520069.10068369  
SRR17520069.10068786  
SRR17520069.10088859  
SRR17520069.10091242  
SRR17520069.10095110  
SRR17520069.10097350  
SRR17520069.10102793  
SRR17520069.10102809  
SRR17520069.10102813  
SRR17520069.10102815  
SRR17520069.10102819  
SRR17520069.10102835  
SRR17520069.10104938  
SRR17520069.10111523  
SRR17520069.10116999  
SRR17520069.10119387  
SRR17520069.10120446  
SRR17520069.10126628  
SRR17520069.10128965  
SRR17520069.10128975  
SRR17520069.10128985  
SRR17520069.10128989  
SRR17520069.10146138  
SRR17520069.10146151  
SRR17520069.10147601  
SRR17520069.10147603  
SRR17520069.10147607  
SRR17520069.10147609  
SRR17520069.10147613  
SRR17520069.10147615  
SRR17520069.10147617  
SRR17520069.10147619  
SRR17520069.10147621  
SRR17520069.10147623  
SRR17520069.10147625  
SRR17520069.10147627  
SRR17520069.10147629  
SRR17520069.10147631  
SRR17520069.10147633  
SRR17520069.10147635  
SRR17520069.10147637  
SRR17520069.10154850  
SRR17520069.10154865  
SRR17520069.10154869

SRR17520069.10154890  
SRR17520069.10154968  
SRR17520069.10156039  
SRR17520069.10160602  
SRR17520069.10160622  
SRR17520069.10161670  
SRR17520069.10171873  
SRR17520069.10178762  
SRR17520069.10178764  
SRR17520069.10178768  
SRR17520069.10182467  
SRR17520069.10182469  
SRR17520069.10182471  
SRR17520069.10182473  
SRR17520069.10189210  
SRR17520069.10199033  
SRR17520069.10199051  
SRR17520069.10200108  
SRR17520069.10200116  
SRR17520069.10203384  
SRR17520069.10203400  
SRR17520069.10203474  
SRR17520069.10203542  
SRR17520069.10203568  
SRR17520069.10206841  
SRR17520069.10208540  
SRR17520069.10208742  
SRR17520069.10208744  
SRR17520069.10208772  
SRR17520069.10209744  
SRR17520069.10235703  
SRR17520069.10248459  
SRR17520069.10256906  
SRR17520069.10256914  
SRR17520069.10257825  
SRR17520069.10257833  
SRR17520069.10262908  
SRR17520069.10264359  
SRR17520069.10271837  
SRR17520069.10275737  
SRR17520069.10290424  
SRR17520069.10290462  
SRR17520069.10290910  
SRR17520069.10293147  
SRR17520069.10294154  
SRR17520069.10299905  
SRR17520069.10304206

SRR17520069. 10304208  
SRR17520069. 10305286  
SRR17520069. 10315377  
SRR17520069. 10317687  
SRR17520069. 10336193  
SRR17520069. 10336278  
SRR17520069. 10337357  
SRR17520069. 10339164  
SRR17520069. 10341161  
SRR17520069. 10344964  
SRR17520069. 10348539  
SRR17520069. 10348556  
SRR17520069. 10349741  
SRR17520069. 10350576  
SRR17520069. 10353236  
SRR17520069. 10353244  
SRR17520069. 10363199  
SRR17520069. 10363682  
SRR17520069. 10365131  
SRR17520069. 10378630  
SRR17520069. 10382212  
SRR17520069. 10386928  
SRR17520069. 10389948  
SRR17520069. 10389989  
SRR17520069. 10394260  
SRR17520069. 10394716  
SRR17520069. 10422282  
SRR17520069. 10425900  
SRR17520069. 10426021  
SRR17520069. 10431200  
SRR17520069. 10431214  
SRR17520069. 10431218  
SRR17520069. 10431220  
SRR17520069. 10432385  
SRR17520069. 10432399  
SRR17520069. 10448468  
SRR17520069. 10456448  
SRR17520069. 10457597  
SRR17520069. 10462785  
SRR17520069. 10472456  
SRR17520069. 10476854  
SRR17520069. 10487888  
SRR17520069. 10487972  
SRR17520069. 10513308  
SRR17520069. 10515476  
SRR17520069. 10515478  
SRR17520069. 10515500

SRR17520069.10518609  
SRR17520069.10527925  
SRR17520069.10527975  
SRR17520069.10536742  
SRR17520069.10551054  
SRR17520069.10551104  
SRR17520069.10559940  
SRR17520069.10559964  
SRR17520069.10559968  
SRR17520069.10559996  
SRR17520069.10560008  
SRR17520069.10560030  
SRR17520069.10560040  
SRR17520069.10560042  
SRR17520069.10560046  
SRR17520069.10560052  
SRR17520069.10560056  
SRR17520069.10560058  
SRR17520069.10562405  
SRR17520069.10570513  
SRR17520069.10580022  
SRR17520069.10593956  
SRR17520069.10593974  
SRR17520069.10593976  
SRR17520069.10593984  
SRR17520069.10594002  
SRR17520069.10594004  
SRR17520069.10594010  
SRR17520069.10594020  
SRR17520069.10594036  
SRR17520069.10594038  
SRR17520069.10597041  
SRR17520069.10602247  
SRR17520069.10604947  
SRR17520069.10611955  
SRR17520069.10616824  
SRR17520069.10633074  
SRR17520069.10635251  
SRR17520069.10636865  
SRR17520069.10636871  
SRR17520069.10649057  
SRR17520069.10649073  
SRR17520069.10654671  
SRR17520069.10658872  
SRR17520069.10662599  
SRR17520069.10662637  
SRR17520069.10663214

SRR17520069.10663617  
SRR17520069.10666479  
SRR17520069.10673380  
SRR17520069.10673388  
SRR17520069.10678496  
SRR17520069.10681992  
SRR17520069.10683698  
SRR17520069.10690051  
SRR17520069.10690885  
SRR17520069.10694225  
SRR17520069.10698288  
SRR17520069.10699132  
SRR17520069.10699985  
SRR17520069.10699987  
SRR17520069.10699989  
SRR17520069.10699991  
SRR17520069.10699993  
SRR17520069.10699995  
SRR17520069.10699997  
SRR17520069.10699999  
SRR17520069.10700001  
SRR17520069.10700003  
SRR17520069.10700005  
SRR17520069.10700007  
SRR17520069.10700009  
SRR17520069.10700011  
SRR17520069.10700013  
SRR17520069.10700015  
SRR17520069.10700017  
SRR17520069.10700019  
SRR17520069.10707524  
SRR17520069.10709351  
SRR17520069.10711535  
SRR17520069.10717185  
SRR17520069.10724220  
SRR17520069.10744122  
SRR17520069.10746430  
SRR17520069.10746432  
SRR17520069.10746434  
SRR17520069.10746436  
SRR17520069.10746438  
SRR17520069.10746440  
SRR17520069.10746442  
SRR17520069.10761795  
SRR17520069.10761805  
SRR17520069.10764572  
SRR17520069.10764576

SRR17520069.10768676  
SRR17520069.10769634  
SRR17520069.10794548  
SRR17520069.10794550  
SRR17520069.10794552  
SRR17520069.10794554  
SRR17520069.10794556  
SRR17520069.10794558  
SRR17520069.10794560  
SRR17520069.10794562  
SRR17520069.10794564  
SRR17520069.10794566  
SRR17520069.10794568  
SRR17520069.10794570  
SRR17520069.10794572  
SRR17520069.10794574  
SRR17520069.10794576  
SRR17520069.10794578  
SRR17520069.10794580  
SRR17520069.10794582  
SRR17520069.10794584  
SRR17520069.10794586  
SRR17520069.10794588  
SRR17520069.10794590  
SRR17520069.10794592  
SRR17520069.10794594  
SRR17520069.10800038  
SRR17520069.10809794  
SRR17520069.10812794  
SRR17520069.10813516  
SRR17520069.10813541  
SRR17520069.10813597  
SRR17520069.10824112  
SRR17520069.10837371  
SRR17520069.10841597  
SRR17520069.10841628  
SRR17520069.10848956  
SRR17520069.10852276  
SRR17520069.10852300  
SRR17520069.10852304  
SRR17520069.10853000  
SRR17520069.10853026  
SRR17520069.10853032  
SRR17520069.10853054  
SRR17520069.10858993  
SRR17520069.10860033  
SRR17520069.10877041

SRR17520069.10877067  
SRR17520069.10878107  
SRR17520069.10900047  
SRR17520069.10900724  
SRR17520069.10900742  
SRR17520069.10901706  
SRR17520069.10909335  
SRR17520069.10909405  
SRR17520069.10909417  
SRR17520069.10909429  
SRR17520069.10917246  
SRR17520069.10917250  
SRR17520069.10917272  
SRR17520069.10921421  
SRR17520069.10921451  
SRR17520069.10921459  
SRR17520069.10921461  
SRR17520069.10935444  
SRR17520069.10938588  
SRR17520069.10938596  
SRR17520069.10956519  
SRR17520069.10956719  
SRR17520069.10966444  
SRR17520069.10966781  
SRR17520069.10968438  
SRR17520069.10972913  
SRR17520069.10976791  
SRR17520069.10986023  
SRR17520069.11007912  
SRR17520069.11007930  
SRR17520069.11007948  
SRR17520069.11009225  
SRR17520069.11011710  
SRR17520069.11014995  
SRR17520069.11017370  
SRR17520069.11017371  
SRR17520069.11017849  
SRR17520069.11017851  
SRR17520069.11024844  
SRR17520069.11030814  
SRR17520069.11030818  
SRR17520069.11030820  
SRR17520069.11030824  
SRR17520069.11030826  
SRR17520069.11030830  
SRR17520069.11030832  
SRR17520069.11030834

SRR17520069.11030836  
SRR17520069.11030838  
SRR17520069.11036711  
SRR17520069.11037227  
SRR17520069.11046044  
SRR17520069.11046046  
SRR17520069.11055075  
SRR17520069.11055079  
SRR17520069.11069098  
SRR17520069.11077710  
SRR17520069.11080690  
SRR17520069.11082064  
SRR17520069.11086138  
SRR17520069.11087158  
SRR17520069.11087196  
SRR17520069.11091929  
SRR17520069.11091943  
SRR17520069.11096535  
SRR17520069.11105372  
SRR17520069.11115950  
SRR17520069.11118377  
SRR17520069.11123898  
SRR17520069.11123928  
SRR17520069.11123934  
SRR17520069.11134006  
SRR17520069.11135975  
SRR17520069.11136117  
SRR17520069.11139373  
SRR17520069.11139437  
SRR17520069.11151765  
SRR17520069.11151785  
SRR17520069.11153979  
SRR17520069.11153993  
SRR17520069.11154003  
SRR17520069.11166275  
SRR17520069.11174054  
SRR17520069.11175847  
SRR17520069.11188043  
SRR17520069.11191343  
SRR17520069.11197967  
SRR17520069.11207632  
SRR17520069.11207654  
SRR17520069.11208072  
SRR17520069.11208074  
SRR17520069.11208158  
SRR17520069.11208190  
SRR17520069.11216304



SRR17520069.11232099  
SRR17520069.11232111  
SRR17520069.11241812  
SRR17520069.11242640  
SRR17520069.11242650  
SRR17520069.11249004  
SRR17520069.11249008  
SRR17520069.11250925  
SRR17520069.11250935  
SRR17520069.11271799  
SRR17520069.11271817  
SRR17520069.11271819  
SRR17520069.11272613  
SRR17520069.11276170  
SRR17520069.11276432  
SRR17520069.11278990  
SRR17520069.11278996  
SRR17520069.11281288  
SRR17520069.11283014  
SRR17520069.11289349  
SRR17520069.11289435  
SRR17520069.11291115  
SRR17520069.11299752  
SRR17520069.11300406  
SRR17520069.11300428  
SRR17520069.11300444  
SRR17520069.11310969  
SRR17520069.11323514  
SRR17520069.11331340  
SRR17520069.11331352  
SRR17520069.11334042  
SRR17520069.11334044  
SRR17520069.11334046  
SRR17520069.11334048  
SRR17520069.11334050  
SRR17520069.11334052  
SRR17520069.11334054  
SRR17520069.11334056  
SRR17520069.11334058  
SRR17520069.11334060  
SRR17520069.11334062  
SRR17520069.11334064  
SRR17520069.11334066  
SRR17520069.11334068  
SRR17520069.11334070  
SRR17520069.11334074  
SRR17520069.11334076

SRR17520069. 11334078  
SRR17520069. 11334080  
SRR17520069. 11334082  
SRR17520069. 11334084  
SRR17520069. 11334086  
SRR17520069. 11334088  
SRR17520069. 11334090  
SRR17520069. 11334092  
SRR17520069. 11334094  
SRR17520069. 11334096  
SRR17520069. 11334098  
SRR17520069. 11334100  
SRR17520069. 11334102  
SRR17520069. 11336716  
SRR17520069. 11336724  
SRR17520069. 11338649  
SRR17520069. 11338651  
SRR17520069. 11338681  
SRR17520069. 11341633  
SRR17520069. 11344675  
SRR17520069. 11344703  
SRR17520069. 11344797  
SRR17520069. 11349690  
SRR17520069. 11356278  
SRR17520069. 11356338  
SRR17520069. 11356346  
SRR17520069. 11358277  
SRR17520069. 11358311  
SRR17520069. 11358355  
SRR17520069. 11358361  
SRR17520069. 11358367  
SRR17520069. 11361984  
SRR17520069. 11377434  
SRR17520069. 11397408  
SRR17520069. 11404571  
SRR17520069. 11406364  
SRR17520069. 11406550  
SRR17520069. 11414752  
SRR17520069. 11414766  
SRR17520069. 11415184  
SRR17520069. 11421676  
SRR17520069. 11421678  
SRR17520069. 11421680  
SRR17520069. 11421682  
SRR17520069. 11421684  
SRR17520069. 11421686  
SRR17520069. 11421688

SRR17520069.11421692  
SRR17520069.11421694  
SRR17520069.11421696  
SRR17520069.11421698  
SRR17520069.11421700  
SRR17520069.11421702  
SRR17520069.11421704  
SRR17520069.11421706  
SRR17520069.11421708  
SRR17520069.11421710  
SRR17520069.11421712  
SRR17520069.11421714  
SRR17520069.11423464  
SRR17520069.11433281  
SRR17520069.11434273  
SRR17520069.11434279  
SRR17520069.11434281  
SRR17520069.11438274  
SRR17520069.11444999  
SRR17520069.11450543  
SRR17520069.11460277  
SRR17520069.11465858  
SRR17520069.11468695  
SRR17520069.11473800  
SRR17520069.11477050  
SRR17520069.11477060  
SRR17520069.11478018  
SRR17520069.11478032  
SRR17520069.11478269  
SRR17520069.11478287  
SRR17520069.11481269  
SRR17520069.11494244  
SRR17520069.11502085  
SRR17520069.11509276  
SRR17520069.11509326  
SRR17520069.11509358  
SRR17520069.11509360  
SRR17520069.11510290  
SRR17520069.11510320  
SRR17520069.11510324  
SRR17520069.11523295  
SRR17520069.11534514  
SRR17520069.11535208  
SRR17520069.11537094  
SRR17520069.11542102  
SRR17520069.11569404  
SRR17520069.11574010

SRR17520069.11582573  
SRR17520069.11587702  
SRR17520069.11603518  
SRR17520069.11608154  
SRR17520069.11615840  
SRR17520069.11616696  
SRR17520069.11627937  
SRR17520069.11627939  
SRR17520069.11627941  
SRR17520069.11627943  
SRR17520069.11627945  
SRR17520069.11627947  
SRR17520069.11627949  
SRR17520069.11627951  
SRR17520069.11627953  
SRR17520069.11627955  
SRR17520069.11627957  
SRR17520069.11627959  
SRR17520069.11627961  
SRR17520069.11627963  
SRR17520069.11627965  
SRR17520069.11627967  
SRR17520069.11627969  
SRR17520069.11627971  
SRR17520069.11627973  
SRR17520069.11627975  
SRR17520069.11627977  
SRR17520069.11627981  
SRR17520069.11627983  
SRR17520069.11627985  
SRR17520069.11627987  
SRR17520069.11627989  
SRR17520069.11627991  
SRR17520069.11627993  
SRR17520069.11627995  
SRR17520069.11627997  
SRR17520069.11627999  
SRR17520069.11638937  
SRR17520069.11638953  
SRR17520069.11638985  
SRR17520069.11650692  
SRR17520069.11650734  
SRR17520069.11650993  
SRR17520069.11661235  
SRR17520069.11661269  
SRR17520069.11661281  
SRR17520069.11664228

SRR17520069.11680763  
SRR17520069.11680765  
SRR17520069.11680791  
SRR17520069.11680829  
SRR17520069.11692134  
SRR17520069.11713736  
SRR17520069.11714605  
SRR17520069.11714615  
SRR17520069.11714617  
SRR17520069.11714621  
SRR17520069.11714625  
SRR17520069.11714635  
SRR17520069.11714641  
SRR17520069.11716770  
SRR17520069.11717074  
SRR17520069.11717076  
SRR17520069.11729416  
SRR17520069.11729419  
SRR17520069.11735050  
SRR17520069.11736212  
SRR17520069.11736214  
SRR17520069.11736232  
SRR17520069.11742030  
SRR17520069.11748389  
SRR17520069.11789984  
SRR17520069.11790028  
SRR17520069.11790040  
SRR17520069.11790074  
SRR17520069.11812325  
SRR17520069.11812768  
SRR17520069.11812996  
SRR17520069.11833791  
SRR17520069.11833805  
SRR17520069.11844766  
SRR17520069.11864893  
SRR17520069.11864929  
SRR17520069.11875487  
SRR17520069.11883705  
SRR17520069.11883707  
SRR17520069.11891083  
SRR17520069.11891093  
SRR17520069.11891099  
SRR17520069.11891105  
SRR17520069.11891107  
SRR17520069.11895407  
SRR17520069.11895409  
SRR17520069.11895413

SRR17520069.11906959  
SRR17520069.11920150  
SRR17520069.11920154  
SRR17520069.11932403  
SRR17520069.11933459  
SRR17520069.11938715  
SRR17520069.11939319  
SRR17520069.11939321  
SRR17520069.11939323  
SRR17520069.11939325  
SRR17520069.11939327  
SRR17520069.11939329  
SRR17520069.11939331  
SRR17520069.11939333  
SRR17520069.11939335  
SRR17520069.11939731  
SRR17520069.11945222  
SRR17520069.11945224  
SRR17520069.11945232  
SRR17520069.11945236  
SRR17520069.11945242  
SRR17520069.11945254  
SRR17520069.11945258  
SRR17520069.11945260  
SRR17520069.11945262  
SRR17520069.11945266  
SRR17520069.11948240  
SRR17520069.11981807  
SRR17520069.11982611  
SRR17520069.11988518  
SRR17520069.11989134  
SRR17520069.11989394  
SRR17520069.11993242  
SRR17520069.11993278  
SRR17520069.11999057  
SRR17520069.11999059  
SRR17520069.11999081  
SRR17520069.11999083  
SRR17520069.12014914  
SRR17520069.12014984  
SRR17520069.12014988  
SRR17520069.12014992  
SRR17520069.12029153  
SRR17520069.12029199  
SRR17520069.12029229  
SRR17520069.12029255  
SRR17520069.12029261

SRR17520069.12029309  
SRR17520069.12029315  
SRR17520069.12039433  
SRR17520069.12040665  
SRR17520069.12041217  
SRR17520069.12042507  
SRR17520069.12056188  
SRR17520069.12056196  
SRR17520069.12056200  
SRR17520069.12065145  
SRR17520069.12071565  
SRR17520069.12079232  
SRR17520069.12083726  
SRR17520069.12089043  
SRR17520069.12096996  
SRR17520069.12097000  
SRR17520069.12098552  
SRR17520069.12098556  
SRR17520069.12098560  
SRR17520069.12103336  
SRR17520069.12116699  
SRR17520069.12127789  
SRR17520069.12129078  
SRR17520069.12129120  
SRR17520069.12129176  
SRR17520069.12129178  
SRR17520069.12137592  
SRR17520069.12143765  
SRR17520069.12144649  
SRR17520069.12154910  
SRR17520069.12154916  
SRR17520069.12155211  
SRR17520069.12155230  
SRR17520069.12155305  
SRR17520069.12155321  
SRR17520069.12164094  
SRR17520069.12173584  
SRR17520069.12185078  
SRR17520069.12185311  
SRR17520069.12185315  
SRR17520069.12187198  
SRR17520069.12188080  
SRR17520069.12188084  
SRR17520069.12188106  
SRR17520069.12188108  
SRR17520069.12190939  
SRR17520069.12190943

SRR17520069. 12191170  
SRR17520069. 12199853  
SRR17520069. 12201202  
SRR17520069. 12201206  
SRR17520069. 12201210  
SRR17520069. 12201220  
SRR17520069. 12201222  
SRR17520069. 12201226  
SRR17520069. 12201230  
SRR17520069. 12201232  
SRR17520069. 12201236  
SRR17520069. 12201240  
SRR17520069. 12201242  
SRR17520069. 12201246  
SRR17520069. 12201248  
SRR17520069. 12201266  
SRR17520069. 12201268  
SRR17520069. 12201274  
SRR17520069. 12201282  
SRR17520069. 12201284  
SRR17520069. 12201286  
SRR17520069. 12201288  
SRR17520069. 12201766  
SRR17520069. 12223872  
SRR17520069. 12225373  
SRR17520069. 12235056  
SRR17520069. 12240849  
SRR17520069. 12247752  
SRR17520069. 12249177  
SRR17520069. 12252805  
SRR17520069. 12252819  
SRR17520069. 12260620  
SRR17520069. 12260642  
SRR17520069. 12265526  
SRR17520069. 12265954  
SRR17520069. 12269829  
SRR17520069. 12269839  
SRR17520069. 12282150  
SRR17520069. 12286346  
SRR17520069. 12286565  
SRR17520069. 12289536  
SRR17520069. 12289552  
SRR17520069. 12289562  
SRR17520069. 12289632  
SRR17520069. 12297162  
SRR17520069. 12297336  
SRR17520069. 12297338



SRR17520069. 12297340  
SRR17520069. 12297342  
SRR17520069. 12297344  
SRR17520069. 12297346  
SRR17520069. 12297348  
SRR17520069. 12297350  
SRR17520069. 12297352  
SRR17520069. 12297354  
SRR17520069. 12297356  
SRR17520069. 12297358  
SRR17520069. 12297360  
SRR17520069. 12297362  
SRR17520069. 12297364  
SRR17520069. 12297366  
SRR17520069. 12297368  
SRR17520069. 12297370  
SRR17520069. 12297372  
SRR17520069. 12297374  
SRR17520069. 12297376  
SRR17520069. 12297378  
SRR17520069. 12297380  
SRR17520069. 12297382  
SRR17520069. 12297384  
SRR17520069. 12297386  
SRR17520069. 12297388  
SRR17520069. 12297390  
SRR17520069. 12297392  
SRR17520069. 12297394  
SRR17520069. 12297396  
SRR17520069. 12297398  
SRR17520069. 12297400  
SRR17520069. 12297402  
SRR17520069. 12297404  
SRR17520069. 12297408  
SRR17520069. 12297410  
SRR17520069. 12297412  
SRR17520069. 12297414  
SRR17520069. 12297416  
SRR17520069. 12297418  
SRR17520069. 12297420  
SRR17520069. 12297422  
SRR17520069. 12297424  
SRR17520069. 12297426  
SRR17520069. 12297428  
SRR17520069. 12297430  
SRR17520069. 12297432  
SRR17520069. 12297434

SRR17520069. 12297436  
SRR17520069. 12297438  
SRR17520069. 12297440  
SRR17520069. 12297442  
SRR17520069. 12297444  
SRR17520069. 12297446  
SRR17520069. 12297448  
SRR17520069. 12297450  
SRR17520069. 12297452  
SRR17520069. 12297454  
SRR17520069. 12297456  
SRR17520069. 12297458  
SRR17520069. 12297460  
SRR17520069. 12297462  
SRR17520069. 12297464  
SRR17520069. 12297466  
SRR17520069. 12297468  
SRR17520069. 12297470  
SRR17520069. 12297472  
SRR17520069. 12297474  
SRR17520069. 12297476  
SRR17520069. 12297478  
SRR17520069. 12297480  
SRR17520069. 12297482  
SRR17520069. 12297484  
SRR17520069. 12297486  
SRR17520069. 12297488  
SRR17520069. 12297490  
SRR17520069. 12297492  
SRR17520069. 12297494  
SRR17520069. 12297496  
SRR17520069. 12297498  
SRR17520069. 12297500  
SRR17520069. 12297502  
SRR17520069. 12297504  
SRR17520069. 12297506  
SRR17520069. 12297508  
SRR17520069. 12297510  
SRR17520069. 12297512  
SRR17520069. 12297514  
SRR17520069. 12297516  
SRR17520069. 12297518  
SRR17520069. 12297520  
SRR17520069. 12303435  
SRR17520069. 12310924  
SRR17520069. 12316363  
SRR17520069. 12316417

SRR17520069. 12316421  
SRR17520069. 12317784  
SRR17520069. 12317786  
SRR17520069. 12323186  
SRR17520069. 12323218  
SRR17520069. 12323244  
SRR17520069. 12326655  
SRR17520069. 12335492  
SRR17520069. 12336585  
SRR17520069. 12336591  
SRR17520069. 12336594  
SRR17520069. 12336942  
SRR17520069. 12343326  
SRR17520069. 12348088  
SRR17520069. 12348090  
SRR17520069. 12348094  
SRR17520069. 12356961  
SRR17520069. 12356991  
SRR17520069. 12358324  
SRR17520069. 12358389  
SRR17520069. 12362116  
SRR17520069. 12366025  
SRR17520069. 12366388  
SRR17520069. 12367907  
SRR17520069. 12369746  
SRR17520069. 12380970  
SRR17520069. 12395344  
SRR17520069. 12405437  
SRR17520069. 12405439  
SRR17520069. 12405469  
SRR17520069. 12410384  
SRR17520069. 12414328  
SRR17520069. 12414332  
SRR17520069. 12426483  
SRR17520069. 12434797  
SRR17520069. 12449839  
SRR17520069. 12449849  
SRR17520069. 12453994  
SRR17520069. 12454032  
SRR17520069. 12464875  
SRR17520069. 12471547  
SRR17520069. 12471549  
SRR17520069. 12474966  
SRR17520069. 12479229  
SRR17520069. 12479235  
SRR17520069. 12479237  
SRR17520069. 12483346

SRR17520069.12484379  
SRR17520069.12505591  
SRR17520069.12519258  
SRR17520069.12519306  
SRR17520069.12519316  
SRR17520069.12520097  
SRR17520069.12529965  
SRR17520069.12531022  
SRR17520069.12531024  
SRR17520069.12531026  
SRR17520069.12531028  
SRR17520069.12531030  
SRR17520069.12531032  
SRR17520069.12531036  
SRR17520069.12531038  
SRR17520069.12531040  
SRR17520069.12531042  
SRR17520069.12531044  
SRR17520069.12531046  
SRR17520069.12531050  
SRR17520069.12535677  
SRR17520069.12535693  
SRR17520069.12535709  
SRR17520069.12535741  
SRR17520069.12548505  
SRR17520069.12548511  
SRR17520069.12552689  
SRR17520069.12552820  
SRR17520069.12558928  
SRR17520069.12558938  
SRR17520069.12559300  
SRR17520069.12562748  
SRR17520069.12565369  
SRR17520069.12565909  
SRR17520069.12565924  
SRR17520069.12577521  
SRR17520069.12578188  
SRR17520069.12578214  
SRR17520069.12580760  
SRR17520069.12584627  
SRR17520069.12589438  
SRR17520069.12614073  
SRR17520069.12630280  
SRR17520069.12630288  
SRR17520069.12630290  
SRR17520069.12639028  
SRR17520069.12644681

SRR17520069. 12644685  
SRR17520069. 12644759  
SRR17520069. 12644785  
SRR17520069. 12644855  
SRR17520069. 12647860  
SRR17520069. 12647862  
SRR17520069. 12647878  
SRR17520069. 12650034  
SRR17520069. 12655098  
SRR17520069. 12655104  
SRR17520069. 12678292  
SRR17520069. 12683650  
SRR17520069. 12685443  
SRR17520069. 12685461  
SRR17520069. 12692685  
SRR17520069. 12720407  
SRR17520069. 12722428  
SRR17520069. 12726763  
SRR17520069. 12729956  
SRR17520069. 12731604  
SRR17520069. 12731612  
SRR17520069. 12735562  
SRR17520069. 12735564  
SRR17520069. 12736884  
SRR17520069. 12736922  
SRR17520069. 12736930  
SRR17520069. 12739249  
SRR17520069. 12740596  
SRR17520069. 12744495  
SRR17520069. 12747398  
SRR17520069. 12757065  
SRR17520069. 12758409  
SRR17520069. 12759129  
SRR17520069. 12760908  
SRR17520069. 12767091  
SRR17520069. 12767105  
SRR17520069. 12768432  
SRR17520069. 12768518  
SRR17520069. 12785055  
SRR17520069. 12785391  
SRR17520069. 12787686  
SRR17520069. 12787690  
SRR17520069. 12787723  
SRR17520069. 12797204  
SRR17520069. 12814972  
SRR17520069. 12832947  
SRR17520069. 12839970

SRR17520069.12839972  
SRR17520069.12839974  
SRR17520069.12839976  
SRR17520069.12839978  
SRR17520069.12839980  
SRR17520069.12839986  
SRR17520069.12839988  
SRR17520069.12839990  
SRR17520069.12850014  
SRR17520069.12852859  
SRR17520069.12853273  
SRR17520069.12854030  
SRR17520069.12854290  
SRR17520069.12854943  
SRR17520069.12854955  
SRR17520069.12860911  
SRR17520069.12860915  
SRR17520069.12871675  
SRR17520069.12881896  
SRR17520069.12885779  
SRR17520069.12885789  
SRR17520069.12885791  
SRR17520069.12885803  
SRR17520069.12885811  
SRR17520069.12885819  
SRR17520069.12885833  
SRR17520069.12890455  
SRR17520069.12892587  
SRR17520069.12892591  
SRR17520069.12899100  
SRR17520069.12905139  
SRR17520069.12910366  
SRR17520069.12911083  
SRR17520069.12912953  
SRR17520069.12912963  
SRR17520069.12921401  
SRR17520069.12921822  
SRR17520069.12921829  
SRR17520069.12921833  
SRR17520069.12921839  
SRR17520069.12921845  
SRR17520069.12921849  
SRR17520069.12921853  
SRR17520069.12925416  
SRR17520069.12925420  
SRR17520069.12927540  
SRR17520069.12927827

SRR17520069. 12932296  
SRR17520069. 12932306  
SRR17520069. 12932318  
SRR17520069. 12932325  
SRR17520069. 12936652  
SRR17520069. 12941826  
SRR17520069. 12944125  
SRR17520069. 12952560  
SRR17520069. 12953263  
SRR17520069. 12957840  
SRR17520069. 12957852  
SRR17520069. 12959809  
SRR17520069. 12963315  
SRR17520069. 12963321  
SRR17520069. 12964238  
SRR17520069. 12978679  
SRR17520069. 12985290  
SRR17520069. 12985302  
SRR17520069. 12985340  
SRR17520069. 13006515  
SRR17520069. 13015685  
SRR17520069. 13041303  
SRR17520069. 13042793  
SRR17520069. 13042797  
SRR17520069. 13042799  
SRR17520069. 13042801  
SRR17520069. 13042803  
SRR17520069. 13042805  
SRR17520069. 13042807  
SRR17520069. 13042809  
SRR17520069. 13042811  
SRR17520069. 13042813  
SRR17520069. 13042815  
SRR17520069. 13042817  
SRR17520069. 13042819  
SRR17520069. 13042821  
SRR17520069. 13042823  
SRR17520069. 13042825  
SRR17520069. 13042827  
SRR17520069. 13042833  
SRR17520069. 13042835  
SRR17520069. 13042837  
SRR17520069. 13042839  
SRR17520069. 13042841  
SRR17520069. 13042843  
SRR17520069. 13042845  
SRR17520069. 13042847

SRR17520069.13042849  
SRR17520069.13042851  
SRR17520069.13042853  
SRR17520069.13042855  
SRR17520069.13042857  
SRR17520069.13042861  
SRR17520069.13042863  
SRR17520069.13042865  
SRR17520069.13042867  
SRR17520069.13042869  
SRR17520069.13056381  
SRR17520069.13058132  
SRR17520069.13058180  
SRR17520069.13058194  
SRR17520069.13060911  
SRR17520069.13060957  
SRR17520069.13070684  
SRR17520069.13092712  
SRR17520069.13092734  
SRR17520069.13093113  
SRR17520069.13099781  
SRR17520069.13099793  
SRR17520069.13103326  
SRR17520069.13116896  
SRR17520069.13133143  
SRR17520069.13133219  
SRR17520069.13141166  
SRR17520069.13143403  
SRR17520069.13144808  
SRR17520069.13154368  
SRR17520069.13158908  
SRR17520069.13161281  
SRR17520069.13161347  
SRR17520069.13161349  
SRR17520069.13169529  
SRR17520069.13175340  
SRR17520069.13189743  
SRR17520069.13208443  
SRR17520069.13233938  
SRR17520069.13241704  
SRR17520069.13242204  
SRR17520069.13242214  
SRR17520069.13244633  
SRR17520069.13244638  
SRR17520069.13245926  
SRR17520069.13245956  
SRR17520069.13245958



SRR17520069. 13247091  
SRR17520069. 13249247  
SRR17520069. 13261827  
SRR17520069. 13262949  
SRR17520069. 13274799  
SRR17520069. 13277032  
SRR17520069. 13277046  
SRR17520069. 13278641  
SRR17520069. 13280246  
SRR17520069. 13282469  
SRR17520069. 13295508  
SRR17520069. 13295873  
SRR17520069. 13295886  
SRR17520069. 13297333  
SRR17520069. 13297401  
SRR17520069. 13304325  
SRR17520069. 13329437  
SRR17520069. 13338831  
SRR17520069. 13345532  
SRR17520069. 13348628  
SRR17520069. 13354149  
SRR17520069. 13354415  
SRR17520069. 13354427  
SRR17520069. 13376314  
SRR17520069. 13395031  
SRR17520069. 13396488  
SRR17520069. 13400964  
SRR17520069. 13400978  
SRR17520069. 13400982  
SRR17520069. 13401479  
SRR17520069. 13406152  
SRR17520069. 13406198  
SRR17520069. 13409663  
SRR17520069. 13409733  
SRR17520069. 13411963  
SRR17520069. 13411967  
SRR17520069. 13412003  
SRR17520069. 13412009  
SRR17520069. 13412071  
SRR17520069. 13415312  
SRR17520069. 13415328  
SRR17520069. 13415372  
SRR17520069. 13415871  
SRR17520069. 13428567  
SRR17520069. 13431899  
SRR17520069. 13431933  
SRR17520069. 13444232

SRR17520069. 13463447  
SRR17520069. 13463567  
SRR17520069. 13463619  
SRR17520069. 13469562  
SRR17520069. 13470340  
SRR17520069. 13477132  
SRR17520069. 13477160  
SRR17520069. 13478320  
SRR17520069. 13484700  
SRR17520069. 13484704  
SRR17520069. 13484712  
SRR17520069. 13484756  
SRR17520069. 13484770  
SRR17520069. 13484784  
SRR17520069. 13498828  
SRR17520069. 13498866  
SRR17520069. 13501722  
SRR17520069. 13507617  
SRR17520069. 13521648  
SRR17520069. 13526854  
SRR17520069. 13527559  
SRR17520069. 13527561  
SRR17520069. 13527565  
SRR17520069. 13527571  
SRR17520069. 13529615  
SRR17520069. 13529621  
SRR17520069. 13529625  
SRR17520069. 13529633  
SRR17520069. 13529635  
SRR17520069. 13529677  
SRR17520069. 13539828  
SRR17520069. 13543007  
SRR17520069. 13554999  
SRR17520069. 13564232  
SRR17520069. 13565709  
SRR17520069. 13570231  
SRR17520069. 13570239  
SRR17520069. 13570245  
SRR17520069. 13573315  
SRR17520069. 13582724  
SRR17520069. 13585630  
SRR17520069. 13592147  
SRR17520069. 13592153  
SRR17520069. 13592157  
SRR17520069. 13597335  
SRR17520069. 13597341  
SRR17520069. 13597353

SRR17520069. 13597359  
SRR17520069. 13604145  
SRR17520069. 13604147  
SRR17520069. 13605133  
SRR17520069. 13605175  
SRR17520069. 13605179  
SRR17520069. 13605834  
SRR17520069. 13606647  
SRR17520069. 13608957  
SRR17520069. 13610510  
SRR17520069. 13616857  
SRR17520069. 13627815  
SRR17520069. 13636172  
SRR17520069. 13637154  
SRR17520069. 13644210  
SRR17520069. 13649753  
SRR17520069. 13654926  
SRR17520069. 13656594  
SRR17520069. 13658948  
SRR17520069. 13658952  
SRR17520069. 13668385  
SRR17520069. 13672620  
SRR17520069. 13672622  
SRR17520069. 13672624  
SRR17520069. 13672626  
SRR17520069. 13672628  
SRR17520069. 13676160  
SRR17520069. 13676298  
SRR17520069. 13677763  
SRR17520069. 13678974  
SRR17520069. 13678978  
SRR17520069. 13683128  
SRR17520069. 13683136  
SRR17520069. 13685953  
SRR17520069. 13688095  
SRR17520069. 13691853  
SRR17520069. 13691865  
SRR17520069. 13691875  
SRR17520069. 13691881  
SRR17520069. 13691899  
SRR17520069. 13691927  
SRR17520069. 13691937  
SRR17520069. 13694254  
SRR17520069. 13694256  
SRR17520069. 13713852  
SRR17520069. 13715388  
SRR17520069. 13715390

SRR17520069. 13715392  
SRR17520069. 13715394  
SRR17520069. 13715396  
SRR17520069. 13715398  
SRR17520069. 13715400  
SRR17520069. 13715402  
SRR17520069. 13715404  
SRR17520069. 13715406  
SRR17520069. 13715408  
SRR17520069. 13715410  
SRR17520069. 13715412  
SRR17520069. 13715414  
SRR17520069. 13715416  
SRR17520069. 13715420  
SRR17520069. 13715422  
SRR17520069. 13715426  
SRR17520069. 13715430  
SRR17520069. 13715432  
SRR17520069. 13715436  
SRR17520069. 13715438  
SRR17520069. 13715440  
SRR17520069. 13715442  
SRR17520069. 13715444  
SRR17520069. 13715446  
SRR17520069. 13715631  
SRR17520069. 13715681  
SRR17520069. 13721276  
SRR17520069. 13721278  
SRR17520069. 13722156  
SRR17520069. 13722186  
SRR17520069. 13724743  
SRR17520069. 13729979  
SRR17520069. 13730256  
SRR17520069. 13742418  
SRR17520069. 13764109  
SRR17520069. 13773866  
SRR17520069. 13776540  
SRR17520069. 13779073  
SRR17520069. 13781637  
SRR17520069. 13795280  
SRR17520069. 13796498  
SRR17520069. 13799864  
SRR17520069. 13801198  
SRR17520069. 13801402  
SRR17520069. 13810278  
SRR17520069. 13816109  
SRR17520069. 13821448

SRR17520069. 13822994  
SRR17520069. 13835604  
SRR17520069. 13835608  
SRR17520069. 13848894  
SRR17520069. 13857107  
SRR17520069. 13861937  
SRR17520069. 13861947  
SRR17520069. 13861957  
SRR17520069. 13861971  
SRR17520069. 13865742  
SRR17520069. 13865744  
SRR17520069. 13865748  
SRR17520069. 13866502  
SRR17520069. 13887353  
SRR17520069. 13898755  
SRR17520069. 13898773  
SRR17520069. 13898791  
SRR17520069. 13910861  
SRR17520069. 13917647  
SRR17520069. 13937844  
SRR17520069. 13937850  
SRR17520069. 13937874  
SRR17520069. 13946602  
SRR17520069. 13956339  
SRR17520069. 13956341  
SRR17520069. 13956343  
SRR17520069. 13956345  
SRR17520069. 13956347  
SRR17520069. 13956349  
SRR17520069. 13956351  
SRR17520069. 13956353  
SRR17520069. 13987920  
SRR17520069. 13993104  
SRR17520069. 13993118  
SRR17520069. 13993156  
SRR17520069. 13993208  
SRR17520069. 13993275  
SRR17520069. 13993281  
SRR17520069. 13993305  
SRR17520069. 13995924  
SRR17520069. 13997215  
SRR17520069. 14012524  
SRR17520069. 14014323  
SRR17520069. 14018669  
SRR17520069. 14021136  
SRR17520069. 14034183  
SRR17520069. 14034197

SRR17520069.14040066  
SRR17520069.14048268  
SRR17520069.14048272  
SRR17520069.14051519  
SRR17520069.14051523  
SRR17520069.14052469  
SRR17520069.14093334  
SRR17520069.14093461  
SRR17520069.14100731  
SRR17520069.14100734  
SRR17520069.14109858  
SRR17520069.14109862  
SRR17520069.14115419  
SRR17520069.14119676  
SRR17520069.14119734  
SRR17520069.14123338  
SRR17520069.14123356  
SRR17520069.14149117  
SRR17520069.14159735  
SRR17520069.14160408  
SRR17520069.14160412  
SRR17520069.14171250  
SRR17520069.14171258  
SRR17520069.14174115  
SRR17520069.14176309  
SRR17520069.14176339  
SRR17520069.14176341  
SRR17520069.14176351  
SRR17520069.14183974  
SRR17520069.14205265  
SRR17520069.14227404  
SRR17520069.14227412  
SRR17520069.14227414  
SRR17520069.14227430  
SRR17520069.14227452  
SRR17520069.14227456  
SRR17520069.14236835  
SRR17520069.14268864  
SRR17520069.14268876  
SRR17520069.14277984  
SRR17520069.14279600  
SRR17520069.14290849  
SRR17520069.14296612  
SRR17520069.14299223  
SRR17520069.14299235  
SRR17520069.14304680  
SRR17520069.14319074

SRR17520069.14326518  
SRR17520069.14326519  
SRR17520069.14326871  
SRR17520069.14326885  
SRR17520069.14327311  
SRR17520069.14327313  
SRR17520069.14339343  
SRR17520069.14339345  
SRR17520069.14339356  
SRR17520069.14339362  
SRR17520069.14340171  
SRR17520069.14344257  
SRR17520069.14361518  
SRR17520069.14370595  
SRR17520069.14373325  
SRR17520069.14378130  
SRR17520069.14378132  
SRR17520069.14378134  
SRR17520069.14378136  
SRR17520069.14378138  
SRR17520069.14378140  
SRR17520069.14378142  
SRR17520069.14378144  
SRR17520069.14378148  
SRR17520069.14378150  
SRR17520069.14378152  
SRR17520069.14378154  
SRR17520069.14378156  
SRR17520069.14378158  
SRR17520069.14378160  
SRR17520069.14378162  
SRR17520069.14378164  
SRR17520069.14378166  
SRR17520069.14378168  
SRR17520069.14378170  
SRR17520069.14378174  
SRR17520069.14378176  
SRR17520069.14378178  
SRR17520069.14378180  
SRR17520069.14378182  
SRR17520069.14378184  
SRR17520069.14378186  
SRR17520069.14378188  
SRR17520069.14378190  
SRR17520069.14378192  
SRR17520069.14378194  
SRR17520069.14378196

SRR17520069. 14378198  
SRR17520069. 14378200  
SRR17520069. 14378202  
SRR17520069. 14378204  
SRR17520069. 14378206  
SRR17520069. 14378208  
SRR17520069. 14378210  
SRR17520069. 14378212  
SRR17520069. 14378214  
SRR17520069. 14378216  
SRR17520069. 14378218  
SRR17520069. 14378220  
SRR17520069. 14378222  
SRR17520069. 14378224  
SRR17520069. 14378226  
SRR17520069. 14378230  
SRR17520069. 14378232  
SRR17520069. 14378234  
SRR17520069. 14378236  
SRR17520069. 14378238  
SRR17520069. 14380688  
SRR17520069. 14380700  
SRR17520069. 14392732  
SRR17520069. 14398656  
SRR17520069. 14410873  
SRR17520069. 14426628  
SRR17520069. 14430062  
SRR17520069. 14446487  
SRR17520069. 14447306  
SRR17520069. 14468518  
SRR17520069. 14471239  
SRR17520069. 14471241  
SRR17520069. 14471243  
SRR17520069. 14471245  
SRR17520069. 14471247  
SRR17520069. 14471249  
SRR17520069. 14471253  
SRR17520069. 14471255  
SRR17520069. 14471257  
SRR17520069. 14471259  
SRR17520069. 14471261  
SRR17520069. 14484912  
SRR17520069. 14484986  
SRR17520069. 14486100  
SRR17520069. 14486102  
SRR17520069. 14497203  
SRR17520069. 14498456



SRR17520069.14498468  
SRR17520069.14498494  
SRR17520069.14498496  
SRR17520069.14498514  
SRR17520069.14500588  
SRR17520069.14501605  
SRR17520069.14501609  
SRR17520069.14502976  
SRR17520069.14503018  
SRR17520069.14503032  
SRR17520069.14503046  
SRR17520069.14514927  
SRR17520069.14515957  
SRR17520069.14528620  
SRR17520069.14528640  
SRR17520069.14532225  
SRR17520069.14539942  
SRR17520069.14548998  
SRR17520069.14560684  
SRR17520069.14569995  
SRR17520069.14571763  
SRR17520069.14571765  
SRR17520069.14575359  
SRR17520069.14580300  
SRR17520069.14588493  
SRR17520069.14589872  
SRR17520069.14594277  
SRR17520069.14599822  
SRR17520069.14599922  
SRR17520069.14605645  
SRR17520069.14607578  
SRR17520069.14607582  
SRR17520069.14607584  
SRR17520069.14607586  
SRR17520069.14607588  
SRR17520069.14607592  
SRR17520069.14607596  
SRR17520069.14607598  
SRR17520069.14607600  
SRR17520069.14607602  
SRR17520069.14607604  
SRR17520069.14607608  
SRR17520069.14607612  
SRR17520069.14607614  
SRR17520069.14607620  
SRR17520069.14607624  
SRR17520069.14607626

SRR17520069.14607630  
SRR17520069.14607632  
SRR17520069.14607636  
SRR17520069.14607638  
SRR17520069.14609713  
SRR17520069.14612659  
SRR17520069.14612685  
SRR17520069.14612733  
SRR17520069.14612759  
SRR17520069.14612781  
SRR17520069.14612815  
SRR17520069.14616205  
SRR17520069.14622903  
SRR17520069.14622929  
SRR17520069.14623717  
SRR17520069.14629736  
SRR17520069.14630070  
SRR17520069.14631061  
SRR17520069.14631121  
SRR17520069.14631133  
SRR17520069.14631135  
SRR17520069.14631148  
SRR17520069.14641126  
SRR17520069.14641128  
SRR17520069.14641130  
SRR17520069.14641132  
SRR17520069.14641135  
SRR17520069.14641137  
SRR17520069.14641139  
SRR17520069.14641143  
SRR17520069.14641334  
SRR17520069.14641376  
SRR17520069.14644712  
SRR17520069.14647103  
SRR17520069.14653758  
SRR17520069.14663873  
SRR17520069.14663879  
SRR17520069.14663953  
SRR17520069.14669447  
SRR17520069.14669457  
SRR17520069.14669485  
SRR17520069.14669489  
SRR17520069.14669893  
SRR17520069.14680303  
SRR17520069.14687039  
SRR17520069.14687063  
SRR17520069.14687065

SRR17520069.14687079  
SRR17520069.14690818  
SRR17520069.14690886  
SRR17520069.14690958  
SRR17520069.14693824  
SRR17520069.14697081  
SRR17520069.14705692  
SRR17520069.14705704  
SRR17520069.14707771  
SRR17520069.14710684  
SRR17520069.14731691  
SRR17520069.14734970  
SRR17520069.14734972  
SRR17520069.14758956  
SRR17520069.14773715  
SRR17520069.14780690  
SRR17520069.14782146  
SRR17520069.14782156  
SRR17520069.14782180  
SRR17520069.14792691  
SRR17520069.14796681  
SRR17520069.14798107  
SRR17520069.14805174  
SRR17520069.14814650  
SRR17520069.14815365  
SRR17520069.14822278  
SRR17520069.14826620  
SRR17520069.14831875  
SRR17520069.14836696  
SRR17520069.14836698  
SRR17520069.14856069  
SRR17520069.14856073  
SRR17520069.14873358  
SRR17520069.14873360  
SRR17520069.14873362  
SRR17520069.14873364  
SRR17520069.14873366  
SRR17520069.14873372  
SRR17520069.14873375  
SRR17520069.14873377  
SRR17520069.14873379  
SRR17520069.14873381  
SRR17520069.14873385  
SRR17520069.14873387  
SRR17520069.14873389  
SRR17520069.14873391  
SRR17520069.14873393

SRR17520069.14873395  
SRR17520069.14873397  
SRR17520069.14873399  
SRR17520069.14873401  
SRR17520069.14873403  
SRR17520069.14873405  
SRR17520069.14873407  
SRR17520069.14873409  
SRR17520069.14873411  
SRR17520069.14873415  
SRR17520069.14873417  
SRR17520069.14873419  
SRR17520069.14881896  
SRR17520069.14884223  
SRR17520069.14888434  
SRR17520069.14888440  
SRR17520069.14892083  
SRR17520069.14892085  
SRR17520069.14892087  
SRR17520069.14892089  
SRR17520069.14892091  
SRR17520069.14892095  
SRR17520069.14892097  
SRR17520069.14892101  
SRR17520069.14892103  
SRR17520069.14892105  
SRR17520069.14892109  
SRR17520069.14892111  
SRR17520069.14892119  
SRR17520069.14892125  
SRR17520069.14892597  
SRR17520069.14898541  
SRR17520069.14898543  
SRR17520069.14898545  
SRR17520069.14898547  
SRR17520069.14898549  
SRR17520069.14898551  
SRR17520069.14898553  
SRR17520069.14898555  
SRR17520069.14898557  
SRR17520069.14898559  
SRR17520069.14898561  
SRR17520069.14898563  
SRR17520069.14898565  
SRR17520069.14898567  
SRR17520069.14898569  
SRR17520069.14898571

SRR17520069.14898573  
SRR17520069.14898575  
SRR17520069.14898579  
SRR17520069.14898581  
SRR17520069.14898583  
SRR17520069.14898585  
SRR17520069.14898587  
SRR17520069.14898589  
SRR17520069.14898591  
SRR17520069.14898593  
SRR17520069.14898595  
SRR17520069.14898597  
SRR17520069.14898599  
SRR17520069.14898601  
SRR17520069.14898603  
SRR17520069.14898605  
SRR17520069.14898607  
SRR17520069.14898609  
SRR17520069.14898611  
SRR17520069.14898615  
SRR17520069.14898617  
SRR17520069.14898619  
SRR17520069.14898621  
SRR17520069.14898623  
SRR17520069.14898625  
SRR17520069.14898627  
SRR17520069.14898629  
SRR17520069.14898631  
SRR17520069.14898633  
SRR17520069.14898635  
SRR17520069.14898637  
SRR17520069.14920365  
SRR17520069.14920375  
SRR17520069.14927077  
SRR17520069.14949026  
SRR17520069.14951872  
SRR17520069.14958532  
SRR17520069.14958536  
SRR17520069.14958546  
SRR17520069.14958550  
SRR17520069.14965474  
SRR17520069.14975976  
SRR17520069.14989533  
SRR17520069.14991173  
SRR17520069.15005011  
SRR17520069.15007704  
SRR17520069.15016789

SRR17520069. 15016797  
SRR17520069. 15016807  
SRR17520069. 15016813  
SRR17520069. 15045594  
SRR17520069. 15063135  
SRR17520069. 15064747  
SRR17520069. 15072337  
SRR17520069. 15074117  
SRR17520069. 15076373  
SRR17520069. 15079402  
SRR17520069. 15084525  
SRR17520069. 15085836  
SRR17520069. 15085844  
SRR17520069. 15097057  
SRR17520069. 15097061  
SRR17520069. 15097067  
SRR17520069. 15097514  
SRR17520069. 15097538  
SRR17520069. 15117906  
SRR17520069. 15117952  
SRR17520069. 15117964  
SRR17520069. 15118255  
SRR17520069. 15122151  
SRR17520069. 15122386  
SRR17520069. 15127502  
SRR17520069. 15127638  
SRR17520069. 15128224  
SRR17520069. 15141035  
SRR17520069. 15141039  
SRR17520069. 15141043  
SRR17520069. 15141057  
SRR17520069. 15141061  
SRR17520069. 15141073  
SRR17520069. 15150305  
SRR17520069. 15160312  
SRR17520069. 15160316  
SRR17520069. 15160941  
SRR17520069. 15160943  
SRR17520069. 15173837  
SRR17520069. 15173839  
SRR17520069. 15182775  
SRR17520069. 15194099  
SRR17520069. 15236200  
SRR17520069. 15236204  
SRR17520069. 15236214  
SRR17520069. 15236230  
SRR17520069. 15236238

SRR17520069. 15237616  
SRR17520069. 15239737  
SRR17520069. 15241320  
SRR17520069. 15264163  
SRR17520069. 15271407  
SRR17520069. 15278292  
SRR17520069. 15278316  
SRR17520069. 15285472  
SRR17520069. 15296526  
SRR17520069. 15296581  
SRR17520069. 15302661  
SRR17520069. 15302663  
SRR17520069. 15303318  
SRR17520069. 15305260  
SRR17520069. 15309251  
SRR17520069. 15323135  
SRR17520069. 15326175  
SRR17520069. 15326296  
SRR17520069. 15332983  
SRR17520069. 15340106  
SRR17520069. 15341887  
SRR17520069. 15341889  
SRR17520069. 15342437  
SRR17520069. 15342445  
SRR17520069. 15342453  
SRR17520069. 15342455  
SRR17520069. 15342459  
SRR17520069. 15342461  
SRR17520069. 15345797  
SRR17520069. 15345801  
SRR17520069. 15345803  
SRR17520069. 15347189  
SRR17520069. 15347194  
SRR17520069. 15347217  
SRR17520069. 15352400  
SRR17520069. 15362109  
SRR17520069. 15362111  
SRR17520069. 15380439  
SRR17520069. 15385926  
SRR17520069. 15385928  
SRR17520069. 15385964  
SRR17520069. 15386004  
SRR17520069. 15389677  
SRR17520069. 15397208  
SRR17520069. 15415706  
SRR17520069. 15415708  
SRR17520069. 15415710

SRR17520069. 15415712  
SRR17520069. 15415714  
SRR17520069. 15415716  
SRR17520069. 15415718  
SRR17520069. 15415720  
SRR17520069. 15415722  
SRR17520069. 15415724  
SRR17520069. 15415726  
SRR17520069. 15415728  
SRR17520069. 15415730  
SRR17520069. 15415732  
SRR17520069. 15415734  
SRR17520069. 15415736  
SRR17520069. 15415738  
SRR17520069. 15415740  
SRR17520069. 15415742  
SRR17520069. 15415744  
SRR17520069. 15415746  
SRR17520069. 15415748  
SRR17520069. 15415750  
SRR17520069. 15415752  
SRR17520069. 15415754  
SRR17520069. 15415756  
SRR17520069. 15415758  
SRR17520069. 15415760  
SRR17520069. 15415762  
SRR17520069. 15415764  
SRR17520069. 15415766  
SRR17520069. 15415768  
SRR17520069. 15418023  
SRR17520069. 15418029  
SRR17520069. 15424583  
SRR17520069. 15425804  
SRR17520069. 15435989  
SRR17520069. 15436247  
SRR17520069. 15458599  
SRR17520069. 15464418  
SRR17520069. 15464442  
SRR17520069. 15464454  
SRR17520069. 15464456  
SRR17520069. 15468904  
SRR17520069. 15477704  
SRR17520069. 15477716  
SRR17520069. 15481359  
SRR17520069. 15481385  
SRR17520069. 15481387  
SRR17520069. 15494771



SRR17520069. 15494775  
SRR17520069. 15496252  
SRR17520069. 15498256  
SRR17520069. 15498312  
SRR17520069. 15500378  
SRR17520069. 15501755  
SRR17520069. 15511773  
SRR17520069. 15524215  
SRR17520069. 15524225  
SRR17520069. 15525491  
SRR17520069. 15535457  
SRR17520069. 15546083  
SRR17520069. 15546091  
SRR17520069. 15549532  
SRR17520069. 15549540  
SRR17520069. 15549544  
SRR17520069. 15552627  
SRR17520069. 15553504  
SRR17520069. 15567437  
SRR17520069. 15574841  
SRR17520069. 15574907  
SRR17520069. 15576317  
SRR17520069. 15577437  
SRR17520069. 15578396  
SRR17520069. 15578687  
SRR17520069. 15581408  
SRR17520069. 15585019  
SRR17520069. 15596761  
SRR17520069. 15596763  
SRR17520069. 15596765  
SRR17520069. 15596767  
SRR17520069. 15596769  
SRR17520069. 15596771  
SRR17520069. 15596773  
SRR17520069. 15596775  
SRR17520069. 15596777  
SRR17520069. 15596779  
SRR17520069. 15596781  
SRR17520069. 15596785  
SRR17520069. 15596787  
SRR17520069. 15596789  
SRR17520069. 15596791  
SRR17520069. 15596797  
SRR17520069. 15596801  
SRR17520069. 15596805  
SRR17520069. 15596809  
SRR17520069. 15596811

SRR17520069. 15600580  
SRR17520069. 15602632  
SRR17520069. 15606691  
SRR17520069. 15607438  
SRR17520069. 15607442  
SRR17520069. 15607458  
SRR17520069. 15613058  
SRR17520069. 15613709  
SRR17520069. 15613711  
SRR17520069. 15613713  
SRR17520069. 15615243  
SRR17520069. 15616593  
SRR17520069. 15616893  
SRR17520069. 15619200  
SRR17520069. 15619461  
SRR17520069. 15620194  
SRR17520069. 15622891  
SRR17520069. 15626806  
SRR17520069. 15626808  
SRR17520069. 15634453  
SRR17520069. 15634493  
SRR17520069. 15634503  
SRR17520069. 15634509  
SRR17520069. 15638355  
SRR17520069. 15640125  
SRR17520069. 15641035  
SRR17520069. 15641053  
SRR17520069. 15641063  
SRR17520069. 15644980  
SRR17520069. 15645713  
SRR17520069. 15645729  
SRR17520069. 15658308  
SRR17520069. 15662092  
SRR17520069. 15662156  
SRR17520069. 15668171  
SRR17520069. 15671051  
SRR17520069. 15671057  
SRR17520069. 15671061  
SRR17520069. 15671109  
SRR17520069. 15676494  
SRR17520069. 15679424  
SRR17520069. 15682731  
SRR17520069. 15682753  
SRR17520069. 15682755  
SRR17520069. 15682767  
SRR17520069. 15682771  
SRR17520069. 15682841

SRR17520069. 15682843  
SRR17520069. 15683102  
SRR17520069. 15685574  
SRR17520069. 15687331  
SRR17520069. 15687335  
SRR17520069. 15701439  
SRR17520069. 15704531  
SRR17520069. 15704559  
SRR17520069. 15704571  
SRR17520069. 15706416  
SRR17520069. 15706456  
SRR17520069. 15706492  
SRR17520069. 15707783  
SRR17520069. 15707833  
SRR17520069. 15713519  
SRR17520069. 15714884  
SRR17520069. 15714894  
SRR17520069. 15718027  
SRR17520069. 15722078  
SRR17520069. 15727875  
SRR17520069. 15730024  
SRR17520069. 15730028  
SRR17520069. 15730082  
SRR17520069. 15733775  
SRR17520069. 15740175  
SRR17520069. 15748065  
SRR17520069. 15748067  
SRR17520069. 15748073  
SRR17520069. 15754220  
SRR17520069. 15754222  
SRR17520069. 15757760  
SRR17520069. 15764549  
SRR17520069. 15767784  
SRR17520069. 15777717  
SRR17520069. 15779140  
SRR17520069. 15782101  
SRR17520069. 15791497  
SRR17520069. 15795728  
SRR17520069. 15800926  
SRR17520069. 15808816  
SRR17520069. 15814408  
SRR17520069. 15818698  
SRR17520069. 15824146  
SRR17520069. 15833436  
SRR17520069. 15835456  
SRR17520069. 15837640  
SRR17520069. 15840309

SRR17520069. 15844245  
SRR17520069. 15845692  
SRR17520069. 15846354  
SRR17520069. 15848929  
SRR17520069. 15853799  
SRR17520069. 15853945  
SRR17520069. 15853949  
SRR17520069. 15853958  
SRR17520069. 15853982  
SRR17520069. 15854006  
SRR17520069. 15859644  
SRR17520069. 15859987  
SRR17520069. 15860005  
SRR17520069. 15863262  
SRR17520069. 15866837  
SRR17520069. 15866845  
SRR17520069. 15866885  
SRR17520069. 15866895  
SRR17520069. 15873770  
SRR17520069. 15879100  
SRR17520069. 15884121  
SRR17520069. 15890395  
SRR17520069. 15894622  
SRR17520069. 15894656  
SRR17520069. 15902988  
SRR17520069. 15902994  
SRR17520069. 15904125  
SRR17520069. 15908529  
SRR17520069. 15918906  
SRR17520069. 15920834  
SRR17520069. 15920930  
SRR17520069. 15920938  
SRR17520069. 15932684  
SRR17520069. 15933366  
SRR17520069. 15933368  
SRR17520069. 15933376  
SRR17520069. 15933386  
SRR17520069. 15949799  
SRR17520069. 15949823  
SRR17520069. 15949861  
SRR17520069. 15949925  
SRR17520069. 15956986  
SRR17520069. 15957000  
SRR17520069. 15969932  
SRR17520069. 15970246  
SRR17520069. 15970379  
SRR17520069. 15970381

SRR17520069. 15970383  
SRR17520069. 15970385  
SRR17520069. 15970387  
SRR17520069. 15970389  
SRR17520069. 15970391  
SRR17520069. 15970393  
SRR17520069. 15970397  
SRR17520069. 15970401  
SRR17520069. 15970403  
SRR17520069. 15970405  
SRR17520069. 15970407  
SRR17520069. 15970409  
SRR17520069. 15970411  
SRR17520069. 15970413  
SRR17520069. 15970415  
SRR17520069. 15970417  
SRR17520069. 15970419  
SRR17520069. 15970421  
SRR17520069. 15970425  
SRR17520069. 15976479  
SRR17520069. 15981116  
SRR17520069. 15983082  
SRR17520069. 15983098  
SRR17520069. 15983104  
SRR17520069. 15983148  
SRR17520069. 15987363  
SRR17520069. 15990623  
SRR17520069. 15991185  
SRR17520069. 15991886  
SRR17520069. 16002766  
SRR17520069. 16009979  
SRR17520069. 16015787  
SRR17520069. 16024474  
SRR17520069. 16034197  
SRR17520069. 16034687  
SRR17520069. 16034973  
SRR17520069. 16039112  
SRR17520069. 16039124  
SRR17520069. 16041879  
SRR17520069. 16041887  
SRR17520069. 16042523  
SRR17520069. 16045242  
SRR17520069. 16046023  
SRR17520069. 16047372  
SRR17520069. 16048884  
SRR17520069. 16048889  
SRR17520069. 16048915

SRR17520069. 16049815  
SRR17520069. 16060273  
SRR17520069. 16060281  
SRR17520069. 16060283  
SRR17520069. 16060289  
SRR17520069. 16063515  
SRR17520069. 16063553  
SRR17520069. 16063565  
SRR17520069. 16064468  
SRR17520069. 16065264  
SRR17520069. 16077918  
SRR17520069. 16077962  
SRR17520069. 16082685  
SRR17520069. 16082707  
SRR17520069. 16087080  
SRR17520069. 16092246  
SRR17520069. 16092248  
SRR17520069. 16092250  
SRR17520069. 16092252  
SRR17520069. 16092254  
SRR17520069. 16092256  
SRR17520069. 16092258  
SRR17520069. 16092262  
SRR17520069. 16092264  
SRR17520069. 16092266  
SRR17520069. 16092268  
SRR17520069. 16092270  
SRR17520069. 16092272  
SRR17520069. 16092274  
SRR17520069. 16092276  
SRR17520069. 16092278  
SRR17520069. 16092280  
SRR17520069. 16092282  
SRR17520069. 16092284  
SRR17520069. 16092286  
SRR17520069. 16092288  
SRR17520069. 16092290  
SRR17520069. 16092292  
SRR17520069. 16092294  
SRR17520069. 16092296  
SRR17520069. 16092298  
SRR17520069. 16092300  
SRR17520069. 16092302  
SRR17520069. 16092304  
SRR17520069. 16092306  
SRR17520069. 16092308  
SRR17520069. 16092310

SRR17520069. 16092312  
SRR17520069. 16092314  
SRR17520069. 16092316  
SRR17520069. 16092318  
SRR17520069. 16092320  
SRR17520069. 16092322  
SRR17520069. 16092324  
SRR17520069. 16092326  
SRR17520069. 16092328  
SRR17520069. 16092330  
SRR17520069. 16092332  
SRR17520069. 16092334  
SRR17520069. 16092336  
SRR17520069. 16092338  
SRR17520069. 16092340  
SRR17520069. 16092344  
SRR17520069. 16092346  
SRR17520069. 16092348  
SRR17520069. 16092350  
SRR17520069. 16092352  
SRR17520069. 16092354  
SRR17520069. 16093393  
SRR17520069. 16096032  
SRR17520069. 16096112  
SRR17520069. 16104467  
SRR17520069. 16105455  
SRR17520069. 16105706  
SRR17520069. 16106862  
SRR17520069. 16120451  
SRR17520069. 16120511  
SRR17520069. 16120513  
SRR17520069. 16128558  
SRR17520069. 16139481  
SRR17520069. 16141308  
SRR17520069. 16145161  
SRR17520069. 16145165  
SRR17520069. 16150000  
SRR17520069. 16163204  
SRR17520069. 16180614  
SRR17520069. 16186249  
SRR17520069. 16188070  
SRR17520069. 16217695  
SRR17520069. 16217897  
SRR17520069. 16238076  
SRR17520069. 16239396  
SRR17520069. 16240766  
SRR17520069. 16242788

SRR17520069. 16245849  
SRR17520069. 16247091  
SRR17520069. 16247111  
SRR17520069. 16249844  
SRR17520069. 16249860  
SRR17520069. 16259812  
SRR17520069. 16273527  
SRR17520069. 16292607  
SRR17520069. 16305551  
SRR17520069. 16305567  
SRR17520069. 16312760  
SRR17520069. 16312766  
SRR17520069. 16313244  
SRR17520069. 16322119  
SRR17520069. 16324032  
SRR17520069. 16324034  
SRR17520069. 16324040  
SRR17520069. 16324052  
SRR17520069. 16326984  
SRR17520069. 16327507  
SRR17520069. 16327509  
SRR17520069. 16352312  
SRR17520069. 16352340  
SRR17520069. 16356737  
SRR17520069. 16366616  
SRR17520069. 16372762  
SRR17520069. 16382842  
SRR17520069. 16394452  
SRR17520069. 16403610  
SRR17520069. 16410208  
SRR17520069. 16412076  
SRR17520069. 16447981  
SRR17520069. 16450323  
SRR17520069. 16458565  
SRR17520069. 16460525  
SRR17520069. 16463160  
SRR17520069. 16467113  
SRR17520069. 16469570  
SRR17520069. 16487158  
SRR17520069. 16493142  
SRR17520069. 16493172  
SRR17520069. 16497795  
SRR17520069. 16498275  
SRR17520069. 16515479  
SRR17520069. 16516903  
SRR17520069. 16516905  
SRR17520069. 16516907



SRR17520069.16516909  
SRR17520069.16516911  
SRR17520069.16516913  
SRR17520069.16516915  
SRR17520069.16516917  
SRR17520069.16516919  
SRR17520069.16516921  
SRR17520069.16516923  
SRR17520069.16516925  
SRR17520069.16516927  
SRR17520069.16516929  
SRR17520069.16516931  
SRR17520069.16516935  
SRR17520069.16516937  
SRR17520069.16516939  
SRR17520069.16516941  
SRR17520069.16516943  
SRR17520069.16516945  
SRR17520069.16516947  
SRR17520069.16516949  
SRR17520069.16516951  
SRR17520069.16516953  
SRR17520069.16516955  
SRR17520069.16516957  
SRR17520069.16516959  
SRR17520069.16516963  
SRR17520069.16516967  
SRR17520069.16516969  
SRR17520069.16516971  
SRR17520069.16516973  
SRR17520069.16516975  
SRR17520069.16516977  
SRR17520069.16516979  
SRR17520069.16516981  
SRR17520069.16516983  
SRR17520069.16516985  
SRR17520069.16516987  
SRR17520069.16516989  
SRR17520069.16516991  
SRR17520069.16516993  
SRR17520069.16516995  
SRR17520069.16516997  
SRR17520069.16516999  
SRR17520069.16517001  
SRR17520069.16517005  
SRR17520069.16517007  
SRR17520069.16517009

SRR17520069. 16517011  
SRR17520069. 16517015  
SRR17520069. 16517017  
SRR17520069. 16517019  
SRR17520069. 16517021  
SRR17520069. 16517023  
SRR17520069. 16517025  
SRR17520069. 16517027  
SRR17520069. 16517029  
SRR17520069. 16517031  
SRR17520069. 16517033  
SRR17520069. 16517035  
SRR17520069. 16517037  
SRR17520069. 16517041  
SRR17520069. 16517043  
SRR17520069. 16517049  
SRR17520069. 16517051  
SRR17520069. 16517053  
SRR17520069. 16517055  
SRR17520069. 16517057  
SRR17520069. 16517059  
SRR17520069. 16517061  
SRR17520069. 16517063  
SRR17520069. 16517065  
SRR17520069. 16517067  
SRR17520069. 16517071  
SRR17520069. 16517073  
SRR17520069. 16517077  
SRR17520069. 16517079  
SRR17520069. 16517081  
SRR17520069. 16517083  
SRR17520069. 16517085  
SRR17520069. 16517087  
SRR17520069. 16517089  
SRR17520069. 16517091  
SRR17520069. 16517093  
SRR17520069. 16521479  
SRR17520069. 16522417  
SRR17520069. 16531388  
SRR17520069. 16538564  
SRR17520069. 16538584  
SRR17520069. 16541369  
SRR17520069. 16547835  
SRR17520069. 16559458  
SRR17520069. 16562766  
SRR17520069. 16562772  
SRR17520069. 16569708

SRR17520069.16569710  
SRR17520069.16569712  
SRR17520069.16569714  
SRR17520069.16569716  
SRR17520069.16569718  
SRR17520069.16569720  
SRR17520069.16569722  
SRR17520069.16569724  
SRR17520069.16569726  
SRR17520069.16569728  
SRR17520069.16569730  
SRR17520069.16569732  
SRR17520069.16569734  
SRR17520069.16569736  
SRR17520069.16569738  
SRR17520069.16569740  
SRR17520069.16569742  
SRR17520069.16569744  
SRR17520069.16569746  
SRR17520069.16569748  
SRR17520069.16569750  
SRR17520069.16569752  
SRR17520069.16569754  
SRR17520069.16569756  
SRR17520069.16569758  
SRR17520069.16569760  
SRR17520069.16569762  
SRR17520069.16569764  
SRR17520069.16569766  
SRR17520069.16569768  
SRR17520069.16569770  
SRR17520069.16569772  
SRR17520069.16569774  
SRR17520069.16569776  
SRR17520069.16569778  
SRR17520069.16569780  
SRR17520069.16569782  
SRR17520069.16569784  
SRR17520069.16569786  
SRR17520069.16569788  
SRR17520069.16569790  
SRR17520069.16569792  
SRR17520069.16575949  
SRR17520069.16585276  
SRR17520069.16590944  
SRR17520069.16591212  
SRR17520069.16591214

SRR17520069. 16594961  
SRR17520069. 16596683  
SRR17520069. 16596701  
SRR17520069. 16599866  
SRR17520069. 16612763  
SRR17520069. 16612765  
SRR17520069. 16612767  
SRR17520069. 16612769  
SRR17520069. 16612771  
SRR17520069. 16612773  
SRR17520069. 16612775  
SRR17520069. 16612777  
SRR17520069. 16612779  
SRR17520069. 16612785  
SRR17520069. 16612787  
SRR17520069. 16612791  
SRR17520069. 16612793  
SRR17520069. 16612795  
SRR17520069. 16612797  
SRR17520069. 16612799  
SRR17520069. 16612801  
SRR17520069. 16612803  
SRR17520069. 16612805  
SRR17520069. 16612807  
SRR17520069. 16612809  
SRR17520069. 16612811  
SRR17520069. 16612813  
SRR17520069. 16612815  
SRR17520069. 16612817  
SRR17520069. 16612819  
SRR17520069. 16612821  
SRR17520069. 16612823  
SRR17520069. 16612825  
SRR17520069. 16612827  
SRR17520069. 16612829  
SRR17520069. 16612831  
SRR17520069. 16612833  
SRR17520069. 16612835  
SRR17520069. 16612837  
SRR17520069. 16612839  
SRR17520069. 16612841  
SRR17520069. 16612843  
SRR17520069. 16612845  
SRR17520069. 16612847  
SRR17520069. 16612851  
SRR17520069. 16612853  
SRR17520069. 16612855

SRR17520069. 16612857  
SRR17520069. 16612859  
SRR17520069. 16612861  
SRR17520069. 16612865  
SRR17520069. 16612867  
SRR17520069. 16620235  
SRR17520069. 16620243  
SRR17520069. 16636549  
SRR17520069. 16643680  
SRR17520069. 16644367  
SRR17520069. 16646581  
SRR17520069. 16656347  
SRR17520069. 16684311  
SRR17520069. 16690405  
SRR17520069. 16690899  
SRR17520069. 16692463  
SRR17520069. 16707678  
SRR17520069. 16722128  
SRR17520069. 16729331  
SRR17520069. 16729361  
SRR17520069. 16729367  
SRR17520069. 16729401  
SRR17520069. 16729447  
SRR17520069. 16730331  
SRR17520069. 16730333  
SRR17520069. 16730339  
SRR17520069. 16730341  
SRR17520069. 16730343  
SRR17520069. 16730347  
SRR17520069. 16730351  
SRR17520069. 16737765  
SRR17520069. 16742999  
SRR17520069. 16751370  
SRR17520069. 16754238  
SRR17520069. 16758070  
SRR17520069. 16758116  
SRR17520069. 16758118  
SRR17520069. 16758136  
SRR17520069. 16758142  
SRR17520069. 16759584  
SRR17520069. 16759590  
SRR17520069. 16759592  
SRR17520069. 16759600  
SRR17520069. 16759602  
SRR17520069. 16759604  
SRR17520069. 16759606  
SRR17520069. 16759608

SRR17520069. 16770338  
SRR17520069. 16772960  
SRR17520069. 16777703  
SRR17520069. 16777721  
SRR17520069. 16777725  
SRR17520069. 16787055  
SRR17520069. 16790827  
SRR17520069. 16791274  
SRR17520069. 16791282  
SRR17520069. 16823417  
SRR17520069. 16823642  
SRR17520069. 16828291  
SRR17520069. 16830340  
SRR17520069. 16830376  
SRR17520069. 16830398  
SRR17520069. 16839883  
SRR17520069. 16839929  
SRR17520069. 16852312  
SRR17520069. 16867600  
SRR17520069. 16867757  
SRR17520069. 16867759  
SRR17520069. 16879352  
SRR17520069. 16880076  
SRR17520069. 16880080  
SRR17520069. 16882694  
SRR17520069. 16889775  
SRR17520069. 16889793  
SRR17520069. 16903364  
SRR17520069. 16906490  
SRR17520069. 16913328  
SRR17520069. 16925894  
SRR17520069. 16940131  
SRR17520069. 16940139  
SRR17520069. 16940145  
SRR17520069. 16944467  
SRR17520069. 16955222  
SRR17520069. 16960343  
SRR17520069. 16960525  
SRR17520069. 16960535  
SRR17520069. 16962981  
SRR17520069. 16962995  
SRR17520069. 16967567  
SRR17520069. 16991611  
SRR17520069. 16991617  
SRR17520069. 16991619  
SRR17520069. 16991633  
SRR17520069. 16992681

SRR17520069.16993277  
SRR17520069.16993391  
SRR17520069.16993421  
SRR17520069.16994220  
SRR17520069.16994222  
SRR17520069.16994246  
SRR17520069.16995171  
SRR17520069.17002021  
SRR17520069.17002035  
SRR17520069.17002047  
SRR17520069.17002063  
SRR17520069.17002071  
SRR17520069.17002085  
SRR17520069.17002107  
SRR17520069.17004335  
SRR17520069.17006675  
SRR17520069.17006709  
SRR17520069.17010487  
SRR17520069.17025300  
SRR17520069.17028176  
SRR17520069.17028198  
SRR17520069.17038199  
SRR17520069.17040224  
SRR17520069.17041731  
SRR17520069.17044311  
SRR17520069.17044317  
SRR17520069.17047545  
SRR17520069.17048316  
SRR17520069.17048318  
SRR17520069.17048320  
SRR17520069.17048322  
SRR17520069.17048324  
SRR17520069.17048326  
SRR17520069.17048328  
SRR17520069.17048330  
SRR17520069.17048332  
SRR17520069.17048334  
SRR17520069.17048336  
SRR17520069.17048338  
SRR17520069.17048340  
SRR17520069.17048342  
SRR17520069.17048344  
SRR17520069.17048346  
SRR17520069.17048348  
SRR17520069.17048350  
SRR17520069.17065949  
SRR17520069.17075013

SRR17520069.17078511  
SRR17520069.17087545  
SRR17520069.17099041  
SRR17520069.17099057  
SRR17520069.17099059  
SRR17520069.17138019  
SRR17520069.17138053  
SRR17520069.17138063  
SRR17520069.17139339  
SRR17520069.17163293  
SRR17520069.17163297  
SRR17520069.17166073  
SRR17520069.17166077  
SRR17520069.17175650  
SRR17520069.17175678  
SRR17520069.17175688  
SRR17520069.17181900  
SRR17520069.17183343  
SRR17520069.17183944  
SRR17520069.17203950  
SRR17520069.17204148  
SRR17520069.17207750  
SRR17520069.17214852  
SRR17520069.17215664  
SRR17520069.17229115  
SRR17520069.17230930  
SRR17520069.17235681  
SRR17520069.17237375  
SRR17520069.17251763  
SRR17520069.17256288  
SRR17520069.17256306  
SRR17520069.17284765  
SRR17520069.17287970  
SRR17520069.17287998  
SRR17520069.17288028  
SRR17520069.17288060  
SRR17520069.17288072  
SRR17520069.17290848  
SRR17520069.17303101  
SRR17520069.17303114  
SRR17520069.17303195  
SRR17520069.17304061  
SRR17520069.17306418  
SRR17520069.17306424  
SRR17520069.17306434  
SRR17520069.17306456  
SRR17520069.17306460



SRR17520069. 17307086  
SRR17520069. 17308563  
SRR17520069. 17308567  
SRR17520069. 17308603  
SRR17520069. 17308605  
SRR17520069. 17332704  
SRR17520069. 17333866  
SRR17520069. 17336477  
SRR17520069. 17336493  
SRR17520069. 17336517  
SRR17520069. 17338664  
SRR17520069. 17345595  
SRR17520069. 17362878  
SRR17520069. 17372413  
SRR17520069. 17372451  
SRR17520069. 17372712  
SRR17520069. 17377593  
SRR17520069. 17381672  
SRR17520069. 17381757  
SRR17520069. 17386633  
SRR17520069. 17387709  
SRR17520069. 17387743  
SRR17520069. 17400223  
SRR17520069. 17400225  
SRR17520069. 17403752  
SRR17520069. 17403774  
SRR17520069. 17407648  
SRR17520069. 17411697  
SRR17520069. 17432520  
SRR17520069. 17432540  
SRR17520069. 17432576  
SRR17520069. 17432616  
SRR17520069. 17432622  
SRR17520069. 17432632  
SRR17520069. 17435446  
SRR17520069. 17435454  
SRR17520069. 17435456  
SRR17520069. 17452379  
SRR17520069. 17464603  
SRR17520069. 17465860  
SRR17520069. 17472142  
SRR17520069. 17473183  
SRR17520069. 17477190  
SRR17520069. 17487039  
SRR17520069. 17494974  
SRR17520069. 17499839  
SRR17520069. 17519982

SRR17520069.17519984  
SRR17520069.17519986  
SRR17520069.17520141  
SRR17520069.17520153  
SRR17520069.17530528  
SRR17520069.17530530  
SRR17520069.17530532  
SRR17520069.17530534  
SRR17520069.17530536  
SRR17520069.17530538  
SRR17520069.17530540  
SRR17520069.17530542  
SRR17520069.17531243  
SRR17520069.17532143  
SRR17520069.17532939  
SRR17520069.17534623  
SRR17520069.17540040  
SRR17520069.17556537  
SRR17520069.17561074  
SRR17520069.17561350  
SRR17520069.17566744  
SRR17520069.17574071  
SRR17520069.17577196  
SRR17520069.17577200  
SRR17520069.17577208  
SRR17520069.17582468  
SRR17520069.17582474  
SRR17520069.17583270  
SRR17520069.17584672  
SRR17520069.17588262  
SRR17520069.17593274  
SRR17520069.17593276  
SRR17520069.17593278  
SRR17520069.17593282  
SRR17520069.17593284  
SRR17520069.17593286  
SRR17520069.17593290  
SRR17520069.17593292  
SRR17520069.17593294  
SRR17520069.17593298  
SRR17520069.17595713  
SRR17520069.17624227  
SRR17520069.17628518  
SRR17520069.17628558  
SRR17520069.17637537  
SRR17520069.17647895  
SRR17520069.17659183

SRR17520069. 17661469  
SRR17520069. 17667516  
SRR17520069. 17668163  
SRR17520069. 17668169  
SRR17520069. 17669021  
SRR17520069. 17676213  
SRR17520069. 17680370  
SRR17520069. 17684160  
SRR17520069. 17687538  
SRR17520069. 17696391  
SRR17520069. 17709395  
SRR17520069. 17709397  
SRR17520069. 17710997  
SRR17520069. 17711007  
SRR17520069. 17711110  
SRR17520069. 17711844  
SRR17520069. 17711866  
SRR17520069. 17717369  
SRR17520069. 17719961  
SRR17520069. 17747607  
SRR17520069. 17752425  
SRR17520069. 17763017  
SRR17520069. 17766419  
SRR17520069. 17768184  
SRR17520069. 17768192  
SRR17520069. 17784473  
SRR17520069. 17784583  
SRR17520069. 17791085  
SRR17520069. 17794189  
SRR17520069. 17809145  
SRR17520069. 17809157  
SRR17520069. 17809159  
SRR17520069. 17834916  
SRR17520069. 17855132  
SRR17520069. 17858444  
SRR17520069. 17874480  
SRR17520069. 17880495  
SRR17520069. 17880521  
SRR17520069. 17891043  
SRR17520069. 17891065  
SRR17520069. 17891073  
SRR17520069. 17896871  
SRR17520069. 17899511  
SRR17520069. 17901658  
SRR17520069. 17901670  
SRR17520069. 17909888  
SRR17520069. 17913781

SRR17520069.17914145  
SRR17520069.17921505  
SRR17520069.17932896  
SRR17520069.17932908  
SRR17520069.17935144  
SRR17520069.17935168  
SRR17520069.17939998  
SRR17520069.17940036  
SRR17520069.17940040  
SRR17520069.17940054  
SRR17520069.17948620  
SRR17520069.17955575  
SRR17520069.17957125  
SRR17520069.17957129  
SRR17520069.17979056  
SRR17520069.17983549  
SRR17520069.17989976  
SRR17520069.17993399  
SRR17520069.17993622  
SRR17520069.17993630  
SRR17520069.17993632  
SRR17520069.17993648  
SRR17520069.18004759  
SRR17520069.18004877  
SRR17520069.18006555  
SRR17520069.18010499  
SRR17520069.18022289  
SRR17520069.18025293  
SRR17520069.18025453  
SRR17520069.18033657  
SRR17520069.18034666  
SRR17520069.18035827  
SRR17520069.18035860  
SRR17520069.18036478  
SRR17520069.18058212  
SRR17520069.18058218  
SRR17520069.18058232  
SRR17520069.18058233  
SRR17520069.18061817  
SRR17520069.18063128  
SRR17520069.18095434  
SRR17520069.18122556  
SRR17520069.18122851  
SRR17520069.18125073  
SRR17520069.18133351  
SRR17520069.18152746  
SRR17520069.18166303

SRR17520069. 18166351  
SRR17520069. 18172241  
SRR17520069. 18187331  
SRR17520069. 18191680  
SRR17520069. 18191694  
SRR17520069. 18192186  
SRR17520069. 18197593  
SRR17520069. 18197663  
SRR17520069. 18199289  
SRR17520069. 18202482  
SRR17520069. 18203182  
SRR17520069. 18224349  
SRR17520069. 18232422  
SRR17520069. 18232647  
SRR17520069. 18235305  
SRR17520069. 18247387  
SRR17520069. 18250912  
SRR17520069. 18280459  
SRR17520069. 18281259  
SRR17520069. 18284170  
SRR17520069. 18284176  
SRR17520069. 18290798  
SRR17520069. 18290800  
SRR17520069. 18301451  
SRR17520069. 18304627  
SRR17520069. 18311309  
SRR17520069. 18312850  
SRR17520069. 18317973  
SRR17520069. 18317977  
SRR17520069. 18317985  
SRR17520069. 18333995  
SRR17520069. 18344522  
SRR17520069. 18348756  
SRR17520069. 18356258  
SRR17520069. 18356276  
SRR17520069. 18356280  
SRR17520069. 18356286  
SRR17520069. 18356300  
SRR17520069. 18358752  
SRR17520069. 18358754  
SRR17520069. 18358756  
SRR17520069. 18358758  
SRR17520069. 18358760  
SRR17520069. 18358762  
SRR17520069. 18358764  
SRR17520069. 18358766  
SRR17520069. 18358768

SRR17520069. 18358770  
SRR17520069. 18358774  
SRR17520069. 18358776  
SRR17520069. 18358778  
SRR17520069. 18358780  
SRR17520069. 18358782  
SRR17520069. 18358784  
SRR17520069. 18358786  
SRR17520069. 18358788  
SRR17520069. 18358790  
SRR17520069. 18358792  
SRR17520069. 18358794  
SRR17520069. 18358796  
SRR17520069. 18358798  
SRR17520069. 18358800  
SRR17520069. 18358802  
SRR17520069. 18358804  
SRR17520069. 18358806  
SRR17520069. 18358808  
SRR17520069. 18358810  
SRR17520069. 18358812  
SRR17520069. 18358814  
SRR17520069. 18358816  
SRR17520069. 18358818  
SRR17520069. 18358819  
SRR17520069. 18358820  
SRR17520069. 18358822  
SRR17520069. 18358824  
SRR17520069. 18358826  
SRR17520069. 18358828  
SRR17520069. 18358830  
SRR17520069. 18358832  
SRR17520069. 18358834  
SRR17520069. 18358836  
SRR17520069. 18358838  
SRR17520069. 18358840  
SRR17520069. 18358842  
SRR17520069. 18358844  
SRR17520069. 18358846  
SRR17520069. 18358848  
SRR17520069. 18358850  
SRR17520069. 18369240  
SRR17520069. 18373735  
SRR17520069. 18378990  
SRR17520069. 18391305  
SRR17520069. 18391398  
SRR17520069. 18391460

SRR17520069. 18396428  
SRR17520069. 18407565  
SRR17520069. 18407675  
SRR17520069. 18431200  
SRR17520069. 18432395  
SRR17520069. 18438991  
SRR17520069. 18443424  
SRR17520069. 18444289  
SRR17520069. 18447241  
SRR17520069. 18453722  
SRR17520069. 18462582  
SRR17520069. 18466313  
SRR17520069. 18469594  
SRR17520069. 18469598  
SRR17520069. 18469600  
SRR17520069. 18469602  
SRR17520069. 18490393  
SRR17520069. 18490423  
SRR17520069. 18490425  
SRR17520069. 18492638  
SRR17520069. 18496606  
SRR17520069. 18507937  
SRR17520069. 18513841  
SRR17520069. 18519672  
SRR17520069. 18519690  
SRR17520069. 18519967  
SRR17520069. 18519990  
SRR17520069. 18523243  
SRR17520069. 18523269  
SRR17520069. 18525034  
SRR17520069. 18527195  
SRR17520069. 18527209  
SRR17520069. 18527223  
SRR17520069. 18556066  
SRR17520069. 18560185  
SRR17520069. 18576558  
SRR17520069. 18576562  
SRR17520069. 18576566  
SRR17520069. 18577684  
SRR17520069. 18577979  
SRR17520069. 18581430  
SRR17520069. 18581577  
SRR17520069. 18581579  
SRR17520069. 18581585  
SRR17520069. 18581587  
SRR17520069. 18581593  
SRR17520069. 18582238

SRR17520069. 18582240  
SRR17520069. 18582244  
SRR17520069. 18595995  
SRR17520069. 18624946  
SRR17520069. 18629086  
SRR17520069. 18635753  
SRR17520069. 18636660  
SRR17520069. 18640638  
SRR17520069. 18646297  
SRR17520069. 18665302  
SRR17520069. 18684898  
SRR17520069. 18691562  
SRR17520069. 18703430  
SRR17520069. 18703557  
SRR17520069. 18703567  
SRR17520069. 18704138  
SRR17520069. 18704170  
SRR17520069. 18717172  
SRR17520069. 18717174  
SRR17520069. 18717176  
SRR17520069. 18718241  
SRR17520069. 18721019  
SRR17520069. 18738970  
SRR17520069. 18744611  
SRR17520069. 18747026  
SRR17520069. 18747028  
SRR17520069. 18748128  
SRR17520069. 18749863  
SRR17520069. 18756387  
SRR17520069. 18758886  
SRR17520069. 18758897  
SRR17520069. 18763811  
SRR17520069. 18790772  
SRR17520069. 18795731  
SRR17520069. 18804139  
SRR17520069. 18804161  
SRR17520069. 18804778  
SRR17520069. 18804785  
SRR17520069. 18810732  
SRR17520069. 18810774  
SRR17520069. 18810810  
SRR17520069. 18810822  
SRR17520069. 18810830  
SRR17520069. 18811122  
SRR17520069. 18813035  
SRR17520069. 18817732  
SRR17520069. 18817756



SRR17520069.18817762  
SRR17520069.18818229  
SRR17520069.18824057  
SRR17520069.18831568  
SRR17520069.18835347  
SRR17520069.18835377  
SRR17520069.18839130  
SRR17520069.18839156  
SRR17520069.18839168  
SRR17520069.18839222  
SRR17520069.18839224  
SRR17520069.18848485  
SRR17520069.18850639  
SRR17520069.18850641  
SRR17520069.18850643  
SRR17520069.18850648  
SRR17520069.18850650  
SRR17520069.18850652  
SRR17520069.18850654  
SRR17520069.18850656  
SRR17520069.18850658  
SRR17520069.18850660  
SRR17520069.18854070  
SRR17520069.18861715  
SRR17520069.18879735  
SRR17520069.18882369  
SRR17520069.18884762  
SRR17520069.18891279  
SRR17520069.18892056  
SRR17520069.18892060  
SRR17520069.18898133  
SRR17520069.18898135  
SRR17520069.18906470  
SRR17520069.18906482  
SRR17520069.18906518  
SRR17520069.18906526  
SRR17520069.18912687  
SRR17520069.18917418  
SRR17520069.18917422  
SRR17520069.18919395  
SRR17520069.18919408  
SRR17520069.18935090  
SRR17520069.18935094  
SRR17520069.18935106  
SRR17520069.18940369  
SRR17520069.18945082  
SRR17520069.18945096

SRR17520069. 18945098  
SRR17520069. 18948080  
SRR17520069. 18948579  
SRR17520069. 18957615  
SRR17520069. 18957617  
SRR17520069. 18957619  
SRR17520069. 18957621  
SRR17520069. 18957623  
SRR17520069. 18957625  
SRR17520069. 18957627  
SRR17520069. 18957629  
SRR17520069. 18957631  
SRR17520069. 18957633  
SRR17520069. 18957635  
SRR17520069. 18957637  
SRR17520069. 18957639  
SRR17520069. 18957641  
SRR17520069. 18957643  
SRR17520069. 18957645  
SRR17520069. 18957647  
SRR17520069. 18957649  
SRR17520069. 18957651  
SRR17520069. 18957653  
SRR17520069. 18957655  
SRR17520069. 18957657  
SRR17520069. 18957661  
SRR17520069. 18957663  
SRR17520069. 18957665  
SRR17520069. 18957667  
SRR17520069. 18957669  
SRR17520069. 18957671  
SRR17520069. 18957673  
SRR17520069. 18957675  
SRR17520069. 18957677  
SRR17520069. 18957679  
SRR17520069. 18957681  
SRR17520069. 18957683  
SRR17520069. 18957687  
SRR17520069. 18957689  
SRR17520069. 18961681  
SRR17520069. 18961705  
SRR17520069. 18961735  
SRR17520069. 18962198  
SRR17520069. 18962200  
SRR17520069. 18962283  
SRR17520069. 18962317  
SRR17520069. 18962329

SRR17520069.18969926  
SRR17520069.18972669  
SRR17520069.18977979  
SRR17520069.18977983  
SRR17520069.18986003  
SRR17520069.18990682  
SRR17520069.19005703  
SRR17520069.19005727  
SRR17520069.19005729  
SRR17520069.19006850  
SRR17520069.19006856  
SRR17520069.19006858  
SRR17520069.19027792  
SRR17520069.19027794  
SRR17520069.19031378  
SRR17520069.19039176  
SRR17520069.19043877  
SRR17520069.19043902  
SRR17520069.19048872  
SRR17520069.19048874  
SRR17520069.19053779  
SRR17520069.19066363  
SRR17520069.19076145  
SRR17520069.19076157  
SRR17520069.19076612  
SRR17520069.19076614  
SRR17520069.19076618  
SRR17520069.19080937  
SRR17520069.19081868  
SRR17520069.19081922  
SRR17520069.19081938  
SRR17520069.19081950  
SRR17520069.19082963  
SRR17520069.19098528  
SRR17520069.19099821  
SRR17520069.19103081  
SRR17520069.19103099  
SRR17520069.19103775  
SRR17520069.19110196  
SRR17520069.19110208  
SRR17520069.19113250  
SRR17520069.19114666  
SRR17520069.19124435  
SRR17520069.19124545  
SRR17520069.19152103  
SRR17520069.19152125  
SRR17520069.19154021

SRR17520069.19154023  
SRR17520069.19161411  
SRR17520069.19166205  
SRR17520069.19166207  
SRR17520069.19166217  
SRR17520069.19166227  
SRR17520069.19175343  
SRR17520069.19175903  
SRR17520069.19182995  
SRR17520069.19184946  
SRR17520069.19185068  
SRR17520069.19200042  
SRR17520069.19201574  
SRR17520069.19201630  
SRR17520069.19201658  
SRR17520069.19201710  
SRR17520069.19205983  
SRR17520069.19205991  
SRR17520069.19206009  
SRR17520069.19221111  
SRR17520069.19221115  
SRR17520069.19221123  
SRR17520069.19221137  
SRR17520069.19226633  
SRR17520069.19246959  
SRR17520069.19247015  
SRR17520069.19247051  
SRR17520069.19247100  
SRR17520069.19250874  
SRR17520069.19252783  
SRR17520069.19255420  
SRR17520069.19257471  
SRR17520069.19259323  
SRR17520069.19259337  
SRR17520069.19262752  
SRR17520069.19263934  
SRR17520069.19264483  
SRR17520069.19271731  
SRR17520069.19273481  
SRR17520069.19274192  
SRR17520069.19274194  
SRR17520069.19274834  
SRR17520069.19274868  
SRR17520069.19274872  
SRR17520069.19274914  
SRR17520069.19278436  
SRR17520069.19279426

SRR17520069.19279464  
SRR17520069.19279474  
SRR17520069.19279885  
SRR17520069.19279893  
SRR17520069.19280517  
SRR17520069.19324108  
SRR17520069.19324122  
SRR17520069.19324170  
SRR17520069.19324198  
SRR17520069.19336532  
SRR17520069.19337389  
SRR17520069.19337393  
SRR17520069.19337413  
SRR17520069.19337423  
SRR17520069.19337425  
SRR17520069.19341327  
SRR17520069.19342477  
SRR17520069.19357304  
SRR17520069.19359529  
SRR17520069.19359531  
SRR17520069.19359543  
SRR17520069.19359545  
SRR17520069.19361025  
SRR17520069.19368265  
SRR17520069.19368273  
SRR17520069.19368321  
SRR17520069.19368349  
SRR17520069.19368870  
SRR17520069.19368892  
SRR17520069.19372773  
SRR17520069.19378112  
SRR17520069.19378114  
SRR17520069.19378116  
SRR17520069.19378118  
SRR17520069.19378120  
SRR17520069.19378122  
SRR17520069.19378126  
SRR17520069.19378128  
SRR17520069.19378130  
SRR17520069.19378132  
SRR17520069.19378134  
SRR17520069.19378136  
SRR17520069.19378138  
SRR17520069.19378140  
SRR17520069.19378142  
SRR17520069.19378144  
SRR17520069.19378146

SRR17520069. 19378148  
SRR17520069. 19378150  
SRR17520069. 19378152  
SRR17520069. 19378154  
SRR17520069. 19378156  
SRR17520069. 19378158  
SRR17520069. 19378160  
SRR17520069. 19378162  
SRR17520069. 19378166  
SRR17520069. 19378168  
SRR17520069. 19378170  
SRR17520069. 19378172  
SRR17520069. 19378174  
SRR17520069. 19378178  
SRR17520069. 19378180  
SRR17520069. 19378182  
SRR17520069. 19378186  
SRR17520069. 19378188  
SRR17520069. 19378190  
SRR17520069. 19378192  
SRR17520069. 19378194  
SRR17520069. 19378198  
SRR17520069. 19378200  
SRR17520069. 19378202  
SRR17520069. 19378204  
SRR17520069. 19378206  
SRR17520069. 19378208  
SRR17520069. 19378210  
SRR17520069. 19383190  
SRR17520069. 19383210  
SRR17520069. 19389763  
SRR17520069. 19389767  
SRR17520069. 19394541  
SRR17520069. 19402630  
SRR17520069. 19402632  
SRR17520069. 19402720  
SRR17520069. 19421095  
SRR17520069. 19424675  
SRR17520069. 19435626  
SRR17520069. 19435628  
SRR17520069. 19435638  
SRR17520069. 19455738  
SRR17520069. 19462719  
SRR17520069. 19462747  
SRR17520069. 19462749  
SRR17520069. 19471517  
SRR17520069. 19479544

SRR17520069. 19484290  
SRR17520069. 19499860  
SRR17520069. 19528921  
SRR17520069. 19537120  
SRR17520069. 6211  
SRR17520069. 16588  
SRR17520069. 23855  
SRR17520069. 25633  
SRR17520069. 25727  
SRR17520069. 29377  
SRR17520069. 29379  
SRR17520069. 29381  
SRR17520069. 29383  
SRR17520069. 29385  
SRR17520069. 29387  
SRR17520069. 29389  
SRR17520069. 29391  
SRR17520069. 29393  
SRR17520069. 29395  
SRR17520069. 29397  
SRR17520069. 29399  
SRR17520069. 29401  
SRR17520069. 29403  
SRR17520069. 29405  
SRR17520069. 32080  
SRR17520069. 33407  
SRR17520069. 34574  
SRR17520069. 34596  
SRR17520069. 36694  
SRR17520069. 48427  
SRR17520069. 53727  
SRR17520069. 57815  
SRR17520069. 59881  
SRR17520069. 64191  
SRR17520069. 103881  
SRR17520069. 103893  
SRR17520069. 123275  
SRR17520069. 123346  
SRR17520069. 125924  
SRR17520069. 145493  
SRR17520069. 155823  
SRR17520069. 160713  
SRR17520069. 165385  
SRR17520069. 167712  
SRR17520069. 169185  
SRR17520069. 169210  
SRR17520069. 169234

SRR17520069. 176882  
SRR17520069. 195807  
SRR17520069. 200671  
SRR17520069. 202087  
SRR17520069. 204639  
SRR17520069. 207515  
SRR17520069. 215948  
SRR17520069. 215949  
SRR17520069. 216915  
SRR17520069. 217827  
SRR17520069. 224691  
SRR17520069. 224978  
SRR17520069. 234224  
SRR17520069. 239537  
SRR17520069. 245574  
SRR17520069. 245598  
SRR17520069. 245638  
SRR17520069. 245646  
SRR17520069. 257229  
SRR17520069. 262967  
SRR17520069. 265072  
SRR17520069. 265086  
SRR17520069. 266234  
SRR17520069. 278244  
SRR17520069. 278246  
SRR17520069. 288353  
SRR17520069. 300897  
SRR17520069. 317496  
SRR17520069. 317500  
SRR17520069. 321163  
SRR17520069. 332915  
SRR17520069. 338812  
SRR17520069. 338814  
SRR17520069. 338822  
SRR17520069. 338823  
SRR17520069. 338826  
SRR17520069. 338834  
SRR17520069. 338836  
SRR17520069. 341516  
SRR17520069. 343412  
SRR17520069. 344372  
SRR17520069. 354076  
SRR17520069. 359988  
SRR17520069. 359994  
SRR17520069. 360002  
SRR17520069. 360046  
SRR17520069. 366269



SRR17520069. 366301  
SRR17520069. 368345  
SRR17520069. 368349  
SRR17520069. 383700  
SRR17520069. 395160  
SRR17520069. 396365  
SRR17520069. 415815  
SRR17520069. 416122  
SRR17520069. 428041  
SRR17520069. 428045  
SRR17520069. 428047  
SRR17520069. 428049  
SRR17520069. 428051  
SRR17520069. 428055  
SRR17520069. 428057  
SRR17520069. 429259  
SRR17520069. 433626  
SRR17520069. 434646  
SRR17520069. 435048  
SRR17520069. 442682  
SRR17520069. 446136  
SRR17520069. 450812  
SRR17520069. 453717  
SRR17520069. 453748  
SRR17520069. 453777  
SRR17520069. 453805  
SRR17520069. 453833  
SRR17520069. 453839  
SRR17520069. 472633  
SRR17520069. 472667  
SRR17520069. 472695  
SRR17520069. 472699  
SRR17520069. 472733  
SRR17520069. 476815  
SRR17520069. 478825  
SRR17520069. 498835  
SRR17520069. 508138  
SRR17520069. 521201  
SRR17520069. 521211  
SRR17520069. 533920  
SRR17520069. 533955  
SRR17520069. 541359  
SRR17520069. 544237  
SRR17520069. 544957  
SRR17520069. 545726  
SRR17520069. 552339  
SRR17520069. 553843

SRR17520069. 556356  
SRR17520069. 561132  
SRR17520069. 562342  
SRR17520069. 569963  
SRR17520069. 573860  
SRR17520069. 578844  
SRR17520069. 585386  
SRR17520069. 595091  
SRR17520069. 595104  
SRR17520069. 598195  
SRR17520069. 598227  
SRR17520069. 598358  
SRR17520069. 604812  
SRR17520069. 610175  
SRR17520069. 622224  
SRR17520069. 622256  
SRR17520069. 622322  
SRR17520069. 622328  
SRR17520069. 623170  
SRR17520069. 623172  
SRR17520069. 623174  
SRR17520069. 624697  
SRR17520069. 641458  
SRR17520069. 643922  
SRR17520069. 643923  
SRR17520069. 643932  
SRR17520069. 666043  
SRR17520069. 666059  
SRR17520069. 679665  
SRR17520069. 680927  
SRR17520069. 686065  
SRR17520069. 693243  
SRR17520069. 693322  
SRR17520069. 700231  
SRR17520069. 700233  
SRR17520069. 700235  
SRR17520069. 700237  
SRR17520069. 700241  
SRR17520069. 700243  
SRR17520069. 700245  
SRR17520069. 700249  
SRR17520069. 700251  
SRR17520069. 700253  
SRR17520069. 700257  
SRR17520069. 700259  
SRR17520069. 700261  
SRR17520069. 700263

SRR17520069.700265  
SRR17520069.700269  
SRR17520069.702947  
SRR17520069.703694  
SRR17520069.715842  
SRR17520069.717914  
SRR17520069.719556  
SRR17520069.724993  
SRR17520069.729546  
SRR17520069.733057  
SRR17520069.733059  
SRR17520069.733111  
SRR17520069.737567  
SRR17520069.745372  
SRR17520069.745379  
SRR17520069.750357  
SRR17520069.752045  
SRR17520069.763289  
SRR17520069.763291  
SRR17520069.763293  
SRR17520069.763299  
SRR17520069.763301  
SRR17520069.763303  
SRR17520069.763305  
SRR17520069.763307  
SRR17520069.763309  
SRR17520069.763311  
SRR17520069.763313  
SRR17520069.763315  
SRR17520069.763317  
SRR17520069.763319  
SRR17520069.763321  
SRR17520069.763323  
SRR17520069.763325  
SRR17520069.763329  
SRR17520069.763331  
SRR17520069.763333  
SRR17520069.763335  
SRR17520069.763337  
SRR17520069.763339  
SRR17520069.763341  
SRR17520069.763343  
SRR17520069.763345  
SRR17520069.763347  
SRR17520069.763349  
SRR17520069.763351  
SRR17520069.764191

SRR17520069. 769602  
SRR17520069. 771166  
SRR17520069. 771180  
SRR17520069. 772410  
SRR17520069. 789421  
SRR17520069. 803924  
SRR17520069. 804025  
SRR17520069. 805848  
SRR17520069. 805870  
SRR17520069. 816166  
SRR17520069. 816174  
SRR17520069. 826691  
SRR17520069. 835413  
SRR17520069. 838622  
SRR17520069. 865789  
SRR17520069. 867373  
SRR17520069. 867377  
SRR17520069. 867447  
SRR17520069. 868750  
SRR17520069. 869618  
SRR17520069. 871658  
SRR17520069. 882300  
SRR17520069. 883368  
SRR17520069. 883370  
SRR17520069. 883372  
SRR17520069. 885726  
SRR17520069. 887637  
SRR17520069. 893596  
SRR17520069. 893601  
SRR17520069. 897003  
SRR17520069. 900708  
SRR17520069. 909594  
SRR17520069. 909596  
SRR17520069. 911330  
SRR17520069. 911337  
SRR17520069. 911352  
SRR17520069. 911363  
SRR17520069. 911391  
SRR17520069. 911405  
SRR17520069. 911409  
SRR17520069. 911414  
SRR17520069. 912589  
SRR17520069. 924476  
SRR17520069. 924636  
SRR17520069. 926879  
SRR17520069. 930798  
SRR17520069. 937641

SRR17520069.937643  
SRR17520069.941714  
SRR17520069.941716  
SRR17520069.941718  
SRR17520069.941727  
SRR17520069.943302  
SRR17520069.948065  
SRR17520069.949958  
SRR17520069.951325  
SRR17520069.958203  
SRR17520069.961107  
SRR17520069.985451  
SRR17520069.1000265  
SRR17520069.1010360  
SRR17520069.1017671  
SRR17520069.1025313  
SRR17520069.1032941  
SRR17520069.1041355  
SRR17520069.1043120  
SRR17520069.1048895  
SRR17520069.1048897  
SRR17520069.1048911  
SRR17520069.1065408  
SRR17520069.1071975  
SRR17520069.1084234  
SRR17520069.1084290  
SRR17520069.1088956  
SRR17520069.1090581  
SRR17520069.1100149  
SRR17520069.1100156  
SRR17520069.1100171  
SRR17520069.1105639  
SRR17520069.1111046  
SRR17520069.1112050  
SRR17520069.1115977  
SRR17520069.1121249  
SRR17520069.1121355  
SRR17520069.1128739  
SRR17520069.1136766  
SRR17520069.1149348  
SRR17520069.1152663  
SRR17520069.1152675  
SRR17520069.1154414  
SRR17520069.1156015  
SRR17520069.1173545  
SRR17520069.1178893  
SRR17520069.1186310

SRR17520069.1189946  
SRR17520069.1190014  
SRR17520069.1190017  
SRR17520069.1201711  
SRR17520069.1205189  
SRR17520069.1214772  
SRR17520069.1216347  
SRR17520069.1228971  
SRR17520069.1235396  
SRR17520069.1238663  
SRR17520069.1256926  
SRR17520069.1264765  
SRR17520069.1264782  
SRR17520069.1266134  
SRR17520069.1266186  
SRR17520069.1278811  
SRR17520069.1288106  
SRR17520069.1292876  
SRR17520069.1293836  
SRR17520069.1316762  
SRR17520069.1316789  
SRR17520069.1334260  
SRR17520069.1334580  
SRR17520069.1342088  
SRR17520069.1342654  
SRR17520069.1347437  
SRR17520069.1347444  
SRR17520069.1348429  
SRR17520069.1382722  
SRR17520069.1392524  
SRR17520069.1394583  
SRR17520069.1396920  
SRR17520069.1406294  
SRR17520069.1412667  
SRR17520069.1412709  
SRR17520069.1412713  
SRR17520069.1419561  
SRR17520069.1435628  
SRR17520069.1435662  
SRR17520069.1436164  
SRR17520069.1446754  
SRR17520069.1446802  
SRR17520069.1458514  
SRR17520069.1462672  
SRR17520069.1470939  
SRR17520069.1471321  
SRR17520069.1471323

SRR17520069. 1471327  
SRR17520069. 1471329  
SRR17520069. 1471331  
SRR17520069. 1471333  
SRR17520069. 1471335  
SRR17520069. 1471337  
SRR17520069. 1471341  
SRR17520069. 1471343  
SRR17520069. 1471345  
SRR17520069. 1471347  
SRR17520069. 1471349  
SRR17520069. 1478837  
SRR17520069. 1486600  
SRR17520069. 1494188  
SRR17520069. 1494206  
SRR17520069. 1498799  
SRR17520069. 1498820  
SRR17520069. 1501714  
SRR17520069. 1505202  
SRR17520069. 1505988  
SRR17520069. 1506909  
SRR17520069. 1508076  
SRR17520069. 1517187  
SRR17520069. 1518839  
SRR17520069. 1521173  
SRR17520069. 1522095  
SRR17520069. 1533100  
SRR17520069. 1534128  
SRR17520069. 1535032  
SRR17520069. 1535124  
SRR17520069. 1535784  
SRR17520069. 1540766  
SRR17520069. 1552406  
SRR17520069. 1552408  
SRR17520069. 1552410  
SRR17520069. 1552412  
SRR17520069. 1552414  
SRR17520069. 1552416  
SRR17520069. 1552418  
SRR17520069. 1552420  
SRR17520069. 1552422  
SRR17520069. 1552424  
SRR17520069. 1552428  
SRR17520069. 1552430  
SRR17520069. 1552432  
SRR17520069. 1552434  
SRR17520069. 1552436

SRR17520069. 1552438  
SRR17520069. 1552440  
SRR17520069. 1552442  
SRR17520069. 1552444  
SRR17520069. 1552446  
SRR17520069. 1552448  
SRR17520069. 1552450  
SRR17520069. 1552452  
SRR17520069. 1552454  
SRR17520069. 1554054  
SRR17520069. 1554058  
SRR17520069. 1554070  
SRR17520069. 1554090  
SRR17520069. 1554097  
SRR17520069. 1554148  
SRR17520069. 1554159  
SRR17520069. 1556197  
SRR17520069. 1575693  
SRR17520069. 1578107  
SRR17520069. 1585363  
SRR17520069. 1585364  
SRR17520069. 1585403  
SRR17520069. 1596677  
SRR17520069. 1604992  
SRR17520069. 1608106  
SRR17520069. 1623657  
SRR17520069. 1623659  
SRR17520069. 1637054  
SRR17520069. 1637056  
SRR17520069. 1640792  
SRR17520069. 1640982  
SRR17520069. 1643041  
SRR17520069. 1650480  
SRR17520069. 1650608  
SRR17520069. 1653632  
SRR17520069. 1653679  
SRR17520069. 1655608  
SRR17520069. 1658589  
SRR17520069. 1658621  
SRR17520069. 1658627  
SRR17520069. 1658643  
SRR17520069. 1664841  
SRR17520069. 1667956  
SRR17520069. 1674692  
SRR17520069. 1678526  
SRR17520069. 1680896  
SRR17520069. 1686229



SRR17520069. 1688782  
SRR17520069. 1691335  
SRR17520069. 1702422  
SRR17520069. 1704835  
SRR17520069. 1705745  
SRR17520069. 1716247  
SRR17520069. 1718558  
SRR17520069. 1725022  
SRR17520069. 1725041  
SRR17520069. 1729443  
SRR17520069. 1729445  
SRR17520069. 1734618  
SRR17520069. 1734620  
SRR17520069. 1734624  
SRR17520069. 1734626  
SRR17520069. 1734628  
SRR17520069. 1734630  
SRR17520069. 1734632  
SRR17520069. 1734634  
SRR17520069. 1734636  
SRR17520069. 1734638  
SRR17520069. 1734642  
SRR17520069. 1734644  
SRR17520069. 1734646  
SRR17520069. 1744585  
SRR17520069. 1750482  
SRR17520069. 1751505  
SRR17520069. 1752770  
SRR17520069. 1752949  
SRR17520069. 1752953  
SRR17520069. 1752957  
SRR17520069. 1752959  
SRR17520069. 1752961  
SRR17520069. 1752963  
SRR17520069. 1752965  
SRR17520069. 1752967  
SRR17520069. 1752969  
SRR17520069. 1752971  
SRR17520069. 1752975  
SRR17520069. 1752977  
SRR17520069. 1752979  
SRR17520069. 1752981  
SRR17520069. 1752983  
SRR17520069. 1752985  
SRR17520069. 1752987  
SRR17520069. 1752991  
SRR17520069. 1752993

SRR17520069.1752995  
SRR17520069.1752997  
SRR17520069.1752999  
SRR17520069.1753001  
SRR17520069.1753005  
SRR17520069.1753009  
SRR17520069.1753011  
SRR17520069.1753013  
SRR17520069.1753015  
SRR17520069.1753017  
SRR17520069.1753019  
SRR17520069.1753021  
SRR17520069.1753023  
SRR17520069.1753025  
SRR17520069.1753029  
SRR17520069.1753031  
SRR17520069.1753033  
SRR17520069.1753035  
SRR17520069.1753037  
SRR17520069.1753039  
SRR17520069.1753041  
SRR17520069.1753043  
SRR17520069.1753045  
SRR17520069.1753047  
SRR17520069.1753049  
SRR17520069.1753051  
SRR17520069.1753053  
SRR17520069.1753055  
SRR17520069.1753057  
SRR17520069.1753059  
SRR17520069.1753063  
SRR17520069.1753065  
SRR17520069.1753067  
SRR17520069.1753069  
SRR17520069.1753071  
SRR17520069.1753073  
SRR17520069.1753075  
SRR17520069.1753077  
SRR17520069.1753079  
SRR17520069.1753083  
SRR17520069.1753085  
SRR17520069.1753087  
SRR17520069.1753089  
SRR17520069.1753091  
SRR17520069.1753093  
SRR17520069.1753095  
SRR17520069.1753097

SRR17520069. 1753099  
SRR17520069. 1753101  
SRR17520069. 1753103  
SRR17520069. 1753105  
SRR17520069. 1753107  
SRR17520069. 1757748  
SRR17520069. 1765363  
SRR17520069. 1769752  
SRR17520069. 1770407  
SRR17520069. 1796599  
SRR17520069. 1796621  
SRR17520069. 1799237  
SRR17520069. 1804881  
SRR17520069. 1807333  
SRR17520069. 1809684  
SRR17520069. 1818468  
SRR17520069. 1831547  
SRR17520069. 1831597  
SRR17520069. 1831722  
SRR17520069. 1833300  
SRR17520069. 1833356  
SRR17520069. 1833376  
SRR17520069. 1833398  
SRR17520069. 1833448  
SRR17520069. 1833470  
SRR17520069. 1833472  
SRR17520069. 1842004  
SRR17520069. 1845689  
SRR17520069. 1847412  
SRR17520069. 1860813  
SRR17520069. 1860831  
SRR17520069. 1866410  
SRR17520069. 1866415  
SRR17520069. 1866921  
SRR17520069. 1881495  
SRR17520069. 1890051  
SRR17520069. 1894006  
SRR17520069. 1894008  
SRR17520069. 1894014  
SRR17520069. 1895933  
SRR17520069. 1895935  
SRR17520069. 1895939  
SRR17520069. 1895941  
SRR17520069. 1895943  
SRR17520069. 1895945  
SRR17520069. 1895947  
SRR17520069. 1895949

SRR17520069.1895951  
SRR17520069.1895953  
SRR17520069.1895955  
SRR17520069.1895957  
SRR17520069.1895988  
SRR17520069.1900598  
SRR17520069.1901878  
SRR17520069.1904532  
SRR17520069.1905406  
SRR17520069.1910045  
SRR17520069.1918020  
SRR17520069.1921257  
SRR17520069.1921945  
SRR17520069.1923726  
SRR17520069.1969848  
SRR17520069.1969869  
SRR17520069.1971278  
SRR17520069.1971312  
SRR17520069.1971328  
SRR17520069.1971358  
SRR17520069.1976507  
SRR17520069.1977550  
SRR17520069.1980980  
SRR17520069.1980994  
SRR17520069.1981018  
SRR17520069.1985101  
SRR17520069.1990842  
SRR17520069.2006858  
SRR17520069.2014614  
SRR17520069.2015962  
SRR17520069.2032902  
SRR17520069.2038366  
SRR17520069.2039065  
SRR17520069.2039067  
SRR17520069.2039075  
SRR17520069.2039079  
SRR17520069.2039091  
SRR17520069.2039093  
SRR17520069.2039123  
SRR17520069.2039131  
SRR17520069.2039139  
SRR17520069.2039155  
SRR17520069.2039163  
SRR17520069.2039167  
SRR17520069.2039181  
SRR17520069.2039204  
SRR17520069.2041902

SRR17520069. 2045058  
SRR17520069. 2048054  
SRR17520069. 2066693  
SRR17520069. 2073990  
SRR17520069. 2080022  
SRR17520069. 2087877  
SRR17520069. 2098224  
SRR17520069. 2098232  
SRR17520069. 2101538  
SRR17520069. 2106636  
SRR17520069. 2110866  
SRR17520069. 2114387  
SRR17520069. 2114393  
SRR17520069. 2114414  
SRR17520069. 2128832  
SRR17520069. 2134852  
SRR17520069. 2135061  
SRR17520069. 2135082  
SRR17520069. 2138508  
SRR17520069. 2138510  
SRR17520069. 2142444  
SRR17520069. 2142904  
SRR17520069. 2142910  
SRR17520069. 2142916  
SRR17520069. 2145063  
SRR17520069. 2145073  
SRR17520069. 2147805  
SRR17520069. 2148926  
SRR17520069. 2158321  
SRR17520069. 2160478  
SRR17520069. 2170333  
SRR17520069. 2170491  
SRR17520069. 2176649  
SRR17520069. 2181564  
SRR17520069. 2193798  
SRR17520069. 2209945  
SRR17520069. 2230304  
SRR17520069. 2247031  
SRR17520069. 2248855  
SRR17520069. 2279378  
SRR17520069. 2281024  
SRR17520069. 2286361  
SRR17520069. 2295972  
SRR17520069. 2299372  
SRR17520069. 2299374  
SRR17520069. 2299376  
SRR17520069. 2299378

SRR17520069. 2299380  
SRR17520069. 2299382  
SRR17520069. 2299384  
SRR17520069. 2299386  
SRR17520069. 2299388  
SRR17520069. 2299390  
SRR17520069. 2299392  
SRR17520069. 2299394  
SRR17520069. 2299396  
SRR17520069. 2299398  
SRR17520069. 2299400  
SRR17520069. 2299402  
SRR17520069. 2299404  
SRR17520069. 2299406  
SRR17520069. 2299408  
SRR17520069. 2299410  
SRR17520069. 2305258  
SRR17520069. 2316722  
SRR17520069. 2336086  
SRR17520069. 2345454  
SRR17520069. 2351090  
SRR17520069. 2363522  
SRR17520069. 2364226  
SRR17520069. 2366205  
SRR17520069. 2366207  
SRR17520069. 2366209  
SRR17520069. 2366211  
SRR17520069. 2366213  
SRR17520069. 2366215  
SRR17520069. 2366217  
SRR17520069. 2366219  
SRR17520069. 2366221  
SRR17520069. 2366223  
SRR17520069. 2366385  
SRR17520069. 2370175  
SRR17520069. 2373794  
SRR17520069. 2373802  
SRR17520069. 2377168  
SRR17520069. 2388505  
SRR17520069. 2388513  
SRR17520069. 2388609  
SRR17520069. 2402927  
SRR17520069. 2417772  
SRR17520069. 2424519  
SRR17520069. 2431833  
SRR17520069. 2432696  
SRR17520069. 2435235

SRR17520069.2435275  
SRR17520069.2435285  
SRR17520069.2438456  
SRR17520069.2439117  
SRR17520069.2446182  
SRR17520069.2458065  
SRR17520069.2458067  
SRR17520069.2458069  
SRR17520069.2458071  
SRR17520069.2458073  
SRR17520069.2458075  
SRR17520069.2458077  
SRR17520069.2458079  
SRR17520069.2458081  
SRR17520069.2458083  
SRR17520069.2458087  
SRR17520069.2458089  
SRR17520069.2458091  
SRR17520069.2458093  
SRR17520069.2458095  
SRR17520069.2458097  
SRR17520069.2458099  
SRR17520069.2458101  
SRR17520069.2458103  
SRR17520069.2458105  
SRR17520069.2458113  
SRR17520069.2458115  
SRR17520069.2458117  
SRR17520069.2458119  
SRR17520069.2458121  
SRR17520069.2458125  
SRR17520069.2462061  
SRR17520069.2462063  
SRR17520069.2462083  
SRR17520069.2462091  
SRR17520069.2464947  
SRR17520069.2481638  
SRR17520069.2490036  
SRR17520069.2497991  
SRR17520069.2498054  
SRR17520069.2500927  
SRR17520069.2500929  
SRR17520069.2500932  
SRR17520069.2505974  
SRR17520069.2506034  
SRR17520069.2506062  
SRR17520069.2514607

SRR17520069. 2524135  
SRR17520069. 2533941  
SRR17520069. 2535191  
SRR17520069. 2545321  
SRR17520069. 2550594  
SRR17520069. 2553611  
SRR17520069. 2556267  
SRR17520069. 2577397  
SRR17520069. 2577399  
SRR17520069. 2605328  
SRR17520069. 2605376  
SRR17520069. 2605411  
SRR17520069. 2606324  
SRR17520069. 2606344  
SRR17520069. 2606368  
SRR17520069. 2606371  
SRR17520069. 2625600  
SRR17520069. 2626886  
SRR17520069. 2634990  
SRR17520069. 2636997  
SRR17520069. 2651275  
SRR17520069. 2652485  
SRR17520069. 2695772  
SRR17520069. 2700323  
SRR17520069. 2705244  
SRR17520069. 2705327  
SRR17520069. 2715485  
SRR17520069. 2717391  
SRR17520069. 2723514  
SRR17520069. 2723535  
SRR17520069. 2737455  
SRR17520069. 2737669  
SRR17520069. 2737671  
SRR17520069. 2737673  
SRR17520069. 2737675  
SRR17520069. 2737677  
SRR17520069. 2737679  
SRR17520069. 2737681  
SRR17520069. 2737683  
SRR17520069. 2737685  
SRR17520069. 2737687  
SRR17520069. 2737689  
SRR17520069. 2737691  
SRR17520069. 2737693  
SRR17520069. 2737695  
SRR17520069. 2737697  
SRR17520069. 2737699



SRR17520069.2742479  
SRR17520069.2748938  
SRR17520069.2752753  
SRR17520069.2752771  
SRR17520069.2752775  
SRR17520069.2752827  
SRR17520069.2753518  
SRR17520069.2753545  
SRR17520069.2755227  
SRR17520069.2758432  
SRR17520069.2760963  
SRR17520069.2769175  
SRR17520069.2769211  
SRR17520069.2780699  
SRR17520069.2781835  
SRR17520069.2782901  
SRR17520069.2790826  
SRR17520069.2820604  
SRR17520069.2820622  
SRR17520069.2820626  
SRR17520069.2820643  
SRR17520069.2823747  
SRR17520069.2829187  
SRR17520069.2829189  
SRR17520069.2829191  
SRR17520069.2829193  
SRR17520069.2829195  
SRR17520069.2829197  
SRR17520069.2829199  
SRR17520069.2829201  
SRR17520069.2829203  
SRR17520069.2829205  
SRR17520069.2829207  
SRR17520069.2829209  
SRR17520069.2830967  
SRR17520069.2841571  
SRR17520069.2841573  
SRR17520069.2841575  
SRR17520069.2841577  
SRR17520069.2841579  
SRR17520069.2841581  
SRR17520069.2841583  
SRR17520069.2841585  
SRR17520069.2841587  
SRR17520069.2841589  
SRR17520069.2841591  
SRR17520069.2841593

SRR17520069.2841595  
SRR17520069.2841597  
SRR17520069.2841599  
SRR17520069.2841601  
SRR17520069.2847082  
SRR17520069.2850746  
SRR17520069.2861590  
SRR17520069.2866444  
SRR17520069.2870057  
SRR17520069.2870737  
SRR17520069.2870813  
SRR17520069.2874723  
SRR17520069.2875049  
SRR17520069.2878704  
SRR17520069.2886773  
SRR17520069.2887062  
SRR17520069.2887064  
SRR17520069.2887066  
SRR17520069.2887068  
SRR17520069.2887070  
SRR17520069.2887072  
SRR17520069.2887074  
SRR17520069.2887076  
SRR17520069.2887078  
SRR17520069.2887080  
SRR17520069.2887082  
SRR17520069.2887084  
SRR17520069.2887086  
SRR17520069.2887088  
SRR17520069.2887090  
SRR17520069.2887092  
SRR17520069.2887094  
SRR17520069.2887096  
SRR17520069.2887098  
SRR17520069.2887100  
SRR17520069.2887102  
SRR17520069.2887104  
SRR17520069.2887106  
SRR17520069.2887108  
SRR17520069.2887110  
SRR17520069.2887112  
SRR17520069.2887114  
SRR17520069.2887116  
SRR17520069.2887118  
SRR17520069.2887120  
SRR17520069.2887122  
SRR17520069.2887124

SRR17520069.2887126  
SRR17520069.2887128  
SRR17520069.2887130  
SRR17520069.2887132  
SRR17520069.2887134  
SRR17520069.2887136  
SRR17520069.2887138  
SRR17520069.2887140  
SRR17520069.2887142  
SRR17520069.2887144  
SRR17520069.2887146  
SRR17520069.2887148  
SRR17520069.2887150  
SRR17520069.2887152  
SRR17520069.2887154  
SRR17520069.2887156  
SRR17520069.2887158  
SRR17520069.2887160  
SRR17520069.2887162  
SRR17520069.2887164  
SRR17520069.2887166  
SRR17520069.2887168  
SRR17520069.2887170  
SRR17520069.2887172  
SRR17520069.2887174  
SRR17520069.2887176  
SRR17520069.2895475  
SRR17520069.2898297  
SRR17520069.2898580  
SRR17520069.2904837  
SRR17520069.2907115  
SRR17520069.2907185  
SRR17520069.2908927  
SRR17520069.2911495  
SRR17520069.2914081  
SRR17520069.2915254  
SRR17520069.2916857  
SRR17520069.2918011  
SRR17520069.2923282  
SRR17520069.2925701  
SRR17520069.2936143  
SRR17520069.2939542  
SRR17520069.2939546  
SRR17520069.2953598  
SRR17520069.2967919  
SRR17520069.2967957  
SRR17520069.2981340

SRR17520069. 2981925  
SRR17520069. 2981927  
SRR17520069. 2981929  
SRR17520069. 2981931  
SRR17520069. 2981933  
SRR17520069. 2981935  
SRR17520069. 2981937  
SRR17520069. 2981939  
SRR17520069. 2981941  
SRR17520069. 2981943  
SRR17520069. 2981945  
SRR17520069. 2981947  
SRR17520069. 2981949  
SRR17520069. 2981951  
SRR17520069. 2981953  
SRR17520069. 2981955  
SRR17520069. 2981957  
SRR17520069. 2981959  
SRR17520069. 2981961  
SRR17520069. 2981963  
SRR17520069. 2981965  
SRR17520069. 2981967  
SRR17520069. 2981969  
SRR17520069. 2981971  
SRR17520069. 2981973  
SRR17520069. 2981975  
SRR17520069. 2981977  
SRR17520069. 2984769  
SRR17520069. 2984777  
SRR17520069. 2999870  
SRR17520069. 3010061  
SRR17520069. 3010091  
SRR17520069. 3010154  
SRR17520069. 3010156  
SRR17520069. 3017777  
SRR17520069. 3020150  
SRR17520069. 3032809  
SRR17520069. 3042232  
SRR17520069. 3052340  
SRR17520069. 3068904  
SRR17520069. 3082821  
SRR17520069. 3090064  
SRR17520069. 3090068  
SRR17520069. 3091683  
SRR17520069. 3098413  
SRR17520069. 3104354  
SRR17520069. 3112386

SRR17520069.3115065  
SRR17520069.3132251  
SRR17520069.3137603  
SRR17520069.3140521  
SRR17520069.3140522  
SRR17520069.3140532  
SRR17520069.3147423  
SRR17520069.3152054  
SRR17520069.3152060  
SRR17520069.3152083  
SRR17520069.3152124  
SRR17520069.3159994  
SRR17520069.3167305  
SRR17520069.3168722  
SRR17520069.3180729  
SRR17520069.3180738  
SRR17520069.3181776  
SRR17520069.3181790  
SRR17520069.3195475  
SRR17520069.3201860  
SRR17520069.3204303  
SRR17520069.3208948  
SRR17520069.3209977  
SRR17520069.3220090  
SRR17520069.3220142  
SRR17520069.3220180  
SRR17520069.3220431  
SRR17520069.3227976  
SRR17520069.3228064  
SRR17520069.3228490  
SRR17520069.3228493  
SRR17520069.3235314  
SRR17520069.3235323  
SRR17520069.3235326  
SRR17520069.3239690  
SRR17520069.3249820  
SRR17520069.3255865  
SRR17520069.3255876  
SRR17520069.3260557  
SRR17520069.3269518  
SRR17520069.3273017  
SRR17520069.3273025  
SRR17520069.3273904  
SRR17520069.3274593  
SRR17520069.3324408  
SRR17520069.3327963  
SRR17520069.3331711

SRR17520069.3331713  
SRR17520069.3331715  
SRR17520069.3331717  
SRR17520069.3331719  
SRR17520069.3331723  
SRR17520069.3332735  
SRR17520069.3332737  
SRR17520069.3333010  
SRR17520069.3338064  
SRR17520069.3341563  
SRR17520069.3348899  
SRR17520069.3348902  
SRR17520069.3362117  
SRR17520069.3384421  
SRR17520069.3384999  
SRR17520069.3392466  
SRR17520069.3409475  
SRR17520069.3410020  
SRR17520069.3414975  
SRR17520069.3414978  
SRR17520069.3428112  
SRR17520069.3430888  
SRR17520069.3443261  
SRR17520069.3443269  
SRR17520069.3462382  
SRR17520069.3465473  
SRR17520069.3465475  
SRR17520069.3474160  
SRR17520069.3476112  
SRR17520069.3476183  
SRR17520069.3476208  
SRR17520069.3476233  
SRR17520069.3478121  
SRR17520069.3480311  
SRR17520069.3482986  
SRR17520069.3482988  
SRR17520069.3482990  
SRR17520069.3482992  
SRR17520069.3482994  
SRR17520069.3482996  
SRR17520069.3482998  
SRR17520069.3483000  
SRR17520069.3483002  
SRR17520069.3483004  
SRR17520069.3483006  
SRR17520069.3483008  
SRR17520069.3483010

SRR17520069. 3483012  
SRR17520069. 3483014  
SRR17520069. 3483022  
SRR17520069. 3487268  
SRR17520069. 3488507  
SRR17520069. 3489929  
SRR17520069. 3491614  
SRR17520069. 3501275  
SRR17520069. 3504698  
SRR17520069. 3504700  
SRR17520069. 3504702  
SRR17520069. 3504704  
SRR17520069. 3504706  
SRR17520069. 3504708  
SRR17520069. 3504710  
SRR17520069. 3504712  
SRR17520069. 3510571  
SRR17520069. 3511699  
SRR17520069. 3512202  
SRR17520069. 3512227  
SRR17520069. 3512297  
SRR17520069. 3514376  
SRR17520069. 3514380  
SRR17520069. 3514382  
SRR17520069. 3514384  
SRR17520069. 3514386  
SRR17520069. 3514388  
SRR17520069. 3514390  
SRR17520069. 3514392  
SRR17520069. 3514394  
SRR17520069. 3514396  
SRR17520069. 3521630  
SRR17520069. 3527807  
SRR17520069. 3527857  
SRR17520069. 3530388  
SRR17520069. 3539904  
SRR17520069. 3539910  
SRR17520069. 3544117  
SRR17520069. 3544685  
SRR17520069. 3552388  
SRR17520069. 3553532  
SRR17520069. 3558471  
SRR17520069. 3578809  
SRR17520069. 3578847  
SRR17520069. 3584066  
SRR17520069. 3584378  
SRR17520069. 3586059

SRR17520069. 3588624  
SRR17520069. 3588655  
SRR17520069. 3594526  
SRR17520069. 3615927  
SRR17520069. 3630108  
SRR17520069. 3630119  
SRR17520069. 3630121  
SRR17520069. 3630125  
SRR17520069. 3630143  
SRR17520069. 3630468  
SRR17520069. 3631541  
SRR17520069. 3643963  
SRR17520069. 3644451  
SRR17520069. 3649563  
SRR17520069. 3660029  
SRR17520069. 3660933  
SRR17520069. 3665875  
SRR17520069. 3666473  
SRR17520069. 3668039  
SRR17520069. 3668522  
SRR17520069. 3668608  
SRR17520069. 3669712  
SRR17520069. 3672760  
SRR17520069. 3675023  
SRR17520069. 3686661  
SRR17520069. 3704595  
SRR17520069. 3706536  
SRR17520069. 3715790  
SRR17520069. 3716043  
SRR17520069. 3726367  
SRR17520069. 3730215  
SRR17520069. 3744992  
SRR17520069. 3766739  
SRR17520069. 3767298  
SRR17520069. 3772247  
SRR17520069. 3790659  
SRR17520069. 3803816  
SRR17520069. 3809396  
SRR17520069. 3820086  
SRR17520069. 3825974  
SRR17520069. 3826120  
SRR17520069. 3828094  
SRR17520069. 3828104  
SRR17520069. 3828116  
SRR17520069. 3838624  
SRR17520069. 3843061  
SRR17520069. 3844491



SRR17520069.3849616  
SRR17520069.3858132  
SRR17520069.3858143  
SRR17520069.3858153  
SRR17520069.3858166  
SRR17520069.3858180  
SRR17520069.3858188  
SRR17520069.3861300  
SRR17520069.3861324  
SRR17520069.3862589  
SRR17520069.3863523  
SRR17520069.3877153  
SRR17520069.3881558  
SRR17520069.3888046  
SRR17520069.3888048  
SRR17520069.3888300  
SRR17520069.3888302  
SRR17520069.3888304  
SRR17520069.3888306  
SRR17520069.3888310  
SRR17520069.3888312  
SRR17520069.3888314  
SRR17520069.3888316  
SRR17520069.3888318  
SRR17520069.3888322  
SRR17520069.3902662  
SRR17520069.3904406  
SRR17520069.3911719  
SRR17520069.3924499  
SRR17520069.3924800  
SRR17520069.3932318  
SRR17520069.3932346  
SRR17520069.3932353  
SRR17520069.3932356  
SRR17520069.3940233  
SRR17520069.3940251  
SRR17520069.3942432  
SRR17520069.3946741  
SRR17520069.3949852  
SRR17520069.3953063  
SRR17520069.3956973  
SRR17520069.3956975  
SRR17520069.3956977  
SRR17520069.3956979  
SRR17520069.3956981  
SRR17520069.3956983  
SRR17520069.3956985

SRR17520069. 3956987  
SRR17520069. 3956989  
SRR17520069. 3956991  
SRR17520069. 3956993  
SRR17520069. 3956995  
SRR17520069. 3956997  
SRR17520069. 3956999  
SRR17520069. 3957001  
SRR17520069. 3957003  
SRR17520069. 3957005  
SRR17520069. 3957007  
SRR17520069. 3957009  
SRR17520069. 3957011  
SRR17520069. 3957013  
SRR17520069. 3957015  
SRR17520069. 3957017  
SRR17520069. 3957019  
SRR17520069. 3957021  
SRR17520069. 3957023  
SRR17520069. 3957025  
SRR17520069. 3957027  
SRR17520069. 3960602  
SRR17520069. 3962075  
SRR17520069. 3967609  
SRR17520069. 3975046  
SRR17520069. 3987310  
SRR17520069. 3999788  
SRR17520069. 4000579  
SRR17520069. 4001603  
SRR17520069. 4001605  
SRR17520069. 4001616  
SRR17520069. 4001619  
SRR17520069. 4004040  
SRR17520069. 4018181  
SRR17520069. 4018209  
SRR17520069. 4021139  
SRR17520069. 4032403  
SRR17520069. 4042159  
SRR17520069. 4051136  
SRR17520069. 4053530  
SRR17520069. 4055552  
SRR17520069. 4071459  
SRR17520069. 4072229  
SRR17520069. 4077014  
SRR17520069. 4092075  
SRR17520069. 4094504  
SRR17520069. 4094505

SRR17520069.4094509  
SRR17520069.4098157  
SRR17520069.4098683  
SRR17520069.4103342  
SRR17520069.4107592  
SRR17520069.4107594  
SRR17520069.4107596  
SRR17520069.4107598  
SRR17520069.4107600  
SRR17520069.4107602  
SRR17520069.4107604  
SRR17520069.4107606  
SRR17520069.4107608  
SRR17520069.4107610  
SRR17520069.4107612  
SRR17520069.4107614  
SRR17520069.4107616  
SRR17520069.4107618  
SRR17520069.4107620  
SRR17520069.4107622  
SRR17520069.4107624  
SRR17520069.4107626  
SRR17520069.4107628  
SRR17520069.4107630  
SRR17520069.4107632  
SRR17520069.4107634  
SRR17520069.4107638  
SRR17520069.4107640  
SRR17520069.4107642  
SRR17520069.4107644  
SRR17520069.4107646  
SRR17520069.4107648  
SRR17520069.4107650  
SRR17520069.4107652  
SRR17520069.4107654  
SRR17520069.4107656  
SRR17520069.4107658  
SRR17520069.4107660  
SRR17520069.4107662  
SRR17520069.4107664  
SRR17520069.4107666  
SRR17520069.4107668  
SRR17520069.4107670  
SRR17520069.4107672  
SRR17520069.4107674  
SRR17520069.4107676  
SRR17520069.4107678

SRR17520069.4107680  
SRR17520069.4107682  
SRR17520069.4107684  
SRR17520069.4107686  
SRR17520069.4107688  
SRR17520069.4107690  
SRR17520069.4107692  
SRR17520069.4107694  
SRR17520069.4107696  
SRR17520069.4107698  
SRR17520069.4108331  
SRR17520069.4119692  
SRR17520069.4120025  
SRR17520069.4120027  
SRR17520069.4124627  
SRR17520069.4133102  
SRR17520069.4137679  
SRR17520069.4137694  
SRR17520069.4137706  
SRR17520069.4161732  
SRR17520069.4161782  
SRR17520069.4162537  
SRR17520069.4170360  
SRR17520069.4170408  
SRR17520069.4180893  
SRR17520069.4180911  
SRR17520069.4180924  
SRR17520069.4180926  
SRR17520069.4180927  
SRR17520069.4189998  
SRR17520069.4190008  
SRR17520069.4214587  
SRR17520069.4221319  
SRR17520069.4234716  
SRR17520069.4234798  
SRR17520069.4235000  
SRR17520069.4235443  
SRR17520069.4247786  
SRR17520069.4248590  
SRR17520069.4253251  
SRR17520069.4256849  
SRR17520069.4260151  
SRR17520069.4260157  
SRR17520069.4263043  
SRR17520069.4269093  
SRR17520069.4273071  
SRR17520069.4274489

SRR17520069.4274527  
SRR17520069.4274529  
SRR17520069.4274535  
SRR17520069.4274568  
SRR17520069.4274593  
SRR17520069.4274609  
SRR17520069.4274612  
SRR17520069.4274613  
SRR17520069.4274629  
SRR17520069.4274692  
SRR17520069.4277973  
SRR17520069.4306334  
SRR17520069.4313862  
SRR17520069.4316316  
SRR17520069.4318144  
SRR17520069.4323372  
SRR17520069.4334024  
SRR17520069.4335822  
SRR17520069.4340055  
SRR17520069.4342353  
SRR17520069.4342361  
SRR17520069.4356417  
SRR17520069.4356422  
SRR17520069.4360797  
SRR17520069.4360799  
SRR17520069.4369632  
SRR17520069.4369710  
SRR17520069.4373841  
SRR17520069.4373849  
SRR17520069.4402760  
SRR17520069.4411087  
SRR17520069.4411120  
SRR17520069.4416761  
SRR17520069.4417065  
SRR17520069.4435838  
SRR17520069.4442535  
SRR17520069.4442541  
SRR17520069.4443951  
SRR17520069.4456507  
SRR17520069.4462793  
SRR17520069.4469313  
SRR17520069.4469314  
SRR17520069.4471442  
SRR17520069.4475505  
SRR17520069.4478749  
SRR17520069.4481334  
SRR17520069.4482424

SRR17520069.4482426  
SRR17520069.4482434  
SRR17520069.4485343  
SRR17520069.4488915  
SRR17520069.4492975  
SRR17520069.4492977  
SRR17520069.4492979  
SRR17520069.4492981  
SRR17520069.4492983  
SRR17520069.4492985  
SRR17520069.4492987  
SRR17520069.4519149  
SRR17520069.4519337  
SRR17520069.4519339  
SRR17520069.4519341  
SRR17520069.4519343  
SRR17520069.4519345  
SRR17520069.4519349  
SRR17520069.4519353  
SRR17520069.4519355  
SRR17520069.4519357  
SRR17520069.4519359  
SRR17520069.4519361  
SRR17520069.4519365  
SRR17520069.4519367  
SRR17520069.4519369  
SRR17520069.4519371  
SRR17520069.4519373  
SRR17520069.4519375  
SRR17520069.4519377  
SRR17520069.4519379  
SRR17520069.4519381  
SRR17520069.4519383  
SRR17520069.4519385  
SRR17520069.4519387  
SRR17520069.4519389  
SRR17520069.4519391  
SRR17520069.4519393  
SRR17520069.4519395  
SRR17520069.4519397  
SRR17520069.4519399  
SRR17520069.4519401  
SRR17520069.4519403  
SRR17520069.4519405  
SRR17520069.4519407  
SRR17520069.4519409  
SRR17520069.4519411

SRR17520069.4519415  
SRR17520069.4519417  
SRR17520069.4519419  
SRR17520069.4519421  
SRR17520069.4519423  
SRR17520069.4519425  
SRR17520069.4519427  
SRR17520069.4519429  
SRR17520069.4519431  
SRR17520069.4526736  
SRR17520069.4528707  
SRR17520069.4530036  
SRR17520069.4530254  
SRR17520069.4531087  
SRR17520069.4532004  
SRR17520069.4532006  
SRR17520069.4532008  
SRR17520069.4532010  
SRR17520069.4532012  
SRR17520069.4532014  
SRR17520069.4537173  
SRR17520069.4537175  
SRR17520069.4537177  
SRR17520069.4537179  
SRR17520069.4537181  
SRR17520069.4537183  
SRR17520069.4537185  
SRR17520069.4537187  
SRR17520069.4537189  
SRR17520069.4537191  
SRR17520069.4537193  
SRR17520069.4537197  
SRR17520069.4537199  
SRR17520069.4537201  
SRR17520069.4537203  
SRR17520069.4537205  
SRR17520069.4537207  
SRR17520069.4537209  
SRR17520069.4537211  
SRR17520069.4537213  
SRR17520069.4537215  
SRR17520069.4537217  
SRR17520069.4537219  
SRR17520069.4537221  
SRR17520069.4537223  
SRR17520069.4537225  
SRR17520069.4537227

SRR17520069.4537229  
SRR17520069.4537231  
SRR17520069.4537233  
SRR17520069.4537235  
SRR17520069.4537237  
SRR17520069.4537239  
SRR17520069.4537241  
SRR17520069.4537243  
SRR17520069.4537245  
SRR17520069.4537247  
SRR17520069.4537249  
SRR17520069.4537251  
SRR17520069.4537253  
SRR17520069.4537255  
SRR17520069.4537257  
SRR17520069.4537259  
SRR17520069.4537261  
SRR17520069.4537263  
SRR17520069.4537267  
SRR17520069.4537269  
SRR17520069.4537271  
SRR17520069.4537273  
SRR17520069.4537275  
SRR17520069.4537277  
SRR17520069.4537279  
SRR17520069.4537281  
SRR17520069.4537283  
SRR17520069.4537285  
SRR17520069.4537287  
SRR17520069.4537289  
SRR17520069.4537291  
SRR17520069.4537293  
SRR17520069.4537295  
SRR17520069.4537297  
SRR17520069.4537299  
SRR17520069.4537301  
SRR17520069.4537303  
SRR17520069.4537305  
SRR17520069.4537307  
SRR17520069.4537309  
SRR17520069.4537311  
SRR17520069.4537313  
SRR17520069.4537315  
SRR17520069.4537317  
SRR17520069.4537319  
SRR17520069.4537321  
SRR17520069.4537323



SRR17520069.4537325  
SRR17520069.4537327  
SRR17520069.4537329  
SRR17520069.4537331  
SRR17520069.4537333  
SRR17520069.4537335  
SRR17520069.4537337  
SRR17520069.4537339  
SRR17520069.4537343  
SRR17520069.4537347  
SRR17520069.4537349  
SRR17520069.4537351  
SRR17520069.4537353  
SRR17520069.4539763  
SRR17520069.4539769  
SRR17520069.4539787  
SRR17520069.4539803  
SRR17520069.4539809  
SRR17520069.4540639  
SRR17520069.4545302  
SRR17520069.4549553  
SRR17520069.4551258  
SRR17520069.4560689  
SRR17520069.4561579  
SRR17520069.4565209  
SRR17520069.4569031  
SRR17520069.4579210  
SRR17520069.4580211  
SRR17520069.4580232  
SRR17520069.4580234  
SRR17520069.4580239  
SRR17520069.4580867  
SRR17520069.4580869  
SRR17520069.4580871  
SRR17520069.4580873  
SRR17520069.4580875  
SRR17520069.4580877  
SRR17520069.4580879  
SRR17520069.4580881  
SRR17520069.4580883  
SRR17520069.4581738  
SRR17520069.4581740  
SRR17520069.4594969  
SRR17520069.4595031  
SRR17520069.4604103  
SRR17520069.4607651  
SRR17520069.4611292

SRR17520069.4611522  
SRR17520069.4611526  
SRR17520069.4616203  
SRR17520069.4616254  
SRR17520069.4616293  
SRR17520069.4616308  
SRR17520069.4616598  
SRR17520069.4639551  
SRR17520069.4640031  
SRR17520069.4641695  
SRR17520069.4644896  
SRR17520069.4644908  
SRR17520069.4656933  
SRR17520069.4665804  
SRR17520069.4674918  
SRR17520069.4691686  
SRR17520069.4699923  
SRR17520069.4703142  
SRR17520069.4711519  
SRR17520069.4712615  
SRR17520069.4719641  
SRR17520069.4720280  
SRR17520069.4727609  
SRR17520069.4735530  
SRR17520069.4738475  
SRR17520069.4741499  
SRR17520069.4745745  
SRR17520069.4745760  
SRR17520069.4747954  
SRR17520069.4756731  
SRR17520069.4756772  
SRR17520069.4763227  
SRR17520069.4763842  
SRR17520069.4764494  
SRR17520069.4764502  
SRR17520069.4764592  
SRR17520069.4764598  
SRR17520069.4765218  
SRR17520069.4765222  
SRR17520069.4765224  
SRR17520069.4765246  
SRR17520069.4765249  
SRR17520069.4768327  
SRR17520069.4771522  
SRR17520069.4780582  
SRR17520069.4782240  
SRR17520069.4782242

SRR17520069.4785580  
SRR17520069.4792230  
SRR17520069.4820773  
SRR17520069.4838918  
SRR17520069.4848382  
SRR17520069.4849353  
SRR17520069.4853928  
SRR17520069.4864252  
SRR17520069.4864256  
SRR17520069.4866852  
SRR17520069.4868238  
SRR17520069.4879479  
SRR17520069.4886104  
SRR17520069.4904655  
SRR17520069.4904745  
SRR17520069.4905688  
SRR17520069.4924378  
SRR17520069.4930330  
SRR17520069.4931262  
SRR17520069.4931311  
SRR17520069.4949973  
SRR17520069.4949975  
SRR17520069.4949977  
SRR17520069.4949981  
SRR17520069.4962936  
SRR17520069.4966090  
SRR17520069.4966108  
SRR17520069.4971428  
SRR17520069.4984289  
SRR17520069.4987689  
SRR17520069.4987790  
SRR17520069.4987801  
SRR17520069.4987833  
SRR17520069.4988368  
SRR17520069.4988370  
SRR17520069.4988372  
SRR17520069.4988374  
SRR17520069.4988376  
SRR17520069.4988378  
SRR17520069.4988380  
SRR17520069.4988382  
SRR17520069.4988384  
SRR17520069.4988386  
SRR17520069.4989607  
SRR17520069.4999805  
SRR17520069.4999930  
SRR17520069.5000349

SRR17520069.5000358  
SRR17520069.5000382  
SRR17520069.5000430  
SRR17520069.5000464  
SRR17520069.5000473  
SRR17520069.5004418  
SRR17520069.5006588  
SRR17520069.5006609  
SRR17520069.5006621  
SRR17520069.5006648  
SRR17520069.5006650  
SRR17520069.5014862  
SRR17520069.5031767  
SRR17520069.5033183  
SRR17520069.5033184  
SRR17520069.5033189  
SRR17520069.5039434  
SRR17520069.5039452  
SRR17520069.5039453  
SRR17520069.5039454  
SRR17520069.5039472  
SRR17520069.5039474  
SRR17520069.5042438  
SRR17520069.5042440  
SRR17520069.5042442  
SRR17520069.5045104  
SRR17520069.5045106  
SRR17520069.5045114  
SRR17520069.5045116  
SRR17520069.5049701  
SRR17520069.5050128  
SRR17520069.5051050  
SRR17520069.5052473  
SRR17520069.5056951  
SRR17520069.5056953  
SRR17520069.5056955  
SRR17520069.5056957  
SRR17520069.5056959  
SRR17520069.5056961  
SRR17520069.5056963  
SRR17520069.5056965  
SRR17520069.5056967  
SRR17520069.5062104  
SRR17520069.5087863  
SRR17520069.5087933  
SRR17520069.5094212  
SRR17520069.5094214

SRR17520069. 5094218  
SRR17520069. 5094220  
SRR17520069. 5094222  
SRR17520069. 5094224  
SRR17520069. 5094226  
SRR17520069. 5094228  
SRR17520069. 5094230  
SRR17520069. 5094234  
SRR17520069. 5094236  
SRR17520069. 5094238  
SRR17520069. 5094240  
SRR17520069. 5094242  
SRR17520069. 5094244  
SRR17520069. 5094246  
SRR17520069. 5094248  
SRR17520069. 5094250  
SRR17520069. 5094252  
SRR17520069. 5094254  
SRR17520069. 5094256  
SRR17520069. 5094258  
SRR17520069. 5094260  
SRR17520069. 5094262  
SRR17520069. 5094264  
SRR17520069. 5094266  
SRR17520069. 5094268  
SRR17520069. 5094270  
SRR17520069. 5094272  
SRR17520069. 5094274  
SRR17520069. 5094948  
SRR17520069. 5095392  
SRR17520069. 5101481  
SRR17520069. 5101510  
SRR17520069. 5105003  
SRR17520069. 5116386  
SRR17520069. 5131409  
SRR17520069. 5139427  
SRR17520069. 5160858  
SRR17520069. 5175702  
SRR17520069. 5175816  
SRR17520069. 5176070  
SRR17520069. 5176071  
SRR17520069. 5176072  
SRR17520069. 5176098  
SRR17520069. 5200060  
SRR17520069. 5200104  
SRR17520069. 5200116  
SRR17520069. 5200175

SRR17520069. 5200224  
SRR17520069. 5207216  
SRR17520069. 5225599  
SRR17520069. 5238832  
SRR17520069. 5242356  
SRR17520069. 5243432  
SRR17520069. 5243486  
SRR17520069. 5249706  
SRR17520069. 5249951  
SRR17520069. 5249953  
SRR17520069. 5261413  
SRR17520069. 5261441  
SRR17520069. 5261459  
SRR17520069. 5276322  
SRR17520069. 5281094  
SRR17520069. 5304728  
SRR17520069. 5304748  
SRR17520069. 5313421  
SRR17520069. 5313423  
SRR17520069. 5313427  
SRR17520069. 5313433  
SRR17520069. 5313435  
SRR17520069. 5313437  
SRR17520069. 5313439  
SRR17520069. 5313449  
SRR17520069. 5313451  
SRR17520069. 5313453  
SRR17520069. 5313455  
SRR17520069. 5313457  
SRR17520069. 5313459  
SRR17520069. 5313461  
SRR17520069. 5313463  
SRR17520069. 5324290  
SRR17520069. 5331073  
SRR17520069. 5344357  
SRR17520069. 5344371  
SRR17520069. 5344386  
SRR17520069. 5351460  
SRR17520069. 5351622  
SRR17520069. 5353167  
SRR17520069. 5353191  
SRR17520069. 5356961  
SRR17520069. 5356989  
SRR17520069. 5369499  
SRR17520069. 5369503  
SRR17520069. 5369505  
SRR17520069. 5375049

SRR17520069. 5375051  
SRR17520069. 5375053  
SRR17520069. 5375055  
SRR17520069. 5375057  
SRR17520069. 5375059  
SRR17520069. 5375061  
SRR17520069. 5375063  
SRR17520069. 5375065  
SRR17520069. 5375067  
SRR17520069. 5375069  
SRR17520069. 5375071  
SRR17520069. 5375073  
SRR17520069. 5375075  
SRR17520069. 5379301  
SRR17520069. 5385164  
SRR17520069. 5385166  
SRR17520069. 5385168  
SRR17520069. 5385170  
SRR17520069. 5385172  
SRR17520069. 5385174  
SRR17520069. 5385176  
SRR17520069. 5385178  
SRR17520069. 5385180  
SRR17520069. 5385182  
SRR17520069. 5385184  
SRR17520069. 5385186  
SRR17520069. 5385188  
SRR17520069. 5385190  
SRR17520069. 5385192  
SRR17520069. 5385194  
SRR17520069. 5385196  
SRR17520069. 5385200  
SRR17520069. 5385202  
SRR17520069. 5385204  
SRR17520069. 5385206  
SRR17520069. 5385208  
SRR17520069. 5385210  
SRR17520069. 5385212  
SRR17520069. 5385216  
SRR17520069. 5385218  
SRR17520069. 5385220  
SRR17520069. 5385222  
SRR17520069. 5385224  
SRR17520069. 5385226  
SRR17520069. 5385228  
SRR17520069. 5385230  
SRR17520069. 5385232

SRR17520069. 5385234  
SRR17520069. 5385236  
SRR17520069. 5385238  
SRR17520069. 5385240  
SRR17520069. 5385242  
SRR17520069. 5385244  
SRR17520069. 5385246  
SRR17520069. 5385248  
SRR17520069. 5385250  
SRR17520069. 5385252  
SRR17520069. 5385254  
SRR17520069. 5385256  
SRR17520069. 5385258  
SRR17520069. 5385260  
SRR17520069. 5385262  
SRR17520069. 5385264  
SRR17520069. 5385268  
SRR17520069. 5385270  
SRR17520069. 5385272  
SRR17520069. 5385274  
SRR17520069. 5385276  
SRR17520069. 5385278  
SRR17520069. 5385280  
SRR17520069. 5385282  
SRR17520069. 5385284  
SRR17520069. 5385286  
SRR17520069. 5385288  
SRR17520069. 5385290  
SRR17520069. 5385292  
SRR17520069. 5385294  
SRR17520069. 5385296  
SRR17520069. 5385298  
SRR17520069. 5385300  
SRR17520069. 5385302  
SRR17520069. 5385304  
SRR17520069. 5385306  
SRR17520069. 5385308  
SRR17520069. 5385310  
SRR17520069. 5385312  
SRR17520069. 5385314  
SRR17520069. 5385316  
SRR17520069. 5385318  
SRR17520069. 5385320  
SRR17520069. 5385322  
SRR17520069. 5385324  
SRR17520069. 5385326  
SRR17520069. 5385328



SRR17520069. 5385330  
SRR17520069. 5385332  
SRR17520069. 5385334  
SRR17520069. 5385336  
SRR17520069. 5385338  
SRR17520069. 5385340  
SRR17520069. 5385342  
SRR17520069. 5389926  
SRR17520069. 5397530  
SRR17520069. 5397570  
SRR17520069. 5397582  
SRR17520069. 5414003  
SRR17520069. 5424113  
SRR17520069. 5424357  
SRR17520069. 5428557  
SRR17520069. 5428566  
SRR17520069. 5433638  
SRR17520069. 5442734  
SRR17520069. 5444395  
SRR17520069. 5457692  
SRR17520069. 5457706  
SRR17520069. 5462848  
SRR17520069. 5474056  
SRR17520069. 5479024  
SRR17520069. 5479062  
SRR17520069. 5479070  
SRR17520069. 5479102  
SRR17520069. 5489514  
SRR17520069. 5489884  
SRR17520069. 5504303  
SRR17520069. 5509965  
SRR17520069. 5520669  
SRR17520069. 5520682  
SRR17520069. 5521425  
SRR17520069. 5530068  
SRR17520069. 5531856  
SRR17520069. 5532383  
SRR17520069. 5538408  
SRR17520069. 5538416  
SRR17520069. 5538429  
SRR17520069. 5548635  
SRR17520069. 5551212  
SRR17520069. 5553949  
SRR17520069. 5553961  
SRR17520069. 5561816  
SRR17520069. 5563212  
SRR17520069. 5565596

SRR17520069.5570410  
SRR17520069.5573029  
SRR17520069.5573097  
SRR17520069.5573127  
SRR17520069.5573147  
SRR17520069.5573153  
SRR17520069.5590519  
SRR17520069.5599632  
SRR17520069.5599633  
SRR17520069.5625185  
SRR17520069.5625212  
SRR17520069.5639398  
SRR17520069.5641459  
SRR17520069.5647365  
SRR17520069.5649792  
SRR17520069.5649794  
SRR17520069.5663446  
SRR17520069.5678613  
SRR17520069.5678882  
SRR17520069.5679013  
SRR17520069.5691392  
SRR17520069.5693923  
SRR17520069.5695437  
SRR17520069.5704289  
SRR17520069.5717702  
SRR17520069.5717712  
SRR17520069.5717714  
SRR17520069.5717718  
SRR17520069.5717720  
SRR17520069.5719051  
SRR17520069.5719077  
SRR17520069.5729021  
SRR17520069.5729030  
SRR17520069.5732877  
SRR17520069.5738262  
SRR17520069.5738266  
SRR17520069.5738278  
SRR17520069.5738398  
SRR17520069.5738402  
SRR17520069.5738404  
SRR17520069.5738406  
SRR17520069.5738410  
SRR17520069.5738412  
SRR17520069.5738414  
SRR17520069.5738416  
SRR17520069.5738418  
SRR17520069.5738420

SRR17520069. 5738424  
SRR17520069. 5738426  
SRR17520069. 5738428  
SRR17520069. 5738430  
SRR17520069. 5738432  
SRR17520069. 5738436  
SRR17520069. 5738438  
SRR17520069. 5738440  
SRR17520069. 5738442  
SRR17520069. 5738444  
SRR17520069. 5738446  
SRR17520069. 5738448  
SRR17520069. 5738450  
SRR17520069. 5738452  
SRR17520069. 5738454  
SRR17520069. 5738456  
SRR17520069. 5738458  
SRR17520069. 5738464  
SRR17520069. 5738466  
SRR17520069. 5738468  
SRR17520069. 5738470  
SRR17520069. 5738472  
SRR17520069. 5738474  
SRR17520069. 5738476  
SRR17520069. 5738478  
SRR17520069. 5738480  
SRR17520069. 5738482  
SRR17520069. 5738484  
SRR17520069. 5738486  
SRR17520069. 5738488  
SRR17520069. 5744179  
SRR17520069. 5760595  
SRR17520069. 5760692  
SRR17520069. 5762247  
SRR17520069. 5767362  
SRR17520069. 5770037  
SRR17520069. 5781920  
SRR17520069. 5784084  
SRR17520069. 5784395  
SRR17520069. 5797452  
SRR17520069. 5800218  
SRR17520069. 5800677  
SRR17520069. 5809858  
SRR17520069. 5809874  
SRR17520069. 5819067  
SRR17520069. 5831485  
SRR17520069. 5831563

SRR17520069. 5832410  
SRR17520069. 5838251  
SRR17520069. 5839958  
SRR17520069. 5845973  
SRR17520069. 5845975  
SRR17520069. 5845977  
SRR17520069. 5845979  
SRR17520069. 5845981  
SRR17520069. 5845983  
SRR17520069. 5845985  
SRR17520069. 5845987  
SRR17520069. 5845989  
SRR17520069. 5845991  
SRR17520069. 5845993  
SRR17520069. 5845995  
SRR17520069. 5848970  
SRR17520069. 5848990  
SRR17520069. 5859984  
SRR17520069. 5859986  
SRR17520069. 5862438  
SRR17520069. 5869934  
SRR17520069. 5871274  
SRR17520069. 5871278  
SRR17520069. 5871280  
SRR17520069. 5871282  
SRR17520069. 5871284  
SRR17520069. 5871286  
SRR17520069. 5871288  
SRR17520069. 5871290  
SRR17520069. 5871292  
SRR17520069. 5871294  
SRR17520069. 5871298  
SRR17520069. 5871302  
SRR17520069. 5871304  
SRR17520069. 5871306  
SRR17520069. 5871310  
SRR17520069. 5871312  
SRR17520069. 5871314  
SRR17520069. 5871316  
SRR17520069. 5871318  
SRR17520069. 5871320  
SRR17520069. 5871322  
SRR17520069. 5871324  
SRR17520069. 5871328  
SRR17520069. 5871330  
SRR17520069. 5871334  
SRR17520069. 5871336

SRR17520069. 5871338  
SRR17520069. 5871342  
SRR17520069. 5871344  
SRR17520069. 5871346  
SRR17520069. 5871348  
SRR17520069. 5871350  
SRR17520069. 5871354  
SRR17520069. 5871358  
SRR17520069. 5871360  
SRR17520069. 5871362  
SRR17520069. 5871364  
SRR17520069. 5871366  
SRR17520069. 5871370  
SRR17520069. 5871372  
SRR17520069. 5871378  
SRR17520069. 5871382  
SRR17520069. 5871384  
SRR17520069. 5871388  
SRR17520069. 5871393  
SRR17520069. 5871395  
SRR17520069. 5871399  
SRR17520069. 5871401  
SRR17520069. 5871403  
SRR17520069. 5871405  
SRR17520069. 5871407  
SRR17520069. 5871409  
SRR17520069. 5871413  
SRR17520069. 5871415  
SRR17520069. 5871417  
SRR17520069. 5871419  
SRR17520069. 5871421  
SRR17520069. 5871423  
SRR17520069. 5871425  
SRR17520069. 5871427  
SRR17520069. 5871429  
SRR17520069. 5873804  
SRR17520069. 5873808  
SRR17520069. 5873810  
SRR17520069. 5873812  
SRR17520069. 5873814  
SRR17520069. 5873816  
SRR17520069. 5873818  
SRR17520069. 5873820  
SRR17520069. 5873822  
SRR17520069. 5873824  
SRR17520069. 5873826  
SRR17520069. 5873828

SRR17520069. 5873830  
SRR17520069. 5873832  
SRR17520069. 5873834  
SRR17520069. 5873836  
SRR17520069. 5873838  
SRR17520069. 5873840  
SRR17520069. 5873842  
SRR17520069. 5873844  
SRR17520069. 5873846  
SRR17520069. 5873848  
SRR17520069. 5873850  
SRR17520069. 5873852  
SRR17520069. 5873854  
SRR17520069. 5873856  
SRR17520069. 5873858  
SRR17520069. 5873860  
SRR17520069. 5873862  
SRR17520069. 5873864  
SRR17520069. 5873866  
SRR17520069. 5873868  
SRR17520069. 5873870  
SRR17520069. 5873872  
SRR17520069. 5873874  
SRR17520069. 5873876  
SRR17520069. 5873878  
SRR17520069. 5873880  
SRR17520069. 5873882  
SRR17520069. 5873884  
SRR17520069. 5873886  
SRR17520069. 5873888  
SRR17520069. 5873890  
SRR17520069. 5873892  
SRR17520069. 5873894  
SRR17520069. 5873896  
SRR17520069. 5873898  
SRR17520069. 5873900  
SRR17520069. 5873902  
SRR17520069. 5873904  
SRR17520069. 5873906  
SRR17520069. 5873908  
SRR17520069. 5873910  
SRR17520069. 5873912  
SRR17520069. 5873914  
SRR17520069. 5873916  
SRR17520069. 5879985  
SRR17520069. 5881705  
SRR17520069. 5889118

SRR17520069. 5889657  
SRR17520069. 5891807  
SRR17520069. 5892341  
SRR17520069. 5892363  
SRR17520069. 5894182  
SRR17520069. 5898475  
SRR17520069. 5917788  
SRR17520069. 5922989  
SRR17520069. 5926542  
SRR17520069. 5937159  
SRR17520069. 5938681  
SRR17520069. 5954406  
SRR17520069. 5960287  
SRR17520069. 5971848  
SRR17520069. 5983626  
SRR17520069. 5984518  
SRR17520069. 5985379  
SRR17520069. 5985882  
SRR17520069. 5985917  
SRR17520069. 5985932  
SRR17520069. 5989211  
SRR17520069. 5990124  
SRR17520069. 5992650  
SRR17520069. 5992660  
SRR17520069. 5992661  
SRR17520069. 5993411  
SRR17520069. 5994433  
SRR17520069. 5994435  
SRR17520069. 5994439  
SRR17520069. 5994441  
SRR17520069. 5994443  
SRR17520069. 5994445  
SRR17520069. 5994447  
SRR17520069. 6000536  
SRR17520069. 6013078  
SRR17520069. 6019805  
SRR17520069. 6024188  
SRR17520069. 6024244  
SRR17520069. 6024599  
SRR17520069. 6024603  
SRR17520069. 6028464  
SRR17520069. 6032565  
SRR17520069. 6034096  
SRR17520069. 6041577  
SRR17520069. 6045194  
SRR17520069. 6045197  
SRR17520069. 6045263

SRR17520069.6045763  
SRR17520069.6045779  
SRR17520069.6051380  
SRR17520069.6052529  
SRR17520069.6052570  
SRR17520069.6056892  
SRR17520069.6056966  
SRR17520069.6056968  
SRR17520069.6056970  
SRR17520069.6056972  
SRR17520069.6056974  
SRR17520069.6056976  
SRR17520069.6056978  
SRR17520069.6056980  
SRR17520069.6056982  
SRR17520069.6056984  
SRR17520069.6056986  
SRR17520069.6056988  
SRR17520069.6056990  
SRR17520069.6056992  
SRR17520069.6056994  
SRR17520069.6056996  
SRR17520069.6056998  
SRR17520069.6057000  
SRR17520069.6057006  
SRR17520069.6057008  
SRR17520069.6057010  
SRR17520069.6057012  
SRR17520069.6057014  
SRR17520069.6057016  
SRR17520069.6057018  
SRR17520069.6057020  
SRR17520069.6057022  
SRR17520069.6057024  
SRR17520069.6057026  
SRR17520069.6057028  
SRR17520069.6057030  
SRR17520069.6057032  
SRR17520069.6057034  
SRR17520069.6057038  
SRR17520069.6057040  
SRR17520069.6057042  
SRR17520069.6057044  
SRR17520069.6057046  
SRR17520069.6057048  
SRR17520069.6057050  
SRR17520069.6057052



SRR17520069.6057054  
SRR17520069.6057056  
SRR17520069.6057058  
SRR17520069.6057060  
SRR17520069.6057062  
SRR17520069.6057064  
SRR17520069.6057066  
SRR17520069.6057068  
SRR17520069.6057070  
SRR17520069.6057074  
SRR17520069.6057076  
SRR17520069.6057078  
SRR17520069.6057082  
SRR17520069.6057086  
SRR17520069.6057088  
SRR17520069.6057090  
SRR17520069.6057092  
SRR17520069.6057094  
SRR17520069.6057096  
SRR17520069.6057098  
SRR17520069.6057100  
SRR17520069.6057102  
SRR17520069.6057104  
SRR17520069.6057106  
SRR17520069.6057108  
SRR17520069.6061304  
SRR17520069.6062311  
SRR17520069.6069628  
SRR17520069.6069762  
SRR17520069.6069791  
SRR17520069.6074412  
SRR17520069.6074594  
SRR17520069.6076778  
SRR17520069.6085084  
SRR17520069.6093608  
SRR17520069.6097166  
SRR17520069.6097168  
SRR17520069.6097876  
SRR17520069.6100071  
SRR17520069.6100547  
SRR17520069.6104404  
SRR17520069.6106523  
SRR17520069.6110724  
SRR17520069.6111314  
SRR17520069.6112581  
SRR17520069.6112583  
SRR17520069.6112593

SRR17520069.6112597  
SRR17520069.6112611  
SRR17520069.6112632  
SRR17520069.6112633  
SRR17520069.6112635  
SRR17520069.6118790  
SRR17520069.6127096  
SRR17520069.6127131  
SRR17520069.6135033  
SRR17520069.6135043  
SRR17520069.6136283  
SRR17520069.6136318  
SRR17520069.6142995  
SRR17520069.6147745  
SRR17520069.6149740  
SRR17520069.6156929  
SRR17520069.6162848  
SRR17520069.6164175  
SRR17520069.6170537  
SRR17520069.6173837  
SRR17520069.6175005  
SRR17520069.6185105  
SRR17520069.6191632  
SRR17520069.6191636  
SRR17520069.6198428  
SRR17520069.6200341  
SRR17520069.6200465  
SRR17520069.6203269  
SRR17520069.6204363  
SRR17520069.6211003  
SRR17520069.6215181  
SRR17520069.6215183  
SRR17520069.6215185  
SRR17520069.6215187  
SRR17520069.6215189  
SRR17520069.6215191  
SRR17520069.6215195  
SRR17520069.6220648  
SRR17520069.6221829  
SRR17520069.6221855  
SRR17520069.6222570  
SRR17520069.6224218  
SRR17520069.6224220  
SRR17520069.6224222  
SRR17520069.6224224  
SRR17520069.6224226  
SRR17520069.6227807

SRR17520069.6232479  
SRR17520069.6233360  
SRR17520069.6237084  
SRR17520069.6237096  
SRR17520069.6246544  
SRR17520069.6246586  
SRR17520069.6246597  
SRR17520069.6248971  
SRR17520069.6252466  
SRR17520069.6264888  
SRR17520069.6264890  
SRR17520069.6264894  
SRR17520069.6264896  
SRR17520069.6264898  
SRR17520069.6264900  
SRR17520069.6264902  
SRR17520069.6264904  
SRR17520069.6273290  
SRR17520069.6273318  
SRR17520069.6273324  
SRR17520069.6275918  
SRR17520069.6280898  
SRR17520069.6280911  
SRR17520069.6280916  
SRR17520069.6280923  
SRR17520069.6280961  
SRR17520069.6283424  
SRR17520069.6288634  
SRR17520069.6291722  
SRR17520069.6294107  
SRR17520069.6297628  
SRR17520069.6310741  
SRR17520069.6316691  
SRR17520069.6323620  
SRR17520069.6338540  
SRR17520069.6339570  
SRR17520069.6341561  
SRR17520069.6350220  
SRR17520069.6353951  
SRR17520069.6364650  
SRR17520069.6370299  
SRR17520069.6370301  
SRR17520069.6370303  
SRR17520069.6370305  
SRR17520069.6370307  
SRR17520069.6370309  
SRR17520069.6370311

SRR17520069. 6370313  
SRR17520069. 6370315  
SRR17520069. 6370317  
SRR17520069. 6370319  
SRR17520069. 6370321  
SRR17520069. 6370323  
SRR17520069. 6370325  
SRR17520069. 6370327  
SRR17520069. 6370329  
SRR17520069. 6370331  
SRR17520069. 6370333  
SRR17520069. 6370335  
SRR17520069. 6370337  
SRR17520069. 6370339  
SRR17520069. 6370341  
SRR17520069. 6370343  
SRR17520069. 6370345  
SRR17520069. 6370347  
SRR17520069. 6370349  
SRR17520069. 6370351  
SRR17520069. 6370353  
SRR17520069. 6370355  
SRR17520069. 6370357  
SRR17520069. 6370359  
SRR17520069. 6370361  
SRR17520069. 6370363  
SRR17520069. 6370365  
SRR17520069. 6370367  
SRR17520069. 6370369  
SRR17520069. 6370371  
SRR17520069. 6370373  
SRR17520069. 6370375  
SRR17520069. 6370379  
SRR17520069. 6370381  
SRR17520069. 6370383  
SRR17520069. 6370385  
SRR17520069. 6370387  
SRR17520069. 6370389  
SRR17520069. 6370391  
SRR17520069. 6379802  
SRR17520069. 6392339  
SRR17520069. 6399269  
SRR17520069. 6409617  
SRR17520069. 6418311  
SRR17520069. 6418317  
SRR17520069. 6418340  
SRR17520069. 6419705

SRR17520069.6419900  
SRR17520069.6421203  
SRR17520069.6421210  
SRR17520069.6428919  
SRR17520069.6429290  
SRR17520069.6438091  
SRR17520069.6438095  
SRR17520069.6445406  
SRR17520069.6446203  
SRR17520069.6446225  
SRR17520069.6457931  
SRR17520069.6480959  
SRR17520069.6485814  
SRR17520069.6499589  
SRR17520069.6505294  
SRR17520069.6505624  
SRR17520069.6505638  
SRR17520069.6505648  
SRR17520069.6505694  
SRR17520069.6510830  
SRR17520069.6517424  
SRR17520069.6538629  
SRR17520069.6538652  
SRR17520069.6539212  
SRR17520069.6540357  
SRR17520069.6545519  
SRR17520069.6548569  
SRR17520069.6551426  
SRR17520069.6554139  
SRR17520069.6561791  
SRR17520069.6561802  
SRR17520069.6564907  
SRR17520069.6577922  
SRR17520069.6578690  
SRR17520069.6578782  
SRR17520069.6594560  
SRR17520069.6594562  
SRR17520069.6596603  
SRR17520069.6598103  
SRR17520069.6599751  
SRR17520069.6636144  
SRR17520069.6642579  
SRR17520069.6642693  
SRR17520069.6643678  
SRR17520069.6644955  
SRR17520069.6644975  
SRR17520069.6644993

SRR17520069. 6646813  
SRR17520069. 6660964  
SRR17520069. 6660967  
SRR17520069. 6663791  
SRR17520069. 6663807  
SRR17520069. 6663819  
SRR17520069. 6666015  
SRR17520069. 6666055  
SRR17520069. 6666065  
SRR17520069. 6666075  
SRR17520069. 6668198  
SRR17520069. 6672918  
SRR17520069. 6672924  
SRR17520069. 6678566  
SRR17520069. 6678594  
SRR17520069. 6678651  
SRR17520069. 6678666  
SRR17520069. 6679235  
SRR17520069. 6679237  
SRR17520069. 6679239  
SRR17520069. 6679241  
SRR17520069. 6679243  
SRR17520069. 6679245  
SRR17520069. 6679247  
SRR17520069. 6686538  
SRR17520069. 6689425  
SRR17520069. 6689426  
SRR17520069. 6711906  
SRR17520069. 6712726  
SRR17520069. 6744173  
SRR17520069. 6744175  
SRR17520069. 6744179  
SRR17520069. 6752870  
SRR17520069. 6762432  
SRR17520069. 6773196  
SRR17520069. 6773202  
SRR17520069. 6773205  
SRR17520069. 6773208  
SRR17520069. 6780214  
SRR17520069. 6781814  
SRR17520069. 6781820  
SRR17520069. 6781822  
SRR17520069. 6781824  
SRR17520069. 6781826  
SRR17520069. 6781828  
SRR17520069. 6781832  
SRR17520069. 6781834

SRR17520069.6783044  
SRR17520069.6810390  
SRR17520069.6812458  
SRR17520069.6821223  
SRR17520069.6824348  
SRR17520069.6826158  
SRR17520069.6837594  
SRR17520069.6848288  
SRR17520069.6854665  
SRR17520069.6855701  
SRR17520069.6858095  
SRR17520069.6858105  
SRR17520069.6858125  
SRR17520069.6863160  
SRR17520069.6867080  
SRR17520069.6876342  
SRR17520069.6879422  
SRR17520069.6880155  
SRR17520069.6903628  
SRR17520069.6907202  
SRR17520069.6911700  
SRR17520069.6911742  
SRR17520069.6911762  
SRR17520069.6918663  
SRR17520069.6918665  
SRR17520069.6921182  
SRR17520069.6921192  
SRR17520069.6933594  
SRR17520069.6936191  
SRR17520069.6954822  
SRR17520069.6954876  
SRR17520069.6964355  
SRR17520069.6967636  
SRR17520069.6974805  
SRR17520069.6974806  
SRR17520069.6976603  
SRR17520069.6981827  
SRR17520069.6981961  
SRR17520069.6984262  
SRR17520069.6990808  
SRR17520069.6990890  
SRR17520069.7009866  
SRR17520069.7012708  
SRR17520069.7016787  
SRR17520069.7017713  
SRR17520069.7021492  
SRR17520069.7033422

SRR17520069. 7033537  
SRR17520069. 7052929  
SRR17520069. 7062499  
SRR17520069. 7062505  
SRR17520069. 7063798  
SRR17520069. 7082054  
SRR17520069. 7102376  
SRR17520069. 7113837  
SRR17520069. 7113843  
SRR17520069. 7120379  
SRR17520069. 7134866  
SRR17520069. 7134868  
SRR17520069. 7134877  
SRR17520069. 7134889  
SRR17520069. 7145742  
SRR17520069. 7146880  
SRR17520069. 7146890  
SRR17520069. 7149143  
SRR17520069. 7149149  
SRR17520069. 7155337  
SRR17520069. 7161201  
SRR17520069. 7161222  
SRR17520069. 7165743  
SRR17520069. 7166700  
SRR17520069. 7166729  
SRR17520069. 7168397  
SRR17520069. 7169869  
SRR17520069. 7173612  
SRR17520069. 7178926  
SRR17520069. 7185011  
SRR17520069. 7197051  
SRR17520069. 7197096  
SRR17520069. 7197571  
SRR17520069. 7198590  
SRR17520069. 7205341  
SRR17520069. 7221189  
SRR17520069. 7224724  
SRR17520069. 7224752  
SRR17520069. 7224766  
SRR17520069. 7228030  
SRR17520069. 7231848  
SRR17520069. 7231866  
SRR17520069. 7231922  
SRR17520069. 7236143  
SRR17520069. 7249773  
SRR17520069. 7251421  
SRR17520069. 7251434



SRR17520069.7251497  
SRR17520069.7258255  
SRR17520069.7258344  
SRR17520069.7267103  
SRR17520069.7274613  
SRR17520069.7297132  
SRR17520069.7299707  
SRR17520069.7307280  
SRR17520069.7307282  
SRR17520069.7307284  
SRR17520069.7307286  
SRR17520069.7307288  
SRR17520069.7307290  
SRR17520069.7307292  
SRR17520069.7307294  
SRR17520069.7307296  
SRR17520069.7307298  
SRR17520069.7307300  
SRR17520069.7307304  
SRR17520069.7307306  
SRR17520069.7307308  
SRR17520069.7307310  
SRR17520069.7307312  
SRR17520069.7307314  
SRR17520069.7307316  
SRR17520069.7307318  
SRR17520069.7307320  
SRR17520069.7307322  
SRR17520069.7307324  
SRR17520069.7307326  
SRR17520069.7307328  
SRR17520069.7307330  
SRR17520069.7307332  
SRR17520069.7307334  
SRR17520069.7307336  
SRR17520069.7307338  
SRR17520069.7307340  
SRR17520069.7307342  
SRR17520069.7307344  
SRR17520069.7307346  
SRR17520069.7308716  
SRR17520069.7318852  
SRR17520069.7318868  
SRR17520069.7329037  
SRR17520069.7329064  
SRR17520069.7329109  
SRR17520069.7346884

SRR17520069.7351754  
SRR17520069.7353572  
SRR17520069.7370299  
SRR17520069.7372152  
SRR17520069.7372156  
SRR17520069.7376262  
SRR17520069.7387955  
SRR17520069.7387970  
SRR17520069.7387979  
SRR17520069.7388012  
SRR17520069.7388089  
SRR17520069.7389671  
SRR17520069.7392728  
SRR17520069.7400376  
SRR17520069.7401777  
SRR17520069.7424576  
SRR17520069.7430177  
SRR17520069.7430203  
SRR17520069.7432720  
SRR17520069.7452162  
SRR17520069.7455654  
SRR17520069.7463592  
SRR17520069.7471819  
SRR17520069.7478234  
SRR17520069.7478236  
SRR17520069.7478238  
SRR17520069.7478240  
SRR17520069.7478242  
SRR17520069.7478244  
SRR17520069.7478246  
SRR17520069.7478248  
SRR17520069.7478250  
SRR17520069.7478252  
SRR17520069.7478254  
SRR17520069.7478256  
SRR17520069.7478260  
SRR17520069.7478262  
SRR17520069.7478627  
SRR17520069.7483057  
SRR17520069.7488991  
SRR17520069.7488999  
SRR17520069.7491635  
SRR17520069.7491643  
SRR17520069.7515225  
SRR17520069.7516564  
SRR17520069.7529820  
SRR17520069.7533316

SRR17520069.7551486  
SRR17520069.7559771  
SRR17520069.7562674  
SRR17520069.7564701  
SRR17520069.7569773  
SRR17520069.7579006  
SRR17520069.7579008  
SRR17520069.7579010  
SRR17520069.7579012  
SRR17520069.7579014  
SRR17520069.7579018  
SRR17520069.7579022  
SRR17520069.7579024  
SRR17520069.7579026  
SRR17520069.7579028  
SRR17520069.7579032  
SRR17520069.7579034  
SRR17520069.7579036  
SRR17520069.7579038  
SRR17520069.7579040  
SRR17520069.7579042  
SRR17520069.7579044  
SRR17520069.7579046  
SRR17520069.7579048  
SRR17520069.7579050  
SRR17520069.7579052  
SRR17520069.7579054  
SRR17520069.7579056  
SRR17520069.7579062  
SRR17520069.7579064  
SRR17520069.7579066  
SRR17520069.7579068  
SRR17520069.7579070  
SRR17520069.7579072  
SRR17520069.7579074  
SRR17520069.7579076  
SRR17520069.7579078  
SRR17520069.7599231  
SRR17520069.7603657  
SRR17520069.7605644  
SRR17520069.7605676  
SRR17520069.7608775  
SRR17520069.7613135  
SRR17520069.7617264  
SRR17520069.7619523  
SRR17520069.7662618  
SRR17520069.7671953

SRR17520069.7672160  
SRR17520069.7674771  
SRR17520069.7679103  
SRR17520069.7679145  
SRR17520069.7682114  
SRR17520069.7688307  
SRR17520069.7688314  
SRR17520069.7689314  
SRR17520069.7689352  
SRR17520069.7694521  
SRR17520069.7696525  
SRR17520069.7701373  
SRR17520069.7701385  
SRR17520069.7704678  
SRR17520069.7704704  
SRR17520069.7706079  
SRR17520069.7721694  
SRR17520069.7733860  
SRR17520069.7738724  
SRR17520069.7755042  
SRR17520069.7764955  
SRR17520069.7767484  
SRR17520069.7778501  
SRR17520069.7790512  
SRR17520069.7792613  
SRR17520069.7792625  
SRR17520069.7792725  
SRR17520069.7811436  
SRR17520069.7814325  
SRR17520069.7821623  
SRR17520069.7824054  
SRR17520069.7826817  
SRR17520069.7827363  
SRR17520069.7829217  
SRR17520069.7835780  
SRR17520069.7836165  
SRR17520069.7838165  
SRR17520069.7847274  
SRR17520069.7848878  
SRR17520069.7848983  
SRR17520069.7857300  
SRR17520069.7859868  
SRR17520069.7871927  
SRR17520069.7891353  
SRR17520069.7892564  
SRR17520069.7898631  
SRR17520069.7898635

SRR17520069.7898659  
SRR17520069.7898663  
SRR17520069.7898731  
SRR17520069.7900702  
SRR17520069.7903012  
SRR17520069.7905298  
SRR17520069.7906236  
SRR17520069.7907857  
SRR17520069.7927234  
SRR17520069.7927253  
SRR17520069.7927260  
SRR17520069.7929184  
SRR17520069.7950304  
SRR17520069.7952340  
SRR17520069.7962972  
SRR17520069.7986365  
SRR17520069.7990656  
SRR17520069.7990668  
SRR17520069.7995537  
SRR17520069.7998597  
SRR17520069.8002641  
SRR17520069.8014724  
SRR17520069.8015599  
SRR17520069.8020523  
SRR17520069.8023027  
SRR17520069.8026632  
SRR17520069.8034881  
SRR17520069.8063060  
SRR17520069.8067376  
SRR17520069.8067410  
SRR17520069.8074440  
SRR17520069.8074448  
SRR17520069.8074452  
SRR17520069.8077692  
SRR17520069.8080869  
SRR17520069.8086449  
SRR17520069.8086476  
SRR17520069.8086500  
SRR17520069.8105575  
SRR17520069.8106622  
SRR17520069.8107037  
SRR17520069.8107116  
SRR17520069.8112415  
SRR17520069.8112438  
SRR17520069.8133587  
SRR17520069.8136302  
SRR17520069.8136308

SRR17520069.8136820  
SRR17520069.8143226  
SRR17520069.8145719  
SRR17520069.8148272  
SRR17520069.8160979  
SRR17520069.8162333  
SRR17520069.8163580  
SRR17520069.8174544  
SRR17520069.8180289  
SRR17520069.8190727  
SRR17520069.8190738  
SRR17520069.8192365  
SRR17520069.8196923  
SRR17520069.8204854  
SRR17520069.8205601  
SRR17520069.8208069  
SRR17520069.8208100  
SRR17520069.8212972  
SRR17520069.8213081  
SRR17520069.8215867  
SRR17520069.8216781  
SRR17520069.8222524  
SRR17520069.8223961  
SRR17520069.8224981  
SRR17520069.8224983  
SRR17520069.8224985  
SRR17520069.8224987  
SRR17520069.8224989  
SRR17520069.8224991  
SRR17520069.8224993  
SRR17520069.8224995  
SRR17520069.8224997  
SRR17520069.8224999  
SRR17520069.8225001  
SRR17520069.8225003  
SRR17520069.8225005  
SRR17520069.8225007  
SRR17520069.8225009  
SRR17520069.8225011  
SRR17520069.8225013  
SRR17520069.8225015  
SRR17520069.8225017  
SRR17520069.8225019  
SRR17520069.8225021  
SRR17520069.8225023  
SRR17520069.8225027  
SRR17520069.8225029

SRR17520069.8225031  
SRR17520069.8225035  
SRR17520069.8233012  
SRR17520069.8236181  
SRR17520069.8244350  
SRR17520069.8245557  
SRR17520069.8245575  
SRR17520069.8248739  
SRR17520069.8253393  
SRR17520069.8254996  
SRR17520069.8254998  
SRR17520069.8255000  
SRR17520069.8255002  
SRR17520069.8255004  
SRR17520069.8255006  
SRR17520069.8255008  
SRR17520069.8255010  
SRR17520069.8255012  
SRR17520069.8255016  
SRR17520069.8255018  
SRR17520069.8255020  
SRR17520069.8255022  
SRR17520069.8255024  
SRR17520069.8255028  
SRR17520069.8255030  
SRR17520069.8255032  
SRR17520069.8255034  
SRR17520069.8255036  
SRR17520069.8255038  
SRR17520069.8255042  
SRR17520069.8255044  
SRR17520069.8255046  
SRR17520069.8255048  
SRR17520069.8255050  
SRR17520069.8255052  
SRR17520069.8255056  
SRR17520069.8255058  
SRR17520069.8255060  
SRR17520069.8255062  
SRR17520069.8255064  
SRR17520069.8255066  
SRR17520069.8255068  
SRR17520069.8255070  
SRR17520069.8255072  
SRR17520069.8255074  
SRR17520069.8255078  
SRR17520069.8255080

SRR17520069.8255082  
SRR17520069.8255084  
SRR17520069.8255086  
SRR17520069.8255088  
SRR17520069.8255090  
SRR17520069.8255092  
SRR17520069.8255094  
SRR17520069.8255096  
SRR17520069.8255100  
SRR17520069.8255102  
SRR17520069.8255104  
SRR17520069.8255106  
SRR17520069.8255108  
SRR17520069.8255110  
SRR17520069.8255112  
SRR17520069.8255114  
SRR17520069.8255116  
SRR17520069.8255118  
SRR17520069.8255120  
SRR17520069.8255122  
SRR17520069.8255124  
SRR17520069.8260356  
SRR17520069.8262940  
SRR17520069.8262947  
SRR17520069.8266427  
SRR17520069.8290280  
SRR17520069.8291660  
SRR17520069.8302030  
SRR17520069.8302080  
SRR17520069.8306459  
SRR17520069.8306497  
SRR17520069.8315772  
SRR17520069.8319553  
SRR17520069.8327970  
SRR17520069.8329620  
SRR17520069.8344741  
SRR17520069.8346259  
SRR17520069.8347119  
SRR17520069.8360436  
SRR17520069.8360464  
SRR17520069.8363076  
SRR17520069.8363103  
SRR17520069.8365139  
SRR17520069.8368867  
SRR17520069.8370349  
SRR17520069.8378554  
SRR17520069.8386843



SRR17520069.8386856  
SRR17520069.8388103  
SRR17520069.8390007  
SRR17520069.8397719  
SRR17520069.8404818  
SRR17520069.8404824  
SRR17520069.8404888  
SRR17520069.8432824  
SRR17520069.8443361  
SRR17520069.8443363  
SRR17520069.8443365  
SRR17520069.8449520  
SRR17520069.8452868  
SRR17520069.8452946  
SRR17520069.8453277  
SRR17520069.8472674  
SRR17520069.8481339  
SRR17520069.8483929  
SRR17520069.8494281  
SRR17520069.8497797  
SRR17520069.8498015  
SRR17520069.8498111  
SRR17520069.8511758  
SRR17520069.8515335  
SRR17520069.8519961  
SRR17520069.8522711  
SRR17520069.8524194  
SRR17520069.8524196  
SRR17520069.8524203  
SRR17520069.8524205  
SRR17520069.8524210  
SRR17520069.8524223  
SRR17520069.8524248  
SRR17520069.8524275  
SRR17520069.8525831  
SRR17520069.8526612  
SRR17520069.8526682  
SRR17520069.8527168  
SRR17520069.8551263  
SRR17520069.8551526  
SRR17520069.8556384  
SRR17520069.8556821  
SRR17520069.8556823  
SRR17520069.8556825  
SRR17520069.8556827  
SRR17520069.8577191  
SRR17520069.8581233

SRR17520069.8603846  
SRR17520069.8607431  
SRR17520069.8618266  
SRR17520069.8642369  
SRR17520069.8657372  
SRR17520069.8672333  
SRR17520069.8680335  
SRR17520069.8692578  
SRR17520069.8693191  
SRR17520069.8700410  
SRR17520069.8705165  
SRR17520069.8705167  
SRR17520069.8705169  
SRR17520069.8705171  
SRR17520069.8705173  
SRR17520069.8705175  
SRR17520069.8705177  
SRR17520069.8705179  
SRR17520069.8705181  
SRR17520069.8705183  
SRR17520069.8705185  
SRR17520069.8705187  
SRR17520069.8705191  
SRR17520069.8705193  
SRR17520069.8705195  
SRR17520069.8705197  
SRR17520069.8705203  
SRR17520069.8705207  
SRR17520069.8723349  
SRR17520069.8724832  
SRR17520069.8728581  
SRR17520069.8738864  
SRR17520069.8738908  
SRR17520069.8744776  
SRR17520069.8767222  
SRR17520069.8767254  
SRR17520069.8772497  
SRR17520069.8774590  
SRR17520069.8788864  
SRR17520069.8791184  
SRR17520069.8791216  
SRR17520069.8817348  
SRR17520069.8832385  
SRR17520069.8832405  
SRR17520069.8848375  
SRR17520069.8849984  
SRR17520069.8857429

SRR17520069.8859462  
SRR17520069.8863328  
SRR17520069.8874669  
SRR17520069.8876035  
SRR17520069.8879391  
SRR17520069.8879422  
SRR17520069.8879461  
SRR17520069.8879462  
SRR17520069.8888177  
SRR17520069.8933427  
SRR17520069.8944897  
SRR17520069.8944899  
SRR17520069.8946637  
SRR17520069.8946675  
SRR17520069.8947179  
SRR17520069.8948451  
SRR17520069.8959040  
SRR17520069.8967608  
SRR17520069.8971573  
SRR17520069.8974398  
SRR17520069.8975862  
SRR17520069.8982759  
SRR17520069.8991602  
SRR17520069.9008657  
SRR17520069.9011397  
SRR17520069.9012018  
SRR17520069.9014151  
SRR17520069.9014153  
SRR17520069.9017202  
SRR17520069.9017217  
SRR17520069.9026818  
SRR17520069.9027906  
SRR17520069.9040704  
SRR17520069.9043873  
SRR17520069.9043925  
SRR17520069.9044136  
SRR17520069.9047124  
SRR17520069.9048412  
SRR17520069.9060651  
SRR17520069.9060683  
SRR17520069.9061642  
SRR17520069.9077265  
SRR17520069.9077830  
SRR17520069.9083607  
SRR17520069.9083637  
SRR17520069.9084273  
SRR17520069.9084295

SRR17520069.9089033  
SRR17520069.9100821  
SRR17520069.9102696  
SRR17520069.9104904  
SRR17520069.9108977  
SRR17520069.9114662  
SRR17520069.9116001  
SRR17520069.9120271  
SRR17520069.9134707  
SRR17520069.9134720  
SRR17520069.9140632  
SRR17520069.9149480  
SRR17520069.9159764  
SRR17520069.9159771  
SRR17520069.9161821  
SRR17520069.9167007  
SRR17520069.9176904  
SRR17520069.9178574  
SRR17520069.9182588  
SRR17520069.9185252  
SRR17520069.9187365  
SRR17520069.9187371  
SRR17520069.9187373  
SRR17520069.9187375  
SRR17520069.9187377  
SRR17520069.9187379  
SRR17520069.9187381  
SRR17520069.9187383  
SRR17520069.9187385  
SRR17520069.9187387  
SRR17520069.9187391  
SRR17520069.9187393  
SRR17520069.9187395  
SRR17520069.9187399  
SRR17520069.9187401  
SRR17520069.9187403  
SRR17520069.9187407  
SRR17520069.9187409  
SRR17520069.9187415  
SRR17520069.9187417  
SRR17520069.9187419  
SRR17520069.9187421  
SRR17520069.9187423  
SRR17520069.9187425  
SRR17520069.9187429  
SRR17520069.9187437  
SRR17520069.9187439

SRR17520069.9187441  
SRR17520069.9187445  
SRR17520069.9187447  
SRR17520069.9187449  
SRR17520069.9187451  
SRR17520069.9187457  
SRR17520069.9187459  
SRR17520069.9187463  
SRR17520069.9187467  
SRR17520069.9188216  
SRR17520069.9188321  
SRR17520069.9188323  
SRR17520069.9190788  
SRR17520069.9195810  
SRR17520069.9200724  
SRR17520069.9200726  
SRR17520069.9200728  
SRR17520069.9200730  
SRR17520069.9200734  
SRR17520069.9200736  
SRR17520069.9200738  
SRR17520069.9200740  
SRR17520069.9200742  
SRR17520069.9200744  
SRR17520069.9200746  
SRR17520069.9200748  
SRR17520069.9200750  
SRR17520069.9200752  
SRR17520069.9200756  
SRR17520069.9200758  
SRR17520069.9200762  
SRR17520069.9200764  
SRR17520069.9200766  
SRR17520069.9200768  
SRR17520069.9200770  
SRR17520069.9200772  
SRR17520069.9200774  
SRR17520069.9200776  
SRR17520069.9200778  
SRR17520069.9200780  
SRR17520069.9200782  
SRR17520069.9200784  
SRR17520069.9200786  
SRR17520069.9200788  
SRR17520069.9200790  
SRR17520069.9200792  
SRR17520069.9200794

SRR17520069. 9200796  
SRR17520069. 9200798  
SRR17520069. 9200802  
SRR17520069. 9200804  
SRR17520069. 9200806  
SRR17520069. 9200808  
SRR17520069. 9200810  
SRR17520069. 9200812  
SRR17520069. 9200814  
SRR17520069. 9200816  
SRR17520069. 9200818  
SRR17520069. 9200820  
SRR17520069. 9200822  
SRR17520069. 9200824  
SRR17520069. 9200826  
SRR17520069. 9200828  
SRR17520069. 9200830  
SRR17520069. 9200832  
SRR17520069. 9200834  
SRR17520069. 9200836  
SRR17520069. 9200838  
SRR17520069. 9200840  
SRR17520069. 9200842  
SRR17520069. 9200844  
SRR17520069. 9200846  
SRR17520069. 9200848  
SRR17520069. 9200850  
SRR17520069. 9200852  
SRR17520069. 9200854  
SRR17520069. 9200856  
SRR17520069. 9200860  
SRR17520069. 9200862  
SRR17520069. 9200864  
SRR17520069. 9200866  
SRR17520069. 9200868  
SRR17520069. 9200870  
SRR17520069. 9200872  
SRR17520069. 9200874  
SRR17520069. 9200876  
SRR17520069. 9200880  
SRR17520069. 9200882  
SRR17520069. 9200884  
SRR17520069. 9200886  
SRR17520069. 9200888  
SRR17520069. 9200890  
SRR17520069. 9200892  
SRR17520069. 9200894

SRR17520069. 9200896  
SRR17520069. 9200898  
SRR17520069. 9200900  
SRR17520069. 9200902  
SRR17520069. 9200904  
SRR17520069. 9200906  
SRR17520069. 9200908  
SRR17520069. 9200912  
SRR17520069. 9200914  
SRR17520069. 9200916  
SRR17520069. 9200918  
SRR17520069. 9200920  
SRR17520069. 9200922  
SRR17520069. 9210637  
SRR17520069. 9215384  
SRR17520069. 9219027  
SRR17520069. 9219031  
SRR17520069. 9238111  
SRR17520069. 9243519  
SRR17520069. 9243524  
SRR17520069. 9243625  
SRR17520069. 9248635  
SRR17520069. 9248681  
SRR17520069. 9256868  
SRR17520069. 9278835  
SRR17520069. 9279517  
SRR17520069. 9279989  
SRR17520069. 9282451  
SRR17520069. 9288388  
SRR17520069. 9289727  
SRR17520069. 9298350  
SRR17520069. 9298354  
SRR17520069. 9298356  
SRR17520069. 9298364  
SRR17520069. 9298366  
SRR17520069. 9298368  
SRR17520069. 9298370  
SRR17520069. 9298372  
SRR17520069. 9304028  
SRR17520069. 9304040  
SRR17520069. 9310286  
SRR17520069. 9340647  
SRR17520069. 9357935  
SRR17520069. 9359063  
SRR17520069. 9367627  
SRR17520069. 9369629  
SRR17520069. 9369636

SRR17520069. 9369638  
SRR17520069. 9369640  
SRR17520069. 9369642  
SRR17520069. 9369644  
SRR17520069. 9369646  
SRR17520069. 9369648  
SRR17520069. 9369650  
SRR17520069. 9369652  
SRR17520069. 9370019  
SRR17520069. 9377550  
SRR17520069. 9388114  
SRR17520069. 9388579  
SRR17520069. 9390980  
SRR17520069. 9403858  
SRR17520069. 9404826  
SRR17520069. 9404952  
SRR17520069. 9404982  
SRR17520069. 9405024  
SRR17520069. 9405062  
SRR17520069. 9405064  
SRR17520069. 9416999  
SRR17520069. 9417001  
SRR17520069. 9417003  
SRR17520069. 9417005  
SRR17520069. 9417007  
SRR17520069. 9442278  
SRR17520069. 9442286  
SRR17520069. 9451386  
SRR17520069. 9466621  
SRR17520069. 9470834  
SRR17520069. 9470836  
SRR17520069. 9470838  
SRR17520069. 9470840  
SRR17520069. 9470842  
SRR17520069. 9470844  
SRR17520069. 9470846  
SRR17520069. 9470848  
SRR17520069. 9470850  
SRR17520069. 9470852  
SRR17520069. 9470854  
SRR17520069. 9470856  
SRR17520069. 9470858  
SRR17520069. 9470860  
SRR17520069. 9470862  
SRR17520069. 9470864  
SRR17520069. 9470866  
SRR17520069. 9470868



SRR17520069.9470870  
SRR17520069.9470872  
SRR17520069.9470874  
SRR17520069.9470876  
SRR17520069.9470878  
SRR17520069.9470880  
SRR17520069.9470882  
SRR17520069.9470884  
SRR17520069.9470886  
SRR17520069.9479887  
SRR17520069.9481551  
SRR17520069.9489389  
SRR17520069.9489409  
SRR17520069.9489997  
SRR17520069.9490001  
SRR17520069.9490041  
SRR17520069.9490119  
SRR17520069.9492642  
SRR17520069.9505308  
SRR17520069.9505311  
SRR17520069.9505320  
SRR17520069.9510330  
SRR17520069.9510334  
SRR17520069.9517131  
SRR17520069.9525670  
SRR17520069.9531152  
SRR17520069.9537323  
SRR17520069.9537324  
SRR17520069.9541912  
SRR17520069.9588891  
SRR17520069.9588892  
SRR17520069.9588899  
SRR17520069.9593329  
SRR17520069.9598478  
SRR17520069.9598565  
SRR17520069.9598571  
SRR17520069.9598591  
SRR17520069.9601294  
SRR17520069.9610309  
SRR17520069.9634156  
SRR17520069.9637844  
SRR17520069.9641135  
SRR17520069.9641634  
SRR17520069.9642224  
SRR17520069.9646008  
SRR17520069.9656202  
SRR17520069.9657919

SRR17520069.9659569  
SRR17520069.9667926  
SRR17520069.9687829  
SRR17520069.9688582  
SRR17520069.9689305  
SRR17520069.9694820  
SRR17520069.9694925  
SRR17520069.9700085  
SRR17520069.9711907  
SRR17520069.9711910  
SRR17520069.9711999  
SRR17520069.9713352  
SRR17520069.9715787  
SRR17520069.9731279  
SRR17520069.9735221  
SRR17520069.9736724  
SRR17520069.9741239  
SRR17520069.9742925  
SRR17520069.9753056  
SRR17520069.9754326  
SRR17520069.9760787  
SRR17520069.9779157  
SRR17520069.9779398  
SRR17520069.9781907  
SRR17520069.9783844  
SRR17520069.9783966  
SRR17520069.9790305  
SRR17520069.9790307  
SRR17520069.9790309  
SRR17520069.9790311  
SRR17520069.9792850  
SRR17520069.9793131  
SRR17520069.9793276  
SRR17520069.9802374  
SRR17520069.9809392  
SRR17520069.9809396  
SRR17520069.9809406  
SRR17520069.9830933  
SRR17520069.9843020  
SRR17520069.9849173  
SRR17520069.9857948  
SRR17520069.9859979  
SRR17520069.9870746  
SRR17520069.9874690  
SRR17520069.9888921  
SRR17520069.9892530  
SRR17520069.9893051

SRR17520069.9899504  
SRR17520069.9901130  
SRR17520069.9901132  
SRR17520069.9901134  
SRR17520069.9901138  
SRR17520069.9901146  
SRR17520069.9901148  
SRR17520069.9901150  
SRR17520069.9901152  
SRR17520069.9901154  
SRR17520069.9901156  
SRR17520069.9901160  
SRR17520069.9901162  
SRR17520069.9901166  
SRR17520069.9901168  
SRR17520069.9901170  
SRR17520069.9901172  
SRR17520069.9901176  
SRR17520069.9901178  
SRR17520069.9901180  
SRR17520069.9901182  
SRR17520069.9908571  
SRR17520069.9920449  
SRR17520069.9920454  
SRR17520069.9922372  
SRR17520069.9924975  
SRR17520069.9930202  
SRR17520069.9930206  
SRR17520069.9938562  
SRR17520069.9946897  
SRR17520069.9953473  
SRR17520069.9953945  
SRR17520069.9958259  
SRR17520069.9971796  
SRR17520069.9980610  
SRR17520069.9980951  
SRR17520069.9982566  
SRR17520069.9983750  
SRR17520069.9983752  
SRR17520069.9983777  
SRR17520069.9983784  
SRR17520069.9997084  
SRR17520069.9997092  
SRR17520069.9997114  
SRR17520069.9997142  
SRR17520069.10011120  
SRR17520069.10017416

SRR17520069.10020869  
SRR17520069.10030191  
SRR17520069.10030287  
SRR17520069.10030365  
SRR17520069.10040914  
SRR17520069.10042394  
SRR17520069.10042809  
SRR17520069.10049244  
SRR17520069.10051266  
SRR17520069.10051352  
SRR17520069.10053108  
SRR17520069.10056573  
SRR17520069.10061405  
SRR17520069.10062326  
SRR17520069.10062369  
SRR17520069.10062387  
SRR17520069.10063820  
SRR17520069.10067468  
SRR17520069.10076921  
SRR17520069.10076923  
SRR17520069.10076925  
SRR17520069.10076927  
SRR17520069.10076929  
SRR17520069.10076931  
SRR17520069.10076933  
SRR17520069.10076935  
SRR17520069.10076937  
SRR17520069.10076939  
SRR17520069.10076941  
SRR17520069.10076943  
SRR17520069.10076945  
SRR17520069.10076947  
SRR17520069.10076949  
SRR17520069.10076951  
SRR17520069.10076953  
SRR17520069.10076955  
SRR17520069.10076957  
SRR17520069.10076959  
SRR17520069.10076961  
SRR17520069.10076963  
SRR17520069.10076965  
SRR17520069.10076967  
SRR17520069.10076969  
SRR17520069.10076971  
SRR17520069.10076973  
SRR17520069.10076975  
SRR17520069.10076977

SRR17520069.10076979  
SRR17520069.10076981  
SRR17520069.10076983  
SRR17520069.10076985  
SRR17520069.10076987  
SRR17520069.10076989  
SRR17520069.10076991  
SRR17520069.10081690  
SRR17520069.10081698  
SRR17520069.10081869  
SRR17520069.10082616  
SRR17520069.10109635  
SRR17520069.10113882  
SRR17520069.10113890  
SRR17520069.10119389  
SRR17520069.10119391  
SRR17520069.10119393  
SRR17520069.10119395  
SRR17520069.10119397  
SRR17520069.10119399  
SRR17520069.10119401  
SRR17520069.10119403  
SRR17520069.10119405  
SRR17520069.10119407  
SRR17520069.10119413  
SRR17520069.10119415  
SRR17520069.10119417  
SRR17520069.10119419  
SRR17520069.10119425  
SRR17520069.10119427  
SRR17520069.10119429  
SRR17520069.10119431  
SRR17520069.10119437  
SRR17520069.10119439  
SRR17520069.10119441  
SRR17520069.10119443  
SRR17520069.10119445  
SRR17520069.10119449  
SRR17520069.10119451  
SRR17520069.10120692  
SRR17520069.10126589  
SRR17520069.10126591  
SRR17520069.10126595  
SRR17520069.10126599  
SRR17520069.10126601  
SRR17520069.10126603  
SRR17520069.10126605

SRR17520069.10126607  
SRR17520069.10126609  
SRR17520069.10126611  
SRR17520069.10126613  
SRR17520069.10126618  
SRR17520069.10126622  
SRR17520069.10126624  
SRR17520069.10126626  
SRR17520069.10140378  
SRR17520069.10140393  
SRR17520069.10142852  
SRR17520069.10146619  
SRR17520069.10146675  
SRR17520069.10147605  
SRR17520069.10148048  
SRR17520069.10148087  
SRR17520069.10148172  
SRR17520069.10154854  
SRR17520069.10155041  
SRR17520069.10155045  
SRR17520069.10166399  
SRR17520069.10179706  
SRR17520069.10189699  
SRR17520069.10189703  
SRR17520069.10191172  
SRR17520069.10200015  
SRR17520069.10200119  
SRR17520069.10203403  
SRR17520069.10208045  
SRR17520069.10208721  
SRR17520069.10228828  
SRR17520069.10228863  
SRR17520069.10245415  
SRR17520069.10250790  
SRR17520069.10256256  
SRR17520069.10266199  
SRR17520069.10266258  
SRR17520069.10267046  
SRR17520069.10269321  
SRR17520069.10273692  
SRR17520069.10274256  
SRR17520069.10275734  
SRR17520069.10285827  
SRR17520069.10285837  
SRR17520069.10285859  
SRR17520069.10290400  
SRR17520069.10315617

SRR17520069. 10316781  
SRR17520069. 10317658  
SRR17520069. 10317694  
SRR17520069. 10340104  
SRR17520069. 10341270  
SRR17520069. 10348296  
SRR17520069. 10348302  
SRR17520069. 10348305  
SRR17520069. 10348338  
SRR17520069. 10348365  
SRR17520069. 10348368  
SRR17520069. 10348408  
SRR17520069. 10348583  
SRR17520069. 10348726  
SRR17520069. 10353261  
SRR17520069. 10358755  
SRR17520069. 10358836  
SRR17520069. 10365249  
SRR17520069. 10366701  
SRR17520069. 10373879  
SRR17520069. 10376152  
SRR17520069. 10376396  
SRR17520069. 10376987  
SRR17520069. 10389977  
SRR17520069. 10393250  
SRR17520069. 10404632  
SRR17520069. 10407128  
SRR17520069. 10407172  
SRR17520069. 10420667  
SRR17520069. 10420687  
SRR17520069. 10420691  
SRR17520069. 10420727  
SRR17520069. 10422289  
SRR17520069. 10428350  
SRR17520069. 10428426  
SRR17520069. 10428464  
SRR17520069. 10429220  
SRR17520069. 10429224  
SRR17520069. 10431211  
SRR17520069. 10446429  
SRR17520069. 10446431  
SRR17520069. 10448453  
SRR17520069. 10448505  
SRR17520069. 10448537  
SRR17520069. 10448683  
SRR17520069. 10449058  
SRR17520069. 10449070

SRR17520069.10449085  
SRR17520069.10453713  
SRR17520069.10459508  
SRR17520069.10459523  
SRR17520069.10464948  
SRR17520069.10473661  
SRR17520069.10476901  
SRR17520069.10476947  
SRR17520069.10491686  
SRR17520069.10499024  
SRR17520069.10533816  
SRR17520069.10533822  
SRR17520069.10533824  
SRR17520069.10533826  
SRR17520069.10533828  
SRR17520069.10533830  
SRR17520069.10547964  
SRR17520069.10556666  
SRR17520069.10558430  
SRR17520069.10559927  
SRR17520069.10559957  
SRR17520069.10560055  
SRR17520069.10566032  
SRR17520069.10569685  
SRR17520069.10581043  
SRR17520069.10594019  
SRR17520069.10594035  
SRR17520069.10594039  
SRR17520069.10596513  
SRR17520069.10596631  
SRR17520069.10597054  
SRR17520069.10598320  
SRR17520069.10600004  
SRR17520069.10601086  
SRR17520069.10604681  
SRR17520069.10604952  
SRR17520069.10605755  
SRR17520069.10605769  
SRR17520069.10605848  
SRR17520069.10605870  
SRR17520069.10609409  
SRR17520069.10609521  
SRR17520069.10614386  
SRR17520069.10615899  
SRR17520069.10615977  
SRR17520069.10616093  
SRR17520069.10617633



SRR17520069.10618969  
SRR17520069.10629487  
SRR17520069.10637757  
SRR17520069.10638859  
SRR17520069.10639139  
SRR17520069.10645004  
SRR17520069.10645142  
SRR17520069.10649056  
SRR17520069.10658885  
SRR17520069.10666482  
SRR17520069.10686444  
SRR17520069.10686472  
SRR17520069.10699198  
SRR17520069.10701330  
SRR17520069.10705357  
SRR17520069.10707525  
SRR17520069.10712592  
SRR17520069.10716013  
SRR17520069.10717015  
SRR17520069.10717414  
SRR17520069.10721239  
SRR17520069.10721291  
SRR17520069.10727957  
SRR17520069.10727965  
SRR17520069.10727971  
SRR17520069.10727993  
SRR17520069.10733961  
SRR17520069.10744107  
SRR17520069.10745190  
SRR17520069.10749923  
SRR17520069.10754092  
SRR17520069.10754106  
SRR17520069.10754121  
SRR17520069.10757938  
SRR17520069.10764585  
SRR17520069.10768303  
SRR17520069.10769639  
SRR17520069.10771324  
SRR17520069.10772580  
SRR17520069.10779078  
SRR17520069.10781233  
SRR17520069.10782462  
SRR17520069.10782522  
SRR17520069.10782531  
SRR17520069.10791260  
SRR17520069.10791262  
SRR17520069.10793750

SRR17520069.10812805  
SRR17520069.10813640  
SRR17520069.10852999  
SRR17520069.10859082  
SRR17520069.10861868  
SRR17520069.10861876  
SRR17520069.10863030  
SRR17520069.10875406  
SRR17520069.10884912  
SRR17520069.10885944  
SRR17520069.10890375  
SRR17520069.10897188  
SRR17520069.10904093  
SRR17520069.10906110  
SRR17520069.10912159  
SRR17520069.10912163  
SRR17520069.10932080  
SRR17520069.10933642  
SRR17520069.10935457  
SRR17520069.10960211  
SRR17520069.10960239  
SRR17520069.10971179  
SRR17520069.10975806  
SRR17520069.10976400  
SRR17520069.10976412  
SRR17520069.10976424  
SRR17520069.10984268  
SRR17520069.10988102  
SRR17520069.10988158  
SRR17520069.10992113  
SRR17520069.10999050  
SRR17520069.11017850  
SRR17520069.11018146  
SRR17520069.11019382  
SRR17520069.11036201  
SRR17520069.11054953  
SRR17520069.11055086  
SRR17520069.11055805  
SRR17520069.11058202  
SRR17520069.11058935  
SRR17520069.11070268  
SRR17520069.11070306  
SRR17520069.11076065  
SRR17520069.11076283  
SRR17520069.11078368  
SRR17520069.11078393  
SRR17520069.11079297

SRR17520069.11090810  
SRR17520069.11091956  
SRR17520069.11092454  
SRR17520069.11114770  
SRR17520069.11116226  
SRR17520069.11116228  
SRR17520069.11116270  
SRR17520069.11118996  
SRR17520069.11122345  
SRR17520069.11126137  
SRR17520069.11126258  
SRR17520069.11126259  
SRR17520069.11139478  
SRR17520069.11144506  
SRR17520069.11160610  
SRR17520069.11160614  
SRR17520069.11160616  
SRR17520069.11160619  
SRR17520069.11160631  
SRR17520069.11160638  
SRR17520069.11161220  
SRR17520069.11161244  
SRR17520069.11161286  
SRR17520069.11162789  
SRR17520069.11185571  
SRR17520069.11187370  
SRR17520069.11189828  
SRR17520069.11192622  
SRR17520069.11208081  
SRR17520069.11216337  
SRR17520069.11233985  
SRR17520069.11240091  
SRR17520069.11241637  
SRR17520069.11242669  
SRR17520069.11243627  
SRR17520069.11244256  
SRR17520069.11249093  
SRR17520069.11256647  
SRR17520069.11265777  
SRR17520069.11268354  
SRR17520069.11272618  
SRR17520069.11272656  
SRR17520069.11272658  
SRR17520069.11276173  
SRR17520069.11276417  
SRR17520069.11281301  
SRR17520069.11281321

SRR17520069.11283007  
SRR17520069.11296695  
SRR17520069.11297604  
SRR17520069.11299765  
SRR17520069.11300395  
SRR17520069.11301945  
SRR17520069.11301946  
SRR17520069.11301947  
SRR17520069.11301949  
SRR17520069.11301984  
SRR17520069.11302022  
SRR17520069.11302037  
SRR17520069.11323515  
SRR17520069.11323761  
SRR17520069.11330730  
SRR17520069.11331341  
SRR17520069.11338682  
SRR17520069.11349365  
SRR17520069.11349477  
SRR17520069.11361988  
SRR17520069.11362016  
SRR17520069.11378210  
SRR17520069.11378212  
SRR17520069.11378214  
SRR17520069.11378216  
SRR17520069.11378218  
SRR17520069.11378220  
SRR17520069.11378222  
SRR17520069.11378224  
SRR17520069.11378226  
SRR17520069.11378228  
SRR17520069.11378230  
SRR17520069.11378232  
SRR17520069.11378234  
SRR17520069.11378236  
SRR17520069.11378238  
SRR17520069.11378240  
SRR17520069.11378242  
SRR17520069.11378244  
SRR17520069.11378246  
SRR17520069.11378248  
SRR17520069.11378250  
SRR17520069.11378254  
SRR17520069.11378256  
SRR17520069.11378258  
SRR17520069.11378260  
SRR17520069.11378262

SRR17520069.11378264  
SRR17520069.11378266  
SRR17520069.11378268  
SRR17520069.11385976  
SRR17520069.11392920  
SRR17520069.11397413  
SRR17520069.11414749  
SRR17520069.11414761  
SRR17520069.11421690  
SRR17520069.11421736  
SRR17520069.11423726  
SRR17520069.11425553  
SRR17520069.11425555  
SRR17520069.11425641  
SRR17520069.11440022  
SRR17520069.11444044  
SRR17520069.11444046  
SRR17520069.11444048  
SRR17520069.11444050  
SRR17520069.11444052  
SRR17520069.11444054  
SRR17520069.11444056  
SRR17520069.11444058  
SRR17520069.11444060  
SRR17520069.11444062  
SRR17520069.11444064  
SRR17520069.11444066  
SRR17520069.11444068  
SRR17520069.11444070  
SRR17520069.11444072  
SRR17520069.11444074  
SRR17520069.11444076  
SRR17520069.11444078  
SRR17520069.11444080  
SRR17520069.11444082  
SRR17520069.11444084  
SRR17520069.11444086  
SRR17520069.11444088  
SRR17520069.11444090  
SRR17520069.11444092  
SRR17520069.11444094  
SRR17520069.11444096  
SRR17520069.11444098  
SRR17520069.11444100  
SRR17520069.11444102  
SRR17520069.11444104  
SRR17520069.11444106

SRR17520069.11444831  
SRR17520069.11450546  
SRR17520069.11457686  
SRR17520069.11468734  
SRR17520069.11469240  
SRR17520069.11477901  
SRR17520069.11502092  
SRR17520069.11502140  
SRR17520069.11509237  
SRR17520069.11509363  
SRR17520069.11511742  
SRR17520069.11511965  
SRR17520069.11511967  
SRR17520069.11511969  
SRR17520069.11511971  
SRR17520069.11511973  
SRR17520069.11511975  
SRR17520069.11511977  
SRR17520069.11511979  
SRR17520069.11511981  
SRR17520069.11511983  
SRR17520069.11513276  
SRR17520069.11521363  
SRR17520069.11523301  
SRR17520069.11526247  
SRR17520069.11526265  
SRR17520069.11526393  
SRR17520069.11530668  
SRR17520069.11530670  
SRR17520069.11530672  
SRR17520069.11530674  
SRR17520069.11530676  
SRR17520069.11530678  
SRR17520069.11530680  
SRR17520069.11530684  
SRR17520069.11530686  
SRR17520069.11530690  
SRR17520069.11530764  
SRR17520069.11531820  
SRR17520069.11537065  
SRR17520069.11540243  
SRR17520069.11560365  
SRR17520069.11563022  
SRR17520069.11563029  
SRR17520069.11569507  
SRR17520069.11584609  
SRR17520069.11588759

SRR17520069.11608167  
SRR17520069.11624738  
SRR17520069.11633551  
SRR17520069.11638538  
SRR17520069.11651003  
SRR17520069.11661330  
SRR17520069.11679438  
SRR17520069.11680467  
SRR17520069.11684459  
SRR17520069.11685194  
SRR17520069.11692141  
SRR17520069.11701268  
SRR17520069.11701270  
SRR17520069.11704048  
SRR17520069.11716870  
SRR17520069.11717077  
SRR17520069.11736203  
SRR17520069.11736377  
SRR17520069.11744247  
SRR17520069.11744257  
SRR17520069.11744271  
SRR17520069.11744273  
SRR17520069.11748314  
SRR17520069.11751644  
SRR17520069.11764784  
SRR17520069.11766062  
SRR17520069.11766136  
SRR17520069.11766167  
SRR17520069.11775356  
SRR17520069.11775380  
SRR17520069.11792380  
SRR17520069.11813747  
SRR17520069.11823743  
SRR17520069.11832543  
SRR17520069.11843562  
SRR17520069.11843590  
SRR17520069.11844759  
SRR17520069.11850373  
SRR17520069.11864902  
SRR17520069.11866983  
SRR17520069.11869267  
SRR17520069.11872101  
SRR17520069.11881386  
SRR17520069.11882487  
SRR17520069.11886053  
SRR17520069.11892822  
SRR17520069.11892891

SRR17520069.11894795  
SRR17520069.11894906  
SRR17520069.11895405  
SRR17520069.11902393  
SRR17520069.11905227  
SRR17520069.11905229  
SRR17520069.11905231  
SRR17520069.11905233  
SRR17520069.11905235  
SRR17520069.11905237  
SRR17520069.11905239  
SRR17520069.11905241  
SRR17520069.11905243  
SRR17520069.11905245  
SRR17520069.11905247  
SRR17520069.11905249  
SRR17520069.11905251  
SRR17520069.11905253  
SRR17520069.11905255  
SRR17520069.11905257  
SRR17520069.11905259  
SRR17520069.11905261  
SRR17520069.11905263  
SRR17520069.11905265  
SRR17520069.11905267  
SRR17520069.11905269  
SRR17520069.11905271  
SRR17520069.11905273  
SRR17520069.11905275  
SRR17520069.11905277  
SRR17520069.11905279  
SRR17520069.11905281  
SRR17520069.11905283  
SRR17520069.11905285  
SRR17520069.11905287  
SRR17520069.11905289  
SRR17520069.11905291  
SRR17520069.11905293  
SRR17520069.11905295  
SRR17520069.11905297  
SRR17520069.11905299  
SRR17520069.11905301  
SRR17520069.11907084  
SRR17520069.11914021  
SRR17520069.11914035  
SRR17520069.11914044  
SRR17520069.11920157



SRR17520069.11924694  
SRR17520069.11927463  
SRR17520069.11927467  
SRR17520069.11929459  
SRR17520069.11929463  
SRR17520069.11929541  
SRR17520069.11929556  
SRR17520069.11930459  
SRR17520069.11935982  
SRR17520069.11945269  
SRR17520069.11959115  
SRR17520069.11974880  
SRR17520069.11974888  
SRR17520069.11974892  
SRR17520069.11974902  
SRR17520069.11974906  
SRR17520069.11974914  
SRR17520069.11974924  
SRR17520069.11974926  
SRR17520069.11974930  
SRR17520069.11974933  
SRR17520069.11974935  
SRR17520069.11981089  
SRR17520069.11983636  
SRR17520069.11983639  
SRR17520069.11988542  
SRR17520069.11989395  
SRR17520069.12000452  
SRR17520069.12000536  
SRR17520069.12010912  
SRR17520069.12010932  
SRR17520069.12014913  
SRR17520069.12019099  
SRR17520069.12027284  
SRR17520069.12029252  
SRR17520069.12038768  
SRR17520069.12041220  
SRR17520069.12043670  
SRR17520069.12043678  
SRR17520069.12048824  
SRR17520069.12050357  
SRR17520069.12057772  
SRR17520069.12071738  
SRR17520069.12072837  
SRR17520069.12083457  
SRR17520069.12083477  
SRR17520069.12083542

SRR17520069.12084086  
SRR17520069.12091806  
SRR17520069.12091807  
SRR17520069.12091830  
SRR17520069.12091863  
SRR17520069.12091881  
SRR17520069.12097005  
SRR17520069.12098549  
SRR17520069.12110462  
SRR17520069.12123819  
SRR17520069.12133678  
SRR17520069.12137609  
SRR17520069.12137637  
SRR17520069.12137657  
SRR17520069.12137675  
SRR17520069.12152118  
SRR17520069.12157145  
SRR17520069.12167588  
SRR17520069.12168979  
SRR17520069.12168993  
SRR17520069.12173669  
SRR17520069.12185093  
SRR17520069.12185103  
SRR17520069.12200888  
SRR17520069.12201211  
SRR17520069.12204065  
SRR17520069.12220280  
SRR17520069.12225368  
SRR17520069.12225456  
SRR17520069.12237773  
SRR17520069.12245735  
SRR17520069.12247787  
SRR17520069.12249004  
SRR17520069.12262352  
SRR17520069.12269766  
SRR17520069.12280016  
SRR17520069.12280044  
SRR17520069.12280088  
SRR17520069.12285480  
SRR17520069.12289491  
SRR17520069.12289601  
SRR17520069.12297165  
SRR17520069.12297169  
SRR17520069.12297406  
SRR17520069.12300333  
SRR17520069.12303448  
SRR17520069.12303470

SRR17520069. 12310926  
SRR17520069. 12312384  
SRR17520069. 12326440  
SRR17520069. 12328941  
SRR17520069. 12331065  
SRR17520069. 12336590  
SRR17520069. 12336592  
SRR17520069. 12339963  
SRR17520069. 12348101  
SRR17520069. 12348109  
SRR17520069. 12355404  
SRR17520069. 12357002  
SRR17520069. 12367926  
SRR17520069. 12371425  
SRR17520069. 12371427  
SRR17520069. 12377846  
SRR17520069. 12386381  
SRR17520069. 12390562  
SRR17520069. 12401119  
SRR17520069. 12404960  
SRR17520069. 12411086  
SRR17520069. 12411089  
SRR17520069. 12414325  
SRR17520069. 12424383  
SRR17520069. 12425051  
SRR17520069. 12430275  
SRR17520069. 12434429  
SRR17520069. 12434800  
SRR17520069. 12456255  
SRR17520069. 12456313  
SRR17520069. 12460194  
SRR17520069. 12462937  
SRR17520069. 12469969  
SRR17520069. 12475011  
SRR17520069. 12479302  
SRR17520069. 12508229  
SRR17520069. 12510756  
SRR17520069. 12510788  
SRR17520069. 12519205  
SRR17520069. 12520683  
SRR17520069. 12520798  
SRR17520069. 12530520  
SRR17520069. 12530536  
SRR17520069. 12530537  
SRR17520069. 12531048  
SRR17520069. 12535744  
SRR17520069. 12539772

SRR17520069. 12542854  
SRR17520069. 12542865  
SRR17520069. 12542868  
SRR17520069. 12551279  
SRR17520069. 12552598  
SRR17520069. 12552698  
SRR17520069. 12552843  
SRR17520069. 12565894  
SRR17520069. 12565967  
SRR17520069. 12577472  
SRR17520069. 12586701  
SRR17520069. 12589441  
SRR17520069. 12589547  
SRR17520069. 12602755  
SRR17520069. 12611929  
SRR17520069. 12611943  
SRR17520069. 12613927  
SRR17520069. 12615412  
SRR17520069. 12617633  
SRR17520069. 12617643  
SRR17520069. 12619736  
SRR17520069. 12621166  
SRR17520069. 12646161  
SRR17520069. 12646166  
SRR17520069. 12648780  
SRR17520069. 12669260  
SRR17520069. 12680836  
SRR17520069. 12682052  
SRR17520069. 12683789  
SRR17520069. 12688412  
SRR17520069. 12694998  
SRR17520069. 12695051  
SRR17520069. 12695147  
SRR17520069. 12697461  
SRR17520069. 12699765  
SRR17520069. 12699791  
SRR17520069. 12704392  
SRR17520069. 12712733  
SRR17520069. 12712742  
SRR17520069. 12712749  
SRR17520069. 12716645  
SRR17520069. 12720424  
SRR17520069. 12735569  
SRR17520069. 12735793  
SRR17520069. 12744496  
SRR17520069. 12749701  
SRR17520069. 12757061

SRR17520069. 12757110  
SRR17520069. 12759126  
SRR17520069. 12759132  
SRR17520069. 12760027  
SRR17520069. 12762846  
SRR17520069. 12767108  
SRR17520069. 12768465  
SRR17520069. 12770492  
SRR17520069. 12784282  
SRR17520069. 12787942  
SRR17520069. 12791326  
SRR17520069. 12802803  
SRR17520069. 12802906  
SRR17520069. 12807854  
SRR17520069. 12825584  
SRR17520069. 12829811  
SRR17520069. 12836025  
SRR17520069. 12841148  
SRR17520069. 12850011  
SRR17520069. 12854031  
SRR17520069. 12860918  
SRR17520069. 12880161  
SRR17520069. 12888705  
SRR17520069. 12888709  
SRR17520069. 12888716  
SRR17520069. 12888717  
SRR17520069. 12888741  
SRR17520069. 12888742  
SRR17520069. 12888748  
SRR17520069. 12888750  
SRR17520069. 12888756  
SRR17520069. 12888773  
SRR17520069. 12888775  
SRR17520069. 12892592  
SRR17520069. 12897113  
SRR17520069. 12897155  
SRR17520069. 12902364  
SRR17520069. 12902419  
SRR17520069. 12910361  
SRR17520069. 12911106  
SRR17520069. 12918062  
SRR17520069. 12920393  
SRR17520069. 12921860  
SRR17520069. 12928652  
SRR17520069. 12928654  
SRR17520069. 12932010  
SRR17520069. 12941849

SRR17520069. 12952686  
SRR17520069. 12952713  
SRR17520069. 12955735  
SRR17520069. 12955743  
SRR17520069. 12957805  
SRR17520069. 12959790  
SRR17520069. 12959800  
SRR17520069. 12959951  
SRR17520069. 12959978  
SRR17520069. 12959990  
SRR17520069. 12960008  
SRR17520069. 12960025  
SRR17520069. 12961275  
SRR17520069. 12973143  
SRR17520069. 12973145  
SRR17520069. 12973147  
SRR17520069. 12973151  
SRR17520069. 12973153  
SRR17520069. 12973155  
SRR17520069. 12973157  
SRR17520069. 12973159  
SRR17520069. 12973161  
SRR17520069. 12973163  
SRR17520069. 12973165  
SRR17520069. 12973167  
SRR17520069. 12973171  
SRR17520069. 12973173  
SRR17520069. 12973175  
SRR17520069. 12973177  
SRR17520069. 12973179  
SRR17520069. 12973181  
SRR17520069. 12973183  
SRR17520069. 12973185  
SRR17520069. 12973187  
SRR17520069. 12973189  
SRR17520069. 12973191  
SRR17520069. 12973193  
SRR17520069. 12973195  
SRR17520069. 12973197  
SRR17520069. 12973199  
SRR17520069. 12973201  
SRR17520069. 12973203  
SRR17520069. 12973207  
SRR17520069. 12973209  
SRR17520069. 12973211  
SRR17520069. 12973213  
SRR17520069. 12973215

SRR17520069.12973217  
SRR17520069.12973219  
SRR17520069.12973221  
SRR17520069.12973223  
SRR17520069.12973225  
SRR17520069.12973227  
SRR17520069.12973229  
SRR17520069.12973231  
SRR17520069.12973233  
SRR17520069.12973235  
SRR17520069.12973237  
SRR17520069.12973239  
SRR17520069.12973433  
SRR17520069.12978698  
SRR17520069.12985267  
SRR17520069.13004253  
SRR17520069.13006316  
SRR17520069.13026446  
SRR17520069.13028646  
SRR17520069.13031046  
SRR17520069.13031054  
SRR17520069.13031067  
SRR17520069.13031072  
SRR17520069.13031086  
SRR17520069.13031118  
SRR17520069.13031142  
SRR17520069.13052403  
SRR17520069.13056795  
SRR17520069.13058195  
SRR17520069.13064381  
SRR17520069.13064391  
SRR17520069.13065754  
SRR17520069.13073761  
SRR17520069.13075411  
SRR17520069.13086797  
SRR17520069.13090275  
SRR17520069.13092609  
SRR17520069.13092643  
SRR17520069.13092645  
SRR17520069.13099770  
SRR17520069.13107097  
SRR17520069.13112269  
SRR17520069.13116905  
SRR17520069.13128666  
SRR17520069.13128671  
SRR17520069.13141158  
SRR17520069.13144478

SRR17520069. 13158903  
SRR17520069. 13161290  
SRR17520069. 13161364  
SRR17520069. 13173176  
SRR17520069. 13176798  
SRR17520069. 13179705  
SRR17520069. 13179754  
SRR17520069. 13179794  
SRR17520069. 13186042  
SRR17520069. 13186044  
SRR17520069. 13186046  
SRR17520069. 13186048  
SRR17520069. 13186050  
SRR17520069. 13186052  
SRR17520069. 13186054  
SRR17520069. 13186056  
SRR17520069. 13186058  
SRR17520069. 13186060  
SRR17520069. 13186062  
SRR17520069. 13186064  
SRR17520069. 13186066  
SRR17520069. 13186068  
SRR17520069. 13186070  
SRR17520069. 13186072  
SRR17520069. 13186074  
SRR17520069. 13186076  
SRR17520069. 13186078  
SRR17520069. 13186080  
SRR17520069. 13186082  
SRR17520069. 13186084  
SRR17520069. 13186086  
SRR17520069. 13186088  
SRR17520069. 13186090  
SRR17520069. 13186092  
SRR17520069. 13186094  
SRR17520069. 13186096  
SRR17520069. 13186098  
SRR17520069. 13186100  
SRR17520069. 13186102  
SRR17520069. 13186104  
SRR17520069. 13186106  
SRR17520069. 13186108  
SRR17520069. 13190017  
SRR17520069. 13202801  
SRR17520069. 13207438  
SRR17520069. 13208445  
SRR17520069. 13213659



SRR17520069. 13213671  
SRR17520069. 13241719  
SRR17520069. 13261814  
SRR17520069. 13261828  
SRR17520069. 13261844  
SRR17520069. 13263596  
SRR17520069. 13263603  
SRR17520069. 13271673  
SRR17520069. 13273116  
SRR17520069. 13277059  
SRR17520069. 13279975  
SRR17520069. 13281417  
SRR17520069. 13290978  
SRR17520069. 13297402  
SRR17520069. 13297895  
SRR17520069. 13310157  
SRR17520069. 13311449  
SRR17520069. 13319550  
SRR17520069. 13321675  
SRR17520069. 13332222  
SRR17520069. 13337034  
SRR17520069. 13341652  
SRR17520069. 13343533  
SRR17520069. 13343535  
SRR17520069. 13343537  
SRR17520069. 13343539  
SRR17520069. 13354424  
SRR17520069. 13354842  
SRR17520069. 13376185  
SRR17520069. 13396559  
SRR17520069. 13397742  
SRR17520069. 13400991  
SRR17520069. 13405415  
SRR17520069. 13411994  
SRR17520069. 13412068  
SRR17520069. 13415327  
SRR17520069. 13415366  
SRR17520069. 13415870  
SRR17520069. 13429705  
SRR17520069. 13436733  
SRR17520069. 13445339  
SRR17520069. 13445347  
SRR17520069. 13448866  
SRR17520069. 13459797  
SRR17520069. 13459811  
SRR17520069. 13460770  
SRR17520069. 13470207

SRR17520069. 13471203  
SRR17520069. 13473209  
SRR17520069. 13478272  
SRR17520069. 13482358  
SRR17520069. 13484073  
SRR17520069. 13484076  
SRR17520069. 13484078  
SRR17520069. 13484080  
SRR17520069. 13484084  
SRR17520069. 13484123  
SRR17520069. 13484789  
SRR17520069. 13486489  
SRR17520069. 13486687  
SRR17520069. 13504476  
SRR17520069. 13507381  
SRR17520069. 13529057  
SRR17520069. 13529059  
SRR17520069. 13529063  
SRR17520069. 13529065  
SRR17520069. 13529067  
SRR17520069. 13529069  
SRR17520069. 13529071  
SRR17520069. 13529073  
SRR17520069. 13529075  
SRR17520069. 13529079  
SRR17520069. 13529081  
SRR17520069. 13529083  
SRR17520069. 13529087  
SRR17520069. 13529089  
SRR17520069. 13529091  
SRR17520069. 13529093  
SRR17520069. 13529099  
SRR17520069. 13529101  
SRR17520069. 13529103  
SRR17520069. 13529105  
SRR17520069. 13529107  
SRR17520069. 13529109  
SRR17520069. 13529113  
SRR17520069. 13529115  
SRR17520069. 13529119  
SRR17520069. 13529121  
SRR17520069. 13529123  
SRR17520069. 13529125  
SRR17520069. 13529129  
SRR17520069. 13529131  
SRR17520069. 13529133  
SRR17520069. 13529135

SRR17520069. 13529137  
SRR17520069. 13529139  
SRR17520069. 13529141  
SRR17520069. 13529143  
SRR17520069. 13529145  
SRR17520069. 13529149  
SRR17520069. 13529151  
SRR17520069. 13529153  
SRR17520069. 13529155  
SRR17520069. 13529157  
SRR17520069. 13529159  
SRR17520069. 13529163  
SRR17520069. 13542076  
SRR17520069. 13542195  
SRR17520069. 13542221  
SRR17520069. 13543711  
SRR17520069. 13543713  
SRR17520069. 13543715  
SRR17520069. 13543719  
SRR17520069. 13543721  
SRR17520069. 13543723  
SRR17520069. 13543727  
SRR17520069. 13543729  
SRR17520069. 13545845  
SRR17520069. 13547121  
SRR17520069. 13547129  
SRR17520069. 13547174  
SRR17520069. 13547181  
SRR17520069. 13547184  
SRR17520069. 13554745  
SRR17520069. 13554747  
SRR17520069. 13554749  
SRR17520069. 13554751  
SRR17520069. 13554753  
SRR17520069. 13554755  
SRR17520069. 13554757  
SRR17520069. 13554759  
SRR17520069. 13554761  
SRR17520069. 13554763  
SRR17520069. 13554765  
SRR17520069. 13554767  
SRR17520069. 13554769  
SRR17520069. 13554771  
SRR17520069. 13554773  
SRR17520069. 13554775  
SRR17520069. 13554777  
SRR17520069. 13554779

SRR17520069. 13554781  
SRR17520069. 13554783  
SRR17520069. 13554785  
SRR17520069. 13554787  
SRR17520069. 13554789  
SRR17520069. 13554791  
SRR17520069. 13554793  
SRR17520069. 13554795  
SRR17520069. 13554797  
SRR17520069. 13554799  
SRR17520069. 13554801  
SRR17520069. 13554803  
SRR17520069. 13554805  
SRR17520069. 13554809  
SRR17520069. 13554811  
SRR17520069. 13554813  
SRR17520069. 13554815  
SRR17520069. 13554817  
SRR17520069. 13554819  
SRR17520069. 13554821  
SRR17520069. 13554823  
SRR17520069. 13554825  
SRR17520069. 13554827  
SRR17520069. 13554829  
SRR17520069. 13554831  
SRR17520069. 13554833  
SRR17520069. 13554835  
SRR17520069. 13554837  
SRR17520069. 13554839  
SRR17520069. 13554841  
SRR17520069. 13554843  
SRR17520069. 13554845  
SRR17520069. 13554847  
SRR17520069. 13554849  
SRR17520069. 13554851  
SRR17520069. 13554853  
SRR17520069. 13554855  
SRR17520069. 13554857  
SRR17520069. 13554859  
SRR17520069. 13554861  
SRR17520069. 13554863  
SRR17520069. 13554865  
SRR17520069. 13554867  
SRR17520069. 13554869  
SRR17520069. 13554871  
SRR17520069. 13554873  
SRR17520069. 13554875

SRR17520069. 13554879  
SRR17520069. 13554881  
SRR17520069. 13554883  
SRR17520069. 13554885  
SRR17520069. 13554887  
SRR17520069. 13554889  
SRR17520069. 13554891  
SRR17520069. 13554893  
SRR17520069. 13554895  
SRR17520069. 13554897  
SRR17520069. 13554899  
SRR17520069. 13554901  
SRR17520069. 13554903  
SRR17520069. 13554905  
SRR17520069. 13554907  
SRR17520069. 13554909  
SRR17520069. 13554911  
SRR17520069. 13554913  
SRR17520069. 13554915  
SRR17520069. 13554917  
SRR17520069. 13554919  
SRR17520069. 13554921  
SRR17520069. 13554923  
SRR17520069. 13554925  
SRR17520069. 13554927  
SRR17520069. 13554929  
SRR17520069. 13554931  
SRR17520069. 13554933  
SRR17520069. 13554935  
SRR17520069. 13554937  
SRR17520069. 13554939  
SRR17520069. 13554941  
SRR17520069. 13562227  
SRR17520069. 13564225  
SRR17520069. 13564233  
SRR17520069. 13565762  
SRR17520069. 13570240  
SRR17520069. 13581442  
SRR17520069. 13582697  
SRR17520069. 13584086  
SRR17520069. 13584087  
SRR17520069. 13584119  
SRR17520069. 13584139  
SRR17520069. 13584157  
SRR17520069. 13584171  
SRR17520069. 13596662  
SRR17520069. 13597332

SRR17520069. 13606809  
SRR17520069. 13618931  
SRR17520069. 13625300  
SRR17520069. 13638510  
SRR17520069. 13638559  
SRR17520069. 13640324  
SRR17520069. 13651367  
SRR17520069. 13667514  
SRR17520069. 13668878  
SRR17520069. 13683149  
SRR17520069. 13684494  
SRR17520069. 13689202  
SRR17520069. 13691884  
SRR17520069. 13691908  
SRR17520069. 13693616  
SRR17520069. 13693618  
SRR17520069. 13693620  
SRR17520069. 13693622  
SRR17520069. 13693624  
SRR17520069. 13693626  
SRR17520069. 13693628  
SRR17520069. 13693630  
SRR17520069. 13693632  
SRR17520069. 13693634  
SRR17520069. 13693636  
SRR17520069. 13693638  
SRR17520069. 13715632  
SRR17520069. 13718786  
SRR17520069. 13721506  
SRR17520069. 13721534  
SRR17520069. 13724724  
SRR17520069. 13724726  
SRR17520069. 13724728  
SRR17520069. 13724732  
SRR17520069. 13724740  
SRR17520069. 13750390  
SRR17520069. 13751688  
SRR17520069. 13756556  
SRR17520069. 13756585  
SRR17520069. 13756611  
SRR17520069. 13756631  
SRR17520069. 13756640  
SRR17520069. 13756644  
SRR17520069. 13756654  
SRR17520069. 13756657  
SRR17520069. 13756706  
SRR17520069. 13756745

SRR17520069. 13760079  
SRR17520069. 13760882  
SRR17520069. 13761542  
SRR17520069. 13766775  
SRR17520069. 13772312  
SRR17520069. 13772324  
SRR17520069. 13772332  
SRR17520069. 13772336  
SRR17520069. 13772342  
SRR17520069. 13772449  
SRR17520069. 13776288  
SRR17520069. 13776573  
SRR17520069. 13778851  
SRR17520069. 13778862  
SRR17520069. 13788389  
SRR17520069. 13788397  
SRR17520069. 13788424  
SRR17520069. 13788431  
SRR17520069. 13788716  
SRR17520069. 13800346  
SRR17520069. 13801229  
SRR17520069. 13801930  
SRR17520069. 13802032  
SRR17520069. 13802034  
SRR17520069. 13807861  
SRR17520069. 13807875  
SRR17520069. 13811641  
SRR17520069. 13811642  
SRR17520069. 13822955  
SRR17520069. 13822985  
SRR17520069. 13840876  
SRR17520069. 13840878  
SRR17520069. 13840880  
SRR17520069. 13840884  
SRR17520069. 13840886  
SRR17520069. 13840888  
SRR17520069. 13840892  
SRR17520069. 13843303  
SRR17520069. 13861972  
SRR17520069. 13869819  
SRR17520069. 13871244  
SRR17520069. 13871263  
SRR17520069. 13879023  
SRR17520069. 13879057  
SRR17520069. 13879815  
SRR17520069. 13898820  
SRR17520069. 13899271

SRR17520069. 13899340  
SRR17520069. 13904721  
SRR17520069. 13917195  
SRR17520069. 13921325  
SRR17520069. 13921328  
SRR17520069. 13921332  
SRR17520069. 13921400  
SRR17520069. 13921408  
SRR17520069. 13944919  
SRR17520069. 13946232  
SRR17520069. 13946234  
SRR17520069. 13946236  
SRR17520069. 13946238  
SRR17520069. 13946240  
SRR17520069. 13946242  
SRR17520069. 13946244  
SRR17520069. 13946248  
SRR17520069. 13946250  
SRR17520069. 13946252  
SRR17520069. 13946254  
SRR17520069. 13958541  
SRR17520069. 13971100  
SRR17520069. 13978398  
SRR17520069. 13979674  
SRR17520069. 13987562  
SRR17520069. 13993252  
SRR17520069. 14003653  
SRR17520069. 14009089  
SRR17520069. 14012587  
SRR17520069. 14012784  
SRR17520069. 14012789  
SRR17520069. 14013132  
SRR17520069. 14016187  
SRR17520069. 14034192  
SRR17520069. 14034200  
SRR17520069. 14034202  
SRR17520069. 14034345  
SRR17520069. 14034351  
SRR17520069. 14040107  
SRR17520069. 14041825  
SRR17520069. 14041984  
SRR17520069. 14058404  
SRR17520069. 14058872  
SRR17520069. 14058874  
SRR17520069. 14058876  
SRR17520069. 14058880  
SRR17520069. 14058882



SRR17520069.14058884  
SRR17520069.14058886  
SRR17520069.14058888  
SRR17520069.14058890  
SRR17520069.14064699  
SRR17520069.14064723  
SRR17520069.14079175  
SRR17520069.14079526  
SRR17520069.14088981  
SRR17520069.14089029  
SRR17520069.14092164  
SRR17520069.14100160  
SRR17520069.14108120  
SRR17520069.14109842  
SRR17520069.14111763  
SRR17520069.14145769  
SRR17520069.14150383  
SRR17520069.14157177  
SRR17520069.14160409  
SRR17520069.14171259  
SRR17520069.14171308  
SRR17520069.14171310  
SRR17520069.14171312  
SRR17520069.14171314  
SRR17520069.14171316  
SRR17520069.14171318  
SRR17520069.14171320  
SRR17520069.14171322  
SRR17520069.14171326  
SRR17520069.14171328  
SRR17520069.14171330  
SRR17520069.14171332  
SRR17520069.14171334  
SRR17520069.14171336  
SRR17520069.14174146  
SRR17520069.14176348  
SRR17520069.14176372  
SRR17520069.14187246  
SRR17520069.14196120  
SRR17520069.14201507  
SRR17520069.14201511  
SRR17520069.14201533  
SRR17520069.14201535  
SRR17520069.14232582  
SRR17520069.14233225  
SRR17520069.14235048  
SRR17520069.14243634

SRR17520069.14251637  
SRR17520069.14264072  
SRR17520069.14264074  
SRR17520069.14264078  
SRR17520069.14264080  
SRR17520069.14264082  
SRR17520069.14264084  
SRR17520069.14264679  
SRR17520069.14266927  
SRR17520069.14267160  
SRR17520069.14268043  
SRR17520069.14290846  
SRR17520069.14290858  
SRR17520069.14290864  
SRR17520069.14293294  
SRR17520069.14293312  
SRR17520069.14306112  
SRR17520069.14306192  
SRR17520069.14307897  
SRR17520069.14309825  
SRR17520069.14319075  
SRR17520069.14319085  
SRR17520069.14326866  
SRR17520069.14326894  
SRR17520069.14327786  
SRR17520069.14359407  
SRR17520069.14359443  
SRR17520069.14359820  
SRR17520069.14359848  
SRR17520069.14359881  
SRR17520069.14361531  
SRR17520069.14363252  
SRR17520069.14365712  
SRR17520069.14376468  
SRR17520069.14377486  
SRR17520069.14380757  
SRR17520069.14384434  
SRR17520069.14384436  
SRR17520069.14397313  
SRR17520069.14397983  
SRR17520069.14399893  
SRR17520069.14404003  
SRR17520069.14404005  
SRR17520069.14404007  
SRR17520069.14404009  
SRR17520069.14404011  
SRR17520069.14404013

SRR17520069.14404015  
SRR17520069.14404017  
SRR17520069.14404019  
SRR17520069.14404023  
SRR17520069.14404025  
SRR17520069.14404027  
SRR17520069.14404029  
SRR17520069.14404031  
SRR17520069.14404033  
SRR17520069.14404035  
SRR17520069.14404037  
SRR17520069.14404039  
SRR17520069.14404041  
SRR17520069.14404043  
SRR17520069.14404045  
SRR17520069.14404047  
SRR17520069.14404049  
SRR17520069.14404051  
SRR17520069.14404053  
SRR17520069.14404055  
SRR17520069.14404057  
SRR17520069.14404059  
SRR17520069.14404061  
SRR17520069.14407989  
SRR17520069.14411223  
SRR17520069.14426621  
SRR17520069.14426627  
SRR17520069.14440745  
SRR17520069.14448779  
SRR17520069.14449142  
SRR17520069.14449147  
SRR17520069.14449192  
SRR17520069.14451012  
SRR17520069.14455634  
SRR17520069.14456523  
SRR17520069.14460238  
SRR17520069.14460282  
SRR17520069.14479660  
SRR17520069.14481863  
SRR17520069.14481867  
SRR17520069.14481869  
SRR17520069.14481871  
SRR17520069.14481873  
SRR17520069.14481875  
SRR17520069.14481877  
SRR17520069.14481879  
SRR17520069.14481881

SRR17520069.14481883  
SRR17520069.14481885  
SRR17520069.14481887  
SRR17520069.14481889  
SRR17520069.14481891  
SRR17520069.14481893  
SRR17520069.14481895  
SRR17520069.14481897  
SRR17520069.14481899  
SRR17520069.14481901  
SRR17520069.14481903  
SRR17520069.14481905  
SRR17520069.14481907  
SRR17520069.14481909  
SRR17520069.14481911  
SRR17520069.14481913  
SRR17520069.14481915  
SRR17520069.14481917  
SRR17520069.14481919  
SRR17520069.14481921  
SRR17520069.14481925  
SRR17520069.14481927  
SRR17520069.14481929  
SRR17520069.14481931  
SRR17520069.14481933  
SRR17520069.14481935  
SRR17520069.14481937  
SRR17520069.14481939  
SRR17520069.14481941  
SRR17520069.14481943  
SRR17520069.14481945  
SRR17520069.14481947  
SRR17520069.14514770  
SRR17520069.14514942  
SRR17520069.14515950  
SRR17520069.14532734  
SRR17520069.14532748  
SRR17520069.14532760  
SRR17520069.14540151  
SRR17520069.14540165  
SRR17520069.14540193  
SRR17520069.14540201  
SRR17520069.14540247  
SRR17520069.14540270  
SRR17520069.14547397  
SRR17520069.14563252  
SRR17520069.14599043

SRR17520069.14610771  
SRR17520069.14623740  
SRR17520069.14626109  
SRR17520069.14629753  
SRR17520069.14630071  
SRR17520069.14631144  
SRR17520069.14636252  
SRR17520069.14656415  
SRR17520069.14657912  
SRR17520069.14663915  
SRR17520069.14669420  
SRR17520069.14677051  
SRR17520069.14683919  
SRR17520069.14685564  
SRR17520069.14686305  
SRR17520069.14687094  
SRR17520069.14690789  
SRR17520069.14690947  
SRR17520069.14705703  
SRR17520069.14705737  
SRR17520069.14711618  
SRR17520069.14711620  
SRR17520069.14746796  
SRR17520069.14759021  
SRR17520069.14759439  
SRR17520069.14764299  
SRR17520069.14780697  
SRR17520069.14782155  
SRR17520069.14782165  
SRR17520069.14782179  
SRR17520069.14783924  
SRR17520069.14792708  
SRR17520069.14819180  
SRR17520069.14822257  
SRR17520069.14824461  
SRR17520069.14836695  
SRR17520069.14836699  
SRR17520069.14845694  
SRR17520069.14849628  
SRR17520069.14850509  
SRR17520069.14873368  
SRR17520069.14874172  
SRR17520069.14874191  
SRR17520069.14875459  
SRR17520069.14875460  
SRR17520069.14877976  
SRR17520069.14879727

SRR17520069.14882761  
SRR17520069.14895857  
SRR17520069.14897121  
SRR17520069.14898490  
SRR17520069.14900689  
SRR17520069.14914809  
SRR17520069.14917512  
SRR17520069.14920394  
SRR17520069.14923389  
SRR17520069.14927132  
SRR17520069.14928031  
SRR17520069.14928322  
SRR17520069.14937840  
SRR17520069.14940923  
SRR17520069.14940927  
SRR17520069.14940931  
SRR17520069.14957164  
SRR17520069.14957225  
SRR17520069.14958081  
SRR17520069.14958577  
SRR17520069.14975063  
SRR17520069.14983262  
SRR17520069.14988994  
SRR17520069.14991184  
SRR17520069.14998356  
SRR17520069.14998410  
SRR17520069.14998412  
SRR17520069.14998413  
SRR17520069.14999341  
SRR17520069.15015202  
SRR17520069.15015204  
SRR17520069.15041905  
SRR17520069.15041925  
SRR17520069.15043875  
SRR17520069.15044662  
SRR17520069.15045615  
SRR17520069.15056540  
SRR17520069.15056597  
SRR17520069.15057944  
SRR17520069.15061679  
SRR17520069.15061698  
SRR17520069.15068900  
SRR17520069.15076370  
SRR17520069.15076434  
SRR17520069.15079393  
SRR17520069.15091307  
SRR17520069.15112291

SRR17520069. 15112330  
SRR17520069. 15118248  
SRR17520069. 15120542  
SRR17520069. 15122167  
SRR17520069. 15122233  
SRR17520069. 15123315  
SRR17520069. 15127539  
SRR17520069. 15127795  
SRR17520069. 15128273  
SRR17520069. 15134418  
SRR17520069. 15145683  
SRR17520069. 15145687  
SRR17520069. 15145745  
SRR17520069. 15145777  
SRR17520069. 15145784  
SRR17520069. 15148479  
SRR17520069. 15160317  
SRR17520069. 15174134  
SRR17520069. 15179558  
SRR17520069. 15179574  
SRR17520069. 15201862  
SRR17520069. 15208155  
SRR17520069. 15215560  
SRR17520069. 15235007  
SRR17520069. 15236275  
SRR17520069. 15240109  
SRR17520069. 15244062  
SRR17520069. 15244188  
SRR17520069. 15246376  
SRR17520069. 15246378  
SRR17520069. 15249793  
SRR17520069. 15251822  
SRR17520069. 15255462  
SRR17520069. 15261427  
SRR17520069. 15279884  
SRR17520069. 15293541  
SRR17520069. 15293547  
SRR17520069. 15293573  
SRR17520069. 15298794  
SRR17520069. 15302688  
SRR17520069. 15303451  
SRR17520069. 15303667  
SRR17520069. 15303709  
SRR17520069. 15326289  
SRR17520069. 15327012  
SRR17520069. 15327484  
SRR17520069. 15327492

SRR17520069. 15327508  
SRR17520069. 15327562  
SRR17520069. 15335401  
SRR17520069. 15339309  
SRR17520069. 15340240  
SRR17520069. 15340266  
SRR17520069. 15340348  
SRR17520069. 15345786  
SRR17520069. 15345816  
SRR17520069. 15349720  
SRR17520069. 15349752  
SRR17520069. 15349788  
SRR17520069. 15349824  
SRR17520069. 15352425  
SRR17520069. 15355837  
SRR17520069. 15372142  
SRR17520069. 15372158  
SRR17520069. 15376957  
SRR17520069. 15380504  
SRR17520069. 15386009  
SRR17520069. 15393127  
SRR17520069. 15400948  
SRR17520069. 15400988  
SRR17520069. 15402162  
SRR17520069. 15402218  
SRR17520069. 15402236  
SRR17520069. 15402306  
SRR17520069. 15406285  
SRR17520069. 15415451  
SRR17520069. 15425238  
SRR17520069. 15437049  
SRR17520069. 15437080  
SRR17520069. 15441687  
SRR17520069. 15447904  
SRR17520069. 15452990  
SRR17520069. 15453022  
SRR17520069. 15454444  
SRR17520069. 15454536  
SRR17520069. 15454537  
SRR17520069. 15456883  
SRR17520069. 15458596  
SRR17520069. 15472378  
SRR17520069. 15496615  
SRR17520069. 15500449  
SRR17520069. 15509357  
SRR17520069. 15519324  
SRR17520069. 15524240



SRR17520069. 15525494  
SRR17520069. 15530668  
SRR17520069. 15534049  
SRR17520069. 15544314  
SRR17520069. 15553455  
SRR17520069. 15564439  
SRR17520069. 15565543  
SRR17520069. 15565603  
SRR17520069. 15569092  
SRR17520069. 15574474  
SRR17520069. 15574914  
SRR17520069. 15577484  
SRR17520069. 15577573  
SRR17520069. 15578325  
SRR17520069. 15578688  
SRR17520069. 15600597  
SRR17520069. 15607439  
SRR17520069. 15613718  
SRR17520069. 15617645  
SRR17520069. 15621228  
SRR17520069. 15621247  
SRR17520069. 15624324  
SRR17520069. 15628368  
SRR17520069. 15634490  
SRR17520069. 15634506  
SRR17520069. 15644975  
SRR17520069. 15645428  
SRR17520069. 15645470  
SRR17520069. 15652105  
SRR17520069. 15659212  
SRR17520069. 15663891  
SRR17520069. 15665121  
SRR17520069. 15669311  
SRR17520069. 15669313  
SRR17520069. 15669317  
SRR17520069. 15669321  
SRR17520069. 15669323  
SRR17520069. 15669325  
SRR17520069. 15682720  
SRR17520069. 15682798  
SRR17520069. 15684227  
SRR17520069. 15684241  
SRR17520069. 15684979  
SRR17520069. 15685352  
SRR17520069. 15685354  
SRR17520069. 15685356  
SRR17520069. 15685360

SRR17520069. 15685362  
SRR17520069. 15685364  
SRR17520069. 15685366  
SRR17520069. 15685368  
SRR17520069. 15685370  
SRR17520069. 15685372  
SRR17520069. 15685603  
SRR17520069. 15691726  
SRR17520069. 15702063  
SRR17520069. 15704525  
SRR17520069. 15714839  
SRR17520069. 15714954  
SRR17520069. 15730067  
SRR17520069. 15743904  
SRR17520069. 15748078  
SRR17520069. 15761709  
SRR17520069. 15761710  
SRR17520069. 15765197  
SRR17520069. 15772379  
SRR17520069. 15777728  
SRR17520069. 15786113  
SRR17520069. 15786115  
SRR17520069. 15786117  
SRR17520069. 15786119  
SRR17520069. 15786121  
SRR17520069. 15786123  
SRR17520069. 15786125  
SRR17520069. 15786127  
SRR17520069. 15786129  
SRR17520069. 15786131  
SRR17520069. 15786133  
SRR17520069. 15786135  
SRR17520069. 15786137  
SRR17520069. 15786139  
SRR17520069. 15786141  
SRR17520069. 15786143  
SRR17520069. 15786145  
SRR17520069. 15786147  
SRR17520069. 15786149  
SRR17520069. 15786151  
SRR17520069. 15786153  
SRR17520069. 15786155  
SRR17520069. 15786157  
SRR17520069. 15786159  
SRR17520069. 15786161  
SRR17520069. 15786163  
SRR17520069. 15786165

SRR17520069. 15786167  
SRR17520069. 15809427  
SRR17520069. 15818943  
SRR17520069. 15824115  
SRR17520069. 15845705  
SRR17520069. 15847242  
SRR17520069. 15847570  
SRR17520069. 15848442  
SRR17520069. 15853790  
SRR17520069. 15854015  
SRR17520069. 15860008  
SRR17520069. 15872272  
SRR17520069. 15879191  
SRR17520069. 15879201  
SRR17520069. 15880190  
SRR17520069. 15880785  
SRR17520069. 15884128  
SRR17520069. 15885823  
SRR17520069. 15892368  
SRR17520069. 15892773  
SRR17520069. 15894359  
SRR17520069. 15894801  
SRR17520069. 15895540  
SRR17520069. 15905770  
SRR17520069. 15914933  
SRR17520069. 15918899  
SRR17520069. 15933389  
SRR17520069. 15938436  
SRR17520069. 15941832  
SRR17520069. 15945063  
SRR17520069. 15945067  
SRR17520069. 15945069  
SRR17520069. 15945071  
SRR17520069. 15946472  
SRR17520069. 15955646  
SRR17520069. 15970267  
SRR17520069. 15970423  
SRR17520069. 15997630  
SRR17520069. 16002797  
SRR17520069. 16011272  
SRR17520069. 16026477  
SRR17520069. 16026493  
SRR17520069. 16026494  
SRR17520069. 16026501  
SRR17520069. 16034198  
SRR17520069. 16034394  
SRR17520069. 16042534

SRR17520069.16046624  
SRR17520069.16060284  
SRR17520069.16066972  
SRR17520069.16066975  
SRR17520069.16075765  
SRR17520069.16086556  
SRR17520069.16090079  
SRR17520069.16090139  
SRR17520069.16090149  
SRR17520069.16091605  
SRR17520069.16105699  
SRR17520069.16105712  
SRR17520069.16105724  
SRR17520069.16105726  
SRR17520069.16105732  
SRR17520069.16106859  
SRR17520069.16120496  
SRR17520069.16125221  
SRR17520069.16134707  
SRR17520069.16151230  
SRR17520069.16158242  
SRR17520069.16188133  
SRR17520069.16190021  
SRR17520069.16190030  
SRR17520069.16190034  
SRR17520069.16190040  
SRR17520069.16190046  
SRR17520069.16190050  
SRR17520069.16190100  
SRR17520069.16190127  
SRR17520069.16190130  
SRR17520069.16191610  
SRR17520069.16193555  
SRR17520069.16193630  
SRR17520069.16193635  
SRR17520069.16193643  
SRR17520069.16193663  
SRR17520069.16197477  
SRR17520069.16197483  
SRR17520069.16197488  
SRR17520069.16197492  
SRR17520069.16200078  
SRR17520069.16200087  
SRR17520069.16200093  
SRR17520069.16200110  
SRR17520069.16201782  
SRR17520069.16201787

SRR17520069. 16211797  
SRR17520069. 16217682  
SRR17520069. 16217729  
SRR17520069. 16217732  
SRR17520069. 16222647  
SRR17520069. 16222661  
SRR17520069. 16223986  
SRR17520069. 16223988  
SRR17520069. 16223990  
SRR17520069. 16223992  
SRR17520069. 16238588  
SRR17520069. 16238593  
SRR17520069. 16238594  
SRR17520069. 16238599  
SRR17520069. 16238617  
SRR17520069. 16242771  
SRR17520069. 16242855  
SRR17520069. 16243478  
SRR17520069. 16243627  
SRR17520069. 16249299  
SRR17520069. 16249347  
SRR17520069. 16256564  
SRR17520069. 16256566  
SRR17520069. 16256568  
SRR17520069. 16256570  
SRR17520069. 16256572  
SRR17520069. 16256576  
SRR17520069. 16256578  
SRR17520069. 16256580  
SRR17520069. 16256582  
SRR17520069. 16256584  
SRR17520069. 16256586  
SRR17520069. 16256588  
SRR17520069. 16261316  
SRR17520069. 16261818  
SRR17520069. 16273628  
SRR17520069. 16273650  
SRR17520069. 16282105  
SRR17520069. 16282146  
SRR17520069. 16282165  
SRR17520069. 16282179  
SRR17520069. 16282228  
SRR17520069. 16293720  
SRR17520069. 16293722  
SRR17520069. 16293756  
SRR17520069. 16304287  
SRR17520069. 16311816

SRR17520069. 16313307  
SRR17520069. 16315517  
SRR17520069. 16315845  
SRR17520069. 16320127  
SRR17520069. 16320243  
SRR17520069. 16320275  
SRR17520069. 16324030  
SRR17520069. 16326962  
SRR17520069. 16326964  
SRR17520069. 16326966  
SRR17520069. 16326968  
SRR17520069. 16326970  
SRR17520069. 16326974  
SRR17520069. 16326976  
SRR17520069. 16326978  
SRR17520069. 16326980  
SRR17520069. 16326982  
SRR17520069. 16326986  
SRR17520069. 16326988  
SRR17520069. 16326990  
SRR17520069. 16326992  
SRR17520069. 16326994  
SRR17520069. 16326996  
SRR17520069. 16326998  
SRR17520069. 16327000  
SRR17520069. 16327002  
SRR17520069. 16327004  
SRR17520069. 16327006  
SRR17520069. 16327008  
SRR17520069. 16327010  
SRR17520069. 16327012  
SRR17520069. 16327014  
SRR17520069. 16327016  
SRR17520069. 16327018  
SRR17520069. 16327020  
SRR17520069. 16327022  
SRR17520069. 16327024  
SRR17520069. 16327026  
SRR17520069. 16327028  
SRR17520069. 16327030  
SRR17520069. 16327032  
SRR17520069. 16327034  
SRR17520069. 16327036  
SRR17520069. 16327038  
SRR17520069. 16327042  
SRR17520069. 16327044  
SRR17520069. 16327046

SRR17520069. 16327048  
SRR17520069. 16327050  
SRR17520069. 16327052  
SRR17520069. 16327054  
SRR17520069. 16327056  
SRR17520069. 16327058  
SRR17520069. 16327060  
SRR17520069. 16327062  
SRR17520069. 16327064  
SRR17520069. 16327066  
SRR17520069. 16327068  
SRR17520069. 16327072  
SRR17520069. 16327074  
SRR17520069. 16327076  
SRR17520069. 16327078  
SRR17520069. 16327080  
SRR17520069. 16327082  
SRR17520069. 16327084  
SRR17520069. 16327086  
SRR17520069. 16327088  
SRR17520069. 16327090  
SRR17520069. 16327092  
SRR17520069. 16327094  
SRR17520069. 16347036  
SRR17520069. 16352167  
SRR17520069. 16352231  
SRR17520069. 16356732  
SRR17520069. 16361219  
SRR17520069. 16361225  
SRR17520069. 16361256  
SRR17520069. 16361952  
SRR17520069. 16361954  
SRR17520069. 16361956  
SRR17520069. 16361958  
SRR17520069. 16361960  
SRR17520069. 16361962  
SRR17520069. 16361964  
SRR17520069. 16362949  
SRR17520069. 16362957  
SRR17520069. 16382149  
SRR17520069. 16383923  
SRR17520069. 16396070  
SRR17520069. 16404242  
SRR17520069. 16407369  
SRR17520069. 16414089  
SRR17520069. 16414137  
SRR17520069. 16418191

SRR17520069. 16433553  
SRR17520069. 16434068  
SRR17520069. 16434069  
SRR17520069. 16434083  
SRR17520069. 16440398  
SRR17520069. 16443113  
SRR17520069. 16458058  
SRR17520069. 16460524  
SRR17520069. 16460550  
SRR17520069. 16463183  
SRR17520069. 16480705  
SRR17520069. 16493089  
SRR17520069. 16498705  
SRR17520069. 16499126  
SRR17520069. 16501125  
SRR17520069. 16509927  
SRR17520069. 16510188  
SRR17520069. 16510229  
SRR17520069. 16515111  
SRR17520069. 16515504  
SRR17520069. 16519132  
SRR17520069. 16527293  
SRR17520069. 16531393  
SRR17520069. 16534491  
SRR17520069. 16540811  
SRR17520069. 16567313  
SRR17520069. 16567315  
SRR17520069. 16567317  
SRR17520069. 16567319  
SRR17520069. 16567321  
SRR17520069. 16567323  
SRR17520069. 16567325  
SRR17520069. 16567327  
SRR17520069. 16567329  
SRR17520069. 16567331  
SRR17520069. 16567333  
SRR17520069. 16567335  
SRR17520069. 16567337  
SRR17520069. 16573050  
SRR17520069. 16581330  
SRR17520069. 16589137  
SRR17520069. 16589198  
SRR17520069. 16591219  
SRR17520069. 16600986  
SRR17520069. 16601003  
SRR17520069. 16612789  
SRR17520069. 16623537



SRR17520069.16623538  
SRR17520069.16625821  
SRR17520069.16638109  
SRR17520069.16643641  
SRR17520069.16644708  
SRR17520069.16646568  
SRR17520069.16647318  
SRR17520069.16647467  
SRR17520069.16648364  
SRR17520069.16653036  
SRR17520069.16653040  
SRR17520069.16655884  
SRR17520069.16674530  
SRR17520069.16697596  
SRR17520069.16697598  
SRR17520069.16697600  
SRR17520069.16697602  
SRR17520069.16697604  
SRR17520069.16697606  
SRR17520069.16697608  
SRR17520069.16697610  
SRR17520069.16697612  
SRR17520069.16697614  
SRR17520069.16697616  
SRR17520069.16697620  
SRR17520069.16697622  
SRR17520069.16697624  
SRR17520069.16697626  
SRR17520069.16697628  
SRR17520069.16697630  
SRR17520069.16697632  
SRR17520069.16697634  
SRR17520069.16697636  
SRR17520069.16697638  
SRR17520069.16697640  
SRR17520069.16697642  
SRR17520069.16697644  
SRR17520069.16697646  
SRR17520069.16697648  
SRR17520069.16697650  
SRR17520069.16697652  
SRR17520069.16697654  
SRR17520069.16697656  
SRR17520069.16697658  
SRR17520069.16697662  
SRR17520069.16697664  
SRR17520069.16697666

SRR17520069. 16697668  
SRR17520069. 16697670  
SRR17520069. 16697672  
SRR17520069. 16697674  
SRR17520069. 16697676  
SRR17520069. 16697678  
SRR17520069. 16697680  
SRR17520069. 16697682  
SRR17520069. 16697684  
SRR17520069. 16697686  
SRR17520069. 16697688  
SRR17520069. 16697690  
SRR17520069. 16697692  
SRR17520069. 16697694  
SRR17520069. 16697696  
SRR17520069. 16697698  
SRR17520069. 16697700  
SRR17520069. 16697702  
SRR17520069. 16697704  
SRR17520069. 16697706  
SRR17520069. 16697708  
SRR17520069. 16697710  
SRR17520069. 16697712  
SRR17520069. 16697714  
SRR17520069. 16697716  
SRR17520069. 16697718  
SRR17520069. 16697720  
SRR17520069. 16697722  
SRR17520069. 16697724  
SRR17520069. 16697726  
SRR17520069. 16697728  
SRR17520069. 16697732  
SRR17520069. 16697734  
SRR17520069. 16697736  
SRR17520069. 16697738  
SRR17520069. 16697740  
SRR17520069. 16697806  
SRR17520069. 16701768  
SRR17520069. 16702381  
SRR17520069. 16707121  
SRR17520069. 16707131  
SRR17520069. 16710528  
SRR17520069. 16713730  
SRR17520069. 16714718  
SRR17520069. 16714946  
SRR17520069. 16720449  
SRR17520069. 16720463

SRR17520069. 16722197  
SRR17520069. 16729464  
SRR17520069. 16730335  
SRR17520069. 16730337  
SRR17520069. 16730345  
SRR17520069. 16730349  
SRR17520069. 16730353  
SRR17520069. 16730355  
SRR17520069. 16748732  
SRR17520069. 16751335  
SRR17520069. 16753885  
SRR17520069. 16754251  
SRR17520069. 16758115  
SRR17520069. 16777738  
SRR17520069. 16791279  
SRR17520069. 16795478  
SRR17520069. 16795482  
SRR17520069. 16795488  
SRR17520069. 16795490  
SRR17520069. 16795491  
SRR17520069. 16798487  
SRR17520069. 16808684  
SRR17520069. 16815344  
SRR17520069. 16817096  
SRR17520069. 16817758  
SRR17520069. 16817896  
SRR17520069. 16817924  
SRR17520069. 16822123  
SRR17520069. 16822125  
SRR17520069. 16822127  
SRR17520069. 16822129  
SRR17520069. 16822131  
SRR17520069. 16822133  
SRR17520069. 16822135  
SRR17520069. 16822137  
SRR17520069. 16822139  
SRR17520069. 16822141  
SRR17520069. 16822143  
SRR17520069. 16822145  
SRR17520069. 16822147  
SRR17520069. 16822149  
SRR17520069. 16822151  
SRR17520069. 16822153  
SRR17520069. 16822155  
SRR17520069. 16822157  
SRR17520069. 16822159  
SRR17520069. 16822161

SRR17520069. 16822163  
SRR17520069. 16822165  
SRR17520069. 16822167  
SRR17520069. 16822169  
SRR17520069. 16822171  
SRR17520069. 16822173  
SRR17520069. 16822175  
SRR17520069. 16822177  
SRR17520069. 16834011  
SRR17520069. 16845062  
SRR17520069. 16848687  
SRR17520069. 16850977  
SRR17520069. 16865860  
SRR17520069. 16867254  
SRR17520069. 16867538  
SRR17520069. 16867854  
SRR17520069. 16868069  
SRR17520069. 16886591  
SRR17520069. 16890445  
SRR17520069. 16894901  
SRR17520069. 16896978  
SRR17520069. 16898171  
SRR17520069. 16899748  
SRR17520069. 16901269  
SRR17520069. 16901621  
SRR17520069. 16906495  
SRR17520069. 16914607  
SRR17520069. 16920461  
SRR17520069. 16923445  
SRR17520069. 16925848  
SRR17520069. 16925850  
SRR17520069. 16932731  
SRR17520069. 16935787  
SRR17520069. 16935842  
SRR17520069. 16935906  
SRR17520069. 16948507  
SRR17520069. 16948620  
SRR17520069. 16948899  
SRR17520069. 16960536  
SRR17520069. 16961315  
SRR17520069. 16963812  
SRR17520069. 16963818  
SRR17520069. 16963828  
SRR17520069. 16963874  
SRR17520069. 16963883  
SRR17520069. 16968643  
SRR17520069. 16968915

SRR17520069. 16970154  
SRR17520069. 16975342  
SRR17520069. 16975348  
SRR17520069. 16981748  
SRR17520069. 16991407  
SRR17520069. 16992682  
SRR17520069. 17000836  
SRR17520069. 17000892  
SRR17520069. 17002932  
SRR17520069. 17006710  
SRR17520069. 17021923  
SRR17520069. 17025313  
SRR17520069. 17025415  
SRR17520069. 17025423  
SRR17520069. 17027359  
SRR17520069. 17028183  
SRR17520069. 17038234  
SRR17520069. 17038405  
SRR17520069. 17042184  
SRR17520069. 17043998  
SRR17520069. 17044006  
SRR17520069. 17044013  
SRR17520069. 17057000  
SRR17520069. 17058393  
SRR17520069. 17061872  
SRR17520069. 17063865  
SRR17520069. 17065966  
SRR17520069. 17067977  
SRR17520069. 17077140  
SRR17520069. 17079788  
SRR17520069. 17079790  
SRR17520069. 17079792  
SRR17520069. 17079796  
SRR17520069. 17079798  
SRR17520069. 17079802  
SRR17520069. 17079804  
SRR17520069. 17079806  
SRR17520069. 17079808  
SRR17520069. 17079810  
SRR17520069. 17079812  
SRR17520069. 17079814  
SRR17520069. 17087558  
SRR17520069. 17089913  
SRR17520069. 17089921  
SRR17520069. 17099030  
SRR17520069. 17103990  
SRR17520069. 17113481

SRR17520069.17117741  
SRR17520069.17119961  
SRR17520069.17131471  
SRR17520069.17131526  
SRR17520069.17131541  
SRR17520069.17131572  
SRR17520069.17131593  
SRR17520069.17134614  
SRR17520069.17134618  
SRR17520069.17134631  
SRR17520069.17134632  
SRR17520069.17134637  
SRR17520069.17139228  
SRR17520069.17139230  
SRR17520069.17139232  
SRR17520069.17139234  
SRR17520069.17139236  
SRR17520069.17139238  
SRR17520069.17139240  
SRR17520069.17139242  
SRR17520069.17139244  
SRR17520069.17139248  
SRR17520069.17139250  
SRR17520069.17139252  
SRR17520069.17139254  
SRR17520069.17139256  
SRR17520069.17139260  
SRR17520069.17139262  
SRR17520069.17139264  
SRR17520069.17139275  
SRR17520069.17139279  
SRR17520069.17139281  
SRR17520069.17139283  
SRR17520069.17139285  
SRR17520069.17139287  
SRR17520069.17139289  
SRR17520069.17139291  
SRR17520069.17139293  
SRR17520069.17139297  
SRR17520069.17139299  
SRR17520069.17139301  
SRR17520069.17139303  
SRR17520069.17139305  
SRR17520069.17139307  
SRR17520069.17139309  
SRR17520069.17139311  
SRR17520069.17139313

SRR17520069. 17139315  
SRR17520069. 17139317  
SRR17520069. 17139319  
SRR17520069. 17139321  
SRR17520069. 17139323  
SRR17520069. 17139325  
SRR17520069. 17139327  
SRR17520069. 17139329  
SRR17520069. 17139333  
SRR17520069. 17139335  
SRR17520069. 17139337  
SRR17520069. 17139341  
SRR17520069. 17139345  
SRR17520069. 17139347  
SRR17520069. 17139349  
SRR17520069. 17139351  
SRR17520069. 17139353  
SRR17520069. 17139355  
SRR17520069. 17139357  
SRR17520069. 17139359  
SRR17520069. 17139363  
SRR17520069. 17139365  
SRR17520069. 17139367  
SRR17520069. 17139371  
SRR17520069. 17139373  
SRR17520069. 17139375  
SRR17520069. 17139377  
SRR17520069. 17139381  
SRR17520069. 17139383  
SRR17520069. 17139385  
SRR17520069. 17139387  
SRR17520069. 17139389  
SRR17520069. 17139391  
SRR17520069. 17139393  
SRR17520069. 17139395  
SRR17520069. 17139397  
SRR17520069. 17139399  
SRR17520069. 17139403  
SRR17520069. 17139405  
SRR17520069. 17139407  
SRR17520069. 17142457  
SRR17520069. 17142465  
SRR17520069. 17142827  
SRR17520069. 17159534  
SRR17520069. 17159547  
SRR17520069. 17159588  
SRR17520069. 17163302

SRR17520069. 17164792  
SRR17520069. 17166094  
SRR17520069. 17166106  
SRR17520069. 17168373  
SRR17520069. 17173217  
SRR17520069. 17175707  
SRR17520069. 17179042  
SRR17520069. 17195317  
SRR17520069. 17202710  
SRR17520069. 17203951  
SRR17520069. 17204343  
SRR17520069. 17204353  
SRR17520069. 17212975  
SRR17520069. 17224902  
SRR17520069. 17224904  
SRR17520069. 17224906  
SRR17520069. 17224908  
SRR17520069. 17224910  
SRR17520069. 17224912  
SRR17520069. 17224914  
SRR17520069. 17224916  
SRR17520069. 17224918  
SRR17520069. 17224920  
SRR17520069. 17224924  
SRR17520069. 17224926  
SRR17520069. 17224928  
SRR17520069. 17224930  
SRR17520069. 17224932  
SRR17520069. 17224934  
SRR17520069. 17224936  
SRR17520069. 17224938  
SRR17520069. 17224940  
SRR17520069. 17224944  
SRR17520069. 17224948  
SRR17520069. 17224950  
SRR17520069. 17224952  
SRR17520069. 17235951  
SRR17520069. 17237384  
SRR17520069. 17237404  
SRR17520069. 17254400  
SRR17520069. 17256273  
SRR17520069. 17274997  
SRR17520069. 17275369  
SRR17520069. 17285291  
SRR17520069. 17292779  
SRR17520069. 17294560  
SRR17520069. 17294570



SRR17520069. 17295612  
SRR17520069. 17306465  
SRR17520069. 17306599  
SRR17520069. 17307087  
SRR17520069. 17333867  
SRR17520069. 17333915  
SRR17520069. 17336484  
SRR17520069. 17337596  
SRR17520069. 17339102  
SRR17520069. 17357062  
SRR17520069. 17359080  
SRR17520069. 17362366  
SRR17520069. 17369469  
SRR17520069. 17372695  
SRR17520069. 17386067  
SRR17520069. 17386101  
SRR17520069. 17388674  
SRR17520069. 17398198  
SRR17520069. 17399368  
SRR17520069. 17407701  
SRR17520069. 17410314  
SRR17520069. 17411936  
SRR17520069. 17411938  
SRR17520069. 17411940  
SRR17520069. 17411942  
SRR17520069. 17411944  
SRR17520069. 17411946  
SRR17520069. 17411948  
SRR17520069. 17411950  
SRR17520069. 17411954  
SRR17520069. 17411956  
SRR17520069. 17411960  
SRR17520069. 17411962  
SRR17520069. 17411964  
SRR17520069. 17411966  
SRR17520069. 17411970  
SRR17520069. 17418495  
SRR17520069. 17427376  
SRR17520069. 17427390  
SRR17520069. 17427412  
SRR17520069. 17427458  
SRR17520069. 17427472  
SRR17520069. 17432625  
SRR17520069. 17434713  
SRR17520069. 17448743  
SRR17520069. 17450094  
SRR17520069. 17452383

SRR17520069.17456039  
SRR17520069.17456048  
SRR17520069.17456101  
SRR17520069.17456232  
SRR17520069.17462308  
SRR17520069.17462828  
SRR17520069.17478275  
SRR17520069.17484073  
SRR17520069.17492849  
SRR17520069.17496249  
SRR17520069.17510033  
SRR17520069.17511752  
SRR17520069.17511770  
SRR17520069.17520003  
SRR17520069.17520212  
SRR17520069.17521666  
SRR17520069.17522884  
SRR17520069.17523117  
SRR17520069.17524498  
SRR17520069.17529965  
SRR17520069.17530016  
SRR17520069.17538594  
SRR17520069.17541231  
SRR17520069.17550883  
SRR17520069.17551266  
SRR17520069.17557165  
SRR17520069.17561085  
SRR17520069.17574097  
SRR17520069.17576647  
SRR17520069.17577253  
SRR17520069.17579067  
SRR17520069.17581370  
SRR17520069.17582507  
SRR17520069.17582531  
SRR17520069.17582541  
SRR17520069.17586338  
SRR17520069.17589237  
SRR17520069.17589986  
SRR17520069.17593857  
SRR17520069.17593868  
SRR17520069.17595689  
SRR17520069.17595752  
SRR17520069.17602658  
SRR17520069.17604210  
SRR17520069.17604212  
SRR17520069.17604214  
SRR17520069.17604216

SRR17520069. 17604218  
SRR17520069. 17604220  
SRR17520069. 17604222  
SRR17520069. 17604224  
SRR17520069. 17609937  
SRR17520069. 17628583  
SRR17520069. 17637554  
SRR17520069. 17640006  
SRR17520069. 17641377  
SRR17520069. 17641379  
SRR17520069. 17648439  
SRR17520069. 17657718  
SRR17520069. 17668170  
SRR17520069. 17692127  
SRR17520069. 17692132  
SRR17520069. 17696394  
SRR17520069. 17704070  
SRR17520069. 17711867  
SRR17520069. 17715313  
SRR17520069. 17716433  
SRR17520069. 17717993  
SRR17520069. 17731068  
SRR17520069. 17736217  
SRR17520069. 17749658  
SRR17520069. 17750524  
SRR17520069. 17760810  
SRR17520069. 17763018  
SRR17520069. 17763038  
SRR17520069. 17774217  
SRR17520069. 17775333  
SRR17520069. 17790542  
SRR17520069. 17791098  
SRR17520069. 17791722  
SRR17520069. 17795589  
SRR17520069. 17803525  
SRR17520069. 17809172  
SRR17520069. 17811936  
SRR17520069. 17820182  
SRR17520069. 17850961  
SRR17520069. 17852475  
SRR17520069. 17855179  
SRR17520069. 17856754  
SRR17520069. 17856824  
SRR17520069. 17856865  
SRR17520069. 17856866  
SRR17520069. 17858473  
SRR17520069. 17865555

SRR17520069.17865557  
SRR17520069.17865559  
SRR17520069.17865561  
SRR17520069.17865563  
SRR17520069.17865565  
SRR17520069.17865567  
SRR17520069.17878948  
SRR17520069.17879779  
SRR17520069.17889791  
SRR17520069.17906468  
SRR17520069.17931633  
SRR17520069.17931637  
SRR17520069.17934949  
SRR17520069.17935428  
SRR17520069.17935502  
SRR17520069.17935528  
SRR17520069.17943019  
SRR17520069.17949064  
SRR17520069.17949099  
SRR17520069.17949154  
SRR17520069.17949244  
SRR17520069.17952336  
SRR17520069.17955594  
SRR17520069.17957623  
SRR17520069.17965609  
SRR17520069.17965795  
SRR17520069.17966138  
SRR17520069.17966146  
SRR17520069.17966148  
SRR17520069.17966150  
SRR17520069.17966152  
SRR17520069.17966154  
SRR17520069.17966156  
SRR17520069.17966158  
SRR17520069.17966160  
SRR17520069.17966162  
SRR17520069.17966164  
SRR17520069.17966166  
SRR17520069.17966168  
SRR17520069.17966170  
SRR17520069.17966172  
SRR17520069.17966174  
SRR17520069.17966176  
SRR17520069.17966178  
SRR17520069.17966180  
SRR17520069.17966184  
SRR17520069.17966186

SRR17520069. 17966190  
SRR17520069. 17966192  
SRR17520069. 17966797  
SRR17520069. 17972170  
SRR17520069. 17993401  
SRR17520069. 18001533  
SRR17520069. 18008089  
SRR17520069. 18013334  
SRR17520069. 18025304  
SRR17520069. 18025434  
SRR17520069. 18029616  
SRR17520069. 18029624  
SRR17520069. 18033662  
SRR17520069. 18034639  
SRR17520069. 18045716  
SRR17520069. 18045812  
SRR17520069. 18057516  
SRR17520069. 18083087  
SRR17520069. 18087184  
SRR17520069. 18087326  
SRR17520069. 18088153  
SRR17520069. 18088155  
SRR17520069. 18088157  
SRR17520069. 18088164  
SRR17520069. 18099519  
SRR17520069. 18102698  
SRR17520069. 18102701  
SRR17520069. 18106917  
SRR17520069. 18116364  
SRR17520069. 18116577  
SRR17520069. 18120216  
SRR17520069. 18121467  
SRR17520069. 18122987  
SRR17520069. 18122995  
SRR17520069. 18126326  
SRR17520069. 18146641  
SRR17520069. 18152758  
SRR17520069. 18169091  
SRR17520069. 18169094  
SRR17520069. 18169099  
SRR17520069. 18169111  
SRR17520069. 18170048  
SRR17520069. 18183494  
SRR17520069. 18183518  
SRR17520069. 18188394  
SRR17520069. 18188396  
SRR17520069. 18188400

SRR17520069. 18188402  
SRR17520069. 18190138  
SRR17520069. 18190140  
SRR17520069. 18190142  
SRR17520069. 18190144  
SRR17520069. 18190146  
SRR17520069. 18190148  
SRR17520069. 18190150  
SRR17520069. 18190154  
SRR17520069. 18190156  
SRR17520069. 18190158  
SRR17520069. 18190160  
SRR17520069. 18190162  
SRR17520069. 18190164  
SRR17520069. 18191701  
SRR17520069. 18192193  
SRR17520069. 18199320  
SRR17520069. 18203191  
SRR17520069. 18208015  
SRR17520069. 18211325  
SRR17520069. 18211334  
SRR17520069. 18211336  
SRR17520069. 18214473  
SRR17520069. 18214516  
SRR17520069. 18219381  
SRR17520069. 18219396  
SRR17520069. 18232261  
SRR17520069. 18232475  
SRR17520069. 18236801  
SRR17520069. 18238297  
SRR17520069. 18246406  
SRR17520069. 18247377  
SRR17520069. 18250985  
SRR17520069. 18263943  
SRR17520069. 18280460  
SRR17520069. 18283476  
SRR17520069. 18283485  
SRR17520069. 18283494  
SRR17520069. 18283495  
SRR17520069. 18283504  
SRR17520069. 18284179  
SRR17520069. 18289446  
SRR17520069. 18290837  
SRR17520069. 18293974  
SRR17520069. 18294018  
SRR17520069. 18301476  
SRR17520069. 18301566

SRR17520069. 18303732  
SRR17520069. 18311307  
SRR17520069. 18312855  
SRR17520069. 18317963  
SRR17520069. 18317970  
SRR17520069. 18320495  
SRR17520069. 18321493  
SRR17520069. 18321554  
SRR17520069. 18324027  
SRR17520069. 18324641  
SRR17520069. 18327290  
SRR17520069. 18328637  
SRR17520069. 18332895  
SRR17520069. 18341653  
SRR17520069. 18341759  
SRR17520069. 18341836  
SRR17520069. 18344745  
SRR17520069. 18353776  
SRR17520069. 18356301  
SRR17520069. 18357273  
SRR17520069. 18362561  
SRR17520069. 18368411  
SRR17520069. 18373738  
SRR17520069. 18383553  
SRR17520069. 18383975  
SRR17520069. 18396439  
SRR17520069. 18417108  
SRR17520069. 18434321  
SRR17520069. 18440783  
SRR17520069. 18443351  
SRR17520069. 18447246  
SRR17520069. 18447703  
SRR17520069. 18456567  
SRR17520069. 18456579  
SRR17520069. 18471112  
SRR17520069. 18472790  
SRR17520069. 18517573  
SRR17520069. 18519989  
SRR17520069. 18527220  
SRR17520069. 18532480  
SRR17520069. 18533430  
SRR17520069. 18533452  
SRR17520069. 18533459  
SRR17520069. 18533497  
SRR17520069. 18534222  
SRR17520069. 18552934  
SRR17520069. 18560668

SRR17520069. 18569534  
SRR17520069. 18569810  
SRR17520069. 18581433  
SRR17520069. 18581574  
SRR17520069. 18582234  
SRR17520069. 18582247  
SRR17520069. 18614281  
SRR17520069. 18616595  
SRR17520069. 18616711  
SRR17520069. 18617420  
SRR17520069. 18620330  
SRR17520069. 18621515  
SRR17520069. 18623314  
SRR17520069. 18636695  
SRR17520069. 18638690  
SRR17520069. 18644120  
SRR17520069. 18651793  
SRR17520069. 18682865  
SRR17520069. 18684893  
SRR17520069. 18689245  
SRR17520069. 18689359  
SRR17520069. 18690326  
SRR17520069. 18701959  
SRR17520069. 18709215  
SRR17520069. 18711691  
SRR17520069. 18712215  
SRR17520069. 18721319  
SRR17520069. 18722734  
SRR17520069. 18725189  
SRR17520069. 18725216  
SRR17520069. 18727898  
SRR17520069. 18732260  
SRR17520069. 18733670  
SRR17520069. 18738640  
SRR17520069. 18744604  
SRR17520069. 18746650  
SRR17520069. 18746706  
SRR17520069. 18746747  
SRR17520069. 18757564  
SRR17520069. 18758932  
SRR17520069. 18764132  
SRR17520069. 18767381  
SRR17520069. 18767383  
SRR17520069. 18767385  
SRR17520069. 18769401  
SRR17520069. 18772548  
SRR17520069. 18773964



SRR17520069. 18777019  
SRR17520069. 18778522  
SRR17520069. 18781861  
SRR17520069. 18786085  
SRR17520069. 18799779  
SRR17520069. 18799787  
SRR17520069. 18807262  
SRR17520069. 18810792  
SRR17520069. 18817477  
SRR17520069. 18818222  
SRR17520069. 18824944  
SRR17520069. 18826399  
SRR17520069. 18826403  
SRR17520069. 18826850  
SRR17520069. 18836568  
SRR17520069. 18839159  
SRR17520069. 18839229  
SRR17520069. 18842216  
SRR17520069. 18842221  
SRR17520069. 18842370  
SRR17520069. 18845156  
SRR17520069. 18848832  
SRR17520069. 18848891  
SRR17520069. 18859371  
SRR17520069. 18864410  
SRR17520069. 18868926  
SRR17520069. 18868928  
SRR17520069. 18869057  
SRR17520069. 18894676  
SRR17520069. 18894748  
SRR17520069. 18894764  
SRR17520069. 18898138  
SRR17520069. 18913973  
SRR17520069. 18914948  
SRR17520069. 18915107  
SRR17520069. 18915127  
SRR17520069. 18920023  
SRR17520069. 18920032  
SRR17520069. 18923957  
SRR17520069. 18923994  
SRR17520069. 18924010  
SRR17520069. 18924507  
SRR17520069. 18924511  
SRR17520069. 18924513  
SRR17520069. 18924517  
SRR17520069. 18924519  
SRR17520069. 18924521

SRR17520069. 18924523  
SRR17520069. 18924525  
SRR17520069. 18924527  
SRR17520069. 18924533  
SRR17520069. 18924534  
SRR17520069. 18924537  
SRR17520069. 18929434  
SRR17520069. 18935081  
SRR17520069. 18935113  
SRR17520069. 18935624  
SRR17520069. 18940374  
SRR17520069. 18959737  
SRR17520069. 18962372  
SRR17520069. 18962602  
SRR17520069. 18963279  
SRR17520069. 18963333  
SRR17520069. 18969061  
SRR17520069. 18976749  
SRR17520069. 18978016  
SRR17520069. 19001252  
SRR17520069. 19012411  
SRR17520069. 19015917  
SRR17520069. 19015957  
SRR17520069. 19021152  
SRR17520069. 19021154  
SRR17520069. 19021156  
SRR17520069. 19021158  
SRR17520069. 19021162  
SRR17520069. 19021164  
SRR17520069. 19021166  
SRR17520069. 19021168  
SRR17520069. 19021170  
SRR17520069. 19021172  
SRR17520069. 19021174  
SRR17520069. 19021176  
SRR17520069. 19021180  
SRR17520069. 19021182  
SRR17520069. 19021184  
SRR17520069. 19021186  
SRR17520069. 19032049  
SRR17520069. 19058656  
SRR17520069. 19060910  
SRR17520069. 19064172  
SRR17520069. 19064174  
SRR17520069. 19064176  
SRR17520069. 19064178  
SRR17520069. 19064180

SRR17520069.19064182  
SRR17520069.19064184  
SRR17520069.19064186  
SRR17520069.19064188  
SRR17520069.19064190  
SRR17520069.19064192  
SRR17520069.19064194  
SRR17520069.19064196  
SRR17520069.19064198  
SRR17520069.19064200  
SRR17520069.19064202  
SRR17520069.19064204  
SRR17520069.19064206  
SRR17520069.19064208  
SRR17520069.19064210  
SRR17520069.19064212  
SRR17520069.19064214  
SRR17520069.19064216  
SRR17520069.19064218  
SRR17520069.19064220  
SRR17520069.19064222  
SRR17520069.19064224  
SRR17520069.19064226  
SRR17520069.19075388  
SRR17520069.19075422  
SRR17520069.19076170  
SRR17520069.19076623  
SRR17520069.19081875  
SRR17520069.19081879  
SRR17520069.19081883  
SRR17520069.19081889  
SRR17520069.19081899  
SRR17520069.19081905  
SRR17520069.19099796  
SRR17520069.19103706  
SRR17520069.19103772  
SRR17520069.19113293  
SRR17520069.19121847  
SRR17520069.19132883  
SRR17520069.19138029  
SRR17520069.19144362  
SRR17520069.19144368  
SRR17520069.19144373  
SRR17520069.19145102  
SRR17520069.19145873  
SRR17520069.19152532  
SRR17520069.19154030

SRR17520069.19154048  
SRR17520069.19163209  
SRR17520069.19178852  
SRR17520069.19183006  
SRR17520069.19183014  
SRR17520069.19183021  
SRR17520069.19195333  
SRR17520069.19195342  
SRR17520069.19203931  
SRR17520069.19203954  
SRR17520069.19203959  
SRR17520069.19206066  
SRR17520069.19208712  
SRR17520069.19208758  
SRR17520069.19221132  
SRR17520069.19232875  
SRR17520069.19240482  
SRR17520069.19244531  
SRR17520069.19249178  
SRR17520069.19252368  
SRR17520069.19255435  
SRR17520069.19257088  
SRR17520069.19259346  
SRR17520069.19274915  
SRR17520069.19279531  
SRR17520069.19299229  
SRR17520069.19300493  
SRR17520069.19300535  
SRR17520069.19306989  
SRR17520069.19308842  
SRR17520069.19311490  
SRR17520069.19311497  
SRR17520069.19319624  
SRR17520069.19324215  
SRR17520069.19325919  
SRR17520069.19325972  
SRR17520069.19329406  
SRR17520069.19330376  
SRR17520069.19334646  
SRR17520069.19334650  
SRR17520069.19337350  
SRR17520069.19339068  
SRR17520069.19348761  
SRR17520069.19361501  
SRR17520069.19378176  
SRR17520069.19383223  
SRR17520069.19383560

SRR17520069. 19386199  
SRR17520069. 19397875  
SRR17520069. 19402721  
SRR17520069. 19409322  
SRR17520069. 19412834  
SRR17520069. 19435645  
SRR17520069. 19458986  
SRR17520069. 19460316  
SRR17520069. 19469915  
SRR17520069. 19473800  
SRR17520069. 19475585  
SRR17520069. 19486130  
SRR17520069. 19491586  
SRR17520069. 19499419  
SRR17520069. 19500587  
SRR17520069. 19503567  
SRR17520069. 19506936  
SRR17520069. 19506952  
SRR17520069. 19517776  
SRR17520069. 19529765  
SRR17520069. 19543604  
SRR17520069. 19553273  
SRR17520069. 19557679  
SRR17520069. 19560283  
SRR17520069. 2879  
SRR17520069. 7675  
SRR17520069. 30055  
SRR17520069. 30069  
SRR17520069. 53651  
SRR17520069. 53798  
SRR17520069. 53808  
SRR17520069. 79059  
SRR17520069. 79060  
SRR17520069. 79061  
SRR17520069. 79065  
SRR17520069. 79075  
SRR17520069. 79085  
SRR17520069. 123273  
SRR17520069. 123338  
SRR17520069. 126940  
SRR17520069. 131683  
SRR17520069. 145581  
SRR17520069. 145613  
SRR17520069. 154656  
SRR17520069. 154700  
SRR17520069. 161013  
SRR17520069. 162922

SRR17520069. 169226  
SRR17520069. 224658  
SRR17520069. 224688  
SRR17520069. 227299  
SRR17520069. 234166  
SRR17520069. 234203  
SRR17520069. 234205  
SRR17520069. 234842  
SRR17520069. 253757  
SRR17520069. 261611  
SRR17520069. 262432  
SRR17520069. 279495  
SRR17520069. 279524  
SRR17520069. 288306  
SRR17520069. 298563  
SRR17520069. 300873  
SRR17520069. 311500  
SRR17520069. 311510  
SRR17520069. 311513  
SRR17520069. 311541  
SRR17520069. 311562  
SRR17520069. 311568  
SRR17520069. 311578  
SRR17520069. 311597  
SRR17520069. 311613  
SRR17520069. 312874  
SRR17520069. 312969  
SRR17520069. 317262  
SRR17520069. 319728  
SRR17520069. 328766  
SRR17520069. 341428  
SRR17520069. 366253  
SRR17520069. 366848  
SRR17520069. 366985  
SRR17520069. 367012  
SRR17520069. 368239  
SRR17520069. 368335  
SRR17520069. 372415  
SRR17520069. 383672  
SRR17520069. 390418  
SRR17520069. 397666  
SRR17520069. 420363  
SRR17520069. 428040  
SRR17520069. 428053  
SRR17520069. 429204  
SRR17520069. 433546  
SRR17520069. 433604

SRR17520069.442632  
SRR17520069.442675  
SRR17520069.446113  
SRR17520069.446117  
SRR17520069.450435  
SRR17520069.450709  
SRR17520069.452114  
SRR17520069.453724  
SRR17520069.453732  
SRR17520069.453766  
SRR17520069.458660  
SRR17520069.491408  
SRR17520069.498790  
SRR17520069.508129  
SRR17520069.516658  
SRR17520069.521202  
SRR17520069.521959  
SRR17520069.541357  
SRR17520069.562341  
SRR17520069.569940  
SRR17520069.578670  
SRR17520069.584309  
SRR17520069.585080  
SRR17520069.592042  
SRR17520069.592994  
SRR17520069.593077  
SRR17520069.595020  
SRR17520069.615355  
SRR17520069.622227  
SRR17520069.622246  
SRR17520069.624528  
SRR17520069.624662  
SRR17520069.624694  
SRR17520069.625517  
SRR17520069.630717  
SRR17520069.641471  
SRR17520069.643928  
SRR17520069.649611  
SRR17520069.662432  
SRR17520069.664610  
SRR17520069.686072  
SRR17520069.693244  
SRR17520069.695304  
SRR17520069.700239  
SRR17520069.703688  
SRR17520069.711097  
SRR17520069.715879

SRR17520069.721085  
SRR17520069.724966  
SRR17520069.725670  
SRR17520069.731634  
SRR17520069.732264  
SRR17520069.732268  
SRR17520069.732288  
SRR17520069.732290  
SRR17520069.732292  
SRR17520069.732301  
SRR17520069.732302  
SRR17520069.733102  
SRR17520069.739323  
SRR17520069.763327  
SRR17520069.792180  
SRR17520069.804005  
SRR17520069.804007  
SRR17520069.838491  
SRR17520069.863526  
SRR17520069.865736  
SRR17520069.882294  
SRR17520069.882521  
SRR17520069.882591  
SRR17520069.885716  
SRR17520069.885860  
SRR17520069.885866  
SRR17520069.888414  
SRR17520069.896996  
SRR17520069.911333  
SRR17520069.930439  
SRR17520069.931774  
SRR17520069.934153  
SRR17520069.965210  
SRR17520069.971871  
SRR17520069.971890  
SRR17520069.972797  
SRR17520069.1013732  
SRR17520069.1022747  
SRR17520069.1038520  
SRR17520069.1040354  
SRR17520069.1043060  
SRR17520069.1109461  
SRR17520069.1116228  
SRR17520069.1128774  
SRR17520069.1141607  
SRR17520069.1155977  
SRR17520069.1155982



SRR17520069. 1182996  
SRR17520069. 1187435  
SRR17520069. 1189993  
SRR17520069. 1208152  
SRR17520069. 1225986  
SRR17520069. 1228955  
SRR17520069. 1231177  
SRR17520069. 1243708  
SRR17520069. 1243730  
SRR17520069. 1256923  
SRR17520069. 1256924  
SRR17520069. 1256925  
SRR17520069. 1256927  
SRR17520069. 1256928  
SRR17520069. 1256929  
SRR17520069. 1256930  
SRR17520069. 1256931  
SRR17520069. 1256933  
SRR17520069. 1256934  
SRR17520069. 1256935  
SRR17520069. 1256936  
SRR17520069. 1256937  
SRR17520069. 1256939  
SRR17520069. 1256940  
SRR17520069. 1256941  
SRR17520069. 1256942  
SRR17520069. 1256943  
SRR17520069. 1256944  
SRR17520069. 1256945  
SRR17520069. 1256946  
SRR17520069. 1256948  
SRR17520069. 1256949  
SRR17520069. 1256950  
SRR17520069. 1256951  
SRR17520069. 1256952  
SRR17520069. 1256953  
SRR17520069. 1256954  
SRR17520069. 1256955  
SRR17520069. 1256956  
SRR17520069. 1256957  
SRR17520069. 1256958  
SRR17520069. 1256959  
SRR17520069. 1256960  
SRR17520069. 1256961  
SRR17520069. 1259971  
SRR17520069. 1266131  
SRR17520069. 1266139

SRR17520069.1267973  
SRR17520069.1278767  
SRR17520069.1278844  
SRR17520069.1278920  
SRR17520069.1292888  
SRR17520069.1336068  
SRR17520069.1340595  
SRR17520069.1341616  
SRR17520069.1341617  
SRR17520069.1342018  
SRR17520069.1347342  
SRR17520069.1347367  
SRR17520069.1347412  
SRR17520069.1352023  
SRR17520069.1352025  
SRR17520069.1352037  
SRR17520069.1352039  
SRR17520069.1352051  
SRR17520069.1352062  
SRR17520069.1352063  
SRR17520069.1352071  
SRR17520069.1352081  
SRR17520069.1352099  
SRR17520069.1358096  
SRR17520069.1364271  
SRR17520069.1368217  
SRR17520069.1382721  
SRR17520069.1383882  
SRR17520069.1396825  
SRR17520069.1406289  
SRR17520069.1412662  
SRR17520069.1412724  
SRR17520069.1435176  
SRR17520069.1435177  
SRR17520069.1435180  
SRR17520069.1435181  
SRR17520069.1435182  
SRR17520069.1435184  
SRR17520069.1435617  
SRR17520069.1436119  
SRR17520069.1446799  
SRR17520069.1446834  
SRR17520069.1471320  
SRR17520069.1471339  
SRR17520069.1478638  
SRR17520069.1478874  
SRR17520069.1478947

SRR17520069. 1494139  
SRR17520069. 1494165  
SRR17520069. 1496349  
SRR17520069. 1496384  
SRR17520069. 1497650  
SRR17520069. 1500502  
SRR17520069. 1505931  
SRR17520069. 1514333  
SRR17520069. 1518877  
SRR17520069. 1522092  
SRR17520069. 1534104  
SRR17520069. 1535072  
SRR17520069. 1554086  
SRR17520069. 1554102  
SRR17520069. 1556182  
SRR17520069. 1572781  
SRR17520069. 1575731  
SRR17520069. 1575733  
SRR17520069. 1575738  
SRR17520069. 1575750  
SRR17520069. 1578084  
SRR17520069. 1596661  
SRR17520069. 1596662  
SRR17520069. 1596675  
SRR17520069. 1608043  
SRR17520069. 1608098  
SRR17520069. 1614295  
SRR17520069. 1640764  
SRR17520069. 1653627  
SRR17520069. 1653661  
SRR17520069. 1653665  
SRR17520069. 1656152  
SRR17520069. 1656166  
SRR17520069. 1656168  
SRR17520069. 1663297  
SRR17520069. 1664024  
SRR17520069. 1667957  
SRR17520069. 1667995  
SRR17520069. 1678505  
SRR17520069. 1679041  
SRR17520069. 1679097  
SRR17520069. 1680865  
SRR17520069. 1680881  
SRR17520069. 1686218  
SRR17520069. 1702403  
SRR17520069. 1724968  
SRR17520069. 1725042

SRR17520069. 1752745  
SRR17520069. 1752951  
SRR17520069. 1752960  
SRR17520069. 1752989  
SRR17520069. 1753007  
SRR17520069. 1767582  
SRR17520069. 1767588  
SRR17520069. 1774395  
SRR17520069. 1796525  
SRR17520069. 1796567  
SRR17520069. 1796595  
SRR17520069. 1799148  
SRR17520069. 1799236  
SRR17520069. 1799269  
SRR17520069. 1799310  
SRR17520069. 1825793  
SRR17520069. 1847386  
SRR17520069. 1857599  
SRR17520069. 1878929  
SRR17520069. 1879998  
SRR17520069. 1879999  
SRR17520069. 1894010  
SRR17520069. 1894016  
SRR17520069. 1895937  
SRR17520069. 1895950  
SRR17520069. 1899899  
SRR17520069. 1904473  
SRR17520069. 1917896  
SRR17520069. 1926825  
SRR17520069. 1926841  
SRR17520069. 1942027  
SRR17520069. 1951540  
SRR17520069. 1962142  
SRR17520069. 1976517  
SRR17520069. 1977525  
SRR17520069. 1978654  
SRR17520069. 1978679  
SRR17520069. 1980939  
SRR17520069. 1981010  
SRR17520069. 1983110  
SRR17520069. 1993968  
SRR17520069. 1998246  
SRR17520069. 2014512  
SRR17520069. 2017996  
SRR17520069. 2034167  
SRR17520069. 2035368  
SRR17520069. 2039053

SRR17520069. 2039153  
SRR17520069. 2039177  
SRR17520069. 2039183  
SRR17520069. 2039187  
SRR17520069. 2039189  
SRR17520069. 2073950  
SRR17520069. 2076572  
SRR17520069. 2076649  
SRR17520069. 2085401  
SRR17520069. 2097233  
SRR17520069. 2106583  
SRR17520069. 2110853  
SRR17520069. 2110872  
SRR17520069. 2125179  
SRR17520069. 2125791  
SRR17520069. 2134841  
SRR17520069. 2141502  
SRR17520069. 2142896  
SRR17520069. 2142908  
SRR17520069. 2147788  
SRR17520069. 2148917  
SRR17520069. 2148925  
SRR17520069. 2148934  
SRR17520069. 2167596  
SRR17520069. 2170449  
SRR17520069. 2175288  
SRR17520069. 2188668  
SRR17520069. 2202468  
SRR17520069. 2248850  
SRR17520069. 2252064  
SRR17520069. 2257023  
SRR17520069. 2314859  
SRR17520069. 2340347  
SRR17520069. 2340376  
SRR17520069. 2340386  
SRR17520069. 2345403  
SRR17520069. 2345437  
SRR17520069. 2363533  
SRR17520069. 2363540  
SRR17520069. 2363545  
SRR17520069. 2366222  
SRR17520069. 2370360  
SRR17520069. 2373791  
SRR17520069. 2377113  
SRR17520069. 2377130  
SRR17520069. 2377151  
SRR17520069. 2381326

SRR17520069. 2385597  
SRR17520069. 2391401  
SRR17520069. 2394993  
SRR17520069. 2395045  
SRR17520069. 2395078  
SRR17520069. 2398433  
SRR17520069. 2402896  
SRR17520069. 2417735  
SRR17520069. 2425179  
SRR17520069. 2425189  
SRR17520069. 2431808  
SRR17520069. 2440393  
SRR17520069. 2454564  
SRR17520069. 2454589  
SRR17520069. 2458085  
SRR17520069. 2458088  
SRR17520069. 2458104  
SRR17520069. 2458107  
SRR17520069. 2458109  
SRR17520069. 2458111  
SRR17520069. 2458123  
SRR17520069. 2458127  
SRR17520069. 2458128  
SRR17520069. 2458130  
SRR17520069. 2462062  
SRR17520069. 2485114  
SRR17520069. 2495073  
SRR17520069. 2520989  
SRR17520069. 2543541  
SRR17520069. 2563339  
SRR17520069. 2563360  
SRR17520069. 2564235  
SRR17520069. 2564237  
SRR17520069. 2564241  
SRR17520069. 2567058  
SRR17520069. 2587179  
SRR17520069. 2597336  
SRR17520069. 2604833  
SRR17520069. 2605349  
SRR17520069. 2606270  
SRR17520069. 2611783  
SRR17520069. 2611823  
SRR17520069. 2614287  
SRR17520069. 2614290  
SRR17520069. 2614298  
SRR17520069. 2614300  
SRR17520069. 2614304

SRR17520069. 2614307  
SRR17520069. 2614334  
SRR17520069. 2625501  
SRR17520069. 2631820  
SRR17520069. 2636939  
SRR17520069. 2642438  
SRR17520069. 2642442  
SRR17520069. 2642443  
SRR17520069. 2642448  
SRR17520069. 2642453  
SRR17520069. 2654384  
SRR17520069. 2690756  
SRR17520069. 2693783  
SRR17520069. 2695720  
SRR17520069. 2695722  
SRR17520069. 2702950  
SRR17520069. 2733855  
SRR17520069. 2752747  
SRR17520069. 2752786  
SRR17520069. 2754352  
SRR17520069. 2773478  
SRR17520069. 2820642  
SRR17520069. 2841567  
SRR17520069. 2841569  
SRR17520069. 2841594  
SRR17520069. 2845421  
SRR17520069. 2856973  
SRR17520069. 2858003  
SRR17520069. 2858033  
SRR17520069. 2870749  
SRR17520069. 2879816  
SRR17520069. 2879870  
SRR17520069. 2889373  
SRR17520069. 2890177  
SRR17520069. 2891857  
SRR17520069. 2894212  
SRR17520069. 2895646  
SRR17520069. 2898570  
SRR17520069. 2907154  
SRR17520069. 2908941  
SRR17520069. 2913973  
SRR17520069. 2923227  
SRR17520069. 2932291  
SRR17520069. 2948589  
SRR17520069. 2953569  
SRR17520069. 2953573  
SRR17520069. 2965834

SRR17520069. 2995380  
SRR17520069. 3006806  
SRR17520069. 3012621  
SRR17520069. 3044053  
SRR17520069. 3054458  
SRR17520069. 3055573  
SRR17520069. 3068896  
SRR17520069. 3082820  
SRR17520069. 3093638  
SRR17520069. 3107897  
SRR17520069. 3118045  
SRR17520069. 3146057  
SRR17520069. 3146059  
SRR17520069. 3146061  
SRR17520069. 3146063  
SRR17520069. 3146067  
SRR17520069. 3146069  
SRR17520069. 3146073  
SRR17520069. 3146075  
SRR17520069. 3146077  
SRR17520069. 3146083  
SRR17520069. 3156005  
SRR17520069. 3172938  
SRR17520069. 3172942  
SRR17520069. 3172981  
SRR17520069. 3187515  
SRR17520069. 3187599  
SRR17520069. 3187628  
SRR17520069. 3195438  
SRR17520069. 3199447  
SRR17520069. 3199470  
SRR17520069. 3228018  
SRR17520069. 3228500  
SRR17520069. 3235312  
SRR17520069. 3235317  
SRR17520069. 3245870  
SRR17520069. 3245956  
SRR17520069. 3245985  
SRR17520069. 3246079  
SRR17520069. 3252787  
SRR17520069. 3254992  
SRR17520069. 3255004  
SRR17520069. 3255871  
SRR17520069. 3273010  
SRR17520069. 3274824  
SRR17520069. 3279231  
SRR17520069. 3310038



SRR17520069. 3324981  
SRR17520069. 3335364  
SRR17520069. 3338065  
SRR17520069. 3339606  
SRR17520069. 3346076  
SRR17520069. 3346369  
SRR17520069. 3352827  
SRR17520069. 3352841  
SRR17520069. 3367842  
SRR17520069. 3399588  
SRR17520069. 3399631  
SRR17520069. 3413801  
SRR17520069. 3413844  
SRR17520069. 3434682  
SRR17520069. 3443194  
SRR17520069. 3450610  
SRR17520069. 3467189  
SRR17520069. 3467199  
SRR17520069. 3469646  
SRR17520069. 3471376  
SRR17520069. 3478084  
SRR17520069. 3493536  
SRR17520069. 3512163  
SRR17520069. 3513984  
SRR17520069. 3514378  
SRR17520069. 3527793  
SRR17520069. 3539957  
SRR17520069. 3540083  
SRR17520069. 3540085  
SRR17520069. 3544649  
SRR17520069. 3544660  
SRR17520069. 3544680  
SRR17520069. 3545266  
SRR17520069. 3545268  
SRR17520069. 3545270  
SRR17520069. 3545271  
SRR17520069. 3545280  
SRR17520069. 3545285  
SRR17520069. 3545291  
SRR17520069. 3545302  
SRR17520069. 3545307  
SRR17520069. 3545326  
SRR17520069. 3545333  
SRR17520069. 3545334  
SRR17520069. 3545347  
SRR17520069. 3545348  
SRR17520069. 3553524

SRR17520069. 3553529  
SRR17520069. 3563629  
SRR17520069. 3578349  
SRR17520069. 3578795  
SRR17520069. 3588637  
SRR17520069. 3602286  
SRR17520069. 3608310  
SRR17520069. 3615972  
SRR17520069. 3628054  
SRR17520069. 3628058  
SRR17520069. 3630127  
SRR17520069. 3631539  
SRR17520069. 3638485  
SRR17520069. 3642065  
SRR17520069. 3642075  
SRR17520069. 3642092  
SRR17520069. 3644306  
SRR17520069. 3644688  
SRR17520069. 3645406  
SRR17520069. 3662889  
SRR17520069. 3666452  
SRR17520069. 3667973  
SRR17520069. 3688364  
SRR17520069. 3712120  
SRR17520069. 3712135  
SRR17520069. 3722043  
SRR17520069. 3737389  
SRR17520069. 3738214  
SRR17520069. 3744987  
SRR17520069. 3744995  
SRR17520069. 3744999  
SRR17520069. 3748486  
SRR17520069. 3770149  
SRR17520069. 3776700  
SRR17520069. 3790658  
SRR17520069. 3790684  
SRR17520069. 3790693  
SRR17520069. 3802152  
SRR17520069. 3809391  
SRR17520069. 3809416  
SRR17520069. 3809447  
SRR17520069. 3809631  
SRR17520069. 3816270  
SRR17520069. 3816272  
SRR17520069. 3826015  
SRR17520069. 3836636  
SRR17520069. 3838562

SRR17520069. 3839146  
SRR17520069. 3839157  
SRR17520069. 3839177  
SRR17520069. 3849613  
SRR17520069. 3858192  
SRR17520069. 3884385  
SRR17520069. 3902605  
SRR17520069. 3907467  
SRR17520069. 3913896  
SRR17520069. 3924723  
SRR17520069. 3924814  
SRR17520069. 3951243  
SRR17520069. 3954807  
SRR17520069. 3954829  
SRR17520069. 3956994  
SRR17520069. 3962184  
SRR17520069. 3967630  
SRR17520069. 3987301  
SRR17520069. 3987304  
SRR17520069. 3987305  
SRR17520069. 3987306  
SRR17520069. 3987309  
SRR17520069. 3999779  
SRR17520069. 4004025  
SRR17520069. 4043436  
SRR17520069. 4049584  
SRR17520069. 4049644  
SRR17520069. 4049868  
SRR17520069. 4072228  
SRR17520069. 4103295  
SRR17520069. 4106029  
SRR17520069. 4107623  
SRR17520069. 4107659  
SRR17520069. 4107681  
SRR17520069. 4111723  
SRR17520069. 4111729  
SRR17520069. 4116572  
SRR17520069. 4120034  
SRR17520069. 4161797  
SRR17520069. 4164900  
SRR17520069. 4170345  
SRR17520069. 4180909  
SRR17520069. 4189989  
SRR17520069. 4204581  
SRR17520069. 4215623  
SRR17520069. 4215635  
SRR17520069. 4216176

SRR17520069.4216189  
SRR17520069.4217499  
SRR17520069.4217538  
SRR17520069.4232028  
SRR17520069.4232073  
SRR17520069.4240864  
SRR17520069.4240870  
SRR17520069.4245700  
SRR17520069.4259460  
SRR17520069.4263011  
SRR17520069.4264388  
SRR17520069.4269104  
SRR17520069.4274493  
SRR17520069.4274507  
SRR17520069.4274516  
SRR17520069.4274521  
SRR17520069.4274570  
SRR17520069.4274688  
SRR17520069.4314261  
SRR17520069.4314310  
SRR17520069.4314323  
SRR17520069.4319780  
SRR17520069.4320064  
SRR17520069.4329591  
SRR17520069.4355882  
SRR17520069.4356686  
SRR17520069.4356886  
SRR17520069.4365598  
SRR17520069.4365606  
SRR17520069.4402757  
SRR17520069.4435825  
SRR17520069.4438193  
SRR17520069.4438195  
SRR17520069.4441085  
SRR17520069.4442503  
SRR17520069.4443943  
SRR17520069.4475603  
SRR17520069.4481297  
SRR17520069.4486055  
SRR17520069.4503607  
SRR17520069.4503664  
SRR17520069.4519139  
SRR17520069.4519351  
SRR17520069.4519386  
SRR17520069.4519404  
SRR17520069.4519413  
SRR17520069.4522973

SRR17520069.4526898  
SRR17520069.4528495  
SRR17520069.4530007  
SRR17520069.4530165  
SRR17520069.4537300  
SRR17520069.4537341  
SRR17520069.4537345  
SRR17520069.4539797  
SRR17520069.4539799  
SRR17520069.4544263  
SRR17520069.4544296  
SRR17520069.4545242  
SRR17520069.4551174  
SRR17520069.4562814  
SRR17520069.4580154  
SRR17520069.4580167  
SRR17520069.4595011  
SRR17520069.4604092  
SRR17520069.4642546  
SRR17520069.4645905  
SRR17520069.4674891  
SRR17520069.4679309  
SRR17520069.4689840  
SRR17520069.4699831  
SRR17520069.4702254  
SRR17520069.4705820  
SRR17520069.4719603  
SRR17520069.4719623  
SRR17520069.4719642  
SRR17520069.4741496  
SRR17520069.4749484  
SRR17520069.4749485  
SRR17520069.4756644  
SRR17520069.4765240  
SRR17520069.4771116  
SRR17520069.4785448  
SRR17520069.4794811  
SRR17520069.4798428  
SRR17520069.4837160  
SRR17520069.4837738  
SRR17520069.4838915  
SRR17520069.4839740  
SRR17520069.4839742  
SRR17520069.4839744  
SRR17520069.4839748  
SRR17520069.4842697  
SRR17520069.4846895

SRR17520069.4848376  
SRR17520069.4868237  
SRR17520069.4876777  
SRR17520069.4879467  
SRR17520069.4926849  
SRR17520069.4926852  
SRR17520069.4930316  
SRR17520069.4935199  
SRR17520069.4943329  
SRR17520069.4957868  
SRR17520069.4985837  
SRR17520069.4988433  
SRR17520069.4988465  
SRR17520069.4988487  
SRR17520069.5000367  
SRR17520069.5000456  
SRR17520069.5000465  
SRR17520069.5006579  
SRR17520069.5032191  
SRR17520069.5062081  
SRR17520069.5071516  
SRR17520069.5071521  
SRR17520069.5072837  
SRR17520069.5072839  
SRR17520069.5072840  
SRR17520069.5072841  
SRR17520069.5072843  
SRR17520069.5072845  
SRR17520069.5072847  
SRR17520069.5072849  
SRR17520069.5072851  
SRR17520069.5072853  
SRR17520069.5072855  
SRR17520069.5072857  
SRR17520069.5072858  
SRR17520069.5072859  
SRR17520069.5072861  
SRR17520069.5072863  
SRR17520069.5072865  
SRR17520069.5072867  
SRR17520069.5072869  
SRR17520069.5072870  
SRR17520069.5072871  
SRR17520069.5072873  
SRR17520069.5072875  
SRR17520069.5072879  
SRR17520069.5072880

SRR17520069. 5072881  
SRR17520069. 5072883  
SRR17520069. 5072885  
SRR17520069. 5072887  
SRR17520069. 5072889  
SRR17520069. 5072891  
SRR17520069. 5072892  
SRR17520069. 5072893  
SRR17520069. 5072894  
SRR17520069. 5072895  
SRR17520069. 5072896  
SRR17520069. 5072897  
SRR17520069. 5072899  
SRR17520069. 5072901  
SRR17520069. 5072902  
SRR17520069. 5072903  
SRR17520069. 5072905  
SRR17520069. 5072906  
SRR17520069. 5083337  
SRR17520069. 5085449  
SRR17520069. 5094232  
SRR17520069. 5112818  
SRR17520069. 5112971  
SRR17520069. 5112972  
SRR17520069. 5115167  
SRR17520069. 5116360  
SRR17520069. 5125491  
SRR17520069. 5125834  
SRR17520069. 5126121  
SRR17520069. 5131375  
SRR17520069. 5132318  
SRR17520069. 5184334  
SRR17520069. 5200123  
SRR17520069. 5204910  
SRR17520069. 5223293  
SRR17520069. 5223305  
SRR17520069. 5243471  
SRR17520069. 5243509  
SRR17520069. 5248805  
SRR17520069. 5255632  
SRR17520069. 5261418  
SRR17520069. 5261456  
SRR17520069. 5271047  
SRR17520069. 5276318  
SRR17520069. 5286177  
SRR17520069. 5313431  
SRR17520069. 5313465

SRR17520069. 5323021  
SRR17520069. 5331300  
SRR17520069. 5349153  
SRR17520069. 5351241  
SRR17520069. 5351254  
SRR17520069. 5351362  
SRR17520069. 5351549  
SRR17520069. 5356957  
SRR17520069. 5356973  
SRR17520069. 5356993  
SRR17520069. 5369496  
SRR17520069. 5369508  
SRR17520069. 5385198  
SRR17520069. 5385215  
SRR17520069. 5385219  
SRR17520069. 5397486  
SRR17520069. 5397535  
SRR17520069. 5402954  
SRR17520069. 5414010  
SRR17520069. 5424176  
SRR17520069. 5424287  
SRR17520069. 5424288  
SRR17520069. 5438841  
SRR17520069. 5457710  
SRR17520069. 5460166  
SRR17520069. 5479004  
SRR17520069. 5479005  
SRR17520069. 5479006  
SRR17520069. 5479007  
SRR17520069. 5479008  
SRR17520069. 5479010  
SRR17520069. 5479011  
SRR17520069. 5479012  
SRR17520069. 5479013  
SRR17520069. 5479014  
SRR17520069. 5479015  
SRR17520069. 5479016  
SRR17520069. 5479017  
SRR17520069. 5479018  
SRR17520069. 5479019  
SRR17520069. 5479020  
SRR17520069. 5479021  
SRR17520069. 5479022  
SRR17520069. 5479023  
SRR17520069. 5479025  
SRR17520069. 5479026  
SRR17520069. 5479028



SRR17520069. 5479030  
SRR17520069. 5479032  
SRR17520069. 5479033  
SRR17520069. 5479034  
SRR17520069. 5479035  
SRR17520069. 5479036  
SRR17520069. 5479037  
SRR17520069. 5479038  
SRR17520069. 5479039  
SRR17520069. 5479040  
SRR17520069. 5479041  
SRR17520069. 5479042  
SRR17520069. 5479043  
SRR17520069. 5479044  
SRR17520069. 5479045  
SRR17520069. 5479046  
SRR17520069. 5479047  
SRR17520069. 5479048  
SRR17520069. 5479049  
SRR17520069. 5479050  
SRR17520069. 5479052  
SRR17520069. 5479053  
SRR17520069. 5479054  
SRR17520069. 5479055  
SRR17520069. 5479056  
SRR17520069. 5479057  
SRR17520069. 5479058  
SRR17520069. 5479059  
SRR17520069. 5479060  
SRR17520069. 5479061  
SRR17520069. 5479063  
SRR17520069. 5479064  
SRR17520069. 5479065  
SRR17520069. 5479066  
SRR17520069. 5479068  
SRR17520069. 5479069  
SRR17520069. 5479071  
SRR17520069. 5479072  
SRR17520069. 5479074  
SRR17520069. 5479075  
SRR17520069. 5479076  
SRR17520069. 5479077  
SRR17520069. 5479078  
SRR17520069. 5479079  
SRR17520069. 5479080  
SRR17520069. 5479081  
SRR17520069. 5479082

SRR17520069. 5479083  
SRR17520069. 5479084  
SRR17520069. 5479085  
SRR17520069. 5479086  
SRR17520069. 5479088  
SRR17520069. 5479089  
SRR17520069. 5479090  
SRR17520069. 5479091  
SRR17520069. 5479092  
SRR17520069. 5479094  
SRR17520069. 5479095  
SRR17520069. 5479096  
SRR17520069. 5479097  
SRR17520069. 5479098  
SRR17520069. 5479099  
SRR17520069. 5479100  
SRR17520069. 5479101  
SRR17520069. 5479103  
SRR17520069. 5479104  
SRR17520069. 5479106  
SRR17520069. 5479107  
SRR17520069. 5479108  
SRR17520069. 5479110  
SRR17520069. 5479111  
SRR17520069. 5479112  
SRR17520069. 5479113  
SRR17520069. 5479114  
SRR17520069. 5479116  
SRR17520069. 5479117  
SRR17520069. 5479118  
SRR17520069. 5479119  
SRR17520069. 5479120  
SRR17520069. 5479122  
SRR17520069. 5479123  
SRR17520069. 5479124  
SRR17520069. 5479125  
SRR17520069. 5479126  
SRR17520069. 5479127  
SRR17520069. 5479128  
SRR17520069. 5479129  
SRR17520069. 5479130  
SRR17520069. 5479132  
SRR17520069. 5479133  
SRR17520069. 5479134  
SRR17520069. 5479135  
SRR17520069. 5479136  
SRR17520069. 5479137

SRR17520069. 5479138  
SRR17520069. 5479139  
SRR17520069. 5489478  
SRR17520069. 5490816  
SRR17520069. 5504293  
SRR17520069. 5504297  
SRR17520069. 5504307  
SRR17520069. 5521988  
SRR17520069. 5524363  
SRR17520069. 5524550  
SRR17520069. 5552104  
SRR17520069. 5561776  
SRR17520069. 5573170  
SRR17520069. 5601792  
SRR17520069. 5601846  
SRR17520069. 5601922  
SRR17520069. 5601958  
SRR17520069. 5609243  
SRR17520069. 5612358  
SRR17520069. 5612394  
SRR17520069. 5625206  
SRR17520069. 5639399  
SRR17520069. 5639401  
SRR17520069. 5639405  
SRR17520069. 5639409  
SRR17520069. 5639411  
SRR17520069. 5639437  
SRR17520069. 5643565  
SRR17520069. 5676469  
SRR17520069. 5715495  
SRR17520069. 5716003  
SRR17520069. 5717700  
SRR17520069. 5717704  
SRR17520069. 5719049  
SRR17520069. 5738400  
SRR17520069. 5738408  
SRR17520069. 5738434  
SRR17520069. 5748716  
SRR17520069. 5767337  
SRR17520069. 5767360  
SRR17520069. 5807947  
SRR17520069. 5822087  
SRR17520069. 5831466  
SRR17520069. 5832389  
SRR17520069. 5843662  
SRR17520069. 5843680  
SRR17520069. 5848604

SRR17520069.5848983  
SRR17520069.5848985  
SRR17520069.5848989  
SRR17520069.5864104  
SRR17520069.5871281  
SRR17520069.5871308  
SRR17520069.5871431  
SRR17520069.5873216  
SRR17520069.5885269  
SRR17520069.5889158  
SRR17520069.5889871  
SRR17520069.5891767  
SRR17520069.5894143  
SRR17520069.5894147  
SRR17520069.5894173  
SRR17520069.5894193  
SRR17520069.5926511  
SRR17520069.5938644  
SRR17520069.5947188  
SRR17520069.5947206  
SRR17520069.5971825  
SRR17520069.5975719  
SRR17520069.5982927  
SRR17520069.5984453  
SRR17520069.5987779  
SRR17520069.5987819  
SRR17520069.5989207  
SRR17520069.5990082  
SRR17520069.5990123  
SRR17520069.5992648  
SRR17520069.6016875  
SRR17520069.6027229  
SRR17520069.6027292  
SRR17520069.6028448  
SRR17520069.6030397  
SRR17520069.6031938  
SRR17520069.6041532  
SRR17520069.6045199  
SRR17520069.6052449  
SRR17520069.6056900  
SRR17520069.6057004  
SRR17520069.6057019  
SRR17520069.6057035  
SRR17520069.6057036  
SRR17520069.6057080  
SRR17520069.6058482  
SRR17520069.6058490

SRR17520069.6058511  
SRR17520069.6062309  
SRR17520069.6072444  
SRR17520069.6074426  
SRR17520069.6076799  
SRR17520069.6076855  
SRR17520069.6080169  
SRR17520069.6085065  
SRR17520069.6093362  
SRR17520069.6093545  
SRR17520069.6112584  
SRR17520069.6112587  
SRR17520069.6112603  
SRR17520069.6112640  
SRR17520069.6112698  
SRR17520069.6117570  
SRR17520069.6127421  
SRR17520069.6136271  
SRR17520069.6147721  
SRR17520069.6148608  
SRR17520069.6155986  
SRR17520069.6156018  
SRR17520069.6156928  
SRR17520069.6182520  
SRR17520069.6185102  
SRR17520069.6188060  
SRR17520069.6188408  
SRR17520069.6200326  
SRR17520069.6200419  
SRR17520069.6200423  
SRR17520069.6200454  
SRR17520069.6200458  
SRR17520069.6203238  
SRR17520069.6215186  
SRR17520069.6228491  
SRR17520069.6228514  
SRR17520069.6232503  
SRR17520069.6233337  
SRR17520069.6264897  
SRR17520069.6273352  
SRR17520069.6280935  
SRR17520069.6283376  
SRR17520069.6283390  
SRR17520069.6296591  
SRR17520069.6296595  
SRR17520069.6296601  
SRR17520069.6323577

SRR17520069. 6338542  
SRR17520069. 6341496  
SRR17520069. 6341539  
SRR17520069. 6353940  
SRR17520069. 6354692  
SRR17520069. 6359093  
SRR17520069. 6368268  
SRR17520069. 6370377  
SRR17520069. 6379788  
SRR17520069. 6389059  
SRR17520069. 6401973  
SRR17520069. 6408744  
SRR17520069. 6408748  
SRR17520069. 6408750  
SRR17520069. 6421186  
SRR17520069. 6446222  
SRR17520069. 6448987  
SRR17520069. 6457930  
SRR17520069. 6466489  
SRR17520069. 6472874  
SRR17520069. 6479568  
SRR17520069. 6482680  
SRR17520069. 6485806  
SRR17520069. 6508836  
SRR17520069. 6508838  
SRR17520069. 6518371  
SRR17520069. 6538619  
SRR17520069. 6554147  
SRR17520069. 6565344  
SRR17520069. 6565374  
SRR17520069. 6574013  
SRR17520069. 6574109  
SRR17520069. 6578685  
SRR17520069. 6589337  
SRR17520069. 6632360  
SRR17520069. 6632401  
SRR17520069. 6642692  
SRR17520069. 6643636  
SRR17520069. 6648898  
SRR17520069. 6657752  
SRR17520069. 6660085  
SRR17520069. 6668172  
SRR17520069. 6672891  
SRR17520069. 6678623  
SRR17520069. 6678624  
SRR17520069. 6689376  
SRR17520069. 6696202

SRR17520069.6701452  
SRR17520069.6701453  
SRR17520069.6738645  
SRR17520069.6766271  
SRR17520069.6768551  
SRR17520069.6768559  
SRR17520069.6781816  
SRR17520069.6784327  
SRR17520069.6787717  
SRR17520069.6787749  
SRR17520069.6787751  
SRR17520069.6810396  
SRR17520069.6810404  
SRR17520069.6810410  
SRR17520069.6810416  
SRR17520069.6812353  
SRR17520069.6820173  
SRR17520069.6821736  
SRR17520069.6837618  
SRR17520069.6857987  
SRR17520069.6903069  
SRR17520069.6921181  
SRR17520069.6921191  
SRR17520069.6936606  
SRR17520069.6943966  
SRR17520069.6944009  
SRR17520069.6944711  
SRR17520069.6947686  
SRR17520069.6953156  
SRR17520069.6953175  
SRR17520069.6953185  
SRR17520069.6954852  
SRR17520069.6965195  
SRR17520069.6974784  
SRR17520069.7016065  
SRR17520069.7016785  
SRR17520069.7016973  
SRR17520069.7017662  
SRR17520069.7021019  
SRR17520069.7021026  
SRR17520069.7052890  
SRR17520069.7052920  
SRR17520069.7052939  
SRR17520069.7063745  
SRR17520069.7107264  
SRR17520069.7134869  
SRR17520069.7134887

SRR17520069. 7149140  
SRR17520069. 7166701  
SRR17520069. 7205818  
SRR17520069. 7206914  
SRR17520069. 7211641  
SRR17520069. 7215797  
SRR17520069. 7224702  
SRR17520069. 7226390  
SRR17520069. 7226392  
SRR17520069. 7231855  
SRR17520069. 7231873  
SRR17520069. 7231937  
SRR17520069. 7232066  
SRR17520069. 7236086  
SRR17520069. 7236095  
SRR17520069. 7236107  
SRR17520069. 7240819  
SRR17520069. 7258246  
SRR17520069. 7258303  
SRR17520069. 7258310  
SRR17520069. 7261598  
SRR17520069. 7261670  
SRR17520069. 7261687  
SRR17520069. 7261688  
SRR17520069. 7285570  
SRR17520069. 7285802  
SRR17520069. 7299624  
SRR17520069. 7311063  
SRR17520069. 7312226  
SRR17520069. 7318817  
SRR17520069. 7318835  
SRR17520069. 7327126  
SRR17520069. 7327150  
SRR17520069. 7327728  
SRR17520069. 7329038  
SRR17520069. 7357036  
SRR17520069. 7357051  
SRR17520069. 7370991  
SRR17520069. 7387952  
SRR17520069. 7387953  
SRR17520069. 7387960  
SRR17520069. 7388035  
SRR17520069. 7394918  
SRR17520069. 7394953  
SRR17520069. 7394967  
SRR17520069. 7401812  
SRR17520069. 7401881



SRR17520069.7430131  
SRR17520069.7432606  
SRR17520069.7432626  
SRR17520069.7432650  
SRR17520069.7450976  
SRR17520069.7483037  
SRR17520069.7486610  
SRR17520069.7488922  
SRR17520069.7488972  
SRR17520069.7491975  
SRR17520069.7500973  
SRR17520069.7524859  
SRR17520069.7529716  
SRR17520069.7533338  
SRR17520069.7557264  
SRR17520069.7579004  
SRR17520069.7579016  
SRR17520069.7579030  
SRR17520069.7579058  
SRR17520069.7579060  
SRR17520069.7579469  
SRR17520069.7579486  
SRR17520069.7600708  
SRR17520069.7613076  
SRR17520069.7613102  
SRR17520069.7615630  
SRR17520069.7637106  
SRR17520069.7667016  
SRR17520069.7679455  
SRR17520069.7689726  
SRR17520069.7708030  
SRR17520069.7708037  
SRR17520069.7715249  
SRR17520069.7743991  
SRR17520069.7744050  
SRR17520069.7750479  
SRR17520069.7755032  
SRR17520069.7755033  
SRR17520069.7755039  
SRR17520069.7764932  
SRR17520069.7764934  
SRR17520069.7778454  
SRR17520069.7785786  
SRR17520069.7787029  
SRR17520069.7787047  
SRR17520069.7799364  
SRR17520069.7799387

SRR17520069.7799423  
SRR17520069.7799744  
SRR17520069.7799767  
SRR17520069.7806417  
SRR17520069.7807159  
SRR17520069.7826779  
SRR17520069.7827362  
SRR17520069.7829184  
SRR17520069.7836160  
SRR17520069.7848832  
SRR17520069.7850450  
SRR17520069.7857452  
SRR17520069.7857468  
SRR17520069.7871931  
SRR17520069.7891290  
SRR17520069.7891300  
SRR17520069.7891301  
SRR17520069.7891326  
SRR17520069.7891338  
SRR17520069.7894694  
SRR17520069.7898609  
SRR17520069.7903006  
SRR17520069.7907793  
SRR17520069.7907816  
SRR17520069.7952334  
SRR17520069.7960938  
SRR17520069.7964093  
SRR17520069.7964145  
SRR17520069.7964170  
SRR17520069.7964186  
SRR17520069.7974890  
SRR17520069.7998571  
SRR17520069.8002654  
SRR17520069.8007344  
SRR17520069.8026593  
SRR17520069.8026601  
SRR17520069.8026612  
SRR17520069.8026617  
SRR17520069.8026619  
SRR17520069.8026631  
SRR17520069.8034846  
SRR17520069.8034871  
SRR17520069.8063061  
SRR17520069.8067380  
SRR17520069.8074439  
SRR17520069.8074449  
SRR17520069.8074456

SRR17520069.8086433  
SRR17520069.8087942  
SRR17520069.8107092  
SRR17520069.8174541  
SRR17520069.8184378  
SRR17520069.8196870  
SRR17520069.8208065  
SRR17520069.8208082  
SRR17520069.8216745  
SRR17520069.8216757  
SRR17520069.8225030  
SRR17520069.8225033  
SRR17520069.8227424  
SRR17520069.8227652  
SRR17520069.8232975  
SRR17520069.8236160  
SRR17520069.8243420  
SRR17520069.8255009  
SRR17520069.8255014  
SRR17520069.8255053  
SRR17520069.8255057  
SRR17520069.8255061  
SRR17520069.8255076  
SRR17520069.8255098  
SRR17520069.8327823  
SRR17520069.8327890  
SRR17520069.8332254  
SRR17520069.8333890  
SRR17520069.8335272  
SRR17520069.8363965  
SRR17520069.8365072  
SRR17520069.8365082  
SRR17520069.8365098  
SRR17520069.8374695  
SRR17520069.8443917  
SRR17520069.8443942  
SRR17520069.8463762  
SRR17520069.8464120  
SRR17520069.8467197  
SRR17520069.8467201  
SRR17520069.8467207  
SRR17520069.8467209  
SRR17520069.8467211  
SRR17520069.8467213  
SRR17520069.8467225  
SRR17520069.8468371  
SRR17520069.8497995

SRR17520069.8498016  
SRR17520069.8498092  
SRR17520069.8498102  
SRR17520069.8515332  
SRR17520069.8524255  
SRR17520069.8526598  
SRR17520069.8526602  
SRR17520069.8527147  
SRR17520069.8531217  
SRR17520069.8531257  
SRR17520069.8544757  
SRR17520069.8554333  
SRR17520069.8564312  
SRR17520069.8591781  
SRR17520069.8603814  
SRR17520069.8607380  
SRR17520069.8608517  
SRR17520069.8611064  
SRR17520069.8618210  
SRR17520069.8618249  
SRR17520069.8630174  
SRR17520069.8630217  
SRR17520069.8630237  
SRR17520069.8639786  
SRR17520069.8657835  
SRR17520069.8665588  
SRR17520069.8684156  
SRR17520069.8700593  
SRR17520069.8700741  
SRR17520069.8723330  
SRR17520069.8735544  
SRR17520069.8738867  
SRR17520069.8751723  
SRR17520069.8751747  
SRR17520069.8769182  
SRR17520069.8772120  
SRR17520069.8773279  
SRR17520069.8793052  
SRR17520069.8858664  
SRR17520069.8863310  
SRR17520069.8879460  
SRR17520069.8888166  
SRR17520069.8909430  
SRR17520069.8909477  
SRR17520069.8910575  
SRR17520069.8910576  
SRR17520069.8910579

SRR17520069.8910580  
SRR17520069.8922610  
SRR17520069.8939457  
SRR17520069.8939960  
SRR17520069.8940488  
SRR17520069.8963672  
SRR17520069.8967961  
SRR17520069.8971228  
SRR17520069.8987243  
SRR17520069.9006243  
SRR17520069.9011665  
SRR17520069.9011919  
SRR17520069.9011947  
SRR17520069.9017132  
SRR17520069.9017151  
SRR17520069.9017152  
SRR17520069.9024777  
SRR17520069.9039576  
SRR17520069.9043849  
SRR17520069.9043924  
SRR17520069.9060613  
SRR17520069.9061526  
SRR17520069.9072216  
SRR17520069.9072219  
SRR17520069.9072256  
SRR17520069.9114654  
SRR17520069.9120267  
SRR17520069.9120269  
SRR17520069.9126873  
SRR17520069.9134708  
SRR17520069.9140666  
SRR17520069.9149431  
SRR17520069.9157223  
SRR17520069.9157228  
SRR17520069.9157235  
SRR17520069.9159703  
SRR17520069.9159749  
SRR17520069.9167004  
SRR17520069.9167009  
SRR17520069.9170561  
SRR17520069.9187405  
SRR17520069.9187431  
SRR17520069.9187443  
SRR17520069.9187461  
SRR17520069.9188838  
SRR17520069.9189153  
SRR17520069.9190773

SRR17520069. 9200891  
SRR17520069. 9200910  
SRR17520069. 9200923  
SRR17520069. 9202212  
SRR17520069. 9202405  
SRR17520069. 9202749  
SRR17520069. 9202781  
SRR17520069. 9205598  
SRR17520069. 9213104  
SRR17520069. 9243562  
SRR17520069. 9251422  
SRR17520069. 9274111  
SRR17520069. 9279509  
SRR17520069. 9279920  
SRR17520069. 9279938  
SRR17520069. 9284864  
SRR17520069. 9284867  
SRR17520069. 9297616  
SRR17520069. 9297660  
SRR17520069. 9298352  
SRR17520069. 9304021  
SRR17520069. 9305423  
SRR17520069. 9305424  
SRR17520069. 9305425  
SRR17520069. 9351674  
SRR17520069. 9382649  
SRR17520069. 9405031  
SRR17520069. 9405032  
SRR17520069. 9428805  
SRR17520069. 9428806  
SRR17520069. 9442276  
SRR17520069. 9445051  
SRR17520069. 9470881  
SRR17520069. 9479176  
SRR17520069. 9489302  
SRR17520069. 9489386  
SRR17520069. 9491506  
SRR17520069. 9491565  
SRR17520069. 9492350  
SRR17520069. 9494026  
SRR17520069. 9498877  
SRR17520069. 9500812  
SRR17520069. 9501602  
SRR17520069. 9505224  
SRR17520069. 9510326  
SRR17520069. 9519349  
SRR17520069. 9525656

SRR17520069.9525659  
SRR17520069.9525664  
SRR17520069.9531847  
SRR17520069.9539853  
SRR17520069.9541848  
SRR17520069.9544688  
SRR17520069.9560716  
SRR17520069.9560730  
SRR17520069.9583177  
SRR17520069.9592437  
SRR17520069.9593320  
SRR17520069.9594164  
SRR17520069.9603977  
SRR17520069.9609088  
SRR17520069.9610308  
SRR17520069.9650874  
SRR17520069.9667845  
SRR17520069.9688579  
SRR17520069.9711898  
SRR17520069.9712214  
SRR17520069.9720268  
SRR17520069.9720285  
SRR17520069.9732363  
SRR17520069.9742371  
SRR17520069.9742388  
SRR17520069.9742429  
SRR17520069.9742438  
SRR17520069.9745546  
SRR17520069.9745554  
SRR17520069.9754325  
SRR17520069.9760736  
SRR17520069.9766554  
SRR17520069.9766592  
SRR17520069.9772721  
SRR17520069.9772867  
SRR17520069.9772889  
SRR17520069.9783928  
SRR17520069.9789806  
SRR17520069.9793271  
SRR17520069.9802333  
SRR17520069.9831430  
SRR17520069.9854887  
SRR17520069.9901136  
SRR17520069.9901140  
SRR17520069.9901142  
SRR17520069.9901144  
SRR17520069.9901158

SRR17520069.9903792  
SRR17520069.9903830  
SRR17520069.9905509  
SRR17520069.9905548  
SRR17520069.9905598  
SRR17520069.9917981  
SRR17520069.9922678  
SRR17520069.9924994  
SRR17520069.9946902  
SRR17520069.9946908  
SRR17520069.9946927  
SRR17520069.9946930  
SRR17520069.9953469  
SRR17520069.9956296  
SRR17520069.9956326  
SRR17520069.9982548  
SRR17520069.9983790  
SRR17520069.9990380  
SRR17520069.10000912  
SRR17520069.10000914  
SRR17520069.10000917  
SRR17520069.10000918  
SRR17520069.10000922  
SRR17520069.10000930  
SRR17520069.10000932  
SRR17520069.10000933  
SRR17520069.10000937  
SRR17520069.10017418  
SRR17520069.10017449  
SRR17520069.10029977  
SRR17520069.10030286  
SRR17520069.10035240  
SRR17520069.10037519  
SRR17520069.10041338  
SRR17520069.10042383  
SRR17520069.10056574  
SRR17520069.10057231  
SRR17520069.10062367  
SRR17520069.10065735  
SRR17520069.10067577  
SRR17520069.10081672  
SRR17520069.10102742  
SRR17520069.10102746  
SRR17520069.10119428  
SRR17520069.10119432  
SRR17520069.10128507  
SRR17520069.10128984



SRR17520069.10140367  
SRR17520069.10146123  
SRR17520069.10146599  
SRR17520069.10147610  
SRR17520069.10147616  
SRR17520069.10148101  
SRR17520069.10148102  
SRR17520069.10148127  
SRR17520069.10151696  
SRR17520069.10156023  
SRR17520069.10161671  
SRR17520069.10189181  
SRR17520069.10191132  
SRR17520069.10247604  
SRR17520069.10247617  
SRR17520069.10250779  
SRR17520069.10257827  
SRR17520069.10266200  
SRR17520069.10273659  
SRR17520069.10273685  
SRR17520069.10274176  
SRR17520069.10274212  
SRR17520069.10290528  
SRR17520069.10314428  
SRR17520069.10315610  
SRR17520069.10327185  
SRR17520069.10337390  
SRR17520069.10341159  
SRR17520069.10348351  
SRR17520069.10348529  
SRR17520069.10348578  
SRR17520069.10350558  
SRR17520069.10353698  
SRR17520069.10365088  
SRR17520069.10376427  
SRR17520069.10376432  
SRR17520069.10382086  
SRR17520069.10382201  
SRR17520069.10382223  
SRR17520069.10394207  
SRR17520069.10420654  
SRR17520069.10420655  
SRR17520069.10420716  
SRR17520069.10425898  
SRR17520069.10428424  
SRR17520069.10431163  
SRR17520069.10432381

SRR17520069.10432396  
SRR17520069.10448495  
SRR17520069.10459410  
SRR17520069.10466004  
SRR17520069.10469014  
SRR17520069.10491623  
SRR17520069.10515483  
SRR17520069.10530207  
SRR17520069.10551063  
SRR17520069.10551084  
SRR17520069.10559930  
SRR17520069.10560032  
SRR17520069.10560061  
SRR17520069.10586131  
SRR17520069.10588793  
SRR17520069.10594032  
SRR17520069.10596574  
SRR17520069.10600026  
SRR17520069.10603538  
SRR17520069.10605801  
SRR17520069.10616079  
SRR17520069.10621173  
SRR17520069.10635103  
SRR17520069.10635242  
SRR17520069.10645024  
SRR17520069.10649053  
SRR17520069.10649061  
SRR17520069.10656245  
SRR17520069.10673347  
SRR17520069.10673369  
SRR17520069.10678466  
SRR17520069.10681990  
SRR17520069.10711534  
SRR17520069.10717184  
SRR17520069.10717864  
SRR17520069.10721234  
SRR17520069.10747936  
SRR17520069.10754111  
SRR17520069.10754114  
SRR17520069.10765539  
SRR17520069.10774752  
SRR17520069.10794503  
SRR17520069.10809803  
SRR17520069.10812776  
SRR17520069.10812800  
SRR17520069.10823069  
SRR17520069.10824472

SRR17520069.10859038  
SRR17520069.10863022  
SRR17520069.10870345  
SRR17520069.10870355  
SRR17520069.10890370  
SRR17520069.10890372  
SRR17520069.10890374  
SRR17520069.10890376  
SRR17520069.10897159  
SRR17520069.10900093  
SRR17520069.10900113  
SRR17520069.10903861  
SRR17520069.10909327  
SRR17520069.10909385  
SRR17520069.10917166  
SRR17520069.10917248  
SRR17520069.10921437  
SRR17520069.10936156  
SRR17520069.10939543  
SRR17520069.10939555  
SRR17520069.10960158  
SRR17520069.10980410  
SRR17520069.11007922  
SRR17520069.11011751  
SRR17520069.11011757  
SRR17520069.11012462  
SRR17520069.11012514  
SRR17520069.11030831  
SRR17520069.11036141  
SRR17520069.11036142  
SRR17520069.11036155  
SRR17520069.11046018  
SRR17520069.11046020  
SRR17520069.11046022  
SRR17520069.11046024  
SRR17520069.11046026  
SRR17520069.11046028  
SRR17520069.11046030  
SRR17520069.11046032  
SRR17520069.11046034  
SRR17520069.11046036  
SRR17520069.11046038  
SRR17520069.11046040  
SRR17520069.11046042  
SRR17520069.11046048  
SRR17520069.11070288  
SRR17520069.11086413

SRR17520069.11086421  
SRR17520069.11091947  
SRR17520069.11096529  
SRR17520069.11104063  
SRR17520069.11112348  
SRR17520069.11117178  
SRR17520069.11117180  
SRR17520069.11118322  
SRR17520069.11124646  
SRR17520069.11135968  
SRR17520069.11136085  
SRR17520069.11137368  
SRR17520069.11139363  
SRR17520069.11139370  
SRR17520069.11139381  
SRR17520069.11155541  
SRR17520069.11160555  
SRR17520069.11160568  
SRR17520069.11160576  
SRR17520069.11171543  
SRR17520069.11187997  
SRR17520069.11188046  
SRR17520069.11191341  
SRR17520069.11192616  
SRR17520069.11194434  
SRR17520069.11241634  
SRR17520069.11242795  
SRR17520069.11249058  
SRR17520069.11249081  
SRR17520069.11251507  
SRR17520069.11271770  
SRR17520069.11278416  
SRR17520069.11278420  
SRR17520069.11291043  
SRR17520069.11291108  
SRR17520069.11300393  
SRR17520069.11300440  
SRR17520069.11300445  
SRR17520069.11334071  
SRR17520069.11336714  
SRR17520069.11338655  
SRR17520069.11338661  
SRR17520069.11338663  
SRR17520069.11338665  
SRR17520069.11338669  
SRR17520069.11338675  
SRR17520069.11341548

SRR17520069.11341591  
SRR17520069.11342894  
SRR17520069.11344633  
SRR17520069.11344660  
SRR17520069.11344724  
SRR17520069.11344774  
SRR17520069.11344805  
SRR17520069.11349431  
SRR17520069.11358331  
SRR17520069.11379080  
SRR17520069.11392918  
SRR17520069.11421685  
SRR17520069.11421723  
SRR17520069.11421732  
SRR17520069.11434346  
SRR17520069.11444097  
SRR17520069.11458276  
SRR17520069.11458329  
SRR17520069.11468700  
SRR17520069.11478020  
SRR17520069.11494210  
SRR17520069.11501419  
SRR17520069.11502070  
SRR17520069.11509283  
SRR17520069.11511739  
SRR17520069.11513220  
SRR17520069.11526264  
SRR17520069.11526327  
SRR17520069.11526353  
SRR17520069.11526362  
SRR17520069.11529863  
SRR17520069.11535834  
SRR17520069.11562970  
SRR17520069.11569420  
SRR17520069.11587694  
SRR17520069.11615841  
SRR17520069.11615853  
SRR17520069.11620924  
SRR17520069.11633629  
SRR17520069.11644668  
SRR17520069.11650711  
SRR17520069.11650712  
SRR17520069.11670670  
SRR17520069.11680450  
SRR17520069.11701263  
SRR17520069.11707935  
SRR17520069.11707980

SRR17520069.11708014  
SRR17520069.11708015  
SRR17520069.11742008  
SRR17520069.11790213  
SRR17520069.11823651  
SRR17520069.11823726  
SRR17520069.11843548  
SRR17520069.11844687  
SRR17520069.11864932  
SRR17520069.11882415  
SRR17520069.11883708  
SRR17520069.11894882  
SRR17520069.11905225  
SRR17520069.11907008  
SRR17520069.11920138  
SRR17520069.11920142  
SRR17520069.11920166  
SRR17520069.11920168  
SRR17520069.11932400  
SRR17520069.11948269  
SRR17520069.11970291  
SRR17520069.11974929  
SRR17520069.12010192  
SRR17520069.12041215  
SRR17520069.12051856  
SRR17520069.12057761  
SRR17520069.12068052  
SRR17520069.12068282  
SRR17520069.12081932  
SRR17520069.12091867  
SRR17520069.12137553  
SRR17520069.12137554  
SRR17520069.12137601  
SRR17520069.12137607  
SRR17520069.12137608  
SRR17520069.12137611  
SRR17520069.12137612  
SRR17520069.12137639  
SRR17520069.12142964  
SRR17520069.12143778  
SRR17520069.12144615  
SRR17520069.12144621  
SRR17520069.12144623  
SRR17520069.12144627  
SRR17520069.12144635  
SRR17520069.12144636  
SRR17520069.12144637

SRR17520069. 12144640  
SRR17520069. 12144641  
SRR17520069. 12155304  
SRR17520069. 12155361  
SRR17520069. 12155421  
SRR17520069. 12167587  
SRR17520069. 12168965  
SRR17520069. 12168967  
SRR17520069. 12168971  
SRR17520069. 12168985  
SRR17520069. 12185312  
SRR17520069. 12185316  
SRR17520069. 12188112  
SRR17520069. 12195670  
SRR17520069. 12201186  
SRR17520069. 12201265  
SRR17520069. 12225362  
SRR17520069. 12225374  
SRR17520069. 12225375  
SRR17520069. 12247751  
SRR17520069. 12260616  
SRR17520069. 12286331  
SRR17520069. 12289474  
SRR17520069. 12289526  
SRR17520069. 12289629  
SRR17520069. 12312356  
SRR17520069. 12316391  
SRR17520069. 12317767  
SRR17520069. 12323259  
SRR17520069. 12335484  
SRR17520069. 12335491  
SRR17520069. 12366038  
SRR17520069. 12367891  
SRR17520069. 12367911  
SRR17520069. 12380951  
SRR17520069. 12380966  
SRR17520069. 12390561  
SRR17520069. 12390568  
SRR17520069. 12401090  
SRR17520069. 12402006  
SRR17520069. 12411005  
SRR17520069. 12411066  
SRR17520069. 12424374  
SRR17520069. 12462932  
SRR17520069. 12469856  
SRR17520069. 12505581  
SRR17520069. 12506519

SRR17520069. 12510761  
SRR17520069. 12519260  
SRR17520069. 12519276  
SRR17520069. 12519300  
SRR17520069. 12520738  
SRR17520069. 12528746  
SRR17520069. 12529793  
SRR17520069. 12529796  
SRR17520069. 12531034  
SRR17520069. 12536336  
SRR17520069. 12548500  
SRR17520069. 12548509  
SRR17520069. 12552785  
SRR17520069. 12565389  
SRR17520069. 12565892  
SRR17520069. 12584157  
SRR17520069. 12584582  
SRR17520069. 12588722  
SRR17520069. 12602736  
SRR17520069. 12621609  
SRR17520069. 12630265  
SRR17520069. 12630271  
SRR17520069. 12636863  
SRR17520069. 12638022  
SRR17520069. 12644768  
SRR17520069. 12644836  
SRR17520069. 12646149  
SRR17520069. 12647850  
SRR17520069. 12655058  
SRR17520069. 12655060  
SRR17520069. 12655086  
SRR17520069. 12667066  
SRR17520069. 12667072  
SRR17520069. 12674862  
SRR17520069. 12688413  
SRR17520069. 12695142  
SRR17520069. 12697439  
SRR17520069. 12698813  
SRR17520069. 12698831  
SRR17520069. 12712746  
SRR17520069. 12736872  
SRR17520069. 12736908  
SRR17520069. 12736910  
SRR17520069. 12736931  
SRR17520069. 12736936  
SRR17520069. 12747423  
SRR17520069. 12749698



SRR17520069. 12756986  
SRR17520069. 12757002  
SRR17520069. 12758406  
SRR17520069. 12767106  
SRR17520069. 12778265  
SRR17520069. 12778268  
SRR17520069. 12785042  
SRR17520069. 12785420  
SRR17520069. 12832919  
SRR17520069. 12837319  
SRR17520069. 12839982  
SRR17520069. 12839984  
SRR17520069. 12860908  
SRR17520069. 12888693  
SRR17520069. 12888737  
SRR17520069. 12888746  
SRR17520069. 12896437  
SRR17520069. 12902333  
SRR17520069. 12921372  
SRR17520069. 12923525  
SRR17520069. 12925418  
SRR17520069. 12925421  
SRR17520069. 12932312  
SRR17520069. 12932331  
SRR17520069. 12932333  
SRR17520069. 12932335  
SRR17520069. 12932339  
SRR17520069. 12952710  
SRR17520069. 12953288  
SRR17520069. 12953302  
SRR17520069. 12953306  
SRR17520069. 12973146  
SRR17520069. 12973205  
SRR17520069. 12973432  
SRR17520069. 12987738  
SRR17520069. 12995215  
SRR17520069. 13038442  
SRR17520069. 13042831  
SRR17520069. 13043683  
SRR17520069. 13052413  
SRR17520069. 13052520  
SRR17520069. 13056291  
SRR17520069. 13056318  
SRR17520069. 13056399  
SRR17520069. 13065766  
SRR17520069. 13065824  
SRR17520069. 13069479

SRR17520069. 13070725  
SRR17520069. 13112309  
SRR17520069. 13133189  
SRR17520069. 13141180  
SRR17520069. 13141241  
SRR17520069. 13144481  
SRR17520069. 13154299  
SRR17520069. 13161346  
SRR17520069. 13177684  
SRR17520069. 13177706  
SRR17520069. 13179706  
SRR17520069. 13193162  
SRR17520069. 13261839  
SRR17520069. 13273097  
SRR17520069. 13282111  
SRR17520069. 13294986  
SRR17520069. 13294996  
SRR17520069. 13297353  
SRR17520069. 13310146  
SRR17520069. 13326870  
SRR17520069. 13355992  
SRR17520069. 13367605  
SRR17520069. 13405414  
SRR17520069. 13406144  
SRR17520069. 13406155  
SRR17520069. 13415313  
SRR17520069. 13429702  
SRR17520069. 13445325  
SRR17520069. 13460757  
SRR17520069. 13463582  
SRR17520069. 13470336  
SRR17520069. 13477100  
SRR17520069. 13478258  
SRR17520069. 13478274  
SRR17520069. 13498815  
SRR17520069. 13498873  
SRR17520069. 13527556  
SRR17520069. 13529056  
SRR17520069. 13529077  
SRR17520069. 13529085  
SRR17520069. 13529097  
SRR17520069. 13529117  
SRR17520069. 13529127  
SRR17520069. 13529161  
SRR17520069. 13529656  
SRR17520069. 13539827  
SRR17520069. 13542210

SRR17520069. 13547120  
SRR17520069. 13554772  
SRR17520069. 13554807  
SRR17520069. 13560600  
SRR17520069. 13584079  
SRR17520069. 13584152  
SRR17520069. 13597099  
SRR17520069. 13608666  
SRR17520069. 13610504  
SRR17520069. 13640322  
SRR17520069. 13644195  
SRR17520069. 13649741  
SRR17520069. 13654276  
SRR17520069. 13655874  
SRR17520069. 13667505  
SRR17520069. 13668873  
SRR17520069. 13668875  
SRR17520069. 13676113  
SRR17520069. 13684540  
SRR17520069. 13691449  
SRR17520069. 13691845  
SRR17520069. 13698192  
SRR17520069. 13715389  
SRR17520069. 13715399  
SRR17520069. 13715433  
SRR17520069. 13721543  
SRR17520069. 13724742  
SRR17520069. 13756605  
SRR17520069. 13756613  
SRR17520069. 13757515  
SRR17520069. 13760006  
SRR17520069. 13760855  
SRR17520069. 13776229  
SRR17520069. 13777128  
SRR17520069. 13777444  
SRR17520069. 13781559  
SRR17520069. 13788394  
SRR17520069. 13791329  
SRR17520069. 13800345  
SRR17520069. 13801196  
SRR17520069. 13801211  
SRR17520069. 13807824  
SRR17520069. 13807842  
SRR17520069. 13816079  
SRR17520069. 13879025  
SRR17520069. 13917193  
SRR17520069. 13917642

SRR17520069. 13917643  
SRR17520069. 13921380  
SRR17520069. 13921384  
SRR17520069. 13946246  
SRR17520069. 13971079  
SRR17520069. 13978358  
SRR17520069. 13978365  
SRR17520069. 13993170  
SRR17520069. 13993319  
SRR17520069. 13994295  
SRR17520069. 14002229  
SRR17520069. 14002495  
SRR17520069. 14009075  
SRR17520069. 14012517  
SRR17520069. 14012550  
SRR17520069. 14020355  
SRR17520069. 14034191  
SRR17520069. 14041953  
SRR17520069. 14051531  
SRR17520069. 14052464  
SRR17520069. 14052560  
SRR17520069. 14092169  
SRR17520069. 14092171  
SRR17520069. 14108090  
SRR17520069. 14115341  
SRR17520069. 14136864  
SRR17520069. 14171240  
SRR17520069. 14174110  
SRR17520069. 14178443  
SRR17520069. 14180119  
SRR17520069. 14227441  
SRR17520069. 14227442  
SRR17520069. 14234936  
SRR17520069. 14235042  
SRR17520069. 14251552  
SRR17520069. 14251621  
SRR17520069. 14264076  
SRR17520069. 14267947  
SRR17520069. 14293239  
SRR17520069. 14293298  
SRR17520069. 14306191  
SRR17520069. 14326514  
SRR17520069. 14326743  
SRR17520069. 14326877  
SRR17520069. 14344174  
SRR17520069. 14357334  
SRR17520069. 14359827

SRR17520069.14361487  
SRR17520069.14361507  
SRR17520069.14378146  
SRR17520069.14378172  
SRR17520069.14380718  
SRR17520069.14381709  
SRR17520069.14381759  
SRR17520069.14398653  
SRR17520069.14404021  
SRR17520069.14404339  
SRR17520069.14411205  
SRR17520069.14426631  
SRR17520069.14446320  
SRR17520069.14446362  
SRR17520069.14446453  
SRR17520069.14448650  
SRR17520069.14481865  
SRR17520069.14481923  
SRR17520069.14481938  
SRR17520069.14484944  
SRR17520069.14485044  
SRR17520069.14498443  
SRR17520069.14498499  
SRR17520069.14504732  
SRR17520069.14511427  
SRR17520069.14514596  
SRR17520069.14554920  
SRR17520069.14560662  
SRR17520069.14564565  
SRR17520069.14567226  
SRR17520069.14568542  
SRR17520069.14568555  
SRR17520069.14569979  
SRR17520069.14607580  
SRR17520069.14607589  
SRR17520069.14607590  
SRR17520069.14607594  
SRR17520069.14607606  
SRR17520069.14607610  
SRR17520069.14607616  
SRR17520069.14607618  
SRR17520069.14607622  
SRR17520069.14607628  
SRR17520069.14607634  
SRR17520069.14610747  
SRR17520069.14612672  
SRR17520069.14612700

SRR17520069.14612739  
SRR17520069.14616252  
SRR17520069.14629712  
SRR17520069.14629751  
SRR17520069.14641141  
SRR17520069.14647092  
SRR17520069.14647095  
SRR17520069.14653723  
SRR17520069.14663954  
SRR17520069.14666925  
SRR17520069.14666926  
SRR17520069.14686237  
SRR17520069.14686250  
SRR17520069.14687049  
SRR17520069.14687069  
SRR17520069.14690874  
SRR17520069.14707747  
SRR17520069.14741513  
SRR17520069.14746786  
SRR17520069.14755682  
SRR17520069.14764244  
SRR17520069.14764252  
SRR17520069.14782145  
SRR17520069.14792676  
SRR17520069.14793997  
SRR17520069.14814633  
SRR17520069.14815366  
SRR17520069.14824415  
SRR17520069.14843641  
SRR17520069.14843642  
SRR17520069.14843643  
SRR17520069.14843644  
SRR17520069.14843645  
SRR17520069.14843646  
SRR17520069.14843647  
SRR17520069.14843648  
SRR17520069.14843649  
SRR17520069.14843650  
SRR17520069.14843651  
SRR17520069.14843652  
SRR17520069.14843653  
SRR17520069.14843654  
SRR17520069.14843655  
SRR17520069.14843656  
SRR17520069.14843657  
SRR17520069.14843658  
SRR17520069.14843659

SRR17520069.14843660  
SRR17520069.14843661  
SRR17520069.14845692  
SRR17520069.14873361  
SRR17520069.14873383  
SRR17520069.14873413  
SRR17520069.14873420  
SRR17520069.14881903  
SRR17520069.14892081  
SRR17520069.14892107  
SRR17520069.14892114  
SRR17520069.14897111  
SRR17520069.14897119  
SRR17520069.14898613  
SRR17520069.14920377  
SRR17520069.14936082  
SRR17520069.14939050  
SRR17520069.14940928  
SRR17520069.14943406  
SRR17520069.14949021  
SRR17520069.14965466  
SRR17520069.14973262  
SRR17520069.14988962  
SRR17520069.14994945  
SRR17520069.15040745  
SRR17520069.15044481  
SRR17520069.15045578  
SRR17520069.15045973  
SRR17520069.15061723  
SRR17520069.15063106  
SRR17520069.15076371  
SRR17520069.15080628  
SRR17520069.15091272  
SRR17520069.15097473  
SRR17520069.15097500  
SRR17520069.15097541  
SRR17520069.15109959  
SRR17520069.15112308  
SRR17520069.15112347  
SRR17520069.15117933  
SRR17520069.15117934  
SRR17520069.15122163  
SRR17520069.15122341  
SRR17520069.15128255  
SRR17520069.15128256  
SRR17520069.15134372  
SRR17520069.15141038

SRR17520069. 15141050  
SRR17520069. 15145754  
SRR17520069. 15160293  
SRR17520069. 15160309  
SRR17520069. 15160931  
SRR17520069. 15293560  
SRR17520069. 15296470  
SRR17520069. 15297237  
SRR17520069. 15302667  
SRR17520069. 15309217  
SRR17520069. 15325749  
SRR17520069. 15326290  
SRR17520069. 15327532  
SRR17520069. 15327544  
SRR17520069. 15340052  
SRR17520069. 15340279  
SRR17520069. 15341890  
SRR17520069. 15342450  
SRR17520069. 15345776  
SRR17520069. 15362094  
SRR17520069. 15362108  
SRR17520069. 15380459  
SRR17520069. 15380494  
SRR17520069. 15395553  
SRR17520069. 15399024  
SRR17520069. 15402148  
SRR17520069. 15402219  
SRR17520069. 15402296  
SRR17520069. 15415449  
SRR17520069. 15418013  
SRR17520069. 15431611  
SRR17520069. 15437045  
SRR17520069. 15437050  
SRR17520069. 15441534  
SRR17520069. 15453000  
SRR17520069. 15453002  
SRR17520069. 15453006  
SRR17520069. 15453008  
SRR17520069. 15453010  
SRR17520069. 15453014  
SRR17520069. 15453016  
SRR17520069. 15453018  
SRR17520069. 15453020  
SRR17520069. 15454402  
SRR17520069. 15454443  
SRR17520069. 15464391  
SRR17520069. 15472353



SRR17520069. 15491628  
SRR17520069. 15494783  
SRR17520069. 15519296  
SRR17520069. 15525486  
SRR17520069. 15525488  
SRR17520069. 15552615  
SRR17520069. 15553490  
SRR17520069. 15565544  
SRR17520069. 15565591  
SRR17520069. 15577433  
SRR17520069. 15578435  
SRR17520069. 15613715  
SRR17520069. 15618357  
SRR17520069. 15620189  
SRR17520069. 15621629  
SRR17520069. 15628359  
SRR17520069. 15632437  
SRR17520069. 15632447  
SRR17520069. 15634445  
SRR17520069. 15638352  
SRR17520069. 15641045  
SRR17520069. 15641089  
SRR17520069. 15643356  
SRR17520069. 15654486  
SRR17520069. 15662155  
SRR17520069. 15665604  
SRR17520069. 15668223  
SRR17520069. 15669315  
SRR17520069. 15671091  
SRR17520069. 15671120  
SRR17520069. 15682780  
SRR17520069. 15684186  
SRR17520069. 15685350  
SRR17520069. 15691673  
SRR17520069. 15697249  
SRR17520069. 15707786  
SRR17520069. 15707791  
SRR17520069. 15712714  
SRR17520069. 15713491  
SRR17520069. 15727877  
SRR17520069. 15730014  
SRR17520069. 15733766  
SRR17520069. 15743895  
SRR17520069. 15754236  
SRR17520069. 15767773  
SRR17520069. 15779117  
SRR17520069. 15814409

SRR17520069. 15818942  
SRR17520069. 15840291  
SRR17520069. 15845665  
SRR17520069. 15845681  
SRR17520069. 15847551  
SRR17520069. 15865130  
SRR17520069. 15872216  
SRR17520069. 15883137  
SRR17520069. 15885776  
SRR17520069. 15894624  
SRR17520069. 15894628  
SRR17520069. 15894651  
SRR17520069. 15899586  
SRR17520069. 15914931  
SRR17520069. 15920786  
SRR17520069. 15945066  
SRR17520069. 15945072  
SRR17520069. 15949849  
SRR17520069. 15949864  
SRR17520069. 15969868  
SRR17520069. 15970395  
SRR17520069. 15970399  
SRR17520069. 15983186  
SRR17520069. 15990653  
SRR17520069. 15991173  
SRR17520069. 16002714  
SRR17520069. 16012504  
SRR17520069. 16012516  
SRR17520069. 16012518  
SRR17520069. 16012520  
SRR17520069. 16012522  
SRR17520069. 16012532  
SRR17520069. 16012538  
SRR17520069. 16012548  
SRR17520069. 16012560  
SRR17520069. 16012566  
SRR17520069. 16012568  
SRR17520069. 16015893  
SRR17520069. 16022199  
SRR17520069. 16034289  
SRR17520069. 16039119  
SRR17520069. 16041878  
SRR17520069. 16060172  
SRR17520069. 16060274  
SRR17520069. 16066895  
SRR17520069. 16066922  
SRR17520069. 16067192

SRR17520069. 16082696  
SRR17520069. 16090117  
SRR17520069. 16091476  
SRR17520069. 16092343  
SRR17520069. 16096074  
SRR17520069. 16106844  
SRR17520069. 16117030  
SRR17520069. 16120487  
SRR17520069. 16120537  
SRR17520069. 16120539  
SRR17520069. 16141287  
SRR17520069. 16141305  
SRR17520069. 16158228  
SRR17520069. 16169138  
SRR17520069. 16169151  
SRR17520069. 16169182  
SRR17520069. 16181163  
SRR17520069. 16193614  
SRR17520069. 16197480  
SRR17520069. 16200065  
SRR17520069. 16200073  
SRR17520069. 16201731  
SRR17520069. 16209566  
SRR17520069. 16211789  
SRR17520069. 16217891  
SRR17520069. 16225742  
SRR17520069. 16238615  
SRR17520069. 16240113  
SRR17520069. 16248343  
SRR17520069. 16248406  
SRR17520069. 16249313  
SRR17520069. 16256571  
SRR17520069. 16256574  
SRR17520069. 16268457  
SRR17520069. 16293730  
SRR17520069. 16298581  
SRR17520069. 16304258  
SRR17520069. 16305557  
SRR17520069. 16313294  
SRR17520069. 16320289  
SRR17520069. 16320291  
SRR17520069. 16326960  
SRR17520069. 16326993  
SRR17520069. 16327049  
SRR17520069. 16327070  
SRR17520069. 16361141  
SRR17520069. 16361957

SRR17520069. 16382793  
SRR17520069. 16396063  
SRR17520069. 16398680  
SRR17520069. 16412074  
SRR17520069. 16412075  
SRR17520069. 16418168  
SRR17520069. 16440319  
SRR17520069. 16443089  
SRR17520069. 16498220  
SRR17520069. 16498239  
SRR17520069. 16498259  
SRR17520069. 16498885  
SRR17520069. 16510176  
SRR17520069. 16516933  
SRR17520069. 16516961  
SRR17520069. 16516965  
SRR17520069. 16517003  
SRR17520069. 16517013  
SRR17520069. 16517039  
SRR17520069. 16517069  
SRR17520069. 16517075  
SRR17520069. 16519126  
SRR17520069. 16521466  
SRR17520069. 16531391  
SRR17520069. 16569727  
SRR17520069. 16575881  
SRR17520069. 16575958  
SRR17520069. 16581323  
SRR17520069. 16585053  
SRR17520069. 16585272  
SRR17520069. 16594953  
SRR17520069. 16599824  
SRR17520069. 16609659  
SRR17520069. 16610933  
SRR17520069. 16610934  
SRR17520069. 16612863  
SRR17520069. 16613469  
SRR17520069. 16620247  
SRR17520069. 16684307  
SRR17520069. 16697729  
SRR17520069. 16702331  
SRR17520069. 16702366  
SRR17520069. 16706334  
SRR17520069. 16706339  
SRR17520069. 16707149  
SRR17520069. 16707201  
SRR17520069. 16707648

SRR17520069. 16707671  
SRR17520069. 16714814  
SRR17520069. 16729330  
SRR17520069. 16729343  
SRR17520069. 16729369  
SRR17520069. 16729389  
SRR17520069. 16737816  
SRR17520069. 16753841  
SRR17520069. 16753845  
SRR17520069. 16754223  
SRR17520069. 16754231  
SRR17520069. 16754235  
SRR17520069. 16754242  
SRR17520069. 16754244  
SRR17520069. 16758574  
SRR17520069. 16759586  
SRR17520069. 16759588  
SRR17520069. 16759594  
SRR17520069. 16759596  
SRR17520069. 16759598  
SRR17520069. 16759609  
SRR17520069. 16772962  
SRR17520069. 16773197  
SRR17520069. 16798466  
SRR17520069. 16799382  
SRR17520069. 16805361  
SRR17520069. 16808592  
SRR17520069. 16839900  
SRR17520069. 16848658  
SRR17520069. 16852674  
SRR17520069. 16852697  
SRR17520069. 16893246  
SRR17520069. 16896939  
SRR17520069. 16913318  
SRR17520069. 16914558  
SRR17520069. 16927404  
SRR17520069. 16935880  
SRR17520069. 16944435  
SRR17520069. 16945516  
SRR17520069. 16947208  
SRR17520069. 16948494  
SRR17520069. 16948890  
SRR17520069. 16960334  
SRR17520069. 16970153  
SRR17520069. 16978606  
SRR17520069. 16983853  
SRR17520069. 16994187

SRR17520069.17000885  
SRR17520069.17002027  
SRR17520069.17002030  
SRR17520069.17002057  
SRR17520069.17002075  
SRR17520069.17002103  
SRR17520069.17025449  
SRR17520069.17038191  
SRR17520069.17038228  
SRR17520069.17038402  
SRR17520069.17047550  
SRR17520069.17051913  
SRR17520069.17056935  
SRR17520069.17058392  
SRR17520069.17065944  
SRR17520069.17099032  
SRR17520069.17104021  
SRR17520069.17134594  
SRR17520069.17134663  
SRR17520069.17139227  
SRR17520069.17139246  
SRR17520069.17139258  
SRR17520069.17139295  
SRR17520069.17139322  
SRR17520069.17139331  
SRR17520069.17139343  
SRR17520069.17139361  
SRR17520069.17139368  
SRR17520069.17139369  
SRR17520069.17139376  
SRR17520069.17139379  
SRR17520069.17139380  
SRR17520069.17139394  
SRR17520069.17139401  
SRR17520069.17139409  
SRR17520069.17139410  
SRR17520069.17166103  
SRR17520069.17173198  
SRR17520069.17183941  
SRR17520069.17183942  
SRR17520069.17196172  
SRR17520069.17203935  
SRR17520069.17204333  
SRR17520069.17204344  
SRR17520069.17207683  
SRR17520069.17212959  
SRR17520069.17214845

SRR17520069. 17214849  
SRR17520069. 17223132  
SRR17520069. 17224907  
SRR17520069. 17224911  
SRR17520069. 17224942  
SRR17520069. 17224946  
SRR17520069. 17251722  
SRR17520069. 17278127  
SRR17520069. 17285184  
SRR17520069. 17288010  
SRR17520069. 17288049  
SRR17520069. 17288137  
SRR17520069. 17290793  
SRR17520069. 17290817  
SRR17520069. 17290818  
SRR17520069. 17294553  
SRR17520069. 17306458  
SRR17520069. 17324381  
SRR17520069. 17332686  
SRR17520069. 17332690  
SRR17520069. 17337146  
SRR17520069. 17338650  
SRR17520069. 17357586  
SRR17520069. 17372406  
SRR17520069. 17381683  
SRR17520069. 17381746  
SRR17520069. 17399330  
SRR17520069. 17399331  
SRR17520069. 17400217  
SRR17520069. 17403741  
SRR17520069. 17407725  
SRR17520069. 17427371  
SRR17520069. 17427487  
SRR17520069. 17432563  
SRR17520069. 17446680  
SRR17520069. 17446702  
SRR17520069. 17452377  
SRR17520069. 17465850  
SRR17520069. 17473179  
SRR17520069. 17515102  
SRR17520069. 17523115  
SRR17520069. 17532867  
SRR17520069. 17540859  
SRR17520069. 17557181  
SRR17520069. 17577250  
SRR17520069. 17593272  
SRR17520069. 17593288

SRR17520069. 17593357  
SRR17520069. 17595733  
SRR17520069. 17628533  
SRR17520069. 17628534  
SRR17520069. 17666644  
SRR17520069. 17666661  
SRR17520069. 17667507  
SRR17520069. 17689262  
SRR17520069. 17692125  
SRR17520069. 17710994  
SRR17520069. 17711086  
SRR17520069. 17716401  
SRR17520069. 17717278  
SRR17520069. 17717290  
SRR17520069. 17717339  
SRR17520069. 17717347  
SRR17520069. 17717374  
SRR17520069. 17717394  
SRR17520069. 17717409  
SRR17520069. 17717415  
SRR17520069. 17719951  
SRR17520069. 17760774  
SRR17520069. 17763011  
SRR17520069. 17766378  
SRR17520069. 17790540  
SRR17520069. 17791018  
SRR17520069. 17791707  
SRR17520069. 17791838  
SRR17520069. 17809163  
SRR17520069. 17855162  
SRR17520069. 17856859  
SRR17520069. 17873889  
SRR17520069. 17880498  
SRR17520069. 17890712  
SRR17520069. 17890732  
SRR17520069. 17890748  
SRR17520069. 17901648  
SRR17520069. 17935155  
SRR17520069. 17947930  
SRR17520069. 17949111  
SRR17520069. 17954381  
SRR17520069. 17955676  
SRR17520069. 17957121  
SRR17520069. 17957122  
SRR17520069. 17957123  
SRR17520069. 17957126  
SRR17520069. 17957127



SRR17520069. 17957128  
SRR17520069. 17966080  
SRR17520069. 17989839  
SRR17520069. 17989845  
SRR17520069. 17993363  
SRR17520069. 17993616  
SRR17520069. 17993618  
SRR17520069. 17993619  
SRR17520069. 17993620  
SRR17520069. 17993621  
SRR17520069. 17993623  
SRR17520069. 17993626  
SRR17520069. 17993627  
SRR17520069. 17993634  
SRR17520069. 17993635  
SRR17520069. 17993642  
SRR17520069. 17993643  
SRR17520069. 17993644  
SRR17520069. 17993649  
SRR17520069. 18008088  
SRR17520069. 18010438  
SRR17520069. 18010440  
SRR17520069. 18013350  
SRR17520069. 18025405  
SRR17520069. 18028190  
SRR17520069. 18033645  
SRR17520069. 18064177  
SRR17520069. 18087291  
SRR17520069. 18088178  
SRR17520069. 18095759  
SRR17520069. 18126342  
SRR17520069. 18133333  
SRR17520069. 18166281  
SRR17520069. 18188398  
SRR17520069. 18189797  
SRR17520069. 18201968  
SRR17520069. 18202446  
SRR17520069. 18202456  
SRR17520069. 18208324  
SRR17520069. 18224347  
SRR17520069. 18232389  
SRR17520069. 18235218  
SRR17520069. 18235238  
SRR17520069. 18235290  
SRR17520069. 18236815  
SRR17520069. 18238264  
SRR17520069. 18273119

SRR17520069. 18276187  
SRR17520069. 18276191  
SRR17520069. 18284156  
SRR17520069. 18289428  
SRR17520069. 18289433  
SRR17520069. 18293821  
SRR17520069. 18293918  
SRR17520069. 18333998  
SRR17520069. 18356278  
SRR17520069. 18376043  
SRR17520069. 18381654  
SRR17520069. 18391323  
SRR17520069. 18391417  
SRR17520069. 18410573  
SRR17520069. 18440775  
SRR17520069. 18440779  
SRR17520069. 18443323  
SRR17520069. 18443342  
SRR17520069. 18443432  
SRR17520069. 18464335  
SRR17520069. 18466306  
SRR17520069. 18469599  
SRR17520069. 18472724  
SRR17520069. 18502968  
SRR17520069. 18506516  
SRR17520069. 18519944  
SRR17520069. 18519983  
SRR17520069. 18519992  
SRR17520069. 18519997  
SRR17520069. 18523255  
SRR17520069. 18524922  
SRR17520069. 18533435  
SRR17520069. 18533446  
SRR17520069. 18533484  
SRR17520069. 18571344  
SRR17520069. 18576584  
SRR17520069. 18577968  
SRR17520069. 18595967  
SRR17520069. 18595971  
SRR17520069. 18595982  
SRR17520069. 18623881  
SRR17520069. 18626638  
SRR17520069. 18638670  
SRR17520069. 18640360  
SRR17520069. 18651746  
SRR17520069. 18651778  
SRR17520069. 18652375

SRR17520069. 18703551  
SRR17520069. 18706872  
SRR17520069. 18710411  
SRR17520069. 18717377  
SRR17520069. 18725205  
SRR17520069. 18727883  
SRR17520069. 18763808  
SRR17520069. 18767380  
SRR17520069. 18769384  
SRR17520069. 18769409  
SRR17520069. 18769411  
SRR17520069. 18776632  
SRR17520069. 18787667  
SRR17520069. 18799776  
SRR17520069. 18804684  
SRR17520069. 18804685  
SRR17520069. 18810787  
SRR17520069. 18811121  
SRR17520069. 18817757  
SRR17520069. 18824069  
SRR17520069. 18831275  
SRR17520069. 18835361  
SRR17520069. 18835370  
SRR17520069. 18837334  
SRR17520069. 18850637  
SRR17520069. 18861698  
SRR17520069. 18864409  
SRR17520069. 18868947  
SRR17520069. 18892058  
SRR17520069. 18906474  
SRR17520069. 18912662  
SRR17520069. 18912685  
SRR17520069. 18915104  
SRR17520069. 18915114  
SRR17520069. 18919095  
SRR17520069. 18919240  
SRR17520069. 18935096  
SRR17520069. 18935109  
SRR17520069. 18948036  
SRR17520069. 18948518  
SRR17520069. 18948533  
SRR17520069. 18948534  
SRR17520069. 18948536  
SRR17520069. 18948542  
SRR17520069. 18948544  
SRR17520069. 18948554  
SRR17520069. 18948562

SRR17520069. 18948563  
SRR17520069. 18948565  
SRR17520069. 18948570  
SRR17520069. 18948571  
SRR17520069. 18948573  
SRR17520069. 18957616  
SRR17520069. 18957642  
SRR17520069. 18957650  
SRR17520069. 18957659  
SRR17520069. 18957685  
SRR17520069. 18961738  
SRR17520069. 18961742  
SRR17520069. 18961744  
SRR17520069. 18961756  
SRR17520069. 19005723  
SRR17520069. 19021159  
SRR17520069. 19043873  
SRR17520069. 19056208  
SRR17520069. 19056213  
SRR17520069. 19060873  
SRR17520069. 19060875  
SRR17520069. 19066168  
SRR17520069. 19066169  
SRR17520069. 19066172  
SRR17520069. 19066173  
SRR17520069. 19066174  
SRR17520069. 19066175  
SRR17520069. 19066176  
SRR17520069. 19066177  
SRR17520069. 19066178  
SRR17520069. 19066179  
SRR17520069. 19066180  
SRR17520069. 19066181  
SRR17520069. 19066182  
SRR17520069. 19066184  
SRR17520069. 19066185  
SRR17520069. 19066187  
SRR17520069. 19066189  
SRR17520069. 19066190  
SRR17520069. 19066191  
SRR17520069. 19066192  
SRR17520069. 19066193  
SRR17520069. 19066194  
SRR17520069. 19066195  
SRR17520069. 19066196  
SRR17520069. 19066197  
SRR17520069. 19066198

SRR17520069.19066199  
SRR17520069.19066200  
SRR17520069.19066201  
SRR17520069.19066202  
SRR17520069.19066203  
SRR17520069.19066204  
SRR17520069.19066205  
SRR17520069.19066206  
SRR17520069.19066207  
SRR17520069.19066209  
SRR17520069.19066210  
SRR17520069.19066211  
SRR17520069.19066212  
SRR17520069.19066213  
SRR17520069.19066214  
SRR17520069.19066215  
SRR17520069.19066216  
SRR17520069.19066217  
SRR17520069.19066218  
SRR17520069.19066219  
SRR17520069.19066220  
SRR17520069.19066221  
SRR17520069.19066222  
SRR17520069.19066223  
SRR17520069.19066224  
SRR17520069.19066225  
SRR17520069.19066226  
SRR17520069.19066227  
SRR17520069.19066228  
SRR17520069.19066229  
SRR17520069.19066230  
SRR17520069.19066231  
SRR17520069.19066232  
SRR17520069.19066233  
SRR17520069.19066234  
SRR17520069.19066235  
SRR17520069.19066236  
SRR17520069.19066237  
SRR17520069.19066238  
SRR17520069.19066239  
SRR17520069.19066240  
SRR17520069.19066241  
SRR17520069.19066242  
SRR17520069.19066244  
SRR17520069.19066245  
SRR17520069.19066246  
SRR17520069.19066247

SRR17520069.19066248  
SRR17520069.19066249  
SRR17520069.19066252  
SRR17520069.19066253  
SRR17520069.19066254  
SRR17520069.19066255  
SRR17520069.19066256  
SRR17520069.19066257  
SRR17520069.19066259  
SRR17520069.19066260  
SRR17520069.19066261  
SRR17520069.19066263  
SRR17520069.19066264  
SRR17520069.19066265  
SRR17520069.19066266  
SRR17520069.19066267  
SRR17520069.19066268  
SRR17520069.19066269  
SRR17520069.19066270  
SRR17520069.19066271  
SRR17520069.19066272  
SRR17520069.19066273  
SRR17520069.19066274  
SRR17520069.19066275  
SRR17520069.19066276  
SRR17520069.19066278  
SRR17520069.19066279  
SRR17520069.19066280  
SRR17520069.19066281  
SRR17520069.19066282  
SRR17520069.19066284  
SRR17520069.19066285  
SRR17520069.19066286  
SRR17520069.19066287  
SRR17520069.19066288  
SRR17520069.19066290  
SRR17520069.19066291  
SRR17520069.19066292  
SRR17520069.19066293  
SRR17520069.19066294  
SRR17520069.19066295  
SRR17520069.19066296  
SRR17520069.19066297  
SRR17520069.19066298  
SRR17520069.19066299  
SRR17520069.19066300  
SRR17520069.19066301

SRR17520069.19066302  
SRR17520069.19066303  
SRR17520069.19066305  
SRR17520069.19066306  
SRR17520069.19066307  
SRR17520069.19066308  
SRR17520069.19066309  
SRR17520069.19066310  
SRR17520069.19066311  
SRR17520069.19066312  
SRR17520069.19066313  
SRR17520069.19066314  
SRR17520069.19066315  
SRR17520069.19066316  
SRR17520069.19066318  
SRR17520069.19066319  
SRR17520069.19066320  
SRR17520069.19066321  
SRR17520069.19066322  
SRR17520069.19066323  
SRR17520069.19066324  
SRR17520069.19066325  
SRR17520069.19066326  
SRR17520069.19066328  
SRR17520069.19066329  
SRR17520069.19066330  
SRR17520069.19066331  
SRR17520069.19066332  
SRR17520069.19066333  
SRR17520069.19066334  
SRR17520069.19066335  
SRR17520069.19066336  
SRR17520069.19066337  
SRR17520069.19066338  
SRR17520069.19066339  
SRR17520069.19066340  
SRR17520069.19066341  
SRR17520069.19066342  
SRR17520069.19066343  
SRR17520069.19066344  
SRR17520069.19066345  
SRR17520069.19066346  
SRR17520069.19066347  
SRR17520069.19066349  
SRR17520069.19066350  
SRR17520069.19066351  
SRR17520069.19066352

SRR17520069.19066353  
SRR17520069.19066354  
SRR17520069.19066355  
SRR17520069.19066356  
SRR17520069.19066357  
SRR17520069.19066358  
SRR17520069.19066359  
SRR17520069.19066360  
SRR17520069.19066361  
SRR17520069.19066362  
SRR17520069.19076154  
SRR17520069.19076169  
SRR17520069.19080904  
SRR17520069.19080931  
SRR17520069.19082946  
SRR17520069.19100266  
SRR17520069.19100271  
SRR17520069.19103776  
SRR17520069.19105556  
SRR17520069.19145870  
SRR17520069.19161454  
SRR17520069.19184874  
SRR17520069.19184989  
SRR17520069.19187363  
SRR17520069.19201699  
SRR17520069.19206051  
SRR17520069.19219189  
SRR17520069.19229168  
SRR17520069.19252338  
SRR17520069.19259338  
SRR17520069.19264456  
SRR17520069.19274828  
SRR17520069.19279454  
SRR17520069.19306984  
SRR17520069.19312888  
SRR17520069.19324076  
SRR17520069.19324184  
SRR17520069.19324234  
SRR17520069.19325895  
SRR17520069.19329403  
SRR17520069.19342474  
SRR17520069.19378124  
SRR17520069.19383216  
SRR17520069.19409319  
SRR17520069.19435623  
SRR17520069.19451451  
SRR17520069.19471510



SRR17520069.19506909  
SRR17520069.19545028  
SRR17520069.19548990
